# Supplementary material for: A Fault Diagnosis Method for One‐Dimensional Vibration Signal Based on Multiresolution tlsDMD and Approximate Entropy
Source: Hindawi journal article supplement (doi:10.1155/2019/3262818), 2019-01-01
Supplement: f1 [file 3262818.f1.zip]

Archive with 105 entries (93 files):
- 3262818.f1/ApEn/
- 3262818.f1/ApEn/ApEn.m
- 3262818.f1/bp_toolbox/
- 3262818.f1/bp_toolbox/BP-toolbox.m
- 3262818.f1/bp_toolbox/BP-toolbox_modify.m
- 3262818.f1/bp_toolbox/BP-toolbox1.m
- 3262818.f1/bp_toolbox/data110.mat
- 3262818.f1/bp_toolbox/data210.mat
- 3262818.f1/bp_toolbox/data310.mat
- 3262818.f1/bp_toolbox/data410.mat
- 3262818.f1/bp_toolbox/error_file.mat
- 3262818.f1/CWRU_bearing signals/
- 3262818.f1/CWRU_bearing signals/12k Drive End Bearing Fault Data/
- 3262818.f1/CWRU_bearing signals/12k Drive End Bearing Fault Data/021/
- 3262818.f1/CWRU_bearing signals/12k Drive End Bearing Fault Data/021/B021_2.mat
- 3262818.f1/CWRU_bearing signals/12k Drive End Bearing Fault Data/021/IR021_2.mat
- 3262818.f1/CWRU_bearing signals/12k Drive End Bearing Fault Data/021/OR021@6_2.mat
- 3262818.f1/CWRU_bearing signals/normal/
- 3262818.f1/CWRU_bearing signals/normal/Normal_1.mat
- 3262818.f1/gear signals/
- 3262818.f1/gear signals/broken teeth fault signal/
- 3262818.f1/gear signals/broken teeth fault signal/Data1.txt
- 3262818.f1/gear signals/broken teeth fault signal/Data10.txt
- 3262818.f1/gear signals/broken teeth fault signal/Data11.txt
- 3262818.f1/gear signals/broken teeth fault signal/Data12.txt
- 3262818.f1/gear signals/broken teeth fault signal/Data13.txt
- 3262818.f1/gear signals/broken teeth fault signal/Data14.txt
- 3262818.f1/gear signals/broken teeth fault signal/Data15.txt
- 3262818.f1/gear signals/broken teeth fault signal/Data16.txt
- 3262818.f1/gear signals/broken teeth fault signal/Data17.txt
- 3262818.f1/gear signals/broken teeth fault signal/Data18.txt
- 3262818.f1/gear signals/broken teeth fault signal/Data19.txt
- 3262818.f1/gear signals/broken teeth fault signal/Data2.txt
- 3262818.f1/gear signals/broken teeth fault signal/Data20.txt
- 3262818.f1/gear signals/broken teeth fault signal/Data3.txt
- 3262818.f1/gear signals/broken teeth fault signal/Data4.txt
- 3262818.f1/gear signals/broken teeth fault signal/Data5.txt
- 3262818.f1/gear signals/broken teeth fault signal/Data6.txt
- 3262818.f1/gear signals/broken teeth fault signal/Data7.txt
- 3262818.f1/gear signals/broken teeth fault signal/Data8.txt
- 3262818.f1/gear signals/broken teeth fault signal/Data9.txt
- 3262818.f1/gear signals/normal gear signal/
- 3262818.f1/gear signals/normal gear signal/Data1.txt
- 3262818.f1/gear signals/normal gear signal/Data10.txt
- 3262818.f1/gear signals/normal gear signal/Data11.txt
- 3262818.f1/gear signals/normal gear signal/Data12.txt
- 3262818.f1/gear signals/normal gear signal/Data13.txt
- 3262818.f1/gear signals/normal gear signal/Data14.txt
- 3262818.f1/gear signals/normal gear signal/Data15.txt
- 3262818.f1/gear signals/normal gear signal/Data16.txt
- 3262818.f1/gear signals/normal gear signal/Data17.txt
- 3262818.f1/gear signals/normal gear signal/Data18.txt
- 3262818.f1/gear signals/normal gear signal/Data19.txt
- 3262818.f1/gear signals/normal gear signal/Data2.txt
- 3262818.f1/gear signals/normal gear signal/Data20.txt
- 3262818.f1/gear signals/normal gear signal/Data3.txt
- 3262818.f1/gear signals/normal gear signal/Data4.txt
- 3262818.f1/gear signals/normal gear signal/Data5.txt
- 3262818.f1/gear signals/normal gear signal/Data6.txt
- 3262818.f1/gear signals/normal gear signal/Data7.txt
- 3262818.f1/gear signals/normal gear signal/Data8.txt
- 3262818.f1/gear signals/normal gear signal/Data9.txt
- 3262818.f1/gear signals/pitch errors signal/
- 3262818.f1/gear signals/pitch errors signal/Data1.txt
- 3262818.f1/gear signals/pitch errors signal/Data10.txt
- 3262818.f1/gear signals/pitch errors signal/Data11.txt
- 3262818.f1/gear signals/pitch errors signal/Data12.txt
- 3262818.f1/gear signals/pitch errors signal/Data13.txt
- 3262818.f1/gear signals/pitch errors signal/Data14.txt
- 3262818.f1/gear signals/pitch errors signal/Data15.txt
- 3262818.f1/gear signals/pitch errors signal/Data16.txt
- 3262818.f1/gear signals/pitch errors signal/Data17.txt
- 3262818.f1/gear signals/pitch errors signal/Data18.txt
- 3262818.f1/gear signals/pitch errors signal/Data19.txt
- 3262818.f1/gear signals/pitch errors signal/Data2.txt
- 3262818.f1/gear signals/pitch errors signal/Data3.txt
- 3262818.f1/gear signals/pitch errors signal/Data4.txt
- 3262818.f1/gear signals/pitch errors signal/Data5.txt
- 3262818.f1/gear signals/pitch errors signal/Data6.txt
- 3262818.f1/gear signals/pitch errors signal/Data7.txt
- 3262818.f1/gear signals/pitch errors signal/Data8.txt
- 3262818.f1/gear signals/pitch errors signal/Data9.txt
- 3262818.f1/gear signals/wear gear signal/
- 3262818.f1/gear signals/wear gear signal/Data1.txt
- 3262818.f1/gear signals/wear gear signal/Data10.txt
- 3262818.f1/gear signals/wear gear signal/Data11.txt
- 3262818.f1/gear signals/wear gear signal/Data12.txt
- 3262818.f1/gear signals/wear gear signal/Data13.txt
- 3262818.f1/gear signals/wear gear signal/Data14.txt
- 3262818.f1/gear signals/wear gear signal/Data15.txt
- 3262818.f1/gear signals/wear gear signal/Data16.txt
- 3262818.f1/gear signals/wear gear signal/Data17.txt
- 3262818.f1/gear signals/wear gear signal/Data18.txt
- 3262818.f1/gear signals/wear gear signal/Data19.txt
- 3262818.f1/gear signals/wear gear signal/Data2.txt
- 3262818.f1/gear signals/wear gear signal/Data20.txt
- 3262818.f1/gear signals/wear gear signal/Data3.txt
- 3262818.f1/gear signals/wear gear signal/Data4.txt
- 3262818.f1/gear signals/wear gear signal/Data5.txt
- 3262818.f1/gear signals/wear gear signal/Data6.txt
- 3262818.f1/gear signals/wear gear signal/Data7.txt
- 3262818.f1/gear signals/wear gear signal/Data8.txt
- 3262818.f1/gear signals/wear gear signal/Data9.txt
- 3262818.f1/mrDMD/
- 3262818.f1/mrDMD/mrDMD_ok.m
