# Supplementary material for: A Fault Diagnosis Method for One‐Dimensional Vibration Signal Based on Multiresolution tlsDMD and Approximate Entropy
Source: Hindawi journal article supplement (doi:10.1155/2019/3262818), 2019-01-01
Supplement: f1 [file 3262818.f1.zip › 3262818.f1/bp_toolbox/BP-toolbox.m]

%Çå¿Õ»·¾³±äÁ¿
clc;
close all;
clear all;
%%%µ¼ÈëÐÅºÅ
%%%Õý³£Öá³ÐÐÅºÅìØ
load('G:\SCIÂÛÎÄ\Fault Recognition Based on MRDMDandApEn\×«Ð´¹ý³ÌÎÄ¼þ\ApEn_normal097.mat');
load('G:\SCIÂÛÎÄ\Fault Recognition Based on MRDMDandApEn\×«Ð´¹ý³ÌÎÄ¼þ\ApEn_normal097_2.mat');
load('G:\SCIÂÛÎÄ\Fault Recognition Based on MRDMDandApEn\×«Ð´¹ý³ÌÎÄ¼þ\ApEn_normal099.mat');
load('G:\SCIÂÛÎÄ\Fault Recognition Based on MRDMDandApEn\×«Ð´¹ý³ÌÎÄ¼þ\ApEn_normal099_2.mat');
load('G:\SCIÂÛÎÄ\Fault Recognition Based on MRDMDandApEn\×«Ð´¹ý³ÌÎÄ¼þ\ApEn_normal098.mat');
load('G:\SCIÂÛÎÄ\Fault Recognition Based on MRDMDandApEn\×«Ð´¹ý³ÌÎÄ¼þ\ApEn_normal098_2.mat');
load('G:\SCIÂÛÎÄ\Fault Recognition Based on MRDMDandApEn\×«Ð´¹ý³ÌÎÄ¼þ\ApEn_normal100.mat');
load('G:\SCIÂÛÎÄ\Fault Recognition Based on MRDMDandApEn\×«Ð´¹ý³ÌÎÄ¼þ\ApEn_normal100_2.mat');
normal(1,:)=ApEn_normal097;
normal(2,:)=ApEn_normal097_2;
normal(3,:)=ApEn_normal099;
normal(4,:)=ApEn_normal099_2;
normal(5,:)=ApEn_normal098;
normal(6,:)=ApEn_normal098_2;
normal(7,:)=ApEn_normal100;
normal(8,:)=ApEn_normal100_2;

%%%%ÄÚÈ¦¹ÊÕÏÐÅºÅìØ
load('G:\SCIÂÛÎÄ\Fault Recognition Based on MRDMDandApEn\×«Ð´¹ý³ÌÎÄ¼þ\ApEn_inner105.mat');
load('G:\SCIÂÛÎÄ\Fault Recognition Based on MRDMDandApEn\×«Ð´¹ý³ÌÎÄ¼þ\ApEn_inner107.mat');
load('G:\SCIÂÛÎÄ\Fault Recognition Based on MRDMDandApEn\×«Ð´¹ý³ÌÎÄ¼þ\ApEn_inner209.mat');
load('G:\SCIÂÛÎÄ\Fault Recognition Based on MRDMDandApEn\×«Ð´¹ý³ÌÎÄ¼þ\ApEn_inner211.mat');
load('G:\SCIÂÛÎÄ\Fault Recognition Based on MRDMDandApEn\×«Ð´¹ý³ÌÎÄ¼þ\ApEn_inner170.mat');
load('G:\SCIÂÛÎÄ\Fault Recognition Based on MRDMDandApEn\×«Ð´¹ý³ÌÎÄ¼þ\ApEn_inner172.mat');
load('G:\SCIÂÛÎÄ\Fault Recognition Based on MRDMDandApEn\×«Ð´¹ý³ÌÎÄ¼þ\ApEn_inner3002.mat');
load('G:\SCIÂÛÎÄ\Fault Recognition Based on MRDMDandApEn\×«Ð´¹ý³ÌÎÄ¼þ\ApEn_inner3004.mat');
inner(1,:)=ApEn_inner105;
inner(2,:)=ApEn_inner107;
inner(3,:)=ApEn_inner209;
inner(4,:)=ApEn_inner211;
inner(5,:)=ApEn_inner170;
inner(6,:)=ApEn_inner172;
inner(7,:)=ApEn_inner3002;
inner(8,:)=ApEn_inner3004;

%%%%¹ö¶¯Ìå¹ÊÕÏÐÅºÅìØ
load('G:\SCIÂÛÎÄ\Fault Recognition Based on MRDMDandApEn\×«Ð´¹ý³ÌÎÄ¼þ\ApEn_ball118.mat');
load('G:\SCIÂÛÎÄ\Fault Recognition Based on MRDMDandApEn\×«Ð´¹ý³ÌÎÄ¼þ\ApEn_ball120.mat');
load('G:\SCIÂÛÎÄ\Fault Recognition Based on MRDMDandApEn\×«Ð´¹ý³ÌÎÄ¼þ\ApEn_ball222.mat');
load('G:\SCIÂÛÎÄ\Fault Recognition Based on MRDMDandApEn\×«Ð´¹ý³ÌÎÄ¼þ\ApEn_ball224.mat');
load('G:\SCIÂÛÎÄ\Fault Recognition Based on MRDMDandApEn\×«Ð´¹ý³ÌÎÄ¼þ\ApEn_ball186.mat');
load('G:\SCIÂÛÎÄ\Fault Recognition Based on MRDMDandApEn\×«Ð´¹ý³ÌÎÄ¼þ\ApEn_ball188.mat');
load('G:\SCIÂÛÎÄ\Fault Recognition Based on MRDMDandApEn\×«Ð´¹ý³ÌÎÄ¼þ\ApEn_ball3006.mat');
load('G:\SCIÂÛÎÄ\Fault Recognition Based on MRDMDandApEn\×«Ð´¹ý³ÌÎÄ¼þ\ApEn_ball3008.mat');
ball(1,:)=ApEn_ball118;
ball(2,:)=ApEn_ball120;
ball(3,:)=ApEn_ball222;
ball(4,:)=ApEn_ball224;
ball(5,:)=ApEn_ball186;
ball(6,:)=ApEn_ball188;
ball(7,:)=ApEn_ball3006;
ball(8,:)=ApEn_ball3008;

%%%%ÍâÈ¦¹ÊÕÏÐÅºÅìØ
load('G:\SCIÂÛÎÄ\Fault Recognition Based on MRDMDandApEn\×«Ð´¹ý³ÌÎÄ¼þ\ApEn_outer130.mat');
load('G:\SCIÂÛÎÄ\Fault Recognition Based on MRDMDandApEn\×«Ð´¹ý³ÌÎÄ¼þ\ApEn_outer132.mat');
load('G:\SCIÂÛÎÄ\Fault Recognition Based on MRDMDandApEn\×«Ð´¹ý³ÌÎÄ¼þ\ApEn_outer234.mat');
load('G:\SCIÂÛÎÄ\Fault Recognition Based on MRDMDandApEn\×«Ð´¹ý³ÌÎÄ¼þ\ApEn_outer236.mat');
load('G:\SCIÂÛÎÄ\Fault Recognition Based on MRDMDandApEn\×«Ð´¹ý³ÌÎÄ¼þ\ApEn_outer197.mat');
load('G:\SCIÂÛÎÄ\Fault Recognition Based on MRDMDandApEn\×«Ð´¹ý³ÌÎÄ¼þ\ApEn_outer198.mat');
load('G:\SCIÂÛÎÄ\Fault Recognition Based on MRDMDandApEn\×«Ð´¹ý³ÌÎÄ¼þ\ApEn_outer199.mat');
load('G:\SCIÂÛÎÄ\Fault Recognition Based on MRDMDandApEn\×«Ð´¹ý³ÌÎÄ¼þ\ApEn_outer200.mat');
outer(1,:)=ApEn_outer130;
outer(2,:)=ApEn_outer132;
outer(3,:)=ApEn_outer234;
outer(4,:)=ApEn_outer236;
outer(5,:)=ApEn_outer197;
outer(6,:)=ApEn_outer198;
outer(7,:)=ApEn_outer199;
outer(8,:)=ApEn_outer200;
% Êý¾ÝÑ¡ÔñºÍ¹éÒ»»¯
c1=zeros(8,9);
c1(:,1)=1;
for i=1:8;
    c1(i,2:9)=normal(i,:);
end

c2=zeros(8,9);
c2(:,1)=2;
for i=1:8;
    c2(i,2:9)=inner(i,:);
end

c3=zeros(8,9);
c3(:,1)=3;
for i=1:8;
    c3(i,2:9)=ball(i,:);
end

c4=zeros(8,9);
c4(:,1)=4;
for i=1:8;
    c4(i,2:9)=outer(i,:);
end


%ÐÅºÅ³ß´ç
[a b] = size(normal);

%½«ËÄÀàÌØÕ÷ÐÅºÅºÏ²¢ÎªÒ»×é(Ã¿×éÐÅºÅµÄµÄµÚÒ»Î¬Îª±êÊ¶Àà1,2,3,4)
data(1:a,:)=c1;
data(a+1:2*a,:)=c2;
data(2*a+1:3*a,:)=c3;
data(3*a+1:4*a,:)=c4;

%ÊäÈëÊä³öÊý¾Ý
input = data(:,2:end);
output1 = data(:,1);

%% Êý¾Ý±ä»»
%°ÑÊä³ö´ÓÒ»Î¬±äËÄÎ¬
for i=1:4*a
    switch output1(i)
        case 1
            output(i,:) = [1 0 0 0];
        case 2
            output(i,:) = [0 1 0 0];
        case 3
            output(i,:) = [0 0 1 0];
        case 4
            output(i,:) = [0 0 0 1];
    end
end


%È¡Ã¿×éÊý¾ÝµÄÑµÁ·¼¯
a1 = 4;
%ÑµÁ·¼¯ÏÂ±ê
num_train = [1:a1 a+1:a+a1 2*a+1:2*a+a1 3*a+1:3*a+a1];
%²âÊÔ¼¯ÏÂ±ê
num_test = [a1+1:a a+a1+1:2*a 2*a+a1+1:3*a 3*a+a1+1:4*a];
input_train = input(num_train,:)';
output_train = output(num_train,:)';
input_test = input(num_test,:)';
output_test = output(num_test,:)';

% ÊäÈëÊý¾Ý¹éÒ»»¯
[inputn,inputps] = mapminmax(input_train);
inputn_test = mapminmax('apply',input_test,inputps);

%% µ÷ÓÃ¹¤¾ßÏä
nntool;

%% ½á¹û·ÖÎö(ÑµÁ·Êý¾Ý)
%¸ù¾ÝÍøÂçÊä³öÕÒ³öÊý¾ÝÊôÓÚÄÄÀà
fore_train=network1_outputs;
for i = 1:4*a1
    output_fore_train(i) = find(fore_train(:,i) == max(fore_train(:,i)));
end

%Ô¤²âÎó²î
output1_train=output1(num_train)';
num_error_train = output_fore_train-output1_train;

%»­³öÔ¤²âÓïÒôÖÖÀàºÍÊµ¼ÊÓïÒôÖÖÀàµÄ·ÖÀàÍ¼
figure;
plot(output_fore_train,'or','linewidth',2);
set(gca,'xlim',[1 4*a1],'ylim',[0 5]);
hold on
plot(output1_train,'.b','linewidth',2)
legend('BP output','expected output');

%»­³öÎó²îÍ¼
figure;
plot(num_error_train)
title('BPÍøÂç·ÖÀàÎó²î','fontsize',12)
xlabel('ÓïÒôÐÅºÅ','fontsize',12)
ylabel('·ÖÀàÎó²î','fontsize',12)

k_train = zeros(1,4);
%Í³¼ÆÎó²î,ÕÒ³öÅÐ¶Ï´íÎóµÄ·ÖÀàÊôÓÚÄÄÒ»Àà
for i=1:4*a1
    if num_error_train(i) ~=0
        [b,c] = max(output_train(:,i));
        switch c
            case 1
                k_train(1) = k_train(1)+1;
            case 2
                k_train(2) = k_train(2)+1;
            case 3
                k_train(3) = k_train(3)+1;
            case 4
                k_train(4) = k_train(4)+1;
        end
    end
end

%ÕÒ³öÃ¿ÀàµÄ¸öÌåºÍ
kk_train=zeros(1,4);
for i=1:4*a1
    [b,c]=max(output_train(:,i));
    switch c
        case 1
            kk_train(1)=kk_train(1)+1;
        case 2
            kk_train(2)=kk_train(2)+1;
        case 3
            kk_train(3)=kk_train(3)+1;
        case 4
            kk_train(4)=kk_train(4)+1;
    end
end

%Í³¼ÆÕýÈ·ÂÊ
rightridio_train = (kk_train-k_train)./kk_train;


%% ½á¹û·ÖÎö£¨²âÊÔÊý¾Ý£©
%¸ù¾ÝÍøÂçÊä³öÕÒ³öÊý¾ÝÊôÓÚÄÄÀà
fore_test=network2_outputs;
for i=1:4*(a-a1)
    output_fore_test(i) = find(fore_test(:,i) == max(fore_test(:,i)));
end

%Ô¤²âÎó²î
output1_test=output1(num_test)';
num_error_test = output_fore_test-output1_test;

%»­³öÔ¤²âÓïÒôÖÖÀàºÍÊµ¼ÊÓïÒôÖÖÀàµÄ·ÖÀàÍ¼
figure;
plot(output_fore_test,'or','linewidth',2);
set(gca,'xlim',[1 4*(a-a1)],'ylim',[0 5]);
hold on
plot(output1_test','.b','linewidth',2)
legend('BP output','expected output');


%»­³öÎó²îÍ¼
figure;
plot(num_error_test)
title('BPÍøÂç·ÖÀàÎó²î','fontsize',12)
xlabel('ÓïÒôÐÅºÅ','fontsize',12)
ylabel('·ÖÀàÎó²î','fontsize',12)

k_test = zeros(1,4);
%Í³¼ÆÎó²î,ÕÒ³öÅÐ¶Ï´íÎóµÄ·ÖÀàÊôÓÚÄÄÒ»Àà
for i=1:4*(a-a1)
    if num_error_test(i) ~=0
        [b,c] = max(output_test(:,i));
        switch c
            case 1
                k_test(1) = k_test(1)+1;
            case 2
                k_test(2) = k_test(2)+1;
            case 3
                k_test(3) = k_test(3)+1;
            case 4
                k_test(4) = k_test(4)+1;
        end
    end
end

%ÕÒ³öÃ¿ÀàµÄ¸öÌåºÍ
kk_test=zeros(1,4);
for i=1:4*(a-a1)
    [b,c]=max(output_test(:,i));
    switch c
        case 1
            kk_test(1)=kk_test(1)+1;
        case 2
            kk_test(2)=kk_test(2)+1;
        case 3
            kk_test(3)=kk_test(3)+1;
        case 4
            kk_test(4)=kk_test(4)+1;
    end
end

%Í³¼ÆÕýÈ·ÂÊ
rightridio_test = (kk_test-k_test)./kk_test;
