# Supplementary material for: A Fault Diagnosis Method for One‐Dimensional Vibration Signal Based on Multiresolution tlsDMD and Approximate Entropy
Source: Hindawi journal article supplement (doi:10.1155/2019/3262818), 2019-01-01
Supplement: f1 [file 3262818.f1.zip › 3262818.f1/gear signals/broken teeth fault signal/Data1.txt]

224    -416   
-240   -48    
160    -32    
-240   16     
16     -240   
128    192    
-48    -768   
96     -64    
-240   64     
-64    -96    
64     288    
-176   112    
-32    -80    
-112   -160   
-64    -128   
144    160    
-160   160    
144    48     
-112   -144   
160    -224   
-80    112    
176    -48    
-128   96     
112    48     
-80    0      
32     320    
32     -32    
-160   -64    
80     112    
96     -112   
32     112    
-224   80     
256    -128   
-320   80     
64     -256   
96     208    
-320   -304   
-480   -32    
-352   48     
96     -144   
-128   -16    
80     32     
-16    16     
-32    0      
-128   48     
144    -128   
-80    32     
-896   -64    
64     144    
-272   -96    
176    160    
-528   -336   
32     48     
-144   -48    
-112   32     
-80    160    
-224   -144   
32     160    
-144   64     
-160   -16    
128    -80    
-16    96     
-320   -16    
80     128    
-16    96     
16     272    
-208   144    
64     -160   
160    16     
-240   160    
-32    96     
-176   64     
-32    176    
-1008  -80    
-16    64     
96     32     
16     96     
48     -48    
48     144    
-48    -64    
-96    32     
0      80     
48     48     
80     80     
-96    -144   
80     112    
-272   16     
-80    0      
-176   -16    
32     128    
208    32     
-80    -32    
-80    -112   
96     48     
192    64     
-32    336    
48     -96    
-96    16     
-96    -16    
-16    -32    
16     16     
-128   48     
-144   80     
368    256    
-80    16     
16     448    
-16    144    
-128   -16    
96     16     
48     -80    
64     -64    
-64    272    
-192   32     
48     -48    
-64    0      
176    304    
-272   -32    
144    80     
-224   -80    
16     -80    
-576   -80    
-16    224    
-192   16     
144    -160   
-112   -32    
-96    48     
64     -32    
-128   80     
48     48     
0      96     
-16    112    
-96    64     
-64    96     
-48    48     
-96    0      
-32    0      
-80    48     
64     -96    
64     160    
0      16     
-48    32     
48     112    
112    -96    
-96    16     
-48    32     
0      96     
-16    32     
-144   -80    
-112   -80    
304    0      
-112   208    
128    96     
-224   208    
-48    48     
32     -384   
0      128    
272    320    
-208   32     
-48    -32    
-32    64     
32     176    
-176   16     
-32    112    
-96    32     
144    112    
-160   80     
-80    0      
-208   -128   
-64    96     
32     0      
80     64     
80     64     
-192   -48    
96     80     
16     -16    
-128   32     
16     16     
64     128    
-96    32     
96     96     
-320   -32    
160    16     
224    176    
16     80     
-80    96     
-288   688    
-1120  -1440  
112    432    
-784   208    
-32    -464   
-128   16     
144    64     
-48    992    
-464   -624   
384    32     
-464   -352   
336    192    
80     80     
144    -16    
-128   176    
80     160    
0      176    
-112   -240   
192    16     
-32    -48    
128    336    
-272   64     
32     304    
0      112    
-16    48     
-224   224    
-144   160    
128    144    
-272   0      
96     160    
-80    48     
-16    176    
-16    80     
-96    -224   
80     -144   
144    176    
112    0      
-112   224    
-352   -256   
-224   208    
288    -96    
-176   64     
32     64     
0      176    
48     144    
64     32     
208    304    
-144   -48    
112    112    
48     240    
16     288    
-16    16     
-48    96     
48     -16    
-128   -80    
-32    32     
96     672    
112    -16    
-288   -320   
368    368    
-192   176    
144    128    
-112   192    
160    64     
-144   64     
128    192    
-48    -16    
160    96     
-112   -80    
32     -400   
64     112    
-32    -336   
80     112    
-48    96     
0      -32    
32     160    
-16    32     
-144   128    
-64    -96    
16     -176   
32     128    
-48    144    
80     96     
-96    -16    
-32    -144   
256    80     
16     -1008  
64     -32    
112    192    
112    -16    
112    192    
16     112    
0      112    
-128   -48    
176    48     
32     -128   
-32    -112   
64     400    
16     160    
-96    -80    
-16    32     
96     -368   
80     48     
32     -672   
80     128    
32     272    
-96    0      
48     16     
64     256    
0      224    
-32    48     
-128   0      
48     -16    
240    -16    
-48    -144   
-112   16     
144    -544   
-96    -96    
160    -672   
96     48     
-32    16     
112    -96    
-48    0      
176    416    
-16    96     
-16    -144   
256    32     
80     464    
80     64     
-112   -128   
112    -48    
128    -80    
32     32     
64     -784   
48     -48    
16     -672   
-32    128    
16     -448   
80     176    
192    224    
48     272    
-112   144    
80     -240   
32     128    
48     -336   
80     -240   
80     -128   
192    256    
-96    -112   
160    224    
-48    -160   
160    256    
-144   48     
48     96     
256    -16    
-48    464    
-16    -64    
-80    -272   
96     96     
80     -256   
32     224    
0      -480   
80     32     
208    0      
-112   192    
80     64     
144    336    
-80    128    
192    256    
-32    32     
80     -80    
176    16     
-48    -32    
128    80     
-48    -256   
80     -80    
80     -160   
112    192    
64     0      
0      224    
16     -400   
112    320    
-64    -112   
176    16     
160    192    
-208   96     
16     -2096  
192    -144   
32     -464   
16     -16    
-64    144    
80     -48    
128    160    
-96    64     
208    48     
-128   -128   
1456   2784   
-1360  176    
-192   -192   
272    48     
-496   128    
160    -704   
-432   48     
576    -848   
192    208    
-16    -448   
-128   -112   
-32    176    
80     -512   
32     624    
144    -272   
-112   64     
-240   -224   
112    -272   
112    -304   
-624   -48    
48     -112   
96     48     
192    96     
16     -80    
-48    -192   
48     -144   
144    -2048  
80     64     
-64    -32    
96     48     
0      -272   
128    144    
48     -64    
48     -128   
-224   96     
256    -112   
-416   160    
288    -336   
-176   -64    
-32    -240   
208    112    
-32    -464   
176    48     
-96    32     
64     160    
32     -80    
144    48     
96     352    
-144   -144   
128    0      
-80    64     
-320   -112   
-16    -208   
0      -64    
48     -16    
32     16     
0      -192   
-32    -176   
-16    -2816  
0      -48    
96     16     
-32    112    
-16    -16    
32     -16    
-64    16     
-32    -208   
-560   -80    
96     0      
-208   -16    
80     80     
-128   -64    
144    -80    
16     -96    
32     -592   
32     208    
-80    -320   
240    0      
-96    320    
-64    -256   
112    80     
48     -256   
48     160    
144    80     
-224   16     
192    -128   
-464   -64    
16     -384   
192    -32    
96     -480   
-80    48     
96     -176   
64     -176   
-144   -32    
144    -64    
-576   -16    
80     32     
-64    -176   
64     -224   
-96    -32    
0      -208   
-224   176    
-16    -80    
80     80     
144    0      
-16    -112   
96     -96    
176    144    
-16    128    
96     128    
-64    -64    
16     144    
-48    32     
32     -16    
-80    -16    
48     64     
-416   128    
0      -272   
96     160    
48     -848   
176    80     
-48    64     
80     -64    
16     192    
96     0      
-16    -176   
0      -64    
-80    48     
112    48     
176    192    
-80    -128   
-32    272    
-848   -112   
-16    -16    
224    -240   
-1392  48     
208    80     
-560   -160   
16     32     
-1648  16     
-144   -16    
96     96     
-16    288    
128    -32    
-144   16     
256    160    
-304   -368   
-256   -528   
144    288    
-128   -48    
-32    80     
-48    48     
-96    48     
0      96     
-208   48     
0      -64    
-112   32     
32     32     
352    368    
-304   112    
-192   -80    
0      144    
-64    16     
-176   64     
192    -672   
112    -96    
-48    368    
-368   16     
-112   80     
256    0      
-48    48     
-464   -32    
-112   192    
240    -144   
-80    128    
-80    -272   
160    48     
208    16     
-64    128    
-48    48     
-144   -16    
32     16     
-80    112    
48     16     
0      0      
-112   48     
-144   16     
-32    0      
-656   96     
-96    32     
160    -32    
48     160    
-16    -304   
64     144    
-48    64     
-16    96     
-144   176    
-1520  -2240  
192    -752   
-320   384    
320    304    
176    128    
112    -160   
0      128    
-368   -64    
464    -480   
-240   32     
224    -176   
-224   -80    
-16    368    
192    48     
32     48     
-208   -32    
-32    -176   
32     -384   
-96    224    
-80    -224   
-80    48     
-16    144    
128    320    
-1152  -160   
-80    400    
-240   -224   
176    -96    
96     112    
352    224    
-176   144    
-144   -32    
-96    -64    
48     0      
-176   144    
-80    16     
-160   96     
-560   -32    
32     0      
80     176    
176    144    
-48    48     
-16    128    
-176   16     
0      96     
-48    112    
192    128    
-32    224    
80     80     
-176   -112   
-64    144    
96     192    
-32    -16    
-80    -96    
32     0      
-80    -112   
-64    176    
16     736    
-176   -144   
-160   -240   
176    64     
-16    16     
-96    -16    
0      224    
-192   -80    
144    80     
96     64     
-176   -48    
-64    160    
-160   -48    
-64    48     
48     48     
96     272    
-96    64     
0      112    
48     0      
80     32     
-128   208    
-128   48     
-96    -416   
144    208    
128    144    
-208   -192   
-64    160    
96     -304   
112    384    
80     -48    
336    304    
-96    112    
-16    0      
144    224    
48     160    
-16    288    
0      240    
32     96     
96     112    
128    272    
-288   -224   
-48    -16    
16     112    
112    128    
64     272    
-48    -16    
0      0      
-80    16     
80     128    
192    224    
96     464    
-176   96     
-64    0      
-64    48     
80     144    
-80    96     
-16    32     
144    192    
-160   -16    
96     -176   
0      320    
48     96     
112    0      
-64    96     
-48    -48    
144    192    
80     496    
-432   -32    
288    320    
-96    112    
112    0      
-48    80     
64     192    
112    272    
-112   176    
288    160    
-80    -32    
16     -32    
-144   64     
-48    32     
160    80     
-128   -32    
128    144    
-48    64     
272    320    
-192   144    
80     -352   
48     224    
96     112    
-128   112    
80     80     
32     48     
0      64     
-32    144    
-16    -16    
32     48     
-48    48     
48     176    
-160   -416   
192    -16    
16     80     
16     -352   
-16    -48    
160    96     
-16    128    
16     128    
-32    160    
80     -32    
0      128    
16     -32    
64     16     
64     -80    
32     80     
-80    144    
-80    -240   
-80    -16    
256    -80    
80     112    
16     80     
-112   160    
32     48     
32     64     
80     112    
96     -16    
48     96     
32     -16    
80     -16    
48     208    
-48    48     
-16    112    
16     80     
80     -144   
112    64     
0      -1536  
-48    144    
-32    128    
64     32     
80     -304   
112    160    
-944   912    
208    -800   
896    496    
256    -144   
448    -112   
-448   -1136  
272    -176   
784    -48    
-192   400    
80     -448   
-240   -192   
128    -592   
80     48     
-144   64     
0      -128   
80     144    
-16    64     
96     176    
-96    -64    
64     176    
112    -240   
16     240    
48     -176   
128    96     
0      -528   
48     0      
-128   -528   
304    256    
0      -48    
-32    96     
16     48     
112    192    
32     80     
-16    0      
16     64     
32     -80    
144    128    
160    -256   
0      64     
-112   -128   
176    240    
80     -288   
48     144    
-144   16     
176    16     
-112   112    
144    176    
0      32     
-16    -192   
0      112    
144    -112   
32     96     
-16    -192   
64     48     
160    -336   
-48    16     
16     -144   
64     -16    
48     320    
0      64     
64     96     
96     96     
80     96     
112    80     
16     32     
96     96     
32     112    
48     -336   
64     144    
-96    -192   
112    240    
-48    -64    
80     -32    
64     -32    
80     -1312  
112    256    
-208   -1296  
144    -640   
64     -112   
96     -64    
-48    16     
-32    -1776  
32     -224   
96     80     
80     96     
-64    96     
112    -160   
240    -304   
-208   112    
16     16     
-192   0      
-112   -80    
0      -192   
-96    -256   
192    -640   
0      -48    
-16    -768   
0      16     
96     480    
-32    -192   
64     -64    
-80    -288   
48     -432   
112    192    
32     -16    
112    176    
-352   -48    
-96    -144   
208    -256   
48     16     
64     -64    
-16    -16    
0      -32    
128    -528   
-48    -320   
64     -48    
-16    -144   
64     -80    
288    352    
0      -64    
64     -176   
-192   -16    
16     -192   
-16    -64    
48     128    
80     224    
-32    -80    
-64    -496   
-160   -1200  
192    32     
48     -1440  
-32    240    
64     -160   
-144   -480   
240    416    
-48    224    
-64    -144   
64     128    
-208   -96    
-64    -160   
-128   -128   
112    -48    
48     0      
0      -288   
112    192    
144    -608   
-112   -64    
112    -192   
32     48     
-80    16     
-32    0      
32     96     
0      48     
-64    -32    
64     64     
-464   -96    
48     -160   
32     80     
160    64     
-128   0      
48     -160   
176    144    
112    -464   
32     144    
-32    -112   
208    96     
-208   -48    
272    -96    
-368   64     
48     -80    
16     96     
64     64     
-256   64     
64     -192   
-32    160    
-16    0      
-96    112    
64     -208   
192    32     
-224   80     
-32    -128   
-16    -48    
336    112    
-240   -80    
128    0      
-112   64     
368    -352   
-512   128    
-48    -576   
0      128    
112    -352   
208    288    
-288   112    
64     32     
-240   -32    
144    64     
-1392  -1760  
1600   -48    
-752   224    
576    -240   
-304   432    
288    -32    
-320   240    
-128   -816   
512    80     
-160   -128   
272    448    
-64    -640   
-96    544    
48     -480   
48     416    
-144   -272   
208    720    
-256   -352   
96     240    
-160   -208   
48     -128   
-112   48     
-144   -160   
-272   -112   
-240   -240   
0      96     
-48    16     
-448   -96    
64     208    
-624   -160   
-224   144    
-384   -96    
-32    80     
-176   -48    
112    32     
-48    0      
-224   -848   
-112   -192   
224    128    
-192   -80    
-208   128    
128    96     
-160   48     
48     -16    
-64    -96    
96     -48    
64     -16    
0      80     
96     80     
-96    160    
-144   -144   
48     48     
-80    -240   
16     48     
-32    -320   
32     80     
96     -16    
-192   -96    
-48    32     
96     64     
-16    144    
-272   112    
16     192    
-96    -80    
112    128    
-160   -144   
32     -16    
-144   -144   
144    128    
-64    112    
-80    16     
-80    32     
-176   -80    
16     0      
-128   -112   
32     128    
-128   128    
-144   -176   
-16    16     
-112   208    
-96    -96    
176    304    
-160   32     
-96    -16    
-96    -144   
160    0      
-64    16     
-112   16     
16     80     
48     176    
-160   32     
-16    112    
-224   -96    
-64    -144   
16     112    
288    784    
16     304    
-112   -80    
-16    -16    
-112   -64    
0      -96    
-32    32     
112    112    
-32    -192   
-48    -96    
-32    96     
80     320    
-112   0      
-144   64     
0      -16    
-80    -32    
64     32     
-64    -64    
64     128    
-64    -32    
0      -80    
128    320    
-96    32     
160    64     
-96    0      
80     -96    
-256   176    
176    416    
-240   -176   
224    96     
-624   -48    
208    160    
-32    96     
112    48     
-48    80     
-16    0      
48     32     
-176   144    
96     192    
224    16     
-16    112    
-144   112    
16     96     
0      -112   
48     96     
-272   0      
160    -64    
16     48     
16     64     
-128   -16    
96     112    
32     80     
-80    -48    
96     0      
-48    80     
80     160    
-80    80     
160    -80    
-128   32     
-48    176    
-32    -144   
0      16     
48     160    
-16    128    
-80    256    
144    336    
-16    176    
0      0      
128    -32    
-64    128    
-64    -128   
-192   -112   
336    112    
96     144    
96     272    
-416   -80    
-16    144    
48     -96    
80     48     
64     112    
-96    96     
-64    -112   
96     112    
144    0      
-128   32     
-48    224    
144    -32    
48     64     
16     48     
112    -16    
64     176    
-64    160    
-16    32     
64     176    
176    -160   
-32    96     
-80    192    
96     240    
-96    16     
0      64     
800    -1344  
-128   -464   
1200   64     
112    -400   
272    272    
432    256    
-528   -352   
1136   0      
-160   480    
80     -80    
-192   304    
-32    -128   
96     288    
208    -272   
-112   160    
48     0      
-112   128    
0      64     
32     -144   
-64    -1072  
112    96     
-64    96     
64     160    
208    64     
-160   -16    
-112   160    
96     176    
208    304    
80     32     
-160   -64    
32     80     
96     96     
96     80     
0      144    
0      -224   
128    112    
-64    64     
160    64     
-176   80     
128    16     
48     128    
16     144    
80     128    
-16    48     
-48    32     
-64    112    
144    96     
112    288    
208    -32    
-144   -768   
32     80     
32     64     
64     144    
16     48     
48     112    
-32    -80    
64     80     
-112   160    
80     160    
-80    -32    
176    160    
0      -32    
-784   -400   
48     128    
-48    -288   
112    -96    
64     -2208  
48     160    
64     112    
-48    48     
96     -32    
-16    192    
-48    48     
32     32     
96     176    
-64    96     
208    160    
-80    -80    
96     112    
80     80     
0      176    
64     -208   
64     192    
144    48     
32     96     
192    352    
64     384    
-240   -368   
224    208    
48     32     
-48    144    
128    96     
-32    -128   
48     160    
0      -48    
0      -32    
-128   -656   
48     32     
176    -1328  
-16    160    
80     16     
-16    144    
-16    16     
64     160    
144    288    
-128   80     
112    80     
16     32     
112    80     
48     -80    
-16    80     
64     -336   
48     80     
16     -240   
160    176    
-80    -128   
48     144    
-80    -32    
32     -144   
48     -16    
112    256    
272    336    
-208   -304   
64     48     
-64    -336   
256    208    
-144   -80    
144    80     
0      -64    
192    240    
-64    96     
-48    80     
16     80     
80     48     
160    16     
-128   -608   
192    192    
-176   -752   
160    112    
-80    -80    
48     32     
112    112    
-96    16     
144    -64    
112    272    
-32    -64    
-128   336    
-96    -96    
192    -304   
48     -688   
-32    -160   
32     16     
160    -288   
320    0      
-64    48     
-80    0      
80     -192   
272    32     
0      -64    
32     224    
-224   -144   
160    -160   
-80    0      
48     -512   
80     -368   
128    80     
-144   -128   
-16    -48    
112    -1696  
160    -64    
-48    -16    
64     48     
144    160    
80     -112   
-16    80     
32     112    
96     -448   
-48    112    
-304   -240   
-16    16     
-16    -80    
32     16     
208    -288   
32     112    
-16    -272   
0      -336   
32     -16    
112    64     
144    -96    
80     -352   
-48    32     
384    -400   
-208   224    
0      0      
-80    128    
-1312  -1456  
880    1776   
-208   -96    
-48    -448   
608    -304   
176    112    
-224   80     
-352   -736   
320    -192   
272    -400   
-48    400    
-80    -176   
80     112    
208    -160   
128    112    
-176   128    
-16    -96    
-160   -496   
16     32     
208    -80    
-240   -560   
448    192    
-80    -1456  
400    224    
-272   48     
224    112    
16     128    
32     -160   
-16    -48    
-112   -32    
16     -48    
64     0      
-112   32     
-16    -128   
-96    -128   
208    -224   
-96    0      
96     -624   
16     48     
32     -112   
16     112    
-80    -32    
64     -16    
-192   16     
144    -112   
-112   -32    
112    80     
-240   -144   
192    48     
-1360  -112   
160    0      
-16    16     
96     -144   
96     0      
-48    48     
208    288    
-336   -16    
272    -80    
-32    112    
-32    16     
-80    96     
-16    -176   
-192   -80    
32     -128   
-192   208    
48     -192   
96     32     
-112   -160   
-96    0      
144    -416   
224    -112   
-176   32     
-32    80     
-256   -64    
32     -16    
32     176    
-208   -96    
-48    -128   
64     64     
-64    -96    
48     -16    
-64    -64    
176    -192   
-176   64     
208    -240   
96     -48    
64     128    
-64    -16    
144    -48    
-64    64     
-64    96     
80     128    
-16    -16    
-16    -336   
-128   -96    
-64    -144   
256    304    
-496   -192   
208    304    
-304   128    
-528   48     
-96    16     
-960   -80    
-16    -32    
32     -16    
32     -16    
64     80     
80     48     
32     -16    
-144   64     
-304   -64    
176    64     
-144   -112   
64     160    
-80    64     
-352   48     
-64    -80    
-144   -16    
32     16     
-640   -32    
-96    32     
-128   -96    
64     -128   
48     -128   
-416   160    
0      -192   
144    48     
-128   -304   
-160   16     
-32    112    
-48    32     
-16    48     
-256   -16    
-96    -32    
-192   128    
16     -64    
-736   -96    
-192   112    
-144   176    
112    80     
96     16     
-16    144    
-272   0      
-240   -80    
80     -400   
-208   -304   
192    256    
-32    -16    
-32    16     
-336   -32    
0      80     
-352   -144   
32     128    
48     -64    
16     64     
-48    -96    
112    288    
-144   32     
-80    -32    
48     16     
0      -48    
-64    144    
48     272    
-320   -112   
0      -176   
-64    -304   
48     -48    
-128   176    
-656   80     
-64    96     
-96    0      
64     -48    
160    32     
16     176    
48     64     
-48    224    
48     80     
-32    64     
64     96     
16     112    
-80    -32    
-96    32     
112    176    
-432   -352   
16     -16    
240    32     
-112   192    
-96    192    
-32    32     
0      112    
-64    0      
80     80     
16     -48    
144    -112   
-112   128    
80     208    
496    -1552  
496    -192   
-352   384    
-192   1136   
-912   -720   
96     96     
-144   224    
-272   112    
-128   128    
-112   -192   
176    16     
-16    -112   
-32    192    
-208   -256   
16     176    
112    16     
112    448    
-352   -112   
144    80     
-112   -64    
-80    48     
-80    176    
272    48     
-208   -16    
176    -160   
-144   48     
112    176    
-64    224    
64     -64    
-64    96     
-144   96     
208    176    
-160   16     
-48    80     
-16    16     
16     48     
80     144    
96     48     
-64    64     
64     80     
16     128    
-64    -64    
0      208    
0      32     
160    80     
-304   -256   
32     0      
-64    32     
-48    48     
16     112    
-80    64     
80     80     
-80    16     
96     16     
-32    64     
80     192    
-64    128    
96     16     
-64    128    
32     80     
-256   -160   
112    112    
-16    64     
-80    16     
-32    0      
0      -48    
16     -48    
144    -64    
-48    -32    
160    224    
48     80     
-144   96     
-64    64     
64     80     
-64    -288   
-80    -352   
96     192    
112    240    
-48    128    
16     80     
-64    32     
-32    -192   
144    112    
144    112    
-16    16     
48     224    
-112   -96    
32     112    
16     -16    
112    112    
-96    16     
32     176    
48     112    
-48    48     
16     32     
16     64     
80     176    
16     96     
-80    0      
64     80     
32     80     
0      48     
48     192    
-112   64     
96     112    
-128   -16    
-48    -1184  
96     128    
-64    80     
80     32     
-16    96     
96     32     
16     128    
-32    48     
-32    16     
48     48     
80     240    
48     64     
80     80     
-80    80     
-16    128    
-96    -112   
176    192    
-144   64     
112    -256   
96     288    
-112   160    
288    160    
-192   80     
80     -16    
48     144    
-32    -16    
80     304    
-144   -112   
16     32     
112    368    
-32    -432   
128    96     
-48    -1536  
112    192    
-80    0      
32     160    
112    32     
16     128    
-112   -448   
400    80     
-160   208    
32     0      
-112   64     
304    208    
-176   64     
-16    -96    
-16    160    
96     -736   
-16    128    
48     400    
-176   16     
272    32     
-32    80     
96     112    
-160   96     
48     176    
32     0      
96     144    
-112   -304   
288    112    
-128   16     
176    128    
-144   -96    
368    -224   
32     -672   
16     -96    
-32    0      
160    -176   
128    112    
0      144    
16     48     
-32    112    
32     -112   
64     -48    
112    112    
-48    32     
-32    -80    
208    -16    
48     176    
48     -160   
-80    48     
96     -1104  
128    80     
-80    48     
128    64     
-208   112    
208    -80    
-96    144    
176    -32    
-912   1424   
-976   800    
832    1248   
304    0      
560    336    
-864   -928   
-336   176    
272    80     
80     240    
144    -32    
-224   80     
-160   96     
144    96     
208    -320   
-48    48     
-16    16     
176    -352   
-48    96     
176    -176   
16     96     
176    416    
16     256    
16     -176   
-16    144    
-80    -192   
240    352    
-80    176    
240    -176   
16     160    
0      -304   
144    64     
-32    -304   
64     160    
96     -128   
-48    192    
368    256    
-416   32     
272    -1392  
-176   48     
240    -16    
-112   -576   
112    -528   
-48    -16    
192    -1008  
0      -16    
-16    -256   
48     -64    
128    304    
-176   -32    
144    0      
80     -224   
-64    -2736  
144    96     
-144   -96    
128    64     
96     48     
80     -208   
48     32     
80     -544   
64     48     
48     -496   
0      48     
-16    -1488  
144    -176   
-96    192    
128    96     
-176   -320   
224    -16    
0      16     
16     0      
-112   -48    
144    -384   
-768   -192   
224    -192   
-48    16     
48     -304   
-64    16     
96     -400   
64     -128   
96     432    
-160   -176   
192    -48    
-80    208    
-64    -48    
-16    64     
-160   48     
32     -64    
-112   -144   
80     80     
-16    -208   
32     -160   
128    32     
-48    -288   
208    64     
-48    -784   
-16    -64    
0      -64    
192    176    
48     -80    
-96    64     
0      -16    
176    160    
48     176    
-16    -16    
-112   32     
0      -96    
144    0      
48     -32    
0      144    
112    -192   
-96    32     
0      -96    
64     112    
144    160    
80     144    
-160   -192   
-48    -64    
-528   -32    
464    -48    
-448   -48    
-16    32     
-144   -16    
384    -128   
-96    -176   
-176   -640   
32     -64    
48     -704   
16     -32    
128    96     
-192   -16    
16     -176   
48     0      
-128   -16    
112    -112   
224    176    
-160   -112   
-1216  -160   
-176   -64    
-672   48     
176    -16    
16     80     
320    -32    
-192   176    
256    16     
-32    -64    
-96    -64    
48     144    
-176   48     
112    80     
-160   48     
64     -192   
-48    224    
-48    80     
16     112    
-80    48     
144    144    
80     -32    
112    -48    
-464   64     
-16    -96    
-32    -32    
-16    -192   
32     32     
32     -80    
48     -144   
32     544    
208    336    
-80    -288   
96     64     
-48    -384   
-32    -80    
208    -224   
16     240    
16     96     
96     -16    
128    -96    
208    160    
-144   0      
-80    -48    
-32    176    
64     -32    
-48    32     
96     144    
-96    -64    
16     -96    
144    144    
-176   -32    
-224   -48    
-48    96     
-208   -80    
-80    112    
-400   -320   
-16    32     
112    112    
0      96     
64     -80    
-240   1024   
-16    224    
464    -128   
-752   -1712  
-352   192    
416    400    
144    608    
-144   288    
-304   -160   
-304   -432   
-576   112    
-144   -224   
144    96     
-272   80     
240    -64    
-144   192    
-176   -224   
208    192    
-32    112    
0      96     
32     224    
-48    -16    
-80    96     
-32    48     
-128   -240   
16     80     
160    656    
144    160    
-272   -272   
-224   16     
272    224    
-176   -128   
16     208    
-32    -176   
-48    -64    
-128   -16    
144    160    
-64    0      
80     112    
64     176    
-128   96     
80     80     
-48    16     
-112   -80    
112    48     
0      240    
224    272    
-192   96     
16     0      
-112   -96    
64     128    
-112   80     
144    192    
-160   0      
-64    -16    
-80    448    
-112   176    
-16    112    
64     304    
-144   -96    
-16    -32    
0      -48    
-32    256    
-112   96     
0      32     
48     48     
-80    64     
-32    32     
-112   80     
0      32     
32     64     
0      96     
16     176    
-48    144    
-336   16     
48     384    
0      416    
-48    96     
64     144    
-64    192    
160    64     
-160   0      
176    288    
-224   0      
176    96     
-224   -256   
160    -160   
-128   -352   
112    32     
-400   192    
-96    32     
-976   -32    
192    48     
16     96     
-80    -64    
64     96     
-112   0      
96     80     
-80    96     
48     0      
-80    96     
48     -32    
-128   -32    
-32    64     
-64    112    
0      32     
112    144    
-144   32     
112    16     
32     112    
0      80     
0      80     
32     112    
-16    32     
-16    32     
96     160    
-80    96     
-16    -32    
-64    80     
64     176    
192    144    
-160   96     
-16    112    
64     96     
32     192    
-144   112    
0      -48    
-32    48     
32     144    
48     -16    
0      64     
16     128    
-48    208    
16     240    
-192   -192   
0      -128   
160    96     
-64    128    
32     32     
-16    144    
144    32     
-80    288    
-144   -32    
112    160    
-112   272    
304    -176   
16     48     
48     -32    
48     80     
-176   16     
-48    0      
320    320    
-112   32     
352    -80    
-192   208    
-224   112    
-128   -352   
-16    -240   
192    160    
-160   64     
-64    128    
-16    48     
256    112    
-144   64     
160    192    
-304   -32    
32     64     
-96    96     
-32    -32    
96     -16    
-64    96     
-80    -32    
256    208    
224    48     
32     128    
-240   48     
64     144    
-64    48     
192    80     
0      32     
-16    64     
-48    32     
32     32     
128    160    
-48    80     
80     -272   
80     96     
208    48     
80     -96    
112    112    
-192   32     
96     256    
-96    112    
64     -512   
80     80     
-720   -912   
-320   -144   
-352   256    
496    0      
544    960    
-432   -784   
-208   512    
336    208    
416    224    
-112   160    
-48    -80    
-80    320    
-16    0      
16     16     
32     -96    
-96    48     
48     128    
32     48     
96     32     
80     64     
80     48     
16     256    
112    32     
-96    112    
64     -48    
64     80     
112    208    
0      144    
112    -16    
-128   -64    
96     -352   
112    160    
80     96     
16     96     
-16    64     
-80    -112   
144    160    
-48    176    
48     -272   
-112   80     
48     64     
16     160    
64     144    
-128   -336   
208    96     
16     -96    
64     -16    
32     -352   
-80    192    
144    160    
96     160    
-192   96     
192    -16    
64     16     
-16    160    
144    192    
-112   -16    
112    64     
80     16     
0      0      
16     -32    
64     112    
48     -752   
32     112    
160    48     
-16    128    
144    160    
-112   96     
112    80     
16     80     
16     0      
80     -16    
-96    16     
176    -80    
-48    352    
-16    -64    
32     -96    
112    -192   
-16    -16    
48     -3456  
16     -16    
16     -32    
160    272    
-80    80     
64     112    
96     -128   
112    128    
-96    96     
96     -112   
-32    16     
80     -160   
48     112    
96     16     
0      192    
-96    -288   
144    272    
-48    128    
128    80     
48     80     
-64    96     
96     128    
-80    -464   
176    160    
-176   -352   
176    128    
-96    -288   
176    96     
-16    -128   
240    112    
80     80     
-128   160    
208    176    
-208   80     
256    96     
-224   -160   
304    176    
-16    80     
-16    96     
128    16     
144    128    
64     -448   
-256   64     
-64    -144   
208    -32    
-96    -1008  
32     -800   
-48    96     
48     -832   
272    32     
-112   32     
-48    -48    
96     -192   
-128   -512   
64     -112   
-80    128    
336    336    
208    192    
-64    -176   
-32    -528   
-80    -272   
240    -800   
144    192    
64     -224   
48     144    
-432   0      
160    192    
-96    -288   
64     -128   
-16    64     
160    -816   
16     -16    
80     48     
112    -48    
112    -176   
0      -80    
64     -256   
-80    224    
160    224    
128    96     
-1072  -32    
-80    -400   
64     -80    
112    64     
-128   -48    
48     -256   
224    288    
32     -832   
-64    -80    
144    -48    
-112   112    
32     80     
32     112    
-64    -48    
96     -16    
-304   64     
-32    64     
-400   -16    
80     256    
64     368    
-176   -368   
-160   -304   
288    -912   
-96    -48    
-64    -112   
96     48     
192    -112   
32     128    
-176   16     
48     -48    
-16    48     
80     160    
-224   176    
-16    -208   
-16    16     
176    -80    
-768   912    
368    1552   
-1040  240    
-112   -1472  
176    320    
-64    -112   
160    288    
112    752    
64     -176   
-80    -48    
-128   -656   
-352   0      
272    -80    
-928   144    
-48    -48    
-48    144    
0      -320   
-192   -96    
208    -416   
192    0      
-160   -176   
0      128    
-16    176    
96     -64    
-160   -48    
0      -240   
-80    32     
80     272    
64     176    
64     144    
-192   -160   
0      -240   
176    96     
0      -160   
0      -48    
-160   128    
160    -160   
-128   -304   
32     -304   
-160   16     
192    96     
-96    128    
48     -16    
-16    64     
48     -240   
-32    64     
-64    -304   
32     64     
-16    -208   
-16    -64    
-272   -48    
-48    -48    
-96    -128   
160    0      
-80    -16    
64     48     
-112   -384   
224    240    
-144   112    
-16    -48    
-112   64     
-64    0      
32     96     
-16    -64    
-560   -16    
-80    -48    
-224   32     
-96    32     
32     64     
-32    48     
32     48     
-64    -48    
64     -32    
32     -80    
-144   -48    
64     -32    
-704   -128   
288    -16    
0      0      
-592   352    
-112   -32    
-128   -32    
128    128    
-624   224    
-208   -32    
80     -96    
144    416    
96     256    
-144   16     
32     -64    
160    -112   
-16    -128   
-80    128    
32     96     
-80    -16    
32     48     
-160   0      
-48    48     
-352   0      
-64    128    
-1056  32     
-96    80     
128    -32    
-224   -128   
-64    -320   
-16    80     
32     -32    
-16    192    
0      0      
-32    160    
-32    -32    
-48    -16    
-96    -16    
16     32     
-16    64     
80     448    
-256   176    
-576   -176   
-112   128    
144    -112   
32     176    
-48    -80    
-32    160    
80     400    
-144   -176   
-96    256    
-48    -32    
144    496    
-192   224    
-48    288    
-320   0      
-16    -16    
-432   -352   
-48    -336   
-96    -592   
80     -48    
80     176    
-64    -128   
64     144    
-176   -32    
-80    32     
-80    -16    
48     304    
-208   32     
-128   -128   
-160   -224   
-192   -304   
-512   -112   
0      112    
16     16     
-32    -32    
64     16     
-80    64     
48     -80    
160    64     
48     32     
32     -272   
160    960    
-80    80     
-80    -176   
16     64     
48     112    
-176   -64    
0      80     
-768   80     
208    -2240  
-240   -112   
-192   0      
112    -32    
16     96     
32     144    
-176   96     
-112   -176   
80     -48    
224    160    
-64    176    
0      336    
-272   -160   
48     160    
-816   -16    
-144   48     
-96    112    
64     -128   
96     32     
128    128    
-208   48     
-128   48     
0      16     
-16    0      
96     -16    
32     -112   
-64    176    
-176   -16    
-80    96     
-32    80     
-16    48     
-720   -2976  
1152   1536   
-1088  512    
-144   16     
-384   -256   
240    416    
-944   -48    
480    368    
-96    -32    
128    -320   
-128   560    
-128   -112   
160    416    
32     -432   
208    256    
-176   -32    
96     288    
-128   144    
160    16     
-48    48     
-16    -16    
96     224    
-144   -48    
144    144    
-192   -112   
160    192    
-80    16     
16     208    
-48    -112   
-16    48     
-64    48     
160    256    
-32    16     
-64    96     
-16    32     
48     48     
-80    -176   
-176   48     
96     240    
96     48     
-32    16     
-224   -16    
32     80     
144    208    
-16    96     
64     96     
16     96     
112    288    
-224   -48    
224    0      
-224   80     
128    160    
16     112    
-48    32     
-64    -32    
96     176    
0      96     
144    -16    
-32    144    
80     128    
32     96     
48     112    
-48    112    
96     112    
48     48     
48     -16    
64     256    
16     368    
-144   144    
0      -128   
160    64     
48     160    
-144   80     
48     -48    
64     -16    
-32    -16    
16     80     
16     80     
96     128    
80     304    
-192   48     
160    112    
48     208    
16     -240   
48     -48    
-48    -336   
-32    -48    
32     0      
-16    16     
32     80     
16     48     
-16    32     
144    0      
32     224    
-64    176    
128    256    
64     -16    
48     -144   
-32    16     
112    144    
-16    48     
48     16     
112    -592   
-144   64     
96     96     
-32    32     
16     -16    
176    64     
-112   48     
-32    80     
80     0      
-16    176    
16     -112   
96     80     
-16    112    
-80    -384   
64     -112   
-176   -608   
208    368    
160    16     
-96    48     
80     16     
176    112    
80     16     
-160   -272   
-32    -320   
0      176    
144    -32    
80     208    
16     96     
16     -256   
16     160    
128    -64    
96     48     
32     -784   
-96    64     
144    368    
32     128    
64     16     
48     160    
32     256    
-64    112    
80     32     
16     -64    
64     -48    
-16    -144   
32     224    
64     0      
16     144    
48     368    
112    64     
-80    -704   
144    0      
-128   -48    
-96    64     
64     -80    
160    432    
0      -176   
-96    -32    
128    208    
48     -96    
64     16     
96     -32    
96     464    
-64    224    
-16    0      
144    -560   
144    128    
-32    -48    
-64    144    
80     -96    
144    96     
0      96     
96     32     
80     128    
112    -560   
-32    48     
64     -240   
96     80     
240    -320   
96     160    
16     -96    
-80    176    
-64    -80    
272    144    
224    32     
32     96     
-96    208    
-16    -224   
96     0      
16     -208   
-80    128    
160    -80    
96     288    
240    -96    
-96    112    
1680   -2128  
560    96     
816    576    
-368   192    
496    -352   
-208   -656   
320    -1904  
176    -48    
112    608    
-256   -32    
32     32     
0      -272   
272    384    
-176   -224   
48     144    
-64    -560   
208    -592   
48     0      
32     -736   
-128   -192   
-128   -368   
384    368    
-288   -256   
352    -144   
-128   -48    
368    -608   
-32    -320   
208    32     
80     304    
192    208    
0      -80    
16     -368   
-80    -96    
256    -320   
-48    -176   
-64    -176   
-112   -80    
256    144    
-112   -288   
352    192    
-96    -128   
80     -64    
0      160    
0      -16    
128    176    
80     -32    
-32    96     
-208   -528   
-32    -288   
176    -96    
-48    64     
0      -64    
48     -304   
-160   -368   
192    -192   
0      -480   
-32    576    
496    -32    
-64    -160   
144    -256   
-48    -160   
96     -240   
-32    -224   
16     112    
-16    -80    
-304   112    
96     -80    
-256   -16    
-16    -176   
80     16     
112    16     
80     128    
-32    -80    
-256   -112   
96     -720   
-32    -80    
208    0      
-32    384    
-160   -224   
16     -48    
16     -96    
96     -48    
-240   32     
80     96     
-400   112    
-224   -432   
-64    -48    
176    -288   
32     48     
-32    -768   
-16    16     
128    64     
112    -96    
-224   -208   
96     -128   
-96    -16    
48     -144   
-96    -272   
32     -192   
-528   -208   
224    112    
-1056  224    
-16    16     
-128   96     
208    -192   
16     -16    
96     -16    
-48    96     
48     32     
64     0      
-16    -48    
32     32     
-384   -48    
96     -32    
-384   -208   
160    176    
-96    144    
-32    -64    
160    368    
-32    -416   
-48    64     
-240   208    
96     176    
-192   32     
256    112    
-96    32     
96     -192   
32     352    
32     160    
-192   -128   
176    192    
288    144    
-176   -256   
-16    -176   
112    -320   
-16    48     
-32    0      
0      -48    
-96    80     
-32    -32    
96     -48    
0      32     
-32    176    
-48    112    
-64    -368   
-128   -352   
-224   -192   
-192   -368   
0      144    
64     -96    
-336   176    
-64    160    
288    -96    
-80    -96    
144    80     
-160   -112   
32     192    
144    160    
176    272    
-272   -48    
-480   -80    
32     48     
-208   -96    
64     80     
-336   0      
-144   112    
0      0      
-336   112    
0      0      
-416   112    
-80    32     
-272   64     
-160   32     
80     16     
-16    320    
-208   -128   
16     64     
80     -208   
256    16     
-192   64     
-240   -80    
160    -96    
-112   192    
-96    160    
-400   16     
-48    32     
-352   -80    
-80    112    
16     -32    
32     -16    
-48    48     
0      288    
-160   -368   
32     -32    
-32    32     
-720   -1440  
208    704    
-1168  544    
-80    -32    
-128   288    
-96    32     
448    768    
-768   -368   
-32    272    
-48    80     
192    96     
-304   32     
96     -112   
-96    176    
128    -176   
-96    320    
240    -80    
-256   192    
-16    -80    
-80    128    
80     -48    
-80    208    
192    0      
-192   192    
64     -96    
-208   32     
368    128    
-144   96     
176    -32    
-128   0      
-96    32     
-16    0      
48     80     
-32    16     
-80    80     
144    96     
-368   -192   
-48    80     
-304   -96    
208    80     
-912   -48    
128    64     
48     112    
32     0      
-80    176    
0      48     
32     64     
16     272    
-352   48     
336    0      
-256   160    
-80    -16    
144    80     
-240   -16    
176    80     
-368   -80    
128    64     
144    160    
-96    0      
-48    -80    
-32    176    
16     144    
-48    -16    
96     272    
-192   -96    
64     -16    
-64    -160   
96     176    
-288   112    
0      96     
-176   -144   
-128   16     
-64    96     
-48    64     
80     48     
176    416    
-112   -64    
288    32     
16     208    
-240   80     
16     -64    
64     -32    
0      64     
-48    -48    
48     -16    
-176   80     
-224   144    
176    224    
112    32     
64     64     
-64    48     
32     -16    
0      -16    
-32    32     
128    192    
-192   -80    
96     144    
160    304    
-176   -224   
-16    80     
0      96     
32     112    
112    -176   
0      -80    
64     128    
208    592    
-16    32     
-80    0      
0      128    
112    240    
32     96     
-176   0      
128    128    
-112   -64    
144    176    
48     80     
-16    -32    
0      160    
-48    224    
96     -128   
-64    0      
64     112    
-48    144    
16     80     
-96    112    
192    160    
-144   96     
64     -48    
-96    -64    
128    112    
-16    112    
-32    224    
80     32     
16     -144   
32     192    
16     208    
112    336    
-272   -16    
224    96     
-192   32     
112    112    
-64    -160   
80     208    
-112   176    
80     160    
-48    208    
192    256    
-144   -96    
112    80     
0      192    
-80    48     
112    304    
-224   112    
64     -832   
-48    -208   
208    272    
112    192    
-80    208    
96     48     
-208   96     
192    128    
-16    96     
48     112    
-80    272    
-64    -48    
176    240    
400    160    
-48    80     
-48    48     
-96    80     
240    352    
-304   32     
112    16     
16     80     
192    -144   
-128   160    
64     80     
32     112    
48     16     
128    96     
-96    96     
160    208    
-128   96     
192    0      
-128   96     
176    64     
-192   96     
64     -32    
80     128    
-48    -112   
48     96     
304    176    
-208   -128   
144    224    
0      96     
176    288    
-656   432    
-256   -752   
-32    -224   
-304   -96    
144    64     
64     480    
256    -480   
-48    416    
240    -304   
-112   96     
176    -64    
176    80     
-112   160    
48     -96    
144    304    
128    208    
-208   16     
160    -384   
-80    112    
240    -128   
160    560    
16     -608   
48     544    
-160   -736   
112    304    
-80    -96    
192    160    
320    272    
112    688    
32     0      
304    112    
-240   -144   
96     288    
-224   -16    
-144   0      
64     96     
-256   128    
48     80     
-160   -32    
64     224    
-48    -144   
32     48     
-96    -16    
208    176    
-144   160    
112    464    
16     144    
224    448    
-128   64     
160    -160   
-48    64     
0      -64    
32     336    
48     -784   
16     48     
16     -1280  
176    -384   
-32    -320   
160    224    
32     288    
128    256    
-32    -16    
80     256    
-80    -144   
64     80     
64     16     
80     -96    
128    -160   
80     -128   
160    112    
96     0      
-128   144    
64     -32    
48     112    
-224   -368   
224    208    
-128   32     
-48    -32    
32     -48    
128    -16    
96     160    
48     -352   
128    256    
-16    -192   
32     112    
224    432    
-80    32     
-32    -64    
96     16     
112    128    
-48    32     
16     16     
80     -576   
112    -1488  
160    -112   
48     -1840  
-32    -112   
-112   -304   
352    160    
96     128    
-16    16     
-192   160    
80     -272   
64     -960   
-32    -176   
16     -400   
48     128    
-1072  -64    
128    16     
64     -96    
128    -368   
32     0      
0      160    
176    160    
-96    -240   
384    192    
-96    80     
0      32     
48     -448   
48     128    
240    0      
-240   112    
-128   -80    
32     -480   
-400   32     
48     -144   
32     176    
128    -368   
80     -64    
-112   -1136  
144    0      
96     0      
-96    96     
160    16     
-80    144    
16     -160   
144    -208   
-368   -16    
128    -16    
-528   -64    
32     -16    
48     144    
112    -560   
-48    -80    
-32    -912   
48     96     
80     -80    
96     96     
48     -64    
48     80     
-144   48     
192    16     
-48    176    
-64    -176   
-352   64     
144    304    
32     0      
112    -128   
16     0      
208    -192   
0      64     
64     -496   
288    464    
-288   -240   
176    112    
128    80     
112    0      
-48    -144   
16     -48    
0      240    
-144   -128   
-464   144    
224    -288   
288    176    
16     -128   
-64    16     
128    -256   
96     96     
-32    64     
96     32     
-96    64     
192    -416   
-144   -112   
144    -320   
-176   32     
32     -128   
-416   -32    
64     16     
-224   -16    
-16    -496   
80     48     
160    -432   
-32    -128   
32     -1232  
64     -16    
-1104  -1840  
544    -576   
-1216  -176   
448    32     
-112   480    
96     -64    
-608   -192   
-416   96     
176    -32    
32     -736   
32     208    
-32    -240   
208    512    
-48    -912   
32     48     
-192   -160   
128    144    
32     80     
80     64     
-32    -48    
16     -80    
-112   128    
32     -64    
-48    144    
-32    -256   
48     128    
32     -384   
96     144    
-80    -32    
32     32     
64     -32    
48     160    
-112   -32    
-16    64     
-32    16     
32     48     
-112   0      
-48    16     
128    32     
-1408  -80    
48     0      
-544   -224   
16     144    
32     16     
16     144    
-80    128    
-400   -32    
-80    160    
-320   32     
208    -48    
-16    160    
16     48     
-496   -48    
48     64     
-240   -160   
64     160    
-240   -16    
64     32     
0      32     
-192   32     
-48    128    
-160   32     
-64    16     
-192   16     
-80    160    
16     32     
-160   0      
-16    -176   
80     96     
0      -16    
-16    64     
96     128    
-144   -80    
-48    48     
-192   0      
-112   -80    
80     224    
-176   112    
-48    -176   
48     -64    
-1392  112    
-176   80     
-32    144    
-64    192    
160    -96    
32     16     
-80    -80    
-32    48     
-32    112    
-32    144    
-192   -96    
288    -64    
-128   96     
0      -16    
-128   112    
-1008  48     
96     64     
16     304    
80     128    
-32    -192   
-112   16     
160    96     
-128   176    
-32    0      
-64    160    
32     -64    
-160   -32    
0      -224   
-272   -336   
0      80     
-192   64     
64     144    
-32    -144   
0      144    
-16    -112   
-48    -16    
32     144    
0      80     
32     -320   
-192   64     
64     -96    
-64    -48    
-96    -16    
-48    -32    
176    80     
-160   48     
160    160    
-1552  0      
-128   32     
16     -80    
64     96     
64     16     
0      112    
80     -32    
0      256    
-64    368    
112    336    
-176   -112   
112    48     
48     96     
-240   -80    
176    80     
-368   64     
96     48     
0      192    
-32    96     
-32    80     
-80    -80    
32     64     
-16    64     
48     80     
-80    112    
192    304    
-304   -144   
272    64     
-272   16     
272    -80    
-48    224    
-192   0      
64     -16    
-112   -16    
288    80     
48     128    
-32    80     
80     288    
-288   -112   
144    176    
-64    0      
-128   -96    
-96    96     
-48    -32    
80     128    
-160   -16    
-64    48     
-32    -112   
128    224    
16     0      
80     192    
-128   64     
80     112    
-32    64     
80     16     
-64    288    
-48    -192   
208    96     
80     160    
-16    128    
-160   96     
80     -16    
144    96     
-160   128    
-48    64     
-32    368    
16     -80    
-176   48     
256    16     
1072   1280   
-992   -624   
160    80     
544    496    
80     -880   
-720   64     
320    192    
-208   384    
400    -368   
-256   688    
208    -288   
-336   320    
-48    32     
192    224    
-144   -176   
48     -48    
-96    96     
96     32     
-112   432    
64     -128   
-128   336    
48     160    
-32    80     
64     -128   
208    608    
32     -16    
-256   -16    
32     16     
288    320    
32     32     
-256   -128   
176    96     
-112   128    
96     32     
-64    -336   
240    -112   
96     368    
16     160    
-96    128    
-48    -320   
16     144    
176    112    
112    -176   
-128   -48    
96     112    
224    272    
-176   176    
-16    64     
-48    160    
176    48     
-112   -464   
16     80     
16     128    
80     16     
-16    64     
112    128    
64     16     
-48    128    
-48    -64    
64     96     
64     112    
-16    160    
-144   -416   
224    80     
16     144    
0      -352   
32     224    
-32    -176   
96     -64    
80     64     
-64    144    
32     144    
80     256    
-64    -16    
96     48     
128    48     
-16    128    
32     32     
-80    -160   
80     96     
-32    16     
0      -16    
48     -912   
-64    304    
-32    160    
224    384    
-128   112    
128    80     
96     208    
80     112    
-48    -96    
0      32     
-16    -16    
0      -208   
144    288    
16     -112   
0      32     
-16    -2640  
64     48     
48     128    
-32    112    
-48    -96    
16     64     
96     32     
16     96     
-16    48     
128    416    
-240   -96    
240    -96    
-32    -16    
48     -304   
32     144    
128    -928   
208    240    
-16    -1152  
48     368    
0      112    
112    112    
-32    256    
64     96     
48     336    
-48    224    
240    224    
-112   -160   
112    112    
16     80     
192    96     
-160   -448   
144    112    
-80    -448   
128    48     
-288   -768   
208    80     
176    -32    
96     32     
-352   192    
320    112    
80     64     
48     -256   
-112   16     
-112   -704   
64     -224   
64     -224   
0      64     
144    -688   
-192   16     
96     64     
-64    16     
208    80     
-64    112    
80     -64    
-16    -240   
80     192    
-64    -96    
96     128    
-96    -112   
144    -48    
-80    -416   
16     48     
48     -304   
64     208    
112    -240   
16     208    
16     64     
32     -160   
144    -48    
16     256    
32     16     
-16    176    
144    160    
-32    -224   
80     224    
96     -304   
48     144    
96     16     
32     112    
176    48     
144    -336   
128    144    
-112   -320   
-112   -736   
144    64     
160    -208   
48     -288   
-128   -2032  
128    -224   
0      96     
32     -96    
144    64     
112    -32    
-80    -96    
96     96     
-48    -384   
-32    96     
-48    0      
-688   -1808  
544    480    
-1232  656    
32     -192   
16     -320   
384    -544   
-224   96     
800    -48    
-288   736    
384    -800   
-64    96     
256    -208   
96     512    
-16    -224   
128    64     
-96    -320   
-784   0      
16     -192   
0      0      
208    -176   
64     16     
48     -64    
144    -96    
-128   -464   
-48    -176   
48     144    
112    0      
-16    96     
-16    -288   
-192   -64    
32     -128   
-80    16     
128    -64    
-48    48     
-80    -176   
112    -208   
48     -992   
48     -16    
32     -2000  
112    32     
-32    -80    
-48    128    
128    -112   
80     -48    
-112   -64    
-48    16     
-96    -16    
112    -16    
-1616  -32    
160    -80    
80     -64    
48     -64    
48     -16    
112    -528   
16     96     
48     -160   
64     48     
-48    32     
32     -48    
-32    -64    
112    32     
32     208    
-80    -16    
-288   -128   
32     -192   
192    144    
-80    -176   
48     96     
0      -224   
144    80     
-32    304    
112    96     
-128   -32    
96     32     
-16    -80    
128    -304   
-272   -64    
-48    32     
-240   48     
128    48     
-272   -48    
32     -80    
16     176    
0      -560   
48     -16    
64     -112   
16     -16    
-80    80     
112    -64    
-192   -32    
32     -80    
-112   48     
160    80     
-144   80     
16     -352   
-528   -432   
112    -384   
224    208    
-48    -32    
-32    176    
-32    -240   
144    -64    
-112   -16    
64     16     
-112   96     
208    160    
-240   -192   
128    -96    
-48    128    
176    -112   
-224   64     
64     -48    
32     32     
96     -96    
32     96     
-48    -16    
-1664  -48    
-112   -16    
144    32     
-176   0      
32     0      
-16    144    
240    -64    
-224   -192   
48     48     
-128   176    
-832   -368   
16     256    
-368   -208   
48     -32    
-64    -16    
-96    32     
-96    80     
-128   64     
-192   -144   
-16    -128   
-80    0      
160    -80    
48     176    
-176   -112   
128    144    
-176   -80    
160    64     
-32    -80    
-272   -288   
240    16     
-96    224    
80     336    
-224   -160   
112    -16    
0      -48    
-128   -176   
-32    -64    
448    224    
-112   16     
144    192    
-272   -144   
80     -32    
208    -128   
-96    144    
0      16     
-272   176    
32     -224   
-96    128    
-304   -128   
160    -112   
-192   272    
-80    -32    
-144   48     
0      32     
48     -32    
-96    -64    
16     128    
272    112    
-144   80     
80     -112   
-32    144    
-16    0      
-96    -96    
176    80     
0      304    
-16    160    
-336   -288   
368    144    
-464   352    
-96    -112   
-96    -32    
288    176    
64     64     
64     -224   
-64    304    
64     -64    
-224   128    
96     112    
256    96     
-112   -80    
-1344  -1168  
1264   -16    
-128   0      
16     672    
-896   -432   
672    320    
-32    -256   
-32    128    
-432   -336   
144    96     
-32    80     
176    48     
32     80     
-176   -176   
-16    -16    
224    656    
-320   112    
-64    32     
128    144    
0      -64    
-144   -336   
-192   64     
304    -32    
-240   -128   
16     96     
144    16     
-16    112    
-160   -48    
96     0      
80     -32    
-80    112    
48     96     
96     32     
-288   32     
144    160    
-16    48     
-96    64     
32     128    
32     -96    
112    128    
-192   128    
144    48     
-272   -128   
96     48     
112    176    
-16    96     
-240   0      
-80    -160   
-64    64     
-32    96     
64     64     
-48    32     
-32    -64    
112    96     
16     192    
-96    16     
-48    64     
32     0      
80     160    
-144   -32    
-16    16     
-144   -80    
0      112    
-32    32     
48     112    
0      112    
32     160    
0      48     
112    144    
-48    80     
16     48     
144    16     
-16    80     
16     64     
-16    96     
-16    320    
-16    128    
-16    96     
176    112    
-96    48     
48     144    
0      320    
-128   32     
48     -208   
240    176    
-176   128    
208    176    
-48    -32    
112    96     
-16    96     
112    352    
-208   64     
192    112    
16     32     
16     32     
-144   48     
144    160    
-32    32     
96     48     
48     64     
-80    80     
0      144    
-176   16     
80     -32    
-80    -48    
80     80     
-32    208    
-112   0      
176    0      
-48    48     
-32    80     
80     16     
48     80     
-128   16     
384    -16    
-32    96     
-160   48     
112    80     
80     288    
176    112    
64     128    
-240   32     
48     16     
272    288    
144    0      
-16    -16    
-144   -128   
-80    -64    
-80    48     
128    -112   
-32    192    
-160   96     
256    16     
80     192    
-304   -112   
144    -80    
-112   -48    
-48    -240   
176    32     
96     144    
-144   48     
176    304    
80     32     
-16    96     
112    400    
96     48     
-96    144    
-48    96     
144    64     
-16    144    
48     112    
128    160    
-96    -272   
176    112    
48     128    
80     16     
160    80     
112    176    
64     96     
48     80     
-112   -80    
224    80     
16     -48    
-64    80     
-48    -64    
-64    -432   
-32    48     
144    48     
48     336    
64     -736   
-80    256    
16     -64    
48     96     
-64    0      
48     112    
48     224    
-80    -16    
-96    -112   
176    176    
-96    -64    
48     -336   
160    144    
0      -48    
64     400    
-96    -288   
160    -48    
112    -144   
16     -32    
48     400    
-32    96     
48     160    
96     144    
-80    -96    
96     192    
80     16     
-256   -1296  
-848   -528   
-208   368    
560    208    
-448   -288   
192    16     
-320   -624   
256    0      
16     -128   
208    144    
96     16     
-144   288    
96     48     
160    160    
96     -48    
-160   -16    
144    208    
64     -64    
16     16     
128    -384   
48     192    
96     -144   
64     192    
16     0      
16     32     
-16    -128   
48     112    
192    96     
-64    112    
48     0      
32     -240   
64     160    
-80    -400   
32     144    
16     -192   
304    128    
-176   32     
144    112    
-48    80     
48     80     
-32    144    
64     96     
64     16     
80     -144   
160    112    
96     -528   
-16    80     
32     -80    
48     16     
48     -112   
128    144    
-48    -80    
64     96     
32     -224   
-80    96     
160    96     
80     -128   
16     48     
64     -128   
-48    32     
208    64     
128    272    
-64    16     
192    272    
-32    -160   
128    96     
32     16     
-144   96     
48     -80    
80     -32    
32     48     
112    -208   
-96    -144   
48     -176   
96     -432   
80     16     
-288   -1616  
352    -240   
32     96     
-96    -112   
112    176    
16     32     
-32    -336   
80     -80    
96     -528   
-240   16     
-448   112    
-48    96     
-1312  32     
32     -64    
-16    32     
-32    -16    
32     -160   
192    -1072  
0      -64    
16     96     
112    64     
48     -240   
-32    64     
32     -144   
0      0      
16     -16    
48     16     
160    96     
16     -208   
64     0      
-96    -384   
224    320    
-96    -96    
192    64     
-160   -1088  
96     -48    
48     -16    
0      64     
32     80     
112    0      
-96    -96    
48     16     
-192   32     
-64    -128   
-1152  -64    
48     -160   
272    96     
-112   -96    
-64    48     
160    -16    
-160   -48    
64     -64    
48     128    
176    -80    
16     -48    
-176   64     
160    -160   
0      96     
-16    -96    
112    720    
-160   -336   
96     -32    
-48    0      
64     -176   
-32    -688   
80     240    
32     48     
-16    128    
0      16     
-32    -128   
-48    -160   
64     32     
32     64     
-16    16     
-176   -64    
192    80     
-736   272    
-256   16     
240    -128   
-320   -576   
304    -160   
288    -1168  
-16    304    
-256   -80    
80     -48    
96     16     
96     -16    
32     64     
-96    -672   
80     96     
-80    -144   
-400   0      
-192   -96    
288    32     
112    -224   
208    32     
-256   -224   
0      -224   
32     16     
128    272    
-32    352    
-208   64     
-176   -336   
176    -16    
112    -144   
96     96     
-32    -656   
-64    64     
288    32     
16     -112   
-48    48     
144    -224   
48     64     
-64    0      
-32    32     
-80    64     
0      0      
96     48     
96     48     
0      80     
960    -624   
-16    1472   
-352   -192   
-640   -672   
272    304    
528    176    
240    112    
-640   400    
-512   -336   
-320   -528   
-48    -160   
208    0      
-32    144    
-16    224    
32     32     
48     0      
-560   -256   
-992   -176   
-16    -16    
-208   -224   
-16    64     
80     192    
0      112    
0      112    
-304   -48    
144    80     
-208   32     
208    336    
-80    -64    
0      80     
-224   -128   
112    32     
-176   -48    
64     192    
-32    0      
-128   192    
-112   112    
16     -80    
-80    48     
-48    16     
48     176    
-224   64     
48     32     
-704   -48    
32     32     
112    48     
-112   96     
160    240    
-112   0      
80     -256   
-208   16     
48     0      
-128   16     
64     64     
16     32     
-336   48     
-224   -256   
96     176    
-496   112    
-80    -48    
112    -48    
64     176    
-96    -304   
0      240    
0      16     
16     -80    
192    160    
16     160    
-160   32     
-128   64     
-32    -64    
64     -32    
-48    192    
-80    64     
48     224    
-992   -128   
208    144    
-96    -160   
32     32     
16     80     
-160   176    
144    272    
-256   -64    
128    -64    
-96    -176   
112    160    
-128   256    
-32    -32    
-160   -32    
32     64     
-352   -160   
48     80     
112    272    
-240   -16    
208    128    
-384   -96    
176    96     
-128   96     
112    96     
-128   16     
80     128    
-176   0      
160    128    
-176   -64    
-80    208    
-208   128    
80     64     
-192   -160   
0      80     
48     48     
-16    32     
-96    16     
0      96     
256    112    
96     48     
-272   64     
80     -144   
-112   -64    
-240   -16    
-16    32     
144    16     
-96    48     
80     160    
16     128    
336    192    
-352   16     
192    208    
-224   176    
112    -112   
-16    -80    
-80    0      
-160   48     
0      32     
-32    -48    
48     -48    
-16    -32    
-16    -16    
0      32     
32     32     
80     64     
-32    240    
-16    112    
128    16     
-144   16     
80     240    
-160   -416   
-64    0      
32     192    
-160   -32    
16     96     
-208   -32    
48     64     
-16    16     
16     0      
-32    -48    
80     96     
32     304    
64     96     
-32    112    
-32    -48    
64     128    
0      160    
112    240    
-32    -112   
256    400    
16     384    
-144   -160   
160    144    
48     -112   
32     240    
32     112    
-16    16     
32     -64    
-48    -48    
208    272    
208    256    
-224   -256   
80     240    
-96    64     
32     160    
48     32     
96     96     
0      128    
-48    -80    
-16    304    
176    176    
-16    -32    
-96    80     
16     80     
-32    16     
0      64     
-80    -16    
16     112    
-32    -48    
48     48     
1504   -1248  
-592   16     
1328   1264   
16     240    
288    -256   
-160   1120   
-432   64     
-64    -336   
304    416    
-368   -416   
144    128    
-160   80     
208    128    
-128   224    
-32    -272   
-32    160    
336    544    
128    528    
-48    160    
-240   -160   
176    144    
112    176    
-32    -128   
-80    -64    
96     96     
112    112    
16     272    
-32    0      
16     -112   
0      -384   
-16    0      
128    80     
128    208    
-80    -64    
144    -48    
-128   -64    
144    160    
-144   208    
64     48     
32     64     
96     112    
-128   -208   
32     272    
96     80     
48     -176   
-32    144    
32     -2208  
112    304    
32     240    
0      -32    
80     16     
32     16     
96     192    
-128   80     
-32    -80    
80     -16    
96     -32    
64     240    
128    240    
-16    48     
48     32     
32     -720   
-112   -32    
64     -208   
96     48     
112    144    
16     96     
96     -64    
-16    128    
48     -64    
80     112    
32     64     
32     -192   
48     -64    
128    -192   
-64    -208   
-32    -1152  
32     -80    
16     -1104  
96     64     
-96    -400   
96     80     
32     32     
128    128    
64     240    
-128   -48    
80     64     
64     -16    
80     80     
16     -112   
48     208    
112    32     
16     96     
64     -304   
0      -16    
112    -288   
128    272    
-16    48     
48     144    
-64    64     
144    64     
64     112    
64     -48    
16     128    
48     -16    
-128   16     
192    -144   
-32    32     
112    -528   
0      176    
96     160    
16     112    
32     80     
64     128    
-32    -64    
64     176    
-16    80     
128    -512   
48     112    
32     -16    
80     176    
-208   -208   
128    112    
48     -192   
0      80     
128    -320   
-144   288    
48     0      
-16    48     
0      16     
128    -64    
-64    256    
16     -96    
128    32     
272    352    
-240   400    
-112   -208   
96     256    
64     -208   
96     144    
32     -464   
-64    -416   
16     128    
48     -1248  
-80    -448   
176    64     
192    -1856  
16     -48    
-32    -96    
144    -80    
-64    192    
16     -96    
-144   -208   
160    -208   
256    160    
128    -496   
-16    416    
-64    176    
16     -48    
80     48     
-512   -80    
160    128    
-112   -176   
160    -384   
-80    -16    
48     -368   
-64    16     
16     16     
64     -272   
48     192    
-48    -64    
160    208    
-128   16     
0      -176   
0      -16    
-832   -96    
0      -208   
48     160    
112    -256   
-16    32     
224    48     
16     0      
80     -224   
-32    48     
0      -192   
-32    128    
160    -64    
64     80     
0      16     
144    -96    
-224   160    
-16    -96    
-144   0      
112    -336   
192    -32    
-416   304    
320    1584   
-800   -896   
32     -512   
-112   -1296  
208    256    
-16    64     
-176   -128   
-64    320    
336    16     
-48    112    
-112   -208   
-384   144    
-96    -384   
224    48     
-144   -80    
256    96     
-16    -176   
0      16     
16     -480   
0      -32    
16     -48    
96     240    
16     -16    
-48    -48    
-16    48     
-176   -176   
-160   -32    
208    160    
-1728  -96    
32     160    
0      48     
112    -160   
-16    80     
48     -16    
64     144    
32     192    
80     -16    
-160   -48    
96     -112   
-16    -80    
64     32     
-224   64     
80     64     
-160   -32    
-96    -272   
-592   96     
-176   -304   
256    256    
-128   -208   
144    176    
-176   -160   
128    -336   
96     64     
32     16     
-112   -48    
-64    64     
64     -48    
16     -96    
-272   -112   
32     -272   
32     -16    
48     -80    
64     48     
32     -208   
48     192    
-272   160    
-80    -80    
32     16     
160    288    
-176   -144   
208    96     
-208   0      
96     -16    
-96    -96    
160    -64    
-112   -32    
80     -112   
96     144    
304    -64    
-256   -48    
80     0      
192    272    
-256   -32    
144    32     
-48    -16    
192    -16    
112    -112   
160    320    
-112   48     
80     -48    
16     48     
-208   -208   
48     192    
16     160    
-432   -16    
48     16     
0      -16    
-64    64     
-1664  -160   
-16    16     
-16    -32    
64     208    
-160   32     
96     16     
-208   -272   
96     48     
-336   -64    
-256   -128   
208    96     
-240   64     
96     -16    
0      240    
-176   64     
-432   48     
-32    -48    
-672   -16    
160    -16    
-16    0      
-176   192    
32     -208   
0      192    
-304   -80    
32     -112   
-96    -48    
-112   32     
-32    -64    
-240   96     
-144   0      
64     128    
-16    96     
-352   80     
0      240    
-176   -240   
96     128    
-208   16     
160    96     
32     -32    
0      16     
-48    32     
48     -16    
-96    32     
-16    16     
-16    96     
-80    80     
-32    32     
-192   144    
-48    48     
-1232  -112   
128    112    
-112   -48    
0      128    
-96    -304   
176    96     
-176   -128   
96     128    
160    848    
-192   -176   
-128   32     
32     -32    
-96    -32    
32     48     
-80    176    
-208   -16    
-160   -16    
-80    -112   
144    400    
-48    -336   
0      240    
-16    272    
-128   160    
-48    16     
-16    -464   
224    80     
96     176    
48     -224   
0      144    
64     192    
-368   32     
80     192    
-768   -176   
32     160    
0      -96    
-128   80     
64     128    
-16    0      
-32    192    
-16    -128   
48     128    
-48    96     
16     176    
-144   -32    
192    -80    
-192   16     
48     80     
-1040  16     
-928   368    
256    1952   
-1104  896    
-960   -432   
-80    -1488  
640    736    
-416   608    
208    720    
0      -320   
288    -256   
-480   -192   
80     80     
80     368    
160    -16    
176    128    
-224   -224   
112    192    
-80    0      
304    416    
-128   176    
-16    -144   
-128   0      
96     288    
-144   16     
16     160    
-368   -112   
256    96     
-224   -48    
32     208    
-16    0      
0      48     
-64    0      
32     64     
16     96     
288    288    
-176   -304   
64     -144   
-176   -144   
320    224    
-16    288    
-192   128    
48     144    
-96    -64    
-32    32     
-16    144    
-64    80     
80     48     
-16    240    
-112   -320   
16     208    
32     -128   
-16    64     
64     -16    
144    48     
-96    96     
48     304    
-16    416    
-80    -16    
-160   -192   
272    -64    
32     176    
48     -48    
48     288    
32     64     
80     304    
-80    -64    
160    32     
112    96     
16     0      
-32    128    
-64    0      
96     96     
-48    16     
-48    96     
144    112    
16     160    
-304   -560   
160    -16    
160    16     
240    576    
-112   112    
-112   288    
64     176    
-208   -48    
16     48     
-32    -16    
-16    224    
-48    -64    
96     160    
32     64     
0      0      
-16    -96    
144    224    
128    128    
32     272    
-128   -16    
160    304    
128    384    
-64    16     
0      -16    
64     112    
64     -32    
0      32     
48     144    
16     48     
64     400    
-240   -48    
256    240    
-144   160    
64     -32    
-96    96     
-64    0      
112    128    
-48    16     
0      64     
-32    -192   
80     -432   
0      -160   
48     -2192  
-16    -48    
96     32     
240    192    
32     192    
-144   176    
96     384    
-48    -224   
96     -96    
-240   -512   
336    192    
32     256    
-48    240    
0      -144   
112    16     
-16    -656   
224    144    
-208   -320   
160    -48    
128    160    
-32    80     
64     144    
-32    -112   
192    -64    
-144   304    
80     112    
-16    64     
48     32     
80     160    
-64    112    
32     0      
48     0      
96     160    
-48    -32    
64     96     
128    160    
-80    -16    
16     16     
32     96     
-96    48     
96     -128   
64     176    
-48    -208   
32     -16    
-48    -176   
144    -496   
368    944    
-464   -128   
-288   -384   
80     144    
256    176    
0      32     
-32    368    
-80    -96    
48     64     
96     80     
64     -80    
48     112    
80     -80    
32     176    
16     -160   
48     96     
48     -320   
32     176    
224    -416   
64     176    
-144   32     
112    240    
-128   192    
-32    0      
128    32     
96     -96    
16     -112   
32     64     
80     192    
80     -64    
160    192    
-96    -192   
16     816    
336    224    
96     400    
-432   -544   
-32    544    
32     -16    
560    256    
-192   208    
208    -464   
-336   -48    
240    -480   
-32    304    
64     -192   
64     240    
-16    -160   
96     96     
-112   -208   
128    144    
48     80     
0      128    
48     80     
-64    -112   
144    128    
-64    -48    
208    64     
-32    -48    
64     352    
208    -160   
-176   -48    
144    -112   
48     96     
96     -592   
-144   -1648  
192    48     
-64    -1008  
160    -96    
-432   96     
304    -64    
112    -64    
-64    -32    
-48    80     
160    224    
48     80     
-144   32     
208    -128   
0      144    
-16    16     
384    192    
-224   -48    
272    -320   
-128   -112   
-128   0      
0      -208   
96     -96    
48     -608   
-96    -416   
256    -704   
-176   112    
128    -128   
160    -80    
48     -128   
0      112    
64     -288   
32     96     
0      96     
48     16     
-304   -96    
16     -240   
16     -112   
-32    64     
96     16     
128    -32    
48     -48    
96     -1296  
-48    -240   
80     -176   
-128   144    
128    16     
96     32     
-16    96     
16     -96    
16     320    
-96    -64    
192    128    
0      0      
32     -128   
224    -176   
-16    64     
128    -496   
-192   16     
16     96     
0      112    
128    160    
-144   -32    
-64    -16    
64     -240   
-160   -16    
16     32     
112    48     
112    -16    
160    -48    
-96    -320   
96     16     
48     -320   
16     -48    
-16    -320   
-176   -208   
64     -176   
144    16     
0      -96    
32     -16    
-48    96     
0      -160   
-16    -96    
64     -176   
-560   48     
16     -80    
96     48     
240    192    
32     -32    
-80    -112   
-32    16     
192    64     
0      -240   
48     -64    
-32    16     
-96    -48    
32     -224   
-16    0      
-48    -32    
-160   96     
16     64     
-192   48     
176    -112   
64     208    
112    -368   
16     320    
0      -32    
272    400    
-176   192    
320    16     
-480   48     
192    144    
-240   0      
272    224    
-240   0      
176    -352   
-176   -64    
160    -464   
-32    64     
0      -384   
64     48     
-144   96     
32     -624   
-16    64     
272    -192   
-432   -352   
288    272    
-64    144    
176    -32    
16     48     
-96    -48    
96     176    
-48    -128   
160    48     
16     176    
-320   48     
-192   48     
-32    -64    
-160   -48    
64     80     
-112   112    
16     -32    
-16    32     
80     -64    
-176   -16    
-112   0      
128    112    
-144   0      
64     128    
-112   -208   
-304   -160   
-16    208    
-112   192    
-176   16     
-368   48     
176    -128   
-128   -48    
-208   -32    
160    -128   
-112   96     
96     -80    
-80    176    
-240   -96    
32     144    
-1024  -944   
768    1856   
-1296  144    
864    -416   
-496   -208   
-448   -384   
384    608    
-1408  -80    
816    368    
-288   224    
160    -96    
-528   -160   
272    144    
-96    -144   
-128   64     
-112   160    
224    192    
32     336    
-160   176    
-112   16     
-96    -192   
-48    144    
-80    32     
96     192    
-320   -192   
80     -32    
32     288    
0      224    
-128   -128   
-240   -80    
32     80     
-144   0      
-128   -192   
-160   64     
16     16     
-208   160    
-144   112    
-112   -32    
-128   128    
-624   -112   
32     128    
0      -176   
16     112    
-32    -48    
96     256    
-64    80     
-208   -592   
128    512    
96     128    
-32    192    
-112   96     
80     128    
-112   0      
-176   -64    
-96    -96    
160    208    
-208   -160   
-16    48     
112    224    
-144   -64    
32     128    
144    288    
-112   -272   
80     -224   
160    80     
144    -16    
-128   128    
-96    112    
96     128    
-96    -16    
64     112    
-672   16     
-64    -176   
-112   64     
-48    80     
-96    -32    
32     -352   
-336   -128   
16     112    
48     64     
-256   -112   
64     -80    
48     208    
32     224    
-80    0      
-256   -736   
-304   96     
144    432    
128    192    
-304   32     
160    48     
112    176    
-112   0      
-112   0      
-144   -432   
80     -80    
112    96     
32     48     
16     96     
-128   -48    
80     48     
48     96     
-32    -16    
96     192    
-48    80     
-16    -224   
-16    -512   
-16    -240   
-16    -80    
128    -32    
0      112    
16     48     
-80    0      
32     96     
-96    0      
-64    -32    
80     80     
48     320    
-48    -64    
32     48     
16     16     
-32    -48    
32     -80    
80     -16    
16     336    
-32    -144   
48     32     
-240   32     
240    144    
-112   32     
48     -192   
48     128    
0      160    
-16    192    
144    -160   
-240   -384   
-208   -192   
288    16     
48     80     
-96    176    
16     192    
96     240    
-16    48     
16     240    
0      -32    
-144   -32    
16     -80    
80     48     
64     64     
-32    32     
160    128    
-96    -32    
112    -16    
-176   96     
128    112    
-144   48     
272    208    
-256   96     
64     64     
-192   32     
0      -48    
112    0      
48     -208   
208    240    
-112   192    
-80    64     
-144   48     
272    -160   
0      144    
0      -80    
-128   128    
208    -128   
-16    64     
0      128    
112    320    
-64    -64    
160    176    
-32    192    
48     -16    
-80    256    
112    -80    
32     128    
192    320    
-80    48     
-16    -64    
80     128    
64     48     
0      112    
48     176    
-16    176    
-16    0      
208    96     
-176   16     
144    80     
-16    -16    
128    112    
624    -720   
688    768    
416    224    
-272   272    
80     -1040  
0      48     
-64    -352   
112    752    
176    48     
-272   -1376  
192    0      
80     176    
144    208    
-96    -128   
96     288    
64     -64    
-64    240    
80     -96    
-32    112    
32     -192   
-32    384    
128    16     
0      -288   
16     -32    
96     -80    
-112   48     
32     192    
112    16     
224    224    
-112   -16    
0      80     
-32    96     
32     32     
96     128    
-64    0      
176    256    
-128   48     
224    -48    
-208   -32    
96     -48    
48     128    
48     -224   
0      64     
-32    96     
64     64     
64     16     
0      48     
64     272    
48     -112   
16     16     
-128   -128   
96     128    
64     -80    
16     16     
48     -208   
96     176    
0      -560   
32     192    
-16    -1024  
192    -16    
0      96     
48     80     
-80    -16    
176    128    
-112   32     
64     -16    
-80    -16    
176    0      
-32    160    
0      -352   
16     128    
48     -256   
48     176    
32     -288   
-48    -64    
160    0      
80     192    
-48    -64    
208    304    
-128   16     
80     112    
48     -144   
64     -736   
-32    176    
-96    -128   
240    432    
-32    -240   
160    80     
-80    -192   
64     80     
16     16     
16     160    
32     144    
48     64     
-64    -112   
32     -304   
96     272    
-16    -432   
64     128    
-16    -112   
144    240    
64     -112   
96     224    
-16    -320   
16     112    
-64    -16    
80     128    
192    320    
96     -80    
-160   -992   
112    -288   
-32    240    
144    -64    
-48    160    
160    -80    
64     304    
16     -400   
32     208    
16     -464   
96     -320   
96     112    
144    -496   
-192   64     
-896   0      
64     -192   
-16    176    
384    -96    
-368   -160   
304    -1792  
-96    16     
224    -16    
-16    16     
32     16     
32     112    
80     -80    
-64    64     
144    128    
32     -96    
-112   -128   
-32    -448   
240    368    
-304   -256   
240    -192   
-192   -736   
256    -144   
32     224    
80     48     
80     128    
64     -80    
-32    -128   
112    128    
32     -80    
64     32     
128    0      
-96    112    
-800   -368   
128    -176   
208    -112   
208    -80    
-128   128    
112    -176   
64     48     
112    -368   
-16    144    
-48    -400   
240    160    
-192   320    
-128   -144   
0      32     
112    -32    
-400   -224   
96     112    
-32    80     
176    -96    
-176   96     
256    -592   
-144   0      
0      -320   
32     -16    
48     16     
96     288    
-48    -64    
128    -208   
-32    -96    
64     -400   
-208   48     
16     48     
-352   -48    
128    -128   
-112   -80    
-64    -272   
-80    80     
208    -480   
-32    96     
144    0      
-368   192    
-1744  -1520  
496    -464   
-768   656    
960    -16    
128    448    
-400   384    
-672   -96    
272    336    
-1472  -160   
-208   -368   
80     336    
96     -144   
112    160    
-112   -256   
64     80     
-16    -64    
-128   -256   
-192   -224   
256    -32    
-416   16     
-64    -80    
-320   400    
-96    -48    
224    -144   
-112   -80    
352    144    
112    -496   
-80    144    
-336   80     
208    -112   
-160   -16    
32     16     
-176   96     
48     48     
-144   192    
112    -16    
-160   48     
80     -176   
128    160    
0      -224   
-32    32     
112    -432   
64     304    
0      176    
-48    -32    
16     192    
-80    -32    
-144   -336   
32     -320   
-128   32     
112    48     
32     -48    
128    -96    
-448   288    
-272   -80    
-16    336    
-480   -160   
-64    -16    
32     592    
-112   96     
96     0      
-688   -208   
-16    0      
336    64     
-32    96     
-80    176    
48     336    
-96    -16    
-16    128    
-112   -96    
-16    -64    
-208   -176   
-144   80     
-112   48     
-384   -64    
0      64     
-304   -80    
48     -16    
-352   128    
80     96     
112    -144   
-256   -256   
176    -144   
48     320    
-48    80     
0      288    
-48    -112   
0      160    
-48    64     
48     256    
-128   -224   
-176   0      
96     64     
-144   16     
-128   -208   
48     32     
-64    -128   
-16    96     
-32    32     
-48    -48    
96     176    
-112   -80    
-208   32     
320    624    
-112   192    
128    160    
-352   -48    
-16    128    
-176   0      
-112   160    
-928   64     
48     112    
32     112    
80     144    
-128   -336   
-16    0      
160    288    
64     64     
-160   -16    
-112   0      
208    240    
-80    64     
-256   112    
-192   -32    
176    144    
-64    96     
48     96     
-160   -64    
-16    80     
64     224    
-32    256    
224    192    
-240   -32    
80     160    
-192   80     
304    -32    
-288   -48    
128    64     
-16    112    
48     96     
-256   -160   
-48    96     
-304   -32    
48     48     
112    96     
-16    48     
0      160    
-80    16     
-16    144    
64     64     
-16    144    
-208   16     
240    112    
-176   -16    
160    128    
-272   -160   
192    -48    
-608   -80    
96     0      
16     208    
-128   -96    
-64    -144   
-16    64     
-96    32     
-48    144    
80     -80    
-128   -32    
32     64     
-256   -48    
-16    -32    
-48    288    
0      -176   
-160   32     
-144   112    
48     -48    
-64    112    
0      48     
48     160    
32     -16    
48     80     
32     80     
-96    0      
192    -128   
96     208    
-64    -32    
-144   304    
32     144    
-80    32     
-80    80     
-32    -16    
192    128    
-128   176    
144    64     
-96    -16    
16     16     
-736   528    
320    -1040  
1488   384    
272    -304   
352    752    
-624   -736   
576    384    
512    112    
-352   0      
-80    -64    
0      320    
48     -192   
-144   192    
-48    -96    
-32    272    
0      -80    
0      128    
176    176    
-192   -80    
-16    -32    
-80    -32    
48     320    
208    112    
-112   96     
192    -32    
-240   64     
208    -80    
-32    192    
336    64     
-112   16     
-16    80     
-48    144    
160    144    
-64    0      
-48    64     
-96    16     
48     -16    
64     192    
64     32     
112    96     
-96    16     
-16    144    
96     96     
144    96     
-128   112    
112    16     
-112   -48    
112    96     
-32    32     
112    112    
-32    32     
-16    32     
96     224    
-64    32     
96     128    
-96    -96    
48     48     
0      176    
-32    48     
-64    -16    
80     80     
-32    16     
0      80     
64     96     
32     96     
64     96     
-128   256    
128    80     
32     144    
-80    80     
96     128    
0      64     
64     112    
-16    80     
-48    16     
80     -64    
48     32     
-16    112    
-96    -48    
64     112    
-112   80     
256    -432   
320    192    
80     112    
-48    48     
0      272    
48     240    
112    96     
64     128    
-80    -32    
-48    80     
-32    64     
112    112    
-16    16     
-304   -592   
160    80     
-32    -352   
96     176    
-48    112    
32     96     
0      176    
32     32     
16     144    
64     112    
80     -64    
80     192    
-112   16     
112    112    
-80    64     
-32    -128   
16     -16    
208    -160   
128    96     
-96    -400   
0      -80    
96     32     
64     64     
16     32     
96     144    
-80    -96    
64     144    
-16    64     
64     80     
-96    80     
192    -48    
128    -32    
-128   -352   
-32    64     
192    48     
112    64     
-16    -128   
96     256    
-48    64     
48     80     
16     32     
80     112    
0      -32    
144    112    
192    144    
16     -32    
-192   -48    
224    -32    
-80    80     
224    -480   
-192   64     
16     -1552  
48     96     
48     -336   
112    96     
-32    16     
112    144    
-64    96     
144    -176   
-96    -64    
32     -160   
96     384    
16     -352   
112    144    
176    -256   
32     16     
-32    -352   
112    144    
16     32     
112    -176   
240    192    
-176   96     
-208   -160   
192    16     
64     192    
48     -224   
-96    160    
80     -64    
112    64     
32     -240   
0      160    
128    -96    
-16    224    
96     -32    
96     144    
-48    96     
96     48     
64     48     
0      -128   
48     48     
32     -416   
32     80     
240    -304   
-144   144    
-64    -192   
208    96     
0      176    
192    208    
-256   -384   
80     -1392  
80     96     
-1184  -1392  
1648   1824   
-992   560    
624    -1584  
-80    -80    
-176   -736   
608    560    
-752   -592   
656    -272   
-16    -432   
336    256    
-192   -1808  
-64    464    
128    -704   
208    368    
-192   -192   
64     144    
112    -464   
-144   -592   
16     -256   
-48    64     
-32    -224   
144    160    
-112   -64    
48     -544   
32     -64    
48     16     
80     576    
-48    -128   
-16    64     
-720   -400   
224    -400   
-880   -48    
80     -256   
-48    -64    
320    560    
-80    0      
64     -1584  
-80    -288   
64     -128   
80     128    
-64    64     
208    288    
-192   -112   
112    -48    
-288   -80    
256    -80    
-272   192    
128    32     
-32    -80    
0      16     
0      -240   
128    -912   
48     -96    
64     -816   
160    176    
-32    -176   
128    144    
-64    -384   
208    -160   
-128   224    
32     144    
-192   -160   
240    80     
16     96     
32     -96    
-64    -240   
240    -96    
-96    48     
48     -448   
32     16     
160    -16    
48     240    
-192   64     
32     -160   
48     -48    
-48    -336   
-608   -32    
-16    -32    
-144   128    
-48    64     
80     -176   
208    -160   
-112   48     
96     -288   
-208   -16    
208    80     
16     96     
-32    64     
64     -128   
-64    16     
0      -160   
-96    32     
48     0      
-80    208    
0      80     
-352   0      
192    -96    
-96    -64    
160    -224   
-80    128    
112    -880   
128    -32    
-16    384    
-192   -128   
-176   176    
-160   -144   
240    -96    
-16    48     
-112   48     
128    -32    
-48    16     
-96    -176   
80     384    
-208   -144   
368    224    
-176   -224   
192    -96    
-656   -192   
224    128    
-96    -48    
112    144    
-176   -16    
336    96     
-432   -80    
224    -32    
16     144    
0      -96    
96     48     
32     -288   
-208   -80    
48     -112   
-80    160    
96     -160   
16     64     
-272   0      
320    208    
-48    -32    
48     64     
-256   128    
160    -32    
0      224    
-1136  32     
192    16     
-992   -144   
-480   -16    
32     32     
-112   -96    
64     112    
-704   48     
-48    80     
-64    -64    
-208   0      
32     64     
16     144    
48     -272   
-32    160    
-208   -176   
0      48     
-16    -16    
-32    16     
16     64     
-256   192    
-16    64     
48     176    
-240   -16    
-144   112    
-320   -16    
80     -112   
-112   -144   
80     -240   
96     160    
-240   -32    
-16    64     
-16    64     
80     112    
-144   112    
-224   -80    
-16    16     
-32    32     
32     64     
-112   32     
-112   -176   
-1008  160    
-16    -32    
-80    -48    
96     128    
32     -16    
48     128    
-48    64     
-96    -32    
-112   32     
0      -32    
80     240    
80     96     
-80    480    
832    -1488  
1184   976    
-816   416    
-400   304    
-64    -208   
160    352    
-464   -160   
-64    -208   
-224   96     
48     0      
288    384    
48     -240   
-144   304    
-368   -464   
48     240    
-208   -224   
-176   192    
-288   -32    
64     160    
-1232  -240   
-16    208    
-160   -112   
160    96     
-176   32     
144    -96    
-256   96     
272    352    
-192   96     
80     -16    
-160   48     
64     32     
64     144    
-128   -16    
48     176    
-400   -80    
48     96     
-16    16     
-32    48     
144    96     
-112   0      
0      80     
-48    48     
0      80     
-16    32     
-48    48     
0      112    
80     144    
-96    -48    
-16    112    
-256   -48    
112    144    
-16    64     
-80    128    
64     64     
-80    -176   
48     16     
-48    224    
-16    192    
48     16     
80     16     
-96    32     
-48    80     
-192   -96    
16     -80    
-112   -16    
16     112    
32     144    
-112   -48    
64     32     
64     208    
-32    32     
16     128    
80     128    
-48    192    
-160   64     
-96    32     
32     80     
-16    48     
-112   -288   
-16    176    
-16    80     
-48    -80    
208    144    
-32    128    
-96    -400   
256    272    
112    288    
160    288    
-192   -64    
80     128    
0      112    
-48    32     
-32    -48    
128    96     
0      64     
-304   -224   
-64    -176   
80     -80    
272    272    
-64    192    
-144   80     
-112   32     
64     16     
-16    32     
-48    32     
-96    -32    
64     32     
-112   -32    
16     128    
48     32     
16     16     
48     96     
80     48     
-16    144    
-80    0      
128    80     
-64    80     
80     64     
-96    -48    
128    64     
-16    144    
112    160    
-240   -16    
128    144    
112    464    
-192   16     
96     -176   
112    144    
112    48     
-48    -112   
-48    144    
144    144    
32     112    
-224   -16    
240    208    
-336   -128   
240    96     
-208   128    
96     -336   
-16    0      
96     64     
112    64     
-64    -16    
112    272    
32     288    
-144   -16    
208    160    
48     48     
16     0      
-128   80     
48     112    
64     288    
-64    -80    
112    -512   
48     320    
-16    176    
-112   -128   
128    208    
48     -176   
32     112    
96     192    
-112   96     
96     64     
-16    112    
112    16     
0      80     
112    192    
-48    192    
144    -240   
0      64     
144    112    
80     32     
-16    176    
48     48     
192    -96    
-80    208    
-32    48     
32     112    
-16    -48    
96     128    
0      -32    
-16    -240   
128    16     
16     -16    
32     64     
-16    -32    
48     48     
80     64     
32     128    
-96    256    
-64    48     
-48    304    
80     -80    
-48    64     
192    144    
-400   -1136  
304    2768   
-144   816    
-912   -592   
800    -48    
176    -368   
-128   240    
0      896    
0      -464   
416    -64    
32     256    
-64    64     
-176   96     
48     96     
384    -192   
-96    464    
192    -80    
-160   224    
-16    -144   
32     -48    
16     -512   
-144   0      
240    -176   
-32    80     
-64    -288   
208    208    
80     -16    
-96    272    
0      -16    
240    368    
-176   128    
192    -80    
-64    128    
64     -240   
112    128    
-80    -576   
112    192    
80     -80    
-64    128    
-16    -2176  
96     96     
-32    48     
64     112    
-16    -80    
128    128    
128    272    
-80    -128   
-48    -64    
160    -272   
64     192    
32     -288   
64     192    
96     -272   
144    0      
-176   144    
160    96     
80     112    
96     96     
0      48     
48     32     
32     80     
112    16     
-112   112    
96     16     
64     64     
96     -160   
-16    96     
0      -208   
304    144    
-64    -480   
-48    64     
112    192    
16     32     
144    -224   
-144   -128   
160    176    
16     -112   
176    224    
-128   -224   
128    -80    
32     48     
-32    128    
64     80     
208    -32    
64     240    
-112   -608   
192    -48    
-16    -528   
-16    -1040  
64     16     
32     -288   
96     0      
16     -144   
-16    -192   
224    352    
-208   -176   
192    128    
16     -32    
80     -208   
-64    -32    
48     -528   
32     176    
-32    -48    
-160   -352   
208    208    
32     -752   
48     16     
-16    -272   
224    0      
-112   -832   
64     64     
80     96     
-16    -224   
-48    -112   
240    128    
-80    -16    
144    96     
-144   0      
192    96     
-1632  -32    
128    -160   
-240   -208   
208    -16    
-96    -64    
208    -192   
-160   -304   
256    -880   
-128   -176   
0      -192   
-64    96     
192    96     
48     16     
160    128    
-160   -32    
-176   256    
-144   272    
320    -32    
-80    -48    
-96    -32    
112    -656   
112    -128   
80     -576   
-160   -160   
-128   48     
48     128    
80     -496   
144    -224   
-96    96     
48     -48    
-144   80     
144    -64    
-112   240    
16     160    
-16    32     
128    -384   
-304   32     
64     -832   
48     64     
144    160    
32     80     
-176   -48    
-32    -192   
80     176    
80     -128   
-112   16     
224    -208   
-16    -160   
192    -32    
-240   80     
48     80     
144    -16    
416    -192   
-96    144    
-80    -2528  
-112   64     
128    304    
176    16     
-16    -272   
80     192    
-288   -272   
-16    0      
-144   -96    
-48    -32    
-272   80     
-16    112    
-96    -208   
64     -304   
32     208    
48     -224   
112    192    
-144   144    
-16    -240   
-240   -64    
256    80     
-272   -128   
0      -32    
-176   1296   
-80    304    
192    -128   
-624   -512   
-64    400    
-288   -432   
384    224    
-80    -496   
128    96     
-496   -112   
48     -32    
-64    64     
160    -32    
-208   160    
64     -80    
0      -144   
-48    -272   
-176   -96    
16     -224   
48     64     
160    -96    
-48    144    
48     16     
-928   -128   
64     -160   
-112   -32    
-304   256    
272    320    
32     80     
16     -80    
-160   16     
112    -16    
0      48     
-1200  -96    
-16    112    
-224   -128   
32     48     
-96    64     
-208   -96    
48     208    
-352   16     
-64    112    
-384   128    
-112   -48    
-16    -96    
-32    224    
160    48     
-16    112    
-112   -160   
64     -80    
-16    -144   
-288   -48    
-48    0      
16     96     
-64    -48    
-208   -240   
-112   -96    
-288   32     
-208   -32    
-128   -32    
128    96     
-32    128    
-64    -112   
-144   -336   
224    80     
-80    -240   
-64    32     
96     128    
32     48     
-32    32     
-32    64     
-16    32     
16     -16    
-112   96     
-144   144    
-144   -32    
128    48     
-48    96     
-32    -80    
16     64     
-32    80     
16     64     
-80    112    
16     16     
-176   -48    
-64    -112   
64     176    
-80    80     
16     112    
-416   -112   
32     32     
-352   -192   
96     64     
80     16     
96     112    
-224   -64    
48     32     
-32    48     
128    48     
-176   16     
0      32     
-16    0      
-32    112    
-80    -16    
-128   -64    
-112   16     
-640   32     
112    112    
-96    -16    
16     80     
32     96     
-192   48     
-16    192    
-112   64     
96     -112   
16     112    
-32    240    
-48    0      
-128   -64    
32     96     
128    160    
-160   32     
-112   128    
16     -48    
112    640    
-416   48     
240    16     
-192   288    
256    -80    
-192   64     
-48    48     
128    48     
-128   16     
112    192    
-224   32     
112    128    
-144   -256   
224    192    
-128   16     
48     48     
-64    144    
160    112    
0      64     
-160   112    
32     -48    
-144   -64    
-96    0      
-112   48     
-64    16     
-272   -160   
96     96     
-96    -48    
-16    32     
-144   -288   
16     -128   
336    -48    
16     256    
-144   176    
-64    144    
-176   -16    
64     144    
144    192    
-32    0      
64     288    
-160   -32    
-48    32     
-16    -112   
272    112    
96     112    
-48    32     
-48    224    
-128   176    
-64    144    
80     32     
208    224    
-240   16     
-80    0      
-32    64     
32     0      
-80    80     
64     128    
-80    48     
-16    96     
-32    336    
-80    -256   
-48    64     
192    -48    
64     128    
-48    64     
48     64     
-96    48     
-32    -128   
-64    144    
32     144    
-96    64     
-592   -1440  
640    736    
-672   -608   
384    160    
752    -592   
-144   -720   
128    224    
240    -144   
-80    64     
48     -320   
16     208    
0      80     
-80    96     
144    240    
-112   -80    
32     192    
144    448    
64     -96    
48     -144   
-16    96     
240    80     
-80    96     
16     96     
144    160    
16     0      
16     96     
-80    160    
160    288    
-48    144    
-80    -192   
-32    -672   
80     64     
32     128    
80     48     
-48    128    
160    144    
-192   64     
96     48     
0      96     
32     48     
-16    48     
0      128    
-48    0      
80     96     
-16    -96    
-144   -592   
192    176    
-32    -32    
240    80     
-208   176    
192    32     
-112   160    
240    240    
-208   160    
112    -16    
-48    -48    
144    208    
-48    112    
112    48     
-32    128    
0      -80    
0      96     
32     -800   
144    208    
-176   96     
128    32     
96     128    
32     16     
-32    80     
-32    96     
48     -64    
64     128    
-48    32     
-416   -144   
16     0      
112    -432   
80     -16    
-16    -944   
32     160    
64     80     
128    0      
80     80     
80     400    
-192   -608   
48     0      
0      -144   
96     240    
-128   32     
128    -80    
-112   0      
144    -416   
0      112    
48     -160   
128    304    
-80    -448   
48     96     
-32    208    
224    128    
0      64     
-48    80     
32     144    
96     192    
-32    -32    
96     -112   
96     352    
144    272    
0      32     
-80    -352   
-32    128    
64     -608   
96     16     
32     -112   
-16    48     
16     64     
112    32     
80     176    
144    144    
-80    160    
272    -112   
-192   32     
0      0      
-16    112    
304    -48    
-112   -16    
-192   -608   
160    -16    
64     -240   
-32    128    
192    -48    
-128   96     
96     -144   
-32    128    
272    32     
192    -192   
-240   0      
32     -288   
96     336    
16     -96    
224    16     
-64    -48    
-16    176    
208    352    
-80    176    
128    -128   
-48    -48    
-48    -448   
32     64     
0      80     
128    -496   
96     176    
-16    -192   
16     224    
0      -64    
144    144    
-80    -64    
128    192    
-64    16     
64     -128   
-32    176    
160    96     
-80    -112   
144    -80    
96     -1760  
160    -288   
-192   -256   
112    -80    
128    128    
-48    -128   
192    240    
-96    -368   
128    32     
-96    0      
128    -768   
48     96     
80     -144   
112    -112   
-16    -160   
32     -144   
112    -64    
80     -192   
64     64     
80     272    
128    32     
-48    -80    
48     -64    
96     -608   
16     -176   
-16    -336   
128    64     
-464   -112   
-160   -240   
-240   208    
-64    -96    
48     0      
64     -144   
160    -64    
-240   -1840  
1200   -528   
16     592    
-288   -608   
176    -208   
464    16     
304    -384   
-448   -832   
208    400    
128    304    
-144   16     
176    128    
96     -144   
-176   -464   
128    -96    
128    -800   
-16    -16    
128    -1328  
-256   -64    
160    -96    
-48    32     
-80    -32    
496    256    
-272   16     
64     -64    
-464   0      
112    -16    
-1440  48     
144    -112   
-208   -96    
112    64     
192    -16    
-112   -688   
64     64     
144    48     
-16    64     
208    576    
32     48     
-112   -176   
-64    -96    
64     16     
112    -80    
-208   64     
96     -112   
-240   48     
112    -96    
64     288    
-80    -192   
0      64     
-16    112    
160    80     
16     0      
0      -272   
-144   -48    
240    -16    
-400   -112   
208    -80    
-256   96     
48     -304   
-1472  64     
96     -176   
-16    -96    
80     -16    
16     96     
64     -1232  
32     80     
-32    -32    
32     48     
-80    48     
96     32     
-16    32     
32     32     
-272   -32    
48     -80    
-128   32     
0      208    
160    -32    
48     16     
144    464    
144    -336   
-128   208    
0      224    
32     160    
-144   64     
-16    -128   
48     -176   
48     -192   
-96    0      
112    176    
-144   16     
80     -48    
32     32     
144    -224   
-32    160    
48     -240   
-192   -160   
160    0      
64     192    
-16    96     
-176   -144   
-64    -128   
160    32     
-80    0      
48     32     
-80    -128   
224    -96    
-144   -16    
-96    -160   
-144   64     
96     -80    
-176   176    
-48    0      
176    144    
-176   -112   
-32    -16    
-128   -16    
16     240    
-64    -48    
160    144    
-128   -48    
-464   -272   
32     144    
-336   128    
96     0      
224    784    
-560   -32    
176    -272   
-528   -192   
304    -16    
-480   32     
-48    48     
80     176    
-16    144    
-144   -144   
32     144    
192    112    
-112   208    
80     32     
16     304    
-96    -80    
-192   -48    
-48    48     
64     176    
-16    160    
-48    -32    
16     304    
-1056  -368   
-80    -96    
-16    -64    
0      48     
-80    0      
128    224    
-96    -288   
80     160    
-16    320    
32     240    
-320   -160   
208    112    
-48    -32    
-48    -112   
48     112    
0      160    
-48    48     
-192   64     
48     80     
-112   -80    
0      64     
-224   -176   
64     -144   
-16    352    
-48    224    
48     32     
32     208    
-48    208    
-256   -192   
80     304    
112    0      
0      -64    
-1056  112    
48     -80    
16     16     
240    64     
-32    112    
192    128    
-176   336    
-320   -128   
-64    48     
-48    -144   
144    112    
-144   112    
-80    64     
80     48     
-128   -64    
-288   -80    
32     96     
-624   -912   
896    1584   
-896   -80    
64     -192   
240    48     
144    -208   
-32    224    
0      128    
112    128    
16     64     
160    0      
-288   0      
144    240    
-208   64     
192    144    
-800   -160   
128    32     
-240   48     
160    64     
-96    -128   
-112   0      
112    64     
0      272    
240    176    
-288   -160   
-96    -16    
-96    96     
32     144    
-16    64     
-16    32     
48     48     
-160   80     
16     64     
-16    80     
16     112    
48     -32    
0      144    
-144   64     
128    -16    
-176   -128   
-64    192    
32     -80    
-16    160    
-144   -16    
272    128    
-176   80     
128    16     
0      384    
-112   -80    
192    144    
-144   144    
48     16     
-16    32     
32     112    
-16    -32    
112    160    
-32    64     
176    32     
-192   32     
-128   -176   
64     64     
0      176    
-80    112    
112    176    
-96    -16    
112    16     
112    192    
-80    224    
176    -48    
0      128    
32     112    
-96    48     
96     48     
-48    16     
64     64     
-32    64     
-160   96     
-80    128    
16     128    
96     -176   
64     112    
-16    160    
-96    -112   
48     208    
-192   64     
64     144    
-240   0      
240    240    
-48    -16    
96     64     
-48    128    
64     112    
-16    80     
112    144    
48     128    
0      -16    
112    80     
-80    64     
48     -80    
-128   -64    
144    192    
-48    80     
128    144    
-96    48     
80     144    
-48    -240   
32     0      
80     448    
0      128    
64     144    
-144   -16    
144    80     
-32    64     
-160   0      
64     96     
-32    144    
400    192    
-192   -1568  
112    112    
-240   -80    
48     112    
176    160    
0      192    
-48    160    
-32    -48    
96     160    
-16    -176   
-48    96     
128    160    
64     16     
80     208    
-176   64     
176    -352   
-208   96     
160    320    
48     128    
0      160    
0      96     
128    96     
0      48     
0      -16    
96     96     
96     144    
32     64     
-16    -48    
32     64     
96     160    
96     64     
-48    80     
64     -208   
0      160    
16     128    
128    32     
16     128    
128    0      
64     304    
0      -80    
32     192    
16     160    
32     256    
-176   112    
-64    -144   
32     -128   
112    -96    
-16    -176   
128    480    
-192   -320   
16     80     
144    240    
64     144    
-128   -272   
0      16     
208    160    
32     64     
-16    240    
-96    -32    
192    128    
128    -208   
16     128    
48     -256   
32     192    
-48    -560   
96     -48    
48     32     
-80    176    
-176   192    
176    80     
0      -48    
64     96     
-80    0      
-32    -16    
128    32     
96     144    
-160   64     
-48    80     
-16    16     
-80    2256   
-1280  -1456  
64     -832   
752    192    
320    1008   
-304   -688   
-48    624    
32     -240   
368    -160   
16     -176   
256    320    
-48    -192   
-32    224    
32     -144   
-96    -432   
-112   -576   
144    112    
160    -432   
-160   -16    
0      -80    
-32    368    
208    -32    
-144   96     
176    64     
368    16     
-96    208    
96     -160   
32     208    
176    -256   
64     192    
48     -160   
176    80     
32     -16    
128    -96    
112    240    
-80    16     
-32    32     
-256   -48    
256    336    
272    -160   
64     96     
-176   -96    
160    48     
48     -128   
-64    80     
112    208    
-80    256    
48     -112   
80     32     
144    96     
96     -160   
-192   112    
80     336    
-128   -1344  
144    16     
-32    -1504  
96     112    
0      128    
-160   -256   
288    -48    
-48    64     
176    -32    
0      0      
0      -208   
144    48     
80     -368   
64     -48    
-1056  48     
-32    48     
80     -160   
96     -448   
48     -32    
80     144    
-32    -112   
64     144    
192    336    
-176   -128   
-64    32     
16     -128   
32     -64    
128    128    
48     -368   
-800   96     
48     -352   
0      -16    
96     -160   
-16    80     
80     -368   
64     48     
112    -3248  
-16    32     
48     -80    
64     16     
32     -32    
-48    64     
-224   -240   
224    80     
-112   32     
96     -96    
-336   -48    
96     -176   
128    -144   
-32    -272   
64     -176   
0      -1280  
96     32     
32     -96    
-128   -48    
144    96     
32     64     
-96    -96    
-64    96     
-96    -112   
112    -80    
-656   80     
16     -240   
80     -288   
64     -160   
336    -128   
-64    -48    
96     -48    
48     -832   
80     272    
0      48     
128    336    
-96    416    
128    288    
32     -96    
16     -48    
-32    -128   
64     0      
-912   16     
176    240    
-16    224    
48     -192   
80     64     
-48    -1696  
208    384    
-48    128    
16     -80    
-96    -160   
176    -224   
-144   -16    
80     -80    
144    256    
288    528    
-128   208    
128    -96    
-1040  0      
80     -304   
-48    -32    
64     -272   
384    304    
-560   -48    
368    -256   
-192   -192   
80     48     
-144   -48    
-16    16     
16     0      
48     144    
-368   0      
-32    -128   
48     -128   
160    80     
-112   64     
-48    -144   
-80    16     
-224   -64    
64     -16    
-192   64     
112    48     
-16    112    
112    -48    
-96    0      
96     128    
-96    -48    
96     -80    
48     80     
48     -96    
-64    80     
224    -448   
-288   0      
-144   -32    
80     64     
-96    96     
-16    -32    
-96    -16    
160    -112   
-192   -80    
-16    0      
-128   96     
144    -240   
48     80     
-96    -176   
-704   -304   
-1264  -640   
624    336    
-736   256    
-240   128    
-336   144    
-928   -256   
-288   528    
-48    -464   
80     512    
272    -368   
-224   160    
-192   -224   
144    96     
-432   -128   
176    -32    
-80    240    
-144   -64    
-32    128    
48     -32    
-160   64     
-528   -176   
-144   336    
-80    -96    
-32    288    
0      -96    
-96    160    
-32    -176   
16     160    
-32    -272   
32     80     
-32    16     
0      128    
-32    64     
-64    32     
-224   -128   
-64    -128   
-160   256    
16     64     
-160   0      
-224   -224   
112    144    
-64    -96    
112    128    
-80    -256   
32     224    
-160   -16    
48     -80    
-32    272    
-128   96     
160    -16    
-208   96     
112    128    
-304   -96    
-32    16     
-608   32     
64     128    
-16    -64    
128    64     
-176   -48    
0      0      
0      112    
-64    32     
80     160    
48     -112   
112    48     
-160   -16    
-176   208    
-80    -64    
-48    16     
-16    -16    
-64    160    
-32    -32    
128    192    
-48    -32    
112    272    
-16    -32    
128    48     
96     304    
-320   0      
-48    -32    
-32    -16    
0      -80    
-128   64     
-160   -16    
-320   -32    
160    448    
-1232  -208   
128    112    
64     16     
48     32     
0      -32    
-64    128    
32     32     
16     144    
-80    128    
96     80     
144    256    
48     112    
-16    160    
-112   -16    
128    112    
-16    144    
-112   48     
-64    -32    
0      64     
48     96     
80     144    
-96    32     
-96    32     
32     320    
16     96     
48     176    
-160   -80    
64     144    
-32    32     
-16    -112   
-288   96     
-128   -400   
256    144    
-224   32     
80     80     
32     112    
112    144    
-160   176    
160    208    
-176   -16    
0      272    
-272   -112   
304    336    
-304   320    
272    224    
0      304    
-144   -64    
-16    96     
-128   -160   
96     32     
112    320    
96     -16    
-48    64     
32     176    
-64    144    
-64    64     
-32    80     
80     -272   
-240   -384   
272    144    
0      304    
-32    64     
16     32     
64     144    
-16    64     
-160   32     
96     -32    
-192   176    
0      64     
48     624    
-112   336    
16     144    
-112   -16    
-32    -176   
-80    0      
96     192    
-272   -288   
-64    -144   
608    240    
128    352    
-336   96     
-48    0      
128    112    
48     -48    
112    -48    
-32    176    
48     32     
-176   96     
0      112    
96     -80    
224    128    
16     112    
-16    176    
-112   112    
128    48     
32     96     
96     192    
-48    112    
16     48     
-32    -16    
176    32     
-160   16     
0      64     
80     192    
-96    96     
144    -16    
32     224    
224    48     
-160   112    
1648   16     
-864   -496   
976    1120   
272    560    
576    -736   
-688   -336   
256    416    
192    32     
-432   -464   
176    160    
48     112    
-16    -112   
-288   224    
144    -16    
-48    16     
32     -176   
-64    160    
64     80     
-240   224    
32     64     
-192   -224   
256    48     
-144   128    
240    -336   
32     384    
64     -2288  
-80    -400   
224    -112   
192    240    
16     128    
32     208    
32     16     
48     288    
-160   144    
288    208    
-144   160    
176    -32    
-208   -464   
112    -304   
384    336    
96     -464   
-144   64     
96     -32    
160    144    
-16    96     
192    224    
-160   384    
-16    160    
-16    144    
-48    -80    
80     16     
0      160    
144    400    
-160   -352   
80     -16    
192    -144   
-112   208    
176    816    
96     -112   
-64    -80    
80     144    
0      80     
-256   -96    
256    256    
288    16     
-112   80     
-16    224    
48     112    
80     -144   
112    48     
80     -384   
32     80     
-16    -672   
128    16     
144    -288   
128    544    
-160   224    
64     32     
384    752    
-352   -160   
-64    -16    
208    176    
48     96     
-160   -160   
224    -208   
-128   -80    
96     -48    
0      -32    
112    160    
0      -240   
-16    80     
48     80     
112    48     
-48    -192   
64     48     
0      -176   
288    272    
160    400    
-32    -144   
-32    64     
-16    -192   
64     -16    
128    -160   
16     128    
16     -64    
-112   -32    
-32    0      
32     -176   
192    288    
80     272    
-96    -80    
48     -416   
32     48     
112    -160   
-64    160    
160    -48    
32     160    
-16    -336   
336    64     
-352   -96    
256    160    
128    -80    
-80    -32    
16     -288   
80     -176   
48     128    
-64    -160   
32     160    
16     -80    
96     96     
-96    -368   
64     32     
-144   -112   
368    208    
-224   176    
352    -672   
-48    160    
-48    -320   
-144   64     
-1696  -144   
96     -288   
16     -288   
80     -160   
-80    -64    
128    -1408  
-48    -320   
272    64     
-80    32     
80     144    
32     -96    
112    -1152  
-64    32     
96     -752   
-192   -64    
0      80     
16     32     
-64    -48    
176    -320   
80     -64    
32     -352   
80     -48    
48     64     
48     -64    
112    -96    
48     48     
80     -192   
-16    208    
112    -256   
16     0      
16     -160   
80     -192   
160    144    
-176   -384   
48     0      
192    112    
32     -176   
112    -592   
-64    32     
0      -192   
-96    208    
64     -16    
48     128    
-160   80     
144    -208   
-272   -112   
128    -112   
-720   -128   
48     112    
32     -32    
64     -144   
96     -208   
-112   -832   
-512   -64    
-16    -32    
144    -32    
64     -48    
800    -96    
-368   -160   
736    320    
-528   480    
160    -800   
-32    336    
224    -16    
-176   -208   
-368   192    
112    -128   
192    -272   
0      -96    
-80    160    
80     240    
144    -16    
16     -288   
-160   -64    
240    -16    
48     48     
32     -48    
-128   64     
80     -96    
-576   32     
48     -240   
112    0      
-64    -96    
0      128    
32     -288   
192    64     
32     0      
-32    -64    
-48    0      
0      64     
32     48     
-48    -160   
-256   -272   
0      -80    
-336   96     
256    -16    
-592   -80    
64     -144   
-16    144    
208    -560   
-32    80     
32     32     
48     16     
-64    176    
144    128    
0      -96    
-64    -16    
-48    80     
80     0      
-48    96     
96     0      
112    -32    
-48    -352   
144    272    
-48    -304   
160    112    
-96    64     
80     0      
80     80     
80     -112   
-96    128    
-32    0      
96     224    
-32    96     
-144   0      
112    -128   
-336   80     
48     -48    
-96    96     
144    -128   
160    -128   
32     16     
-1392  -176   
-176   -96    
16     16     
-32    -80    
48     16     
-64    144    
-16    -224   
-176   -64    
-176   -176   
128    160    
-64    80     
32     -80    
-192   -384   
-240   96     
0      16     
-192   -48    
-48    32     
-160   0      
-144   -128   
-384   32     
-144   0      
32     -48    
-96    32     
-96    336    
-240   -64    
-64    -256   
48     272    
48     0      
-480   -48    
-48    0      
160    320    
-32    -32    
-416   -16    
48     32     
-1744  -32    
16     80     
-32    16     
-32    96     
112    -32    
32     240    
-32    -112   
0      -16    
0      224    
240    176    
-160   -16    
-96    16     
-160   48     
-192   -304   
-32    -192   
-16    96     
-80    80     
-752   -208   
-208   -176   
-16    80     
112    192    
-80    -416   
64     176    
16     80     
192    704    
-256   32     
16     96     
-48    64     
0      96     
-16    144    
-64    0      
-16    96     
-192   -112   
176    272    
-208   -80    
32     208    
-160   -128   
-16    32     
32     64     
-16    32     
16     32     
-160   112    
32     128    
112    128    
-144   -80    
-64    -16    
64     320    
-384   32     
32     80     
64     -32    
240    128    
-192   64     
-48    80     
-64    32     
48     -96    
-16    272    
-144   -16    
0      240    
-240   -112   
160    32     
-256   80     
0      16     
-240   0      
80     128    
-272   -112   
96     0      
0      16     
48     128    
-112   112    
-32    0      
48     0      
144    176    
32     16     
-192   -112   
192    176    
-112   96     
64     32     
-304   240    
176    -64    
-240   16     
-64    32     
80     144    
-160   -64    
96     48     
96     96     
0      64     
-1200  -1376  
1200   1600   
-1024  336    
736    -320   
-176   560    
368    -704   
-784   848    
-16    -512   
288    576    
-176   -384   
32     336    
-256   -208   
304    336    
-64    -192   
208    224    
-304   -64    
208    144    
-256   16     
272    -32    
-160   80     
80     -272   
-208   224    
96     160    
16     448    
160    -160   
80     192    
96     48     
48     320    
80     -192   
-64    128    
224    -192   
16     320    
-48    -48    
-48    352    
80     -128   
-96    96     
0      64     
192    528    
-144   -208   
-64    -192   
-64    80     
80     80     
64     32     
-16    -32    
48     64     
176    112    
-160   -96    
-80    -64    
32     96     
-32    160    
80     160    
-128   48     
64     -144   
-16    32     
96     80     
-48    -16    
-112   112    
-32    0      
-48    80     
-16    80     
-80    48     
-16    96     
-80    -160   
144    16     
-48    16     
-32    176    
-64    96     
-64    144    
48     176    
-96    112    
80     64     
112    96     
-32    -16    
-48    112    
-32    48     
192    192    
-128   128    
0      16     
240    400    
-288   192    
80     16     
112    48     
176    416    
-64    112    
-64    -128   
80     144    
-144   -32    
176    144    
-128   144    
32     128    
-48    96     
176    288    
-128   112    
-112   -96    
-16    144    
160    496    
112    400    
144    -1680  
32     240    
-16    112    
-32    0      
-64    -160   
144    64     
-32    64     
32     -128   
-16    96     
80     48     
128    -32    
-160   48     
48     -96    
0      80     
96     -48    
-48    -1184  
80     32     
48     192    
16     64     
16     -64    
128    240    
208    320    
-240   80     
144    48     
-48    48     
112    64     
208    160    
32     -112   
32     160    
176    208    
-144   0      
160    64     
-64    -640   
128    176    
0      48     
-80    144    
48     208    
-32    96     
240    -96    
-64    80     
-160   112    
160    112    
32     112    
-16    -192   
48     32     
0      -176   
48     96     
0      -240   
64     48     
208    -32    
-16    128    
0      -320   
-32    64     
80     48     
144    272    
-192   16     
176    64     
-176   160    
144    -288   
0      80     
-32    -96    
96     144    
-16    -560   
16     80     
96     -2848  
-160   16     
144    32     
80     240    
64     -48    
-48    -304   
48     -96    
176    128    
-32    192    
-96    256    
112    48     
-80    -272   
224    192    
80     32     
-144   64     
48     -224   
80     128    
64     96     
-64    96     
0      -64    
112    80     
32     208    
160    -368   
96     272    
-16    -800   
-48    128    
32     -80    
144    48     
-32    -112   
112    192    
-16    -320   
48     224    
-112   128    
176    48     
0      96     
1024   -896   
560    384    
-80    336    
-384   512    
16     -352   
384    128    
-96    -928   
80     752    
-32    -240   
144    144    
48     -1184  
80     128    
64     176    
-16    64     
144    80     
48     -480   
-160   -1360  
112    -144   
-80    176    
256    -80    
-160   224    
48     96     
160    208    
-112   -384   
128    -16    
0      -144   
80     0      
96     96     
-48    -96    
-112   112    
-1072  -112   
64     -80    
-32    48     
0      -512   
96     -16    
112    -1520  
16     -176   
-80    96     
128    -112   
0      0      
80     96     
0      -208   
0      64     
48     -336   
-112   -96    
-336   -112   
-96    -272   
208    -64    
16     80     
0      -96    
144    -320   
-64    -144   
144    96     
32     64     
48     16     
-32    -96    
64     128    
32     192    
32     -272   
224    -224   
-80    -16    
96     80     
-144   288    
-112   -208   
32     -144   
64     -720   
160    -16    
0      -320   
32     80     
-80    144    
208    96     
-64    -64    
16     -48    
80     -16    
80     -48    
80     192    
-176   -64    
-192   -112   
240    176    
32     32     
80     16     
32     0      
64     -16    
-80    -256   
192    -352   
-112   192    
208    16     
-80    -128   
80     176    
64     0      
-32    128    
64     48     
-240   16     
112    128    
-528   16     
240    160    
-64    -144   
64     -64    
-16    160    
112    -176   
-48    80     
48     -32    
64     128    
-16    0      
16     -272   
-32    -144   
64     176    
-16    32     
32     48     
-208   -16    
112    -192   
-672   64     
-16    -128   
96     96     
-64    -400   
16     -128   
32     -1520  
48     -80    
128    112    
128    96     
-208   128    
-208   -128   
-304   160    
112    -80    
-576   -304   
-208   -320   
-448   128    
-64    -64    
-64    48     
-16    -368   
112    -32    
-144   16     
-16    -48    
-48    208    
-80    -128   
-16    -16    
80     48     
-144   16     
16     32     
-96    16     
16     80     
-64    16     
112    80     
0      48     
64     -592   
144    -176   
112    -16    
112    160    
-224   96     
80     64     
0      16     
96     176    
-256   176    
-48    -192   
208    16     
-32    48     
32     224    
-144   -288   
96     0      
-416   -288   
-16    160    
-144   80     
-672   64     
-16    64     
-368   -16    
-224   -224   
160    272    
-160   -48    
80     -16    
-16    160    
160    -48    
-384   -32    
-48    -80    
192    0      
-256   -48    
-48    128    
32     0      
0      128    
-64    -64    
-64    48     
16     96     
-496   0      
-160   0      
272    -32    
-176   48     
-304   -304   
-48    192    
-96    -32    
-16    48     
0      -64    
-32    0      
48     -160   
96     256    
-16    16     
-352   96     
-1248  -544   
-544   -592   
80     880    
672    0      
-480   -16    
320    -672   
-400   688    
304    -112   
-288   192    
64     -128   
-48    -144   
-64    192    
-96    160    
-48    224    
-160   -320   
-128   96     
-96    -224   
-96    80     
-464   -16    
-48    176    
32     368    
0      256    
-208   32     
-48    -208   
0      -80    
-80    -32    
240    256    
-208   96     
112    0      
-352   -224   
144    32     
48     32     
-16    16     
-16    80     
96     96     
-224   -80    
-32    112    
32     -16    
-16    48     
96     176    
-112   32     
48     64     
-128   0      
128    176    
-48    112    
-160   -32    
0      96     
0      128    
-240   -32    
-144   64     
-304   -112   
32     80     
32     112    
-16    -80    
0      80     
32     176    
-240   48     
160    0      
-16    112    
-112   80     
64     128    
-128   -16    
32     -48    
-240   -112   
32     240    
-448   -160   
112    0      
-80    304    
-112   -16    
64     16     
96     -64    
48     48     
-48    112    
0      32     
-96    80     
128    240    
-336   0      
80     -32    
-80    48     
64     -16    
-240   160    
16     -128   
160    272    
-208   -96    
160    -96    
16     -16    
160    208    
-208   -64    
208    48     
-192   112    
32     128    
-64    64     
32     48     
-48    -48    
128    160    
-352   64     
288    368    
-304   -32    
224    304    
-160   16     
160    48     
32     96     
-48    48     
32     32     
-32    -48    
16     144    
32     96     
80     32     
-240   -144   
-48    32     
-16    64     
0      -32    
112    144    
-32    -32    
80     144    
-320   -32    
352    336    
-128   64     
144    -112   
-112   48     
-112   0      
48     16     
208    -112   
-272   208    
128    144    
224    32     
48     16     
-32    32     
-80    80     
16     96     
48     -112   
96     160    
32     112    
192    400    
-160   32     
224    16     
-352   16     
48     272    
64     -32    
64     32     
-176   16     
64     48     
-32    -16    
0      -64    
48     336    
64     368    
64     -16    
-16    -16    
-208   112    
80     32     
0      96     
80     208    
-80    128    
32     208    
-160   160    
144    160    
16     -48    
176    16     
16     176    
112    112    
-16    192    
32     0      
-16    -224   
80     80     
-48    240    
128    416    
48     368    
-144   -64    
80     -128   
128    -112   
64     128    
176    208    
-192   128    
0      32     
-16    176    
80     -80    
112    16     
-64    48     
32     160    
-32    0      
112    112    
32     48     
-80    -160   
64     240    
160    -384   
-144   -80    
0      -80    
208    144    
16     -48    
-48    144    
64     -32    
80     -96    
32     208    
-16    144    
80     0      
0      -64    
32     -1824  
-32    -784   
1408   368    
0      -688   
-176   544    
384    -128   
-112   272    
80     -480   
16     432    
-96    -336   
160    544    
-160   -112   
256    224    
-208   96     
192    -80    
-96    16     
-16    -128   
-16    112    
-16    -96    
128    128    
48     -48    
144    208    
-112   80     
144    144    
-96    -32    
48     192    
-64    -112   
128    96     
32     96     
96     32     
144    96     
-144   -112   
112    144    
144    -240   
48     48     
48     -736   
-16    112    
-16    96     
144    48     
-16    -112   
0      144    
0      208    
80     96     
-48    96     
-112   112    
176    128    
-32    -368   
96     80     
96     -128   
64     112    
64     -160   
-16    144    
80     -2176  
-160   48     
112    144    
-32    -80    
32     144    
-32    128    
-48    -224   
32     -144   
112    160    
-80    48     
32     0      
96     -512   
144    144    
-16    48     
64     304    
0      -16    
144    256    
-32    -16    
192    48     
32     -32    
192    240    
-160   -32    
-128   304    
272    528    
32     -480   
128    48     
-96    -192   
48     32     
48     -320   
64     112    
112    112    
0      64     
0      -64    
64     96     
0      0      
176    400    
-48    64     
32     -112   
32     160    
64     -144   
96     112    
32     -240   
64     112    
-16    -160   
0      32     
112    -16    
160    240    
-64    32     
-16    -192   
-16    16     
96     -544   
112    -480   
0      32     
32     -2096  
128    -16    
-32    -304   
128    0      
0      96     
80     16     
16     128    
16     -160   
32     -608   
16     16     
160    -16    
-48    -48    
-224   16     
48     -240   
160    -112   
-112   -272   
192    -16    
-192   -576   
240    -16    
16     368    
-16    -176   
112    0      
-96    -144   
288    -384   
-224   240    
64     -96    
-80    208    
-448   -224   
112    -48    
-928   48     
0      -208   
144    64     
-64    96     
112    -48    
-64    -640   
176    -32    
80     -368   
-48    96     
64     96     
304    752    
-384   -96    
272    -256   
64     80     
112    -96    
-416   -160   
80     -96    
256    208    
0      -304   
64     -192   
80     -416   
-16    -48    
176    -432   
-160   128    
64     -112   
-112   80     
304    -32    
-96    -176   
0      64     
-96    -144   
240    336    
-272   -128   
-992   0      
-48    -96    
176    -128   
-64    -272   
-96    -144   
160    32     
-32    -144   
240    -32    
-160   -48    
112    64     
32     32     
16     48     
64     -80    
-160   0      
16     -64    
-592   -64    
96     -32    
-80    128    
-32    -32    
96     112    
48     -304   
64     64     
160    -64    
176    16     
-48    96     
320    -304   
-64    256    
48     -240   
-288   0      
-112   -1936  
624    560    
-512   -400   
-528   -384   
-48    -352   
784    704    
-512   -768   
416    -144   
0      -1616  
496    -256   
-16    -16    
-192   -48    
-80    48     
192    112    
-112   176    
-32    -32    
-240   16     
80     -256   
-176   -128   
-96    -256   
-96    128    
128    -320   
32     144    
112    -256   
-48    -128   
-368   64     
-16    -144   
80     32     
0      0      
-48    -96    
0      -16    
-48    192    
48     -32    
-192   80     
-48    -64    
272    288    
-304   -336   
128    208    
-48    -16    
-16    -32    
-240   -96    
128    96     
80     112    
144    0      
-208   32     
64     -48    
-96    96     
208    272    
-208   -16    
-160   -96    
16     240    
-640   -288   
80     144    
-176   32     
-160   0      
-48    -16    
-400   64     
-224   0      
32     -144   
-144   48     
160    64     
-128   48     
32     -48    
128    176    
-720   -208   
224    272    
-544   -416   
240    64     
-144   32     
-32    32     
-176   0      
64     32     
-64    -80    
160    112    
-192   16     
160    128    
-224   32     
-16    -240   
48     80     
-48    -48    
-64    0      
64     0      
48     288    
-16    96     
-96    -16    
-80    160    
-400   -80    
64     80     
-96    16     
-16    -96    
-1040  32     
32     208    
-32    -176   
128    48     
-64    -304   
64     80     
-80    96     
64     48     
-112   48     
-192   -112   
0      0      
112    128    
64     240    
-240   96     
-128   96     
-304   -16    
0      -16    
-80    -48    
32     192    
32     128    
-32    96     
-80    0      
112    64     
96     256    
-32    176    
-80    -96    
-80    32     
-160   32     
288    96     
-256   -48    
-192   64     
-208   16     
-176   16     
-144   -16    
-240   -272   
0      -96    
-48    192    
-48    -48    
192    112    
-272   80     
80     -64    
-64    -16    
0      80     
32     -96    
128    224    
-336   -112   
176    -64    
-400   -144   
80     128    
80     -16    
-64    64     
304    32     
-240   96     
192    96     
-64    0      
-96    -48    
-80    112    
-112   48     
48     80     
-64    80     
-128   -80    
144    352    
-192   -48    
64     160    
-128   192    
80     128    
48     288    
16     64     
16     16     
-144   -48    
16     -48    
0      0      
144    128    
-48    144    
240    496    
-320   672    
128    128    
-256   -464   
144    96     
-80    -48    
0      112    
192    336    
-128   192    
-64    64     
-80    -16    
240    80     
160    32     
-96    -32    
-224   -16    
48     128    
-144   -64    
64     112    
-80    -80    
-16    -48    
-16    288    
-16    80     
32     -96    
-16    80     
-16    112    
-112   144    
32     192    
64     -352   
64     16     
16     160    
96     48     
-80    -32    
-368   1056   
-48    -528   
400    400    
-480   -208   
-560   -96    
528    576    
480    704    
-144   432    
-224   -96    
0      -192   
112    0      
-80    -96    
160    16     
-128   304    
160    48     
80     208    
-80    64     
240    192    
16     224    
-32    64     
48     112    
-32    96     
-16    112    
-48    0      
64     -80    
-64    160    
176    640    
-16    192    
112    112    
-352   80     
336    192    
-96    -32    
16     160    
32     80     
128    96     
-112   80     
160    112    
-128   32     
176    96     
48     16     
-32    112    
96     80     
-80    -64    
-128   -16    
-64    -80    
32     -368   
240    304    
-224   32     
128    64     
-64    -32    
96     96     
-48    112    
160    96     
-48    80     
32     48     
64     624    
-144   144    
96     192    
64     208    
176    -112   
16     -272   
144    160    
-96    192    
-96    64     
32     48     
80     64     
16     80     
32     80     
-48    80     
32     80     
-48    32     
32     128    
16     128    
-16    160    
48     240    
48     208    
80     464    
16     160    
64     144    
-64    192    
176    48     
-48    16     
192    320    
-128   96     
144    32     
-240   -272   
144    -176   
-128   -400   
160    64     
-80    288    
-80    -256   
0      48     
160    -976   
80     144    
-32    16     
144    176    
-32    64     
112    128    
-48    0      
112    48     
-16    160    
160    80     
-80    16     
-64    -64    
80     192    
-48    -144   
144    160    
-112   -368   
160    80     
-16    128    
48     80     
0      -32    
64     128    
48     112    
64     112    
80     272    
-32    32     
48     -64    
0      0      
112    224    
48     -112   
-176   160    
96     -672   
16     176    
-32    -864   
-96    96     
48     -192   
96     96     
-48    96     
64     32     
-48    -16    
48     176    
96     208    
-32    -80    
192    -16    
0      -368   
112    176    
-16    -496   
80     144    
-32    -96    
224    272    
-224   -2608  
96     0      
-16    144    
-48    -656   
288    -16    
80     144    
144    16     
-96    48     
32     -32    
96     -592   
80     144    
0      -160   
352    560    
-224   112    
48     112    
192    0      
-112   32     
-144   -144   
-128   96     
96     -144   
16     -240   
368    304    
-144   0      
144    384    
-112   64     
112    288    
-80    -160   
-80    -64    
96     -272   
-240   -112   
32     -1632  
144    240    
96     256    
-160   -96    
80     -192   
240    16     
16     0      
96     48     
80     192    
48     -64    
16     80     
-16    -32    
112    -32    
48     -64    
160    256    
-64    -176   
112    -304   
80     272    
-32    -640   
-80    -1376  
-16    160    
224    -896   
80     -16    
16     -1152  
-576   -592   
832    1808   
-960   -352   
-112   -240   
-96    -272   
928    80     
-528   -160   
-64    -368   
-192   -144   
592    -224   
16     -336   
112    0      
96     112    
112    -160   
48     -128   
-96    -112   
32     -800   
96     96     
128    128    
64     -128   
-64    -144   
-208   0      
144    32     
96     176    
-48    0      
-112   -144   
-208   -112   
144    -48    
-80    -240   
192    64     
-96    -16    
160    -80    
-80    48     
112    -1776  
16     -64    
176    32     
-160   128    
224    -112   
-80    16     
48     16     
16     -128   
-192   -64    
80     -112   
240    144    
-128   16     
64     -80    
-16    -784   
144    240    
64     -1520  
-96    16     
-80    -32    
112    64     
32     224    
-64    -48    
-80    -176   
-48    -64    
-96    0      
0      -32    
-384   -112   
-64    0      
128    80     
-64    -192   
64     -16    
144    -672   
-144   48     
192    -32    
-176   -48    
64     32     
48     0      
-64    16     
0      -48    
-32    32     
112    0      
-432   -80    
0      -80    
-640   176    
-80    96     
80     -16    
192    -112   
32     32     
-16    -1136  
48     80     
-16    -128   
96     96     
80     336    
-144   -64    
-32    -48    
-16    -96    
-80    48     
64     16     
32     -32    
80     16     
16     16     
176    32     
-80    48     
-80    -688   
64     -272   
-16    160    
-32    -80    
-208   32     
64     -128   
-16    -32    
-16    -192   
-48    80     
80     -32    
160    0      
-224   -592   
128    64     
-112   -448   
224    96     
80     -608   
0      -16    
144    176    
-64    -144   
-160   48     
-96    -128   
112    112    
48     32     
32     32     
-144   128    
-576   64     
64     -176   
-16    80     
-160   -176   
368    208    
128    32     
-1328  -224   
-176   224    
-32    -96    
176    48     
-80    96     
0      160    
32     48     
-208   -16    
224    -64    
-80    496    
-880   -128   
160    0      
-96    -64    
-48    64     
0      128    
-272   112    
48     96     
-544   -16    
-16    -16    
32     64     
-336   -160   
64     -176   
-112   -16    
16     -48    
-48    16     
-160   -48    
64     240    
0      -224   
-176   -224   
32     32     
96     208    
80     224    
-48    48     
-32    48     
0      -96    
16     96     
32     96     
16     192    
-64    -64    
-32    32     
-48    32     
-96    -32    
-80    -288   
32     112    
80     80     
-112   64     
-80    128    
144    -32    
0      32     
-160   32     
-32    -80    
-176   64     
288    160    
-224   224    
16     -192   
-96    -240   
256    192    
-176   -144   
80     -80    
48     -80    
-48    112    
-208   -48    
-192   -80    
48     -32    
32     -32    
-112   176    
-128   -80    
32     208    
-1696  -208   
-32    80     
1472   -1344  
32     -32    
688    352    
-304   176    
64     48     
224    -976   
-224   80     
448    832    
-256   0      
16     80     
-80    -112   
-192   16     
16     16     
-352   48     
64     208    
32     96     
176    16     
-224   -144   
-16    144    
0      80     
-128   -64    
144    192    
-96    -176   
176    32     
-112   -144   
176    -128   
0      240    
-128   320    
-64    -208   
-96    160    
64     -192   
-80    -32    
0      96     
-80    -128   
112    96     
-32    -96    
16     -32    
-320   -256   
48     -144   
80     96     
0      160    
-64    96     
176    80     
-192   -160   
96     96     
96     208    
-80    32     
0      96     
64     112    
64     16     
16     -16    
-16    32     
48     -112   
-144   64     
80     112    
-16    80     
-304   -688   
416    496    
-160   -176   
16     176    
16     -32    
96     160    
112    176    
-144   160    
-16    48     
-48    32     
96     80     
-32    64     
32     32     
48     96     
80     96     
-144   -16    
0      80     
-272   80     
32     272    
-256   -304   
224    -32    
-64    160    
-32    -32    
-48    384    
-80    48     
96     304    
16     304    
-176   16     
-16    -64    
112    304    
-224   -160   
96     32     
-80    -128   
208    208    
-144   80     
-64    112    
32     80     
32     32     
0      80     
-48    -16    
112    192    
-32    32     
64     176    
-176   -96    
144    160    
-16    32     
80     64     
16     16     
80     48     
64     96     
0      96     
16     48     
80     112    
32     112    
48     -32    
-80    96     
-48    0      
80     80     
-32    80     
144    416    
-80    -176   
96     48     
48     128    
64     144    
-32    96     
80     80     
112    320    
-64    80     
80     16     
-112   160    
128    16     
144    448    
16     208    
-48    -80    
32     464    
-80    0      
-32    -480   
-64    -832   
-80    -288   
240    -32    
-96    192    
80     144    
0      176    
64     80     
-16    -32    
32     192    
144    224    
-112   96     
0      -64    
-208   -336   
80     -128   
96     272    
48     96     
-16    48     
80     16     
48     192    
-16    96     
80     -144   
32     32     
224    384    
112    912    
-48    -288   
-48    -64    
112    -496   
-16    144    
64     64     
32     -96    
128    432    
-16    -352   
-112   -64    
-80    -128   
112    -80    
96     112    
-16    144    
64     208    
-160   -16    
64     -560   
176    80     
96     0      
64     224    
-64    -112   
0      -304   
-16    -48    
112    -1024  
80     336    
-48    64     
-48    160    
64     -32    
128    16     
32     -176   
0      112    
-16    176    
80     80     
-96    -48    
128    -144   
80     112    
144    -272   
-16    224    
208    -112   
-16    208    
224    -768   
-16    -864   
-32    0      
-160   368    
96     -960   
16     -256   
704    480    
-704   -16    
448    320    
-352   -448   
656    128    
-256   -144   
-16    64     
0      -144   
96     48     
64     -1520  
-80    48     
80     -80    
80     112    
64     64     
-80    128    
80     192    
-16    224    
144    -32    
-80    -128   
80     96     
80     48     
80     144    
0      -80    
128    16     
-32    -448   
96     160    
32     -48    
96     64     
-112   -32    
256    448    
-96    128    
112    -16    
-64    64     
128    -368   
112    160    
0      -144   
96     64     
-48    -288   
16     96     
112    128    
32     -80    
192    -144   
-256   112    
240    112    
-80    32     
80     32     
0      -128   
48     128    
32     -752   
144    128    
-80    -48    
96     128    
-16    -112   
96     128    
32     -96    
-16    80     
-32    -128   
128    144    
-32    160    
-32    -32    
-16    -128   
128    -272   
-64    -368   
-96    -112   
96     80     
176    -160   
112    304    
-96    -96    
224    288    
0      -304   
-32    48     
-32    -32    
80     -944   
80     16     
-16    -80    
-48    -192   
144    192    
-64    -16    
-64    -176   
384    -80    
-32    -144   
192    176    
-144   -112   
160    192    
48     -32    
-16    128    
160    96     
-112   -160   
-128   -96    
80     -64    
48     -224   
-1184  -64    
-112   -144   
160    0      
16     -80    
96     -80    
-144   -112   
64     -272   
32     96     
48     -240   
-32    16     
-64    320    
48     -256   
0      144    
-192   -64    
256    64     
-352   48     
160    176    
64     -176   
80     112    
-96    -240   
48     -672   
64     336    
0      -688   
144    224    
48     -336   
-48    -64    
80     -160   
-32    0      
-80    16     
192    -48    
-192   -32    
128    -144   
-448   160    
64     -64    
0      96     
144    -32    
32     112    
-176   -960   
16     32     
160    80     
0      -48    
0      128    
48     112    
-112   32     
112    -96    
-16    -32    
96     -352   
-768   -208   
0      -80    
-80    -80    
64     -32    
64     224    
160    -176   
-128   64     
128    -896   
-144   80     
-80    -48    
144    -192   
-64    240    
96     -352   
-320   -32    
160    112    
-144   -32    
96     -32    
-992   64     
32     64     
-32    640    
96     -96    
144    -336   
96     -352   
64     112    
-128   80     
160    -112   
16     0      
16     -112   
80     80     
80     -16    
0      64     
-48    -224   
-480   -32    
96     -112   
208    -96    
80     -48    
-16    176    
-80    -896   
0      -176   
-160   80     
176    96     
-208   32     
-64    128    
-160   -48    
80     -128   
-192   32     
-80    -48    
16     -16    
64     160    
224    -32    
-96    -208   
1648   -1792  
336    -624   
832    736    
-352   144    
576    -176   
-352   -464   
576    -48    
-144   -16    
256    624    
-272   208    
224    0      
-80    -176   
208    16     
-16    96     
-1072  -192   
32     -80    
-1264  -96    
-112   16     
-96    64     
-672   -240   
16     -320   
96     208    
-256   -288   
80     -176   
-16    -368   
304    -16    
-32    96     
-304   -464   
144    48     
-160   -96    
-16    192    
-48    64     
-144   -32    
-64    -32    
32     32     
-16    112    
-752   -512   
32     -32    
64     96     
-48    112    
32     -320   
-208   64     
-128   -192   
16     80     
-176   -448   
240    336    
-48    192    
256    672    
-400   -80    
-32    -48    
-16    32     
-48    -16    
-32    160    
-720   -160   
0      80     
-80    -16    
-224   -960   
256    608    
224    144    
-64    0      
-48    112    
-80    144    
-48    224    
-80    192    
-32    -64    
32     128    
-176   -80    
16     48     
-256   -144   
48     80     
80     -80    
80     48     
48     16     
32     112    
-96    -208   
112    -32    
-64    144    
-48    32     
-16    128    
-176   -144   
-64    -32    
-64    -208   
32     48     
-336   16     
160    160    
-864   -32    
-144   64     
32     -160   
80     208    
-48    16     
0      144    
32     208    
-16    -96    
64     0      
-16    112    
-96    -48    
-64    -64    
-64    -48    
144    -96    
-48    224    
-400   64     
-32    48     
-208   -112   
192    112    
160    192    
32     16     
0      144    
-16    64     
0      80     
-32    144    
48     64     
32     128    
0      80     
-128   0      
0      32     
-304   -272   
128    176    
-1056  80     
-160   -144   
176    112    
-256   -96    
128    -192   
-128   -160   
96     -96    
-48    -112   
64     16     
-176   -176   
-176   -288   
-144   112    
160    208    
-240   -384   
112    16     
-368   160    
160    224    
-256   128    
224    0      
32     288    
-32    160    
-48    16     
16     16     
96     176    
-240   -128   
96     -64    
-96    272    
256    720    
-320   464    
224    336    
-16    32     
-48    -16    
-16    -64    
16     64     
144    -80    
96     -16    
-96    96     
48     48     
-80    96     
80     -16    
-160   16     
-32    -240   
48     16     
-144   -80    
64     144    
48     64     
-112   112    
80     112    
48     -48    
-176   -32    
48     64     
-32    144    
-80    -48    
80     144    
-32    96     
-176   0      
-32    64     
64     -80    
-144   -256   
144    144    
-96    320    
-96    144    
-16    112    
192    176    
-80    16     
0      96     
144    -16    
96     48     
0      144    
-128   0      
128    96     
-64    32     
0      80     
96     48     
192    -48    
-64    288    
-80    272    
16     16     
48     0      
464    -576   
368    16     
128    432    
-256   336    
-400   -112   
640    864    
-560   -288   
112    720    
-400   -336   
416    64     
-144   -128   
96     336    
-32    224    
144    -64    
-64    64     
80     -112   
-112   320    
176    -112   
-112   160    
64     -48    
-128   304    
48     0      
-128   192    
64     -1824  
192    176    
-224   -112   
160    320    
-128   96     
256    224    
-64    0      
-16    112    
0      64     
-16    48     
0      144    
48     80     
80     80     
16     96     
-336   64     
272    -288   
80     32     
-128   -864   
96     224    
16     16     
48     48     
96     80     
-16    176    
0      -176   
80     416    
-112   -80    
208    80     
-144   -16    
48     64     
160    192    
-192   -80    
240    80     
-112   -1120  
0      -16    
96     256    
-96    -96    
224    64     
16     176    
0      64     
144    32     
-64    48     
32     80     
-96    -48    
-16    -16    
176    112    
-48    48     
0      16     
112    -112   
96     48     
0      208    
-16    48     
240    432    
-80    160    
144    48     
320    80     
64     352    
-240   0      
128    16     
64     0      
32     0      
32     -32    
112    128    
-16    -112   
224    352    
-176   -544   
288    96     
32     -80    
32     -32    
-16    96     
-16    48     
96     80     
64     -32    
0      -128   
128    112    
64     192    
48     -256   
32     112    
-16    -144   
16     224    
-96    -176   
64     176    
32     32     
32     256    
-80    -304   
16     -16    
96     -16    
128    128    
0      32     
32     -128   
64     48     
160    -128   
-80    144    
144    -80    
-48    16     
128    -160   
224    256    
-64    -528   
80     0      
-48    96     
96     16     
16     192    
-16    -16    
176    160    
32     -512   
-96    32     
160    16     
-32    144    
160    -320   
-48    112    
48     -160   
-48    -272   
-32    -64    
192    16     
112    288    
-64    -64    
96     -16    
0      32     
16     16     
112    -96    
0      16     
128    -272   
16     64     
144    -16    
64     400    
16     -272   
64     64     
-16    -416   
128    -384   
-32    144    
96     -240   
112    80     
-352   -432   
160    -288   
-112   16     
128    -720   
16     -96    
128    128    
-32    -48    
176    288    
-112   -96    
288    -1104  
96     -416   
224    -1344  
-208   176    
-64    -144   
208    128    
-240   112    
-96    -128   
128    64     
-16    -224   
128    32     
-80    -784   
128    -128   
80     192    
0      -112   
32     128    
-48    48     
208    32     
-112   -80    
192    224    
-32    -160   
16     -208   
-96    -464   
272    -160   
48     -368   
-48    -32    
144    -128   
16     -16    
-80    -3072  
304    -240   
16     -240   
128    80     
-1104  -1888  
1360   2352   
-736   656    
544    -768   
-128   448    
368    -560   
-1216  96     
768    -64    
-368   256    
272    -592   
-240   96     
-64    -816   
320    -16    
144    -48    
-48    112    
-96    -144   
48     64     
-208   160    
-48    -384   
-176   -288   
-32    -224   
-320   240    
80     80     
-32    176    
272    -464   
-160   144    
160    -112   
-288   -16    
368    32     
-80    320    
80     -240   
160    224    
16     96     
0      224    
-32    288    
0      -16    
-160   -64    
128    -112   
-1808  -176   
208    -128   
80     -112   
112    -48    
256    48     
-96    -1744  
128    32     
176    160    
-48    -144   
-64    -208   
272    272    
-80    32     
-128   112    
-48    0      
224    -80    
-256   176    
64     0      
-928   16     
32     -256   
-416   48     
-192   -432   
-16    -160   
-48    -144   
160    128    
96     -96    
-32    -16    
112    96     
32     -96    
64     96     
48     48     
-192   -144   
-80    -80    
-112   0      
144    -32    
-32    -16    
112    -336   
-16    160    
-400   320    
-128   48     
48     64     
0      16     
-64    -224   
-32    -112   
16     -80    
128    -80    
-304   -160   
160    -64    
-144   -160   
224    -80    
96     128    
176    -176   
-96    -48    
0      32     
144    176    
-80    144    
-144   -32    
-96    -96    
128    -272   
-64    -48    
-16    64     
-192   -48    
-48    -32    
240    16     
-304   -32    
64     160    
-1184  -176   
-224   336    
-112   128    
-32    -32    
80     160    
-1392  -176   
-80    -16    
0      -48    
32     -128   
64     16     
64     48     
-80    -192   
-112   -384   
-48    -208   
224    192    
-48    480    
-288   0      
32     0      
-208   16     
48     144    
-400   -112   
-192   -224   
-720   -64    
0      -96    
64     80     
-80    -32    
-224   -288   
-80    -128   
-64    -256   
-16    272    
112    16     
80     272    
-80    0      
80     -64    
-272   16     
48     160    
80     -16    
-144   80     
0      160    
-544   48     
128    128    
-208   -32    
144    -96    
-16    -128   
-128   -48    
64     128    
-80    128    
16     -16    
32     160    
-144   112    
-16    96     
16     -32    
-128   64     
-32    256    
-816   -128   
80     16     
-32    -80    
144    96     
-80    64     
0      -32    
96     448    
-144   -64    
64     -96    
96     192    
-32    -80    
-128   0      
-80    48     
-352   32     
-64    -48    
-304   0      
352    96     
48     -32    
-48    48     
64     48     
-80    160    
-16    64     
-80    160    
48     160    
-32    32     
0      160    
144    -144   
-32    -80    
96     160    
-96    -64    
-80    80     
32     224    
-32    16     
-32    -16    
288    64     
-192   64     
112    -96    
-144   64     
32     48     
-400   -304   
64     -432   
944    896    
-256   608    
160    -16    
-624   -272   
352    96     
-192   128    
-528   -528   
-208   176    
48     -224   
256    608    
-48    -176   
-208   432    
-16    -352   
-96    304    
-16    -112   
16     272    
-32    -240   
-192   128    
144    -64    
-272   160    
48     48     
-304   80     
-96    -160   
48     144    
96     272    
144    160    
-96    0      
-64    48     
48     160    
112    -16    
-64    176    
16     -48    
-192   32     
96     48     
32     192    
-192   0      
128    32     
-48    48     
16     144    
48     64     
-48    208    
-80    -48    
64     32     
-80    144    
96     -208   
144    0      
-304   176    
144    -32    
48     80     
-96    64     
64     112    
64     64     
32     -16    
32     16     
-96    128    
208    208    
-96    32     
80     -32    
-112   -16    
80     128    
-80    48     
48     -80    
48     -16    
112    160    
-208   32     
-64    96     
112    48     
80     64     
0      96     
16     192    
32     96     
32     -16    
-16    208    
-96    -96    
160    -32    
64     240    
-64    208    
-144   -32    
160    96     
-96    -128   
0      -144   
-48    16     
32     144    
64     192    
-16    176    
16     64     
-64    -160   
192    416    
-16    288    
16     80     
-64    -48    
256    96     
-224   -16    
96     400    
-176   -256   
0      16     
144    -48    
64     176    
-32    -32    
-128   -80    
0      32     
96     80     
96     144    
48     160    
48     304    
16     128    
128    240    
-144   -272   
64     112    
32     112    
0      64     
64     96     
-16    48     
64     0      
0      112    
64     320    
96     192    
48     192    
-32    -48    
144    224    
16     96     
32     96     
-128   208    
128    -176   
-32    -96    
128    -1248  
32     96     
0      -16    
80     96     
96     -32    
112    240    
-320   -128   
96     -224   
-16    16     
320    368    
-160   -112   
128    80     
-48    -32    
96     -128   
-144   48     
224    0      
-112   48     
224    224    
-192   96     
208    192    
-48    32     
48     -16    
-16    144    
-16    -128   
96     112    
80     -192   
80     208    
16     80     
224    48     
-240   64     
112    -240   
80     32     
144    -2352  
32     48     
-64    128    
32     80     
-128   -112   
96     32     
96     160    
240    64     
-208   112    
48     64     
64     144    
64     -16    
128    128    
-128   -288   
176    176    
-176   -320   
208    96     
-160   -224   
224    48     
-96    96     
144    64     
-64    16     
-192   64     
96     400    
32     144    
-16    -48    
-32    -160   
336    64     
16     -240   
-128   32     
80     -384   
112    176    
-48    -528   
256    80     
-112   -80    
32     112    
-800   -2224  
1488   3328   
-448   1536   
80     -480   
80     400    
656    -560   
-656   288    
576    -480   
-320   512    
432    -736   
-224   512    
48     -480   
288    352    
-16    -144   
192    336    
-240   -48    
160    96     
-32    32     
384    -240   
-80    128    
64     -704   
80     352    
96     240    
80     80     
-96    -512   
-48    176    
96     -128   
96     960    
-192   -272   
-160   48     
240    96     
0      176    
-32    -128   
16     96     
64     288    
-16    -144   
96     -176   
16     -224   
96     48     
48     -224   
-128   96     
-48    -224   
48     -608   
80     80     
64     -800   
-304   -160   
-1584  -176   
16     -464   
64     -64    
-32    -48    
112    -16    
-16    -784   
144    -48    
-160   240    
112    -16    
-80    80     
64     16     
128    -880   
112    64     
-16    -672   
32     80     
-208   16     
96     144    
-160   -32    
208    -752   
32     -112   
96     -784   
48     -144   
160    480    
48     -80    
224    -128   
0      80     
96     -16    
-128   144    
-48    -96    
112    -192   
0      -16    
48     -80    
0      -272   
80     -208   
112    -224   
96     160    
-96    32     
224    -720   
272    -112   
-224   -112   
-144   -48    
-16    48     
32     144    
48     64     
-80    -16    
96     64     
32     80     
80     0      
-32    -208   
0      16     
128    -80    
80     -80    
-32    -656   
144    -208   
112    -128   
144    128    
80     208    
32     -32    
16     176    
-32    -96    
-48    -112   
0      -224   
-48    32     
144    96     
-208   96     
144    16     
-496   32     
-16    -544   
-192   112    
208    -560   
32     160    
32     32     
208    64     
-464   -80    
144    -80    
-160   48     
144    -80    
-16    48     
-96    -304   
-384   256    
-32    -272   
64     -16    
-64    -128   
32     80     
-64    -272   
112    -48    
-176   -32    
368    336    
-192   -192   
96     -80    
-256   64     
128    0      
-240   -112   
0      -128   
-320   -48    
-16    -144   
-96    -32    
176    -48    
16     16     
80     -592   
240    64     
-48    -480   
96     -16    
128    128    
96     -64    
-304   48     
48     -144   
-224   0      
240    -192   
16     112    
144    -144   
-144   -80    
112    -288   
-80    48     
112    -240   
16     80     
0      64     
96     64     
-64    -160   
-48    -240   
-144   64     
-144   16     
-32    48     
96     64     
-16    0      
144    -160   
-1456  -16    
192    -112   
-48    160    
80     -240   
-144   -16    
48     128    
-512   48     
-112   160    
80     -64    
-48    -208   
224    160    
96     48     
0      -192   
-128   48     
208    -144   
16     176    
-64    -64    
96     240    
48     -160   
-352   48     
-96    48     
-416   0      
-96    0      
-416   64     
-640   48     
192    -1088  
1408   288    
208    -512   
-864   1072   
496    -96    
-176   368    
192    -528   
80     320    
-432   -384   
-256   336    
-80    -400   
32     320    
-224   -80    
-80    128    
96     80     
-688   -96    
-16    -176   
16     -128   
-96    144    
80     0      
96     176    
-272   -464   
32     176    
-48    -112   
48     272    
32     64     
-48    112    
48     -112   
-160   64     
32     -16    
-256   80     
-160   48     
-208   112    
48     0      
16     -176   
-16    80     
-32    16     
0      0      
-64    144    
-96    64     
112    80     
-176   16     
-48    0      
-208   32     
64     32     
0      128    
-48    160    
-192   -256   
-48    0      
-48    -128   
48     192    
48     -96    
-112   128    
0      112    
-16    -32    
-112   16     
-32    80     
-80    -48    
32     -16    
16     352    
-288   48     
-32    -128   
-416   -96    
16     144    
-288   64     
80     128    
-80    -144   
96     176    
-128   0      
160    48     
-16    48     
0      -16    
96     144    
-112   112    
208    432    
-320   -160   
160    -368   
-112   -64    
176    272    
-128   128    
32     80     
16     -32    
96     160    
32     96     
-64    32     
-48    80     
64     -32    
96     208    
-96    80     
-16    96     
64     96     
32     -16    
0      96     
224    400    
-272   336    
-240   176    
-112   -112   
32     0      
64     144    
48     128    
-80    128    
-80    -48    
-64    48     
-48    -112   
0      128    
-32    272    
32     128    
-128   -96    
0      128    
-416   -80    
-96    128    
-16    64     
112    96     
-32    64     
0      16     
16     96     
48     0      
0      -32    
48     288    
32     144    
-192   -64    
0      96     
64     80     
-16    -48    
192    272    
-192   144    
208    16     
-176   48     
144    192    
-48    32     
0      -16    
176    144    
-16    32     
288    320    
-464   144    
288    128    
-176   64     
128    -144   
0      160    
-16    48     
64     128    
-48    96     
-32    -32    
96     352    
-192   -96    
16     -96    
112    -64    
112    192    
-176   0      
-32    112    
208    432    
-208   224    
-112   -144   
288    112    
-16    -208   
224    96     
-224   224    
112    -48    
-48    16     
96     -16    
240    272    
-272   112    
48     16     
-80    576    
-208   -176   
80     32     
16     272    
80     -144   
-176   96     
112    208    
-80    -16    
96     128    
16     -48    
272    208    
-176   96     
112    16     
-32    96     
160    224    
-176   -112   
144    160    
144    96     
-160   256    
-96    -288   
160    96     
96     336    
-208   -64    
-96    112    
160    48     
-32    96     
64     16     
240    48     
-176   32     
-80    144    
16     48     
176    464    
-1296  96     
464    16     
-800   -48    
736    -3072  
-64    816    
-64    -64    
-80    352    
-160   -448   
672    720    
-160   32     
48     144    
-48    64     
16     -16    
64     96     
80     208    
32     -96    
-336   -384   
256    32     
96     -304   
-16    48     
-16    160    
-112   288    
48     224    
48     -32    
-80    272    
144    144    
16     -176   
-176   32     
128    -48    
208    144    
-144   32     
80     -32    
-16    0      
96     -384   
-32    16     
128    -640   
-64    80     
16     128    
16     -176   
176    0      
-80    224    
160    0      
-64    96     
-80    -128   
192    208    
-32    160    
256    176    
-432   -48    
320    -160   
-112   128    
112    -416   
-16    64     
0      80     
192    -48    
-48    -144   
144    160    
-80    80     
32     80     
96     144    
-16    160    
64     64     
32     -64    
64     80     
128    0      
16     160    
-64    -448   
64     128    
-32    -1824  
128    112    
-64    80     
64     208    
-48    -64    
224    128    
-80    16     
-16    -384   
240    80     
-80    80     
-16    160    
-32    -256   
112    96     
64     -352   
64     -16    
-96    -128   
80     320    
-176   -48    
80     -16    
128    16     
-128   16     
144    96     
-64    -256   
80     0      
64     -288   
-48    0      
160    -192   
-128   64     
176    0      
32     80     
0      -128   
80     128    
-32    16     
96     16     
128    -32    
-64    176    
192    224    
-144   16     
144    144    
112    -208   
-16    16     
-48    64     
64     112    
144    -80    
112    368    
-240   -208   
272    112    
-208   16     
144    112    
48     128    
-48    112    
112    -1520  
-208   -176   
16     -1408  
256    -192   
-96    -32    
32     -144   
32     176    
-16    -64    
192    304    
16     -320   
208    -240   
-32    256    
96     -32    
240    144    
-784   112    
112    -176   
192    32     
-176   -128   
208    0      
96     -896   
-80    -48    
16     32     
-16    -160   
-16    48     
48     96     
80     -544   
-48    -128   
32     -48    
96     80     
-16    -144   
-32    -176   
-80    0      
48     -16    
-32    -32    
224    -416   
-64    -112   
0      -928   
-32    -176   
64     64     
-48    0      
16     -128   
16     192    
64     -32    
-128   -32    
-16    -112   
16     176    
-784   192    
128    80     
-176   -480   
16     -1024  
-16    -80    
80     -848   
256    208    
-128   64     
-256   144    
80     -320   
-16    -48    
160    -16    
160    112    
48     -64    
64     -32    
-208   -64    
96     224    
16     -80    
64     -32    
128    -80    
192    64     
-32    160    
16     -480   
0      128    
64     -64    
80     160    
-96    32     
32     0      
80     0      
112    -208   
-64    -32    
176    -624   
-544   -144   
464    -288   
-496   -416   
-176   -192   
736    80     
-448   -128   
0      -320   
-96    16     
-32    -112   
-96    16     
-32    -144   
-160   32     
-16    64     
32     -48    
64     16     
-432   -16    
-64    -336   
-96    -224   
0      -224   
48     128    
64     -16    
96     128    
-16    -208   
32     -208   
16     144    
128    80     
-112   64     
48     32     
-208   -160   
48     32     
-768   -224   
208    -48    
-608   -32    
240    -128   
-112   144    
128    -48    
80     112    
-32    -384   
112    -80    
-64    64     
64     80     
32     48     
160    64     
-240   16     
144    -64    
-224   0      
16     -256   
128    112    
-64    -160   
192    128    
-112   -304   
160    -16    
-160   -16    
176    -48    
-176   -48    
64     0      
-16    32     
16     -256   
-128   -208   
144    -64    
32     176    
160    96     
-16    272    
-368   -256   
64     288    
-1392  -272   
64     -16    
32     16     
-16    112    
-96    64     
-576   -64    
-128   -144   
112    64     
-80    48     
-128   -272   
128    -208   
-288   128    
-240   128    
-128   -224   
192    192    
-144   0      
-96    64     
0      80     
-192   0      
32     -80    
-160   96     
0      208    
-32    128    
-16    0      
-32    -224   
-16    -80    
192    -128   
-64    112    
32     -16    
-80    48     
112    -64    
-160   0      
-64    48     
-64    -32    
-64    -16    
-96    16     
0      80     
-432   0      
-64    0      
-1344  -208   
128    128    
-208   64     
112    48     
-128   -112   
128    128    
0      48     
-80    16     
-32    16     
16     144    
-112   -32    
96     256    
-48    -32    
-48    0      
-128   -48    
-432   96     
160    128    
-80    -64    
112    224    
0      160    
80     112    
-48    -64    
48     304    
-64    16     
-64    -32    
-16    112    
-160   -64    
0      48     
-160   48     
224    656    
-672   -32    
288    -16    
-1136  144    
144    -16    
-224   -240   
-16    64     
80     80     
96     48     
-80    64     
-64    48     
-16    48     
-80    -16    
-32    144    
-160   -96    
-16    -32    
-32    32     
48     288    
-1152  -176   
0      -112   
80     80     
336    -448   
-48    96     
-160   144    
-48    -48    
-112   0      
80     112    
144    272    
-64    -80    
-208   -192   
336    64     
-384   304    
-48    128    
-256   -32    
304    16     
128    208    
-304   64     
-112   416    
-288   -256   
128    -112   
32     160    
-48    128    
-224   64     
96     64     
192    -240   
160    240    
-272   48     
-80    320    
-448   -160   
-208   96     
-32    16     
-144   64     
16     96     
0      128    
-112   32     
32     -32    
48     112    
-96    -128   
112    80     
-144   48     
80     128    
-480   848    
-112   2016   
-912   128    
-368   -608   
368    -176   
16     16     
0      400    
-96    64     
304    576    
80     -144   
-176   96     
-144   -80    
288    -32    
-80    -112   
144    48     
-80    112    
48     176    
-64    176    
32     32     
128    64     
0      208    
-32    176    
16     96     
176    240    
-240   48     
240    128    
-192   128    
320    176    
-272   -144   
48     64     
-80    16     
160    112    
48     192    
16     48     
0      96     
-32    -48    
64     -64    
-48    -48    
-16    176    
64     48     
48     128    
-80    64     
112    80     
-192   16     
144    32     
-112   16     
16     16     
64     -112   
128    -112   
-80    208    
32     64     
32     112    
16     16     
192    160    
-80    96     
16     16     
224    32     
32     384    
-96    -192   
128    112    
0      176    
-32    48     
48     128    
-64    112    
160    -80    
0      176    
16     224    
-96    0      
96     80     
48     64     
-16    64     
-16    160    
-16    0      
144    -48    
128    208    
-160   -80    
-208   -800   
176    128    
-48    80     
96     80     
-96    16     
192    144    
0      144    
-176   64     
16     160    
-64    -80    
48     -80    
144    256    
-224   80     
176    112    
48     96     
32     -1200  
32     80     
80     -64    
112    304    
-112   240    
-128   48     
160    32     
-48    -48    
288    352    
-176   64     
96     96     
0      -48    
96     128    
-144   -400   
32     112    
160    176    
32     160    
80     -240   
-176   -16    
144    208    
48     64     
32     64     
-80    -16    
144    336    
128    -64    
0      -192   
64     80     
64     -128   
-160   -48    
-96    80     
48     -400   
128    -112   
-112   -272   
224    368    
144    112    
256    464    
64     192    
-32    240    
-176   -96    
144    48     
-112   -32    
112    128    
-96    96     
80     -112   
128    208    
96     -528   
80     96     
16     -320   
64     112    
80     160    
80     304    
-16    160    
176    32     
-112   32     
96     128    
-96    -128   
288    240    
-32    208    
96     16     
-48    96     
112    -64    
64     48     
80     160    
-48    16     
80     -1200  
0      128    
80     272    
16     128    
16     0      
-32    64     
96     112    
-64    -32    
112    352    
-16    -240   
240    512    
-80    -672   
-128   -128   
144    -400   
112    0      
80     -128   
0      0      
-32    -176   
64     0      
-48    -48    
240    320    
176    96     
-48    -128   
80     224    
16     -112   
16     144    
64     -160   
144    144    
32     -80    
-16    0      
-64    16     
240    240    
16     64     
-32    96     
16     240    
32     -16    
32     128    
96     -80    
-32    32     
48     -208   
48     32     
1312   1040   
-1280  -48    
1088   1392   
128    320    
96     -112   
-32    912    
-832   -512   
32     -1040  
240    368    
-128   -736   
144    -944   
-128   16     
112    -1584  
-48    -128   
112    -160   
-144   -48    
96     -192   
48     336    
224    544    
-16    -176   
128    -480   
-48    80     
-16    -384   
-64    80     
-224   -80    
128    -48    
-112   -64    
160    -48    
-16    -272   
160    -416   
-112   -224   
128    80     
48     112    
80     -32    
32     80     
48     -704   
32     144    
-32    -80    
144    144    
-96    -96    
80     -304   
-688   -32    
64     -144   
16     64     
16     -32    
-16    48     
112    -768   
64     -16    
128    -1040  
0      144    
160    128    
-32    128    
32     -80    
-16    -208   
-48    -80    
80     -176   
-176   -208   
-16    -224   
160    16     
96     176    
-16    -48    
64     -144   
-48    -224   
256    -1008  
-272   -96    
112    48     
-16    48     
176    -32    
0      -32    
-64    -48    
80     32     
-48    80     
-16    -144   
-544   -16    
64     32     
-16    80     
352    160    
-192   160    
-16    -208   
-80    176    
144    -272   
96     240    
-32    -32    
144    48     
-48    160    
-112   -32    
128    176    
32     -96    
-320   -64    
-32    0      
-96    160    
96     -16    
16     16     
96     -144   
32     -16    
112    208    
64     16     
-64    -64    
32     -16    
-32    0      
32     -288   
-160   -64    
96     -160   
-496   32     
32     0      
-16    240    
-96    -272   
144    48     
-96    -816   
192    96     
-64    -1968  
160    112    
-96    0      
80     16     
-112   0      
48     128    
-48    -96    
48     80     
-48    80     
-32    -16    
-656   -256   
32     -288   
208    64     
112    -208   
-80    144    
96     112    
-48    32     
-336   16     
-32    -144   
64     32     
32     128    
-48    176    
64     -272   
32     112    
-48    -352   
-176   144    
144    -144   
32     -160   
160    48     
-80    16     
-160   -32    
-32    0      
-16    208    
0      -16    
112    240    
-256   -80    
-192   -112   
-64    160    
-32    96     
16     -48    
96     -16    
80     -112   
80     96     
-976   -144   
-224   16     
-96    96     
-320   -176   
96     -32    
-16    0      
-176   0      
-80    96     
-96    -48    
112    -32    
16     112    
176    64     
0      240    
-208   -272   
-16    160    
-208   -160   
-368   -80    
96     160    
-48    -240   
96     64     
-144   16     
0      -32    
-848   16     
-48    224    
80     208    
-48    96     
-112   176    
-32    80     
-128   -256   
96     208    
-48    -128   
160    112    
-32    176    
-208   32     
-80    -16    
-240   -48    
-80    32     
-112   -96    
176    160    
-1360  48     
32     352    
-336   -176   
-48    96     
96     -1424  
992    -656   
672    624    
208    672    
-720   -368   
144    176    
-64    112    
256    160    
-160   16     
0      -208   
-48    32     
-176   0      
-112   96     
-64    -48    
272    208    
-176   -144   
112    128    
0      48     
32     16     
-80    -16    
-80    112    
-48    80     
48     64     
-112   -16    
-112   -464   
-16    160    
-384   80     
224    64     
-1152  -96    
0      64     
96     -48    
-48    32     
-32    80     
-80    16     
-32    64     
-144   -96    
304    128    
-288   144    
256    0      
-336   -112   
48     128    
-80    16     
-48    64     
16     -32    
-112   64     
176    0      
-256   -16    
144    112    
112    16     
16     0      
64     80     
-128   112    
144    144    
-32    0      
32     144    
-80    144    
32     0      
-16    160    
-48    -64    
16     48     
112    128    
-48    80     
96     -16    
32     128    
-112   160    
-80    48     
-32    -128   
64     144    
-32    176    
64     -48    
144    224    
-208   -112   
64     96     
-64    -32    
112    288    
-240   -160   
64     0      
-32    128    
128    256    
-208   -96    
160    112    
48     416    
-240   -16    
272    112    
-144   -48    
-144   -208   
48     128    
-96    176    
112    -144   
-112   128    
48     144    
-80    128    
48     160    
-64    48     
16     16     
-32    96     
96     16     
112    160    
-144   16     
64     144    
64     96     
0      64     
-128   48     
48     80     
-128   -160   
128    0      
-160   16     
-48    -224   
-16    16     
96     128    
112    16     
96     208    
-240   -64    
-16    64     
32     32     
48     16     
128    -144   
-352   144    
16     80     
240    -80    
-208   16     
-96    -64    
256    128    
-112   -64    
-32    128    
0      -32    
32     192    
-128   32     
64     128    
-48    0      
128    176    
-48    112    
-48    -64    
96     128    
-176   128    
224    64     
32     64     
80     128    
64     128    
112    176    
-48    64     
80     32     
-48    96     
64     176    
-16    48     
48     288    
0      16     
-64    -240   
144    112    
-48    64     
16     128    
0      -16    
192    144    
-176   -96    
80     160    
160    864    
-112   -176   
-80    0      
96     32     
-144   16     
144    96     
-80    112    
48     -720   
-128   -48    
-32    112    
160    368    
-80    -112   
80     192    
-16    256    
-64    160    
-176   32     
48     -304   
96     112    
240    112    
0      -352   
176    256    
-16    160    
48     -576   
32     144    
80     16     
64     128    
96     96     
-112   -16    
176    208    
160    32     
64     80     
-16    -112   
112    -112   
96     160    
64     0      
-48    176    
0      64     
80     -288   
32     128    
16     -16    
-816   -2384  
1312   1888   
-1040  -240   
448    -144   
-32    1248   
432    -464   
-576   240    
240    -176   
240    512    
0      -352   
-192   -160   
-96    112    
272    32     
48     336    
32     -208   
-64    160    
16     64     
240    640    
-192   -240   
-160   -208   
176    -48    
-32    0      
-32    112    
-32    208    
176    -96    
-208   -32    
176    240    
-48    -96    
96     192    
-16    -128   
176    64     
0      -672   
-64    176    
0      0      
96     0      
208    448    
32     224    
64     400    
-192   64     
192    -96    
96     16     
32     96     
-64    -80    
80     112    
80     -416   
-16    160    
-32    -656   
128    240    
0      -80    
80     48     
-176   192    
96     80     
0      208    
-48    112    
-16    0      
80     -288   
128    -240   
-48    -224   
224    464    
-144   -144   
144    144    
-16    32     
80     -64    
-144   32     
272    96     
-96    64     
0      96     
32     -16    
80     -16    
48     64     
48     -384   
32     48     
48     -144   
80     112    
64     -144   
48     32     
128    336    
224    240    
80     -288   
160    -240   
-144   -64    
96     -256   
64     288    
-32    -144   
48     192    
-128   -224   
240    208    
-16    -16    
80     -80    
-48    -112   
160    240    
-48    16     
-16    -80    
80     80     
160    -304   
-48    176    
-128   -560   
16     -1344  
208    32     
0      -560   
-80    -128   
64     -688   
192    -176   
0      160    
-112   -144   
64     0      
160    160    
-48    -48    
96     128    
32     -336   
-144   -112   
16     -624   
16     -208   
-832   32     
-48    -80    
192    176    
128    0      
48     128    
80     -736   
64     96     
-32    -16    
16     0      
96     -576   
-16    -304   
144    -96    
-176   208    
256    32     
112    464    
-48    -16    
16     -368   
144    -32    
-144   -144   
192    128    
-48    -208   
96     -368   
272    32     
-16    -32    
0      64     
16     80     
96     -32    
16     48     
-96    112    
80     16     
-544   -64    
112    -208   
-736   -64    
144    -416   
-80    16     
176    -448   
-32    -192   
32     -1440  
48     192    
-144   -80    
160    -80    
128    -112   
16     96     
-160   -128   
80     64     
-96    96     
64     -208   
-480   176    
64     64     
48     208    
-48    16     
176    -912   
128    -256   
576    752    
-320   -176   
-80    96     
96     -160   
160    -256   
-96    192    
-112   -128   
48     144    
-16    -16    
-112   48     
-48    -144   
-816   -64    
0      -80    
0      16     
64     16     
0      48     
80     -2080  
112    -80    
-64    -48    
-16    -96    
-16    80     
-48    224    
-208   -48    
96     -32    
-768   -128   
160    -96    
-352   -176   
192    32     
208    -64    
64     0      
-96    -672   
768    -1312  
592    768    
160    592    
-480   -416   
208    160    
176    -448   
96     240    
96     64     
-240   -16    
144    16     
-80    112    
16     -48    
128    112    
-32    -208   
176    96     
-112   -592   
176    -80    
-64    144    
48     0      
-80    96     
-16    -32    
16     80     
-32    -80    
160    48     
-32    32     
-112   288    
208    -96    
-224   -80    
176    -144   
64     96     
96     48     
-816   -16    
80     -16    
-208   -224   
0      -96    
-144   64     
224    176    
64     -64    
-128   80     
-32    0      
-128   -32    
-1296  -144   
-80    -16    
192    -320   
0      240    
-32    64     
48     272    
-240   -144   
-288   48     
-160   16     
-400   64     
-112   0      
112    0      
-176   0      
-432   -320   
160    192    
-320   80     
144    -176   
-48    -112   
-208   48     
-48    32     
-16    -128   
96     192    
-112   128    
64     -48    
-64    0      
-32    64     
-416   16     
0      80     
64     -96    
176    80     
-64    -64    
32     192    
-128   -368   
112    208    
-256   -48    
96     16     
32     128    
-112   48     
-112   -16    
-192   96     
-160   -16    
-32    192    
-80    48     
-64    -224   
80     160    
-256   -32    
208    -16    
-160   -16    
64     64     
-32    128    
-16    64     
-32    16     
-128   -32    
-16    -144   
-48    80     
-32    160    
-32    32     
-64    -16    
-864   -48    
-32    80     
144    96     
80     80     
0      48     
-144   48     
192    400    
-160   -64    
128    -32    
-176   32     
96     80     
64     240    
112    112    
-288   -160   
-48    -96    
-992   -32    
80     352    
-32    -80    
-112   -128   
96     160    
-272   -112   
48     144    
-80    -32    
64     64     
0      0      
-64    -16    
16     128    
-48    -48    
-240   0      
0      64     
-320   -16    
-48    48     
160    0      
-112   -64    
64     -48    
-272   144    
112    160    
-48    -48    
-32    -96    
96     -336   
-320   32     
160    144    
-224   0      
48     16     
-32    -32    
32     -32    
64     448    
48     16     
-32    -48    
32     96     
-64    32     
96     144    
-32    -32    
64     480    
16     320    
-176   -496   
240    608    
144    208    
-112   -64    
-80    192    
-240   -192   
64     192    
16     80     
0      32     
16     288    
16     -32    
-208   -192   
160    176    
16     64     
-80    0      
0      144    
128    128    
-16    16     
-208   0      
32     64     
-160   -16    
-48    112    
-16    96     
16     64     
32     64     
-32    48     
48     96     
48     48     
176    16     
64     160    
0      80     
-272   32     
80     96     
48     48     
-48    160    
-80    0      
-16    96     
256    80     
-80    80     
-112   112    
-192   160    
-1168  -336   
-208   -912   
0      144    
0      48     
-336   -128   
752    1216   
-688   -272   
400    -96    
32     -176   
48     -32    
112    176    
-16    64     
-80    112    
176    -192   
32     -96    
64     80     
-144   96     
-80    0      
-320   -16    
0      -352   
-160   240    
-16    32     
-32    160    
-32    -16    
-48    80     
64     -48    
80     416    
48     -240   
64     -16    
112    -96    
128    128    
-48    -16    
-32    16     
-64    -208   
112    -32    
64     192    
128    144    
-160   176    
-16    -1264  
64     -16    
-16    128    
80     112    
96     64     
0      -64    
-64    240    
-64    -32    
-48    496    
192    112    
-176   -80    
80     144    
-144   160    
32     -32    
-48    -64    
0      -240   
48     224    
-112   -48    
64     32     
128    144    
-80    32     
-112   160    
0      32     
-32    -32    
16     64     
192    80     
-112   112    
0      -32    
128    16     
160    48     
-32    -144   
48     144    
0      -1776  
32     -128   
64     80     
208    80     
64     128    
-336   -496   
240    -160   
160    304    
96     304    
-304   144    
144    64     
128    240    
48     272    
-64    80     
64     -544   
224    48     
272    496    
-240   -32    
0      16     
192    96     
48     80     
-160   -64    
128    48     
112    -16    
64     288    
-32    -96    
96     -144   
272    352    
-16    -160   
-48    96     
-80    -464   
176    32     
16     -1264  
32     144    
48     16     
-96    -192   
-32    -272   
80     -144   
112    -80    
48     80     
0      64     
16     -128   
16     96     
16     -224   
64     -64    
112    -160   
0      80     
80     -912   
-240   48     
288    -16    
48     96     
-256   0      
288    -16    
144    320    
-160   96     
224    16     
-96    144    
128    80     
48     48     
16     112    
-48    -32    
112    32     
48     -32    
-144   -48    
128    -688   
-336   -304   
192    -176   
144    -16    
-32    96     
144    240    
32     208    
64     -208   
48     240    
-32    -208   
96     -80    
-80    -688   
48     80     
0      -64    
80     112    
16     -112   
64     144    
-192   -64    
176    176    
0      16     
128    -32    
64     -224   
-32    48     
32     144    
64     -272   
-32    64     
192    -160   
-112   -192   
128    -64    
64     368    
96     -800   
-144   48     
-16    64     
192    144    
32     16     
64     0      
192    -1248  
-96    240    
272    -48    
128    80     
80     96     
-16    48     
32     160    
128    -128   
-16    128    
80     -416   
0      -304   
288    -272   
0      112    
48     -288   
-80    0      
160    -352   
96     -64    
0      -688   
32     48     
208    0      
-144   -176   
96     224    
-32    -176   
144    32     
0      -32    
1920   1952   
-1248  400    
496    -192   
48     -128   
-368   -1232  
256    640    
-864   -576   
1280   592    
-432   -304   
288    96     
-288   -208   
176    64     
-80    48     
320    80     
-368   160    
48     -368   
-16    208    
48     -64    
-32    80     
-176   -112   
112    48     
80     -48    
128    -256   
16     -128   
-32    -736   
288    -64    
-128   -1056  
96     32     
-160   96     
288    224    
-80    -96    
0      -80    
-144   112    
208    -16    
-224   -16    
32     -320   
-1504  -64    
176    -304   
48     -112   
-32    32     
224    0      
-48    -704   
64     -160   
16     -256   
32     64     
112    144    
0      0      
-48    192    
-224   -32    
304    -48    
-32    -208   
-320   112    
112    16     
-96    128    
144    -144   
-64    64     
128    -320   
160    80     
48     -192   
-144   80     
192    80     
32     16     
-32    0      
32     -240   
-80    -48    
64     -96    
16     -48    
80     -32    
-384   96     
0      -144   
16     0      
112    -288   
32     144    
64     -1520  
-32    96     
32     32     
32     -432   
48     192    
-16    -160   
272    48     
0      16     
-192   -224   
32     -480   
-656   -48    
16     -128   
48     256    
-176   -176   
96     16     
176    -768   
-96    80     
-304   -32    
-32    -16    
-112   -32    
144    -112   
-288   -80    
192    128    
-96    32     
80     -16    
-96    192    
80     16     
112    96     
-80    -256   
16     272    
-48    -208   
128    -16    
-128   0      
160    112    
48     304    
-80    -112   
96     288    
-48    -208   
96     128    
-32    64     
272    240    
-144   -160   
128    32     
-496   -256   
208    224    
-464   -560   
-752   32     
32     16     
-624   -128   
-96    48     
112    -144   
-192   -128   
176    32     
-368   -336   
208    352    
-16    144    
-432   -96    
64     -80    
-592   -192   
96     144    
80     208    
-112   16     
-32    80     
-64    160    
-64    -384   
-656   -32    
128    96     
-16    -112   
144    16     
-64    -80    
-64    -80    
-112   144    
16     96     
-208   -288   
176    176    
-16    112    
-112   -32    
-80    80     
-96    -32    
0      16     
-416   -160   
-112   -96    
-416   416    
-304   192    
-336   64     
-208   -16    
96     -96    
160    160    
-144   -112   
0      64     
-208   -96    
224    80     
-336   80     
80     -272   
240    176    
-144   32     
-272   -192   
-160   144    
-64    128    
208    -192   
-288   160    
96     -128   
-176   224    
-112   -160   
64     -48    
-16    32     
32     80     
-112   48     
-80    128    
16     -16    
0      -80    
-112   48     
144    160    
-16    0      
-560   112    
-32    80     
-48    -32    
80     144    
272    -16    
-128   144    
-32    0      
-144   32     
48     80     
720    1424   
320    800    
32     -960   
-576   -80    
-144   -464   
112    208    
112    208    
-432   -464   
-128   -80    
-64    320    
400    -144   
-112   368    
-112   -48    
-16    272    
64     -112   
-80    208    
48     -208   
256    960    
-256   -96    
32     -16    
-80    -208   
-80    -112   
320    80     
-1024  240    
160    -176   
-128   64     
80     224    
64     192    
32     -176   
-48    32     
144    48     
0      224    
-48    0      
-48    16     
-272   -240   
144    48     
-96    32     
144    368    
-384   -64    
0      -80    
32     160    
48     48     
-16    -192   
-80    -16    
224    48     
-64    176    
-80    304    
240    416    
-32    272    
-112   16     
-48    80     
-96    -16    
96     256    
-48    0      
-32    -16    
-160   -336   
32     0      
16     112    
-208   -688   
-48    64     
0      -48    
48     176    
-240   -160   
16     80     
0      32     
0      80     
-352   -432   
224    -368   
160    176    
32     192    
16     128    
-48    240    
-48    32     
112    32     
48     0      
-160   -352   
32     -112   
16     32     
-48    0      
-48    -48    
112    144    
-80    -336   
-128   48     
-16    -96    
192    256    
-16    -48    
32     64     
-80    -336   
32     192    
144    192    
-32    96     
-160   96     
16     -48    
32     -144   
-256   -208   
96     176    
-64    144    
16     272    
-16    64     
-64    32     
112    -32    
32     112    
-224   16     
112    -80    
-48    -368   
96     -368   
112    224    
32     32     
64     240    
-160   80     
32     64     
128    32     
-48    -32    
48     -128   
32     -32    
0      48     
160    128    
48     112    
192    288    
-96    0      
-16    -112   
-16    160    
-32    112    
-32    -64    
112    48     
-112   -16    
144    -16    
-48    80     
16     32     
-48    48     
128    0      
-64    16     
-16    -16    
-176   112    
352    80     
32     192    
-16    176    
-16    96     
64     128    
0      -96    
-16    -448   
-48    112    
112    -560   
16     80     
96     48     
0      144    
-64    48     
48     96     
-48    -64    
-16    16     
-32    80     
48     96     
96     -272   
-112   -48    
144    160    
112    -560   
-112   224    
80     -208   
-64    160    
32     160    
144    80     
-32    224    
112    128    
-16    112    
80     32     
144    112    
-96    32     
80     80     
64     48     
64     144    
128    -352   
0      176    
-16    -272   
-96    128    
-32    -48    
176    160    
-64    -16    
128    160    
48     -16    
32     64     
48     -80    
96     96     
-128   80     
-80    -64    
16     80     
208    -224   
-16    16     
64     -656   
64     192    
16     -880   
-144   128    
144    -128   
48     16     
64     -64    
-128   16     
320    208    
-832   720    
-1584  320    
80     224    
-48    -432   
464    208    
-800   816    
464    -48    
16     416    
176    -560   
-48    368    
-32    -208   
208    320    
-16    -16    
112    -144   
-160   400    
208    -64    
-160   256    
144    -160   
-32    224    
80     -48    
48     256    
48     0      
256    272    
-160   -384   
176    224    
-144   -272   
224    240    
-240   -32    
320    240    
0      0      
-16    16     
-48    128    
64     -448   
144    176    
96     -48    
-64    176    
64     -80    
-32    96     
96     -96    
96     160    
16     -48    
16     176    
-16    -32    
160    160    
-96    32     
48     -192   
32     96     
48     -64    
80     96     
32     -144   
48     32     
16     -224   
16     128    
64     -16    
0      16     
64     -480   
176    -48    
48     128    
-80    -176   
32     64     
32     16     
112    -1344  
32     48     
16     -1392  
-32    -80    
64     32     
48     -48    
80     64     
48     16     
32     128    
48     -224   
16     -64    
48     48     
112    80     
192    -192   
-1248  -144   
48     -112   
-64    -208   
80     -480   
272    368    
176    -672   
0      128    
0      64     
0      -384   
64     16     
96     208    
-80    -320   
48     16     
16     -80    
144    0      
-720   -176   
-96    -224   
64     -96    
0      -576   
-16    -176   
160    64     
128    0      
208    -2720  
-96    -144   
-32    -320   
-16    224    
80     -80    
80     96     
-112   -48    
80     16     
-32    0      
144    -112   
-416   0      
32     -48    
32     -80    
192    -112   
-32    -32    
-16    -1616  
-160   -304   
80     -144   
0      16     
32     -64    
32     64     
-176   -112   
-16    -128   
64     16     
64     -16    
-208   48     
-128   -352   
-48    -496   
-64    -464   
176    -128   
144    -384   
96     80     
0      -960   
-16    96     
-16    -240   
112    16     
-128   -32    
64     -16    
-160   -112   
128    -112   
-128   -96    
32     64     
-2128  -240   
256    32     
-64    144    
96     -48    
-208   48     
224    -768   
48     32     
32     -16    
16     48     
-64    32     
96     48     
-80    -16    
16     -208   
-112   128    
256    -80    
-320   -128   
-48    -192   
-32    96     
-16    -80    
-48    80     
-16    -368   
16     176    
48     48     
-64    -96    
176    272    
-256   -80    
-320   -288   
304    32     
-32    112    
-32    -80    
-208   80     
256    -192   
-800   -160   
48     -352   
-64    -32    
160    -704   
32     288    
80     -112   
80     32     
-176   96     
48     -64    
-112   144    
80     160    
-144   -112   
96     64     
-80    176    
48     -128   
-384   176    
192    -208   
320    -96    
32     16     
-112   -96    
-368   16     
288    16     
96     -32    
80     80     
1856   -2000  
112    -784   
416    800    
-352   -144   
48     144    
-240   -400   
128    848    
-32    -496   
48     1184   
-896   -864   
-352   304    
-224   -464   
-464   288    
-128   -176   
-1120  160    
-352   -96    
368    -80    
16     944    
96     96     
-272   208    
-480   -400   
336    128    
-576   -96    
32     0      
208    304    
-224   208    
16     -320   
-240   -64    
16     -16    
128    448    
-128   -16    
-112   48     
0      96     
48     112    
48     32     
-352   -704   
96     -64    
32     112    
32     144    
0      208    
-160   96     
48     64     
-320   -176   
32     -80    
-208   -16    
144    176    
-224   80     
160    -16    
-272   -32    
128    32     
-32    -80    
32     96     
192    144    
-288   192    
64     48     
-128   32     
-128   0      
-112   -32    
32     352    
-224   128    
64     -64    
32     0      
-160   128    
-656   -256   
80     -48    
128    96     
80     272    
-256   -32    
112    32     
48     0      
-16    16     
0      96     
-96    -96    
160    96     
64     208    
-32    16     
-160   48     
128    -80    
16     -240   
0      16     
64     64     
-16    160    
-144   -112   
256    -32    
-32    -80    
160    176    
32     32     
0      64     
32     176    
-96    -16    
64     96     
-176   80     
0      16     
-336   -112   
128    64     
-1088  -80    
-16    0      
0      -16    
-128   128    
-16    0      
0      64     
-64    -16    
-32    -80    
32     -64    
-240   48     
256    80     
-48    192    
-80    144    
-64    -80    
-16    48     
-512   -112   
-32    208    
-16    176    
-32    -160   
-16    0      
128    32     
-96    -112   
-144   112    
272    256    
-320   0      
128    192    
-128   64     
16     112    
-208   -160   
64     0      
-320   -32    
112    0      
-64    -16    
-16    128    
32     96     
176    288    
-112   32     
128    48     
-112   368    
-48    16     
112    -80    
-256   -112   
-96    48     
16     -64    
128    64     
0      144    
-16    -80    
48     -16    
-128   160    
48     16     
32     48     
144    224    
-32    48     
16     96     
-80    -16    
-16    80     
80     0      
-16    160    
-80    -16    
80     160    
0      304    
96     -64    
-128   32     
80     144    
96     0      
80     160    
0      32     
-48    -64    
-128   -96    
32     0      
80     -48    
48     112    
240    208    
-80    128    
-96    352    
-112   128    
96     -32    
144    -32    
112    192    
-112   -128   
-112   16     
240    16     
64     160    
-96    208    
-96    112    
48     80     
176    96     
32     336    
-144   -144   
-96    144    
112    128    
-32    32     
16     96     
0      16     
64     128    
-32    48     
80     160    
-32    -32    
16     0      
-16    -16    
-640   -1344  
368    1088   
-336   -496   
-752   -256   
-336   -192   
352    672    
-752   -912   
464    672    
-32    352    
416    224    
-256   -32    
-48    -160   
160    384    
208    -224   
-128   528    
48     -160   
32     256    
0      0      
144    192    
16     -64    
32     128    
-96    16     
-80    208    
112    112    
32     96     
-16    -16    
112    0      
-80    -16    
-32    144    
-32    96     
144    0      
-96    16     
32     -176   
-16    176    
112    -1712  
-32    80     
112    64     
-16    32     
16     128    
32     80     
48     48     
16     80     
-32    0      
80     112    
-48    64     
48     112    
-64    0      
-16    -272   
48     160    
112    -192   
-16    16     
64     32     
-32    32     
112    160    
32     112    
16     224    
0      80     
32     -192   
112    48     
0      144    
-48    80     
80     160    
32     -192   
64     80     
0      16     
-32    112    
16     -592   
-112   64     
192    16     
-112   128    
0      -272   
64     192    
16     32     
48     16     
64     32     
192    144    
-32    288    
32     -16    
144    80     
96     -64    
-80    48     
-32    -1968  
128    -32    
32     -368   
-32    48     
32     -128   
-176   -288   
48     -176   
80     288    
-32    96     
64     80     
16     96     
16     -144   
48     112    
32     -336   
-176   -176   
80     -816   
64     128    
208    -544   
-128   80     
-96    -64    
112    96     
128    32     
96     160    
-80    16     
96     48     
32     96     
32     -80    
16     128    
48     -128   
-16    112    
80     48     
16     16     
64     -176   
0      16     
96     64     
-48    128    
48     16     
0      0      
224    64     
16     -144   
64     64     
-32    -432   
32     64     
0      -112   
48     -128   
112    -400   
32     112    
48     -304   
48     -16    
-48    192    
96     64     
32     160    
-32    0      
320    176    
-224   -160   
144    144    
-64    128    
64     -16    
80     -64    
64     224    
-64    -368   
0      48     
160    -96    
176    -96    
-64    -160   
304    -624   
-48    176    
-752   32     
-96    -816   
192    128    
-48    0      
-64    -96    
256    304    
16     32     
208    96     
-80    48     
304    64     
-32    80     
80     -592   
0      96     
64     -384   
0      -496   
-208   -64    
64     64     
48     -32    
192    -80    
-32    16     
-96    -880   
-48    16     
32     176    
-48    -64    
144    256    
0      -48    
80     -128   
-256   224    
32     -192   
16     -128   
-96    -48    
144    16     
32     -192   
16     -64    
0      -208   
128    256    
0      -128   
144    -528   
-96    0      
32     -80    
0      16     
336    -112   
-80    112    
128    16     
-224   112    
208    -128   
0      -176   
-640   64     
1536   -384   
48     672    
432    48     
-576   -432   
-176   -816   
80     -720   
432    688    
-368   -800   
-176   320    
128    -96    
0      160    
-80    -256   
-176   128    
112    -112   
-64    432    
48     -48    
240    112    
-32    -576   
-192   -336   
208    -592   
-112   -96    
144    224    
48     224    
16     -96    
-64    48     
-64    -32    
224    176    
-240   16     
96     96     
-16    208    
-48    80     
-816   -112   
-64    -112   
-80    32     
176    -160   
16     128    
-16    0      
128    48     
32     -64    
64     -32    
48     48     
0      -32    
80     16     
48     -160   
-656   32     
208    32     
-352   -16    
32     -224   
0      144    
96     -64    
32     -80    
80     -480   
16     144    
208    -16    
0      80     
48     128    
-80    -80    
-176   48     
32     -112   
-336   0      
64     -192   
0      48     
48     0      
-112   32     
96     -512   
112    16     
128    -384   
-112   -16    
64     64     
16     96     
48     48     
-80    64     
-48    -160   
112    96     
-112   176    
-144   64     
32     -16    
-16    0      
-832   -32    
0      -176   
96     144    
160    272    
-416   -112   
176    112    
192    272    
-400   -192   
256    -160   
-112   64     
64     96     
-32    32     
16     -128   
-80    128    
80     -144   
-16    0      
112    128    
-48    160    
-176   -192   
-208   -64    
-112   -144   
-288   -96    
-16    160    
-384   80     
64     0      
-16    0      
-208   0      
176    -48    
-96    96     
-368   -240   
288    64     
-192   -48    
160    144    
-16    -224   
-272   -48    
-208   -128   
352    160    
-128   16     
-176   80     
-96    96     
96     192    
0      112    
96     -16    
-288   -80    
-16    64     
-32    -144   
48     -272   
32     496    
176    144    
-176   32     
64     32     
-160   64     
144    256    
-16    128    
-16    160    
-160   160    
240    592    
-208   176    
48     -144   
-80    -96    
16     224    
160    -64    
-64    224    
64     -112   
16     -16    
-16    -48    
-256   -96    
48     48     
-192   80     
48     64     
-96    -16    
-64    -32    
-1168  96     
112    160    
-48    -16    
-80    -144   
-48    -272   
-112   176    
-16    128    
0      160    
48     64     
32     16     
-128   -112   
80     256    
48     160    
112    208    
-112   -160   
-176   -48    
128    272    
-192   112    
48     176    
32     -16    
-32    208    
128    112    
-144   -160   
-32    64     
-16    752    
96     -128   
-48    -256   
144    144    
-128   -272   
-48    176    
-240   -16    
0      16     
-928   -32    
0      304    
-160   -320   
-96    32     
48     128    
-16    176    
96     128    
32     272    
-144   96     
-128   -32    
64     -48    
0      144    
-32    64     
-656   -2720  
640    -352   
-1008  -432   
416    -368   
704    -496   
-128   -400   
-32    -80    
48     208    
272    416    
48     -272   
48     224    
-176   112    
160    96     
-16    80     
96     48     
-192   64     
64     -16    
-192   16     
112    -48    
112    32     
-128   0      
16     208    
-112   -64    
16     224    
176    128    
80     -48    
-320   -16    
208    272    
-32    -96    
0      64     
-336   0      
224    112    
-96    32     
-32    48     
0      32     
0      -64    
16     32     
-176   -32    
144    16     
0      -32    
0      16     
-48    112    
-48    96     
-16    -96    
80     -16    
-176   -48    
240    176    
80     336    
-16    112    
112    112    
-160   80     
48     48     
16     64     
16     32     
-32    48     
80     160    
32     368    
-64    224    
-48    0      
32     16     
80     32     
-48    -16    
32     96     
128    64     
-32    128    
-128   -16    
-16    96     
16     64     
144    80     
-96    0      
-32    96     
-128   16     
48     128    
-112   96     
80     112    
-96    -80    
80     80     
-16    208    
96     0      
64     16     
16     112    
96     240    
32     176    
48     32     
0      -64    
112    208    
-64    160    
-32    112    
16     32     
80     32     
64     32     
-32    128    
64     208    
0      160    
16     32     
-32    32     
320    336    
-80    96     
48     96     
-64    32     
160    96     
64     112    
48     160    
-80    -112   
96     192    
48     144    
-48    -1024  
112    144    
-80    96     
112    80     
-64    64     
32     16     
32     48     
48     32     
32     224    
32     160    
16     -176   
0      32     
32     32     
112    32     
-32    -80    
-16    16     
144    96     
0      96     
0      96     
96     -48    
-48    336    
-80    -128   
160    80     
-208   0      
144    -96    
-208   -240   
80     0      
64     144    
-16    -112   
64     288    
-96    -320   
80     80     
144    -624   
32     192    
-16    0      
96     240    
144    208    
0      -16    
-80    128    
-80    -176   
112    -112   
160    16     
112    176    
-48    -16    
-16    112    
-80    -144   
208    176    
96     -128   
-32    -16    
-64    -32    
192    -144   
320    -272   
96     224    
96     48     
-160   208    
48     112    
112    304    
32     48     
288    -80    
-144   256    
-160   -368   
-128   96     
224    -16    
224    -64    
96     -1664  
80     112    
-144   288    
-208   208    
-16    -32    
320    0      
-176   -128   
16     -144   
80     208    
32     -160   
112    192    
112    -32    
128    144    
0      -368   
48     224    
-144   -800   
208    160    
16     144    
128    64     
-128   96     
0      -48    
32     96     
-64    -208   
192    80     
80     -272   
0      112    
-304   2448   
-1728  -1040  
512    464    
384    112    
304    -1104  
-304   16     
-176   0      
336    -224   
16     -272   
240    -112   
-16    288    
0      -288   
144    320    
16     -528   
-64    -48    
64     -288   
144    448    
-32    -320   
48     -192   
48     -112   
240    192    
-96    -192   
32     96     
16     16     
176    -144   
64     240    
-80    -128   
208    -752   
-64    -48    
96     112    
0      -224   
48     64     
48     -32    
96     80     
16     -1056  
80     -848   
-32    128    
112    -352   
32     48     
-224   16     
96     -32    
16     -144   
16     -720   
96     112    
80     -1264  
-80    -96    
192    160    
-64    -32    
336    32     
-192   144    
224    -160   
-128   128    
224    80     
-272   80     
-352   -224   
32     -272   
144    16     
0      -272   
96     -80    
-64    -160   
64     -176   
16     -400   
32     -176   
128    160    
-112   112    
112    -112   
144    112    
0      -336   
144    112    
-96    16     
112    -16    
-192   16     
48     -32    
80     -112   
-16    -336   
128    -96    
48     -672   
48     16     
32     192    
0      48     
112    -288   
128    64     
112    128    
-144   -80    
0      -48    
48     -192   
-160   160    
-64    -80    
112    0      
-80    -224   
112    -64    
16     -144   
-144   -48    
160    -288   
-208   48     
48     -32    
-32    0      
128    32     
32     32     
-208   -16    
64     -352   
-16    16     
48     -208   
-336   -112   
64     224    
144    288    
0      -112   
-160   -384   
-16    -448   
80     128    
128    -128   
16     224    
-96    -48    
64     -128   
-128   -160   
128    80     
-176   -16    
-48    128    
-512   -144   
-224   -32    
-80    -48    
48     -128   
304    0      
-112   -256   
-208   -160   
176    -896   
96     144    
-128   48     
272    -32    
-240   32     
160    -144   
-192   80     
240    -64    
160    160    
-192   -272   
-320   -64    
80     144    
0      192    
256    -240   
-128   64     
16     -656   
256    -112   
-336   48     
144    -192   
-192   -272   
-32    -352   
-112   144    
16     -112   
0      0      
80     -80    
-144   -48    
112    16     
-32    -80    
128    -416   
-48    288    
-160   64     
-80    -352   
16     80     
64     160    
-32    -256   
16     -48    
64     304    
32     48     
-48    -304   
-32    -304   
160    288    
144    -96    
-64    112    
-944   -160   
-48    96     
48     48     
-480   400    
-48    -32    
-800   -144   
16     96     
32     -240   
-96    64     
64     -48    
96     -64    
112    -16    
-48    128    
-256   0      
16     112    
-80    -32    
-96    -32    
0      112    
-352   -112   
-48    128    
-208   -48    
-48    -64    
-816   -16    
48     240    
-64    48     
-176   -48    
-288   -288   
160    32     
-336   -2384  
1280   64     
-208   112    
-160   496    
-400   624    
-336   256    
128    -1040  
48     -16    
288    656    
-128   352    
-80    32     
464    224    
-48    -320   
-320   -32    
112    208    
-32    -224   
80     240    
0      -64    
-176   -64    
-48    80     
-176   -48    
-16    160    
496    32     
-352   -112   
0      0      
-304   32     
48     0      
0      144    
272    -80    
-192   16     
-16    -64    
144    112    
-176   32     
0      64     
80     192    
-80    64     
144    448    
-352   -16    
-64    -320   
-256   -48    
0      96     
-192   16     
-96    96     
-144   -48    
-16    64     
16     -32    
48     176    
-112   0      
32     -16    
-80    -48    
176    16     
-32    -32    
-64    48     
32     160    
80     176    
-224   64     
80     128    
128    208    
-368   -336   
128    224    
-64    -48    
-64    -16    
80     224    
-96    80     
32     48     
-48    32     
96     0      
-64    128    
80     96     
32     80     
-16    48     
-192   -32    
112    48     
-448   -32    
16     80     
176    480    
-64    96     
-16    96     
96     544    
-64    96     
-304   -48    
64     160    
-16    176    
-32    288    
-304   -176   
32     -288   
-272   -464   
128    48     
-256   160    
-48    -320   
32     128    
-80    16     
96     -16    
48     144    
48     80     
-32    0      
-64    -96    
32     0      
64     112    
-64    -16    
-32    128    
-48    0      
48     128    
-64    0      
-32    -16    
0      16     
-48    192    
48     -16    
32     224    
0      -96    
-48    -16    
-16    80     
160    64     
-64    112    
-48    0      
112    208    
-96    208    
32     256    
-208   -96    
-96    -32    
112    160    
-96    48     
-32    80     
-32    176    
48     -240   
-96    320    
-64    272    
64     208    
-256   0      
64     -64    
96     48     
-96    -64    
-32    208    
16     144    
96     64     
-272   -192   
176    -96    
-176   176    
128    -192   
64     224    
-80    160    
112    96     
-176   16     
160    128    
-208   -48    
0      -144   
32     256    
80     176    
64     192    
16     128    
-64    128    
112    112    
-112   48     
80     -112   
-80    -112   
144    -144   
160    432    
-208   32     
96     96     
-48    192    
-48    -32    
-16    0      
-16    80     
160    96     
-32    32     
-96    -256   
144    432    
240    432    
-48    160    
0      -240   
16     112    
-32    192    
-64    -240   
-32    16     
240    336    
-304   -80    
-96    48     
128    528    
96     -176   
-16    240    
0      -48    
48     160    
-192   48     
16     -16    
176    -272   
208    288    
48     48     
-128   224    
48     16     
240    48     
-64    112    
0      96     
16     -960   
64     128    
-32    96     
-400   2256   
-1712  32     
64     720    
272    -112   
704    -80    
-800   -576   
160    368    
176    496    
112    -96    
-112   160    
-176   -448   
-48    16     
-32    -432   
144    128    
-48    -16    
144    192    
-192   48     
224    112    
-16    48     
112    224    
96     0      
-80    192    
48     -144   
-96    96     
48     -128   
112    -96    
-32    128    
144    128    
-48    32     
80     -816   
-16    48     
208    144    
-80    128    
112    64     
-32    64     
96     128    
48     32     
-96    64     
16     192    
144    96     
64     -96    
-96    176    
160    -240   
128    144    
-160   -48    
192    48     
-112   144    
160    -80    
-16    96     
-16    64     
128    48     
-32    144    
48     64     
64     80     
32     144    
32     -224   
80     80     
-80    -112   
144    64     
64     64     
16     96     
-16    -1888  
96     48     
-32    -112   
96     64     
-80    96     
-64    -160   
128    16     
-16    128    
128    128    
-96    -368   
192    160    
-80    -320   
112    160    
-32    -192   
192    160    
160    -704   
112    -96    
96     -112   
64     208    
-48    96     
128    112    
160    240    
-96    -224   
176    64     
0      -320   
160    112    
-48    -160   
96     208    
16     -64    
96     80     
48     -336   
80     224    
-32    16     
0      0      
176    176    
-144   32     
208    176    
0      -176   
-16    80     
64     -192   
96     32     
144    -304   
-112   64     
32     -352   
240    304    
48     -176   
0      -208   
-96    0      
80     -544   
192    96     
-64    -1408  
224    -464   
16     224    
-64    -640   
48     -432   
-16    16     
128    16     
-48    -128   
368    160    
-48    128    
-16    -192   
32     -1120  
160    112    
-48    -704   
160    48     
48     176    
192    -128   
-96    -32    
80     -528   
144    -208   
-80    -1040  
112    -48    
240    96     
-48    112    
-112   -16    
176    32     
-64    -272   
160    80     
32     -240   
0      96     
-16    80     
-32    -496   
-816   -176   
0      -512   
112    0      
48     -96    
0      -32    
16     -608   
48     -112   
16     -1376  
0      -48    
32     16     
64     256    
-64    -64    
0      -80    
-64    80     
32     -64    
-496   -272   
208    -80    
16     64     
32     80     
0      -48    
80     -160   
16     -144   
-96    -1056  
176    304    
64     48     
-80    48     
128    -176   
256    -176   
-320   -48    
96     -96    
144    240    
0      -320   
-768   64     
-48    -128   
128    16     
32     -432   
-160   -80    
48     -144   
-32    112    
16     -96    
-16    0      
-16    -96    
48     48     
-272   -240   
80     128    
-112   16     
0      -64    
-368   0      
-112   -176   
-64    32     
64     96     
64     0      
-192   -288   
1968   -784   
-752   -496   
1184   1104   
-64    448    
1136   -736   
-848   -400   
672    -272   
256    1504   
-576   -144   
-464   -80    
48     -240   
-96    80     
-16    -48    
-160   -368   
192    -368   
96     128    
144    -1040  
-96    -176   
160    224    
-16    -336   
144    128    
32     -112   
-192   -96    
176    208    
208    112    
-96    48     
-16    -176   
32     -112   
80     0      
144    -112   
64     -48    
192    -368   
-64    64     
-544   -288   
208    -16    
-416   48     
64     64     
-400   -80    
336    -64    
32     -80    
160    -192   
-384   64     
208    -240   
32     80     
-16    -176   
32     336    
-320   0      
16     -112   
-128   32     
208    -48    
-32    272    
80     192    
0      384    
-128   0      
16     272    
-224   -336   
224    112    
160    336    
-224   -304   
-112   16     
-96    32     
48     0      
-976   48     
80     -16    
-432   80     
-16    32     
128    -112   
-80    144    
0      -160   
-32    80     
-16    -80    
-16    128    
-176   -32    
-48    208    
-64    -240   
16     384    
16     176    
-144   224    
128    112    
-80    -80    
-176   -176   
-320   112    
-112   64     
80     -64    
-48    -64    
112    0      
-96    -64    
-384   -496   
0      0      
80     -96    
-64    128    
-96    128    
-48    80     
96     128    
-192   0      
16     272    
0      368    
-48    -64    
-336   -80    
64     16     
0      -64    
32     192    
-128   -128   
80     80     
0      112    
-80    -160   
128    80     
-64    480    
-48    352    
-192   -64    
-48    -16    
80     16     
128    128    
-624   176    
0      32     
48     -80    
48     208    
-64    -144   
48     208    
0      112    
-80    -48    
32     -48    
-112   -208   
48     -160   
-96    -352   
-32    -640   
-256   -464   
-64    176    
-416   -176   
48     128    
-528   -144   
80     112    
-112   -176   
-48    -176   
0      0      
-80    48     
96     80     
-48    -80    
-48    32     
64     112    
-16    160    
16     208    
-16    112    
-224   -32    
128    -192   
-624   -608   
96     -160   
-96    -80    
0      48     
-16    144    
16     96     
96     208    
-80    -256   
-16    64     
-48    144    
80     240    
-160   -48    
96     32     
-80    -48    
80     112    
-160   -112   
112    32     
80     48     
-32    160    
16     -32    
16     16     
80     80     
144    -16    
32     208    
-112   64     
-16    -16    
-16    32     
80     48     
-192   -48    
48     144    
-160   -352   
160    240    
-48    128    
-16    16     
-96    144    
176    32     
-32    64     
96     -80    
16     272    
-96    -112   
112    80     
32     16     
0      192    
-240   48     
96     48     
0      16     
224    176    
-160   208    
-80    0      
-16    304    
16     -128   
224    448    
64     32     
416    -80    
-48    64     
-528   48     
64     -224   
-16    336    
-240   -224   
240    464    
-272   -160   
224    -176   
-176   416    
32     -176   
-48    352    
0      -272   
16     256    
80     -112   
16     240    
-112   -112   
0      112    
-80    48     
64     224    
-144   -16    
112    80     
-32    64     
64     112    
48     96     
0      96     
64     64     
48     192    
-48    80     
16     -48    
-128   144    
96     32     
80     112    
32     96     
160    224    
-368   -32    
176    96     
240    112    
-224   64     
112    112    
-48    144    
144    144    
-16    -32    
64     144    
-112   96     
128    -96    
16     112    
-80    160    
64     -80    
-80    96     
16     112    
-64    -368   
48     -112   
48     80     
80     192    
32     80     
64     96     
0      0      
48     112    
48     0      
32     192    
-96    128    
80     64     
32     -80    
160    176    
-128   -112   
96     -368   
-32    -16    
128    160    
-64    -64    
112    208    
-48    48     
32     -16    
160    448    
-304   80     
32     -208   
80     64     
-64    128    
-32    176    
0      0      
80     -16    
64     64     
-96    -176   
0      32     
32     32     
-48    256    
80     32     
48     160    
0      144    
-64    -16    
128    160    
-16    -48    
128    64     
-112   32     
96     224    
-48    16     
96     -208   
0      112    
48     -560   
-16    48     
16     0      
48     0      
192    160    
-32    16     
-48    -368   
-48    80     
128    64     
128    176    
-224   -128   
80     -160   
32     80     
80     -304   
16     -64    
16     -16    
128    80     
64     128    
224    -240   
-64    144    
96     80     
32     -64    
-16    -16    
80     -176   
48     256    
32     -64    
80     0      
-112   -176   
-144   -64    
192    80     
-272   -192   
32     -32    
96     384    
-96    128    
208    144    
-128   224    
144    -64    
-144   48     
80     32     
64     64     
-80    -112   
80     -160   
192    112    
0      -352   
80     544    
176    176    
-160   -160   
160    -272   
0      48     
16     -1056  
48     64     
0      0      
80     256    
-32    -48    
160    144    
-32    160    
0      -416   
-112   -32    
288    16     
-96    48     
144    -176   
16     96     
144    32     
144    592    
-496   -784   
-144   -352   
384    128    
176    224    
-240   64     
112    0      
80     112    
112    -224   
-64    128    
240    -80    
96     112    
-96    128    
-144   32     
80     -64    
16     16     
160    -400   
32     160    
0      128    
-16    64     
144    48     
80     -176   
64     96     
-64    -32    
96     96     
144    32     
-48    64     
32     -272   
-96    288    
0      -448   
-80    160    
112    -16    
-720   -2640  
1296   3648   
-848   416    
-160   -1792  
48     -688   
16     48     
-384   512    
-304   -576   
-48    384    
176    -240   
16     -496   
80     240    
224    160    
96     -448   
-48    48     
32     -944   
16     208    
0      -640   
240    -272   
-96    -16    
112    240    
-96    16     
112    48     
-32    -224   
272    -2160  
-240   -112   
352    848    
-112   144    
48     64     
-272   -112   
288    -240   
-224   144    
-208   -64    
112    16     
-528   -32    
32     -144   
48     -272   
240    -80    
0      320    
-176   -544   
-112   -176   
288    -256   
48     -192   
-32    -144   
-32    16     
176    -48    
32     -176   
-16    -32    
0      -160   
16     16     
-80    -16    
192    -16    
-48    -256   
240    272    
-16    64     
32     -160   
80     -544   
144    -544   
0      32     
48     304    
0      112    
80     -16    
128    320    
-272   -240   
64     48     
64     -208   
-288   -80    
-16    -16    
272    48     
16     -208   
-128   96     
64     -528   
96     64     
-32    -32    
80     176    
-16    -272   
16     -352   
-112   -160   
112    -608   
160    560    
-16    -16    
-176   -80    
112    -80    
-336   -96    
32     64     
16     208    
-16    -16    
112    -32    
16     -1824  
48     144    
-32    -16    
-64    -224   
-80    -48    
144    256    
0      160    
-112   -32    
-688   -384   
128    -304   
-336   -80    
-32    192    
0      80     
48     -16    
112    192    
32     -432   
32     80     
-112   256    
176    128    
-64    -144   
-160   -320   
-160   -80    
240    -32    
-224   -32    
80     48     
16     64     
80     0      
-96    80     
176    -272   
-80    192    
48     -608   
-48    -208   
128    96     
-32    128    
-432   144    
368    48     
-576   48     
352    160    
-256   112    
240    192    
-112   0      
64     -128   
-208   -80    
-48    -144   
176    64     
224    176    
-128   -96    
64     48     
-288   -64    
-16    16     
16     -16    
-80    16     
80     64     
144    -96    
-128   -32    
-272   -32    
-960   -160   
-112   -320   
-64    -32    
-16    96     
80     48     
-320   -48    
-32    112    
-160   -64    
0      -48    
-944   48     
32     112    
-48    -288   
0      -48    
112    -64    
0      48     
-96    -112   
144    32     
-32    -32    
16     64     
-80    112    
64     -80    
-32    48     
-80    64     
48     -32    
-272   -80    
-32    -48    
128    96     
-160   48     
-80    -144   
192    112    
48     -48    
0      -16    
-272   -224   
-144   -16    
-32    16     
32     112    
48     -32    
48     176    
-128   -112   
-32    -96    
-80    96     
-176   64     
-48    192    
-64    48     
96     48     
48     -96    
0      144    
-176   0      
-64    80     
32     -16    
16     48     
16     80     
-1104  752    
112    -960   
832    400    
176    -144   
128    -608   
-288   -752   
-1296  -144   
864    576    
-480   -48    
160    -16    
-256   -144   
240    48     
-48    112    
-192   112    
-80    16     
112    48     
-208   48     
112    80     
-96    -16    
-176   -48    
-16    -64    
-336   -32    
48     112    
64     -64    
-32    -80    
-16    -48    
-176   112    
208    240    
64     -32    
-128   16     
0      32     
64     160    
0      48     
-16    112    
-160   -96    
16     32     
-16    0      
176    144    
80     -64    
-288   0      
128    144    
-112   64     
112    48     
-176   80     
112    0      
-112   32     
-32    144    
32     48     
48     32     
-224   32     
144    144    
-160   0      
-16    112    
-16    -176   
16     64     
-80    -48    
0      160    
-64    -64    
96     112    
-112   -16    
-48    -16    
-16    32     
-112   -96    
80     176    
-176   -32    
160    304    
-400   -48    
-32    32     
96     16     
-64    96     
0      96     
-96    80     
32     -48    
80     64     
80     80     
-48    -48    
-96    48     
16     112    
64     -32    
-112   -16    
32     192    
-208   -144   
32     32     
80     0      
80     144    
80     208    
-16    -128   
64     -48    
-176   96     
64     64     
-64    0      
48     80     
-32    -16    
-64    -80    
32     32     
32     112    
-160   -16    
0      144    
112    464    
-208   -128   
16     -208   
-96    0      
48     -96    
16     160    
-32    64     
128    272    
16     96     
-256   -32    
96     -48    
0      64     
64     80     
-16    144    
-16    64     
144    16     
-80    -224   
32     112    
48     -64    
48     48     
272    432    
-48    32     
-48    32     
-48    -32    
-16    96     
224    80     
-64    128    
80     272    
-32    256    
32     -176   
-160   -80    
144    64     
16     352    
64     176    
48     -48    
-192   -560   
176    448    
-48    256    
128    16     
-96    112    
160    48     
-208   -16    
16     -496   
80     192    
-80    -48    
16     32     
128    32     
240    176    
-144   48     
32     48     
0      64     
0      64     
-80    16     
160    176    
-160   0      
64     96     
-144   -304   
-16    -176   
96     32     
80     144    
0      112    
-192   32     
160    112    
144    80     
48     -32    
-16    160    
128    -48    
64     144    
-32    -16    
128    -32    
-128   128    
-48    -64    
64     -16    
96     96     
-32    -880   
96     112    
-80    224    
-112   256    
-112   0      
240    16     
48     128    
-32    96     
-112   -32    
80     32     
96     192    
-64    -112   
144    224    
112    -208   
320    -48    
-192   -960   
0      -32    
48     112    
144    -48    
48     320    
-112   144    
48     112    
48     -16    
80     32     
-880   -976   
1072   128    
-384   112    
96     112    
-192   -272   
464    256    
80     -304   
-112   -400   
432    -1152  
-288   160    
288    112    
16     -32    
-64    224    
128    -144   
0      304    
0      -144   
32     624    
0      -288   
-16    352    
16     -432   
80     192    
-16    -208   
400    448    
-336   -544   
-96    32     
-64    -480   
64     160    
192    144    
-96    208    
32     -128   
-32    208    
144    -48    
176    96     
-192   -48    
144    0      
32     32     
0      -624   
-272   -336   
176    -560   
144    224    
-144   -128   
160    96     
-32    -224   
64     16     
-48    -64    
144    64     
-48    -176   
96     0      
112    240    
-80    -160   
48     112    
96     -464   
96     16     
-16    -80    
144    16     
-48    -16    
16     64     
32     80     
-32    64     
32     0      
48     -48    
64     112    
16     -224   
224    16     
96     -176   
-112   112    
112    208    
-96    48     
176    128    
-32    112    
-16    -144   
0      32     
32     -16    
128    96     
-32    112    
0      -16    
48     336    
64     -240   
176    416    
-32    -144   
96     -16    
128    224    
-48    176    
96     -112   
16     48     
-32    -320   
224    144    
-192   208    
80     -80    
48     -16    
-32    -32    
176    64     
16     -32    
80     -480   
-32    0      
-64    -560   
256    -240   
192    224    
112    -16    
16     -608   
0      144    
0      -128   
48     160    
48     -864   
128    -160   
-896   16     
112    -448   
48     176    
16     -80    
144    16     
-96    -480   
192    176    
-112   144    
112    -16    
32     -32    
-112   112    
96     -208   
-48    112    
-128   -32    
80     -96    
-592   288    
16     -192   
16     -288   
176    -496   
-176   -64    
192    -1360  
-128   -32    
80     -1488  
-16    64     
96     -192   
-224   80     
32     -192   
32     32     
16     -144   
-48    0      
-496   96     
240    48     
0      -176   
80     -96    
-96    -16    
128    80     
128    144    
64     -160   
80     -96    
48     -288   
16     -32    
-64    -48    
96     -80    
112    208    
0      -48    
-48    16     
32     -368   
-192   -32    
-64    -16    
-32    0      
96     96     
-128   128    
96     -336   
-64    -48    
16     -1344  
16     -48    
-48    48     
288    -80    
-208   208    
16     -320   
-192   -144   
96     96     
-208   160    
-288   -80    
-672   -96    
112    -288   
192    -64    
112    -192   
-64    192    
64     -1136  
176    16     
176    256    
-64    -336   
-64    64     
96     16     
32     -80    
48     144    
-288   128    
96     48     
-816   -32    
112    -160   
176    -96    
64     -112   
80     112    
-48    -208   
-80    64     
0      192    
32     -256   
-192   128    
32     48     
-864   -1904  
640    -80    
-1408  -160   
128    -688   
-176   384    
144    -96    
-480   224    
368    224    
-160   496    
480    -720   
-336   368    
-192   -352   
112    608    
16     -528   
80     480    
-160   -224   
208    112    
0      128    
-112   16     
16     -16    
112    16     
112    48     
-32    -192   
-128   208    
416    -320   
-544   80     
-16    -112   
-432   224    
-32    -16    
0      16     
-128   -160   
-48    128    
96     32     
16     144    
-144   -32    
-416   -288   
240    112    
-416   -96    
336    128    
-224   80     
160    32     
-48    80     
-112   -16    
64     80     
-1088  -16    
-16    112    
-112   16     
208    448    
-208   -16    
144    -96    
-112   -160   
96     16     
-32    0      
16     0      
0      32     
-48    144    
-80    48     
-96    -80    
-128   48     
-96    80     
-48    128    
-368   -48    
-64    -64    
-256   -176   
64     80     
-240   32     
48     304    
-96    -240   
208    0      
-96    0      
-32    48     
-48    0      
80     48     
-64    48     
-80    64     
208    240    
-320   -176   
112    208    
-80    -16    
64     -176   
0      -48    
16     160    
-112   176    
-256   -144   
128    112    
-160   -176   
-160   -16    
-16    -80    
80     208    
-192   -144   
-32    144    
-16    -64    
-32    -16    
-448   16     
96     80     
-96    -208   
16     0      
96     192    
-80    -64    
32     0      
0      0      
32     64     
-80    -32    
32     80     
-208   32     
192    336    
-256   48     
64     -32    
-448   -112   
96     112    
-80    -208   
48     160    
48     32     
0      128    
-32    64     
208    256    
32     288    
-32    240    
-144   16     
-80    112    
-64    -32    
64     -80    
256    208    
-240   -224   
32     48     
-736   96     
176    16     
-112   -144   
0      -32    
64     160    
64     272    
-240   112    
16     -48    
32     -16    
-16    0      
80     304    
-320   -160   
160    176    
-224   -64    
128    128    
-224   -16    
32     -32    
-32    128    
-64    32     
-112   48     
208    384    
-160   272    
-128   64     
-48    -176   
48     -48    
-32    80     
-224   -32    
-128   -64    
48     -96    
144    368    
-144   32     
-16    -64    
-16    16     
160    304    
-32    64     
-32    144    
240    -16    
-32    160    
-48    -48    
-96    -80    
208    224    
0      176    
-16    -80    
48     128    
32     176    
-16    -16    
32     64     
80     160    
0      32     
0      64     
-64    16     
48     80     
-48    32     
32     80     
48     192    
-32    96     
-64    16     
32     128    
-112   144    
-160   -48    
64     128    
0      80     
96     16     
-128   0      
-48    224    
-96    80     
-64    144    
-272   176    
144    -96    
-208   16     
160    112    
1904   -1536  
-160   384    
-32    64     
-560   240    
336    528    
-192   -320   
208    -48    
128    -352   
-160   32     
48     -48    
64     352    
-64    -160   
96     160    
-48    -96    
256    560    
-224   48     
-16    240    
0      112    
-32    144    
112    -80    
-288   -368   
256    256    
176    48     
-32    272    
-32    -48    
240    288    
-288   -32    
288    64     
-128   144    
208    144    
-176   48     
80     128    
48     96     
0      16     
-80    -16    
0      160    
176    160    
-80    -16    
32     0      
16     0      
48     128    
48     112    
0      0      
-64    16     
-32    96     
144    0      
32     -160   
128    -16    
-176   -1168  
224    16     
-48    208    
0      96     
96     -32    
-32    128    
48     112    
-64    16     
96     32     
96     192    
-80    32     
80     32     
16     96     
48     -208   
48     192    
-112   -112   
112    -64    
144    160    
-32    304    
-32    -16    
160    -64    
32     32     
16     208    
-96    96     
80     80     
32     16     
48     352    
-112   32     
176    -32    
80     80     
-16    -416   
16     144    
-32    32     
176    208    
-176   -112   
192    0      
-64    -176   
112    208    
-224   -240   
208    96     
-192   112    
176    144    
16     0      
32     -48    
112    192    
224    -128   
-320   64     
224    -768   
64     96     
208    -288   
32     128    
0      -112   
64     128    
48     16     
48     80     
16     112    
128    176    
-48    240    
96     -112   
-144   -16    
112    -80    
176    112    
-64    -256   
192    304    
-176   -656   
208    80     
-144   -128   
240    144    
-32    208    
80     48     
96     112    
-160   -112   
272    32     
96     -144   
-128   176    
112    -144   
208    16     
-16    -528   
-80    48     
16     -208   
96     80     
0      48     
16     160    
32     256    
160    224    
0      144    
192    -48    
-272   256    
144    -80    
192    -16    
48     -64    
-208   144    
80     -560   
144    48     
32     -624   
16     240    
176    592    
48     240    
80     160    
-208   -176   
160    96     
48     -64    
48     96     
96     112    
192    32     
-160   -176   
208    48     
16     -128   
-16    -64    
144    64     
-64    176    
32     80     
-16    -608   
-32    -112   
-128   -208   
128    96     
112    272    
0      656    
-64    -112   
256    -80    
128    -80    
112    176    
-160   -32    
80     320    
80     -416   
16     -1408  
-80    16     
112    0      
-16    64     
-464   0      
-32    -112   
96     -96    
96     -288   
-112   -128   
32     -880   
240    320    
-144   128    
-32    -208   
256    -272   
80     -32    
48     -352   
-64    96     
128    192    
-16    -160   
-384   16     
-64    -240   
-128   -224   
-608   -1600  
496    1232   
-128   112    
-784   160    
-144   -1840  
800    208    
-352   -128   
496    144    
-32    304    
432    -32    
32     240    
-96    -272   
-192   128    
144    -304   
-976   192    
-32    -112   
32     -64    
-64    -528   
144    -256   
16     -2768  
96     16     
-96    0      
144    256    
-64    80     
128    -80    
-272   -16    
176    -80    
-304   -96    
96     -16    
32     176    
224    -80    
-112   -16    
48     -80    
96     32     
80     -272   
64     48     
-112   -112   
32     128    
48     -192   
160    -160   
-128   -112   
192    208    
-64    0      
224    -16    
-192   64     
304    80     
-1104  16     
-16    -272   
144    112    
144    64     
-32    16     
0      -1264  
64     112    
80     32     
80     -112   
-128   -32    
208    80     
-256   -32    
80     -208   
-304   -288   
80     -16    
-544   -80    
64     -80    
-464   0      
-48    -528   
64     48     
96     -256   
-48    96     
160    16     
-48    32     
48     48     
-16    -64    
-368   64     
-16    48     
48     -48    
96     -48    
-320   -112   
176    -80    
112    -96    
64     -160   
-64    176    
0      -144   
-48    48     
288    64     
32     -80    
-496   -80    
192    192    
-112   96     
96     144    
-80    0      
160    -96    
-112   0      
-32    -176   
-368   128    
112    -160   
32     48     
0      -192   
16     96     
-128   96     
-32    -128   
-144   -16    
80     16     
-32    -80    
48     32     
-208   -32    
176    -112   
-224   -48    
16     -16    
0      96     
-240   -48    
32     32     
-304   -336   
-192   16     
112    80     
-672   0      
80     208    
-16    32     
48     48     
-48    -112   
80     0      
-96    32     
96     16     
-96    32     
112    -80    
-400   -32    
16     -64    
-176   -288   
-432   16     
240    128    
-48    32     
16     48     
-448   -48    
-80    -32    
-1008  80     
-16    288    
-96    -96    
144    128    
-96    -48    
112    -16    
-256   -288   
176    128    
-96    64     
-32    128    
-80    16     
-32    -32    
-128   368    
16     -416   
128    192    
-400   32     
0      -16    
-336   -64    
-16    112    
-208   -176   
32     64     
-96    -80    
224    144    
128    176    
-320   256    
-80    -208   
-32    32     
-16    -16    
-112   128    
-48    48     
-64    -32    
144    80     
-1280  -128   
416    -32    
-256   144    
240    128    
-128   32     
0      -176   
320    240    
-224   -176   
144    160    
-256   32     
240    0      
-176   112    
48     0      
-368   0      
-80    -96    
-368   -32    
144    80     
32     128    
-112   32     
-32    0      
-16    64     
64     -160   
-48    -32    
112    64     
48     64     
-128   48     
-32    -32    
-256   160    
-96    -240   
-176   64     
64     16     
128    1744   
-1520  464    
448    768    
176    -16    
800    448    
-416   800    
-464   32     
-80    -144   
176    320    
-112   -192   
-176   -176   
-144   48     
160    224    
64     -208   
-80    32     
-32    144    
-64    -80    
-80    -192   
160    208    
0      128    
144    256    
-96    272    
80     48     
-192   -32    
-48    -16    
160    224    
0      432    
80     0      
64     144    
-352   -64    
208    48     
-208   -48    
32     112    
96     48     
-48    80     
224    208    
-288   96     
192    -48    
-320   48     
224    80     
-112   48     
48     0      
-320   -160   
176    192    
-240   -64    
16     96     
64     80     
48     144    
-160   80     
32     16     
112    48     
-112   160    
96     64     
-112   128    
48     64     
48     112    
-80    -64    
-16    64     
48     112    
0      32     
32     176    
0      96     
-80    80     
96     -64    
-64    96     
48     192    
-240   0      
128    0      
-32    -48    
64     32     
-224   -48    
176    240    
-144   -32    
208    160    
-160   48     
-48    -128   
112    224    
-32    112    
32     -16    
112    256    
-112   48     
80     -48    
96     128    
-144   176    
0      128    
-128   16     
80     128    
-96    -144   
176    112    
-192   -96    
-48    -80    
144    192    
-48    144    
192    224    
-64    16     
-112   -16    
96     16     
176    160    
48     128    
-48    144    
32     0      
144    160    
-32    -16    
32     224    
0      112    
32     192    
16     48     
48     64     
-16    96     
80     256    
-48    144    
0      32     
80     96     
96     128    
64     208    
-144   -288   
-64    -112   
-160   96     
432    256    
-16    128    
-16    16     
-224   80     
336    16     
-112   -48    
-256   -192   
48     -48    
-32    240    
16     16     
176    48     
-240   96     
-32    -144   
48     32     
-32    0      
96     -160   
160    224    
-176   -2560  
176    -80    
-160   48     
112    160    
144    192    
48     96     
256    128    
-224   160    
192    64     
-16    96     
-16    -48    
64     256    
-128   48     
64     -192   
-32    80     
32     -464   
64     336    
-16    240    
32     144    
-112   160    
192    160    
32     192    
128    112    
48     -16    
-16    96     
16     16     
0      -96    
128    48     
-32    -368   
192    80     
-32    592    
240    320    
-96    -2208  
64     0      
-96    -128   
48     -128   
128    176    
-16    288    
32     96     
112    32     
144    -192   
224    256    
-16    144    
-96    -144   
64     272    
48     -240   
32     80     
80     -720   
-96    -32    
-16    -64    
208    192    
144    144    
-32    48     
-32    16     
0      48     
-32    32     
224    -144   
64     96     
96     160    
80     128    
16     -160   
-128   1184   
-192   128    
272    -288   
-608   -640   
-416   416    
-208   336    
512    576    
-288   80     
160    176    
-336   -496   
160    128    
0      -144   
176    64     
-224   48     
160    -816   
-32    240    
48     32     
144    96     
-32    -160   
0      144    
16     192    
96     64     
-64    96     
96     96     
-80    -208   
-32    -464   
224    576    
256    -240   
-272   -272   
96     -48    
240    176    
-80    -64    
0      192    
80     -784   
16     0      
0      -112   
224    208    
-48    0      
144    176    
112    272    
16     -80    
96     144    
-16    16     
-16    -48    
112    32     
-32    192    
176    320    
-112   192    
80     -48    
16     32     
48     176    
-16    -720   
96     208    
-80    -144   
48     -1040  
48     352    
0      -656   
224    48     
112    480    
64     -240   
-32    -16    
160    48     
-16    272    
-80    -144   
48     -320   
80     0      
48     -592   
-144   0      
-592   -16    
80     -304   
80     16     
16     -16    
32     -32    
16     -320   
112    80     
32     320    
128    432    
128    192    
80     112    
-48    -160   
160    0      
16     -144   
240    -16    
-32    48     
176    -16    
-48    -352   
144    -544   
-144   -416   
80     -480   
-112   80     
-32    -352   
32     0      
160    -496   
-160   96     
0      -208   
80     176    
0      32     
160    16     
-160   -96    
144    -112   
-48    16     
112    -96    
-16    16     
16     -112   
112    112    
-80    -448   
96     -48    
-112   -352   
128    80     
-16    0      
64     80     
-64    64     
80     16     
-128   -64    
48     -48    
80     224    
-16    -112   
-192   -128   
48     48     
192    48     
48     -160   
-160   32     
160    -96    
48     160    
32     64     
-80    48     
-48    -176   
112    -144   
-96    64     
64     -160   
-32    16     
64     32     
-208   32     
-48    -272   
-32    -80    
16     -352   
64     176    
-32    -224   
80     144    
-16    16     
208    128    
-304   96     
80     -272   
-64    48     
-32    -736   
48     -160   
96     -16    
-352   -240   
-80    64     
-288   -80    
112    -16    
112    128    
0      -352   
336    512    
-208   -1584  
32     -112   
112    192    
-112   -64    
-160   -160   
-144   -16    
-32    -160   
48     -48    
272    224    
-128   96     
208    368    
-80    -96    
112    320    
-80    -432   
-80    -48    
-80    160    
-240   -208   
-32    -112   
176    112    
16     112    
-128   -192   
16     112    
224    176    
-32    -16    
128    144    
-64    32     
16     -240   
16     64     
48     -64    
80     -16    
-80    -16    
-176   16     
-224   -256   
144    -96    
0      176    
-48    256    
-224   96     
-16    128    
32     -176   
96     -240   
-272   32     
-1296  -992   
512    2000   
-832   -176   
-848   -304   
16     -784   
144    576    
-416   -288   
48     176    
-80    -96    
592    -112   
-208   -32    
96     -192   
-32    272    
-192   -128   
-32    208    
-48    16     
48     96     
-176   -32    
-288   48     
-32    -48    
-400   -16    
-64    16     
160    192    
96     128    
-336   0      
-240   -64    
32     -64    
96     144    
-144   -128   
208    160    
-192   -64    
192    176    
-176   32     
-48    0      
-48    0      
112    240    
-192   192    
112    -128   
-160   96     
-336   -32    
16     64     
-80    0      
-16    0      
128    0      
-80    192    
-48    -224   
-48    80     
144    352    
-80    16     
128    0      
-144   48     
32     -32    
-32    144    
-192   176    
160    -48    
-64    -32    
0      80     
-48    144    
-80    -208   
-16    160    
0      48     
-112   64     
48     64     
16     64     
-96    112    
-80    -16    
-160   -64    
192    96     
-96    48     
32     64     
-80    16     
-336   -64    
32     16     
-208   0      
112    -144   
48     -352   
-32    256    
-128   96     
96     144    
-112   -80    
48     128    
-64    128    
-32    -64    
128    0      
-128   -48    
-80    368    
-304   -112   
96     96     
-864   -48    
128    144    
-128   -64    
96     80     
-64    -48    
112    80     
-112   96     
-64    -16    
160    16     
-64    80     
-32    -16    
-16    96     
64     128    
-32    -32    
48     64     
-128   -64    
128    208    
160    80     
-176   -80    
32     -64    
-112   128    
96     32     
48     144    
-144   -32    
80     96     
-112   -48    
-16    -32    
-96    0      
48     64     
80     48     
-272   -224   
-256   112    
32     112    
240    80     
112    64     
-160   112    
240    304    
144    304    
48     -368   
-144   160    
-208   128    
224    16     
112    256    
-224   16     
336    256    
-144   32     
0      16     
32     272    
-288   -112   
288    64     
48     16     
-64    112    
16     16     
0      144    
48     16     
-32    32     
32     -112   
0      -96    
-112   -176   
64     256    
112    256    
-16    48     
0      80     
16     192    
-32    224    
-16    64     
-128   16     
192    256    
128    304    
-64    -96    
-96    -64    
-112   -64    
48     80     
128    112    
-128   -32    
64     112    
-32    -144   
192    496    
-176   -352   
80     288    
-32    160    
64     0      
80     32     
32     144    
-272   -144   
-16    80     
-32    80     
112    0      
-64    -96    
32     176    
112    -160   
0      -240   
-128   128    
-80    144    
-32    16     
112    160    
-64    -16    
0      128    
208    80     
-96    112    
48     160    
32     96     
80     16     
160    -48    
-112   48     
80     64     
-16    112    
112    48     
384    432    
400    144    
-480   -80    
-384   -32    
-32    512    
288    304    
224    432    
-144   96     
-176   128    
-80    -224   
144    112    
192    -1984  
64     368    
-80    -64    
0      -112   
128    64     
-80    -64    
160    160    
-112   -16    
80     0      
48     240    
160    176    
-96    176    
16     0      
-48    160    
48     208    
-16    -496   
-112   -144   
208    160    
-16    -112   
128    224    
-64    160    
80     208    
-16    288    
16     -16    
-64    0      
-16    -352   
96     336    
64     304    
16     112    
0      64     
32     -240   
16     -16    
80     208    
80     32     
32     -96    
192    48     
112    16     
48     112    
-16    -112   
112    160    
0      80     
0      144    
0      144    
32     -48    
0      48     
192    480    
80     48     
0      -320   
32     -80    
48     80     
128    64     
-48    80     
48     112    
0      144    
32     48     
-16    32     
112    80     
64     64     
64     -144   
48     96     
64     -208   
-16    16     
-16    -240   
32     -16    
224    -272   
0      128    
96     96     
16     160    
256    -176   
-176   112    
80     -128   
16     64     
64     128    
-32    -16    
224    384    
32     528    
-48    208    
-80    -336   
176    -32    
0      -176   
32     80     
-16    -32    
80     96     
16     96     
48     144    
0      0      
-16    -96    
192    176    
0      -448   
160    272    
-80    -272   
80     112    
-80    -512   
144    112    
16     -208   
192    272    
-32    64     
80     112    
0      32     
80     32     
-16    48     
32     -176   
144    64     
-16    -368   
224    320    
-80    -176   
144    -16    
-192   -240   
160    64     
96     -112   
64     64     
-16    192    
-80    128    
256    192    
-160   224    
48     176    
176    -16    
-48    144    
96     -176   
64     -96    
-64    -240   
128    64     
-48    0      
416    192    
-64    96     
32     -288   
32     256    
96     -272   
0      48     
112    -64    
48     -640   
48     -368   
16     -672   
32     -336   
48     144    
240    160    
96     192    
-32    -80    
48     128    
-16    -256   
192    -400   
-32    272    
0      -96    
0      208    
-176   32     
96     352    
-176   -672   
144    -368   
128    -80    
112    -112   
16     -80    
96     -640   
96     176    
-176   0      
-64    -400   
64     112    
80     144    
32     -112   
32     -208   
96     -112   
-80    -64    
-64    208    
32     -160   
112    -112   
112    -480   
-80    -304   
16     -1056  
-16    -16    
160    0      
-96    288    
-32    -32    
-48    112    
64     -96    
96     -32    
-64    16     
16     0      
-304   80     
64     -112   
-96    -208   
160    -336   
112    16     
192    -320   
-288   128    
224    0      
-16    96     
656    -272   
-64    -1184  
192    304    
-144   336    
-336   -464   
128    -256   
-64    -272   
-208   352    
-448   128    
144    -80    
208    -160   
-64    384    
80     -208   
-48    -192   
48     -96    
96     -96    
16     144    
48     16     
80     0      
-80    -32    
-64    -96    
112    112    
-144   32     
48     -160   
-160   0      
240    -160   
-32    -144   
128    32     
-32    -256   
144    0      
-32    304    
144    -64    
-112   -64    
48     -272   
-144   0      
192    208    
-80    32     
-96    -96    
-400   128    
176    -384   
-800   -32    
32     -224   
16     64     
192    -480   
-80    160    
64     -784   
-32    -512   
-240   128    
-32    -16    
96     0      
-32    0      
-112   0      
128    64     
-176   32     
80     -176   
-128   208    
0      -80    
96     96     
32     -80    
-48    48     
-160   -32    
112    0      
0      128    
-64    48     
64     -32    
144    -144   
-128   0      
64     32     
-224   32     
144    -96    
64     -32    
0      -48    
-16    96     
64     -288   
112    192    
32     -16    
240    144    
80     0      
32     -64    
-96    128    
-80    -64    
80     176    
-176   -48    
0      -128   
176    64     
-496   -112   
-208   -176   
-112   64     
-368   -48    
-80    32     
80     144    
-240   -64    
48     32     
-48    0      
112    304    
-256   64     
16     32     
144    80     
-112   0      
-320   -144   
16     96     
-400   -224   
112    160    
-80    -32    
144    0      
64     336    
-176   64     
128    -64    
-336   0      
112    32     
48     96     
-64    64     
-400   32     
144    -16    
-80    -80    
32     -80    
16     -240   
48     352    
240    16     
-192   -192   
64     -96    
-336   80     
208    128    
-16    16     
-112   -16    
96     128    
-208   112    
-336   48     
16     16     
-16    -112   
-32    240    
32     32     
-32    160    
-16    16     
96     208    
-48    272    
-32    0      
-96    -80    
160    176    
-96    -32    
16     32     
-64    -80    
-144   -16    
0      32     
64     80     
128    272    
-16    -80    
-48    -64    
112    480    
-192   -208   
-48    -16    
0      -192   
16     -192   
96     224    
-80    192    
112    160    
-160   -128   
96     144    
64     224    
-1520  -112   
32     64     
16     -64    
80     128    
144    576    
-528   -288   
-288   -352   
48     128    
160    32     
-80    16     
-112   32     
-48    0      
160    160    
-224   -16    
32     112    
-784   -80    
160    144    
-32    192    
0      176    
-112   -80    
0      -48    
160    48     
48     144    
-272   32     
-144   80     
160    48     
64     0      
48     32     
-176   -16    
-32    96     
-160   16     
144    112    
-96    64     
32     -64    
-64    208    
80     128    
-912   -1312  
1264   2896   
-1456  512    
224    -528   
272    752    
-16    -240   
-464   48     
448    80     
-32    112    
160    -256   
-512   -80    
-48    16     
48     144    
-16    64     
32     80     
-176   112    
16     32     
-80    16     
64     16     
0      -96    
-48    -32    
-16    224    
-48    352    
112    96     
-192   -112   
-48    32     
0      128    
-224   -416   
352    304    
-32    160    
80     48     
-32    176    
32     128    
-16    0      
16     240    
-128   -96    
80     -176   
80     352    
-32    16     
48     144    
96     0      
32     112    
16     96     
32     96     
64     224    
48     144    
-64    112    
0      -160   
-336   -640   
176    224    
-256   16     
96     176    
-112   -128   
160    -16    
32     64     
64     208    
80     688    
128    800    
-128   -80    
80     176    
32     -176   
-192   144    
192    -80    
-272   64     
272    64     
-144   48     
64     -64    
-96    160    
144    -16    
48     192    
-80    64     
48     160    
144    64     
-32    128    
64     16     
-32    32     
112    -80    
176    288    
-160   -32    
32     -144   
160    96     
48     224    
-16    -64    
128    -400   
-16    0      
96     -32    
64     176    
112    48     
96     208    
-16    128    
128    0      
-96    64     
48     64     
-48    48     
16     -48    
16     -32    
32     112    
48     -48    
-32    -1712  
112    0      
32     48     
224    400    
32     192    
-128   96     
-96    48     
64     96     
0      -32    
-48    16     
0      -32    
80     208    
-128   -240   
0      -16    
64     32     
64     -208   
80     144    
-64    -384   
96     224    
-32    96     
64     208    
64     80     
0      48     
32     16     
160    160    
32     208    
112    0      
-112   176    
80     0      
64     352    
224    192    
-144   0      
0      224    
176    368    
-64    80     
-64    -192   
208    32     
-80    128    
80     -224   
-16    -96    
0      -64    
64     112    
-16    48     
96     0      
-64    176    
240    -48    
-176   -16    
176    -1696  
-160   -176   
16     144    
0      16     
96     -144   
16     192    
-32    160    
-32    -16    
160    128    
-80    32     
192    176    
-32    -400   
240    48     
80     -16    
48     192    
48     -96    
80     144    
-16    -880   
48     48     
0      80     
16     -240   
128    224    
128    48     
112    160    
16     128    
32     80     
80     -224   
176    400    
16     -160   
32     192    
128    176    
96     -192   
96     -528   
160    80     
80     -64    
-96    128    
0      96     
96     96     
-96    48     
-48    -336   
144    80     
-16    -192   
48     112    
-16    -224   
80     128    
48     -400   
-80    48     
-128   -176   
240    112    
144    16     
96     224    
-256   -448   
608    -160   
1072   176    
432    -928   
416    800    
-336   -480   
-32    -192   
1168   16     
-144   144    
64     -432   
-208   -48    
64     144    
80     -80    
48     64     
48     128    
-80    192    
32     -1344  
80     -128   
64     -16    
0      304    
32     -112   
96     192    
16     -112   
176    112    
-128   -208   
112    80     
-32    224    
352    -1104  
-240   -112   
96     -752   
32     96     
64     48     
0      80     
32     -64    
80     -368   
-80    -256   
240    -464   
96     -208   
80     48     
-128   96     
192    128    
0      -160   
80     -160   
0      32     
144    -272   
-64    -48    
-96    160    
128    64     
144    -96    
-224   -256   
192    -48    
128    -432   
-64    112    
208    -128   
-32    -64    
128    240    
-16    16     
16     -112   
96     176    
-48    -32    
96     64     
-32    -80    
96     48     
-336   -128   
80     -128   
64     80     
112    144    
-32    48     
160    -1056  
128    -80    
16     -1152  
-144   112    
112    -32    
80     96     
-48    -160   
-80    -576   
-32    -304   
-208   16     
-112   -128   
160    -144   
208    144    
-64    -176   
112    -64    
-16    -480   
-112   96     
-160   -1776  
208    -112   
0      -160   
-128   16     
-208   -32    
160    208    
-208   -16    
32     112    
-96    -96    
144    16     
-320   -32    
-64    -96    
-32    -80    
112    80     
112    32     
16     -160   
-16    0      
208    -256   
32     -16    
-112   -48    
-112   -192   
192    464    
32     -80    
-32    -48    
32     -272   
-48    96     
48     -80    
-192   64     
96     48     
-80    -128   
64     -640   
-48    160    
64     -2160  
-32    224    
-16    160    
96     -176   
-208   -144   
288    128    
-128   -112   
0      -32    
-112   -160   
16     -128   
-224   0      
-160   -272   
48     -32    
80     -144   
32     32     
16     -304   
208    160    
-112   -224   
304    96     
-208   144    
288    224    
-240   0      
80     -16    
-112   144    
112    160    
0      -128   
16     -160   
80     -80    
-32    -128   
80     80     
144    -144   
96     64     
-80    -144   
-32    -16    
16     -48    
160    80     
176    864    
-64    96     
-304   -176   
48     -32    
32     64     
48     -64    
96     128    
-608   -96    
128    112    
-144   -64    
-416   -48    
-224   48     
-160   80     
-384   -112   
384    0      
-32    48     
-64    -336   
-48    -32    
144    128    
-176   -32    
-80    16     
-16    0      
-304   -304   
-112   144    
16     -16    
-144   0      
112    64     
-32    96     
-64    -80    
-448   176    
-112   -64    
48     48     
-64    64     
80     0      
-112   80     
-144   -176   
128    112    
-96    -48    
208    -256   
144    288    
-80    -80    
-320   -16    
-928   -80    
-560   1200   
-448   880    
-1104  112    
272    -400   
416    624    
-512   -144   
416    736    
-352   -560   
656    80     
-592   -48    
368    16     
-96    32     
-96    64     
-192   -80    
-144   16     
-208   112    
64     320    
64     224    
-480   -160   
-224   64     
-16    -272   
-64    352    
-48    -368   
64     320    
-64    -192   
128    320    
160    -720   
-48    -48    
-16    -352   
128    224    
-176   240    
-48    32     
-144   64     
48     96     
-16    304    
-784   -80    
32     176    
-32    112    
192    128    
-144   -16    
16     16     
144    320    
-48    112    
-176   -16    
32     -176   
144    -112   
-128   -240   
-96    -112   
-32    -64    
-16    144    
-224   64     
112    96     
-48    -208   
-80    16     
32     64     
272    704    
-272   544    
80     288    
16     -64    
-176   -288   
-64    -64    
16     64     
-112   96     
-96    32     
224    48     
-240   -32    
48     144    
16     112    
-32    80     
-48    80     
64     -32    
0      96     
-32    128    
-32    48     
80     528    
80     16     
240    0      
0      208    
32     224    
-128   48     
-224   -144   
128    336    
48     32     
-16    224    
-128   -48    
32     -304   
160    208    
-80    80     
-48    96     
48     80     
160    96     
-48    144    
-144   112    
-144   48     
32     -16    
-112   -160   
-80    16     
112    416    
-80    0      
96     -64    
-128   16     
80     80     
-80    112    
160    80     
80     272    
-48    -144   
-96    48     
16     80     
-160   -16    
80     112    
-64    16     
-16    16     
32     -48    
80     -80    
32     352    
-144   -112   
144    96     
-64    -144   
384    96     
-192   -80    
64     0      
-48    0      
160    256    
-128   48     
112    160    
32     32     
144    176    
-144   80     
96     48     
192    16     
-128   144    
160    112    
128    128    
-288   -96    
128    16     
96     240    
-96    176    
240    80     
-144   80     
64     96     
-64    -16    
112    -176   
-112   16     
192    112    
128    128    
-208   64     
112    224    
-144   -16    
64     32     
0      128    
-96    64     
-144   32     
224    16     
-224   -96    
224    160    
-16    -208   
128    128    
-16    208    
48     112    
-112   224    
0      96     
0      112    
-48    -240   
192    0      
-64    208    
0      48     
-224   32     
256    272    
48     -32    
96     -448   
-16    192    
80     128    
-80    160    
-240   -32    
240    192    
-80    32     
32     16     
32     64     
112    16     
-128   0      
80     176    
-80    48     
80     224    
0      256    
16     -992   
96     240    
0      64     
0      -16    
96     64     
224    80     
-160   32     
-48    64     
80     272    
64     64     
-48    176    
2080   864    
-768   592    
832    64     
128    -128   
-144   -816   
272    960    
-1056  -1184  
992    688    
-384   240    
272    704    
-208   -96    
-192   -80    
64     160    
272    112    
-128   144    
-48    -16    
96     256    
0      -176   
-48    176    
176    -368   
-48    272    
128    -176   
-16    368    
96     -112   
-80    224    
96     -144   
-16    304    
80     32     
16     224    
96     -144   
-144   80     
96     -32    
32     -48    
48     32     
-16    -96    
144    32     
-80    -176   
224    176    
-160   -768   
144    64     
-16    -304   
64     144    
48     64     
16     128    
-48    -96    
0      112    
0      96     
96     -64    
288    96     
-240   -16    
240    32     
-64    -480   
128    144    
32     -48    
-96    112    
112    -784   
80     112    
-16    64     
80     144    
-112   -48    
128    176    
64     64     
0      80     
16     80     
112    -160   
64     128    
48     -112   
112    144    
48     48     
32     80     
32     -672   
112    32     
48     112    
-16    0      
0      80     
192    48     
-64    -160   
176    -144   
-96    192    
-16    -400   
160    48     
128    -128   
-64    -160   
-16    -256   
32     144    
112    -96    
48     288    
16     80     
0      -208   
-48    32     
160    208    
144    160    
160    -192   
0      -48    
48     -80    
-32    128    
192    -160   
-160   -144   
48     -400   
-32    272    
128    -64    
0      -176   
-48    -112   
144    -896   
64     -1056  
112    224    
64     -272   
48     192    
208    256    
64     64     
-112   64     
48     -192   
128    112    
64     -16    
-16    176    
48     0      
0      48     
176    64     
80     208    
48     -656   
-944   48     
112    -192   
96     96     
96     -400   
-80    -160   
32     -1856  
-112   -112   
160    0      
160    16     
48     -512   
32     0      
-80    -128   
32     -32    
-80    144    
96     -544   
-752   -352   
192    -16    
96     64     
-80    -240   
48     -144   
64     96     
64     16     
112    -80    
-16    -128   
96     -256   
0      80     
208    48     
-32    144    
-16    48     
64     -96    
-96    -64    
16     -208   
-128   -128   
192    -16    
-80    -48    
128    -32    
-80    288    
64     -384   
-352   -80    
240    -64    
0      64     
-144   192    
0      -128   
-128   -64    
240    -272   
-288   -64    
0      80     
-672   16     
-64    -48    
128    -80    
80     -224   
-128   -64    
-32    -224   
288    -32    
-32    32     
32     -48    
16     16     
112    -96    
-16    0      
64     0      
-96    48     
64     96     
-272   -208   
16     160    
0      16     
16     -240   
144    64     
96     -16    
-80    32     
80     -944   
160    224    
-160   -32    
208    64     
-144   224    
336    -16    
-128   -32    
1728   -1552  
208    -464   
432    688    
-896   -32    
-48    256    
240    -16    
48     -48    
32     192    
-240   -512   
16     -384   
-160   224    
48     -240   
176    240    
-16    -192   
-368   144    
-32    -352   
32     -112   
32     -16    
176    144    
-176   -224   
-64    -336   
256    -288   
-32    -112   
0      -896   
320    -400   
-224   160    
96     -272   
80     400    
-128   -208   
-16    -32    
176    192    
-96    16     
16     48     
-128   32     
160    48     
16     -48    
-64    -432   
48     96     
160    -96    
32     384    
-80    -48    
128    -64    
-192   128    
176    -160   
-32    0      
-32    -144   
48     -32    
128    -160   
-208   -96    
160    -192   
16     112    
-464   -160   
112    224    
-144   64     
-560   -128   
0      -16    
64     64     
-128   0      
32     80     
32     -32    
80     -32    
-48    -16    
32     208    
-48    -64    
-16    -160   
96     192    
-272   -240   
304    464    
-240   160    
128    -64    
96     48     
-128   0      
80     48     
-224   96     
-32    32     
-432   -16    
32     -32    
16     -32    
64     80     
-64    -48    
32     96     
-32    -80    
-272   -144   
160    -144   
32     64     
-160   -176   
48     64     
-144   96     
-192   16     
-192   16     
80     144    
-32    192    
32     112    
-112   -112   
144    -144   
-48    96     
-32    -176   
0      -48    
16     0      
64     -16    
0      32     
-112   96     
-112   64     
-160   -32    
-16    64     
-240   48     
-96    -352   
-912   -176   
176    96     
-32    -160   
-48    128    
96     176    
-112   -48    
272    64     
-224   0      
224    128    
-384   64     
80     160    
128    -48    
-80    48     
208    -64    
-304   -48    
-976   -240   
240    80     
128    32     
-64    160    
-32    64     
64     0      
-96    48     
32     128    
-64    32     
128    0      
-384   128    
336    240    
80     -96    
-272   -112   
-256   64     
-336   -16    
288    288    
112    48     
-176   112    
48     320    
-96    32     
16     80     
-80    288    
-80    256    
208    96     
-224   -48    
-16    0      
-64    32     
-128   0      
80     96     
-32    -48    
-192   128    
-1456  -48    
0      -128   
32     32     
16     96     
64     208    
32     64     
48     32     
-96    48     
80     128    
-320   -16    
256    208    
48     -64    
176    112    
-144   128    
-48    0      
64     192    
-96    16     
64     192    
0      16     
112    64     
-32    16     
64     240    
-160   -64    
32     -16    
160    -144   
144    128    
-160   272    
-80    -96    
-144   32     
128    64     
-96    112    
0      112    
48     16     
-16    144    
-16    -48    
-16    0      
-16    144    
0      128    
-64    -32    
32     144    
0      0      
272    688    
-944   800    
-1792  32     
256    576    
1008   1040   
-640   -624   
-224   336    
256    -272   
80     304    
-112   -144   
160    176    
-128   160    
208    -48    
-112   288    
160    -448   
-288   240    
304    0      
-48    416    
96     80     
16     96     
64     -176   
-16    272    
208    32     
-48    208    
0      -16    
32     96     
48     16     
112    64     
-112   64     
-16    32     
-48    16     
80     80     
288    224    
-112   16     
-80    48     
112    -32    
48     96     
-16    80     
-16    192    
112    0      
16     32     
-176   80     
80     80     
48     16     
0      64     
-96    32     
16     96     
144    128    
-128   80     
32     112    
112    96     
0      80     
16     96     
64     64     
-16    -16    
64     160    
-16    64     
112    160    
-48    32     
96     176    
-16    -176   
96     -192   
-64    288    
48     112    
-32    32     
160    128    
-48    -48    
0      16     
48     -16    
64     -16    
16     144    
64     64     
48     144    
-48    -224   
0      0      
16     -336   
192    16     
-32    368    
-160   -1856  
-16    -128   
-32    -80    
32     48     
128    240    
-112   -48    
96     64     
32     128    
-128   32     
48     112    
-80    -288   
16     144    
-16    16     
64     -208   
128    64     
32     -3024  
32     -176   
-80    -128   
48     -64    
208    112    
48     160    
16     80     
-80    128    
16     -48    
80     48     
48     32     
32     128    
208    224    
-176   -352   
64     -32    
48     -464   
144    64     
-32    -656   
-16    208    
32     -16    
96     128    
-48    -80    
80     112    
0      128    
96     80     
48     128    
-96    -176   
16     16     
48     -128   
256    176    
-48    -336   
48     160    
-16    -752   
32     -224   
0      -320   
16     128    
80     -144   
-32    48     
32     16     
64     160    
-32    32     
-48    -96    
-32    0      
240    64     
80     80     
144    -48    
-240   -32    
192    -160   
48     96     
144    -368   
-16    144    
16     -80    
272    16     
-48    192    
128    368    
-192   -32    
112    16     
176    96     
-96    -720   
-80    0      
464    64     
64     208    
160    32     
-208   160    
48     -144   
304    96     
-64    144    
80     64     
-208   192    
64     -128   
96     176    
-240   -240   
368    -80    
-144   -304   
80     0      
-80    -128   
80     224    
64     -176   
16     112    
0      -80    
272    112    
-176   112    
160    -80    
48     128    
80     -112   
-80    -64    
192    -224   
96     304    
64     -64    
-128   -48    
448    -96    
32     480    
-128   -192   
-144   48     
240    -176   
144    -1344  
160    -192   
0      -512   
-16    -48    
-256   -112   
128    -464   
240    -160   
176    -1712  
-1184  -1040  
1120   144    
32     -144   
240    912    
-848   -800   
816    448    
-16    -80    
192    144    
-352   -576   
144    -272   
96     -352   
-1328  -240   
128    -48    
-112   -304   
144    -304   
304    560    
-192   -1408  
-96    -224   
128    272    
-16    -272   
-48    -400   
-48    96     
368    -384   
-288   -160   
-64    -96    
208    -96    
-480   96     
-64    -32    
160    -32    
64     -176   
-16    -112   
144    -496   
112    -96    
-32    -480   
176    96     
-16    16     
-16    64     
64     -176   
32     16     
64     128    
-80    64     
96     32     
-144   -176   
-272   -16    
160    -48    
-16    -32    
-16    -272   
48     -192   
128    -560   
-32    32     
64     -64    
-48    48     
48     -128   
144    -32    
-32    192    
-64    -64    
-96    -80    
96     -256   
-368   32     
16     -192   
-176   -16    
128    -96    
-320   0      
64     -320   
32     48     
48     112    
64     208    
0      -80    
160    112    
-176   -16    
48     -32    
-48    -144   
48     16     
-208   -48    
64     0      
-400   256    
32     80     
-64    -80    
144    -192   
-48    96     
96     -832   
80     352    
-144   16     
48     -240   
144    16     
-80    0      
48     192    
16     -96    
-16    96     
80     -96    
-544   224    
-176   -224   
-368   -16    
80     -224   
0      96     
-80    -448   
144    176    
-176   -96    
112    -112   
-48    32     
48     64     
-32    112    
-96    -64    
-128   -32    
-32    -176   
-192   -32    
112    32     
-144   64     
176    -240   
0      16     
-48    -352   
112    -304   
-112   0      
-16    32     
272    -16    
32     128    
-240   -32    
160    0      
-112   208    
288    112    
-32    128    
-80    32     
64     112    
272    32     
112    16     
-352   -208   
-64    -144   
-144   -96    
112    32     
64     -160   
-16    32     
-192   32     
336    -16    
0      144    
-160   -144   
64     -144   
144    -112   
16     80     
-144   -272   
96     144    
-160   48     
-80    224    
112    80     
-208   0      
-48    176    
-1280  80     
-240   128    
112    16     
32     16     
64     64     
-112   -48    
-192   -224   
-64    -16    
-80    -112   
128    144    
-64    -304   
96     48     
0      160    
-160   -80    
-16    0      
-128   -160   
112    160    
-16    -80    
-176   48     
96     -16    
-224   -272   
-192   -320   
96     144    
-64    208    
-80    -16    
-192   192    
-96    -112   
-96    48     
-144   -128   
48     192    
16     192    
-64    0      
-176   -224   
48     32     
112    -192   
160    64     
112    64     
-80    192    
64     80     
-64    -16    
144    -80    
32     -144   
-16    -16    
48     112    
-128   64     
-144   64     
-80    48     
-464   -128   
0      176    
-432   -48    
-384   -2256  
-176   -992   
-432   240    
576    -160   
720    -160   
-512   -304   
336    48     
-32    -160   
288    -32    
-160   -80    
112    384    
16     128    
16     112    
-48    16     
0      -112   
-144   32     
32     -32    
16     0      
0      0      
96     144    
64     80     
-80    192    
48     160    
-64    32     
-48    -48    
16     16     
96     128    
160    160    
-112   160    
-288   -256   
32     32     
-1056  -80    
16     -32    
16     208    
112    -48    
112    112    
-288   64     
80     80     
-128   80     
64     16     
-96    32     
16     48     
-160   -96    
80     80     
-112   96     
96     192    
-704   0      
-16    -16    
64     -48    
-32    80     
16     16     
-48    96     
32     80     
96     64     
-112   64     
0      -32    
-16    -32    
-128   -32    
64     144    
-176   -400   
160    80     
0      -48    
-32    -16    
128    240    
-48    64     
48     240    
16     320    
-144   64     
0      -48    
64     32     
-16    0      
32     80     
-96    -32    
176    112    
-96    -16    
-48    -240   
-96    -400   
96     64     
-208   192    
64     -80    
0      176    
-48    32     
64     -32    
0      144    
-16    160    
-96    64     
-32    160    
-16    112    
192    224    
-96    -16    
-128   -32    
32     16     
112    128    
64     128    
-80    64     
-32    64     
208    176    
-48    48     
0      48     
80     80     
16     80     
80     160    
-112   32     
16     80     
-32    32     
-16    -112   
112    128    
0      352    
32     -32    
0      48     
0      48     
64     48     
-16    32     
80     80     
48     64     
-128   -192   
208    192    
-112   32     
96     32     
-160   64     
144    144    
144    16     
-64    -48    
96     144    
-192   80     
48     -64    
16     -176   
176    208    
32     96     
112    0      
-192   176    
64     0      
48     64     
-48    144    
112    64     
-112   -304   
400    -32    
-80    384    
32     0      
0      48     
80     208    
32     48     
-16    96     
-64    48     
160    48     
-48    -64    
96     272    
0      96     
-32    -240   
16     -48    
96     304    
-16    144    
-16    112    
80     -224   
288    224    
-144   -16    
64     304    
-336   256    
-16    -192   
32     -32    
224    208    
112    160    
-336   80     
128    -384   
480    0      
-320   -160   
-32    -96    
48     16     
192    128    
80     -16    
-96    224    
160    368    
-272   -112   
272    -272   
112    368    
-48    -160   
-176   -96    
352    -64    
368    0      
176    16     
-96    -192   
-16    80     
336    448    
-208   -48    
-80    96     
0      48     
176    0      
-32    160    
0      -16    
0      64     
16     48     
-48    96     
224    96     
-64    176    
144    80     
-80    -464   
1584   144    
-304   -432   
624    320    
-272   144    
480    -192   
-112   -512   
-96    224    
-48    336    
304    400    
-96    112    
-80    -48    
-32    160    
-48    -208   
80     192    
0      -368   
-16    48     
96     -432   
112    208    
48     -1168  
-96    64     
80     144    
16     160    
16     0      
48     272    
0      -48    
32     -192   
48     224    
64     -144   
64     -32    
-64    -608   
208    112    
16     -176   
32     208    
64     -336   
16     64     
-80    96     
224    -48    
-16    160    
80     128    
64     160    
-48    -144   
48     112    
112    -432   
-80    112    
80     -192   
0      80     
80     -304   
32     96     
272    -256   
-144   224    
96     48     
16     96     
0      32     
96     96     
112    544    
-288   -384   
208    176    
80     96     
64     -96    
48     -464   
48     208    
48     -304   
96     192    
-176   -512   
224    0      
-112   32     
48     -1168  
-112   32     
0      32     
-48    176    
96     -112   
-16    -16    
64     -80    
-16    64     
80     -272   
96     112    
-112   -80    
160    192    
-48    -288   
144    -368   
-128   -32    
160    -464   
-48    -48    
-608   -48    
144    -48    
48     272    
32     -560   
112    -32    
-16    -416   
64     48     
0      112    
112    96     
32     272    
-240   -336   
352    -192   
-128   0      
80     -64    
96     -128   
-320   -128   
176    -624   
-16    -96    
64     -512   
64     -32    
112    -80    
32     64     
32     -208   
-48    -160   
-16    -384   
272    96     
-16    -96    
-16    96     
48     32     
48     -16    
-144   -80    
32     48     
-192   32     
224    80     
-240   80     
368    80     
80     -160   
160    -768   
-208   32     
336    96     
-96    -192   
128    -80    
-480   -368   
0      -48    
-16    -240   
144    -32    
0      0      
-176   160    
-96    -96    
112    -32    
144    -224   
-80    -192   
80     -448   
-128   64     
112    96     
64     16     
16     -32    
32     -64    
-176   -192   
-16    32     
-32    64     
176    0      
0      96     
-256   -240   
192    -176   
32     -160   
0      -32    
0      -64    
144    128    
-32    -1712  
144    0      
-32    -96    
160    32     
-128   -80    
128    32     
-112   80     
80     -208   
-160   -96    
80     0      
-528   -224   
144    -64    
-208   -160   
176    160    
48     352    
128    -32    
16     -16    
-64    -160   
272    320    
-16    128    
224    -112   
-112   -144   
80     -272   
-80    208    
160    96     
-64    128    
96     -80    
-256   -16    
112    -400   
0      80     
80     -464   
64     240    
-112   -336   
128    -144   
48     128    
16     -112   
-128   128    
64     -96    
-80    64     
128    128    
-256   -112   
128    -304   
48     -112   
288    2336   
-1680  -624   
256    416    
432    544    
976    -816   
-512   -1040  
-16    640    
560    496    
-80    -176   
96     -16    
-352   -224   
32     -16    
0      336    
16     -256   
128    96     
-128   -48    
16     -272   
-384   -368   
-1248  208    
240    256    
-864   112    
48     64     
-48    48     
160    112    
-32    -224   
-64    -48    
-64    -96    
192    160    
-160   -144   
160    320    
-96    -240   
96     0      
-176   -320   
32     -64    
-96    256    
0      -48    
-176   64     
-672   -48    
48     48     
-16    -96    
-48    16     
0      32     
-32    -32    
-192   -48    
-32    32     
-256   -224   
112    128    
0      32     
80     96     
-16    160    
96     192    
-64    128    
-224   -32    
-80    -16    
-240   64     
32     32     
160    -144   
-96    -160   
48     -32    
128    240    
-160   -16    
64     192    
-64    -16    
144    224    
-320   -32    
0      32     
-32    48     
64     48     
-64    80     
16     16     
16     96     
-480   32     
-112   32     
144    -48    
48     128    
-48    48     
224    336    
-272   192    
-160   -176   
-176   80     
48     -32    
80     176    
16     48     
0      112    
-320   16     
-272   -176   
-992   -32    
0      144    
16     -96    
-32    160    
-16    16     
0      -48    
-64    16     
48     48     
32     -16    
32     128    
16     -16    
-80    -96    
-16    96     
32     48     
-32    48     
-64    48     
80     112    
-320   48     
32     112    
32     256    
-160   -48    
144    112    
-144   64     
192    112    
-192   -48    
80     96     
-160   -48    
64     128    
-64    32     
32     208    
-176   -96    
32     144    
-416   -32    
-32    144    
-48    -64    
-192   16     
192    48     
16     -80    
-128   64     
-16    368    
-144   144    
64     48     
-64    -16    
128    48     
0      208    
-304   144    
32     -112   
-224   48     
-16    64     
-48    208    
96     0      
48     -176   
128    176    
-96    16     
-48    64     
48     144    
112    336    
-16    32     
16     144    
-272   -32    
-64    -80    
-64    288    
96     160    
-32    64     
64     48     
-96    0      
16     0      
0      128    
-112   -16    
-80    224    
-192   -176   
128    -16    
112    64     
-208   -16    
64     144    
-80    -32    
112    80     
64     144    
96     112    
-16    128    
-16    -128   
0      208    
80     112    
-144   -32    
80     96     
16     -160   
-48    -32    
144    80     
0      -80    
-32    128    
-160   128    
80     80     
-16    112    
-16    288    
-16    32     
-80    16     
64     176    
0      32     
144    144    
-32    128    
-48    144    
0      -16    
32     96     
-64    64     
-16    16     
64     144    
-240   80     
144    416    
-256   48     
-32    96     
96     -1264  
896    -672   
720    768    
240    704    
-704   -304   
208    208    
-16    144    
384    256    
-336   -112   
48     -176   
-48    -16    
32     48     
16     176    
-48    64     
288    176    
-160   -16    
80     96     
16     32     
80     80     
-80    16     
32     176    
-128   -16    
64     64     
-192   -128   
160    -224   
96     288    
-128   176    
240    64     
-80    16     
-32    32     
144    144    
-16    96     
48     112    
48     64     
-80    64     
-96    -96    
288    80     
-112   240    
272    16     
-240   -64    
128    144    
32     -544   
0      64     
144    144    
-112   48     
240    240    
-192   16     
128    112    
144    48     
-48    -64    
128    192    
-176   -48    
224    144    
-64    -64    
48     -112   
-32    112    
16     -1216  
-16    112    
96     96     
-16    16     
96     128    
-16    32     
48     -16    
64     240    
-144   176    
80     64     
-16    -128   
32     176    
-64    0      
144    -352   
96     224    
32     -352   
80     80     
80     -224   
0      304    
-112   32     
112    176    
-16    -176   
112    64     
-64    -112   
160    224    
-48    144    
-112   0      
256    128    
48     0      
-144   -176   
96     224    
-192   0      
256    -1360  
-128   192    
160    -32    
-80    192    
64     -16    
-48    0      
48     -32    
-48    160    
32     -32    
64     -32    
-16    16     
112    80     
112    16     
-48    -448   
-64    0      
80     -112   
-16    -16    
64     -704   
-144   0      
224    112    
-176   32     
224    64     
0      112    
0      -16    
-80    -64    
16     48     
208    128    
-16    16     
80     256    
-320   160    
272    -336   
-64    64     
-48    -64    
240    112    
48     240    
80     64     
112    -64    
96     224    
112    208    
16     -400   
32     48     
0      -576   
-64    32     
32     -96    
-112   208    
128    192    
64     32     
64     -400   
-48    80     
-16    -64    
128    96     
-16    80     
16     160    
32     144    
16     -112   
32     96     
0      -64    
0      -48    
96     -16    
16     96     
48     -272   
-32    32     
16     -224   
192    160    
-64    16     
-16    -1520  
-16    64     
-656   -784   
256    592    
80     -48    
48     -320   
0      -64    
0      128    
-48    -128   
160    272    
-48    -96    
112    176    
-80    -480   
224    -384   
-160   -80    
64     -1200  
96     -48    
-496   -112   
224    160    
-176   -64    
-176   16     
96     128    
-128   -944   
96     -96    
16     112    
64     0      
32     160    
-32    -64    
80     -144   
16     112    
96     144    
-96    -144   
-288   -256   
224    112    
80     -16    
-32    -160   
64     -176   
144    -512   
304    -192   
-64    -704   
48     -16    
-48    -128   
144    272    
-912   -2528  
592    528    
-384   496    
160    416    
-752   -400   
416    -160   
-576   208    
176    -80    
80     96     
128    -176   
-16    0      
112    -32    
160    -144   
-96    -640   
0      160    
-64    -224   
160    -128   
-48    -432   
352    144    
48     256    
-32    -80    
-224   160    
144    -96    
-416   32     
80     -160   
112    -64    
-32    -32    
0      96     
80     -800   
-16    16     
80     80     
96     64     
-160   32     
96     -80    
-320   -192   
192    -48    
-320   -160   
144    -336   
-752   80     
160    -208   
-208   -64    
128    -496   
0      -16    
16     -880   
0      112    
32     112    
-80    -144   
48     304    
-192   -160   
176    160    
-176   -48    
-48    -80    
112    48     
-144   -176   
-32    64     
-928   96     
352    208    
0      144    
-32    -256   
0      16     
128    -80    
48     -240   
-112   -64    
112    16     
160    -32    
160    -48    
-208   48     
0      -96    
0      32     
80     48     
-64    48     
48     -128   
-32    0      
112    -240   
-16    96     
-144   -48    
-192   -160   
-448   -80    
0      -560   
-96    64     
160    80     
-112   -64    
64     32     
-48    -16    
192    288    
-448   -160   
112    -160   
64     112    
96     -48    
32     -32    
64     192    
64     32     
-208   -64    
64     -208   
16     32     
80     -80    
-80    -32    
-64    -144   
160    192    
112    -48    
-144   32     
-16    0      
208    16     
-32    64     
-560   -256   
-80    32     
-944   48     
64     -80    
-864   112    
0      176    
32     32     
-48    80     
80     -112   
16     64     
-480   -48    
32     368    
-48    64     
160    192    
-144   128    
80     16     
-224   16     
-352   -176   
16     128    
-192   -224   
128    176    
-1472  240    
304    624    
-352   -176   
32     -64    
-80    -144   
64     96     
-160   -128   
208    160    
-96    128    
16     384    
-64    144    
-64    176    
16     80     
16     32     
-112   48     
-208   288    
-32    -64    
-64    -112   
48     16     
-96    192    
96     -32    
-16    -16    
80     160    
32     112    
-160   96     
112    160    
-64    96     
-80    96     
-256   0      
96     80     
-336   48     
192    224    
-96    96     
-32    -32    
96     176    
-80    64     
-32    -48    
64     352    
-480   -304   
208    400    
80     464    
-96    -432   
0      -80    
-48    64     
-144   -16    
192    0      
48     80     
-112   -96    
-112   32     
-288   -112   
96     144    
-32    -80    
80     80     
48     48     
-144   64     
-64    64     
-64    192    
-64    32     
-16    64     
208    272    
-16    -256   
64     32     
-112   -32    
16     96     
-480   -32    
-64    112    
64     240    
-80    -16    
-96    0      
-128   32     
1072   -1664  
-256   -304   
320    0      
-544   80     
320    160    
-160   48     
-32    352    
-64    -16    
64     112    
-912   -304   
80     208    
128    -16    
-64    192    
-16    64     
64     112    
-80    0      
112    176    
-128   16     
-48    32     
-208   -48    
0      -112   
48     112    
-32    112    
176    160    
-336   -320   
0      176    
-208   -16    
224    80     
-128   128    
160    0      
-32    -80    
-96    128    
96     80     
96     176    
-128   -64    
176    320    
-80    192    
-16    -80    
-192   16     
16     112    
-64    16     
32     96     
-80    128    
160    0      
-128   64     
96     208    
-16    -16    
16     160    
160    -80    
0      144    
-48    -16    
-16    96     
-80    32     
64     112    
48     64     
16     16     
48     352    
32     -160   
64     16     
-224   48     
80     64     
16     -64    
96     96     
32     272    
-112   -144   
-32    -128   
80     144    
-80    80     
-80    160    
128    16     
48     -48    
64     160    
-48    176    
0      112    
48     -64    
192    352    
-176   -112   
48     32     
0      160    
-32    32     
0      16     
0      -64    
-48    -16    
160    208    
-64    64     
-16    -96    
-32    192    
-160   96     
240    16     
-128   144    
128    32     
-112   144    
-16    -64    
96     128    
-16    -48    
-16    -32    
96     176    
-208   192    
32     -16    
-16    16     
48     80     
0      80     
192    240    
64     32     
-48    48     
-80    64     
224    384    
-128   64     
96     -16    
-112   64     
0      16     
112    256    
112    112    
-16    -2272  
0      -32    
96     80     
48     272    
0      32     
-112   -32    
80     128    
-112   -96    
128    112    
48     64     
16     16     
16     -64    
-128   -96    
208    256    
32     -64    
32     -48    
-32    96     
96     0      
-96    0      
112    128    
32     160    
208    80     
-128   272    
16     -64    
48     128    
-32    -592   
16     -304   
-48    176    
112    -16    
-48    144    
32     -304   
80     -32    
-16    464    
128    336    
-144   -96    
192    112    
0      96     
-32    80     
48     -688   
48     -32    
64     304    
-128   -160   
160    656    
-368   -272   
48     -176   
128    -752   
112    160    
-64    -1104  
-48    48     
144    208    
48     112    
-96    -64    
-80    -32    
112    208    
-16    128    
0      80     
-64    -32    
32     96     
64     -16    
112    96     
-32    128    
-112   96     
0      32     
80     128    
96     -688   
-48    48     
48     112    
48     80     
96     96     
-96    240    
-48    -144   
80     -16    
224    160    
144    -16    
-160   96     
48     0      
208    112    
-32    -336   
0      288    
-112   -672   
0      128    
-96    96     
-656   -288   
-384   880    
0      1808   
-848   112    
352    -704   
144    768    
-304   656    
-656   32     
208    192    
384    -448   
112    -208   
0      176    
48     0      
16     0      
96     144    
48     0      
-112   48     
-96    16     
96     -48    
160    160    
96     32     
-48    -32    
96     288    
-144   -224   
208    -32    
48     -48    
-16    -64    
304    160    
0      400    
144    -16    
64     192    
-112   -48    
16     160    
16     272    
304    -16    
-160   288    
-16    -656   
144    240    
64     -64    
16     112    
160    -48    
32     16     
64     -384   
16     128    
80     128    
-16    -1360  
0      -128   
-80    -528   
288    32     
-32    -208   
16     -384   
128    64     
176    -48    
96     -64    
80     128    
128    -112   
16     80     
0      -80    
-64    -416   
176    80     
-16    -96    
160    336    
-96    -240   
80     -1072  
0      -128   
320    -240   
-112   48     
64     -448   
32     48     
48     -496   
0      -64    
32     80     
128    144    
-160   -32    
64     144    
32     -80    
240    368    
-544   -96    
0      -480   
-720   128    
144    48     
-48    -144   
32     -480   
-128   -304   
224    -752   
80     16     
-400   -560   
240    -240   
288    448    
-144   -16    
48     -256   
112    144    
-96    48     
-48    192    
-208   -416   
-96    -304   
128    80     
-32    -80    
-288   -416   
32     -112   
176    16     
160    32     
-128   128    
48     -160   
32     96     
-96    -208   
128    112    
32     272    
48     160    
-304   128    
-32    -208   
-368   -64    
112    -48    
64     96     
128    64     
-96    16     
64     -400   
0      -48    
256    384    
-16    48     
-128   0      
160    192    
-160   -192   
64     -176   
-368   -368   
160    -64    
-176   80     
96     -64    
272    0      
0      -352   
-48    -144   
16     -512   
0      112    
80     -144   
16     96     
16     768    
240    64     
-144   -16    
-80    -112   
-176   -48    
128    80     
-256   -96    
-16    -48    
-736   -80    
144    64     
48     272    
176    -48    
-64    112    
96     -816   
-16    -128   
64     -32    
160    -48    
-64    48     
0      64     
32     160    
-32    -96    
-48    352    
32     -256   
-64    0      
32     -96    
112    96     
48     -48    
224    192    
-1088  0      
144    -256   
-128   240    
272    -304   
-144   64     
0      -48    
-160   48     
0      -112   
32     16     
-128   -176   
-32    128    
-96    -96    
144    0      
-400   -256   
128    0      
-128   128    
16     -96    
-16    96     
80     32     
-272   48     
144    -176   
-32    160    
96     48     
-176   96     
112    112    
-112   32     
-592   -96    
48     -80    
-832   -176   
-720   16     
160    192    
-256   16     
-48    48     
-1184  272    
-304   -624   
480    368    
32     32     
624    672    
-528   -592   
704    400    
-336   -288   
192    -272   
-576   -144   
416    16     
-256   208    
0      -96    
-256   224    
112    -64    
-240   144    
-16    -80    
-80    176    
-128   -112   
-128   80     
16     -144   
-32    -48    
16     32     
32     -64    
0      -64    
-160   -16    
112    32     
-80    144    
-16    -128   
-128   -16    
32     112    
144    160    
-64    64     
-240   0      
-512   -96    
-16    128    
176    48     
-176   112    
64     -96    
112    96     
-64    112    
-64    16     
48     208    
-64    -48    
-64    64     
-16    -16    
16     128    
-80    -176   
80     144    
-400   16     
176    96     
-64    32     
48     96     
-32    -128   
-64    80     
-64    -112   
16     144    
-48    16     
80     48     
-160   0      
16     -16    
0      48     
-64    16     
48     112    
-32    0      
-16    32     
-1328  0      
-112   32     
64     -144   
-80    48     
80     128    
64     32     
16     32     
-32    16     
-48    48     
32     176    
-48    -32    
128    208    
-160   0      
-144   -176   
48     128    
-384   112    
-64    16     
192    64     
144    32     
-96    -160   
-64    112    
-112   256    
32     16     
-48    96     
48     64     
32     96     
-80    -96    
-32    -112   
-96    -16    
224    272    
-144   -96    
16     32     
32     112    
-16    48     
-16    -80    
-112   128    
48     48     
-256   64     
112    64     
-64    80     
96     96     
-176   -112   
-160   -16    
48     176    
0      256    
48     112    
-176   112    
176    112    
-160   48     
112    -208   
-112   208    
80     80     
0      96     
80     128    
-16    -32    
-112   -16    
0      128    
16     32     
16     96     
80     0      
-320   -592   
112    368    
-16    80     
48     96     
64     80     
-64    -32    
0      160    
80     64     
80     112    
-48    64     
-16    144    
-64    -336   
16     144    
-48    160    
-112   -208   
16     -208   
-48    144    
48     48     
128    352    
-80    96     
-176   -240   
64     96     
-96    16     
96     48     
-32    96     
96     0      
-64    -64    
-32    -96    
-304   -192   
640    560    
-192   224    
64     224    
-160   0      
96     0      
96     128    
-96    16     
144    208    
-96    -32    
352    256    
-240   112    
96     -192   
160    32     
0      144    
-208   -112   
16     336    
0      224    
208    -112   
-288   160    
80     0      
-128   208    
-96    96     
192    16     
32     80     
48     128    
-176   16     
64     112    
128    48     
80     16     
-128   176    
144    -64    
32     16     
0      176    
-96    16     
0      80     
80     128    
288    32     
-112   160    
-64    -32    
-64    32     
16     64     
1088   1216   
624    944    
176    -768   
-544   -96    
96     -352   
96     -112   
336    464    
-144   -560   
-192   368    
-80    160    
304    -96    
-128   240    
48     48     
64     208    
96     -16    
-64    160    
112    -208   
176    1056   
96     -384   
96     16     
176    -176   
288    48     
224    176    
-368   176    
48     -80    
-112   272    
48     304    
80     176    
64     112    
-80    -144   
64     32     
-16    -32    
0      -288   
-16    96     
-16    -160   
16     192    
-80    -1232  
-64    -304   
16     272    
112    112    
-16    144    
0      32     
160    208    
-64    -80    
80     48     
48     112    
-208   -672   
16     -160   
256    96     
80     0      
-48    240    
64     -1728  
-96    144    
224    32     
80     144    
176    96     
-240   240    
0      176    
256    736    
-256   -128   
0      128    
0      96     
256    240    
-176   256    
16     -320   
176    -16    
96     -288   
64     48     
-160   -1184  
32     96     
32     0      
-16    32     
32     -144   
80     112    
64     80     
176    480    
-160   352    
16     -16    
160    160    
-128   -176   
-32    64     
128    400    
-32    64     
-64    -400   
-96    -176   
96     -1408  
0      48     
112    640    
-192   -64    
80     32     
0      -64    
160    176    
-32    128    
80     80     
112    32     
-16    160    
0      -64    
48     16     
176    -208   
32     96     
-48    16     
160    192    
16     160    
-32    -112   
-32    -80    
208    400    
-256   -32    
0      -400   
-32    -32    
160    -160   
144    96     
0      -160   
0      112    
-16    -64    
160    288    
-16    -480   
80     48     
-192   0      
96     -656   
272    160    
-128   -80    
-64    -192   
192    48     
80     96     
0      -32    
16     16     
0      -80    
-32    48     
144    64     
-48    0      
-48    -512   
-128   -1040  
352    256    
-272   -800   
400    -208   
-320   -128   
256    -192   
-16    -128   
128    -896   
0      -272   
32     144    
64     80     
128    144    
-16    -144   
96     -160   
-16    112    
16     -416   
64     0      
32     48     
-16    -144   
-576   -32    
80     -464   
80     -48    
-96    -240   
112    160    
224    -480   
-208   96     
144    96     
-96    -64    
192    -240   
32     64     
-16    176    
128    0      
-80    -80    
176    -176   
-544   -64    
-128   0      
160    16     
80     -112   
32     -96    
208    -1536  
-64    -112   
-32    -192   
-256   -16    
80     -112   
96     144    
0      -208   
160    64     
32     -48    
0      0      
0      16     
64     144    
16     -32    
96     -64    
96     -208   
240    -32    
-64    -64    
96     -288   
64     192    
48     -16    
-176   80     
256    -192   
0      -240   
-16    32     
-64    -96    
-272   -560   
-176   736    
-2672  464    
0      0      
-464   -304   
288    128    
-752   736    
160    -112   
-96    160    
224    -464   
-112   336    
-48    -208   
208    336    
16     -224   
64     -112   
-208   -16    
160    -224   
-752   -64    
192    -176   
-240   80     
48     -160   
16     144    
48     -592   
192    192    
-128   -2080  
192    208    
-192   -128   
176    0      
-304   -96    
320    144    
-288   -96    
-32    -48    
-192   16     
128    96     
160    96     
96     32     
-32    48     
80     -224   
-48    64     
96     -304   
144    -80    
-96    -16    
16     -16    
-544   -80    
160    -64    
-144   96     
64     112    
48     48     
0      -96    
-112   0      
16     -160   
48     16     
32     -32    
96     96     
16     -208   
64     -112   
-16    80     
96     -240   
-32    -32    
-64    48     
-48    16     
32     16     
-144   -48    
16     -80    
-192   -128   
16     -32    
32     112    
128    -16    
80     32     
48     16     
-384   48     
16     48     
-192   16     
16     48     
0      0      
112    176    
-80    -96    
48     -64    
64     32     
-64    16     
224    240    
32     304    
-352   -256   
-144   -48    
16     -48    
0      -64    
64     48     
-528   48     
-48    -16    
-256   -32    
64     112    
96     80     
-32    112    
96     48     
336    672    
-176   112    
0      -128   
-16    -288   
-128   -16    
64     128    
-80    224    
-16    64     
-400   -112   
-16    -32    
-368   0      
-80    16     
64     128    
80     272    
-912   112    
16     176    
-176   -208   
0      112    
-80    -160   
176    112    
48     448    
-128   240    
-80    16     
-112   -16    
96     96     
64     176    
-32    48     
-416   96     
-32    32     
32     -16    
96     352    
-32    416    
144    320    
-80    304    
-208   -48    
16     -48    
-64    -128   
160    96     
-192   48     
80     80     
-112   -32    
16     160    
-240   16     
-96    80     
-240   -144   
64     80     
64     96     
-80    -160   
128    48     
32     -16    
48     0      
-176   208    
32     64     
-32    48     
-16    32     
-64    32     
-128   16     
32     112    
-112   32     
-976   -80    
32     160    
336    -80    
-240   208    
-112   -32    
-48    16     
48     112    
128    64     
-80    48     
0      96     
-32    0      
-96    -192   
240    352    
160    288    
-208   -96    
32     0      
112    240    
16     -128   
-256   144    
-16    128    
80     80     
160    96     
-288   48     
80     -16    
-176   128    
16     -96    
64     48     
32     176    
-80    16     
144    112    
48     32     
-32    0      
112    80     
-64    96     
176    160    
-144   128    
-192   80     
64     -80    
96     -144   
128    240    
-160   0      
-96    64     
-48    64     
-1184  -48    
-48    -592   
64     -720   
-16    416    
-288   96     
-80    48     
672    -432   
-400   1552   
128    -432   
-272   656    
176    -320   
304    736    
-208   -448   
32     688    
-112   -16    
208    -32    
-400   -352   
192    -368   
80     -32    
576    144    
-224   400    
-64    96     
112    144    
48     -16    
48     384    
224    -288   
-80    352    
-192   -112   
128    -224   
-112   176    
-48    80     
320    304    
-272   16     
64     112    
-64    48     
96     -16    
-112   176    
240    128    
-48    112    
-144   80     
80     -16    
-80    -96    
128    160    
-64    80     
208    256    
-304   80     
176    80     
-128   48     
96     112    
80     -32    
16     144    
64     112    
32     288    
-32    0      
64     64     
80     192    
96     0      
16     64     
-112   -48    
368    48     
-112   112    
-48    272    
-80    -64    
192    -32    
16     16     
-80    112    
16     48     
128    48     
16     144    
-32    80     
64     112    
-16    48     
80     144    
-224   96     
-16    -32    
-32    -496   
176    -896   
16     144    
-128   -96    
0      272    
-80    192    
-128   -240   
144    48     
-80    32     
32     160    
-144   48     
-16    -16    
48     160    
-112   0      
96     128    
16     176    
32     -256   
64     0      
-16    64     
-16    96     
80     160    
48     160    
-32    160    
-16    -16    
80     32     
-16    16     
-32    -64    
32     176    
160    368    
0      -32    
-48    32     
-112   -208   
256    0      
-112   -768   
160    256    
32     208    
-16    208    
0      -16    
288    416    
-176   0      
96     272    
-64    96     
144    64     
-32    320    
-256   -352   
-112   0      
80     -368   
112    112    
240    -320   
-208   128    
-32    -144   
-128   64     
0      -48    
176    16     
-64    48     
16     -16    
80     96     
-304   128    
352    0      
-16    -128   
-16    352    
-32    -48    
256    32     
112    -48    
-160   96     
48     -1120  
64     112    
-80    -32    
272    112    
-16    -16    
-80    16     
-32    -64    
-32    96     
80     32     
-32    -64    
176    96     
-16    80     
176    32     
-48    -160   
48     32     
-32    -304   
128    224    
80     -48    
64     48     
-64    128    
16     288    
48     -16    
32     160    
-16    -240   
-48    -96    
64     -272   
64     -96    
-64    224    
-32    -1152  
16     96     
272    -160   
144    304    
-16    -1216  
-80    112    
16     -224   
80     176    
-144   -32    
0      -224   
64     -32    
160    -464   
16     176    
-32    -336   
-128   80     
192    48     
80     80     
32     -96    
0      112    
32     -32    
96     64     
0      -16    
112    176    
-80    192    
176    -96    
64     0      
112    -80    
1760   -560   
-528   -224   
1232   256    
-64    0      
1136   608    
-720   -272   
-112   -480   
288    32     
224    -400   
-128   208    
-32    -688   
112    -144   
16     -144   
64     -1456  
-16    48     
112    64     
64     160    
80     -32    
80     64     
48     -16    
16     -160   
48     -160   
192    160    
96     -368   
-128   -64    
144    -1280  
48     48     
-80    48     
112    32     
16     -112   
0      -192   
48     -80    
160    16     
80     64     
16     128    
96     32     
64     -128   
-64    96     
112    -384   
-16    32     
-112   -16    
32     -64    
-96    0      
32     -208   
48     -144   
80     -784   
48     64     
96     -1280  
64     16     
48     80     
32     80     
80     80     
48     112    
96     -48    
-32    48     
-64    -64    
128    -32    
-416   80     
0      -112   
0      -160   
80     -176   
112    16     
-48    -112   
0      -64    
112    -2272  
128    -80    
128    -240   
-64    -16    
48     -128   
304    80     
-144   -32    
16     0      
-464   -80    
80     -80    
-576   -144   
224    -32    
-16    -32    
-16    -96    
-32    -352   
64     -960   
112    160    
96     16     
16     272    
112    -96    
32     -160   
-80    64     
272    208    
48     160    
48     -64    
-176   32     
112    -48    
-160   96     
-16    -240   
32     16     
80     -80    
208    32     
-112   96     
-32    -96    
64     32     
224    80     
-144   48     
-80    -128   
0      -32    
112    32     
-1104  -96    
80     -144   
-656   -96    
32     -160   
96     32     
96     -256   
-32    32     
16     -992   
48     64     
48     16     
-16    96     
-112   -48    
128    112    
-112   -16    
48     -32    
-320   -96    
144    48     
48     64     
192    96     
-176   -16    
96     -272   
176    560    
-80    -960   
-48    -128   
112    208    
96     -96    
0      0      
-64    48     
80     32     
16     -32    
0      -208   
96     208    
-80    -16    
112    48     
-144   64     
128    -304   
0      144    
32     -352   
-16    16     
-64    16     
160    -32    
-128   0      
-32    -320   
-16    48     
128    16     
-80    16     
48     -48    
-64    96     
-176   -208   
112    0      
-400   288    
64     48     
-176   -16    
-464   -32    
-48    0      
-208   -96    
32     -96    
192    240    
-48    -96    
-16    96     
-160   -16    
16     -48    
-352   -256   
-576   0      
-144   0      
-176   96     
-48    160    
-64    16     
-336   -16    
-64    96     
-64    -48    
-16    208    
-160   32     
-48    32     
-352   -96    
80     112    
-32    -32    
0      48     
-16    -16    
160    144    
-144   -272   
32     16     
-144   48     
-64    32     
-32    -32    
320    -80    
-80    144    
48     -80    
-480   96     
-64    -80    
-48    0      
32     96     
1264   672    
-368   816    
-144   -96    
-832   -576   
-112   736    
-64    -224   
512    960    
-352   -304   
-512   96     
128    -336   
64     224    
-128   -240   
0      160    
160    112    
0      432    
128    128    
16     64     
32     -320   
-256   -304   
128    -272   
-80    16     
64     224    
0      192    
-96    -144   
-48    96     
0      48     
176    256    
-240   16     
0      128    
-944   112    
-32    176    
32     -160   
-48    144    
16     32     
64     -32    
-32    112    
-144   -48    
32     0      
-48    64     
0      96     
16     64     
-80    112    
-176   -192   
0      -48    
-320   16     
240    240    
-48    -224   
16     -48    
-80    144    
-32    -32    
0      -64    
-16    128    
-16    96     
160    80     
-64    160    
0      112    
-192   -16    
-16    0      
48     144    
-192   96     
128    32     
-512   0      
-192   128    
-160   64     
-16    -64    
160    64     
80     160    
-144   -48    
32     48     
-32    80     
-64    0      
-160   112    
0      -96    
128    208    
-288   80     
-160   48     
112    48     
-112   96     
16     -16    
0      64     
32     128    
80     320    
-336   -32    
128    80     
144    384    
-256   -96    
272    16     
-144   32     
64     128    
-192   -128   
0      0      
48     160    
32     48     
64     0      
144    288    
-112   128    
32     -16    
32     16     
-16    -64    
48     0      
64     208    
-32    144    
32     -16    
64     48     
-16    112    
128    64     
112    256    
-208   -80    
240    16     
-160   48     
144    112    
48     16     
-128   32     
-176   -128   
352    208    
-160   -48    
64     128    
-144   80     
336    352    
0      160    
64     80     
-240   -64    
-16    96     
-48    -192   
176    -64    
80     464    
208    208    
-96    80     
-48    -64    
-160   64     
48     112    
192    192    
-80    144    
112    240    
288    640    
0      160    
0      -192   
-16    32     
48     192    
176    160    
-80    208    
64     -208   
80     0      
-16    -48    
-80    80     
128    112    
80     192    
80     80     
32     96     
-48    -16    
-96    192    
144    160    
80     224    
-80    -144   
16     -96    
-80    208    
-64    144    
16     176    
48     48     
144    64     
-112   32     
128    320    
-144   48     
128    128    
-96    -80    
80     256    
112    320    
96     112    
-32    80     
16     144    
-64    144    
80     -16    
176    16     
160    272    
-80    288    
-272   32     
16     -176   
80     -16    
96     -192   
16     128    
80     96     
128    64     
48     176    
64     240    
-96    48     
160    112    
176    224    
64     112    
-64    -64    
192    192    
-160   48     
-32    64     
64     0      
128    -112   
64     176    
-288   -1120  
-1328  -32    
-160   976    
544    416    
64     -368   
-336   -48    
-288   224    
224    16     
112    192    
192    288    
32     -64    
-160   48     
112    112    
128    -144   
-64    -128   
-32    -1232  
16     160    
48     288    
160    144    
128    32     
-48    32     
352    -592   
16     48     
80     -96    
-208   128    
192    160    
256    -96    
-176   32     
176    -64    
64     0      
80     -352   
-80    144    
240    -864   
-128   64     
64     96     
112    192    
64     144    
80     192    
-144   64     
176    112    
-80    64     
144    -32    
0      80     
64     64     
48     208    
32     16     
-176   16     
144    -336   
32     96     
-48    -768   
64     128    
64     144    
96     160    
-16    80     
112    128    
0      -32    
48     -384   
224    112    
64     128    
112    240    
-80    -208   
64     176    
-64    -464   
48     304    
96     -256   
64     176    
32     64     
-32    128    
-64    64     
48     80     
80     80     
80     -208   
16     16     
128    -400   
0      64     
192    -80    
-176   32     
64     -128   
32     -32    
160    -352   
32     80     
-64    16     
128    256    
-96    -32    
144    16     
0      48     
0      -192   
64     112    
80     -64    
80     112    
16     0      
96     208    
16     48     
0      64     
64     -720   
192    352    
-160   16     
48     96     
-64    32     
224    0      
-64    -800   
32     -96    
32     368    
80     -32    
-32    144    
144    -16    
32     96     
-16    -144   
176    160    
-48    -64    
0      -160   
32     48     
48     -304   
128    -240   
64     -64    
-32    -288   
32     -208   
80     144    
192    -16    
-144   -192   
-48    -304   
176    208    
224    -144   
-96    -144   
-32    32     
480    336    
-336   32     
304    -304   
-240   -144   
80     -160   
0      -144   
-32    128    
176    -176   
-80    -48    
192    -384   
-96    -96    
128    208    
-112   112    
224    96     
-224   16     
160    -64    
-16    144    
-224   -32    
128    -32    
-144   0      
112    -352   
-192   -208   
176    -48    
160    16     
-80    -368   
16     0      
96     -992   
144    0      
-16    -48    
-32    288    
96     -320   
-64    -176   
272    80     
160    96     
-80    240    
-144   -64    
-816   64     
0      -192   
48     16     
80     320    
-256   144    
-32    -320   
16     0      
32     -272   
128    48     
48     -48    
272    160    
0      16     
-48    -208   
-112   -48    
0      -224   
48     64     
80     0      
-80    -16    
144    96     
64     -48    
32     -48    
16     16     
144    -1056  
-112   -32    
240    208    
-16    -48    
-96    -32    
32     -48    
0      -304   
144    -48    
-48    -240   
112    0      
-272   -128   
32     -272   
-304   256    
-688   -2272  
896    -480   
128    16     
-160   -496   
528    464    
144    624    
-160   -448   
-80    112    
208    240    
368    -64    
-176   -48    
32     48     
-208   -16    
96     -32    
0      80     
224    -192   
-160   16     
112    -432   
208    -80    
-640   -16    
128    224    
-176   144    
-16    -48    
-176   -128   
96     -48    
112    48     
-160   -192   
80     -16    
48     0      
32     144    
48     -48    
0      80     
80     -192   
144    -16    
-80    -112   
160    80     
-224   16     
176    -48    
-160   -80    
48     -64    
-80    16     
64     0      
0      -32    
128    -96    
112    224    
-1232  -160   
256    480    
-464   -176   
144    0      
-256   80     
96     -32    
-144   -80    
-272   16     
-176   128    
208    288    
-224   -112   
176    96     
-192   -32    
-368   -256   
16     96     
-80    -16    
-48    112    
80     32     
96     -32    
-48    208    
-336   -16    
144    224    
-352   -64    
112    64     
-848   112    
-16    32     
16     0      
48     48     
-48    -16    
128    -16    
-32    64     
112    96     
-16    0      
-176   -128   
-176   112    
-144   -32    
-16    -32    
-112   16     
-64    224    
-112   -64    
-160   -208   
-16    -48    
-144   -32    
48     -112   
32     48     
48     -112   
-48    48     
-80    -64    
128    32     
-48    96     
16     224    
-192   32     
80     16     
-32    0      
-320   -96    
-16    48     
-48    192    
-64    112    
48     -80    
-192   -176   
80     32     
32     176    
-112   -96    
-32    176    
-16    16     
-16    48     
112    32     
-272   64     
48     112    
-208   48     
48     -208   
-208   64     
-80    96     
400    80     
16     144    
-48    48     
-240   128    
352    96     
-192   16     
-64    80     
-64    32     
-80    112    
-144   -32    
176    64     
-48    -64    
-112   32     
-528   -16    
-16    144    
304    176    
-112   112    
112    96     
-48    48     
-128   0      
144    80     
64     16     
-96    48     
-32    -112   
-64    32     
112    144    
-80    320    
208    256    
-256   0      
-48    176    
-272   -16    
16     -64    
96     112    
-32    -32    
-64    -16    
240    176    
-96    16     
-16    -352   
16     320    
48     128    
-48    -208   
-208   112    
176    320    
-128   -32    
-112   -208   
-144   -144   
144    448    
96     32     
-144   16     
64     96     
-32    128    
128    -96    
128    160    
-144   -32    
-160   -16    
-32    160    
-112   -368   
80     128    
-112   -48    
64     160    
-48    112    
0      -32    
64     192    
-64    -96    
48     128    
80     48     
-80    96     
-48    16     
112    -16    
-64    -192   
48     -32    
96     256    
192    368    
-208   128    
48     176    
160    96     
-64    0      
1376   -1744  
-192   -624   
848    -112   
-400   0      
256    880    
16     624    
-496   -480   
16     528    
-96    240    
-160   -416   
96     -32    
-272   -64    
-80    48     
144    384    
-16    -32    
-64    -176   
192    304    
16     -48    
16     96     
0      16     
-96    160    
240    160    
-448   -352   
192    -176   
-224   -32    
416    176    
-64    16     
32     80     
-128   48     
112    16     
144    64     
0      16     
112    176    
80     96     
-32    32     
128    176    
-96    -400   
-80    -336   
176    144    
96     224    
-32    176    
-16    128    
96     16     
112    144    
-48    48     
0      32     
-80    -48    
64     -48    
48     0      
64     96     
-16    16     
32     128    
16     304    
128    160    
-112   -112   
112    -576   
64     352    
-80    -16    
-48    32     
48     32     
0      48     
80     160    
64     -32    
-64    128    
0      0      
-112   16     
80     128    
-48    -48    
0      112    
-64    -16    
64     -288   
16     112    
16     -1696  
48     144    
48     0      
272    400    
-160   144    
-16    176    
0      96     
16     -288   
-48    -144   
96     -112   
32     -48    
80     208    
48     80     
-144   192    
-80    -32    
144    -336   
176    -16    
160    176    
-64    112    
-32    192    
-48    48     
80     128    
64     64     
112    272    
-48    176    
-144   -144   
32     64     
240    112    
-16    48     
0      96     
0      -896   
80     48     
16     -1760  
-48    -32    
160    144    
-32    96     
144    112    
0      144    
0      -64    
64     80     
-176   16     
208    32     
-16    96     
32     -128   
32     0      
80     0      
0      16     
80     -160   
-80    96     
176    496    
-64    -32    
64     16     
-176   -512   
320    -320   
-96    416    
320    416    
-96    128    
-80    -48    
32     -16    
80     -48    
176    48     
16     32     
80     -480   
-224   -176   
128    -912   
112    288    
-160   -96    
192    128    
48     176    
-16    -96    
48     16     
48     -288   
0      64     
96     64     
144    288    
80     80     
0      192    
-64    -128   
112    96     
-32    -624   
80     48     
-48    80     
80     -192   
32     128    
240    352    
-48    16     
128    -48    
32     0      
32     -208   
16     80     
96     -48    
-112   48     
112    -464   
32     160    
192    272    
128    272    
-128   32     
-48    -192   
16     -144   
224    32     
-160   -16    
32     -128   
112    240    
32     -224   
32     336    
-16    32     
16     -32    
160    80     
48     32     
-160   96     
160    -1072  
-96    -48    
0      -384   
352    256    
-1072  -192   
-48    48     
-48    -48    
-48    -1776  
224    -240   
16     -16    
0      -176   
48     256    
160    -96    
32     176    
352    -1664  
1184   -1280  
288    432    
-80    320    
-352   -240   
-112   304    
-32    -608   
112    16     
160    -224   
-256   -224   
224    -320   
-48    -80    
144    256    
-16    -192   
176    -272   
64     112    
-16    -32    
80     0      
48     32     
-48    -160   
-64    208    
-160   -192   
-128   -176   
-32    -256   
112    -96    
80     -16    
-32    112    
96     -1360  
-48    -256   
112    0      
-80    80     
128    80     
-112   96     
32     -96    
-112   -208   
-208   192    
96     -96    
-464   0      
128    80     
128    -240   
-16    -64    
-80    -64    
272    -80    
-208   -48    
96     -128   
96     160    
-80    -416   
256    64     
-480   0      
240    -16    
-160   -16    
64     176    
-224   16     
-80    -64    
80     -80    
160    -128   
48     96     
0      48     
112    128    
-192   -144   
192    144    
-48    -128   
176    -80    
-112   -32    
128    0      
-96    144    
-64    -384   
-128   80     
-48    -96    
-400   32     
96     -80    
48     128    
-16    -112   
48     80     
96     -176   
-16    224    
-112   128    
128    -96    
112    -80    
-16    32     
-256   16     
64     -96    
-176   112    
48     0      
-96    32     
16     -80    
-320   0      
16     -464   
48     80     
48     -496   
-48    48     
-16    128    
160    96     
16     64     
0      -192   
-16    64     
-32    64     
-64    -32    
48     -32    
32     80     
32     -48    
0      -64    
16     -112   
128    96     
256    -112   
-16    272    
-32    64     
-16    -96    
-208   -16    
32     -80    
64     48     
32     0      
-160   64     
304    176    
-144   0      
464    368    
-368   96     
48     0      
64     176    
-336   -224   
-848   -160   
-112   160    
16     48     
-16    -48    
64     16     
80     208    
-224   -256   
-80    -96    
-16    -192   
-16    -80    
-672   -80    
0      272    
-336   -224   
144    -144   
-144   -480   
-400   96     
64     -48    
-80    144    
-32    80     
-224   48     
-64    80     
16     16     
-80    96     
128    96     
-96    80     
-64    -128   
-32    112    
-112   -224   
48     96     
0      64     
-112   48     
64     208    
-112   -192   
48     48     
-576   -32    
-16    224    
-1008  -160   
80     272    
-64    240    
32     80     
-48    0      
96     128    
-96    -112   
-64    48     
64     32     
80     320    
-96    -160   
-176   -16    
-128   32     
-160   -144   
48     112    
48     176    
-128   -112   
-528   -80    
128    192    
-160   -256   
-96    144    
32     48     
-16    160    
-32    96     
0      16     
176    96     
-144   64     
-96    192    
16     64     
208    192    
-64    -80    
-96    16     
-304   -224   
64     0      
64     -32    
-96    256    
-144   -144   
-112   128    
80     64     
-896   -1824  
800    1056   
-928   -320   
736    80     
-416   48     
752    496    
-752   176    
544    -64    
-208   144    
96     -400   
-224   -160   
-416   80     
320    368    
32     -112   
112    432    
-496   -80    
240    128    
-48    272    
-192   -96    
-240   -112   
-64    -432   
272    320    
-32    16     
-96    -48    
32     -16    
-1568  -192   
224    320    
48     160    
32     80     
-96    0      
64     64     
-48    64     
80     16     
288    32     
-144   304    
32     -160   
-208   -80    
208    240    
-176   624    
80     32     
-688   96     
32     -32    
32     32     
16     -48    
-80    112    
0      80     
-128   -16    
48     -64    
32     0      
16     -80    
-64    336    
-112   64     
160    320    
-416   -160   
192    448    
-576   -256   
224    32     
192    576    
-208   -368   
144    224    
-16    -48    
0      128    
32     -48    
96     96     
272    32     
0      80     
-80    -96    
-16    224    
-96    -80    
80     176    
48     -16    
-16    144    
-48    32     
-16    208    
16     32     
0      336    
112    240    
-16    288    
192    80     
16     -32    
-128   -192   
64     144    
48     160    
-32    -48    
16     -16    
80     112    
-80    -64    
-160   -160   
0      -64    
112    192    
-16    160    
-64    128    
-64    -32    
128    144    
-112   32     
80     272    
-48    352    
-16    0      
-128   -112   
0      16     
64     48     
48     160    
-32    0      
48     48     
0      96     
-16    -128   
112    80     
0      448    
-16    480    
-96    -80    
0      48     
-64    -96    
128    112    
-384   32     
96     112    
128    32     
16     128    
-96    -176   
128    96     
-32    80     
32     -48    
64     80     
80     16     
48     64     
-32    -656   
-16    -144   
144    -432   
304    544    
-128   96     
80     112    
112    288    
-80    -16    
16     48     
-80    -32    
48     -48    
0      176    
0      96     
48     96     
96     208    
-64    176    
-32    32     
-48    0      
80     -528   
-64    -80    
32     -96    
96     96     
240    80     
112    368    
-32    112    
64     208    
-16    176    
32     32     
128    608    
-352   -80    
384    320    
-192   0      
-32    -32    
48     -128   
16     64     
192    -1808  
-48    176    
16     224    
0      -16    
144    160    
112    320    
-96    160    
-32    352    
-96    48     
0      -112   
-80    -48    
-16    80     
80     112    
16     -176   
112    80     
32     -480   
96     320    
96     80     
96     144    
80     80     
0      128    
-80    64     
176    208    
-240   -112   
208    80     
80     208    
16     16     
32     48     
112    -176   
112    48     
80     -144   
-48    32     
-16    -1472  
208    32     
-48    0      
80     208    
-304   400    
-544   -752   
512    80     
-256   432    
-192   48     
-432   -96    
688    416    
-720   -656   
384    448    
-208   -432   
592    112    
-304   -608   
192    -208   
-32    -784   
304    -176   
-32    352    
48     -48    
-112   272    
96     -48    
128    176    
-32    -112   
-64    112    
16     112    
160    128    
-64    -336   
-64    -16    
0      112    
48     176    
144    -112   
-96    -16    
64     -16    
48     96     
96     208    
80     48     
0      144    
-64    -192   
160    224    
-48    -800   
176    112    
-208   -592   
80     32     
128    -32    
96     80     
0      -800   
-32    32     
32     144    
112    16     
-48    16     
96     416    
176    -128   
64     -192   
-144   144    
256    -176   
0      -48    
0      16     
144    160    
96     -320   
-48    -96    
128    -1824  
-48    32     
64     64     
112    -112   
-64    96     
-272   -160   
128    -224   
80     -48    
-16    144    
-128   32     
192    16     
80     -128   
16     176    
-80    -80    
-32    64     
112    -112   
144    -16    
80     192    
32     -640   
112    176    
-480   176    
-48    -144   
16     -112   
96     96     
112    32     
-112   -2592  
48     -192   
96     304    
112    96     
-32    48     
160    -48    
32     -176   
16     -32    
64     -384   
-96    208    
-704   -96    
96     112    
-16    -16    
144    -240   
64     -160   
144    -416   
0      -32    
48     -624   
176    32     
112    112    
0      -16    
0      -48    
16     80     
112    48     
208    160    
-48    64     
0      -144   
-768   160    
112    -128   
48     16     
16     -128   
80     96     
128    16     
-32    -384   
160    -224   
-320   -400   
240    256    
-128   96     
96     32     
64     64     
-288   64     
-80    96     
-384   -16    
-32    96     
96     176    
80     0      
304    160    
-160   -160   
224    80     
-16    -768   
-96    -80    
16     16     
-64    -64    
-80    -144   
128    224    
-80    -96    
-48    -176   
-256   144    
64     256    
-1296  64     
0      -80    
96     96     
-272   -864   
192    -112   
0      64     
112    112    
64     -32    
64     -32    
-64    32     
-16    96     
48     96     
-224   16     
-64    -48    
-144   -448   
-80    288    
176    80     
-224   -16    
64     -48    
-80    144    
-80    -64    
-384   -336   
240    -656   
368    208    
-256   160    
-256   0      
128    128    
160    0      
-384   -176   
96     -16    
-144   -48    
32     -144   
-224   -32    
288    -352   
144    80     
-48    -352   
-64    64     
-320   80     
112    -64    
112    80     
16     32     
-128   32     
0      -112   
-48    -32    
128    0      
0      48     
-64    32     
80     0      
16     -16    
-192   48     
160    48     
16     144    
64     48     
-192   -48    
-672   1904   
-816   -1616  
-256   -672   
1200   -48    
-592   -64    
-144   304    
-112   448    
32     -560   
528    0      
-192   32     
-160   64     
-672   -192   
224    288    
80     -144   
-176   -80    
-256   -112   
288    176    
-80    368    
-112   0      
-208   -112   
144    -544   
48     288    
-48    -368   
128    384    
-288   -400   
192    96     
-80    -608   
-48    0      
-80    -368   
96     240    
-112   48     
192    32     
-64    384    
-624   -32    
112    256    
-112   64     
96     -112   
-256   -304   
-80    -384   
512    176    
-96    240    
-176   -64    
-48    -48    
128    64     
-32    96     
112    176    
-384   320    
-112   -16    
-368   176    
-80    -144   
64     32     
0      80     
112    272    
-80    -16    
-96    -112   
144    416    
-80    -80    
-48    -288   
432    496    
-272   -208   
-96    144    
-96    80     
-96    -400   
-224   -128   
400    192    
-208   16     
-112   16     
-80    -112   
224    48     
-32    -160   
-16    96     
16     80     
0      -160   
80     0      
32     160    
-80    64     
-160   -48    
128    -80    
128    432    
80     192    
-832   -432   
304    48     
-16    144    
32     -16    
80     352    
-176   -32    
48     128    
-256   -96    
48     -80    
-64    48     
-64    0      
-80    -64    
64     -16    
16     128    
-80    144    
-512   -80    
-64    -176   
-1024  -128   
144    208    
-80    160    
-96    80     
-32    0      
0      128    
-64    144    
-16    80     
-16    192    
48     160    
-160   -320   
-144   -224   
-32    0      
16     16     
-112   64     
-608   48     
48     112    
32     112    
-80    112    
96     176    
-80    128    
48     384    
-144   48     
160    144    
-160   160    
-256   192    
256    192    
-400   176    
272    272    
-112   192    
-112   128    
-80    48     
32     80     
48     -32    
-80    208    
224    80     
192    368    
-208   -112   
80     96     
-240   -48    
112    96     
-80    0      
64     64     
-128   -32    
224    -16    
-320   -96    
-96    -16    
128    128    
-128   -320   
0      112    
-64    16     
64     32     
-48    -16    
16     176    
-32    -16    
32     -16    
-224   0      
112    144    
-288   -368   
160    -64    
64     112    
64     160    
-80    -16    
144    -32    
-48    48     
16     48     
-16    144    
112    48     
32     96     
-16    48     
32     -32    
-48    -32    
80     48     
-96    176    
-64    144    
-128   -32    
192    96     
144    144    
-48    -64    
-80    192    
-80    32     
64     64     
16     96     
64     -48    
0      112    
-96    -48    
64     -128   
32     192    
-64    16     
-64    176    
-16    128    
32     16     
80     32     
16     128    
-80    160    
-32    96     
-16    0      
80     -32    
64     96     
-864   576    
336    -656   
976    304    
144    -192   
304    80     
-560   -1056  
336    -144   
848    432    
-176   464    
32     -96    
-160   -272   
144    368    
64     -64    
-224   448    
16     -256   
176    384    
-16    16     
48     208    
-96    -128   
48     192    
112    16     
16     288    
32     32     
176    96     
-96    -64    
128    16     
-192   160    
320    240    
0      -16    
-32    96     
-32    32     
112    160    
-48    -32    
16     96     
48     80     
80     -656   
112    224    
112    -32    
-48    48     
-48    32     
144    208    
80     48     
-16    176    
-112   16     
144    48     
-208   -32    
192    112    
-64    -144   
-48    -16    
32     80     
128    -416   
-16    96     
48     160    
-32    0      
112    48     
48     128    
0      -16    
128    32     
-80    160    
32     32     
80     80     
64     64     
64     112    
48     96     
80     16     
-32    -464   
16     16     
112    0      
0      272    
-96    32     
160    208    
-64    -32    
64     112    
-48    -192   
-32    16     
192    368    
-192   144    
192    48     
32     -160   
80     112    
-64    -256   
-32    0      
112    -624   
-48    112    
32     256    
-128   -112   
160    -16    
176    400    
-176   32     
80     128    
-96    32     
112    80     
32     144    
-96    -80    
208    160    
0      -128   
-32    64     
0      -464   
0      16     
160    -1600  
48     112    
-80    -1424  
-80    16     
112    176    
32     208    
32     -64    
96     112    
-64    112    
80     -32    
0      96     
64     -320   
64     144    
0      -96    
96     32     
-96    -592   
64     112    
112    -384   
48     16     
192    304    
32     128    
-16    0      
0      -352   
48     208    
208    -592   
-48    208    
64     -416   
-48    256    
64     -496   
-192   -128   
160    -64    
32     320    
16     128    
48     -48    
-160   -720   
272    528    
-32    288    
144    -96    
-16    176    
128    -176   
-96    32     
80     -192   
96     208    
0      -208   
16     48     
144    -240   
160    128    
-144   -32    
96     192    
64     32     
64     -272   
-80    -1056  
128    -16    
16     -2720  
0      -192   
64     176    
-96    -96    
64     -16    
176    64     
112    176    
-160   -144   
48     -544   
240    160    
80     -144   
-16    96     
-1056  -240   
192    -448   
-144   -208   
256    -480   
-128   0      
-16    -480   
112    -16    
64     64     
32     -288   
16     16     
16     80     
32     32     
-304   80     
48     -176   
96     48     
-208   48     
-16    16     
-1312  0      
448    80     
-64    -64    
96     -528   
0      32     
352    -560   
16     144    
-32    -64    
0      112    
32     -256   
208    192    
-32    -112   
96     -16    
-208   0      
64     240    
-1840  -1776  
1344   -416   
-784   592    
880    -752   
-176   592    
240    -336   
-16    544    
-16    -768   
496    128    
-192   -448   
208    544    
96     -560   
0      672    
-80    -576   
160    464    
-624   -496   
336    624    
-688   -416   
144    240    
48     -48    
16     -176   
-240   -96    
352    -1008  
-208   -192   
112    -32    
0      208    
64     -48    
-128   0      
48     16     
48     64     
-640   -176   
-32    16     
-304   -144   
-48    192    
80     -16    
-32    48     
-128   160    
400    -96    
-64    288    
112    48     
32     32     
48     -16    
64     -96    
-48    48     
48     -16    
-32    160    
112    144    
-208   80     
16     -304   
-112   -48    
32     -224   
-128   128    
-64    -32    
64     176    
16     -1168  
-16    -96    
16     64     
16     32     
-416   64     
48     -16    
-96    -192   
64     -112   
-400   -48    
0      0      
-144   0      
80     -48    
112    272    
128    -48    
-64    96     
112    -432   
64     -48    
-80    32     
-80    48     
-48    32     
240    192    
-144   32     
80     -16    
-16    320    
-160   -16    
-48    16     
80     -112   
16     288    
240    -144   
-80    240    
-64    192    
16     0      
176    304    
96     224    
-128   48     
-32    -112   
96     32     
16     208    
-64    -48    
144    208    
-288   -480   
-64    -560   
144    96     
-464   -160   
128    240    
-144   64     
-48    16     
48     64     
-1232  -48    
112    192    
-160   -80    
112    80     
-80    -48    
16     128    
-560   -160   
32     -80    
-336   -352   
144    128    
-160   -224   
-64    64     
-64    16     
-160   -144   
-192   -64    
-160   96     
64     64     
-64    144    
48     0      
48     -96    
-80    -288   
-352   -16    
0      0      
16     -192   
32     48     
-48    -96    
-160   -112   
-96    -208   
-256   -272   
0      96     
160    224    
-96    -96    
-288   48     
-224   128    
-1568  -16    
-32    -16    
-64    32     
16     176    
128    -48    
-96    80     
80     192    
-96    16     
-16    -320   
0      -16    
-32    64     
128    -16    
-240   16     
-128   -16    
-176   -16    
-944   -96    
80     160    
-176   -48    
128    -48    
-16    96     
-96    0      
32     0      
-32    16     
96     0      
112    272    
-160   -208   
224    176    
-16    192    
-64    -64    
-64    -336   
80     -48    
96     240    
-944   -64    
-80    256    
64     -208   
-144   -32    
192    176    
16     304    
-160   48     
16     0      
32     64     
-48    80     
-80    64     
16     48     
64     32     
-80    160    
128    -144   
-928   80     
16     128    
-96    48     
-48    96     
128    16     
-192   -48    
96     144    
-192   -224   
16     192    
-128   128    
128    0      
-80    160    
976    -928   
224    80     
-64    608    
-480   416    
240    -640   
112    -112   
176    -304   
-208   320    
176    128    
-144   -160   
288    -32    
-16    -64    
48     240    
-160   -128   
144    80     
-48    -96    
-368   -32    
208    112    
-224   64     
288    -16    
-176   176    
-48    160    
128    160    
-128   -128   
112    -64    
-16    64     
48     176    
-16    112    
-80    32     
-48    32     
48     128    
-32    -16    
-16    144    
-304   -32    
64     48     
48     128    
0      16     
-112   96     
112    64     
-48    0      
32     144    
-32    112    
-64    0      
32     64     
-80    -48    
192    112    
-240   -224   
208    48     
-32    208    
16     48     
128    80     
-96    64     
128    112    
16     144    
0      -16    
-64    -96    
16     208    
32     160    
64     0      
112    -32    
16     80     
-64    48     
80     352    
-96    64     
0      16     
64     -32    
112    0      
16     80     
0      96     
-80    96     
192    80     
-80    144    
16     0      
96     64     
-16    -48    
176    224    
-208   96     
96     80     
256    272    
-80    176    
48     144    
-16    0      
32     208    
-32    -48    
240    512    
-64    224    
176    224    
-144   -240   
160    208    
-80    -80    
96     224    
-80    96     
-32    16     
96     192    
-80    64     
48     -80    
-96    -80    
160    192    
16     272    
32     160    
-48    48     
-16    0      
80     112    
16     128    
112    0      
0      -16    
64     96     
0      -224   
64     80     
-64    64     
64     -16    
64     96     
0      80     
48     80     
-64    -176   
16     -128   
0      -64    
-96    -32    
112    32     
96     16     
272    256    
-144   32     
-128   -768   
96     288    
144    48     
-32    96     
64     256    
48     144    
0      112    
-80    96     
-16    -48    
192    16     
-48    -80    
128    208    
-224   -112   
144    64     
32     80     
128    -272   
-16    112    
96     -1440  
64     192    
-144   32     
160    192    
-64    48     
144    160    
64     16     
144    -16    
192    32     
32     176    
-48    0      
-48    -48    
112    96     
32     112    
-176   160    
0      -592   
0      48     
96     304    
-144   48     
-16    -16    
48     -64    
208    160    
-96    160    
-96    -64    
176    224    
48     272    
-192   -208   
208    128    
64     -16    
32     -32    
-32    -80    
176    112    
16     -592   
0      96     
128    -416   
32     0      
-48    -96    
64     64     
32     128    
-32    112    
32     48     
16     -96    
144    80     
-192   -272   
64     16     
32     -160   
144    32     
16     0      
16     176    
-128   -1920  
0      192    
80     48     
-208   128    
256    -96    
-80    -16    
144    112    
-448   1568   
-960   -640   
608    512    
592    560    
-128   -432   
-144   0      
-240   -32    
688    992    
-496   128    
-16    224    
96     -368   
80     320    
0      16     
32     192    
-160   -416   
96     96     
112    48     
288    160    
32     64     
16     -352   
192    544    
-304   -576   
432    0      
-400   112    
400    48     
-160   128    
144    0      
-32    64     
32     -32    
96     96     
0      -16    
96     48     
96     -96    
80     112    
112    80     
48     96     
80     -144   
0      64     
16     16     
240    -1824  
-160   80     
112    -768   
0      -304   
128    0      
0      -368   
96     32     
0      -272   
112    -32    
-64    48     
144    224    
-16    128    
64     -80    
112    -432   
-160   160    
208    -96    
-48    32     
-48    80     
80     64     
-80    -272   
48     -544   
64     -144   
-16    -256   
96     80     
-48    -1296  
208    64     
-64    256    
0      -448   
208    -336   
-48    208    
16     -16    
0      112    
-176   -112   
176    32     
-1472  -80    
32     -256   
192    -80    
0      -32    
112    16     
16     -272   
32     -208   
160    -320   
32     -160   
48     -32    
32     272    
48     96     
0      -112   
-96    -112   
192    64     
-192   -48    
80     -160   
64     0      
128    -112   
-64    -128   
128    -320   
-176   -208   
352    -1152  
-144   -112   
176    160    
-128   -32    
16     48     
32     -80    
-144   -176   
112    0      
-32    -48    
80     -96    
-1040  -288   
-16    -80    
160    -48    
128    32     
112    192    
-160   -304   
192    144    
-112   -192   
96     144    
-80    48     
112    112    
-208   -112   
64     -64    
-160   -48    
112    -96    
-496   -32    
-96    0      
-352   48     
48     -16    
-288   144    
176    -288   
128    32     
112    -160   
-16    112    
16     160    
32     -16    
-32    -80    
-192   -240   
16     -64    
-48    32     
192    -32    
112    -112   
-272   240    
-48    -64    
192    0      
144    -320   
-32    48     
-32    -992   
-80    -48    
32     -128   
-144   -464   
288    32     
176    -144   
-224   0      
80     80     
-112   48     
144    -96    
-528   -16    
192    -272   
-64    320    
64     -304   
64     400    
64     -144   
64     -16    
-112   -80    
80     0      
-176   32     
80     96     
-176   -96    
208    240    
-144   -112   
-32    -112   
-432   -16    
-48    32     
64     -48    
96     48     
176    -320   
-144   48     
160    0      
-32    160    
-48    -32    
128    16     
96     96     
0      80     
-48    -144   
-128   -80    
144    112    
-64    80     
-240   -96    
96     0      
32     -16    
-224   208    
-64    -16    
-256   -16    
0      16     
-352   -80    
-80    -16    
-1248  -80    
160    144    
48     -32    
16     128    
-240   384    
272    -208   
576    -176   
-288   16     
-944   -704   
640    320    
-336   -320   
112    944    
-240   -384   
96     112    
-32    -336   
-176   480    
-48    -32    
-48    176    
-64    48     
160    -96    
-80    400    
-144   32     
64     128    
-112   -160   
-32    192    
16     48     
16     112    
-112   -192   
144    -96    
-96    0      
128    416    
-80    208    
-448   -32    
-208   32     
112    -48    
32     112    
-160   -16    
16     16     
0      32     
112    32     
-48    16     
-64    -16    
-80    96     
-16    -16    
-96    -96    
-128   48     
-128   80     
-64    -112   
-320   -80    
-208   -128   
160    512    
-64    0      
-48    -16    
0      -48    
48     32     
-32    80     
48     0      
0      128    
96     144    
-176   112    
32     48     
0      128    
-80    32     
160    80     
-384   16     
112    192    
-48    -16    
-96    112    
64     0      
-96    96     
64     128    
-96    112    
96     48     
-160   16     
96     112    
-288   -144   
128    0      
-96    64     
-96    160    
0      224    
-176   176    
96     -192   
-112   -16    
0      144    
16     32     
16     176    
-112   32     
-80    64     
-96    112    
-144   -48    
0      112    
48     -32    
-32    16     
-16    64     
-368   16     
80     144    
48     16     
-16    64     
48     80     
96     160    
-32    96     
-32    -48    
48     32     
48     64     
32     80     
-48    112    
80     128    
-128   -48    
-64    32     
-16    48     
64     96     
0      112    
-32    48     
64     96     
16     64     
32     112    
-128   16     
192    176    
-112   -32    
160    112    
-112   48     
112    64     
-144   96     
48     32     
-64    112    
-32    32     
96     256    
-208   -32    
112    -48    
-128   144    
48     -32    
16     160    
-112   64     
64     -64    
-64    96     
-64    -80    
-64    304    
-80    -176   
80     80     
-64    96     
64     -64    
-32    96     
96     192    
-48    96     
-16    64     
64     80     
128    80     
-96    48     
0      -592   
176    208    
-224   288    
48     -32    
-96    176    
368    288    
-288   -16    
32     -48    
-96    176    
192    80     
-144   96     
48     224    
-128   -96    
256    64     
-80    112    
80     160    
-192   64     
16     176    
48     32     
-112   16     
0      -224   
224    160    
-176   128    
128    80     
-128   128    
400    -208   
-64    272    
-32    -160   
-48    368    
224    -160   
128    160    
-80    32     
-48    16     
-48    128    
32     -32    
64     -496   
112    96     
-16    208    
-80    -80    
160    144    
32     144    
128    -112   
-48    32     
144    128    
128    48     
-128   32     
128    32     
-256   128    
160    -96    
-160   48     
224    0      
-496   1952   
-944   672    
976    1216   
112    304    
560    800    
-576   1072   
-224   160    
-16    -96    
240    256    
-80    -144   
-176   -176   
-160   -16    
160    192    
128    -304   
-64    -672   
32     224    
224    -64    
-160   80     
144    224    
64     176    
80     256    
-48    272    
112    80     
-112   32     
-112   -464   
192    240    
0      416    
112    64     
112    112    
-144   -768   
256    32     
-96    -656   
64     112    
80     -32    
80     80     
32     -32    
0      224    
64     -64    
-144   80     
48     128    
144    272    
-64    0      
-16    -192   
64     144    
64     -16    
80     144    
16     -64    
-48    -48    
128    0      
-64    192    
64     80     
-48    160    
64     -16    
112    80     
-96    -32    
192    240    
-320   0      
176    -128   
32     80     
80     -192   
0      128    
16     -288   
96     160    
16     -720   
144    -160   
64     -144   
192    320    
-224   -32    
208    256    
-176   -48    
176    144    
48     16     
64     128    
-48    32     
64     -192   
128    240    
32     -512   
64     128    
32     -112   
-16    -112   
192    -608   
-48    288    
-96    -32    
192    48     
80     -96    
48     144    
32     80     
128    144    
-48    80     
160    -144   
-48    272    
-80    -128   
144    64     
0      -256   
144    192    
-112   -144   
80     176    
-64    -16    
64     -32    
128    48     
64     -32    
-32    80     
144    -128   
32     -112   
176    16     
-64    64     
48     -48    
112    144    
80     -528   
0      128    
-128   -400   
160    288    
0      16     
176    -160   
32     32     
-16    240    
-96    240    
416    -176   
-272   -48    
-16    -128   
32     64     
272    -224   
-160   112    
256    -48    
0      464    
144    272    
64     -480   
48     -32    
-144   -368   
64     -1408  
96     144    
-80    -656   
144    -176   
48     -912   
-192   0      
336    176    
-160   32     
192    32     
160    112    
-48    -160   
144    64     
48     128    
32     128    
32     -64    
32     -48    
-1280  -96    
144    128    
96     -192   
64     -464   
16     -272   
0      -464   
96     160    
80     176    
176    144    
-16    -272   
-160   160    
48     -160   
128    192    
16     32     
96     -32    
-608   -80    
32     -160   
64     -96    
192    -128   
80     544    
384    16     
16     176    
80     -1824  
-192   -224   
-64    -352   
80     112    
128    176    
48     224    
-32    -112   
160    -176   
-64    208    
96     -160   
-528   -176   
128    96     
-16    -16    
32     -160   
144    16     
144    -1088  
-96    16     
112    80     
96     144    
64     -96    
-32    -48    
-160   -160   
-16    -240   
-208   0      
16     64     
-96    80     
-16    80     
-112   -48    
-400   -1968  
-512   -576   
-944   -928   
624    -48    
48     640    
224    -112   
-448   384    
336    240    
-64    -128   
-32    -176   
144    368    
-272   -416   
-400   -208   
208    80     
-1184  48     
-224   -96    
-16    -48    
48     0      
384    336    
-112   -1152  
144    64     
-224   16     
352    -176   
-208   128    
160    48     
-208   240    
336    192    
-256   144    
144    -432   
48     384    
16     -16    
208    96     
-48    -208   
16     16     
48     -336   
144    336    
-416   64     
-48    64     
-112   32     
80     -128   
-160   -160   
48     -32    
48     -48    
-32    -80    
-32    64     
80     16     
-32    -32    
16     -400   
-80    16     
48     -384   
112    128    
-192   64     
192    -96    
-256   -96    
112    -48    
-64    144    
16     96     
-48    240    
96     16     
-256   -176   
96     -128   
80     80     
-16    -208   
32     160    
-496   -32    
-400   -32    
0      64     
-1280  -16    
48     48     
48     -16    
-48    112    
80     48     
-16    48     
48     -96    
-160   -144   
368    -176   
128    368    
-272   -80    
16     128    
-272   -112   
-128   -80    
-128   160    
-592   32     
-64    320    
-784   -48    
-32    -128   
-112   -432   
-48    -416   
224    -144   
160    304    
-112   16     
-32    176    
-160   -288   
16     -32    
-16    32     
-144   -32    
96     160    
-96    80     
64     208    
-432   -64    
-48    -112   
0      -96    
48     48     
-112   96     
-32    32     
32     -48    
-32    -48    
32     0      
-160   16     
112    80     
-96    32     
176    112    
-160   16     
-16    48     
-320   -16    
-64    -96    
-240   192    
-16    112    
16     -224   
32     144    
112    -48    
144    192    
-208   -48    
-16    80     
144    96     
32     144    
-32    -96    
-64    -48    
32     -64    
-48    160    
16     176    
-384   16     
0      112    
-448   0      
-288   144    
16     -336   
0      16     
208    112    
-64    64     
-32    80     
-96    -64    
32     80     
-32    160    
32     0      
16     576    
-192   240    
96     0      
-16    -64    
-96    32     
-16    48     
0      128    
112    64     
16     304    
-208   -288   
112    -32    
-96    320    
-64    -640   
-48    -160   
272    128    
176    144    
-256   256    
-80    -16    
-64    176    
-16    16     
-128   240    
48     -240   
-112   -272   
48     -16    
-48    -16    
-16    160    
-16    128    
-32    256    
-16    -128   
0      -48    
-240   48     
16     176    
-256   32     
-80    64     
-32    -16    
96     16     
-112   96     
-48    64     
0      128    
16     128    
48     32     
-64    128    
-48    16     
48     128    
64     112    
-160   16     
80     64     
64     224    
-208   160    
-240   16     
48     80     
48     112    
96     272    
528    -384   
32     528    
96     208    
-768   -240   
336    -368   
176    -144   
432    976    
-272   352    
128    -16    
-80    -96    
80     272    
-144   -224   
80     64     
112    80     
112    112    
-144   32     
16     32     
-96    32     
16     64     
-32    192    
-80    64     
128    -144   
-128   0      
96     -64    
-112   64     
16     160    
32     32     
-128   -16    
272    112    
-80    128    
128    80     
-160   64     
64     80     
16     -96    
256    192    
-240   80     
240    16     
-224   -80    
144    192    
-64    16     
80     96     
-64    48     
176    32     
-32    192    
112    64     
-176   -112   
0      208    
48     32     
144    0      
-64    176    
96     -144   
96     224    
-208   112    
240    160    
-208   -48    
96     144    
16     96     
16     32     
0      -48    
112    176    
-32    16     
32     32     
48     96     
-112   0      
112    128    
-160   -16    
64     128    
-48    64     
0      48     
0      -144   
-80    -960   
144    144    
-32    32     
80     -96    
144    160    
-96    272    
-32    48     
80     32     
48     80     
-32    160    
0      32     
0      -16    
16     -80    
96     192    
-192   48     
160    -352   
0      48     
176    192    
-128   -16    
128    144    
-64    80     
-16    -32    
80     96     
64     48     
-16    16     
-64    32     
128    64     
-80    -80    
96     192    
-48    160    
80     -160   
-48    -16    
192    144    
-192   32     
224    160    
-160   -16    
128    48     
-80    32     
160    0      
-16    96     
16     160    
0      112    
0      -48    
-16    -96    
-64    176    
192    -80    
-48    0      
64     -1680  
-160   96     
272    176    
32     144    
16     224    
0      112    
128    464    
112    112    
112    -48    
-160   128    
80     80     
160    -16    
128    320    
128    192    
96     256    
-144   48     
48     144    
0      -1008  
48     32     
16     -128   
112    -16    
0      -16    
-48    112    
32     -16    
96     48     
0      -64    
-96    -128   
64     -144   
-64    -112   
160    144    
48     -48    
16     96     
64     -1072  
48     256    
32     -1216  
64     -96    
96     64     
224    432    
-80    96     
-16    -16    
112    64     
80     -256   
-64    112    
112    64     
80     80     
-128   -784   
-16    144    
80     -208   
-48    -16    
96     -96    
48     144    
-32    16     
32     176    
16     192    
-16    -16    
80     64     
112    48     
32     80     
0      -128   
16     96     
160    -304   
-160   -112   
-192   48     
32     -128   
128    112    
-128   96     
-112   -128   
176    128    
96     -112   
-112   32     
64     96     
16     -368   
112    128    
80     -112   
-80    64     
-32    -128   
112    64     
-608   -2128  
736    272    
-448   -1072  
176    -528   
416    384    
-256   -880   
336    560    
176    544    
-32    -1792  
192    -48    
-192   128    
32     -16    
160    320    
208    -80    
-144   0      
-80    -208   
32     112    
-48    -80    
112    -256   
128    48     
-112   -192   
32     -416   
-80    128    
80     -1136  
96     -128   
-96    -112   
112    -48    
48     -1168  
-192   -560   
448    240    
-240   -176   
48     -160   
32     208    
240    320    
-144   -32    
192    -208   
-96    -256   
-464   -160   
48     -16    
160    256    
32     112    
0      -144   
48     -656   
16     -176   
96     144    
-16    -176   
0      -96    
112    96     
-96    -256   
-32    32     
-64    -256   
32     32     
48     -16    
192    96     
-160   -112   
144    64     
48     288    
112    512    
-240   -704   
448    128    
-272   -128   
96     144    
-160   32     
144    -96    
64     48     
-64    64     
48     16     
-32    64     
64     -368   
-112   96     
-16    -352   
64     48     
96     -128   
-48    80     
-48    -640   
96     496    
0      128    
80     48     
128    -64    
320    224    
-320   144    
-64    -352   
-176   -112   
96     -224   
-192   16     
16     -80    
-112   304    
-16    160    
-112   -16    
-64    -368   
176    32     
144    -288   
0      112    
64     -16    
80     64     
-16    48     
-32    32     
0      -48    
-32    -80    
16     80     
-80    48     
-704   144    
-48    -128   
128    0      
16     -368   
80     80     
0      -128   
128    208    
-96    -16    
96     -128   
-128   32     
144    -16    
16     144    
0      16     
-48    112    
-96    -416   
48     208    
-16    0      
176    16     
-256   -112   
176    -32    
80     -768   
32     -160   
80     -16    
-96    -32    
176    -64    
-128   80     
0      -512   
-64    -192   
-208   -144   
240    -304   
-304   80     
192    -32    
176    928    
16     224    
-16    400    
96     -512   
32     32     
-96    -112   
48     80     
32     80     
16     64     
-240   -128   
192    64     
-96    -48    
64     384    
-48    464    
-32    -64    
80     128    
-448   -160   
0      192    
-272   -96    
-384   -16    
16     240    
-1040  80     
-176   -112   
-160   -944   
0      208    
352    208    
-64    336    
-112   48     
-16    32     
-272   -112   
-32    -176   
-64    -256   
224    416    
192    176    
-336   48     
32     -64    
-64    -16    
-48    -32    
-672   -16    
-80    -112   
48     -64    
-144   64     
48     -112   
-48    208    
-208   -288   
96     192    
-80    16     
16     -64    
-32    32     
128    0      
48     96     
-144   64     
-32    32     
80     112    
48     -16    
-368   -48    
-144   80     
-816   128    
-48    -16    
-144   128    
128    -32    
-64    -16    
-64    48     
-336   128    
320    752    
816    448    
96     -624   
592    400    
-688   -800   
208    -176   
608    48     
-480   -16    
-288   32     
-192   -16    
-128   -16    
176    128    
-160   -176   
48     112    
-176   -16    
128    112    
32     64     
-96    -48    
-160   0      
-64    -16    
-64    112    
-80    -48    
-48    16     
-800   -160   
96     112    
-128   -80    
48     176    
-16    -32    
32     16     
80     192    
-16    112    
-96    -16    
-80    -16    
16     16     
-16    80     
96     -48    
-160   96     
208    128    
-64    -80    
-80    112    
-32    -16    
32     80     
208    144    
-128   144    
-16    64     
-240   -208   
128    240    
-128   -64    
192    0      
-128   32     
64     96     
-16    64     
-64    80     
-416   -224   
96     288    
-896   32     
0      16     
-16    96     
-16    0      
-32    0      
16     64     
-48    64     
-80    112    
32     80     
0      -80    
-112   -128   
-160   -144   
-144   208    
-192   -64    
112    32     
-448   32     
-48    240    
-80    -32    
224    304    
48     144    
16     112    
16     64     
32     -160   
48     48     
-160   96     
-16    -160   
80     304    
-112   112    
-48    -144   
352    320    
-48    -80    
64     32     
-128   80     
144    192    
48     112    
-96    160    
144    48     
-192   -64    
16     -96    
-16    112    
48     176    
-16    112    
-112   0      
-16    0      
-32    96     
80     80     
-160   32     
80     32     
0      32     
64     -48    
-176   64     
128    224    
-112   -48    
48     176    
-96    0      
224    160    
-336   -64    
192    208    
-144   -112   
-16    448    
32     176    
32     -288   
-80    288    
0      192    
160    224    
0      -64    
-96    -64    
112    176    
0      144    
-48    48     
160    128    
-304   -128   
128    80     
-80    112    
80     144    
-64    48     
96     16     
0      160    
-176   -208   
96     -32    
128    256    
16     -32    
-16    112    
32     208    
-96    -16    
96     80     
-48    64     
80     96     
-64    -96    
-32    32     
16     0      
-16    128    
64     320    
144    240    
-64    112    
96     160    
-192   96     
-144   -48    
96     -96    
32     272    
112    -64    
-224   -192   
192    176    
80     0      
64     16     
80     224    
-16    -192   
96     816    
192    144    
208    -208   
0      48     
16     96     
-112   112    
224    -16    
80     64     
0      32     
0      32     
48     -320   
128    144    
-64    -1040  
112    64     
96     96     
208    32     
32     112    
-16    144    
-160   -16    
112    -128   
304    160    
160    160    
-128   96     
-48    192    
-80    -48    
32     -320   
16     160    
-96    -256   
208    80     
0      224    
176    16     
-176   32     
1680   -1104  
-400   -640   
1392   1824   
-160   32     
880    -288   
-672   -528   
368    96     
320    448    
-336   -688   
128    304    
112    -496   
96     64     
-16    112    
48     112    
-176   176    
48     -16    
112    256    
144    -96    
64     320    
-144   -240   
32     -144   
96     64     
-48    -32    
80     -224   
16     -80    
240    -48    
16     144    
48     -864   
192    336    
144    -32    
0      144    
-64    -64    
64     -80    
144    160    
64     96     
128    -32    
-288   -288   
416    352    
-240   -192   
384    448    
-224   -48    
112    32     
-16    -416   
32     32     
32     -1936  
176    208    
-96    288    
-208   -144   
-272   -576   
256    32     
96     128    
-16    -80    
96     -96    
-128   -256   
192    0      
16     -192   
-96    480    
592    304    
-112   0      
96     -448   
0      -128   
96     16     
0      -208   
32     160    
0      0      
-48    240    
80     -80    
48     128    
0      -176   
64     160    
80     -272   
64     160    
-80    -176   
-64    176    
112    -240   
-32    -16    
160    48     
0      384    
-128   -144   
64     240    
128    16     
32     144    
0      112    
80     -32    
240    128    
-256   -464   
128    32     
160    80     
64     112    
-16    32     
-16    -192   
64     16     
96     -2560  
-224   -64    
-304   -112   
80     -128   
64     -192   
0      -976   
32     -448   
96     -32    
256    128    
112    352    
-16    48     
-96    128    
208    -48    
32     -960   
32     16     
-16    -400   
160    -432   
-192   0      
32     -368   
32     -80    
0      -384   
64     -48    
16     -1952  
80     16     
144    192    
-32    -48    
0      224    
48     144    
-128   -304   
80     48     
48     16     
-16    -272   
-32    -256   
48     -256   
48     -512   
176    112    
64     288    
-16    -288   
-64    -96    
240    -528   
-144   -96    
208    -272   
-304   176    
224    -32    
32     176    
-208   -112   
48     -32    
-176   -64    
256    160    
-544   0      
272    32     
-48    336    
304    496    
-240   176    
128    272    
96     -176   
16     -256   
48     32     
64     -96    
16     16     
96     -208   
-64    48     
32     0      
-128   -112   
96     -352   
16     -240   
112    -32    
64     -160   
-192   128    
160    -32    
0      0      
-16    -528   
32     144    
48     -400   
-32    -80    
64     64     
48     112    
-208   -32    
64     -224   
-128   -32    
-160   -256   
-576   48     
32     -304   
64     32     
240    -224   
0      256    
-32    -736   
-128   128    
144    32     
16     96     
-128   128    
32     -288   
16     -64    
96     -64    
-384   -48    
48     16     
-144   48     
48     96     
-1184  -96    
144    -464   
192    144    
-48    192    
0      144    
-224   560    
-224   -368   
480    144    
-448   112    
-368   -112   
-256   240    
-64    -240   
208    -16    
-528   336    
368    -176   
-288   -240   
336    -320   
-32    336    
160    -160   
32     144    
64     -80    
80     -256   
-192   48     
224    -16    
-64    -64    
0      -16    
-64    112    
-64    32     
-64    16     
-48    -224   
-320   -48    
-144   -192   
304    112    
-176   -80    
0      96     
-16    16     
0      -32    
16     96     
0      48     
32     96     
-48    16     
160    272    
-32    -80    
-272   32     
80     -112   
240    48     
-400   -32    
48     208    
-448   -240   
-192   -80    
-16    0      
-224   144    
-16    -256   
-224   224    
-336   48     
336    -96    
-144   48     
0      -16    
208    160    
-224   32     
240    160    
-384   -80    
-32    0      
80     144    
-224   16     
176    -80    
-224   160    
-112   16     
64     -160   
-80    96     
-752   32     
-32    64     
-32    -144   
96     32     
-96    -32    
-96    32     
-32    -128   
112    48     
16     176    
-48    80     
144    240    
-112   416    
-96    96     
224    -64    
80     144    
-272   48     
80     0      
-304   64     
-80    16     
-16    -112   
128    48     
16     112    
64     384    
-208   16     
144    0      
-16    0      
-32    -192   
16     128    
-80    64     
80     128    
-112   -112   
-16    -96    
-720   112    
16     128    
32     -112   
64     80     
0      -208   
-96    144    
-208   48     
64     160    
48     224    
-80    224    
-144   -288   
32     16     
-16    0      
-64    -16    
-128   -48    
-448   32     
48     96     
80     -64    
-96    128    
96     64     
-16    0      
64     240    
112    -16    
-128   80     
64     64     
-32    128    
-128   -192   
48     192    
-96    -32    
192    240    
-96    224    
-96    64     
-720   16     
0      176    
144    -48    
-144   32     
96     64     
-96    -192   
16     128    
-16    -32    
64     16     
-176   -144   
160    144    
16     224    
0      0      
-192   -48    
16     64     
-288   -80    
-16    128    
144    224    
16     272    
-64    -80    
-48    -48    
-32    96     
64     112    
-64    160    
-16    32     
48     -144   
-416   -480   
240    48     
-432   -96    
128    128    
-320   16     
80     112    
-16    112    
96     192    
-176   -64    
144    -384   
144    -192   
288    240    
-160   224    
-176   80     
128    112    
0      80     
-112   64     
32     112    
16     80     
176    96     
-128   96     
64     -32    
16     112    
-48    32     
16     112    
-48    112    
176    64     
-144   -96    
32     128    
-48    272    
-16    -32    
-64    112    
144    -64    
80     144    
-64    96     
64     -16    
0      112    
-176   144    
256    -96    
-16    16     
112    80     
-1200  -1680  
1216   1648   
-480   400    
688    -672   
-416   512    
432    -400   
-720   240    
560    -208   
-192   496    
96     -336   
-128   336    
-208   112    
384    96     
64     32     
16     32     
-240   32     
80     96     
-144   208    
48     -272   
-96    -144   
-112   -128   
-176   304    
32     240    
-48    304    
192    -224   
-80    288    
128    -64    
-304   112    
192    32     
48     352    
64     -96    
192    384    
64     176    
-48    208    
-16    288    
32     160    
80     80     
96     -16    
32     -32    
160    -48    
80     -16    
32     64     
256    -48    
-176   -144   
224    80     
176    384    
-224   -64    
-112   -80    
288    448    
0      224    
-160   192    
32     80     
176    -304   
-16    224    
16     32     
176    128    
-176   -608   
-288   -96    
-176   -96    
-96    -64    
16     112    
208    224    
-96    -128   
48     160    
176    128    
-112   -48    
32     32     
16     -64    
-48    -112   
-64    176    
-48    96     
176    288    
-64    -48    
80     80     
32     -64    
32     -32    
-192   256    
160    80     
-32    64     
-112   -432   
128    -320   
208    0      
-16    -528   
-16    32     
224    48     
64     272    
160    416    
-112   0      
96     48     
-16    80     
32     -16    
96     176    
-32    48     
-80    -32    
16     -48    
160    -208   
272    288    
-16    -128   
-80    -64    
48     -112   
192    192    
80     96     
48     112    
-64    -128   
96     208    
-224   -176   
368    416    
-128   32     
32     112    
-16    96     
16     32     
96     -64    
128    48     
80     224    
32     -64    
-80    -192   
208    -464   
32     32     
192    -16    
-256   112    
240    16     
-80    224    
0      32     
-32    -176   
176    -48    
80     16     
64     128    
-96    -16    
192    128    
-48    -224   
32     288    
80     -320   
-16    208    
-80    -128   
240    208    
-160   16     
256    32     
-80    32     
-48    80     
48     48     
112    -352   
192    288    
-144   -224   
208    176    
-80    -48    
144    304    
64     -864   
80     272    
16     80     
96     160    
-32    128    
208    -80    
-16    0      
80     -384   
48     64     
-16    -64    
64     336    
-112   0      
112    96     
-64    0      
208    176    
16     -96    
-48    112    
256    -48    
-176   240    
0      -48    
16     48     
144    -832   
0      -256   
96     16     
192    128    
80     240    
-256   -112   
16     144    
176    -208   
144    224    
0      -208   
16     192    
112    176    
0      -1760  
128    32     
-528   -144   
-48    -224   
0      16     
-48    -160   
64     -64    
96     -832   
48     -192   
144    96     
32     64     
16     256    
0      -384   
128    -672   
16     208    
112    -304   
-32    480    
576    -272   
1264   448    
-592   160    
-320   -272   
720    -512   
-128   -704   
-96    -400   
192    480    
832    640    
-336   -416   
192    224    
80     -560   
16     368    
80     -304   
112    224    
-80    -320   
-112   208    
128    -288   
-48    32     
80     -352   
64     -144   
96     -176   
-112   -816   
224    -304   
-64    -128   
288    -128   
-112   16     
80     -16    
-96    -16    
80     -32    
-544   -48    
176    64     
-480   -176   
48     96     
48     -160   
80     128    
-48    -32    
128    0      
-144   -96    
64     -64    
-48    80     
96     96     
80     -48    
32     128    
112    -144   
-144   -96    
96     160    
-544   0      
368    -48    
-768   128    
112    -416   
-32    0      
48     -448   
80     0      
64     -208   
-176   80     
192    -16    
0      64     
-48    -32    
32     -32    
-112   32     
0      -176   
-64    -16    
-32    -16    
-544   -144   
-64    -320   
224    -48    
128    -112   
16     64     
-16    -496   
128    144    
0      -80    
64     0      
-64    80     
-32    -64    
128    128    
-96    304    
-64    -96    
144    -208   
-32    64     
-48    64     
-368   352    
-96    -16    
-64    -176   
176    -592   
-64    -32    
144    -720   
112    288    
-400   -80    
-96    -288   
-48    -48    
192    96     
-64    -16    
16     80     
16     64     
416    592    
-320   -64    
16     -160   
-80    96     
176    -304   
32     0      
-336   -32    
96     48     
-288   -320   
-16    -320   
80     0      
0      -176   
32     96     
-16    112    
-80    0      
96     -144   
-544   -48    
32     -368   
-32    128    
160    96     
-48    80     
32     48     
-736   -80    
-80    48     
-80    112    
32     16     
16     80     
-16    16     
-192   -352   
-208   -176   
-784   -112   
128    -224   
-64    48     
32     128    
-208   128    
-208   16     
16     -16    
-512   -32    
160    -144   
-896   -192   
64     -144   
-256   112    
-16    16     
96     -32    
-48    32     
-96    -112   
112    128    
-160   -48    
128    16     
-128   16     
48     32     
-128   96     
0      48     
0      64     
64     0      
-96    -32    
-496   -112   
80     176    
-80    -96    
64     32     
-144   208    
32     -64    
-112   -160   
176    16     
32     16     
-208   208    
-32    16     
32     80     
128    -192   
-16    -16    
-176   96     
-160   16     
-128   32     
-240   64     
0      160    
-160   -80    
-32    208    
96     -272   
32     160    
-80    -32    
64     160    
-64    0      
32     -16    
0      32     
-64    32     
64     160    
224    -160   
112    192    
-304   96     
-128   -32    
-112   -160   
240    176    
-80    -16    
-112   -80    
128    64     
-80    64     
-32    -16    
-192   144    
288    48     
-144   64     
704    1104   
560    672    
-32    -272   
-992   -400   
-416   -80    
432    128    
16     -32    
-48    608    
-256   -144   
-16    -288   
-128   16     
64     112    
160    -16    
-112   208    
128    -16    
-32    368    
-160   -224   
-112   304    
-128   -320   
96     208    
-272   -64    
208    288    
-96    -96    
128    80     
-48    -368   
-32    -32    
384    784    
-352   -176   
-80    -16    
-112   64     
192    96     
-224   -48    
144    48     
-160   96     
160    480    
-368   -192   
-16    -192   
-80    -64    
224    96     
96     336    
0      128    
-48    48     
16     288    
0      96     
-32    -96    
-192   -16    
144    -16    
96     128    
-96    -80    
0      48     
-112   -48    
48     -80    
112    128    
-144   -16    
176    96     
0      80     
0      160    
-16    48     
96     192    
48     16     
32     48     
16     -48    
112    336    
-176   112    
48     0      
80     176    
-32    -48    
304    432    
-240   224    
48     16     
112    64     
-96    -32    
64     -48    
32     80     
48     128    
-128   96     
0      16     
0      48     
-32    128    
-16    112    
32     112    
160    432    
-144   96     
80     -160   
160    0      
-160   -272   
208    64     
-128   128    
80     32     
-144   48     
144    112    
-224   0      
64     176    
-192   -192   
192    -96    
-32    96     
0      112    
96     16     
64     96     
80     176    
80     64     
32     288    
-64    96     
0      48     
-16    -32    
16     176    
16     16     
80     224    
-80    128    
112    96     
-64    32     
32     48     
-176   -48    
304    -32    
-144   48     
192    -16    
-192   80     
-48    80     
32     -32    
64     64     
128    0      
-240   -176   
-80    0      
272    128    
80     -464   
0      80     
-96    112    
208    48     
-112   64     
160    256    
-64    128    
208    -16    
-400   48     
336    288    
16     -48    
176    0      
-352   -144   
96     112    
224    256    
160    -400   
-48    160    
64     336    
96     128    
0      96     
48     272    
-64    256    
288    144    
-112   48     
128    112    
-96    32     
48     48     
-48    -112   
128    32     
-176   112    
128    112    
-112   -112   
112    -80    
32     80     
32     240    
80     32     
64     176    
48     112    
16     208    
-144   -16    
80     -224   
240    -48    
96     240    
-32    32     
-32    96     
64     -464   
-64    -64    
48     -208   
64     -48    
112    160    
80     16     
-48    80     
112    0      
32     -176   
208    176    
-128   96     
-144   96     
112    128    
160    -96    
80     -32    
-144   -240   
128    32     
-16    -256   
32     96     
144    32     
96     112    
-128   -64    
176    144    
-80    -112   
48     144    
16     16     
-768   -2160  
832    304    
-944   576    
-304   -160   
-16    -240   
608    -400   
-320   -144   
960    832    
-544   336    
704    -288   
-384   192    
432    -176   
-224   608    
80     -448   
80     512    
-16    -416   
-48    320    
-16    -112   
-32    192    
256    -352   
16     176    
64     -464   
32     176    
-160   176    
208    0      
16     128    
160    32     
-144   160    
16     -32    
16     -48    
32     -144   
224    160    
32     -32    
16     176    
-64    -224   
80     0      
80     -208   
96     240    
48     -80    
64     64     
-96    16     
64     160    
64     64     
48     96     
144    128    
-48    -80    
48     80     
80     -32    
-128   80     
176    -96    
-16    112    
32     -112   
80     112    
48     -96    
32     112    
0      -272   
64     96     
16     112    
80     -256   
-16    -1424  
80     -80    
48     -2192  
-32    -96    
48     -32    
-16    -48    
240    160    
-48    -160   
96     128    
-48    -192   
144    -960   
-48    48     
160    0      
-160   32     
-272   -64    
176    -736   
208    -32    
-176   -288   
-48    -64    
384    112    
176    224    
80     144    
-48    -128   
0      64     
96     -96    
-16    -240   
32     -16    
-16    -160   
128    96     
64     304    
-80    -416   
16     -64    
16     -304   
160    112    
-96    -672   
-32    -144   
80     -3376  
112    80     
80     160    
-96    -48    
0      16     
32     -32    
144    -16    
80     -240   
-224   16     
-16    16     
-416   0      
48     -176   
48     16     
-32    -16    
80     -144   
-80    -272   
176    -16    
96     80     
-96    32     
160    -112   
-48    0      
48     -144   
32     48     
-48    -16    
48     -48    
-128   48     
240    0      
-96    -192   
-32    -80    
32     144    
144    -384   
-64    0      
64     -1200  
160    16     
-64    -48    
112    192    
96     176    
-160   -48    
96     128    
-176   -368   
144    -80    
-288   -80    
176    48     
-176   -16    
128    16     
64     -96    
112    -112   
48     -320   
-16    128    
96     -64    
48     208    
-144   0      
48     -336   
32     32     
144    -48    
-144   0      
-112   32     
112    288    
-96    0      
-1376  -288   
176    -320   
-112   -128   
416    -80    
-256   240    
192    80     
-16    16     
16     -96    
240    48     
-224   0      
528    -288   
-304   240    
-160   -32    
-160   -192   
-48    80     
-96    -160   
-64    -144   
144    224    
32     -16    
-48    176    
48     -1600  
224    -64    
-240   32     
128    -64    
-128   80     
48     224    
-304   -96    
-32    -112   
320    -96    
-32    64     
-304   -224   
224    -224   
304    144    
-64    -160   
-144   32     
48     224    
-48    -240   
