# Supplementary material for: A Fault Diagnosis Method for One‐Dimensional Vibration Signal Based on Multiresolution tlsDMD and Approximate Entropy
Source: Hindawi journal article supplement (doi:10.1155/2019/3262818), 2019-01-01
Supplement: f1 [file 3262818.f1.zip › 3262818.f1/gear signals/broken teeth fault signal/Data2.txt]

-208   128    
64     32     
-48    -16    
-48    272    
-144   -32    
112    64     
-80    112    
-80    -112   
-48    112    
48     128    
-48    -32    
-32    192    
-96    272    
0      -80    
-112   80     
160    -16    
32     48     
-16    144    
-160   -80    
0      96     
208    -80    
80     240    
-208   0      
-80    48     
272    1664   
-816   -1424  
256    -144   
528    768    
-352   -720   
176    816    
-624   -480   
992    496    
-272   -160   
320    -208   
-32    -80    
-176   368    
192    0      
0      560    
-48    -288   
112    352    
-48    -128   
0      -272   
128    -432   
224    240    
112    368    
32     400    
-48    -400   
128    176    
-64    -16    
-16    -16    
144    384    
-32    224    
304    144    
-464   -640   
272    256    
0      64     
64     160    
0      192    
48     144    
96     208    
-128   352    
112    -16    
-64    16     
-80    0      
144    144    
-16    32     
176    96     
-64    224    
0      32     
-16    192    
-112   0      
160    160    
-176   96     
176    0      
-96    64     
-16    96     
48     240    
-112   48     
64     80     
112    240    
-256   -80    
80     0      
-64    -192   
96     -144   
112    240    
32     320    
-224   16     
208    16     
-48    80     
48     112    
-80    0      
48     16     
16     96     
-48    0      
48     112    
16     32     
0      -96    
-32    176    
-16    -96    
128    -304   
-80    -272   
16     64     
-80    48     
48     96     
-80    256    
-48    -96    
-48    -144   
208    0      
-144   -16    
-32    128    
96     144    
32     -176   
0      176    
16     64     
112    176    
-96    112    
64     32     
0      -16    
96     64     
-48    160    
-16    32     
16     16     
0      80     
0      -48    
0      32     
32     48     
96     -288   
144    352    
-288   -48    
352    112    
-112   96     
128    -16    
128    192    
-32    32     
96     128    
144    224    
-32    64     
176    192    
-288   -32    
544    160    
-304   128    
32     -512   
128    416    
0      -352   
-64    -80    
32     96     
0      208    
224    176    
-160   32     
16     -272   
128    -32    
-208   -64    
144    128    
-16    -48    
-16    -80    
80     -64    
0      -96    
48     16     
224    -496   
-144   144    
64     336    
64     80     
224    -832   
-144   160    
16     80     
256    16     
-240   80     
160    32     
96     112    
32     -144   
-32    32     
96     -192   
32     80     
48     -304   
32     144    
64     -832   
-64    64     
64     304    
0      144    
48     -128   
160    96     
-64    64     
128    32     
0      224    
48     112    
48     176    
0      112    
16     112    
144    -864   
-112   64     
16     96     
-208   176    
16     -144   
-48    -144   
144    16     
272    208    
-128   224    
-48    -464   
64     240    
160    -608   
-80    160    
-144   -784   
32     32     
64     -192   
144    80     
-128   -16    
-80    -112   
176    176    
64     16     
0      0      
96     144    
16     80     
32     -160   
-16    64     
64     -160   
-16    112    
96     -80    
128    256    
96     32     
-16    352    
1024   -1920  
752    400    
-32    304    
-208   864    
-32    -336   
448    -928   
-480   -848   
32     64     
-272   -544   
208    208    
304    256    
160    -96    
-112   240    
-96    -480   
176    272    
96     -160   
-64    -768   
48     16     
80     160    
80     -128   
-32    -368   
-32    -880   
192    -96    
-112   -208   
192    -176   
-208   -320   
320    240    
-112   432    
144    -128   
-112   48     
80     -48    
176    -48    
-64    48     
48     -240   
-32    16     
-240   -80    
96     128    
-1456  -32    
176    16     
-80    -160   
80     -368   
32     -176   
32     -512   
64     -80    
-16    32     
64     64     
96     64     
-32    64     
16     -128   
32     64     
64     112    
-48    -48    
32     80     
144    -80    
16     -240   
128    -144   
0      208    
48     -128   
64     -16    
112    -1216  
192    -32    
64     0      
-32    -16    
64     -128   
96     -48    
-48    32     
96     16     
-256   -144   
80     -80    
-1200  144    
-48    -96    
32     64     
96     -48    
-480   16     
-112   -848   
-48    112    
48     -64    
80     64     
-144   -240   
112    176    
-112   0      
0      -304   
112    16     
32     64     
-304   -448   
272    192    
240    192    
192    128    
-96    -144   
80     -240   
80     192    
-32    -208   
48     0      
64     -16    
176    -16    
-288   -240   
-32    -320   
80     -112   
320    208    
-576   160    
-112   -144   
-1120  -64    
80     -176   
144    64     
-32    0      
48     64     
48     -832   
0      64     
-48    32     
80     0      
-64    -48    
48     48     
32     -16    
32     16     
-192   -80    
208    -144   
-48    16     
112    -96    
-144   -96    
176    -192   
64     176    
112    -736   
-112   -272   
64     48     
128    384    
-304   -96    
96     -288   
-64    0      
128    48     
-144   -272   
-32    96     
96     128    
16     -64    
-112   64     
272    0      
-112   -64    
224    -112   
-112   144    
112    -144   
-16    -48    
0      64     
128    -160   
-192   -48    
128    144    
-16    256    
-128   -96    
96     96     
96     -224   
48     48     
-720   -96    
144    176    
0      224    
-304   -160   
-16    16     
0      176    
-64    96     
-80    -144   
32     112    
64     -176   
-96    32     
144    16     
-368   -32    
-128   -304   
64     192    
16     -208   
16     80     
32     96     
32     112    
64     -64    
-288   16     
96     64     
-176   16     
-80    144    
96     -32    
176    -144   
-32    32     
-48    96     
-112   -32    
32     80     
16     0      
-144   -48    
-32    64     
0      -112   
64     144    
-144   0      
0      96     
-352   -16    
16     16     
-912   -16    
16     336    
-128   32     
32     176    
-128   -144   
64     80     
96     -176   
-400   -2400  
1648   3920   
-624   1008   
-352   -752   
64     0      
-176   -144   
-160   32     
-528   320    
-736   -384   
544    144    
0      272    
-176   -64    
-64    -80    
272    144    
-224   -16    
32     352    
-48    144    
-128   -288   
-128   -112   
48     -160   
-80    -144   
-96    16     
192    304    
-144   96     
0      -96    
-640   80     
160    16     
-96    -80    
-144   48     
272    176    
-224   160    
160    48     
-192   0      
-32    -32    
64     48     
-80    48     
64     192    
112    96     
-240   -64    
0      80     
-240   -64    
48     128    
16     -16    
-80    -32    
160    64     
-80    144    
-80    32     
-80    -96    
32     16     
-32    208    
-48    80     
0      -80    
-16    192    
-208   -160   
0      96     
-352   -32    
192    192    
16     -48    
-80    -96    
64     176    
-112   128    
32     -16    
-16    96     
96     208    
-48    112    
0      48     
-80    0      
16     80     
96     -32    
16     112    
-128   -16    
160    192    
-96    32     
32     -48    
-48    32     
80     96     
-224   -64    
208    112    
-144   48     
0      -96    
112    80     
-80    128    
128    272    
-160   -48    
224    192    
-336   192    
48     -64    
96     64     
-160   32     
32     96     
-64    -80    
96     112    
-16    112    
-112   -32    
96     256    
-240   0      
144    48     
-16    16     
-112   0      
-112   -48    
-80    -64    
-16    176    
96     112    
-176   -16    
192    320    
-160   -80    
160    160    
-80    128    
64     -48    
-32    160    
-64    64     
112    80     
-64    -64    
-144   -112   
160    144    
-48    64     
160    64     
-32    96     
240    288    
-128   224    
208    112    
-240   48     
64     -16    
-112   16     
112    16     
-16    192    
96     144    
128    64     
-176   -32    
-64    112    
208    160    
0      144    
336    176    
-240   144    
288    576    
-192   400    
288    -48    
-144   -32    
-144   144    
-32    96     
176    112    
-32    -80    
-64    -48    
-208   80     
16     160    
-96    -240   
288    -16    
-32    272    
48     48     
-64    96     
112    48     
160    128    
-16    240    
0      128    
-16    -240   
-96    112    
16     96     
144    64     
-96    256    
80     -368   
-64    16     
0      80     
176    304    
80     192    
-144   224    
192    64     
224    160    
96     48     
112    112    
16     128    
208    368    
240    -192   
80     80     
-176   112    
80     560    
-240   0      
-96    32     
64     -32    
96     -64    
-48    16     
48     16     
64     112    
32     144    
16     192    
-64    64     
16     144    
-48    -192   
128    272    
-32    80     
-16    -352   
96     192    
-96    -1760  
-176   -48    
240    112    
-32    -32    
96     160    
-848   -240   
944    -32    
272    624    
-544   416    
-272   576    
-336   -256   
480    176    
-256   -160   
192    0      
-240   176    
-16    -1376  
192    352    
64     112    
-48    112    
64     32     
96     -16    
-112   -528   
112    80     
-128   -32    
128    64     
-48    112    
48     272    
-32    144    
0      -496   
-32    48     
256    -560   
-80    240    
-16    -864   
96     160    
144    -64    
-128   96     
-64    -48    
16     112    
0      32     
0      176    
144    208    
80     -112   
-64    160    
-64    -288   
256    224    
-48    -48    
128    112    
0      -592   
-16    176    
32     -1840  
32     144    
-144   -128   
176    96     
-16    -16    
16     -64    
48     144    
96     16     
80     112    
64     16     
16     112    
-16    -544   
128    -64    
96     -176   
0      176    
0      128    
128    144    
80     160    
-48    32     
0      16     
240    -304   
32     64     
32     -160   
128    96     
112    -272   
16     64     
-16    -240   
64     128    
80     -144   
-48    176    
0      -32    
-96    64     
112    -48    
32     96     
16     -48    
32     -80    
-32    80     
96     -160   
-16    176    
128    -16    
-80    32     
64     -320   
112    128    
32     -32    
48     112    
-80    -704   
96     -1088  
-32    -64    
80     -432   
80     -1152  
96     0      
-112   -608   
48     -80    
96     -2352  
160    0      
-80    48     
32     32     
80     48     
64     -16    
48     96     
112    32     
-64    -304   
80     192    
96     -48    
-16    -288   
-48    -144   
64     -400   
80     -192   
16     -688   
-16    0      
96     -336   
64     0      
48     240    
48     -96    
-112   -144   
96     144    
192    64     
80     64     
-272   0      
96     0      
128    560    
-352   48     
256    -112   
-144   64     
288    -176   
-112   -336   
-16    -128   
160    192    
-16    -80    
80     16     
-64    208    
48     -80    
-16    -176   
96     -16    
-48    -48    
32     0      
16     128    
224    240    
16     -208   
-48    112    
16     -816   
80     -304   
32     -224   
176    160    
-16    64     
-112   48     
16     -96    
240    -112   
-64    16     
-64    -224   
-144   -112   
272    -432   
-192   -112   
96     -80    
48     64     
-224   64     
16     96     
112    -144   
64     -80    
272    -528   
-144   208    
-176   -272   
-128   32     
176    0      
288    -48    
-160   -128   
96     -32    
-400   176    
-208   160    
144    -96    
304    -224   
-64    -176   
64     -384   
16     160    
64     -80    
96     192    
80     96     
144    64     
-80    -16    
96     96     
-272   -192   
176    16     
-160   144    
112    -80    
-432   64     
0      -272   
64     16     
-64    -336   
160    0      
128    32     
0      96     
160    2624   
-1744  -1088  
624    576    
464    96     
640    -1024  
-448   -352   
-224   -80    
480    -128   
-160   -336   
272    -224   
-16    144    
-32    -144   
224    432    
16     -272   
16     -288   
-272   128    
176    256    
-128   48     
0      -112   
-16    -16    
176    144    
-240   32     
96     -96    
-208   -64    
160    -80    
-48    80     
32     -80    
48     128    
-288   -128   
112    64     
-112   -16    
0      -48    
-32    96     
96     16     
16     16     
-16    -112   
0      128    
96     -32    
-16    48     
-64    -96    
64     144    
-880   -192   
48     48     
32     96     
-304   -64    
-48    0      
-272   32     
-176   160    
-656   -176   
-208   160    
96     -192   
-64    112    
96     -16    
-96    64     
-352   -368   
64     -32    
32     -240   
-80    144    
48     -16    
-64    32     
-16    128    
-112   32     
-64    -96    
-304   64     
-176   176    
48     -32    
128    80     
-176   -128   
176    208    
-240   -80    
112    96     
-16    -32    
-96    64     
0      64     
-144   -112   
96     144    
-304   -160   
-48    16     
-16    128    
32     96     
-16    -64    
32     32     
64     144    
-160   80     
-16    -144   
80     -64    
80     64     
-176   64     
16     16     
-176   -32    
16     -48    
-80    96     
-48    -80    
64     224    
-176   0      
-496   -16    
-144   -96    
-128   -48    
32     128    
-96    -48    
16     128    
64     144    
16     48     
80     -96    
48     288    
16     304    
-16    64     
-112   -240   
-80    -32    
-32    128    
48     -32    
48     272    
-112   -48    
48     112    
16     -176   
64     160    
16     32     
-160   192    
288    96     
-176   32     
-16    96     
-160   128    
192    32     
-80    -208   
-160   -176   
-64    -112   
128    208    
-240   64     
288    96     
-144   -48    
32     -128   
-96    48     
96     32     
240    160    
-288   16     
-48    0      
-96    208    
-96    128    
160    0      
-64    64     
-160   48     
224    224    
-608   -112   
112    -112   
-1376  -448   
-48    -400   
112    304    
-64    -48    
96     16     
16     64     
-32    -16    
16     224    
-32    -48    
112    96     
-176   160    
-80    0      
-64    -176   
-80    -96    
32     208    
96     -96    
-80    -80    
112    240    
-48    160    
80     -208   
-160   -272   
112    160    
80     112    
-48    80     
176    128    
-96    48     
16     16     
-48    256    
-64    -96    
96     112    
0      144    
0      16     
-64    0      
-16    -48    
80     -16    
64     -64    
32     160    
-16    128    
16     160    
-128   -144   
64     96     
-16    80     
64     -160   
-160   144    
208    80     
-80    112    
-208   -64    
16     272    
-80    -16    
-16    16     
16     32     
96     32     
-496   -288   
816    -688   
-128   544    
-304   -272   
-96    48     
496    -64    
256    -32    
-560   -608   
240    432    
160    384    
80     64     
112    224    
96     144    
-208   0      
192    208    
112    -16    
0      -16    
32     32     
-96    64     
0      -32    
144    176    
-112   96     
320    320    
-160   176    
-96    -160   
-144   160    
192    320    
160    208    
-48    48     
-176   48     
128    64     
64     64     
-176   64     
112    80     
-80    -48    
16     16     
96     464    
240    304    
-112   16     
-80    16     
112    96     
-16    112    
-80    32     
160    80     
-80    96     
16     112    
48     304    
-64    208    
48     192    
-64    -48    
96     64     
32     96     
0      -32    
-16    32     
240    288    
-272   0      
144    -144   
96     32     
128    80     
-80    128    
96     96     
48     80     
-144   192    
144    128    
-32    48     
0      -880   
0      64     
-16    448    
32     144    
112    48     
48     64     
16     64     
48     64     
48     32     
64     176    
-256   -304   
208    -32    
-16    32     
32     -176   
96     160    
128    -64    
64     240    
0      -896   
16     -16    
48     32     
112    32     
64     416    
-96    176    
-32    160    
-16    -112   
80     -144   
128    0      
32     96     
64     160    
16     160    
-208   -256   
336    208    
48     48     
96     96     
-256   80     
128    -32    
144    112    
32     64     
16     32     
16     -48    
112    144    
-48    -64    
112    128    
-144   -80    
176    48     
32     96     
80     64     
80     -240   
-48    48     
112    -960   
-16    64     
48     160    
16     -64    
96     -32    
128    96     
-64    -160   
16     160    
-16    208    
112    -144   
256    736    
-352   -208   
256    -240   
-272   -560   
336    32     
48     -192   
16     112    
-48    -1952  
128    224    
-112   32     
80     0      
336    288    
0      384    
144    176    
-80    160    
32     -16    
0      48     
32     128    
128    48     
16     160    
112    -96    
112    416    
-96    -576   
0      -16    
80     -16    
64     64     
-32    112    
16     -592   
96     64     
144    -208   
48     432    
64     -128   
-240   -128   
192    -64    
-16    -32    
-32    -320   
96     160    
16     -16    
0      64     
16     64     
32     112    
0      -32    
0      -128   
-192   -80    
160    -144   
16     368    
0      96     
48     80     
144    64     
64     272    
-112   -256   
128    288    
112    -272   
64     -1312  
-16    208    
32     -1632  
32     208    
160    -64    
-16    -80    
256    32     
-112   80     
-160   -160   
-16    16     
64     -192   
208    112    
0      176    
-112   128    
192    48     
0      -96    
96     112    
-16    -176   
-400   -2272  
1040   1584   
-864   160    
272    -576   
-256   -1408  
528    416    
-624   -1472  
272    128    
-208   112    
352    -48    
112    -464   
-176   48     
224    112    
-128   32     
160    160    
-96    -128   
-48    16     
-224   -32    
304    64     
-48    -272   
0      -96    
48     -256   
96     208    
192    288    
-96    -336   
0      -240   
0      176    
48     64     
96     112    
-80    0      
112    -208   
-240   32     
16     -272   
-64    32     
64     -32    
128    -112   
32     -320   
-48    112    
240    -336   
-176   -128   
-16    112    
144    32     
112    64     
-64    -160   
32     -128   
-112   -48    
-176   -112   
96     320    
-432   -112   
336    -16    
-144   -16    
64     -256   
-32    -128   
64     -64    
-32    -64    
160    -1104  
-16    176    
128    -176   
96     64     
-144   -160   
256    0      
-112   112    
0      48     
-496   48     
-64    -48    
-336   -192   
160    -48    
16     304    
96     -304   
112    112    
48     -688   
32     176    
-80    -128   
144    16     
16     48     
0      -48    
-144   -144   
128    -48    
0      224    
-128   -64    
176    32     
80     80     
-240   -64    
80     -432   
32     176    
0      -576   
-96    -16    
48     144    
-48    -16    
0      -32    
-32    -208   
-192   32     
-48    -176   
-64    32     
-48    -32    
144    192    
-64    -64    
16     0      
144    -176   
-96    32     
144    -320   
-32    48     
96     176    
-144   -64    
-160   -128   
-48    -176   
-64    -288   
96     176    
-144   48     
192    112    
-192   32     
16     -112   
128    144    
-80    -224   
80     16     
16     -368   
224    -256   
-32    64     
-224   -256   
144    160    
-64    48     
-16    112    
-16    -32    
48     64     
-48    -112   
16     -32    
48     80     
224    208    
-128   -128   
96     64     
144    -272   
-464   64     
-16    -112   
-624   64     
-64    208    
-224   -16    
32     64     
-48    16     
-128   -48    
64     -128   
-96    32     
-16    32     
-16    128    
-96    -336   
32     48     
32     96     
-48    208    
-32    48     
-32    16     
-16    64     
-176   -16    
-48    48     
-1200  32     
112    224    
-80    48     
16     32     
-96    16     
64     112    
-304   -352   
128    0      
-32    128    
-64    48     
-48    96     
-112   80     
-16    144    
-224   -352   
64     192    
-32    112    
-64    48     
-32    0      
160    96     
-256   -144   
80     112    
112    192    
-48    16     
-128   -160   
-16    144    
80     64     
-160   -144   
64     0      
-96    0      
-64    64     
-256   -96    
-64    -32    
-928   -224   
-16    272    
-256   -416   
32     96     
128    64     
-80    160    
-144   128    
-160   -16    
160    16     
-64    192    
32     96     
-160   48     
1872   -352   
-1168  -864   
1136   1216   
-112   624    
1184   -48    
-800   -912   
416    672    
-64    160    
-288   -496   
-16    32     
240    176    
224    288    
-256   -48    
-128   112    
-208   -496   
80     96     
-80    64     
-16    -64    
-80    208    
48     -16    
224    256    
-96    -864   
-80    32     
32     176    
192    -64    
-144   -48    
80     32     
-32    128    
-80    16     
-80    -32    
96     32     
16     48     
-160   112    
-288   -224   
176    32     
-1280  176    
176    128    
-432   -512   
288    -352   
0      176    
208    224    
-240   96     
112    -32    
48     160    
-48    32     
32     64     
80     336    
80     240    
-144   -128   
48     288    
-48    -96    
64     48     
64     -224   
32     16     
64     -96    
96     304    
-336   -400   
80     -144   
272    448    
-176   224    
48     0      
-32    128    
128    -96    
-256   128    
16     48     
16     96     
-64    -16    
48     128    
-112   16     
16     64     
-64    32     
32     0      
112    112    
32     80     
-64    -48    
-80    -384   
-64    -224   
128    16     
-80    -160   
128    208    
16     96     
-48    80     
64     112    
80     336    
-96    96     
-32    64     
192    224    
64     304    
-64    64     
-160   -64    
48     -16    
64     48     
176    288    
-256   48     
16     16     
16     -160   
0      -80    
80     80     
96     160    
48     160    
-64    48     
0      96     
16     80     
32     112    
-16    -128   
112    192    
-112   96     
80     -288   
0      -208   
32     144    
112    80     
-16    128    
-64    240    
144    64     
48     48     
-144   208    
160    272    
-32    208    
-80    192    
96     96     
-80    256    
-32    64     
-96    -80    
48     -64    
240    400    
-192   80     
128    240    
-320   96     
288    144    
-144   192    
0      -112   
96     160    
-48    0      
144    96     
-128   32     
208    32     
16     400    
-208   -192   
64     -64    
-16    -320   
176    272    
-96    208    
96     176    
144    336    
-176   128    
48     -32    
-128   -144   
16     -192   
96     -32    
-32    -368   
0      -16    
64     176    
16     -320   
48     240    
-128   -640   
224    80     
-144   128    
176    192    
-32    192    
-32    80     
128    -16    
-16    48     
-32    160    
-176   -64    
80     -96    
96     -80    
128    48     
48     -512   
32     160    
160    -1744  
-80    176    
-48    112    
48     160    
32     96     
16     80     
16     144    
-112   64     
-48    112    
16     16     
64     48     
64     144    
80     32     
16     32     
0      80     
-32    -144   
96     176    
16     80     
-96    80     
16     80     
0      32     
96     48     
80     272    
-192   16     
192    176    
-176   -96    
-704   -2224  
832    1200   
-1008  208    
288    -16    
-208   -480   
256    448    
-480   -144   
224    832    
-208   -1312  
272    128    
-368   -64    
192    -96    
-48    416    
112    -208   
-160   96     
32     -400   
112    128    
32     32     
80     112    
128    32     
0      32     
48     -416   
112    112    
32     160    
144    -96    
0      128    
32     112    
144    256    
-112   96     
208    176    
-80    96     
128    160    
16     -608   
-48    144    
96     -368   
192    256    
-160   -128   
128    96     
-144   -256   
304    144    
-16    48     
16     16     
-48    0      
80     144    
144    160    
64     -368   
-176   128    
112    -528   
192    -112   
-192   64     
160    144    
80     -128   
-32    112    
-80    -368   
80     -16    
0      -16    
-16    144    
160    240    
-96    -96    
64     -320   
48     -144   
0      32     
64     -48    
128    240    
-48    32     
80     64     
-32    -320   
176    128    
48     96     
-128   -448   
112    80     
160    -256   
-64    96     
-704   -16    
-144   -1056  
112    -32    
80     208    
-160   -496   
288    -1456  
-144   -192   
176    208    
0      -64    
32     32     
160    16     
16     -256   
-80    -112   
144    -240   
-32    48     
-496   -80    
96     -336   
64     -96    
112    -336   
32     -304   
224    -368   
-128   -448   
80     -48    
0      16     
112    80     
-80    16     
16     -64    
64     32     
-16    -112   
80     0      
-368   -64    
160    160    
-160   96     
-48    -48    
32     -192   
-16    -48    
128    32     
64     -400   
0      16     
128    -224   
-96    48     
80     -256   
-32    32     
64     208    
16     -112   
64     496    
-240   -16    
-832   128    
-80    -144   
96     -64    
-64    -208   
128    128    
0      48     
32     0      
16     -80    
-224   -144   
128    -48    
208    -16    
-288   -160   
288    -432   
-128   48     
192    -240   
-640   32     
32     112    
80     -112   
-32    -48    
176    0      
16     -736   
-96    -288   
112    -1616  
32     192    
-48    -496   
256    304    
32     272    
16     -80    
-192   32     
64     0      
-224   -32    
-64    -48    
-496   -224   
48     -272   
224    -80    
-32    -16    
352    592    
-336   -512   
128    -64    
-128   -128   
32     -240   
-64    -48    
272    64     
-80    656    
-400   176    
80     16     
448    -144   
0      64     
-160   -64    
-128   48     
144    -176   
160    -16    
32     -496   
112    64     
-464   -32    
0      32     
-336   -144   
224    -64    
48     0      
96     -64    
-256   32     
80     -176   
-96    0      
144    96     
-16    96     
-48    -240   
32     128    
160    -496   
48     112    
-144   64     
112    32     
-80    208    
-16    -144   
0      96     
256    -64    
-32    64     
2000   -1504  
16     -416   
960    1184   
-464   416    
560    336    
-176   432    
-144   -304   
-576   208    
-384   -224   
-384   -432   
-112   400    
-80    -160   
-80    32     
48     0      
80     208    
-112   -192   
-144   -224   
176    -592   
160    112    
-496   -128   
-176   80     
96     -272   
-112   208    
112    0      
48     80     
-112   32     
-944   192    
240    80     
32     112    
-48    32     
224    0      
-192   -80    
-288   -336   
112    400    
96     -272   
16     112    
96     208    
-192   16     
96     480    
-224   48     
160    -32    
-48    112    
-48    -48    
-144   -16    
-96    0      
0      -208   
-16    240    
-96    256    
-32    -80    
-80    -48    
192    128    
-96    64     
-112   -224   
-64    -16    
176    -128   
64     -48    
-240   192    
80     528    
-784   -544   
256    128    
-48    -80    
0      -64    
-144   416    
256    240    
-192   -272   
-16    -16    
32     112    
-32    -80    
-96    0      
32     -32    
0      16     
-80    32     
-96    192    
-112   -112   
80     0      
-448   160    
-96    288    
-208   -128   
64     -432   
-288   -160   
240    176    
-16    208    
-240   32     
80     -16    
-64    -464   
0      80     
16     0      
240    304    
-96    192    
32     32     
-96    16     
96     192    
-176   112    
-32    0      
64     32     
0      128    
192    256    
-144   112    
-80    -16    
-80    -64    
-32    32     
16     112    
48     -112   
-80    -32    
-48    -96    
-144   -176   
48     144    
-160   352    
160    288    
-112   0      
-128   -64    
128    112    
-80    32     
96     64     
-32    128    
96     80     
-304   -224   
48     -16    
-176   -368   
0      -16    
-112   32     
144    48     
-256   48     
-304   -192   
304    -144   
-176   16     
48     -208   
-96    -16    
80     96     
16     96     
-16    112    
112    -64    
-272   48     
-48    -176   
-96    128    
32     48     
288    176    
-496   16     
0      112    
-80    64     
32     32     
-32    256    
144    128    
-96    208    
-64    16     
208    416    
-32    -64    
96     64     
-160   128    
64     112    
-64    -16    
48     144    
112    160    
-224   16     
176    160    
96     48     
-208   144    
-32    0      
-80    0      
176    176    
-112   16     
32     96     
-16    96     
-144   -64    
144    160    
-176   -64    
112    160    
-32    96     
0      208    
-16    112    
-64    -48    
240    0      
96     80     
-48    224    
-64    16     
80     208    
64     -160   
80     112    
-160   0      
16     128    
-64    80     
32     48     
64     288    
-48    32     
-32    96     
16     64     
48     32     
96     32     
48     176    
-64    32     
80     80     
-112   -32    
80     128    
16     192    
32     96     
-368   368    
-400   -400   
1072   32     
-1072  272    
-48    32     
-16    -304   
400    -256   
-112   544    
-304   -496   
320    320    
-128   -48    
480    432    
-112   -240   
-160   288    
80     -48    
240    256    
-272   0      
96     -32    
80     224    
160    16     
-96    96     
-16    0      
-48    192    
80     0      
-144   112    
240    -144   
-64    192    
288    16     
-288   96     
-32    32     
80     144    
128    -480   
-64    128    
0      0      
48     208    
32     0      
144    256    
-16    16     
-144   160    
48     96     
192    96     
-112   32     
-32    176    
-128   -80    
256    -400   
-128   112    
128    -816   
-32    -48    
64     256    
-48    48     
176    16     
-96    48     
64     96     
112    160    
0      208    
0      96     
-48    80     
0      16     
0      176    
-48    -80    
128    0      
-16    -832   
32     48     
32     192    
-32    -64    
64     96     
96     16     
16     224    
-112   96     
80     0      
96     16     
48     112    
64     144    
16     224    
-32    0      
32     80     
0      -208   
224    64     
48     -224   
-48    208    
-16    96     
80     48     
112    160    
-96    144    
-48    240    
-80    -48    
64     -32    
0      176    
-48    80     
160    -80    
48     128    
80     -16    
0      128    
80     16     
144    160    
-48    -1536  
128    112    
16     80     
32     96     
-32    -128   
304    320    
80     192    
-32    -432   
16     48     
176    -48    
48     160    
-64    -384   
64     176    
128    -560   
96     80     
-16    -112   
64     64     
32     64     
80     48     
16     160    
64     48     
-48    -16    
160    96     
-224   -192   
48     -112   
32     112    
176    -480   
48     80     
128    320    
-48    336    
64     -144   
0      16     
144    608    
48     224    
-16    16     
-64    -112   
80     112    
64     -128   
64     208    
64     -1056  
-144   -144   
224    -128   
16     128    
-16    -320   
96     48     
48     32     
96     208    
-224   -304   
176    128    
-96    -160   
144    -672   
112    -432   
16     80     
32     -896   
64     -80    
0      80     
80     -16    
0      96     
208    -80    
48     112    
32     -128   
176    -1968  
64     128    
48     -512   
-48    16     
-32    -96    
128    -1168  
-64    16     
-16    -80    
-176   -192   
288    -160   
-128   48     
176    112    
-80    96     
96     -16    
32     -32    
48     32     
-32    112    
-32    -64    
192    -80    
-352   -64    
-112   -336   
64     -128   
160    80     
0      0      
-96    -208   
64     -128   
256    -2960  
-288   -240   
80     -96    
-32    128    
128    -32    
-48    256    
-32    -176   
96     -128   
-192   32     
432    -16    
-1520  80     
-32    -160   
32     16     
160    64     
-1056  1616   
-496   -1632  
160    -240   
768    -48    
-16    -560   
-528   -352   
144    80     
-416   -80    
496    -592   
-272   640    
256    -560   
-432   480    
128    -256   
16     432    
48     -1008  
-80    448    
304    -640   
176    576    
-80    -1632  
176    240    
-32    -256   
336    -80    
-64    -64    
80     224    
0      -48    
-32    -352   
-592   -112   
208    32     
-1536  -96    
-16    32     
48     -48    
128    -64    
-112   -32    
48     -160   
0      -32    
0      -112   
32     -272   
0      -928   
0      -112   
144    16     
-48    64     
-48    48     
96     -128   
-336   0      
64     80     
-800   -144   
-32    -416   
96     16     
16     -736   
144    176    
32     0      
48     -16    
-112   80     
128    -96    
-144   -80    
64     32     
16     48     
96     -96    
-64    -32    
48     -80    
-96    64     
48     96     
-80    320    
-16    -80    
32     16     
-32    -48    
48     -416   
-720   -128   
32     -128   
-144   48     
32     96     
-32    0      
32     -128   
-192   -32    
0      -224   
-48    -80    
80     -32    
48     64     
-32    -464   
-64    64     
-144   144    
0      -48    
-64    -208   
-144   -112   
176    32     
-48    -64    
-160   -80    
-16    -304   
-16    -128   
64     -48    
-272   112    
-544   -128   
16     -80    
-304   -64    
-1680  -112   
272    656    
-992   432    
-32    32     
128    -144   
-128   -48    
176    -128   
-64    80     
96     -48    
32     160    
-48    -96    
96     96     
-128   -144   
128    -64    
-176   -96    
-224   -16    
-80    144    
32     -64    
-128   32     
-272   -16    
-112   80     
48     48     
160    288    
-80    -48    
112    16     
-704   -208   
208    -32    
-144   -80    
96     208    
64     320    
32     -80    
48     336    
-96    80     
-64    96     
-16    -32    
32     176    
160    352    
80     304    
-1200  0      
-176   64     
-320   -64    
368    96     
-16    -176   
-208   128    
64     128    
0      -16    
-48    32     
-112   16     
64     32     
-48    -48    
0      80     
-368   304    
96     64     
-672   -80    
-64    96     
64     -48    
-16    192    
160    -16    
-224   64     
-48    -144   
64     96     
-80    224    
-80    -64    
64     64     
-64    48     
-80    -16    
-272   32     
-96    -80    
-128   176    
-272   -80    
64     -96    
32     160    
32     112    
-240   -80    
-64    -80    
144    0      
64     64     
-48    64     
-160   32     
-80    192    
80     -304   
-32    192    
48     160    
-224   -32    
128    208    
-240   -16    
80     144    
-80    160    
-160   64     
112    160    
-160   -96    
96     -80    
32     -32    
-48    128    
-32    128    
-64    32     
-48    32     
160    176    
-192   -256   
32     256    
-672   -64    
-672   -1936  
608    672    
-448   336    
-656   -400   
96     368    
-368   48     
768    560    
-688   112    
0      416    
160    -64    
0      80     
48     -320   
-272   448    
16     -416   
0      384    
128    -32    
160    272    
32     112    
-96    112    
96     -16    
16     192    
64     -32    
-16    224    
-64    176    
160    -16    
-128   -32    
0      -32    
-16    144    
80     176    
-80    32     
64     16     
-64    96     
48     16     
0      160    
-32    0      
-16    -112   
272    160    
-224   64     
224    64     
-256   48     
112    16     
16     128    
-48    80     
144    176    
0      32     
-32    112    
-160   48     
176    432    
-256   16     
208    -16    
-176   96     
16     -80    
-32    64     
-64    -48    
16     80     
-16    144    
48     96     
32     -128   
-32    160    
-32    128    
0      128    
0      64     
80     48     
16     -96    
112    96     
-176   96     
0      256    
0      -48    
240    32     
-32    48     
-80    16     
48     48     
0      0      
-80    16     
16     144    
224    272    
-144   -64    
176    240    
-144   128    
0      -192   
48     64     
-64    144    
16     304    
-224   -144   
160    96     
-144   -128   
-128   32     
-48    -80    
112    192    
-16    -48    
-16    176    
32     0      
-32    -80    
48     64     
48     48     
-32    -16    
0      -80    
112    128    
-112   -80    
48     48     
0      -32    
128    112    
48     48     
64     48     
-32    192    
240    368    
-144   48     
80     -48    
16     128    
112    160    
32     80     
-48    64     
32     0      
16     80     
48     96     
128    160    
112    304    
16     240    
-112   -1696  
-64    32     
-16    -80    
240    64     
208    240    
-208   -128   
-32    96     
64     144    
144    48     
-64    0      
64     -144   
112    192    
16     208    
-240   -432   
112    -64    
0      -912   
96     112    
-16    176    
32     16     
64     128    
48     0      
-48    48     
80     112    
48     240    
-96    96     
48     -16    
-96    48     
128    304    
-16    -112   
0      64     
192    -256   
112    160    
0      -2368  
-96    16     
-48    -144   
192    192    
-16    272    
-112   -64    
-32    -112   
128    240    
-80    112    
-32    64     
-32    32     
368    128    
-32    192    
-80    -128   
64     208    
96     -336   
-160   32     
128    -1456  
176    272    
16     -112   
-64    32     
80     0      
64     112    
-80    -16    
112    96     
48     32     
32     -112   
16     96     
80     -352   
0      160    
-32    -432   
48     144    
80     -208   
-96    128    
-80    -128   
64     144    
64     16     
80     32     
-16    144    
-80    64     
-48    192    
32     -160   
-336   112    
208    -432   
-96    128    
208    -64    
1056   784    
-736   -1520  
992    384    
-32    -544   
224    -48    
-208   -384   
112    176    
592    736    
-512   -928   
0      192    
48     -272   
80     96     
-32    -96    
80     32     
48     -368   
32     128    
32     -128   
304    256    
-16    144    
128    32     
16     128    
-128   -320   
448    -160   
-336   -96    
304    16     
32     112    
0      -48    
128    -32    
-64    48     
224    -64    
-128   96     
96     -160   
64     96     
112    -32    
80     -1328  
-48    -16    
80     -2256  
0      256    
64     -48    
224    48     
-112   16     
96     -32    
0      -256   
80     16     
0      -80    
144    160    
16     -208   
96     -576   
-80    32     
112    -448   
-16    80     
0      -80    
96     -288   
-160   96     
240    -464   
-64    -128   
80     -1152  
64     -48    
32     16     
48     64     
80     128    
-48    -64    
96     -240   
-112   -80    
208    32     
-128   224    
-160   -192   
192    -96    
-416   32     
32     -16    
16     -32    
64     -112   
144    16     
-16    -624   
0      -304   
112    -336   
-112   -160   
128    -48    
-32    32     
16     -80    
224    32     
-272   -96    
80     -32    
-1264  192    
112    96     
0      -48    
160    -176   
96     96     
112    -448   
16     -144   
48     -128   
64     144    
-64    -192   
48     -224   
-272   -304   
272    -112   
-144   -112   
80     48     
-128   -32    
-16    112    
-48    80     
32     -240   
96     -32    
64     -336   
80     32     
80     -224   
16     96     
192    64     
80     112    
-96    96     
-128   -48    
112    64     
-96    -160   
80     64     
16     -96    
-784   -48    
-64    -496   
-64    -80    
64     -96    
112    -48    
16     -240   
-160   128    
288    -80    
0      16     
-400   112    
160    16     
64     -48    
64     -96    
-160   0      
80     80     
-304   -96    
48     -64    
-480   -80    
128    -32    
-80    112    
224    -336   
160    -48    
-128   -672   
-96    16     
192    48     
128    -32    
-368   16     
0      0      
-368   -48    
144    -368   
-144   -352   
208    112    
16     80     
16     -208   
64     96     
80     -160   
112    -32    
-32    -144   
192    -48    
-288   160    
16     -128   
-224   272    
-32    -160   
-96    -48    
128    -48    
16     16     
32     0      
-304   64     
-112   -304   
192    192    
16     -256   
16     -16    
-272   128    
-208   128    
-48    -112   
96     128    
112    -352   
-16    96     
-128   96     
48     48     
-192   -48    
144    -176   
-304   96     
288    -16    
-48    80     
-448   -192   
80     224    
-32    48     
-928   16     
32     0      
-160   240    
-272   160    
64     0      
96     0      
48     -80    
-32    -96    
32     -80    
112    32     
224    176    
32     128    
-160   -112   
-784   288    
336    -80    
1136   -64    
-496   -400   
-880   -464   
720    304    
-592   -368   
64     768    
-176   -336   
0      176    
-96    -432   
160    560    
-128   -256   
-48    224    
-64    -32    
224    0      
-176   240    
64     224    
-80    48     
-128   -112   
-112   96     
-32    48     
32     176    
-352   -112   
128    64     
-240   -80    
240    432    
-144   -16    
112    112    
-96    48     
176    64     
-48    64     
-208   32     
16     0      
-96    -16    
192    112    
-96    16     
-48    96     
-336   32     
64     -16    
-160   -288   
16     208    
-48    64     
384    96     
-256   64     
48     112    
32     400    
-96    64     
-96    -64    
-32    -16    
64     32     
-64    32     
0      0      
-176   64     
128    160    
-784   -96    
160    128    
-16    48     
16     16     
112    80     
-48    48     
32     128    
-48    64     
32     160    
48     16     
-80    80     
48     160    
-96    80     
-96    128    
-80    80     
-16    64     
-80    16     
16     -144   
-192   64     
-112   192    
288    384    
-224   96     
80     -80    
-16    16     
-96    128    
0      16     
-64    160    
16     144    
-128   64     
16     176    
-560   -128   
64     160    
64     -48    
-32    80     
-32    32     
0      160    
16     112    
0      0      
-48    32     
-80    -32    
64     144    
-96    48     
0      -32    
-144   -112   
64     64     
-576   -160   
-160   96     
80     112    
64     112    
-128   0      
64     48     
16     32     
-64    64     
0      64     
48     96     
96     80     
-32    128    
-112   32     
64     64     
-80    16     
80     112    
-96    48     
96     80     
-112   128    
80     0      
-96    64     
80     64     
0      224    
-48    96     
160    144    
-160   112    
-16    -176   
-32    192    
-16    0      
128    144    
-64    96     
112    80     
-144   256    
48     -176   
48     48     
16     32     
128    16     
-80    128    
128    208    
-192   -64    
0      80     
-32    -32    
112    144    
-144   16     
272    -112   
-112   304    
-224   -80    
144    -32    
-32    208    
208    176    
-304   0      
288    208    
-192   32     
160    128    
-272   16     
96     -32    
-16    -192   
256    304    
-160   16     
16     -32    
-144   0      
64     176    
112    112    
-144   64     
272    -16    
-160   256    
-32    -64    
-16    128    
16     32     
432    176    
-400   80     
176    16     
-96    272    
384    -208   
-160   160    
128    -16    
-48    176    
48     64     
64     -16    
32     32     
-64    96     
-48    -32    
16     -80    
192    144    
-64    128    
160    48     
-160   16     
80     144    
144    32     
64     -1216  
112    80     
-80    64     
240    32     
-48    96     
80     128    
-960   -336   
-864   -416   
1264   1296   
384    640    
-144   -688   
-672   320    
496    1104   
384    240    
64     80     
224    -240   
-224   112    
-144   80     
112    80     
176    -176   
-80    -32    
-16    -80    
64     160    
-80    -16    
176    -80    
-96    48     
144    480    
48     96     
-80    -16    
32     160    
-64    -720   
176    272    
-144   -928   
272    64     
-16    176    
0      32     
48     -32    
-16    128    
64     -288   
128    112    
-112   144    
416    496    
-496   -64    
272    -176   
-160   112    
304    -112   
-192   32     
112    -368   
-32    112    
224    128    
-48    128    
-48    -48    
96     144    
48     48     
-96    144    
48     -16    
144    128    
-96    144    
144    -16    
-96    144    
80     -16    
64     192    
48     -288   
64     144    
32     -416   
80     128    
32     0      
32     112    
-48    80     
160    -16    
-128   64     
112    256    
-208   32     
208    -144   
0      48     
64     -112   
-80    80     
128    -480   
-80    -16    
208    -512   
-48    144    
-48    -896   
96     224    
-32    64     
80     0      
80     224    
-128   -128   
176    0      
144    80     
-128   256    
64     -752   
-48    80     
48     -272   
-32    -112   
176    -16    
-64    32     
-32    -144   
176    208    
-112   80     
224    288    
-80    128    
-160   -544   
208    32     
160    -352   
96     192    
-80    -160   
16     32     
80     -48    
80     -32    
48     64     
16     128    
32     112    
-32    80     
64     -48    
-64    32     
96     192    
-16    -96    
64     0      
32     -416   
-32    -64    
64     -48    
64     -128   
-80    -528   
0      176    
160    -96    
160    192    
64     64     
-96    -720   
144    96     
112    -1776  
-240   -736   
64     -224   
64     -208   
-208   16     
400    -544   
-32    -16    
-96    96     
128    -96    
48     176    
-48    80     
272    -208   
-128   304    
32     -592   
192    80     
-288   -160   
32     -384   
96     112    
128    -352   
80     -112   
-96    -16    
160    -192   
-48    -848   
128    -112   
0      112    
96     112    
32     32     
-64    80     
128    -160   
-192   -48    
16     -144   
-32    -80    
-304   64     
96     -224   
-96    -128   
112    -240   
-80    -80    
112    -320   
112    144    
32     -80    
-80    -16    
80     -624   
-240   -592   
32     -224   
0      208    
-64    160    
80     144    
-720   -80    
64     -512   
48     -112   
0      96     
-96    176    
-32    -16    
0      -224   
128    -96    
16     80     
-32    -80    
128    208    
16     -16    
64     16     
96     192    
-16    -304   
-256   -64    
16     -112   
32     32     
160    -16    
48     48     
96     -64    
-32    32     
-64    -1056  
64     32     
80     48     
-224   1104   
208    64     
608    624    
-960   480    
304    128    
-64    -304   
80     -144   
-624   -64    
-48    -336   
224    112    
-80    -496   
32     -64    
208    528    
-128   96     
-64    -800   
16     32     
64     -48    
-32    -128   
-240   -256   
272    -176   
-144   -32    
128    176    
-576   112    
304    112    
-1104  -128   
272    -224   
-48    -384   
192    -464   
-160   272    
272    -560   
0      -208   
-96    -80    
224    48     
-256   96     
160    80     
-112   -32    
32     -48    
-144   -96    
64     -16    
-16    64     
32     144    
-16    96     
32     -208   
-64    80     
208    -560   
-16    16     
-256   -16    
-16    -112   
-16    64     
0      -144   
-144   -80    
32     0      
-96    -32    
96     -96    
-32    32     
48     -288   
-96    -480   
208    -416   
-192   -112   
80     80     
128    224    
-16    0      
-112   0      
-48    -48    
96     32     
-96    48     
16     48     
-64    16     
32     48     
-144   48     
-96    -192   
16     96     
-320   -32    
48     48     
80     144    
-240   -96    
-256   -336   
-272   -352   
16     -32    
-48    80     
-48    96     
-48    64     
-16    -240   
80     -256   
16     144    
-192   16     
208    480    
-32    368    
-80    272    
-112   -144   
160    -80    
32     128    
-352   96     
-96    64     
-336   -16    
32     0      
-64    -32    
0      32     
-176   -160   
240    144    
-112   -48    
32     32     
-192   -128   
128    32     
48     96     
-128   -96    
192    240    
-144   -16    
80     128    
-48    16     
64     0      
-816   -32    
80     80     
-48    -16    
64     144    
-160   -224   
64     0      
-16    192    
0      32     
16     -32    
-160   -16    
48     144    
176    0      
-80    48     
-48    -80    
-16    48     
-176   144    
96     304    
-448   0      
48     32     
-48    -32    
32     48     
-16    -32    
-112   -160   
240    176    
-208   -16    
32     96     
-224   -96    
192    16     
-32    80     
32     48     
-144   0      
112    0      
-1232  -16    
144    112    
48     480    
-224   224    
0      -16    
16     64     
96     -80    
0      112    
-288   32     
224    96     
-160   48     
160    -560   
32     -128   
-272   -576   
80     192    
-320   192    
304    80     
64     272    
-64    128    
-128   288    
-32    -288   
96     32     
0      -224   
-160   -64    
-80    -64    
128    128    
-80    0      
80     -80    
-32    192    
-64    160    
-240   16     
240    -32    
176    208    
-240   80     
-144   48     
16     128    
96     -96    
-48    48     
16     96     
-112   -32    
32     -16    
32     64     
-64    144    
-80    -288   
112    176    
-16    -112   
96     -96    
112    -48    
16     112    
96     224    
-80    176    
16     0      
96     48     
-672   -1104  
-704   -96    
-48    448    
368    -192   
224    -64    
-208   -272   
-304   -64    
416    80     
240    592    
176    144    
-16    -32    
-208   240    
112    160    
32     -16    
-128   -128   
0      80     
48     96     
32     144    
-16    16     
192    80     
-160   -48    
-16    96     
16     -96    
-80    48     
144    -48    
16     144    
-48    48     
48     112    
-64    -16    
32     -32    
-64    96     
176    128    
-80    80     
-160   -96    
48     48     
-128   -112   
-48    256    
176    -112   
-16    48     
-128   96     
208    144    
-96    64     
-16    -64    
96     0      
96     224    
80     144    
-96    -96    
112    272    
-256   64     
336    64     
-128   128    
-32    0      
160    112    
-176   144    
112    16     
-48    -48    
176    80     
32     144    
80     112    
-80    32     
32     176    
-144   16     
112    128    
16     16     
0      176    
-32    -16    
-160   160    
224    112    
-48    80     
64     80     
-64    32     
96     112    
32     32     
48     96     
32     -256   
0      -128   
-16    304    
-128   160    
160    192    
-32    -32    
48     96     
-80    -1568  
64     -64    
176    48     
16     96     
-32    416    
-32    64     
80     64     
32     48     
80     144    
-48    0      
128    112    
32     -32    
48     -32    
-80    112    
-64    -64    
240    -272   
-16    128    
16     0      
64     112    
48     112    
96     48     
16     0      
32     48     
80     160    
176    80     
-208   -320   
64     -32    
-128   80     
144    96     
128    176    
-112   -272   
208    208    
-96    -544   
48     32     
-192   -80    
240    208    
16     32     
128    48     
-240   -48    
224    160    
16     -80    
48     96     
-224   -32    
384    112    
160    144    
48     -448   
-64    304    
-64    -272   
336    96     
-128   96     
48     192    
16     192    
-80    80     
128    144    
96     576    
-144   144    
224    16     
-16    48     
-96    -64    
48     208    
48     -112   
160    160    
-16    -48    
64     80     
16     -496   
-128   -48    
0      -32    
48     128    
-16    16     
64     64     
-48    32     
80     240    
48     80     
-96    -416   
128    96     
128    80     
128    240    
-16    -752   
32     112    
96     -576   
0      32     
-80    -320   
112    224    
48     -96    
48     192    
0      160    
-80    -32    
176    48     
112    -144   
112    112    
-16    -240   
-32    128    
160    -544   
64     96     
80     -208   
32     -96    
16     96     
320    192    
-128   256    
-32    -160   
-48    -48    
240    128    
-160   -96    
128    -112   
80     32     
128    -16    
-64    0      
-32    -80    
112    48     
112    -128   
48     208    
-64    -848   
112    256    
112    16     
48     80     
1360   -1360  
304    480    
416    -208   
-576   -288   
208    -304   
272    -1088  
32     592    
432    736    
-288   -176   
-16    -176   
48     -176   
48     -144   
16     -2224  
128    112    
112    112    
48     80     
128    -144   
-112   -592   
224    -16    
64     304    
-48    -176   
160    224    
-32    -224   
192    48     
16     -192   
192    -336   
160    336    
-96    32     
304    -48    
-304   80     
-48    -416   
-704   -32    
112    -48    
-32    -208   
160    -176   
64     -144   
112    -1008  
-272   -352   
64     -96    
192    80     
32     32     
-16    144    
176    0      
-48    -64    
-304   -96    
144    32     
-1056  -64    
16     16     
96     32     
80     -448   
80     -144   
0      -352   
160    -208   
-96    -32    
-80    0      
0      -32    
-256   -768   
352    64     
96     -48    
-160   -48    
64     -48    
0      64     
160    160    
-320   64     
0      -48    
32     -16    
96     -208   
0      48     
48     -144   
0      64     
80     -80    
32     96     
64     -48    
-112   48     
32     288    
-320   -544   
32     -160   
-48    -96    
-176   -80    
-144   272    
144    -80    
144    304    
64     112    
-112   -224   
112    64     
96     -208   
-64    -144   
112    -80    
192    -48    
80     176    
-96    -128   
-224   48     
96     -144   
-320   -32    
64     -80    
-336   -48    
128    -80    
-48    -112   
80     -864   
-80    32     
64     -1728  
96     80     
-48    -16    
144    80     
-144   -48    
96     16     
-336   -80    
48     -48    
-80    64     
80     48     
-80    -32    
-16    -16    
64     32     
32     -64    
64     80     
64     -176   
80     -240   
-240   80     
192    -80    
-160   160    
-16    0      
80     128    
64     112    
-48    -48    
48     -272   
-288   -16    
160    -272   
32     400    
160    -128   
-16    80     
32     -208   
112    64     
-192   0      
64     -576   
-496   -416   
256    -128   
-288   -16    
128    -128   
-192   112    
144    -96    
-80    -96    
32     -64    
128    352    
-48    -32    
96     48     
-272   -320   
48     -224   
48     192    
-144   96     
-96    -16    
112    32     
-64    80     
48     -48    
48     -144   
-32    -48    
176    272    
-128   656    
96     -48    
-352   -368   
192    -176   
-32    144    
-176   16     
0      128    
-224   304    
-48    96     
-272   -64    
-160   -224   
144    -64    
144    144    
-16    48     
64     160    
-320   -224   
144    112    
112    -80    
16     -96    
48     128    
-192   -160   
-96    176    
-448   -208   
-16    32     
-240   208    
-112   -16    
-320   32     
-16    -96    
-704   -192   
-16    80     
-128   -64    
16     192    
32     -96    
-96    -64    
80     16     
-16    0      
112    -16    
-48    160    
144    48     
-48    80     
688    176    
-464   -1216  
-16    32     
-336   224    
48     -560   
80     -336   
432    -96    
-272   224    
16     480    
-112   -352   
80     -128   
-128   240    
16     -96    
-96    256    
-64    -272   
0      192    
-112   -80    
32     64     
-304   -80    
64     80     
-144   -16    
128    224    
-224   64     
96     -208   
-240   16     
176    -16    
-48    144    
16     64     
-160   48     
64     -64    
-144   128    
112    64     
-16    96     
-672   -112   
-112   64     
160    224    
0      192    
-80    -80    
-32    112    
160    -16    
-32    128    
-48    48     
0      32     
16     48     
-16    96     
96     208    
-160   -224   
192    176    
-560   -48    
304    112    
-224   -160   
96     48     
32     96     
-48    112    
16     -16    
64     144    
-112   160    
64     48     
-16    16     
0      112    
16     96     
-160   -48    
-16    48     
-112   16     
16     208    
-64    0      
16     -128   
48     -64    
-112   176    
-112   64     
16     64     
144    -48    
48     272    
-160   16     
112    160    
-80    48     
-240   -112   
0      112    
-96    -160   
96     -16    
-64    144    
-80    -176   
256    272    
-160   304    
-128   -96    
400    320    
-208   -16    
240    176    
-240   -32    
80     144    
0      16     
-80    128    
96     240    
-240   -128   
0      -80    
96     -96    
32     160    
32     80     
-48    48     
48     96     
-16    48     
128    224    
-256   -48    
64     -64    
-96    32     
-16    -192   
0      64     
48     272    
-144   -80    
64     128    
-112   96     
128    -32    
16     80     
32     176    
0      64     
80     128    
-352   -256   
176    80     
240    96     
-176   -32    
112    112    
0      -48    
128    48     
-128   -192   
32     -272   
-112   128    
272    0      
-32    144    
0      64     
32     0      
-48    96     
128    256    
80     80     
32     -144   
-192   0      
208    560    
-112   -32    
96     48     
32     160    
32     208    
-80    80     
64     -32    
-16    -32    
48     -160   
48     112    
64     176    
48     224    
-48    64     
96     368    
-176   -192   
0      -48    
32     -432   
-16    -384   
-48    96     
64     16     
80     240    
32     -16    
16     128    
0      112    
32     80     
0      16     
80     128    
176    704    
-272   224    
-288   -176   
96     -192   
160    48     
48     -736   
-80    80     
32     -16    
160    48     
48     176    
48     48     
48     96     
64     32     
32     272    
-32    80     
-16    32     
144    -32    
128    80     
96     160    
64     256    
-192   -416   
128    48     
272    -304   
64     80     
-112   192    
-16    128    
32     -48    
0      80     
-32    160    
32     32     
144    160    
272    48     
-80    -32    
1360   -1168  
800    1088   
288    -496   
-672   16     
288    -496   
80     480    
-112   128    
144    128    
-48    592    
-80    -112   
-32    -576   
-112   160    
240    160    
-16    16     
64     16     
-16    -288   
144    128    
80     32     
-32    -176   
112    -432   
-48    -112   
352    -1264  
-240   -64    
512    528    
-128   160    
240    160    
16     -256   
304    368    
32     352    
80     64     
32     -176   
96     112    
-48    -160   
256    224    
-112   -352   
160    -96    
80     368    
-32    32     
64     96     
272    -96    
32     32     
80     80     
-48    64     
0      48     
208    496    
-64    -336   
0      -144   
-80    -1088  
192    112    
96     -160   
128    208    
-16    -64    
32     80     
0      -1280  
32     80     
64     -32    
128    1104   
-160   -112   
-80    128    
48     -160   
80     -176   
128    -16    
-160   -112   
208    -48    
-16    144    
-32    96     
48     -224   
48     16     
-48    160    
32     16     
48     80     
64     -16    
-144   -64    
-16    -704   
144    192    
-112   -176   
208    128    
48     32     
-96    -96    
64     -48    
80     144    
64     -16    
-16    256    
32     -176   
96     144    
-176   -48    
128    -896   
32     144    
48     -208   
32     32     
-32    -112   
80     -64    
160    32     
-64    48     
0      -368   
112    112    
96     -128   
112    96     
-96    -224   
80     -1472  
208    64     
176    -480   
16     -144   
-64    -64    
176    64     
32     -144   
96     -496   
-96    -224   
144    -144   
80     -80    
32     16     
0      0      
16     16     
80     64     
48     -384   
144    336    
-16    16     
-16    -32    
240    192    
-96    -240   
80     -48    
32     176    
80     208    
-96    -336   
256    192    
-16    144    
64     -208   
208    144    
-64    144    
-48    -96    
208    256    
-48    112    
-176   -272   
-80    -304   
0      -176   
48     -48    
80     -208   
0      -48    
80     -608   
-16    -48    
144    -2224  
-352   -16    
224    32     
-80    304    
240    96     
-288   -32    
-112   -144   
0      -288   
-176   -240   
128    0      
-1104  128    
16     -16    
128    -224   
-32    -192   
224    -160   
-80    -960   
64     -176   
176    -16    
128    240    
48     -128   
64     16     
48     96     
48     -112   
-80    -16    
64     48     
-176   -304   
32     -144   
96     -16    
32     -176   
-272   0      
64     -528   
192    144    
-144   -2912  
80     144    
-16    -208   
112    16     
112    -96    
112    96     
-112   128    
-112   -32    
-16    -32    
16     -32    
-240   112    
0      -192   
-48    -16    
112    -288   
0      64     
48     -2272  
80     80     
-32    48     
48     -240   
32     -144   
224    128    
-144   288    
16     16     
-352   480    
-64    -448   
544    272    
-672   144    
-64    -112   
-272   48     
288    48     
-336   -896   
-112   688    
-464   -96    
272    -64    
-144   -192   
96     80     
64     224    
96     -96    
-64    48     
80     -176   
-288   144    
256    -112   
32     32     
0      -192   
96     224    
-48    -48    
192    64     
-192   -96    
288    -128   
-272   -80    
352    48     
-256   112    
224    112    
-80    -64    
-16    -288   
-256   -48    
-16    -224   
96     176    
-384   -144   
176    288    
-176   0      
-1200  0      
32     -16    
-224   -48    
-160   80     
80     176    
-96    -32    
96     0      
-48    -16    
16     64     
-80    -224   
-128   208    
-224   64     
64     -112   
-48    96     
-112   -16    
-112   80     
-272   112    
32     96     
-128   96     
-720   -112   
32     192    
-288   -192   
192    0      
-16    96     
0      48     
80     -128   
-48    176    
-32    -176   
32     96     
-112   -112   
32     32     
-80    192    
-240   -48    
-32    16     
-32    -80    
-96    64     
-352   -16    
160    352    
-96    80     
112    96     
160    -128   
16     384    
-400   -192   
192    48     
0      -64    
-48    -96    
0      0      
112    144    
-112   128    
80     288    
-208   -16    
96     64     
-16    -32    
-192   -272   
16     208    
-272   -288   
176    144    
-48    -176   
0      -112   
96     192    
-48    96     
-16    0      
-32    128    
0      192    
-128   144    
-96    64     
-32    80     
16     16     
-352   64     
-96    -320   
64     -128   
96     -16    
96     96     
-160   -48    
-48    32     
-80    0      
144    96     
-208   96     
128    128    
-176   -32    
64     176    
-64    128    
-64    208    
-160   -32    
-48    48     
16     -112   
16     160    
-64    -80    
160    64     
-16    464    
-192   48     
96     80     
-48    128    
32     16     
-192   0      
0      32     
-112   -352   
-32    -16    
64     -32    
96     256    
-208   -240   
48     48     
0      240    
-48    -48    
96     96     
-48    -32    
96     32     
-48    64     
112    208    
-16    288    
-32    -80    
-48    -32    
16     160    
-208   0      
-16    208    
16     64     
-112   -224   
-176   -272   
208    64     
-208   64     
64     80     
-64    96     
0      48     
16     144    
80     176    
-176   -48    
-64    -432   
208    -128   
96     64     
-96    224    
-176   64     
176    160    
96     192    
-160   -16    
64     144    
0      64     
128    64     
-112   80     
64     -16    
64     144    
-16    16     
-112   32     
-48    128    
112    16     
-96    -144   
96     192    
-48    256    
48     16     
-144   64     
224    -16    
80     96     
-48    96     
96     16     
-16    128    
-288   80     
272    -32    
-80    -32    
160    128    
-1200  -1600  
1296   2080   
-448   464    
496    -832   
-320   -384   
-208   -336   
448    480    
-688   -400   
720    -224   
-96    112    
144    288    
-416   -48    
96     320    
272    -128   
-48    192    
-352   -192   
-48    144    
-32    128    
-32    -64    
-144   -416   
-144   -48    
-64    160    
64     400    
-64    144    
208    -80    
-176   96     
160    32     
-272   -288   
208    -96    
16     272    
144    -128   
80     400    
112    160    
-64    336    
128    368    
-48    224    
32     128    
-48    -32    
64     -16    
192    80     
64     -32    
-32    80     
336    80     
-208   -144   
144    -144   
160    336    
-144   -144   
0      -96    
272    336    
80     176    
-208   176    
16     96     
176    -64    
-16    192    
-16    0      
160    128    
-112   -256   
-320   64     
-320   48     
-112   -512   
32     -48    
176    192    
16     -112   
-16    128    
192    224    
-96    16     
128    112    
16     96     
-16    -32    
-176   48     
-32    128    
144    240    
-32    -48    
128    144    
-16    -224   
160    224    
-192   -1312  
224    192    
-48    112    
-48    -384   
80     16     
192    32     
-16    -48    
-96    -32    
176    -80    
48     144    
160    384    
-16    96     
80     112    
-48    -304   
96     96     
80     16     
-16    160    
-144   -96    
0      -96    
96     -96    
272    208    
-96    192    
-128   -272   
-16    112    
272    192    
0      80     
-144   -352   
-32    48     
112    16     
-240   -128   
320    48     
-16    80     
16     -2448  
-16    112    
-32    -144   
64     -96    
128    96     
96     224    
0      128    
-64    -144   
160    320    
0      -96    
192    112    
-272   -16    
336    80     
-128   144    
48     96     
-48    -256   
208    16     
16     144    
80     96     
-80    80     
224    160    
-80    48     
144    320    
112    112    
16     16     
-64    0      
192    -64    
-96    144    
192    -624   
0      16     
-80    -560   
-16    80     
160    -128   
176    144    
-144   48     
192    144    
-64    0      
160    352    
48     16     
80     160    
32     128    
96     -352   
16     160    
160    -400   
-16    -32    
128    80     
64     80     
-16    -752   
96     256    
-128   80     
96     128    
-96    48     
240    0      
32     128    
-112   -80    
272    192    
-160   96     
32     32     
-32    -64    
112    80     
0      -144   
112    64     
144    32     
80     224    
-288   64     
64     -416   
256    -48    
96     -96    
32     -2832  
-16    -256   
112    304    
16     -240   
112    272    
-80    -128   
-16    160    
-16    -208   
-64    -48    
96     -48    
48     -112   
64     -16    
128    -432   
-16    160    
-1024  -32    
208    -624   
0      96     
0      80     
16     -48    
112    528    
752    -1376  
800    1248   
224    368    
-368   -128   
672    -848   
-352   -336   
448    -512   
-112   464    
464    -240   
-560   -208   
336    -64    
80     0      
144    -48    
-160   -176   
224    -176   
80     -96    
-128   48     
176    -96    
-80    48     
160    -96    
48     176    
112    -48    
-336   144    
272    -208   
-448   64     
176    -240   
-96    208    
240    -64    
-48    -80    
32     -336   
-64    96     
160    -448   
-96    -48    
64     -48    
-96    -16    
96     -16    
0      160    
-128   80     
128    -64    
-112   -144   
-16    -80    
-320   -48    
96     -16    
-48    64     
176    -112   
-128   32     
240    -160   
-32    -96    
16     -144   
-96    80     
240    16     
-48    64     
-16    64     
192    -64    
-64    80     
-48    -160   
-32    80     
16     32     
-528   -80    
32     -288   
32     -128   
112    -400   
80     304    
-96    -16    
144    96     
64     96     
32     -160   
-80    0      
80     48     
-64    -48    
144    80     
-240   -48    
96     -96    
-752   48     
64     -160   
-224   256    
-64    -288   
208    -144   
96     0      
-48    208    
-224   0      
96     -128   
-80    48     
256    112    
-208   -64    
48     -112   
-144   -80    
48     144    
-32    96     
-112   -96    
256    -48    
-112   -16    
32     48     
32     -304   
48     144    
-64    -160   
112    288    
64     96     
112    -176   
-320   -64    
208    -32    
-176   176    
16     -112   
48     144    
-32    -288   
48     64     
-16    -640   
-128   -144   
32     -480   
128    32     
-32    112    
112    -16    
-208   0      
64     -32    
-80    -48    
80     80     
-96    -16    
16     -432   
-192   48     
144    -320   
-400   -64    
-432   -416   
0      -16    
-608   -304   
-208   0      
96     96     
-144   160    
-272   0      
-208   80     
-16    144    
48     16     
0      144    
80     -144   
64     624    
-528   208    
96     304    
-752   -288   
208    64     
32     96     
-608   -80    
-32    -96    
-320   48     
-16    48     
-176   144    
0      16     
-1440  -32    
-112   0      
80     32     
-32    80     
96     -32    
-32    128    
80     112    
-176   32     
176    -48    
-240   0      
80     -160   
144    160    
-144   96     
96     -16    
-256   80     
-1040  -64    
-32    0      
-320   -48    
256    304    
-384   -256   
272    288    
-208   -256   
112    0      
-176   48     
48     -16    
32     96     
-32    96     
16     96     
-288   -128   
144    112    
0      0      
176    112    
-608   64     
128    112    
-176   -112   
80     48     
-16    48     
-224   -272   
208    0      
176    160    
16     80     
-384   64     
32     -32    
-16    -32    
-112   160    
-224   16     
16     352    
-416   -208   
-48    96     
176    -192   
1680   80     
-1152  -656   
432    496    
304    496    
368    -736   
-1040  -336   
448    128    
-240   464    
128    -336   
-176   384    
96     -128   
-176   112    
-432   224    
192    48     
-336   64     
96     -432   
48     368    
48     -32    
-48    608    
-160   -208   
-128   176    
-48    -16    
80     112    
-96    -48    
224    432    
-176   -48    
-192   -64    
-144   64     
272    320    
-96    -32    
-224   -80    
176    128    
-64    208    
48     -32    
-80    -288   
256    16     
16     304    
16     128    
-208   32     
-96    -288   
-32    32     
128    160    
-128   -320   
0      -32    
-896   32     
128    112    
-256   16     
48     -16    
-80    96     
160    80     
-112   32     
-48    0      
16     176    
48     48     
-64    -32    
64     48     
48     0      
-144   0      
-32    -16    
112    64     
64     128    
0      224    
-176   -96    
240    -32    
48     144    
48     -32    
-96    112    
-96    -336   
144    -64    
16     0      
-128   144    
80     112    
-16    224    
-80    112    
112    64     
64     64     
0      48     
64     64     
-32    96     
-16    16     
-16    48     
-32    -16    
32     -192   
-128   192    
-48    112    
112    304    
-48    256    
-32    -16    
112    32     
32     80     
32     32     
-32    -64    
16     0      
32     32     
112    304    
0      96     
32     144    
-48    32     
0      64     
80     208    
-240   -96    
0      -16    
16     -48    
80     192    
-32    -16    
-48    80     
96     368    
-16    112    
96     128    
0      32     
0      112    
-16    -144   
48     -16    
32     -176   
48     160    
-128   0      
160    -48    
32     32     
32     -224   
80     144    
16     32     
48     -80    
16     128    
96     192    
-160   -48    
256    -32    
-240   112    
64     96     
32     80     
64     32     
64     320    
128    160    
112    80     
-192   16     
-176   160    
416    64     
80     32     
-256   48     
160    288    
-80    112    
272    224    
-16    336    
-32    224    
16     80     
-48    160    
128    128    
-112   -832   
112    64     
-32    -864   
192    32     
-112   128    
80     144    
-208   -16    
320    128    
-64    112    
128    64     
-144   -64    
304    32     
96     176    
16     80     
-32    112    
64     96     
48     48     
16     -816   
32     96     
-64    256    
304    144    
-64    16     
160    160    
-144   -16    
32     256    
96     -336   
-96    64     
80     112    
0      96     
144    224    
-32    -32    
-48    0      
80     -688   
48     48     
112    -912   
-32    208    
-176   -32    
112    16     
-16    176    
16     -112   
-16    0      
176    80     
-96    32     
0      112    
160    240    
48     -224   
-48    256    
80     -64    
32     128    
16     -208   
800    288    
112    896    
1632   -32    
-704   112    
-432   -704   
496    400    
-304   -512   
560    848    
-496   -416   
240    128    
-352   -400   
480    656    
32     -272   
-304   256    
64     -576   
224    288    
-96    -1680  
352    496    
-272   -64    
176    -32    
-288   240    
256    144    
32     80     
-96    -336   
64     80     
64     -192   
32     224    
32     -416   
-64    32     
80     -688   
-80    208    
192    -80    
-144   96     
112    32     
-112   96     
48     -48    
32     64     
64     112    
176    -128   
-16    48     
-80    -32    
112    128    
112    -144   
-80    32     
48     -96    
48     144    
48     -1216  
128    240    
-16    32     
176    112    
-96    -128   
64     -64    
64     80     
48     48     
32     144    
0      -112   
-48    80     
112    -64    
-16    -112   
128    -80    
96     336    
-128   -320   
48     -368   
128    16     
32     -784   
-32    144    
-832   -64    
0      -272   
96     -80    
-64    -304   
96     -240   
16     80     
32     -96    
112    112    
-48    32     
96     272    
-176   -352   
224    -624   
176    304    
80     32     
16     -32    
-976   -176   
64     -16    
224    -48    
16     -192   
32     -32    
32     -96    
176    96     
48     240    
-80    -304   
128    -880   
160    288    
16     -128   
48     112    
96     -144   
144    144    
-144   96     
-96    -144   
-32    -48    
96     0      
64     32     
64     -80    
16     -128   
32     -2080  
64     112    
-128   -80    
128    192    
64     160    
16     -16    
-16    -80    
64     -240   
-48    -48    
112    -48    
-464   -32    
48     -96    
16     -112   
64     -816   
80     -16    
16     -784   
64     160    
112    32     
-112   16     
-144   -160   
176    240    
-160   -288   
240    -48    
-288   160    
256    0      
-1296  -160   
96     -32    
192    -64    
16     -64    
0      16     
-32    -32    
176    -64    
-256   256    
176    192    
-112   -80    
96     -48    
96     96     
-16    -16    
-16    64     
-16    -16    
-224   -176   
224    144    
-848   0      
16     -272   
96     -144   
384    -256   
-176   0      
-16    -1520  
288    64     
-80    208    
-80    32     
-64    -112   
0      -176   
80     -192   
32     224    
-432   -96    
-16    16     
-48    -64    
336    -80    
-1648  48     
-176   -544   
288    288    
-192   -272   
80     -96    
-80    272    
192    -128   
-224   -16    
112    32     
-240   0      
160    16     
-400   16     
240    0      
-304   160    
16     -176   
-288   -32    
336    -128   
-96    80     
32     -176   
16     96     
256    256    
-400   -144   
-64    -240   
336    208    
112    64     
-224   0      
-80    48     
-32    48     
-32    -192   
112    -288   
-144   208    
-64    -48    
-144   160    
-304   -1232  
992    2800   
-640   176    
-224   -736   
224    -160   
576    368    
-592   288    
48     -368   
208    416    
464    -32    
-288   384    
-176   -208   
-32    -80    
-368   -240   
256    240    
-1008  -272   
-800   -768   
144    208    
96     128    
-16    -32    
-576   224    
-144   112    
208    240    
-144   304    
144    128    
-96    -64    
-384   80     
112    64     
-272   -112   
32     176    
32     16     
-112   64     
-32    64     
-400   -48    
48     -32    
-368   -160   
96     96     
-1248  -16    
-16    80     
64     96     
-256   -144   
16     -160   
48     128    
176    32     
-160   96     
16     -48    
-128   80     
144    32     
-384   144    
0      -192   
-128   32     
-80    80     
16     64     
-48    128    
-1584  -176   
-64    -32    
16     -128   
80     144    
-64    -16    
-48    -32    
-16    160    
-16    144    
-112   64     
64     144    
32     16     
-48    64     
-64    16     
-176   0      
64     96     
-752   -32    
112    -32    
64     64     
-80    176    
-80    -176   
-144   32     
112    368    
-192   -48    
208    -80    
80     32     
-48    32     
-48    112    
16     112    
-64    48     
64     -128   
-192   224    
-256   80     
32     -112   
-16    -32    
32     48     
-32    16     
0      144    
32     80     
160    192    
-224   16     
-48    48     
-240   -176   
160    96     
-128   32     
48     112    
-272   32     
16     64     
-1728  -64    
48     32     
16     16     
-16    -16    
16     -64    
48     96     
160    272    
-64    112    
-48    0      
-128   80     
128    64     
96     -144   
-208   16     
-128   -176   
-16    128    
-496   -144   
192    16     
32     256    
-80    128    
144    96     
-272   64     
64     0      
112    288    
-160   48     
176    48     
-176   -128   
-48    -112   
-192   0      
64     -48    
160    -48    
-592   80     
288    -32    
96     48     
-320   64     
160    -144   
-144   -16    
-64    160    
64     32     
128    64     
-128   48     
64     176    
-288   32     
208    160    
-160   240    
96     192    
128    160    
-112   96     
144    176    
16     128    
-16    160    
48     80     
-16    112    
-96    -32    
-80    144    
-144   -288   
96     176    
96     96     
64     64     
-96    48     
80     -16    
16     32     
128    112    
32     160    
0      -288   
-96    0      
96     -96    
240    224    
80     288    
32     0      
-48    208    
16     -256   
-16    96     
128    192    
-224   0      
-32    -80    
-64    112    
-48    96     
-16    96     
-48    96     
0      -96    
-64    -80    
160    176    
-64    112    
-32    176    
-160   80     
-32    0      
-80    -16    
64     16     
-128   -48    
128    -32    
144    112    
-80    272    
-112   16     
-96    0      
128    112    
688    -1872  
960    0      
-48    736    
-48    -432   
192    64     
-64    528    
576    -144   
32     704    
-16    160    
-80    -48    
0      -144   
192    -64    
48     176    
-160   -48    
64     208    
96     48     
32     256    
-16    112    
48     96     
-112   -80    
16     112    
-128   -80    
48     128    
0      128    
64     -192   
16     128    
-176   112    
144    80     
32     64     
64     128    
-16    112    
160    320    
-240   96     
48     112    
-224   -80    
160    80     
-48    80     
16     -336   
80     96     
48     -1872  
16     176    
48     80     
64     64     
-64    16     
48     96     
64     160    
0      176    
144    320    
-144   32     
80     0      
0      128    
80     48     
16     -16    
96     64     
-32    -64    
80     208    
-16    144    
48     48     
128    464    
-160   0      
-32    -32    
64     -16    
-80    -16    
112    144    
0      0      
64     32     
48     144    
80     -16    
32     80     
16     -128   
32     80     
80     -544   
96     160    
-16    -32    
0      32     
272    224    
-112   464    
-144   -240   
208    160    
-192   0      
0      32     
144    240    
64     144    
-16    144    
16     -688   
-32    -64    
80     -320   
96     64     
112    -256   
-80    -16    
64     -16    
144    160    
-80    32     
0      112    
-32    48     
224    192    
-16    64     
32     -96    
64     80     
80     -16    
64     176    
-16    -480   
-16    64     
96     -608   
16     -112   
48     -272   
32     336    
32     -80    
80     128    
0      48     
48     -112   
-32    32     
112    -96    
16     96     
-16    -240   
176    144    
0      -128   
144    64     
-192   -944   
112    112    
96     -32    
64     32     
64     64     
-80    224    
80     304    
16     -592   
176    160    
32     -32    
176    -16    
-112   96     
48     64     
112    -256   
-64    144    
144    -128   
-80    0      
384    -176   
-16    352    
0      -48    
32     -176   
64     176    
48     -128   
32     112    
-32    0      
240    176    
-96    -160   
160    192    
48     -176   
16     144    
-16    -112   
96     208    
80     176    
16     -672   
-128   -176   
304    0      
-240   -800   
240    16     
-208   -160   
-32    -304   
-80    -672   
224    -80    
192    96     
-192   16     
80     160    
368    -320   
-80    128    
-176   -64    
0      -912   
32     48     
16     -16    
-48    96     
224    272    
-352   -336   
256    -256   
144    -384   
32     -64    
-192   112    
240    -144   
368    -416   
208    -144   
16     -224   
0      80     
352    192    
-240   -208   
-80    -80    
-16    -32    
-32    -144   
0      -352   
16     -16    
-48    -80    
48     0      
16     -864   
176    -64    
16     144    
-32    80     
-32    48     
1696   -704   
80     416    
480    96     
-768   -256   
464    -304   
-1216  -720   
-48    240    
16     352    
192    96     
-96    -64    
-32    -480   
-336   -48    
0      -704   
16     224    
48     -48    
-48    48     
48     64     
96     144    
-48    48     
-32    0      
-16    128    
48     144    
-144   -64    
80     80     
-80    -144   
80     -112   
-32    160    
144    -96    
64     32     
-48    -304   
192    64     
-16    0      
80     112    
16     48     
16     -80    
-224   112    
208    -240   
-336   96     
64     -112   
-96    96     
-32    -16    
16     80     
144    -1296  
-112   112    
96     -80    
16     -112   
16     48     
32     16     
160    -64    
-112   16     
-96    -32    
16     -96    
-432   64     
64     0      
-192   416    
-176   -384   
128    176    
32     -352   
96     -128   
64     208    
0      112    
16     -64    
128    176    
-304   -96    
224    -64    
-192   0      
0      96     
-96    -16    
112    32     
-272   -64    
112    -160   
-144   176    
160    -144   
32     96     
-96    -96    
112    48     
-368   -16    
304    96     
-112   0      
144    112    
16     -144   
80     -176   
-112   -48    
-48    -176   
-128   64     
64     -208   
160    -48    
192    80     
-80    176    
-16    -64    
-144   -48    
-64    80     
0      -176   
-64    -80    
96     0      
128    144    
-160   -128   
16     16     
-144   -224   
192    208    
-640   -32    
112    48     
-304   -272   
112    -112   
-96    16     
144    -48    
-16    272    
64     64     
-64    32     
-624   -16    
-32    80     
160    -16    
-160   -48    
-32    48     
32     64     
-64    -48    
-48    160    
-192   -64    
80     -16    
-48    16     
-176   0      
112    64     
-144   -144   
112    144    
-1376  32     
480    576    
-144   272    
240    64     
-224   -96    
-16    64     
-48    -96    
96     208    
-176   112    
128    112    
-64    96     
-96    112    
192    0      
-160   160    
0      144    
-368   64     
32     80     
-816   272    
-144   32     
-48    -256   
-64    32     
-208   -480   
192    224    
32     160    
16     96     
-80    16     
-32    16     
-80    16     
-32    144    
-112   48     
160    80     
-64    144    
-176   80     
0      80     
-32    -16    
64     0      
-80    16     
-32    144    
80     240    
-224   -64    
160    176    
80     432    
-16    -240   
-128   -80    
0      -32    
-64    48     
-80    208    
-448   -32    
-64    80     
-320   -384   
96     112    
288    288    
-64    0      
-144   144    
-80    -48    
-32    -16    
64     80     
-80    96     
-64    64     
32     -16    
-224   -256   
64     208    
-96    96     
32     -16    
-544   -48    
96     96     
-64    208    
-48    -48    
-16    -64    
0      160    
32     192    
-112   560    
304    -864   
1104   752    
-768   352    
-288   -1072  
464    -32    
432    128    
-240   -656   
-176   32     
304    -320   
-48    -48    
0      32     
-16    96     
16     -112   
64     192    
-64    48     
-32    -128   
48     464    
320    496    
-80    32     
160    64     
-144   -80    
48     160    
-96    0      
48     -48    
80     -16    
32     80     
-208   112    
64     -80    
-176   -64    
80     -48    
-64    32     
16     32     
-128   48     
32     64     
-48    96     
-192   -144   
-144   -96    
0      64     
160    32     
0      64     
-64    80     
0      64     
80     208    
32     32     
-96    112    
-32    32     
32     96     
0      16     
16     176    
0      208    
16     96     
48     112    
-48    32     
96     48     
32     96     
-32    -96    
-112   -64    
64     80     
64     224    
16     32     
0      144    
-32    48     
144    400    
-208   160    
96     -48    
-64    -32    
0      32     
0      64     
-96    80     
16     80     
64     32     
-16    48     
64     80     
-32    160    
-128   96     
272    544    
-256   384    
-160   80     
-32    -304   
80     -80    
-16    64     
48     32     
16     176    
64     64     
-16    -80    
256    -16    
80     256    
-16    32     
48     96     
-16    128    
112    64     
-32    64     
32     112    
-32    -16    
80     144    
-32    64     
-32    -80    
32     32     
128    48     
128    144    
-112   64     
32     144    
48     48     
96     160    
-64    80     
208    400    
-176   -96    
160    224    
-224   -288   
160    128    
-32    48     
128    -480   
0      48     
0      96     
96     96     
-80    32     
80     32     
0      192    
128    160    
-16    -96    
-96    -64    
64     64     
96     96     
32     -16    
0      -256   
192    560    
16     -1840  
-64    96     
0      176    
112    64     
32     288    
-16    64     
128    32     
-32    112    
48     112    
304    -176   
0      48     
128    128    
48     192    
-64    16     
32     48     
128    -256   
16     112    
0      -800   
144    208    
-240   -96    
208    128    
-112   208    
64     -32    
16     -304   
16     112    
48     -224   
288    -192   
-256   -32    
96     -128   
-208   -96    
-48    -352   
192    192    
160    -384   
-16    -16    
112    64     
32     128    
96     32     
-64    -48    
96     304    
16     -144   
48     0      
128    192    
48     64     
-48    -224   
96     -32    
32     32     
96     96     
16     -432   
128    160    
192    -416   
112    64     
64     112    
192    368    
-224   -112   
48     192    
-48    112    
96     176    
-48    0      
160    128    
0      64     
-64    -224   
48     96     
64     -480   
-16    16     
0      -32    
144    -16    
96     -592   
96     112    
48     208    
800    2480   
-1824  -432   
1104   608    
48     720    
-32    16     
256    -32    
-624   -1088  
720    496    
-496   -320   
240    160    
-48    -80    
48     64     
-144   224    
224    32     
-192   16     
128    80     
0      96     
16     -160   
80     80     
80     -224   
-16    112    
160    16     
48     96     
0      -64    
-16    16     
-16    -1456  
160    144    
48     176    
48     0      
-16    -16    
128    224    
96     176    
48     16     
32     176    
112    -112   
112    320    
-256   -336   
128    160    
32     -16    
208    64     
-144   -64    
32     -16    
96     128    
16     -320   
-16    160    
-576   -224   
128    -528   
64     16     
-176   -256   
128    -96    
-16    -528   
192    -160   
-16    240    
-32    -160   
0      -80    
144    64     
-32    -128   
64     64     
48     -272   
0      16     
-288   32     
48     16     
-176   48     
144    -48    
112    -80    
64     96     
-16    -128   
112    -592   
304    176    
-192   192    
32     -144   
128    -400   
48     48     
80     -256   
-64    -304   
128    32     
16     32     
-352   -96    
32     0      
80     48     
-96    -464   
144    -128   
160    -304   
-176   64     
160    32     
160    432    
-240   -80    
352    208    
-240   16     
224    -32    
-144   -64    
16     -368   
-928   -144   
64     -384   
16     128    
80     -48    
-48    0      
96     -448   
32     0      
-64    -1248  
80     176    
-16    -80    
192    192    
-96    -16    
160    64     
-144   0      
288    0      
-208   96     
144    96     
-736   32     
-160   16     
64     -96    
160    48     
176    48     
-48    -496   
-64    192    
-96    48     
416    112    
32     64     
-176   0      
176    96     
32     80     
-48    -96    
48     -112   
-144   112    
80     -144   
-432   -64    
16     -144   
-80    32     
160    -336   
176    48     
-96    -288   
192    -80    
-96    -112   
224    -32    
-208   64     
192    32     
-256   64     
64     -32    
-528   -112   
80     -96    
-112   0      
128    16     
0      128    
-16    -128   
176    112    
-32    -1632  
80     -48    
-80    64     
112    -80    
0      -16    
80     144    
-272   -16    
96     -80    
-48    336    
16     -16    
-96    -352   
144    192    
64     64     
0      -128   
-80    48     
-48    48     
32     32     
80     112    
256    272    
-112   -96    
64     208    
-128   -112   
48     -48    
144    -160   
144    48     
32     256    
-240   -176   
-224   64     
-416   -80    
-96    -144   
64     48     
-1296  -16    
-80    -48    
-640   -16    
-112   -96    
64     32     
-16    112    
48     176    
-240   -64    
0      -432   
-96    64     
-288   -112   
-16    96     
-112   -144   
-48    0      
176    -64    
-160   32     
-80    -80    
-704   0      
16     384    
-1024  -2240  
544    400    
-272   640    
-112   528    
-832   -304   
320    0      
-240   576    
-64    -288   
64     -16    
-160   -32    
32     96     
-80    -128   
112    16     
-176   -272   
80     224    
-688   -160   
-48    -464   
-112   -304   
208    336    
16     64     
-16    80     
-16    96     
48     32     
-112   80     
-128   -160   
48     -16    
-192   64     
-16    128    
-32    -176   
-80    0      
-160   -32    
0      -48    
-272   144    
144    304    
-304   -368   
176    -144   
-208   -560   
336    64     
-80    320    
-64    112    
0      48     
128    80     
-96    16     
-32    112    
-80    64     
48     160    
-144   112    
-32    -32    
-176   -32    
-160   -144   
-112   64     
48     -208   
144    144    
-64    64     
32     336    
-112   432    
16     272    
-336   -384   
192    64     
-96    128    
80     -112   
-48    176    
-32    -112   
16     224    
-384   -192   
224    96     
80     -32    
0      64     
-16    64     
0      32     
0      16     
-64    48     
0      48     
80     144    
0      112    
-608   -672   
-16    -384   
-304   -320   
112    304    
-16    -16    
-64    480    
96     16     
-128   80     
-16    -32    
96     80     
-96    160    
-112   -32    
80     192    
-16    32     
16     -96    
0      -96    
112    144    
32     80     
48     288    
-304   -48    
208    336    
96     320    
-144   -16    
0      -64    
0      112    
128    64     
-80    -32    
32     96     
-80    -16    
112    352    
-336   -96    
272    208    
-288   128    
160    -16    
-336   -48    
16     0      
80     80     
-48    96     
-48    64     
32     -176   
48     -128   
-96    -224   
-32    80     
-96    -112   
48     -80    
224    176    
80     64     
-288   -80    
176    400    
-304   -288   
240    -272   
-272   -224   
448    256    
0      336    
-80    320    
-96    128    
96     48     
-48    -32    
208    -144   
-80    -64    
160    304    
-16    272    
-144   -64    
48     128    
-16    -64    
96     0      
80     368    
-128   144    
16     -80    
-16    -16    
176    208    
-224   -32    
112    128    
-16    32     
80     -48    
-48    128    
-16    144    
64     -160   
64     16     
16     320    
-112   -192   
-32    128    
112    16     
64     48     
-176   80     
144    192    
-96    -48    
80     48     
336    64     
-400   -528   
96     304    
-96    192    
32     208    
-32    16     
112    176    
-112   192    
-144   -16    
64     160    
0      -32    
112    160    
-32    48     
32     128    
-64    0      
-32    48     
16     48     
-16    32     
144    112    
64     -112   
-32    -912   
16     0      
-96    224    
-48    144    
32     48     
96     112    
-80    -48    
96     0      
-96    -16    
208    144    
80     80     
32     160    
-384   -176   
672    -496   
208    368    
-288   -976   
-96    384    
64     144    
496    32     
16     400    
96     0      
-208   0      
256    -48    
-48    288    
-16    64     
64     112    
16     64     
32     0      
-128   -48    
176    160    
48     -384   
32     64     
48     96     
-48    80     
128    112    
-64    -16    
176    80     
-16    80     
48     352    
192    144    
-256   -96    
176    128    
0      48     
80     -48    
-160   144    
208    -160   
-64    -32    
160    -1232  
-160   176    
256    256    
96     64     
-48    32     
-48    176    
48     -112   
96     208    
-256   -64    
224    -32    
-80    128    
32     -16    
336    368    
-352   -400   
240    96     
-96    -352   
160    96     
-64    16     
144    96     
16     -240   
-128   -192   
160    48     
-160   256    
144    -240   
128    144    
-32    176    
32     -224   
80     -128   
192    -160   
-128   208    
48     -464   
144    80     
0      -2304  
-32    144    
-32    -208   
96     64     
160    32     
32     96     
48     160    
-32    -16    
176    160    
-144   32     
144    48     
112    16     
-16    128    
0      -1200  
112    368    
-112   -832   
336    224    
-32    -560   
16     -80    
224    128    
-80    256    
128    -112   
48     -304   
32     128    
16     -144   
64     208    
-80    -320   
80     96     
80     -528   
48     80     
0      -64    
96     144    
80     -32    
112    128    
-144   -48    
240    192    
-32    48     
16     -192   
-32    128    
0      -192   
0      -32    
128    -80    
32     -16    
48     -32    
144    192    
48     -80    
64     -16    
-16    -416   
128    -96    
16     176    
16     64     
48     -912   
80     -64    
-112   -576   
160    -128   
96     64     
32     -160   
32     0      
-32    16     
208    160    
-80    -240   
160    256    
-128   16     
160    -720   
-320   16     
160    112    
64     -544   
224    -64    
-48    192    
-48    -288   
80     -1248  
32     -240   
48     -384   
-16    -144   
112    112    
-144   -320   
64     -656   
-16    -128   
96     208    
96     448    
-544   -272   
128    -192   
-864   -112   
16     48     
144    -48    
32     -128   
192    560    
-96    -896   
0      112    
-96    -288   
16     -160   
128    -96    
80     256    
-64    -208   
0      96     
-80    -16    
64     -144   
-304   176    
-96    -240   
-16    0      
176    -64    
-16    -32    
-32    -64    
32     0      
208    -176   
48     64     
-16    128    
-128   32     
64     -48    
96     -80    
-144   16     
-48    -32    
-208   0      
32     -160   
-128   -144   
-96    -256   
96     -96    
176    -304   
128    32     
-112   -192   
-128   48     
176    -48    
-16    144    
-64    0      
-80    80     
112    -80    
64     32     
-432   96     
-224   368    
-2496  -2112  
464    -512   
-272   768    
336    112    
0      -96    
-80    -1008  
528    272    
-384   -512   
880    -48    
-192   640    
416    -48    
-208   48     
-48    -64    
96     96     
16     -256   
-352   144    
-48    -80    
-272   -208   
-80    -384   
192    -112   
-128   16     
32     320    
-80    -528   
224    -128   
-256   -32    
144    -176   
-160   -48    
112    -416   
48     16     
-128   -256   
-80    144    
0      -160   
-368   -192   
-16    -576   
32     -160   
320    32     
-240   -208   
32     -256   
-48    -256   
-112   16     
64     64     
-32    0      
96     0      
-192   -144   
96     80     
-208   -64    
192    480    
-464   -352   
240    -48    
64     208    
-96    -144   
16     -32    
112    -208   
32     -96    
-80    96     
0      96     
96     0      
240    176    
-320   128    
80     96     
-160   -96    
32     -48    
128    272    
-32    -224   
-144   112    
-48    -240   
144    64     
-64    -80    
-544   32     
0      32     
-560   48     
-128   -128   
-80    80     
-48    -128   
96     96     
-256   -608   
384    -96    
160    336    
-272   -64    
-272   64     
112    -64    
64     96     
32     272    
-256   128    
-48    -400   
48     432    
64     464    
-736   -240   
48     -80    
128    160    
0      48     
-448   -224   
128    96     
-176   112    
32     352    
-96    -144   
64     -16    
288    432    
-176   240    
-112   96     
-288   -112   
128    0      
-144   16     
64     128    
-224   240    
-128   96     
-16    -144   
64     128    
16     -96    
64     96     
48     80     
-64    32     
-80    48     
-192   -48    
-32    -16    
48     96     
-64    80     
-192   -256   
-128   -80    
-160   32     
-64    -208   
-32    48     
64     160    
192    48     
-160   256    
80     -96    
-16    112    
-128   0      
80     160    
-80    128    
208    384    
-160   64     
176    272    
-544   112    
0      -304   
224    368    
-512   352    
176    224    
-96    -16    
32     -224   
-80    16     
-16    80     
32     112    
-208   -304   
208    -96    
-16    80     
16     160    
-160   64     
80     160    
-64    160    
80     240    
-784   -32    
96     112    
-48    -176   
32     48     
-32    -176   
160    -128   
0      160    
-16    -64    
-48    208    
-32    32     
128    400    
-400   -128   
320    112    
-224   -192   
384    240    
-800   -64    
112    112    
-48    32     
96     240    
0      272    
-192   16     
-32    336    
-64    -288   
176    256    
-144   -160   
144    176    
-16    16     
16     64     
-144   0      
96     224    
-208   -272   
176    144    
64     240    
0      16     
-128   144    
96     32     
-80    64     
48     48     
128    -96    
16     80     
-96    208    
48     80     
-16    64     
-96    -16    
208    -1408  
208    -368   
464    224    
0      -32    
-304   -80    
240    -160   
-64    576    
960    16     
-352   208    
48     -48    
-192   464    
0      -336   
-80    368    
80     32     
-96    128    
-112   -32    
-80    -208   
-16    80     
48     80     
-176   96     
160    -64    
32     160    
80     16     
-32    144    
-48    -96    
32     224    
128    32     
-128   144    
64     -16    
-48    80     
48     80     
112    176    
-32    -16    
-96    160    
160    48     
-128   112    
208    16     
-224   176    
160    -80    
32     128    
-48    80     
80     144    
-48    128    
0      -32    
-128   -16    
48     64     
80     112    
96     -80    
96     192    
-128   32     
176    64     
-80    32     
0      80     
96     48     
-32    192    
-32    -160   
48     176    
-144   -32    
176    80     
-144   -16    
80     64     
96     96     
0      80     
64     112    
48     80     
48     48     
192    304    
-176   32     
208    192    
-96    64     
32     48     
-32    80     
16     -48    
80     112    
-48    32     
128    -448   
-64    -144   
112    48     
-96    0      
-48    0      
80     144    
96     432    
-96    176    
96     0      
272    80     
-112   -272   
304    208    
-144   -64    
64     112    
-16    48     
32     -512   
16     80     
32     80     
64     336    
160    144    
96     128    
-144   -64    
80     112    
-64    -112   
96     160    
-32    -128   
224    256    
-112   -160   
-80    -64    
48     64     
64     -64    
112    96     
-32    -2144  
144    176    
-128   -160   
112    64     
32     48     
32     16     
-16    -64    
16     80     
80     112    
80     112    
-160   128    
112    -176   
16     96     
128    32     
96     144    
0      -848   
16     112    
96     224    
-80    144    
416    688    
-464   -144   
224    -64    
-32    128    
144    32     
-16    128    
-64    -80    
32     -80    
80     -16    
-32    -176   
112    48     
48     96     
48     128    
-112   -2208  
224    448    
-320   64     
304    112    
-240   -240   
240    0      
-64    64     
144    224    
48     96     
64     -96    
-48    160    
80     -240   
0      112    
64     -128   
320    96     
-112   -256   
-80    -240   
112    -64    
256    96     
208    64     
-176   176    
96     32     
80     144    
112    16     
0      64     
-64    -96    
240    -416   
-64    384    
-176   -224   
64     112    
176    -80    
-144   -160   
80     -448   
-64    176    
144    -48    
-128   192    
208    16     
-32    32     
-48    160    
80     -848   
32     96     
128    48     
32     -16    
112    -96    
144    16     
0      -400   
0      160    
0      -32    
48     16     
64     112    
176    64     
-112   -208   
-144   -176   
160    32     
32     -64    
128    96     
-240   160    
-1776  -2224  
864    -784   
-368   1072   
880    -240   
-96    544    
-112   -304   
592    368    
-64    -464   
544    -160   
-160   -2144  
256    304    
64     -1216  
112    240    
-96    64     
176    -32    
-128   -32    
-160   -400   
-112   -368   
288    48     
144    16     
-160   -128   
-64    320    
-176   -16    
384    -272   
-96    -304   
320    48     
64     -464   
64     32     
80     -1088  
208    -160   
-80    -464   
0      -16    
64     256    
-16    -80    
128    -608   
-48    16     
16     -160   
0      -144   
160    160    
16     -80    
-464   -160   
112    -96    
128    128    
32     -208   
-32    0      
80     -48    
-192   -640   
192    -560   
32     -240   
32     16     
48     208    
96     -144   
64     224    
-48    80     
0      -48    
64     256    
-48    16     
80     -48    
272    528    
-128   -16    
112    -144   
-16    80     
96     -400   
48     16     
-80    -160   
-64    128    
144    48     
-144   -304   
-144   -176   
128    -80    
-80    208    
-64    -128   
-400   -80    
48     -224   
-64    -160   
176    -192   
-256   224    
32     -704   
48     64     
48     -16    
-48    -64    
112    144    
-96    -16    
-96    -160   
-192   -208   
128    -240   
64     16     
-240   -144   
-96    -80    
48     -176   
96     208    
128    96     
-32    64     
208    384    
-208   96     
160    48     
-16    96     
48     64     
144    64     
0      80     
48     -48    
16     -32    
-352   -192   
0      -336   
16     304    
-48    -16    
-512   -128   
16     -416   
-112   0      
160    -976   
64     128    
-64    -96    
64     16     
-176   16     
0      -32    
-160   -112   
-80    -96    
-224   -48    
304    112    
-352   48     
-96    -352   
64     -32    
304    -416   
-16    128    
-112   -528   
208    16     
-80    32     
64     -16    
-80    -16    
112    -176   
-304   -176   
160    16     
32     192    
144    -64    
-304   -80    
-112   -288   
192    144    
48     -80    
16     96     
96     -80    
32     16     
-112   48     
128    48     
-96    16     
176    112    
-32    32     
128    0      
-32    48     
16     -80    
16     128    
96     -80    
-112   96     
48     -48    
-64    16     
-80    96     
-928   240    
-320   -48    
-944   64     
-160   16     
368    0      
-112   64     
0      -176   
112    80     
-64    -32    
128    96     
-128   -96    
0      -80    
-192   -128   
32     48     
-80    112    
-128   32     
-96    224    
-16    -112   
-64    16     
-192   128    
-208   -176   
-16    80     
96     64     
32     144    
-48    -48    
-32    80     
0      96     
-352   -272   
32     -16    
112    16     
96     -48    
-128   128    
16     -32    
-16    144    
-320   64     
64     -176   
-656   208    
48     16     
-32    -32    
-32    80     
432    -464   
416    608    
1680   -496   
-416   -320   
-368   -880   
224    112    
544    320    
-304   -128   
-144   -112   
-288   16     
384    -112   
-128   352    
-144   -256   
-352   192    
208    -128   
16     256    
112    -160   
-128   160    
112    -80    
128    128    
-256   -16    
48     128    
-80    48     
240    128    
-160   -32    
64     64     
-448   -112   
128    -32    
-432   112    
272    112    
-48    32     
-16    16     
-64    176    
128    48     
-16    112    
128    176    
-32    160    
-112   -80    
-32    160    
0      -80    
-48    48     
-80    -32    
-32    160    
-112   -80    
128    144    
-48    48     
144    -16    
-240   0      
48     48     
32     80     
-32    -32    
0      48     
-16    -16    
0      128    
-48    -48    
-64    352    
-320   -160   
240    160    
-304   -96    
64     48     
-1328  -224   
-16    32     
16     96     
112    144    
-96    16     
-16    32     
-64    48     
-16    32     
128    112    
16     112    
0      160    
-64    32     
128    240    
-256   -32    
112    336    
-144   80     
176    -32    
160    48     
-128   16     
272    592    
-336   272    
-32    160    
32     -112   
80     -176   
-96    -96    
16     64     
-160   32     
-80    -16    
-160   -128   
-16    80     
160    80     
64     32     
0      -80    
64     96     
160    576    
96     272    
-96    -144   
-16    -128   
96     64     
0      -32    
48     240    
-80    -96    
-64    48     
-80    -32    
128    128    
144    224    
-48    192    
208    480    
16     224    
-96    -16    
-64    0      
208    96     
80     32     
-32    48     
-16    48     
96     64     
-112   -64    
16     48     
192    176    
-96    -48    
32     64     
-48    128    
96     96     
-112   112    
208    208    
160    48     
-96    -96    
-80    64     
176    144    
32     -16    
16     -32    
0      224    
-16    64     
16     48     
-32    -16    
48     32     
16     -80    
160    96     
80     128    
-48    96     
-256   -80    
224    192    
-144   -16    
176    144    
-224   -16    
96     48     
-64    -16    
48     -2960  
112    80     
0      64     
64     112    
32     160    
144    96     
-160   -16    
112    112    
-96    144    
160    -80    
112    160    
208    160    
-112   -48    
-16    160    
80     128    
32     -320   
224    -80    
48     304    
-176   -48    
-64    -160   
240    224    
-128   112    
0      16     
-112   144    
176    176    
-32    -16    
32     112    
-64    -32    
192    96     
-176   144    
144    -336   
-16    128    
16     32     
16     0      
96     80     
16     96     
48     -128   
32     144    
32     32     
112    16     
-208   -144   
48     16     
192    208    
16     208    
-96    240    
-144   -224   
112    144    
144    144    
-288   -1984  
864    3248   
-256   1600   
-352   -576   
448    -192   
-128   -192   
368    240    
-896   608    
336    -592   
272    16     
-160   80     
160    16     
-176   192    
128    -800   
224    144    
96     -112   
16     512    
224    272    
-96    544    
-96    224    
-192   -176   
32     -272   
208    240    
0      80     
-144   -128   
-16    -224   
-96    192    
192    -176   
-240   80     
368    176    
-144   -176   
0      -80    
-128   -32    
112    -144   
16     80     
112    -96    
16     -32    
-96    48     
160    160    
112    80     
-48    -176   
-48    160    
144    -64    
-80    -64    
-16    -384   
96     -80    
192    -752   
-80    0      
224    -928   
-112   112    
48     160    
32     48     
16     -96    
144    128    
-96    96     
112    -48    
-16    80     
48     -144   
64     48     
128    96     
-128   96     
144    -208   
128    96     
-32    -160   
80     32     
-16    -32    
96     96     
80     160    
0      -272   
32     64     
96     -192   
48     112    
64     -288   
16     0      
80     -80    
64     224    
144    224    
112    208    
80     -512   
64     112    
112    -240   
224    48     
32     416    
-80    -32    
208    160    
32     -144   
80     96     
48     -80    
0      16     
64     -16    
-48    0      
80     -112   
64     144    
16     -144   
-32    -48    
80     48     
160    -1072  
-16    0      
64     -160   
64     -96    
0      64     
64     -1280  
96     80     
-112   -304   
208    0      
-96    160    
336    160    
-176   160    
64     128    
0      -224   
64     16     
32     -496   
112    -736   
-192   -304   
160    -48    
-272   -176   
368    -544   
-48    -144   
32     -2112  
-16    -128   
64     80     
272    144    
0      -416   
-160   0      
96     -560   
-144   32     
-64    80     
80     -48    
-320   48     
64     128    
256    -176   
-32    176    
192    -304   
32     -224   
-112   112    
240    176    
48     -96    
-96    -240   
-160   128    
192    -240   
48     80     
-112   48     
144    64     
-256   32     
96     -112   
-240   -128   
288    80     
-160   144    
208    80     
-80    48     
112    -1024  
-464   -80    
112    -64    
32     96     
128    0      
176    240    
-384   -160   
256    -64    
-304   -64    
160    -128   
-400   -112   
-16    16     
48     -48    
80     -208   
-64    -96    
240    -304   
80     144    
224    -208   
112    144    
96     64     
32     112    
-288   -80    
-112   -208   
96     144    
80     -48    
-48    16     
112    -112   
-832   128    
160    -32    
0      0      
64     -304   
32     96     
352    -64    
-32    -96    
-128   -32    
96     -144   
-80    -64    
48     0      
32     144    
32     -32    
-128   80     
96     -176   
-176   224    
80     -64    
-304   96     
48     -208   
-944   1088   
320    -288   
896    112    
-528   -224   
-272   -1488  
96     -448   
896    432    
-576   -272   
304    192    
-752   -368   
624    48     
-400   -256   
48     176    
-192   320    
288    -496   
-64    160    
-32    -1056  
112    96     
-208   -224   
96     -64    
0      128    
96     80     
-400   -128   
144    -64    
-32    -96    
-16    32     
-64    112    
176    -32    
-16    48     
64     -272   
96     96     
48     -32    
-336   96     
16     80     
-176   -80    
-144   -96    
64     0      
32     64     
48     48     
16     16     
16     32     
-48    64     
-256   -144   
96     32     
-176   -64    
48     80     
-16    16     
-80    80     
-80    16     
-944   -112   
-48    -80    
-1136  -32    
-16    112    
128    64     
-112   -192   
-16    48     
-192   64     
-448   -112   
176    80     
-96    -64    
0      112    
0      96     
-80    -80    
16     -48    
-368   -32    
-32    48     
-64    112    
-176   -256   
-928   -32    
-96    80     
48     -64    
0      144    
0      32     
-64    160    
-144   -112   
-96    176    
16     80     
-32    48     
-48    -112   
-144   80     
-16    -16    
-32    -352   
96     176    
-848   -16    
-80    -32    
-96    -208   
176    144    
144    112    
-32    160    
-32    -64    
-144   -16    
-128   -48    
112    -48    
0      32     
-32    -208   
-304   -208   
-112   -176   
176    176    
-304   192    
-160   16     
-1152  -80    
176    96     
-48    -144   
32     96     
-48    80     
16     32     
0      64     
16     32     
-64    32     
-80    -32    
-48    32     
0      32     
96     48     
-80    96     
-112   -48    
-144   32     
-48    64     
48     -48    
-96    -32    
192    112    
0      96     
0      80     
-224   0      
144    128    
-16    176    
-144   -48    
0      -192   
144    176    
-128   -112   
-64    -128   
-464   16     
192    128    
64     -16    
-128   0      
192    240    
-336   -112   
144    64     
-208   160    
96     -128   
-64    48     
80     80     
-32    -112   
-96    16     
-64    128    
96     320    
-288   -96    
224    176    
-400   -64    
0      0      
-160   32     
96     112    
48     288    
-144   -112   
128    64     
-16    240    
-16    192    
-192   -160   
160    160    
-32    -224   
16     128    
48     64     
-80    192    
80     32     
48     128    
16     32     
32     48     
32     32     
48     208    
96     -64    
-112   16     
128    96     
-96    32     
16     176    
-144   0      
192    -32    
-96    -32    
64     240    
-32    16     
-96    64     
128    128    
0      32     
80     48     
-192   48     
80     48     
-96    64     
112    48     
-64    48     
0      0      
-272   -144   
224    224    
-176   128    
160    80     
-128   208    
112    64     
-48    32     
-1168  816    
48     -912   
-288   -448   
1088   48     
-256   288    
-336   -608   
272    400    
32     -192   
336    656    
-144   48     
-304   -112   
-112   -112   
304    272    
64     80     
-272   80     
48     -112   
-128   176    
112    -192   
-32    144    
96     192    
0      384    
16     80     
176    80     
-16    256    
48     176    
-112   128    
-128   96     
240    0      
-80    96     
-144   -160   
176    0      
-48    128    
80     16     
16     112    
-160   48     
240    -80    
-96    80     
0      112    
64     16     
48     112    
-32    96     
80     96     
48     80     
64     192    
0      32     
-16    -16    
48     176    
144    272    
-64    -48    
64     16     
48     256    
-64    80     
176    16     
-256   0      
160    -128   
48     112    
-64    32     
128    176    
32     96     
0      -64    
80     144    
-32    112    
112    32     
64     48     
-64    64     
96     96     
-64    -208   
160    208    
-240   16     
64     -256   
160    144    
16     -368   
16     176    
-64    64     
176    160    
-32    48     
144    256    
-96    -48    
160    96     
-96    48     
-48    112    
0      -192   
16     0      
96     128    
-64    -400   
208    0      
-96    -704   
96     144    
80     80     
32     64     
144    224    
-112   64     
96     -16    
80     160    
-112   -48    
224    32     
-64    0      
224    208    
-32    80     
192    144    
-128   144    
32     -464   
48     80     
32     0      
112    96     
-16    -48    
0      112    
112    -336   
-16    192    
64     64     
144    144    
-160   -32    
160    -16    
-48    64     
96     -320   
64     144    
-80    -160   
128    48     
-80    -272   
176    0      
-176   -176   
48     80     
144    144    
400    176    
-400   0      
96     -144   
32     128    
-96    -128   
48     48     
96     -48    
64     96     
32     0      
-208   96     
144    -912   
-128   0      
352    -1712  
-48    96     
-256   -16    
272    80     
48     112    
0      80     
96     -64    
-16    -272   
176    272    
-64    -720   
272    -16    
-208   -272   
176    112    
16     -304   
-48    112    
48     -208   
144    272    
16     176    
32     80     
-160   80     
48     32     
-32    -16    
112    -80    
128    160    
112    -240   
-16    -96    
-16    -160   
96     208    
112    -112   
96     32     
128    -112   
80     -80    
16     176    
80     112    
16     -96    
48     0      
256    176    
-80    -256   
-112   -32    
16     480    
192    -112   
144    -288   
80     144    
80     -272   
0      208    
96     -304   
0      -512   
-16    32     
64     96     
-144   -224   
0      96     
96     -304   
0      -32    
128    -2240  
80     192    
-96    144    
16     16     
128    16     
80     -80    
0      112    
-304   -2816  
576    -496   
-944   240    
672    -352   
784    688    
-1728  -720   
304    112    
-80    224    
208    -176   
192    224    
112    -256   
-144   -416   
64     128    
176    -96    
48     -240   
-192   0      
96     -64    
-16    96     
144    -224   
144    -144   
-448   -64    
304    352    
-144   -208   
112    -80    
-32    64     
272    32     
-64    -176   
-64    -960   
256    128    
0      -112   
-128   160    
48     -128   
208    112    
-144   -48    
144    -112   
16     32     
48     176    
-672   64     
32     -240   
208    -48    
-48    -176   
160    64     
-48    -32    
96     112    
32     -112   
-64    128    
48     64     
160    -32    
-208   32     
48     -96    
-128   -64    
80     -144   
-448   -80    
-16    -224   
112    16     
112    -256   
96     -128   
-160   -720   
-112   -160   
128    -3136  
64     128    
-48    -128   
112    176    
-16    -320   
160    48     
-304   -16    
32     80     
-272   -16    
128    96     
-400   -32    
16     32     
-32    -80    
48     -240   
-16    144    
48     -400   
48     -32    
128    112    
96     192    
-48    32     
112    -128   
-32    16     
16     112    
-208   0      
160    96     
-400   -176   
160    -288   
-880   64     
64     -96    
16     96     
48     -144   
16     32     
0      -80    
16     -64    
-432   96     
0      32     
-256   -160   
160    48     
-144   -48    
80     -144   
-496   -160   
96     -112   
32     -48    
80     -112   
32     96     
64     -80    
-288   -16    
112    64     
-16    0      
-32    0      
80     128    
-32    32     
48     16     
-48    64     
16     -48    
-64    -80    
128    128    
-48    160    
112    -176   
-96    -32    
-96    -96    
-528   -32    
-112   0      
-96    -16    
176    176    
-64    -16    
-272   -592   
304    16     
-144   272    
304    -16    
-224   224    
192    16     
-16    0      
-592   -112   
96     48     
-208   -336   
128    16     
-112   144    
-224   112    
-336   -112   
-768   -192   
-208   160    
176    -288   
-48    48     
64     -112   
32     32     
-624   16     
32     352    
-80    -96    
64     -32    
144    64     
32     112    
-208   48     
-64    0      
64     64     
-16    416    
-240   272    
-80    336    
0      -64    
160    -240   
96     -32    
32     -112   
80     160    
-128   32     
-64    48     
128    -224   
-192   -16    
112    320    
-400   192    
-176   128    
32     -64    
160    32     
-400   -224   
-144   -32    
-416   112    
-96    112    
16     -320   
192    144    
80     0      
-80    32     
-160   112    
-48    0      
32     48     
0      32     
-96    -64    
-112   -128   
-144   144    
-160   32     
-208   48     
-96    -80    
0      0      
-144   16     
160    32     
-48    112    
48     -48    
144    96     
-16    48     
1472   416    
-1056  -176   
1136   1184   
-80    160    
352    -1104  
-288   528    
48     -64    
-64    -112   
16     288    
-176   -176   
176    304    
-288   64     
256    320    
-16    -128   
0      -48    
-64    176    
-48    -32    
64     272    
-144   80     
64     32     
48     144    
32     160    
-128   -112   
-160   -16    
-400   -112   
-32    96     
96     48     
0      0      
-16    96     
-16    80     
0      32     
-128   -32    
0      80     
-64    32     
128    96     
-256   -80    
80     128    
-192   -96    
32     64     
-384   -48    
0      128    
16     64     
-32    0      
32     112    
-96    -16    
16     16     
96     128    
-16    304    
192    -144   
-96    160    
-192   -80    
96     112    
-80    0      
32     128    
-32    128    
16     -32    
176    128    
-96    144    
96     32     
-128   16     
64     208    
-80    64     
32     -16    
-48    -64    
-48    224    
-112   -80    
144    96     
-144   -64    
256    176    
-144   80     
-16    64     
48     48     
64     96     
-16    64     
-48    -32    
160    208    
-128   -64    
32     0      
-32    112    
16     112    
-32    -48    
128    80     
-112   80     
-176   96     
-16    -48    
64     -64    
128    176    
-96    208    
64     0      
-80    48     
48     -16    
0      112    
16     0      
112    256    
-96    96     
-16    48     
0      0      
112    16     
-16    96     
-48    48     
48     128    
80     160    
-32    48     
64     -64    
32     304    
80     304    
0      48     
-96    -192   
-96    16     
64     208    
48     -64    
32     240    
-112   -64    
32     96     
112    -16    
48     176    
64     64     
-80    192    
256    -16    
-224   -80    
-16    112    
-16    160    
272    -16    
-256   -176   
-160   -144   
64     -128   
112    256    
-96    176    
240    80     
-128   80     
96     -48    
-80    64     
224    48     
240    176    
-240   80     
-32    48     
80     272    
0      160    
160    16     
-80    96     
-16    32     
240    16     
-112   96     
96     -144   
-80    -224   
-64    -304   
128    336    
-64    0      
160    64     
-16    64     
16     0      
-16    192    
-16    -48    
80     -96    
-64    240    
16     96     
-96    -720   
96     16     
0      -784   
112    -144   
-80    -64    
160    320    
0      160    
16     -336   
-80    -272   
176    336    
80     192    
-80    96     
208    -80    
-48    128    
112    48     
-16    224    
16     -16    
64     -400   
80     176    
48     -48    
-48    112    
32     -16    
128    -48    
112    -16    
112    192    
-32    80     
32     160    
-64    -64    
64     32     
80     160    
16     -112   
48     240    
32     -448   
64     0      
-128   -1520  
160    272    
-48    304    
-80    96     
-32    112    
160    80     
192    -2224  
1040   -176   
-272   368    
-144   128    
48     800    
-432   176    
336    -784   
80     -288   
416    560    
-176   -240   
64     112    
208    -176   
80     -224   
-192   48     
128    272    
-48    -208   
112    304    
48     -32    
0      -128   
-16    128    
-96    -256   
0      256    
544    -352   
-272   -144   
208    -416   
-176   64     
-16    -1584  
32     96     
176    -112   
-160   0      
48     96     
160    128    
-112   80     
112    48     
96     224    
-48    -176   
192    352    
-160   -96    
160    -224   
-144   -368   
48     160    
144    -128   
-16    128    
-48    48     
32     64     
96     128    
160    128    
-80    -48    
16     -352   
-32    -16    
176    0      
32     0      
32     -128   
80     176    
16     -160   
-80    144    
128    80     
80     208    
-48    48     
176    272    
-96    -32    
144    48     
96     416    
-48    48     
48     -112   
80     -128   
144    48     
16     -112   
96     80     
64     0      
16     80     
48     -176   
112    -944   
48     144    
-64    -688   
240    464    
-832   160    
80     -128   
304    416    
-176   -1072  
-112   -416   
144    -1344  
-32    80     
16     432    
-48    48     
64     -128   
16     -512   
176    -368   
-48    128    
64     224    
-64    32     
-480   0      
96     -672   
96     -64    
128    -608   
80     80     
-128   -352   
128    -112   
96     448    
176    -48    
-32    -1280  
16     -32    
48     -176   
16     64     
112    16     
-48    -80    
-480   48     
-48    -224   
-144   -32    
-16    16     
64     -144   
0      80     
160    -176   
32     -384   
-16    -272   
128    -16    
32     208    
64     144    
16     48     
-96    -96    
176    0      
-64    0      
-16    -160   
-240   176    
16     -480   
64     192    
-64    160    
160    144    
-256   -336   
112    32     
64     176    
80     48     
0      48     
-32    96     
-80    -368   
-192   -464   
80     -320   
-128   32     
-96    -80    
208    -16    
16     0      
32     -544   
-176   -96    
160    -144   
-80    -176   
32     -1520  
96     256    
64     -32    
48     -64    
-80    48     
-64    -80    
32     -80    
80     -48    
-272   -304   
192    32     
-240   416    
144    48     
-528   160    
112    -176   
48     -128   
16     -272   
224    272    
-48    64     
16     -112   
64     64     
112    432    
48     48     
-144   -272   
-160   -240   
48     32     
128    -96    
48     208    
-320   -80    
128    -272   
48     -336   
320    32     
16     208    
112    80     
-96    32     
-48    -176   
16     112    
-128   -272   
112    96     
32     288    
-32    96     
-112   -128   
176    -96    
-16    -224   
48     -352   
-112   -144   
224    -128   
-160   80     
208    160    
-176   -96    
-80    64     
1520   -1872  
-496   -1120  
960    528    
-496   448    
448    -544   
-288   32     
-320   -336   
256    -192   
-112   -80    
176    -16    
-480   128    
-1008  -80    
-160   256    
-1424  -112   
-48    128    
-432   -16    
32     96     
128    48     
-80    -32    
64     -288   
-128   0      
352    48     
-16    208    
112    -96    
-96    0      
-64    -272   
160    80     
-96    64     
32     128    
-224   -96    
-64    48     
-208   -80    
-448   0      
-272   16     
192    -32    
0      -128   
-224   144    
48     0      
-32    -160   
-160   80     
64     160    
48     48     
-160   64     
32     -32    
-48    80     
-32    0      
96     80     
-240   176    
320    -96    
-96    96     
16     64     
-128   -160   
32     80     
-144   -160   
80     80     
0      304    
-128   -64    
160    112    
-240   -128   
112    -80    
-48    80     
112    192    
-240   64     
144    176    
-544   -192   
112    -16    
128    272    
-160   -16    
160    0      
-112   -16    
48     224    
-256   -128   
32     96     
-256   -80    
-16    -64    
-80    -192   
32     -32    
-192   240    
-192   48     
-320   -224   
112    48     
-112   -176   
0      -80    
96     64     
-224   -32    
96     160    
-80    0      
-16    80     
16     64     
32     16     
0      48     
-128   96     
-128   -96    
-80    -32    
-128   176    
-160   48     
-304   80     
-80    16     
144    144    
-16    -80    
0      144    
-128   112    
128    112    
-48    -48    
-48    -112   
-48    -224   
48     64     
-64    64     
64     96     
-16    0      
-208   128    
-992   0      
0      96     
-16    -32    
32     48     
-416   -416   
160    32     
-80    112    
80     0      
48     80     
-176   96     
-16    -80    
16     80     
64     64     
-176   -80    
176    256    
-240   48     
-32    96     
0      80     
16     64     
96     128    
-160   -64    
144    48     
80     32     
-128   -48    
144    32     
128    144    
-160   -64    
128    64     
-176   0      
112    160    
-128   128    
-32    32     
64     176    
-16    -32    
32     144    
-112   -80    
16     -16    
80     128    
48     80     
-48    32     
0      64     
0      -192   
-96    64     
-112   0      
-16    48     
64     48     
-128   -80    
-64    -64    
224    -32    
32     224    
64     48     
-64    272    
32     80     
16     -432   
-16    192    
192    144    
-256   -48    
16     64     
-32    96     
128    64     
-64    48     
-64    64     
-64    16     
176    112    
-64    32     
-160   0      
48     80     
-48    80     
-16    -32    
80     64     
192    192    
-256   -32    
96     144    
80     -32    
-16    -80    
48     112    
48     128    
224    160    
144    32     
-64    160    
-160   0      
192    32     
-32    32     
0      128    
-912   864    
-416   304    
-464   1184   
-704   160    
-96    -336   
-288   16     
-64    -224   
-80    1136   
96     -96    
224    272    
-352   -32    
352    128    
112    -96    
64     64     
-272   -80    
272    352    
-144   128    
-256   -336   
304    128    
96     48     
176    416    
-320   -128   
160    288    
176    192    
-128   0      
-224   80     
-48    208    
176    192    
-208   144    
16     144    
-80    -32    
16     128    
-32    -16    
96     32     
32     -224   
320    -528   
160    96     
-32    208    
-416   -240   
96     352    
208    -144   
48     112    
-80    112    
0      144    
64     128    
-64    -336   
192    160    
-144   192    
32     16     
-128   16     
128    -1216  
-16    -32    
-32    -48    
144    16     
-112   16     
112    128    
-96    400    
-272   -560   
0      -224   
144    32     
-48    128    
-32    -96    
16     192    
-16    -384   
-96    128    
80     -560   
32     112    
208    -16    
-16    128    
80     16     
16     160    
-32    80     
32     192    
16     96     
-16    144    
-32    -128   
-160   -256   
96     -144   
-64    -48    
-16    128    
160    320    
-32    144    
32     -896   
-16    0      
48     96     
80     80     
16     112    
128    432    
32     256    
-16    -64    
48     -96    
-16    -192   
64     208    
32     -96    
96     32     
48     -288   
-128   -112   
192    -720   
0      80     
112    -1152  
-96    176    
-16    48     
144    144    
32     128    
16     112    
-112   16     
96     128    
80     -240   
-64    -416   
16     32     
224    -160   
112    96     
-96    -48    
16     96     
128    -320   
16     240    
-16    32     
144    320    
-64    64     
96     192    
48     0      
0      -96    
128    160    
96     -48    
-96    240    
336    656    
-48    416    
128    -48    
-48    64     
192    -320   
-48    192    
0      48     
80     176    
192    272    
-96    208    
160    128    
-64    -704   
64     544    
64     -192   
-16    0      
-16    -512   
0      -80    
128    -144   
-16    112    
96     64     
192    544    
-16    544    
144    112    
-128   32     
128    -2128  
-16    32     
128    -176   
-128   304    
112    464    
-80    -16    
-80    -448   
-32    0      
128    -384   
16     208    
0      -288   
176    -512   
-64    160    
96     -352   
0      48     
-784   -64    
48     16     
80     368    
-144   -32    
128    48     
-32    -1648  
32     -96    
240    -32    
-48    96     
128    144    
-80    32     
144    -160   
-96    32     
176    48     
32     -384   
-208   128    
-16    -96    
144    192    
-80    -416   
176    -208   
112    -304   
-16    -192   
48     -720   
192    -16    
48     176    
0      0      
-48    -176   
48     -32    
128    -64    
-32    128    
128    -48    
-112   80     
784    2560   
-1120  224    
-592   -368   
544    96     
352    352    
176    -560   
-256   480    
400    -800   
272    608    
-224   -352   
32     256    
-128   0      
224    -288   
-176   528    
192    -400   
-480   208    
128    -320   
-32    224    
160    -176   
0      80     
128    -752   
-112   64     
192    -448   
-80    16     
0      -96    
48     0      
-32    16     
112    -16    
-336   -32    
176    -224   
-192   -80    
176    96     
-304   64     
16     -320   
-352   32     
368    -224   
-64    192    
208    -288   
-224   32     
128    -64    
160    176    
-272   -80    
128    -192   
-240   -64    
144    192    
-48    -64    
96     -16    
-192   208    
-64    -384   
-1728  -96    
-32    144    
144    64     
-32    -128   
0      96     
48     -48    
80     -48    
-112   32     
128    48     
-272   80     
96     -112   
-704   64     
-16    -144   
16     -80    
112    0      
-144   240    
-16    -96    
-96    16     
224    -464   
-16    80     
-240   16     
32     -80    
80     64     
16     -112   
-128   0      
-80    -64    
-160   -336   
224    144    
-336   64     
112    -128   
-48    0      
96     -368   
32     176    
80     -448   
128    32     
144    32     
16     0      
-64    -240   
96     64     
-96    96     
16     0      
-48    128    
112    96     
-48    32     
240    192    
-640   -48    
-32    -160   
0      16     
-688   -208   
-272   -32    
-64    80     
-1216  0      
-112   -80    
-704   -224   
-64    0      
208    272    
-208   48     
16     -64    
-16    64     
16     -96    
16     80     
-128   -96    
16     128    
64     -192   
-16    -16    
-64    64     
-288   -48    
48     96     
-384   -160   
176    464    
-1792  64     
80     128    
-112   -112   
-96    -64    
-144   -416   
128    112    
-160   0      
96     112    
-96    -320   
-192   -208   
-32    -80    
176    -144   
-192   -160   
192    -96    
-32    192    
-32    80     
-80    144    
112    160    
-64    -80    
-112   -64    
144    160    
-176   -288   
-32    -144   
48     16     
-48    96     
16     -16    
208    464    
-48    224    
-144   -192   
-112   96     
-320   -64    
112    48     
-976   -32    
32     80     
-64    -80    
320    176    
-96    -48    
288    -48    
-304   -336   
128    -64    
-144   80     
-96    64     
-112   -32    
32     -16    
448    816    
-464   208    
-160   -64    
-16    -288   
320    48     
-64    0      
-208   80     
-32    160    
-32    0      
80     144    
64     -48    
32     96     
-16    304    
-288   64     
-32    -80    
144    80     
96     -16    
-48    144    
-288   -96    
64     -48    
-304   16     
128    272    
-16    96     
-144   112    
-32    32     
16     16     
-48    128    
-16    -16    
256    160    
-160   0      
80     16     
-112   48     
240    0      
624    240    
720    992    
-304   -480   
-704   -368   
352    -32    
464    -144   
0      -320   
656    800    
-528   448    
-48    -112   
-176   32     
-16    16     
224    -32    
-368   32     
176    208    
-192   128    
112    96     
-144   192    
-16    -192   
144    64     
224    112    
-160   224    
-16    -176   
-144   48     
-64    -432   
128    208    
-96    352    
-160   112    
-320   -288   
128    80     
32     -176   
224    160    
-272   -80    
208    -176   
48     208    
128    -48    
160    -16    
80     272    
-176   -352   
-112   64     
16     192    
0      0      
128    192    
-192   -80    
32     144    
-320   -96    
128    -112   
80     -80    
176    320    
144    32     
-192   48     
-16    64     
96     224    
-48    256    
32     96     
-16    96     
-96    -304   
16     -80    
96     400    
-64    -32    
-112   32     
96     192    
160    -112   
-128   -16    
16     128    
-96    96     
112    0      
0      144    
16     64     
80     96     
-32    48     
-32    16     
-32    80     
-16    112    
-32    48     
-96    -240   
256    -32    
16     160    
-32    1008   
128    -48    
-112   -32    
-16    176    
128    192    
16     160    
64     464    
-112   -48    
-144   16     
-64    -32    
128    -16    
0      80     
-48    -192   
-144   -80    
64     32     
96     96     
-16    112    
-32    -336   
-144   -192   
208    -16    
112    240    
80     96     
0      0      
-16    16     
96     240    
48     80     
128    272    
-112   0      
-96    -928   
-32    -272   
160    224    
208    192    
-160   -112   
112    160    
48     48     
32     -80    
48     64     
-64    240    
192    240    
-64    -32    
-16    -16    
80     112    
208    160    
-176   -304   
48     -352   
208    -96    
-160   64     
64     160    
32     64     
-32    16     
80     32     
64     -48    
-16    48     
-128   -80    
64     96     
112    192    
64     96     
128    144    
-48    -240   
48     96     
112    32     
-32    0      
-48    -16    
80     48     
64     128    
48     16     
-32    -336   
32     144    
32     32     
-64    160    
80     32     
80     -80    
-48    112    
80     -304   
96     96     
112    -400   
32     160    
-64    128    
96     112    
64     96     
144    160    
-160   144    
112    48     
-48    64     
192    128    
-32    64     
16     -96    
160    144    
-160   -240   
208    208    
-80    48     
144    32     
192    -336   
-16    240    
0      80     
-160   32     
144    -16    
112    96     
48     48     
96     192    
48     -16    
64     0      
16     -32    
208    112    
-128   16     
80     -512   
16     128    
96     -1776  
80     96     
16     -304   
-32    96     
-16    -32    
96     224    
64     -96    
176    32     
-112   48     
16     32     
2336   1504   
-1296  -176   
512    352    
256    -208   
-48    -896   
560    832    
-576   528    
272    368    
336    -560   
-320   144    
192    224    
-224   -16    
144    80     
144    -64    
-16    144    
64     -80    
-64    48     
96     48     
-48    -80    
112    -192   
-64    64     
80     144    
112    192    
80     -32    
-112   -48    
176    224    
0      336    
240    -240   
-144   128    
128    -592   
64     112    
16     -304   
48     160    
-16    -112   
64     128    
160    -16    
0      240    
-16    -160   
-48    -1328  
128    48     
64     -16    
32     -272   
-32    -80    
16     -576   
144    -96    
-48    160    
208    -16    
-16    16     
-64    -32    
64     64     
144    -224   
0      -832   
80     112    
-48    -624   
16     32     
-176   48     
-16    -240   
112    -64    
16     -352   
32     -80    
80     -176   
64     -48    
112    272    
80     64     
48     16     
48     -32    
64     -96    
-64    32     
16     144    
-176   -16    
-480   16     
-16    -496   
-592   -64    
16     -176   
-32    -144   
256    112    
-240   -64    
208    -1056  
32     -112   
96     -464   
-80    32     
32     -176   
16     -176   
-32    -112   
80     -16    
-320   -272   
224    -112   
-144   272    
-144   32     
64     -144   
-48    -32    
96     -256   
16     -304   
-80    32     
144    -592   
48     96     
32     -128   
0      16     
-16    -336   
240    -80    
-32    128    
-48    -272   
-240   -48    
176    32     
-384   144    
80     -256   
128    240    
-48    -48    
0      -16    
-16    -896   
32     -16    
80     16     
-16    32     
0      0      
-32    -368   
-112   -112   
144    -208   
-352   -176   
144    224    
-80    32     
48     -32    
128    -96    
48     -16    
208    -80    
-32    -448   
16     160    
-16    176    
128    -16    
-224   -176   
160    -288   
-144   208    
80     32     
-192   -80    
-80    -576   
112    416    
-16    192    
-16    -128   
-16    -224   
128    48     
-80    -160   
64     80     
128    -384   
32     -176   
-48    -48    
144    80     
-288   80     
-80    -128   
128    -32    
96     -16    
-352   -32    
-80    -208   
-304   16     
48     -80    
-16    32     
96     -96    
-96    32     
-16    -624   
192    -128   
-192   64     
-64    48     
-176   -16    
240    64     
-64    -144   
80     -80    
-320   -112   
208    -96    
-240   128    
208    -240   
-48    160    
-48    -656   
48     96     
-48    48     
80     48     
-64    -96    
64     128    
-48    176    
-48    64     
-224   -112   
208    -32    
64     128    
16     80     
-80    32     
-1008  -176   
0      144    
-480   -256   
-80    240    
208    -112   
112    192    
-128   48     
-1088  -16    
-192   -176   
464    -128   
-64    208    
112    80     
-144   112    
-48    208    
-1440  -880   
784    -192   
-976   544    
1008   -928   
-256   816    
160    -256   
-624   592    
-16    -640   
240    176    
-352   -336   
-144   432    
-144   -336   
208    400    
-224   -352   
240    64     
-272   -128   
272    160    
-192   32     
64     -112   
-32    416    
-112   -288   
-208   256    
272    -464   
-224   -48    
48     -80    
48     304    
0      -96    
-1264  -48    
176    128    
-32    16     
-96    96     
-32    128    
192    -64    
-144   176    
-16    -112   
-112   160    
-368   -464   
432    400    
112    368    
32     64     
-128   -64    
64     0      
-144   224    
0      96     
-64    -128   
128    176    
80     128    
32     160    
-16    -96    
-112   32     
48     64     
-32    192    
-96    160    
-208   0      
-80    -64    
-208   -16    
80     -32    
-272   -144   
64     96     
-1376  -96    
48     64     
-144   -112   
0      192    
-32    16     
112    48     
-64    -80    
48     -64    
-128   -64    
32     32     
64     80     
0      64     
48     176    
-112   -16    
128    144    
-272   -240   
96     160    
-112   16     
-80    -224   
80     -192   
-16    128    
-112   160    
-96    -352   
-80    -80    
48     -16    
-32    96     
64     16     
-112   -128   
-176   -176   
96     96     
-176   0      
0      0      
0      -160   
-48    112    
112    -32    
-96    64     
272    832    
-272   208    
-144   -208   
-64    -176   
0      80     
64     48     
-160   -48    
-96    0      
96     -112   
-64    -32    
-48    64     
48     176    
-64    -32    
64     96     
-64    96     
64     48     
-16    80     
96     64     
80     128    
-64    -48    
-80    -112   
160    368    
-160   -16    
144    64     
-160   16     
112    -144   
-128   288    
80     496    
-64    -80    
288    176    
-192   144    
160    160    
-16    128    
0      -16    
-16    256    
-64    96     
176    176    
-240   48     
80     288    
32     -144   
16     -16    
-208   112    
-16    96     
176    32     
0      -32    
-112   48     
0      32     
0      16     
-16    0      
-80    -16    
48     64     
64     144    
-192   -128   
144    0      
-48    48     
64     112    
48     176    
160    -64    
-32    96     
-96    96     
128    -128   
16     48     
48     208    
0      160    
-112   256    
80     208    
16     176    
-48    -144   
112    16     
80     256    
-48    -128   
-64    -160   
320    80     
80     336    
-64    272    
-256   -48    
144    160    
160    -32    
-80    32     
80     288    
-208   -160   
192    -80    
-16    96     
48     32     
-64    96     
-16    96     
224    -32    
0      96     
32     144    
48     96     
0      256    
-64    -32    
16     96     
32     -16    
176    64     
-160   48     
-16    160    
16     176    
64     -160   
32     64     
1776   2000   
-1840  624    
-160   320    
512    832    
-16    -624   
-64    720    
-1200  -240   
432    752    
-16    -208   
-32    352    
-288   -192   
-48    320    
272    -16    
144    176    
-224   -224   
-16    48     
128    208    
224    112    
-32    -48    
112    -192   
-144   80     
128    176    
208    176    
-80    -32    
-32    128    
16     -64    
32     -176   
144    -32    
-192   -128   
128    32     
80     -704   
64     -16    
32     128    
0      64     
96     112    
128    144    
-160   -240   
48     144    
16     -80    
80     64     
-112   -32    
-16    -160   
96     48     
16     -208   
48     144    
144    -720   
-48    160    
-64    -208   
16     160    
-16    -144   
240    160    
-176   112    
208    160    
-144   96     
48     80     
16     80     
96     64     
32     32     
64     -240   
16     80     
-48    -688   
32     176    
-64    -240   
64     160    
144    -32    
64     208    
-48    144    
-160   64     
112    16     
32     32     
144    320    
-160   -96    
96     48     
96     -144   
-112   -144   
240    -592   
-128   80     
112    -96    
0      48     
-32    -304   
128    0      
112    64     
-16    16     
-64    160    
160    128    
-128   -80    
48     -240   
208    512    
-144   -224   
160    64     
-32    32     
64     128    
160    -496   
80     80     
16     32     
128    48     
112    304    
96     224    
-96    0      
32     -208   
80     64     
64     -96    
160    96     
-16    -176   
32     -128   
48     -112   
96     272    
64     -160   
16     32     
16     -400   
96     128    
64     144    
16     112    
96     176    
-64    -16    
160    128    
-32    -112   
192    96     
64     -208   
48     256    
-96    -48    
-128   -80    
160    -32    
192    256    
-32    -192   
48     -1872  
-32    -16    
192    -592   
-48    -432   
32     -16    
96     -800   
48     48     
80     -768   
32     -144   
-128   -16    
272    64     
-112   80     
160    -48    
-80    -1120  
144    80     
48     -224   
0      -80    
240    112    
-48    -80    
-32    -192   
48     -656   
64     -112   
96     -624   
-144   96     
32     -128   
112    160    
208    160    
-16    128    
-176   -320   
160    32     
176    224    
176    128    
-384   -32    
224    -224   
-1344  -160   
160    -288   
-32    -144   
128    -384   
144    128    
-80    -400   
64     -288   
336    -640   
0      -128   
16     -224   
-80    192    
80     16     
-48    -64    
-176   32     
16     -64    
-336   0      
80     64     
32     -16    
160    16     
-96    -256   
144    -224   
80     -48    
0      -1568  
-96    64     
176    -32    
64     208    
144    -176   
-32    -16    
-64    32     
-32    -48    
96     -32    
64     -16    
-752   -80    
256    0      
48     224    
224    -64    
-208   -48    
-384   -912   
736    -368   
-416   -464   
-240   224    
-304   -192   
560    240    
160    -240   
-352   784    
0      48     
-32    -192   
-336   -272   
144    80     
-352   -96    
64     64     
112    -384   
80     -400   
-64    -352   
304    -1168  
-80    208    
64     144    
96     384    
-160   -64    
-96    -96    
96     -304   
80     -96    
-576   0      
208    160    
-384   32     
16     -240   
-64    0      
192    -160   
16     32     
32     -288   
64     112    
16     96     
144    -112   
-208   -16    
48     0      
64     80     
0      32     
32     16     
48     -48    
-128   16     
16     -224   
96     64     
-64    -160   
96     128    
-48    -272   
240    0      
-464   -32    
128    -144   
-128   -16    
48     176    
-32    -80    
32     -144   
32     128    
-64    -176   
-80    -64    
0      -192   
0      80     
48     -208   
32     32     
-48    -64    
-336   -112   
-48    240    
-48    -240   
160    0      
80     144    
-64    192    
-160   0      
64     16     
112    -96    
-80    32     
-752   -96    
-16    -208   
-48    -16    
-32    48     
32     64     
-672   -96    
80     80     
-352   96     
-32    -80    
-208   256    
-176   176    
80     128    
-128   -112   
416    384    
-384   -128   
240    -48    
-16    128    
-16    -80    
-112   32     
-96    -96    
-96    -208   
336    -128   
-224   -48    
-48    -80    
-208   32     
-32    16     
0      -16    
32     96     
-16    -16    
-64    128    
32     -176   
-176   -112   
0      -208   
-16    160    
16     112    
48     96     
-48    112    
-64    48     
-80    64     
-128   -64    
128    176    
-16    48     
-240   -176   
16     -144   
-96    80     
176    288    
128    16     
0      256    
-272   144    
144    -64    
32     -208   
-368   -80    
-64    128    
176    208    
-128   48     
16     32     
-464   64     
-32    -16    
48     -192   
-80    -144   
128    -96    
-192   224    
288    16     
48     -176   
-256   -80    
-16    224    
176    16     
-16    64     
16     64     
-48    112    
-80    -112   
-288   -256   
32     144    
64     176    
112    -16    
0      -32    
-96    32     
32     16     
-96    48     
16     48     
48     -112   
-80    -48    
208    64     
-176   32     
0      112    
-48    32     
-80    32     
192    80     
-32    80     
112    320    
-288   -320   
-96    -112   
224    32     
224    48     
128    160    
-96    256    
-16    -32    
-80    32     
-64    128    
208    128    
48     64     
64     64     
-16    128    
-352   -64    
80     16     
64     48     
-48    48     
16     144    
48     -80    
-16    0      
-208   -112   
0      -208   
80     16     
-32    112    
-64    144    
16     128    
-192   -48    
48     224    
-592   -64    
-32    -96    
112    80     
96     -16    
1536   -1104  
-752   -320   
1024   512    
0      400    
1136   -496   
-560   -176   
-160   -224   
352    208    
224    -288   
-480   -176   
-48    352    
32     -368   
160    352    
-32    -224   
144    112    
-96    -64    
0      272    
32     -176   
-96    208    
144    32     
-128   0      
96     128    
-208   0      
176    80     
-208   -112   
32     192    
-144   -144   
144    48     
-16    16     
0      -16    
-16    -16    
-48    128    
176    80     
48     144    
-48    32     
-48    -48    
-16    112    
-96    96     
160    80     
-160   0      
112    208    
32     272    
80     0      
-160   64     
0      64     
96     32     
0      -192   
64     -64    
48     176    
48     96     
-16    64     
16     144    
32     96     
-32    32     
-32    0      
112    80     
-96    144    
0      64     
32     -48    
-96    -128   
96     144    
-112   128    
64     16     
32     -64    
48     80     
32     112    
32     192    
-48    0      
176    272    
-160   32     
64     -672   
64     16     
224    256    
-128   128    
-112   96     
160    208    
160    -80    
80     112    
-176   80     
48     -16    
32     -16    
96     80     
0      192    
16     48     
-80    -64    
64     -416   
16     0      
112    336    
-16    80     
-32    96     
32     112    
80     16     
128    96     
16     144    
32     80     
-64    32     
16     48     
64     48     
128    208    
0      80     
-16    -80    
0      80     
32     -64    
112    96     
-48    80     
48     -16    
80     144    
-64    48     
64     96     
-16    80     
16     64     
32     128    
-32    16     
-560   -112   
0      64     
176    -128   
-80    -48    
-16    -2320  
32     0      
192    112    
-80    48     
176    96     
-160   -48    
144    -96    
80     480    
-144   -48    
176    -16    
-208   0      
304    -240   
-144   256    
32     -272   
32     256    
0      -544   
144    80     
32     112    
-16    -96    
112    32     
-96    112    
128    80     
-80    16     
160    96     
128    112    
-96    64     
32     0      
400    768    
-464   144    
224    -176   
96     -16    
144    48     
-176   -1456  
0      0      
272    352    
-32    -96    
64     128    
16     16     
-32    -96    
176    224    
-96    192    
32     -144   
-80    128    
256    -128   
-96    64     
96     -528   
-80    -16    
304    -528   
-240   80     
240    -528   
-32    160    
96     -160   
-32    176    
-224   -176   
176    448    
32     -96    
240    80     
-112   -32    
192    -416   
0      80     
112    -112   
48     16     
64     -48    
0      96     
144    -16    
160    80     
-64    144    
-32    32     
32     -48    
80     -176   
64     48     
112    -304   
224    32     
-32    -192   
384    -144   
48     320    
64     0      
-128   -64    
-176   -672   
416    128    
-656   -576   
-272   -464   
16     208    
832    592    
-432   64     
-240   -784   
-64    -352   
208    -112   
240    48     
-16    64     
144    -240   
112    240    
48     -192   
192    368    
-320   -96    
224    -1024  
144    112    
16     -160   
-256   -432   
80     -128   
144    -272   
208    -96    
-96    -736   
-64    -160   
96     -128   
48     -96    
16     -32    
32     -192   
-80    0      
224    224    
0      -608   
-16    80     
-176   -208   
112    -352   
-464   -240   
32     192    
256    -48    
16     -112   
-48    -144   
80     -352   
160    0      
48     64     
-48    32     
96     16     
-16    112    
176    176    
-256   -48    
48     -48    
-32    96     
-96    -80    
32     -96    
-16    -224   
80     -688   
16     -240   
208    160    
-96    16     
192    -240   
-224   -80    
192    -96    
-128   64     
48     -128   
112    320    
-304   -112   
240    64     
-208   -160   
208    192    
64     -112   
96     96     
0      -80    
112    0      
80     -208   
48     -432   
-48    0      
240    320    
-192   32     
192    -16    
48     -48    
-128   -144   
80     -112   
-192   48     
96     16     
16     -240   
80     -48    
-48    96     
-48    -368   
160    224    
-192   -720   
176    144    
80     224    
-48    64     
224    -80    
-32    -288   
-32    -176   
128    80     
-256   16     
192    48     
-384   -208   
64     -144   
-352   -32    
96     -48    
32     0      
-112   -272   
64     160    
0      -496   
240    128    
-112   0      
-32    -160   
-96    -32    
64     48     
-64    -64    
128    80     
-192   -112   
-160   -192   
-352   0      
512    416    
144    32     
-144   -272   
-208   176    
240    -64    
272    -16    
-576   16     
112    96     
272    272    
240    240    
0      -176   
32     -96    
-304   96     
240    16     
192    160    
-64    96     
160    96     
16     -112   
-240   -16    
416    -592   
-48    48     
-16    176    
96     16     
-176   16     
128    -144   
-384   0      
-64    -16    
48     176    
-112   -64    
64     176    
-64    -320   
96     176    
-256   -208   
16     144    
32     0      
-640   -80    
-32    -32    
-608   48     
-176   -48    
192    32     
-64    -288   
112    80     
-128   96     
48     64     
-240   144    
-336   -160   
-96    80     
-80    48     
-256   -128   
16     -560   
16     224    
128    400    
-64    64     
16     176    
-272   64     
-192   -144   
-16    -80    
112    192    
160    16     
-128   -144   
-160   -112   
96     288    
-32    -16    
-32    128    
-32    -80    
-64    -32    
-48    144    
-160   112    
-16    -128   
-288   -48    
32     80     
-432   48     
-48    0      
112    -48    
64     -176   
16     48     
-96    208    
-112   -176   
-16    -16    
32     -48    
880    -1744  
-112   -224   
1344   -112   
-496   -640   
-288   -64    
-160   -640   
-480   -192   
480    112    
64     96     
-256   -64    
-144   80     
496    112    
0      208    
-80    -96    
-160   -112   
144    0      
176    304    
-256   -144   
-144   -96    
-80    -48    
48     64     
160    192    
-64    96     
-384   -320   
-64    -32    
-48    16     
-96    32     
208    112    
-192   128    
0      -336   
-208   -32    
48     160    
-96    32     
96     96     
-160   -32    
144    32     
-384   -112   
96     112    
-1472  -224   
144    0      
-112   -32    
-48    144    
48     64     
112    208    
-96    64     
80     -80    
-192   -224   
368    64     
-112   112    
48     160    
-80    -64    
-96    32     
16     48     
-112   16     
96     176    
-208   -176   
-96    -352   
16     48     
-80    -208   
-64    80     
96     352    
-32    -16    
-32    -80    
64     48     
32     32     
-112   80     
-112   16     
128    128    
-80    -16    
64     96     
16     48     
-32    48     
0      32     
0      48     
16     -64    
-80    -224   
-48    -416   
-144   -144   
0      32     
-48    304    
-96    32     
0      -48    
-160   -32    
96     0      
-48    208    
160    368    
-96    352    
96     272    
80     64     
176    -32    
64     336    
32     144    
-128   64     
16     32     
64     96     
80     32     
0      64     
-48    48     
-176   -32    
0      80     
16     80     
48     80     
0      128    
64     112    
-16    48     
-16    64     
32     144    
80     80     
32     192    
-64    -16    
32     80     
-128   -48    
128    128    
-96    32     
0      48     
-16    -144   
80     -48    
-32    160    
16     112    
-160   -32    
-96    16     
224    96     
0      80     
-128   -96    
-176   -96    
144    80     
-176   64     
208    304    
-80    -48    
64     -48    
32     144    
80     32     
16     0      
-16    -112   
240    240    
16     448    
-112   160    
0      112    
96     96     
-96    -32    
32     160    
-208   -112   
240    240    
-48    64     
304    -32    
-384   96     
32     80     
-96    256    
-48    -16    
80     96     
48     80     
-144   -112   
32     80     
-96    96     
-96    -208   
304    16     
192    592    
192    -624   
-352   16     
224    -32    
192    64     
128    96     
-128   -96    
-32    -16    
112    -64    
96     48     
208    176    
80     128    
112    144    
-16    16     
-32    144    
32     256    
-128   -352   
-160   -192   
80     128    
176    80     
112    16     
-80    96     
64     -16    
64     48     
192    144    
128    176    
-112   16     
32     192    
32     32     
-16    -32    
160    368    
-80    64     
0      32     
-32    -560   
176    96     
128    -192   
192    80     
112    224    
-96    80     
-128   528    
-64    -496   
560    -624   
32     208    
-112   -176   
0      96     
176    624    
-16    288    
0      -288   
32     -1616  
-32    -16    
144    192    
-240   32     
-16    0      
96     16     
-16    -80    
96     144    
-128   -48    
192    32     
-32    64     
48     16     
16     224    
-16    -96    
96     112    
-128   -1024  
80     64     
160    -976   
48     208    
32     16     
-32    112    
96     -64    
-48    128    
80     80     
32     80     
16     80     
48     0      
-48    -128   
-16    48     
144    176    
208    -16    
-144   32     
64     -176   
112    144    
64     -288   
-144   -32    
32     -48    
48     224    
96     112    
176    -16    
-128   128    
32     -208   
144    128    
-64    112    
112    -80    
48     -576   
16     112    
96     -960   
0      64     
112    -208   
-80    80     
64     144    
32     80     
-64    16     
112    256    
-176   0      
240    80     
-80    32     
96     -256   
64     80     
80     -592   
48     48     
32     -96    
48     96     
48     -336   
0      80     
48     320    
-112   64     
128    64     
224    -96    
32     80     
-80    144    
80     80     
16     -480   
64     160    
80     96     
-176   16     
272    16     
-32    80     
64     -64    
32     112    
32     -32    
80     80     
-16    -32    
160    144    
-64    -960   
-80    -320   
128    32     
48     -48    
0      -16    
64     -48    
32     64     
112    -144   
0      -48    
64     -480   
96     -400   
160    32     
-176   -304   
112    -144   
16     -16    
176    -304   
64     0      
-32    -560   
224    112    
-48    96     
48     -192   
-96    -48    
256    0      
16     -768   
112    16     
-144   -144   
144    160    
160    -112   
48     -192   
0      -160   
384    -336   
192    176    
160    -288   
-64    192    
-144   -816   
352    -16    
-32    192    
-16    160    
256    176    
32     160    
112    -32    
16     368    
-400   -272   
320    -192   
-96    -160   
-80    -16    
64     -64    
16     -320   
96     -272   
-64    -384   
128    -208   
-32    -480   
80     -224   
64     112    
32     224    
16     -64    
-16    64     
-16    160    
-32    192    
-144   48     
-96    -16    
-1232  128    
96     176    
32     -176   
-48    -272   
32     -16    
64     -160   
80     48     
-80    -176   
48     80     
48     -288   
176    352    
-160   -336   
96     240    
-176   128    
48     -240   
-64    -48    
112    112    
-320   -32    
0      96     
16     80     
112    -752   
48     96     
64     -1072  
64     -96    
160    -192   
-48    160    
-208   16     
-96    -208   
-48    48     
-32    -256   
-304   48     
160    -32    
-80    80     
32     -208   
48     0      
48     -480   
304    16     
-16    -752   
32     64     
-112   64     
96     -64    
48     896    
512    -224   
-800   -240   
-384   80     
-16    848    
208    304    
-272   -192   
-272   -608   
48     240    
-48    -352   
224    96     
112    0      
128    192    
-336   -224   
160    -192   
-64    112    
16     48     
96     176    
-192   -224   
0      -80    
160    80     
48     96     
-48    144    
32     96     
-48    -128   
0      272    
32     -624   
16     -464   
-192   64     
160    -112   
208    144    
-112   96     
-192   32     
144    272    
-336   -256   
128    32     
-160   160    
288    464    
-96    192    
-1584  -464   
32     48     
-640   -384   
-432   176    
48     128    
-512   -48    
-48    -16    
-64    0      
32     -16    
64     80     
-80    16     
128    128    
-32    160    
-832   -16    
80     160    
-160   -240   
112    80     
128    464    
-368   -560   
240    128    
-160   -128   
112    -16    
-384   -48    
32     32     
64     96     
96     80     
80     -48    
-64    96     
48     -208   
0      144    
32     -112   
32     144    
32     16     
-160   16     
80     96     
-272   -16    
144    112    
-192   368    
-16    96     
-1232  -48    
-128   64     
-544   -304   
-192   0      
-96    -368   
272    272    
-64    -16    
-400   -304   
32     -288   
-32    112    
-48    32     
-192   192    
-16    96     
96     128    
-96    -64    
-240   32     
-48    -96    
0      112    
-32    96     
0      -16    
-32    -16    
32     -128   
-96    -96    
64     112    
-64    80     
48     272    
-112   16     
-16    32     
-192   -192   
32     80     
-144   0      
48     48     
-480   0      
128    144    
0      -144   
32     96     
-32    -128   
-96    -144   
64     192    
48     48     
144    208    
-224   48     
48     128    
-176   32     
64     -144   
32     64     
-128   -208   
-448   -128   
-112   -240   
80     -32    
-80    80     
80     -80    
16     336    
80     144    
-80    400    
48     256    
-208   -80    
32     -208   
32     -16    
0      0      
96     144    
-96    80     
-48    -64    
80     288    
-144   208    
-16    160    
96     336    
0      -16    
-128   -192   
-32    0      
64     64     
-16    -48    
96     112    
-128   -64    
160    48     
-144   -16    
32     -208   
-224   -480   
288    720    
48     272    
-128   32     
-48    16     
32     96     
0      -16    
-144   -96    
112    80     
80     224    
48     320    
-320   -192   
-32    -112   
-176   -32    
48     192    
-176   144    
-96    -160   
48     -144   
160    96     
-176   144    
-48    272    
32     -64    
112    176    
80     128    
-48    112    
-128   112    
64     -160   
128    48     
144    160    
-64    64     
-80    80     
48     80     
0      0      
64     -48    
224    -80    
-32    208    
48     160    
-128   48     
32     112    
-64    32     
-736   -2704  
1360   2032   
-928   1008   
-272   -400   
-16    176    
-560   -768   
656    752    
-912   -16    
576    -192   
-160   224    
336    16     
-416   96     
80     80     
144    0      
32     32     
64     32     
-64    112    
-16    176    
-16    32     
112    128    
-192   -64    
176    192    
-80    96     
208    64     
-112   -64    
144    144    
16     64     
64     192    
-48    16     
32     -48    
-80    48     
112    176    
16     128    
-64    0      
-80    64     
192    208    
-32    32     
64     80     
-112   144    
176    144    
48     64     
-80    80     
64     96     
96     64     
48     80     
80     144    
-112   80     
128    192    
-304   32     
272    -624   
-112   128    
80     112    
0      128    
-64    16     
-16    -48    
96     80     
-32    192    
96     0      
48     48     
-64    32     
80     96     
-48    32     
16     128    
64     -80    
-16    -592   
48     -48    
128    32     
0      240    
-192   96     
-32    64     
176    -96    
48     32     
-128   224    
-32    32     
160    112    
48     256    
160    288    
32     128    
-64    -16    
16     -112   
-112   96     
48     -384   
192    272    
-208   -32    
208    -176   
112    224    
-288   0      
208    144    
-192   0      
208    32     
-64    96     
-64    -64    
192    192    
32     -32    
-32    -112   
128    288    
-64    -272   
96     -16    
32     128    
64     80     
0      64     
64     96     
32     -128   
64     240    
-48    112    
80     112    
112    272    
16     32     
64     0      
-96    -48    
80     96     
112    -976   
16     208    
80     -416   
32     128    
-80    224    
128    -112   
224    288    
128    288    
-384   -96    
336    224    
-144   80     
112    128    
16     112    
144    144    
16     80     
112    -32    
-16    272    
96     -704   
80     16     
-16    -512   
96     96     
64     16     
48     128    
48     96     
160    256    
-16    -112   
-112   -160   
112    288    
0      -224   
96     -64    
0      -224   
64     160    
0      -384   
80     176    
80     -480   
80     128    
-96    -16    
48     192    
16     -336   
-16    96     
144    160    
32     -512   
144    144    
160    192    
-128   192    
64     -176   
32     256    
96     -192   
16     16     
16     0      
-48    128    
0      -48    
192    -128   
-224   -496   
96     -144   
-48    400    
48     -80    
128    112    
32     64     
0      160    
-32    -224   
80     144    
48     -64    
16     -32    
-16    -608   
192    288    
-144   -64    
64     -1680  
-80    48     
64     -160   
32     -864   
496    -240   
48     -688   
-320   -176   
-32    32     
176    -240   
96     64     
32     48     
128    144    
-80    -400   
272    -1808  
-192   -16    
160    -592   
16     -64    
-80    -32    
-112   1584   
-480   -1152  
-144   -256   
-400   0      
-448   -560   
1040   -464   
-128   112    
240    0      
-368   -64    
368    -160   
160    -192   
80     80     
-192   -416   
208    32     
48     0      
64     -16    
-144   -16    
112    -608   
96     -96    
128    32     
160    432    
-144   -1648  
96     272    
240    -416   
-256   -48    
80     112    
224    496    
-256   160    
-256   -224   
-176   -208   
144    -208   
-800   -48    
0      256    
128    -192   
16     -304   
-32    -192   
176    -1296  
-400   -496   
320    -16    
-256   -144   
208    64     
-80    96     
-160   -160   
-48    -112   
-160   -272   
-80    -288   
-224   -560   
368    368    
192    256    
-16    48     
16     -96    
128    -208   
-112   336    
80     128    
16     128    
64     -208   
224    240    
-560   -576   
240    -80    
-96    -96    
208    -48    
-192   -176   
80     112    
-176   -96    
64     80     
-48    64     
80     -304   
0      48     
0      -768   
32     64     
0      32     
64     -96    
-144   80     
48     -144   
32     288    
-112   0      
-288   -160   
112    -336   
-192   192    
112    0      
32     64     
48     -288   
32     160    
32     -528   
-80    32     
144    448    
-16    -128   
-32    -96    
48     64     
64     -112   
48     32     
-48    -32    
176    160    
-128   288    
0      -32    
192    112    
112    -64    
176    432    
-80    48     
-32    -80    
-256   -208   
112    -48    
-64    48     
32     -64    
-208   64     
96     96     
32     0      
-32    -128   
0      48     
112    -80    
-176   48     
64     -32    
32     160    
64     -16    
128    224    
-176   16     
-80    -240   
-80    0      
0      -32    
48     16     
112    176    
-256   -112   
160    -176   
-336   112    
224    96     
-64    128    
112    272    
-480   -160   
-512   -304   
-704   144    
-80    64     
-288   -256   
64     80     
-48    208    
-48    -144   
-64    -96    
-112   16     
192    144    
-144   -16    
-208   0      
-16    -80    
-32    -32    
-80    -128   
32     -144   
-528   -192   
256    32     
32     240    
32     176    
-144   144    
-16    -32    
-112   -96    
32     128    
-32    32     
32     64     
-96    -32    
208    544    
-272   -48    
48     112    
-64    -96    
-16    16     
-32    -96    
-224   -64    
16     160    
-96    0      
-144   0      
-336   256    
-128   -32    
0      0      
-96    32     
64     -96    
-128   176    
16     -304   
0      96     
80     96     
48     -336   
-128   160    
-32    64     
-208   16     
0      64     
48     32     
-32    192    
-16    -144   
-928   -80    
144    208    
-160   -64    
0      128    
0      16     
16     32     
0      96     
-80    -96    
16     64     
48     240    
-16    144    
-176   -16    
-16    -16    
1056   2656   
-1824  160    
-1168  -400   
272    480    
-192   -448   
16     688    
-352   560    
-144   -144   
416    -464   
-672   96     
336    160    
-272   112    
208    112    
-112   64     
-160   -240   
-112   -96    
48     192    
16     0      
-16    96     
0      -208   
32     16     
64     112    
144    128    
-48    48     
-160   0      
128    272    
-48    80     
0      -64    
-112   48     
80     -96    
-128   96     
32     64     
-16    48     
32     96     
-592   -16    
224    112    
-352   -128   
128    0      
-112   224    
256    32     
-144   64     
-144   0      
32     32     
-16    -16    
0      96     
0      128    
48     144    
-192   -128   
-192   48     
96     -96    
-112   48     
-16    224    
128    16     
-80    64     
-48    -16    
16     112    
80     0      
128    48     
-32    128    
-128   0      
0      0      
0      256    
-256   -176   
160    160    
-48    176    
96     48     
64     -144   
112    -128   
48     176    
-176   160    
128    144    
16     -48    
80     128    
0      192    
16     -48    
160    384    
80     720    
80     -208   
176    -80    
16     160    
-208   -16    
128    0      
80     112    
176    80     
64     -80    
96     144    
-96    80     
144    208    
-128   160    
80     96     
-48    -112   
0      48     
64     48     
-80    96     
208    176    
-160   176    
160    192    
-16    48     
-32    32     
16     48     
-32    64     
-144   32     
80     96     
32     32     
48     176    
0      208    
-80    -240   
48     48     
-48    -16    
128    176    
32     96     
32     96     
112    96     
-96    -32    
96     64     
-48    112    
144    96     
16     224    
-192   -304   
-16    -224   
32     16     
112    192    
224    -48    
-176   -48    
144    176    
48     320    
64     16     
-128   112    
-64    144    
64     96     
96     -208   
-48    112    
96     144    
112    272    
32     288    
-48    64     
-144   -464   
144    208    
32     112    
-16    112    
0      80     
-32    0      
208    96     
-96    160    
176    272    
-224   -144   
96     -368   
48     128    
48     128    
80     112    
-192   16     
128    -48    
-16    192    
-16    -2256  
272    624    
-144   240    
144    -96    
16     240    
144    48     
-80    96     
0      0      
0      0      
80     128    
304    544    
-128   288    
-96    224    
32     -224   
304    112    
-48    -352   
-96    0      
176    256    
-48    192    
0      -32    
-32    160    
96     -16    
112    176    
-112   -96    
144    64     
-16    0      
208    96     
-96    96     
96     -320   
-112   144    
0      -192   
64     144    
64     -240   
64     128    
-160   0      
64     96     
32     288    
64     64     
400    -176   
-64    144    
0      0      
-160   80     
0      512    
-1344  -2000  
480    -240   
-496   608    
512    -480   
96     208    
48     64     
-256   352    
16     -224   
496    160    
-352   -192   
352    192    
0      160    
-16    48     
-160   -320   
160    272    
128    32     
16     480    
144    16     
-16    480    
48     -80    
192    144    
-160   -64    
144    -16    
-144   -16    
128    -16    
-80    112    
704    512    
-368   -16    
112    -304   
-32    288    
-64    -624   
0      160    
80     -544   
16     272    
-48    -128   
-176   16     
160    -96    
-96    240    
96     32     
-32    112    
112    -16    
96     320    
128    224    
-176   -208   
48     -208   
304    -416   
32     192    
-288   -624   
48     -48    
96     -192   
16     144    
0      -272   
144    16     
-64    128    
48     80     
240    992    
-240   576    
272    288    
128    32     
-32    -112   
-80    -224   
112    208    
-96    48     
16     32     
256    -224   
176    80     
16     -272   
128    384    
-112   96     
32     -64    
-48    -208   
-96    96     
-16    -1520  
64     -64    
112    400    
128    -128   
288    0      
32     0      
224    368    
-144   -80    
-176   -32    
128    192    
112    80     
-32    192    
-80    -960   
-48    -400   
-112   80     
16     128    
0      -16    
128    96     
80     -176   
32     -1248  
-80    -48    
64     160    
32     -144   
16     -368   
0      0      
144    288    
-176   0      
144    -352   
-16    -160   
-128   16     
-32    0      
144    128    
96     -272   
0      -288   
112    -416   
-48    -64    
32     -992   
48     80     
96     -112   
64     0      
64     -272   
64     -144   
0      -144   
-144   -272   
176    112    
-48    160    
-1056  -176   
-96    -208   
176    -112   
160    0      
32     80     
-128   -944   
-32    -288   
64     -384   
32     112    
-96    -96    
64     0      
-48    -400   
16     -144   
48     80     
192    32     
-224   64     
80     32     
160    -16    
-208   0      
208    -32    
80     -112   
-64    32     
16     -608   
-48    32     
144    -16    
-48    128    
48     -368   
-32    -96    
-160   -208   
64     48     
96     64     
112    -32    
-832   192    
-64    -32    
112    -144   
128    -192   
64     144    
32     -304   
144    -32    
80     16     
16     -176   
-16    -48    
-96    64     
96     -48    
0      208    
16     -320   
96     -128   
-528   -96    
-16    -176   
-336   144    
-16    -96    
-32    16     
80     -1184  
64     144    
112    -16    
-144   128    
-64    -128   
80     208    
-176   64     
32     -112   
-176   64     
96     -64    
-128   96     
96     128    
272    -48    
48     -32    
16     176    
64     -368   
48     208    
-192   32     
32     16     
32     -144   
128    96     
-304   -16    
288    0      
-176   16     
64     -96    
-528   192    
144    -1104  
-32    208    
128    -464   
-576   -176   
528    -352   
-32    1088   
912    -160   
-672   96     
144    -448   
-192   320    
-96    -384   
-16    256    
144    -176   
-64    144    
-256   -192   
144    48     
-176   0      
-816   -16    
-112   -32    
-384   -224   
-224   288    
176    -64    
-416   128    
128    -176   
-80    224    
288    -32    
-240   144    
112    -48    
0      48     
80     -128   
-1248  -64    
112    0      
-64    64     
64     16     
-64    -144   
-112   -48    
-112   -16    
-224   48     
96     176    
-48    16     
-112   80     
-128   -32    
96     -48    
-48    64     
176    96     
-96    -48    
160    272    
-160   -192   
304    32     
-304   16     
0      -64    
-48    112    
-192   32     
80     -32    
-240   48     
-80    -48    
-176   -48    
-96    -32    
-256   0      
0      112    
-96    -32    
96     -48    
-48    -64    
-144   64     
0      -16    
-16    0      
0      16     
16     128    
-224   -32    
-64    96     
-256   -64    
-32    0      
128    224    
-400   -144   
128    32     
-144   96     
16     192    
80     -176   
16     -48    
-64    160    
-64    16     
208    304    
-48    32     
-32    0      
-256   -48    
160    -16    
0      -48    
64     320    
-528   -448   
-32    -384   
-64    -48    
144    176    
96     176    
-160   96     
16     -64    
-64    432    
-32    16     
-48    64     
-80    64     
112    208    
-48    112    
-64    -32    
-128   0      
-512   -560   
-32    -16    
-512   -192   
96     -128   
16     64     
-224   64     
32     64     
32     32     
-48    48     
16     128    
80     96     
64     176    
-144   32     
-224   -160   
0      64     
-64    -112   
128    112    
-352   -64    
16     -320   
-80    32     
16     -272   
-32    -48    
192    96     
-48    -48    
-64    80     
16     144    
0      96     
64     208    
-208   0      
112    64     
96     496    
16     128    
-224   -240   
-80    16     
144    48     
-64    128    
-32    -64    
128    112    
-144   48     
112    16     
-128   48     
64     16     
-80    0      
16     -16    
80     144    
-352   -144   
64     224    
32     -16    
48     192    
-128   0      
144    208    
-176   -144   
176    -48    
32     224    
0      64     
-112   224    
-16    64     
112    48     
0      128    
16     0      
-128   208    
0      48     
-112   80     
240    112    
96     96     
-128   -64    
32     16     
32     80     
112    112    
-272   96     
192    16     
-192   96     
160    -16    
-256   48     
80     96     
-32    -32    
0      32     
160    112    
-160   32     
0      -176   
80     160    
64     192    
-144   0      
-32    112    
160    96     
16     176    
-176   -176   
336    96     
-208   -48    
96     128    
-128   -16    
128    256    
-1152  -1136  
-128   -1040  
0      160    
256    544    
-368   -32    
752    320    
-496   -320   
672    64     
-128   400    
80     -144   
64     192    
112    -80    
16     368    
112    -416   
0      368    
176    -128   
64     560    
-128   -288   
144    448    
208    224    
112    288    
-272   -64    
208    240    
-160   288    
-96    -64    
176    112    
-64    -128   
-96    -48    
272    208    
-160   -176   
-112   -96    
176    80     
16     128    
-32    32     
0      144    
-160   32     
112    304    
-112   112    
64     64     
64     -160   
64     208    
16     -208   
-80    -608   
-48    64     
176    -672   
-128   208    
208    336    
-80    192    
64     32     
-64    -64    
96     96     
48     16     
64     -80    
-32    16     
192    64     
-16    48     
0      48     
-48    48     
144    80     
-32    -288   
16     64     
-96    -144   
224    0      
-64    96     
0      64     
-16    176    
64     272    
-48    64     
-64    240    
-144   96     
192    128    
-144   48     
112    -256   
96     48     
48     -576   
-128   80     
160    -1168  
-32    96     
96     208    
-16    192    
-32    -256   
208    416    
-224   320    
-32    144    
80     -16    
80     -48    
240    -96    
64     -96    
-48    64     
80     -192   
64     0      
32     -384   
128    160    
0      32     
32     192    
64     0      
32     208    
112    272    
32     208    
-16    240    
-32    -128   
144    208    
-160   0      
96     128    
48     -80    
16     112    
176    -32    
32     224    
-128   -128   
128    96     
-64    -208   
48     32     
-192   -64    
288    80     
-160   -112   
128    -288   
-32    48     
-96    -160   
-64    64     
176    -592   
32     128    
-80    -480   
-96    144    
192    16     
64     32     
16     -96    
-112   112    
176    0      
-16    64     
208    304    
-80    80     
368    48     
-368   -192   
224    240    
-32    -368   
336    0      
-208   -112   
-32    96     
272    176    
128    160    
16     80     
240    320    
-48    192    
160    192    
0      336    
-32    -48    
192    128    
-64    -64    
32     80     
64     -48    
-48    48     
128    144    
112    80     
-144   -80    
96     -64    
16     -16    
-48    -800   
0      112    
-1280  32     
112    -656   
48     -336   
-48    -768   
176    -48    
-240   32     
288    272    
-48    48     
128    -320   
64     176    
-32    -272   
128    -496   
-80    80     
64     -320   
-16    48     
-688   -160   
16     -256   
64     16     
-112   -208   
-16    -96    
112    -224   
224    -96    
128    -448   
-144   -256   
-32    144    
160    176    
0      -176   
16     176    
64     -320   
64     32     
-48    -48    
32     -112   
-112   48     
32     0      
16     32     
96     -192   
0      -256   
2064   544    
-1504  480    
-896   -688   
-256   720    
1520   80     
-896   -272   
-32    -288   
160    -32    
32     -96    
-192   176    
64     -208   
-80    144    
176    -464   
16     384    
32     -672   
-32    144    
128    -112   
16     464    
-48    80     
16     -112   
48     -176   
-64    96     
160    144    
0      0      
-80    -144   
-160   -224   
96     -16    
-64    0      
16     160    
-96    -96    
80     16     
0      -96    
304    -848   
-48    16     
64     64     
80     16     
0      192    
-48    -208   
-64    32     
144    -128   
0      -48    
-80    -16    
80     48     
144    16     
-224   -32    
64     -272   
-48    96     
128    -496   
-16    80     
-32    64     
176    -16    
-112   -48    
32     -208   
-80    -64    
96     -160   
-224   112    
16     0      
-496   -16    
32     -176   
-1552  16     
64     -608   
112    -112   
80     -16    
32     160    
-16    -384   
64     16     
-32    0      
0      -96    
-64    -32    
0      -16    
128    80     
-16    0      
16     48     
32     -16    
-160   -128   
176    -224   
176    80     
16     -176   
-288   -160   
-48    -160   
96     -128   
160    64     
176    64     
-160   112    
176    48     
-96    80     
16     16     
-64    -32    
32     -176   
96     208    
-16    32     
96     -96    
80     -352   
112    96     
96     336    
-128   144    
-96    32     
224    -96    
-96    32     
48     -64    
-176   128    
32     -64    
48     32     
16     -64    
-208   -64    
-560   -192   
-96    192    
-656   -208   
-32    48     
32     112    
-176   32     
-192   112    
-704   -48    
96     48     
-16    32     
-48    32     
16     160    
0      -16    
-144   -128   
-48    160    
-160   -240   
-64    32     
208    144    
-48    -48    
-16    48     
-352   512    
-144   -96    
-80    -96    
-96    160    
-112   -48    
-48    0      
16     -144   
80     144    
-112   -128   
160    592    
-384   -160   
416    144    
-128   0      
208    -32    
-352   -32    
-64    -64    
-48    80     
-32    0      
-48    64     
-224   112    
-64    -224   
-128   0      
32     224    
-192   -80    
-48    -16    
64     -48    
112    336    
-272   16     
240    -64    
240    96     
64     -64    
-64    160    
-256   32     
224    -144   
-192   0      
48     -16    
-336   288    
-224   16     
96     -64    
-128   576    
-144   -448   
-32    144    
-32    96     
64     -64    
-160   176    
48     80     
-64    -48    
-64    80     
48     -144   
112    192    
-128   16     
16     -32    
16     144    
-432   -16    
-80    -96    
80     -624   
176    80     
-304   176    
-64    -288   
208    256    
-64    176    
-336   -112   
-80    48     
208    48     
-128   -32    
112    128    
32     -128   
-208   32     
-688   -80    
160    96     
176    400    
-1312  -80    
912    256    
-704   336    
736    -368   
-496   624    
80     -48    
-80    80     
-32    -448   
416    592    
-224   -208   
0      176    
32     48     
-112   16     
64     -32    
176    288    
-32    -240   
-320   -400   
176    0      
16     64     
-16    128    
16     176    
-176   240    
0      224    
-112   -48    
-64    128    
-16    96     
96     -96    
-336   80     
-32    16     
208    112    
-96    32     
16     64     
-144   16     
160    0      
-80    -16    
112    32     
-128   0      
-16    80     
-128   -144   
112    -32    
-112   96     
176    160    
-272   -48    
-144   -64    
112    64     
-64    128    
304    352    
-480   80     
272    -112   
-80    96     
16     48     
-16    48     
0      192    
64     -128   
16     -16    
112    48     
-16    144    
-16    80     
64     112    
-16    208    
64     112    
-32    48     
32     0      
112    96     
-112   48     
-48    64     
48     80     
32     64     
-80    -64    
32     128    
-32    144    
-112   32     
192    96     
-48    96     
64     -48    
208    -80    
-64    96     
-48    96     
-32    80     
80     96     
48     96     
-80    -160   
-16    112    
-64    288    
-256   -32    
0      -128   
144    144    
-128   -16    
176    112    
-112   32     
64     -112   
96     64     
-96    -32    
192    192    
-144   0      
176    208    
-80    0      
32     96     
-16    48     
16     48     
32     -48    
128    48     
-96    144    
96     144    
-144   80     
112    128    
64     16     
32     16     
0      224    
-112   48     
176    32     
48     272    
-240   -48    
160    48     
-96    112    
96     112    
32     -608   
-80    -16    
48     -64    
-160   96     
48     32     
224    96     
-176   -80    
32     16     
-16    112    
16     128    
128    272    
80     96     
112    32     
-32    256    
80     128    
320    -304   
-400   224    
160    128    
160    208    
-176   128    
176    64     
80     32     
-96    128    
32     32     
-32    0      
-32    0      
16     160    
-16    -224   
-96    -448   
16     144    
128    -80    
48     -16    
-80    64     
32     48     
32     32     
0      16     
208    208    
-48    32     
-16    48     
-16    -160   
0      -16    
-32    160    
-80    -64    
16     64     
64     160    
-192   -96    
64     -16    
-16    -48    
-16    192    
96     352    
-176   -256   
0      -144   
-32    0      
32     -160   
256    352    
-208   -32    
64     208    
32     -48    
64     -112   
96     112    
128    -144   
112    0      
64     -480   
80     80     
80     -1072  
-112   112    
0      0      
160    144    
96     -32    
96     256    
0      144    
64     112    
32     176    
64     32     
-96    64     
32     -144   
256    112    
160    -48    
0      128    
-128   -576   
-288   -288   
576    16     
-528   -384   
-448   288    
928    640    
-704   112    
144    -544   
-352   -144   
224    -656   
-32    192    
-96    -320   
160    224    
-16    -80    
112    48     
16     -976   
-48    128    
-32    -128   
144    -48    
-48    64     
48     128    
-32    160    
80     -224   
-16    -16    
32     -304   
128    224    
128    -64    
16     176    
32     -144   
-48    -128   
32     -80    
-80    -64    
208    64     
32     112    
208    -128   
-64    16     
80     144    
128    32     
0      64     
64     -32    
16     112    
64     0      
80     80     
112    -64    
-16    96     
96     32     
-96    112    
-32    -208   
176    -1344  
-112   -64    
240    -48    
-112   -64    
144    -112   
-16    -896   
160    -112   
-64    -2960  
16     -96    
112    128    
0      -176   
64     -128   
80     -112   
112    -336   
112    272    
48     -224   
-32    80     
64     208    
32     16     
80     -272   
96     -400   
16     -160   
48     32     
32     0      
80     -400   
80     -112   
0      144    
-192   -528   
240    -272   
-48    144    
-64    -80    
80     -224   
-64    64     
64     -112   
-512   112    
32     -48    
32     -32    
112    -240   
64     176    
144    -1248  
0      48     
0      -640   
-224   -160   
208    -32    
176    224    
-96    -64    
96     64     
-240   -112   
160    0      
-64    -16    
0      16     
16     -112   
80     -160   
80     0      
96     -224   
-160   -48    
112    -1472  
-144   -112   
304    128    
-112   192    
-32    -48    
-48    -64    
16     32     
80     96     
-416   16     
48     16     
-1056  -16    
-32    -96    
96     224    
80     -80    
64     16     
16     -160   
80     176    
128    -64    
-96    0      
48     128    
112    112    
48     -80    
48     -16    
0      272    
48     -160   
-720   -96    
96     80     
-48    -16    
0      16     
-64    -32    
144    -80    
-192   -48    
400    176    
-144   64     
112    0      
-112   -112   
48     96     
80     -160   
144    48     
48     -96    
-96    -16    
80     -32    
-304   64     
48     -416   
-96    -64    
96     -928   
112    208    
16     -992   
-176   -192   
144    -80    
32     80     
528    -96    
-336   208    
-192   -80    
64     -16    
-32    -96    
176    96     
-32    64     
0      -240   
-128   32     
432    352    
-448   96     
-96    -32    
0      -160   
-16    0      
16     0      
-224   64     
-112   256    
48     -192   
192    -192   
-176   128    
-144   -464   
-528   32     
320    -32    
272    -16    
160    176    
-176   224    
-288   144    
-1280  288    
-352   0      
-96    -144   
-64    160    
48     -112   
-192   16     
-64    -224   
-32    -112   
64     0      
-288   -160   
-240   64     
32     48     
-400   -112   
-64    736    
-656   1472   
-16    688    
-80    -240   
-48    -400   
-208   -160   
-32    240    
32     240    
48     272    
288    16     
-80    272    
48     -64    
-416   -192   
80     -128   
-432   -272   
64     112    
0      160    
-96    160    
48     -16    
-80    128    
80     208    
-528   64     
-48    32     
64     176    
-144   -64    
96     -112   
-80    224    
176    -176   
-64    -144   
-48    112    
96     48     
16     176    
-240   -32    
-96    -80    
-304   -48    
-64    -192   
176    -80    
-64    48     
-544   160    
-16    -48    
-128   -144   
32     96     
80     0      
-16    80     
64     -32    
-64    32     
48     32     
-96    -304   
160    64     
-304   176    
144    -16    
-16    80     
-112   -32    
-432   16     
-80    64     
-64    -144   
320    208    
-128   112    
-80    -224   
-16    128    
-128   0      
0      32     
48     96     
-80    112    
96     -96    
-16    256    
-160   -16    
-64    16     
-144   -48    
96     128    
-848   0      
80     256    
-64    -288   
48     -112   
0      128    
-80    128    
-208   80     
160    144    
-160   0      
32     64     
-112   -32    
0      64     
-48    160    
-272   -16    
96     224    
-720   -304   
96     -64    
128    256    
-240   80     
160    80     
0      80     
16     0      
16     16     
48     -144   
32     224    
-144   208    
-112   16     
160    96     
-224   -208   
288    288    
-448   -48    
176    128    
-48    -64    
144    208    
-128   -272   
80     64     
48     224    
-32    64     
96     112    
-176   -48    
192    272    
-80    -16    
48     48     
-256   -192   
160    256    
-80    -192   
16     0      
16     64     
48     -96    
-192   112    
-176   0      
80     -48    
48     -112   
-112   96     
208    256    
160    144    
0      288    
48     192    
-192   144    
-48    32     
16     -128   
-64    32     
-48    32     
-64    16     
32     16     
48     144    
96     112    
80     80     
-32    32     
32     48     
0      16     
-32    272    
16     176    
176    64     
-112   96     
128    176    
-160   -208   
192    128    
-96    112    
96     144    
-16    80     
80     160    
32     0      
-16    112    
-64    -64    
32     208    
-48    64     
160    288    
-112   0      
64     96     
-64    64     
64     80     
0      176    
128    224    
32     -32    
240    528    
-48    192    
-256   -240   
128    80     
112    0      
80     320    
-64    -80    
32     32     
-112   -112   
-80    16     
208    240    
208    176    
-16    -112   
16     208    
16     96     
16     80     
48     48     
160    144    
0      160    
-64    0      
32     240    
160    176    
32     64     
-128   96     
32     -224   
48     48     
16     80     
32     16     
-64    32     
16     -48    
32     32     
1552   -1360  
-512   -48    
1216   752    
-256   -128   
240    -128   
-208   1120   
-720   -176   
-32    -304   
144    -96    
-160   -304   
160    176    
-192   128    
96     160    
0      192    
-16    -64    
-80    160    
192    256    
80     544    
-112   192    
-144   -128   
128    48     
112    176    
0      -64    
-48    -1024  
96     80     
128    192    
-16    192    
0      -48    
112    -48    
48     -176   
-16    0      
80     64     
128    256    
-80    -96    
208    32     
-96    -160   
128    -96    
-144   208    
80     -400   
48     64     
112    -16    
-16    144    
0      208    
64     80     
0      80     
-48    160    
16     144    
112    352    
48     224    
16     32     
0      -80    
16     -208   
80     160    
-128   -112   
80     96     
32     -1264  
176    64     
48     240    
112    320    
-112   -368   
80     48     
32     16     
-96    -48    
16     -192   
112    96     
80     112    
48     -64    
112    160    
48     -64    
64     64     
64     -144   
48     96     
16     -1408  
96     -80    
208    160    
-80    -176   
-112   -800   
144    -80    
32     176    
112    160    
-32    336    
112    32     
64     240    
80     -112   
112    256    
-128   -176   
80     112    
112    -48    
64     64     
0      -832   
32     208    
64     96     
32     64     
48     192    
32     -240   
112    96     
80     -96    
-16    96     
0      -336   
-48    64     
144    -288   
48     112    
0      -560   
16     80     
48     0      
-176   -80    
208    224    
-32    0      
160    112    
-64    -80    
112    160    
0      -64    
80     128    
32     -96    
32     -16    
64     -96    
16     128    
112    -368   
-48    0      
64     -224   
160    272    
-176   48     
32     -464   
48     -2432  
64     -224   
64     -128   
-112   176    
32     64     
32     -80    
-32    0      
144    -112   
-80    224    
16     112    
128    -48    
192    576    
-208   112    
-112   -16    
32     128    
64     -512   
128    0      
80     -112   
-48    -128   
0      -736   
16     -80    
16     -480   
176    -112   
192    48     
-16    -96    
-16    -352   
128    16     
-64    -272   
16     -48    
-256   -352   
224    -240   
320    96     
240    -288   
-32    192    
-32    -400   
-16    -144   
96     -400   
0      144    
176    256    
-144   -64    
160    -352   
-128   96     
-32    -208   
32     192    
-80    0      
48     -144   
-256   0      
-32    -160   
208    256    
-48    -352   
16     -32    
-16    -128   
48     -32    
64     -1072  
-304   80     
144    -208   
-128   80     
224    16     
16     48     
-80    -160   
-16    -112   
-464   -288   
-48    -304   
112    64     
112    -80    
64     -32    
144    -544   
32     96     
-48    -1968  
0      80     
80     -48    
192    64     
-528   496    
400    1696   
-1120  0      
112    -768   
-576   -1104  
336    288    
-272   176    
-272   -144   
0      176    
400    -208   
0      96     
-96    -288   
128    304    
-80    -208   
224    128    
-192   0      
160    -32    
-96    48     
112    -16    
-48    -48    
112    -112   
-480   48     
112    -48    
-16    -64    
0      -32    
160    176    
-144   -288   
48     112    
128    -2848  
-32    -16    
-64    48     
-16    -48    
80     0      
16     -32    
-672   -16    
80     -32    
-160   288    
-96    -160   
-112   -16    
-16    0      
192    32     
0      -352   
-16    64     
160    -2224  
-16    -112   
80     16     
96     32     
-464   -80    
272    128    
-384   -16    
192    144    
-256   -80    
224    -48    
-16    96     
16     -80    
32     48     
0      -80    
160    96     
96     -272   
-16    32     
0      64     
48     -64    
-176   32     
64     0      
-96    -80    
176    32     
0      192    
-64    96     
-112   -176   
208    -16    
-192   32     
160    -96    
-48    160    
64     64     
-1424  -48    
-48    -144   
-96    208    
-176   32     
128    -16    
-16    32     
-80    96     
-160   -64    
112    -416   
-448   80     
-272   -128   
-32    112    
176    224    
-64    -112   
192    160    
-384   96     
112    -16    
-256   -80    
48     32     
96     0      
64     224    
-176   -32    
80     32     
-128   -32    
48     112    
-48    -128   
96     96     
-256   -160   
-112   80     
-160   112    
-96    -48    
176    304    
-224   80     
288    192    
-320   112    
224    -32    
-112   -80    
32     32     
112    -16    
16     272    
-16    -32    
32     32     
0      32     
16     176    
128    128    
-80    272    
-64    128    
96     32     
-400   16     
-272   -80    
16     160    
-464   -32    
-128   -64    
-32    -128   
32     80     
0      -32    
-48    80     
80     128    
48     -16    
0      192    
0      -32    
-16    144    
-16    112    
48     144    
-32    -48    
-48    32     
-80    -160   
16     112    
-912   -64    
160    112    
-48    -96    
144    240    
-16    96     
-32    0      
16     48     
-48    48     
-112   16     
0      80     
-16    208    
112    32     
-32    128    
-48    256    
-96    -528   
-480   32     
96     208    
0      -48    
-32    240    
0      0      
-64    -128   
-48    -32    
64     144    
16     336    
-32    -16    
0      208    
-176   -304   
-48    16     
-128   80     
0      128    
-160   368    
-160   48     
0      -256   
224    224    
160    64     
-16    -16    
-64    32     
-32    96     
-48    80     
32     32     
64     128    
-192   -64    
0      160    
-48    64     
32     -16    
-288   -48    
96     32     
80     32     
16     0      
48     160    
-96    192    
0      -32    
-80    112    
80     96     
-560   1328   
-496   -592   
-304   -528   
736    -64    
192    1584   
-432   -640   
-640   -48    
304    496    
-112   272    
-80    -160   
-64    144    
-128   80     
-16    192    
16     224    
-128   -176   
-16    48     
-64    -32    
96     176    
-288   -592   
-80    -208   
112    208    
16     64     
-80    0      
-16    64     
112    -32    
48     128    
32     224    
16     96     
32     48     
-80    48     
160    80     
80     0      
-160   0      
112    208    
-160   -144   
352    288    
-128   224    
128    32     
-272   -144   
224    80     
0      64     
32     48     
48     48     
32     96     
112    144    
16     128    
-96    32     
-48    16     
128    592    
-16    -144   
144    336    
-96    16     
16     -16    
-80    112    
32     96     
64     -272   
128    -48    
272    464    
-16    208    
-80    128    
-112   96     
64     80     
-208   -96    
128    16     
-48    -112   
16     -48    
-80    192    
64     16     
-48    80     
80     48     
80     112    
16     48     
-16    64     
112    0      
64     176    
-48    96     
416    1200   
-320   416    
48     96     
-272   -480   
208    -576   
48     48     
96     -128   
32     256    
48     96     
-144   32     
112    0      
112    288    
16     -80    
32     112    
-32    192    
32     256    
-160   -160   
80     32     
112    -48    
96     -144   
-176   -144   
-16    -160   
176    208    
64     144    
-112   16     
0      96     
208    192    
0      48     
-128   128    
-144   -240   
304    304    
-240   -160   
240    176    
-48    208    
128    -208   
-32    80     
-32    32     
160    80     
-48    128    
176    368    
96     304    
32     336    
32     336    
64     256    
-16    -96    
-32    112    
32     -64    
96     -400   
144    96     
-208   -304   
336    160    
144    224    
-48    64     
32     -112   
192    144    
-160   176    
192    256    
-112   16     
80     -304   
224    336    
0      128    
-32    112    
32     -32    
64     64     
48     -80    
0      176    
64     0      
-144   32     
128    -864   
-48    48     
64     -16    
-144   80     
112    144    
0      80     
-48    64     
176    272    
-144   80     
192    -368   
64     48     
64     32     
32     96     
64     -256   
128    176    
48     -896   
0      336    
64     -336   
16     368    
-32    160    
192    -688   
-48    -240   
592    752    
-272   80     
-48    48     
48     96     
160    -128   
-32    288    
-128   -496   
48     160    
-32    -208   
128    112    
-32    -96    
80     96     
-64    32     
0      112    
-16    96     
0      -672   
80     176    
160    -432   
48     144    
-16    -640   
0      192    
-96    -272   
-16    48     
64     -16    
16     48     
96     -656   
-128   -96    
176    144    
208    48     
48     240    
-208   -960   
688    -912   
496    384    
-160   -32    
-80    -32    
16     240    
416    -304   
128    464    
80     -128   
-144   80     
160    -368   
48     352    
-32    80     
112    -592   
0      -480   
176    -192   
-160   -512   
224    -112   
0      128    
64     -80    
64     160    
-16    -96    
112    112    
-64    -160   
208    -512   
-80    16     
144    80     
80     144    
-64    -304   
112    -560   
0      -160   
112    -608   
-176   16     
240    -224   
-32    -144   
128    -336   
-80    48     
176    240    
144    -80    
-64    -192   
-64    176    
144    -256   
16     112    
-480   -128   
240    -240   
-1568  32     
32     80     
384    320    
-336   -176   
288    -240   
-144   -496   
192    -176   
-16    80     
96     -16    
64     80     
-128   -192   
256    -64    
-192   272    
-32    -320   
240    32     
-240   128    
48     -32    
48     -224   
208    -176   
-80    144    
32     -672   
112    80     
32     -1984  
48     80     
-32    -16    
64     96     
144    -160   
64     -80    
-32    96     
-48    -80    
-432   -112   
-80    96     
176    -128   
112    -224   
16     -16    
16     -80    
-80    304    
-96    -560   
288    96     
32     -128   
-16    -96    
288    0      
-32    208    
32     -48    
80     -176   
-208   32     
48     16     
-208   128    
-96    -32    
64     112    
112    -176   
32     -80    
32     -496   
64     144    
80     80     
144    144    
-128   -48    
208    -32    
-32    32     
48     -208   
-112   48     
-96    -256   
-128   -64    
160    16     
-832   -208   
32     -80    
64     32     
48     -160   
64     16     
0      -592   
112    208    
-80    32     
48     -112   
-96    288    
64     -112   
-256   -48    
160    -16    
0      32     
-16    -240   
-192   -176   
-16    -96    
112    32     
-64    -304   
224    240    
-80    -464   
128    -48    
-368   -80    
96     64     
16     192    
208    192    
-144   80     
-64    -128   
-176   0      
128    -48    
-224   16     
240    144    
16     192    
64     -64    
-64    208    
144    -160   
-16    272    
32     32     
-176   -112   
176    128    
0      -48    
-144   32     
96     -144   
-32    32     
80     16     
-112   -176   
320    336    
-464   -384   
-720   -480   
112    144    
160    64     
-320   80     
-176   -64    
-64    144    
-80    48     
-32    -144   
-176   -48    
192    224    
-160   64     
48     32     
-496   -192   
-352   -288   
48     80     
-176   -96    
0      224    
-176   64     
-96    -16    
-32    64     
96     64     
-128   -16    
-32    112    
0      64     
144    96     
-208   112    
-256   -224   
64     -16    
-32    0      
160    144    
-192   -32    
-80    48     
128    48     
-64    0      
-80    240    
-192   -96    
-32    112    
-192   96     
-704   -224   
-800   1328   
-112   1520   
-528   -112   
416    -288   
0      528    
-288   800    
-928   -16    
336    -16    
192    -512   
80     208    
-144   96     
64     96     
0      16     
-192   -80    
-112   -128   
-544   -128   
-64    -96    
64     -144   
192    208    
0      -112   
32     192    
64     304    
-208   80     
128    -96    
-48    160    
-112   -192   
144    -16    
-64    160    
272    80     
16     176    
-144   -32    
-48    208    
-16    144    
272    256    
-240   0      
-16    -496   
128    176    
0      112    
-16    144    
16     32     
16     -16    
-64    -16    
-32    144    
32     128    
-32    48     
-64    -64    
-112   -176   
96     208    
-48    32     
-48    -176   
96     160    
128    64     
-144   0      
48     48     
32     48     
-96    -48    
-144   16     
-48    64     
0      48     
-16    176    
32     192    
-176   -192   
-112   -416   
160    144    
48     -64    
-352   160    
0      160    
-32    96     
-16    16     
16     64     
32     64     
48     -16    
-144   0      
-48    64     
-48    80     
32     112    
-432   -128   
-208   -272   
224    208    
-80    96     
-64    -176   
64     112    
-80    16     
144    176    
-144   -432   
-176   -176   
240    0      
272    688    
-352   -16    
80     -96    
96     192    
0      160    
-304   32     
-128   -432   
-32    -208   
64     112    
-48    48     
-224   -192   
48     -48    
128    64     
128    160    
-208   -32    
16     112    
-48    80     
-96    -224   
-112   -480   
-32    -224   
-112   -176   
0      48     
-48    96     
32     80     
48     96     
32     48     
64     96     
-96    -48    
-16    48     
32     160    
240    448    
-80    48     
16     80     
-32    32     
16     0      
48     -64    
-112   48     
160    -96    
-64    96     
32     96     
96     80     
-48    48     
-16    -208   
-16    128    
0      96     
32     -64    
64     -48    
-128   272    
-336   -464   
224    -128   
-96    48     
-16    112    
128    240    
0      144    
0      128    
-64    176    
144    288    
-128   96     
32     -32    
-32    64     
64     0      
-144   -96    
96     48     
-48    -128   
144    0      
-48    208    
48     160    
-48    96     
128    384    
-144   96     
80     0      
0      128    
112    0      
48     64     
16     -176   
-96    304    
-48    64     
32     256    
-64    -128   
176    -464   
48     176    
-32    -80    
-96    96     
224    -320   
-16    112    
32     48     
-48    368    
0      -240   
64     256    
-64    48     
64     112    
-112   112    
128    -64    
-48    32     
32     -272   
-32    -48    
48     80     
128    192    
-48    0      
32     144    
0      96     
-48    144    
-48    -16    
176    128    
-160   -32    
224    112    
-112   -256   
112    144    
-240   -112   
-64    -800   
752    448    
-224   -1216  
544    -688   
-352   -224   
400    -80    
-160   256    
336    -176   
-416   -288   
544    -48    
-64    368    
128    -48    
-240   96     
144    160    
80     144    
16     0      
176    160    
-144   -1440  
80     64     
-64    160    
128    80     
-16    112    
144    64     
32     -512   
-176   64     
112    112    
144    144    
128    80     
-208   -128   
48     144    
64     -96    
96     144    
-32    -256   
0      112    
208    -1744  
-96    64     
96     32     
-192   -16    
144    -64    
-16    128    
16     64     
64     112    
-16    80     
64     -64    
16     96     
32     -48    
112    288    
224    -272   
-80    112    
48     -640   
32     96     
32     -2128  
112    32     
32     48     
64     144    
96     -16    
-16    192    
32     0      
192    -16    
-32    80     
96     96     
-32    48     
160    160    
-16    64     
48     -848   
-16    -48    
48     -256   
0      160    
-32    0      
80     112    
-64    16     
80     128    
64     160    
-64    -528   
208    80     
0      -288   
48     32     
112    -80    
-112   48     
96     -256   
112    96     
-80    -80    
-32    80     
80     80     
112    96     
160    -304   
0      -112   
-96    96     
96     -64    
0      128    
0      -112   
80     192    
64     0      
-16    -112   
16     -144   
48     224    
-16    -160   
0      -16    
32     144    
112    -192   
0      32     
-48    0      
0      -608   
48     -48    
48     -2528  
80     -96    
96     48     
96     64     
-192   -160   
144    -48    
32     -896   
96     -32    
-48    -144   
48     64     
128    -176   
48     -208   
-144   16     
128    -1232  
64     -224   
128    -224   
112    -80    
-48    -1056  
48     48     
112    192    
-64    -32    
400    416    
-464   -160   
304    -80    
-64    128    
144    48     
16     32     
-720   -160   
64     0      
96     -80    
-16    -160   
144    -80    
96     176    
96     -80    
-128   128    
176    160    
-224   -80    
288    96     
-208   -272   
224    -144   
-112   0      
144    128    
-16    -64    
96     -144   
-256   64     
112    80     
16     16     
64     -592   
336    64     
-144   336    
-160   -320   
96     -48    
256    112    
192    -16    
-224   -176   
-112   -176   
112    -64    
0      -64    
32     32     
-704   -224   
272    -80    
-160   272    
-160   -816   
64     32     
176    -144   
-160   -208   
80     160    
-112   96     
176    -192   
-160   96     
176    -16    
-32    80     
-176   80     
96     -144   
-1152  -96    
128    144    
-896   -80    
144    -16    
144    -48    
48     -208   
0      144    
32     128    
16     0      
128    80     
144    32     
-64    48     
-112   -32    
80     0      
32     -80    
32     0      
-208   256    
-1744  -2208  
752    -528   
-848   832    
816    -512   
-176   544    
-48    -1328  
368    288    
112    288    
96     48     
-96    -496   
-64    288    
-144   -480   
176    400    
-272   -352   
160    240    
-400   -256   
-112   -272   
-272   -560   
256    80     
-32    288    
-48    -208   
-288   336    
-224   -304   
304    -48    
-192   -112   
224    224    
-128   -208   
48     96     
-16    -112   
288    112    
-176   -96    
64     -96    
0      144    
48     64     
-16    192    
208    -288   
0      80     
16     -32    
240    112    
-96    64     
64     16     
-16    -16    
80     144    
-16    160    
-16    -224   
16     112    
-32    240    
-208   -336   
-336   -288   
-112   -80    
16     -48    
-208   -112   
64     -96    
-352   272    
-80    80     
0      48     
224    -112   
128    -48    
-208   416    
304    240    
144    32     
-480   -288   
-32    64     
192    -336   
0      48     
-144   160    
-48    192    
16     144    
128    96     
-128   16     
-320   -144   
-160   -64    
-32    176    
-16    144    
-64    16     
-64    -80    
208    -192   
144    32     
-80    176    
48     128    
64     128    
-240   -64    
304    80     
-240   160    
16     192    
-128   192    
-32    0      
-96    368    
-64    32     
-64    -16    
-176   -224   
-80    -208   
144    176    
64     -48    
-112   -80    
32     16     
-112   -160   
0      0      
-176   -16    
0      96     
-112   128    
-144   -96    
-496   16     
208    608    
-528   0      
144    144    
-64    -48    
96     192    
176    128    
-128   96     
-80    80     
128    112    
-16    192    
112    96     
-64    -64    
-64    80     
96     192    
-64    32     
-176   -32    
-416   -128   
256    288    
32     112    
-208   192    
-112   0      
144    112    
16     64     
16     48     
64     112    
-96    32     
16     288    
0      176    
96     176    
-288   -176   
80     176    
-256   16     
320    96     
-320   -128   
16     -16    
32     112    
96     112    
32     16     
-160   80     
64     -16    
-144   -80    
64     -64    
-64    64     
0      176    
-80    48     
0      32     
-448   -160   
-32    96     
-864   -160   
288    144    
-144   32     
256    96     
-96    -320   
112    16     
32     80     
-80    112    
-80    208    
64     48     
-16    48     
-160   48     
-96    64     
-224   -96    
208    144    
-16    16     
112    80     
-32    48     
32     32     
16     96     
80     -96    
112    400    
-112   -48    
-80    192    
32     48     
-48    96     
-80    -112   
48     64     
-48    16     
64     -16    
160    -192   
80     288    
-48    64     
-192   128    
-32    0      
64     80     
-16    -80    
16     32     
32     0      
-96    80     
-208   48     
-16    48     
112    208    
-80    16     
2288   1984   
-1584  464    
-528   -544   
-176   464    
1136   384    
-496   -224   
-128   -336   
224    688    
384    -432   
-464   496    
64     -432   
16     496    
80     -240   
96     560    
-112   -272   
48     96     
-64    48     
224    112    
-96    128    
32     0      
80     240    
112    -96    
-16    336    
48     -176   
64     224    
16     -144   
32     416    
-64    -112   
-32    176    
-16    -48    
32     144    
128    -32    
-64    176    
32     16     
16     112    
112    0      
-48    96     
96     32     
-16    144    
-80    0      
48     96     
16     96     
-48    -16    
-32    112    
80     16     
16     160    
-16    48     
208    128    
-112   64     
16     80     
48     80     
32     112    
32     96     
48     80     
-16    -16    
32     144    
96     160    
-96    -16    
192    -32    
-16    96     
48     80     
16     112    
64     80     
48     96     
0      -32    
48     144    
16     144    
48     160    
-32    -48    
48     64     
0      0      
80     80     
-64    16     
0      -496   
-64    64     
272    64     
-128   144    
160    80     
144    256    
-144   80     
192    0      
-144   -16    
-160   -64    
-224   -80    
208    160    
80     -16    
96     -48    
-112   16     
48     -192   
0      128    
80     -1056  
80     192    
16     128    
32     96     
384    800    
-160   416    
-16    -80    
64     -48    
128    176    
144    160    
-48    240    
32     128    
0      16     
80     -112   
16     128    
16     16     
96     160    
64     416    
64     288    
80     240    
-32    160    
-48    160    
0      32     
144    80     
112    480    
-112   288    
16     -112   
-32    48     
176    64     
48     192    
-16    -544   
16     144    
64     -1344  
176    128    
64     240    
-32    560    
112    224    
-48    288    
-128   -112   
112    0      
-32    -128   
176    -16    
-48    112    
96     -160   
-32    80     
96     -64    
48     64     
0      -464   
48     48     
96     -848   
48     192    
-96    -256   
176    144    
80     64     
96     96     
-32    240    
32     -32    
48     64     
64     -288   
48     144    
-64    -256   
80     224    
-16    -96    
64     64     
-80    -656   
448    240    
-256   240    
64     16     
-64    64     
144    160    
112    64     
-64    -80    
64     160    
-48    -240   
96     -80    
192    160    
176    240    
-224   -384   
256    128    
64     -608   
48     16     
-176   176    
96     160    
0      64     
128    -208   
-128   48     
208    -208   
-128   176    
128    -224   
128    160    
32     -32    
-32    64     
176    -96    
144    128    
-32    -272   
176    192    
32     112    
128    -704   
-96    80     
-16    -208   
224    -448   
256    -160   
32     192    
-176   -96    
16     16     
96     -128   
-384   1168   
-432   -144   
48     -1008  
-240   400    
-304   -704   
0      -272   
1136   -832   
-576   -352   
32     -512   
-112   256    
480    -32    
96     -64    
-176   -784   
144    -1248  
144    -432   
208    320    
-368   -352   
144    -352   
-112   -432   
432    112    
-448   160    
-112   -80    
320    -96    
-464   80     
-64    -448   
304    -176   
16     688    
112    -176   
-64    -368   
-208   -272   
256    -240   
176    -192   
-128   -288   
-96    80     
112    -16    
160    576    
-16    160    
0      -336   
-128   -112   
96     -192   
-656   0      
-32    0      
160    208    
0      -144   
16     64     
-144   -320   
432    80     
-32    128    
128    32     
80     -64    
-64    128    
-96    -128   
-64    -112   
-112   -256   
96     112    
-144   -16    
160    48     
-16    -32    
-128   -496   
-32    -96    
-48    -368   
-112   48     
208    -1392  
0      128    
16     -32    
-48    16     
0      -48    
80     -32    
-32    112    
-32    32     
-288   80     
-16    -80    
-912   -32    
-48    -144   
16     -80    
0      -160   
-144   112    
-48    -288   
128    224    
-144   112    
48     -16    
208    -144   
-64    160    
-192   80     
32     -80    
-816   -96    
96     -48    
-96    80     
112    -16    
-336   160    
-64    -160   
112    64     
112    -1360  
32     224    
-48    128    
16     -96    
-48    160    
-48    -112   
-208   -128   
80     -64    
-32    48     
16     0      
-96    144    
80     -32    
240    -160   
-224   -368   
160    16     
64     -544   
16     80     
80     128    
16     64     
-32    -160   
32     -176   
16     64     
256    -48    
-336   224    
240    192    
-64    32     
-112   -64    
160    112    
144    -112   
-80    -64    
144    -64    
128    208    
-32    208    
192    192    
-320   176    
208    -32    
96     48     
-176   -80    
-16    -32    
-16    0      
-272   -80    
160    -352   
-304   48     
-192   160    
112    80     
0      -240   
-224   48     
-192   -64    
-512   16     
-64    208    
-384   32     
96     -80    
-32    48     
-304   -96    
112    -176   
-160   -48    
64     -32    
-32    64     
-48    -96    
-80    48     
112    -16    
-304   32     
0      -96    
0      16     
-16    176    
-160   0      
-64    0      
-1392  112    
-64    32     
192    48     
0      112    
0      -64    
-192   64     
32     -64    
-160   16     
-96    -16    
-48    48     
160    -240   
144    96     
0      192    
-304   -32    
-16    48     
-176   112    
-32    176    
-144   -80    
-32    32     
96     -288   
48     160    
-112   -112   
-144   -96    
0      16     
128    144    
-64    -80    
-96    128    
-32    0      
-48    -32    
16     16     
-368   -64    
0      64     
-1328  -128   
112    96     
-80    -96    
32     144    
1168   2048   
-1904  608    
-448   -32    
384    1168   
848    288    
-464   -288   
-128   736    
384    224    
192    -752   
-288   192    
48     32     
-224   336    
16     -160   
80     496    
-48    -320   
-32    240    
-80    -160   
16     208    
-112   -240   
128    0      
-144   48     
112    208    
48     128    
-160   -64    
-160   -32    
-32    80     
-160   112    
-48    112    
-32    -80    
0      32     
0      96     
0      -16    
-80    80     
32     16     
-96    96     
160    -48    
-48    32     
-192   -48    
32     64     
-240   -48    
128    112    
-80    32     
64     80     
-528   -128   
-208   32     
32     48     
32     -16    
0      48     
-32    32     
112    80     
-16    80     
-64    48     
0      32     
176    80     
-128   -224   
128    64     
-256   128    
0      176    
64     48     
32     80     
-16    112    
64     160    
-32    96     
-32    -64    
0      0      
-32    48     
80     160    
-160   -144   
128    -112   
64     64     
-48    128    
-96    32     
48     96     
32     0      
96     0      
208    144    
-112   176    
-80    96     
-64    -32    
16     -176   
32     48     
32     16     
-16    112    
96     80     
-240   -64    
-112   -448   
32     64     
128    0      
80     256    
-16    96     
80     160    
-64    112    
-32    0      
64     144    
-16    -32    
-32    -224   
-96    -256   
-48    -48    
224    224    
-96    128    
-80    48     
-32    32     
144    16     
128    112    
-128   16     
96     48     
-48    48     
32     64     
16     128    
64     80     
-112   0      
16     96     
-32    -32    
128    96     
-96    32     
128    96     
-176   16     
-16    -32    
-32    -16    
96     -48    
64     144    
48     32     
32     112    
-80    -16    
16     80     
16     16     
64     -304   
-80    -32    
80     160    
-32    -128   
-32    176    
32     32     
112    144    
-48    0      
272    304    
-224   16     
96     48     
-80    272    
-16    -64    
80     16     
32     208    
-32    -32    
-48    -16    
160    128    
48     48     
-128   -480   
304    96     
32     272    
64     144    
-160   0      
192    176    
-32    80     
-48    32     
160    192    
-16    -128   
272    16     
-48    256    
96     96     
-16    208    
-16    -240   
32     -64    
0      16     
64     -944   
-16    32     
32     16     
32     64     
208    192    
-96    80     
-32    0      
-64    112    
32     112    
-64    -16    
-32    0      
64     64     
32     112    
0      0      
-32    48     
32     -1920  
112    112    
112    48     
-64    80     
0      128    
96     16     
-16    160    
-16    96     
16     96     
0      96     
48     48     
96     80     
96     176    
-160   -224   
112    144    
0      -160   
256    48     
64     -144   
32     192    
1744   -1728  
-352   -352   
912    48     
-544   112    
160    -576   
-48    -464   
-144   -112   
704    128    
-416   48     
96     -272   
160    416    
0      128    
-160   -112   
0      -336   
176    240    
-208   -336   
304    112    
96     272    
128    208    
-160   -16    
64     -64    
-176   -48    
208    -416   
-64    -144   
-16    -192   
208    192    
64     16     
-80    176    
160    -464   
0      240    
144    -208   
-64    0      
64     144    
80     -32    
-16    32     
208    112    
32     64     
-16    128    
112    144    
64     -480   
48     112    
-32    -480   
96     -64    
128    -48    
-112   224    
160    80     
-64    -240   
160    0      
-32    192    
112    -144   
112    128    
0      240    
80     -80    
96     112    
-16    -32    
128    160    
-144   -96    
144    128    
48     160    
-160   64     
128    -560   
112    144    
-32    144    
-48    0      
64     -80    
176    0      
32     0      
32     -176   
16     160    
-64    -224   
176    224    
-80    -144   
176    96     
0      -32    
96     368    
-128   -384   
256    -192   
-160   0      
128    -560   
0      80     
-384   -16    
64     -1152  
-128   -320   
304    -1312  
-16    -16    
64     -352   
80     -16    
0      240    
112    -48    
0      -704   
128    192    
-80    80     
48     -32    
128    128    
16     -304   
-400   -128   
-32    -336   
208    16     
-48    -224   
192    96     
-96    -1312  
0      -256   
16     32     
64     -176   
144    96     
80     -144   
-32    -16    
112    -48    
80     0      
16     -64    
-176   0      
-112   -48    
144    48     
-48    -80    
192    -96    
64     -64    
-32    48     
96     -992   
-32    128    
224    -80    
-256   -16    
48     -304   
144    144    
288    -32    
-336   -128   
48     -176   
128    80     
-864   -80    
48     -48    
80     -32    
80     -48    
48     96     
-160   -384   
48     -112   
-64    -112   
288    48     
-48    32     
-224   0      
208    32     
112    16     
-144   -96    
80     -304   
-144   -384   
224    -48    
32     -128   
256    -112   
-224   -176   
176    -384   
0      -128   
-16    -2592  
48     32     
112    160    
80     32     
-48    0      
-96    256    
-32    -160   
-32    -176   
-176   -80    
64     112    
-608   -32    
48     -176   
32     -272   
0      -176   
112    -192   
96     -208   
96     176    
0      -224   
-48    128    
-16    -48    
-32    -48    
-128   -32    
112    256    
-160   -96    
-160   -288   
-160   256    
432    -48    
-224   176    
32     -112   
16     80     
16     -544   
32     192    
-112   -96    
-16    -64    
-576   -48    
112    -80    
-256   0      
0      -64    
-384   -48    
224    16     
-384   -48    
-16    -112   
176    -32    
160    -96    
16     304    
16     -336   
-656   -704   
560    1664   
-928   -224   
-416   -400   
128    -48    
464    -656   
-208   80     
368    -208   
240    320    
128    96     
-112   -96    
-48    192    
320    -160   
0      32     
-256   -272   
-112   16     
16     -48    
-16    128    
64     -80    
96     -64    
-160   -32    
80     144    
-112   -32    
16     224    
128    144    
128    -272   
-352   -48    
-784   -80    
80     0      
-272   -160   
-400   96     
128    48     
-80    -16    
-128   16     
-1408  -80    
-80    -48    
32     -32    
-112   32     
176    -96    
-16    -32    
-432   -272   
48     144    
-96    -80    
128    96     
-16    -80    
-112   0      
64     128    
0      224    
-192   32     
128    112    
-176   64     
-672   -16    
-112   -64    
32     -96    
-96    16     
0      32     
96     400    
-176   80     
32     -16    
-48    -48    
32     0      
-64    -32    
-64    96     
128    64     
-208   64     
-176   16     
-464   -64    
-80    16     
-96    -64    
-64    80     
0      -16    
16     112    
-48    -112   
-80    96     
-16    0      
16     -16    
48     16     
-32    224    
16     0      
-112   -96    
-64    0      
-80    160    
-16    176    
-432   16     
0      -64    
32     -96    
-16    192    
-112   -192   
64     80     
32     16     
96     16     
-48    64     
0      144    
-32    112    
-64    16     
-80    0      
256    304    
-48    48     
-80    -32    
-96    0      
128    -16    
112    128    
0      176    
-48    0      
64     192    
-160   -16    
48     48     
-96    -16    
-80    0      
48     96     
32     80     
-64    0      
-32    80     
-80    -144   
48     48     
-512   128    
128    32     
-32    48     
16     16     
192    272    
-64    -112   
-96    80     
-16    -32    
192    144    
-112   0      
-256   -544   
64     64     
-288   96     
64     -96    
-272   224    
224    -144   
80     112    
-80    48     
128    80     
-112   -256   
176    128    
-128   128    
240    272    
-240   -80    
144    -32    
-112   192    
0      -192   
48     64     
0      -64    
176    112    
-416   240    
-48    304    
16     176    
-48    -112   
176    64     
128    160    
-160   112    
-112   0      
112    64     
240    224    
-160   272    
-192   336    
-48    -16    
0      -224   
272    16     
144    -16    
-112   48     
-80    144    
-16    112    
32     -208   
48     -112   
368    352    
-272   144    
-256   112    
-32    48     
64     48     
-112   -176   
32     16     
-32    160    
-16    160    
-48    48     
208    176    
96     192    
0      112    
-80    240    
-80    32     
48     64     
-32    48     
0      -32    
80     48     
144    336    
-112   -80    
-96    0      
0      32     
-48    -96    
48     240    
16     112    
80     240    
-80    96     
128    -96    
16     48     
1456   -2000  
176    96     
640    384    
-336   144    
-288   640    
304    128    
-528   160    
0      256    
-144   464    
-192   32     
208    16     
-240   144    
128    32     
-48    -32    
144    -80    
-64    -16    
-64    -128   
304    448    
-208   224    
64     32     
-160   -80    
160    160    
176    96     
-112   16     
64     32     
-80    128    
240    176    
-80    16     
64     -16    
0      64     
112    112    
-16    48     
-80    32     
16     112    
128    96     
-112   -128   
160    128    
0      112    
64     -912   
0      64     
-16    128    
80     144    
16     64     
48     32     
-160   16     
240    208    
-112   32     
176    240    
-176   -176   
320    48     
-320   -32    
144    -352   
-80    48     
192    -608   
-32    144    
80     176    
0      -96    
112    160    
-48    48     
32     32     
112    112    
-16    160    
80     288    
-192   -144   
208    0      
-112   144    
-64    -176   
144    288    
48     -320   
48     48     
-16    -32    
64     96     
96     80     
32     192    
-80    -16    
176    208    
-208   80     
64     96     
-16    -144   
96     144    
-32    176    
32     -32    
96     -48    
224    -96    
-96    272    
160    -304   
32     -80    
192    96     
-80    128    
208    -176   
-144   160    
-32    -112   
128    192    
-160   -112   
176    240    
-48    32     
176    -32    
-80    32     
64     -304   
-32    128    
112    -304   
-32    -16    
176    -1344  
0      80     
-96    -320   
-48    -80    
64     144    
304    272    
80     0      
-32    -288   
-16    256    
112    -352   
32     128    
96     -176   
144    128    
-16    -208   
-96    32     
112    -976   
0      96     
80     48     
224    16     
-48    48     
-208   144    
288    224    
224    -96    
-96    128    
80     -176   
32     80     
-16    16     
0      16     
144    -80    
128    48     
-112   -32    
-64    96     
192    80     
32     32     
112    -64    
-144   32     
64     224    
80     -256   
160    80     
-128   -288   
144    112    
-32    0      
240    688    
-144   0      
160    0      
32     -32    
80     80     
-48    -80    
48     112    
96     -64    
96     144    
-96    -80    
80     -32    
32     -368   
96     128    
16     96     
-48    -272   
192    368    
80     64     
-32    -64    
0      -160   
112    -1744  
96     368    
-64    -912   
80     16     
-144   -48    
48     -240   
0      -192   
-48    -768   
160    -192   
-64    -544   
128    -32    
-96    -80    
176    224    
48     160    
0      -32    
96     -192   
32     32     
80     -192   
0      -496   
-368   -64    
160    -192   
-64    -160   
96     -272   
112    112    
-96    -448   
32     64     
224    416    
176    -208   
240    -176   
112    112    
0      32     
-112   240    
-576   1312   
112    1824   
-1376  176    
-416   -432   
-240   1024   
-448   -96    
80     -64    
-208   128    
688    688    
-16    -1392  
-192   -352   
176    -160   
144    16     
16     -48    
128    112    
-192   -352   
128    80     
-128   144    
64     -112   
48     16     
-64    -288   
-112   144    
96     144    
112    -272   
-144   -480   
336    224    
0      -32    
-160   -64    
-32    0      
240    -80    
-128   0      
-48    64     
16     16     
-64    64     
-336   -48    
80     -128   
-720   -176   
112    -368   
-224   -112   
304    -64    
-192   -128   
48     -624   
96     96     
96     -32    
-64    160    
-80    0      
112    -16    
-48    -192   
48     -224   
-16    -48    
-16    -64    
-112   -16    
96     0      
112    208    
32     -224   
-64    -48    
96     -672   
16     368    
32     -16    
16     112    
128    -48    
-48    -80    
0      128    
16     128    
-144   48     
64     32     
0      0      
128    -128   
-240   32     
112    -224   
0      80     
0      -336   
80     96     
-16    32     
48     -64    
-160   -64    
304    256    
-208   160    
48     -16    
80     368    
-144   -80    
-224   -368   
112    -64    
-160   80     
32     128    
-32    80     
64     -448   
-32    -336   
32     0      
208    144    
-32    224    
-16    160    
-176   32     
128    -32    
-64    0      
80     -80    
-192   16     
-96    -208   
-32    -48    
80     16     
160    112    
-272   -192   
-1488  -80    
-16    64     
48     16     
80     112    
-16    -80    
48     224    
-32    -144   
64     160    
-16    -176   
32     -48    
32     0      
224    64     
-416   -208   
-16    32     
80     -256   
-272   112    
0      176    
-80    16     
-144   -64    
-96    80     
-176   0      
-400   -80    
-160   176    
64     -352   
-64    256    
-80    240    
112    224    
-336   -256   
144    -16    
-160   -208   
16     48     
-80    160    
-32    80     
64     192    
-304   -192   
32     -176   
-480   16     
176    -160   
144    144    
-160   80     
-96    -144   
-160   -32    
144    80     
-64    64     
-32    -192   
0      176    
80     160    
-80    80     
0      96     
-128   64     
144    160    
-96    0      
96     -64    
-608   -320   
96     -224   
80     240    
-96    128    
112    -32    
-80    256    
-80    -32    
-96    -128   
-32    48     
64     32     
-48    16     
-112   -272   
32     144    
176    384    
-128   192    
-320   -272   
0      144    
32     32     
80     64     
-272   -448   
160    416    
-352   -96    
-144   96     
64     64     
80     -96    
-80    224    
16     -48    
48     192    
-368   -96    
-16    -160   
32     -176   
144    304    
-416   -112   
-32    256    
64     -32    
144    144    
-144   96     
64     96     
-16    -16    
-64    32     
-64    16     
-912   416    
-1056  64     
-112   272    
672    16     
144    400    
-608   -672   
-624   512    
176    336    
16     16     
-144   144    
128    48     
-144   0      
-16    -96    
0      144    
-64    -160   
32     176    
-144   -32    
64     112    
-16    -16    
-96    32     
144    80     
-928   16     
-112   48     
-112   80     
160    -48    
80     112    
-112   96     
80     208    
-80    16     
80     80     
-48    32     
208    128    
-208   48     
112    80     
-144   -48    
128    208    
-160   -80    
-16    64     
-80    144    
112    96     
16     -48    
-192   96     
176    48     
112    144    
-160   80     
112    -16    
-144   144    
0      -160   
16     192    
-160   0      
208    96     
-192   80     
32     64     
32     48     
-80    32     
0      -64    
112    128    
-112   128    
16     -48    
-32    176    
-80    0      
-16    16     
16     -16    
32     80     
-32    -16    
0      176    
-80    -192   
160    32     
-112   144    
128    128    
-48    -96    
144    128    
-128   80     
112    128    
-64    48     
96     112    
128    208    
128    -80    
128    -48    
-96    80     
-144   16     
112    128    
160    336    
-80    -176   
176    32     
-32    16     
96     64     
-80    16     
48     144    
16     80     
48     64     
96     16     
-48    128    
-32    96     
-112   -112   
176    160    
-144   0      
240    160    
-48    96     
-80    64     
-16    16     
64     -32    
80     80     
-64    144    
32     160    
160    304    
48     144    
-112   -288   
-48    160    
-16    64     
240    80     
-48    96     
128    80     
48     384    
-112   112    
144    -144   
-80    48     
176    144    
-144   160    
416    176    
-144   -32    
-112   -112   
16     -32    
208    160    
-16    64     
-16    -1408  
144    176    
0      0      
16     64     
-64    80     
144    -64    
-112   0      
64     224    
176    48     
-64    64     
-192   -208   
272    176    
-96    -112   
16     -192   
-16    48     
64     -416   
64     48     
-80    48     
112    128    
16     48     
112    160    
-80    -64    
48     96     
32     176    
32     48     
-16    32     
80     64     
-112   96     
128    -176   
-112   64     
64     -416   
144    464    
-16    -1728  
0      -112   
0      -128   
256    352    
48     208    
64     208    
-112   112    
0      16     
-80    -256   
352    608    
-80    -16    
-32    -32    
96     144    
240    -176   
0      144    
-48    -848   
112    -32    
0      16     
272    448    
-256   -48    
64     16     
-16    48     
64     64     
-48    80     
32     176    
64     160    
-16    -112   
96     16     
160    -272   
-48    176    
32     -528   
64     96     
80     -560   
32     144    
-128   96     
-32    -16    
144    192    
208    64     
-48    32     
1248   -1440  
816    480    
912    64     
-496   0      
880    -1152  
-320   -768   
624    -64    
288    1632   
-352   32     
-352   80     
-128   -464   
416    16     
96     -16    
-64    -256   
192    384    
192    112    
-16    208    
32     -800   
272    448    
32     -336   
64     -128   
-48    -80    
64     -32    
32     -272   
-32    -512   
144    -64    
0      208    
128    112    
-16    128    
16     16     
176    -160   
-16    112    
-80    -32    
-192   96     
112    -128   
-48    304    
288    -32    
-224   -464   
272    -432   
-224   256    
288    176    
-80    64     
16     -96    
112    -1360  
-48    -464   
48     -432   
176    496    
64     96     
0      -16    
64     -128   
-16    -80    
96     -240   
80     -176   
80     0      
96     -512   
160    320    
-288   -1296  
64     -128   
-160   288    
-144   -352   
80     -80    
112    224    
112    -288   
-96    -2272  
-16    -192   
16     96     
-16    -80    
128    240    
0      -32    
64     -336   
-80    32     
96     -112   
112    96     
-176   0      
80     -32    
-32    -496   
80     -288   
128    -272   
48     -816   
160    48     
48     16     
-32    -48    
80     -400   
80     176    
-64    -288   
-48    32     
192    64     
224    368    
-272   48     
-32    -176   
-784   -128   
144    -80    
176    192    
-128   -160   
96     -48    
-16    -800   
128    -160   
64     -128   
48     128    
-16    16     
32     80     
96     32     
80     -80    
-144   0      
32     -304   
112    128    
0      -48    
0      -432   
80     -352   
144    176    
144    -288   
-176   48     
-64    -80    
192    32     
80     0      
-160   32     
112    96     
96     160    
-192   16     
112    -32    
-208   96     
160    -32    
-512   -112   
16     -368   
528    560    
-80    160    
96     544    
-320   -720   
304    96     
-112   -48    
-16    -208   
-112   16     
128    176    
-32    176    
16     80     
80     -32    
-64    48     
-128   96     
-48    -128   
-976   -336   
80     -80    
80     48     
80     -384   
160    416    
-80    -672   
240    512    
-112   160    
160    -160   
-112   0      
64     -96    
-416   -208   
64     -32    
272    -64    
-352   48     
128    -320   
-64    -320   
48     96     
144    -128   
-96    144    
112    -1392  
96     -64    
-96    64     
0      -80    
-400   -240   
176    -64    
-320   -160   
32     -96    
-160   -16    
0      -64    
-192   64     
-64    -160   
32     80     
0      -128   
80     64     
-64    48     
112    192    
-176   -48    
80     -32    
-16    0      
64     64     
-112   48     
192    112    
-400   -16    
80     -144   
-896   32     
112    16     
-16    32     
-448   -80    
192    64     
-80    32     
-560   16     
-128   64     
144    -160   
96     128    
0      48     
-672   -592   
-496   112    
432    480    
-720   -128   
-80    176    
-576   -16    
320    0      
-880   32     
-640   -592   
0      480    
-176   -544   
-112   208    
-144   -64    
96     80     
-1568  -96    
32     -128   
-48    16     
-32    -80    
-192   -16    
304    48     
-320   -128   
32     -96    
-272   96     
144    -96    
-48    240    
32     -64    
-96    192    
0      48     
-176   48     
-432   -144   
-160   48     
-48    48     
-32    128    
-48    -16    
144    128    
-208   -240   
-32    -112   
-112   256    
240    160    
64     64     
-240   -64    
64     80     
-192   64     
64     80     
-112   -160   
96     208    
-288   48     
64     -224   
80     64     
-176   192    
224    -176   
-128   112    
112    176    
-112   0      
0      -80    
-32    64     
-96    48     
-80    96     
48     -16    
-128   112    
64     32     
-288   -32    
-32    96     
-128   16     
80     -128   
96     0      
-16    96     
-96    176    
96     112    
-128   0      
176    48     
-48    128    
32     96     
32     176    
-128   -80    
112    320    
-176   -96    
272    -80    
-240   192    
-288   80     
80     0      
-32    0      
32     -96    
-64    96     
-144   32     
160    -16    
80     368    
-240   -16    
32     80     
-64    -80    
0      16     
-32    -128   
16     160    
-96    16     
0      160    
-48    128    
-96    32     
176    288    
-16    80     
-16    176    
-32    96     
64     16     
0      160    
-128   16     
-80    -80    
16     128    
-16    64     
96     128    
-416   -192   
-16    -544   
16     272    
-16    80     
48     192    
-16    64     
0      48     
48     128    
-32    -176   
112    176    
-128   -384   
176    80     
-96    160    
-16    16     
64     224    
16     96     
-160   192    
176    160    
-64    64     
32     256    
-16    128    
240    304    
-208   256    
224    240    
-16    240    
-64    -48    
-112   16     
-96    -48    
-64    -144   
128    400    
-16    -80    
-96    64     
48     208    
-16    272    
-96    80     
0      64     
128    16     
-304   -464   
256    -48    
-64    256    
-16    48     
-144   -64    
64     144    
-144   16     
-48    160    
112    0      
-160   208    
-16    0      
-32    144    
32     448    
160    320    
-80    -16    
64     -16    
-48    64     
-48    160    
-416   -560   
16     -288   
640    336    
48     368    
-368   80     
32     64     
144    96     
128    -48    
144    80     
-128   112    
80     32     
-192   48     
160    0      
144    -48    
128    176    
0      144    
-128   176    
-48    64     
64     0      
16     64     
32     192    
-128   0      
80     80     
96     32     
96     32     
-176   48     
16     16     
-16    224    
-128   0      
112    80     
128    256    
64     -64    
-208   80     
336    1936   
-1184  -2368  
240    -160   
1008   272    
-288   -608   
-544   -416   
720    800    
-432   -384   
736    -528   
-160   592    
176    -16    
-576   -96    
112    240    
256    160    
-208   -192   
0      80     
128    96     
272    512    
-320   80     
-32    64     
-80    -240   
384    256    
-64    64     
144    176    
-32    -48    
176    96     
208    -480   
224    96     
16     -48    
-192   16     
0      48     
160    -576   
0      384    
-96    -48    
240    304    
-112   176    
112    -80    
0      -224   
0      -224   
496    256    
-144   176    
-128   -64    
128    64     
96     48     
16     -64    
128    176    
-160   0      
16     0      
96     96     
0      -32    
32     64     
16     96     
64     304    
-48    128    
-80    16     
160    368    
-32    -160   
48     -512   
448    560    
-192   -368   
64     320    
48     112    
64     -240   
-96    -176   
432    224    
-112   -336   
-32    48     
80     144    
240    64     
48     16     
64     128    
0      96     
16     -64    
32     64     
96     -64    
16     -16    
-32    -224   
144    0      
64     -16    
208    368    
-272   -2016  
176    -48    
144    -224   
96     48     
48     512    
-64    64     
-32    80     
-32    -256   
80     -48    
48     -32    
16     80     
-32    -560   
64     16     
96     -224   
-32    208    
-96    -160   
-112   -288   
128    -208   
160    128    
-64    128    
64     176    
32     32     
96     272    
16     208    
48     -64    
48     272    
80     -96    
-112   -288   
-80    -352   
144    160    
240    128    
-176   64     
32     96     
64     64     
-32    -80    
48     160    
160    320    
-48    -128   
64     256    
-208   -288   
304    176    
-48    -176   
-240   192    
256    -192   
-224   288    
208    -32    
-112   160    
96     -16    
16     80     
32     32     
0      -704   
-16    -1472  
80     -192   
352    -1056  
-240   -96    
320    128    
-128   0      
16     176    
32     -112   
0      48     
64     -128   
144    -2544  
-32    0      
0      -368   
112    16     
-352   -432   
240    -224   
-80    16     
128    -176   
32     0      
80     -976   
-32    -80    
48     208    
-144   -80    
144    128    
-32    -16    
32     -96    
176    96     
64     -96    
-32    32     
-192   -96    
64     -240   
-560   -80    
112    0      
48     -80    
64     -160   
32     -16    
80     -2704  
16     -64    
128    16     
64     48     
0      -32    
-448   -32    
144    -176   
144    128    
-64    -192   
16     176    
-448   -16    
48     -176   
48     -64    
64     -96    
112    -16    
-96    -208   
208    -112   
32     -528   
80     80     
16     -80    
-32    160    
80     -160   
128    -32    
32     80     
-80    -80    
-512   -48    
32     -352   
-416   -80    
96     16     
-1040  640    
80     -1232  
1248   480    
16     -784   
528    496    
-736   -1008  
304    -240   
848    400    
-224   320    
-144   -256   
-112   -416   
-112   160    
144    -144   
-576   352    
64     -368   
288    256    
16     -400   
16     16     
-96    -576   
48     192    
144    -96    
0      256    
-96    -64    
208    -176   
-112   -128   
64     -112   
-224   128    
304    272    
-128   -96    
-48    -80    
-80    -64    
128    -64    
64     96     
64     -96    
-32    80     
48     -976   
112    -16    
112    -80    
32     -144   
-112   32     
176    160    
-16    48     
80     -16    
-304   0      
160    -128   
-64    96     
96     64     
96     32     
112    -192   
-128   80     
224    -832   
0      -128   
-160   96     
64     -48    
-48    48     
-16    -224   
-48    32     
0      -320   
-16    96     
-32    -96    
16     64     
64     -144   
48     16     
128    -304   
-48    16     
-96    112    
32     144    
0      -80    
112    48     
-256   0      
80     96     
-176   -16    
96     -80    
32     -16    
80     -32    
-240   64     
-528   -192   
0      96     
-96    -272   
0      112    
-16    144    
-432   -96    
-16    -128   
-1136  -128   
-32    96     
64     128    
80     -96    
176    -80    
-208   144    
96     -112   
-48    0      
-144   -176   
0      -16    
-112   -240   
160    80     
-112   -48    
-368   -80    
-96    32     
-208   384    
-368   -160   
-576   -144   
-128   96     
80     -96    
-240   -160   
16     -192   
128    352    
-48    -160   
-112   112    
32     -160   
48     80     
-16    32     
-80    80     
-16    64     
112    48     
0      176    
-192   160    
-48    -128   
-1024  128    
208    208    
-112   -32    
16     32     
-144   16     
-64    -240   
0      -176   
80     96     
-32    176    
-128   -64    
-128   -256   
64     176    
128    192    
-176   -208   
0      224    
-464   -32    
128    352    
-32    128    
32     192    
-48    -176   
96     224    
-16    96     
-160   -80    
-16    64     
-64    48     
32     160    
-256   -32    
16     368    
-288   -240   
-48    -128   
-16    -16    
48     32     
-992   -128   
-80    48     
-32    -64    
64     144    
-112   0      
96     176    
-112   96     
-224   -48    
64     -48    
160    64     
32     128    
-224   32     
144    128    
-128   -128   
112    48     
-1040  -32    
112    48     
-160   144    
64     -32    
64     112    
-176   -64    
64     64     
-80    96     
64     80     
-16    -160   
80     80     
-96    96     
-64    128    
-352   -176   
176    16     
-96    32     
64     160    
-160   80     
192    -128   
-48    128    
-64    -96    
-128   176    
64     0      
160    80     
-176   32     
16     48     
-192   -48    
240    -64    
-32    192    
128    96     
-384   64     
-64    48     
-1040  -224   
560    208    
-944   256    
976    -704   
-48    816    
0      -176   
-304   528    
64     -352   
416    176    
-336   -192   
208    368    
-144   -128   
224    304    
-160   -128   
96     112    
-288   48     
304    112    
-128   192    
112    -80    
16     576    
-128   -320   
-176   368    
176    -512   
-48    32     
112    -96    
128    400    
-112   -144   
-80    96     
32     96     
-48    96     
-64    32     
-48    192    
160    -144   
-128   224    
96     -32    
-128   176    
-240   -208   
384    416    
112    352    
-144   -80    
-16    32     
-144   -48    
48     256    
16     112    
32     0      
64     224    
80     288    
-16    128    
16     -64    
-32    48     
64     48     
96     288    
-96    224    
-16    144    
-80    144    
96     208    
96     96     
64     64     
112    192    
-16    32     
64     -48    
-48    16     
64     192    
-112   144    
64     32     
-16    -64    
112    80     
-48    32     
16     80     
0      0      
48     96     
16     224    
-112   -368   
64     64     
80     32     
16     80     
32     80     
48     128    
-128   -192   
208    112    
-96    32     
-96    -128   
272    112    
48     304    
-64    176    
112    80     
48     -48    
176    -304   
16     144    
-48    48     
176    16     
0      -64    
112    160    
80     288    
-112   -160   
48     -272   
-192   -160   
96     -144   
112    240    
-64    144    
144    272    
0      48     
-64    -288   
256    448    
-128   144    
144    128    
-240   -192   
272    256    
32     80     
112    160    
-32    32     
192    272    
-112   112    
80     112    
-80    -80    
192    400    
-160   0      
16     -464   
16     80     
-16    -1184  
144    272    
64     -48    
-96    208    
-112   160    
384    352    
-256   0      
240    224    
-192   -272   
160    176    
128    112    
-80    224    
288    144    
0      -512   
-16    96     
-176   -1248  
336    16     
80     112    
-144   96     
32     64     
96     -48    
0      176    
-112   128    
96     48     
96     80     
48     384    
-64    192    
128    160    
-32    64     
-16    64     
80     -128   
-48    64     
112    48     
-16    144    
80     -352   
16     192    
-16    0      
128    0      
32     48     
144    64     
144    48     
-32    -448   
96     0      
48     144    
-16    -112   
16     -208   
256    496    
-160   -1344  
-48    64     
48     -1408  
304    -80    
96     160    
-208   96     
-16    32     
32     16     
96     48     
96     -32    
-144   176    
128    -96    
112    144    
80     -400   
-32    224    
-32    -1104  
0      112    
64     -352   
96     -16    
0      32     
160    240    
-64    0      
16     -624   
-16    -16    
192    -112   
-96    144    
240    -528   
-48    128    
80     -32    
-1024  816    
288    -1008  
1280   592    
128    -832   
-240   16     
48     -480   
416    1184   
656    -272   
-160   -32    
-128   -432   
272    224    
-64    -64    
32     -16    
-96    48     
160    -160   
-32    144    
112    -80    
-96    240    
208    -512   
-112   -368   
96     -144   
-64    -1744  
16     -160   
224    96     
-48    -16    
-96    -16    
112    -816   
80     0      
128    -16    
0      -176   
64     64     
16     -224   
80     -1424  
16     80     
-16    -656   
0      16     
80     16     
144    -512   
-48    -16    
96     -528   
64     -48    
0      -368   
112    80     
80     -272   
16     -144   
-48    80     
144    -112   
128    240    
80     -160   
64     0      
-112   144    
-80    -96    
-32    32     
-1360  -240   
64     96     
80     64     
0      -304   
80     -32    
16     -1152  
-80    -128   
128    -576   
0      -128   
144    -32    
48     64     
-96    -320   
80     128    
-80    -64    
96     32     
-160   48     
0      -32    
112    -64    
144    -192   
16     0      
16     -368   
80     208    
-144   -960   
320    96     
-32    16     
-16    80     
0      -224   
-16    -80    
-96    -32    
128    -16    
32     32     
0      16     
-576   -128   
-32    -48    
-48    112    
128    96     
-48    -64    
80     -48    
-48    -96    
32     -80    
0      48     
96     32     
-96    -272   
-16    -32    
80     -144   
16     -144   
16     -80    
-400   -96    
16     -32    
-160   16     
112    -96    
96     96     
0      -800   
-48    -32    
48     160    
64     96     
48     96     
-32    48     
-112   -80    
80     0      
-160   -80    
160    208    
-96    288    
96     240    
-384   64     
-16    -240   
-32    -144   
16     -304   
304    288    
0      -416   
0      -144   
-192   64     
176    0      
-240   -64    
96     -128   
-32    80     
192    176    
-80    144    
-48    -176   
-352   16     
48     -208   
160    96     
-96    -160   
192    176    
-160   -160   
192    -64    
-240   -64    
48     -112   
32     160    
-48    -64    
-16    64     
128    160    
-352   64     
-112   96     
-256   -96    
240    -112   
-16    96     
-16    -96    
16     -48    
64     -688   
176    48     
-272   80     
0      -64    
80     32     
288    -32    
-224   16     
-16    64     
-176   -64    
160    128    
-48    32     
144    -160   
144    64     
-624   -112   
-96    -16    
0      128    
-736   48     
32     -32    
-672   -48    
80     160    
-960   -16    
-80    48     
-80    160    
48     16     
16     64     
-32    48     
16     -144   
-32    128    
-160   -192   
0      96     
240    64     
-224   0      
-32    -32    
-432   -32    
32     -96    
-800   -16    
96     80     
144    -16    
-80    16     
32     0      
-208   -208   
-80    -112   
240    32     
0      208    
-1040  1056   
-208   48     
32     160    
304    -32    
-432   224    
288    416    
-176   224    
496    -48    
-1040  -32    
-352   -416   
-112   80     
0      -176   
-48    160    
-48    -128   
32     304    
-64    16     
48     480    
-128   16     
-160   -32    
384    480    
-336   -192   
-32    -144   
-144   112    
-400   -16    
32     -112   
-192   0      
288    128    
-64    32     
64     192    
-64    96     
-96    48     
0      64     
-176   112    
-32    80     
48     112    
-16    -64    
-144   -32    
-144   16     
80     128    
-32    64     
-48    32     
64     80     
-128   -384   
16     0      
192    112    
-112   112    
-16    64     
-48    -16    
176    128    
-160   32     
0      16     
16     -32    
112    288    
-128   0      
96     -64    
-96    -48    
0      64     
16     -96    
-96    32     
80     112    
-16    80     
-32    16     
32     64     
128    -112   
64     224    
-208   96     
16     -64    
128    160    
-128   32     
-128   144    
-592   0      
64     16     
-496   0      
0      -16    
-16    -256   
192    112    
-128   96     
-48    0      
-32    112    
16     -32    
64     112    
-112   -176   
144    304    
-288   144    
64     368    
-336   -144   
464    432    
-320   -80    
224    64     
-32    32     
-16    16     
-16    160    
-80    -112   
128    48     
288    -144   
-64    -64    
-96    -64    
16     -32    
-48    0      
-16    80     
-16    112    
-32    64     
-48    128    
176    304    
-176   -128   
112    96     
-32    128    
32     112    
112    128    
-32    112    
-16    80     
-64    64     
-32    -48    
96     144    
112    80     
-320   -224   
80     -64    
-128   0      
256    432    
80     0      
-16    208    
-224   192    
176    -32    
144    -144   
-368   -112   
128    208    
96     160    
32     80     
-64    -64    
-32    128    
48     -16    
-48    -16    
-64    -208   
192    96     
-240   176    
352    0      
96     -32    
-256   -64    
112    272    
272    48     
-16    144    
16     64     
16     176    
32     -112   
-208   -400   
32     128    
80     272    
128    -32    
0      64     
-32    16     
-48    32     
0      64     
48     -32    
144    48     
-144   -112   
192    336    
-288   32     
64     96     
-96    -32    
16     -336   
144    112    
-96    128    
64     256    
-80    -80    
32     -224   
32     -240   
128    144    
32     256    
-208   128    
-32    -112   
32     -16    
0      -16    
128    144    
-128   48     
80     -368   
-48    112    
80     80     
80     128    
64     112    
-16    48     
0      64     
224    272    
-48    224    
-128   -320   
112    112    
176    368    
-192   -16    
-16    176    
0      -48    
-48    -784   
-32    32     
-64    96     
80     112    
96     176    
96     288    
752    2192   
-1616  112    
-896   -96    
224    496    
1200   800    
-784   -768   
-112   288    
336    640    
208    -320   
-320   -16    
96     -384   
160    -864   
-48    64     
128    352    
-128   -288   
-80    176    
32     128    
256    592    
-144   -64    
112    -64    
-160   -64    
160    80     
0      0      
144    16     
-96    0      
144    16     
16     -96    
272    256    
-128   32     
32     -80    
-160   96     
304    128    
112    48     
-80    80     
-96    -48    
32     64     
112    112    
-16    0      
80     160    
-64    -32    
224    176    
-96    -144   
96     96     
-160   -80    
272    48     
-128   128    
208    272    
-16    -16    
-16    112    
-16    -80    
0      144    
160    112    
64     -48    
32     128    
-64    -192   
288    432    
-224   -608   
224    96     
16     192    
16     224    
-32    -1200  
32     -80    
16     16     
64     224    
-96    -32    
160    112    
-16    -32    
0      -224   
-48    0      
-32    -624   
-32    128    
176    -96    
-32    -16    
144    -720   
-16    96     
-16    -352   
0      128    
-176   128    
208    32     
-48    64     
176    384    
48     112    
48     -1040  
-48    0      
112    16     
128    208    
-32    -48    
-32    -160   
32     -112   
64     32     
16     0      
48     96     
48     128    
0      64     
-32    32     
48     -464   
176    192    
-48    -176   
-16    -48    
80     -64    
48     112    
80     -304   
16     176    
16     -144   
160    176    
-64    32     
48     -1616  
80     160    
16     -1328  
80     -448   
16     16     
80     -144   
112    80     
-80    -1024  
176    -64    
-64    -80    
128    0      
32     192    
144    64     
-112   -432   
144    -16    
0      -480   
16     48     
80     -432   
-32    -368   
-96    0      
-144   -112   
352    96     
-320   -560   
176    -144   
64     -768   
-16    -80    
208    256    
-96    -48    
176    -48    
160    176    
-128   32     
144    80     
-112   64     
160    -48    
-752   -48    
32     -272   
16     -32    
128    -240   
-208   -560   
256    -432   
128    352    
-48    -320   
48     -32    
-32    -96    
128    352    
-128   -432   
192    80     
-112   -112   
96     16     
-672   -64    
96     80     
-16    -160   
192    32     
160    -48    
64     -224   
-16    -160   
16     -848   
144    80     
-176   -112   
112    -16    
0      80     
128    -128   
-160   -48    
-16    -96    
96     272    
-224   -96    
-16    80     
-304   -240   
304    192    
-176   -208   
-160   64     
-32    -368   
32     16     
144    -144   
48     192    
96     0      
-16    0      
-112   -176   
192    160    
-48    16     
-32    0      
-480   96     
16     -128   
-1440  16     
16     -48    
32     160    
-64    -592   
144    144    
256    -1856  
-16    64     
-608   -1392  
992    -48    
208    480    
-176   352    
-848   -880   
336    -1008  
-320   256    
208    336    
-608   336    
-16    -128   
384    16     
0      -128   
-96    48     
-16    -544   
112    -48    
80     64     
-144   16     
-16    64     
-32    -144   
-112   384    
-80    64     
-16    128    
-112   -48    
96     32     
32     -160   
48     48     
16     -272   
80     64     
-48    -64    
256    48     
-256   32     
128    -48    
-112   16     
96     80     
-80    144    
96     160    
-112   16     
-144   -240   
64     -16    
64     -432   
-128   -16    
-32    -144   
192    160    
-176   -368   
-752   -144   
-48    16     
-16    48     
64     256    
-144   0      
112    -32    
0      64     
0      16     
48     32     
-32    16     
272    48     
-80    32     
-656   0      
-48    32     
32     32     
-656   -96    
96     64     
-336   48     
48     -16    
-960   144    
-96    304    
-80    0      
-80    -48    
96     32     
-32    -16    
-96    0      
112    160    
-272   -160   
112    -16    
0      160    
-368   -240   
208    176    
-288   48     
64     32     
-640   0      
-144   80     
-16    -192   
80     112    
-176   96     
32     64     
-112   -160   
112    80     
-176   -336   
80     -16    
-96    112    
-16    -112   
128    48     
-128   304    
0      128    
-128   32     
80     -80    
288    64     
-96    64     
-48    32     
96     208    
-224   -176   
64     32     
-80    -48    
-32    16     
96     80     
-32    64     
-112   64     
-48    32     
-16    -32    
-128   -48    
272    144    
-176   96     
-64    0      
-1552  -128   
80     128    
96     -112   
-32    -160   
160    32     
-416   80     
352    144    
-128   -48    
-16    144    
-352   32     
208    64     
-208   -96    
-96    -368   
-432   -96    
-32    288    
-928   -176   
256    80     
-288   -112   
48     64     
-64    96     
-96    160    
32     -80    
16     128    
-144   96     
288    112    
-256   64     
-48    -96    
-48    0      
-176   -48    
208    0      
-288   -64    
112    16     
-144   -208   
-32    -48    
-32    0      
-80    -32    
112    80     
48     -16    
0      96     
-32    0      
-64    -48    
-16    16     
-48    0      
32     304    
-112   160    
-288   -96    
32     -48    
-1536  -288   
-224   32     
-96    224    
144    224    
-64    -64    
256    720    
-384   -416   
-336   -432   
-16    80     
64     -96    
-48    80     
-80    112    
80     288    
-192   -48    
-112   -112   
112    80     
144    272    
-64    -112   
16     48     
192    0      
-80    64     
0      128    
0      112    
128    80     
64     304    
32     96     
-112   -16    
32     -32    
-80    64     
80     48     
32     144    
-64    112    
-80    96     
176    112    
0      144    
-96    160    
-80    2176   
-1664  -816   
-272   768    
640    608    
608    -368   
-304   112    
128    992    
272    -144   
-32    -192   
-240   -320   
256    224    
-304   -320   
16     144    
160    160    
208    64     
-176   -16    
-128   -32    
32     192    
176    128    
-144   32     
80     -16    
-64    112    
144    -160   
-144   128    
64     112    
-64    304    
192    208    
-96    192    
96     -272   
176    320    
-112   32     
224    64     
-48    96     
0      16     
48     192    
96     288    
64     160    
-64    128    
0      32     
96     -16    
-16    0      
0      96     
144    16     
-64    -32    
0      32     
32     176    
-48    64     
0      0      
-144   -16    
32     16     
-16    80     
-80    -2928  
128    -48    
-80    -64    
112    32     
80     240    
-48    160    
-80    176    
112    32     
-176   -48    
48     144    
64     96     
16     48     
-80    0      
32     128    
-112   0      
48     -288   
112    96     
80     96     
48     80     
-16    112    
48     96     
32     80     
64     80     
32     -48    
208    112    
64     416    
-192   48     
-32    176    
-96    -112   
192    0      
-32    -16    
48     64     
-48    112    
-48    16     
32     -80    
-144   -272   
48     -304   
176    -32    
192    352    
-64    192    
-80    -112   
32     80     
112    48     
96     112    
-112   -16    
144    -48    
-16    64     
96     -1008  
-160   0      
48     -16    
144    64     
80     96     
-48    96     
-112   -32    
160    80     
-80    -208   
192    192    
-176   -48    
160    80     
-64    96     
208    -336   
-80    80     
64     -416   
80     96     
-16    -160   
64     256    
32     32     
16     -96    
16     32     
176    144    
176    192    
-144   -16    
-32    48     
160    0      
96     176    
16     -128   
64     48     
128    -128   
64     208    
32     -752   
0      80     
48     160    
224    288    
-320   48     
128    -144   
-48    -112   
192    96     
-16    160    
-16    -96    
-16    -32    
96     0      
16     192    
80     -304   
-32    400    
-32    -256   
160    224    
32     -896   
192    192    
-48    -96    
32     144    
80     -16    
16     336    
-64    -80    
160    -48    
-224   304    
128    -720   
-240   -256   
352    -240   
192    368    
-272   -16    
128    176    
48     -144   
144    304    
-256   144    
96     160    
-80    48     
-16    -240   
0      64     
0      -336   
96     160    
-48    -400   
176    -80    
144    64     
-80    224    
-32    224    
-16    144    
48     -1344  
144    144    
64     176    
-112   112    
0      48     
48     -48    
64     96     
-16    -144   
-32    128    
0      -160   
-64    128    
144    -96    
16     112    
0      -96    
-16    176    
-144   -192   
112    -864   
96     0      
112    -672   
96     -1040  
-336   368    
320    -528   
-336   -1056  
576    544    
-96    -400   
128    -224   
-48    -480   
240    144    
16     -480   
0      -240   
80     144    
240    -96    
-16    176    
96     -368   
48     -224   
-720   -48    
96     -176   
16     0      
0      -80    
16     -48    
80     -528   
48     0      
112    160    
-16    -32    
-64    64     
112    96     
32     16     
64     0      
-240   -160   
176    -128   
-320   0      
32     64     
80     -144   
16     -160   
160    64     
48     -288   
-16    -16    
-64    -896   
272    -128   
-96    -224   
0      144    
144    -96    
16     176    
-80    -16    
48     -32    
-16    176    
-80    16     
-864   -208   
-32    -112   
48     -48    
144    32     
-80    208    
160    -512   
-64    -48    
96     -96    
-80    128    
64     -16    
96     -48    
0      -16    
80     -80    
0      0      
16     -32    
0      128    
-16    -128   
144    0      
128    -48    
-240   -32    
112    -672   
-112   -64    
192    -752   
16     48     
32     0      
48     -160   
-128   -64    
-64    -288   
-288   -16    
128    -64    
-16    -96    
192    48     
-672   -112   
64     -384   
64     -96    
-32    -304   
112    272    
-80    -1088  
288    128    
-320   -16    
224    96     
-352   -208   
192    80     
-160   0      
144    80     
-304   16     
-16    -288   
-128   -64    
-112   0      
192    48     
0      -16    
0      112    
16     -256   
64     32     
-96    16     
80     48     
-208   48     
80     80     
-240   -80    
144    -112   
-128   0      
160    -128   
-192   128    
224    128    
-176   96     
208    -288   
-224   -16    
192    -336   
64     192    
-160   16     
112    64     
-112   64     
256    -128   
-320   -64    
-32    -96    
0      32     
16     -16    
96     0      
-80    -80    
-880   64     
288    -320   
48     80     
-48    -32    
32     -16    
-176   176    
-656   -32    
-176   32     
400    320    
64     64     
-16    -48    
-32    16     
-64    -16    
64     16     
-1408  16     
80     80     
-112   96     
-64    64     
96     208    
-864   -352   
48     -80    
-352   96     
0      16     
0      32     
48     96     
160    64     
-16    -16    
32     -144   
32     16     
-288   96     
96     208    
32     -16    
-16    240    
-176   -80    
-128   32     
48     96     
-384   0      
-16    -96    
-160   352    
-16    -240   
-1840  -144   
-16    32     
-80    -32    
-16    112    
64     -176   
96     112    
-112   -256   
-80    112    
-64    80     
-160   -64    
32     192    
-32    384    
-144   0      
-80    -224   
176    192    
-512   -128   
-16    -96    
144    224    
16     96     
-112   64     
0      16     
-80    -192   
-32    -32    
-16    96     
-128   96     
16     0      
-112   32     
-16    64     
-448   560    
48     1696   
-528   992    
-96    -80    
-1104  -672   
32     -144   
160    208    
192    368    
176    448    
-96    -144   
-64    -80    
-16    -48    
192    16     
-80    96     
-160   144    
-48    144    
-64    -32    
-208   -16    
32     -80    
-272   -112   
-112   16     
-48    -48    
48     144    
96     -64    
32     16     
64     -80    
80     128    
0      432    
176    336    
-144   0      
-160   -48    
16     0      
48     -48    
-80    160    
-288   -224   
16     192    
192    -128   
-32    -272   
-16    -96    
32     192    
144    224    
-80    80     
0      48     
-16    80     
16     80     
-64    32     
-48    0      
-96    0      
-64    64     
-176   -144   
112    16     
-1168  -80    
-128   -96    
96     80     
-64    -16    
64     96     
-64    -320   
224    240    
48     112    
16     176    
-48    32     
-96    176    
-144   -32    
64     224    
-80    -96    
48     48     
16     80     
0      32     
32     96     
48     96     
-16    96     
32     16     
0      80     
64     0      
32     -48    
0      -336   
0      -208   
272    -32    
-16    160    
-64    160    
128    -96    
-48    336    
80     96     
48     208    
-80    -128   
96     96     
80     176    
80     80     
-32    -80    
208    176    
48     -64    
48     112    
-224   -64    
144    160    
-176   -128   
-16    0      
32     64     
32     128    
80     144    
-112   112    
0      32     
-32    16     
144    64     
-96    -48    
96     80     
-112   0      
144    160    
-128   -48    
64     80     
-80    96     
64     48     
16     96     
32     80     
32     64     
32     80     
112    464    
-208   48     
160    16     
-96    96     
320    144    
-144   80     
32     48     
-48    144    
128    336    
64     -48    
-128   80     
224    16     
16     288    
0      304    
-16    256    
16     -16    
96     112    
0      -48    
-128   -144   
-96    -576   
-64    -176   
144    192    
-32    -80    
112    176    
64     64     
-80    32     
64     32     
64     352    
-80    224    
-64    32     
64     -64    
-160   -288   
48     0      
-16    96     
112    80     
-64    -32    
160    32     
-240   -384   
80     -928   
80     -16    
96     64     
80     32     
112    704    
-128   -16    
16     -304   
112    128    
48     112    
16     64     
16     128    
48     368    
112    304    
-288   -320   
-48    -64    
176    -16    
80     96     
48     -384   
0      64     
-240   48     
176    112    
192    208    
48     48     
48     288    
-80    48     
-64    16     
128    -32    
-48    -96    
80     272    
-80    208    
-112   -320   
224    112    
32     -320   
64     80     
-32    144    
-32    64     
0      48     
32     -128   
208    80     
-48    96     
48     -80    
0      128    
-16    48     
880    3232   
-1136  480    
-864   -1216  
96     -240   
-320   96     
32     256    
-608   -576   
-96    -144   
560    -208   
-320   48     
160    32     
-112   144    
112    240    
192    128    
-112   -112   
96     -48    
-48    32     
112    -96    
32     112    
64     16     
-32    64     
128    128    
80     144    
64     -336   
-16    -96    
-32    96     
192    192    
80     128    
96     192    
-160   -160   
48     -208   
112    160    
80     32     
96     112    
-64    -176   
240    176    
0      -576   
128    -16    
-160   -448   
48     64     
160    160    
-64    96     
-16    32     
0      -16    
128    16     
96     48     
16     176    
64     -176   
-112   128    
96     -304   
112    128    
64     -320   
48     176    
48     -144   
16     64     
16     -64    
64     192    
32     64     
112    16     
64     64     
64     32     
48     48     
64     -192   
112    176    
-48    -16    
-48    64     
192    -144   
32     -48    
0      -48    
-80    192    
96     32     
96     48     
64     208    
-48    0      
144    208    
-16    32     
-32    192    
-32    -256   
-32    32     
48     -256   
160    192    
-144   -272   
128    -16    
-96    64     
80     -512   
304    272    
-272   -512   
144    0      
-1200  -64    
160    -96    
0      -80    
80     64     
80     128    
-48    192    
80     -288   
32     0      
16     -208   
0      144    
80     -48    
-64    -368   
128    96     
64     -128   
96     0      
-160   -144   
-32    -208   
-32    -48    
64     -48    
-64    -16    
304    -256   
-16    -96    
-16    0      
48     -64    
176    -32    
112    176    
-16    32     
80     144    
192    288    
-64    -448   
-656   -416   
128    0      
16     64     
160    -176   
-16    -112   
-144   -240   
208    96     
-96    -1952  
288    48     
-192   -160   
16     192    
-48    -80    
144    96     
-128   -192   
48     -32    
-192   64     
-64    -96    
-1408  -320   
304    -48    
48     -176   
48     -224   
16     32     
64     -48    
192    16     
-16    -992   
16     48     
0      -368   
-48    -64    
80     -80    
32     128    
80     -96    
80     176    
-160   -32    
32     -144   
-592   -16    
-128   -64    
112    -224   
80     -208   
0      48     
64     -1440  
-16    144    
48     0      
-16    -64    
96     64     
96     160    
64     688    
-112   -64    
-208   -224   
208    -192   
-496   16     
16     -112   
-160   -128   
80     -208   
64     160    
-48    -912   
32     112    
48     64     
0      -208   
-176   48     
192    160    
-208   -112   
96     -16    
-64    160    
-16    64     
-720   0      
80     -144   
192    -64    
128    -144   
16     160    
0      -48    
-64    96     
96     -16    
176    -16    
-320   -64    
176    64     
-96    112    
32     96     
-784   352    
96     1728   
-880   944    
-608   -640   
176    -960   
960    176    
-432   -64    
512    0      
-96    384    
192    480    
-672   -144   
48     -240   
96     112    
208    0      
-80    -80    
-176   -96    
16     -240   
-112   -48    
256    192    
-352   -224   
128    -368   
-48    176    
-1616  -80    
48     -112   
-288   -128   
112    -48    
-80    96     
-464   -528   
48     48     
160    144    
-16    96     
-16    80     
-16    80     
-352   -160   
-32    288    
-368   -224   
-32    -288   
-48    48     
-48    80     
64     144    
128    -48    
-48    0      
-784   -32    
-96    48     
304    288    
64     272    
96     240    
16     192    
-480   -944   
64     16     
-96    -240   
144    208    
-64    -48    
112    -80    
-64    0      
48     128    
-128   144    
-96    816    
-112   48     
-272   192    
-48    -160   
-448   -16    
0      16     
-448   -128   
240    16     
-64    0      
48     -144   
-32    224    
64     -64    
-16    192    
-96    32     
16     128    
64     160    
-48    112    
-80    -32    
-144   -192   
-272   -224   
176    352    
-64    112    
0      -192   
16     0      
-64    32     
16     -48    
16     112    
16     48     
64     32     
-16    16     
-16    16     
0      208    
-80    -80    
80     48     
-768   0      
64     144    
-96    -240   
32     -64    
80     -336   
-128   -160   
-80    -112   
-208   -352   
224    -48    
-48    240    
-16    272    
-224   -16    
-160   0      
96     128    
-48    16     
-240   -16    
-48    80     
144    -144   
0      160    
-48    32     
-32    16     
64     16     
16     32     
-16    64     
-80    -496   
-80    64     
208    192    
-32    -144   
240    48     
-160   16     
-128   -368   
160    272    
-944   -352   
176    -80    
-112   128    
112    0      
-96    -224   
192    128    
-16    208    
-192   -208   
176    272    
-16    272    
-32    -16    
80     32     
-128   160    
-64    16     
-96    48     
0      -64    
48     48     
-16    64     
-64    144    
-80    80     
112    352    
-144   144    
272    320    
-160   32     
16     -80    
-176   -64    
-64    -48    
48     160    
-112   32     
-48    -48    
192    208    
-80    64     
80     96     
-48    -416   
64     -16    
64     48     
16     112    
32     208    
64     176    
-112   0      
48     112    
-64    0      
0      -64    
48     -32    
112    32     
96     208    
-96    48     
80     -96    
96     48     
96     288    
-16    -112   
0      256    
-32    -16    
176    -80    
192    208    
80     80     
-64    128    
-80    176    
-80    48     
-32    16     
-160   -32    
48     16     
128    16     
0      48     
0      96     
-80    0      
64     112    
-96    -16    
48     -128   
-16    144    
160    128    
-128   64     
16     192    
1696   -160   
-800   -400   
800    128    
176    432    
-32    -304   
640    896    
-1072  -112   
1184   608    
16     176    
-256   -272   
-320   160    
80     -64    
384    368    
-128   64     
-192   -48    
-96    -128   
48     144    
256    160    
0      64     
-96    -32    
-16    0      
112    160    
176    128    
32     96     
-256   -128   
192    336    
-176   32     
128    48     
-144   0      
144    -16    
-16    96     
-32    96     
144    96     
-16    80     
0      48     
240    160    
-320   -96    
192    0      
-208   160    
272    32     
-48    80     
-80    32     
96     80     
-32    -48    
16     144    
128    176    
16     128    
64     80     
-272   48     
320    16     
-32    160    
-48    160    
160    64     
-80    80     
32     16     
32     96     
96     128    
240    160    
-80    48     
-64    -128   
144    208    
-16    -128   
-48    -32    
128    208    
-96    64     
112    0      
96     -96    
64     -80    
-32    240    
-96    80     
224    80     
0      -32    
48     160    
0      144    
112    -208   
208    464    
48     176    
432    16     
144    144    
-144   176    
-32    -80    
192    16     
-16    -240   
192    16     
-32    -272   
112    208    
-224   32     
208    240    
112    32     
48     -96    
-48    -16    
48     -816   
16     0      
-32    -1456  
144    192    
-144   -160   
192    144    
144    208    
0      -32    
-48    0      
32     80     
32     32     
112    -144   
-16    -48    
96     64     
240    496    
-48    -128   
-96    -16    
-16    16     
112    208    
48     -784   
-32    96     
48     64     
-16    64     
16     96     
96     112    
-32    -32    
16     -96    
112    304    
336    -96    
-96    112    
128    -688   
-128   176    
96     -240   
-48    192    
208    -1104  
-96    176    
112    -128   
-16    -48    
160    32     
0      272    
-16    112    
80     -256   
-64    -192   
32     -576   
16     208    
272    496    
-240   -64    
240    -80    
-80    144    
96     -64    
64     -64    
-96    96     
64     144    
32     32     
128    320    
208    464    
-224   -352   
112    128    
-48    -48    
64     128    
48     96     
-112   128    
352    -96    
-384   -528   
336    -80    
80     480    
-128   -32    
96     -464   
-144   -48    
-576   64     
-96    304    
48     0      
-176   -480   
48     -480   
208    64     
352    176    
-336   32     
80     -80    
32     208    
112    -32    
-32    -928   
128    160    
80     -240   
-176   80     
-848   0      
272    0      
-48    -16    
96     -544   
48     -144   
64     48     
-32    16     
112    -32    
208    64     
-32    -304   
48     -64    
-112   -816   
32     128    
16     -48    
-32    -176   
-192   112    
-96    -224   
48     -256   
96     -16    
208    -48    
-96    -352   
1040   304    
624    -144   
-256   -256   
-736   -432   
-64    128    
496    64     
-80    32     
128    448    
-448   -176   
272    -272   
-176   -288   
368    -160   
96     -160   
80     288    
160    -240   
-128   -128   
368    -624   
-112   48     
-64    -416   
-176   240    
160    -384   
160    320    
-240   -224   
224    128    
-224   -128   
96     208    
-224   -512   
416    192    
0      -144   
448    48     
32     272    
144    -80    
-192   400    
224    -864   
-80    176    
208    -128   
-352   -96    
-16    32     
-96    -48    
-96    -80    
-32    192    
-176   0      
0      -112   
-272   -16    
-32    -32    
-160   160    
112    -352   
288    288    
128    -992   
112    144    
0      -32    
48     -176   
-192   128    
176    -112   
-16    -32    
-32    -432   
-256   -528   
-368   -304   
-384   -448   
0      -240   
64     64     
144    -48    
0      112    
64     -592   
-112   96     
80     0      
144    -48    
-80    16     
96     -16    
-176   -16    
144    48     
-256   -48    
96     112    
-192   64     
32     -64    
-128   144    
-64    -96    
0      96     
-80    -416   
32     -240   
240    64     
192    224    
-352   32     
0      -112   
-32    96     
0      112    
160    192    
-80    32     
128    80     
-32    -32    
-336   16     
48     -192   
48     -32    
96     -336   
16     -32    
0      16     
80     144    
-304   -336   
176    -96    
48     -16    
80     288    
-240   64     
80     -16    
-16    -64    
112    -80    
-352   -240   
176    112    
-128   -48    
-544   -112   
-96    32     
16     -64    
-592   -144   
-144   128    
192    64     
-112   -224   
112    -112   
128    288    
64     96     
112    -160   
-928   -96    
352    240    
-400   128    
144    -48    
-240   -432   
-304   -32    
32     112    
-336   96     
160    -48    
-352   16     
-144   -176   
-720   -32    
-48    64     
-32    64     
176    160    
-48    96     
16     -112   
16     -160   
-224   96     
144    16     
-16    0      
-48    16     
-128   320    
80     16     
-272   0      
-96    -80    
-688   0      
32     -208   
0      16     
-16    16     
-128   -224   
-96    80     
48     -288   
32     256    
-112   -160   
80     176    
16     288    
-160   112    
16     -96    
-64    32     
144    -112   
-16    128    
0      16     
400    384    
-368   96     
16     -32    
128    144    
16     -64    
0      -144   
-16    64     
-80    224    
-224   -48    
-112   112    
64     -176   
176    96     
64     112    
-272   -64    
48     112    
-128   -64    
-32    144    
64     -48    
-32    224    
80     -128   
-208   -80    
32     -96    
48     0      
-48    -64    
-16    -16    
80     192    
-16    128    
-80    128    
-176   -128   
80     192    
-544   -176   
112    160    
-1120  -80    
656    752    
-1264  240    
-688   480    
688    784    
208    -32    
-272   -304   
272    368    
-672   -128   
480    0      
-800   -208   
576    0      
-384   288    
368    -64    
-96    400    
-480   -496   
-112   288    
240    -96    
-160   352    
80     -256   
64     272    
-16    -160   
-128   352    
64     -96    
32     320    
16     -256   
16     208    
-96    -32    
64     304    
-48    -80    
-240   -32    
-192   -32    
192    80     
16     96     
48     48     
-96    64     
128    -96    
-224   -48    
256    160    
-176   80     
112    0      
-224   -16    
112    80     
-160   -32    
32     32     
-272   -112   
-16    48     
48     176    
16     -32    
208    160    
-272   144    
240    48     
-64    96     
128    128    
0      48     
-144   48     
-48    32     
96     160    
-112   48     
96     160    
-80    0      
80     112    
32     32     
-96    96     
0      48     
128    16     
48     112    
-16    16     
112    128    
-48    48     
16     16     
-16    -64    
96     64     
-16    96     
-16    0      
0      48     
160    192    
-80    -176   
160    16     
-160   112    
-16    144    
112    32     
64     16     
-80    -192   
0      0      
32     192    
16     64     
32     256    
-112   -16    
-16    -304   
80     224    
128    608    
-32    112    
176    0      
-32    -160   
16     -48    
-64    48     
64     -272   
0      -16    
-32    -32    
48     160    
-96    -48    
96     80     
-48    -64    
96     128    
96     496    
64     352    
16     144    
32     64     
16     96     
96     80     
-32    96     
0      48     
16     160    
32     32     
80     80     
-176   -224   
96     160    
16     144    
256    96     
32     160    
96     -16    
-16    64     
0      144    
112    128    
304    624    
-48    320    
-16    -48    
-32    272    
-16    -32    
48     16     
-48    -256   
112    144    
-96    64     
176    -2240  
-48    96     
224    176    
-48    304    
32     -80    
48     224    
0      112    
-32    64     
48     256    
-96    -48    
128    -16    
-80    64     
128    128    
-128   -96    
96     64     
-16    -816   
32     80     
0      96     
96     208    
-144   176    
96     128    
0      112    
0      -112   
64     0      
-96    192    
-32    -32    
-128   -16    
176    -176   
160    -64    
-16    192    
16     -512   
-176   128    
208    -1952  
-176   48     
384    160    
-80    80     
-16    80     
80     96     
32     -16    
80     176    
-240   -112   
304    128    
-160   144    
272    -176   
-240   96     
192    -128   
32     -16    
96     -1616  
160    96     
-80    16     
208    0      
16     112    
-48    112    
-224   -16    
208    160    
144    112    
-224   -64    
0      -48    
320    224    
-160   -112   
80     32     
176    48     
96     -512   
-736   464    
-336   -832   
-160   -672   
-112   528    
-400   -320   
640    704    
-192   -784   
448    656    
-224   64     
192    368    
-64    -272   
144    400    
-96    -432   
192    16     
32     -144   
336    240    
-160   0      
-48    -192   
0      192    
384    176    
64     592    
-144   -48    
0      272    
0      0      
-144   -176   
176    -624   
464    672    
-480   -656   
256    336    
-160   -32    
64     -96    
80     -512   
112    80     
-16    160    
48     336    
-128   -16    
128    192    
-80    32     
160    -352   
144    16     
32     16     
64     64     
16     112    
-16    96     
96     -112   
-128   192    
240    96     
-16    208    
80     16     
-32    80     
96     96     
64     -1424  
160    0      
-112   -224   
272    -1776  
-32    -144   
48     128    
-32    -176   
160    112    
-16    -272   
0      64     
-32    -256   
224    -752   
-112   144    
16     -576   
-64    176    
-512   16     
144    -96    
-160   160    
0      -16    
224    64     
-160   -320   
144    -176   
128    64     
64     80     
-112   80     
176    128    
-16    -560   
16     224    
-16    -448   
16     -304   
160    576    
-144   224    
-64    -32    
192    -48    
-48    -352   
256    -272   
0      80     
-16    -1184  
64     32     
96     -80    
-16    16     
112    -48    
-80    -64    
128    -32    
64     -48    
-192   128    
128    -32    
-464   -32    
80     -112   
16     -208   
128    0      
-80    0      
48     -224   
48     -144   
32     -240   
-48    -96    
96     32     
-32    208    
96     80     
-48    48     
-96    -64    
-128   -224   
224    -144   
-160   -16    
64     -48    
-224   0      
80     64     
16     -400   
-48    -160   
128    -384   
-160   -96    
-32    -48    
240    160    
32     -16    
0      -144   
-240   0      
176    -208   
-208   48     
112    80     
-480   -48    
256    -240   
-592   112    
432    -80    
80     -112   
32     32     
-240   128    
144    32     
240    192    
-32    16     
-112   -32    
-128   224    
144    -48    
-96    -32    
64     80     
-400   144    
272    -144   
-1104  -80    
144    -32    
-16    48     
64     -656   
16     -48    
160    -624   
-160   0      
80     96     
-64    -160   
80     -160   
48     32     
-96    64     
112    -96    
-112   64     
64     32     
-224   160    
-96    -176   
112    -80    
224    -304   
128    336    
-32    -192   
0      96     
-336   176    
0      -112   
-80    192    
80     -160   
16     128    
112    -80    
-48    80     
176    0      
80     64     
192    -176   
-144   128    
-144   -464   
160    144    
16     96     
80     -48    
-240   -32    
144    -96    
-176   -16    
32     -16    
48     -64    
96     80     
-224   32     
208    -112   
-672   -176   
208    -192   
96     96     
-1520  -1696  
-640   -192   
336    80     
-1744  240    
16     -560   
64     -96    
-240   480    
320    1040   
-448   -432   
512    336    
-256   -224   
-576   -48    
-160   -208   
-208   -32    
176    272    
-352   -96    
-288   32     
32     112    
-432   -304   
224    -32    
-400   80     
64     -16    
-1184  320    
160    -32    
-64    -176   
-32    -128   
-32    16     
-48    144    
112    32     
48     128    
-32    -16    
64     0      
-224   16     
96     112    
-80    64     
-80    48     
-80    208    
-336   0      
-80    -48    
-320   -112   
0      64     
128    -32    
-64    96     
-160   -240   
128    80     
-48    48     
48     32     
0      288    
-16    -80    
-16    32     
-160   16     
48     112    
-80    16     
48     64     
-256   48     
144    192    
-144   -32    
80     112    
-48    -32    
96     208    
-128   144    
-48    64     
160    32     
64     64     
-192   48     
-16    32     
16     64     
64     64     
112    80     
-416   128    
0      32     
-944   -16    
-16    96     
-16    -48    
16     144    
128    272    
-240   48     
80     -112   
-176   -416   
-64    -224   
16     96     
16     192    
-16    192    
-208   48     
-304   -128   
96     80     
-1040  -32    
80     80     
-160   -320   
0      144    
80     192    
-96    32     
-160   -96    
96     160    
0      80     
144    256    
-160   0      
-112   -48    
96     -16    
16     48     
32     144    
-176   48     
16     96     
32     16     
32     32     
-96    -96    
128    192    
48     -32    
0      48     
-32    128    
16     48     
-80    -16    
-64    16     
80     128    
-48    -16    
16     64     
-256   64     
-176   32     
0      16     
32     240    
-32    -48    
-16    48     
32     160    
48     48     
-80    -48    
-80    288    
-48    16     
144    -16    
-96    160    
16     -16    
-48    16     
-272   -128   
176    224    
-96    -48    
144    144    
-176   -240   
400    48     
-272   160    
192    112    
-96    176    
48     0      
0      64     
-48    80     
112    96     
-144   -64    
-16    -80    
160    304    
112    352    
-208   96     
-16    -32    
160    80     
32     0      
-112   -160   
208    -112   
208    384    
-240   -32    
64     400    
-336   -128   
320    0      
-176   112    
160    176    
-160   224    
-128   -48    
224    112    
-240   -32    
-112   -272   
400    304    
-80    64     
96     128    
-160   128    
32     64     
16     -16    
-80    80     
80     16     
-160   112    
-240   16     
192    112    
-48    160    
48     16     
-16    -16    
224    208    
96     112    
-304   -144   
-32    -32    
464    432    
-176   160    
-224   -32    
160    160    
288    64     
-224   -48    
-16    304    
-16    208    
-128   96     
48     -80    
128    80     
48     160    
-1408  1200   
-368   -1200  
64     368    
928    256    
-224   -576   
-96    -352   
-144   400    
320    752    
-464   -576   
-144   -1616  
208    -80    
-48    400    
160    400    
-256   96     
48     -208   
-64    96     
336    624    
-96    32     
64     128    
-64    176    
-80    -64    
0      -32    
80     -80    
80     -48    
48     -208   
64     176    
80     96     
-80    -48    
176    48     
0      -48    
-32    80     
96     144    
0      64     
160    192    
-96    176    
144    128    
-144   64     
32     48     
80     48     
80     -176   
-16    288    
80     -304   
0      -64    
-16    48     
192    144    
0      128    
96     96     
-176   -208   
384    -48    
-176   224    
32     64     
-64    32     
112    -240   
160    0      
-80    -112   
144    240    
-208   -1280  
160    16     
48     80     
0      32     
112    112    
16     32     
0      -128   
32     144    
-80    16     
144    80     
144    160    
-48    -224   
80     160    
-48    -432   
128    144    
-16    -464   
208    192    
-80    -320   
32     -16    
64     192    
-256   128    
208    272    
32     -48    
144    64     
16     64     
64     128    
160    80     
-112   80     
80     -224   
208    240    
96     112    
-176   0      
192    -752   
-112   64     
96     -48    
80     352    
-128   -16    
208    240    
-224   -16    
160    -96    
-16    16     
144    16     
32     144    
-16    -624   
-48    128    
32     -240   
112    112    
16     -208   
224    368    
-32    48     
32     -64    
-48    -96    
0      80     
176    128    
-48    -208   
-16    192    
-32    -288   
416    176    
-192   64     
48     48     
240    240    
-48    64     
176    -160   
-176   96     
176    48     
224    48     
-80    64     
-96    -16    
-16    208    
112    64     
192    304    
16     -272   
160    144    
-80    16     
96     48     
192    -240   
-224   144    
64     -192   
224    48     
48     176    
64     -784   
160    64     
-144   -80    
48     -928   
160    -144   
32     -1552  
80     -160   
-48    128    
256    -304   
-96    64     
32     -160   
176    96     
-96    -272   
64     -1328  
48     32     
32     0      
144    208    
-400   -32    
256    -176   
192    192    
-128   -256   
-64    -64    
96     0      
64     -96    
96     112    
-80    -128   
48     112    
16     -64    
288    16     
0      240    
112    288    
-272   -144   
-336   -336   
48     -224   
-560   -144   
176    320    
-64    -128   
64     -720   
96     -48    
80     -976   
208    -16    
112    -48    
64     16     
32     96     
32     272    
-48    -64    
-80    -240   
80     -208   
64     -80    
240    128    
32     -64    
32     -48    
32     -64    
-48    -144   
112    -256   
96     -192   
80     224    
16     176    
48     112    
-656   -1184  
704    880    
-624   -16    
-112   -416   
-96    -752   
368    -128   
96     560    
80     -64    
-128   96     
208    32     
48     256    
-128   16     
176    -944   
16     -48    
176    -80    
-208   0      
224    80     
-80    -48    
-16    -96    
-64    -240   
128    -80    
-64    64     
112    160    
64     80     
-80    -128   
64     -128   
96     32     
208    -240   
-128   160    
32     -96    
32     32     
-64    -96    
224    -432   
-240   112    
208    -320   
-256   96     
-112   64     
-304   48     
-112   -128   
-176   -80    
-16    -352   
32     32     
64     -128   
112    80     
16     -1600  
80     -32    
-224   -16    
80     -96    
-176   -96    
16     96     
-80    -48    
16     80     
-304   -160   
128    -128   
-112   -128   
112    -64    
96     32     
16     -96    
64     144    
-128   -960   
224    32     
-96    96     
80     48     
96     240    
-16    -80    
32     112    
48     224    
-336   48     
96     -144   
192    -16    
96     -112   
16     96     
0      -368   
96     32     
-64    -16    
16     -224   
-304   -528   
272    -160   
-272   176    
48     -64    
-16    112    
-48    32     
-80    -176   
96     -176   
-96    96     
-1488  -192   
16     336    
-848   -160   
176    160    
0      64     
-160   112    
-128   -16    
-288   0      
96     96     
-288   -80    
-32    32     
64     80     
32     96     
80     -16    
-112   64     
-112   -272   
64     48     
-192   -96    
-80    112    
-80    32     
-272   192    
-192   -176   
80     112    
-144   144    
-144   16     
-208   64     
160    16     
16     80     
-32    -96    
-64    80     
96     80     
-48    -48    
-16    16     
48     80     
-80    80     
-240   -64    
-64    0      
128    144    
-112   48     
-528   128    
48     512    
-2016  48     
-96    -64    
-128   -32    
176    -80    
-32    -160   
-64    176    
32     -16    
-32    80     
-144   -16    
320    752    
-352   -192   
192    -80    
-128   112    
48     -32    
-208   -64    
-352   192    
32     32     
-16    64     
128    192    
-160   -80    
80     -48    
-32    128    
16     32     
-32    112    
-80    -64    
144    128    
-48    192    
-304   160    
-112   -320   
-352   -256   
208    -224   
272    240    
-1120  128    
-64    48     
-80    -128   
32     16     
96     112    
-32    96     
-240   -400   
416    0      
-80    256    
-112   96     
-400   -48    
112    16     
80     32     
192    -176   
-112   384    
-512   -352   
96     -64    
48     160    
304    352    
-400   160    
-304   -208   
16     48     
256    -144   
96     48     
-64    -560   
96     112    
272    80     
32     80     
-240   -32    
192    144    
48     32     
80     80     
-64    144    
32     112    
-64    112    
64     -64    
64     64     
48     32     
240    704    
-48    -336   
-320   -240   
-656   -496   
-96    768    
304    160    
176    -64    
-112   32     
-416   -272   
64     -352   
64     0      
160    96     
16     240    
-32    208    
96     80     
0      16     
-176   -240   
32     -16    
-272   -192   
32     -128   
-144   -32    
176    224    
-160   16     
16     144    
-208   0      
160    80     
-192   48     
224    320    
-32    48     
16     64     
-128   -16    
80     16     
0      112    
0      96     
96     96     
-112   208    
64     96     
-96    -144   
-96    32     
96     80     
0      160    
-32    96     
80     96     
-64    112    
0      32     
48     80     
-64    128    
128    208    
128    -128   
32     128    
-176   32     
128    48     
-48    112    
144    80     
128    448    
-384   16     
208    96     
16     240    
-48    -112   
48     0      
64     144    
-16    16     
112    64     
-240   144    
144    -48    
-128   -64    
112    96     
-16    176    
16     64     
-64    48     
96     -48    
16     176    
-48    128    
0      48     
96     -80    
112    80     
-176   -80    
144    144    
-160   -48    
128    304    
-144   32     
144    16     
16     -16    
32     -32    
112    160    
32     304    
0      -128   
128    112    
-64    160    
16     80     
16     80     
48     144    
0      192    
-272   -304   
336    176    
-32    -48    
16     -128   
80     96     
-192   -32    
256    64     
-48    144    
48     48     
-16    48     
128    112    
0      128    
-16    -128   
-64    64     
16     96     
240    -48    
-80    32     
0      96     
32     48     
16     64     
112    96     
-32    160    
64     176    
128    224    
-240   96     
416    272    
64     64     
-32    192    
-160   160    
240    160    
-80    -272   
-176   -288   
-32    144    
-48    -368   
144    64     
96     -576   
-96    128    
160    304    
112    160    
-32    112    
176    240    
-144   48     
0      208    
0      16     
112    48     
-16    48     
-80    -144   
80     128    
144    -288   
-208   -64    
304    -672   
-112   16     
176    384    
-96    240    
144    0      
-16    48     
-32    80     
16     80     
16     -96    
16     -16    
16     192    
64     32     
-16    112    
64     -352   
48     -32    
0      -288   
96     256    
0      -336   
48     144    
144    48     
-176   96     
16     160    
-128   -192   
48     32     
16     144    
-48    160    
128    64     
-80    -128   
0      -192   
112    272    
-32    -256   
112    288    
0      -224   
16     0      
0      -480   
48     48     
-32    0      
144    128    
-48    112    
112    192    
16     -240   
112    32     
96     224    
-80    -208   
0      48     
80     -128   
16     112    
64     -560   
16     -128   
-48    -48    
112    272    
48     224    
-352   1456   
-32    800    
256    -256   
-768   -96    
-16    -576   
48     -352   
320    -304   
128    608    
320    208    
-96    -192   
-80    -416   
112    112    
0      -128   
-16    -96    
112    112    
0      112    
0      -64    
32     48     
304    416    
0      32     
160    16     
16     -208   
32     176    
0      -128   
64     -32    
96     -96    
64     128    
-192   128    
144    -512   
-112   -32    
144    -736   
-48    -112   
176    0      
-128   -160   
240    -48    
-32    -576   
112    -96    
-160   -80    
128    -16    
144    48     
32     -32    
-16    -336   
-16    0      
128    -720   
-128   0      
-256   144    
-16    16     
64     128    
0      -64    
192    128    
-16    -112   
64     -64    
64     -672   
80     112    
80     80     
16     -128   
-32    -544   
-16    -64    
144    -16    
48     288    
-96    -16    
96     -176   
-720   -160   
160    -192   
-48    64     
16     -304   
-32    64     
0      -512   
96     -96    
-64    -768   
96     0      
80     32     
0      64     
0      -96    
48     -64    
-160   80     
96     -16    
-736   -32    
-112   -160   
-16    -288   
80     -288   
64     192    
64     -608   
32     -16    
16     -1680  
0      -64    
224    -176   
80     224    
0      -112   
80     32     
-144   64     
160    16     
-320   -16    
32     0      
-1136  -64    
80     -16    
-16    -64    
0      -112   
96     -32    
128    -208   
96     128    
-32    -112   
16     128    
-32    -48    
80     -16    
-64    48     
256    336    
-144   -96    
128    -112   
-800   -48    
144    -256   
-672   16     
128    0      
16     -16    
48     -272   
80     128    
0      -736   
64     0      
-64    112    
192    176    
-112   -176   
-80    -256   
128    -64    
64     -96    
-16    32     
-32    -16    
-96    400    
48     -144   
-48    -64    
48     -176   
96     48     
32     -960   
32     -16    
16     48     
-48    32     
48     -192   
336    -176   
-80    80     
48     16     
-96    160    
-16    64     
-160   -80    
176    -272   
32     112    
32     -144   
128    320    
-224   -48    
192    16     
-224   192    
96     -112   
-112   128    
16     32     
80     -112   
304    96     
-400   64     
80     -96    
-240   -96    
-16    -320   
112    128    
176    -64    
64     -128   
-128   -16    
-48    -128   
0      -16    
48     -208   
-48    192    
144    32     
-160   -16    
160    80     
-112   0      
48     -144   
-96    48     
-512   -128   
96     80     
-96    -192   
48     64     
32     -176   
-160   144    
96     -48    
0      240    
-80    -16    
-576   112    
-96    -48    
112    -48    
-16    -144   
-32    272    
80     16     
-128   -32    
0      176    
-256   -112   
-192   -160   
0      -64    
192    80     
-16    48     
0      128    
-112   48     
-1120  -160   
-1392  -528   
688    448    
352    464    
-352   304    
176    -224   
-176   -80    
416    688    
-560   -400   
112    112    
-32    -144   
-80    96     
-176   112    
-16    64     
-176   -112   
-80    -16    
32     80     
0      16     
0      -16    
-16    -16    
-96    112    
-48    -112   
32     80     
0      96     
48     0      
-192   -48    
80     96     
32     64     
-128   -96    
-80    16     
80     32     
32     80     
-160   144    
-80    64     
32     -144   
48     64     
-80    -288   
-16    240    
176    64     
-16    16     
-144   64     
-32    0      
96     64     
32     -32    
-16    144    
-32    -96    
-112   128    
-32    64     
-224   0      
-208   -32    
-64    80     
144    32     
-96    176    
-112   -48    
-176   -112   
80     128    
144    48     
-80    64     
-48    32     
-32    16     
-48    16     
-64    80     
-144   -32    
112    32     
-112   -16    
0      160    
-80    -352   
64     -16    
128    336    
-160   112    
192    48     
-128   144    
-16    -48    
32     48     
-64    -64    
32     192    
-160   -128   
64     0      
32     192    
-32    64     
80     -16    
160    96     
96     384    
0      -80    
0      48     
-80    -32    
-112   -96    
160    384    
-272   -32    
272    80     
-192   -112   
64     176    
-240   -64    
128    192    
-448   -112   
240    112    
-80    96     
-48    64     
80     144    
-16    32     
-112   48     
96     96     
48     160    
16     -96    
128    176    
-272   -128   
320    96     
-464   -320   
304    -64    
-256   48     
16     144    
112    144    
32     128    
32     32     
-80    -16    
-32    272    
-48    -144   
288    -32    
-176   144    
32     128    
80     48     
-224   112    
192    64     
-80    0      
-32    80     
64     80     
-80    32     
16     -16    
-64    -16    
112    48     
160    224    
-160   160    
272    208    
-112   -16    
48     96     
-112   80     
192    32     
-80    144    
80     208    
-112   80     
96     48     
-48    32     
144    48     
-64    144    
-32    -176   
64     192    
-80    64     
16     112    
-80    80     
48     112    
32     32     
-32    -32    
-192   -64    
160    176    
16     -16    
176    384    
0      0      
-112   -144   
80     80     
64     48     
80     160    
80     128    
-32    -96    
128    -112   
48     16     
80     272    
-96    -144   
32     96     
112    -128   
112    144    
-96    128    
-144   48     
0      320    
208    -16    
48     -64    
96     384    
-48    272    
-64    112    
-16    32     
96     -80    
-32    48     
80     96     
-16    32     
16     -512   
96     160    
208    240    
-144   48     
-64    64     
80     128    
96     96     
16     128    
-80    176    
-64    -32    
64     112    
192    80     
48     -16    
192    1200   
96     800    
16     -1456  
-320   -720   
-336   832    
336    448    
-144   -656   
224    96     
112    544    
16     80     
-64    64     
176    352    
112    80     
0      192    
-48    -96    
224    320    
160    464    
-256   -160   
-112   -384   
192    -128   
32     240    
-48    96     
128    160    
-64    -48    
64     16     
-16    128    
64     208    
-16    80     
128    160    
-208   -16    
112    -240   
64     96     
-80    -128   
-112   -48    
80     -432   
112    752    
144    336    
-256   -16    
-32    -464   
224    128    
-64    -16    
16     48     
48     -48    
32     96     
16     64     
-96    -160   
112    -64    
128    112    
80     112    
-32    -320   
-16    -64    
32     -1552  
64     80     
144    144    
-80    0      
-80    -272   
128    80     
304    592    
-288   -48    
160    32     
48     0      
192    -32    
-144   -112   
48     0      
160    -352   
48     0      
32     -336   
-16    112    
96     -272   
48     144    
-48    0      
96     112    
0      0      
16     192    
32     160    
352    480    
-80    560    
-176   -720   
0      -160   
-80    -144   
240    -144   
16     16     
48     32     
-48    -192   
144    128    
-96    -64    
176    224    
32     48     
160    -352   
-16    112    
128    -48    
-32    32     
-112   -176   
112    -32    
192    -48    
32     -64    
-96    -464   
-32    -112   
192    32     
64     48     
-112   80     
32     160    
176    0      
160    80     
-144   -192   
80     -96    
-64    160    
192    -112   
48     224    
48     -112   
0      80     
-16    -160   
112    16     
144    80     
16     128    
16     352    
112    -240   
128    -560   
-80    128    
80     -688   
-80    -64    
-48    -1648  
64     -112   
80     -224   
240    0      
-64    288    
384    576    
-320   144    
96     -64    
-48    -848   
192    16     
-352   -288   
240    32     
-528   80     
96     336    
32     64     
-16    -64    
80     -128   
48     304    
0      32     
64     352    
128    -176   
0      -272   
64     32     
48     64     
96     -16    
32     48     
96     48     
-192   96     
-64    -144   
128    32     
32     -368   
16     96     
-80    -288   
176    80     
-16    272    
208    96     
-48    -96    
-48    -32    
96     288    
-32    96     
-32    -48    
112    368    
-816   -736   
320    -16    
576    560    
96     -224   
-128   -112   
48     -176   
64     -400   
208    -2656  
32     -48    
80     -112   
-32    128    
48     32     
48     32     
-64    -96    
112    32     
-256   -64    
64     80     
0      144    
-48    144    
-16    -208   
80     -144   
48     -272   
160    -400   
144    176    
48     144    
-16    144    
176    16     
-96    -80    
0      256    
16     0      
-160   -112   
32     80     
1408   1392   
-1264  -832   
16     288    
-112   240    
112    -160   
-32    -304   
-544   -240   
688    144    
-128   -96    
-48    64     
-48    0      
128    64     
-16    224    
-240   -32    
128    -128   
-432   -160   
112    -208   
-624   -16    
16     -80    
48     -48    
0      -240   
192    192    
-96    -224   
112    32     
-320   -112   
144    64     
-144   48     
96     192    
-16    -48    
-112   -224   
-80    -64    
80     96     
160    80     
-112   -80    
96     16     
-32    -160   
272    112    
-160   -144   
96     32     
-96    -32    
64     -48    
-240   112    
192    -80    
-16    64     
-176   -48    
112    0      
112    32     
-192   -112   
256    -80    
-192   -32    
240    -176   
-96    208    
80     128    
-608   -16    
0      -160   
-208   48     
-192   -176   
336    16     
-144   288    
-48    -112   
80     48     
48     64     
-272   16     
-336   -240   
224    112    
-352   48     
0      16     
48     0      
16     -32    
-16    80     
-144   160    
-144   32     
-400   64     
-48    0      
48     16     
-208   -176   
256    112    
-160   128    
-144   -64    
64     0      
-192   -32    
-32    128    
112    288    
-160   -48    
96     16     
-208   256    
-128   -80    
-48    304    
-256   80     
-672   -80    
-96    16     
160    -16    
80     144    
80     -128   
128    224    
-176   -192   
-192   -112   
96     16     
0      80     
-48    96     
-80    32     
-112   0      
-176   -160   
-176   112    
-496   64     
-80    32     
-48    -16    
0      -96    
-48    -128   
64     208    
-176   -96    
48     176    
-112   32     
48     -64    
-144   32     
-80    48     
96     128    
-32    -32    
64     80     
0      48     
-144   0      
0      160    
176    224    
-240   -208   
128    -128   
-96    48     
176    272    
-208   -48    
-32    32     
32     -32    
-48    -48    
32     96     
-160   64     
256    368    
-304   -80    
192    240    
-1088  -112   
112    304    
80     -16    
-144   -352   
288    224    
-128   0      
48     128    
-144   144    
128    80     
16     384    
112    176    
-272   -208   
-48    -48    
-112   16     
-32    64     
-112   0      
-16    96     
160    304    
-304   -256   
64     64     
-208   256    
-224   -448   
0      -144   
112    192    
16     48     
-160   0      
64     0      
0      80     
160    64     
-224   -160   
176    144    
0      224    
16     128    
-144   96     
112    16     
-32    0      
48     80     
208    112    
-64    16     
-96    -112   
48     96     
48     0      
64     112    
-48    32     
16     160    
-160   16     
128    144    
-208   -48    
48     -16    
144    128    
64     32     
-96    144    
-64    0      
80     16     
-64    64     
80     64     
-256   -16    
144    80     
-16    -176   
160    -112   
1632   -2016  
-208   -704   
1168   1776   
-608   704    
256    416    
160    96     
-112   80     
464    176    
-576   -64    
336    -128   
-176   80     
48     -16    
48     160    
-16    128    
-48    64     
16     32     
16     48     
144    -144   
-128   -240   
112    48     
16     112    
272    240    
-128   208    
192    -16    
-32    224    
0      -48    
-64    -336   
-176   -48    
48     16     
-144   64     
112    112    
112    144    
16     144    
16     -192   
-160   -48    
192    -48    
0      208    
96     -32    
-32    -80    
96     -48    
112    96     
-208   80     
80     16     
-96    -64    
128    -16    
144    160    
112    592    
-176   -96    
-112   16     
160    -16    
96     144    
-112   -80    
48     48     
16     128    
32     -48    
80     -176   
-16    208    
160    320    
-64    -400   
192    -848   
64     48     
-80    -96    
176    480    
-16    176    
16     -48    
48     -16    
-16    96     
-128   80     
112    128    
0      48     
112    96     
-64    48     
16     336    
-32    -96    
32     -192   
112    -192   
-48    -352   
384    288    
96     432    
-208   96     
48     -16    
112    192    
144    80     
16     224    
-160   -16    
96     592    
32     368    
-64    0      
-32    -400   
192    -352   
-32    192    
32     80     
32     48     
48     96     
240    624    
32     160    
48     -112   
160    208    
240    432    
-64    0      
-32    0      
-48    -16    
160    32     
96     80     
0      -48    
160    416    
176    -1168  
16     112    
-16    48     
80     16     
160    112    
48     64     
64     -224   
64     96     
16     -16    
16     160    
0      16     
-32    -432   
-144   -32    
208    -224   
-16    -48    
32     -864   
-16    288    
-48    256    
224    192    
-128   192    
288    128    
-288   -112   
160    144    
64     16     
208    528    
-160   96     
48     -32    
112    336    
-80    -560   
304    16     
-80    -64    
112    304    
128    -1728  
16     112    
-96    -288   
192    -64    
32     48     
112    -16    
-112   -144   
128    64     
96     224    
64     -16    
80     208    
32     160    
112    160    
32     32     
128    112    
-80    -528   
48     128    
0      -272   
48     0      
96     16     
48     144    
-16    48     
-64    176    
64     112    
16     -240   
224    16     
32     -96    
-32    -32    
32     -432   
-48    112    
64     -176   
96     320    
-96    -224   
144    432    
96     -96    
-16    208    
128    16     
16     160    
144    -48    
32     32     
48     112    
16     -192   
-32    320    
0      -352   
96     192    
48     -96    
0      128    
-32    -1392  
128    112    
16     -48    
176    80     
0      112    
112    208    
-16    -272   
32     144    
0      208    
32     -64    
-288   480    
16     192    
864    480    
-800   -176   
-16    -80    
-624   -592   
592    -1072  
-576   144    
512    0      
-128   -288   
336    -320   
-208   -304   
-16    -368   
208    -96    
176    -192   
96     144    
-16    -48    
-80    32     
128    -144   
176    -560   
-96    16     
32     -144   
-192   320    
240    -288   
-80    -112   
-16    -208   
96     48     
0      -48    
32     16     
-64    -192   
176    -384   
64     -128   
16     192    
-112   -16    
224    0      
-128   -96    
48     -304   
-48    224    
32     64     
144    -112   
-192   -64    
144    48     
16     0      
80     -144   
0      -128   
16     -640   
160    64     
-16    -496   
208    64     
-272   128    
176    0      
-48    -16    
16     -80    
80     144    
-128   0      
-128   32     
32     -80    
-1152  -64    
112    -192   
112    80     
-64    -352   
128    48     
-48    -288   
-160   32     
0      -192   
-48    -48    
112    48     
32     160    
-16    -16    
160    32     
-304   -96    
64     -144   
-704   -64    
64     16     
128    48     
96     176    
-160   16     
96     -400   
-64    128    
-48    -896   
80     160    
-16    96     
80     0      
64     -208   
208    -80    
-336   -224   
192    -240   
-320   256    
112    -32    
-48    112    
16     -240   
128    0      
48     -432   
32     -240   
208    -80    
144    224    
-128   0      
48     -144   
96     176    
0      -64    
-352   -32    
32     16     
-16    -16    
96     -224   
-288   -208   
64     -96    
32     64     
-64    -128   
16     16     
32     -160   
224    192    
-240   176    
80     -64    
-320   -160   
112    48     
-112   -16    
224    80     
-160   -16    
144    -160   
64     -80    
-16    -32    
32     176    
160    16     
0      -32    
96     -512   
-64    32     
128    -112   
176    736    
-128   -96    
16     -160   
0      144    
112    0      
-128   -48    
16     -96    
-48    96     
96     -48    
-144   32     
144    -400   
176    352    
-656   16     
16     -256   
32     -64    
272    48     
-320   32     
208    -496   
-352   -224   
240    -16    
-96    96     
-32    0      
-32    0      
-544   -224   
-16    128    
-416   -224   
-80    16     
272    800    
-576   -208   
208    -224   
-208   -32    
0      64     
-256   16     
-80    -32    
224    176    
-128   -32    
80     80     
-352   -176   
-256   -192   
0      320    
-192   -112   
192    112    
64     176    
-224   -144   
160    112    
-416   -144   
256    -48    
-224   160    
144    -48    
-1664  16     
-80    48     
-144   -112   
-32    112    
112    -16    
-16    112    
-80    -112   
-128   32     
16     112    
-128   -32    
-80    -16    
-48    16     
64     16     
-80    16     
-96    16     
-400   -32    
-64    -80    
80     128    
128    64     
-112   16     
1456   -128   
-1040  -1472  
624    768    
144    544    
80     -688   
-192   1072   
-544   -224   
704    544    
-624   128    
144    -192   
-576   -128   
352    48     
-240   128    
128    48     
-448   -96    
288    -64    
-80    352    
160    -1056  
0      160    
-192   -48    
32     608    
-16    160    
-288   304    
224    -576   
-96    464    
48     -160   
-48    272    
-1056  -416   
112    208    
-192   -352   
192    176    
0      128    
80     64     
16     176    
-16    32     
-144   224    
32     112    
0      192    
-208   -176   
128    208    
-112   48     
-128   0      
-288   80     
128    320    
-160   -64    
144    -48    
288    528    
-368   -336   
-112   -192   
-112   -208   
128    48     
-64    144    
128    -224   
-32    160    
48     32     
48     160    
-64    176    
64     32     
160    -144   
0      432    
-96    64     
96     -160   
80     192    
144    -16    
-16    16     
160    240    
-16    112    
144    496    
-208   0      
-112   0      
0      -256   
176    -80    
-48    32     
-64    160    
-80    -16    
256    192    
-128   112    
192    64     
272    400    
-112   208    
16     128    
-48    -176   
96     160    
160    208    
-48    128    
0      128    
-64    160    
-160   -160   
160    144    
-176   -96    
48     -240   
128    160    
96     16     
32     176    
128    240    
112    -16    
-128   -144   
48     0      
64     -48    
112    144    
-160   64     
96     32     
48     80     
160    304    
16     368    
192    480    
160    96     
-192   -112   
80     -32    
48     -16    
128    80     
-64    48     
96     128    
0      208    
176    272    
-144   48     
-16    272    
-144   32     
16     -176   
80     0      
80     480    
16     256    
-32    32     
0      32     
-16    208    
224    224    
-240   192    
96     80     
-128   -64    
16     64     
-80    128    
16     112    
304    272    
-192   -112   
96     224    
-176   -144   
192    -16    
0      32     
112    64     
-32    64     
112    32     
-16    64     
96     96     
-80    128    
80     144    
-64    96     
16     80     
80     16     
80     144    
-16    48     
0      176    
80     176    
64     96     
-48    32     
-80    112    
208    336    
-208   80     
224    32     
-80    -32    
304    0      
-64    -80    
-16    -624   
80     -16    
64     176    
144    96     
-16    128    
-64    96     
96     80     
0      112    
-64    0      
176    352    
-176   48     
32     64     
48     32     
112    96     
-96    -48    
64     -464   
112    272    
48     -512   
-80    160    
144    192    
-80    112    
0      16     
240    64     
48     -16    
128    272    
-32    16     
64     256    
0      0      
-48    96     
0      16     
272    144    
-48    -96    
48     144    
32     32     
-816   -1664  
-96    32     
176    -80    
-592   496    
16     -384   
256    512    
-544   -672   
288    624    
-448   16     
864    176    
-352   64     
240    -336   
-336   496    
272    -1072  
-32    688    
80     -1088  
32     560    
-96    -144   
160    400    
48     -496   
-80    160    
-16    -176   
64     336    
48     -96    
-144   -96    
80     16     
80     -32    
80     160    
-48    -112   
32     16     
32     -160   
32     240    
160    -64    
-64    160    
-32    -32    
64     -32    
48     -64    
16     208    
64     128    
96     -16    
-16    -16    
0      -48    
96     64     
112    48     
32     80     
48     -176   
32     64     
-160   -976   
160    48     
-16    80     
48     64     
-16    80     
144    176    
-128   64     
96     -496   
16     112    
48     -320   
192    256    
-96    -32    
112    80     
-16    -48    
96     96     
-80    -64    
112    144    
-112   64     
144    64     
80     -64    
96     -128   
-32    96     
80     16     
64     48     
112    -80    
16     128    
0      -288   
224    176    
-112   -320   
128    176    
-176   144    
64     48     
112    -32    
-96    -1744  
224    -256   
160    32     
64     -80    
128    176    
-64    0      
80     48     
128    144    
112    64     
64     112    
128    -80    
-16    80     
-96    -352   
48     -1312  
-144   -32    
-112   -416   
112    256    
-816   64     
16     160    
-64    -112   
16     -800   
32     -144   
112    48     
64     80     
32     128    
0      -208   
0      -512   
0      -288   
-96    -368   
64     -64    
224    16     
64     -64    
-272   -96    
-80    -176   
96     -64    
32     -448   
64     0      
160    -176   
-96    -64    
16     -880   
64     -112   
144    -48    
-176   -16    
16     80     
0      -128   
112    -288   
-176   -288   
208    128    
16     -160   
80     48     
-32    32     
16     -16    
144    -304   
48     -16    
112    -896   
-48    16     
16     48     
144    256    
-96    -96    
-32    -32    
-112   -176   
128    256    
-464   32     
64     64     
-1296  -96    
304    -192   
-48    -64    
16     -240   
32     -48    
32     -704   
176    32     
32     -128   
-32    48     
48     -80    
304    80     
-416   -112   
320    16     
-48    64     
32     -32    
-336   -112   
96     -48    
-736   16     
32     64     
32     64     
-64    96     
-32    -176   
144    -704   
80     416    
-176   -288   
80     16     
96     16     
320    -96    
-272   64     
80     -112   
-240   -144   
96     144    
-144   64     
256    -32    
-320   80     
144    -352   
-96    64     
96     -464   
0      0      
-64    144    
-16    48     
-48    -160   
-16    -64    
-48    -128   
144    0      
-80    80     
-48    -80    
-128   16     
384    -192   
-1248  32     
-16    -368   
-16    80     
16     912    
-608   -1280  
64     -256   
640    496    
-320   -928   
-16    800    
-464   304    
304    816    
-320   -448   
224    -288   
-128   -208   
208    432    
112    160    
0      224    
-256   -432   
208    96     
64     -144   
-320   -640   
64     -432   
208    144    
224    384    
-352   -48    
176    -480   
-48    240    
80     -464   
-240   -80    
192    160    
48     448    
288    -16    
-272   -512   
-256   -192   
-144   -80    
-80    112    
-1072  64     
-80    64     
240    384    
-272   304    
112    -176   
-176   -144   
32     -96    
144    112    
-512   -64    
224    160    
-544   -16    
64     96     
-144   128    
-96    -48    
128    256    
-288   32     
128    -16    
-240   64     
-48    96     
144    48     
-64    -64    
160    48     
48     176    
-528   -208   
112    96     
-352   -544   
176    -112   
-16    288    
-16    336    
-176   -96    
160    80     
-160   112    
-16    16     
-144   -128   
-16    96     
-80    64     
-320   0      
-16    32     
48     -80    
64     256    
-144   16     
-32    -224   
128    -80    
-224   -208   
-272   32     
-224   -48    
48     176    
-240   176    
-16    -192   
16     -128   
-192   112    
-1136  -32    
-224   16     
96     48     
32     160    
-64    -32    
32     48     
0      64     
-80    -64    
112    112    
-48    96     
96     240    
-80    96     
-48    16     
0      96     
-160   -144   
-320   16     
-80    144    
96     80     
144    128    
-16    496    
-320   -64    
160    48     
-288   -160   
176    -96    
-64    16     
-16    48     
0      128    
48     96     
-160   16     
160    384    
-624   -32    
464    288    
-272   0      
192    112    
-160   -16    
160    48     
-80    -16    
0      64     
-160   0      
272    208    
-304   48     
64     -48    
96     64     
-208   48     
64     16     
-176   -96    
-128   -48    
-256   -224   
-144   176    
160    -32    
80     -48    
-224   80     
192    256    
64     16     
64     128    
-224   160    
96     16     
208    80     
-320   16     
192    -16    
-112   -16    
0      48     
-208   -80    
-16    -48    
48     128    
32     32     
-16    128    
32     96     
-80    80     
16     96     
0      128    
64     -208   
80     144    
-240   -48    
80     32     
-160   80     
64     96     
48     160    
-48    176    
16     112    
96     48     
-192   64     
16     160    
-256   80     
-32    -48    
-16    -144   
112    -16    
176    128    
-304   160    
-48    0      
-80    128    
192    176    
-112   96     
-160   -64    
32     32     
64     64     
96     96     
-144   32     
-80    -144   
176    176    
-16    16     
-32    16     
64     144    
-16    48     
64     96     
-112   0      
0      0      
-16    112    
80     -32    
112    256    
96     144    
-64    560    
864    -1184  
672    192    
-480   784    
-192   480    
0      -80    
720    864    
-800   -448   
304    592    
-608   -336   
320    192    
112    144    
224    128    
-48    144    
-48    -384   
32     224    
112    -128   
-160   368    
80     -64    
96     320    
0      -160   
-48    160    
-192   80     
352    256    
-144   -16    
96     -144   
-192   64     
304    288    
-192   160    
144    16     
-128   0      
0      16     
176    224    
-48    48     
64     160    
-96    0      
112    96     
48     112    
-32    144    
192    80     
-96    32     
96     96     
-16    112    
48     32     
-16    48     
0      96     
16     208    
48     208    
80     64     
-16    0      
-48    0      
96     208    
-96    224    
-96    -512   
96     80     
0      -592   
208    -96    
16     112    
-32    160    
-48    96     
48     48     
-16    -16    
16     48     
-96    112    
48     112    
32     96     
48     144    
-16    16     
128    -448   
-64    -16    
128    -752   
0      176    
64     64     
64     48     
80     192    
-32    128    
-80    -16    
80     64     
32     16     
64     320    
160    208    
96     272    
-96    368    
32     -224   
0      80     
144    112    
80     320    
-64    208    
-16    -48    
-32    -48    
32     -64    
16     -80    
80     224    
-48    16     
112    176    
48     192    
48     432    
-16    176    
-112   -352   
208    -32    
160    -336   
16     112    
-144   -2656  
0      32     
128    -32    
0      0      
96     64     
-16    128    
0      32     
16     96     
64     48     
16     -96    
80     240    
0      16     
112    128    
0      -256   
48     -16    
96     16     
16     112    
192    -192   
-128   -16    
48     32     
16     80     
144    128    
-64    64     
48     -80    
0      288    
192    480    
-96    -272   
32     224    
144    -288   
32     16     
16     0      
128    176    
-32    -304   
-32    32     
112    160    
48     -112   
176    48     
-32    272    
64     -48    
-32    -144   
192    240    
-32    -1232  
16     -16    
80     -176   
112    304    
-144   -336   
48     160    
80     -192   
64     48     
-144   -80    
240    160    
-80    144    
64     -64    
-48    160    
48     -208   
-16    144    
-48    -160   
112    208    
32     -64    
-48    64     
112    -240   
112    176    
80     -848   
16     208    
208    112    
-80    -1344  
112    32     
-64    -112   
160    -2208  
-112   -112   
0      80     
48     -32    
-32    144    
32     0      
48     0      
144    -48    
96     176    
0      -80    
32     -192   
32     80     
128    -432   
-368   64     
-864   -48    
48     -304   
16     -80    
96     -800   
64     -112   
-16    -288   
-96    -304   
96     160    
128    0      
192    160    
64     -80    
0      -288   
1248   -528   
-832   -432   
784    752    
-224   400    
80     -400   
288    -224   
-384   -288   
944    432    
-512   -592   
144    -256   
208    128    
-160   64     
0      -384   
-48    192    
80     -176   
-16    240    
144    -32    
320    384    
-48    16     
-16    48     
-464   0      
32     -240   
224    -128   
-80    -208   
16     -64    
176    -880   
16     48     
32     -16    
128    -16    
0      80     
208    16     
-208   -32    
144    -64    
-128   -192   
-16    -272   
-544   0      
0      -48    
0      32     
80     -272   
32     -80    
48     -608   
-32    16     
96     32     
112    160    
-112   80     
80     48     
-288   -432   
208    -16    
-240   32     
144    -320   
144    96     
-16    144    
0      -208   
80     -16    
64     16     
144    -16    
-160   64     
160    -368   
80     240    
-144   -64    
176    -80    
64     48     
48     80     
-112   -16    
96     -160   
112    -32    
80     -240   
-304   -112   
48     -16    
-416   32     
176    -32    
-144   48     
192    -976   
0      192    
48     208    
-128   -32    
192    160    
-128   -32    
-176   -144   
80     -16    
-272   0      
144    208    
-416   -224   
352    112    
32     224    
-128   -672   
224    32     
-48    -240   
32     144    
-128   -64    
96     16     
-208   112    
32     -112   
-80    -16    
112    240    
-144   48     
48     -48    
48     0      
0      -176   
32     -16    
64     48     
-32    112    
112    -192   
32     0      
80     144    
192    -112   
-96    160    
-144   -208   
224    16     
-112   32     
160    64     
0      -48    
-96    -80    
-144   -256   
48     96     
-48    -96    
48     128    
0      -32    
-224   208    
-16    112    
-672   -32    
-352   -144   
32     96     
-64    -224   
208    -144   
-176   304    
192    -48    
-272   -80    
-128   -176   
-112   96     
128    48     
176    192    
-336   -176   
-16    96     
192    560    
-96    144    
-16    -208   
-288   48     
-80    144    
-320   96     
-144   128    
80     -288   
-32    32     
-96    -80    
-64    16     
-32    -80    
32     176    
-16    48     
-112   -96    
-64    -16    
-64    208    
112    144    
-224   64     
-128   -224   
-800   -224   
-80    240    
-16    176    
48     144    
16     -80    
112    48     
-80    -256   
80     304    
48     96     
112    416    
-128   -128   
16     96     
-32    160    
32     0      
-80    48     
-16    -16    
-64    192    
-720   0      
32     16     
-32    64     
-48    416    
-224   -272   
0      -208   
144    128    
80     -144   
-64    96     
-80    -64    
48     16     
-16    96     
16     256    
-160   -80    
112    0      
-32    16     
32     128    
-128   -112   
224    240    
-128   224    
-128   -32    
0      16     
64     32     
16     128    
-496   64     
-784   -720   
-560   656    
704    320    
1008   -240   
-640   -336   
-112   96     
16     144    
-736   -192   
288    336    
-16    80     
-336   -240   
-32    192    
112    -32    
-16    16     
-128   -16    
64     112    
-128   16     
32     96     
-16    -128   
-48    32     
256    128    
-16    48     
-368   -144   
-192   -544   
240    208    
80     32     
-224   48     
240    208    
0      -48    
-48    80     
-128   80     
144    32     
-176   32     
48     -16    
112    192    
-80    208    
16     192    
-480   -64    
176    -16    
-48    96     
192    96     
-16    96     
16     96     
16     128    
-96    64     
-128   32     
128    -96    
-16    96     
-128   -144   
64     32     
-144   -16    
112    160    
-224   80     
64     128    
-48    -224   
48     -384   
112    32     
80     176    
64     176    
-80    80     
32     192    
-48    -16    
-48    -16    
48     -112   
64     304    
-144   80     
-96    96     
16     128    
-32    48     
32     16     
32     32     
-48    -16    
96     112    
32     96     
144    176    
-96    80     
-80    -128   
48     48     
-16    160    
-16    160    
-112   -48    
32     32     
0      80     
0      48     
16     -64    
48     96     
32     64     
32     64     
64     128    
-32    48     
80     80     
-160   -112   
112    112    
0      64     
96     -16    
-208   -128   
112    128    
16     32     
48     144    
-64    0      
16     48     
96     32     
64     96     
-32    32     
-144   -80    
208    144    
-144   32     
112    80     
-96    64     
96     112    
48     80     
-48    160    
0      128    
32     -64    
144    128    
96     384    
16     -32    
-64    -80    
112    112    
96     176    
64     -32    
-160   32     
224    144    
-48    96     
-96    -352   
320    -16    
-48    256    
208    144    
-80    144    
80     208    
96     -48    
-48    192    
16     -16    
48     -32    
96     16     
-32    192    
128    80     
-144   80     
32     -160   
0      -96    
32     -112   
48     -1664  
32     48     
144    -16    
96     512    
-128   352    
-32    224    
-48    -64    
160    -48    
144    48     
-64    160    
-176   -48    
96     32     
304    32     
-192   80     
16     432    
-272   -608   
-32    -112   
160    -64    
288    0      
32     32     
-48    176    
-16    112    
-32    -144   
176    -176   
464    208    
-80    144    
-144   176    
-32    144    
16     -96    
-48    -48    
32     -656   
160    240    
32     -736   
-48    192    
160    144    
80     96     
0      272    
-32    208    
-144   48     
80     112    
-64    32     
16     -16    
112    96     
128    80     
32     64     
-112   -208   
112    160    
-32    -720   
48     256    
-16    -176   
32     224    
-96    16     
128    -80    
16     32     
1536   -2064  
32     -160   
608    192    
-176   272    
-288   432    
352    480    
-416   -80    
48     208    
-112   0      
-64    96     
288    -672   
-240   208    
160    48     
16     -16    
48     -96    
-16    112    
-64    -128   
272    304    
-48    304    
64     -16    
0      48     
128    80     
176    96     
-176   -224   
112    80     
-80    32     
208    160    
-64    -16    
64     32     
32     64     
128    112    
48     96     
-16    -224   
0      112    
128    -336   
-80    0      
144    -272   
-16    112    
80     -112   
48     32     
0      -240   
48     112    
0      16     
128    96     
-128   48     
192    176    
48     128    
80     80     
16     0      
208    -16    
-208   64     
224    -96    
-80    64     
208    48     
-64    160    
80     -1040  
160    48     
32     160    
16     -1232  
-16    48     
-112   80     
16     -1568  
32     80     
0      -288   
144    48     
-64    112    
48     -64    
80     208    
240    -144   
-48    80     
-16    -32    
96     -240   
112    112    
48     -32    
-144   -64    
-736   16     
-128   -1008  
48     -112   
32     -288   
96     64     
-16    -576   
80     -128   
112    64     
48     112    
-96    64     
192    -96    
192    -208   
144    192    
-32    -304   
96     -64    
-352   -80    
80     -80    
48     -112   
96     -96    
32     -32    
-48    -112   
112    -240   
112    -272   
48     112    
-80    -32    
48     64     
112    -64    
96     192    
64     -208   
16     16     
-144   160    
96     16     
-288   -48    
64     -288   
-48    112    
176    -512   
144    192    
-96    -80    
48     0      
176    -224   
0      -48    
0      -80    
-48    192    
304    208    
-80    32     
-80    0      
-96    48     
-576   -48    
160    -400   
-96    -192   
-96    -160   
240    -32    
-192   -144   
208    -96    
0      -368   
0      -80    
-48    -96    
0      144    
256    48     
0      192    
-144   -96    
128    16     
-544   -32    
256    48     
-448   32     
64     96     
32     -240   
-80    -384   
16     -80    
160    -320   
32     320    
192    176    
-96    -176   
128    144    
64     -144   
-80    -48    
176    64     
-16    -160   
144    -48    
-16    288    
48     -336   
-1088  -192   
224    112    
0      48     
48     -864   
64     240    
192    -832   
-80    -416   
-144   -352   
240    48     
160    400    
96     -64    
-304   0      
208    -320   
-16    144    
64     -144   
32     384    
-80    -224   
32     -32    
16     -576   
16     -144   
-64    96     
16     -64    
16     -80    
128    128    
16     80     
0      -16    
-208   -80    
112    144    
-160   -48    
64     80     
-688   192    
0      -128   
-96    -16    
272    -240   
16     272    
144    0      
16     208    
-64    192    
-64    48     
-144   448    
160    -224   
304    432    
-384   32     
-160   -1200  
688    240    
-592   288    
-256   -944   
432    1120   
176    48     
-896   -128   
32     -48    
-688   -80    
-48    -96    
-288   80     
-208   96     
16     -32    
32     368    
0      -112   
-192   -64    
-496   -384   
-96    128    
-464   144    
272    -16    
-416   -368   
224    208    
-144   -64    
-160   -16    
-144   16     
304    -96    
-128   0      
-448   112    
48     64     
-64    0      
-16    64     
-160   0      
-48    144    
64     -128   
-192   -80    
176    -80    
-336   -64    
-16    128    
64     48     
16     64     
-192   112    
-32    16     
-288   32     
16     -96    
-96    -160   
32     48     
-32    -80    
128    48     
-16    -128   
80     288    
-32    48     
-112   -160   
64     224    
-32    336    
-32    16     
-128   80     
16     -144   
-720   -128   
-16    128    
-272   160    
-80    64     
-48    -32    
32     0      
16     -224   
-32    64     
64     80     
16     80     
-48    64     
80     48     
32     48     
-32    48     
-112   80     
224    416    
-144   256    
32     32     
176    112    
-352   -272   
16     -304   
16     -32    
-128   96     
0      368    
-64    128    
-16    -32    
-176   -320   
80     16     
48     64     
96     256    
-160   192    
-112   80     
-240   -96    
112    80     
-1008  -32    
160    432    
-96    -48    
-32    -80    
-80    0      
112    48     
-112   80     
-80    48     
-48    64     
0      48     
112    240    
-224   -96    
96     224    
-448   -160   
192    128    
-64    144    
48     -48    
-16    96     
0      0      
112    48     
-80    48     
16     -96    
-16    0      
80     160    
-96    16     
-80    -64    
-48    -48    
112    176    
-48    -96    
-48    256    
-416   -832   
288    112    
-144   480    
160    304    
-272   48     
80     112    
32     -96    
64     16     
-48    128    
-96    -160   
16     -384   
-112   -288   
224    -176   
-128   80     
96     272    
-128   -112   
-192   48     
0      -256   
48     48     
64     128    
32     -48    
-32    352    
16     112    
-32    96     
-32    -32    
48     48     
-192   -96    
112    -64    
-96    -48    
-32    -208   
224    240    
48     544    
48     -80    
-48    160    
32     -80    
32     -176   
-48    32     
224    240    
-64    160    
-32    16     
80     128    
32     480    
-80    128    
-336   -224   
192    -96    
80     160    
96     -96    
32     256    
48     -80    
112    32     
48     -320   
288    320    
32     192    
-16    128    
-208   128    
128    -96    
-192   128    
128    -128   
-16    224    
64     288    
-80    256    
-112   -112   
160    144    
16     -64    
-16    144    
-80    -144   
192    80     
-160   48     
256    192    
-272   -48    
128    176    
1392   -2032  
-256   -1072  
752    368    
-384   592    
944    96     
-688   -352   
64     -80    
288    96     
32     -416   
-32    96     
16     208    
176    128    
-128   288    
48     -16    
32     304    
-64    -112   
64     208    
144    128    
-80    -64    
112    -112   
-112   96     
320    80     
-16    240    
80     80     
-160   32     
-32    16     
192    176    
0      96     
144    144    
-144   -16    
112    -176   
-48    112    
208    112    
-112   -800   
144    80     
-16    -160   
16     160    
16     32     
160    16     
-208   80     
64     176    
112    64     
-64    80     
-96    48     
112    96     
-224   -48    
192    -256   
-32    320    
192    -240   
80     64     
-64    112    
64     64     
48     64     
48     128    
48     32     
112    288    
-176   -80    
208    96     
-80    -16    
96     -16    
64     96     
112    96     
-48    128    
80     -96    
-64    80     
80     208    
208    416    
-256   32     
208    192    
-96    -288   
160    192    
-208   -32    
160    96     
-64    64     
112    48     
16     16     
32     -224   
16     96     
0      32     
-112   48     
160    -544   
48     208    
-64    -256   
272    64     
-224   -304   
128    176    
-192   -144   
192    192    
-80    96     
160    128    
-80    16     
144    0      
-32    16     
96     -208   
96     160    
0      -48    
160    224    
-128   -1040  
256    208    
-32    -1952  
64     128    
-80    48     
160    144    
-16    -80    
128    192    
32     160    
112    -64    
-80    -64    
80     -640   
272    160    
-112   -32    
48     176    
-80    -624   
160    128    
144    16     
-320   -208   
208    0      
-32    176    
16     144    
208    -96    
-128   96     
0      -192   
64     112    
80     -384   
-48    16     
160    -96    
-48    176    
32     -64    
0      80     
0      48     
128    96     
-160   64     
224    144    
144    16     
-96    -208   
176    48     
96     -64    
-48    32     
128    -176   
0      128    
96     -32    
16     176    
16     -192   
64     160    
32     16     
80     -240   
-80    -96    
48     -640   
144    0      
32     -64    
32     -624   
32     -288   
192    224    
-176   -32    
64     144    
-16    -64    
176    304    
-112   -336   
32     -384   
240    -32    
-48    -416   
80     64     
-160   144    
192    -688   
80     -624   
0      -1136  
256    128    
-112   -288   
32     -112   
80     288    
32     -80    
-144   16     
16     -144   
80     -96    
0      96     
-48    128    
-80    -96    
-128   -80    
-16    -64    
-1296  -128   
160    -64    
160    32     
-144   -240   
160    -160   
160    -928   
-64    -256   
112    -112   
48     160    
224    160    
96     64     
-64    -64    
0      -208   
96     16     
48     16     
-176   80     
-784   896    
-352   560    
-432   608    
-656   128    
-80    -944   
-80    48     
16     -48    
128    800    
256    -64    
144    352    
-656   -320   
304    -160   
112    -192   
176    -32    
-768   32     
208    16     
-288   32     
-112   -544   
240    96     
112    -144   
64     240    
-272   -736   
208    272    
128    64     
-176   -128   
-192   -144   
64     144    
112    208    
-144   -320   
-560   -32    
0      -144   
-464   -64    
112    0      
160    224    
-96    -400   
352    80     
96     -160   
192    320    
-432   -272   
320    288    
-48    -208   
288    -80    
-224   48     
112    32     
-192   32     
-16    -144   
112    0      
48     304    
-656   -64    
-176   -560   
96     -112   
64     -576   
16     -160   
80     -1568  
16     -64    
64     128    
-96    -176   
-736   -592   
352    304    
-224   -32    
144    128    
-400   -112   
144    -96    
-432   -96    
32     -192   
16     96     
16     -176   
176    80     
32     -496   
48     -128   
-80    48     
48     -16    
-80    112    
64     80     
-128   80     
32     -224   
-224   -336   
112    -400   
-192   64     
32     160    
144    352    
-48    -128   
16     80     
-80    -16    
160    64     
64     64     
32     160    
80     400    
80     144    
-176   -112   
128    -240   
-16    16     
80     112    
-48    32     
144    -80    
32     -128   
-320   -432   
-448   16     
-112   96     
-272   128    
-176   128    
-640   -64    
0      0      
64     16     
-48    32     
16     48     
-48    192    
0      -512   
-112   -304   
-320   -320   
144    160    
-128   -208   
-160   128    
64     -16    
-64    0      
-176   96     
32     -224   
-32    128    
-192   112    
32     128    
64     80     
-96    144    
32     -48    
112    464    
-176   32     
288    1008   
80     400    
96     368    
-208   0      
16     -48    
-144   96     
-96    -96    
0      144    
-128   272    
-144   208    
-832   32     
-160   -32    
-16    272    
112    144    
-48    -96    
0      -304   
-80    -80    
32     -48    
-96    48     
64     272    
128    592    
0      544    
64     304    
-384   -144   
-48    -112   
-400   -128   
48     -96    
-192   80     
208    672    
-256   -160   
-96    -288   
-80    0      
144    0      
-48    208    
-128   112    
176    160    
-96    176    
16     96     
-48    -64    
32     64     
-144   80     
112    176    
-336   -48    
64     64     
-192   -192   
-16    112    
128    32     
-128   64     
96     160    
-112   -16    
80     304    
-160   -112   
144    128    
-16    -32    
160    160    
-160   32     
128    32     
-960   224    
48     -112   
176    176    
-32    16     
-48    128    
-16    -112   
112    32     
-80    -48    
-96    112    
-176   -48    
48     32     
-16    80     
176    -48    
-240   16     
2048   352    
-1280  -736   
688    -144   
96     32     
544    560    
-144   -400   
-224   -336   
704    352    
-112   -320   
-48    208    
-16    -80    
80     304    
-160   -128   
144    320    
-208   16     
80     64     
-176   16     
160    16     
16     208    
-48    -112   
-32    128    
128    -80    
48     320    
-16    -192   
-96    192    
48     -176   
96     192    
-80    -112   
-16    192    
-48    -224   
64     96     
-16    80     
-16    144    
16     0      
-176   0      
192    -64    
64     144    
176    80     
-128   16     
-112   16     
192    112    
-176   80     
96     -64    
-80    112    
-16    112    
16     112    
112    32     
48     416    
-160   -128   
192    64     
-96    240    
112    48     
-48    0      
0      48     
16     224    
16     64     
-64    80     
80     64     
-64    128    
-80    -144   
48     176    
-16    80     
48     -32    
80     96     
-64    240    
-16    80     
-80    32     
224    64     
-64    0      
48     96     
-16    112    
192    144    
-128   -160   
64     128    
-240   -32    
-128   -336   
224    192    
-192   288    
64     -16    
176    80     
32     -16    
0      144    
32     128    
48     -16    
192    64     
-96    -16    
112    -144   
16     0      
0      192    
-112   -176   
80     -112   
48     128    
-16    48     
160    256    
-144   48     
112    16     
0      -144   
32     -80    
112    112    
-48    80     
80     192    
-64    -16    
-64    -112   
176    160    
128    80     
-64    -336   
96     144    
96     224    
112    112    
-32    0      
0      208    
32     112    
48     80     
-16    32     
16     64     
-80    128    
48     -96    
-48    0      
144    -480   
48     48     
96     -880   
16     16     
16     144    
48     -96    
128    -128   
-48    -32    
0      64     
80     -176   
160    240    
-112   -128   
144    -64    
-16    144    
-32    -176   
112    -384   
0      144    
224    -160   
-160   -96    
240    -800   
-80    112    
64     64     
32     192    
112    256    
112    48     
-32    -128   
208    736    
-96    -80    
-96    -224   
16     96     
96     16     
-32    128    
64     -64    
128    128    
96     96     
-128   112    
176    96     
16     144    
80     -736   
160    32     
96     96     
224    272    
-80    224    
32     128    
-16    48     
656    -144   
-144   192    
-384   -352   
128    -96    
288    -240   
112    112    
-256   -384   
112    352    
-112   -32    
32     48     
-48    -176   
192    80     
16     80     
-128   240    
-112   0      
112    -112   
112    64     
160    -176   
-64    96     
80     -512   
16     48     
144    -144   
0      144    
-16    80     
-16    96     
64     0      
48     160    
-16    16     
304    16     
-80    64     
64     -144   
-16    128    
240    -960   
656    864    
560    1040   
-208   -592   
-656   -880   
320    -336   
512    -704   
224    -304   
880    784    
-560   528    
-96    16     
-96    -304   
272    224    
192    -416   
-192   144    
192    -96    
160    336    
32     -224   
-64    496    
96     -480   
160    32     
272    288    
-128   256    
-32    -144   
-144   -32    
48     -576   
160    48     
32     496    
-128   -80    
-176   -208   
96     -144   
176    -80    
208    -144   
-112   32     
304    -240   
80     240    
144    -48    
208    -2448  
32     144    
-64    -1584  
-64    -1440  
32     128    
48     -560   
128    64     
-32    -256   
32     -48    
-128   64     
160    -208   
160    -64    
208    256    
144    -480   
-176   64     
112    16     
16     272    
-144   176    
48     16     
-16    64     
-80    -1152  
112    -272   
160    -640   
-144   -176   
48     320    
64     32     
112    -112   
-96    -256   
80     -176   
-80    112    
128    -112   
0      112    
-160   0      
96     0      
-1488  -96    
0      -240   
-32    -96    
144    -16    
-16    -48    
-32    -528   
288    -336   
48     -1088  
96     912    
48     -256   
-48    0      
0      160    
160    0      
-96    64     
96     80     
-384   -192   
16     -16    
-96    -64    
208    -128   
-16    -48    
48     -528   
-64    -176   
80     -1536  
128    80     
16     48     
-64    -384   
-96    -272   
240    -144   
-64    80     
144    0      
0      -128   
32     -96    
-1152  112    
128    -32    
160    32     
-96    -176   
-64    -272   
16     -560   
144    192    
224    48     
-96    -80    
48     64     
80     32     
16     -96    
0      0      
-48    272    
80     32     
-560   -272   
48     -304   
-224   -16    
240    128    
-240   112    
80     -560   
224    -112   
-160   -352   
144    48     
-32    48     
-16    -32    
64     -16    
112    -144   
-16    -16    
48     -192   
-224   -96    
336    144    
48     256    
176    -16    
0      192    
32     -368   
80     48     
32     128    
32     -224   
-64    64     
176    64     
0      -80    
112    -112   
-368   96     
160    32     
-160   80     
144    -64    
-96    -80    
-32    -160   
-16    -32    
176    -224   
96     48     
32     96     
-48    272    
-96    64     
48     -96    
-16    -112   
-32    192    
-64    0      
-16    80     
48     64     
-16    -112   
-176   -16    
208    -176   
-80    96     
208    48     
-96    32     
-16    96     
96     -192   
-16    112    
96     80     
-272   0      
112    80     
16     48     
112    -128   
-16    48     
0      -192   
96     112    
-496   -80    
272    0      
-112   -80    
32     48     
-160   96     
-16    -128   
-16    -16    
-80    80     
-96    80     
-176   -128   
-48    112    
64     -144   
96     -48    
-48    64     
-80    64     
1296   -496   
-416   224    
800    -480   
192    -240   
-416   -512   
544    1120   
-752   32     
512    496    
-384   -208   
112    192    
-240   112    
96     -144   
16     432    
48     -400   
-224   416    
64     -432   
-112   480    
0      -288   
-80    336    
112    -304   
-128   240    
-64    -16    
80     256    
16     -144   
-176   -48    
96     64     
-256   320    
224    -16    
-208   32     
96     -128   
-32    -48    
64     80     
48     128    
-80    16     
48     64     
48     64     
-16    160    
-176   -176   
-80    64     
32     112    
32     80     
-448   -176   
-144   0      
-304   -272   
128    48     
-112   64     
192    64     
-80    32     
-160   -32    
48     32     
80     16     
-48    128    
64     80     
-112   32     
48     -16    
0      128    
-272   -208   
144    80     
64     64     
32     32     
48     32     
-64    -32    
32     96     
-32    64     
48     -16    
-96    -16    
48     16     
64     16     
-64    224    
-288   -96    
112    208    
-256   -128   
96     80     
-224   -96    
-32    -16    
192    240    
-336   112    
112    0      
48     -32    
32     64     
-112   96     
-112   -112   
16     -240   
-96    0      
-64    48     
-80    48     
32     -144   
176    176    
-496   0      
64     32     
-48    48     
0      48     
-16    16     
-112   -48    
144    128    
-64    64     
-48    16     
-16    64     
144    432    
-240   -64    
32     -144   
-192   -80    
96     0      
-240   -112   
16     64     
160    272    
32     16     
-176   16     
64     -16    
48     128    
0      32     
-64    112    
-16    64     
160    80     
-16    64     
32     176    
-96    -144   
80     240    
192    208    
-48    112    
16     80     
-176   -64    
-64    -208   
32     -192   
160    272    
-64    224    
-64    48     
-208   -432   
48     96     
-32    48     
16     0      
-112   144    
80     16     
80     128    
32     320    
-48    128    
16     -224   
112    224    
96     112    
-96    -16    
64     96     
32     48     
16     144    
-128   0      
0      304    
-32    -112   
-64    -96    
112    96     
80     96     
0      48     
-112   32     
48     112    
144    176    
-96    -32    
144    144    
-96    160    
-112   48     
80     -16    
224    128    
-16    96     
-176   32     
16     32     
112    -112   
80     32     
-176   128    
128    -16    
-64    208    
48     -16    
64     80     
-128   16     
96     48     
0      128    
80     80     
16     -80    
-16    -48    
112    192    
-112   176    
-112   -1104  
144    0      
112    96     
80     160    
-112   96     
224    -176   
48     176    
-48    -16    
-64    192    
-48    32     
224    0      
-48    160    
16     32     
-160   80     
144    -144   
144    176    
192    48     
-128   160    
-144   -640   
160    2368   
-688   688    
-240   -336   
592    -288   
368    336    
-496   416    
-48    112    
208    608    
128    -624   
-272   128    
208    -80    
112    272    
96     -208   
32     480    
80     -208   
-192   304    
128    -384   
128    464    
48     -240   
64     528    
-176   -128   
-160   352    
128    -240   
16     0      
176    -48    
240    384    
0      -432   
-128   80     
144    -2448  
144    176    
-16    32     
-96    144    
128    -112   
0      224    
32     -144   
-16    240    
-128   480    
240    352    
-80    128    
0      -208   
80     48     
0      -112   
144    288    
16     -320   
64     112    
0      240    
96     288    
-32    -64    
16     -112   
-48    -16    
80     96     
144    256    
-96    224    
48     176    
-32    0      
48     176    
128    112    
32     160    
96     -80    
48     48     
48     -1744  
16     32     
64     64     
-64    160    
0      16     
64     16     
80     80     
64     176    
16     96     
144    -32    
48     112    
112    96     
-112   128    
80     48     
144    48     
32     -224   
48     112    
48     -48    
-80    -144   
240    96     
-16    96     
-80    -48    
272    176    
64     336    
-16    160    
64     64     
176    -176   
208    224    
32     -16    
-16    96     
192    0      
-32    -16    
80     -128   
96     288    
-96    -224   
48     -288   
-192   -192   
128    -336   
128    256    
16     -176   
128    288    
32     -128   
-16    128    
208    256    
-80    144    
128    -256   
-256   -192   
192    -832   
96     80     
48     144    
16     -160   
96     208    
0      -160   
64     80     
16     -112   
144    352    
-64    -80    
-16    -48    
-16    -176   
0      32     
176    -80    
96     160    
-48    432    
-32    -368   
368    384    
-208   -1200  
272    -1104  
-64    -112   
128    -496   
128    256    
-16    -64    
240    16     
-96    -112   
32     64     
32     240    
352    -160   
-96    128    
-96    96     
112    0      
48     -96    
-352   -80    
-16    -512   
288    -112   
96     -208   
-32    192    
96     -1088  
112    -48    
-48    -528   
48     -128   
16     96     
0      16     
96     112    
-144   -112   
128    -176   
-176   160    
48     -208   
112    -128   
-432   144    
64     48     
0      112    
160    -176   
0      -48    
0      -368   
80     -128   
64     -144   
-48    -160   
-64    -256   
240    64     
288    -48    
160    112    
-320   -16    
-16    80     
-96    -144   
96     -128   
192    32     
-112   -80    
16     -160   
144    -208   
256    -48    
0      -1264  
-144   160    
240    -96    
48     64     
80     64     
128    -64    
-208   32     
-48    -160   
-288   -144   
80     -192   
-464   -176   
-32    -32    
-48    80     
112    -144   
-240   -160   
64     -528   
2304   1472   
-1328  752    
560    64     
16     352    
-16    -992   
224    1008   
-1296  -352   
752    656    
-160   -96    
0      208    
-304   -176   
-160   -32    
224    -240   
224    -16    
-208   -192   
64     0      
32     -464   
96     -64    
-96    -32    
144    -304   
-176   96     
112    64     
-32    192    
48     -224   
-240   0      
32     -224   
-16    224    
192    -176   
-128   32     
80     -192   
16     128    
128    -1552  
80     -16    
-320   -32    
128    16     
64     192    
-224   -112   
0      -80    
-48    -32    
-160   -176   
16     48     
-112   64     
112    -96    
-32    -32    
48     -160   
32     48     
64     -304   
-48    -288   
112    160    
-112   128    
48     -16    
-144   48     
80     16     
-48    112    
-80    48     
48     -16    
32     112    
-16    -192   
48     -48    
-112   -192   
16     176    
-16    192    
-560   80     
32     144    
-1136  -32    
32     128    
16     144    
-192   16     
160    16     
-16    32     
160    176    
-496   16     
-560   -272   
128    64     
-416   -288   
240    32     
-208   64     
32     -256   
-144   0      
-816   -64    
96     -32    
192    32     
-96    -16    
-48    32     
16     160    
-176   -384   
-64    -144   
-112   272    
-128   96     
-64    -176   
-128   0      
-64    0      
32     32     
-48    0      
-112   16     
64     -64    
80     288    
0      144    
-928   -144   
-112   0      
-32    -80    
128    128    
0      0      
-32    48     
-112   -272   
0      32     
-32    224    
-32    -80    
-16    -16    
-64    48     
0      32     
-400   96     
-96    -16    
-656   80     
-80    128    
224    224    
0      272    
32     -32    
16     240    
-144   144    
-208   -16    
-80    -96    
272    128    
0      48     
-208   -112   
-112   160    
-48    -64    
0      -128   
-224   -48    
0      160    
-1024  16     
-112   144    
-112   -256   
64     144    
-96    0      
240    224    
-176   -32    
208    112    
-176   0      
80     80     
-32    64     
80     -48    
112    176    
-192   -16    
-48    -48    
-240   -48    
-16    160    
-96    16     
-160   -32    
96     -32    
16     128    
64     96     
-208   208    
-80    -96    
160    112    
32     208    
32     96     
-176   48     
16     96     
16     48     
-96    16     
-48    -32    
192    48     
-48    144    
-128   -128   
-16    -48    
240    128    
-64    0      
16     16     
-64    160    
0      32     
-240   -64    
-64    64     
-144   -112   
96     64     
-160   0      
48     80     
48     112    
-176   -48    
96     64     
0      144    
-16    64     
-64    0      
128    112    
0      144    
16     80     
-80    112    
16     80     
-64    -48    
128    176    
-96    0      
-48    64     
176    368    
-64    32     
80     112    
-144   -48    
624    896    
336    96     
-976   -352   
-496   -128   
0      672    
64     -112   
240    -128   
-624   -272   
496    208    
-64    -48    
160    32     
-160   432    
48     -32    
48     336    
240    -80    
-176   48     
-112   -272   
-48    80     
32     144    
-16    -256   
16     224    
144    432    
-192   32     
96     -80    
-192   0      
80     192    
-32    272    
48     0      
48     -32    
-96    -32    
160    112    
-48    48     
80     112    
0      160    
-32    -32    
-48    16     
64     208    
-128   16     
144    128    
-48    128    
80     48     
0      80     
160    288    
-64    112    
0      48     
-16    48     
96     160    
-32    160    
112    96     
-32    32     
32     -32    
32     176    
-80    48     
160    -48    
-32    0      
144    208    
-160   -16    
112    48     
0      144    
-32    64     
80     32     
-32    0      
16     -32    
48     64     
-64    144    
-16    -304   
272    176    
-208   -80    
96     -1776  
-112   32     
112    64     
32     32     
16     32     
80     80     
16     -48    
-144   128    
-64    -32    
96     80     
-80    -32    
112    176    
-48    96     
96     112    
-128   288    
-16    -432   
160    144    
-32    -64    
288    288    
-272   -48    
272    96     
-48    144    
16     192    
-48    96     
64     -16    
-128   -368   
384    32     
-352   -336   
112    96     
-160   192    
256    -320   
-112   128    
48     -64    
32     128    
-80    112    
176    128    
-176   -144   
128    128    
48     176    
48     144    
32     -16    
32     176    
0      0      
32     144    
-48    -16    
192    16     
112    96     
-144   -512   
144    -32    
-128   48     
272    416    
144    16     
-32    256    
-176   80     
208    32     
128    -144   
-304   -48    
112    208    
176    176    
-16    80     
48     -112   
-32    128    
0      -368   
32     32     
-80    -96    
208    48     
-256   -16    
336    16     
112    -112   
-208   -16    
48     272    
256    80     
16     48     
80     -96    
0      176    
0      -272   
-112   -240   
144    96     
16     336    
64     -1088  
64     64     
-48    0      
16     16     
-80    0      
64     32     
80     -96    
-48    -64    
192    176    
-176   -272   
32     128    
0      -144   
32     112    
160    -480   
-48    144    
112    160    
-176   -128   
80     -80    
208    -16    
288    96     
208    192    
-112   224    
48     16     
16     64     
16     96     
304    176    
32     -432   
128    144    
-32    -208   
-16    80     
80     -240   
112    96     
48     -64    
-16    192    
64     -112   
112    112    
-80    64     
16     -400   
272    144    
16     -128   
-16    160    
0      -192   
128    144    
112    -64    
-16    128    
-48    -192   
128    128    
32     -2816  
1280   -1520  
-608   -432   
896    576    
-352   176    
272    336    
208    -912   
-640   -208   
656    112    
-320   -448   
0      32     
-80    192    
16     -160   
320    224    
-80    -720   
144    0      
0      -1776  
48     112    
16     -144   
0      -96    
176    -112   
16     -976   
144    -80    
-96    -304   
144    16     
0      80     
-80    96     
32     -80    
32     -128   
176    -112   
0      16     
192    -64    
-224   64     
160    32     
144    -240   
-336   -112   
80     -304   
-32    -16    
32     -256   
112    -48    
0      -1472  
0      -176   
80     288    
32     -112   
48     -128   
-336   80     
160    -96    
-80    -304   
-48    -160   
80     48     
-464   32     
80     64     
16     32     
112    80     
-128   -176   
112    48     
-32    -288   
32     -368   
-176   -16    
16     -352   
-32    -160   
144    -160   
-96    -64    
-32    -80    
96     -128   
-160   64     
48     80     
-96    96     
80     -144   
176    176    
-32    -160   
160    -16    
64     -128   
160    224    
-96    32     
-112   128    
224    208    
128    -176   
32     -16    
-112   16     
-160   -192   
96     -272   
-1008  -96    
144    128    
240    -64    
16     -144   
-48    -32    
48     -368   
128    336    
0      -176   
0      96     
48     96     
80     -64    
32     0      
48     -16    
-48    0      
16     -80    
-336   -32    
128    48     
-304   144    
-16    -272   
-16    -48    
48     -384   
32     -64    
144    -16    
0      80     
16     -48    
112    16     
-144   -48    
176    48     
-448   0      
80     -32    
-144   96     
32     -64    
-16    80     
0      -144   
144    192    
-32    -272   
32     80     
0      -672   
176    96     
-336   -96    
240    -112   
-448   -112   
160    -80    
0      400    
-80    -144   
112    -64    
-160   -160   
128    -32    
-128   32     
48     16     
48     16     
-48    -48    
160    -416   
48     64     
-112   -160   
160    64     
-192   80     
176    64     
-288   -112   
160    16     
-128   -48    
-16    16     
-64    32     
400    496    
-432   208    
-592   -352   
128    192    
64     -48    
-1072  -48    
-64    16     
224    272    
-192   -144   
224    32     
-160   -48    
96     -208   
64     48     
0      192    
-96    -64    
-240   -160   
160    48     
32     -240   
128    160    
-176   -64    
240    320    
-352   32     
-160   -64    
-160   112    
-304   -160   
-112   192    
-272   -80    
176    352    
-64    -176   
144    32     
-480   -224   
224    144    
-336   -112   
32     48     
32     0      
-48    48     
-80    48     
-128   -64    
0      16     
-32    144    
-112   48     
-624   80     
-32    96     
-896   -112   
128    48     
80     -112   
-16    192    
272    -256   
-112   304    
0      -32    
-208   0      
-192   -496   
16     -544   
-448   -848   
-336   -224   
-128   160    
0      -528   
-464   -400   
64     64     
-96    160    
160    -240   
64     256    
-32    -144   
112    96     
-64    128    
16     144    
144    352    
-400   80     
112    -64    
48     48     
-96    48     
-336   -560   
-80    -32    
-752   -48    
176    48     
-272   -224   
-16    -16    
64     128    
-64    112    
0      -48    
64     0      
-112   240    
176    96     
-160   -32    
-144   0      
64     0      
-128   -384   
320    16     
-432   112    
352    128    
-192   -32    
16     0      
-48    240    
144    16     
-128   16     
-80    -32    
128    160    
-176   -32    
32     0      
-64    -128   
96     176    
-160   32     
80     80     
-256   -160   
144    32     
112    -64    
32     -16    
48     144    
-80    0      
112    144    
-208   -16    
80     64     
-80    0      
64     64     
-32    208    
-160   -144   
-64    -208   
208    32     
-224   128    
32     64     
48     240    
80     16     
0      64     
48     80     
-48    128    
16     0      
128    400    
-128   0      
112    80     
-80    16     
-48    -112   
-16    64     
-96    176    
0      -32    
240    -144   
-32    128    
-112   32     
-80    48     
224    304    
-192   -16    
192    144    
16     272    
-80    -96    
208    -16    
-192   -128   
176    48     
32     336    
-128   128    
16     48     
-112   -144   
32     16     
0      128    
32     80     
16     16     
-144   -16    
0      48     
-16    -64    
128    48     
-80    48     
-112   32     
-16    -48    
-64    0      
144    0      
-160   48     
-112   -48    
-192   -32    
80     80     
496    400    
96     32     
-240   -96    
-160   160    
224    80     
256    96     
-256   64     
80     96     
224    304    
80     128    
176    -96    
-96    16     
-240   112    
288    96     
96     160    
-80    224    
48     96     
32     336    
-240   -64    
432    128    
-144   176    
192    208    
-48    0      
-80    80     
0      -48    
-176   16     
80     -32    
48     144    
-96    -16    
96     96     
-80    -48    
16     48     
-16    80     
32     112    
80     64     
-96    64     
16     -96    
-64    0      
16     -48    
32     32     
80     -256   
-96    64     
-80    32     
16     64     
96     80     
144    288    
-80    272    
144    256    
-240   -96    
112    -48    
-432   -528   
-96    -144   
16     304    
192    96     
16     144    
-48    -64    
32     -16    
0      64     
-96    0      
16     192    
80     96     
-112   -64    
96     224    
144    -176   
32     144    
48     176    
16     32     
16     0      
224    464    
16     16     
-96    -992   
0      -48    
64     -416   
48     64     
32     160    
-32    96     
-96    80     
208    160    
0      112    
-16    208    
-112   2240   
-1664  -848   
-400   576    
608    672    
336    400    
-48    80     
-480   192    
192    -800   
80     32     
-112   64     
288    176    
-288   -304   
-16    128    
208    -48    
240    128    
-176   16     
-64    -16    
-16    160    
320    96     
-80    48     
144    -48    
-80    128    
224    -96    
-48    144    
80     160    
32     288    
192    304    
-48    208    
64     -464   
224    384    
-176   -32    
288    112    
-64    64     
48     -64    
32     176    
112    -16    
16     144    
-64    -512   
32     80     
112    -896   
0      48     
-64    112    
208    80     
-80    -48    
128    128    
16     160    
-48    32     
80     0      
-64    -192   
16     32     
96     -176   
-64    112    
176    -112   
-64    -16    
96     -160   
96     256    
-64    -1968  
-32    208    
48     -16    
-128   -48    
80     192    
64     112    
16     32     
32     -624   
64     176    
16     -48    
64     112    
112    16     
96     96     
32     -64    
16     128    
32     -80    
48     64     
48     32     
48     -48    
128    0      
80     -480   
-176   16     
32     -112   
-160   -32    
272    16     
-16    256    
-16    -224   
16     336    
-96    -176   
112    -32    
-192   -416   
48     -336   
144    -128   
208    -1696  
-144   176    
-16    -128   
48     -400   
128    -16    
96     -320   
-128   -288   
176    192    
-48    -176   
144    320    
-192   -80    
64     0      
128    -80    
144    -1408  
-32    96     
-16    -832   
208    -352   
-560   -128   
144    -80    
-80    -208   
208    -1360  
-96    -144   
176    -176   
-80    64     
128    128    
80     -16    
48     -224   
-48    192    
32     -48    
-32    -32    
96     176    
144    -32    
-432   16     
-96    -128   
128    -32    
144    -16    
48     -48    
96     -224   
0      -128   
176    128    
-16    -96    
96     -288   
-160   160    
96     32     
112    288    
-352   -96    
192    -160   
-288   -16    
48     80     
-208   0      
112    -32    
16     -96    
176    -64    
-48    -32    
160    -1392  
-240   -432   
208    -240   
192    144    
96     -112   
48     224    
-80    -128   
-16    -144   
144    -16    
-16    176    
-80    -96    
128    320    
-208   144    
288    -496   
-240   -208   
304    -464   
-112   272    
-208   -112   
96     144    
128    -32    
144    208    
-256   -16    
128    112    
-64    144    
32     -240   
-400   -80    
-48    -352   
-176   -112   
-16    -512   
64     -160   
256    80     
-112   144    
-64    -3040  
0      96     
128    -112   
112    96     
-32    96     
-96    -16    
-112   -80    
64     80     
-80    -96    
48     -16    
-160   96     
-16    0      
0      48     
160    -288   
-80    32     
96     -592   
64     272    
-176   96     
48     -112   
32     -16    
80     -16    
-256   768    
-16    176    
-320   16     
-512   -928   
208    528    
-48    -784   
-112   -448   
336    672    
-16    304    
96     -208   
-32    -16    
-208   384    
112    -384   
-160   64     
80     -128   
-128   -32    
-64    -64    
-32    80     
-112   -96    
-272   -32    
0      32     
-80    48     
128    -352   
-48    16     
160    -128   
96     96     
-80    96     
128    -16    
-240   -32    
304    64     
-144   96     
192    64     
-288   -32    
96     -112   
-144   -304   
224    -96    
-208   176    
-304   -64    
-48    48     
-240   -208   
-1024  0      
16     32     
-944   16     
128    -48    
0      128    
64     96     
-48    -240   
64     80     
-48    48     
144    16     
-192   48     
48     -112   
-288   -208   
-224   208    
80     32     
-624   -80    
96     16     
0      96     
-64    16     
-784   -112   
0      32     
32     -128   
16     32     
64     -48    
-16    32     
-16    -64    
-160   64     
32     -176   
16     64     
16     80     
16     160    
-112   80     
64     240    
-224   0      
-96    -32    
144    -112   
16     192    
-160   64     
32     128    
-112   -48    
-16    16     
16     272    
-256   -112   
96     -176   
32     16     
48     176    
-144   48     
-32    -48    
16     16     
-160   64     
0      64     
-192   64     
-96    -64    
-400   -208   
256    368    
-320   -128   
224    176    
0      0      
-64    -16    
80     64     
-96    32     
16     128    
-32    48     
80     -16    
-160   -80    
176    176    
0      48     
-16    32     
-976   -128   
0      64     
112    -64    
-80    48     
32     16     
128    144    
80     48     
-192   32     
-16    96     
48     208    
-32    48     
-32    16     
-160   -16    
32     -32    
48     144    
-416   -128   
-16    -192   
-256   64     
288    272    
128    -48    
-176   -16    
-112   -80    
48     16     
-128   -96    
-208   -176   
256    48     
-96    -176   
128    224    
-80    160    
-80    0      
-96    48     
80     112    
-544   -112   
80     96     
32     32     
-32    176    
112    288    
-80    336    
80     -48    
-192   -160   
-80    -16    
32     80     
-64    48     
-64    -64    
80     112    
-272   -208   
0      -48    
-544   -304   
0      256    
64     192    
-32    176    
80     160    
-32    -64    
-128   128    
96     208    
80     96     
-64    -160   
160    544    
-304   -256   
176    16     
-16    0      
80     80     
-64    32     
-16    192    
224    16     
-16    32     
0      96     
-48    -48    
0      96     
256    272    
-144   320    
-32    -272   
0      -96    
32     48     
-144   -128   
0      -112   
96     -112   
80     224    
-96    0      
-48    16     
64     -16    
80     -32    
-16    160    
-80    16     
0      160    
96     0      
-96    -64    
1344   -1424  
160    400    
480    80     
-640   -144   
480    -384   
16     -400   
-256   208    
432    512    
-176   -96    
48     -64    
-80    112    
64     192    
0      64     
128    176    
-96    112    
96     160    
32     -160   
0      48     
16     96     
64     48     
-112   -32    
208    256    
-128   -160   
176    16     
48     96     
144    0      
112    160    
-144   304    
272    -176   
-176   64     
-64    48     
32     16     
80     208    
-16    -80    
144    128    
-48    -144   
96     -64    
-272   -256   
96     32     
176    272    
-80    96     
48     112    
112    -80    
0      0      
-48    32     
96     96     
-128   -64    
48     112    
16     64     
96     80     
96     -32    
-16    96     
96     -112   
-32    128    
128    144    
-32    160    
-176   -208   
576    672    
-144   -128   
-48    80     
-80    -64    
160    112    
80     -112   
-48    128    
-48    96     
16     64     
48     16     
32     96     
-16    0      
96     160    
64     48     
32     128    
-64    -16    
-80    224    
16     80     
-32    16     
176    -112   
48     -544   
32     48     
192    -1120  
-240   208    
160    0      
64     432    
-64    16     
-16    64     
208    480    
-32    576    
-112   -224   
-16    0      
192    -64    
0      112    
0      48     
-16    -80    
128    64     
32     -384   
0      48     
64     64     
-16    -48    
160    208    
-32    48     
80     192    
-64    64     
128    96     
-16    16     
32     64     
-96    -208   
192    240    
-16    -80    
80     96     
16     -64    
80     32     
16     -1056  
32     64     
64     -720   
16     208    
240    480    
-128   0      
64     -64    
-176   0      
160    0      
-32    -192   
64     96     
64     128    
-64    112    
224    160    
-192   224    
64     -560   
192    224    
-32    -352   
80     64     
-48    112    
16     64     
16     -48    
-64    -448   
256    -144   
96     64     
0      144    
96     48     
16     -16    
16     -448   
80     32     
48     -384   
16     -112   
-16    -384   
64     -240   
-64    -224   
256    288    
96     224    
0      144    
64     128    
-16    -240   
160    176    
-16    -384   
48     -80    
80     64     
144    320    
112    400    
-240   -448   
80     -528   
112    -16    
80     64     
32     144    
48     32     
144    448    
-144   0      
-48    -592   
16     304    
96     -48    
0      64     
16     -80    
160    -112   
-48    -112   
112    240    
-48    -176   
80     -32    
112    144    
-32    -16    
48     48     
-48    -64    
96     -1712  
176    32     
32     256    
-96    16     
-80    128    
64     -144   
96     128    
16     -160   
32     208    
32     96     
-48    -208   
64     0      
176    -480   
64     -384   
-608   144    
160    -528   
-16    240    
240    -1472  
48     -656   
32     -176   
0      224    
-464   144    
784    1248   
-768   -624   
144    816    
-304   -480   
192    256    
64     -480   
112    0      
-256   192    
64     -352   
-48    144    
64     -688   
-16    80     
160    -368   
48     64     
64     -112   
-128   64     
160    -304   
-208   192    
192    -496   
-144   16     
-64    -112   
96     160    
-144   -16    
16     -32    
224    -240   
-48    16     
112    16     
64     -48    
96     16     
-80    -640   
320    336    
32     80     
-16    -64    
-32    -128   
80     32     
144    96     
-32    -112   
-48    -144   
-16    -144   
-848   -48    
128    144    
16     -176   
224    16     
-288   -48    
272    -672   
-288   -112   
144    -144   
96     128    
16     96     
0      0      
32     80     
-112   48     
-96    -48    
16     -112   
-208   -16    
32     16     
128    -80    
-16    -320   
80     -128   
48     -112   
-16    -64    
16     -1456  
96     -64    
-112   80     
-32    -48    
-32    -48    
224    32     
-80    256    
-64    -112   
112    288    
80     96     
-496   96     
16     -112   
-192   -224   
128    16     
-128   144    
112    -400   
0      208    
-160   -96    
192    -96    
96     192    
128    -96    
-320   0      
-64    -48    
96     64     
80     64     
-144   48     
208    -48    
-96    -16    
128    -176   
-32    240    
-16    -592   
112    176    
-256   -48    
240    0      
-144   96     
-16    -256   
-400   -64    
80     -16    
16     48     
272    320    
-352   128    
208    -208   
-144   -32    
112    -432   
-32    64     
112    -288   
-112   48     
176    64     
48     16     
-176   -256   
272    112    
-112   224    
48     -320   
64     64     
128    -144   
-368   -16    
144    -80    
208    96     
-960   -32    
304    256    
-736   112    
-256   32     
-48    16     
-224   -160   
-176   208    
144    48     
-112   16     
80     0      
144    352    
-16    -16    
-128   -160   
-64    -32    
208    96     
-144   -128   
96     128    
-112   -48    
-336   0      
-128   48     
-304   288    
-32    144    
-16    160    
-112   -112   
-240   -304   
-320   -160   
208    112    
-80    -16    
-16    -32    
304    176    
-160   112    
32     -208   
-16    160    
0      -16    
80     32     
-32    96     
48     96     
-64    -48    
-160   128    
-592   -832   
48     80     
-176   304    
-208   192    
16     80     
32     96     
-16    -32    
-144   -32    
48     48     
64     128    
32     32     
-64    16     
144    192    
-80    -112   
-16    96     
-16    176    
-112   64     
-368   -80    
112    48     
96     160    
-80    160    
-144   -96    
-96    -32    
176    0      
0      16     
-80    80     
-240   0      
-64    0      
-160   176    
-112   -96    
-240   128    
48     48     
-848   -512   
0      -128   
-368   -1184  
1296   16     
-416   656    
-64    -208   
-272   1168   
-32    -224   
64     -256   
-144   -784   
192    352    
-288   272    
0      352    
-256   112    
160    -112   
-304   112    
160    160    
-176   32     
16     -256   
272    352    
32     64     
-96    160    
16     272    
-32    192    
192    384    
-336   112    
-64    -64    
-176   256    
32     352    
-256   -80    
-96    -208   
0      256    
-240   0      
-224   96     
64     176    
-160   64     
208    288    
-96    448    
-112   -144   
-64    112    
-144   160    
-48    -16    
32     0      
-96    -32    
256    368    
-320   -48    
64     -208   
-976   -864   
32     -304   
144    384    
-160   224    
32     192    
112    -64    
112    144    
0      32     
16     192    
176    752    
48     752    
-272   -368   
192    80     
-80    -208   
-64    80     
176    -160   
-96    96     
320    112    
-96    176    
32     -64    
-48    176    
128    -32    
0      144    
-48    96     
16     96     
144    192    
-192   32     
160    32     
-128   16     
160    -80    
224    368    
-96    16     
0      -144   
144    32     
0      240    
-16    -16    
128    224    
-64    0      
160    -16    
-128   48     
96     80     
-144   0      
32     80     
16     -80    
-48    96     
80     96     
16     64     
-32    -128   
112    240    
-48    0      
80     -64    
0      -208   
128    -16    
32     48     
112    240    
64     176    
-112   96     
-96    144    
48     112    
16     -64    
-16    0      
0      16     
80     176    
-64    32     
0      0      
32     48     
112    80     
0      80     
-128   -64    
96     256    
0      176    
-32    320    
-160   176    
112    48     
-32    208    
-32    96     
112    448    
48     96     
32     240    
0      176    
176    560    
-80    -48    
-64    -112   
144    384    
-80    304    
32     -48    
-128   -192   
176    -48    
-80    64     
0      32     
128    80     
48     160    
0      112    
16     16     
192    96     
-144   176    
224    80     
-192   -224   
128    -288   
-144   -208   
32     -16    
-32    -32    
96     -224   
0      128    
96     -208   
-80    96     
160    96     
-80    16     
160    112    
32     160    
208    80     
96     368    
0      224    
32     128    
-32    0      
64     144    
-48    -32    
64     0      
0      -176   
144    -1968  
0      32     
48     80     
16     112    
48     128    
48     -96    
160    320    
0      0      
0      224    
64     480    
-80    -160   
80     64     
208    64     
144    -256   
-64    112    
-48    -576   
96     80     
0      432    
-64    192    
64     32     
32     80     
64     -192   
-48    64     
-16    -96    
80     240    
-64    144    
-144   -32    
192    64     
160    -96    
128    208    
-496   -48    
560    -160   
1120   656    
336    -656   
512    624    
-448   -736   
0      -480   
1216   448    
-288   64     
160    64     
-320   -144   
48     16     
64     -32    
32     0      
80     128    
-80    32     
48     -16    
16     -112   
48     0      
-16    -3264  
16     0      
80     224    
-32    80     
144    32     
-32    -32    
-32    -16    
-16    96     
320    240    
-80    -144   
64     112    
16     -480   
48     32     
32     -160   
80     80     
64     -80    
-160   -64    
272    208    
48     16     
144    -32    
-144   160    
112    144    
96     -32    
96     144    
0      -288   
160    192    
-96    -112   
16     208    
48     32     
352    -64    
-144   -32    
96     192    
64     -80    
-16    208    
48     -32    
80     112    
16     -80    
0      -112   
32     176    
16     -368   
48     96     
-16    -64    
96     32     
160    160    
-96    144    
48     -384   
32     128    
-16    64     
-16    -624   
-32    -16    
-96    -96    
48     -1008  
16     -160   
0      -176   
64     -224   
112    288    
-128   -544   
240    -208   
112    112    
-64    336    
-96    -128   
288    -480   
-144   -128   
64     -368   
-80    64     
-544   192    
-144   -656   
272    48     
-128   -544   
272    64     
-48    -896   
96     -144   
0      176    
-144   -320   
160    96     
0      -112   
112    -192   
144    176    
32     0      
64     -288   
-128   -16    
32     48     
-32    64     
-64    -320   
144    0      
48     -176   
96     16     
-112   -2928  
160    -112   
112    -288   
-32    48     
16     -176   
-16    80     
80     -272   
144    -32    
-304   112    
128    48     
-880   -64    
144    208    
96     -48    
-80    -48    
96     32     
64     -160   
-96    -208   
112    16     
-80    48     
256    32     
-16    256    
-144   -32    
208    64     
-48    96     
160    -256   
-240   -80    
128    -160   
96     -176   
96     48     
64     64     
112    -240   
-48    -144   
240    -528   
-16    208    
32     -96    
64     80     
-32    32     
160    -64    
-112   176    
80     -80    
-208   -64    
-48    -320   
-384   -96    
48     16     
-224   -16    
-32    -512   
-48    32     
32     -1936  
-144   -224   
320    -16    
-112   16     
-16    48     
32     -96    
-144   -96    
96     112    
-64    144    
-112   -32    
-160   -288   
256    -208   
-1296  64     
80     -32    
-208   112    
144    -80    
128    240    
-80    -112   
80     -128   
-112   0      
128    -128   
128    112    
-32    -80    
64     80     
-32    -96    
-64    64     
-96    -112   
-32    -32    
-16    -144   
-32    32     
128    -240   
80     32     
-240   -16    
48     -128   
0      0      
32     48     
-112   0      
-16    -32    
-464   32     
96     -400   
-160   16     
336    -16    
-1088  1248   
-528   -1296  
48     -432   
1296   -224   
32     -336   
-528   -464   
-112   576    
32     -304   
256    304    
-448   -176   
336    -80    
-544   304    
416    -32    
0      80     
96     -272   
-144   288    
-1520  -432   
-32    224    
-224   -448   
-352   96     
-144   -192   
-256   256    
176    192    
-464   224    
-32    -272   
64     224    
-64    80     
208    464    
-192   240    
-624   -192   
-16    160    
-112   -352   
96     224    
-64    -256   
-160   -48    
-16    -160   
-32    -80    
-16    -48    
-496   -48    
-32    -80    
-816   96     
-32    -16    
-128   -304   
0      -32    
-192   -32    
192    80     
-272   -16    
176    704    
-96    144    
-32    -112   
-96    0      
-32    -48    
-48    144    
-32    144    
-112   -32    
-432   -16    
-352   -736   
208    -320   
112    240    
-64    352    
80     416    
-64    -48    
-80    144    
96     80     
112    112    
-224   64     
-176   -32    
32     48     
-128   16     
16     48     
-288   -32    
176    112    
-1104  0      
0      16     
80     -336   
0      -336   
-32    -256   
-192   -32    
-48    -32    
-16    240    
176    208    
-16    0      
-112   80     
48     32     
32     0      
0      400    
-224   0      
-400   -32    
48     -16    
-160   -96    
0      80     
48     -160   
64     32     
64     224    
-144   256    
-48    288    
16     96     
16     -304   
48     272    
-80    240    
-32    112    
96     48     
-176   -144   
32     80     
-1024  -448   
96     0      
224    112    
-16    48     
112    208    
-112   16     
-80    48     
0      128    
176    224    
-48    176    
0      288    
32     288    
-80    32     
-288   -176   
96     -464   
-544   80     
16     -32    
-96    0      
-176   -96    
80     -48    
176    240    
-64    160    
32     144    
-128   144    
128    128    
-64    80     
80     112    
32     128    
-112   -64    
-48    64     
-320   -160   
-208   144    
80     0      
80     0      
-160   64     
-64    48     
144    96     
176    64     
-176   48     
80     32     
-16    48     
-64    192    
0      128    
48     112    
32     160    
-48    -144   
-48    144    
80     -160   
-16    -112   
80     144    
-16    80     
-32    -16    
-32    112    
-112   80     
64     96     
-96    160    
80     112    
64     128    
-304   -192   
224    32     
-96    176    
-32    112    
-96    -48    
64     160    
-32    0      
64     0      
128    128    
80     80     
-272   144    
-144   176    
112    0      
-16    32     
32     -16    
-192   -112   
128    208    
0      -48    
112    64     
-32    64     
-64    112    
-16    176    
-144   -16    
80     48     
144    144    
0      0      
96     32     
32     192    
-32    160    
-32    -192   
64     224    
0      240    
96     48     
-48    432    
864    -400   
864    896    
-368   288    
-304   0      
384    -480   
80     -176   
-80    -144   
80     304    
528    480    
-240   -432   
288    272    
-16    -256   
128    384    
-48    -288   
144    416    
0      -240   
-128   336    
208    -144   
-64    240    
64     -176   
-16    224    
96     -32    
-224   160    
240    -64    
-176   80     
160    -32    
-64    368    
96     80     
-16    48     
0      64     
-48    96     
128    192    
-16    32     
16     160    
32     -16    
0      160    
64     144    
-128   112    
160    -16    
-80    -16    
-96    -112   
112    160    
48     -656   
-112   80     
128    -80    
-64    176    
144    0      
192    0      
-272   96     
80     64     
96     64     
-16    160    
0      -176   
176    96     
-16    32     
-16    -368   
-16    176    
112    -464   
-48    64     
16     -32    
-16    0      
96     64     
32     288    
-32    -32    
160    64     
112    128    
32     160    
-96    0      
96     160    
16     -16    
64     0      
64     144    
80     -64    
16     96     
128    -736   
-32    224    
176    -128   
176    32     
-48    464    
-112   160    
16     -32    
64     -64    
-32    -80    
192    320    
0      112    
144    16     
-64    176    
-96    -560   
112    80     
224    160    
160    432    
-192   -368   
-32    48     
96     112    
144    112    
-80    -112   
-144   -256   
176    160    
160    176    
16     16     
-16    -128   
48     48     
0      -160   
160    112    
240    240    
-48    176    
48     -944   
-48    224    
48     -16    
16     96     
-16    16     
48     128    
-16    16     
112    -48    
-32    64     
64     -176   
32     48     
160    192    
48     192    
112    -176   
-32    16     
96     -816   
80     144    
112    400    
-112   432    
128    128    
-32    -64    
64     176    
32     -240   
16     -64    
112    -240   
112    -16    
96     112    
-272   -144   
112    -400   
-48    -192   
336    128    
-96    48     
112    48     
64     32     
64     160    
-128   48     
192    208    
-80    -80    
208    192    
-160   -160   
208    224    
-32    -224   
96     32     
-64    -32    
48     96     
96     -16    
224    -96    
32     128    
48     -144   
160    272    
-432   -80    
192    -144   
32     -16    
176    -624   
0      -160   
-96    -128   
112    -64    
-128   -80    
208    16     
64     160    
192    -240   
-176   -192   
112    0      
32     144    
0      64     
-16    32     
-48    -288   
160    128    
-128   -304   
176    0      
-144   32     
272    -48    
-80    32     
128    -80    
-16    128    
-176   -80    
144    224    
-96    224    
-16    -64    
32     -64    
-80    -128   
-16    -320   
-336   -144   
176    -224   
128    96     
-64    -672   
224    -48    
16     -2080  
-48    -48    
-496   -1936  
1392   3536   
-176   1536   
-256   -656   
256    -928   
928    224    
-1104  224    
288    112    
-496   240    
608    -848   
-400   432    
208    -608   
128    496    
48     -608   
112    432    
-112   -208   
0      336    
-128   -384   
512    208    
-304   -176   
48     -384   
-64    144    
224    352    
-144   48     
-64    -512   
-80    176    
160    -368   
-160   592    
0      -192   
-256   -32    
352    -784   
-32    192    
-16    -80    
-64    128    
-48    192    
16     0      
0      -224   
32     -144   
32     -112   
112    80     
-384   64     
-32    -160   
48     -96    
144    48     
32     -64    
-128   -1888  
160    0      
32     -160   
96     -16    
-128   64     
96     80     
-128   64     
144    80     
-352   144    
112    32     
-240   0      
96     16     
-64    -16    
112    -160   
-48    176    
112    -224   
64     64     
80     368    
-144   32     
208    80     
0      -112   
-32    -80    
80     -256   
-64    304    
144    -176   
176    112    
-64    -64    
64     -32    
32     -112   
-96    48     
112    -128   
64     96     
-112   16     
0      -192   
-240   -32    
144    -128   
-96    96     
-112   -272   
224    -208   
192    -160   
-496   0      
80     -96    
-288   112    
128    -192   
96     112    
-128   -144   
144    144    
-160   32     
32     -32    
-64    -80    
-96    16     
48     0      
64     -48    
-128   -112   
-64    -128   
-64    -80    
176    64     
-16    128    
-208   -144   
80     256    
-544   -224   
-800   32     
-176   -176   
-80    -96    
80     16     
-672   32     
0      144    
-32    64     
-160   128    
-160   80     
256    192    
-80    80     
144    128    
0      176    
0      96     
-16    -208   
-80    48     
160    192    
-176   -64    
-288   -176   
-448   192    
-112   -16    
-320   -16    
-80    32     
80     -32    
-112   -112   
-16    -224   
-48    112    
192    64     
-112   -48    
-48    48     
-112   112    
80     32     
0      -48    
-64    -16    
-192   0      
-32    -144   
-64    48     
144    128    
-736   -32    
-32    -208   
48     -96    
-96    176    
0      -48    
32     176    
0      64     
-32    80     
-64    -64    
-112   -16    
160    16     
64     64     
32     -272   
-80    -80    
16     80     
-624   -48    
-16    128    
-16    -64    
96     192    
-16    -64    
-96    -272   
-160   -208   
112    192    
-224   48     
48     96     
-32    48     
-32    144    
96     0      
-288   -64    
128    64     
-176   -48    
48     96     
-224   -64    
160    176    
16     -96    
0      112    
-128   16     
96     -80    
192    96     
176    112    
-192   -160   
-48    32     
-32    32     
-48    96     
-112   16     
32     112    
96     144    
-688   -80    
-112   64     
208    -64    
-96    0      
32     64     
-1232  704    
784    -416   
1072   -128   
80     -256   
-1072  640    
704    320    
-480   352    
528    -384   
-464   160    
-272   -416   
-304   224    
192    -272   
160    320    
-336   -64    
256    192    
96     64     
-208   -48    
96     272    
-144   -96    
0      64     
16     128    
80     208    
-112   -112   
-192   0      
112    -96    
-176   160    
64     80     
-80    128    
64     -96    
16     112    
-16    96     
128    96     
-208   48     
144    96     
-80    0      
112    -16    
-192   -96    
112    176    
0      0      
16     80     
-176   48     
112    80     
48     112    
-112   -16    
48     64     
0      128    
32     -128   
112    224    
-80    80     
112    16
[truncated: 32,011 more chars]
