# Supplementary material for: A Fault Diagnosis Method for One‐Dimensional Vibration Signal Based on Multiresolution tlsDMD and Approximate Entropy
Source: Hindawi journal article supplement (doi:10.1155/2019/3262818), 2019-01-01
Supplement: f1 [file 3262818.f1.zip › 3262818.f1/gear signals/broken teeth fault signal/Data3.txt]

80     48     
-256   -16    
64     16     
-80    96     
-144   -144   
-160   -80    
-96    16     
-304   16     
96     112    
-1040  -224   
96     -64    
112    -176   
-96    288    
-144   144    
-112   96     
208    160    
-96    32     
-96    48     
96     -80    
128    0      
32     32     
-32    96     
-48    0      
112    96     
-352   -64    
48     0      
112    -144   
96     192    
-64    320    
-48    64     
-176   528    
-128   -544   
432    -144   
-512   304    
-64    224    
-128   48     
304    -272   
-128   496    
-624   -224   
112    320    
-144   -336   
464    160    
-192   -64    
64     176    
-160   160    
176    -16    
-224   -64    
-32    32     
96     144    
80     -16    
-176   -80    
112    80     
-416   96     
256    96     
-272   16     
208    -144   
-192   48     
288    -16    
-192   176    
144    64     
80     80     
0      0      
16     160    
-16    16     
16     80     
-208   -80    
272    336    
-128   32     
-32    144    
-144   64     
192    0      
-48    64     
-64    144    
16     80     
112    48     
-48    16     
32     112    
0      -208   
208    96     
-368   160    
240    -80    
0      48     
-96    32     
240    176    
-192   64     
144    112    
-96    208    
-96    -32    
128    80     
48     288    
112    -144   
-32    32     
-16    96     
16     -96    
80     144    
-144   144    
16     96     
-112   -48    
144    0      
128    208    
-192   96     
128    160    
48     16     
112    224    
-128   160    
48     -16    
96     672    
-368   160    
32     -176   
240    -176   
-128   128    
-80    48     
64     368    
-112   176    
128    16     
64     -64    
240    112    
-128   96     
-64    128    
-32    128    
80     96     
80     112    
112    64     
176    224    
-64    -64    
96     256    
-80    96     
32     0      
-48    -480   
96     112    
32     -64    
0      64     
112    -32    
-16    144    
96     48     
112    112    
-176   -160   
208    464    
-128   96     
16     224    
-112   -96    
96     96     
80     80     
-32    -1360  
48     0      
16     16     
-16    48     
192    224    
-48    -80    
-112   -528   
96     144    
96     352    
80     64     
-64    -96    
112    -48    
32     288    
0      96     
48     -176   
112    -64    
64     64     
80     -976   
0      224    
96     112    
48     128    
96     432    
-16    96     
-160   -208   
128    128    
96     48     
-48    96     
80     -160   
32     -224   
-64    112    
128    -288   
-32    32     
96     -864   
-224   -176   
144    80     
32     224    
64     208    
96     -16    
0      -176   
128    16     
-96    -400   
288    608    
112    480    
-16    -416   
192    80     
16     -192   
160    48     
-48    -272   
80     144    
48     -128   
96     176    
-64    352    
-128   320    
-320   -144   
176    -48    
224    144    
-16    32     
0      -80    
192    112    
48     32     
96     -64    
-96    128    
288    -464   
-64    208    
-32    -224   
32     128    
48     144    
80     144    
-96    -48    
336    144    
-224   -64    
128    0      
0      240    
176    -64    
-144   160    
16     -384   
144    0      
16     -176   
-80    16     
64     128    
-80    144    
-16    -960   
80     -80    
2016   -1120  
-640   -736   
1040   1200   
-80    256    
528    0      
-400   -256   
-224   -32    
544    -32    
-352   -304   
80     -160   
64     -16    
48     -160   
-192   192    
128    -128   
-64    64     
112    0      
16     400    
112    -240   
32     96     
128    -240   
96     160    
-80    -288   
288    224    
16     16     
96     64     
96     -112   
-112   -32    
64     288    
48     304    
-224   0      
-64    -80    
48     -1072  
112    -80    
192    -288   
224    -1632  
144    -224   
352    160    
-48    -176   
256    160    
0      32     
-48    80     
48     -80    
-128   -176   
64     144    
0      -512   
-112   -192   
112    -80    
0      272    
-224   -272   
-48    -176   
160    -32    
64     -480   
144    128    
-144   -176   
96     -80    
96     112    
-16    304    
592    -48    
192    288    
16     -112   
48     96     
-224   -144   
16     32     
-528   -16    
208    -160   
-64    -48    
-112   -192   
32     -96    
160    -544   
112    -32    
80     -128   
128    -96    
80     48     
0      -32    
240    32     
-16    -320   
48     -224   
-48    -304   
-1136  -176   
160    48     
0      -16    
48     -448   
64     96     
192    -320   
112    -80    
48     -2992  
-480   -224   
192    -112   
0      16     
48     -32    
-16    0      
-32    -288   
144    16     
-288   144    
64     208    
-1232  160    
64     0      
144    -176   
80     -128   
-96    -80    
48     -1248  
144    80     
96     -144   
0      96     
-240   -272   
176    -64    
32     -64    
112    -48    
32     128    
64     -16    
-288   -16    
80     0      
-64    128    
16     -176   
32     192    
256    224    
-96    -48    
-80    -48    
-80    -464   
192    96     
48     -160   
-96    -160   
-80    -128   
64     -16    
256    176    
-160   -16    
112    -80    
-672   32     
176    0      
48     32     
240    0      
-32    112    
64     -128   
0      -16    
-16    -176   
16     112    
-32    32     
240    32     
-288   -32    
-80    -32    
-32    -16    
160    -160   
-272   64     
128    -80    
80     112    
64     -160   
-32    176    
112    -272   
48     48     
16     -16    
80     128    
-64    -176   
64     -224   
16     80     
32     48     
0      -48    
80     48     
-160   112    
160    -160   
-80    112    
192    -208   
80     144    
-208   -32    
304    -48    
-240   80     
16     -64    
-176   -144   
112    -16    
-96    -32    
144    -64    
64     176    
80     128    
-480   -64    
-304   -224   
224    16     
-480   -64    
80     -80    
-96    80     
-736   128    
-112   -176   
304    176    
-160   -48    
-48    144    
-64    -48    
0      -176   
-16    -64    
-352   -144   
32     -16    
-32    64     
-32    224    
-64    -32    
48     -192   
-128   208    
-176   -112   
-48    48     
96     96     
304    -624   
-400   224    
800    672    
-288   320    
608    -592   
-832   -400   
640    -272   
-608   208    
480    -256   
-432   -48    
352    -336   
-48    384    
-16    -80    
-176   336    
-96    -208   
-32    176    
-336   -64    
32     96     
-896   -112   
0      64     
0      -48    
48     128    
-176   -96    
144    0      
-112   -48    
-16    -16    
64     368    
96     112    
-128   32     
-80    -48    
-16    128    
-48    -96    
0      208    
32     -16    
-32    96     
-32    -144   
192    256    
-272   -144   
128    48     
16     64     
32     96     
32     96     
-112   32     
-64    -144   
-96    32     
96     192    
0      -240   
160    192    
-560   96     
320    32     
-576   -112   
64     128    
80     -64    
-96    80     
128    -96    
16     96     
-112   32     
96     144    
-96    -64    
80     48     
-32    64     
-48    80     
-16    -128   
-336   -176   
-48    96     
-384   -96    
-32    64     
-32    -64    
0      32     
-48    48     
-128   64     
-160   0      
32     -16    
112    144    
-144   -96    
-16    -128   
-64    128    
-48    192    
16     -80    
80     -16    
-32    96     
16     128    
192    272    
-208   -64    
-32    -64    
-192   -16    
192    48     
48     32     
48     272    
-176   -336   
-32    -384   
-128   80     
128    192    
16     96     
-112   160    
-192   -176   
224    480    
16     48     
-32    96     
-64    32     
112    192    
-48    96     
16     16     
-80    32     
-288   -480   
0      -16    
32     -128   
48     -144   
-112   -48    
32     112    
-48    -16    
48     64     
-16    48     
32     128    
64     96     
112    224    
-64    48     
-96    -80    
0      0      
16     -48    
160    80     
-96    -64    
-16    0      
-224   -80    
128    -192   
-128   -80    
208    144    
-32    0      
-32    128    
32     112    
48     128    
112    224    
-144   -16    
112    64     
240    576    
0      112    
-144   -208   
64     128    
80     16     
-32    144    
-32    -16    
176    192    
-160   32     
128    -32    
-160   48     
128    96     
-96    16     
96     48     
0      80     
-48    0      
16     176    
-16    48     
-32    176    
-96    -16    
160    224    
-96    -160   
192    112    
-96    208    
48     16     
-192   64     
192    0      
224    96     
32     160    
-48    -32    
-208   80     
144    48     
-192   48     
432    192    
-144   32     
-48    -80    
48     64     
48     112    
96     160    
-160   -64    
272    144    
-176   80     
224    64     
-288   0      
208    80     
32     -64    
112    112    
64     48     
-32    64     
32     -400   
-64    -1760  
-80    80     
-224   0      
240    144    
128    96     
-128   48     
32     -80    
176    288    
-144   -128   
80     240    
144    0      
112    208    
-352   1200   
-304   112    
-368   -1008  
-368   -160   
-464   -464   
864    512    
-240   -736   
400    720    
-208   48     
160    416    
48     -272   
48     544    
-48    -80    
96     32     
64     16     
224    272    
-48    144    
0      32     
80     112    
240    48     
96     -16    
48     -64    
-128   208    
176    48     
-64    -160   
64     -208   
368    944    
-176   -128   
-240   -192   
96     80     
96     96     
-48    -144   
128    64     
-48    -240   
128    464    
-96    -784   
-48    -192   
-64    -16    
272    112    
96     384    
-16    64     
-80    -80    
0      304    
128    32     
96     -16    
-208   -160   
176    -448   
112    64     
32     -448   
64     128    
16     -432   
144    32     
96     -1360  
-112   32     
48     64     
80     0      
48     128    
80     64     
32     128    
128    0      
80     48     
96     -144   
32     400    
48     -48    
96     48     
32     -96    
-48    -144   
192    -1264  
-160   48     
192    -112   
96     32     
-80    48     
128    80     
-160   32     
64     64     
0      64     
32     -192   
16     0      
48     -192   
-16    64     
16     -480   
80     0      
-32    -432   
240    -144   
80     -160   
-112   -128   
0      16     
-96    112    
48     16     
-64    48     
160    224    
0      32     
-16    160    
-128   -592   
208    0      
-16    -144   
32     32     
48     -160   
96     32     
112    0      
128    128    
-16    112    
32     144    
96     0      
32     -192   
80     128    
-48    -576   
-16    -16    
160    -208   
128    80     
-32    -16    
144    256    
-48    -144   
320    80     
-224   -336   
368    272    
-240   128    
176    80     
208    -1712  
-128   -272   
240    -1792  
-176   -160   
32     -448   
160    -128   
224    128    
-80    -16    
0      48     
64     -288   
-16    -1024  
0      32     
32     -352   
16     112    
-176   -784   
416    32     
112    -352   
-272   -80    
-32    16     
208    -32    
112    -144   
16     -976   
-176   -96    
-32    96     
96     -256   
-16    -688   
144    -48    
-80    -32    
240    -16    
-304   -160   
192    -336   
64     0      
160    -48    
16     -160   
96     -192   
-96    -32    
96     -784   
-128   -144   
160    -144   
-80    -32    
48     -16    
-32    -112   
32     80     
48     32     
-224   64     
16     -176   
32     -272   
192    -208   
32     144    
-48    -256   
-16    -160   
96     -16    
-16    -80    
64     80     
-48    -256   
64     -48    
48     16     
-16    -48    
224    -80    
48     64     
160    144    
-352   0      
-128   -288   
-832   16     
144    -48    
32     -96    
-16    -64    
-80    -64    
-48    -624   
0      80     
176    -304   
64     144    
-144   16     
208    16     
-112   -160   
48     48     
-160   -32    
-672   -2560  
96     -48    
-400   144    
-576   128    
544    144    
112    -352   
64     -272   
368    1168   
-384   -1600  
544    288    
-288   -176   
272    -256   
-320   -112   
80     -464   
32     384    
32     -272   
-544   176    
48     -240   
-704   -80    
320    -496   
-112   112    
144    -544   
-80    240    
96     -1312  
32     48     
-16    -112   
80     -32    
-416   48     
96     -32    
-64    -96    
0      0      
-64    -32    
-64    -144   
-544   -64    
-64    -96    
64     16     
96     -16    
64     160    
48     -464   
32     -80    
-528   -16    
128    64     
16     0      
-32    -80    
128    0      
-48    -64    
-64    -32    
128    16     
-192   0      
192    -208   
-80    96     
128    -304   
0      112    
96     -688   
64     48     
-80    -64    
48     16     
-144   -48    
96     0      
-288   -288   
64     0      
-96    208    
48     16     
-224   -80    
-560   -320   
176    112    
-32    -336   
48     128    
16     64     
-16    160    
-160   -64    
-48    0      
-160   -64    
-192   -80    
96     48     
192    288    
-224   96     
-16    -192   
288    256    
32     160    
32     96     
-176   -80    
-112   -96    
112    128    
-416   -80    
0      -16    
-176   -96    
80     48     
-144   368    
-80    -16    
0      -64    
-144   48     
176    -64    
-112   32     
-96    -64    
160    128    
32     192    
-176   -64    
-160   -80    
-192   -48    
48     0      
-32    64     
16     64     
-240   16     
-144   -16    
-528   -144   
48     -64    
-96    80     
-64    48     
-16    -128   
-32    80     
16     -64    
32     48     
-256   0      
144    64     
-48    -16    
0      16     
-96    0      
-80    -48    
0      -32    
-352   80     
176    32     
-208   -192   
64     192    
-96    -64    
176    -160   
-112   192    
-64    -64    
96     -16    
-96    128    
160    192    
-160   32     
-176   -32    
-64    0      
-64    -32    
176    336    
-320   16     
-352   -96    
-176   -16    
160    -160   
-16    128    
112    80     
-80    128    
-16    96     
0      32     
-160   112    
-112   -96    
-48    -272   
80     80     
-48    144    
-208   -16    
-128   80     
-800   128    
-192   32     
-208   -240   
112    80     
80     -112   
208    320    
-352   32     
256    -128   
-80    64     
240    -32    
64     256    
-160   -32    
576    -64    
-480   128    
32     -80    
48     -80    
-16    48     
160    -48    
-176   48     
96     160    
-64    -32    
-176   64     
64     -64    
192    176    
-96    32     
32     16     
-96    32     
-64    240    
-208   -96    
-32    16     
352    240    
-144   48     
-160   -288   
160    16     
224    80     
-224   16     
-128   64     
128    160    
32     -192   
-208   32     
176    208    
-224   0      
-112   16     
-160   -96    
2480   -1488  
-704   -464   
400    448    
-448   128    
304    496    
-464   -480   
112    -112   
240    -336   
432    672    
-160   -112   
-128   192    
-128   -32    
240    -336   
112    128    
-32    144    
32     272    
-528   -640   
112    -16    
160    -64    
-112   -80    
144    240    
288    144    
-176   32     
16     32     
112    64     
-32    208    
-32    80     
16     -112   
96     96     
-144   32     
128    80     
-48    16     
-32    -64    
64     0      
-80    0      
176    0      
-96    16     
64     64     
-64    32     
-16    -112   
128    96     
-80    192    
32     -48    
-144   0      
-144   -96    
208    160    
48     160    
96     192    
-16    -96    
128    16     
-64    112    
96     0      
16     176    
-48    -32    
160    -32    
-48    -112   
32     208    
-160   0      
64     32     
48     96     
48     48     
16     48     
80     64     
0      32     
0      48     
64     32     
64     -16    
0      96     
-64    0      
80     48     
-16    144    
-144   48     
176    32     
32     128    
-128   -224   
-16    -800   
48     48     
16     208    
-192   -48    
160    112    
-16    48     
32     -16    
48     48     
-144   160    
-64    -16    
256    48     
48     256    
-224   128    
160    192    
-64    -32    
32     -816   
80     48     
-112   48     
128    -48    
16     176    
112    112    
-64    80     
64     0      
32     64     
64     96     
-64    80     
16     16     
48     0      
32     32     
240    304    
-80    64     
32     -144   
-16    -944   
16     16     
224    192    
-16    16     
-48    160    
-64    64     
432    160    
-224   304    
-48    -80    
288    368    
-224   -80    
240    -128   
-192   128    
224    -16    
192    16     
-144   -800   
-16    32     
-96    160    
144    144    
80     208    
32     48     
32     0      
-128   160    
-32    -272   
96     -16    
-288   16     
288    -272   
48     96     
128    -224   
112    64     
-48    -432   
-192   112    
176    -688   
176    128    
128    -208   
-112   144    
128    0      
128    368    
-144   112    
176    64     
-48    112    
64     -16    
112    112    
-16    -48    
32     96     
48     80     
-112   32     
48     32     
-96    -112   
64     -944   
192    96     
32     -32    
64     96     
0      -64    
32     80     
96     64     
64     -48    
64     -272   
-112   80     
64     -192   
256    -112   
112    320    
16     -400   
-32    288    
16     -1056  
32     80     
96     96     
-16    144    
-96    160    
-64    -384   
-80    16     
16     -192   
48     32     
128    -208   
96     80     
128    -400   
-112   112    
96     64     
48     -48    
32     -416   
112    80     
48     -64    
64     80     
112    64     
-80    96     
-96    160    
224    -144   
160    64     
80     -192   
-1040  1856   
240    320    
-64    240    
-288   96     
-544   -64    
608    -368   
-112   -1936  
-320   -352   
48     -1008  
48     -256   
160    -64    
-64    -96    
96     -80    
-112   -1568  
160    -240   
64     64     
-80    -272   
0      0      
64     -272   
0      -1744  
16     160    
96     -1168  
32     128    
16     -64    
16     -256   
96     16     
80     -128   
80     16     
16     -448   
-48    -208   
32     -944   
-48    -144   
176    160    
-32    -144   
272    -240   
-80    80     
96     -48    
32     64     
-80    -80    
80     -384   
-784   -48    
48     -352   
96     -16    
128    48     
-32    -16    
80     -544   
-48    -80    
0      -64    
160    32     
-64    -96    
176    96     
-112   0      
144    0      
-208   -144   
160    -160   
-320   -192   
16     -160   
-96    -32    
16     -288   
-80    -640   
80     -624   
80     -160   
96     -560   
-96    272    
48     -48    
-64    96     
176    -128   
80     -96    
-128   -32    
0      96     
-32    -48    
0      16     
-1472  -48    
0      -32    
16     -112   
-48    -240   
160    160    
-240   -96    
16     -224   
160    -272   
-16    64     
144    -208   
80     144    
-64    144    
32     -240   
0      -128   
80     -112   
-176   -32    
0      -192   
-192   -80    
80     -48    
144    144    
-16    -384   
-80    32     
96     -2224  
112    48     
-64    0      
48     -64    
-176   -96    
64     -192   
-64    -16    
48     -160   
-288   -32    
16     -32    
-416   -16    
-16    -80    
-224   64     
-64    -528   
160    96     
-16    -304   
96     48     
-176   -16    
128    48     
-160   16     
32     -112   
-96    48     
-16    -32    
48     0      
-112   -128   
-80    32     
32     -272   
0      48     
-32    -96    
-16    80     
160    -576   
48     -320   
-176   224    
0      -224   
32     32     
0      48     
160    64     
-64    16     
-128   64     
160    -160   
-224   -112   
288    -96    
-336   80     
208    -288   
-48    112    
16     -448   
-80    -224   
-160   112    
16     -112   
64     64     
48     0      
-224   16     
80     -224   
-192   -32    
112    -96    
-128   96     
-208   -336   
112    16     
-368   -160   
-144   224    
-48    -224   
-848   -336   
192    -96    
176    160    
-128   192    
-592   -16    
-160   -128   
112    -128   
80     32     
48     128    
-224   -448   
144    -64    
-48    288    
-176   -80    
-752   -144   
240    48     
-16    80     
384    -32    
-464   208    
-144   -336   
-192   -48    
16     224    
64     256    
-240   96     
16     -352   
80     32     
96     -336   
64     144    
64     -688   
-352   -48    
192    0      
-80    160    
-128   -48    
-16    96     
-96    48     
-96    -48    
-128   48     
-96    -32    
-48    32     
32     -48    
96     128    
-96    -64    
1744   -1744  
480    1136   
-256   -208   
-528   -416   
400    -272   
-448   -752   
-80    80     
32     480    
96     -48    
-128   176    
-400   -80    
-16    144    
-256   -80    
48     160    
16     -64    
0      48     
80     144    
-16    112    
16     112    
-160   48     
96     144    
-48    144    
32     96     
-112   144    
0      0      
-144   -144   
32     176    
48     -160   
48     -48    
-128   -176   
224    112    
-48    48     
16     80     
16     16     
-64    32     
-112   -80    
96     -64    
-112   128    
0      -80    
-64    64     
-208   -16    
80     112    
-464   -112   
32     -32    
-96    -272   
-48    64     
112    64     
-144   -96    
-16    160    
-160   16     
176    -48    
-192   128    
192    128    
-176   80     
-16    -304   
144    0      
-144   144    
-16    -208   
48     32     
-48    176    
-112   0      
144    128    
-96    32     
48     -64    
-128   144    
-48    128    
0      16     
80     32     
16     32     
32     32     
-224   48     
0      -80    
-176   -16    
48     128    
-144   64     
96     240    
16     -96    
32     32     
16     -16    
-16    -208   
96     208    
-144   96     
144    256    
-64    -64    
-16    -48    
-176   -128   
-64    112    
-128   48     
144    -128   
-16    48     
-16    96     
-16    -64    
0      48     
160    288    
-112   0      
112    16     
48     112    
-64    -16    
96     176    
-192   32     
192    -48    
-48    128    
16     0      
-240   -32    
224    16     
-128   80     
208    16     
-48    32     
-48    80     
32     48     
16     64     
-32    -112   
16     208    
80     80     
-80    64     
-32    80     
-48    -32    
32     -224   
-112   -80    
-48    112    
256    96     
64     160    
-64    144    
-32    128    
-64    -144   
-16    -240   
-112   -240   
32     32     
-16    64     
208    80     
-176   -96    
-48    -16    
160    16     
48     -16    
-32    -32    
80     -48    
-32    16     
-96    -48    
0      16     
80     48     
64     -32    
-64    -144   
80     144    
-272   -16    
288    128    
-256   16     
160    -144   
-176   -48    
128    64     
16     -32    
-64    64     
16     -16    
-48    -16    
160    48     
-128   128    
96     -240   
-240   48     
32     144    
-80    -96    
48     96     
0      48     
64     -304   
-80    -96    
128    160    
-96    16     
-208   -512   
96     0      
176    304    
-48    128    
-64    64     
64     -64    
-128   -128   
112    -32    
64     80     
96     240    
-176   16     
-32    -864   
144    176    
32     -96    
32     32     
48     144    
48     80     
16     -64    
0      -32    
48     208    
176    64     
-96    -240   
16     80     
32     112    
64     32     
64     112    
-64    -48    
-16    192    
112    -480   
-16    144    
-16    16     
-16    -80    
-352   112    
272    -96    
-288   -128   
-304   -224   
384    -1200  
352    944    
64     640    
-336   -768   
-112   -112   
160    -64    
112    0      
48     -544   
32     96     
0      -64    
144    64     
272    576    
-48    160    
-208   -416   
-96    -64    
32     64     
208    224    
-16    -192   
0      -384   
32     96     
112    -80    
112    176    
-64    -816   
144    64     
-16    -3424  
64     48     
128    144    
128    160    
-112   0      
160    -128   
-80    -48    
224    176    
-96    304    
48     16     
80     48     
80     -64    
32     64     
16     -48    
32     32     
16     -496   
16     192    
-32    -64    
96     272    
16     144    
0      -32    
32     -64    
48     0      
80     176    
-96    -80    
32     96     
16     -800   
160    16     
128    192    
64     192    
-48    -208   
80     0      
16     -272   
-96    -16    
16     -192   
64     16     
48     0      
64     32     
96     144    
16     -752   
64     32     
96     -48    
64     96     
-16    -240   
80     -96    
192    -224   
-80    80     
-32    -1840  
-144   -144   
-48    -128   
48     208    
-32    256    
112    0      
96     240    
112    -224   
80     304    
-128   -192   
208    160    
80     -16    
32     16     
16     -176   
48     256    
80     112    
32     -816   
16     64     
80     -1488  
112    -864   
48     -96    
16     -912   
48     -48    
32     -2000  
96     -208   
48     112    
32     -192   
-16    112    
64     -48    
0      112    
-48    16     
96     -608   
-16    0      
176    -608   
-16    -160   
-928   0      
16     -80    
80     -80    
16     -384   
32     -48    
16     -480   
80     32     
80     144    
0      32     
0      -272   
-96    -16    
224    -288   
128    -48    
-80    32     
48     288    
-688   48     
160    -368   
-16    -160   
160    -560   
64     160    
-32    -208   
48     -192   
160    64     
-96    -256   
80     48     
-16    16     
64     -256   
112    224    
-240   -112   
-32    -128   
-128   -80    
192    80     
-16    -128   
208    208    
-256   -96    
32     -512   
-96    -64    
128    -1312  
-256   -176   
96     -32    
-64    0      
16     -80    
48     144    
-240   -48    
-96    -48    
-240   -192   
160    -192   
-224   -64    
-48    -48    
64     -48    
-16    -208   
112    -96    
80     -16    
160    0      
112    240    
80     -16    
-112   -240   
144    -144   
-128   -96    
128    112    
-80    -320   
16     -144   
112    48     
48     -96    
-464   112    
-144   -304   
96     176    
-48    -128   
-48    368    
96     -656   
-80    0      
-64    -96    
64     -128   
96     32     
48     0      
-64    32     
64     -240   
-1152  -64    
16     -400   
-208   -48    
48     112    
-208   32     
96     -224   
-224   -96    
64     -880   
-416   -96    
320    -816   
-176   464    
-448   -608   
240    368    
-80    -80    
480    64     
-112   656    
-288   -256   
-192   16     
96     -256   
-16    -32    
160    -176   
-96    80     
304    -96    
-64    64     
-304   48     
192    -32    
-208   96     
16     -64    
-128   -32    
80     -48    
0      64     
192    -144   
-320   -64    
176    48     
-64    112    
80     -224   
-32    64     
96     -256   
-80    16     
-288   -32    
-16    -112   
-160   -80    
16     48     
0      -96    
0      208    
-128   -208   
0      -144   
-288   -32    
240    -32    
-16    80     
-208   -32    
-144   96     
64     -64    
-208   0      
128    16     
-400   32     
48     96     
-208   16     
32     96     
-48    -160   
-96    -96    
32     -80    
48     64     
96     -32    
-288   64     
80     -112   
48     64     
-32    -48    
-64    112    
32     48     
-80    48     
32     128    
-560   -240   
112    16     
-688   112    
-80    32     
80     -192   
0      80     
-80    -112   
160    80     
-144   -144   
-80    -48    
-128   -80    
112    48     
48     272    
-96    -208   
-48    -96    
-32    16     
-256   0      
-672   -208   
144    64     
-208   -16    
96     32     
112    224    
-272   80     
304    -96    
-240   64     
144    32     
-32    0      
-144   -192   
-48    0      
-112   -80    
-16    240    
0      64     
-112   80     
-112   -64    
176    -32    
-64    -32    
32     48     
16     112    
176    208    
-160   -80    
112    80     
-192   -48    
304    80     
-288   -176   
224    -16    
-112   48     
-80    64     
-32    0      
48     112    
-512   -80    
-32    -64    
-80    128    
-112   -144   
320    16     
-208   96     
-112   48     
176    64     
-352   16     
128    112    
-208   -112   
-112   16     
64     96     
-224   -96    
64     64     
-272   -128   
160    48     
32     80     
-176   112    
176    176    
-16    -48    
-96    64     
32     80     
112    -128   
-144   96     
16     160    
-112   48     
128    80     
-176   -160   
192    128    
-192   0      
64     -112   
-544   0      
64     128    
0      64     
0      80     
32     48     
80     144    
-112   16     
-96    -128   
64     192    
-48    -240   
48     144    
128    640    
-64    -336   
-80    -144   
128    96     
16     -128   
-48    160    
64     112    
32     -96    
-128   -192   
-96    -64    
-16    304    
32     32     
160    224    
-112   144    
-96    16     
-272   -96    
80     -320   
-48    -32    
96     -128   
-224   -32    
-32    176    
16     -32    
64     16     
144    32     
-80    80     
-48    128    
0      -16    
128    16     
-112   -32    
48     32     
-128   64     
96     192    
-96    32     
-32    64     
0      96     
-144   -96    
144    112    
-80    80     
64     64     
-64    32     
1904   -1392  
-256   -448   
1408   960    
-416   576    
912    -1040  
-640   -416   
432    560    
-192   368    
-336   -224   
16     16     
80     -32    
48     -112   
-176   80     
-160   -144   
192    336    
-64    -144   
-144   80     
-160   -384   
96     352    
256    288    
-272   -48    
336    416    
-160   -80    
176    -16    
-80    32     
256    96     
-48    176    
112    176    
64     0      
-128   32     
48     64     
80     -96    
0      112    
112    128    
-80    -64    
128    0      
-112   144    
176    -96    
-240   -112   
176    128    
32     112    
96     112    
0      16     
-16    96     
80     96     
80     176    
-48    32     
80     96     
32     576    
64     -32    
-96    208    
-64    -832   
48     192    
-112   96     
-16    0      
48     -176   
-64    -432   
-48    -128   
272    512    
-256   32     
160    160    
-112   32     
128    -16    
-208   -16    
320    192    
-96    16     
-32    -352   
128    16     
112    -432   
-48    0      
16     128    
96     0      
32     96     
96     80     
32     48     
96     -16    
-224   -384   
496    112    
192    320    
272    496    
-96    288    
-96    -400   
48     336    
-48    -1392  
-16    160    
16     -128   
48     288    
-96    -144   
112    240    
-112   -16    
80     -64    
-32    -176   
192    272    
32     112    
-32    -16    
-128   -16    
176    -160   
96     256    
-96    -496   
96     0      
128    96     
80     80     
-96    32     
64     80     
80     -16    
112    304    
-272   -256   
272    304    
-208   -48    
144    -160   
-80    176    
112    -96    
144    192    
-80    -16    
32     48     
-16    -1632  
48     48     
-16    48     
80     -224   
-96    128    
208    192    
-16    96     
-64    112    
-96    112    
32     -16    
320    -16    
-112   304    
224    144    
-240   -80    
160    16     
-16    -272   
-64    80     
32     128    
176    128    
16     96     
112    384    
-128   -128   
48     176    
32     160    
80     -64    
32     144    
64     112    
16     0      
0      -672   
48     0      
0      160    
112    16     
0      16     
96     96     
16     64     
-64    64     
112    112    
32     -144   
48     16     
-64    -240   
176    144    
-48    -688   
176    224    
-32    -160   
48     48     
0      -16    
128    160    
48     64     
48     256    
0      -96    
80     -544   
224    368    
144    224    
-176   160    
-48    -96    
224    -16    
-32    32     
-48    96     
48     -48    
32     128    
80     -144   
48     112    
-16    -304   
80     -560   
32     64     
-48    -208   
32     -1104  
192    -416   
144    -800   
128    -96    
32     -1072  
-144   48     
64     128    
-32    -192   
144    48     
-16    -272   
48     -240   
-16    -80    
320    -288   
-160   208    
48     -736   
-784   -2896  
192    192    
-496   240    
496    -32    
304    -688   
-96    -144   
160    112    
-112   -176   
-96    336    
240    -192   
208    -80    
-240   -48    
176    -16    
96     -48    
-112   -80    
32     -144   
-64    48     
96     -16    
48     -16    
96     -288   
-16    -96    
-16    -1424  
224    0      
-64    -320   
176    -48    
-64    -208   
-48    -160   
176    -112   
-208   96     
144    176    
-16    -32    
-80    0      
-16    -112   
96     -80    
-64    -368   
224    80     
-160   -32    
176    0      
-176   -1776  
-320   32     
80     -288   
32     16     
-16    16     
224    -32    
-160   48     
16     -32    
-256   -192   
-64    -192   
-592   -64    
-128   112    
192    -128   
-80    48     
96     -96    
112    -256   
0      -16    
112    -96    
-112   0      
256    -160   
-16    96     
-112   -16    
240    -272   
-64    16     
16     64     
-32    -80    
144    -176   
-896   240    
16     -224   
-64    -112   
16     -368   
96     160    
-80    -1440  
96     144    
-16    -176   
96     -176   
-48    32     
-32    -160   
80     -48    
-80    128    
-80    -80    
96     -176   
-1040  16     
-16    -192   
112    240    
-80    -192   
304    208    
-16    -624   
-16    -160   
160    80     
-128   112    
112    -80    
48     16     
-240   48     
48     32     
-96    0      
32     -144   
-176   -32    
64     -192   
64     128    
-16    -80    
48     48     
32     -464   
64     -96    
-32    32     
208    144    
-32    48     
64     -64    
-256   0      
272    320    
-144   96     
112    -112   
-224   0      
176    -48    
-224   192    
176    -224   
16     -48    
16     -144   
80     -144   
16     224    
96     -112   
-128   -320   
0      -112   
-160   32     
80     -32    
-48    -32    
128    16     
-128   80     
-1568  -288   
80     128    
-144   -240   
-16    64     
0      64     
16     192    
-96    0      
-464   -16    
-208   -208   
-704   32     
-208   -112   
288    208    
-48    -160   
-80    48     
128    320    
-1120  -272   
176    112    
-272   -128   
128    80     
-240   16     
-304   -144   
-208   -208   
-304   64     
-96    96     
144    80     
32     -48    
-1344  -32    
0      96     
-96    -656   
160    240    
-128   16     
176    -80    
64     288    
-112   112    
-272   -112   
-48    32     
-96    64     
80     -16    
-64    -16    
-224   -352   
-16    208    
-176   -32    
-64    -128   
-16    -112   
48     64     
-48    32     
-16    80     
-128   -256   
192    -48    
-16    96     
-80    16     
16     32     
-32    48     
48     32     
16     16     
-64    16     
-288   144    
208    -16    
-784   16     
-16    128    
32     -160   
160    64     
-16    112    
-96    0      
32     32     
-32    112    
144    0      
-368   -16    
32     16     
192    -64    
128    -32    
1808   -1904  
688    176    
512    352    
-528   368    
640    272    
-32    -768   
176    -224   
480    192    
-672   -176   
384    -112   
-400   112    
384    0      
-176   -272   
-112   240    
-16    -128   
48     -48    
-48    0      
-496   -528   
240    0      
32     -144   
176    352    
144    160    
-80    176    
48     -144   
-32    224    
-48    -48    
64     -288   
-272   -48    
96     -32    
-192   32     
-128   0      
112    128    
-80    -16    
80     -96    
-384   -112   
176    -32    
-64    80     
96     16     
-16    -96    
0      -48    
144    112    
-176   32     
48     -32    
-176   -112   
80     -64    
0      64     
192    640    
-352   -288   
-112   64     
64     -48    
128    112    
-176   -96    
16     -48    
32     144    
-16    -32    
16     -192   
-96    144    
128    224    
-16    -256   
176    80     
-112   -64    
-64    -144   
-96    320    
-16    160    
0      -80    
-16    -32    
0      80     
-80    48     
48     128    
-16    48     
96     64     
-32    32     
-48    224    
64     80     
80     160    
-32    -624   
16     -624   
128    48     
176    544    
-112   80     
0      16     
128    96     
128    96     
32     240    
-144   -32    
-144   -192   
368    368    
96     384    
-48    -512   
-64    -16    
0      112    
144    48     
-144   64     
-16    -16    
0      -96    
48     -112   
64     32     
16     -48    
144    176    
-16    80     
48     -80    
96     80     
0      -80    
-80    0      
-32    80     
-128   -384   
64     -496   
16     -224   
32     -48    
112    -16    
48     128    
-16    48     
80     144    
64     80     
64     80     
-112   -96    
16     32     
48     224    
128    224    
-32    96     
0      16     
64     48     
0      -96    
96     32     
-80    128    
144    -96    
-48    96     
-48    96     
160    80     
-80    0      
0      -192   
-128   48     
48     112    
-64    -128   
240    64     
-288   384    
-176   -528   
240    -112   
-160   48     
0      48     
96     240    
64     112    
-32    144    
-128   160    
160    368    
-96    144    
16     -32    
-16    96     
16     -272   
0      -16    
-32    -160   
32     -400   
80     32     
-32    -1024  
96     160    
-32    48     
48     464    
-64    -16    
96     16     
0      96     
144    48     
-80    64     
176    -16    
-384   112    
80     0      
48     240    
160    -368   
80     16     
16     -112   
-16    16     
-96    96     
176    -80    
-144   16     
48     48     
-64    192    
128    -160   
-80    80     
96     16     
-32    128    
0      0      
64     64     
48     -144   
-96    224    
64     -1584  
96     176    
112    -656   
-112   48     
80     160    
-16    48     
-64    -48    
32     -144   
32     32     
-32    96     
208    160    
-16    -160   
32     96     
-784   720    
-288   -896   
288    -16    
112    256    
640    -288   
-448   -464   
576    336    
-336   -400   
448    -48    
-496   -144   
512    192    
-80    192    
80     -64    
-208   176    
240    32     
-112   0      
96     -64    
64     144    
-32    -16    
-112   -48    
128    -64    
64     -784   
32     16     
16     80     
0      -48    
0      176    
160    80     
-16    144    
0      -336   
-16    80     
48     -448   
176    144    
32     -192   
-96    96     
112    -624   
-112   128    
192    -144   
-176   144    
176    -80    
64     96     
-48    64     
48     80     
48     192    
64     -176   
0      96     
64     -16    
32     160    
96     -496   
-128   128    
96     -128   
160    128    
-32    -640   
128    160    
-96    -32    
64     64     
-64    -64    
80     112    
128    0      
64     0      
-192   16     
208    -112   
16     112    
64     -48    
16     64     
96     -16    
0      32     
16     -208   
16     272    
96     64     
0      -608   
-32    -784   
48     -128   
64     -608   
32     -144   
-16    -2784  
48     -80    
96     96     
176    144    
-48    32     
160    -160   
0      -560   
0      -256   
48     -896   
-208   80     
-64    80     
176    224    
-2176  -128   
192    -528   
144    -240   
-16    -96    
96     -128   
-32    -320   
64     -224   
176    96     
-256   -464   
64     -224   
0      64     
176    112    
-112   64     
192    -16    
64     -64    
-384   -224   
-32    -160   
80     112    
144    48     
0      -64    
64     -704   
48     -112   
64     -3408  
96     -128   
-16    -208   
0      112    
64     -16    
160    80     
-272   -224   
176    128    
-288   -96    
240    64     
-96    48     
-176   -240   
192    -16    
16     -176   
-64    -160   
176    -976   
-128   -176   
112    48     
-48    288    
160    -704   
-176   32     
64     -16    
16     192    
-160   64     
96     -240   
-912   -144   
48     -96    
-16    -64    
32     48     
288    560    
64     -464   
64     -32    
16     -752   
192    400    
112    -144   
64     -16    
-32    -496   
176    16     
96     304    
48     -112   
-352   -32    
80     -80    
-320   -16    
48     96     
-16    96     
-64    -448   
352    592    
-592   -1568  
112    -208   
-64    -48    
224    32     
-272   -32    
-16    -176   
-32    80     
-16    -192   
-224   64     
-112   -224   
-320   80     
-112   -96    
-96    -288   
192    -496   
112    144    
48     -368   
208    240    
-288   -208   
384    -48    
-496   96     
288    -176   
-64    48     
0      80     
-96    -80    
48     -32    
-128   -96    
96     -128   
-32    112    
-48    -48    
-16    192    
-16    -224   
32     -176   
-144   -64    
32     -64    
-112   -32    
32     32     
-112   48     
192    32     
-176   64     
32     -112   
-80    -32    
-1136  -1056  
1296   1424   
-544   320    
528    -416   
-176   -384   
192    -688   
336    416    
-800   -464   
512    -112   
-32    -272   
128    80     
-112   48     
-144   64     
16     -32    
224    -176   
-896   16     
208    64     
-480   416    
16     48     
-272   96     
-192   -448   
0      288    
-16    -176   
-192   592    
-704   -576   
-80    224    
160    -304   
176    448    
-160   -112   
128    256    
-560   -320   
-80    -48    
-384   -80    
48     80     
32     160    
112    160    
-80    48     
-336   -80    
-96    -144   
48     192    
-16    -32    
-496   32     
96     48     
96     144    
-32    48     
-176   -208   
96     224    
-224   -288   
-176   -352   
16     -208   
-240   0      
-16    32     
-160   -176   
32     -80    
-176   288    
-112   32     
-256   -16    
160    -32    
208    -176   
-144   208    
192    144    
112    96     
-112   -320   
-96    16     
288    16     
0      16     
-96    144    
-48    -224   
176    80     
128    240    
-112   128    
-160   -224   
-208   -16    
-64    16     
112    112    
-64    -64    
-112   -320   
32     -192   
-80    -128   
-160   -128   
96     32     
112    144    
-64    -368   
-144   48     
-208   -192   
160    192    
-160   16     
112    144    
-528   -400   
64     128    
96     -176   
48     272    
-208   80     
16     -16    
64     -48    
-64    48     
-160   64     
48     176    
-32    96     
-48    96     
-144   32     
-48    -128   
128    256    
-448   -96    
-80    -288   
80     -272   
80     320    
-208   -16    
-64    -80    
-128   -32    
96     -48    
64     32     
-48    -32    
-80    64     
32     16     
112    304    
-112   0      
48     176    
-432   -128   
48     32     
-224   0      
-96    304    
-128   -32    
112    32     
64     32     
-208   64     
112    176    
-80    208    
80     64     
0      48     
-48    32     
-112   96     
-32    144    
160    48     
-80    -96    
32     240    
-240   -144   
112    -16    
-80    -112   
64     48     
-80    64     
128    80     
-96    48     
16     32     
-112   80     
-16    -112   
-192   16     
64     48     
-16    32     
48     80     
-48    32     
16     48     
-16    -48    
64     -80    
32     224    
0      48     
0      -144   
-48    -240   
80     96     
-48    16     
-32    96     
-144   64     
160    192    
-176   80     
16     16     
-80    0      
-16    -32    
128    160    
-64    64     
48     16     
-64    48     
96     -16    
-192   -48    
112    64     
-80    192    
48     -64    
0      176    
0      48     
-176   -16    
32     112    
96     96     
-80    0      
16     160    
-48    144    
-176   -128   
96     48     
128    -48    
128    -32    
-48    128    
-64    16     
16     192    
-192   0      
240    16     
-96    176    
128    -32    
-80    64     
16     32     
-1024  768    
640    -960   
1824   496    
240    -496   
-160   -704   
-128   -608   
768    976    
48     -272   
-128   96     
-352   -400   
336    432    
64     -208   
-112   256    
-112   64     
96     128    
0      32     
0      96     
160    176    
-32    -64    
-64    48     
96     16     
-64    256    
128    -96    
-304   112    
240    -128   
-272   -96    
320    64     
-128   304    
224    -112   
-224   96     
80     16     
112    160    
80     48     
-128   16     
-32    32     
-112   -96    
48     32     
128    192    
112    96     
-160   -80    
48     -384   
16     112    
112    -2560  
-32    96     
-16    16     
32     96     
-80    48     
272    144    
-112   48     
48     64     
32     144    
64     96     
-16    112    
96     80     
-16    -16    
48     0      
80     176    
-48    -368   
176    -16    
-64    64     
64     128    
-64    64     
128    80     
32     32     
48     32     
-80    0      
32     128    
-32    64     
96     32     
16     64     
16     -112   
96     80     
-32    -288   
32     48     
32     352    
240    224    
-80    0      
160    32     
-16    16     
0      -64    
272    528    
48     560    
-160   128    
-48    -112   
16     -208   
128    -160   
112    272    
-160   -32    
0      -32    
16     -704   
96     32     
80     -288   
-80    32     
-16    -16    
-32    -352   
-64    -240   
256    272    
32     16     
128    -64    
-48    80     
-32    -272   
112    192    
64     -240   
80     112    
16     -224   
48     144    
-32    -912   
96     -208   
-128   -240   
80     -112   
80     0      
192    48     
32     128    
-96    -144   
16     32     
32     -144   
32     176    
176    -64    
-80    0      
0      -32    
96     128    
128    -640   
-16    48     
-64    176    
64     0      
80     -48    
-176   -16    
352    192    
-16    -240   
16     112    
-16    -112   
32     0      
208    -208   
-32    112    
96     -464   
0      160    
0      -672   
160    240    
-64    16     
96     0      
128    0      
-96    0      
0      112    
32     64     
128    64     
128    32     
-112   80     
64     -112   
64     48     
48     -112   
112    80     
32     -112   
32     -592   
32     -16    
80     -928   
-96    -64    
-16    448    
-256   -448   
80     -160   
80     -1536  
144    -224   
0      -112   
-16    -112   
80     48     
-48    -256   
352    128    
-160   0      
-176   -96    
48     16     
176    -112   
128    16     
-240   96     
-16    -16    
80     -128   
16     -512   
16     -48    
48     -464   
64     64     
64     64     
128    -16    
-32    -480   
64     80     
16     -304   
-32    128    
48     -144   
80     -80    
-208   -48    
288    -192   
-96    0      
-64    -208   
240    -16    
0      176    
208    128    
-224   -304   
16     -128   
128    -16    
-1136  -1504  
1648   2176   
-576   1008   
240    -944   
-160   48     
32     -352   
192    1392   
-1072  -976   
448    -384   
32     -624   
240    -176   
-208   -208   
-96    -32    
64     -112   
432    272    
-304   128    
16     -160   
176    576    
-352   -80    
-112   128    
-528   -592   
464    96     
96     400    
32     -112   
-16    -128   
-48    32     
-48    -32    
64     -512   
-336   -32    
416    -672   
96     208    
-144   144    
96     -128   
-32    48     
112    -16    
-48    -400   
80     -432   
-272   48     
272    0      
-336   64     
-208   -32    
80     64     
64     -304   
48     0      
-32    -304   
288    96     
-96    112    
48     -208   
-112   32     
0      -16    
-48    -64    
-48    -144   
-16    16     
96     96     
-224   -16    
0      -64    
112    112    
128    -496   
112    16     
-64    -528   
384    32     
-96    176    
-32    160    
-160   -112   
176    -112   
-112   48     
16     -16    
-80    16     
144    -80    
-96    96     
-16    -96    
64     64     
-16    -192   
144    224    
-96    -96    
-96    -48    
-80    -240   
-80    -96    
-288   -48    
96     -48    
-208   272    
0      128    
64     -304   
80     48     
-304   0      
32     -144   
-560   -32    
96     -48    
0      128    
144    -144   
32     32     
-160   16     
112    -64    
32     32     
96     128    
-112   128    
32     -32    
-112   0      
-48    -256   
-64    -160   
208    -80    
112    176    
0      -80    
16     176    
-128   -528   
80     -144   
-336   16     
-48    -32    
-64    -144   
112    32     
-16    32     
0      -48    
-80    -144   
-32    -96    
64     48     
96     -192   
-336   96     
80     -176   
-32    144    
-112   -240   
-128   -16    
288    224    
-256   0      
0      -48    
-576   -80    
176    160    
-1856  400    
-176   208    
256    112    
16     144    
-208   -224   
144    224    
-224   -144   
176    0      
128    80     
-416   80     
144    -64    
-96    -192   
-192   -64    
-160   -80    
16     -80    
-128   80     
-80    256    
-128   64     
-112   0      
-224   -96    
-32    32     
192    112    
-96    0      
112    176    
-48    -16    
0      112    
-32    -80    
-32    96     
-48    32     
0      160    
-96    224    
-128   -96    
-304   -192   
32     192    
-16    -112   
80     -96    
0      32     
0      -32    
32     208    
-208   160    
208    288    
-112   96     
256    96     
-32    0      
64     320    
-320   -96    
-96    -16    
-400   -224   
256    208    
-64    -112   
-64    96     
160    80     
96     -48    
-112   224    
-208   -16    
-32    128    
256    0      
-16    256    
-288   -224   
-112   128    
-96    -128   
32     -32    
-352   0      
80     112    
-1168  -96    
-16    -2096  
96     176    
-160   0      
0      16     
32     -32    
-640   -1808  
336    1216   
-496   -336   
-816   -560   
-208   -224   
144    656    
-592   -912   
352    592    
-80    368    
-608   64     
-336   -80    
-112   -176   
160    384    
176    -272   
-80    528    
-64    -304   
64     288    
-80    -32    
80     176    
-16    16     
-48    32     
-16    16     
-304   112    
288    208    
-400   -128   
16     -80    
-96    -32    
32     128    
-96    128    
16     48     
0      -32    
-144   64     
144    48     
-144   112    
96     16     
-224   -48    
96     80     
-80    64     
0      112    
144    80     
-64    16     
48     96     
0      80     
0      16     
0      48     
-16    16     
32     160    
112    192    
-16    -32    
16     64     
-112   -48    
128    208    
-80    112    
-16    96     
80     128    
-16    -144   
144    32     
-16    224    
16     240    
-16    32     
48     32     
-16    16     
0      80     
-128   -144   
80     -48    
-16    16     
48     144    
-64    80     
-80    -16    
32     -16    
64     208    
-80    64     
0      96     
80     112    
-96    48     
-144   80     
-32    112    
0      80     
0      16     
-80    -224   
-176   96     
32     16     
-16    -304   
96     128    
80     128    
-80    0      
0      -80    
128    144    
176    288    
-80    64     
16     144    
64     48     
-48    0      
96     -16    
64     48     
-32    -256   
-96    -144   
16     -48    
176    160    
0      256    
-144   16     
-80    0      
128    32     
64     80     
-80    48     
-16    128    
16     48     
96     128    
-112   32     
16     64     
-112   -352   
96     -512   
48     80     
96     48     
-144   64     
32     16     
112    160    
-64    -32    
64     112    
16     64     
160    208    
-144   -48    
16     32     
-160   -288   
208    176    
-176   -400   
144    -224   
-32    272    
160    -144   
-16    -16    
-64    256    
80     160    
128    32     
-112   112    
176    96     
-48    64     
160    0      
-80    176    
160    -144   
80     240    
-32    128    
80     -160   
-80    192    
32     -512   
0      16     
-16    32     
144    272    
-192   16     
64     32     
-16    0      
176    176    
-64    16     
128    0      
48     144    
-48    32     
272    176    
-240   -160   
192    -80    
-64    -432   
48     16     
48     -528   
32     -64    
176    208    
-80    -32    
16     -48    
-64    208    
16     0      
-32    -48    
128    -16    
-80    -160   
0      128    
-112   -64    
128    80     
176    -160   
-32    80     
48     -496   
80     80     
48     -400   
-48    64     
-16    0      
192    144    
-16    96     
-32    48     
-128   80     
144    80     
48     80     
112    80     
-96    112    
64     -48    
32     16     
288    -560   
-80    144    
80     -224   
-240   192    
208    -128   
48     80     
-16    144    
1744   -1264  
-272   384    
368    512    
-800   -128   
512    -720   
-192   -448   
144    288    
96     -64    
-400   -384   
272    -128   
304    -96    
-240   0      
-112   -224   
304    224    
-128   112    
128    224    
112    80     
288    224    
-240   -112   
160    -128   
-96    16     
48     -208   
208    16     
-32    -96    
0      16     
112    -176   
-64    224    
80     112    
80     80     
-128   -128   
144    -416   
-48    -1536  
160    -64    
112    96     
-160   0      
256    -64    
16     0      
-80    80     
176    -48    
64     80     
-32    16     
80     -912   
16     32     
80     -704   
-160   32     
-608   -304   
64     -1456  
176    48     
0      -368   
32     -32    
16     240    
64     -160   
112    144    
-256   -64    
240    -48    
-16    80     
48     -816   
-80    96     
16     -448   
144    -192   
-256   64     
-48    -224   
80     -128   
128    128    
-48    -80    
-16    -336   
16     -240   
176    144    
160    -176   
16     -48    
-80    32     
176    0      
-32    48     
128    -80    
-32    -192   
160    80     
-176   -240   
224    0      
-112   -192   
80     -192   
144    -560   
0      96     
112    -688   
96     -96    
176    48     
-304   112    
256    -288   
32     208    
-176   0      
112    0      
-304   -160   
112    48     
-1744  -128   
0      -384   
256    256    
-160   -160   
208    0      
16     -400   
48     -80    
96     112    
-144   160    
48     16     
32     -80    
-224   -16    
32     -208   
-48    -112   
-96    -80    
-288   -96    
224    128    
-176   80     
192    -48    
-80    -64    
160    -368   
-64    0      
192    -1072  
-48    144    
0      -48    
96     -112   
-112   -224   
-48    -192   
-208   0      
176    16     
-128   64     
112    -144   
-224   240    
176    -48    
-208   -416   
0      -64    
48     160    
208    -112   
-16    -80    
16     32     
-160   -112   
96     -32    
96     -96    
-48    -240   
-144   -80    
-128   128    
272    -192   
-224   32     
-32    -128   
-416   48     
160    -48    
80     80     
16     -688   
-32    112    
-144   128    
224    -16    
-336   32     
112    64     
-288   -48    
-16    64     
-64    -48    
144    -16    
-224   -224   
144    -192   
-112   144    
0      -176   
96     208    
64     -288   
128    64     
-112   -144   
64     240    
-48    96     
144    48     
-96    -144   
144    -96    
16     -80    
112    192    
-32    64     
80     -112   
-128   48     
240    -80    
-128   0      
-320   -320   
64     448    
272    -64    
-960   64     
-96    -48    
16     -128   
-192   64     
32     112    
-160   -32    
0      -32    
-224   -112   
0      -224   
-112   48     
-320   -240   
-48    112    
-128   -96    
-144   -80    
-32    0      
192    -64    
-96    128    
-800   192    
-16    48     
-48    928    
624    1968   
96     -64    
-768   -192   
-16    -368   
320    -496   
256    736    
-16    448    
144    -96    
-48    192    
-240   -400   
-16    -64    
-64    16     
-192   -32    
-80    160    
-896   64     
32     320    
64     96     
-80    16     
-32    -144   
16     80     
-288   -144   
224    368    
-96    208    
-64    -192   
-224   -96    
96     16     
96     96     
-336   16     
-144   -16    
-224   -96    
-144   64     
-32    0      
-48    96     
-128   -208   
-16    176    
-112   -176   
48     32     
-80    64     
-16    -32    
112    208    
-64    112    
-16    0      
-176   128    
-96    -16    
-48    80     
-80    160    
-640   0      
32     80     
-176   -208   
32     -80    
-48    -80    
32     80     
0      48     
0      32     
0      -64    
-80    -32    
-240   -96    
-176   -144   
16     48     
-96    -16    
64     96     
-384   -80    
80     64     
-80    -208   
16     80     
80     -16    
64     64     
0      128    
-208   64     
16     0      
48     64     
-32    48     
16     128    
-32    -16    
-128   -48    
-32    -48    
-272   96     
48     256    
-272   64     
-32    -48    
80     -32    
-32    64     
80     128    
-160   80     
112    80     
32     128    
-32    -16    
-32    64     
-64    -16    
-48    -32    
32     96     
-16    96     
96     208    
-144   -48    
-64    0      
144    256    
-112   32     
0      112    
-64    80     
176    64     
-96    96     
16     64     
-112   -32    
64     112    
-144   32     
176    96     
-80    16     
-32    96     
-80    0      
-128   -48    
-48    64     
32     64     
0      80     
0      176    
-48    48     
-96    -80    
16     128    
0      96     
96     -32    
-272   -96    
80     192    
16     -144   
16     64     
-48    128    
32     112    
160    496    
144    -272   
32     176    
-112   32     
96     64     
-112   224    
96     -32    
80     128    
-96    48     
32     80     
0      16     
-96    -16    
160    128    
-32    112    
0      -16    
32     192    
-96    -32    
32     80     
-32    16     
160    -16    
144    464    
-144   320    
-144   112    
-112   -80    
0      -208   
224    144    
-144   112    
-112   112    
64     16     
320    192    
-272   128    
-32    400    
-224   64     
0      -128   
160    -64    
192    -64    
-32    64     
-176   64     
0      128    
32     -256   
80     -48    
192    368    
-192   272    
-288   112    
16     -16    
112    32     
32     -96    
-16    -64    
16     304    
-48    128    
-32    -240   
176    176    
112    176    
32     144    
-176   176    
48     32     
96     96     
0      16     
0      -32    
112    -48    
0      224    
160    80     
-112   64     
48     -32    
-48    0      
-96    176    
208    -64    
-16    352    
112    -32    
32     -192   
16     64     
976    1664   
-1456  -288   
960    1072   
64     160    
1072   -896   
-896   -624   
112    -272   
512    432    
-160   -304   
224    -64    
-128   160    
-80    -192   
192    512    
-96    -240   
-48    -192   
80     240    
192    -144   
-16    -128   
-32    -160   
48     -16    
224    192    
-16    128    
32     128    
0      32     
32     -144   
112    112    
-112   64     
192    304    
-64    112    
32     16     
64     0      
-32    -720   
32     128    
64     64     
32     112    
144    160    
-80    80     
80     32     
0      80     
-48    -128   
96     128    
-64    16     
48     80     
64     96     
80     -144   
-128   -32    
144    -160   
-64    -64    
208    -1088  
-224   96     
304    64     
-192   160    
224    48     
-256   80     
80     -112   
32     64     
-48    128    
-16    -64    
112    48     
-48    -32    
32     96     
16     -128   
48     32     
96     -48    
-144   -64    
192    -1280  
48     128    
16     -16    
-128   96     
48     48     
160    96     
-80    48     
32     -48    
64     80     
-16    -48    
-32    32     
192    -32    
32     224    
-16    -480   
64     -64    
160    -528   
32     192    
0      192    
-160   -64    
224    176    
-16    304    
-288   16     
176    -288   
64     144    
-48    -432   
208    224    
-32    -496   
112    112    
-32    -176   
144    -64    
80     16     
64     208    
-64    0      
112    96     
-80    32     
112    112    
16     16     
128    64     
-80    192    
112    -320   
-144   -128   
144    -208   
208    432    
-48    -160   
96     176    
-144   -112   
128    96     
144    80     
-64    80     
-112   192    
0      48     
112    16     
96     -112   
-176   448    
432    -48    
48     160    
0      16     
-256   160    
384    32     
16     -48    
-208   -224   
96     -592   
-16    64     
-48    -432   
192    96     
-1488  -208   
-48    -416   
-96    -112   
-32    -1184  
448    64     
-48    -944   
80     0      
-16    256    
-64    -336   
272    112    
48     -80    
-96    16     
224    64     
-96    -752   
208    -272   
-1056  -624   
144    -48    
48     128    
-80    -80    
208    80     
-16    -352   
16     -192   
80     -1024  
96     -352   
-128   -640   
160    288    
128    -128   
-176   -160   
160    -32    
32     -16    
-304   -240   
-48    -80    
-16    240    
0      -176   
128    -176   
-160   -816   
112    240    
-16    -880   
192    128    
-64    -128   
-128   336    
16     -192   
-128   96     
48     32     
128    -144   
-32    80     
48     -32    
-464   -64    
32     -240   
32     -128   
16     -256   
64     -16    
128    -176   
-352   -48    
112    -1104  
-16    112    
128    -32    
-48    -80    
-80    336    
80     208    
-272   16     
32     -320   
-336   -144   
192    -320   
-112   -48    
96     128    
-576   -3280  
736    -448   
-432   -160   
592    -1360  
480    -32    
-64    -160   
-160   0      
576    1232   
-160   -656   
-48    -624   
32     -112   
-80    -16    
224    32     
64     160    
64     -208   
-304   -176   
272    -64    
-192   16     
208    32     
64     32     
-16    -16    
-16    160    
-64    176    
-224   -272   
96     -128   
-16    -64    
64     128    
-48    -80    
-128   0      
0      -160   
-400   -32    
-16    -208   
16     128    
32     -496   
80     80     
-256   -112   
-16    -256   
80     -448   
64     128    
80     320    
-96    -112   
-64    128    
80     -64    
-16    -80    
0      -176   
-16    48     
96     -128   
-32    -128   
48     -272   
96     128    
-128   -16    
80     -64    
96     16     
128    192    
-112   0      
-80    -224   
-16    128    
48     112    
-16    32     
0      128    
0      -16    
-208   -112   
64     208    
-480   -224   
128    -112   
16     48     
16     16     
64     16     
-16    -48    
-48    -32    
80     -48    
-112   32     
16     -32    
48     32     
-1104  -128   
-80    16     
-896   -144   
64     128    
-368   -224   
96     544    
80     112    
-544   192    
-32    64     
-848   224    
-192   0      
-96    -32    
48     -96    
128    16     
-224   0      
-256   16     
-112   0      
-48    -192   
96     96     
80     32     
-128   96     
-64    48     
-400   -256   
128    64     
-64    192    
112    64     
-752   48     
16     -80    
240    48     
-48    -32    
-48    -112   
0      0      
160    112    
-48    -64    
96     160    
-224   -96    
80     0      
-48    176    
48     0      
-16    112    
-128   -64    
-64    -64    
-160   -208   
-656   -288   
16     -160   
80     16     
128    48     
-192   -96    
64     208    
0      80     
16     16     
-272   -384   
160    -320   
48     272    
80     368    
-32    160    
-352   -96    
-64    64     
-64    -32    
176    144    
-48    -128   
128    -240   
-416   -352   
-128   -400   
112    112    
-240   -80    
160    80     
-48    176    
-48    -96    
-32    -80    
80     48     
-80    80     
32     -240   
-48    0      
176    240    
-560   96     
-32    64     
16     128    
16     -32    
-80    160    
-208   0      
32     -144   
-416   -368   
288    96     
-160   160    
80     48     
-32    80     
-32    128    
-464   -208   
-48    0      
-336   -240   
80     176    
-48    16     
16     -384   
-96    80     
240    112    
-112   160    
32     144    
-128   48     
64     -16    
80     400    
-208   -144   
16     240    
-240   -256   
64     -48    
-64    16     
-128   -80    
-32    96     
48     112    
48     32     
128    -80    
32     176    
-128   160    
-272   96     
0      -112   
128    48     
-128   -80    
-32    160    
128    -16    
-112   160    
64     80     
-256   -64    
144    64     
1248   -2352  
-272   -880   
816    400    
-272   512    
-32    0      
288    112    
-560   -96    
272    -352   
-352   144    
160    -32    
-192   176    
80     176    
-112   160    
112    80     
32     0      
32     144    
-64    80     
144    160    
-48    -144   
-32    16     
144    -16    
16     272    
32     80     
-176   16     
64     -48    
32     -80    
48     80     
112    224    
-96    48     
48     0      
0      80     
128    80     
-80    112    
64     48     
-32    0      
32     176    
32     -32    
0      32     
-208   64     
176    160    
-80    -112   
-208   96     
176    32     
48     112    
-80    48     
128    64     
-176   128    
176    16     
-336   144    
144    -64    
96     112    
-160   32     
64     112    
-112   -32    
16     32     
-16    -48    
32     240    
-48    16     
144    16     
-64    64     
224    80     
-16    96     
48     176    
48     144    
-80    64     
48     64     
64     32     
48     304    
16     -48    
144    128    
48     64     
-16    144    
32     -32    
80     64     
64     80     
-64    16     
-80    48     
-112   112    
112    256    
-64    -80    
176    96     
-96    112    
-16    -112   
-32    240    
-64    160    
80     144    
-112   208    
208    208    
-96    -48    
144    64     
-48    112    
16     96     
-32    80     
80     144    
48     128    
0      -64    
96     80     
-80    128    
-48    -112   
16     -432   
80     176    
0      -1456  
-16    -16    
48     112    
96     64     
304    256    
-16    352    
0      -80    
-16    -16    
-16    0      
64     32     
64     48     
48     96     
-192   -32    
336    112    
16     48     
-64    -128   
128    80     
-80    224    
-32    224    
272    96     
-96    112    
-16    32     
16     80     
112    16     
-48    32     
128    240    
-48    176    
32     32     
0      -64    
32     128    
112    -112   
-160   -32    
208    -752   
128    192    
-64    16     
160    48     
16     144    
-64    0      
0      -112   
-16    48     
16     96     
32     64     
64     48     
16     -112   
64     112    
-80    -176   
160    160    
-32    -336   
112    96     
16     -1248  
80     80     
48     32     
-32    144    
0      192    
176    224    
96     208    
16     -432   
32     272    
240    96     
-160   80     
32     -368   
112    160    
96     -240   
-48    16     
64     -864   
16     464    
-96    -400   
48     80     
160    128    
16     80     
-48    16     
192    -272   
-16    96     
96     -656   
-16    224    
304    -288   
-16    48     
32     -784   
80     192    
-16    -544   
96     80     
-64    96     
128    192    
-16    -16    
80     16     
208    144    
64     144    
0      96     
-16    -48    
96     128    
80     -96    
-80    160    
-80    -352   
192    208    
208    -80    
32     112    
1184   -1456  
720    608    
720    -176   
-368   64     
544    -112   
0      -672   
560    288    
208    1280   
-336   624    
-416   -384   
0      -352   
224    -208   
160    128    
0      -64    
192    -288   
32     80     
-48    -944   
-64    96     
-480   -192   
160    -48    
160    -48    
-80    -1584  
-112   -336   
128    -2336  
192    -240   
-96    80     
176    -80    
96     272    
-16    -16    
80     -752   
112    -96    
208    -272   
-96    0      
-80    -304   
144    -32    
-128   -144   
80     -256   
-352   -144   
288    -416   
240    -96    
176    -272   
-240   -80    
192    -224   
-16    -16    
32     -16    
0      368    
-80    -64    
96     -208   
-96    -16    
176    -304   
-592   208    
128    48     
80     224    
-128   -336   
96     48     
-80    -912   
240    -176   
224    528    
-192   -192   
176    288    
16     -16    
-144   -64    
16     -336   
-160   -112   
352    -32    
-112   16     
16     0      
80     0      
48     -144   
0      -80    
32     -384   
-144   -16    
32     -768   
0      208    
16     -176   
-64    -240   
-128   -288   
192    -32    
-32    16     
144    256    
-240   48     
16     -176   
-800   -112   
48     -176   
64     48     
64     -64    
48     128    
160    -176   
16     288    
-48    -288   
80     -80    
-32    -16    
96     144    
-32    32     
96     -144   
-128   -272   
-16    -320   
144    128    
16     -16    
96     160    
-96    -96    
0      -16    
144    -432   
32     144    
32     16     
32     64     
-96    96     
112    -480   
-160   -320   
64     0      
-416   32     
64     -64    
-480   16     
160    -192   
-864   -64    
-80    -304   
32     -208   
48     -352   
64     112    
80     -3200  
16     -144   
-352   -80    
16     0      
-128   368    
64     48     
-64    128    
256    272    
-16    496    
-80    -80    
16     -48    
48     -224   
80     -48    
0      -64    
144    208    
-192   -16    
96     -32    
-288   96     
32     -496   
80     144    
144    192    
0      112    
-32    -96    
-48    -208   
-16    -240   
-528   -368   
16     -480   
80     96     
-416   -80    
-128   192    
-32    96     
-912   -32    
-16    224    
-80    32     
-112   -288   
448    -48    
-224   496    
224    -112   
-256   0      
96     -96    
-32    -144   
-176   -64    
80     -48    
-912   -384   
192    144    
-256   96     
80     16     
16     -48    
-160   128    
96     144    
-16    112    
16     -128   
-32    112    
-112   64     
-48    -64    
-32    80     
-192   -112   
48     160    
-160   0      
-272   32     
0      16     
-144   0      
-48    16     
-496   -96    
-80    128    
-960   48     
-64    -48    
64     176    
-32    112    
-192   -112   
112    128    
-32    -192   
48     144    
-48    112    
-32    -144   
48     48     
-160   16     
-672   -592   
-512   16     
480    336    
-624   272    
-224   48     
-1376  192    
-224   -384   
-240   560    
-288   -576   
304    320    
0      -432   
-48    128    
-192   -32    
256    -80    
-240   240    
144    -208   
-128   352    
-16    -144   
-176   160    
112    -128   
-528   -48    
80     -32    
-160   336    
240    -64    
-208   0      
-144   -208   
-32    208    
-96    -176   
48     128    
-112   -144   
160    160    
-176   48     
32     144    
-128   -96    
-48    16     
-192   -16    
288    368    
-16    48     
64     0      
-256   -96    
96     -32    
-16    160    
48     -32    
-112   64     
16     32     
-48    80     
16     -64    
-192   96     
-64    48     
176    -64    
-288   64     
48     160    
-368   -240   
48     192    
-64    80     
64     64     
112    -32    
-16    80     
32     80     
-16    32     
-48    -32    
48     80     
-16    16     
64     32     
-80    272    
-160   -160   
144    64     
-304   -112   
-80    32     
112    224    
-128   48     
80     96     
-112   -32    
144    112    
-96    64     
0      -144   
144    368    
-304   80     
-48    -224   
272    32     
-336   48     
32     176    
-368   -144   
48     -96    
48     256    
-272   -208   
0      -32    
-112   -80    
-48    256    
-32    32     
48     112    
-112   32     
-32    -48    
-96    -32    
-32    16     
64     64     
-80    128    
128    288    
-144   96     
96     96     
-80    96     
32     16     
0      160    
48     144    
16     -32    
16     224    
-112   80     
16     96     
-224   -80    
128    112    
-16    208    
-16    16     
48     128    
0      -16    
64     -16    
32     144    
-64    64     
192    336    
-48    0      
-160   480    
32     0      
-16    0      
160    128    
-48    80     
128    432    
-224   -48    
208    48     
-80    144    
80     384    
96     64     
32     320    
96     288    
64     128    
-160   -112   
0      -176   
-32    160    
32     -128   
32     32     
48     -32    
32     192    
-144   -64    
32     192    
96     288    
80     80     
-48    16     
160    544    
-208   -336   
-32    -192   
80     272    
96     64     
-16    112    
0      32     
144    144    
48     240    
-112   128    
208    128    
32     176    
48     -528   
96     -16    
112    160    
176    288    
-32    368    
-32    80     
48     16     
704    192    
-256   128    
-480   -208   
80     -128   
304    -256   
144    176    
-176   48     
-48    -224   
-48    48     
64     96     
48     -32    
96     144    
32     336    
-272   80     
48     -32    
80     16     
144    16     
-80    -144   
-32    64     
48     -96    
48     -48    
48     192    
-96    -1616  
16     80     
112    16     
80     96     
-80    96     
80     80     
-32    192    
-32    -48    
96     176    
240    64     
32     48     
2016   -1280  
-288   -464   
1280   1392   
-384   272    
656    -784   
-560   -704   
640    -192   
-16    -32    
-112   -160   
96     160    
128    208    
-208   -112   
-176   160    
160    -16    
0      80     
16     -192   
0      208    
-32    -240   
-112   176    
-16    -160   
-48    -272   
128    -1088  
-64    48     
176    288    
0      144    
128    -64    
160    -400   
112    -64    
96     -48    
-16    80     
48     144    
208    16     
32     320    
-80    -16    
224    144    
-160   80     
144    -576   
64     -112   
-64    -624   
512    224    
-128   240    
-48    -48    
64     16     
144    80     
16     96     
128    0      
-112   224    
16     -80    
64     176    
32     -16    
-16    32     
80     -64    
32     272    
16     -128   
-80    80     
80     96     
64     -16    
-16    -688   
288    576    
-96    -80    
0      -16    
48     128    
176    -96    
-240   -208   
272    -48    
0      -48    
-16    -144   
32     96     
240    -512   
0      96     
-128   64     
32     48     
160    208    
-48    0      
80     224    
-48    -640   
96     -112   
-32    -240   
-32    -224   
0      144    
272    336    
-96    -272   
80     -160   
48     -128   
64     -224   
176    352    
144    192    
256    336    
-32    -1472  
-96    -1984  
240    -48    
112    272    
-16    160    
-64    64     
80     -176   
208    16     
160    288    
0      368    
-144   48     
112    -880   
32     0      
80     -432   
-112   -80    
-320   -80    
16     -832   
112    -224   
16     -608   
32     -256   
128    64     
160    -32    
-128   -80    
16     -128   
144    112    
-16    -48    
112    -80    
-64    -64    
64     64     
-80    16     
-400   0      
-80    -32    
112    16     
160    64     
-80    -96    
-16    -384   
256    -144   
-96    112    
32     128    
80     -240   
0      64     
80     -336   
-80    -64    
64     -144   
-16    -144   
96     208    
80     64     
-464   -80    
-80    -192   
-80    -144   
80     -224   
176    -48    
48     -352   
0      32     
288    128    
-80    -48    
160    -112   
-160   144    
128    0      
-64    -32    
-144   -272   
48     -240   
-192   -80    
64     -80    
128    128    
48     -64    
-64    -64    
160    -336   
224    -288   
-176   -2560  
16     176    
-16    -16    
128    96     
-208   -64    
160    -16    
-96    -16    
-112   -160   
144    128    
-32    -48    
-1440  32     
-16    -208   
-192   -80    
0      48     
-128   -112   
272    -416   
128    128    
-16    128    
-96    0      
-32    96     
224    -272   
80     160    
-48    32     
-16    80     
0      -176   
-336   -48    
-16    -80    
-80    0      
-16    -128   
144    112    
96     -560   
16     160    
32     -144   
32     -176   
32     -80    
-16    0      
-64    144    
64     0      
-576   -112   
32     -112   
400    -672   
176    -48    
512    496    
-496   112    
-80    -16    
80     -576   
208    80     
-432   -512   
176    -48    
-400   80     
592    -272   
-288   272    
-48    -256   
-352   352    
288    -192   
-32    160    
-112   112    
160    96     
48     -176   
16     16     
0      -208   
96     96     
-16    192    
240    -224   
-224   96     
112    -240   
-288   240    
320    32     
-48    48     
0      -112   
-48    64     
160    -240   
-112   144    
32     -352   
-32    160    
-400   -144   
96     416    
80     -192   
-1488  -16    
-128   -48    
208    32     
-16    -32    
-48    112    
-112   -64    
112    -80    
-192   64     
160    -208   
-48    48     
-432   -224   
160    48     
-224   -208   
-448   96     
-48    64     
-592   -32    
-128   -80    
32     192    
16     -32    
-320   192    
-272   -112   
112    -32    
-16    -16    
-352   64     
-32    80     
-112   -80    
128    144    
-208   -96    
-144   -64    
48     128    
-48    -192   
80     48     
-128   32     
16     64     
-1008  -48    
-48    -16    
160    48     
16     -80    
112    -160   
-64    224    
-112   -176   
32     -32    
48     64     
-64    112    
-112   0      
80     32     
48     -48    
160    336    
-240   128    
16     -272   
-16    0      
-64    0      
48     -32    
-128   -256   
48     128    
-64    -208   
-16    0      
-112   144    
48     64     
-32    48     
-32    -176   
16     192    
-80    -160   
-224   -16    
80     176    
0      32     
-208   80     
96     112    
80     160    
-16    128    
-16    32     
-32    -16    
48     80     
-128   48     
16     48     
-48    16     
-64    -16    
-128   -192   
80     144    
-16    -192   
-80    0      
-416   96     
16     96     
112    64     
80     96     
144    272    
-128   240    
-32    -144   
-96    -16    
112    608    
-96    208    
32     80     
-176   -176   
-48    -64    
-208   -144   
-64    144    
-128   -224   
-336   -320   
-432   112    
-32    288    
-64    -144   
-96    32     
0      80     
0      48     
-128   0      
160    80     
-160   -16    
-32    -176   
-96    96     
-32    96     
80     64     
-80    16     
64     48     
-192   16     
-176   32     
112    96     
-176   -80    
144    112    
48     320    
-192   96     
0      0      
112    32     
48     0      
-208   48     
64     64     
80     16     
-80    -128   
-96    144    
-192   -128   
-176   192    
32     -32    
96     128    
-144   0      
64     0      
-48    128    
-16    16     
0      -160   
-32    112    
-16    224    
-192   80     
-32    -16    
16     -16    
80     160    
-144   48     
-128   32     
352    192    
-96    32     
96     0      
-48    176    
320    -176   
-16    320    
-96    -16    
48     112    
32     -128   
64     240    
-144   128    
-48    64     
48     32     
208    96     
-752   -1584  
1312   -176   
-768   16     
240    416    
-496   176    
576    32     
48     32     
-48    -560   
224    128    
-416   16     
224    0      
-80    288    
-80    208    
128    -112   
-32    304    
-96    -144   
-64    192    
80     -240   
-64    272    
16     -240   
80     240    
-32    -32    
-16    304    
-272   -224   
0      16     
-128   128    
32     176    
-176   -144   
-16    -48    
-32    128    
192    144    
-64    128    
16     -48    
128    64     
-16    80     
192    128    
-112   304    
224    464    
-176   208    
-96    -32    
160    48     
-48    128    
32     320    
-96    208    
80     112    
-112   144    
160    256    
-16    224    
-16    0      
0      -16    
-32    48     
96     16     
-16    272    
32     192    
-16    -32    
-32    208    
48     32     
192    16     
80     -1264  
80     160    
64     80     
32     96     
-32    320    
-128   160    
0      48     
80     48     
48     -128   
-16    16     
-64    -80    
112    80     
-48    96     
16     -64    
16     80     
144    -400   
0      96     
48     0      
32     96     
0      16     
64     -32    
-128   112    
-64    208    
32     32     
144    48     
-368   -176   
128    -208   
0      80     
-96    0      
80     -16    
-96    -208   
32     32     
16     -1264  
128    272    
-144   32     
-80    16     
112    64     
-16    192    
128    -144   
304    336    
-32    336    
32     128    
-144   -96    
-16    -352   
192    176    
-64    -64    
80     -16    
-176   -176   
256    64     
32     224    
-96    80     
-32    -416   
80     -48    
16     16     
144    144    
-160   -80    
112    112    
16     80     
112    -272   
-160   -16    
128    -208   
144    128    
-48    -128   
80     208    
80     -2000  
-80    -96    
-176   192    
208    128    
-80    -48    
176    144    
-160   -48    
112    16     
192    32     
-128   64     
256    144    
64     -304   
-16    80     
-224   -368   
256    64     
160    16     
-112   80     
-16    64     
128    -16    
48     16     
-128   112    
48     -48    
80     -336   
48     400    
0      -512   
160    192    
-64    -256   
0      80     
48     -288   
-32    96     
112    0      
32     -32    
96     -64    
-80    208    
48     -144   
128    -64    
48     208    
96     144    
32     272    
128    -208   
-16    128    
-16    -144   
96     -32    
32     0      
48     -48    
-64    -176   
320    48     
192    160    
96     320    
-304   16     
64     192    
144    -736   
96     -208   
96     -288   
-96    -240   
128    -96    
96     48     
96     48     
-64    32     
32     112    
256    -240   
48     -896   
64     112    
-16    192    
32     224    
-752   -240   
64     -368   
144    -176   
80     -304   
-96    -48    
96     -912   
-80    -224   
176    128    
0      -224   
-368   80     
-432   -80    
-1472  64     
368    -16    
-32    112    
-752   -864   
-32    304    
-256   -288   
432    16     
-208   -384   
96     16     
-144   -304   
240    64     
0      80     
32     -272   
-112   -16    
288    32     
192    272    
-144   -80    
112    -128   
-32    -336   
0      80     
64     -48    
-208   176    
160    -384   
48     -64    
16     -672   
0      80     
128    -112   
32     64     
112    -32    
-272   48     
128    0      
-16    64     
-16    -32    
96     -112   
128    112    
-80    -112   
-608   -80    
-160   -144   
160    -240   
48     -48    
48     112    
96     -240   
-48    -80    
-64    -1856  
96     64     
16     -144   
112    48     
16     176    
-80    0      
32     16     
-64    -48    
-256   32     
32     -16    
-272   -32    
16     -176   
80     144    
64     -128   
16     -144   
176    -1040  
0      96     
80     32     
48     272    
-96    -80    
128    -128   
64     -112   
112    -112   
-160   48     
64     48     
-496   64     
240    16     
-336   -96    
160    -272   
96     96     
-128   -336   
144    304    
-224   -960   
224    -304   
-96    -112   
-16    -16    
-16    48     
32     -96    
-160   -112   
64     0      
-256   -352   
64     -512   
-352   -240   
176    256    
-160   -64    
144    -128   
-128   -32    
80     -2208  
112    -240   
-96    -112   
64     16     
-96    -176   
160    192    
-160   -16    
16     -288   
-272   -112   
80     48     
0      112    
-48    -64    
96     96     
0      -144   
112    352    
-288   -32    
16     -96    
0      64     
160    80     
-80    0      
32     -96    
-32    16     
0      -96    
48     128    
0      144    
-208   192    
48     -256   
-64    -192   
-656   -352   
128    112    
176    240    
-352   -96    
-160   0      
-528   -64    
208    80     
-144   -64    
112    192    
-16    48     
-16    -16    
-128   -176   
-64    0      
-816   -128   
-16    -16    
-176   -160   
-80    0      
48     128    
-240   16     
-48    -48    
-352   -48    
0      80     
-640   80     
80     32     
16     16     
-64    -144   
-240   -336   
160    16     
128    -16    
0      272    
-192   -128   
-160   0      
160    112    
-32    176    
-256   64     
-224   -96    
144    272    
16     64     
-160   32     
144    -80    
48     16     
112    -64    
-32    48     
16     -48    
64     192    
-208   -144   
-16    -144   
192    144    
-80    -16    
-32    0      
-208   112    
-32    48     
-208   -144   
-96    128    
-832   -80    
48     64     
-80    -80    
16     128    
-144   -304   
-16    96     
32     64     
-64    112    
-16    32     
-32    96     
-16    208    
-224   -32    
-64    64     
-96    32     
96     48     
-80    16     
-80    256    
-112   -64    
-32    160    
-320   -32    
96     -208   
-80    80     
176    160    
1392   464    
-432   400    
352    480    
-288   208    
320    -32    
-256   -512   
16     224    
224    752    
-352   128    
-416   -32    
32     112    
128    -224   
-64    80     
48     -192   
-128   -16    
-144   -304   
128    48     
144    384    
144    240    
-208   -16    
288    464    
-336   -112   
-48    -32    
-256   32     
-96    -128   
-176   32     
288    176    
-288   64     
160    -96    
-272   -16    
192    48     
64     48     
0      -16    
16     128    
-16    32     
16     -48    
-48    112    
-32    128    
96     48     
-192   96     
-16    64     
80     80     
-32    0      
128    144    
0      160    
-80    16     
16     144    
-16    144    
80     176    
-96    -96    
-32    0      
32     96     
-64    -64    
112    16     
-288   -16    
144    224    
-240   -16    
128    32     
32     112    
-96    16     
96     112    
-112   -16    
-32    64     
-176   32     
-48    -16    
80     -64    
48     400    
-352   -128   
176    80     
-272   -144   
-32    64     
16     240    
-48    32     
128    208    
-64    16     
48     16     
288    64     
-32    208    
48     -16    
80     224    
-112   -32    
160    144    
-176   -208   
256    224    
-80    288    
0      320    
-192   16     
368    352    
-240   -48    
192    48     
-16    80     
-32    64     
32     192    
-80    -96    
0      -176   
240    -176   
-96    128    
-64    -32    
-48    192    
176    128    
-80    80     
32     96     
-32    64     
-96    64     
112    -144   
-80    -80    
32     48     
112    192    
-112   -16    
96     64     
-224   -144   
208    0      
48     80     
-96    64     
48     -16    
160    32     
-176   64     
288    240    
-48    192    
80     -208   
-192   -80    
0      -48    
192    -112   
-224   64     
16     160    
288    192    
80     288    
-288   -112   
32     16     
112    32     
48     48     
48     208    
32     224    
176    272    
-16    96     
192    16     
-336   208    
16     48     
160    -64    
128    160    
-336   -192   
176    192    
112    80     
-16    -752   
-80    128    
16     -272   
-32    -80    
96     240    
0      32     
128    48     
0      -16    
-16    64     
112    -80    
-112   64     
160    80     
-144   -32    
0      -336   
144    448    
-96    -448   
64     16     
176    176    
16     64     
-32    128    
16     16     
-48    -16    
208    272    
-32    160    
0      112    
-368   48     
-48    96     
48     -160   
96     32     
288    176    
-208   -64    
-64    64     
-32    -864   
128    -16    
80     32     
-32    32     
64     112    
64     16     
-16    -512   
112    96     
-176   -304   
64     192    
96     352    
-128   -320   
80     -64    
208    -512   
32     16     
-32    -320   
64     128    
96     -96    
-48    144    
-64    -160   
80     64     
48     -64    
1632   -1440  
-368   -464   
1312   256    
-16    32     
512    -1264  
-224   -208   
16     -752   
144    336    
128    -464   
-224   -64    
-112   -64    
176    -352   
-32    240    
80     -256   
176    272    
0      48     
32     304    
112    16     
32     160    
48     -176   
64     -16    
32     176    
48     80     
-16    -224   
32     -48    
64     -336   
64     192    
176    336    
-16    16     
16     0      
-96    16     
192    80     
64     -208   
-96    48     
0      -176   
64     80     
128    -384   
-16    112    
-32    -144   
64     48     
16     -160   
32     -48    
-64    80     
160    -16    
16     0      
-16    32     
32     176    
0      64     
96     48     
128    80     
16     0      
32     -336   
-16    128    
48     -288   
16     32     
16     -48    
192    112    
-48    80     
144    128    
-160   -304   
48     256    
-16    -160   
80     48     
112    496    
-80    -160   
0      160    
16     -256   
32     0      
176    -160   
32     -48    
176    80     
32     -736   
-128   128    
-64    -112   
144    96     
-576   -304   
64     -640   
-16    0      
32     -608   
64     -240   
128    -304   
-32    -128   
48     80     
80     48     
48     96     
-32    -224   
-128   -736   
80     128    
96     -288   
32     112    
-320   -16    
32     48     
-112   16     
96     -48    
16     0      
16     48     
144    32     
-32    -1136  
32     -128   
144    -176   
32     80     
32     -160   
-64    96     
64     -272   
96     48     
-176   -80    
64     -256   
-16    32     
-32    -96    
128    96     
-16    0      
80     -80    
16     -528   
0      -112   
64     64     
64     64     
176    96     
-32    -16    
-16    -32    
16     -272   
-16    64     
-32    -112   
-32    96     
-176   -208   
224    -48    
-176   -400   
128    -304   
-48    -16    
128    0      
80     -848   
-144   -32    
96     -112   
-112   -48    
80     -160   
-48    80     
112    96     
96     16     
-416   -16    
160    0      
-1392  -144   
128    80     
48     64     
-32    32     
-48    -16    
144    -576   
-192   -512   
240    -352   
80     448    
-96    16     
96     80     
-64    64     
176    96     
-160   -352   
112    -80    
-272   32     
64     80     
-192   48     
64     -208   
256    -96    
32     -208   
192    64     
-192   -1088  
240    32     
-48    0      
80     -32    
-208   -160   
192    144    
-304   -32    
192    -208   
-224   32     
208    -48    
-896   80     
256    -336   
-160   64     
144    -192   
-96    128    
32     -1360  
96     -48    
64     96     
48     0      
-128   224    
-48    -48    
-48    32     
96     64     
-240   48     
-32    -288   
-112   -16    
48     -272   
192    -32    
64     -80    
144    64     
-128   48     
-16    -16    
-352   192    
0      -112   
-144   48     
128    0      
560    1248   
272    736    
-544   -368   
320    -576   
496    624    
-160   624    
0      352    
-320   -384   
-48    128    
-16    -32    
-1472  -112   
-224   64     
-160   64     
176    -320   
-80    0      
-160   -160   
224    -48    
-48    32     
64     16     
-48    0      
-224   112    
176    128    
-464   -144   
-64    64     
-48    -144   
-16    176    
-112   -176   
-384   0      
-128   -144   
-176   -64    
-240   0      
112    240    
-32    32     
-256   80     
-32    80     
-96    -352   
0      -144   
-128   96     
208    32     
0      144    
-64    -96    
-96    208    
-32    -48    
-64    -32    
-464   0      
128    176    
-32    32     
-64    -112   
-112   -288   
64     128    
-48    -48    
64     96     
-64    16     
96     -16    
-192   32     
-16    -64    
-80    80     
-16    -48    
112    224    
-320   -64    
-32    32     
-720   -32    
16     32     
-144   -144   
96     -32    
-48    -192   
64     112    
-224   32     
96     32     
-112   0      
176    80     
0      176    
-80    96     
-80    16     
-16    0      
-144   -224   
-32    -128   
-112   160    
64     48     
64     176    
-16    32     
-128   -32    
160    -64    
-176   176    
-16    96     
-32    64     
64     64     
-160   -224   
80     0      
-240   0      
-32    -32    
112    80     
-80    304    
-1040  96     
-96    96     
32     -336   
128    32     
-80    96     
16     96     
80     112    
-80    -48    
16     64     
-96    80     
128    256    
-80    0      
144    112    
-352   -80    
128    96     
-528   16     
64     32     
32     80     
-80    -16    
144    192    
-64    80     
192    48     
16     160    
-64    320    
-144   240    
400    0      
-336   -32    
-112   48     
-32    -48    
320    64     
-368   32     
208    224    
32     384    
48     224    
-32    -16    
-208   -64    
-16    128    
80     16     
176    208    
32     112    
48     96     
-256   80     
80     32     
-96    304    
-96    80     
192    64     
-208   -48    
-32    -16    
-96    192    
112    -272   
16     -96    
-64    16     
96     16     
-144   64     
32     -48    
-112   0      
-80    -32    
16     96     
-80    0      
176    368    
-272   -80    
80     48     
-144   96     
64     128    
80     368    
-32    96     
128    16     
-96    48     
80     -48    
-80    -64    
96     32     
0      48     
224    256    
-128   848    
160    304    
-192   -336   
80     0      
-32    -112   
32     -208   
64     336    
-48    224    
112    192    
96     0      
160    -176   
80     192    
48     224    
-160   16     
48     240    
-112   -128   
48     80     
32     256    
-160   64     
-32    -144   
16     80     
160    176    
-96    96     
64     48     
0      32     
192    -16    
16     208    
-144   160    
-112   -16    
0      -16    
-128   -96    
1552   -1344  
-256   -176   
1328   -160   
-320   -208   
160    592    
368    784    
-848   -688   
-192   -640   
16     208    
-64    320    
128    -96    
80     624    
-224   144    
272    144    
-176   -64    
112    -544   
112    128    
-128   192    
64     -16    
-96    -144   
208    -80    
-16    64     
176    -48    
-32    128    
64     48     
16     272    
112    96     
-112   -32    
64     -160   
208    144    
-224   -640   
240    -16    
0      96     
16     80     
48     160    
96     272    
80     128    
-128   96     
80     64     
32     32     
0      -112   
0      80     
112    -16    
16     -16    
80     96     
0      -256   
80     192    
-96    288    
-32    -48    
-16    -48    
112    128    
-96    32     
128    272    
-112   64     
48     48     
32     -32    
208    608    
-16    -176   
144    -16    
32     176    
0      -256   
-16    128    
160    -464   
-16    240    
-32    32     
96     160    
48     48     
0      80     
-16    -16    
112    112    
-48    0      
64     144    
-48    16     
0      -144   
128    128    
80     0      
-144   -320   
96     -704   
48     80     
80     -528   
0      128    
-32    112    
32     -160   
32     -144   
96     208    
-96    64     
144    368    
-16    96     
192    96     
80     64     
192    -336   
96     304    
-80    -528   
-80    64     
96     -240   
192    80     
-32    48     
48     128    
-32    48     
208    288    
-144   -64    
16     16     
80     48     
192    -48    
16     112    
-64    -176   
0      0      
112    -304   
-80    96     
112    -32    
32     144    
32     -16    
16     128    
-48    16     
80     112    
0      48     
160    400    
-16    32     
16     -768   
0      144    
160    48     
48     112    
-208   -288   
80     112    
64     -368   
32     64     
-112   32     
32     -16    
160    -16    
-32    128    
-16    -64    
0      -192   
32     128    
128    -96    
-48    -48    
272    -32    
112    448    
-32    -16    
-96    32     
48     -288   
96     0      
80     144    
-160   -32    
192    128    
0      -1440  
352    -2112  
-384   -48    
32     224    
-48    160    
-32    0      
80     -64    
96     128    
-112   -384   
64     208    
-176   -240   
128    -304   
208    32     
80     -336   
448    128    
-48    -272   
416    -384   
-32    224    
128    -400   
-224   -240   
48     -864   
-32    -128   
32     32     
-64    -480   
48     16     
112    -144   
64     -576   
-16    80     
0      -512   
176    -32    
-16    16     
-32    208    
-112   32     
-16    64     
-16    -96    
160    -208   
64     32     
-128   -272   
32     -80    
64     176    
16     -112   
48     -224   
-16    144    
80     -112   
-128   112    
80     -80    
64     -112   
-960   96     
-32    -224   
-144   48     
208    -224   
80     0      
96     -368   
1024   -2240  
80     496    
224    -80    
-160   -592   
128    256    
400    -128   
224    480    
-528   -368   
-160   -448   
-480   -352   
160    -128   
-224   -192   
160    -80    
64     -64    
96     -464   
-400   -128   
16     -1584  
-48    48     
128    -64    
-16    96     
192    -112   
80     128    
-128   -64    
32     64     
-160   -80    
192    0      
-960   16     
48     48     
224    48     
-112   -240   
96     16     
48     -160   
112    112    
48     -352   
32     96     
-176   -288   
32     80     
16     16     
224    -128   
-336   0      
224    64     
-288   80     
16     -272   
-128   -112   
80     80     
112    128    
0      -384   
80     112    
-192   -992   
320    -112   
-80    128    
-48    -112   
16     80     
-144   -48    
240    -160   
-32    -352   
-16    0      
64     16     
-160   48     
-16    -160   
48     208    
-48    -464   
16     64     
96     -208   
-96    -64    
-80    32     
-144   -80    
-96    32     
32     16     
-96    48     
16     -32    
-64    -32    
96     32     
-240   -240   
-32    -288   
-16    368    
-96    -48    
160    -16    
192    -64    
48     -16    
-400   96     
144    -96    
80     48     
-144   0      
48     320    
-160   -368   
288    32     
-128   -208   
-272   64     
0      -144   
160    160    
-448   -64    
16     144    
-64    -32    
-448   -176   
48     208    
-656   -32    
160    128    
0      96     
-144   -32    
128    -48    
-144   -48    
80     16     
-96    96     
-80    -224   
-96    0      
-48    -112   
48     128    
32     16     
-240   0      
-64    0      
160    32     
-128   -32    
-720   32     
-64    0      
128    -112   
-272   96     
-240   -48    
-48    -16    
-272   -160   
-160   48     
96     16     
64     80     
16     208    
-96    16     
64     400    
-32    32     
112    16     
-608   32     
32     80     
32     16     
48     288    
64     16     
-48    208    
-176   -128   
-96    80     
208    288    
64     48     
-32    48     
-48    -64    
-192   16     
-112   -16    
-64    96     
-272   64     
64     304    
-368   16     
16     336    
-240   -400   
48     -128   
-112   -48    
144    64     
-64    64     
32     -80    
-32    -48    
-16    80     
-176   -80    
-80    64     
-128   -128   
96     224    
-16    48     
-160   -80    
48     224    
-624   -128   
0      -16    
16     32     
64     144    
32     -480   
64     352    
0      -64    
-80    64     
-64    32     
128    -96    
128    128    
-208   -144   
-96    128    
-368   -112   
112    48     
-144   176    
64     32     
16     -224   
16     -272   
-64    240    
-224   128    
-160   32     
160    240    
-128   -80    
-48    48     
96     -32    
-144   80     
0      96     
-96    0      
64     -80    
-240   48     
-48    16     
32     -96    
-176   48     
96     48     
1104   -1360  
304    544    
-416   -832   
-480   -624   
416    272    
32     -368   
-32    176    
160    336    
-304   -48    
0      -64    
-176   -16    
-16    -16    
112    16     
16     64     
320    288    
-48    112    
192    80     
-304   -240   
128    144    
0      32     
96     16     
-64    -144   
176    160    
-64    176    
0      -48    
-144   -48    
-176   64     
-48    48     
48     448    
-96    48     
192    48     
-32    64     
-128   -32    
256    176    
-208   32     
224    48     
-400   -32    
224    384    
-160   96     
-64    -32    
-192   -64    
48     48     
16     -32    
-16    192    
0      -32    
-80    -144   
-16    128    
80     208    
-176   80     
-64    80     
80     -144   
-112   112    
48     64     
64     112    
128    32     
160    192    
-128   -208   
272    640    
-32    -176   
160    288    
16     -16    
-48    256    
-16    32     
32     176    
16     -16    
0      32     
-16    48     
64     144    
-64    0      
16     144    
32     64     
16     48     
32     80     
16     80     
240    96     
64     32     
-96    -480   
64     0      
-48    80     
-64    -160   
80     176    
144    224    
0      0      
-96    -32    
176    0      
48     272    
-304   -368   
96     -48    
48     112    
48     144    
-144   128    
16     128    
144    112    
64     0      
0      112    
48     80     
48     144    
0      32     
-96    -64    
32     -560   
128    176    
144    176    
0      160    
-48    64     
-16    64     
32     80     
32     96     
64     160    
32     64     
-48    64     
80     48     
-96    96     
48     64     
32     80     
64     -160   
0      192    
176    480    
-96    32     
32     -48    
-112   32     
144    80     
32     48     
32     96     
32     304    
-128   0      
64     -128   
-128   16     
192    32     
64     368    
128    -592   
-64    64     
-48    -144   
96     112    
32     48     
272    144    
-496   -160   
208    -256   
-32    176    
0      -16    
-32    144    
128    128    
0      112    
-64    -144   
64     192    
128    -208   
112    48     
32     -80    
64     384    
-112   -48    
96     96     
-16    0      
0      64     
96     -176   
80     176    
-160   176    
160    240    
-144   32     
240    80     
-480   -544   
320    0      
-32    144    
16     -688   
96     192    
64     240    
160    272    
-304   -256   
112    -64    
-96    -32    
224    192    
32     176    
32     0      
112    48     
16     -208   
-80    224    
192    96     
144    144    
160    -672   
16     128    
-80    -736   
-32    -16    
144    0      
16     80     
0      208    
-48    48     
16     -80    
288    208    
-32    64     
48     112    
16     64     
32     -48    
96     -16    
208    -416   
32     192    
32     -144   
-32    112    
48     -240   
0      96     
-624   -3216  
1280   1408   
-1088  320    
384    -160   
-80    -496   
416    272    
-80    800    
416    0      
-160   192    
144    -624   
80     704    
-96    -352   
176    384    
-240   -352   
432    128    
-288   48     
272    144    
-112   -48    
176    -64    
-48    48     
80     -368   
-48    160    
144    -160   
32     288    
96     -112   
32     80     
-16    -192   
64     112    
64     0      
16     96     
144    48     
-64    -1328  
80     -1968  
0      32     
128    -1168  
-48    -32    
160    432    
48     96     
16     -32    
-64    -176   
144    48     
0      -112   
48     -848   
32     32     
144    -128   
-64    160    
64     -112   
-16    -640   
80     -48    
-16    -656   
160    -112   
0      -288   
16     -96    
160    -800   
-32    -128   
80     -16    
-16    64     
112    -224   
48     128    
-16    -192   
64     32     
-112   -144   
80     0      
-800   96     
-16    -160   
128    -112   
128    -176   
-16    32     
128    -1040  
240    -32    
176    96     
-32    208    
-144   -320   
192    -48    
128    -32    
-128   -112   
-80    -80    
-80    -80    
-288   48     
-80    -192   
16     -192   
304    -208   
-48    -112   
-64    -432   
144    272    
-16    -320   
-64    160    
-144   -48    
80     64     
144    0      
48     -80    
-16    48     
96     -16    
-336   80     
-32    -240   
-1424  -304   
96     0      
32     -16    
48     -224   
96     -48    
-48    -2000  
-64    64     
80     16     
0      -112   
96     80     
0      128    
-48    16     
128    320    
-528   -80    
128    -208   
-160   16     
32     80     
112    -144   
32     48     
64     -240   
80     -80    
-80    80     
80     -320   
144    208    
48     400    
-160   -240   
96     0      
-16    -112   
48     160    
144    48     
-304   -320   
144    -448   
-208   0      
176    -224   
96     128    
16     -368   
32     16     
48     -2176  
128    208    
-48    -80    
80     -368   
-112   32     
144    416    
-400   0      
48     -272   
-832   -80    
32     0      
-416   0      
80     -112   
16     48     
80     -160   
-96    -80    
0      -544   
96     -112   
-128   160    
96     128    
96     288    
0      0      
-128   224    
-128   224    
-144   -160   
160    -96    
-16    -32    
128    -16    
-224   48     
240    -304   
-64    64     
96     -240   
-48    32     
-144   0      
160    -608   
160    288    
224    480    
-288   48     
80     112    
-64    48     
96     96     
-112   -16    
192    -224   
16     160    
-768   -128   
-48    112    
80     160    
-768   80     
-160   16     
-1680  -144   
-176   -192   
208    -32    
64     96     
-208   32     
-208   32     
160    -64    
0      32     
-672   -304   
-96    128    
-48    -96    
112    64     
48     48     
-240   -112   
112    32     
-176   112    
-48    96     
-896   480    
416    1728   
-1024  496    
-560   -832   
-624   -448   
64     288    
-48    368    
-80    240    
96     32     
112    240    
-416   -32    
-176   -208   
256    144    
-16    -16    
16     144    
-480   -64    
112    144    
-1920  -64    
64     112    
16     -48    
-96    0      
16     96     
-32    64     
112    -144   
-304   -384   
-96    -240   
-80    96     
144    480    
-496   -160   
-160   32     
-48    -96    
-32    -144   
-464   64     
-80    224    
32     -208   
-64    160    
-80    -192   
224    608    
-352   -368   
320    112    
-176   -352   
176    80     
-96    64     
-112   -80    
-128   80     
96     80     
-48    -304   
32     -432   
64     -240   
-144   416    
-176   64     
0      -48    
80     64     
-128   32     
48     176    
-48    128    
32     -112   
160    1040   
-224   -464   
80     320    
-112   -256   
64     80     
-176   -160   
-128   -32    
-32    -240   
-32    176    
-16    -16    
32     192    
16     -96    
-144   96     
-16    -64    
-96    64     
48     64     
-32    144    
-96    -96    
-144   -272   
-32    -352   
-48    48     
48     240    
-144   192    
-32    -112   
160    -128   
16     -80    
16     0      
-112   48     
144    48     
16     272    
-160   80     
16     -32    
-48    64     
-96    -64    
-64    128    
-64    32     
16     64     
48     160    
16     224    
-144   16     
80     256    
48     336    
240    560    
-128   272    
-128   -240   
-64    -48    
-16    -208   
176    48     
-224   -96    
80     176    
-80    -32    
144    16     
-416   -112   
128    112    
-16    0      
-16    0      
16     144    
32     48     
16     96     
-96    208    
64     128    
-160   -48    
112    400    
-224   160    
192    112    
-320   -160   
192    48     
-288   -48    
128    -96    
-32    256    
32     64     
0      64     
160    96     
-112   0      
-16    -144   
144    240    
-32    176    
-64    -16    
160    160    
-48    176    
80     112    
-128   -16    
48     0      
96     32     
32     96     
-96    48     
0      112    
-16    32     
0      96     
176    592    
96     288    
48     320    
-48    64     
-96    -32    
16     0      
-16    -32    
-16    80     
16     128    
0      96     
0      64     
128    464    
-176   112    
-16    96     
-48    -32    
-32    -16    
-16    -32    
-192   -144   
96     112    
-48    -16    
-16    128    
48     144    
80     -80    
64     240    
32     48     
16     224    
-128   128    
256    128    
-80    48     
128    192    
32     384    
-176   80     
-32    16     
144    -80    
176    0      
-32    176    
-176   -336   
112    -192   
16     240    
-144   64     
32     112    
80     96     
96     32     
-48    112    
64     32     
48     128    
-48    80     
-48    -64    
272    -64    
-48    160    
16     192    
-704   128    
-80    368    
192    400    
-752   -144   
-112   -64    
-96    416    
-160   -368   
-592   -224   
-48    -256   
160    704    
240    -192   
-272   -32    
112    -48    
160    224    
-176   208    
144    32     
-80    -80    
96     48     
32     -736   
112    -32    
-64    128    
192    112    
-112   288    
256    -48    
-272   112    
432    -128   
-352   208    
320    64     
-240   384    
272    -48    
-32    144    
-32    -288   
64     192    
-32    -176   
32     224    
128    32     
-176   32     
144    -16    
-112   128    
272    0      
-32    112    
-128   -16    
96     80     
48     128    
16     -160   
32     176    
-64    -464   
-16    224    
32     -144   
384    128    
-256   -816   
96     96     
112    224    
-128   144    
128    -48    
-80    112    
96     112    
64     224    
32     -64    
144    48     
-128   16     
160    -160   
32     160    
-16    -336   
112    80     
-64    -2144  
112    96     
32     -272   
176    -48    
48     176    
-96    208    
80     32     
80     16     
32     128    
0      -32    
144    80     
192    256    
16     -64    
384    -576   
112    288    
-192   -512   
96     -16    
128    80     
-80    -96    
16     -64    
-48    208    
-32    16     
-112   -528   
112    -32    
80     -688   
32     144    
-48    -352   
112    160    
-48    -128   
32     80     
-80    -80    
128    128    
-144   32     
32     -64    
48     96     
32     176    
0      -96    
96     32     
128    144    
-48    16     
80     32     
32     -368   
-64    -96    
224    272    
-64    192    
16     144    
0      48     
48     -160   
32     -32    
-48    0      
80     0      
-16    16     
32     -32    
176    -1152  
-16    -144   
-208   -256   
-128   -96    
208    336    
112    32     
-112   -160   
96     -128   
-64    144    
224    160    
16     -160   
-64    0      
176    -16    
32     0      
160    -208   
-96    -160   
64     -160   
16     -800   
32     0      
160    272    
80     144    
-96    -144   
144    -112   
-16    -96    
32     48     
144    64     
-48    -128   
-288   -224   
32     -304   
-1792  -112   
160    144    
80     -16    
48     64     
32     -256   
-48    -400   
96     -272   
192    144    
176    800    
32     256    
-304   -128   
80     -304   
80     128    
-16    0      
16     -112   
-144   0      
80     -80    
32     80     
288    16     
-144   160    
48     -832   
176    -16    
272    -1344  
-304   -48    
-32    -32    
32     304    
-160   -96    
144    -96    
-192   -16    
224    -16    
-288   -48    
96     -112   
208    -32    
64     -240   
112    -96    
-32    -272   
-112   160    
64     -432   
192    32     
-32    -176   
48     48     
-144   0      
176    128    
-112   32     
-48    -32    
16     48     
-48    0      
-192   -208   
-16    256    
112    32     
-48    80     
1376   -864   
320    592    
-208   64     
-960   -240   
560    240    
176    -416   
64     16     
-272   32     
80     -128   
-96    -112   
160    -256   
-32    272    
48     96     
-304   160    
48     -576   
16     0      
128    -272   
160    224    
176    32     
272    448    
-80    -32    
-48    -96    
16     -112   
96     -80    
48     -192   
128    112    
-368   112    
192    64     
-992   176    
-112   -368   
-80    160    
16     -432   
80     240    
-48    -624   
64     272    
-480   -272   
144    -80    
128    80     
80     -96    
48     -128   
112    64     
-48    -96    
192    -64    
-1264  -208   
176    0      
240    256    
-144   -208   
-32    -448   
272    -64    
192    -16    
-304   112    
32     0      
96     96     
32     -32    
-112   48     
112    -160   
240    1008   
-288   416    
-128   112    
48     -192   
64     -208   
-784   -288   
16     320    
-144   80     
-368   -128   
192    -32    
128    16     
-80    -80    
-16    192    
-208   96     
80     -48    
-32    -160   
16     160    
-192   -48    
-80    -176   
-144   -160   
-80    -368   
0      0      
-144   16     
16     128    
112    272    
-128   64     
-64    -272   
-512   144    
-16    32     
32     96     
96     528    
-112   -272   
-80    0      
-368   -240   
64     80     
-160   -64    
-48    96     
-32    -32    
-144   -208   
0      -96    
-240   224    
48     288    
-336   -272   
144    -16    
48     -32    
48     304    
-288   0      
80     144    
128    -96    
160    288    
-256   -240   
-80    0      
-192   -64    
80     -32    
-128   -32    
64     -32    
16     128    
-320   -64    
0      -192   
-160   -48    
-112   -112   
16     -128   
96     96     
-400   192    
112    272    
-96    -32    
48     -160   
-80    0      
128    272    
-48    240    
-16    192    
-48    -48    
-160   -64    
-32    16     
-80    64     
192    208    
-240   32     
32     -16    
-112   -128   
96     -80    
-80    160    
0      -48    
192    48     
-208   80     
-112   32     
16     16     
144    160    
-192   16     
176    144    
-128   64     
96     304    
-240   -336   
80     192    
-16    -160   
0      112    
-16    112    
48     0      
-160   96     
16     -16    
0      0      
-48    48     
-32    272    
48     -64    
-16    0      
-304   -240   
208    80     
-608   -128   
96     32     
48     224    
64     -48    
96     32     
16     192    
-16    0      
-16    192    
-80    112    
0      -64    
80     -112   
0      16     
112    80     
-448   0      
80     48     
-128   80     
0      96     
48     48     
-16    0      
32     0      
-32    80     
-64    -64    
32     208    
-64    208    
-64    48     
112    192    
-48    32     
48     -48    
-48    -16    
144    144    
-304   -64    
96     112    
-16    96     
64     0      
0      64     
1312   1920   
-1600  768    
48     896    
288    384    
-128   -752   
160    672    
-1424  -464   
608    560    
-240   -192   
-48    352    
-384   -352   
-208   304    
288    -128   
-144   240    
64     -160   
-192   224    
240    0      
-64    224    
16     -176   
32     96     
-16    -16    
-32    176    
16     144    
64     16     
-96    -112   
-32    16     
-48    112    
224    192    
-64    64     
48     16     
-48    32     
80     64     
-16    176    
-48    16     
16     128    
32     0      
-48    64     
-96    32     
0      16     
32     144    
48     80     
-32    64     
32     128    
80     0      
16     144    
32     32     
-32    -16    
96     384    
-160   -112   
176    80     
-176   48     
48     -48    
0      112    
-80    16     
176    64     
48     192    
-16    -16    
16     128    
32     112    
-48    32     
16     16     
-16    16     
144    144    
16     128    
-32    -64    
128    16     
96     128    
48     160    
-48    208    
16     -368   
112    80     
-32    48     
0      144    
0      48     
80     0      
32     96     
-48    -144   
80     32     
16     272    
-144   -32    
32     -16    
48     160    
16     112    
48     80     
-128   -816   
-32    -32    
-80    32     
128    80     
112    48     
96     320    
-160   -320   
-48    -432   
-160   32     
96     208    
80     160    
-96    128    
-16    -240   
144    352    
160    224    
-16    -208   
-16    16     
160    -2224  
80     160    
112    208    
-16    96     
16     272    
-256   -32    
112    176    
112    112    
-96    -144   
80     144    
-16    32     
48     128    
0      112    
48     -16    
80     64     
-32    -1488  
32     176    
64     112    
240    160    
-32    80     
48     64     
32     -160   
64     192    
64     32     
80     320    
48     160    
-160   -176   
64     0      
112    -128   
48     96     
16     -800   
-112   128    
80     -2432  
-16    128    
192    -240   
-304   -224   
112    0      
64     352    
-112   32     
112    80     
-16    112    
32     -208   
80     128    
-48    -176   
160    80     
-96    -304   
176    112    
-16    -304   
64     80     
16     -1168  
112    48     
-96    0      
144    192    
-176   32     
160    16     
-48    112    
80     -160   
224    128    
-128   144    
176    144    
-160   -48    
192    160    
96     -304   
32     96     
160    192    
-176   -80    
240    272    
16     0      
128    64     
-80    96     
128    80     
16     -32    
32     64     
-128   -288   
112    -16    
32     96     
96     16     
-96    -272   
0      16     
64     192    
96     80     
32     48     
-208   112    
112    64     
80     80     
-32    -16    
-48    -80    
320    64     
64     -144   
-144   -32    
96     -384   
96     160    
-48    -144   
240    112    
-48    -256   
32     96     
-528   -1808  
1296   3104   
-704   992    
432    -864   
16     416    
688    -368   
-528   1184   
96     -512   
128    160    
416    -816   
-208   816    
128    -432   
144    880    
-112   -528   
192    -64    
-320   -192   
224    -96    
-368   -720   
192    -176   
-48    -128   
192    -448   
-64    96     
128    -144   
224    432    
-176   -48    
-48    560    
256    0      
-208   -960   
-224   -64    
400    -240   
-240   112    
-112   -176   
96     32     
-576   -96    
0      -160   
16     -96    
-64    -208   
192    320    
-112   96     
80     96     
96     192    
16     80     
128    -272   
80     112    
-48    48     
112    0      
-176   0      
208    -128   
-176   48     
144    -176   
-256   -64    
48     16     
80     -128   
176    -976   
-160   -192   
192    -368   
-80    32     
96     144    
0      32     
144    96     
32     -192   
-96    -96    
96     -256   
-80    288    
80     -96    
-224   -32    
32     -112   
-32    -240   
160    -128   
-224   -224   
176    -96    
64     0      
80     96     
32     176    
-144   -80    
80     -96    
-80    0      
16     0      
-96    16     
-96    -208   
-848   -112   
16     -96    
-400   -320   
0      -288   
0      16     
-16    0      
176    432    
-16    -784   
64     48     
128    -96    
96     -48    
-32    -48    
16     -192   
-64    -128   
128    -144   
-128   160    
64     -128   
-96    176    
16     -32    
112    128    
48     -144   
-96    0      
-48    -880   
128    -16    
16     16     
96     -224   
-256   -16    
48     -240   
-64    16     
80     -16    
-16    112    
64     48     
-288   -48    
-64    -432   
16     -352   
-16    -288   
48     112    
128    -336   
-96    96     
464    208    
-416   -144   
-32    -80    
-96    32     
-80    -112   
176    128    
-128   -224   
144    192    
-240   16     
192    -160   
-16    0      
112    -128   
-176   -80    
128    -256   
-192   -64    
144    240    
-16    -224   
-112   48     
-144   128    
96     64     
160    -128   
-96    -32    
-96    -112   
-80    -176   
16     -128   
160    16     
-464   16     
-144   -320   
-32    48     
-1168  0      
48     48     
-800   -16    
64     80     
80     48     
-64    176    
-16    -224   
-144   -80    
48     0      
48     320    
-224   64     
144    128    
-512   -256   
112    128    
-80    -64    
-208   -32    
144    176    
-384   -48    
144    464    
-688   -64    
0      -80    
112    48     
-64    0      
80     80     
-144   96     
-48    -64    
32     64     
-144   -192   
-144   -64    
80     176    
-48    0      
32     -48    
0      -96    
-112   112    
-688   -16    
64     128    
-560   96     
48     -48    
-304   -96    
64     48     
-64    -176   
32     112    
96     -160   
-32    96     
-160   80     
32     0      
-112   -160   
-144   32     
0      16     
-848   -1184  
-512   -112   
272    -368   
-896   464    
-1232  -400   
496    880    
-640   -816   
-48    448    
-544   -544   
624    704    
-112   -256   
-48    -32    
-96    16     
208    -96    
-48    304    
96     -144   
-240   208    
-240   -208   
80     16     
-96    -128   
0      112    
-64    0      
-128   304    
288    0      
-304   -16    
80     -224   
-128   208    
-16    96     
-16    128    
-32    0      
32     16     
-192   128    
-48    16     
-80    128    
-208   -16    
-128   80     
-16    -160   
-160   -48    
16     80     
16     64     
-16    16     
-176   128    
96     64     
-64    48     
-80    -64    
-224   -16    
48     48     
32     48     
-112   160    
-240   -96    
32     48     
96     -160   
-96    144    
48     64     
-48    128    
-16    64     
48     80     
-112   16     
48     32     
-32    32     
32     48     
-32    -32    
-80    -64    
128    160    
-96    64     
16     80     
-16    112    
0      32     
0      0      
16     -48    
16     0      
48     64     
-48    80     
0      80     
48     64     
-32    -48    
-16    -320   
-16    0      
-48    368    
-240   -112   
0      -48    
-64    -96    
64     80     
48     304    
-80    -80    
-32    -80    
16     16     
-16    128    
48     80     
80     304    
-160   -32    
32     -16    
-208   96     
192    160    
-208   16     
0      112    
96     96     
48     192    
0      80     
-96    32     
0      112    
112    64     
144    144    
0      48     
-64    80     
-144   -64    
0      -64    
208    80     
64     432    
-144   -64    
-48    48     
48     128    
112    96     
80     144    
-112   80     
112    80     
-64    0      
80     144    
-80    32     
112    64     
64     240    
-16    32     
-80    -96    
64     192    
144    160    
-32    0      
-16    304    
-48    48     
176    16     
-144   128    
112    64     
-96    -80    
-112   32     
144    288    
-96    -112   
32     144    
-128   -432   
80     -80    
-192   96     
224    144    
-144   144    
128    -16    
-64    48     
112    160    
-32    112    
-128   -96    
208    176    
-176   208    
-32    -272   
48     -96    
320    128    
16     192    
-176   0      
224    48     
-144   256    
-32    32     
160    -16    
-16    -176   
256    80     
-224   160    
112    0      
-64    -16    
112    0      
144    176    
-160   144    
0      -16    
-128   640    
-80    -272   
112    -544   
0      208    
144    -80    
-128   192    
16     64     
64     -16    
0      176    
240    -16    
-32    176    
-32    -64    
16     32     
64     96     
-112   -176   
192    64     
64     320    
64     -192   
-96    -112   
320    -336   
-16    400    
-32    -96    
-96    64     
288    128    
80     32     
160    -48    
-112   224    
-16    -256   
48     176    
144    208    
240    32     
-32    96     
128    1136   
320    832    
-768   -272   
-544   16     
176    352    
416    608    
16     -240   
-80    144    
-80    -112   
80     -368   
112    -16    
-80    128    
48     -16    
160    -16    
64     144    
32     16     
-368   -352   
288    -448   
112    48     
-96    -320   
16     272    
272    -16    
-208   96     
80     16     
176    160    
-48    160    
48     80     
-64    -272   
32     -128   
48     80     
80     -112   
-16    80     
48     -256   
128    176    
-32    -272   
160    112    
-32    -816   
16     160    
32     16     
128    48     
-144   208    
208    64     
-48    -32    
32     64     
112    240    
16     -48    
64     48     
-160   -976   
256    192    
-112   160    
176    16     
-96    -576   
112    16     
80     144    
-192   176    
160    224    
-16    -32    
144    64     
-32    -960   
16     32     
16     -720   
64     176    
-80    -64    
64     112    
112    -144   
-32    80     
-80    48     
64     80     
32     64     
0      48     
16     144    
96     -48    
-80    96     
176    -112   
-32    96     
64     -224   
256    -16    
-16    80     
-128   160    
0      -208   
64     80     
64     48     
128    192    
-128   176    
64     -1456  
-48    -32    
16     -240   
160    96     
-16    -128   
192    176    
-32    -32    
176    288    
-160   -80    
80     48     
64     -192   
-32    256    
-32    16     
144    -240   
-96    -32    
112    -384   
112    -512   
-1232  -48    
64     -576   
-96    -48    
96     -336   
0      -240   
64     -2560  
192    208    
-144   192    
208    -64    
-48    -256   
-32    64     
160    -432   
-112   16     
-128   -320   
288    -160   
-192   -96    
112    -48    
32     -160   
-16    -240   
320    -336   
-192   -384   
-16    32     
192    96     
0      -224   
176    -112   
-224   128    
208    -208   
-160   160    
128    -16    
96     80     
-64    208    
208    -288   
-128   16     
-112   -192   
160    -48    
160    64     
96     64     
160    -720   
-320   -32    
32     -80    
144    112    
128    -144   
-32    112    
-64    -32    
256    -16    
-464   -64    
144    -240   
-624   16     
0      0      
96     -64    
16     -288   
96     -112   
48     -528   
-112   -32    
128    48     
-96    -160   
96     48     
224    16     
-112   -64    
32     -96    
-160   -160   
48     16     
16     16     
112    48     
-32    -304   
-192   -192   
-176   -720   
96     -32    
96     288    
16     -1008  
-64    304    
192    -176   
-80    -80    
16     -48    
0      160    
-48    -32    
112    176    
-176   -80    
128    -272   
-272   -128   
112    -144   
-32    208    
-80    -64    
0      64     
192    -544   
176    -16    
16     112    
32     48     
-32    96     
64     64     
112    -32    
-48    -80    
0      -96    
128    -80    
48     -64    
-48    -48    
1744   -432   
-720   -432   
1008   144    
-304   -400   
112    304    
-256   -464   
-464   -48    
336    896    
-32    -160   
-240   -288   
-80    -48    
0      0      
80     160    
-880   -32    
0      -224   
48     144    
0      -80    
160    304    
32     48     
176    32     
-96    240    
112    -48    
-64    -16    
-16    -112   
-16    16     
32     -112   
-64    64     
240    16     
-288   16     
144    -336   
32     64     
64     -96    
-48    64     
-32    -64    
-528   -128   
176    48     
-448   64     
-16    16     
-96    -16    
-16    -32    
16     16     
-160   -80    
96     -96    
-352   -32    
-880   -96    
96     224    
-416   -96    
32     16     
-32    -64    
-144   128    
-32    0      
-272   96     
-16    64     
-176   -32    
-160   0      
128    -48    
-16    64     
-48    -144   
0      80     
-144   -176   
-112   -112   
-320   -368   
144    128    
-96    160    
96     128    
0      128    
16     80     
-48    96     
-16    0      
0      -16    
-976   -32    
-16    112    
80     160    
32     80     
0      -192   
64     112    
256    416    
-96    176    
224    128    
-16    48     
-48    32     
-64    -144   
-160   -160   
-224   -176   
-32    -80    
-240   64     
64     192    
-1488  -80    
-16    80     
-96    -208   
-16    144    
-64    -112   
-16    0      
144    96     
-48    64     
0      144    
-256   0      
32     32     
-48    112    
-16    64     
-16    16     
-32    16     
-256   -80    
80     144    
-128   -64    
128    128    
-160   -96    
192    288    
-144   160    
-96    -48    
-112   16     
32     32     
48     80     
-128   48     
-16    48     
-96    -144   
80     48     
-384   96     
112    16     
-80    -128   
144    160    
16     96     
-16    0      
-224   48     
-96    32     
48     -320   
-16    -288   
-48    240    
-144   -128   
80     64     
-208   80     
224    160    
-192   -32    
-32    176    
-80    -128   
-144   -32    
288    160    
-384   32     
208    -96    
-64    96     
128    128    
0      -16    
-128   160    
-64    -80    
80     128    
-48    48     
-64    112    
-48    -144   
48     144    
64     64     
-96    64     
-64    -16    
112    128    
96     320    
-320   128    
112    -80    
-416   -272   
288    -128   
80     128    
-48    304    
-192   -128   
96     128    
-16    -112   
-48    128    
16     96     
176    -400   
48     368    
-192   32     
-48    -16    
-112   0      
272    64     
-80    128    
128    416    
-368   -144   
352    -16    
-144   224    
32     16     
-256   -432   
352    -256   
416    192    
112    32     
-272   304    
-64    32     
80     592    
-32    80     
-112   80     
32     -64    
144    -16    
-176   -48    
96     0      
-48    -48    
128    144    
-112   96     
96     192    
-160   160    
-32    -48    
-64    96     
-880   304    
-1168  -1088  
960    1344   
368    640    
240    64     
-304   -304   
-528   -112   
784    240    
-368   -416   
400    160    
-192   224    
-144   32     
0      320    
0      -128   
144    -64    
-112   112    
-16    -48    
64     80     
-16    -16    
-16    -64    
-160   -96    
64     32     
96     240    
160    -80    
-112   128    
48     16     
-32    128    
176    352    
-80    128    
16     -32    
-16    112    
80     32     
32     64     
16     112    
80     32     
48     160    
-48    32     
80     64     
-128   64     
96     -144   
128    96     
-128   128    
160    80     
-48    128    
80     0      
-32    32     
-32    80     
16     -176   
128    -64    
-80    192    
112    64     
-48    32     
0      128    
48     16     
-48    -128   
16     -80    
192    336    
-112   -16    
160    -64    
-96    176    
-80    32     
96     48     
32     144    
-32    0      
0      32     
-32    208    
-16    -208   
112    128    
112    160    
0      -112   
-48    32     
32     -3184  
160    48     
-48    224    
-64    64     
96     80     
80     48     
80     -16    
32     80     
-48    96     
80     240    
-160   80     
160    -96    
48     -32    
16     -160   
96     192    
-32    -528   
64     -128   
144    320    
-112   160    
80     96     
32     80     
32     448    
-32    -128   
-48    -112   
176    96     
112    176    
-304   -208   
160    112    
-144   -288   
224    192    
-80    -336   
144    80     
-64    -896   
64     -48    
-32    -592   
16     -16    
48     80     
240    48     
-96    64     
16     80     
-32    48     
176    -128   
-80    80     
16     -80    
48     16     
64     16     
-176   -48    
128    -544   
80     -160   
-112   16     
96     16     
272    96     
-48    96     
-16    256    
80     144    
176    -64    
-112   -96    
32     48     
48     32     
144    80     
64     -976   
-48    -16    
144    -272   
96     0      
0      -256   
112    0      
-48    -16    
-48    32     
-16    -16    
96     112    
96     48     
0      -240   
-16    96     
-80    -512   
176    -32    
-112   -384   
240    400    
-48    -160   
96     32     
0      -240   
-48    96     
16     -64    
64     48     
160    176    
-128   32     
240    240    
-176   -80    
80     -16    
0      -48    
64     16     
16     -96    
128    176    
16     48     
64     224    
48     -800   
224    544    
-32    80     
-176   -640   
192    64     
128    0      
80     -560   
144    -96    
-48    64     
112    -64    
-96    -176   
144    -32    
208    272    
0      -96    
-16    -400   
64     16     
48     -192   
96     -48    
0      -272   
96     -752   
-176   -48    
-48    -1696  
32     -208   
128    0      
64     -16    
0      -304   
64     -144   
112    128    
32     -48    
64     -496   
160    16     
128    -272   
-272   -3152  
608    -656   
-528   -64    
80     -432   
32     -496   
16     -352   
112    832    
368    192    
0      -192   
0      -192   
352    400    
-160   16     
16     -128   
208    176    
-80    -480   
96     96     
-16    64     
288    640    
-160   -160   
-80    -592   
-128   80     
112    -80    
48     64     
-32    -608   
32     -96    
96     -208   
-64    16     
-144   -16    
0      -64    
-16    -112   
144    -16    
-176   0      
160    -48    
-288   32     
176    -32    
-448   -80    
112    -608   
-128   -224   
96     -32    
16     -16    
32     -784   
-80    64     
64     256    
64     -48    
64     -32    
80     -64    
-64    -16    
0      -80    
-176   -192   
-64    -112   
-512   -192   
16     128    
16     128    
144    16     
32     -48    
32     -208   
128    176    
112    -624   
64     192    
0      48     
-16    -64    
0      -32    
32     -128   
-128   -96    
32     -256   
-32    112    
112    -16    
-416   0      
96     -176   
-448   -16    
64     -224   
48     96     
80     -304   
-16    -48    
-32    -208   
192    -240   
-96    16     
240    272    
-480   -144   
32     -368   
-336   0      
160    -80    
-256   192    
48     -64    
16     64     
32     -128   
-16    0      
160    -848   
-48    32     
-240   -32    
-16    16     
32     0      
48     -32    
-128   32     
80     16     
-208   32     
-16    -128   
-16    32     
64     96     
48     96     
96     -96    
-128   80     
160    -128   
32     -48    
-16    64     
64     80     
0      -208   
112    -64    
-128   80     
64     -144   
-48    80     
80     32     
32     96     
32     0      
-64    64     
-96    -192   
16     80     
-112   -16    
-160   16     
-48    0      
-768   160    
-48    -16    
-272   -64    
-192   -64    
32     -32    
160    32     
48     -32    
16     496    
-928   -336   
-64    -16    
-352   -64    
96     64     
48     304    
-176   -16    
16     -16    
-176   64     
-160   -432   
112    -176   
-32    176    
48     -32    
-96    160    
16     16     
-16    -32    
-288   -80    
96     208    
0      64     
80     464    
0      176    
-240   -272   
48     -160   
-96    16     
32     64     
-80    96     
48     320    
-528   288    
-160   192    
-912   -80    
176    0      
64     224    
-80    80     
-112   -240   
-32    112    
-64    176    
16     112    
-160   16     
96     -16    
-64    96     
-288   -192   
-144   0      
-128   -32    
-48    0      
-528   -96    
48     -64    
144    304    
96     144    
-96    -288   
-48    -16    
-32    -64    
128    480    
-96    32     
112    96     
-64    -16    
-128   16     
-32    16     
16     208    
-32    48     
-160   176    
-16    80     
-160   -112   
32     0      
16     80     
-64    96     
-64    -32    
48     256    
-192   96     
0      368    
-272   16     
-16    32     
-496   -208   
336    -1104  
-128   832    
-272   480    
-496   256    
448    160    
144    -112   
256    304    
-368   -80    
-96    16     
-48    48     
-176   -192   
48     192    
0      48     
160    64     
-96    96     
-240   -64    
144    48     
-480   -224   
16     0      
-944   -16    
80     224    
16     64     
80     64     
-272   48     
112    112    
48     96     
0      96     
64     -16    
-80    -64    
-112   64     
-112   -80    
64     144    
-48    80     
144    128    
-192   176    
-224   -224   
16     64     
16     144    
192    64     
-160   48     
-16    64     
0      -32    
112    16     
-176   64     
192    144    
-272   32     
240    112    
-208   -80    
96     144    
32     80     
-144   96     
48     16     
-16    -32    
-32    112    
0      -32    
160    96     
-128   32     
48     128    
-80    16     
64     144    
-112   -64    
96     144    
-208   64     
-64    96     
128    -16    
80     128    
16     272    
-112   -128   
160    80     
-144   80     
32     -16    
-48    96     
96     128    
-48    32     
128    0      
-48    64     
48     96     
-16    -32    
80     176    
-160   160    
80     16     
176    240    
-256   64     
112    64     
-64    16     
112    -32    
224    -32    
80     288    
-144   -16    
96     0      
-96    48     
16     96     
-16    208    
-64    64     
-16    80     
16     32     
64     48     
96     144    
-96    32     
160    176    
32     32     
-48    -48    
-80    0      
0      48     
-16    -32    
32     64     
-208   -48    
320    192    
-224   16     
288    144    
-64    80     
-48    -32    
-16    64     
144    64     
112    176    
0      48     
-80    368    
-80    144    
336    -16    
-208   144    
192    192    
240    256    
-80    -96    
-64    32     
80     144    
32     0      
-16    16     
-32    -16    
-32    80     
32     48     
176    80     
-160   112    
304    144    
-128   32     
112    80     
-176   -96    
144    -912   
32     256    
-16    -240   
-48    80     
128    128    
-80    -16    
128    144    
-64    96     
16     -176   
0      80     
32     192    
32     128    
-64    -64    
80     48     
-16    32     
-80    -144   
0      -32    
96     -496   
64     -32    
-96    -128   
192    608    
160    80     
0      128    
64     112    
80     -80    
-48    -48    
144    208    
16     224    
80     240    
-96    16     
48     0      
48     -96    
-80    -240   
0      -64    
128    144    
160    112    
128    208    
-176   -96    
32     112    
-64    368    
16     -112   
96     0      
16     -16    
0      128    
-32    160    
64     -192   
128    224    
-16    -336   
80     208    
16     -160   
64     -48    
16     16     
48     0      
32     -160   
96     48     
-128   80     
-48    112    
128    -16    
16     -80    
48     112    
-816   -2736  
1392   2304   
-1072  -336   
176    -688   
320    736    
352    -48    
-384   -2160  
656    464    
-64    64     
192    0      
-336   208    
80     208    
160    32     
32     80     
48     -48    
-192   -288   
208    128    
0      -688   
240    176    
128    -368   
48     -16    
0      -496   
0      224    
96     0      
-32    80     
-16    -80    
160    48     
-80    160    
32     0      
112    32     
-80    -208   
80     80     
96     -256   
-16    160    
-80    -208   
16     32     
96     464    
160    272    
-144   -192   
-48    -16    
144    208    
-48    -160   
32     64     
80     -16    
32     96     
64     48     
-48    -96    
256    -112   
-32    -240   
432    304    
-128   -32    
176    96     
-32    176    
112    64     
80     -2592  
144    16     
-176   96     
-352   -928   
-48    -400   
272    -176   
-96    64     
0      224    
-32    64     
240    240    
-80    -96    
-48    208    
-16    80     
80     -960   
-16    32     
-32    112    
48     -528   
-464   48     
-16    -1008  
32     -192   
48     -1680  
48     -32    
-48    -1744  
144    -608   
-336   -320   
-64    -432   
-176   -80    
224    64     
32     112    
112    -80    
96     -32    
64     -128   
-336   -112   
32     -176   
192    -16    
-16    -80    
128    -96    
48     -112   
64     -160   
-80    -864   
0      -416   
144    -128   
96     208    
-128   -160   
-128   -64    
208    64     
64     -160   
-224   -96    
0      32     
-416   0      
64     -32    
-144   0      
144    -240   
-16    160    
112    -1168  
-32    208    
96     -16    
-96    -48    
16     -128   
64     -16    
-144   -96    
-80    -48    
-112   -288   
96     -224   
-352   -256   
32     -176   
16     -176   
48     -288   
96     96     
112    -224   
-112   96     
80     -1744  
48     -176   
128    -144   
-224   -576   
144    32     
96     208    
-96    -64    
-64    -128   
-720   -160   
32     -160   
-432   48     
-32    48     
-128   -336   
240    -144   
-80    176    
160    -656   
-48    128    
176    224    
-144   -112   
128    -80    
64     -240   
-64    192    
64     -176   
-176   64     
112    48     
-80    112    
-80    32     
-688   48     
48     -432   
16     16     
-16    -512   
176    160    
-96    -80    
208    0      
-144   16     
64     -176   
-576   -80    
160    32     
-80    32     
-32    -80    
-240   -112   
-16    -688   
16     64     
192    96     
-112   208    
-16    -176   
256    176    
-272   -16    
-16    16     
-176   -80    
64     16     
80     -64    
96     144    
-112   32     
48     -16    
-144   48     
-16    -128   
-192   -128   
240    -128   
64     176    
64     -128   
-48    256    
-256   -16    
64     0      
80     -96    
144    112    
-96    0      
32     16     
80     -112   
-64    64     
-176   160    
48     -64    
32     576    
-864   1456   
-608   448    
-192   -864   
-128   16     
-272   -496   
0      208    
-272   496    
-1024  -192   
-16    0      
0      -240   
-80    80     
80     64     
-48    48     
-816   -96    
-32    48     
-16    -224   
-48    16     
48     -48    
0      64     
0      32     
64     80     
-144   144    
-16    -32    
-288   -64    
-208   -16    
-80    144    
96     240    
0      160    
-288   -288   
80     144    
-96    -96    
144    48     
-176   64     
128    64     
-128   -32    
64     -80    
-288   80     
-128   176    
0      0      
-272   144    
-128   80     
-80    -112   
-80    160    
-176   -224   
112    128    
48     112    
0      32     
0      80     
96     -176   
-96    112    
-16    64     
16     16     
-80    144    
-48    48     
-240   -192   
-32    64     
-2112  -48    
288    -80    
-32    128    
-272   96     
144    -112   
16     16     
-80    80     
-160   32     
176    -80    
48     224    
-80    48     
-32    32     
112    -48    
-32    48     
-48    160    
-448   0      
144    80     
32     -32    
-16    160    
-96    -16    
64     144    
-80    80     
-64    -16    
0      16     
-80    96     
-16    64     
0      176    
64     -32    
48     144    
-144   -256   
-144   -240   
64     256    
80     -240   
160    160    
-80    -80    
80     128    
16     32     
16     144    
-128   -48    
-48    16     
-224   -128   
-16    64     
16     128    
-112   -32    
-48    80     
-256   -96    
160    256    
-832   -96    
112    112    
-128   32     
224    160    
96     240    
-32    112    
-112   32     
64     160    
32     32     
-80    32     
0      160    
-48    48     
224    304    
-304   -288   
48     112    
-32    16     
272    96     
-16    16     
-64    384    
-208   64     
144    80     
-112   -80    
176    224    
-48    192    
-80    -48    
-80    -48    
32     48     
-32    96     
-64    16     
16     80     
16     112    
-16    144    
128    176    
-80    96     
-176   -256   
48     208    
32     -240   
0      -448   
-96    192    
112    176    
-208   16     
-32    -16    
32     -48    
-16    -16    
64     416    
0      16     
-32    0      
0      128    
64     0      
80     176    
16     96     
-96    -208   
224    560    
-368   -144   
224    224    
112    272    
-80    32     
-128   80     
48     0      
-112   80     
128    32     
-64    32     
32     -272   
144    352    
112    64     
-48    -176   
-16    -16    
-16    48     
32     176    
-80    32     
64     64     
96     -64    
-16    80     
-208   -144   
0      80     
96     48     
48     112    
16     64     
16     112    
-16    112    
-16    96     
-144   -96    
208    16     
112    128    
0      -16    
-112   160    
-80    -80    
208    112    
16     96     
-16    64     
0      48     
192    176    
128    48     
112    -96    
880    816    
-960   -1248  
944    1040   
496    560    
688    -256   
-944   -816   
432    16     
-48    528    
-96    -16    
-224   128    
-192   32     
0      -96    
-80    32     
176    224    
-160   -112   
144    128    
48     192    
192    128    
-64    416    
192    144    
-16    144    
16     64     
32     144    
-32    -304   
64     -64    
16     -1168  
-80    -64    
352    112    
16     208    
224    96     
32     192    
-112   0      
-48    320    
-112   0      
256    176    
-144   -96    
320    0      
-368   -176   
16     -592   
-128   288    
0      -1424  
48     32     
176    112    
0      112    
-48    -16    
32     96     
16     48     
256    592    
-368   -224   
272    128    
0      112    
-32    0      
-64    48     
112    -176   
0      112    
64     144    
-64    -160   
-16    -1056  
176    224    
-96    16     
-80    144    
0      128    
16     32     
-192   -96    
272    464    
-304   -64    
128    224    
112    -16    
144    -112   
-80    48     
48     -432   
48     48     
16     -1040  
48     32     
16     -944   
80     0      
256    608    
-32    880    
-256   -144   
-64    -480   
208    80     
-48    -32    
32     48     
16     -128   
128    48     
32     -80    
352    944    
-304   -176   
-80    -544   
0      -448   
272    256    
-128   -16    
-16    16     
112    -32    
80     272    
240    608    
96     112    
16     -160   
192    128    
240    448    
48     176    
-64    0      
0      -96    
128    16     
128    -112   
-16    112    
-32    -336   
144    -320   
48     -144   
64     64     
112    48     
96     -48    
48     80     
48     -240   
48     112    
112    -192   
-96    0      
32     -592   
16     -32    
240    -64    
-32    96     
-32    64     
112    160    
-32    0      
144    208    
-48    -112   
112    -368   
-80    176    
160    -112   
-16    128    
96     -224   
-16    144    
176    -352   
-64    80     
320    -192   
-352   208    
192    304    
512    -1216  
-320   384    
-240   -176   
0      -1824  
144    -288   
-32    -880   
32     -16    
128    48     
-176   -400   
224    -192   
0      16     
128    96     
-96    176    
96     -384   
0      112    
64     -192   
-288   16     
-384   -64    
32     -352   
112    -80    
144    -1456  
-176   -64    
64     -272   
64     -96    
-16    0      
176    -64    
-192   -416   
304    48     
-224   16     
256    288    
-192   -16    
112    -32    
-32    -16    
80     48     
48     -336   
-80    -16    
-48    -224   
16     -144   
-48    -64    
80     -288   
32     -80    
16     -544   
96     48     
112    -160   
0      112    
96     -80    
-80    80     
-192   -96    
112    64     
-944   -112   
-64    0      
96     -16    
48     -48    
160    -176   
-48    -944   
112    80     
16     -176   
0      208    
-64    176    
80     112    
-464   368    
96     304    
240    160    
-560   -528   
-432   -144   
-448   -80    
896    208    
-624   -208   
544    -192   
-256   -1008  
240    -192   
-96    96     
32     -64    
208    128    
64     -64    
-64    0      
16     96     
-128   0      
144    -32    
-192   -80    
-80    -32    
-1648  -128   
96     -160   
64     -176   
-16    -80    
160    -32    
-208   -608   
272    112    
-16    112    
128    -288   
-224   -48    
16     64     
128    208    
144    -160   
-336   16     
128    -144   
-336   128    
240    -80    
-160   80     
160    -272   
96     96     
-16    -464   
0      48     
-16    48     
96     -96    
-64    64     
96     32     
-416   -16    
112    -96    
-400   -48    
192    -80    
-144   80     
48     32     
112    80     
-160   -288   
96     16     
16     -112   
-32    144    
128    48     
32     112    
-384   -80    
128    80     
-192   -16    
80     64     
-48    80     
-48    80     
-16    160    
-16    -352   
96     64     
-48    -160   
96     160    
32     -144   
144    144    
-80    32     
48     -48    
-128   96     
96     -48    
-160   16     
0      -80    
0      -16    
-48    -192   
0      0      
32     -64    
32     256    
-528   -192   
176    16     
-448   -272   
-544   -192   
-192   240    
-288   -80    
80     96     
-16    32     
-16    16     
80     -48    
-176   -208   
48     -176   
32     80     
-640   -48    
80     80     
-160   -144   
96     192    
-256   -512   
-208   -48    
-112   -64    
160    304    
-32    64     
-224   -48    
-192   -64    
272    64     
16     192    
64     64     
-176   -160   
-192   -80    
16     144    
-64    -112   
0      112    
32     80     
-64    272    
-16    -48    
-80    80     
-48    -128   
-368   -128   
64     128    
-1040  0      
-48    -96    
-80    16     
208    320    
-224   -176   
288    544    
-336   -336   
128    96     
-48    48     
16     224    
0      0      
-176   -64    
-16    0      
0      128    
-128   -48    
-304   0      
16     64     
-1232  -48    
0      256    
-288   -480   
224    48     
-96    32     
32     16     
80     416    
-192   -64    
-128   -160   
-112   96     
-16    64     
96     64     
-48    48     
48     -16    
16     48     
-560   -288   
128    -224   
16     32     
-96    256    
80     192    
-48    0      
144    112    
-160   -48    
-16    80     
-64    64     
96     64     
-160   80     
-48    -80    
256    192    
-144   96     
-160   -128   
0      128    
-880   48     
352    -64    
-192   112    
48     -160   
48     160    
-96    16     
176    32     
-128   64     
-16    -48    
-176   -32    
0      48     
-48    -16    
-48    80     
-176   16     
64     208    
-1072  -144   
16     -688   
96     -16    
16     96     
-16    0      
0      80     
-64    0      
144    112    
-80    128    
-48    112    
-16    80     
-1200  -1280  
1328   800    
-944   -336   
1040   -784   
-1136  -160   
592    -32    
-656   704    
608    -336   
160    672    
160    -400   
-400   384    
-192   -176   
480    272    
-128   0      
128    80     
-416   -112   
304    224    
-368   -224   
304    -160   
-352   304    
272    -272   
-160   624    
-144   80     
-80    224    
256    -480   
-96    352    
240    -272   
64     560    
-144   -224   
144    256    
-128   -176   
96     32     
-160   96     
32     64     
32     160    
-112   -80    
144    96     
0      192    
192    416    
-64    -192   
112    16     
48     160    
-32    16     
-64    -272   
-64    128    
112    -16    
-16    224    
-192   224    
352    560    
-96    128    
64     32     
-144   80     
112    32     
-16    336    
48     -176   
80     128    
64     224    
-128   144    
-144   64     
272    672    
-416   -224   
64     112    
-192   16     
192    176    
-272   288    
-112   -192   
192    -32    
144    64     
112    544    
-288   -16    
-48    -80    
-32    -160   
144    -48    
48     80     
16     176    
-96    0      
208    0      
-32    0      
176    -64    
240    272    
-16    256    
160    224    
0      -224   
-16    96     
224    0      
112    192    
16     256    
16     224    
-32    -144   
192    144    
0      64     
96     208    
32     -48    
64     -48    
0      32     
0      -48    
-64    -48    
192    336    
-32    112    
64     288    
-64    80     
48     80     
96     128    
-16    -32    
-16    -160   
-96    -624   
32     -96    
-96    -176   
176    -2160  
-112   -208   
-64    80     
48     112    
112    112    
-80    -16    
96     80     
-16    224    
-16    96     
128    192    
-112   -192   
-32    -112   
160    -32    
-32    -80    
96     176    
176    -624   
96     112    
-96    160    
0      128    
208    256    
112    176    
16     64     
16     128    
112    368    
-96    240    
288    208    
-176   -32    
128    192    
-224   64     
304    80     
-144   -16    
64     0      
32     -1088  
128    144    
0      0      
-80    96     
112    -304   
-32    32     
96     -64    
64     160    
32     96     
16     144    
0      32     
48     -240   
-32    80     
-32    -160   
176    192    
-128   -1216  
240    176    
16     -400   
-80    160    
64     192    
-64    208    
-80    96     
128    112    
-112   64     
112    -176   
-32    96     
96     -128   
128    64     
-112   -192   
128    160    
-16    -480   
48     144    
224    -592   
-144   144    
-16    0      
32     112    
48     -32    
128    144    
-16    -112   
112    160    
64     96     
-32    48     
144    224    
-96    -160   
16     144    
240    -112   
-16    48     
112    32     
-48    128    
-64    128    
80     80     
-96    -64    
192    96     
-16    128    
96     -560   
32     256    
160    -400   
-144   608    
384    -736   
384    432    
-576   352    
-352   -96    
-96    -656   
496    832    
-832   -400   
288    528    
-256   16     
496    -32    
-224   288    
224    -416   
0      480    
128    -528   
-16    608    
160    -512   
-64    464    
96     -384   
64     272    
80     -704   
-112   256    
32     64     
176    -224   
96     -80    
-496   -96    
-128   -1696  
176    -96    
-64    -1168  
256    64     
-32    0      
-32    -32    
64     224    
96     -48    
48     96     
-48    -80    
-80    -416   
80     16     
160    -64    
144    0      
-992   -80    
16     -544   
-64    96     
192    -64    
80     32     
-48    -1072  
32     -64    
-80    80     
320    16     
-64    -336   
0      32     
64     -304   
112    48     
-16    -176   
96     -112   
-304   -64    
80     64     
112    48     
64     -224   
160    -208   
-16    -16    
0      -96    
16     -160   
144    0      
48     -160   
-96    176    
0      -160   
-32    0      
48     -256   
80     -16    
-32    48     
32     -32    
-384   -48    
32     -112   
32     -48    
240    0      
32     -32    
80     16     
-96    112    
-48    -592   
48     32     
-96    -304   
208    -160   
32     16     
32     208    
-64    160    
-64    -64    
-784   -176   
160    -176   
128    48     
96     64     
96     48     
16     -240   
96     -64    
16     -352   
16     32     
240    256    
16     16     
-48    80     
-176   -144   
-48    32     
144    96     
48     -32    
0      16     
-640   -112   
16     -256   
112    -64    
128    -304   
-16    192    
224    16     
64     304    
16     48     
-80    -48    
112    -48    
128    -80    
-32    32     
-16    -144   
176    -16    
16     0      
-208   -192   
80     -208   
-288   -80    
0      -128   
32     32     
96     -208   
-48    0      
80     -1232  
-16    -496   
-128   16     
128    -16    
128    80     
80     16     
-176   16     
64     -80    
-208   16     
48     -96    
80     -16    
64     -16    
80     240    
-48    -240   
-16    -16    
-144   32     
144    112    
-144   -208   
144    32     
-128   -48    
96     -48    
-320   96     
-16    -128   
32     48     
112    48     
16     112    
-32    -224   
112    224    
-80    -256   
80     112    
32     -112   
96     64     
-304   96     
272    -32    
-32    160    
32     -16    
-96    16     
0      32     
96     96     
-16    -256   
64     416    
-960   -352   
16     -144   
176    48     
-320   128    
-112   -80    
-496   80     
224    -208   
-480   -16    
-96    -64    
32     16     
-64    128    
-112   32     
64     -64    
-912   -144   
112    32     
-416   -96    
48     144    
-176   -160   
-80    80     
-160   240    
-112   -128   
-128   48     
64     0      
16     80     
-432   32     
-32    -96    
48     64     
272    96     
-336   48     
-48    112    
-32    -16    
-1280  -496   
848    -208   
-768   -144   
1232   -416   
-512   528    
288    -496   
-448   1056   
-176   -528   
-704   -48    
-272   -128   
-208   -48    
-256   336    
176    -464   
128    816    
-16    -240   
-272   608    
-144   -368   
80     432    
-96    112    
160    528    
-112   -224   
-80    -16    
-64    224    
112    -80    
-80    16     
-496   528    
144    96     
-144   -128   
-160   320    
0      -816   
0      192    
-240   64     
304    192    
-160   96     
-32    64     
-64    144    
48     432    
-112   192    
80     -96    
-64    64     
-64    -32    
144    144    
-112   -32    
96     208    
-32    16     
-48    16     
-64    -16    
-96    0      
16     192    
32     -112   
16     128    
-160   64     
144    48     
-16    -208   
-112   32     
-208   0      
0      32     
-1344  80     
48     80     
176    448    
-352   112    
128    -16    
64     -80    
-112   176    
-80    -112   
64     -32    
64     144    
-64    64     
-240   -64    
16     48     
-112   -96    
32     96     
0      80     
16     32     
-96    176    
-96    -176   
96     -112   
-144   -224   
-176   64     
16     128    
64     288    
-176   224    
80     -64    
32     -64    
-128   224    
32     144    
-112   128    
-400   -32    
-32    48     
16     16     
16     48     
0      -32    
16     16     
96     192    
16     272    
-128   80     
-32    -48    
144    80     
-80    -128   
80     64     
-144   64     
64     128    
-64    -80    
0      -32    
-144   -128   
272    192    
-208   144    
224    192    
-368   0      
64     208    
-32    -16    
16     64     
16     128    
-64    112    
96     112    
-32    208    
-320   80     
320    176    
-208   0      
192    64     
16     368    
80     96     
-176   -32    
16     -32    
96     96     
240    304    
-240   96     
96     96     
-368   0      
112    0      
80     -32    
-112   -112   
80     -16    
-160   144    
-112   -64    
368    16     
-320   80     
80     160    
80     -48    
32     16     
-32    80     
-48    -64    
128    192    
-96    208    
192    160    
-80    -32    
-96    112    
-32    0      
192    272    
-64    -32    
48     192    
-64    16     
48     144    
112    -16    
-96    96     
-16    16     
16     112    
32     288    
48     -16    
-48    48     
-96    32     
128    0      
32     224    
0      64     
0      0      
-96    0      
128    -64    
-48    -128   
80     -96    
-48    240    
-80    192    
-224   -32    
96     144    
272    112    
32     160    
-96    144    
-32    -176   
144    240    
-48    32     
-176   48     
0      -64    
96     144    
32     96     
-128   64     
32     -176   
128    176    
0      16     
32     144    
-64    -32    
80     80     
80     128    
0      -736   
64     176    
48     -80    
-16    272    
0      48     
-96    144    
0      0      
-1024  1456   
-16    -592   
704    208    
-112   -384   
-784   256    
592    -320   
48     560    
208    -208   
-208   576    
64     -448   
64     -32    
-160   112    
128    112    
-128   384    
208    -208   
16     304    
-64    -144   
80     240    
96     -96    
-16    144    
64     -96    
-64    176    
240    112    
-112   -192   
-48    48     
16     144    
224    144    
48     208    
0      0      
-16    -240   
0      128    
128    -80    
-16    144    
64     16     
-80    128    
176    16     
64     -176   
-48    16     
144    -176   
-16    64     
96     -160   
-16    112    
64     -176   
48     48     
-32    32     
48     96     
-32    0      
0      128    
16     144    
96     -160   
32     0      
16     -192   
-32    128    
0      -64    
64     96     
0      -64    
128    0      
64     -976   
-16    48     
-48    16     
16     80     
32     32     
64     112    
-48    80     
48     -16    
112    192    
64     128    
96     144    
96     -112   
-16    0      
112    -160   
-16    112    
32     -192   
96     144    
-48    112    
-48    128    
-32    16     
80     112    
0      48     
-112   -992   
-48    192    
48     -160   
16     -240   
96     -176   
160    144    
-64    16     
-112   -176   
48     -32    
160    160    
-64    -16    
48     160    
-32    -256   
16     48     
192    96     
0      -96    
-16    32     
96     -176   
160    368    
96     16     
-192   -16    
-48    -80    
96     16     
240    48     
96     160    
-160   32     
144    -1120  
-16    32     
80     -400   
96     -656   
32     -96    
48     -1936  
16     -48    
96     112    
32     112    
16     64     
176    80     
-96    -48    
128    -160   
0      -416   
128    80     
-176   -32    
64     48     
-80    -64    
272    0      
-176   -160   
32     -752   
160    272    
0      -848   
-64    -208   
96     160    
128    -320   
16     112    
-144   -80    
208    -112   
-64    -48    
224    32     
-160   -64    
-224   -96    
-80    240    
-960   -208   
128    16     
32     64     
32     -320   
32     -96    
64     -1232  
128    -160   
-48    -400   
176    256    
0      112    
-16    64     
-16    -320   
224    -256   
-112   -160   
112    -16    
-208   176    
128    -192   
-96    48     
-16    -96    
48     80     
-32    -160   
112    80     
32     16     
112    96     
32     -16    
80     80     
16     -144   
-96    -16    
80     -96    
48     -112   
-48    16     
112    -416   
-32    -160   
128    -272   
0      0      
-16    -16    
-80    -16    
288    -1168  
-96    208    
-96    -224   
-16    64     
-32    0      
96     144    
-96    -96    
-16    -144   
-64    -128   
128    0      
-416   -48    
-16    0      
192    0      
48     -288   
0      128    
-128   -912   
96     -32    
0      -128   
288    -96    
-160   96     
96     -48    
-176   368    
-1088  -16    
-80    -208   
64     64     
-48    272    
-304   144    
48     -64    
-208   -416   
416    96     
144    336    
-384   -368   
96     272    
304    -64    
-128   -192   
-32    -128   
-176   -208   
-320   -16    
32     -112   
96     48     
-432   -128   
16     48     
16     -128   
96     -32    
-32    176    
128    -176   
0      16     
-112   112    
240    112    
-160   32     
16     48     
112    272    
-80    128    
0      -112   
-80    -80    
-272   -48    
144    -112   
96     128    
16     -96    
96     128    
48     -96    
-32    144    
0      48     
32     16     
32     -96    
160    96     
-240   144    
192    48     
-160   -368   
176    -80    
-112   128    
144    -96    
48     208    
-144   -144   
128    32     
-1040  -224   
-256   -32    
32     -16    
-336   0      
0      96     
-1392  64     
-176   -176   
144    32     
-176   48     
144    -64    
0      0      
-368   -80    
-32    96     
-336   -336   
176    240    
-384   -224   
32     80     
-48    0      
-144   -16    
-192   0      
-448   -32    
-64    -176   
48     64     
-224   -128   
176    16     
-96    -16    
-288   -64    
80     48     
-32    0      
128    304    
-80    32     
-16    112    
-128   224    
-80    -192   
96     96     
-512   32     
64     48     
-304   -112   
16     96     
-464   0      
-96    -80    
160    224    
-192   16     
160    -64    
0      96     
-32    96     
-16    160    
-144   112    
-80    80     
48     -112   
-208   16     
-112   -192   
112    -32    
-256   16     
-912   -160   
128    192    
-144   -16    
176    80     
-272   -224   
144    208    
-160   96     
96     144    
-32    144    
-240   -16    
112    80     
-208   -80    
16     96     
-208   -32    
256    224    
-288   -64    
64     64     
-432   -64    
352    112    
-80    384    
0      80     
16     144    
96     64     
-144   80     
32     224    
144    144    
-96    96     
0      176    
208    560    
48     240    
-128   -272   
-96    48     
-720   64     
176    176    
-16    208    
176    -320   
-112   -80    
96     32     
-160   -80    
144    -112   
-160   0      
64     48     
32     -16    
-176   -16    
16     16     
-224   -80    
64     -16    
-352   -48    
-80    464    
144    -32    
-16    32     
-32    -80    
-64    64     
-16    -16    
16     272    
-16    32     
-96    -16    
192    -16    
-320   -80    
64     96     
-224   176    
-176   -112   
-16    16     
-176   -32    
64     160    
-112   -304   
80     -32    
144    192    
256    384    
-416   -160   
-112   32     
-144   64     
128    -144   
-128   0      
112    112    
-96    0      
80     224    
-208   32     
-96    16     
-16    112    
32     32     
80     240    
-16    64     
48     176    
-112   112    
-32    -192   
-64    0      
224    144    
-192   -64    
32     128    
304    -272   
-736   -880   
848    -80    
-432   -432   
-480   96     
960    592    
-368   320    
176    544    
-256   0      
-64    -288   
64     192    
-48    64     
64     160    
-48    -48    
128    16     
-64    32     
112    224    
-16    112    
32     32     
-16    112    
80     0      
160    -128   
96     240    
48     -32    
-224   -32    
0      240    
352    208    
-48    -32    
-80    -48    
80     16     
0      -16    
-128   96     
160    128    
-64    64     
80     32     
16     48     
16     224    
-48    96     
-48    16     
128    80     
-96    80     
64     0      
-80    144    
-144   32     
64     16     
-64    16     
96     240    
144    192    
-112   96     
80     144    
-80    64     
32     0      
0      48     
32     96     
-64    32     
16     128    
-48    432    
-16    272    
-16    -96    
-32    -64    
112    -16    
-16    -816   
32     16     
64     352    
-32    80     
-80    96     
16     64     
48     32     
96     -16    
0      48     
32     96     
16     64     
32     112    
-48    48     
16     176    
48     112    
-80    -1840  
-16    -48    
-16    -48    
80     80     
96     64     
-128   16     
48     0      
-32    176    
96     144    
-128   64     
48     -16    
144    224    
-80    0      
0      -176   
-64    32     
96     -560   
32     16     
176    224    
-16    128    
16     80     
-112   32     
176    224    
-32    96     
-16    96     
0      112    
16     -32    
112    144    
-32    16     
-16    -32    
32     80     
176    32     
0      -16    
16     -1328  
80     128    
32     96     
-16    48     
32     -336   
64     48     
64     -32    
16     192    
-112   -160   
64     48     
128    208    
112    -96    
-160   16     
-16    -176   
288    16     
0      -528   
-48    144    
16     -1840  
144    64     
144    -272   
0      304    
-16    32     
144    128    
-80    192    
112    -16    
48     144    
0      -240   
64     -112   
64     -336   
-64    160    
224    -640   
-96    16     
128    -256   
0      176    
32     -176   
96     48     
32     -80    
208    192    
-240   80     
112    96     
112    208    
176    -128   
112    192    
16     -192   
-48    96     
96     -96    
144    176    
-80    -768   
16     -16    
128    -176   
384    -48    
16     208    
96     112    
-256   112    
64     -976   
144    256    
48     -320   
160    320    
-80    -160   
-16    48     
-64    -384   
272    0      
208    -240   
0      16     
-80    144    
-48    144    
-48    48     
128    16     
176    208    
-80    32     
-80    128    
16     32     
64     -32    
-48    -176   
-32    96     
0      -96    
48     96     
64     -192   
176    224    
16     96     
128    -2288  
-80    0      
128    -2416  
0      -320   
256    -32    
-48    -432   
128    -304   
-32    -592   
96     -208   
-112   1072   
-704   32     
96     480    
-112   -272   
496    592    
-864   -432   
256    -432   
-384   224    
-16    -256   
128    -288   
-112   -512   
224    -432   
80     -64    
16     -864   
80     0      
80     224    
-64    144    
64     192    
-192   -416   
128    -800   
80     64     
16     -224   
-16    64     
-144   32     
80     0      
-176   -240   
-80    64     
192    112    
16     -64    
48     -144   
-16    -704   
80     -80    
144    -256   
16     16     
32     -96    
32     96     
-32    -128   
144    -176   
-112   -16    
96     -176   
-880   -128   
0      16     
64     48     
64     -144   
112    -80    
-128   -816   
48     -48    
128    -64    
-128   208    
304    -112   
-80    224    
-160   -112   
64     -96    
-80    -32    
-48    32     
-272   -32    
64     -208   
-112   -16    
-32    -96    
144    -224   
-48    -64    
32     64     
32     -1440  
80     16     
96     96     
-192   0      
48     -64    
32     32     
0      144    
-176   -32    
-112   -16    
160    -32    
-912   -16    
48     -64    
-80    48     
48     -16    
-32    16     
176    -784   
32     144    
128    -224   
32     32     
-48    128    
16     144    
-32    -80    
112    -80    
-16    112    
112    -16    
-208   -160   
192    128    
-544   -32    
160    -208   
-32    16     
128    -240   
16     160    
16     -1136  
112    64     
-128   64     
112    -192   
-192   -80    
48     -208   
-208   -64    
96     -112   
-80    160    
-80    -144   
-464   -96    
96     -384   
112    400    
80     -256   
-80    32     
32     -256   
112    0      
64     -32    
-96    -144   
-144   96     
192    -80    
16     64     
96     -16    
-192   64     
-64    -272   
-880   80     
-144   -224   
80     96     
304    -96    
48     64     
-448   64     
256    -96    
160    16     
-192   32     
48     -80    
16     -64    
-64    128    
80     -160   
-64    32     
32     -272   
-192   208    
80     -96    
160    368    
-64    -352   
-752   160    
-384   32     
-224   64     
0      48     
-528   160    
32     80     
-192   -32    
-80    -272   
48     -336   
-192   -224   
-176   192    
-96    -16    
-48    -128   
32     128    
-416   -256   
16     144    
-32    32     
-48    144    
-64    -64    
-64    96     
-32    160    
-400   -336   
-176   -16    
160    368    
-48    -80    
-48    -176   
96     224    
144    240    
-192   208    
-32    -96    
-16    -48    
0      -48    
-112   96     
-32    -32    
-48    160    
128    -128   
-160   0      
16     16     
-1056  192    
-112   -224   
128    -16    
-16    48     
0      -80    
-16    240    
-16    -32    
-16    112    
-96    -192   
-64    0      
16     112    
-224   -32    
-16    -128   
0      112    
128    -336   
-352   -144   
32     160    
-144   16     
16     80     
-128   -80    
112    -32    
-48    0      
64     2672   
-1888  -16    
224    1232   
176    368    
480    416    
-528   -832   
-496   48     
464    -160   
-592   -688   
112    -32    
-464   208    
0      16     
128    160    
-32    -48    
16     -192   
-128   -128   
160    224    
-160   -32    
160    144    
-80    -32    
-64    -96    
-304   176    
64     400    
-416   -192   
192    0      
-544   32     
64     48     
-112   -112   
-160   -16    
112    -32    
32     128    
-112   144    
-16    112    
-64    48     
-48    64     
32     80     
-144   128    
144    192    
-448   -192   
192    -128   
-960   16     
-32    160    
128    48     
-32    64     
0      32     
-48    80     
16     144    
48     368    
-128   112    
-16    -16    
-32    0      
16     176    
16     112    
-128   -208   
0      64     
160    208    
-272   64     
144    -32    
-32    -80    
192    320    
-272   -16    
160    176    
32     128    
-160   16     
96     176    
16     48     
-144   -16    
-64    144    
-112   48     
32     144    
-64    0      
16     32     
16     80     
-16    64     
16     96     
-16    -48    
224    416    
-144   240    
-48    160    
-112   32     
32     -208   
-352   -368   
64     -176   
48     160    
48     224    
48     160    
-128   96     
-128   -352   
48     -192   
144    112    
80     240    
-48    160    
-64    176    
48     -16    
48     32     
64     96     
-48    -176   
0      -128   
48     160    
96     64     
96     224    
-224   -80    
48     112    
96     32     
16     80     
16     32     
-16    128    
-48    32     
16     48     
-48    32     
16     32     
-16    32     
0      240    
64     32     
-208   64     
48     -32    
16     128    
-64    -256   
16     -128   
-16    80     
96     112    
-96    64     
-16    -64    
64     304    
80     -16    
-80    256    
-304   -832   
320    112    
-208   336    
208    336    
-208   112    
48     112    
0      -64    
96     48     
-64    112    
64     160    
112    192    
-256   -16    
96     -48    
-272   -112   
224    -80    
-64    112    
-64    160    
160    96     
-144   -1136  
176    160    
-112   112    
-16    -160   
-16    16     
144    112    
32     208    
0      144    
-48    80     
192    192    
-128   0      
192    160    
-192   -240   
112    -64    
-112   0      
112    -1408  
0      48     
-96    -48    
112    160    
-16    144    
-32    48     
48     144    
32     96     
-48    0      
128    544    
-320   -352   
144    -48    
-80    -32    
96     -128   
176    96     
-80    -832   
160    288    
32     352    
64     0      
208    272    
16     112    
-144   -32    
128    160    
-48    -352   
-80    288    
112    128    
-80    32     
-48    -176   
304    80     
224    32     
-80    176    
-80    128    
-48    -224   
176    144    
-96    -112   
-48    192    
0      -288   
64     240    
-80    -64    
-160   464    
592    192    
-432   208    
-272   48     
-432   -320   
688    48     
-96    -80    
32     576    
-96    -784   
64     -32    
192    -800   
32     144    
112    240    
32     96     
192    160    
-80    -64    
-48    128    
48     128    
32     48     
48     -288   
-96    96     
320    -192   
-32    240    
128    -784   
-160   32     
80     -592   
160    160    
80     112    
64     128    
-96    -48    
128    144    
-64    -16    
144    128    
-32    144    
128    -96    
96     352    
-32    -528   
16     -32    
-48    -320   
48     112    
144    -80    
-48    80     
16     -432   
192    144    
-240   64     
272    64     
-176   144    
208    144    
-112   224    
-48    -1088  
208    112    
-64    -144   
80     128    
16     -48    
32     16     
48     -272   
64     208    
-112   -32    
208    16     
-32    96     
256    80     
0      96     
48     -224   
64     192    
-80    -208   
64     80     
160    -96    
48     288    
48     -480   
112    112    
32     -144   
48     176    
64     -32    
112    -1040  
48     64     
32     -272   
-80    -1680  
-80    32     
128    -1392  
48     -192   
160    208    
0      -48    
32     32     
-48    -48    
-48    112    
96     64     
0      112    
144    176    
16     -432   
96     48     
-80    -80    
-48    -320   
64     48     
112    -448   
128    -128   
0      -1440  
144    -96    
-32    368    
0      -160   
80     80     
16     0      
48     -336   
-96    -64    
128    -96    
0      -80    
192    336    
-48    192    
-176   -160   
-112   -240   
32     -128   
240    -304   
0      0      
32     48     
-48    -16    
64     -1040  
160    48     
-304   -608   
64     0      
48     -48    
224    -336   
-144   -32    
32     -256   
-32    -96    
144    -80    
32     0      
64     48     
48     80     
48     48     
112    64     
32     -608   
96     64     
176    208    
32     64     
144    -128   
-96    -96    
16     48     
96     64     
-304   -96    
48     -208   
-960   32     
48     -144   
64     -32    
80     -368   
-208   -112   
144    -544   
-96    0      
96     -112   
-48    -32    
-48    64     
80     80     
-176   -160   
64     112    
-96    -48    
-32    240    
-256   -80    
-128   -128   
16     -288   
96     304    
0      -128   
-16    -272   
128    -32    
48     -64    
48     160    
-96    -96    
144    16     
48     176    
-96    -176   
-128   -144   
112    -64    
-656   16     
80     -320   
-624   240    
-64    -96    
176    160    
96     -384   
0      112    
-144   -2384  
160    -112   
160    112    
32     0      
-368   208    
0      -96    
-496   -160   
112    -192   
-368   -16    
-32    96     
-160   96     
144    -128   
48     64     
48     -160   
32     -64    
64     -592   
96     96     
-336   112    
80     -160   
-48    160    
160    96     
-1152  -64    
720    2688   
-944   1264   
-656   -512   
-496   -1504  
752    608    
-672   576    
368    -224   
-304   -384   
704    224    
-560   16     
48     -16    
320    80     
144    -144   
64     416    
-256   -96    
128    64     
-112   -192   
96     -176   
-192   -96    
-112   -272   
96     272    
-400   80     
96     0      
-128   -144   
-1072  240    
-128   -48    
-1696  -224   
-144   32     
208    16     
-96    64     
-48    -272   
-32    0      
-336   -80    
-96    496    
-384   -160   
64     128    
-160   -304   
208    480    
224    544    
-704   -176   
176    -16    
0      176    
-16    -32    
-880   48     
-224   -112   
96     -336   
96     336    
-160   16     
16     -48    
16     224    
-96    -32    
48     -176   
-144   -144   
-80    -48    
0      -48    
256    640    
-384   -80    
-176   -368   
-160   400    
-208   -80    
-496   48     
32     224    
48     96     
-80    224    
32     -304   
48     16     
-48    -16    
-80    144    
-16    80     
16     32     
-48    48     
-112   0      
-64    80     
-192   64     
0      64     
-400   240    
112    320    
-112   16     
224    240    
-80    -240   
-64    -80    
96     144    
16     112    
-48    96     
16     -64    
0      80     
32     224    
-80    272    
-176   32     
32     48     
-112   -64    
0      96     
-944   96     
128    176    
-32    -32    
0      -112   
-96    -208   
64     -64    
32     112    
48     208    
-128   112    
-160   16     
176    48     
-48    16     
-64    16     
-288   48     
-64    80     
-688   -192   
-16    -16    
32     176    
-48    16     
-80    0      
-192   -32    
160    -64    
32     112    
-112   16     
112    -32    
-224   -96    
-96    -128   
128    144    
-224   -48    
112    64     
-384   0      
-16    -336   
48     -32    
-176   -512   
-256   -272   
208    -272   
-32    176    
-16    224    
32     128    
-112   96     
96     -64    
-256   -80    
128    32     
-112   160    
192    32     
-128   176    
-112   -48    
-32    64     
-112   -96    
48     -16    
16     -32    
-16    112    
16     144    
-16    352    
96     528    
96     288    
0      96     
16     112    
-224   -64    
48     128    
-160   -80    
192    624    
-304   -32    
416    608    
-272   112    
-32    -176   
-32    -64    
-32    -64    
96     192    
-112   32     
64     112    
-64    -80    
64     224    
-144   -144   
48     176    
-112   112    
256    48     
80     224    
-48    112    
0      0      
0      -80    
48     48     
32     80     
48     160    
96     32     
-128   144    
-96    -48    
64     112    
-32    -80    
128    64     
0      -48    
80     272    
-112   80     
48     -160   
-32    256    
32     112    
-128   128    
80     -48    
80     96     
-32    64     
-80    64     
-16    0      
128    208    
96     -80    
16     160    
2112   528    
-1232  -784   
832    -48    
96     176    
912    -624   
-448   112    
176    192    
-384   496    
48     -528   
-224   256    
208    -48    
-32    80     
-160   224    
-16    -16    
-16    240    
32     -192   
-160   128    
320    64     
-48    160    
176    0      
-112   160    
96     -48    
-80    272    
128    -16    
32     176    
128    112    
-112   144    
176    192    
-80    128    
96     48     
-64    112    
112    96     
48     192    
-48    64     
160    112    
-128   -128   
80     32     
-176   176    
320    80     
-96    32     
-32    32     
-32    -112   
96     128    
80     48     
-32    -560   
48     192    
96     0      
-64    144    
0      192    
272    -112   
-64    128    
-96    176    
144    -64    
128    160    
-160   -240   
96     64     
48     -80    
48     32     
96     128    
32     -352   
0      32     
80     192    
48     16     
64     176    
-128   240    
160    -32    
112    64     
96     -112   
-48    160    
32     144    
32     -32    
112    -32    
48     -48    
16     240    
0      -144   
160    304    
-16    -96    
32     -32    
288    192    
-224   112    
80     -32    
-16    32     
32     -32    
192    352    
-144   -96    
176    240    
-112   16     
32     -144   
112    -128   
80     -160   
-64    64     
96     112    
32     144    
16     112    
176    304    
-240   -224   
128    96     
-48    -64    
96     -48    
-96    -48    
-16    144    
80     80     
0      -192   
96     96     
-144   -224   
192    272    
-80    -624   
-32    128    
16     -2000  
-32    -16    
112    96     
112    0      
-48    0      
112    192    
-80    32     
80     16     
80     160    
-16    -80    
176    160    
-80    -336   
240    -16    
-128   -80    
96     160    
80     192    
96     272    
-128   192    
208    192    
-64    16     
64     144    
48     192    
192    -128   
-64    112    
224    96     
-16    208    
-32    -352   
-112   192    
160    -48    
16     16     
32     -256   
80     192    
-80    -48    
64     -16    
-128   32     
144    0      
96     160    
160    -48    
-16    560    
64     -144   
-160   -144   
240    -32    
0      32     
48     64     
48     112    
32     -432   
160    160    
112    0      
160    576    
0      96     
48     -928   
-224   -384   
64     -304   
48     -208   
208    -80    
192    288    
96     64     
-96    288    
160    -64    
112    176    
208    -64    
-176   -1120  
-96    64     
-16    0      
-32    80     
-464   48     
-32    -640   
-32    -128   
-16    -432   
208    -112   
192    -432   
-128   -96    
16     -1728  
-16    -160   
256    144    
16     48     
16     -368   
-32    0      
112    -272   
-16    80     
-576   -64    
-48    0      
-1440  -48    
32     80     
48     -128   
224    -224   
-160   -256   
160    -1136  
16     -16    
320    -48    
1696   -1488  
688    464    
144    144    
-640   -432   
384    336    
-176   -64    
400    48     
-368   -624   
176    -464   
64     80     
464    -336   
-176   272    
-16    -256   
48     144    
-16    -1648  
-48    -16    
-16    -96    
-64    80     
-112   -112   
64     32     
-176   -400   
160    32     
-432   -160   
160    -160   
-1584  -192   
256    -32    
448    -144   
32     -128   
-128   -336   
32     -816   
-32    16     
160    -112   
0      352    
0      -32    
96     208    
-96    16     
80     -48    
128    144    
-160   -352   
-16    -144   
-144   -80    
-32    -64    
64     112    
64     -64    
-32    -464   
208    -16    
112    -416   
112    32     
-176   -96    
176    -176   
-80    32     
80     -160   
16     -256   
80     224    
16     80     
-32    -368   
-624   0      
208    320    
-288   -272   
48     80     
80     -96    
32     -848   
32     -144   
48     352    
-144   -240   
256    96     
160    -128   
-128   128    
-144   -192   
-48    112    
48     -288   
-160   16     
16     -320   
-16    112    
48     -320   
48     144    
64     -368   
224    -256   
-64    -64    
368    816    
-336   -176   
192    80     
-240   288    
160    -16    
-192   -48    
160    272    
-752   -144   
96     48     
-64    16     
224    -192   
-32    16     
-256   -80    
-16    -112   
112    256    
160    256    
-128   96     
80     272    
-384   -144   
112    -272   
96     80     
128    -32    
-112   144    
-464   -48    
48     96     
-112   -256   
-32    -144   
32     64     
-128   192    
48     448    
-736   16     
-336   -304   
32     0      
0      48     
64     96     
16     32     
16     -80    
16     48     
-496   -240   
32     48     
112    -368   
-96    -96    
48     64     
80     -80    
-64    16     
-160   -336   
48     -144   
-208   16     
-160   -112   
96     96     
-160   -128   
-256   -224   
-48    -112   
-128   -80    
-16    112    
256    160    
-320   16     
192    96     
-384   16     
0      48     
-48    0      
48     32     
16     64     
208    144    
-688   0      
-64    0      
16     0      
80     -64    
-144   48     
80     80     
-16    -32    
-176   -48    
-80    64     
-64    -48    
-32    32     
-48    64     
-48    64     
-448   -96    
32     288    
-864   -64    
-16    64     
48     -128   
48     288    
-80    -176   
-32    32     
64     144    
32     -32    
-96    144    
176    112    
-240   16     
64     144    
-160   -32    
-16    -80    
256    16     
-176   144    
48     128    
-48    -80    
80     -32    
48     -80    
-64    16     
32     192    
-16    64     
16     128    
0      -32    
-80    128    
-160   -80    
160    208    
64     -96    
48     144    
-208   32     
-80    48     
-976   -144   
48     144    
64     -144   
-32    144    
-80    32     
-16    48     
-112   0      
-976   -2272  
688    576    
-1088  -176   
-16    -176   
-384   -240   
240    640    
-832   0      
416    368    
-320   416    
240    -240   
-144   272    
-32    -528   
176    880    
32     -560   
0      544    
-112   -336   
160    624    
144    -208   
-64    144    
0      32     
-16    176    
-112   16     
64     160    
-32    80     
-32    -112   
144    112    
32     64     
80     144    
-112   0      
-16    160    
208    176    
-80    96     
-112   -160   
-112   208    
48     -32    
16     224    
-128   -272   
-16    224    
-224   -48    
112    112    
-64    -64    
-80    64     
-32    112    
160    96     
-32    48     
-32    -32    
-32    32     
-112   128    
80     48     
64     48     
-144   128    
-64    -32    
80     48     
-240   -96    
-32    16     
144    80     
-16    80     
32     0      
64     -32    
16     80     
-48    32     
96     112    
32     32     
64     144    
-16    96     
144    32     
-144   -48    
16     -16    
160    144    
-48    176    
0      32     
48     32     
48     16     
-32    144    
16     144    
-80    32     
160    112    
-64    -64    
240    144    
-192   -16    
112    96     
-80    -80    
96     160    
80     368    
32     96     
80     64     
192    192    
-128   192    
-112   -144   
224    80     
-48    192    
-32    0      
0      -16    
96     64     
-32    -96    
32     0      
-176   64     
192    -320   
16     96     
96     224    
-32    -384   
-96    -448   
-16    16     
256    272    
80     64     
-48    112    
16     64     
208    416    
-128   32     
-80    -16    
64     144    
-16    -48    
-16    -1648  
48     32     
48     96     
-64    -80    
-16    -64    
128    176    
48     -160   
32     144    
16     272    
32     160    
32     48     
64     192    
112    320    
-48    384    
64     -128   
-16    -880   
112    496    
64     320    
16     -16    
-112   -208   
48     96     
48     0      
16     224    
256    160    
-368   -336   
272    -144   
-32    192    
-112   -288   
-544   -400   
0      96     
64     -208   
-64    32     
160    144    
-80    96     
-16    128    
-160   0      
80     -16    
128    128    
64     176    
64     96     
-112   0      
80     144    
48     144    
-96    -64    
128    176    
-96    -48    
-16    0      
160    -1488  
112    144    
-16    128    
-32    64     
224    160    
112    -16    
16     0      
16     -32    
112    48     
-112   48     
208    64     
-144   -16    
48     16     
80     -224   
-16    128    
16     -672   
80     160    
-16    -1584  
-96    224    
-80    -272   
272    48     
-16    0      
0      80     
-64    96     
176    32     
0      128    
112    -304   
80     288    
176    -256   
192    288    
-240   -288   
144    64     
144    -1056  
112    80     
-352   -1632  
112    112    
112    64     
160    144    
-128   -16    
1648   -432   
48     592    
112    112    
-816   80     
272    -32    
576    -240   
-192   -96    
320    704    
-640   -96    
544    -96    
-176   112    
160    -80    
144    -64    
-112   208    
128    -16    
80     -144   
-16    0      
-32    -16    
128    -64    
96     -128   
-32    32     
144    -32    
80     -112   
-32    208    
224    -16    
64     -224   
-48    64     
128    192    
80     -96    
48     224    
48     -240   
96     176    
32     32     
-80    320    
112    -304   
-64    0      
96     -256   
128    16     
0      -320   
0      64     
64     224    
112    -368   
16     16     
64     -464   
80     -1536  
176    112    
-16    -1280  
0      -64    
-16    -1440  
-32    -240   
48     32     
48     -64    
224    336    
-144   -80    
112    -336   
-64    256    
0      112    
48     176    
-336   -96    
144    -16    
48     -112   
64     -48    
0      -80    
96     -480   
-32    -32    
96     -288   
0      -144   
144    112    
-96    -272   
160    -592   
48     112    
32     -96    
-32    64     
-96    -64    
192    32     
-480   -128   
64     0      
-16    80     
-16    -192   
256    208    
-144   -16    
80     -160   
192    304    
-176   96     
16     -80    
0      -32    
64     -16    
128    384    
-240   80     
48     -80    
-64    -112   
0      -16    
128    128    
160    0      
112    128    
-32    -960   
-192   -448   
0      -336   
240    64     
96     -48    
48     368    
48     192    
16     -128   
-96    -80    
64     32     
-96    224    
160    -144   
-560   144    
0      -368   
112    64     
112    -368   
-144   64     
48     -768   
48     112    
144    -128   
-64    112    
80     -144   
-64    -208   
16     144    
240    384    
-608   16     
160    -16    
-688   -176   
48     -32    
-480   -208   
-32    -64    
-16    64     
112    -352   
-16    -32    
96     -496   
-32    80     
96     -208   
-176   -96    
96     -32    
176    -224   
-128   -208   
-208   80     
-336   64     
336    32     
-592   32     
-32    -192   
32     32     
144    -528   
-160   112    
176    -800   
80     64     
-48    336    
-32    160    
32     80     
-16    -64    
-208   -32    
32     32     
-240   16     
96     96     
-448   -208   
128    -368   
-96    176    
160    -336   
80     -32    
32     -176   
96     208    
-432   224    
160    304    
-160   160    
96     -32    
32     -48    
32     112    
-112   -128   
-32    -352   
0      16     
-16    176    
-96    320    
-112   -176   
208    192    
48     -112   
-112   96     
-112   64     
224    -96    
160    256    
-48    16     
-96    64     
96     16     
80     -64    
0      80     
-192   112    
-176   112    
-96    64     
-624   -320   
160    32     
-80    48     
-352   64     
-144   0      
-576   80     
-16    96     
-64    -256   
-144   128    
48     -96    
-448   704    
-80    -208   
912    -32    
-1136  144    
-160   -160   
-832   80     
848    128    
-1056  -112   
144    -272   
-304   592    
352    -608   
-352   448    
-560   -592   
48     592    
-48    -384   
192    368    
-432   -288   
-48    288    
-112   -80    
80     80     
-48    -208   
-112   64     
-32    144    
-112   -48    
-128   112    
-160   -160   
-192   208    
-32    48     
-64    320    
-1008  -144   
-48    64     
16     -208   
16     208    
-16    -48    
32     192    
-32    48     
16     48     
-128   0      
96     -16    
-176   -16    
-48    32     
32     96     
-144   80     
16     64     
-320   -48    
-160   80     
-128   -64    
240    176    
-80    -272   
208    176    
-240   208    
192    64     
-112   80     
64     96     
-96    208    
16     112    
16     16     
-112   16     
-64    32     
-208   -144   
112    96     
-848   112    
16     144    
-128   -80    
-16    -16    
112    64     
-48    256    
32     240    
-128   16     
224    112    
-176   0      
32     112    
-112   -48    
128    80     
-128   -32    
32     192    
-32    192    
-80    -16    
112    48     
-192   80     
128    64     
-32    80     
-64    144    
-96    -16    
-48    128    
-144   -112   
240    480    
-48    288    
96     288    
-320   -384   
160    272    
-352   -144   
96     240    
-16    128    
-96    64     
144    192    
-64    80     
176    288    
-64    96     
-16    -80    
-32    208    
96     96     
-48    64     
0      96     
-176   -16    
112    96     
-256   -208   
192    240    
16     224    
-32    -64    
-32    64     
16     64     
160    208    
-16    128    
-32    48     
0      112    
144    336    
-80    368    
80     400    
-128   64     
0      48     
-192   -80    
-128   0      
224    224    
-48    16     
64     16     
-192   160    
176    192    
-112   96     
128    176    
-80    80     
96     144    
-272   -48    
48     112    
0      128    
32     80     
-256   -48    
16     16     
64     160    
-48    144    
32     16     
0      80     
80     96     
-48    48     
144    112    
-48    64     
-16    -208   
-32    -144   
112    48     
64     32     
-48    272    
-32    16     
-16    144    
192    240    
-32    272    
-112   -32    
208    48     
64     272    
16     16     
-128   16     
224    208    
160    176    
-48    112    
80     128    
-80    48     
16     64     
-96    -96    
176    256    
64     224    
0      -32    
64     96     
-16    192    
0      0      
0      80     
64     160    
16     32     
48     64     
-224   -32    
128    64     
-144   16     
96     -1200  
32     144    
-32    96     
64     96     
80     128    
-144   0      
48     80     
48     144    
112    96     
16     16     
-48    112    
48     0      
-80    128    
112    80     
64     16     
144    0      
-48    80     
-16    64     
-976   -1728  
176    -544   
48     480    
400    -224   
-32    -208   
64     432    
-336   208    
176    -496   
-64    432    
272    -464   
112    304    
-224   80     
176    -304   
96     224    
112    48     
48     592    
128    208    
128    352    
-400   -272   
192    32     
96     -208   
-128   -48    
112    -80    
288    272    
-240   80     
192    64     
-272   -16    
272    -176   
-32    80     
208    -464   
-64    48     
16     128    
-16    176    
64     128    
32     176    
0      16     
128    48     
-48    80     
-96    128    
128    128    
-80    -64    
64     128    
16     -64    
160    112    
-64    -64    
160    112    
-64    128    
96     176    
-112   320    
192    96     
16     144    
64     80     
0      128    
16     64     
144    -48    
-80    -48    
192    224    
-16    -64    
144    96     
-32    -816   
32     48     
64     -544   
64     112    
64     -64    
-144   224    
0      -208   
224    80     
-64    144    
16     80     
112    -16    
96     -96    
16     272    
-96    -160   
80     160    
64     0      
64     96     
112    -1408  
176    112    
112    -2688  
48     176    
0      32     
64     48     
80     -64    
48     80     
160    144    
-16    48     
0      176    
32     288    
240    304    
-32    -80    
144    48     
64     -96    
96     128    
-64    -560   
32     -288   
-80    -128   
176    144    
0      160    
0      48     
32     144    
-128   -288   
112    160    
48     -320   
48     80     
64     -144   
-16    -48    
48     -224   
32     176    
160    -1008  
48     96     
-112   0      
16     48     
96     -64    
96     16     
0      16     
112    64     
-240   16     
384    192    
-80    128    
128    -336   
-96    128    
-48    -224   
240    64     
64     -128   
-160   -1824  
256    112    
128    -944   
16     -576   
-16    64     
48     -192   
80     -48    
80     -1440  
48     80     
256    224    
-16    -64    
16     -112   
-112   144    
0      -48    
240    -128   
80     -784   
-192   256    
80     -32    
160    -320   
208    48     
32     -16    
32     -176   
-112   -560   
32     -64    
48     544    
112    -112   
64     112    
0      -112   
16     -256   
0      80     
64     -272   
128    176    
-240   0      
80     320    
-368   0      
112    -64    
48     -256   
80     -256   
16     64     
-64    -96    
80     -112   
272    -768   
176    336    
-16    -48    
-336   112    
0      -16    
0      -32    
144    112    
32     -176   
0      208    
-64    -160   
-16    -96    
80     48     
96     48     
32     -176   
0      -64    
32     -1744  
-64    112    
48     176    
-112   80     
64     -16    
128    160    
-288   -64    
48     -208   
128    -112   
80     128    
-768   64     
-48    16     
96     -32    
128    -400   
-48    -128   
128    -1024  
0      32     
0      784    
592    -1056  
672    80     
-592   624    
-336   400    
-96    -368   
-96    -16    
-432   96     
-288   -192   
128    384    
-1184  -592   
224    32     
96     -336   
48     -48    
-64    -224   
160    -752   
112    96     
96     464    
-144   -176   
176    96     
-96    -80    
32     16     
-144   -16    
192    -128   
-128   -144   
32     -208   
-96    144    
272    384    
-16    -208   
96     -16    
-96    -1216  
112    64     
-64    32     
-112   0      
-96    -48    
96     -80    
-240   -48    
-32    -64    
-144   96     
80     32     
-160   -48    
-48    -240   
-16    192    
64     -544   
144    128    
-160   -192   
128    -16    
-192   -288   
176    -96    
-80    64     
80     96     
-96    0      
32     128    
-16    16     
16     -64    
-1568  -48    
208    -16    
-96    160    
128    -80    
48     272    
-144   -304   
-192   64     
-224   -144   
160    -112   
-64    192    
0      -32    
48     128    
-32    -80    
-112   -32    
-64    -256   
-176   96     
-224   -16    
128    192    
-128   -176   
176    64     
-96    80     
-528   -112   
-208   112    
-416   64     
176    -16    
-32    0      
32     0      
64     0      
-144   -16    
-48    -16    
-32    16     
-64    -96    
48     -208   
-176   -16    
-80    32     
0      64     
-208   112    
16     80     
-112   96     
-80    80     
-336   64     
16     48     
-192   -48    
-32    32     
128    128    
48     128    
-112   -32    
0      128    
-128   -352   
-144   -48    
-48    48     
32     16     
16     96     
-272   48     
64     64     
-208   64     
-64    0      
-352   48     
0      48     
192    64     
-96    64     
0      -48    
-32    64     
48     -16    
-128   -48    
176    144    
-240   -32    
32     64     
-368   -48    
32     96     
-336   16     
32     -272   
0      256    
-144   160    
-1616  -32    
-224   32     
48     -192   
32     144    
96     80     
-128   208    
-64    -96    
48     -32    
-64    160    
80     -80    
-64    176    
96     176    
-112   80     
-144   -48    
80     144    
-1008  -96    
-16    112    
368    192    
-400   336    
-80    -224   
80     32     
16     80     
-112   0      
-112   -16    
272    288    
-48    0      
-48    -48    
-80    0      
-240   -160   
160    320    
-432   32     
64     32     
-128   -160   
256    112    
-160   -16    
-48    -16    
-64    -64    
48     176    
-80    -176   
160    352    
-128   32     
16     -16    
-256   -112   
32     80     
-64    208    
96     0      
-256   16     
-1008  -48    
-160   144    
144    144    
-32    112    
-16    -32    
80     96     
64     96     
32     96     
-48    48     
16     -16    
176    112    
16     160    
0      192    
-272   112    
-32    48     
-112   160    
16     112    
-48    96     
64     -16    
96     240    
192    64     
-144   144    
64     -1888  
1040   240    
544    896    
-480   832    
-640   144    
640    224    
-400   -32    
256    16     
-304   0      
192    -32    
160    80     
-128   96     
-80    -48    
80     224    
112    96     
0      288    
-144   0      
48     -16    
-112   160    
-128   -80    
-48    -144   
-112   -64    
304    272    
-96    -64    
-16    48     
-48    80     
96     464    
-16    112    
224    112    
-240   112    
208    48     
-80    0      
-48    0      
80     64     
0      48     
240    240    
-192   208    
144    16     
-128   16     
32     80     
48     64     
112    48     
-80    80     
96     144    
16     64     
-128   16     
32     96     
80     256    
-176   96     
80     -32    
112    128    
-64    96     
80     192    
-128   64     
112    48     
32     64     
144    112    
-112   96     
80     64     
-144   80     
112    112    
-32    112    
-64    -16    
160    352    
-288   -80    
144    -1392  
144    32     
144    272    
48     128    
32     224    
16     64     
80     16     
80     208    
-48    112    
64     112    
32     64     
128    80     
-16    32     
48     160    
-80    -16    
128    208    
-112   128    
144    -96    
16     160    
-48    176    
48     80     
-16    112    
-16    -96    
112    32     
48     112    
-80    -32    
176    80     
-112   32     
80     272    
-160   64     
80     -352   
192    112    
-16    128    
0      96     
48     48     
64     48     
48     176    
32     176    
160    240    
-32    -32    
48     -224   
-96    48     
48     -48    
48     112    
160    32     
-16    -272   
-80    16     
128    -2896  
0      16     
80     -32    
-16    16     
240    576    
-96    112    
272    -48    
-256   64     
160    64     
272    240    
112    176    
-112   224    
176    64     
-320   -304   
80     32     
-16    80     
-112   112    
272    112    
-16    96     
-160   48     
48     16     
-32    32     
0      96     
176    96     
-144   80     
64     -144   
-64    -128   
16     80     
144    0      
32     80     
352    16     
-224   160    
272    -2704  
-80    112    
32     -224   
64     224    
-32    144    
96     144    
-96    32     
112    64     
0      0      
32     176    
48     208    
-48    32     
208    96     
32     -304   
176    0      
32     -192   
64     192    
128    336    
128    112    
-160   48     
144    224    
-368   48     
32     -608   
176    208    
224    320    
144    176    
32     -16    
128    240    
-96    -32    
16     -96    
32     -112   
0      144    
-48    160    
-16    96     
-112   -80    
144    240    
144    -144   
32     16     
96     176    
-16    -1200  
80     128    
112    -288   
96     112    
-16    -112   
32     -16    
0      -48    
48     128    
-96    -16    
0      160    
96     96     
64     192    
-64    96     
32     16     
-304   -3408  
736    -368   
-928   -48    
640    -528   
944    992    
-432   -1216  
-352   -480   
352    640    
448    592    
128    96     
-224   -64    
64     320    
304    336    
-288   -784   
112    -400   
-272   -1392  
256    208    
224    544    
-160   -304   
112    -208   
-96    -80    
144    224    
-112   -48    
288    -768   
-192   -16    
288    272    
-272   144    
272    -16    
-304   -640   
672    192    
-336   -368   
192    -64    
64     -48    
-32    -240   
32     -1008  
192    -16    
-32    224    
144    32     
-48    -48    
144    64     
128    -384   
-80    48     
16     -192   
112    16     
-144   -96    
64     64     
-32    160    
256    144    
-112   64     
32     -688   
0      -112   
96     496    
-32    80     
128    32     
-48    -16    
112    -128   
-96    -144   
144    96     
128    -16    
-176   -176   
224    0      
-64    -96    
32     -64    
144    -96    
112    -224   
208    80     
64     -1696  
-176   64     
80     -80    
48     48     
80     16     
96     0      
-80    0      
48     -160   
-208   -64    
32     -432   
-976   -272   
160    0      
-160   -112   
48     -160   
-176   -192   
176    -784   
32     224    
96     -64    
-64    384    
-16    -80    
64     -288   
-256   -464   
64     -544   
-208   -272   
160    224    
-304   -32    
-32    16     
-176   -80    
144    -96    
112    -48    
-112   -96    
64     112    
64     -320   
64     0      
-112   -32    
160    80     
64     96     
32     -16    
-192   32     
128    64     
-160   -48    
160    -48    
-576   -64    
208    0      
16     128    
80     -176   
-48    80     
96     -256   
48     32     
-64    32     
16     -240   
-464   -80    
64     160    
-64    48     
96     -192   
-464   -96    
64     -16    
96     64     
0      -64    
-48    96     
16     -208   
-16    144    
112    -304   
-128   -64    
48     48     
64     112    
32     16     
16     0      
-192   64     
176    240    
-224   -128   
32     -224   
64     -64    
208    32     
32     112    
-96    -112   
160    160    
48     0      
-48    -16    
16     112    
-80    -384   
352    -160   
48     0      
48     -112   
16     144    
-16    -16    
128    80     
-32    96     
-464   -192   
208    640    
48     80     
96     128    
160    416    
-688   80     
-288   -208   
-800   -48    
96     -160   
0      -80    
-16    -48    
48     0      
48     -64    
160    -48    
32     208    
-320   -320   
0      240    
-80    -288   
-16    160    
32     352    
-192   160    
-224   -320   
-80    96     
64     16     
-16    32     
-176   48     
-736   -112   
-16    -128   
-48    48     
64     128    
-16    -16    
16     240    
-80    -96    
-144   0      
-176   80     
-16    0      
0      128    
-224   16     
80     96     
-32    112    
-272   128    
-720   0      
0      32     
32     64     
-192   592    
-128   -464   
-192   480    
-48    -144   
-624   272    
416    288    
32     -128   
16     0      
-144   -144   
-16    -32    
-80    -64    
-64    64     
80     80     
32     112    
-960   -32    
48     112    
-80    -64    
32     176    
48     80     
-64    -16    
48     16     
160    112    
-64    112    
112    48     
-224   96     
-48    80     
160    192    
-48    48     
160    176    
-848   -208   
256    96     
-208   -96    
176    128    
32     128    
-16    112    
-160   -160   
48     112    
-128   176    
208    -64    
-144   80     
80     192    
-16    144    
-64    -48    
-32    -80    
-336   -16    
112    224    
0      -256   
96     0      
-272   176    
64     -16    
-16    160    
-256   -96    
160    32     
-192   144    
64     32     
-192   -144   
64     32     
-224   -80    
64     112    
-160   -16    
80     224    
-1040  -48    
-80    64     
32     80     
-96    112    
48     96     
-144   0      
176    128    
-16    96     
16     112    
-112   -32    
0      32     
-16    0      
32     -16    
-112   -48    
96     336    
-160   144    
-48    -32    
176    48     
16     112    
-80    192    
-32    32     
64     0      
-160   80     
80     384    
-256   -240   
336    32     
-160   16     
144    176    
-192   -80    
144    144    
-64    80     
0      112    
96     160    
80     0      
112    176    
-208   32     
112    176    
-64    128    
-64    16     
96     64     
32     96     
-80    -32    
96     256    
-64    -128   
-80    48     
112    192    
128    208    
80     96     
-64    32     
-64    32     
160    64     
-80    -32    
64     96     
96     160    
64     32     
-144   160    
-48    0      
0      32     
-16    -32    
-128   48     
176    240    
112    176    
96     256    
-112   -16    
80     400    
80     112    
352    96     
-224   48     
-16    112    
16     32     
224    272    
16     256    
48     224    
-112   192    
-64    48     
64     96     
32     32     
96     128    
32     -64    
-64    176    
16     96     
32     96     
-16    64     
80     208    
-144   16     
128    240    
-272   -288   
144    0      
16     208    
80     48     
0      96     
64     16     
96     112    
96     96     
-64    -80    
32     48     
0      48     
96     304    
96     96     
-80    128    
16     176    
-32    -176   
48     -608   
0      160    
112    64     
112    -288   
224    512    
-48    -112   
32     48     
-64    176    
32     -96    
176    32     
-16    64     
0      160    
-240   -160   
128    144    
16     48     
16     -640   
-16    0      
224    80     
144    320    
64     80     
-192   80     
272    352    
-48    -144   
-16    96     
64     -32    
48     176    
112    128    
-64    0      
0      96     
256    16     
-48    -160   
96     80     
-32    -384   
80     64     
304    224    
208    208    
-640   -208   
-192   -240   
240    1008   
64     208    
160    80     
-240   -96    
-160   96     
-16    -32    
96     144    
64     0      
128    288    
112    272    
-48    96     
32     -16    
176    -48    
-48    0      
96     208    
48     -272   
0      16     
208    192    
-32    -48    
192    0      
0      -80    
272    -176   
144    256    
-64    352    
288    -224   
-96    208    
-16    -752   
144    96     
0      -608   
80     -176   
-16    48     
192    144    
48     144    
-160   160    
-144   -320   
160    -288   
128    144    
-16    16     
80     256    
32     -176   
-64    48     
80     -112   
-32    144    
0      -2256  
48     208    
128    48     
-16    256    
112    16     
16     288    
48     48     
-48    -80    
32     32     
256    352    
-512   -384   
0      -368   
96     -144   
16     16     
16     80     
-96    -48    
192    16     
64     64     
0      176    
-32    112    
0      -176   
-16    144    
64     -144   
32     128    
48     -480   
64     112    
80     -544   
-96    -16    
96     192    
96     320    
144    -176   
48     128    
224    256    
-128   304    
-160   -144   
176    240    
80     80     
-112   -48    
64     -16    
320    432    
80     304    
-32    -128   
96     32     
240    -160   
112    160    
-96    -96    
80     -864   
64     16     
80     -1728  
96     96     
128    80     
128    -896   
-48    16     
16     -240   
0      -112   
160    96     
16     -96    
112    160    
-16    -128   
128    160    
0      -64    
48     -240   
128    128    
80     -16    
64     -128   
0      -192   
64     -416   
32     -176   
64     -448   
-32    -176   
128    -336   
0      -224   
240    272    
-192   -64    
64     -128   
-32    128    
64     -176   
-32    160    
96     -336   
48     32     
-320   -160   
112    -16    
-32    -176   
176    32     
48     -160   
64     -800   
96     -32    
96     -224   
272    272    
-96    -240   
128    112    
32     -160   
32     96     
-128   16     
80     0      
-16    -144   
80     -240   
-544   -32    
80     -368   
32     -48    
224    80     
112    32     
-16    -96    
32     128    
32     -128   
112    144    
-32    80     
48     -176   
-48    32     
176    240    
-48    704    
-144   -720   
-1456  -224   
256    -336   
-64    0      
16     -64    
80     80     
96     208    
-32    32     
48     -688   
-80    -288   
160    -80    
192    96     
-64    80     
112    272    
-272   -368   
48     -416   
0      -144   
192    80     
-240   160    
48     256    
-16    80     
80     -672   
16     272    
16     -352   
-32    64     
128    0      
288    0      
-112   48     
32     -128   
-32    96     
144    -96    
32     32     
16     48     
-64    256    
0      -176   
-176   80     
208    -416   
-80    32     
96     -352   
1136   -1952  
-224   -416   
992    48     
-352   176    
752    -336   
-448   -112   
-192   -720   
384    672    
96     -352   
-544   48     
-176   -32    
208    -176   
-128   80     
384    -240   
-96    -128   
128    64     
-496   48     
208    -32    
-112   96     
112    16     
-48    48     
112    80     
-128   32     
32     -64    
-192   -160   
32     32     
208    208    
96     16     
32     48     
-96    -448   
64     -16    
128    256    
32     80     
16     64     
-32    -32    
-48    32     
32     -256   
-144   16     
112    160    
128    112    
-144   -80    
-64    144    
-320   -272   
128    240    
-496   -128   
-576   32     
32     80     
-144   160    
-176   -144   
-1088  -16    
-192   48     
0      64     
16     80     
-32    -128   
-160   0      
-608   -192   
96     80     
-352   -240   
-16    192    
64     -32    
-16    128    
16     64     
-16    16     
-80    16     
16     128    
-48    208    
32     32     
-16    -128   
144    -208   
-32    240    
-272   -32    
80     80     
192    -64    
-64    240    
-80    -32    
48     288    
-16    192    
-16    128    
-16    48     
48     -160   
96     192    
-352   -32    
96     128    
-800   -64    
32     -64    
144    -32    
-48    48     
224    -64    
-160   -16    
-48    128    
-112   -16    
-16    48     
-128   -80    
48     48     
-112   -32    
64     240    
-544   -224   
32     16     
-400   -160   
80     32     
16     0      
16     48     
-96    48     
176    208    
-96    -48    
32     64     
-224   -256   
144    -48    
-80    64     
64     128    
112    32     
-96    48     
-96    112    
-16    -16    
48     208    
-176   -144   
176    208    
48     416    
-64    -32    
-32    -384   
32     128    
64     -32    
16     -16    
-48    144    
-272   -48    
320    544    
-224   144    
320    160    
-352   -144   
32     128    
16     -176   
80     288    
32     0      
0      32     
0      128    
-48    192    
0      -48    
-64    -304   
-160   112    
32     208    
-32    64     
-16    -176   
-64    80     
-80    0      
48     48     
-160   -32    
-80    288    
32     112    
-80    144    
16     48     
48     -32    
-128   -128   
96     80     
64     -256   
16     -16    
-64    160    
-192   16     
112    208    
-64    -32    
96     128    
16     176    
-16    64     
80     32     
16     192    
80     384    
-80    672    
-48    176    
16     -528   
112    64     
16     48     
-16    160    
32     -48    
16     32     
-64    0      
144    160    
0      96     
64     32     
16     -144   
16     -32    
80     128    
48     304    
-128   160    
-112   -16    
16     48     
112    240    
64     160    
-256   -48    
-16    96     
64     -128   
96     48     
-32    112    
-64    112    
48     64     
-32    224    
-32    -96    
-64    208    
96     128    
-720   -1568  
-704   -1216  
848    112    
848    528    
-32    416    
-304   176    
-320   336    
112    0      
192    16     
0      -176   
16     176    
-144   112    
80     80     
128    144    
0      -32    
-48    64     
160    -128   
-128   16     
96     176    
-48    16     
-144   32     
-48    128    
32     192    
256    32     
-496   -464   
128    -160   
-32    112    
224    480    
-576   -256   
96     112    
-32    128    
48     128    
-128   16     
64     256    
-128   -144   
64     240    
-80    112    
80     160    
-176   -144   
256    48     
-240   -16    
128    144    
-16    176    
96     -32    
-80    128    
80     -208   
-16    -208   
80     -512   
304    304    
368    448    
-128   -144   
80     128    
48     32     
-128   160    
96     176    
-16    192    
80     -16    
240    1120   
-352   -480   
160    224    
-80    -256   
128    80     
64     64     
-112   32     
48     -144   
-16    -64    
-48    80     
32     -64    
96     -16    
-32    192    
48     0      
32     128    
96     144    
-128   112    
-64    -48    
16     -240   
80     -272   
96     176    
80     304    
0      320    
-96    -608   
144    32     
96     -512   
80     16     
-80    64     
208    96     
48     304    
-160   64     
96     16     
48     176    
0      -48    
48     208    
-32    64     
32     80     
176    240    
16     96     
-80    64     
112    160    
32     384    
256    64     
-128   320    
-96    -208   
16     16     
112    -96    
256    96     
-208   -144   
112    208    
-16    16     
128    -128   
-64    64     
128    -144   
48     48     
32     -464   
48     208    
64     -352   
64     128    
-64    16     
192    288    
-192   -64    
176    464    
-320   144    
240    144    
-160   64     
128    -80    
48     272    
160    -224   
0      288    
16     -48    
32     320    
160    -704   
-48    -16    
0      0      
208    272    
-48    160    
-32    -16    
208    192    
-80    128    
208    128    
-144   -208   
64     64     
64     -240   
64     112    
-16    -32    
64     160    
80     -304   
0      160    
288    512    
64     320    
64     304    
-64    -16    
16     -64    
48     48     
80     16     
-32    -720   
48     160    
64     -80    
48     112    
144    144    
-192   96     
16     -176   
-48    -16    
16     32     
48     48     
-32    0      
160    240    
32     -208   
-16    -272   
128    336    
-16    -112   
96     176    
64     -144   
128    304    
-128   -48    
176    112    
-64    -112   
160    192    
128    320    
-176   304    
-80    48     
80     -976   
112    -48    
-16    112    
0      -304   
176    -16    
96     -1312  
-80    0      
0      208    
80     16     
128    64     
32     128    
80     80     
96     128    
-48    -64    
0      -16    
272    -624   
112    64     
-400   112    
-720   -544   
160    960    
-64    -1024  
-720   -432   
-48    -624   
-288   32     
256    -128   
-704   -400   
64     -656   
160    592    
336    -176   
-208   32     
48     -48    
320    128    
-544   80     
160    -128   
-32    80     
112    -160   
64     128    
160    -240   
-112   16     
256    -2192  
-128   112    
320    -368   
-320   128    
464    -288   
-240   288    
224    -48    
-240   256    
0      -144   
64     -32    
-720   -64    
48     192    
-16    -64    
80     16     
112    -48    
-112   -848   
0      0      
-144   96     
272    64     
80     -16    
-176   128    
-48    -96    
64     -96    
-16    -112   
112    144    
-192   -80    
32     -96    
16     -16    
368    -480   
-80    -16    
96     -48    
224    0      
-128   272    
144    -16    
16     -96    
112    -64    
-112   112    
-16    16     
96     176    
-128   32     
-272   -112   
64     -48    
-2304  -144   
96     -48    
16     64     
80     0      
80     176    
96     -640   
176    0      
16     48     
0      48     
-80    48     
176    0      
16     192    
-48    -256   
16     224    
96     512    
-128   -128   
160    -240   
144    112    
-112   -384   
64     16     
144    -640   
176    80     
-16    -128   
112    64     
16     64     
176    128    
-256   64     
48     -48    
-64    -144   
48     -112   
16     -32    
32     -96    
144    0      
-128   -352   
192    144    
160    -368   
-144   -16    
-112   0      
32     0      
-160   -32    
176    -176   
-128   -96    
112    128    
160    416    
16     -96    
-192   -96    
-16    -32    
144    160    
80     16     
-48    112    
128    16     
32     0      
0      128    
80     -16    
-80    -32    
32     16     
112    256    
432    384    
-256   -64    
-16    -160   
-240   144    
224    128    
-96    80     
-144   -400   
-176   48     
16     -96    
-624   -80    
-16    0      
-192   0      
0      16     
-1184  48     
-160   0      
80     48     
-144   -128   
48     -384   
64     240    
80     -64    
-80    96     
-48    -448   
32     16     
-112   96     
64     176    
-112   32     
32     16     
-320   -192   
-48    0      
-112   80     
-560   64     
48     80     
48     48     
32     -16    
-368   -208   
272    32     
64     384    
288    208    
-112   -80    
32     64     
48     112    
-272   -48    
32     176    
-320   -32    
-144   16     
-240   -192   
304    -48    
-128   -48    
48     256    
-304   -96    
160    128    
48     128    
-96    48     
80     80     
-160   32     
128    0      
-224   64     
-16    -80    
32     144    
-96    -16    
-144   48     
-192   32     
-352   -160   
-96    -48    
64     96     
-48    240    
64     -144   
-128   80     
272    -16    
-32    80     
-96    48     
176    48     
16     112    
128    -64    
192    224    
-48    -80    
-144   -16    
-1008  -512   
608    2864   
-816   752    
96     -480   
144    -464   
480    272    
-480   480    
0      160    
-64    -208   
432    -144   
-496   288    
64     -160   
0      640    
32     -304   
-176   352    
-432   -496   
256    336    
-1504  -400   
624    416    
-368   -48    
160    320    
-16    224    
160    144    
0      48     
-224   -352   
64     32     
-208   32     
320    1088   
-304   -128   
-16    208    
-256   -304   
240    -224   
-640   -336   
32     32     
-128   48     
-160   -48    
-48    -16    
-112   304    
-48    -48    
-128   96     
0      272    
0      96     
0      32     
-112   16     
304    224    
-304   48     
80     480    
-256   -128   
320    592    
-112   96     
96     16     
-80    48     
-32    16     
-128   320    
80     64     
64     80     
-112   -96    
32     -720   
-592   -400   
80     -128   
-96    0      
176    288    
48     224    
0      -16    
-16    192    
-160   -16    
-16    128    
96     160    
-48    176    
64     144    
-96    96     
0      -48    
-64    80     
0      48     
0      80     
240    608    
-208   400    
64     112    
128    64     
80     256    
128    -16    
-208   -16    
112    208    
-32    96     
-160   48     
96     16     
-240   -400   
64     0      
176    160    
64     288    
-128   -16    
-112   80     
80     -16    
208    64     
160    400    
0      368    
-128   160    
-96    -128   
256    80     
64     240    
-208   128    
-80    -128   
192    112    
16     -112   
64     160    
-304   -384   
128    96     
144    96     
32     80     
80     224    
-48    48     
-96    16     
-32    -16    
208    224    
48     208    
16     288    
0      80     
96     224    
-272   -64    
352    0      
-240   144    
336    64     
-112   272    
48     64     
-80    -192   
112    32     
32     64     
96     0      
-64    144    
160    144    
-48    96     
-144   64     
144    0      
-64    96     
112    64     
144    304    
-16    64     
160    64     
-304   80     
144    128    
128    64     
32     112    
-48    48     
-48    32     
80     48     
-112   160    
32     -320   
-16    192    
-16    32     
48     -176   
-16    96     
96     -2288  
-48    208    
-32    96     
192    96     
16     48     
176    176    
-16    -304   
96     96     
-48    176    
80     224    
-160   128    
16     144    
0      48     
-48    -720   
112    16     
-80    -272   
0      -48    
-96    144    
192    208    
128    0      
144    112    
-128   144    
128    304    
-112   64     
-64    -96    
240    192    
32     -16    
80     112    
96     -48    
64     128    
48     160    
32     208    
64     -800   
-96    0      
0      -32    
192    16     
48     -352   
16     0      
64     192    
32     160    
-112   32     
0      -112   
224    400    
-80    -192   
48     224    
-32    -128   
-896   -2032  
640    -992   
-1344  -416   
160    -432   
192    480    
-224   -160   
800    1056   
-816   -336   
480    480    
-208   -608   
96     160    
-80    -288   
160    528    
48     -208   
0      -32    
128    -176   
-16    -64    
128    64     
80     -176   
112    -32    
-96    128    
48     160    
80     112    
-16    64     
176    16     
-112   -16    
224    128    
-272   -448   
224    80     
-32    -544   
160    80     
-128   16     
144    96     
-64    -480   
96     80     
-16    32     
112    112    
-16    208    
-48    96     
96     32     
16     -160   
-32    192    
160    -256   
64     192    
-128   -272   
112    48     
-32    -64    
160    -160   
224    -320   
-320   160    
224    80     
64     80     
16     112    
96     16     
48     48     
128    -272   
96     160    
-80    -32    
272    240    
-48    -96    
128    80     
16     -64    
112    160    
32     -336   
80     -48    
-48    96     
96     -2016  
-160   64     
-208   -160   
64     -1104  
-32    16     
112    0      
-128   -48    
96     -16    
128    128    
-96    -32    
160    32     
-80    240    
48     -48    
224    -528   
112    96     
-48    -160   
32     -448   
-624   176    
160    -288   
144    80     
-176   -336   
144    -224   
-32    -528   
64     -176   
96     352    
208    368    
-224   0      
96     -16    
64     -176   
-32    -48    
0      -176   
80     -400   
-16    0      
64     0      
32     -16    
0      -64    
80     -96    
32     -368   
176    80     
48     240    
160    144    
48     -320   
80     112    
208    64     
0      144    
-96    32     
112    -32    
-160   -48    
64     -176   
-624   -16    
128    144    
-32    32     
112    -64    
-64    -96    
48     -16    
-32    64     
144    -80    
-80    80     
96     80     
-64    -336   
-288   -272   
160    -144   
-32    0      
-80    -128   
-112   16     
32     0      
16     -48    
64     -240   
80     -272   
80     -144   
-48    352    
224    368    
-176   -96    
208    0      
48     16     
-160   -96    
176    48     
-224   16     
176    16     
-304   96     
176    176    
-496   64     
128    -144   
-32    -128   
96     -256   
-16    112    
48     -352   
112    144    
144    -256   
128    64     
-48    48     
304    176    
-272   16     
160    -80    
-576   -48    
160    -112   
-48    96     
-48    -64    
32     16     
-80    -272   
224    288    
112    -288   
112    96     
-352   -112   
240    -96    
-80    80     
80     -16    
-224   -16    
96     -160   
-208   160    
-48    -240   
32     160    
16     -80    
160    96     
-64    -336   
96     80     
-16    -576   
96     128    
-192   112    
-64    -192   
-16    -16    
208    160    
-144   -80    
-144   -32    
0      80     
224    192    
-112   -16    
336    -176   
0      96     
144    -176   
-192   80     
160    240    
-1088  -1728  
448    -624   
-432   224    
528    784    
-384   -96    
304    576    
-176   -448   
352    176    
-240   240    
48     -400   
-256   32     
256    -528   
-240   240    
192    -528   
96     448    
32     -272   
48     560    
-896   -224   
96     448    
-688   -48    
176    80     
-160   -96    
-80    -64    
48     -144   
-80    -512   
-304   -240   
304    544    
64     112    
-336   -112   
144    32     
-112   208    
-32    -96    
-48    112    
-64    0      
-80    320    
-32    -48    
-320   -288   
-96    32     
208    -48    
-96    416    
-96    -160   
16     160    
-304   -144   
192    48     
0      160    
-64    -64    
-48    0      
128    -112   
-144   16     
-96    80     
-96    32     
-576   -16    
16     160    
32     112    
-48    32     
64     -32    
0      0      
-80    -64    
-128   -64    
80     48     
32     128    
-16    176    
-128   -272   
80     0      
-208   -16    
32     32     
-32    272    
-96    32     
-208   -96    
-192   112    
-128   -208   
112    80     
-80    -144   
80     -64    
64     96     
96     48     
-64    -48    
-32    0      
48     128    
144    176    
-80    176    
80     48     
80     464    
-224   32     
224    -64    
-144   -256   
48     -192   
64     48     
-48    112    
0      112    
-224   -64    
112    192    
-80    208    
64     160    
-144   -128   
-64    -16    
-48    -96    
16     48     
-288   -80    
32     80     
-880   16     
128    128    
-16    160    
144    -32    
32     240    
-80    48     
128    128    
0      16     
-128   16     
-80    -144   
-144   -48    
-16    -32    
176    192    
-176   208    
-112   192    
-16    -16    
-208   -64    
176    48     
-208   -64    
240    176    
-16    144    
144    176    
176    272    
0      64     
-144   112    
-32    144    
128    96     
48     64     
-64    48     
64     48     
-176   0      
-256   192    
304    112    
32     -256   
-16    144    
-256   160    
384    96     
-48    0      
-96    96     
48     208    
112    96     
32     80     
288    240    
-176   48     
176    144    
-48    320    
-96    112    
128    96     
-16    16     
-32    48     
-32    32     
-80    -48    
-32    96     
144    112    
-160   112    
32     48     
-240   -288   
64     -16    
-160   -32    
96     208    
80     80     
32     112    
-48    128    
80     144    
-160   64     
112    -128   
192    -48    
144    288    
-32    160    
-112   48     
48     224    
-176   -128   
144    256    
0      -48    
16     144    
96     48     
-32    32     
160    -32    
80     144    
112    352    
-160   80     
-96    0      
144    80     
48     160    
-16    96     
32     64     
32     64     
0      64     
-80    -32    
160    16     
-64    80     
-48    -16    
144    80     
128    64     
0      224    
96     64     
-400   864    
-384   -704   
1040   -416   
-1088  704    
-304   -480   
320    704    
-256   -384   
-256   -336   
336    -208   
-144   400    
480    0      
-304   176    
272    -368   
176    672    
-32    -304   
32     400    
-32    -160   
64     272    
272    -48    
112    288    
-64    -64    
-96    256    
-32    176    
320    16     
-176   48     
160    -80    
-128   208    
48     112    
-16    208    
48     0      
64     112    
-80    128    
144    256    
-128   16     
128    128    
-192   -128   
16     -32    
0      -16    
64     -352   
144    64     
0      96     
-128   128    
96     96     
64     128    
-16    32     
-16    112    
-16    32     
112    80     
-128   -32    
128    80     
16     -16    
0      -48    
32     208    
64     -1552  
-16    96     
-16    144    
80     64     
-32    96     
128    144    
-16    16     
64     -32    
-16    128    
-16    112    
96     96     
112    176    
48     80     
-80    -80    
48     112    
-16    -352   
176    176    
-80    -208   
192    96     
-48    48     
80     96     
16     -128   
-80    -16    
176    96     
160    16     
16     -16    
-240   -208   
80     -16    
144    -64    
128    192    
96     -176   
-80    80     
224    -400   
64     208    
-32    -496   
-16    48     
0      -368   
128    208    
-32    32     
80     64     
64     16     
64     -96    
80     -192   
-96    -416   
80     -16    
240    16     
0      112    
32     96     
-48    96     
64     -1504  
112    96     
32     64     
32     160    
160    208    
-48    -32    
0      -128   
16     32     
192    112    
-32    -192   
-16    112    
80     -160   
64     144    
16     -432   
48     128    
16     -48    
80     112    
-16    32     
48     64     
-16    112    
208    224    
64     -80    
-48    -112   
-32    192    
128    -624   
80     144    
-32    -16    
160    0      
-64    -160   
144    256    
64     -16    
-128   32     
112    112    
-32    0      
288    368    
-320   0      
272    128    
-160   -240   
224    0      
-32    -64    
160    144    
-32    16     
48     128    
176    112    
-144   144    
96     -672   
128    -48    
112    208    
-112   -576   
0      48     
-128   64     
256    -704   
-192   -304   
-16    -2848  
32     48     
208    -64    
-112   288    
-112   -112   
224    64     
16     80     
160    32     
-176   16     
96     16     
272    176    
-384   -176   
112    -128   
-48    32     
144    -224   
-64    -432   
32     96     
80     -1472  
64     -176   
-48    -32    
128    0      
-240   96     
176    64     
-16    32     
-32    48     
16     -208   
192    64     
-192   0      
-240   -128   
32     16     
336    240    
0      -48    
-128   -128   
240    0      
240    -1280  
-96    -32    
-64    288    
-48    112    
-48    -304   
192    16     
128    -240   
0      96     
-1072  -2160  
1328   32     
-928   96     
736    -560   
-352   -384   
624    -176   
-368   608    
304    96     
-336   -160   
-64    -464   
128    336    
-96    80     
64     -160   
112    80     
112    48     
-112   80     
-224   -848   
256    64     
80     -48    
128    -80    
80     176    
-112   160    
192    96     
-176   192    
112    -1328  
-16    96     
0      96     
128    16     
-208   -32    
32     112    
96     0      
32     16     
-256   -16    
-48    -32    
-176   -96    
16     -16    
112    -160   
16     -224   
-16    80     
16     -464   
160    0      
-32    176    
240    16     
-128   -16    
-96    -256   
128    128    
0      16     
176    432    
-368   -208   
208    -16    
-96    -128   
-544   -16    
0      -240   
0      16     
256    -704   
-48    32     
128    -512   
-64    -240   
-32    -80    
144    112    
-80    80     
64     -32    
-32    -32    
32     -64    
-336   32     
32     -48    
16     32     
80     -16    
16     16     
160    -192   
-112   96     
-144   0      
160    -128   
-32    96     
16     48     
-112   -48    
0      176    
-112   176    
32     -112   
96     80     
-32    -16    
32     128    
112    128    
-144   112    
80     -464   
192    144    
-160   128    
208    96     
-32    -16    
80     16     
48     128    
128    240    
-176   32     
240    32     
-16    96     
176    -16    
-192   32     
-144   -208   
-32    32     
-400   -192   
32     48     
-16    160    
-288   32     
-208   0      
-1120  -288   
-32    -32    
0      -16    
96     320    
-96    0      
-32    -64    
-288   -112   
112    128    
-320   -128   
-128   80     
-96    -32    
144    -48    
-368   -112   
48     -64    
-240   0      
16     -16    
64     -112   
-208   80     
0      -48    
208    64     
-192   -192   
-192   -96    
-80    240    
240    176    
-64    240    
176    80     
-128   224    
-16    176    
96     -112   
-224   112    
0      -64    
112    64     
-256   240    
0      64     
-272   16     
-176   112    
32     32     
208    192    
112    -128   
-112   144    
0      48     
128    224    
-192   144    
80     -16    
-16    96     
-48    32     
48     64     
-224   -16    
-64    48     
128    -16    
-80    64     
0      48     
-112   -192   
-32    -160   
176    64     
16     64     
-16    32     
-16    -80    
32     16     
16     48     
16     80     
80     -176   
-256   32     
-96    -624   
-112   96     
96     304    
-272   -112   
-16    336    
128    -192   
-144   16     
80     48     
-48    288    
-64    96     
-48    176    
-48    32     
16     -80    
64     32     
64     0      
48     224    
-208   0      
-32    128    
64     176    
208    -16    
112    64     
-16    96     
0      48     
-80    96     
32     144    
-208   0      
64     -16    
144    80     
128    64     
-320   -64    
1040   -1536  
-992   -1392  
848    -96    
-976   -336   
-64    624    
112    -128   
-512   160    
480    336    
-288   48     
-48    -416   
-128   304    
-32    0      
96     96     
0      48     
-16    -96    
64     80     
-192   32     
176    240    
-176   64     
-32    -80    
32     -96    
-48    16     
144    64     
96     80     
32     128    
-64    0      
64     96     
-144   48     
96     16     
-16    160    
64     80     
64     16     
-32    208    
80     112    
-240   96     
208    -48    
48     112    
-32    112    
16     112    
-32    112    
32     128    
-64    64     
-32    0      
16     -112   
0      32     
128    -32    
-80    32     
96     80     
64     48     
0      -48    
96     112    
16     96     
48     48     
64     128    
-112   0      
112    64     
80     48     
64     80     
32     112    
-208   -400   
320    336    
16     208    
-32    -48    
176    288    
-80    -32    
96     176    
-48    304    
-192   64     
48     -16    
96     80     
32     64     
96     32     
-112   -64    
224    144    
-144   -32    
-32    -16    
16     -64    
-80    272    
-208   0      
80     48     
-96    128    
-48    -16    
96     192    
64     304    
-32    112    
-32    0      
32     16     
-128   -96    
32     32     
16     48     
16     160    
80     272    
-48    96     
-96    16     
128    128    
-16    32     
80     32     
32     96     
16     96     
48     112    
0      64     
16     64     
-16    32     
16     96     
16     176    
96     112    
96     160    
-112   -1088  
192    160    
-80    64     
112    48     
-48    96     
160    176    
-32    48     
-16    128    
80     176    
-96    0      
64     112    
-16    128    
128    -208   
-144   -320   
16     80     
128    -1008  
48     0      
80     224    
0      352    
80     48     
32     -64    
48     368    
32     0      
-32    16     
64     192    
64     -224   
16     144    
-144   -16    
48     -448   
16     -96    
304    16     
-112   112    
96     64     
-112   48     
224    224    
80     48     
-64    192    
112    32     
-80    -144   
112    144    
-32    240    
16     16     
16     64     
192    64     
-16    176    
-96    -320   
-112   -192   
336    -896   
-128   48     
240    576    
-336   112    
304    48     
80     48     
32     -80    
-32    160    
-192   -48    
208    128    
48     80     
-224   -48    
288    -112   
0      -304   
160    160    
-128   -96    
-32    32     
96     -432   
320    -128   
32     144    
-240   -96    
112    -128   
32     352    
192    368    
-464   -16    
-256   -176   
80     -256   
304    -48    
128    -112   
32     -528   
0      -320   
304    112    
32     -640   
-32    176    
128    112    
0      192    
16     -16    
-32    160    
32     48     
64     16     
160    160    
96     -64    
16     112    
1824   -2144  
400    1312   
-352   -480   
-416   -416   
480    304    
-336   -240   
-160   -272   
16     528    
176    -112   
-128   176    
-176   -48    
128    -400   
16     16     
32     0      
32     96     
0      -368   
112    208    
96     -192   
48     192    
-48    0      
160    256    
16     160    
80     48     
-176   64     
272    48     
-96    176    
208    64     
-32    -64    
16     -128   
48     192    
176    -224   
-32    160    
32     64     
112    80     
-32    64     
176    -224   
-80    128    
32     -2288  
144    112    
-400   -112   
48     -272   
96     16     
64     -864   
128    -128   
-80    128    
144    16     
48     144    
128    304    
-320   128    
288    -192   
32     -336   
-32    32     
128    -80    
-32    32     
-240   16     
160    32     
-64    -240   
224    -352   
-240   -32    
224    -688   
144    32     
-48    -96    
16     -224   
16     -528   
0      -112   
128    -256   
-64    144    
0      48     
32     -16    
16     -32    
80     -176   
112    112    
-96    0      
160    -64    
144    -32    
32     -128   
-64    -864   
16     -112   
48     -48    
0      176    
-16    -96    
208    144    
48     -80    
-144   -144   
-80    32     
-48    -320   
160    -144   
160    208    
-176   32     
208    -128   
16     0      
16     -448   
16     48     
224    80     
-32    224    
0      96     
-192   0      
96     -32    
-48    -112   
32     96     
-160   -64    
-48    48     
-80    -368   
64     64     
-32    -320   
-112   192    
0      -128   
64     -32    
-64    -1216  
96     128    
80     -112   
64     64     
-96    64     
32     96     
208    96     
112    -80    
-640   32     
144    -128   
-352   16     
80     16     
32     96     
384    64     
-272   64     
208    -448   
-112   -48    
336    -112   
-496   -496   
112    80     
-112   -64    
240    -64    
64     0      
-368   160    
0      32     
-240   -32    
144    128    
-464   -112   
128    -256   
-80    64     
96     -352   
176    112    
0      -1120  
112    -48    
-128   -224   
-160   -272   
-544   -16    
0      -32    
-48    288    
-96    48     
-48    -64    
48     -256   
-496   -16    
16     -176   
80     -80    
64     -144   
-48    176    
-64    16     
-64    16     
-80    128    
64     -144   
-96    -96    
96     208    
-176   -48    
48     144    
-48    128    
-208   0      
-256   192    
96     208    
-48    -240   
-64    -48    
0      -64    
-16    176    
0      96     
80     96     
-80    64     
-160   -336   
128    16     
224    208    
32     -128   
-144   160    
112    -48    
-48    48     
-240   -48    
-16    112    
-480   -336   
-1136  32     
-240   -160   
-608   144    
0      192    
-224   -16    
-112   -32    
-112   64     
-128   -128   
80     48     
64     96     
-128   -32    
-32    144    
-320   -208   
-256   -1200  
1072   -272   
-240   656    
-464   304    
-48    -32    
96     160    
-192   -224   
-400   0      
-544   416    
48     64     
64     -32    
64     208    
-48    144    
-64    0      
-112   -144   
144    128    
32     -16    
-240   -416   
96     -48    
96     176    
-192   0      
-128   128    
144    112    
-304   -96    
-48    48     
-64    80     
144    112    
-80    -16    
96     160    
-160   -416   
160    160    
16     80     
-160   -96    
-112   -32    
0      -176   
-96    112    
112    160    
-64    272    
-384   -112   
-32    16     
-592   -32    
48     32     
-96    32     
48     96     
-96    -80    
-96    48     
0      64     
-16    160    
48     208    
32     32     
112    32     
-16    16     
-112   -112   
-96    0      
64     80     
-192   -96    
48     -112   
-528   -32    
176    176    
32     16     
-128   80     
48     240    
-160   -48    
192    256    
-320   -32    
48     144    
-96    -32    
48     16     
-128   16     
112    48     
-80    16     
16     144    
-416   -80    
144    288    
-32    160    
32     96     
304    848    
48     352    
16     112    
-176   -304   
80     -256   
-48    -32    
0      -48    
16     128    
-16    -112   
-208   -96    
48     256    
-384   -192   
48     48     
-32    96     
64     16     
-16    16     
0      80     
-16    32     
32     144    
0      48     
64     128    
16     192    
-80    -16    
96     128    
-224   0      
128    96     
16     16     
-16    64     
48     144    
-16    -160   
-32    -16    
-48    160    
32     16     
80     128    
-80    16     
32     96     
0      128    
-128   -48    
80     96     
-80    -48    
112    240    
-32    -32    
-64    -64    
16     48     
32     144    
208    256    
-160   -16    
-128   32     
112    64     
32     0      
0      32     
-176   80     
-48    -128   
0      112    
-80    16     
144    48     
0      224    
-96    16     
96     160    
272    976    
-96    160    
32     -272   
16     64     
256    -48    
-48    192    
16     160    
128    80     
-128   -48    
80     48     
-48    -192   
-112   -96    
288    368    
-208   160    
0      64     
48     64     
16     112    
48     -288   
256    -304   
-160   -16    
144    112    
-240   -192   
48     64     
96     128    
160    160    
-144   -160   
96     48     
80     96     
112    80     
-112   -144   
80     304    
48     -96    
-32    0      
64     176    
32     48     
48     -16    
-48    32     
-64    80     
32     16     
32     144    
0      -48    
160    -192   
80     96     
112    16     
16     320    
16     64     
-64    176    
96     64     
96     64     
112    -64    
64     192    
80     -48    
64     224    
-16    128    
48     112    
48     176    
32     -368   
64     288    
0      48     
-16    192    
64     -32    
-448   -2512  
928    -144   
-480   144    
320    -96    
80     -992   
144    208    
176    608    
-224   -16    
80     384    
224    16     
32     -1968  
-176   80     
48     64     
-48    48     
224    64     
-208   64     
160    128    
-16    112    
32     0      
-16    48     
16     -160   
48     240    
-32    80     
96     -160   
-64    64     
160    -176   
-144   -16    
0      192    
176    160    
32     48     
-64    144    
0      128    
64     112    
32     -64    
64     128    
16     16     
-80    128    
128    -64    
-192   0      
256    112    
16     -48    
-32    144    
48     -848   
16     48     
192    48     
-112   96     
288    448    
-256   96     
128    64     
80     16     
-32    -64    
112    128    
-48    160    
176    -32    
48     32     
64     -208   
-96    160    
144    -272   
0      144    
48     -2656  
-32    0      
128    112    
16     96     
48     -48    
64     192    
-112   80     
112    96     
48     -32    
64     0      
-80    80     
192    -272   
128    256    
-16    -432   
64     96     
80     -272   
32     320    
-128   0      
176    256    
-96    16     
160    32     
-16    -96    
128    128    
-64    48     
-32    -144   
224    112    
32     112    
-64    -64    
0      -16    
-176   -48    
272    -128   
-144   128    
128    96     
-64    192    
64     32     
-16    -16    
96     32     
-112   96     
112    96     
96     -160   
16     32     
16     -144   
224    80     
-64    -176   
96     96     
-32    -272   
80     112    
0      -64    
0      192    
224    304    
-80    256    
240    16     
-208   -224   
96     32     
96     0      
256    208    
48     -144   
-32    144    
-176   32     
320    208    
272    -160   
-256   128    
336    192    
96     -704   
-96    -64    
-816   -176   
80     -1264  
96     -48    
-32    -832   
0      -144   
-64    224    
128    -144   
208    144    
-96    64     
272    160    
16     -32    
144    -16    
-160   144    
224    -480   
-64    224    
-128   16     
-64    16     
176    -96    
-16    -160   
208    -80    
-16    -1360  
16     -336   
80     192    
80     48     
48     96     
0      -112   
80     -320   
-16    128    
-48    -240   
-16    -144   
-96    160    
48     -224   
-48    96     
208    512    
-48    -448   
80     -32    
128    32     
80     -608   
64     -16    
112    -48    
48     16     
-32    -224   
-48    -64    
64     208    
112    -16    
64     240    
-80    -160   
-544   -96    
96     -32    
96     -384   
96     48     
96     176    
-224   -352   
-32    -128   
144    -896   
96     80     
144    240    
-64    128    
-16    16     
112    -272   
-80    0      
-48    -160   
-160   96     
48     16     
-112   32     
32     -384   
-16    -224   
80     -1072  
64     -48    
-48    -656   
-32    0      
0      16     
80     48     
-400   2160   
-1184  -1584  
-32    -336   
864    16     
544    1200   
-272   -736   
-736   -192   
688    16     
-16    64     
64     -64    
-160   96     
32     80     
48     80     
112    -48    
-192   -544   
112    96     
128    224    
240    768    
-80    -160   
-448   -320   
160    -64    
-240   -48    
144    176    
-256   176    
208    -80    
-304   112    
160    -448   
-64    64     
80     -192   
48     32     
96     0      
-32    -32    
-272   -48    
64     -80    
16     160    
-96    -448   
32     -192   
-48    -160   
176    240    
-16    -32    
-112   112    
80     -224   
-48    48     
-64    16     
48     80     
-112   48     
128    176    
-256   64     
64     -16    
-256   -80    
240    0      
-240   96     
128    -80    
96     16     
80     -288   
48     336    
-64    240    
272    512    
-288   -176   
80     80     
-288   16     
160    -96    
-64    -16    
96     16     
-112   32     
160    -192   
160    112    
48     -144   
-176   96     
-544   -96    
80     192    
-240   -96    
-1088  -64    
-144   -112   
-784   96     
-112   16     
-384   672    
-128   464    
-224   176    
-96    -160   
-80    -128   
160    -304   
-160   80     
16     48     
-304   -48    
80     -16    
-144   -336   
-80    160    
-96    -32    
0      64     
-48    144    
-128   288    
-208   -112   
-976   -48    
0      48     
208    176    
-176   32     
-96    64     
112    256    
-80    16     
-32    0      
-80    0      
64     64     
-80    112    
-80    -32    
32     128    
16     256    
-112   -32    
32     128    
-112   64     
-816   -80    
-112   16     
64     -160   
144    96     
-192   -128   
48     -64    
-48    -160   
-96    -80    
0      -288   
0      0      
-128   -96    
32     96     
-16    160    
0      128    
-16    512    
-736   -240   
192    48     
-400   -144   
80     -208   
-32    -192   
80     224    
-16    -208   
64     48     
-96    80     
-160   144    
48     656    
-128   -128   
-80    -160   
-80    0      
16     96     
-384   -112   
160    272    
-240   -32    
-16    0      
0      0      
64     224    
-64    112    
-80    -192   
32     96     
80     160    
-16    32     
-80    208    
224    144    
-352   -96    
240    128    
-128   -32    
48     32     
-512   176    
112    176    
48     128    
-128   -144   
0      192    
-16    80     
16     208    
-96    144    
224    -624   
-224   -304   
480    608    
-320   112    
-112   96     
-96    -32    
160    128    
-736   -48    
-128   0      
16     144    
-32    -32    
112    160    
-16    128    
32     80     
-80    32     
-48    48     
-32    -32    
80     96     
96     32     
176    128    
-192   32     
64     112    
-320   112    
-64    -48    
96     80     
80     32     
48     -144   
-64    -80    
-32    112    
0      32     
160    272    
-128   -64    
32     176    
-32    1344   
-224   32     
-496   -432   
-176   432    
192    128    
32     352    
-80    -160   
112    176    
-240   -400   
144    176    
-16    128    
48     80     
-32    192    
128    16     
-96    16     
-48    32     
-16    112    
0      16     
-160   80     
128    -32    
16     176    
32     128    
160    160    
-128   -144   
64     224    
-144   -80    
176    112    
16     160    
-16    -128   
48     -16    
-176   144    
272    144    
-32    80     
32     16     
0      256    
224    128    
-112   0      
-96    96     
176    16     
48     64     
-48    160    
48     96     
208    112    
-272   48     
144    32     
-32    80     
-16    0      
0      64     
-160   -96    
192    96     
-144   160    
176    176    
-176   32     
96     16     
0      160    
16     -128   
-16    160    
-80    80     
112    -80    
16     272    
-128   160    
-64    48     
-48    -336   
-48    320    
-64    32     
144    64     
96     128    
80     128    
-144   80     
96     96     
64     32     
64     112    
0      224    
-96    64     
160    96     
-128   -64    
144    48     
96     144    
-64    -64    
48     96     
32     80     
-32    -128   
144    32     
-48    160    
-48    -48    
304    400    
-320   -160   
240    48     
-144   0      
64     176    
0      -16    
0      160    
80     240    
-112   -640   
144    128    
-32    96     
-80    96     
96     112    
0      80     
80     80     
64     128    
-16    0      
-16    96     
32     -16    
0      144    
208    128    
-96    -208   
96     192    
0      -16    
128    192    
0      -2192  
-32    80     
48     160    
176    160    
128    272    
-144   -32    
-16    240    
48     112    
240    48     
16     64     
32     368    
-192   0      
208    128    
-80    -336   
256    288    
-48    80     
0      -16    
-48    32     
256    16     
-64    -256   
112    240    
32     48     
-48    96     
96     80     
80     256    
144    -48    
-48    64     
32     64     
160    112    
-176   320    
320    -336   
-32    176    
96     -1248  
-176   144    
192    256    
-48    400    
96     -80    
-144   -16    
128    64     
32     112    
32     112    
96     -176   
32     16     
96     144    
-144   -224   
192    -512   
-400   -224   
160    -64    
128    144    
128    224    
-96    112    
-32    32     
96     192    
48     16     
-48    144    
-112   -224   
16     -48    
160    256    
0      -192   
-32    32     
32     -208   
208    176    
32     0      
-32    176    
-64    -48    
80     144    
-32    64     
32     96     
-32    16     
64     -32    
0      80     
48     -480   
48     80     
224    -320   
48     144    
0      -144   
-144   112    
96     -352   
128    128    
-128   -48    
96     128    
16     16     
240    192    
-48    112    
-16    -208   
-144   224    
-192   1872   
-592   -512   
-320   -656   
-208   -256   
96     -272   
-128   -368   
480    256    
-80    288    
-224   848    
-384   -944   
384    -48    
0      -784   
176    -1040  
112    -80    
64     -176   
16     -16    
96     -448   
240    384    
-128   112    
16     -320   
96     -16    
-32    -144   
32     -128   
-128   -48    
144    -128   
-144   240    
-512   -48    
192    -640   
-144   112    
144    144    
96     -80    
144    -480   
48     -48    
32     192    
32     128    
-32    112    
16     -192   
288    -208   
192    48     
-128   -144   
32     96     
-288   32     
80     48     
-576   -16    
32     -112   
112    -80    
320    48     
-288   -352   
160    -336   
-96    16     
128    -176   
64     144    
64     -160   
-48    304    
48     -128   
64     -272   
32     320    
144    128    
-1040  -464   
288    -128   
16     -128   
-48    -272   
208    448    
-16    -208   
-32    -64    
32     -2384  
-160   96     
-48    -32    
112    112    
48     0      
112    -16    
-112   -32    
64     176    
-160   -144   
96     -112   
-1472  -576   
48     -480   
512    240    
192    0      
-160   -128   
112    -528   
112    128    
208    32     
48     208    
-128   16     
-80    -144   
304    368    
64     176    
-96    -512   
32     16     
-352   208    
112    -112   
-128   0      
16     -208   
32     48     
112    -624   
64     -32    
144    -48    
224    336    
-64    96     
32     -176   
64     64     
112    -64    
80     112    
-16    -16    
-400   -336   
80     -576   
-576   -240   
64     -128   
128    0      
144    -32    
32     64     
112    -1424  
48     -128   
-112   -48    
-80    -128   
-256   48     
112    208    
-560   -48    
0      -160   
-176   -176   
-32    -160   
-64    -96    
128    -224   
-16    256    
160    -576   
16     80     
-16    -320   
192    -32    
-96    32     
64     -224   
-80    32     
32     64     
-176   -96    
208    -16    
-192   0      
-160   -304   
64     -224   
-96    -144   
0      96     
144    -96    
48     176    
-48    160    
-112   160    
160    400    
32     32     
-48    -64    
-16    -16    
64     32     
-16    -96    
0      0      
128    -240   
-80    16     
-512   -112   
96     176    
-480   -128   
80     528    
-128   -64    
-144   -144   
-128   -48    
-544   -96    
-128   144    
256    80     
-528   112    
112    -112   
-80    144    
256    -336   
-32    80     
-192   -32    
0      112    
-464   -80    
0      80     
-208   -48    
-32    48     
-128   112    
-96    -64    
-128   112    
-240   -48    
-160   96     
96     -160   
-96    48     
-320   -80    
-160   144    
96     -160   
112    272    
0      -128   
-240   64     
80     112    
-48    16     
-16    112    
64     -176   
16     80     
-304   48     
96     176    
-1200  16     
16     64     
-128   -768   
112    -432   
-32    -160   
224    48     
112    896    
-272   -512   
512    944    
432    -64    
-128   80     
-288   -160   
160    400    
-272   -144   
0      96     
-208   192    
112    48     
-272   -208   
112    -16    
-64    -80    
32     48     
-176   112    
192    -96    
16     240    
160    -96    
-128   96     
-160   -144   
96     192    
16     16     
-32    160    
-160   -96    
144    224    
-288   -112   
128    112    
-80    0      
-80    96     
112    112    
-336   -192   
144    -32    
-192   128    
224    -96    
-128   144    
0      112    
-64    112    
0      0      
-240   -208   
0      128    
-144   64     
16     128    
-16    48     
-400   48     
240    -48    
-48    80     
-32    128    
64     160    
-160   80     
80     -32    
-80    64     
-80    112    
96     -32    
-128   96     
-144   32     
96     48     
0      96     
64     96     
-80    16     
-48    64     
32     128    
-48    16     
80     -16    
-16    96     
-48    0      
-16    32     
64     32     
0      144    
-48    32     
64     112    
-128   0      
32     -400   
112    240    
32     -128   
160    192    
0      32     
80     96     
16     208    
-176   224    
-160   -16    
208    368    
-256   -16    
352    0      
-224   -48    
128    48     
-272   0      
-80    32     
48     176    
208    576    
-128   96     
-96    -48    
-96    -96    
128    176    
-144   -192   
32     176    
48     64     
0      272    
-80    -48    
-240   -32    
160    64     
-96    -16    
16     64     
-48    -16    
16     160    
-32    32     
32     80     
-176   112    
96     128    
0      -80    
-48    80     
16     16     
160    256    
-64    16     
-32    -16    
224    32     
16     64     
-48    192    
80     176    
-48    -48    
112    192    
-112   160    
272    32     
80     704    
-96    -160   
-32    32     
16     112    
-32    32     
16     128    
-32    16     
-64    96     
80     96     
-48    -16    
-48    -624   
80     208    
128    352    
-32    -160   
-64    -208   
176    0      
-160   160    
192    352    
-352   -32    
112    -176   
-32    128    
-16    144    
32     112    
48     144    
-80    16     
96     96     
64     176    
-64    -112   
352    -96    
224    608    
-112   48     
-256   0      
48     -32    
288    128    
-48    112    
80     128    
-96    64     
192    -1088  
-112   256    
-96    -96    
208    144    
-32    224    
-16    16     
176    48     
-64    112    
32     48     
-64    400    
80     -96    
224    112    
-144   -112   
176    96     
-48    192    
64     -256   
32     80     
48     192    
-32    32     
16     0      
48     48     
16     32     
32     128    
16     128    
-16    16     
48     96     
128    80     
-160   -16    
-1664  -80    
160    16     
32     -144   
144    96     
-256   672    
-1552  -1344  
688    144    
-528   832    
816    -192   
192    560    
-256   848    
-704   -16    
512    656    
-176   -176   
192    -352   
-384   320    
368    -144   
96     48     
-16    -160   
96     -784   
0      -32    
-128   272    
-160   64     
-96    32     
-16    -16    
-112   -192   
-160   224    
288    -160   
-112   112    
96     -96    
-16    -176   
48     240    
-48    -144   
80     -320   
64     -112   
208    16     
-32    -256   
-96    -16    
48     -16    
-112   -80    
64     48     
-32    128    
48     160    
48     112    
80     -32    
96     -16    
64     80     
192    -288   
-80    -112   
256    -160   
16     256    
-224   -1328  
352    512    
112    -112   
112    304    
-160   160    
176    96     
-176   224    
160    -144   
64     160    
192    288    
-112   320    
0      -16    
208    752    
-224   -496   
48     160    
-80    -176   
288    320    
-224   288    
48     -160   
144    -80    
144    48     
112    720    
-208   -416   
-16    0      
96     -400   
128    -16    
96     -160   
-32    112    
16     -192   
224    160    
-32    48     
224    48     
272    352    
0      304    
64     112    
32     -272   
144    272    
256    160    
64     96     
48     -144   
-32    112    
0      -704   
352    320    
-96    -112   
128    112    
-16    -32    
176    -64    
-16    96     
64     -640   
128    -16    
112    -608   
16     -560   
80     -32    
-80    -912   
80     -48    
48     48     
48     -112   
144    16     
32     -16    
-224   -320   
128    -240   
240    -640   
144    208    
-16    -16    
-112   112    
128    -48    
160    -256   
-32    -320   
80     -336   
-16    -80    
144    -64    
144    -128   
128    -2016  
-96    0      
80     -48    
-128   -304   
80     16     
48     80     
128    -256   
-144   -96    
-48    -176   
-48    -96    
-368   0      
96     0      
112    -240   
-160   -144   
16     -144   
224    48     
160    -112   
0      -640   
-208   16     
208    -64    
-16    80     
48     -160   
32     -144   
16     16     
96     -32    
64     128    
0      -16    
144    48     
48     -224   
96     -64    
32     -304   
0      112    
112    144    
48     128    
-112   -80    
224    144    
-64    0      
96     -16    
-48    192    
96     -160   
-288   -224   
48     -368   
-64    64     
0      -240   
48     -128   
112    -160   
-176   -16    
16     -800   
64     -48    
48     -176   
96     64     
-32    80     
80     0      
-128   208    
160    -464   
-288   256    
-48    -144   
-208   48     
80     112    
-240   32     
32     -128   
48     -80    
80     -336   
64     -80    
128    -160   
112    288    
-32    192    
-160   -192   
-96    -112   
160    -208   
-144   -80    
112    -32    
-176   80     
-80    -32    
-912   -16    
32     -304   
80     176    
16     -320   
480    1024   
-512   608    
-1744  -32    
64     448    
272    -240   
0      -288   
-544   848    
368    -48    
160    224    
-256   -256   
16     -128   
-96    144    
352    -272   
-80    528    
192    -704   
-320   480    
304    -944   
-112   448    
64     -240   
0      304    
-80    -368   
112    336    
-48    -32    
272    352    
-336   -320   
176    192    
-656   -176   
288    208    
-224   0      
288    -176   
-128   16     
-272   -16    
16     128    
16     0      
32     144    
16     -144   
-48    16     
-64    32     
80     32     
128    80     
-16    -32    
-16    32     
-336   -80    
144    0      
-640   -192   
64     64     
16     32     
-208   80     
48     64     
-512   -96    
-96    -80    
-192   -64    
16     112    
-96    -32    
48     -16    
-144   -32    
32     -32    
-448   -112   
-64    80     
-48    -96    
16     48     
64     128    
-256   48     
32     80     
-80    -32    
-48    0      
-320   64     
16     112    
-160   32     
16     64     
-64    -160   
64     96     
-48    16     
80     64     
-16    32     
-80    80     
-160   192    
-80    -48    
192    32     
-192   48     
176    368    
-720   0      
-96    144    
-1808  -176   
-32    -240   
-80    -144   
80     64     
48     16     
-112   -32    
32     -16    
-224   -96    
96     48     
-48    64     
16     -96    
48     144    
48     432    
-112   224    
-240   -208   
-176   -32    
0      16     
-32    -64    
80     288    
-32    -160   
16     144    
-48    48     
80     80     
112    208    
16     192    
0      -16    
-16    -64    
-96    -64    
-80    -144   
80     16     
80     64     
-64    64     
-1056  -448   
64     16     
-32    -96    
0      -16    
-48    -32    
-32    32     
32     192    
16     -48    
-16    64     
-160   -64    
32     -336   
-96    -208   
0      160    
-16    16     
32     176    
-800   -32    
16     208    
-16    -32    
32     96     
-16    16     
0      32     
0      192    
-16    144    
-144   80     
-48    16     
-32    48     
96     128    
-96    112    
-192   -224   
96     112    
-112   -128   
48     176    
-80    160    
16     80     
16     48     
16     80     
-112   48     
96     144    
-48    64     
-32    0      
-16    128    
352    48     
-176   240    
-272   -64    
-16    16     
-32    112    
208    112    
-16    64     
-64    80     
-16    -48    
32     -144   
160    400    
128    256    
-144   -144   
144    48     
0      176    
-48    -96    
-192   240    
-16    48     
80     128    
-128   48     
-80    -48    
224    80     
-144   32     
144    -64    
32     160    
32     128    
-96    0      
80     80     
-80    -80    
80     -16    
0      224    
96     48     
-144   176    
-48    80     
-112   -272   
128    176    
176    0      
-336   192    
16     48     
160    32     
128    64     
1184   832    
256    960    
-304   -32    
-592   -512   
32     -128   
-64    -1056  
624    688    
-240   -16    
144    1056   
-464   -160   
144    -16    
0      -224   
256    80     
-32    368    
320    -48    
-144   240    
192    -32    
320    976    
-224   96     
-336   -336   
-32    96     
448    272    
-256   368    
176    -32    
256    320    
-64    240    
128    -112   
-144   -64    
-48    -80    
192    384    
-16    96     
48     160    
-64    32     
0      128    
-96    -64    
-80    -368   
-128   -112   
128    96     
64     224    
-32    240    
-96    96     
128    48     
-32    -80    
96     96     
48     64     
128    208    
-192   176    
112    -144   
-208   208    
112    -48    
64     128    
-80    112    
160    -1120  
-176   176    
128    32     
0      224    
-32    32     
128    80     
-64    -176   
160    -32    
32     160    
-16    368    
-208   -48    
272    64     
-64    96     
80     160    
-112   -32    
128    -480   
-16    64     
48     96     
32     96     
128    112    
32     160    
-144   160    
-16    -160   
128    -144   
-64    -112   
-192   -224   
48     144    
48     80     
-96    304    
32     -112   
128    -272   
-48    176    
96     -352   
-160   48     
128    176    
80     176    
0      112    
80     96     
80     0      
32     80     
64     48     
0      128    
48     208    
-48    0      
64     80     
144    96     
0      16     
128    -112   
-80    96     
112    160    
112    224    
-16    80     
-64    0      
96     -48    
-80    -96    
128    -64    
32     96     
-32    80     
0      112    
48     32     
-96    -256   
80     352    
-224   -336   
256    192    
-128   -992   
208    128    
-80    -176   
64     80     
-64    -80    
192    272    
-176   -64    
272    208    
-160   160    
240    16     
192    384    
16     -64    
160    128    
-32    -368   
-64    -32    
96     32     
-128   80     
320    -2336  
-144   176    
-112   48     
304    80     
48     -32    
-112   192    
-32    96     
224    -144   
0      352    
32     -432   
128    112    
-16    -112   
-64    112    
192    -288   
-96    32     
144    160    
-16    144    
80     112    
-32    32     
-80    -16    
32     -304   
96     112    
176    -160   
-192   112    
192    -128   
-32    112    
48     -240   
48     -32    
-16    -560   
32     144    
112    -1040  
48     320    
80     144    
80     384    
16     -176   
208    -176   
96     192    
48     48     
-208   128    
-112   -432   
240    208    
96     -144   
-32    144    
128    -176   
208    224    
128    16     
-48    -1120  
32     32     
96     -1200  
320    -288   
-80    -160   
64     -256   
80     32     
0      -1232  
64     0      
64     224    
32     -112   
48     208    
112    -64    
-32    256    
32     -80    
-80    -704   
64     -16    
-912   800    
368    -592   
1104   96     
128    -1584  
64     -608   
-224   -1120  
688    640    
0      -128   
80     496    
-448   -336   
192    -80    
-48    -896   
-224   448    
-48    -544   
224    320    
-160   -64    
64     96     
-1488  -256   
144    -48    
-80    -160   
176    -80    
16     128    
16     -96    
192    -112   
-112   -1280  
160    160    
-112   16     
160    208    
64     -96    
48     0      
-112   -48    
16     -80    
-112   64     
96     -64    
-16    0      
80     -96    
64     -64    
16     -736   
-16    -128   
96     -2048  
64     128    
48     80     
16     96     
64     -80    
32     -80    
-144   -32    
48     192    
0      16     
80     -32    
-1488  -80    
48     -64    
80     32     
128    -96    
-64    64     
0      -768   
48     -16    
112    -96    
-48    224    
-128   16     
-48    -32    
32     80     
112    -112   
-192   0      
16     -128   
-32    -112   
144    -16    
80     96     
32     16     
0      0      
304    -240   
32     112    
64     -448   
16     64     
32     -48    
128    -80    
192    80     
-32    -64    
-96    32     
-16    -304   
-48    -48    
96     48     
-112   96     
48     192    
112    -32    
-16    -384   
-48    -128   
256    -352   
112    176    
-32    64     
-16    -48    
-48    -16    
32     16     
-192   -96    
112    0      
-32    -32    
96     -304   
-768   -352   
16     -528   
160    160    
64     -112   
-64    64     
16     -608   
176    -96    
-192   16     
-64    -80    
-176   -32    
16     48     
-64    32     
80     128    
-96    -16    
0      -64    
-720   -32    
48     -144   
160    96     
-32    -96    
160    144    
-128   -144   
-16    -112   
-128   -96    
192    -96    
32     176    
80     -16    
-144   64     
48     -80    
-80    32     
48     -496   
112    -16    
96     64     
16     80     
-160   -160   
16     240    
0      -32    
-800   0      
-64    -32    
-336   384    
-320   -48    
-736   80     
-304   -112   
224    -160   
-64    144    
112    16     
-144   -64    
-192   -16    
64     160    
-288   -336   
-64    -224   
192    304    
-144   96     
0      64     
-48    32     
128    16     
-176   -96    
80     80     
32     240    
80     -96    
-16    112    
-32    48     
-208   -112   
-48    128    
-16    -16    
-80    48     
16     64     
0      96     
16     112    
-112   -128   
-144   144    
-192   48     
-80    -32    
-144   128    
16     0      
-112   -64    
-48    16     
-160   16     
96     144    
-128   96     
16     -80    
32     -16    
-128   96     
-112   -32    
-192   -48    
80     160    
0      48     
16     48     
-160   -48    
0      128    
-464   -208   
64     128    
0      -96    
64     64     
-32    32     
48     336    
-112   112    
-32    128    
-208   -48    
96     48     
80     0      
-256   -2224  
1248   1392   
-288   -160   
448    -576   
-368   -608   
496    160    
-16    800    
48     -16    
-32    -128   
208    -352   
112    592    
-240   -96    
48     80     
96     96     
112    -96    
-112   272    
176    80     
-256   128    
48     -48    
128    16     
-48    -160   
-64    -32    
0      16     
144    -80    
-336   -96    
240    48     
-48    16     
-160   192    
48     16     
-96    -64    
-80    -96    
48     144    
-80    48     
96     96     
-528   -32    
32     128    
16     64     
-48    16     
32     128    
64     0      
16     96     
-16    128    
32     48     
64     128    
-144   144    
160    -16    
-32    32     
-144   112    
-64    160    
-48    -192   
48     176    
-160   192    
112    -80    
64     144    
-128   32     
144    16     
-80    16     
144    160    
-48    64     
0      -16    
64     -32    
-32    208    
-192   -144   
64     112    
-64    48     
-48    96     
0      112    
32     288    
-208   0      
128    -16    
80     80     
0      32     
-48    176    
-64    -32    
128    48     
-272   -96    
16     160    
-160   -176   
16     144    
-112   64     
-48    16     
80     160    
80     352    
-288   16     
144    112    
160    432    
-224   -128   
288    48     
-96    32     
0      128    
-48    -32    
112    96     
-32    112    
16     32     
144    80     
80     272    
-16    112    
16     -64    
128    80     
-16    64     
176    192    
-128   240    
-32    0      
0      -32    
64     -16    
48     16     
96     -48    
-192   32     
96     32     
16     160    
16     128    
112    64     
-112   0      
160    80     
-48    32     
80     0      
32     96     
-48    128    
48     32     
-176   0      
16     -176   
-96    48     
48     -16    
96     -1168  
336    256    
-352   240    
224    128    
-256   -96    
96     96     
0      0      
160    128    
-48    16     
-128   -16    
-96    -32    
304    80     
-352   -384   
112    -80    
-112   224    
112    -64    
144    144    
-160   32     
16     96     
-80    192    
144    256    
80     112    
48     144    
-64    400    
80     160    
32     -16    
96     176    
-48    0      
128    224    
16     -80    
64     -256   
-32    256    
-48    -320   
256    224    
-80    160    
208    128    
-80    96     
32     112    
-16    -64    
16     192    
48     96     
112    336    
-176   112    
176    208    
192    32     
224    -560   
160    96     
64     -752   
176    -16    
336    112    
-32    112    
-16    112    
-128   272    
96     288    
160    176    
80     -208   
80     240    
-144   -112   
-64    -32    
80     80     
-112   -208   
0      32     
48     112    
16     -80    
-32    32     
-80    112    
16     80     
96     256    
-48    -224   
128    -32    
80     144    
144    192    
-128   32     
16     -80    
1328   -1568  
-480   -624   
1056   -288   
-384   -928   
80     608    
-208   -3456  
0      112    
320    224    
-192   64     
-128   -336   
96     304    
96     256    
32     48     
-48    -16    
112    -96    
176    192    
0      32     
16     176    
64     -352   
48     80     
64     -384   
96     -96    
192    -112   
32     -48    
-160   -80    
-80    272    
352    240    
32     -32    
0      -32    
32     -128   
192    48     
-48    -912   
176    160    
-16    16     
64     96     
112    -80    
64     208    
80     -96    
-96    96     
96     -48    
-16    112    
128    96     
48     -160   
32     128    
16     -1056  
16     112    
-144   -272   
144    0      
0      -64    
-16    -80    
16     -464   
32     144    
48     16     
16     128    
0      64     
64     -80    
0      -288   
-160   -192   
32     -16    
160    -64    
128    176    
-16    -80    
112    256    
80     -720   
64     192    
-112   -400   
32     160    
0      96     
144    -656   
-32    32     
32     -1744  
32     -624   
32     0      
0      -1056  
48     32     
48     -304   
80     -96    
160    288    
96     -80    
16     32     
48     32     
160    -64    
48     144    
128    -416   
-48    -64    
144    -96    
-32    80     
208    -96    
112    32     
48     -128   
96     -352   
16     -64    
80     -416   
-64    -80    
64     80     
32     -80    
304    -64    
-112   16     
112    -208   
-48    64     
48     0      
96     128    
-720   0      
16     -176   
80     -48    
128    -320   
-80    -128   
128    -176   
0      96     
96     -384   
-64    -16    
128    -176   
-32    96     
64     64     
-16    304    
-16    -144   
80     -112   
-80    96     
128    -16    
-368   -192   
16     16     
208    112    
112    -272   
-208   -80    
96     -1120  
48     432    
-336   128    
272    48     
-144   240    
368    -192   
-256   32     
32     -176   
-144   -64    
-80    -112   
-224   48     
-64    -96    
176    32     
0      -432   
-128   -16    
-80    -224   
144    176    
-112   64     
176    -16    
16     -96    
48     -112   
-32    -16    
96     416    
-224   192    
-128   -48    
-192   -80    
80     -224   
304    48     
48     -144   
-48    -80    
0      -112   
192    496    
-16    448    
-288   16     
64     -80    
144    -320   
144    176    
-64    32     
32     64     
-48    -192   
-592   -288   
160    -240   
-240   16     
208    368    
-240   128    
-208   -384   
96     112    
96     -800   
288    48     
-224   -80    
64     0      
-496   -48    
0      -128   
0      96     
144    -16    
-208   -48    
80     64     
32     -16    
48     -96    
-16    -80    
144    -448   
-128   32     
224    -736   
48     144    
-64    48     
80     144    
-160   -400   
128    96     
112    -272   
144    144    
48     48     
48     112    
-48    208    
-288   -2224  
1248   -32    
-208   -32    
-176   720    
-432   592    
-480   0      
240    -672   
-176   -160   
144    80     
144    -304   
-32    32     
224    128    
96     64     
0      80     
-96    80     
-256   160    
-16    288    
-192   -288   
128    -80    
-32    112    
-16    -16    
-96    16     
-1104  -16    
16     -16    
-16    -64    
32     32     
48     -16    
-112   48     
64     -176   
-128   32     
-64    -96    
64     128    
-176   -144   
144    144    
-192   32     
-48    112    
-112   48     
-240   64     
64     96     
-176   48     
-48    64     
128    32     
-32    96     
-96    -96    
80     32     
-16    96     
-96    -160   
176    -112   
-416   32     
208    16     
-80    80     
16     144    
-64    112    
-16    -64    
-176   -224   
64     144    
-448   32     
208    48     
-64    -64    
112    80     
0      -128   
64     96     
64     48     
-224   16     
96     -128   
48     144    
-304   -112   
16     96     
-336   0      
80     -112   
-16    112    
-208   16     
32     80     
-1072  -112   
-16    192    
-128   -96    
32     160    
0      80     
16     48     
16     -16    
-32    208    
-48    48     
80     144    
112    -112   
-64    224    
96     288    
-512   -176   
128    -16    
-432   -16    
192    208    
-160   16     
0      96     
144    208    
-256   -64    
128    128    
-144   -16    
192    176    
-144   48     
96     80     
-144   80     
32     64     
-224   -144   
160    208    
-176   48     
-16    -192   
-64    -144   
-16    64     
208    160    
-32    -16    
-80    -64    
-48    208    
144    16     
-96    96     
32     -128   
-112   16     
-32    -80    
-208   -16    
32     64     
-32    96     
128    112    
-1456  -160   
-384   160    
-96    128    
320    -48    
-16    -32    
-240   32     
192    -160   
-192   -32    
0      64     
-16    32     
0      48     
-112   -96    
-112   192    
32     -16    
160    368    
64     80     
48     192    
-240   64     
176    176    
96     80     
16     192    
48     -160   
-160   -128   
32     -64    
128    -256   
-64    320    
16     64     
-112   -16    
-64    -16    
16     0      
0      16     
192    144    
-112   -176   
128    -16    
-112   368    
32     -64    
-80    -96    
192    256    
-16    96     
-48    -352   
16     160    
0      256    
-80    32     
-160   -384   
160    64     
192    464    
64     80     
-112   96     
192    -208   
-16    224    
48     16     
16     480    
-48    -64    
32     -48    
-96    96     
32     -112   
-144   112    
48     64     
128    -80    
64     48     
112    176    
0      192    
16     80     
16     112    
48     32     
16     112    
64     80     
-32    112    
-16    48     
-48    -64    
-144   144    
64     208    
-48    160    
-48    80     
-64    64     
144    64     
208    -2256  
1408   240    
-448   320    
160    544    
-832   -528   
688    -848   
-336   -624   
-144   -624   
240    336    
32     496    
16     80     
176    -3008  
96     32     
-224   0      
256    192    
32     -112   
32     80     
80     -32    
-48    48     
96     128    
144    144    
-112   -16    
496    320    
-208   80     
32     -32    
-240   160    
128    -128   
192    304    
32     96     
-208   0      
80     80     
80     48     
-128   96     
80     80     
48     48     
80     48     
0      464    
256    336    
-176   0      
-32    48     
64     64     
-16    -128   
-48    32     
128    48     
-64    128    
32     144    
16     176    
64     256    
64     272    
-16    -16    
48     144    
-64    96     
112    128    
-144   -192   
272    192    
-128   16     
144    -336   
0      0      
160    -96    
-176   16     
208    240    
96     64     
-160   16     
160    176    
16     96     
16     64     
-16    -32    
64     144    
-16    176    
80     32     
64     80     
0      -208   
32     96     
80     -128   
96     160    
64     -160   
-112   16     
-16    48     
-32    16     
-144   -336   
176    -160   
80     -48    
128    -64    
-80    192    
208    -64    
-64    320    
-96    -224   
48     -16    
128    -176   
240    240    
-32    -336   
-80    160    
-144   -240   
128    144    
32     0      
144    384    
-112   32     
-64    -16    
32     96     
256    -176   
-48    160    
16     -96    
32     144    
96     -240   
80     176    
-96    -720   
192    240    
-48    -32    
176    160    
-64    128    
16     -48    
32     32     
-48    208    
208    48     
-64    16     
128    128    
128    416    
48     240    
-32    -416   
0      208    
144    -80    
48     32     
0      -240   
64     224    
160    80     
128    1056   
-80    -80    
96     -432   
-64    -16    
288    -160   
80     128    
-32    -384   
64     0      
48     -208   
-16    144    
96     288    
160    464    
64     640    
192    224    
-80    112    
-32    64     
112    80     
128    288    
16     96     
-32    -32    
176    416    
-32    -64    
0      0      
16     -192   
128    112    
112    -368   
16     128    
-16    -16    
128    -144   
16     32     
256    -16    
-96    -800   
32     -240   
64     -1376  
16     -96    
128    -1472  
80     112    
224    160    
-16    -32    
-48    64     
112    48     
128    560    
-128   -96    
-96    -192   
128    -80    
32     -144   
176    -528   
-208   -16    
96     -768   
144    -64    
96     -336   
240    80     
112    -528   
-16    -32    
-96    160    
160    -112   
-32    -192   
112    -160   
-80    0      
16     224    
-32    -64    
192    0      
96     48     
0      -32    
0      -16    
144    -256   
0      -176   
0      -848   
144    -48    
16     -32    
32     80     
16     3424   
-1968  -144   
272    400    
112    128    
720    -192   
-848   -672   
-144   128    
416    592    
80     -352   
48     16     
16     -144   
-16    -320   
32     32     
208    -368   
-400   16     
176    -64    
-176   32     
224    64     
64     160    
16     0      
32     48     
-352   -160   
192    176    
-432   -48    
144    -48    
32     -32    
-128   112    
96     96     
64     -288   
0      16     
32     -96    
112    176    
-48    32     
160    64     
-208   -64    
176    -320   
-144   -112   
-16    64     
112    64     
80     -96    
144    128    
112    -112   
80     -16    
-80    -304   
288    64     
-128   -416   
160    48     
-48    304    
-160   -352   
272    80     
-128   16     
128    48     
48     -16    
0      80     
32     -224   
-624   48     
32     -240   
176    -32    
32     -32    
-64    -96    
48     -288   
32     192    
-208   -16    
160    -48    
0      -96    
176    -48    
-240   176    
-96    -96    
32     -64    
0      -64    
-128   48     
32     -192   
128    144    
16     -128   
48     128    
64     -688   
48     0      
-176   96     
144    -32    
80     -64    
-32    128    
-192   0      
160    192    
-416   -16    
144    -16    
-16    16     
80     16     
-16    96     
96     -224   
32     144    
144    64     
-64    -80    
64     128    
144    -32    
32     -48    
64     -144   
-112   112    
64     48     
-80    48     
192    112    
-112   64     
-624   -176   
-80    48     
-128   -112   
32     -48    
144    336    
-224   144    
0      -96    
-928   -192   
-96    -80    
144    64     
-160   16     
32     128    
-112   48     
112    -64    
-64    -48    
-1200  -656   
144    64     
-208   -48    
128    -160   
-32    80     
-128   48     
80     -48    
-96    96     
16     128    
-48    112    
80     144    
48     176    
32     80     
-16    -32    
80     96     
-32    48     
-32    32     
96     -144   
-160   160    
-48    112    
-32    32     
-96    160    
-64    16     
64     112    
-112   -16    
16     144    
-192   -96    
-32    64     
-16    16     
80     112    
-48    -16    
224    240    
-96    -208   
48     -16    
-48    48     
48     48     
64     160    
-144   16     
-48    96     
-208   0      
-16    192    
-496   -512   
48     320    
-48    176    
-128   128    
-32    -256   
64     112    
32     -80    
-112   -48    
80     32     
-32    464    
-80    -320   
-96    32     
144    112    
-16    64     
0      32     
176    64     
-32    80     
-80    -48    
0      256    
208    -208   
-64    16     
48     32     
80     192    
0      112    
16     48     
-48    128    
-48    80     
0      48     
32     -48    
224    112    
-64    176    
32     160    
-384   -80    
80     112    
48     80     
-160   96     
-16    -16    
80     160    
128    16     
-160   32     
1472   -1728  
624    208    
944    16     
-464   32     
848    -736   
-384   -784   
480    912    
-64    1200   
-464   -112   
-368   48     
96     -256   
128    0      
-64    0      
-48    -240   
192    368    
0      80     
32     256    
-32    -32    
32     80     
-112   -96    
-32    -32    
32     48     
-176   -112   
144    304    
288    80     
-112   32     
112    -64    
-16    192    
96     96     
96     96     
80     -96    
192    16     
-96    16     
-32    -240   
112    96     
-240   -32    
80     80     
-432   -64    
224    224    
144    -16    
112    0      
-240   192    
160    16     
0      0      
-48    64     
-32    320    
-224   0      
128    -32    
16     112    
208    -16    
-192   240    
144    272    
-128   192    
-160   32     
112    320    
-144   -368   
288    80     
208    608    
-240   -272   
208    208    
-80    64     
80     -32    
48     32     
80     0      
320    176    
-64    16     
48     96     
-48    96     
16     32     
32     128    
32     32     
16     96     
-48    64     
32     208    
-16    80     
-48    -272   
48     -64    
160    64     
-16    16     
192    368    
-160   0      
64     64     
16     176    
32     96     
112    96     
0      112    
48     240    
32     416    
-80    160    
-64    -32    
80     -16    
-64    0      
64     224    
-16    112    
32     32     
-16    0      
-80    -96    
144    96     
-48    32     
176    176    
-112   160    
-48    96     
144    160    
64     208    
-16    64     
0      112    
0      208    
80     -304   
-64    -352   
16     16     
192    144    
128    -192   
-112   224    
-48    96     
144    -16    
16     208    
-16    -48    
144    288    
-16    128    
0      96     
48     64     
-16    208    
144    192    
48     208    
-48    224    
160    800    
96     80     
160    416    
-192   -1424  
192    48     
-32    144    
32     32     
16     80     
240    304    
-112   96     
144    96     
-128   64     
-48    80     
80     -80    
80     144    
80     -144   
-112   -240   
96     -16    
32     -1600  
48     -144   
144    32     
80     432    
176    288    
-80    160    
128    160    
-16    64     
96     80     
-80    128    
-32    64     
304    80     
0      544    
64     16     
-64    0      
-16    -592   
80     -144   
80     -592   
-16    32     
96     -32    
192    176    
-128   -448   
80     224    
16     176    
-48    240    
176    208    
48     32     
64     -144   
144    -272   
-48    160    
144    -384   
-112   128    
64     -656   
112    112    
-32    -96    
-48    112    
-48    -16    
128    64     
48     176    
16     -160   
160    128    
64     -80    
-48    80     
112    -112   
176    224    
-64    -144   
16     160    
-32    -192   
160    96     
128    -16    
-176   112    
192    112    
-128   16     
-816   -2032  
1072   1392   
-1008  912    
32     -512   
-48    -464   
704    144    
-752   256    
848    224    
-208   336    
384    -768   
-432   352    
208    -352   
-16    528    
64     -160   
80     176    
-144   -176   
160    48     
-16    176    
144    -128   
80     224    
64     -64    
0      208    
112    -352   
48     304    
112    -448   
-48    272    
64     -656   
128    384    
-80    0      
128    208    
-80    -176   
32     96     
128    -16    
-80    16     
208    80     
-16    -96    
-112   -112   
0      -32    
96     112    
272    16     
-144   80     
96     -48    
-16    -1424  
128    80     
32     -352   
64     64     
-224   144    
224    -752   
160    160    
-256   -1840  
304    -128   
-80    48     
80     160    
-16    48     
128    -96    
0      64     
16     80     
80     16     
-48    0      
32     192    
112    -48    
-1504  -144   
16     -800   
80     -32    
112    -416   
160    -16    
0      -640   
-32    176    
128    176    
-64    -192   
160    -160   
-16    160    
48     16     
80     192    
48     -208   
224    272    
-448   -96    
224    -208   
112    144    
-224   -32    
112    32     
80     -224   
80     -208   
-16    -1168  
-96    -112   
192    -64    
96     400    
-96    -32    
64     96     
48     -112   
64     -112   
-144   -80    
32     96     
-400   48     
64     0      
-64    64     
144    -80    
144    160    
96     -800   
-16    176    
64     96     
64     32     
128    112    
-80    -272   
-96    -16    
16     -96    
64     80     
144    32     
-1136  -32    
16     -256   
64     192    
48     -112   
-48    128    
48     -512   
32     48     
128    128    
-16    -176   
160    96     
-112   -304   
64     240    
-64    48     
-48    32     
16     64     
-432   112    
-96    96     
-384   48     
-32    80     
96     128    
80     -32    
240    240    
-112   -1456  
288    320    
0      256    
-32    -128   
-64    64     
0      -208   
-16    -112   
80     80     
-96    48     
-64    -64    
-64    176    
80     128    
-528   48     
64     -256   
240    432    
-272   -416   
128    -112   
-48    160    
144    -160   
-48    -16    
48     -32    
-144   32     
0      208    
-16    192    
-272   -160   
-160   -128   
-176   -560   
208    160    
192    176    
112    176    
80     -112   
-160   176    
-480   -16    
-208   -240   
0      -176   
96     256    
-240   128    
-192   16     
272    80     
176    16     
-48    -128   
16     112    
-96    48     
0      -80    
48     32     
48     -208   
16     64     
-288   128    
-32    32     
-80    112    
192    -48    
32     96     
0      -48    
-80    112    
64     -128   
96     160    
96     -112   
-32    80     
-1056  -128   
176    128    
-160   80     
-288   -64    
-96    288    
-256   -48    
-48    48     
-1488  -144   
-1024  -1792  
1328   2576   
-768   640    
384    -576   
-176   -192   
0      80     
-704   368    
-320   -784   
-32    1008   
-16    -416   
96     -64    
-192   128    
160    208    
-80    -288   
-144   112    
-224   -96    
-64    224    
-272   -32    
384    -208   
32     32     
112    -48    
-192   224    
112    176    
-80    160    
208    -32    
-400   144    
-80    304    
-224   -112   
0      160    
-384   0      
224    32     
-448   192    
-304   -32    
-64    -144   
-288   80     
-96    -128   
-32    80     
-80    272    
112    192    
-432   -16    
144    -208   
112    64     
-64    0      
-160   208    
-64    -16    
16     160    
-224   -288   
-96    160    
-32    -208   
-32    32     
-64    144    
96     96     
-80    -528   
-32    -48    
128    32     
-16    -80    
-96    96     
80     576    
-80    -64    
-128   112    
112    -64    
-112   -16    
0      -96    
-32    336    
-144   -16    
64     -80    
192    16     
0      64     
-144   96     
32     176    
-32    96     
0      80     
-64    0      
-16    80     
-64    -16    
64     208    
112    560    
-32    192    
-96    -64    
112    -288   
-1008  -64    
224    -16    
16     224    
-160   16     
16     -32    
-32    -128   
-128   -64    
-64    -224   
-96    112    
96     96     
-16    32     
0      -96    
-32    32     
-208   -352   
112    0      
-992   -96    
0      -208   
80     128    
96     160    
128    96     
48     32     
-48    -80    
32     16     
32     144    
96     128    
48     176    
-288   -160   
-32    -96    
-144   -320   
112    192    
240    272    
-144   -48    
16     112    
-64    48     
48     -96    
0      128    
-96    -48    
384    368    
-192   -32    
176    160    
-32    112    
32     -144   
48     80     
-96    -176   
320    336    
-32    288    
-80    240    
128    240    
-16    112    
48     128    
-80    32     
80     144    
-80    16     
96     176    
-112   96     
112    -16    
-224   0      
16     32     
-32    -96    
128    48     
-16    96     
-16    128    
240    112    
-64    0      
160    16     
-144   160    
96     16     
-160   32     
160    -80    
-32    32     
-16    208    
32     64     
112    208    
-112   -32    
-64    16     
160    128    
80     -80    
-192   208    
-32    160    
0      -32    
112    32     
-48    64     
112    80     
96     128    
-176   -64    
224    240    
-208   -96    
112    176    
-144   -48    
-16    208    
32     224    
-160   -32    
224    -48    
128    0      
-32    224    
-96    32     
48     208    
128    -80    
144    128    
-176   80     
0      112    
-128   16     
96     32     
16     288    
0      48     
-32    80     
64     64     
64     0      
80     96     
32     128    
16     48     
112    32     
-16    64     
64     224    
-16    128    
48     64     
-32    80     
1120   -288   
96     496    
48     320    
-432   336    
208    -128   
464    432    
-128   176    
-208   -176   
-288   80     
16     32     
352    128    
16     -304   
-272   208    
160    80     
80     256    
-80    -1120  
-32    144    
160    -1200  
128    112    
0      -16    
-16    192    
48     80     
32     144    
48     -80    
64     48     
-176   -32    
48     160    
-80    208    
272    128    
-16    64     
-48    -480   
48     96     
0      -496   
128    208    
16     48     
-48    -16    
64     80     
96     144    
208    16     
-176   80     
64     16     
64     208    
160    16     
-80    144    
96     0      
-32    16     
32     224    
160    -240   
144    112    
-192   -160   
160    112    
48     48     
0      144    
32     96     
176    96     
-64    -48    
96     208    
-64    -112   
128    64     
-16    80     
112    0      
32     48     
96     -400   
112    224    
0      -992   
32     96     
48     -128   
192    80     
-64    160    
-80    48     
16     80     
-16    48     
64     32     
0      -112   
-16    0      
240    176    
-176   128    
208    -384   
48     32     
96     -608   
-32    48     
64     -640   
128    0      
-112   64     
48     128    
-144   -256   
176    32     
128    464    
0      -96    
80     48     
-32    -96    
128    80     
64     -64    
96     304    
80     16     
-32    32     
112    -560   
32     80     
32     -96    
64     608    
48     496    
96     304    
-64    64     
144    -368   
-16    80     
-16    -160   
16     -144   
160    -96    
64     224    
-32    -176   
32     176    
96     -2000  
48     144    
-32    112    
208    480    
-80    64     
48     -320   
32     256    
-16    -288   
32     16     
80     -16    
144    256    
0      -176   
32     0      
16     -272   
144    240    
-96    -496   
144    -320   
112    352    
96     -640   
0      -128   
-256   0      
80     -624   
48     64     
272    -176   
-160   -176   
32     -16    
64     96     
0      48     
96     96     
32     48     
112    -96    
80     -96    
48     112    
160    48     
-192   -656   
-304   -32    
32     -48    
64     -64    
16     -800   
112    -144   
112    -2464  
-48    -96    
80     224    
64     -32    
64     -48    
-96    48     
128    -464   
-32    64     
128    32     
-48    48     
-368   -112   
64     0      
176    -32    
-32    16     
-16    -192   
304    -64    
-48    -80    
240    400    
-64    -208   
176    -400   
-16    112    
112    -48    
48     16     
48     -16    
112    -112   
-96    48     
-192   -336   
-96    -32    
160    64     
-16    64     
-128   -368   
96     -32    
0      -192   
-176   -112   
64     96     
-48    -16    
320    96     
-128   272    
-48    -192   
-128   -128   
80     -64    
80     128    
-400   -112   
0      16     
96     -112   
288    1072   
-1440  -752   
736    288    
256    400    
80     -1808  
-576   128    
32     -192   
112    288    
-176   -512   
48     672    
-16    -320   
16     320    
-416   16     
208    96     
-32    -496   
-64    96     
144    160    
160    -112   
16     48     
96     -896   
0      208    
240    -656   
160    336    
-96    0      
288    160    
-176   -320   
32     64     
-272   -64    
224    -16    
-128   -16    
112    -16    
16     192    
32     -144   
-80    272    
144    -1088  
-48    -32    
0      144    
192    256    
-384   -416   
-32    -416   
-464   128    
128    -80    
-128   16     
32     -192   
0      32     
208    32     
-112   0      
-16    -336   
-32    80     
32     -400   
96     96     
-64    80     
240    48     
-192   -48    
112    -80    
-192   112    
-16    0      
0      288    
64     256    
-160   32     
16     -80    
-16    -80    
80     -208   
32     64     
0      32     
0      -16    
-128   -16    
128    16     
-48    176    
-16    -16    
96     48     
80     16     
48     224    
-96    -128   
-112   -32    
144    -176   
32     80     
-176   -80    
64     112    
-176   -432   
192    48     
-96    32     
-352   -240   
224    128    
-400   176    
-80    80     
96     -64    
-96    -208   
176    16     
-48    48     
-160   -144   
112    -32    
-304   -320   
112    192    
-16    0      
-80    32     
96     208    
-336   -48    
0      -208   
-32    96     
32     112    
-992   256    
-128   -32    
64     80     
48     80     
-176   0      
16     80     
-256   -192   
80     64     
112    64     
-160   176    
64     64     
-80    160    
48     64     
-16    96     
-96    0      
-240   -16    
112    288    
-240   -48    
-32    0      
-80    -144   
192    -48    
-80    160    
-32    496    
-48    -32    
224    192    
-272   64     
96     112    
-80    48     
-32    32     
-48    128    
-192   48     
16     32     
-848   -64    
128    256    
144    -112   
32     64     
-176   0      
16     80     
176    -16    
-96    0      
-96    48     
48     96     
0      32     
16     64     
-112   -176   
16     -64    
-96    32     
-384   -112   
128    32     
-64    -16    
112    128    
0      64     
112    -64    
-144   192    
-80    -32    
160    -16    
-64    240    
16     144    
-144   -64    
-128   96     
32     112    
-32    256    
-144   -112   
112    208    
-400   64     
-16    -32    
-16    -112   
128    112    
-288   176    
-128   80     
-32    -48    
256    96     
48     -96    
-160   96     
-32    64     
112    -80    
224    272    
-160   -16    
16     128    
-736   -48    
-16    -96    
112    96     
-112   208    
16     96     
-128   160    
32     96     
128    -96    
0      80     
64     32     
0      176    
-128   32     
144    240    
-240   -272   
160    160    
-160   -96    
-640   -400   
-128   400    
-1568  480    
272    -176   
-16    560    
-416   -880   
384    816    
-560   -336   
464    256    
-304   -368   
160    128    
-208   -80    
80     112    
32     160    
80     -144   
-112   144    
176    -64    
96     448    
-96    -96    
112    0      
-48    0      
48     224    
144    64     
-304   144    
192    -64    
-176   32     
48     0      
0      64     
-64    -64    
64     176    
96     48     
0      80     
48     128    
-16    96     
16     48     
16     -160   
208    112    
-224   128    
176    0      
-144   96     
48     80     
80     96     
-48    80     
80     128    
16     80     
16     128    
-176   80     
192    384    
-192   80     
208    -80    
-80    160    
0      -48    
64     128    
-32    -80    
96     48     
-16    160    
64     192    
-16    -144   
-48    80     
-32    112    
-16    112    
16     80     
96     32     
-16    -96    
32     32     
-112   80     
32     192    
0      0      
160    48     
-32    96     
-80    0      
80     32     
144    112    
-80    16     
48     128    
240    320    
-112   -32    
192    256    
-112   160    
48     -176   
-16    64     
-64    144    
32     272    
-208   -112   
96     64     
0      32     
-176   32     
32     -128   
176    224    
0      0      
16     144    
80     64     
-96    -64    
80     112    
96     112    
-48    160    
-80    -192   
96     96     
-48    -16    
64     48     
-32    -16    
96     -352   
16     64     
96     -1280  
-32    160    
224    304    
-128   16     
80     0      
16     192    
96     112    
-16    64     
-80    -48    
112    48     
-48    -96    
64     112    
64     16     
144    -464   
0      144    
-96    -1760  
16     -48    
112    32     
272    208    
32     160    
-160   -32    
0      240    
112    80     
48     64     
48     256    
16     144    
96     144    
-32    128    
-48    -224   
176    80     
0      -320   
160    240    
-128   -864   
160    96     
0      32     
144    48     
-48    -608   
96     144    
64     208    
-80    96     
80     112    
-208   -224   
96     32     
96     -352   
224    16     
240    16     
-80    96     
-32    -400   
32     64     
144    240    
-112   320    
-176   -16    
176    -48    
-64    32     
96     336    
-208   -144   
32     -80    
128    -16    
48     64     
-64    112    
32     -208   
96     176    
-16    -16    
-48    -112   
176    32     
32     112    
64     -16    
64     208    
96     80     
16     80     
-32    112    
128    -16    
144    16     
16     208    
64     48     
16     -336   
0      0      
96     -48    
96     112    
144    -64    
-128   32     
192    48     
-16    176    
96     -48    
-80    208    
144    96     
32     -352   
32     112    
128    -224   
240    -192   
80     240    
-16    16     
-80    0      
-640   -1760  
1040   -256   
-64    384    
256    -640   
112    192    
-240   -608   
224    176    
-128   -320   
272    -336   
304    -224   
112    288    
-64    96     
176    80     
112    16     
80     -96    
0      400    
0      -272   
48     -256   
-208   -192   
272    -736   
-208   -400   
-288   192    
-32    -784   
528    0      
-336   -1664  
272    144    
-64    -112   
48     0      
160    176    
-96    -16    
112    48     
64     112    
32     112    
-64    96     
48     16     
160    -448   
-576   -80    
96     32     
16     -64    
-16    -128   
144    -96    
48     -1728  
80     -176   
-144   80     
176    -144   
32     144    
32     80     
32     -240   
-112   -64    
96     -288   
-32    -16    
-176   64     
112    -128   
176    176    
-192   -64    
240    -64    
-80    -192   
144    48     
64     -432   
0      -32    
112    32     
96     64     
48     -256   
80     160    
0      -176   
288    32     
-208   368    
-80    -256   
-448   0      
96     -192   
-64    64     
64     112    
64     16     
160    -176   
-192   -64    
48     -288   
320    112    
-16    128    
64     80     
-96    128    
32     -240   
-32    -64    
0      -560   
32     112    
-112   96     
-160   256    
-128   -80    
272    224    
-224   -448   
160    64     
32     -2128  
32     80     
32     96     
-48    -80    
-96    -240   
352    -176   
-240   -16    
96     -64    
-272   96     
160    80     
-1424  -16    
64     -32    
16     -112   
-48    -192   
144    -48    
-32    -320   
96     96     
144    96     
-16    -48    
48     16     
-112   -64    
112    -48    
96     80     
-128   -48    
80     -80    
112    64     
-192   -208   
208    64     
-80    64     
16     -16    
16     -816   
-160   112    
16     -272   
128    -80    
-256   256    
80     208    
128    112    
-160   -64    
-384   -160   
96     -16    
-176   -32    
224    0      
-224   -96    
192    -208   
144    240    
128    -256   
32     48     
-400   256    
32     48     
176    -32    
16     -16    
-368   32     
144    -32    
-128   -128   
176    64     
112    608    
-32    96     
-144   -32    
-64    -160   
48     80     
80     -32    
16     32     
160    240    
48     -96    
-160   0      
240    112    
-64    -80    
32     -80    
192    112    
-64    112    
-48    48     
-16    -240   
48     0      
96     -288   
64     208    
112    96     
-176   368    
-96    208    
-464   -240   
32     -32    
-336   48     
-224   64     
-16    256    
96     -32    
160    16     
-64    -48    
-240   -192   
16     128    
-208   -176   
32     128    
16     64     
-64    64     
-112   -48    
-96    160    
-96    -112   
-144   96     
192    -96    
32     16     
-160   240    
-48    -16    
-64    160    
48     0      
176    48     
-80    -144   
176    -144   
-48    80     
-112   416    
832    -1344  
224    96     
-368   896    
-400   448    
-288   -368   
368    528    
-848   -640   
240    336    
-224   -96    
144    -224   
16     0      
112    -256   
-112   272    
-32    -400   
-48    240    
160    -32    
112    624    
-208   -128   
96     80     
-272   -160   
-256   96     
-192   96     
-480   -96    
-176   16     
160    -432   
-128   128    
176    144    
-96    272    
48     -96    
-128   112    
48     48     
32     96     
-176   48     
-48    -16    
16     16     
208    96     
-16    64     
-160   0      
-16    144    
16     -32    
-32    0      
64     160    
-144   176    
352    64     
-368   -16    
112    160    
-32    304    
64     144    
-80    -16    
48     -32    
48     96     
-64    80     
-368   96     
-64    128    
-704   96     
-176   -80    
128    160    
-128   80     
-16    -272   
16     48     
96     112    
16     240    
32     48     
-16    0      
32     80     
-192   -16    
48     224    
-224   -32    
176    384    
-96    -64    
176    -64    
-16    -16    
176    160    
-144   64     
-112   96     
224    384    
80     -32    
64     32     
-144   112    
-16    -48    
0      -64    
48     112    
48     192    
48     96     
-224   -160   
0      32     
64     32     
16     240    
32     128    
-32    112    
48     48     
-64    -64    
112    64     
-64    80     
80     112    
-160   -64    
64     112    
-80    0      
112    208    
-48    32     
-32    128    
48     80     
0      48     
16     32     
48     80     
-96    80     
-32    64     
32     96     
48     128    
0      16     
-96    0      
48     80     
-32    48     
-112   64     
160    144    
-32    -80    
128    96     
-64    144    
128    32     
0      160    
-16    32     
112    192    
-48    -16    
160    224    
-192   -272   
144    -176   
-160   416    
192    0      
-144   128    
-32    -32    
64     112    
-64    -64    
208    112    
-112   80     
128    64     
144    208    
-176   112    
176    80     
-112   48     
160    128    
-64    48     
0      112    
-96    32     
96     144    
-224   -464   
208    -160   
-48    400    
-48    -48    
80     176    
-48    128    
144    304    
-128   -320   
144    144    
-32    -16    
48     208    
-240   64     
96     16     
240    16     
0      224    
208    48     
-208   96     
224    144    
80     80     
48     176    
-112   -16    
144    336    
-224   80     
160    -80    
-128   112    
208    112    
-176   320    
128    -96    
-48    144    
16     0      
-16    192    
-64    128    
112    -32    
16     144    
96     96     
-32    272    
-112   96     
-64    32     
64     48     
96     176    
0      128    
-128   -176   
-64    0      
144    32     
-64    -1376  
16     80     
112    128    
-112   32     
96     320    
-112   192    
64     112    
-64    64     
1312   -1120  
-1008  -1680  
96     256    
-256   512    
848    -208   
-672   -528   
-48    16     
-80    -272   
-368   -96    
48     -144   
176    144    
-176   240    
-96    304    
32     224    
240    -80    
-80    192    
160    96     
-48    -16    
16     144    
128    112    
-48    -240   
-48    16     
304    160    
-64    16     
16     -960   
-48    96     
192    448    
-80    176    
176    -80    
-224   80     
224    -32    
16     48     
-16    32     
0      48     
128    64     
-96    -256   
112    224    
96     -96    
0      48     
-32    -416   
160    240    
0      464    
-32    -96    
16     112    
48     112    
64     96     
48     96     
-112   -96    
48     -192   
0      192    
144    -320   
-64    144    
80     -112   
80     96     
-16    -1280  
112    176    
-224   -944   
208    128    
-16    80     
144    80     
-48    144    
80     96     
0      112    
48     -160   
96     0      
16     -256   
-96    80     
0      -608   
96     64     
16     -480   
32     0      
128    32     
-80    112    
160    80     
0      96     
-48    -48    
240    176    
-48    224    
32     -176   
160    208    
-80    -192   
16     -112   
160    -320   
-80    240    
32     -160   
-16    64     
64     16     
-32    -96    
160    32     
-32    32     
-48    -144   
176    224    
-48    160    
176    160    
-64    80     
-80    -160   
160    64     
176    16     
48     192    
-48    64     
64     32     
128    -528   
96     -256   
16     208    
0      -1536  
0      160    
-192   0      
96     -1328  
16     80     
160    -160   
-112   -96    
32     48     
160    112    
96     208    
16     96     
-32    64     
32     -16    
-80    -480   
432    144    
-224   -272   
-64    128    
-912   -288   
400    -192   
-144   -192   
128    160    
96     208    
144    -208   
-32    -96    
64     192    
-224   -208   
304    -16    
-32    16     
144    -176   
80     96     
-64    -128   
64     -80    
32     -224   
-160   -16    
32     16     
144    208    
32     -80    
64     48     
-192   -48    
336    -80    
-128   -16    
160    -96    
-144   128    
32     16     
0      80     
16     -112   
96     -256   
-64    -96    
64     160    
-32    128    
-48    -32    
240    -16    
-16    -576   
224    -80    
32     16     
96     144    
112    272    
-48    -160   
0      -96    
16     80     
-368   -416   
176    -48    
320    336    
208    256    
-976   -160   
-16    -320   
32     -272   
-96    -208   
-64    96     
240    -32    
144    -64    
16     -1216  
-48    128    
144    192    
0      48     
-64    224    
96     -144   
-112   -32    
64     144    
-480   32     
-16    -272   
-576   32     
176    192    
-16    80     
64     -496   
16     -16    
176    -560   
128    208    
-112   96     
48     16     
-48    16     
80     -96    
576    -1296  
-240   96     
384    -464   
-400   -912   
-272   576    
480    80     
-1184  -544   
-64    -608   
240    544    
-96    -624   
272    176    
128    160    
48     64     
-160   -112   
16     -400   
-128   64     
240    192    
-192   -96    
-96    -272   
-224   -128   
112    -304   
-16    224    
-16    -224   
240    -112   
-48    -448   
48     176    
-304   -144   
240    32     
-224   176    
64     -368   
-144   16     
96     224    
-176   -32    
144    -48    
-352   -160   
128    -96    
-208   80     
192    16     
-144   64     
-48    -208   
128    -48    
-160   160    
96     48     
64     208    
-16    -16    
80     -80    
-80    -288   
320    16     
-48    16     
96     208    
-16    -160   
96     192    
-176   -336   
112    96     
-128   -96    
-416   -160   
-80    -240   
64     144    
-144   -224   
-640   48     
16     208    
-16    -80    
-64    -48    
80     32     
80     80     
-608   -96    
16     96     
-128   -176   
96     80     
-256   -96    
0      80     
-16    80     
-160   0      
-80    -16    
32     -112   
-112   -224   
-384   -320   
-112   -80    
96     0      
-128   320    
-416   -64    
160    176    
-240   -144   
192    176    
-96    192    
32     240    
-160   240    
-112   16     
80     0      
144    16     
48     320    
-352   144    
-144   64     
-1360  -160   
16     80     
0      -128   
96     176    
-32    -48    
32     160    
-96    32     
-128   -48    
32     64     
-16    64     
48     96     
-96    -64    
32     64     
-400   -128   
128    128    
-1520  -64    
80     48     
-32    -16    
176    128    
-144   -256   
-32    80     
-16    32     
-96    -128   
112    144    
-80    176    
16     -128   
-208   0      
112    96     
176    128    
-160   -64    
-336   64     
112    160    
112    32     
16     0      
16     96     
0      -112   
64     176    
16     192    
48     64     
-128   96     
144    208    
-400   48     
64     -288   
-32    -96    
176    32     
-320   96     
-48    64     
-1904  -224   
160    112    
0      176    
0      0      
-48    240    
-64    64     
208    80     
-80    -176   
176    176    
-176   -32    
-64    96     
96     -16    
-80    272    
-304   -240   
96     208    
-864   160    
-32    -608   
-304   -128   
272    -64    
48     320    
-352   16     
128    176    
64     176    
128    400    
-224   160    
80     128    
-112   112    
-32    -96    
-144   -32    
32     0      
-112   80     
-32    -128   
96     -64    
64     176    
-128   144    
-112   272    
16     96     
80     96     
64     112    
0      160    
-160   80     
-80    0      
64     208    
0      -32    
32     144    
-224   -48    
16     0      
-160   48     
80     -32    
48     144    
16     240    
-96    112    
-224   32     
64     -16    
-96    -96    
48     96     
464    -1680  
16     464    
80     48     
-320   -416   
528    464    
-208   -128   
-32    48     
-304   -640   
256    -96    
0      -208   
-16    80     
16     16     
224    112    
-16    224    
112    112    
-64    80     
48     48     
-96    64     
32     32     
-48    48     
96     -16    
160    160    
-80    160    
96     64     
-176   64     
16     96     
160    208    
0      112    
128    48     
-176   32     
128    -32    
-64    128    
32     64     
32     80     
32     128    
-64    80     
176    96     
-144   208    
112    0      
32     -48    
-32    144    
32     160    
176    256    
-256   -80    
112    -32    
-64    64     
192    240    
16     0      
32     144    
-32    160    
224    0      
-144   192    
64     0      
208    96     
-96    96     
208    240    
-160   48     
32     48     
-32    0      
32     64     
-16    0      
112    128    
64     112    
0      -144   
128    16     
-32    112    
192    176    
-64    112    
112    112    
0      32     
80     48     
48     96     
-96    32     
160    176    
-32    352    
-48    64     
144    -544   
0      64     
-32    -1664  
48     96     
64     16     
96     144    
64     288    
48     32     
-16    -32    
128    -16    
-112   208    
-16    80     
32     -144   
64     96     
-96    -16    
80     -192   
64     192    
16     -432   
-16    128    
160    304    
80     64     
32     16     
128    176    
16     80     
112    128    
-64    32     
224    240    
-256   -128   
144    176    
-80    96     
256    208    
-144   16     
160    -160   
-112   96     
128    32     
0      80     
-16    0      
64     160    
48     16     
128    176    
-144   -96    
128    80     
-64    -160   
64     48     
-80    144    
352    64     
192    176    
-96    -656   
16     288    
16     112    
304    128    
-48    16     
-144   128    
32     0      
288    192    
-112   144    
432    240    
16     192    
32     -48    
-96    -32    
-208   -288   
304    224    
112    -208   
-16    176    
64     -32    
-32    192    
96     -560   
0      96     
80     -128   
0      -96    
-80    -192   
80     240    
96     272    
0      16     
32     96     
64     48     
0      272    
32     -240   
-128   -16    
224    208    
144    320    
80     -640   
-64    16     
16     32     
64     -16    
80     32     
-80    112    
96     240    
0      -912   
80     416    
-32    -352   
-64    96     
160    -64    
96     144    
96     -32    
-32    64     
-16    -32    
192    16     
96     128    
96     96     
-80    -336   
16     144    
272    288    
-144   176    
80     -192   
-32    -208   
224    240    
-128   -464   
144    -48    
96     -304   
96     272    
-48    -48    
16     48     
112    16     
80     64     
-112   32     
192    0      
160    -592   
128    0      
-16    -1040  
1376   -544   
-448   -224   
1104   784    
-192   544    
384    -464   
-128   -320   
-624   -496   
480    608    
-80    368    
32     -240   
32     0      
-240   -16    
80     32     
64     -112   
256    0      
16     16     
256    32     
-160   -208   
128    128    
96     -80    
64     -16    
-48    -240   
144    -272   
-32    160    
48     -176   
208    -96    
-160   400    
-16    0      
160    112    
-112   -80    
112    -32    
80     -144   
64     -144   
96     -1648  
64     32     
224    -32    
96     176    
-112   16     
-48    -224   
96     -240   
144    -80    
-304   64     
96     -128   
-608   16     
16     -48    
64     208    
-32    -144   
0      160    
96     -208   
-112   -80    
-16    0      
80     32     
48     144    
-96    0      
-128   -64    
16     -176   
-80    32     
-544   -768   
-32    544    
-80    -304   
96     128    
-48    -624   
-16    -32    
144    -144   
-32    -16    
32     -1136  
-32    128    
64     -176   
-48    128    
-80    -16    
64     112    
-64    -48    
96     32     
-144   -80    
-48    0      
-224   512    
-112   352    
-224   -64    
128    -80    
192    -48    
-96    -656   
-128   -144   
128    -48    
64     16     
-48    128    
0      32     
240    416    
-16    272    
-304   -64    
-48    -176   
32     -48    
208    0      
-288   80     
32     -240   
48     96     
160    -240   
-96    96     
128    -272   
32     0      
160    112    
-16    -16    
-112   64     
-48    -160   
-112   -112   
112    -48    
-32    64     
96     0      
0      16     
0      -240   
48     144    
16     -208   
-16    80     
-48    32     
64     -32    
-48    48     
144    352    
-208   208    
96     -96    
-96    16     
208    -16    
-160   -32    
16     -208   
-352   80     
80     256    
32     -64    
80     64     
80     32     
32     464    
-336   160    
16     224    
-32    32     
96     0      
16     -80    
-112   -288   
-16    -672   
-64    -256   
176    160    
-128   -96    
64     96     
32     48     
-848   -384   
-1008  -96    
-48    272    
-656   80     
-96    -32    
-560   -16    
-256   -288   
-128   -160   
-96    -48    
112    -64    
-48    -16    
48     -128   
-144   64     
112    -272   
-32    -16    
-128   -480   
-224   -368   
208    800    
-32    192    
-112   -64    
-432   48     
-112   -64    
224    -64    
-112   -80    
160    96     
32     48     
80     192    
-128   0      
-64    -208   
32     160    
-32    144    
-112   256    
16     16     
-192   -128   
-32    16     
-448   -16    
-48    80     
144    -48    
176    176    
64     128    
-144   128    
-48    -272   
240    -48    
64     -48    
96     192    
-144   96     
16     64     
-48    -16    
-16    32     
64     16     
-32    240    
-256   64     
64     176    
-224   -96    
-784   -48    
-64    32     
-624   -48    
-736   80     
528    576    
-592   176    
208    16     
-672   480    
368    512    
-736   -240   
-48    608    
-112   -48    
304    176    
-336   -80    
144    16     
-336   96     
240    32     
-256   112    
112    96     
-208   -64    
112    0      
80     64     
-64    16     
-48    112    
80     176    
64     192    
-112   -64    
16     -64    
-240   32     
112    64     
-160   32     
96     112    
-544   -16    
0      96     
-32    128    
-112   48     
128    96     
-112   -48    
176    448    
-112   160    
64     -80    
-256   -96    
16     48     
64     64     
-16    112    
-112   -80    
16     64     
-480   -160   
96     224    
0      -112   
176    160    
-272   80     
240    144    
-128   -32    
16     16     
0      96     
16     128    
48     16     
96     192    
-112   192    
0      -80    
32     128    
-160   0      
-16    64     
80     96     
-32    128    
-80    80     
0      -32    
80     -32    
-64    -48    
48     128    
-224   112    
48     16     
-48    -160   
80     176    
-192   32     
96     -16    
-96    224    
112    128    
192    288    
48     -32    
32     -112   
48     208    
-160   64     
208    240    
-192   48     
-48    -176   
96     0      
-256   -80    
272    32     
-128   -32    
16     144    
48     80     
48     176    
-48    0      
128    48     
80     64     
176    320    
-96    144    
32     64     
96     80     
-96    -32    
160    128    
-16    64     
-32    -32    
0      80     
16     80     
208    32     
128    432    
-160   176    
208    16     
-176   48     
112    16     
112    112    
-80    64     
-112   128    
192    32     
-32    96     
-32    -128   
16     -144   
-96    192    
288    192    
-144   -160   
160    16     
-208   208    
288    112    
64     144    
-272   -240   
112    192    
-160   112    
208    112    
16     16     
32     80     
-160   80     
128    256    
-160   240    
16     16     
80     160    
16     272    
64     112    
-96    -160   
208    160    
32     64     
64     96     
16     -16    
32     64     
-32    -96    
0      -80    
-64    96     
112    48     
112    176    
96     -128   
-16    48     
-96    -96    
80     32     
16     -64    
-16    160    
-32    -128   
208    304    
-80    -16    
144    176    
-64    128    
0      48     
-48    16     
176    -96    
80     208    
176    192    
-64    144    
-144   -112   
160    -80    
128    144    
0      64     
-64    48     
64     112    
-48    144    
0      112    
-48    0      
96     208    
-80    -144   
-64    -192   
160    256    
96     -272   
80     144    
64     384    
-64    112    
-192   96     
144    96     
112    128    
-48    80     
-128   16     
80     112    
48     80     
176    80     
16     48     
80     -336   
160    240    
-64    -192   
-16    144    
-512   240    
-432   944    
-752   464    
-416   -256   
144    -1008  
784    224    
-416   304    
208    32     
48     -32    
480    432    
-384   -64    
-32    -272   
96     144    
256    -128   
-32    112    
0      -400   
112    -48    
-48    48     
192    352    
-144   -176   
-80    -48    
-16    96     
48     320    
128    -48    
-400   -320   
320    -48    
32     -16    
96     -64    
-384   -656   
240    160    
-16    -384   
48     144    
-48    -608   
128    48     
-208   192    
144    16     
-256   -80    
64     -368   
288    480    
16     0      
144    224    
-80    -16    
96     96     
16     -256   
16     -176   
48     160    
48     336    
128    656    
112    800    
-240   -320   
208    -144   
-64    -96    
64     112    
-16    160    
0      -304   
160    64     
16     -800   
96     -688   
448    512    
-112   304    
-16    128    
32     16     
-16    -80    
96     -32    
-176   -32    
176    -48    
32     48     
32     16     
16     240    
64     -272   
16     160    
48     -96    
-16    176    
112    -32    
32     144    
48     -192   
-128   192    
-128   -192   
160    48     
144    384    
-48    -1216  
-80    -96    
-832   -64    
64     -288   
112    32     
-96    -784   
224    256    
-48    16     
-16    -304   
96     160    
16     -80    
144    160    
-16    32     
64     -336   
80     336    
-16    -160   
160    192    
-320   176    
160    240    
-32    384    
-64    -896   
-32    -416   
96     -608   
144    -112   
112    112    
-96    64     
48     176    
96     -112   
0      -496   
176    32     
96     -352   
16     64     
-256   64     
16     144    
96     -16    
112    48     
32     -48    
-96    -176   
96     -64    
32     -208   
160    -48    
48     -160   
64     -32    
144    -64    
-144   240    
320    288    
-16    96     
176    528    
-288   -336   
-432   -144   
-80    -144   
192    112    
-32    -288   
80     80     
-144   -240   
48     -224   
-48    -1760  
64     0      
224    240    
64     144    
-80    112    
16     -304   
-32    48     
-16    -128   
-416   -272   
-80    -672   
192    -240   
32     -176   
96     -160   
48     0      
0      -128   
0      -592   
64     192    
-48    0      
96     -32    
-80    80     
96     112    
-128   272    
192    192    
-80    176    
-16    64     
-832   -80    
0      -128   
144    -80    
96     -96    
-16    16     
128    80     
112    48     
112    96     
48     -144   
-96    128    
-48    16     
240    112    
-80    16     
112    176    
64     240    
-224   48     
80     -160   
48     -144   
240    32     
-96    112    
-16    -768   
192    112    
64     -464   
-96    -64    
-160   64     
80     -80    
32     -32    
32     -112   
-416   -96    
128    -144   
-176   16     
16     -48    
64     -160   
96     -224   
32     176    
-816   -1744  
368    1088   
-240   512    
-432   48     
208    16     
-496   240    
160    -256   
-352   -48    
-288   512    
496    96     
-128   -96    
32     -176   
-1472  320    
304    -464   
112    224    
96     -144   
112    112    
-144   80     
-32    96     
32     -48    
-80    -96    
0      0      
-48    240    
208    112    
-16    -48    
0      -160   
-32    -160   
96     -16    
96     -48    
-48    96     
128    -48    
-16    96     
-32    -32    
-480   -32    
-16    -48    
-528   48     
192    224    
-48    128    
-224   -32    
-64    16     
80     -96    
-624   -16    
16     176    
-48    -48    
112    48     
-384   -256   
-128   128    
-16    -224   
-96    256    
-336   64     
336    -16    
-80    96     
-208   0      
144    128    
-208   -16    
128    64     
-256   48     
48     16     
16     112    
-80    -32    
176    -16    
-112   112    
-32    48     
144    48     
-96    176    
-96    -80    
48     64     
-176   -144   
48     48     
-112   160    
-64    -32    
80     0      
112    80     
-96    -176   
-16    16     
128    352    
-160   -80    
272    80     
288    32     
-80    400    
-368   -176   
160    48     
-128   -192   
32     -176   
-304   0      
16     272    
-208   -128   
224    160    
-208   -240   
224    80     
32     0      
32     32     
-160   112    
-144   -208   
96     -16    
-64    -48    
-16    -32    
16     80     
32     96     
-128   -48    
48     144    
-80    144    
-48    64     
32     -16    
0      -32    
-32    -112   
-128   96     
48     48     
-192   -96    
112    32     
-16    16     
16     128    
-144   -112   
0      48     
-96    0      
-96    144    
128    80     
-112   48     
64     0      
-64    688    
-16    336    
-16    0      
-256   -64    
208    176    
16     112    
-80    -48    
16     -128   
-96    80     
64     80     
-224   16     
64     80     
-400   176    
48     80     
32     80     
32     -16    
-224   -272   
272    80     
-80    464    
224    192    
-176   0      
32     0      
-16    160    
16     304    
80     -32    
-112   -48    
80     -64    
-144   -80    
16     -16    
144    208    
48     176    
32     -96    
-96    80     
48     -64    
80     80     
112    672    
64     496    
-256   0      
-16    -64    
96     192    
-64    -32    
48     144    
-160   -64    
16     32     
80     112    
448    480    
-256   192    
-112   112    
32     -96    
288    112    
-64    16     
-112   0      
160    288    
-336   -32    
48     -16    
-288   -32    
192    32     
-16    144    
-48    96     
112    96     
16     16     
144    48     
-144   64     
144    176    
-112   64     
176    16     
-96    96     
144    48     
-208   48     
80     128    
32     80     
-16    208    
48     112    
80     240    
-208   -192   
112    192    
80     96     
96     272    
-480   1200   
-144   -336   
-272   -416   
-544   400    
128    -96    
160    352    
336    -352   
-160   448    
144    -112   
0      128    
96     -48    
208    208    
-240   16     
112    160    
176    224    
48     240    
-96    16     
-16    -96    
-64    -112   
208    -208   
0      368    
144    -112   
-288   464    
96     -400   
-48    400    
16     -112   
16     -160   
176    -112   
320    208    
288    192    
144    304    
144    208    
-80    400    
128    128    
16     192    
32     128    
-240   -304   
64     224    
-144   -896   
32     -32    
-48    160    
32     64     
-16    96     
0      32     
-16    176    
-176   112    
128    -336   
240    16     
208    224    
128    224    
-96    80     
80     96     
16     -144   
128    -112   
112    128    
-64    128    
48     288    
-384   16     
-96    -240   
48     -240   
48     -64    
160    192    
48     -32    
-96    304    
-112   -16    
32     160    
128    208    
-16    96     
64     -368   
-16    144    
96     -592   
0      80     
96     80     
48     96     
304    704    
-176   320    
112    -144   
240    112    
48     192    
176    160    
-304   -64    
96     96     
16     112    
-80    -256   
80     48     
-80    -912   
32     -48    
208    240    
0      240    
-32    -224   
-48    96     
48     -192   
224    80     
112    304    
16     352    
-112   160    
-112   -416   
240    144    
112    32     
-208   96     
-16    -144   
112    80     
112    -32    
96     144    
-208   -320   
224    192    
64     48     
112    128    
16     128    
32     80     
-80    64     
48     -16    
224    240    
64     64     
16     320    
160    -128   
-32    128    
-176   -656   
272    -288   
0      -496   
240    64     
-128   128    
-16    -32    
-32    -208   
288    96     
0      160    
144    48     
-80    160    
224    -208   
-16    112    
48     80     
128    128    
-32    -32    
-16    -32    
224    144    
-64    144    
128    -80    
-80    32     
-64    176    
80     -544   
96     80     
80     -608   
-80    192    
224    -96    
-144   96     
96     -48    
112    -80    
0      -32    
112    112    
-16    160    
48     48     
128    144    
-96    112    
64     64     
80     -160   
48     160    
16     -256   
128    0      
64     -192   
-32    -16    
144    -80    
-64    96     
112    -192   
80     400    
0      -48    
160    144    
160    272    
48     -512   
48     -640   
-32    -80    
0      -2048  
64     -256   
48     64     
352    48     
-80    192    
-32    -160   
48     240    
-64    -48    
48     -464   
48     176    
96     -160   
-112   128    
-336   -64    
304    -240   
80     -80    
-16    0      
16     -32    
80     16     
-48    -128   
32     96     
128    -384   
80     240    
-144   -16    
336    96     
-256   16     
32     -288   
-112   -496   
-176   -832   
752    -32    
-144   -560   
-512   -432   
544    32     
-288   528    
1360   64     
-768   16     
432    -208   
-272   224    
-32    -464   
16     224    
272    -288   
-144   176    
80     -416   
80     320    
80     -208   
-480   256    
64     -368   
32     0      
0      -272   
112    128    
-16    -208   
160    16     
-32    -560   
176    16     
-160   -112   
128    96     
112    64     
96     -80    
-144   128    
80     -208   
-80    32     
96     -144   
-720   -16    
0      -400   
192    112    
-48    -336   
112    -64    
48     -2048  
-128   128    
128    -128   
64     192    
-96    -64    
48     48     
-272   -32    
160    -96    
-128   -128   
-240   160    
160    -16    
32     0      
-144   80     
64     -176   
-128   96     
128    -112   
96     176    
0      -32    
80     160    
-144   -112   
128    -144   
-64    -80    
16     64     
-64    0      
192    0      
-128   64     
80     -224   
-912   64     
32     -272   
16     64     
96     -176   
112    64     
80     -1488  
-32    -128   
64     -32    
144    -80    
-256   -272   
176    128    
-224   80     
-32    -192   
-240   -208   
128    -96    
-192   -160   
-96    -160   
-64    16     
272    -16    
-16    224    
128    -384   
48     -112   
-304   -80    
112    16     
192    160    
240    -32    
-144   -208   
48     32     
-80    80     
336    496    
-448   -160   
32     -48    
-112   208    
160    -176   
-144   -16    
-144   -160   
144    64     
0      -272   
160    192    
-16    32     
32     0      
144    176    
48     160    
-112   0      
112    32     
-32    32     
-304   -192   
-16    112    
-176   0      
-48    96     
32     16     
-848   -64    
-80    80     
-976   -64    
-48    -32    
32     -32    
-16    0      
-160   -464   
-48    -112   
80     -96    
-16    -64    
-64    -272   
48     112    
-176   96     
-192   128    
0      112    
-160   -96    
304    432    
-512   288    
32     208    
-368   80     
96     -16    
80     16     
-208   -96    
-352   -288   
128    144    
-192   -48    
160    160    
-112   -128   
96     32     
-128   96     
-112   16     
-16    64     
96     16     
-48    80     
-368   16     
-144   48     
-1376  -128   
-96    80     
-32    -128   
256    80     
-144   16     
208    144    
-304   112    
16     48     
48     16     
-64    48     
384    208    
-368   -32    
160    272    
-288   -64    
96     -32    
-224   48     
48     16     
0      -32    
48     160    
0      -48    
-160   -144   
240    160    
-112   32     
176    160    
-256   80     
48     48     
-96    48     
32     -32    
64     272    
-96    -176   
288    0      
128    256    
-848   -96    
-176   160    
32     -112   
96     64     
-128   128    
-144   48     
-48    352    
-64    -96    
-112   80     
192    -64    
720    1392   
-1088  -736   
160    16     
512    592    
288    -240   
-2096  -240   
32     -16    
208    656    
160    -304   
-400   480    
160    -496   
-352   592    
-112   -176   
112    336    
-112   -448   
240    304    
-144   80     
224    256    
-528   16     
240    -16    
-352   448    
96     -192   
-112   240    
48     -32    
-48    0      
32     -368   
0      400    
416    368    
-160   -112   
240    -176   
-224   128    
48     -48    
-16    272    
-16    0      
224    304    
-80    64     
112    -96    
16     224    
-112   48     
352    528    
-112   64     
144    128    
-16    320    
-160   112    
-64    -96    
-80    -32    
-16    -96    
16     320    
32     -16    
128    144    
-208   -16    
-32    112    
64     -32    
-48    16     
48     192    
-80    96     
48     192    
-112   16     
128    144    
-192   32     
64     176    
-96    -80    
240    256    
-464   64     
64     32     
-48    48     
128    96     
0      16     
224    368    
-96    144    
192    -96    
48     176    
16     -128   
128    80     
-112   80     
112    112    
-16    -64    
128    144    
-112   -80    
176    208    
-32    128    
160    64     
64     400    
96     -160   
240    -16    
-144   -128   
32     -96    
-16    64     
-16    208    
48     112    
-112   0      
0      64     
32     192    
0      176    
-144   -112   
0      48     
80     16     
80     32     
-32    64     
32     112    
64     128    
64     48     
80     224    
64     -16    
-112   80     
-96    96     
16     16     
-16    -112   
-48    0      
144    240    
-32    128    
96     288    
-16    64     
32     32     
-128   128    
288    240    
0      240    
16     112    
208    432    
-240   48     
48     32     
-96    80     
160    128    
0      -80    
-160   -48    
64     320    
-80    128    
192    64     
-32    32     
64     112    
-144   -112   
112    -16    
-320   48     
384    400    
-64    -80    
112    64     
-256   -64    
80     144    
144    48     
-16    -592   
-48    64     
-16    -64    
-64    112    
96     80     
-32    -16    
16     -112   
208    128    
-112   128    
32     80     
-16    16     
64     80     
-32    16     
32     0      
-48    48     
208    -208   
48     160    
144    -1456  
-192   -16    
80     112    
-48    96     
64     144    
32     32     
96     128    
96     48     
-48    -32    
-96    -80    
32     128    
-144   0      
144    48     
64     -32    
96     80     
144    -1056  
-112   112    
160    80     
-16    192    
48     -112   
48     32     
32     16     
80     176    
-112   192    
96     -112   
208    -16    
48     96     
48     -32    
96     -256   
48     112    
0      -272   
16     160    
48     -784   
48     176    
-16    -304   
80     80     
-32    64     
128    240    
-32    64     
32     160    
2304   432    
-1520  -672   
384    -336   
-288   -48    
1312   304    
-672   224    
0      -560   
0      -784   
288    -544   
-384   544    
208    -160   
-80    224    
-16    320    
160    96     
-80    64     
16     -240   
96     208    
-16    32     
96     256    
-112   -80    
272    -16    
-64    -112   
64     -80    
128    0      
-32    144    
32     -96    
96     208    
160    144    
32     256    
-160   -352   
176    48     
-128   -160   
272    160    
-16    -48    
112    80     
32     -272   
48     192    
-48    -224   
16     144    
96     64     
192    80     
-112   96     
48     48     
64     128    
-16    -176   
80     112    
-32    16     
176    224    
-64    -224   
0      160    
144    -16    
64     80     
16     -32    
80     80     
32     -96    
112    -2736  
-16    32     
128    -2144  
0      -208   
96     112    
96     -144   
128    -128   
-80    384    
64     -64    
32     96     
128    64     
96     32     
32     -112   
-16    -944   
64     -32    
48     -304   
0      96     
-80    32     
48     -144   
112    -176   
32     -576   
80     -48    
-80    -240   
128    96     
0      -96    
-80    -224   
32     96     
80     32     
32     -416   
-80    -80    
48     -160   
16     96     
-272   -16    
144    112    
-1936  -192   
32     -64    
32     96     
176    96     
-80    -16    
-16    -544   
16     -384   
96     -16    
192    224    
-64    48     
-16    176    
48     -192   
176    -64    
-64    -32    
0      -32    
-256   32     
128    -32    
96     -32    
64     -256   
-32    16     
80     -1200  
-48    0      
144    -1040  
176    176    
-144   16     
112    80     
16     -96    
64     -128   
-96    0      
64     -48    
48     -64    
16     32     
-736   -64    
-112   -320   
48     112    
64     0      
256    -96    
-144   -1024  
64     32     
80     -176   
-32    128    
112    96     
-32    -16    
-48    0      
128    32     
-192   -80    
208    544    
-256   -208   
128    -48    
-16    -32    
224    96     
-96    48     
176    -48    
-64    128    
64     0      
192    288    
-208   64     
160    -112   
16     -16    
96     0      
-144   -80    
-16    -80    
32     112    
192    384    
-592   -64    
32     -336   
0      16     
208    -160   
-80    416    
-128   -368   
288    176    
-96    -32    
240    -48    
-112   32     
64     -144   
224    544    
-416   -192   
432    -80    
-16    -48    
-16    -192   
-48    -448   
-32    144    
80     -144   
48     128    
-48    -352   
224    48     
-528   -16    
160    -16    
-128   128    
96     64     
-176   -80    
192    112    
48     32     
-144   -160   
-1136  -112   
528    272    
96     224    
-144   -160   
112    112    
96     32     
80     -192   
-32    304    
-32    160    
-128   144    
80     -160   
0      16     
96     -32    
-1632  576    
-16    -1328  
-64    288    
560    -176   
160    -288   
-288   48     
-176   400    
224    -368   
-176   -448   
96     -240   
-240   32     
-400   208    
-16    96     
0      -48    
-96    -176   
-48    -64    
48     416    
288    272    
-528   -160   
80     32     
-80    -400   
-112   -144   
304    96     
-112   112    
-32    -128   
-64    -144   
-16    128    
-432   336    
-64    -16    
32     112    
-80    64     
-272   -144   
-64    96     
-240   -112   
32     192    
-32    -112   
-16    112    
0      48     
48     0      
16     352    
-208   -48    
144    16     
-160   64     
240    176    
-128   64     
-80    -80    
-80    -32    
32     0      
-48    112    
16     32     
144    48     
-304   16     
64     48     
-144   96     
-144   16     
-96    16     
80     -48    
-48    64     
-96    64     
-128   -48    
-96    112    
-16    -16    
-32    80     
32     -64    
128    80     
-64    64     
-128   0      
32     48     
32     64     
-32    16     
-48    80     
-16    128    
-192   0      
80     16     
-352   0      
64     -32    
384    -96    
0      144    
-144   -16    
-160   16     
64     80     
64     80     
64     -32    
-112   160    
48     368    
-288   -96    
48     16     
16     96     
-112   -32    
96     112    
-48    64     
-992   -208   
0      32     
-64    -224   
112    32     
-160   80     
48     160    
16     96     
-112   16     
32     -16    
-32    64     
16     32     
48     176    
-160   96     
32     208    
-112   112    
-176   0      
16     -32    
-80    32     
128    160    
48     -48    
-80    64     
-16    32     
80     0      
0      192    
96     192    
320    224    
-320   160    
160    32     
-144   208    
128    224    
128    80     
-112   144    
-32    64     
224    256    
112    80     
-32    0      
-32    32     
48     -48    
-64    128    
0      -176   
48     80     
-336   32     
304    32     
0      96     
-176   0      
-80    -144   
-32    32     
-80    80     
80     -64    
80     112    
-160   32     
112    288    
64     64     
-64    64     
-128   224    
160    80     
-176   64     
64     112    
16     -32    
80     176    
-256   -80    
32     176    
-16    -16    
16     32     
112    128    
0      -512   
-48    32     
0      272    
0      0      
-32    -32    
0      -144   
64     160    
32     -96    
-144   96     
96     112    
-128   48     
-208   -368   
-16    224    
-48    192    
16     80     
-192   80     
224    80     
-144   16     
-16    -96    
48     240    
112    208    
16     -48    
80     32     
-32    -32    
64     96     
64     192    
-48    96     
-128   -32    
176    112    
48     64     
224    80     
96     0      
0      128    
32     208    
-80    112    
80     144    
-96    -240   
48     112    
-64    192    
0      432    
-720   -384   
544    1648   
-976   -560   
-64    -272   
-192   -624   
704    -48    
-208   192    
960    416    
-288   336    
128    -64    
-160   176    
-112   -112   
288    176    
-64    -48    
160    -16    
-160   -32    
144    96     
-48    144    
96     -16    
-160   -80    
192    80     
-128   144    
48     192    
96     208    
-144   -64    
96     80     
80     32     
16     256    
-64    112    
32     -816   
16     0      
-80    96     
352    208    
-160   192    
176    112    
-288   -32    
16     48     
64     32     
-48    16     
48     192    
48     32     
32     64     
80     128    
48     32     
-112   -848   
80     128    
48     -1520  
0      160    
160    304    
-80    48     
80     128    
-32    160    
80     112    
80     224    
64     80     
48     96     
0      176    
-16    -48    
64     80     
160    560    
-192   -64    
-16    -160   
32     -48    
-48    -112   
96     144    
16     -80    
112    -80    
0      112    
112    128    
0      16     
16     128    
-16    80     
80     -16    
0      32     
160    -96    
64     112    
272    48     
-48    160    
320    -2064  
96     144    
-64    112    
128    16     
-32    -64    
64     32     
16     -64    
128    112    
112    192    
-32    -48    
-48    0      
80     -208   
64     240    
48     -96    
-80    64     
48     -752   
160    112    
16     -1488  
-96    16     
48     48     
80     128    
80     112    
-32    -32    
32     64     
80     -32    
16     80     
64     -800   
64     96     
96     112    
-32    -64    
128    -64    
-48    48     
112    -240   
-64    144    
176    128    
48     144    
-32    80     
96     240    
-96    32     
128    -1232  
-64    112    
320    0      
-96    64     
48     -96    
32     64     
112    -240   
80     144    
144    -48    
16     368    
-16    -192   
160    272    
-144   16     
112    -160   
-48    192    
128    -176   
144    144    
-112   -64    
336    736    
-352   -208   
336    -128   
-96    -32    
208    16     
-144   -96    
48     -1104  
112    48     
144    -1328  
-80    -2384  
112    96     
32     -1376  
80     0      
96     224    
0      -160   
-16    48     
160    -16    
208    272    
0      208    
-192   -464   
208    240    
176    -1072  
240    0      
-128   16     
80     -464   
64     -32    
160    -160   
256    48     
-64    -400   
-240   -528   
400    80     
-160   384    
48     144    
-176   -64    
224    -512   
176    160    
-112   -144   
16     512    
-304   -176   
224    -176   
-176   32     
96     -48    
-192   -144   
64     -32    
368    -192   
256    16     
-64    96     
-96    -1104  
-224   -272   
-96    -256   
16     144    
-96    0      
32     0      
-32    64     
-32    -80    
-144   -96    
64     -128   
128    -144   
224    -80    
0      128    
128    -224   
-384   864    
64     2000   
-960   256    
-128   -752   
80     -912   
176    -16    
544    560    
-496   208    
64     160    
-48    -208   
32     32     
-336   -208   
208    -208   
48     -192   
96     -256   
-48    48     
64     -240   
-32    208    
96     -80    
112    160    
-144   0      
-32    48     
-160   -48    
112    144    
-352   -96    
304    64     
-848   48     
240    -64    
-336   -320   
-48    48     
144    32     
128    -48    
16     176    
48     -1200  
-16    112    
-48    -160   
208    -112   
-64    -48    
64     176    
-16    -48    
16     -112   
-720   -64    
144    0      
-320   48     
160    -144   
-64    64     
96     -256   
-48    -256   
272    -1792  
-240   176    
240    -16    
-16    80     
-144   -16    
192    0      
-336   -48    
32     -208   
64     96     
-80    16     
-128   -160   
-16    -144   
-16    80     
80     -496   
0      128    
-32    -688   
240    -32    
-80    240    
32     48     
-240   -16    
176    16     
-48    32     
-32    16     
-16    240    
32     -160   
0      -112   
48     -48    
80     208    
-144   -48    
160    176    
-64    -32    
-16    -32    
-272   -32    
208    -16    
-96    176    
-176   16     
48     192    
0      -192   
0      -128   
160    160    
-320   16     
208    -48    
0      96     
-240   -64    
48     80     
32     -192   
-288   176    
-240   160    
-1472  -80    
112    80     
-160   -192   
112    224    
-192   -192   
16     16     
-48    -288   
128    192    
-272   -432   
160    160    
-160   -272   
-176   32     
-64    -16    
-96    0      
64     176    
80     16     
-48    32     
-704   -96    
112    176    
128    -144   
-96    -16    
-48    -32    
128    -48    
-304   -112   
-160   48     
128    -256   
-80    -112   
-112   112    
256    352    
208    208    
-144   272    
-80    112    
-80    128    
-32    -16    
-864   -160   
-64    0      
-192   -112   
64     16     
48     -208   
48     64     
64     96     
-32    0      
-32    48     
0      0      
-64    -32    
-112   128    
-96    112    
112    96     
-112   48     
-32    224    
-256   -272   
-80    -64    
-16    144    
0      -64    
48     96     
32     176    
128    224    
-144   -64    
80     -64    
-80    -48    
160    112    
48     320    
48     16     
-32    128    
-224   -160   
-48    48     
-576   0      
112    -48    
80     -96    
16     -64    
96     464    
-128   96     
96     144    
32     -48    
-96    -112   
192    352    
-48    128    
112    16     
-64    -16    
-144   -208   
-48    96     
-272   176    
0      96     
64     -32    
-96    -48    
80     32     
-144   -16    
80     144    
16     176    
32     -144   
-160   -80    
16     96     
-64    80     
48     80     
-128   -32    
128    128    
-416   -16    
80     144    
192    -32    
-16    48     
-256   -2752  
544    -64    
-624   0      
688    -272   
928    -336   
-272   -192   
-16    432    
80     0      
80     -448   
224    80     
80     192    
-304   -16    
160    208    
304    96     
-208   -80    
96     112    
48     320    
0      32     
-352   -400   
128    -16    
-112   80     
64     128    
0      64     
16     208    
-208   -64    
48     80     
-48    80     
-48    96     
16     192    
-16    -80    
96     160    
-32    192    
128    208    
-128   96     
-64    -144   
32     112    
144    224    
32     32     
-48    48     
-96    0      
80     96     
-64    48     
0      144    
96     32     
-16    32     
80     128    
-32    144    
144    208    
-176   208    
32     -48    
32     -208   
16     32     
-48    0      
192    192    
-144   32     
176    144    
-48    96     
192    320    
96     240    
-16    -64    
0      32     
112    16     
-16    64     
112    -288   
208    64     
-128   80     
-64    192    
-96    48     
176    112    
-128   96     
80     128    
16     80     
-48    32     
-96    -16    
80     80     
80     224    
-288   -320   
-224   -272   
-192   -176   
-16    -48    
16     0      
48     352    
32     64     
64     240    
-192   96     
-32    304    
32     -192   
192    192    
16     160    
80     96     
-48    176    
112    96     
-48    0      
48     112    
48     80     
32     80     
-16    80     
-48    -128   
80     64     
32     16     
96     -496   
-48    112    
32     144    
80     48     
16     96     
-16    64     
112    304    
32     32     
48     192    
-32    96     
-16    -32    
16     64     
16     192    
64     96     
16     128    
112    -32    
-32    64     
64     32     
32     192    
64     48     
-32    -48    
-96    -48    
192    192    
64     128    
32     240    
-208   -192   
32     -160   
112    -128   
-32    288    
128    128    
-32    -224   
-16    32     
128    -784   
160    256    
-112   80     
-16    -736   
64     -16    
176    528    
-32    208    
-224   128    
128    16     
128    96     
-32    -48    
32     80     
32     96     
16     64     
208    224    
-64    -208   
192    -64    
80     144    
112    80     
-80    160    
144    400    
-48    576    
-160   160    
96     96     
272    192    
0      208    
-112   -144   
-64    -48    
160    16     
0      256    
128    -320   
-128   112    
80     -1392  
-192   -32    
32     64     
-16    224    
-32    16     
32     64     
16     96     
0      96     
192    192    
-144   -176   
16     48     
0      -112   
48     128    
16     -576   
48     256    
112    -864   
-96    64     
240    48     
80     144    
0      -32    
-16    192    
-32    -64    
-96    144    
112    112    
64     64     
80     96     
96     -416   
48     224    
112    -496   
80     112    
144    -48    
160    144    
-160   848    
-32    1984   
-704   416    
192    -480   
-160   -448   
512    -416   
-176   304    
400    304    
-128   272    
80     -736   
-128   64     
32     -304   
224    256    
-144   -320   
192    144    
-96    -80    
96     80     
0      64     
96     96     
-32    -80    
112    -64    
48     224    
32     80     
144    96     
-192   -144   
192    16     
-48    -144   
-16    256    
192    -144   
0      48     
-48    128    
96     320    
64     80     
32     -720   
48     -1360  
48     0      
-80    -432   
288    -32    
-240   304    
352    0      
-80    0      
0      -64    
48     96     
0      -48    
224    -48    
-160   32     
352    -32    
-352   48     
224    -160   
32     -1104  
-304   -128   
128    -240   
-48    80     
176    -16    
32     -240   
64     -2672  
-48    -48    
144    80     
-16    48     
96     -80    
-32    16     
144    -48    
-80    32     
-16    -128   
64     144    
-752   32     
96     -16    
64     -272   
32     -16    
-64    -256   
176    -272   
96     112    
32     -112   
96     0      
64     -16    
-32    288    
-48    -160   
160    272    
-112   -16    
128    -160   
-288   -128   
80     0      
-96    -192   
48     -352   
112    -16    
96     -240   
32     32     
-128   -416   
-432   -160   
224    0      
-80    112    
160    96     
-64    -16    
-48    -96    
16     -160   
-432   -32    
-96    80     
-1104  -32    
96     -80    
64     -128   
-16    -208   
96     -80    
-16    -848   
96     96     
0      16     
32     80     
80     96     
48     96     
96     176    
-48    112    
112    32     
-176   -48    
-96    0      
80     64     
336    112    
48     -208   
-16    -16    
-128   -496   
304    208    
256    -736   
-256   128    
256    144    
112    32     
-96    -144   
-16    -128   
32     112    
48     -112   
-288   -64    
32     -240   
-336   -48    
80     -16    
-112   -16    
-32    32     
144    64     
64     -576   
208    48     
-304   64     
224    64     
64     160    
16     -32    
-240   -64    
96     -48    
-240   64     
160    -128   
-320   48     
16     -48    
112    112    
0      -400   
16     64     
32     -704   
96     -112   
-96    16     
32     48     
-80    80     
160    16     
-96    128    
144    160    
-368   -496   
32     208    
48     48     
48     -144   
64     224    
80     -112   
16     -112   
160    -256   
160    64     
176    368    
-128   -336   
0      112    
80     -288   
32     16     
-64    80     
-112   48     
32     336    
0      -80    
-464   -480   
160    448    
-384   64     
-80    176    
16     80     
-256   -192   
-16    64     
-16    0      
-128   160    
48     -96    
32     96     
208    208    
-304   32     
-16    -80    
-32    -16    
-96    -112   
-32    144    
-336   -80    
128    0      
80     176    
64     -16    
-48    32     
960    -944   
768    1264   
256    -432   
-560   -832   
112    -224   
208    -400   
624    1040   
-640   -464   
-48    176    
-192   -336   
160    16     
-144   -336   
48     192    
-400   -96    
336    496    
-32    288    
-48    -240   
-80    416    
64     368    
-384   -48    
-64    -192   
128    96     
16     176    
272    -112   
-208   16     
160    -112   
-64    0      
-16    48     
16     -80    
64     -16    
-160   -32    
-128   48     
-144   -80    
-32    48     
-160   192    
-272   -368   
-112   -384   
0      32     
208    144    
-128   -16    
0      112    
80     176    
16     0      
-16    0      
-48    -16    
144    48     
-16    48     
48     128    
-176   -368   
160    208    
16     -144   
-912   -48    
32     80     
-128   48     
240    240    
64     432    
48     368    
-48    16     
-160   -400   
128    32     
-176   96     
16     -112   
0      176    
144    112    
-368   -128   
144    208    
-272   -64    
32     160    
-144   -32    
64     96     
64     0      
-192   64     
-64    -64    
16     64     
48     80     
-112   128    
112    -400   
-432   -192   
-96    -192   
-528   384    
176    0      
-128   144    
128    -64    
-480   96     
-16    96     
-32    160    
-96    16     
192    144    
-32    192    
80     -16    
-96    112    
80     128    
-176   -16    
-128   -96    
-48    -32    
224    112    
-80    0      
-16    -176   
48     64     
48     144    
16     32     
-16    64     
32     208    
-16    32     
80     112    
-208   -352   
304    128    
-240   -16    
240    80     
-144   128    
240    144    
-224   -32    
-160   128    
64     80     
-16    32     
144    336    
16     272    
32     240    
-96    16     
64     192    
32     32     
-112   -16    
-128   -32    
192    -224   
-128   -64    
-48    304    
-16    192    
192    368    
-240   -16    
144    -176   
160    48     
-176   96     
144    256    
-80    192    
-16    -208   
240    320    
-96    -112   
-64    0      
32     176    
-16    -16    
96     288    
-80    64     
96     192    
-112   48     
112    -16    
-16    128    
48     -112   
-144   64     
144    160    
32     96     
-96    64     
112    240    
-272   -32    
256    -16    
16     -32    
16     144    
32     192    
96     208    
80     128    
16     -160   
-16    240    
64     112    
-32    224    
-48    144    
240    -656   
-112   -272   
560    688    
-336   80     
-32    144    
-32    32     
160    0      
-80    256    
-176   16     
32     160    
-32    32     
144    112    
-64    144    
48     48     
-32    64     
-48    16     
16     176    
48     80     
0      208    
144    -48    
-32    32     
-16    -224   
32     160    
-80    208    
0      96     
48     160    
48     80     
192    112    
-208   -128   
160    192    
176    0      
144    256    
-64    -896   
816    -1232  
304    544    
-304   240    
-400   -464   
208    368    
-64    -80    
288    224    
48     -80    
-80    -32    
160    32     
0      144    
-64    96     
112    112    
16     48     
128    64     
-272   -176   
224    128    
16     176    
32     -176   
48     176    
-32    -1456  
160    96     
-80    -64    
176    96     
-32    96     
96     416    
128    160    
-112   -96    
64     0      
32     128    
128    16     
-176   64     
208    64     
-80    -112   
160    -96    
-176   -304   
224    256    
96     -112   
-48    48     
-48    192    
128    80     
0      -416   
-176   0      
176    -96    
0      256    
-16    64     
272    176    
-240   -48    
224    -176   
-64    64     
176    -256   
-64    48     
128    -768   
32     160    
-112   -336   
176    160    
-208   112    
224    -192   
32     80     
0      208    
-32    16     
160    -208   
176    272    
-160   -16    
112    -80    
160    0      
64     144    
-96    -496   
48     32     
96     -240   
176    96     
-32    112    
16     192    
-32    -112   
256    288    
-144   16     
144    -64    
112    224    
-64    48     
96     112    
16     -496   
16     48     
272    -320   
-64    64     
16     -96    
64     240    
-160   64     
288    -16    
-96    96     
96     48     
0      208    
16     -176   
128    144    
-48    -576   
64     16     
96     -176   
-64    144    
64     -160   
48     64     
48     -16    
32     128    
80     176    
80     0      
64     64     
-96    -16    
336    400    
-80    -16    
208    128    
-208   -256   
160    112    
64     -144   
192    144    
32     -64    
16     208    
-16    -608   
80     -48    
-16    32     
112    -480   
-48    -1536  
208    176    
48     -624   
-32    -208   
160    -1376  
0      144    
48     112    
96     32     
160    208    
-48    -96    
32     -1168  
80     224    
32     -288   
80     112    
-80    -480   
16     -192   
-64    -288   
224    -352   
0      -368   
-32    -192   
272    -16    
-336   -576   
224    80     
-128   -16    
160    -304   
-128   -240   
96     -272   
-32    48     
144    176    
-192   -32    
96     48     
-864   -128   
96     -112   
96     80     
-32    -208   
288    400    
-208   -448   
400    96     
192    784    
16     80     
-144   -80    
80     48     
64     -144   
16     64     
-48    -32    
64     -48    
224    320    
-144   -240   
0      -48    
64     -80    
96     -64    
16     -432   
128    48     
16     32     
64     -16    
128    16     
0      144    
32     -80    
-96    -160   
32     0      
64     16     
-208   0      
48     -288   
-96    -192   
128    -176   
-96    96     
0      -112   
-96    -16    
224    -400   
32     48     
-80    -176   
64     192    
240    -240   
-32    160    
-128   -16    
128    -32    
-336   48     
848    976    
192    1008   
-80    -896   
-816   -320   
544    -240   
-176   -912   
208    384    
352    560    
-688   -752   
240    -96    
-32    224    
336    -80    
-128   -64    
64     -192   
32     176    
208    -128   
48     96     
0      224    
160    160    
96     -176   
160    -16    
64     0      
-16    64     
0      -528   
96     48     
-160   144    
-96    -608   
-256   -16    
128    0      
48     112    
96     0      
-144   0      
96     -32    
-96    -160   
-16    -112   
96     112    
-48    -400   
256    64     
192    -496   
-48    -64    
-160   112    
-96    64     
-96    -16    
96     0      
-32    -16    
128    0      
128    432    
-320   -448   
48     272    
-48    -64    
160    -48    
32     -64    
32     16     
64     -64    
48     -96    
-64    -64    
96     304    
32     272    
-112   -368   
176    64     
-16    -112   
-96    64     
208    432    
-112   80     
-16    -192   
-16    32     
-1072  -128   
-96    96     
32     64     
-112   32     
16     64     
-624   0      
-80    304    
-288   -128   
-16    80     
192    -320   
0      -96    
496    240    
0      368    
-432   -256   
112    96     
-384   -240   
144    112    
0      128    
-80    64     
-80    176    
272    336    
-208   -80    
-592   -496   
0      -80    
112    304    
0      -32    
-64    -64    
16     64     
112    160    
80     32     
-64    -272   
64     80     
224    416    
-96    96     
-128   -112   
-80    16     
64     -32    
160    80     
-32    96     
-752   -128   
16     -176   
-256   -384   
16     16     
112    -160   
160    144    
0      -80    
0      16     
-48    32     
-48    -48    
-96    -32    
-16    48     
16     240    
-224   -48    
48     32     
-720   -96    
-160   -16    
-640   -160   
16     16     
64     224    
64     32     
128    96     
-240   32     
160    80     
16     48     
48     -48    
48     64     
-80    128    
-16    192    
112    16     
-288   -448   
-320   -208   
144    -176   
48     176    
-208   -80    
144    256    
0      224    
32     64     
-32    256    
96     80     
-176   -64    
-80    -144   
32     48     
-32    0      
0      16     
32     48     
0      -64    
-112   -144   
-32    224    
16     -16    
-96    32     
176    368    
-144   80     
80     -48    
-176   0      
32     -80    
-64    0      
128    -96    
-272   240    
-80    32     
-208   128    
16     -144   
-32    -224   
32     176    
-80    -128   
-112   80     
144    -112   
-112   16     
-16    0      
-96    256    
96     -128   
-32    224    
80     0      
-16    144    
-128   -48    
-144   -64    
64     96     
-208   96     
144    -64    
112    192    
16     112    
-112   64     
0      112    
-16    16     
-32    144    
96     -128   
0      80     
-64    80     
112    160    
-64    64     
-64    16     
-464   96     
-80    -432   
48     288    
176    48     
336    864    
-432   -544   
704    832    
-48    -144   
176    0      
-432   -144   
336    320    
-160   -16    
16     48     
-128   256    
144    16     
-112   128    
-48    -160   
16     176    
16     -16    
-144   160    
144    -80    
80     224    
48     -16    
0      96     
-96    -112   
80     208    
112    48     
-16    128    
16     -32    
-80    16     
48     96     
32     48     
32     80     
-80    112    
112    64     
-160   64     
224    16     
-128   160    
128    -80    
64     144    
-32    112    
64     112    
-32    96     
32     -48    
-160   -16    
96     144    
64     160    
48     -64    
-144   128    
96     16     
112    112    
-96    128    
64     128    
-112   48     
96     80     
-32    0      
0      224    
32     -112   
128    256    
-320   -64    
208    112    
16     96     
80     144    
-16    48     
48     64     
0      16     
64     128    
-16    16     
128    128    
-32    64     
16     48     
96     64     
-32    80     
48     96     
-32    -96    
64     -16    
48     64     
160    368    
-64    48     
176    112    
16     80     
-16    -240   
80     -48    
-128   48     
-64    96     
32     352    
-240   160    
144    -96    
128    80     
-96    -96    
48     -80    
-32    48     
16     208    
112    16     
-256   -96    
160    112    
32     64     
96     112    
-80    192    
144    128    
32     160    
-128   -96    
-80    16     
112    240    
128    144    
-48    -240   
96     192    
64     -528   
32     96     
112    48     
-32    -176   
48     112    
48     112    
288    176    
-128   -32    
128    176    
-112   0      
192    144    
80     112    
-176   112    
208    112    
32     16     
-64    -80    
192    192    
-128   -192   
144    176    
-80    304    
128    -368   
32     192    
112    64     
16     96     
-16    208    
80     48     
48     -48    
32     96     
16     -112   
32     208    
272    -32    
-48    16     
48     -1488  
0      224    
192    160    
80     0      
0      16     
0      -352   
160    32     
144    416    
32     48     
-80    -32    
64     128    
112    -208   
32     160    
32     -64    
-112   32     
416    512    
-640   -48    
112    -2704  
32     48     
208    176    
-80    144    
-112   16     
160    224    
0      80     
64     0      
-160   -64    
192    -128   
48     400    
-80    -480   
224    48     
112    -208   
-48    -16    
304    -400   
-160   -32    
336    -64    
-64    288    
144    -48    
128    144    
-64    112    
96     -384   
64     112    
112    -256   
64     80     
-64    -272   
-32    192    
32     -176   
-32    64     
16     288    
112    48     
80     96     
-16    80     
-16    96     
-32    -272   
240    80     
64     128    
112    128    
-80    64     
-400   1744   
-336   -1568  
-128   -624   
976    16     
-128   -272   
-624   -736   
448    -112   
-160   1088   
16     -3408  
192    0      
-32    -416   
160    288    
64     -112   
-80    96     
64     -960   
128    656    
96     -368   
624    880    
-368   112    
128    304    
-128   -320   
400    -272   
80     -256   
272    -240   
-192   -96    
-352   -80    
-32    -48    
80     -192   
-176   -848   
-160   -528   
-64    -704   
160    -256   
96     240    
0      -304   
80     -16    
160    -192   
-64    -288   
64     -112   
96     272    
-176   -64    
-304   112    
112    -96    
32     -160   
-96    -192   
80     -32    
160    -48    
-96    -464   
336    -832   
64     208    
112    112    
32     112    
64     0      
0      288    
-80    32     
-96    -208   
-272   -64    
240    -80    
-224   -16    
48     -16    
-48    -320   
-176   -336   
32     -32    
-80    -1024  
-48    48     
-80    -48    
32     176    
-48    16     
16     -224   
-240   -272   
64     -192   
-80    64     
96     304    
-496   112    
32     -224   
48     -48    
64     -320   
64     288    
-112   -48    
-112   96     
-16    -160   
-48    -16    
32     -144   
144    112    
-272   64     
96     -48    
-240   -96    
192    -192   
-704   -48    
48     -240   
-880   0      
96     -64    
128    272    
64     -48    
-80    128    
240    -240   
-224   80     
208    0      
32     96     
0      192    
176    -112   
-96    32     
160    -128   
-320   176    
-16    -224   
0      -272   
144    288    
-272   192    
-64    -528   
-80    -144   
-48    -512   
160    96     
0      80     
-48    -112   
-16    -80    
80     48     
-624   32     
192    -16    
-240   -48    
16     48     
0      64     
-32    -96    
-128   -160   
160    -336   
240    16     
-48    -256   
-80    64     
96     0      
16     16     
-112   -48    
96     32     
16     -160   
-224   -32    
96     32     
176    144    
-80    -96    
-176   -128   
-256   32     
144    -64    
32     48     
16     -112   
96     -96    
-96    16     
80     -96    
0      160    
0      0      
128    192    
0      -48    
-80    16     
48     -160   
-96    80     
176    48     
80     176    
-288   -32    
224    128    
-160   -16    
-1088  64     
16     384    
-96    0      
32     -32    
176    -128   
32     0      
-16    -80    
-96    -192   
224    -48    
-144   16     
32     112    
-16    16     
-16    -320   
64     112    
-16    48     
-80    32     
112    288    
-256   -32    
80     -112   
-208   192    
32     -96    
0      16     
-64    32     
128    160    
-96    32     
-128   -112   
96     176    
-80    -128   
176    -80    
144    192    
-32    -80    
-48    272    
-176   64     
-16    80     
-112   64     
-64    -80    
-288   160    
-128   128    
-288   0      
-144   -64    
0      -80    
128    -1120  
-384   -896   
1056   704    
48     144    
528    1280   
-592   -480   
-16    -480   
1104   240    
-544   -112   
0      208    
-656   -16    
96     -256   
-1904  48     
96     -192   
-160   192    
208    -224   
-176   96     
240    0      
-176   128    
-144   -160   
96     256    
-48    16     
144    192    
-320   -48    
224    16     
-224   -64    
240    304    
-448   96     
224    0      
-208   -16    
64     48     
112    160    
-48    -80    
-96    80     
-32    0      
32     32     
48     -48    
128    96     
-112   -16    
-128   64     
-96    32     
16     176    
-16    -32    
-64    192    
-240   -160   
-16    32     
-112   0      
320    176    
-144   0      
80     80     
-32    48     
-64    48     
-64    48     
-64    0      
-32    -32    
-48    64     
80     144    
-272   0      
176    48     
-560   -80    
0      112    
0      112    
48     96     
64     80     
-16    -48    
64     96     
-16    176    
0      176    
16     96     
16     16     
16     48     
48     64     
-176   -80    
32     96     
-96    -16    
224    224    
-96    224    
48     64     
192    272    
-256   -48    
0      -352   
-48    -112   
-96    48     
-192   64     
176    272    
-64    -144   
144    -80    
-144   -64    
160    208    
-16    160    
0      64     
16     128    
-32    48     
64     80     
288    752    
-224   256    
-16    -64    
112    -64    
-64    16     
48     96     
-144   144    
48     96     
-224   -112   
80     -160   
-16    80     
-16    80     
48     128    
64     320    
32     272    
176    288    
-16    176    
-80    80     
-112   -32    
112    48     
128    480    
-80    288    
32     144    
-144   -112   
112    192    
0      176    
-96    0      
48     176    
96     64     
176    160    
-16    384    
-48    464    
16     112    
-64    176    
-64    -80    
160    80     
-48    -112   
144    256    
-160   32     
64     48     
-32    96     
112    96     
-16    -80    
48     80     
16     80     
16     192    
-64    16     
80     -144   
80     192    
-16    80     
-112   80     
-64    48     
160    0      
48     144    
0      160    
-48    80     
0      64     
96     112    
-32    -16    
48     176    
192    32     
-80    80     
-176   0      
368    160    
-64    160    
-32    128    
-160   -16    
0      -64    
176    96     
-96    48     
160    384    
-240   0      
16     -176   
240    112    
128    224    
-32    -48    
-16    192    
128    -64    
144    32     
-64    96     
32     32     
128    -80    
-16    0      
144    -64    
16     160    
-48    112    
-32    16     
0      160    
64     192    
-80    -16    
0      240    
16     144    
-80    -16    
-112   144    
224    -128   
288    32     
-128   80     
-48    -736   
-80    112    
336    -576   
112    32     
32     112    
2032   -1200  
-592   -896   
960    1152   
-352   480    
432    368    
-112   112    
-320   -32    
672    432    
-224   -112   
256    288    
-208   -368   
-160   176    
0      -464   
336    -176   
-112   160    
-80    -80    
208    352    
-112   -48    
480    288    
64     352    
64     112    
80     368    
-96    -352   
80     -272   
224    816    
64     -80    
240    320    
-224   -224   
320    128    
-224   -1872  
128    144    
-16    192    
96     96     
48     192    
80     160    
0      -112   
-128   208    
112    80     
-16    -64    
-16    256    
80     -16    
144    80     
80     -112   
16     224    
48     -640   
64     224    
-80    -800   
208    160    
-240   128    
272    -16    
-64    144    
16     112    
112    256    
-48    -96    
192    192    
48     112    
32     64     
64     -208   
-32    -224   
128    -288   
0      320    
0      176    
-64    -96    
208    144    
-48    176    
32     48     
-48    -64    
224    160    
-96    -352   
96     96     
48     -240   
112    144    
80     128    
-32    96     
112    -272   
208    240    
-16    -80    
-144   192    
80     -48    
192    288    
16     -128   
176    -176   
176    304    
-128   -160   
240    160    
-48    -64    
80     128    
96     -80    
32     16     
80     -240   
-32    -32    
48     -48    
160    240    
0      224    
-16    -272   
80     16     
0      -176   
16     -2800  
80     -48    
64     112    
48     48     
32     160    
64     -112   
-112   -304   
208    16     
-80    272    
400    368    
-256   -176   
96     224    
0      -224   
48     -256   
-1440  -224   
144    -560   
64     -224   
144    -144   
-336   -368   
432    -352   
-160   -240   
128    80     
48     16     
0      -304   
176    96     
64     -96    
-208   16     
144    -336   
64     48     
-128   80     
80     -112   
-32    80     
64     -160   
320    -32    
-48    112    
256    -112   
16     320    
-96    48     
272    -176   
176    16     
-144   -384   
-32    112    
192    -80    
16     64     
-256   -96    
144    -16    
-352   48     
144    48     
-32    -80    
224    96     
-112   160    
160    -736   
-112   -48    
112    -48    
-112   48     
128    96     
16     96     
32     -64    
80     160    
-464   -288   
272    -80    
-608   0      
144    16     
0      16     
-16    0      
-176   -96    
32     -144   
-208   -192   
272    -352   
-16    -112   
384    -80    
0      272    
-128   -48    
-48    288    
-32    -176   
128    64     
-48    16     
-64    48     
-80    -496   
144    -240   
-16    -48    
32     -48    
-16    64     
192    -272   
0      192    
32     -48    
-112   -48    
96     192    
48     -64    
0      64     
0      32     
-96    -64    
112    -144   
-336   -32    
144    -80    
96     64     
240    -80    
16     -16    
144    -368   
2080   -512   
-1232  144    
880    -224   
-160   352    
1152   944    
-688   -400   
-368   -688   
768    384    
48     -496   
64     256    
-192   -304   
224    496    
64     -432   
32     368    
-128   -1008  
-48    176    
-16    64     
80     96     
-80    48     
128    -48    
-160   -80    
16     16     
64     176    
16     32     
-112   80     
64     -80    
208    288    
80     -224   
16     48     
48     -336   
-16    48     
176    80     
64     0      
-64    48     
0      80     
112    16     
48     32     
-128   64     
160    48     
-160   -32    
112    -208   
-32    160    
-256   -112   
32     32     
-464   -128   
-672   48     
-96    0      
-1120  -64    
-112   -32    
48     64     
-80    80     
48     16     
-80    16     
176    -48    
-144   -224   
-464   -192   
-32    256    
-128   -48    
96     160    
16     64     
-176   32     
-16    64     
-256   80     
-32    -64    
-128   0      
-128   -32    
-736   80     
-256   -208   
192    -176   
112    112    
-240   112    
96     192    
-128   -80    
32     16     
96     32     
80     96     
-32    272    
-32    80     
96     64     
-208   -176   
-64    32     
-912   -256   
32     -96    
-16    64     
16     32     
-16    -144   
-208   -240   
64     -304   
16     192    
-16    48     
-64    128    
-64    -48    
0      32     
-96    0      
-80    -32    
-352   -208   
144    128    
16     352    
-976   96     
-240   -16    
-80    -304   
144    80     
64     -80    
-48    144    
-64    48     
64     48     
0      48     
-48    144    
-16    80     
-32    0      
16     96     
-32    64     
-16    64     
-224   -16    
16     0      
96     64     
-64    64     
112    144    
-80    32     
224    208    
-192   16     
0      -16    
-176   16     
160    144    
-80    64     
0      -304   
-80    256    
32     512    
-256   -192   
0      160    
-16    80     
96     16     
-80    48     
-208   80     
48     176    
-240   -32    
144    256    
-64    -144   
208    48     
-304   96     
-32    -96    
-256   -144   
160    240    
-176   -16    
48     -16    
-208   -224   
80     288    
-128   -64    
-48    32     
128    64     
96     96     
-160   -48    
96     208    
-96    96     
112    32     
-224   176    
-80    16     
32     112    
-176   16     
112    144    
-528   -144   
16     96     
48     96     
80     128    
144    -48    
-144   192    
160    -16    
-144   -48    
128    144    
0      16     
64     64     
-112   -16    
-64    128    
-64    16     
-112   96     
80     -32    
96     16     
112    224    
-16    32     
-128   0      
48     128    
-16    32     
32     16     
-144   80     
48     112    
-80    48     
-64    0      
16     96     
-64    0      
-48    16     
192    272    
-32    192    
224    128    
-192   144    
128    32     
16     32     
-1088  -256   
544    -496   
-256   -192   
1040   -144   
-192   480    
-320   -144   
304    1120   
-16    -160   
0      -256   
192    -16    
-128   208    
-304   -240   
272    272    
416    304    
-560   240    
192    384    
-272   112    
160    -400   
-400   -272   
432    96     
-240   176    
224    160    
-48    320    
-160   -16    
48     80     
-128   96     
128    80     
48     0      
-48    208    
208    96     
-160   208    
32     -48    
-32    80     
-96    -48    
240    64     
-144   48     
112    224    
112    96     
-96    32     
0      80     
128    80     
16     112    
48     80     
-80    -48    
144    32     
16     224    
-48    48     
16     0      
48     64     
32     272    
-32    -16    
80     32     
32     224    
128    -48    
-64    160    
0      80     
144    144    
-32    32     
96     16     
16     192    
-64    144    
64     -16    
-32    144    
-32    64     
48     80     
-32    -208   
16     -608   
16     32     
272    144    
-96    144    
-48    48     
128    176    
-48    0      
160    64     
-96    112    
160    176    
-192   -32    
240    208    
-208   -80    
176    -80    
16     96     
16     16     
128    256    
112    -480   
96     304    
-96    160    
272    -80    
32     240    
-80    80     
64     112    
32     0      
32     -144   
-16    96     
-32    -16    
288    384    
-240   -16    
208    -96    
0      96     
64     -144   
16     96     
16     128    
32     192    
80     -48    
-160   16     
48     -128   
96     -64    
-32    80     
32     80     
240    96     
-128   128    
144    96     
-32    -96    
64     -16    
-48    -160   
144    160    
-64    -800   
112    112    
16     -128   
32     160    
-96    -80    
48     144    
-176   0      
256    128    
-64    -16    
304    -48    
-144   64     
0      -528   
-48    128    
48     -96    
96     144    
96     -400   
32     -32    
-80    -1008  
-48    32     
16     -176   
-16    -112   
80     80     
0      32     
-16    -64    
208    -48    
-64    32     
160    64     
48     144    
-80    -672   
144    176    
160    -576   
-176   112    
64     -192   
-16    96     
112    64     
48     80     
-48    128    
-48    64     
112    96     
160    400    
-16    208    
208    -432   
-128   80     
160    -272   
-64    80     
32     -48    
112    80     
0      -288   
-80    -208   
48     -256   
144    48     
0      -16    
-80    -240   
48     144    
-32    -160   
96     -48    
-16    112    
-144   256    
0      -48    
-16    -416   
272    0      
272    160    
-32    64     
-80    160    
80     64     
-16    -1520  
32     192    
-64    -128   
32     -464   
64     -80    
128    -1200  
-80    16     
-64    -80    
80     0      
96     160    
32     -320   
128    -32    
64     160    
80     -192   
-96    128    
80     64     
1280   -1952  
-352   -384   
1360   -752   
-304   -496   
592    -1088  
-368   -768   
288    -1632  
336    208    
160    160    
-48    -304   
32     480    
32     -288   
80     32     
-112   -128   
208    -144   
80     -16    
-208   0      
32     80     
64     0      
32     -208   
80     -144   
-112   -48    
272    -32    
0      -128   
16     -192   
-208   144    
112    320    
144    -256   
-144   -192   
-16    -384   
272    -160   
-160   64     
128    0      
-784   80     
48     -128   
144    -160   
-64    -736   
112    64     
64     -288   
-144   -112   
80     -16    
-112   112    
176    -64    
16     64     
-80    16     
128    -64    
-288   -112   
96     -272   
-144   -128   
64     -144   
112    32     
48     48     
48     32     
96     -48    
48     -16    
32     -1632  
48     32     
352    144    
176    160    
-64    96     
-64    -32    
16     48     
-48    -48    
32     192    
144    -128   
-336   192    
64     80     
-208   -32    
0      -320   
-16    64     
64     -624   
64     96     
0      -80    
160    48     
0      -16    
176    48     
-256   -112   
16     -160   
-16    -16    
160    128    
-160   96     
-80    -192   
-720   -16    
32     -176   
48     160    
16     -528   
80     128    
-48    -64    
48     -208   
-128   -64    
16     -16    
-224   48     
-16    -32    
-96    32     
96     -128   
-208   -80    
-80    -176   
144    112    
48     -144   
144    208    
-16    -544   
16     48     
-16    -48    
128    80     
-48    0      
-32    -48    
32     64     
-32    0      
-48    -64    
32     -48    
-32    32     
112    64     
-80    128    
48     16     
16     -48    
160    -160   
64     208    
0      -32    
-16    -112   
96     80     
160    112    
16     -112   
-80    -16    
96     112    
80     48     
-96    -224   
288    -192   
-96    304    
-816   -208   
0      96     
-368   48     
-416   -128   
-112   160    
-416   -80    
-32    -16    
-880   -112   
-112   96     
208    48     
-192   80     
96     -112   
-96    128    
-720   -288   
0      96     
-416   -208   
176    0      
176    544    
-288   256    
-112   160    
-320   -160   
96     -128   
-112   64     
-112   192    
-864   80     
32     32     
400    80     
-384   160    
-144   256    
-160   64     
-32    -272   
176    -16    
240    -16    
-128   0      
-128   128    
-112   48     
0      -208   
-80    -128   
416    400    
-864   112    
-288   96     
-64    -80    
32     48     
-48    -192   
16     -16    
112    128    
-112   64     
-144   -80    
128    144    
80     192    
-16    64     
-144   224    
-192   -64    
32     48     
-112   -96    
-64    -96    
-288   -144   
64     320    
80     -80    
-160   48     
-32    -288   
-80    -112   
-128   176    
192    0      
16     336    
-48    -32    
48     -16    
-32    16     
1504   800    
-1200  192    
832    1152   
-304   272    
336    -880   
-336   544    
-96    -16    
176    -64    
-192   0      
352    48     
64     176    
-272   160    
64     176    
16     -32    
-128   -64    
32     240    
112    320    
-64    80     
-320   -336   
48     16     
-16    96     
32     144    
64     96     
-96    -32    
64     -32    
-48    16     
-80    64     
64     144    
-96    144    
48     144    
-32    0      
-112   -64    
-48    64     
-288   -96    
112    112    
48     -32    
48     112    
112    48     
-96    16     
0      48     
64     112    
16     96     
16     48     
48     128    
-16    16     
-96    -32    
32     16     
-16    208    
272    -64    
-192   224    
176    -64    
-176   96     
144    160    
-208   64     
32     0      
0      -32    
112    208    
-64    128    
128    16     
-192   48     
48     192    
-96    32     
80     -32    
16     80     
-128   176    
112    -32    
80     96     
-48    -48    
16     144    
-96    64     
80     48     
-16    64     
-112   0      
16     -16    
-64    -16    
96     96     
-48    -144   
64     144    
-256   -48    
48     0      
160    16     
80     144    
0      336    
-192   -96    
144    80     
-32    80     
-112   192    
-16    -16    
144    176    
-112   -16    
224    160    
-160   -16    
64     48     
0      112    
-64    -80    
128    112    
-16    80     
80     80     
0      32     
-64    48     
64     144    
48     80     
80     -32    
-16    208    
16     64     
64     48     
-64    -96    
224    272    
-144   160    
192    128    
-224   144    
32     -112   
112    208    
-64    -80    
-96    176    
32     64     
208    288    
16     -160   
-224   0      
64     144    
128    176    
80     -32    
-208   112    
48     240    
112    16     
240    288    
-192   0      
144    32     
-80    160    
64     80     
176    64     
0      32     
64     112    
-224   128    
256    224    
-64    32     
144    16     
32     0      
-160   160    
80     128    
144    -32    
16     -160   
-80    -32    
-80    192    
48     160    
272    656    
48     48     
16     0      
-128   192    
64     32     
16     48     
-48    32     
-16    -928   
0      48     
256    -288   
-160   0      
64     -64    
64     304    
32     144    
48     -224   
-48    272    
144    256    
-64    -32    
-32    -80    
-96    -336   
288    512    
16     -48    
-96    -160   
80     80     
16     -128   
208    -256   
144    240    
-112   0      
-32    112    
16     192    
48     -208   
80     96     
-32    -80    
80     176    
-80    80     
80     80     
96     224    
-16    -240   
32     160    
80     0      
-48    80     
32     -1296  
208    176    
80     -352   
-48    -16    
80     336    
16     272    
-96    -32    
-48    192    
80     -32    
-16    80     
1440   208    
-1040  -48    
1024   1136   
-192   -112   
800    -1472  
-496   -1840  
0      -272   
704    560    
240    912    
144    -32    
-160   -240   
-64    64     
80     272    
-128   32     
128    -160   
96     -192   
64     -272   
208    384    
-112   -96    
144    96     
144    -784   
160    112    
80     -288   
192    272    
-80    -112   
176    144    
-96    64     
0      272    
112    -64    
0      -176   
-16    80     
96     160    
0      144    
16     -112   
48     96     
96     -640   
288    416    
-192   -448   
0      -112   
-32    -192   
160    96     
48     112    
32     48     
64     32     
80     -336   
128    112    
112    -272   
80     352    
-64    -288   
-16    -48    
32     -192   
32     160    
48     -96    
-80    -112   
208    112    
112    448    
-128   -192   
80     0      
112    192    
-32    -32    
-16    336    
80     -288   
0      80     
80     -368   
112    176    
48     -64    
48     96     
32     -64    
64     96     
64     48     
32     -2160  
32     16     
-384   48     
16     -1056  
48     80     
0      -2448  
-112   -528   
176    -32    
16     32     
-192   -240   
224    48     
160    -192   
32     -208   
64     -544   
0      -112   
224    48     
128    336    
-464   288    
-80    -208   
48     -288   
256    -752   
48     -128   
32     -1216  
-64    -32    
64     48     
16     -256   
272    304    
32     32     
-32    -48    
-160   0      
160    0      
128    16     
-320   32     
16     -16    
48     -48    
208    128    
-144   -64    
208    -80    
-128   -48    
176    -1088  
-32    64     
48     -256   
176    192    
-112   -96    
176    32     
-16    -192   
32     -480   
-64    -96    
112    80     
-480   112    
-48    -160   
48     16     
176    96     
80     -128   
-80    -944   
-160   -736   
304    80     
-48    512    
208    160    
-304   96     
-80    -48    
64     -224   
0      0      
-16    48     
-320   0      
48     -640   
-208   -448   
128    -704   
-144   -80    
208    -592   
80     128    
-112   -1648  
64     -256   
-32    -224   
160    160    
-208   -80    
-48    -80    
64     192    
112    -64    
-336   -32    
32     32     
-1376  -96    
224    160    
-144   0      
144    -112   
-160   -240   
224    -928   
160    384    
-176   48     
160    -32    
48     256    
-16    -48    
-64    -64    
16     -176   
128    16     
0      -144   
-176   -192   
160    144    
-544   352    
-48    -64    
-32    -240   
48     -288   
0      224    
96     -32    
-160   -80    
192    336    
-208   -96    
-720   -80    
80     -96    
80     -176   
32     176    
-192   -80    
64     48     
-528   -144   
80     -400   
144    -96    
128    -112   
-32    0      
-112   160    
176    -16    
-16    224    
-144   64     
-80    128    
0      -32    
-16    80     
-16    -112   
-784   -2544  
624    288    
-688   256    
832    -432   
-240   -336   
352    -176   
-288   480    
336    32     
-80    368    
-64    0      
256    128    
-288   -224   
320    16     
-112   128    
160    -160   
-160   128    
160    -96    
-192   112    
-160   96     
0      48     
-816   -240   
-608   -96    
112    112    
-496   208    
32     -32    
-1040  48     
-224   96     
80     48     
-112   -32    
32     -32    
-48    16     
-48    32     
-96    64     
-176   -192   
-64    48     
-256   -432   
-80    -48    
-80    160    
192    144    
-48    -160   
-544   96     
-96    -48    
-544   48     
-176   32     
304    0      
-208   144    
-208   -64    
96     400    
-384   -224   
416    96     
-176   192    
-16    0      
-32    16     
-16    48     
-80    -48    
48     64     
-16    160    
144    -16    
32     144    
-304   -304   
272    64     
-128   -80    
-16    192    
64     32     
-64    48     
96     0      
0      96     
-112   288    
-96    -128   
96     64     
16     32     
-64    112    
-80    -96    
16     0      
-320   -96    
-48    0      
-112   -176   
80     112    
16     64     
-192   0      
128    48     
0      32     
-96    -128   
-16    112    
-64    192    
-16    160    
-192   -32    
96     128    
-160   0      
-128   -64    
16     0      
112    64     
-64    32     
0      80     
-144   -48    
128    208    
-112   48     
48     48     
80     192    
-144   0      
16     -32    
-96    0      
128    160    
-160   64     
-112   0      
-80    -96    
-32    -304   
80     272    
-112   64     
160    160    
-64    128    
-64    32     
112    112    
-208   -160   
-32    -48    
-176   48     
208    -64    
-192   32     
144    128    
-576   -144   
-96    80     
-112   -128   
0      -960   
-48    240    
-32    0      
192    176    
-128   48     
112    112    
-16    160    
48     48     
96     208    
-80    192    
96     16     
-208   128    
-80    96     
96     144    
-192   64     
-48    96     
160    64     
-80    16     
-32    0      
-16    16     
128    80     
-48    16     
80     48     
-48    16     
64     128    
-96    144    
-64    64     
-16    -16    
32     160    
-64    32     
64     112    
-64    -80    
192    16     
-32    208    
48     192    
-48    144    
64     192    
-48    368    
-176   -96    
-128   -176   
-64    0      
64     -112   
-144   -16    
160    544    
-64    -64    
-32    -16    
112    208    
16     160    
-80    -80    
48     80     
208    240    
-48    -96    
80     240    
-80    128    
144    -16    
96     208    
64     208    
-96    128    
-32    128    
0      -32    
112    0      
0      176    
-80    224    
-112   96     
224    192    
16     16     
-48    16     
0      -48    
-16    64     
128    80     
-144   208    
-112   -32    
-144   80     
32     32     
-624   -928   
816    1136   
-1088  -800   
768    -288   
-576   -32    
-448   -608   
368    1136   
-448   288    
64     800    
-160   -16    
-80    240    
-544   16     
288    384    
-16    160    
16     -16    
-80    112    
192    16     
-48    320    
16     0      
96     224    
0      -272   
80     80     
128    256    
112    64     
-240   -400   
80     -144   
192    336    
160    352    
32     96     
-160   -64    
128    128    
-64    0      
128    176    
368    576    
-144   -16    
240    96     
-64    32     
320    304    
-224   -256   
432    240    
-288   96     
368    48     
-112   -160   
112    144    
-96    -2320  
-16    -48    
48     -32    
0      336    
-16    -64    
-144   -112   
80     -48    
-32    0      
48     -96    
32     80     
16     0      
208    304    
-144   -128   
-272   -816   
400    432    
-192   -736   
160    256    
-160   64     
128    80     
-96    80     
32     96     
32     64     
32     64     
192    240    
64     128    
16     32     
48     160    
48     64     
0      -16    
32     112    
-64    -48    
64     48     
-208   -864   
16     -160   
-48    16     
-64    160    
192    176    
-32    208    
16     -32    
32     0      
32     96     
160    112    
0      80     
112    128    
128    336    
-80    -192   
144    16     
48     -1472  
48     192    
-48    64     
160    64     
16     -320   
32     -64    
96     208    
16     176    
-32    112    
-64    48     
96     48     
112    -128   
48     80     
48     -240   
64     240    
-64    -640   
112    -176   
-16    -1072  
80     288    
48     16     
-32    32     
-112   48     
224    -32    
16     128    
-112   48     
128    -192   
-80    -192   
176    128    
80     -96    
0      0      
96     -80    
32     128    
144    -528   
64     80     
-176   -288   
272    128    
32     448    
80     0      
-48    96     
96     -432   
128    64     
32     -528   
128    272    
16     -176   
80     64     
-128   -160   
32     -384   
128    -256   
160    224    
48     80     
-16    160    
48     -144   
80     64     
48     -240   
64     -416   
112    240    
176    48     
-32    224    
160    48     
-32    96     
112    16     
-80    64     
-16    -224   
384    80     
-32    576    
224    -448   
-128   0      
-272   -96    
112    -1664  
32     96     
48     -880   
80     -80    
224    176    
-128   0      
96     208    
112    128    
-16    224    
192    64     
80     -160   
48     -144   
160    -416   
-160   112    
-48    -32    
-48    0      
64     -96    
112    -64    
-48    -96    
32     -2208  
0      -80    
112    48     
96     112    
32     -128   
112    -192   
16     -576   
-32    0      
144    -80    
160    128    
-176   32     
48     112    
0      -144   
144    -96    
112    16     
-144   -224   
240    64     
-128   -288   
-720   -2688  
1088   688    
-528   896    
-80    -400   
-144   -432   
640    720    
-720   -208   
688    656    
-400   -224   
320    -96    
-432   -96    
288    -176   
-96    288    
192    -368   
-16    96     
80     -384   
144    32     
-128   -32    
112    128    
128    80     
-144   -64    
16     -32    
-48    48     
144    64     
-384   -240   
-96    48     
96     0      
80     -64    
80     -128   
-16    -656   
144    -96    
32     -112   
112    16     
-48    160    
208    32     
-240   -96    
48     -272   
-224   272    
288    16     
-112   64     
-128   -96    
-800   16     
32     16     
96     0      
-16    -80    
80     160    
-32    -320   
128    -64    
80     144    
-80    -176   
192    16     
-128   -32    
96     176    
48     -208   
-32    32     
80     -80    
-64    112    
-16    -240   
-192   128    
-48    -128   
80     96     
80     -512   
-64    128    
144    16     
160    -160   
0      80     
32     32     
-272   0      
176    -224   
-448   -112   
48     -32    
-176   128    
-48    -128   
32     -32    
112    -304   
16     144    
80     -1184  
224    272    
-32    336    
48     48     
-144   -96    
128    96     
16     272    
-160   80     
48     -16    
64     240
[truncated: 272,011 more chars]
