# Supplementary material for: A Fault Diagnosis Method for One‐Dimensional Vibration Signal Based on Multiresolution tlsDMD and Approximate Entropy
Source: Hindawi journal article supplement (doi:10.1155/2019/3262818), 2019-01-01
Supplement: f1 [file 3262818.f1.zip › 3262818.f1/gear signals/broken teeth fault signal/Data4.txt]

-16    -16    
-128   96     
48     -144   
80     0      
-80    144    
112    -80    
-80    -32    
96     0      
16     176    
-16    0      
-80    112    
144    288    
-176   -48    
352    48     
-128   320    
-496   -496   
-144   -128   
96     144    
-352   -336   
16     96     
-320   64     
-80    96     
-32    592    
-208   -176   
0      -160   
16     48     
64     32     
-16    0      
-96    32     
-64    16     
-96    -240   
-128   32     
112    384    
-240   -32    
-64    -80    
-272   64     
-16    48     
-800   -32    
-80    224    
160    -144   
-192   64     
256    32     
-112   -32    
-80    -144   
-64    176    
0      -112   
0      -16    
-32    48     
128    -48    
-240   64     
192    432    
-256   128    
-48    -384   
432    560    
272    16     
-272   -144   
-80    -80    
80     -48    
-16    -112   
128    176    
-96    112    
-128   -64    
-80    192    
-64    -80    
-48    112    
-32    16     
48     64     
-304   -32    
64     176    
-208   112    
-128   144    
-16    -48    
112    -144   
48     16     
80     16     
-96    240    
-112   32     
-48    112    
0      160    
192    144    
-384   -48    
16     224    
-112   -272   
304    208    
-96    -848   
544    -672   
-256   400    
-208   112    
16     128    
-192   368    
0      416    
0      160    
0      -208   
-128   -128   
192    0      
48     80     
-96    96     
0      32     
112    112    
0      48     
-112   80     
-192   -176   
-64    144    
80     -48    
-112   48     
48     144    
-16    80     
-80    -32    
16     0      
-128   32     
192    352    
-176   192    
144    48     
-144   -48    
-208   48     
160    112    
-272   -48    
-96    32     
112    112    
-96    -96    
128    32     
-256   64     
208    80     
-160   -128   
64     128    
-144   128    
256    64     
-288   0      
32     -48    
-240   -208   
-48    -112   
352    96     
-336   176    
256    0      
-128   80     
80     16     
32     160    
-16    0      
128    176    
-144   0      
160    -96    
-64    208    
-176   -16    
304    -80    
-96    128    
32     208    
-128   -48    
80     -160   
0      272    
-112   96     
32     32     
0      -16    
144    176    
-160   48     
48     144    
-64    -144   
80     16     
-16    64     
0      144    
-112   -80    
48     304    
-144   -96    
32     -96    
0      144    
-32    128    
128    368    
-208   80     
160    80     
0      112    
32     -48    
288    0      
-16    272    
-112   112    
176    0      
-176   48     
64     112    
32     192    
-160   16     
192    144    
160    80     
-32    48     
16     32     
64     112    
48     0      
128    112    
-128   -16    
176    96     
-64    0      
32     64     
-64    16     
-192   -160   
112    -16    
64     64     
144    0      
0      112    
128    192    
-80    -48    
112    32     
-16    -96    
64     144    
32     80     
16     48     
0      272    
48     32     
-144   96     
48     16     
160    160    
-112   -48    
144    96     
-144   80     
80     -32    
-128   -144   
288    192    
-176   112    
80     64     
-80    0      
64     96     
-16    144    
192    272    
0      112    
-112   -2432  
96     192    
48     64     
-64    16     
288    240    
0      160    
0      224    
-64    160    
128    208    
-32    448    
48     48     
-176   -64    
160    64     
32     112    
0      112    
80     -672   
32     -16    
128    288    
-144   -208   
240    704    
-400   -256   
64     -64    
80     128    
128    128    
-64    80     
-80    -16    
96     224    
-16    -112   
-32    96     
-160   -208   
80     -208   
0      160    
32     320    
-64    -32    
16     32     
64     96     
64     64     
-32    240    
-112   128    
16     64     
-32    16     
112    128    
-176   -64    
48     -112   
0      64     
112    -80    
-176   144    
48     -960   
128    64     
128    144    
16     112    
-112   96     
128    112    
64     144    
16     96     
-112   192    
48     -64    
0      112    
-112   112    
-464   784    
-1424  -1920  
912    752    
-416   288    
352    64     
240    -544   
-224   -240   
448    368    
-416   -288   
928    176    
-416   240    
400    -224   
-256   256    
256    192    
96     64     
-32    -112   
-144   -32    
32     -32    
112    -304   
-80    48     
256    -832   
-160   80     
48     -160   
-160   -16    
304    -48    
-144   80     
48     0      
48     144    
0      80     
144    -176   
-208   -192   
192    -192   
32     240    
-48    -352   
96     -32    
0      -432   
400    352    
-368   -256   
48     208    
-80    192    
16     112    
64     112    
96     128    
80     160    
-80    -592   
64     80     
80     -32    
224    448    
-256   -272   
288    144    
32     -16    
-176   -16    
16     96     
240    144    
-16    112    
48     96     
-64    64     
288    96     
32     208    
-112   -64    
80     208    
-80    -320   
0      112    
160    -96    
128    -48    
-208   -80    
192    96     
160    -240   
128    -1504  
-64    64     
64     -208   
32     -592   
48     -208   
80     -768   
208    -48    
32     256    
-336   -816   
240    -176   
272    48     
336    480    
-336   0      
160    -448   
96     0      
112    -336   
48     208    
-224   -560   
48     -160   
464    496    
-48    -464   
32     -352   
-48    -672   
224    112    
-48    128    
16     -48    
128    -160   
-96    -336   
192    -272   
128    48     
192    -96    
-64    128    
-176   0      
80     -256   
-128   -160   
-32    -432   
0      -80    
96     -496   
-48    -432   
-176   -688   
64     -400   
128    -1104  
32     -176   
32     -112   
16     64     
16     96     
-48    96     
-144   -160   
16     -64    
-96    -64    
256    288    
-288   0      
240    16     
128    48     
-304   -496   
256    -384   
-32    -432   
16     -16    
208    64     
-192   144    
224    -112   
-16    -192   
-160   -32    
-112   -352   
80     -48    
-64    -176   
-240   -96    
192    240    
-416   -208   
352    -448   
-288   -160   
112    -304   
32     160    
64     96     
48     160    
32     -112   
160    96     
-64    192    
32     176    
-192   -48    
64     -176   
-288   -176   
48     -144   
-80    -32    
112    -112   
16     -32    
80     -448   
80     144    
96     288    
-224   -32    
128    -16    
96     144    
64     0      
-16    -16    
-336   16     
288    368    
-416   -256   
272    -112   
-496   48     
272    96     
-80    64     
48     -192   
96     0      
-176   -288   
144    -128   
-64    96     
-80    -224   
112    112    
80     -112   
-128   16     
96     -112   
-48    96     
64     32     
-128   16     
-80    -96    
-80    0      
128    -112   
144    16     
-32    -352   
48     -48    
-480   160    
128    -176   
-320   -80    
144    0      
-112   -48    
192    32     
-240   208    
80     -112   
-752   -688   
64     768    
-128   -64    
-288   -480   
0      64     
-496   32     
736    352    
-912   -32    
416    -160   
-48    192    
368    48     
-304   -240   
-64    224    
128    -256   
80     96     
16     -208   
-48    208    
0      -16    
-240   0      
176    -32    
-240   16     
-1200  -48    
-144   352    
-560   -48    
-128   32     
208    -112   
0      80     
-96    -208   
32     -16    
-208   -128   
192    208    
-144   -64    
0      80     
-208   -224   
208    128    
-128   -128   
-48    -112   
-160   224    
-80    144    
0      0      
-624   -128   
0      112    
48     -16    
-16    80     
64     -128   
-16    96     
-64    -176   
-80    -16    
16     -48    
-272   -32    
240    16     
-160   128    
32     0      
-16    192    
-144   -32    
-16    0      
32     144    
-208   32     
48     48     
-160   16     
176    -64    
-96    -32    
0      96     
0      -64    
96     80     
-96    64     
-80    64     
-80    -80    
48     -16    
-96    112    
-176   64     
0      32     
-256   16     
-48    80     
-224   0      
-48    -80    
160    -48    
112    272    
-80    64     
144    160    
-144   0      
-32    0      
48     -48    
-144   112    
-96    160    
-160   0      
16     208    
-592   -448   
128    80     
-528   -64    
144    112    
-80    -48    
-32    96     
48     176    
-96    112    
-112   -144   
-128   -32    
112    288    
-96    -32    
0      48     
-48    0      
32     224    
-32    0      
0      64     
-192   0      
48     144    
-176   -240   
96     96     
16     160    
16     144    
-192   -144   
64     -176   
16     96     
0      0      
-96    128    
0      0      
96     336    
-80    -48    
0      192    
-112   -288   
48     0      
64     96     
176    112    
-80    -96    
32     80     
48     128    
-144   192    
272    480    
-496   -144   
256    144    
-144   80     
192    80     
-240   32     
16     -32    
-64    -32    
96     -16    
-32    16     
48     -64    
112    384    
96     160    
-160   -240   
80     208    
-160   -48    
272    192    
-240   -64    
144    -208   
-48    -16    
-64    112    
48     96     
-48    0      
-16    -48    
128    192    
-32    96     
-16    -48    
336    560    
-272   288    
176    -384   
-48    -96    
320    96     
-64    112    
-320   0      
272    128    
-96    -16    
208    144    
-256   16     
240    -80    
-16    192    
-288   48     
48     -80    
80     160    
-48    -32    
-16    80     
-48    320    
64     -208   
-144   144    
-304   -64    
240    176    
-336   64     
128    32     
16     16     
32     144    
-48    112    
16     80     
176    32     
176    32     
-96    64     
48     160    
-16    0      
0      128    
-32    112    
-32    32     
64     112    
192    -48    
16     208    
-48    0      
-64    48     
64     96     
496    1248   
256    976    
-304   -1056  
-496   -208   
-240   -96    
128    -288   
384    560    
-544   -96    
368    -320   
-352   288    
496    -480   
-496   656    
96     -368   
32     512    
224    -352   
-32    480    
32     -320   
32     960    
16     -624   
240    208    
-16    -96    
224    160    
16     48     
-320   64     
128    -80    
-128   336    
-128   -256   
272    192    
80     320    
-32    80     
-112   144    
32     -192   
160    240    
-16    16     
-16    64     
64     176    
-144   -64    
16     -192   
0      224    
112    -64    
96     160    
48     64     
176    32     
-160   -224   
224    176    
16     192    
-192   -416   
304    400    
192    240    
80     272    
-128   192    
32     -16    
-96    288    
144    -144   
80     160    
112    176    
-240   -496   
-64    144    
192    -480   
-320   -128   
0      32     
-16    256    
96     0      
-240   272    
-112   -272   
192    -80    
112    -48    
144    448    
-288   32     
0      -432   
112    256    
-16    -304   
96     32     
32     -528   
160    128    
160    480    
-128   352    
128    272    
288    336    
-272   -16    
-32    32     
96     528    
-64    -32    
-32    112    
-128   -304   
128    -128   
-16    -48    
192    752    
-176   -256   
-16    -16    
0      -1072  
160    176    
32     -128   
96     176    
160    352    
0      64     
-48    -16    
144    48     
208    176    
64     -128   
-96    80     
96     -224   
112    192    
-16    -352   
-32    48     
224    -432   
-32    0      
-112   -544   
-96    -160   
160    -96    
176    144    
-176   -112   
16     64     
144    192    
64     176    
128    96     
-64    -112   
-96    96     
32     -176   
192    64     
32     208    
-48    32     
128    -1376  
96     64     
-80    192    
192    176    
-112   192    
80     -464   
112    128    
-48    -800   
64     192    
-64    -16    
416    240    
-192   -160   
160    208    
-240   -272   
208    16     
-32    -64    
160    96     
-48    64     
128    48     
48     112    
64     -176   
-16    208    
0      -304   
48     192    
-32    -112   
144    64     
16     -144   
0      64     
32     -128   
64     112    
48     -608   
0      176    
-32    96     
208    -2032  
-144   -736   
288    -224   
0      -976   
224    -144   
-16    160    
64     -192   
0      -96    
48     -144   
112    96     
-16    0      
16     -1072  
48     128    
48     -96    
16     16     
80     -736   
-112   -400   
144    32     
192    -432   
32     128    
-16    -672   
96     -48    
32     304    
-48    0      
-32    144    
144    96     
-32    -448   
0      128    
240    -96    
-96    16     
-176   32     
16     -224   
-688   112    
96     -368   
-48    -208   
96     -928   
112    -32    
-16    -1152  
48     176    
64     32     
-656   -896   
-1248  -1232  
608    -576   
-720   784    
304    176    
-336   272    
32     -832   
-896   32     
-288   16     
832    112    
-256   -352   
272    240    
-320   -32    
384    64     
-48    -1216  
192    -160   
48     -144   
-96    224    
160    -80    
128    -32    
-160   -160   
16     -48    
-64    80     
32     -32    
-784   -80    
32     16     
128    0      
96     -32    
-224   16     
32     -1024  
-48    0      
96     112    
128    96     
-32    48     
-48    -208   
-48    -288   
96     -352   
-128   64     
96     96     
-176   -32    
-32    -176   
-96    0      
128    -384   
48     -32    
-96    -224   
128    48     
64     -288   
-80    128    
-16    -16    
0      -48    
-48    -32    
16     80     
32     32     
-112   -16    
-496   -224   
32     -64    
-496   -160   
48     128    
0      -16    
160    0      
16     64     
128    -1248  
-112   80     
80     112    
-32    -128   
64     32     
160    0      
32     96     
-112   -96    
-48    96     
64     -80    
-16    32     
0      0      
16     -80    
144    -176   
-160   -80    
64     32     
-160   -16    
-80    -48    
176    96     
-400   -496   
160    -240   
-192   -16    
-64    48     
48     256    
-80    128    
-96    0      
192    -288   
48     208    
112    -176   
80     112    
32     -384   
16     128    
0      160    
-32    -32    
-144   -144   
16     32     
-16    160    
-64    160    
0      144    
64     96     
-32    -96    
240    -144   
16     160    
160    -16    
16     48     
-32    -96    
-352   -160   
-160   -304   
-1104  -48    
144    160    
16     -16    
-16    112    
-48    0      
48     144    
96     16     
-160   96     
-160   -48    
-144   48     
-96    -32    
48     160    
-16    -48    
-432   -80    
-64    112    
-112   16     
96     192    
-1024  64     
304    288    
-96    -176   
-128   -32    
0      -96    
-32    32     
112    -96    
-64    96     
-112   -352   
-80    96     
-96    16     
96     224    
-96    -64    
128    -16    
48     48     
-192   128    
-192   -128   
-480   80     
-32    16     
112    48     
-112   160    
-80    -64    
64     32     
-64    -144   
32     64     
32     0      
16     128    
16     48     
-128   -176   
-208   -96    
32     352    
-304   96     
-256   -96    
48     0      
-32    -48    
0      112    
-112   -32    
80     32     
-64    -80    
224    16     
-128   240    
-272   192    
-192   -32    
0      80     
16     -48    
0      64     
-144   208    
-80    16     
-192   -64    
-608   32     
0      -64    
48     -16    
-32    16     
160    80     
-64    80     
32     112    
-128   -80    
-80    176    
-112   64     
64     32     
-48    48     
256    -16    
-208   64     
-144   32     
160    -144   
32     272    
384    64     
-256   160    
-80    32     
-96    48     
-1504  544    
816    144    
-448   -512   
656    -480   
-352   -48    
-432   -448   
592    544    
-864   -576   
288    -672   
-336   -736   
416    384    
-160   112    
-432   64     
224    400    
80     -48    
-80    208    
-96    -48    
416    224    
-576   -480   
-128   -96    
-496   128    
-16    -176   
-96    112    
48     192    
-480   -592   
-32    -176   
-32    96     
144    208    
-80    80     
224    256    
-80    -176   
128    0      
-160   80     
16     -32    
0      48     
144    288    
-64    112    
-16    -96    
48     32     
-176   -208   
160    96     
-112   144    
192    208    
-160   16     
0      48     
-80    -32    
192    0      
-96    48     
224    48     
-96    208    
-32    48     
64     112    
-96    -208   
128    176    
-272   -32    
176    -32    
-96    0      
-16    224    
64     16     
96     352    
-176   0      
160    -208   
96     112    
-160   176    
128    -16    
-48    -64    
48     144    
-16    48     
176    144    
-128   32     
48     80     
64     80     
64     -32    
80     -32    
-32    144    
-64    128    
160    -48    
416    16     
-64    80     
-144   -160   
96     -16    
48     208    
-208   112    
288    -32    
32     -32    
112    192    
-112   80     
48     16     
64     64     
-32    96     
64     112    
0      192    
-48    32     
0      -96    
-32    -32    
16     48     
80     144    
-32    144    
-144   80     
-32    16     
96     32     
-32    -16    
32     -96    
-32    80     
160    496    
-112   16     
-64    -224   
-112   -16    
256    -16    
0      112    
16     160    
64     224    
-160   -16    
16     -1296  
208    416    
-144   80     
192    272    
-64    96     
128    64     
-48    320    
16     160    
-80    32     
0      -48    
64     32     
320    352    
-288   80     
64     0      
-512   16     
112    -96    
208    0      
-176   -16    
16     -64    
48     176    
-256   64     
384    16     
-176   48     
32     336    
96     48     
32     -80    
0      176    
-144   -320   
160    112    
64     224    
-32    -544   
224    16     
-64    -144   
-144   0      
64     -16    
-64    32     
208    112    
-48    80     
96     80     
0      0      
96     -128   
-80    128    
32     -80    
96     128    
32     96     
80     -256   
0      96     
16     -2080  
64     -96    
160    128    
64     96     
224    288    
-208   144    
224    288    
-224   64     
112    -96    
160    48     
256    -64    
-160   16     
-80    64     
-64    -80    
272    32     
96     48     
-48    96     
96     -512   
208    -16    
112    -336   
-96    112    
-80    64     
240    -48    
96     224    
-80    32     
-32    80     
16     -144   
112    16     
48     -16    
112    112    
48     -96    
-32    128    
80     -1168  
-16    112    
-16    -1184  
-32    0      
-528   -2896  
736    848    
-880   720    
-208   -608   
-192   384    
-320   -144   
32     -16    
-96    432    
0      -48    
304    -352   
-64    -32    
-64    -304   
32     224    
240    -240   
64     640    
-32    -336   
96     448    
-48    -64    
144    48     
-16    0      
0      192    
48     96     
-32    -464   
128    224    
0      -432   
-32    -16    
64     -96    
-16    64     
16     128    
32     192    
80     -32    
-64    128    
80     0      
-48    176    
208    48     
-96    -320   
96     96     
112    -272   
-48    128    
96     -144   
0      48     
96     -80    
64     112    
-16    -2016  
16     96     
-16    96     
48     112    
48     -512   
80     -32    
48     -1600  
80     -144   
80     176    
-16    80     
0      112    
80     16     
0      128    
192    -304   
112    -112   
-64    144    
-32    -720   
32     32     
64     -144   
64     -1152  
0      -112   
80     -1360  
128    32     
80     -176   
96     64     
144    -512   
-16    -176   
160    176    
-48    -16    
48     -80    
64     112    
0      -16    
-112   112    
-32    -144   
64     -304   
-256   -48    
-128   -416   
144    160    
16     -272   
-48    -400   
224    -1536  
32     -160   
-96    -288   
176    16     
160    96     
288    288    
-48    -208   
48     160    
-128   16     
-48    -80    
-80    -64    
48     0      
128    -224   
-192   -336   
64     -272   
192    -112   
80     224    
-96    -256   
-176   32     
144    -176   
32     48     
80     -208   
-32    -128   
-32    48     
64     16     
-80    16     
32     -272   
80     -128   
80     -80    
48     80     
144    -32    
-144   80     
-32    -544   
208    224    
-32    -48    
80     96     
-64    -96    
192    64     
-144   0      
96     -288   
-512   -176   
208    -160   
-496   -224   
16     -240   
32     -128   
160    -80    
64     -192   
16     -320   
-16    240    
224    -144   
-112   64     
16     80     
128    352    
-176   -224   
112    -32    
-144   -32    
256    -112   
-128   144    
128    64     
-144   -176   
16     96     
16     -64    
-64    -400   
48     -48    
192    32     
32     80     
-128   0      
48     -112   
64     112    
-16    -128   
-48    48     
0      16     
-272   -112   
176    -32    
-208   160    
176    -128   
-80    112    
96     -48    
-80    208    
-32    -1424  
32     -128   
-112   -112   
160    -64    
-464   112    
112    224    
-240   -48    
160    -176   
0      -16    
144    0      
144    80     
-48    -64    
144    48     
128    -176   
-80    144    
48     -480   
160    112    
-64    -16    
32     64     
-48    64     
64     0      
-16    -80    
-16    -80    
-16    16     
0      32     
-208   32     
32     48     
-16    144    
-752   -128   
144    0      
-48    -16    
-576   -16    
-176   176    
-720   64     
-192   400    
-1344  -1872  
1216   -16    
-752   288    
576    208    
-64    752    
32     112    
-912   -880   
384    -48    
240    640    
-320   -416   
32     224    
-80    112    
-32    -352   
-288   0      
-64    -224   
-320   -128   
-96    96     
416    688    
-160   128    
80     352    
-208   -80    
-464   -208   
160    64     
16     128    
48     -160   
-176   32     
-128   32     
160    48     
-368   -272   
224    -64    
-96    192    
144    144    
-416   -16    
-96    64     
-176   -16    
48     80     
-176   -16    
176    80     
-64    -144   
-144   16     
32     144    
-16    16     
64     240    
-224   0      
144    -80    
-112   0      
112    336    
-1024  -80    
96     -48    
0      112    
-80    80     
64     -224   
80     224    
-80    16     
0      -112   
-144   16     
192    128    
-48    80     
-128   -144   
192    32     
-272   128    
-80    -32    
-48    16     
16     64     
-976   16     
16     112    
-64    0      
-192   16     
160    0      
64     64     
-64    0      
-48    144    
-80    48     
48     -48    
-192   -96    
144    176    
-48    -64    
0      0      
0      368    
-384   -96    
160    160    
32     -64    
-192   160    
-64    -48    
144    224    
-320   96     
64     -32    
-16    -128   
-32    64     
112    240    
-160   -80    
112    64     
-160   80     
-80    -176   
-16    32     
-176   160    
208    112    
-128   -64    
48     -48    
-112   -128   
160    32     
-80    144    
144    224    
-64    32     
-32    240    
-176   64     
160    96     
-432   -272   
208    64     
-128   -64    
48     128    
176    256    
-144   144    
-16    112    
144    144    
-144   0      
144    96     
-112   -16    
112    160    
-176   80     
272    224    
-192   -16    
-16    0      
-160   96     
288    80     
-96    384    
16     160    
-16    64     
96     48     
-112   -64    
80     256    
-64    16     
128    48     
-32    32     
32     -32    
-176   80     
256    320    
96     -32    
32     144    
-192   -96    
-32    80     
80     256    
96     64     
16     -16    
16     224    
-144   176    
144    112    
-128   80     
80     96     
-32    64     
-96    16     
32     112    
-32    -128   
-96    -208   
48     -208   
0      384    
-80    192    
64     144    
-80    -32    
160    144    
0      128    
80     80     
32     96     
240    544    
-272   32     
-48    256    
-96    208    
112    -160   
16     160    
112    64     
-48    160    
192    32     
192    128    
192    320    
-224   16     
-288   128    
16     -144   
128    64     
80     0      
64     96     
-32    -112   
160    16     
-16    144    
64     208    
-32    144    
160    -48    
160    160    
0      64     
-48    0      
192    160    
-112   240    
-64    -16    
-16    -16    
64     -16    
96     112    
-320   1072   
-704   -704   
-960   464    
640    352    
1136   1504   
-832   -880   
16     160    
864    -176   
48     96     
-352   -160   
16     -48    
-32    -32    
160    112    
80     256    
-64    -48    
-64    0      
112    192    
-64    80     
32     -192   
176    64     
0      48     
368    160    
-48    144    
176    32     
-320   80     
320    272    
128    32     
-160   48     
192    176    
112    48     
-96    -64    
-48    112    
192    128    
-144   -416   
128    16     
64     192    
80     288    
-16    144    
-128   -16    
192    16     
-64    112    
160    112    
-48    112    
16     -160   
48     112    
-128   16     
16     128    
144    32     
-64    -64    
-32    -112   
16     -672   
32     128    
96     128    
-32    96     
32     112    
80     -144   
80     -384   
-96    -48    
-48    16     
192    272    
16     112    
0      48     
96     160    
48     -384   
176    144    
-112   64     
32     176    
-80    -896   
80     128    
0      208    
16     32     
-48    -144   
32     160    
-16    64     
32     48     
48     -32    
80     96     
16     176    
0      -256   
80     192    
32     -320   
0      160    
0      -432   
96     192    
-16    -48    
128    48     
0      64     
48     112    
32     48     
32     112    
48     48     
0      -208   
0      80     
176    0      
0      112    
-16    -240   
80     32     
112    -560   
48     64     
0      -1472  
48     16     
64     48     
80     144    
48     112    
32     96     
-96    0      
224    -192   
-32    96     
112    -160   
48     160    
64     -480   
48     96     
0      -144   
32     160    
48     -256   
160    208    
64     304    
48     -16    
-80    -96    
144    -144   
96     144    
16     -144   
-48    96     
208    -32    
0      112    
-144   -704   
352    32     
-160   96     
272    96     
-160   -320   
176    128    
64     -80    
-64    480    
96     -32    
-32    -272   
160    -736   
-64    32     
272    256    
-208   -224   
176    -32    
-32    96     
48     -128   
64     0      
0      160    
192    -96    
32     160    
-32    368    
16     -64    
32     -384   
64     16     
160    -240   
-160   -112   
0      -528   
144    16     
320    384    
-128   224    
-64    352    
32     -336   
192    -16    
192    -32    
112    -160   
-80    144    
-64    -96    
16     -32    
-608   -272   
0      -128   
288    304    
-224   160    
-224   0      
80     -1072  
160    -272   
0      -96    
-64    -352   
96     -16    
-272   128    
-16    -208   
176    208    
-32    128    
32     -48    
-464   144    
32     -32    
96     32     
48     -16    
-16    -144   
160    -368   
64     48     
208    -208   
-160   -48    
112    -48    
-64    -80    
-48    -64    
160    16     
-32    192    
16     -64    
224    -32    
48     0      
1456   32     
-960   -320   
832    1008   
-128   -80    
1200   -1104  
-624   -720   
208    -64    
544    80     
-224   96     
256    -128   
80     48     
-208   -128   
352    368    
-16    -224   
48     -368   
-1168  0      
192    -176   
-96    16     
-64    -304   
0      -48    
240    -80    
-16    144    
80     -1232  
-176   -80    
16     -48    
80     96     
-80    16     
64     -80    
-176   32     
112    96     
0      -112   
-16    -48    
-432   64     
80     32     
80     -64    
16     -432   
0      128    
112    -592   
48     64     
-48    0      
144    0      
-64    32     
64     -160   
-32    48     
32     -64    
-112   0      
208    0      
-432   64     
352    -272   
-240   176    
240    -304   
-64    160    
176    32     
-160   96     
-144   -144   
64     -208   
-160   80     
-16    0      
-96    -48    
-80    32     
-96    96     
16     -128   
-160   -176   
112    -32    
-192   144    
176    -272   
80     128    
-32    -800   
96     128    
-240   0      
208    64     
-80    64     
48     80     
-48    0      
32     -80    
-160   0      
64     -272   
-96    64     
16     -16    
48     -32    
0      -112   
32     160    
-1552  144    
-1184  -176   
96     32     
16     32     
-96    160    
0      -64    
96     128    
-144   -128   
144    96     
-16    32     
48     0      
240    128    
-112   -48    
-320   -256   
-64    48     
-16    32     
16     32     
-144   16     
-80    144    
-48    0      
-544   -176   
-112   80     
96     112    
80     48     
32     -96    
0      80     
-320   -80    
208    96     
-400   -64    
48     -64    
128    192    
-32    -32    
-144   80     
-32    16     
64     176    
-160   -144   
-224   -112   
-384   160    
16     144    
144    -144   
-176   32     
-176   48     
176    80     
272    288    
-304   16     
80     -16    
-128   96     
-64    0      
64     64     
-48    64     
96     96     
-240   112    
-576   32     
-192   -32    
96     -224   
0      -16    
-176   48     
128    144    
80     -16    
-112   -224   
-128   -48    
-144   112    
-32    80     
320    592    
-64    -32    
48     -48    
-288   32     
-272   -32    
-80    0      
-976   0      
32     80     
-32    -144   
272    272    
-176   16     
16     -32    
16     176    
16     144    
32     -256   
-64    192    
96     240    
-48    -128   
-96    -160   
-160   32     
288    544    
-48    -16    
-80    96     
16     -80    
0      240    
192    -272   
96     176    
-96    16     
-48    112    
-32    128    
-96    -288   
64     80     
-48    -32    
64     176    
-96    144    
48     128    
-160   16     
-16    -80    
-176   16     
48     96     
-96    48     
0      -144   
144    144    
96     -400   
-80    16     
0      176    
-80    192    
-112   32     
-80    128    
-256   -272   
16     64     
432    1792   
-1680  -64    
-144   1232   
-48    512    
768    -1408  
-544   -1024  
-240   -128   
464    -320   
224    912    
176    256    
-144   -96    
48     144    
144    384    
-304   -224   
128    16     
32     128    
-128   -48    
176    368    
-208   0      
112    48     
160    80     
-64    -144   
144    128    
96     496    
0      112    
-160   -96    
-112   144    
32     352    
144    0      
-112   0      
-96    -96    
80     -16    
0      112    
32     -16    
0      32     
80     64     
176    384    
-112   480    
-48    64     
-160   -288   
192    80     
-48    16     
-32    80     
-64    -48    
144    48     
-16    16     
80     96     
64     352    
-16    208    
0      32     
16     96     
-16    112    
80     64     
-128   -96    
192    96     
16     448    
-64    -256   
96     32     
-32    112    
-16    128    
-48    272    
0      -96    
32     112    
64     80     
96     176    
16     32     
32     64     
-16    16     
32     96     
64     96     
0      80     
-48    16     
48     96     
-112   16     
48     144    
16     -192   
-48    -272   
224    -16    
-16    64     
-192   64     
160    16     
96     352    
48     -208   
112    128    
-80    -80    
160    144    
32     272    
32     464    
-224   -80    
64     -1552  
192    32     
32     64     
0      128    
-96    80     
96     96     
48     0      
224    288    
0      240    
-80    32     
-96    -64    
112    128    
16     16     
16     192    
-32    48     
16     -336   
144    192    
-176   16     
176    160    
-128   144    
144    32     
-32    224    
32     16     
80     128    
-144   48     
160    0      
-32    144    
-48    -240   
32     16     
80     144    
-32    -400   
-80    -48    
0      384    
176    208    
112    -32    
-80    176    
-176   -672   
336    16     
-128   432    
144    256    
-240   80     
48     128    
-16    -160   
160    48     
-16    144    
-16    -352   
64     -208   
-176   -912   
80     -544   
-112   -48    
144    64     
208    80     
-144   192    
80     -320   
16     48     
112    112    
-16    -64    
-48    160    
80     96     
32     176    
16     -80    
80     96     
-80    -352   
176    -16    
-32    160    
16     -256   
144    112    
224    656    
80     224    
-144   160    
80     -112   
128    64     
-128   -80    
192    112    
-16    192    
48     -128   
48     48     
0      -624   
224    688    
0      -704   
16     -16    
0      -240   
128    128    
-32    256    
16     -304   
-48    -32    
352    208    
-144   0      
0      64     
80     208    
64     -432   
96     176    
-16    -592   
80     112    
-144   -288   
16     128    
160    -2864  
240    224    
48     80     
16     144    
32     80     
224    16     
-112   144    
32     0      
48     80     
32     -64    
16     96     
-624   2144   
-1184  -336   
128    -96    
544    -64    
-320   -512   
48     144    
-640   64     
928    400    
-544   272    
160    -64    
-48    64     
-160   -240   
208    112    
80     -96    
-64    -48    
144    -128   
48     64     
16     -80    
96     80     
80     -816   
208    112    
-208   128    
176    0      
-160   64     
176    -288   
160    160    
-80    80     
128    256    
-32    -112   
96     64     
-64    -160   
224    176    
-80    32     
96     64     
-16    -144   
96     -2096  
48     -32    
16     -432   
-16    -1152  
-32    80     
64     -176   
-144   80     
208    -464   
96     -32    
-80    0      
160    -208   
-160   176    
224    -48    
-160   -32    
32     -128   
208    -192   
-224   160    
128    0      
64     -64    
-480   -32    
64     -304   
128    -16    
-128   -512   
176    -128   
48     -1344  
128    -32    
32     32     
112    -144   
32     -288   
-128   32     
32     0      
0      -128   
128    112    
-144   16     
-736   -48    
-16    -288   
176    32     
-112   -80    
192    48     
0      -256   
128    32     
144    -368   
192    -240   
128    -80    
-48    176    
48     -80    
128    128    
-96    16     
128    -416   
32     -32    
-32    -112   
-400   -64    
64     -32    
48     96     
48     -736   
32     -112   
160    -1184  
-48    16     
16     -96    
-16    -32    
256    224    
-176   -96    
16     -64    
96     80     
-272   -80    
144    -192   
-256   -32    
144    -48    
-128   -192   
48     -544   
144    32     
128    -240   
16     -96    
-64    -752   
80     64     
176    0      
-48    0      
48     0      
0      -192   
-96    -64    
64     -384   
-160   -208   
64     -32    
-16    -208   
240    -160   
-160   16     
128    -144   
0      64     
192    -576   
-144   48     
112    32     
96     80     
80     144    
-32    0      
64     -48    
176    -240   
-560   -64    
80     -112   
272    48     
-16    144    
-400   -80    
192    -160   
-32    0      
16     -256   
48     -16    
-48    0      
112    64     
80     -16    
112    -160   
-512   -80    
112    112    
-48    96     
0      -16    
-96    80     
32     -160   
0      -16    
16     -464   
48     112    
192    128    
-112   0      
-32    -80    
-16    32     
32     -32    
-160   -144   
64     -64    
-16    224    
-48    48     
16     16     
-144   96     
48     -96    
-80    -240   
128    48     
96     144    
-1072  -144   
-1584  -112   
32     96     
-368   -112   
48     80     
144    160    
-48    -48    
-16    -96    
-112   96     
128    -48    
-128   -96    
-128   -160   
0      112    
-64    -16    
32     -16    
-80    -48    
-496   -48    
-96    144    
-688   -256   
-48    32     
-64    64     
-160   96     
-80    80     
-224   -64    
256    64     
-96    192    
-208   -16    
-176   48     
1728   -512   
-1408  -1536  
1216   1360   
-64    816    
784    1232   
-496   -304   
-320   -112   
992    784    
-576   16     
-128   -16    
-304   48     
176    192    
-32    144    
-320   -96    
-160   -256   
32     -96    
16     144    
-16    -48    
-32    160    
-80    -112   
16     288    
-96    -176   
-272   -64    
32     192    
224    112    
-208   32     
-256   -96    
-32    176    
0      -176   
112    112    
96     -144   
144    32     
-176   0      
-144   -240   
96     80     
-368   32     
80     64     
-544   -160   
288    176    
96     -96    
48     16     
-1632  -64    
192    32     
-160   -80    
48     128    
16     304    
-128   112    
16     16     
80     240    
-48    -96    
208    128    
-80    80     
80     192    
-208   64     
-32    80     
-96    80     
-64    368    
32     288    
-272   -64    
144    -80    
48     176    
-16    -160   
80     240    
48     -32    
208    80     
16     -48    
32     80     
-224   -16    
-96    64     
-48    -64    
112    80     
-192   -48    
0      208    
-16    -48    
16     64     
80     496    
-64    336    
-80    160    
208    208    
-48    -176   
-80    -128   
-16    -16    
-80    112    
-16    -32    
-176   -144   
64     112    
-240   -96    
-144   -176   
-608   -288   
80     192    
16     112    
-48    128    
0      -80    
128    128    
-80    64     
64     272    
0      336    
-80    -48    
80     32     
-32    -48    
160    80     
-128   64     
0      16     
64     64     
-16    112    
64     -96    
96     16     
16     416    
-32    512    
-48    -48    
-112   -80    
96     80     
112    80     
-112   64     
-144   80     
128    16     
-80    96     
-128   -144   
128    -16    
-144   80     
64     -80    
0      48     
-16    -96    
0      -64    
32     -608   
-80    -560   
112    -416   
-16    352    
-48    80     
-144   -32    
96     96     
-112   16     
-32    48     
16     -80    
80     -48    
-96    80     
48     192    
-64    0      
112    112    
96     208    
0      112    
16     224    
0      0      
-112   -48    
16     -320   
-64    -400   
32     -208   
-48    144    
32     112    
32     192    
0      128    
96     160    
-64    -160   
-48    16     
16     32     
112    80     
-16    112    
16     96     
64     112    
-16    32     
-32    16     
96     32     
64     -16    
48     176    
-32    0      
48     112    
48     64     
240    -96    
80     128    
-48    -16    
80     80     
64     -16    
-16    112    
16     128    
-64    32     
160    -48    
-32    240    
-64    16     
96     80     
-16    64     
144    16     
-48    -16    
272    80     
-112   240    
-96    -240   
112    224    
128    96     
-224   208    
-16    80     
0      -80    
64     -112   
144    336    
-144   64     
48     80     
-48    128    
80     -48    
-592   416    
256    112    
208    640    
208    -80    
112    -704   
-96    -80    
320    224    
16     -288   
288    560    
-368   -832   
304    368    
-160   -560   
96     160    
-160   -64    
128    64     
0      160    
128    0      
-64    240    
-32    -32    
-160   -112   
192    -112   
-112   224    
176    -80    
-64    320    
208    -496   
-176   208    
304    -688   
-160   176    
240    -32    
-96    256    
96     -80    
-32    128    
16     80     
160    144    
32     48     
-208   -80    
112    -32    
64     -48    
256    48     
-128   -96    
0      112    
16     -320   
160    208    
16     -1136  
-16    64     
0      112    
176    80     
32     0      
-304   192    
288    -144   
48     192    
-128   16     
112    -176   
48     -16    
64     0      
-64    192    
48     -336   
32     80     
144    -2272  
-32    48     
96     32     
16     224    
0      64     
48     0      
32     -16    
0      208    
16     48     
-16    -64    
96     16     
176    0      
-16    48     
80     -64    
-48    -32    
112    -144   
64     288    
-112   -880   
288    -96    
32     480    
-208   64     
224    80     
48     -16    
128    144    
80     304    
-32    -64    
256    -352   
-32    128    
96     -192   
128    -64    
112    48     
-96    16     
96     -144   
0      128    
-16    -16    
160    144    
-80    80     
144    128    
0      -176   
32     -1024  
80     96     
-32    -160   
208    320    
-80    -112   
16     -96    
112    -128   
160    96     
-64    -352   
80     48     
64     144    
176    208    
-64    -80    
16     32     
48     32     
32     -304   
64     96     
16     -96    
-16    96     
48     -224   
16     96     
272    -304   
-224   96     
176    160    
-64    -208   
-16    64     
-32    -816   
32     0      
-176   -32    
96     -1040  
64     -416   
-16    -1520  
-16    -176   
128    -48    
-64    -288   
208    16     
96     128    
144    -176   
192    304    
-96    -32    
-128   -32    
-48    -48    
144    -80    
-656   -176   
32     -224   
128    -112   
-48    -256   
160    96     
224    64     
-80    -32    
48     -32    
0      -16    
32     32     
160    0      
-48    -256   
0      32     
-128   -16    
272    32     
-160   80     
400    96     
-352   -400   
112    -368   
-64    -80    
16     -336   
80     -32    
240    256    
272    752    
-432   -32    
208    16     
384    -304   
144    80     
-208   32     
-144   -32    
-144   48     
144    -224   
-320   16     
224    -80    
-144   64     
-48    224    
-144   -112   
240    -304   
80     16     
112    -48    
-128   176    
48     0      
96     -32    
0      112    
-32    16     
-160   -96    
48     -208   
-144   -96    
32     -32    
-48    -16    
128    -112   
16     -112   
112    -800   
48     192    
256    -432   
-48    128    
1728   -672   
-960   -1280  
608    1040   
272    608    
-80    -400   
-608   -400   
480    736    
-256   -496   
-1264  -544   
-48    240    
96     -176   
-80    -96    
-224   256    
320    -192   
-208   -160   
144    -304   
32     -16    
208    288    
-272   240    
-128   -96    
-16    -176   
-288   -96    
-32    -16    
-208   -32    
16     -128   
112    -96    
416    -256   
48     208    
96     -512   
-128   96     
16     -96    
224    -176   
-464   288    
-32    -112   
-240   176    
-80    -16    
-112   -128   
48     -336   
-48    -160   
496    112    
-128   208    
-32    -336   
80     48     
64     -448   
48     32     
144    16     
-96    128    
-48    -32    
112    176    
16     -48    
16     -32    
32     160    
64     224    
-112   112    
-64    -240   
128    224    
112    -320   
-32    -624   
352    96     
-192   -32    
16     336    
0      96     
144    0      
-208   -256   
368    160    
-64    16     
-80    -48    
32     80     
192    48     
-480   -64    
-32    144    
-128   -48    
96     96     
-48    0      
-192   48     
-208   -512   
-1056  -464   
32     -32    
-608   -352   
224    544    
-192   -80    
-64    -32    
192    112    
32     48     
-208   16     
240    320    
-32    80     
112    192    
-112   -48    
-112   -64    
96     64     
16     16     
-144   160    
0      320    
-96    144    
32     192    
-176   -144   
-256   -384   
48     -144   
-96    96     
176    160    
-32    -32    
-128   16     
0      64     
-144   -32    
112    240    
96     240    
0      320    
-416   -32    
-96    -80    
-128   0      
64     160    
-96    -32    
32     80     
128    144    
-192   16     
96     -496   
-160   128    
112    208    
160    -16    
-128   112    
-128   -32    
-80    112    
176    336    
-352   -32    
48     240    
-64    112    
-224   -48    
0      48     
-48    -32    
192    304    
-112   256    
272    160    
-192   -128   
48     -96    
-192   64     
-32    -32    
128    80     
-64    -16    
96     112    
-80    0      
48     240    
-368   16     
144    192    
-112   -48    
288    496    
-192   96     
128    64     
-80    32     
-64    80     
32     32     
-48    32     
-32    128    
96     112    
48     64     
-112   -16    
-32    384    
-496   -16    
64     16     
-96    -112   
0      240    
-112   32     
-112   16     
16     96     
0      -32    
-48    160    
96     32     
-128   80     
64     80     
-128   16     
-144   16     
176    -128   
-192   32     
112    256    
-1648  -160   
-32    16     
-16    -16    
112    112    
64     128    
-16    0      
64     128    
-96    16     
192    64     
-208   80     
0      16     
-96    80     
128    -16    
16     32     
80     128    
-64    112    
-128   -48    
96     192    
96     -16    
208    208    
-176   64     
-32    64     
2432   1328   
-1552  480    
480    176    
304    112    
-384   -608   
176    864    
-592   320    
48     384    
96     -736   
-144   272    
128    128    
-256   160    
0      112    
256    16     
-208   192    
80     -272   
-144   352    
64     -32    
32     368    
-80    -464   
-128   256    
-32    -96    
96     320    
16     -160   
-80    32     
128    240    
16     304    
96     -48    
-176   144    
176    -80    
48     48     
48     96     
16     144    
-16    48     
-80    112    
176    80     
-144   -32    
-16    -16    
32     224    
224    144    
-144   0      
0      32     
0      48     
144    -16    
16     192    
-16    112    
144    64     
-96    208    
-288   16     
240    0      
-80    192    
80     144    
64     144    
-112   0      
-16    -16    
96     176    
0      -48    
176    176    
-192   16     
112    0      
0      48     
0      112    
-96    48     
48     80     
64     48     
-96    112    
32     -48    
64     160    
-16    -112   
160    80     
-32    64     
160    80     
-48    160    
32     128    
16     112    
80     -128   
96     -96    
80     160    
-64    144    
32     -96    
64     -736   
64     128    
32     288    
160    96     
80     64     
208    144    
-160   224    
-80    -160   
272    32     
-64    160    
-16    16     
128    96     
-32    -192   
160    80     
-16    32     
-48    -592   
208    176    
16     240    
160    416    
-192   -80    
16     -144   
160    208    
112    48     
128    16     
-80    -64    
-16    112    
160    -208   
-16    -48    
32     64     
32     176    
48     -32    
64     96     
64     -1296  
-32    96     
96     384    
32     336    
0      -16    
48     192    
80     -48    
16     -32    
-32    -64    
64     224    
16     48     
32     -48    
64     -32    
96     16     
-64    -80    
64     -400   
160    320    
48     -192   
-16    -80    
-32    160    
48     96     
16     64     
208    320    
-208   -128   
96     0      
48     224    
-80    -128   
80     112    
0      -336   
112    64     
32     -64    
32     160    
128    -208   
-224   -192   
160    -560   
32     96     
-16    80     
32     112    
64     64     
128    128    
-144   -48    
64     -32    
16     16     
128    -112   
-32    272    
-32    -160   
-80    0      
128    -848   
64     176    
-144   -1696  
64     96     
128    112    
192    192    
-192   -80    
448    240    
-112   64     
144    -144   
16     240    
144    -240   
-16    80     
0      -528   
80     16     
-16    -192   
112    64     
208    128    
-32    144    
-112   -64    
128    176    
96     112    
0      128    
-208   80     
208    208    
-32    64     
176    -48    
-144   192    
64     -592   
144    144    
128    -32    
64     16     
-320   -96    
240    96     
64     48     
144    80     
-144   96     
1744   -480   
496    272    
144    560    
-592   -144   
-64    208    
288    -736   
-144   512    
800    -32    
-704   368    
464    -400   
-400   304    
288    32     
176    384    
-96    -1072  
224    448    
32     -272   
80     -1424  
-80    -48    
112    -1952  
-160   80     
80     48     
80     544    
-112   -528   
80     -160   
224    -192   
272    240    
-96    -32    
-96    144    
208    -256   
80     -240   
-864   -176   
16     -464   
-80    -304   
176    -192   
0      -128   
240    -1328  
-96    -96    
272    720    
-48    48     
-48    -400   
128    0      
-16    48     
-16    288    
-16    -16    
64     -144   
-528   -64    
176    144    
80     176    
48     -240   
64     -272   
-64    -240   
192    -208   
32     -528   
32     144    
-16    -208   
48     176    
-16    -208   
144    32     
48     16     
112    -48    
-64    0      
144    -48    
-64    192    
-112   -160   
16     -80    
16     -992   
48     -144   
128    -496   
-112   64     
96     -96    
-16    144    
32     -48    
80     160    
-16    80     
32     96     
-224   -176   
176    -64    
-448   -112   
-128   -496   
128    -160   
64     48     
-240   -176   
32     -432   
-32    -96    
352    -784   
-160   -32    
48     -160   
-16    -208   
160    16     
80     -128   
-208   32     
16     -192   
-32    32     
144    48     
-656   -16    
288    272    
-288   144    
-32    -320   
-80    -304   
112    -544   
208    208    
-16    144    
0      -64    
16     128    
-16    -160   
64     -48    
-48    128    
-112   -144   
112    128    
-480   0      
32     -48    
-768   0      
96     32     
112    112    
32     -656   
32     128    
96     144    
-16    -160   
-96    -96    
-208   -224   
160    -64    
64     96     
-176   80     
80     -64    
-448   -192   
64     160    
-48    128    
80     -48    
80     32     
64     -224   
80     304    
-64    128    
-64    64     
-112   192    
-64    128    
224    -48    
48     -32    
-368   80     
144    -16    
-48    0      
0      0      
32     48     
80     -112   
32     32     
-128   -176   
240    48     
96     64     
-16    32     
-80    -64    
96     -112   
-64    32     
160    64     
-208   96     
176    -128   
-128   128    
-16    -80    
0      0      
-336   -96    
144    112    
-64    112    
-416   80     
16     256    
-1136  -16    
-112   -192   
-240   32     
-144   -64    
16     -224   
48     -48    
256    128    
-128   176    
-560   48     
-16    32     
-288   -144   
144    176    
80     304    
-304   0      
64     -96    
16     96     
0      16     
-256   80     
0      16     
-384   16     
32     160    
160    -320   
64     128    
-192   -80    
-32    112    
-64    32     
128    48     
-64    48     
0      112    
-128   -144   
16     176    
-112   224    
-32    -16    
-48    256    
656    -496   
0      544    
-96    464    
-496   400    
736    -1056  
-256   -352   
384    -208   
-400   208    
288    48     
-448   -208   
320    96     
-48    -208   
-64    320    
-160   -224   
32     176    
-624   -304   
-192   256    
-976   48     
-144   144    
64     -336   
-16    320    
-32    -96    
32     208    
-112   -192   
112    16     
16     64     
0      208    
-96    0      
-112   48     
-96    0      
-16    48     
0      80     
-336   80     
48     112    
-48    -112   
-32    64     
176    96     
-224   112    
304    48     
-208   -32    
16     96     
-64    48     
-32    -16    
-32    48     
48     32     
128    112    
-256   -32    
-240   -48    
-224   192    
-64    -192   
-32    96     
32     112    
-32    96     
-32    80     
80     -64    
-32    208    
-256   112    
176    -32    
0      -80    
16     16     
-160   32     
-32    96     
-16    -208   
64     16     
128    48     
48     128    
16     160    
-128   64     
32     112    
-16    16     
176    224    
-80    -80    
160    80     
16     176    
-176   -32    
-160   48     
-80    -64    
96     -80    
-112   -64    
16     -16    
16     32     
-32    16     
0      -112   
32     128    
-112   -80    
48     -208   
-80    -48    
128    480    
-240   -160   
80     80     
-160   -80    
32     -32    
-64    16     
0      -32    
96     96     
-128   -144   
112    176    
48     112    
32     -112   
-32    32     
16     96     
-32    112    
-96    32     
32     48     
16     160    
-64    224    
0      0      
-240   -192   
32     -192   
112    144    
-48    48     
-16    16     
80     96     
-32    48     
112    192    
-64    304    
80     272    
-16    112    
-16    -144   
-16    -48    
-64    0      
336    368    
-160   -80    
-16    -16    
-144   112    
256    192    
-112   32     
48     32     
-16    96     
48     112    
-32    96     
-16    32     
80     176    
-96    -80    
160    112    
-240   -16    
192    192    
-256   80     
160    64     
-48    32     
32     48     
0      224    
-16    -48    
64     96     
64     272    
-64    208    
32     112    
80     32     
128    32     
-96    96     
-144   -48    
144    32     
320    64     
0      240    
-272   -16    
144    80     
192    176    
48     64     
-64    48     
-16    32     
144    -16    
-16    112    
32     112    
160    -16    
80     288    
-128   -64    
80     48     
80     208    
32     -48    
0      32     
0      112    
96     160    
32     80     
-32    128    
-48    144    
112    48     
-48    64     
144    128    
-128   -48    
96     160    
0      32     
-32    -608   
48     144    
48     -2160  
144    240    
64     16     
64     128    
-128   112    
-32    48     
112    -80    
-16    176    
-112   -48    
240    64     
-80    192    
272    64     
-240   32     
-704   -704   
576    -992   
-400   -1216  
-32    368    
-96    240    
16     368    
272    -336   
-432   720    
384    80     
-64    208    
160    -192   
112    544    
-96    -176   
80     352    
144    -112   
16     0      
-80    -160   
16     -528   
96     304    
64     -288   
112    336    
80     336    
-48    112    
80     -448   
-16    208    
48     160    
32     384    
-32    -96    
0      -112   
-64    16     
160    -144   
-64    64     
32     -448   
-16    144    
-16    -1200  
32     128    
64     112    
0      64     
16     0      
16     64     
48     16     
80     160    
0      160    
-16    -64    
-80    96     
144    -224   
176    288    
64     -224   
-16    32     
80     -288   
48     240    
48     -336   
32     -96    
0      64     
32     192    
80     64     
80     32     
80     144    
-16    32     
112    16     
144    16     
0      144    
80     32     
-96    128    
96     -640   
144    112    
-64    -128   
48     48     
128    -80    
64     48     
-48    160    
-48    144    
80     128    
32     -816   
48     176    
80     -256   
208    176    
16     -160   
32     128    
32     -112   
-16    64     
144    -80    
-64    -64    
208    64     
-64    96     
16     48     
-128   -208   
304    304    
-128   48     
176    -64    
0      -208   
64     112    
0      -416   
176    496    
-208   -240   
432    224    
-160   -272   
288    240    
-144   -96    
128    -368   
-64    192    
-32    -160   
144    -96    
0      48     
128    -1792  
16     -160   
32     32     
64     -32    
144    208    
144    256    
-176   144    
128    -160   
-80    -16    
192    144    
-32    -112   
160    -368   
-1632  -176   
48     -208   
160    144    
96     -256   
176    16     
-128   -272   
80     0      
256    32     
-496   -240   
112    -192   
176    16     
64     -368   
-144   112    
16     32     
16     -16    
-496   -160   
-160   -288   
80     -224   
0      -96    
32     32     
320    -256   
-96    -80    
-112   -2368  
80     -48    
240    -128   
-64    144    
-48    208    
-32    80     
16     -480   
-176   -544   
160    176    
176    -64    
112    32     
0      -48    
48     48     
112    -368   
-64    -16    
160    -992   
-224   128    
16     48     
96     384    
-80    -112   
80     -32    
-80    -112   
112    -96    
-144   64     
64     144    
-528   -144   
224    -64    
-64    -320   
80     -368   
-192   64     
0      -320   
-144   -112   
64     -1072  
144    -240   
0      -128   
-96    -16    
-160   48     
80     -48    
80     0      
0      -16    
-176   -64    
16     -144   
-2128  -144   
144    160    
-112   0      
112    -16    
160    144    
96     -880   
-240   96     
64     -80    
160    -144   
64     80     
64     -224   
-80    -144   
240    -144   
112    224    
64     -64    
-128   64     
-992   1120   
-96    -208   
1152   -224   
-208   -448   
-1024  -448   
784    288    
-192   160    
256    272    
-288   -128   
-32    -128   
-160   -144   
-48    400    
-48    -272   
-128   448    
-112   -224   
208    32     
-176   -288   
64     -208   
16     16     
112    -240   
16     176    
144    80     
-48    48     
-144   -128   
144    64     
-48    16     
144    368    
-64    96     
80     -16    
-208   -64    
224    -48    
-288   -32    
-16    -48    
96     64     
128    -144   
176    -32    
-224   16     
32     -48    
-96    64     
128    -32    
-48    -32    
48     112    
-192   64     
368    32     
-272   64     
144    96     
-32    96     
32     -32    
32     32     
-592   -288   
-800   32     
-112   48     
-608   160    
-192   64     
112    112    
-368   -320   
128    -64    
-96    96     
32     -368   
32     -32    
176    -48    
16     288    
-416   -304   
48     32     
16     64     
-48    80     
48     224    
-192   48     
80     288    
-272   -32    
80     -64    
128    -32    
144    176    
-128   80     
-128   48     
160    288    
112    -16    
96     -256   
-160   224    
-32    48     
80     -16    
-16    80     
-48    48     
-80    48     
-368   -128   
48     48     
-240   0      
96     336    
-48    -112   
-32    80     
0      -80    
80     16     
112    -48    
-32    96     
0      80     
-144   -64    
-96    -48    
0      16     
32     176    
-112   -16    
-48    128    
-128   32     
-96    -112   
-432   -96    
0      80     
-48    -112   
96     160    
-128   -160   
112    128    
-64    32     
32     0      
-32    32     
0      64     
0      96     
-16    64     
0      80     
-144   -112   
-128   0      
-448   -192   
176    144    
-160   -48    
240    176    
-240   -96    
176    32     
-96    272    
-16    -112   
80     128    
-160   32     
224    96     
-320   64     
64     0      
-16    160    
16     -96    
-112   32     
80     240    
-320   -272   
32     176    
-112   0      
96     -16    
-96    80     
144    144    
32     64     
-192   -16    
0      64     
64     640    
-448   -32    
400    0      
-144   224    
-144   -240   
-256   -48    
-1296  0      
-16    160    
0      -160   
32     160    
80     -32    
-128   32     
16     288    
-224   -16    
48     -80    
-112   64     
352    112    
-240   -16    
32     64     
-144   -112   
80     192    
-464   -176   
304    320    
-48    128    
80     -32    
-224   -32    
48     -16    
-80    272    
96     -64    
-48    80     
64     -16    
16     176    
-176   -48    
48     160    
-112   -80    
80     192    
64     32     
160    208    
64     -16    
-176   112    
-32    -96    
0      -32    
144    0      
80     112    
64     128    
0      96     
-144   112    
224    -16    
-160   48     
96     -64    
16     160    
64     368    
432    2752   
-1056  656    
-608   -800   
-64    -400   
-48    -896   
432    -464   
80     544    
352    688    
-272   16     
-224   112    
208    64     
224    288    
-176   -192   
0      -48    
208    96     
-112   112    
48     -16    
96     112    
112    80     
240    112    
-208   144    
96     48     
16     240    
-64    48     
80     176    
112    192    
-80    128    
-64    -96    
-96    160    
128    192    
80     16     
-96    80     
32     -48    
128    112    
-160   32     
352    400    
-304   16     
144    48     
-192   32     
272    192    
-320   -128   
96     80     
-16    48     
160    144    
80     80     
-32    16     
-64    -128   
256    208    
-192   144    
160    32     
16     112    
16     -32    
208    176    
-224   80     
176    208    
-144   80     
208    48     
64     128    
48     80     
-80    80     
64     48     
48     96     
-48    -16    
128    48     
-80    32     
-16    144    
-240   -32    
192    144    
-144   -112   
192    160    
-16    16     
-48    -400   
-48    0      
144    -352   
-80    -176   
224    80     
-96    64     
112    128    
16     80     
64     192    
-208   48     
128    -256   
0      224    
-112   32     
48     96     
-64    16     
64     -96    
32     16     
80     -1424  
-64    96     
224    -128   
64     288    
-48    128    
32     176    
48     176    
176    64     
-48    -176   
48     80     
80     192    
-32    80     
16     32     
-16    -224   
-16    -32    
144    -272   
80     160    
32     64     
16     128    
-64    -32    
-80    0      
208    32     
80     128    
-32    48     
-64    -64    
-112   48     
176    0      
112    -96    
192    -96    
-336   128    
384    64     
112    128    
48     -208   
-304   80     
208    80     
-96    32     
-48    -320   
-32    -32    
48     112    
16     64     
176    16     
-208   -144   
32     32     
16     -32    
80     208    
80     -304   
160    112    
-64    -784   
272    64     
-208   -1120  
80     0      
48     32     
64     96     
176    32     
-144   32     
112    16     
96     -48    
32     16     
16     -176   
-16    32     
144    -720   
48     0      
32     16     
80     224    
32     -656   
128    176    
-128   -48    
192    416    
-144   144    
160    96     
64     16     
96     -992   
-32    48     
-48    -512   
176    128    
112    -144   
272    960    
-144   -272   
-240   -160   
-32    -512   
64     -112   
-96    16     
64     96     
96     336    
0      128    
0      -48    
176    -160   
208    272    
0      -48    
16     80     
240    -16    
-80    32     
-16    -352   
32     144    
128    -224   
-64    64     
160    176    
160    -1280  
64     48     
-288   -144   
48     -1040  
-48    -112   
0      -304   
64     112    
112    160    
-80    0      
32     112    
-432   -1104  
-256   -688   
-816   144    
736    -16    
816    1088   
-544   -1616  
-272   -656   
80     688    
272    -496   
-112   -400   
48     16     
-160   -496   
368    -2784  
-96    240    
240    32     
-208   -96    
64     128    
0      32     
336    -128   
112    160    
64     -64    
-48    160    
96     192    
-192   -32    
160    -176   
-192   -48    
432    352    
-256   -400   
304    -176   
-192   0      
304    128    
0      -112   
-80    64     
16     -208   
-32    48     
32     -144   
208    48     
-176   16     
128    -192   
-768   16     
160    -128   
128    80     
0      -368   
-32    64     
176    -1424  
-16    -176   
112    128    
-80    400    
128    64     
16     16     
-112   -80    
64     -32    
-352   80     
16     -48    
-576   -96    
16     -32    
112    176    
224    -272   
32     -16    
64     -16    
-96    -48    
-64    32     
144    240    
32     144    
-32    -16    
-80    48     
80     -48    
-144   -16    
32     96     
-288   64     
64     48     
-592   0      
64     -112   
-96    -80    
128    -32    
80     208    
-64    -752   
224    128    
64     -48    
224    128    
-144   144    
0      48     
80     -48    
-64    -160   
-64    -16    
16     -96    
16     496    
32     592    
-336   368    
0      -288   
176    0      
160    -224   
-48    128    
-144   -48    
32     -192   
96     80     
-64    -48    
128    16     
-32    -240   
48     -48    
-32    96     
-16    16     
16     -32    
48     32     
160    -432   
-96    -80    
240    -368   
-160   0      
112    144    
-64    48     
32     16     
-80    -16    
16     -16    
0      0      
-80    48     
0      -80    
16     -96    
32     128    
80     32     
80     -224   
-80    16     
112    80     
208    32     
-80    64     
64     -128   
-176   0      
48     -32    
16     256    
-160   16     
64     16     
16     112    
-192   -32    
64     -288   
-80    -112   
224    0      
-144   32     
-176   -288   
0      -208   
208    80     
96     48     
-160   0      
32     -112   
144    64     
-48    80     
-96    48     
144    496    
-320   32     
-368   -464   
96     64     
48     -208   
64     192    
-432   -304   
176    112    
-288   16     
80     -464   
-64    80     
-528   -352   
-80    16     
208    -32    
272    80     
0      160    
-176   80     
-224   80     
320    32     
-336   -128   
64     -32    
-336   -32    
-32    -160   
48     96     
16     0      
112    -80    
-224   32     
-16    32     
-848   128    
192    80     
80     96     
-128   160    
-80    -32    
64     96     
96     -272   
-96    -48    
-16    80     
-32    16     
0      64     
-80    -48    
-160   -64    
-192   -112   
-128   -128   
-144   32     
96     176    
-1040  192    
-272   144    
-48    -80    
-48    16     
0      -144   
32     80     
-400   -1728  
1360   1280   
-816   352    
256    -272   
128    -208   
128    -96    
448    336    
-592   32     
-352   -80    
80     -480   
0      96     
-16    -32    
176    320    
-16    112    
0      80     
-80    96     
-128   64     
-96    96     
48     32     
0      16     
-112   -48    
48     144    
32     240    
48     192    
-496   -112   
-80    48     
80     48     
96     208    
-48    -48    
48     80     
-128   -16    
0      80     
-80    80     
32     64     
0      64     
-64    160    
-176   -112   
-32    -16    
-48    176    
112    -16    
-112   48     
128    -32    
128    128    
128    128    
-208   0      
48     -48    
0      192    
112    224    
128    -64    
-160   64     
-64    -96    
128    128    
-208   192    
128    -64    
-32    -32    
16     144    
48     -16    
-128   64     
96     112    
-64    80     
48     128    
-48    48     
-16    96     
32     192    
-144   -64    
176    192    
-16    64     
-32    112    
64     32     
-176   -32    
64     64     
-16    80     
-64    112    
64     32     
-144   128    
-16    288    
-80    -160   
208    -48    
-16    32     
32     176    
-272   16     
160    64     
-48    128    
-192   80     
32     128    
-112   -272   
368    128    
-224   32     
112    144    
-48    -16    
112    144    
-48    48     
16     144    
32     80     
160    16     
160    272    
-256   64     
96     112    
32     176    
-96    -16    
128    80     
16     80     
32     80     
48     208    
64     -16    
-64    0      
160    176    
128    176    
-32    16     
-144   48     
-80    -32    
176    80     
-160   -64    
80     112    
64     112    
144    96     
-160   64     
32     64     
-64    64     
32     -16    
-128   16     
112    96     
176    144    
80     256    
-160   -128   
-32    144    
-224   144    
400    80     
-48    16     
-144   64     
32     128    
224    288    
64     288    
80     240    
0      128    
128    -160   
-256   -96    
0      144    
128    64     
160    144    
96     0      
-160   176    
16     64     
80     144    
48     -96    
32     0      
0      -32    
176    336    
16     176    
16     -16    
32     48     
-48    80     
64     176    
-16    32     
128    144    
-80    128    
96     256    
-160   -192   
-48    -176   
80     -128   
64     -1040  
48     176    
48     112    
48     -16    
-16    64     
-64    240    
-48    -240   
64     320    
32     32     
-64    48     
-144   -208   
32     112    
-32    64     
0      -112   
16     96     
0      -2688  
64     -32    
80     48     
-64    -16    
240    -64    
-16    288    
32     208    
-48    -128   
160    16     
-96    336    
-144   96     
64     176    
128    -32    
0      -208   
16     80     
-48    -768   
80     80     
128    -448   
-80    80     
-48    96     
64     16     
-384   -2672  
592    -96    
-368   -448   
480    -368   
160    -416   
-64    192    
208    656    
80     0      
-80    -384   
368    -64    
-176   256    
-112   -960   
128    272    
208    -16    
-240   -48    
-160   -48    
144    80     
0      192    
32     368    
48     0      
-32    -176   
0      304    
-16    176    
32     192    
64     -192   
-112   96     
144    -832   
32     -64    
-256   -400   
432    208    
-128   48     
112    192    
-64    128    
288    304    
-224   -32    
192    -96    
-144   64     
320    80     
96     416    
16     -128   
-16    80     
64     -288   
0      -16    
80     -64    
80     64     
-80    -224   
32     112    
16     112    
-48    80     
48     176    
16     -256   
128    176    
32     -912   
112    144    
0      -720   
144    128    
128    304    
48     688    
-128   -560   
416    96     
-144   -176   
80     208    
-208   -32    
176    128    
144    48     
16     -80    
48     128    
48     -208   
48     64     
32     -16    
16     80     
64     -32    
80     64     
64     -672   
0      -80    
64     48     
48     -16    
336    -16    
48     -16    
240    -2112  
-16    96     
-144   112    
144    80     
48     112    
-48    -80    
96     32     
304    464    
32     240    
-64    -256   
144    -1008  
160    16     
144    32     
-144   48     
-1504  -192   
80     -1280  
112    -144   
-48    -224   
96     -64    
0      -304   
96     -128   
-16    112    
32     -128   
48     -96    
16     -64    
128    -352   
-16    48     
96     -160   
80     -96    
-400   -64    
64     -112   
32     -48    
64     -48    
48     -128   
32     80     
48     -240   
144    -48    
-128   240    
80     -80    
-32    48     
112    -208   
48     32     
0      -224   
144    0      
48     320    
-32    -224   
112    240    
16     -144   
288    272    
-240   -544   
160    64     
0      -144   
-80    -16    
16     -112   
32     -720   
144    -208   
96     32     
16     128    
80     32     
-16    48     
-112   -288   
-480   -96    
80     -32    
-32    -80    
-144   -240   
-16    -192   
32     -944   
-80    -288   
208    -176   
-80    48     
144    -16    
-64    80     
32     32     
0      96     
-224   -240   
224    -192   
-496   112    
208    688    
-1312  -288   
-96    -32    
-80    -224   
128    -128   
16     16     
64     -368   
128    256    
-96    80     
160    160    
-320   -320   
176    -144   
64     96     
80     -144   
48     96     
0      -160   
-672   96     
176    -224   
144    -32    
144    -96    
80     192    
-64    16     
-16    0      
112    -112   
64     32     
-64    80     
-128   112    
-432   -176   
240    0      
-112   -96    
112    -64    
-368   0      
-32    -96    
64     -32    
48     -384   
192    80     
32     -336   
64     128    
-64    32     
16     32     
-336   2560   
-480   928    
-1264  -368   
176    -336   
-496   80     
-272   -352   
-64    640    
-240   -160   
752    64     
-432   -192   
320    64     
-352   -352   
304    256    
176    -32    
-32    -16    
16     32     
80     32     
-80    64     
96     -80    
-32    16     
-48    -16    
160    176    
0      16     
80     48     
-912   -384   
96     176    
-608   -80    
-1040  144    
-16    32     
-1216  -144   
-96    -64    
-112   144    
-32    64     
48     -32    
-224   -32    
176    96     
-128   48     
-464   -336   
-96    96     
-144   -144   
96     80     
-144   -160   
-48    64     
32     -16    
-112   32     
-64    80     
-448   128    
32     128    
-160   32     
192    -48    
-48    32     
16     64     
-112   32     
-32    32     
0      -128   
112    112    
-64    160    
-16    -128   
-32    0      
-304   -16    
32     64     
80     80     
-16    112    
-672   32     
-48    64     
112    -192   
96     96     
-48    160    
-176   112    
-32    -96    
160    -96    
0      16     
-192   176    
-64    -48    
112    96     
-80    144    
224    208    
-80    16     
-64    -112   
-80    64     
-320   32     
64     48     
128    176    
-192   -48    
112    -352   
16     240    
-272   -16    
256    144    
-256   -32    
192    128    
-144   48     
0      16     
64     16     
-16    -80    
-48    176    
-192   240    
-64    208    
-48    -208   
64     144    
-32    -144   
-32    64     
48     112    
-32    -192   
16     160    
-112   160    
48     80     
128    368    
-32    64     
80     -32    
-144   64     
-112   -64    
80     16     
32     0      
144    0      
0      112    
-32    32     
-16    -256   
-32    -16    
112    272    
-432   -32    
240    112    
-96    80     
16     160    
-64    0      
-48    48     
-464   -240   
80     32     
-1200  112    
128    -544   
0      -16    
16     -176   
-16    64     
160    128    
-16    64     
64     80     
80     240    
0      -80    
-272   -208   
16     144    
64     48     
-32    -16    
-48    96     
-112   64     
-176   -96    
16     -32    
0      208    
96     176    
-48    144    
0      80     
48     -112   
-144   -80    
0      -16    
16     -240   
-32    -16    
48     208    
-112   16     
96     192    
-288   32     
32     -16    
-48    64     
-16    96     
-16    64     
48     32     
288    624    
-480   -304   
-240   -96    
-128   -80    
240    176    
-80    96     
16     64     
-144   -112   
128    80     
48     176    
48     48     
32     32     
16     48     
80     304    
-32    80     
-32    32     
64     -96    
144    80     
32     144    
32     208    
-208   -144   
192    80     
128    48     
64     96     
-112   208    
-32    96     
80     -48    
16     96     
-64    128    
64     48     
128    240    
208    16     
-32    128    
1424   -1488  
400    240    
192    -112   
-672   144    
256    -256   
352    -656   
64     528    
80     112    
-144   304    
-16    -96    
144    0      
-96    48     
48     128    
0      160    
16     0      
-160   -96    
96     16     
160    112    
-64    16     
0      0      
128    -96    
224    288    
-192   -160   
96     -208   
16     -256   
352    128    
16     160    
-112   -320   
128    112    
128    192    
-96    128    
80     128    
32     -16    
48     112    
144    -48    
64     16     
-224   -576   
368    304    
-80    144    
160    496    
-272   64     
48     80     
32     16     
0      -32    
-128   16     
208    336    
32     384    
208    400    
-384   -1264  
224    -64    
-32    -1616  
96     128    
80     96     
-112   -64    
144    144    
-64    112    
-352   -896   
224    608    
256    144    
176    256    
-80    -192   
32     256    
64     0      
-32    -96    
0      -96    
64     -416   
32     32     
64     128    
32     16     
16     96     
144    64     
64     128    
112    48     
-80    144    
16     -32    
208    96     
-160   -16    
-96    -160   
112    -32    
240    112    
-80    -48    
32     -128   
112    256    
-112   0      
48     80     
176    336    
-16    240    
-48    112    
-16    32     
64     32     
0      128    
16     64     
0      128    
224    160    
0      160    
-48    -672   
48     320    
112    -368   
304    512    
-112   112    
-16    -224   
-32    -368   
80     -32    
112    16     
-160   -32    
64     112    
32     -96    
112    -64    
-64    -272   
112    112    
32     -160   
16     64     
48     -160   
80     112    
48     -832   
-32    336    
112    192    
-96    0      
176    352    
-320   256    
240    128    
-112   192    
-96    112    
192    304    
64     128    
48     128    
-16    224    
256    240    
-96    0      
-32    -592   
176    304    
0      224    
64     -16    
-96    -240   
208    48     
-80    64     
48     -80    
32     48     
96     -208   
32     128    
16     -160   
96     224    
-96    -416   
224    208    
-192   -240   
208    -192   
-176   -176   
128    -16    
-96    -64    
144    128    
16     208    
32     176    
-64    -32    
208    -32    
-80    96     
160    -80    
-48    -176   
176    -208   
48     176    
48     -80    
96     208    
80     96     
16     80     
64     48     
-80    -80    
16     -656   
144    48     
-80    -1296  
64     -80    
32     80     
160    -208   
96     112    
32     144    
32     -48    
0      128    
48     -256   
256    112    
192    -192   
-96    64     
-576   144    
-32    -592   
128    -64    
0      -1520  
-80    -192   
208    304    
80     -32    
-16    96     
-16    -96    
32     48     
32     -128   
0      16     
0      -48    
112    80     
32     64     
-304   -32    
0      -80    
1504   2480   
-1808  -336   
352    160    
80     304    
960    528    
-672   -1248  
208    160    
112    -224   
368    -16    
-336   -96    
160    48     
64     -16    
208    -288   
-128   464    
-64    -608   
-704   224    
256    -96    
80     32     
-16    -272   
64     -16    
192    -1472  
0      32     
128    96     
-80    32     
112    16     
-64    48     
80     96     
-64    -112   
0      -16    
80     -144   
-512   96     
96     -272   
80     0      
80     -240   
-32    48     
144    -144   
-128   -272   
32     -1488  
144    176    
176    -144   
-256   0      
-16    0      
144    0      
0      64     
16     -96    
-832   -32    
80     -192   
-912   320    
-304   -144   
288    96     
-112   112    
-64    -64    
176    -432   
-224   64     
256    -96    
-48    32     
48     -16    
128    80     
-112   -48    
128    -144   
-256   128    
80     -64    
-144   -16    
16     192    
-96    -128   
48     -464   
32     128    
16     -480   
-96    64     
176    -16    
144    -48    
-48    32     
-96    -144   
-48    -128   
0      -48    
-256   -160   
16     -656   
-352   -96    
-112   160    
-912   -176   
336    -288   
-80    224    
112    -176   
-176   288    
-96    176    
32     -240   
-320   -160   
-64    -208   
-16    16     
-32    112    
-112   48     
160    144    
-320   16     
192    16     
-64    -80    
208    144    
-160   160    
80     -96    
32     128    
-160   80     
80     -192   
-64    32     
208    -48    
-64    176    
128    -64    
-160   -160   
-16    -336   
208    528    
-64    16     
-48    240    
-32    -128   
0      48     
-1056  -224   
-720   -32    
0      -64    
-112   -32    
-64    -64    
224    160    
-240   -192   
-208   -560   
-192   -80    
32     160    
192    160    
-624   -112   
32     -64    
-80    -48    
16     192    
-144   -624   
64     16     
-32    64     
0      96     
-48    112    
-320   0      
-32    32     
192    400    
80     256    
-128   192    
16     -144   
-96    64     
48     64     
-96    -192   
-16    32     
48     112    
112    224    
-16    80     
-176   96     
-256   -160   
-144   -224   
-64    128    
-144   16     
48     80     
-16    -16    
-96    -32    
-400   -336   
256    16     
160    400    
256    64     
-32    16     
-32    32     
80     80     
-240   -48    
80     128    
16     16     
-96    80     
-624   48     
48     0      
-1008  -208   
208    128    
-240   -16    
48     16     
64     -16    
-32    80     
-96    -48    
-64    112    
16     -32    
144    128    
-192   0      
128    16     
-80    80     
48     80     
-176   96     
-160   -96    
32     192    
-144   -80    
144    256    
-96    -192   
-64    -16    
-80    48     
128    -32    
48     96     
0      0      
-96    64     
-432   112    
48     -208   
-144   64     
320    64     
-1184  1312   
-384   -1008  
0      -912   
1296   32     
-480   -96    
16     -32    
-304   432    
192    -160   
192    320    
-368   -208   
128    -144   
-592   400    
448    -64    
-80    208    
32     -384   
-224   368    
96     -288   
-1200  352    
-176   -480   
384    336    
-288   -384   
96     480    
-128   112    
-96    112    
96     -416   
48     400    
96     0      
-176   304    
48     160    
32     32     
-48    -160   
128    240    
-144   112    
-144   64     
-16    432    
16     48     
-48    64     
160    -144   
32     0      
112    -192   
176    144    
0      16     
48     -256   
-144   -160   
288    256    
48     208    
-256   64     
16     32     
208    576    
64     160    
-256   0      
-16    -32    
128    -16    
0      176    
-16    32     
112    64     
-256   -480   
-448   -336   
-416   -432   
-80    -112   
32     160    
192    352    
-16    -240   
-16    80     
224    256    
-160   16     
80     112    
-16    144    
-48    -128   
-144   80     
-112   32     
144    240    
-96    -64    
96     128    
32     32     
0      48     
-208   352    
192    320    
0      128    
-112   -336   
160    -16    
208    64     
16     -80    
-144   -48    
176    32     
-16    0      
208    464    
32     176    
-48    32     
0      80     
-48    -16    
64     272    
-16    192    
-192   -96    
32     -96    
80     -176   
240    160    
-48    128    
-144   -272   
-32    144    
288    128    
112    144    
16     208    
-224   -64    
160    464    
-352   -128   
208    240    
16     16     
-32    48     
32     128    
-32    112    
48     -48    
0      16     
160    128    
32     -80    
-176   -512   
0      192    
288    224    
16     432    
-304   96     
208    32     
48     176    
80     224    
-128   -96    
-32    -64    
96     0      
128    32     
-96    112    
160    96     
-80    16     
-64    112    
32     -48    
-16    224    
-32    -192   
208    256    
-64    96     
160    80     
-256   112    
32     176    
176    32     
-16    80     
48     224    
-128   96     
208    112    
-224   64     
96     0      
64     -128   
-32    112    
-32    0      
32     -416   
80     0      
64     -944   
-96    176    
96     80     
80     32     
32     160    
0      48     
80     -16    
16     32     
-32    -32    
96     80     
-96    64     
96     64     
64     416    
-80    -144   
160    -48    
112    160    
32     -16    
16     112    
-16    80     
-16    128    
16     -112   
0      144    
384    112    
-48    -48    
-32    0      
0      64     
-32    224    
64     -16    
32     80     
96     96     
-16    -304   
64     112    
272    -2608  
64     64     
0      144    
-32    -64    
64     80     
-48    160    
-80    0      
64     -80    
176    208    
-176   32     
288    32     
-112   -32    
16     16     
-1024  624    
256    -672   
560    -48    
208    -80    
-544   -1296  
384    -304   
192    1216   
800    -160   
-592   128    
336    -224   
-80    448    
-16    -144   
112    208    
32     -160   
0      48     
-48    -32    
240    160    
0      -192   
96     -16    
-144   -496   
176    -144   
-112   -848   
240    -96    
-160   272    
224    -224   
-208   304    
384    -112   
-224   272    
144    -240   
-64    240    
208    -256   
16     256    
48     -176   
0      176    
64     -656   
-80    96     
160    -16    
-64    32     
80     80     
144    176    
64     96     
-48    -336   
0      96     
208    -256   
-64    224    
176    -160   
-96    80     
144    -208   
-16    48     
304    -160   
-176   160    
176    48     
48     240    
-128   -64    
160    -112   
32     -160   
32     -96    
160    176    
-16    -80    
112    64     
48     -32    
-32    176    
144    -112   
64     288    
-64    -224   
96     -656   
16     0      
80     -400   
-32    112    
-1328  -80    
160    -48    
-96    -32    
128    -816   
128    -80    
-160   -400   
208    -176   
-144   256    
32     96     
240    0      
80     -464   
-64    32     
-16    32     
224    32     
64     32     
-144   16     
-224   -288   
208    -160   
48     32     
176    336    
-96    -400   
32     -448   
-192   32     
160    96     
96     -256   
-128   80     
64     -480   
128    176    
176    48     
64     208    
-176   -96    
160    -32    
-304   16     
96     -32    
-48    32     
-112   -624   
-128   -208   
112    -1328  
16     -224   
64     -368   
-48    64     
112    0      
48     128    
32     48     
32     -176   
-176   -112   
80     -144   
-736   48     
-48    16     
96     -288   
32     -272   
160    -160   
-16    -496   
16     -64    
64     -144   
224    208    
-48    16     
112    112    
-176   -48    
32     32     
-112   -112   
80     48     
16     96     
-48    -16    
80     -48    
64     48     
80     112    
64     192    
32     16     
48     -640   
-80    96     
16     -160   
144    16     
-144   -96    
208    64     
-160   16     
256    16     
-192   -112   
112    -128   
-112   32     
80     -128   
-192   128    
112    -96    
-112   176    
64     -560   
32     160    
0      -224   
192    144    
-176   96     
80     -176   
-304   -176   
192    -208   
32     48     
32     64     
-272   -32    
-160   -32    
-272   -80    
-144   -192   
384    160    
-112   -592   
64     16     
96     -1440  
48     176    
-32    112    
-112   -176   
-112   16     
-160   48     
128    32     
-208   32     
160    16     
80     -80    
-240   16     
160    -192   
-64    32     
240    -128   
-16    288    
-32    16     
-160   -112   
128    112    
160    -16    
-160   64     
96     -112   
160    256    
-96    -160   
-48    128    
160    -208   
-32    192    
-480   1376   
-416   -352   
-544   -1328  
-208   464    
-496   -432   
416    480    
192    -608   
-32    1312   
-368   -592   
176    256    
-112   -432   
240    400    
-224   -336   
160    336    
96     -96    
-128   368    
-288   -144   
-464   -336   
-464   64     
224    48     
-256   240    
176    -16    
-768   112    
176    -144   
-576   -160   
-80    -384   
240    752    
64     112    
-448   -80    
96     -96    
-240   32     
48     -144   
16     176    
-192   -64    
48     544    
-240   -96    
-80    -352   
-544   -144   
160    -32    
-160   496    
-48    64     
0      48     
-96    368    
96     -16    
32     0      
-112   -400   
112    16     
96     -16    
-96    -80    
48     80     
-96    16     
16     48     
-16    176    
-96    80     
-240   -128   
80     0      
-224   0      
16     0      
-112   -96    
80     64     
-16    -112   
80     16     
-64    384    
96     -16    
80     128    
-48    48     
-96    -64    
16     -96    
-16    -144   
144    48     
-80    0      
-160   32     
128    208    
-256   80     
80     80     
16     16     
-32    0      
48     96     
-192   -80    
-64    32     
0      -16    
0      -288   
-80    -240   
64     0      
-144   160    
112    368    
-448   272    
16     112    
192    96     
0      80     
80     -16    
-96    -16    
-16    48     
16     -48    
224    224    
-112   112    
16     16     
-208   -80    
-64    -128   
-224   -112   
-32    144    
-256   -48    
32     48     
-496   -80    
0      80     
0      48     
48     416    
-112   32     
80     96     
-96    -80    
48     48     
-64    -32    
128    128    
64     176    
96     0      
-192   32     
32     -112   
16     16     
-624   -192   
160    96     
16     352    
-32    16     
192    256    
-144   96     
-112   16     
144    -48    
48     144    
-192   112    
112    112    
-64    -80    
112    256    
-240   48     
336    48     
-704   -224   
-160   128    
80     144    
288    16     
-176   -64    
16     64     
-208   64     
208    144    
160    224    
-176   176    
48     48     
-176   128    
144    128    
-256   16     
192    32     
32     112    
96     16     
-48    112    
112    112    
-176   -16    
320    128    
-112   64     
112    96     
-32    96     
144    -48    
128    64     
-128   16     
16     112    
-32    160    
32     -48    
48     192    
32     176    
-48    304    
160    0      
-16    64     
144    128    
-64    0      
-80    128    
128    0      
-160   16     
128    224    
-80    0      
128    240    
-128   96     
-80    -48    
48     64     
-16    0      
-16    144    
-64    64     
-16    64     
80     80     
-96    48     
16     -144   
80     144    
48     64     
-80    112    
-48    48     
144    272    
-112   -112   
-144   128    
176    -48    
0      112    
32     48     
-816   368    
864    -160   
1360   -544   
112    -64    
-1168  -96    
864    592    
-384   288    
400    -240   
208    64     
-464   -192   
272    224    
-128   48     
272    -224   
-304   384    
352    -144   
160    416    
-144   -128   
128    400    
-144   -208   
80     112    
-48    48     
176    240    
-64    -64    
-96    -144   
16     0      
176    224    
0      -192   
16     112    
-16    -80    
80     128    
-16    128    
192    96     
-240   80     
144    64     
-80    64     
192    -64    
-144   0      
80     192    
80     96     
-32    48     
-80    144    
160    -432   
16     112    
32     0      
-48    160    
80     48     
112    128    
-96    176    
176    48     
-64    -80    
64     80     
16     160    
144    144    
-144   112    
32     -80    
80     96     
-48    -160   
112    128    
-16    -240   
80     0      
16     320    
-64    128    
64     -32    
160    160    
-48    48     
-32    160    
32     96     
16     48     
128    240    
-128   -112   
240    48     
-32    -64    
48     32     
80     -144   
-112   48     
224    336    
80     -176   
144    -448   
-176   -96    
128    128    
192    288    
-64    0      
96     16     
0      208    
224    -80    
32     176    
-48    -160   
32     -16    
32     -816   
128    240    
-16    -1296  
96     -64    
80     0      
128    112    
128    352    
-32    288    
-64    48     
96     -192   
128    160    
48     112    
0      176    
-32    -144   
112    80     
16     -224   
-16    16     
160    -192   
-16    224    
48     -64    
64     80     
0      48     
144    96     
-64    144    
-80    -128   
208    160    
-32    16     
96     144    
-16    -272   
96     32     
48     -192   
-32    144    
32     -464   
-32    64     
144    144    
96     -32    
-32    96     
0      416    
160    -112   
96     32     
-64    128    
144    -496   
0      64     
80     -80    
16     144    
16     -240   
16     144    
-16    -384   
304    320    
-48    32     
160    96     
-224   32     
240    240    
48     64     
96     -128   
32     128    
16     -80    
256    -32    
32     160    
128    352    
-128   -160   
96     64     
112    0      
-64    -144   
-80    -32    
480    -352   
16     112    
176    -112   
-208   -624   
64     -160   
320    -1744  
-80    80     
112    256    
-224   -48    
96     -96    
80     -128   
-256   -32    
384    -160   
-160   96     
160    -16    
-144   -208   
-144   112    
-288   -176   
32     -32    
48     16     
240    -128   
-96    -64    
176    -624   
64     16     
80     48     
-16    -160   
192    48     
48     176    
64     -352   
-16    -128   
432    -208   
-80    128    
-192   -240   
16     32     
-192   48     
32     -224   
128    -192   
-32    -48    
80     -96    
-144   -512   
192    80     
272    -80    
96     32     
-1008  352    
128    -448   
-128   -592   
-128   688    
-848   -128   
480    144    
-1376  -352   
48     464    
-304   -656   
112    -96    
-16    -192   
208    -96    
208    288    
-176   -1632  
-80    -112   
208    192    
144    544    
-240   48     
0      48     
32     -176   
-96    16     
-112   0      
384    -80    
-1296  -160   
96     -240   
-32    -160   
96     112    
0      -48    
80     -256   
-48    32     
64     64     
48     128    
64     64     
-80    64     
112    96     
-48    -48    
0      48     
48     32     
0      16     
48     32     
-480   32     
96     -272   
-32    -32    
224    -400   
48     96     
48     -64    
-112   -416   
192    -112   
-96    16     
-32    0      
96     0      
-176   32     
128    -272   
-736   32     
96     32     
-208   32     
64     -304   
112    112    
-16    -464   
80     -16    
-32    -2224  
112    208    
0      96     
-32    0      
-64    -48    
48     16     
-304   -48    
32     -96    
0      112    
32     16     
48     -160   
160    -64    
-80    112    
112    -224   
-48    352    
-208   208    
160    80     
-32    -80    
160    -16    
-272   32     
80     32     
-48    96     
16     -192   
96     -176   
224    112    
-688   16     
208    -352   
32     32     
80     -224   
112    192    
-48    240    
-432   0      
48     -32    
-64    -48    
128    -16    
-176   16     
64     48     
-16    -32    
-128   -96    
144    -48    
-256   80     
-672   -80    
-80    80     
-224   -288   
-80    -32    
-48    -48    
32     288    
-256   64     
-192   0      
-128   80     
96     80     
64     -16    
16     -64    
-240   0      
-224   -144   
-64    32     
-112   -80    
144    112    
-192   32     
240    0      
-160   80     
-256   64     
112    64     
-48    128    
112    -48    
-544   -96    
-128   -112   
0      -192   
-64    48     
128    -208   
48     288    
-240   -32    
352    112    
-112   144    
-336   -192   
32     -192   
-112   48     
16     80     
80     -112   
-64    64     
-688   -112   
0      144    
192    0      
-128   48     
-176   32     
144    32     
-176   -240   
64     48     
48     16     
0      128    
32     112    
32     208    
-64    -16    
-192   -16    
16     32     
-64    -464   
-16    64     
-240   288    
48     64     
-96    -96    
32     -112   
48     80     
-48    -144   
-96    112    
-16    -32    
-160   -112   
-256   -320   
0      192    
-192   176    
16     64     
-224   128    
176    -80    
-560   -64    
-32    32     
128    16     
96     240    
-32    -80    
-64    -96    
80     48     
-96    -32    
64     -16    
-80    112    
-144   112    
112    192    
16     96     
-112   -96    
0      -80    
-240   -128   
96     160    
-544   -16    
96     224    
-64    0      
0      -48    
32     112    
96     192    
-432   -2720  
560    -288   
-864   240    
592    -96    
96     320    
64     -288   
224    896    
272    -880   
208    400    
-48    -80    
272    656    
-240   -32    
208    176    
-112   112    
192    48     
-272   -128   
288    96     
-160   32     
48     -112   
-32    128    
64     -48    
-32    208    
-64    128    
64     176    
-352   -208   
-32    -32    
48     112    
192    160    
-96    144    
-48    -96    
-16    -48    
-112   -32    
-16    -144   
-32    192    
80     -16    
48     80     
-160   224    
-96    -32    
-64    64     
-416   -192   
-16    64     
64     64     
48     80     
48     96     
0      128    
16     176    
-176   32     
48     0      
80     16     
-64    144    
-96    -96    
16     144    
-160   -16    
160    16     
-80    64     
48     48     
80     32     
-128   -64    
32     80     
-208   -656   
208    192    
32     128    
112    224    
0      192    
32     64     
-48    96     
96     416    
-224   48     
128    -32    
80     16     
-16    0      
-32    80     
0      96     
64     96     
-16    -32    
-80    -96    
96     -64    
-208   96     
-384   -208   
208    112    
-192   96     
48     112    
112    128    
16     304    
-64    128    
16     32     
-16    16     
64     64     
128    64     
96     96     
-96    -64    
-16    48     
64     128    
-96    0      
32     112    
-96    16     
272    208    
-128   -160   
32     32     
64     80     
80     160    
64     176    
-16    128    
-48    16     
96     112    
0      -80    
128    160    
0      256    
48     -48    
48     128    
-112   -32    
96     80     
-96    48     
80     -304   
48     64     
-32    -64    
176    208    
-64    48     
112    32     
-176   0      
160    128    
48     64     
-16    -16    
48     112    
-112   -32    
-96    -544   
96     -32    
64     240    
160    -720   
0      240    
0      224    
48     -32    
0      176    
-16    32     
160    96     
-128   -384   
208    288    
-224   224    
160    -112   
-96    240    
192    32     
-16    -32    
48     192    
32     -272   
16     -64    
16     304    
32     96     
80     160    
0      32     
96     64     
48     208    
-144   32     
80     -64    
368    -96    
-160   208    
176    32     
-208   256    
112    -48    
176    -592   
16     176    
128    -752   
-208   160    
112    -32    
96     224    
80     304    
-336   -288   
432    -96    
32     224    
160    96     
-240   32     
80     144    
16     -432   
240    16     
-32    96     
-32    -16    
48     -208   
352    224    
-16    128    
-336   96     
-48    32     
16     -64    
192    48     
128    -336   
192    272    
112    -80    
208    160    
16     80     
96     32     
48     96     
96     16     
0      -400   
48     112    
-64    112    
-32    0      
-32    -48    
112    48     
-384   -2288  
528    16     
-160   -320   
240    -384   
80     32     
80     0      
176    560    
144    -224   
-464   -176   
80     -352   
-64    -96    
-48    -416   
176    128    
-80    -64    
160    64     
-144   96     
48     80     
-112   80     
16     -16    
176    32     
-176   -288   
144    176    
96     -80    
256    80     
-224   -144   
128    64     
-96    -16    
208    272    
-32    32     
0      -32    
-32    64     
208    112    
80     128    
-16    32     
64     48     
16     -16    
-16    64     
64     -128   
-16    80     
144    128    
176    96     
-160   -448   
128    -208   
16     144    
80     -384   
64     128    
-240   -48    
176    -1248  
0      -464   
128    -144   
-112   -96    
128    32     
-48    -160   
240    128    
-144   -256   
96     112    
288    -816   
16     80     
-96    -128   
240    -96    
16     256    
-144   -112   
48     -128   
0      80     
160    -160   
96     -16    
-48    48     
-112   -128   
64     -416   
144    -112   
16     -16    
64     224    
-96    -96    
336    -64    
128    -400   
-32    -288   
-400   96     
16     -144   
-32    64     
80     96     
-48    -112   
224    -112   
0      -32    
-144   -512   
48     160    
-16    -80    
64     -64    
208    160    
-304   80     
208    0      
0      -192   
-32    16     
96     -48    
-512   -240   
192    -144   
-192   16     
-16    -448   
128    -16    
-16    -288   
224    144    
-208   -464   
32     128    
-64    -336   
112    176    
-304   -336   
224    96     
-144   80     
64     16     
-32    -48    
-64    -272   
288    144    
32     -64    
112    32     
-64    -112   
240    -80    
112    -1776  
16     0      
96     -64    
112    -64    
-160   48     
-128   -96    
128    -48    
32     -224   
-288   48     
240    208    
160    160    
-16    112    
-32    128    
0      -192   
-64    -80    
160    -560   
-16    32     
-128   -48    
80     0      
-80    -112   
64     -272   
-64    -80    
-16    -96    
-64    -64    
144    0      
-432   -128   
32     -192   
-2048  -176   
48     -144   
64     96     
192    -32    
-48    -144   
-32    -1504  
16     -32    
48     -48    
64     0      
-80    64     
144    272    
-160   -144   
176    64     
-144   -192   
240    -144   
-128   32     
96     -16    
0      160    
112    -240   
16     160    
-128   16     
160    -80    
-176   32     
-96    -160   
-64    -160   
224    336    
-64    32     
48     0      
-112   -192   
32     -80    
-16    144    
240    48     
-16    288    
-16    -368   
-144   32     
-96    160    
128    -96    
-32    112    
-16    -48    
-80    112    
-96    -112   
-16    96     
32     -128   
176    192    
-64    16     
-256   16     
-1392  -208   
32     64     
-592   -112   
-288   48     
-64    -240   
-48    112    
64     48     
-656   80     
-800   -2192  
896    800    
-1040  -256   
352    -368   
112    -816   
-144   -688   
48     480    
-80    304    
-32    208    
80     -352   
-80    304    
-128   64     
-272   0      
112    96     
-160   -112   
64     80     
-848   160    
224    736    
-160   -304   
-224   -464   
-256   -288   
160    144    
-16    16     
-112   96     
-32    16     
-16    0      
0      48     
-304   -80    
-16    32     
-176   48     
-16    112    
-192   176    
64     192    
-1984  -240   
-64    -96    
-176   -96    
256    304    
-96    -144   
-32    112    
16     32     
0      16     
-32    128    
-32    16     
128    16     
-48    0      
-16    192    
-272   112    
48     304    
-384   176    
144    80     
-80    -240   
48     32     
-16    -96    
48     160    
-80    0      
80     32     
-64    -32    
96     240    
96     368    
-80    -32    
-112   -32    
32     96     
-48    0      
-96    -240   
80     64     
-1216  -32    
-48    176    
-112   -96    
80     0      
-96    80     
-16    96     
0      48     
-144   -16    
-96    -80    
-16    64     
0      240    
-144   -32    
-368   -80    
-464   -272   
16     -176   
-864   -352   
144    272    
80     32     
0      192    
0      176    
-48    -48    
32     -160   
96     192    
-64    80     
96     80     
-64    176    
112    32     
-48    -16    
-112   -32    
64     96     
-112   96     
-64    16     
0      -80    
-16    -16    
32     48     
0      80     
-48    80     
-32    80     
80     32     
0      96     
-32    32     
32     192    
0      0      
-64    64     
0      64     
-96    -48    
-192   0      
96     112    
16     32     
-64    80     
48     112    
-48    16     
80     48     
-16    160    
-32    -32    
-80    -96    
-176   -112   
176    192    
-48    64     
64     224    
-304   -32    
32     -96    
112    -112   
-32    240    
64     144    
32     48     
-64    112    
80     -96    
144    176    
-176   48     
32     -720   
128    -64    
96     512    
-112   48     
-160   128    
96     32     
80     32     
96     32     
16     240    
16     96     
80     640    
-32    128    
-48    176    
80     32     
112    0      
64     144    
-96    -16    
112    208    
96     464    
-272   368    
-16    0      
160    208    
16     -160   
-32    16     
-32    0      
48     -128   
0      80     
64     -32    
32     144    
-32    -64    
-80    64     
64     176    
-128   80     
-64    96     
32     48     
112    160    
-48    160    
-64    -32    
-16    32     
96     160    
-16    32     
32     32     
-16    208    
128    32     
-160   64     
96     176    
-64    80     
96     64     
16     0      
80     -32    
32     96     
128    0      
96     160    
32     176    
0      80     
0      160    
16     0      
96     192    
-32    32     
-32    160    
16     48     
-704   -2560  
832    -96    
-224   240    
352    112    
32     -160   
-80    -544   
496    816    
-128   -16    
-32    48     
-96    0      
208    128    
-128   144    
32     -16    
-128   144    
192    -16    
-272   16     
256    144    
-32    160    
80     -1168  
32     240    
32     80     
16     64     
112    160    
-16    112    
80     48     
48     32     
48     112    
128    64     
-80    -16    
0      64     
96     0      
-16    16     
48     128    
-16    0      
64     64     
32     -112   
368    432    
-352   80     
384    96     
-240   32     
256    112    
32     -272   
16     48     
112    144    
-144   64     
160    48     
-240   -96    
224    0      
32     -128   
-16    112    
128    -176   
-208   128    
192    -64    
0      32     
16     112    
64     16     
112    80     
-48    128    
112    80     
-32    48     
96     144    
16     -160   
80     128    
-16    -384   
-112   48     
160    -544   
160    112    
32     544    
-144   -96    
160    32     
48     304    
-128   0      
80     144    
32     96     
48     128    
64     64     
352    208    
-208   176    
80     -80    
64     -64    
128    16     
-64    144    
-64    -1264  
208    256    
-144   160    
-96    32     
240    368    
-288   -144   
304    48     
-224   -128   
160    256    
32     -240   
80     48     
96     -528   
160    160    
-128   -336   
240    240    
-144   -704   
80     96     
64     64     
-16    80     
48     32     
16     -16    
16     32     
-16    32     
160    112    
-176   -192   
320    240    
-16    96     
144    96     
-48    -304   
-32    32     
144    -128   
16     176    
32     176    
112    128    
64     160    
80     304    
144    64     
80     0      
-192   176    
352    -32    
-144   144    
64     -192   
48     192    
32     -144   
-16    -16    
176    16     
128    112    
16     -112   
-32    192    
32     48     
64     -656   
64     -448   
-32    -192   
112    -2096  
-16    48     
128    -240   
48     -272   
-16    32     
32     -144   
144    240    
-80    -160   
160    -1456  
-48    0      
128    -128   
-128   64     
-16    0      
64     -64    
80     -128   
-80    -208   
112    -112   
16     -160   
144    -112   
32     192    
16     48     
-16    -672   
0      96     
144    -272   
-96    64     
64     224    
48     80     
-256   -176   
64     -256   
64     80     
0      48     
0      -80    
64     -32    
-32    -304   
48     -1024  
176    144    
64     -1024  
112    400    
-208   -32    
-32    -48    
208    320    
128    -256   
-208   -160   
0      -64    
-432   -32    
0      16     
112    -32    
144    -272   
-32    -288   
-32    -1488  
-16    16     
64     48     
-16    96     
80     -144   
64     16     
128    -64    
64     48     
-272   144    
32     -144   
-96    96     
128    -16    
-272   1664   
-368   -880   
-352   -384   
816    -272   
480    1568   
-640   -1104  
-240   432    
128    -448   
272    560    
-112   48     
-96    -112   
-96    64     
80     0      
-240   80     
32     -288   
-176   80     
-48    -112   
272    448    
-288   -704   
16     -240   
208    -224   
64     48     
16     48     
-96    192    
128    -32    
-64    -112   
-64    112    
32     -256   
-128   -96    
0      -160   
-272   -48    
96     -16    
-288   96     
16     -320   
-16    -128   
304    -16    
-16    320    
208    496    
-336   -112   
112    -160   
112    -16    
-112   -16    
16     0      
0      48     
144    128    
-192   64     
-32    -192   
-304   16     
96     96     
-32    64     
-32    208    
80     0      
16     -816   
-48    -80    
16     -80    
112    -208   
-160   -496   
48     -160   
272    544    
-160   -48    
96     80     
-16    -16    
0      -176   
-80    -112   
368    144    
-48    -144   
-80    0      
-48    0      
160    -160   
-208   -48    
64     16     
-16    0      
64     16     
-128   16     
48     16     
-112   -32    
32     -80    
288    32     
-16    160    
224    144    
-912   -80    
-160   -160   
16     320    
-208   -32    
32     160    
-384   -144   
-16    176    
-320   -128   
32     -112   
-48    96     
0      112    
-128   -128   
80     112    
96     16     
32     256    
-624   -176   
-160   160    
64     304    
64     128    
-96    -64    
-64    -80    
64     128    
-192   -112   
-112   112    
-48    -32    
208    416    
-160   -112   
208    144    
-256   -112   
112    -16    
-128   -144   
16     32     
96     64     
-192   0      
-192   0      
-320   -304   
0      -128   
-400   -160   
64     32     
-816   -96    
-32    16     
112    -16    
0      176    
-176   -32    
112    512    
0      -208   
48     -96    
-400   -576   
240    32     
-64    272    
-80    32     
-48    112    
64     0      
-128   -128   
-224   112    
-256   -336   
64     -112   
160    80     
-96    16     
80     112    
-64    -64    
96     -112   
-272   144    
128    128    
-32    128    
-64    -32    
0      80     
-128   64     
-160   32     
-176   -160   
96     128    
-144   -176   
160    176    
16     -16    
-240   80     
-48    -32    
-32    -48    
-144   -64    
80     16     
-96    176    
16     -64    
-176   32     
-96    64     
112    64     
-528   224    
128    592    
-1488  -256   
16     -240   
80     -160   
48     -32    
-80    128    
272    -64    
48     128    
80     -16    
16     96     
-80    0      
80     176    
-32    16     
64     48     
-64    -16    
144    16     
-176   64     
32     192    
-112   96     
-96    64     
128    240    
80     -256   
80     144    
16     -16    
-16    80     
80     112    
-96    144    
32     272    
-32    16     
-224   -144   
32     192    
1520   -768   
-800   -976   
928    256    
-304   448    
320    -400   
-320   0      
-144   -16    
128    256    
-16    -96    
-80    -48    
-48    112    
-96    -48    
0      288    
-192   -144   
128    176    
-256   -128   
80     144    
16     64     
0      64     
32     -16    
-32    32     
192    192    
-80    224    
160    80     
-208   -128   
32     96     
-80    -16    
96     240    
48     48     
-80    -160   
-32    -64    
-48    112    
256    160    
-176   -16    
32     -16    
-32    176    
336    144    
-240   16     
16     64     
32     -80    
32     48     
-128   112    
144    96     
112    64     
-208   64     
128    16     
16     80     
-80    -32    
192    144    
-192   -32    
176    16     
-176   144    
144    128    
-192   32     
80     -48    
64     208    
-112   -160   
352    176    
-240   224    
16     -80    
160    176    
32     256    
-96    128    
48     -48    
160    176    
-96    192    
96     32     
80     16     
208    80     
-80    128    
48     160    
-192   -48    
160    96     
-64    16     
-48    144    
-32    -16    
240    256    
-48    96     
48     -16    
48     48     
-16    144    
64     96     
144    320    
80     -64    
112    128    
-96    -48    
16     -208   
160    448    
-160   -16    
208    -1024  
-48    -16    
96     144    
0      32     
48     0      
64     96     
16     128    
-80    16     
144    96     
16     96     
-144   -64    
80     128    
-80    -64    
240    272    
-144   192    
48     -960   
-32    48     
64     176    
192    176    
-96    48     
0      -48    
-64    -16    
80     64     
-32    80     
80     0      
-80    -32    
64     -48    
96     64     
64     -32    
-96    -160   
-48    -240   
16     208    
144    -240   
80     64     
-128   16     
144    160    
-128   80     
128    160    
48     256    
-64    -80    
32     -32    
64     128    
-48    0      
-80    -320   
192    16     
32     -608   
-48    64     
0      -1424  
96     -288   
0      112    
-16    -80    
-48    -128   
0      48     
32     -128   
-32    -144   
48     0      
80     -352   
16     144    
80     224    
16     16     
48     -112   
48     32     
32     -288   
64     112    
64     272    
-16    448    
16     128    
96     368    
240    144    
-128   32     
16     -48    
16     112    
112    16     
64     0      
48     64     
48     0      
64     272    
-80    -64    
-16    -80    
144    80     
64     96     
160    -256   
32     80     
-48    96     
0      64     
32     48     
208    96     
16     80     
48     -96    
32     112    
80     -512   
0      48     
64     -208   
-16    0      
160    16     
96     304    
-128   32     
-64    80     
80     16     
128    96     
0      -32    
48     -304   
-16    112    
240    -368   
64     240    
0      -32    
112    80     
-448   1584   
32     -848   
-288   -1232  
880    64     
-432   -512   
-368   -432   
512    -528   
-112   112    
640    752    
-736   -496   
416    16     
-288   144    
528    160    
-64    -128   
-80    112    
-32    48     
336    224    
64     192    
-48    224    
0      112    
-32    -32    
48     96     
96     -912   
96     -16    
-48    -336   
208    -768   
-16    112    
160    288    
32     -128   
128    80     
160    -32    
-80    16     
0      -112   
16     -480   
224    96     
-80    -1136  
-272   -352   
-144   32     
0      -224   
80     16     
96     -144   
112    -128   
48     -304   
-16    -16    
96     272    
-32    32     
32     32     
-64    -32    
160    -64    
32     0      
16     -544   
96     240    
32     96     
0      -112   
144    -64    
96     -368   
160    16     
-176   -736   
80     -32    
64     -368   
-16    112    
112    -64    
32     -96    
-16    -304   
-32    96     
336    0      
-32    -16    
-128   16     
32     -96    
64     -128   
32     -240   
64     -48    
96     -112   
-64    32     
0      -464   
128    -240   
304    -144   
-192   320    
-16    -16    
-96    -64    
368    32     
-32    16     
-176   112    
-128   -240   
-160   -128   
208    656    
-16    224    
-320   -368   
0      -368   
336    160    
96     272    
-160   -720   
48     32     
176    48     
112    400    
-80    496    
-80    -128   
-16    0      
0      -64    
112    128    
32     48     
144    -16    
-48    -224   
256    0      
112    -16    
32     192    
112    256    
192    640    
48     288    
-112   128    
-32    -32    
96     -128   
-16    -48    
-16    -48    
-144   -48    
80     64     
-592   -48    
-32    -160   
-1040  -64    
224    -64    
-112   64     
96     -464   
112    176    
64     -288   
128    -176   
-80    160    
16     160    
-64    -80    
-48    32     
-272   -80    
0      80     
112    -96    
-32    0      
176    -192   
-304   -16    
192    480    
544    -112   
-288   400    
96     16     
0      -16    
-272   -96    
64     -112   
-208   176    
16     -80    
-128   64     
256    160    
80     304    
0      32     
-208   64     
80     -144   
-16    112    
144    -48    
-80    144    
32     64     
64     -80    
-128   -32    
16     -224   
160    -224   
0      176    
-32    16     
48     80     
-160   0      
272    240    
-416   -176   
432    -208   
-96    -128   
-544   -176   
-240   128    
16     48     
-368   64     
16     176    
-32    112    
-112   48     
80     336    
-112   -320   
160    176    
-352   -288   
192    80     
-16    16     
-64    -32    
64     128    
-64    32     
-480   -416   
80     192    
-144   112    
0      -16    
-112   96     
128    80     
-1552  -32    
0      0      
192    -112   
-64    48     
-16    64     
48     144    
-64    -128   
32     32     
1904   -784   
-752   -96    
688    144    
-112   -144   
32     -544   
208    128    
-752   -320   
1088   480    
-560   208    
256    304    
-480   176    
112    -352   
0      416    
112    -352   
-176   368    
-48    -240   
32     192    
80     -16    
-64    256    
-80    -144   
64     80     
16     -64    
16     176    
64     -32    
-192   64     
224    32     
-272   -48    
96     48     
-192   -32    
288    176    
-48    96     
16     -64    
-48    80     
-64    48     
32     16     
-272   -240   
192    -32    
-64    192    
208    -64    
-288   48     
16     64     
-32    48     
64     16     
0      -80    
0      0      
32     144    
-96    -32    
-64    64     
-256   -16    
192    16     
0      16     
-64    160    
-16    16     
-192   64     
-320   -224   
48     112    
-896   96     
144    16     
0      64     
-256   -32    
144    64     
-48    16     
16     128    
32     64     
32     64     
-16    -48    
-32    128    
-48    -48    
96     112    
-144   -32    
32     96     
-144   -32    
64     176    
16     64     
-64    48     
80     80     
16     48     
160    336    
-192   16     
128    80     
-160   -64    
64     -224   
-16    -112   
-112   96     
-160   0      
112    368    
-656   -80    
192    -32    
144    16     
-80    80     
96     64     
-128   32     
0      80     
80     -128   
-336   -96    
112    160    
32     112    
0      0      
-48    208    
-112   -64    
96     192    
-352   -288   
128    176    
-16    240    
80     128    
-32    48     
112    192    
16     304    
-112   16     
208    320    
-96    -96    
128    176    
-96    80     
304    224    
-256   -64    
192    192    
-352   -144   
256    208    
48     -304   
-128   -32    
144    128    
-64    -128   
32     64     
160    96     
-96    -160   
176    144    
-320   48     
-48    -48    
224    288    
-112   0      
160    -96    
-112   128    
112    32     
96     208    
48     -80    
32     128    
0      176    
144    160    
-256   -208   
80     -160   
-16    208    
112    288    
-272   -144   
224    64     
-48    272    
304    192    
-112   112    
48     80     
-32    0      
96     144    
48     32     
96     96     
48     128    
-304   -32    
256    -128   
-304   96     
48     176    
-16    64     
240    176    
64     64     
-256   -16    
0      96     
16     128    
112    64     
-80    160    
0      -64    
368    144    
-96    128    
-112   -128   
32     160    
-80    160    
240    -240   
-48    192    
-32    -48    
160    -96    
-320   -384   
224    -48    
64     112    
-16    48     
16     96     
-32    48     
16     144    
16     64     
-80    64     
144    176    
32     64     
16     96     
-128   -112   
96     16     
-32    112    
96     -80    
32     80     
-96    16     
160    112    
160    48     
48     128    
1952   -1632  
-432   -704   
624    1360   
-224   432    
128    -32    
112    528    
-624   112    
928    -272   
-496   992    
288    -512   
-544   320    
384    -336   
-48    512    
128    -320   
-272   528    
160    -464   
48     624    
32     -1200  
160    448    
-240   -304   
208    592    
-144   -160   
-16    272    
176    -400   
-32    -368   
-112   -208   
224    -320   
-272   -144   
128    -96    
-176   -144   
208    -80    
160    384    
-64    -224   
128    336    
112    -16    
-16    48     
32     96     
64     80     
-160   -96    
96     -128   
112    96     
-32    -16    
48     48     
160    320    
-176   64     
128    -16    
224    656    
-48    96     
-224   -256   
-16    -192   
160    16     
-16    112    
176    -80    
-128   16     
128    -48    
160    -96    
64     -352   
96     32     
96     -1472  
240    352    
144    144    
176    144    
-96    32     
208    64     
-16    192    
160    368    
-48    176    
-16    -144   
208    176    
-16    -112   
96     -112   
112    -496   
64     144    
-80    0      
-48    0      
224    -864   
0      -272   
-80    -176   
32     -144   
0      64     
208    -16    
80     -80    
16     -48    
240    64     
160    -32    
48     320    
0      144    
64     -192   
304    320    
32     96     
-16    192    
-16    -96    
64     -16    
48     64     
0      -80    
80     0      
160    240    
-80    -176   
0      112    
-64    -16    
112    32     
48     96     
64     48     
96     -112   
64     48     
-272   -336   
240    112    
192    96     
208    -688   
-32    -2464  
-96    -208   
208    -64    
112    0      
-128   -112   
96     -240   
-16    64     
112    -240   
160    64     
32     48     
-128   128    
96     -176   
-48    -448   
-32    96     
-1216  -160   
128    -848   
-32    -304   
96     -432   
-48    -112   
48     -336   
96     -96    
-32    -16    
-16    -368   
-96    -64    
240    112    
64     -176   
208    64     
-176   -64    
192    160    
-240   -32    
48     -240   
-576   0      
144    -96    
80     -16    
96     -672   
-32    -112   
96     -1664  
48     16     
80     16     
64     32     
-16    -112   
-160   160    
128    -32    
-112   48     
48     -16    
16     -80    
-1104  16     
176    160    
-192   -96    
128    -64    
-16    -160   
144    -320   
48     16     
32     96     
272    48     
-80    -128   
112    112    
32     64     
32     -112   
-80    96     
48     -64    
-192   64     
32     96     
-96    80     
48     -256   
144    128    
144    16     
-48    -208   
0      -256   
176    112    
32     32     
0      0      
96     192    
32     -80    
-160   -240   
208    -144   
-128   -144   
96     -16    
-112   160    
80     -48    
32     96     
0      -288   
224    -16    
-80    -160   
144    16     
-48    -16    
32     80     
-1200  448    
816    -704   
1120   784    
464    0      
288    384    
-512   -976   
-272   64     
1120   -496   
-1360  0      
128    -592   
-192   176    
240    -576   
-144   224    
48     -3376  
48     208    
-48    -208   
-32    -48    
160    64     
-32    48     
-368   -160   
192    -16    
-336   112    
224    -32    
-448   -16    
336    -208   
-176   144    
352    -80    
-48    272    
320    -848   
-144   32     
-32    16     
128    144    
-192   48     
-16    -80    
-208   -80    
32     -224   
0      -80    
192    80     
64     0      
-16    -80    
32     80     
48     -112   
64     48     
-96    112    
-16    0      
32     -16    
-64    32     
-32    64     
-48    -112   
-144   -48    
64     32     
-48    64     
80     32     
-160   -80    
16     -176   
16     -16    
224    -80    
-80    192    
112    80     
-496   0      
0      32     
-304   48     
-80    48     
96     0      
-32    -64    
96     112    
-80    112    
64     48     
0      80     
-544   -144   
96     128    
48     -96    
0      64     
-16    80     
-384   -96    
256    208    
-528   160    
64     96     
-624   224    
-256   -80    
128    -384   
-160   -128   
-176   -144   
-144   48     
32     16     
112    -48    
48     -304   
-288   -144   
-32    96     
-208   -32    
-32    80     
-80    112    
16     80     
-112   -48    
336    816    
-256   128    
-80    -64    
0      -240   
112    112    
32     -80    
16     288    
-64    32     
-112   -80    
48     -16    
0      80     
0      128    
16     112    
0      320    
0      304    
32     208    
-1152  32     
-16    128    
-80    -64    
160    96     
-80    128    
32     272    
-48    80     
-96    -80    
128    224    
-16    96     
-64    0      
-32    128    
32     -48    
-48    -64    
-48    336    
-240   304    
80     112    
-240   -192   
80     -16    
80     -80    
-64    -32    
48     224    
-160   0      
64     48     
-208   16     
32     0      
-128   -112   
32     16     
-48    64     
-16    176    
-192   -112   
160    -48    
-16    -16    
16     96     
-208   -48    
80     144    
112    -16    
0      80     
-48    96     
-112   16     
0      16     
112    112    
-32    16     
32     128    
128    32     
-352   0      
-96    64     
-16    64     
32     208    
-16    80     
-144   0      
0      144    
80     -16    
-128   48     
64     336    
-224   0      
-48    -160   
224    80     
16     144    
-112   -64    
-144   112    
176    0      
-32    -16    
64     112    
16     0      
16     -48    
-32    240    
128    -80    
32     176    
-112   96     
-48    16     
-80    48     
0      144    
-160   -96    
16     272    
-112   64     
32     64     
-464   -112   
128    -48    
208    0      
-192   32     
-64    48     
-32    80     
288    144    
64     32     
-16    96     
1744   -1280  
-592   -688   
848    1008   
-368   528    
560    -112   
-640   -16    
-208   -240   
224    448    
-208   -48    
144    -128   
0      80     
112    144    
-112   272    
-96    -560   
-64    224    
48     -208   
240    528    
-400   -784   
528    208    
-16    -64    
352    272    
-176   208    
64     -432   
64     112    
208    576    
-16    176    
144    288    
-32    480    
176    32     
-320   -384   
96     80     
16     64     
-64    -16    
64     256    
-112   48     
304    288    
-160   384    
96     64     
-48    -16    
0      176    
160    96     
16     48     
144    96     
-16    240    
16     80     
-48    176    
-48    48     
144    240    
-144   144    
176    -48    
-128   112    
-16    64     
64     192    
-48    -96    
144    176    
64     176    
16     96     
80     80     
-64    -256   
112    -112   
-64    288    
0      368    
-128   -144   
240    176    
-160   16     
0      -1568  
-96    -48    
176    128    
-64    64     
64     80     
48     80     
32     80     
16     224    
-144   64     
96     -112   
128    128    
-32    288    
-288   128    
112    0      
96     240    
-64    -672   
192    -64    
192    128    
-192   224    
192    208    
-160   64     
112    144    
64     128    
0      16     
96     80     
-64    -32    
80     16     
96     160    
-48    160    
80     240    
32     -192   
96     112    
32     -32    
80     0      
32     240    
-48    144    
80     160    
96     240    
-112   -256   
160    32     
-32    -128   
240    224    
-176   48     
64     64     
0      128    
-32    -336   
-16    -112   
32     -2080  
32     -32    
80     64     
-144   64     
176    -16    
48     48     
-80    -576   
32     -16    
-80    -80    
320    320    
-112   -16    
32     -80    
-80    32     
240    -80    
160    448    
80     -288   
64     208    
16     96     
224    32     
-48    352    
48     -16    
208    -64    
-160   240    
64     64     
176    0      
-80    16     
-112   16     
176    -32    
80     -16    
-80    272    
112    -48    
0      112    
16     -3024  
-32    96     
256    112    
-176   96     
144    112    
-32    112    
80     48     
-48    32     
16     64     
16     -112   
176    96     
144    176    
-224   -48    
272    256    
-64    128    
112    -368   
0      80     
-48    -752   
16     112    
32     -16    
-64    112    
176    -80    
96     32     
336    0      
48     -160   
0      144    
-16    -160   
-64    -16    
0      -512   
240    208    
16     -272   
-112   -80    
144    -48    
128    304    
48     80     
-64    128    
128    0      
64     -112   
192    208    
-192   -32    
96     160    
32     -160   
32     -16    
48     32     
32     144    
48     0      
48     128    
128    -368   
-64    176    
80     -16    
-16    -80    
160    176    
-336   -688   
352    -1312  
1152   -32    
352    -400   
272    -112   
-320   -240   
304    304    
112    -208   
160    432    
-400   -1632  
0      192    
48     -736   
0      480    
-16    -752   
224    352    
48     -352   
80     -256   
-64    -336   
160    -1056  
-32    -128   
128    96     
16     64     
-16    32     
192    -160   
-32    -416   
96     208    
-112   -112   
128    112    
-32    -80    
64     -160   
32     -128   
-64    -192   
176    64     
64     -112   
80     -144   
0      -432   
48     -160   
64     144    
-96    -32    
176    16     
-80    128    
80     48     
16     32     
-112   -64    
32     -112   
-224   -64    
32     48     
16     64     
80     -512   
-64    -160   
80     -384   
128    -48    
80     -304   
96     -80    
80     48     
-208   80     
128    -240   
64     -256   
-128   -80    
-48    48     
-336   16     
80     -16    
16     -144   
80     224    
16     -16    
128    80     
96     -16    
208    -96    
-128   160    
32     -240   
224    48     
0      -128   
96     32     
-80    -16    
96     -48    
-160   -176   
64     -240   
-656   -16    
112    144    
-128   0      
176    -16    
-112   128    
48     -672   
-32    -16    
80     -32    
240    608    
-112   64     
32     16     
-144   -192   
96     -192   
-160   -32    
128    48     
-240   48     
0      16     
-672   32     
336    128    
48     -16    
16     -1008  
-96    -112   
224    -1264  
128    176    
-112   48     
48     -32    
-112   0      
192    16     
-64    32     
48     16     
-96    48     
112    -96    
-720   0      
16     -144   
48     80     
80     -48    
48     80     
176    -320   
-112   -160   
-48    64     
0      16     
0      96     
-144   16     
80     32     
80     80     
48     48     
-64    -96    
-96    16     
208    400    
-80    176    
48     -160   
16     144    
64     -272   
144    -128   
-96    176    
80     -48    
-112   96     
0      -416   
48     128    
-112   -240   
0      144    
-208   0      
32     -80    
48     -96    
-16    208    
-1600  -304   
-80    16     
-48    48     
-432   224    
-304   -176   
64     0      
-16    48     
96     16     
-176   -32    
192    48     
-128   144    
48     -64    
128    384    
-1536  -224   
144    -16    
-208   -112   
112    0      
-80    96     
0      -96    
128    256    
-416   -160   
-64    96     
-240   64     
-16    32     
32     -80    
112    128    
-256   -176   
32     192    
-112   -112   
144    160    
144    -128   
-80    64     
-32    -80    
-48    -16    
-64    96     
-480   -32    
-96    -48    
-48    112    
16     112    
-1200  -64    
-112   96     
96     -144   
0      32     
0      0      
-16    128    
-48    -16    
-16    0      
256    -160   
64     192    
80     -144   
-256   272    
32     0      
-64    -32    
-48    80     
-16    1520   
-528   -320   
-160   -608   
-528   160    
-320   -592   
176    -240   
512    560    
-528   96     
-192   -128   
176    288    
224    -256   
-64    176    
-32    352    
-64    16     
144    160    
-384   272    
-80    32     
112    -720   
-176   -112   
336    -432   
-16    384    
0      192    
-128   208    
0      -224   
32     224    
-48    16     
160    128    
-272   0      
32     0      
48     288    
-256   32     
32     -32    
-672   -80    
48     144    
48     -176   
-32    176    
0      0      
80     80     
16     64     
32     80     
-32    32     
-80    64     
0      -144   
160    64     
-144   144    
32     112    
-80    -192   
-128   -160   
-16    208    
64     -112   
160    96     
-64    208    
-64    16     
112    48     
-96    144    
96     112    
-224   16     
176    112    
-16    192    
-192   48     
-16    -144   
128    128    
-224   64     
-16    -16    
80     -16    
32     64     
-48    -112   
0      32     
-96    160    
-48    16     
112    160    
-208   -32    
112    32     
-64    128    
48     320    
-208   -48    
304    336    
-224   -32    
128    -32    
32     32     
-80    112    
16     112    
-96    -112   
240    144    
-32    -32    
128    -144   
-16    112    
-64    208    
0      64     
32     16     
80     208    
-80    80     
-48    -96    
64     112    
-80    128    
144    16     
-64    0      
192    160    
-32    96     
112    272    
-128   208    
-80    -144   
32     32     
0      -32    
128    64     
-64    -96    
-32    144    
16     -64    
-112   96     
112    96     
48     80     
-80    0      
96     96     
-64    32     
32     -16    
64     96     
-112   64     
80     64     
-272   -80    
224    -96    
-368   -160   
208    112    
128    192    
352    256    
-400   224    
128    0      
-112   -64    
16     0      
0      16     
112    112    
-32    -16    
-80    0      
-176   0      
176    -48    
-304   -320   
240    -160   
-112   272    
-64    16     
224    80     
-80    48     
-48    -16    
16     304    
0      0      
144    208    
-16    80     
96     288    
-224   -48    
176    0      
-16    64     
-16    176    
32     32     
-80    -192   
80     -240   
32     192    
-48    304    
304    48     
0      48     
64     64     
-48    80     
-48    16     
32     224    
-96    48     
-80    16     
160    -80    
-128   48     
-128   80     
-112   -1136  
-272   -48    
176    96     
-80    16     
144    192    
-96    32     
128    32     
224    176    
192    -288   
-224   16     
-128   96     
-64    240    
64     0      
112    160    
96     -80    
0      48     
176    208    
64     80     
80     176    
16     96     
32     128    
160    32     
0      96     
-16    32     
144    256    
-16    -80    
-208   128    
0      -32    
144    48     
80     96     
-144   -1760  
512    -656   
400    384    
-208   960    
-448   -560   
752    656    
-576   -80    
384    176    
-432   -272   
176    112    
-288   -192   
128    256    
128    288    
0      -192   
48     96     
80     -256   
-16    208    
64     -544   
0      80     
128    -176   
16     160    
64     176    
16     144    
-16    -288   
-32    80     
224    -80    
-64    288    
16     368    
176    160    
0      64     
-112   -48    
48     96     
-16    -48    
32     96     
-16    -160   
112    64     
112    80     
-112   96     
128    -64    
96     256    
64     80     
0      112    
-16    128    
16     -240   
-16    96     
-32    -160   
144    192    
32     -384   
-16    0      
32     -304   
16     64     
80     -2864  
-16    64     
64     96     
64     -32    
16     0      
-224   -272   
-80    -96    
16     -288   
32     64     
176    -80    
0      160    
80     -112   
48     -80    
0      -720   
48     64     
96     -16    
128    192    
0      160    
80     112    
32     32     
32     -80    
112    176    
-48    -96    
48     48     
48     -176   
192    384    
-48    16     
48     208    
-64    80     
160    112    
48     -96    
96     80     
-48    112    
64     48     
-16    112    
-16    -96    
96     224    
0      16     
48     48     
32     -144   
32     64     
128    48     
-64    80     
64     0      
96     160    
48     176    
-16    -1040  
-32    64     
80     -960   
64     -336   
64     16     
48     80     
0      -192   
0      224    
208    -80    
-48    0      
80     0      
48     112    
80     -368   
-32    -480   
32     80     
48     -416   
128    96     
-16    208    
-80    -272   
0      -176   
48     -80    
208    0      
-96    -592   
-48    0      
144    -976   
208    -64    
-96    112    
-80    -160   
416    304    
-240   32     
352    -64    
-304   144    
-48    -208   
16     -160   
-1056  -32    
192    -176   
-112   -16    
240    16     
-144   -112   
192    -640   
-160   -96    
240    320    
-48    -144   
192    0      
-48    160    
-64    0      
192    -64    
-288   -64    
128    -576   
-288   -224   
240    112    
112    192    
-112   96     
48     -80    
144    -464   
80     96     
-16    -1056  
-80    -128   
160    -352   
160    64     
176    48     
-64    32     
-208   -16    
48     -64    
144    32     
144    -80    
-912   32     
-64    192    
-16    144    
-32    -352   
368    -96    
304    -304   
-32    144    
-80    80     
64     160    
32     -48    
0      -96    
32     64     
96     16     
-288   -240   
-32    -272   
-352   -32    
272    -384   
-656   160    
80     -32    
-32    64     
64     -896   
48     112    
-96    -1280  
-32    64     
-64    96     
112    176    
-96    240    
-64    -48    
32     64     
-224   -80    
64     16     
32     112    
-80    0      
288    448    
-208   800    
112    -192   
-448   -368   
-384   -816   
960    -848   
-272   624    
96     544    
-240   -144   
-224   -240   
48     -64    
64     144    
-112   16     
64     -80    
80     -112   
-48    -512   
-80    48     
320    0      
0      272    
112    -224   
-144   -192   
-80    32     
224    0      
-96    16     
16     -64    
-256   -16    
256    160    
-208   0      
32     -240   
-1472  -128   
128    -96    
112    160    
-80    -112   
0      112    
-16    16     
-848   -64    
112    80     
-16    80     
96     48     
32     0      
-128   64     
80     48     
-112   -32    
112    -16    
-240   32     
-384   112    
-48    64     
-960   -144   
-144   16     
256    0      
-640   32     
160    16     
-176   16     
160    64     
-64    64     
0      112    
80     -208   
64     192    
0      16     
16     16     
-32    -80    
32     144    
-96    -80    
-224   -112   
144    32     
-192   160    
-80    -48    
-112   96     
-16    -160   
-1072  -96    
-144   16     
224    16     
32     64     
-480   48     
-160   -80    
-16    -144   
-128   96     
-112   -144   
16     -32    
64     144    
-128   48     
-16    -16    
-16    -144   
144    224    
-288   112    
144    80     
-352   -80    
-80    64     
-208   -144   
160    208    
-240   -96    
112    48     
32     32     
-80    -64    
16     192    
-272   -48    
112    80     
-16    16     
48     160    
-288   -16    
32     48     
-240   -16    
80     144    
0      -192   
-64    -48    
-144   -64    
128    176    
96     80     
0      -192   
-224   16     
80     112    
128    96     
-144   80     
80     -32    
-16    32     
-16    -176   
-336   -32    
-48    80     
96     208    
0      96     
80     -96    
-192   208    
-16    128    
240    -112   
-112   16     
-224   -64    
320    -112   
-240   -64    
48     80     
-16    -48    
-80    -32    
-80    -112   
-80    192    
-32    48     
128    368    
-64    -48    
48     192    
-224   64     
176    160    
64     80     
0      160    
32     -208   
-192   -48    
0      32     
144    -176   
-48    352    
96     112    
-128   16     
-496   -48    
64     -48    
-32    0      
144    64     
-64    -32    
64     0      
-128   208    
0      -96    
-48    -112   
128    144    
-16    128    
0      -272   
-64    0      
-16    192    
-32    80     
-240   -432   
32     -192   
208    448    
128    128    
-192   32     
240    -128   
-128   144    
128    -48    
-192   320    
112    -80    
64     80     
-80    32     
80     64     
-224   32     
64     0      
64     -64    
16     -32    
16     144    
32     160    
48     192    
-80    -128   
96     64     
48     96     
48     -160   
-128   160    
224    192    
-336   32     
-224   -96    
-48    176    
-32    -96    
-192   -64    
-64    -32    
96     -16    
-320   -656   
800    -592   
-160   608    
-96    592    
-1024  -560   
896    -768   
144    480    
-592   -816   
-112   112    
-32    160    
112    144    
64     192    
208    320    
-240   -80    
240    192    
32     -16    
-32    -32    
80     80     
-112   -16    
160    64     
144    224    
-176   0      
304    400    
-160   208    
-80    -160   
-160   112    
208    432    
224    288    
-32    96     
-176   32     
144    64     
64     64     
-144   112    
96     48     
16     32     
32     48     
112    608    
144    256    
-224   -192   
-32    144    
0      32     
-16    -1376  
-96    32     
112    0      
-16    112    
16     144    
48     336    
-16    240    
16     128    
-80    -64    
144    160    
-128   -48    
-16    -128   
-144   64     
272    400    
-400   -144   
240    -544   
112    112    
144    -96    
48     128    
80     0      
32     0      
48     144    
64     144    
48     96     
16     48     
0      32     
0      144    
64     64     
96     112    
48     64     
0      -704   
64     48     
32     96     
48     144    
-208   -192   
240    -32    
48     112    
0      -176   
32     128    
112    400    
16     -96    
96     32     
16     -32    
-32    96     
80     16     
80     144    
-32    256    
0      -1952  
32     -160   
96     48     
128    48     
-64    128    
-32    96     
16     -144   
-160   -160   
288    240    
0      176    
16     -16    
-208   -96    
160    16     
176    -64    
16     80     
0      -320   
0      -32    
176    256    
-80    -32    
192    144    
-112   16     
176    0      
64     304    
-16    -16    
96     160    
-112   -32    
176    -48    
-32    -64    
64     -112   
48     -80    
192    0      
128    112    
-80    -896   
48     208    
112    256    
160    16     
-48    336    
-128   -144   
304    0      
-128   288    
208    208    
-96    48     
-48    48     
64     -208   
160    192    
-112   -752   
32     -528   
32     -816   
-32    -336   
192    -720   
-16    224    
112    16     
80     224    
-80    -208   
176    160    
96     -32    
80     -240   
128    176    
128    -384   
0      160    
32     -272   
-32    -16    
128    -160   
-64    -128   
112    -32    
-16    96     
64     -208   
144    448    
16     64     
0      32     
96     96     
32     -784   
16     32     
-32    0      
160    288    
-128   -80    
160    16     
64     -96    
160    480    
112    -176   
-80    96     
-32    -144   
48     48     
144    112    
-176   -592   
32     -80    
80     -128   
48     32     
-80    80     
32     176    
48     -304   
96     304    
0      -368   
-112   256    
112    16     
-96    -1104  
-48    -192   
304    -1232  
256    -256   
-16    160    
0      -624   
-16    -48    
176    -864   
-16    -176   
96     0      
-16    -160   
176    48     
16     64     
384    -1744  
928    -160   
-256   -672   
-48    544    
-432   -1168  
560    -16    
-336   -192   
592    80     
-224   80     
48     -688   
208    -176   
-128   -1888  
112    0      
128    64     
96     0      
32     96     
-16    128    
176    -192   
0      128    
-176   -16    
160    224    
-544   -80    
144    -368   
-16    -160   
80     -320   
80     64     
-48    32     
112    -16    
-16    -976   
64     -32    
0      -80    
32     64     
-112   -160   
192    64     
-240   0      
16     64     
-800   -240   
-16    -64    
224    -32    
112    -144   
-32    128    
-32    48     
256    -96    
-160   -1168  
112    -32    
48     80     
16     -80    
288    96     
-368   -48    
320    -80    
-48    -96    
0      32     
112    -112   
-16    64     
32     -32    
144    -64    
-96    -352   
-336   -144   
160    -112   
-192   64     
288    96     
-16    64     
-112   -80    
48     32     
-240   -16    
16     -64    
32     32     
-160   32     
48     -32    
-48    -192   
320    -64    
-96    -96    
64     -48    
32     -496   
48     96     
32     -528   
32     -16    
-96    -112   
80     64     
-240   32     
128    16     
-80    48     
0      -208   
32     16     
-240   -112   
-352   144    
-96    -128   
192    144    
-48    -96    
112    80     
-32    -224   
128    160    
16     -32    
80     -80    
-160   208    
-96    -96    
-160   96     
-96    -192   
144    208    
0      -64    
128    144    
-112   0      
160    64     
48     -352   
-32    -16    
16     -368   
128    -64    
-208   80     
96     0      
32     48     
-160   0      
-32    80     
64     -32    
-128   -128   
208    -112   
-448   -288   
64     -432   
48     128    
224    -544   
-384   -64    
272    -176   
128    128    
16     0      
-80    48     
-16    16     
64     192    
-80    64     
208    224    
-96    48     
96     -64    
-240   160    
192    -96    
144    -16    
-448   32     
32     240    
80     160    
-992   16     
-80    0      
-928   48     
-48    -16    
0      80     
16     -80    
16     0      
-80    48     
64     -144   
-64    0      
160    128    
16     80     
0      -128   
-160   -64    
-16    16     
-224   112    
-192   -96    
-192   80     
112    128    
-160   144    
-144   -544   
-64    128    
96     208    
-112   -64    
32     -16    
48     32     
48     -96    
-160   -208   
48     240    
-80    320    
-128   -368   
32     144    
144    112    
-80    0      
-16    48     
96     -64    
-336   80     
96     160    
-80    80     
192    -352   
-128   -112   
64     112    
32     64     
-80    80     
64     32     
-144   96     
96     192    
-16    0      
-80    -48    
0      64     
144    272    
-320   16     
-176   32     
64     -128   
128    80     
64     80     
-176   -32    
160    112    
80     0      
112    0      
272    -208   
720    1360   
-32    -720   
-352   -832   
208    -256   
224    -144   
32     384    
-64    864    
-1296  288    
-320   -288   
-64    -496   
176    -176   
208    224    
-96    -64    
240    480    
-80    112    
-80    0      
112    272    
128    32     
-16    80     
-144   -160   
-64    112    
-32    -48    
-176   112    
-96    -448   
144    -96    
-144   128    
160    128    
-128   96     
-80    -48    
176    176    
-48    96     
-160   32     
-208   48     
-80    -96    
-112   224    
208    32     
-272   -416   
-112   -224   
-256   288    
256    208    
-336   0      
-16    -48    
128    176    
-128   -16    
96     -16    
16     336    
32     160    
-112   -144   
-16    352    
-96    -128   
-80    -64    
128    -32    
-256   -144   
160    -32    
240    608    
-336   48     
-96    -352   
208    336    
-64    64     
64     -48    
64     288    
32     208    
-112   272    
80     -64    
32     32     
-144   -80    
16     192    
-208   16     
16     64     
80     48     
-16    64     
80     208    
-32    80     
64     96     
192    576    
-176   160    
-32    80     
32     112    
-192   -64    
176    96     
-160   -32    
80     160    
-80    -32    
16     -80    
32     96     
-128   -144   
16     -80    
-16    -64    
64     208    
-32    128    
16     96     
-32    -80    
64     32     
-208   0      
80     192    
-16    416    
-64    0      
96     32     
-32    -16    
96     48     
48     112    
-64    0      
64     32     
16     112    
48     -112   
144    96     
32     448    
-32    560    
-112   -64    
-48    -16    
64     16     
192    128    
-96    128    
-32    144    
160    64     
48     336    
-112   -16    
32     0      
32     176    
-16    -64    
32     64     
-96    -256   
80     -192   
-80    -224   
-16    -752   
-208   -400   
32     -176   
16     16     
64     128    
32     -96    
48     144    
-48    -48    
-16    -144   
96     48     
-112   48     
176    144    
-32    -112   
-64    -16    
32     48     
32     256    
16     48     
48     -1808  
-48    112    
128    128    
-64    -272   
-128   -192   
-32    -48    
48     48     
0      112    
32     48     
64     224    
-112   -352   
320    48     
-272   16     
144    -128   
-16    64     
192    -16    
48     96     
-48    80     
80     32     
16     64     
16     176    
0      64     
64     -32    
-16    32     
128    -224   
-32    96     
64     96     
-64    -16    
80     288    
16     128    
-64    -368   
64     96     
0      -1392  
128    336    
-176   -32    
192    48     
80     80     
128    -32    
-80    64     
96     -64    
-64    336    
-80    -48    
128    -16    
-32    48     
-32    192    
-96    -800   
160    -16    
96     -256   
64     176    
-80    112    
32     48     
96     160    
144    -32    
32     -80    
1680   -1184  
-608   -560   
992    272    
32     -32    
704    -80    
-368   -144   
96     -224   
256    736    
-96    -912   
-80    288    
16     -1024  
240    160    
-176   -384   
272    -96    
-128   384    
192    -128   
-208   192    
240    -48    
-80    336    
32     -384   
-16    176    
224    -272   
16     304    
16     -784   
16     208    
0      -176   
192    240    
-16    -1168  
128    144    
-112   -112   
192    0      
-16    80     
112    208    
128    128    
-48    -128   
0      0      
192    -160   
192    176    
80     -336   
-176   64     
224    32     
-96    208    
256    -320   
-64    64     
0      112    
48     128    
176    32     
32     400    
-208   16     
368    -48    
-96    240    
112    32     
0      16     
32     -128   
48     304    
64     32     
-48    64     
64     -240   
16     176    
32     -80    
64     144    
-32    96     
64     -240   
96     96     
-80    -224   
-16    96     
-32    -272   
192    64     
16     -48    
64     160    
-48    -160   
176    112    
-16    -288   
80     32     
-112   32     
32     -1376  
192    112    
-208   128    
96     0      
224    -128   
112    176    
64     32     
-32    0      
208    -416   
64     64     
32     -352   
144    -832   
32     160    
-16    -96    
96     112    
80     -80    
48     -624   
64     -80    
240    272    
-176   -96    
208    -32    
-64    -80    
96     -2224  
-160   -96    
16     96     
32     -80    
0      -112   
96     -32    
-144   -112   
32     208    
-352   -176   
-80    -192   
-720   -128   
48     -64    
96     -32    
-16    -336   
32     -160   
64     -576   
0      -64    
64     144    
-32    -64    
64     -160   
-112   0      
288    160    
-352   144    
160    80     
-96    0      
-80    -16    
-32    -320   
160    -64    
-144   -64    
176    16     
48     -336   
-144   -208   
32     -240   
48     -272   
-80    -352   
192    -32    
80     112    
144    112    
128    304    
-112   -48    
-16    -112   
-32    -176   
-752   32     
0      -224   
48     -96    
192    32     
-48    96     
160    -672   
112    368    
-96    -80    
32     -32    
32     80     
32     -16    
-48    -96    
-16    -368   
-16    -16    
0      0      
272    48     
-32    -16    
0      -64    
-336   -688   
48     -224   
16     -288   
0      128    
96     -1680  
208    96     
240    880    
-400   48     
-128   -192   
352    -240   
144    -16    
-112   128    
-768   -16    
64     -16    
-896   -176   
80     64     
144    32     
-64    -16    
-48    304    
-160   -416   
208    -16    
112    48     
144    -64    
-240   128    
0      -48    
-128   48     
112    96     
-192   112    
0      -240   
-208   80     
144    -144   
0      80     
-64    -32    
128    112    
-48    -48    
16     -496   
-48    128    
208    -32    
-48    16     
2144   -1824  
-704   -864   
960    1360   
-336   464    
128    112    
-576   -64    
416    688    
-96    -336   
112    -784   
208    112    
48     -416   
144    -176   
-448   224    
224    -64    
-192   -16    
128    -368   
-224   -32    
160    -272   
-128   480    
-112   16     
-272   96     
464    -464   
-32    384    
-1168  -160   
192    576    
-176   -16    
-848   -128   
448    64     
-544   240    
-160   -128   
16     128    
16     112    
160    112    
-176   224    
272    -144   
-176   0      
-48    -176   
-32    256    
-80    48     
48     96     
48     -32    
-272   80     
-80    -112   
16     32     
-48    32     
-48    112    
-144   336    
48     176    
-80    -80    
-64    -272   
192    48     
-208   -112   
0      -32    
-128   -224   
144    -80    
32     144    
-208   -32    
112    544    
0      -48    
32     112    
-96    -80    
16     80     
-736   -16    
256    288    
-48    -176   
48     96     
-144   112    
128    80     
-80    -240   
-80    -80    
32     80     
0      0      
0      48     
32     32     
80     128    
-16    528    
-128   352    
32     -32    
464    816    
-480   -256   
80     16     
192    80     
-80    96     
-128   -128   
224    -16    
-256   -112   
-16    48     
-176   -64    
-144   -16    
-48    48     
-176   16     
32     32     
-128   -48    
-96    -144   
-1152  -128   
-64    -192   
80     -64    
304    352    
48     288    
-64    160    
-96    80     
80     -64    
64     48     
-96    112    
-16    112    
-96    0      
-32    -48    
-176   -448   
144    112    
-96    192    
-16    -16    
-112   -64    
16     48     
112    64     
-176   0      
80     48     
16     224    
-48    -144   
144    16     
-320   128    
224    80     
32     -16    
-304   -80    
80     -48    
-400   0      
128    112    
0      -80    
-144   112    
-64    -32    
-48    -64    
-96    -144   
-80    -16    
-96    64     
304    192    
-240   144    
112    16     
-144   128    
-288   -16    
64     96     
-208   -112   
96     128    
112    -160   
-16    16     
-48    80     
112    48     
-160   -256   
208    96     
-176   128    
80     16     
-80    16     
0      48     
0      112    
-64    0      
-128   96     
-16    -16    
-64    -208   
128    -208   
32     96     
48     144    
-32    48     
112    48     
32     80     
16     96     
-48    96     
32     16     
32     32     
64     144    
-64    -128   
80     64     
-160   -176   
0      224    
-64    160    
-160   -16    
192    32     
112    128    
48     48     
-176   96     
-64    -16    
96     32     
0      80     
0      -64    
48     160    
-80    -208   
208    64     
-160   96     
48     112    
-48    160    
16     48     
64     32     
112    48     
-48    128    
0      160    
-48    80     
112    -64    
96     80     
-64    64     
-800   192    
560    -336   
912    368    
400    -384   
384    800    
-96    -672   
-352   -208   
1008   512    
-224   544    
-48    -208   
-176   32     
144    112    
144    144    
-304   176    
-64    -272   
160    400    
48     -32    
-16    272    
-64    -144   
16     96     
160    -80    
-128   304    
80     16     
96     176    
-96    -192   
32     192    
-48    224    
240    112    
-144   -64    
-16    0      
144    32     
-48    256    
96     -1536  
-48    80     
-32    32     
144    192    
-32    160    
48     -48    
-96    96     
208    160    
-32    80     
48     32     
-96    80     
96     -32    
64     224    
16     160    
80     32     
-32    -160   
-240   96     
256    -32    
0      160    
0      128    
112    160    
-144   -48    
32     64     
64     144    
64     -16    
144    96     
-144   128    
0      -240   
96     96     
0      128    
0      -288   
32     64     
176    -208   
-128   64     
0      -80    
128    192    
-80    0      
128    64     
0      48     
112    32     
-48    -48    
80     160    
-112   0      
160    16     
0      -32    
240    -64    
-112   112    
80     -1808  
64     16     
96     112    
96     368    
48     112    
80     96     
64     -128   
0      192    
-80    128    
288    -16    
-16    176    
-32    32     
128    112    
80     -96    
144    272    
96     -128   
-32    64     
192    -496   
32     64     
48     -48    
-32    560    
64     304    
144    272    
-80    64     
160    80     
-80    -16    
-16    -112   
16     -256   
208    16     
48     176    
-16    -96    
32     192    
96     -336   
48     112    
-96    -1008  
144    464    
-80    224    
0      -48    
32     176    
48     -112   
48     -32    
-16    -224   
64     192    
16     -48    
-32    -112   
80     -464   
144    288    
-64    -480   
32     -576   
112    304    
112    368    
0      -48    
-48    176    
-16    32     
48     144    
208    640    
-128   -128   
-16    -32    
112    80     
-32    -16    
80     -224   
0      32     
144    32     
0      112    
32     112    
176    320    
-208   -208   
144    32     
-16    0      
96     -304   
16     80     
128    48     
144    112    
-48    -288   
80     192    
32     -320   
112    192    
-48    0      
80     48     
0      -512   
128    -128   
-80    48     
-32    -1424  
96     -736   
160    32     
-32    -976   
-64    -240   
352    48     
-96    -224   
224    96     
-48    96     
176    16     
-32    -48    
64     144    
16     -64    
128    -1440  
32     96     
64     -336   
-160   -336   
-96    -32    
192    48     
-32    -64    
-112   -528   
0      -32    
96     96     
-144   -96    
80     208    
-144   -144   
384    112    
-80    224    
128    0      
-80    64     
16     -16    
224    -352   
-624   -192   
48     -160   
-32    16     
1024   -32    
-1104  -896   
896    464    
-176   176    
336    -320   
-400   320    
-16    -192   
16     368    
-192   -464   
176    656    
-176   -272   
16     96     
-368   -64    
288    48     
-16    -208   
80     48     
176    208    
48     -864   
-16    -32    
80     -816   
-16    416    
192    -688   
144    416    
-112   -176   
272    -16    
-336   -480   
48     80     
32     16     
160    -96    
-336   -16    
64     -160   
16     64     
48     -64    
-112   192    
96     -224   
-32    -112   
48     112    
48     -496   
-96    -416   
192    -64    
-144   160    
80     -96    
-304   -224   
32     -208   
-608   -16    
208    -48    
-352   -176   
32     -240   
-32    -16    
48     -288   
96     176    
0      -1840  
16     -192   
64     -112   
160    64     
-64    -80    
32     16     
-208   -16    
-80    -48    
-336   -112   
112    112    
-400   48     
64     -192   
80     -112   
112    -416   
64     160    
112    80     
-48    160    
32     80     
0      -96    
-16    16     
112    -80    
-112   -80    
-48    0      
-64    48     
208    128    
-272   16     
96     -208   
256    416    
-208   128    
96     16     
192    -272   
208    400    
-16    0      
-96    -96    
-224   144    
-16    -48    
192    416    
48     112    
-192   48     
0      -80    
96     64     
-96    16     
-16    -96    
112    32     
-96    -464   
112    -1328  
112    -48    
96     128    
192    160    
-272   0      
96     48     
-64    0      
16     16     
96     416    
-224   -16    
144    96     
-224   -192   
272    224    
-240   -96    
144    48     
-112   16     
-704   160    
-128   0      
-560   80     
-112   64     
32     208    
-256   -80    
0      -208   
-32    64     
0      16     
48     288    
-32    -272   
-96    256    
-240   -224   
384    304    
-272   0      
-48    160    
-128   16     
0      32     
32     160    
-16    224    
176    80     
-32    -320   
-48    64     
-80    112    
272    -48    
-144   -224   
-208   112    
0      -160   
96     -80    
-32    80     
-176   32     
48     0      
-128   16     
-80    336    
64     224    
64     160    
-544   -16    
-32    -32    
-96    -112   
0      64     
32     80     
96     0      
80     -32    
-240   80     
96     -32    
-96    -144   
-32    160    
-64    128    
-16    208    
0      -32    
-32    32     
-400   96     
-16    -144   
-192   64     
80     80     
-112   -32    
304    48     
208    160    
48     128    
-368   16     
-112   48     
80     -16    
32     32     
32     288    
-480   -240   
32     -160   
-272   16     
48     16     
-1072  -48    
-32    192    
144    -272   
64     112    
16     48     
48     96     
-48    224    
-144   64     
16     48     
32     48     
112    -32    
-160   32     
-32    96     
-64    176    
32     32     
-176   -48    
1920   2048   
-1808  704    
-736   -304   
480    928    
-208   -688   
-144   512    
-896   48     
144    688    
272    -480   
-368   128    
-144   -96    
-96    288    
160    -144   
144    352    
-448   -176   
16     16     
48     80     
144    48     
-96    0      
160    -160   
-192   -16    
16     160    
144    144    
-96    0      
-48    64     
-16    0      
0      128    
48     -48    
-160   48     
-16    -64    
32     160    
112    0      
96     144    
-32    48     
64     112    
80     80     
-96    -16    
32     128    
64     112    
144    48     
-176   64     
16     48     
-16    -48    
48     80     
-16    112    
192    64     
-96    128    
-128   -240   
-32    128    
-64    16     
288    160    
-208   96     
240    128    
-192   112    
0      48     
-32    16     
80     144    
-112   -16    
160    -32    
-96    16     
-80    80     
-32    112    
-96    -32    
96     80     
144    80     
-16    208    
-96    112    
-192   -16    
128    16     
-48    16     
0      288    
-96    80     
16     -112   
64     64     
-256   -192   
224    160    
-208   32     
208    -80    
-64    48     
-64    -96    
160    -48    
48     96     
-80    160    
-176   64     
192    288    
-256   -320   
0      -128   
16     384    
-128   96     
0      32     
0      96     
16     -32    
112    144    
112    16     
-32    16     
32     -80    
16     64     
176    176    
-64    -48    
48     32     
-16    -64    
160    160    
-64    -32    
16     64     
0      112    
192    304    
-144   240    
48     -96    
0      -16    
48     128    
112    64     
-16    160    
0      16     
96     96     
-32    32     
112    240    
96     384    
0      -32    
-64    -304   
-112   48     
-16    -48    
176    48     
288    240    
-208   -96    
-16    80     
0      144    
224    48     
-112   -64    
0      0      
96     208    
96     272    
-176   64     
48     -112   
0      -208   
96     48     
32     224    
-16    0      
208    192    
-16    32     
96     112    
48     48     
80     48     
-64    128    
0      112    
-64    48     
192    464    
-32    208    
-32    64     
112    -320   
128    176    
-32    -304   
-112   48     
-80    -192   
256    128    
-48    288    
-32    -16    
-32    -48    
32     176    
16     -32    
-32    64     
-144   -64    
336    144    
-32    176    
0      -240   
48     240    
96     -288   
-80    0      
160    0      
64     176    
32     16     
-16    64     
80     -96    
80     96     
-48    16     
144    128    
-96    -16    
64     -96    
-32    112    
160    -16    
-16    160    
-48    -784   
48     128    
32     -32    
-80    160    
-64    -336   
48     160    
48     64     
112    32     
-80    64     
-112   112    
-48    144    
64     -48    
-304   32     
192    -432   
-48    128    
176    -176   
720    1120   
-1008  -1664  
864    416    
320    656    
336    -448   
-400   0      
-224   0      
720    880    
-480   384    
0      288    
16     -432   
32     96     
64     -128   
192    192    
-160   -592   
32     112    
112    -624   
352    304    
112    -1280  
-80    -96    
176    256    
-176   -192   
368    -16    
-320   240    
416    32     
-128   -176   
0      -48    
112    -64    
-16    -96    
240    -16    
-96    80     
80     -384   
96     112    
144    -48    
80     240    
0      48     
112    -16    
-16    -48    
32     -480   
240    176    
-128   -80    
128    96     
-16    -112   
96     48     
-48    -464   
112    128    
-16    -400   
80     128    
-16    -592   
80     336    
-16    -16    
48     -2736  
0      176    
-96    -32    
224    -848   
-48    -64    
64     112    
80     -128   
48     -16    
0      -80    
32     176    
32     -16    
48     0      
32     -32    
96     -1184  
-144   160    
144    -1168  
128    -128   
-112   144    
96     -176   
64     -144   
112    -736   
48     -32    
-16    16     
0      -48    
96     160    
-224   -16    
144    -208   
16     48     
32     -224   
128    128    
-96    -80    
192    -64    
-1264  64     
272    -288   
48     -288   
192    -304   
-128   -128   
256    -848   
-96    64     
48     144    
96     -80    
0      -336   
-48    -128   
64     -48    
-288   128    
256    400    
-288   -112   
-144   272    
-176   -96    
240    -32    
96     16     
0      -32    
96     -80    
16     -336   
64     -960   
16     96     
80     -240   
16     48     
-64    -112   
0      -16    
64     -128   
128    32     
-176   -32    
48     80     
-944   -80    
368    80     
-80    48     
144    -576   
-48    -144   
-48    -672   
160    0      
240    -160   
-208   224    
224    144    
208    -240   
-112   -128   
-64    -48    
-48    64     
96     16     
-336   -144   
160    -64    
-48    -64    
192    128    
-304   -16    
304    -288   
-240   160    
64     -1712  
192    -80    
48     -160   
-208   -48    
32     -96    
176    -64    
-192   -96    
32     160    
-352   320    
64     -48    
-832   16     
-208   80     
256    32     
0      -64    
48     160    
-64    -1168  
32     320    
-96    -80    
144    64     
16     -320   
128    -96    
-112   208    
16     -64    
-112   96     
160    -96    
-16    -128   
176    48     
-1040  -48    
160    -144   
176    288    
80     -592   
160    -112   
-16    80     
64     64     
-176   16     
-160   48     
96     0      
80     16     
16     128    
0      -96    
-352   -32    
160    -160   
32     0      
64     -224   
16     144    
112    -544   
96     32     
-272   -16    
32     -272   
128    16     
64     80     
-112   144    
16     80     
-64    96     
96     112    
-160   16     
0      -336   
64     32     
0      -96    
2080   432    
-1536  416    
576    -96    
-320   464    
1504   -928   
-752   32     
-160   -416   
208    896    
224    -768   
-352   272    
-144   -320   
272    48     
-176   64     
144    -48    
-176   -112   
32     32     
-160   320    
128    -16    
-176   96     
80     -80    
-144   32     
-576   -32    
-176   96     
112    -128   
-96    -48    
96     -48    
-32    128    
-160   0      
-80    -16    
-176   -448   
-112   0      
112    144    
112    96     
-144   32     
-16    -32    
-80    -48    
-64    96     
-80    48     
-64    80     
-96    0      
112    80     
-64    128    
-80    64     
-128   80     
112    -128   
-240   -32    
176    208    
-16    368    
-128   -48    
-64    -192   
-112   96     
32     -16    
32     96     
-144   80     
-144   48     
160    0      
-64    32     
144    -16    
16     160    
128    272    
16     128    
16     16     
-96    16     
-80    96     
16     -80    
128    80     
-64    16     
-112   16     
-160   -16    
-288   -16    
-560   -240   
240    256    
-176   -224   
176    32     
0      96     
208    48     
-192   208    
-352   64     
256    0      
-160   80     
176    112    
-16    80     
-48    -32    
-144   0      
48     32     
-144   48     
32     -160   
-16    -48    
-144   -96    
16     16     
0      96     
16     80     
-16    112    
-16    64     
-32    64     
64     64     
-48    80     
-80    32     
-80    -64    
112    144    
-240   -16    
64     112    
-1440  -32    
0      -32    
96     96     
-80    32     
-16    -48    
32     80     
-80    -16    
-32    32     
-80    48     
-48    0      
16     80     
-48    32     
0      32     
-160   -32    
-32    144    
112    32     
-160   80     
32     16     
48     112    
-32    -80    
112    112    
-96    -80    
176    192    
-96    352    
160    -224   
-80    -48    
-64    -48    
144    144    
-240   -112   
128    112    
-32    -48    
112    96     
16     224    
-192   -96    
144    32     
-144   176    
144    -16    
-80    48     
112    80     
-96    -16    
64     160    
-176   -32    
112    80     
-112   384    
240    -240   
128    192    
-128   64     
64     -96    
-80    -32    
128    176    
-208   48     
128    128    
-144   -16    
336    80     
-16    48     
-192   304    
-128   -192   
48     64     
-32    -16    
32     224    
-64    -32    
0      16     
224    192    
-112   -160   
416    -128   
-160   304    
96     32     
-128   96     
48     -112   
352    208    
-144   -32    
112    192    
-64    48     
144    -16    
-160   112    
128    16     
-80    128    
64     -16    
32     64     
144    80     
-16    224    
-128   16     
0      32     
112    128    
144    -208   
32     80     
-96    16     
96     80     
-96    80     
64     32     
-208   144    
80     -112   
-144   96     
160    48     
-320   1472   
0      1520   
80     752    
464    -240   
-16    -800   
-832   -864   
384    800    
384    208    
112    64     
32     128    
-272   96     
0      128    
224    112    
96     -336   
-144   -80    
-16    -112   
192    128    
-96    80     
80     -32    
64     32     
160    416    
96     272    
-112   16     
16     -208   
-48    -128   
208    208    
-128   48     
208    0      
-32    160    
32     -32    
64     64     
-16    128    
112    128    
32     32     
-80    208    
320    496    
-400   -32    
256    -32    
-128   -528   
288    64     
-176   96     
96     16     
-32    144    
224    80     
-48    112    
-48    48     
48     112    
112    240    
-224   16     
160    -32    
16     96     
-48    128    
144    128    
-176   -288   
144    48     
48     -336   
96     16     
-16    176    
80     96     
-80    112    
112    144    
0      352    
-32    32     
144    80     
-176   176    
176    272    
-128   -208   
272    64     
-48    -32    
160    32     
-144   -32    
144    128    
48     -896   
176    160    
-96    -144   
144    96     
-144   96     
96     80     
16     48     
64     160    
-64    -96    
160    -48    
64     352    
48     -160   
192    96     
-80    32     
0      32     
176    -816   
-128   16     
80     -400   
96     240    
-96    48     
224    -32    
-48    -208   
96     -80    
160    320    
-160   -16    
240    176    
-80    -240   
16     -16    
48     -480   
112    112    
96     -128   
-176   16     
112    -112   
0      -112   
240    96     
0      96     
-16    48     
-16    16     
48     64     
112    -144   
96     160    
-80    -608   
-176   -48    
32     -96    
512    320    
192    -32    
-240   32     
-64    -128   
240    128    
208    112    
-240   128    
144    144    
48     32     
80     -144   
144    -352   
32     176    
-128   -240   
304    112    
16     0      
16     144    
48     -144   
48     320    
-112   -1920  
352    112    
-80    224    
272    160    
-112   48     
-96    -128   
144    -880   
-80    -176   
240    -80    
-96    -80    
48     16     
176    -240   
32     64     
0      -208   
0      112    
96     80     
64     -592   
-16    128    
160    -1520  
-32    -976   
-48    -224   
0      -288   
176    128    
-112   -240   
0      -48    
80     -1536  
64     -112   
144    224    
-80    176    
160    224    
-32    -64    
192    48     
-720   -384   
-224   -416   
48     -32    
-48    -128   
32     -80    
16     144    
128    -960   
-16    -128   
-80    -672   
80     64     
160    160    
-48    -112   
32     -16    
144    -192   
32     -144   
48     128    
-96    -48    
96     48     
112    272    
128    -16    
0      -96    
16     -176   
32     -16    
48     -464   
0      -16    
-48    160    
32     -192   
288    -176   
-64    128    
-16    64     
208    2464   
-1648  -656   
224    1152   
240    608    
1232   -336   
-1344  -1104  
-256   224    
896    928    
-64    -576   
-80    -128   
16     -368   
-176   -192   
0      0      
208    208    
32     16     
-16    -48    
-304   -64    
64     0      
112    32     
0      -16    
-208   0      
-16    0      
256    -160   
-128   -336   
-112   -16    
-32    96     
288    416    
-112   -880   
144    -256   
176    336    
0      48     
112    48     
-48    -144   
-80    -80    
48     112    
-128   192    
160    64     
-336   -32    
144    -176   
48     0      
64     -256   
-32    80     
176    -720   
0      -32    
32     32     
0      32     
64     176    
-96    192    
-16    -80    
32     -208   
-48    80     
-64    -144   
-224   144    
-80    -64    
32     0      
64     -96    
160    608    
-32    -1136  
192    256    
-176   -80    
16     -128   
-160   112    
144    0      
-160   16     
-64    -160   
-80    0      
96     -16    
-64    16     
48     -16    
80     64     
32     -272   
0      64     
64     -288   
64     16     
32     48     
192    336    
-256   32     
272    192    
-192   16     
208    144    
-272   64     
-16    0      
-736   144    
-144   -288   
176    32     
16     -144   
240    256    
-48    464    
-816   224    
-144   -192   
-464   -192   
64     -32    
96     32     
-32    80     
16     80     
-32    96     
0      -160   
-64    16     
-912   -384   
112    48     
-32    112    
64     128    
-48    -16    
-352   -64    
64     32     
-528   -48    
48     144    
-352   0      
160    96     
0      64     
-80    -80    
-16    -96    
-48    32     
80     -96    
64     144    
-32    -32    
-64    0      
48     32     
-48    48     
176    128    
-256   -96    
-64    16     
160    96     
0      -16    
-464   -64    
-48    -64    
48     96     
48     96     
-144   96     
32     16     
-48    -48    
-256   48     
96     -32    
-192   -128   
96     -32    
-64    208    
48     336    
-304   -32    
-16    -192   
80     96     
64     16     
0      192    
64     -96    
64     -16    
-112   0      
176    -48    
-416   160    
128    304    
-224   -112   
48     64     
32     -128   
-112   160    
-128   -112   
-112   112    
-272   -176   
384    -160   
-1616  112    
48     272    
-240   48     
0      -240   
208    208    
-32    32     
-48    144    
-192   -240   
304    -16    
-224   -64    
64     -32    
-112   224    
288    160    
-16    144    
-80    80     
48     80     
-96    192    
-96    -96    
112    16     
240    32     
-112   -64    
-80    176    
-192   16     
-112   48     
48     64     
144    192    
-80    0      
-16    32     
-80    -64    
32     128    
-160   64     
128    112    
144    0      
-64    16     
0      -128   
128    -32    
-128   128    
96     128    
-112   144    
64     48     
304    2528   
-2144  -512   
624    704    
-400   272    
176    192    
-768   -416   
-208   16     
-384   640    
-320   96     
-208   224    
-32    48     
-80    112    
-64    320    
64     -48    
-96    -48    
0      0      
-16    112    
80     16     
-32    64     
176    32     
-144   -64    
16     160    
32     64     
-48    -32    
80     -80    
112    112    
16     144    
-32    112    
0      112    
-16    -80    
16     64     
112    112    
32     128    
-144   -32    
80     96     
-112   -160   
-48    240    
144    -32    
16     -16    
-144   128    
160    128    
-112   64     
-112   -128   
48     -16    
48     176    
96     160    
-160   -144   
80     256    
-384   -16    
336    48     
-304   48     
-16    -16    
160    160    
-176   176    
128    -16    
-32    -80    
160    96     
48     112    
32     128    
-16    96     
16     128    
-176   -32    
80     128    
-32    0      
-48    144    
48     0      
-176   -32    
176    112    
-32    64     
32     96     
-48    16     
80     64     
48     32     
16     32     
48     -160   
16     128    
-192   176    
16     112    
144    96     
-16    -16    
80     176    
-64    96     
0      -128   
96     144    
16     240    
-144   176    
144    32     
32     64     
-16    64     
16     96     
-16    0      
48     112    
32     16     
80     128    
-96    48     
-48    -112   
128    80     
-16    176    
32     16     
16     112    
32     48     
112    32     
-96    -96    
112    144    
32     144    
176    96     
-240   -160   
208    128    
-176   -48    
160    -48    
0      160    
-32    32     
240    240    
-32    0      
32     144    
-112   -48    
272    144    
-64    32     
192    192    
-208   192    
352    192    
-272   -400   
0      -16    
-352   -80    
240    128    
176    -144   
0      -640   
-160   320    
-16    64     
272    64     
-208   -48    
112    16     
-144   32     
-128   -144   
160    -176   
112    336    
64     96     
96     32     
-64    192    
16     -160   
32     160    
32     -928   
128    112    
0      80     
48     208    
160    320    
-16    272    
16     -48    
-64    -64    
0      0      
128    144    
-64    32     
80     48     
112    112    
16     -144   
16     -48    
32     -512   
80     192    
96     -672   
16     224    
96     240    
48     64     
-128   -304   
160    144    
64     80     
-96    -128   
128    496    
-128   -288   
96     48     
32     -176   
32     64     
-32    -208   
32     96     
208    -352   
-32    80     
-80    -80    
144    352    
-80    -64    
128    208    
-48    -48    
432    400    
16     16     
64     -176   
160    32     
160    -160   
96     224    
-80    -256   
112    224    
96     -720   
80     96     
-32    -544   
-64    32     
144    112    
96     192    
32     48     
-16    64     
176    2256   
-1712  -624   
864    1536   
336    256    
544    -304   
-608   -160   
-496   -16    
176    -336   
112    352    
112    -80    
48     304    
-304   -96    
112    288    
-32    16     
-80    -336   
0      64     
176    -176   
64     336    
-80    -128   
160    64     
64     -32    
-16    176    
32     112    
48     208    
64     -672   
-128   96     
-32    -256   
48     -80    
-304   -176   
368    -112   
0      96     
32     -176   
-48    64     
272    32     
-96    0      
208    -112   
-160   32     
288    -112   
160    464    
0      128    
0      -1456  
48     32     
48     -416   
-16    -144   
16     -144   
-16    -1344  
16     -160   
80     -2160  
-128   0      
-16    -128   
160    -144   
-16    208    
16     -192   
128    16     
80     16     
208    -48    
-160   -16    
256    416    
48     -528   
-1168  -16    
-32    -368   
-16    96     
-32    -112   
112    0      
96     -1984  
16     -320   
48     128    
64     -16    
32     -48    
48     112    
48     -80    
32     32     
80     -128   
80     -176   
-272   -112   
32     -368   
32     -368   
384    -80    
-80    -64    
80     -48    
176    -240   
80     -736   
48     32     
112    -48    
-16    -144   
128    -240   
16     112    
64     -112   
96     -64    
96     160    
80     -80    
-352   -48    
0      -128   
144    80     
64     -176   
32     -16    
80     -592   
16     32     
144    48     
-128   64     
96     -96    
0      16     
96     32     
-32    -64    
-208   -48    
-48    -368   
-608   -96    
16     -112   
32     16     
80     -32    
-176   0      
32     -736   
32     112    
80     -1856  
16     112    
32     -32    
-48    -192   
16     80     
0      -96    
32     128    
-176   64     
0      64     
-32    80     
-976   -176   
64     -48    
-48    -352   
160    -384   
-112   -176   
176    -400   
-48    64     
64     -128   
96     16     
-16    -48    
48     144    
-16    480    
-32    128    
-64    -144   
80     -64    
-400   -192   
256    32     
-112   32     
112    -144   
0      160    
224    -304   
64     224    
-16    336    
160    16     
-560   -288   
80     -64    
-112   -16    
64     -80    
-176   32     
0      -144   
-144   64     
-48    128    
16     -160   
-208   -384   
128    -64    
240    -64    
16     64     
-176   0      
160    0      
32     48     
-48    -48    
-16    -272   
16     -256   
160    416    
-16    48     
-112   64     
-32    64     
-288   16     
-144   -224   
208    256    
-80    -32    
-256   -48    
-240   96     
48     -144   
16     -16    
160    16     
-48    48     
16     80     
32     -128   
208    32     
16     144    
-16    -160   
-80    80     
-736   -272   
48     96     
-16    -48    
-64    96     
-144   176    
-576   -48    
48     80     
-1744  -240   
-16    80     
80     -16    
-176   576    
-608   -752   
-208   -544   
-384   -176   
96     304    
-48    -304   
128    -96    
256    0      
-608   -96    
448    64     
-592   -208   
448    -64    
-144   336    
-112   -16    
-240   80     
-112   32     
-128   -112   
-112   64     
64     -16    
96     80     
-16    -16    
-240   -16    
96     176    
-144   16     
160    -128   
-272   -48    
144    64     
0      160    
-32    64     
-288   -80    
-16    -80    
-80    64     
112    112    
-16    -80    
-16    32     
-112   -176   
32     176    
48     48     
-144   -48    
32     128    
144    16     
-144   80     
-48    -32    
-16    32     
-64    -16    
-128   160    
-432   16     
-32    -112   
0      -16    
-48    16     
128    -32    
-48    32     
32     128    
64     176    
-64    48     
0      -112   
0      256    
-144   -16    
96     48     
-80    128    
-16    16     
-176   -80    
96     176    
-48    48     
-48    64     
128    -48    
112    64     
-32    80     
-80    192    
-176   0      
0      -64    
80     -32    
-80    128    
-64    16     
48     0      
-16    144    
-112   -48    
272    224    
-64    -64    
16     48     
0      288    
-128   -48    
224    352    
-400   -144   
224    -64    
-16    144    
-208   -64    
288    64     
-240   0      
-208   -48    
-80    16     
-288   -48    
0      -64    
0      -64    
0      80     
128    384    
-192   0      
96     32     
96     48     
-48    0      
128    128    
-32    48     
-80    -32    
96     176    
-208   -32    
208    16     
-80    112    
32     128    
112    64     
-176   0      
160    48     
-16    48     
-80    96     
-16    144    
160    16     
-192   -48    
96     128    
-208   -224   
-128   32     
208    416    
-32    16     
-112   144    
-208   176    
272    32     
-32    64     
-208   -192   
-48    128    
0      64     
16     -32    
80     64     
-144   80     
48     64     
0      128    
16     208    
-80    16     
-32    -96    
-64    96     
176    208    
-48    -160   
128    112    
48     80     
16     128    
64     16     
-48    80     
48     0      
-48    -208   
16     -16    
80     -96    
96     240    
-64    128    
64     160    
-128   -64    
32     96     
48     48     
-144   32     
16     -208   
48     80     
16     128    
32     128    
16     112    
16     64     
16     64     
48     80     
48     192    
32     544    
128    288    
64     112    
128    -128   
16     112    
-64    -16    
-64    32     
32     128    
-96    128    
-32    64     
16     112    
64     64     
-32    16     
-224   -64    
128    240    
48     -16    
64     128    
-32    240    
-112   48     
64     16     
176    176    
0      96     
-80    64     
-64    128    
64     64     
64     80     
112    32     
32     64     
192    -192   
16     240    
-32    -128   
-112   -336   
-48    192    
-768   -2112  
784    -528   
-464   144    
272    -80    
336    288    
-48    400    
-144   -320   
144    -112   
192    272    
32     160    
32     128    
64     64     
16     -32    
-64    -576   
80     16     
80     -480   
-32    176    
112    192    
-16    96     
-96    -16    
80     176    
-128   64     
224    160    
-272   -384   
80     -208   
-64    64     
336    496    
-448   -128   
-96    -256   
144    128    
96     -832   
-96    32     
32     256    
-16    -112   
64     224    
-112   160    
16     -112   
-96    -64    
176    -16    
-192   368    
-64    64     
16     144    
96     64     
-80    -160   
80     -128   
-32    -240   
192    -48    
448    256    
-96    80     
160    208    
-160   112    
80     -160   
-80    288    
-112   -80    
112    160    
-16    64     
80     -448   
-352   -272   
272    -240   
0      160    
208    -384   
48     -32    
224    -224   
-16    128    
112    -384   
16     160    
-48    -112   
32     192    
0      48     
80     128    
-32    16     
32     -144   
0      192    
-80    -208   
240    400    
-80    48     
48     16     
48     -112   
-80    -96    
144    -3056  
-32    192    
-48    96     
32     224    
16     0      
64     192    
-32    128    
80     -32    
112    160    
48     144    
48     96     
-32    -128   
64     64     
160    0      
-64    96     
16     16     
128    128    
64     -96    
128    96     
-128   96     
128    -64    
160    112    
144    0      
16     144    
-176   -416   
176    160    
32     -448   
80     64     
-128   -192   
160    176    
64     -144   
0      -16    
-48    32     
48     112    
64     -112   
0      -304   
144    400    
96     176    
-16    64     
288    -80    
-80    -80    
80     -112   
80     272    
64     240    
-48    96     
240    -320   
0      -1440  
128    -112   
288    -2128  
-176   112    
32     -96    
288    -64    
64     -128   
-144   -400   
16     -288   
-48    -16    
48     -208   
128    128    
64     144    
80     208    
-80    48     
176    -288   
16     128    
144    128    
-48    -112   
64     -240   
-272   -384   
16     -128   
64     -224   
16     -96    
128    -592   
0      32     
16     192    
96     -336   
-32    96     
80     32     
-32    -320   
-16    0      
192    -80    
112    48     
-752   -224   
96     -176   
144    64     
112    64     
0      -32    
0      96     
176    -272   
-112   -1584  
32     -64    
64     -80    
-112   -32    
144    -96    
128    96     
-336   -80    
144    -160   
-400   -240   
176    -48    
-128   -64    
-16    192    
-80    80     
-112   -640   
176    -32    
-32    -528   
-64    112    
96     -128   
112    0      
144    -32    
-32    96     
-64    -32    
96     -48    
-16    -16    
64     -80    
-144   -320   
192    -80    
-64    64     
0      -208   
-48    400    
368    -224   
192    176    
16     -1120  
-224   80     
-192   320    
48     -208   
-32    272    
-432   208    
240    -96    
-144   -256   
320    -64    
-192   160    
-96    112    
96     144    
48     -112   
16     -464   
-48    256    
240    -592   
0      80     
48     -144   
64     192    
-96    112    
160    16     
-160   -208   
304    -80    
-336   0      
288    144    
-224   208    
240    32     
-512   -80    
-16    -240   
96     96     
0      -240   
16     128    
-96    16     
64     -112   
-160   -64    
-224   -192   
-192   -80    
128    -96    
-224   128    
112    32     
-176   -64    
96     -224   
80     48     
-32    -176   
32     32     
64     -16    
-16    -96    
48     -64    
-16    96     
0      -48    
112    144    
-224   -32    
224    64     
-304   -208   
48     -176   
-240   64     
-32    -352   
112    128    
-32    16     
80     48     
208    -144   
-16    -64    
-80    -80    
48     -16    
-48    0      
16     64     
-144   80     
176    -112   
-16    -16    
64     -64    
-48    -64    
80     -144   
48     192    
-368   -912   
240    -336   
-384   -96    
-1328  320    
-144   -80    
128    160    
-240   -96    
-336   -112   
-272   64     
80     224    
-224   -144   
272    -80    
-176   -112   
-128   -176   
16     112    
-160   -16    
-112   160    
-96    -48    
-16    48     
-16    32     
-32    -16    
-224   -48    
0      0      
0      48     
-128   -48    
16     192    
16     -32    
80     112    
-32    -192   
-96    -144   
-64    -112   
208    304    
-144   48     
-16    0      
-64    -48    
-176   16     
48     80     
-48    64     
128    144    
-208   32     
80     128    
-528   -32    
64     -64    
-32    384    
32     176    
160    48     
-176   48     
192    224    
-192   -16    
-32    16     
-16    -96    
-48    -96    
80     96     
-240   64     
-368   -48    
-80    48     
-960   -144   
64     160    
160    208    
-192   -16    
144    96     
-240   -32    
272    240    
-224   16     
64     0      
-32    160    
-32    192    
160    80     
-224   32     
32     0      
-208   -112   
-64    -320   
96     176    
16     48     
64     80     
-112   16     
48     -64    
-32    176    
0      -192   
288    560    
-256   224    
96     -96    
-208   128    
96     48     
-144   32     
32     48     
-144   -16    
32     144    
16     224    
-80    304    
80     160    
128    16     
144    144    
-128   -32    
-96    32     
128    288    
-224   32     
16     -48    
-112   96     
112    -16    
-128   128    
-320   -144   
128    144    
48     -112   
16     48     
-128   96     
112    176    
-128   64     
128    -32    
-80    64     
144    16     
-128   144    
48     80     
64     96     
-192   80     
80     112    
-64    208    
-192   -128   
160    176    
32     80     
80     256    
-640   784    
-272   -624   
-336   -352   
-304   544    
96     -112   
192    432    
176    -432   
-48    400    
16     -96    
0      96     
0      -16    
176    176    
-192   96     
80     48     
144    208    
-16    176    
-48    80     
0      -208   
0      -80    
32     -288   
16     320    
-80    -272   
-176   480    
-48    -448   
-16    400    
-144   -208   
-16    -304   
336    -64    
240    176    
208    32     
208    416    
96     112    
-80    368    
96     48     
-16    224    
80     160    
-352   -304   
96     192    
-240   -32    
16     -48    
-176   80     
-48    0      
-96    64     
80     80     
0      240    
-192   144    
64     -384   
272    96     
160    272    
128    192    
-64    144    
32     48     
-32    16     
32     48     
80     128    
-32    128    
80     160    
-544   -224   
-112   -496   
112    -80    
32     -16    
80     240    
-32    -96    
48     192    
-112   -16    
32     144    
32     240    
16     112    
16     272    
0      128    
80     -80    
0      32     
128    80     
-16    112    
272    608    
-208   416    
64     64     
240    64     
80     176    
112    -64    
-192   -16    
0      192    
-32    128    
-160   144    
144    -272   
-128   -432   
160    64     
144    240    
16     224    
-32    64     
-64    64     
96     64     
192    48     
128    208    
-96    192    
-144   0      
-112   -64    
320    400    
-16    176    
-240   -912   
-32    -112   
96     -1440  
112    -16    
80     96     
-80    128    
176    304    
-112   80     
160    48     
0      48     
0      -96    
-96    64     
48     304    
128    288    
-160   -48    
32     -48    
304    496    
-160   -960   
-112   64     
-64    -192   
368    112    
-48    -32    
0      -128   
-96    -16    
176    112    
208    288    
-32    144    
32     16     
-64    112    
128    160    
48     -64    
256    160    
16     -272   
48     0      
-48    240    
80     -48    
-48    160    
64     -16    
176    16     
-144   144    
-48    48     
160    128    
80     -16    
-128   -128   
112    144    
96     -80    
80     320    
-80    -576   
160    32     
-16    -704   
112    96     
32     80     
176    -160   
-32    -176   
32     144    
16     32     
32     48     
32     240    
-80    -64    
144    96     
-96    -176   
224    176    
16     -128   
-48    112    
192    -80    
-192   192    
80     -288   
0      32     
16     -48    
48     -32    
80     48     
128    288    
16     288    
-224   -16    
160    80     
224    48     
64     160    
128    0      
-32    192    
64     -48    
32     32     
48     64     
-48    -16    
-96    128    
80     32     
-16    -64    
176    96     
-32    0      
80     192    
112    208    
-32    0      
-32    96     
304    -176   
-112   176    
64     -112   
-48    112    
16     -144   
-576   576    
-272   -1008  
784    320    
-128   304    
-128   -416   
-368   -640   
656    688    
-16    32     
96     -272   
-304   80     
288    -432   
80     656    
96     -400   
-96    624    
0      -640   
0      448    
160    -112   
-32    -272   
96     -288   
-128   48     
208    -2096  
-80    288    
144    -1456  
-32    64     
144    -64    
-160   48     
224    80     
-64    128    
96     -208   
-48    64     
128    144    
32     16     
48     -64    
48     -448   
-592   16     
32     -400   
160    -32    
0      -624   
48     -80    
112    -1040  
64     -80    
-16    80     
0      16     
224    -96    
-96    128    
192    -384   
-240   96     
128    16     
128    -64    
-352   -48    
-160   32     
160    -64    
16     -16    
-64    -48    
144    -208   
16     160    
128    -784   
112    -96    
-16    -352   
32     48     
160    -32    
-16    144    
128    -16    
0      128    
-288   -112   
96     -224   
-496   -48    
96     -112   
80     144    
-96    -176   
160    128    
-64    -160   
-192   -80    
96     208    
-112   0      
320    368    
-224   192    
16     -144   
272    -224   
-96    32     
-48    -32    
0      -64    
160    80     
224    16     
160    -192   
-320   -224   
160    -896   
-80    16     
192    512    
32     192    
224    80     
-400   -96    
0      0      
48     128    
-144   -48    
0      -48    
-592   -432   
272    128    
-1488  112    
48     -192   
32     -16    
160    32     
128    256    
64     -800   
64     512    
-144   -144   
96     32     
-16    64     
-48    -144   
32     48     
64     -80    
-448   0      
16     -96    
-176   32     
128    -16    
-176   -240   
80     -80    
96     208    
320    -464   
-32    128    
-32    -64    
48     160    
16     80     
144    32     
-160   432    
32     96     
-272   -256   
16     48     
-80    -16    
64     -32    
-32    -208   
48     -256   
0      48     
32     -400   
-80    -528   
-192   -336   
0      -208   
-48    -80    
0      272    
-112   48     
96     160    
-128   112    
128    16     
-32    32     
64     -224   
0      80     
112    -208   
0      128    
32     -112   
48     48     
-48    -16    
-64    16     
-320   -16    
192    160    
-112   0      
160    0      
-144   240    
-48    -128   
-16    -16    
64     -256   
208    32     
-480   112    
-32    64     
-912   -144   
-912   -288   
-32    -64    
-640   80     
0      96     
-352   0      
96     32     
48     32     
-160   32     
0      -64    
224    -80    
-384   16     
0      -32    
-160   -112   
32     48     
96     80     
-224   16     
-16    64     
-16    112    
288    -192   
-32    240    
-304   -64    
-464   -128   
-64    96     
176    208    
-144   32     
-144   -112   
176    192    
-144   -160   
176    192    
-112   272    
224    16     
-112   64     
1712   -1264  
560    80     
240    944    
-736   -384   
112    240    
-288   -1024  
688    816    
-400   -752   
368    176    
-288   -64    
304    208    
-80    -304   
16     432    
-96    -176   
-48    352    
-352   -528   
208    208    
0      -112   
128    160    
-464   -320   
-16    -272   
-240   256    
128    -128   
-176   -64    
320    -144   
-48    208    
-112   -672   
176    672    
128    112    
16     176    
128    -32    
-64    144    
-32    -48    
80     80     
-16    -240   
80     -32    
-352   32     
48     48     
-16    -32    
-256   -32    
80     80     
-80    32     
-80    -112   
64     32     
16     208    
64     16     
-80    128    
16     -64    
-176   32     
-48    -48    
-48    64     
-192   -16    
32     208    
-64    112    
-48    -48    
144    64     
-352   -112   
48     112    
-112   16     
144    32     
-64    48     
48     224    
-304   -128   
176    -32    
-80    96     
128    16     
-256   112    
-96    -240   
-816   -304   
-272   -16    
-128   144    
112    112    
32     304    
-80    48     
64     0      
32     80     
-96    -64    
128    144    
-80    64     
0      16     
32     64     
-160   -48    
96     -80    
-640   208    
0      80     
176    336    
-48    128    
160    -16    
0      -32    
32     16     
-80    -32    
0      -48    
0      -32    
112    96     
-32    160    
48     128    
-192   32     
0      96     
112    96     
-16    192    
-64    96     
-96    -64    
64     -16    
16     64     
0      0      
-64    96     
16     128    
112    96     
0      112    
-208   -64    
112    176    
-160   -224   
112    96     
96     -96    
96     112    
-224   -48    
128    -176   
-96    16     
80     -272   
96     80     
64     208    
48     -16    
-16    112    
16     256    
-96    0      
288    -16    
-96    160    
-80    96     
80     96     
0      -32    
112    288    
48     192    
208    48     
-272   -80    
-128   160    
192    96     
240    16     
-256   -16    
144    224    
-192   96     
304    192    
-64    160    
-144   176    
96     80     
-96    192    
176    208    
-160   80     
176    -16    
-80    32     
64     16     
-112   80     
128    96     
-208   -64    
320    144    
-256   0      
128    96     
-64    -16    
272    16     
112    112    
48     144    
0      128    
32     176    
-16    -32    
32     144    
80     128    
0      320    
256    64     
-112   0      
160    160    
-176   -16    
16     256    
160    0      
-64    64     
144    224    
-80    48     
112    224    
-32    112    
16     0      
48     64     
64     64     
-32    112    
-16    112    
-64    -32    
160    96     
-176   32     
80     -480   
96     144    
96     -128   
-80    64     
0      96     
112    208    
16     -32    
-112   160    
128    -48    
0      96     
-16    32     
-352   288    
800    -16    
1504   -448   
-80    224    
-976   -544   
752    656    
-464   -1392  
576    224    
-144   80     
-352   -240   
208    96     
80     272    
192    -288   
-304   336    
224    -208   
240    432    
-192   -96    
240    528    
-208   -160   
176    -176   
-160   112    
304    -80    
-48    0      
48     96     
-16    16     
176    144    
32     128    
-16    -656   
-16    -32    
112    64     
-48    192    
208    32     
-176   96     
144    16     
-128   -112   
192    -64    
0      -160   
48     160    
96     -400   
-16    64     
-144   256    
176    112    
16     96     
32     0      
-48    64     
80     96     
64     32     
-80    -16    
160    80     
80     -176   
0      48     
48     -112   
112    80     
-96    -544   
-16    32     
80     -1280  
-32    96     
80     144    
16     -32    
64     -80    
32     368    
-128   96     
96     -48    
144    160    
16     -64    
-32    144    
48     176    
0      32     
144    16     
-80    80     
224    -160   
0      64     
0      -32    
96     160    
-128   -16    
304    400    
96     -160   
160    -1024  
-144   -80    
224    -80    
208    256    
-32    -192   
64     16     
48     48     
208    176    
16     -224   
-64    80     
16     -80    
32     48     
96     224    
0      256    
112    -48    
112    -464   
80     112    
128    144    
-16    176    
32     -80    
112    -48    
96     -48    
64     192    
-16    -432   
-16    96     
96     80     
48     128    
0      -64    
176    -80    
-16    304    
32     -112   
48     240    
48     80     
144    112    
-48    16     
-96    16     
208    -112   
-16    80     
80     0      
32     160    
96     32     
64     -240   
-208   144    
-320   -272   
-16    -272   
128    144    
128    -176   
48     16     
-48    -1952  
128    -336   
96     208    
-80    -48    
176    -48    
-16    -64    
112    -144   
80     48     
48     -288   
-48    -144   
-288   -128   
256    352    
0      -16    
96     -256   
-224   -192   
256    -176   
48     -48    
96     -352   
0      64     
16     -208   
240    48     
-16    -32    
48     288    
-112   -96    
160    -48    
-32    64     
-160   -464   
32     -176   
416    -96    
-64    0      
192    -256   
-240   0      
416    -704   
0      96     
-16    -32    
-48    16     
-96    64     
208    -64    
-112   112    
80     -464   
32     -16    
-336   64     
16     -208   
-240   -128   
320    -32    
64     -160   
64     112    
-16    -272   
112    -32    
-96    -1488  
288    16     
-16    80     
112    -48    
-192   -16    
96     240    
-192   -48    
-16    32     
272    -352   
144    384    
-1584  -240   
160    -256   
208    48     
64     -272   
-176   32     
240    -352   
-16    -16    
-16    -208   
224    16     
112    112    
96     0      
-160   64     
1680   -336   
-256   128    
192    240    
-1344  -304   
-96    64     
-352   -784   
384    224    
192    240    
112    48     
-272   -432   
96     -144   
32     -112   
112    -192   
176    160    
192    112    
-16    -64    
-592   -432   
368    -16    
-640   -176   
48     -176   
-64    176    
224    -96    
-96    112    
48     -672   
16     -16    
-144   112    
16     80     
48     -32    
48     0      
-176   0      
128    32     
-192   -32    
0      -64    
-16    -32    
-16    48     
320    64     
-32    -224   
0      96     
0      -80    
16     -176   
176    160    
32     192    
-64    -32    
-160   -176   
-144   -64    
256    32     
-16    160    
64     112    
16     -96    
128    -144   
-96    128    
80     -256   
-16    128    
-240   -240   
-544   -80    
-128   -32    
-432   48     
-160   -16    
96     -96    
-80    64     
128    32     
-32    48     
128    -112   
-144   -64    
-1184  -160   
112    112    
-144   -112   
16     112    
-16    48     
16     48     
16     176    
-192   -96    
176    80     
-352   32     
-16    -128   
-304   48     
-304   48     
144    160    
-192   -128   
-48    -64    
-16    32     
-16    -16    
128    256    
-192   112    
-144   -224   
240    144    
-64    320    
-160   16     
-112   112    
-128   -16    
-528   -128   
64     208    
-400   -32    
144    128    
-192   -64    
208    160    
-160   -208   
-48    -112   
-80    64     
-32    64     
-112   64     
0      16     
16     64     
-144   -128   
128    240    
-320   -16    
16     32     
-1040  32     
-48    112    
80     -80    
-112   0      
-144   -96    
16     -80    
256    160    
-224   288    
64     16     
-96    272    
-16    -32    
192    96     
-256   160    
352    176    
-32    128    
-496   32     
128    256    
-176   112    
240    160    
-96    -80    
16     32     
-32    144    
-272   32     
64     -144   
-176   -16    
64     32     
224    -96    
-176   144    
32     -96    
-32    -16    
-528   16     
-64    80     
80     -48    
48     96     
48     208    
-144   64     
128    112    
-128   192    
32     16     
80     160    
-96    112    
48     96     
16     80     
-160   32     
-16    64     
-240   -16    
64     96     
-128   -32    
-80    -176   
64     -304   
-32    96     
-16    192    
-48    -16    
0      144    
32     96     
-64    96     
16     48     
-16    112    
-240   64     
48     -368   
-224   -48    
64     80     
-192   32     
-128   32     
304    256    
-160   -16    
32     144    
-64    128    
64     64     
64     176    
80     16     
32     -64    
64     16     
-64    112    
-16    240    
-256   -96    
48     16     
160    144    
32     -80    
96     176    
0      160    
0      112    
-16    96     
16     112    
-160   0      
160    -16    
96     128    
128    64     
-240   0      
1184   -1664  
-608   -592   
816    32     
-240   -240   
-32    80     
-80    -656   
-128   96     
528    448    
-96    -32    
-192   -144   
-112   224    
112    -144   
48     176    
96     -64    
-16    80     
128    144    
-192   32     
160    64     
32     144    
16     -48    
32     -96    
-32    96     
208    64     
48     16     
32     48     
-16    128    
144    160    
-224   0      
192    32     
-96    -48    
96     32     
96     0      
128    256    
80     96     
-80    16     
-32    0      
208    128    
-32    80     
48     16     
-16    112    
112    96     
-64    112    
0      48     
-112   -16    
-48    -16    
48     176    
240    192    
16     128    
-48    128    
112    64     
32     112    
16     128    
80     208    
-80    80     
16     48     
64     128    
-64    208    
32     80     
80     96     
32     32     
-144   -64    
32     -96    
16     32     
64     -48    
48     160    
16     -96    
240    48     
144    224    
-64    160    
-80    128    
112    80     
144    112    
-96    64     
0      48     
16     32     
240    64     
-64    656    
32     -736   
320    144    
-160   112    
112    32     
-16    160    
-80    80     
48     -16    
128    32     
-16    112    
96     160    
-160   -16    
0      -32    
-32    -32    
128    64     
0      240    
-64    -928   
160    96     
16     64     
160    64     
-64    48     
80     128    
16     80     
64     128    
-64    -96    
80     32     
0      -64    
160    160    
-16    80     
144    208    
-160   -160   
176    -256   
-64    208    
160    64     
-96    128    
48     112    
176    176    
0      -160   
-16    128    
64     0      
32     -16    
-48    128    
160    160    
32     128    
-32    -208   
0      16     
176    -464   
-16    112    
128    -544   
64     640    
-48    176    
80     64     
-48    128    
192    -80    
-64    48     
-32    128    
144    -16    
-32    -32    
64     48     
160    432    
112    -160   
160    48     
-160   128    
192    -640   
-96    208    
48     -1312  
48     64     
-80    32     
272    208    
-64    -32    
112    144    
-64    80     
64     0      
-32    16     
48     -80    
96     208    
112    32     
-256   32     
272    -352   
-304   -64    
320    -368   
-176   256    
-48    48     
-32    -80    
128    96     
240    112    
-208   128    
32     -80    
336    -160   
-64    192    
-80    -32    
-16    -528   
-32    80     
288    -96    
-64    160    
256    176    
-368   16     
272    -112   
48     368    
16     0      
-96    48     
240    -32    
448    -64    
208    48     
-80    -80    
-16    112    
320    0      
-288   0      
-64    -48    
0      208    
128    -768   
-32    224    
16     0      
-16    0      
32     96     
-80    80     
240    -1424  
-48    96     
80     368    
-80    -48    
1248   624    
-368   240    
816    720    
-64    480    
400    -448   
-272   -880   
-144   96     
224    400    
224    320    
-112   112    
-1520  32     
-192   -368   
32     -256   
160    -976   
0      -128   
-48    -512   
128    16     
80     256    
80     -128   
-16    160    
128    112    
16     -416   
-64    16     
-32    -240   
224    -272   
-1232  -32    
208    -144   
-48    -128   
16     -192   
16     48     
240    -240   
-32    32     
16     -960   
48     -96    
0      -32    
48     -160   
80     -112   
-80    144    
160    -160   
-16    -208   
-80    48     
112    0      
80     0      
16     -112   
16     -112   
16     -480   
144    -96    
-64    -960   
32     128    
-48    32     
272    32     
-128   96     
256    144    
-336   -16    
64     -400   
112    16     
-144   16     
96     -192   
48     -80    
-80    48     
64     -256   
112    80     
-32    -368   
48     -112   
0      -1712  
0      160    
96     -128   
0      -16    
64     32     
80     16     
-128   144    
-32    -368   
48     -48    
64     64     
-1600  0      
192    336    
-128   -128   
192    -64    
64     -16    
32     -1296  
144    208    
-64    80     
208    192    
16     -16    
96     -352   
0      -32    
-80    -160   
-96    80     
240    -160   
-144   64     
32     -128   
-208   -112   
48     -288   
144    352    
-80    -400   
128    16     
112    80     
-32    -112   
112    192    
-224   -176   
192    -96    
-48    0      
96     80     
-160   -96    
-320   -80    
-176   -224   
-864   -144   
-48    -288   
48     80     
32     -176   
48     80     
-144   -96    
80     144    
-112   96     
-128   64     
-32    112    
0      -64    
96     -176   
0      -16    
-224   80     
336    112    
-64    144    
16     -32    
32     80     
64     -496   
-192   -96    
-128   -304   
64     -96    
16     112    
224    64     
-48    32     
-48    0      
64     -32    
32     -48    
-48    -80    
112    -80    
-96    64     
16     -240   
32     96     
-512   -256   
-272   -112   
-64    -160   
-576   -16    
-176   -32    
48     -64    
-336   -96    
208    -112   
-240   -16    
176    64     
16     -32    
-464   -64    
-48    -32    
-304   -400   
144    32     
-272   -64    
112    -272   
-208   112    
-96    128    
80     -80    
-656   16     
-16    16     
32     16     
-128   -96    
176    176    
-272   -80    
-560   -608   
160    96     
144    112    
-32    128    
-48    112    
-128   -80    
-112   -96    
-288   -192   
48     176    
48     160    
-176   64     
-320   -192   
64     160    
-192   -192   
-64    48     
-16    -48    
96     128    
16     -176   
16     32     
0      144    
-64    -80    
-144   -192   
-112   64     
16     80     
64     -16    
0      96     
-176   32     
-144   176    
-544   32     
-32    96     
-80    -80    
-192   496    
-448   -64    
176    48     
-256   -432   
-496   0      
784    -576   
-464   -272   
224    480    
-112   -368   
-176   -128   
-160   160    
0      0      
-304   -48    
144    160    
16     -144   
48     96     
144    480    
-80    288    
-176   -256   
-240   -192   
80     80     
80     144    
96     -96    
-96    -192   
-16    112    
16     80     
144    192    
-224   -48    
160    96     
-288   -640   
160    144    
64     112    
64     80     
-112   32     
160    -176   
-64    -32    
96     96     
-176   272    
0      16     
32     80     
-16    32     
-16    32     
-384   48     
112    32     
-1168  -64    
-16    144    
16     96     
64     304    
32     208    
-112   -32    
0      -64    
0      0      
16     112    
-80    112    
16     80     
-160   -240   
96     -80    
48     272    
112    272    
-352   0      
16     0      
48     16     
-176   -80    
128    64     
-240   -48    
48     192    
0      80     
96     96     
-176   -32    
80     32     
-112   -48    
16     128    
-128   -16    
128    112    
48     192    
-64    144    
288    720    
-368   320    
-16    -208   
-128   -112   
144    -160   
64     112    
16     -32    
-16    112    
-16    128    
-208   -144   
272    272    
-160   16     
96     32     
-32    112    
32     80     
48     0      
16     64     
64     32     
64     80     
16     64     
-64    -80    
48     16     
-32    128    
64     64     
-96    48     
112    112    
-48    48     
-16    -160   
32     128    
112    272    
-96    -64    
128    224    
-176   48     
192    48     
-176   0      
128    80     
-16    112    
32     80     
32     144    
-128   -32    
64     112    
-128   0      
96     144    
-80    16     
-32    -32    
144    96     
96     64     
0      96     
-96    256    
-48    -272   
48     -208   
112    160    
-128   -64    
160    80     
-368   -208   
144    96     
-16    -48    
-80    144    
32     -144   
16     -272   
-176   128    
208    336    
-176   -48    
112    -48    
112    32     
-16    80     
64     48     
-64    -16    
32     -112   
112    176    
128    64     
144    176    
96     64     
0      16     
-16    112    
96     32     
64     320    
-64    0      
288    -32    
48     0      
128    400    
-16    160    
-64    112    
48     64     
-32    -16    
-48    96     
0      208    
0      320    
144    112    
-128   -256   
240    256    
144    160    
-80    -16    
128    32     
-48    32     
176    240    
-80    320    
-16    -160   
16     48     
-32    -48    
288    288    
-208   -32    
128    -464   
160    -352   
-80    256    
224    112    
-80    176    
64     224    
-96    64     
16     -64    
48     32     
-32    96     
16     -64    
96     96     
-16    112    
80     -32    
-16    160    
192    -80    
128    32     
144    176    
1856   928    
-976   -496   
1056   544    
-208   720    
-80    32     
112    -112   
-736   -192   
544    400    
-368   208    
48     16     
-48    -16    
-16    96     
32     -400   
224    48     
-128   -352   
16     144    
-48    32     
32     96     
80     -80    
96     112    
-112   -64    
64     192    
16     32     
-80    -160   
64     -16    
-96    -192   
208    144    
32     -128   
64     -16    
-96    -256   
208    128    
96     -960   
48     144    
-32    48     
80     80     
-64    -208   
288    -80    
-192   240    
272    -32    
0      96     
-96    -80    
128    128    
48     -112   
176    64     
-112   -64    
256    128    
-224   -400   
256    96     
-144   -32    
128    128    
32     32     
32     208    
-32    64     
-32    -224   
16     96     
80     -336   
272    128    
-160   -16    
160    176    
-32    -320   
80     128    
-16    -384   
64     80     
32     144    
-64    144    
48     -16    
176    48     
112    240    
-160   -80    
144    0      
176    192    
-176   80     
128    -192   
32     112    
32     -176   
32     176    
288    0      
-144   176    
0      0      
80     176    
160    0      
-112   -16    
-32    -160   
288    112    
-128   208    
-96    -176   
272    368    
-352   -304   
336    64     
-160   -16    
128    272    
80     0      
96     16     
32     -80    
144    -1008  
-160   0      
-352   144    
-96    -352   
48     -112   
64     -816   
-16    -208   
48     -64    
0      -112   
48     192    
16     -112   
208    224    
-256   -160   
368    -432   
-112   192    
256    -80    
-128   -224   
-32    -80    
208    -48    
-32    0      
16     -112   
48     -128   
80     -64    
160    224    
160    -592   
64     96     
-48    -160   
272    160    
-208   -16    
112    -160   
-16    -144   
144    -128   
-144   -256   
80     -336   
-848   -64    
160    -32    
-16    16     
208    -96    
96     64     
-80    -1440  
176    -80    
-176   112    
144    16     
160    128    
16     112    
-240   -80    
192    -80    
-448   -192   
144    -16    
-416   32     
32     -80    
128    -48    
32     -48    
80     -64    
-16    -272   
112    -48    
-48    -48    
32     128    
-16    -272   
160    64     
-256   -176   
160    192    
64     688    
-176   -272   
-256   0      
80     -32    
-32    -128   
176    -64    
-96    112    
112    -64    
-160   -96    
64     -272   
112    288    
16     -320   
112    144    
-48    48     
-48    0      
-112   16     
80     -432   
-80    64     
208    -48    
-352   -272   
128    64     
128    144    
48     128    
48     160    
128    -688   
-16    96     
96     -144   
-48    32     
112    144    
112    -64    
-96    96     
144    -176   
-80    32     
-16    -32    
-80    144    
-16    -80    
-1168  -304   
96     -352   
-64    0      
-48    -384   
-640   1360   
-880   -544   
432    896    
-896   368    
-160   -352   
64     544    
-336   144    
-64    752    
-144   -624   
528    160    
-400   -224   
96     48     
112    -48    
176    48     
112    176    
-64    64     
-256   -32    
32     -624   
-48    -320   
352    256    
96     176    
-16    80     
-80    240    
144    -224   
-288   -64    
128    -384   
96     32     
-112   -32    
48     208    
-192   -272   
-912   -96    
-64    -16    
128    32     
-112   144    
-16    32     
-160   -80    
160    224    
-80    -16    
-32    -464   
-128   96     
96     0      
-64    96     
-192   -64    
-32    32     
-480   -208   
-64    32     
-96    16     
0      -96    
96     400    
-144   -160   
48     160    
-288   -192   
-16    32     
112    64     
112    96     
-432   -144   
-96    -288   
-208   -112   
336    640    
-432   -144   
160    -16    
64     16     
-32    -64    
-176   32     
-160   -144   
80     240    
-288   -48    
0      96     
0      64     
64     48     
-16    -64    
-16    128    
-16    -64    
48     128    
-32    16     
0      80     
112    688    
-256   416    
96     176    
-160   0      
128    128    
-176   -32    
-112   96     
-1520  -192   
-96    64     
-16    -352   
192    112    
16     16     
-176   0      
112    16     
-80    112    
32     32     
-144   0      
48     64     
48     208    
-16    64     
-320   0      
16     144    
-784   176    
-112   96     
-48    -64    
128    144    
96     48     
-272   0      
-48    16     
32     64     
192    336    
-144   -48    
192    208    
-224   -48    
96     -48    
-256   -32    
80     32     
-272   16     
-80    128    
-64    -144   
0      -128   
-64    -48    
-32    -176   
80     48     
-128   -32    
112    144    
-16    208    
32     80     
-32    352    
-320   -16    
144    -96    
-272   -320   
-48    -112   
192    96     
32     48     
-48    224    
144    112    
-192   80     
80     16     
48     -48    
-224   -224   
336    336    
-96    112    
32     64     
-96    112    
112    -144   
-32    -16    
-48    32     
64     80     
-160   -80    
-176   -16    
176    368    
-80    -48    
48     48     
64     -32    
-48    16     
-96    16     
144    112    
0      0      
0      32     
-16    0      
-240   -96    
-16    -16    
80     128    
-288   32     
32     48     
112    112    
-112   -320   
0      96     
0      768    
-16    -48    
-320   -176   
256    16     
48     -32    
-32    160    
-240   16     
208    80     
-32    48     
48     112    
48     32     
-32    160    
32     16     
-32    144    
64     96     
16     144    
112    -144   
48     160    
-80    64     
-96    160    
-16    112    
0      -16    
160    144    
-16    -16    
64     224    
-16    32     
-32    192    
144    -128   
-80    240    
-48    176    
16     96     
-64    368    
-96    1472   
-608   80     
112    -304   
-192   -496   
624    176    
-304   64     
-32    512    
-224   224    
208    64     
-224   -304   
112    32     
96     96     
80     80     
-112   80     
96     16     
-16    112    
32     144    
32     -16    
64     64     
-48    -32    
-48    0      
-16    80     
16     144    
16     48     
-16    -48    
-112   -64    
288    96     
-208   192    
272    192    
-160   16     
-16    48     
80     192    
80     80     
-128   96     
160    128    
-144   208    
240    64     
-160   80     
192    128    
16     48     
80     32     
-112   160    
176    80     
64     112    
-64    176    
0      0      
-48    -64    
96     -192   
0      224    
-64    -224   
80     144    
-16    16     
176    -352   
-144   48     
144    80     
0      272    
-32    -112   
144    176    
-112   256    
176    -176   
-32    48     
16     160    
-112   16     
32     -144   
80     176    
-48    -96    
-16    96     
-48    -2416  
208    144    
-80    64     
80     192    
-16    16     
112    0      
96     64     
32     224    
-144   -32    
128    240    
-32    48     
96     -16    
32     64     
-48    -160   
128    320    
-176   -496   
128    112    
80     144    
80     48     
224    0      
112    304    
-144   112    
176    32     
-64    16     
64     128    
80     112    
-160   64     
208    128    
144    -112   
-32    64     
64     -528   
96     128    
32     -2816  
112    96     
-160   -16    
128    64     
16     -48    
16     48     
48     32     
-240   -160   
80     -80    
64     96     
192    48     
48     32     
96     208    
-64    -304   
160    48     
64     -752   
64     64     
32     -336   
64     128    
192    320    
-48    -16    
-96    176    
64     112    
192    96     
-112   -96    
208    208    
-80    96     
80     -80    
-112   -256   
288    144    
-112   160    
128    176    
16     128    
32     80     
16     -448   
176    288    
80     16     
-80    208    
48     80     
128    208    
-112   144    
304    -464   
-16    176    
64     -48    
-112   160    
208    128    
-16    432    
80     -624   
-208   -48    
160    32     
32     96     
-16    96     
112    48     
16     0      
144    -96    
-112   -192   
288    480    
-400   -208   
160    -192   
112    144    
160    -352   
-96    96     
-48    -624   
96     176    
80     64     
-32    160    
-192   -192   
128    304    
96     416    
-16    -176   
-32    0      
80     0      
144    160    
32     -64    
-32    192    
-48    -96    
96     96     
32     16     
32     240    
-80    48     
80     -48    
-48    32     
-1504  -144   
-48    -608   
176    -112   
160    -496   
32     -80    
-112   -1488  
0      -128   
144    112    
-32    48     
48     64     
-96    -32    
224    -736   
0      112    
-112   -512   
-192   160    
-1552  -528   
-272   -1008  
-64    144    
224    -288   
304    -368   
-384   -1088  
624    464    
-80    64     
48     416    
-368   -80    
272    144    
144    -96    
-80    208    
-32    -304   
288    -160   
32     128    
-64    0      
-576   -112   
-112   -224   
192    -112   
-16    96     
0      -96    
64     -224   
-16    -32    
-48    -288   
96     112    
80     608    
-16    160    
-96    16     
128    -208   
-320   -112   
48     -224   
-1008  -96    
0      -96    
144    -80    
48     -128   
256    224    
-112   -736   
176    -224   
48     -256   
-16    96     
80     48     
96     16     
-160   -240   
112    80     
-224   -96    
-112   32     
48     96     
-64    -112   
-352   0      
96     -80    
-80    -240   
96     -336   
-128   96     
64     304    
16     16     
-128   -304   
128    144    
-16    0      
-64    -128   
32     -16    
64     -32    
-208   -256   
208    208    
-1296  -128   
48     -64    
0      16     
64     -128   
-32    64     
96     112    
16     32     
32     16     
128    0      
-144   64     
80     -144   
-64    80     
-192   -32    
-864   -320   
32     -144   
-240   -16    
-112   -176   
-80    -64    
48     -256   
80     48     
80     -368   
64     -128   
-272   -448   
288    288    
-128   464    
-16    64     
-304   -144   
128    16     
-64    0      
0      -16    
96     -48    
16     160    
32     160    
-96    -336   
-32    -160   
192    -176   
128    160    
-32    176    
32     144    
-48    -32    
112    -144   
-96    64     
-32    288    
-16    256    
32     112    
-64    48     
-112   -240   
-576   80     
96     -32    
64     32     
96     160    
-16    -16    
64     64     
144    -288   
16     112    
16     48     
-80    -64    
256    128    
-224   224    
-64    -240   
64     -16    
-160   -368   
176    16     
-592   -128   
48     128    
-128   -160   
-16    352    
-288   80     
-320   -64    
32     208    
-112   -224   
320    272    
-64    192    
-96    48     
112    16     
-144   -64    
-192   -48    
256    16     
-128   80     
96     -48    
-192   -448   
-272   -128   
64     176    
-144   -16    
16     144    
-192   144    
48     80     
-448   96     
32     -64    
-32    0      
0      96     
-96    -224   
176    -48    
-144   -48    
48     144    
-64    32     
-112   0      
128    -48    
-48    -192   
208    32     
-304   256    
-208   -48    
-784   160    
48     -112   
-496   0      
-16    -16    
-64    -112   
144    96     
0      -96    
-16    256    
112    96     
-48    64     
192    16     
-112   192    
32     -96    
-64    224    
0      -16    
48     32     
144    240    
-464   -80    
-64    -32    
-48    -176   
64     96     
-48    -48    
48     112    
-32    96     
-112   176    
112    -48    
-368   112    
48     16     
-16    16     
48     96     
800    -1008  
768    688    
160    160    
-432   160    
224    -784   
-80    -272   
-176   -320   
240    528    
0      -112   
-256   -400   
192    80     
32     80     
0      336    
-64    -272   
-80    320    
32     -192   
-112   256    
0      -128   
-64    208    
-976   -176   
-80    320    
96     -32    
32     144    
96     -80    
32     64     
-176   32     
192    256    
-32    80     
80     32     
-272   -64    
-160   -16    
80     160    
32     32     
0      144    
-336   -96    
32     240    
16     80     
-48    16     
-128   48     
176    96     
-32    96     
-16    64     
32     112    
-144   16     
48     0      
-112   0      
128    144    
-96    -32    
304    80     
-480   -48    
160    16     
-48    64     
-80    16     
160    96     
-64    160    
-64    -80    
32     0      
-96    144    
96     -48    
32     112    
-96    -32    
112    128    
-144   -80    
112    144    
-48    -64    
0      64     
160    176    
-144   32     
112    112    
-96    0      
80     144    
-64    32     
96     48     
16     32     
-16    64     
-32    112    
-32    -96    
48     0      
-112   80     
16     32     
0      128    
-16    128    
-16    -144   
224    48     
96     32     
-64    -112   
64     192    
-144   240    
48     0      
-64    64     
48     48     
32     80     
-64    -96    
-48    -320   
48     80     
192    288    
-80    0      
16     16     
80     240    
32     16     
96     48     
-208   -112   
96     144    
-192   96     
96     64     
-80    48     
160    144    
-144   176    
-144   48     
192    368    
-64    48     
144    176    
-32    160    
272    176    
-208   0      
192    112    
-304   -80    
240    224    
80     -336   
-32    48     
128    128    
-16    -128   
32     80     
144    112    
-112   -160   
176    208    
-192   208    
16     -304   
160    256    
-32    0      
64     -64    
-160   160    
208    112    
32     128    
64     -64    
-64    80     
48     176    
192    352    
-256   -368   
128    -160   
48     272    
128    368    
-112   -64    
160    48     
0      64     
336    160    
-32    256    
32     96     
-112   -64    
112    144    
-16    -128   
80     -48    
48     192    
-256   -640   
336    128    
-560   -16    
80     -64    
64     48     
304    272    
48     176    
-192   32     
16     96     
32     112    
96     16     
-160   32     
128    -48    
272    240    
-128   96     
16     -624   
64     176    
-64    -16    
320    -144   
-96    192    
160    -80    
96     192    
-160   48     
208    -80    
-32    160    
32     -16    
64     144    
80     112    
32     -176   
-48    32     
-48    -400   
96     240    
16     -640   
0      80     
-16    48     
112    16     
-96    288    
16     128    
-112   -16    
192    32     
48     192    
128    112    
-80    176    
288    1040   
-512   -1616  
-16    -432   
784    496    
0      -816   
-720   -64    
288    -1264  
160    1376   
-240   -656   
224    -16    
-208   -240   
320    704    
-96    -112   
-80    288    
-16    -560   
192    400    
16     -96    
576    496    
-432   128    
128    320    
-112   80     
240    -256   
64     16     
144    32     
-112   224    
208    -256   
-32    512    
-48    -224   
-96    -80    
-144   -368   
80     -128   
128    16     
16     -240   
16     48     
80     -128   
176    -96    
-48    -256   
96     -80    
144    272    
-176   0      
80     176    
96     80     
48     32     
-64    -128   
64     112    
176    -128   
-128   -240   
320    192    
144    528    
144    176    
32     80     
32     -256   
32     256    
-112   32     
-96    16     
32     64     
192    96     
-288   -32    
-16    -272   
-144   -448   
-144   -160   
80     96     
-48    -16    
0      0      
-96    -96    
32     256    
-112   -32    
160    256    
-224   -128   
64     -368   
96     112    
-336   176    
-16    -1168  
32     -432   
48     -2400  
96     -32    
160    240    
-16    288    
48     272    
-16    -240   
-48    64     
-16    -224   
128    160    
-160   80     
80     -784   
-384   -224   
48     -240   
32     0      
112    -48    
-240   -272   
224    -80    
64     -928   
96     -208   
0      176    
240    272    
-176   48     
128    -96    
64     -96    
0      128    
272    -112   
-16    -144   
48     -96    
-48    16     
128    32     
176    -16    
48     496    
144    448    
-224   -128   
16     -1536  
32     -64    
96     -80    
0      112    
0      -192   
80     128    
96     256    
16     16     
-16    16     
-32    -16    
-1520  -256   
48     -192   
16     -80    
224    144    
112    -16    
16     -608   
-96    -32    
48     -560   
192    224    
64     -16    
48     64     
-80    48     
224    192    
-256   96     
320    112    
-864   -112   
208    16     
-240   64     
272    -128   
-48    -16    
48     -208   
-48    -16    
112    -960   
16     -16    
-16    -16    
96     144    
0      0      
192    -32    
-80    -16    
96     32     
-144   16     
48     96     
0      16     
-16    -16    
-32    -128   
272    -192   
-160   0      
224    -528   
16     64     
176    -32    
96     -176   
-80    -64    
80     -80    
-160   -32    
48     -128   
-288   96     
-32    -144   
-304   112    
112    -272   
-656   -48    
96     -176   
32     96     
48     -240   
16     336    
128    -64    
208    192    
-192   0      
16     -32    
-64    144    
16     16     
-80    16     
80     -176   
-384   -16    
80     -80    
96     -80    
256    -16    
32     160    
-96    -240   
-112   256    
-160   64     
64     -64    
-48    -16    
64     -80    
-32    144    
-160   -32    
64     48     
16     -144   
112    96     
2112   -16    
-1424  -704   
352    -1056  
-192   -208   
400    -192   
528    1088   
-976   -112   
880    432    
32     -112   
-480   -352   
16     112    
-96    -176   
256    176    
-144   0      
64     96     
32     -208   
-688   32     
-240   -240   
-96    64     
-784   -272   
112    208    
-32    0      
-192   48     
-224   -32    
-656   0      
-128   -16    
176    240    
-80    160    
128    -32    
-208   0      
-192   -80    
144    112    
-560   -144   
-64    128    
32     -48    
-16    0      
-64    80     
-432   -64    
-48    64     
-144   16     
80     144    
-320   80     
16     32     
-48    32     
0      -32    
-48    32     
-32    64     
240    64     
-80    96     
-16    32     
-48    -16    
-32    32     
-112   48     
48     64     
-112   -48    
-96    80     
-576   -80    
-176   -16    
-512   -112   
-112   48     
48     -48    
16     112    
-32    -224   
32     112    
-48    -48    
-32    64     
-32    96     
32     176    
-16    0      
32     16     
16     64     
-144   -16    
-80    48     
-144   32     
0      96     
192    240    
-144   80     
96     -128   
-16    112    
-192   32     
224    64     
-112   336    
-272   0      
-144   16     
-32    -96    
144    -80    
16     -48    
-176   32     
-304   -48    
0      96     
-128   -32    
80     144    
-48    -48    
80     32     
336    688    
-208   304    
-64    -160   
48     -112   
32     0      
32     176    
-32    304    
-48    80     
-144   -80    
-16    -128   
16     112    
-288   16     
80     208    
128    480    
-16    432    
64     240    
-64    32     
32     96     
-32    -64    
144    96     
-16    192    
-16    64     
-96    -64    
-128   -128   
32     80     
32     176    
-256   -32    
80     -64    
32     -64    
112    48     
-64    368    
0      384    
112    112    
-112   80     
64     -48    
80     80     
0      32     
-64    96     
-112   16     
32     96     
-32    96     
-80    -32    
-96    -112   
32     48     
-64    48     
16     144    
-16    32     
96     -112   
-48    144    
-48    32     
-256   -16    
16     144    
64     -80    
48     128    
-144   48     
-32    80     
-208   -112   
96     96     
-48    -16    
48     128    
192    48     
-96    112    
-208   -16    
256    96     
-32    160    
0      80     
-64    64     
-48    128    
208    112    
-224   -48    
96     384    
-208   0      
32     -128   
272    96     
64     192    
-48    -48    
-112   160    
208    -32    
80     16     
64     64     
-16    16     
144    48     
-192   144    
192    -48    
-64    112    
0      160    
-16    32     
0      128    
48     176    
-80    -32    
-32    224    
-48    128    
32     64     
-128   96     
240    -48    
208    -48    
-160   64     
-192   -64    
-32    96     
256    64     
128    48     
32     112    
1712   -1328  
-656   -656   
688    928    
-240   608    
192    -288   
-368   192    
-128   464    
656    336    
-240   832    
128    -144   
-384   -32    
208    64     
160    160    
-80    -640   
-112   416    
32     -240   
304    512    
-320   -160   
608    384    
32     240    
240    48     
-32    368    
16     -320   
48     16     
288    800    
0      224    
240    336    
-160   256    
256    -48    
-224   -176   
112    48     
-16    128    
96     80     
32     240    
-48    80     
176    128    
-160   288    
144    128    
-96    0      
16     240    
-64    -80    
96     -864   
128    48     
-32    -400   
48     80     
32     240    
-96    96     
240    256    
-240   144    
240    0      
-64    176    
0      64     
96     144    
-80    -64    
208    208    
-16    128    
0      -64    
96     80     
-16    -368   
80     -96    
-144   240    
32     272    
-16    -144   
208    224    
-96    176    
64     96     
-128   -80    
256    208    
-160   -96    
80     112    
16     48     
112    16     
64     256    
-32    -288   
112    -48    
176    -2032  
48     496    
-32    176    
112    -16    
80     80     
96     -96    
144    -144   
128    336    
-208   112    
288    192    
-48    80     
96     -64    
48     112    
32     -256   
80     64     
-32    -224   
64     80     
80     288    
-32    192    
-48    48     
144    80     
48     48     
-16    -16    
64     144    
16     176    
48     112    
0      -112   
96     64     
-112   -320   
208    112    
-128   240    
416    448    
-304   -1104  
176    240    
-32    0      
128    96     
32     0      
112    80     
-16    -48    
112    -16    
-400   -80    
448    -128   
-208   -32    
160    -112   
112    240    
-48    -672   
16     16     
48     -160   
-112   48     
240    -272   
-80    16     
-48    -112   
80     -64    
-96    112    
144    -112   
256    176    
-80    -48    
352    32     
-288   -16    
48     80     
256    -224   
32     256    
-128   -32    
208    112    
48     48     
-112   144    
16     -80    
96     32     
-160   80     
272    192    
48     0      
0      -144   
-64    176    
64     -96    
16     48     
32     -32    
64     112    
32     96     
160    80     
-64    32     
16     -368   
-32    32     
-960   80     
48     -592   
112    -96    
-32    -144   
-16    -48    
176    -96    
-16    -16    
0      -240   
0      -16    
48     -160   
0      -128   
-112   -1120  
96     0      
96     -656   
288    -16    
-176   224    
-80    -128   
-48    -16    
208    -128   
32     144    
-176   -528   
16     -48    
256    -48    
64     -96    
-16    176    
-64    -128   
64     -320   
224    208    
16     -80    
16     208    
-128   -48    
48     -256   
-224   0      
16     -176   
32     16     
0      -160   
144    16     
64     -480   
16     48     
1120   2512   
-1648  448    
-576   -224   
48     912    
496    -1104  
304    656    
-1264  -208   
576    48     
-224   -80    
-80    -480   
-32    240    
16     -320   
224    96     
144    -784   
64     -16    
-64    -64    
-80    -16    
144    96     
0      -144   
-96    -160   
32     -16    
-64    128    
208    128    
-352   16     
160    -208   
-16    -112   
288    -208   
-48    64     
80     -96    
64     96     
80     -1392  
112    64     
-16    0      
48     96     
-48    32     
128    -48    
-32    32     
32     -192   
-112   64     
0      -144   
-320   16     
32     -64    
16     96     
80     -224   
-32    32     
64     -800   
32     32     
0      48     
16     64     
16     16     
0      64     
-80    -96    
48     -80    
-256   -48    
64     0      
-208   160    
32     -16    
-1456  -320   
64     -352   
48     112    
48     -336   
-32    80     
80     -784   
48     192    
-144   80     
64     -64    
-144   32     
16     16     
96     208    
-192   96     
-192   -80    
112    -80    
0      -48    
96     -144   
96     224    
32     32     
-80    0      
-240   -48    
128    -96    
48     272    
32     144    
48     224    
32     320    
-144   -80    
32     -80    
96     400    
-16    -96    
-544   144    
16     -208   
48     144    
32     -368   
0      112    
-80    144    
16     -80    
48     96     
112    256    
-48    144    
48     -112   
-144   -208   
224    -176   
64     176    
16     16     
-144   96     
48     -208   
160    112    
-208   -448   
-592   48     
-80    48     
-48    32     
-48    64     
256    32     
-96    -128   
48     80     
-128   32     
144    128    
-96    16     
-144   -32    
0      176    
-160   -128   
-16    48     
-208   -128   
-32    128    
64     112    
-64    -16    
-128   48     
-80    304    
-224   -16    
-1200  -256   
-48    128    
112    32     
-32    -112   
-112   -176   
96     192    
0      -176   
-144   0      
240    160    
-256   -48    
176    16     
-320   112    
32     -144   
-176   0      
0      96     
-176   -96    
-80    32     
-16    96     
-80    224    
-400   -304   
240    192    
0      -48    
64     0      
-144   32     
64     128    
0      176    
-96    -128   
32     64     
-80    96     
208    144    
-288   32     
128    48     
-304   -96    
-48    112    
32     48     
-144   96     
-16    -128   
-96    80     
48     -80    
-112   144    
32     144    
-64    96     
144    -16    
-160   16     
144    96     
-96    -32    
-96    112    
-16    16     
208    64     
-144   112    
-32    16     
48     -64    
-48    -16    
32     96     
-32    16     
16     112    
112    -16    
-48    48     
-192   -96    
-80    -16    
-48    -16    
48     160    
-48    32     
-192   112    
-448   -208   
-80    64     
208    -96    
-112   144    
144    176    
-320   544    
-1088  1136   
-16    64     
-608   -64    
384    -272   
-208   576    
96     -400   
-32    544    
336    224    
-16    192    
-768   -416   
208    448    
-64    80     
-144   -432   
432    64     
-224   -304   
16     -96    
-288   144    
608    720    
-224   -48    
80     208    
-336   -64    
112    -32    
-64    16     
48     144    
-384   -112   
-272   32     
-96    192    
160    -48    
-240   -224   
48     -160   
-64    224    
112    128    
-64    80     
-112   96     
-16    96     
-112   -80    
-48    64     
-16    16     
112    64     
-128   0      
0      144    
80     80     
112    192    
-208   96     
144    -64    
-32    32     
112    256    
-160   112    
48     -128   
0      96     
-224   80     
144    -112   
32     112    
-96    112    
176    32     
-112   0      
176    128    
-32    96     
-16    48     
208    0      
0      224    
-112   -32    
96     80     
64     48     
48     176    
-112   64     
32     208    
-256   -48    
160    80     
48     16     
-16    48     
96     112    
-32    160    
16     -16    
-96    -64    
240    176    
-80    -32    
96     16     
-32    320    
-64    128    
-80    0      
96     -96    
-144   64     
-176   -80    
208    64     
-160   240    
32     64     
0      -96    
48     96     
128    208    
-112   -32    
144    80     
80     240    
-160   -208   
304    208    
-256   64     
224    224    
-128   32     
96     32     
-32    -16    
144    32     
16     112    
96     240    
-16    32     
0      240    
-48    192    
144    112    
-192   -64    
48     -16    
0      64     
-32    64     
208    304    
-80    224    
32     192    
112    144    
-128   -16    
144    96     
-80    16     
176    208    
-176   112    
320    208    
-192   -16    
32     16     
-304   0      
352    48     
-96    304    
48     192    
48     112    
96     -448   
-112   -32    
112    288    
32     96     
160    112    
16     192    
112    224    
-128   208    
160    224    
176    80     
-64    160    
80     64     
-64    160    
80     -16    
128    96     
-16    -176   
32     224    
-32    224    
224    192    
-128   48     
96     96     
-64    -16    
-16    144    
32     160    
144    32     
-128   -304   
208    -96    
-144   208    
-64    32     
64     160    
0      -208   
176    144    
-16    -1920  
80     144    
32     80     
208    640    
-192   -128   
96     256    
0      -80    
272    16     
-112   -32    
112    -64    
-32    144    
256    -128   
96     144    
64     -224   
-80    368    
-176   -992   
128    -192   
144    128    
128    -112   
16     192    
64     -80    
48     -16    
16     128    
0      224    
-32    -80    
224    96     
128    144    
-16    112    
32     -208   
144    304    
-176   -64    
80     48     
80     -368   
112    96     
16     96     
-448   -1776  
176    -624   
-1312  272    
592    -208   
656    1184   
-272   -672   
-128   -112   
1072   192    
96     -32    
-352   -336   
-32    -240   
-80    -96    
288    -512   
-64    336    
-32    -64    
-112   48     
16     -32    
16     256    
144    48     
160    -96    
-16    64     
304    128    
-128   80     
208    -160   
-144   192    
336    -112   
-48    -48    
-128   -112   
288    192    
48     -16    
-80    144    
-16    160    
208    160    
-48    48     
112    -448   
80     128    
48     176    
-32    176    
-48    -160   
224    48     
-80    -160   
192    128    
-64    32     
80     192    
48     48     
-48    -528   
-32    80     
176    -1120  
-64    -752   
-16    -208   
16     192    
48     -16    
112    112    
-48    -320   
32     96     
96     -256   
96     -192   
-208   -192   
0      -768   
144    176    
96     -160   
16     32     
-192   128    
96     -352   
112    32     
-96    -256   
32     -48    
-32    64     
128    -64    
0      80     
48     16     
32     112    
0      -64    
16     -832   
-16    64     
96     -448   
80     192    
-160   224    
32     -128   
64     -192   
112    -400   
48     96     
32     -128   
144    128    
-16    -1440  
176    -64    
-16    80     
16     64     
112    -16    
0      48     
112    0      
16     -144   
-352   -48    
80     -80    
-1504  -144   
-16    -160   
224    128    
-16    -224   
112    -128   
-96    -432   
144    -96    
96     -32    
32     176    
32     0      
64     176    
-64    -128   
112    0      
-48    -32    
0      -32    
-192   48     
64     -112   
-48    -48    
32     -176   
0      -272   
64     -464   
64     112    
128    -848   
-32    32     
64     16     
272    288    
-128   -176   
-64    32     
32     16     
208    32     
-144   64     
-96    -400   
-752   192    
-144   -272   
272    -16    
-256   16     
240    -128   
-64    -512   
32     -16    
160    32     
-112   -80    
48     224    
-96    -176   
96     96     
0      -256   
80     32     
-16    -224   
-144   48     
16     80     
-176   -128   
96     32     
-240   -272   
192    -496   
64     -16    
272    176    
-16    160    
-144   16     
-16    -64    
96     -96    
128    -32    
-432   -320   
-16    -160   
-16    -224   
320    112    
-32    160    
48     -64    
-224   144    
160    -32    
128    208    
96     -864   
240    224    
-304   112    
-80    -256   
-144   -128   
480    -64    
256    80     
0      -16    
-48    160    
-64    112    
-352   128    
-16    -448   
304    208    
-192   -320   
-48    -48    
-80    96     
80     -160   
-176   112    
32     48     
-16    64     
0      48     
-96    256    
16     -224   
-192   32     
176    -112   
-48    0      
0      -112   
144    0      
-208   -96    
0      -128   
-32    48     
-576   16     
-128   80     
-800   -1664  
768    576    
-272   48     
448    -272   
-128   -64    
272    -816   
-64    352    
-160   -48    
80     -64    
-16    -112   
-368   0      
-128   32     
-128   -224   
-192   144    
48     32     
-480   160    
-128   -272   
-272   -160   
32     96     
-16    0      
0      16     
-48    64     
16     208    
144    16     
-144   -16    
-80    -32    
-192   112    
64     192    
-48    -32    
-144   -144   
-112   -80    
32     128    
-128   32     
-48    32     
16     0      
144    16     
-128   -272   
-96    64     
-48    -304   
48     96     
-32    64     
64     112    
0      64     
-32    -32    
-16    -16    
32     128    
-160   64     
144    384    
-416   48     
-272   -112   
-208   96     
16     -144   
0      16     
144    -48    
-144   128    
96     256    
-160   -128   
32     80     
-176   -16    
128    32     
-112   16     
80     144    
-208   0      
48     -48    
32     -32    
-32    272    
-16    -80    
96     144    
80     -144   
0      64     
-160   48     
96     32     
-64    64     
-48    32     
-16    32     
128    96     
-304   -16    
16     -32    
-16    0      
-240   64     
-144   80     
96     -32    
16     0      
16     -128   
-240   -96    
192    -224   
112    96     
-144   112    
0      16     
112    96     
-80    64     
32     112    
-128   64     
80     96     
-176   32     
16     80     
-64    -96    
-32    96     
-16    0      
112    16     
48     80     
64     224    
-96    -16    
-48    16     
48     32     
128    288    
32     224    
-160   -16    
-16    176    
-192   -144   
272    176    
-432   -192   
-32    176    
112    0      
32     144    
80     32     
-64    208    
-176   -64    
160    96     
-320   -64    
-32    48     
112    160    
96     -160   
-192   64     
-240   128    
240    208    
-32    176    
-128   256    
288    80     
-144   32     
-144   80     
288    272    
96     80     
16     80     
-288   -16    
192    -16    
-64    -48    
-16    -160   
0      0      
-64    112    
16     48     
144    96     
-144   64     
176    48     
-96    192    
208    608    
-208   32     
128    0      
32     80     
-16    48     
-32    16     
32     96     
48     -48    
64     176    
-96    32     
96     176    
-64    -16    
32     256    
-32    112    
-96    -160   
144    288    
80     112    
-16    16     
-96    -80    
64     224    
160    448    
-80    80     
-16    -32    
0      96     
-160   16     
32     -32    
-16    192    
192    208    
-176   64     
96     -32    
-48    176    
48     64     
-16    144    
-32    48     
80     32     
80     160    
112    160    
-112   -80    
32     64     
-32    240    
-96    0      
48     96     
112    272    
-16    -64    
-48    -96    
272    0      
-64    208    
160    -48    
-48    256    
64     288    
-96    208    
-16    576    
48     80     
624    224    
-640   -16    
-304   -896   
-352   192    
96     416    
-384   -896   
176    -512   
528    400    
-224   336    
112    240    
176    400    
48     -192   
-208   -16    
128    176    
-112   -112   
64     208    
32     -64    
0      -2256  
48     112    
32     48     
-96    128    
528    144    
-192   48     
80     -64    
-144   224    
48     336    
176    240    
48     16     
-176   -16    
96     32     
112    48     
-96    160    
96     -512   
48     48     
16     16     
64     528    
224    288    
-96    -32    
-112   0      
128    80     
-96    16     
-48    0      
160    32     
-32    112    
-16    96     
16     -64    
64     272    
48     -352   
-32    -32    
64     -1392  
48     112    
96     64     
-80    -80    
160    128    
-112   0      
128    -240   
16     32     
128    256    
-128   64     
192    192    
48     -144   
-128   48     
128    -112   
48     128    
0      -336   
-32    128    
-16    96     
32     176    
64     -16    
64     80     
0      64     
64     112    
64     64     
144    160    
-48    -128   
-96    -96    
-16    112    
-64    -176   
-112   -176   
192    -848   
112    80     
112    -432   
-96    288    
176    96     
-16    208    
-64    -32    
96     0      
80     -112   
208    80     
-16    176    
-64    32     
-32    64     
112    -272   
64     96     
112    -64    
-32    224    
-48    -352   
48     96     
64     -112   
48     192    
-64    -48    
48     128    
48     -32    
48     96     
16     -32    
144    -480   
0      112    
80     -192   
32     144    
0      -224   
96     16     
-112   -368   
144    48     
0      48     
0      144    
128    64     
0      368    
0      -48    
-48    -304   
-32    48     
224    -48    
-16    -128   
48     64     
-96    -112   
448    -112   
-304   384    
304    -192   
-112   -96    
80     -288   
176    112    
32     160    
48     0      
64     -2176  
192    368    
-144   368    
32     224    
112    352    
-112   -208   
32     -16    
-48    -80    
96     32     
0      -144   
64     -944   
-48    80     
128    -960   
-256   -192   
-112   16     
48     16     
16     32     
48     -96    
144    96     
-64    -800   
-32    -64    
112    416    
-256   -416   
256    16     
48     160    
144    -240   
-32    64     
96     -560   
16     32     
-160   -96    
160    -352   
176    96     
-32    -368   
80     -464   
-64    -464   
336    80     
-32    -688   
80     112    
-64    96     
112    -80    
96     224    
-160   -80    
64     128    
-32    -288   
-16    -80    
144    -96    
-416   -320   
32     -80    
96     -224   
48     -560   
240    -272   
96     -320   
-112   -16    
-208   224    
-272   -80    
160    -112   
32     64     
32     160    
176    -80    
-288   112    
208    -64    
-224   -96    
160    -48    
400    -1344  
-128   -496   
576    464    
-144   -512   
688    -320   
-400   -128   
16     0      
32     -432   
192    -112   
-144   -288   
48     96     
-16    48     
-32    -32    
-256   32     
128    32     
-480   0      
48     -224   
112    96     
0      -288   
48     -128   
16     -192   
240    208    
0      80     
32     64     
-272   -176   
16     -272   
0      32     
48     0      
-32    32     
-112   -128   
-1088  -128   
0      -160   
-1808  -16    
-80    -16    
144    32     
176    -160   
-32    368    
32     -960   
48     -64    
-160   0      
128    48     
112    32     
-96    32     
-80    -112   
-80    16     
-384   -128   
96     64     
-224   96     
464    -112   
-240   128    
192    -336   
-48    80     
80     -496   
96     -48    
-112   96     
48     192    
16     -144   
160    48     
-320   -128   
208    -192   
-160   160    
96     112    
-96    16     
144    -208   
48     -96    
96     -400   
80     304    
-80    -16    
160    -32    
-160   32     
48     -16    
-160   -64    
96     32     
-144   16     
16     -64    
-16    32     
80     96     
-432   112    
-64    -384   
224    32     
-64    -128   
0      16     
80     176    
-352   32     
-16    -16    
64     -128   
112    160    
-144   16     
144    80     
-16    -32    
-96    48     
-80    -32    
64     176    
-528   96     
32     112    
-96    -96    
-288   -112   
96     128    
-224   -160   
-16    128    
-400   64     
96     0      
176    -32    
0      160    
-16    32     
-48    272    
-320   16     
272    144    
16     -192   
-144   64     
32     -208   
-48    -64    
48     64     
48     96     
-208   112    
-48    352    
-320   80     
-384   -32    
-256   144    
192    128    
144    96     
-320   -128   
128    144    
-128   -368   
112    64     
-240   -96    
144    -64    
-176   -32    
128    96     
-128   16     
0      -64    
-112   -64    
-192   176    
80     32     
-416   -32    
-192   32     
32     -16    
32     64     
-16    -48    
0      160    
64     32     
48     80     
-48    96     
-96    16     
-48    -64    
-96    -208   
-16    -16    
32     208    
80     160    
-224   -96    
16     64     
-160   0      
-112   64     
128    -208   
-96    32     
64     -64    
0      112    
-112   -96    
192    80     
-144   48     
208    240    
-96    16     
16     96     
-272   -32    
-608   -384   
48     208    
-944   96     
-80    -32    
80     -32    
16     128    
112    -160   
-160   96     
-96    16     
80     -16    
-16    192    
304    144    
-240   -80    
0      -32    
16     160    
-80    -32    
112    176    
-288   80     
112    192    
16     0      
-128   -96    
208    48     
-48    224    
16     144    
-32    64     
64     96     
-64    48     
-96    144    
-224   -128   
192    176    
32     -48    
96     80     
608    -1104  
992    992    
416    -304   
-592   -624   
944    -800   
-16    -1136  
336    208    
416    1008   
-816   -480   
352    -144   
-368   -128   
560    256    
-256   -240   
-176   -272   
112    -16    
144    -80    
-16    224    
64     128    
208    400    
32     112    
-32    64     
0      48     
48     -32    
-32    128    
-16    -272   
192    16     
-240   160    
224    144    
-160   -16    
0      32     
16     48     
-64    48     
0      160    
-224   288    
-32    -16    
-96    80     
240    96     
32     32     
144    368    
-464   112    
336    160    
-128   -32    
-32    96     
0      112    
-48    64     
64     -304   
192    384    
0      96     
-96    -176   
96     96     
-112   -64    
112    16     
16     -80    
128    64     
-16    -64    
128    224    
-512   -464   
176    -32    
112    64     
0      304    
0      -64    
144    240    
32     48     
-64    192    
32     -16    
-16    96     
-48    0      
16     160    
-96    64     
-64    48     
64     80     
-16    32     
144    176    
-48    64     
32     96     
112    144    
-256   -128   
80     48     
-128   -96    
16     176    
160    256    
-48    64     
0      128    
80     128    
-80    -16    
80     80     
-96    -64    
256    128    
-96    128    
48     304    
48     176    
32     32     
80     144    
-48    -16    
-16    64     
-96    -112   
256    336    
-112   96     
128    128    
-160   16     
160    48     
32     112    
-16    96     
64     96     
16     -512   
128    144    
48     0      
-80    0      
64     368    
112    16     
-96    -64    
-32    128    
128    0      
64     16     
-48    96     
32     0      
16     -304   
-64    -64    
224    -32    
-96    -208   
96     -16    
32     112    
80     128    
48     144    
64     -544   
-64    96     
240    -176   
368    432    
-208   256    
48     -96    
48     336    
-48    -48    
0      96     
48     80     
48     -208   
0      128    
-64    -144   
80     176    
112    192    
128    256    
0      128    
32     224    
16     -464   
-112   -80    
0      -320   
-16    -368   
112    -96    
0      -176   
48     160    
48     -240   
-32    112    
144    -256   
-96    -96    
16     64     
80     160    
112    272    
-48    144    
32     -48    
32     80     
64     32     
-16    16     
96     32     
96     -112   
64     208    
16     -144   
64     128    
96     0      
288    -16    
80     576    
16     48     
64     -16    
48     32     
48     80     
32     112    
-32    64     
48     -320   
-48    240    
-48    -144   
96     80     
16     -224   
160    32     
-80    -1376  
288    32     
-112   -480   
-80    -208   
112    192    
96     80     
-176   208    
-16    112    
0      -32    
112    -144   
128    320    
-160   -288   
80     112    
-16    -480   
96     -16    
-528   192    
224    -192   
176    720    
256    48     
-176   -464   
64     -112   
176    448    
48     -512   
192    720    
-272   -400   
304    400    
-160   -400   
160    112    
-112   -352   
176    0      
-32    112    
176    -48    
-16    192    
32     -80    
-96    -352   
176    -144   
-32    272    
208    -80    
-80    176    
224    -320   
-160   80     
288    -240   
-96    256    
208    -208   
-80    304    
64     -256   
16     128    
0      -320   
192    208    
0      32     
-160   -416   
112    -16    
144    -112   
208    -272   
-128   -112   
48     -1232  
0      -64    
192    -272   
32     -208   
-16    128    
32     -160   
208    112    
64     160    
-288   -208   
352    -48    
-48    -160   
48     0      
-80    0      
48     -608   
32     128    
0      -160   
0      0      
64     -256   
80     -16    
16     -2912  
80     -48    
-16    144    
80     -64    
96     16     
-160   144    
-48    32     
16     -144   
-112   -80    
32     -192   
-768   16     
-16    0      
160    -80    
0      -368   
32     -208   
-64    -1744  
-32    -384   
256    96     
-336   384    
-16    -208   
224    112    
96     -208   
64     96     
-80    16     
224    -80    
-208   -16    
-16    -160   
160    -192   
112    0      
-16    16     
16     -128   
-16    128    
80     -1648  
-16    32     
240    0      
-192   0      
144    -16    
-48    -128   
32     -128   
-96    -144   
-176   -16    
64     -32    
-432   -64    
48     -144   
-352   -16    
224    16     
-240   -64    
-64    -992   
0      -32    
80     32     
80     112    
-96    48     
64     -144   
-80    -128   
32     -320   
-112   32     
0      -160   
-48    16     
16     -176   
-208   432    
-224   -208   
128    32     
-80    -896   
96     0      
-32    -400   
96     176    
-192   224    
176    -208   
-80    -160   
-208   -288   
-16    64     
160    -48    
-384   -240   
256    -208   
-1280  16     
224    -128   
-96    128    
96     112    
112    -16    
-48    -1488  
176    48     
0      -80    
-48    -224   
-112   16     
16     0      
-128   -624   
192    128    
64     272    
32     -160   
-96    144    
64     -192   
112    160    
-48    -304   
-48    -96    
112    -624   
128    144    
-112   32     
256    736    
-352   80     
80     -112   
-416   -240   
96     -224   
-80    -80    
128    160    
-336   -288   
0      -192   
496    176    
240    -64    
-176   144    
-192   -32    
-80    80     
128    -80    
0      -32    
-240   48     
80     0      
-272   -16    
144    32     
128    -80    
192    128    
-144   112    
-624   -48    
-64    64     
-272   -48    
-96    96     
0      144    
-320   -48    
64     32     
-16    -64    
64     0      
48     48     
64     32     
32     192    
-176   -64    
240    -32    
-32    192    
16     -144   
-208   64     
-592   1680   
-320   -1152  
-240   -912   
384    -288   
-336   -288   
-656   240    
-336   256    
-208   64     
-80    576    
-672   -112   
48     -288   
-640   192    
448    -64    
48     96     
-64    -160   
-48    320    
48     32     
-128   480    
-64    -240   
224    96     
304    64     
32     544    
-144   32     
-176   -48    
-112   -496   
32     64     
304    592    
-176   368    
-32    -80    
-48    96     
160    -80    
-240   16     
-80    0      
144    80     
-224   128    
-32    0      
-80    -80    
-176   320    
-80    80     
-320   -96    
-16    -160   
256    -32    
16     144    
-48    -192   
0      48     
128    16     
32     -224   
32     48     
-208   -96    
64     -16    
-128   32     
-64    0      
-96    -112   
208    336    
-240   16     
-80    -144   
-592   -192   
320    752    
-512   -416   
-48    176    
0      -48    
16     -48    
0      400    
-96    80     
-192   80     
96     -80    
96     16     
-64    -16    
48     208    
-128   16     
-16    160    
-176   -64    
176    256    
-32    64     
-32    112    
-32    96     
-16    -32    
-224   176    
-144   64     
-192   -336   
336    368    
-64    32     
-32    -256   
-96    160    
-176   -272   
192    128    
-176   0      
144    160    
80     320    
-128   32     
96     80     
0      160    
-16    192    
-32    32     
112    -80    
64     -160   
-16    368    
16     400    
-80    320    
-64    -64    
32     -32    
-112   -48    
-112   -96    
-48    64     
-48    32     
64     -176   
16     -96    
80     32     
128    336    
144    336    
-208   -192   
-16    -80    
80     32     
16     128    
64     160    
-64    16     
-112   256    
-192   -80    
192    -16    
-272   80     
48     32     
128    160    
-32    64     
-160   -288   
128    -144   
-192   -48    
96     -16    
-64    -32    
-64    -48    
-48    -64    
48     -48    
-16    0      
-80    -64    
0      48     
240    256    
80     208    
32     80     
-80    112    
16     0      
112    32     
16     -16    
-48    0      
0      -32    
32     32     
-32    -64    
-64    -240   
48     112    
48     144    
0      112    
128    -32    
0      112    
-48    96     
160    16     
16     0      
96     48     
32     160    
0      -160   
16     -128   
80     272    
-80    128    
-96    -32    
144    128    
32     48     
192    112    
-288   32     
160    64     
16     32     
-16    112    
80     96     
16     96     
80     -32    
-128   208    
-64    96     
80     -48    
48     -192   
80     48     
-16    160    
-208   32     
96     -32    
128    128    
-16    112    
48     192    
-64    -16    
0      80     
16     160    
32     32     
-64    176    
0      48     
0      32     
144    112    
-16    -2240  
176    32     
-80    112    
-16    -16    
128    192    
-64    32     
-864   -2144  
496    992    
-336   64     
-496   -336   
144    352    
-512   368    
-208   -624   
272    80     
-320   608    
592    -16    
-288   -80    
128    -128   
0      464    
240    -176   
-64    224    
80     -96    
160    336    
-16    0      
48     0      
0      -400   
48     112    
-80    -48    
16     0      
64     160    
16     -272   
-64    -48    
128    240    
48     176    
144    112    
-272   -16    
80     128    
160    144    
16     -128   
32     112    
-32    -160   
-32    80     
208    320    
32     64     
0      32     
-128   -208   
208    64     
16     -2272  
48     96     
-48    96     
224    64     
-48    96     
48     144    
16     -272   
176    240    
-240   160    
304    80     
-96    48     
64     -48    
128    128    
0      -32    
32     160    
16     -192   
-80    -16    
192    -144   
-144   128    
96     -256   
16     96     
16     0      
80     272    
-96    -48    
144    96     
64     32     
64     -32    
-96    112    
64     -32    
112    80     
80     -208   
96     128    
-16    -352   
-16    128    
0      0      
0      144    
224    -48    
112    208    
-176   128    
32     -208   
80     48     
176    80     
-128   160    
80     -48    
-80    -64    
112    -496   
-16    240    
-80    -240   
272    80     
64     144    
80     256    
-16    96     
64     112    
192    0      
32     -80    
112    112    
48     -96    
32     112    
-16    -400   
240    160    
192    0      
32     0      
0      -32    
144    128    
32     -64    
-80    -224   
0      16     
192    176    
96     192    
-16    -112   
64     112    
32     -144   
48     64     
64     -96    
144    176    
-48    -320   
160    192    
-288   -288   
96     -112   
-32    -160   
176    -240   
-16    64     
32     0      
16     -48    
176    -96    
-112   -352   
176    -144   
160    432    
144    96     
-128   -32    
32     -160   
144    64     
32     48     
304    -16    
-400   -272   
336    -176   
0      352    
-128   -192   
128    -464   
0      -80    
64     -656   
-128   -96    
224    -368   
-128   -80    
64     -304   
-16    112    
112    240    
16     -144   
96     -160   
-96    32     
64     96     
-16    112    
112    -80    
-80    -320   
-176   -80    
256    -176   
-144   112    
0      -176   
64     -176   
272    -2272  
-128   -144   
16     -112   
48     64     
48     -128   
80     272    
-160   -240   
144    112    
-384   -96    
272    -48    
-480   64     
112    80     
48     -96    
16     32     
32     -240   
144    -240   
112    -32    
192    -400   
-128   96     
0      -208   
96     64     
224    -96    
32     -32    
-112   -176   
176    128    
-80    0      
80     -224   
-1056  80     
320    -384   
-64    128    
128    -128   
-224   112    
64     -448   
208    176    
144    0      
-48    160    
-352   -1376  
784    3360   
-912   944    
240    -832   
-160   -384   
464    -176   
-992   304    
-80    -176   
96     720    
272    -624   
-272   48     
64     -656   
224    688    
96     -464   
80     688    
-16    -400   
-112   288    
-64    -608   
224    448    
-272   -336   
208    240    
-272   16     
-112   448    
-960   -288   
128    -448   
176    48     
304    96     
-128   176    
-96    -960   
160    16     
208    32     
48     -16    
-256   32     
128    -128   
-64    128    
96     -16    
-128   96     
-128   224    
176    160    
-64    -176   
32     0      
144    -144   
-16    160    
128    -272   
0      -144   
-208   -96    
48     64     
-32    208    
32     80     
16     0      
-112   -208   
-96    -64    
112    -48    
-176   144    
32     -48    
-96    64     
112    -176   
16     -16    
-32    -112   
144    144    
-48    32     
80     80     
-80    48     
96     112    
-336   -112   
128    -112   
-112   -96    
160    -32    
-192   -32    
-368   0      
80     96     
-272   -160   
64     160    
-80    64     
-240   112    
32     -48    
-720   16     
-112   64     
-320   -336   
16     -304   
48     32     
-64    160    
-32    -496   
-128   16     
-32    -256   
-16    64     
16     -176   
-352   -224   
-96    -128   
-16    48     
-32    0      
-48    -112   
-80    -160   
-176   80     
-16    -80    
64     144    
208    768    
-336   -64    
-96    -128   
-224   -384   
128    112    
80     16     
-112   -16    
64     96     
-48    -304   
112    -48    
-80    -16    
112    288    
-256   -32    
32     144    
-368   -80    
16     32     
-96    -112   
160    64     
64     112    
-16    0      
-16    -80    
0      160    
-32    48     
16     32     
-32    64     
80     -112   
-192   224    
-32    240    
-80    -128   
-528   32     
-176   128    
176    -16    
32     112    
32     16     
-32    112    
0      -16    
-32    -16    
-176   160    
16     304    
224    -64    
-112   16     
-240   144    
-48    -48    
160    -48    
-448   -16    
-16    112    
-832   64     
-16    64     
-80    -208   
-160   -240   
112    -64    
-48    16     
0      32     
144    64     
-96    32     
16     80     
-80    -80    
64     -16    
-112   208    
-32    0      
208    -16    
-480   96     
48     80     
-112   -96    
-96    0      
176    176    
-32    192    
256    -16    
-96    128    
-16    80     
-128   -112   
16     48     
-16    208    
-272   112    
-256   -144   
128    16     
144    -16    
64     -16    
-32    208    
-64    -64    
192    32     
96     240    
-128   -48    
-16    144    
16     64     
32     -112   
16     128    
-240   128    
-32    48     
-352   -96    
96     16     
-112   -128   
-32    144    
96     64     
-96    96     
-32    48     
160    240    
-64    -144   
96     224    
-64    64     
-768   -2592  
592    560    
-784   320    
-416   -368   
272    640    
-432   112    
560    784    
-832   -448   
320    752    
-32    -224   
112    176    
-112   -336   
80     560    
96     -272   
48     304    
-128   -96    
224    176    
-48    112    
0      96     
0      64     
80     224    
-112   -128   
-48    128    
-64    144    
144    -80    
48     64     
-16    -48    
-32    160    
0      96     
-128   48     
112    0      
-64    128    
-16    -64    
32     176    
-192   -80    
96     80     
224    208    
-160   32     
192    128    
-224   96     
224    0      
-16    96     
16     144    
80     80     
0      16     
-64    64     
112    64     
0      144    
48     16     
32     96     
-160   64     
256    112    
-112   32     
160    128    
-32    144    
-16    48     
-80    -160   
144    192    
-16    240    
32     16     
112    -16    
48     64     
0      80     
32     352    
-160   16     
16     -256   
80     -64    
160    16     
-48    96     
-64    80     
-64    32     
240    96     
-128   160    
48     48     
96     48     
-96    -80    
288    272    
-304   96     
192    48     
256    352    
-112   -320   
144    160    
16     16     
80     208    
32     0      
96     96     
96     192    
240    192    
-112   -224   
32     224    
0      64     
32     176    
32     224    
0      80     
96     128    
-16    -480   
256    352    
-96    -16    
48     64     
-32    224    
160    112    
-16    48     
32     48     
0      64     
64     112    
-128   -256   
160    0      
-16    176    
-16    -272   
-32    64     
-16    -832   
176    160    
96     -1088  
-80    64     
64     112    
16     16     
-16    48     
32     176    
64     -80    
192    384    
-80    -16    
-112   -16    
-64    -144   
144    32     
160    32     
80     -272   
-224   112    
160    -1344  
-16    0      
32     32     
112    64     
144    208    
-16    128    
-32    0      
96     176    
64     -32    
0      128    
48     96     
-32    80     
80     144    
-16    -128   
-32    32     
160    64     
-48    112    
128    144    
96     32     
16     112    
-112   336    
-192   -192   
112    32     
112    80     
32     96     
-64    16     
48     -208   
352    -80    
16     -128   
-160   -16    
80     -656   
208    144    
48     -272   
16     176    
-192   -496   
128    272    
-64    -64    
160    0      
64     -80    
-32    272    
-112   32     
64     -112   
0      112    
160    -144   
16     -16    
80     -64    
112    144    
16     -176   
-96    288    
-16    16     
80     128    
-16    80     
160    128    
-16    96     
64     -656   
-16    80     
288    -32    
-112   160    
32     -80    
64     160    
144    -192   
48     144    
64     -192   
96     48     
16     64     
112    320    
-144   -192   
96     240    
224    32     
144    80     
-1120  80     
176    144    
224    192    
176    -128   
64     784    
-224   160    
192    128    
272    448    
272    224    
-384   -432   
208    -1680  
160    16     
-32    -720   
-272   -144   
64     -320   
80     -272   
48     -272   
336    -528   
-48    -48    
112    432    
-64    -80    
-48    -96    
-64    -208   
224    -1168  
48     -48    
-112   -96    
16     48     
-64    96     
-16    -624   
-48    96     
96     -416   
64     -144   
16     -1232  
48     -32    
0      176    
192    32     
-32    208    
-16    -64    
160    -112   
-160   48     
96     -16    
32     64     
96     240    
-64    -16    
-752   -96    
-32    -176   
160    -16    
-32    128    
112    -80    
32     -544   
48     -80    
32     -160   
-16    -224   
208    -176   
0      64     
208    160    
-96    -96    
-64    -48    
64     112    
-528   -48    
128    -48    
64     0      
96     -48    
-16    112    
-64    -192   
144    -256   
176    -608   
-96    112    
144    32     
0      16     
112    16     
16     -144   
-128   -32    
96     -48    
0      336    
-176   64     
64     96     
80     -80    
16     -48    
80     160    
-144   32     
192    -528   
-176   -144   
192    -64    
0      -160   
16     32     
-112   -160   
128    80     
-160   -272   
96     96     
48     -224   
-816   -64    
144    -256   
-336   528    
-320   -64    
272    48     
0      -624   
256    -64    
-64    -1056  
128    -32    
-112   112    
48     -48    
48     0      
-16    128    
-112   192    
-80    96     
-32    -176   
0      -64    
-144   64     
240    192    
-160   144    
160    -160   
-144   0      
256    -1184  
-96    -32    
208    144    
-96    16     
-240   -112   
192    128    
-224   96     
288    -16    
-96    240    
-48    80     
192    -144   
-336   -368   
0      112    
128    -320   
96     -32    
64     -64    
-16    0      
-272   64     
160    -48    
-304   -16    
32     -80    
-96    -16    
-144   176    
224    -112   
64     -256   
-592   160    
-32    -128   
240    160    
112    -80    
-80    208    
-96    112    
0      -368   
-160   -240   
176    208    
16     -16    
160    80     
-96    -16    
32     48     
0      -192   
-16    64     
-352   0      
-448   32     
0      144    
80     224    
-112   0      
32     -64    
-1024  -16    
48     64     
-256   128    
48     256    
-176   -128   
192    80     
-80    -320   
16     -112   
-96    16     
-48    320    
-48    -144   
0      144    
-64    -544   
-224   -64    
-224   16     
-144   16     
-32    0      
112    -16    
-112   64     
-768   -32    
-144   -48    
128    -192   
80     192    
-128   -96    
64     144    
32     -144   
0      272    
-384   -192   
32     0      
128    -64    
80     80     
0      -112   
-128   -144   
48     48     
64     272    
-32    80     
-32    16     
-1008  1728   
432    -736   
1104   208    
-32    -672   
-672   -224   
272    -688   
624    896    
-176   -256   
208    400    
-480   -304   
320    128    
-272   240    
-16    -96    
-240   512    
0      -144   
-80    96     
-224   -512   
32     352    
48     -128   
96     160    
32     16     
96     112    
-176   32     
0      48     
-64    80     
-144   112    
16     192    
0      48     
-16    48     
-336   -96    
144    48     
-1200  -160   
32     208    
112    -48    
32     128    
64     64     
-144   48     
-48    64     
64     80     
64     -48    
-16    64     
16     192    
-64    -48    
80     80     
-400   -16    
112    112    
-128   -304   
176    48     
0      32     
-32    112    
16     64     
-80    112    
80     176    
-64    16     
64     96     
-112   -144   
-112   80     
-128   0      
0      -224   
-208   -224   
128    160    
-288   64     
96     96     
48     -64    
-48    96     
-16    160    
-16    160    
48     48     
32     96     
32     0      
-48    -64    
16     -16    
128    208    
-144   80     
-160   -32    
96     -16    
-224   -272   
-32    112    
-176   80     
128    -80    
96     48     
32     -16    
16     160    
16     16     
0      0      
96     96     
16     160    
32     176    
96     144    
-80    48     
48     32     
-32    -16    
80     48     
16     144    
-16    64     
-80    -16    
0      32     
48     112    
32     96     
-32    64     
-48    128    
48     48     
-144   -32    
32     48     
-32    64     
-16    144    
-128   0      
-32    64     
32     112    
0      -16    
16     80     
-48    -32    
144    128    
-128   16     
160    128    
-192   -192   
96     48     
-208   48     
176    48     
-128   112    
16     16     
144    192    
-112   -48    
208    240    
-240   -288   
320    -48    
-240   368    
288    32     
-160   112    
-16    -48    
96     144    
-80    -48    
144    64     
-96    80     
96     32     
160    192    
-160   96     
128    32     
-48    144    
112    80     
16     80     
-16    80     
0      96     
80     112    
-208   -400   
192    -240   
160    512    
-176   -16    
160    160    
-224   16     
192    256    
-160   -288   
240    112    
-32    32     
160    128    
-336   128    
80     208    
80     -64    
112    96     
144    32     
-16    96     
16     48     
-96    -80    
128    160    
-256   -192   
144    -1088  
-160   272    
96     -80    
-64    48     
0      112    
144    288    
-272   -16    
288    144    
-288   32     
224    240    
-320   64     
224    112    
-112   -96    
64     64     
112    32     
16     -112   
-16    -16    
-48    144    
96     -32    
144    240    
32     144    
-48    256    
-96    288    
-144   -64    
-64    80     
48     -192   
0      128    
-32    0      
160    272    
208    64     
-96    -976   
-400   -1472  
912    304    
496    608    
-384   480    
-320   -560   
0      -1280  
272    448    
256    368    
-400   208    
208    -16    
304    112    
-16    80     
-128   -160   
80     128    
0      -144   
16     0      
-176   -96    
256    160    
-128   16     
80     112    
48     112    
-16    96     
-32    -80    
176    144    
32     -144   
16     -16    
-32    -64    
32     32     
16     112    
160    -112   
-144   144    
192    -176   
16     144    
-16    -16    
32     128    
-64    -80    
224    48     
-176   48     
288    160    
-96    -112   
96     128    
-48    192    
240    80     
-96    32     
-32    -160   
112    176    
48     -400   
80     208    
32     -1072  
64     176    
-16    -336   
96     32     
-80    32     
144    96     
0      16     
48     80     
16     144    
64     -48    
96     64     
0      -368   
112    192    
-32    -272   
144    96     
16     -112   
96     0      
64     32     
304    304    
-112   -32    
128    288    
-160   -64    
144    240    
48     0      
48     -256   
0      80     
48     -160   
112    240    
16     -112   
112    128    
0      -48    
-16    -112   
128    48     
-96    256    
-48    -48    
208    64     
0      -16    
80     -16    
32     80     
48     32     
0      48     
240    48     
-144   112    
48     -304   
112    0      
0      -304   
128    320    
-272   0      
176    160    
-16    -64    
96     -448   
112    -1184  
0      -16    
-16    -816   
96     -16    
96     -320   
112    0      
32     80     
16     -32    
112    -48    
64     -176   
-16    -1920  
48     64     
128    -192   
-48    -64    
-160   -192   
64     -320   
16     384    
-80    16     
320    -48    
-352   -1376  
112    -160   
208    112    
192    -96    
-224   192    
304    128    
-96    192    
160    208    
-32    -144   
-96    -32    
-176   32     
192    -176   
0      144    
48     -272   
80     -112   
-64    32     
16     -144   
208    -832   
-112   32     
304    144    
-96    -32    
-48    -336   
-128   144    
-112   -496   
240    -80    
-256   16     
144    -48    
-608   0      
192    -192   
112    -80    
48     32     
-16    -48    
80     128    
208    -64    
-160   -960   
192    -144   
-32    -64    
-16    128    
128    -64    
-112   80     
80     -64    
-80    -288   
-336   32     
112    80     
-192   48     
64     16     
400    320    
-416   -768   
-16    -352   
-144   -784   
192    80     
96     96     
32     240    
320    0      
-64    32     
-288   -16    
-112   48     
32     -64    
128    -144   
-400   -32    
16     0      
-288   -208   
80     -368   
0      -112   
32     -272   
160    240    
144    400    
0      128    
-112   -144   
96     96     
-64    48     
-32    112    
-112   64     
112    -288   
-32    -96    
176    224    
-992   48     
-96    -96    
-160   -1456  
768    -800   
352    880    
-336   336    
-1088  -448   
176    -352   
480    480    
192    768    
-416   -176   
48     -48    
0      -96    
-272   -224   
272    -64    
-224   208    
240    -128   
-64    0      
-48    -144   
368    224    
0      -656   
32     32     
-144   224    
16     -80    
-272   48     
64     -192   
-256   -320   
32     -48    
32     656    
160    80     
-176   -208   
48     -96    
224    160    
-96    -640   
16     176    
-160   -96    
128    -16    
0      -32    
224    144    
-176   -32    
144    64     
-16    160    
32     48     
0      -16    
48     16     
-496   -192   
-64    -160   
-96    256    
-336   336    
-64    256    
0      0      
-560   -112   
-64    160    
-1120  -80    
-32    192    
32     -64    
48     48     
-16    -96    
48     192    
128    -160   
-16    224    
-16    -48    
32     -48    
-32    -32    
48     96     
16     -16    
48     -48    
-80    -64    
-144   64     
-32    16     
-336   64     
-32    -16    
96     -32    
-176   -32    
-112   -64    
64     64     
-112   0      
-96    -128   
-80    -528   
128    32     
-16    128    
112    176    
-160   112    
160    48     
-192   0      
-32    -80    
-128   128    
-304   288    
16     528    
-48    384    
80     48     
16     -240   
160    208    
-112   -48    
-112   48     
-48    48     
-32    48     
144    64     
-32    0      
-64    64     
-80    -64    
48     176    
-464   32     
48     112    
-32    0      
128    144    
-48    -272   
48     160    
-48    48     
96     96     
-112   96     
-80    -48    
-64    48     
16     -32    
-16    48     
-80    112    
16     64     
-176   -224   
112    96     
-1536  0      
96     -48    
-208   -160   
112    112    
256    128    
-128   0      
-160   16     
0      64     
64     32     
-16    32     
48     144    
32     -16    
16     112    
-176   96     
128    32     
-1040  64     
144    256    
-256   48     
16     -240   
-16    -112   
96     48     
-128   160    
-128   -48    
-16    -16    
112    80     
-16    240    
-192   -192   
-96    160    
-224   -256   
384    144    
-144   -192   
208    256    
-176   16     
-176   48     
112    0      
-48    208    
0      -16    
80     384    
-320   240    
208    -432   
-400   -112   
160    -160   
-96    320    
-384   -176   
176    160    
-192   0      
32     368    
-96    -16    
64     160    
80     320    
-64    64     
-112   176    
-32    -64    
16     112    
80     -320   
-32    -64    
32     192    
16     160    
-256   -80    
176    80     
96     -64    
16     -224   
-16    256    
-32    32     
32     128    
-16    160    
64     16     
-80    32     
-64    -64    
224    272    
-176   0      
-48    -16    
112    176    
-160   128    
32     -16    
-224   64     
224    32     
16     64     
48     64     
1776   -240   
-768   -816   
992    384    
-448   624    
288    112    
-576   -256   
0      320    
-64    -16    
-320   -112   
-400   -224   
144    272    
-64    -32    
16     304    
32     80     
48     96     
-80    80     
32     96     
-16    -16    
80     112    
80     80     
48     0      
-16    192    
-32    0      
-16    64     
-16    -128   
192    112    
96     160    
-16    96     
48     144    
-112   -96    
112    48     
16     112    
128    128    
-64    48     
32     80     
-128   -240   
-16    176    
48     32     
112    -16    
-224   48     
224    -240   
-16    112    
0      0      
-32    -96    
80     160    
80     192    
-48    -144   
64     80     
-272   144    
336    48     
-96    128    
-112   -16    
128    -16    
-80    176    
0      -288   
16     -496   
80     80     
80     112    
64     160    
-16    64     
32     160    
-48    64     
128    112    
16     16     
0      144    
-16    0      
-48    0      
96     -16    
32     112    
32     80     
-48    -256   
96     144    
96     48     
96     176    
112    -208   
80     -80    
-32    304    
-112   128    
192    192    
-48    -64    
144    144    
-48    160    
-32    -160   
192    96     
-64    96     
48     176    
-16    112    
80     64     
-48    32     
64     96     
-64    16     
112    144    
-16    16     
160    144    
-144   48     
-112   -352   
240    80     
-96    96     
32     -48    
32     112    
48     -400   
128    48     
-64    -1584  
96     112    
64     176    
176    64     
-160   -144   
144    64     
-112   112    
208    112    
-32    96     
0      32     
208    256    
-32    -112   
64     192    
-112   -208   
240    144    
-48    -416   
176    240    
-160   -720   
320    192    
-256   -320   
16     -16    
-80    48     
224    144    
96     -256   
-240   -32    
-48    320    
80     -256   
192    80     
-192   -320   
96     16     
-144   -352   
-80    -96    
224    -2768  
160    224    
96     304    
-16    80     
-128   64     
144    48     
0      64     
80     -16    
128    96     
16     -128   
32     160    
160    160    
32     432    
176    -432   
-128   -48    
0      -352   
128    144    
-16    -640   
64     16     
48     64     
112    176    
-112   -160   
48     -1040  
16     -32    
128    112    
48     32     
128    32     
80     176    
-48    -160   
128    48     
128    32     
-112   80     
80     -96    
64     192    
16     80     
-32    80     
-32    160    
0      -96    
48     0      
128    -144   
-48    96     
-80    -128   
176    176    
16     -176   
-48    -16    
160    -400   
192    528    
80     -80    
-64    -16    
224    192    
-16    192    
-96    -320   
-16    -96    
112    -496   
80     -304   
16     80     
-32    -224   
48     48     
128    48     
-32    96     
0      -160   
32     -368   
-368   -2672  
-112   -1152  
-48    -144   
448    -672   
176    -1232  
-192   -240   
512    624    
48     96     
-144   -1616  
368    192    
-48    336    
-160   -48    
96     352    
208    -288   
-160   -48    
-176   -16    
80     0      
-96    112    
-400   144    
144    -160   
-1840  -272   
32     -32    
-16    272    
48     64     
96     -208   
-144   -1856  
176    -96    
32     48     
-288   -448   
448    96     
-352   -32    
96     -48    
-64    144    
-80    80     
-112   -128   
-128   -64    
-64    -32    
272    -112   
48     288    
128    192    
16     -32    
32     -32    
48     96     
16     80     
128    -144   
0      -112   
0      -192   
80     -64    
-144   16     
0      48     
0      -192   
32     16     
48     -80    
144    -144   
48     -48    
192    32     
-288   272    
176    -16    
-128   -544   
448    -32    
-80    -64    
48     192    
-96    64     
32     112    
112    -160   
-176   -80    
32     -96    
-448   0      
48     -192   
96     96     
48     -48    
32     -128   
64     -1184  
0      32     
96     -160   
16     -288   
16     -256   
400    0      
-208   0      
80     48     
-144   -288   
48     384    
-432   64     
112    32     
-1664  -256   
128    -96    
112    208    
144    -224   
64     -16    
224    160    
96     0      
-80    -16    
-16    -176   
0      48     
48     -48    
-48    0      
64     64     
-80    64     
96     -112   
-400   32     
64     -304   
16     32     
160    -144   
-64    -16    
128    -400   
-16    -208   
-480   16     
48     0      
-144   0      
96     96     
-128   -16    
64     -80    
-160   -48    
32     -112   
-80    16     
96     176    
-208   -80    
208    -208   
-144   96     
336    -192   
-80    0      
-32    48     
64     96     
32     128    
112    -80    
-240   -32    
272    -80    
-16    336    
-32    192    
-16    160    
-32    -208   
80     160    
-1696  -288   
-32    48     
-160   -416   
-464   -240   
-16    112    
-192   -240   
48     224    
112    -64    
-208   32     
160    -32    
80     400    
-80    160    
-128   0      
-368   -368   
-112   -288   
-32    -240   
48     96     
32     112    
-384   -112   
-32    -32    
-400   -112   
16     -160   
-1568  -240   
0      -48    
64     -320   
144    928    
-32    -128   
-176   -304   
-64    -256   
16     112    
-64    -192   
-48    -32    
64     208    
0      240    
-176   -32    
-208   0      
96     -16    
-16    128    
-112   160    
-64    128    
-320   -320   
-112   -416   
192    176    
-224   -128   
48     368    
16     -80    
-16    64     
-16    96     
-96    48     
-128   176    
96     -192   
128    48     
-48    128    
-128   16     
-272   16     
32     16     
-16    -64    
192    0      
112    -96    
-96    192    
-32    112    
-160   -64    
16     48     
-48    48     
-576   -2864  
912    1120   
-160   1264   
-352   208    
128    -16    
-1008  -336   
368    832    
-1712  -352   
208    496    
16     -256   
176    -16    
-192   112    
224    64     
48     192    
80     -48    
-112   16     
16     64     
-192   80     
144    48     
64     96     
-160   -64    
112    224    
-480   -32    
224    96     
-192   -112   
144    32     
-80    96     
48     160    
0      -64    
32     -16    
-128   96     
144    208    
-48    16     
-64    48     
32     112    
-96    -112   
-48    -160   
-864   -128   
144    304    
176    -48    
-272   -32    
-16    80     
-48    16     
96     176    
-192   0      
-16    48     
32     64     
48     256    
-176   -128   
160    48     
-368   -64    
96     176    
-224   -16    
-32    0      
48     48     
48     144    
-16    -32    
96     16     
-80    144    
0      48     
32     80     
32     160    
-96    32     
-48    16     
128    0      
-48    32     
-112   224    
-16    240    
16     144    
192    48     
-16    80     
0      192    
-128   -80    
192    -16    
-128   16     
-48    -208   
-176   -192   
-80    -80    
-16    112    
32     288    
-176   -48    
256    144    
-144   16     
208    -176   
-32    320    
-304   -64    
256    -32    
-176   160    
96     80     
-48    48     
-16    16     
-80    -16    
96     -48    
16     320    
-128   96     
-48    64     
64     -144   
-80    -48    
-48    32     
96     112    
-16    112    
16     32     
160    208    
-160   80     
80     0      
0      64     
-64    -128   
224    16     
-128   160    
32     80     
48     16     
-64    160    
80     32     
80     48     
64     144    
-64    64     
144    144    
-336   -192   
176    144    
224    80     
-80    48     
-32    0      
192    112    
64     -48    
-192   -48    
80     -192   
-192   176    
336    128    
-64    128    
16     48     
32     144    
-16    208    
96     192    
80     80     
16     -112   
-160   -32    
64     320    
32     240    
-96    -176   
16     192    
-80    -48    
-16    -1648  
48     48     
-32    80     
64     96     
-48    -96    
-32    -48    
80     0      
0      192    
80     480    
96     96     
-128   48     
176    368    
-176   96     
-48    -16    
-416   -176   
32     -464   
96     -64    
-224   80     
208    96     
96     -64    
64     64     
0      144    
-128   -448   
160    384    
368    304    
192    32     
-80    48     
-48    0      
-16    176    
176    32     
0      -528   
16     -48    
128    432    
32     32     
64     80     
16     -208   
80     -32    
96     176    
80     288    
-96    144    
-32    -96    
16     32     
176    0      
64     192    
-48    80     
-16    -32    
128    64     
96     -880   
16     96     
0      176    
-48    96     
64     288    
-112   80     
112    -48    
-32    0      
416    1616   
-1472  -816   
816    1296   
400    288    
352    -448   
-496   240    
-352   64     
384    -224   
-304   -112   
384    -736   
-48    144    
-144   -32    
64     176    
80     -16    
-64    -80    
32     32     
192    352    
-48    128    
-144   -96    
144    144    
160    -64    
-128   -80    
176    -64    
-128   320    
160    208    
-288   144    
64     144    
112    624    
-176   -208   
-64    -144   
112    -48    
112    80     
0      224    
-16    -48    
192    208    
0      96     
352    592    
-336   -448   
128    96     
-128   -608   
160    208    
-32    -16    
256    160    
32     96     
80     -48    
-208   -32    
48     -368   
-96    -320   
464    496    
-80    112    
48     160    
-32    96     
144    -160   
256    160    
0      -112   
32     160    
352    864    
-272   0      
-192   -256   
224    -112   
-48    64     
-48    -800   
32     -272   
144    -336   
192    256    
16     -128   
-16    144    
64     -208   
96     112    
64     -80    
-32    192    
80     -816   
128    176    
-16    -32    
192    256    
-16    -16    
160    -64    
208    32     
0      128    
-32    -160   
176    -192   
48     288    
128    -112   
112    208    
-16    -80    
144    352    
-16    -112   
144    -1040  
80     256    
64     -512   
80     -400   
32     -32    
96     -560   
-48    -240   
32     -656   
144    112    
-48    0      
-64    -80    
-192   -240   
224    -192   
64     304    
32     240    
-16    -224   
-112   64     
208    208    
0      -224   
112    32     
-16    -192   
160    0      
-64    -160   
0      -32    
64     -1680  
96     -80    
32     96     
-32    -128   
96     -144   
-176   -176   
208    -160   
112    -48    
-256   64     
0      96     
-1056  -240   
32     80     
-16    -224   
16     -144   
-16    -256   
144    -448   
112    -448   
-144   -960   
320    304    
-80    -16    
-112   160    
80     -240   
224    -112   
-96    160    
128    0      
0      144    
-48    112    
144    0      
128    -336   
0      -80    
-64    -800   
0      48     
-32    -960   
128    32     
16     144    
224    96     
48     128    
112    32     
-144   128    
48     -80    
-96    -64    
48     -16    
-880   -64    
80     -176   
-48    -16    
176    336    
-144   112    
96     -336   
16     80     
-16    -336   
16     -16    
-144   -96    
112    16     
64     0      
-16    0      
-16    -32    
176    -160   
-352   224    
32     0      
-256   272    
-48    32     
320    16     
-112   -272   
112    208    
96     -32    
-192   48     
0      -16    
240    -224   
176    0      
-80    -64    
-368   -112   
256    -64    
-80    192    
-128   80     
-160   96     
96     -96    
80     -64    
48     -240   
16     64     
128    -528   
-16    16     
-176   64     
128    -256   
-224   -16    
48     -16    
-864   -2064  
640    752    
-496   640    
-224   -304   
-256   32     
-480   -176   
48     -336   
16     -464   
-80    672    
608    -720   
-288   -112   
64     -176   
16     288    
208    -128   
64     112    
-48    48     
144    -32    
-272   32     
128    0      
-208   -48    
-80    -112   
16     48     
-16    128    
224    192    
-64    -48    
-1072  -224   
0      -64    
256    0      
-16    32     
-112   112    
80     48     
32     -112   
-80    0      
0      32     
80     48     
-384   -64    
272    320    
-240   -144   
-16    96     
-176   16     
32     16     
-64    32     
-160   144    
-144   -96    
-272   -48    
-128   -80    
32     96     
-32    -272   
288    176    
-416   64     
80     -208   
-16    96     
-192   -240   
32     112    
-288   112    
176    96     
-112   160    
-64    -48    
64     128    
-384   -32    
240    -48    
48     176    
-32    80     
32     -192   
-80    176    
-96    -240   
96     112    
-112   -192   
64     48     
-80    208    
-208   -80    
48     80     
-144   -16    
-16    80     
-176   -16    
128    304    
-800   -80    
320    112    
272    -48    
16     384    
-320   -128   
240    112    
-128   -160   
-80    -288   
-176   32     
-128   144    
-192   16     
192    48     
-160   -64    
128    0      
-64    0      
-304   0      
-192   112    
-144   -304   
160    48     
-80    -128   
80     32     
-112   32     
-16    0      
48     64     
-48    -32    
64     240    
-16    -32    
32     48     
-80    -112   
-144   -256   
-96    32     
144    176    
-720   -16    
144    80     
-64    -112   
-64    48     
16     80     
-16    80     
160    160    
-112   16     
128    176    
-208   48     
96     -16    
-96    256    
-16    32     
-48    80     
-48    128    
-80    80     
-64    32     
32     -192   
-48    -64    
-48    -80    
160    144    
-224   80     
0      80     
-64    48     
0      -48    
32     160    
144    272    
-208   -48    
32     112    
-144   96     
16     112    
-176   0      
48     0      
32     208    
16     208    
144    0      
-144   80     
64     144    
-192   -112   
80     -288   
96     176    
112    176    
48     16     
-304   -96    
144    16     
-80    112    
0      -192   
320    512    
-112   256    
192    -16    
-32    256    
112    64     
-32    128    
-16    48     
48     64     
-16    80     
144    336    
-128   144    
-48    64     
192    0      
96     80     
-160   -32    
-48    32     
80     240    
-128   112    
-16    -64    
-64    96     
192    16     
-48    144    
-144   0      
112    96     
-80    -32    
192    80     
-224   48     
208    128    
-384   -64    
96     -64    
-32    160    
96     0      
-64    128    
-16    80     
96     112    
-32    176    
32     0      
288    80     
-224   -48    
144    112    
-80    80     
112    224    
-896   -1104  
64     -912   
-304   272    
240    400    
-400   256    
608    112    
-624   -624   
704    -144   
-160   512    
-48    -64    
-32    256    
48     112    
-32    -32    
16     -128   
80     320    
144    176    
-240   48     
112    -368   
96     352    
224    -96    
112    400    
-16    -304   
160    496    
-224   -336   
160    208    
-176   48     
256    336    
128    160    
16     608    
-96    -192   
352    -208   
-240   -160   
80     272    
-96    -16    
-176   -16    
-16    -16    
-256   160    
112    112    
-272   32     
48     208    
-64    128    
32     -16    
-96    16     
288    208    
-144   160    
96     208    
-32    32     
352    624    
-144   80     
192    0      
-64    64     
16     64     
-16    320    
64     48     
32     32     
-128   -544   
176    -896   
-256   -256   
160    176    
112    336    
48     -48    
16     0      
16     240    
144    96     
-64    128    
32     128    
64     64     
-64    0      
48     -32    
32     96     
48     176    
-112   144    
64     32     
0      0      
-80    -144   
-80    -112   
-128   336    
-64    -416   
-48    -192   
112    -48    
224    160    
80     240    
-208   0      
0      -368   
176    128    
-32    224    
224    240    
-192   -48    
176    -16    
32     112    
-96    96     
96     224    
32     -160   
64     -128   
-32    -96    
64     64     
144    352    
-80    -176   
64     -176   
208    144    
80     256    
-128   176    
-16    64     
128    -128   
48     48     
-208   -320   
192    176    
-192   -864   
256    160    
-16    -1360  
96     -64    
-64    -208   
0      144    
96     64     
-48    -288   
96     128    
128    288    
112    224    
160    -272   
-80    48     
336    -48    
-192   208    
144    -304   
32     -144   
0      -480   
48     160    
0      -464   
144    -16    
64     48     
-80    96     
128    128    
64     128    
-32    80     
96     -16    
112    128    
-80    -208   
176    0      
-192   -144   
176    48     
112    -176   
-32    96     
80     32     
32     96     
96     32     
-64    224    
80     160    
96     -1072  
-16    80     
32     -320   
96     112    
-80    -112   
192    112    
-80    16     
32     -64    
0      -96    
96     240    
-144   -80    
192    -16    
-48    96     
208    -48    
-16    -16    
16     -112   
336    416    
-288   -64    
176    112    
144    -32    
64     16     
112    -448   
32     64     
0      80     
-160   32     
64     192    
192    -640   
272    192    
0      -624   
-32    -720   
48     80     
64     -304   
16     32     
144    -1824  
16     -16    
160    80     
-48    -112   
176    0      
128    48     
0      32     
-16    0      
64     112    
16     64     
0      32     
96     -224   
-48    128    
-80    -416   
64     -16    
-16    -368   
-896   -2528  
608    128    
-1168  128    
96     -144   
224    144    
-384   -288   
752    848    
-736   -624   
496    656    
-208   -512   
64     272    
-784   -576   
-32    560    
192    -512   
16     112    
192    -368   
16     176    
32     -128   
80     -176   
64     -176   
0      -192   
-48    112    
96     128    
128    176    
-96    -192   
0      -144   
-160   16     
144    64     
-160   -48    
0      -16    
112    -32    
48     -128   
80     -208   
-64    -1792  
144    -48    
-16    160    
0      -32    
48     144    
160    -128   
-144   48     
48     -272   
-64    16     
48     -16    
-368   -48    
144    -176   
-32    16     
160    -272   
-192   -176   
-256   -240   
288    -16    
80     144    
-96    32     
-160   -160   
48     0      
-208   -48    
96     192    
-256   0      
160    48     
-80    64     
80     -32    
-1936  -32    
80     64     
-112   -16    
160    -176   
-96    128    
0      -816   
-48    112    
-16    32     
128    -48    
0      48     
-48    16     
48     80     
-48    -128   
-640   -112   
32     -32    
-176   -192   
192    -64    
-176   384    
-80    -416   
80     -128   
208    -704   
-48    176    
0      384    
-144   64     
-464   -256   
272    -48    
-192   -144   
208    -48    
-96    320    
-176   -96    
-240   -368   
304    -224   
144    16     
64     -320   
-80    144    
-32    -128   
336    560    
-208   128    
64     160    
-256   -96    
112    32     
-32    -32    
-80    -16    
-32    32     
48     -272   
-272   -352   
240    -64    
-64    -112   
144    -112   
-16    208    
-48    -208   
-272   32     
16     0      
-128   -32    
-112   0      
112    128    
0      128    
32     48     
-240   -560   
-16    -64    
-112   -80    
-208   -144   
-64    32     
-16    -128   
0      -208   
-176   -96    
-80    0      
48     144    
-1152  -32    
0      80     
-416   16     
-80    -112   
112    -176   
-64    -64    
32     128    
-96    160    
128    112    
0      128    
-192   -336   
0      16     
-128   0      
80     32     
-208   64     
144    80     
-112   64     
-32    64     
-160   32     
-32    -16    
0      48     
-144   -16    
80     64     
-80    -64    
208    240    
-304   -288   
128    -16    
-112   80     
240    -112   
-80    208    
-256   -96    
0      -48    
-528   -128   
336    80     
-480   80     
16     64     
-96    -16    
-80    -80    
160    80     
64     -16    
16     128    
-128   32     
64     64     
-48    48     
-32    -16    
-272   -80    
64     -64    
-96    208    
48     -16    
-320   192    
-128   -96    
-976   -48    
80     64     
-16    -32    
-192   160    
128    -16    
160    336    
-48    -16    
-96    16     
80     0      
176    32     
-112   16     
-64    64     
32     96     
-208   112    
192    -80    
-288   -16    
272    160    
-1632  240    
656    -288   
-560   -432   
1216   -400   
-64    -48    
-384   -752   
0      976    
-80    -192   
240    320    
-208   -544   
96     288    
-256   16     
272    -112   
-400   -48    
304    -160   
-128   416    
-96    -272   
-16    288    
96     -592   
288    432    
16     -80    
144    432    
-240   64     
96     256    
-208   -608   
-48    64     
-64    -224   
192    992    
-432   -288   
-160   0      
-1200  -304   
-176   0      
-16    0      
0      208    
240    448    
-16    160    
16     -256   
-144   -208   
128    0      
112    336    
-144   176    
-160   80     
-32    96     
-96    176    
48     128    
-160   -288   
144    48     
32     -64    
0      -16    
-96    32     
32     80     
-32    144    
64     192    
-160   224    
48     80     
-96    32     
-112   -112   
80     32     
-80    -16    
-128   176    
64     96     
64     32     
0      112    
-80    48     
128    240    
-80    80     
-16    32     
80     -32    
-112   -64    
96     -256   
64     240    
-240   -80    
112    240    
-96    128    
16     32     
64     64     
-32    112    
64     96     
-16    80     
-112   -16    
224    32     
16     96     
-160   -512   
48     64     
-144   160    
-112   224    
48     448    
32     208    
176    -64    
-16    32     
0      112    
32     80     
112    -32    
160    32     
80     160    
-96    176    
64     144    
-48    -32    
32     128    
-192   -80    
16     64     
-32    64     
128    -48    
-176   48     
80     32     
128    80     
-32    32     
112    336    
64     128    
-112   208    
-32    32     
-48    -64    
32     64     
-176   0      
192    160    
-80    -48    
-16    -208   
-64    -1376  
-80    16     
-96    0      
144    96     
144    224    
-80    -144   
-144   112    
96     128    
112    80     
96     0      
-160   16     
192    64     
-64    32     
160    336    
-112   64     
320    -448   
-416   16     
304    272    
64     112    
208    -16    
-256   48     
-80    64     
288    240    
144    144    
-16    160    
-80    256    
64     80     
-144   -64    
144    288    
-32    224    
240    -416   
-112   32     
64     112    
48     64     
-16    32     
64     -32    
96     96     
-112   112    
96     112    
-112   -144   
0      -480   
16     144    
0      144    
64     0      
48     144    
0      -416   
128    208    
-128   -448   
112    -112   
208    -48    
144    304    
-48    96     
16     128    
48     224    
-16    -16    
80     192    
64     16     
48     144    
80     -128   
16     112    
192    -288   
112    128    
112    96     
-112   80     
-80    32     
240    128    
80     112    
16     48     
-32    32     
176    96     
-64    64     
32     128    
112    -48    
48     -96    
-112   80     
192    -192   
32     -32    
64     64     
64     112    
-688   -1472  
-1008  -1232  
1008   -944   
-800   672    
64     -640   
464    832    
-272   -368   
-96    336    
-288   -464   
368    432    
208    -208   
-32    48     
-64    -304   
272    -32    
32     160    
112    -720   
-176   144    
112    -16    
-80    -96    
320    -16    
-128   160    
80     -80    
-192   416    
336    32     
-192   80     
192    -176   
-80    -16    
0      112    
64     -224   
96     128    
32     32     
80     80     
-144   16     
176    192    
16     64     
48     80     
16     224    
-16    32     
48     32     
-16    -384   
112    96     
112    -576   
-64    96     
96     -176   
64     96     
80     -144   
80     128    
-160   -48    
288    0      
-144   112    
96     144    
-32    80     
0      -80    
48     176    
96     -160   
144    176    
-80    -48    
128    112    
64     -48    
112    288    
-64    -272   
80     -160   
32     -32    
112    176    
-80    64     
128    -416   
96     -1136  
64     0      
48     -656   
-64    -80    
80     -96    
32     -48    
-32    64     
80     48     
0      80     
-32    -336   
-64    -400   
80     352    
32     288    
-144   -16    
-176   -544   
0      -400   
-832   -96    
16     -416   
16     -176   
48     -208   
112    -144   
96     -976   
80     192    
-96    -48    
0      -160   
176    -144   
80     208    
16     -112   
-16    48     
-304   -368   
96     -48    
-240   64     
16     48     
0      -144   
32     -64    
64     -208   
64     -32    
16     -16    
64     128    
96     192    
-112   -336   
48     128    
0      -16    
80     -16    
-48    16     
48     64     
-128   0      
144    -80    
-64    -64    
96     -192   
16     -48    
96     -160   
80     80     
64     -656   
-352   128    
48     -16    
32     16     
-80    16     
192    112    
-32    -176   
224    112    
-624   16     
320    -96    
-496   0      
112    80     
96     32     
16     -128   
160    -16    
-32    -352   
224    272    
-384   -80    
368    32     
-96    16     
208    -80    
-160   -48    
-48    0      
16     64     
-16    16     
-48    -16    
96     288    
-128   -224   
144    -256   
48     16     
64     -576   
-112   -48    
112    -1504  
256    496    
-256   144    
112    -224   
176    32     
112    -304   
208    144    
-288   0      
128    -80    
-32    -192   
-416   -64    
96     64     
-224   64     
192    -144   
-112   608    
0      -624   
80     176    
-144   32     
272    -144   
-224   128    
160    16     
-48    -32    
48     -32    
-80    -144   
64     -32    
-336   -64    
128    -80    
-32    96     
80     -304   
-48    -80    
160    -880   
208    -192   
-432   176    
144    -256   
112    336    
-32    80     
-304   -224   
64     16     
16     -128   
32     -80    
-112   80     
272    -96    
-160   96     
-80    -112   
208    80     
256    -144   
-1200  -1552  
1328   368    
-592   416    
272    -272   
64     464    
112    544    
-272   -512   
16     -560   
544    368    
0      -64    
-752   -32    
64     96     
-416   -272   
-48    -160   
48     240    
192    432    
-480   -416   
-816   -224   
0      128    
-96    32     
-64    32     
-208   160    
64     -32    
0      -160   
-208   0      
-16    -96    
96     -48    
-224   -128   
128    80     
144    80     
-240   0      
80     80     
-32    -64    
0      64     
80     96     
-32    64     
-208   -16    
-96    32     
96     -256   
192    144    
-208   128    
304    80     
-336   -176   
-160   -96    
176    192    
-144   -32    
64     320    
-192   -240   
224    192    
-336   32     
32     -32    
-1168  -48    
-16    -32    
128    0      
-16    144    
-32    -64    
-80    96     
48     -224   
-32    80     
-48    16     
-48    0      
-16    32     
-128   -48    
-80    32     
-272   -48    
-80    64     
-240   96     
-48    -16    
-48    0      
-64    80     
-128   -224   
128    -48    
16     112    
-32    48     
16     -96    
-32    272    
-96    224    
-96    32     
80     32     
-96    0      
48     112    
48     336    
-176   128    
-1008  -320   
272    80     
-224   0      
208    208    
32     -32    
112    160    
16     80     
32     192    
-224   80     
16     -48    
32     32     
-32    96     
-32    64     
-96    32     
-64    -16    
-368   -96    
96     128    
16     -32    
48     176    
-144   32     
16     112    
-144   -48    
16     64     
80     96     
-192   80     
128    64     
-64    -80    
-112   32     
-112   -64    
80     0      
-144   112    
192    224    
-384   144    
-336   128    
176    0      
-48    336    
96     176    
160    112    
-176   112    
-48    32     
304    176    
-48    48     
112    128    
-64    192    
192    112    
-112   112    
-112   -48    
128    -32    
-288   144    
48     -48    
288    112    
-160   144    
96     176    
192    16     
-288   32     
16     48     
176    96     
-64    48     
128    192    
16     48     
0      -16    
80     336    
16     208    
96     64     
-64    128    
0      80     
32     48     
-96    32     
144    -16    
-96    -16    
112    16     
-48    96     
16     80     
80     -160   
80     144    
-192   0      
48     64     
-80    32     
192    16     
96     176    
-144   -288   
-16    16     
80     -272   
32     352    
256    128    
48     144    
48     0      
-160   64     
-256   64     
272    -48    
0      128    
-32    -80    
-16    128    
-128   96     
-48    112    
32     64     
0      32     
48     0      
224    144    
80     224    
-64    -32    
-288   16     
16     128    
0      -32    
16     0      
112    32     
-48    48     
32     112    
48     240    
-80    -32    
32     48     
32     -64    
400    2288   
-1328  -144   
0      800    
336    736    
1120   -496   
-672   -176   
-176   -224   
208    -416   
272    -64    
-64    352    
304    112    
-192   160    
64     112    
64     224    
80     -144   
-96    16     
112    64     
32     320    
0      176    
192    80     
-80    192    
16     144    
-16    -16    
80     96     
0      96     
-16    -64    
-16    64     
160    160    
48     48     
0      192    
-64    0      
192    160    
-160   112    
160    0      
-288   16     
336    -16    
-80    32     
-48    -416   
48     160    
-16    -16    
128    160    
-32    80     
32     32     
16     -64    
96     48     
48     -64    
96     144    
16     32     
48     48     
-32    -304   
80     144    
64     112    
80     -176   
96     176    
-80    -2256  
144    96     
64     144    
80     128    
64     96     
128    624    
176    144    
48     192    
-224   -80    
112    0      
-48    -16    
144    16     
-32    96     
-128   48     
16     64     
0      -656   
64     48     
64     -32    
-64    64     
128    80     
16     112    
-64    -560   
-176   -464   
208    -256   
112    336    
-16    64     
32     32     
-64    112    
48     -384   
96     -64    
48     -112   
-48    64     
80     -496   
-48    128    
128    64     
0      80     
-64    -16    
0      -48    
112    64     
208    240    
-128   32     
48     -16    
64     112    
48     -48    
48     96     
48     0      
16     32     
64     -448   
16     96     
112    -16    
-32    80     
64     0      
0      -16    
112    368    
-80    80     
176    48     
-160   -48    
192    80     
48     16     
64     80     
-16    -368   
80     0      
128    -288   
-32    160    
192    144    
-96    48     
32     96     
80     32     
112    16     
48     80     
16     320    
0      176    
96     -64    
80     -144   
0      160    
240    -368   
-144   176    
48     -256   
160    96     
-96    0      
176    64     
-160   -208   
464    -16    
-96    336    
-16    -96    
80     80     
48     48     
64     0      
16     -96    
-32    64     
208    -160   
-32    0      
128    96     
48     128    
-32    -880   
32     48     
48     64     
16     -640   
-96    176    
-80    -192   
400    -1088  
-192   -224   
224    -1440  
-432   80     
112    -80    
16     -96    
240    160    
112    -80    
-208   160    
80     -16    
496    -208   
-384   304    
96     -144   
80     -224   
208    -128   
144    -1104  
-80    -80    
144    -432   
-224   -256   
352    -384   
-16    160    
112    -32    
-96    -560   
400    -528   
368    272    
32     -128   
-320   288    
-80    -64    
192    480    
-1088  32     
-128   -80    
112    -160   
304    0      
-80    -48    
64     -144   
-32    -192   
144    32     
-32    -16    
144    -16    
-176   176    
64     -240   
-48    48     
-624   1760   
-1376  -816   
1136   1600   
352    848    
464    192    
-464   -704   
-544   -304   
816    -832   
48     -32    
208    -496   
-80    192    
-128   -64    
64     256    
176    -160   
-48    -336   
-144   -32    
48     -96    
-80    64     
32     -112   
-112   -144   
16     -192   
96     -48    
96     -96    
48     -160   
208    -624   
-208   16     
272    -80    
-96    208    
48     -48    
96     -32    
-16    -16    
16     0      
-288   -160   
16     -64    
-544   -112   
304    192    
-864   176    
128    -48    
0      -128   
16     -320   
144    112    
80     -784   
0      32     
144    64     
-32    96     
80     0      
-80    -48    
80     320    
-272   -112   
256    -16    
-112   160    
-112   -32    
48     -224   
-16    -128   
32     -368   
128    272    
32     -432   
224    288    
-384   0      
288    -176   
64     48     
-64    16     
-144   -80    
96     128    
-304   -112   
160    -336   
-400   -144   
0      -96    
-32    112    
128    -160   
16     -80    
160    -48    
-128   128    
-144   -16    
112    -112   
-208   -224   
304    176    
-240   48     
112    48     
-160   256    
-80    -160   
64     48     
64     -240   
32     96     
16     112    
-80    272    
-48    -400   
288    -32    
-224   32     
112    48     
-64    48     
128    144    
-80    64     
-16    -256   
240    80     
-224   0      
144    128    
-16    -16    
32     -64    
-368   -288   
-80    160    
-32    16     
-512   0      
-96    48     
-960   0      
32     -112   
-208   144    
-160   0      
240    64     
-224   -96    
224    96     
-144   64     
-672   -320   
-160   -80    
-336   -336   
32     -32    
192    0      
-48    240    
-48    -16    
-192   0      
-256   -32    
-432   -32    
128    -144   
-192   32     
144    256    
-32    48     
416    496    
-256   32     
112    192    
-272   -48    
-192   -128   
-16    -80    
-224   -80    
-96    -16    
-80    -64    
64     144    
-128   96     
112    96     
-640   -16    
16     16     
-288   -160   
0      192    
16     64     
144    112    
-112   -48    
64     160    
-128   -32    
32     0      
-112   48     
16     64     
16     0      
-128   144    
80     144    
-880   -160   
48     -112   
-112   96     
144    128    
64     160    
32     32     
0      144    
-80    -112   
-16    48     
16     112    
144    -80    
96     32     
-144   -160   
48     400    
-48    80     
-208   80     
96     -96    
-496   -144   
208    368    
-224   -128   
256    144    
-16    0      
16     -80    
-80    32     
32     192    
-32    96     
32     32     
-48    16     
32     16     
-80    80     
32     144    
48     160    
-448   -336   
16     16     
32     48     
16     32     
32     48     
-32    48     
80     96     
-144   128    
16     -32    
0      -80    
96     32     
-352   -1824  
304    -160   
-896   32     
672    -192   
768    800    
-784   -352   
-528   -512   
464    864    
240    -224   
112    160    
-16    224    
16     144    
64     64     
64     96     
-96    0      
64     64     
-64    288    
-128   48     
-304   -400   
-48    -192   
-16    112    
112    160    
-80    128    
-80    144    
-64    48     
64     80     
16     112    
-32    64     
0      112    
-16    32     
-32    144    
-32    192    
80     192    
-144   -48    
-112   -192   
-32    96     
192    240    
-16    16     
-64    80     
-16    64     
64     64     
16     176    
-80    32     
64     -32    
-64    -48    
-16    192    
-16    192    
0      304    
-96    272    
-48    -64    
-16    -160   
16     0      
64     48     
224    256    
-80    32     
80     80     
-64    -64    
160    224    
80     352    
0      16     
-64    0      
144    144    
-144   -48    
176    -160   
-48    -64    
0      96     
-32    160    
0      80     
144    48     
-112   80     
16     112    
0      64     
16     64     
-112   -48    
96     144    
-64    160    
-64    -80    
-464   -192   
-176   0      
-16    -144   
-48    -128   
112    256    
48     -32    
48     176    
-48    176    
16     48     
48     -128   
144    224    
-64    64     
160    48     
-160   128    
128    96     
-112   -48    
64     80     
64     80     
64     112    
-64    32     
-16    -96    
48     48     
64     64     
80     96     
0      112    
32     144    
48     16     
32     128    
-64    16     
224    352    
-64    -16    
48     -240   
-48    64     
64     32     
-16    48     
64     112    
48     48     
-16    112    
144    176    
-112   -32    
80     48     
-112   128    
144    96     
-96    -96    
-48    -32    
64     32     
48     -208   
48     192    
-96    144    
112    16     
128    -112   
-32    240    
48     144    
48     -16    
-80    128    
64     -96    
128    112    
-112   96     
-16    -720   
224    32     
-16    480    
32     -464   
-176   64     
128    -752   
192    16     
32     80     
-16    208    
0      128    
80     560    
176    208    
0      400    
80     32     
160    112    
16     -16    
-16    80     
128    224    
160    560    
-272   304    
80     -320   
256    304    
0      -96    
-32    96     
-64    48     
176    48     
-16    96     
80     64     
-48    -32    
64     48     
-96    -64    
208    128    
-112   128    
0      -16    
64     64     
112    0      
-80    192    
-16    -144   
-80    16     
80     -48    
-32    32     
-32    -48    
-112   144    
80     96     
-96    -48    
48     336    
144    -96    
144    64     
16     -400   
64     64     
0      -368   
160    144    
112    -208   
48     160    
-16    176    
16     96     
112    48     
16     352    
16     16     
-16    176    
128    -80    
-528   -1696  
1264   416    
-672   -16    
464    -128   
160    -304   
-64    -496   
240    96     
-32    -304   
80     -512   
160    80     
112    192    
-96    176    
32     0      
-96    64     
256    128    
-192   -768   
208    144    
-16    -16    
32     32     
32     -176   
80     32     
-16    -496   
96     224    
0      -256   
48     64     
112    144    
-32    112    
80     32     
0      80     
48     32     
80     -64    
16     160    
48     64     
64     80     
16     -144   
64     64     
192    240    
-192   -16    
192    -832   
-160   112    
240    -16    
32     -2176  
-128   -16    
160    0      
-64    -1024  
96     16     
-32    224    
112    -144   
144    112    
-64    -112   
160    224    
-192   0      
256    -32    
-32    -16    
80     -512   
32     0      
80     -272   
32     -352   
160    -16    
-48    -32    
48     -144   
16     -1664  
64     -192   
16     128    
-80    -144   
176    0      
64     16     
-16    -288   
-80    -176   
192    -48    
-176   144    
112    -128   
0      0      
-1072  -96    
32     0      
96     -160   
240    320    
-80    0      
144    -32    
96     -80    
-48    288    
-64    -320   
96     -480   
0      240    
-16    16     
-64    64     
176    416    
-128   -416   
144    128    
-256   -176   
96     96     
32     -256   
112    32     
64     -320   
144    192    
-224   -1888  
208    48     
16     -16    
32     128    
0      -112   
0      64     
-128   -96    
112    -80    
-512   16     
80     -96    
-384   160    
-160   -80    
400    64     
-128   -224   
288    -128   
-160   -400   
64     -16    
192    48     
-64    256    
64     -16    
48     -80    
-32    16     
176    288    
80     48     
16     224    
-224   0      
352    16     
-480   -128   
112    -336   
-16    -64    
144    -224   
-112   -128   
144    -1680  
-32    32     
112    -32    
0      -16    
96     112    
80     -112   
-48    64     
96     -176   
-224   112    
96     80     
-272   208    
80     -144   
-288   16     
96     -416   
64     224    
0      -2000  
144    48     
-48    -16    
144    80     
-96    48     
48     -80    
-96    -64    
112    -64    
-176   0      
112    32     
-96    128    
208    -192   
-912   16     
80     -48    
-64    -544   
-48    -496   
144    256    
-192   -32    
32     160    
-96    0      
0      -112   
-192   -144   
176    144    
-32    256    
16     32     
-208   112    
0      -400   
16     16     
224    176    
16     144    
96     240    
-160   -32    
-32    -80    
208    208    
144    -16    
64     -16    
-80    32     
-16    0      
-128   -16    
160    -224   
0      160    
-48    -176   
64     256    
-96    -128   
64     -64    
-192   -48    
-432   -112   
-16    0      
-144   -32    
-80    128    
-80    96     
-16    -144   
0      16     
-80    -16    
-544   -1376  
928    1520   
-1808  -704   
800    -352   
-1312  -640   
672    96     
-656   416    
96     -688   
192    720    
240    -80    
-240   64     
-352   -16    
272    352    
112    80     
-16    16     
-128   -64    
96     80     
64     672    
-144   -160   
-416   -528   
224    32     
-112   16     
48     256    
-128   272    
32     16     
-352   80     
-528   64     
-48    16     
-320   80     
-32    192    
112    0      
-80    32     
-224   -16    
-16    64     
160    -64    
32     208    
64     96     
-80    272    
-96    160    
-64    -144   
-32    80     
-208   -16    
-96    0      
-144   0      
-48    96     
-224   -288   
32     -32    
-96    0      
-176   -304   
176    144    
-240   -112   
224    160    
-128   -64    
32     32     
-160   16     
80     160    
-48    192    
-304   -384   
-32    -64    
112    -96    
160    -32    
-48    96     
160    80     
-48    224    
80     272    
-176   -64    
144    -96    
32     144    
112    0      
-112   144    
48     0      
-64    32     
0      0      
-208   0      
48     -16    
-256   64     
-256   -544   
144    -176   
80     -96    
160    352    
-160   32     
-64    176    
64     64     
-48    96     
-32    48     
-80    -64    
-160   96     
-80    -64    
80     176    
-96    16     
-80    -144   
48     -64    
-352   80     
96     48     
-16    160    
-128   0      
192    304    
112    176    
-96    -32    
80     -16    
32     160    
48     48     
-64    48     
32     96     
112    80     
-160   144    
-192   -160   
256    288    
-240   0      
192    48     
-128   160    
96     48     
32     160    
-96    240    
-16    48     
-16    -64    
64     32     
32     208    
-80    -144   
-96    112    
-64    64     
96     176    
-64    64     
-128   32     
64     176    
192    -160   
-160   240    
-32    -64    
-144   -144   
48     -128   
32     48     
-224   32     
48     96     
-80    -64    
80     176    
-16    208    
-176   -448   
192    288    
-80    144    
64     96     
-16    128    
96     240    
-96    -128   
128    -48    
-32    -32    
0      240    
-96    -128   
64     208    
64     48     
80     112    
-128   96     
0      80     
0      112    
0      176    
-32    176    
112    112    
48     384    
128    32     
-144   16     
-32    -48    
64     272    
-48    64     
64     64     
48     464    
-208   -384   
32     -352   
336    496    
96     64     
-224   32     
32     160    
128    -192   
32     160    
-80    0      
0      16     
-16    80     
48     128    
-32    16     
16     64     
-32    0      
64     0      
-48    128    
48     272    
16     16     
96     -16    
144    160    
48     -304   
-32    240    
48     48     
-16    176    
48     80     
32     80     
-48    -32    
64     240    
80     -112   
-64    144    
32     128    
-784   480    
-656   112    
-288   544    
352    240    
704    -464   
-688   -192   
304    592    
0      48     
32     -112   
-128   48     
208    160    
-128   -48    
-16    128    
-32    -208   
208    32     
-208   16     
64     -16    
64     176    
-96    96     
224    176    
-176   -48    
16     208    
96     112    
-96    16     
96     48     
-96    -192   
288    320    
-160   64     
112    -528   
-16    144    
112    -2784  
96     128    
-80    48     
48     112    
176    192    
16     -96    
-16    16     
64     64     
80     -16    
-80    64     
112    144    
0      64     
176    48     
-176   -192   
304    96     
-80    -288   
0      144    
224    384    
-464   -16    
352    64     
-128   208    
96     -96    
-48    128    
80     16     
-32    144    
16     -48    
-64    -32    
-320   80     
240    -320   
96     176    
-208   -320   
112    0      
16     -1664  
112    272    
-224   -240   
160    -80    
48     160    
16     272    
-144   16     
80     64     
-16    -96    
48     -64    
-48    208    
80     0      
32     16     
176    -336   
-160   48     
208    -304   
80     208    
-64    -144   
128    32     
48     112    
0      -112   
80     128    
-176   32     
112    48     
272    448    
-288   -176   
320    -64    
-128   48     
64     -400   
48     16     
-32    -128   
128    176    
-160   -288   
176    144    
-32    112    
-64    112    
112    112    
48     96     
80     96     
64     -192   
0      16     
0      -720   
96     80     
-16    -32    
240    144    
-64    -144   
64     80     
-16    -336   
160    224    
-64    0      
-32    80     
-16    160    
176    144    
208    288    
-112   -208   
80     144    
-16    -128   
352    64     
-32    -112   
48     416    
-208   -160   
240    96     
-96    -480   
304    256    
-112   32     
64     -144   
0      -16    
192    -112   
-32    400    
128    144    
112    96     
-64    -64    
96     144    
32     48     
176    -64    
-32    272    
0      0      
176    416    
-144   48     
320    80     
-32    -80    
160    -496   
-400   -48    
272    -352   
-160   -64    
144    -1104  
-128   -240   
176    -1312  
16     -96    
0      128    
80     -96    
0      64     
48     -272   
16     -400   
320    368    
-416   -928   
256    144    
-432   128    
192    -80    
0      32     
-48    -96    
96     64     
64     -368   
-16    -144   
-144   -112   
176    192    
-48    -304   
-96    32     
-64    -352   
48     64     
16     32     
80     0      
-368   144    
-80    -128   
48     -80    
32     64     
128    32     
-48    -288   
96     80     
32     64     
32     0      
-128   -16    
128    -96    
176    -64    
96     112    
-48    48     
-112   -208   
-544   -128   
80     -176   
-80    -80    
-80    96     
112    -144   
32     0      
-128   96     
-176   32     
-1872  -1664  
192    -720   
-160   752    
320    208    
176    -128   
-272   -864   
752    352    
-176   -288   
144    720    
-432   -192   
464    16     
224    -48    
16     128    
-208   -480   
336    -304   
16     112    
-32    -528   
-208   112    
-16    -48    
176    -96    
-160   -112   
32     -176   
32     -16    
16     -32    
-272   -48    
96     16     
-640   512    
32     32     
-160   -48    
224    -160   
32     48     
96     -1232  
96     80     
-144   -80    
128    -16    
-48    -64    
320    256    
-224   48     
144    -176   
-560   -208   
80     16     
-64    16     
80     -112   
64     -96    
112    -96    
-48    64     
-96    -256   
112    128    
-48    -64    
144    96     
32     32     
-48    -176   
-128   -16    
-64    0      
-64    112    
-32    -160   
-64    -144   
224    128    
-64    -16    
-64    -160   
-32    32     
-32    -256   
-16    16     
320    368    
-208   -112   
80     144    
128    -128   
16     -16    
-32    -48    
16     80     
80     -16    
-112   -32    
48     -256   
-16    128    
32     -224   
-336   -256   
-656   -624   
-1184  -80    
192    304    
-1872  0      
-192   -112   
192    16     
0      -64    
48     48     
-32    -48    
112    -512   
-288   -368   
-1136  32     
-48    432    
-272   -128   
48     112    
-112   16     
-432   -64    
-112   -272   
-80    -240   
-48    160    
-48    224    
-192   -224   
-48    -272   
32     -32    
144    64     
-48    160    
-176   64     
-16    96     
16     -208   
96     96     
-144   272    
-160   240    
-32    112    
-32    96     
-112   -32    
-288   -48    
-16    176    
-1696  -160   
48     176    
-48    -80    
112    96     
-80    -16    
144    272    
-96    -128   
-96    32     
32     -16    
0      96     
-160   0      
96     16     
-176   32     
-48    -128   
-32    -32    
-480   0      
0      96     
80     -160   
-208   64     
-80    -480   
192    64     
-240   288    
192    384    
112    128    
-176   32     
32     144    
0      -128   
-96    16     
48     16     
-16    -16    
208    96     
-32    240    
-208   176    
96     160    
-32    0      
64     16     
0      160    
-32    -16    
80     48     
-112   48     
-48    -48    
-64    96     
0      112    
-96    48     
160    48     
-240   96     
80     64     
-656   32     
0      176    
96     288    
-32    -144   
112    -32    
-112   -80    
80     128    
-240   144    
16     96     
48     256    
-208   -48    
-16    80     
-16    -80    
-256   -96    
80     64     
-384   -80    
32     48     
64     -112   
-32    176    
16     -16    
-144   352    
-96    -128   
48     160    
80     -16    
32     160    
-160   -16    
16     32     
0      112    
96     -96    
-48    96     
64     144    
0      -96    
-1008  16     
-224   160    
64     80     
-400   416    
-160   752    
496    32     
-592   -176   
-144   -80    
-560   0      
416    -80    
-512   288    
368    160    
-32    400    
-16    -256   
-144   48     
-32    16     
272    112    
48     128    
64     -80    
-112   272    
-112   -144   
16     160    
176    -128   
-192   80     
32     -64    
-128   432    
80     -208   
-96    160    
-48    -192   
96     256    
-32    -32    
32     112    
-48    -80    
160    160    
0      16     
32     160    
-176   48     
192    176    
-16    -80    
0      -96    
-112   192    
0      64     
192    128    
-144   -48    
16     160    
48     64     
32     128    
48     -32    
-96    64     
176    128    
-64    -112   
208    160    
-336   112    
272    -32    
-176   80     
64     -16    
128    240    
-144   48     
32     16     
-32    112    
-128   96     
80     -64    
32     192    
-32    -80    
80     128    
-64    32     
64     64     
-64    0      
-48    32     
-80    96     
0      128    
96     -64    
80     48     
-32    176    
-16    64     
80     96     
48     80     
32     160    
-32    128    
64     48     
144    192    
-112   80     
96     208    
-16    144    
0      32     
80     -160   
-32    -144   
-32    224    
-144   0      
240    432    
-208   -96    
304    32     
-64    112    
32     64     
0      48     
-64    80     
16     192    
-144   -128   
48     96     
-112   0      
144    128    
-176   -368   
144    -576   
-112   16     
96     32     
-48    -16    
272    256    
16     176    
-80    32     
-48    64     
80     96     
176    96     
-112   48     
144    224    
48     -368   
48     16     
-112   128    
160    -16    
0      160    
48     -1648  
-64    64     
192    144    
-192   272    
48     224    
96     16     
-48    64     
64     192    
-32    -128   
-32    -16    
80     16     
-192   -704   
448    432    
-64    32     
-32    64     
0      -272   
64     0      
48     224    
16     112    
64     304    
48     16     
32     128    
-224   -160   
128    -32    
208    432    
-32    0      
-112   224    
-32    48     
192    528    
-192   336    
176    -64    
-48    48     
144    -1120  
0      96     
-48    32     
-64    32     
80     48     
48     256    
-144   -576   
496    32     
-64    608    
-64    -240   
-224   -32    
352    -240   
160    144    
-128   -144   
48     96     
32     -1008  
240    96     
-208   496    
16     -96    
192    144    
-64    224    
-32    -32    
208    96     
-160   -16    
96     -16    
-96    368    
112    -176   
192    128    
-128   -192   
160    80     
-96    -384   
80     64     
-16    -384   
112    144    
0      48     
32     96     
-32    -32    
80     48     
64     96     
112    112    
-48    80     
144    -496   
64     80     
0      -272   
-64    272    
-16    -240   
0      160    
128    -192   
-352   -1024  
-64    2368   
-48    1824   
-368   -272   
416    -208   
320    80     
-288   336    
-192   -160   
480    -368   
128    288    
-80    112    
-240   -320   
32     256    
448    -160   
-64    336    
-112   -368   
-160   352    
-64    -800   
224    352    
208    -192   
64     816    
-192   -752   
-32    592    
-128   -352   
560    272    
-240   -224   
176    256    
-32    -416   
240    288    
96     112    
288    -688   
-208   224    
-16    -256   
112    -32    
-32    -96    
16     -160   
160    -112   
64     -1600  
-32    -208   
256    288    
-64    -176   
-48    48     
96     -304   
32     -64    
48     96     
-32    -224   
-48    128    
-32    -80    
-256   -496   
-1280  -368   
-80    -80    
176    0      
16     -272   
112    -240   
80     -608   
48     -192   
-96    48     
320    -80    
208    -256   
-48    336    
288    272    
64     144    
0      -544   
0      -16    
240    96     
32     -32    
-64    112    
16     -704   
240    -128   
160    80     
16     208    
0      -1280  
-16    0      
112    80     
-32    160    
-80    -48    
-144   -320   
32     -304   
64     -208   
-192   96     
256    16     
144    48     
-128   -384   
384    0      
-32    -368   
256    288    
-160   -80    
-80    -240   
-64    -256   
144    224    
96     176    
-112   -288   
-176   -16    
176    -48    
-128   -288   
16     -400   
-560   32     
-16    -32    
160    80     
-64    -64    
0      0      
32     -160   
48     0      
-112   -816   
208    160    
64     -432   
0      -512   
288    224    
80     64     
112    208    
-128   48     
0      -16    
192    160    
-528   144    
80     -320   
0      -80    
-48    -160   
208    112    
16     -96    
64     208    
-160   -80    
160    -416   
-144   -16    
0      -64    
-144   -80    
256    128    
-384   -96    
32     -224   
-400   -16    
64     -208   
-32    -112   
64     -256   
-112   -32    
192    -384   
-256   0      
416    -16    
-96    32     
-80    64     
64     112    
-80    -64    
64     -48    
-224   48     
64     -64    
-96    -32    
32     -32    
32     176    
48     16     
-64    112    
96     -384   
112    -160   
-224   32     
96     80     
-32    144    
96     48     
-160   -80    
96     64     
80     128    
-128   48     
48     112    
32     -64    
-16    0      
96     -320   
-16    144    
-112   -272   
0      112    
16     80     
-208   48     
-192   -32    
144    16     
-128   -32    
32     32     
160    80     
-160   32     
-128   -96    
-1056  -144   
0      16     
-384   -240   
48     -96    
0      16     
-16    64     
-128   48     
-272   144    
-160   64     
-640   -64    
112    -32    
96     -80    
176    192    
-16    -176   
-16    160    
0      -112   
-32    80     
-128   -96    
304    272    
-112   -80    
32     112    
-96    0      
-1024  -2352  
-320   -816   
80     -144   
-608   448    
352    608    
-704   -144   
480    240    
-976   80     
-16    -16    
384    432    
-16    -224   
-192   32     
-208   -96    
240    -48    
-80    208    
-128   -176   
-16    208    
-224   0      
96     64     
16     -160   
-192   -64    
-64    -16    
96     272    
-16    -192   
-64    32     
-144   -368   
80     112    
-32    128    
-48    112    
-32    -128   
16     48     
-80    64     
48     48     
-80    80     
-176   16     
16     0      
-176   64     
-16    192    
-48    0      
0      16     
-48    16     
0      64     
128    96     
64     112    
-128   0      
-64    -112   
-16    160    
-96    80     
0      48     
-112   -16    
80     80     
-288   -96    
112    128    
-160   -208   
160    80     
16     96     
16     80     
-80    144    
-32    -32    
64     80     
-64    -48    
0      128    
-144   16     
128    112    
-144   -16    
-96    -32    
-528   -112   
128    208    
-64    -128   
176    176    
16     64     
32     96     
-64    80     
80     48     
-48    144    
-32    176    
-128   208    
64     0      
208    -16    
-112   96     
224    240    
-416   0      
-64    224    
-96    -80    
-32    -192   
-64    -16    
-48    -96    
80     64     
-208   -80    
112    64     
-96    48     
192    112    
-16    16     
32     -80    
0      96     
320    704    
-16    96     
0      16     
-128   -208   
16     -32    
112    -32    
48     208    
16     32     
-64    16     
-16    48     
-80    -48    
96     208    
-144   96     
112    416    
-112   32     
-32    -64    
-256   -208   
240    96     
112    48     
-112   32     
-48    -176   
144    -48    
32     112    
0      -16    
32     48     
-48    -32    
0      160    
-32    64     
96     48     
-208   -64    
144    -272   
-16    -224   
-160   48     
32     144    
128    144    
128    160    
-128   96     
-32    160    
64     32     
16     64     
32     0      
48     192    
-32    32     
48     144    
-80    16     
-64    16     
0      16     
192    384    
-160   -96    
144    128    
-112   -64    
144    16     
-32    176    
-32    64     
80     80     
-16    32     
-32    48     
-64    32     
96     176    
-160   -64    
176    400    
-160   -256   
320    -32    
-16    256    
64     -16    
-112   176    
112    112    
144    64     
0      128    
176    320    
-192   -160   
272    32     
240    128    
-112   96     
-144   -80    
80     128    
80     48     
16     112    
-80    112    
80     64     
80     32     
-80    192    
0      0      
-64    160    
-48    48     
144    -16    
48     128    
-32    64     
160    112    
128    48     
-112   -1392  
160    32     
-112   96     
240    144    
-128   160    
-144   96     
112    -16    
64     -112   
144    208    
-128   32     
-80    64     
0      80     
-512   624    
-480   -528   
-336   -992   
96     144    
-144   -400   
-48    -864   
528    416    
-544   -96    
16     -528   
48     320    
656    80     
80     496    
-320   96     
-16    480    
-48    -144   
-64    -144   
-160   48     
16     -256   
-256   -160   
128    -112   
32     -608   
-144   -80    
192    240    
-112   288    
-144   -624   
48     96     
-64    -80    
368    192    
-352   -48    
0      -16    
96     16     
96     -32    
-64    112    
-80    -208   
160    128    
-48    112    
320    -32    
-112   -1808  
32     16     
176    -48    
16     176    
0      -32    
0      96     
16     -32    
0      -16    
64     -48    
80     -64    
192    304    
80     -464   
-16    272    
48     -256   
48     80     
64     -928   
32     128    
0      -112   
0      0      
-96    160    
96     128    
160    448    
-240   208    
112    -32    
160    -192   
112    320    
-176   -64    
144    -16    
160    176    
96     192    
-192   -384   
144    128    
-16    -576   
48     32     
16     80     
16     -48    
192    48     
128    368    
-96    96     
112    -128   
272    32     
112    -48    
-16    -16    
64     -544   
0      352    
-80    -256   
256    64     
-48    -464   
272    208    
-16    64     
48     48     
-32    96     
0      112    
144    144    
-16    -16    
-48    16     
80     -224   
112    48     
-16    -336   
0      80     
80     -80    
0      176    
64     -32    
48     128    
-64    -80    
144    0      
192    256    
-256   -96    
192    112    
0      -32    
48     -112   
128    -32    
48     0      
112    -16    
128    304    
0      48     
144    80     
-224   -384   
544    -1088  
-224   176    
64     -1408  
176    384    
-144   32     
80     -864   
-48    -176   
-48    80     
288    -32    
-176   32     
-48    -416   
160    -80    
-192   -208   
112    96     
16     -480   
0      -624   
48     -96    
80     -144   
-48    -64    
-224   -160   
-96    32     
128    160    
160    -80    
160    48     
-176   -48    
80     -80    
256    -144   
-208   -112   
176    -112   
176    96     
80     -384   
-80    48     
128    -272   
48     -272   
-368   -48    
32     16     
112    80     
0      -64    
48     80     
16     -496   
96     -256   
144    -1952  
-80    64     
160    -48    
16     224    
48     16     
32     128    
-112   48     
64     -96    
-96    -48    
-128   -48    
-240   160    
-288   -112   
80     -256   
32     -1360  
160    -96    
160    -48    
-224   192    
-16    -112   
48     176    
208    -80    
-48    176    
-224   -176   
144    16     
-32    64     
32     144    
-608   -160   
144    -224   
256    16     
32     -16    
48     32     
64     16     
-16    16     
112    -816   
-16    96     
80     -32    
-16    -224   
96     144    
64     16     
-32    80     
-64    -144   
336    -272   
256    352    
1056   384    
-512   32     
-128   -912   
368    16     
208    272    
-448   -1056  
32     160    
-208   32     
624    208    
-352   -16    
-112   -336   
-224   288    
288    -304   
-304   128    
-64    -64    
-144   208    
-16    -320   
-304   -208   
-32    -32    
96     176    
32     -592   
-64    -16    
160    16     
-112   -16    
-80    144    
64     192    
-64    -48    
16     16     
-112   48     
160    -32    
-624   -32    
48     -256   
0      -16    
32     -224   
32     192    
96     -64    
128    112    
-192   -48    
48     16     
-32    96     
112    64     
32     -32    
0      16     
32     80     
112    -112   
-64    32     
-16    -48    
-272   32     
160    -64    
-48    16     
-96    -368   
32     -64    
-32    -224   
32     48     
-96    160    
160    80     
48     16     
64     -96    
-160   -64    
64     0      
32     -16    
144    -80    
-80    48     
-896   -272   
-32    112    
-528   -496   
-240   0      
-64    128    
48     -16    
-96    48     
-144   32     
-224   0      
-16    64     
32     144    
80     80     
-48    48     
-176   0      
-208   80     
32     -192   
32     144    
-64    96     
80     80     
16     112    
-240   -368   
-128   48     
-256   -224   
0      112    
-80    16     
0      0      
80     -32    
112    96     
-160   -160   
-32    -128   
32     -128   
128    368    
80     304    
-192   -112   
-112   -128   
-48    -48    
80     64     
-176   48     
-112   64     
-384   32     
-80    16     
-48    -64    
48     112    
-32    -128   
32     32     
16     0      
16     0      
16     80     
-160   -16    
32     0      
64     64     
-16    0      
16     128    
-32    32     
48     80     
-128   -32    
-496   -80    
-48    96     
160    48     
-64    -240   
96     -64    
-192   176    
112    160    
-64    -80    
-48    192    
-16    128    
128    -32    
-304   32     
80     64     
-160   112    
80     -64    
-304   80     
192    -32    
80     32     
-80    144    
64     -16    
-48    32     
0      256    
-48    0      
-96    -96    
32     16     
-16    144    
-80    -64    
-128   48     
-16    64     
0      96     
-352   -352   
256    192    
-448   -192   
112    -224   
-80    160    
32     48     
96     16     
-112   160    
112    96     
-208   112    
32     -96    
16     192    
-48    -80    
32     160    
-96    64     
-160   160    
32     0      
112    -32    
16     0      
48     176    
64     32     
-64    -16    
16     32     
-32    80     
-48    16     
160    80     
32     160    
-16    -16    
-144   -96    
96     208    
-224   -32    
144    80     
-224   -48    
16     48     
-32    64     
48     64     
-64    112    
-16    80     
-112   0      
208    0      
-64    -48    
144    32     
-272   112    
-96    -16    
-80    240    
-1168  -2032  
1264   -192   
-736   176    
464    432    
-288   560    
544    448    
-432   -640   
368    160    
224    672    
-352   -512   
-16    160    
224    128    
176    -112   
-160   80     
208    0      
-496   -48    
96     0      
160    496    
-32    144    
64     576    
-32    -32    
-64    96     
80     112    
112    384    
-96    -208   
-128   112    
64     0      
192    176    
-304   -224   
320    80     
-320   64     
208    128    
-160   32     
0      144    
128    160    
-64    0      
-160   48     
128    -48    
-64    -16    
-80    80     
64     160    
-32    16     
32     224    
-272   -240   
80     0      
80     208    
176    448    
-128   -48    
96     64     
-64    240    
48     -144   
32     0      
32     160    
192    64     
-48    64     
-16    144    
-32    -16    
64     144    
-96    -160   
80     160    
0      96     
128    32     
16     144    
-80    96     
80     32     
80     96     
112    304    
-128   -32    
240    96     
-32    48     
32     64     
-208   96     
80     -16    
96     176    
-80    -160   
-144   96     
48     -48    
-48    112    
-80    80     
16     0      
112    96     
176    368    
-336   32     
160    80     
144    416    
-304   -64    
320    48     
0      64     
-64    96     
32     -464   
16     -16    
64     -1824  
16     80     
96     16     
112    304    
-128   144    
128    0      
16     0      
-48    -64    
32     -16    
96     256    
-80    144    
144    48     
-32    -32    
80     -16    
192    80     
64     -208   
-128   -32    
208    112    
-96    96     
176    80     
-16    16     
-16    -32    
-112   -144   
240    160    
64     112    
16     16     
0      144    
160    368    
96     -112   
0      16     
-176   -304   
144    208    
144    -80    
-32    -80    
-96    -16    
208    176    
-160   -32    
64     48     
-32    64     
128    192    
48     32     
-208   -48    
96     64     
128    80     
272    96     
-96    -928   
-288   -16    
224    -640   
160    160    
-16    -16    
128    -16    
-144   -128   
240    192    
-144   -80    
272    16     
-192   -64    
176    64     
96     0      
-80    -48    
80     96     
144    16     
48     144    
64     0      
-96    352    
80     -336   
32     -16    
-32    -128   
80     144    
32     -48    
32     128    
-32    64     
-16    -32    
96     -432   
80     -16    
128    160    
-16    -624   
-208   288    
32     -96    
-96    160    
0      -400   
-64    336    
-64    -128   
-64    -16    
0      -560   
384    272    
144    384    
-96    -368   
-16    352    
48     -240   
64     192    
16     -192   
64     176    
32     -256   
176    304    
-80    -752   
-32    48     
64     64     
192    112    
-128   -128   
32     -224   
240    0      
-80    64     
-48    224    
96     -128   
16     576    
720    -336   
1328   1008   
-704   224    
-576   -320   
224    80     
112    64     
-336   -512   
240    -352   
608    592    
-176   -80    
192    -1984  
16     48     
144    -256   
-48    -144   
176    192    
96     144    
64     240    
-16    -48    
-32    48     
0      -32    
-112   -1248  
192    240    
-48    -208   
128    -224   
-704   -208   
176    -256   
240    -32    
-160   -288   
16     -176   
192    -592   
0      -16    
-64    128    
32     16     
32     -176   
0      160    
80     16     
64     96     
64     -48    
-48    -144   
-80    96     
-96    -272   
176    -96    
16     -400   
-64    80     
48     -240   
48     32     
-64    -1472  
128    -96    
-32    -256   
0      -64    
112    128    
48     176    
-16    -16    
112    -64    
-352   -64    
-48    -480   
-1472  -224   
176    48     
48     144    
16     -384   
32     16     
112    -1792  
-320   -368   
48     -112   
176    80     
64     16     
0      16     
-48    -16    
48     -16    
-16    0      
48     80     
-384   16     
176    48     
-128   -32    
64     -192   
-128   -64    
176    -240   
-128   -16    
112    -96    
16     160    
16     -144   
32     0      
-128   -16    
144    0      
-144   -16    
176    -48    
-160   112    
32     -48    
-544   112    
-32    -144   
16     -32    
32     -96    
144    128    
0      -1344  
48     64     
-160   -176   
256    96     
-144   16     
192    16     
-224   -16    
112    -272   
-336   -80    
80     -240   
-128   64     
80     -192   
-304   160    
-16    -320   
128    64     
-16    -256   
32     96     
-48    16     
64     176    
-48    -80    
112    -144   
-400   64     
0      32     
-80    -48    
-16    -16    
32     112    
80     -16    
-96    -160   
16     -224   
160    64     
32     -304   
-160   -144   
240    -80    
-256   80     
-144   -208   
-160   96     
-48    -208   
176    16     
-160   96     
208    0      
-240   0      
176    -144   
-448   64     
176    -160   
-144   96     
176    -160   
16     -48    
-96    -32    
32     -32    
-224   0      
192    -32    
-224   32     
32     -384   
16     -208   
224    32     
-144   96     
-112   64     
-16    16     
-480   -224   
112    144    
-176   -192   
-48    -176   
112    -256   
-336   -16    
80     224    
-272   240    
-192   0      
96     -32    
80     -16    
128    -48    
-96    80     
-352   272    
-32    224    
-336   -592   
352    -80    
288    112    
-208   80     
-160   128    
-80    144    
176    32     
-640   -80    
80     80     
144    160    
-160   -112   
-48    -96    
80     32     
208    -240   
-32    224    
0      -176   
-32    112    
0      112    
-16    112    
-176   -16    
-160   64     
-48    80     
96     -128   
-48    224    
-544   -32    
64     144    
-512   -48    
144    32     
-144   -64    
48     96     
144    640    
-272   592    
112    192    
-480   -352   
-704   -32    
1040   -528   
-480   208    
-272   576    
-176   -368   
-208   -32    
224    -176   
-128   208    
-112   112    
-16    -48    
160    64     
-80    -224   
-96    112    
256    80     
-144   96     
64     16     
-256   -80    
0      112    
128    96     
16     80     
-272   -96    
-192   16     
-736   -32    
0      112    
-16    -96    
-16    48     
64     112    
48     80     
-112   -16    
32     48     
16     32     
-32    16     
112    80     
-208   0      
80     32     
-64    -16    
-48    96     
-112   -16    
32     80     
-48    -80    
-112   64     
144    176    
-160   16     
128    208    
-192   -32    
256    48     
-256   64     
192    32     
-160   -64    
144    112    
-96    128    
64     144    
-48    -112   
64     240    
-576   -48    
-16    -32    
96     128    
-48    128    
16     128    
0      -48    
96     112    
-208   64     
-16    -48    
-16    176    
272    16     
-112   96     
-48    80     
-112   -16    
96     96     
-96    48     
-128   -96    
224    288    
-160   48     
16     0      
0      0      
-16    176    
-80    -48    
80     48     
-16    -48    
-32    256    
-368   -192   
160    -80    
-144   -128   
-80    240    
32     48     
-32    64     
-16    -16    
48     80     
-64    -16    
144    208    
-160   96     
80     112    
16     32     
112    32     
-16    80     
-176   -80    
96     160    
16     96     
0      0      
80     16     
-16    272    
112    256    
-64    16     
-80    -144   
-48    80     
96     192    
80     64     
-80    80     
-16    -80    
-64    128    
48     -16    
32     208    
112    176    
-96    96     
144    -80    
-224   -96    
-32    80     
160    96     
192    -48    
-176   48     
-64    16     
496    64     
-160   320    
-144   96     
272    160    
-192   64     
208    144    
-160   112    
272    48     
-32    64     
-256   -80    
-80    -16    
160    112    
96     -32    
32     96     
-192   64     
32     -16    
160    208    
-80    192    
208    224    
-352   128    
176    -144   
-112   64     
144    96     
32     16     
0      208    
16     160    
16     96     
32     144    
-16    224    
128    -144   
-16    112    
192    320    
-128   -176   
-48    0      
64     496    
48     80     
-64    -112   
96     160    
336    480    
-288   32     
-128   -224   
0      -80    
32     32     
96     256    
-112   -96    
48     384    
64     -224   
32     0      
64     112    
-112   96     
48     96     
160    48     
-16    320    
96     192    
-16    160    
-80    80     
80     64     
96     96     
64     32     
16     176    
-16    32     
64     160    
-208   32     
80     304    
96     -48    
128    -64    
240    64     
-64    -1296  
144    80     
80     64     
96     48     
32     448    
-288   256    
176    112    
-320   -304   
160    736    
288    1168   
-96    608    
32     896    
-528   -336   
0      -544   
64     -64    
0      -1088  
64     144    
128    0      
-48    0      
80     352    
-96    64     
64     -528   
32     48     
-32    -112   
80     384    
16     -32    
-176   -48    
144    32     
-48    -192   
208    80     
176    144    
128    112    
-112   -1168  
128    160    
160    64     
-16    0      
80     48     
176    112    
-64    -32    
96     96     
-240   -384   
208    0      
128    448    
144    -48    
0      176    
-16    -48    
80     48     
128    -816   
-48    96     
16     -464   
0      -64    
64     16     
128    176    
16     80     
64     80     
-16    112    
96     240    
64     16     
-128   -368   
208    -96    
48     192    
-80    0      
-48    48     
0      -16    
48     -496   
128    112    
-112   -128   
96     112    
16     48     
0      48     
16     128    
64     -288   
-32    144    
64     -512   
48     64     
32     -160   
32     128    
80     -16    
64     32     
272    480    
-128   320    
-32    96     
128    208    
128    -80    
-160   0      
0      -160   
64     96     
16     96     
144    16     
-64    160    
0      -288   
32     -144   
160    -176   
112    320    
-160   -288   
-48    176    
112    -16    
160    32     
-16    32     
48     16     
-80    -496   
16     -192   
32     -48    
224    16     
-80    96     
0      -176   
64     80     
64     -208   
64     144    
-80    -320   
224    -368   
-96    16     
208    -1344  
-144   48     
-384   -304   
80     -16    
-64    48     
240    -48    
-80    -16    
48     -720   
160    240    
48     368    
-48    -176   
0      0      
64     112    
240    -144   
-32    -176   
16     -336   
-32    -224   
320    112    
-352   160    
368    -96    
-176   -864   
144    -240   
176    -160   
32     48     
16     192    
64     -32    
240    416    
-320   352    
32     128    
48     288    
-80    -80    
64     -176   
-240   112    
80     -256   
-16    -48    
64     -112   
-32    -48    
96     -224   
-96    -176   
208    -384   
-16    -64    
-16    -208   
-48    112    
144    -80    
-80    224    
-176   64     
112    -160   
-416   -560   
416    224    
-928   80     
112    -112   
48     -80    
48     -16    
0      -96    
48     -64    
80     -64    
112    -64    
-32    32     
96     -624   
240    368    
128    176    
-128   -208   
-112   16     
64     -16    
-272   -16    
-48    -176   
-704   0      
112    -368   
-432   -80    
64     -576   
128    128    
48     -1344  
16     304    
-96    -64    
-16    144    
-80    -512   
128    16     
-48    -112   
16     80     
-448   144    
112    -160   
-1648  -96    
128    0      
-336   -160   
-48    -80    
-16    0      
64     -176   
-16    64     
-112   864    
112    448    
-160   320    
-96    -320   
752    -400   
-368   -288   
96     -160   
-160   336    
-96    -32    
-256   -432   
352    -32    
32     -32    
112    160    
-48    -640   
288    192    
-304   16     
160    -48    
48     128    
80     112    
16     -48    
-64    -64    
80     32     
80     48     
80     96     
-32    -32    
-96    160    
176    -160   
-16    48     
176    -160   
-96    80     
32     32     
-32    80     
-96    -48    
-16    -48    
-112   -32    
64     -256   
-48    96     
32     48     
112    -16    
-128   -224   
-272   128    
48     -336   
-32    80     
-416   -256   
32     64     
-96    48     
240    16     
-176   176    
288    -112   
-128   48     
16     128    
0      -16    
32     -96    
-80    -16    
-336   -160   
48     304    
-192   -96    
224    128    
-160   -48    
-240   -208   
-128   112    
-80    48     
-96    80     
-32    64     
16     -96    
336    -32    
32     320    
-32    -80    
128    96     
-336   -64    
80     208    
-48    -144   
128    160    
-128   16     
-256   -144   
-64    -96    
-96    48     
-128   256    
-96    -32    
48     -32    
-480   -48    
-224   -160   
112    16     
-144   240    
-32    -80    
96     32     
32     -96    
-176   16     
128    64     
-64    -48    
80     96     
-128   80     
48     64     
-96    192    
-32    128    
-272   -112   
144    16     
-256   112    
-64    0      
-80    -64    
32     192    
-96    -176   
-32    0      
80     144    
-112   64     
-16    176    
-240   32     
272    304    
0      -112   
-144   64     
-96    64     
80     0      
-192   -112   
112    64     
-176   -80    
336    528    
-192   -416   
256    48     
-96    240    
-288   176    
224    128    
-384   -48    
64     80     
-80    -64    
112    32     
-320   -144   
112    -64    
-672   -192   
144    128    
-176   -80    
80     48     
16     0      
-176   160    
0      -48    
-32    -96    
-144   32     
128    144    
-32    48     
48     128    
-64    80     
-112   -16    
64     96     
-224   32     
128    96     
-208   -48    
-32    -144   
-32    -16    
16     176    
80     144    
-64    -48    
48     96     
48     112    
-128   96     
-32    -208   
-144   48     
-64    -176   
112    304    
-304   -176   
224    80     
-400   -160   
288    304    
-64    16     
64     192    
-208   32     
-32    -112   
0      0      
208    432    
-112   -112   
-32    16     
32     128    
80     -224   
-16    192    
-288   -144   
112    -48    
-32    112    
288    448    
-304   -80    
80     16     
16     128    
64     -48    
32     224    
-16    128    
16     80     
16     -16    
176    32     
80     48     
-112   96     
-32    112    
128    128    
96     112    
0      224    
-208   48     
96     -48    
96     240    
112    16     
-144   96     
1728   -1712  
-48    -112   
1200   816    
-480   480    
1248   -432   
-528   -928   
416    496    
-96    624    
-64    -272   
-64    192    
128    -80    
272    288    
-192   -144   
-240   -80    
-48    -256   
176    176    
32     272    
-208   -240   
80     288    
-240   -288   
144    288    
-160   -160   
-64    -16    
80     256    
368    256    
-160   80     
144    -48    
80     160    
112    16     
160    224    
80     -112   
176    0      
-64    -48    
160    -144   
-32    192    
-64    -48    
-16    -16    
-160   80     
96     656    
48     64     
16     16     
-176   80     
208    32     
-32    -112   
-32    112    
-80    160    
-48    64     
64     -96    
80     80     
96     -48    
-64    416    
144    208    
48     288    
-128   48     
64     256    
-96    -352   
288    16     
176    576    
-240   -256   
240    224    
-80    80     
96     -32    
-32    32     
144    16     
208    -128   
-16    -208   
16     112    
96     -320   
48     80     
0      96     
64     32     
48     96     
-16    64     
48     240    
-16    96     
-80    -384   
160    32     
96     64     
144    96     
160    368    
-112   -96    
32     32     
0      -48    
32     48     
64     96     
32     64     
64     320    
-16    320    
-64    208    
16     -64    
16     -48    
-48    64     
16     64     
144    256    
-32    16     
48     -48    
-128   -160   
208    -1392  
-112   16     
112    80     
-96    176    
-16    112    
96     128    
-16    112    
48     48     
-112   0      
64     224    
-48    -288   
48     -320   
16     32     
240    -32    
96     96     
-128   -192   
0      176    
144    -912   
16     208    
-80    32     
208    320    
-80    64     
96     96     
-32    48     
64     208    
112    160    
96     288    
-80    192    
224    752    
128    352    
160    416    
-176   144    
176    -352   
-32    144    
48     -1344  
16     128    
208    224    
-112   176    
128    48     
-48    64     
-64    320    
144    -160   
0      80     
80     -304   
-96    0      
128    -336   
-16    112    
96     -1152  
144    256    
80     384    
160    368    
-112   80     
96     64     
-48    0      
176    128    
-128   128    
64     160    
224    32     
-32    -48    
48     96     
-32    -496   
-16    80     
80     -544   
144    288    
-16    32     
112    -16    
160    96     
-32    160    
48     320    
96     400    
-96    176    
192    32     
64     112    
80     -192   
144    -32    
-16    32     
160    112    
-80    64     
48     -16    
96     -160   
0      96     
-32    48     
16     128    
48     16     
48     144    
80     -1872  
160    32     
-32    384    
0      -144   
144    96     
96     64     
-112   160    
48     -48    
16     32     
96     -160   
96     -1184  
-128   0      
224    192    
-208   0      
-2448  -2704  
960    48     
-656   80     
352    -1232  
48     -400   
576    -416   
-528   -160   
992    592    
-464   -48    
496    -1680  
-448   32     
336    -496   
-176   432    
160    -464   
0      -160   
-448   -240   
144    -160   
-32    0      
48     -32    
128    16     
16     -1440  
-16    64     
96     144    
96     144    
48     -160   
-192   128    
112    0      
-32    224    
160    -128   
-80    -192   
-160   -64    
16     64     
64     -144   
-32    32     
224    -144   
-160   -496   
144    -160   
-96    -96    
320    -32    
-96    -112   
-80    -16    
160    -80    
32     48     
-32    -80    
-32    -32    
-160   160    
48     32     
-192   -64    
32     304    
160    -320   
80     0      
-144   80     
208    -304   
32     -160   
-48    80     
112    64     
160    0      
-48    -160   
112    192    
-96    -112   
-64    -32    
80     -16    
-128   16     
128    -176   
16     96     
0      16     
-240   128    
-48    -176   
64     -80    
96     -1232  
-64    160    
0      144    
-96    -96    
96     -64    
96     -176   
-192   -176   
96     -256   
-96    176    
48     192    
-1104  -96    
-64    -384   
-48    48     
80     -336   
-144   0      
272    -176   
-144   112    
192    -64    
32     -64    
-48    -16    
-32    -16    
64     32     
64     192    
-192   16     
112    16     
-352   -96    
-32    -160   
80     -16    
-112   -256   
144    16     
32     -240   
48     32     
-208   80     
32     -272   
-112   16     
64     -48    
-112   32     
-32    -160   
-272   -176   
112    -240   
-32    128    
32     -368   
-32    96     
176    -80    
-16    112    
112    -224   
-80    -80    
-112   -32    
0      0      
64     144    
272    -256   
-144   -128   
32     -160   
-208   -208   
0      -192   
0      -336   
48     96     
-368   48     
32     -272   
-144   -128   
-1216  -368   
144    -96    
-256   80     
-160   -80    
48     256    
-240   48     
272    144    
-112   144    
96     -16    
-192   32     
144    -16    
-1232  -192   
-80    -80    
-1008  -288   
96     96     
-80    -384   
-16    608    
112    256    
-624   -224   
160    144    
-688   -112   
-16    112    
80     48     
32     0      
160    0      
112    -16    
64     32     
-32    128    
-64    -192   
-256   -176   
144    -80    
-224   -192   
64     0      
-256   -80    
-16    112    
-176   672    
-208   -176   
-400   -160   
208    192    
-48    -144   
-304   -80    
-64    -80    
144    16     
192    -64    
-128   144    
192    176    
-192   64     
-80    32     
128    0      
128    128    
96     16     
-160   32     
-272   -16    
-48    16     
-352   -160   
64     112    
-112   -16    
80     96     
-32    -128   
0      32     
-80    64     
64     -32    
32     160    
-64    -16    
128    64     
-208   48     
96     112    
-448   208    
-1456  -2064  
96     -768   
-144   864    
400    368    
0      368    
16     -528   
-208   720    
-80    -272   
176    -224   
-400   128    
240    80     
-32    -160   
-176   384    
16     -128   
-128   48     
-112   -64    
80     64     
-64    -32    
-288   112    
-176   -192   
48     128    
-48    112    
128    128    
-256   -176   
32     208    
-272   -240   
16     128    
-272   160    
384    160    
-368   16     
64     48     
-32    0      
-96    96     
-832   -32    
112    16     
-16    176    
-256   -240   
-32    48     
128    144    
160    416    
-240   -16    
80     208    
-32    -16    
80     176    
-240   -48    
208    400    
-80    -96    
208    160    
-32    16     
-48    -32    
48     176    
80     272    
-80    -80    
-112   -16    
-16    304    
-64    256    
-208   -416   
320    432    
-48    -80    
-96    192    
-80    0      
-32    -112   
-16    112    
-352   -192   
160    192    
-16    80     
64     224    
-128   80     
80     160    
0      16     
-32    32     
-48    -48    
-96    16     
64     128    
-64    48     
64     272    
176    -112   
128    32     
352    784    
-416   -224   
176    48     
80     544    
-48    -48    
-128   0      
128    368    
-256   -128   
32     80     
-192   -176   
224    0      
-32    80     
96     -32    
-240   -144   
48     -176   
160    32     
-32    64     
-64    -368   
-192   -208   
224    -16    
160    224    
96     160    
-64    48     
0      80     
16     112    
96     144    
-80    96     
-128   -16    
-192   -272   
-32    -400   
96     144    
256    288    
-32    64     
0      128    
48     96     
-16    -64    
112    112    
-96    128    
320    288    
-240   -128   
160    96     
-80    48     
224    -16    
-112   112    
-16    -128   
336    176    
-128   80     
16     240    
16     192    
48     128    
16     64     
-32    -32    
32     80     
-64    -32    
48     160    
144    224    
112    64     
-64    64     
-96    48     
96     -32    
144    32     
-16    32     
-32    96     
224    128    
-80    16     
96     0      
-192   -48    
0      -64    
-48    112    
64     -16    
64     0      
-112   -144   
80     80     
128    144    
-16    -48    
-16    16     
160    176    
144    -96    
-144   224    
-32    208    
-48    -32    
64     -32    
0      96     
112    48     
64     0      
-192   0      
144    48     
-80    -304   
32     128    
16     -864   
32     208    
80     160    
-176   48     
32     -32    
192    -32    
176    176    
-16    112    
-48    192    
-16    48     
128    -144   
64     224    
-32    48     
32     -48    
16     -32    
80     -240   
-16    96     
32     160    
-112   48     
80     80     
48     16     
128    128    
-32    96     
80     -80    
-48    96     
-16    -32    
128    272    
-16    80     
-624   -592   
-544   160    
1072   -128   
-736   272    
112    -96    
-384   528    
256    -480   
-128   400    
-352   -416   
624    288    
-336   -176   
480    224    
-128   256    
48     -256   
-64    336    
240    -352   
-160   528    
112    -464   
-96    384    
176    -32    
-16    224    
48     0      
-48    368    
112    -128   
-80    128    
160    -224   
32     272    
208    -16    
-144   48     
-80    16     
80     -112   
112    96     
-32    -304   
48     48     
0      64     
0      80     
128    -1872  
48     64     
-192   48     
112    208    
128    -32    
-32    144    
-96    64     
-32    -128   
304    80     
-112   -288   
144    48     
-64    64     
64     304    
80     -624   
144    16     
-128   0      
112    112    
80     112    
80     128    
0      0      
32     128    
48     48     
0      128    
16     -16    
96     -96    
32     80     
48     0      
32     48     
80     -128   
-32    112    
112    16     
-32    256    
-176   32     
192    80     
32     0      
-80    -336   
-16    64     
32     -96    
128    80     
112    -16    
-144   -112   
288    -128   
-80    192    
16     -16    
32     48     
64     -464   
80     -1840  
0      160    
64     -1264  
-96    -32    
-176   272    
-144   -48    
112    -336   
160    -160   
16     -64    
96     128    
80     -16    
0      -16    
128    -16    
176    128    
96     -112   
64     64     
16     112    
176    -16    
-160   -336   
112    144    
160    0      
64     32     
16     -304   
-48    -80    
96     -48    
-96    -112   
112    288    
96     32     
64     -16    
32     80     
16     16     
-32    96     
128    96     
128    176    
-480   -16    
80     -208   
-128   64     
288    0      
-64    -32    
48     -624   
-64    -80    
-64    -1440  
112    -368   
144    16     
32     208    
-32    -16    
-192   -448   
-272   -112   
272    48     
-448   -96    
48     192    
-688   -96    
32     -448   
192    288    
16     -32    
64     -368   
112    48     
16     0      
-48    -128   
48     128    
128    0      
0      80     
-80    -64    
176    160    
48     -16    
-48    -112   
-496   -64    
96     -224   
64     0      
-80    -272   
64     80     
16     -112   
32     16     
80     -928   
-176   -32    
112    -160   
192    48     
0      96     
-128   -96    
-16    -32    
288    80     
-256   -192   
32     -64    
-448   -208   
160    32     
-464   -32    
288    -192   
-160   96     
32     -1776  
64     96     
112    80     
32     -16    
48     96     
-48    224    
-176   112    
-48    -112   
-32    -48    
112    144    
-80    80     
-32    0      
-688   -160   
240    32     
-80    -128   
160    -96    
48     64     
560    -64    
-192   128    
-272   -112   
112    -32    
-16    -64    
-16    288    
-240   64     
96     48     
-80    -96    
192    -64    
-160   528    
-48    -16    
-336   -576   
-224   432    
-48    -368   
144    576    
240    -576   
-128   400    
48     -112   
-240   144    
304    -272   
-288   608    
0      -432   
-144   32     
-32    -192   
-112   224    
-208   -288   
368    48     
-240   -224   
-128   -352   
-144   224    
32     -80    
-208   688    
48     -144   
-352   64     
32     -128   
-128   144    
160    -48    
-256   -112   
16     -16    
192    160    
-560   -112   
80     176    
-80    -336   
-864   0      
112    64     
96     560    
-144   0      
-480   -176   
-240   -96    
304    -32    
-96    80     
192    80     
-64    64     
160    32     
-96    288    
-160   -112   
0      80     
-16    -112   
-256   -96    
-80    96     
64     32     
-112   -32    
-464   0      
-176   0      
-400   16     
-112   64     
192    144    
-80    96     
-192   -112   
16     112    
-16    -272   
96     -48    
-32    64     
0      64     
-112   48     
-32    0      
48     -16    
112    176    
0      48     
-144   96     
-16    64     
-784   64     
16     160    
-176   -80    
-32    0      
128    -96    
0      48     
-160   -288   
192    -32    
16     112    
-208   -256   
48     32     
128    128    
256    320    
-208   -160   
0      -80    
-512   -256   
208    80     
16     32     
48     112    
-32    -224   
-64    -32    
32     -32    
-176   -64    
256    560    
-240   400    
-80    -64    
-256   -320   
-64    128    
32     -16    
-112   80     
-240   -96    
16     176    
-112   -336   
160    96     
0      96     
144    0      
-128   112    
48     -32    
-32    128    
64     -80    
-112   64     
64     48     
-112   80     
80     64     
-96    -144   
32     128    
208    320    
-608   0      
160    96     
-96    16     
0      96     
176    -96    
0      -48    
-160   112    
144    -16    
-80    -16    
16     64     
-64    48     
-80    -96    
-64    -112   
-288   -32    
208    272    
-464   -160   
176    16     
-256   160    
48     112    
176    32     
-112   112    
-64    112    
128    64     
-112   48     
96     224    
-16    48     
-80    -336   
-96    0      
-256   -48    
240    160    
-224   32     
160    144    
-64    0      
-48    -112   
64     272    
-96    -16    
160    48     
-48    288    
0      16     
0      -48    
16     -80    
16     -144   
32     16     
48     -176   
224    320    
-80    48     
16     32     
176    384    
-176   0      
-112   192    
-80    -192   
224    -32    
256    32     
-224   80     
-32    32     
-64    0      
32     -16    
112    208    
-256   128    
128    16     
96     64     
16     0      
0      208    
-64    -64    
0      80     
16     16     
112    -32    
-48    16     
0      128    
-80    0      
48     160    
-32    -144   
112    160    
-368   -112   
256    80     
-128   64     
80     64     
976    -1600  
-96    -192   
1392   352    
496    -464   
160    480    
544    528    
-688   -496   
1280   -64    
-272   384    
32     -48    
-240   320    
-64    -192   
112    240    
176    -144   
-112   192    
48     0      
32     208    
0      -32    
-16    -32    
16     32     
48     96     
16     144    
16     96     
96     64     
-240   -32    
-16    96     
144    208    
144    80     
0      48     
0      0      
16     80     
16     48     
96     16     
-48    112    
144    80     
96     304    
-272   -112   
80     -48    
-80    144    
160    -112   
-16    128    
-16    144    
112    0      
-16    -16    
0      128    
64     64     
96     128    
-128   -176   
176    160    
-144   208    
224    -16    
-144   160    
144    32     
-32    208    
-48    32     
48     -208   
64     128    
-112   -1536  
160    -16    
64     0      
0      176    
16     192    
-64    112    
64     176    
144    112    
48     176    
0      208    
-176   0      
192    112    
-80    -48    
80     32     
-160   128    
48     -320   
128    48     
-96    -128   
224    64     
-208   32     
96     -112   
0      32     
-32    48     
144    -128   
192    160    
-112   32     
-128   112    
192    272    
-224   -560   
64     -128   
224    272    
-176   32     
80     -2192  
-16    80     
16     0      
160    176    
96     64     
64     64     
0      -176   
144    240    
64     160    
-64    -16    
48     48     
96     -96    
80     112    
64     -80    
16     80     
-32    -544   
176    320    
-112   -592   
144    -64    
0      32     
80     160    
64     0      
0      144    
0      -16    
128    0      
-16    64     
224    64     
64     352    
80     -64    
-112   48     
-80    -496   
32     -32    
208    -288   
288    304    
-224   -128   
-16    80     
-48    96     
288    80     
-112   -64    
96     -80    
80     208    
144    0      
-176   64     
112    -464   
32     32     
128    -80    
48     192    
-16    -1216  
160    192    
-32    -16    
128    144    
48     80     
128    80     
-48    112    
48     -256   
-48    64     
192    320    
-48    176    
0      -96    
144    -64    
128    -48    
-16    64     
-128   -48    
-48    -160   
240    160    
16     304    
-80    -32    
32     -80    
0      240    
32     -240   
0      96     
-48    -32    
320    144    
-48    -160   
-32    -64    
32     -128   
64     288    
-80    -96    
144    -112   
32     112    
80     -1088  
-64    -16    
-1488  -64    
96     -576   
32     -64    
160    -48    
-64    -96    
112    96     
-16    -208   
144    80     
-16    64     
-32    80     
64     0      
64     -336   
-112   96     
-16    -128   
32     112    
-144   0      
112    0      
-16    96     
-96    -528   
48     64     
48     -992   
-288   -16    
256    -176   
-64    80     
192    160    
-16    1376   
-1056  -1104  
656    544    
416    736    
384    -528   
-608   128    
-144   -128   
576    752    
-224   416    
16     32     
80     -640   
32     48     
128    -224   
0      48     
-256   -384   
-208   0      
160    -208   
176    352    
192    128    
-112   -80    
-224   320    
-256   -192   
-208   16     
-368   32     
432    -112   
-224   -112   
256    -16    
-112   -112   
160    -288   
-48    -176   
144    64     
96     80     
48     32     
64     80     
96     -32    
-48    -32    
32     -160   
64     112    
96     16     
-80    176    
-128   -224   
-32    -80    
0      -656   
128    16     
-16    -48    
0      32     
32     0      
32     176    
0      48     
-16    0      
-16    -48    
32     32     
-144   128    
-32    -208   
160    -80    
80     -128   
-320   32     
144    -224   
64     48     
-16    -32    
0      80     
48     -144   
64     -192   
-80    32     
16     208    
-112   0      
160    -192   
-384   96     
-32    16     
0      32     
128    -16    
112    -16    
0      -16    
32     16     
-32    -352   
96     192    
-192   32     
128    -96    
-48    80     
64     -208   
-272   96     
-48    -144   
-32    208    
-160   -96    
224    -96    
48     -96    
128    144    
-176   -400   
208    80     
-112   -480   
112    80     
-112   96     
48     -64    
-128   -32    
176    112    
-656   48     
400    272    
-368   -144   
352    192    
-320   -48    
224    -224   
112    -80    
0      -304   
80     32     
48     -352   
-112   48     
48     160    
-224   -80    
-80    -48    
-48    -48    
0      0      
112    0      
96     160    
0      -96    
-48    32     
-224   -176   
336    352    
-1296  -48    
144    -96    
-928   -160   
-144   -176   
64     -16    
-960   -240   
-320   128    
-160   224    
160    48     
0      16     
-192   0      
64     16     
16     48     
-144   -96    
144    160    
-176   16     
176    352    
-304   -224   
176    -112   
-224   96     
-288   256    
128    -80    
0      -64    
-368   -96    
-1440  -208   
-16    -160   
16     -80    
0      304    
128    336    
48     0      
-288   -224   
-224   144    
224    64     
-16    80     
32     176    
-80    48     
-48    256    
-208   -144   
32     80     
-32    -304   
96     16     
128    208    
0      96     
-128   -64    
128    32     
-80    -336   
160    192    
-128   80     
96     304    
160    320    
-32    -112   
80     -160   
48     -16    
48     160    
-64    112    
-208   176    
-608   -32    
80     64     
64     48     
-16    32     
-48    -112   
112    16     
0      16     
-96    48     
-80    80     
-96    -256   
32     96     
-32    176    
-80    -208   
96     0      
32     96     
-576   0      
-16    160    
0      48     
112    240    
-32    112    
-32    -112   
64     16     
-80    16     
1888   -544   
-1168  -384   
624    -208   
-480   304    
944    -768   
-576   -112   
-48    -368   
80     688    
112    -576   
-816   48     
-32    64     
144    -96    
-48    208    
64     -144   
64     144    
0      0      
-64    320    
144    16     
-208   64     
176    0      
-160   -32    
112    144    
-144   32     
112    80     
-592   -208   
-96    -48    
-16    32     
96     144    
-64    -16    
48     32     
-160   -48    
32     112    
112    64     
-176   32     
-16    -32    
-32    0      
160    176    
-208   -64    
80     96     
-480   -128   
128    192    
-80    64     
48     192    
-144   64     
160    0      
-208   -48    
112    112    
0      336    
-32    16     
48     -64    
-112   96     
144    64     
-112   32     
16     128    
-176   0      
80     96     
48     0      
112    80     
-16    16     
96     304    
96     160    
16     144    
-32    160    
-48    64     
0      -16    
48     -16    
16     96     
-144   16     
64     160    
-160   96     
-16    0      
176    208    
-144   -144   
128    32     
-32    64     
400    496    
-304   304    
-64    16     
224    0      
-192   -128   
128    0      
0      192    
-64    144    
-64    144    
80     -16    
0      0      
48     -256   
96     304    
-80    64     
32     96     
64     160    
0      96     
-16    96     
-48    0      
48     96     
48     32     
64     112    
-112   -16    
-16    32     
96     160    
0      32     
48     80     
-16    48     
64     48     
-16    48     
64     16     
-64    -64    
64     144    
0      32     
144    176    
-96    16     
64     96     
0      80     
160    128    
-80    16     
160    192    
-80    96     
144    16     
-80    64     
0      -32    
48     144    
32     -64    
112    160    
-144   -160   
192    224    
-272   64     
240    -192   
-176   48     
176    -128   
96     128    
0      64     
80     48     
-48    -80    
128    112    
16     256    
-112   -32    
192    80     
-96    176    
96     -80    
-32    64     
64     96     
0      16     
48     176    
-48    -16    
96     80     
-16    448    
240    -224   
112    208    
-64    144    
112    -48    
-48    48     
96     128    
-144   32     
112    -112   
-80    64     
352    112    
32     -128   
-176   272    
-80    -576   
32     48     
64     64     
48     192    
-32    32     
32     32     
176    144    
-112   -144   
368    -288   
-144   336    
32     -32    
-32    176    
0      -144   
416    -112   
-208   -80    
176    -48    
-64    64     
288    -432   
-128   144    
96     16     
-48    128    
48     -96    
80     96     
144    80     
32     272    
-128   -16    
80     112    
112    144    
176    -432   
0      80     
64     48     
96     80     
-96    -432   
128    48     
-176   -16    
144    -128   
-144   112    
208    128    
-688   1584   
208    1840   
144    752    
512    -480   
16     -880   
-672   -128   
608    880    
416    64     
16     224    
128    -304   
-208   112    
-144   -656   
256    96     
208    -240   
-160   48     
-80    -272   
160    80     
-80    48     
144    -112   
0      48     
96     336    
144    160    
-80    -544   
16     160    
0      -368   
176    304    
-144   -384   
160    80     
-32    16     
160    32     
-96    0      
80     224    
80     128    
112    400    
-96    160    
224    -496   
-304   -160   
224    -176   
0      112    
224    -16    
-96    0      
80     -1152  
64     160    
112    -48    
-32    144    
32     32     
64     176    
144    304    
-176   -592   
208    0      
-16    -112   
32     32     
48     16     
-48    32     
128    -128   
0      32     
192    -704   
-144   128    
176    96     
-160   -608   
144    112    
-1328  -16    
48     -368   
112    192    
-144   -544   
224    64     
176    16     
256    112    
-48    96     
64     -32    
-16    48     
112    -208   
112    -48    
32     144    
16     -32    
80     320    
-464   -32    
176    -320   
16     48     
32     -208   
64     -16    
0      -384   
32     32     
272    -208   
32     48     
-64    112    
16     -48    
224    256    
-400   -16    
240    -16    
32     -336   
-304   -160   
288    -144   
-80    -144   
144    -528   
80     160    
-80    -432   
112    -48    
-16    -1056  
48     -16    
48     48     
-32    -32    
48     -256   
-160   -80    
144    -192   
48     -48    
48     32     
32     16     
-1824  -208   
-64    -320   
176    -160   
144    -48    
-32    32     
-64    -192   
-112   -32    
80     -688   
240    -96    
176    -144   
-336   112    
240    224    
272    -64    
-32    96     
-224   -112   
48     48     
-80    -192   
-128   -400   
-48    -256   
128    256    
32     -368   
-32    -48    
-160   -2992  
-16    0      
-32    48     
64     144    
-64    -144   
192    -48    
-272   -48    
256    -320   
-496   16     
128    -48    
-1008  -16    
80     -112   
272    -16    
-176   -400   
128    -16    
112    -320   
16     48     
48     -64    
-16    -96    
16     -32    
48     -176   
-80    -32    
112    176    
-144   16     
176    160    
-368   -64    
160    272    
-432   112    
160    -64    
96     16     
128    -368   
-112   -32    
48     -496   
144    -48    
240    64     
208    912    
-208   112    
-128   0      
-64    -272   
16     -272   
-496   -64    
48     -160   
112    368    
96     -112   
48     32     
208    -224   
128    240    
-608   48     
48     -144   
64     224    
-64    -112   
-208   -48    
32     -48    
-16    0      
-176   -432   
-32    80     
208    64     
-64    128    
-32    -384   
48     96     
16     -672   
32     80     
112    112    
-96    64     
-176   -48    
176    0      
-720   -2240  
832    800    
-1568  -640   
304    -400   
16     368    
640    -208   
-224   0      
-1568  -128   
416    464    
16     -160   
-768   -96    
-144   256    
64     320    
-400   48     
-48    -192   
-352   -32    
400    272    
-48    48     
-64    -288   
48     -176   
-352   -224   
16     304    
-112   64     
160    224    
-256   -272   
-96    -176   
-48    -480   
-128   -288   
-128   224    
-416   -432   
80     48     
-160   16     
96     16     
-64    0      
-112   -128   
-320   -176   
-16    16     
-64    -96    
48     0      
-48    64     
-80    224    
32     128    
-96    208    
-80    -48    
128    80     
-64    64     
-192   -176   
-112   -240   
96     160    
16     64     
16     32     
0      224    
-96    -224   
48     112    
32     48     
-48    144    
-64    -384   
32     192    
-224   -112   
16     -112   
16     192    
-16    -32    
-144   -48    
176    -96    
32     96     
-32    -80    
16     96     
-16    -144   
-80    96     
-16    80     
32     64     
-16    48     
-352   -64    
-32    64     
-208   -16    
-96    16     
-48    176    
-224   -32    
-320   -112   
-16    -112   
-240   -176   
176    256    
-96    -96    
240    176    
-144   80     
48     80     
-160   -96    
-16    -496   
160    -256   
112    208    
0      288    
-96    128    
-176   -96    
-160   -80    
144    64     
-224   -32    
64     128    
-48    128    
-48    32     
64     192    
-160   -160   
16     80     
0      0      
128    112    
-160   16     
0      144    
-160   -176   
144    96     
-288   -80    
192    80     
-304   80     
96     32     
-64    48     
-48    32     
-16    32     
-48    48     
96     336    
-80    48     
16     0      
-144   0      
80     192    
0      0      
-192   96     
-64    32     
112    240    
-176   -32    
-144   80     
32     -64    
64     32     
32     160    
32     -32    
80     64     
-64    144    
48     128    
-64    48     
48     -48    
16     -48    
32     240    
-256   0      
16     0      
-256   -80    
176    272    
-128   176    
-112   48     
160    80     
-160   -464   
400    -96    
-80    288    
128    -16    
-160   208    
-16    32     
48     48     
80     160    
-144   -112   
384    576    
-272   272    
32     80     
176    48     
-96    0      
-144   -80    
-272   16     
208    -48    
16     16     
272    336    
-240   -48    
224    144    
-144   96     
256    496    
-240   0      
-64    32     
80     208    
-160   0      
0      0      
-64    112    
32     96     
-144   32     
112    112    
240    144    
-48    32     
16     128    
32     176    
-32    -16    
96     112    
-48    48     
48     32     
32     112    
32     128    
112    176    
-144   144    
80     112    
-64    128    
80     48     
-80    -32    
192    -112   
-48    64     
0      64     
-400   992    
-528   960    
-208   176    
-64    -96    
256    800    
-192   -32    
320    1008   
-352   848    
16     -768   
32     -96    
-112   -112   
256    144    
-304   144    
-16    -96    
144    128    
-112   16     
96     208    
-64    0      
160    0      
0      80     
32     144    
48     160    
16     352    
96     144    
-144   -128   
16     16     
160    192    
64     176    
-32    64     
16     96     
64     -128   
-16    -288   
64     96     
0      -352   
64     112    
0      -32    
80     -80    
-96    176    
176    192    
144    48     
-144   64     
80     160    
112    128    
-16    -288   
-32    -32    
-48    -32    
16     -16    
128    0      
112    -432   
-160   160    
128    32     
16     160    
-96    -32    
272    -80    
-192   192    
176    160    
-144   -208   
32     0      
-32    -64    
32     80     
-48    -16    
112    -112   
-80    80     
112    -32    
0      -32    
64     -2560  
112    128    
-64    160    
128    80     
48     64     
48     96     
-16    176    
-48    112    
144    304    
-112   128    
96     48     
256    -240   
112    144    
-144   -192   
64     224    
-112   -176   
224    160    
0      272    
-128   32     
144    -224   
32     0      
96     240    
-128   64     
128    32     
80     80     
16     144    
16     -192   
0      144    
-16    -224   
192    32     
192    0      
-192   32     
192    -3408  
0      64     
-16    -64    
144    144    
-32    80     
144    240    
-80    32     
160    -112   
-112   -32    
224    80     
-16    96     
160    -96    
-112   48     
96     -160   
112    48     
-32    -320   
64     96     
96     128    
112    96     
-192   80     
160    96     
-16    32     
48     -624   
-160   48     
256    -80    
160    208    
112    96     
-96    -80    
16     160    
-112   160    
528    0      
-64    32     
-192   0      
128    176    
192    160    
80     320    
96     256    
32     128    
112    -48    
-256   -560   
16     128    
160    -256   
160    112    
64     -128   
-160   192    
64     16     
128    160    
-16    -48    
-32    -32    
-16    -224   
-544   -32    
112    -336   
112    -80    
48     -736   
0      -96    
80     224    
32     -224   
112    -32    
112    128    
128    400    
-48    -176   
-32    -1904  
64     80     
80     -176   
-224   -64    
-672   96     
96     -608   
-64    -160   
-48    -480   
128    96     
-48    -912   
112    96     
48     144    
-48    -96    
64     144    
32     192    
64     -16    
80     80     
160    -48    
-144   64     
-416   -48    
128    -208   
16     352    
-240   -544   
-176   -144   
192    -208   
-112   -144   
-128   -880   
160    -288   
192    -80    
144    112    
-112   -32    
32     16     
112    -128   
80     48     
-240   112    
64     -112   
-192   64     
112    64     
-320   704    
0      2608   
-448   784    
-240   -976   
-160   -976   
160    -240   
304    304    
144    64     
288    544    
-176   -272   
-32    -240   
64     64     
304    -96    
-304   -48    
-32    192    
96     208    
48     -160   
-48    208    
16     -320   
320    -32    
-96    -608   
0      16     
32     -96    
192    -32    
-176   -96    
160    -144   
-160   -32    
64     320    
176    368    
-352   -400   
-480   64     
128    -48    
32     -80    
-112   -256   
176    48     
-176   -688   
368    208    
-160   128    
160    -144   
-176   -256   
112    80     
-192   0      
16     -80    
-80    16     
0      -32    
0      32     
96     144    
16     -32    
128    -368   
80     80     
-48    -608   
144    96     
0      128    
64     32     
16     112    
-16    -144   
-48    32     
80     -144   
-512   -384   
240    -128   
-304   -128   
224    -336   
-96    32     
96     -224   
16     160    
144    -192   
16     64     
-336   16     
96     -192   
-144   16     
48     -48    
-48    48     
80     -32    
-208   -16    
144    0      
-64    -48    
352    448    
-80    352    
144    -176   
32     208    
64     -544   
16     -336   
-176   -144   
16     -144   
32     288    
16     16     
-96    -48    
96     208    
-160   208    
-64    -192   
-64    -16    
128    32     
-48    128    
-192   -128   
48     144    
-1472  -160   
112    208    
-48    16     
-160   -32    
64     0      
-928   64     
16     112    
-16    16     
-16    48     
16     16     
48     96     
-128   -16    
-16    112    
-128   -176   
-16    128    
16     -80    
0      -48    
48     32     
-128   16     
-48    -48    
-256   16     
128    272    
-64    16     
160    -16    
-208   -80    
48     -112   
-160   -368   
16     64     
-64    16     
-32    96     
160    160    
-224   160    
48     0      
64     96     
-144   80     
16     48     
-80    192    
-272   48     
0      -48    
-80    -672   
144    -32    
48     240    
-80    80     
96     272    
16     -32    
-64    64     
-96    -144   
-16    160    
-96    -64    
-112   16     
-64    -224   
-208   -368   
-288   -48    
112    208    
-1664  -96    
32     64     
48     -32    
80     192    
-64    -112   
48     -304   
-16    32     
176    208    
32     912    
-32    -256   
-160   -80    
16     -144   
-160   96     
-144   -80    
16     128    
-224   144    
144    128    
0      208    
-48    -320   
-16    -128   
128    80     
-64    16     
80     384    
-112   -224   
-16    -192   
192    16     
112    32     
112    256    
-48    160    
16     208    
-128   -144   
96     240    
-1184  16     
-80    48     
32     80     
208    -32    
64     96     
-48    32     
0      96     
-16    16     
80     -80    
-80    32     
144    224    
-80    -96    
-32    208    
-272   -112   
96     192    
-448   0      
-512   576    
448    80     
464    912    
-96    -400   
480    192    
-688   -880   
320    160    
1104   320    
-592   128    
304    -32    
-272   32     
16     16     
-288   -80    
-32    64     
-80    -16    
64     64     
80     64     
32     64     
-32    16     
-64    32     
128    16     
-112   112    
192    48     
-208   112    
80     0      
-304   -32    
80     208    
16     112    
96     0      
-160   112    
16     -48    
-16    16     
-80    48     
64     176    
112    48     
32     -64    
-80    48     
0      112    
96     0      
-160   0      
-64    64     
80     192    
-32    0      
-16    176    
32     -80    
-48    -16    
16     160    
16     64     
160    80     
-192   96     
144    112    
-64    0      
16     80     
0      48     
32     208    
-144   -96    
128    144    
-224   64     
96     16     
64     32     
32     144    
48     32     
64     16     
48     96     
-48    144    
-64    80     
80     -48    
96     -64    
160    96     
-64    192    
-96    80     
64     -16    
0      80     
-80    176    
112    112    
-32    272    
-80    160    
-64    32     
-16    -16    
48     -128   
176    176    
-176   -128   
112    32     
-192   208    
96     0      
192    240    
-304   160    
176    0      
-32    32     
160    112    
-32    80     
48     208    
-32    208    
-32    -16    
64     -160   
80     192    
-96    128    
32     112    
-16    32     
-16    96     
-48    64     
64     160    
-16    -80    
128    96     
-32    192    
80     144    
144    384    
-112   112    
176    -16    
-128   64     
16     96     
96     -32    
48     192    
16     -48    
48     128    
-112   0      
80     -48    
208    192
[truncated: 362,011 more chars]
