# Supplementary material for: A Fault Diagnosis Method for One‐Dimensional Vibration Signal Based on Multiresolution tlsDMD and Approximate Entropy
Source: Hindawi journal article supplement (doi:10.1155/2019/3262818), 2019-01-01
Supplement: f1 [file 3262818.f1.zip › 3262818.f1/gear signals/broken teeth fault signal/Data5.txt]

-112   0      
48     16     
16     -1264  
160    -112   
48     128    
-16    -80    
96     32     
-32    144    
128    144    
224    -32    
-176   -48    
-16    80     
-128   -160   
-32    -64    
272    -80    
112    -96    
-16    -192   
112    -64    
-96    -208   
240    -432   
-64    -80    
96     112    
48     16     
112    -176   
-192   224    
-64    -208   
64     224    
-160   -32    
64     -16    
-400   48     
-112   -128   
112    -48    
-96    -528   
96     -128   
96     -48    
32     -80    
144    -224   
-240   144    
32     -240   
112    -64    
48     16     
-16    0      
-48    -112   
112    -240   
-224   -64    
80     -112   
-80    0      
160    -208   
192    96     
-256   -112   
160    -112   
-48    -752   
0      48     
80     80     
-144   -96    
128    48     
-80    -48    
-112   -48    
48     -144   
-192   48     
112    -240   
-288   -160   
-112   -288   
64     -80    
64     -160   
-64    48     
128    -112   
128    304    
-144   -112   
32     32     
-160   -64    
128    -96    
-176   -16    
-32    -240   
-48    -32    
-48    -288   
-144   -112   
160    -48    
32     -112   
128    192    
48     48     
16     -144   
128    16     
64     -592   
224    304    
-208   80     
96     -240   
-64    160    
304    256    
-384   -176   
96     -352   
-656   80     
192    -256   
-256   0      
-144   -160   
64     -64    
64     -176   
224    160    
-160   -976   
208    112    
-368   16     
16     48     
16     -32    
32     -160   
-240   -16    
128    -304   
0      32     
48     96     
-80    32     
48     16     
-16    0      
32     -352   
80     144    
-128   -1104  
160    0      
-160   96     
16     -16    
48     96     
-16    96     
-192   -32    
-128   -16    
208    208    
112    96     
-64    -96    
32     -64    
320    64     
-96    -112   
144    -16    
128    144    
-784   0      
64     -64    
80     32     
0      0      
16     48     
0      112    
-64    48     
-48    16     
176    -64    
48     64     
-272   -288   
0      64     
80     16     
128    64     
-160   96     
48     -224   
-16    192    
-320   -112   
144    176    
-208   -112   
144    32     
112    -128   
-48    -64    
-368   -96    
-112   16     
-48    -96    
112    48     
-96    -176   
1232   912    
0      176    
-32    -288   
-960   -144   
128    112    
64     -384   
16     96     
160    304    
-656   336    
0      -48    
-128   -256   
-128   352    
224    -224   
-112   352    
-16    -400   
-176   224    
-144   -656   
80     496    
-176   -256   
0      384    
-176   -128   
128    592    
-416   -576   
-784   112    
-80    32     
352    304    
-160   160    
-112   -368   
320    256    
-304   -192   
208    176    
-64    144    
-144   -288   
64     176    
-48    -96    
0      144    
-256   -416   
288    864    
-224   416    
-64    64     
-1024  -112   
16     128    
-112   112    
-48    144    
32     96     
-128   64     
176    192    
-64    192    
-32    0      
48     48     
-96    16     
112    0      
-48    272    
-128   112    
-48    -112   
-880   -48    
32     0      
80     -112   
32     -16    
128    192    
-16    16     
96     112    
-64    224    
-176   176    
-16    48     
-32    16     
-16    -112   
48     96     
-176   -48    
112    48     
-624   48     
80     64     
32     80     
64     0      
-32    80     
-160   -176   
80     48     
-48    -48    
-96    -288   
-80    -80    
-64    208    
-256   -80    
-96    -272   
-304   -176   
352    48     
-256   -96    
-96    112    
-48    -336   
0      -64    
0      48     
0      112    
0      64     
16     -16    
-48    96     
-112   -64    
96     688    
-96    464    
0      48     
-208   -176   
-32    160    
64     -48    
-16    96     
80     32     
-64    64     
-32    -304   
32     160    
32     48     
192    160    
-192   80     
32     -32    
-48    128    
48     -112   
-16    144    
-32    -16    
-16    160    
-128   -112   
-176   -208   
192    240    
160    304    
-160   128    
112    16     
-96    -16    
32     80     
112    -176   
16     -48    
-192   80     
176    -48    
-80    -32    
-80    -32    
-16    96     
-144   -112   
-64    -48    
-64    144    
176    288    
-32    -32    
160    -16    
-224   144    
16     128    
240    64     
-32    160    
0      112    
48     32     
-48    48     
-16    144    
32     96     
64     -208   
32     80     
-64    144    
192    32     
-112   112    
144    112    
-48    64     
-80    -64    
144    256    
-176   -32    
160    -16    
-96    192    
-32    80     
32     16     
32     -16    
128    32     
0      176    
0      -112   
224    192    
-128   96     
96     -32    
160    176    
-144   -16    
-144   240    
-144   -240   
160    16     
240    -48    
-192   160    
-64    48     
-80    -1088  
112    16     
112    192    
-176   208    
96     16     
80     64     
96     32     
16     128    
-64    -32    
0      160    
-32    160    
80     -16    
-16    64     
112    144    
112    -16    
32     -496   
-32    -32    
176    192    
-144   128    
224    -32    
-96    96     
48     32     
-256   -720   
656    -176   
1328   704    
320    -704   
-32    560    
352    -96    
-352   -64    
1344   -208   
-512   336    
224    -320   
-144   528    
96     -240   
-32    320    
96     -208   
32     80     
64     -16    
80     144    
-128   32     
112    -304   
-48    128    
80     -144   
-80    144    
80     144    
128    48     
-48    -32    
-112   -1264  
128    64     
48     208    
128    -16    
-32    48     
48     16     
-16    -32    
144    64     
-48    96     
96     64     
160    256    
-208   -64    
208    48     
-176   -144   
224    -32    
16     -96    
-48    160    
128    80     
0      0      
0      256    
0      80     
208    -32    
-80    -48    
240    64     
-160   256    
112    -32    
-48    -64    
80     144    
32     -128   
-80    112    
16     -336   
96     160    
-144   -352   
96     80     
-16    -592   
80     192    
0      112    
-32    160    
0      208    
96     80     
112    64     
0      -176   
-80    48     
128    -80    
16     32     
80     -128   
-96    208    
0      -544   
144    -16    
-16    -128   
208    -32    
0      160    
-16    -48    
160    64     
16     240    
144    80     
224    -32    
-16    -32    
-16    288    
176    176    
-80    -192   
160    -48    
208    208    
-176   48     
144    128    
-16    64     
64     96     
176    160    
16     16     
16     -144   
128    144    
144    -16    
48     144    
-48    -672   
16     160    
96     -176   
48     64     
112    0      
-16    16     
0      -352   
80     48     
16     208    
112    160    
-16    -48    
16     -32    
128    208    
160    112    
-48    80     
64     -64    
-48    144    
272    176    
48     320    
128    -32    
32     272    
-96    128    
-64    -752   
16     -64    
288    -112   
64     -688   
0      -176   
-32    -1232  
160    -128   
16     -64    
48     -96    
80     240    
192    96     
-144   176    
32     -240   
64     -416   
48     0      
192    -112   
-144   -16    
240    -144   
-96    -672   
112    -112   
48     -736   
128    -96    
-16    112    
32     48     
-48    -3056  
192    192    
-48    240    
-32    -144   
112    -256   
48     144    
32     -176   
-176   0      
-352   -304   
288    -80    
-448   192    
-48    -80    
16     -144   
80     -96    
32     -80    
-48    -800   
-32    -96    
352    112    
0      80     
16     -176   
32     272    
64     16     
-64    -16    
64     -32    
64     96     
48     -32    
-32    -128   
96     0      
48     -240   
0      0      
160    -128   
-32    -32    
160    -1616  
-64    96     
160    -80    
-112   64     
32     -48    
64     80     
0      -16    
-160   16     
-496   -160   
48     -112   
-1648  -144   
32     -112   
16     80     
-64    -128   
-32    80     
80     -832   
-240   96     
224    -192   
-48    96     
96     96     
-1456  1104   
-864   -1248  
384    352    
448    0      
256    -416   
-848   -176   
32     208    
48     272    
-144   -160   
176    -256   
256    -416   
-48    288    
112    320    
-160   208    
-80    -240   
48     16     
-48    -128   
-32    -320   
-64    -16    
192    192    
-288   368    
80     -32    
-480   240    
176    -448   
-48    -160   
128    -288   
320    352    
-208   -192   
240    208    
-432   -304   
384    -144   
32     32     
16     -48    
-352   128    
80     -112   
32     -32    
-112   -96    
0      0      
64     -160   
-80    0      
144    -128   
32     128    
112    -960   
-16    -48    
-112   0      
-48    32     
-48    32     
32     112    
-144   -128   
64     -96    
-320   -48    
112    16     
-256   -112   
160    -64    
-128   144    
224    -48    
-160   -32    
176    -304   
80     32     
-64    -48    
128    80     
-64    48     
64     -32    
-112   80     
48     -256   
176    48     
-32    288    
-144   -16    
-784   -272   
64     64     
-272   -304   
32     224    
-96    -48    
-160   144    
-80    0      
48     -80    
208    32     
-80    96     
-16    -32    
96     176    
-112   32     
176    0      
-208   -192   
-544   -304   
-128   272    
-176   80     
-224   80     
304    256    
-256   -80    
176    0      
-80    80     
-48    0      
48     192    
-160   -144   
128    -80    
384    -144   
-160   -144   
48     48     
-368   -176   
112    32     
-112   -32    
-80    160    
0      48     
-208   0      
160    288    
-160   -128   
160    96     
-208   144    
-48    96     
-784   32     
-80    112    
-16    -80    
64     128    
-64    -144   
240    224    
48     80     
-208   -160   
48     -16    
-192   -16    
288    384    
0      64     
-96    208    
-576   -64    
256    -48    
-368   160    
-208   -16    
208    96     
16     128    
-208   -256   
64     96     
-32    32     
80     -64    
-240   -128   
-112   -272   
208    96     
-224   112    
320    -16    
-32    112    
-320   32     
112    224    
240    16     
-224   32     
0      96     
-48    -192   
0      -112   
-80    -96    
-144   0      
224    64     
-48    -64    
-144   112    
-48    16     
-64    160    
128    96     
0      16     
-64    -16    
48     224    
-240   0      
-80    208    
192    -80    
-80    80     
16     144    
-176   80     
-144   0      
-16    -96    
192    64     
48     384    
-48    48     
-272   112    
-64    64     
-272   -208   
240    176    
-592   -96    
192    256    
-112   32     
-32    -48    
96     144    
-16    80     
-16    96     
-48    64     
32     48     
64     80     
48     160    
-240   -32    
16     -32    
80     272    
-160   144    
-224   -64    
224    -16    
112    32     
32     96     
-80    80     
32     256    
-16    160    
-64    128    
-80    48     
-112   -160   
-608   -688   
-320   624    
288    -304   
-816   352    
-96    48     
-480   -64    
-160   -592   
-144   752    
-416   -288   
544    640    
-112   -432   
32     112    
-256   -208   
224    192    
-80    256    
16     -128   
-144   208    
96     -336   
-128   -112   
128    96     
-224   64     
-64    -32    
-32    368    
144    48     
-48    -32    
-80    -96    
128    16     
-128   -64    
48     64     
-48    96     
208    80     
-224   112    
144    144    
-144   112    
16     48     
-32    32     
64     0      
64     192    
112    48     
16     64     
16     48     
64     272    
-16    -16    
144    208    
-144   0      
128    -16    
-128   -208   
256    400    
-256   96     
32     -32    
16     96     
-16    16     
144    144    
-48    -208   
128    80     
0      48     
32     336    
16     16     
144    112    
-48    320    
32     48     
-208   -64    
112    16     
-96    128    
16     80     
0      -48    
32     48     
48     -32    
80     0      
16     -64    
48     176    
128    224    
-192   64     
0      -32    
64     112    
-176   -80    
96     -144   
-112   272    
-16    -16    
48     -800   
112    48     
-16    16     
48     80     
-48    176    
16     48     
16     160    
-80    -32    
64     80     
32     -80    
96     112    
0      160    
-48    -112   
80     176    
80     64     
-32    -400   
0      48     
128    176    
16     112    
-16    -48    
32     32     
32     64     
80     96     
-32    128    
48     144    
32     -112   
-16    64     
-32    -144   
80     80     
-32    112    
64     -160   
80     128    
80     -416   
32     144    
-112   48     
160    128    
-80    -16    
208    240    
-64    96     
128    80     
-96    -32    
128    48     
-128   80     
128    -48    
-32    128    
96     16     
160    448    
-240   -1504  
272    -96    
-176   144    
288    80     
-112   208    
32     16     
16     112    
-16    16     
64     -64    
64     192    
-48    -128   
80     64     
-96    112    
128    -304   
-96    32     
176    -576   
80     80     
-64    -1856  
64     112    
208    800    
-480   -32    
384    -112   
-16    240    
112    -80    
-208   -112   
160    192    
128    32     
16     -160   
16     -64    
112    -16    
-16    -192   
80     384    
-176   -864   
96     -64    
-80    -2128  
400    128    
-192   16     
32     32     
48     48     
48     128    
-64    -160   
288    224    
-48    176    
112    -368   
-208   -32    
208    96     
-48    272    
128    -608   
-144   0      
160    -336   
-32    208    
32     96     
48     128    
-32    -80    
32     256    
80     48     
128    -208   
176    0      
-48    -32    
96     32     
-16    -288   
112    32     
0      0      
32     128    
-48    96     
-32    128    
208    144    
-208   -80    
144    -144   
112    -144   
160    0      
-128   1632   
48     1376   
-368   -1008  
-128   -432   
-352   -1216  
752    -752   
-96    672    
256    544    
-400   -144   
-48    -144   
384    32     
144    -816   
-176   -1584  
16     -16    
160    -864   
-32    -64    
-64    256    
160    -80    
32     64     
176    368    
-80    256    
80     112    
-144   -1344  
176    80     
32     -352   
-48    48     
-96    -400   
112    -368   
-16    -32    
256    -1168  
-176   -176   
128    -896   
48     -64    
80     368    
0      48     
32     320    
64     -208   
-112   -208   
128    96     
96     -176   
64     -16    
-144   112    
240    112    
-816   -32    
-16    -304   
80     0      
48     -352   
176    256    
-96    -288   
192    -112   
-64    416    
96     -48    
80     -16    
48     96     
144    48     
-16    16     
0      -16    
0      -64    
-224   16     
-32    -96    
208    128    
-16    -16    
128    -64    
32     80     
16     96     
112    -1232  
176    224    
-16    0      
96     176    
-144   -128   
112    -208   
-144   -144   
144    -96    
-368   96     
64     -160   
64     160    
-48    -336   
192    0      
32     -464   
-96    -144   
208    -1360  
-112   320    
-16    -272   
176    48     
48     -224   
144    80     
-48    -16    
48     352    
-176   -80    
240    32     
-1424  -48    
48     -176   
-192   -96    
96     -48    
112    272    
-240   -144   
112    128    
64     -1184  
48     -48    
64     64     
0      240    
-80    -64    
80     -112   
0      -240   
128    -96    
-160   32     
16     -96    
-32    -64    
48     -240   
-80    16     
112    -368   
16     208    
64     -1632  
-32    -32    
-32    -144   
240    272    
-320   -96    
256    -64    
-640   -128   
240    0      
-96    80     
144    128    
-512   16     
288    -96    
-288   -80    
192    16     
-96    32     
16     -416   
80     240    
-32    -16    
160    48     
-144   80     
32     48     
-224   176    
128    0      
-64    288    
-48    -48    
224    -16    
-128   -112   
-64    16     
16     112    
-16    -112   
192    -288   
-96    0      
16     -48    
-48    48     
144    32     
96     64     
0      64     
-16    -80    
-112   0      
208    16     
-192   -48    
208    -144   
-80    112    
-80    0      
64     144    
-288   16     
-1296  -128   
-176   -80    
-224   112    
64     224    
96     16     
-96    -16    
416    560    
-464   -352   
-48    -144   
-304   -288   
-96    -224   
48     96     
-528   -416   
288    208    
-112   160    
-176   96     
-96    80     
96     80     
32     -16    
-1152  -80    
-80    128    
64     16     
-64    96     
-144   64     
32     -176   
0      -112   
96     288    
80     80     
-48    0      
16     80     
-144   32     
-112   80     
-320   -144   
64     -384   
-80    -16    
112    336    
-752   96     
-208   -16    
-592   608    
-384   -640   
176    16     
-464   496    
-1216  -112   
-96    -992   
512    560    
0      704    
-400   -224   
-240   -320   
96     112    
-336   -192   
48     240    
-960   16     
64     -224   
-144   32     
-96    128    
128    -64    
16     288    
80     192    
-192   176    
80     -16    
-16    48     
32     -96    
-80    -208   
-80    112    
16     336    
304    96     
-480   -432   
192    32     
-416   48     
16     288    
-128   96     
96     -80    
-80    -32    
-48    -240   
96     176    
16     32     
-16    112    
80     320    
-80    144    
-96    32     
-112   -16    
48     64     
-32    176    
-736   -112   
160    256    
176    208    
-128   -16    
16     64     
-144   96     
80     96     
-112   240    
-16    -64    
-96    -16    
-144   -304   
32     48     
64     -48    
-80    -128   
160    192    
-528   -128   
-64    128    
128    -208   
128    16     
192    80     
0      112    
-16    64     
16     32     
16     16     
48     80     
48     80     
32     96     
-16    80     
-160   -80    
0      16     
-176   -240   
112    -240   
-64    0      
0      64     
-48    320    
-80    192    
112    160    
-240   -112   
176    160    
-144   176    
192    304    
-272   32     
96     -80    
-16    -144   
272    208    
-80    288    
32     192    
-112   32     
16     -64    
80     64     
-80    -80    
80     160    
-96    32     
112    224    
-192   0      
-64    -64    
-32    -32    
96     160    
-32    64     
-64    48     
32     64     
-96    -128   
192    176    
-192   -16    
192    80     
-80    96     
192    112    
-112   80     
0      48     
16     16     
16     -16    
-32    208    
32     16     
-32    -128   
80     208    
128    80     
80     144    
-144   -32    
96     176    
128    160    
80     112    
-16    -16    
16     -80    
160    32     
-48    192    
128    48     
-64    112    
96     176    
0      224    
-224   -64    
160    144    
96     240    
-32    224    
-256   -80    
96     -64    
32     48     
160    192    
-176   -16    
96     -32    
-192   -416   
320    -304   
-112   128    
112    352    
-288   64     
-48    -464   
96     64     
128    160    
-64    80     
32     -32    
-80    448    
256    -144   
224    944    
-144   224    
16     256    
-240   -160   
208    32     
-32    32     
80     32     
-192   -176   
352    -384   
-32    128    
0      -80    
-128   224    
240    144    
160    208    
-64    96     
368    176    
-80    192    
-32    -64    
-48    -96    
304    144    
-96    -48    
-16    176    
-96    96     
-80    -448   
32     112    
112    192    
0      64     
-16    32     
144    64     
32     128    
16     -16    
96     112    
0      96     
-64    -176   
112    -144   
208    16     
-48    208    
64     192    
-64    -192   
128    32     
-272   2032   
-2048  -992   
1056   1168   
-80    608    
-48    288    
256    -272   
-416   64     
832    816    
-304   16     
-192   176    
48     -112   
-80    32     
-96    288    
48     -192   
16     -64    
32     -128   
32     112    
128    48     
-64    112    
112    16     
32     112    
-16    112    
112    112    
-64    -48    
144    -48    
80     48     
-80    -80    
80     176    
-48    0      
160    -16    
-64    -288   
176    144    
-32    -2016  
0      80     
64     -288   
208    96     
-192   240    
112    -112   
-80    -64    
-96    112    
272    160    
-80    -64    
32     -16    
144    -176   
16     176    
64     -224   
-48    -16    
128    32     
-112   112    
304    -160   
-144   80     
64     -64    
128    288    
-208   176    
192    -16    
-48    -16    
224    32     
48     128    
0      -80    
-48    64     
80     -448   
-32    96     
32     -112   
112    208    
-176   -800   
192    96     
-160   16     
160    112    
16     48     
48     80     
-16    16     
64     -1072  
64     112    
0      -448   
32     64     
32     112    
-128   112    
112    -320   
192    48     
0      80     
-112   176    
64     64     
160    96     
-192   48     
128    192    
-208   -256   
400    -160   
-96    64     
96     32     
16     112    
128    -192   
-16    112    
96     -128   
96     112    
80     -112   
176    192    
-144   96     
176    -336   
16     -1264  
-80    -160   
128    64     
64     -16    
32     32     
96     128    
80     80     
0      -160   
0      128    
144    176    
48     192    
-16    80     
-16    -816   
96     48     
0      -592   
80     -320   
96     112    
144    -32    
16     -64    
16     -496   
0      -96    
16     96     
-16    -16    
0      48     
208    32     
160    240    
-208   -144   
-16    -384   
-480   128    
384    80     
32     -64    
-1072  -48    
0      16     
176    112    
48     -192   
96     16     
160    -144   
160    -192   
-176   16     
-112   -96    
144    -240   
160    160    
160    -208   
-112   112    
32     112    
64     -64    
-1008  -192   
48     -400   
48     80     
240    176    
-32    112    
48     -640   
80     -96    
-16    -2192  
0      48     
-16    -64    
192    256    
-16    16     
96     0      
-304   -368   
32     -144   
-448   -320   
64     -288   
240    80     
96     -16    
48     -112   
48     0      
-320   -32    
16     -608   
112    352    
112    80     
-80    16     
0      -16    
48     0      
-64    32     
32     16     
-32    16     
0      -112   
-864   -112   
96     -64    
-96    -256   
240    -176   
-48    272    
48     -224   
32     -64    
208    128    
-144   256    
-256   0      
80     48     
96     -64    
0      -16    
-16    48     
-16    -64    
-16    64     
160    112    
-368   -64    
32     -16    
64     32     
-560   -2352  
1040   480    
-592   -2096  
384    -544   
-64    -848   
96     160    
144    560    
144    384    
-480   -320   
336    -80    
-384   -144   
32     -48    
32     176    
304    16     
-144   64     
-176   -496   
32     48     
-16    -576   
144    80     
-96    0      
-144   -112   
-288   48     
80     80     
-64    -192   
32     32     
-64    -176   
176    240    
176    624    
224    192    
-144   64     
-192   -384   
128    16     
128    -224   
-96    -64    
80     64     
-160   48     
224    64     
-80    -192   
-48    -336   
64     -80    
192    224    
-64    -80    
-608   16     
144    -304   
-48    128    
-16    48     
-32    224    
-256   64     
-368   -64    
-96    -96    
-96    128    
-128   -112   
64     32     
-16    0      
80     -16    
-128   -32    
-32    -304   
-64    -896   
-368   448    
-224   128    
-64    96     
-112   -176   
80     48     
16     0      
-32    32     
-16    64     
16     32     
-176   48     
-80    16     
48     -48    
-16    48     
64     16     
-16    112    
-176   -64    
256    208    
-48    -64    
-144   -208   
-112   176    
-96    64     
-96    -208   
-272   192    
256    -32    
-912   -96    
48     -144   
80     128    
48     240    
-336   -320   
112    -160   
-16    0      
48     176    
-208   -16    
-48    32     
128    128    
-16    -16    
-48    32     
-224   -96    
80     160    
-64    16     
64     48     
-256   -80    
64     16     
-96    -208   
64     160    
-192   -288   
32     192    
-32    64     
80     64     
16     112    
0      -16    
-64    96     
64     -16    
-48    0      
32     32     
16     80     
-272   0      
-32    -112   
-608   -144   
-32    272    
64     -32    
-64    128    
16     96     
-32    -32    
-112   32     
-240   0      
-64    144    
128    16     
-176   224    
-160   -48    
144    -112   
-496   -96    
128    144    
-64    -176   
-16    128    
64     16     
-48    224    
288    128    
-112   48     
-16    112    
16     160    
-16    -32    
-32    96     
-112   48     
-144   -272   
0      -224   
-112   -96    
-16    -96    
-336   32     
240    480    
0      -144   
-176   112    
48     144    
-32    -112   
144    144    
-64    256    
0      -96    
64     240    
-16    144    
64     160    
-304   -480   
64     -80    
96     80     
-240   -16    
-16    160    
64     32     
0      400    
-112   -64    
-16    -160   
-112   256    
32     0      
-64    48     
-16    48     
112    -112   
-128   192    
192    192    
-128   16     
144    144    
-80    96     
-48    0      
-32    80     
-80    16     
96     0      
64     176    
-128   32     
-192   16     
-48    48     
48     16     
48     96     
-48    32     
-48    160    
-256   -80    
-64    -48    
80     16     
80     80     
160    48     
-48    208    
144    64     
-48    48     
400    256    
48     -720   
560    512    
-128   -96    
-640   -240   
656    336    
-400   96     
-80    720    
-272   -512   
0      -80    
192    -208   
-48    480    
0      -48    
-112   256    
144    48     
16     -32    
-32    224    
96     0      
-16    48     
0      16     
-192   80     
192    192    
-144   80     
240    -112   
-192   32     
160    -32    
-64    256    
48     112    
-64    32     
112    0      
-48    192    
112    0      
-112   64     
-48    -16    
16     96     
-64    -112   
160    -64    
-192   80     
208    192    
112    48     
-160   80     
48     96     
64     64     
240    176    
-128   176    
-16    48     
-80    -80    
64     256    
160    -16    
0      0      
0      96     
16     128    
16     0      
-48    -1712  
112    32     
-32    272    
64     -32    
0      112    
-32    96     
80     16     
32     32     
48     128    
64     160    
-48    -32    
112    0      
-32    0      
-48    144    
64     192    
80     -272   
160    32     
32     160    
-176   96     
32     -96    
160    176    
-176   -112   
80     -144   
-64    -80    
128    144    
-112   144    
0      144    
144    -128   
80     272    
-144   -48    
320    -400   
-112   224    
-64    -48    
80     80     
-112   208    
256    144    
-128   48     
144    -32    
0      64     
0      160    
-80    192    
144    16     
-96    -160   
144    112    
0      80     
48     -48    
-32    80     
-32    -720   
80     176    
176    224    
64     -48    
-112   112    
-128   -64    
112    0      
-128   80     
208    112    
64     112    
-112   96     
0      -240   
192    96     
-64    -160   
-16    32     
128    128    
160    384    
0      -112   
-64    -208   
-32    -16    
128    128    
160    -128   
-16    128    
-240   -160   
304    368    
-256   16     
320    -96    
-144   -16    
48     32     
-16    64     
112    96     
64     48     
-96    -624   
96     128    
-32    -128   
0      -128   
176    240    
112    320    
-16    0      
-48    176    
112    144    
144    64     
-64    112    
96     112    
32     160    
-96    -640   
112    -112   
-128   -800   
128    -240   
32     80     
144    144    
0      144    
112    384    
-224   0      
208    112    
-96    -64    
128    -96    
-32    16     
-16    -528   
112    128    
-48    -336   
128    224    
-80    80     
-16    -752   
304    -1024  
336    400    
-32    48     
-144   96     
112    -16    
48     -32    
112    208    
-192   -384   
48     48     
32     -304   
96     48     
-16    -64    
48     128    
-48    -176   
112    80     
-48    -1120  
0      112    
-32    32     
512    -80    
80     80     
-288   -256   
-48    -80    
96     -192   
128    112    
16     80     
64     128    
-16    -128   
256    240    
-208   -160   
176    32     
16     96     
208    -496   
272    1840   
-400   -736   
-240   -1360  
-352   -192   
-400   -256   
1136   -496   
-480   -544   
432    -272   
-288   112    
240    -192   
-16    64     
-16    -48    
-48    -240   
144    208    
288    80     
-368   80     
16     -320   
192    -320   
-528   -192   
240    -144   
48     192    
192    -48    
-144   112    
528    -1216  
-112   176    
144    96     
64     -448   
464    272    
96     480    
-96    -448   
128    -160   
-32    16     
0      -256   
48     224    
-112   -192   
176    -96    
0      128    
144    160    
-112   -400   
368    -208   
80     96     
112    -32    
16     16     
0      0      
128    384    
48     16     
-80    160    
-224   -528   
-1056  -704   
240    -272   
64     0      
-16    -176   
96     -336   
32     176    
48     -64    
32     -656   
-448   -128   
848    576    
-176   -96    
144    32     
16     16     
0      -192   
192    -224   
-256   0      
32     -128   
-400   96     
112    16     
64     0      
32     -176   
64     -208   
112    -1120  
32     64     
96     64     
-32    80     
0      -272   
160    -384   
-128   -160   
-16    -224   
32     128    
176    -32    
-352   32     
128    -496   
-624   80     
-112   -288   
96     32     
128    -48    
-80    128    
-16    -1584  
16     -48    
-96    -128   
16     48     
-128   -48    
0      0      
176    144    
-32    80     
-240   -128   
144    144    
-208   64     
304    352    
-128   192    
16     -464   
48     16     
80     -928   
208    64     
-256   -144   
128    96     
-48    -48    
80     -208   
-272   -128   
192    48     
-128   16     
0      64     
-32    192    
80     16     
96     112    
32     176    
144    272    
-160   -352   
160    -128   
-208   128    
272    192    
-144   208    
-208   -16    
240    560    
-64    176    
64     192    
-96    176    
304    176    
-112   -352   
-32    32     
240    16     
-160   96     
160    -64    
64     -128   
-32    -96    
-192   -144   
-112   48     
128    16     
-80    112    
16     -16    
-32    -48    
192    64     
-336   64     
-144   -304   
-192   -128   
-208   -656   
-96    -240   
128    -64    
-304   -16    
48     48     
-944   96     
-96    224    
-560   -80    
128    96     
-80    -16    
48     -16    
-64    -208   
160    -16    
-64    176    
0      96     
-176   96     
-160   64     
-64    32     
-128   16     
-64    64     
-496   -112   
96     48     
-736   0      
32     16     
-112   -144   
32     -192   
16     -80    
32     224    
32     -128   
-16    272    
48     -720   
80     176    
-32    192    
-192   80     
-80    160    
-112   -16    
48     192    
-208   -64    
-256   -128   
-208   -48    
16     80     
-96    -32    
0      144    
-64    -256   
48     128    
-144   -352   
48     -80    
96     192    
48     144    
-144   128    
-160   48     
1760   2192   
-1584  176    
352    464    
-208   288    
240    -160   
144    -128   
-656   144    
912    64     
112    368    
-96    -80    
-128   32     
0      336    
224    -128   
-192   464    
-272   -336   
-176   80     
256    0      
48     160    
-64    32     
-48    -16    
-848   -112   
-16    160    
192    64     
-176   -64    
32     64     
-64    112    
256    224    
-160   -32    
0      64     
48     -176   
-128   160    
-16    0      
16     144    
-240   -224   
-64    128    
-128   -160   
-64    -32    
-64    128    
208    112    
32     64     
-336   -48    
32     80     
96     32     
64     128    
16     96     
-64    64     
0      -48    
32     288    
-240   -192   
192    192    
-240   144    
16     -16    
16     112    
-160   -64    
160    32     
-96    112    
16     112    
-32    64     
32     16     
32     144    
-144   64     
-32    -128   
48     128    
-192   0      
176    112    
-208   80     
80     144    
16     240    
-64    -96    
176    64     
-128   96     
32     112    
-96    16     
80     128    
-176   96     
-16    -32    
80     384    
-544   48     
-192   -48    
208    -160   
-176   32     
-144   80     
176    512    
-144   272    
208    -64    
80     -96    
160    96     
-80    176    
-64    176    
0      192    
32     16     
64     48     
160    64     
32     112    
16     32     
48     128    
-80    16     
192    160    
-48    48     
32     16     
160    192    
-112   -32    
32     0      
-64    64     
128    48     
80     224    
-192   -48    
16     192    
16     176    
48     208    
16     32     
-32    -16    
-16    240    
-144   16     
64     -32    
-96    -32    
32     0      
144    176    
-48    96     
-32    -192   
-48    176    
-80    -128   
48     144    
-192   -256   
176    176    
-64    128    
224    288    
-48    32     
-144   -16    
176    144    
64     160    
128    -16    
-128   0      
64     32     
-96    -112   
64     208    
48     96     
64     -176   
-96    -16    
176    -432   
-80    208    
-16    32     
112    16     
-16    0      
176    96     
16     240    
128    208    
-16    160    
-48    -96    
48     16     
32     240    
64     144    
-16    208    
-144   -256   
-32    -1392  
-256   -368   
272    80     
-160   112    
144    128    
-16    128    
64     32     
16     144    
96     240    
-96    -48    
224    -384   
128    -192   
208    -128   
-192   288    
-192   32     
224    -288   
64     160    
-32    -80    
96     192    
-64    96     
192    64     
-96    112    
176    -16    
64     224    
-32    32     
-32    -96    
-32    112    
160    0      
-80    -64    
144    320    
-96    32     
112    -16    
-80    -560   
336    -16    
-16    96     
-32    112    
192    0      
16     176    
-16    96     
272    112    
-80    -208   
48     64     
-912   -1216  
880    2896   
-256   1808   
-304   -864   
112    -304   
32     -352   
-160   1152   
-704   -64    
304    496    
16     -240   
48     80     
-288   -64    
192    208    
128    64     
-32    96     
-112   -160   
-16    -176   
160    240    
384    -112   
-272   -96    
-48    -320   
96     32     
-48    -2240  
48     -240   
0      48     
48     -176   
96     304    
544    336    
-352   -176   
16     -304   
32     288    
-96    -336   
-16    224    
64     -80    
32     96     
16     -16    
-96    -64    
208    -368   
-192   -16    
256    80     
16     240    
48     -48    
64     144    
192    192    
-32    0      
-16    -112   
336    288    
144    624    
-192   -608   
-160   -80    
128    -592   
64     144    
-80    -192   
176    -32    
-48    48     
64     -16    
-80    -320   
208    112    
368    64     
384    400    
-112   240    
16     -256   
-48    -208   
128    -16    
0      -64    
208    -176   
16     -32    
64     -32    
32     -240   
144    -272   
160    128    
16     128    
-64    160    
-32    0      
48     -112   
-160   -240   
288    -496   
-80    240    
-208   -176   
0      80     
112    224    
64     64     
-16    -272   
144    208    
0      -384   
80     -464   
80     560    
-144   -96    
-32    -1536  
160    -48    
80     -1152  
-48    -96    
48     256    
32     -48    
96     -64    
80     -144   
112    320    
80     -32    
-176   -1776  
256    64     
192    80     
176    224    
-192   -432   
80     -80    
-160   -128   
0      -544   
-160   -272   
256    32     
-112   -112   
224    -880   
16     -48    
80     -64    
-96    -416   
32     -496   
240    48     
-80    -288   
-80    -176   
96     144    
112    -176   
-512   -256   
-224   -160   
368    192    
-160   -64    
128    -304   
48     -496   
-144   -96    
176    240    
-64    96     
208    -64    
-96    64     
-32    -176   
80     128    
-48    32     
-64    48     
96     48     
16     96     
80     -304   
192    -112   
-240   -176   
352    -384   
-48    -32    
32     -16    
-128   224    
240    -112   
-96    112    
0      -272   
96     64     
80     -80    
-80    80     
-80    -48    
48     -208   
32     -32    
144    128    
16     32     
48     -224   
-112   64     
112    176    
-112   -96    
256    -176   
-32    16     
192    -112   
-16    16     
0      -48    
224    304    
-304   -112   
352    48     
-48    16     
48     64     
-96    -48    
-64    32     
-160   96     
-48    -752   
144    0      
304    -1344  
176    384    
-208   -32    
0      80     
-96    -96    
96     -288   
-64    -64    
64     16     
-480   -48    
240    -32    
-288   -16    
240    -112   
-96    32     
-16    -448   
64     192    
-48    -144   
32     16     
-112   -144   
160    32     
-336   0      
144    -192   
-64    192    
128    80     
-976   -960   
-272   720    
-32    -368   
-784   -432   
48     64     
-512   160    
912    224    
-800   -16    
464    -160   
-144   208    
-176   -288   
144    80     
-288   -48    
304    128    
-144   -32    
240    32     
-112   -16    
-32    -80    
48     160    
208    -96    
-80    -144   
64     -80    
48     -304   
96     -240   
-64    160    
48     -192   
-32    224    
-32    -272   
-48    96     
32     -144   
32     80     
-16    -112   
-32    224    
64     -160   
64     128    
-64    -320   
128    80     
-192   96     
-96    128    
-48    96     
-96    -32    
-176   16     
-128   32     
32     64     
16     64     
32     16     
-16    -96    
96     400    
-224   -320   
176    112    
-224   -96    
192    112    
-96    96     
-288   128    
112    -80    
-272   112    
-128   -16    
-64    48     
-48    -16    
96     16     
-96    32     
32     -144   
32     16     
32     112    
-80    96     
160    -96    
-32    96     
-64    16     
-224   -16    
16     112    
-112   -96    
48     96     
-96    0      
16     64     
-1696  -32    
32     176    
-80    176    
96     -208   
208    -240   
0      304    
-176   -48    
0      -16    
-64    -224   
0      -112   
176    256    
-96    160    
64     112    
-256   160    
-208   -272   
-96    -112   
240    352    
-96    336    
-240   0      
-48    0      
48     96     
64     16     
-112   -176   
-128   -256   
80     64     
80     144    
-80    -16    
-64    128    
-160   -64    
0      128    
16     -64    
368    624    
-880   32     
48     432    
-160   -80    
80     128    
32     64     
32     0      
-32    112    
-240   -48    
64     48     
-96    0      
32     -16    
-32    -16    
96     528    
-48    80     
48     320    
-688   -176   
128    192    
-48    -32    
80     288    
-112   192    
160    112    
-112   -128   
112    112    
-16    80     
-32    -64    
112    64     
48     16     
0      192    
-368   -176   
144    -256   
-320   -432   
224    -16    
-256   -112   
192    192    
0      32     
-16    224    
-112   -48    
160    192    
-112   48     
160    80     
-176   32     
192    128    
-80    48     
-112   -80    
-32    128    
-48    32     
96     80     
256    0      
-176   112    
80     48     
96     272    
-192   -32    
208    64     
-48    96     
128    160    
-224   64     
-336   -192   
96     112    
-272   -144   
320    400    
-208   -64    
128    -320   
-176   0      
176    48     
-112   48     
64     32     
96     64     
80     80     
-96    272    
-112   -112   
80     160    
-48    -48    
192    192    
-160   48     
96     80     
-272   -80    
-16    96     
-96    160    
-192   -240   
80     80     
160    224    
160    32     
-272   -16    
96     128    
160    160    
-64    32     
272    -352   
-16    224    
-48    -80    
-256   80     
-176   480    
-1360  -1744  
240    -784   
-144   832    
384    112    
-224   864    
80     -128   
-432   416    
320    -288   
336    272    
-256   -144   
64     224    
96     -256   
-128   224    
48     -320   
112    352    
0      -32    
112    480    
-96    -112   
48     208    
32     176    
96     0      
-240   -112   
224    272    
-208   384    
48     -80    
48     48     
464    192    
-704   -512   
496    288    
-240   112    
-32    -48    
192    304    
16     96     
-48    48     
-64    80     
-16    112    
160    352    
-48    176    
-64    192    
144    -128   
-64    176    
160    96     
-32    -176   
-160   -1792  
112    112    
-128   144    
160    144    
-48    176    
112    64     
-16    -32    
64     96     
-32    -176   
160    -48    
-224   -112   
320    240    
-96    -128   
96     176    
-64    48     
192    -304   
-16    96     
16     -48    
-16    -32    
256    160    
-112   144    
32     -160   
-16    176    
-32    -32    
256    544    
-208   208    
240    64     
80     0      
-64    16     
96     48     
-48    -112   
16     112    
32     -48    
64     112    
-48    -112   
144    208    
-80    64     
48     144    
48     -48    
80     16     
240    -192   
96     112    
-32    0      
-160   -32    
-144   160    
176    -80    
-16    160    
128    -528   
-64    176    
16     160    
-80    -96    
208    16     
-48    112    
0      -176   
0      -64    
-32    -192   
144    16     
80     240    
-48    16     
32     112    
160    -176   
-48    128    
96     -464   
128    400    
-176   -704   
160    32     
-48    16     
96     64     
0      128    
176    240    
0      224    
96     -48    
-144   80     
96     -80    
128    80     
-128   0      
224    112    
0      32     
16     128    
256    -32    
-80    96     
-80    -576   
176    96     
80     96     
-160   160    
96     64     
16     -16    
128    240    
-144   16     
352    32     
-176   -224   
-80    96     
32     -96    
352    48     
-112   -608   
80     160    
-160   -688   
240    176    
144    240    
-128   176    
80     16     
-48    -96    
176    144    
-128   -144   
176    0      
48     -64    
80     64     
-32    -400   
112    80     
-160   -464   
288    160    
-64    160    
144    96     
-80    -160   
304    0      
64     96     
16     64     
32     144    
32     96     
32     32     
32     0      
48     -48    
16     64     
320    96     
-96    0      
144    176    
-48    -384   
32     448    
128    -96    
-128   -784   
160    80     
0      -64    
96     -592   
-16    -160   
112    288    
96     -144   
32     144    
-96    -128   
16     -16    
160    32     
96     -896   
-144   -304   
160    -560   
48     128    
96     32     
-80    -112   
32     48     
80     -64    
80     -128   
-128   -208   
288    -112   
-16    -32    
48     0      
-896   384    
560    -624   
1264   320    
464    -208   
-800   800    
432    -96    
32     464    
80     -832   
-352   208    
-400   -512   
336    608    
-144   -912   
176    608    
-192   -672   
256    208    
64     16     
-32    -64    
-48    -320   
128    -48    
-160   80     
224    96     
-144   80     
-16    -272   
-352   96     
32     -416   
32     144    
128    -144   
48     16     
160    -976   
-112   -48    
208    -1024  
-224   -48    
48     -80    
64     192    
176    -144   
176    -32    
-240   16     
0      32     
-224   -48    
80     48     
-1440  -64    
16     -32    
-16    -64    
160    64     
-160   -32    
96     -288   
-64    144    
144    -48    
64     64     
-80    -144   
128    16     
0      0      
64     64     
-16    -32    
80     -112   
-528   48     
16     -192   
-176   32     
0      -64    
32     144    
144    -256   
80     -32    
-64    160    
64     64     
-64    -16    
64     48     
-64    -64    
96     16     
-176   -192   
96     -160   
-608   -32    
80     32     
-336   32     
64     -32    
128    -208   
64     -624   
32     160    
-112   -176   
80     192    
-112   -80    
-32    -144   
-16    -16    
80     272    
-80    -144   
0      -144   
-48    -48    
16     80     
-112   96     
128    -32    
-144   -32    
64     -320   
16     176    
160    -192   
-64    112    
-480   -192   
48     -256   
-48    -48    
112    224    
-160   48     
0      48     
-48    -48    
192    -96    
-96    16     
16     -112   
0      96     
160    -64    
48     -64    
64     -496   
-16    -128   
-96    -96    
-64    -112   
-48    0      
192    80     
-208   32     
144    -64    
-224   -32    
96     -176   
-112   32     
32     -160   
80     32     
-1008  -96    
176    96     
-160   -192   
-272   128    
-64    64     
-320   -64    
-192   208    
64     0      
-80    -128   
-48    32     
80     112    
-32    16     
-96    16     
-112   80     
64     32     
-96    400    
-224   -128   
96     16     
-160   0      
176    112    
-240   32     
64     64     
-1472  -16    
-16    64     
192    176    
-208   96     
144    -128   
48     32     
-224   -80    
-144   32     
-64    -192   
-48    112    
160    352    
-352   -80    
-96    -96    
16     -32    
16     -144   
-704   368    
-256   -176   
-80    144    
-112   16     
64     -96    
-112   176    
-176   -240   
560    464    
-624   -160   
512    -48    
-96    256    
112    -128   
-80    16     
-112   128    
48     64     
-64    96     
-80    -16    
112    32     
-240   64     
-32    -144   
16     192    
32     0      
-64    32     
144    96     
-16    16     
-32    80     
-352   -224   
496    400    
-80    224    
-96    -32    
-96    64     
224    128    
-544   -208   
80     192    
-272   176    
-16    256    
-176   -192   
64     32     
64     16     
-992   1856   
-864   -1280  
336    448    
656    272    
288    -624   
-752   -128   
-96    -32    
368    32     
-336   -720   
96     96     
-192   -32    
-32    368    
96     160    
64     -64    
-224   -144   
32     16     
192    608    
16     -48    
-240   -128   
0      48     
-80    -192   
-32    64     
144    96     
-64    -32    
16     -32    
-240   -112   
80     192    
0      144    
0      -16    
16     32     
-96    64     
160    96     
-144   32     
80     160    
-112   96     
-80    -32    
48     112    
-32    64     
-64    -80    
160    352    
-704   -80    
144    32     
-96    64     
256    160    
-16    144    
-192   -96    
-16    64     
-64    -48    
112    160    
-208   80     
144    0      
-144   112    
64     -32    
-96    96     
-208   128    
-48    192    
-48    -96    
224    80     
-48    64     
-32    0      
-16    96     
32     144    
-16    80     
32     176    
32     0      
0      0      
-96    16     
80     96     
-16    96     
-48    80     
64     -48    
112    128    
-160   128    
48     32     
-64    96     
128    320    
16     -80    
160    -112   
64     80     
-112   16     
96     176    
-32    48     
64     0      
32     -48    
192    448    
-464   -112   
128    -80    
32     0      
-160   -16    
160    80     
-80    128    
32     -48    
128    96     
-176   -64    
192    208    
-160   -80    
144    176    
-32    64     
-112   -16    
-16    112    
32     32     
80     64     
160    48     
-80    144    
80     96     
-96    32     
48     96     
32     -64    
48     16     
-32    208    
48     112    
112    -16    
64     320    
-288   -96    
192    32     
-32    80     
96     96     
64     96     
-176   -32    
128    16     
-272   16     
224    80     
160    64     
-144   32     
32     112    
16     80     
0      -16    
128    240    
-96    -96    
160    -544   
-64    224    
48     96     
224    64     
-496   96     
272    64     
160    288    
-128   208    
144    32     
48     48     
-176   80     
128    80     
-96    -64    
64     32     
-112   -80    
144    -496   
-48    -64    
-48    16     
112    128    
0      32     
-32    96     
32     32     
48     64     
32     -96    
96     96     
-16    32     
64     192    
32     528    
-80    16     
80     -80    
0      -256   
192    176    
-48    -1232  
-64    48     
176    128    
-32    160    
48     176    
240    688    
-112   0      
80     32     
48     -112   
192    16     
96     80     
-192   208    
96     96     
16     -400   
64     48     
64     -800   
112    128    
16     192    
0      176    
-128   80     
0      176    
144    -352   
208    64     
-80    -144   
-16    128    
-128   144    
32     -160   
-32    112    
96     -192   
0      32     
16     -928   
176    272    
-80    -320   
0      -32    
-16    -384   
1344   2496   
-1584  752    
528    544    
112    528    
1072   -1120  
-720   -80    
80     176    
-176   448    
480    -160   
-176   96     
160    -240   
32     160    
-16    0      
144    112    
-48    -224   
32     144    
-32    0      
128    320    
-144   64     
288    96     
-144   208    
144    32     
48     160    
32     -192   
32     80     
-48    -432   
32     48     
112    -64    
80     48     
32     -512   
16     112    
160    80     
-128   176    
96     48     
-128   176    
256    32     
64     -160   
-32    128    
64     -320   
-16    112    
128    -80    
-16    128    
48     -48    
48     -48    
80     -80    
48     -64    
144    128    
80     176    
32     96     
128    -288   
64     176    
80     -96    
64     96     
32     -80    
-16    64     
192    48     
32     176    
64     -256   
80     80     
208    496    
-16    48     
48     112    
-144   -352   
32     -96    
-16    -272   
96     -288   
32     -160   
0      272    
16     16     
16     96     
64     -160   
128    112    
-96    -128   
112    80     
0      96     
144    -304   
-240   -256   
336    -1296  
288    224    
-80    -48    
176    -16    
-64    32     
-16    -1440  
112    -352   
112    80     
-48    -192   
32     208    
-16    -16    
192    -160   
16     96     
0      -400   
-80    -48    
128    -144   
256    96     
-128   -32    
64     -80    
16     -112   
96     -896   
16     -96    
32     -1088  
32     -16    
80     96     
0      -96    
96     32     
32     48     
112    -64    
-32    -64    
112    336    
-80    -48    
16     -128   
-160   -64    
160    -128   
64     -112   
48     -80    
32     -336   
48     -112   
96     -448   
64     -144   
224    -16    
-176   16     
64     32     
64     0      
-48    16     
16     -96    
-80    128    
16     208    
-416   -160   
112    64     
0      32     
256    -400   
-96    64     
64     -320   
96     16     
-48    48     
144    80     
-112   -272   
416    -272   
-176   304    
64     -208   
-48    -16    
48     48     
-32    -32    
32     -80    
16     -64    
192    -144   
0      -64    
80     -240   
48     96     
16     -288   
0      -64    
128    64     
16     -80    
-96    80     
32     -464   
160    192    
-144   -176   
-320   192    
-416   -192   
-784   -384   
32     -48    
256    112    
-16    -304   
-256   96     
112    -1344  
464    480    
-576   -32    
320    -144   
-32    80     
272    32     
-144   -112   
-64    32     
-208   0      
16     -272   
32     272    
-128   64     
128    -16    
176    -704   
160    112    
-48    -352   
16     -272   
-144   128    
208    -16    
-272   -208   
240    80     
-64    64     
224    -288   
112    224    
32     -80    
32     144    
64     -304   
80     160    
0      -208   
0      256    
-96    -240   
0      -32    
-16    -32    
-896   -720   
-976   -1584  
848    528    
240    288    
-112   -560   
32     112    
112    512    
400    0      
-512   -592   
512    320    
-144   0      
-48    96     
-256   0      
-272   -144   
-32    -64    
-144   64     
-48    -128   
96     32     
-64    -48    
96     -144   
-224   -96    
176    -176   
-352   80     
-864   -272   
64     16     
-160   -96    
128    176    
-16    256    
-464   160    
-16    -64    
-672   0      
0      80     
-144   -16    
-48    80     
96     -32    
160    304    
-176   128    
32     16     
-16    -160   
48     96     
80     -208   
-16    112    
-32    -16    
-128   32     
-96    128    
112    16     
-192   80     
64     240    
-304   -144   
416    -32    
-240   160    
96     -176   
-64    64     
16     -240   
-64    144    
-48    -48    
144    -112   
96     320    
-160   -32    
176    -48    
-16    192    
-176   -80    
-80    48     
-80    160    
-48    -112   
96     -48    
-144   48     
-96    112    
-144   -96    
160    48     
0      0      
32     256    
-144   64     
128    -112   
48     32     
-160   -80    
-80    224    
-192   32     
0      80     
-192   112    
-144   -80    
-1648  -96    
0      112    
-224   0      
32     176    
-64    -96    
64     -96    
112    224    
-304   48     
128    96     
-112   32     
0      16     
-32    16     
32     -160   
-48    80     
-192   192    
-624   -96    
176    128    
-96    -224   
208    240    
-272   0      
160    128    
-144   -112   
160    224    
-144   -256   
96     160    
-80    112    
32     16     
-80    -64    
-128   -16    
96     208    
-144   -16    
32     176    
-64    -96    
192    144    
48     -32    
-240   16     
128    16     
32     0      
-96    80     
-160   16     
384    112    
-304   32     
48     240    
-16    192    
400    128    
-624   -176   
112    80     
-640   -80    
48     -32    
112    -16    
48     208    
-96    32     
48     -16    
0      48     
-176   -160   
112    16     
-224   -112   
16     -32    
80     0      
-16    16     
-240   -176   
32     -128   
-144   -48    
240    112    
0      112    
64     -16    
-192   64     
16     48     
80     0      
-32    80     
32     64     
-16    -48    
144    0      
-240   96     
208    32     
-144   -16    
48     64     
0      64     
-48    16     
80     240    
-112   32     
32     64     
16     128    
-192   0      
128    224    
-96    -128   
-64    16     
-32    64     
-192   96     
80     208    
-272   -144   
64     -32    
-16    176    
-128   -32    
32     144    
32     144    
16     -16    
-32    160    
64     16     
-112   48     
48     96     
-176   0      
112    144    
-64    -256   
160    272    
32     224    
-80    32     
16     96     
16     48     
-32    128    
16     224    
80     -144   
-80    0      
80     160    
80     240    
-496   1280   
-128   1648   
64     128    
-624   -192   
-304   -944   
768    48     
432    528    
-480   -512   
288    176    
128    160    
-128   16     
16     -32    
-16    -32    
0      -80    
128    192    
0      128    
-64    -64    
80     544    
240    368    
-112   -144   
48     -144   
16     128    
48     224    
48     48     
16     -48    
-48    -176   
48     112    
-112   208    
144    32     
-128   -96    
192    32     
-160   -16    
96     16     
-144   144    
176    -128   
64     192    
96     -192   
-112   -128   
112    64     
192    80     
-32    112    
32     96     
64     176    
32     48     
16     32     
16     -96    
16     16     
80     0      
160    -64    
-64    -96    
80     112    
64     176    
0      240    
-48    -192   
176    176    
-80    48     
240    384    
-192   144    
-176   -272   
48     -112   
224    144    
-32    64     
96     304    
-48    176    
-16    -768   
240    96     
160    -656   
48     128    
-32    112    
96     96     
-16    48     
64     48     
48     16     
48     96     
-48    -96    
112    16     
-64    -592   
16     -640   
272    -112   
112    112    
192    304    
-80    -96    
16     144    
64     -32    
112    128    
32     144    
-16    112    
-64    -48    
144    144    
-32    64     
160    64     
-32    112    
48     16     
48     96     
32     48     
16     -16    
160    -64    
96     224    
-32    -528   
96     128    
-32    -496   
112    48     
16     64     
80     128    
-32    48     
64     112    
-80    32     
96     80     
32     64     
32     -16    
48     128    
48     -176   
64     128    
0      -272   
80     144    
32     -528   
64     224    
-64    -64    
112    144    
0      32     
64     208    
32     112    
-176   -80    
160    112    
96     -672   
16     80     
32     -64    
-32    272    
112    -272   
0      32     
144    32     
144    384    
-176   208    
48     -144   
192    16     
-80    -32    
80     96     
176    -416   
0      16     
112    -32    
-80    144    
-64    32     
96     144    
144    144    
-16    0      
192    208    
-240   160    
16     240    
-192   176    
96     80     
-32    -144   
96     32     
-64    -432   
32     0      
144    192    
-96    208    
-80    -128   
48     -128   
160    -304   
128    32     
-128   -144   
96     -368   
-64    -48    
144    -384   
80     -368   
112    -96    
64     32     
48     -144   
-80    -880   
160    64     
-80    96     
176    32     
0      -288   
16     -224   
240    -208   
48     112    
-112   -288   
-112   -224   
192    -96    
-16    -656   
-704   288    
144    -208   
0      -32    
32     -672   
96     -160   
208    -432   
160    240    
96     96     
80     48     
48     272    
0      32     
64     -176   
-16    240    
-272   -80    
112    160    
-480   -224   
64     -224   
-112   96     
448    832    
-720   -144   
-144   -1264  
-416   256    
1024   256    
-496   -96    
176    256    
-576   -336   
304    -192   
96     -32    
-336   96     
112    176    
-192   -80    
272    -80    
-48    -32    
-32    0      
144    16     
16     -48    
48     -48    
64     -944   
144    160    
80     -32    
160    48     
-224   -64    
208    64     
16     112    
32     -192   
0      0      
80     -352   
-768   -16    
16     -96    
112    80     
64     -128   
-288   -32    
288    192    
-448   -32    
352    -80    
-144   224    
256    -16    
-32    0      
-192   -64    
112    -16    
-208   -112   
160    0      
-288   -112   
336    96     
-656   16     
-48    -400   
16     -160   
32     -304   
176    16     
0      -96    
-64    144    
-48    -176   
128    -16    
-192   0      
176    64     
-96    32     
32     -32    
-144   64     
32     -32    
-336   -16    
128    -112   
128    0      
48     80     
-80    112    
128    -880   
224    192    
-208   112    
80     -128   
-192   96     
0      -16    
-48    16     
-16    -240   
-112   0      
-64    -16    
144    0      
0      112    
32     208    
-16    -320   
208    64     
128    128    
-80    -48    
16     -16    
112    240    
-224   -48    
400    160    
-544   -64    
336    -160   
-288   -144   
96     -64    
-64    112    
80     -80    
-80    64     
256    -320   
-128   96     
80     -400   
112    176    
-144   -64    
-16    64     
0      48     
112    160    
-144   -160   
224    144    
-144   0      
368    80     
-832   -352   
-512   -336   
-64    64     
-464   -64    
48     160    
16     144    
-144   16     
-128   -32    
-368   64     
-64    -224   
64     -80    
-128   96     
32     -16    
64     80     
-272   -80    
224    0      
-48    96     
112    48     
192    96     
-112   112    
-128   32     
-128   -112   
32     -32    
0      128    
-192   176    
-112   256    
-48    80     
-1184  0      
16     -16    
16     -304   
-160   16     
96     96     
0      144    
112    -48    
-176   -160   
64     16     
-64    48     
80     -96    
-176   -16    
112    144    
-96    32     
-64    48     
-272   -80    
16     96     
-96    16     
-16    16     
16     96     
-16    -176   
-96    -80    
96     592    
-48    -224   
-32    -32    
128    160    
-64    -240   
-48    96     
-128   64     
48     32     
-432   -144   
-16    16     
-48    144    
128    208    
112    -16    
-112   64     
-128   16     
-48    64     
80     -336   
144    80     
48     128    
-448   -176   
-96    128    
32     -96    
64     48     
16     32     
-112   64     
-576   -16    
32     -48    
32     -144   
16     32     
0      0      
0      96     
-16    64     
-176   48     
-96    0      
-16    64     
-112   -64    
192    224    
-96    128    
-128   -48    
-32    48     
1648   -1376  
-640   -608   
1344   1408   
-512   720    
1344   -1168  
-800   -624   
528    608    
-336   192    
-256   -288   
64     240    
96     -320   
-32    -48    
-272   32     
-256   -272   
208    288    
-224   -160   
-64    128    
-1424  -480   
112    592    
144    304    
-272   -80    
224    304    
-112   -48    
176    -64    
-176   -16    
208    32     
-80    16     
48     160    
-80    16     
-32    96     
-80    0      
48     -16    
0      48     
96     112    
-16    48     
-48    -256   
-160   -80    
-16    -368   
160    128    
-16    96     
-80    160    
96     176    
32     80     
-80    -64    
48     80     
96     64     
0      160    
48     112    
-144   -128   
224    48     
128    -144   
-64    96     
48     -48    
-144   176    
144    144    
48     144    
144    304    
240    416    
-272   -400   
192    48     
-224   48     
32     -160   
-64    192    
176    96     
-64    -16    
32     128    
-112   160    
32     0      
-144   64     
48     48     
80     80     
-208   -80    
0      112    
-144   -64    
80     112    
-160   48     
416    1040   
-320   480    
0      64     
-208   -176   
176    -272   
32     80     
48     -80    
16     224    
0      16     
-80    64     
48     -32    
144    224    
-80    -80    
144    160    
0      304    
-32    144    
-64    -64    
16     -48    
96     0      
48     176    
-160   -96    
-96    -64    
128    208    
-64    48     
-64    -16    
-16    48     
192    160    
-64    48     
-112   -2160  
16     16     
144    336    
-80    -64    
112    192    
-32    112    
48     -80    
-80    32     
-32    -112   
144    32     
-112   64     
144    224    
-16    -64    
-64    -128   
64     -112   
80     -1600  
0      -48    
32     192    
112    80     
32     -64    
96     144    
-192   128    
320    -64    
-64    432    
208    144    
0      160    
-80    304    
-112   112    
64     144    
-144   -144   
160    -480   
-16    48     
336    608    
-160   288    
64     32     
32     96     
-32    -128   
144    0      
32     352    
-32    160    
16     -48    
-48    -48    
80     400    
-112   -48    
48     96     
0      -144   
96     -80    
-64    -176   
96     208    
-48    -16    
-112   32     
0      112    
0      -432   
-96    176    
192    80     
-64    -96    
0      -96    
-64    48     
-48    160    
160    -224   
-32    448    
-176   240    
-288   -480   
48     -96    
320    -144   
0      -16    
-64    272    
192    -32    
32     -112   
128    32     
64     80     
16     48     
64     96     
-16    80     
96     48     
96     -128   
64     0      
48     64     
80     112    
-80    -240   
-48    64     
48     -32    
160    -128   
80     64     
96     48     
16     96     
160    144    
-96    96     
112    32     
-64    16     
-64    -224   
16     144    
1744   992    
-1456  -1104  
640    208    
-192   640    
320    -3056  
-384   -64    
-256   80     
368    448    
-96    -272   
-16    96     
16     96     
160    48     
-32    304    
-32    -288   
144    112    
-80    -400   
64     64     
96     -192   
-48    80     
192    80     
-96    64     
192    272    
-64    208    
96     16     
-176   -192   
64     80     
336    144    
-64    224    
112    -496   
-96    -80    
112    -48    
128    176    
128    48     
-96    -16    
128    -16    
-240   -48    
272    -80    
-112   128    
144    16     
-32    -144   
128    144    
-112   48     
256    64     
-48    -192   
48     16     
32     -96    
64     192    
240    192    
-448   64     
160    -592   
48     -224   
48     0      
80     -1680  
-32    32     
96     -48    
64     -272   
144    -208   
-192   -704   
80     -384   
224    112    
-208   112    
112    128    
-16    -432   
160    -544   
-208   128    
96     -272   
192    96     
48     192    
-80    -368   
-800   -64    
160    -624   
32     -48    
0      -480   
32     64     
16     -1568  
160    -32    
-112   64     
144    -192   
96     -64    
-80    96     
144    0      
-16    96     
-320   -368   
144    -176   
-976   -160   
96     -48    
224    400    
-320   -688   
368    -128   
-160   -624   
96     -32    
48     16     
-16    0      
144    112    
-192   0      
208    -128   
-32    80     
-304   -112   
176    64     
-208   32     
48     16     
48     48     
0      -240   
48     -48    
112    -272   
-48    64     
288    -64    
-256   -128   
96     -144   
64     208    
208    48     
0      -80    
-80    32     
-32    -48    
80     96     
160    -80    
-816   -96    
80     -240   
-32    -16    
352    176    
-128   32     
-32    -112   
-112   80     
256    -80    
-144   -32    
272    192    
-128   80     
-48    -176   
-16    -240   
32     32     
-96    -96    
-32    64     
80     -80    
-736   0      
64     16     
64     112    
128    -864   
-208   16     
128    -1856  
64     64     
-192   16     
272    80     
-128   -48    
-48    -16    
-48    32     
160    304    
-224   400    
96     0      
-352   -176   
224    -144   
16     -48    
32     -176   
112    32     
32     -496   
160    480    
-272   -320   
176    336    
-544   -240   
144    -32    
-240   80     
128    144    
-176   32     
48     -160   
-192   80     
64     -256   
16     224    
-112   -368   
32     192    
176    -112   
-32    96     
-112   -80    
64     32     
-16    48     
32     -16    
-128   64     
32     -160   
-160   0      
0      -96    
-144   -32    
16     -80    
-16    80     
-16    -80    
64     64     
112    -576   
256    0      
-48    128    
-32    16     
-208   32     
144    16     
16     48     
-112   64     
0      48     
80     -32    
48     192    
-48    0      
-48    96     
-1600  -176   
-96    1792   
-624   -416   
-848   -768   
-112   -384   
-256   -128   
-544   -656   
176    624    
-544   256    
64     512    
-752   -224   
704    -144   
-128   176    
-304   16     
160    112    
-160   -112   
0      160    
-32    112    
0      240    
-368   -160   
-352   -336   
-48    -96    
-768   -176   
-16    176    
-128   -128   
96     -64    
-16    0      
-112   144    
-64    -336   
0      160    
64     144    
-32    16     
16     -96    
-64    32     
-96    48     
80     336    
-176   32     
160    160    
48     -16    
-256   64     
-240   112    
-192   -160   
32     144    
-16    -32    
96     96     
-64    48     
-112   -48    
0      -272   
-80    64     
32     80     
-96    96     
-48    112    
48     192    
-80    272    
-624   -16    
-48    32     
64     144    
48     288    
-128   -80    
-112   192    
48     -112   
-112   16     
-80    208    
32     160    
-304   -192   
-16    -64    
-160   112    
-144   80     
-144   0      
48     64     
16     48     
-176   -64    
0      112    
64     256    
-48    -16    
80     144    
128    480    
48     592    
368    224    
-80    -80    
-128   112    
96     160    
-64    144    
144    96     
-48    -16    
-64    80     
64     624    
0      208    
-192   -512   
-144   -304   
224    64     
32     144    
96     48     
-16    32     
0      224    
144    528    
-96    -48    
80     -80    
112    128    
64     224    
-112   224    
-496   -112   
16     64     
-304   -64    
-32    -16    
32     128    
16     272    
80     96     
-96    -144   
-80    -112   
96     -96    
176    112    
-32    16     
-16    -16    
-192   -80    
80     48     
-176   0      
48     96     
32     96     
-176   -64    
176    -16    
-80    -32    
-32    144    
-48    32     
16     -48    
128    320    
-32    0      
128    160    
-272   0      
144    64     
32     96     
-32    0      
192    144    
-80    160    
48     80     
96     80     
-160   -416   
-144   0      
288    0      
-64    64     
-192   16     
144    144    
-96    144    
96     80     
-128   176    
144    112    
-304   -240   
-32    -96    
16     48     
32     80     
-16    16     
16     64     
16     -64    
112    32     
-96    176    
16     64     
-32    80     
64     368    
-176   48     
-16    -208   
-16    112    
-96    -144   
80     112    
128    -96    
-160   304    
-80    16     
112    256    
32     -48    
192    -48    
48     128    
16     -32    
-32    112    
80     -224   
-80    144    
-64    -32    
16     320    
96     -160   
-16    224    
16     32     
32     112    
-96    96     
48     -80    
96     64     
0      240    
-32    32     
48     64     
96     176    
-80    -64    
48     144    
-64    32     
-16    176    
48     -16    
144    128    
-160   -32    
208    80     
-32    48     
48     80     
-960   640    
80     -384   
0      256    
176    48     
560    528    
-672   -656   
848    704    
-656   -160   
464    -560   
-592   -240   
704    -32    
-272   448    
160    -272   
-256   464    
224    -112   
-112   240    
128    -80    
-16    304    
-112   -128   
48     192    
32     -80    
112    224    
-96    0      
32     -768   
-16    -32    
-80    -16    
160    208    
48     176    
48     -16    
-112   -48    
-16    128    
112    64     
128    208    
-128   -16    
80     160    
16     -112   
256    192    
-112   32     
-64    -400   
240    64     
-48    -2000  
48     48     
-16    240    
-16    -96    
-32    16     
0      64     
112    144    
48     -112   
80     96     
-96    96     
144    0      
-64    144    
48     96     
128    -144   
-32    160    
32     -1040  
64     224    
-16    64     
176    48     
-128   48     
144    64     
32     64     
80     96     
-16    64     
128    64     
-96    -64    
160    192    
-160   80     
192    -80    
16     48     
32     -208   
-16    64     
96     -976   
48     64     
16     48     
112    192    
-48    -224   
160    160    
-208   16     
112    48     
-32    112    
-32    -224   
48     -224   
96     -272   
64     48     
-48    -160   
-96    208    
-96    224    
288    80     
-160   -416   
176    80     
-64    0      
0      16     
0      -368   
-16    48     
288    336    
-48    -144   
16     16     
64     80     
64     64     
112    -288   
-160   -48    
160    -640   
-96    160    
80     -1856  
16     160    
112    96     
64     320    
-128   112    
288    384    
-64    240    
64     80     
-16    208    
256    -208   
-144   96     
176    -144   
-240   32     
224    96     
96     -336   
32     -176   
176    128    
-32    -112   
112    176    
48     32     
-48    -304   
192    96     
-320   -624   
192    304    
192    32     
-32    128    
112    -512   
-112   80     
144    -64    
112    240    
96     -352   
64     176    
-32    80     
64     -1712  
-160   -192   
192    -80    
16     0      
176    112    
-176   -240   
208    -192   
128    576    
224    64     
-112   16     
64     32     
0      -368   
112    0      
32     -944   
96     16     
128    -128   
-320   -608   
304    -208   
-80    -448   
16     144    
0      -1088  
144    0      
240    144    
-128   -64    
-48    80     
80     -48    
96     48     
16     176    
-64    -336   
448    32     
48     192    
-48    -176   
-496   -96    
-64    -352   
208    -448   
160    80     
-208   -144   
368    -576   
-320   48     
176    16     
112    -96    
-32    -112   
-48    80     
16     -80    
32     144    
-224   -80    
-48    -112   
-640   -32    
128    32     
80     -48    
-64    32     
80     -80    
-64    -128   
80     -32    
64     -304   
-208   -80    
144    48     
128    80     
64     -80    
2288   -1632  
-816   -1344  
640    1200   
-368   640    
144    -160   
16     656    
-576   -208   
1200   -48    
-544   480    
64     -432   
-528   -80    
272    -400   
128    400    
-32    -128   
-224   176    
192    -560   
-112   400    
160    -1200  
96     160    
-288   -80    
32     448    
-48    -160   
208    160    
208    -576   
48     432    
-48    -752   
128    16     
-288   -1008  
208    -48    
-48    -96    
256    0      
112    272    
48     -144   
32     208    
64     -64    
-160   -32    
176    176    
-48    320    
-160   -192   
96     176    
80     -160   
-64    16     
64     80     
192    352    
-224   -16    
96     96     
256    576    
-32    -112   
-720   -288   
0      -352   
-64    -32    
0      16     
80     -112   
-112   -144   
112    -48    
160    -320   
32     -16    
144    -496   
128    -432   
288    240    
128    -16    
-256   16     
-32    16     
64     -48    
112    96     
16     320    
-16    -80    
-400   -576   
192    -400   
16     -16    
144    -304   
48     48     
64     -80    
-64    80     
-128   -80    
192    -64    
-96    -208   
-144   48     
-192   -416   
0      -160   
64     -16    
80     80     
-304   -192   
176    -96    
192    240    
0      176    
96     304    
-432   -208   
-1536  -208   
64     112    
-32    128    
80     -160   
16     64     
-160   -48    
64     -64    
-240   -80    
256    256    
-96    176    
-64    176    
-80    0      
-16    -160   
48     96     
16     0      
-128   -224   
-48    -320   
-48    112    
-400   -416   
-720   16     
-288   -320   
-16    80     
80     112    
80     -48    
-48    32     
-128   -256   
32     192    
-96    -112   
80     0      
-112   32     
-80    192    
192    128    
-112   32     
-288   -208   
80     16     
208    0      
-208   0      
-112   16     
64     0      
-16    112    
-112   -192   
32     64     
80     -208   
-336   -48    
192    48     
-16    176    
112    -32    
-320   -48    
16     -96    
48     -80    
-48    48     
-192   0      
-16    32     
-128   -96    
16     64     
16     80     
-48    64     
208    -16    
-176   -48    
-48    48     
-144   -80    
-64    80     
-112   48     
16     112    
-208   -16    
176    64     
-464   -112   
48     48     
-1104  128    
-32    32     
80     -256   
16     -112   
144    192    
-64    48     
-64    -64    
16     80     
-80    16     
48     208    
16     0      
-80    -48    
-32    -16    
-32    48     
-48    0      
-112   240    
80     -160   
144    64     
-48    192    
-48    -64    
-16    208    
-48    0      
-16    144    
64     -64    
-32    64     
32     -16    
-64    -144   
240    144    
0      112    
-112   160    
-288   64     
64     80     
-288   -208   
48     0      
16     -16    
32     192    
-208   144    
32     48     
-16    80     
64     48     
2448   1968   
-1600  48     
-896   -1520  
-400   160    
176    -720   
384    976    
-944   0      
576    416    
544    -48    
-624   -144   
240    96     
-96    64     
320    240    
-128   80     
96     48     
-32    48     
32     144    
-32    64     
-80    32     
64     48     
-128   16     
192    64     
-96    240    
272    64     
-176   0      
144    64     
-208   64     
208    32     
-192   112    
240    160    
-32    64     
-128   -160   
0      176    
-96    0      
160    240    
-80    48     
-96    -16    
-32    80     
16     80     
64     96     
16     32     
-64    32     
0      144    
80     16     
-16    80     
-48    48     
-32    -48    
-112   128    
16     48     
48     112    
-128   -64    
0      64     
64     112    
-48    64     
0      80     
48     64     
16     0      
192    112    
-128   160    
16     32     
-16    128    
96     32     
-32    160    
-16    112    
-32    16     
-48    -48    
96     80     
64     128    
-112   48     
128    144    
-16    0      
80     48     
-16    64     
16     -32    
192    176    
-128   -96    
0      176    
-224   224    
-32    -96    
176    144    
-176   -272   
208    -128   
-16    64     
-144   80     
144    272    
-144   128    
16     64     
144    -16    
32     176    
80     176    
96     128    
-144   80     
32     256    
-64    224    
-48    48     
-80    -64    
32     208    
96     192    
-128   160    
32     176    
48     272    
32     -80    
64     112    
0      112    
16     80     
16     96     
-48    -144   
-32    80     
-16    -240   
-32    -16    
192    208    
-112   80     
32     144    
-64    64     
176    160    
160    432    
-64    208    
64     0      
-96    80     
176    224    
80     144    
64     16     
-48    160    
128    208    
-32    -640   
256    752    
-64    -464   
176    80     
-144   -32    
80     160    
0      -64    
-16    -32    
160    176    
-112   0      
96     192    
-64    64     
80     -32    
32     16     
144    64     
112    -208   
16     192    
-208   -368   
208    128    
-96    64     
240    144    
-128   48     
-48    64     
128    -288   
32     80     
96     64     
32     64     
-64    16     
64     0      
128    128    
-112   -96    
128    256    
-96    -64    
0      -112   
96     -896   
192    176    
0      64     
-96    144    
48     16     
160    144    
208    -112   
-48    272    
-144   -160   
128    -304   
160    224    
-128   -48    
0      -16    
-96    -576   
144    96     
64     -1440  
80     128    
112    -80    
176    144    
-272   32     
192    176    
-128   80     
80     96     
0      -16    
96     32     
96     48     
272    -256   
-112   112    
48     -144   
-48    48     
96     -320   
128    144    
-160   -1072  
-32    0      
-208   0      
272    -16    
64     112    
-32    112    
-256   448    
-1504  -1584  
800    -48    
-288   800    
624    64     
224    160    
-160   -528   
288    -80    
256    1008   
336    624    
-352   -96    
176    -32    
352    -96    
32     160    
-208   -960   
16     224    
32     -720   
-240   -224   
160    -208   
400    176    
560    256    
-240   224    
-144   -144   
256    -16    
64     -720   
96     320    
224    -80    
-32    672    
96     224    
-16    -320   
-64    128    
-16    -144   
256    288    
-128   -96    
96     192    
16     -144   
192    656    
-16    -96    
32     -48    
-64    -16    
128    -272   
160    96     
-32    -160   
144    -544   
-16    48     
0      -368   
-144   32     
240    -1056  
-64    144    
224    -64    
48     -128   
0      176    
112    -16    
-80    -64    
176    -48    
144    -16    
112    -16    
160    80     
0      48     
-496   -240   
-96    -96    
-48    -64    
96     -128   
272    -192   
-128   112    
0      -32    
32     112    
160    32     
-64    -144   
64     32     
48     -288   
16     144    
-128   -16    
80     64     
-224   -32    
144    0      
112    576    
-176   176    
80     -32    
208    -16    
-112   0      
160    -928   
288    128    
-224   16     
-32    192    
16     -64    
144    16     
16     0      
80     -144   
64     16     
32     -80    
-736   -128   
128    -32    
64     48     
112    -96    
48     0      
80     -1040  
32     -64    
96     0      
48     96     
0      112    
176    -16    
-272   16     
144    -112   
-96    -480   
176    0      
-432   32     
368    112    
-176   80     
64     -400   
-272   -64    
16     -448   
112    96     
-16    -32    
-48    -112   
160    -144   
-128   -80    
32     -192   
-144   16     
224    0      
-224   -32    
64     -16    
-16    16     
-864   32     
-32    -192   
96     -96    
48     -32    
96     80     
0      -1008  
32     176    
0      80     
272    272    
-96    96     
240    48     
-304   96     
80     -192   
-192   -80    
0      32     
-144   48     
240    16     
-64    16     
-48    -256   
0      -128   
80     -144   
-80    128    
96     64     
112    -64    
-320   176    
32     -48    
-96    32     
16     -144   
-112   -16    
160    96     
-112   0      
48     -64    
-16    16     
64     -448   
192    -32    
-112   -544   
112    32     
-80    32     
-16    272    
-96    16     
-16    32     
-176   -128   
176    -80    
-80    -192   
64     -16    
-128   144    
-32    48     
-256   -96    
144    -80    
400    0      
-240   48     
-432   80     
-144   -32    
-32    -32    
16     -48    
-96    112    
-80    -80    
112    96     
80     -144   
-48    128    
-224   -32    
-32    -48    
16     16     
-16    -112   
80     128    
-128   96     
-208   -96    
-96    16     
-512   -64    
-32    64     
-848   -160   
16     128    
64     -176   
-288   576    
944    -784   
-32    -160   
-224   912    
-448   16     
-368   -272   
272    464    
-768   -560   
304    720    
-416   -368   
160    0      
32     96     
-144   208    
-64    144    
-1072  -352   
-96    176    
-32    -240   
-112   352    
-96    -160   
80     256    
-80    -352   
-128   128    
-96    32     
192    64     
-176   -32    
32     -128   
-288   112    
16     224    
-192   112    
-224   -32    
-80    64     
48     -112   
96     176    
-96    -112   
48     160    
-32    -80    
-32    0      
48     144    
-64    16     
80     16     
-304   -64    
-48    16     
-96    96     
16     32     
-96    -16    
-128   0      
-544   -48    
64     48     
0      -64    
-16    112    
32     112    
32     160    
-112   48     
-32    48     
80     128    
48     -176   
-16    80     
-48    224    
64     176    
32     96     
-16    16     
-240   -32    
96     144    
16     -80    
112    -16    
-64    -48    
-176   0      
-48    128    
-160   -160   
112    -16    
16     256    
-80    16     
-144   16     
32     112    
-208   32     
-96    112    
-32    144    
32     112    
144    0      
-160   -288   
-176   48     
-80    -144   
32     -112   
-80    80     
160    112    
-160   48     
-112   -272   
-48    64     
128    128    
-208   16     
48     176    
-208   -144   
16     0      
-1440  -160   
-112   80     
-32    -224   
32     -16    
96     224    
128    320    
-208   64     
-176   -128   
32     0      
160    48     
0      96     
-144   48     
64     128    
-128   -32    
64     128    
64     112    
-16    48     
16     -16    
32     144    
32     48     
48     48     
-112   64     
-16    -32    
96     160    
-64    -16    
64     144    
-208   -128   
128    208    
-208   -80    
80     64     
-80    48     
192    160    
-128   -288   
112    -112   
-112   128    
80     176    
-32    -16    
0      192    
-16    192    
80     -64    
-176   96     
16     -32    
-16    256    
16     -128   
-16    192    
160    -96    
80     144    
-144   128    
112    -16    
32     96     
16     240    
-48    16     
-144   -96    
144    48     
-112   144    
48     80     
-112   0      
160    208    
-32    48     
-80    -208   
192    192    
-128   32     
192    -80    
-192   112    
96     32     
96     32     
-80    128    
112    80     
-224   80     
48     -32    
32     208    
-96    -144   
112    240    
-80    64     
-16    208    
0      -16    
16     96     
128    64     
-48    112    
144    32     
-16    -80    
96     112    
-96    0      
32     -48    
144    112    
64     224    
-224   -112   
32     48     
128    208    
-16    0      
48     112    
96     16     
48     64     
16     80     
64     96     
-32    160    
16     80     
48     -48    
256    144    
16     -144   
112    304    
-256   32     
16     -400   
0      128    
-384   -832   
896    -464   
-688   -192   
16     608    
-464   -512   
848    576    
-16    -96    
-16    304    
-48    208    
-16    32     
-112   -416   
368    320    
176    288    
-240   -192   
352    112    
-432   -112   
144    -32    
-16    -96    
144    368    
48     320    
144    96     
-160   176    
80     192    
-48    224    
32     -48    
-192   80     
288    -16    
64     208    
-160   -224   
272    208    
-176   -1616  
208    112    
-160   48     
80     256    
176    112    
-64    96     
-160   80     
240    32     
-64    -64    
32     160    
16     112    
-528   -144   
16     176    
-64    -288   
48     32     
160    80     
144    496    
-112   -176   
48     112    
0      192    
96     -112   
0      96     
0      224    
256    48     
32     64     
-96    112    
16     -160   
48     128    
32     -288   
32     128    
-48    -16    
160    80     
-16    -1360  
-48    64     
0      -256   
128    128    
64     224    
-64    -32    
160    32     
-16    96     
0      -16    
-128   -16    
80     0      
160    48     
-48    224    
-176   -208   
144    64     
-80    -464   
-16    48     
112    -464   
96     128    
128    400    
-240   -32    
256    112    
112    400    
-160   -144   
384    -48    
-48    192    
0      -240   
0      0      
64     -384   
0      144    
16     -112   
160    64     
0      176    
80     64     
-32    -80    
160    176    
-80    0      
208    288    
-128   288    
16     -608   
64     16     
48     -384   
128    80     
112    -304   
-48    144    
112    -176   
32     128    
0      -80    
144    64     
-128   -48    
128    32     
-128   -112   
224    -16    
112    -32    
-64    -48    
48     64     
-112   -96    
208    -112   
-128   -144   
128    96     
192    -96    
352    208    
-352   -176   
144    -80    
-32    -16    
-16    -480   
64     -1440  
80     32     
-16    -1408  
-48    -64    
-176   -1072  
272    -128   
-240   -176   
320    -224   
-64    256    
-128   -144   
256    80     
-16    -32    
16     -192   
48     272    
32     -368   
176    -208   
-96    -128   
144    -160   
-128   -64    
192    -160   
96     -80    
-16    -2032  
144    -192   
-16    96     
32     -320   
80     192    
-32    176    
368    -112   
-64    96     
-160   -64    
-32    64     
-64    -32    
32     128    
48     48     
-48    -192   
320    -16    
-208   -640   
32     16     
16     -80    
-176   -240   
256    -32    
-144   -32    
192    176    
80     -320   
64     128    
304    144    
80     352    
-400   -272   
-64    -32    
-16    -176   
160    -208   
64     0      
144    -32    
48     -336   
112    112    
48     -48    
-32    -16    
80     48     
112    48     
64     192    
-80    16     
-96    -64    
64     80     
-672   -32    
-112   -144   
176    -112   
112    -48    
-256   -16    
-1024  976    
-96    -208   
416    48     
-160   32     
-976   -128   
544    368    
-400   32     
336    416    
-624   -320   
-16    -336   
-384   -128   
144    240    
-448   160    
16     -48    
-48    -128   
144    -576   
-64    64     
160    -1568  
0      32     
112    -96    
112    0      
-32    64     
160    -208   
-96    -48    
80     -128   
48     0      
-224   64     
-384   256    
80     -80    
-48    -64    
-32    -144   
112    64     
32     -576   
16     80     
-80    16     
112    -112   
192    -16    
-64    48     
80     160    
-112   0      
-80    -32    
-144   -160   
48     -16    
96     -160   
-32    0      
80     -256   
160    272    
-16    -704   
96     -272   
-80    128    
48     80     
0      0      
-64    -80    
0      -96    
112    -16    
48     432    
-128   432    
32     160    
-48    -384   
16     -96    
32     -96    
64     48     
0      -16    
160    192    
-112   -64    
176    -16    
-80    48     
16     -64    
-176   80     
64     32     
48     80     
32     32     
-352   -80    
-48    -176   
0      32     
-416   80     
-208   -144   
16     -64    
-96    -112   
80     -32    
-928   0      
-160   -96    
112    80     
-112   -80    
144    112    
-96    -32    
48     -128   
-288   -96    
16     -288   
80     112    
-32    -96    
80     144    
-48    0      
16     32     
-16    16     
-64    -80    
-144   -144   
-16    176    
-96    -16    
176    48     
-128   -64    
64     -48    
48     64     
0      32     
32     64     
-144   -144   
176    160    
-128   16     
16     -64    
0      96     
0      48     
48     64     
-112   112    
-32    96     
-496   -144   
112    96     
96     288    
32     -64    
-96    -144   
160    192    
32     -128   
-96    -112   
-144   80     
80     80     
-16    64     
-352   -672   
224    32     
-432   64     
240    32     
-576   64     
208    -16    
-992   -64    
-96    144    
0      -208   
-48    -128   
128    112    
-160   96     
256    176    
-176   -32    
96     0      
-128   144    
48     -160   
-16    48     
-16    -80    
144    112    
-208   272    
-288   80     
64     176    
32     -192   
176    176    
80     144    
-208   -16    
48     -32    
96     64     
80     144    
-144   48     
-32    80     
224    -192   
208    176    
-112   -48    
-160   224    
-496   -48    
48     240    
48     -64    
256    0      
-208   192    
-272   144    
-288   96     
-64    -32    
256    -176   
96     64     
-16    -48    
-208   208    
-128   224    
-240   -112   
160    -208   
-192   -160   
144    64     
-304   64     
-96    48     
128    128    
0      96     
96     112    
-16    48     
48     272    
-128   -192   
48     144    
-128   144    
64     -48    
-144   80     
16     -48    
-64    96     
-32    48     
144    80     
-16    240    
-32    80     
-944   2016   
-1392  -1024  
544    368    
512    -16    
864    -624   
-944   -704   
272    432    
576    384    
-384   -528   
144    -256   
-400   -208   
80     160    
16     160    
80     48     
-64    96     
48     176    
0      176    
-48    -208   
48     -64    
-128   -80    
160    112    
-96    32     
0      160    
48     96     
-64    -16    
-96    -32    
-128   128    
128    320    
0      32     
-80    -96    
64     -32    
96     144    
-16    96     
16     64     
-32    96     
176    112    
-144   16     
32     48     
-64    32     
128    112    
-80    0      
16     144    
128    112    
-48    -16    
96     64     
-16    80     
-16    128    
160    112    
-384   160    
240    -128   
32     144    
-208   -64    
176    112    
-128   -128   
144    128    
64     400    
-192   -48    
128    64     
-64    96     
80     16     
-80    80     
80     80     
-80    80     
32     96     
96     -144   
32     176    
-192   0      
272    336    
-240   -32    
256    128    
-112   112    
64     32     
0      96     
32     96     
0      112    
112    -16    
48     144    
16     128    
80     64     
32     96     
-64    160    
48     64     
80     -144   
-64    -64    
-48    -16    
112    112    
16     -80    
144    144    
-96    32     
160    48     
-16    32     
112    80     
-16    112    
-32    -16    
144    144    
-80    144    
80     128    
-96    64     
32     -48    
32     -320   
80     32     
64     128    
0      160    
-80    -16    
112    16     
48     48     
80     160    
-64    -80    
-48    0      
-96    -16    
256    176    
-192   -272   
64     16     
16     160    
64     -144   
48     160    
48     -2304  
-32    96     
192    112    
-112   32     
-32    0      
-48    224    
176    -16    
176    -32    
-240   304    
-32    144    
352    96     
-128   256    
176    112    
64     -16    
-160   80     
96     -448   
16     96     
144    -32    
-176   -160   
80     -32    
0      16     
112    -272   
144    0      
-80    16     
-96    80     
16     0      
144    128    
128    240    
32     -208   
-16    -144   
-128   -432   
96     176    
208    -448   
-64    96     
48     80     
16     112    
16     0      
144    320    
-240   -48    
240    96     
32     432    
-96    -176   
-64    -16    
-16    32     
208    208    
-48    -128   
-16    -128   
128    48     
208    480    
-272   -1152  
-96    -128   
80     176    
144    48     
-64    192    
-112   16     
48     80     
48     -128   
96     224    
128    48     
-16    -128   
176    192    
48     80     
0      -272   
112    96     
-16    -336   
64     -16    
64     208    
0      48     
96     -32    
16     144    
80     192    
-16    -240   
-16    336    
96     -48    
32     96     
128    -384   
64     160    
208    -368   
32     208    
32     -16    
-768   -2496  
1152   832    
-1104  96     
336    -560   
-208   -880   
976    400    
-112   496    
608    1520   
96     -48    
160    -448   
-176   -592   
0      32     
128    -128   
160    288    
0      -864   
-96    -96    
272    160    
-32    -1008  
176    128    
-16    -48    
-64    -2272  
-64    -64    
160    816    
-176   -176   
176    -144   
112    16     
96     32     
-80    -256   
-48    48     
112    -176   
144    112    
-80    208    
80     160    
0      -16    
128    -128   
80     -1024  
-128   -288   
48     -1824  
-32    -80    
352    -144   
-112   -256   
0      176    
96     -112   
80     -256   
-32    176    
0      -144   
96     -16    
64     -336   
32     -144   
-912   -96    
48     -48    
112    -16    
96     -256   
96     192    
32     -496   
0      -240   
0      -96    
0      224    
96     -160   
-64    224    
192    -224   
-112   112    
0      32     
0      128    
-208   -16    
64     -16    
-96    -80    
128    -256   
32     16     
96     -672   
48     0      
32     32     
-80    48     
112    0      
-96    32     
-32    -80    
144    352    
-96    32     
128    -64    
128    560    
112    32     
-368   112    
32     -160   
-16    32     
128    -16    
-48    -16    
112    -544   
-48    -64    
-16    -480   
-16    208    
-80    -208   
128    -64    
32     -32    
128    16     
-368   -16    
48     -160   
-512   -336   
192    -64    
112    192    
80     48     
-112   -112   
32     -368   
192    112    
48     -64    
16     112    
0      -112   
160    48     
-144   -48    
160    -96    
-176   128    
128    -208   
-64    128    
32     64     
-192   128    
-80    -224   
-592   -32    
80     -432   
0      192    
16     -416   
144    128    
64     112    
80     -400   
-272   -128   
0      160    
-32    -32    
320    560    
-560   176    
336    -448   
-464   -240   
272    -144   
112    32     
-48    -48    
-32    128    
80     16     
-64    48     
16     0      
256    -288   
-64    160    
144    432    
-48    288    
0      -80    
-256   16     
112    128    
-96    208    
64     0      
96     16     
112    16     
-112   -64    
48     -496   
176    0      
-144   64     
-16    80     
48     128    
32     0      
80     112    
-48    48     
-160   -512   
-112   -64    
128    128    
32     -16    
-432   -16    
64     -128   
-64    64     
96     -272   
-848   144    
-80    96     
-1216  -48    
-192   -464   
-240   -80    
32     0      
32     304    
-160   176    
96     -176   
80     304    
-784   -176   
-144   0      
-240   -304   
96     48     
0      -96    
48     160    
-112   -144   
-224   224    
-16    -144   
-816   48     
240    288    
-208   384    
-208   -48    
0      -32    
-32    -128   
-128   -64    
-80    80     
-80    -48    
224    208    
-32    -64    
-112   64     
-96    -64    
-624   448    
-560   576    
-528   288    
-48    -48    
-640   -160   
-448   144    
0      656    
-640   272    
288    -208   
112    -320   
-48    -272   
32     -48    
-160   176    
-112   0      
80     16     
-64    -128   
96     144    
-224   112    
112    -272   
-80    -64    
-384   -96    
112    160    
-208   192    
192    -96    
-96    -96    
-48    -208   
96     128    
-112   144    
80     48     
-112   -32    
96     64     
-160   32     
112    80     
-224   16     
192    0      
-160   32     
-80    304    
80     80     
-160   -272   
32     208    
64     -112   
-32    144    
-160   128    
304    112    
-144   16     
-16    -112   
48     176    
-304   -208   
384    128    
-480   96     
320    32     
-288   -48    
48     128    
48     -48    
-160   -32    
0      80     
112    32     
0      96     
-192   -16    
112    192    
-448   -32    
224    80     
-144   -48    
80     16     
-224   -16    
-48    160    
-256   -192   
80     -16    
-144   64     
-96    128    
-48    -16    
64     48     
-64    128    
-64    64     
32     32     
16     176    
16     160    
16     128    
-16    -176   
-64    48     
-144   96     
-64    48     
112    272    
-512   -48    
272    0      
-240   16     
48     96     
-144   -48    
128    64     
-48    144    
32     144    
-128   48     
0      32     
-16    0      
0      -128   
96     112    
-160   16     
128    240    
-160   -32    
128    96     
-128   16     
48     80     
-128   -16    
112    176    
-32    -32    
144    240    
-144   144    
48     -160   
-96    -96    
-80    -48    
240    160    
-128   0      
48     128    
-128   48     
128    32     
128    64     
-256   -176   
160    -64    
-80    128    
32     -192   
16     -48    
-128   0      
144    0      
80     144    
-32    64     
-112   128    
128    128    
-320   16     
112    48     
-16    128    
16     -16    
48     80     
-208   -96    
176    16     
160    32     
-128   16     
96     0      
144    112    
-128   16     
-32    -112   
-32    80     
0      64     
-48    96     
80     64     
-32    96     
64     96     
16     288    
16     32     
-80    -32    
96     144    
-32    16     
32     96     
-48    -128   
80     496    
-272   32     
208    208    
64     160    
96     160    
64     0      
48     48     
-48    -64    
-48    0      
176    176    
-64    -128   
176    160    
96     400    
-128   96     
-144   -192   
112    80     
112    160    
-16    -240   
-16    80     
160    -16    
-32    144    
112    176    
-48    128    
128    -384   
112    80     
16     64     
112    112    
-176   80     
112    48     
-176   96     
160    208    
-64    -96    
-32    -656   
160    112    
144    304    
-64    16     
-80    64     
32     112    
80     48     
-32    192    
-176   -80    
176    192    
128    48     
128    64     
592    -736   
928    1376   
320    -432   
-432   -976   
544    -736   
208    -1296  
208    416    
48     -272   
-112   64     
320    224    
128    -48    
16     0      
48     16     
112    -256   
272    368    
-96    32     
64     80     
112    112    
176    80     
64     144    
32     -32    
32     64     
-64    -128   
96     176    
-48    -416   
128    -80    
-96    -80    
176    208    
-96    32     
-32    -32    
160    96     
-16    96     
-80    112    
-192   -32    
96     -16    
-160   -560   
336    96     
-320   -816   
240    -80    
-288   80     
272    240    
-176   -256   
48     -16    
32     112    
-144   32     
112    96     
32     256    
128    192    
0      -256   
-32    288    
80     -576   
-80    16     
208    -64    
-80    48     
128    -208   
240    608    
-160   224    
-160   -256   
144    448    
-80    -96    
176    112    
48     80     
96     224    
-80    16     
160    0      
16     -96    
48     80     
-32    96     
-16    192    
48     -1280  
64     64     
0      16     
80     240    
-16    16     
112    160    
160    672    
48     -624   
-64    144    
176    -96    
-32    -128   
48     -320   
80     128    
32     -192   
-16    -16    
16     -304   
64     96     
64     144    
-176   -112   
-96    -192   
80     32     
48     48     
-32    -64    
16     -48    
208    128    
-64    144    
112    240    
-96    160    
16     -240   
64     48     
96     -64    
96     112    
-64    144    
64     -1088  
0      64     
-16    -48    
-16    0      
224    112    
48     720    
0      -48    
-96    -16    
112    -96    
224    128    
48     128    
-128   256    
80     -400   
208    -816   
-128   240    
128    -656   
-96    -512   
-544   0      
16     -176   
32     -208   
64     -1216  
96     -224   
-96    32     
384    688    
-128   336    
80     -352   
-48    -192   
144    80     
0      -352   
112    112    
80     -16    
128    80     
-1264  -64    
144    16     
16     -160   
144    96     
-48    -224   
96     -64    
16     -240   
-80    -144   
112    -288   
80     -224   
112    480    
176    448    
-32    432    
32     192    
-112   -368   
-160   -176   
32     -272   
160    -192   
-80    16     
112    592    
-112   -1040  
80     -160   
-96    -2960  
-96    -160   
-16    64     
-64    144    
192    112    
-128   176    
-128   -112   
112    -320   
-320   -112   
48     48     
-1232  160    
-240   -208   
64     -48    
0      -144   
16     -80    
192    -368   
-48    0      
176    80     
-80    -16    
16     -240   
128    -64    
96     160    
-16    -32    
-48    160    
0      16     
-32    64     
-96    -224   
128    -160   
160    96     
0      -32    
128    -240   
208    32     
80     -1696  
-32    96     
-64    -64    
32     -80    
112    64     
-80    96     
144    -80    
-64    -32    
576    2368   
-896   608    
-704   -336   
464    176    
112    256    
400    -832   
-512   528    
576    -1088  
96     704    
-256   -208   
-32    -80    
-112   -80    
336    -224   
-592   352    
224    -480   
-480   208    
240    -272   
0      320    
208    -224   
-848   80     
96     -464   
0      160    
144    -448   
-16    160    
-208   -112   
64     -64    
-224   16     
192    176    
-288   -112   
192    16     
-256   -80    
176    128    
-192   16     
-48    -288   
16     192    
160    -64    
-208   48     
96     -128   
-32    16     
192    48     
-128   32     
0      -64    
0      128    
96     48     
16     -48    
-48    0      
-128   -96    
-288   -352   
208    144    
-288   160    
80     -208   
-144   96     
-944   -320   
-128   -96    
0      -128   
-80    80     
0      32     
16     96     
-32    -96    
-32    16     
16     16     
64     -16    
-208   16     
-704   -32    
192    -176   
-32    -192   
-32    112    
-192   176    
96     32     
-48    32     
-32    32     
-128   128    
-224   -32    
16     16     
112    -48    
0      256    
32     -240   
352    144    
-272   176    
-176   208    
-192   -192   
128    64     
112    272    
-384   160    
80     32     
32     144    
16     208    
-560   -64    
64     64     
208    -16    
32     80     
-112   48     
-192   176    
-64    -208   
160    240    
-192   -64    
160    32     
-144   -144   
160    128    
-144   64     
-96    -144   
32     128    
-208   -160   
32     -16    
-208   64     
-160   -32    
-144   -128   
16     176    
-112   -64    
48     176    
-96    -32    
96     112    
-16    96     
-32    -64    
-16    80     
-32    16     
64     -48    
0      96     
-128   112    
-16    368    
-32    48     
-192   -176   
-64    -128   
80     64     
-32    -48    
128    -160   
-288   -80    
176    -128   
-128   -16    
0      0      
-64    -128   
-64    160    
-64    -96    
-48    96     
-384   32     
336    352    
-368   16     
96     -176   
-112   48     
112    176    
48     -48    
-208   -128   
128    -32    
0      144    
32     80     
-80    432    
-48    -32    
-320   -304   
240    112    
-144   -32    
0      112    
-208   16     
48     96     
-1056  144    
0      -96    
176    208    
-64    64     
0      -176   
-256   -96    
224    112    
-48    48     
128    144    
48     -32    
192    144    
-32    496    
-336   -80    
-432   -432   
368    160    
-192   48     
-192   48     
-96    80     
0      -32    
336    32     
-64    64     
192    256    
-144   112    
-112   80     
144    -32    
160    192    
-112   -128   
16     144    
-272   -48    
112    144    
160    -80    
32     160    
-160   0      
-80    0      
-32    16     
64     32     
-16    80     
96     0      
32     176    
-192   -32    
128    -32    
-288   -32    
128    160    
-384   272    
-1488  -1504  
-64    -768   
-160   688    
352    480    
0      432    
16     -368   
-144   896    
-64    -272   
368    0      
-528   -80    
496    64     
-144   112    
-96    160    
144    -160   
32     -32    
-96    144    
288    448    
-176   176    
-160   336    
-16    -192   
288    320    
-208   96     
64     80     
-352   -368   
96     224    
-64    -80    
16     416    
-480   -32    
336    144    
-512   -160   
96     96     
240    176    
-144   64     
224    -32    
80     256    
64     80     
-64    -224   
-208   -160   
256    224    
-32    224    
-160   16     
80     256    
-64    -112   
64     176    
-48    16     
48     368    
96     -112   
240    48     
80     240    
80     -96    
-48    208    
96     336    
128    160    
-112   48     
0      224    
-112   128    
-48    -240   
48     112    
144    144    
48     192    
-48    16     
64     192    
-80    -112   
80     32     
144    192    
-16    128    
176    256    
-128   112    
-16    112    
48     16     
-112   -48    
32     64     
-128   -64    
64     -144   
-16    64     
-48    -32    
336    -80    
32     16     
256    944    
-240   -224   
80     0      
32     496    
0      -16    
-160   32     
128    464    
-176   -80    
32     272    
-176   -208   
160    -912   
0      112    
32     -1280  
-80    -16    
48     32     
176    176    
0      176    
-16    0      
-352   -352   
192    -208   
128    112    
160    272    
-32    64     
16     144    
112    240    
80     -128   
64     272    
-64    -368   
-64    48     
-64    -416   
-112   -192   
192    224    
112    272    
-112   48     
112    112    
-48    -80    
128    160    
-224   -272   
480    368    
-224   112    
208    128    
-80    48     
128    -608   
-48    64     
64     320    
272    544    
16     416    
-16    352    
96     128    
144    240    
0      48     
-96    16     
80     16     
-16    -128   
160    224    
0      16     
112    0      
-112   -336   
16     0      
80     -1024  
144    112    
0      -224   
16     128    
240    112    
-64    0      
128    -16    
-112   144    
128    -16    
-112   32     
240    16     
-16    -128   
-32    176    
80     -224   
96     160    
48     -32    
-32    48     
128    -160   
192    16     
-272   256    
-32    64     
48     -32    
192    -16    
0      96     
64     -288   
112    160    
-208   -96    
224    112    
-48    -256   
80     160    
-48    -256   
16     208    
64     -1216  
-192   0      
96     -112   
192    -16    
112    224    
-112   -144   
0      176    
-16    -464   
208    48     
16     48     
-48    64     
32     -32    
48     -32    
96     -32    
-16    80     
32     -624   
-32    64     
80     48     
96     32     
96     160    
-16    -224   
128    208    
-48    -32    
64     32     
128    112    
-16    64     
-496   -480   
-560   272    
1088   224    
-736   240    
96     -64    
-512   -640   
320    -576   
-112   32     
-352   -384   
848    208    
-272   -400   
544    192    
-192   -448   
160    -256   
-144   208    
288    -544   
-192   432    
112    -384   
-80    320    
160    -208   
-32    16     
128    -144   
-64    128    
160    -144   
-336   96     
112    -416   
48     128    
160    -304   
0      16     
-192   -880   
96     32     
176    96     
-32    48     
16     -656   
16     96     
0      -512   
224    336    
48     -48    
-48    -80    
-80    48     
256    -48    
-16    -64    
48     -144   
-80    0      
272    -96    
-32    112    
80     -960   
16     -304   
176    160    
-256   112    
368    -96    
-160   64     
32     -16    
80     -32    
-144   -144   
32     -192   
-304   -32    
-96    -208   
224    112    
-144   -192   
128    -192   
16     -544   
-112   -80    
32     128    
-16    -64    
112    -16    
48     0      
-112   80     
-128   -64    
0      0      
112    -16    
-208   -16    
96     64     
48     -48    
32     -176   
128    -96    
-96    -432   
288    32     
48     -912   
-112   160    
48     -64    
112    -192   
16     304    
-48    0      
32     144    
-32    -192   
-16    48     
-96    -112   
-240   -176   
224    -80    
-48    112    
160    -208   
64     80     
32     -416   
144    160    
-48    -64    
144    -96    
-48    32     
16     0      
-96    -224   
32     -240   
-48    48     
64     128    
-112   96     
48     -64    
-432   -80    
-16    -416   
-128   -48    
176    -272   
128    208    
-128   -32    
80     80     
-16    0      
32     16     
-80    80     
224    304    
-208   64     
128    208    
-240   32     
224    -112   
-112   -48    
160    -176   
-16    64     
-96    -576   
48     -96    
128    112    
-80    -80    
-144   -432   
64     48     
80     272    
80     176    
-160   -192   
112    144    
-96    32     
224    272    
-384   208    
32     -64    
64     64     
80     64     
-64    64     
-272   -96    
192    -16    
-144   32     
96     144    
-160   -32    
128    320    
-208   -192   
16     -240   
-96    -64    
-160   -272   
48     112    
-496   -160   
112    128    
-784   -240   
-368   -80    
0      64     
-464   144    
-128   -144   
-64    80     
112    64     
80     48     
-240   -112   
240    32     
0      -64    
-368   -48    
-96    -32    
-224   -80    
-176   192    
64     -32    
-80    96     
-96    -48    
-144   16     
-32    144    
64     -16    
48     -48    
-1120  80     
-112   192    
-80    -32    
32     -16    
112    32     
32     160    
-80    -256   
-144   -48    
336    192    
-144   -48    
96     0      
-128   128    
384    -272   
-144   256    
-240   -80    
-688   32     
-32    -128   
208    288    
-144   144    
-80    -160   
-64    64     
112    -160   
-864   -768   
160    -208   
-576   -64    
-16    272    
-16    48     
272    416    
160    -112   
-256   -176   
448    -48    
-448   48     
-384   48     
-128   256    
-96    -80    
128    -48    
-32    208    
16     -32    
-192   448    
64     -352   
-96    288    
-80    -432   
80     320    
64     -224   
96     880    
-464   -160   
-256   64     
-528   -304   
64     176    
176    192    
-352   16     
64     64     
-48    -32    
48     -176   
112    208    
-32    -32    
-80    112    
128    16     
32     464    
-368   -208   
-368   -384   
-64    32     
-288   -80    
32     64     
-96    -208   
32     96     
48     144    
-224   224    
-128   112    
32     0      
-16    -176   
0      -32    
-80    80     
64     80     
-16    48     
-112   32     
-32    80     
-16    32     
-32    144    
-624   -16    
-16    160    
16     48     
0      96     
64     -80    
48     -32    
-80    48     
-96    32     
-80    96     
-32    -64    
160    112    
16     144    
80     32     
-288   -32    
48     112    
80     176    
-16    160    
-32    128    
-96    -48    
192    -16    
-16    -48    
-176   -368   
192    -16    
48     128    
-144   -240   
64     112    
16     96     
320    384    
-320   -192   
64     0      
32     -144   
208    112    
16     80     
-16    64     
-16    -32    
112    64     
80     32     
-96    -32    
320    608    
-208   528    
-64    -80    
-288   -464   
80     240    
144    96     
-112   144    
64     16     
0      112    
-80    -96    
144    112    
-48    160    
144    -32    
-32    192    
0      -64    
32     192    
-80    -144   
64     176    
32     32     
-16    144    
-16    48     
-128   -160   
112    176    
144    176    
-208   80     
128    32     
-64    64     
32     80     
96     -192   
0      -80    
-176   64     
80     -80    
-32    -16    
-80    -16    
0      80     
-64    -96    
-112   -144   
0      144    
224    304    
-16    -112   
160    80     
-272   160    
144    80     
144    16     
-112   112    
48     160    
176    144    
-128   64     
48     192    
64     96     
96     -96    
-176   64     
32     128    
208    208    
-144   112    
144    80     
-80    16     
0      -32    
0      224    
48     -16    
64     176    
-160   112    
32     0      
-80    -16    
112    -416   
160    -48    
-32    -112   
144    -48    
96     368    
-48    -112   
32     128    
144    496    
-192   128    
-32    0      
160    -160   
256    -16    
0      -16    
-240   80     
48     -64    
16     -80    
128    160    
-112   -1552  
-64    64     
176    -32    
80     128    
64     48     
-16    256    
32     -48    
0      128    
-16    -80    
176    48     
-16    -16    
48     224    
16     48     
32     16     
48     -96    
96     96     
-112   80     
288    96     
-112   96     
64     96     
848    -1440  
-128   -208   
1536   496    
416    -432   
-96    -48    
752    576    
-800   -208   
1248   64     
-528   368    
240    -128   
-272   -96    
64     -240   
64     -672   
176    -384   
-96    272    
112    -128   
32     -256   
-48    -96    
0      80     
48     16     
0      16     
-32    -208   
160    192    
96     -224   
-96    16     
-48    -128   
160    144    
112    -1824  
32     16     
0      176    
32     80     
32     48     
176    48     
-96    128    
208    112    
48     256    
-224   -192   
192    96     
-96    32     
256    48     
-80    -144   
-16    144    
112    -1168  
-16    32     
32     -160   
160    80     
16     96     
-96    -208   
0      96     
-80    128    
336    96     
-208   32     
240    112    
-80    64     
-32    96     
112    -448   
48     160    
-80    -400   
192    -16    
64     -208   
-48    176    
-48    32     
0      48     
64     -16    
208    112    
32     224    
32     -80    
-160   32     
240    -64    
-48    48     
144    224    
-112   48     
160    -96    
96     96     
-64    -192   
256    224    
-304   -112   
304    16     
-112   32     
-80    -384   
176    16     
48     -48    
-16    304    
-208   -208   
160    224    
-128   -272   
-112   -96    
48     32     
-32    80     
-16    -384   
64     128    
0      -48    
64     -32    
80     0      
-16    -240   
-32    -2544  
16     -224   
144    304    
16     -112   
64     -32    
48     -96    
96     144    
-16    -224   
80     -896   
-48    80     
272    208    
-128   16     
80     -944   
48     48     
-1392  -16    
80     -96    
-80    -112   
112    -240   
96     -96    
64     112    
64     -176   
64     96     
16     -64    
-64    -528   
64     -48    
112    -48    
192    176    
64     -112   
-176   -464   
-80    208    
112    -48    
176    64     
-32    -368   
80     16     
16     -208   
32     16     
0      -80    
240    48     
-64    -128   
-32    144    
-96    -32    
96     16     
-16    0      
112    -144   
-224   0      
80     -144   
32     -48    
-112   -400   
144    -32    
-48    -128   
128    112    
80     -1120  
-144   -208   
288    96     
-128   112    
-16    -96    
-32    32     
64     64     
32     208    
-240   0      
112    -240   
-768   -112   
80     160    
-64    -64    
0      16     
96     -144   
176    -80    
-144   -48    
64     -224   
64     240    
32     112    
-64    -160   
96     64     
64     -96    
-64    -96    
-16    -32    
-64    16     
48     48     
-848   16     
144    -144   
64     -128   
128    -160   
0      32     
112    -160   
-64    64     
112    -16    
64     -80    
-64    -160   
-160   -176   
64     0      
16     80     
80     -64    
-32    -176   
-784   -16    
16     -384   
-224   80     
128    -208   
64     32     
192    -400   
-48    32     
-80    0      
-1328  -1104  
448    -416   
-48    176    
384    -608   
160    112    
-736   -880   
512    176    
-656   -400   
224    -160   
224    -64    
192    416    
-96    160    
0      -160   
-16    0      
112    80     
16     112    
-288   64     
32     -480   
-336   -272   
240    0      
-272   -96    
368    144    
-144   208    
512    -160   
-368   -64    
272    -256   
80     288    
-96    -96    
208    208    
-224   -48    
256    32     
-144   -48    
16     0      
-176   0      
48     -32    
80     0      
-80    80     
0      16     
48     -224   
-80    16     
-1136  -256   
-16    128    
-432   -240   
-48    176    
0      80     
-320   0      
-16    0      
-16    96     
32     32     
0      -112   
-48    128    
112    32     
-48    -160   
-656   -272   
-96    144    
192    176    
-256   64     
144    16     
-288   64     
-128   80     
-48    0      
-16    16     
-512   64     
-32    144    
-352   48     
80     -192   
96     -64    
-288   112    
48     -112   
128    32     
32     -96    
32     224    
-160   0      
-48    16     
-176   64     
-48    304    
96     64     
-48    -96    
-64    48     
-432   -128   
-208   128    
-608   -96    
64     224    
160    -384   
128    -48    
-240   -256   
-144   160    
-96    0      
-32    160    
-48    0      
80     64     
-80    -32    
-32    32     
-160   48     
176    704    
-336   64     
-352   -224   
-48    -64    
144    -96    
-64    16     
80     -144   
-64    112    
0      128    
-16    64     
144    224    
-304   -16    
64     96     
-192   -128   
-32    80     
-80    96     
144    160    
-816   -112   
144    144    
-128   -272   
64     208    
-112   0      
240    32     
-48    48     
-208   -16    
32     176    
-144   80     
192    16     
-192   64     
-144   32     
192    -272   
-320   -144   
-480   -16    
64     144    
32     16     
-32    32     
16     64     
-16    160    
208    256    
-112   224    
-64    -128   
-32    144    
-144   144    
272    -112   
0      -64    
-224   112    
0      64     
112    -16    
96     176    
-336   176    
-144   128    
48     208    
-16    16     
-96    224    
-64    32     
160    0      
-128   48     
0      -48    
-160   80     
48     80     
-32    -32    
16     16     
0      -96    
-64    128    
-800   -16    
0      -96    
-32    32     
160    -16    
-32    112    
32     240    
-176   -96    
-112   -240   
64     -64    
64     -128   
144    64     
-176   240    
32     -32    
-272   -192   
16     80     
224    112    
-48    176    
-16    -64    
16     64     
48     80     
80     112    
-48    80     
-48    0      
-16    32     
208    208    
-32    176    
-208   -288   
176    32     
16     144    
-80    160    
-96    208    
64     48     
16     48     
-48    64     
-32    96     
-16    0      
96     144    
32     224    
1088   2928   
-1472  0      
-800   -304   
-64    864    
1264   624    
-640   -752   
-160   464    
240    336    
208    -64    
-336   320    
16     -384   
224    464    
-32    -32    
32     560    
-176   -400   
-80    272    
-48    -112   
336    736    
-368   -176   
256    16     
-240   -176   
224    160    
-16    208    
128    32     
-112   176    
128    -32    
-64    240    
224    160    
-160   80     
80     -80    
-192   32     
144    16     
112    208    
-128   32     
16     32     
48     16     
128    160    
-48    96     
64     96     
-96    32     
192    208    
-80    176    
48     208    
-192   128    
208    0      
-128   0      
192    144    
48     480    
-128   48     
96     -64    
-48    128    
96     0      
16     80     
16     144    
-96    80     
96     224    
-80    -48    
128    64     
-16    176    
32     320    
80     160    
16     64     
0      160    
-160   -16    
0      -304   
272    144    
0      -992   
-48    64     
96     272    
-192   96     
-16    -16    
224    240    
-144   -128   
224    64     
-16    96     
416    400    
-352   112    
-80    80     
320    16     
-176   -288   
256    80     
-16    -336   
64     224    
-64    192    
64     -32    
32     -32    
112    -192   
64     352    
-112   96     
-32    192    
112    176    
-48    80     
0      128    
64     80     
32     -192   
96     64     
32     -688   
-16    48     
32     416    
80     160    
48     80     
48     112    
-16    -320   
48     32     
-64    -112   
112    32     
-16    -32    
48     64     
48     80     
96     -240   
-32    16     
48     -784   
16     64     
192    -656   
-64    32     
160    192    
-64    128    
96     16     
-64    48     
80     16     
64     208    
64     -64    
64     32     
-16    -80    
112    128    
-64    96     
272    -272   
-192   48     
192    -352   
64     96     
-32    -1776  
128    64     
-64    -96    
176    144    
0      256    
-96    -64    
112    80     
-112   -32    
160    -16    
-64    -176   
128    112    
16     -176   
48     192    
-16    -352   
128    96     
-96    -32    
320    -192   
80     272    
-48    80     
16     -128   
16     64     
128    192    
-208   -272   
208    160    
-64    -80    
384    128    
80     -400   
-144   336    
-48    -288   
32     64     
144    -128   
64     240    
-80    -16    
64     48     
176    192    
-48    -112   
416    -96    
-112   256    
96     48     
-96    -16    
112    -96    
336    48     
-128   -32    
160    224    
-16    32     
240    -1200  
-64    224    
64     -32    
-16    112    
-32    -64    
80     -144   
192    -1600  
-32    -48    
-112   128    
64     -112   
112    160    
256    -384   
-32    128    
0      -16    
96     32     
-96    -704   
128    -1184  
-192   64     
144    -400   
-96    -16    
-928   -32    
-880   1184   
-752   1312   
848    1136   
576    -16    
-48    -1792  
832    -480   
-528   128    
992    320    
-608   -32    
528    64     
-64    -288   
-176   32     
128    -208   
304    -592   
-672   -64    
48     -192   
80     64     
32     -368   
192    32     
-64    -672   
-32    352    
112    -1072  
-80    128    
64     32     
-32    -64    
112    48     
-224   -128   
0      -48    
0      -192   
-192   -112   
-112   -16    
288    176    
32     -64    
0      -48    
-48    -944   
160    -80    
-144   -1856  
64     80     
160    32     
48     112    
-48    -288   
-32    128    
-32    16     
64     -64    
-208   48     
128    32     
-896   -16    
48     -32    
-32    -224   
144    -80    
16     112    
112    -192   
-16    64     
128    -832   
0      64     
64     -224   
128    48     
-112   16     
240    64     
-208   -48    
112    -112   
-176   -32    
112    -192   
-320   160    
80     -160   
-128   -224   
112    -640   
-128   160    
144    -2272  
-32    144    
208    32     
80     32     
-128   48     
-80    -288   
-32    -144   
-48    -208   
48     -80    
-16    -64    
-64    16     
48     -96    
16     16     
-176   -400   
208    -144   
32     -656   
-144   80     
16     32     
32     -32    
-64    -128   
80     -160   
-64    0      
-48    -16    
96     -112   
-32    160    
-176   0      
-64    -128   
48     -112   
272    -192   
-48    48     
80     -192   
48     160    
-272   -80    
48     -48    
-176   -32    
64     48     
-64    0      
128    144    
-224   -32    
48     -112   
32     96     
-48    -112   
224    96     
-96    -80    
16     48     
-80    -480   
288    48     
48     64     
-336   -272   
-96    -96    
16     176    
80     -96    
-128   -176   
-288   -80    
80     -144   
0      0      
112    -96    
-32    224    
144    -272   
176    240    
-1360  -400   
-816   -16    
-272   -80    
-336   160    
-208   -160   
80     -192   
-96    -144   
-192   0      
64     -240   
-48    112    
-96    -80    
-64    0      
-80    112    
-240   -176   
-112   240    
176    128    
32     80     
16     64     
-448   -112   
32     160    
-1488  -128   
32     112    
64     -64    
-32    144    
80     -128   
-128   -32    
80     -112   
-32    64     
-176   -208   
48     -80    
48     112    
-48    64     
-80    144    
-64    48     
0      48     
-224   -176   
-32    0      
-560   -1152  
112    112    
-320   96     
0      240    
-192   64     
64     48     
80     128    
-96    -368   
80     16     
48     80     
-128   96     
-240   -32    
0      -80    
48     144    
-80    -112   
-224   48     
64     80     
-128   -144   
16     160    
160    160    
0      64     
-224   -176   
-144   -112   
64     0      
16     -32    
-16    80     
16     208    
-112   64     
-112   -192   
192    160    
-128   -80    
-112   192    
-352   -2016  
1472   656    
-256   656    
-576   64     
-368   -304   
256    656    
176    528    
-80    -128   
-32    192    
-160   -128   
-80    -80    
-288   -320   
416    -64    
-288   112    
112    112    
-464   -352   
-16    240    
112    -48    
64     224    
-208   -32    
48     192    
-176   80     
-32    32     
-96    -48    
32     -208   
-96    144    
112    672    
-176   192    
16     16     
-144   256    
128    0      
-128   -112   
-544   -48    
-112   0      
144    -16    
-32    0      
144    128    
-192   -16    
128    80     
16     16     
-48    -16    
32     -96    
32     112    
-272   -192   
48     96     
-304   160    
256    544    
-672   32     
-96    -32    
-80    -128   
64     112    
-128   32     
128    128    
-96    -16    
32     32     
0      336    
-160   64     
112    96     
-160   208    
80     -64    
-112   -96    
144    240    
-80    208    
-32    0      
112    0      
32     -32    
-32    80     
32     16     
0      80     
16     16     
16     16     
-64    16     
0      32     
-48    48     
128    256    
-144   -128   
192    64     
256    112    
-32    128    
160    64     
-192   -96    
112    -16    
-16    48     
80     -48    
0      48     
48     32     
112    416    
-128   576    
-128   32     
0      -208   
-16    -144   
32     80     
-16    112    
-128   64     
32     16     
96     112    
-16    -32    
-48    32     
-112   -160   
96     176    
-48    48     
-32    48     
-32    16     
-64    -16    
64     0      
-176   -16    
16     144    
128    96     
-48    96     
-32    -16    
48     80     
16     64     
96     80     
-32    80     
-16    48     
-96    -144   
48     0      
16     192    
-48    -96    
-112   16     
80     112    
272    112    
-96    -16    
-112   -16    
64     144    
96     48     
-32    80     
96     160    
80     -48    
16     64     
0      240    
0      -96    
32     128    
32     112    
-112   192    
-32    -240   
-48    -240   
192    0      
-32    224    
-96    32     
-32    -32    
80     48     
96     224    
-80    -64    
48     688    
-224   224    
272    -64    
-80    -128   
288    -80    
-80    -288   
-80    80     
112    32     
16     256    
-96    -16    
112    96     
-208   256    
112    -704   
-176   -176   
288    64     
112    256    
-288   128    
176    0      
16     176    
80     272    
-272   -80    
64     0      
48     -544   
80     -64    
-64    64     
-32    32     
0      128    
0      -80    
128    -112   
128    240    
-80    -208   
-128   192    
-16    -128   
96     64     
96     96     
48     -80    
-96    96     
16     -304   
16     160    
48     0      
0      64     
-48    144    
-16    -48    
-144   192    
144    -16    
0      48     
16     96     
-96    32     
-144   96     
80     80     
144    -176   
16     128    
304    -2272  
144    960    
-560   -3232  
0      -1072  
240    288    
128    -64    
96     -32    
-208   -208   
128    16     
208    64     
-48    0      
48     176    
224    96     
96     -64    
64     80     
-64    -160   
80     128    
-16    -64    
112    32     
-64    -592   
80     0      
112    -48    
16     240    
48     16     
-128   112    
-96    -16    
208    -48    
0      80     
128    -288   
-176   32     
224    -560   
-48    96     
48     -224   
64     64     
0      -704   
0      272    
144    0      
-64    112    
-16    80     
208    16     
-112   32     
48     -240   
176    144    
-64    -320   
0      -64    
48     -240   
160    272    
-64    -304   
176    16     
-112   -160   
144    -32    
16     160    
-64    176    
224    -112   
-64    48     
128    128    
-64    -96    
48     112    
64     -160   
80     32     
16     -112   
112    96     
-16    -176   
80     144    
16     -112   
112    128    
48     48     
-48    176    
32     112    
-16    -160   
112    80     
48     -64    
-48    0      
128    -240   
-32    256    
-112   -16    
-16    -16    
128    -96    
32     0      
160    -160   
-96    -2192  
64     -80    
112    -1120  
-288   64     
16     -16    
32     -608   
192    64     
-160   -1408  
160    -192   
-64    -96    
112    -64    
48     112    
112    144    
-80    -1104  
16     32     
144    16     
-240   64     
144    -480   
80     -384   
-288   16     
64     -608   
-64    -144   
256    -480   
-192   -64    
176    -240   
-96    -48    
240    208    
-112   -112   
224    -320   
-144   64     
48     -80    
112    80     
-224   -160   
160    -112   
-608   -48    
272    0      
-224   -144   
144    -432   
-32    -112   
192    -320   
-208   -272   
128    -416   
160    -64    
80     -208   
-176   -208   
-96    16     
0      0      
96     -64    
112    -112   
-480   16     
144    -144   
-528   -64    
256    -112   
192    128    
-128   -192   
208    0      
-112   -304   
-16    0      
-64    128    
144    0      
96     -192   
80     64     
-272   16     
32     -128   
32     32     
176    208    
112    176    
0      -16    
32     -80    
64     -256   
96     64     
80     -144   
16     -48    
96     -256   
-144   16     
16     -16    
-96    -352   
16     32     
144    48     
-160   -64    
96     -128   
-416   -64    
0      -272   
-1840  -112   
144    48     
-80    -336   
240    272    
-112   -176   
32     -1152  
-64    48     
176    -160   
160    -64    
-144   -16    
16     16     
-192   -80    
96     -32    
-16    32     
-32    -128   
-112   -112   
224    -16    
160    64     
96     -304   
-160   -16    
320    336    
-32    -256   
-144   0      
64     -208   
224    80     
96     -48    
-112   96     
-64    -32    
256    -80    
-16    16     
16     -32    
-16    -96    
-32    -64    
-208   704    
128    -928   
-336   16     
-176   -32    
128    576    
-48    -128   
-128   -208   
-160   -368   
-16    368    
-32    -192   
80     16     
0      -16    
-208   112    
-16    -272   
-48    -240   
112    -160   
0      48     
-32    -128   
-608   -112   
80     -112   
80     176    
176    224    
-192   -16    
64     -32    
-48    32     
-112   32     
80     -384   
-272   -80    
-192   -160   
-64    -144   
-368   -16    
48     96     
-32    80     
-496   128    
48     -48    
-192   -96    
-32    -224   
-208   80     
96     272    
80     48     
-128   32     
64     -16    
48     -160   
-48    -16    
64     112    
-32    -352   
48     32     
0      -64    
-48    -64    
0      48     
-80    -80    
-64    96     
-144   -304   
-64    112    
-480   64     
-16    144    
-112   -176   
544    704    
-384   -336   
0      224    
-272   -336   
224    48     
-32    64     
-80    80     
-128   64     
-160   -48    
-48    -64    
-32    64     
-48    0      
-176   96     
16     16     
-288   -48    
16     64     
-208   -32    
32     192    
-288   -512   
112    -256   
-160   64     
-144   -144   
-80    336    
-80    96     
112    384    
-48    80     
-16    0      
-256   16     
0      -16    
-800   -448   
128    -144   
144    32     
112    272    
-176   -96    
-192   0      
64     32     
-96    16     
-48    48     
-176   -64    
128    112    
-96    -32    
-32    64     
-288   -128   
-48    -64    
-304   -16    
80     64     
16     -112   
-32    64     
32     48     
16     96     
-48    80     
16     32     
64     80     
0      64     
-16    128    
-80    32     
0      64     
0      0      
-96    -304   
128    -144   
-64    320    
-448   -96    
-240   112    
16     80     
32     144    
-80    -224   
16     0      
-80    32     
160    -48    
-144   112    
-144   -352   
112    16     
-16    64     
256    -192   
-368   0      
128    112    
-1184  704    
-336   320    
-32    32     
128    176    
0      112    
-176   -128   
48     80     
-64    48     
0      0      
-240   -144   
144    -64    
-272   -288   
80     208    
-272   224    
16     48     
-48    64     
64     -16    
-96    16     
80     80     
16     176    
-144   -32    
192    240    
32     176    
176    832    
-448   -464   
-80    0      
-64    -16    
112    112    
-80    48     
48     128    
64     160    
-128   208    
112    432    
-352   -352   
144    240    
96     64     
48     -32    
16     208    
-32    48     
-400   -256   
192    -80    
144    48     
112    96     
16     336    
-32    -80    
16     -16    
64     96     
32     64     
-96    224    
-32    -144   
80     -16    
192    192    
-128   -80    
-16    96     
-64    -48    
32     32     
32     -96    
224    -16    
-192   64     
32     176    
-128   48     
64     128    
0      48     
-672   -2144  
880    1184   
-464   -32    
64     336    
-176   -832   
448    608    
-304   448    
688    544    
-512   -288   
624    -80    
-208   272    
64     112    
-80    352    
-32    -384   
288    352    
-160   -160   
128    304    
-80    112    
64     0      
16     -16    
32     64     
-64    80     
32     128    
-16    144    
0      32     
112    0      
-64    80     
16     48     
-16    -48    
16     128    
-32    48     
16     48     
0      32     
-16    160    
96     0      
-96    16     
96     224    
-64    240    
0      -144   
-48    -176   
16     48     
176    112    
16     96     
16     0      
-16    16     
48     48     
112    240    
0      -64    
128    80     
-304   0      
256    176    
-144   -160   
112    48     
32     48     
-32    -144   
16     -16    
96     -816   
-96    80     
128    32     
16     96     
-16    64     
32     48     
16     80     
16     144    
-144   -96    
144    0      
80     0      
-16    32     
16     208    
-160   -320   
48     -16    
80     -1264  
32     192    
-64    48     
128    -32    
-32    112    
176    32     
256    192    
160    -16    
64     144    
-32    304    
-96    -48    
320    448    
-336   -80    
320    -256   
96     208    
-240   -496   
336    112    
-208   -1488  
176    160    
-128   0      
80     64     
32     -176   
32     80     
48     80     
160    320    
-176   -128   
160    -80    
64     32     
48     -48    
80     112    
-16    -192   
32     96     
224    -160   
-96    16     
48     176    
-128   -224   
192    -176   
-16    48     
-16    64     
208    96     
-96    64     
-80    -16    
160    64     
32     -80    
-48    32     
128    -208   
144    384    
-48    -336   
-32    -112   
96     -384   
32     128    
96     -144   
64     128    
-240   -176   
304    384    
-160   176    
384    -16    
-192   -16    
48     -352   
-48    48     
80     -48    
48     80     
-48    -224   
112    144    
16     -96    
-32    -128   
64     -16    
128    352    
-16    64     
-80    160    
144    -16    
32     -432   
-32    112    
64     0      
112    352    
0      48     
96     320    
-208   -560   
112    176    
-16    -16    
128    320    
0      16     
16     192    
80     16     
160    64     
-160   192    
112    -256   
-80    64     
128    -112   
48     16     
-32    -208   
0      64     
-32    -384   
160    -336   
-176   -928   
192    48     
80     544    
0      -1824  
-80    32     
-320   -48    
64     -112   
16     -64    
64     -736   
80     -64    
64     112    
-64    -144   
160    320    
-96    -160   
0      112    
32     16     
144    -656   
80     80     
272    -32    
-160   16     
-208   -80    
240    -32    
160    16     
-16    -1264  
-80    -96    
64     -720   
32     -16    
-16    176    
64     0      
176    224    
208    -112   
48     -112   
1392   -1296  
384    288    
304    -224   
-864   64     
288    -256   
480    -176   
-256   -272   
96     -448   
-64    -80    
16     -272   
160    -1664  
-352   -176   
128    -320   
-304   176    
128    -288   
-64    -64    
80     -48    
288    272    
-736   -272   
80     -64    
-1600  -288   
160    144    
0      -224   
-48    -208   
32     -528   
208    -304   
0      96     
-32    80     
16     -368   
160    -96    
32     64     
96     -112   
48     -64    
-224   -16    
224    -256   
-272   128    
208    -16    
-352   -496   
320    -16    
-208   -368   
304    -1024  
-64    176    
240    176    
16     144    
-96    -416   
-48    -112   
-128   -240   
80     -128   
320    656    
-176   -80    
64     112    
-48    -224   
-2672  -64    
128    -368   
16     -96    
-16    -224   
288    592    
-624   -1600  
48     208    
128    -224   
0      176    
-144   16     
-48    80     
128    64     
64     80     
96     -144   
0      80     
-48    -112   
64     80     
-80    -48    
32     -96    
16     16     
96     -800   
32     16     
128    16     
192    400    
48     128    
160    48     
-256   -96    
0      -64    
176    0      
-32    192    
-16    -16    
112    48     
-112   -48    
224    -384   
64     272    
128    -192   
16     192    
-64    0      
112    -16    
-496   -80    
80     -112   
-224   -160   
64     -192   
32     176    
-112   -144   
-96    -128   
-96    -496   
208    -64    
96     -288   
32     272    
0      -112   
-16    32     
-48    96     
-48    -48    
-16    16     
48     208    
-48    96     
0      80     
-240   -160   
48     -112   
-80    -128   
-16    -256   
-32    128    
-464   -384   
-96    -80    
16     -32    
-400   -144   
48     -96    
-640   -160   
32     -224   
352    80     
-160   -320   
208    -256   
-208   -48    
208    -240   
-112   -608   
32     -80    
96     192    
-112   -384   
112    240    
-144   192    
-384   -16    
96     176    
-368   80     
80     -64    
-304   -48    
-80    -48    
-208   -48    
-160   -16    
-32    -32    
0      128    
-32    128    
-16    160    
144    400    
-16    256    
-64    80     
-64    0      
-48    48     
-32    0      
-48    -80    
-208   -16    
-64    96     
-608   32     
32     112    
144    -48    
-160   64     
-208   -272   
48     0      
-144   -240   
-128   16     
-32    -16    
-16    224    
-16    -48    
-160   0      
0      304    
-192   -192   
80     96     
-128   112    
160    96     
-176   16     
48     -112   
-96    -176   
96     112    
176    144    
-352   -48    
-128   64     
-48    -192   
160    -48    
-256   32     
-96    32     
128    -144   
96     176    
-176   96     
-128   48     
-352   -128   
96     16     
-32    -16    
64     32     
96     16     
-80    112    
-160   128    
-224   -144   
0      -80    
48     96     
-976   -2224  
1040   656    
-1376  -400   
464    -128   
-416   -624   
304    240    
-480   208    
928    656    
-688   64     
816    112    
-672   16     
224    -32    
-224   352    
80     -400   
64     256    
-16    -64    
48     48     
-144   144    
-80    -96    
112    64     
-400   -80    
32     64     
-608   -48    
112    208    
0      -64    
-288   -16    
192    -144   
-128   48     
144    -80    
-384   144    
208    80     
-112   0      
32     -48    
-208   96     
176    16     
-288   -112   
288    368    
-960   -64    
144    16     
-192   80     
128    48     
80     32     
-48    96     
16     64     
80     64     
-96    0      
32     112    
16     -128   
192    -80    
-272   192    
48     -32    
64     -16    
-16    112    
176    32     
-112   144    
64     112    
-16    176    
-144   -64    
96     64     
48     224    
32     -64    
64     16     
-32    144    
-160   -144   
112    144    
-160   96     
80     112    
-16    80     
80     -48    
128    160    
-240   48     
64     80     
-32    -48    
128    256    
-112   160    
80     48     
0      800    
-336   256    
-144   -304   
288    -96    
-256   16     
-32    48     
112    336    
-128   64     
256    -144   
64     -80    
128    176    
0      320    
-144   112    
64     144    
0      -96    
-16    -96    
192    48     
32     160    
80     48     
16     80     
-80    -64    
192    192    
-80    16     
80     32     
144    256    
-64    0      
-48    32     
-96    16     
80     32     
112    320    
-160   128    
-32    -16    
48     32     
48     80     
144    80     
-48    16     
16     288    
-48    48     
144    0      
-128   -32    
16     16     
48     80     
0      192    
0      -160   
-16    160    
16     -32    
80     128    
-224   -336   
160    -464   
-48    112    
240    320    
-16    144    
-192   -16    
192    96     
16     128    
144    -16    
-112   64     
112    48     
-16    -128   
48     144    
0      32     
80     -128   
-176   -16    
192    -208   
-32    224    
16     -48    
80     0      
-32    -32    
176    80     
32     240    
128    224    
48     240    
-32    -96    
16     0      
16     176    
32     16     
0      208    
0      -16    
32     -224   
-288   -432   
144    -672   
-176   160    
80     16     
-48    96     
112    80     
16     112    
16     160    
-80    -64    
496    -816   
-96    0      
-32    96     
-352   48     
80     0      
224    -240   
-80    -80    
48     -528   
64     272    
-32    208    
144    176    
-144   48     
288    80     
-176   176    
112    48     
-16    0      
96     80     
16     96     
48     -32    
-48    208    
-48    -224   
112    96     
-16    -16    
240    112    
-176   -800   
48     96     
64     400    
32     48     
512    -304   
-48    240    
32     0      
-240   64     
-288   496    
-1360  -1872  
480    -48    
-480   752    
544    -432   
160    784    
112    -160   
-256   -144   
-48    -208   
528    -240   
-528   -256   
416    224    
-16    96     
-32    -16    
-16    -176   
160    368    
-32    -128   
0      176    
192    -368   
48     496    
144    -336   
160    144    
-16    -432   
240    64     
-208   -144   
192    16     
-208   176    
368    720    
64     464    
-16    448    
-112   96     
272    -480   
-224   -144   
96     -192   
-128   32     
-160   -304   
-64    -48    
64     240    
-80    32     
-80    -208   
112    272    
32     0      
-16    -64    
112    128    
208    -144   
-32    96     
176    208    
-32    240    
176    384    
-80    240    
160    -304   
-32    48     
-48    -224   
192    432    
-80    -288   
64     32     
-160   -496   
240    -1296  
-272   -384   
160    16     
80     112    
80     112    
-16    -896   
32     -80    
144    96     
-48    -32    
48     144    
80     -176   
-112   -528   
96     128    
-64    -752   
64     0      
-48    -352   
128    -576   
-32    -96    
112    -304   
-240   288    
-32    -128   
160    0      
48     -2448  
16     -368   
96     96     
160    336    
-208   -480   
-144   -16    
160    -160   
-240   -496   
336    128    
64     80     
-192   112    
0      32     
-80    -96    
64     -160   
176    -144   
192    -576   
-64    112    
-144   16     
-64    -224   
352    176    
-64    208    
-176   -368   
-112   -208   
192    -144   
112    -32    
-80    48     
-112   -32    
176    144    
-64    -240   
192    -16    
16     -96    
96     -80    
-112   -288   
48     112    
176    64     
-96    48     
112    -16    
240    544    
-208   -144   
-112   0      
32     -560   
224    -272   
-160   -128   
-16    -192   
-96    -80    
160    -192   
320    160    
-16    -80    
112    -32    
-80    -224   
144    128    
48     64     
176    144    
-64    32     
16     -192   
-160   -144   
224    -96    
-384   32     
160    -208   
-256   -16    
-96    -112   
-224   -112   
32     -992   
32     224    
-32    -784   
192    176    
-112   0      
144    80     
-32    -208   
32     -224   
-160   0      
80     160    
-16    -16    
80     80     
-464   80     
128    -144   
16     -160   
64     -16    
-16    80     
176    -256   
32     112    
-64    -80    
32     -176   
-240   64     
96     -112   
-112   272    
80     -192   
-208   0      
128    32     
-128   -48    
48     48     
-80    32     
64     -288   
128    -128   
112    -320   
160    96     
-304   64     
144    -96    
-32    48     
-32    -16    
-16    -112   
48     -16    
-144   -192   
48     -32    
-48    0      
224    80     
48     192    
-64    -128   
64     240    
0      -128   
0      -128   
0      -16    
224    -32    
-160   -48    
32     -16    
16     192    
48     16     
16     64     
2512   1728   
-1648  208    
544    -288   
-96    160    
-944   -1120  
336    992    
-2160  -864   
560    864    
-448   48     
-528   464    
-272   -192   
-304   16     
112    -16    
192    128    
-176   32     
-80    -96    
112    176    
-624   -160   
-80    64     
-160   -240   
-64    192    
96     16     
-400   224    
144    -176   
-736   -64    
144    -192   
-352   304    
320    192    
-624   16     
64     -208   
-80    -16    
-16    -112   
-112   32     
-32    32     
48     -48    
0      64     
-128   32     
-80    0      
48     48     
-16    64     
-48    0      
-176   48     
-48    16     
-656   -96    
16     32     
-128   64     
112    32     
-48    224    
-336   16     
288    -144   
-192   0      
-48    -16    
-112   0      
16     112    
80     -16    
32     192    
-352   -112   
96     16     
-448   -32    
96     16     
160    0      
16     64     
64     -112   
112    320    
-224   -208   
80     32     
0      96     
-32    48     
-48    64     
-96    96     
-48    -96    
-96    64     
-16    0      
16     64     
-64    112    
-848   96     
-16    288    
-32    -384   
272    -112   
0      256    
-80    160    
48     48     
-192   -192   
0      -176   
112    224    
-160   96     
64     112    
-112   192    
-128   -176   
32     -144   
-80    144    
128    416    
-336   -144   
16     112    
48     48     
64     16     
16     80     
-288   -336   
-16    16     
80     48     
64     96     
-64    80     
0      -32    
-128   0      
80     16     
80     512    
32     144    
-112   192    
48     176    
128    144    
-160   -80    
-16    0      
-48    48     
-80    32     
48     32     
-48    16     
-16    -160   
-96    -16    
-160   -192   
48     208    
-144   -16    
80     128    
-768   -32    
-96    96     
-160   -240   
-48    -384   
32     -64    
160    80     
16     32     
-16    0      
16     160    
0      112    
48     224    
-240   -96    
128    112    
160    608    
-32    352    
64     176    
-160   16     
144    -64    
-80    32     
-64    -112   
240    192    
-240   32     
96     -64    
-128   64     
80     144    
-112   48     
0      -16    
16     96     
-192   -96    
48     208    
48     48     
-16    144    
-96    0      
176    192    
-176   -176   
160    48     
-48    176    
-16    -16    
-112   48     
32     -96    
224    144    
-96    32     
0      32     
-304   -48    
112    0      
-128   80     
368    176    
-112   64     
0      0      
32     96     
-32    128    
32     144    
-64    -112   
288    160    
-256   0      
208    112    
-272   -32    
224    64     
16     0      
16     96     
160    96     
64     -80    
256    144    
-208   128    
-80    -80    
-96    64     
272    208    
-48    32     
-128   -48    
64     48     
-16    144    
16     -80    
-16    352    
288    48     
-96    80     
1488   -128   
752    608    
176    736    
-800   -496   
80     192    
16     -640   
560    608    
-352   -368   
-160   368    
64     -464   
48     304    
-64    -272   
304    144    
-80    112    
128    160    
-272   -64    
-16    0      
-64    176    
-16    -384   
-48    16     
-176   -256   
144    384    
144    -160   
48     336    
32     432    
192    480    
-336   16     
-256   -1152  
496    144    
-16    -736   
-64    0      
48     192    
16     -80    
112    128    
80     -320   
16     48     
160    352    
16     224    
-96    192    
-32    -768   
64     48     
48     -64    
224    -368   
-176   -144   
112    -1536  
208    448    
-80    16     
32     288    
96     112    
112    80     
-32    80     
0      32     
-48    -480   
96     32     
32     16     
80     144    
16     144    
-80    16     
80     32     
-48    -880   
32     208    
-32    304    
144    -80    
-112   144    
0      -112   
64     -80    
48     160    
-96    48     
208    384    
-176   176    
176    -112   
144    176    
-64    -208   
128    -48    
-16    -144   
128    96     
48     -304   
64     80     
32     96     
176    144    
-80    112    
160    64     
80     560    
48     112    
240    -32    
-128   -288   
0      -208   
-16    -240   
0      160    
48     -16    
-128   32     
112    -160   
-32    160    
32     -16    
-144   -112   
-48    -80    
96     16     
16     16     
16     176    
0      48     
96     -64    
80     64     
32     -64    
112    0      
0      -160   
-48    96     
144    -752   
-32    -112   
-64    -208   
128    32     
-32    32     
128    272    
128    208    
48     304    
-192   64     
208    272    
-64    64     
240    -432   
-96    128    
256    -128   
-48    144    
96     -96    
256    240    
-16    -48    
-144   112    
-80    144    
240    176    
-48    32     
-80    -64    
80     64     
224    -64    
-144   160    
160    -288   
192    -160   
-128   -320   
-176   64     
240    -16    
176    32     
-96    -176   
0      144    
0      -80    
208    80     
176    128    
-32    32     
176    288    
-64    -80    
-16    320    
48     -160   
112    80     
-32    -96    
64     96     
-16    -96    
96     256    
32     -320   
-32    -1344  
64     48     
16     -192   
-96    -64    
-416   48     
32     -704   
48     32     
48     -816   
-64    -32    
208    128    
-208   -32    
288    384    
0      -320   
176    -288   
0      128    
32     48     
48     112    
-80    -80    
96     -560   
-752   -128   
96     -512   
-16    -160   
112    -176   
16     -128   
96     -272   
160    -224   
16     -416   
-160   -96    
144    -272   
16     144    
48     -160   
-128   32     
112    -304   
-16    -96    
-512   -16    
96     -144   
-272   48     
-80    -32    
160    -64    
-80    -512   
64     -80    
48     400    
-736   -3248  
560    -16    
-608   976    
-224   -224   
32     48     
384    112    
-592   -176   
576    480    
-656   128    
448    -304   
-272   144    
208    -384   
-240   336    
144    -624   
128    528    
-48    -320   
-48    96     
-32    -64    
-128   48     
192    -272   
-144   0      
112    80     
-144   64     
16     -160   
-160   -288   
32     -96    
-1056  -176   
-128   112    
80     -176   
80     -352   
-48    -16    
192    -496   
-96    -64    
64     32     
-32    0      
16     64     
176    16     
-208   96     
0      -48    
-272   -48    
0      16     
-224   32     
48     0      
-64    -144   
192    -144   
-48    96     
144    -32    
80     240    
-160   -16    
192    -96    
-144   -32    
80     -128   
-384   48     
64     -80    
-176   128    
48     -112   
-272   64     
32     -112   
-336   32     
-16    -320   
-64    80     
-48    48     
192    80     
-48    16     
-96    -128   
-208   -16    
32     -64    
-64    96     
112    -16    
-144   96     
64     -368   
-224   16     
-48    -176   
0      -32    
32     -96    
112    192    
-80    -912   
80     -96    
-272   -576   
48     -256   
96     240    
32     208    
-64    304    
-144   -64    
-48    -48    
160    -32    
-16    48     
96     32     
-112   -288   
96     -16    
176    176    
-576   -336   
-576   -272   
80     160    
-784   80     
0      -96    
-16    -400   
32     96     
112    -16    
-48    96     
-16    16     
-32    32     
-480   -112   
16     80     
-128   -176   
128    192    
-336   -160   
-208   -240   
48     48     
-128   32     
-16    -48    
-832   -144   
-80    -80    
240    48     
-144   -16    
112    32     
-160   -16    
-144   -160   
32     128    
-272   -176   
80     -16    
0      192    
-80    96     
-112   -112   
-176   144    
-272   -208   
80     -160   
-192   112    
-240   112    
-32    -32    
-80    -80    
16     64     
-208   -128   
64     32     
-16    -16    
16     -144   
-256   128    
-32    32     
16     -16    
-96    16     
144    16     
-160   64     
48     160    
-320   -32    
-128   -112   
192    0      
-208   144    
32     -288   
32     -80    
272    48     
-240   -48    
-112   -16    
208    128    
-224   224    
-192   16     
48     -64    
-112   -128   
112    -144   
-640   128    
-96    -96    
-1104  -80    
32     -48    
224    -16    
-144   192    
-80    -48    
112    512    
-400   -144   
144    -16    
-128   224    
192    -112   
-240   32     
16     96     
-96    -48    
48     80     
-128   -48    
176    64     
-96    144    
16     -144   
16     128    
128    208    
-80    -112   
64     112    
80     16     
-144   96     
-272   -224   
160    176    
-112   240    
-128   -128   
-176   32     
208    48     
-560   -112   
144    48     
-240   -112   
-64    -608   
-208   64     
-16    112    
144    208    
-1376  -752   
752    32     
-656   304    
416    -576   
304    464    
48     672    
-592   -288   
48     -384   
240    272    
-16    -32    
-656   -48    
-16    32     
128    -256   
-32    -112   
0      96     
128    560    
-336   -64    
-16    -192   
128    240    
-48    -48    
-80    16     
-320   32     
256    -32    
-192   -96    
80     32     
112    112    
16     128    
0      160    
0      -32    
48     96     
-128   32     
128    80     
80     80     
-96    176    
16     48     
-96    48     
-96    -16    
64     160    
32     16     
32     320    
-80    80     
16     -96    
-16    32     
144    144    
-16    32     
-32    16     
-160   -240   
320    128    
-288   48     
128    0      
-16    64     
-80    48     
192    240    
-592   32     
64     160    
-64    -32    
192    -16    
48     176    
-64    80     
64     32     
-96    80     
48     48     
64     192    
-80    -48    
96     16     
64     112    
-112   -64    
48     96     
-144   -96    
112    48     
48     192    
-160   192    
144    -16    
32     144    
-32    -32    
64     -128   
96     -48    
16     176    
-176   48     
48     16     
-48    80     
-80    -112   
128    112    
-160   224    
0      0      
288    64     
-16    288    
-176   48     
112    128    
-80    -32    
16     -64    
96     144    
-192   0      
160    64     
-304   -48    
192    144    
-144   16     
176    80     
-16    96     
64     128    
-80    96     
16     16     
96     96     
0      -16    
192    240    
-80    32     
48     32     
80     176    
-16    144    
96     64     
-112   0      
-16    112    
112    -544   
144    160    
-176   224    
160    96     
-96    80     
192    16     
96     224    
-96    224    
256    80     
-192   96     
-16    96     
160    144    
-208   -208   
224    80     
-288   -320   
144    -640   
-208   -16    
80     -240   
256    16     
-128   144    
384    128    
32     128    
-272   80     
160    -96    
-224   0      
32     32     
144    48     
-32    -80    
-64    48     
-32    32     
-48    -272   
0      160    
-32    -656   
0      -80    
0      0      
32     112    
96     32     
-48    64     
32     112    
80     48     
-32    -80    
192    112    
-80    16     
48     176    
96     528    
-144   -48    
80     -48    
0      -144   
144    224    
-32    256    
-96    64     
128    144    
-16    160    
48     160    
256    688    
-128   -16    
96     32     
16     -96    
176    -160   
112    160    
-192   -128   
144    112    
0      -368   
32     80     
16     -96    
64     128    
16     528    
16     192    
-112   48     
16     128    
160    -96    
224    144    
-64    -96    
-96    -48    
-64    208    
64     -176   
-48    48     
128    -416   
0      48     
96     -256   
96     288    
-80    -2208  
0      -32    
0      -96    
320    1984   
-1264  -432   
-128   784    
480    656    
1200   128    
-912   -176   
224    80     
-336   64     
592    -304   
-224   96     
352    -176   
-80    320    
32     -64    
144    256    
-16    -144   
-80    48     
112    80     
-16    112    
-32    -80    
272    -336   
-64    80     
112    -32    
-16    288    
48     -256   
-48    16     
80     -384   
64     144    
256    16     
-64    208    
-64    -176   
32     -16    
-64    -192   
240    -320   
0      288    
176    -144   
48     144    
-128   16     
128    144    
-48    -368   
64     0      
48     -160   
80     128    
80     80     
64     -832   
-96    48     
96     -1424  
-96    96     
-576   32     
144    48     
-96    80     
96     -1616  
-64    0      
64     32     
80     32     
32     80     
48     48     
80     -48    
-48    32     
80     -576   
-16    480    
-256   -416   
-16    -592   
-352   -128   
-32    -448   
160    -96    
-32    -448   
80     -304   
48     -64    
112    -48    
16     80     
-16    -144   
48     -368   
48     64     
0      -64    
64     16     
64     -48    
208    496    
-752   16     
448    192    
32     16     
-112   -112   
208    -48    
-16    -96    
32     -208   
96     -1888  
80     -64    
96     -96    
48     144    
0      64     
48     96     
-64    112    
16     -176   
-144   -144   
176    -32    
-224   32     
112    0      
-128   -48    
128    -448   
32     -80    
48     -544   
-176   -48    
48     48     
16     32     
80     48     
-32    48     
16     -32    
-80    -352   
80     112    
-64    128    
-144   -48    
0      -272   
32     -96    
144    -384   
-336   -16    
32     -512   
64     32     
32     -1472  
16     240    
64     -256   
32     -112   
-128   0      
96     16     
32     48     
-112   -48    
-96    -16    
-32    -512   
-608   -400   
80     112    
-64    64     
160    -96    
-96    144    
192    -880   
16     48     
-32    16     
96     -64    
-96    -288   
288    -96    
-336   64     
176    -240   
-688   -32    
48     -64    
224    16     
-16    128    
-16    -32    
128    -192   
-96    48     
64     -368   
0      16     
-192   0      
96     -48    
-208   32     
-80    -64    
-128   -192   
48     -80    
-64    272    
-80    -240   
-256   -112   
-48    -256   
416    -64    
0      -240   
32     144    
-96    -272   
-96    0      
128    48     
80     80     
-448   -416   
480    -16    
-112   256    
80     32     
-336   16     
224    -80    
16     16     
400    -256   
-240   368    
-96    -496   
192    192    
-144   16     
48     192    
-448   0      
64     -256   
112    48     
208    -32    
0      80     
320    -432   
-400   -144   
112    -160   
-128   288    
-32    -192   
80     128    
-192   -48    
-32    32     
-544   -208   
-320   -32    
112    32     
-128   208    
16     64     
-1488  16     
1312   -192   
-336   528    
464    544    
-176   16     
224    -448   
48     -1056  
64     912    
-80    32     
112    272    
-352   -192   
272    80     
-176   128    
-128   48     
16     32     
-112   -48    
-176   -32    
-1056  32     
48     160    
48     128    
-16    160    
-128   16     
32     96     
-64    -112   
-176   -32    
256    -224   
-128   48     
272    128    
-352   48     
-128   80     
-144   -16    
80     48     
-160   64     
32     64     
-304   -144   
32     112    
224    -144   
-192   224    
16     -128   
0      -16    
-80    -64    
-48    16     
-32    0      
-160   -48    
32     32     
-224   160    
112    48     
-320   16     
48     304    
-1376  -112   
384    16     
-160   64     
64     0      
-64    -208   
-16    -48    
0      64     
96     320    
-48    -96    
224    256    
-256   16     
208    -80    
16     144    
-320   -48    
-16    -32    
-448   112    
-16    -80    
112    -192   
-16    48     
-80    128    
-128   64     
80     80     
-32    -64    
96     208    
-256   80     
128    -32    
-16    -64    
-80    -112   
-80    176    
-160   48     
-160   64     
80     288    
-480   -272   
208    128    
-48    -64    
-160   96     
-32    160    
-80    -48    
80     -64    
80     176    
-304   32     
112    48     
-48    48     
-48    16     
64     64     
-112   -336   
112    224    
-1376  0      
-64    0      
96     80     
-16    -80    
208    208    
-288   -16    
144    112    
-160   -128   
176    208    
-112   -240   
80     160    
-176   64     
144    112    
-256   -144   
16     48     
-336   144    
32     -16    
64     176    
-128   -32    
192    192    
48     -80    
-144   32     
32     -64    
32     0      
-128   48     
-80    48     
176    -32    
-192   64     
-32    176    
96     256    
304    80     
-448   -176   
128    64     
-112   96     
64     -32    
80     -48    
32     192    
-144   -16    
48     0      
-96    -48    
-96    -112   
32     -112   
-112   -16    
-80    -96    
192    80     
-16    0      
32     -48    
-16    -192   
-112   -16    
192    144    
64     96     
48     -80    
-208   32     
48     96     
48     -64    
-16    80     
-32    32     
48     128    
32     -144   
-128   176    
112    -96    
16     -32    
64     48     
32     80     
-16    96     
48     128    
-80    96     
16     0      
64     144    
-192   -16    
80     256    
-192   -288   
176    272    
-176   -96    
-96    208    
16     128    
-128   -128   
64     -16    
16     144    
-80    64     
-48    32     
0      192    
0      -16    
-16    112    
-48    -48    
-16    96     
-96    0      
-48    80     
64     128    
64     -176   
96     208    
48     208    
-80    48     
0      48     
32     32     
16     128    
-32    224    
64     -112   
-96    -16    
32     112    
112    256    
-400   992    
128    800    
608    304    
-544   112    
-400   -1008  
624    64     
464    768    
-544   -576   
224    144    
272    192    
-224   -176   
0      -96    
112    128    
-32    -96    
160    240    
-128   32     
16     -416   
-144   48     
416    -1328  
32     192    
80     -112   
-80    80     
32     224    
144    112    
0      -64    
-48    -176   
-96    48     
48     288    
64     -32    
-80    -80    
192    128    
-96    -128   
64     16     
-32    -272   
112    240    
48     224    
80     -272   
-64    -32    
96     32     
144    96     
-48    80     
32     48     
32     224    
64     -96    
32     96     
96     -96    
32     -176   
16     16     
192    -336   
-96    -32    
64     -256   
80     208    
0      240    
16     -176   
112    144    
-32    80     
176    304    
-64    272    
-208   -304   
48     -384   
208    112    
0      -48    
48     304    
-80    -112   
-32    48     
240    -2032  
128    0      
16     16     
0      144    
48     32     
0      80     
0      -48    
112    96     
-64    -96    
16     -256   
144    0      
-48    -704   
-16    -624   
224    -480   
64     288    
160    96     
-64    368    
32     -272   
80     128    
80     48     
96     224    
-128   0      
80     64     
80     144    
-16    -32    
80     32     
0      16     
80     160    
48     -448   
32     144    
16     -112   
176    96     
16     -112   
0      16     
-16    48     
16     112    
96     32     
16     112    
64     96     
-16    -208   
48     96     
32     -64    
-64    80     
96     -192   
-48    144    
160    -80    
-32    48     
32     -560   
32     80     
64     48     
16     96     
0      128    
16     32     
80     144    
80     -64    
-16    160    
16     -144   
-80    32     
160    -96    
128    16     
-32    -128   
-32    272    
0      -960   
144    160    
16     48     
208    -1456  
-80    160    
-400   48     
96     -272   
160    96     
-112   -1296  
144    -336   
176    272    
112    96     
-48    144    
-128   -64    
128    64     
96     -48    
144    -208   
-48    -16    
128    48     
16     -528   
-608   16     
-48    -560   
192    64     
0      -288   
80     0      
48     -2208  
128    -48    
-160   192    
160    -128   
-16    -320   
256    224    
-48    -416   
-176   -48    
16     -208   
96     16     
-448   -64    
16     32     
32     -160   
208    -352   
-96    -448   
336    16     
16     -80    
0      16     
160    -128   
32     -16    
208    304    
-112   16     
0      0      
-64    16     
32     -160   
48     496    
-192   -288   
-560   -48    
160    -656   
-32    176    
272    -64    
-32    176    
64     -896   
-208   -112   
32     -272   
16     80     
-48    -16    
80     64     
-96    -48    
16     -128   
-384   -48    
0      -176   
-32    -144   
128    16     
176    64     
592    2928   
-2176  -1104  
1056   624    
160    688    
-336   -736   
224    -16    
-720   -304   
688    304    
-656   -288   
160    -64    
-48    32     
-32    -64    
-80    256    
160    -32    
-1120  0      
0      -208   
16     -64    
64     -80    
64     128    
80     -512   
-48    112    
0      -176   
96     0      
-80    16     
176    -80    
-64    -112   
112    144    
-528   -96    
64     -144   
-192   -80    
240    -64    
-368   144    
32     -80    
0      48     
16     -768   
48     -96    
224    384    
-416   -256   
96     0      
-160   -80    
-16    -80    
144    -48    
-224   -48    
144    -16    
-272   -48    
112    -48    
-80    -64    
112    -528   
80     128    
-80    -944   
208    208    
-352   -48    
208    -64    
-112   64     
48     -48    
-224   -80    
-32    16     
16     16     
112    32     
-128   16     
0      -80    
96     64     
48     -176   
96     96     
16     -160   
128    32     
-80    208    
-48    -224   
32     -48    
32     96     
-192   -96    
288    16     
-160   80     
96     -96    
-144   -64    
224    -192   
-224   -96    
-576   -160   
32     128    
-288   176    
-928   -128   
96     0      
-16    336    
-400   -144   
432    -16    
-112   -64    
-32    -288   
112    0      
-208   -48    
32     -80    
-896   -208   
112    240    
-336   -16    
16     320    
-192   -192   
80     -16    
-144   0      
-48    96     
48     80     
-352   0      
64     96     
-448   -16    
-112   -160   
16     -80    
48     96     
-208   -224   
112    112    
-432   -304   
336    240    
-224   80     
176    112    
-112   64     
-80    -64    
-64    -16    
-272   0      
64     128    
-368   32     
-96    272    
-64    96     
256    32     
-240   -64    
144    112    
112    16     
-224   -144   
-80    -128   
-64    32     
-48    -48    
-160   -176   
-80    -64    
-512   -112   
-32    48     
-240   -64    
-96    48     
-1072  -16    
0      -48    
64     -176   
-208   112    
240    112    
96     224    
-144   64     
-144   -48    
16     32     
-32    -32    
176    144    
-144   96     
-32    -144   
48     80     
-48    48     
-576   -16    
16     112    
-32    16     
144    112    
-48    0      
-160   -32    
112    144    
-112   -176   
128    208    
-16    224    
-128   -240   
0      32     
48     48     
-80    -144   
48     112    
-416   -64    
112    -16    
-320   -192   
32     96     
-80    128    
96     144    
128    0      
-176   -16    
-96    80     
-80    80     
48     -288   
160    80     
32     -80    
-368   -112   
-96    144    
-144   -128   
80     64     
-752   -48    
0      64     
-48    128    
32     -128   
96     16     
-32    0      
-32    16     
-16    48     
48     96     
-96    0      
-48    32     
-80    32     
16     -16    
-64    192    
-96    48     
-288   -64    
-112   0      
1536   480    
-1520  -1888  
1008   1360   
32     624    
1536   -464   
-992   -1168  
128    272    
240    672    
-336   -480   
144    432    
-48    -240   
-112   64     
-336   -48    
0      -32    
0      -32    
272    112    
-128   128    
288    496    
-368   -608   
-48    -384   
128    224    
-64    -80    
48     240    
-224   112    
64     -112   
-128   176    
-48    64     
16     48     
80     96     
-32    224    
160    -16    
-16    0      
-192   64     
32     48     
352    128    
-16    -96    
176    176    
-112   288    
48     192    
-80    -48    
32     176    
-112   16     
-16    16     
32     64     
16     144    
-64    16     
96     160    
-64    240    
-64    -192   
-64    80     
-16    -272   
0      176    
-96    -128   
160    128    
-80    -32    
128    384    
-208   368    
144    416    
-320   -240   
224    176    
-128   128    
32     -64    
-32    80     
64     32     
-128   112    
64     -96    
224    96     
-32    0      
16     112    
-48    -32    
64     176    
48     32     
16     80     
0      16     
48     176    
32     48     
304    640    
-176   528    
-176   240    
32     -64    
-32    48     
144    -128   
16     192    
48     48     
-112   32     
128    80     
48     16     
128    208    
-80    -32    
160    80     
-48    144    
80     272    
-48    16     
-48    -32    
112    160    
144    144    
-96    96     
-64    96     
64     240    
-128   48     
-16    -288   
0      112    
112    -1424  
-32    64     
16     16     
0      144    
192    368    
-112   -16    
208    176    
-176   48     
0      -128   
-96    80     
-32    -560   
160    128    
-224   48     
32     -352   
16     -64    
-16    -1104  
112    -32    
16     80     
-64    32     
80     224    
32     96     
48     64     
64     416    
-240   -224   
224    16     
-272   -16    
144    -192   
0      -96    
16     -32    
96     -320   
0      -608   
32     192    
-16    -144   
80     624    
-64    -128   
-128   -272   
16     -80    
0      176    
32     -96    
176    400    
-144   112    
32     -16    
-32    48     
144    -48    
-32    192    
-16    -640   
0      208    
176    -464   
-32    0      
-48    -16    
160    144    
-240   -256   
288    64     
48     32     
0      -80    
80     384    
80     16     
64     128    
64     -240   
48     224    
64     -32    
-48    -144   
80     -352   
432    -48    
-368   -768   
320    336    
-64    272    
0      80     
-16    48     
128    192    
-208   160    
-144   -128   
80     144    
64     -128   
128    112    
0      -464   
64     112    
-64    -416   
48     32     
16     -144   
64     16     
160    -16    
144    160    
-80    32     
128    224    
-80    48     
96     112    
80     112    
64     -1328  
112    -48    
-64    -592   
64     208    
48     -192   
0      192    
0      -288   
1584   -1296  
-608   -992   
832    368    
-288   176    
-224   208    
496    320    
-736   -576   
672    176    
-288   -368   
224    16     
-144   -112   
240    240    
-32    192    
32     -96    
80     -544   
0      32     
48     32     
112    208    
-16    112    
16     -32    
-64    -1184  
192    144    
-48    80     
144    -112   
-80    -48    
48     16     
400    384    
-144   64     
144    -80    
-160   -192   
192    -688   
112    144    
144    32     
-192   -64    
-1552  -160   
-240   -1504  
320    -288   
-128   -160   
192    -144   
-64    -480   
160    -208   
-112   128    
208    -288   
-80    -176   
80     0      
80     -336   
-16    160    
288    208    
-528   -192   
-208   -128   
-32    0      
80     -64    
32     16     
-16    -176   
32     -96    
48     -240   
144    -240   
-256   48     
176    -304   
112    144    
-208   0      
96     16     
-144   -240   
144    64     
-208   64     
160    -208   
-64    64     
16     16     
-96    -48    
96     -320   
112    -48    
64     -288   
-64    112    
64     -160   
0      -32    
176    16     
-208   64     
112    -32    
0      80     
-160   -64    
176    -272   
-496   -32    
32     -384   
-16    96     
-160   -208   
160    80     
144    -320   
-208   -288   
304    240    
-272   96     
208    80     
-64    0      
-80    128    
144    -80    
-448   -80    
240    -320   
-432   80     
-112   -16    
32     16     
64     32     
-32    -160   
160    -320   
-160   -32    
176    -1040  
0      0      
32     -48    
96     -80    
-288   -160   
96     -384   
-64    -80    
128    -256   
16     80     
144    144    
-448   -80    
96     -336   
-832   -272   
80     -208   
80     160    
64     -304   
-80    176    
112    -64    
-80    -240   
48     -96    
128    160    
-496   -128   
64     -80    
-192   -160   
272    32     
-480   -336   
240    32     
-64    0      
96     -288   
-128   -32    
160    -752   
-16    112    
336    -64    
-128   112    
-192   -144   
96     80     
-160   -240   
160    -496   
-256   -32    
256    160    
-304   0      
144    -64    
-80    -224   
96     0      
192    448    
-16    -288   
96     -160   
-16    64     
64     64     
64     64     
48     -224   
-64    416    
112    96     
-336   -336   
160    208    
0      -16    
80     -64    
-208   160    
-864   -272   
-32    128    
-432   -96    
-224   -16    
-16    368    
-768   0      
-272   -320   
192    -48    
-48    64     
80     -96    
-32    112    
96     16     
-256   -112   
-192   -416   
128    16     
-208   -128   
32     16     
-160   64     
32     16     
-16    -48    
-336   32     
-96    96     
48     -128   
-80    144    
-96    176    
0      -32    
64     -48    
48     48     
0      -64    
-32    -16    
16     128    
208    0      
-224   64     
-240   -112   
144    -48    
-256   0      
1568   -544   
800    832    
352    -80    
-1248  -64    
464    352    
400    -816   
-32    -464   
832    -16    
-736   256    
928    -368   
-480   128    
304    -80    
-144   -208   
-32    80     
112    208    
-80    0      
-96    -32    
-32    32     
32     0      
-144   144    
-64    -80    
112    352    
-96    -128   
128    80     
-80    -32    
-32    64     
208    -336   
-272   0      
-48    -48    
-240   32     
-48    -112   
208    144    
-64    64     
80     -112   
-256   64     
-176   -160   
160    384    
-224   -320   
48     -32    
64     -192   
80     32     
-112   128    
16     32     
-64    -16    
48     -96    
64     128    
16     144    
80     160    
-272   -128   
208    96     
-240   128    
-112   -144   
48     -224   
96     96     
96     -80    
128    -48    
-256   -208   
32     80     
208    208    
-112   -64    
112    128    
32     -96    
-32    -128   
0      176    
144    64     
-80    -224   
-48    80     
-1216  32     
32     112    
-32    64     
32     16     
0      80     
-32    -304   
-48    64     
0      112    
-64    176    
112    0      
-704   -448   
-160   -448   
304    144    
-224   -48    
112    0      
-288   64     
-352   -16    
160    112    
0      96     
-320   -384   
-112   -288   
368    464    
-112   272    
32     -16    
-224   -32    
48     32     
-80    -16    
-64    48     
-32    272    
-112   64     
-64    -112   
-224   -320   
144    -64    
48     112    
32     144    
-112   128    
0      64     
-32    64     
-80    48     
48     448    
112    560    
-32    288    
-112   144    
-160   -96    
32     0      
80     16     
0      32     
128    112    
0      224    
16     48     
-48    -48    
48     208    
80     80     
-64    64     
32     144    
64     192    
-32    176    
80     -32    
-272   0      
48     -112   
96     48     
-32    128    
80     32     
-80    96     
288    -16    
-112   32     
288    32     
-368   160    
144    -32    
320    256    
-352   176    
48     -112   
0      128    
64     -160   
-64    64     
-16    128    
64     16     
-176   -240   
144    -192   
16     80     
64     112    
-32    192    
0      48     
-16    96     
-96    48     
-80    64     
48     32     
-16    32     
144    112    
160    -128   
-224   304    
-32    48     
64     48     
0      16     
208    -16    
-192   -192   
304    192    
-336   80     
192    288    
-160   112    
144    144    
64     -32    
112    128    
144    -160   
-96    240    
-80    -32    
32     112    
-96    80     
80     16     
16     176    
-128   -48    
96     112    
48     -16    
16     128    
64     -160   
-48    368    
-224   -368   
160    -768   
64     -48    
0      -112   
0      16     
48     224    
64     0      
-64    -48    
112    112    
-48    -32    
112    112    
-80    224    
64     112    
-656   -672   
64     1024   
-256   -208   
-16    -576   
-160   32     
-112   -656   
160    176    
-688   80     
224    -208   
256    320    
32     -64    
-160   -48    
-80    224    
256    -208   
-32    288    
160    -304   
-80    400    
32     -80    
32     128    
240    -96    
-224   32     
112    16     
-160   432    
256    -112   
-160   160    
160    -96    
0      272    
-112   -48    
96     -16    
64     96     
112    208    
-64    32     
0      144    
-128   -160   
176    80     
-32    -656   
80     48     
-176   -144   
192    192    
-64    -96    
-32    32     
-16    -304   
96     96     
-48    -16    
16     96     
16     48     
48     -128   
-16    128    
64     -64    
272    -16    
-96    -192   
32     128    
128    -512   
-96    96     
160    160    
32     192    
-48    -16    
144    48     
-96    128    
96     -32    
96     96     
-32    -64    
112    96     
16     -96    
112    144    
48     -96    
64     80     
128    -96    
-96    112    
80     0      
-32    16     
80     96     
-48    80     
48     16     
64     48     
0      64     
80     64     
-48    -128   
176    -208   
-128   32     
0      -368   
16     160    
-48    -768   
0      -160   
224    -272   
96     48     
-80    -160   
48     224    
-240   160    
304    112    
-80    64     
144    32     
32     80     
-16    -240   
16     -336   
-48    -272   
256    320    
-32    -32    
64     0      
112    192    
48     48     
64     32     
-176   -48    
96     96     
0      32     
112    176    
32     64     
144    128    
0      112    
-96    112    
240    256    
-48    64     
128    96     
0      176    
256    -208   
-128   -736   
128    144    
-224   -464   
256    144    
-208   -128   
-208   -1520  
224    -80    
-16    -864   
-80    -160   
208    400    
-96    -304   
128    144    
-16    128    
96     -400   
-32    -32    
112    -48    
-64    192    
-16    0      
112    -80    
-544   -208   
-16    -128   
32     -32    
80     -16    
240    416    
96     -208   
64     -144   
-48    112    
160    -288   
176    -352   
-16    64     
128    -400   
-144   -192   
224    -48    
80     -80    
-368   0      
80     -64    
-288   80     
-64    -32    
0      -32    
96     -208   
64     448    
64     -2240  
208    160    
-144   64     
-128   -80    
-48    -176   
128    16     
-112   -16    
16     -32    
-224   0      
192    -32    
-1568  128    
-224   -128   
192    -224   
32     112    
64     -64    
192    -848   
-80    64     
32     -144   
0      352    
0      -304   
320    0      
-224   48     
192    -16    
-96    176    
96     -128   
-160   -128   
80     -16    
-656   -48    
80     -64    
-32    -16    
32     -96    
16     96     
32     -688   
-32    -16    
192    -16    
160    -32    
-64    48     
-112   80     
48     -96    
64     -32    
-48    0      
-176   224    
-2288  -1920  
448    -768   
-240   1072   
592    96     
32     496    
-208   -1344  
576    128    
160    832    
-32    144    
-64    -464   
-64    80     
128    -320   
-128   304    
-240   -384   
224    352    
-416   -208   
32     64     
-128   -80    
112    0      
-32    -288   
96     -720   
-96    -48    
304    -32    
-384   -208   
-112   -128   
-112   128    
-48    0      
96     176    
0      -384   
-48    32     
-224   -160   
160    96     
-112   -16    
48     -80    
-160   16     
128    80     
-64    96     
-176   -336   
64     176    
-16    -112   
80     96     
-16    64     
208    -224   
-208   -288   
192    -160   
16     48     
-96    -752   
-32    -176   
320    -48    
0      288    
-848   -240   
80     96     
-192   -128   
272    224    
-112   64     
176    96     
-144   288    
176    112    
-112   288    
176    224    
-112   96     
-272   -480   
240    496    
-1088  -224   
-128   -96    
-96    -288   
-64    32     
16     336    
112    128    
-144   32     
-256   -240   
16     -112   
112    80     
-80    192    
0      16     
32     -176   
-400   -432   
16     -144   
-80    -288   
48     192    
176    224    
-80    -192   
16     192    
-64    -16    
32     224    
-544   208    
-64    144    
-512   -240   
176    416    
-16    64     
-96    176    
-32    -400   
0      48     
-64    -96    
0      0      
-176   -96    
80     224    
-176   32     
-16    208    
-208   -48    
-48    16     
-32    80     
-304   -64    
-224   -208   
-752   -544   
-32    192    
-352   -448   
240    208    
-176   -336   
-80    16     
16     32     
-32    0      
-80    16     
80     -16    
-64    208    
0      144    
112    80     
-160   -112   
-144   -112   
320    -48    
32     192    
32     64     
144    32     
-16    -160   
-240   0      
-32    64     
128    224    
96     112    
0      16     
-80    48     
0      192    
-96    192    
80     112    
-240   -144   
-144   32     
-160   160    
384    -48    
-144   112    
48     -16    
-32    80     
64     96     
-48    16     
-176   32     
48     -16    
-112   -32    
-48    -64    
-64    112    
0      64     
-96    96     
-192   -96    
0      32     
-1232  -80    
16     32     
112    176    
-144   -32    
192    160    
-16    -240   
-80    96     
-32    224    
-80    96     
-32    128    
128    48     
-32    80     
144    80     
-352   -48    
96     80     
-112   48     
-48    -32    
96     160    
-64    0      
0      96     
192    64     
-224   144    
-80    -64    
16     80     
48     -48    
16     80     
-112   -208   
160    304    
-144   32     
-48    96     
-288   144    
-160   0      
-64    -32    
96     -96    
0      -48    
96     160    
-64    64     
-32    192    
16     32     
-192   -96    
96     -16    
-80    64     
32     -80    
-48    176    
80     16     
-304   784    
-416   -192   
320    -448   
-672   1040   
-272   -64    
-192   464    
16     -336   
-448   -448   
-16    416    
80     272    
-16    -208   
-16    112    
16     48     
-16    208    
48     -144   
-16    208    
64     -16    
-48    192    
16     -96    
96     64     
96     -16    
-192   80     
16     64     
0      176    
176    80     
-80    -16    
-128   80     
16     16     
-96    -96    
-48    96     
96     64     
16     32     
-64    160    
32     128    
48     128    
-80    -16    
-80    80     
112    -16    
-48    112    
0      16     
144    64     
-192   -48    
-32    128    
-48    0      
160    80     
-96    128    
80     16     
-16    -48    
64     80     
32     96     
48     96     
48     112    
-32    32     
96     176    
-96    32     
128    128    
-128   -160   
64     80     
32     192    
16     96     
32     16     
32     48     
96     112    
-48    80     
112    48     
0      -32    
160    176    
-64    48     
48     144    
-112   96     
0      32     
16     -16    
-32    -304   
0      32     
16     96     
-128   -96    
240    160    
-144   240    
64     128    
224    224    
-304   -144   
32     -368   
-80    -32    
-176   128    
-160   -192   
160    192    
-16    -144   
112    -960   
-48    16     
32     -2768  
0      80     
80     128    
96     176    
16     64     
64     48     
320    624    
-176   352    
-16    -128   
224    112    
0      -32    
96     128    
-128   176    
64     -16    
-48    -16    
112    -176   
48     112    
48     272    
16     160    
112    480    
-32    304    
32     128    
-48    -32    
96     -48    
64     16     
-32    -32    
-64    -272   
80     -80    
48     -112   
144    144    
32     -336   
-48    -16    
-16    -1904  
112    96     
80     -16    
-48    96     
-144   -288   
128    -368   
-208   -288   
288    128    
-32    16     
64     176    
48     240    
-32    -128   
96     -16    
32     16     
80     96     
64     -960   
-64    112    
208    -448   
-96    -16    
64     16     
144    16     
0      272    
-64    112    
0      96     
-16    32     
272    64     
-96    -96    
32     160    
32     -80    
48     48     
144    -160   
32     0      
0      -1040  
64     80     
32     -144   
-128   -48    
304    416    
-224   160    
48     -48    
80     -224   
128    128    
0      -16    
-112   160    
80     -256   
32     -80    
240    -96    
-176   240    
-176   -272   
16     112    
80     96     
48     16     
-96    144    
0      208    
144    48     
-32    -480   
-16    128    
192    -336   
-32    224    
80     -256   
32     112    
16     -128   
48     64     
48     -1168  
-48    160    
128    -160   
80     192    
-96    -176   
112    -256   
-96    64     
32     -96    
176    432    
-32    48     
-64    208    
-80    -288   
128    144    
64     -16    
-240   -912   
-400   1456   
688    1440   
-784   288    
576    -1248  
176    704    
-1744  704    
-848   -624   
784    64     
288    112    
-304   -512   
-304   -64    
0      -496   
304    -32    
208    -208   
160    352    
-80    -32    
-160   -784   
400    432    
224    -144   
352    -288   
-80    32     
64     -272   
80     -176   
112    -224   
208    576    
128    -784   
-16    192    
-192   128    
160    -656   
176    -208   
-208   192    
256    48     
-96    128    
144    80     
-96    -48    
96     48     
-208   -160   
304    0      
0      -224   
-80    112    
192    -112   
-32    -16    
160    -352   
-16    -64    
160    96     
-288   112    
208    320    
-208   128    
0      0      
112    -480   
-704   -112   
96     -240   
-816   0      
144    -128   
80     16     
112    -736   
176    -160   
16     -608   
-272   -400   
64     16     
-96    160    
64     -176   
224    0      
-224   160    
-16    -16    
-96    -32    
112    112    
-160   -64    
112    -80    
48     -96    
64     -176   
-192   -80    
64     16     
112    32     
160    112    
-16    800    
-80    192    
160    -160   
80     176    
-48    -64    
160    -64    
240    288    
-512   112    
144    16     
-640   -80    
304    -80    
-64    0      
80     -336   
80     112    
-16    -1456  
0      -48    
48     16     
16     -32    
16     -80    
96     -160   
-208   -80    
32     -128   
-1072  -144   
-32    64     
32     0      
112    16     
-912   -80    
160    -480   
144    0      
-176   -352   
192    96     
-48    176    
-16    16     
80     112    
64     -128   
-432   -32    
96     240    
-96    64     
176    -32    
-304   -64    
512    128    
-464   128    
32     -240   
160    336    
0      32     
144    48     
-144   0      
-16    -64    
224    192    
-144   -144   
-112   -160   
192    -96    
-160   0      
160    -16    
-48    -32    
-160   -272   
-272   -96    
-80    -16    
176    64     
96     -128   
-192   -96    
224    32     
96     -192   
-224   96     
-32    32     
176    -16    
112    224    
-320   -48    
224    -176   
-144   -16    
-48    -208   
144    64     
-672   -224   
112    208    
-1008  -512   
-896   16     
-144   -144   
-464   -32    
-16    64     
0      80     
32     64     
-208   -48    
112    -64    
-64    64     
-16    -16    
32     -48    
-16    144    
-192   -144   
48     64     
-128   64     
48     -160   
32     16     
128    -80    
16     256    
-320   16     
-160   112    
80     -208   
32     -48    
240    176    
-80    80     
-336   -432   
144    32     
-80    -64    
0      80     
-112   0      
160    32     
-16    144    
-192   0      
-288   -32    
16     144    
-32    -80    
-240   16     
-80    176    
-336   -96    
-32    -16    
-240   -288   
80     160    
-160   -112   
144    16     
32     -32    
80     112    
2384   912    
-1808  -304   
656    -320   
-272   496    
832    448    
272    624    
-1184  -464   
-48    560    
-32    -160   
-208   -288   
-272   96     
240    336    
128    -16    
-144   336    
-224   -304   
0      144    
0      -48    
112    304    
-80    -96    
16     -16    
-192   -80    
0      144    
-224   48     
-144   16     
96     48     
-32    144    
240    96     
-112   -16    
-80    -16    
-48    16     
-16    80     
80     16     
-112   64     
-160   -48    
-128   32     
32     -80    
0      32     
-160   -112   
192    176    
-336   -192   
112    80     
-80    64     
96     80     
48     48     
-48    96     
-16    96     
-32    -16    
-64    96     
-112   112    
48     96     
-128   -96    
64     32     
-64    80     
0      112    
-992   -144   
-96    176    
80     32     
16     -112   
16     0      
-80    -64    
-16    64     
-144   -32    
16     80     
-48    176    
48     112    
0      112    
48     144    
-144   -48    
208    416    
-112   -64    
48     0      
16     96     
-64    16     
16     32     
-80    48     
-112   48     
-144   -64    
64     64     
-16    48     
-96    208    
-96    128    
112    176    
-256   -176   
304    224    
-48    80     
-64    -400   
256    320    
0      112    
112    192    
-64    -32    
64     112    
32     208    
-96    -48    
80     0      
16     -32    
-48    -16    
-144   -144   
0      -176   
112    128    
64     336    
-144   64     
-64    16     
48     16     
80     80     
48     112    
-48    80     
-48    48     
16     80     
-16    0      
48     96     
-16    -32    
80     112    
-144   -16    
32     0      
-80    64     
-48    32     
112    192    
-64    -16    
96     112    
-64    -32    
96     192    
-160   -64    
80     48     
-128   32     
144    128    
-192   -336   
256    80     
-288   192    
80     144    
-16    0      
0      240    
64     0      
48     32     
-112   112    
176    96     
-96    -192   
272    176    
-160   128    
272    -32    
-144   320    
-96    -80    
128    96     
-80    176    
80     160    
-32    48     
48     96     
96     240    
-208   -192   
64     -16    
64     128    
16     112    
-32    32     
128    240    
-128   64     
64     48     
-176   80     
112    -64    
160    160    
-80    80     
96     80     
-112   -32    
112    -32    
144    208    
-32    -32    
48     176    
-80    16     
48     16     
112    -16    
-80    48     
-48    -48    
-128   144    
80     112    
-16    64     
-16    -848   
48     48     
112    80     
-16    352    
-80    32     
80     -32    
80     128    
144    48     
-176   0      
16     128    
128    80     
-144   64     
-16    96     
64     48     
48     16     
0      -272   
32     80     
-48    64     
0      -16    
16     208    
208    112    
80     144    
48     48     
-48    160    
240    1168   
-1568  -688   
704    1152   
384    480    
48     -800   
-528   32     
80     -640   
432    608    
-48    -1632  
-48    368    
-288   -416   
32     240    
96     96     
64     -64    
-160   112    
-48    -32    
-96    16     
16     -416   
112    320    
96     -272   
64     288    
-16    -208   
144    336    
-304   -2096  
80     0      
-48    320    
224    160    
-32    64     
-32    128    
272    224    
-160   224    
128    16     
-16    0      
0      -16    
224    32     
-48    96     
96     0      
80     80     
-80    128    
64     96     
112    -720   
-16    128    
16     -48    
112    -16    
-32    64     
112    208    
-96    -80    
-64    -80    
48     208    
32     -288   
176    -112   
-224   -208   
128    -48    
240    -208   
-320   144    
224    -432   
-32    16     
112    16     
0      144    
-32    32     
256    32     
64     176    
-64    -176   
96     32     
96     -96    
48     160    
-32    32     
48     224    
-160   -176   
208    48     
80     -112   
0      32     
112    112    
0      128    
96     -32    
-144   -416   
96     176    
-80    -560   
128    96     
-112   128    
-16    16     
192    96     
176    256    
-304   -224   
112    16     
240    16     
-352   -48    
384    -96    
48     -784   
-48    96     
0      -208   
48     -2192  
32     0      
32     224    
176    -128   
48     288    
-32    -336   
64     -80    
48     -96    
-64    64     
176    16     
-80    0      
-48    -64    
96     -672   
-128   -96    
-688   -128   
32     -208   
-48    -64    
176    -144   
-48    -64    
128    -256   
32     -144   
-64    16     
240    64     
96     -48    
32     112    
16     -256   
-128   0      
112    -208   
-48    -368   
-64    -128   
48     16     
304    16     
-64    -368   
-96    -64    
-240   -256   
464    368    
-144   -304   
288    96     
0      -64    
16     112    
80     48     
-48    96     
448    96     
-48    128    
-64    208    
-176   -96    
352    -224   
64     -48    
-160   0      
-16    0      
176    64     
48     -560   
32     -224   
-128   -176   
64     208    
-16    -368   
128    48     
-176   48     
64     -80    
-80    -128   
48     -112   
-192   64     
0      64     
80     0      
112    160    
-144   -80    
144    -1440  
-64    -80    
128    -208   
48     48     
0      64     
96     -112   
-80    0      
-64    -400   
-48    -224   
160    -208   
-80    -16    
-80    -80    
-544   160    
-16    -176   
0      160    
-80    -224   
-144   160    
128    -368   
112    -192   
96     -224   
128    -128   
-272   208    
-16    -240   
32     144    
48     -144   
-256   96     
192    -320   
-672   -80    
80     -224   
-336   144    
64     -432   
208    16     
32     -752   
-32    -32    
32     16     
-48    96     
-48    48     
-32    -32    
-224   -48    
112    -64    
-624   -304   
-272   -816   
-1264  208    
832    464    
1504   -16    
-720   -704   
64     96     
352    -608   
176    48     
-128   304    
128    144    
-288   -160   
48     96     
-16    64     
32     -144   
-272   -80    
32     -160   
32     176    
144    -128   
128    -16    
-48    -352   
32     448    
-192   -576   
64     112    
32     128    
272    -112   
-448   -128   
144    208    
-16    -96    
-64    -48    
-208   16     
192    16     
-128   48     
32     -144   
-48    64     
-16    -192   
48     0      
-336   -288   
128    80     
-128   -48    
-80    -64    
-128   96     
-192   96     
144    -96    
32     0      
-64    16     
160    -48    
-160   96     
-864   -112   
144    208    
-160   64     
144    144    
-304   -224   
-208   64     
-48    32     
-128   32     
-32    208    
192    400    
144    480    
-992   -112   
-128   -128   
48     -16    
0      32     
-208   -16    
96     96     
80     -80    
-16    112    
-80    -48    
-32    -64    
0      16     
-112   16     
0      80     
-32    -32    
48     64     
-1312  -80    
-64    16     
64     -32    
80     160    
-224   -112   
80     160    
-176   -208   
-80    32     
0      176    
0      96     
16     48     
-176   -64    
32     32     
-144   64     
0      64     
-112   112    
-64    -48    
-352   -48    
80     48     
0      64     
-80    96     
-32    -64    
16     80     
48     224    
-160   -32    
-48    32     
-192   -96    
32     112    
-96    48     
16     96     
-112   64     
-64    32     
-368   -16    
-48    32     
-16    -176   
96     128    
-16    64     
-112   -32    
-16    32     
-16    -80    
48     128    
-48    128    
-128   -128   
-80    -64    
32     224    
-64    -96    
-320   -80    
-400   -96    
240    144    
-64    -128   
-96    144    
-16    112    
256    896    
-176   -288   
160    80     
-240   0      
320    96     
-192   176    
-16    -64    
80     96     
-192   -16    
240    256    
-320   -112   
128    64     
-688   16     
96     -544   
-96    -112   
48     144    
-80    192    
-48    96     
16     112    
-64    -32    
240    -64    
-368   32     
0      128    
-256   48     
0      -80    
176    -48    
96     192    
-640   64     
-176   -80    
224    -16    
-160   16     
128    320    
-352   64     
-64    -112   
-48    -96    
304    -16    
-128   0      
-80    144    
-144   64     
32     -128   
-160   -304   
432    416    
-160   160    
-256   112    
-48    48     
96     64     
-80    -160   
-48    -112   
128    224    
-16    160    
-64    -208   
176    192    
176    240    
-96    32     
-128   192    
-128   -112   
144    96     
96     96     
-64    -48    
96     80     
-48    -96    
176    144    
-176   96     
112    16     
-48    80     
-96    48     
16     64     
-48    192    
16     -96    
64     288    
-96    0      
-544   2512   
-1904  -896   
608    672    
320    48     
960    -688   
-1040  -656   
304    464    
672    464    
-448   -560   
80     -352   
-336   -160   
112    160    
-64    224    
144    80     
-160   32     
32     176    
80     288    
-16    -48    
-32    -112   
-48    -112   
224    64     
0      80     
-64    160    
224    160    
-128   -16    
32     32     
-80    160    
64     272    
48     48     
-64    -96    
64     -32    
128    192    
0      128    
80     80     
-80    48     
192    96     
-64    64     
-16    32     
16     64     
96     80     
-32    32     
48     144    
-16    0      
0      48     
80     64     
48     128    
-48    112    
208    176    
-416   112    
224    -144   
0      160    
-48    0      
80     16     
48     -48    
64     176    
-32    272    
-96    -16    
0      -144   
-32    -592   
96     16     
-64    -800   
96     160    
-48    64     
48     -16    
176    48     
-32    304    
-32    16     
160    160    
32     -32    
128    128    
-176   48     
192    96     
-80    80     
48     -16    
48     80     
192    -800   
-176   144    
128    64     
144    80     
16     176    
-112   48     
160    64     
-48    32     
64     -144   
-240   -80    
160    -272   
112    160    
-144   128    
64     -304   
96     128    
-48    -304   
80     160    
-64    32     
160    192    
-96    80     
64     64     
48     176    
48     128    
-96    -208   
144    64     
-16    48     
96     208    
-96    -64    
112    -256   
16     128    
80     16     
16     16     
-16    -672   
160    224    
48     96     
80     48     
-112   -80    
64     128    
80     -48    
96     96     
32     0      
32     64     
-48    -64    
96     -16    
0      144    
80     80     
304    -32    
-128   96     
-192   144    
272    -1104  
112    16     
-304   48     
192    -80    
48     -112   
0      176    
-16    -16    
32     -112   
16     -80    
-96    64     
192    144    
176    -368   
48     128    
96     96     
-240   112    
272    -400   
16     64     
-16    128    
224    80     
-256   -16    
192    -96    
48     -272   
-128   -416   
192    320    
-80    64     
208    48     
-16    -160   
0      96     
32     -112   
16     16     
64     -144   
16     -48    
48     112    
64     0      
-32    -128   
16     112    
176    400    
-16    -112   
-16    -128   
64     -64    
368    384    
-224   -112   
-160   -288   
112    -32    
80     -32    
112    368    
-64    -96    
80     432    
112    -176   
144    64     
80     -112   
-32    -1744  
-16    -80    
192    48     
0      -160   
80     176    
0      -32    
-48    48     
48     -336   
16     32     
64     -432   
48     -416   
-16    80     
112    -416   
-80    -64    
-1088  -128   
176    -272   
256    112    
144    -192   
-160   128    
224    176    
144    16     
48     80     
1264   -2224  
-48    -528   
848    0      
-368   -144   
16     512    
496    -1312  
-832   -1184  
144    384    
48     32     
-32    -176   
48     -176   
-16    64     
32     -368   
-64    -112   
224    -160   
-64    -448   
288    144    
176    208    
-16    32     
128    112    
160    -320   
144    -192   
-224   64     
208    48     
-176   -32    
144    -448   
-16    -80    
-64    -288   
176    -64    
-32    -1584  
-32    -96    
128    -208   
-256   64     
96     -224   
-32    48     
0      0      
224    352    
-256   384    
64     32     
-1184  -304   
160    -48    
96     -80    
-32    -208   
80     64     
80     -240   
16     16     
96     -1200  
-16    160    
144    160    
64     176    
-64    -32    
16     32     
-48    160    
-16    -368   
-288   -80    
48     -224   
-496   192    
-112   64     
-288   -176   
192    -496   
-96    -176   
96     -1680  
32     192    
0      -16    
96     64     
-160   -96    
64     -144   
-16    -160   
96     32     
-336   -32    
48     64     
-736   -144   
64     -80    
64     -80    
32     -144   
-48    48     
320    -384   
-48    272    
80     -96    
288    480    
-96    80     
-128   -160   
-112   0      
-16    208    
-96    224    
-64    -192   
-16    -192   
32     -320   
-320   96     
16     16     
-128   0      
80     -272   
96     64     
-112   16     
48     32     
-96    80     
-192   -160   
160    64     
32     112    
-64    16     
-144   -144   
0      -80    
192    16     
96     32     
32     -80    
-48    0      
192    -320   
-112   -32    
64     80     
-64    -32    
64     32     
32     176    
-16    -64    
48     -64    
-192   -64    
208    0      
-224   -112   
128    -224   
-48    -16    
16     -128   
16     -80    
-416   -304   
-16    304    
-32    -16    
-448   -64    
-448   -416   
368    -368   
-320   224    
240    432    
-160   -32    
-32    -80    
32     -32    
-320   -128   
48     48     
-960   -208   
240    560    
-608   288    
-480   272    
0      352    
-496   -192   
-16    -208   
-1504  -64    
112    32     
16     -64    
64     80     
-32    -96    
64     96     
-416   -368   
160    96     
-48    0      
64     144    
-16    16     
-16    96     
-176   192    
-80    32     
-16    496    
-144   -144   
-48    -304   
-224   -32    
-32    0      
-32    16     
16     96     
-48    96     
48     -32    
-48    -240   
0      192    
-64    48     
96     528    
-384   -576   
48     128    
96     48     
-64    288    
-32    -224   
64     -16    
112    304    
-416   -32    
-64    -192   
192    128    
112    208    
-160   -128   
-224   112    
96     -96    
-16    208    
48     -256   
16     256    
-32    272    
-112   112    
-96    -128   
-128   64     
32     -32    
-64    -16    
32     -192   
-64    -80    
0      96     
160    32     
-128   16     
48     160    
256    2976   
-2112  -384   
368    336    
80     224    
-128   -576   
-96    -336   
-208   528    
784    528    
-1056  -208   
-80    352    
48     -256   
-160   -80    
128    32     
144    48     
-64    0      
-48    -16    
-48    64     
-16    112    
-16    240    
32     -64    
0      112    
-224   -64    
160    256    
-128   0      
0      -16    
-128   -32    
80     240    
-32    80     
0      16     
-80    -16    
32     16     
0      112    
-64    80     
16     96     
-48    16     
16     0      
-128   128    
-96    192    
-80    -208   
-16    80     
-160   -32    
288    48     
-176   112    
96     0      
-32    112    
-80    -112   
144    128    
-256   -144   
352    32     
-400   0      
96     -16    
-176   -48    
48     160    
-48    32     
-64    48     
-112   -48    
96     48     
-32    112    
-48    64     
144    288    
-208   80     
224    96     
-32    -16    
0      32     
-16    144    
-48    144    
-32    -64    
176    192    
-432   -64    
176    160    
-48    -64    
96     144    
-144   64     
112    64     
16     80     
-16    -48    
-48    -128   
80     -96    
-64    112    
-80    208    
-80    48     
0      16     
0      -80    
-96    -192   
-64    224    
-112   80     
128    144    
64     64     
-96    32     
48     64     
-48    -80    
32     48     
-80    112    
96     144    
-48    176    
-16    160    
-288   -144   
160    0      
32     48     
-80    -48    
64     160    
-48    160    
64     -16    
16     32     
0      144    
16     272    
112    368    
-176   224    
112    16     
-48    -96    
-112   80     
32     16     
80     80     
32     32     
64     208    
-144   128    
96     -160   
-144   -64    
144    64     
-128   -128   
224    -64    
-80    64     
-96    0      
64     128    
96     64     
-80    64     
32     64     
160    224    
0      128    
-32    48     
-16    32     
176    -48    
-128   80     
112    -80    
96     16     
16     288    
-144   32     
80     64     
-48    16     
-48    32     
80     0      
-112   -320   
80     112    
0      176    
80     96     
64     -16    
16     160    
112    416    
0      80     
-64    -48    
16     32     
16     144    
-16    96     
112    48     
-48    96     
240    0      
-64    224    
-32    -400   
80     304    
-16    -368   
64     368    
-128   -64    
0      -80    
-16    16     
80     -144   
32     128    
160    448    
-64    -16    
-16    128    
16     -64    
48     176    
-112   -96    
80     -64    
112    240    
-48    -416   
64     176    
48     112    
48     -80    
-128   16     
96     224    
-96    32     
112    112    
32     -256   
176    208    
-176   -128   
80     144    
112    -32    
64     -192   
128    112    
32     -864   
96     176    
144    -2000  
-64    128    
176    -96    
240    224    
-48    -176   
-16    128    
-112   208    
-768   -2240  
400    -192   
-32    800    
144    672    
-336   -48    
240    624    
-560   -112   
64     736    
96     -448   
176    432    
80     -736   
-16    64     
-160   -16    
-64    -368   
272    208    
48     96     
96     400    
48     -144   
48     400    
-240   -384   
16     -48    
304    400    
-16    96     
-80    -240   
32     16     
304    -640   
-192   128    
32     16     
96     -32    
80     48     
48     32     
-16    0      
0      -128   
-192   416    
16     16     
16     176    
176    -336   
80     240    
192    448    
-512   128    
368    -144   
96     112    
-32    64     
144    192    
-144   -16    
208    -128   
192    400    
48     64     
-32    -64    
208    -112   
-160   96     
208    -96    
16     -112   
16     -176   
208    112    
272    368    
-416   -288   
96     -128   
256    128    
-16    144    
-96    -176   
160    336    
80     144    
-96    240    
64     -336   
16     48     
16     -160   
0      192    
-64    16     
64     96     
16     -1232  
16     -2064  
16     80     
0      -2016  
32     128    
176    576    
-112   -48    
-96    -112   
64     -1312  
-96    -288   
160    32     
48     -16    
48     160    
48     -160   
0      -48    
64     -16    
64     -624   
-128   -192   
16     -288   
80     16     
-992   -112   
16     -416   
16     -288   
192    -48    
-80    80     
128    208    
-64    176    
0      224    
80     -112   
80     -192   
80     96     
-16    96     
-16    64     
32     -64    
0      -80    
-416   -320   
224    -48    
80     400    
0      16     
-96    -144   
96     -144   
208    -64    
-16    -496   
-176   64     
128    -128   
176    112    
-64    160    
80     192    
-144   128    
144    48     
-176   64     
32     64     
-304   80     
80     0      
-80    192    
384    576    
-144   96     
48     -336   
-64    -96    
160    64     
-32    176    
64     -144   
64     48     
48     96     
-96    -32    
80     96     
32     -64    
-320   432    
-32    -224   
-240   -112   
80     -256   
-176   -112   
128    -416   
-80    64     
128    -400   
112    480    
32     528    
128    160    
-160   -32    
64     -160   
-176   -128   
128    -400   
-688   -64    
32     16     
-176   -80    
64     352    
16     64     
-32    -624   
-112   16     
64     -1360  
112    240    
16     -16    
96     -48    
80     64     
-64    -16    
-128   96     
32     32     
-192   112    
240    144    
-224   48     
192    -320   
16     -112   
-48    -224   
96     96     
-48    -144   
96     32     
-16    272    
-208   -224   
-144   -16    
96     -128   
-32    16     
32     48     
-16    32     
-64    -32    
-144   32     
48     -240   
-64    192    
-16    -176   
-32    -16    
160    -272   
144    -16    
-144   -16    
-32    -16    
-112   -208   
128    112    
-96    16     
-368   96     
-912   176    
608    -16    
-592   112    
-352   -352   
208    448    
-304   -480   
96     1008   
-240   -688   
208    320    
-240   -528   
144    224    
-64    -64    
208    16     
-224   80     
176    -160   
-160   272    
80     16     
-80    112    
-112   -208   
-32    160    
-752   -240   
-80    416    
-720   -384   
-656   64     
48     -144   
-112   208    
-32    -64    
-128   16     
-16    -96    
64     96     
-32    48     
48     192    
32     -16    
-512   -144   
-32    64     
-48    64     
16     192    
-64    -48    
-224   16     
192    64     
-160   16     
-16    -64    
-672   -16    
16     64     
-1136  0      
64     0      
-112   96     
-16    -208   
-80    -144   
-192   176    
112    -80    
-16    -48    
64     272    
-112   -48    
-48    -64    
-32    -80    
16     128    
-64    48     
64     112    
-112   0      
-80    48     
80     -112   
32     288    
-272   -96    
176    0      
16     -32    
32     0      
-208   48     
-32    80     
64     -48    
-16    -128   
32     128    
-112   64     
-64    -32    
-240   128    
-208   48     
-1232  -272   
192    144    
-240   16     
80     128    
-80    -304   
48     32     
48     320    
-208   -112   
224    208    
-160   96     
64     128    
16     -176   
48     144    
-256   -80    
80     128    
-512   32     
16     32     
16     -48    
-128   80     
112    64     
-64    -192   
48     -96    
48     16     
-48    32     
80     208    
-128   -48    
-80    -240   
-48    -48    
240    224    
-176   -80    
-176   -144   
80     80     
-512   16     
48     80     
-64    144    
96     112    
16     64     
-96    0      
-16    48     
-128   -48    
16     16     
-32    -16    
224    528    
-368   160    
112    144    
-384   -64    
64     -48    
-352   -176   
112    208    
-32    288    
32     32     
-32    -80    
-304   -192   
224    224    
0      64     
-80    0      
96     -32    
-160   32     
-80    -144   
-272   -112   
-64    -32    
160    256    
-336   -160   
32     80     
-16    192    
-32    112    
-112   16     
0      64     
96     -208   
-176   -320   
320    272    
-48    112    
-64    80     
-48    0      
32     160    
-80    64     
-48    208    
32     32     
-288   80     
-16    -48    
-256   -432   
256    336    
192    416    
48     160    
-144   -16    
-80    144    
-304   -16    
-112   0      
16     48     
-176   224    
-336   -48    
-96    0      
256    112    
112    80     
96     96     
-144   144    
16     -16    
-48    0      
192    176    
48     32     
-160   208    
-240   -64    
112    48     
-64    -48    
224    96     
-224   48     
-48    48     
32     0      
192    176    
-16    112    
0      0      
-48    96     
144    96     
32     96     
32     -16    
112    160    
-240   64     
112    -80    
-224   96     
208    144    
-592   576    
-1520  -1696  
512    192    
-96    992    
464    112    
496    272    
-240   -160   
64     80     
-448   -176   
1472   0      
-720   128    
528    -144   
-192   320    
64     176    
128    16     
-96    -32    
-80    64     
336    208    
-112   64     
-224   144    
-128   64     
96     192    
-176   288    
80     -96    
-288   -192   
-16    16     
32     -16    
-48    544    
-416   -208   
160    96     
-128   0      
128    32     
128    112    
-64    -16    
288    -128   
64     288    
160    48     
128    0      
-32    64     
-96    32     
-176   96     
32     128    
96     16     
96     64     
-64    -464   
-16    112    
-240   -624   
208    48     
0      32     
80     64     
16     240    
-96    48     
-16    -96    
16     64     
112    224    
80     -64    
48     -240   
0      96     
160    384    
-144   -640   
176    16     
32     -336   
64     -224   
-16    560    
208    112    
-208   16     
16     64     
-16    112    
112    -48    
-16    -96    
112    32     
-16    16     
32     0      
0      80     
80     -176   
112    128    
176    400    
-80    512    
64     -32    
448    880    
-496   -288   
80     32     
272    64     
-32    32     
-160   -272   
320    240    
-224   -48    
-80    0      
-128   -112   
16     -144   
160    96     
-64    -160   
0      -32    
64     -288   
112    160    
-64    -128   
-64    48     
-112   -464   
-32    -336   
64     -64    
32     192    
80     208    
0      0      
80     208    
-32    -16    
16     32     
144    176    
80     208    
-64    -416   
-128   -224   
-96    -528   
224    208    
-32    144    
32     144    
-32    0      
192    208    
-176   48     
112    -576   
-96    256    
144    -256   
256    16     
-112   -320   
48     208    
0      -320   
224    96     
-288   -288   
176    32     
80     96     
48     144    
-80    -80    
144    160    
192    320    
-96    -288   
176    192    
-208   -352   
192    176    
-80    48     
224    144    
64     -384   
-16    80     
48     80     
48     -16    
-96    -32    
64     112    
96     48     
0      96     
16     -32    
32     -80    
128    160    
-64    -96    
128    80     
32     -256   
0      144    
112    -352   
32     0      
144    -320   
16     272    
64     -272   
96     -464   
16     128    
-1328  96     
-80    -400   
160    0      
80     -1216  
224    -64    
-256   -128   
160    -160   
48     80     
32     48     
80     112    
0      48     
128    -80    
-208   96     
80     -192   
144    -96    
-32    128    
32     -288   
16     32     
-48    -1376  
192    -144   
32     -224   
-64    -32    
64     192    
64     -112   
112    128    
-80    -16    
16     -224   
-96    16     
128    -32    
80     -128   
-224   16     
-32    -208   
112    -144   
0      -400   
80     32     
96     -128   
0      -32    
-16    -3504  
1184   -272   
384    512    
96     384    
-480   -192   
-48    -192   
-48    -128   
-32    -16    
-768   -64    
96     -128   
-1920  -192   
640    16     
-224   -128   
-64    -112   
128    -48    
208    -928   
16     -176   
-80    16     
160    80     
96     -32    
16     -48    
-144   32     
144    -176   
-80    80     
176    -176   
-48    112    
-32    -272   
0      112    
128    -112   
-32    -16    
-32    -288   
-48    32     
128    -1360  
-16    192    
96     48     
16     64     
-48    -48    
112    240    
0      -144   
16     -192   
-624   -144   
144    -96    
-1712  -48    
64     -80    
-192   -64    
144    -240   
-48    192    
192    -464   
-48    16     
-112   -96    
96     -16    
96     32     
0      112    
-16    64     
-96    -16    
-112   -112   
80     80     
-64    -144   
192    32     
-112   96     
96     -400   
80     64     
64     -640   
-16    160    
32     0      
192    16     
-192   16     
64     -112   
-400   112    
-16    -192   
64     0      
-96    -48    
144    80     
0      -16    
-160   0      
32     -192   
48     -144   
192    -736   
16     240    
-208   64     
144    -368   
-592   -48    
0      -96    
-240   -64    
240    -64    
16     -48    
272    336    
-560   80     
128    -512   
-384   48     
-64    -320   
48     16     
32     -288   
96     64     
-64    -16    
-48    -144   
-192   48     
96     32     
-64    -32    
64     -192   
-160   192    
80     -96    
-816   -112   
112    -64    
48     -32    
-16    144    
64     176    
-1152  0      
-688   32     
-80    48     
-1120  -144   
48     112    
128    32     
-32    32     
96     -112   
-96    -16    
32     -176   
-16    -32    
0      -176   
-240   -272   
-272   -112   
0      96     
0      128    
-128   48     
-16    336    
-48    160    
64     -64    
-256   -160   
-48    -208   
208    352    
-32    112    
-96    -112   
-48    -112   
-64    -112   
16     256    
64     432    
-368   -96    
160    64     
-32    224    
-32    -144   
-32    96     
-112   -16    
96     64     
-128   0      
80     176    
-64    48     
80     128    
-144   -64    
-64    -176   
64     112    
16     -32    
48     64     
-64    80     
-64    80     
48     160    
-240   -128   
96     112    
-80    144    
-80    -32    
144    0      
64     96     
-720   -48    
-144   -16    
160    -32    
80     32     
64     -112   
-160   -112   
96     16     
-352   64     
96     -64    
-208   80     
-80    -32    
48     32     
-32    128    
-176   -80    
48     -16    
-512   128    
-80    224    
-128   -128   
176    16     
80     128    
-64    16     
-160   16     
-16    -48    
144    224    
-16    -144   
112    160    
-32    16     
416    -112   
-304   208    
-16    -48    
-16    64     
128    48     
-400   224    
-112   32     
80     64     
32     -144   
128    48     
528    1312   
48     832    
-416   -864   
-784   304    
-48    -672   
528    272    
0      -368   
272    976    
-704   176    
32     0      
-752   -496   
-256   432    
176    -224   
-80    336    
0      -224   
80     320    
-256   -560   
160    416    
-256   -112   
96     144    
-176   48     
176    240    
-208   -176   
-176   -160   
-32    176    
-576   -16    
-192   128    
-48    -192   
336    352    
-256   -272   
208    224    
-80    -16    
-32    -176   
144    272    
32     80     
80     144    
-192   -576   
208    688    
0      512    
128    48     
-112   48     
96     112    
-112   128    
-64    112    
-16    96     
0      -96    
96     112    
144    128    
32     112    
32     240    
-64    48     
-48    -16    
-96    160    
32     16     
112    144    
0      32     
16     80     
0      -48    
-176   -96    
-48    32     
96     96     
-32    240    
-112   96     
16     48     
-64    -80    
64     128    
16     160    
-96    48     
-96    -48    
-32    80     
-16    96     
48     48     
-32    -48    
-80    32     
0      16     
160    224    
-112   96     
48     96     
208    560    
-208   288    
208    144    
64     0      
128    592    
64     128    
-240   240    
16     144    
16     -96    
320    448    
64     176    
-64    160    
-80    -48    
176    80     
-96    112    
48     64     
16     176    
48     0      
-16    -80    
-368   -144   
112    -224   
96     336    
-16    96     
112    224    
-32    -16    
-16    64     
80     192    
16     48     
80     32     
-128   -80    
128    176    
-32    -16    
64     272    
-96    -32    
48     320    
80     144    
48     176    
-32    64     
80     0      
176    272    
-128   -16    
32     80     
-16    48     
224    -64    
-128   224    
-16    384    
-32    -160   
160    160    
-176   144    
160    32     
48     96     
0      -96    
-48    64     
32     0      
80     96     
-160   208    
160    304    
208    -16    
-64    64     
-224   144    
160    80     
208    64     
-144   144    
16     64     
176    -304   
-16    80     
-16    -1040  
-64    -176   
96     -96    
-112   64     
96     96     
128    256    
-112   32     
32     128    
32     -176   
64     112    
-128   0      
224    96     
80     208    
-128   -224   
112    32     
-16    -656   
48     -32    
-48    -96    
16     -48    
224    256    
-208   64     
96     -240   
32     144    
64     464    
-96    -96    
-48    -80    
224    64     
48     112    
-48    -128   
-80    128    
32     -64    
256    112    
-256   -224   
-16    -80    
48     -144   
128    96     
-32    0      
-16    224    
-64    -48    
64     144    
32     -192   
160    -128   
48     144    
16     -48    
-16    192    
64     -240   
-48    16     
144    -512   
-64    -80    
176    -1424  
-64    208    
112    -64    
0      304    
1296   -368   
48     576    
-80    624    
-448   144    
448    -672   
112    -560   
160    -96    
-144   96     
304    112    
-208   -224   
352    144    
-32    -832   
64     320    
-16    -176   
176    288    
-64    -48    
-160   256    
208    288    
-48    -272   
144    -160   
-96    -128   
128    128    
16     -16    
32     -48    
128    -80    
32     160    
32     -320   
-32    64     
64     16     
16     112    
0      32     
64     112    
-32    144    
64     -256   
-64    32     
-16    -144   
128    256    
16     -128   
240    96     
-240   -192   
192    128    
-48    -144   
96     144    
0      16     
32     -112   
-112   48     
32     -176   
80     -64    
160    -368   
0      176    
-80    -48    
208    96     
-96    -144   
80     -32    
0      -144   
16     -16    
80     0      
-16    -384   
64     128    
0      -944   
96     144    
-672   16     
-16    -448   
64     192    
80     -80    
48     -64    
0      -2576  
-64    -192   
128    112    
-16    -80    
96     -64    
-112   208    
0      -32    
112    -80    
-48    -480   
224    -288   
-208   32     
-16    -240   
192    -96    
-32    -512   
176    -128   
192    -1040  
0      -256   
-96    192    
176    128    
-208   -432   
176    -208   
288    224    
-400   -48    
144    -32    
16     0      
-288   -64    
176    64     
96     -96    
64     -64    
16     -240   
128    -96    
112    80     
-32    -192   
48     -176   
96     -240   
96     160    
80     -96    
48     96     
-64    144    
224    256    
-256   -16    
112    -384   
-352   -80    
112    96     
96     -16    
-64    -128   
64     -160   
96     -160   
16     -48    
48     -192   
16     0      
16     -48    
-96    -160   
-16    -208   
192    -48    
48     128    
-80    -336   
-448   -80    
48     128    
-1040  -80    
-16    -304   
-80    32     
48     -576   
-32    32     
-32    -576   
80     -48    
208    32     
-48    0      
-32    144    
-96    -96    
32     16     
48     16     
-176   -32    
32     16     
-336   -64    
-32    -96    
80     0      
32     0      
80     48     
144    -912   
-48    32     
-16    32     
-112   -144   
-112   -48    
176    80     
-64    128    
-32    -96    
-672   -224   
272    -304   
-64    176    
-96    -96    
64     -48    
144    -144   
64     64     
32     -272   
-176   32     
-160   176    
-32    -96    
128    -64    
112    -144   
-224   80     
-144   -160   
-208   -32    
64     -48    
32     -32    
32     -112   
96     80     
64     -176   
64     112    
-128   96     
80     -16    
-64    112    
80     -48    
-128   32     
-16    32     
-16    64     
-16    -32    
96     80     
32     -112   
-48    64     
96     -256   
-64    32     
96     -32    
0      144    
-736   -160   
-416   48     
-192   48     
-384   -160   
-32    304    
288    -64    
-160   64     
-768   -992   
528    -1216  
0      -256   
-192   368    
-128   -240   
384    624    
-176   -432   
-160   880    
-192   -432   
-368   96     
-16    -160   
-848   320    
-240   -112   
-16    224    
96     192    
80     48     
-240   64     
-160   -544   
-192   0      
-80    -320   
-240   16     
128    160    
48     -16    
-64    32     
-112   0      
288    224    
-240   128    
112    -64    
-192   320    
-32    -176   
-1072  -48    
-160   32     
176    32     
-32    64     
16     16     
-48    176    
80     -208   
-48    -16    
0      112    
160    48     
-80    160    
-96    16     
-48    -80    
-112   -48    
-64    0      
-432   96     
-80    -128   
112    -48    
-32    64     
-16    48     
32     32     
-32    -160   
32     208    
-160   112    
112    64     
-80    -32    
-48    48     
-32    -16    
-112   -32    
-32    160    
-64    144    
-64    0      
-848   -320   
96     32     
-96    128    
-112   128    
48     -176   
16     144    
-80    96     
-16    32     
16     -64    
112    32     
-64    64     
32     -16    
-128   96     
-80    112    
-144   80     
-256   -224   
48     144    
80     -144   
48     224    
-64    80     
-16    224    
-32    -96    
96     -208   
16     64     
-48    160    
-96    80     
-64    128    
-128   16     
-112   -32    
-16    64     
-16    -16    
0      176    
-112   704    
-256   -32    
176    -304   
-160   -160   
160    -32    
-64    0      
96     144    
-32    96     
0      144    
-192   -32    
128    384    
-272   -96    
160    128    
-176   16     
16     112    
-384   -112   
-176   96     
-48    48     
64     96     
-64    -48    
192    160    
32     128    
-144   -64    
16     -16    
-176   0      
192    272    
-32    -32    
-64    272    
-288   -64    
352    64     
-288   128    
16     112    
160    256    
-144   48     
-96    -32    
32     16     
32     48     
160    -16    
-272   64     
128    -80    
128    256    
-80    -128   
144    96     
-432   112    
0      192    
304    -32    
-112   -16    
-176   64     
160    -80    
-32    -64    
64     80     
80     576    
0      176    
16     32     
-240   -16    
128    16     
-144   -64    
32     48     
-48    80     
176    48     
-48    128    
80     -80    
-80    128    
32     -80    
-96    160    
16     64     
128    -80    
-16    64     
80     96     
-16    208    
-176   -48    
48     -144   
-64    -208   
96     -96    
64     160    
-16    288    
-160   80     
-112   96     
128    -192   
112    144    
-80    144    
-64    64     
-48    16     
112    32     
-48    112    
16     112    
-64    16     
112    -16    
128    208    
-176   16     
80     96     
128    208    
0      224    
-176   80     
80     16     
32     -96    
16     64     
64     -96    
64     -80    
48     192    
0      352    
-160   48     
-48    -48    
-544   592    
704    -304   
1088   32     
240    -784   
-432   -384   
240    -384   
384    416    
-128   -752   
304    640    
-320   -528   
320    736    
-320   -352   
240    272    
-352   -48    
368    -336   
-80    16     
-96    -176   
-48    32     
32     48     
96     160    
-32    -176   
176    288    
-96    80     
64     96     
-144   -128   
128    144    
0      -80    
176    112    
-96    -48    
80     -288   
-32    -16    
64     -1680  
112    192    
-16    16     
-48    32     
-48    -32    
128    176    
0      112    
80     96     
-112   96     
160    192    
-144   16     
144    272    
-240   -16    
176    -96    
-112   0      
192    -704   
16     480    
-16    48     
64     -48    
16     144    
96     48     
-48    64     
0      128    
-144   16     
32     32     
32     -80    
160    128    
16     -112   
128    144    
144    176    
96     64     
-32    176    
32     -832   
32     64     
192    112    
32     160    
-80    144    
112    304    
-112   96     
192    16     
0      16     
-32    -192   
48     144    
48     -224   
256    320    
-288   -112   
272    -96    
64     -336   
96     352    
-160   -1232  
32     96     
-96    -208   
224    -80    
48     80     
64     112    
0      320    
-112   -320   
176    112    
32     -192   
96     64     
0      -272   
0      48     
32     -880   
112    80     
16     -512   
32     128    
48     208    
48     32     
0      -32    
64     96     
96     80     
64     -64    
96     288    
-32    96     
48     64     
64     -176   
96     80     
16     0      
0      64     
112    16     
64     128    
32     96     
-96    64     
144    112    
-48    -16    
224    208    
-80    96     
112    96     
-32    -192   
96     16     
-32    -128   
96     80     
0      64     
48     96     
240    -16    
-208   48     
208    -176   
-128   128    
224    64     
-32    96     
16     112    
64     80     
-32    -160   
128    -144   
32     240    
64     -240   
32     208    
-80    -112   
144    48     
-64    -320   
176    -16    
96     112    
-64    -368   
128    80     
-688   320    
-240   -1408  
496    96     
-160   -384   
176    -48    
-224   32     
224    176    
-32    -80    
192    -208   
-32    -704   
208    32     
-144   192    
0      320    
-16    -448   
144    -688   
-432   -144   
160    -160   
-112   -112   
32     -240   
208    80     
-144   -448   
64     -64    
-176   256    
96     -224   
0      -224   
0      144    
176    48     
-448   -144   
160    -160   
-208   -96    
-352   128    
-176   64     
-48    -32    
16     -224   
64     -144   
96     -112   
-16    80     
-80    -64    
-32    -64    
192    -64    
64     224    
48     -160   
-144   304    
-112   16     
0      -208   
-32    48     
128    -16    
-752   -144   
192    32     
-16    144    
160    -160   
-128   32     
1456   -752   
-1040  -1504  
80     560    
-272   368    
832    -416   
-528   -384   
48     16     
-304   80     
-496   -176   
112    -240   
-80    -80    
-208   -80    
-544   112    
32     64     
224    -128   
-32    -32    
0      -208   
0      -560   
16     96     
128    144    
32     -128   
-144   64     
256    -96    
-256   -144   
-96    64     
-32    80     
96     416    
-512   -80    
112    -16    
-224   -112   
304    -272   
-80    64     
128    -240   
128    64     
48     -16    
304    80     
-320   208    
128    -192   
-224   -32    
128    -16    
-144   48     
112    -112   
-416   -64    
176    16     
-80    -16    
0      -96    
80     48     
160    -304   
-176   80     
-48    -128   
160    -80    
-272   16     
160    -16    
-304   80     
112    -192   
-208   -48    
192    -240   
-320   16     
160    0      
-160   16     
192    -144   
-16    144    
0      -944   
64     240    
-224   -32    
176    0      
96     -32    
240    160    
-192   32     
32     176    
-144   -80    
144    -64    
-32    96     
-48    -16    
48     96     
96     -128   
64     96     
-48    -384   
-336   -32    
-32    -48    
128    176    
-336   32     
288    -288   
-16    -32    
-112   112    
-64    -16    
0      64     
-48    -16    
-16    -240   
96     96     
-448   -208   
240    -96    
-208   112    
-224   128    
-128   64     
-112   -80    
48     -80    
-608   -16    
-32    48     
96     160    
-96    -64    
80     0      
-176   -80    
-320   -48    
32     96     
-112   96     
-160   48     
16     80     
-16    144    
-64    16     
224    80     
-224   0      
192    80     
-112   112    
-384   176    
48     160    
-192   48     
-160   64     
112    16     
-48    -80    
-224   -64    
0      -32    
208    -16    
-272   -16    
176    224    
32     368    
48     224    
-80    48     
0      0      
-576   0      
-64    32     
208    192    
-32    160    
80     -128   
0      160    
-224   -208   
112    96     
-288   160    
176    -16    
-64    112    
-192   -128   
-16    144    
-272   -224   
208    -96    
-688   -32    
128    -32    
-1456  -16    
128    64     
-48    -144   
48     80     
-96    -176   
0      96     
144    160    
-208   -32    
112    -80    
-208   64     
-96    128    
48     240    
-176   32     
128    -32    
-112   -16    
-224   -48    
64     176    
-128   -96    
80     96     
272    928    
-240   368    
-48    336    
-288   -464   
112    -48    
-96    -128   
32     -208   
-160   272    
-80    112    
-128   0      
96     -16    
-304   -128   
80     80     
-640   -16    
-16    192    
128    128    
-304   -112   
-32    48     
64     32     
-144   48     
-128   -80    
-80    16     
96     80     
0      96     
-144   -48    
32     80     
0      -144   
160    256    
-1120  112    
-144   128    
-64    -64    
-80    16     
1216   -1504  
-112   -48    
928    -128   
-384   -656   
80     240    
400    640    
-608   -528   
-304   -592   
128    432    
-224   16     
272    128    
-144   416    
-288   144    
192    -80    
-128   112    
112    -16    
208    176    
-224   192    
0      -144   
-112   -208   
224    -112   
-16    48     
96     -160   
48     208    
-80    -16    
144    432    
112    96     
-144   128    
-16    -192   
240    256    
-112   48     
128    -80    
-48    80     
-48    0      
-16    80     
16     160    
176    160    
-272   48     
144    112    
-272   -128   
80     -32    
-64    80     
144    0      
-16    176    
48     48     
-48    0      
144    320    
-80    384    
0      32     
-16    -16    
64     -48    
0      48     
-64    128    
16     128    
-48    0      
-16    48     
80     208    
160    -96    
0      80     
48     288    
16     0      
-144   80     
144    240    
-64    160    
48     48     
-128   128    
64     48     
-144   0      
0      96     
-64    32     
16     48     
-16    80     
16     48     
32     16     
16     128    
-80    -32    
-16    -64    
-160   -112   
-48    -112   
-48    -112   
-48    64     
208    368    
-144   16     
288    192    
-96    96     
80     112    
-144   -96    
48     -448   
192    -208   
176    272    
32     272    
-128   80     
0      -16    
48     64     
144    96     
-64    16     
112    144    
-144   160    
144    -592   
-16    96     
64     -224   
64     192    
48     80     
16     48     
-64    64     
128    240    
-128   -64    
192    272    
-192   -32    
288    176    
-208   160    
128    32     
-192   -48    
128    -160   
64     112    
16     -528   
0      -32    
64     -48    
0      144    
48     160    
-96    -16    
-160   -32    
192    144    
64     32     
-48    -32    
-80    -192   
64     112    
-16    16     
96     128    
0      -80    
96     -720   
-16    144    
96     32     
0      64     
80     112    
-32    208    
-80    -192   
16     -192   
128    -144   
144    256    
-144   112    
-96    -32    
112    144    
112    128    
-16    0      
-144   -320   
0      -48    
352    -32    
-64    -128   
192    224    
-80    0      
-96    -176   
192    112    
-112   112    
64     16     
-48    512    
-64    128    
432    144    
-416   -176   
192    -32    
-224   -208   
-96    -144   
128    48     
144    16     
-96    -192   
112    -80    
16     -32    
160    272    
-112   192    
32     288    
48     -16    
0      16     
368    -64    
-144   -80    
-16    -64    
112    -96    
176    32     
32     -224   
0      192    
-16    -1888  
-112   96     
16     48     
160    240    
-16    64     
32     32     
128    80     
16     16     
48     -64    
112    -368   
48     112    
32     -384   
128    -160   
224    -64    
0      192    
16     80     
-16    176    
96     64     
-624   0      
-1360  -704   
1280   1104   
448    672    
-192   -320   
304    -48    
-528   -448   
704    528    
-32    -64    
96     144    
-96    -304   
0      80     
64     112    
128    -64    
-112   -64    
64     96     
48     -48    
-16    -16    
64     144    
96     -160   
-112   96     
64     -304   
112    304    
80     -192   
32     64     
-48    -144   
16     176    
64     64     
16     -1376  
32     112    
0      -960   
128    64     
-544   96     
64     -800   
32     -64    
32     -2368  
64     -224   
80     144    
48     112    
240    96     
-176   -80    
96     -256   
64     80     
32     -192   
-32    -96    
32     -160   
64     176    
-352   -256   
96     -144   
-128   -128   
224    -112   
-48    0      
0      -912   
240    -144   
-176   224    
208    -128   
-128   -192   
0      -16    
144    -128   
96     96     
-64    -128   
144    32     
-864   -128   
96     -80    
80     0      
-64    -48    
176    32     
-48    -48    
32     -96    
96     -2896  
-32    -96    
112    -48    
0      48     
96     -96    
32     16     
128    -304   
-16    0      
-384   128    
80     -160   
-144   -64    
208    48     
-128   -16    
64     -624   
160    48     
-128   -416   
80     256    
-32    -192   
320    128    
-128   -32    
160    192    
-240   -160   
160    32     
-32    -16    
144    48     
-624   -16    
16     -160   
144    176    
-80    -176   
160    -96    
80     -432   
-80    -16    
112    -3424  
-128   32     
256    -32    
-176   -64    
32     48     
-32    64     
144    144    
-128   -128   
-432   -128   
-96    32     
-384   -64    
48     16     
0      16     
16     -368   
48     -16    
32     -992   
32     96     
80     -48    
160    -80    
-144   128    
176    -112   
16     0      
-48    -176   
-128   -32    
256    304    
32     64     
80     -320   
-272   128    
-16    -256   
208    64     
-64    -288   
32     -96    
-256   -32    
-80    -448   
176    48     
176    96     
-64    112    
80     -32    
-320   0      
32     -16    
-336   32     
80     -288   
144    -96    
-64    -304   
64     96     
144    144    
-48    400    
-96    64     
-112   -272   
-160   16     
160    0      
-112   80     
64     0      
-112   -16    
144    144    
-144   -112   
80     -64    
-48    -208   
96     80     
96     -80    
192    -512   
-80    224    
-48    64     
80     -80    
-48    48     
-16    160    
-128   -272   
128    288    
32     16     
-48    -96    
-80    128    
48     -96    
0      240    
-384   -256   
0      96     
-736   -400   
-672   -64    
32     96     
-208   0      
64     400    
-2048  -272   
-304   -16    
192    -128   
-112   144    
-144   -112   
48     -176   
-256   -240   
96     48     
-672   -288   
48     64     
0      96     
-16    176    
-128   160    
-208   -144   
-32    80     
-464   48     
-304   720    
-32    3088   
-448   1040   
-224   -640   
-160   160    
-16    -80    
-160   -208   
-304   -320   
368    480    
-32    -96    
-304   -144   
0      32     
64     -64    
-48    -160   
-352   160    
80     224    
-96    16     
-32    416    
-576   -320   
80     16     
-80    -176   
192    160    
-48    -96    
-80    208    
-256   -32    
-48    -160   
-208   240    
-176   -256   
16     -480   
64     80     
160    80     
-160   80     
-192   80     
-496   16     
16     432    
-48    -160   
48     16     
-160   -304   
192    448    
-64    256    
-112   -128   
48     32     
32     48     
16     -176   
32     128    
0      80     
-144   16     
48     16     
-224   -112   
64     64     
-32    32     
48     16     
32     64     
16     -256   
-80    112    
80     144    
0      192    
-400   -592   
480    688    
-352   -272   
80     160    
-224   0      
176    32     
-368   128    
-48    96     
-352   -64    
0      32     
32     32     
-192   16     
-16    48     
-48    48     
-16    32     
-96    16     
16     32     
0      48     
-48    192    
0      336    
-208   272    
-432   -96    
192    48     
-1232  -240   
-144   96     
-80    -224   
112    64     
-80    96     
-64    128    
-128   0      
160    192    
-96    272    
-48    112    
-128   -64    
-32    -48    
192    112    
-176   -16    
16     64     
-112   32     
96     112    
-112   32     
64     64     
0      96     
0      64     
-16    128    
-48    112    
80     64     
-112   -96    
64     -16    
-192   -96    
96     48     
-32    32     
16     80     
16     96     
-48    -16    
32     128    
48     96     
-16    112    
48     80     
32     288    
-208   -112   
96     64     
-96    32     
272    128    
-240   16     
96     144    
-144   48     
48     -16    
32     80     
-80    -48    
176    48     
-112   -160   
96     192    
-80    64     
48     -128   
64     208    
80     -32    
-32    288    
160    480    
-144   160    
-16    -96    
0      16     
-112   -176   
256    272    
-112   112    
96     48     
-64    -32    
160    -16    
64     208    
80     400    
144    352    
-32    -48    
32     -16    
96     112    
-96    0      
-32    64     
32     96     
16     288    
0      256    
32     144    
-96    32     
32     -528   
-192   -96    
192    192    
-48    0      
144    128    
-48    128    
-96    -96    
96     384    
-224   -144   
0      -160   
-48    352    
64     32     
-48    32     
64     80     
96     32     
-160   -16    
176    96     
160    240    
160    112    
208    352    
-48    96     
-160   48     
0      -16    
144    144    
32     288    
-64    48     
-48    128    
144    0      
16     0      
48     48     
32     96     
16     96     
16     -64    
0      96     
64     128    
0      -32    
-80    240    
16     16     
-16    80     
-16    -272   
-288   -576   
96     -2256  
96     640    
64     0      
-768   320    
944    400    
-576   304    
528    -480   
-480   368    
208    -368   
112    464    
-208   -32    
-16    288    
-48    -64    
368    -400   
-48    224    
32     -784   
48     192    
80     80     
-96    80     
160    -16    
-80    176    
224    112    
-144   128    
112    -288   
-160   160    
64     80     
112    144    
128    112    
-160   -160   
176    -64    
0      64     
112    224    
112    -48    
-16    32     
128    208    
32     416    
80     -304   
-32    0      
-32    -128   
160    176    
-64    -16    
48     144    
128    -32    
16     -16    
144    160    
-32    -352   
96     128    
-288   -1552  
240    -16    
-16    240    
80     176    
-32    16     
-48    0      
-32    -128   
128    224    
-80    80     
192    -64    
-16    128    
0      -144   
96     64     
48     -224   
-32    48     
64     -976   
144    16     
48     -1520  
-144   192    
-16    128    
64     64     
192    96     
32     192    
-16    176    
32     -176   
192    128    
-160   -96    
208    128    
-176   -160   
-112   16     
-48    -96    
64     -80    
160    -448   
-48    192    
-112   -224   
224    368    
-240   80     
144    -64    
272    368    
-112   -1056  
272    160    
-192   -240   
160    208    
80     -64    
-64    144    
112    -672   
48     0      
112    -1344  
-16    256    
-48    48     
160    128    
-160   -32    
160    112    
96     176    
-64    -336   
64     32     
16     -48    
208    96     
224    48     
-192   272    
192    -256   
-96    96     
96     -688   
112    96     
-32    64     
-32    -2800  
160    64     
-64    -64    
32     -1088  
-16    -224   
-80    -208   
352    192    
-80    32     
80     0      
-272   224    
352    -80    
80     240    
-256   -224   
16     -1200  
-80    48     
192    -480   
-80    48     
-608   0      
96     112    
64     -112   
16     -112   
0      -144   
-128   -2112  
128    16     
224    416    
-64    -240   
112    64     
0      -144   
32     -144   
-16    48     
-64    -224   
112    80     
-320   -176   
-80    -368   
96     -448   
-32    -352   
96     -432   
32     336    
64     -32    
80     -480   
64     160    
-128   -304   
96     48     
-112   -64    
144    160    
-16    -176   
-16    -208   
-96    32     
0      -224   
-480   96     
-64    -128   
64     -800   
64     -256   
320    32     
144    -848   
-192   -272   
160    48     
-48    208    
80     144    
-80    64     
-112   -96    
80     -176   
-96    -160   
-48    -64    
-32    240    
-64    -176   
-16    -80    
48     -192   
112    -144   
96     -640   
256    192    
-128   -1520  
-112   -32    
256    -112   
128    64     
-192   32     
-64    48     
-64    -80    
64     160    
-304   32     
144    -96    
-1040  176    
240    -144   
16     80     
1632   -2048  
416    1200   
128    -160   
-720   -32    
768    -352   
-48    -48    
-80    -160   
144    720    
-240   576    
112    -96    
-384   -272   
64     -256   
224    16     
48     -96    
16     -96    
48     -304   
160    224    
96     -592   
-224   0      
96     -16    
224    0      
-112   -16    
144    -160   
-384   144    
32     -32    
-288   64     
80     48     
16     624    
-192   -176   
-512   -480   
160    -576   
32     64     
16     -544   
-32    144    
32     272    
-32    64     
64     448    
-192   80     
-320   -224   
-48    80     
-208   224    
80     -144   
-48    0      
48     -224   
160    208    
80     -112   
32     0      
-32    -688   
-208   -176   
-144   128    
-64    -176   
-112   64     
-32    -48    
64     96     
112    144    
-32    144    
0      -720   
144    736    
112    -112   
-64    448    
-80    -144   
-48    160    
-960   -16    
-48    -48    
-208   16     
-1008  -80    
0      -96    
64     144    
-64    0      
64     64     
-144   -48    
32     -112   
-128   -64    
-512   48     
16     96     
-416   16     
-208   -16    
-480   -304   
80     -288   
144    496    
0      48     
-128   16     
-48    -160   
-80    -96    
96     96     
-144   -16    
128    448    
-80    112    
-64    16     
-16    80     
-128   -288   
0      48     
16     -48    
64     256    
-64    144    
-48    16     
48     112    
-272   -192   
112    -32    
-704   0      
128    -64    
128    112    
32     256    
-80    -96    
-160   128    
128    -64    
-128   -96    
80     224    
-176   192    
-32    80     
-272   -144   
-128   -128   
-176   -48    
-16    32     
-48    32     
-112   16     
-1792  -736   
0      32     
32     128    
-176   336    
48     16     
-112   -112   
128    -96    
-32    -192   
32     -176   
-96    -112   
-32    -64    
0      -16    
-224   -96    
32     0      
-176   -48    
-304   -544   
-48    64     
96     144    
176    336    
-144   -1008  
80     64     
32     208    
0      96     
-96    -32    
16     48     
32     48     
144    -176   
-240   64     
-128   -192   
-80    -304   
-160   -400   
176    32     
-256   -144   
48     144    
48     64     
-96    -16    
48     240    
-192   48     
144    48     
-160   16     
160    16     
-96    96     
128    -48    
16     288    
-64    144    
-32    48     
80     208    
-1040  -176   
96     128    
-16    64     
-32    -32    
128    32     
-176   80     
16     32     
0      48     
96     -224   
80     64     
0      160    
-48    -16    
-16    288    
-32    -640   
144    304    
-64    80     
-224   112    
16     160    
32     32     
48     192    
-64    -160   
16     16     
128    80     
16     112    
-80    96     
16     80     
-112   -48    
64     128    
-256   -192   
64     160    
32     304    
-144   80     
-16    -80    
-80    -48    
-1008  -1648  
704    240    
-1168  -240   
736    64     
-272   -336   
272    128    
-400   464    
832    416    
-592   320    
384    -208   
-304   256    
128    0      
32     288    
-96    -176   
176    16     
-208   64     
336    -64    
-144   336    
112    -64    
-16    80     
-144   -144   
32     192    
-16    80     
80     272    
-32    -176   
-16    64     
32     -80    
64     128    
-16    32     
-80    224    
240    16     
-128   64     
96     32     
-160   64     
80     64     
-112   64     
96     112    
-32    80     
-192   80     
-32    -80    
128    -16    
-160   128    
48     160    
80     16     
0      80     
144    96     
-144   112    
16     0      
-80    272    
160    -144   
-64    96     
0      160    
0      -112   
16     144    
-144   -128   
96     0      
16     0      
48     80     
-48    192    
80     0      
-96    96     
80     64     
112    64     
0      128    
48     -32    
0      64     
64     160    
-16    160    
80     176    
176    0      
48     112    
-48    176    
-80    0      
144    80     
80     176    
-80    -32    
224    384    
48     800    
-176   -80    
128    -208   
112    64     
-128   32     
64     -64    
-16    32     
256    -64    
80     -976   
32     256    
-128   144    
240    288    
16     112    
80     64     
0      -128   
0      -48    
-80    -80    
-32    16     
-32    208    
-96    -16    
-16    -112   
112    -320   
32     48     
-64    -976   
32     256    
128    160    
64     208    
-176   80     
64     128    
48     -48    
144    160    
-112   -112   
16     112    
80     0      
-48    16     
48     144    
16     -384   
16     240    
80     -176   
80     112    
16     96     
64     32     
-16    -16    
-128   -512   
48     -128   
176    288    
80     48     
-32    32     
0      -144   
32     320    
-16    112    
16     -368   
128    16     
16     -160   
112    80     
48     -2336  
16     64     
0      240    
48     320    
96     320    
-80    176    
16     -256   
80     128    
32     -80    
16     0      
16     64     
112    -64    
80     128    
144    -208   
128    304    
32     -224   
32     64     
-64    -480   
112    16     
-16    176    
160    240    
-112   112    
64     64     
-32    -80    
-240   -432   
208    48     
-112   64     
176    144    
-64    80     
144    112    
-16    -32    
128    192    
-48    -160   
608    -96    
-144   -32    
-32    176    
-384   -64    
144    48     
144    128    
-80    -176   
96     0      
16     48     
-16    -32    
64     -144   
-48    48     
272    48     
-160   144    
144    -272   
32     48     
64     -32    
-32    144    
96     128    
-96    112    
112    -48    
64     0      
48     48     
16     -160   
-16    96     
144    -96    
-48    192    
32     -160   
240    304    
-288   -1120  
208    272    
-16    144    
160    304    
-432   880    
160    -288   
-944   -1616  
-112   144    
-176   48     
400    -160   
32     -192   
0      144    
112    80     
80     -192   
128    128    
128    -160   
-64    -496   
80     144    
160    -416   
-80    -64    
-1536  336    
16     -240   
32     416    
-304   -368   
192    -48    
48     -304   
-32    -208   
96     -48    
-16    16     
224    -400   
-80    192    
-336   224    
-144   -96    
-96    -688   
-144   -240   
-240   96     
48     -320   
192    32     
224    -400   
176    -128   
368    -336   
-64    64     
224    304    
-32    224    
0      -256   
-32    64     
-128   -192   
64     224    
-96    -144   
176    -48    
-144   192    
160    432    
-192   -240   
-96    -480   
192    32     
112    -304   
64     320    
-144   -784   
-80    -192   
160    -48    
-272   -1024  
336    -304   
144    272    
64     400    
-96    256    
0      16     
0      -608   
-1056  -16    
288    192    
-176   -16    
112    -208   
-48    -16    
80     -352   
-496   -112   
-64    -480   
192    176    
-16    -160   
96     128    
-192   -32    
208    256    
-496   144    
192    192    
-112   96     
0      -272   
-304   -288   
176    -48    
48     128    
-96    -272   
16     80     
-64    -672   
96     -272   
128    64     
48     -64    
-112   -16    
176    16     
-48    -80    
32     -80    
-16    192    
176    128    
-784   96     
-80    -464   
-656   -176   
192    224    
192    272    
-128   -512   
-176   -192   
112    -176   
64     -32    
-64    -48    
48     -176   
128    144    
-32    -112   
-96    64     
0      -80    
-144   -96    
16     -160   
32     -64    
80     48     
80     400    
-96    -1392  
304    448    
-304   -48    
144    96     
112    -240   
64     -16    
80     128    
-176   48     
0      -272   
112    -288   
-192   80     
160    176    
-48    128    
192    -240   
-16    64     
-48    -416   
48     176    
112    144    
-80    96     
48     64     
-16    0      
-112   -80    
160    192    
-224   80     
400    80     
-160   32     
112    -32    
-384   -64    
240    -256   
-176   192    
240    -192   
208    -160   
16     144    
-976   -32    
80     -96    
-48    -96    
32     48     
16     48     
-16    -160   
32     -64    
-160   -32    
-896   -512   
96     48     
-720   -80    
176    144    
-144   -224   
-144   48     
-32    32     
-400   -32    
128    48     
-160   144    
-48    64     
-48    -96    
-80    -64    
96     -80    
64     -16    
-256   192    
-48    288    
-272   -64    
144    64     
176    -32    
-96    -112   
80     0      
-288   160    
-48    96     
-288   32     
-16    224    
-896   -176   
-112   80     
176    -224   
128    0      
0      -32    
-16    -32    
16     -64    
-64    192    
-96    96     
32     -128   
144    256    
-320   -48    
208    -80    
-400   -32    
-144   -96    
-672   -864   
528    16     
400    352    
288    -352   
-256   320    
176    -352   
-144   400    
1040   -256   
-528   272    
256    -160   
-192   448    
64     -272   
-272   320    
320    -64    
-272   144    
-64    -176   
112    240    
-592   -160   
-16    96     
-160   -240   
64     96     
-32    160    
32     0      
16     160    
-160   -96    
-16    144    
-96    -144   
48     208    
-80    -16    
128    208    
-176   -112   
16     112    
-320   -144   
16     192    
48     -80    
144    176    
-112   16     
48     128    
-144   -16    
-16    -16    
0      32     
-96    48     
48     80     
-144   -128   
64     16     
-192   64     
96     208    
-432   -224   
-160   176    
-1008  -112   
224    176    
-176   64     
-64    -32    
0      112    
-64    32     
80     128    
-208   32     
64     -32    
-16    128    
-32    0      
-96    16     
64     224    
-176   -64    
160    224    
-464   16     
-48    64     
-80    80     
-48    32     
32     96     
0      144    
-32    0      
80     112    
-16    16     
-16    0      
-16    192    
0      96     
48     368    
-304   -96    
288    -96    
-288   32     
-64    176    
-16    64     
0      -160   
32     0      
272    224    
-144   80     
16     64     
-96    144    
-192   -256   
160    32     
112    160    
128    384    
-464   -144   
48     96     
16     48     
144    64     
32     64     
-192   -272   
32     16     
80     112    
16     80     
-16    112    
16     -16    
32     80     
112    64     
112    528    
96     192    
-128   160    
112    224    
176    256    
-48    -32    
32     64     
-48    48     
-32    48     
64     32     
16     112    
176    16     
-96    -16    
-112   -240   
32     208    
-80    -48    
96     192    
-96    64     
0      48     
-144   16     
-32    -352   
-32    -16    
144    144    
32     64     
-32    96     
32     96     
-32    96     
80     176    
-192   -48    
144    144    
32     368    
240    208    
-160   256    
16     80     
80     80     
-80    64     
48     -32    
144    256    
-144   -32    
192    112    
-128   0      
112    128    
-80    16     
32     80     
48     96     
32     48     
32     112    
32     160    
-160   96     
176    192    
-48    64     
96     -16    
0      320    
-112   16     
-32    0      
64     -64    
80     0      
-16    240    
-128   48     
32     112    
176    -128   
-32    96     
-16    208    
-48    -224   
-48    16     
96     80     
32     128    
-32    64     
-16    160    
336    96     
-144   16     
96     -48    
-48    160    
112    80     
-32    128    
-96    0      
32     -96    
80     128    
304    -432   
-176   -48    
176    -48    
160    208    
112    112    
-128   224    
0      48     
176    128    
-128   80     
-112   32     
-32    272    
0      -16    
-64    64     
224    -144   
624    1440   
-1168  -1152  
464    224    
560    752    
112    -736   
-192   352    
-416   -512   
720    768    
-208   -256   
-96    384    
-16    -336   
-240   576    
64     -128   
208    320    
-16    -592   
240    384    
-64    -256   
304    224    
48     -160   
64     80     
-96    384    
64     -224   
-224   -608   
0      -384   
32     -208   
-112   -176   
-32    80     
-160   48     
176    288    
-256   -352   
352    32     
16     -16    
0      80     
-64    16     
-16    112    
128    448    
32     160    
32     -32    
128    128    
16     -528   
128    336    
-80    -16    
160    -208   
-32    160    
160    128    
112    384    
-64    80     
144    368    
-176   -352   
-32    96     
16     -368   
96     80     
0      80     
64     0      
-64    -16    
272    192    
-80    16     
96     0      
-64    112    
160    -288   
-16    112    
0      -400   
-80    16     
160    -304   
-48    96     
32     -144   
48     160    
-64    80     
304    528    
-240   336    
160    32     
192    144    
-128   -272   
144    16     
32     -272   
32     112    
16     -128   
64     128    
-48    -192   
192    256    
-48    -448   
80     144    
0      -288   
80     0      
272    -112   
112    112    
144    224    
-160   -48    
-96    192    
176    -16    
-32    80     
128    144    
32     208    
16     -48    
16     -48    
192    -192   
-32    144    
32     -32    
-32    -128   
-240   -112   
-368   -176   
96     -1360  
-64    -208   
48     -2080  
64     -48    
64     -128   
32     -96    
-16    176    
128    -48    
128    160    
-48    48     
96     -80    
-48    -160   
96     -256   
64     -528   
-448   48     
-32    -144   
176    -160   
-128   -304   
336    -304   
-320   -1088  
240    -336   
-48    160    
-96    -208   
208    144    
16     -192   
160    -32    
-272   160    
224    -48    
-16    -208   
-96    -16    
-96    -176   
208    -96    
-240   -144   
320    224    
16     -752   
208    -64    
-160   -1232  
16     112    
160    -32    
-144   -80    
-80    -96    
-48    -96    
-64    -160   
112    -80    
16     128    
-80    -352   
-992   -64    
-96    80     
112    -112   
0      -240   
80     0      
-16    -256   
-160   96     
-16    -208   
16     16     
48     -16    
80     368    
-288   128    
256    -48    
-80    -32    
128    -64    
-128   -96    
-48    -112   
96     160    
-192   -64    
304    448    
-16    -432   
64     -16    
80     -1984  
32     80     
144    48     
-112   16     
16     112    
48     -240   
0      64     
32     -272   
-112   128    
64     -112   
-192   0      
176    -112   
-192   0      
-128   -384   
144    96     
160    -176   
48     0      
32     16     
128    -48    
-144   -48    
32     -96    
0      -80    
32     80     
-48    -16    
176    -176   
-64    -96    
64     -112   
-816   -16    
-400   576    
-912   -1152  
704    -1296  
-864   1264   
-368   -80    
-144   -112   
-112   -560   
-752   96     
304    -336   
-48    816    
-128   -656   
-128   304    
-336   -752   
352    656    
-128   -288   
208    240    
-80    -112   
64     -32    
128    224    
-128   160    
-48    -112   
-160   64     
48     192    
96     -160   
-128   -32    
16     -224   
-64    176    
80     16     
-96    32     
80     -64    
48     -144   
-48    64     
192    -272   
-96    -96    
0      48     
-64    -96    
32     -16    
32     -96    
-128   80     
112    -64    
-160   48     
-112   64     
80     32     
-128   -256   
96     0      
-528   -208   
96     48     
-144   -48    
-208   144    
144    32     
-352   -112   
-32    144    
-784   64     
-16    144    
-64    16     
16     0      
144    32     
-208   16     
-80    -144   
16     80     
-224   16     
32     -48    
-16    -32    
-240   16     
48     128    
-528   -48    
-80    80     
-80    32     
-16    0      
-336   -80    
16     -32    
80     -16    
-128   48     
-128   32     
64     96     
16     -160   
48     -272   
48     80     
-320   272    
-160   -64    
-224   -192   
-96    -96    
-96    0      
-32    256    
-272   -208   
-240   -160   
64     -192   
-64    64     
64     16     
144    480    
-224   -368   
-64    -16    
-112   80     
80     112    
-96    0      
32     112    
176    464    
0      352    
-176   -64    
-128   -96    
32     48     
208    16     
80     176    
-96    -96    
0      96     
-112   -112   
-160   -160   
256    160    
-32    352    
-16    -16    
-144   32     
-16    128    
-48    -16    
32     96     
-144   16     
80     80     
-336   -80    
96     208    
-48    -96    
80     96     
32     240    
-16    -64    
16     64     
-192   128    
-16    -144   
-64    -16    
-272   0      
96     -32    
32     0      
-144   144    
-16    -48    
-464   -112   
16     112    
-384   128    
16     -48    
32     192    
64     -224   
-112   224    
-96    128    
48     16     
-48    32     
160    48     
-80    96     
32     144    
-192   16     
-16    -64    
48     240    
-240   48     
-288   -288   
16     0      
176    208    
-160   0      
-48    96     
272    576    
-160   208    
-64    -16    
176    16     
32     -176   
160    96     
-416   0      
176    -64    
-144   -48    
160    48     
-256   128    
-368   0      
112    -16    
-336   336    
160    -192   
0      256    
-32    96     
48     -80    
-160   208    
-64    -144   
32     48     
-144   48     
320    112    
-272   -16    
112    -48    
64     160    
64     16     
-80    -32    
144    176    
-32    176    
-32    144    
192    -352   
176    320    
-272   0      
16     -160   
128    128    
176    144    
-112   48     
32     32     
-80    96     
0      -112   
208    272    
208    256    
0      32     
-112   80     
1968   -1216  
-128   304    
352    272    
-688   32     
80     224    
80     -896   
208    96     
304    144    
-32    320    
-272   -272   
32     128    
32     0      
176    -336   
32     112    
64     16     
0      272    
-288   -336   
112    48     
336    224    
-256   -16    
112    240    
128    48     
-144   -144   
48     64     
112    160    
112    256    
-96    32     
-48    -80    
80     32     
112    48     
-32    80     
0      128    
16     48     
144    160    
-128   32     
144    192    
-112   32     
16     160    
64     32     
112    80     
-96    224    
112    32     
-64    -80    
0      96     
176    192    
0      64     
32     80     
-160   -48    
272    112    
-192   272    
160    32     
-128   160    
96     0      
208    192    
-272   32     
208    288    
-176   -32    
224    16     
-32    112    
-16    0      
-32    112    
32     112    
-48    80     
48     144    
64     0      
32     32     
-208   -304   
48     -752   
48     144    
-16    -2224  
48     32     
96     256    
-144   48     
192    128    
-96    96     
96     80     
304    -32    
-64    80     
-128   160    
-128   0      
128    112    
0      64     
96     -80    
-128   192    
0      -192   
32     -16    
0      48     
96     304    
-48    -48    
192    192    
-48    80     
192    160    
-256   -64    
48     32     
-16    -32    
16     176    
-16    32     
128    32     
-80    0      
80     -800   
96     160    
32     -2320  
48     192    
-144   48     
144    80     
0      -224   
32     64     
112    80     
-144   176    
128    -32    
-16    112    
-16    112    
160    -144   
32     32     
-128   -16    
304    -16    
-128   -624   
0      -16    
128    48     
-64    96     
240    -112   
-208   112    
16     48     
208    144    
-64    -80    
48     -192   
-128   48     
96     -288   
-144   0      
96     -80    
176    144    
-16    -528   
144    16     
48     -1776  
-176   96     
112    -48    
128    288    
-16    80     
288    112    
-128   32     
-96    -80    
160    160    
112    -400   
16     64     
-16    -352   
304    16     
-144   0      
32     16     
112    -496   
-32    128    
64     -32    
32     112    
-48    -32    
80     112    
-112   64     
144    -112   
-64    128    
-16    32     
224    -16    
48     -208   
48     96     
-48    -336   
0      32     
80     -1376  
144    96     
48     -176   
-48    16     
-32    -80    
368    80     
96     416    
0      -32    
-48    368    
0      -512   
-16    96     
128    -144   
16     144    
-16    224    
-16    144    
-80    -80    
96     -32    
32     -96    
192    -112   
16     192    
-1056  0      
-32    -592   
160    64     
80     -352   
96     -272   
48     112    
48     -128   
64     160    
32     16     
-128   48     
64     -528   
240    -1376  
224    112    
-16    -16    
256    -1344  
-864   -800   
704    -32    
-144   -512   
-576   144    
352    -576   
-176   -528   
592    -16    
-240   208    
-112   -496   
-160   -320   
32     -144   
160    -224   
-80    0      
224    -176   
112    -240   
-224   16     
208    144    
128    112    
-16    -256   
96     -48    
32     -288   
192    -160   
48     -2336  
32     16     
-48    48     
-112   112    
32     48     
64     -16    
96     0      
32     -176   
-320   -48    
-112   48     
-240   -64    
-176   -32    
224    -112   
96     -464   
0      -64    
16     -320   
-112   32     
80     96     
16     96     
48     -192   
48     0      
-32    32     
128    -16    
-208   -32    
96     -48    
-864   -144   
-16    -208   
112    -208   
0      -64    
96     32     
96     -96    
-32    32     
96     48     
80     -32    
-16    -112   
48     96     
-208   -640   
288    272    
-32    144    
32     -192   
-64    128    
32     -176   
-576   144    
64     272    
-176   32     
160    -208   
32     -32    
80     -1488  
32     64     
0      0      
208    112    
-80    -16    
-16    -352   
32     288    
-128   272    
-256   -32    
-32    -224   
-176   -64    
48     -240   
-1104  -80    
64     -160   
-16    48     
80     -352   
80     128    
16     -16    
-48    -304   
-16    -64    
96     80     
-128   208    
-96    -16    
-96    -32    
160    16     
-80    -32    
0      -208   
-16    -16    
112    -144   
96     128    
16     -288   
48     64     
-416   -16    
64     -64    
-32    48     
80     -16    
48     -32    
32     -80    
-32    128    
0      -240   
-96    -96    
-16    0      
224    96     
32     -32    
-32    96     
112    -304   
-96    -192   
-16    160    
0      -32    
144    32     
-96    0      
-48    64     
144    0      
-160   -112   
64     0      
-176   -80    
160    -336   
48     96     
-1568  -112   
112    64     
-1296  -496   
96     48     
32     -32    
-240   128    
-16    -16    
-512   -480   
0      -176   
-32    304    
-96    -64    
64     -16    
-128   32     
-80    0      
-32    176    
-416   -112   
144    96     
0      -64    
-144   64     
48     80     
-400   -64    
-32    64     
-688   0      
-176   48     
-288   -96    
48     96     
80     288    
-176   -128   
-256   -400   
-16    -48    
352    0      
-80    208    
0      112    
-112   -32    
-32    -48    
48     16     
-64    112    
16     -464   
352    128    
-432   240    
-112   -32    
-544   -160   
224    -16    
-32    -32    
400    64     
-448   64     
64     -208   
96     368    
-80    48     
-48    96     
-48    -32    
336    16     
160    64     
-48    128    
-32    48     
224    272    
-832   -112   
-48    16     
-32    208    
96     -48    
-128   48     
-96    -48    
-80    0      
-80    64     
0      64     
176    64     
-96    224    
-48    32     
-144   80     
-224   1840   
-1696  -576   
720    1424   
320    864    
80     -176   
80     -96    
-400   128    
400    -272   
112    192    
-48    -192   
-32    256    
-288   0      
16     192    
-208   -144   
0      0      
-208   16     
0      -80    
-256   -48    
32     16     
-160   -368   
-80    16     
144    80     
-16    208    
192    -64    
-80    80     
-48    32     
-64    128    
16     208    
-32    48     
-48    -64    
-64    0      
176    112    
-208   -64    
-16    128    
-656   -80    
-48    16     
80     96     
0      64     
-48    48     
48     112    
80     64     
-176   96     
96     64     
-80    96     
160    16     
-240   -32    
80     96     
-176   -320   
288    192    
-576   112    
128    0      
-96    80     
-32    16     
80     80     
-80    0      
48     -64    
-96    224    
-112   -144   
192    128    
-384   144    
-80    -112   
176    128    
-160   32     
96     -16    
-176   48     
-32    64     
128    -32    
144    64     
96     192    
-64    160    
-64    32     
80     -16    
32     96     
-240   64     
32     48     
-32    -96    
112    0      
-144   -48    
112    128    
0      80     
-16    256    
-32    -16    
144    -112   
48     48     
-96    112    
-16    176    
-48    -32    
224    64     
-16    208    
-64    112    
16     0      
16     80     
-160   -48    
16     -144   
128    112    
-128   112    
192    208    
-128   16     
80     48     
-16    -16    
-96    80     
48     -16    
80     144    
-80    64     
-64    -16    
16     0      
-80    48     
0      32     
32     16     
-48    176    
32     0      
16     144    
48     -128   
16     224    
160    128    
-160   112    
96     192    
16     48     
32     -144   
48     192    
-112   176    
352    176    
-272   160    
112    112    
-16    -32    
-160   -112   
-32    32     
160    -224   
-48    0      
96     48     
32     192    
0      176    
16     112    
160    144    
-112   208    
-32    96     
160    240    
-64    176    
192    240    
-16    16     
16     80     
16     64     
0      320    
64     208    
112    64     
-112   64     
32     144    
48     80     
80     80     
-16    128    
-96    -16    
64     -528   
32     176    
160    -1456  
-96    -64    
176    16     
-176   128    
224    48     
48     160    
-32    64     
64     160    
-48    -96    
16     96     
32     80     
224    16     
-80    48     
-128   -304   
32     64     
144    16     
64     144    
80     112    
-48    -32    
-96    -112   
80     128    
160    176    
-16    256    
0      -304   
-96    160    
0      96     
48     0      
-64    32     
-48    -160   
128    208    
-64    32     
80     160    
16     -16    
144    256    
0      176    
-80    80     
16     -128   
48     48     
-48    -96    
-48    208    
16     -112   
-64    32     
32     192    
80     112    
-96    320    
544    -1456  
1040   304    
-176   -656   
400    1056   
-144   176    
320    272    
-416   -112   
208    -48    
320    544    
-368   -368   
80     64     
224    112    
80     224    
-48    -48    
-16    0      
144    -48    
-32    -256   
-112   -864   
288    288    
160    -272   
-208   0      
80     128    
192    96     
-64    -48    
-32    64     
-32    128    
208    0      
-16    160    
96     -80    
-160   -400   
256    -752   
48     144    
48     -544   
-16    48     
128    -1696  
-80    112    
144    144    
16     288    
48     48     
32     96     
80     144    
64     -288   
-32    192    
112    -96    
-48    64     
-16    -32    
144    208    
48     -64    
144    160    
-16    -64    
176    224    
0      64     
-32    -96    
48     80     
160    128    
64     96     
-64    -480   
-48    -176   
112    0      
128    336    
-112   -32    
48     96     
32     -208   
16     320    
48     -160   
-32    304    
-32    96     
32     -256   
-16    0      
160    16     
64     -176   
16     -48    
32     -144   
0      -144   
-16    -48    
112    -208   
-224   -544   
192    -272   
96     272    
64     288    
0      -624   
-80    144    
80     -544   
16     64     
-208   176    
0      -48    
-48    -304   
192    -576   
-16    -96    
144    -928   
-16    -32    
112    128    
64     -64    
32     -176   
0      48     
128    -512   
-192   -48    
-16    -224   
112    -176   
-160   48     
128    -496   
-64    -96    
64     -832   
80     -16    
80     -16    
0      0      
80     112    
144    -64    
-32    -128   
80     32     
-16    -112   
-32    80     
128    80     
96     -96    
-512   -176   
64     -176   
-576   -192   
64     -16    
96     0      
-32    -368   
48     -128   
112    -768   
96     -144   
16     -80    
-64    96     
48     -48    
48     -240   
-176   32     
-16    112    
-16    -96    
-64    -32    
0      -192   
32     64     
0      208    
48     -336   
256    432    
-208   80     
-32    -96    
0      -16    
192    -16    
144    -192   
0      64     
-128   -48    
32     80     
-80    32     
176    -80    
-320   -208   
224    -64    
-624   160    
-32    -304   
-32    80     
48     -160   
-80    0      
-32    -1680  
176    240    
-64    32     
0      48     
-240   -208   
192    -16    
48     48     
-32    -112   
-176   -32    
-32    -272   
-240   0      
48     32     
-320   0      
112    -96    
64     16     
-144   -960   
96     64     
-16    -176   
192    304    
-64    -32    
-160   -208   
16     -64    
96     -64    
-336   -32    
80     -32    
-144   -16    
128    -144   
-16    -304   
256    -80    
112    80     
16     -80    
32     160    
96     -16    
-32    -144   
160    48     
48     48     
-176   16     
80     -32    
-48    64     
176    16     
-160   80     
176    -400   
64     -32    
160    -112   
1440   1968   
-1504  -1184  
1056   704    
-112   688    
-144   -144   
-304   64     
-592   -304   
528    240    
-336   224    
-64    -176   
32     64     
-272   -80    
176    -48    
176    64     
-48    -224   
-32    128    
-1296  -288   
-880   64     
-16    32     
-416   112    
-96    80     
0      -32    
48     144    
-32    -32    
48     -32    
0      -240   
32     208    
-208   -112   
48     80     
-288   -160   
224    80     
-352   -80    
-480   16     
-16    32     
-128   0      
16     16     
-544   384    
-480   0      
256    -112   
-240   0      
208    16     
64     144    
-208   -16    
112    192    
-80    -224   
48     48     
-16    0      
-112   32     
64     192    
-224   -48    
0      128    
-176   -160   
48     -32    
-1472  32     
0      48     
144    0      
-176   96     
64     -352   
32     64     
-160   -224   
0      48     
32     64     
-32    64     
32     16     
-96    -32    
-112   144    
-64    144    
-96    -160   
144    128    
-96    256    
-416   -240   
272    208    
-240   -128   
112    32     
-64    -64    
48     272    
-272   -80    
-16    32     
-160   16     
32     64     
-48    -96    
144    192    
-128   64     
-368   -336   
144    64     
-944   -32    
-48    0      
-48    48     
-224   0      
272    -48    
-224   96     
112    128    
-304   96     
16     -96    
-112   -112   
96     80     
-160   128    
-16    16     
-192   -48    
-112   -16    
-144   -96    
224    96     
-288   -96    
128    192    
-96    128    
32     64     
-16    112    
0      160    
176    272    
-64    128    
96     48     
-224   16     
96     48     
32     96     
176    224    
-144   -64    
-64    160    
-1216  -32    
384    -2784  
80     112    
-256   96     
288    192    
-256   48     
112    64     
-160   80     
16     -16    
144    96     
-128   32     
-48    48     
-112   16     
16     -96    
144    192    
-1008  64     
16     192    
32     144    
-192   96     
128    80     
-112   -288   
-224   -32    
0      128    
32     112    
80     176    
-32    -80    
-192   -160   
16     80     
-112   -48    
-96    0      
-320   0      
32     80     
-16    96     
64     -32    
-32    64     
32     128    
-32    160    
0      96     
112    176    
-144   -80    
-112   -448   
48     336    
64     208    
-80    16     
128    336    
-16    128    
-48    -64    
64     192    
48     144    
-16    192    
-48    32     
80     96     
-128   -272   
64     176    
96     240    
-48    48     
-32    304    
-160   96     
-80    48     
96     64     
144    112    
0      -48    
-64    32     
-64    128    
0      144    
144    48     
48     32     
-64    -48    
128    224    
-48    -16    
96     16     
-16    -160   
144    128    
-96    32     
32     112    
-96    144    
112    -32    
176    128    
48     80     
-16    112    
-960   352    
-144   1472   
-560   1136   
-544   144    
-400   -1520  
400    176    
288    160    
-64    896    
-160   -848   
624    336    
-400   -384   
160    272    
144    288    
160    -16    
208    544    
-192   48     
0      96     
48     -384   
0      -368   
272    272    
128    336    
-192   96     
48     336    
112    0      
-128   32     
112    -32    
96     16     
-128   144    
-16    176    
128    192    
-160   16     
64     48     
128    128    
-64    96     
-208   -112   
112    16     
16     640    
144    128    
-256   -112   
48     240    
112    160    
-112   96     
32     96     
96     48     
16     0      
48     144    
-80    16     
256    64     
-48    -288   
336    240    
-176   -48    
208    208    
-112   -80    
112    128    
16     -848   
256    64     
160    416    
-240   -48    
-208   -400   
288    272    
-192   112    
0      112    
-112   -64    
256    96     
-16    64     
-128   48     
-64    80     
16     -368   
16     128    
-112   -464   
80     80     
112    0      
-32    144    
32     32     
32     64     
-16    -32    
0      192    
224    -48    
-432   32     
-96    -144   
-208   112    
144    -112   
80     -176   
112    -96    
96     -128   
16     144    
-80    -224   
64     48     
160    144    
-32    16     
160    -80    
0      352    
-32    160    
-64    -32    
32     -112   
144    80     
80     208    
-160   -128   
0      16     
176    112    
0      64     
-80    -816   
32     128    
224    -864   
32     144    
-144   48     
160    224    
-32    256    
96     32     
-16    192    
32     -96    
0      -32    
-32    -80    
128    32     
80     -160   
-112   80     
64     -640   
48     -80    
-16    -320   
160    48     
-16    -64    
48     112    
112    176    
48     144    
-32    160    
64     400    
112    -160   
48     -288   
-144   -416   
208    -320   
48     240    
48     -48    
-112   240    
128    -320   
112    144    
80     48     
80     352    
-160   -352   
192    192    
-16    224    
112    -512   
-32    192    
64     160    
80     -48    
48     -160   
32     16     
32     -272   
96     224    
-80    -688   
192    112    
16     96     
-80    80     
144    208    
-16    -160   
0      32     
0      -320   
192    224    
-48    -592   
224    352    
-16    -64    
80     80     
-80    -288   
160    16     
160    -432   
-80    -1296  
272    128    
80     -1184  
-272   -304   
-320   64     
224    -96    
-16    -96    
96     80     
-96    -16    
96     176    
96     -112   
80     128    
80     -176   
32     -208   
80     112    
64     -656   
0      144    
16     -592   
112    -176   
32     64     
0      -336   
-32    160    
-16    -224   
128    -80    
144    -912   
32     -48    
48     240    
16     -16    
32     272    
176    -80    
-224   -80    
-80    144    
80     -224   
416    16     
32     -624   
592    -880   
224    144    
-400   -384   
192    80     
-128   -224   
64     384    
80     -1040  
224    -336   
-240   -304   
-32    -32    
-64    -48    
-48    112    
64     80     
96     32     
-208   -112   
-32    16     
-544   -16    
128    112    
-16    -112   
0      -64    
16     16     
176    -1120  
-16    -80    
32     0      
112    192    
-144   0      
240    64     
-176   48     
96     -112   
-144   -192   
-80    -64    
-112   112    
96     96     
-16    -112   
80     -32    
48     96     
0      -432   
-80    32     
160    -1408  
48     48     
-16    80     
80     -96    
96     -32    
-224   -208   
-32    -48    
128    -64    
-128   -32    
32     -48    
-1248  -256   
224    -144   
-368   128    
208    -96    
-192   16     
128    -816   
32     176    
96     -272   
48     160    
-176   -96    
320    -80    
-176   224    
80     144    
-112   -128   
192    0      
-320   176    
64     -176   
-304   48     
80     32     
-112   192    
-32    -272   
112    32     
-160   -48    
16     176    
-528   80     
32     -32    
-16    80     
-96    -96    
48     -16    
48     16     
-144   80     
160    0      
-208   112    
16     -432   
-48    192    
-128   -544   
96     144    
32     336    
-48    -208   
-32    128    
-192   -48    
-48    112    
-32    -112   
-128   128    
176    0      
-256   64     
208    -272   
0      128    
-48    -352   
64     128    
64     -256   
-64    -64    
16     48     
-144   -64    
16     48     
-16    0      
-96    -48    
0      64     
-112   128    
0      -64    
-144   -128   
-192   -368   
32     128    
-160   16     
80     112    
-224   -176   
-240   -144   
-48    32     
-272   80     
-16    48     
-992   -176   
-48    80     
208    160    
0      96     
-32    -288   
0      -16    
-112   -48    
64     80     
48     64     
160    224    
-176   16     
-272   0      
32     240    
-48    64     
48     16     
-320   -128   
-224   96     
-176   -176   
96     -16    
144    64     
-224   16     
176    704    
-48    240    
-208   -464   
0      144    
16     288    
-48    112    
48     336    
-192   -304   
16     16     
-192   48     
48     16     
-336   64     
16     80     
-208   16     
224    480    
-432   -528   
208    32     
-160   -16    
-288   -256   
32     -16    
32     128    
16     0      
-240   -128   
48     16     
-240   0      
240    528    
-304   -112   
48     64     
-816   48     
112    240    
-176   -48    
128    16     
48     -128   
32     176    
-64    -48    
-64    -32    
144    128    
16     -16    
0      144    
-160   -16    
64     128    
-112   16     
-48    -16    
-528   -352   
144    320    
-160   48     
-80    48     
-96    48     
256    -32    
-64    64     
-288   48     
144    16     
-32    128    
80     256    
-224   -48    
-128   64     
-80    64     
-752   -768   
368    2688   
-352   1520   
-496   -528   
-32    -592   
960    128    
-544   752    
-32    48     
-64    -80    
624    288    
-304   48     
0      -32    
-160   208    
80     128    
-224   64     
32     -64    
-96    208    
-32    48     
-192   320    
-400   -48    
112    208    
-224   -224   
80     64     
-48    -176   
16     64     
-112   -128   
48     256    
-128   336    
16     192    
-240   16     
320    352    
-304   -128   
80     48     
-352   112    
-64    64     
208    448    
-192   -80    
384    272    
-32    80     
160    160    
-80    208    
-176   -16    
64     112    
96     48     
64     48     
-32    256    
-192   -112   
144    -80    
-16    96     
16     64     
-64    144    
-32    112    
176    240    
-144   128    
0      192    
-80    80     
80     32     
80     352    
-48    16     
-208   -208   
272    112    
-160   -16    
-48    32     
240    528    
-144   -32    
-64    -112   
-48    -64    
-32    80     
-144   32     
144    144    
-16    64     
64     80     
-112   16     
-80    32     
-96    -48    
112    176    
-208   -224   
32     -672   
-384   -384   
176    224    
208    48     
-208   32     
160    16     
128    96     
-96    240    
96     96     
-16    0      
-432   -448   
160    16     
256    656    
-48    304    
-112   -160   
-96    -16    
112    -16    
16     64     
48     160    
112    496    
-64    128    
-48    -64    
-112   -128   
80     16     
64     176    
-112   112    
-48    176    
-64    32     
112    128    
64     320    
0      512    
224    544    
32     304    
-64    96     
64     80     
80     48     
-32    48     
-80    112    
-16    16     
96     96     
64     64     
-16    48     
-48    -240   
-16    16     
144    160    
32     -64    
64     128    
-32    -48    
240    240    
-208   224    
272    80     
-192   48     
160    112    
16     144    
64     96     
-208   144    
192    112    
-144   80     
32     -224   
256    304    
-496   -704   
400    64     
-96    0      
48     16     
48     208    
32     128    
64     144    
16     16     
96     176    
80     368    
-16    208    
16     112    
64     -64    
16     -112   
32     16     
-32    -448   
144    16     
-16    144    
32     0      
48     144    
-48    -16    
16     48     
144    64     
-96    -192   
112    144    
-208   80     
96     144    
128    -16    
304    -512   
-32    320    
-80    -896   
-176   96     
-32    -2064  
144    16     
16     48     
16     48     
208    -160   
144    112    
32     256    
64     112    
-48    64     
192    112    
-80    224    
64     -160   
-16    224    
0      -208   
112    96     
64     -64    
-96    32     
16     192    
160    192    
-48    32     
96     96     
0      80     
32     144    
-112   -80    
144    -176   
-112   48     
304    -80    
-48    96     
80     -64    
-1072  864    
0      -1904  
-32    240    
400    -176   
144    16     
-32    64     
208    272    
-96    -464   
336    304    
-336   -288   
528    144    
-304   304    
304    -448   
-272   432    
416    -416   
-240   304    
112    -448   
-16    400    
160    -400   
-112   272    
176    -224   
48     448    
64     -144   
64     208    
0      -80    
192    160    
-32    -48    
96     -128   
-64    48     
208    0      
32     64     
64     -128   
32     224    
80     -368   
32     176    
48     -288   
16     48     
176    96     
128    128    
-64    112    
48     -240   
0      64     
128    -304   
48     144    
64     16     
128    176    
-128   -144   
96     304    
-144   -624   
240    224    
-160   144    
128    -1040  
-16    112    
-304   -224   
64     -1104  
48     -112   
80     -864   
-32    -48    
0      64     
192    -128   
-112   160    
96     -176   
-64    -224   
96     128    
-32    -128   
48     16     
144    32     
-48    208    
-880   -192   
176    -768   
48     -16    
48     144    
64     -16    
64     -688   
32     -48    
32     288    
-16    -16    
112    48     
-80    112    
112    64     
-208   96     
48     -48    
64     -480   
-400   -240   
-80    -32    
-128   -80    
240    48     
-176   -432   
320    -1040  
-128   -128   
128    -256   
32     16     
32     32     
-64    240    
-32    -176   
-128   0      
-80    -96    
208    304    
-176   -48    
128    32     
-1440  -48    
80     48     
128    -64    
16     -80    
48     -32    
48     -80    
-64    -192   
240    -80    
-64    96     
160    -128   
-256   -160   
64     -256   
96     48     
-64    -96    
-32    -128   
-288   -48    
160    144    
-64    0      
-80    16     
80     224    
64     -432   
64     48     
64     -1104  
0      -32    
32     32     
208    272    
-192   -176   
192    -64    
-336   -96    
0      -320   
-240   -48    
64     96     
-240   -96    
0      -96    
-48    -16    
64     -208   
-64    48     
0      -880   
0      -144   
0      -64    
160    192    
-256   -272   
256    -128   
-304   -96    
144    32     
-80    496    
16     80     
-544   -432   
96     -48    
16     -80    
144    -64    
0      48     
128    -128   
144    208    
-304   -80    
272    -336   
-528   -48    
96     32     
-112   80     
208    64     
16     80     
-176   -144   
-112   96     
32     -144   
144    112    
-176   -144   
160    32     
272    -160   
-144   64     
-96    -176   
96     144    
-160   -16    
384    -32    
-416   0      
320    -160   
-192   96     
-16    -128   
80     16     
-32    32     
-640   -48    
64     -240   
48     32     
112    -336   
-16    112    
-176   176    
32     160    
-96    0      
64     -32    
48     -64    
32     64     
-80    -16    
80     96     
-96    16     
176    0      
-64    96     
-1856  -128   
48     96     
-2080  -1376  
912    2752   
-416   912    
-352   -656   
-256   -128   
112    -496   
80     1264   
-992   -848   
784    -400   
-48    192    
48     240    
-784   -416   
-64    448    
-16    -320   
160    336    
-352   -192   
64     240    
-336   -400   
-48    16     
-128   16     
-208   112    
-224   224    
-1072  272    
-176   -80    
400    -304   
-208   48     
80     -336   
16     576    
-96    -112   
64     256    
-48    -176   
0      32     
-192   -80    
16     112    
-48    48     
-80    16     
32     112    
-400   64     
48     320    
-112   -192   
64     128    
16     48     
16     64     
-112   -192   
-128   160    
32     64     
16     96     
-112   320    
336    544    
-80    112    
-128   -80    
-128   64     
-176   -80    
-64    304    
-912   -336   
160    176    
80     240    
-128   192    
-224   -144   
160    336    
-384   -240   
-32    -112   
-16    208    
32     0      
-352   128    
-208   -240   
160    -32    
64     32     
96     640    
-848   -144   
32     48     
-80    -240   
96     32     
48     -240   
16     64     
48     112    
64     -80    
-96    -48    
160    -80    
288    512    
-96    272    
64     288    
-64    -320   
112    224    
80     112    
16     96     
32     112    
-48    64     
32     -336   
320    448    
-128   0      
-32    48     
-48    16     
96     -32    
-32    80     
-32    -80    
64     16     
-32    80     
-64    -64    
-64    32     
-64    176    
-1184  -32    
-48    128    
48     32     
-64    -176   
-32    -240   
-192   -128   
-128   -352   
272    112    
-112   -128   
-208   48     
0      96     
-128   -112   
16     160    
-160   -224   
16     192    
-240   -48    
-16    96     
-144   -48    
-80    128    
256    128    
48     128    
-176   -64    
80     32     
192    -16    
-160   16     
-48    48     
96     288    
64     144    
-16    16     
-32    64     
224    240    
-240   176    
304    176    
-208   -96    
128    144    
-272   192    
352    96     
-208   96     
64     16     
0      112    
80     128    
-80    -16    
-144   128    
48     -48    
0      48     
64     32     
-48    144    
96     96     
-96    96     
64     16     
-96    0      
-32    64     
-16    32     
80     160    
-144   -64    
144    176    
-16    -128   
-144   208    
-112   144    
-48    48     
80     64     
144    80     
16     80     
112    32     
0      128    
128    112    
48     160    
-64    112    
80     144    
-48    16     
48     112    
0      256    
-144   48     
80     -16    
128    80     
48     96     
-48    -16    
64     64     
-16    224    
0      16     
-32    192    
112    48     
-80    -48    
48     144    
32     256    
-112   208    
-144   48     
80     128    
-64    -64    
64     0      
0      16     
64     208    
-80    -128   
80     208    
-16    128    
48     80     
-80    112    
944    48     
-96    256    
1568   -352   
-592   -176   
-288   -1056  
160    320    
576    592    
-480   16     
112    -240   
-272   -80    
496    64     
-96    192    
-32    -48    
-128   304    
160    -16    
-128   64     
16     16     
96     176    
16     32     
-16    -176   
16     -384   
-64    224    
208    96     
-192   -80    
176    80     
-176   32     
224    208    
-32    240    
160    16     
-160   16     
-80    96     
192    96     
-64    112    
0      32     
-160   -16    
144    -224   
48     192    
128    -464   
0      112    
-48    0      
64     176    
32     80     
96     96     
-64    32     
80     80     
-96    32     
0      80     
112    0      
32     112    
32     144    
32     -32    
80     80     
32     -912   
64     144    
-32    -736   
16     96     
80     64     
192    32     
32     -32    
-80    160    
0      112    
64     80     
48     80     
32     176    
-32    112    
32     -48    
80     64     
48     -224   
-32    80     
64     -256   
32     64     
96     -48    
64     96     
-32    -304   
192    160    
-144   -128   
144    224    
-272   208    
96     -80    
144    192    
-224   -448   
96     -16    
-128   -128   
-80    80     
112    -288   
-80    80     
16     -944   
112    0      
-160   -32    
208    128    
-48    80     
176    112    
-64    -48    
32     -384   
160    144    
224    400    
128    192    
0      -208   
-48    -80    
32     -256   
128    0      
96     80     
16     80     
16     64     
-16    96     
112    32     
128    256    
80     112    
-32    -304   
80     48     
0      -288   
96     32     
80     -288   
112    128    
-96    -416   
16     -112   
-48    -48    
176    144    
96     160    
-80    -16    
16     128    
80     176    
96     80     
-96    112    
192    144    
144    -208   
-80    224    
0      0      
80     128    
-80    -112   
64     0      
16     -160   
160    64     
-96    16     
96     96     
-16    112    
-336   32     
80     -608   
16     -16    
80     -1184  
96     32     
-16    112    
128    -224   
16     208    
96     48     
-80    64     
0      -160   
176    -1584  
16     128    
16     -144   
-80    32     
-352   0      
80     -1152  
0      -144   
64     -256   
256    144    
-288   -368   
160    -176   
240    176    
0      16     
-16    0      
0      32     
128    96     
32     96     
-48    -112   
-96    -96    
-528   -240   
32     -240   
-112   288    
-80    -336   
144    48     
32     -384   
224    16     
-192   -2272  
128    -144   
-64    -176   
-144   224    
64     -96    
80     112    
48     -288   
112    -48    
-224   48     
96     0      
-96    0      
-112   -16    
80     -256   
112    -80    
-32    -64    
176    -640   
-96    -16    
16     -32    
224    432    
-32    -176   
-96    144    
-176   -224   
160    -48    
-16    64     
-304   -464   
-1232  1536   
528    256    
-864   -32    
752    -784   
-64    544    
32     -192   
-128   704    
256    -2416  
336    256    
-336   -192   
352    0      
-80    352    
-32    -656   
-64    48     
176    -624   
-144   304    
-400   -688   
-1120  224    
-32    -352   
432    224    
-352   -96    
-16    32     
272    -1392  
0      112    
-32    -144   
320    -80    
-112   560    
304    -48    
-176   256    
-192   -128   
-96    -16    
128    0      
-336   -64    
0      64     
-272   0      
-16    -96    
256    80     
-48    -272   
-16    -64    
208    -64    
32     64     
-32    64     
0      32     
-208   -32    
-32    -96    
-32    -16    
80     -128   
-32    48     
96     -288   
-160   208    
64     -192   
48     96     
176    -304   
-128   176    
-112   -16    
0      -240   
-928   -64    
112    -32    
-128   192    
-16    -16    
112    48     
80     -144   
-384   80     
80     -304   
-16    16     
128    32     
-16    80     
80     -432   
-144   112    
-64    -32    
80     48     
-32    32     
64     144    
-240   160    
16     -224   
-16    -48    
-48    112    
-336   32     
128    -80    
64     416    
64     -64    
240    -48    
-288   -192   
-1584  48     
208    176    
-560   64     
128    96     
304    -16    
-32    -48    
128    -80    
-64    -16    
80     -32    
-16    208    
-320   32     
-64    -16    
80     -272   
48     96     
176    -80    
-80    112    
-96    32     
-48    48     
-192   -96    
-176   -144   
-176   -64    
208    288    
-240   96     
208    -224   
-352   -144   
-272   -176   
16     80     
-80    -48    
16     192    
-32    272    
-16    -32    
128    400    
-208   -16    
144    112    
-240   48     
128    80     
-336   176    
32     96     
-1120  -32    
-80    -80    
-64    -160   
160    384    
-144   64     
192    288    
-256   128    
64     -16    
48     96     
-320   -144   
80     16     
-224   48     
32     -64    
-48    64     
-416   32     
-128   -144   
80     -16    
-160   -64    
128    96     
48     -80    
-48    80     
-80    256    
112    16     
-128   32     
-112   128    
16     -16    
96     176    
-128   -48    
-384   80     
-80    -64    
-448   0      
176    96     
-144   -64    
48     48     
-112   -208   
-48    112    
96     -32    
-160   64     
48     112    
48     0      
-112   304    
16     32     
-64    96     
-80    -96    
112    -16    
-160   -176   
96     112    
-272   48     
0      144    
-112   -144   
144    32     
304    112    
-160   224    
-240   16     
-64    64     
112    208    
-64    112    
-160   0      
32     -80    
64     176    
-336   -16    
-112   48     
-736   -224   
144    176    
0      96     
-80    96     
-48    80     
0      -32    
48     96     
-80    32     
16     128    
0      -96    
16     336    
-176   -32    
-64    160    
-288   -144   
-1264  1648   
240    -672   
1104   -80    
112    -384   
-752   -544   
192    -384   
512    464    
-48    -224   
80     496    
-416   -240   
304    16     
-368   96     
96     -96    
-160   640    
80     -368   
0      336    
-160   -160   
16     240    
64     -160   
-48    96     
0      -112   
96     272    
-16    144    
128    32     
-256   0      
128    80     
-80    160    
144    112    
-112   16     
16     -112   
-16    128    
112    64     
-32    144    
80     -32    
-112   144    
128    48     
16     112    
-128   0      
-32    -64    
0      32     
-48    16     
-16    96     
-64    48     
96     32     
-192   -96    
48     -192   
16     -80    
80     0      
0      64     
96     112    
-16    112    
0      128    
48     16     
16     48     
16     16     
48     128    
-48    192    
-112   -128   
112    48     
-16    64     
16     96     
48     96     
48     48     
80     224    
-96    192    
-32    128    
-64    112    
-64    32     
208    96     
-176   224    
-96    -64    
128    80     
-80    0      
80     96     
-32    144    
-32    144    
-80    0      
80     0      
64     64     
64     352    
32     240    
48     208    
-64    320    
192    96     
-144   32     
0      -144   
240    272    
-96    160    
48     32     
0      112    
64     16     
32     240    
-32    64     
96     80     
32     80     
128    320    
-176   -208   
32     -224   
0      -48    
192    352    
-112   160    
-32    80     
-48    16     
128    64     
128    96     
-80    -256   
64     160    
0      96     
96     96     
0      96     
48     32     
16     32     
0      80     
64     32     
32     144    
-96    -272   
192    240    
-160   -144   
48     -416   
-64    0      
112    -1120  
-48    80     
64     48     
-96    80     
144    112    
-144   -272   
160    -32    
-96    272    
96     -16    
48     16     
-144   112    
112    80     
144    32     
-112   -128   
192    144    
-32    -432   
272    208    
-144   144    
256    -80    
-160   304    
0      48     
112    160    
-96    176    
80     128    
0      48     
32     48     
112    320    
-144   -96    
80     -80    
112    144    
48     -64    
0      96     
48     -576   
-32    112    
80     48     
16     352    
96     -96    
144    192    
-128   0      
128    112    
-112   -96    
48     -144   
112    192    
-16    -224   
48     144    
-64    -384   
128    80     
96     -80    
0      208    
-16    -1408  
-64    160    
16     112    
-32    32     
-32    96     
96     96     
64     80     
-32    160    
-48    16     
128    -256   
96     160    
112    -160   
-64    96     
32     -336   
160    112    
-208   -1888  
64     128    
48     144    
96     32     
0      112    
80     96     
-144   0      
64     -160   
48     272    
320    0      
32     256    
48     -144   
16     144    
-768   1728   
-1488  -832   
448    576    
592    128    
112    96     
-592   432    
160    336    
-96    -80    
-48    -288   
288    192    
-208   -224   
-208   -96    
304    448    
224    -304   
-304   32     
112    48     
-64    80     
112    -240   
-240   48     
240    -32    
-96    176    
-16    -224   
-32    -96    
-80    -192   
16     -224   
160    192    
208    -32    
-112   176    
80     -192   
160    176    
-144   -16    
144    112    
-16    48     
112    -2240  
64     16     
-64    -1696  
48     144    
-512   -16    
-32    -64    
64     -64    
96     -976   
0      -16    
80     -704   
112    64     
-112   208    
144    -48    
0      -256   
0      112    
-64    -240   
64     -96    
144    16     
-224   -160   
112    -208   
96     80     
-80    -208   
144    -208   
-32    -176   
128    -1040  
0      -80    
32     -80    
192    -240   
-64    0      
16     -32    
80     -112   
-32    112    
64     0      
112    80     
-336   208    
-80    -96    
-528   -48    
-32    32     
80     0      
-48    -16    
64     -96    
176    -320   
-16    80     
-176   -160   
128    80     
-80    48     
-16    0      
-80    -160   
48     -128   
-112   240    
-160   -192   
256    160    
32     176    
96     -240   
208    -240   
-128   192    
128    -496   
-240   -64    
144    208    
-80    64     
144    -96    
80     160    
-208   -80    
224    -48    
-208   0      
240    32     
-304   -16    
160    -32    
-176   -176   
96     -544   
-208   80     
0      -240   
192    128    
-240   -992   
128    96     
144    -48    
-80    -16    
144    48     
-144   0      
80     16     
80     160    
-176   -32    
0      0      
-320   -80    
160    32     
-32    64     
288    128    
-144   304    
304    -752   
-208   96     
128    -48    
-80    -128   
208    16     
-64    -224   
0      -160   
112    -160   
-688   -32    
0      -32    
48     160    
48     -128   
-672   16     
-128   -272   
16     -80    
32     -896   
48     112    
-16    32     
64     -128   
-288   -32    
-16    -176   
-368   -80    
144    80     
-240   64     
160    48     
96     160    
-160   -32    
128    16     
-96    -192   
128    240    
80     16     
-16    64     
-128   48     
128    -32    
-160   -208   
272    -48    
-32    160    
-32    224    
64     144    
-32    -144   
-96    -32    
32     -256   
128    144    
80     -48    
192    624    
48     -208   
-208   64     
-32    80     
128    -112   
-64    80     
112    -96    
-48    112    
240    16     
-144   64     
-80    -96    
-32    624    
256    -256   
176    64     
-352   64     
32     -160   
-592   -128   
-608   0      
-176   48     
-192   64     
-32    32     
-176   64     
-240   48     
48     -160   
-64    64     
208    16     
-144   16     
-464   -64    
224    32     
-336   -96    
-80    176    
48     -32    
-80    128    
592    -2880  
1168   496    
80     848    
-832   16     
112    608    
-464   64     
32     320    
-16    160    
80     -400   
-304   112    
0      -208   
160    -96    
32     224    
32     96     
-80    96     
0      -176   
-128   64     
80     -64    
-144   16     
64     80     
48     144    
-112   208    
192    -272   
-64    80     
-16    -336   
176    128    
-224   160    
144    272    
-16    0      
-144   -112   
-80    -16    
-16    48     
0      80     
-96    48     
-48    32     
-16    -192   
-176   48     
-1280  -112   
240    240    
-256   -96    
160    96     
-160   -48    
128    -16    
-32    16     
-80    16     
80     16     
-80    64     
48     80     
16     32     
-16    128    
-16    128    
-16    160    
-128   0      
64     176    
64     48     
-48    -208   
80     -192   
288    192    
176    432    
0      256    
-80    0      
48     96     
16     -80    
-144   -288   
192    160    
-176   192    
-16    208    
-176   64     
80     112    
-496   -80    
64     96     
-32    64     
-256   80     
0      160    
-32    64     
64     0      
-16    160    
64     224    
-32    48     
-16    -64    
-16    32     
80     208    
-352   -80    
128    48     
-1264  -320   
80     160    
-16    160    
64     64     
16     48     
0      16     
48     112    
-16    224    
-16    96     
-48    32     
64     64     
-64    0      
112    16     
-272   -64    
144    160    
-48    64     
32     96     
-32    160    
-48    -16    
80     160    
-80    0      
112    16     
-80    48     
32     144    
48     32     
-16    80     
-192   0      
112    128    
-112   32     
64     144    
16     0      
32     0      
32     320    
32     64     
-80    -32    
48     144    
112    160    
-16    -32    
-160   96     
48     32     
64     64     
-256   -192   
416    144    
-448   112    
352    -80    
-144   224    
16     -80    
112    80     
-144   128    
160    96     
-16    112    
128    240    
-144   32     
144    0      
-144   64     
176    176    
-80    -128   
192    176    
-128   96     
-128   144    
80     176    
-96    16     
224    -320   
-112   16     
112    128    
-96    192    
-96    80     
144    16     
48     208    
-64    192    
-32    112    
144    -80    
-160   80     
48     208    
-336   160    
-64    -48    
96     0      
304    32     
-64    64     
-96    128    
-112   48     
96     -128   
32     -96    
336    576    
-240   160    
-240   176    
-176   -128   
160    64     
16     -96    
-48    32     
80     288    
-64    112    
16     -288   
80     128    
224    272    
32     160    
-64    144    
128    64     
128    80     
0      32     
16     96     
-48    0      
0      -48    
96     224    
-48    224    
128    32     
-32    96     
48     -16    
-48    160    
-16    -48    
128    96     
48     256    
-112   64     
-848   -1088  
160    -320   
192    48     
528    -304   
896    -1008  
-672   -592   
192    -2768  
656    480    
-128   64     
192    -16    
-256   192    
-32    0      
0      80     
-16    -16    
32     96     
48     240    
-64    -240   
48     112    
144    400    
80     16     
-144   48     
0      -624   
48     192    
96     176    
-112   -16    
64     128    
32     192    
-48    -48    
112    -32    
16     48     
128    192    
16     176    
32     128    
-32    80     
112    -80    
64     -48    
176    -96    
-96    128    
80     -672   
96     144    
-32    32     
80     160    
16     -208   
160    64     
-64    0      
112    128    
-64    -32    
16     160    
192    -80    
32     48     
-80    112    
192    -64    
-96    144    
144    -432   
-96    -32    
128    -1488  
160    176    
-176   80     
224    80     
-80    -48    
128    96     
-16    64     
80     -64    
112    304    
-144   -80    
160    -80    
96     -80    
-224   32     
208    -128   
-32    -16    
160    -704   
-16    128    
32     80     
128    112    
16     176    
-80    0      
192    144    
-80    96     
16     96     
80     -368   
80     224    
-64    -144   
144    64     
64     -240   
48     304    
-176   -304   
192    -80    
144    0      
-16    256    
-16    48     
16     80     
32     112    
32     -608   
0      64     
208    -32    
-176   112    
144    -160   
-32    64     
192    -224   
16     80     
-32    -240   
80     176    
48     80     
96     0      
-32    64     
96     288    
176    0      
16     -256   
128    128    
-80    64     
256    96     
-128   -16    
16     -16    
176    -96    
-16    64     
16     80     
-32    176    
128    144    
80     -2208  
-144   16     
-416   144    
144    176    
112    48     
-208   -272   
96     144    
224    -96    
-144   -64    
-96    -32    
176    -80    
-48    96     
64     16     
144    -336   
-32    -128   
-112   96     
-160   80     
-240   240    
16     -144   
0      112    
32     -112   
16     -176   
240    -1264  
-80    -32    
-48    224    
288    176    
-80    -160   
144    -96    
-128   -960   
-272   32     
64     96     
64     -64    
80     32     
16     -16    
64     -96    
64     16     
176    112    
-208   -240   
256    80     
144    272    
-128   -208   
48     -144   
-128   224    
144    16     
-64    0      
32     -208   
128    96     
128    368    
-208   -512   
-352   -336   
160    -96    
112    -16    
16     208    
-80    -128   
48     48     
-32    -48    
-16    32     
96     0      
-32    -176   
192    384    
-80    0      
32     -80    
-64    48     
80     -80    
-336   -48    
0      -208   
-400   32     
144    -240   
32     -224   
48     -560   
144    80     
-80    -128   
32     -16    
384    64     
80     240    
16     -224   
16     240    
48     208    
-32    256    
-288   592    
224    448    
336    224    
-208   96     
-480   -848   
672    -416   
496    784    
-480   -1168  
400    -112   
368    192    
-112   -192   
16     -16    
80     224    
32     -32    
-32    0      
-192   112    
48     -288   
-32    32     
16     -128   
-304   -16    
160    32     
128    240    
-128   -752   
336    320    
-80    176    
-16    -336   
-96    176    
160    400    
-16    144    
-16    -48    
-528   -80    
160    -112   
-80    0      
0      -32    
144    64     
-48    -432   
32     32     
-208   -912   
432    320    
112    448    
96     -112   
-48    64     
0      32     
-96    -64    
192    144    
-176   -16    
16     32     
-112   -32    
48     -288   
112    64     
144    -96    
48     48     
48     16     
64     176    
112    160    
-448   -256   
176    -32    
-16    128    
48     256    
-64    -80    
112    96     
48     -96    
-16    -64    
240    -48    
-16    48     
-368   -48    
48     112    
-160   -112   
-1088  -80    
-112   0      
-1360  -80    
-80    32     
-656   16     
-80    64     
64     64     
-176   -80    
16     -368   
-128   -240   
-272   -144   
64     64     
-224   288    
208    304    
-384   80     
0      -48    
112    -64    
-272   -96    
128    -16    
240    352    
-128   368    
-1104  80     
-160   -208   
224    -128   
16     -16    
-16    96     
-32    144    
-160   -128   
-16    16     
192    352    
-48    192    
0      48     
-144   -16    
32     96     
64     32     
-96    128    
-512   -64    
16     112    
192    192    
-144   48     
112    -48    
-128   96     
64     -208   
-16    224    
-16    -48    
32     96     
-128   16     
80     -16    
-128   48     
-176   -48    
-64    240    
-16    128    
-80    64     
-1184  -208   
128    272    
-80    -208   
-96    64     
-160   -32    
256    112    
-208   384    
-96    176    
-48    0      
-160   -80    
32     -96    
144    64     
-16    112    
-64    160    
-112   64     
-64    496    
176    320    
-16    288    
-16    240    
144    112    
-208   -48    
48     -16    
-80    368    
-112   144    
16     64     
16     48     
80     176    
-160   -144   
-96    -192   
80     176    
-272   48     
32     208    
-1328  -48    
128    96     
80     176    
-16    480    
48     128    
-320   -96    
192    128    
-48    -16    
-96    -48    
0      112    
0      208    
-160   48     
-80    80     
-16    32     
48     112    
-960   384    
-272   -464   
80     -112   
16     16     
80     128    
144    112    
-96    -112   
176    368    
-80    16     
16     48     
256    304    
-32    112    
-96    80     
0      -80    
48     -80    
-224   96     
96     64     
-48    352    
-144   -64    
320    224    
112    -64    
-16    160    
-112   96     
-64    -16    
128    80     
16     64     
0      -32    
48     224    
0      0      
-16    176    
80     -720   
640    192    
-304   64     
-192   336    
272    -976   
-48    -160   
-128   -368   
272    528    
-128   304    
-96    -272   
160    128    
-256   -112   
176    256    
-256   -176   
256    272    
-144   0      
64     160    
0      112    
16     144    
48     -80    
-112   64     
256    80     
0      192    
128    112    
-240   -16    
-16    144    
64     80     
64     32     
80     96     
-128   -16    
160    112    
-112   32     
160    144    
-144   128    
144    80     
144    224    
-32    384    
-128   -144   
0      -32    
-128   0      
144    160    
32     32     
-48    96     
128    64     
-224   112    
176    32     
-112   112    
80     -112   
144    176    
-208   64     
224    32     
-96    128    
16     32     
32     96     
-32    0      
48     0      
64     48     
-80    176    
144    64     
16     336    
48     48     
48     64     
144    64     
32     128    
-32    112    
-16    160    
48     -48    
160    224    
-128   96     
176    144    
16     -48    
16     144    
-80    16     
160    112    
16     192    
48     80     
64     -96    
128    16     
0      144    
-144   160    
112    96     
96     160    
-48    -112   
176    160    
-224   176    
96     240    
-192   -112   
224    96     
-144   16     
112    -1136  
-32    16     
96     112    
-64    80     
32     208    
0      192    
-16    64     
128    48     
-144   48     
80     0      
-96    -576   
144    208    
-112   48     
80     -160   
-16    32     
96     -416   
192    32     
32     256    
32     256    
48     80     
0      64     
-32    -48    
112    64     
32     -80    
-112   32     
272    208    
0      96     
-128   0      
64     -320   
-48    160    
-64    -288   
256    64     
-176   -64    
128    64     
16     144    
112    160    
-144   -176   
336    336    
-304   80     
128    112    
-48    112    
48     64     
112    144    
-240   -432   
256    32     
144    -224   
-48    128    
112    -992   
80     144    
-96    48     
96     48     
-48    32     
128    128    
-16    -64    
64     112    
-32    96     
96     -64    
16     288    
160    -16    
-32    48     
160    -112   
0      48     
64     -1136  
112    176    
-80    -1184  
80     128    
160    160    
128    304    
16     -496   
80     272    
160    272    
-80    32     
128    96     
80     32     
80     -80    
-64    -848   
112    176    
64     256    
-16    -256   
32     32     
192    144    
-16    64     
96     16     
64     0      
0      96     
160    80     
16     352    
352    272    
-208   -1008  
64     32     
64     -96    
16     -16    
80     96     
48     176    
80     -32    
-16    -16    
80     16     
160    192    
-80    -128   
96     208    
64     128    
48     -320   
16     224    
-112   -368   
256    128    
-64    32     
112    128    
-192   -80    
1360   1888   
-1584  -2736  
656    944    
368    720    
1248   240    
-768   -976   
-32    816    
-64    -1472  
-96    -800   
0      208    
208    -224   
144    256    
-272   112    
-112   96     
64     -304   
80     80     
192    368    
80     -208   
16     304    
0      -144   
-224   -336   
-288   16     
64     -112   
144    -160   
-48    -464   
64     -304   
304    -304   
80     64     
32     128    
-112   -160   
144    -144   
-16    32     
192    -160   
112    512    
-80    -496   
352    -16    
-576   -16    
256    304    
-304   -480   
640    224    
-208   -176   
352    -176   
-160   -80    
144    240    
64     48     
0      -272   
160    176    
-144   64     
-16    80     
-80    -208   
304    -160   
-288   -16    
192    48     
-720   48     
-176   -608   
112    16     
160    528    
32     -48    
-128   -880   
240    -144   
-32    16     
48     -16    
32     128    
80     240    
-256   48     
128    144    
-96    0      
64     -192   
-624   -32    
144    -176   
64     96     
0      -80    
96     80     
96     -320   
-128   -144   
48     -2064  
96     320    
272    128    
96     176    
80     368    
-80    -80    
-240   -240   
160    -80    
-176   32     
48     224    
-1152  112    
32     -16    
160    208    
48     -144   
0      144    
-16    -480   
32     -16    
112    64     
256    128    
-256   -16    
96     -240   
-176   -400   
304    -160   
-16    240    
112    -16    
-352   96     
32     -192   
112    0      
48     -96    
32     128    
96     -512   
176    272    
-16    -112   
-80    -400   
48     0      
208    96     
-576   -64    
-144   16     
-208   -144   
176    -192   
-384   -48    
-64    -176   
208    -96    
-48    -176   
144    0      
-48    -64    
32     -16    
-160   -64    
-16    -176   
32     -64    
48     -480   
-112   -560   
112    -416   
224    624    
-176   48     
112    96     
-32    -112   
-240   32     
-16    -288   
80     -128   
144    -288   
-64    64     
96     144    
48     -128   
-96    0      
144    128    
-96    112    
192    144    
-16    240    
-16    128    
128    224    
48     -240   
-304   -224   
-160   -432   
16     48     
-608   -96    
-1088  32     
-16    48     
-1456  -96    
80     160    
-400   -240   
-64    -368   
-16    -48    
96     32     
32     96     
-144   144    
-320   -208   
-48    224    
-64    -48    
16     -48    
-288   -240   
16     96     
64     144    
-368   -32    
-64    0      
-288   80     
-32    96     
-176   -32    
-192   48     
176    48     
-272   -80    
-112   -144   
144    64     
48     80     
-32    112    
0      160    
-144   -112   
64     272    
-288   -288   
208    128    
-112   0      
16     32     
-112   -80    
64     192    
-64    128    
-16    112    
-80    -48    
144    48     
96     -32    
-176   64     
112    48     
-272   -16    
-896   -2320  
1040   544    
-880   -32    
448    -48    
-128   -336   
144    16     
-592   48     
1024   528    
-480   304    
528    -176   
-512   48     
240    -288   
-176   368    
128    -240   
-32    288    
0      -128   
80     176    
-128   64     
0      16     
80     32     
-32    32     
-32    224    
-32    144    
32     240    
-64    -384   
-160   128    
80     -48    
-96    160    
192    16     
-176   16     
128    32     
-176   128    
112    64     
-80    128    
112    0      
-144   96     
256    352    
-592   48     
32     16     
-944   -96    
224    128    
0      160    
112    32     
-112   16     
-48    96     
32     0      
16     96     
-128   128    
-16    -128   
208    112    
-416   96     
144    48     
-256   -112   
144    240    
-1072  -32    
80     -384   
-16    32     
0      128    
-16    64     
112    96     
-16    48     
32     112    
128    48     
-80    288    
-160   -64    
32     -80    
80     112    
64     80     
-112   128    
-64    64     
64     -64    
32     0      
0      176    
-64    64     
80     32     
80     336    
-240   -144   
224    -192   
-64    224    
-288   96     
80     80     
64     -16    
32     32     
96     304    
-240   -256   
224    112    
-48    128    
112    48     
96     0      
32     160    
-96    0      
48     144    
-32    80     
-64    16     
176    288    
-304   -48    
256    128    
-320   -256   
112    -16    
-80    48     
-16    64     
64     128    
-32    -16    
112    -48    
-208   32     
208    304    
-176   48     
-128   80     
-16    -48    
16     16     
48     48     
16     80     
-48    48     
96     128    
16     80     
48     160    
0      80     
-48    128    
16     -16    
96     384    
-16    64     
48     80     
0      144    
80     -16    
16     64     
-128   240    
16     416    
80     16     
16     176    
-192   -16    
272    304    
32     192    
-32    128    
112    144    
-144   -64    
176    96     
-368   -160   
96     -32    
-16    224    
96     -32    
-128   0      
32     288    
-80    160    
-64    160    
32     80     
224    288    
-336   -384   
272    48     
48     208    
64     64     
0      112    
-16    64     
32     112    
-32    224    
80     320    
-304   -48    
128    0      
-224   -240   
224    48     
160    352    
160    336    
-96    96     
16     240    
-96    32     
32     -16    
128    304    
-368   160    
-240   -176   
48     64     
336    176    
0      -96    
-16    -240   
-112   48     
272    -2256  
32     96     
288    304    
-16    144    
-160   144    
-16    -64    
176    112    
80     16     
48     96     
-160   128    
16     -208   
160    -16    
48     64     
-112   -112   
32     80     
64     -96    
128    144    
-32    128    
176    32     
48     192    
-64    48     
192    48     
-64    192    
80     80     
-208   352    
-1456  -1840  
48     -816   
0      864    
400    592    
208    448    
-16    -512   
-80    976    
-192   -16    
432    512    
-496   -144   
656    16     
-176   128    
48     224    
80     -272   
96     96     
-32    128    
320    656    
-80    288    
-112   80     
64     -192   
320    -32    
-224   96     
0      -400   
-224   -256   
96     -32    
112    96     
-32    80     
-272   -48    
32     -48    
-32    64     
224    -160   
48     96     
-16    -96    
304    -144   
-16    112    
224    -256   
176    160    
128    -48    
-112   160    
-192   -1584  
16     288    
32     -112   
128    96     
0      -144   
64     208    
-176   -208   
80     -48    
-16    80     
64     -48    
-16    176    
0      -128   
-16    -48    
0      -544   
128    272    
96     -272   
80     -112   
-48    0      
336    736    
-192   -176   
208    144    
16     48     
80     -560   
-160   480    
368    -32    
-208   32     
80     -80    
-16    176    
112    -512   
32     80     
96     -144   
64     144    
32     0      
32     144    
32     -144   
112    144    
192    720    
-64    384    
128    144    
496    560    
-464   -224   
64     -224   
256    224    
-16    -128   
-80    -112   
304    -16    
-176   0      
80     64     
-80    0      
32     16     
0      -48    
-16    96     
64     -48    
96     96     
16     -112   
-32    128    
-80    -160   
16     -128   
96     -112   
128    208    
-32    32     
64     416    
0      32     
128    16     
-80    208    
-384   64     
80     -64    
-16    -272   
-128   -1184  
-112   -576   
144    192    
352    192    
-128   256    
0      -80    
48     96     
48     -96    
-48    32     
-96    -160   
128    176    
-32    272    
-816   -144   
160    16     
-96    -256   
-80    -32    
368    336    
-288   0      
352    224    
32     208    
32     -160   
80     -144   
80     176    
256    176    
-160   272    
320    -176   
-112   -272   
-128   -144   
-144   -128   
-592   -16    
240    64     
-48    -80    
80     -608   
16     -80    
64     -304   
-48    96     
208    176    
-160   80     
208    304    
-208   32     
0      -48    
-96    32     
-16    16     
96     -64    
-464   -64    
16     -176   
160    -112   
96     -320   
32     0      
-16    -272   
288    -192   
80     -896   
-32    240    
-160   -64    
80     32     
-96    32     
256    48     
-224   80     
16     -208   
-272   48     
-112   -48    
80     64     
32     80     
96     -80    
32     -32    
-64    80     
-16    -960   
64     80     
192    -112   
64     96     
-160   48     
96     -112   
112    0      
-16    -32    
-64    80     
-16    -48    
-48    64     
112    96     
224    -48    
-64    -64    
32     64     
-32    -992   
160    112    
32     160    
176    -80    
-176   0      
-16    -208   
-80    144    
-16    -64    
-736   -1216  
-64    608    
576    80     
-656   -464   
-1216  -80    
-448   528    
-96    -480   
176    -160   
-448   -16    
656    80     
-448   -240   
256    64     
-128   480    
96     -272   
-144   288    
0      -352   
-80    384    
-32    -320   
-16    144    
128    0      
0      80     
-64    0      
16     80     
160    -16    
-416   -80    
304    -176   
-80    240    
192    0      
-288   112    
128    -32    
64     112    
32     -112   
-80    48     
32     -48    
16     128    
48     -48    
-48    -80    
-128   -224   
0      160    
96     112    
-16    -32    
-112   64     
-128   16     
-80    -48    
144    -64    
-144   16     
112    -48    
-144   160    
-672   -32    
288    -48    
-672   -112   
80     160    
-256   -176   
16     80     
64     80     
48     32     
-80    -64    
-96    240    
-208   80     
224    -16    
-48    48     
96     80     
-48    96     
-384   -368   
112    272    
-400   -192   
144    288    
-32    0      
0      0      
32     112    
-224   -32    
80     128    
-368   16     
64     0      
-352   16     
-48    -32    
208    128    
-288   96     
-64    -112   
144    16     
32     48     
-48    144    
-80    -64    
-32    -144   
-224   0      
-64    96     
-192   -192   
240    16     
80     432    
-608   -48    
48     0      
-400   -112   
32     96     
16     32     
80     320    
16     64     
-112   32     
32     16     
-32    0      
-80    -336   
160    608    
48     544    
-208   160    
-224   48     
-112   -112   
-16    -16    
-320   -144   
32     32     
192    192    
48     208    
-112   -176   
-80    112    
64     48     
48     96     
0      160    
96     384    
-64    256    
-144   -112   
16     160    
0      -112   
16     32     
-352   -96    
96     144    
-32    -224   
-64    -240   
16     -96    
144    368    
0      -16    
-160   -704   
-208   64     
112    336    
32     272    
-208   80     
-48    48     
16     -16    
96     608    
-48    176    
-128   0      
176    32     
-16    192    
80     128    
0      -16    
160    224    
-112   16     
16     96     
16     48     
112    320    
64     160    
-80    16     
-80    48     
32     32     
-240   32     
96     64     
-320   48     
112    -16    
128    144    
-112   48     
208    -160   
0      80     
32     176    
-16    48     
16     -48    
16     192    
-80    128    
-160   -16    
-192   16     
112    224    
-192   64     
-80    64     
-240   128    
176    -48    
-80    64     
0      128    
64     96     
-48    112    
-96    32     
64     -96    
-32    32     
144    160    
-208   16     
32     -16    
-48    -16    
192    208    
32     64     
16     -144   
80     192    
-48    32     
96     48     
-304   176    
256    -128   
-64    192    
16     32     
-176   112    
192    -128   
160    272    
128    64     
-224   96     
-256   -112   
-672   1040   
-176   -128   
-400   352    
704    -272   
-160   544    
-208   -16    
-304   384    
192    -192   
544    -128   
-368   176    
144    0      
-48    0      
64     304    
-144   -48    
64     80     
-224   192    
128    128    
0      144    
144    -192   
-16    432    
-16    -208   
96     160    
224    -16    
-192   224    
-96    -192   
80     272    
-112   -64    
304    464    
-432   -64    
96     144    
-64    80     
192    80     
144    144    
-80    0      
64     48     
96     160    
368    496    
-432   -240   
-16    -240   
-32    112    
128    96     
-16    48     
272    32     
0      64     
64     176    
-16    272    
-112   64     
16     -32    
16     -176   
32     -16    
-48    112    
160    112    
0      48     
32     160    
-144   -48    
144    208    
-112   -80    
192    80     
176    240    
64     32     
48     128    
64     -48    
64     160    
-160   112    
32     128    
-80    16     
32     -96    
0      80     
48     96     
64     -16    
32     128    
-96    -96    
48     -672   
112    128    
64     -1008  
32     0      
64     112    
0      0      
32     -144   
-176   -48    
-96    176    
48     80     
16     -112   
-256   -96    
128    -224   
16     160    
-192   128    
64     -192   
-96    64     
16     -160   
0      160    
64     192    
-96    32     
-80    96     
176    304    
-176   -128   
240    -176   
256    128    
128    528    
-80    -48    
-176   -128   
96     -32    
208    48     
-16    144    
144    -336   
-224   112    
208    -2256  
-96    144    
64     80     
0      208    
128    -240   
0      48     
176    -96    
-160   -48    
144    80     
-16    144    
192    384    
-144   -224   
0      -128   
80     -192   
-16    112    
128    80     
176    16     
-32    -144   
-128   144    
448    224    
-224   96     
176    160    
16     144    
128    112    
112    288    
-16    336    
272    80     
-96    -144   
16     208    
32     240    
336    -160   
-64    144    
-224   -464   
256    64     
16     -48    
-80    112    
112    48     
80     64     
0      64     
-160   -272   
160    96     
16     -208   
0      16     
192    -192   
-64    112    
112    -352   
16     48     
96     -320   
-80    192    
96     48     
176    16     
-112   144    
80     112    
48     48     
-48    -192   
96     112    
32     -48    
336    208    
-112   -160   
96     112    
0      -400   
80     480    
-160   -1088  
-112   -80    
144    -80    
192    80     
64     -64    
-48    80     
-16    224    
224    -224   
-80    288    
-32    -32    
64     80     
96     16     
64     144    
-48    192    
-16    16     
-16    128    
64     128    
112    -64    
128    -144   
-80    112    
-1312  48     
96     -144   
-32    -112   
176    -1344  
-64    -368   
176    80     
-48    0      
112    64     
16     192    
1344   -176   
48     208    
-64    -64    
-480   224    
224    -704   
176    -240   
-48    -368   
-112   400    
336    -112   
-160   -672   
352    -96    
-64    -80    
96     128    
64     -208   
128    48     
16     -496   
-160   160    
240    48     
-64    64     
128    -272   
-64    16     
80     48     
-48    -112   
64     -160   
112    -112   
32     80     
48     112    
-48    -144   
128    -2096  
-16    -80    
48     32     
-112   80     
16     112    
48     96     
-48    -112   
16     -288   
0      112    
64     -176   
-480   16     
-144   -48    
208    32     
-48    -144   
96     -32    
32     -368   
208    -64    
-64    -64    
256    112    
64     112    
176    -112   
-320   48     
0      -48    
-48    16     
-16    16     
-272   -64    
-32    -32    
64     -224   
96     -224   
-112   96     
112    0      
16     -48    
144    -336   
0      176    
0      -16    
48     272    
80     64     
80     16     
-48    128    
-48    -128   
-96    -32    
16     -256   
-256   176    
-112   48     
16     0      
176    -192   
-96    -128   
256    -336   
-192   64     
112    -176   
128    16     
-128   -48    
224    -224   
48     32     
-16    48     
-400   -64    
208    160    
-784   -416   
0      -224   
-240   432    
-96    -528   
-32    80     
32     -528   
32     -48    
176    -608   
112    -64    
-80    -16    
16     -160   
-368   48     
160    96     
-112   -48    
0      -48    
48     -32    
128    0      
16     -16    
64     -160   
0      192    
288    288    
-80    128    
-96    -176   
64     -80    
16     128    
96     -32    
-176   -64    
80     -32    
48     80     
96     -48    
-160   -64    
96     -48    
-48    0      
-64    -240   
112    -32    
176    -80    
224    272    
-256   16     
-80    -144   
-32    288    
208    -48    
-64    80     
32     144    
-208   48     
0      -272   
-160   -96    
96     -192   
96     240    
-624   -96    
112    272    
-688   -528   
-624   32     
-16    -16    
-464   80     
-64    96     
112    48     
-160   -16    
112    64     
-96    64     
80     32     
32     -208   
-144   -48    
-16    240    
-352   -208   
-64    0      
-176   -16    
-256   80     
-48    80     
-128   -176   
160    -80    
96     112    
-192   0      
-1248  -96    
128    144    
112    16     
-32    176    
-336   -192   
96     272    
-64    -240   
208    16     
64     -16    
-160   208    
-240   -48    
-112   32     
-80    -32    
64     -48    
-80    -32    
-192   144    
32     64     
-1248  -16    
-320   224    
-48    -208   
32     160    
-16    -112   
32     96     
-64    80     
64     80     
-64    -16    
160    160    
-48    -96    
48     128    
32     32     
0      16     
-144   112    
-480   -80    
208    0      
-112   48     
-32    176    
16     -272   
-64    304    
272    0      
-160   48     
-1120  -1344  
656    -1056  
112    64     
-112   400    
-176   -32    
32     656    
48     -272   
-480   880    
0      -64    
80     192    
144    -144   
176    -144   
-256   -144   
32     144    
-32    -48    
-80    -48    
-160   -112   
-128   -432   
128    352    
0      -224   
-48    112    
128    416    
-192   0      
64     -48    
-1600  -16    
224    304    
-96    272    
-32    -80    
176    160    
-64    0      
0      48     
-144   80     
32     -32    
-80    128    
-80    -64    
-64    112    
128    176    
-112   -80    
-16    16     
-256   -32    
48     160    
96     176    
-64    -48    
64     64     
-192   96     
224    80     
16     176    
32     -64    
-64    -16    
80     112    
-112   160    
80     32     
-128   -144   
32     160    
-288   48     
-208   -32    
128    112    
-32    112    
-80    16     
64     -48    
64     192    
-16    112    
32     336    
-160   -32    
160    -64    
-96    80     
-32    160    
-80    -128   
80     32     
80     144    
-96    160    
16     48     
112    64     
-16    160    
0      -128   
192    128    
32     32     
64     112    
-48    64     
-48    80     
-16    -64    
96     -64    
32     0      
-32    208    
16     240    
16     144    
64     0      
128    80     
128    48     
48     -48    
0      112    
16     32     
-112   16     
-128   -496   
64     -176   
-16    64     
224    432    
-384   0      
80     16     
-208   144    
80     0      
112    96     
-32    32     
64     16     
-16    -96    
80     32     
-32    112    
128    80     
-32    32     
-80    0      
-112   -128   
112    32     
-112   32     
-16    16     
16     112    
-176   32     
304    288    
-32    112    
96     -96    
-192   -16    
-80    -96    
192    48     
144    -16    
-368   -96    
352    -96    
-112   -80    
96     160    
-48    80     
96     192    
32     96     
32     64     
96     224    
176    272    
48     288    
-96    -64    
64     144    
-176   192    
272    -112   
-16    -144   
-32    240    
-96    96     
272    112    
80     240    
-16    272    
-16    96     
-16    -32    
80     96     
-48    304    
48     16     
160    48     
-64    -16    
-64    -80    
-32    112    
0      -16    
128    144    
-80    -128   
160    192    
-144   96     
-16    -304   
48     32     
16     96     
112    128    
-64    176    
16     256    
-48    -32    
80     -160   
-80    -192   
192    64     
80     112    
-144   256    
64     -48    
-16    -192   
96     96     
96     -64    
-96    128    
48     -64    
48     144    
80     64     
48     224    
-16    112    
16     64     
48     -112   
160    272    
-80    80     
48     -128   
64     208    
-32    0      
-80    80     
-48    -112   
176    16     
-48    -544   
32     16     
-48    16     
96     224    
32     272    
-96    272    
-768   -2256  
752    448    
-1568  800    
304    -80    
176    592    
192    -624   
-48    752    
608    -688   
-48    576    
304    -848   
208    720    
-208   -272   
288    400    
64     -160   
208    112    
-320   -144   
288    176    
-256   112    
288    -64    
-16    48     
256    -128   
-160   240    
288    32     
-144   224    
192    -64    
-96    160    
112    -336   
-80    80     
16     -48    
80     144    
96     -16    
16     112    
-16    144    
128    48     
16     112    
112    -224   
-112   64     
128    -320   
32     112    
112    -240   
32     -32    
160    0      
-16    176    
176    -16    
-192   96     
224    192    
-96    -80    
48     0      
-32    -48    
32     48     
96     -96    
-112   96     
224    32     
16     -64    
192    -208   
32     112    
32     -160   
32     112    
128    80     
64     432    
32     -64    
-32    32     
64     16     
32     -192   
0      112    
32     -112   
80     128    
112    -64    
96     128    
32     -16    
-80    128    
160    96     
-96    80     
48     -80    
128    -384   
-208   80     
16     -16    
-272   -2272  
240    -96    
-16    -1616  
32     0      
80     -64    
48     64     
80     320    
-80    0      
-16    64     
-16    -64    
96     -736   
48     144    
16     -608   
-144   -16    
-16    160    
64     -80    
160    48     
0      -448   
64     -208   
64     -1264  
-32    -176   
112    128    
160    160    
-16    -128   
0      112    
16     -48    
-16    -80    
112    -32    
0      -144   
-192   32     
64     -16    
-16    -96    
112    -304   
-16    -96    
112    -512   
-16    -16    
144    -960   
-64    0      
160    -112   
-160   -80    
112    -112   
-96    112    
192    -16    
32     144    
-304   -192   
112    64     
-1984  -208   
272    96     
-256   -416   
400    -176   
-240   224    
368    -720   
-256   -176   
64     -176   
112    192    
-32    -192   
208    224    
-240   -32    
224    -64    
-32    64     
-112   32     
-16    0      
-48    176    
144    48     
32     16     
-64    -48    
96     -128   
80     80     
-144   -1104  
352    192    
-336   0      
160    -48    
0      32     
96     -16    
-32    80     
128    -48    
-32    256    
80     -48    
-832   0      
-16    -160   
192    -160   
288    -80    
-64    256    
192    -848   
-288   16     
368    96     
96     -64    
-96    96     
16     -192   
32     256    
-48    -192   
80     -144   
-48    0      
-448   -112   
-288   -16    
336    -112   
-192   -112   
240    0      
-144   -1120  
128    -32    
16     -496   
80     112    
-48    64     
-32    192    
-256   -112   
80     16     
-112   32     
-48    96     
-192   -112   
80     128    
128    -176   
208    -208   
32     112    
128    -128   
-128   144    
-64    -16    
-144   176    
-208   -80    
-80    -64    
-176   -16    
-240   1216   
96     1696   
-80    352    
384    -272   
48     -416   
-928   -704   
544    320    
464    272    
144    80     
32     32     
-368   32     
0      48     
64     -32    
224    -320   
-272   16     
144    -128   
-16    96     
16     -16    
-144   -80    
16     -256   
-112   240    
128    -176   
-16    256    
-576   -176   
-256   -48    
16     64     
-784   -112   
-48    112    
-48    -64    
64     16     
-128   96     
160    208    
0      -64    
-144   96     
-1296  -112   
48     -192   
96     -336   
0      208    
48     -176   
-368   48     
-48    -80    
-288   240    
160    64     
-512   0      
-48    16     
-320   64     
-96    64     
16     -112   
112    -16    
-48    32     
-16    144    
-48    -112   
-64    32     
144    16     
-224   48     
64     64     
-64    128    
-32    -80    
-400   -64    
-48    16     
-464   16     
16     16     
32     32     
-80    -32    
80     -208   
-16    208    
-320   -128   
-192   -16    
48     112    
16     -96    
48     80     
-64    112    
-128   64     
-32    -16    
48     112    
-192   -64    
160    160    
-528   16     
176    144    
-80    -80    
0      176    
112    -64    
112    400    
-304   96     
64     -48    
64     -80    
-48    -48    
-32    48     
48     176    
-192   144    
160    32     
-144   256    
-544   -144   
208    112    
-64    -304   
240    224    
-176   -48    
32     176    
-128   -48    
-32    -160   
48     96     
-48    96     
-96    80     
64     96     
-64    -144   
-64    -32    
-128   16     
-304   -16    
80     16     
-1008  -192   
0      160    
0      48     
144    208    
0      -64    
-96    -80    
-16    -80    
208    400    
-128   -48    
80     16     
-208   32     
192    112    
112    144    
-160   208    
0      176    
-320   -112   
-352   -192   
160    -80    
-208   96     
-32    16     
176    144    
64     96     
-288   16     
48     -64    
-64    32     
-16    112    
160    160    
-112   112    
-32    -144   
-48    64     
-272   -176   
64     192    
0      80     
400    192    
-240   192    
192    128    
-96    64     
-32    32     
32     112    
-80    64     
32     160    
-80    16     
64     80     
-224   -144   
0      224    
-176   64     
-48    192    
160    0      
16     -48    
144    -32    
-32    176    
-80    96     
80     272    
64     16     
-64    32     
16     208    
-368   -128   
48     -432   
192    -48    
224    384    
144    224    
16     304    
64     144    
-48    128    
48     -48    
64     96     
-80    128    
-48    96     
0      128    
-96    -112   
80     128    
-32    -304   
112    240    
80     64     
0      -16    
16     192    
176    336    
96     80     
0      80     
-48    32     
-16    112    
32     96     
-112   -16    
-80    16     
-48    48     
208    160    
-144   96     
32     144    
-704   -800   
-352   -736   
-976   48     
656    144    
1280   80     
-704   -1168  
-80    448    
752    1008   
64     192    
-144   -288   
32     352    
-160   -48    
304    32     
-272   240    
240    -16    
-288   -96    
112    240    
64     96     
48     48     
144    96     
0      112    
-16    336    
0      384    
48     208    
16     -112   
16     -128   
80     -256   
32     -144   
48     240    
-240   -368   
288    160    
-176   304    
240    112    
-64    160    
80     -16    
32     16     
-112   -16    
-16    0      
-16    -48    
48     96     
-32    256    
-48    80     
0      288    
-128   -288   
80     96     
64     128    
16     -2320  
-32    -272   
144    96     
48     80     
96     192    
-16    160    
112    112    
48     80     
48     32     
48     144    
16     -176   
-128   144    
-32    -16    
64     -240   
-16    32     
160    -1408  
-48    32     
96     112    
-64    64     
64     16     
32     144    
16     0      
16     128    
-80    -192   
48     112    
-16    32     
48     128    
16     96     
-64    -128   
64     208    
-32    -144   
144    304    
144    -416   
32     128    
112    80     
-96    -160   
80     -96    
80     112    
-32    -192   
176    112    
-96    -112   
192    336    
-80    432    
-96    -32    
-160   -144   
112    -384   
144    96     
128    -1344  
-48    192    
-80    64     
160    176    
32     -16    
96     144    
-96    -80    
256    288    
-64    112    
-96    -160   
-64    48     
96     32     
80     0      
80     64     
16     192    
112    32     
16     192    
0      -288   
96     160    
32     -144   
160    160    
-64    32     
32     128    
-128   -176   
160    32     
16     192    
112    -128   
-128   32     
64     -368   
272    128    
-160   -576   
-16    96     
112    -256   
160    112    
-48    -32    
64     64     
64     -144   
48     192    
16     192    
80     -464   
48     192    
176    -192   
-240   96     
128    -400   
16     -16    
32     -112   
-96    192    
-16    -320   
-16    -32    
192    112    
0      176    
0      -80    
-176   -448   
256    -256   
256    -16    
-48    96     
-16    48     
-80    64     
0      -48    
208    112    
-80    48     
96     -16    
-64    496    
32     16     
368    480    
-304   272    
144    32     
-208   -672   
0      -1104  
128    -112   
144    -32    
-112   -48    
224    -32    
64     32     
112    192    
-128   -112   
64     256    
96     -336   
-16    -688   
352    -96    
-128   -224   
-272   -16    
-976   -64    
128    -400   
80     -80    
112    -256   
-32    16     
-96    -688   
64     -128   
160    208    
32     -80    
16     96     
96     -64    
48     -80    
112    192    
96     -560   
-16    48     
-320   -32    
64     -80    
384    0      
-96    -336   
160    -16    
-48    -320   
112    -16    
288    3040   
-2128  -1040  
1088   912    
-32    752    
208    16     
-368   -192   
-384   -192   
736    464    
-384   32     
-160   16     
-976   -160   
-32    -240   
-48    192    
112    -944   
16     -80    
80     -992   
32     32     
160    -32    
-336   128    
176    -256   
-64    96     
-112   -32    
176    128    
-224   -48    
160    -160   
-400   -128   
-64    -96    
96     80     
-48    0      
240    32     
-160   -224   
224    128    
-48    -464   
32     80     
112    -32    
208    368    
-224   144    
224    -288   
-192   64     
144    -96    
-16    48     
-64    -80    
-176   64     
176    -32    
-256   -16    
96     -416   
-64    80     
80     -256   
64     -16    
112    -16    
-96    -32    
32     -32    
0      304    
-208   16     
176    -112   
-96    -32    
224    -48    
-272   64     
48     -112   
-1872  -112   
96     -48    
-32    80     
32     -544   
80     240    
-96    -160   
224    160    
-192   -48    
144    96     
-64    32     
80     128    
-240   -16    
96     0      
-224   48     
48     -144   
-288   112    
32     240    
-64    64     
224    -416   
80     64     
80     -1088  
-176   0      
80     80     
176    144    
-272   32     
176    208    
-352   -416   
448    -16    
-192   16     
144    64     
-80    80     
144    -80    
-16    80     
112    -336   
32     80     
96     16     
192    224    
-304   80     
176    48     
-80    32     
-32    -128   
64     16     
32     -16    
-16    96     
32     64     
-304   -144   
96     -512   
80     160    
16     -112   
-384   32     
-160   16     
224    32     
-32    -16    
-144   -48    
-128   16     
176    80     
64     96     
-160   128    
32     32     
-1552  -208   
64     32     
-528   -80    
304    256    
0      64     
-464   0      
32     -16    
-256   320    
96     112    
160    96     
-240   64     
-112   0      
16     96     
208    16     
16     304    
-128   -48    
-64    112    
-128   -128   
80     144    
96     32     
-64    64     
0      -96    
-112   16     
-64    80     
-80    -80    
0      80     
-672   80     
-192   64     
80     -224   
-272   -208   
80     -144   
144    144    
-128   32     
48     96     
0      112    
96     48     
32     -64    
32     32     
112    128    
16     288    
0      112    
-192   64     
-32    176    
-176   -32    
16     80     
-32    16     
-32    96     
-224   -304   
256    416    
-80    -368   
-80    160    
96     208    
-144   0      
32     192    
-144   -64    
32     48     
0      64     
48     208    
-448   48     
-128   64     
0      96     
-16    448    
-112   -192   
-80    -144   
176    256    
-192   -112   
16     -64    
32     288    
-144   0      
-80    240    
-16    -32    
-16    16     
48     64     
-272   -160   
48     0      
-272   -64    
112    112    
32     144    
-144   64     
176    -2480  
784    -368   
288    704    
-208   48     
-32    32     
624    784    
-192   -32    
160    16     
16     64     
-304   0      
176    64     
-160   96     
-16    48     
-112   -288   
32     -80    
128    192    
-80    128    
144    128    
-160   -48    
96     80     
-32    176    
112    128    
-304   96     
-64    80     
-128   32     
32     400    
-320   -304   
-160   -384   
160    -48    
-32    -128   
80     208    
-64    128    
48     128    
-48    288    
16     -80    
-192   -128   
16     -160   
-48    160    
160    416    
-128   -48    
0      80     
-160   -80    
64     -160   
48     96     
80     160    
16     112    
32     48     
-16    -48    
16     16     
32     96     
-16    -32    
96     128    
16     -224   
-32    128    
-80    48     
48     224    
-272   -352   
528    768    
-240   -144   
144    176    
-160   16     
176    32     
48     224    
-144   16     
-16    144    
0      48     
96     96     
-176   -48    
48     96     
-96    0      
64     112    
48     112    
16     64     
-32    96     
16     256    
-208   -160   
-64    -96    
-272   112    
96     0      
-112   -288   
16     -176   
48     128    
-64    -320   
32     208    
0      80     
-80    -96    
-16    -384   
-16    64     
96     256    
-144   16     
-16    32     
96     80     
144    96     
-32    80     
-16    32     
0      80     
0      112    
32     64     
0      16     
112    128    
-32    80     
64     240    
-112   16     
96     192    
48     16     
80     112    
-16    80     
64     80     
-48    32     
32     112    
-48    -32    
64     96     
-32    48     
64     112    
48     112    
80     256    
-112   336    
64     -80    
-16    48     
80     16     
112    64     
-64    -48    
128    176    
64     336    
-16    -48    
-32    144    
96     16     
144    192    
-192   224    
128    224    
-80    -256   
96     48     
-32    48     
-32    -32    
-32    -320   
-48    -176   
144    320    
-32    -96    
160    320    
32     64     
-80    32     
112    128    
32     256    
-48    112    
-16    64     
80     32     
-32    -176   
-48    -16    
80     64     
80     64     
48     32     
96     128    
-128   48     
256    96     
-48    64     
-32    -64    
-144   -240   
160    512    
288    208    
-48    96     
-32    -592   
80     48     
32     -832   
-16    80     
80     -192   
0      -144   
272    448    
-80    112    
-160   -384   
-32    112    
-96    -48    
32     -80    
256    416    
48     128    
-240   -64    
-64    -160   
-80    -288   
96     -1088  
80     64     
16     96     
0      80     
192    -96    
80     176    
-96    48     
-64    176    
-32    96     
80     128    
32     128    
-16    -48    
32     144    
-80    -176   
176    144    
96     16     
128    48     
0      32     
144    80     
-32    96     
96     512    
80     -784   
480    432    
-160   -144   
-784   -240   
864    560    
-448   -192   
288    352    
-208   -608   
80     -128   
272    -624   
-192   384    
96     -1440  
-144   384    
288    -16    
-32    -16    
0      80     
96     112    
48     64     
-32    -160   
0      80     
48     112    
192    160    
16     -256   
48     96     
-16    -96    
32     208    
144    -64    
32     48     
0      128    
64     80     
-16    -96    
0      192    
112    144    
144    -64    
48     -112   
16     48     
64     160    
144    -272   
-128   16     
32     32     
128    192    
96     -16    
-80    160    
32     -80    
64     80     
80     144    
80     96     
112    112    
-160   -32    
192    112    
16     -240   
32     128    
48     -48    
16     48     
16     -176   
48     224    
32     -304   
112    -1248  
0      64     
80     -1376  
16     0      
-224   32     
112    -544   
-16    -16    
0      -912   
176    -112   
48     384    
-176   -16    
-16    112    
160    -448   
96     -352   
-144   112    
32     -320   
128    64     
-16    -256   
224    112    
-192   -32    
160    -144   
16     176    
-208   0      
240    48     
112    -160   
144    -320   
160    -352   
-288   -112   
224    -368   
-80    176    
80     -16    
-64    96     
32     -64    
0      -336   
-288   -192   
96     240    
-624   -112   
80     -128   
96     -256   
112    -304   
32     -208   
16     -112   
32     48     
64     -64    
96     368    
-128   -112   
160    -16    
-32    -144   
48     -224   
-32    48     
16     160    
-864   -96    
32     80     
0      -96    
192    -48    
-176   -64    
224    -32    
96     -16    
0      -224   
176    240    
64     -96    
-176   16     
80     80     
208    -32    
-48    32     
-96    -96    
128    -128   
-48    -96    
-208   16     
-128   32     
-208   -32    
112    -48    
-80    -208   
80     -1680  
16     192    
-80    96     
96     128    
144    272    
-96    0      
-144   -272   
-48    -96    
192    64     
-48    -80    
-608   48     
0      -96    
-96    -112   
0      -496   
48     80     
144    96     
80     432    
96     -64    
176    416    
-304   -224   
96     112    
-96    -256   
16     -272   
-48    128    
0      64     
-96    128    
-32    -96    
-384   -16    
16     -112   
-16    0      
32     -64    
144    80     
64     -1184  
192    736    
-304   -80    
-144   -304   
16     -160   
176    32     
-80    48     
16     -224   
-96    16     
0      -208   
16     80     
32     -16    
64     144    
-16    -208   
-64    64     
-224   128    
192    -16    
-96    16     
0      192    
-256   -32    
208    -144   
64     144    
-16    -80    
-272   -48    
-80    16     
-512   48     
160    -144   
16     112    
-112   -464   
256    32     
-224   128    
-144   -64    
-48    128    
160    -16    
-400   -144   
768    -1344  
-640   96     
208    448    
80     688    
-272   16     
176    -432   
-688   -48    
48     -32    
-432   -144   
-48    80     
160    208    
-304   176    
-176   -16    
-128   160    
-160   -48    
80     224    
-32    -64    
32     32     
48     16     
32     -112   
240    208    
-304   -48    
384    176    
-32    112    
0      32     
-144   -240   
-32    -352   
304    704    
64     288    
-144   16     
-176   48     
16     -144   
96     -112   
-112   -224   
-80    -384   
-240   -416   
480    352    
-192   48     
304    528    
-480   208    
112    32     
-128   32     
-32    -112   
-80    160    
0      192    
32     224    
176    528    
-1392  -544   
272    96     
0      -128   
128    64     
144    224    
-192   -128   
64     64     
-176   -16    
-80    -432   
-608   -496   
320    336    
16     144    
-176   144    
-512   144    
-144   384    
16     64     
48     32     
64     -96    
-32    144    
64     -240   
-16    32     
0      16     
-48    16     
16     32     
-96    -80    
32     16     
-16    -48    
192    640    
-320   112    
64     -48    
-448   -256   
112    288    
-1008  -32    
-64    192    
-32    0      
0      64     
-80    96     
64     -192   
64     304    
-16    96     
48     128    
0      96     
64     32     
-128   48     
80     80     
-112   0      
48     -64    
-944   96     
-112   0      
80     -112   
-32    -176   
96     -32    
32     80     
16     256    
-48    128    
-64    128    
-80    144    
48     80     
-16    16     
-16    208    
-80    32     
64     176    
-800   -112   
-80    -48    
64     32     
48     -64    
-80    48     
-160   -416   
-96    -64    
288    224    
64     -16    
64     -64    
-96    -64    
-144   -368   
176    192    
-224   -352   
176    -160   
-288   -144   
96     -64    
-48    -640   
144    80     
112    192    
-48    -128   
-16    272    
48     160    
-48    32     
64     208    
-16    192    
16     176    
-112   192    
-16    -32    
128    16     
-176   -80    
-112   -16    
112    176    
-80    -32    
96     112    
48     384    
208    272    
-80    80     
48     144    
-80    144    
96     64     
-48    -16    
48     112    
-176   -16    
80     96     
-48    48     
144    416    
-112   192    
48     48     
-16    144    
-80    80     
0      48     
-80    -112   
80     112    
80     16     
0      128    
-80    -112   
224    16     
-112   192    
32     128    
0      336    
-96    112    
352    80     
-144   80     
80     144    
32     368    
-192   96     
128    -48    
256    -48    
112    160    
-96    96     
-144   -112   
240    112    
-32    288    
-144   64     
0      112    
80     0      
128    16     
16     160    
64     48     
80     112    
-32    112    
-48    96     
160    -144   
32     80     
48     176    
-832   -1312  
416    928    
-80    112    
-272   48     
96     16     
-704   288    
-32    -432   
208    160    
-272   352    
832    96     
-480   -48    
256    96     
-112   304    
192    -96    
32     240    
16     0      
144    64     
-128   112    
64     -48    
128    16     
-80    48     
80     0      
-32    336    
208    128    
-64    32     
64     -144   
-64    32     
240    32     
-64    112    
-16    160    
160    0      
-64    -64    
48     80     
-48    -592   
128    96     
-64    128    
208    256    
-64    112    
-80    48     
-64    32     
224    64     
-64    80     
64     224    
-16    -352   
96     80     
-32    -64    
16     -80    
16     -160   
224    80     
-288   64     
288    0      
-48    144    
-32    16     
224    208    
-256   112    
256    112    
-128   176    
32     16     
64     16     
-48    -32    
192    -16    
-64    80     
32     96     
256    -128   
-112   208    
48     -528   
80     96     
-48    -64    
112    80     
-96    304    
32     16     
64     16     
96     128    
-32    -16    
48     16     
144    272    
-112   -512   
384    -48    
288    -80    
-64    496    
-192   -192   
288    144    
-128   -400   
144    -80    
-176   0      
64     336    
-144   -80    
272    80     
-144   -96    
224    80     
32     96     
48     -32    
-64    208    
-64    -176   
96     96     
16     -96    
96     112    
-128   -2864  
32     48     
32     -16    
-32    0      
32     112    
48     -32    
144    112    
48     -240   
-64    -112   
16     -288   
240    368    
-96    -112   
128    128    
16     -240   
0      64     
80     -208   
80     96     
96     160    
16     80     
80     160    
-32    192    
112    -64    
-48    -1072  
32     -288   
112    0      
128    240    
320    32     
-176   -64    
64     -176   
64     160    
-32    -224   
144    272    
-176   144    
112    192    
48     -208   
-32    16     
128    192    
144    176    
-16    176    
80     -80    
-176   -512   
240    -96    
-32    48     
80     -80    
80     208    
-16    -208   
256    112    
-160   192    
176    -144   
-192   -64    
-192   -288   
-16    -224   
192    80     
32     -800   
-64    -144   
128    176    
-160   0      
48     -912   
128    -96    
240    304    
144    -176   
-144   -1216  
160    64     
-112   -160   
208    112    
-144   64     
16     -96    
-192   -208   
112    -720   
240    -48    
480    -64    
-144   64     
0      32     
-16    80     
208    272    
-144   -208   
160    -160   
16     32     
176    48     
-272   -144   
80     -144   
0      -384   
-64    -176   
128    -288   
0      16     
0      -256   
208    -176   
160    -864   
-112   -224   
144    -48    
-160   144    
160    80     
-48    80     
16     -208   
48     64     
-400   -128   
224    -80    
-464   192    
240    16     
-48    0      
1664   -1008  
560    80     
-48    -464   
-816   -352   
320    448    
-48    -912   
128    416    
-48    -128   
-48    304    
-160   -256   
64     -112   
-112   112    
176    96     
16     -48    
-32    -256   
-80    -496   
368    32     
-96    -32    
128    160    
-80    -1184  
144    -128   
0      368    
-16    -448   
96     176    
-16    -272   
192    288    
-224   -144   
-352   592    
-496   -144   
-496   -112   
-224   -96    
192    -208   
0      -80    
112    -192   
176    -1168  
96     -128   
368    352    
-16    16     
144    176    
-16    128    
-160   -16    
32     -112   
-464   128    
112    144    
-144   32     
160    -176   
-112   240    
208    432    
-208   -64    
-128   -528   
144    128    
144    -160   
160    272    
-320   32     
-32    -144   
-400   32     
-256   -832   
560    304    
304    512    
-64    176    
-48    128    
96     -32    
-96    -400   
128    224    
320    -16    
-224   80     
-240   -48    
32     -112   
-720   -208   
-32    -16    
-144   48     
224    144    
-176   -32    
48     -112   
-128   -320   
144    -384   
-368   224    
16     160    
32     192    
-128   -576   
208    128    
80     48     
16     -272   
-256   -128   
272    -32    
-144   -80    
304    432    
-128   0      
48     48     
-240   -80    
144    -16    
112    272    
-128   112    
-176   64     
-816   -288   
-976   -320   
80     -80    
-928   128    
16     320    
-1488  -112   
80     -96    
160    64     
-16    128    
0      16     
80     112    
16     224    
-32    -16    
-160   -176   
0      32     
-64    -320   
-176   112    
144    224    
-240   176    
-208   -192   
-48    -96    
-64    512    
-1344  -96    
16     16     
-80    -176   
16     208    
-416   -96    
0      48     
-256   -416   
48     240    
48     48     
144    208    
-144   80     
80     176    
-224   16     
112    48     
-32    320    
48     224    
32     80     
-272   -16    
-176   -16    
32     -80    
-32    80     
48     -144   
-128   48     
-32    96     
64     -64    
-128   32     
48     288    
-144   64     
128    -32    
-128   224    
-160   112    
32     96     
-1088  -112   
64     144    
96     -16    
-48    112    
96     48     
-112   176    
-16    -64    
-96    48     
16     224    
-128   -32    
192    64     
-112   32     
96     -16    
-272   -160   
-96    -80    
48     208    
-160   -16    
368    0      
112    128    
-112   -96    
0      80     
-176   160    
-80    64     
16     -80    
256    -112   
160    -64    
-48    336    
-192   0      
-64    224    
-16    -16    
-64    16     
96     80     
-368   -32    
64     -112   
96     96     
0      96     
128    304    
-176   112    
0      80     
32     144    
-64    32     
0      -128   
-16    32     
-16    176    
-112   -96    
-16    32     
-48    224    
-160   -80    
-64    480    
768    -96    
688    1040   
-64    592    
-544   -96    
240    -720   
64     -112   
-192   -192   
112    304    
560    368    
-336   -416   
224    416    
-208   -384   
144    416    
-416   -384   
64     432    
112    -208   
-240   368    
192    -192   
-32    272    
16     -160   
16     288    
112    16     
-32    256    
80     -64    
-192   -16    
16     64     
-16    320    
48     160    
-96    -16    
-112   -32    
48     80     
32     144    
128    32     
-96    144    
48     -16    
-32    160    
240    160    
-256   0      
128    -64    
-48    64     
48     96     
-32    112    
32     32     
32     -32    
-64    80     
112    176    
-80    -80    
96     240    
-112   32     
288    64     
-256   -32    
112    96     
-48    128    
-96    96     
96     0      
16     256    
-96    -176   
160    144    
-32    0      
48     16     
80     208    
-64    112    
144    80     
-32    224    
32     16     
48     80     
48     128    
128    48     
64     208    
-144   -32    
160    144    
-112   -48    
112    128    
-32    0      
64     32     
304    464    
-128   -32    
176    -112   
-64    16     
0      128    
112    16     
80     112    
-96    -208   
16     32     
-208   0      
192    144    
-96    208    
32     112    
-16    -240   
-48    -16    
16     240    
192    112    
208    -16    
0      -80    
32     80     
-48    80     
256    384    
-304   -160   
64     128    
-128   112    
96     96     
16     48     
-112   -272   
112    96     
0      -368   
64     80     
160    80     
-16    64     
160    208    
64     304    
-128   -48    
112    128    
0      16     
96     96     
-64    0      
80     224    
96     144    
-48    -1456  
-48    -448   
-48    112    
112    16     
128    -16    
-96    48     
-16    16     
176    0      
-208   -16    
160    192    
128    144    
-96    128    
16     48     
-48    -384   
48     -48    
80     -480   
160    64     
-112   0      
16     64     
240    224    
64     192    
48     16     
96     48     
-48    -272   
208    176    
-256   16     
224    112    
-224   16     
160    -176   
-96    80     
112    16     
64     48     
112    -2144  
-16    64     
-32    96     
160    144    
64     -16    
160    160    
-48    32     
320    144    
-240   176    
96     0      
0      16     
64     -64    
224    128    
-80    -48    
48     64     
-192   -928   
208    176    
64     -64    
160    96     
-192   112    
128    64     
-32    80     
64     112    
0      0      
-32    32     
160    304    
-160   -128   
176    128    
-96    -224   
272    128    
-112   -608   
80     96     
-16    -704   
-96    128    
-16    288    
-192   -80    
0      -176   
176    208    
272    112    
-176   -48    
-32    112    
304    32     
-16    128    
256    -400   
80     320    
32     -208   
-272   64     
-304   224    
-1232  -1120  
608    -208   
-384   1056   
432    -624   
192    1360   
-64    -16    
-416   -144   
480    -624   
448    192    
-208   -112   
144    -32    
64     -48    
112    208    
-16    -224   
16     -16    
48     128    
112    432    
-64    16     
-48    96     
80     272    
176    240    
-144   -192   
80     144    
-80    256    
64     -208   
144    -176   
688    752    
-432   -512   
32     0      
-112   -16    
112    48     
80     112    
96     320    
-64    48     
-736   -128   
-32    -832   
-112   -288   
64     176    
160    -96    
336    528    
-48    -64    
16     96     
80     128    
96     176    
32     -304   
-64    -896   
160    -16    
112    -1200  
-64    -48    
-304   0      
32     -112   
144    80     
64     0      
-64    0      
16     -2112  
112    -144   
64     128    
128    -32    
64     272    
64     32     
80     32     
-96    -16    
32     144    
80     0      
-16    112    
0      32     
16     -272   
16     -528   
64     -400   
144    -208   
-48    -48    
80     -304   
96     64     
-160   128    
96     0      
80     -176   
-80    -16    
176    16     
-64    -80    
-112   -32    
64     -80    
-368   -272   
80     -496   
-16    -16    
-16    128    
208    432    
-96    -320   
96     -176   
160    -176   
-48    0      
80     48     
48     16     
64     -96    
144    -176   
112    256    
16     32     
-272   80     
0      -48    
112    -64    
-16    -96    
32     96     
-48    -672   
48     -64    
48     -640   
64     64     
0      48     
-32    224    
-32    -16    
112    -112   
-176   -64    
128    -192   
-384   -176   
144    -80    
-1136  -240   
160    -208   
-448   -48    
192    -416   
-144   -80    
224    -752   
-112   -16    
192    -16    
48     80     
-160   80     
112    112    
-64    -96    
288    -48    
-416   64     
64     -48    
-176   -128   
80     -64    
-848   240    
192    -96    
-80    160    
-112   -176   
-32    192    
368    32     
64     -48    
-288   64     
176    224    
-96    64     
192    0      
-384   128    
32     -80    
0      80     
-112   -176   
224    240    
80     -416   
48     32     
-32    -288   
80     144    
-384   32     
112    -96    
-432   -80    
192    -32    
-96    -32    
128    0      
-176   -320   
112    32     
-64    192    
16     -144   
-256   32     
48     -304   
112    144    
0      -128   
64     -80    
-224   -112   
304    192    
-336   -16    
144    0      
-48    48     
80     160    
80     16     
-128   64     
-32    32     
-16    -80    
-176   -16    
64     -80    
128    224    
-624   0      
-16    256    
-80    -128   
-592   -208   
16     160    
64     -16    
32     -32    
112    128    
-80    96     
48     -32    
-112   -32    
128    32     
-32    -16    
-32    -80    
-48    112    
48     -80    
-416   -80    
-32    64     
1120   -1776  
-1264  -1520  
400    64     
-416   -224   
48     -32    
-560   224    
336    -224   
-272   -16    
16     -320   
-224   192    
-112   -240   
-16    -144   
-384   224    
208    -272   
-64    416    
0      -400   
0      352    
-304   -256   
16     384    
-656   -96    
224    144    
-64    -80    
32     112    
-64    -48    
112    64     
-224   -208   
160    128    
80     128    
96     208    
-128   32     
-32    -176   
-224   16     
0      -48    
0      240    
32     -64    
-48    64     
-192   16     
-80    0      
-16    -96    
128    96     
80     -112   
-192   96     
32     48     
64     96     
-96    -16    
-80    -32    
-96    80     
16     64     
-96    0      
-64    96     
16     0      
-752   -128   
0      32     
-32    -112   
64     96     
80     112    
-32    0      
96     80     
-112   96     
32     176    
32     64     
128    0      
-176   96     
32     -16    
-96    32     
32     80     
-160   -128   
112    128    
-560   -16    
128    96     
-96    64     
0      48     
-32    48     
-32    32     
176    48     
32     0      
-112   176    
-224   256    
304    432    
-208   -16    
-48    -80    
-64    -16    
48     224    
-384   -32    
-96    -80    
16     -32    
-112   16     
96     144    
160    480    
-128   -16    
-112   -64    
-80    80     
-96    48     
-112   32     
-128   32     
208    320    
-80    256    
-80    128    
-176   -240   
48     -608   
112    32     
96     144    
-16    96     
-16    112    
-16    64     
0      -96    
128    -16    
32     384    
-32    48     
-32    0      
-32    144    
-32    -32    
160    208    
-352   -32    
112    96     
-64    32     
80     80     
-48    64     
-16    -16    
128    128    
-96    96     
144    -48    
-96    32     
112    384    
-96    -32    
224    288    
-336   128    
192    32     
-32    160    
-48    64     
160    -16    
-192   -64    
112    112    
-80    96     
96     96     
-96    224    
304    -144   
-208   144    
-32    -32    
-64    96     
-48    32     
32     64     
-16    160    
96     144    
80     256    
-128   -16    
272    176    
80     400    
-160   80     
16     -32    
32     64     
64     32     
-144   -96    
208    -96    
96     304    
-144   32     
16     288    
-320   -32    
320    48     
-128   160    
176    112    
-128   160    
-16    32     
176    128    
-272   -112   
64     -288   
304    432    
-160   -96    
192    288    
-272   80     
112    128    
0      -96    
-16    128    
128    16     
-176   160    
-80    48     
144    192    
-96    96     
32     -16    
96     -48    
-16    176    
80     0      
-272   -48    
272    384    
-320   48     
0      -144   
96     112    
288    288    
-80    48     
-192   128    
-64    304    
32     -16    
-32    -96    
272    128    
64     112    
-176   208    
-544   -1488  
1648   2944   
-752   144    
144    -656   
-48    672    
336    -208   
-256   112    
128    752    
80     480    
-112   -64    
-304   320    
-16    -112   
-64    -160   
-96    368    
320    352    
-112   48     
-240   -704   
256    272    
208    256    
0      -112   
112    240    
-48    -688   
144    192    
-112   272    
0      80     
16     112    
80     128    
-16    -32    
-160   -16    
16     128    
272    96     
-48    96     
16     112    
-96    -48    
112    -304   
64     96     
48     -240   
0      128    
-32    -208   
32     -144   
208    0      
-64    288    
224    144    
-144   32     
-112   -128   
256    192    
0      96     
192    368    
-272   -80    
256    -16    
-80    144    
128    -64    
-16    80     
-16    -544   
224    128    
-16    64     
80     128    
-160   80     
160    32     
80     96     
64     128    
-80    -48    
80     96     
64     80     
-16    0      
64     96     
96     -128   
16     224    
16     -384   
128    208    
-48    -592   
64     -16    
112    32     
-48    160    
32     -32    
96     320    
-256   176    
144    -112   
176    -16    
128    -64    
-64    80     
48     -112   
0      64     
64     -736   
128    -32    
96     208    
-144   96     
192    -128   
-32    144    
-48    112    
96     192    
-48    48     
48     -160   
192    160    
-16    -112   
240    256    
-96    -272   
48     80     
80     -16    
64     16     
112    -16    
-16    128    
-80    -32    
144    144    
-64    32     
208    160    
-112   160    
16     -128   
96     -64    
-48    -272   
176    224    
96     -96    
48     160    
-80    -64    
272    0      
-16    -288   
-240   16     
416    144    
-192   96     
144    -96    
-80    224    
80     -576   
224    -208   
0      176    
-32    -32    
112    240    
64     96     
192    304    
-64    -16    
256    112    
-64    128    
-32    112    
160    -32    
-224   -384   
64     -112   
-80    -32    
96     -112   
144    -16    
64     -736   
-224   32     
112    -16    
208    -32    
176    96     
-144   48     
144    160    
224    240    
-112   272    
96     80     
48     -64    
-48    112    
-32    -16    
32     -400   
0      -16    
64     -80    
-112   -240   
80     -544   
-144   -368   
128    224    
224    48     
32     208    
0      -32    
16     -304   
-160   16     
96     -256   
112    128    
-80    -272   
-80    32     
32     -624   
208    -64    
96     176    
32     -224   
-80    112    
208    -368   
-48    80     
96     -368   
16     192    
16     -176   
32     224    
0      -80    
144    -96    
16     -96    
128    -176   
-1072  64     
-128   -176   
-16    -16    
192    48     
144    -96    
176    -240   
-48    32     
48     -2080  
48     176    
32     64     
-128   32     
144    -96    
192    -16    
16     -64    
-80    -96    
736    -1824  
-224   -32    
608    -288   
-96    -464   
-480   336    
64     -1040  
160    224    
320    32     
-96    -112   
-256   -192   
-16    64     
64     -48    
-16    48     
-32    -96    
80     16     
64     96     
-112   112    
-864   64     
16     -48    
16     -144   
32     -144   
48     192    
192    -240   
16     96     
80     -96    
-48    -64    
48     -16    
32     -32    
48     -16    
112    144    
-208   80     
208    -48    
-144   96     
112    -128   
-112   64     
192    -192   
80     112    
0      -384   
64     96     
32     -432   
112    -48    
-144   48     
64     0      
-176   -96    
128    -128   
-80    -176   
64     -96    
16     48     
112    -32    
32     -112   
112    -176   
48     80     
64     -384   
0      160    
-80    0      
208    112    
-64    0      
80     0      
-160   -32    
48     208    
96     192    
32     128    
-240   -128   
176    -48    
-672   -16    
144    -48    
-64    304    
-160   -128   
64     16     
48     80     
272    -80    
16     64     
0      -112   
128    80     
-16    -48    
-112   -272   
32     -464   
-144   -256   
-352   -464   
304    272    
-320   -48    
32     144    
0      -144   
-528   80     
-192   80     
-288   -48    
-160   -32    
-336   -32    
112    80     
48     0      
-224   -144   
32     -64    
-16    80     
-352   -128   
16     112    
-176   -64    
240    176    
-128   -320   
-16    16     
-32    16     
-16    112    
-16    160    
-80    128    
-80    -16    
-288   96     
-112   -32    
240    128    
-128   -16    
32     -80    
-32    176    
16     -64    
32     80     
-80    64     
32     48     
32     80     
-80    32     
0      144    
-192   -80    
-48    0      
-96    32     
32     32     
-1088  64     
-96    -64    
160    224    
-32    -48    
176    16     
-144   304    
-32    -96    
112    -32    
-224   144    
128    -96    
-80    96     
-80    -48    
112    96     
-320   32     
320    576    
-544   96     
240    -224   
-176   -80    
112    -16    
-144   -208   
-64    96     
128    80     
32     48     
-96    96     
-48    48     
0      32     
-16    32     
48     144    
16     16     
-32    -16    
-176   -16    
160    288    
-160   48     
16     -112   
128    128    
288    -320   
-160   176    
-352   -48    
64     -16    
-192   -128   
208    192    
32     208    
-64    -16    
-272   -48    
272    592    
-880   -176   
112    32     
-176   16     
368    80     
-128   96     
-144   -48    
-160   160    
128    -176   
176    176    
-160   32     
-80    -288   
-32    32     
272    160    
-240   192    
-192   240    
-352   32     
80     112    
-416   384    
32     16     
-128   -48    
48     176    
32     -32    
0      128    
-16    -32    
208    112    
-32    112    
80     -64    
-64    192    
-96    -96    
64     80     
32     48     
-416   -1728  
224    -1520  
304    416    
-176   1200   
-336   672    
-240   16     
176    -192   
144    -112   
-160   16     
-96    -368   
304    144    
-32    144    
48     176    
-16    208    
48     0      
48     96     
-240   -160   
128    -32    
-64    0      
96     -112   
-96    16     
16     80     
16     -16    
112    48     
-128   64     
64     160    
-192   16     
-16    192    
80     48     
-192   -96    
-64    64     
112    64     
80     112    
16     128    
32     96     
64     240    
16     224    
48     -48    
-48    64     
80     32     
0      128    
-32    64     
-16    48     
-64    112    
32     48     
80     112    
0      176    
16     144    
272    -112   
-144   96     
48     144    
16     48     
0      96     
112    80     
48     432    
-288   -80    
224    96     
-64    208    
272    -64    
-112   48     
-32    144    
48     32     
96     192    
-208   48     
208    -16    
-48    48     
-48    112    
-256   32     
112    48     
0      -16    
48     80     
-176   144    
96     16     
144    112    
-240   -160   
144    160    
-272   64     
240    144    
-80    48     
64     176    
144    -80    
48     32     
32     208    
-144   176    
48     32     
80     -112   
240    176    
-112   224    
48     96     
64     32     
32     -880   
48     48     
32     -80    
128    128    
-112   112    
208    192    
-128   32     
128    96     
16     0      
0      160    
0      -16    
112    160    
-80    32     
-16    0      
80     96     
-16    -608   
144    192    
48     -48    
-64    144    
48     16     
16     176    
96     -96    
-16    272    
112    80     
-32    64     
-112   -272   
-16    16     
64     -96    
96     -240   
-128   208    
288    -688   
96     176    
-64    96     
-48    176    
192    32     
0      96     
-48    -80    
64     -64    
-16    -96    
160    128    
64     80     
-64    160    
256    48     
16     -80    
-16    16     
64     -144   
32     80     
-112   -912   
64     96     
80     96     
64     16     
16     -48    
-64    16     
-32    -32    
192    144    
-160   -16    
176    144    
-96    64     
128    -208   
48     0      
-48    -64    
32     -32    
16     -544   
192    192    
-176   -400   
192    -192   
-160   144    
48     208    
64     -112   
16     128    
80     -32    
48     -128   
-48    -32    
160    192    
-64    -16    
0      -400   
128    64     
176    0      
-48    144    
-16    -720   
48     112    
-80    -496   
128    48     
16     64     
48     272    
-128   48     
112    -240   
96     224    
64     16     
0      96     
64     -128   
80     144    
48     -256   
0      16     
80     112    
208    112    
-16    -32    
-16    160    
48     64     
96     112    
-16    112    
-48    -384   
-32    144    
80     -112   
48     48     
-16    -304   
624    -1360  
96     -48    
688    -16    
-96    -528   
-32    160    
64     656    
-208   128    
-192   -608   
192    352    
-368   -400   
448    64     
-272   128    
144    -224   
-48    176    
80     -304   
-16    240    
208    176    
128    624    
-32    -304   
-224   -240   
208    208    
128    -1680  
-32    -32    
0      -720   
32     -1008  
112    -96    
-32    -1184  
80     -224   
80     -112   
176    256    
-160   32     
112    -112   
32     256    
-48    -160   
160    -48    
0      -112   
32     112    
-288   -48    
-32    32     
-80    -336   
144    -96    
-64    -32    
80     -176   
64     -128   
0      -304   
16     -176   
96     -112   
32     0      
80     -96    
32     16     
128    256    
48     -144   
-16    -256   
-80    -112   
128    -64    
-912   32     
-80    -48    
-144   -368   
160    -16    
144    192    
-96    -928   
48     64     
48     0      
32     288    
-112   -256   
-80    224    
16     -224   
112    -176   
-64    -16    
64     48     
-48    96     
32     -160   
16     -48    
192    224    
-80    112    
144    -192   
128    96     
448    -144   
320    352    
48     64     
16     224    
-224   16     
64     -16    
-112   0      
0      -320   
-576   0      
-128   -240   
-1008  -208   
112    -144   
-64    -32    
96     -112   
-224   32     
48     -1104  
-32    80     
32     -64    
-16    32     
160    208    
16     160    
-144   -144   
112    -112   
-208   -48    
128    32     
-192   -32    
80     48     
176    -16    
32     -416   
112    16     
-80    -624   
176    128    
-48    32     
144    -16    
-128   -16    
112    48     
-80    -16    
96     -48    
-32    48     
64     48     
-80    32     
-32    -240   
-592   160    
96     -96    
64     160    
-64    -368   
-32    48     
256    -2384  
64     -64    
160    400    
-64    48     
16     -160   
-16    160    
80     0      
144    144    
-640   112    
112    -208   
-400   96     
128    528    
208    -192   
48     -448   
64     112    
-16    144    
-112   176    
-96    48     
208    32     
-48    -16    
64     48     
32     112    
-304   -224   
48     -16    
-112   48     
64     -32    
96     0      
80     112    
112    -528   
304    48     
-208   256    
32     128    
-224   -304   
64     -112   
128    96     
160    32     
16     -176   
64     -16    
112    48     
80     48     
-208   -224   
176    -64    
176    32     
-512   -208   
-144   176    
-32    48     
-512   32     
-192   48     
-1248  -208   
32     16     
64     32     
-32    48     
96     -160   
-64    80     
192    -224   
-144   208    
-144   -80    
-48    176    
32     -208   
-32    -16    
32     -80    
-192   16     
16     0      
-256   176    
-16    112    
-192   112    
-80    224    
112    -32    
-112   208    
-160   -128   
-32    224    
-48    -96    
-528   -1776  
1712   1040   
-832   240    
432    -208   
-288   -1072  
512    208    
-432   80     
304    -208   
-240   432    
112    -64    
-352   176    
-144   -16    
48     0      
-112   64     
192    -16    
-96    112    
80     80     
-112   80     
-16    48     
-64    -32    
48     -32    
-16    96     
-32    192    
-96    16     
-112   -32    
-80    128    
-96    0      
48     -16    
80     224    
-80    -208   
-96    16     
-16    144    
48     64     
16     96     
-80    96     
0      48     
-112   256    
112    -80    
-112   64     
112    160    
0      -48    
-32    176    
-384   -48    
64     112    
96     -96    
-176   32     
304    208    
-240   80     
176    176    
-112   -64    
-16    80     
48     -80    
-16    144    
80     192    
-16    80     
0      -48    
-32    176    
-400   -96    
-16    144    
48     80     
32     -32    
64     96     
-48    16     
80     -16    
16     32     
-96    192    
-16    96     
-16    -112   
32     112    
-144   160    
-256   -320   
208    272    
-224   -112   
160    64     
32     80     
-48    272    
-224   -48    
96     96     
-128   48     
128    80     
0      -96    
128    192    
-144   48     
-96    -112   
208    64     
-96    80     
-80    16     
-160   160    
-368   -48    
272    48     
-240   64     
176    160    
-144   176    
80     -16    
-96    -112   
144    96     
-208   80     
64     48     
-80    -32    
0      64     
-80    -32    
208    80     
-352   -128   
80     112    
-64    128    
0      32     
0      112    
-32    160    
224    320    
-160   112    
144    48     
-240   32     
112    16     
0      96     
240    272    
-160   -64    
-48    128    
-144   256    
272    208    
256    144    
-208   160    
320    160    
-64    128    
-16    32     
-160   16     
32     48     
112    -32    
-96    -64    
-80    -96    
-64    48     
-32    -16    
224    112    
-96    160    
272    192    
-32    80     
64     80     
-80    160    
224    64     
80     336    
-48    128    
-64    112    
64     80     
-80    -80    
128    96     
-48    128    
-48    -160   
32     160    
64     160    
16     112    
-32    96     
0      64     
96     112    
-96    0      
-48    0      
144    192    
-64    -96    
48     176    
80     336    
-208   -288   
112    80     
48     48     
0      -80    
80     128    
48     96     
64     -16    
-80    -112   
32     128    
-16    192    
112    272    
192    0      
-160   -48    
-80    112    
48     144    
48     -240   
336    160    
96     0      
-192   112    
-80    144    
48     -48    
112    96     
208    176    
-48    96     
-96    144    
48     -112   
96     0      
-32    16     
-32    16     
80     128    
0      -272   
32     96     
-16    48     
16     -624   
0      -32    
128    288    
-96    80     
0      80     
0      48     
1696   -336   
-1200  -1504  
1152   1264   
-240   576    
1648   -1200  
-784   -400   
176    320    
128    304    
-272   -432   
176    0      
32     -208   
128    48     
-304   112    
64     -32    
208    336    
160    32     
-96    64     
96     -64    
-160   -368   
192    -32    
48     192    
112    64     
0      -48    
-16    128    
176    -64    
16     128    
64     -1232  
80     144    
80     64     
-32    64     
176    160    
96     32     
-144   48     
64     208    
-16    -48    
320    448    
0      320    
224    272    
-400   -64    
160    -112   
144    80     
0      -352   
0      96     
-32    -448   
160    208    
-80    -32    
32     -64    
-32    160    
-208   -208   
192    240    
-208   32     
288    144    
-96    -336   
192    80     
-160   -336   
144    240    
-32    32     
-224   -304   
96     -2912  
192    -48    
112    48     
-48    48     
128    192    
0      240    
-48    144    
96     -128   
256    0      
80     96     
64     48     
16     160    
80     80     
96     -272   
32     64     
0      -896   
96     48     
16     80     
-112   -144   
-336   -144   
-272   -112   
-32    -288   
-48    -1136  
160    192    
128    0      
64     176    
-16    -224   
144    304    
-144   -368   
112    144    
48     -128   
96     64     
48     32     
144    288    
-48    -16    
-112   -64    
80     -64    
208    32     
80     0      
-64    -192   
-48    -80    
224    32     
16     64     
-32    -160   
32     176    
192    -80    
176    160    
-176   -208   
224    160    
-144   96     
224    -432   
0      -480   
80     0      
0      -848   
-48    -128   
144    -48    
160    -16    
48     320    
-64    128    
80     -48    
48     32     
64     -1408  
16     16     
32     -512   
-32    112    
32     80     
112    -928   
-160   16     
80     -208   
176    0      
-32    -1776  
160    208    
0      -80    
112    -64    
32     -48    
-16    -288   
32     -176   
-64    -624   
80     0      
272    80     
-144   -144   
128    -96    
-80    -112   
48     -256   
112    -80    
144    224    
32     -112   
48     -320   
-16    -240   
256    176    
-96    -64    
96     -48    
96     -32    
16     -240   
64     -112   
80     64     
0      -96    
-768   -48    
256    272    
-272   -368   
176    -448   
48     0      
32     -464   
64     48     
16     80     
128    -48    
-144   -64    
64     688    
224    48     
-160   -336   
0      -160   
128    0      
-96    -48    
16     16     
224    -208   
96     -160   
32     -48    
16     -560   
-64    32     
96     -48    
0      144    
112    -48    
0      144    
80     -48    
-16    144    
-176   16     
-64    0      
-160   -272   
192    32     
-752   -96    
0      64     
64     144    
32     -16    
16     96     
304    -400   
-288   128    
96     96     
64     -96    
336    160    
176    -736   
592    -592   
240    176    
-368   128    
128    112    
16     304    
-112   288    
-288   16     
160    -496   
-160   -160   
208    -768   
32     16     
-32    256    
96     32     
32     64     
96     -304   
-384   -80    
192    -160   
-208   96     
112    -32    
-224   32     
-16    -160   
-160   -32    
-80    -464   
128    80     
16     -384   
80     416    
96     -688   
-80    -160   
80     80     
16     32     
-80    -48    
-144   32     
96     64     
16     -64    
-144   -160   
-160   -48    
400    192    
80     -80    
0      64     
-48    0      
144    64     
-144   96     
-96    -176   
64     0      
32     224    
16     144    
128    192    
-48    -208   
128    -80    
-112   16     
160    -48    
-64    96     
160    -32    
0      96     
-832   -448   
64     320    
-256   -64    
-64    -80    
-240   80     
-896   -16    
-96    -80    
144    16     
-160   144    
-16    -240   
96     -64    
0      80     
16     208    
-512   -240   
176    0      
-96    -256   
144    128    
-16    192    
0      48     
16     -96    
0      160    
-160   -160   
-192   80     
-96    128    
16     -16    
80     64     
-384   -304   
112    16     
-480   -96    
-32    0      
208    240    
-400   80     
32     -112   
32     64     
-224   0      
-176   64     
-96    80     
-64    -80    
192    288    
-128   -32    
-144   48     
32     -112   
16     128    
48     -96    
0      192    
0      112    
-32    80     
-144   -64    
0      -256   
80     176    
-144   -48    
96     -48    
-208   -288   
128    96     
-1600  0      
176    272    
-64    -64    
-80    96     
16     0      
16     80     
-64    96     
-16    64     
-16    96     
176    256    
-80    -16    
-16    16     
-16    48     
64     64     
-96    144    
-208   -16    
16     112    
-32    -112   
-144   16     
96     64     
-64    16     
-16    16     
-16    16     
-48    48     
48     240    
-128   192    
160    48     
-112   -16    
-48    240    
16     48     
-144   112    
240    272    
-1568  -224   
64     128    
-80    48     
64     80     
112    480    
-48    -16    
-128   -96    
-32    0      
80     48     
-144   64     
0      64     
0      64     
192    336    
-480   -528   
192    112    
-528   -272   
-112   -80    
80     64     
16     112    
80     112    
-112   -16    
112    80     
-64    64     
224    80     
-224   -208   
336    416    
-112   144    
32     112    
-192   48     
112    96     
-176   -144   
96     96     
272    208    
-144   0      
80     -32    
16     80     
128    48     
-32    48     
64     64     
-16    160    
-48    80     
-96    112    
-160   -176   
192    16     
128    208    
-32    32     
-144   96     
80     32     
144    64     
-96    32     
-48    48     
-48    48     
208    128    
144    0      
-16    -224   
1616   -480   
-928   -2464  
176    400    
272    464    
16     -320   
-544   -336   
160    -656   
-224   656    
-448   -368   
176    176    
-112   112    
224    160    
-240   128    
32     112    
-256   -416   
272    112    
-96    176    
336    -352   
-240   -160   
224    -96    
48     224    
48     -128   
112    304    
208    16     
-48    224    
32     -176   
208    672    
-160   144    
160    112    
-336   -128   
160    160    
-64    -48    
80     -144   
-48    240    
16     48     
-112   96     
-176   320    
-16    112    
-144   80     
208    144    
-128   48     
160    32     
-112   16     
-16    80     
80     192    
16     176    
-96    -384   
272    464    
-240   -144   
160    208    
-80    352    
16     32     
0      32     
-32    -64    
144    0      
96     240    
-112   -256   
-48    -96    
336    448    
-288   -32    
144    240    
32     64     
-64    -240   
112    112    
288    -176   
240    16     
-112   96     
-16    160    
-32    128    
32     96     
64     96     
80     128    
32     -96    
-96    48     
-80    64     
48     208    
272    560    
-512   64     
-80    -352   
128    -336   
80     48     
-48    32     
64     240    
-208   -80    
240    96     
80     352    
-224   -112   
-304   -416   
272    272    
96     144    
80     112    
-192   16     
96     -384   
80     112    
0      -48    
96     416    
-96    176    
32     32     
-144   -160   
144    -16    
64     160    
-16    160    
-112   112    
96     112    
80     144    
32     176    
32     512    
144    512    
16     416    
-128   -128   
0      32     
32     -560   
112    48     
-32    48     
64     160    
48     288    
80     96     
-48    -160   
48     160    
96     48     
-48    112    
48     176    
48     0      
128    256    
112    -336   
-64    112    
-16    -848   
96     48     
0      224    
80     32     
-32    176    
256    32     
-80    16     
288    -32    
-384   80     
208    112    
416    288    
-320   64     
192    80     
-32    -272   
176    -80    
-32    -144   
-16    144    
80     -80    
-144   -208   
224    -48    
96     256    
16     96     
-16    224    
48     128    
0      16     
96     240    
-144   16     
144    112    
0      -96    
96     128    
128    -560   
96     240    
-96    -64    
160    48     
-112   -1200  
176    -32    
16     -48    
80     96     
192    336    
-16    -128   
-32    288    
-272   160    
160    112    
80     -272   
128    80     
208    -352   
-96    240    
224    -352   
48     224    
-32    16     
96     144    
-48    112    
144    96     
48     112    
80     -400   
-48    128    
368    -272   
-112   256    
96     -176   
-48    96     
112    -528   
0      80     
64     -160   
96     160    
32     176    
-32    80     
112    256    
-48    96     
224    -128   
16     -32    
-736   576    
-464   -96    
-640   464    
720    304    
-288   -144   
112    368    
-480   128    
80     288    
-256   -224   
112    -240   
-112   -336   
-80    288    
80     -80    
-80    -64    
48     -432   
0      -128   
224    -240   
-48    -1504  
128    -304   
80     176    
96     -208   
-64    304    
144    -320   
-64    -560   
96     -240   
-128   -464   
224    -32    
48     400    
32     -144   
-32    -80    
48     -144   
112    -64    
128    96     
64     0      
32     16     
176    160    
-64    16     
112    -96    
-96    -64    
144    80     
128    16     
0      -128   
-64    112    
112    -208   
-704   -16    
16     -160   
-16    80     
96     -112   
176    -16    
-64    -176   
32     -16    
80     -384   
-144   48     
240    -112   
-64    176    
80     32     
80     -64    
-352   -96    
80     -192   
-32    48     
-160   -96    
160    16     
-48    -208   
112    -16    
-32    -624   
96     -144   
128    -592   
-16    240    
48     -112   
128    64     
-80    -80    
48     64     
-128   -64    
80     16     
-240   -16    
32     144    
-1696  0      
112    -80    
-240   -48    
16     32     
32     128    
0      -736   
0      -192   
160    -352   
-48    64     
-256   -144   
304    224    
-272   0      
256    -64    
-64    48     
64     -144   
-160   -64    
32     16     
-96    96     
-80    -352   
64     112    
-64    -240   
96     16     
32     -48    
192    96     
-176   -48    
112    0      
-176   -144   
256    48     
-352   -32    
-48    -48    
-560   0      
96     -48    
-224   64     
-32    -208   
96     96     
144    -64    
0      48     
32     -624   
128    160    
48     64     
144    32     
-336   -64    
240    112    
-256   -48    
96     64     
80     16     
0      -64    
-208   64     
64     -384   
0      -16    
128    160    
96     -496   
32     80     
208    48     
-96    128    
224    -64    
-128   16     
80     -16    
32     64     
64     -128   
-32    64     
160    512    
-240   -64    
96     -176   
16     -32    
352    288    
-320   48     
160    -80    
-1488  -512   
224    -32    
144    144    
-48    112    
96     48
[truncated: 110,011 more chars]
