# Supplementary material for: A Fault Diagnosis Method for One‐Dimensional Vibration Signal Based on Multiresolution tlsDMD and Approximate Entropy
Source: Hindawi journal article supplement (doi:10.1155/2019/3262818), 2019-01-01
Supplement: f1 [file 3262818.f1.zip › 3262818.f1/gear signals/broken teeth fault signal/Data6.txt]

-80    -48    
-96    112    
-256   80     
-64    -352   
-16    128    
-240   -96    
-64    48     
32     -176   
176    -288   
128    32     
-48    -416   
-80    -112   
128    -64    
32     64     
80     -192   
784    -1264  
-272   -304   
272    128    
192    352    
576    -864   
-1312  80     
208    -192   
48     208    
176    -48    
-288   -80    
96     -368   
96     -160   
-160   544    
240    -224   
-32    384    
160    -240   
-336   64     
192    -80    
-384   -16    
48     -224   
-240   -80    
128    0      
176    -48    
-64    -96    
176    -144   
-144   -176   
288    80     
-64    -496   
192    64     
-64    96     
176    -144   
-192   128    
96     -16    
0      128    
64     -128   
-400   -64    
208    -80    
-1120  112    
128    -224   
-208   32     
224    -80    
-96    160    
256    -416   
-48    16     
-16    48     
64     -32    
208    16     
64     304    
-480   80     
400    -144   
-288   176    
80     -80    
-112   64     
80     -176   
16     256    
32     -32    
-32    80     
48     -1040  
112    128    
-240   -112   
96     -48    
-160   128    
64     -32    
-96    -80    
0      -96    
-240   32     
112    -80    
0      64     
80     -176   
144    64     
16     -336   
176    192    
-32    -432   
96     32     
32     176    
-112   -240   
144    -192   
-16    336    
-384   -80    
240    32     
-64    -96    
160    144    
48     272    
-64    -272   
320    192    
-1072  -144   
80     176    
64     -160   
-16    160    
-112   -16    
-1024  64     
-96    48     
-288   -64    
64     80     
16     64     
64     96     
64     -224   
-112   -144   
-288   -208   
-32    80     
32     176    
-96    80     
-16    -64    
32     -48    
16     -32    
-224   -160   
32     128    
-256   160    
96     112    
-16    -176   
32     16     
48     -80    
-112   16     
-272   -80    
96     192    
-96    0      
80     144    
-112   80     
32     -448   
48     -128   
-48    144    
0      32     
-16    144    
-80    -80    
-64    -272   
-128   -64    
-80    48     
160    80     
176    80     
-160   -144   
-32    -48    
-64    -16    
32     -32    
64     64     
-64    240    
320    160    
-256   -112   
48     96     
-112   0      
32     0      
16     208    
-864   176    
208    208    
-176   -16    
224    688    
-304   -480   
-96    -160   
80     256    
16     48     
-32    96     
-32    -48    
48     96     
16     320    
-208   144    
48     48     
-80    48     
-336   -784   
16     16     
-16    -96    
160    384    
-32    320    
0      64     
16     -48    
864    224    
-384   96     
-256   -176   
96     -208   
288    32     
208    224    
-256   48     
-160   272    
-400   -80    
192    144    
96     -80    
16     240    
0      352    
-400   64     
-16    -80    
48     -32    
192    32     
-48    112    
-144   48     
32     -80    
112    128    
-64    80     
-64    80     
-208   -16    
64     64     
-1216  -96    
-144   64     
96     0      
-48    256    
-208   -112   
160    112    
144    48     
176    16     
2048   -1840  
-144   -608   
784    1152   
-496   544    
32     656    
-672   -368   
576    720    
-656   -400   
192    -480   
288    -48    
-192   272    
176    -160   
-160   256    
128    -48    
-96    128    
-80    -352   
-32    -48    
-16    -144   
-144   352    
-176   96     
-304   -80    
224    -160   
-48    272    
256    128    
128    512    
-128   0      
-64    -160   
448    160    
64     336    
-112   -48    
128    224    
16     128    
128    240    
-272   144    
320    48     
-336   -16    
208    48     
-32    96     
112    128    
144    176    
48     -80    
-112   144    
0      -64    
0      192    
16     32     
64     192    
-160   352    
-80    224    
-112   -32    
-48    16     
80     48     
16     128    
48     272    
-224   -160   
96     -32    
160    416    
-64    48     
-32    -192   
304    320    
-16    96     
48     128    
-144   160    
-112   -464   
128    288    
288    48     
-96    128    
-128   16     
112    144    
64     16     
64     96     
-16    64     
64     192    
32     48     
0      48     
32     64     
-16    -80    
-48    -208   
256    -48    
96     672    
80     64     
-320   -304   
240    128    
176    336    
-176   -80    
144    256    
-32    80     
16     128    
-96    0      
-80    -128   
96     32     
32     112    
-96    -16    
16     -16    
0      144    
-32    240    
-16    192    
-96    -208   
-176   -352   
112    -96    
16     192    
144    240    
-16    96     
16     208    
16     160    
-16    64     
144    288    
48     144    
-16    128    
-272   -448   
-96    -640   
304    304    
0      416    
16     144    
32     80     
128    160    
-176   48     
64     -384   
32     320    
144    336    
112    112    
16     144    
-112   -48    
-112   224    
320    288    
-352   16     
336    288    
-32    -320   
0      80     
32     112    
96     160    
176    240    
-80    352    
304    192    
-176   -96    
-16    -144   
-112   160    
32     48     
256    208    
-64    32     
112    -64    
16     0      
-16    -1104  
-64    80     
192    256    
-64    80     
192    448    
-112   80     
160    64     
-96    64     
48     16     
96     48     
-64    112    
48     48     
192    112    
80     -112   
32     128    
-80    -304   
384    -96    
0      -112   
32     304    
-176   96     
192    64     
-32    16     
272    0      
-128   112    
-32    128    
176    144    
-144   -160   
176    160    
0      -224   
144    -80    
112    -80    
-80    240    
-64    -672   
-16    48     
144    -192   
64     160    
-160   16     
48     96     
160    16     
16     192    
0      0      
-48    -96    
32     0      
160    64     
112    -16    
0      -32    
32     128    
-32    -224   
64     64     
32     -656   
96     0      
16     128    
-48    144    
80     -64    
0      96     
-1168  -1584  
704    -320   
-1600  -96    
432    -176   
-160   288    
-624   -1104  
288    864    
-272   -352   
304    864    
96     -272   
-48    -96    
-304   -48    
224    160    
304    16     
-32    -64    
-96    192    
320    -192   
-112   288    
144    -544   
16     240    
32     -256   
32     240    
128    -64    
-32    288    
80     -240   
-192   48     
160    -112   
-16    256    
256    32     
-288   -112   
96     -240   
128    -80    
80     -944   
-16    -96    
80     32     
-32    -160   
272    400    
64     80     
-64    16     
-128   -112   
240    -48    
48     80     
64     -416   
-80    -304   
112    0      
0      -432   
64     -96    
48     -1280  
112    256    
-112   -720   
304    16     
-112   48     
80     -32    
112    -48    
32     80     
16     64     
128    176    
-96    -224   
192    80     
-672   -96    
128    -320   
0      -48    
96     64     
32     80     
32     -560   
32     -304   
96     48     
32     64     
-160   -64    
240    96     
128    -48    
-64    80     
48     -96    
16     0      
-144   16     
96     96     
-128   -160   
320    -32    
-64    32     
-16    96     
48     -96    
96     -800   
80     176    
48     96     
80     96     
80     -352   
160    304    
-240   -144   
80     -224   
144    0      
16     80     
-608   -32    
112    -144   
-32    -128   
64     -128   
224    64     
144    -112   
96     80     
32     48     
112    48     
-160   -368   
352    176    
48     384    
128    128    
-192   -16    
-80    -304   
16     128    
-112   -384   
-560   32     
128    16     
-16    16     
64     -464   
-16    16     
0      -1392  
112    80     
80     48     
64     48     
-32    32     
32     112    
160    128    
-80    -16    
-208   -96    
-48    80     
-400   -256   
176    -176   
16     -80    
48     -64    
-48    176    
-80    -832   
-96    32     
288    192    
0      64     
-48    224    
32     -272   
-80    -624   
240    464    
-64    128    
112    -272   
48     192    
128    -160   
-144   -64    
96     -128   
128    224    
32     -624   
-48    64     
-64    160    
144    -144   
-304   -80    
64     -80    
64     32     
48     64     
-272   -48    
128    -16    
-544   -80    
96     -32    
128    112    
-112   -144   
128    -32    
144    -160   
80     64     
-208   -16    
128    32     
224    176    
48     -64    
-48    32     
128    -112   
-48    48     
-144   -112   
192    64     
-112   48     
-240   -32    
80     -48    
-32    160    
-1728  -256   
-80    96     
-96    240    
-704   144    
-80    -32    
192    -64    
-48    112    
16     -32    
-80    16     
48     -64    
160    256    
32     -288   
64     192    
-512   -272   
528    -48    
-304   64     
-144   -112   
32     96     
-64    -112   
-176   240    
-688   -80    
0      80     
64     -96    
144    48     
272    1536   
-608   160    
-176   -1200  
-512   288    
-48    -800   
304    496    
304    -352   
-48    608    
-224   -96    
-272   304    
208    -464   
-304   688    
96     -384   
-64    496    
-128   -304   
-496   368    
-352   -480   
400    128    
-240   -80    
128    -32    
0      64     
256    144    
-416   240    
272    -160   
-336   128    
224    144    
-208   256    
-16    -288   
-224   -96    
-224   -176   
272    80     
-128   80     
16     -80    
128    128    
-32    -128   
16     64     
-48    448    
48     208    
-240   0      
-160   16     
256    80     
-240   32     
48     144    
-240   -16    
32     112    
-512   128    
112    208    
-80    -32    
16     -16    
-48    -96    
-128   16     
112    48     
16     128    
0      208    
-128   -112   
32     176    
-128   0      
160    96     
48     64     
112    128    
-304   -32    
112    -32    
64     -48    
-64    128    
-16    112    
-80    48     
80     0      
32     48     
16     160    
-64    -32    
0      96     
-48    64     
112    240    
-32    144    
-16    160    
-224   -176   
240    16     
-864   -32    
-160   -224   
256    -16    
48     96     
-160   -240   
32     -48    
128    32     
224    288    
-192   32     
16     -96    
0      -112   
-64    -112   
32     64     
-224   -16    
48     32     
-208   32     
-80    -48    
-128   -112   
256    416    
-320   288    
-128   -128   
-144   -384   
144    272    
192    304    
-112   144    
-16    -64    
-96    32     
-64    0      
128    32     
16     272    
144    -176   
-64    112    
-16    0      
-32    96     
0      -16    
80     144    
80     64     
-128   64     
64     96     
-112   -64    
112    176    
32     -32    
-192   16     
144    -48    
-16    160    
0      160    
32     -96    
256    -80    
-144   304    
112    128    
0      0      
16     16     
-112   64     
32     128    
-32    -16    
-144   96     
32     144    
16     160    
112    -80    
-64    80     
-192   176    
208    48     
48     128    
-16    144    
144    64     
0      32     
16     128    
0      112    
80     -128   
128    -16    
-80    144    
32     -64    
32     112    
-48    16     
16     128    
-112   48     
144    176    
-160   80     
128    -96    
48     192    
-96    96     
96     96     
-16    0      
112    144    
32     304    
-176   -32    
112    -32    
-48    224    
80     -64    
96     -240   
64     64     
-64    224    
-224   -48    
-48    160    
288    16     
-48    128    
80     192    
-80    -64    
32     48     
128    96     
-128   208    
-64    64     
0      80     
128    -16    
64     64     
-32    128    
64     96     
-32    320    
-16    -32    
-32    192    
160    96     
16     32     
-64    80     
16     112    
160    -144   
-16    304    
-112   16     
32     -176   
16     112    
-512   672    
192    -528   
736    -128   
-48    496    
336    80     
-928   -624   
704    560    
64     464    
64     -80    
-352   176    
352    -304   
-16    640    
-80    -320   
-48    48     
64     -336   
-128   -1840  
32     16     
128    544    
16     -128   
-32    -32    
-48    64     
96     224    
-64    64     
32     32     
48     32     
16     16     
16     336    
-16    16     
16     -256   
32     16     
16     -288   
128    16     
-48    288    
80     0      
-112   96     
0      -112   
176    256    
-112   80     
288    16     
-208   80     
32     64     
64     64     
0      128    
64     32     
96     64     
48     16     
-96    160    
144    -640   
-176   80     
272    -48    
-64    144    
96     -48    
16     96     
-32    0      
224    32     
-16    336    
-192   -48    
240    64     
0      -128   
-32    80     
32     16     
16     48     
144    -816   
32     48     
0      112    
176    224    
-112   16     
16     112    
64     96     
32     64     
96     112    
16     -272   
96     128    
32     -160   
-32    176    
-112   -320   
160    -16    
64     -400   
-144   16     
16     -1728  
-32    16     
-48    64     
128    112    
32     112    
-16    256    
96     0      
-144   16     
48     416    
48     -16    
32     64     
64     -48    
48     -80    
16     -16    
32     64     
96     -176   
-80    -160   
-32    -64    
48     -48    
144    -16    
-32    96     
80     112    
0      48     
-32    64     
80     -16    
160    368    
-80    -128   
32     -32    
32     -224   
64     160    
96     -48    
-64    -16    
0      16     
160    112    
-112   -112   
112    -144   
-48    32     
80     -144   
16     32     
80     -320   
176    176    
96     96     
128    272    
-192   -224   
96     144    
-112   -96    
400    -560   
-208   -16    
256    -1200  
-64    80     
-464   -96    
-32    -592   
96     0      
128    -544   
-48    -288   
48     80     
16     -48    
112    160    
-80    96     
96     80     
-16    -80    
96     -336   
48     128    
96     -128   
64     16     
-48    -32    
-80    -432   
176    -208   
176    -320   
64     128    
-96    -784   
32     -32    
224    128    
224    -96    
-224   -320   
-96    -128   
224    16     
112    160    
-96    -160   
96     -32    
-592   -112   
208    -48    
64     -64    
96     -80    
176    64     
-64    80     
48     -208   
304    112    
16     -128   
64     -144   
-48    64     
32     80     
64     80     
-144   32     
-32    -240   
-208   -80    
176    -16    
-208   80     
176    64     
-128   -128   
144    -368   
96     16     
16     80     
-240   32     
144    -16    
128    208    
144    0      
-48    128    
-176   -32    
16     -112   
16     16     
48     128    
-688   -144   
288    192    
0      64     
192    -192   
-160   -160   
736    1024   
432    -48    
-1088  -1088  
-256   -160   
-288   720    
368    -352   
160    -128   
-384   -544   
400    32     
48     0      
-112   64     
-128   256    
-880   -80    
224    368    
368    224    
-80    112    
-112   32     
-128   -608   
-176   -128   
192    -288   
-192   -48    
320    416    
48     -16    
-96    16     
-128   -176   
64     176    
-208   96     
32     -32    
144    352    
-240   -48    
0      -256   
-80    64     
208    -48    
-48    64     
-16    64     
-96    64     
-80    -96    
-64    -304   
-288   16     
128    -128   
-256   96     
96     48     
-160   -192   
64     -224   
-96    -32    
256    -128   
-80    -64    
144    -352   
-16    0      
-112   208    
48     16     
-64    -64    
80     160    
-224   144    
208    64     
-224   -112   
64     -32    
-128   -16    
32     -352   
64     112    
16     96     
16     96     
96     -224   
-128   -192   
16     144    
0      160    
0      0      
144    80     
-80    160    
96     16     
-32    -64    
96     -144   
-96    96     
80     -128   
16     -64    
32     -64    
-240   64     
-96    -368   
-512   -48    
-128   -128   
-48    32     
-176   64     
-272   144    
-400   112    
272    -64    
0      -48    
224    32     
-224   -96    
-48    -64    
-144   128    
-224   -144   
96     176    
-48    0      
32     -64    
80     128    
-432   80     
320    224    
-368   -128   
256    272    
-672   -16    
240    80     
32     48     
-96    48     
-64    -112   
32     -32    
-112   -16    
112    144    
16     16     
-16    16     
-192   0      
0      -64    
-48    32     
-112   176    
-80    0      
-176   80     
-192   0      
64     160    
-80    80     
16     -224   
-176   48     
-32    -208   
160    0      
64     -48    
-464   -144   
240    -176   
-208   -176   
-16    96     
16     32     
16     128    
-352   -80    
-48    16     
-1664  0      
208    288    
32     144    
-64    -64    
0      -80    
-256   160    
176    -128   
16     -128   
-128   176    
-144   64     
224    64     
32     224    
-96    144    
-144   64     
-32    96     
-224   0      
-64    288    
16     -16    
144    64     
-80    -16    
-80    -96    
-80    112    
48     -32    
96     80     
-128   -96    
96     160    
-320   -80    
-32    80     
-96    -64    
0      80     
-160   48     
-48    144    
-1424  64     
-48    -64    
32     -160   
0      -256   
144    -16    
32     208    
-240   192    
32     -64    
-64    0      
0      16     
64     32     
-192   96     
48     -64    
-176   -48    
64     64     
-928   16     
0      96     
32     48     
80     -32    
48     192    
-48    112    
64     -128   
-32    176    
-96    224    
-96    32     
0      32     
64     -80    
-16    16     
-128   -16    
-16    96     
-288   128    
0      352    
-80    208    
-672   -3136  
736    768    
-1216  800    
48     -288   
-80    -144   
432    256    
-336   800    
608    -192   
-224   400    
480    -320   
-240   736    
-80    -208   
208    384    
160    -352   
112    384    
-192   -256   
160    176    
-224   16     
336    48     
-160   -64    
256    -16    
-272   112    
224    144    
-304   192    
288    -128   
-224   112    
128    48     
-112   112    
32     -16    
16     112    
112    16     
0      96     
16     112    
64     128    
0      80     
80     64     
-176   16     
128    160    
-48    64     
128    80     
-224   -160   
112    96     
16     176    
176    16     
-160   144    
208    224    
-176   0      
-80    -320   
48     160    
16     48     
64     128    
-208   112    
176    80     
-96    16     
160    -16    
-128   48     
80     32     
-64    160    
96     -16    
-80    -16    
-112   -32    
-64    -128   
16     -32    
112    192    
-144   64     
16     48     
16     -32    
48     16     
48     -208   
32     16     
208    240    
-48    64     
-32    240    
-64    112    
256    128    
-112   -320   
-32    -288   
144    112    
-112   128    
176    368    
-112   112    
-96    -16    
-16    -240   
80     0      
96     112    
32     176    
-64    160    
0      -96    
144    48     
128    48     
32     144    
-16    32     
32     96     
32     80     
0      48     
0      80     
0      160    
112    192    
-48    0      
-48    -272   
80     64     
48     -1440  
48     128    
32     272    
-32    48     
64     96     
80     176    
-16    32     
48     112    
-96    -16    
160    112    
-16    64     
112    144    
-160   -16    
128    -144   
-80    0      
192    -544   
-64    144    
160    96     
-16    192    
0      -32    
0      144    
32     32     
96     224    
-48    16     
352    336    
-320   96     
272    -128   
-48    144    
96     -128   
96     272    
-80    -240   
160    224    
-128   -784   
144    -80    
32     144    
-32    -112   
192    -176   
-112   160    
128    96     
-96    48     
80     48     
112    80     
-16    128    
-16    -64    
480    672    
-496   -64    
288    -176   
0      -1696  
48     0      
-48    -336   
-16    48     
288    400    
-96    -176   
112    144    
-96    16     
48     -160   
96     96     
-48    208    
16     -176   
-96    112    
240    -208   
-48    112    
64     -16    
-96    -32    
224    -48    
-192   0      
336    48     
16     288    
96     -64    
-48    128    
-80    -32    
176    352    
-32    -96    
224    -48    
-128   -16    
160    -176   
-32    32     
128    0      
80     48     
16     48     
16     64     
176    80     
112    64     
-96    208    
-32    -32    
16     -16    
112    240    
208    64     
128    -192   
128    160    
-80    0      
352    -16    
-160   -304   
160    0      
-64    -176   
48     304    
544    2544   
-1040  0      
-704   -848   
-192   -784   
-128   -848   
992    -1136  
-240   736    
432    240    
-336   160    
-176   -496   
368    -64    
144    144    
-80    32     
32     16     
176    -48    
-16    128    
32     -1056  
96     176    
128    -112   
256    -1328  
-80    288    
144    -480   
-160   -64    
144    96     
32     -80    
144    160    
-144   -48    
160    32     
-80    128    
240    -224   
-144   48     
48     -272   
-144   -16    
-272   48     
-32    -112   
144    320    
-48    -704   
-32    -240   
48     -272   
144    -112   
0      -16    
0      32     
208    0      
16     16     
-48    -416   
-48    64     
32     -32    
240    272    
-288   -48    
240    -64    
-32    16     
80     -176   
96     32     
-48    0      
176    128    
-48    -64    
176    -80    
-32    -320   
224    144    
-96    -160   
192    112    
-16    80     
96     -128   
-256   32     
-48    64     
-224   112    
160    -32    
32     -32    
96     -16    
-80    0      
80     -544   
-96    -96    
176    -112   
-32    192    
32     -80    
112    272    
-304   -112   
192    -112   
-160   -64    
-16    -32    
-224   -96    
112    480    
-224   -144   
240    -320   
48     -320   
208    -1008  
-112   -48    
160    416    
-176   64     
256    -48    
-96    144    
-208   -112   
192    48     
-192   -240   
256    144    
-304   -32    
96     144    
-304   -96    
80     -160   
48     0      
64     -32    
-16    144    
288    -640   
-112   -80    
208    -176   
-96    -176   
32     48     
144    96     
16     -112   
48     48     
-304   -64    
160    16     
-448   16     
160    -80    
-48    0      
144    160    
-144   240    
416    -784   
-400   -112   
-16    -64    
160    64     
224    16     
-256   128    
-368   80     
-96    96     
-96    80     
-16    -48    
-144   -64    
16     32     
-608   0      
400    -32    
-48    192    
96     -432   
-80    192    
-144   16     
208    96     
-352   96     
288    0      
-128   112    
-128   -128   
-32    64     
-224   -16    
288    0      
-128   0      
48     -128   
-64    -288   
176    176    
112    -48    
16     176    
-16    16     
0      80     
80     -80    
-80    -16    
176    -80    
32     48     
-128   -32    
128    -160   
-96    64     
96     -96    
0      112    
64     16     
144    272    
-224   -192   
-208   -144   
-208   -1120  
-1408  -464   
80     48     
-32    288    
-96    224    
128    0      
48     256    
112    -512   
-48    96     
-480   -64    
-112   192    
-192   -208   
80     -32    
48     176    
-256   -144   
-112   128    
0      128    
-32    32     
-80    128    
96     208    
-128   16     
-256   -48    
-32    -80    
48     32     
0      0      
0      128    
-112   32     
-32    96     
0      -112   
112    176    
80     128    
-176   80     
256    -2000  
272    -176   
112    688    
-1328  -32    
160    464    
-144   1424   
-272   -320   
-32    -480   
144    208    
64     -208   
-224   -160   
-128   -112   
352    -112   
-144   192    
64     0      
-208   -224   
-96    256    
224    192    
-176   80     
-224   16     
-304   64     
-160   176    
-96    -144   
-32    -16    
64     -160   
-64    288    
128    544    
-272   128    
304    368    
-432   80     
192    16     
-208   -128   
64     48     
-64    128    
64     112    
-384   16     
160    176    
-176   80     
224    144    
-32    -208   
-112   0      
96     16     
176    96     
-160   -80    
32     80     
48     240    
96     160    
-320   -96    
0      -32    
-144   -64    
64     -48    
-96    128    
96     -64    
-32    112    
-16    32     
16     512    
-288   16     
128    192    
32     160    
-48    -192   
16     176    
-16    64     
-144   240    
-128   -16    
64     16     
-144   -64    
48     128    
-1392  -208   
-96    64     
0      32     
0      64     
0      112    
0      80     
-48    112    
48     176    
-160   -80    
80     176    
160    112    
-48    128    
128    144    
-160   -160   
96     0      
-384   0      
-16    16     
160    48     
-32    -80    
208    352    
-176   416    
-176   144    
-224   -256   
112    -144   
112    64     
96     128    
-224   64     
-48    64     
-80    48     
0      32     
80     128    
-96    -128   
224    208    
-48    176    
0      80     
-128   -64    
0      48     
80     64     
-48    96     
64     256    
-144   -64    
16     48     
-128   32     
-48    -32    
-80    48     
208    112    
16     80     
-32    96     
16     -80    
64     -48    
0      144    
80     224    
-16    0      
-112   32     
32     64     
144    128    
-176   -176   
48     144    
-64    16     
16     48     
144    176    
-128   -32    
96     -64    
-16    112    
48     96     
80     48     
-48    -96    
240    144    
-64    480    
-64    96     
32     80     
160    48     
48     208    
-80    -16    
-288   -48    
336    96     
0      144    
336    112    
-384   320    
0      16     
-48    112    
64     -48    
64     -32    
64     176    
-144   -32    
64     256    
-336   -304   
192    -112   
64     64     
0      192    
272    80     
0      288    
368    16     
-32    272    
96     0      
-208   0      
96     96     
-176   224    
-32    0      
-64    -416   
144    -16    
16     -48    
16     240    
32     176    
-16    160    
240    0      
0      96     
-48    192    
-32    224    
-16    112    
-48    80     
192    112    
32     112    
-80    112    
-32    -16    
48     160    
-16    -144   
-16    -160   
32     208    
16     32     
-160   96     
112    -96    
32     128    
-16    64     
-64    176    
-128   112    
128    128    
0      48     
16     128    
560    -1200  
256    1744   
-656   -96    
-208   -1072  
272    400    
-176   -1024  
96     32     
-304   -448   
256    -96    
96     16     
112    64     
16     32     
288    80     
-96    224    
160    144    
-144   64     
64     80     
48     160    
96     -144   
-32    32     
112    -32    
160    128    
-32    256    
144    80     
-128   80     
16     48     
192    176    
48     144    
128    -64    
-176   48     
192    -32    
-32    144    
112    176    
0      -336   
16     96     
-80    -272   
272    144    
-176   -336   
176    48     
-80    -96    
48     112    
16     48     
176    256    
-144   -96    
128    0      
-32    80     
80     -144   
80     0      
-96    -112   
112    160    
240    -80    
-256   144    
128    -1520  
160    144    
-96    -2192  
160    176    
-96    48     
64     112    
80     32     
48     48     
-16    64     
32     64     
96     112    
48     16     
128    96     
-80    -384   
96     96     
64     -240   
48     96     
96     -192   
0      48     
80     80     
-16    32     
160    224    
-16    48     
128    -208   
256    112    
-128   80     
48     -320   
-80    16     
208    -352   
16     192    
0      -64    
224    -48    
-64    -304   
224    400    
-256   80     
112    32     
-32    -32    
208    160    
-80    32     
128    -336   
-48    0      
112    -288   
-64    144    
96     -16    
272    -16    
-32    -48    
80     144    
80     -256   
48     176    
48     16     
96     -16    
-32    -48    
48     -96    
112    -1312  
48     -32    
0      -32    
0      32     
80     112    
96     -16    
-64    0      
128    -80    
16     48     
80     -112   
-80    -528   
144    128    
32     -16    
144    -32    
-1264  32     
224    -320   
96     0      
-80    -160   
-144   -80    
256    384    
320    -32    
192    -128   
-256   0      
-48    176    
224    0      
0      -128   
48     -128   
-80    -192   
-96    -336   
-720   0      
80     272    
64     48     
176    -48    
-16    -128   
-64    -368   
32     -176   
48     16     
208    -96    
-16    -80    
112    144    
176    144    
-96    112    
80     -176   
-32    -208   
-80    -48    
128    80     
-112   -64    
32     -304   
96     -80    
-32    -288   
80     0      
96     -1008  
112    112    
112    96     
-208   192    
208    192    
16     96     
-144   64     
144    32     
-160   32     
-128   -352   
-496   480    
-160   -272   
128    -112   
80     48     
32     -48    
-48    -1328  
-208   -192   
224    -480   
-48    48     
-32    16     
144    304    
-192   -96    
112    0      
-128   -224   
416    224    
-288   16     
96     -48    
128    -32    
128    -128   
16     208    
-128   -400   
112    176    
144    -784   
112    144    
-48    -16    
-48    -224   
160    112    
16     -64    
0      32     
-32    -48    
-400   1552   
-1424  -832   
0      816    
512    128    
224    -416   
-576   -576   
-160   400    
256    -576   
-48    128    
176    -64    
128    128    
-384   -128   
112    96     
-128   -16    
-144   -336   
-432   -160   
128    -208   
-112   192    
-48    -96    
-288   112    
0      -176   
0      208    
0      -336   
-128   128    
-288   -96    
-96    16     
-48    -192   
64     -144   
-496   -320   
432    48     
-240   48     
80     -16    
-160   64     
272    256    
-128   -16    
224    -352   
-144   16     
272    -320   
128    416    
-160   160    
-16    32     
-96    -16    
0      -112   
-64    64     
144    -96    
-64    -176   
16     -16    
16     96     
-96    -112   
-64    80     
96     -400   
0      240    
144    -160   
-736   96     
-16    16     
-192   32     
-192   -240   
224    464    
112    -448   
336    96     
-128   -32    
0      256    
-176   -64    
-432   -48    
96     16     
-144   -160   
64     128    
-272   -144   
32     32     
-48    32     
-112   0      
16     32     
-432   64     
0      32     
64     0      
-112   -464   
-16    -528   
112    -80    
-336   -64    
64     32     
16     -192   
160    448    
-96    32     
0      48     
16     -128   
-192   144    
-96    -32    
-192   -128   
128    0      
-832   48     
-48    80     
0      0      
-48    48     
96     32     
48     64     
-96    -272   
-48    -80    
-128   80     
-64    16     
-96    64     
48     -64    
-80    -48    
32     16     
-128   0      
-400   0      
-128   16     
-80    64     
48     96     
-80    -96    
48     112    
-80    -128   
-16    0      
16     80     
64     48     
0      80     
-64    -352   
-32    -112   
-32    176    
0      48     
96     208    
-192   112    
-464   128    
-48    80     
-96    -224   
0      192    
64     -64    
-16    128    
-144   -80    
112    -128   
-96    -32    
32     32     
16     -16    
-96    0      
64     256    
0      512    
208    272    
-496   -256   
64     176    
96     -224   
80     144    
32     96     
-16    160    
-128   -272   
64     -160   
32     16     
-16    128    
128    272    
32     272    
0      -48    
-128   64     
16     112    
-288   -176   
224    176    
-272   240    
16     96     
96     240    
16     48     
-16    -288   
-256   -240   
224    96     
0      48     
144    128    
-144   80     
0      32     
-80    256    
-112   0      
-96    -208   
-144   240    
-112   -32    
-80    16     
32     80     
48     -208   
-16    240    
160    240    
16     80     
48     96     
240    192    
-144   64     
-64    80     
-192   -16    
112    -48    
112    64     
-48    160    
-192   112    
-208   48     
64     48     
-16    80     
48     80     
-48    144    
-32    64     
-144   -112   
128    32     
0      48     
144    16     
-128   144    
144    96     
-368   -144   
624    320    
32     -656   
560    496    
-176   64     
-400   -32    
592    208    
-448   144    
64     976    
-272   -768   
128    144    
272    -240   
-128   640    
-80    -288   
-64    528    
112    -112   
-48    -32    
16     176    
112    16     
16     112    
-64    -32    
-80    112    
80     96     
-16    160    
144    -96    
-96    80     
0      -112   
-32    256    
-32    32     
-16    48     
0      -16    
-80    176    
112    -48    
-144   112    
32     32     
48     112    
-48    -160   
144    -64    
-112   192    
144    112    
-16    16     
-288   -48    
80     160    
0      32     
208    256    
-208   32     
-16    0      
-32    48     
48     192    
256    -16    
-80    64     
128    176    
-80    96     
112    80     
-80    -16    
128    144    
-144   160    
112    -32    
-32    176    
0      48     
112    64     
0      48     
80     144    
64     64     
32     16     
16     48     
48     112    
-48    32     
128    96     
160    80     
96     80     
-16    272    
-112   48     
64     -240   
112    224    
-160   -80    
96     80     
-144   -32    
128    80     
-80    176    
-16    16     
224    32     
-64    112    
-128   -32    
224    192    
-32    208    
-208   -208   
80     112    
-224   64     
256    -144   
-112   48     
112    -1856  
48     112    
-16    144    
-64    208    
128    -32    
-48    -112   
128    112    
-32    80     
0      16     
16     96     
-80    32     
96     192    
144    224    
96     -64    
-48    176    
-144   -624   
208    -16    
-160   16     
224    160    
64     80     
-32    176    
0      32     
208    112    
-112   48     
-16    32     
96     144    
192    400    
16     128    
-80    -496   
48     16     
48     -672   
160    -48    
-32    -1376  
-176   -96    
240    352    
-192   128    
304    112    
-96    -32    
64     112    
-32    128    
80     160    
64     -128   
-96    -32    
96     -96    
-64    -64    
-16    -352   
240    304    
112    0      
-16    64     
-80    -352   
64     128    
112    112    
-64    144    
112    192    
64     208    
-160   -80    
64     -272   
-144   -80    
144    -336   
80     352    
80     96     
32     208    
96     208    
-128   0      
192    -336   
-160   -80    
160    160    
-32    48     
-32    -16    
160    144    
-128   -32    
80     -64    
-80    144    
16     -816   
448    384    
304    -160   
0      160    
-192   -80    
112    64     
48     -16    
64     272    
-176   -32    
96     64     
-16    16     
80     16     
-32    80     
64     -32    
-48    80     
96     -384   
-64    96     
16     -336   
32     64     
464    -176   
0      112    
-304   -1600  
-16    32     
96     48     
160    112    
32     144    
-32    80     
0      32     
208    176    
-144   32     
256    -128   
64     112    
160    -48    
496    1744   
-176   528    
-496   -256   
-464   -656   
-96    -784   
272    -672   
96     80     
-144   304    
-352   -400   
-32    -256   
112    -144   
240    -240   
-16    96     
-48    80     
272    160    
-144   32     
16     -112   
144    0      
64     -64    
128    -240   
48     176    
224    -224   
-144   -256   
-224   192    
-96    144    
96     0      
0      -864   
384    192    
384    240    
-32    16     
-16    -352   
144    -128   
32     -608   
224    208    
0      -176   
192    32     
0      224    
144    16     
-336   -64    
304    -496   
80     80     
32     -144   
-32    80     
-48    -592   
48     96     
112    -32    
16     96     
-288   -688   
-32    -80    
192    -176   
144    192    
-128   -112   
0      48     
0      176    
-32    -112   
-368   -80    
-64    256    
608    192    
-240   -464   
64     -112   
64     0      
-16    -224   
-80    -160   
64     -48    
32     -160   
-48    16     
-16    128    
48     0      
-144   0      
64     -96    
-752   -48    
80     -128   
-336   -48    
-48    32     
16     -256   
16     -336   
304    128    
48     288    
-32    160    
-48    -80    
128    -96    
96     192    
32     -208   
-160   64     
256    -272   
-224   -208   
-80    -112   
48     32     
32     32     
-80    -112   
0      -288   
64     96     
16     -736   
16     0      
64     96     
-64    -128   
48     80     
-96    -64    
-48    -96    
0      144    
-176   80     
32     -48    
-288   -80    
192    -192   
-1248  -112   
32     -240   
48     144    
144    -240   
0      0      
-64    0      
192    -32    
32     112    
48     80     
-240   64     
112    48     
48     448    
-112   -80    
-96    -224   
128    -384   
80     -80    
160    64     
192    -32    
-128   -256   
304    272    
-512   256    
144    16     
-240   160    
112    -352   
0      -48    
96     32     
80     -80    
-208   -144   
272    32     
48     128    
-288   -64    
48     -160   
144    224    
112    80     
16     -80    
0      -32    
64     -96    
192    -32    
-176   -64    
-16    -160   
-112   -512   
-16    -352   
112    -144   
-64    -48    
160    -32    
64     80     
-768   -256   
96     240    
-592   -160   
80     32     
-96    32     
-80    16     
-64    144    
128    -64    
16     208    
0      96     
80     112    
80     176    
-160   -32    
-672   -144   
0      112    
-224   -288   
208    64     
-112   112    
-48    32     
-64    32     
-48    -96    
96     -112   
-128   304    
16     -48    
-1056  160    
-16    -224   
400    -48    
-16    192    
-256   -64    
16     208    
-32    -128   
112    224    
-128   0      
-160   -32    
96     -80    
32     0      
-64    96     
-112   112    
-96    -16    
-320   16     
-128   -64    
-32    -192   
80     128    
80     0      
-16    224    
-128   -32    
2272   736    
-1184  32     
816    128    
-208   128    
192    -80    
592    304    
-752   -192   
592    512    
464    -96    
-464   -128   
-144   192    
0      320    
256    -64    
-160   368    
-144   -352   
-192   -64    
112    96     
112    112    
32     80     
-128   -96    
64     -32    
-32    80     
160    160    
-48    -80    
-96    80     
-288   208    
96     176    
-16    -208   
-16    112    
128    -96    
-192   16     
-16    32     
144    144    
-16    -16    
-192   32     
80     32     
-272   -208   
48     96     
-48    80     
208    96     
-464   -144   
32     48     
-192   -64    
96     112    
-32    144    
112    64     
-32    16     
128    336    
-432   -80    
288    48     
-128   208    
-16    -16    
112    160    
-320   -48    
272    32     
-176   -16    
32     96     
-560   64     
-48    16     
128    112    
-224   128    
32     -48    
32     32     
-80    144    
112    0      
-16    160    
-96    80     
-32    352    
-368   -208   
256    64     
-128   -48    
48     160    
-144   0      
80     48     
-80    144    
-128   -48    
-16    32     
-496   -32    
-160   96     
112    -192   
96     128    
-192   80     
192    496    
-288   256    
144    32     
-32    -160   
224    48     
-80    48     
-112   144    
-64    176    
-16    64     
160    112    
112    80     
176    176    
-64    0      
192    304    
-96    96     
128    128    
-128   16     
112    64     
96     96     
-128   0      
112    0      
-48    80     
144    80     
80     240    
-176   -48    
112    352    
-64    192    
-32    192    
80     96     
-32    0      
48     224    
-144   -64    
96     -16    
-160   -96    
-16    32     
160    208    
-96    16     
64     -176   
-16    224    
80     32     
-32    48     
-192   -240   
192    128    
-80    96     
160    224    
-32    48     
-304   -48    
176    128    
-112   96     
160    32     
-80    48     
64     16     
0      -112   
0      112    
128    112    
80     -80    
-128   -32    
224    64     
-96    160    
-16    0      
144    64     
-96    -96    
208    64     
48     144    
112    224    
48     464    
-64    -160   
64     64     
-16    80     
128    160    
-32    192    
112    80     
128    416    
-288   -384   
-80    -64    
-128   192    
96     -160   
-64    96     
176    64     
-80    96     
128    192    
-48    -32    
576    -160   
-128   0      
-32    240    
-432   -16    
160    0      
176    144    
-48    -80    
16     0      
80     320    
-144   -128   
128    -336   
-112   48     
352    -208   
-144   160    
112    32     
16     96     
32     48     
96     112    
16     -48    
0      304    
-112   -80    
160    128    
-112   0      
352    96     
-240   -48    
16     -80    
160    128    
48     -144   
544    -224   
-16    272    
32     -48    
-224   48     
-416   608    
-1280  -1072  
640    416    
-624   800    
464    -448   
128    928    
-80    -224   
-64    1120   
-208   -624   
864    272    
-736   -720   
528    320    
-112   -784   
32     112    
-64    -112   
256    336    
-112   160    
16     -96    
-48    -336   
32     304    
96     112    
144    -144   
48     -16    
160    -384   
-192   208    
128    -512   
-208   336    
160    -288   
544    608    
-16    528    
16     128    
288    0      
-176   -80    
0      208    
80     32     
-288   -80    
48     -16    
-336   272    
80     0      
-336   80     
32     -32    
32     224    
-32    -432   
-96    16     
224    160    
-32    224    
-64    224    
48     -304   
384    368    
112    304    
192    176    
-144   -192   
96     48     
-80    240    
144    -32    
64     -32    
-80    32     
112    -1264  
-656   -464   
-112   -848   
192    144    
48     176    
80     304    
-48    -112   
112    176    
-112   80     
64     -224   
128    208    
-48    -80    
128    272    
-80    -224   
96     -16    
-64    -528   
144    80     
32     -16    
192    368    
-208   400    
-32    240    
208    16     
48     96     
144    -224   
48     16     
224    480    
-240   -224   
-112   48     
160    -80    
-160   -352   
352    144    
64     256    
112    96     
-32    144    
-112   -64    
144    288    
224    16     
-736   0      
-48    -416   
-128   -336   
16     -2720  
288    128    
-32    176    
-176   -256   
48     -32    
176    32     
96     96     
112    -416   
0      -112   
176    368    
-128   -128   
208    32     
-944   -112   
96     -80    
-32    -48    
96     -112   
48     48     
-80    16     
64     -48    
352    608    
-176   -528   
-64    0      
-96    -304   
384    48     
-16    0      
80     -320   
-112   -240   
-160   -240   
208    32     
-16    112    
80     -128   
-48    -48    
128    -32    
48     -96    
272    -3056  
-32    -48    
32     -96    
16     80     
144    -112   
-16    144    
-112   -272   
128    -144   
-528   -32    
96     -80    
-1296  16     
160    32     
-80    -80    
176    -112   
80     -80    
80     -1568  
0      -240   
80     -64    
-64    192    
144    -16    
0      96     
32     -192   
-80    -16    
-48    32     
96     64     
-464   64     
0      192    
64     -112   
96     -304   
0      -32    
128    -48    
-32    128    
16     -448   
144    464    
-144   -96    
176    -112   
96     128    
-16    -128   
-64    16     
16     -112   
-352   176    
0      -208   
-592   -48    
480    -16    
112    80     
-64    0      
48     48     
-112   -704   
80     -48    
80     176    
64     144    
-128   0      
112    -32    
96     -256   
160    -144   
-192   32     
16     -192   
-656   112    
-48    32     
-352   32     
96     -720   
96     256    
-176   -592   
352    64     
-144   48     
0      128    
-480   0      
464    -544   
-336   -32    
416    -144   
-288   560    
272    -592   
-192   816    
1056   -592   
-352   528    
160    -528   
-96    576    
128    -464   
-96    320    
208    -176   
-16    16     
-544   -144   
240    32     
-48    80     
48     0      
-80    64     
96     -304   
-224   272    
160    -352   
-112   256    
160    -320   
-96    288    
288    -288   
-192   16     
128    -128   
48     176    
0      -128   
-16    192    
0      -112   
32     96     
-208   -176   
0      -80    
-80    -224   
144    -80    
-144   80     
-240   16     
16     80     
-896   -256   
-208   -16    
112    176    
-736   80     
0      -32    
-352   48     
80     192    
336    -128   
-208   32     
0      64     
80     48     
-160   176    
64     -48    
-592   -160   
48     112    
64     32     
-272   -48    
32     96     
-192   -48    
16     192    
-368   -96    
80     128    
-64    128    
144    -32    
80     144    
64     32     
96     -80    
-16    176    
-48    -176   
176    80     
-16    16     
0      96     
-144   -32    
-240   -144   
128    320    
-320   -192   
160    -80    
-720   16     
-80    96     
-192   -208   
-64    64     
-176   -512   
48     32     
-64    -16    
64     144    
-48    192    
-48    64     
-144   -416   
0      32     
64     496    
32     96     
64     -16    
-272   -176   
-128   -160   
-272   -128   
224    160    
-224   -160   
48     16     
-16    160    
-96    -48    
-64    32     
-128   -304   
160    128    
-96    0      
96     80     
-16    48     
32     288    
-112   112    
-32    176    
-464   -64    
144    80     
32     -16    
32     0      
-80    48     
0      144    
-128   0      
16     0      
-64    192    
16     32     
-208   128    
-16    64     
-64    112    
80     96     
-208   -288   
-112   -208   
16     256    
-208   -288   
144    144    
32     128    
96     272    
-112   272    
16     96     
-48    -48    
352    304    
-304   336    
80     336    
-160   192    
-48    -32    
112    48     
-288   -160   
160    -48    
-256   0      
-176   16     
192    128    
-112   64     
192    144    
-160   112    
16     96     
-16    48     
112    32     
-64    48     
64     112    
-192   32     
32     -16    
-272   -64    
-16    112    
-272   -64    
-112   160    
272    144    
-240   48     
-48    64     
48     32     
-64    32     
480    144    
-416   -16    
208    224    
-240   0      
32     -80    
0      96     
-112   -96    
96     112    
-16    112    
128    144    
-192   -128   
256    128    
-128   16     
224    144    
-208   64     
80     96     
-16    48     
16     32     
32     272    
-192   -272   
400    64     
-16    192    
16     64     
-160   112    
96     48     
96     80     
-192   64     
-48    96     
-128   304    
16     -96    
-176   16     
208    -32    
-64    2256   
-704   -1088  
-176   -720   
832    512    
-336   -704   
160    624    
-592   -224   
960    656    
-512   240    
0      -144   
-256   -192   
-128   336    
352    -160   
-128   240    
0      -336   
176    480    
-16    16     
16     304    
-144   -176   
16     -16    
0      288    
16     48     
-128   144    
192    224    
-32    -224   
128    -208   
112    240    
528    784    
-352   -352   
336    -16    
-224   16     
160    32     
-96    160    
160    96     
304    304    
-16    192    
48     -16    
-16    176    
-16    64     
352    416    
-112   128    
128    144    
112    336    
-160   144    
64     -16    
-160   -16    
160    -16    
-16    224    
176    64     
112    96     
16     112    
-16    144    
80     -32    
-80    48     
32     144    
-80    80     
80     208    
-48    32     
112    128    
-160   112    
-48    96     
16     -32    
112    288    
-176   -96    
128    128    
-96    -80    
80     64     
64     -80    
112    160    
224    -32    
208    176    
-144   112    
128    96     
-16    240    
-96    32     
64     48     
112    128    
-16    32     
-64    -400   
-48    80     
128    -784   
128    144    
-160   -400   
256    -48    
16     208    
-192   208    
-16    480    
-48    160    
96     -336   
96     48     
-48    96     
176    224    
48     80     
64     -336   
112    176    
-64    -16    
112    176    
16     64     
32     80     
-160   -144   
48     16     
96     -160   
32     -96    
-160   16     
80     64     
80     -16    
32     96     
80     272    
144    16     
-112   160    
16     -224   
48     -80    
96     -448   
-176   0      
224    192    
-112   -48    
176    -112   
-48    -80    
-160   -240   
16     64     
-16    64     
272    352    
16     128    
-64    -16    
-80    288    
112    -144   
240    112    
-144   -272   
128    64     
64     -592   
288    288    
-208   160    
448    48     
-240   -240   
64     96     
-64    160    
336    16     
-16    16     
-176   -224   
160    256    
128    112    
144    112    
112    -128   
-64    176    
96     -752   
-16    96     
-112   80     
144    112    
80     0      
-32    128    
80     128    
-16    -112   
80     144    
112    -224   
-48    128    
112    -128   
-16    -48    
80     -528   
96     192    
0      -512   
112    64     
48     48     
-48    128    
208    144    
-192   64     
208    160    
144    -432   
192    224    
-32    32     
32     112    
128    128    
-112   16     
112    48     
32     32     
64     -176   
64     -32    
96     192    
144    -208   
48     16     
256    -336   
-80    -912   
-96    -112   
224    48     
96     16     
32     -64    
80     -176   
128    96     
-64    -80    
32     160    
96     -256   
128    -240   
-112   48     
208    -768   
-32    -112   
-112   80     
96     96     
-672   -3040  
-464   -1152  
704    -368   
-656   -1344  
320    560    
-400   -128   
752    -32    
-656   528    
-128   -304   
432    160    
144    -160   
-32    -32    
-128   -128   
384    -240   
-32    96     
160    -256   
-144   -208   
96     -208   
-160   -720   
384    -320   
-160   128    
176    -96    
-112   160    
208    48     
-112   -80    
64     -128   
64     48     
-32    64     
-368   -96    
80     -96    
48     -64    
112    -48    
-128   -128   
144    32     
32     0      
96     -592   
48     16     
-16    -96    
-80    0      
-48    -64    
80     48     
-32    0      
-32    -32    
-400   -128   
16     48     
-224   -64    
96     144    
-128   16     
256    -272   
-96    -64    
64     -32    
-16    80     
32     80     
48     128    
80     -96    
160    208    
-160   32     
96     -80    
16     64     
96     48     
-144   112    
80     -416   
-320   -80    
64     -240   
-192   0      
96     -160   
128    144    
32     -800   
32     96     
-16    -64    
48     32     
-96    0      
0      16     
-16    160    
48     -96    
-320   -176   
-16    -304   
-368   208    
96     384    
-112   176    
-208   -336   
48     -64    
144    -1504  
16     -16    
64     -96    
64     -80    
32     80     
48     32     
0      368    
-80    -80    
-592   -176   
176    -176   
0      240    
16     96     
-224   16     
-64    -400   
128    112    
48     48     
32     96     
-336   0      
32     -80    
-256   48     
64     -48    
-16    16     
32     -32    
0      176    
-96    -160   
128    144    
0      96     
64     -80    
48     -224   
-16    160    
80     -160   
64     128    
-208   32     
112    -80    
-256   -64    
128    0      
0      32     
64     -160   
-96    224    
64     -160   
-176   -144   
-48    -144   
-272   160    
128    -368   
96     528    
-1504  -224   
544    -80    
-336   16     
-176   -16    
-16    -16    
32     32     
80     80     
-16    16     
32     368    
-288   -80    
224    64     
-288   -64    
256    32     
-528   -80    
64     144    
-528   -240   
-448   -96    
-48    16     
-432   112    
160    -144   
-368   192    
-16    256    
-64    -144   
-80    -96    
112    80     
-48    -96    
-112   -176   
464    128    
-48    -80    
256    80     
-304   160    
-32    -96    
256    -32    
-144   144    
32     0      
-336   112    
-160   -208   
-448   64     
-336   -96    
416    -176   
-352   272    
96     -144   
-32    128    
-192   -64    
112    -32    
32     112    
-32    112    
272    96     
-208   48     
112    -80    
-128   112    
32     0      
16     -48    
176    160    
-368   96     
-16    144    
-80    -448   
352    288    
-288   128    
0      -224   
64     64     
160    112    
-80    16     
112    -112   
-128   224    
-80    -144   
-48    144    
176    208    
192    16     
-928   -96    
192    1856   
-256   -80    
-16    -224   
-512   -112   
-496   -368   
560    -112   
-48    192    
48     944    
-672   -192   
-16    -256   
16     -400   
-160   -144   
-272   32     
272    400    
-144   -80    
-80    -272   
-96    -176   
432    400    
-96    80     
16     -64    
16     176    
64     80     
-16    192    
-48    112    
-80    -144   
-144   -48    
-32    96     
-32    0      
64     64     
-208   32     
176    160    
-208   -48    
-160   -80    
0      -48    
-80    48     
256    112    
-96    128    
96     64     
-128   32     
-32    -144   
80     96     
0      256    
48     -48    
-144   16     
-256   -80    
240    176    
-416   -32    
-32    144    
0      -64    
96     96     
-80    112    
48     -32    
-96    48     
16     -96    
48     16     
-48    -16    
-16    192    
-192   0      
128    16     
-160   0      
112    96     
-272   0      
48     0      
96     96     
-112   64     
64     80     
80     48     
-32    96     
16     96     
48     128    
48     160    
-32    -80    
16     48     
-64    80     
-112   -80    
128    176    
-256   144    
192    272    
-16    -48    
128    64     
0      32     
16     64     
128    288    
-64    -64    
240    -32    
-80    96     
-16    96     
-96    -16    
160    112    
-128   0      
128    176    
48     272    
-32    64     
0      192    
-80    32     
64     96     
64     0      
32     48     
0      80     
-80    96     
-160   -32    
160    112    
-16    32     
80     64     
-176   16     
-32    -96    
32     112    
144    176    
64     16     
-48    128    
-64    144    
176    48     
128    80     
-288   32     
144    -96    
48     112    
-240   -112   
288    64     
-144   96     
48     -128   
-112   64     
-80    96     
304    0      
-48    64     
-176   0      
80     0      
-112   -160   
96     16     
-144   32     
272    144    
32     112    
-32    160    
256    0      
-416   240    
64     48     
256    160    
-192   112    
176    48     
112    32     
-128   96     
0      96     
16     -96    
32     0      
-32    128    
80     -32    
-128   -144   
-32    -16    
-48    -48    
64     -16    
-32    96     
32     160    
48     80     
48     -64    
144    128    
0      112    
96     160    
96     624    
-64    0      
48     -96    
0      112    
128    96     
-16    208    
-96    48     
128    16     
-48    160    
16     -1648  
288    736    
-160   0      
96     32     
80     -48    
112    -32    
160    112    
-192   192    
96     160    
80     16     
-16    -32    
80     -48    
64     80     
16     0      
-32    176    
-96    -768   
64     192    
176    -144   
176    32     
-80    -128   
-32    64     
-128   192    
48     96     
-96    -208   
128    80     
-16    16     
48     64     
160    320    
-80    -160   
0      48     
0      -320   
1344   2880   
-1472  -1856  
704    896    
160    608    
928    -1200  
-512   -64    
-32    512    
-192   512    
512    32     
-176   128    
256    -112   
-64    208    
16     128    
112    96     
0      -160   
0      96     
16     -864   
112    384    
-48    -256   
256    128    
-176   128    
128    176    
-48    64     
64     80     
0      32     
-32    -208   
16     64     
160    32     
64     64     
0      -96    
16     112    
160    -1008  
-144   112    
112    -160   
-144   96     
256    -32    
80     160    
-48    96     
48     160    
0      112    
144    80     
16     128    
32     -256   
80     -16    
96     -288   
96     -48    
64     -80    
80     96     
48     -304   
64     -80    
32     112    
80     96     
48     32     
80     160    
-48    48     
192    -192   
80     160    
64     -112   
80     112    
112    512    
144    144    
32     160    
-192   -48    
64     -208   
-16    16     
128    -32    
-32    144    
-144   176    
64     -288   
32     432    
32     -384   
128    144    
-96    -176   
176    80     
-16    -48    
-32    -192   
-128   -784   
176    -192   
-160   -80    
272    32     
-96    224    
16     -656   
64     -48    
-960   -144   
16     -720   
-48    -48    
-32    -416   
0      -80    
208    96     
48     -224   
-96    -48    
32     -256   
176    -320   
48     96     
-16    -48    
-64    80     
256    -304   
-16    -640   
-224   0      
64     -400   
96     96     
80     -224   
-16    -16    
0      -352   
128    32     
16     -32    
192    160    
-48    160    
80     -32    
80     -144   
16     16     
80     -16    
-48    -128   
64     16     
64     0      
32     -256   
160    -80    
0      -160   
112    -288   
-128   -16    
160    -176   
112    -32    
-32    -320   
48     160    
-160   -256   
32     -336   
-16    -48    
48     208    
112    -208   
0      48     
-416   0      
112    -80    
16     96     
64     -176   
128    48     
-96    -464   
352    160    
-272   -64    
272    -96    
-48    96     
224    48     
-80    0      
48     -48    
-16    16     
128    -224   
-80    64     
48     16     
-96    128    
32     -160   
-192   -64    
48     -160   
-144   -16    
32     16     
352    -160   
-16    176    
64     -240   
-192   400    
-112   -224   
160    -240   
0      64     
32     16     
-176   -48    
-160   -96    
112    -112   
128    384    
-400   -528   
544    64     
-32    -688   
208    128    
-160   -208   
48     32     
-224   -288   
224    -96    
-48    320    
-96    16     
-624   -128   
320    -128   
-160   16     
-240   16     
32     -16    
0      -176   
272    80     
64     -720   
320    320    
128    112    
224    0      
128    160    
64     -64    
-400   128    
112    -208   
-208   80     
16     -16    
-48    320    
-96    -64    
16     -32    
96     -304   
-608   -1856  
224    -752   
32     32     
240    -240   
0      -480   
0      288    
352    608    
-112   224    
-608   -432   
208    0      
-16    -128   
-176   64     
128    -64    
64     -112   
96     -304   
-32    128    
48     -272   
-176   -48    
-32    0      
112    -128   
-208   -144   
224    16     
-16    208    
256    -32    
-256   144    
48     -16    
-112   96     
-176   48     
16     160    
-976   -192   
16     128    
-48    -80    
-32    -32    
-48    64     
-528   -64    
-32    272    
-80    112    
48     64     
-32    -96    
80     160    
176    -48    
-176   80     
-48    -112   
80     208    
0      -80    
64     80     
-176   48     
-80    192    
-80    -224   
-208   80     
-192   96     
96     16     
-176   -32    
-1584  -160   
-208   64     
112    0      
192    -48    
-208   64     
32     -32    
16     -272   
-80    192    
-80    -32    
48     112    
-80    144    
128    -64    
32     64     
-96    224    
-272   0      
-224   -112   
128    64     
-64    -64    
48     288    
-240   -176   
208    -16    
-80    -80    
-128   0      
-128   192    
-16    128    
-32    32     
-16    32     
-112   -80    
-48    32     
0      288    
-368   32     
64     144    
-912   -240   
208    0      
64     48     
-160   96     
112    0      
-64    48     
16     16     
0      16     
48     -64    
-176   96     
-144   160    
-176   -32    
128    112    
-112   -64    
80     176    
-672   -144   
256    192    
-192   -160   
240    272    
-80    -128   
0      144    
-80    32     
96     80     
-128   -128   
32     128    
0      64     
48     64     
-48    128    
-112   0      
160    144    
-160   -112   
-144   96     
-160   -48    
64     64     
-80    96     
-160   80     
432    112    
-288   64     
112    256    
-64    256    
320    80     
-496   -144   
144    48     
-224   16     
112    32     
16     -128   
112    256    
-1024  -32    
-48    -32    
-32    32     
-176   -144   
128    -32    
-160   -16    
-16    -16    
128    16     
-64    -32    
-112   -48    
-48    -128   
-224   -112   
256    160    
-144   48     
48     -80    
-560   -80    
-16    80     
128    0      
-64    96     
16     48     
0      64     
96     -144   
-144   160    
80     -96    
16     -48    
64     32     
-80    64     
16     128    
-80    96     
0      144    
32     48     
96     160    
-208   48     
32     240    
-128   -304   
80     160    
-48    32     
-160   160    
96     224    
-176   -96    
96     -48    
-128   32     
-48    96     
-96    80     
32     192    
48     48     
0      112    
16     -16    
-64    96     
48     128    
-80    64     
96     112    
16     -160   
112    272    
-80    160    
-96    0      
-96    0      
80     32     
-96    80     
-32    224    
48     -144   
-112   -32    
48     160    
32     256    
-432   1216   
-144   608    
656    704    
-800   128    
-400   -864   
544    448    
-192   1456   
-48    208    
-48    80     
272    -48    
-528   -208   
144    -32    
96     144    
144    -144   
0      320    
0      112    
-80    48     
0      320    
288    320    
-64    32     
-32    -128   
64     128    
-64    160    
112    64     
48     0      
-16    -160   
0      96     
-48    224    
128    48     
-96    -96    
256    144    
-144   0      
48     -16    
-16    256    
128    304    
-16    192    
80     -240   
-272   -368   
80     48     
208    160    
-32    144    
64     64     
16     192    
64     -48    
16     80     
32     -96    
64     80     
32     16     
176    -16    
-48    64     
-16    -64    
112    208    
-96    224    
0      -320   
144    192    
-80    -416   
240    416    
-176   208    
-112   -240   
32     -176   
208    144    
-16    112    
64     304    
-128   16     
48     64     
224    -80    
192    0      
-16    48     
-16    -80    
112    112    
0      -800   
64     64     
80     80     
80     208    
-48    128    
64     80     
-16    -512   
-16    -304   
288    -128   
112    352    
112    192    
-64    208    
0      96     
48     -272   
64     128    
16     -448   
64     176    
-48    -432   
144    144    
0      80     
80     32     
32     224    
48     144    
0      48     
64     208    
-32    -16    
208    112    
112    240    
-16    -144   
80     96     
-48    -128   
160    96     
16     -64    
32     96     
32     -224   
48     112    
-64    -16    
80     224    
16     32     
96     176    
-16    32     
80     -80    
32     112    
48     -64    
48     128    
32     -80    
64     208    
-32    -960   
64     112    
48     -2032  
48     208    
-16    16     
-144   32     
64     16     
160    -32    
-64    16     
16     256    
-32    224    
176    0      
-16    0      
144    -192   
128    320    
-64    -32    
48     -176   
160    -16    
-96    -208   
112    -112   
240    144    
-48    -48    
80     272    
-32    128    
-64    0      
80     80     
192    -256   
-32    32     
112    160    
-48    336    
-16    -16    
-80    48     
208    -592   
0      -80    
32     160    
16     0      
112    -16    
-128   -112   
64     144    
-128   -528   
272    192    
-48    -496   
48     -64    
-32    -128   
96     176    
-176   -208   
64     80     
16     -304   
224    -192   
-16    -96    
336    -496   
-160   -160   
144    48     
96     -672   
80     32     
128    -320   
-208   -192   
112    112    
32     -16    
-48    64     
144    -80    
-80    -16    
112    -128   
0      -1280  
272    176    
144    -272   
-32    80     
-256   16     
16     -464   
-80    -128   
192    -560   
32     128    
0      -384   
80     0      
64     288    
160    -144   
-64    256    
224    0      
64     -96    
0      32     
1632   -2256  
-144   -1568  
-32    48     
-144   208    
752    880    
-560   -528   
272    -96    
224    -384   
240    -80    
-288   272    
96     64     
48     64     
48     192    
96     -112   
-80    -32    
16     -64    
64     0      
-224   0      
32     0      
-1520  -32    
64     -80    
0      -32    
48     48     
16     -32    
-16    -368   
0      -64    
256    -80    
-48    96     
144    -144   
-128   0      
128    0      
144    48     
48     96     
64     -96    
-608   -48    
16     -288   
208    -192   
-160   144    
176    32     
128    -128   
-352   -32    
112    -2464  
16     16     
192    -16    
-96    160    
144    16     
-144   -16    
-96    -80    
-48    -176   
-144   0      
112    16     
-528   112    
48     -48    
-32    -208   
0      -352   
32     -64    
288    -1392  
-160   80     
160    128    
-16    0      
0      16     
32     16     
-48    0      
48     80     
-288   64     
96     -64    
-160   -96    
48     80     
-1216  -96    
192    -320   
144    288    
-160   -400   
112    96     
-32    48     
48     -80    
112    96     
288    48     
-352   144    
64     -16    
16     -128   
144    -80    
-240   80     
0      -352   
192    176    
-96    0      
-112   64     
272    240    
-368   -224   
176    96     
-224   -160   
32     224    
48     -32    
-16    32     
80     -240   
0      208    
-208   -224   
144    112    
-64    -80    
-512   64     
64     -400   
16     48     
64     -704   
48     160    
-208   144    
96     48     
48     208    
-144   -16    
208    160    
-192   0      
192    -32    
-176   -16    
96     0      
192    128    
-128   256    
-1376  -96    
-16    32     
-368   -176   
-384   144    
96     144    
-608   272    
0      -32    
0      -64    
-352   -128   
304    48     
-192   48     
224    96     
-160   -96    
-320   -192   
-96    16     
-208   -32    
80     64     
160    32     
16     256    
-144   -48    
-16    80     
-304   128    
16     -160   
-64    0      
-608   208    
-80    80     
208    -80    
-288   -208   
-304   -336   
16     224    
-96    -32    
64     80     
-48    112    
32     32     
-96    80     
16     32     
-112   16     
48     128    
-32    -64    
-176   -16    
-224   -112   
240    -48    
96     784    
-160   -144   
-64    64     
0      64     
-176   -176   
32     32     
-160   48     
112    96     
-288   -96    
32     16     
64     192    
-48    -368   
-192   160    
-48    96     
-32    16     
16     80     
80     -432   
192    48     
160    64     
-128   -320   
0      176    
-16    80     
16     208    
-112   64     
0      -32    
-224   -32    
-32    -80    
-304   48     
48     96     
-560   -16    
16     240    
48     -256   
-16    160    
-128   64     
0      160    
0      32     
352    -176   
-16    192    
-64    32     
-128   80     
-272   832    
-1312  -2336  
960    784    
-224   832    
-368   240    
-656   -256   
-368   -176   
0      896    
-144   -416   
128    96     
-192   0      
-144   32     
-32    -144   
96     64     
-128   -304   
160    352    
-80    64     
32     -80    
-192   -560   
160    176    
144    448    
-1184  0      
64     128    
128    -64    
-272   0      
64     -48    
-48    -16    
-144   144    
0      192    
32     64     
-144   -48    
0      32     
-48    32     
-96    224    
-160   -64    
16     48     
-512   400    
32     128    
-128   -336   
-48    96     
96     192    
-48    144    
128    96     
-16    32     
-64    64     
16     96     
-160   -48    
16     -112   
144    384    
-144   -176   
128    304    
-208   -128   
-32    80     
96     80     
48     64     
-16    48     
-96    -288   
160    288    
224    496    
-336   -64    
144    -96    
128    96     
-16    -48    
-64    144    
-272   -208   
240    288    
0      16     
-32    48     
-48    80     
96     112    
48     96     
-144   64     
32     48     
0      80     
-32    48     
0      112    
208    800    
-176   368    
288    240    
-144   0      
112    176    
64     32     
-32    160    
64     -48    
-32    96     
80     -144   
96     64     
64     144    
-144   48     
176    64     
-64    128    
112    112    
-128   -64    
96     96     
48     208    
112    176    
-128   112    
96     240    
112    368    
-112   48     
0      -32    
16     112    
176    128    
-112   64     
-32    32     
-48    80     
240    384    
-192   -80    
288    256    
-208   64     
112    -64    
-112   80     
112    32     
96     96     
-96    128    
64     16     
-64    -128   
-32    0      
16     -32    
80     112    
-96    -16    
96     160    
-64    224    
144    128    
32     336    
-256   64     
256    -64    
-192   -304   
64     128    
176    80     
64     224    
-32    208    
128    80     
-144   128    
80     48     
112    -48    
-176   -176   
384    320    
-96    -16    
128    112    
-96    -752   
160    -112   
-16    0      
160    192    
32     48     
112    144    
-112   -112   
208    448    
-64    -48    
112    96     
16     -16    
32     32     
-48    -48    
64     -48    
64     176    
-16    -320   
272    576    
-352   -416   
144    32     
48     112    
48     176    
16     128    
0      144    
112    -144   
-176   0      
-112   448    
288    288    
-96    -80    
112    -336   
112    112    
-32    -336   
16     128    
240    -192   
48     176    
0      96     
-16    208    
16     144    
96     32     
-16    144    
112    32     
-16    96     
192    64     
-32    272    
-112   32     
-80    160    
32     -624   
160    160    
48     -160   
-64    224    
0      80     
48     128    
-80    -64    
320    112    
-368   -16    
176    304    
32     -96    
304    112    
-32    -736   
976    -464   
-48    256    
-240   48     
-208   -80    
224    448    
-224   -176   
304    -1712  
-16    -160   
-32    -64    
80     144    
80     16     
-32    224    
32     -48    
128    32     
96     48     
-144   -80    
192    48     
16     48     
80     16     
32     -96    
16     128    
112    -624   
-16    -16    
144    80     
-32    112    
96     400    
80     176    
-64    -80    
96     -480   
32     176    
144    48     
-144   80     
96     -176   
32     0      
128    -288   
-32    144    
128    176    
144    96     
-80    -48    
48     208    
0      112    
192    176    
-224   16     
240    -224   
0      224    
80     -96    
272    384    
-272   -560   
272    96     
-112   -48    
208    96     
-64    -96    
192    160    
-48    0      
32     -240   
96     256    
-496   16     
272    -1008  
-80    -32    
32     -208   
96     -176   
128    96     
96     64     
-48    -64    
192    -192   
0      176    
48     -480   
-96    -1344  
144    -64    
80     -400   
96     144    
-96    160    
0      -32    
96     -240   
112    -512   
0      -160   
64     416    
16     160    
0      -16    
128    -80    
-48    -48    
112    0      
-64    -464   
-16    0      
288    304    
-352   -160   
-848   -336   
80     -240   
-128   -176   
160    -160   
-64    -64    
80     -496   
192    112    
48     -848   
-64    -96    
144    64     
112    112    
96     -128   
-32    144    
64     -160   
128    96     
-496   -240   
80     -144   
-976   80     
48     -64    
64     -176   
-112   -688   
208    -80    
32     -192   
176    176    
48     -16    
-160   80     
96     -144   
32     48     
-48    32     
80     0      
-16    96     
160    256    
-432   -32    
16     -208   
48     0      
144    -208   
0      128    
96     -32    
-32    32     
128    -912   
-272   -80    
208    64     
48     64     
-96    -48    
64     16     
-192   -16    
128    48     
-560   80     
336    -64    
-432   -128   
96     256    
64     0      
-48    -240   
224    48     
-32    -1648  
48     112    
-16    0      
144    0      
16     400    
96     48     
-240   -192   
16     -160   
-352   -32    
-16    48     
-496   -32    
16     0      
432    400    
-320   -480   
176    64     
-80    -464   
-112   -240   
80     -16    
112    128    
-32    -16    
-32    -160   
-192   16     
-16    -32    
48     464    
-256   -96    
48     64     
-32    -176   
64     64     
-32    -192   
160    64     
64     -240   
16     160    
-48    144    
16     -160   
-128   32     
48     0      
0      0      
16     -16    
-32    -16    
32     -112   
-128   -96    
-64    -80    
32     80     
256    48     
-144   112    
-48    -176   
16     32     
-64    16     
112    -32    
-128   -16    
-32    48     
176    0      
80     160    
-160   32     
128    -112   
-608   2512   
368    -256   
-544   -864   
1008   -32    
-592   -592   
-1984  -608   
-560   -400   
-176   -240   
-368   432    
-272   -112   
176    160    
-400   96     
400    -64    
-96    -96    
64     176    
16     144    
160    128    
80     384    
-192   80     
-16    192    
-144   -224   
-112   128    
64     96     
-240   96     
-96    -288   
-192   64     
-272   -128   
384    -48    
-16    176    
288    48     
16     96     
-320   -400   
-16    208    
-496   -144   
320    144    
-96    192    
-16    -480   
32     112    
-80    16     
-96    64     
48     80     
-80    -80    
-176   64     
-32    160    
-32    -48    
0      16     
-112   -16    
-48    0      
80     96     
96     -48    
48     -96    
-128   112    
48     -64    
16     80     
0      48     
0      -48    
224    480    
-128   176    
-224   -160   
-1440  80     
-16    32     
-32    -80    
240    240    
96     112    
-320   -144   
144    224    
-96    -64    
128    64     
-80    16     
-48    112    
-96    128    
-96    -48    
-192   48     
-80    128    
-912   -128   
48     112    
-112   -432   
448    288    
272    320    
-144   -224   
-48    64     
112    240    
16     64     
64     224    
-80    32     
0      -208   
80     416    
144    416    
-352   -256   
-48    -336   
64     64     
-176   -96    
-32    160    
32     80     
96     144    
-128   -160   
112    0      
48     144    
128    288    
-128   256    
-96    0      
32     -16    
128    32     
0      80     
-80    -32    
32     32     
-208   -576   
-80    -368   
80     -208   
192    0      
48     32     
-96    48     
-96    0      
-160   16     
-48    96     
-16    -64    
-16    80     
-64    16     
144    160    
-688   -208   
272    96     
-624   -32    
-96    128    
128    -16    
-48    80     
-48    -32    
144    112    
-176   160    
128    48     
0      80     
16     64     
-176   -224   
-64    -112   
-16    -16    
16     -128   
176    624    
-416   -128   
256    64     
-96    -48    
32     16     
-48    80     
0      144    
96     176    
-64    -32    
128    240    
0      336    
48     336    
-144   16     
80     64     
-112   -96    
80     96     
-32    -16    
96     16     
-16    80     
16     -16    
32     160    
0      272    
-128   16     
208    -48    
-80    176    
96     32     
-144   192    
-96    160    
112    448    
-160   -352   
208    -32    
-32    -96    
96     96     
-224   224    
16     160    
144    240    
-224   -32    
240    192    
96     -96    
48     112    
64     96     
32     128    
-32    0      
96     64     
-48    144    
48     0      
32     384    
-112   -80    
112    160    
32     -16    
64     160    
-112   0      
32     48     
16     160    
176    32     
-128   64     
112    224    
-80    -256   
48     224    
-224   128    
128    64     
-192   496    
160    256    
832    1104   
-208   16     
-288   0      
416    -672   
80     -128   
-528   -96    
464    32     
-16    256    
48     -336   
-128   528    
160    -352   
0      560    
160    -416   
0      256    
64     -16    
-96    192    
192    48     
96     96     
-64    16     
48     160    
-96    192    
144    -160   
-128   208    
272    -112   
-304   160    
224    -48    
32     240    
192    16     
-80    288    
-112   -80    
-80    272    
80     -32    
80     224    
0      -96    
160    352    
-176   0      
128    160    
-144   -208   
48     160    
-16    -32    
32     -352   
48     80     
-16    -624   
64     32     
0      48     
32     112    
80     208    
304    16     
-224   96     
112    96     
64     -16    
-96    128    
160    -96    
-16    224    
-64    -112   
112    -336   
-112   144    
96     -384   
144    128    
-16    96     
96     96     
0      96     
128    144    
16     48     
64     48     
80     176    
-80    112    
80     128    
-16    16     
128    160    
-48    16     
80     32     
64     16     
0      48     
112    -1552  
-16    -144   
96     16     
-64    32     
-16    112    
64     176    
-80    208    
-32    -64    
256    0      
224    -32    
-128   -160   
240    112    
-192   304    
96     -160   
48     80     
48     -400   
64     64     
32     -640   
16     -96    
80     0      
208    288    
-144   -176   
144    112    
16     48     
32     48     
176    0      
-128   -192   
112    16     
-112   -80    
128    64     
48     -48    
48     32     
0      -800   
-96    0      
208    240    
32     432    
64     128    
0      192    
160    128    
-112   -48    
160    -160   
-112   224    
64     160    
64     -256   
176    96     
32     -112   
-32    0      
128    -32    
16     144    
16     48     
144    0      
-288   -528   
192    528    
192    208    
-64    -112   
160    -144   
-64    -288   
96     112    
112    -16    
96     192    
0      -352   
-32    128    
16     -512   
-160   48     
192    128    
-64    -64    
144    80     
-128   80     
192    160    
96     448    
128    160    
-96    -208   
80     192    
48     -224   
112    112    
0      -128   
128    48     
128    16     
-368   -1248  
224    -144   
96     -464   
-48    272    
-544   0      
160    -208   
240    64     
-112   -480   
-80    -48    
80     -1536  
80     -80    
80     240    
-96    -80    
480    64     
-16    96     
-64    -208   
-32    -32    
-64    -48    
272    -256   
96     112    
-224   -208   
416    -96    
-368   -592   
176    -256   
128    -512   
-48    -64    
96     -240   
0      -64    
48     448    
-48    -96    
0      -64    
96     208    
112    64     
0      16     
-400   -16    
112    -112   
-48    -96    
48     80     
-32    -64    
96     -128   
96     96     
144    -1280  
-32    -192   
1504   -368   
-896   -1632  
160    224    
496    784    
48     -592   
-672   -192   
-64    -544   
544    960    
-960   -288   
304    -240   
-288   -160   
384    112    
-48    128    
0      80     
-208   -416   
224    128    
0      64     
688    -176   
-480   240    
-160   -160   
0      128    
16     -48    
0      16     
-80    -288   
-64    192    
208    -368   
32     48     
-608   -464   
80     -240   
-192   -272   
224    48     
96     112    
64     -128   
64     16     
-48    48     
144    -304   
-48    32     
128    -32    
-320   192    
-208   -80    
-224   112    
80     -96    
-96    -192   
16     144    
112    176    
112    -320   
-112   160    
432    464    
-16    144    
80     192    
0      -208   
16     -64    
144    48     
-480   -192   
16     -96    
-96    -48    
192    -176   
-368   -112   
48     -368   
-96    -528   
-16    -320   
112    176    
-176   -240   
80     -112   
-208   16     
144    256    
-704   48     
0      -288   
-208   -80    
80     -48    
-16    112    
64     -128   
-208   80     
-16    -432   
48     32     
160    -272   
176    240    
-320   192    
-64    -96    
-224   -432   
144    -144   
-96    32     
16     -112   
-272   48     
112    -128   
-352   -48    
224    -80    
-112   192    
-128   -384   
-32    112    
128    -32    
-80    48     
-240   64     
112    -16    
128    336    
-192   48     
64     0      
80     128    
-16    288    
128    -176   
-144   0      
-32    -128   
32     192    
-144   -240   
96     0      
-16    192    
-144   400    
-368   -208   
-640   0      
-144   -112   
-224   -96    
-144   96     
-16    -160   
80     16     
48     144    
-80    16     
-48    -64    
-32    48     
-576   -304   
176    48     
-48    96     
-48    96     
80     0      
48     -48    
-208   48     
-144   0      
112    256    
-912   48     
48     64     
-16    64     
208    160    
-336   16     
336    176    
-320   -32    
192    80     
-336   80     
208    -32    
-80    32     
-128   -96    
48     96     
-48    16     
-16    0      
-416   0      
80     176    
-144   -48    
128    96     
-176   -64    
144    176    
-112   -48    
-96    80     
64     16     
-128   64     
-144   -48    
208    48     
-160   -32    
64     64     
-112   0      
-64    -176   
0      32     
-1216  -64    
-32    208    
-144   -272   
32     32     
0      -48    
-96    32     
-80    48     
80     16     
-64    -16    
64     64     
-32    128    
0      0      
-16    96     
112    -208   
32     368    
-320   -80    
-16    160    
48     96     
-48    64     
0      32     
48     -96    
0      80     
-16    -112   
80     -96    
64     272    
0      112    
-272   80     
-128   32     
80     32     
16     -16    
-96    0      
64     48     
-1584  -48    
-48    112    
32     -16    
32     128    
48     48     
2064   2768   
-1168  1152   
-1744  -1376  
-48    624    
-176   -752   
-272   416    
-320   -336   
-112   576    
432    -464   
-608   160    
0      -336   
-160   368    
240    32     
48     256    
-112   -64    
64     -16    
-48    224    
128    48     
-48    192    
80     -48    
-64    208    
176    -112   
-96    368    
48     -240   
-112   176    
112    -160   
-272   224    
240    -80    
-192   144    
160    16     
-80    144    
64     -144   
-48    192    
32     64     
128    224    
32     224    
-128   64     
16     32     
-176   48     
48     96     
128    112    
-32    0      
-64    80     
-112   -32    
112    64     
-112   112    
64     64     
-32    112    
16     80     
-48    96     
-16    32     
-80    -32    
32     112    
-80    48     
16     144    
32     48     
16     0      
176    16     
-16    176    
-48    96     
0      96     
32     48     
32     80     
-16    112    
-176   16     
96     144    
16     0      
48     64     
-144   0      
-16    64     
32     48     
32     64     
16     80     
16     80     
240    144    
-144   -80    
112    32     
-256   144    
-48    -16    
112    -48    
0      128    
160    -160   
192    48     
-160   16     
96     256    
-144   128    
16     208    
64     80     
128    96     
32     48     
96     -16    
-80    128    
-96    160    
64     208    
-144   -32    
-96    -208   
0      192    
112    176    
16     272    
-80    112    
48     192    
16     32     
112    80     
-16    160    
16     80     
-32    80     
64     0      
16     128    
16     -96    
-96    80     
176    256    
-96    -64    
64     192    
-64    80     
144    160    
144    416    
-128   128    
80     0      
-128   32     
304    256    
48     176    
96     32     
-144   144    
80     144    
-64    32     
240    864    
-48    272    
128    -80    
-96    -16    
64     -1488  
16     0      
-16    0      
144    192    
-96    32     
112    96     
-112   16     
112    32     
-64    -48    
144    96     
96     80     
32     208    
-224   -80    
208    -480   
-144   48     
256    -1664  
-128   48     
-32    64     
144    64     
48     112    
80     64     
-16    64     
0      48     
64     208    
128    128    
-144   -16    
144    272    
-112   272    
64     -304   
112    128    
112    16     
48     -48    
-48    -464   
96     96     
48     112    
272    16     
-112   256    
-96    -80    
144    -176   
208    240    
-224   -16    
48     -32    
-112   144    
192    -64    
128    32     
32     -112   
48     0      
176    -560   
-208   96     
176    -336   
-112   144    
80     80     
64     16     
32     32     
48     80     
160    -144   
-80    -32    
64     48     
0      -64    
16     96     
144    -240   
-80    416    
-48    -272   
-176   128    
208    -624   
144    208    
-16    48     
-336   320    
-1568  -1248  
880    256    
-352   944    
512    -144   
240    688    
-224   -1312  
528    112    
96     592    
400    688    
-336   -656   
352    240    
256    -224   
-32    320    
-384   -544   
320    320    
0      112    
-192   -192   
320    288    
448    144    
512    384    
-336   -288   
48     224    
288    -192   
-16    144    
160    96     
192    -160   
-48    160    
96     288    
0      -240   
-64    160    
-80    0      
304    272    
-176   32     
112    -176   
32     192    
272    464    
-48    192    
96     -176   
-96    0      
128    -176   
144    96     
-16    -224   
192    240    
16     112    
32     -496   
-192   80     
-480   112    
-48    -1200  
192    -16    
80     -1248  
-32    48     
112    -112   
-80    -160   
160    16     
96     16     
112    176    
144    176    
-32    -80    
32     -64    
-160   16     
-112   48     
-384   -240   
256    0      
-176   144    
64     -240   
64     -208   
96     -1632  
-96    -288   
128    96     
-16    0      
48     -80    
0      32     
80     48     
112    0      
160    112    
48     704    
-208   272    
176    -64    
160    112    
-80    -272   
192    -160   
272    192    
-272   96     
96     -304   
96     -80    
240    -320   
-48    64     
64     -432   
144    96     
16     -96    
16     -80    
0      64     
0      -32    
-288   -160   
64     -64    
0      -64    
64     -16    
96     96     
0      -640   
112    -64    
128    32     
-128   48     
144    -144   
96     -224   
-128   112    
64     -192   
-32    128    
-144   -192   
-128   -96    
48     -64    
128    -48    
96     144    
-80    0      
32     -1344  
-208   -32    
224    -1632  
64     144    
-32    0      
224    256    
-240   80     
208    80     
-224   -16    
0      0      
144    -80    
-160   -112   
-1920  -432   
208    -176   
-144   -304   
64     -16    
128    48     
64     -352   
0      32     
176    48     
-96    -144   
144    -112   
-32    0      
48     240    
144    -112   
-80    64     
-128   -48    
-224   0      
224    -464   
-112   -16    
128    -160   
224    112    
32     -1024  
-48    112    
112    -16    
64     -64    
-64    16     
32     96     
-320   80     
-16    -48    
-192   16     
16     -16    
-32    -192   
208    -48    
-320   96     
128    -368   
-32    240    
64     -352   
48     160    
-128   128    
32     32     
64     0      
-112   0      
-192   160    
-256   -80    
-48    -48    
112    -192   
96     96     
128    48     
-240   208    
-48    -336   
128    224    
176    16     
-96    224    
-112   -96    
176    0      
-112   112    
0      96     
-208   -80    
192    -144   
176    112    
0      64     
0      -16    
48     -64    
-272   32     
-368   -192   
32     96     
-160   -96    
-816   -96    
16     32     
-240   32     
-96    144    
-464   64     
592    -192   
-144   176    
1024   16     
-416   368    
-224   -1120  
-432   208    
224    192    
-464   80     
-48    0      
-400   -32    
384    144    
-416   16     
-304   -32    
-128   384    
176    -144   
-48    192    
-432   16     
-64    128    
-16    -192   
112    -112   
-128   144    
192    160    
-240   -128   
96     -48    
16     96     
-160   -16    
-32    160    
32     128    
16     32     
-352   -80    
-32    32     
-1136  -112   
-48    96     
-240   0      
32     64     
-48    -112   
16     176    
32     -192   
32     96     
0      32     
-48    96     
-48    112    
32     16     
-32    0      
-176   32     
-48    -32    
-16    -64    
-64    128    
-272   48     
-128   -16    
-48    -176   
16     80     
0      -80    
48     -16    
80     112    
-176   160    
-32    32     
48     -96    
96     48     
-64    48     
32     112    
80     112    
-16    48     
-112   80     
-48    192    
-16    32     
32     96     
96     -32    
-160   112    
-144   -32    
96     -80    
-80    0      
32     112    
-96    32     
0      32     
80     48     
-176   -64    
16     80     
-144   480    
-208   16     
144    192    
-48    240    
16     32     
-160   -80    
64     0      
144    352    
-160   16     
-32    48     
32     16     
-128   -176   
-48    96     
-192   -48    
16     176    
-304   -48    
0      160    
-848   240    
-96    -16    
-16    -144   
-96    -32    
160    208    
80     160    
-112   80     
16     80     
0      32     
64     32     
-48    32     
-64    -16    
32     112    
-16    16     
48     176    
-272   -112   
-32    32     
16     160    
48     48     
112    176    
-144   -48    
128    160    
-160   32     
96     16     
-224   0      
144    112    
0      48     
192    160    
-288   -80    
32     144    
176    496    
-80    -144   
16     32     
0      160    
32     -80    
32     32     
-208   160    
96     64     
-16    48     
16     -176   
-16    208    
-176   -96    
144    320    
-368   -64    
208    32     
16     192    
-48    96     
32     16     
0      32     
192    192    
-16    144    
-48    -128   
112    48     
48     240    
-64    -32    
-16    80     
16     112    
-64    160    
48     16     
32     368    
128    -128   
96     176    
-48    64     
96     80     
-48    -16    
96     48     
128    208    
-48    -48    
16     112    
-144   16     
96     64     
16     -64    
48     176    
-208   -96    
-96    144    
-32    96     
-48    32     
96     192    
-64    48     
128    80     
-32    352    
-128   48     
-48    -80    
64     96     
112    0      
-64    48     
-64    32     
96     144    
-176   80     
0      80     
96     176    
-16    80     
64     80     
48     80     
192    112    
-208   -48    
80     96     
-160   112    
320    32     
0      80     
48     208    
1664   -2352  
-384   -880   
720    832    
-304   352    
752    432    
-384   -208   
-496   -128   
624    0      
-336   -16    
32     -480   
288    640    
-224   16     
-64    -128   
-32    192    
16     -80    
-144   -48    
160    -464   
144    672    
-32    -224   
-32    352    
-64    -240   
0      -32    
224    -128   
48     208    
-48    -64    
144    96     
-192   96     
160    160    
-32    -464   
-112   -64    
144    -112   
0      16     
192    144    
32     -2192  
-160   144    
272    -80    
0      128    
-32    128    
192    144    
32     32     
16     144    
0      -48    
64     96     
32     192    
-48    80     
32     -48    
48     -16    
224    288    
-80    -256   
80     48     
-32    128    
0      160    
160    0      
-160   272    
128    128    
64     80     
-80    16     
112    208    
-16    32     
96     0      
48     176    
-48    -80    
144    32     
32     -80    
-48    144    
0      -640   
64     96     
112    256    
-32    48     
96     -96    
32     64     
112    96     
-80    144    
-32    -112   
-64    -560   
144    208    
-304   -352   
240    96     
-48    -128   
96     160    
16     -272   
64     16     
192    -2608  
-240   32     
160    -80    
80     480    
-240   -32    
368    48     
-80    -16    
64     16     
-64    -16    
112    32     
80     288    
-96    -112   
160    176    
-208   -432   
256    80     
64     -192   
48     96     
-128   -64    
176    96     
-80    128    
128    208    
-144   0      
256    -336   
-192   32     
272    -48    
-32    208    
128    -352   
-32    112    
-16    -208   
160    128    
0      -48    
80     -32    
-80    32     
-16    80     
160    16     
96     96     
176    224    
-176   16     
352    176    
-272   -112   
96     -32    
-32    -160   
112    -48    
-32    -112   
48     -16    
240    -144   
-32    32     
-16    96     
160    192    
0      144    
528    48     
-224   -336   
224    368    
-144   448    
320    -128   
-16    80     
-144   32     
16     160    
208    -32    
80     0      
-64    -352   
-144   -256   
176    208    
-32    -224   
80     -32    
-80    -48    
64     -176   
0      -144   
64     -560   
160    32     
64     -880   
16     -16    
-16    -80    
-128   -224   
48     -48    
192    -192   
64     64     
-96    48     
-16    -464   
32     -112   
-288   -16    
0      -240   
-16    288    
304    -176   
208    -288   
272    -192   
0      -128   
-64    304    
112    -352   
192    272    
-80    80     
-160   -288   
-192   -160   
352    96     
288    -224   
-96    -32    
-48    240    
-432   -128   
-80    -240   
144    -64    
-64    -848   
48     -80    
16     -80    
64     -64    
0      48     
-224   80     
80     -96    
80     224    
-112   -128   
128    -160   
-160   48     
176    -32    
-1040  -112   
0      -144   
1408   -1616  
-256   -336   
1296   -144   
-128   -320   
384    -656   
16     -1840  
240    -144   
32     -48    
192    240    
-352   -96    
304    416    
-144   -352   
32     0      
-192   -160   
256    -16    
-448   224    
96     32     
-288   80     
112    -368   
-32    -16    
96     -752   
-96    96     
304    144    
-160   -48    
-16    -160   
-208   112    
160    224    
80     -144   
-128   -192   
64     -128   
64     -112   
16     -128   
-32    64     
16     -208   
0      64     
160    -272   
-48    176    
128    0      
0      -240   
-144   -304   
64     -80    
-144   80     
144    16     
-496   0      
32     -160   
-320   -48    
-64    -256   
64     -48    
64     -128   
-32    64     
160    -224   
-16    224    
-224   80     
16     112    
-48    32     
-16    -256   
32     -352   
288    96     
-80    272    
48     160    
-240   -48    
112    80     
48     -48    
16     -288   
224    112    
-16    -32    
-64    192    
-128   96     
96     48     
16     32     
64     -48    
-64    32     
32     -32    
32     96     
64     0      
64     32     
64     48     
-128   0      
16     -224   
48     208    
-240   -128   
-800   96     
-80    -64    
-48    176    
-176   -96    
-448   -48    
-128   16     
48     16     
32     80     
16     0      
-64    0      
-256   -272   
0      96     
-496   -128   
0      128    
-112   -352   
-80    64     
-96    48     
112    16     
-176   -80    
0      32     
16     48     
-112   96     
-16    64     
64     16     
-176   0      
64     -112   
-32    64     
0      -80    
32     160    
32     48     
-144   -16    
0      64     
-208   -144   
64     -96    
32     176    
48     48     
-976   -176   
-160   -16    
272    224    
-32    -48    
-128   0      
-16    64     
176    -16    
0      96     
-240   -320   
64     192    
-320   -64    
384    64     
-384   80     
128    -144   
-144   160    
-368   -128   
64     80     
-112   -128   
112    272    
-256   -112   
208    96     
-160   -384   
32     64     
-144   0      
112    96     
48     208    
16     -48    
-128   160    
-416   -352   
80     -160   
48     0      
208    192    
-288   96     
-32    80     
-160   0      
208    112    
-48    -16    
-144   -240   
16     -32    
240    -128   
96     256    
-320   32     
-96    96     
-256   -48    
160    96     
-16    96     
32     48     
-464   96     
-64    -64    
112    -192   
96     -16    
320    96     
96     208    
-128   -16    
-144   160    
-160   144    
-16    48     
16     -64    
112    336    
-128   144    
-256   -48    
-160   0      
-176   -176   
-32    112    
-224   -32    
32     128    
0      64     
-112   48     
112    272    
-112   -48    
192    -64    
-48    96     
112    32     
-32    368    
-64    -32    
-16    96     
-48    32     
-128   -112   
16     64     
-496   -1168  
864    2480   
-1216  768    
112    -192   
-192   -1360  
1152   336    
-112   1072   
96     432    
112    304    
272    -80    
-96    304    
-288   -256   
112    256    
-48    -48    
192    224    
-576   16     
-64    -336   
-16    64     
192    304    
48     304    
-288   -80    
32     192    
-112   48     
48     32     
-240   -192   
48     96     
48     96     
-64    -16    
-208   -192   
64     16     
96     96     
-16    176    
-16    96     
-32    80     
64     64     
16     -96    
128    128    
-144   80     
112    80     
32     112    
0      80     
-64    0      
64     128    
-16    -96    
-32    128    
96     176    
-64    32     
160    320    
-176   -112   
272    80     
-320   96     
256    80     
-144   -16    
256    208    
-272   80     
144    0      
-48    -96    
-16    192    
-64    0      
128    80     
-16    96     
48     112    
-80    32     
96     -64    
48     192    
-64    160    
112    16     
-48    16     
176    0      
-112   80     
-64    80     
80     80     
-16    112    
0      0      
-16    48     
192    208    
-128   160    
128    80     
64     48     
48     176    
-96    48     
128    96     
-80    0      
112    160    
-336   -64    
240    -176   
96     64     
-96    112    
48     96     
80     144    
-48    48     
80     160    
-32    128    
160    160    
-64    112    
-16    64     
96     64     
-16    96     
0      0      
96     48     
32     80     
-32    -80    
-80    -16    
64     16     
32     -1456  
192    352    
-48    176    
-80    32     
0      160    
32     -16    
160    112    
-144   -32    
-48    128    
144    0      
32     -160   
128    32     
-64    128    
-96    -160   
224    176    
-224   -912   
96     80     
208    96     
48     -96    
-320   96     
176    64     
288    64     
-192   240    
-64    192    
352    16     
-176   32     
-96    96     
240    160    
64     -32    
-64    160    
-128   -128   
304    176    
80     160    
16     32     
-208   48     
160    272    
128    80     
128    224    
-240   -368   
32     -96    
-160   32     
320    352    
-48    384    
144    -192   
-128   0      
48     -960   
64     -32    
32     -1552  
176    48     
-80    -64    
112    0      
-32    160    
-16    -224   
32     176    
192    240    
-48    -48    
96     -112   
64     112    
144    176    
-112   -64    
16     -336   
304    336    
176    176    
32     0      
-128   -32    
144    -160   
32     192    
32     64     
48     416    
-96    -64    
80     -48    
-32    80     
16     -16    
-16    112    
16     64     
112    -240   
160    128    
48     -256   
16     96     
-16    -976   
80     304    
-16    -944   
64     112    
96     224    
-32    0      
-80    -48    
160    -304   
-32    256    
176    112    
-96    224    
-48    -192   
0      192    
80     -80    
96     -1824  
1200   480    
-224   432    
-64    464    
-384   432    
176    -128   
-880   -880   
-208   -816   
416    80     
80     464    
96     -32    
96     320    
112    -224   
-80    -32    
160    48     
-80    -144   
176    -400   
32     -112   
0      64     
80     208    
96     128    
-80    -48    
432    192    
-208   -48    
80     48     
-48    -80    
80     448    
32     144    
160    112    
-240   -144   
128    80     
80     -240   
-48    -1072  
48     48     
48     -1024  
-48    0      
-640   480    
128    -1152  
-112   -240   
-96    -432   
160    -176   
48     64     
-112   -144   
176    48     
-32    -256   
0      176    
16     64     
80     -720   
64     224    
-32    -304   
48     32     
-528   -32    
80     -256   
-64    -128   
256    32     
-128   -112   
208    -256   
16     -48    
208    -96    
-80    -96    
192    -144   
80     80     
-128   -160   
128    128    
96     -176   
-16    -288   
-384   -16    
32     0      
16     96     
80     -64    
64     -32    
48     -112   
32     -192   
48     -240   
112    64     
-32    -288   
-64    -16    
-32    64     
-144   -96    
-80    -160   
224    -192   
16     -48    
144    -208   
-560   96     
112    -320   
-16    48     
-48    -272   
64     -176   
160    -432   
160    48     
32     -96    
-128   96     
-48    -128   
48     48     
-48    48     
144    160    
-80    256    
-16    -144   
-80    -80    
80     -112   
96     48     
16     -16    
0      80     
80     -144   
32     112    
16     -1280  
96     80     
48     64     
48     32     
32     96     
-16    -144   
-80    -112   
-64    -80    
-96    -32    
64     -96    
-224   96     
208    96     
-144   304    
16     -336   
-112   -48    
16     -304   
224    352    
-48    -224   
32     -48    
-336   -288   
544    -416   
-496   112    
272    192    
-480   -176   
0      -224   
0      -32    
144    -64    
-1200  0      
32     -496   
224    432    
-176   144    
-16    272    
-32    -48    
-144   -272   
-80    -240   
16     16     
-16    -48    
-32    -80    
0      16     
16     16     
-32    -288   
-16    -32    
96     192    
16     16     
-16    128    
96     -128   
128    -16    
-160   160    
-32    -16    
32     192    
-272   -464   
352    272    
16     112    
32     -32    
64     -128   
-48    160    
0      -64    
-432   0      
144    -128   
112    128    
-48    -560   
-80    -912   
16     208    
224    288    
-144   112    
48     96     
-176   16     
96     -112   
-32    288    
-80    -112   
-16    240    
16     -32    
-272   -64    
-336   -272   
16     -32    
-432   -64    
-160   32     
0      144    
64     -240   
16     16     
16     -64    
-400   64     
48     16     
16     64     
32     64     
-32    224    
-176   -240   
-64    240    
16     -192   
-32    112    
-48    -16    
448    -1808  
-32    -528   
144    352    
-32    48     
592    672    
-512   -384   
-528   336    
-192   -128   
352    -384   
-160   -112   
160    96     
48     160    
-144   96     
32     80     
64     112    
-256   -144   
-16    80     
-128   80     
-128   0      
-32    -80    
-80    -32    
-96    80     
-176   80     
-1664  -16    
-176   -32    
-48    -160   
192    160    
-64    -96    
80     96     
-144   -16    
80     -64    
-112   64     
192    112    
-112   128    
96     16     
64     64     
-272   304    
-64    -80    
-784   -112   
0      96     
32     32     
192    80     
-208   -96    
96     -32    
-144   112    
16     -48    
32     112    
-192   16     
432    32     
-384   48     
160    64     
-32    32     
48     64     
-304   112    
48     128    
-208   32     
16     -48    
96     128    
-160   -96    
160    -32    
-288   192    
112    96     
-144   -48    
48     64     
-48    -80    
-16    128    
-128   -32    
144    -48    
-416   -96    
32     112    
-1552  -192   
112    16     
-48    160    
176    80     
-64    48     
80     128    
-48    192    
64     144    
-64    -80    
128    64     
-32    80     
16     64     
128    384    
-368   -224   
240    80     
-240   -144   
176    192    
-160   32     
96     112    
-80    16     
16     112    
-64    32     
96     224    
-32    144    
-32    -64    
80     64     
-304   -144   
224    224    
-192   -96    
16     192    
-192   -16    
144    0      
0      48     
-96    112    
-48    160    
144    304    
-128   160    
80     -112   
-32    0      
-176   0      
128    48     
-128   0      
80     128    
-112   80     
-112   160    
144    -144   
-144   -80    
112    32     
-176   -112   
304    -96    
-128   48     
-80    32     
96     80     
160    32     
-176   16     
48     80     
96     16     
-64    80     
-96    -16    
0      32     
128    -128   
-144   -48    
-16    48     
288    0      
-48    224    
-224   -64    
192    224    
-80    -48    
0      96     
16     16     
48     48     
-32    64     
0      128    
-96    16     
0      64     
112    320    
-96    32     
-32    16     
-16    64     
0      48     
-48    32     
-48    48     
16     64     
128    384    
-176   32     
112    48     
-256   -48    
160    96     
-416   -112   
208    -16    
-48    288    
112    160    
-32    48     
80     192    
96     240    
-80    -16    
-80    -160   
144    176    
-16    80     
0      -32    
32     320    
-144   -64    
208    208    
80     256    
0      160    
-224   -192   
240    160    
176    176    
-16    80     
80     304    
-32    48     
-32    64     
144    -112   
32     176    
-160   176    
-160   192    
80     -96    
48     16     
48     48     
-48    64     
-64    16     
128    32     
-48    304    
-128   -48    
16     160    
-16    -16    
-848   80     
848    1120   
-1136  -544   
960    -80    
-688   -656   
-192   -544   
528    1456   
-432   0      
176    -464   
1040   -464   
-240   96     
-224   96     
96     160    
352    272    
80     0      
-208   224    
176    176    
64     304    
64     128    
96     144    
-48    -448   
64     -48    
128    320    
112    -144   
-112   -192   
96     -96    
288    352    
48     288    
0      144    
-96    0      
176    128    
-16    -48    
192    224    
304    544    
-80    32     
320    144    
-160   -160   
352    352    
-192   -896   
528    160    
-384   -1520  
352    64     
-112   80     
176    176    
-128   0      
-32    -48    
96     16     
-80    336    
-144   -144   
-16    80     
80     -112   
-16    48     
128    64     
-80    -752   
-48    48     
208    -816   
-64    336    
-208   -784   
224    224    
-128   -16    
144    256    
-208   16     
112    96     
64     80     
-128   16     
112    160    
48     -96    
224    112    
0      -128   
48     64     
64     96     
64     80     
64     -320   
16     96     
-112   -80    
192    256    
32     288    
-176   192    
-48    128    
-48    -560   
32     32     
112    64     
160    -48    
32     -288   
0      32     
208    -576   
16     80     
16     -832   
128    0      
80     80     
64     128    
32     176    
64     48     
-144   -48    
288    -336   
0      176    
208    288    
-128   224    
128    -128   
0      64     
112    -224   
144    80     
-16    -32    
64     64     
96     96     
48     112    
-48    -192   
144    272    
224    704    
96     112    
-112   -96    
-16    -16    
240    32     
144    -176   
-64    224    
-32    -112   
256    288    
-112   0      
0      -80    
128    112    
80     -592   
80     32     
-1136  -48    
32     -1856  
128    -16    
-16    -2224  
-224   -560   
48     -432   
-112   112    
112    304    
-32    32     
32     176    
80     -160   
-112   -1600  
128    -128   
-16    -352   
112    -16    
96     560    
-240   -128   
224    -128   
-96    -256   
112    -80    
32     -192   
96     96     
208    432    
-128   -48    
96     32     
-144   80     
192    -512   
32     -16    
0      -64    
80     -160   
-352   128    
320    -432   
-400   -64    
304    -672   
-128   -192   
64     -336   
112    48     
0      -3360  
96     -32    
48     144    
-112   176    
-16    32     
-64    -64    
240    64     
-16    -128   
-304   -16    
-192   -80    
-1456  -144   
-16    128    
-112   0      
176    -160   
80     -368   
176    -400   
-48    -80    
0      -128   
240    -16    
0      96     
-16    144    
-144   80     
16     32     
-32    48     
-80    48     
80     16     
80     256    
144    -208   
96     -208   
144    0      
48     16     
-64    128    
-64    -944   
224    -128   
80     -64    
-160   0      
32     192    
-16    16     
704    288    
-144   -32    
352    -336   
-128   16     
-1056  -256   
480    640    
-384   -640   
528    864    
-128   -608   
80     -896   
16     -192   
128    208    
-64    112    
96     -96    
-64    48     
16     -240   
16     64     
-288   -240   
-80    96     
-160   -160   
-112   160    
-256   -160   
-112   -32    
224    -240   
-144   -704   
176    -64    
32     256    
112    -64    
-224   80     
144    -16    
-544   64     
176    -96    
-208   32     
48     -32    
-16    80     
-64    -48    
144    -80    
-208   -224   
192    64     
208    48     
-176   -16    
48     144    
96     -16    
-480   64     
32     -272   
-96    224    
128    -32    
16     32     
-80    -112   
-96    16     
272    -176   
-400   192    
176    -96    
48     80     
64     -320   
-80    192    
-192   -16    
64     -16    
0      -32    
32     16     
-32    -16    
128    96     
-224   160    
32     -224   
-112   -48    
32     -96    
96     144    
-384   -96    
112    160    
-240   -416   
-192   -64    
0      64     
-576   80     
0      -32    
240    336    
-160   16     
176    -224   
-112   -16    
-144   64     
16     112    
-80    -96    
112    96     
48     160    
-192   -48    
-240   16     
-352   32     
16     224    
-192   -64    
160    112    
-464   -96    
32     16     
-1360  -16    
0      16     
80     0      
80     224    
-128   -48    
112    32     
-160   -304   
224    256    
-144   64     
176    272    
-176   112    
-112   -80    
48     -48    
-32    -80    
32     -48    
-240   192    
0      224    
-192   48     
-160   -128   
16     -144   
-16    80     
-48    -80    
16     80     
16     96     
-112   112    
16     48     
-128   48     
16     -480   
80     -112   
64     176    
-32    80     
-144   80     
-896   -288   
192    -144   
-192   -96    
16     128    
80     -192   
0      16     
-176   -224   
-32    -96    
-16    48     
48     16     
112    176    
-80    144    
320    336    
-528   -96    
-64    48     
-512   -112   
144    144    
16     -128   
32     64     
112    16     
-144   96     
112    608    
96     240    
-160   -96    
16     16     
-32    0      
-96    16     
48     -64    
-224   -80    
48     144    
-112   32     
384    176    
-704   -48    
352    -128   
-368   -336   
64     -96    
16     112    
48     80     
80     0      
160    96     
272    976    
-496   112    
128    -16    
320    -176   
192    96     
-272   80     
-192   48     
-176   0      
192    -560   
64     176    
80     96     
-176   144    
-112   240    
-144   -112   
144    -64    
112    80     
64     96     
-144   208    
-48    -48    
80     80     
-176   128    
-32    176    
-288   -64    
64     80     
144    16     
-80    64     
-96    32     
80     112    
-224   64     
80     -64    
112    240    
160    16     
-96    96     
1312   128    
-864   -2000  
-16    384    
448    352    
-256   -736   
-656   -432   
288    896    
-256   128    
368    -208   
-432   656    
144    -336   
-288   128    
80     384    
224    336    
-400   -304   
96     48     
96     160    
160    512    
-384   320    
160    -80    
96     -208   
272    176    
-112   128    
16     0      
0      -224   
272    -64    
416    64     
-128   176    
-16    -48    
-16    192    
-112   -16    
224    -32    
-112   240    
96     32     
16     352    
-64    128    
32     32     
48     80     
-48    -80    
400    48     
-240   224    
-64    -112   
32     144    
16     -32    
32     128    
160    -16    
-32    160    
-96    -64    
-16    96     
112    32     
0      0      
112    208    
0      256    
96     176    
-96    96     
0      48     
64     -32    
112    -304   
-48    144    
-16    80     
-96    208    
64     144    
224    304    
-288   -272   
240    224    
-16    0      
48     0      
0      144    
176    160    
-32    96     
32     192    
32     80     
160    208    
-112   -80    
96     240    
-160   -320   
112    -304   
-16    96     
-64    -496   
144    608    
80     160    
-112   -16    
64     112    
192    192    
-64    -64    
224    368    
16     64     
128    272    
-112   80     
-48    16     
96     -48    
96     -496   
-64    288    
-16    -1328  
80     64     
208    176    
64     496    
16     368    
-96    -16    
0      48     
64     0      
-16    80     
32     0      
-16    -64    
16     80     
80     -16    
112    -48    
160    432    
64     -512   
64     288    
-272   -240   
176    -16    
112    16     
-48    32     
176    336    
-176   -32    
256    368    
-400   -128   
288    -48    
-96    128    
-160   -32    
32     -32    
80     16     
0      -512   
-112   -224   
64     -144   
96     -160   
48     0      
-160   -160   
176    96     
112    304    
-112   128    
112    176    
-256   -240   
256    144    
32     112    
176    -32    
112    224    
-48    -416   
96     112    
0      -1760  
-64    48     
64     -48    
160    208    
-32    96     
96     272    
-112   96     
176    176    
-192   0      
160    32     
64     48     
-16    80     
80     -32    
144    -144   
80     48     
48     -80    
-48    -112   
352    -352   
-32    288    
32     272    
-192   80     
144    -16    
32     96     
224    -64    
-64    80     
-80    112    
192    -112   
-128   128    
192    -80    
0      64     
128    -160   
192    176    
-112   -432   
-80    0      
-64    -48    
224    32     
48     112    
-112   96     
16     112    
176    -144   
48     192    
64     -160   
-48    160    
-16    -336   
208    192    
112    -208   
-16    192    
32     -592   
-32    80     
64     64     
48     128    
80     -112   
48     176    
-48    160    
112    -176   
-32    80     
-1136  -1872  
816    320    
-1152  96     
-32    -192   
32     112    
-432   -96    
176    -192   
-304   -352   
512    1120   
32     -384   
-128   -128   
-64    -512   
224    -1216  
240    -192   
48     48     
-96    -144   
304    208    
-112   -32    
144    -208   
-32    0      
96     -48    
48     128    
128    -800   
-96    320    
176    -864   
-400   32     
-272   -256   
-64    48     
368    -48    
-288   80     
128    -96    
64     -1344  
128    -112   
-32    256    
112    -112   
-32    64     
240    288    
48     80     
32     0      
-128   -336   
96     -560   
32     64     
128    32     
16     -16    
0      -720   
64     -96    
16     -144   
112    -336   
176    -496   
-224   128    
256    -176   
-16    -32    
48     -160   
128    128    
-16    64     
96     64     
-192   32     
-48    -208   
-272   -80    
-96    -32    
80     -80    
48     -176   
32     -16    
80     -448   
-144   -224   
176    -224   
-240   64     
96     -96    
-16    144    
-16    128    
128    -96    
-272   -32    
80     -64    
-320   80     
-16    128    
0      -80    
48     128    
96     -208   
208    -192   
-128   32     
64     -592   
64     96     
224    272    
-160   128    
-96    128    
-96    -368   
0      -176   
144    96     
-256   96     
240    -48    
-176   16     
64     -160   
-144   16     
64     -464   
208    224    
32     -752   
32     96     
64     16     
32     -48    
-112   -176   
304    304    
32     176    
16     -240   
-384   -128   
144    -224   
-656   0      
-80    -464   
-64    96     
128    -96    
80     144    
-16    -608   
64     80     
48     -80    
48     -48    
0      160    
224    288    
-256   0      
208    176    
-592   -240   
176    -96    
-272   -64    
176    80     
-208   80     
-64    -192   
-16    -48    
176    -800   
-144   -128   
-288   -288   
144    432    
64     256    
-80    -48    
-176   -176   
192    -16    
-144   160    
304    624    
-400   -16    
176    160    
48     304    
32     -352   
48     176    
32     -240   
64     96     
-240   16     
128    112    
-256   -96    
32     -224   
-192   -64    
96     0      
-32    16     
128    -16    
-160   -32    
-48    -96    
-624   48     
208    -48    
-128   -48    
288    -64    
-592   352    
-224   -16    
-480   -48    
64     -16    
208    96     
-288   -32    
160    80     
-112   -96    
96     -128   
-688   -96    
-1136  -112   
-128   320    
-144   -128   
176    160    
-464   -208   
-112   -64    
-80    96     
-304   0      
64     -112   
-272   96     
-64    224    
32     0      
-64    -32    
160    -112   
16     128    
80     -64    
-96    128    
352    -192   
-48    144    
48     -144   
-240   144    
160    -128   
32     208    
-208   0      
16     16     
-272   -160   
-704   64     
-64    176    
64     64     
-176   80     
-32    80     
-1424  -1824  
1008   -752   
-800   544    
560    -64    
-208   816    
256    -96    
-192   400    
-96    -640   
640    240    
-544   -112   
352    416    
-16    -352   
-448   576    
-64    -528   
-96    416    
-32    -224   
64     720    
-368   -320   
144    320    
-192   -288   
144    80     
-64    -224   
320    176    
-480   0      
-48    -192   
-288   80     
64     -80    
112    304    
-320   80     
48     -16    
-144   48     
224    -96    
160    96     
-176   -48    
-112   0      
0      16     
112    32     
-480   -384   
16     -288   
160    192    
-272   -80    
96     48     
-528   -512   
128    80     
-256   -48    
128    192    
-176   -144   
0      -64    
-16    -112   
0      112    
-16    176    
64     80     
-16    0      
-48    -80    
64     208    
-240   -48    
-16    176    
-32    224    
64     208    
-496   -32    
32     112    
16     16     
0      -224   
112    96     
16     64     
-64    112    
-16    64     
80     64     
-16    112    
-48    80     
-112   32     
48     128    
-16    80     
-16    128    
-256   -32    
-80    32     
144    16     
112    96     
-64    64     
240    -16    
176    0      
-128   -272   
64     272    
240    176    
208    384    
-320   -16    
208    -80    
-208   0      
192    240    
-128   -64    
-16    64     
80     32     
112    160    
32     -112   
-64    -64    
160    80     
-304   -32    
-80    -64    
-32    -272   
176    304    
-16    256    
-32    240    
-128   -112   
80     192    
-48    256    
160    64     
-32    288    
-48    -240   
112    144    
-16    96     
32     80     
-64    112    
112    208    
-16    0      
-16    64     
-112   0      
80     176    
48     112    
112    -16    
-224   -32    
192    -32    
16     112    
-48    112    
80     -96    
224    -96    
-160   288    
32     96     
16     -48    
-32    -64    
-16    112    
-128   16     
16     -32    
-224   48     
160    176    
0      80     
224    -32    
-208   112    
-32    160    
224    32     
-32    144    
-16    128    
176    112    
-80    48     
16     176    
16     96     
48     -240   
-16    80     
-144   48     
192    96     
-144   112    
160    96     
-80    -16    
0      -16    
32     192    
-16    16     
112    96     
-80    208    
0      32     
80     16     
64     -16    
64     -112   
-16    32     
144    -96    
176    336    
-80    16     
112    64     
176    496    
-240   -32    
-128   128    
96     -192   
192    0      
224    16     
-304   112    
96     32     
0      16     
48     -288   
0      160    
-144   176    
144    -496   
96     96     
80     64     
0      224    
-32    -64    
0      128    
32     112    
128    16     
-16    64     
64     144    
-96    -48    
64     176    
-48    -80    
176    192    
-160   96     
240    -672   
-96    144    
32     48     
144    -1200  
416    -240   
1232   880    
576    -448   
-304   -16    
544    400    
-464   192    
1232   -352   
-512   800    
80     -400   
-80    304    
-32    -464   
32     -1040  
112    -464   
32     128    
48     -192   
144    272    
-128   0      
64     16     
-32    80     
64     -144   
-112   144    
96     48     
80     240    
-32    -80    
-96    -64    
160    64     
144    -240   
48     -16    
16     -704   
16     32     
32     96     
160    0      
-112   112    
208    48     
64     320    
-128   -32    
64     48     
-64    112    
272    96     
-80    -48    
0      128    
128    -16    
32     64     
-16    -208   
192    48     
-48    -1200  
-32    -208   
0      144    
-32    96     
256    96     
-176   96     
112    80     
-96    -64    
48     128    
80     -64    
64     160    
-32    -192   
144    0      
32     -352   
-48    128    
32     -352   
16     80     
64     16     
144    128    
16     112    
32     208    
-208   0      
208    0      
32     64     
128    304    
-128   96     
64     -528   
128    80     
-32    -272   
272    208    
-240   -80    
208    -32    
-64    48     
-16    -48    
128    16     
160    160    
16     320    
-208   64     
192    272    
-224   -624   
-16    -144   
208    400    
-96    160    
-48    -160   
80     112    
0      -352   
112    128    
48     -304   
80     96     
-32    -128   
96     32     
128    -80    
-32    -304   
80     0      
80     -144   
96     144    
64     -32    
32     112    
-32    -16    
256    432    
-160   -240   
112    -112   
16     96     
96     -416   
-32    48     
-1792  -208   
128    -496   
64     -80    
32     -160   
96     -16    
80     -912   
32     -192   
-128   -96    
80     -336   
160    0      
240    192    
-16    64     
-128   -64    
16     -320   
80     0      
-288   -16    
0      -128   
48     176    
0      -384   
-16    -64    
64     -1568  
240    -96    
-64    128    
176    208    
-128   -224   
160    80     
48     -80    
-80    16     
32     -64    
48     -64    
-288   32     
-16    -32    
176    -32    
16     -208   
96     -336   
144    -576   
160    -144   
144    128    
-176   -48    
80     0      
-64    64     
176    -32    
-240   240    
-80    -176   
224    -80    
-144   112    
64     112    
-176   -160   
64     0      
112    -48    
-64    80     
-32    80     
80     -464   
16     0      
0      -176   
96     -16    
16     128    
0      32     
64     64     
64     96     
-48    -112   
32     -144   
-96    16     
128    -192   
-16    0      
-16    96     
-64    -112   
-16    -208   
32     -160   
64     -64    
48     80     
144    64     
0      -176   
32     48     
-32    16     
-80    -96    
-80    32     
64     -48    
208    -32    
-656   -16    
64     -400   
176    -544   
-96    -128   
0      -64    
-64    48     
-112   -592   
720    2144   
-576   240    
-176   -464   
224    -416   
-96    16     
128    144    
-448   432    
128    -208   
-240   -208   
-464   80     
-16    -448   
48     -48    
320    -160   
224    304    
-64    208    
192    -848   
112    368    
-96    64     
-128   -240   
272    -128   
-144   -80    
16     48     
64     80     
-176   48     
176    -176   
-256   48     
240    -128   
-32    -16    
160    -48    
0      80     
-32    96     
32     48     
0      64     
0      -16    
-128   16     
128    -160   
-176   -16    
-80    -48    
128    128    
0      -48    
-1072  64     
48     -192   
0      -224   
80     -144   
176    96     
-96    112    
-192   32     
-96    48     
144    128    
-112   -48    
48     -16    
-32    80     
112    304    
-112   -48    
-16    -384   
176    144    
-1504  -192   
128    16     
-368   -32    
-480   80     
-32    32     
-80    -96    
0      -16    
-224   -48    
-16    288    
-96    -112   
192    16     
80     0      
16     192    
-448   -128   
112    96     
16     -80    
96     48     
16     0      
-336   -272   
-80    96     
-176   -128   
32     96     
-80    0      
32     -16    
-576   -16    
-32    -32    
-144   240    
-176   16     
96     -32    
32     -80    
96     -224   
-96    -16    
32     112    
-48    96     
-48    144    
-16    64     
80     64     
-160   -240   
-224   160    
-944   -16    
48     176    
48     16     
192    224    
-176   0      
208    48     
-128   0      
-112   -176   
64     -128   
-80    32     
-16    96     
128    160    
-176   -48    
0      -16    
-32    -64    
32     -80    
128    192    
-336   64     
-48    48     
64     -208   
-48    80     
208    112    
-64    144    
-64    -176   
-208   -240   
-64    16     
128    -128   
-144   144    
-176   -128   
224    -48    
-64    112    
-160   32     
-272   -128   
128    80     
-48    -128   
112    192    
-112   -112   
240    160    
32     288    
80     -80    
-144   80     
-240   160    
192    48     
176    -112   
-272   112    
-144   48     
272    0      
-288   -192   
96     176    
-496   512    
32     176    
48     32     
-192   16     
192    16     
-48    48     
-16    16     
-16    144    
160    -96    
-96    80     
144    -16    
-224   -80    
16     -112   
-112   80     
0      144    
16     -96    
-160   -16    
80     80     
16     -96    
-144   144    
-48    -112   
48     240    
16     144    
160    -64    
-48    16     
-32    144    
-256   32     
-32    64     
128    -112   
144    240    
-720   -224   
-176   96     
80     48     
96     80     
-32    112    
0      144    
-48    32     
32     -16    
96     208    
-80    -96    
16     -16    
224    -48    
64     144    
-208   224    
-16    64     
16     160    
0      -32    
128    48     
96     -112   
208    -80    
-32    64     
-32    288    
880    -672   
-32    80     
480    640    
-544   224    
-464   -816   
688    1136   
-752   -608   
432    720    
-352   -448   
304    64     
-80    -64    
288    240    
-128   160    
48     -320   
-160   192    
304    -96    
176    608    
-128   96     
-16    128    
-240   -208   
16     240    
-128   -16    
224    128    
-112   -64    
192    -96    
-80    80     
176    240    
-48    272    
32     -32    
-80    112    
-16    80     
80     160    
-112   -32    
-16    80     
0      -80    
192    64     
-32    48     
48     80     
0      112    
64     144    
-16    16     
16     0      
-64    272    
192    32     
-16    -64    
96     32     
128    608    
-112   112    
16     -16    
-32    -80    
176    96     
32     112    
16     16     
-32    176    
64     128    
-128   208    
144    16     
112    224    
-32    32     
192    160    
-32    128    
80     160    
-96    -48    
112    176    
0      -48    
-16    160    
80     240    
-32    -128   
144    336    
-128   32     
208    144    
-96    -48    
224    16     
-128   96     
-128   128    
384    704    
-192   16     
208    32     
-32    144    
-112   112    
64     -240   
-16    208    
48     -16    
-16    176    
-16    16     
80     80     
32     -16    
128    320    
-96    32     
0      32     
48     192    
80     -16    
80     -160   
16     96     
0      48     
32     -144   
-32    32     
80     -320   
128    208    
-64    64     
16     160    
-48    64     
48     -80    
96     64     
-16    112    
-16    -432   
96     176    
-96    0      
176    160    
-32    80     
112    -176   
-16    48     
112    -336   
-16    80     
128    -496   
16     80     
96     0      
-32    160    
80     -32    
96     176    
-160   -64    
240    256    
-240   -160   
384    176    
-336   -32    
272    -224   
-96    304    
80     -96    
128    160    
-144   -176   
112    144    
-96    -432   
208    0      
-112   112    
144    192    
112    64     
-128   192    
96     0      
32     -128   
32     96     
48     -80    
-16    96     
16     -80    
128    144    
-256   -704   
224    -144   
176    -512   
-144   32     
176    80     
-128   96     
192    304    
-144   -288   
176    96     
-48    -192   
176    144    
-224   48     
80     192    
112    -320   
176    144    
144    -928   
-64    96     
32     -496   
80     32     
144    208    
-176   16     
96     176    
-192   208    
128    -128   
-64    -416   
80     176    
112    192    
-112   -64    
144    -160   
-208   -32    
176    -16    
-144   128    
192    32     
0      48     
32     0      
96     128    
-80    112    
-80    16     
-16    128    
208    -96    
80     256    
0      -208   
-80    320    
-32    -96    
-64    -16    
-16    -112   
160    96     
-128   -464   
192    192    
-32    240    
192    -976   
-144   0      
1072   -448   
-528   -1872  
528    992    
-416   -768   
992    -768   
-560   -288   
816    -320   
0      608    
-192   -352   
224    -96    
-80    -32    
-144   -800   
80     224    
64     240    
144    0      
-256   224    
48     -128   
96     0      
-96    -224   
112    -128   
-48    -816   
-16    -80    
400    352    
-80    -224   
64     -208   
-144   -32    
320    256    
-144   224    
208    -176   
-224   -240   
-288   -176   
32     -288   
-144   -48    
32     -80    
128    -64    
0      -896   
128    48     
48     -2640  
32     -96    
-48    -48    
48     224    
16     -32    
-80    -160   
80     -176   
48     -112   
-112   0      
-16    32     
-1280  -128   
80     -144   
-48    -96    
192    0      
-96    16     
160    16     
48     -16    
-32    0      
160    192    
-144   -144   
128    64     
-48    -16    
96     -48    
-32    112    
96     -64    
-816   -16    
192    -432   
-128   80     
-16    0      
-208   -16    
160    -352   
-64    -80    
128    -1552  
-144   32     
128    144    
-32    -48    
144    96     
-48    0      
-80    -240   
16     -160   
-288   -112   
96     -96    
-672   192    
-48    -208   
192    16     
96     -320   
-96    32     
224    -528   
-32    208    
32     -32    
128    48     
-112   0      
16     -112   
0      112    
-16    96     
-80    -16    
112    -64    
-448   -192   
208    -32    
-912   16     
192    -96    
-48    48     
-48    -496   
128    112    
176    0      
208    160    
-272   48     
48     -48    
-464   -80    
208    0      
-16    96     
32     16     
-176   0      
-80    -160   
96     -16    
192    112    
-32    128    
-128   -272   
48     176    
544    432    
32     -48    
-224   -160   
-240   -32    
32     112    
352    32     
-400   -16    
48     -256   
-32    224    
16     -208   
112    -48    
-112   -192   
-64    64     
224    -448   
144    240    
-112   112    
48     112    
-112   272    
-80    -48    
144    16     
-16    96     
16     48     
32     48     
-208   16     
160    -80    
-192   0      
-816   -336   
-96    -16    
-368   -176   
-816   -64    
0      112    
-208   -32    
-80    48     
-1696  -64    
-80    -80    
48     -48    
96     208    
48     80     
16     112    
-272   -224   
256    368    
-320   -80    
112    64     
-208   -96    
-32    -176   
-112   -48    
-272   -64    
16     0      
-16    -64    
192    928    
-880   -112   
-320   -96    
16     -112   
-96    -256   
-368   -128   
16     -32    
-48    240    
-16    80     
0      -48    
96     16     
96     144    
-64    96     
-64    32     
176    224    
-160   -48    
-144   32     
-96    64     
-784   -192   
-240   -176   
-16    80     
176    176    
16     32     
-80    128    
-16    96     
-144   -64    
-16    48     
0      112    
-64    144    
-128   16     
32     48     
-848   -3472  
1088   608    
-2048  -96    
160    -448   
1008   -80    
-272   -1008  
-48    48     
432    1136   
-208   128    
224    -112   
-256   192    
0      112    
160    288    
-336   80     
16     -48    
-480   -64    
272    304    
-256   -48    
-64    -128   
112    -240   
-16    -16    
-96    16     
32     304    
112    240    
-80    -80    
16     -208   
-64    -416   
0      -192   
-96    208    
-128   -416   
144    48     
-176   144    
96     48     
-80    192    
-752   -128   
16     48     
-32    -16    
80     16     
0      -80    
-48    32     
0      304    
16     128    
-32    192    
-128   -176   
112    96     
-48    48     
-48    -96    
-320   -384   
272    176    
-352   -32    
80     208    
-32    208    
-16    16     
0      16     
32     32     
-16    96     
-112   -368   
80     224    
-208   -48    
-16    -112   
-96    112    
96     48     
-224   -144   
128    -48    
-240   0      
48     64     
-16    64     
-16    0      
-32    96     
32     112    
32     80     
-32    64     
16     64     
16     80     
-96    112    
-208   -80    
144    240    
-192   0      
64     80     
-160   -176   
-64    64     
192    224    
-16    0      
256    208    
-144   96     
64     160    
-224   -128   
48     -464   
128    -288   
160    208    
-16    288    
-112   208    
-176   -96    
160    96     
144    64     
-32    32     
32     112    
-64    96     
128    64     
-16    112    
-64    -48    
-32    64     
64     48     
48     64     
-128   80     
-48    144    
-32    -64    
-48    0      
-176   -240   
208    112    
-80    160    
112    32     
-64    64     
16     32     
48     80     
32     80     
128    352    
-32    -48    
16     0      
64     240    
16     64     
-32    32     
-208   48     
176    80     
16     64     
0      48     
-96    80     
32     -80    
128    160    
-128   48     
96     -48    
0      80     
32     128    
-16    -48    
-48    -80    
208    80     
32     544    
-112   224    
-64    16     
192    80     
16     96     
16     160    
-256   -32    
288    112    
32     144    
304    -16    
-448   112    
-64    144    
-80    160    
0      16     
32     -16    
128    192    
-112   -64    
48     208    
-240   -240   
128    -160   
208    80     
96     528    
272    176    
-144   176    
368    0      
48     176    
112    48     
-224   -176   
112    64     
-80    80     
32     16     
0      -336   
176    -1136  
192    144    
16     176    
32     96     
80     448    
32     80     
-32    -176   
32     176    
176    144    
-80    80     
-224   -144   
208    0      
64     -208   
64     -240   
80     128    
-32    -608   
-16    128    
112    64     
-16    128    
-192   48     
112    160    
32     112    
-80    48     
64     -32    
160    48     
-240   0      
64     112    
96     144    
-32    -64    
144    656    
272    -1040  
-416   432    
176    64     
-768   240    
464    48     
-16    -352   
208    224    
-160   64     
16     48     
64     48     
48     144    
112    144    
144    176    
128    80     
-80    32     
64     -224   
16     176    
32     -912   
-64    -80    
80     208    
128    32     
16     80     
80     128    
-64    -32    
-80    96     
128    112    
32     -112   
80     32     
-112   -288   
128    32     
0      -240   
0      160    
112    -208   
32     80     
-48    -1488  
272    64     
-176   16     
128    144    
80     48     
-32    32     
-32    144    
192    0      
-32    176    
-32    -288   
64     64     
160    128    
0      96     
128    -208   
-112   160    
176    -432   
-16    144    
-64    128    
256    0      
-64    48     
144    144    
-96    -16    
-16    -160   
80     64     
96     -128   
48     144    
112    32     
16     112    
80     16     
64     16     
80     -144   
112    112    
-64    64     
80     176    
-32    -32    
96     48     
80     112    
-80    -160   
176    32     
-48    224    
-96    224    
112    -240   
64     48     
16     -96    
192    272    
-128   -176   
160    112    
80     240    
-48    -32    
80     80     
-272   -368   
176    0      
-160   -16    
176    48     
-48    -240   
64     48     
64     -224   
112    288    
-64    80     
32     80     
112    128    
-48    -480   
112    0      
96     -736   
-96    32     
112    64     
-32    80     
240    96     
-240   -304   
176    -48    
-64    -1072  
288    160    
-128   96     
224    -64    
-80    144    
48     -48    
128    -112   
-192   -48    
144    128    
-32    0      
-272   32     
-176   -176   
128    -96    
-48    -256   
176    -224   
-176   -336   
240    64     
192    -2160  
16     -256   
-144   -64    
-80    176    
256    -16    
64     32     
16     -64    
-96    -32    
112    -128   
-80    16     
224    64     
112    256    
0      -144   
-112   -128   
-112   -144   
192    -448   
-16    -16    
176    0      
0      128    
80     16     
-48    208    
-80    -208   
80     -144   
-64    -112   
224    112    
-64    208    
80     32     
48     -112   
-16    -160   
160    80     
0      0      
16     144    
-16    -1120  
80     176    
-48    -112   
-16    -144   
-96    -48    
32     -64    
-48    112    
176    -208   
-272   -144   
80     -160   
-320   48     
64     -368   
-160   80     
176    -64    
-48    128    
-32    -1920  
160    0      
128    -16    
-80    64     
-80    160    
32     64     
-16    -96    
192    224    
-416   -192   
128    -256   
-160   -368   
-48    288    
-608   16     
-96    -208   
96     272    
-48    -288   
32     128    
176    -80    
32     192    
16     96     
32     -176   
-96    -176   
288    -64    
-304   48     
160    -16    
-32    144    
96     -96    
-304   32     
304    800    
-560   16     
-496   -1152  
384    400    
176    -240   
80     112    
-624   -32    
-128   32     
-64    -336   
192    64     
-112   176    
80     160    
-48    112    
-48    -288   
144    -144   
48     -368   
112    128    
0      -208   
192    48     
-176   16     
320    272    
-288   -272   
320    -16    
-64    176    
160    48     
32     -16    
-160   176    
64     -128   
-192   -224   
-240   112    
192    -128   
64     256    
-1616  -288   
-160   -144   
-160   -144   
-640   -160   
-144   -128   
96     224    
112    192    
-64    64     
48     32     
144    -160   
-16    16     
128    80     
48     160    
-336   -176   
0      32     
-80    -224   
64     64     
-16    -64    
-112   112    
32     -176   
-1040  0      
-112   32     
96     -48    
-352   -496   
496    560    
-160   -16    
-64    96     
-128   -64    
-208   -224   
32     176    
-128   96     
-32    80     
-32    0      
0      16     
-80    16     
0      16     
-48    48     
-272   32     
-32    80     
48     32     
-240   0      
-96    0      
-304   -304   
-32    -256   
-224   112    
32     -32    
-320   -96    
112    -144   
0      128    
16     -176   
-128   48     
144    112    
-272   -272   
-160   -320   
-1488  -128   
176    240    
-48    96     
-48    144    
-80    -16    
112    48     
-64    32     
-64    -96    
-128   -16    
0      80     
-32    48     
-112   -32    
-64    48     
-144   -96    
0      96     
-1072  -96    
144    208    
-80    -16    
128    96     
-96    -48    
0      32     
0      80     
32     80     
16     64     
32     64     
-80    64     
32     16     
0      96     
-128   -256   
160    256    
-272   0      
224    96     
-352   16     
224    64     
32     32     
-32    -128   
96     176    
-96    64     
288    224    
-288   80     
128    -384   
-208   -48    
160    64     
144    80     
-272   144    
80     -16    
0      80     
-624   112    
-16    48     
112    64     
-48    272    
48     -112   
-160   112    
48     48     
-64    96     
-192   -208   
-48    -64    
-16    -112   
16     16     
32     224    
-176   32     
-80    96     
-128   -64    
-112   48     
80     80     
32     192    
-64    -32    
144    160    
32     144    
128    816    
-400   -336   
-64    64     
0      -32    
-48    32     
48     192    
-80    48     
64     192    
-112   224    
176    496    
-288   -272   
0      128    
144    64     
32     0      
80     256    
-48    16     
-240   -128   
112    -112   
208    16     
-80    -16    
128    368    
-144   160    
80     48     
112    64     
-32    32     
-32    240    
-160   48     
-32    -112   
208    192    
-80    -32    
48     112    
-32    64     
-64    0      
80     -16    
128    -272   
48     192    
-96    64     
-16    144    
64     176    
16     80     
-928   -2288  
1072   800    
-880   112    
400    176    
-48    -368   
272    144    
32     1056   
368    -80    
0      480    
208    -768   
32     752    
-144   -224   
32     464    
-160   -336   
320    144    
-80    -16    
176    128    
-64    272    
48     -64    
16     80     
0      -64    
96     320    
-48    0      
224    272    
-208   -112   
160    144    
-112   -32    
-64    224    
112    -96    
16     128    
-64    64     
80     208    
48     -32    
-144   96     
128    64     
16     -48    
128    -64    
-304   64     
192    128    
-80    -96    
-128   32     
144    144    
96     144    
80     112    
-160   -32    
48     -32    
96     192    
64     48     
192    32     
-144   112    
64     208    
-48    32     
64     -16    
64     48     
-16    96     
48     64     
176    144    
-112   -816   
64     112    
16     0      
-16    144    
64     80     
32     96     
-16    64     
-16    144    
-16    64     
64     32     
-32    -320   
160    64     
-160   64     
-32    -144   
48     16     
192    -1280  
-48    288    
16     -48    
208    368    
64     240    
144    288    
-48    -48    
128    -160   
48     32     
-144   144    
112    112    
-80    176    
-112   -112   
176    -144   
128    144    
96     -288   
80     64     
-80    272    
112    144    
80     176    
-64    64     
112    -64    
80     80     
176    80     
-64    224    
-32    48     
144    144    
-64    48     
192    32     
64     128    
-96    -320   
80     64     
-64    -1200  
256    64     
128    400    
-192   224    
256    0      
-144   64     
96     -48    
96     96     
-80    16     
-48    160    
192    64     
-32    -64    
16     32     
-48    -496   
-112   96     
352    -1008  
-128   16     
112    -544   
-256   192    
320    16     
64     208    
-336   -240   
64     208    
-112   16     
192    -32    
80     128    
32     -80    
32     144    
64     -48    
32     192    
32     -464   
-96    0      
144    -80    
144    192    
-128   -192   
192    144    
-16    16     
48     192    
96     64     
-32    32     
64     80     
-80    -656   
0      -48    
96     -384   
112    304    
48     96     
16     80     
-48    -384   
160    208    
32     96     
-160   48     
48     -160   
0      -80    
80     176    
48     -176   
-32    48     
80     -96    
16     48     
176    -16    
-48    256    
80     -112   
304    352    
176    96     
128    -112   
-32    176    
96     64     
-48    32     
112    256    
-144   80     
48     -32    
48     112    
96     -48    
-48    32     
16     -256   
96     192    
176    -320   
-48    160    
-64    80     
-64    176    
336    -80    
176    -704   
-272   0      
-560   -208   
64     -928   
176    80     
48     -272   
64     -32    
32     -720   
368    -144   
-160   192    
128    -144   
-32    160    
96     -96    
-496   -80    
-304   -800   
-560   -224   
192    176    
-384   112    
624    -336   
-336   -32    
160    -720   
112    -784   
272    -960   
80     -32    
160    272    
-144   176    
32     96     
272    336    
-144   -80    
-96    256    
80     -336   
288    144    
-192   -112   
128    80     
-128   -320   
80     32     
416    160    
-48    224    
-32    16     
160    -1984  
512    352    
16     128    
-176   -144   
176    -192   
80     48     
-16    -128   
320    -32    
-128   -16    
192    -256   
-416   480    
32     -176   
-48    16     
288    -544   
80     0      
16     -848   
192    64     
-48    -32    
32     272    
112    96     
64     208    
-544   -528   
-80    -304   
-112   -240   
144    128    
-336   -64    
48     -368   
-240   80     
-16    -256   
-416   -16    
-128   112    
800    400    
-224   -528   
96     64     
32     -128   
48     -192   
-16    -224   
80     -16    
-48    -32    
32     96     
-192   32     
48     -32    
-800   -112   
96     -112   
32     64     
96     16     
-64    96     
-80    -240   
-16    -288   
96     -464   
160    -80    
-80    208    
192    192    
-16    -16    
48     -208   
-432   -160   
144    -112   
-176   0      
224    -64    
-48    304    
-176   -192   
48     64     
16     -576   
48     -48    
32     320    
64     0      
-144   -16    
144    -112   
-368   96     
-80    -176   
48     208    
-32    192    
144    240    
-96    128    
-704   -192   
16     -544   
32     16     
224    -272   
32     16     
0      96     
64     16     
-48    -160   
0      -160   
-112   -32    
176    160    
0      112    
32     144    
-144   0      
96     -64    
-672   496    
-96    -112   
-32    -96    
176    -400   
-32    -80    
32     192    
80     -112   
-304   16     
320    288    
-192   336    
160    112    
-160   224    
208    -400   
-160   -128   
144    -64    
192    144    
-416   -192   
288    16     
-320   -192   
-400   -240   
-96    -48    
-656   64     
48     256    
-208   80     
-80    -16    
-16    -208   
-16    -160   
-208   -32    
144    -64    
-416   -464   
144    -304   
-80    -224   
80     48     
-256   -144   
96     0      
-48    48     
112    256    
-160   128    
16     48     
-128   32     
-736   16     
-16    160    
160    -96    
16     176    
-240   -64    
96     144    
-80    -96    
32     64     
80     96     
-64    96     
-80    -128   
96     32     
-144   80     
-16    -16    
-16    32     
-448   0      
128    -80    
-448   320    
-16    -96    
-80    32     
0      0      
368    -224   
80     272    
-208   80     
-48    112    
-128   -32    
-112   48     
-112   32     
-192   0      
112    -32    
-64    -48    
-32    112    
-1136  -96    
-64    16     
-16    -144   
16     64     
0      -224   
64     96     
144    64     
-80    192    
-112   112    
2368   560    
-1104  192    
800    224    
-224   192    
656    224    
-336   -288   
-752   -192   
528    640    
256    -368   
-240   304    
192    -112   
48     304    
-16    192    
64     0      
-400   48     
80     -224   
64     432    
64     -224   
-96    272    
-64    -288   
-16    144    
0      -96    
80     368    
-816   -240   
-144   256    
144    208    
-144   224    
0      -224   
-96    96     
176    -176   
-144   144    
-80    -16    
144    144    
-32    -32    
-80    64     
144    176    
-368   -288   
160    16     
-880   0      
288    64     
-80    64     
-80    80     
112    48     
48     80     
-80    48     
96     144    
-16    64     
48     192    
-352   -64    
336    80     
-64    160    
-224   0      
208    64     
-448   0      
96     -32    
0      80     
32     48     
160    128    
-80    0      
0      -32    
0      144    
-16    224    
-16    -32    
96     224    
-192   -96    
144    -16    
-144   -160   
64     64     
-208   96     
-64    96     
192    0      
-32    16     
-96    160    
-80    -48    
128    32     
0      16     
0      -416   
368    64     
48     432    
-368   -64    
256    80     
-80    64     
-80    -96    
0      160    
-208   256    
-96    96     
-32    -48    
144    -32    
112    -96    
0      80     
-48    144    
16     128    
-112   144    
32     176    
-144   32     
48     64     
-144   -48    
16     0      
112    144    
-160   80     
-32    16     
160    208    
128    256    
-176   144    
48     128    
-96    -320   
80     64     
-32    16     
16     96     
-32    -80    
-16    64     
-96    32     
0      -48    
0      192    
32     96     
112    128    
-16    128    
16     16     
16     64     
-16    -176   
32     -32    
64     304    
32     16     
128    352    
-224   -208   
144    80     
-160   -48    
160    320    
64     0      
16     112    
96     -48    
0      192    
80     112    
16     176    
144    288    
-64    -16    
-32    -368   
96     304    
144    96     
-176   -16    
208    -48    
48     96     
-32    176    
144    160    
-80    64     
96     -80    
-224   -160   
176    208    
64     160    
80     160    
96     -32    
-16    -16    
48     0      
-144   -496   
256    480    
80     384    
48     -48    
272    -400   
16     48     
160    80     
-96    80     
96     144    
80     16     
-48    144    
-192   416    
-160   64     
-64    -192   
304    -416   
-64    208    
-80    -96    
48     -240   
128    208    
-64    -1056  
80     144    
-80    80     
352    160    
-240   96     
208    0      
-32    144    
48     48     
-32    144    
64     32     
64     224    
-144   -160   
160    64     
-64    -48    
208    80     
-176   -64    
192    32     
144    -16    
-16    64     
-48    80     
-272   352    
-16    -64    
32     176    
240    0      
288    2048   
-752   -1296  
-16    -304   
1024   368    
-416   -560   
-96    480    
-272   48     
640    1168   
-288   -1440  
-96    -288   
-48    -560   
-64    544    
272    -80    
-96    224    
-16    -368   
64     464    
-112   -336   
64     160    
-128   -304   
560    96     
-208   -256   
96     64     
128    384    
-48    208    
144    -224   
32     -192   
64     96     
-48    400    
176    352    
-128   -80    
192    64     
48     80     
112    160    
-32    16     
-32    240    
32     -16    
-32    -464   
288    16     
80     -192   
128    -144   
192    16     
80     112    
48     -272   
-16    -48    
224    128    
224    400    
-240   -32    
32     -256   
272    464    
208    -928   
-160   128    
0      -208   
160    64     
32     80     
-48    0      
80     -240   
272    192    
-608   -96    
-256   112    
-352   -480   
192    0      
160    256    
112    -128   
-160   80     
80     0      
48     -48    
192    64     
32     144    
112    -208   
-176   96     
-48    -576   
176    96     
0      0      
96     -512   
-16    80     
-304   608    
-80    -544   
304    -224   
96     -560   
240    80     
-112   -48    
-80    -32    
160    368    
16     -128   
-32    224    
-80    -80    
112    -416   
80     128    
80     -432   
-240   0      
-944   -48    
0      -208   
80     -80    
16     0      
160    160    
64     -1424  
-112   -400   
-96    -96    
240    464    
64     128    
-128   -224   
-80    -240   
-48    -48    
80     -176   
80     -368   
-128   80     
160    80     
-48    64     
128    -272   
-64    -160   
144    -464   
144    48     
144    -208   
-48    96     
160    176    
-144   352    
352    64     
-320   -224   
80     -96    
-48    144    
32     192    
48     -112   
-784   -176   
80     -128   
64     -208   
112    48     
-80    48     
240    -176   
-112   -128   
224    -272   
-128   320    
64     240    
0      112    
-64    -48    
-80    -128   
128    -128   
-64    -16    
-192   -128   
-144   -32    
-144   16     
208    -144   
-112   -32    
240    -32    
-160   -96    
272    -1424  
-176   208    
96     96     
80     112    
-224   -144   
112    0      
-192   -112   
-64    -80    
64     80     
-48    144    
-1072  -112   
0      -64    
32     80     
-48    -384   
192    48     
16     -496   
128    32     
32     -48    
32     -128   
144    272    
-144   -272   
320    112    
144    16     
-16    144    
80     -224   
-560   160    
-32    -240   
176    -96    
272    -272   
224    -80    
64     -384   
-176   -16    
48     224    
-16    -144   
128    -16    
96     16     
-400   80     
0      -208   
64     -32    
80     0      
0      160    
-96    48     
-240   64     
112    16     
-80    128    
96     -752   
-64    -48    
-80    160    
-112   -112   
80     -32    
-16    224    
0      48     
-160   352    
-176   112    
1248   512    
-672   240    
-256   -224   
-432   64     
672    -608   
-576   128    
560    -96    
240    720    
-208   -608   
96     448    
-256   -416   
224    240    
-144   -272   
128    272    
0      -160   
-128   208    
128    32     
144    -80    
-336   -64    
-176   -144   
48     272    
48     -336   
-368   160    
-48    -144   
-320   96     
-128   -48    
-192   112    
-16    -96    
32     144    
-96    -144   
48     48     
-64    -144   
-272   -208   
48     -64    
-96    64     
48     96     
-240   -48    
32     -160   
-32    0      
-352   32     
-16    144    
48     112    
-160   -80    
-464   -32    
-32    160    
160    -208   
112    112    
-304   64     
288    64     
-80    0      
0      96     
-16    0      
-208   -32    
64     -16    
-48    32     
-160   112    
48     96     
-176   64     
-320   -128   
0      96     
176    48     
-16    -16    
80     -64    
-80    112    
32     -208   
-48    64     
-64    16     
-16    32     
-80    48     
-64    16     
-208   0      
-112   -80    
-32    64     
-336   -128   
64     -64    
-336   160    
-16    256    
-16    -128   
80     0      
-128   -64    
-64    80     
160    336    
-16    -16    
32     48     
-256   -64    
128    -64    
96     0      
160    432    
-176   -224   
-16    -384   
-224   -128   
192    256    
48     64     
-144   160    
-80    -192   
192    192    
128    64     
-64    288    
-128   0      
32     160    
16     112    
16     176    
-48    144    
-112   48     
-144   32     
-400   -112   
16     -80    
-864   -208   
144    192    
48     96     
-112   32     
-96    64     
-112   0      
64     48     
-112   -176   
64     96     
16     208    
224    208    
-128   80     
32     64     
-224   0      
16     208    
-368   80     
272    672    
-176   112    
-80    -192   
-64    64     
128    -32    
48     96     
0      -16    
-80    80     
-80    0      
-96    16     
-80    -432   
16     -48    
-256   -192   
64     64     
-496   192    
-32    0      
-16    96     
0      80     
192    96     
-160   48     
96     32     
-48    16     
160    128    
-128   96     
16     96     
-16    64     
80     48     
-224   -96    
-64    -32    
-352   16     
-96    -32    
80     64     
-112   240    
80     -48    
-48    80     
192    96     
-80    144    
-240   176    
32     16     
-48    80     
448    -208   
-272   128    
-112   64     
-96    80     
80     48     
96     64     
16     80     
0      80     
-32    112    
320    96     
-240   0      
208    16     
-96    112    
224    96     
-80    112    
-80    32     
48     80     
-32    48     
368    112    
-128   48     
144    -64    
112    144    
48     112    
-112   176    
-32    0      
160    64     
-48    192    
-144   -32    
64     384    
-96    48     
-16    0      
80     -64    
2000   -1248  
-944   -992   
576    720    
0      912    
224    -144   
48     480    
-608   -640   
912    672    
-416   208    
-192   48     
-240   -400   
-48    352    
224    192    
-144   160    
-208   -80    
48     -48    
64     320    
144    176    
-176   160    
-64    -176   
112    368    
-240   -192   
0      192    
48     288    
-48    -176   
160    -160   
112    352    
544    688    
-352   -352   
320    16     
-192   64     
144    -32    
-16    256    
112    80     
224    400    
-48    128    
48     -160   
-16    96     
0      48     
304    560    
-128   160    
64     144    
-48    304    
-208   -224   
64     -336   
-128   -144   
160    -1008  
16     80     
112    80     
64     96     
48     112    
-64    160    
112    64     
-144   112    
96     128    
-160   32     
-16    -192   
32     80     
128    112    
-144   48     
64     112    
32     -736   
192    320    
-160   128    
128    176    
-96    64     
128    96     
80     -96    
48     176    
176    -80    
272    224    
-160   80     
144    128    
32     272    
-96    -32    
112    48     
48     -272   
0      96     
0      -656   
32     144    
112    32     
112    144    
-144   -288   
320    -96    
64     -16    
-176   160    
64     432    
-80    208    
112    0      
48     -192   
32     144    
192    -16    
0      144    
64     -352   
128    160    
-128   96     
96     160    
-32    -192   
16     48     
-128   -144   
80     0      
48     96     
32     -80    
-64    48     
64     -256   
160    80     
32     -208   
144    320    
80     -80    
-64    128    
0      -2416  
48     -96    
144    144    
-144   0      
208    256    
-128   -32    
144    -112   
-32    -192   
-112   -176   
16     0      
112    176    
160    144    
-16    80     
-64    -192   
-48    240    
144    -288   
192    96     
-144   -32    
160    96     
0      -16    
288    336    
-176   240    
464    -656   
-368   -176   
208    -112   
-32    192    
272    -208   
-48    16     
-160   -320   
192    304    
144    -96    
128    96     
32     224    
-16    160    
48     -208   
-16    16     
-16    176    
144    64     
144    64     
-80    -112   
96     144    
-16    -224   
64     128    
112    -80    
-16    144    
112    -320   
-80    -32    
32     -16    
176    288    
-48    176    
-48    -224   
80     -640   
-96    -160   
240    -1184  
-256   -80    
256    208    
112    -176   
208    192    
-48    32     
16     64     
160    48     
-96    -640   
96     192    
32     -32    
32     160    
-512   -304   
128    -192   
32     -336   
96     -1296  
176    -16    
-32    -1568  
-128   -16    
192    80     
96     -128   
0      -32    
16     -16    
144    -336   
-160   16     
48     -144   
0      -64    
-144   16     
-80    -48    
192    32     
-48    -224   
96     64     
64     -608   
-720   -3872  
240    -1136  
-64    512    
-320   -144   
144    560    
-320   -192   
144    -384   
-272   112    
-192   -208   
336    32     
32     144    
-640   -256   
-112   208    
304    -592   
0      352    
64     -384   
-96    -400   
64     -176   
-144   192    
368    -272   
-128   32     
112    16     
-192   144    
96     80     
-160   -112   
48     -48    
-752   -176   
-80    176    
80     -240   
80     -32    
48     0      
160    -160   
-112   -192   
48     -1008  
-32    16     
112    -64    
144    192    
-80    160    
16     -48    
-240   -48    
32     -240   
-272   -16    
16     16     
-672   -48    
128    48     
-160   48     
112    -272   
-48    224    
64     -480   
112    96     
-64    64     
96     16     
0      48     
64     -48    
-64    112    
128    -112   
-64    144    
32     -48    
-32    96     
64     -160   
-544   -48    
0      -384   
208    80     
144    -336   
-64    96     
192    64     
48     -64    
-48    16     
96     -112   
-272   48     
96     0      
-32    96     
-16    -80    
-336   32     
-80    -160   
-384   -256   
-16    -432   
160    32     
-272   -640   
-192   -272   
-240   -16    
112    192    
-32    304    
-112   -80    
0      -80    
176    -16    
-96    64     
96     112    
-256   -192   
32     16     
48     64     
16     -16    
-16    -64    
96     -16    
16     112    
-80    -240   
-16    -320   
128    224    
80     64     
-128   48     
-48    -128   
-64    16     
112    -144   
0      112    
80     16     
-48    192    
-352   -192   
32     -128   
-32    -304   
-32    128    
0      16     
-928   -48    
-16    0      
-112   16     
-240   -32    
96     -16    
-96    48     
80     0      
-48    112    
-32    -96    
-96    -80    
-704   -208   
80     176    
-176   -304   
64     112    
-240   -80    
272    -208   
-112   64     
-336   96     
96     48     
-64    128    
0      0      
128    144    
-176   -112   
-224   -32    
0      -208   
-176   160    
-192   144    
144    32     
-192   112    
128    -48    
-288   -96    
-32    128    
0      80     
-128   -128   
0      -32    
-112   288    
-16    -128   
-80    -128   
192    144    
0      160    
32     -96    
160    -176   
-48    48     
-224   96     
-128   -64    
-128   240    
128    -208   
32     304    
-304   -64    
-624   -80    
-272   -144   
-784   -32    
-80    176    
-288   -368   
368    400    
-464   -144   
112    -192   
-144   208    
96     -112   
-48    80     
48     176    
-112   -16    
96     0      
-240   -16    
240    32     
-96    160    
-208   -32    
32     96     
80     96     
-80    0      
0      -192   
-48    32     
16     192    
-272   -160   
160    96     
-80    224    
-144   -64    
-304   -32    
144    80     
-80    64     
176    -32    
-272   -128   
-48    128    
-16    -96    
16     160    
128    384    
-1216  -16    
320    48     
-640   80     
160    -768   
416    752    
-352   400    
-432   48     
64     -128   
544    400    
-384   -176   
-192   -208   
48     112    
-544   -128   
128    144    
-32    16     
304    400    
-384   -192   
112    -144   
48     192    
-48    64     
0      144    
-192   208    
128    112    
-144   -64    
32     144    
-80    32     
80     16     
-240   16     
32     80     
176    112    
-176   16     
80     80     
48     -16    
48     160    
64     160    
-64    64     
-144   -16    
0      112    
-16    -112   
224    144    
-288   176    
256    80     
-640   -208   
-32    -32    
144    128    
-48    64     
-32    112    
0      -208   
96     208    
-112   0      
96     80     
-176   -16    
80     -96    
-96    64     
80     272    
-144   32     
-64    32     
160    48     
-16    48     
48     32     
-32    80     
48     80     
48     64     
-128   64     
80     -32    
48     144    
-16    128    
0      48     
80     128    
16     64     
-96    -144   
112    192    
-48    144    
128    64     
32     352    
-144   144    
176    48     
64     -64    
96     80     
-80    48     
16     192    
-16    -16    
48     -48    
-64    -176   
64     288    
-240   16     
128    -80    
-32    96     
-48    48     
80     144    
-80    80     
-32    -80    
176    176    
-80    -48    
240    256    
-128   80     
-32    -48    
112    112    
-80    -80    
112    192    
-96    80     
-48    48     
112    96     
-80    -48    
144    128    
-112   112    
0      32     
80     -64    
-48    0      
160    176    
64     80     
-80    80     
-32    240    
160    -32    
48     112    
-288   0      
416    192    
-208   112    
160    -80    
-96    32     
0      128    
256    48     
16     160    
-112   32     
96     224    
32     208    
192    224    
-96    240    
144    -176   
-32    288    
-64    32     
112    -544   
-304   80     
176    -80    
192    64     
16     400    
96     80     
16     64     
-224   112    
96     80     
192    160    
96     -16    
-64    224    
32     -64    
112    -128   
-128   288    
112    -720   
48     144    
0      128    
80     112    
0      96     
-16    32     
48     144    
-96    48     
96     128    
-128   -192   
64     -80    
272    160    
-16    128    
-16    -48    
-32    -16    
16     48     
64     80     
64     96     
48     -208   
-128   64     
-80    -336   
256    160    
64     384    
-80    -448   
-64    352    
48     -256   
-16    128    
112    96     
-16    32     
0      272    
0      -160   
-48    32     
80     -960   
80     -32    
160    64     
0      176    
-96    32     
-32    112    
112    192    
64     -16    
64     -96    
96     144    
96     64     
32     -16    
48     160    
-144   -288   
48     0      
256    -496   
208    96     
-32    -432   
-256   208    
-208   -1056  
320    192    
-64    -352   
-544   624    
320    -64    
-352   0      
224    -128   
-432   -528   
128    -192   
-128   224    
144    32     
0      -208   
0      112    
160    -320   
128    16     
-144   96     
96     -128   
16     -80    
32     32     
64     -192   
-16    -16    
192    160    
64     32     
0      16     
112    -96    
128    224    
-112   -672   
144    80     
-32    -784   
80     32     
80     0      
176    352    
0      0      
48     16     
-96    48     
208    -128   
16     96     
64     -224   
48     112    
128    -208   
-16    160    
112    -224   
-80    -48    
32     -1008  
48     128    
224    160    
48     192    
-64    64     
160    80     
80     208    
48     112    
96     208    
-16    -48    
-16    32     
144    -32    
16     288    
128    48     
64     112    
176    304    
-128   -416   
32     -32    
0      -1344  
-64    16     
-720   -48    
48     -496   
112    -240   
80     -1824  
-32    -208   
0      224    
128    -96    
128    128    
-64    -96    
80     32     
0      -192   
128    -192   
-160   -32    
352    -240   
368    528    
-608   -64    
160    -48    
-16    32     
-16    -512   
112    -192   
144    -192   
-32    16     
32     128    
-64    -112   
128    -352   
32     64     
32     -16    
0      -32    
80     -80    
256    96     
-224   -80    
64     -176   
-112   32     
112    -128   
48     16     
48     -80    
16     -144   
80     -1600  
-16    -16    
96     -160   
-48    64     
80     -64    
-64    -48    
192    288    
-160   -384   
-16    -64    
-144   -112   
-512   -32    
16     -160   
32     -64    
32     -224   
32     -240   
176    -608   
-160   32     
208    -240   
-160   16     
80     -64    
48     0      
-48    -80    
96     -16    
-304   32     
-16    -352   
16     -272   
64     48     
-64    -208   
144    0      
-160   144    
112    -48    
64     64     
-16    -1632  
144    64     
-80    -528   
208    304    
-288   176    
256    -144   
-176   192    
240    -176   
-176   0      
0      -48    
-320   16     
112    -192   
80     192    
16     -208   
0      112    
48     -560   
96     96     
32     128    
0      -48    
0      -176   
464    16     
-448   -48    
224    -128   
-384   240    
336    -160   
-416   0      
0      32     
-1264  16     
-240   -272   
224    -96    
112    -176   
0      64     
-96    -1216  
448    208    
-272   112    
128    16     
-576   -80    
160    96     
-176   -144   
272    208    
-560   128    
128    -208   
-272   16     
288    336    
-208   176    
-272   -144   
272    16     
96     -112   
176    -16    
-208   -192   
96     96     
304    0      
192    320    
-240   16     
144    -16    
-96    48     
96     -32    
-128   176    
96     -80    
-16    208    
-80    -448   
16     128    
-112   -32    
-256   -1568  
1152   1584   
-624   144    
176    -368   
336    -528   
-288   -128   
320    512    
-736   288    
160    -80    
-240   -128   
-864   -320   
-272   48     
-704   -448   
-816   -48    
80     -32    
-16    160    
16     128    
-944   112    
-160   -32    
240    128    
-144   -16    
32     160    
-96    128    
-48    144    
-288   96     
-16    -176   
-128   208    
16     -32    
-320   -192   
-64    32     
-384   -16    
32     112    
-256   48     
-64    -16    
-976   -16    
-48    -112   
192    -48    
-144   -112   
-32    16     
144    64     
-32    -112   
-64    128    
80     48     
-112   16     
80     -96    
-144   32     
0      16     
-80    -288   
208    96     
-544   80     
128    -48    
-800   -64    
-96    -48    
48     -32    
-80    64     
16     -192   
80     176    
-208   -96    
176    0      
-320   176    
48     -64    
64     80     
-96    128    
-48    -48    
-64    16     
-112   144    
0      128    
64     48     
112    16     
-32    176    
-160   -160   
-80    16     
128    -64    
-48    144    
-64    144    
48     240    
-80    80     
144    144    
-144   -80    
-160   -112   
48     32     
-192   176    
64     304    
-192   -144   
192    16     
64     -496   
32     144    
-224   48     
32     32     
0      48     
-32    80     
-128   -32    
-112   -16    
64     352    
-368   -160   
336    160    
-368   -160   
256    128    
-480   -64    
16     96     
64     64     
0      112    
-32    80     
144    48     
16     112    
-112   160    
48     32     
-32    80     
-32    32     
176    144    
-64    -16    
-192   0      
64     144    
-128   48     
128    80     
0      176    
-16    144    
16     64     
-208   0      
240    304    
144    -16    
-112   176    
-192   64     
240    64     
-48    -416   
-240   -208   
-208   -112   
128    128    
-432   -48    
32     0      
-64    128    
16     224    
128    192    
-224   80     
112    192    
-96    -64    
0      128    
16     144    
32     0      
-96    112    
-32    160    
-16    80     
176    320    
32     112    
64     48     
-128   16     
80     192    
-32    208    
144    -32    
16     112    
-32    80     
16     112    
-48    -288   
16     160    
-192   16     
352    160    
-288   0      
128    288    
-16    16     
-16    -96    
48     224    
-16    32     
32     224    
64     192    
-208   0      
192    64     
-32    144    
-48    32     
-96    96     
-112   48     
128    304    
-208   0      
-16    -32    
-16    144    
-80    -112   
64     192    
80     144    
16     16     
-64    176    
48     -32    
-80    80     
64     112    
-16    64     
96     112    
-32    -256   
-32    160    
-48    64     
0      160    
0      32     
80     48     
16     144    
-64    144    
32     16     
-16    -16    
16     208    
16     224    
-176   496    
224    -656   
1184   832    
-560   192    
-448   -576   
576    416    
48     1456   
-192   0      
-64    48     
368    64     
-352   -224   
128    -64    
144    240    
112    -80    
32     272    
-96    32     
-80    -96    
-96    -96    
464    432    
64     368    
-48    -80    
-128   64     
32     160    
144    160    
32     80     
-64    -144   
16     128    
32     240    
64     48     
-160   -160   
288    208    
-160   -16    
64     16     
-80    128    
160    272    
48     256    
32     -704   
-80    16     
64     32     
208    176    
-48    96     
64     64     
-16    192    
64     -16    
-16    96     
64     -112   
16     -32    
80     -16    
176    -64    
-64    -144   
64     144    
64     192    
16     240    
-80    -144   
208    160    
-144   0      
288    336    
-288   0      
-96    -272   
80     -208   
256    80     
-64    -80    
144    240    
-32    336    
-80    -144   
288    32     
224    -272   
64     160    
-48    -1488  
64     112    
-16    16     
80     64     
80     176    
160    336    
-144   128    
48     112    
0      32     
-16    192    
320    96     
192    144    
112    304    
-48    -720   
-32    64     
32     -912   
32     64     
48     -464   
272    256    
-192   -64    
64     80     
16     128    
64     -16    
16     0      
32     48     
64     112    
32     32     
-16    80     
48     -208   
128    304    
-16    64     
128    96     
-80    -608   
48     112    
80     -32    
16     112    
48     48     
48     128    
-144   -144   
272    96     
-144   0      
224    -144   
-96    112    
144    -160   
-16    80     
80     -160   
48     96     
0      -736   
80     128    
-32    64     
160    80     
-80    -64    
128    208    
96     192    
-64    224    
-16    112    
0      -368   
96     16     
112    16     
-96    368    
0      -96    
64     32     
-64    -320   
192    64     
-48    256    
-16    240    
80     -144   
272    720    
-192   560    
-32    -224   
16     0      
192    -192   
112    96     
32     -144   
-48    112    
0      16     
48     128    
128    -368   
-144   -112   
240    -64    
-64    -560   
-64    32     
-144   -160   
-16    -2016  
0      -160   
-144   -1664  
256    -192   
48     -112   
48     -240   
-160   128    
192    80     
64     208    
-16    -80    
80     -704   
112    80     
80     64     
-32    16     
-144   208    
-32    0      
-32    -272   
80     80     
128    -144   
-144   -656   
112    -96    
48     144    
208    112    
80     -208   
64     -80    
-48    -304   
-16    480    
0      0      
32     48     
-112   16     
-112   -176   
-32    -48    
16     -384   
96     0      
192    64     
64     96     
-32    -1376  
48     -192   
112    -576   
-160   160    
-32    -128   
32     256    
-176   32     
96     16     
-576   -48    
160    -288   
-1600  -32    
720    -368   
-432   240    
-112   304    
-512   -432   
832    -656   
-48    -144   
368    432    
-352   -32    
352    -112   
128    112    
-288   -64    
208    80     
-128   0      
352    16     
-288   80     
-48    48     
224    32     
16     -192   
48     -160   
16     48     
80     0      
80     -672   
240    -48    
-176   -176   
96     384    
-160   80     
176    -48    
-80    16     
112    -48    
0      32     
-16    -80    
-752   16     
96     -160   
16     32     
320    64     
-208   320    
224    -848   
-96    80     
64     0      
176    -128   
-176   32     
128    -48    
-176   16     
144    -208   
-208   -48    
352    -144   
-704   128    
16     -96    
-272   0      
64     -144   
112    -32    
0      -688   
-16    160    
64     -576   
144    176    
-256   32     
224    80     
-272   -80    
16     -128   
-224   32     
64     80     
-112   48     
112    -16    
112    -112   
80     -96    
-64    96     
112    -304   
192    256    
-608   144    
112    -96    
-208   48     
-16    -96    
-48    -16    
-16    -192   
64     128    
-112   -96    
176    0      
32     16     
0      128    
48     -304   
112    112    
96     112    
16     0      
-64    -48    
-64    -176   
-80    -192   
208    272    
-272   -128   
240    176    
-224   -176   
144    144    
-144   -48    
112    32     
-64    -64    
304    -48    
-16    160    
-576   -320   
-64    64     
-16    48     
-928   16     
96     96     
-464   32     
48     -96    
144    144    
-176   -48    
176    48     
-288   -16    
-48    64     
-80    144    
-368   -32    
-112   112    
-80    -192   
-304   -192   
-48    0      
-16    80     
96     16     
-496   -64    
-160   -160   
96     -128   
-208   48     
80     48     
160    80     
16     128    
80     112    
-128   48     
0      176    
112    144    
32     16     
-16    64     
-224   -16    
-80    -32    
-256   -224   
96     48     
-240   -176   
160    16     
-64    256    
-48    -32    
-144   -336   
-16    16     
-96    -160   
160    288    
-112   112    
64     -48    
-16    32     
64     112    
-80    48     
-32    48     
-16    48     
-48    96     
-96    48     
-288   -32    
48     256    
0      -112   
48     192    
-48    128    
-80    -672   
-32    192    
32     112    
-80    -16    
-176   128    
112    128    
-64    0      
16     16     
-96    -32    
0      272    
-272   -96    
80     304    
-80    -416   
64     112    
240    272    
-144   48     
-16    320    
-160   64     
96     -48    
80     96     
144    32     
-32    -16    
-144   32     
-176   0      
0      64     
-48    -80    
112    160    
-608   -160   
208    208    
80     16     
144    -80    
-64    -96    
176    48     
64     192    
16     64     
-160   128    
-64    -16    
208    0      
-32    128    
16     112    
-1104  -2800  
1664   3328   
-2096  416    
256    -192   
-576   -1520  
1104   496    
-672   576    
16     -240   
16     -352   
576    -368   
-224   0      
48     304    
240    496    
-32    -64    
272    496    
-304   -144   
192    400    
-512   160    
192    464    
-208   64     
0      -288   
-96    32     
-16    224    
-176   32     
48     176    
-272   0      
144    64     
-160   16     
-224   -16    
112    48     
-192   -48    
-16    96     
-96    -16    
64     112    
256    336    
-208   -368   
224    -240   
-32    -224   
320    320    
-32    224    
-48    128    
48     80     
16     64     
-128   -48    
-16    176    
-48    48     
96     304    
-32    192    
80     352    
-336   -208   
240    112    
-272   112    
144    -32    
80     176    
48     16     
16     288    
-240   128    
304    512    
-176   112    
16     96     
-48    64     
144    -80    
-32    32     
-32    -64    
-144   48     
192    80     
208    128    
-32    0      
-48    128    
80     -16    
32     208    
-112   -32    
80     160    
-32    -16    
-16    192    
-96    -32    
352    768    
-32    560    
16     352    
48     64     
64     176    
112    -64    
-80    224    
-16    -64    
-80    80     
144    -32    
64     32     
128    224    
-208   -96    
192    96     
-112   96     
96     288    
-64    -16    
-16    0      
128    176    
128    160    
-112   80     
-48    80     
64     224    
-16    192    
32     -64    
-48    80     
160    160    
-128   -16    
48     64     
-48    160    
256    432    
-208   -16    
256    176    
-176   112    
64     -80    
-112   16     
96     64     
144    32     
-64    144    
32     80     
-144   -144   
16     0      
-32    -128   
160    112    
-32    64     
112    -1904  
16     240    
112    96     
32     288    
-224   96     
224    -80    
-128   -304   
80     240    
144    128    
96     96     
-112   16     
208    80     
-128   160    
48     -96    
144    -64    
-240   -1104  
480    368    
-112   144    
128    96     
-80    96     
128    -96    
-80    -80    
128    176    
0      -192   
160    160    
-128   -192   
208    432    
-128   -112   
64     -320   
64     64     
-16    -192   
32     -16    
96     128    
80     192    
-80    0      
240    560    
-368   -224   
144    80     
16     -32    
48     128    
0      128    
-16    128    
160    -16    
-176   -208   
32     720    
224    32     
-192   -160   
144    -1328  
144    96     
-48    32     
0      144    
272    -16    
96     192    
-16    96     
32     160    
-48    48     
-96    -176   
32     192    
112    -16    
32     160    
176    -224   
32     224    
-112   -320   
-80    256    
0      -544   
192    160    
144    32     
-16    144    
-32    144    
48     112    
-48    176    
272    -112   
-256   176    
48     128    
64     16     
272    -464   
112    -368   
640    -464   
80     224    
-240   -272   
-224   -128   
480    448    
-448   -256   
416    160    
-112   -112   
0      -48    
32     -16    
96     -16    
0      -384   
112    -32    
96     32     
80     32     
-96    -96    
160    64     
48     -192   
48     32     
0      96     
32     176    
128    16     
-32    32     
160    80     
-32    -192   
112    432    
64     -144   
-64    -96    
160    80     
48     176    
96     -48    
-192   48     
144    -1472  
48     0      
128    -48    
-112   256    
192    256    
128    -512   
-48    -2176  
0      -32    
80     96     
128    16     
-192   16     
240    -304   
0      240    
48     -336   
240    416    
-224   -560   
272    -272   
-112   48     
192    -528   
-160   0      
-656   -16    
32     -128   
0      -240   
192    16     
-176   48     
240    -1536  
32     -48    
-16    144    
128    -64    
112    16     
160    160    
-128   -352   
128    -128   
64     -512   
80     -272   
-256   32     
80     -256   
112    -16    
144    -336   
32     16     
16     -304   
48     -160   
240    288    
-160   -64    
160    80     
48     144    
-48    -48    
64     48     
16     -128   
48     -304   
-112   112    
-80    -208   
-1056  -256   
-32    -208   
-224   -128   
352    -528   
-128   48     
160    -448   
-48    48     
-16    -368   
-112   176    
-48    -160   
-32    16     
-32    0      
-80    32     
-32    -96    
48     -16    
-416   16     
96     32     
-16    96     
144    -160   
208    176    
-112   -560   
240    -48    
-48    -1056  
240    208    
-80    48     
208    192    
-176   -128   
128    -208   
-32    48     
96     64     
-80    96     
-16    80     
-176   64     
272    -32    
-144   -96    
256    -544   
80     -16    
16     -928   
144    304    
32     256    
32     144    
-176   -288   
128    48     
-64    128    
0      80     
-112   128    
64     16     
-624   -96    
-32    -144   
-448   80     
128    -192   
160    -16    
128    -320   
-208   80     
272    736    
-64    16     
16     -96    
16     32     
-48    176    
-48    48     
-288   -16    
-224   -432   
-112   96     
-32    48     
-64    -16    
64     -80    
0      80     
64     -352   
-64    -272   
80     -736   
160    160    
-80    -320   
16     304    
-16    224    
-112   -176   
16     176    
0      -32    
80     0      
16     16     
-64    -304   
48     -288   
304    128    
16     -272   
64     48     
-112   112    
112    64     
-176   0      
64     -112   
144    -64    
-16    0      
-144   -64    
128    16     
-96    48     
96     -160   
16     -48    
80     -208   
-16    176    
432    -240   
-704   -48    
16     0      
144    16     
-48    -32    
-48    64     
-112   -16    
96     48     
-32    112    
176    -48    
-400   -80    
-688   -192   
240    48     
-544   -96    
2080   -1632  
-112   -208   
432    1168   
-816   752    
-464   -96    
128    544    
-816   576    
1088   288    
-720   112    
688    -288   
-688   -16    
272    -208   
-80    48     
-32    -80    
64     0      
128    -144   
176    176    
-208   -192   
432    176    
-160   96     
128    160    
-304   256    
-128   -48    
-912   32     
-16    144    
-80    16     
96     -480   
-416   -96    
32     -48    
-304   -288   
16     -48    
128    224    
-16    96     
96     -80    
-176   48     
128    -32    
-16    128    
-48    -64    
16     -64    
96     -80    
32     192    
-240   128    
32     -32    
-32    48     
16     -256   
144    160    
192    480    
-224   -208   
-64    160    
-48    -64    
64     -32    
-176   -96    
32     -64    
96     288    
16     -48    
-192   -304   
-96    192    
192    208    
48     -288   
192    16     
32     -32    
-64    -112   
64     336    
-32    80     
-48    -144   
-48    0      
-80    32     
-64    160    
32     16     
-96    0      
-272   -192   
48     128    
-256   0      
48     96     
96     112    
-64    -576   
0      -848   
32     -16    
160    624    
-16    -32    
-96    16     
160    -16    
96     144    
-16    320    
-64    64     
-272   -672   
352    352    
32     544    
96     96     
-320   -224   
-16    0      
192    144    
-128   48     
-48    0      
-112   -400   
128    -48    
-48    176    
-64    112    
-176   16     
0      48     
0      -144   
176    128    
-464   -160   
48     112    
-64    64     
-128   -352   
-48    -608   
-64    -352   
80     -16    
32     32     
-80    48     
-176   0      
32     128    
0      32     
96     48     
-272   -176   
128    176    
-208   48     
48     96     
-64    48     
80     112    
-32    16     
48     -128   
16     -64    
-48    144    
160    16     
-48    96     
-32    80     
64     16     
32     80     
-112   -224   
112    128    
-64    176    
64     96     
112    96     
-80    -80    
-160   -112   
288    -16    
-96    144    
-112   48     
160    224    
16     144    
32     128    
-208   192    
192    352    
-192   16     
64     80     
16     128    
48     16     
-48    16     
-32    -48    
64     -96    
32     32     
-32    160    
64     128    
-48    96     
-80    288    
-80    -96    
48     -80    
-80    176    
80     0      
-32    192    
176    256    
-400   32     
176    -80    
96     48     
320    -272   
128    160    
-48    176    
-96    144    
-96    240    
16     256    
-80    0      
-16    128    
16     16     
112    48     
-192   48     
128    32     
-16    144    
32     -32    
64     144    
80     208    
-240   16     
224    0      
-16    192    
80     16     
-144   128    
160    144    
-96    48     
48     160    
112    -112   
-80    96     
64     128    
96     144    
-32    112    
0      64     
1472   -1552  
-32    0      
144    -400   
224    112    
80     320    
208    -272   
-192   352    
1168   -32    
-320   352    
112    64     
-128   -80    
160    -240   
-80    464    
176    -96    
-96    352    
-64    -208   
48     176    
144    80     
-48    208    
-32    -16    
64     0      
112    96     
16     16     
16     0      
-32    16     
240    -368   
-80    0      
32     64     
-48    32     
240    192    
48     80     
16     96     
80     96     
-96    112    
128    16     
-224   -192   
160    -112   
0      224    
192    -224   
-80    192    
32     -336   
-32    144    
96     -32    
16     112    
48     160    
160    176    
-96    0      
32     336    
-368   -448   
368    0      
-160   128    
80     112    
128    208    
-192   -272   
144    0      
-16    -784   
32     128    
192    -1568  
0      240    
-80    -16    
112    160    
-32    128    
80     144    
0      48     
-32    160    
80     112    
16     -16    
128    32     
-64    -64    
80     112    
32     -96    
160    144    
-48    -304   
48     64     
64     -112   
80     144    
-32    -16    
128    240    
64     -144   
112    112    
32     -32    
96     -16    
80     496    
-96    96     
64     112    
224    32     
-160   -32    
400    -784   
-176   48     
48     -160   
64     128    
-16    48     
96     160    
128    336    
0      208    
-16    64     
-32    -160   
176    288    
-112   -400   
128    272    
32     -512   
96     368    
32     -192   
64     64     
128    -112   
128    80     
-48    0      
0      -64    
64     96     
48     80     
112    208    
-144   -96    
144    224    
-64    -368   
0      80     
-16    -256   
304    352    
-48    -96    
16     -16    
224    -240   
-32    48     
0      80     
144    160    
-32    32     
128    288    
-80    -80    
208    -416   
0      512    
160    -400   
-48    64     
64     -192   
64     176    
-16    -64    
64     176    
-32    -256   
64     -16    
-80    0      
0      -1088  
-64    96     
-912   96     
64     -288   
-96    -240   
48     -528   
-80    16     
272    752    
-240   176    
160    160    
-48    -208   
96     -688   
48     0      
-16    -272   
-16    48     
160    -240   
16     192    
-384   -816   
368    -224   
-48    512    
96     -304   
-144   0      
320    -192   
96     -16    
-80    -192   
48     80     
16     -112   
240    96     
-176   -32    
-16    -96    
96     224    
-224   -224   
-80    -128   
208    128    
0      -272   
208    112    
-208   48     
304    -992   
-16    -112   
-32    144    
192    32     
-112   64     
-64    32     
16     -144   
16     208    
48     -144   
128    -64    
80     16     
0      0      
-240   0      
16     -64    
64     -112   
144    -144   
144    0      
16     96     
-128   64     
176    -560   
0      112    
160    -224   
-288   352    
-1808  -1776  
448    -944   
-176   1024   
528    208    
-224   480    
-288   -1056  
144    80     
352    480    
-208   192    
224    -656   
-192   496    
416    -496   
-112   544    
-160   -480   
304    448    
-336   -240   
-32    96     
-416   -160   
0      32     
-240   -112   
144    -336   
-304   224    
304    -512   
-272   144    
-16    -512   
128    112    
-64    -512   
-16    128    
112    -464   
192    240    
128    -48    
-16    -32    
-208   -96    
112    0      
-256   -112   
240    96     
-720   -96    
224    256    
-32    -352   
64     -224   
128    160    
16     -144   
32     -112   
32     -592   
112    16     
-80    96     
-80    208    
240    528    
16     112    
-80    48     
-96    -48    
16     -48    
32     144    
-64    -272   
176    -112   
16     32     
-48    -368   
-144   32     
-80    112    
-368   -336   
32     -64    
96     160    
-144   -320   
-144   -32    
-192   -160   
192    -32    
-48    64     
112    96     
-896   48     
32     -304   
128    256    
16     -176   
0      -16    
0      32     
176    80     
112    400    
-128   208    
48     224    
240    64     
-336   -64    
-16    -32    
160    640    
-176   -192   
-176   64     
-1152  -448   
128    -64    
-160   -128   
80     720    
-240   0      
-816   -144   
32     -80    
-416   -48    
-48    144    
112    128    
80     304    
16     -16    
-144   -176   
128    -256   
288    208    
0      -64    
-112   112    
48     -336   
-176   96     
-16    240    
-80    160    
32     304    
128    256    
-320   32     
-880   0      
-32    -96    
128    -128   
-144   16     
-48    -224   
112    304    
80     -48    
32     48     
-192   128    
80     48     
-64    -224   
-160   -192   
48     240    
320    368    
-144   128    
-256   16     
16     80     
-304   96     
-80    16     
64     -64    
-64    96     
32     0      
-64    368    
128    48     
-304   -176   
176    128    
-192   80     
384    320    
-320   96     
80     128    
-560   -96    
-32    64     
-64    32     
96     64     
0      -80    
64     -16    
-64    -144   
-64    -32    
144    48     
-64    80     
80     48     
-256   32     
32     80     
32     -48    
-160   -48    
32     96     
16     64     
-608   -96    
224    80     
-992   -128   
80     240    
-64    -160   
64     48     
80     160    
-80    64     
176    96     
-208   16     
96     112    
32     176    
-80    -16    
32     80     
-16    16     
-128   32     
-16    208    
-800   32     
48     -32    
176    32     
64     192    
-48    -80    
-112   80     
80     128    
-80    160    
-32    0      
32     240    
-48    48     
-128   -144   
208    80     
-96    -144   
128    112    
-576   160    
112    80     
-16    160    
-128   -32    
208    64     
-192   112    
128    0      
-80    32     
-64    0      
-1168  864    
944    -480   
1168   1376   
560    48     
-48    1136   
-64    -528   
-32    -48    
1008   -400   
-432   528    
-32    -48    
48     48     
-144   -16    
224    -160   
-288   448    
192    -336   
-192   368    
208    -224   
-112   400    
48     -192   
-256   64     
256    -80    
-352   240    
208    -96    
-320   176    
304    -96    
-192   208    
272    -48    
-112   352    
176    -144   
-176   112    
-32    64     
144    128    
-16    48     
16     16     
-224   -32    
80     -32    
32     16     
224    80     
16     80     
-48    32     
-32    128    
0      48     
80     64     
-80    48     
-16    64     
16     16     
-64    128    
144    64     
-64    80     
-80    -48    
64     128    
48     96     
32     112    
-16    64     
32     16     
-16    64     
80     112    
-80    96     
176    16     
-16    80     
16     64     
32     128    
-48    -48    
112    128    
-64    -48    
32     112    
-16    144    
16     176    
48     64     
16     48     
32     80     
96     96     
0      112    
-32    0      
-16    48     
208    272    
-128   176    
144    64     
176    256    
-272   -240   
96     -272   
-96    224    
-176   128    
-96    96     
96     160    
192    -96    
112    -32    
-128   16     
-48    64     
32     48     
0      112    
112    176    
-96    32     
128    80     
256    560    
-128   368    
32     -80    
128    64     
48     0      
112    176    
-48    208    
96     112    
-80    -48    
32     -32    
32     160    
48     176    
80     208    
48     320    
-64    192    
48     80     
-80    -592   
144    176    
16     16     
96     112    
-96    -48    
80     -64    
64     64     
16     80     
144    208    
-32    64     
-144   -464   
128    240    
-16    -208   
48     -144   
-112   272    
64     -208   
-16    -144   
-16    -48    
112    -16    
176    224    
-32    176    
-32    192    
-48    16     
96     -624   
16     80     
32     -80    
-48    32     
48     32     
-16    0      
64     192    
-16    -416   
224    16     
-96    -576   
80     112    
-160   112    
80     80     
176    -64    
0      144    
-32    96     
-48    48     
48     48     
144    176    
-48    16     
64     16     
272    144    
-192   0      
-80    -112   
368    -80    
-48    208    
48     -272   
-80    80     
-16    -112   
176    64     
-176   0      
144    432    
-256   -80    
96     -112   
240    240    
32     -64    
32     0      
-64    -32    
240    -64    
64     -368   
64     128    
-48    -320   
144    160    
-144   -944   
288    -16    
-64    112    
80     128    
-112   -96    
64     -144   
32     112    
16     -32    
-80    368    
-16    -432   
48     112    
16     -512   
240    64     
64     -400   
-128   0      
0      80     
256    160    
192    144    
-16    112    
32     96     
656    640    
-992   -1216  
112    -112   
608    960    
128    -1152  
-832   -160   
832    -528   
-400   736    
-96    -832   
0      -48    
368    -16    
-48    752    
-240   64     
304    464    
-336   -640   
224    -112   
-16    48     
112    -1200  
144    -208   
320    -192   
208    448    
-336   -160   
272    -192   
-32    144    
32     -64    
-16    -208   
128    -1264  
64     336    
128    192    
-288   -608   
176    -48    
112    -704   
80     -96    
48     208    
0      48     
288    448    
-80    368    
80     32     
-96    -240   
80     -624   
208    48     
0      -16    
208    160    
-240   160    
48     -400   
-64    16     
32     -1360  
288    400    
-176   -608   
272    -32    
-96    64     
48     -112   
64     144    
-64    -208   
192    -32    
48     160    
0      32     
32     -176   
-336   -352   
176    -256   
-176   208    
64     -336   
0      -192   
224    -368   
-112   64     
96     -3424  
-160   -272   
304    -1040  
-128   -80    
144    -32    
-48    96     
80     -112   
112    160    
-288   -32    
80     -224   
-448   80     
16     432    
-144   48     
112    -128   
64     96     
32     -432   
256    -208   
176    64     
-160   224    
176    -96    
-176   48     
64     -16    
64     0      
-48    -48    
128    0      
-208   -64    
80     -336   
160    128    
-80    -432   
-16    80     
160    -208   
48     64     
96     -2128  
16     160    
16     64     
0      48     
-48    48     
112    128    
-240   -416   
192    -448   
-592   -96    
384    160    
-720   16     
96     96     
-112   80     
48     -96    
48     -224   
64     -432   
-16    96     
128    -16    
-176   16     
64     16     
96     -48    
-48    -176   
32     -80    
-480   -176   
352    112    
-64    0      
-16    0      
-960   -48    
176    -80    
80     384    
144    -112   
48     112    
16     -176   
240    -128   
-48    64     
48     -64    
-288   -80    
-96    112    
-32    16     
192    0      
-224   96     
16     -32    
-16    -64    
16     -160   
-112   272    
144    -16    
16     80     
80     0      
0      -272   
-480   80     
-80    -32    
80     112    
-96    -16    
-48    16     
-32    -208   
-192   32     
64     -128   
16     32     
144    144    
-224   -48    
304    -336   
-160   112    
64     -48    
48     80     
-144   144    
16     48     
-48    16     
-112   -64    
48     -224   
32     -176   
304    -32    
-48    272    
-112   96     
-352   96     
160    -80    
-656   -176   
-1264  16     
-160   96     
-304   -192   
144    64     
-144   112    
-112   0      
16     -80    
176    32     
32     144    
-96    96     
-272   -48    
176    192    
-176   -336   
48     48     
-144   -112   
-64    48     
0      48     
-176   -16    
32     96     
-448   -48    
80     -16    
-816   -112   
112    128    
1808   -1488  
-1072  -224   
768    -288   
-48    -32    
832    752    
-48    -208   
-432   -544   
1072   304    
-208   -128   
-32    224    
-288   -160   
192    384    
-48    48     
64     16     
-192   32     
-384   -96    
-32    256    
-176   -208   
64     336    
48     -48    
0      48     
-32    80     
-16    112    
0      0      
-240   -32    
96     160    
48     224    
96     96     
-688   -112   
-16    -32    
-960   -128   
80     144    
80     -16    
32     96     
0      0      
-32    32     
0      64     
-224   -32    
48     16     
-16    48     
80     64     
-112   -16    
-48    48     
-112   -64    
-16    -16    
-112   -80    
48     128    
96     -112   
0      0      
-16    -256   
-80    96     
0      176    
0      48     
96     160    
-48    -112   
80     -32    
-128   160    
-48    208    
32     144    
32     192    
-192   48     
112    160    
-16    -48    
64     -48    
-48    32     
-96    -32    
64     160    
-240   -224   
176    -176   
48     64     
-112   176    
-48    96     
32     96     
-48    0      
144    64     
-144   -32    
16     288    
-944   -128   
144    96     
-32    -80    
-16    144    
-96    -176   
16     -224   
-112   64     
0      32     
16     32     
-256   -208   
80     -48    
-112   96     
-48    -16    
-224   0      
-16    -16    
-352   112    
-64    80     
48     80     
-256   -112   
272    368    
-32    336    
0      16     
-128   -96    
144    48     
80     128    
0      112    
-160   32     
32     80     
-16    16     
96     96     
-64    96     
-64    16     
16     48     
32     112    
32     96     
32     80     
-16    112    
-64    0      
144    160    
-128   -16    
112    160    
-144   32     
288    288    
-256   0      
80     112    
-64    80     
144    80     
-16    32     
80     -32    
-32    368    
64     336    
-32    -128   
-192   64     
96     -16    
16     0      
-16    96     
-16    96     
-80    -96    
-32    -32    
32     192    
48     -64    
128    112    
-80    128    
80     -64    
0      48     
144    224    
-16    16     
16     16     
272    144    
-176   288    
48     -48    
-80    0      
192    64     
-160   0      
-80    0      
144    416    
-160   -48    
208    112    
-208   208    
96     64     
-80    -48    
0      144    
96     -176   
-16    128    
128    128    
-80    128    
-32    -64    
176    144    
-176   64     
144    -32    
16     96     
64     144    
112    16     
-80    -32    
64     112    
16     -16    
-16    208    
-96    -16    
240    -80    
-112   128    
-80    128    
-64    -48    
32     128    
112    160    
32     48     
16     48     
80     48     
112    192    
-32    32     
16     144    
64     -16    
80     48     
16     80     
-32    352    
-192   32     
16     160    
-80    -112   
160    112    
112    48     
-240   -2704  
1248   3472   
-784   864    
288    -400   
-272   -144   
512    -32    
-176   544    
-32    528    
480    624    
-128   -288   
128    128    
-16    176    
-160   -224   
-112   -368   
352    -96    
-64    -128   
240    -64    
-176   288    
368    192    
-80    112    
-96    -288   
-96    64     
112    16     
144    16     
-48    -64    
176    -48    
16     32     
-208   144    
128    -208   
-32    -64    
48     -528   
48     208    
64     368    
32     64     
-48    112    
32     128    
80     32     
-16    32     
0      80     
112    48     
-32    64     
48     160    
80     112    
112    160    
-192   160    
144    -192   
-16    32     
112    -720   
-96    160    
80     -64    
80     240    
-160   0      
144    -80    
0      144    
-16    96     
96     0      
-16    64     
160    192    
32     -80    
-16    0      
240    -272   
-48    208    
32     -288   
64     128    
32     -1312  
32     160    
16     32     
96     368    
-224   -96    
288    96     
-16    32     
0      -80    
32     176    
0      -224   
160    64     
-80    -256   
-64    160    
48     -240   
64     80     
-48    16     
-32    32     
96     64     
208    208    
-304   64     
64     32     
272    336    
-352   96     
352    -16    
64     -96    
48     96     
32     -112   
0      16     
32     -96    
32     112    
96     -736   
112    272    
-96    80     
176    0      
16     32     
-32    -48    
112    96     
48     -112   
-32    128    
112    -64    
16     64     
64     -64    
224    32     
0      -160   
-48    0      
112    -32    
-48    96     
192    32     
-96    -32    
-32    -192   
-112   128    
256    -192   
96     -48    
112    208    
-32    -32    
32     288    
160    -368   
-112   0      
-32    -176   
240    224    
304    -128   
-112   -560   
-32    32     
144    -1024  
-144   16     
-512   -96    
64     -384   
48     48     
48     -1376  
-272   -128   
176    -2384  
-64    -128   
336    -16    
-80    -16    
-208   -48    
288    -32    
48     -288   
-96    16     
112    48     
-64    16     
80     96     
-64    -112   
160    -96    
-176   -608   
208    -144   
128    -336   
-32    0      
144    -1184  
0      -208   
0      -192   
32     16     
-16    304    
128    16     
0      -80    
16     -96    
-128   32     
80     -80    
-896   112    
16     -32    
-80    -16    
176    -672   
-64    -64    
48     -96    
-144   -48    
-272   -48    
112    96     
-64    0      
96     112    
-144   -64    
96     -304   
-16    -32    
64     -896   
80     192    
96     224    
-96    48     
16     128    
96     -16    
80     -336   
16     -32    
176    -560   
32     -32    
192    208    
-64    112    
-176   -32    
128    -176   
-16    32     
-48    -80    
64     96     
144    -336   
-912   -32    
0      -288   
176    -96    
112    -272   
432    -2256  
432    -1200  
256    816    
-400   640    
-672   -464   
672    496    
-416   -608   
368    368    
-48    304    
-144   -112   
64     -80    
-176   -304   
272    304    
-160   -96    
160    -32    
112    176    
80     -112   
0      48     
32     -192   
64     0      
-16    64     
48     544    
-176   32     
176    -384   
-624   80     
208    -112   
-176   128    
16     240    
160    160    
16     -256   
-112   80     
32     -400   
16     32     
-96    16     
16     -96    
-400   -48    
128    -112   
-496   -48    
128    -48    
-80    80     
64     48     
-64    0      
-16    -48    
32     -112   
0      -112   
-16    192    
144    -16    
64     112    
-144   -64    
64     -160   
-96    48     
128    96     
-112   16     
144    64     
-32    -48    
96     -208   
-400   -320   
-112   -400   
-304   96     
112    -16    
144    176    
-1136  112    
-16    -16    
-64    -128   
-784   48     
-64    32     
144    -48    
80     160    
48     80     
0      80     
80     -64    
-48    16     
144    48     
-112   0      
-48    -112   
96     64     
-368   80     
-336   16     
16     160    
-256   48     
64     16     
-576   96     
-16    32     
-1088  0      
-208   -112   
112    16     
-48    64     
48     -64    
-48    80     
-240   -272   
48     48     
-160   -176   
-32    176    
-112   48     
0      16     
16     48     
-224   128    
-192   -80    
-752   48     
-16    32     
144    160    
-32    96     
-176   -96    
32     112    
-80    -128   
208    240    
-80    -32    
32     48     
16     96     
-80    32     
-64    0      
-112   -16    
-32    -64    
-208   80     
16     208    
-1936  -304   
-32    -96    
-48    -16    
224    112    
-192   -112   
-176   0      
80     208    
96     -144   
-176   64     
-272   48     
416    672    
-544   -144   
320    16     
-464   16     
192    -96    
-640   -64    
-112   64     
160    -16    
-128   112    
208    80     
-256   -32    
128    -16    
-96    32     
144    112    
-144   -80    
160    80     
-48    208    
-128   80     
96     96     
-224   -48    
-16    -464   
80     -80    
16     96     
96     240    
-160   160    
0      -80    
80     -32    
-16    160    
-32    176    
-80    -176   
48     -272   
64     80     
32     176    
-256   176    
-112   48     
-48    -48    
128    48     
-368   -16    
48     128    
-96    320    
-80    112    
0      -368   
240    -144   
304    128    
-192   96     
-176   128    
-80    128    
144    64     
-64    -64    
96     144    
-240   96     
-80    -112   
-448   -336   
80     -416   
272    -112   
-112   192    
48     128    
-80    96     
0      128    
48     80     
-96    48     
16     96     
-16    160    
64     -48    
0      352    
-240   -80    
48     320    
-384   -32    
112    160    
32     112    
-64    -32    
512    416    
-400   848    
64     256    
-416   -464   
-400   640    
880    496    
-336   512    
-608   -80    
-192   -224   
-112   -16    
256    -144   
-192   624    
-144   -96    
112    80     
64     -64    
-48    -144   
-144   -32    
304    80     
0      272    
-16    -32    
-272   -96    
-16    32     
16     64     
128    144    
-160   -112   
-48    32     
192    272    
48     192    
16     32     
-48    -32    
96     96     
144    176    
-32    96     
0      80     
-64    64     
-16    48     
144    128    
-128   48     
192    112    
-112   -32    
-48    64     
32     112    
16     112    
64     0      
-32    48     
160    256    
-192   -128   
304    240    
-400   64     
448    16     
-224   112    
128    80     
-48    80     
144    64     
-80    -80    
16     272    
-16    -64    
176    144    
-64    48     
80     32     
16     64     
-32    48     
-16    192    
-128   0      
192    -48    
-64    224    
-144   -16    
32     192    
0      -48    
176    64     
-96    80     
112    112    
64     96     
48     144    
-128   0      
144    80     
-48    128    
-32    112    
32     -16    
96     144    
-160   64     
48     32     
32     -144   
368    96     
-112   304    
80     -368   
64     -32    
128    80     
-32    64     
128    224    
-128   96     
64     48     
96     64     
-64    -64    
128    224    
-192   16     
256    144    
-64    -64    
96     -64    
-64    64     
16     -896   
48     32     
80     208    
48     -16    
-32    -112   
-48    -32    
112    112    
160    160    
32     -64    
-112   32     
80     112    
176    144    
-144   48     
112    -256   
32     128    
128    -240   
-48    96     
-16    48     
272    272    
16     96     
144    48     
-208   240    
80     208    
208    -64    
-144   128    
-192   -64    
384    -112   
-208   -32    
16     48     
208    48     
-112   -192   
-32    -112   
-32    -368   
320    112    
96     320    
32     96     
128    272    
-176   128    
240    80     
32     80     
-32    80     
176    -80    
-112   16     
48     -208   
160    -272   
-96    16     
224    208    
-160   -336   
208    96     
16     -672   
32     32     
128    96     
-64    0      
64     16     
-16    208    
16     -32    
-80    -272   
224    176    
48     0      
80     -80    
-128   -496   
144    224    
16     -336   
-16    -304   
-16    -688   
240    480    
128    96     
-128   96     
256    -96    
-16    176    
128    -16    
-160   272    
128    -80    
112    -256   
16     144    
0      -400   
-32    128    
48     -128   
160    32     
0      -352   
0      112    
0      112    
144    240    
-48    -32    
128    64     
48     176    
32     -272   
32     176    
160    -64    
-224   224    
-224   -160   
112    336    
-48    -240   
-32    32     
32     -320   
144    16     
-192   -640   
192    -416   
64     432    
-64    576    
-128   320    
240    496    
-32    208    
-528   -720   
-320   32     
-96    -256   
304    176    
16     96     
208    240    
-128   -272   
208    -96    
96     16     
-48    -1776  
144    80     
-928   -96    
144    -736   
192    240    
-144   -560   
288    256    
-96    -1008  
-32    -368   
-32    176    
144    400    
224    432    
16     80     
-224   -128   
128    16     
96     -336   
-80    80     
-192   16     
16     -16    
64     -80    
16     -304   
304    176    
-64    -560   
-112   -208   
160    -64    
32     48     
-48    0      
144    -160   
-16    -384   
-304   96     
16     -176   
144    224    
64     224    
48     -64    
112    -48    
48     -96    
80     -80    
-80    -160   
192    -64    
-48    -480   
128    -112   
0      -112   
64     352    
-144   -160   
128    208    
144    48     
-128   -176   
16     48     
0      -224   
-192   -112   
0      -96    
16     80     
32     -48    
96     32     
80     -736   
-16    -48    
16     336    
48     128    
144    80     
256    352    
-240   240    
-32    0      
-112   -32    
32     -192   
-464   -368   
48     -176   
-96    -16    
-16    128    
240    -96    
-96    -160   
-80    -416   
128    -976   
224    96     
160    224    
-144   112    
-112   128    
16     -48    
16     64     
64     -64    
-48    272    
-64    -192   
32     -112   
32     -96    
320    96     
-48    -80    
-16    96     
128    80     
64     32     
80     -32    
-96    -288   
160    160    
-80    -128   
144    64     
-48    64     
-240   -128   
112    -64    
-144   96     
240    0      
-368   80     
112    -16    
96     448    
80     -560   
-48    -112   
32     -1440  
176    -208   
-160   -64    
-32    -176   
-128   80     
208    -160   
-128   848    
-176   -320   
144    -304   
-64    -112   
176    112    
80     -352   
-80    208    
64     -512   
48     96     
-80    144    
112    320    
80     208    
176    416    
48     112    
-48    64     
-240   -32    
192    -32    
32     176    
16     -32    
-1104  -48    
256    96     
-160   -48    
112    -144   
16     64     
64     144    
112    -128   
-144   128    
16     16     
-16    80     
16     128    
128    160    
-112   -304   
-64    -128   
112    -32    
16     96     
-448   -240   
128    304    
-160   -144   
-336   -160   
-160   48     
-640   48     
80     560    
-672   -496   
-80    -32    
240    16     
-176   144    
64     -240   
-96    0      
-32    128    
80     64     
-208   -400   
288    64     
-80    -64    
-128   80     
-176   144    
-96    -96    
0      224    
208    -256   
-32    176    
-144   288    
-176   144    
48     -160   
176    112    
-80    -160   
48     80     
-192   -368   
128    144    
-112   64     
128    144    
-144   48     
48     176    
1056   2896   
-1936  -304   
368    656    
-400   352    
496    16     
-672   -528   
-80    -48    
656    688    
-160   -128   
-144   192    
-160   -128   
-32    16     
-32    32     
208    80     
-256   -16    
128    0      
-448   0      
208    48     
-176   96     
112    112    
-80    -32    
-208   48     
-16    -32    
32     48     
16     -144   
96     48     
-176   208    
48     112    
-160   -16    
-80    -32    
-144   16     
208    96     
-176   112    
112    48     
-144   16     
-64    -224   
64     -80    
-48    48     
96     240    
80     -16    
-112   -32    
-112   128    
32     -32    
-128   96     
128    -80    
-80    192    
-32    48     
160    368    
-624   -128   
368    -16    
-560   32     
32     80     
-368   -48    
64     176    
-32    -32    
64     48     
-48    160    
-32    -48    
112    112    
-128   -48    
224    144    
-176   80     
-32    112    
-64    80     
-128   16     
0      -80    
144    208    
-432   128    
96     -64    
112    80     
-16    64     
64     176    
64     -16    
64     48     
16     112    
-48    -32    
-80    64     
-112   80     
64     128    
-48    16     
16     32     
48     144    
-128   -224   
-80    176    
-128   160    
144    176    
-144   32     
192    192    
-160   -16    
64     0      
-64    16     
48     96     
-16    144    
48     160    
16     192    
-144   -80    
144    32     
-224   48     
48     -16    
0      -48    
128    128    
-112   64     
48     64     
-112   -16    
96     128    
80     -32    
16     96     
0      352    
-240   -48    
48     80     
-256   -144   
160    96     
96     176    
-112   48     
352    384    
-208   16     
304    352    
-48    32     
16     112    
-64    192    
336    160    
-192   16     
-48    128    
-96    -128   
192    -80    
-144   80     
80     -64    
-112   -48    
-80    -96    
96     32     
-144   -112   
112    0      
-192   80     
128    80     
96     -32    
-96    -128   
-96    0      
208    16     
-64    48     
80     128    
-96    32     
64     160    
16     256    
-16    32     
32     64     
16     128    
0      -32    
-80    -96    
32     -48    
-16    48     
0      80     
-32    64     
64     96     
176    0      
-240   48     
-96    -16    
-32    -32    
80     80     
-96    48     
64     -96    
208    224    
16     224    
48     -16    
-16    336    
48     144    
16     -416   
0      144    
320    320    
-336   -48    
48     32     
96     176    
48     -32    
-64    32     
-16    64     
0      192    
-16    80     
-32    432    
16     -64    
-32    96     
32     48     
64     48     
-80    48     
32     -96    
-64    -160   
208    128    
128    192    
-208   -640   
48     0      
16     80     
80     144    
0      48     
-32    96     
384    -112   
32     272    
-96    -80    
-64    96     
0      144    
-1040  -528   
-208   -784   
176    112    
176    416    
96     -192   
288    240    
-448   192    
336    -32    
-192   -720   
784    -496   
-64    208    
368    224    
-304   96     
224    0      
368    96     
-80    112    
80     336    
-16    -96    
16     144    
-144   -640   
160    112    
64     112    
0      128    
-80    -64    
80     384    
96     -256   
-96    0      
-16    0      
176    96     
-16    144    
-80    -48    
80     32     
-96    -112   
-80    496    
-144   16     
160    128    
-160   -160   
560    560    
160    -80    
96     0      
-160   128    
256    176    
-64    80     
64     32     
80     80     
0      -384   
272    16     
-64    -208   
208    144    
32     -560   
128    288    
112    -544   
-96    64     
176    -1248  
64     208    
-144   -320   
-96    -208   
400    416    
-128   -224   
208    96     
-64    112    
176    -144   
-16    -176   
128    48     
-16    -336   
0      48     
-64    -80    
80     176    
32     -384   
48     112    
-48    48     
48     32     
96     -80    
96     144    
-16    32     
-80    -176   
0      -176   
160    -816   
-48    -272   
240    0      
0      272    
-48    -240   
80     240    
128    64     
-96    160    
0      -112   
96     192    
224    240    
48     240    
48     0      
96     -352   
112    96     
160    -16    
-176   48     
96     -128   
-112   -288   
288    -144   
-48    256    
96     -1024  
-80    160    
32     48     
176    -368   
0      144    
32     -464   
64     -1968  
160    80     
-48    -1152  
-112   -368   
80     -48    
192    224    
0      16     
-176   -112   
16     48     
192    -176   
112    -288   
-176   -64    
224    -176   
-48    144    
-560   -160   
-32    -384   
48     -128   
144    -336   
64     208    
-32    128    
128    176    
-32    464    
144    336    
112    -96    
-32    48     
80     -608   
-64    240    
-16    -384   
128    48     
-96    192    
0      -48    
0      48     
-144   -464   
320    176    
-96    -368   
64     -144   
-16    -1280  
144    -160   
64     80     
80     128    
48     208    
128    544    
96     -64    
160    -48    
-96    48     
80     -96    
-624   16     
80     -224   
352    448    
-320   -320   
448    560    
-160   -64    
48     64     
-16    -160   
48     0      
208    64     
-64    224    
-64    160    
64     -80    
-48    -64    
176    16     
-640   0      
-16    128    
-80    96     
96     -256   
-48    0      
48     -352   
-64    -32    
144    -1920  
80     240    
-32    -144   
0      -48    
160    112    
-144   64     
-160   -96    
-32    256    
-112   -64    
32     -48    
-448   -128   
288    32     
-160   16     
256    -368   
48     32     
80     -320   
-80    240    
48     64     
-16    -192   
224    -112   
-64    -112   
-176   -96    
48     160    
-64    -16    
64     -208   
-96    -800   
448    64     
224    -112   
-480   96     
256    48     
-112   -112   
192    608    
96     -96    
-272   -304   
224    -240   
-96    464    
-176   -176   
-64    224    
-64    -400   
32     80     
-448   -208   
96     32     
-176   32     
64     -128   
-32    128    
64     -272   
-32    192    
176    -1344  
-48    176    
-32    -64    
80     208    
0      -48    
-80    48     
64     80     
-96    96     
96     -112   
-112   64     
96     -64    
96     16     
48     32     
112    -160   
-192   16     
48     96     
288    64     
-272   32     
112    -32    
-128   128    
128    16     
-64    -112   
64     160    
-32    112    
112    -208   
-144   80     
-544   -144   
304    48     
-576   -112   
-896   112    
-64    64     
-1168  -304   
-160   32     
-688   -48    
-64    64     
144    -32    
-128   -16    
96     48     
-16    -96    
32     -64    
-176   32     
-160   -352   
96     48     
-144   -256   
-256   16     
48     192    
-32    -128   
48     0      
-240   -32    
-16    240    
-560   -16    
48     112    
96     288    
-464   -64    
64     -400   
144    112    
-96    48     
-64    160    
-80    -128   
-16    16     
-256   64     
-48    48     
-80    32     
-16    80     
-48    128    
-144   -64    
-80    48     
-80    -144   
32     32     
96     32     
-80    -32    
208    48     
-192   160    
208    304    
-256   80     
128    112    
-160   64     
0      -16    
16     128    
-48    160    
-160   -32    
-80    128    
-352   176    
144    176    
-304   -144   
32     16     
16     64     
-192   64     
96     144    
0      48     
32     -16    
48     96     
-144   0      
208    144    
-64    -48    
-16    448    
-112   80     
-176   32     
128    192    
-80    -32    
144    288    
-144   272    
224    176    
-48    192    
0      208    
-80    16     
144    432    
-16    144    
-48    112    
32     96     
-80    -192   
32     -160   
-288   -176   
240    416    
-1104  -144   
96     80     
0      64     
80     80     
-80    80     
-48    16     
-176   48     
-16    -528   
-48    -48    
128    320    
-64    -32    
-48    80     
-32    16     
-144   -16    
128    64     
-240   -128   
-32    112    
-32    -16    
32     48     
16     416    
272    224    
-160   224    
176    160    
-48    64     
-112   96     
-208   -32    
240    -736   
224    80     
-208   240    
-128   80     
0      -16    
320    96     
-96    48     
-112   160    
-208   176    
32     -32    
48     0      
-16    -64    
224    160    
-208   144    
-160   -16    
0      -16    
112    96     
96     48     
-64    160    
-448   -160   
48     -48    
128    208    
0      96     
0      96     
-112   112    
48     32     
-64    96     
-16    -16    
336    -16    
-224   64     
48     -16    
-32    144    
48     -128   
1184   656    
672    896    
128    -592   
-464   -272   
416    128    
368    256    
256    -336   
240    496    
-336   400    
288    -192   
-112   336    
0      48     
192    -128   
-160   64     
208    288    
-176   176    
16     -256   
16     -64    
416    -176   
-16    256    
0      64     
-16    112    
-48    -192   
192    208    
208    -304   
-48    288    
-64    112    
256    32     
-208   -240   
128    192    
192    -176   
32     -16    
32     -80    
32     336    
64     -112   
80     48     
256    208    
128    304    
-192   80     
-160   -16    
-96    144    
16     -32    
-32    -32    
16     -64    
-32    112    
-176   -128   
16     256    
-112   192    
48     -16    
-16    96     
112    0      
-80    -80    
-32    -64    
80     224    
128    -48    
16     0      
-48    224    
288    672    
-144   -144   
128    96     
32     -80    
48     -176   
-144   448    
320    224    
-160   0      
32     144    
-112   96     
96     -32    
16     48     
64     16     
-16    80     
64     -32    
0      64     
96     48     
96     112    
240    -1536  
-128   480    
16     80     
464    448    
-528   -64    
256    192    
80     192    
-144   -64    
-32    -96    
272    -128   
-256   0      
128    144    
-112   -64    
32     -48    
112    128    
-16    -448   
80     96     
64     -16    
-32    -64    
-16    64     
-80    -128   
64     0      
208    160    
48     192    
16     240    
-112   32     
64     32     
48     80     
-80    64     
112    192    
-64    -256   
-16    -48    
-144   -480   
16     -224   
240    240    
224    224    
-176   112    
32     144    
64     -48    
-32    -16    
-32    80     
0      144    
176    304    
48     80     
-160   32     
288    -256   
-144   -240   
-128   -656   
336    368    
-288   368    
320    448    
-160   -512   
96     224    
32     128    
16     112    
144    -16    
-48    208    
304    64     
0      -144   
-48    -80    
-80    -176   
-48    16     
240    -224   
-48    48     
96     -2832  
-16    64     
144    208    
-144   176    
96     64     
0      144    
176    272    
-176   -16    
208    64     
-80    32     
16     128    
64     -32    
48     16     
-32    -304   
128    128    
48     -320   
48     128    
-96    256    
208    32     
128    -80    
80     192    
-208   192    
-32    -96    
16     96     
160    -400   
160    32     
-96    -80    
112    48     
-96    -608   
192    192    
16     -160   
48     144    
192    -160   
32     176    
32     176    
-160   96     
48     0      
144    -160   
96     160    
16     32     
48     -16    
128    -176   
0      32     
144    16     
-160   16     
160    16     
32     96     
96     -16    
64     224    
-16    32     
0      64     
32     48     
64     -64    
160    -656   
96     96     
-80    64     
16     -128   
1264   2720   
-1536  640    
-384   432    
416    384    
-64    -336   
368    656    
-176   16     
-384   80     
336    -80    
-416   -176   
256    -368   
-288   -720   
224    -32    
272    -1056  
-80    -160   
-96    112    
224    -80    
-64    224    
96     -240   
48     -944   
-48    32     
160    -64    
64     176    
-512   -64    
64     -128   
-96    -176   
176    -160   
-160   -32    
304    128    
-32    -336   
32     -240   
0      -192   
160    -32    
-16    112    
96     96     
80     -112   
112    -16    
32     0      
-48    0      
-48    -208   
16     0      
96     16     
176    0      
96     -608   
-80    -160   
80     -272   
-16    48     
128    -224   
224    -32    
-176   96     
176    48     
0      -112   
16     -80    
-64    96     
0      -80    
-400   80     
16     -112   
-64    -176   
224    -288   
-80    32     
64     48     
0      -64    
48     -1056  
48     240    
-112   -176   
128    -32    
-16    80     
128    -16    
-80    128    
16     48     
-288   -80    
112    -32    
-576   16     
64     -16    
-48    144    
16     -128   
-16    128    
112    -480   
192    144    
-144   32     
80     128    
48     32     
208    160    
-224   16     
64     16     
-176   -208   
80     -256   
64     384    
-96    48     
-272   48     
112    -176   
16     192    
32     -640   
32     128    
224    224    
0      0      
-48    -48    
48     -64    
-128   -32    
32     -288   
288    304    
192    160    
-352   -96    
-32    -272   
-1184  -80    
16     -432   
-80    -160   
16     -304   
96     112    
160    -2896  
-16    -160   
-320   16     
32     32     
-32    -64    
112    160    
96     272    
-80    0      
-16    208    
-224   -160   
112    -96    
-32    -192   
112    80     
32     -176   
-256   -208   
-48    -240   
208    -16    
-224   -48    
48     -432   
-32    272    
176    128    
-48    160    
-48    -336   
16     144    
0      16     
-16    464    
-80    96     
-48    224    
-288   -336   
80     160    
16     80     
-496   -80    
16     96     
-144   96     
-128   96     
-32    -128   
-112   128    
-48    -208   
-48    -16    
96     -16    
-16    32     
-192   -128   
-128   80     
-656   -32    
16     144    
-144   -64    
112    128    
-144   176    
-112   -80    
128    -16    
224    80     
0      32     
-144   0      
112    80     
-416   -176   
64     32     
-272   -144   
176    64     
-224   240    
-96    -32    
16     128    
-176   -96    
112    16     
-352   96     
16     64     
-272   -128   
0      176    
-16    112    
-144   32     
-80    -176   
176    112    
16     -16    
16     80     
-128   96     
272    -96    
-208   16     
-48    -144   
-176   192    
240    -176   
32     272    
-496   -176   
0      64     
-1856  -288   
192    208    
-192   16     
96     144    
-112   -96    
144    80     
-912   -1104  
384    0      
-720   0      
368    336    
-544   0      
656    336    
-400   -160   
128    -304   
80     -64    
-576   -80    
240    224    
-64    -160   
0      448    
16     -448   
-144   400    
64     -160   
-32    560    
32     -400   
-16    432    
-96    -512   
48     272    
-16    -192   
16     544    
-224   -176   
-448   -160   
-48    64     
-656   -96    
176    464    
-432   -240   
128    160    
0      -32    
80     -16    
32     112    
-96    -64    
-32    96     
48     0      
288    464    
-464   -224   
-144   -240   
-224   -96    
112    64     
-288   -80    
96     -160   
80     32     
-32    160    
-32    256    
-192   -128   
0      -64    
32     -64    
-16    16     
16     160    
96     128    
-64    -48    
-16    80     
-208   48     
-64    48     
-320   64     
80     240    
16     176    
-16    0      
48     112    
-16    -16    
80     -176   
80     32     
80     144    
-176   64     
64     80     
-96    -80    
144    224    
-160   48     
48     96     
-208   32     
-32    0      
-32    80     
-96    64     
-32    144    
80     0      
144    128    
16     352    
80     -16    
64     -128   
-80    48     
32     160    
208    224    
0      192    
-80    192    
160    64     
0      304    
112    208    
32     16     
0      64     
144    96     
48     128    
48     16     
-16    80     
-144   -400   
32     -208   
64     80     
112    320    
-112   160    
-16    272    
0      48     
-32    32     
128    96     
64     496    
48     176    
-112   -48    
-16    -80    
32     -32    
176    336    
-112   0      
96     320    
-176   96     
48     96     
-64    32     
-80    0      
304    352    
-176   -16    
0      -144   
-16    -48    
0      112    
160    32     
-64    192    
32     416    
96     32     
112    80     
-256   96     
-16    16     
112    32     
-48    80     
96     320    
128    224    
64     32     
-112   -48    
-96    80     
160    192    
240    -16    
-64    96     
-96    128    
144    16     
-64    32     
16     144    
16     -32    
-16    48     
64     -32    
32     336    
96     80     
96     16     
-112   48     
96     32     
-16    128    
160    176    
-16    96     
48     0      
-16    128    
0      240    
16     -80    
48     96     
48     128    
64     192    
-96    -2112  
-48    48     
0      160    
-80    -16    
176    80     
-32    240    
-64    0      
160    -144   
112    160    
16     224    
-144   176    
0      -16    
-48    -128   
-16    -384   
176    368    
-320   -1232  
192    -96    
80     144    
48     32     
-80    192    
-16    96     
48     16     
112    160    
144    -176   
176    160    
-32    160    
16     112    
-80    160    
80     -128   
-16    112    
160    -48    
-80    -96    
160    48     
-80    272    
144    16     
-16    256    
1408   64     
-384   416    
-32    -32    
-496   448    
848    -1200  
-496   48     
240    -336   
-160   336    
336    -96    
-224   -464   
256    32     
96     -3024  
-96    336    
192    -176   
0      336    
48     -272   
-160   272    
176    0      
-176   208    
208    -224   
-96    288    
80     128    
80     192    
32     -176   
64     -240   
64     -32    
-16    -48    
128    128    
32     0      
48     48     
-64    -16    
48     96     
16     64     
16     160    
64     16     
-96    0      
160    96     
-160   48     
240    48     
-16    -48    
-16    144    
80     -128   
16     -16    
32     -432   
64     16     
176    -1168  
-208   -160   
224    0      
-96    208    
112    32     
64     -96    
-96    128    
128    -128   
48     176    
80     -576   
0      48     
-112   -112   
176    96     
0      -352   
80     0      
0      112    
64     160    
80     32     
64     -16    
176    112    
96     -304   
48     128    
-80    -112   
80     112    
32     -176   
224    256    
-192   -624   
160    80     
128    16     
-176   -32    
176    256    
-256   -64    
240    -128   
0      48     
16     144    
192    64     
16     0      
64     -160   
64     96     
-48    -480   
48     -176   
128    -128   
160    272    
-208   -160   
160    -16    
-48    -80    
96     -256   
48     48     
-272   -96    
80     -784   
-16    -112   
160    -1488  
176    -176   
16     -272   
96     -160   
48     96     
96     80     
-48    32     
64     -352   
-80    -768   
208    304    
-64    128    
32     -48    
-80    16     
112    -96    
96     -48    
32     -480   
48     -96    
0      -304   
192    176    
32     256    
80     240    
16     176    
-32    -112   
0      -640   
48     32     
336    208    
-16    -48    
-192   -176   
-16    -16    
-208   32     
96     -352   
16     -16    
112    -64    
176    176    
0      -2256  
-96    -144   
80     -16    
-32    48     
208    32     
-160   96     
224    -32    
-128   -128   
-112   -32    
-32    -80    
-64    -64    
144    144    
-48    -64    
160    -128   
128    208    
-32    -528   
-112   80     
80     -576   
192    144    
16     -64    
-112   -32    
-192   -176   
240    -128   
32     -64    
-192   128    
-272   -80    
160    -16    
224    -160   
16     -256   
-32    -64    
16     -96    
112    96     
-64    -624   
208    0      
112    16     
-128   128    
-32    0      
32     96     
32     -32    
128    -112   
-240   -48    
96     -80    
-768   0      
32     64     
-144   208    
112    -144   
16     64     
112    -800   
0      64     
-16    80     
144    -32    
-64    0      
208    64     
-160   -176   
128    -16    
-192   -96    
192    -48    
-720   -16    
32     32     
-352   -144   
32     -352   
-64    128    
64     -976   
64     352    
320    -1536  
-16    -96    
-928   -1504  
640    -896   
96     336    
-32    544    
-560   480    
-96    176    
240    -288   
224    800    
32     128    
-208   -272   
192    16     
352    48     
0      112    
-128   -64    
160    -240   
-432   -304   
-16    -528   
224    32     
176    400    
-144   192    
144    80     
-80    160    
-112   -112   
128    -80    
16     -48    
16     272    
176    -48    
0      32     
-128   -224   
16     -64    
112    80     
32     -32    
-32    16     
48     0      
-256   -160   
48     -176   
-80    96     
32     -112   
-208   -16    
-576   -96    
64     112    
-480   -256   
-240   48     
-48    -16    
-368   80     
112    0      
256    224    
-32    -112   
0      -48    
-64    -32    
32     176    
-16    0      
-464   -208   
48     128    
-48    -96    
-32    64     
-384   -224   
-64    80     
-64    64     
-80    -16    
16     144    
-528   48     
-48    224    
-1568  -96    
160    -32    
80     240    
-80    112    
48     -240   
48     32     
-32    -80    
-32    144    
-16    96     
32     128    
-96    96     
-128   -224   
64     -32    
-144   -16    
0      80     
-432   32     
-80    128    
288    -32    
-128   -224   
0      -144   
-32    240    
-64    80     
64     160    
0      0      
128    64     
64     -64    
16     -48    
-16    96     
16     80     
-112   -16    
-144   -576   
-16    -144   
-448   -64    
224    352    
-336   -16    
224    48     
-272   32     
112    -32    
48     64     
-96    0      
16     0      
0      16     
80     48     
-48    80     
112    96     
-16    0      
-144   -16    
-464   -160   
144    48     
176    96     
32     160    
-32    -112   
-272   -64    
128    144    
-176   96     
80     -48    
-144   -144   
-96    -16    
-96    0      
192    -80    
-432   -272   
112    64     
-32    -192   
48     96     
-1536  -192   
16     160    
80     112    
-80    0      
176    64     
64     176    
192    352    
-208   32     
64     -80    
-176   80     
-32    272    
144    -64    
-32    80     
-288   -112   
160    16     
-112   -112   
-16    112    
48     272    
112    480    
64     -16    
-176   112    
-176   80     
208    -32    
-80    32     
0      -16    
-48    96     
-16    176    
-32    -16    
-112   -112   
96     -208   
-112   -32    
-80    192    
32     0      
-64    16     
128    0      
-32    0      
32     176    
-192   -48    
16     -32    
144    96     
208    -48    
32     -160   
48     336    
-96    -64    
0      -32    
-208   0      
288    128    
0      160    
-32    -16    
0      0      
16     80     
144    128    
0      144    
-16    32     
-48    32     
208    208    
-112   112    
-48    -176   
144    -32    
224    304    
-112   144    
-144   160    
64     64     
16     32     
48     160    
0      32     
64     64     
16     48     
16     288    
912    3488   
-1440  -32    
-736   -272   
160    1168   
1184   576    
-384   -464   
-192   304    
384    400    
240    -16    
-304   368    
-16    -496   
160    528    
-16    -16    
0      464    
-224   -464   
-16    208    
96     -16    
240    576    
-160   -32    
-80    -224   
-128   -48    
112    48     
32     240    
80     80     
48     256    
64     -112   
-128   224    
208    272    
-80    160    
96     16     
-160   128    
256    96     
-64    48     
0      112    
-48    128    
96     96     
32     112    
-32    64     
-32    80     
16     32     
16     96     
-64    -112   
-16    -48    
112    16     
192    96     
-80    32     
-16    192    
-160   96     
160    0      
144    272    
-48    -288   
32     96     
-64    96     
112    144    
-32    32     
0      -112   
160    -16    
32     80     
-48    -80    
-32    -224   
48     96     
64     240    
-32    112    
80     -16    
-80    96     
128    -384   
112    192    
-48    144    
208    224    
-64    112    
176    80     
0      -16    
64     128    
-16    144    
96     64     
144    160    
-176   64     
208    -192   
32     0      
144    304    
-112   64     
16     112    
-64    0      
224    -96    
96     176    
32     48     
64     448    
-96    80     
144    16     
0      0      
80     -144   
16     96     
-112   -48    
32     -144   
80     96     
48     -480   
-32    80     
112    -128   
32     128    
-80    0      
64     80     
32     -176   
64     80     
16     160    
-96    96     
96     -16    
80     224    
-32    96     
128    -48    
-48    64     
112    -224   
0      112    
32     -432   
64     160    
64     448    
0      16     
48     48     
80     176    
-16    48     
160    224    
-192   -32    
224    192    
-80    80     
192    144    
-208   80     
144    -208   
64     320    
-160   -112   
288    96     
-240   -256   
256    32     
-64    80     
112    64     
-48    240    
0      16     
48     80     
48     192    
112    -96    
64     -208   
48     160    
-16    -272   
0      80     
64     -304   
144    96     
-48    -144   
112    -544   
96     240    
-304   160    
256    -80    
-112   288    
320    192    
-256   0      
240    144    
-272   -336   
336    64     
-208   -96    
80     160    
32     -400   
256    272    
-112   -192   
64     240    
-192   -64    
144    224    
144    208    
-112   48     
320    80     
-192   160    
-16    -80    
176    -48    
48     80     
416    128    
-480   -32    
304    96     
-96    144    
432    -224   
-128   80     
224    80     
0      -816   
48     -32    
-192   -224   
64     -1552  
-32    -16    
16     -1424  
112    -48    
160    112    
-96    -144   
64     192    
0      -48    
144    112    
128    -96    
208    -560   
80     112    
288    -704   
272    272    
-336   -192   
16     -208   
-384   -1104  
-496   -1536  
624    -480   
592    -816   
-448   272    
640    1376   
-688   288    
-160   -416   
192    -720   
336    -512   
112    144    
-112   -16    
192    -256   
-16    144    
16     0      
272    240    
-240   -352   
160    -112   
192    -64    
0      96     
-128   -1328  
-16    -80    
208    -992   
160    -48    
-96    16     
-80    -80    
224    80     
16     32     
-272   -128   
64     -96    
-1856  48     
272    0      
-128   -96    
0      -16    
128    -160   
-64    -1168  
384    -224   
-176   64     
176    80     
-96    -32    
96     32     
16     112    
176    -112   
-336   -128   
80     -96    
-304   112    
16     -32    
-32    -128   
208    -128   
-32    32     
64     -208   
0      80     
-32    -1104  
256    48     
-96    -16    
96     80     
0      80     
16     -176   
80     48     
64     0      
-112   48     
80     -64    
-832   0      
-48    -192   
32     -112   
48     -288   
-128   96     
-208   -208   
128    144    
16     -112   
176    112    
-64    16     
-32    112    
-128   -16    
224    -48    
-272   -224   
256    -112   
-704   -64    
144    -80    
-272   64     
80     64     
-96    32     
288    -768   
-224   240    
0      -320   
112    64     
-16    0      
32     -32    
-48    -96    
0      -32    
-384   -96    
192    16     
-208   192    
96     144    
-80    32     
144    -272   
128    48     
16     -256   
32     144    
32     112    
-16    16     
-176   64     
16     -160   
-304   48     
32     16     
48     224    
-96    -32    
-80    32     
208    112    
-160   -32    
304    -128   
-192   48     
128    -160   
-64    128    
240    224    
240    96     
-416   -272   
16     -96    
-96    192    
336    16     
-192   -32    
-128   -16    
-128   -176   
128    -192   
-640   -112   
112    -128   
-112   160    
-176   128    
-272   16     
0      -16    
-448   -144   
-32    48     
-96    -160   
64     0      
144    -80    
-160   112    
0      -112   
32     16     
-96    -96    
288    16     
-192   64     
176    144    
-432   0      
-448   48     
96     64     
-176   80     
-32    16     
-400   32     
-32    -32    
-352   16     
-96    -48    
48     -16    
-16    240    
112    0      
144    336    
-176   -304   
176    368    
-240   -192   
32     -32    
0      32     
80     -16    
-208   -64    
-512   -208   
32     -96    
-1216  -80    
32     864    
384    176    
-80    368    
48     -256   
-32    32     
-336   -272   
0      -96    
-80    176    
160    -64    
48     0      
96     -16    
-48    112    
-144   128    
-16    -64    
0      368    
-128   -48    
-480   80     
-32    32     
-32    -128   
-192   -256   
-48    0      
144    144    
80     176    
-128   96     
16     64     
-160   -64    
16     48     
16     48     
-128   128    
-144   -16    
80     48     
-1216  -1664  
656    1504   
-912   160    
-224   -144   
752    -128   
-48    -736   
32     112    
176    1088   
-304   -16    
448    -64    
-448   -160   
128    208    
128    704    
-320   16     
-16    -80    
-336   -48    
320    336    
-512   -96    
-80    -128   
224    -48    
-48    -80    
-16    224    
64     336    
176    288    
-80    -16    
32     -224   
0      -384   
-32    -112   
16     208    
-192   -400   
160    96     
-128   256    
208    32     
-96    176    
80     -32    
-96    -128   
48     -16    
-32    32     
64     -80    
-64    48     
112    320    
80     64     
-80    16     
-128   48     
224    96     
-128   -16    
-16    240    
-176   -16    
80     144    
-32    0      
-48    -16    
80     208    
-64    48     
32     112    
-64    -48    
0      80     
-128   -336   
272    112    
-208   -64    
176    272    
-160   16     
-16    -16    
-400   80     
32     48     
32     96     
0      144    
-16    -16    
-32    32     
-64    64     
16     128    
0      64     
48     96     
16     64     
-80    -32    
16     160    
-96    -64    
80     -64    
-144   -80    
16     -32    
32     -112   
0      -48    
112    288    
-96    -80    
256    96     
-64    128    
32     176    
-112   0      
-112   -400   
80     -336   
240    224    
32     192    
-32    272    
-112   16     
64     48     
112    16     
80     96     
-80    64     
16     112    
16     64     
112    208    
-176   -96    
-32    -64    
48     80     
112    80     
-48    144    
-160   64     
0      -16    
96     16     
-80    112    
48     -16    
112    192    
16     64     
80     112    
-48    96     
48     96     
16     32     
128    256    
-16    160    
32     -16    
-64    32     
32     224    
160    112    
-112   96     
-48    80     
80     224    
64     112    
-64    112    
-16    16     
48     16     
48     160    
32     64     
80     96     
0      96     
-32    208    
80     224    
-48    -64    
96     -288   
16     160    
-16    128    
-80    16     
-32    16     
224    288    
-96    176    
-112   32     
96     64     
-80    -320   
320    -208   
-16    320    
-112   32     
-48    224    
-48    32     
160    -1120  
32     160    
32     32     
288    688    
-256   176    
176    208    
192    208    
-128   128    
-112   -128   
-160   80     
160    -80    
0      80     
112    176    
-112   -144   
304    112    
64     -192   
272    544    
-112   48     
-48    96     
32     112    
-112   80     
80     288    
-192   144    
-80    -160   
-64    80     
176    16     
176    64     
-96    32     
32     -224   
80     128    
192    -672   
112    160    
-96    -1360  
48     160    
96     112    
-32    -112   
208    416    
-48    144    
-48    144    
-128   -48    
240    80     
208    16     
144    32     
96     -32    
0      16     
-48    -112   
240    -1440  
816    -1488  
320    288    
352    704    
-640   -224   
304    144    
32     480    
672    176    
-304   272    
-192   -144   
304    320    
-112   32     
-96    -192   
240    64     
64     -32    
32     128    
0      128    
64     96     
-32    -96    
64     112    
16     176    
-48    160    
144    -208   
-16    80     
96     -48    
32     -16    
16     144    
96     0      
-48    32     
208    -256   
-128   80     
144    -624   
-96    112    
96     -320   
16     48     
144    304    
-112   96     
96     -64    
-64    96     
144    32     
-48    32     
48     96     
48     -608   
96     192    
-96    -272   
144    32     
48     -80    
-80    112    
224    -224   
-16    64     
-48    80     
192    80     
-128   208    
144    -32    
80     96     
16     -176   
48     128    
0      -272   
48     96     
64     -160   
96     176    
80     -32    
32     64     
64     -16    
32     0      
64     48     
64     80     
-32    48     
80     176    
-32    -1184  
64     -480   
80     96     
-48    -272   
144    32     
-16    64     
-112   288    
48     -384   
96     32     
32     -176   
192    -608   
-144   -64    
192    -224   
80     256    
-480   -16    
144    -64    
16     -352   
192    48     
-144   64     
192    -912   
-32    -176   
64     48     
48     -208   
112    240    
-48    80     
32     -48    
96     320    
0      -656   
48     -32    
-32    32     
-16    -80    
112    32     
-48    -288   
224    112    
-208   -672   
160    -16    
-64    -1744  
288    160    
-96    80     
192    -16    
-80    16     
-64    64     
96     -160   
-96    -176   
96     80     
32     64     
-272   96     
-176   -384   
160    -80    
-64    -448   
128    -160   
-112   -864   
368    176    
160    112    
-320   -128   
-96    64     
48     320    
448    32     
-112   -64    
-224   0      
-16    -16    
-864   -32    
-64    48     
528    32     
32     208    
80     -32    
-208   -256   
-288   -176   
240    336    
128    -16    
32     48     
-16    64     
-64    80     
128    -32    
-16    0      
80     -144   
-304   -304   
48     -224   
-448   192    
144    128    
32     80     
0      -256   
-16    48     
16     -384   
64     144    
-32    144    
240    272    
-32    128    
80     -304   
-224   -96    
80     -128   
-160   -80    
96     -96    
-640   -64    
128    -48    
192    -208   
112    160    
-192   -400   
144    -144   
112    192    
48     -128   
144    112    
-96    -16    
-48    0      
32     32     
176    144    
-80    -80    
48     -208   
-128   112    
224    -192   
-416   -64    
-144   -208   
-48    96     
96     -224   
-144   16     
128    -688   
32     16     
-288   192    
-80    -16    
-208   32     
144    -160   
-32    -176   
80     48     
-112   16     
176    128    
0      48     
112    -112   
1504   -1520  
32     80     
432    -160   
-704   32     
432    -528   
112    -496   
-208   0      
384    480    
-176   -240   
-64    -128   
48     -16    
-112   32     
80     -112   
-304   -48    
272    -176   
-128   192    
16     -448   
-224   -96    
112    192    
-320   80     
-112   -112   
-816   -128   
48     -16    
144    288    
-144   -96    
160    -144   
-176   320    
-1264  -128   
384    336    
-304   80     
80     -48    
-112   16     
-272   0      
80     -160   
-384   32     
128    64     
-544   144    
-32    384    
-160   -192   
-64    -256   
224    -16    
-160   96     
-112   -112   
64     208    
-144   -112   
-32    80     
-48    -160   
0      64     
-48    112    
-176   48     
-128   80     
48     32     
-112   112    
-1088  -160   
-96    -64    
32     -128   
240    704    
-448   16     
-240   160    
-16    -224   
-96    128    
16     -48    
-176   16     
192    48     
0      48     
-16    128    
0      64     
-16    16     
-208   -32    
-16    176    
-128   48     
48     64     
-32    -32    
128    96     
-240   -272   
144    464    
-64    80     
240    -64    
160    128    
192    384    
-208   336    
-320   -144   
144    272    
-16    32     
-96    96     
-192   -64    
336    576    
-112   144    
-64    -32    
16     -208   
112    -16    
128    96     
-144   16     
-48    -16    
-112   -16    
48     96     
-272   -32    
96     48     
-96    48     
80     160    
-688   -80    
16     128    
-416   -176   
96     32     
64     16     
16     48     
-16    16     
-64    16     
-64    16     
0      80     
16     0      
16     80     
80     112    
-80    64     
-48    -16    
-128   272    
-160   160    
-608   -80    
-32    32     
176    32     
0      0      
-80    -16    
-16    96     
64     336    
0      -64    
-80    144    
0      -144   
144    464    
-272   160    
48     208    
-272   -96    
192    96     
-192   -64    
-32    -80    
-64    -400   
-144   -272   
96     224    
-80    -112   
80     240    
16     -16    
-96    16     
0      32     
16     336    
-144   176    
-16    48     
-32    -80    
-48    -240   
-256   -112   
48     48     
48     96     
-16    32     
112    80     
-176   0      
176    -32    
-80    -80    
0      -160   
-112   -464   
304    960    
-32    96     
0      -96    
-64    -48    
64     96     
-112   -80    
-48    -96    
160    160    
112    64     
96     400    
-64    -16    
64     32     
0      48     
-32    112    
0      432    
-144   -112   
-112   -288   
128    208    
-384   -240   
-16    240    
96     -112   
144    192    
160    256    
-112   144    
-96    256    
80     -192   
160    80     
176    160    
-32    16     
16     80     
32     16     
-128   -64    
256    64     
0      96     
-176   160    
128    240    
-224   -64    
112    128    
-16    32     
-640   -816   
-96    480    
-96    -288   
-320   112    
-192   -752   
544    720    
-400   -352   
896    272    
-480   -48    
592    528    
-528   -160   
176    192    
-64    48     
160    -112   
32     192    
-96    -48    
80     416    
-16    -32    
-96    -16    
128    -48    
-96    80     
48     64     
-48    208    
176    160    
-80    64     
112    -48    
-96    192    
96     -32    
-16    48     
96     144    
-16    128    
48     -16    
-16    96     
16     80     
128    80     
-96    -32    
240    336    
-208   320    
112    -16    
-16    -16    
0      -1552  
192    144    
32     96     
0      80     
-48    -16    
48     32     
112    192    
48     32     
176    48     
-224   160    
160    160    
-48    48     
64     -64    
64     -144   
64     144    
16     -192   
160    112    
-96    208    
80     64     
32     32     
16     128    
48     64     
32     112    
0      48     
0      160    
16     -192   
48     48     
-32    -112   
80     -80    
-80    144    
-32    -288   
32     -16    
208    192    
-32    272    
0      -32    
224    384    
0      256    
128    240    
-144   176    
112    -160   
16     0      
-144   176    
96     -80    
-32    64     
-128   -64    
208    -704   
128    288    
48     -896   
192    80     
-112   112    
160    144    
48     -240   
-64    144    
96     -96    
48     16     
80     48     
0      272    
-32    144    
96     -80    
-112   32     
144    16     
96     128    
-32    -288   
-16    -48    
32     288    
144    112    
176    272    
-224   256    
176    32     
-64    64     
0      16     
96     -128   
112    192    
-176   -80    
240    176    
-32    -128   
-48    -112   
256    -480   
0      208    
-96    -1664  
64     80     
192    16     
-80    112    
-80    112    
352    0      
-32    272    
224    -176   
-96    208    
16     -224   
128    80     
-32    -272   
96     192    
64     -432   
-48    16     
128    -256   
176    208    
-144   -208   
128    48     
16     112    
160    32     
-48    64     
144    32     
16     64     
80     -32    
64     224    
144    176    
0      128    
16     -32    
-80    -16    
176    -592   
-48    112    
96     64     
-32    48     
96     176    
208    96     
96     352    
-32    -336   
96     256    
-128   -432   
208    96     
16     -80    
48     128    
-96    -96    
-32    112    
32     -944   
16     256    
-64    352    
-256   -1376  
96     144    
-880   -96    
80     -416   
-32    -208   
208    -464   
48     -16    
32     80     
16     -80    
224    240    
-64    -272   
-48    144    
-160   -240   
-48    -416   
208    32     
208    0      
-144   272    
-480   -32    
96     -336   
128    -16    
208    0      
-80    64     
-16    -224   
80     -32    
128    -80    
-176   32     
128    -128   
-32    224    
144    96     
-1120  -1824  
1184   3120   
-672   160    
144    -448   
-400   -768   
-848   -272   
640    304    
-704   -144   
784    -880   
208    272    
-80    -2192  
-256   -16    
32     224    
224    -160   
-80    16     
-112   64     
128    64     
-144   -160   
128    240    
-144   -240   
-736   -64    
-96    -304   
144    208    
112    -144   
128    32     
-48    -80    
128    -16    
-320   -1248  
416    176    
224    256    
32     176    
-288   240    
32     -32    
-64    -112   
-96    0      
-112   -64    
64     -512   
32     384    
-96    -64    
256    256    
-64    -240   
32     -48    
80     -1776  
-48    16     
272    224    
16     32     
128    208    
224    48     
-656   -288   
-240   -416   
-304   -304   
160    0      
-400   -96    
112    32     
0      64     
112    -224   
32     -448   
208    48     
496    384    
-208   320    
144    80     
-272   112    
112    -48    
-464   -16    
96     64     
-208   -16    
96     -80    
-128   96     
64     -80    
-1616  -16    
32     -176   
32     144    
144    16     
-32    80     
128    -528   
-176   -512   
-160   -128   
0      -80    
64     32     
160    224    
-320   176    
96     -288   
-96    224    
32     -176   
112    48     
-16    -160   
160    80     
-64    -80    
-32    -80    
-112   16     
80     -80    
-64    96     
-16    32     
-176   -80    
144    144    
-192   -192   
176    -80    
-176   224    
48     96     
0      256    
-80    -96    
0      -128   
16     -432   
128    -16    
96     80     
-64    16     
16     192    
16     -64    
0      -96    
0      -32    
32     96     
112    112    
0      160    
0      144    
-96    80     
-1360  144    
-112   48     
-944   -208   
-176   128    
-160   240    
-624   144    
-32    96     
-496   -32    
112    48     
-112   160    
144    256    
16     144    
144    512    
-432   -224   
336    144    
-384   16     
-64    96     
0      -256   
-32    16     
-240   16     
-160   -128   
-128   0      
-64    64     
96     112    
-880   -64    
-80    0      
64     -304   
0      32     
-480   -336   
128    -64    
-224   -752   
96     -144   
32     128    
-96    -32    
-96    80     
-16    32     
-96    32     
16     272    
-80    -32    
0      -48    
-64    80     
-464   -96    
-48    144    
32     64     
112    192    
-32    -80    
96     48     
80     176    
-80    -128   
-80    96     
-112   48     
160    -112   
-208   192    
-144   -32    
-320   -48    
-160   -32    
-304   -64    
208    128    
-176   48     
112    144    
-112   -400   
96     16     
208    64     
-288   272    
-112   32     
64     160    
112    -64    
-160   48     
-176   48     
16     -96    
16     -32    
-96    0      
16     128    
-16    -48    
32     112    
-48    -96    
64     16     
96     -144   
112    144    
-160   304    
-32    80     
-128   320    
448    256    
640    1040   
176    48     
-432   192    
-752   -144   
240    208    
-704   -640   
288    752    
-160   -48    
-48    0      
32     160    
96     -128   
0      448    
-16    -224   
-128   304    
48     -320   
-176   304    
256    -80    
-64    160    
-176   -256   
16     384    
-336   0      
128    192    
-112   -160   
272    64     
-240   32     
176    144    
-288   256    
144    80     
-48    -32    
-16    32     
0      64     
-144   -96    
-64    176    
-160   -144   
-64    144    
-384   -112   
-304   96     
272    -64    
64     0      
-128   112    
32     160    
112    48     
16     48     
64     80     
-144   48     
-16    48     
-112   176    
176    -80    
-80    16     
32     176    
48     -80    
-112   144    
0      -16    
112    16     
32     -16    
-32    48     
0      128    
0      -80    
0      96     
-96    32     
96     -16    
48     192    
32     0      
-144   -80    
16     128    
48     144    
-32    160    
16     -32    
128    32     
0      96     
-80    112    
32     -16    
32     32     
-160   -48    
-112   -240   
-192   -400   
-432   112    
48     48     
112    -80    
-16    224    
0      144    
192    432    
-16    208    
160    32     
-64    -112   
128    -16    
-32    0      
-80    96     
0      144    
112    272    
16     96     
64     176    
80     144    
96     160    
-16    144    
32     208    
0      48     
32     160    
96     160    
-128   -48    
0      112    
192    192    
16     64     
-80    144    
-160   -128   
96     336    
96     64     
0      96     
-32    64     
-32    80     
64     96     
64     16     
-128   -80    
112    -16    
-80    96     
128    128    
64     64     
-256   -240   
32     -224   
-128   -224   
192    192    
32     -48    
-128   32     
80     64     
80     368    
32     -48    
-64    208    
-16    16     
144    176    
48     -64    
-112   192    
96     64     
32     -32    
96     288    
-48    256    
96     -80    
-224   -96    
304    144    
-48    128    
16     -656   
16     -160   
32     128    
16     176    
80     144    
-32    160    
112    288    
-160   -112   
112    80     
32     160    
-96    -208   
128    400    
-304   80     
432    -672   
-416   -512   
256    -656   
96     320    
-224   0      
96     144    
-224   16     
256    160    
-64    64     
48     144    
-256   -640   
144    -160   
128    0      
256    512    
-496   -160   
224    -144   
-16    224    
128    -96    
-32    -112   
144    -1488  
48     16     
48     144    
-144   80     
304    -32    
-144   144    
80     16     
96     128    
32     64     
-64    176    
304    -80    
112    128    
-64    0      
64     -64    
-96    128    
144    96     
-64    112    
16     96     
32     160    
-160   -80    
320    80     
-128   304    
176    96     
-96    32     
2112   -1536  
608    -16    
512    704    
-704   -64    
336    160    
256    96     
-368   -32    
1040   256    
-672   -896   
832    -400   
-736   112    
448    -288   
96     240    
48     112    
-96    96     
-128   -448   
336    576    
-144   -208   
240    720    
-272   -288   
224    80     
-160   -224   
176    -144   
64     -368   
16     -96    
208    144    
-112   144    
128    560    
-272   64     
-192   0      
-208   -96    
48     -80    
80     -320   
160    -16    
192    -320   
144    -32    
288    304    
0      176    
160    0      
16     336    
-48    48     
32     32     
-240   176    
128    192    
-32    128    
144    -496   
-16    304    
176    512    
-144   48     
-144   -576   
48     32     
176    -256   
160    400    
-240   -48    
-16    0      
144    64     
-160   -1280  
544    -96    
64     -1200  
352    416    
0      272    
-32    -832   
-80    -16    
224    -32    
288    -16    
-176   112    
-96    -160   
64     128    
0      -480   
64     -1456  
0      64     
144    -864   
48     112    
-160   -48    
144    -368   
16     -576   
96     -544   
-112   -16    
-48    -464   
-16    144    
224    272    
112    -96    
-64    64     
192    64     
192    -272   
-16    448    
0      48     
-96    16     
-528   -240   
32     -448   
-112   -176   
96     -304   
0      -16    
-96    -176   
32     -160   
128    -1136  
336    192    
-16    -1840  
-144   -272   
112    80     
256    336    
176    -16    
-32    96     
-400   -192   
208    272    
-1664  -272   
224    112    
-32    -80    
64     -16    
64     -64    
0      -976   
-32    -208   
48     -112   
160    128    
96     -176   
-192   -384   
-112   -176   
432    32     
-144   368    
128    -176   
-64    -80    
160    -96    
144    224    
32     -16    
-64    96     
176    -800   
144    32     
-64    -1248  
64     80     
16     -64    
80     -384   
-128   -256   
176    48     
96     112    
-48    80     
-608   -112   
224    16     
-1696  0      
288    -80    
-16    48     
16     -16    
0      -128   
32     -1024  
96     192    
-160   -16    
288    -432   
-160   144    
64     32     
-64    -16    
16     -128   
-192   -80    
0      64     
-208   0      
288    48     
-416   64     
176    -128   
48     -128   
160    -560   
-112   208    
128    176    
-80    -16    
-16    16     
112    -160   
-96    -96    
272    -336   
-112   192    
64     112    
-192   32     
176    80     
-464   -64    
160    -464   
48     48     
80     -80    
0      176    
-304   -1312  
336    -64    
-80    -64    
144    -144   
-176   48     
64     -16    
-48    -48    
96     -96    
-112   -32    
96     -64    
-224   144    
48     -240   
96     256    
48     -272   
32     0      
-48    -64    
208    32     
-368   -144   
128    48     
-64    112    
112    48     
0      16     
2096   2080   
-1840  448    
320    80     
32     336    
48     -832   
48     896    
-1088  -1072  
688    928    
-336   -320   
-1152  400    
128    -272   
-272   448    
240    -144   
16     176    
-192   -256   
-144   -16    
176    16     
-16    112    
-32    -32    
208    -208   
-80    96     
0      -256   
-224   192    
176    -64    
-320   80     
144    -144   
-560   176    
304    112    
-256   16     
224    -96    
-176   112    
112    -128   
-256   64     
64     -16    
-288   -144   
192    -16    
-144   160    
192    160    
-96    112    
48     -64    
-96    64     
-32    16     
16     80     
-256   -96    
80     -32    
-144   80     
80     112    
-288   -240   
64     224    
-224   -16    
304    48     
-160   176    
16     -112   
-32    80     
-240   -80    
64     80     
-96    64     
-48    112    
-64    48     
-176   80     
-1456  -48    
16     64     
-96    32     
32     -48    
64     -32    
-160   -32    
-16    32     
0      112    
-80    -48    
-16    -32    
-32    16     
16     64     
-64    128    
-432   -272   
-16    32     
-352   -320   
48     -176   
-32    32     
-176   144    
-96    -304   
96     0      
0      128    
-48    96     
-208   64     
-160   0      
256    144    
-96    192    
112    128    
-48    -80    
-256   -112   
-32    -64    
336    176    
176    -96    
64     -16    
-160   -272   
-112   48     
336    496    
-208   -96    
32     208    
-176   32     
96     64     
-144   -96    
-128   -80    
-16    64     
0      -272   
-192   -224   
192    112    
-400   48     
192    192    
-64    256    
-64    -32    
80     96     
64     48     
-48    0      
-144   32     
32     192    
-16    96     
-16    32     
-224   -384   
-16    0      
-224   -112   
160    32     
-304   -80    
-96    0      
-112   -480   
32     -64    
16     304    
128    96     
-48    144    
-16    80     
48     288    
-64    32     
64     128    
-48    -144   
272    704    
-384   400    
160    512    
-288   176    
80     -144   
192    32     
-96    32     
64     -48    
-112   80     
48     64     
112    96     
0      112    
-16    80     
-48    112    
-48    -48    
48     144    
16     -48    
-32    128    
112    192    
-256   -16    
96     -80    
-144   48     
80     -48    
208    128    
-192   128    
144    0      
-224   80     
144    64     
112    160    
-160   -64    
384    352    
-496   -176   
368    320    
-160   48     
208    80     
-96    80     
80     32     
64     96     
-16    112    
-32    64     
-80    -128   
240    224    
-80    32     
144    208    
-224   0      
144    96     
-80    16     
0      32     
-16    272    
-48    -192   
352    128    
-32    208    
0      16     
-160   64     
176    80     
64     32     
-160   96     
-48    96     
-128   304    
-128   -240   
-48    144    
128    -32    
-272   2624   
-656   -1072  
-208   -912   
976    288    
-208   -336   
64     224    
-512   -96    
704    48     
-32    192    
-160   224    
-48    -400   
-320   480    
224    -208   
96     368    
-16    -432   
160    688    
-64    -96    
160    368    
-240   -224   
304    160    
32     320    
64     96     
-176   160    
208    112    
-48    -256   
48     -272   
144    304    
336    256    
0      32     
176    32     
-144   -784   
96     -48    
16     80     
160    128    
272    288    
0      192    
64     64     
-64    144    
-64    32     
384    400    
-128   208    
144    160    
48     240    
-224   -288   
144    16     
-128   -896   
112    0      
48     352    
160    64     
96     80     
-16    64     
-32    144    
112    0      
-112   112    
64     144    
-128   80     
96     224    
-160   -64    
160    -288   
-128   128    
80     -96    
16     -32    
192    192    
-192   192    
112    112    
-96    48     
64     80     
80     -64    
128    256    
224    32     
176    48     
-80    192    
160    64     
32     144    
-128   32     
112    16     
80     80     
-32    -960   
-16    -48    
0      80     
96     32     
144    -16    
-112   -208   
272    -176   
80     160    
-208   80     
144    512    
-96    208    
144    -160   
80     64     
-16    -176   
192    192    
-16    -560   
64     112    
64     -960   
-80    96     
96     64     
32     0      
-112   -144   
-48    -64    
80     -48    
128    80     
0      32     
32     -112   
64     176    
112    -208   
96     128    
160    -16    
16     160    
-48    -416   
-48    96     
80     -112   
224    176    
-112   176    
48     160    
-16    -16    
80     48     
160    -32    
-176   -864   
192    112    
160    192    
128    368    
112    -16    
48     48     
-144   48     
-32    192    
256    160    
0      80     
16     32     
96     80     
240    144    
-192   -448   
288    144    
48     -304   
-112   48     
-64    -16    
224    192    
112    -560   
-112   0      
0      -160   
80     64     
208    32     
176    304    
-128   96     
192    -1696  
-96    -288   
16     -16    
32     128    
160    -144   
-16    96     
48     -160   
0      16     
64     96     
112    96     
-16    -48    
96     -96    
-32    96     
-32    -960   
240    112    
-368   112    
112    -528   
64     -48    
-80    -128   
240    16     
-240   -2368  
240    192    
48     -80    
224    32     
0      176    
0      -48    
176    -96    
-144   0      
128    96     
-80    32     
-128   48     
-16    -304   
112    16     
-16    -976   
112    -272   
176    -304   
0      48     
-144   -336   
128    -144   
128    224    
-32    -144   
-16    -368   
128    112    
16     -48    
32     144    
-352   -64    
128    32     
-1584  32     
160    144    
-80    -160   
80     32     
48     -48    
-928   -3440  
928    352    
-1248  912    
64     -96    
48     512    
-608   -752   
640    688    
-832   -496   
0      208    
176    -96    
-16    64     
-304   -64    
64     128    
416    -304   
-16    192    
-16    -896   
-352   128    
48     -1168  
-128   96     
352    -96    
-176   0      
-32    -16    
48     -96    
-144   -16    
112    -96    
-48    48     
112    -48    
-624   32     
48     -288   
96     -160   
-32    -240   
176    80     
0      -528   
32     128    
-48    -96    
48     64     
48     96     
32     176    
-96    -32    
-48    -48    
-192   -64    
176    -16    
-1264  -128   
-16    -64    
288    16     
16     -16    
144    16     
48     96     
-64    48     
176    -176   
-16    0      
32     80     
48     64     
0      32     
32     -32    
240    -64    
16     0      
-96    -32    
128    0      
0      80     
-96    -144   
-80    144    
272    -640   
96     192    
-64    -1216  
224    -128   
-48    0      
64     -16    
-128   -64    
48     48     
-80    0      
96     64     
-208   16     
96     -16    
-96    -48    
32     -432   
-64    -96    
224    -336   
-224   -304   
-144   -224   
80     160    
-208   160    
144    288    
-224   -80    
96     -80    
64     16     
96     96     
-96    128    
-128   -224   
-432   -16    
224    -80    
32     112    
0      -256   
112    240    
-96    48     
-1440  -288   
-144   -240   
176    160    
64     112    
48     64     
-144   32     
64     -160   
-16    -48    
32     -64    
-128   64     
-16    80     
-96    96     
-96    -400   
48     -32    
-176   64     
-176   -32    
-112   16     
16     48     
160    112    
-160   -96    
-96    -48    
32     -96    
0      0      
64     32     
16     -32    
-416   -304   
16     208    
-160   -384   
-160   -128   
-16    160    
-208   -208   
320    -112   
-224   128    
-32    32     
-816   -32    
-64    96     
80     64     
-80    48     
-32    -64    
48     112    
112    -208   
-288   112    
112    64     
32     16     
32     48     
64     16     
-192   48     
-80    32     
-80    48     
-336   -128   
224    320    
-1088  0      
48     -224   
0      -192   
192    192    
-96    -96    
64     112    
304    496    
-272   192    
-96    -32    
80     -48    
-80    -144   
192    48     
-304   160    
32     -128   
-160   16     
-144   -192   
208    160    
-288   0      
112    64     
-48    544    
-304   -192   
224    80     
-176   144    
288    -96    
-176   112    
32     160    
-48    -64    
48     80     
-32    -96    
144    112    
-272   -32    
128    16     
48     48     
112    240    
-80    -176   
-16    80     
144    96     
-224   112    
-48    -192   
80     256    
-16    272    
-272   -144   
-96    32     
112    -16    
0      80     
48     16     
224    48     
-944   -96    
-96    96     
128    80     
160    -16    
-1232  -1840  
1104   0      
-576   416    
208    176    
-384   736    
-80    -16    
-336   -464   
32     -560   
480    432    
-112   -240   
128    288    
-272   48     
160    -192   
-176   -192   
128    112    
176    672    
-272   96     
-64    -112   
80     128    
-64    -32    
-48    -64    
-128   16     
256    16     
-64    16     
-208   -96    
64     160    
-96    32     
-64    128    
48     32     
96     80     
-96    48     
32     64     
96     80     
-112   144    
112    112    
-80    0      
0      48     
-64    96     
128    80     
-128   144    
-112   128    
-16    -80    
0      16     
208    128    
-64    32     
-48    48     
-208   -256   
352    80     
-208   128    
176    32     
-48    64     
16     96     
32     32     
-192   160    
0      224    
-48    112    
64     -16    
144    96     
-80    48     
112    16     
-96    128    
96     80     
80     224    
-128   -16    
96     -16    
-48    16     
32     64     
-32    16     
96     112    
48     32     
80     -176   
-128   240    
0      -48    
144    192    
-16    192    
80     16     
112    -208   
96     48     
-96    16     
16     112    
-96    112    
64     -80    
64     16     
-16    240    
-192   112    
112    -32    
48     96     
-192   112    
80     160    
-64    -32    
0      -64    
80     -16    
-96    64     
96     -96    
-80    176    
48     48     
-96    96     
64     16     
16     64     
-80    16     
-80    112    
0      16     
160    112    
-48    32     
192    224    
-128   176    
0      -128   
128    96     
-64    48     
256    160    
-160   -16    
32     176    
-64    48     
304    64     
-160   272    
112    -208   
272    352    
-144   64     
256    64     
-208   128    
336    160    
16     64     
-144   192    
112    96     
0      288    
64     176    
64     352    
-48    64     
160    176    
-112   240    
0      -2240  
-16    -32    
-160   0      
368    -80    
0      112    
16     256    
144    80     
-16    144    
-256   48     
176    80     
112    -144   
192    176    
-128   128    
144    -80    
112    320    
-96    -896   
144    128    
16     48     
0      128    
128    128    
0      112    
-32    32     
64     128    
-144   -192   
128    144    
-96    -16    
128    176    
256    48     
-16    -32    
32     112    
0      -96    
16     32     
96     -176   
112    144    
48     -96    
32     16     
144    336    
304    -64    
32     256    
0      48     
-16    192    
-64    -208   
64     32     
160    64     
16     64     
0      -80    
-80    80     
-80    -720   
16     64     
-32    -2080  
160    -144   
96     144    
160    208    
-96    96     
48     320    
-192   0      
-128   -240   
144    64     
96     -128   
96     48     
144    -208   
-16    272    
-144   -704   
176    -80    
128    -176   
144    64     
-912   528    
320    -144   
96     592    
-160   528    
-480   -400   
752    656    
-304   -416   
96     288    
-16    208    
256    -544   
48     -32    
-48    160    
112    160    
-112   80     
128    64     
80     -16    
-80    144    
-64    16     
176    64     
-48    64     
16     32     
112    144    
-32    -80    
48     0      
32     -400   
48     144    
0      -64    
160    224    
-32    -368   
0      0      
-64    -32    
-80    16     
160    -64    
-64    128    
240    -208   
32     -80    
-32    128    
160    32     
-16    48     
80     -48    
16     96     
48     -64    
80     96     
112    -112   
-16    96     
64     64     
-80    -1088  
32     -224   
-416   -144   
-144   -2000  
208    -32    
-112   -576   
176    -80    
0      -48    
112    -48    
-32    -16    
16     -176   
96     96     
0      -400   
160    224    
176    288    
128    48     
-48    160    
-496   -80    
-16    -432   
128    192    
-32    -240   
48     -208   
96     -1664  
-48    -48    
64     128    
64     -16    
-16    112    
32     64     
64     -96    
-192   -400   
32     -528   
-240   -400   
-272   -336   
288    0      
32     32     
112    -112   
96     144    
-48    -96    
48     -160   
128    -16    
48     64     
80     48     
-32    64     
48     -464   
-32    -144   
208    -32    
112    176    
-272   32     
112    -96    
-720   -48    
144    -112   
0      16     
16     -144   
48     64     
128    -416   
32     0      
96     128    
-80    48     
112    16     
-80    -16    
160    288    
-176   -144   
64     -112   
-144   -160   
-272   -112   
-32    -256   
-416   0      
64     -128   
16     -128   
96     -112   
16     -32    
128    -384   
-32    32     
32     16     
80     160    
-16    32     
-96    -64    
-112   0      
-32    -368   
96     -272   
64     144    
-848   32     
240    -128   
-160   16     
224    -80    
16     -80    
-32    192    
112    64     
-112   -576   
176    -224   
64     336    
-96    -32    
144    64     
-80    112    
160    96     
16     -144   
-224   16     
144    -192   
-208   -16    
144    -16    
32     144    
80     -256   
0      96     
160    -912   
-32    -128   
-224   0      
-192   -288   
496    160    
-144   -64    
240    400    
-464   80     
64     -160   
176    -16    
-64    -16    
48     0      
-208   32     
208    -304   
0      48     
0      688    
-160   -336   
96     -16    
32     32     
-48    -16    
-208   -32    
-128   -96    
16     0      
352    -32    
-32    352    
0      -224   
-48    -112   
144    272    
48     32     
-352   160    
-224   160    
96     0      
128    -96    
-80    432    
208    -48    
16     0      
80     16     
112    64     
-32    16     
64     -240   
32     128    
-592   -64    
80     64     
-176   -32    
-112   -96    
-80    -16    
-272   -32    
-320   -64    
-496   -1392  
144    304    
-432   -208   
-224   352    
608    -32    
-64    -32    
-224   -336   
-256   96     
-96    -528   
272    240    
-400   -208   
-32    160    
-80    112    
80     64     
-144   96     
-240   -176   
144    -32    
-352   -16    
-16    -192   
-32    -64    
64     128    
16     -96    
192    112    
-176   -32    
112    224    
-176   -32    
32     240    
-16    -16    
-144   80     
-112   16     
-192   -32    
32     32     
-976   16     
16     96     
-64    240    
-96    288    
16     -144   
-32    80     
-80    -176   
128    224    
-96    48     
64     16     
-96    80     
-112   -32    
0      64     
-240   96     
32     176    
-160   -224   
-32    64     
-192   48     
48     48     
-224   -256   
176    112    
-96    160    
-256   -16    
192    48     
0      288    
192    -144   
32     -16    
-96    96     
32     48     
80     112    
-240   96     
192    -48    
-224   -128   
-48    128    
-240   -64    
208    80     
-16    -48    
80     128    
-208   128    
-16    -32    
96     32     
-240   -160   
112    128    
-304   16     
208    112    
-224   -16    
0      208    
-400   -272   
80     -16    
-1040  144    
-112   192    
32     32     
-48    -112   
224    48     
-96    240    
-64    64     
16     -48    
16     80     
0      80     
-64    -160   
-96    -64    
-64    96     
32     112    
-128   64     
-496   -16    
-16    -48    
128    144    
-112   64     
144    64     
-64    80     
96     -32    
-16    80     
32     -112   
48     240    
80     -48    
-80    96     
48     16     
-48    112    
160    32     
-240   -48    
-48    -32    
64     0      
-64    96     
16     176    
-96    144    
128    -112   
-96    0      
-176   -96    
224    64     
-64    16     
224    224    
-176   304    
336    416    
-192   464    
112    -32    
-160   -16    
-96    0      
0      -32    
16     -32    
-272   -48    
160    0      
-128   48     
-64    144    
192    96     
-48    208    
-224   16     
16     128    
-192   -96    
64     64     
96     176    
-64    224    
144    96     
-176   -64    
176    80     
-16    64     
16     96     
48     64     
112    80     
0      240    
-112   192    
-96    -176   
112    288    
0      224    
112    -80    
64     96     
0      224    
96     -16    
-112   64     
80     16     
16     0      
112    -16    
0      224    
64     112    
112    32     
16     -80    
48     96     
-48    -16    
-48    -64    
32     336    
0      -96    
80     192    
-64    -16    
0      128    
-48    144    
64     -64    
-16    64     
0      80     
-48    64     
32     112    
-48    0      
96     176    
16     128    
-128   -32    
0      -32    
160    64     
64     144    
16     80     
112    -80    
48     32     
48     256    
48     144    
-96    144    
-32    32     
-96    1312   
-400   -480   
112    160    
-272   32     
-608   240    
752    -560   
-304   -208   
96     576    
-304   0      
208    112    
176    -16    
32     176    
-48    368    
64     16     
96     32     
128    0      
112    112    
-368   -624   
192    80     
224    240    
-160   -816   
112    272    
128    32     
48     16     
-80    16     
-16    160    
192    192    
16     272    
32     96     
-176   -160   
112    144    
64     112    
-64    -80    
-32    -112   
176    -176   
0      -160   
96     144    
32     288    
-48    48     
80     80     
64     176    
16     -48    
96     256    
-32    16     
80     192    
-96    160    
0      48     
96     240    
16     112    
-32    -48    
16     -352   
48     0      
112    -224   
-112   144    
48     112    
0      -128   
160    -32    
208    432    
-80    48     
-96    80     
80     16     
80     64     
-112   16     
144    -176   
-208   64     
16     -176   
80     96     
112    -208   
48     112    
64     -112   
48     112    
48     -32    
-16    -16    
48     -80    
176    112    
-48    144    
336    560    
-368   368    
-64    -384   
-80    -112   
96     -256   
208    80     
32     -272   
80     128    
32     -336   
-96    -32    
272    176    
0      192    
48     -16    
16     176    
-48    96     
112    -80    
32     96     
80     0      
96     64     
80     -240   
-32    -64    
48     -256   
-48    128    
80     -144   
32     112    
32     -48    
80     112    
-64    32     
96     128    
64     288    
-112   -224   
224    240    
-144   -112   
224    128    
-160   -224   
160    112    
16     -128   
64     96     
32     -16    
0      64     
0      0      
16     96     
32     144    
-64    32     
0      -32    
208    -96    
192    144    
32     -304   
-48    304    
-64    -448   
112    -96    
144    0      
96     128    
128    -288   
-112   -96    
32     48     
192    64     
-64    128    
32     -928   
32     -2208  
-128   -160   
208    -1456  
-176   -176   
48     32     
128    16     
96     160    
80     -32    
-32    48     
0      -320   
176    -944   
144    112    
128    -160   
32     0      
-192   -160   
-16    -128   
144    -160   
128    -384   
-80    -208   
336    -528   
32     -112   
240    416    
-48    -224   
0      64     
-16    -96    
80     -288   
-16    112    
32     112    
-16    -32    
-48    80     
-128   -400   
144    96     
272    128    
-32    -32    
160    -224   
-32    -144   
256    -1104  
32     272    
16     16     
-48    0      
128    -192   
224    416    
-144   -336   
144    64     
112    -304   
-224   80     
-144   80     
-48    80     
96     128    
-96    0      
64     -240   
-16    -432   
-32    -32    
144    -48    
80     48     
16     -336   
0      144    
144    -96    
96     -160   
80     48     
32     64     
400    3024   
-1904  -448   
432    368    
128    400    
128    112    
-448   -688   
-96    432    
384    -1552  
-128   -96    
-208   -32    
144    112    
48     0      
80     160    
16     -48    
-48    -32    
-80    -80    
160    16     
-576   -16    
32     32     
64     96     
-32    -160   
-80    -32    
128    -448   
-32    48     
160    -16    
-80    -128   
144    192    
0      -288   
-48    -80    
-112   -176   
144    48     
80     32     
-64    112    
0      -192   
-848   -80    
0      -512   
432    336    
-400   -528   
352    0      
-144   -304   
160    -128   
-32    -16    
0      -208   
80     96     
-128   -48    
80     64     
-224   -80    
-352   -128   
16     -144   
-288   0      
208    -32    
-224   128    
208    -304   
-16    16     
64     -80    
64     -48    
-64    96     
-48    32     
-16    112    
16     -16    
-176   -16    
32     -48    
-80    96     
32     48     
-48    32     
192    -176   
112    144    
-16    -64    
-240   -144   
208    48     
-96    176    
-16    -48    
64     80     
-48    64     
48     -16    
-48    -80    
304    224    
-144   160    
144    0      
16     0      
-48    -160   
-16    112    
-272   -432   
-1696  64     
-32    64     
-368   64     
112    368    
-1376  -224   
192    176    
-224   48     
64     -16    
-32    -224   
48     32     
48     -192   
-32    352    
-496   -320   
176    64     
-224   -144   
-80    112    
-96    -144   
-16    96     
-160   -16    
-176   256    
-240   32     
-512   80     
-16    288    
32     48     
-48    16     
-432   -288   
176    64     
-272   -48    
224    128    
-80    176    
-208   0      
-64    32     
-160   -48    
-64    -64    
208    -32    
-96    96     
-400   80     
160    -128   
-400   -160   
-128   -144   
176    144    
-48    192    
128    144    
64     144    
-64    128    
-160   16     
64     80     
-32    0      
48     128    
48     208    
-112   16     
-288   192    
-208   -16    
-48    -160   
-208   -208   
-64    32     
192    112    
32     -48    
-48    96     
32     -128   
-112   112    
48     112    
-32    0      
-80    32     
64     16     
-96    64     
64     64     
-112   32     
-16    80     
112    16     
32     -80    
-96    0      
-16    -240   
32     416    
48     192    
-224   0      
48     192    
-112   -96    
-48    64     
-144   0      
208    272    
-288   -64    
-64    -80    
-208   64     
80     -400   
-576   96     
32     176    
-224   32     
80     16     
144    -288   
32     -80    
48     304    
-112   -144   
-64    144    
0      80     
48     224    
32     80     
-16    -16    
-416   -144   
0      32     
-1136  0      
48     176    
-48    96     
-80    96     
160    80     
-80    144    
-128   32     
16     112    
32     16     
336    -160   
-64    192    
-48    0      
-64    80     
-304   752    
-1264  -2448  
480    384    
-192   832    
160    256    
-64    176    
-960   -336   
-272   -1104  
80     -736   
416    -96    
96     448    
-304   16     
288    352    
-16    16     
80     -128   
-160   -112   
32     -96    
-128   -336   
-128   -528   
336    320    
240    320    
-128   176    
16     304    
64     0      
-144   144    
0      -32    
-32    -128   
-64    192    
-128   144    
80     -16    
-144   -128   
80     112    
-16    48     
-48    208    
-48    112    
-48    -32    
112    176    
16     -112   
32     -176   
-48    160    
16     160    
-32    128    
176    112    
-64    0      
-64    112    
-96    16     
-32    96     
16     -16    
144    496    
-224   -176   
208    240    
-288   -96    
64     48     
96     128    
64     64     
0      96     
-128   -160   
240    352    
80     416    
-272   -16    
0      -64    
112    0      
64     -32    
-80    80     
-80    -80    
112    192    
32     32     
-16    32     
-32    80     
80     64     
80     144    
-176   0      
64     80     
-96    -16    
-16    96     
-64    16     
320    832    
32     560    
160    288    
32     80     
96     192    
64     16     
-48    208    
96     -32    
-96    64     
80     -112   
48     32     
112    224    
-208   -48    
224    48     
-32    208    
112    192    
-48    0      
-16    32     
96     208    
112    160    
-96    96     
-16    96     
48     240    
-64    144    
48     -48    
-48    64     
160    144    
-96    0      
96     96     
-96    112    
224    -2400  
-192   -16    
320    176    
-160   160    
80     -80    
-96    -32    
48     32     
160    -16    
0      144    
32     256    
-112   112    
80     0      
-48    96     
144    -144   
0      80     
64     -496   
0      128    
176    80     
96     32     
-176   208    
80     -144   
96     48     
48     400    
144    352    
-32    -48    
64     -112   
64     -80    
-16    48     
-16    -16    
-32    -320   
176    192    
112    -64    
16     128    
80     112    
-48    32     
0      -16    
240    128    
32     240    
-64    -288   
80     -48    
64     80     
128    0      
-144   -32    
112    0      
-32    -144   
48     -496   
0      160    
48     -656   
-64    -96    
160    176    
16     -672   
64     -240   
160    256    
16     64     
-112   -32    
160    -48    
240    96     
-144   -336   
288    -224   
32     224    
-336   -672   
-80    32     
256    192    
0      64     
128    -1184  
-128   96     
0      0      
96     48     
80     128    
128    16     
0      144    
48     32     
80     128    
32     48     
16     96     
32     -112   
256    -112   
80     -144   
64     112    
-64    -336   
-64    -32    
144    112    
16     0      
96     160    
-32    48     
-16    80     
16     -160   
128    208    
-128   -112   
128    192    
-480   -816   
432    912    
-784   -464   
416    -144   
-336   -912   
704    336    
-288   -144   
352    656    
-464   144    
432    144    
-240   -192   
128    -32    
128    208    
128    -176   
-96    112    
112    -336   
96     176    
16     -80    
96     80     
64     -96    
96     128    
-48    -96    
160    240    
-32    64     
64     128    
16     -16    
-96    -128   
272    -16    
-176   0      
256    256    
-112   -240   
32     32     
96     96     
128    144    
-112   -32    
224    176    
-192   96     
224    -1008  
-144   32     
-160   80     
64     -400   
96     -160   
-80    -176   
224    -112   
32     352    
-80    -64    
16     -32    
-80    -256   
432    64     
-272   -208   
192    -528   
-80    128    
64     -272   
96     208    
-432   -112   
176    112    
-96    -112   
224    -192   
32     96     
-32    -224   
320    -272   
0      -960   
-32    -64    
32     -464   
144    -144   
48     112    
0      144    
64     -112   
80     -352   
-96    0      
-112   -144   
-336   64     
80     -176   
128    0      
80     -368   
-16    -48    
48     -864   
0      128    
64     -64    
80     -16    
48     96     
0      96     
208    304    
-160   -112   
112    0      
16     0      
-128   -176   
352    -128   
-48    16     
16     -352   
160    -192   
-32    -624   
48     16     
64     224    
-160   -16    
96     -96    
128    16     
-48    0      
48     16     
-16    80     
64     -96    
-128   -16    
-80    -80    
-1312  16     
0      -32    
128    -48    
-16    32     
-32    -16    
32     -1040  
48     32     
32     -464   
32     96     
160    192    
48     48     
-16    -64    
-48    -400   
-80    -64    
96     0      
-304   80     
-80    32     
112    -16    
-80    -320   
224    -64    
96     -288   
-48    -32    
32     -64    
0      -128   
208    160    
-208   -304   
0      48     
-32    -240   
-240   -176   
-96    -128   
-128   144    
80     -16    
-464   -96    
-176   -192   
-48    -96    
64     -288   
32     -224   
160    -2144  
-176   -208   
176    160    
-144   -32    
16     -64    
-32    -240   
0      128    
112    400    
-272   -208   
80     -192   
80     -80    
64     -32    
112    112    
64     -32    
32     480    
-416   176    
-224   -528   
176    464    
96     -64    
-80    -32    
-48    32     
-32    -32    
64     -16    
-32    -16    
48     -64    
-160   128    
304    288    
-128   48     
192    -496   
-16    96     
-176   -64    
48     80     
-48    64     
-32    -32    
-16    -64    
112    -16    
-304   48     
64     -128   
-128   64     
112    16     
16     16     
-240   -224   
32     144    
-464   -448   
-208   240    
-144   112    
16     -16    
-80    80     
-48    32     
-112   -16    
-208   -80    
32     160    
256    -48    
-112   208    
-112   -144   
160    48     
-240   -32    
1072   848    
752    784    
-224   -928   
-272   -432   
432    368    
240    -960   
-64    -560   
624    432    
-928   240    
688    160    
-384   -96    
448    -160   
-240   -160   
240    368    
-96    176    
-176   -16    
208    -64    
80     464    
64     16     
-144   16     
96     -80    
-48    224    
-80    -32    
-656   -64    
64     -32    
-1040  224    
-112   -384   
-144   -32    
-96    144    
-16    -144   
-16    0      
96     96     
-48    160    
-32    -192   
-48    128    
32     80     
-112   -32    
176    -80    
16     -48    
-176   -32    
-80    80     
-128   192    
96     32     
0      80     
-48    -128   
-32    -16    
272    368    
-368   -192   
96     272    
-64    0      
0      -112   
-96    80     
-80    0      
-80    224    
-112   -32    
-384   -240   
112    416    
-1120  208    
-176   -272   
272    -32    
-96    -80    
-64    144    
160    416    
-208   -144   
-48    -144   
-80    48     
-64    80     
-96    64     
0      -32    
0      -16    
-80    16     
64     128    
-608   192    
-48    -32    
128    160    
-64    -160   
-16    -416   
512    304    
80     528    
-240   128    
112    176    
-32    64     
240    144    
32     176    
-128   32     
-96    128    
304    400    
-192   -64    
-64    -736   
80     -144   
64     272    
144    80     
-96    96     
-16    112    
48     64     
16     -16    
80     -64    
64     128    
96     320    
-64    208    
-176   -144   
128    80     
-144   -64    
64     64     
-32    96     
-80    -272   
48     -512   
-16    -336   
48     -32    
144    0      
64     128    
-160   -16    
0      112    
-224   -96    
112    16     
-272   -160   
96     128    
-192   16     
48     128    
-96    48     
48     64     
-16    -16    
80     -112   
32     -16    
-48    96     
176    32     
-112   96     
-32    16     
80     16     
32     96     
-64    -160   
-64    176    
16     160    
-32    -48    
32     -16    
96     496    
32     -64    
112    144    
-80    160    
-128   -64    
16     128    
48     32     
-16    240    
-144   112    
144    384    
-64    272    
48     224    
-48    112    
64     32     
0      96     
16     48     
128    64     
-112   16     
16     112    
0      64     
16     96     
-64    -16    
272    -192   
-48    128    
-16    112    
-96    112    
-64    192    
272    464    
-384   -144   
512    0      
-112   -128   
256    -16    
-272   80     
0      96     
16     208    
48     256    
-16    16     
0      80     
80     224    
48     -144   
80     416    
-96    -144   
128    208    
32     48     
64     64     
32     64     
0      240    
16     -272   
176    288    
-80    144    
64     -32    
-176   80     
224    128    
-112   160    
96     80     
176    64     
-144   -944   
64     224    
-80    64     
64     80     
16     32     
2384   1056   
-1392  0      
496    64     
-144   128    
-16    -624   
224    560    
-800   -528   
896    768    
-512   -496   
192    528    
-320   -752   
256    96     
-32    224    
272    16     
-304   112    
96     -256   
80     352    
160    -16    
-176   288    
160    -112   
48     224    
112    -144   
-64    336    
64     -144   
-32    192    
128    -496   
-96    224    
272    112    
-160   208    
144    -48    
-32    64     
-16    -96    
80     240    
80     -80    
32     112    
160    128    
-32    240    
32     -80    
-64    -192   
0      96     
160    -96    
-32    0      
64     -2976  
64     192    
64     80     
32     96     
-80    -336   
80     224    
64     -224   
32     224    
-112   0      
128    80     
-48    64     
128    -112   
16     128    
48     -272   
80     16     
-48    -1408  
0      32     
208    -384   
-144   160    
96     0      
-16    96     
80     80     
-48    48     
64     16     
128    112    
80     224    
-80    -48    
192    160    
32     -160   
128    224    
-16    -656   
96     64     
80     -112   
96     128    
-192   16     
32     -48    
64     16     
-32    32     
48     192    
-48    64     
48     48     
224    -272   
144    32     
-144   -416   
160    -128   
-48    80     
-16    64     
208    -112   
-112   96     
128    16     
48     80     
-64    -240   
144    176    
208    208    
-16    -384   
-16    -32    
320    336    
-128   0      
32     -160   
32     -144   
48     -224   
208    160    
16     -1776  
-32    208    
-32    64     
0      128    
16     -16    
48     160    
208    304    
16     -176   
64     64     
-80    -112   
144    176    
-32    -160   
96     -128   
-16    -304   
96     32     
-32    160    
0      96     
-16    -16    
96     -560   
0      48     
-1152  -16    
-48    -320   
160    -128   
-192   -752   
528    144    
-128   -1952  
0      -288   
32     288    
48     -128   
80     272    
-32    -208   
112    -32    
-32    -48    
96     -1376  
-192   -128   
-128   -32    
160    336    
0      0      
-96    -160   
-16    -128   
176    144    
-128   256    
256    160    
0      0      
128    64     
-16    -80    
-16    -384   
0      48     
144    -160   
0      224    
-48    -672   
432    -160   
-64    544    
16     -528   
-96    -80    
352    64     
112    96     
-160   -624   
96     -32    
32     -928   
48     32     
-224   48     
96     -96    
160    304    
-224   -64    
-144   -176   
224    0      
-1104  -240   
224    80     
-192   256    
288    -304   
32     48     
-64    -1120  
144    -176   
-80    -128   
96     32     
0      -16    
64     240    
-112   -64    
96     -96    
-144   -96    
16     0      
-80    80     
32     -48    
-96    -112   
176    0      
112    -96    
-32    -624   
-112   64     
176    -384   
32     128    
112    -144   
-288   288    
-1968  -1920  
528    -928   
-224   1088   
496    176    
-128   448    
-304   -1056  
-240   112    
272    368    
0      304    
-16    -480   
240    496    
304    -832   
-16    336    
-128   -496   
288    432    
-144   -240   
-176   336    
-336   -320   
-192   176    
-112   -416   
144    -208   
-480   80     
256    -48    
-992   -80    
-32    -80    
224    -80    
32     -528   
-64    -112   
224    -1072  
160    272    
128    -48    
-16    256    
-256   -80    
80     112    
-224   -96    
304    144    
16     160    
288    304    
-752   -144   
16     -272   
64     128    
32     -320   
32     272    
16     192    
-16    0      
-144   0      
240    544    
-160   160    
-32    80     
-208   -320   
128    -112   
-80    -80    
160    -192   
-288   48     
240    -96    
-256   -96    
256    -176   
80     80     
-416   -704   
192    -48    
-16    -208   
80     -256   
-192   -32    
352    16     
16     160    
80     -32    
-208   -320   
256    -256   
-64    208    
-48    48     
0      -112   
-512   -160   
16     112    
16     128    
0      -64    
-112   -224   
-144   -112   
-128   -64    
-160   -240   
64     -64    
144    0      
-144   -608   
-272   144    
-16    32     
208    240    
-48    160    
-16    -16    
-672   -752   
208    160    
-160   144    
64     96     
-480   16     
96     -80    
-1488  -272   
-80    -48    
48     80     
80     304    
-64    112    
-240   -16    
-64    -208   
128    96     
48     336    
-272   16     
-16    -320   
48     -192   
-224   -592   
0      80     
-48    -32    
-256   160    
32     32     
32     16     
48     160    
-208   -32    
32     -112   
-32    -128   
-32    80     
224    96     
-176   32     
192    208    
-16    32     
-96    -336   
-160   -160   
112    64     
64     112    
-48    128    
-512   -96    
-80    -32    
-160   -128   
128    64     
-80    -160   
-64    0      
-208   -96    
144    208    
-256   -48    
320    -32    
-272   16     
64     -96    
-48    16     
-128   -160   
32     48     
-224   -64    
80     112    
-224   32     
64     240    
-64    -80    
-32    -48    
-160   96     
112    -32    
-32    112    
-64    0      
64     144    
-64    112    
-16    32     
-128   -80    
-32    80     
112    208    
-240   160    
-272   -176   
96     -64    
96     -112   
-112   112    
-64    32     
-16    -16    
80     96     
80     64     
-48    80     
-80    144    
0      32     
-16    128    
-16    48     
-16    224    
-96    0      
64     -16    
192    112    
-48    112    
-48    -128   
96     192    
-64    112    
-32    -16    
-64    48     
96     80     
-112   -16    
32     144    
64     128    
-64    128    
-224   -32    
16     48     
-592   -16    
-32    0      
-32    16     
96     32     
-80    128    
64     -80    
-32    208    
128    32     
-400   656    
-912   -480   
-64    -688   
-720   992    
-288   -64    
-480   192    
608    -624   
-112   -96    
-288   -208   
544    896    
-352   -416   
176    160    
-208   -464   
224    352    
32     144    
80     -16    
-80    304    
0      48     
-96    80     
176    -48    
0      80     
32     48     
32     288    
-96    -176   
96     224    
-96    -192   
112    224    
16     32     
48     224    
-144   -240   
128    224    
64     -32    
-16    176    
-64    0      
-16    144    
96     64     
192    352    
0      144    
-176   16     
16     0      
0      80     
96     80     
16     64     
0      128    
-144   -80    
48     -16    
-64    128    
176    144    
-176   32     
64     48     
-144   -32    
-32    16     
64     96     
-32    32     
80     96     
96     112    
32     256    
-160   32     
144    16     
32     80     
32     16     
-32    144    
0      32     
-16    0      
96     208    
-144   16     
32     80     
48     48     
96     48     
64     144    
-80    64     
48     144    
-112   32     
144    256    
-64    96     
80     352    
-176   -48    
320    -80    
32     48     
-48    96     
352    688    
-304   336    
-32    96     
240    -64    
-16    -112   
-80    -144   
64     80     
0      160    
-64    -112   
112    16     
-96    -48    
64     32     
96     16     
0      -48    
80     192    
-16    224    
192    96     
-80    -16    
80     112    
0      32     
32     80     
16     192    
112    112    
16     112    
-32    48     
112    112    
16     112    
32     0      
0      -32    
32     -48    
48     -16    
0      -240   
128    80     
112    144    
-80    96     
-64    -224   
144    48     
64     224    
160    128    
-192   96     
64     64     
16     96     
112    48     
-48    0      
-80    -192   
32     -464   
-16    -368   
-16    256    
144    144    
-80    112    
-16    32     
0      96     
48     32     
64     96     
-64    -16    
96     96     
-16    128    
112    144    
-32    112    
32     -144   
-48    48     
160    -96    
-16    288    
64     -1984  
80     160    
16     64     
144    160    
-80    224    
80     32     
48     80     
96     112    
-80    80     
64     144    
16     112    
0      -32    
48     240    
240    -352   
32     304    
-176   -304   
96     0      
-80    -64    
256    96     
16     144    
16     112    
-16    64     
16     -176   
224    288    
176    96     
-160   -80    
224    -112   
-16    224    
176    -240   
-64    208    
-96    -64    
96     144    
112    -256   
-96    64     
208    -48    
-96    176    
16     -112   
160    64     
-16    160    
16     0      
176    80     
0      -288   
112    -16    
208    -48    
0      80     
80     128    
-96    128    
64     -448   
176    128    
208    -128   
-144   304    
-160   -16    
160    96     
112    128    
784    1568   
-32    992    
-384   -1136  
-336   -320   
64     -272   
720    -112   
-304   -512   
400    272    
-464   -320   
208    -208   
0      -272   
-256   240    
80     -48    
416    816    
272    -2976  
-144   16     
-16    -64    
432    368    
-512   -80    
-288   -816   
176    112    
384    -48    
-208   368    
112    -80    
144    -1088  
-96    192    
96     -784   
-16    -176   
-1344  -240   
432    -80    
0      48     
32     -96    
-16    -32    
-48    -1504  
144    -208   
-192   -416   
192    -272   
48     -144   
128    160    
48     -400   
-80    144    
128    -64    
-64    -64    
16     -80    
96     -256   
32     80     
-144   -592   
128    -320   
-192   -384   
48     -16    
112    -1488  
-32    48     
272    256    
-272   272    
112    -16    
-80    160    
-64    -64    
192    -96    
-192   -160   
160    -224   
-304   -16    
-16    96     
-192   -128   
208    -240   
48     -80    
80     -64    
-48    -128   
16     -336   
-80    64     
128    -128   
32     80     
64     64     
32     -32    
-224   80     
-32    -96    
-128   -448   
64     -384   
-176   -64    
96     64     
96     80     
-240   -16    
64     -320   
192    -1632  
80     64     
16     0      
-64    128    
-64    32     
80     -96    
-128   32     
64     -48    
-16    160    
-48    0      
-432   -32    
0      -160   
-224   144    
-48    -224   
0      -48    
112    -848   
112    0      
48     80     
-80    64     
32     0      
112    80     
-80    304    
-16    -112   
96     -48    
-16    -368   
-368   -48    
32     -320   
16     16     
-48    -16    
16     -96    
32     -320   
16     160    
-16    -1744  
176    64     
-272   0      
112    -96    
-32    -208   
112    -128   
-240   -208   
240    80     
-512   -144   
144    80     
-112   96     
160    80     
112    464    
64     -336   
48     48     
-16    -448   
160    -112   
0      48     
-64    -32    
128    -112   
-80    64     
-112   -16    
208    -48    
-176   80     
16     64     
160    -16    
32     -176   
-160   256    
176    -272   
-16    96     
-160   112    
-32    -16    
16     64     
-96    -32    
-80    48     
-64    -64    
-16    -32    
-64    -64    
32     112    
64     -32    
-192   -48    
80     112    
-208   -80    
-480   -96    
-96    128    
128    0      
-304   96     
-96    160    
-176   32     
-32    48     
-128   -96    
224    -112   
0      -192   
144    -48    
-1456  112    
-80    64     
-816   48     
240    -64    
16     0      
32     32     
-144   96     
-416   -256   
80     144    
-272   128    
-48    16     
-1296  -80    
128    32     
16     112    
-160   32     
-80    -48    
224    224    
-16    -112   
64     80     
-144   -128   
-272   -112   
-16    16     
-160   -48    
112    144    
-272   0      
96     16     
-176   -144   
-16    80     
2320   144    
-1520  -480   
592    -576   
-240   560    
624    0      
544    784    
-1152  -144   
896    576    
32     -144   
-240   -256   
-240   32     
160    272    
32     -16    
-304   224    
-80    -176   
-336   48     
96     -16    
-16    144    
80     128    
-16    -96    
-80    -144   
-16    160    
144    80     
-80    64     
-128   0      
0      112    
112    96     
16     112    
-144   -32    
96     48     
-432   -80    
160    96     
-32    -96    
64     80     
-48    0      
80     16     
16     80     
-144   32     
16     32     
-112   16     
64     32     
-48    64     
-16    80     
-64    -32    
-48    -16    
-192   -128   
48     112    
-976   -112   
0      0      
96     -16    
-48    128    
0      160    
-112   16     
80     160    
-48    -112   
112    -16    
-80    192    
-32    256    
-64    64     
32     176    
-208   -16    
144    160    
-288   32     
64     -48    
-32    16     
-80    -64    
96     128    
-192   -224   
176    -160   
192    64     
-112   224    
-32    112    
-16    48     
-48    -64    
144    32     
80     112    
-16    288    
-304   -48    
144    112    
-64    -32    
32     144    
-48    -112   
16     -176   
16     128    
-112   16     
-32    -112   
-208   -192   
128    -64    
-48    128    
-32    0      
-272   16     
0      -48    
-544   -80    
-96    80     
32     80     
-256   -112   
272    320    
-32    352    
0      64     
-176   -144   
112    32     
128    144    
48     112    
-96    80     
0      96     
-32    -16    
96     112    
32     176    
0      80     
32     48     
16     80     
16     80     
-32    16     
-16    96     
-48    0      
176    176    
-144   0      
112    128    
-192   -16    
304    288    
-240   16     
96     96     
-32    96     
144    128    
-32    32     
32     -160   
16     384    
32     416    
0      -96    
-32    192    
64     0      
16     -80    
-32    96     
-16    96     
0      128    
-176   -48    
128    224    
-16    -96    
224    64     
-112   224    
32     -16    
32     0      
176    256    
-16    80     
0      -48    
96     -32    
-32    272    
-112   -16    
16     48     
144    96     
32     80     
-176   -96    
176    272    
-144   96     
208    0      
-128   304    
-64    16     
112    64     
-112   112    
48     32     
16     64     
80     112    
128    112    
-48    80     
176    -48    
-240   128    
176    192    
-16    16     
144    128    
48     64     
32     80     
-80    32     
-160   16     
112    112    
-160   64     
80     0      
64     0      
96     240    
-144   -160   
-48    16     
128    208    
48     -1920  
48     16     
-80    80     
128    160    
-16    32     
64     96     
-32    32     
96     64     
-96    -16    
240    256    
-128   192    
208    144    
-272   80     
144    48     
80     16     
-992   -832   
592    -112   
96     -800   
848    -384   
-336   -400   
96     -400   
656    1280   
64     496    
-320   -432   
352    160    
-48    208    
-224   -224   
144    64     
288    112    
-304   48     
176    -432   
-112   80     
32     -544   
-240   -192   
368    48     
-144   32     
48     32     
96     320    
-208   -320   
32     32     
80     128    
224    128    
0      96     
0      -48    
256    224    
-176   -32    
208    64     
-64    -448   
16     0      
224    96     
-112   96     
128    -160   
48     32     
-64    48     
32     96     
112    80     
32     144    
32     96     
16     -144   
176    112    
64     176    
-16    48     
-112   -368   
160    144    
16     -416   
128    -80    
0      96     
80     128    
208    -80    
-144   208    
64     32     
96     -112   
32     32     
80     -32    
64     208    
-32    -96    
160    96     
-144   -64    
112    96     
96     -64    
96     64     
-80    -32    
0      -48    
160    128    
-128   128    
-16    -32    
96     96     
96     32     
128    -240   
-112   80     
96     -480   
272    112    
80     -16    
16     16     
128    -256   
48     240    
-96    96     
48     80     
240    -32    
-48    208    
-64    -176   
304    -16    
-160   352    
-80    -160   
176    64     
80     -32    
32     176    
16     -112   
64     48     
32     -16    
80     64     
-32    48     
-16    224    
-16    48     
160    -16    
-128   256    
176    -128   
64     -416   
16     -112   
-32    -128   
208    -16    
-176   80     
160    -48    
32     160    
-96    -224   
176    352    
-112   16     
320    -448   
-48    0      
-1232  -16    
144    48     
-48    -224   
32     -224   
-16    -160   
64     -896   
-96    -80    
256    208    
80     -48    
-16    32     
160    192    
144    112    
0      32     
-96    -368   
96     112    
-64    0      
16     -736   
64     -48    
-160   32     
160    -32    
80     -416   
0      -352   
-48    -704   
192    192    
160    32     
128    32     
-96    -32    
-96    16     
176    128    
32     -288   
-64    -16    
192    128    
-688   192    
272    -144   
-160   -112   
208    -96    
16     16     
-48    -672   
-64    -16    
176    0      
48     -96    
256    -368   
16     288    
-144   64     
96     64     
-192   -32    
160    32     
-464   16     
112    -80    
16     -48    
224    464    
-304   64     
96     336    
-144   144    
240    -1200  
-16    128    
96     -160   
32     96     
128    0      
224    -64    
64     240    
-96    -96    
-800   32     
64     -432   
96     48     
96     -240   
-48    96     
80     -560   
-80    -48    
48     -656   
16     192    
-48    -112   
208    112    
0      96     
16     -32    
-96    -64    
128    144    
-272   32     
96     -48    
16     -96    
112    -80    
112    -32    
-560   -3616  
608    -240   
-1488  -272   
464    -240   
656    1184   
-96    -848   
-336   -96    
992    -416   
-32    592    
-112   -144   
-112   -32    
-96    -64    
192    -16    
16     208    
-688   -96    
-176   -192   
16     0      
80     96     
160    16     
128    -1792  
16     -96    
-48    496    
-224   -160   
288    32     
0      160    
192    -32    
-192   -224   
-16    288    
256    80     
-128   0      
-64    16     
80     112    
176    -144   
-48    32     
-112   -16    
48     -96    
0      96     
-48    32     
-96    -64    
176    -112   
-272   -64    
128    -32    
-192   80     
128    -48    
-16    -64    
32     -272   
64     192    
-192   -192   
-96    128    
96     112    
-96    16     
-32    -80    
64     -16    
-16    -16    
16     -16    
-80    128    
64     544    
-192   128    
-128   -400   
-96    -176   
-512   -272   
16     48     
-256   -32    
0      320    
-112   192    
-240   -112   
-80    16     
-256   -80    
48     32     
48     -16    
-32    80     
96     48     
-128   32     
-128   -144   
96     144    
-320   -48    
-48    -32    
16     -128   
-16    16     
-144   0      
-64    48     
-80    -96    
0      -208   
-128   0      
-592   48     
-112   112    
-192   -32    
-80    -48    
-64    -128   
112    64     
-112   0      
64     160    
-64    0      
64     -16    
48     48     
-16    80     
-32    -64    
-32    16     
16     64     
-192   -16    
-112   -32    
-384   96     
32     -16    
16     80     
80     64     
-64    -144   
-96    32     
48     176    
-16    0      
16     96     
-16    80     
64     112    
-112   16     
48     272    
-176   0      
16     -112   
-128   208    
96     240    
-16    -96    
-128   0      
48     -80    
64     -64    
-64    16     
-160   160    
112    32     
-208   -160   
-224   -192   
144    160    
-256   48     
240    32     
-272   256    
-16    -48    
64     176    
16     -176   
160    96     
-160   -208   
208    224    
-32    48     
80     128    
-128   -64    
128    240    
-208   -32    
112    -32    
-48    112    
128    -32    
0      96     
-192   400    
16     288    
-800   -112   
144    0      
96     -64    
0      176    
-16    32     
-64    0      
0      96     
80     400    
32     272    
-272   -160   
304    80     
80     -80    
48     256    
-304   -16    
64     160    
-128   -96    
64     -112   
80     176    
-176   48     
48     384    
-224   112    
-176   -128   
128    112    
48     -32    
240    -48    
-48    -16    
-64    48     
-144   -64    
-160   -96    
272    208    
-16    48     
-32    32     
96     176    
144    64     
64     32     
-16    32     
144    48     
-128   32     
48     128    
-16    96     
-16    48     
32     128    
176    -304   
-48    48     
192    -176   
16     112    
176    48     
48     176    
16     160    
-48    -1488  
1056   -1360  
-16    256    
-416   464    
-432   816    
-528   -192   
704    -336   
-48    -48    
176    0      
-144   -288   
48     192    
208    192    
80     192    
-48    128    
64     32     
-64    64     
-112   48     
96     -176   
-16    -144   
112    112    
-128   -16    
-16    96     
-96    -32    
176    144    
-288   -224   
0      80     
176    288    
64     208    
-48    32     
-64    16     
64     80     
96     160    
-32    48     
80     112    
-48    96     
-16    64     
128    144    
-144   0      
192    112    
-16    48     
-16    112    
16     96     
-16    64     
80     -16    
-144   64     
160    240    
-112   -16    
256    288    
-320   16     
368    32     
-352   16     
208    80     
-144   32     
240    112    
-112   -64    
16     192    
64     -80    
48     160    
-16    32     
64     112    
80     64     
0      144    
-32    160    
16     -80    
80     80     
-128   144    
80     32     
16     192    
240    -16    
0      128    
-48    -1680  
96     128    
16     64     
64     176    
-64    -64    
256    224    
-144   160    
-64    48     
112    32     
96     208    
-48    -16    
112    48     
-64    -224   
128    320    
-208   128    
224    -912   
192    32     
0      224    
-32    80     
48     112    
-64    64     
64     64     
0      32     
112    112    
-32    192    
-80    -64    
96     64     
64     -32    
0      -64    
-32    80     
16     -176   
80     128    
0      0      
96     -48    
-48    128    
-64    272    
48     128    
-32    -32    
-16    -16    
-64    208    
112    -64    
48     256    
-64    -32    
-16    -112   
128    64     
64     -336   
64     192    
-48    -2144  
224    128    
-160   -96    
-48    160    
80     64     
304    0      
-160   -16    
-128   128    
416    0      
112    272    
-208   192    
240    -80    
-16    144    
64     -240   
0      160    
288    -224   
112    48     
-400   -1760  
-80    -16    
176    16     
112    32     
32     32     
-176   112    
48     -16    
112    80     
-32    256    
288    -64    
-272   272    
96     -336   
-80    128    
160    -208   
80     64     
-32    -400   
0      176    
32     96     
32     160    
16     176    
192    -48    
-128   32     
272    272    
-32    -32    
-80    -368   
112    320    
128    16     
-16    48     
16     -640   
336    496    
-176   -336   
-32    -112   
16     -48    
80     48     
0      112    
0      32     
48     256    
208    -240   
96     128    
16     -16    
-16    224    
48     -16    
240    128    
-48    -48    
64     176    
16     80     
16     16     
80     160    
32     64     
16     -64    
32     240    
48     128    
32     176    
-80    0      
-16    -272   
256    -48    
160    -48    
112    160    
-64    -32    
176    256    
128    -48    
0      64     
1392   -2128  
176    -1664  
752    80     
-352   -704   
560    -1072  
-80    -1056  
96     -1680  
704    496    
128    832    
240    176    
80     48     
-96    -32    
-64    96     
-16    -96    
160    -1152  
-80    -464   
320    16     
96     64     
0      64     
128    -192   
32     -352   
224    -128   
-64    -32    
192    -608   
0      -96    
256    208    
-16    -256   
-112   48     
0      -112   
64     -352   
112    80     
80     112    
16     -192   
-48    -64    
64     -256   
-704   32     
400    160    
-208   -96    
-64    -784   
64     -224   
160    -1024  
48     -48    
32     0      
144    0      
80     0      
112    32     
112    -256   
64     96     
-272   -192   
0      -208   
-448   64     
32     80     
64     -272   
0      96     
192    -16    
32     -96    
-160   -144   
176    -160   
0      240    
-16    128    
-16    176    
-160   -96    
96     -32    
-32    48     
192    32     
16     32     
80     -320   
-272   -64    
32     -96    
48     64     
48     -272   
-16    80     
48     -1504  
16     96     
32     -16    
-48    -256   
-112   -368   
288    -112   
-80    32     
-176   112    
-80    -144   
112    96     
-608   -256   
176    -16    
-176   -144   
240    -160   
80     160    
32     -784   
-96    -32    
80     -176   
176    128    
-32    64     
-16    -96    
-160   -48    
96     -48    
-112   -96    
208    208    
-96    192    
0      48     
-1776  -160   
80     -192   
160    80     
0      -240   
0      48     
64     -592   
176    -80    
-208   -16    
176    -80    
16     112    
128    -112   
-32    176    
0      -32    
-48    96     
-128   -256   
-128   -64    
48     -208   
-48    -208   
32     -336   
96     112    
48     -528   
-16    -192   
-80    -64    
192    144    
-96    -80    
-48    64     
-384   -752   
352    -192   
-272   224    
176    80     
-1040  144    
32     0      
-48    0      
128    -352   
16     160    
-128   -160   
96     -352   
-192   -304   
176    -496   
-128   96     
176    288    
112    16     
-128   64     
-16    -16    
80     80     
-192   112    
-928   -320   
48     288    
-688   -288   
-592   -80    
48     -16    
-176   48     
-128   0      
-192   -80    
-80    32     
16     -288   
176    144    
176    528    
16     -16    
-112   32     
48     -64    
-32    -240   
-112   -80    
256    32     
-320   112    
-16    -16    
-80    16     
-80    -16    
-128   512    
-176   -64    
-1312  -240   
-96    -304   
192    16     
-160   256    
-256   -608   
0      16     
160    16     
-144   -32    
-112   192    
32     144    
32     -96    
0      80     
-112   -192   
-32    128    
-256   48     
-64    80     
128    -272   
-688   96     
-96    -32    
-96    -32    
112    160    
128    -16    
-192   144    
32     16     
-160   -80    
0      96     
-160   16     
-960   -1568  
208    624    
-128   240    
496    -352   
-304   -128   
-720   96     
-496   144    
208    160    
-288   432    
96     -16    
-48    -80    
-224   -208   
224    64     
-64    80     
-32    -80    
-80    80     
-16    0      
-176   80     
48     192    
48     32     
-384   -48    
-144   112    
80     64     
32     224    
-48    -256   
-96    64     
-32    192    
48     192    
32     -16    
-32    80     
-32    -48    
96     128    
-96    64     
64     64     
-48    80     
-48    -176   
80     16     
-400   96     
128    144    
48     -48    
-96    96     
-16    64     
144    48     
-96    32     
160    -16    
-144   160    
0      32     
112    336    
-368   -80    
416    80     
-480   32     
80     48     
-96    -96    
80     176    
0      0      
16     80     
-16    160    
-32    -64    
80     96     
-128   -176   
272    160    
-176   176    
32     144    
-48    80     
-128   -16    
-48    -144   
96     192    
-240   160    
128    -64    
80     96     
-32    64     
-48    96     
64     -32    
48     48     
48     144    
-48    16     
-80    32     
-160   16     
-16    48     
-64    16     
80     64     
32     176    
-80    -144   
-64    192    
-128   128    
112    112    
-144   48     
240    224    
-160   16     
112    32     
-64    16     
-16    48     
-96    64     
16     128    
0      144    
-80    16     
112    32     
-64    96     
64     80     
-80    -32    
176    112    
-96    96     
176    176    
-160   -16    
80     128    
-64    -80    
80     -16    
48     368    
-144   96     
144    144    
-304   -112   
112    80     
128    176    
-160   96     
240    208    
-176   96     
464    352    
-192   160    
176    80     
-32    288    
224    272    
112    48     
-96    160    
-128   64     
128    0      
48     48     
-176   32     
208    80     
0      96     
64     0      
0      208    
-32    176    
240    288    
-304   144    
160    64     
64     48     
16     144    
-48    80     
80     32     
32     160    
-64    64     
32     96     
144    64     
-80    16     
80     96     
-80    16     
16     -80    
64     192    
32     48     
0      64     
-32    64     
-112   -48    
48     192    
-16    -336   
96     128    
-80    32     
64     -16    
-112   -128   
0      160    
-16    208    
192    176    
0      160    
-16    48     
80     208    
-128   0      
80     -336   
176    416    
96     80     
-208   -48    
80     80     
64     112    
48     -528   
-80    0      
16     96     
-48    64     
80     160    
-32    352    
-144   -80    
-16    48     
-48    80     
96     -32    
-48    208    
80     16     
-144   -160   
144    -320   
160    144    
-208   -288   
48     32     
32     96     
144    192    
80     112    
-64    96     
272    -144   
112    288    
-48    64     
-32    128    
-48    64     
-1376  -1600  
48     -432   
160    336    
240    480    
224    -512   
64     -256   
-256   -800   
-32    -368   
-16    -256   
352    -368   
80     464    
192    352    
-176   144    
32     32     
192    -64    
64     96     
48     112    
-96    -32    
-16    -80    
0      -480   
160    272    
-96    -336   
96     32     
48     16     
32     448    
-80    -208   
16     -80    
-64    48     
128    160    
-48    80     
-96    64     
64     96     
-160   -80    
128    176    
-128   -288   
288    16     
-320   -416   
528    240    
-112   -720   
432    240    
-480   176    
224    32     
-80    80     
32     -32    
224    112    
-16    -64    
176    -160   
32     -128   
224    208    
-208   -592   
240    224    
-96    -64    
16     208    
144    -496   
-64    144    
-272   -432   
320    352    
144    304    
-128   192    
144    -192   
64     -128   
-32    -192   
-16    -896   
128    48     
-32    16     
-48    48     
-64    -64    
128    96     
32     -32    
64     80     
-32    112    
80     32     
80     32     
112    64     
48     32     
-112   -624   
160    -80    
176    -224   
48     32     
224    -160   
-64    144    
0      -336   
80     208    
96     96     
-48    240    
0      -32    
144    416    
176    256    
32     -960   
32     -16    
80     -112   
112    96     
224    224    
-208   80     
112    -192   
-64    -320   
176    -160   
32     304    
64     16     
0      -1792  
-32    96     
128    -432   
112    112    
-96    80     
80     48     
160    240    
-64    -880   
-112   -368   
80     -800   
192    256    
48     32     
-160   80     
16     96     
192    -416   
128    -416   
-192   -64    
240    -16    
32     160    
-144   -96    
-32    -368   
80     -192   
112    -240   
48     240    
48     16     
80     -64    
-16    -1184  
144    160    
272    -256   
-208   112    
128    -144   
-16    368    
0      -32    
64     208    
-416   64     
0      -96    
-1088  -64    
-96    -176   
192    256    
64     32     
80     -128   
-16    -400   
96     -64    
48     -256   
-144   -128   
112    -192   
64     -128   
224    -128   
32     64     
-64    48     
128    16     
-16    32     
144    -80    
-96    -64    
96     -192   
80     -48    
96     -272   
96     128    
128    -1584  
0      80     
80     -80    
-80    32     
-80    -160   
144    -144   
-64    112    
-32    16     
-336   0      
96     -48    
-1312  -224   
144    -96    
-16    -144   
176    -96    
16     -128   
-32    -288   
-96    16     
80     -64    
128    64     
-224   96     
-16    -48    
64     64     
48     -64    
-32    -80    
-16    -80    
-16    176    
-256   112    
48     -304   
48     160    
-64    80     
-48    -32    
0      0      
176    -256   
144    16     
-48    224    
-48    -32    
48     64     
80     -128   
-96    -96    
528    -1136  
-176   64     
80     160    
-64    224    
-176   -608   
144    32     
48     96     
96     -80    
80     208    
-208   -480   
320    272    
128    -160   
-160   176    
16     -208   
-16    176    
128    -64    
-192   96     
32     -208   
-592   -96    
0      -528   
128    -48    
64     -64    
48     -32    
-160   176    
256    -192   
-368   64     
304    -80    
-160   112    
160    0      
-192   112    
160    -208   
-176   128    
144    -96    
32     160    
0      -144   
96     16     
-512   32     
176    176    
-144   -80    
-1280  -64    
208    160    
-144   48     
96     64     
-32    -96    
-64    112    
112    -144   
-16    64     
176    176    
-80    -64    
112    -176   
-128   272    
32     -256   
-336   0      
-48    -32    
-208   224    
16     16     
-528   48     
0      -80    
-432   0      
-144   -208   
48     112    
-80    0      
-160   -128   
64     176    
-144   -16    
64     32     
-144   -288   
112    80     
-64    96     
-128   128    
-80    16     
64     32     
32     -32    
-208   224    
-160   -80    
192    -48    
-16    400    
-368   -224   
208    -48    
-192   -240   
144    144    
-16    176    
-144   -144   
176    48     
-240   0      
-32    -176   
-64    -64    
-48    176    
-128   96     
64     112    
-496   -80    
32     32     
0      -112   
176    224    
-192   -208   
128    112    
-80    144    
-48    16     
-304   -16    
-96    48     
-112   -48    
-32    -48    
112    224    
-368   96     
48     16     
-352   -80    
-48    160    
-16    -160   
-80    -96    
80     -80    
16     -80    
-80    32     
64     112    
-80    16     
32     128    
0      112    
-16    192    
-48    -32    
-96    96     
48     -144   
-256   32     
16     192    
96     48     
32     128    
-112   160    
-16    272    
112    64     
-32    240    
-96    16     
240    336    
16     224    
-80    48     
144    176    
-208   0      
160    32     
-384   -176   
144    112    
-912   80     
0      -16    
32     0      
-32    208    
-32    96     
-80    80     
16     64     
-16    -400   
-144   -272   
240    224    
0      160    
-128   80     
64     16     
-144   -16    
-16    96     
-256   16     
-16    64     
-288   160    
48     16     
-144   -16    
112    304    
144    352    
-48    64     
48     96     
-96    160    
-96    96     
-352   -400   
352    48     
-208   256    
-80    96     
-112   -144   
400    240    
0      128    
32     -144   
48     224    
-64    48     
-80    -32    
-64    16     
304    16     
48     160    
-240   96     
-176   -48    
-64    128    
64     -128   
144    208    
-208   16     
-128   48     
48     -16    
80     144    
80     -16    
-96    80     
-32    80     
128    48     
-144   96     
-32    -32    
-96    256    
-208   -144   
48     128    
-144   -128   
-1008  -1568  
960    3248   
-560   1712   
-16    -432   
-32    -320   
496    416    
-672   400    
112    -352   
-208   576    
208    -432   
80     32     
-128   -48    
256    272    
-32    32     
-16    256    
-48    -112   
48     112    
-176   -368   
544    -16    
-112   96     
-96    336    
-320   -144   
192    416    
-16    48     
176    288    
-336   144    
-128   176    
-16    -320   
224    384    
-384   -112   
240    80     
-272   256    
-80    192    
80     160    
-208   -144   
-32    32     
-128   -16    
-64    304    
128    0      
-224   64     
160    -176   
144    160    
-80    -96    
-32    240    
-80    64     
64     128    
224    0      
64     208    
32     32     
-64    -32    
-16    288    
32     96     
80     -240   
-80    -144   
144    48     
32     48     
-64    208    
-64    240    
320    240    
-80    -16    
48     -688   
0      48     
16     -144   
112    368    
-80    16     
160    128    
160    32     
64     144    
-128   48     
16     192    
16     96     
48     96     
-96    -128   
0      -48    
64     64     
0      -1008  
128    656    
-16    96     
240    -32    
208    -144   
-288   144    
272    64     
0      208    
-320   -96    
64     -32    
48     0      
-112   -16    
48     -144   
-192   -208   
256    112    
16     -448   
80     64     
-16    -992   
48     -96    
144    -32    
80     48     
-80    -352   
-64    -64    
208    96     
224    176    
48     144    
-32    -16    
-80    0      
48     -32    
80     144    
96     64     
-112   48     
-96    -1456  
-48    -464   
0      16     
288    416    
32     -144   
-64    96     
96     64     
-48    -48    
80     80     
-192   -272   
464    304    
-128   0      
272    352    
-160   -176   
176    -32    
-160   -512   
48     32     
304    -2224  
80     304    
0      384    
16     224    
96     96     
48     64     
-160   -48    
208    64     
64     64     
128    96     
48     176    
80     -224   
-96    64     
-32    -176   
112    -16    
160    -112   
16     112    
-32    -1472  
288    160    
-176   -48    
176    48     
-144   96     
160    -48    
-80    96     
240    -32    
-16    48     
-16    96     
112    80     
112    128    
64     144    
-80    -80    
160    112    
176    -96    
-240   272    
64     -48    
96     0      
208    64     
-128   -1120  
32     64     
80     -656   
-144   -64    
288    -112   
-96    176    
48     -144   
-48    48     
-16    -272   
128    256    
-224   -240   
256    -16    
160    -16    
48     -112   
-80    -384   
16     -160   
192    -32    
176    -32    
-80    208    
16     -128   
16     160    
96     -256   
0      256    
-64    -608   
32     240    
64     0      
112    -816   
48     48     
-1040  -32    
16     -896   
112    -64    
32     32     
80     96     
48     -944   
-32    -80    
-96    432    
448    304    
544    736    
80     448    
-336   -304   
-32    -336   
496    -608   
-256   400    
-864   -640   
192    -96    
-96    -288   
448    224    
-16    -592   
-208   176    
128    -368   
128    480    
-208   -304   
128    48     
64     64     
160    -304   
-96    -32    
0      -112   
0      48     
-64    -16    
-64    -16    
-576   -288   
-80    -16    
224    -192   
-256   32     
176    48     
80     -48    
112    0      
-64    64     
96     -32    
0      -16    
48     80     
32     16     
48     -128   
-128   96     
208    -64    
-208   0      
-64    -160   
-16    96     
16     -48    
272    80     
-80    -272   
-96    -96    
-64    -352   
0      336    
112    -160   
80     16     
-176   32     
176    -96    
-96    -48    
128    -80    
-192   0      
64     32     
-1168  -80    
32     -48    
32     -128   
112    -480   
-64    -16    
48     -656   
-16    32     
192    -80    
-128   80     
-80    -80    
0      160    
-272   -64    
224    16     
-160   16     
0      -32    
-672   -32    
-16    -112   
192    -16    
80     16     
-96    -112   
208    -32    
-144   112    
128    48     
64     -96    
-32    112    
16     -176   
64     64     
96     -160   
80     -16    
160    112    
-384   -96    
192    -336   
-176   128    
32     -112   
48     -32    
64     -608   
-32    -16    
-80    -1648  
128    -64    
-16    48     
96     64     
-544   16     
176    240    
-432   -272   
224    -144   
-80    160    
160    -64    
-224   0      
-32    -448   
144    352    
64     -432   
-224   0      
0      0      
112    96     
-16    64     
0      64     
-112   32     
160    -16    
-112   -64    
80     48     
64     0      
96     32     
176    304    
-16    -80    
48     80     
-32    -128   
0      -80    
144    -16    
-624   160    
-48    256    
-48    144    
-176   -416   
-48    -80    
176    208    
32     16     
-48    224    
32     -240   
-144   -464   
-304   240    
80     112    
-208   -208   
-208   -48    
128    16     
-352   -16    
32     64     
-704   128    
16     -48    
64     16     
-112   80     
112    -208   
-272   -80    
112    -128   
80     112    
-48    -144   
-48    16     
-224   -208   
-144   -32    
32     32     
-16    144    
-144   -64    
-64    -16    
-48    160    
-576   80     
-224   -48    
240    96     
160    176    
-64    -80    
-32    128    
32     -240   
-16    192    
-128   -96    
112    32     
-224   64     
32     -48    
0      144    
-96    -48    
-16    32     
-144   16     
-80    144    
-752   32     
144    16     
160    -64    
-48    16     
-64    -192   
96     160    
64     16     
-144   112    
64     -192   
-16    176    
0      -128   
224    112    
-400   -32    
-64    -16    
64     96     
-192   -32    
-304   224    
-192   -96    
192    80     
16     -96    
80     32     
960    1552   
-128   224    
16     -560   
-928   48     
240    -144   
176    32     
288    -112   
112    384    
-384   256    
-400   -16    
272    -272   
-592   480    
288    -224   
-16    336    
-48    -288   
32     464    
-192   -704   
304    464    
-304   -320   
192    480    
-176   -224   
288    496    
-464   -272   
400    96     
-272   16     
368    400    
-1088  96     
-80    -224   
176    32     
-352   -240   
240    240    
-144   160    
-32    -128   
112    176    
0      0      
0      96     
-48    240    
48     432    
-16    336    
-336   -32    
256    112    
-544   -96    
96     304    
-96    112    
32     80     
-176   128    
208    272    
-32    160    
-64    -16    
16     -16    
-176   -16    
64     32     
-48    224    
112    224    
-160   -144   
160    272    
-304   -80    
144    16     
0      -48    
128    128    
64     64     
32     80     
-32    304    
-224   128    
0      80     
64     16     
64     -16    
-96    32     
-32    48     
-80    -128   
32     128    
-112   -48    
16     96     
128    112    
64     128    
-16    -48    
0      80     
-32    -16    
0      -240   
-128   -32    
-144   240    
-32    64     
-112   -336   
-272   -80    
48     -272   
48     80     
-96    192    
0      -128   
-96    -112   
-16    -48    
16     96     
-16    80     
0      -48    
0      240    
128    208    
-80    512    
96     304    
-48    80     
64     160    
-144   16     
80     -48    
32     -48    
192    80     
-80    144    
32     -272   
-48    32     
48     -96    
304    368    
-272   -16    
0      48     
-128   16     
144    16     
-64    48     
80     112    
-48    128    
32     32     
-80    -112   
-80    -112   
240    368    
80     256    
48     192    
-80    16     
112    32     
32     -160   
-288   160    
-16    -96    
144    -48    
-112   16     
-48    80     
-64    -304   
32     -176   
-160   -64    
128    80     
176    96     
-16    -144   
-128   80     
-48    192    
240    32     
-32    64     
-80    128    
96     64     
128    112    
-240   32     
176    224    
80     80     
112    -784   
-176   192    
160    144    
32     144    
-160   16     
176    48     
-128   32     
128    176    
-48    112    
112    32     
-112   64     
-16    160    
0      -128   
80     112    
112    176    
128    -592   
-64    -160   
96     -48    
-48    304    
96     -128   
0      240    
80     240    
-112   176    
224    -96    
272    144    
16     -128   
-160   112    
-160   -32    
160    -48    
32     144    
64     -272   
-224   -16    
128    -160   
176    64     
112    128    
-64    64     
-64    224    
192    -16    
16     -48    
128    80     
96     48     
16     176    
-64    96     
16     -96    
64     128    
144    -416   
-64    144    
-16    -176   
192    272    
-64    32     
80     128    
2368   2016   
-1856  208    
64     -800   
592    752    
-64    -752   
224    1248   
-944   -256   
240    480    
96     -400   
-240   192    
48     -112   
-192   112    
256    -112   
112    32     
-240   -112   
48     64     
48     224    
208    48     
-80    16     
112    -240   
-64    128    
96     96     
208    80     
-16    -32    
-16    -16    
80     -16    
0      -48    
304    64     
-192   -400   
160    0      
-16    192    
160    -32    
0      160    
16     80     
32     96     
0      -192   
64     16     
-48    128    
208    144    
48     -80    
-80    144    
80     -320   
32     96     
96     176    
64     112    
96     96     
-144   96     
144    144    
-144   144    
144    -128   
96     -48    
-80    32     
176    -464   
-48    16     
48     -368   
96     240    
32     -80    
144    -16    
16     -256   
16     192    
-48    80     
16     48     
48     -64    
80     -80    
16     0      
-64    -32    
96     208    
-16    -144   
288    144    
-96    -64    
32     176    
64     -192   
144    80     
-64    -288   
32     128    
224    256    
-112   -960   
208    304    
-768   96     
144    -1760  
-32    -80    
-64    -864   
48     112    
-48    32     
32     -48    
192    304    
-176   -96    
-64    -208   
240    112    
80     -736   
-16    112    
112    -176   
-128   -48    
-336   -144   
112    -816   
-96    -16    
80     -720   
-48    -96    
0      -800   
32     -144   
16     208    
0      -160   
-16    64     
144    0      
48     -176   
160    144    
-48    -400   
96     64     
-112   48     
144    -64    
-256   16     
48     -128   
128    -144   
-48    -368   
144    -144   
-64    -336   
48     -256   
32     -176   
64     -48    
208    -208   
32     304    
48     -112   
-192   -192   
16     48     
176    96     
192    -80    
-144   -16    
80     192    
16     -160   
-16    -96    
16     -272   
176    -64    
208    -80    
-384   64     
112    96     
-144   -48    
208    32     
16     -32    
-16    0      
-16    -112   
-256   -80    
0      -64    
-192   -80    
112    -16    
16     16     
96     -528   
0      -352   
80     -1520  
-16    160    
-112   -160   
128    160    
-16    96     
96     144    
-336   0      
48     -176   
0      -80    
-48    128    
-368   96     
0      0      
-160   -16    
128    -288   
-240   -64    
16     48     
64     96     
96     0      
0      -128   
16     16     
-80    144    
16     -16    
96     32     
48     112    
80     -80    
-64    -16    
32     -192   
-704   -304   
128    -16    
-80    96     
176    -544   
-80    192    
192    -432   
32     -144   
-80    -48    
80     -32    
32     -112   
64     96     
-256   -112   
64     -48    
-240   -96    
176    -176   
-112   0      
64     -160   
32     16     
448    -896   
-176   48     
-32    -112   
-16    -32    
-48    336    
-192   2288   
-800   816    
-144   -464   
-112   -448   
-48    112    
256    176    
-416   784    
-304   -176   
-80    -160   
-416   -192   
128    -288   
-48    -144   
80     48     
16     128    
-128   16     
64     0      
-64    272    
336    240    
-336   -128   
416    224    
-272   48     
160    -192   
-128   240    
-592   -240   
0      -208   
-960   -192   
192    112    
-80    -16    
-800   -80    
0      64     
-496   64     
-64    -48    
32     48     
-32    -16    
64     48     
-32    -80    
-976   -112   
-160   112    
48     -32    
-32    80     
-16    -80    
-32    48     
80     -96    
-240   96     
96     32     
-160   128    
-48    16     
-528   144    
64     128    
16     -64    
-32    -32    
-16    -16    
64     240    
-48    -176   
32     -48    
16     -32    
-288   -80    
96     -80    
-32    48     
-32    144    
-80    32     
-32    -32    
-320   -80    
48     16     
-96    176    
-128   -224   
288    -16    
16     192    
0      96     
-112   16     
64     48     
32     -32    
48     0      
16     32     
-32    -80    
-224   80     
-128   -96    
-416   -64    
-176   -64    
-208   -32    
-16    112    
48     -32    
-192   288    
-240   -272   
160    0      
-16    -96    
128    -80    
-80    0      
48     64     
-48    160    
-80    144    
-80    16     
176    64     
-16    -160   
-208   208    
-144   64     
64     0      
96     80     
96     160    
-128   -16    
128    16     
-160   160    
32     -96    
-112   -160   
-48    112    
-112   80     
144    144    
-192   -48    
64     48     
-288   -160   
32     64     
-880   64     
-16    160    
-64    0      
16     -32    
-32    48     
144    208    
-80    96     
-144   -224   
-208   -224   
16     48     
192    -96    
-160   128    
-160   -208   
-192   -256   
-48    80     
-128   -16    
64     32     
80     48     
0      64     
96     144    
0      224    
240    192    
32     368    
112    -32    
-224   64     
-160   80     
80     -32    
144    -80    
-368   48     
96     128    
-16    -80    
-80    -848   
80     160    
64     512    
0      112    
48     48     
-144   64     
192    0      
32     96     
-112   -16    
0      144    
128    -96    
-32    144    
80     -112   
-80    80     
-272   -256   
-48    112    
-48    80     
48     -64    
-16    16     
64     96     
96     16     
-240   96     
0      -160   
32     112    
96     144    
96     -80    
64     128    
-176   64     
-112   80     
-32    16     
224    0      
112    272    
-96    16     
-80    80     
80     16     
48     48     
0      128    
-32    144    
-48    16     
64     32     
80     144    
-48    -64    
-128   -128   
288    -16    
80     160    
-112   304    
-16    64     
-32    128    
32     -32    
144    32     
16     -64    
192    -64    
112    96     
-80    288    
1040   -560   
-272   304    
464    736    
-800   208    
-112   -512   
368    576    
-624   -528   
416    416    
-272   -272   
240    -16    
-96    64     
304    128    
-192   256    
80     -336   
-192   96     
288    16     
160    432    
-80    32     
-48    48     
-112   -48    
-16    128    
-32    176    
256    96     
-192   -48    
144    -128   
-48    128    
112    80     
-128   176    
64     -16    
-80    32     
-32    128    
96     160    
32     64     
-64    64     
-16    -432   
144    64     
32     96     
96     80     
0      96     
112    144    
0      160    
32     16     
32     224    
16     0      
32     -48    
96     16     
144    368    
-128   192    
16     -80    
-16    -704   
96     48     
96     128    
16     -96    
64     144    
16     96     
-64    368    
96     16     
112    176    
48     352    
48     -144   
0      144    
-96    -160   
-32    -272   
96     144    
80     -640   
-16    144    
80     112    
-32    112    
112    256    
-112   32     
224    192    
-96    16     
80     -112   
32     144    
-192   128    
368    544    
-304   208    
384    64     
-112   -48    
-32    -272   
64     0      
0      -512   
80     288    
-48    160    
0      48     
32     16     
112    96     
-64    -128   
0      80     
-48    -64    
112    272    
48     48     
112    -112   
0      80     
32     -288   
48     128    
-48    -400   
96     64     
112    144    
0      112    
0      -240   
-32    80     
-16    -144   
160    80     
-96    32     
80     16     
96     144    
-64    -176   
144    128    
-16    -112   
96     80     
32     -224   
32     64     
48     -752   
64     80     
96     272    
-32    -32    
32     64     
16     -16    
144    112    
-144   -96    
208    176    
-224   -160   
320    96     
-160   112    
80     -64    
144    -464   
-96    128    
224    -224   
-176   112    
112    -272   
-16    192    
32     -112   
80     112    
16     208    
64     -320   
-32    176    
-16    -96    
144    80     
-48    -512   
144    112    
0      -656   
-32    96     
96     -16    
-96    240    
-176   -208   
528    256    
-304   96     
288    96     
-240   0      
240    224    
-64    -160   
224    -96    
-48    112    
192    -224   
-160   256    
32     128    
-48    -64    
208    -128   
64     64     
192    -48    
-112   -16    
-32    -80    
224    -16    
-128   -816   
96     -128   
0      -1664  
-48    -304   
48     64     
-112   0      
288    336    
-240   -32    
256    160    
-288   -176   
272    -1152  
-224   64     
208    16     
32     -32    
-640   -96    
112    -1312  
48     -128   
0      -400   
16     -80    
112    -496   
208    80     
48     160    
-32    32     
-176   272    
-112   -304   
-128   -192   
128    32     
16     -192   
0      -48    
-112   176    
176    -160   
-16    -16    
-64    -1584  
592    -224   
864    1296   
-384   624    
768    -1920  
-352   -912   
1040   -320   
-608   -64    
16     240    
432    96     
192    -256   
-160   -144   
-48    -32    
272    160    
-512   80     
128    -96    
-224   -96    
336    0      
-240   -112   
80     -1168  
-16    -48    
32     32     
208    112    
48     -32    
80     -176   
-112   -272   
304    -176   
-160   208    
144    -80    
-192   -32    
-32    -256   
160    -112   
-32    -368   
-32    0      
112    -416   
-240   -224   
352    -1920  
-64    160    
240    -64    
-128   -16    
96     208    
-48    96     
48     -32    
-48    -128   
-672   -64    
208    -16    
-1408  0      
-16    -64    
160    16     
-32    48     
112    16     
0      -544   
64     112    
144    -32    
-48    64     
112    176    
-192   -64    
64     -16    
16     -160   
48     32     
0      -32    
80     64     
32     16     
-624   -64    
144    -608   
-96    16     
-192   -688   
-16    96     
128    160    
96     16     
-96    -112   
112    48     
-224   -64    
224    -32    
-160   16     
48     -112   
-48    -112   
-48    -96    
-272   -112   
112    0      
-144   96     
96     -416   
192    160    
-160   -1712  
176    -256   
48     -64    
32     128    
-112   -128   
176    32     
-240   -80    
128    -80    
-48    144    
-48    16     
48     160    
-112   -96    
80     -32    
112    -176   
256    208    
-96    96     
-80    16     
16     -32    
192    160    
0      -32    
48     96     
-144   160    
0      -176   
-64    -16    
144    32     
32     224    
16     16     
-144   64     
192    -272   
192    208    
-48    192    
-528   80     
-48    0      
-64    160    
-208   32     
384    -32    
-448   -192   
0      32     
32     -96    
224    -64    
-192   0      
-640   -160   
-16    304    
304    -128   
-432   -48    
16     128    
-256   64     
272    16     
-336   128    
80     -48    
-16    256    
-224   -96    
208    128    
0      -16    
-192   -16    
192    128    
-400   -48    
96     16     
-240   -80    
-192   -16    
80     96     
-336   -144   
80     64     
-320   -32    
-32    208    
-48    0      
-48    128    
-240   -144   
-128   48     
48     -304   
-16    48     
-32    -144   
112    192    
0      -160   
-128   48     
-144   96     
0      -16    
-48    -16    
48     240    
-176   224    
-288   112    
-368   -112   
-368   -624   
-288   -272   
-160   -288   
96     240    
64     48     
80     112    
-16    256    
32     32     
-80    112    
-96    64     
-16    128    
-32    64     
-32    -16    
32     64     
16     -256   
-80    112    
144    144    
-80    -160   
64     208    
128    176    
-128   -96    
-96    32     
-64    16     
64     96     
-64    48     
-80    112    
-96    16     
-112   32     
256    64     
-32    128    
-96    96     
576    2944   
-2480  -672   
176    752    
480    432    
752    -384   
-352   -400   
96     1040   
80     -144   
-272   -272   
-224   0      
224    -48    
-384   -320   
-48    -32    
192    208    
-192   -112   
-48    48     
-1088  -224   
48     224    
384    400    
-32    128    
-16    128    
-64    128    
192    112    
-240   -32    
144    112    
-160   176    
368    688    
-272   64     
160    -272   
-144   464    
192    256    
144    176    
-80    144    
48     -48    
-96    64     
0      16     
80     160    
-96    128    
96     48     
48     160    
16     16     
-48    0      
-80    -144   
-16    208    
64     16     
-48    32     
0      256    
-64    384    
0      128    
-96    -64    
48     -64    
-32    48     
0      208    
-16    96     
-96    -32    
-48    32     
96     384    
32     -224   
112    144    
-16    144    
0      -48    
-272   0      
144    160    
-48    256    
16     32     
80     224    
48     48     
-48    64     
-32    48     
32     80     
-32    48     
16     80     
16     64     
48     32     
-80    48     
80     272    
-160   -272   
112    16     
48     32     
128    208    
-16    144    
-64    160    
0      -48    
-16    -128   
112    128    
-48    176    
304    464    
-192   432    
80     128    
-16    -160   
112    144    
64     224    
-96    96     
0      64     
16     16     
160    144    
-176   32     
128    112    
-64    -16    
240    160    
-192   48     
64     -16    
-112   16     
176    144    
-64    32     
-80    16     
160    192    
-80    -16    
144    128    
-112   -16    
176    112    
-80    128    
144    112    
-48    96     
0      96     
-80    -80    
176    112    
-96    176    
128    32     
-128   -48    
16     144    
224    208    
-64    32     
-80    96     
48     160    
80     176    
-48    80     
16     176    
-64    -64    
96     176    
-64    16     
144    112    
-64    -32    
64     240    
128    240    
-160   -544   
48     -352   
16     -48    
192    192    
-80    96     
-96    96     
176    96     
32     208    
-144   -16    
80     128    
-144   0      
480    -176   
-32    -96    
96     80     
48     128    
-80    -560   
32     32     
144    320    
-16    32     
464    560    
-336   256    
-32    192    
48     16     
-112   -80    
80     64     
-304   -112   
112    96     
-64    -64    
352    256    
-208   -16    
320    32     
-48    144    
272    304    
-240   32     
-160   -96    
144    224    
-224   -48    
80     16     
-16    0      
128    192    
-240   -96    
144    176    
192    96     
48     -96    
96     192    
0      64     
32     0      
96     -752   
-16    80     
80     48     
0      32     
96     32     
192    128    
-240   96     
32     64     
-144   32     
208    64     
96     160    
176    -304   
128    192    
-80    -304   
-112   608    
-112   736    
-176   880    
272    -1344  
400    512    
-432   -256   
368    720    
-544   576    
304    -576   
16     -272   
-208   -144   
320    288    
-208   -96    
-48    -64    
144    -112   
-16    96     
96     160    
-16    32     
112    -1392  
-32    112    
0      16     
48     192    
-80    208    
160    -32    
-96    -160   
112    -112   
160    144    
-16    -320   
80     64     
-96    -256   
304    144    
-144   -192   
160    80     
-112   -528   
48     112    
-32    -224   
304    176    
-256   112    
304    112    
-96    16     
0      -592   
96     176    
32     -64    
16     96     
144    -208   
-64    192    
144    -80    
-32    -64    
-48    16     
16     80     
192    64     
-48    224    
48     -272   
208    -48    
-160   272    
224    -64    
-96    112    
64     -48    
80     80     
112    -16    
-80    0      
176    16     
-48    96     
80     -32    
112    240    
-64    -48    
176    -816   
-144   80     
64     -336   
112    -464   
0      -32    
80     -832   
-64    -240   
144    -1280  
-96    -96    
144    -32    
256    -80    
-64    240    
-80    -160   
80     -448   
-32    -64    
144    -464   
-160   32     
-176   -96    
80     -176   
64     -16    
0      64     
80     -80    
64     -720   
96     48     
-48    -240   
160    0      
-80    48     
-16    -224   
128    -208   
16     48     
32     -128   
96     -112   
-32    -80    
96     -192   
-784   -32    
0      0      
64     96     
0      -208   
160    -16    
-96    -528   
176    16     
-80    -208   
128    32     
16     32     
192    80     
-16    -48    
112    -16    
-272   -112   
128    -96    
-592   -160   
16     32     
224    -16    
-48    -192   
176    64     
-16    128    
208    -80    
-256   -704   
-64    -48    
320    32     
0      272    
128    -80    
-176   32     
-96    -48    
176    16     
32     32     
-80    48     
-32    -224   
-192   -128   
-48    -128   
-144   0      
432    144    
192    160    
-64    128    
48     -256   
-144   112    
112    -16    
80     -48    
32     16     
80     192    
-256   16     
176    -48    
-352   -272   
112    -240   
-32    112    
64     64     
64     16     
48     -576   
112    96     
112    -32    
-16    -144   
64     16     
80     112    
0      144    
64     -64    
-32    96     
-48    -96    
-112   32     
128    0      
-256   16     
-16    -384   
240    384    
16     -832   
-128   96     
160    -1280  
-16    96     
-32    112    
112    -144   
-144   -112   
64     -48    
-144   112    
32     80     
-192   0      
96     160    
-16    192    
16     -144   
-16    -112   
240    208    
-240   -80    
-32    -48    
288    240    
-224   16     
32     144    
-176   -80    
96     -32    
48     80     
-32    -144   
-144   -64    
144    -224   
160    48     
32     -16    
-176   208    
-144   -1984  
528    352    
-144   352    
-160   -192   
48     -48    
368    464    
-144   16     
320    288    
-192   -240   
-32    -144   
32     -144   
160    0      
-208   -96    
-656   64     
208    176    
-224   -320   
-384   336    
-128   -272   
64     64     
-112   -48    
48     80     
-160   32     
0      128    
-208   -48    
144    -176   
-176   192    
-16    80     
368    256    
-400   -160   
224    208    
-48    -192   
-400   0      
-80    0      
-112   192    
-256   48     
96     192    
-256   304    
-592   -240   
-32    -144   
96     64     
48     96     
-64    -48    
32     160    
-64    -208   
80     -32    
64     64     
32     -16    
160    128    
-80    32     
-176   -16    
-64    64     
-112   16     
-128   128    
32     112    
-1184  -64    
-16    -48    
112    512    
-432   -544   
304    -128   
0      -192   
352    144    
-144   64     
-48    -32    
-64    144    
32     48     
0      64     
-16    112    
64     48     
-16    16     
-448   -64    
32     128    
16     -32    
-32    80     
-32    96     
-96    -48    
256    512    
-144   -32    
240    64     
-112   160    
320    -16    
-304   112    
32     -32    
-272   160    
-48    16     
-816   -144   
256    336    
-224   464    
-64    128    
-64    -240   
80     -32    
16     64     
-32    32     
-80    64     
64     64     
-32    96     
-128   -32    
-48    32     
-128   -64    
96     176    
-112   48     
80     192    
-1312  -48    
112    96     
-64    48     
160    64     
-16    112    
16     0      
48     64     
0      80     
48     48     
-64    0      
32     112    
48     80     
16     64     
-128   16     
240    592    
-240   -192   
128    -16    
-144   32     
208    32     
-48    0      
0      -16    
96     352    
-112   32     
112    96     
-192   96     
176    80     
160    336    
-16    176    
-176   -64    
-16    416    
-48    32     
-64    -32    
-16    -752   
-144   -320   
160    144    
-240   80     
96     176    
-96    16     
32     48     
32     -96    
-32    160    
-16    272    
-96    208    
0      16     
-224   -96    
-112   -304   
80     224    
-16    96     
0      0      
112    192    
-64    112    
0      -128   
144    80     
-160   -80    
16     16     
-128   -272   
368    512    
-32    112    
-16    16     
-192   112    
128    -16    
-16    128    
32     -208   
-16    48     
96     160    
288    208    
-160   96     
144    -16    
-112   96     
0      -16    
240    240    
64     64     
-96    16     
-144   192    
-112   -208   
48     128    
48     -128   
16     208    
-80    144    
80     -16    
64     80     
240    0      
-16    112    
-48    48     
32     112    
-16    128    
0      -32    
80     192    
-112   48     
-160   160    
176    96     
-144   96     
320    80     
-112   -16    
16     80     
2176   240    
-912   -208   
656    -96    
-80    256    
928    -848   
-496   208    
-624   -896   
560    864    
176    -576   
-192   416    
-64    -144   
160    288    
-80    176    
464    -176   
-320   320    
160    -80    
-144   368    
208    -32    
-32    224    
0      -112   
32     192    
80     -96    
32     304    
64     -16    
-32    -1456  
-32    80     
96     240    
96     32     
-16    208    
-32    -160   
96     32     
16     176    
80     224    
96     48     
-176   -48    
160    208    
-48    160    
64     48     
0      80     
48     -2832  
112    80     
-96    64     
64     80     
160    48     
32     48     
32     160    
48     112    
32     128    
-208   32     
192    -16    
96     112    
48     128    
-16    -16    
-16    32     
0      -288   
144    208    
-48    208    
176    -16    
0      80     
32     144    
0      48     
48     128    
-80    160    
128    112    
64     -16    
64     32     
-128   112    
48     -32    
-96    128    
112    -208   
96     96     
80     -2080  
-176   32     
160    -112   
0      32     
-80    -352   
112    0      
-16    32     
208    224    
-80    208    
-144   48     
272    128    
48     96     
176    -192   
96     0      
-288   16     
208    -656   
-48    160    
32     -1840  
64     96     
-16    0      
32     80     
64     -64    
176    352    
-176   48     
112    208    
32     -80    
144    48     
32     96     
80     -128   
16     144    
0      -304   
224    240    
-144   96     
112    32     
-32    -256   
-64    -144   
128    -16    
-16    208    
32     32     
128    64     
-80    160    
128    -128   
-32    0      
80     -336   
64     128    
240    224    
-256   96     
96     -416   
96     64     
-48    -1744  
48     144    
144    -16    
16     16     
-144   80     
128    -544   
-32    256    
352    -240   
-192   64     
144    -208   
16     288    
128    -96    
-80    0      
80     -352   
96     144    
-112   -176   
128    208    
160    272    
16     -112   
-32    128    
0      -608   
64     112    
64     -16    
64     208    
96     112    
32     112    
-96    -336   
64     -128   
-64    -224   
160    -176   
48     176    
32     -576   
32     144    
32     -288   
112    -720   
160    -32    
-32    -1056  
144    96     
-176   -64    
224    -304   
48     176    
32     -160   
-64    64     
-144   -176   
128    -880   
176    176    
80     288    
-320   0      
-608   96     
96     -96    
112    64     
-16    -80    
224    -96    
48     -16    
32     -80    
16     128    
192    112    
-32    16     
-80    -80    
-80    -608   
-144   -80    
224    -192   
160    112    
-304   208    
-176   -32    
192    0      
144    -16    
176    -112   
-64    -320   
-16    32     
96     -400   
128    32     
-144   256    
128    -240   
-16    144    
48     128    
-944   -1792  
1152   3168   
-896   544    
368    -592   
-912   -1264  
912    64     
-656   112    
480    -144   
224    384    
192    -992   
-96    -64    
16     -368   
240    640    
-48    -384   
48     160    
-416   -224   
352    -128   
-256   -176   
48     64     
-448   -464   
-48    -112   
-288   128    
48     304    
48     -208   
-128   -352   
192    -112   
192    -896   
-32    -144   
-416   -720   
416    448    
176    384    
48     96     
-208   96     
48     -96    
-288   32     
-32    -320   
-592   -304   
96     -512   
128    432    
-48    -112   
224    64     
-144   96     
176    -64    
0      112    
160    -16    
-64    112    
128    176    
112    752    
0      368    
-544   -400   
288    -368   
-336   -96    
0      -128   
-672   32     
80     -96    
208    32     
-16    -816   
112    -960   
464    160    
-16    176    
-16    400    
0      -32    
-128   32     
112    -96    
-688   0      
112    -80    
-160   16     
48     16     
-208   176    
48     -288   
32     96     
32     -288   
80     320    
80     -368   
-48    16     
0      -64    
-96    -32    
-400   -240   
192    -240   
112    400    
-16    128    
-96    -48    
-16    -80    
-224   -160   
80     -192   
-112   -96    
304    368    
-80    160    
-96    -16    
176    -48    
-48    -112   
112    -64    
-80    -32    
128    128    
-16    320    
-48    -112   
80     128    
32     -16    
-64    336    
-32    96     
-16    -80    
-400   -272   
176    112    
-80    16     
-1040  -144   
-144   32     
-544   -16    
0      -144   
-80    -176   
16     -16    
112    0      
-160   -128   
-128   0      
-16    128    
32     -96    
16     -64    
64     96     
-112   16     
-112   -80    
-208   -208   
-32    -160   
128    0      
0      192    
-1360  160    
-208   -16    
288    160    
-64    112    
32     -144   
256    176    
-272   -160   
16     -16    
192    192    
-48    128    
-176   -16    
32     -48    
-128   -48    
-16    -160   
-16    -112   
-320   96     
16     192    
0      96     
80     48     
-176   -16    
176    96     
-320   -80    
272    224    
-272   -96    
32     32     
80     32     
-96    -80    
32     32     
-160   144    
-16    144    
-16    -48    
-32    96     
-96    96     
-144   -128   
0      -240   
144    -80    
-64    -16    
144    -96    
0      80     
80     48     
32     96     
-208   64     
-16    96     
64     224    
-224   64     
-16    -16    
64     64     
-416   -176   
48     16     
-144   32     
-128   128    
96     -80    
-80    -16    
144    -112   
-240   288    
-288   48     
0      -64    
80     112    
144    96     
-176   16     
-64    -224   
64     0      
-400   -96    
80     272    
-1072  -32    
128    80     
-16    -96    
-80    16     
112    48     
144    -112   
-160   320    
-128   256    
32     -64    
48     -128   
192    -400   
112    -480   
608    560    
-288   304    
-496   -304   
304    336    
-272   16     
288    1008   
-480   -640   
-16    -112   
288    -32    
-128   512    
-160   80     
0      128    
16     -160   
0      -80    
-192   240    
224    -32    
-144   144    
48     -80    
-288   224    
176    -80    
-144   272    
112    -288   
96     320    
-208   -224   
-112   336    
64     48     
-48    48     
-128   -96    
32     224    
80     -64    
-96    192    
-192   -96    
80     176    
-160   -160   
192    144    
-144   96     
272    -48    
-96    16     
-80    160    
80     96     
80     128    
-48    16     
160    128    
-128   48     
-96    -16    
48     272    
112    -224   
-80    128    
64     128    
128    32     
-48    176    
32     -16    
48     -16    
16     0      
0      48     
-16    192    
64     -48    
-64    48     
0      64     
-16    -64    
144    240    
-112   -32    
128    64     
-32    96     
-48    16     
-48    144    
-32    -16    
144    48     
-32    64     
-32    128    
0      -16    
48     16     
-240   -96    
-64    -304   
-208   -480   
-288   240    
-144   -48    
272    -160   
-32    240    
-32    96     
192    464    
-48    224    
208    64     
-48    -176   
112    -32    
-64    -16    
-128   32     
-32    128    
160    352    
-16    112    
160    256    
-48    32     
144    192    
16     192    
-16    160    
16     48     
16     144    
144    176    
-176   -96    
0      112    
144    160    
80     128    
-96    128    
-32    -32    
-64    224    
208    144    
-48    48     
64     304    
0      80     
80     128    
112    80     
-112   -48    
96     0      
-96    112    
128    144    
32     -16    
-176   -256   
-16    -240   
-16    -96    
80     16     
160    -16    
-192   32     
144    -688   
80     352    
0      -96    
-48    240    
-32    -16    
176    192    
48     -160   
-96    208    
80     96     
96     144    
-16    48     
32     336    
-112   -464   
-16    32     
192    176    
-80    -480   
64     112    
-32    -160   
208    112    
-96    192    
144    336    
-128   80     
144    -144   
-144   -144   
160    128    
32     48     
-80    96     
80     192    
-176   -64    
224    -624   
-192   -608   
192    -16    
144    -112   
-224   224    
16     128    
-240   -16    
304    128    
16     144    
-64    -16    
-160   32     
-64    -368   
352    32     
368    480    
-400   -432   
128    -32    
-16    -80    
272    304    
-192   -992   
208    112    
-48    48     
176    80     
-272   112    
288    48     
-16    160    
96     32     
64     32     
-16    128    
48     224    
64     -96    
240    176    
-128   -96    
144    64     
-208   -272   
192    144    
-16    -1072  
-64    80     
64     144    
-48    192    
-16    -208   
80     320    
96     80     
32     80     
832    1136   
432    768    
-368   -528   
-576   -752   
304    -320   
272    -608   
-64    256    
80     -752   
-176   784    
-48    -240   
304    -32    
-400   80     
272    16     
48     208    
160    -80    
-96    32     
432    48     
-288   272    
-80    -464   
-96    112    
144    -384   
240    464    
-192   -400   
272    128    
-192   96     
192    192    
-192   -176   
-96    80     
96     -288   
400    240    
-208   256    
320    -64    
-208   224    
224    64     
192    256    
176    192    
48     -368   
-80    -288   
160    112    
48     -48    
-64    32     
32     80     
208    -112   
-96    -1232  
48     -160   
-224   -560   
288    -96    
-80    -400   
112    -208   
-16    160    
144    -16    
16     160    
48     -608   
96     -512   
192    80     
112    -64    
-32    1024   
-688   176    
336    224    
-48    -400   
-32    -416   
64     -256   
240    -96    
-32    -144   
96     80     
48     -144   
0      -64    
80     -96    
160    336    
32     -64    
192    -176   
0      16     
-32    -16    
-16    -144   
272    400    
-64    -240   
288    -432   
64     -528   
-16    -144   
240    -464   
-144   48     
48     -128   
96     240    
208    -80    
-128   80     
128    192    
-288   -400   
-80    -64    
80     48     
-1584  -128   
-32    -240   
32     -464   
192    -224   
16     64     
48     -560   
32     272    
48     32     
-80    -272   
160    144    
-112   160    
-96    -128   
128    -128   
80     -144   
16     -16    
-880   -512   
112    -80    
256    -16    
32     16     
128    192    
0      -96    
-16    -176   
32     -2240  
224    192    
96     48     
64     240    
-16    64     
128    208    
-208   -32    
416    -224   
-448   32     
336    -32    
-304   304    
-32    -144   
-480   -224   
32     -368   
-112   32     
256    -1472  
-112   144    
144    112    
16     128    
-208   208    
80     -192   
-176   -48    
16     -208   
192    96     
-64    -32    
-400   -32    
-128   -160   
0      16     
208    -272   
-112   0      
48     -208   
-16    144    
272    -528   
-240   -64    
112    -64    
128    -96    
-96    272    
64     32     
-240   96     
80     -80    
-880   -48    
-80    -64    
144    48     
16     -112   
128    160    
48     -304   
192    80     
-64    -816   
80     -64    
-48    0      
32     80     
-64    -64    
64     -144   
0      -240   
-32    64     
-48    224    
-64    -64    
64     272    
48     -224   
112    -128   
112    -304   
16     144    
-64    96     
-304   96     
288    32     
-16    0      
-96    -96    
64     16     
-96    -48    
0      -64    
32     48     
80     -64    
-1056  144    
-32    -48    
0      16     
96     0      
32     80     
32     -48    
-320   16     
64     0      
-160   -112   
16     0      
16     176    
64     64     
128    96     
2272   1728   
-1616  272    
160    80     
-112   272    
64     -672   
32     816    
-1152  -672   
640    912    
-400   -256   
-288   496    
-304   -320   
-336   368    
512    -64    
-64    320    
-48    -288   
-256   16     
224    -176   
128    256    
-48    -192   
240    96     
-192   -64    
16     -32    
-96    192    
112    -160   
-224   96     
144    -128   
-240   192    
48     48     
-352   96     
352    -240   
-272   112    
64     -256   
32     304    
0      -256   
-32    192    
144    -80    
-192   128    
160    112    
-128   96     
80     -32    
-80    80     
-96    0      
-16    48     
-112   -80    
192    -48    
-48    160    
80     96     
-80    -48    
-160   16     
-64    48     
256    48     
-240   96     
144    -64    
-48    112    
-128   -48    
-32    32     
-144   0      
-176   64     
144    160    
-352   16     
96     80     
-16    32     
-128   48     
96     -224   
-160   96     
-48    32     
-96    48     
-32    48     
-96    -48    
16     32     
-144   0      
112    128    
-144   48     
0      -16    
-592   -16    
-96    -112   
-80    -176   
-144   384    
-64    16     
64     -96    
80     176    
-128   112    
16     432    
-192   144    
0      -176   
192    32     
-48    -48    
128    48     
64     512    
-288   -32    
-96    -288   
-128   -80    
16     160    
96     144    
-48    160    
-48    128    
0      -16    
-48    240    
112    176    
16     -64    
-96    16     
128    160    
-160   192    
-16    16     
-48    144    
32     -96    
-272   48     
0      -208   
-128   -256   
-64    -48    
112    96     
16     112    
48     112    
-80    112    
0      -16    
-192   -64    
0      16     
0      64     
224    240    
-160   48     
160    368    
-528   -96    
-96    64     
16     48     
256    704    
-160   400    
48     144    
-96    -32    
-32    0      
80     112    
-48    -160   
128    96     
32     48     
16     240    
-384   -336   
160    -176   
-176   -288   
32     32     
-112   96     
0      80     
32     -96    
32     176    
16     48     
16     112    
-64    80     
128    80     
-80    0      
32     112    
16     64     
-48    -80    
-32    112    
48     128    
64     -48    
320    16     
-144   96     
64     16     
32     240    
-208   -32    
224    80     
-80    112    
160    176    
-144   128    
-224   -112   
128    144    
-288   -144   
368    384    
-96    48     
160    64     
-208   0      
208    128    
-48    112    
64     16     
112    64     
64     64     
-32    304    
-240   -112   
192    160    
-144   0      
304    176    
-176   32     
32     48     
-48    48     
-48    112    
-16    320    
-208   -176   
128    -32    
128    192    
288    80     
-224   0      
-16    80     
224    160    
0      128    
128    -272   
112    320    
-144   -352   
-240   16     
-512   64     
-1216  -720   
640    -160   
-288   992    
480    0      
176    768    
-480   -32    
-176   -176   
176    112    
80     160    
-96    -144   
-176   80     
176    16     
176    240    
16     -2544  
-96    64     
16     48     
-160   -80    
80     -16    
-32    -112   
176    16     
-96    -160   
16     -48    
464    256    
-352   336    
64     112    
144    336    
80     -320   
-224   -64    
416    -96    
-128   96     
-144   0      
224    240    
-16    96     
0      48     
-16    128    
16     160    
128    384    
-64    208    
-96    -384   
192    16     
-16    128    
144    -48    
-48    80     
-48    -336   
80     144    
-128   16     
176    304    
-48    192    
128    48     
-16    -48    
16     80     
16     -464   
240    0      
-256   -80    
288    240    
-96    32     
80     80     
-80    32     
224    -752   
-96    80     
64     -1008  
-16    -48    
224    144    
-112   208    
64     -224   
-32    160    
0      16     
320    592    
-224   272    
208    0      
176    176    
-192   -192   
160    48     
32     -112   
0      192    
-16    -48    
96     144    
-16    -1424  
144    224    
-96    -128   
32     144    
112    192    
0      -16    
272    -160   
128    32     
80     144    
-80    64     
-144   192    
208    16     
-16    208    
144    -144   
-64    192    
-16    -400   
-112   -64    
176    -16    
-64    176    
64     -16    
-16    -64    
-96    -192   
112    -352   
144    160    
16     16     
16     160    
144    -192   
-32    64     
128    -352   
144    384    
-112   -80    
128    48     
-64    0      
96     32     
32     192    
48     144    
48     96     
176    -112   
-160   32     
112    -160   
64     96     
0      -16    
192    224    
128    16     
-144   240    
288    64     
96     128    
-160   -48    
160    160    
144    64     
-144   176    
80     96     
-16    -176   
144    112    
-208   -48    
368    64     
-48    -208   
-48    -16    
-128   0      
240    192    
112    -368   
16     -192   
-208   0      
112    -288   
320    -64    
-336   80     
64     -16    
128    0      
-48    -208   
32     32     
16     32     
272    -32    
-48    80     
64     -80    
80     176    
-48    -144   
112    -144   
0      80     
128    -128   
32     304    
-32    -192   
208    -768   
16     0      
0      -352   
144    80     
-128   -704   
256    176    
48     -32    
-32    -32    
-16    -48    
96     32     
96     64     
32     -64    
48     -16    
48     -304   
-288   -80    
48     -160   
-1264  48     
64     -176   
32     16     
-80    -656   
96     -96    
0      -816   
128    -32    
-16    48     
0      -32    
144    -80    
-112   160    
80     -320   
176    -32    
-64    -48    
80     144    
-400   0      
160    -64    
64     -160   
-16    48     
16     -128   
96     16     
32     16     
1008   128    
272    480    
1648   -992   
-368   -208   
-144   -1120  
160    -304   
480    -32    
-304   352    
-16    80     
-352   -256   
-384   -368   
-160   384    
112    -416   
-144   320    
176    -416   
224    -256   
-160   -64    
336    512    
-272   -48    
256    -160   
-288   32     
192    -48    
0      -144   
-320   -304   
-80    112    
96     -32    
-48    64     
112    -32    
-80    -352   
160    -80    
-80    16     
240    64     
-128   80     
128    -64    
-256   16     
176    -32    
-112   -16    
96     0      
-80    64     
-16    0      
-272   96     
128    -144   
-416   -48    
0      -368   
0      96     
32     -112   
96     48     
0      -816   
32     -48    
96     -48    
16     -144   
-144   144    
112    16     
-112   112    
-16    -176   
-16    80     
48     -144   
-32    112    
32     -352   
128    -32    
160    144    
-144   224    
-368   -64    
96     -176   
-192   -112   
112    64     
-160   96     
-32    -64    
48     176    
-32    -144   
-64    -64    
48     -64    
-128   -80    
192    -64    
-48    192    
48     64     
-112   -16    
240    -336   
176    240    
96     176    
48     -16    
-240   -80    
128    48     
-32    96     
64     160    
-32    96     
-48    -16    
80     -128   
-352   32     
112    144    
-720   16     
-352   -16    
48     32     
-432   16     
144    448    
-928   336    
-160   -16    
112    -192   
64     80     
144    112    
-48    144    
-512   -144   
144    64     
-320   -224   
-32    -144   
48     -96    
0      320    
-96    16     
-160   -16    
-144   64     
-176   0      
-128   64     
-464   -16    
176    80     
0      -48    
-64    16     
-160   -64    
80     0      
-96    -48    
-16    224    
-64    -208   
-112   -48    
48     176    
80     -48    
0      -16    
-80    544    
-32    -144   
112    64     
-272   32     
-1488  -176   
-112   16     
16     -48    
112    144    
-128   0      
80     320    
-192   -16    
288    224    
-208   80     
160    -48    
-272   96     
128    96     
0      0      
-144   -112   
32     96     
-704   48     
144    -112   
64     128    
80     288    
-176   -192   
-48    -96    
16     112    
-112   -192   
-128   0      
304    144    
-80    64     
192    16     
-288   144    
-160   -176   
256    80     
-416   80     
112    64     
-560   -48    
64     -80    
-48    -176   
-304   -176   
448    -128   
-256   368    
96     -16    
-96    96     
-48    80     
-16    -96    
112    128    
-32    144    
256    80     
-256   32     
176    -32    
-704   16     
96     64     
-48    -32    
176    144    
-32    160    
-48    48     
32     -304   
208    208    
-192   192    
-32    -224   
64     80     
176    112    
-80    16     
0      -224   
-96    224    
-336   -208   
0      192    
176    192    
112    16     
-16    48     
-160   1760   
0      448    
-400   -432   
-448   48     
-432   -240   
640    80     
-32    -32    
-16    704    
-688   -400   
304    32     
-112   -96    
176    144    
-48    416    
0      112    
48     112    
-48    -448   
112    240    
208    352    
-144   112    
48     -80    
-16    64     
-32    96     
160    112    
-192   -64    
-16    -112   
-208   -96    
0      192    
128    160    
-16    -16    
-48    96     
112    144    
-16    64     
-96    96     
-48    0      
-16    -16    
176    96     
-48    144    
160    80     
-144   0      
-80    96     
224    -16    
-112   240    
176    192    
-144   64     
-160   -64    
144    48     
-64    112    
144    240    
-256   -96    
208    32     
-64    112    
16     16     
32     288    
-400   -64    
208    -32    
-16    16     
160    96     
-80    272    
48     -16    
64     160    
48     48     
32     96     
80     112    
64     32     
-32    80     
80     64     
-64    -48    
48     64     
-96    32     
96     64     
64     272    
-160   16     
208    96     
-16    32     
-16    -80    
64     16     
-112   80     
64     208    
-160   0      
64     80     
0      32     
-16    16     
160    224    
-208   144    
112    -96    
240    128    
-48    288    
-112   64     
176    112    
-80    16     
80     -16    
96     288    
-128   0      
160    144    
-320   -32    
192    192    
-128   0      
160    64     
48     128    
0      -64    
-64    96     
112    64     
80     160    
48     -16    
144    224    
-32    112    
64     16     
144    272    
-16    96     
48     48     
-112   64     
16     144    
128    -64    
48     160    
-64    -336   
224    160    
-144   80     
224    32     
64     176    
-112   144    
272    48     
-208   128    
32     96     
192    112    
-304   -176   
288    80     
-256   -256   
112    -464   
-176   0      
64     -48    
288    0      
-112   160    
336    80     
64     144    
-288   96     
208    -128   
-144   64     
16     -112   
176    32     
-32    -96    
-64    80     
-80    0      
-64    -240   
32     192    
-80    -560   
32     -96    
0      -2864  
-16    128    
128    96     
0      80     
16     160    
64     64     
-80    0      
224    144    
-96    48     
64     208    
128    336    
-192   -16    
64     32     
-16    -160   
160    272    
16     -112   
-112   160    
144    192    
-32    320    
0      -144   
272    560    
-256   -240   
48     0      
48     16     
144    -48    
256    224    
-192   -80    
96     240    
32     -240   
64     48     
80     -128   
192    80     
64     -384   
0      176    
-80    48     
0      240    
0      -192   
192    -16    
-80    -128   
32     -224   
32     336    
0      -128   
-64    208    
80     -80    
32     48     
16     -224   
208    224    
-16    -160   
64     96     
-80    -64    
2176   784    
-1104  944    
1184   224    
-192   208    
672    -1984  
-288   -144   
-32    -272   
240    928    
240    -400   
-320   -48    
-16    -528   
192    80     
-80    32     
160    32     
16     32     
144    160    
-112   48     
256    352    
-64    256    
176    -144   
-48    176    
112    -48    
128    112    
32     -272   
64     128    
-96    -192   
48     48     
80     0      
96     32     
-16    -16    
64     -1648  
112    32     
-112   -2048  
112    48     
-112   -48    
256    128    
80     -160   
0      16     
16     -208   
16     128    
128    144    
0      112    
32     -176   
96     -1616  
64     96     
112    -736   
-48    64     
32     0      
96     -368   
32     -272   
96     -464   
16     -144   
64     -1104  
96     80     
-48    48     
160    48     
80     -96    
32     -80    
80     -288   
0      320    
288    208    
-16    192    
-480   -224   
128    -320   
0      -128   
192    -64    
0      176    
-208   -336   
112    -144   
128    -1008  
64     -272   
64     -224   
-32    -32    
192    0      
-48    64     
-48    -416   
32     -592   
-192   -400   
-144   -304   
-112   336    
-144   176    
0      0      
176    -48    
96     -64    
-80    16     
-16    -32    
-32    -416   
-16    48     
192    32     
16     16     
-48    -384   
32     -160   
32     112    
-16    -48    
-64    32     
-64    -64    
256    80     
0      -288   
16     -48    
96     -64    
16     80     
64     -672   
-32    112    
32     -64    
96     128    
-128   -112   
224    96     
-192   32     
192    -208   
-672   -48    
96     -336   
-400   -144   
0      -272   
128    48     
80     -32    
0      -128   
128    -224   
-64    16     
64     -176   
-32    96     
64     48     
128    48     
-192   -144   
160    144    
-256   -224   
176    -176   
-240   48     
64     48     
-672   -144   
-128   -144   
112    64     
96     -592   
-16    112    
128    -352   
48     80     
80     -64    
-160   144    
-224   -288   
256    -80    
-176   48     
176    -48    
-112   48     
48     -64    
-320   -48    
32     -256   
48     192    
16     -176   
32     112    
80     -384   
112    -208   
-624   0      
64     -176   
-64    -192   
384    368    
-560   -128   
368    64     
-512   -64    
592    -288   
-384   144    
-16    -112   
32     144    
-144   -160   
416    48     
-128   64     
-128   -400   
16     -368   
320    432    
-192   192    
48     96     
-240   -96    
224    -32    
-384   -144   
208    320    
-400   48     
64     -224   
-48    192    
-48    304    
-208   112    
-208   -16    
256    -160   
240    16     
-608   80     
-192   128    
-160   -48    
32     -32    
144    224    
-224   16     
128    176    
-16    96     
-384   -160   
-64    112    
-64    -272   
-576   -160   
144    -64    
-160   144    
0      64     
-528   624    
-64    2176   
-2704  448    
-96    -528   
112    288    
-544   -432   
176    272    
-96    512    
128    176    
-16    -96    
-176   96     
-16    -16    
144    96     
-128   -80    
-80    -48    
32     64     
-80    112    
-304   176    
48     16     
-32    128    
48     144    
-208   -32    
32     80     
-128   -32    
-80    -128   
192    112    
-112   144    
80     -16    
-96    -176   
-80    128    
48     0      
-64    208    
-176   16     
-96    -16    
-1088  -128   
-32    -80    
160    -224   
-64    32     
96     112    
80     0      
-128   96     
-32    -16    
-16    96     
-32    -32    
80     -16    
-160   -16    
96     80     
-272   -272   
224    272    
-480   -16    
288    48     
-224   -16    
128    80     
-64    -176   
-16    32     
16     -96    
-48    224    
-112   -144   
256    176    
-304   128    
144    -64    
32     64     
-96    32     
48     -48    
-32    96     
-32    176    
-160   -48    
176    96     
112    160    
-176   112    
-16    48     
0      32     
224    64     
-176   112    
-80    32     
16     192    
-16    48     
208    96     
-64    0      
-48    -48    
64     80     
-688   128    
112    176    
-16    -80    
48     -64    
32     48     
16     272    
-224   -80    
128    -32    
-80    48     
16     96     
-48    48     
16     64     
0      320    
-528   -368   
368    144    
-784   -176   
224    -176   
16     144    
0      48     
112    64     
-80    64     
16     80     
48     48     
96     160    
-80    176    
80     48     
-128   32     
16     80     
112    80     
0      32     
-64    96     
16     96     
-16    112    
0      0      
-16    144    
-16    128    
16     80     
-112   32     
256    320    
64     -48    
-160   144    
-352   -64    
304    128    
-96    -336   
-176   -240   
-320   -240   
96     48     
-128   0      
192    0      
-48    144    
80     304    
128    256    
-96    112    
16     176    
-160   -160   
48     32     
-80    80     
96     0      
32     128    
0      144    
80     176    
80     208    
-80    16     
240    48     
-96    96     
112    128    
-96    192    
112    -48    
48     96     
-48    96     
64     144    
-32    -208   
144    48     
-256   80     
176    16     
-128   0      
112    112    
-16    80     
16     -48    
64     256    
0      32     
32     160    
80     160    
-192   32     
112    192    
-64    -112   
0      48     
-64    64     
-176   128    
96     240    
-96    -48    
32     -48    
32     128    
-80    32     
48     144    
-48    160    
16     -16    
0      112    
48     0      
-144   16     
80     128    
-144   -16    
128    144    
48     -208   
96     144    
48     208    
-32    80     
16     96     
64     16     
32     160    
-32    224    
80     -48    
-80    -32    
16     224    
-64    160    
-240   912    
16     -256   
928    768    
-656   176    
-416   -1488  
688    368    
176    1216   
-416   -512   
64     112    
496    144    
-432   -304   
112    32     
48     144    
112    -160   
64     272    
-64    48     
-48    0      
-32    -368   
496    496    
-112   -1168  
-32    -96    
16     128    
-16    240    
128    80     
64     0      
-48    -160   
0      128    
-64    192    
144    0      
-144   -160   
288    48     
-192   16     
112    -240   
-16    192    
192    -208   
16     272    
80     -1296  
-128   -32    
96     32     
176    128    
-48    96     
64     96     
16     128    
16     160    
32     0      
16     -64    
80     80     
48     -160   
192    -16    
80     96     
48     224    
48     80     
0      160    
-128   -48    
240    160    
-64    64     
272    144    
-336   -272   
16     -112   
64     -16    
208    80     
64     96     
128    48     
16     368    
-128   -336   
288    -48    
192    -240   
32     112    
16     -176   
48     96     
0      48     
96     64     
0      16     
176    320    
-80    192    
0      64     
112    416    
-32    -112   
320    128    
192    -48    
64     272    
-32    -304   
-32    112    
16     -352   
48     32     
0      -160   
320    272    
-224   16     
112    48     
16     144    
32     -192   
64     64     
16     112    
64     64     
48     -144   
16     128    
48     -48    
128    272    
-64    -256   
96     80     
-64    -16    
80     112    
96     16     
0      112    
80     96     
16     -464   
-96    -208   
288    48     
-160   0      
224    -96    
-96    64     
144    -160   
0      64     
32     -112   
32     96     
48     -240   
96     80     
-32    112    
144    -1328  
-48    -576   
96     -32    
176    48     
64     32     
-32    112    
-32    -192   
64     80     
32     -528   
0      128    
16     112    
112    -1328  
-96    16     
80     -560   
-48    144    
-416   208    
16     -480   
208    48     
-304   -208   
32     -80    
0      -304   
-32    -288   
192    64     
160    -16    
-80    32     
0      64     
48     16     
0      -384   
160    -336   
144    -128   
-352   -32    
-16    -16    
112    -96    
-80    -224   
80     -224   
-160   -240   
192    -224   
160    -768   
192    -208   
-64    288    
-16    -32    
-16    -384   
-96    0      
80     -112   
224    208    
-224   -16    
96     -288   
240    -32    
-144   -400   
80     -16    
80     192    
96     -80    
-96    -512   
64     -224   
144    64     
160    240    
48     -96    
64     64     
-16    -208   
160    320    
-208   -96    
128    -48    
-160   -224   
-96    -16    
48     16     
16     64     
16     -16    
144    -736   
-32    -96    
-16    -1504  
32     0      
160    0      
80     224    
-256   -176   
128    -64    
-272   0      
112    -96    
-208   192    
112    -112   
-112   -608   
880    -1040  
-512   160    
0      384    
-704   -240   
1088   -1136  
-336   16     
384    464    
-432   -240   
256    -80    
256    64     
-256   -32    
208    208    
-112   -32    
400    80     
-896   0      
-80    -16    
-272   112    
80     -32    
48     0      
-32    -752   
80     32     
96     48     
192    -272   
-160   -80    
144    336    
-192   112    
192    -48    
-384   0      
64     -128   
-128   64     
-16    32     
-32    80     
96     -176   
0      64     
224    -320   
-64    352    
144    0      
80     -160   
-240   112    
256    -128   
-848   -48    
128    -128   
-320   32     
128    -160   
-144   48     
288    -16    
-256   80     
16     -304   
-16    -16    
64     -192   
32     0      
32     112    
0      64     
-80    -64    
160    64     
-432   0      
208    48     
-16    16     
48     -32    
-240   0      
64     -80    
-96    16     
112    -160   
144    -16    
64     0      
-64    144    
-112   -80    
-1344  -16    
-272   112    
96     -64    
144    80     
-48    16     
48     32     
0      -256   
16     16     
-256   -96    
192    32     
-128   0      
32     256    
-32    -448   
-496   -32    
-48    272    
-192   -64    
64     -48    
-144   160    
-96    -112   
-752   256    
-512   -160   
304    0      
-224   -112   
-256   48     
-16    144    
0      -16    
-96    48     
160    -208   
-208   112    
-64    0      
32     176    
-16    48     
-208   64     
32     64     
-448   48     
32     -160   
192    208    
-160   32     
144    80     
-272   -48    
96     -224   
-112   144    
176    144    
-176   112    
-48    64     
-160   -160   
-80    0      
-64    48     
96     -64    
-48    -64    
-96    -48    
-16    -32    
-144   32     
-128   -144   
208    96     
0      16     
144    144    
-32    304    
-64    144    
80     112    
-80    -48    
-32    0      
-192   -32    
-32    -16    
-144   -112   
144    80     
-752   -240   
192    -48    
-160   16     
-32    -64    
64     -112   
0      16     
-48    96     
112    144    
-192   -32    
-112   -16    
16     144    
64     160    
-16    64     
-176   0      
-48    16     
-288   -32    
-32    80     
-416   0      
48     272    
16     -64    
-48    128    
-64    80     
-128   -720   
64     320    
48     144    
-16    16     
-128   256    
80     144    
-224   -160   
32     80     
-144   80     
48     320    
-544   -48    
80     256    
-128   -304   
80     48     
224    384    
-80    112    
32     352    
-208   16     
64     -64    
96     176    
96     -48    
-32    0      
-64    80     
-160   48     
48     112    
-80    -176   
112    128    
-96    -64    
192    192    
112    48     
64     16     
-48    -144   
128    32     
64     192    
32     64     
-112   160    
-16    0      
288    80     
-176   0      
16     160    
-1152  -2272  
1296   3152   
-1360  992    
-96    -272   
-496   -1552  
848    592    
-528   448    
-176   -96    
96     -448   
688    -144   
-304   -192   
0      352    
128    464    
-80    -160   
192    352    
-176   -112   
128    384    
-160   -208   
464    608    
-64    192    
-32    -240   
-96    32     
64     336    
-80    80     
64     288    
-352   -32    
-48    -160   
-80    80     
-144   48     
176    16     
-32    160    
-32    64     
144    128    
0      80     
256    320    
-208   -320   
224    -304   
16     -192   
304    288    
-144   160    
-16    96     
16     64     
128    160    
-48    0      
0      192    
32     48     
-32    208    
0      176    
112    448    
-336   -224   
288    176    
-368   96     
144    -96    
64     144    
16     -16    
32     272    
-208   80     
352    544    
-176   144    
-112   64     
32     80     
128    -80    
0      -16    
-16    48     
-144   48     
128    80     
128    96     
-16    0      
0      128    
80     0      
80     224    
-128   -32    
80     144    
-64    -160   
0      128    
48     112    
352    736    
-80    560    
-32    352    
16     48     
64     128    
160    -64    
-64    256    
32     -16    
-128   64     
192    0      
-64    -32    
144    208    
-112   0      
192    -560   
16     224    
96     304    
-64    -16    
-64    -32    
112    144    
144    160    
-80    96     
-32    80     
64     192    
-80    176    
32     -64    
-48    96     
144    144    
32     80     
32     -1872  
-96    112    
240    400    
-208   -48    
272    192    
-160   160    
96     -48    
-96    -16    
-32    -32    
192    48     
-80    -144   
32     96     
-112   -128   
32     -320   
64     96     
128    -592   
-80    16     
96     -384   
48     224    
144    80     
80     336    
-272   48     
176    -128   
-256   -336   
224    336    
160    192    
16     48     
-96    160    
160    -128   
-144   176    
64     0      
176    128    
-256   -496   
496    416    
-144   128    
96     80     
-80    336    
176    -32    
-64    -16    
144    176    
16     32     
160    192    
-112   -64    
144    160    
-32    0      
112    -160   
112    96     
-48    -208   
64     -32    
32     -1136  
128    272    
-64    -80    
224    672    
-368   -336   
96     16     
0      -80    
80     160    
80     192    
-64    48     
272    256    
-224   -144   
-16    512    
400    -208   
-32    -48    
64     -768   
80     176    
-32    -1424  
64     128    
208    0      
64     240    
-32    64     
16     160    
0      48     
64     16     
32     144    
80     -416   
16     160    
192    -112   
-48    256    
-112   96     
-64    192    
16     -1040  
208    176    
0      -64    
0      256    
-48    112    
32     -64    
0      144    
304    -944   
-256   16     
144    -64    
80     -32    
192    32     
16     -416   
1024   -592   
-128   288    
-160   352    
-400   -112   
592    288    
-320   -288   
496    352    
-112   -512   
32     96     
128    -304   
64     176    
-64    32     
144    32     
112    -304   
80     0      
-160   -32    
144    144    
80     112    
0      -592   
-16    80     
32     -1456  
192    -496   
32     -160   
96     -1424  
48     -16    
-16    432    
224    -80    
-112   16     
208    -96    
-48    96     
32     -32    
-112   -32    
272    112    
-32    -176   
-32    96     
-480   48     
288    160    
0      -96    
48     -272   
-48    -64    
80     -976   
-16    -64    
-48    0      
160    -96    
64     288    
48     48     
96     48     
-112   -224   
112    -224   
-48    80     
-192   16     
-48    16     
-384   64     
0      -64    
80     -208   
64     -256   
-64    -96    
272    -128   
-192   80     
128    -160   
64     32     
112    -144   
64     272    
-16    -288   
192    -112   
-32    112    
48     32     
-272   -96    
176    -336   
32     -96    
112    -64    
0      160    
0      16     
112    -192   
160    -672   
-160   -64    
128    -16    
-16    240    
-64    -48    
160    -112   
-192   -304   
96     -272   
-96    0      
-64    -208   
-848   16     
-272   -32    
-16    -176   
240    -320   
-288   -80    
208    -1536  
-144   112    
64     -176   
192    272    
-160   -112   
-32    -32    
-80    0      
-80    0      
-96    -64    
48     128    
-688   32     
128    -16    
-48    0      
144    -400   
192    224    
-48    -208   
256    144    
-32    -112   
208    -48    
-160   48     
224    16     
-80    -64    
64     -80    
-32    144    
112    0      
-256   128    
0      -208   
-752   48     
288    112    
-176   64     
240    -320   
48     16     
0      -2400  
160    160    
0      208    
112    64     
-448   -160   
48     0      
-64    80     
32     -16    
-336   32     
64     -16    
-96    -16    
0      -128   
-144   240    
208    -448   
16     -64    
160    -224   
-128   -64    
-48    768    
96     224    
-32    -144   
64     -32    
-144   160    
48     -48    
80     352    
-96    -352   
-480   16     
0      -224   
64     48     
0      -112   
-16    64     
48     48     
160    -48
[truncated: 242,011 more chars]
