# Supplementary material for: A Fault Diagnosis Method for One‐Dimensional Vibration Signal Based on Multiresolution tlsDMD and Approximate Entropy
Source: Hindawi journal article supplement (doi:10.1155/2019/3262818), 2019-01-01
Supplement: f1 [file 3262818.f1.zip › 3262818.f1/gear signals/broken teeth fault signal/Data7.txt]

0      96     
-112   128    
192    128    
-16    -48    
160    144    
-80    48     
160    -64    
96     80     
-16    96     
128    112    
-16    -32    
-48    112    
32     -480   
32     80     
160    -528   
32     128    
80     16     
80     208    
-80    240    
128    -16    
96     64     
0      -48    
128    64     
-96    -16    
144    -48    
96     -352   
-48    -192   
16     -128   
160    96     
32     -16    
256    96     
0      -16    
160    112    
-160   -32    
-144   176    
272    -16    
80     -48    
0      -32    
16     -176   
-80    160    
-48    -144   
64     128    
32     0      
96     32     
208    -480   
96     272    
48     -64    
-64    288    
-112   -48    
112    -48    
32     -32    
144    -240   
0      80     
64     32     
32     208    
0      -128   
32     0      
96     -48    
-304   912    
-464   -1024  
-720   688    
896    512    
992    640    
-912   -544   
160    -176   
144    -2336  
480    -288   
-112   432    
400    160    
-288   224    
192    -128   
32     288    
112    -272   
-208   -48    
224    32     
-32    0      
16     -80    
224    -624   
0      -128   
-176   -80    
0      16     
112    -80    
-32    -320   
96     -176   
16     240    
224    -272   
-16    224    
-48    -352   
16     -320   
16     96     
144    -112   
0      160    
112    -304   
144    -208   
-336   192    
128    -80    
-32    -32    
32     -208   
64     -128   
64     -416   
64     16     
48     -112   
-48    0      
80     208    
-128   64     
64     -80    
64     0      
-176   48     
48     -80    
-64    32     
-16    -16    
176    -160   
-80    -96    
16     -176   
128    -224   
-80    -80    
48     -352   
-288   -544   
48     -96    
32     144    
128    80     
-32    256    
32     -32    
48     0      
-64    128    
-16    -128   
-352   -64    
48     -48    
64     16     
32     112    
80     112    
64     -480   
144    0      
16     -176   
320    576    
-192   368    
-48    -112   
-192   -352   
160    -240   
0      -16    
64     -128   
-16    240    
48     -80    
-192   80     
16     -224   
-64    0      
-48    -656   
128    48     
80     -208   
32     368    
-128   -16    
0      -288   
128    -16    
-32    -128   
-48    -32    
-16    0      
-48    32     
96     -96    
-816   -48    
16     -320   
-368   -48    
16     -272   
96     144    
48     -912   
96     208    
-256   -272   
224    -128   
-336   -80    
224    80     
-192   32     
128    112    
-160   -32    
48     32     
-320   64     
-112   -48    
192    32     
-48    -48    
256    176    
-64    -416   
16     -288   
-48    0      
160    144    
-144   16     
224    480    
-352   240    
96     -384   
-80    128    
-176   -48    
144    -80    
-16    48     
32     0      
192    -192   
-160   64     
176    0      
-288   -144   
480    48     
-208   176    
48     -64    
-128   -48    
-48    80     
128    -112   
-128   32     
16     -16    
-64    48     
80     -272   
32     144    
-128   -304   
-32    16     
-480   -240   
-16    160    
-48    224    
-416   -176   
64     -64    
-192   160    
416    -32    
-288   256    
-208   -64    
144    -48    
-112   -144   
-224   48     
16     192    
-32    -96    
-96    112    
288    688    
-608   -288   
112    -80    
-832   -16    
256    96     
-1024  48     
-112   0      
-160   16     
224    -160   
160    208    
-144   -80    
-208   -256   
160    208    
112    48     
-208   288    
-288   96     
-144   48     
64     -80    
-192   480    
80     -112   
-272   -64    
-80    0      
-864   -224   
-160   -80    
-16    -176   
224    144    
-80    -64    
160    112    
-128   -208   
-128   -32    
0      0      
0      64     
-176   1024   
-208   -1584  
0      96     
-592   240    
-160   880    
-784   592    
112    -688   
64     -288   
-176   -96    
96     -448   
-96    96     
-48    48     
96     288    
-112   160    
128    80     
-48    16     
-112   -176   
80     32     
-160   -16    
-48    -96    
-160   16     
128    176    
-480   16     
160    240    
-240   -144   
176    48     
-176   32     
176    208    
32     48     
-320   -96    
-32    -16    
-16    16     
32     96     
-96    96     
32     64     
-128   240    
16     32     
-416   -128   
64     128    
80     -16    
-32    128    
-80    64     
-16    144    
-64    80     
-32    48     
-48    32     
-16    144    
0      48     
256    -48    
-240   96     
-64    -64    
0      80     
-48    16     
160    112    
-480   368    
-176   -112   
128    128    
-64    80     
272    -32    
-160   64     
-16    160    
96     32     
64     224    
-320   -80    
192    32     
-176   48     
0      192    
-272   -96    
224    112    
-912   -192   
-32    64     
-288   16     
96     -16    
128    96     
-144   -48    
160    208    
-384   -16    
208    64     
-256   -64    
64     32     
48     -96    
-48    160    
-64    208    
-64    112    
96     -64    
48     -64    
64     160    
-112   240    
128    -32    
-48    32     
16     80     
-48    -80    
0      -16    
96     240    
-128   176    
80     16     
-48    48     
-112   -32    
112    176    
-224   48     
256    16     
-96    112    
144    144    
-208   -32    
192    64     
-192   48     
208    80     
-48    48     
-32    112    
-16    16     
-112   16     
32     -64    
-128   192    
192    80     
-176   80     
112    96     
-48    32     
112    -112   
64     64     
-128   144    
368    192    
-112   160    
-16    128    
-80    -48    
32     -64    
-160   -112   
16     -144   
32     -64    
16     112    
160    96     
112    80     
-80    176    
400    112    
-64    96     
-16    0      
80     16     
-32    32     
-96    64     
-32    0      
96     128    
16     -16    
80     0      
-48    96     
-16    -16    
128    64     
-128   16     
176    176    
-64    80     
128    160    
16     -48    
-80    160    
-32    -144   
0      0      
144    176    
-160   64     
128    -176   
-208   -1472  
32     192    
32     -80    
-16    64     
112    48     
80     160    
-64    -16    
96     320    
-128   -96    
16     -240   
48     0      
176    224    
-144   32     
48     176    
-96    -176   
-112   -960   
80     32     
48     128    
64     240    
-80    80     
96     -96    
80     192    
32     16     
-16    96     
48     112    
32     80     
112    16     
-80    -80    
80     208    
-48    48     
16     -112   
-32    128    
32     0      
96     80     
-16    144    
-80    80     
-16    64     
48     176    
32     48     
48     48     
1040   -2160  
112    288    
1264   832    
-224   48     
48     432    
-48    80     
-48    64     
-80    -992   
160    208    
-352   -288   
384    208    
-336   160    
176    32     
-48    -560   
96     -160   
-96    176    
288    448    
48     496    
-96    -64    
-160   -176   
240    64     
144    208    
-80    -176   
-16    96     
80     -480   
128    128    
-80    -16    
32     -32    
96     -144   
112    128    
-80    32     
128    128    
64     256    
-80    -224   
176    256    
-32    -320   
128    272    
-208   -144   
256    192    
-96    -272   
192    80     
-48    -128   
0      32     
64     112    
0      32     
-32    48     
176    208    
48     0      
48     -144   
32     208    
144    0      
48     144    
-48    -144   
16     32     
128    -320   
0      -16    
-80    -1040  
-96    -80    
144    176    
96     288    
-128   128    
80     224    
-32    48     
112    -176   
-224   0      
0      64     
16     192    
64     -224   
-16    80     
80     -80    
80     128    
16     96     
48     128    
112    320    
-48    128    
80     -96    
96     -144   
288    -224   
352    64     
128    224    
96     -16    
-160   208    
-16    -112   
48     112    
16     -160   
144    128    
-112   -368   
-96    -32    
160    96     
-96    0      
112    -32    
-16    -80    
0      -368   
48     -224   
0      128    
-16    -352   
208    192    
-16    80     
0      16     
144    -16    
-64    64     
144    -96    
-16    -448   
32     64     
80     -160   
32     -256   
-336   -112   
-16    -48    
80     -112   
112    -736   
16     -48    
64     -176   
64     32     
32     96     
48     -256   
0      -992   
96     160    
32     -112   
-32    -32    
48     -256   
64     128    
-912   144    
-64    -384   
-80    -48    
128    -16    
64     -192   
128    -1440  
-80    112    
144    80     
32     -96    
-64    -144   
-48    -16    
80     144    
-256   0      
-48    -64    
240    80     
-1120  -32    
160    -224   
64     -128   
288    -48    
-48    -96    
0      -544   
64     -80    
-64    -1600  
-80    -176   
96     -176   
-16    -64    
288    128    
-272   -32    
-16    64     
-32    -192   
-128   48     
112    128    
-240   -544   
128    -224   
112    -80    
-80    224    
96     160    
128    -336   
32     32     
48     0      
80     144    
96     112    
48     -64    
-64    112    
32     32     
-96    -400   
240    0      
-416   -16    
96     32     
16     -240   
96     -96    
-48    192    
176    -656   
-32    64     
128    -2656  
192    -320   
208    48     
16     -32    
32     368    
-208   -528   
-240   48     
-32    -32    
-32    -32    
16     -96    
-496   160    
32     -192   
48     -224   
128    -272   
48     64     
128    -704   
-192   0      
144    16     
-80    -160   
-48    -32    
-96    16     
-1056  480    
-720   -288   
240    -144   
624    -256   
-480   -432   
0      304    
-496   -112   
352    -16    
-432   48     
160    -16    
-64    48     
-160   -16    
208    -48    
16     32     
-16    -48    
-144   0      
192    32     
-96    96     
80     -160   
-80    48     
16     -80    
-16    64     
160    80     
-48    112    
176    -560   
80     -240   
-144   96     
80     -64    
-48    96     
-32    -32    
32     -16    
16     32     
-144   -64    
16     -64    
-64    -16    
64     -160   
192    528    
-448   -448   
128    -32    
-272   -672   
288    48     
-96    80     
-352   48     
16     128    
-16    -64    
-144   -64    
16     -32    
0      0      
112    176    
-112   32     
-512   0      
-144   0      
-624   -272   
16     208    
-64    128    
-240   0      
-64    128    
-768   -96    
-16    -48    
-1152  -32    
-112   32     
80     -16    
0      128    
96     96     
-64    -112   
80     -128   
-48    224    
-144   -144   
176    32     
16     240    
-272   -128   
192    32     
-512   64     
-16    0      
-16    -16    
0      -32    
-928   -48    
-96    -96    
-176   -32    
0      256    
-240   -160   
256    64     
48     336    
-384   -96    
304    48     
-96    -32    
-64    -144   
288    48     
-144   208    
64     48     
-64    -96    
-64    112    
-48    64     
-80    192    
-32    32     
-32    -32    
48     32     
-32    -80    
-32    32     
-128   0      
64     176    
-16    96     
64     48     
-176   -48    
64     16     
-32    -32    
-32    -48    
-160   -16    
-608   -128   
32     64     
96     0      
64     96     
-48    80     
-128   -160   
-64    -48    
176    112    
-96    64     
-96    -208   
-336   0      
-240   -304   
112    -64    
-368   -16    
192    96     
-400   112    
160    96     
-48    -224   
128    320    
32     288    
-96    176    
80     80     
-48    32     
-144   -16    
0      -112   
-128   64     
32     128    
64     -32    
-144   0      
-96    48     
-336   -240   
240    16     
-240   0      
-16    128    
16     368    
-160   16     
64     48     
-64    32     
0      0      
-48    64     
0      -48    
16     64     
-32    64     
-128   -16    
176    128    
-304   -64    
16     112    
-992   0      
-240   -464   
256    336    
-16    0      
-48    32     
-16    192    
0      32     
-128   16     
96     272    
-128   32     
48     48     
-240   -288   
240    320    
-272   0      
96     368    
48     -96    
-32    -80    
160    240    
-144   16     
-288   144    
112    288    
-128   -144   
32     112    
-80    0      
16     -32    
-80    176    
-32    -80    
96     144    
-16    64     
32     176    
0      -64    
16     -176   
96     96     
-16    64     
48     112    
32     16     
112    112    
0      144    
-208   0      
128    80     
80     64     
112    0      
-48    2224   
-464   -304   
-320   -992   
-176   -672   
-160   464    
432    208    
688    1488   
-576   160    
-512   -192   
80     64     
272    128    
208    192    
-192   0      
-112   0      
-16    -240   
144    368    
-144   -32    
144    416    
-48    32     
-32    -320   
80     16     
80     -80    
-32    128    
208    -192   
-160   -144   
16     144    
0      48     
-160   -64    
144    16     
-16    -96    
0      96     
16     240    
0      16     
16     176    
-16    448    
-224   -224   
80     -32    
112    384    
240    176    
-48    -16    
-48    -64    
0      96     
0      -16    
64     80     
-112   -32    
176    -1104  
96     224    
96     224    
-320   -400   
288    144    
-80    128    
160    80     
-48    80     
-112   144    
192    352    
-16    160    
192    384    
0      -128   
-96    -128   
96     -112   
-96    -320   
64     0      
-64    128    
144    192    
128    -16    
-32    128    
-80    128    
32     64     
-96    32     
16     96     
128    64     
0      112    
-64    64     
96     176    
32     64     
-64    112    
496    736    
-384   528    
96     80     
-224   -64    
272    -192   
-16    80     
32     -80    
32     208    
-32    32     
-16    32     
128    64     
80     64     
-48    -32    
144    112    
0      64     
0      192    
-80    -656   
64     16     
64     16     
112    144    
-224   -112   
-32    -80    
192    288    
-64    128    
-176   -416   
64     112    
48     16     
64     112    
-112   128    
32     -128   
192    384    
-112   -320   
192    160    
-112   368    
128    -64    
0      96     
0      -48    
160    -32    
-16    128    
160    160    
48     48     
-48    -48    
128    176    
96     128    
0      -256   
16     208    
64     -240   
32     -80    
224    160    
-288   -16    
336    -304   
-160   416    
272    96     
-16    96     
-112   192    
32     208    
96     224    
-128   -192   
192    -128   
-112   -288   
384    480    
-176   112    
96     16     
48     -128   
-80    -160   
112    -2672  
16     240    
-32    96     
64     32     
-48    -80    
176    416    
-96    32     
-32    -96    
48     48     
112    -304   
-32    160    
176    -112   
-16    64     
-112   -224   
32     128    
16     -320   
-288   -112   
160    -80    
96     336    
32     0      
-272   -192   
-32    176    
192    -32    
-304   496    
48     384    
-144   0      
0      -560   
144    144    
64     -224   
-32    272    
192    -192   
144    192    
144    -16    
48     176    
-48    32     
80     -80    
32     128    
128    -96    
112    128    
80     -320   
128    240    
-80    -256   
-176   32     
-16    -96    
160    -16    
160    -80    
0      -2576  
48     -64    
32     -1904  
144    160    
-32    -32    
160    -224   
-32    -160   
16     64     
0      -16    
288    2688   
-1792  -16    
48     304    
176    224    
608    -2496  
-688   -304   
160    -912   
-48    48     
240    -64    
-208   -16    
112    64     
-64    -784   
96     -96    
0      -480   
144    -64    
-112   -1520  
64     0      
160    320    
-80    -128   
224    32     
-144   -48    
32     112    
96     128    
-32    -32    
80     -272   
-336   -144   
224    -80    
-128   -160   
176    -176   
16     -16    
80     -240   
128    -144   
-64    400    
16     -144   
208    80     
-48    -80    
112    -128   
-64    48     
48     -16    
-96    -128   
32     80     
-80    16     
-880   -16    
-128   -48    
256    -96    
32     -784   
16     -16    
272    -144   
-560   -32    
400    -64    
-112   288    
128    -272   
-32    0      
-32    -96    
48     0      
-32    48     
192    64     
-576   64     
112    -336   
240    96     
-240   -144   
144    80     
16     -288   
144    176    
-144   -48    
16     -96    
192    -16    
16     96     
-112   48     
16     -48    
-16    -16    
48     -288   
-336   -32    
16     -80    
-800   -112   
160    -48    
-96    -16    
160    -528   
64     144    
-32    -1552  
96     -16    
-16    32     
-32    -176   
128    80     
-160   -128   
-240   -288   
272    240    
-496   -384   
336    0      
-320   -16    
0      48     
96     -80    
0      -96    
128    224    
-128   -544   
176    176    
-48    48     
-16    0      
-128   64     
0      -80    
-288   32     
112    48     
-32    -32    
16     -48    
-144   -64    
0      -96    
208    96     
16     -208   
0      112    
96     -272   
144    240    
-272   -32    
0      -80    
-144   0      
176    112    
64     240    
-96    -64    
-64    16     
-32    -176   
128    -80    
0      -144   
-128   336    
-224   -64    
288    64     
-64    -416   
176    128    
-336   -48    
32     -16    
48     112    
176    16     
-128   0      
96     192    
48     64     
-80    -144   
-16    96     
96     32     
208    -48    
-928   256    
-32    16     
128    384    
-704   96     
128    144    
-432   -32    
160    224    
-1072  16     
160    368    
-208   -80    
80     -144   
-32    48     
96     112    
-80    0      
-32    80     
-144   -192   
-32    32     
32     -240   
-32    -48    
400    400    
-752   -400   
112    32     
-96    48     
48     32     
64     64     
-128   -48    
96     128    
-48    -16    
-208   -224   
-240   -192   
-192   -256   
-112   96     
32     -16    
-64    0      
-16    32     
-32    48     
-80    0      
-144   208    
-96    -32    
-288   128    
-96    64     
-32    -48    
-32    80     
-16    -16    
-32    96     
48     0      
-192   64     
176    -32    
-112   80     
-96    16     
-208   -32    
16     96     
48     96     
-128   176    
-576   -96    
-144   32     
-128   -176   
16     176    
-144   128    
-176   272    
-1216  1008   
-960   -928   
-208   -560   
336    240    
544    432    
-880   288    
432    240    
-592   -256   
384    -320   
-688   -16    
416    128    
-416   0      
-224   64     
32     -480   
96     -80    
-32    96     
-128   32     
-128   0      
-176   176    
64     -192   
-96    160    
-96    -112   
64     288    
-144   -96    
-80    32     
192    16     
-160   480    
-64    -176   
-64    -96    
-112   -80    
208    144    
-320   -16    
144    32     
-96    400    
96     -48    
-192   -48    
288    128    
-16    240    
-16    -144   
80     -112   
16     112    
16     -48    
-16    128    
-832   -240   
-128   128    
-96    80     
-160   256    
-48    -16    
-224   -64    
96     80     
-16    -160   
-80    -32    
64     112    
-192   144    
-144   -64    
-32    80     
-464   -528   
128    176    
112    80     
-96    48     
64     64     
-80    48     
-128   -144   
208    448    
-288   -64    
224    256    
32     -64    
160    48     
-112   0      
-112   -32    
80     32     
-96    64     
16     0      
80     224    
-48    -80    
224    416    
-192   624    
-384   -208   
16     -176   
240    96     
-192   -96    
16     16     
-112   -48    
112    32     
-64    96     
192    304    
-544   -432   
144    16     
0      480    
96     240    
-192   -80    
32     128    
112    48     
-64    176    
240    416    
-176   192    
-32    32     
-112   -64    
128    48     
0      32     
0      240    
-240   -16    
64     128    
0      0      
96     160    
192    576    
224    816    
0      496    
-112   160    
0      32     
-80    -80    
128    112    
16     48     
96     64     
-128   48     
96     176    
16     80     
-16    -64    
-32    16     
240    80     
-80    -16    
176    192    
-128   272    
-48    -48    
272    256    
-208   0      
352    176    
-336   48     
176    144    
-96    -32    
128    448    
0      128    
0      80     
80     320    
-96    -304   
64     -96    
-176   48     
144    96     
48     -32    
0      144    
16     112    
80     128    
-16    -48    
64     144    
-80    -96    
-48    -240   
64     112    
48     48     
48     112    
-64    48     
64     112    
16     16     
144    48     
-48    144    
80     80     
-80    64     
176    384    
-320   -64    
224    -32    
-64    128    
64     -224   
112    32     
16     48     
-96    304    
-144   16     
128    96     
144    -96    
320    64     
-48    160    
-80    0      
-80    128    
176    48     
-240   32     
-48    16     
80     160    
128    -560   
-32    224    
-48    -2368  
80     160    
-48    80     
64     -48    
112    128    
-112   256    
48     -96    
64     128    
64     80     
16     64     
16     16     
-16    96     
0      160    
80     -400   
96     176    
-64    -160   
304    128    
-64    96     
32     96     
-704   432    
240    -720   
-320   208    
464    160    
512    608    
-208   -320   
432    816    
-320   -576   
416    288    
-384   -336   
544    320    
-240   48     
176    -144   
-144   -1488  
320    -16    
-224   144    
112    -96    
0      160    
96     -112   
-160   160    
176    -176   
-16    320    
144    -160   
-16    208    
0      -352   
64     304    
80     -464   
0      192    
32     -832   
112    192    
96     128    
64     176    
-16    -48    
-32    128    
48     -16    
-176   -96    
144    -48    
32     64     
160    -16    
0      -160   
0      112    
0      -48    
64     80     
64     -400   
0      176    
144    112    
-32    128    
64     80     
-304   80     
288    -32    
-16    176    
32     112    
144    192    
-256   80     
176    -384   
48     128    
0      80     
208    16     
-32    16     
-112   -16    
128    80     
-48    112    
32     48     
48     112    
-64    32     
32     -80    
0      -80    
144    -128   
-48    48     
32     -128   
0      16     
160    -368   
-48    96     
0      -400   
96     96     
80     -32    
-16    64     
80     240    
64     -416   
128    -96    
112    -64    
96     -368   
96     416    
-32    208    
176    -64    
144    240    
-160   -272   
400    112    
-256   -64    
160    16     
-16    -32    
16     -1408  
64     80     
128    -208   
16     -496   
-288   64     
-48    -208   
160    160    
-128   -464   
96     112    
32     -288   
64     176    
80     -16    
48     0      
144    -48    
96     0      
-32    -80    
-176   -48    
80     -144   
48     -96    
-336   64     
-160   -192   
128    -64    
-64    -592   
0      -112   
-48    -208   
304    240    
-64    32     
-32    -384   
240    -368   
-128   32     
0      -80    
160    96     
-96    -48    
128    240    
-272   -32    
224    -240   
-96    560    
112    -176   
-32    -64    
48     -272   
48     -144   
0      -1024  
-96    80     
0      0      
80     96     
-32    -48    
-48    -640   
-96    -16    
192    64     
-176   32     
-80    -144   
-224   64     
-64    -32    
224    496    
-208   32     
112    96     
0      -416   
48     16     
16     -32    
-32    80     
-32    -48    
128    -144   
-160   16     
-16    -704   
224    0      
-112   464    
-80    -240   
-64    -80    
272    -144   
80     -144   
-224   -96    
176    -256   
32     32     
240    -1088  
-288   64     
144    -272   
112    304    
-288   0      
64     -48    
48     128    
-112   -240   
-48    32     
-176   144    
-368   -176   
48     96     
48     -32    
240    -112   
-144   176    
160    -672   
-16    32     
32     160    
32     64     
96     -48    
96     -96    
-496   0      
16     -48    
-80    32     
32     -144   
80     64     
144    -16    
-416   32     
-112   -256   
128    16     
64     -400   
64     64     
-48    320    
-1696  -1488  
-528   -624   
-96    592    
304    -128   
96     336    
-528   -784   
656    224    
-368   608    
96     -80    
-304   -336   
464    80     
208    -240   
-96    -176   
128    -224   
128    512    
-96    -208   
-464   192    
64     -112   
-192   352    
-32    -416   
32     112    
-64    -144   
-336   16     
-320   -400   
128    160    
-80    -96    
112    288    
-608   -224   
-608   -400   
-304   16     
544    -112   
-48    336    
-176   -96    
80     144    
-80    -224   
-48    0      
-80    -192   
-32    -96    
-48    32     
128    -16    
-112   -32    
48     96     
176    -160   
-544   -224   
144    32     
-384   96     
-272   -448   
128    32     
16     0      
160    144    
-272   80     
112    32     
-192   144    
-96    -176   
16     128    
-16    -48    
-208   272    
16     32     
80     656    
-160   96     
-16    16     
-144   -48    
144    160    
-208   96     
-640   -128   
112    48     
96     -16    
192    512    
-368   -256   
32     -64    
-80    -160   
16     -16    
96     48     
-144   80     
-48    64     
-48    -64    
-96    -48    
128    -64    
256    544    
-96    256    
80     160    
-64    -432   
160    240    
256    48     
-48    160    
80     64     
-80    96     
-32    -336   
240    208    
-32    0      
-144   64     
-160   32     
64     -16    
-48    48     
-576   -320   
16     -96    
-1584  -64    
-112   80     
-176   -192   
48     176    
32     48     
-32    64     
-32    0      
80     -128   
32     -48    
-256   -432   
144    -48    
208    16     
16     144    
-288   96     
-16    240    
-112   -48    
192    256    
-288   -256   
192    48     
-208   -16    
32     -32    
0      48     
80     192    
-64    272    
16     -192   
-256   -224   
-160   -48    
128    32     
32     -80    
-64    -64    
-32    -80    
-96    128    
-96    -96    
-16    16     
32     -256   
-160   -144   
96     -144   
160    224    
0      -48    
-224   -48    
-96    -112   
-32    -160   
-96    16     
-32    -48    
64     112    
-144   -48    
-48    48     
48     192    
-64    16     
272    48     
-96    64     
80     80     
-16    16     
-48    96     
64     80     
-16    144    
-128   32     
240    176    
-288   -32    
160    80     
-176   112    
64     -16    
192    -64    
-80    176    
16     192    
-96    -48    
-16    -16    
32     64     
-48    96     
-32    112    
80     32     
-16    -64    
112    80     
-144   32     
-16    0      
-48    48     
160    -192   
144    368    
-256   -32    
-80    32     
0      144    
-80    -48    
32     48     
128    0      
-32    128    
48     -128   
-96    -128   
16     224    
-176   -16    
-80    144    
-160   -144   
128    64     
16     -64    
96     96     
32     64     
-128   48     
96     80     
-16    16     
112    176    
-32    -48    
-496   1408   
128    1872   
-2000  208    
16     544    
-80    64     
-512   -416   
496    496    
-768   -336   
496    32     
-400   64     
240    -48    
-224   256    
272    -208   
96     432    
-64    -432   
-144   288    
160    -192   
-144   352    
48     -160   
112    272    
-144   -288   
128    272    
48     144    
192    240    
-240   -176   
128    192    
-32    16     
160    208    
-208   64     
176    64     
-16    16     
-112   0      
144    192    
-80    16     
-32    -1344  
16     -288   
16     -16    
-16    144    
160    256    
16     48     
-96    -32    
-16    48     
96     144    
160    48     
-80    80     
80     64     
0      0      
-128   112    
96     0      
-80    0      
144    48     
-48    128    
144    80     
-112   32     
96     0      
32     96     
48     16     
144    224    
-80    64     
48     32     
0      48     
32     -32    
-80    128    
96     112    
-48    -224   
0      32     
96     -1248  
64     176    
-128   0      
160    160    
48     32     
80     96     
-48    96     
64     32     
-48    352    
-16    112    
-96    288    
-32    96     
288    0      
16     -272   
16     -192   
-96    -1200  
-112   176    
96     64     
80     0      
-64    96     
48     -128   
64     -96    
-80    128    
208    96     
-64    80     
128    48     
0      -144   
48     -48    
128    -32    
304    736    
32     -320   
16     -32    
-112   -1104  
128    16     
32     -320   
64     144    
-16    -32    
16     80     
-48    32     
128    96     
32     64     
-16    -256   
176    336    
-32    -80    
16     -64    
-48    -400   
208    64     
96     -704   
-32    80     
-80    -1264  
176    -16    
-16    224    
160    144    
-144   -32    
-32    -16    
-48    112    
80     -80    
80     48     
-96    -48    
64     -512   
112    -656   
-64    208    
80     -48    
48     176    
32     -320   
-16    80     
32     128    
80     80     
-48    -32    
80     32     
96     208    
80     -96    
-32    128    
32     -544   
-80    -32    
128    -144   
112    384    
-16    -240   
144    176    
-64    -272   
224    128    
-128   144    
96     64     
48     -16    
64     -144   
-16    96     
48     -432   
48     112    
-16    -288   
64     256    
128    -288   
112    272    
-176   -224   
80     -16    
-128   -384   
208    64     
16     32     
32     160    
32     64     
-32    -432   
272    -544   
192    -64    
-208   -80    
256    -64    
-16    224    
192    -224   
-64    208    
-96    -208   
112    96     
80     80     
-32    -544   
256    48     
-80    -768   
96     -1472  
80     -160   
-32    -1088  
0      -16    
176    -768   
-112   -48    
224    -112   
96     160    
32     32     
-64    128    
-64    -192   
240    -80    
144    -256   
112    -80    
-240   32     
-16    -528   
-800   -80    
112    -240   
1392   480    
768    -288   
144    -192   
-544   -1072  
-48    624    
672    192    
-368   -80    
560    -352   
-304   336    
160    -640   
-48    96     
-448   -224   
176    176    
16     192    
560    192    
-192   -32    
128    -272   
240    784    
-16    -272   
-272   -208   
-64    -368   
576    240    
-352   -336   
128    -80    
336    -176   
-64    336    
32     -80    
0      -128   
-128   -208   
272    208    
-736   0      
16     64     
0      80     
32     -128   
112    0      
-176   -1424  
96     -320   
144    224    
16     224    
0      112    
-144   -48    
-16    -128   
64     -368   
-64    -96    
64     -192   
-96    96     
-192   96     
208    -32    
-192   -368   
-320   -224   
96     -736   
-64    96     
192    -80    
-240   64     
192    -160   
80     208    
-160   -96    
112    64     
-256   -384   
224    -64    
-160   144    
-32    176    
-1312  -256   
288    -64    
-160   0      
96     32     
-144   -112   
288    -368   
-128   -16    
96     16     
-16    -128   
32     64     
112    112    
-32    16     
96     -144   
0      176    
16     336    
-144   144    
112    -272   
-16    64     
192    -352   
128    16     
16     -256   
-96    32     
192    32     
-16    -80    
-512   32     
0      48     
-128   -128   
80     -32    
-464   -160   
112    -16    
-144   144    
48     16     
-96    -64    
80     -256   
64     80     
112    -736   
-64    16     
-96    0      
128    112    
-112   -32    
80     -96    
-336   -240   
336    192    
-336   208    
240    192    
-304   -64    
208    -176   
-128   -48    
192    -144   
96     112    
-16    64     
128    -64    
16     224    
-208   -192   
352    112    
-48    -96    
-64    32     
112    304    
96     272    
0      -32    
-96    16     
-160   -304   
208    0      
-656   -176   
144    -240   
-160   0      
-224   -128   
48     -80    
-832   16     
-144   -16    
320    96     
-496   96     
384    -80    
-224   32     
16     32     
16     -96    
-272   -176   
-96    176    
-176   -240   
144    16     
-64    80     
-128   -64    
144    -16    
-192   80     
-240   -80    
-48    -32    
-128   -48    
0      64     
-224   -16    
0      16     
16     -16    
-16    -16    
-80    80     
-48    -208   
-32    144    
-64    -64    
-32    0      
-16    96     
-80    48     
32     -240   
-352   0      
-80    -48    
-208   288    
-288   32     
256    112    
-112   64     
240    -160   
32     176    
-48    64     
-240   48     
-16    -16    
64     -144   
224    96     
-240   -80    
-176   -112   
-64    16     
96     80     
-256   224    
-112   -48    
-496   -176   
240    160    
-272   0      
-32    -64    
-16    128    
48     -32    
112    -32    
-32    144    
-32    80     
0      80     
-96    48     
64     224    
-80    -48    
16     -32    
-48    -48    
-608   144    
-416   528    
592    -400   
-976   464    
-112   -96    
-416   16     
336    -592   
-784   560    
240    -352   
32     624    
-48    -560   
-48    384    
16     -240   
-48    208    
-256   80     
-32    -64    
64     224    
-48    16     
-160   128    
160    80     
-224   -32    
80     -16    
-368   208    
304    -128   
-384   80     
272    -256   
-384   64     
64     96     
-320   16     
80     32     
-112   -16    
-16    80     
-1856  -144   
-304   112    
16     32     
-32    96     
-16    -16    
-16    160    
0      32     
64     64     
-64    0      
-64    80     
0      96     
0      16     
112    0      
-112   0      
48     80     
0      -64    
-32    64     
32     112    
-96    64     
96     160    
-128   -16    
32     112    
-112   -48    
144    32     
-224   144    
32     112    
16     -64    
160    112    
-128   -32    
64     32     
112    96     
-16    48     
48     176    
-112   112    
16     32     
-80    16     
48     -64    
-96    128    
-208   -16    
160    -64    
-80    16     
0      48     
-64    0      
-80    -48    
96     16     
64     0      
48     80     
128    688    
-304   -176   
208    288    
-32    80     
144    32     
-112   -48    
96     0      
112    352    
-80    64     
-80    -16    
48     32     
48     -32    
16     176    
96     144    
-16    144    
16     64     
-48    96     
320    368    
-128   -160   
48     -160   
-32    32     
176    240    
-80    80     
-112   16     
32     64     
80     112    
80     48     
-80    -16    
16     32     
-48    32     
80     96     
0      128    
-16    0      
-48    48     
16     96     
16     -32    
16     128    
-80    -16    
96     144    
-112   -16    
32     0      
32     0      
80     160    
64     -16    
64     96     
-48    80     
-16    80     
-16    -208   
96     -176   
-16    192    
-80    32     
160    64     
-48    240    
0      -32    
0      32     
-16    -592   
192    400    
-240   -32    
224    240    
-176   0      
240    -32    
-16    208    
-16    16     
0      -48    
112    160    
-48    96     
144    -16    
-144   -352   
160    304    
-128   48     
48     -384   
16     128    
112    -160   
-144   -80    
176    208    
-112   128    
192    -48    
-96    336    
-96    16     
112    64     
-176   -16    
128    48     
-32    -32    
96     112    
80     160    
48     -352   
176    -48    
-112   -288   
160    -16    
0      48     
112    192    
96     16     
32     64     
-16    32     
-32    64     
-32    -64    
-80    80     
208    -128   
-240   16     
-16    160    
0      -208   
0      48     
96     -64    
48     64     
16     160    
80     16     
128    208    
-80    48     
-16    -176   
48     16     
64     16     
32     64     
32     352    
-128   -32    
16     144    
-192   -336   
160    32     
144    -224   
-304   -1520  
1168   2560   
-864   1072   
272    -992   
-416   -256   
752    -688   
-512   -48    
128    560    
624    720    
-256   -192   
144    -80    
-16    160    
-32    -160   
-96    32     
368    -336   
-64    96     
176    -304   
-256   224    
592    -240   
-64    224    
0      -112   
-64    176    
-16    -144   
336    96     
-48    64     
208    -96    
-112   96     
-48    -48    
160    80     
-144   -1424  
160    -96    
-112   -32    
192    256    
-48    16     
-48    160    
112    0      
-32    32     
-64    16     
96     96     
96     48     
-48    -144   
48     176    
80     -208   
64     208    
-192   -336   
80     -48    
128    64     
192    368    
-192   -224   
80     48     
-48    240    
32     -48    
16     -16    
0      48     
176    32     
32     -112   
16     192    
16     -208   
80     128    
16     -256   
48     160    
-48    -112   
160    64     
-16    -256   
-32    -384   
32     -48    
192    -1616  
32     -592   
-64    -240   
208    -912   
-16    -96    
96     96     
-112   32     
112    16     
160    80     
32     416    
-160   -224   
240    144    
-128   80     
64     -96    
80     16     
32     -112   
160    32     
-1280  -304   
320    -240   
-64    16     
96     -272   
176    -64    
-64    -2016  
48     -256   
-16    -32    
128    32     
-48    -288   
160    -16    
32     80     
-288   16     
-320   -112   
-128   -176   
-704   16     
0      -160   
80     128    
48     -320   
96     -224   
96     -368   
-16    -160   
192    -64    
-208   -32    
160    -144   
96     112    
-64    -240   
208    48     
-240   16     
160    -96    
0      288    
144    48     
-32    -64    
-96    -352   
48     -64    
160    -800   
272    80     
-112   -1360  
256    160    
-32    16     
-160   -16    
-64    -176   
-16    -112   
48     -64    
-64    -144   
80     -48    
-64    -224   
-1504  -80    
144    -128   
-32    32     
448    96     
-416   64     
176    -112   
-176   288    
288    -304   
-112   64     
-144   0      
80     80     
96     16     
80     -80    
-240   -64    
-176   -16    
-32    112    
0      -304   
-544   16     
-32    -16    
0      -176   
80     -800   
16     48     
112    -720   
0      112    
-16    48     
96     48     
-176   0      
176    -400   
-80    -80    
112    160    
-128   0      
-16    -16    
-256   -80    
16     0      
-128   -464   
64     -432   
224    -64    
96     -1200  
-64    64     
-144   64     
-16    -256   
-112   128    
-48    192    
-480   48     
80     -112   
-16    -432   
224    -224   
-32    -48    
-112   208    
-96    0      
160    -48    
48     32     
64     -320   
176    -208   
-144   0      
80     32     
-32    160    
-64    -32    
-80    -240   
48     96     
-160   -160   
208    -160   
-112   128    
0      64     
-48    48     
64     -192   
64     32     
144    2112   
-1072  -944   
-720   384    
640    400    
1600   -304   
-768   -928   
-160   336    
384    0      
112    -208   
304    384    
-32    16     
-80    -336   
-80    224    
-368   -400   
-32    96     
-224   -128   
-480   112    
-32    80     
-640   32     
0      -80    
-208   -64    
192    384    
-288   -64    
112    16     
0      0      
16     32     
-688   -416   
0      240    
48     -96    
-48    48     
-144   96     
64     32     
64     64     
-160   -16    
0      16     
-320   0      
16     16     
-192   -16    
80     0      
112    -32    
-80    16     
-32    -16    
-64    112    
64     -128   
-48    -112   
-32    48     
-64    64     
-48    240    
-320   16     
160    208    
-352   32     
0      -16    
-960   -144   
64     96     
-32    -64    
16     176    
32     560    
192    464    
-48    -64    
-240   -240   
-32    -128   
-48    -16    
-16    0      
-48    224    
-16    0      
32     -128   
-80    96     
-176   -112   
96     -16    
-16    -144   
-16    112    
-80    -144   
32     80     
16     0      
-128   80     
16     112    
-16    160    
-128   -144   
-32    -16    
-16    64     
-80    80     
-144   96     
-16    32     
-32    160    
-368   80     
-112   64     
0      -144   
16     112    
64     112    
16     160    
-112   16     
32     -64    
-80    -112   
32     48     
-64    112    
0      48     
-160   -64    
128    176    
-128   80     
-96    -80    
-176   64     
80     -112   
0      16     
64     96     
-48    48     
16     -48    
32     112    
-112   -48    
96     80     
-96    64     
-32    32     
-64    16     
-256   -96    
16     48     
-208   -208   
64     144    
-1056  -16    
-80    0      
-16    64     
-16    96     
16     64     
-80    0      
16     224    
96     -16    
48     80     
-240   -176   
448    160    
-624   80     
448    -96    
-288   112    
64     -80    
144    96     
-256   80     
192    48     
-128   32     
208    96     
-192   48     
128    64     
-208   32     
128    128    
-144   -144   
112    16     
-16    80     
-128   176    
64     16     
-192   64     
80     -400   
32     -128   
128    144    
16     208    
-112   176    
-16    -96    
64     -16    
-144   48     
-64    112    
-112   -272   
-16    -144   
112    128    
-96    208    
-448   -32    
-112   -80    
176    64     
96     -112   
80     192    
-64    80     
-128   112    
48     -96    
384    -224   
-32    80     
128    80     
-240   160    
-80    208    
-224   -128   
96     96     
64     48     
112    192    
-112   272    
176    112    
16     48     
-16    80     
-32    208    
-208   -32    
144    112    
-48    0      
-16    -48    
48     32     
80     208    
48     -32    
-112   0      
96     96     
-80    -80    
-80    304    
128    0      
32     208    
-112   16     
112    -16    
0      16     
1568   -192   
-1328  -432   
688    1152   
-240   512    
448    -720   
-336   64     
-208   144    
512    -128   
-368   16     
320    32     
144    80     
-144   80     
160    368    
64     32     
-80    48     
64     144    
-32    128    
32     -224   
-16    -176   
48     48     
192    48     
-96    -160   
-32    128    
144    160    
16     -16    
32     64     
-48    144    
160    320    
-32    80     
-128   -96    
96     -16    
48     64     
80     160    
32     16     
-16    112    
16     -16    
-128   -1376  
48     96     
-16    80     
128    112    
-32    64     
16     112    
32     80     
-16    32     
48     64     
32     96     
-112   64     
208    144    
-464   -176   
240    -96    
32     160    
-16    -304   
64     48     
96     -2320  
48     128    
32     208    
-80    16     
32     80     
32     112    
80     32     
-32    64     
48     176    
-48    128    
48     -64    
160    112    
-80    240    
80     -80    
96     112    
64     -880   
48     144    
-80    32     
176    112    
-96    80     
96     96     
-16    16     
192    192    
-208   112    
128    112    
48     -32    
48     48     
-32    16     
128    -352   
-96    96     
192    -64    
-256   -96    
224    -2336  
80     192    
-160   -320   
112    48     
-16    -64    
48     144    
0      112    
-48    112    
176    176    
-144   -208   
176    96     
-32    -320   
128    192    
-80    -240   
160    112    
0      -240   
64     176    
-80    -112   
192    176    
-16    128    
48     176    
-64    -48    
48     144    
240    208    
64     -16    
16     16     
-64    32     
144    112    
32     0      
112    80     
-16    -976   
112    176    
-96    -336   
48     80     
32     80     
96     160    
240    -32    
-112   160    
-176   160    
352    -160   
64     96     
-368   -384   
272    -96    
16     -512   
-96    176    
96     -512   
0      48     
-80    -288   
-96    176    
208    48     
176    320    
-80    192    
96     176    
-160   144    
288    -176   
-32    96     
16     -144   
256    176    
-144   -96    
192    -96    
16     -336   
-160   -96    
176    224    
-32    160    
192    16     
32     112    
-80    -16    
0      144    
80     160    
16     176    
0      -160   
48     -128   
112    -16    
-16    -48    
-16    96     
144    224    
32     -16    
-16    -96    
64     48     
320    336    
-176   -48    
-128   -352   
176    -64    
32     -880   
48     96     
-16    -192   
80     208    
176    -208   
64     -64    
-16    96     
0      -128   
16     -1328  
176    48     
16     -304   
-32    160    
16     80     
0      -160   
-608   16     
16     -64    
80     -80    
0      128    
32     16     
64     32     
-32    -208   
-48    -32    
208    -112   
176    -192   
16     160    
-80    -16    
64     192    
-32    -32    
-16    -176   
1776   -1584  
-304   48     
1040   608    
-464   32     
400    -256   
-160   -544   
-480   -1088  
768    -464   
32     576    
400    128    
-160   -64    
-96    0      
64     -16    
-208   -64    
80     -208   
-192   -272   
32     -64    
-576   272    
-112   -464   
144    -224   
240    -320   
-192   -112   
160    -368   
64     352    
0      -176   
-96    32     
176    160    
-48    240    
160    16     
-112   -80    
-272   -176   
144    -176   
-320   -16    
128    -64    
128    0      
48     -64    
64     -128   
0      176    
112    384    
-32    -912   
64     48     
64     32     
-32    32     
0      64     
96     -144   
-48    -32    
96     -208   
-208   -96    
208    64     
-208   240    
-64    -160   
-64    96     
112    -208   
64     48     
-80    -1776  
48     -176   
64     96     
-32    48     
-176   -256   
144    -48    
-544   -224   
48     -32    
-96    192    
16     -16    
-240   -32    
16     -272   
16     0      
144    -192   
16     112    
96     -416   
32     48     
-112   0      
64     32     
-160   -16    
48     32     
-64    -16    
192    384    
-112   -64    
176    -192   
-32    416    
96     -208   
-64    176    
0      144    
64     160    
64     -112   
-64    -144   
-16    -112   
112    48     
-48    256    
-16    80     
-160   -112   
176    -112   
0      -32    
64     -80    
-80    112    
48     -16    
-176   -64    
272    -128   
-32    224    
-416   -512   
-944   -64    
-48    -48    
176    80     
-48    48     
48     -32    
-144   -48    
160    32     
-176   -64    
240    48     
-240   0      
-576   -160   
64     288    
-256   -288   
64     128    
-144   -32    
144    48     
-96    -128   
-80    -80    
-128   -176   
96     96     
-32    -112   
-96    48     
96     304    
64     64     
48     -48    
-416   -576   
304    -240   
-304   128    
192    512    
-16    64     
-208   -48    
-16    80     
-144   0      
32     -16    
-464   -112   
272    368    
-576   224    
-176   -16    
-48    -208   
-128   -112   
112    -208   
-16    192    
176    -112   
-144   -64    
-32    -16    
-16    96     
80     0      
-256   -128   
192    112    
-160   160    
-16    144    
-496   -64    
-32    48     
-240   32     
0      64     
16     368    
-112   -176   
16     0      
-16    0      
32     64     
-80    80     
32     96     
-16    192    
80     -16    
-64    -112   
-48    192    
-224   0      
112    640    
-912   -576   
16     176    
144    -48    
16     320    
-16    -80    
-32    48     
80     160    
80     -16    
96     -240   
96     -32    
112    256    
-192   0      
-144   112    
16     -64    
-16    176    
-128   -288   
-16    272    
-96    128    
-80    -16    
32     -48    
160    112    
16     -80    
-64    16     
32     -176   
-144   96     
-48    64     
0      64     
-16    112    
-64    64     
-640   1152   
-1648  -256   
272    352    
576    -384   
-240   -240   
0      -32    
-208   480    
416    160    
-208   400    
-320   0      
48     -32    
-144   -64    
400    -16    
-96    192    
-96    -256   
-128   240    
64     -128   
-112   192    
-16    16     
16     -16    
-64    0      
-96    64     
112    224    
0      128    
-64    -80    
-144   48     
112    240    
-160   0      
80     32     
-288   -80    
160    64     
-240   0      
128    160    
-48    128    
96     32     
-64    -16    
48     272    
-80    224    
48     -176   
-48    96     
32     32     
112    32     
-304   32     
208    80     
-160   48     
0      -48    
-16    80     
-272   -128   
448    144    
-384   96     
224    16     
-48    64     
16     112    
128    32     
-64    16     
-32    48     
128    96     
-80    80     
16     80     
144    256    
-240   48     
80     16     
-80    -16    
32     48     
16     144    
-32    128    
80     -32    
96     192    
-240   32     
112    144    
-64    -32    
112    160    
-208   48     
144    64     
-96    -32    
16     48     
-64    -96    
112    48     
-128   32     
16     160    
-80    32     
32     48     
-80    -128   
48     -80    
0      256    
-128   64     
128    112    
-80    -48    
0      112    
-112   -32    
32     0      
48     80     
-16    128    
128    144    
-16    240    
-48    128    
-80    0      
128    -16    
128    112    
-32    0      
-16    48     
0      208    
-32    -80    
64     64     
-48    144    
0      464    
144    320    
-208   144    
160    16     
32     -32    
-160   48     
128    80     
48     80     
32     96     
80     160    
-224   64     
144    -160   
-192   -112   
192    64     
-192   -160   
224    -1232  
-160   0      
0      48     
96     64     
208    64     
-176   48     
112    128    
144    144    
-96    64     
-16    48     
-16    -16    
256    16     
-208   32     
112    -96    
208    0      
0      128    
-128   64     
144    -208   
16     -32    
0      112    
32     -16    
-32    0      
64     96     
16     160    
64     48     
32     128    
48     240    
64     288    
0      96     
-48    -16    
48     -160   
32     144    
0      -48    
112    32     
-16    240    
192    -16    
0      272    
-32    -176   
128    112    
-80    64     
64     288    
-112   -96    
-112   -176   
-16    -160   
96     -128   
32     -16    
240    576    
-128   -544   
-32    128    
80     80     
32     176    
-160   -224   
96     112    
64     32     
0      0      
-48    -32    
160    128    
-48    -64    
-192   -160   
96     192    
-64    -208   
96     96     
144    -464   
128    160    
-112   -672   
64     144    
176    -16    
0      0      
16     32     
48     176    
96     160    
160    80     
-48    96     
192    -240   
240    256    
-16    -96    
-80    128    
-32    208    
-1152  -1904  
-208   -288   
48     576    
32     800    
-400   -224   
304    176    
-480   16     
-64    320    
160    -560   
352    512    
112    -144   
0      112    
-160   -272   
-32    -496   
304    -480   
48     -176   
208    64     
-16    -16    
208    656    
-272   -176   
-48    -128   
224    224    
32     -32    
-192   -544   
0      240    
272    -240   
-96    112    
-48    -144   
96     96     
64     -160   
-16    -16    
64     16     
-80    176    
-112   480    
-80    224    
-16    144    
80     112    
112    336    
384    192    
-464   -32    
368    0      
160    176    
-128   -128   
160    240    
-176   -320   
192    -176   
304    112    
-32    -208   
96     32     
176    208    
-96    176    
208    -1472  
0      -1232  
-48    -96    
240    -496   
368    240    
-416   -2416  
-80    -448   
352    224    
-48    -16    
80     32     
176    144    
48     -320   
-144   192    
160    -800   
64     -48    
64     -160   
-32    0      
-224   32     
80     -48    
48     -144   
16     -416   
48     -16    
32     -384   
96     0      
176    736    
48     80     
0      -144   
192    176    
-16    -176   
48     -32    
32     96     
16     -96    
-928   -160   
48     -528   
48     16     
128    -160   
-192   -144   
-96    -576   
96     0      
64     -1200  
-48    16     
0      -32    
144    272    
-80    0      
160    464    
-432   -144   
64     -240   
-368   -160   
96     -48    
96     -48    
-96    -16    
80     -16    
80     -224   
-32    -192   
-32    -656   
80     176    
32     -96    
-16    -352   
-16    -176   
224    128    
48     64     
-80    64     
-208   128    
144    -224   
-96    96     
-64    -48    
144    96     
-48    -80    
16     -64    
64     -384   
64     176    
80     -16    
144    512    
-48    -144   
240    688    
0      112    
224    384    
-336   32     
208    0      
-176   -80    
128    -96    
-672   32     
208    128    
-80    32     
112    -112   
-144   144    
64     -464   
112    160    
-16    80     
160    16     
-128   128    
112    -208   
-160   -128   
0      -560   
-368   -528   
96     -240   
-128   -16    
-16    0      
-864   -48    
16     -432   
-16    208    
-16    -816   
-16    -256   
336    48     
-192   -320   
16     -48    
-112   64     
144    112    
48     64     
-240   -144   
224    -48    
-224   -96    
80     -48    
-224   16     
128    -256   
-32    -32    
192    -160   
96     16     
-560   144    
48     128    
-464   96     
48     -16    
-144   -32    
192    -96    
-48    32     
32     -160   
-32    -112   
112    -144   
32     144    
-16    -32    
-64    144    
208    -96    
-400   -48    
32     -80    
144    80     
-96    -192   
176    -48    
0      48     
112    0      
-176   128    
-112   -128   
80     -224   
32     80     
-144   16     
-144   48     
-128   32     
304    -240   
-320   -384   
576    144    
-656   16     
-640   -112   
96     864    
-432   -640   
336    288    
-320   0      
64     272    
-272   -256   
80     336    
64     0      
0      -224   
-80    32     
80     144    
-192   16     
48     112    
-384   32     
-32    0      
-704   -16    
48     -64    
48     160    
112    -16    
-64    176    
16     -48    
0      -80    
16     0      
-96    -128   
48     160    
-176   0      
0      -112   
-160   128    
32     -48    
-64    128    
-224   -256   
64     16     
-720   160    
64     16     
-224   -224   
64     144    
-128   -160   
176    112    
-112   -32    
16     128    
-32    80     
80     -32    
-16    272    
-320   0      
192    -64    
-80    176    
48     80     
-304   -48    
-96    48     
0      80     
64     160    
-128   -32    
128    144    
-96    96     
-32    -80    
16     128    
-176   -48    
128    -32    
48     208    
-144   160    
-32    0      
-128   -128   
-272   -32    
-32    112    
-752   32     
48     80     
144    -48    
112    112    
-48    240    
-192   -112   
208    160    
-176   352    
32     -336   
160    -32    
-192   -32    
-48    128    
-112   32     
-64    -192   
0      240    
-576   -32    
208    64     
-144   48     
-96    64     
-32    16     
112    0      
-16    0      
48     16     
-32    144    
-80    64     
128    144    
-192   96     
160    128    
16     64     
128    176    
-32    48     
96     80     
96     32     
-32    64     
32     -16    
48     128    
-16    128    
112    112    
128    272    
-128   80     
0      64     
-48    176    
112    144    
-144   32     
48     0      
-64    -16    
32     16     
64     -64    
32     144    
-80    160    
-16    240    
128    32     
-64    -128   
-48    -208   
-80    16     
112    -240   
-80    -32    
-192   -32    
-96    -192   
-160   -96    
-368   -112   
144    32     
-288   112    
112    -16    
48     336    
-160   0      
240    32     
-176   208    
208    208    
-208   48     
192    -112   
-80    64     
80     16     
-96    80     
64     -16    
-272   16     
96     -240   
48     176    
48     160    
-32    -64    
32     192    
16     16     
0      128    
144    48     
-16    -48    
-96    64     
-48    -64    
16     80     
-32    64     
384    304    
-96    240    
112    240    
-16    176    
-96    144    
-112   -16    
672    -384   
-96    144    
-304   -112   
32     -144   
192    80     
208    208    
-288   -48    
-32    288    
-224   16     
144    64     
64     0      
32     160    
80     336    
-240   48     
64     -16    
128    48     
160    48     
-16    160    
-112   48     
16     -144   
192    256    
0      160    
0      64     
-144   80     
112    -720   
80     64     
-128   64     
160    144    
-112   208    
-32    -64    
144    176    
192    48     
64     64     
2144   -848   
-1136  -1248  
608    1168   
96     656    
-32    80     
-672   -304   
144    -496   
-80    80     
336    16     
-256   736    
-224   -128   
-80    144    
-224   256    
272    80     
-384   -240   
384    -16    
-128   96     
160    592    
-528   -16    
144    -304   
368    16     
112    -112   
-16    320    
-192   -96    
128    -256   
64     -112   
608    576    
-368   144    
304    64     
-80    144    
192    -64    
-128   240    
-32    144    
144    144    
-192   128    
112    128    
-32    -224   
48     432    
-160   224    
112    -64    
96     -224   
224    80     
-96    48     
32     112    
-48    32     
208    112    
80     -272   
96     160    
-176   -128   
64     -288   
-16    160    
16     -336   
112    -272   
-32    -304   
208    112    
96     32     
-160   224    
-128   80     
368    176    
-112   0      
144    96     
-48    -16    
48     -128   
-80    240    
112    -240   
176    160    
48     -160   
112    208    
-48    -240   
0      160    
64     -512   
32     80     
16     -160   
-32    112    
32     112    
32     64     
-128   -176   
352    -80    
48     112    
-16    912    
112    -80    
-64    16     
-48    64     
208    -288   
64     272    
-64    144    
-16    16     
0      -128   
48     -64    
0      48     
64     144    
-128   16     
80     96     
144    240    
32     64     
32     144    
80     96     
128    192    
48     -384   
-128   48     
64     -160   
32     48     
32     -1136  
64     16     
32     -32    
16     0      
-48    -48    
96     -288   
48     96     
224    96     
-112   176    
-128   -736   
128    80     
96     -96    
80     112    
-80    -192   
80     48     
48     432    
96     96     
144    32     
-368   -64    
320    32     
16     -368   
-112   64     
176    0      
-144   320    
288    336    
-112   144    
64     160    
32     112    
32     -128   
144    -16    
-112   160    
288    80     
32     80     
48     -1664  
-112   -336   
-96    -224   
256    -1056  
-48    -144   
128    112    
0      -144   
32     224    
-112   -144   
144    160    
-64    -80    
240    -976   
-160   0      
272    -176   
-176   16     
80     -1168  
64     -32    
-32    0      
32     32     
176    -32    
48     -464   
48     -32    
0      -720   
304    -192   
-48    272    
64     128    
-112   -752   
160    0      
48     -432   
192    48     
-272   96     
-16    -144   
-208   48     
-112   -80    
160    -160   
-16    -464   
176    -240   
-112   96     
-64    80     
80     0      
80     -48    
176    0      
-64    208    
-112   -112   
160    -16    
0      160    
-64    -144   
-672   0      
64     -208   
144    32     
-48    -304   
32     80     
-64    -336   
144    -96    
0      -1856  
272    -32    
-16    -112   
112    0      
32     -32    
80     48     
-32    160    
-48    -128   
-528   144    
960    272    
-656   1472   
192    64     
-752   -192   
80     -128   
48     64     
-736   -1248  
448    160    
-448   128    
352    -288   
-144   288    
208    -672   
-176   384    
64     -512   
0      528    
240    -544   
-256   304    
240    -352   
-176   144    
-48    -368   
0      112    
144    -416   
80     208    
128    -160   
-160   0      
-160   -192   
32     64     
96     48     
96     -176   
-272   -48    
32     -80    
-624   -144   
16     -224   
-336   80     
96     -176   
32     192    
96     0      
-16    16     
-16    -1824  
64     192    
0      32     
16     48     
-96    -48    
-16    -16    
-16    32     
0      128    
-80    -80    
48     64     
-256   -16    
240    -48    
0      160    
48     -272   
64     176    
-32    -368   
-16    80     
-32    112    
16     -16    
-192   128    
-96    -16    
-16    -32    
64     16     
-128   64     
-16    32     
16     0      
32     -144   
-80    64     
96     -320   
96     80     
144    -288   
64     80     
-304   -16    
288    -32    
-192   -160   
112    -128   
-144   48     
0      64     
112    288    
-176   -128   
96     -144   
64     -320   
-16    192    
-80    -112   
64     -16    
-160   32     
-464   112    
-208   -128   
-736   -224   
240    256    
-208   96     
-32    16     
80     96     
-112   112    
-208   -64    
0      48     
-48    96     
-64    160    
0      -16    
48     64     
-128   16     
-544   -144   
256    400    
-80    64     
-48    -48    
-672   48     
48     -48    
32     -96    
-128   -32    
-64    -112   
128    96     
144    96     
-64    32     
-80    -240   
-48    -64    
-80    0      
0      112    
48     256    
-80    48     
-48    96     
-48    64     
96     80     
-464   32     
0      32     
-112   -64    
-32    -112   
48     -288   
16     176    
-48    0      
-48    128    
-96    -288   
-192   -144   
192    64     
-16    128    
-16    208    
-176   -128   
-160   -160   
-160   96     
64     -16    
128    48     
-128   -32    
32     -80    
-80    80     
32     32     
96     96     
48     -16    
-160   48     
112    -160   
16     64     
48     176    
-48    16     
32     160    
-224   0      
48     48     
-80    -96    
-128   -48    
80     32     
-80    80     
80     48     
-64    160    
-176   -32    
-112   -80    
-96    96     
144    208    
-128   -48    
-80    -16    
32     80     
32     0      
-240   -48    
-96    -16    
-112   128    
80     -176   
16     176    
-16    0      
-80    32     
-160   80     
48     -32    
16     16     
160    80     
-16    144    
-208   -80    
-48    0      
48     128    
32     144    
-208   48     
48     32     
-96    160    
-208   -144   
96     192    
-256   -64    
416    224    
-144   192    
64     0      
-208   16     
160    224    
16     64     
-224   -48    
-16    -16    
16     144    
-160   1296   
-1232  -800   
432    256    
464    240    
-32    -448   
-320   336    
-112   -96    
-64    80     
80     -208   
-144   672    
-32    -240   
-192   64     
-48    112    
16     224    
16     -272   
-224   96     
224    128    
80     96     
-48    -160   
80     256    
0      -96    
96     -32    
-112   352    
32     -176   
64     64     
48     0      
272    320    
32     -32    
-96    400    
-80    -144   
176    96     
-48    16     
-80    80     
112    32     
-48    96     
0      80     
-48    96     
-144   528    
176    224    
-64    0      
0      0      
-32    -48    
96     160    
-96    128    
16     176    
-160   0      
16     144    
160    304    
-160   80     
144    112    
-144   48     
48     48     
-16    32     
0      48     
-112   -48    
112    -112   
-128   64     
64     -32    
32     -48    
-144   32     
64     16     
-32    80     
16     160    
-32    80     
176    -16    
128    128    
-64    64     
32     128    
-48    -48    
96     48     
-32    144    
0      112    
16     64     
-16    -16    
-32    32     
16     112    
-48    176    
64     96     
128    128    
64     400    
112    -64    
240    32     
-208   -256   
128    160    
224    112    
208    416    
-160   32     
192    -112   
-112   -160   
208    -2320  
112    80     
0      112    
64     96     
96     96     
-32    -192   
-16    -144   
192    176    
-336   112    
-32    -80    
-32    -320   
32     224    
144    304    
-48    160    
-48    -192   
-32    -480   
-16    -96    
112    -112   
48     144    
240    128    
-96    128    
32     -16    
-48    128    
112    0      
32     128    
0      -80    
-16    192    
16     -16    
-96    -128   
0      -48    
272    160    
16     208    
64     112    
-80    48     
64     80     
160    -64    
-256   128    
80     48     
96     -80    
16     64     
-144   -80    
144    64     
96     -176   
-176   -112   
192    80     
112    -336   
-64    -160   
-160   -1040  
16     176    
256    48     
-96    96     
-96    48     
128    16     
-48    208    
-80    112    
96     32     
80     112    
-64    272    
-48    -96    
224    80     
-128   -272   
80     16     
64     -160   
-16    128    
96     -64    
64     -32    
-48    -64    
-32    48     
112    0      
128    48     
-96    128    
64     192    
-112   192    
192    64     
-112   192    
96     -192   
48     96     
-16    -112   
80     -80    
48     -976   
144    240    
-208   -496   
-48    128    
-112   -64    
352    256    
-96    -64    
64     176    
16     -64    
256    -176   
80     240    
-80    -112   
16     176    
48     -1328  
160    -80    
64     -1008  
-144   160    
64     128    
-128   96     
48     -16    
208    -16    
-48    128    
144    112    
-80    80     
32     96     
176    304    
-64    -848   
128    256    
-112   -192   
-560   -1840  
-16    800    
736    96     
-672   -256   
80     160    
-592   400    
736    -672   
-608   384    
128    -288   
336    512    
-96    -480   
192    208    
-208   -96    
272    16     
-320   352    
336    -80    
-32    128    
-48    -192   
-16    -816   
80     16     
-16    176    
128    -80    
-192   368    
320    -320   
-128   -768   
80     -368   
32     224    
0      -16    
160    384    
-32    -208   
64     80     
-32    -192   
128    128    
-32    144    
32     -1200  
16     112    
-64    -272   
176    -272   
-144   -96    
320    -1488  
-112   -48    
-48    48     
144    -64    
32     64     
64     -160   
32     64     
16     -112   
16     -304   
160    192    
-112   -32    
240    -48    
-320   0      
192    -224   
64     16     
16     -208   
112    32     
32     -496   
32     -240   
64     -1168  
32     48     
-48    80     
160    96     
48     -80    
32     48     
80     16     
-160   -96    
-96    -208   
48     -32    
-304   -48    
64     48     
-32    -192   
80     -160   
0      0      
-48    -512   
48     -160   
-48    -400   
160    -96    
192    -192   
-208   -32    
256    -64    
-16    144    
64     112    
176    80     
-288   -240   
0      0      
144    48     
-176   -320   
176    -192   
336    512    
-288   -128   
160    -320   
-16    48     
64     -160   
96     128    
64     -160   
64     -48    
-48    -160   
64     -192   
-224   -96    
-32    -480   
-224   -16    
128    -48    
128    112    
64     -32    
-32    -32    
-32    -560   
224    384    
-96    64     
96     -48    
48     16     
64     -16    
-32    -64    
-80    -112   
-64    -96    
64     -16    
-32    0      
80     -112   
-240   -304   
0      -544   
-80    -288   
192    -304   
112    240    
160    -1504  
-192   -32    
-176   -112   
96     160    
48     -64    
0      80     
-80    192    
16     144    
-304   -128   
-16    -96    
-224   -176   
192    112    
-96    64     
128    160    
-64    -32    
144    -608   
48     -208   
0      64     
32     -16    
-48    48     
-16    -48    
-64    48     
32     -32    
48     0      
144    -384   
-48    80     
-48    32     
-144   0      
32     -352   
144    144    
112    -672   
-32    -112   
-224   -160   
304    -80    
-32    112    
-96    -144   
-160   -96    
176    -64    
-80    16     
16     80     
-224   -80    
176    80     
-112   32     
16     -368   
112    128    
-176   192    
-32    -48    
-48    144    
-176   -32    
0      -80    
32     32     
-16    160    
64     16     
-32    144    
-64    96     
64     -80    
-1456  -144   
112    32     
-912   -208   
80     128    
48     112    
-448   -16    
-64    80     
-400   -192   
16     176    
192    -32    
32     128    
-32    32     
-96    32     
160    0      
-48    160    
-112   -176   
240    592    
32     -96    
-96    -64    
-304   -144   
1424   -432   
368    624    
-1168  -560   
-288   -256   
-80    80     
544    -528   
64     128    
128    -512   
-688   -272   
96     -144   
192    192    
-240   96     
16     -144   
16     128    
64     -208   
-112   112    
128    80     
304    656    
-304   -256   
-48    -16    
176    288    
-1200  -144   
272    208    
-448   32     
272    48     
-288   -96    
272    48     
-128   48     
-48    -208   
-128   128    
96     16     
160    48     
-208   32     
80     64     
-240   -48    
160    32     
-480   48     
112    192    
-240   -96    
-32    64     
-64    -224   
128    128    
32     64     
-112   112    
-16    48     
-64    32     
32     32     
-32    -16    
-32    -48    
-48    -48    
-32    112    
0      0      
16     -48    
-432   0      
-128   192    
64     -96    
-96    -64    
64     96     
-32    112    
-80    -112   
48     96     
-96    96     
0      16     
32     32     
144    -48    
48     336    
-400   -32    
160    -48    
-224   0      
64     208    
-176   -16    
48     32     
80     32     
-32    -16    
16     16     
0      -48    
-64    176    
-96    -48    
80     160    
-240   -112   
96     48     
-208   -32    
144    304    
-384   32     
64     -64    
128    -80    
48     -96    
-80    0      
0      128    
-128   112    
64     176    
-16    32     
-48    -16    
80     160    
96     640    
-352   -80    
192    48     
-80    -16    
-64    -48    
-176   0      
144    64     
-208   144    
144    -48    
64     208    
-64    32     
112    272    
-128   -96    
-16    16     
128    128    
32     80     
32     176    
-224   -80    
192    64     
-144   -64    
96     144    
0      208    
-80    96     
48     48     
-96    128    
80     -80    
-32    -48    
-80    96     
-16    96     
320    32     
-384   -272   
80     128    
-32    -224   
96     80     
-112   -64    
-96    112    
144    128    
0      64     
128    144    
112    272    
112    288    
-64    48     
112    16     
-208   128    
16     -32    
48     -240   
-48    192    
-96    -48    
208    144    
80     192    
-48    256    
-16    16     
-96    -80    
48     64     
-64    192    
144    16     
32     64     
-16    48     
-48    32     
48     128    
-16    -96    
144    160    
-32    64     
144    368    
-128   80     
48     16     
16     48     
0      160    
32     128    
-112   96     
0      32     
160    48     
144    352    
-80    -64    
-160   112    
-128   112    
-16    -16    
112    32     
-16    -1968  
160    288    
-112   -32    
48     16     
64     144    
16     80     
-16    112    
0      16     
-32    0      
80     96     
-144   128    
-16    16     
48     112    
-48    32     
-160   -128   
192    -1088  
176    96     
-32    304    
-32    80     
-16    176    
-16    -16    
112    32     
112    -144   
272    -32    
80     160    
-96    208    
-176   -384   
-192   -736   
528    672    
-384   1152   
-720   -1040  
560    1376   
-560   -784   
400    560    
-80    160    
64     224    
64     -160   
-80    272    
208    96     
-32    208    
-48    -288   
160    48     
-208   0      
48     -64    
0      80     
112    -576   
-48    80     
192    -1008  
-112   160    
80     -48    
-80    96     
0      128    
0      -16    
0      -128   
96     80     
-32    -208   
112    48     
-96    96     
160    48     
64     192    
16     -336   
-48    112    
96     -1136  
-16    144    
80     176    
-16    80     
160    144    
-64    256    
80     0      
-176   16     
48     16     
-16    80     
256    112    
64     320    
-16    80     
32     -272   
16     128    
128    -64    
32     112    
16     -944   
-64    80     
32     -64    
16     -64    
96     64     
48     -96    
128    224    
160    192    
96     304    
-64    -112   
0      -96    
16     -128   
128    160    
48     -48    
-32    176    
96     -2384  
-16    80     
176    -144   
-16    48     
-16    96     
48     224    
32     -16    
144    -48    
-144   -16    
256    -288   
16     192    
128    48     
-144   272    
16     -256   
-48    -192   
160    -1104  
16     112    
16     112    
0      176    
-32    -96    
160    64     
32     0      
0      -736   
0      64     
64     -80    
48     32     
80     -96    
-16    80     
80     -112   
16     144    
32     -128   
48     32     
0      16     
96     128    
-64    -16    
80     112    
32     -16    
-16    -192   
80     0      
112    -48    
-64    80     
128    -304   
0      112    
80     -176   
32     160    
-64    -112   
144    128    
-48    -32    
176    -96    
-48    -32    
80     -368   
-32    -352   
160    48     
-32    -544   
208    -80    
-240   16     
320    -32    
-240   48     
208    -304   
32     272    
-16    -112   
128    -880   
-128   0      
144    16     
-32    -16    
96     -112   
-96    -512   
-112   -16    
160    -240   
-176   64     
192    -16    
0      16     
96     -528   
32     -80    
-48    64     
16     -96    
80     -80    
-160   -496   
352    64     
-208   288    
-272   -224   
112    -192   
-672   0      
112    -32    
112    -224   
64     176    
96     -224   
-16    -432   
-80    -176   
176    48     
224    -80    
-80    208    
112    80     
-192   -272   
256    160    
-160   -96    
-64    64     
-16    -64    
80     144    
192    -304   
64     -48    
-64    -32    
96     -144   
-192   -16    
560    -432   
-192   80     
288    -128   
-160   160    
128    -176   
0      -112   
-16    -16    
16     80     
-128   -48    
32     -272   
-128   -48    
-16    -128   
-64    -16    
96     -48    
48     96     
352    -496   
-96    80     
16     0      
64     64     
-32    -80    
192    -16    
-160   32     
224    -240   
-352   32     
96     -96    
-912   -1376  
-704   -384   
1424   1520   
800    128    
-656   -1328  
288    -1728  
-416   -544   
544    640    
-224   32     
-16    -128   
80     208    
-48    32     
224    -112   
-192   80     
-48    32     
-48    224    
-176   -16    
-864   -128   
192    -64    
48     96     
48     -592   
-64    80     
208    -416   
160    80     
-176   48     
160    -256   
-176   160    
-64    16     
-48    -16    
16     96     
-64    160    
128    -192   
-368   -16    
64     -176   
176    96     
-64    16     
336    496    
-224   -464   
48     -256   
-304   -48    
208    64     
-144   -16    
48     32     
-16    48     
112    -144   
-304   -224   
32     -144   
-80    32     
208    112    
-128   -16    
176    -176   
-240   160    
-112   -112   
48     112    
-96    0      
128    144    
-128   -80    
112    80     
-112   -48    
112    48     
-96    -80    
160    128    
-16    16     
224    -32    
-80    192    
-512   -480   
192    -96    
160    208    
-224   32     
96     272    
-864   -80    
48     16     
176    -80    
-112   192    
32     -96    
64     80     
-64    48     
128    16     
0      -96    
48     112    
0      -144   
-96    240    
-112   -272   
-16    32     
-320   80     
-544   -32    
-192   -32    
-528   80     
-80    -144   
256    64     
-224   -80    
-32    -192   
16     256    
-112   -128   
192    272    
-160   -272   
32     0      
-48    0      
96     128    
-48    64     
-208   0      
48     32     
112    224    
160    112    
-1472  144    
-224   32     
-176   -192   
96     48     
80     -16    
16     160    
-64    -144   
-288   -32    
128    0      
48     176    
-128   80     
-240   -64    
80     160    
224    400    
48     -48    
-448   -144   
-208   112    
176    96     
416    112    
-240   48     
112    48     
-48    272    
-240   -352   
-32    -80    
-64    -16    
-64    48     
16     16     
-64    112    
-176   -112   
-96    112    
-176   96     
0      -32    
-304   -64    
-64    192    
96     -160   
-192   32     
-80    16     
80     48     
0      112    
256    96     
-288   0      
96     16     
-48    96     
-48    -16    
0      32     
-64    -32    
144    80     
-320   -112   
32     32     
-32    112    
48     0      
112    336    
-112   -128   
0      176    
-144   -32    
112    96     
-80    64     
128    192    
-144   32     
32     32     
-208   -256   
96     144    
-768   -720   
400    496    
208    656    
288    112    
-176   256    
-80    -80    
48     112    
-48    -352   
128    32     
32     144    
-64    144    
-352   32     
-48    -128   
-48    64     
-64    -96    
-160   160    
160    96     
0      80     
-96    144    
192    208    
16     64     
-144   48     
-64    -32    
128    96     
0      48     
-64    96     
-144   160    
64     -192   
48     -16    
208    304    
-16    112    
-80    -320   
-576   -224   
-80    -960   
256    736    
-544   160    
-256   512    
-112   1168   
544    528    
-432   32     
-48    -256   
-160   -96    
96     48     
-80    -64    
176    208    
-416   -64    
80     -112   
32     384    
-48    112    
64     -144   
-224   -32    
112    0      
-192   -80    
272    208    
-208   32     
240    -96    
-288   -48    
80     208    
-416   -336   
336    16     
-144   128    
-48    -352   
-192   -32    
144    320    
-32    16     
144    128    
-96    96     
80     240    
-80    128    
96     144    
-96    16     
32     -224   
-16    160    
-96    112    
192    160    
32     32     
-48    64     
128    224    
-144   0      
-16    -112   
-144   -64    
32     32     
80     128    
-48    112    
128    96     
-48    80     
-96    -16    
64     112    
32     336    
-64    -96    
176    240    
-144   0      
-48    32     
112    32     
-16    0      
48     144    
-96    80     
64     80     
16     96     
-32    -32    
32     128    
-16    32     
16     144    
-48    16     
16     -672   
48     16     
48     160    
64     272    
-128   -160   
112    16     
48     48     
80     64     
32     48     
-16    256    
-64    -96    
112    -64    
64     0      
16     208    
160    304    
-208   -624   
128    -112   
208    48     
256    192    
16     288    
-128   80     
16     48     
80     16     
144    80     
-48    48     
64     96     
-16    80     
144    160    
-160   0      
64     -32    
-16    -176   
240    144    
-64    -880   
16     176    
-144   -64    
208    128    
-224   16     
192    80     
-64    144    
80     16     
-80    -80    
0      80     
0      -32    
32     -224   
144    320    
-48    -288   
80     80     
-16    -2160  
80     64     
-96    -48    
0      64     
144    128    
32     -80    
-16    112    
16     128    
32     16     
160    208    
-112   -80    
112    0      
-16    160    
80     -48    
64     48     
0      -304   
-16    240    
-112   -224   
112    -112   
96     -80    
112    240    
-112   192    
-32    -48    
16     128    
160    192    
16     16     
-96    -176   
32     16     
320    -432   
-16    -64    
160    -48    
0      32     
-32    -512   
160    96     
-48    272    
64     -48    
-32    528    
-32    64     
384    704    
-336   240    
64     144    
-256   -176   
0      -160   
128    -240   
128    -16    
-48    -112   
288    -80    
16     -944   
-32    -32    
96     240    
160    304    
144    176    
-64    0      
288    80     
-80    288    
208    80     
144    -144   
96     96     
-32    0      
-96    96     
16     -192   
64     0      
-16    -80    
-64    192    
16     -80    
32     112    
128    144    
-32    96     
96     128    
-128   -464   
160    112    
160    80     
48     320    
-272   16     
32     32     
16     -400   
160    48     
16     16     
-400   704    
480    1760   
-1104  592    
-176   -896   
784    -528   
-352   -96    
704    496    
-480   688    
176    -544   
64     -128   
-176   -464   
288    256    
-160   32     
-64    -80    
272    -128   
-32    -1360  
16     160    
16     -880   
80     96     
80     -400   
0      -48    
64     128    
-32    -208   
160    -208   
0      -1744  
80     -160   
-16    144    
48     80     
64     144    
32     -192   
32     -576   
16     16     
80     -128   
-144   112    
48     0      
32     -112   
96     64     
144    -400   
-80    -96    
80     -64    
176    -160   
-64    -576   
16     -96    
176    224    
-144   -128   
48     -304   
-112   96     
144    -32    
80     -16    
-336   -64    
32     32     
-288   -32    
-224   64     
208    -224   
112    96     
-48    -16    
112    -224   
-48    -80    
96     -448   
80     48     
-32    80     
48     96     
16     -112   
96     -96    
48     -48    
-32    48     
-48    -16    
-80    -64    
-176   48     
96     -208   
16     -80    
-16    -304   
-128   16     
96     -752   
-32    -64    
176    -96    
0      384    
-192   32     
144    -160   
64     -64    
144    128    
-288   80     
96     -144   
-800   48     
-256   -240   
304    160    
-144   -480   
272    48     
-208   -864   
112    80     
-16    -240   
64     144    
-80    48     
48     112    
-176   -80    
256    -80    
-32    192    
-176   -96    
-224   16     
-16    -16    
-448   -16    
128    96     
0      80     
80     -80    
-48    0      
192    -816   
-112   80     
160    160    
-64    -64    
-64    -48    
0      -144   
208    0      
-16    -64    
-32    272    
-32    -16    
-80    16     
-192   -336   
160    112    
80     -208   
0      80     
128    -560   
160    64     
-640   -144   
-144   -48    
-96    48     
192    -96    
-272   -256   
-80    -32    
-240   -128   
208    -208   
-192   -144   
-96    -352   
128    48     
-48    -64    
464    208    
176    80     
16     -80    
-320   -240   
-176   -64    
144    160    
64     0      
96     0      
-16    16     
-176   -112   
48     80     
-128   32     
48     -80    
64     -144   
-192   -320   
32     80     
16     144    
-848   0      
32     80     
-32    16     
-32    80     
128    32     
-256   -256   
192    96     
0      -80    
176    272    
-64    96     
-464   112    
128    224    
-96    -240   
-96    112    
48     96     
-80    48     
-192   -144   
112    464    
-256   -240   
-1616  -48    
-144   16     
48     32     
-112   208    
-16    -208   
64     192    
-256   -320   
-80    32     
-96    -128   
-64    -32    
-144   16     
160    -128   
-128   272    
-32    80     
-80    -128   
-176   160    
-224   176    
-80    32     
-16    16     
-16    -176   
-80    64     
-224   -160   
32     160    
16     96     
-144   160    
-64    -112   
-176   16     
48     48     
-352   688    
-288   2016   
-752   1088   
64     -192   
-816   -1168  
784    -144   
16     -48    
-304   -512   
432    208    
160    -16    
-224   -48    
0      -16    
112    -64    
-144   -160   
-192   -32    
64     144    
32     128    
-32    416    
-192   -224   
-368   -32    
-64    0      
48     64     
64     160    
-96    144    
-48    128    
-16    -16    
-144   256    
-96    -336   
-80    -432   
176    96     
48     -16    
-48    64     
-48    80     
-64    -16    
-144   352    
48     -48    
-368   -176   
-16    -96    
-16    144    
-64    304    
-16    64     
0      0      
48     48     
112    -144   
16     64     
48     48     
-48    176    
-80    0      
0      112    
-64    -16    
128    144    
-992   -160   
16     96     
160    -240   
-176   128    
0      48     
-80    48     
-96    -448   
-544   -432   
320    320    
-192   112    
48     80     
-48    192    
16     -64    
-144   0      
16     32     
-336   -32    
48     96     
48     48     
-48    112    
16     144    
-64    64     
-16    16     
32     32     
64     -16    
-64    -16    
-32    80     
-48    -128   
384    16     
-144   16     
128    336    
-32    -112   
0      336    
16     192    
32     -48    
-48    -80    
48     48     
64     272    
-48    -224   
80     -16    
128    160    
32     48     
-192   -32    
-48    64     
64     112    
32     48     
-128   -128   
80     128    
-32    128    
32     64     
-80    0      
32     -32    
64     32     
112    128    
-64    64     
-32    160    
-96    16     
-16    32     
32     144    
-80    -32    
96     144    
-256   -64    
0      -32    
0      64     
64     48     
64     48     
-16    32     
192    128    
-80    256    
80     32     
-192   -48    
32     32     
32     -64    
64     64     
0      144    
-96    128    
208    208    
-192   112    
80     96     
288    256    
-112   192    
144    48     
-64    64     
-112   -32    
32     32     
-16    -672   
48     64     
176    416    
-128   128    
-48    160    
-96    -112   
32     112    
96     -48    
16     112    
64     304    
32     176    
80     256    
-144   48     
-32    -96    
32     112    
-16    96     
-16    48     
-128   64     
96     16     
-32    -96    
-112   -2016  
32     144    
-16    80     
192    -576   
-224   16     
416    272    
-96    192    
-96    112    
192    176    
-48    64     
112    96     
-224   -16    
80     -80    
-96    48     
-272   -32    
128    -368   
-16    0      
160    160    
-48    -112   
-192   32     
208    240    
112    0      
160    272    
64     144    
-80    176    
0      16     
176    80     
-16    -16    
0      240    
-96    48     
-32    -736   
208    224    
-48    -528   
128    144    
48     32     
0      32     
144    -32    
144    80     
-160   96     
96     208    
-208   -48    
144    176    
-48    16     
-544   -480   
-96    576    
-240   -672   
-144   64     
-128   -1376  
592    192    
-192   -432   
880    352    
-336   192    
496    768    
-608   -448   
288    128    
-16    -32    
160    160    
-112   112    
-128   -192   
112    224    
32     -80    
16     112    
112    -80    
16     112    
0      0      
64     368    
-32    -128   
112    0      
-128   -176   
176    208    
-16    32     
-16    176    
48     32     
112    48     
-32    48     
48     -16    
-16    -16    
-48    -368   
48     80     
-160   -992   
192    -96    
-48    160    
208    160    
-48    32     
-112   48     
-32    32     
112    160    
160    208    
-144   -64    
16     -64    
48     -96    
48     96     
208    -304   
-160   64     
112    -16    
0      16     
32     80     
96     80     
-16    224    
-48    -64    
128    96     
-32    96     
64     32     
48     -112   
64     144    
16     -928   
96     16     
64     64     
-16    160    
-16    -48    
144    -48    
-16    16     
32     112    
-96    128    
128    -48    
112    32     
-16    0      
-80    80     
192    -64    
-64    240    
304    192    
48     80     
80     -240   
64     112    
-224   -480   
128    80     
192    144    
-144   -128   
256    -112   
-80    176    
-128   -320   
176    0      
-208   -16    
272    -16    
-80    80     
-32    -128   
160    -16    
128    64     
-128   192    
96     48     
32     -48    
176    32     
0      -1072  
80     16     
16     -896   
16     -832   
288    208    
-192   -704   
112    -96    
48     -1904  
-144   -304   
208    48     
-64    64     
64     48     
160    128    
-112   -224   
128    0      
-64    -352   
112    80     
64     -32    
176    96     
-240   160    
48     -656   
-160   -160   
112    -112   
64     0      
112    144    
-160   -64    
240    -16    
32     80     
208    -304   
-16    96     
-224   -272   
176    32     
-144   -80    
128    0      
-944   -96    
-80    -80    
144    -32    
224    64     
-160   -96    
48     -128   
0      112    
240    -864   
-32    0      
160    -112   
-48    64     
112    -32    
-16    -208   
-16    -32    
144    16     
-80    256    
144    -144   
32     512    
-112   -240   
96     160    
112    -560   
-32    -336   
16     -3040  
-144   -16    
96     -16    
-32    128    
144    64     
-16    -16    
-224   -96    
32     -48    
0      -32    
-32    272    
-912   160    
272    80     
192    208    
48     -576   
64     -32    
144    -784   
-48    96     
48     160    
-160   -48    
-48    -32    
64     -48    
0      -96    
-64    -96    
-112   80     
-96    -16    
-320   32     
-112   16     
-656   -16    
96     64     
400    144    
-16    -352   
-64    -32    
128    -592   
128    80     
-80    96     
-32    80     
80     -48    
80     -16    
-48    96     
32     -192   
80     96     
192    -112   
-176   96     
1696   -1104  
1120   1488   
-848   -944   
-480   -192   
48     -912   
896    -368   
-640   208    
240    -176   
80     368    
16     -320   
-80    -160   
-128   -128   
112    16     
80     16     
16     -192   
-48    -496   
96     128    
128    -256   
-192   -160   
128    -464   
288    32     
-64    16     
128    -48    
-176   128    
112    32     
-288   112    
0      32     
96     544    
80     320    
-1568  -352   
-32    -384   
-112   -144   
64     16     
16     80     
-112   336    
-112   96     
32     464    
0      -64    
-112   -176   
112    32     
-160   288    
128    -144   
-32    128    
96     -256   
-96    176    
64     -96    
128    128    
-368   -432   
-464   -128   
80     64     
-944   -224   
112    32     
-496   32     
-16    96     
112    144    
-48    -32    
0      -816   
16     256    
-64    -64    
-160   560    
-336   -32    
-16    192    
-416   -144   
80     -80    
-272   80     
80     0      
16     48     
-144   16     
-64    64     
-256   32     
-48    48     
48     0      
32     224    
-192   16     
-96    144    
16     64     
-144   176    
-352   -464   
-176   -240   
16     128    
160    16     
-192   144    
-176   -64    
-16    208    
-432   -16    
-48    192    
-416   -64    
176    16     
32     128    
-32    112    
-64    -64    
-32    -32    
96     96     
48     64     
-192   -176   
-80    -112   
-128   -112   
-256   -160   
-96    -320   
-224   -192   
176    208    
-160   304    
-192   48     
-144   -192   
80     -16    
112    -112   
96     64     
-64    96     
64     64     
0      16     
-64    16     
80     32     
32     112    
16     160    
-16    128    
-64    32     
-128   240    
-96    -16    
16     32     
192    240    
-400   160    
256    208    
-240   336    
-192   -144   
64     208    
32     -32    
16     336    
-144   32     
32     416    
-80    -144   
-32    -64    
-224   -192   
224    96     
-192   32     
-48    16     
224    80     
-128   80     
112    160    
-368   -64    
0      -16    
48     -16    
-48    96     
-144   -64    
-32    144    
-144   -80    
80     32     
-112   336    
240    256    
-224   16     
16     64     
0      128    
80     32     
16     80     
80     128    
-64    64     
16     0      
-48    80     
-80    48     
-48    96     
112    144    
32     96     
-80    -48    
64     -16    
-96    0      
144    48     
-32    112    
-64    128    
192    64     
-256   112    
-32    -32    
48     48     
-32    -32    
96     16     
48     96     
-240   80     
64     32     
-176   -48    
176    0      
-448   272    
-256   -48    
160    0      
80     96     
96     48     
-144   -32    
208    0      
0      80     
-16    128    
-48    144    
-48    0      
0      -48    
16     80     
-128   0      
80     288    
-240   112    
-96    -80    
240    0      
64     -48    
80     224    
1200   -1152  
-32    -176   
48     -144   
80     -96    
-464   256    
768    80     
-960   -80    
736    -64    
-320   272    
16     -352   
0      400    
96     -112   
64     416    
16     -352   
16     -16    
160    128    
16     160    
80     144    
-80    -16    
-160   0      
320    64     
-144   128    
160    16     
-208   160    
224    0      
-304   112    
320    -48    
-256   208    
304    16     
-224   0      
96     192    
16     128    
0      -16    
-32    96     
16     0      
32     32     
176    304    
-112   192    
-16    -16    
-208   -16    
96     64     
96     64     
32     160    
0      64     
64     32     
0      32     
48     112    
-16    -176   
288    320    
-320   80     
320    -16    
-112   144    
16     0      
160    160    
-240   -352   
208    112    
-96    -16    
32     0      
32     176    
-96    -160   
160    64     
-48    208    
48     0      
192    240    
-144   0      
144    16     
-96    -240   
32     32     
80     144    
-16    -176   
96     32     
16     96     
-48    112    
64     16     
128    176    
-208   -32    
192    240    
-64    368    
-304   -16    
-32    -384   
288    96     
-176   -16    
160    64     
0      16     
208    -464   
112    -96    
0      -848   
-96    224    
240    320    
96     144    
96     32     
0      -96    
-64    16     
32     32     
-80    0      
0      48     
-112   -80    
0      -240   
96     176    
112    -144   
-128   48     
-32    32     
192    208    
64     272    
-208   64     
32     96     
32     -112   
64     -80    
128    32     
-32    96     
64     112    
-112   32     
0      -192   
96     48     
-64    -128   
96     16     
48     -528   
0      80     
112    -96    
-64    -32    
0      -256   
-240   -112   
16     144    
304    144    
-304   -176   
144    48     
-96    224    
288    64     
-32    -16    
-32    -96    
160    176    
16     -32    
144    32     
-112   -1376  
80     48     
64     -480   
-48    16     
160    -16    
144    288    
-208   -112   
64     32     
-96    96     
112    16     
96     208    
0      -208   
48     64     
0      -240   
16     0      
208    112    
96     80     
48     224    
48     -96    
-112   -32    
128    -32    
16     112    
64     -176   
272    288    
-112   -912   
160    -64    
-64    -192   
160    96     
-144   -80    
96     144    
32     -112   
16     112    
-128   -128   
0      -304   
256    -64    
416    496    
-336   -64    
32     -272   
32     208    
192    -112   
0      -112   
80     16     
80     0      
48     0      
-176   80     
208    -368   
-112   80     
48     80     
80     80     
80     128    
-64    -352   
304    -1280  
-160   -96    
208    -2512  
0      80     
160    112    
-48    -16    
0      32     
224    -144   
-80    128    
-32    -48    
-160   -320   
-112   -48    
80     -80    
80     -144   
512    1632   
-1328  -1888  
816    560    
448    -16    
288    -896   
-704   -80    
304    -304   
272    -608   
-256   -736   
80     128    
48     -16    
-80    -272   
16     -16    
320    -128   
-192   -48    
112    128    
-240   -80    
-160   176    
-336   32     
192    -400   
-304   -256   
192    -176   
-160   -80    
64     -320   
176    384    
-96    -144   
256    0      
400    -624   
-64    -416   
0      -224   
-16    320    
-176   32     
-192   160    
-32    -224   
80     -192   
32     112    
-32    -176   
288    -80    
-352   -48    
304    -1120  
-64    80     
80     -128   
-48    32     
288    80     
48     -208   
-176   -112   
256    288    
-496   256    
80     32     
-976   48     
96     -192   
-16    0      
-48    -352   
192    80     
-48    -1072  
96     96     
-160   -176   
144    -624   
-640   -528   
-48    -352   
-128   0      
192    176    
-288   80     
64     -48    
-128   96     
-48    -112   
-64    -16    
80     -96    
-64    0      
224    64     
-208   112    
80     -64    
96     -64    
64     32     
32     -16    
144    496    
-224   -16    
224    -304   
272    -208   
128    -32    
320    80     
-864   -48    
48     -352   
64     208    
224    -144   
48     128    
144    -2608  
-128   -80    
-128   -48    
16     -192   
-64    0      
64     0      
-96    -16    
48     -80    
-528   -176   
128    -144   
-208   -32    
384    64     
-128   -32    
-112   -784   
-16    256    
288    -1728  
128    112    
-112   160    
-48    -32    
64     448    
-16    128    
-144   -144   
176    48     
-256   -144   
48     64     
-288   144    
144    -48    
160    128    
-112   -432   
112    -128   
32     192    
-16    -48    
32     112    
-160   -288   
-32    160    
-32    32     
64     48     
-48    -80    
-64    48     
112    -128   
-240   48     
-192   -160   
224    224    
-848   -80    
144    80     
-80    256    
-1072  80     
-48    96     
-64    -224   
-16    16     
176    0      
-80    0      
224    0      
-432   0      
256    -304   
-128   -16    
-608   -176   
0      272    
0      -192   
-208   96     
-176   -240   
96     32     
-80    80     
-64    96     
64     0      
-32    -32    
-64    48     
80     64     
-80    -32    
-192   -16    
-32    128    
16     -144   
112    64     
-256   -80    
-144   16     
-80    -16    
-112   -48    
-16    64     
-144   -112   
112    80     
-112   32     
-128   0      
-224   -192   
80     48     
16     -32    
128    80     
-96    96     
-16    256    
-320   -16    
32     -32    
144    0      
-16    -48    
112    64     
-416   32     
-112   -16    
-160   -48    
-16    272    
-752   -96    
-48    64     
64     -224   
192    16     
-96    -112   
16     -32    
16     160    
-80    176    
-32    128    
112    -128   
48     256    
-192   -96    
320    64     
-304   48     
16     32     
1168   -1296  
32     16     
-576   -128   
208    -224   
160    -80    
144    -240   
-288   336    
608    -160   
-176   560    
-32    -304   
-176   736    
32     -560   
-208   672    
416    -448   
-192   496    
-160   -512   
48     480    
-432   -176   
-112   304    
144    -256   
-80    160    
48     0      
-192   176    
64     0      
-192   -80    
64     16     
-80    192    
192    272    
-304   -128   
16     48     
-384   -208   
-16    160    
-32    -96    
-80    256    
96     -32    
-48    224    
-64    -80    
-32    128    
80     0      
-32    160    
48     16     
-64    16     
-32    16     
-112   -32    
128    112    
-64    144    
64     96     
-80    224    
-320   64     
352    0      
-176   112    
32     -32    
-64    128    
48     48     
64     80     
32     128    
-240   16     
144    0      
-112   32     
80     -16    
-128   96     
-16    16     
-224   -112   
0      208    
-80    16     
96     64     
64     112    
32     144    
-32    48     
-16    112    
48     -48    
16     160    
16     64     
-16    80     
48     32     
-144   32     
-48    48     
0      -272   
-16    64     
-128   112    
16     32     
64     16     
-96    32     
96     -16    
-144   112    
32     128    
80     272    
0      208    
64     -32    
-80    -80    
-96    240    
32     80     
192    96     
-64    112    
256    272    
-160   112    
0      48     
160    352    
-16    80     
64     48     
-80    128    
64     96     
-16    128    
-32    -16    
0      80     
-128   -112   
-64    96     
32     -32    
32     -208   
-96    -80    
48     128    
32     80     
80     128    
16     144    
-16    32     
48     64     
-144   -256   
96     112    
-32    112    
304    320    
-32    192    
16     128    
-64    144    
16     160    
144    176    
144    448    
16     16     
-96    0      
-32    -80    
128    -16    
32     96     
32     176    
-32    336    
-16    48     
0      32     
224    224    
-256   -624   
80     384    
-112   256    
-112   -80    
176    0      
-48    32     
112    -64    
0      160    
-64    16     
144    128    
-64    80     
48     208    
-144   32     
32     96     
16     80     
80     -336   
-32    112    
112    256    
-144   -48    
160    16     
-80    112    
256    -16    
-64    192    
-112   0      
112    -48    
-112   -64    
336    144    
-128   112    
32     32     
-128   -32    
80     -304   
192    192    
80     48     
-128   96     
48     96     
32     144    
64     64     
80     64     
-48    0      
112    304    
-176   -80    
208    128    
-80    32     
224    96     
-16    96     
-16    -176   
16     80     
-48    -624   
-112   160    
-176   -208   
144    96     
128    224    
96     112    
-160   -144   
128    224    
112    80     
-32    32     
368    -144   
-192   -128   
176    32     
-160   -368   
80     368    
-624   -464   
-640   -720   
-16    -480   
-192   496    
176    80     
32     608    
240    -864   
240    672    
-384   -272   
384    -96    
-144   0      
304    -400   
-256   384    
336    -384   
96     304    
80     -816   
-32    48     
240    -2912  
224    880    
-80    -336   
144    208    
-32    80     
144    208    
-208   -208   
400    272    
-160   160    
-272   -592   
16     368    
288    144    
32     176    
-112   -432   
192    80     
-96    -176   
80     80     
64     -144   
-32    0      
160    272    
64     176    
-128   64     
176    -480   
16     112    
192    -464   
272    48     
-224   -704   
80     64     
-16    -384   
32     112    
112    208    
48     48     
144    80     
16     32     
-32    48     
128    0      
0      80     
48     -48    
-16    96     
48     -16    
16     48     
176    0      
-112   160    
64     -48    
48     -16    
96     176    
-112   80     
176    128    
-32    64     
32     16     
128    32     
-96    -112   
272    -80    
32     -960   
-64    0      
64     224    
16     80     
96     0      
128    -32    
-32    144    
80     -16    
-16    224    
-128   -32    
176    -208   
-64    96     
320    64     
-256   -1152  
-96    -224   
208    -1632  
-112   -496   
272    -2080  
-64    -16    
64     192    
-80    -128   
32     -16    
0      -176   
80     -208   
-176   -96    
192    -144   
-224   80     
16     -16    
-16    -128   
-224   -272   
80     -496   
160    64     
-16    -368   
16     -272   
160    -624   
0      -240   
80     -272   
48     160    
16     -112   
48     144    
16     -144   
80     112    
-96    -176   
80     -96    
-96    -144   
64     -176   
32     32     
96     -464   
-64    -64    
304    -1040  
-256   -128   
64     -144   
-64    112    
-64    -64    
48     64     
112    -304   
144    -32    
-256   144    
144    16     
-208   -64    
96     -128   
-96    -208   
80     -256   
-192   -48    
400    96     
-128   -64    
48     -1040  
-112   176    
80     -32    
144    -80    
0      -96    
-80    32     
0      -48    
176    64     
-528   -48    
208    32     
-800   -240   
48     112    
-160   96     
208    -48    
-48    -112   
80     -224   
-96    -32    
112    96     
96     96     
-64    96     
144    -64    
-192   -112   
64     -272   
64     112    
0      112    
-48    -64    
0      32     
-160   -64    
160    16     
-128   -48    
128    -752   
176    16     
96     -960   
-64    0      
-96    80     
80     -112   
-176   -96    
176    -32    
0      0      
32     -96    
-48    64     
-64    -352   
-368   -48    
-48    0      
32     96     
-48    -192   
144    48     
144    -736   
-192   16     
-112   16     
80     192    
-240   -80    
160    64     
-64    -32    
128    32     
-336   -80    
144    -16    
-80    -48    
-16    80     
32     0      
64     -96    
-128   80     
-688   368    
880    -336   
1136   -416   
80     -32    
-864   -416   
256    -176   
192    16     
160    80     
-128   32     
-160   -224   
-112   -96    
-176   432    
160    -608   
-528   352    
224    -592   
64     464    
-16    -240   
-96    32     
64     -352   
-144   96     
272    -16    
-80    64     
-96    -16    
48     0      
-32    -32    
-128   -144   
-400   -112   
208    48     
-768   -96    
-80    48     
64     48     
-240   -80    
48     240    
-240   -16    
-112   96     
-224   -176   
-48    64     
80     -16    
0      192    
-48    -160   
32     80     
-432   -112   
128    112    
-208   -128   
48     32     
-96    80     
-192   -16    
128    16     
-320   48     
112    0      
0      48     
-32    64     
-96    16     
-32    80     
-176   -160   
0      64     
0      -16    
32     144    
48     -112   
-64    64     
-144   -64    
-192   64     
176    48     
64     208    
-96    64     
-416   -144   
-96    -48    
-880   -96    
-64    16     
-96    -96    
64     144    
-48    -48    
-16    64     
-32    176    
-48    -48    
-32    64     
-48    -16    
-64    368    
128    496    
-96    -16    
-144   -64    
-48    -160   
-192   -96    
112    192    
48     96     
0      272    
-96    -80    
-32    80     
80     -176   
16     224    
112    160    
-80    176    
-32    0      
-128   -128   
0      48     
64     288    
-64    144    
-288   -160   
160    96     
-1248  -16    
64     160    
-96    -96    
-80    -48    
128    16     
-16    80     
-144   16     
48     192    
-192   -144   
-32    -128   
0      112    
16     80     
16     16     
-336   -16    
96     32     
-272   -48    
48     80     
-16    0      
0      48     
48     96     
-80    0      
32     -16    
-32    160    
128    80     
-16    -80    
-48    240    
-224   0      
208    -112   
-448   80     
0      32     
-48    -48    
-64    176    
192    144    
-224   -96    
64     96     
-32    80     
112    16     
-80    368    
208    -112   
-176   96     
0      -32    
64     144    
-96    16     
-32    16     
16     112    
0      32     
-96    32     
-96    -112   
144    192    
-32    352    
-144   -112   
112    80     
0      144    
112    0      
-112   -416   
-16    32     
-64    176    
-112   64     
-208   176    
128    -96    
-160   112    
-192   -48    
48     224    
-96    -128   
288    128    
-32    144    
-64    0      
80     464    
-464   -64    
224    -48    
-64    144    
96     -48    
-16    96     
-208   112    
80     -64    
-64    16     
-16    0      
144    144    
-48    16     
80     64     
0      32     
-96    -16    
176    48     
0      256    
-16    128    
48     -128   
208    48     
-48    384    
-208   -240   
-80    32     
256    128    
96     80     
208    -48    
-224   128    
-32    -160   
192    192    
176    240    
112    16     
-112   48     
1728   -960   
208    1584   
-208   -48    
-736   -240   
176    528    
208    -288   
192    48     
128    416    
96     400    
-240   -352   
-16    160    
-48    112    
368    -144   
-160   96     
256    -16    
-224   176    
304    32     
-352   -208   
304    16     
-176   112    
48     -288   
80     160    
-80    -64    
0      112    
48     64     
0      176    
64     80     
96     112    
-80    -48    
48     32     
-96    16     
112    160    
-48    80     
128    256    
-16    128    
-96    -560   
64     128    
0      112    
144    64     
-64    240    
-144   -16    
96     32     
-16    112    
144    144    
-112   48     
-48    -32    
48     176    
112    -208   
-368   144    
176    -80    
48     -336   
16     32     
64     96     
-112   80     
288    16     
-16    -16    
144    128    
-80    128    
64     32     
80     96     
16     -64    
48     96     
-16    -32    
48     -112   
32     128    
16     64     
80     80     
48     -784   
-32    0      
96     160    
0      0      
48     -32    
144    112    
-112   -80    
144    112    
-32    192    
-80    64     
144    112    
32     -160   
160    80     
-16    -304   
-16    176    
-16    -736   
112    0      
0      176    
0      304    
-16    32     
176    32     
-240   -112   
96     160    
-64    -32    
0      -48    
80     -16    
-80    -96    
160    32     
-64    -144   
112    160    
-80    -160   
144    80     
32     -1632  
64     128    
-112   -48    
16     32     
80     80     
64     -32    
192    240    
-80    128    
80     32     
128    96     
16     80     
144    -96    
-176   112    
80     48     
224    -32    
-64    -400   
-128   80     
304    -1808  
-272   -48    
240    16     
0      192    
-48    -16    
128    -80    
-240   80     
272    -528   
32     80     
-144   -128   
96     32     
-80    -672   
128    64     
-224   -1136  
288    128    
-32    144    
0      112    
224    96     
-400   128    
112    48     
112    -48    
16     224    
208    -208   
-64    144    
-48    -112   
144    176    
0      -272   
272    192    
-16    -96    
192    176    
64     224    
48     240    
48     -16    
-48    160    
80     96     
80     48     
0      112    
144    0      
48     128    
16     -192   
16     128    
112    -544   
-32    32     
16     256    
112    224    
-16    0      
128    -720   
-48    144    
96     -928   
-96    -224   
192    16     
-48    -176   
-16    -464   
-224   -1120  
0      -224   
32     -48    
16     -80    
304    416    
-16    -496   
64     -896   
32     256    
112    -880   
160    224    
-48    160    
96     -208   
-48    128    
-32    -256   
80     -96    
128    -176   
0      -128   
-32    32     
-32    -96    
-80    192    
16     -48    
96     -256   
0      64     
176    -192   
80     256    
-176   112    
32     -160   
-864   -160   
192    -96    
-800   -448   
256    -864   
256    624    
-416   -720   
-384   -240   
176    -464   
80     -176   
-192   416    
352    -16    
-16    -48    
224    -528   
-192   224    
16     -272   
-336   256    
80     -160   
144    -32    
-112   -176   
0      -304   
32     -304   
48     16     
-64    -1040  
32     144    
80     128    
96     -160   
-96    -272   
208    32     
16     96     
-48    96     
-16    32     
-16    -240   
208    -272   
64     -80    
208    128    
80     32     
112    -144   
-128   -224   
160    128    
48     -16    
64     64     
-48    48     
176    96     
-64    112    
80     -112   
-128   -224   
48     -112   
-352   -64    
256    -128   
-256   112    
48     -112   
16     -96    
112    -992   
32     80     
64     -16    
64     144    
-144   -16    
192    32     
-192   -64    
128    -32    
-112   -32    
112    480    
-160   32     
-16    -48    
-1360  -128   
144    -384   
-64    64     
128    -192   
32     384    
-160   -368   
128    0      
-48    -32    
96     -16    
-96    -80    
16     0      
16     144    
32     0      
-144   -48    
224    -16    
-608   48     
-256   -608   
80     32     
32     -64    
32     64     
112    -16    
80     128    
-224   32     
112    -112   
-16    64     
64     64     
-144   16     
112    -80    
-48    160    
32     64     
-176   -32    
48     -176   
144    48     
32     -128   
-64    80     
-112   16     
192    -80    
-80    48     
48     0      
-16    48     
64     -80    
-96    32     
0      -96    
-64    32     
-64    -176   
32     128    
-448   16     
80     -16    
-752   -448   
-16    80     
32     16     
-352   64     
-48    16     
128    -32    
-80    -48    
-112   144    
-48    -96    
32     -48    
-64    112    
-224   32     
96     112    
-432   -192   
-32    160    
-160   -544   
-192   -144   
-160   224    
-64    -112   
128    64     
-464   -16    
160    0      
-1456  -48    
-32    128    
144    48     
-80    64     
240    464    
-368   -128   
176    -304   
-208   128    
160    -96    
-80    32     
-128   112    
16     -64    
-96    64     
-80    96     
-112   -80    
-240   -32    
-80    144    
-352   0      
-272   -96    
-144   -208   
80     176    
-48    64     
-176   -16    
272    32     
-336   64     
240    240    
-448   128    
-48    -112   
-16    -80    
224    112    
64     80     
-288   192    
-144   -48    
480    320    
-608   -80    
256    -96    
0      -48    
192    160    
-16    16     
-288   32     
-96    -112   
80     -128   
224    368    
-304   0      
64     -80    
256    -144   
-64    192    
-320   80     
-112   176    
-176   -208   
320    64     
-32    -352   
48     288    
192    -32    
64     144    
0      192    
160    144    
-208   160    
-144   -64    
-96    112    
-128   -32    
0      48     
-208   -224   
128    208    
-784   -160   
-160   752    
-384   2112   
-416   896    
64     -464   
64     640    
-608   32     
576    624    
-528   -64    
240    160    
208    -112   
-352   48     
176    48     
-48    80     
96     48     
-352   64     
48     176    
16     96     
-160   -96    
144    -16    
-16    -32    
16     -80    
-176   16     
144    160    
16     96     
144    176    
-224   -16    
96     80     
-336   -96    
176    208    
-48    -64    
-80    16     
64     80     
32     64     
32     112    
-112   16     
0      16     
-224   160    
144    -96    
-48    128    
80     64     
-80    112    
-48    96     
-128   -32    
48     128    
-48    -64    
-80    48     
16     96     
128    112    
-16    -80    
-48    208    
-112   -16    
240    96     
-160   128    
128    96     
-224   -16    
-128   -256   
320    240    
-320   96     
320    144    
-352   48     
80     32     
144    80     
-96    112    
48     -32    
80     176    
-176   80     
96     -160   
-32    -32    
48     128    
-64    144    
16     80     
32     -48    
16     96     
-160   224    
112    -32    
64     16     
-32    -32    
32     192    
-128   128    
-32    32     
0      208    
-64    -112   
224    112    
-16    192    
-224   96     
-32    -16    
32     -160   
32     -112   
32     320    
-96    0      
176    112    
-16    112    
-32    0      
80     48     
144    224    
-288   64     
160    176    
-128   -48    
192    64     
16     176    
-64    -16    
80     80     
-48    96     
-16    -32    
96     80     
80     80     
-80    144    
64     32     
16     144    
0      64     
144    96     
-16    0      
-16    160    
-64    -32    
16     96     
-16    -64    
0      96     
-16    48     
48     208    
-128   128    
144    -48    
-16    -80    
-272   48     
352    80     
32     80     
112    352    
-176   240    
272    352    
-240   128    
160    0      
-144   -32    
64     80     
80     64     
-160   -1984  
160    16     
128    -48    
-48    96     
32     16     
80     80     
-176   -16    
32     64     
32     64     
96     0      
64     -80    
-16    128    
32     32     
-80    -272   
-80    32     
112    -16    
16     112    
64     -240   
32     96     
-96    144    
96     16     
64     -48    
32     336    
48     48     
144    272    
-208   112    
256    96     
-112   112    
-32    -176   
32     112    
48     -64    
0      192    
96     -512   
96     32     
-32    128    
112    416    
-160   -16    
160    192    
112    -112   
32     -80    
-112   64     
0      80     
144    144    
48     -48    
16     96     
-112   -336   
48     208    
48     -960   
64     112    
0      0      
128    208    
-80    96     
80     160    
0      -160   
224    336    
-80    128    
-80    80     
64     112    
80     -16    
80     80     
-96    16     
64     -80    
-64    -64    
64     240    
16     -144   
-96    208    
352    -1952  
1232   704    
-304   464    
288    1024   
-256   -16    
864    928    
-512   32     
160    -352   
336    560    
-336   -624   
176    96     
176    -240   
32     224    
16     -960   
-64    -48    
112    -80    
64     -96    
-176   -352   
352    400    
128    112    
-176   -368   
128    272    
192    -448   
64     -16    
0      -16    
96     224    
112    -112   
16     144    
96     -96    
-48    -528   
144    80     
176    208    
112    64     
-96    -16    
160    -112   
-32    -112   
224    224    
-128   112    
144    128    
0      -48    
112    112    
32     -80    
-48    64     
128    48     
-32    64     
32     -32    
96     160    
32     -112   
48     -944   
-48    352    
48     64     
64     -80    
-16    -48    
80     32     
0      -288   
144    128    
-16    32     
48     240    
-48    -224   
96     -1840  
-48    -96    
144    -560   
-160   -48    
-368   -512   
256    -128   
-80    16     
-64    -432   
-32    -128   
144    -784   
-16    -112   
32     112    
48     -48    
48     128    
96     -96    
-48    -256   
-48    96     
400    464    
-224   352    
-304   16     
80     -352   
64     -128   
112    -464   
48     -112   
16     -176   
-16    -112   
80     -960   
320    208    
-144   -96    
32     -32    
64     176    
-16    -16    
112    -48    
-16    128    
-176   -128   
80     -32    
-1408  -256   
160    -64    
128    144    
-32    -80    
144    -48    
-112   -352   
112    -272   
80     -256   
0      112    
64     0      
16     96     
128    48     
-64    0      
48     -64    
-32    48     
-48    0      
80     0      
112    0      
64     -80    
32     -64    
48     -448   
-32    0      
48     -768   
48     96     
96     64     
-80    16     
-96    -144   
208    16     
80     48     
32     -80    
-144   208    
-48    -320   
-576   -208   
16     -128   
-272   32     
64     -64    
-96    -16    
96     -720   
96     176    
-96    -16    
128    64     
208    624    
-192   -64    
64     -208   
32     -208   
128    -64    
-48    -128   
-128   0      
128    -128   
-240   32     
112    -64    
128    272    
-368   -800   
224    176    
0      -1584  
176    16     
-48    176    
-32    -48    
64     -96    
0      416    
-416   -16    
176    272    
-128   -32    
-16    -128   
-48    -80    
-32    -96    
96     352    
-80    -112   
80     80     
-144   -880   
160    96     
-16    -64    
-160   -240   
-272   224    
-48    -80    
80     80     
-144   -176   
-16    32     
272    176    
-160   48     
96     -368   
96     64     
-64    -336   
80     576    
-112   -16    
112    160    
-64    -80    
-160   -96    
-80    -32    
-48    80     
-16    -32    
96     16     
-144   16     
144    -128   
-240   -80    
32     -64    
-16    112    
96     -16    
48     208    
-256   0      
-576   80     
-224   -176   
-160   64     
560    -944   
256    1088   
-304   -32    
-96    -352   
-272   -16    
704    112    
-496   -80    
64     -256   
32     32     
-368   -208   
64     64     
-192   208    
-288   128    
80     32     
-32    -64    
-96    32     
-560   -80    
-48    80     
32     -48    
80     176    
-64    0      
-32    112    
-176   -96    
-16    80     
112    -224   
-256   -176   
208    144    
-64    32     
0      -16    
-416   -16    
144    32     
-224   32     
0      80     
96     0      
-48    0      
-96    -96    
176    464    
-464   -384   
144    16     
-144   144    
240    64     
-32    96     
-176   32     
-64    32     
-16    -32    
-144   -16    
176    112    
-192   96     
-208   128    
32     16     
-80    -128   
160    64     
-144   64     
112    192    
16     80     
-64    16     
-160   80     
-16    -48    
-32    112    
-32    16     
0      0      
-32    64     
-48    16     
-512   -112   
64     240    
-208   -160   
208    0      
80     16     
-112   80     
-48    -128   
112    0      
-128   96     
80     0      
-48    96     
-16    112    
-96    -80    
0      -80    
-32    160    
-144   -128   
96     0      
-304   160    
-96    32     
80     -144   
128    288    
-176   64     
48     0      
0      240    
-80    -32    
352    288    
-400   0      
304    64     
-208   -64    
96     64     
-160   112    
144    96     
-240   -80    
256    32     
-80    160    
-96    -32    
96     144    
80     144    
-128   64     
64     48     
-128   -64    
48     0      
-16    112    
0      -48    
-32    96     
-112   80     
176    272    
-560   0      
80     112    
-96    16     
144    -48    
-16    176    
-48    160    
-16    32     
-48    -16    
16     288    
64     80     
160    304    
-192   144    
192    112    
-496   -128   
176    -16    
-400   -128   
128    176    
-80    -96    
48     32     
-128   0      
64     128    
0      -16    
80     112    
32     208    
-16    64     
48     240    
-192   -48    
192    16     
-240   -208   
0      160    
160    64     
64     160    
-16    160    
0      64     
-176   80     
80     32     
-16    160    
0      -32    
48     128    
-80    -96    
48     80     
-128   -48    
96     80     
32     112    
-16    64     
16     112    
16     176    
-128   -64    
0      -96    
112    176    
80     96     
-48    80     
32     112    
-16    48     
-80    -112   
128    64     
96     192    
176    224    
-272   -224   
160    32     
-16    -112   
224    224    
48     240    
-144   64     
16     304    
176    -16    
112    48     
-32    256    
0      224    
-128   64     
80     96     
160    -64    
-48    128    
-96    48     
0      112    
80     -16    
0      128    
48     32     
0      112    
32     144    
-48    96     
0      64     
-16    48     
-16    0      
112    272    
-112   112    
-128   -16    
-16    32     
1472   688    
-1632  -2944  
800    656    
384    272    
1280   -256   
-896   -576   
112    144    
192    992    
-224   -528   
-48    288    
-48    -176   
16     128    
-304   0      
-32    80     
-160   -256   
304    80     
0      -1680  
416    800    
-192   -96    
-288   -304   
192    144    
-128   -80    
16     320    
-176   208    
176    -48    
-224   32     
32     144    
32     16     
80     80     
64     224    
112    144    
-16    -528   
32     48     
32     80     
368    368    
-176   -304   
176    -176   
16     -48    
288    272    
-112   112    
32     96     
0      32     
160    160    
-32    48     
-48    -64    
48     96     
-32    -896   
32     16     
160    -1520  
-176   -128   
224    288    
-336   112    
112    -16    
-16    192    
-32    -128   
32     -32    
-16    -432   
-160   176    
176    336    
-256   -304   
240    -64    
48     96     
-16    192    
128    -96    
-80    -80    
-112   128    
-64    96     
64     -16    
-16    144    
-64    112    
128    32     
-16    128    
32     64     
16     144    
64     -48    
96     160    
-64    -432   
32     -480   
-16    -992   
32     208    
-144   -272   
80     224    
0      0      
128    80     
144    48     
-32    128    
-48    64     
-16    96     
208    160    
-80    -48    
192    0      
64     32     
-16    176    
-48    -416   
48     -16    
64     -496   
128    224    
-160   -80    
-48    96     
128    144    
-64    32     
-16    -64    
16     48     
160    32     
96     -32    
-160   80     
208    -240   
-112   160    
160    -144   
32     256    
-16    -352   
0      -16    
-32    16     
176    160    
48     144    
-112   96     
16     -288   
0      -992   
48     80     
64     -640   
-80    128    
128    -48    
16     144    
64     16     
-32    128    
-48    -208   
304    16     
-96    384    
336    176    
-224   64     
112    -32    
96     256    
-32    -224   
32     -32    
224    -144   
-48    48     
16     384    
48     128    
-128   -272   
112    -48    
80     -80    
32     32     
-64    -80    
272    -80    
-112   144    
0      -176   
112    -624   
32     -16    
240    -400   
-128   -144   
128    -768   
80     -256   
-32    128    
64     64     
80     64     
-32    -192   
64     -224   
224    288    
-240   -688   
64     -160   
-80    32     
80     -96    
112    64     
-48    -160   
176    112    
-272   -368   
80     288    
400    320    
48     -64    
-48    -192   
64     16     
-32    -272   
-160   -16    
256    -112   
-96    192    
-96    16     
-48    48     
-240   -112   
96     -368   
-32    -192   
32     -336   
-64    48     
16     -752   
-80    -32    
128    -32    
96     -96    
48     -256   
64     128    
-128   -48    
80     48     
-128   -48    
64     -64    
-176   -192   
16     -128   
112    -48    
144    64     
80     176    
-128   -320   
1744   -1776  
-384   -1200  
592    64     
-352   -16    
32     464    
-32    96     
-256   96     
112    -304   
160    -144   
-160   -208   
64     224    
128    16     
-48    96     
16     -112   
128    -608   
-112   -32    
112    -336   
80     192    
-96    48     
128    128    
-240   -128   
32     16     
-144   -48    
16     -80    
-96    -16    
16     32     
-336   0      
-112   -240   
32     -208   
48     48     
80     96     
96     -336   
-80    112    
144    224    
32     32     
192    48     
-192   -80    
96     80     
0      -48    
-128   16     
64     -16    
-160   -96    
-48    48     
-96    64     
48     -16    
-80    80     
16     -544   
-80    -192   
432    -960   
-240   128    
256    0      
-80    96     
-160   16     
128    16     
-192   -64    
128    48     
-304   -208   
288    -80    
-256   208    
32     -320   
208    64     
-80    -192   
-16    64     
112    -736   
192    128    
-416   80     
176    -256   
-128   -64    
144    0      
-224   48     
80     -112   
64     48     
64     -48    
-208   48     
-16    -240   
64     -16    
80     -128   
32     -32    
16     96     
32     48     
-144   -96    
128    -16    
-224   -16    
208    176    
-208   80     
128    32     
-16    368    
-256   -176   
480    160    
-1232  0      
96     0      
-176   16     
32     -16    
48     80     
-80    -144   
-16    80     
-1360  48     
-112   -16    
176    32     
-48    64     
-32    -208   
-48    48     
-384   -192   
224    352    
-192   32     
96     128    
-176   -224   
0      48     
192    208    
-176   80     
-48    96     
-208   0      
-112   -128   
-864   -112   
-64    80     
80     112    
96     256    
-96    -112   
80     112    
-208   -240   
320    -16    
-48    32     
48     304    
-288   144    
224    64     
-112   -64    
224    192    
-160   80     
-192   -80    
-32    0      
-368   96     
-128   32     
-96    32     
48     48     
-128   -80    
64     208    
208    272    
16     80     
-208   -192   
16     176    
-96    -256   
-32    -272   
64     112    
64     208    
-208   96     
-448   80     
-96    -96    
-48    64     
96     352    
-96    -96    
16     -48    
0      160    
32     -48    
0      80     
-208   32     
-112   -32    
128    368    
-288   64     
112    -64    
32     304    
-288   -48    
-160   0      
96     -32    
0      80     
144    -96    
-64    32     
176    -64    
-224   -176   
256    224    
-64    192    
-32    80     
-96    144    
32     16     
-128   -96    
16     96     
-96    80     
-16    48     
-160   96     
112    64     
80     -96    
-80    0      
80     80     
-80    32     
80     -16    
-80    -96    
240    384    
-144   192    
-176   -32    
-256   -48    
320    32     
-80    -32    
-64    96     
-176   -64    
0      128    
48     240    
-272   -80    
-64    80     
-16    160    
-688   -656   
-240   1696   
-32    1328   
-640   -96    
-16    -864   
1152   720    
-704   512    
48     -128   
48     64     
432    112    
-304   160    
-32    0      
-48    320    
128    96     
32     160    
32     -80    
32     368    
-112   -32    
224    608    
-384   64     
112    64     
-32    -208   
-48    -80    
48     -128   
-224   -176   
128    -16    
0      368    
-272   -16    
224    32     
-144   96     
160    320    
-128   -16    
64     144    
-32    192    
0      -144   
-64    112    
48     192    
-240   -32    
208    -64    
192    80     
-160   -80    
176    256    
-272   0      
128    48     
-96    0      
80     -112   
96     160    
112    160    
-16    -96    
-112   64     
-80    -16    
64     320    
-272   -64    
240    -32    
-48    16     
160    -64    
112    240    
-256   -304   
48     96     
240    272    
-192   112    
64     208    
32     176    
-128   -192   
0      0      
96     16     
368    128    
-176   80     
0      96     
-144   80     
-16    80     
32     96     
32     32     
96     240    
-48    128    
-16    64     
48     -16    
-176   -352   
464    272    
432    624    
-224   -48    
-64    144    
-80    48     
-16    48     
80     144    
-80    16     
-48    -368   
-16    -192   
480    464    
32     480    
-192   -64    
-224   -144   
256    144    
-16    96     
-16    64     
-192   -160   
80     -80    
16     176    
0      -192   
-144   -96    
-16    -192   
80     32     
96     176    
-128   96     
48     80     
48     64     
64     144    
272    656    
144    640    
64     496    
-176   0      
48     48     
-16    -16    
96     -400   
48     96     
80     32     
16     -16    
-48    -16    
96     128    
-32    176    
32     144    
48     64     
32     96     
-96    -384   
64     -96    
48     -96    
-64    -64    
176    80     
-32    -416   
-96    0      
128    -96    
48     64     
-16    80     
-128   80     
80     80     
160    48     
-256   -240   
160    640    
224    -80    
-240   240    
16     32     
80     -256   
80     -64    
0      -784   
-16    176    
160    -1120  
-112   -96    
144    -224   
16     96     
16     80     
-16    128    
16     0      
64     80     
-16    80     
0      64     
128    112    
-32    -112   
176    112    
144    208    
-176   16     
176    -368   
32     160    
96     -48    
64     208    
-192   -96    
160    528    
-272   -208   
256    -32    
-64    -256   
144    96     
-160   224    
-64    -16    
80     272    
-144   -144   
288    208    
208    -352   
64     192    
48     -528   
0      96     
112    32     
32     112    
16     96     
80     128    
-128   192    
16     -272   
192    352    
-112   -144   
112    112    
48     -224   
32     128    
80     -544   
32     224    
-16    -48    
0      112    
144    64     
-160   32     
272    32     
16     96     
16     112    
-1024  208    
-48    -1152  
-192   496    
368    128    
-576   -48    
496    32     
-224   112    
320    -64    
48     64     
-144   -176   
336    -112   
-240   608    
288    -512   
-112   512    
400    -128   
-224   336    
32     -192   
16     80     
160    -160   
-128   64     
304    -64    
-64    192    
128    -32    
0      -96    
32     -80    
80     96     
-80    176    
224    304    
-96    -1152  
80     -1152  
-48    -256   
32     192    
64     64     
176    32     
0      -32    
144    160    
-64    144    
80     -48    
-96    -96    
176    -496   
48     144    
80     -304   
-80    192    
-448   -144   
0      -880   
0      -224   
128    -112   
48     -208   
224    -192   
-256   -240   
304    -16    
-64    -16    
64     -336   
160    160    
-80    -144   
112    32     
48     112    
-16    -32    
-32    -80    
-48    -48    
-496   -128   
-32    0      
80     -160   
0      -496   
128    -192   
-48    -384   
112    -80    
64     64     
-64    64     
144    -112   
-16    -48    
96     -16    
0      0      
-64    -16    
80     -32    
-784   -32    
96     64     
16     -224   
112    -208   
-48    -64    
32     -128   
32     96     
0      -176   
32     -256   
-16    -256   
-32    32     
112    224    
-224   48     
-32    0      
304    -176   
-176   0      
112    -192   
-80    -32    
32     16     
224    208    
-272   -160   
128    64     
-16    -864   
16     32     
-144   -144   
336    240    
-144   16     
112    128    
-224   -128   
64     -496   
-112   -160   
128    -192   
-224   16     
-16    -272   
-448   48     
64     -480   
48     -32    
-160   -528   
144    144    
-48    -144   
0      80     
-160   -32    
240    144    
-160   -16    
-32    -208   
-48    -32    
-32    32     
-240   -48    
80     -80    
-1856  -128   
-32    -288   
-16    16     
160    -208   
-240   -560   
432    -544   
-96    48     
-16    0      
96     80     
-64    -80    
80     96     
-288   -32    
64     -112   
48     -32    
160    400    
-208   -96    
128    -144   
-64    -32    
256    -304   
-208   0      
272    -1312  
-176   -128   
-32    -320   
-48    -128   
-80    -32    
176    32     
-128   64     
32     -16    
-96    64     
64     0      
-560   -144   
80     192    
-288   -32    
800    -48    
-336   112    
112    96     
-128   -80    
-48    -16    
224    128    
-208   -112   
96     96     
-272   -144   
320    224    
-224   16     
368    -80    
-320   80     
-848   -176   
-16    -16    
-1488  144    
192    -144   
176    160    
-608   -32    
272    80     
-1616  32     
64     -16    
160    16     
-112   32     
112    80     
-64    48     
32     -16    
-48    -32    
-48    0      
64     240    
64     -112   
-224   -32    
-16    0      
-368   -64    
-128   -16    
-512   -48    
-160   -16    
-816   80     
-144   96     
48     -64    
-176   16     
-1536  -896   
1248   1824   
-240   -144   
480    -288   
-432   -400   
-272   -400   
320    160    
-816   -16    
192    -112   
160    -272   
112    368    
-368   -128   
-32    80     
-1200  176    
64     -32    
-192   -160   
96     208    
-240   16     
128    -160   
-272   128    
-48    -96    
-144   288    
-128   256    
-32    -160   
48     -192   
-80    16     
-176   -176   
-96    512    
-592   -112   
32     64     
-64    -208   
240    128    
-160   -32    
-96    32     
16     80     
-144   -96    
-32    16     
-176   32     
-32    -112   
-96    144    
16     -32    
-160   64     
32     48     
-304   -112   
-48    -64    
-16    -128   
48     48     
-32    -608   
-128   -96    
192    96     
128    192    
-80    128    
-32    144    
-16    -304   
80     192    
-16    64     
176    32     
-32    160    
-16    32     
80     -176   
-496   288    
112    336    
64     -96    
-176   160    
96     112    
16     16     
64     176    
-80    128    
-144   -144   
240    336    
32     144    
-48    -16    
112    64     
-176   32     
-64    64     
-480   -32    
160    160    
128    272    
-272   192    
-144   -96    
-144   -240   
-48    -96    
48     48     
144    240    
-352   32     
16     -64    
-320   -64    
32     -96    
-256   -64    
320    464    
-368   -112   
64     32     
-32    288    
64     16     
48     208    
0      240    
0      112    
48     -32    
-16    -96    
-96    -160   
176    16     
-96    96     
64     64     
-48    -128   
-128   128    
48     336    
-192   -304   
0      -368   
192    160    
96     128    
192    160    
-144   112    
-80    -80    
112    192    
-288   -16    
128    0      
-48    0      
-48    144    
0      -128   
-32    144    
160    224    
32     224    
0      -288   
-224   -224   
144    32     
112    144    
-176   48     
32     112    
-112   96     
80     112    
48     16     
-144   16     
144    240    
-208   0      
320    128    
-112   -96    
0      160    
48     144    
32     112    
48     64     
64     192    
0      64     
64     160    
-48    128    
0      16     
-32    -16    
-16    -64    
-96    176    
80     -80    
48     48     
80     32     
-48    128    
64     64     
96     32     
-112   -16    
112    224    
80     48     
-128   0      
160    48     
-240   64     
48     160    
0      -32    
160    80     
-16    64     
-80    32     
144    128    
-128   16     
16     128    
48     176    
-48    -48    
64     80     
48     80     
-96    64     
-32    208    
-64    -176   
304    144    
-16    240    
-48    -64    
-48    240    
-144   -560   
64     144    
112    -16    
32     144    
64     -48    
128    -96    
32     272    
16     112    
-256   176    
-48    -16    
128    64     
80     -16    
48     16     
48     112    
-128   64     
96     -784   
-64    48     
144    208    
0      32     
-1344  -992   
816    592    
-1488  816    
48     48     
-288   240    
-432   -176   
256    496    
-256   -16    
-32    32     
128    -704   
-32    304    
16     -448   
-48    416    
176    -304   
-16    336    
32     -256   
64     368    
16     80     
80     192    
96     -16    
-16    32     
-48    48     
144    144    
-144   -32    
128    -160   
-112   64     
304    -240   
-192   192    
176    -1472  
-256   0      
240    160    
80     144    
16     48     
-96    208    
64     -160   
128    160    
48     160    
80     240    
-160   -32    
48     48     
144    16     
-16    0      
0      64     
-16    -112   
192    96     
-16    160    
96     80     
-16    -368   
16     80     
32     64     
80     144    
64     48     
-16    64     
112    160    
0      -32    
96     80     
-48    -272   
96     48     
-16    32     
96     80     
-16    -304   
80     112    
0      96     
64     96     
64     32     
48     32     
-48    96     
-192   -304   
0      160    
80     -288   
64     80     
32     -96    
96     128    
-32    -464   
64     48     
112    -352   
192    208    
-16    -32    
160    96     
-80    80     
64     -112   
304    656    
-80    -240   
96     0      
48     -176   
128    -80    
48     -208   
-16    272    
-48    -64    
80     48     
16     -144   
176    -16    
-32    112    
0      240    
-48    112    
0      96     
-96    -112   
-32    0      
160    144    
-128   -112   
48     128    
160    -48    
48     80     
48     -256   
-48    -32    
64     -80    
48     176    
112    16     
16     272    
224    400    
32     224    
32     -16    
-48    -32    
144    208    
128    -112   
32     48     
-80    -384   
144    0      
64     144    
144    112    
-80    -320   
32     -1824  
32     96     
96     -1424  
-32    96     
-176   32     
112    -432   
-112   -256   
-80    -848   
128    16     
0      -1120  
48     -16    
64     32     
144    -48    
-16    128    
32     -96    
80     -160   
0      128    
96     -80    
32     64     
-288   -80    
64     -288   
16     -48    
96     -880   
-16    96     
128    48     
-80    -48    
-16    -3520  
128    -304   
16     -176   
-16    64     
-32    -48    
-16    32     
80     -96    
48     -272   
-192   32     
240    192    
-1392  -256   
256    80     
16     96     
-32    -80    
32     -208   
64     -992   
144    0      
-16    -64    
-96    48     
-96    -176   
256    16     
-64    -32    
-192   96     
-112   -160   
112    128    
-240   -48    
96     -16    
-160   -16    
224    -272   
-16    -80    
-80    -128   
224    0      
-96    -1568  
32     96     
16     48     
-48    128    
-48    -112   
64     16     
-144   -64    
304    -112   
-448   -128   
-32    -240   
-1584  -160   
16     0      
-112   48     
-176   144    
-96    -144   
64     -384   
160    96     
80     32     
-96    96     
-144   96     
-832   -1248  
128    -368   
-496   -288   
16     112    
0      208    
-16    128    
-240   -384   
-80    -48    
-16    -176   
304    -64    
-48    -352   
0      -336   
112    608    
-192   -240   
288    416    
-336   -496   
160    304    
224    432    
-112   288    
-448   -416   
-176   -32    
432    32     
-480   -80    
176    -288   
336    496    
-16    16     
144    144    
0      0      
16     -432   
-272   -304   
-48    -208   
-128   128    
-32    64     
-32    96     
-32    -16    
288    240    
-144   144    
-144   -16    
-64    -304   
-32    48     
320    -144   
80     80     
0      160    
-128   -32    
-96    -16    
0      -16    
160    16     
-96    -208   
32     -96    
-80    48     
-32    -16    
0      -64    
64     96     
160    192    
-128   48     
-784   -80    
-112   112    
64     -16    
-192   -64    
-144   -192   
368    32     
-224   176    
0      -16    
96     -96    
0      -32    
0      304    
-32    -96    
96     128    
-208   -320   
64     80     
-528   -320   
-240   16     
-32    32     
-384   32     
48     -16    
-96    208    
-288   336    
144    144    
192    32     
32     -240   
-48    -96    
-336   -208   
-96    96     
-224   -400   
240    -16    
-128   -208   
128    144    
-64    48     
-32    16     
-144   80     
-272   0      
96     176    
-224   48     
80     64     
-80    -112   
64     176    
-208   -96    
32     64     
-16    -32    
96     64     
-48    192    
-128   0      
16     128    
-48    80     
-192   -304   
32     0      
-32    80     
336    496    
-288   80     
-992   64     
-112   -16    
96     -48    
160    144    
32     48     
16     32     
16     112    
-560   -176   
352    128    
-128   -32    
32     48     
0      272    
64     192    
-192   -64    
-96    -64    
-576   -80    
336    160    
-192   -96    
160    -160   
-336   -160   
64     -64    
128    16     
-320   -32    
144    -96    
-272   128    
-112   -96    
368    256    
-416   -16    
16     -128   
0      64     
-400   32     
208    80     
-384   -80    
16     224    
-160   16     
128    16     
-176   112    
-16    176    
112    64     
-16    176    
32     48     
-144   48     
32     0      
-80    96     
112    160    
-176   0      
64     96     
-720   -64    
112    -80    
48     96     
-128   112    
96     -32    
-96    160    
-16    -64    
-16    32     
-48    128    
32     32     
80     320    
-176   96     
32     272    
-288   -384   
192    32     
-800   16     
48     224    
-192   32     
-208   -64    
336    128    
64     64     
-96    -96    
32     -16    
32     208    
-16    144    
-48    0      
32     48     
96     160    
-240   16     
-64    64     
64     128    
0      -64    
48     192    
-144   64     
-64    0      
112    48     
0      -32    
48     0      
-48    48     
32     48     
-16    256    
-128   80     
-768   320    
-352   -288   
-1616  64     
624    576    
784    1152   
-496   -784   
176    1168   
80     -320   
688    208    
-432   -272   
128    208    
-240   -32    
112    -240   
48     304    
112    -256   
-224   144    
32     -48    
-16    224    
96     -16    
96     256    
-32    -16    
48     208    
-128   112    
224    16     
-208   -80    
224    -80    
-128   192    
144    272    
-64    128    
0      16     
64     80     
-96    -80    
112    176    
-32    80     
-32    112    
112    48     
-80    0      
32     112    
-32    16     
48     80     
32     80     
-32    128    
-64    112    
112    80     
-64    0      
48     128    
-64    -16    
48     112    
-80    144    
112    112    
-96    0      
-16    -64    
80     32     
0      112    
192    112    
-128   112    
-16    16     
64     64     
48     112    
-112   16     
-64    16     
-96    -192   
80     128    
-32    96     
-16    -32    
96     -48    
48     48     
128    176    
-64    -32    
48     -80    
208    16     
-64    192    
0      112    
-32    64     
32     -32    
144    64     
176    160    
-80    -576   
-16    32     
128    48     
-64    -352   
160    256    
32     0      
16     160    
-208   -32    
16     64     
288    544    
-192   -48    
32     160    
-16    32     
32     96     
0      80     
-48    -512   
16     192    
0      32     
112    144    
160    432    
-176   -16    
-64    -208   
48     -16    
192    176    
32     240    
-160   -96    
-16    128    
-16    -128   
144    -160   
-48    32     
64     -240   
16     80     
112    160    
-16    80     
16     0      
80     80     
16     80     
80     64     
-16    -16    
48     96     
32     48     
0      64     
-48    48     
80     80     
48     160    
-48    -32    
32     176    
96     -288   
32     48     
-32    0      
224    560    
-112   304    
144    0      
-32    -64    
16     128    
112    -112   
-96    224    
96     112    
64     -96    
80     -96    
-48    -96    
16     -64    
64     -64    
-224   16     
256    -1600  
-48    192    
16     0      
64     128    
-16    0      
176    176    
-128   -240   
288    144    
-96    288    
80     -144   
-96    -16    
112    -176   
-64    -80    
208    -48    
-16    224    
160    -608   
16     272    
-160   16     
128    112    
-96    96     
144    176    
48     48     
0      -16    
128    176    
0      80     
240    -16    
-160   -64    
112    16     
48     -272   
128    240    
96     -496   
0      16     
64     32     
80     112    
-80    128    
-48    80     
304    -176   
-128   0      
-32    32     
64     -144   
32     96     
80     -160   
32     -16    
0      -192   
192    48     
112    -176   
-32    64     
-64    -16    
176    64     
-16    -96    
80     144    
-176   112    
48     -240   
32     32     
224    -192   
16     192    
-48    -96    
-48    224    
-832   -1552  
224    0      
400    192    
-96    -112   
736    320    
-352   448    
-240   -304   
-928   -544   
448    -480   
-96    -16    
-16    -1248  
352    -16    
64     544    
-176   -112   
336    176    
-224   64     
224    48     
80     -528   
-64    -192   
16     -160   
112    0      
-160   256    
96     -144   
-32    -336   
32     -128   
96     32     
208    -80    
-112   -160   
96     -192   
64     160    
80     -112   
-32    -592   
0      32     
208    -560   
-144   80     
160    0      
-32    -64    
-192   32     
144    -16    
80     -80    
48     -192   
0      -16    
64     -176   
96     112    
-96    -736   
16     -208   
96     -64    
176    288    
48     -176   
-32    144    
16     96     
96     -240   
-32    -16    
-176   -112   
-480   -96    
16     -64    
80     -16    
0      -64    
48     -288   
144    -544   
0      48     
80     -80    
16     32     
112    112    
-32    80     
112    -96    
0      -96    
-112   -80    
272    -112   
-304   96     
0      -96    
0      -16    
-16    -544   
112    -64    
-96    -512   
0      -32    
288    -416   
16     256    
16     -176   
80     -80    
-112   96     
-48    112    
-96    -176   
224    -80    
-448   -112   
128    -160   
-352   128    
-176   128    
96     -160   
96     -80    
80     128    
-48    -1008  
112    96     
48     0      
-80    -256   
272    224    
-128   112    
96     0      
0      -224   
-240   -224   
128    -192   
-16    160    
-64    112    
-96    48     
16     -272   
32     80     
224    -336   
-16    128    
32     288    
80     -80    
-96    -16    
160    -32    
-816   -272   
32     -192   
-128   -272   
288    32     
-128   32     
0      48     
-80    -96    
-112   -368   
112    -128   
-96    -256   
288    208    
32     128    
144    208    
-624   96     
384    64     
-288   -96    
192    112    
48     32     
112    128    
-96    -32    
-128   -176   
304    80     
112    32     
64     176    
-144   96     
144    192    
32     48     
-256   16     
-336   16     
192    144    
0      -112   
32     64     
-272   -80    
144    48     
-96    -256   
128    -160   
-192   96     
-336   -160   
32     32     
-976   -384   
-720   32     
-144   0      
-528   -32    
0      240    
-1056  64     
112    -208   
-256   -192   
-64    160    
32     -144   
-48    96     
-112   -48    
-32    48     
-352   -432   
80     -240   
-240   -336   
16     304    
-320   0      
0      176    
-16    48     
-464   208    
-160   -208   
208    48     
272    0      
256    288    
-176   -64    
-480   112    
-16    -48    
-48    -256   
32     112    
80     -80    
112    16     
-48    16     
-176   48     
-16    160    
-352   -272   
128    112    
-128   128    
0      48     
160    96     
-80    80     
-192   -160   
160    48     
32     -160   
64     256    
-48    80     
-592   1136   
-48    2144   
320    192    
-1088  -224   
-224   -736   
768    224    
-512   -16    
-64    16     
-240   416    
224    320    
-224   -448   
64     336    
64     -112   
0      80     
-16    96     
32     64     
48     272    
-64    288    
-48    0      
32     -32    
-16    32     
-128   32     
16     576    
-192   16     
112    -256   
-400   48     
208    32     
-176   80     
-64    256    
144    144    
-96    16     
-128   64     
0      112    
0      80     
-80    -32    
-16    96     
-160   -96    
0      64     
-304   16     
272    224    
-512   32     
144    96     
-160   16     
80     -64    
80     32     
-96    48     
80     16     
32     80     
-64    32     
-16    -16    
16     272    
-32    80     
32     96     
-224   -64    
48     128    
-832   -208   
-96    -256   
96     -112   
192    304    
208    432    
16     240    
-144   -48    
32     48     
48     0      
48     -256   
64     176    
-128   112    
0      208    
-240   -64    
96     112    
0      -48    
0      48     
-16    96     
-32    80     
-16    80     
16     32     
-32    32     
-32    16     
128    160    
144    128    
-144   -16    
-112   80     
32     16     
-96    -256   
0      48     
-224   0      
32     176    
-16    64     
-32    32     
-64    32     
64     64     
-48    96     
32     80     
-64    -48    
80     0      
0      48     
-112   -16    
-176   -48    
112    112    
-32    160    
144    96     
-144   48     
-16    -16    
80     64     
64     112    
-16    96     
0      80     
112    224    
-96    -48    
64     32     
0      112    
-16    32     
16     80     
-64    16     
32     48     
112    144    
0      192    
-64    -128   
-16    48     
80     192    
128    48     
-64    0      
-112   160    
176    16     
16     16     
-16    160    
-80    16     
144    32     
144    -272   
-48    256    
-112   48     
208    160    
-32    160    
96     -32    
-16    96     
-80    16     
48     -160   
96     160    
-96    128    
128    80     
-32    -32    
-16    16     
0      96     
-112   -192   
80     80     
16     -32    
128    192    
-288   -160   
208    0      
112    64     
224    64     
32     240    
0      16     
-48    208    
96     0      
-16    128    
-240   -176   
80     128    
208    -16    
-32    112    
-192   64     
-48    64     
-32    32     
-16    128    
96     112    
-48    16     
-64    -128   
48     -128   
80     80     
176    304    
-208   192    
-128   -112   
0      240    
96     0      
304    -2320  
-32    -16    
80     80     
-96    64     
-112   32     
64     160    
224    32     
-16    96     
208    80     
64     128    
64     -144   
-32    112    
80     -16    
16     -224   
-32    48     
-32    -512   
-16    96     
128    48     
64     352    
-96    32     
80     352    
-208   -16    
48     176    
-32    0      
48     64     
1024   -1504  
496    1744   
-480   64     
-784   -1136  
816    192    
-224   -576   
-96    -32    
96     -768   
144    240    
176    144    
112    160    
-80    208    
320    48     
-48    80     
0      -16    
-16    48     
128    272    
64     -144   
-16    -368   
16     112    
272    -32    
-32    176    
-80    -1232  
208    176    
-80    -112   
128    144    
-96    176    
128    208    
-48    16     
-80    -48    
64     -64    
112    176    
64     176    
32     -64    
-48    64     
64     -448   
128    64     
-64    -960   
128    112    
64     -80    
-16    64     
48     128    
32     96     
112    32     
-48    112    
96     96     
16     -16    
-16    80     
240    -208   
-32    144    
0      -304   
160    208    
-96    -16    
128    240    
-48    -256   
128    -80    
64     128    
-64    112    
128    32     
-16    80     
96     32     
32     -48    
64     112    
16     -96    
-48    -32    
176    -128   
-48    240    
-16    -288   
64     144    
208    -512   
-16    80     
-16    0      
112    128    
16     32     
64     176    
-16    -64    
160    16     
-80    128    
112    -240   
112    112    
0      -112   
144    16     
16     -80    
144    512    
-272   -224   
224    -16    
80     112    
-128   -144   
-16    80     
160    -2048  
-80    -1968  
192    48     
-48    192    
144    0      
-32    16     
192    -368   
64     176    
16     -80    
-16    80     
96     80     
0      -192   
48     64     
80     -320   
-96    240    
-640   -208   
128    -160   
64     -144   
128    -64    
16     -256   
-16    -2528  
-80    -128   
240    128    
16     -32    
-16    -16    
16     16     
80     -336   
96     48     
112    -592   
-144   32     
96     16     
-192   64     
16     -128   
224    96     
192    -336   
-336   -160   
144    -208   
304    -144   
-224   0      
64     -96    
128    -96    
-48    -128   
0      32     
80     -176   
-32    -176   
-176   64     
240    -80    
-96    64     
-16    -224   
96     224    
-112   -32    
272    -48    
-96    -128   
-32    -80    
176    352    
-48    192    
352    48     
-160   288    
-32    -448   
-16    48     
0      -32    
144    -160   
-224   48     
0      32     
80     -80    
0      32     
64     -112   
192    -1104  
-208   -160   
240    -48    
16     0      
-32    -64    
64     0      
0      -16    
96     160    
-144   -192   
-80    -128   
-272   0      
384    480    
-704   -176   
-96    0      
112    -144   
0      16     
224    -64    
80     -176   
-160   80     
176    -64    
32     16     
48     96     
-32    -176   
-32    48     
96     160    
-176   -192   
0      -48    
-224   -96    
192    64     
-544   16     
128    112    
-32    0      
96     -592   
16     80     
-32    -336   
112    64     
-160   48     
80     -176   
-16    -80    
240    -304   
-912   80     
-16    -32    
-976   912    
-96    2064   
-1440  160    
-256   -528   
-112   -752   
752    -1056  
240    672    
-208   -1712  
464    80     
-144   -112   
-160   -240   
-64    0      
96     128    
16     -48    
-16    80     
-96    112    
48     -176   
208    48     
32     -400   
-16    0      
112    -160   
304    352    
-256   64     
176    176    
-384   192    
64     -320   
-176   64     
64     240    
240    192    
-96    -16    
-48    48     
96     -208   
32     32     
64     -64    
112    128    
-384   -208   
80     208    
-160   -320   
-592   -560   
-16    -48    
64     336    
-240   48     
80     32     
16     -16    
48     -64    
-176   -48    
-144   -208   
128    80     
-80    112    
-96    -64    
-144   -336   
-32    144    
-16    16     
-64    -176   
-48    64     
160    128    
-144   304    
-576   -160   
-80    -144   
-16    -96    
-112   112    
-112   64     
64     64     
-224   -160   
48     64     
48     -128   
-16    0      
16     16     
16     -16    
64     16     
-400   32     
-64    48     
-784   0      
-16    32     
112    48     
32     64     
-80    0      
288    544    
-224   -48    
128    -16    
224    544    
-32    112    
-112   64     
-144   80     
-80    80     
-128   112    
-160   -176   
-224   -112   
80     128    
-1008  256    
-96    0      
-192   -320   
112    0      
64     -128   
48     160    
-16    144    
-16    80     
-144   -112   
144    304    
-160   16     
32     -64    
-160   96     
176    112    
32     96     
-496   -112   
16     128    
0      -48    
48     80     
48     -48    
-64    96     
-16    -48    
48     112    
-160   -48    
16     -64    
-112   112    
64     64     
48     32     
-288   -64    
112    352    
-256   64     
16     -64    
-1328  48     
144    144    
-32    -48    
-32    -48    
-32    128    
16     16     
112    976    
-112   -336   
64     -352   
-240   -48    
224    48     
-96    80     
-48    96     
-96    -32    
64     144    
-912   -464   
96     -128   
-16    -160   
208    -288   
-64    160    
96     352    
128    96     
-176   144    
64     -80    
-48    -16    
48     272    
-224   -192   
48     240    
0      96     
32     112    
-208   -128   
48     -560   
-96    48     
256    304    
-208   -16    
192    32     
-288   -240   
16     -32    
128    208    
-208   16     
128    176    
-144   112    
128    128    
-288   -144   
32     0      
-112   144    
-144   48     
-16    96     
0      -432   
-176   224    
144    80     
-160   288    
0      192    
32     -32    
-16    0      
112    384    
-256   -128   
-16    -128   
-16    128    
48     80     
-240   16     
32     80     
0      -128   
-32    208    
160    128    
-176   240    
-176   -96    
352    176    
160    16     
-48    128    
-48    160    
-128   -16    
144    192    
-160   -160   
32     224    
32     32     
16     192    
-96    96     
-272   1088   
-48    944    
-592   208    
-112   -288   
-656   -160   
656    464    
-240   48     
48     -128   
-128   -144   
192    -256   
80     128    
-48    240    
32     160    
-112   144    
160    0      
-48    96     
32     16     
16     96     
-80    -128   
-32    -80    
48     0      
48     192    
-64    96     
-16    16     
-80    -48    
128    -64    
16     96     
128    160    
-96    112    
48     48     
-48    80     
192    48     
-80    176    
112    48     
-64    32     
-64    48     
-16    -144   
64     48     
-64    80     
176    192    
0      -16    
-176   128    
208    32     
-32    144    
144    16     
-48    160    
-16    128    
240    288    
-432   0      
400    48     
-96    160    
0      0      
0      80     
-48    80     
16     48     
96     48     
48     -224   
176    0      
-16    144    
-48    -144   
-16    32     
-16    176    
-48    48     
128    80     
0      32     
32     128    
-112   32     
16     -16    
16     112    
-16    -32    
16     32     
64     -512   
16     176    
-16    80     
80     96     
64     176    
-16    64     
96     32     
-16    -48    
96     96     
-112   96     
32     64     
0      -32    
48     -96    
144    96     
-224   80     
128    -224   
-16    -32    
80     -96    
16     112    
48     -16    
16     48     
16     144    
112    64     
16     -176   
-16    224    
-96    0      
192    32     
64     96     
-32    -320   
80     96     
-48    -160   
48     16     
80     -592   
32     176    
-16    240    
128    352    
-160   64     
160    80     
48     -80    
-144   64     
48     32     
96     96     
80     96     
48     -64    
-144   96     
96     -432   
-80    -48    
128    -1376  
-112   -144   
144    -1632  
-128   16     
96     160    
48     80     
160    176    
-112   96     
192    96     
128    176    
128    256    
32     144    
80     112    
256    0      
-112   240    
304    -48    
-176   112    
96     256    
112    176    
80     80     
-64    64     
16     16     
112    80     
-96    64     
96     -80    
144    32     
-64    -304   
80     96     
-48    -1024  
32     64     
128    80     
0      -16    
64     -336   
16     96     
-16    -32    
64     160    
128    -256   
-112   96     
0      48     
32     -240   
64     -80    
-96    -80    
112    -112   
112    -128   
-16    208    
128    -304   
-48    368    
112    -2544  
144    -144   
-224   -128   
368    448    
-112   80     
96     80     
64     -272   
16     -304   
96     64     
-96    -32    
176    240    
0      -80    
32     -288   
240    112    
64     208    
96     -448   
-64    48     
112    -16    
-16    0      
64     256    
-1712  -80    
-64    -368   
128    -176   
176    -128   
64     -96    
-64    -1312  
0      -96    
96     192    
-144   -176   
48     -16    
160    112    
224    16     
-128   64     
2240   -2800  
-480   -352   
896    752    
-368   800    
944    -736   
-544   -656   
368    -672   
576    752    
-352   -368   
32     -224   
96     -32    
176    256    
64     144    
-192   -640   
208    464    
32     -224   
272    288    
-176   0      
96     112    
-464   -320   
-32    -720   
288    176    
-32    -656   
176    -96    
-48    -1008  
80     -96    
336    176    
-288   272    
16     -80    
-144   -16    
160    96     
0      16     
48     176    
144    48     
-16    -240   
320    -144   
144    80     
16     -256   
-336   -400   
32     -64    
32     -288   
64     -1952  
-320   32     
96     -240   
112    240    
240    32     
48     272    
-240   -240   
224    224    
-208   -80    
-16    96     
144    -48    
-32    0      
16     32     
208    -16    
-80    0      
-160   -1232  
48     80     
288    208    
-96    -96    
128    -32    
32     -80    
-80    -144   
80     64     
-112   64     
80     -16    
-1152  -32    
-32    -288   
-160   32     
-16    -368   
80     48     
64     -224   
16     0      
128    160    
80     32     
-48    32     
272    432    
-192   224    
-32    32     
-368   80     
-64    -128   
-320   -176   
80     -160   
-32    16     
32     -272   
48     -32    
96     -320   
144    352    
-176   -512   
-128   -480   
-32    48     
96     32     
-48    64     
0      80     
-16    176    
-32    -32    
32     160    
-176   -240   
192    -96    
16     -32    
96     224    
16     -352   
-32    48     
-48    32     
128    128    
-144   16     
112    144    
-272   64     
96     -400   
-208   -256   
48     144    
96     192    
16     -80    
-656   -32    
96     -336   
176    96     
-80    -128   
64     -16    
-144   0      
0      -32    
48     48     
-32    -160   
-48    -112   
-128   -64    
-64    -288   
128    -64    
-144   -464   
-336   -528   
96     -336   
-1424  -240   
-16    240    
-224   -128   
-32    80     
32     -64    
-352   -16    
32     -32    
-272   96     
112    -16    
-16    32     
16     64     
-64    -80    
-256   -96    
-528   -224   
96     64     
-352   -48    
16     0      
-128   16     
-288   176    
80     80     
-192   224    
-112   64     
-16    96     
-16    80     
-656   -48    
-240   -240   
176    -128   
-16    64     
80     -48    
80     -32    
80     176    
48     208    
-96    -192   
-224   -112   
48     -64    
-16    112    
-48    32     
-64    -32    
-96    -48    
-128   -272   
-144   -32    
-80    -16    
-48    160    
-160   160    
64     128    
-160   -256   
224    208    
-80    -16    
-64    -48    
96     -32    
32     192    
-128   0      
-96    128    
-96    -32    
-144   208    
-32    -256   
80     112    
-48    48     
-128   -144   
48     144    
-112   -16    
-192   128    
16     112    
16     -48    
96     16     
-144   96     
-16    -48    
16     128    
-128   32     
-368   -272   
-192   304    
-192   -816   
-48    208    
240    -304   
-320   160    
352    -480   
-448   912    
208    -672   
64     480    
-48    -496   
-128   208    
-80    48     
96     0      
16     224    
-80    -368   
-240   272    
-240   -240   
64     272    
-976   -160   
-64    160    
128    -128   
-144   272    
144    -128   
-144   176    
144    -48    
-176   208    
192    64     
-128   112    
0      -128   
-128   240    
0      -64    
-144   -16    
32     176    
-80    32     
0      160    
48     -144   
32     160    
224    96     
-176   64     
-96    -16    
112    160    
-48    0      
-16    -32    
-64    -16    
-176   80     
160    64     
-176   32     
-48    -80    
-352   -288   
-320   128    
16     144    
32     32     
-32    96     
-144   80     
64     -80    
-16    16     
-64    16     
-64    128    
32     48     
-112   48     
80     112    
-160   -80    
-16    112    
-192   -112   
128    -48    
16     112    
16     160    
-80    112    
32     80     
64     0      
16     96     
-48    240    
-144   16     
192    -16    
-64    80     
-96    -16    
64     32     
-176   160    
64     176    
272    -32    
-48    64     
0      192    
-128   -160   
64     -160   
-48    128    
-160   0      
48     32     
-112   48     
-64    224    
-32    -32    
48     112    
-96    -32    
48     0      
32     64     
-48    -128   
192    272    
-192   80     
224    336    
-64    80     
160    112    
-80    32     
208    240    
-256   16     
-16    -48    
-32    -96    
192    32     
-64    -160   
48     96     
80     176    
96     128    
-64    0      
0      256    
32     48     
64     80     
-32    80     
16     80     
-16    64     
-32    -32    
16     32     
192    416    
-48    176    
-80    0      
-64    48     
160    -32    
32     176    
-32    336    
80     336    
112    64     
-80    272    
-16    112    
176    272    
16     336    
160    160    
-64    320    
-240   -128   
-48    0      
-32    16     
64     -640   
80     176    
64     16     
-144   176    
0      0      
-80    16     
80     0      
112    192    
80     176    
16     224    
-32    64     
-160   -128   
160    64     
16     32     
32     176    
32     -512   
16     -48    
128    -48    
224    96     
48     224    
48     80     
96     480    
-176   -64    
-80    -160   
64     -112   
32     -112   
160    144    
-160   112    
-64    -480   
432    32     
32     416    
-112   192    
-304   -80    
320    64     
112    80     
96     256    
-288   176    
16     32     
32     -224   
112    64     
144    112    
-112   240    
-80    0      
80     -96    
128    16     
160    -624   
-160   112    
-80    -320   
240    176    
80     272    
0      48     
-64    -144   
80     32     
16     16     
-96    96     
112    112    
-112   176    
48     -48    
176    0      
224    32     
-32    -112   
1296   1520   
-1328  -1776  
480    752    
656    672    
624    -128   
-1040  -624   
368    288    
-256   128    
400    -160   
-496   592    
176    -336   
-160   64     
-96    -48    
496    224    
-400   -256   
224    416    
-48    -480   
336    224    
-160   -800   
320    -16    
-48    368    
48     -160   
0      320    
96     32     
-16    416    
-192   -176   
-320   176    
304    -560   
112    656    
-256   -848   
32     192    
-256   -576   
224    144    
-112   48     
64     -160   
48     -32    
48     16     
-160   -80    
-80    176    
128    112    
96     288    
-80    160    
112    -112   
-16    112    
48     -176   
-64    64     
96     80     
64     -64    
192    32     
64     128    
160    -160   
-32    224    
-80    -48    
256    192    
-64    176    
0      -464   
48     -64    
192    -128   
-176   -160   
32     -64    
64     -48    
32     16     
32     176    
352    -32    
-208   32     
-48    64     
-48    -896   
112    208    
-512   -80    
112    -880   
80     -272   
160    -2752  
-16    -400   
0      144    
112    -48    
96     112    
240    368    
-144   416    
80     -240   
496    -560   
-448   -240   
144    -112   
128    96     
-560   -176   
-96    -352   
240    64     
-256   -272   
112    -32    
-80    -96    
32     -80    
144    -16    
-144   -160   
48     -336   
64     176    
112    304    
-80    288    
112    -128   
16     -288   
-288   -144   
64     -256   
0      32     
192    -80    
48     16     
0      -624   
0      -64    
16     -3200  
80     -80    
240    192    
128    336    
96     384    
-96    112    
-128   -384   
144    -64    
-96    -64    
80     -16    
-1376  80     
16     -224   
48     192    
80     64     
64     -144   
-256   -528   
80     -144   
192    -96    
-64    80     
-192   -240   
240    144    
-96    16     
0      80     
-64    0      
80     16     
-992   -48    
-128   -80    
128    -16    
112    -128   
32     160    
112    80     
-16    -48    
-144   -736   
80     0      
64     -144   
176    128    
-16    96     
48     -16    
16     176    
0      -176   
-80    -32    
0      -32    
48     288    
-16    -48    
144    0      
-128   -256   
128    -16    
48     -320   
-64    112    
144    240    
-176   -112   
0      48     
-64    -544   
-48    -304   
128    -96    
-112   112    
0      16     
-368   -160   
64     -336   
-832   -224   
96     -336   
-144   -32    
96     -352   
64     144    
96     -240   
128    -16    
-224   0      
64     160    
-368   64     
0      -48    
288    -16    
64     16     
-144   80     
-112   -80    
96     -64    
144    64     
-32    16     
160    -112   
-48    64     
224    -96    
-144   -16    
-464   64     
32     0      
-48    32     
128    -16    
-96    -16    
0      -96    
-112   -16    
96     -32    
-16    48     
112    32     
-96    80     
48     -384   
32     1696   
-1248  112    
-640   352    
592    688    
464    512    
-336   -800   
-64    432    
416    400    
224    -256   
-272   -32    
160    -240   
-224   544    
-736   -928   
-256   784    
-208   -752   
-864   464    
224    -368   
-160   464    
80     -384   
-544   192    
16     -160   
16     256    
48     32     
-48    224    
-48    -192   
-256   -352   
208    208    
-144   -208   
-32    -48    
-368   16     
-48    32     
192    128    
-208   16     
-48    -80    
-400   96     
16     16     
-512   64     
32     -128   
-112   64     
160    -32    
-176   -64    
-16    16     
-112   64     
128    -16    
112    144    
-272   -128   
-96    -16    
-320   -32    
0      128    
208    -112   
-208   128    
-96    32     
-32    -48    
-816   -32    
-48    16     
-32    -112   
16     -16    
-16    -16    
32     -64    
32     80     
-144   -32    
48     160    
16     -48    
48     112    
-16    96     
0      -112   
-416   -16    
-176   -64    
208    32     
-32    96     
64     -64    
16     48     
-16    -80    
-128   112    
-32    64     
32     16     
64     -16    
0      -208   
64     192    
-240   0      
16     -80    
-16    -48    
0      160    
-224   -144   
208    112    
32     -240   
272    448    
-256   -80    
64     -192   
48     16     
-144   32     
80     16     
-80    -32    
-48    80     
16     64     
-64    0      
-176   48     
0      16     
-288   -144   
16     -128   
-1520  176    
96     208    
-272   80     
32     16     
0      -96    
16     208    
48     80     
-128   -208   
128    96     
16     192    
80     16     
-32    112    
48     64     
-128   -64    
32     16     
-208   96     
224    416    
-64    128    
80     224    
-304   -80    
112    -16    
-32    32     
48     32     
-48    64     
-192   -320   
64     -192   
-32    96     
-32    144    
-176   32     
-112   -272   
-176   16     
144    208    
-64    144    
-32    224    
-64    -128   
-144   -320   
96     208    
80     0      
80     192    
-240   -80    
128    80     
-208   -32    
48     16     
16     0      
96     48     
-624   -48    
112    -160   
32     -16    
96     192    
16     128    
0      160    
16     32     
80     80     
32     48     
-192   -16    
0      128    
-48    -16    
112    160    
-208   32     
112    -16    
-48    96     
32     96     
0      80     
-48    32     
0      144    
80     112    
-144   -32    
16     0      
80     160    
-48    -80    
192    192    
-192   48     
144    32     
-304   48     
96     48     
80     112    
-16    192    
0      96     
-80    -48    
208    80     
16     144    
-64    16     
-80    -80    
176    160    
160    80     
-80    -64    
-32    80     
-80    96     
32     -80    
-400   176    
224    -64    
32     176    
-16    96     
32     48     
32     -48    
176    192    
112    144    
-80    128    
-288   128    
-912   976    
-336   144    
-272   416    
352    -320   
288    800    
-608   80     
192    400    
-176   -80    
960    -144   
-784   336    
336    -32    
176    128    
-48    224    
-16    0      
48     240    
-272   -32    
160    -32    
16     -96    
128    16     
-96    128    
128    96     
144    368    
-208   -16    
160    64     
64     -112   
176    400    
-96    16     
-128   -208   
240    64     
-176   64     
240    96     
-80    192    
-80    -96    
160    304    
96     32     
80     -2288  
-112   -416   
256    768    
-16    480    
112    -48    
-128   48     
112    -16    
-48    -80    
0      160    
32     256    
64     48     
48     -16    
16     -32    
32     -144   
96     272    
64     16     
80     144    
32     -128   
-16    0      
64     48     
64     32     
-32    112    
80     256    
-32    320    
48     160    
-16    64     
-16    -80    
80     -48    
16     -144   
-16    208    
16     -400   
-16    -96    
128    192    
-80    80     
16     160    
128    48     
16     112    
32     80     
16     -64    
128    144    
-80    -48    
192    112    
-32    128    
-80    -304   
176    48     
-240   -144   
96     80     
224    -656   
-256   160    
-32    -48    
80     -16    
-96    80     
160    480    
-176   160    
32     288    
32     -32    
-96    -144   
160    112    
48     -112   
112    128    
16     -48    
-48    -400   
80     -448   
64     96     
96     -864   
160    384    
-16    256    
-32    112    
-32    -64    
128    80     
-96    64     
128    -320   
64     336    
48     -240   
16     96     
64     -304   
-112   64     
80     -656   
32     128    
96     -816   
-64    144    
64     0      
0      0      
-144   -192   
256    368    
16     144    
48     64     
-80    160    
160    -240   
128    144    
-320   -64    
352    32     
-64    -640   
48     144    
-32    384    
160    80     
96     272    
-80    336    
272    112    
-128   -48    
48     288    
48     128    
272    48     
-48    -16    
-176   64     
336    -128   
-32    112    
-64    -64    
224    128    
16     0      
48     80     
-80    -192   
192    -224   
-176   -16    
80     -240   
160    336    
-48    -144   
96     0      
96     -240   
48     112    
-32    -304   
192    112    
48     128    
-80    16     
144    -608   
-16    -224   
48     80     
-64    -1008  
-32    -80    
-336   -16    
-64    32     
112    -128   
16     -640   
80     -336   
272    -640   
80     128    
-32    240    
-112   160    
144    16     
-16    96     
176    -288   
-112   32     
80     -144   
320    -160   
-336   80     
16     -128   
0      -96    
112    -192   
112    48     
-16    -144   
-16    144    
0      -1232  
-16    -176   
16     160    
96     96     
32     0      
16     176    
48     -208   
112    -32    
-368   -64    
352    -224   
-912   -32    
128    -64    
2592   944    
-1664  -544   
592    -512   
464    -672   
736    -176   
-272   208    
-160   -784   
320    704    
336    -176   
-848   336    
160    -592   
-240   256    
64     -48    
-400   224    
-336   -96    
112    -128   
112    176    
256    -128   
-240   -64    
144    -144   
-32    -416   
128    -64    
-80    176    
128    -112   
-112   112    
192    -288   
-112   272    
64     -192   
-400   288    
-16    -464   
-672   16     
0      -224   
48     96     
96     -112   
-32    112    
112    -720   
-80    48     
144    -64    
-128   176    
96     32     
96     -96    
-272   32     
112    -144   
-320   -16    
64     -96    
-208   0      
64     32     
-288   80     
160    -416   
-144   64     
272    -1008  
-144   80     
192    32     
32     96     
-64    -48    
80     0      
-128   64     
96     -176   
-160   160    
64     64     
-320   16     
176    16     
-720   0      
32     -160   
64     208    
-16    -336   
112    64     
16     -352   
16     -96    
-240   80     
32     -144   
-16    32     
-64    112    
-192   64     
208    -144   
-400   -208   
352    -128   
-160   -32    
80     -256   
48     112    
-64    -336   
176    48     
-288   80     
64     288    
-336   -128   
32     -32    
32     -48    
-128   -144   
-304   -256   
272    -144   
-240   -176   
80     -80    
-16    112    
-32    -160   
0      96     
-1552  -272   
-512   0      
16     160    
-16    64     
32     208    
0      160    
-48    48     
-48    -112   
-112   -16    
80     -16    
-112   16     
-128   -304   
144    208    
-1280  -16    
48     -32    
-368   -144   
-192   64     
144    160    
-112   48     
-80    16     
-768   -32    
16     208    
16     48     
0      128    
0      -96    
-16    -224   
-64    -192   
128    240    
0      32     
-176   -96    
-16    112    
-144   32     
288    224    
-240   -144   
96     208    
-192   -192   
-64    -80    
-576   -96    
32     208    
160    176    
-112   -16    
-320   -176   
208    192    
-240   -112   
128    128    
-128   16     
64     48     
32     64     
-16    -96    
-16    128    
-112   32     
-48    16     
16     368    
-240   176    
-928   -208   
48     -176   
80     32     
32     128    
-128   -80    
-80    -96    
208    160    
-96    224    
-96    -48    
-96    -96    
64     320    
-176   64     
-80    -16    
-128   -160   
208    208    
-1168  32     
48     16     
0      144    
48     48     
0      -272   
-144   80     
-16    80     
0      -32    
-48    208    
48     -48    
0      32     
-208   -16    
96     -144   
-96    32     
-128   144    
-48    -96    
-32    192    
-272   -272   
16     176    
32     16     
0      144    
208    -32    
-224   144    
32     -32    
-32    128    
16     -64    
-16    48     
-32    144    
64     -96    
48     96     
-240   80     
96     -144   
-720   192    
208    16     
-16    96     
-848   -352   
208    -1296  
80     384    
-176   464    
16     160    
-448   528    
288    -640   
-160   448    
96     -112   
64     256    
-160   -176   
32     400    
-480   -208   
-16    240    
-32    -16    
192    272    
-176   128    
48     -256   
-240   16     
272    32     
-80    80     
-208   -80    
400    -112   
-432   32     
96     32     
-144   -32    
-80    -112   
-16    0      
-176   96     
160    64     
-224   48     
96     -112   
32     208    
128    48     
-64    112    
128    48     
-80    -16    
64     176    
-128   0      
32     144    
-144   16     
144    80     
16     80     
48     128    
-16    144    
-128   16     
112    112    
-16    64     
112    96     
-112   -96    
48     128    
-32    16     
0      -96    
48     80     
-96    144    
64     144    
-128   -48    
128    96     
-16    112    
-80    -32    
128    128    
-48    112    
0      0      
0      48     
64     -112   
80     288    
-256   96     
192    -48    
-32    64     
80     208    
-384   -80    
48     16     
64     32     
64     0      
80     80     
80     64     
-176   144    
-48    0      
64     112    
-80    -32    
144    128    
-144   96     
192    432    
-288   -112   
144    -32    
-32    -112   
112    32     
-64    176    
160    224    
-176   192    
80     0      
32     -16    
16     32     
32     48     
80     192    
-96    -48    
240    128    
-16    176    
-176   64     
-64    -64    
16     144    
-48    96     
160    -16    
-32    176    
16     -64    
16     96     
32     -64    
0      144    
160    80     
48     80     
-192   -80    
-48    -16    
96     64     
80     176    
-32    64     
-32    64     
-144   112    
240    224    
32     128    
64     -48    
-128   160    
-32    -48    
240    32     
32     -32    
-304   144    
480    160    
-256   32     
80     -48    
-80    160    
96     -80    
16     16     
-80    -1568  
0      16     
64     32     
-160   -160   
96     80     
-80    240    
192    0      
320    80     
-336   48     
144    256    
176    -32    
-64    80     
-112   -64    
-64    -320   
128    32     
176    -288   
-96    80     
224    0      
-144   80     
-32    0      
64     112    
16     16     
32     176    
80     -16    
-48    112    
32     -64    
0      32     
16     16     
48     -48    
-48    160    
176    -672   
-64    96     
144    -2048  
112    368    
-208   -64    
128    0      
-80    -224   
160    -80    
48     0      
16     352    
-176   80     
-16    144    
224    -64    
32     48     
-48    96     
-48    -16    
32     32     
80     -464   
-32    128    
32     -608   
96     0      
64     -32    
128    192    
-128   -272   
112    304    
80     400    
-176   -80    
64     -32    
176    -304   
80     64     
16     -192   
0      192    
64     -336   
-96    160    
-80    -896   
80     -16    
160    32     
2368   1328   
-1520  96     
928    224    
48     512    
1072   -1504  
-272   352    
-64    -464   
-176   816    
368    -512   
-384   384    
16     -320   
208    144    
-304   -1392  
384    -160   
-128   192    
112    32     
-32    208    
256    336    
64     192    
112    -304   
48     144    
-32    -96    
80     208    
-128   -64    
352    48     
64     -160   
0      112    
32     96     
128    144    
-32    64     
144    96     
-32    0      
32     80     
32     240    
96     -240   
128    128    
-80    -64    
80     224    
32     -256   
48     80     
48     -352   
176    368    
-16    0      
256    -128   
-256   32     
160    -1744  
16     -144   
-1216  368    
-144   -224   
16     -144   
64     -48    
32     -272   
160    -320   
96     -368   
16     224    
48     48     
-80    -160   
48     48     
80     -336   
-16    -48    
224    -208   
64     256    
-160   128    
96     -400   
48     -176   
64     -560   
64     -48    
112    -1152  
32     -16    
16     -48    
96     -16    
32     -576   
96     -32    
64     32     
-144   80     
80     32     
-96    -608   
-80    -96    
-320   -176   
176    -112   
160    -32    
32     32     
64     -288   
64     -112   
-64    -144   
16     -192   
80     -336   
-240   -96    
32     -176   
-48    96     
80     -112   
112    -32    
-480   -48    
32     48     
-640   -32    
16     -32    
112    16     
64     -16    
-16    -64    
96     -64    
-64    -48    
112    -64    
0      64     
32     -176   
80     112    
-112   -32    
144    -112   
-64    64     
-16    -32    
-64    64     
-32    -48    
96     -128   
32     -256   
80     -96    
128    -288   
-64    32     
48     -416   
16     80     
48     -48    
32     112    
32     144    
-32    -112   
-48    80     
0      -96    
-48    96     
-64    -160   
336    160    
-272   -192   
112    -208   
-32    -272   
80     112    
80     -672   
-48    -64    
96     32     
-64    0      
96     -80    
16     144    
-64    -240   
16     128    
-400   -80    
80     -16    
-64    -80    
112    128    
64     16     
-80    -240   
80     112    
-208   -688   
176    -160   
256    160    
-144   -96    
112    128    
-96    -208   
192    176    
48     -416   
-160   112    
32     -80    
112    176    
-192   -48    
0      -112   
256    -400   
-16    192    
144    -112   
-240   -16    
176    160    
112    -48    
-240   144    
-16    -240   
-48    240    
16     -160   
0      -48    
-96    48     
-96    -96    
-240   -160   
496    -48    
-192   -256   
256    48     
-112   16     
128    48     
-144   0      
-208   16     
-32    64     
-64    64     
-80    -80    
176    48     
-64    80     
-64    -64    
-128   -16    
64     -16    
368    -192   
-496   32     
48     160    
-592   -160   
-912   -128   
96     -96    
-960   64     
144    -112   
-608   160    
32     96     
-560   -1392  
-656   352    
1232   1152   
576    176    
-688   -880   
864    800    
-448   336    
0      -112   
-320   -976   
224    -144   
240    80     
-208   96     
176    0      
-352   -160   
-128   -16    
-1824  -48    
-144   32     
96     -64    
112    144    
-368   -160   
336    368    
-400   -112   
144    48     
-112   112    
-32    -16    
0      112    
-64    16     
-192   -112   
80     16     
-96    144    
0      -80    
-144   112    
-224   32     
80     64     
-144   -64    
48     80     
-384   -240   
256    32     
-64    144    
144    80     
-128   -16    
-80    160    
-128   112    
16     -16    
-48    0      
-272   64     
112    96     
-800   -80    
-80    -80    
80     -16    
-48    160    
160    -96    
-160   64     
80     -16    
-112   48     
-144   48     
32     96     
-112   -64    
64     80     
0      96     
-208   0      
-32    48     
-208   -16    
-48    80     
160    32     
-192   208    
0      -16    
176    64     
208    128    
32     96     
16     224    
-80    0      
96     -32    
48     96     
-144   48     
-256   -96    
16     128    
-48    32     
144    48     
-416   -16    
-16    80     
96     192    
-240   80     
208    -176   
-32    192    
-144   160    
0      16     
0      128    
-80    -208   
160    80     
-208   64     
32     32     
-16    80     
-128   272    
-784   0      
-160   -64    
192    -48    
-32    32     
16     112    
-112   32     
32     -16    
-32    16     
-32    112    
-80    96     
160    208    
-160   -224   
160    16     
-272   -64    
144    128    
-512   -208   
-32    -32    
-48    112    
48     160    
-48    96     
0      -32    
32     -64    
0      64     
-80    -144   
32     -224   
-112   48     
144    112    
144    160    
-208   -48    
-352   16     
240    -112   
-96    -16    
80     144    
32     240    
336    192    
-272   64     
112    160    
-176   80     
336    128    
-128   80     
192    48     
-96    192    
-256   -16    
96     64     
0      144    
112    144    
80     0      
-128   -16    
16     48     
-224   -112   
144    0      
16     -80    
-80    16     
160    32     
-112   32     
48     -32    
-144   32     
128    80     
-80    -96    
-16    64     
80     160    
64     112    
144    304    
-112   0      
48     160    
-80    48     
160    48     
-32    112    
144    208    
-160   96     
160    64     
-64    -128   
64     144    
-288   -976   
240    304    
272    512    
160    240    
-144   272    
0      -16    
64     336    
192    -384   
16     272    
-160   0      
-64    224    
-64    -48    
176    -32    
-128   160    
80     -16    
-96    112    
16     96     
32     176    
48     -208   
-32    128    
64     176    
176    128    
-16    112    
48     128    
-48    16     
-16    64     
-16    -288   
176    192    
-288   0      
-16    176    
-16    0      
16     160    
1760   -2160  
80     0      
736    16     
-512   -272   
-336   -80    
272    -864   
-320   -240   
560    112    
-64    352    
-368   -176   
192    304    
-112   -240   
16     16     
256    48     
112    160    
16     0      
-176   80     
-16    176    
304    448    
-16    176    
-32    48     
-80    192    
32     336    
-96    112    
128    -176   
-80    -80    
32     -176   
-192   -432   
208    112    
-336   -880   
304    96     
-128   208    
144    -32    
16     192    
16     64     
96     48     
-112   16     
48     -176   
-16    -16    
16     32     
-96    32     
-16    64     
48     16     
96     0      
-96    -688   
112    96     
144    -1536  
96     96     
-288   -160   
144    64     
-32    -176   
176    112    
-128   64     
176    176    
-48    0      
64     80     
16     176    
-16    -112   
224    160    
-64    128    
128    32     
-32    -1552  
128    112    
-32    144    
160    0      
192    -32    
112    96     
-32    96     
64     64     
32     48     
32     -176   
96     112    
32     32     
-16    112    
64     -272   
-32    -64    
64     -1376  
224    448    
-176   -512   
32     176    
0      -304   
48     -80    
-48    -64    
224    352    
-224   96     
112    -144   
48     -32    
160    -96    
112    384    
-160   -400   
-112   -48    
0      -576   
96     64     
112    -144   
48     144    
-96    32     
80     144    
-112   -48    
208    192    
0      32     
224    -16    
-48    112    
-32    -224   
48     16     
144    0      
96     96     
0      -16    
-64    0      
112    -272   
48     176    
-32    -32    
160    208    
-48    112    
160    128    
-112   64     
112    -96    
32     96     
160    -160   
-64    -16    
96     -160   
0      240    
80     -160   
-32    -48    
-80    -896   
160    144    
32     -128   
48     144    
-96    80     
64     -16    
192    -976   
-64    -288   
144    -128   
-16    16     
112    144    
64     -144   
80     256    
-112   -96    
16     -208   
16     -352   
64     -560   
80     208    
-32    64     
-32    -112   
-192   80     
128    -656   
48     -112   
-224   -928   
272    -208   
224    0      
-16    0      
-16    176    
0      -64    
48     112    
48     112    
32     -336   
-176   -32    
-32    48     
304    -624   
-64    528    
64     192    
128    304    
-80    -624   
192    -64    
32     -256   
-32    -32    
64     -496   
144    -64    
32     -336   
-320   -160   
-64    -96    
80     32     
112    32     
192    -240   
-352   0      
112    -160   
272    32     
192    -48    
0      -336   
96     224    
176    0      
64     -80    
160    -176   
-64    0      
64     -80    
144    48     
-96    48     
80     32     
32     -208   
-32    -32    
320    16     
-560   96     
80     -112   
-160   32     
320    -96    
192    -16    
32     -432   
16     192    
-32    208    
-64    96     
400    -640   
992    608    
720    192    
-208   480    
-304   -384   
0      -16    
128    -80    
656    768    
-1120  496    
-32    -400   
-48    -256   
-16    -352   
32     32     
208    -592   
-80    128    
48     -224   
32     32     
-144   16     
144    0      
-80    -80    
64     -48    
-32    -16    
0      96     
-304   0      
-80    -128   
-1008  48     
192    16     
64     80     
208    -400   
-192   16     
192    -112   
-16    0      
96     48     
32     48     
64     32     
-48    -368   
-48    64     
-16    -96    
96     -48    
-176   16     
256    144    
-16    -80    
32     -16    
96     -192   
-16    192    
240    128    
16     -96    
-80    208    
-112   16     
16     -96    
-80    -112   
64     -144   
32     112    
-224   112    
192    -112   
-96    -144   
192    -368   
0      96     
48     -368   
-144   0      
80     128    
48     48     
-272   -48    
96     112    
-240   -144   
144    80     
-48    16     
48     144    
-160   -16    
112    -160   
32     96     
48     -32    
-16    112    
-784   144    
-1504  0      
-16    -192   
-1072  -144   
-224   192    
-48    16     
-16    64     
192    80     
-64    144    
-32    -320   
-80    -32    
-1088  -112   
144    256    
-144   -144   
416    160    
-336   -224   
96     80     
-240   -64    
-192   16     
-80    -32    
-240   224    
-128   144    
-912   -128   
16     240    
-96    -80    
16     -80    
-208   -16    
-32    80     
-32    -48    
-64    64     
176    176    
-272   -112   
32     64     
-80    48     
176    192    
-96    -32    
32     32     
-224   48     
48     0      
32     0      
64     112    
-64    -64    
64     32     
-192   -240   
128    112    
-16    16     
128    48     
-176   240    
144    144    
-128   32     
-320   -112   
-144   32     
16     128    
160    -208   
-816   -288   
-48    304    
0      -80    
192    80     
-144   -304   
-128   0      
-112   -96    
-32    -48    
48     -16    
64     -208   
-192   80     
-256   -64    
-128   16     
0      32     
112    64     
-736   -208   
32     256    
0      -192   
-16    80     
-112   -224   
0      -32    
96     128    
16     192    
32     48     
-64    112    
-80    64     
128    160    
16     48     
-80    -128   
-32    112    
-192   -16    
80     272    
-336   64     
32     112    
-32    144    
-64    -32    
-16    96     
-64    0      
-16    128    
0      -96    
192    352    
64     -176   
-192   0      
-48    -48    
-48    144    
-96    -144   
208    32     
-624   0      
16     96     
-160   32     
32     32     
64     96     
-48    -16    
96     -144   
0      -48    
-96    192    
0      80     
-240   -16    
-64    224    
-32    -32    
-80    0      
144    48     
-448   -16    
-16    96     
48     48     
0      -48    
48     224    
-96    32     
112    160    
64     32     
32     -16    
1984   -1280  
-128   208    
928    128    
-480   624    
-144   -416   
304    -816   
-848   -256   
608    864    
-128   128    
-144   -16    
64     -16    
16     160    
0      -32    
-144   -80    
240    224    
32     160    
48     240    
-176   192    
-80    -160   
48     160    
32     64     
-32    176    
-64    256    
0      112    
80     -48    
-176   144    
-16    -48    
64     -96    
-320   -368   
432    48     
-272   16     
0      80     
-96    32     
64     240    
-192   -96    
96     64     
0      64     
80     -224   
96     128    
-48    160    
112    112    
-32    192    
16     96     
32     16     
-128   144    
0      128    
48     224    
-128   32     
112    112    
16     -32    
-32    0      
192    144    
-96    48     
-64    224    
0      160    
-32    96     
80     32     
336    832    
-368   -576   
384    336    
-208   -208   
352    144    
-32    128    
64     -48    
-224   80     
64     128    
0      128    
32     32     
16     64     
64     80     
48     96     
16     96     
0      64     
-64    48     
-32    112    
-32    176    
-80    -160   
-112   -96    
-304   144    
112    32     
-96    -288   
16     -80    
48     -16    
160    -96    
-48    208    
16     144    
-112   0      
144    -64    
-32    272    
16     224    
-112   -128   
96     80     
64     160    
96     -256   
-16    80     
32     160    
160    224    
-80    0      
80     80     
0      32     
80     176    
32     192    
16     128    
-16    0      
32     48     
16     -80    
48     80     
-16    -16    
80     32     
48     96     
0      -1024  
32     64     
32     160    
80     112    
48     96     
16     80     
-16    -48    
-48    -112   
32     -16    
0      176    
192    80     
-112   128    
-32    160    
-16    -112   
32     -112   
-64    -544   
176    64     
-16    320    
-48    176    
144    16     
-144   -48    
128    80     
0      -96    
32     80     
112    176    
-128   288    
464    176    
16     400    
-176   -192   
160    208    
-144   -496   
112    112    
64     -432   
80     80     
32     320    
0      144    
80     -464   
-192   -160   
0      -272   
160    240    
-48    64     
32     48     
96     272    
0      -192   
96     96     
-48    -48    
-48    96     
-16    -1440  
144    -800   
-96    560    
400    176    
-160   96     
-64    192    
160    112    
-32    112    
128    64     
-272   -208   
128    -48    
-80    -16    
32     64     
144    -64    
-16    16     
224    -624   
-64    -80    
-208   -400   
224    160    
144    0      
160    240    
64     176    
-32    112    
112    112    
160    208    
0      64     
-80    32     
32     -96    
128    -480   
208    192    
-16    -208   
128    144    
64     -128   
16     96     
192    16     
16     320    
-176   0      
144    256    
-160   -80    
208    -80    
16     16     
32     -672   
592    -288   
768    640    
-16    -240   
-624   -432   
704    224    
-352   -224   
272    208    
-304   496    
64     176    
-208   -176   
160    -208   
80     48     
80     32     
-48    -32    
32     80     
96     -112   
-16    0      
112    96     
32     -192   
32     -16    
16     -64    
0      -272   
208    80     
-96    -336   
128    48     
-976   -80    
48     -464   
96     -176   
80     -1120  
-48    -32    
144    64     
0      -48    
32     176    
64     16     
32     -832   
128    128    
64     352    
0      80     
32     -272   
-96    176    
-880   -208   
0      -496   
0      -16    
208    -96    
0      -32    
32     -640   
32     -48    
96     48     
-160   -96    
192    -128   
32     64     
16     -224   
-144   64     
-32    -160   
80     -128   
80     96     
48     -48    
64     16     
-48    -16    
112    -208   
64     -160   
32     32     
32     -544   
48     -64    
112    16     
-128   176    
-16    -208   
48     -144   
48     -64    
-64    144    
-112   0      
32     -176   
-624   -16    
-32    0      
16     -80    
208    192    
112    192    
288    0      
-96    -224   
208    -576   
-64    256    
-112   -80    
304    496    
-352   -192   
352    -64    
48     32     
-272   -416   
64     -16    
-256   -48    
272    160    
-128   -176   
16     -112   
112    -496   
-80    144    
-80    -1888  
80     -32    
16     -208   
80     128    
-224   -96    
112    -112   
-288   -112   
0      32     
128    80     
-32    -32    
-1184  -128   
32     16     
-16    -64    
272    16     
-208   128    
272    -496   
-176   112    
96     -48    
160    -160   
-64    96     
112    -80    
-16    176    
-80    -16    
368    -96    
-224   -448   
-832   -48    
352    -304   
-112   80     
16     -160   
160    112    
128    -480   
-160   112    
64     -64    
-64    -192   
48     32     
-64    32     
-112   -16    
80     -64    
-80    32     
32     -288   
-288   -128   
112    64     
80     -48    
-16    -416   
96     192    
80     -576   
16     96     
-208   -16    
160    80     
-224   -48    
96     0      
-64    -64    
128    192    
-16    240    
64     256    
16     -128   
176    288    
-512   112    
208    -64    
48     -80    
16     -544   
144    144    
-64    80     
48     48     
-160   32     
64     -16    
-96    96     
-16    -64    
-48    112    
176    64     
-96    224    
-656   -16    
288    288    
-928   112    
16     -112   
-256   -128   
-96    -64    
-128   32     
-80    112    
-208   -112   
-1392  -16    
0      16     
128    -80    
-160   32     
32     0      
-320   -112   
-288   -304   
-96    64     
-112   -192   
48     160    
96     208    
-112   -192   
48     -48    
-32    144    
16     0      
-160   176    
-64    96     
-496   -64    
-128   128    
-224   -16    
240    128    
-240   160    
208    48     
-224   16     
1392   -32    
288    992    
-432   48     
-160   -256   
416    -496   
80     -144   
-384   80     
32     144    
-352   -176   
144    -144   
-48    -16    
-16    176    
112    352    
-96    -16    
16     -144   
-176   80     
128    144    
-192   -32    
-48    -16    
32     0      
-80    -112   
-352   48     
-96    240    
-288   96     
-32    -48    
-880   -128   
160    128    
-64    -496   
-336   -320   
272    144    
128    352    
0      240    
-48    144    
-32    144    
-176   -112   
-32    -128   
-240   48     
-240   -368   
240    288    
-32    32     
-128   64     
-160   256    
-144   -176   
32     256    
80     -64    
96     48     
-128   -272   
64     -224   
624    464    
-240   64     
0      192    
-32    48     
80     -16    
-336   320    
-32    16     
-304   112    
80     -32    
-400   800    
-320   -528   
256    256    
-352   -144   
48     32     
-144   -32    
160    -352   
0      128    
16     32     
-80    64     
16     112    
-208   -144   
0      96     
-144   -128   
80     160    
-256   0      
-208   112    
-80    16     
-64    -224   
128    -288   
-144   -192   
-64    -64    
240    304    
16     0      
-64    80     
-112   -64    
-32    80     
-64    32     
-96    -16    
112    64     
-64    32     
-96    96     
48     16     
-16    96     
112    16     
-144   16     
80     64     
0      0      
-32    -64    
192    224    
-224   0      
0      -240   
-160   -272   
-112   -240   
224    320    
-64    240    
-80    208    
-64    32     
128    256    
-32    -64    
144    224    
-112   224    
112    176    
-80    160    
16     96     
64     160    
-48    -16    
64     224    
-224   -80    
160    416    
-176   -16    
112    144    
48     192    
-176   288    
208    64     
0      64     
128    -240   
112    272    
-48    288    
224    576    
-32    128    
-128   96     
96     16     
-112   32     
-32    144    
192    288    
64     80     
-224   48     
80     -32    
-80    48     
160    -32    
16     -16    
-144   48     
96     144    
-144   64     
128    112    
-240   0      
224    32     
-192   144    
144    496    
-144   448    
48     144    
-16    32     
96     176    
-32    64     
32     48     
192    -16    
-144   96     
112    80     
-64    32     
0      80     
48     192    
48     80     
96     128    
-64    128    
64     0      
80     192    
-32    0      
160    176    
-32    112    
-32    -16    
176    144    
-256   48     
144    32     
32     80     
240    -144   
-48    128    
0      224    
-16    48     
0      176    
272    -272   
-80    336    
-144   80     
-80    48     
208    64     
16     128    
-16    112    
112    -192   
144    224    
-80    112    
16     176    
-144   -160   
80     -544   
48     176    
80     -2128  
128    32     
-80    144    
-64    208    
48     -64    
128    -16    
80     160    
-544   -944   
240    1024   
-992   -640   
208    -384   
-432   -544   
368    448    
-208   -672   
768    1248   
-576   -704   
528    480    
-432   -256   
192    -112   
-48    416    
160    -240   
-64    592    
48     -352   
48     496    
80     96     
-16    128    
64     -32    
-16    144    
160    48     
-64    272    
160    -64    
-176   -16    
288    -448   
-208   96     
112    96     
0      336    
192    -224   
-80    128    
-48    32     
144    48     
-64    128    
32     128    
112    176    
-48    -272   
208    176    
96     -48    
112    64     
-80    -48    
80     96     
16     16     
32     112    
-48    -256   
-16    80     
64     96     
80     256    
-16    -32    
0      -128   
0      48     
144    -240   
0      224    
176    -80    
-32    96     
-16    -944   
128    0      
32     -2832  
208    144    
-64    64     
64     16     
32     208    
16     224    
48     -48    
0      48     
112    64     
64     48     
-16    144    
0      272    
-144   96     
112    -560   
144    64     
32     32     
-64    144    
144    80     
-48    192    
-32    -16    
160    416    
-512   48     
-128   -256   
272    -32    
48     -272   
-80    128    
128    -464   
-112   48     
272    -352   
96     -48    
64     -32    
112    480    
-144   80     
208    192    
16     -32    
80     0      
64     112    
-80    -64    
64     0      
16     -224   
32     -64    
160    48     
48     112    
112    -16    
-48    80     
176    -1648  
-16    -176   
48     -32    
80     -1728  
-32    -160   
-96    -48    
192    -448   
-48    80     
96     -464   
64     -80    
16     96     
32     16     
128    64     
48     0      
64     48     
32     64     
32     -800   
80     -112   
-64    -160   
-144   -352   
-656   -272   
304    -896   
144    -256   
-160   -128   
64     96     
160    -128   
80     -128   
-96    160    
-16    -208   
176    96     
-16    192    
-32    160    
80     -16    
-32    -384   
64     -96    
-96    16     
304    624    
-240   -320   
240    144    
-48    -112   
0      -592   
208    48     
-240   176    
128    -160   
-16    -96    
48     0      
16     -160   
96     304    
48     16     
-16    -352   
64     -16    
16     -208   
-448   32     
-208   -816   
384    320    
112    -112   
144    -160   
224    -272   
32     -32    
176    144    
-192   16     
96     32     
80     96     
-272   -48    
-240   -32    
-64    -208   
272    -64    
-208   128    
-272   -160   
112    -128   
112    96     
-16    32     
192    -64    
-208   80     
240    -864   
0      128    
32     -176   
160    128    
-128   32     
80     0      
-208   -16    
208    -176   
-224   -240   
64     208    
-560   64     
160    32     
-80    80     
336    -192   
-96    48     
-16    -560   
176    160    
96     0      
528    -272   
-64    224    
48     -240   
-272   -16    
-256   448    
-1072  -704   
256    -224   
-864   128    
608    -448   
384    768    
-368   -352   
304    480    
-80    -576   
368    448    
-400   -352   
176    -176   
-64    0      
96     -304   
128    48     
320    192    
-416   -48    
240    -464   
-464   -160   
0      -496   
-96    16     
208    -320   
240    528    
-144   -544   
256    112    
-448   48     
80     96     
-336   -80    
-368   160    
-224   -400   
272    304    
-544   -192   
416    240    
-320   -224   
128    -80    
272    112    
176    -272   
512    544    
-176   -336   
240    272    
-272   208    
-32    -64    
-16    128    
-112   224    
16     -16    
-64    0      
112    -48    
-48    48     
144    592    
32     -64    
-144   -144   
-800   -96    
96     -16    
-256   96     
-416   -160   
-112   32     
-256   0      
-160   -688   
-1344  -736   
-368   -320   
96     240    
-32    208    
128    96     
0      -128   
-1296  -224   
112    224    
-992   -352   
208    128    
-80    -128   
112    256    
-272   32     
-304   32     
144    -80    
-240   -80    
0      176    
80     128    
128    704    
-80    -112   
336    -160   
-224   -64    
384    528    
-224   32     
-240   48     
144    240    
112    32     
-96    208    
-256   -112   
160    64     
-448   0      
-16    16     
0      64     
32     32     
32     -96    
32     144    
-64    -48    
176    96     
144    -48    
-32    272    
-128   64     
-272   -512   
272    144    
48     64     
-32    112    
-416   96     
0      80     
-176   -144   
80     64     
-1936  -448   
240    272    
-224   -80    
240    192    
-160   -192   
16     -80    
0      272    
-256   112    
48     -48    
16     160    
112    48     
-32    -64    
-48    -32    
-320   -128   
256    96     
-352   -80    
128    -96    
-240   -64    
128    -80    
64     -960   
-112   128    
64     80     
-176   -112   
112    128    
-80    0      
112    400    
-176   128    
0      16     
-176   -64    
272    80     
-144   48     
192    16     
-240   16     
-16    112    
176    80     
-112   32     
-64    176    
-96    32     
160    192    
-400   -32    
192    -160   
-32    16     
0      336    
16     16     
-48    160    
-96    -96    
-48    240    
-416   -128   
288    160    
-144   48     
144    128    
64     -144   
-16    192    
-96    96     
80     128    
-48    144    
48     128    
-16    96     
-80    -240   
-128   304    
-288   -32    
176    32     
-96    -96    
176    16     
80     80     
-48    288    
-240   112    
32     176    
16     -16    
256    48     
64     80     
-80    16     
-80    192    
-144   -16    
112    160    
-48    80     
-16    160    
160    0      
-112   -64    
208    80     
-80    96     
-96    128    
48     160    
-144   192    
16     -48    
-32    -16    
96     144    
-160   -64    
64     -80    
-16    272    
32     -32    
0      304    
848    288    
704    1360   
80     320    
-528   -160   
-240   -192   
544    240    
-944   32     
448    -144   
-160   400    
128    -608   
-64    656    
32     -800   
160    672    
-144   -512   
96     496    
112    -272   
-208   480    
160    -176   
0      336    
32     -208   
0      144    
96     112    
-32    192    
32     0      
64     48     
-80    80     
144    96     
-208   80     
-16    -80    
-32    112    
128    64     
32     192    
32     -48    
-48    128    
0      -32    
0      128    
64     -160   
176    192    
-64    32     
-32    128    
64     64     
-144   80     
144    96     
-96    48     
0      -32    
-16    80     
80     128    
32     0      
112    160    
-208   96     
240    80     
-64    160    
16     -16    
80     112    
-208   0      
160    80     
-64    96     
48     128    
144    224    
0      64     
96     160    
80     160    
-96    64     
160    80     
-128   192    
-16    32     
-32    144    
-80    -48    
80     96     
64     144    
0      64     
80     128    
-80    -256   
160    160    
-64    192    
64     224    
32     384    
0      -32    
304    -80    
32     288    
-64    112    
96     80     
-48    -144   
48     -32    
96     400    
-16    176    
-48    96     
-128   -528   
0      -64    
16     -800   
240    560    
16     480    
-16    -16    
-112   -48    
224    144    
-32    112    
80     272    
144    240    
-128   32     
80     32     
-48    176    
96     176    
-16    0      
96     80     
-16    -112   
-80    -240   
-112   0      
48     80     
64     -112   
-16    0      
80     96     
96     128    
-16    -112   
32     144    
-32    -32    
96     112    
-32    -160   
96     -64    
96     176    
272    -256   
32     240    
48     -1024  
0      176    
16     144    
144    208    
-32    0      
64     -16    
-208   0      
32     -112   
112    32     
80     80     
96     320    
-80    80     
64     64     
0      -288   
352    560    
-240   256    
224    576    
-144   -768   
32     -160   
192    -80    
-32    48     
160    0      
-80    112    
96     64     
64     32     
48     256    
-64    -64    
64     64     
48     -32    
112    96     
48     -448   
-16    96     
96     -320   
0      -48    
176    80     
-48    112    
320    96     
-208   192    
96     16     
48     -432   
64     96     
176    -192   
-80    96     
80     -192   
-144   0      
208    -448   
48     64     
80     -112   
-144   32     
176    96     
-80    128    
64     -32    
160    112    
96     144    
-112   64     
48     -64    
96     32     
96     80     
48     -144   
-96    96     
160    -160   
32     96     
176    -432   
-160   64     
64     -96    
64     0      
-96    64     
-288   -160   
176    -512   
176    96     
-64    400    
96     -304   
144    320    
-32    -416   
96     320    
224    48     
160    160    
688    1488   
96     -224   
-16    -352   
-576   -272   
128    -32    
-736   32     
304    -560   
-224   352    
144    -800   
48     48     
256    -1328  
-80    336    
0      -368   
16     368    
112    -304   
16     48     
-416   -512   
32     64     
-256   -176   
272    -48    
-1328  224    
64     -96    
128    32     
240    16     
-176   352    
256    -80    
-16    288    
240    -192   
-16    -96    
304    -896   
-272   80     
176    48     
-32    112    
144    -48    
272    32     
-192   -16    
96     -224   
-128   144    
-16    -16    
336    528    
-144   -496   
48     -16    
-128   -1168  
-32    -48    
112    -32    
-32    -96    
80     -32    
96     -64    
-96    -112   
-80    -208   
-32    80     
-32    0      
-32    192    
-192   64     
160    -112   
32     -448   
-96    -208   
192    -320   
-16    -16    
112    32     
-16    80     
112    -48    
-128   -96    
48     -64    
0      0      
-16    112    
-32    16     
-608   96     
128    64     
-336   64     
-112   -16    
304    112    
-176   -352   
224    0      
80     -1264  
0      144    
0      -16    
112    -48    
-16    96     
192    64     
-160   112    
64     -128   
-112   -224   
16     -320   
-352   -144   
16     0      
224    400    
-144   -128   
-80    96     
208    -992   
-16    64     
208    224    
16     48     
-160   -64    
176    -144   
64     176    
48     0      
-176   32     
0      -80    
-16    112    
64     0      
-48    48     
-80    -368   
144    0      
0      -160   
192    80     
-256   112    
32     32     
-48    -128   
-32    -64    
48     112    
0      96     
-48    192    
64     0      
-48    160    
-288   -64    
272    144    
16     64     
128    176    
80     224    
80     288    
-80    64     
-64    -144   
96     16     
160    -32    
-80    64     
-128   256    
0      160    
80     -160   
-96    -112   
64     -144   
208    96     
-192   96     
224    112    
-224   -560   
-1728  -112   
-176   32     
-160   80     
80     -48    
-64    -64    
-48    160    
176    0      
0      32     
16     16     
-96    80     
-336   -256   
80     272    
-1104  -304   
240    64     
-256   -416   
-176   96     
48     96     
32     32     
0      0      
-816   96     
-112   -48    
128    96     
-144   16     
256    368    
-416   48     
-96    -64    
80     -32    
-176   -112   
160    96     
-144   0      
176    176    
96     160    
-400   16     
-128   -64    
-320   -64    
16     112    
-768   -64    
32     128    
0      -48    
-48    32     
-96    -96    
-16    176    
32     -112   
0      176    
-128   0      
80     0      
-48    32     
-16    16     
-128   64     
-64    16     
-16    80     
-416   48     
32     -176   
-1376  -96    
32     80     
-144   -48    
0      144    
64     80     
-16    48     
-176   16     
176    -48    
-96    64     
16     48     
-720   -656   
640    -784   
992    1088   
464    112    
-144   176    
-304   -480   
208    496    
320    -768   
144    608    
-384   -720   
-112   720    
-16    -640   
16     752    
-208   -240   
160    224    
-80    16     
0      -16    
-96    96     
64     80     
-304   160    
0      -160   
-256   384    
32     -288   
-144   384    
224    -224   
-208   208    
144    -32    
48     160    
32     48     
-192   16     
48     -160   
-288   48     
192    112    
-64    112    
-64    -64    
-320   -208   
192    16     
-1344  -16    
48     160    
32     16     
-96    48     
16     80     
64     128    
-48    -32    
96     112    
-64    64     
64     48     
80     112    
-208   32     
192    32     
-144   -16    
48     112    
-256   32     
-112   80     
32     96     
16     64     
-32    144    
-96    16     
80     96     
-16    256    
-48    32     
-112   -80    
160    -16    
-48    160    
-16    144    
16     -32    
48     112    
-208   48     
-48    96     
-48    16     
-32    64     
-32    64     
-64    32     
0      224    
-32    32     
-16    0      
-128   -96    
-80    352    
0      480    
-80    96     
-208   -48    
112    -48    
80     -48    
96     112    
112    16     
-48    144    
32     80     
-64    64     
144    192    
32     160    
-64    -16    
-48    -80    
48     208    
-16    0      
48     128    
144    352    
160    176    
-80    80     
16     -112   
96     64     
96     160    
64     128    
-112   96     
144    64     
0      80     
-48    -80    
64     160    
16     304    
-16    48     
96     80     
-176   48     
16     32     
16     224    
-144   -48    
224    112    
-32    48     
96     128    
-80    96     
64     16     
-64    112    
-16    48     
0      32     
96     304    
-48    -144   
-16    -112   
-272   128    
80     -240   
192    96     
-160   272    
176    -16    
-16    128    
16     240    
48     160    
-64    0      
128    224    
-32    -16    
224    464    
-320   -112   
176    32     
-112   16     
256    176    
-64    112    
112    144    
-48    112    
48     112    
144    304    
-224   64     
240    -16    
128    304    
-240   96     
-48    -64    
-80    0      
112    96     
-32    224    
96     -80    
96     256    
-96    32     
112    368    
-256   16     
256    48     
-64    176    
208    80     
-144   160    
-48    16     
112    48     
-320   -240   
192    -16    
288    384    
-256   -192   
160    -80    
-160   128    
48     -720   
256    32     
-96    192    
160    16     
-128   160    
32     48     
80     192    
-80    64     
64     48     
176    128    
-160   16     
160    32     
-16    64     
128    96     
-416   -48    
80     -80    
176    288    
64     80     
-224   64     
32     32     
0      176    
192    -32    
304    -32    
-160   128    
-48    96     
-64    64     
304    240    
-992   -800   
288    -640   
64     432    
-80    -352   
-160   240    
336    -64    
-256   416    
0      -128   
0      64     
16     -224   
176    96     
48     -48    
144    0      
-336   -160   
48     -144   
-176   208    
320    320    
-80    16     
16     -224   
32     -16    
-48    -896   
16     192    
272    -240   
-128   -32    
16     -112   
64     144    
96     192    
112    224    
32     32     
-48    32     
112    144    
48     -64    
-80    80     
-48    -192   
-16    64     
304    -32    
0      192    
96     -352   
-64    80     
-144   -176   
320    144    
-48    192    
112    48     
-176   -16    
-48    -160   
272    240    
48     -32    
-16    48     
160    -432   
16     224    
16     -240   
0      0      
-32    -864   
224    -48    
-64    128    
176    208    
-144   128    
64     -16    
112    96     
-48    -160   
208    192    
-32    -128   
64     48     
64     96     
-32    32     
112    -16    
48     96     
48     -32    
128    144    
-16    112    
80     -16    
80     -112   
-128   96     
176    144    
-32    -48    
64     176    
192    -208   
16     16     
192    -80    
-64    160    
0      -48    
80     144    
144    -64    
-16    368    
-16    416    
-112   -960   
256    -16    
-1232  80     
-96    -1312  
208    64     
-64    -1008  
176    -288   
-128   448    
32     -208   
112    32     
16     128    
-32    64     
160    32     
-48    -48    
48     -16    
128    -688   
80     -208   
-192   96     
-48    -48    
80     -176   
64     64     
112    -160   
112    -496   
-80    -96    
192    64     
16     112    
128    -240   
80     64     
-64    -352   
80     80     
272    -80    
-368   -192   
160    -16    
-48    -288   
112    -192   
0      -608   
-96    80     
288    -240   
32     64     
-16    -2336  
112    112    
160    128    
224    240    
-64    160    
288    176    
-176   160    
-48    -352   
-208   -272   
-160   -336   
-1104  -224   
16     16     
32     48     
112    -112   
-64    -16    
-144   -624   
-32    -112   
96     0      
-16    224    
-64    -16    
128    128    
-256   64     
96     -112   
-128   96     
0      48     
-160   64     
64     32     
16     -48    
64     -272   
-160   -112   
128    -144   
-48    48     
32     -672   
160    176    
-144   -96    
64     80     
-96    -32    
96     176    
0      112    
-64    -32    
-16    32     
-64    128    
-544   112    
320    464    
-304   -112   
64     -192   
96     64     
192    -688   
128    128    
-112   0      
208    112    
-16    -112   
80     128    
-16    -112   
16     -16    
-272   112    
32     -112   
-256   80     
96     -144   
-32    96     
176    -32    
80     80     
-112   -592   
-96    32     
16     -64    
96     -112   
160    16     
-16    -16    
-320   48     
-112   -64    
-208   -176   
144    144    
-16    256    
-672   -2608  
896    880    
-1376  -736   
464    -112   
1008   400    
-288   -320   
224    224    
80     336    
-512   -80    
336    -208   
-336   352    
160    -304   
48     432    
0      -176   
80     256    
-144   -384   
64     160    
112    -16    
144    208    
-48    -336   
48     0      
-240   96     
144    -48    
-304   0      
176    -32    
-80    96     
16     32     
-304   32     
224    -64    
-144   -64    
224    -64    
16     144    
-240   16     
-48    64     
-1136  -352   
-400   16     
128    16     
-272   32     
64     160    
-704   32     
-16    64     
-16    0      
-80    32     
112    -48    
64     160    
-160   -48    
64     80     
-80    -32    
32     -128   
96     112    
-464   -64    
176    160    
-192   16     
224    80     
-832   -16    
-32    16     
-624   16     
-96    16     
64     0      
-16    112    
-208   -480   
-48    176    
64     -208   
0      16     
48     272    
-16    96     
-32    -176   
96     -64    
48     80     
-192   80     
-128   64     
-480   16     
80     80     
-16    -96    
48     32     
-112   -224   
112    240    
-304   -368   
368    -96    
320    544    
-96    16     
0      112    
-144   96     
-80    -224   
16     -16    
0      80     
0      144    
-144   32     
-432   -32    
208    176    
-48    -112   
-80    -16    
-32    -96    
112    192    
-112   32     
-144   -32    
-128   48     
160    96     
32     64     
-80    48     
64     96     
-128   -16    
-16    80     
-416   -112   
-16    48     
144    64     
16     80     
144    320    
-224   -192   
176    64     
-32    80     
80     0      
-64    64     
0      144    
-16    32     
-64    64     
-48    80     
-192   0      
-272   -32    
-80    160    
-848   64     
-16    -16    
-32    80     
32     64     
48     176    
80     32     
48     448    
-16    160    
80     -144   
-64    208    
-96    32     
80     -48    
-48    176    
0      -64    
96     176    
-416   -80    
-208   -352   
96     -176   
112    320    
-144   16     
96     112    
-160   144    
160    128    
32     48     
-112   112    
96     48     
-96    16     
48     176    
-208   0      
48     32     
-448   -16    
32     144    
-80    64     
0      -112   
-48    16     
-16    336    
-144   -176   
-208   -112   
-48    -96    
480    128    
-176   208    
-160   16     
0      0      
-256   -208   
192    96     
64     256    
112    -416   
192    320    
-144   240    
-16    0      
-176   32     
352    32     
48     144    
272    320    
-528   -80    
336    -112   
-80    464    
-128   -96    
32     -176   
144    16     
528    272    
112    -64    
-304   256    
-16    16     
64     544    
32     48     
64     96     
-64    -112   
112    16     
-128   -112   
96     -32    
16     64     
80     128    
-96    112    
96     176    
-304   96     
64     -48    
-80    64     
-592   -2128  
448    -144   
-96    -544   
304    -288   
816    -880   
-224   -160   
288    560    
496    480    
-448   -48    
320    16     
-112   -128   
-240   -16    
256    32     
112    -128   
128    64     
80     192    
32     208    
16     192    
-16    16     
192    176    
16     160    
-48    192    
16     112    
-80    48     
-160   -80    
208    80     
0      256    
144    80     
0      -64    
-64    176    
208    112    
-16    160    
-96    64     
0      48     
48     96     
64     96     
96     0      
-32    144    
-48    48     
16     0      
-64    80     
112    144    
64     176    
96     -64    
-64    112    
-16    0      
128    208    
-128   144    
80     288    
96     -224   
16     160    
-96    64     
128    96     
-96    -192   
192    -80    
32     416    
-128   -192   
160    80     
16     144    
208    -96    
-80    128    
-32    160    
192    96     
32     256    
-192   -80    
240    128    
-80    288    
0      208    
-144   -80    
208    -128   
48     64     
0      -688   
-112   -32    
224    48     
64     176    
-128   80     
144    352    
-32    -16    
224    96     
-16    -48    
80     -64    
-16    240    
-80    128    
144    160    
144    -448   
80     128    
0      144    
-208   80     
160    -96    
64     -16    
0      128    
48     96     
64     -368   
16     160    
-48    128    
240    -32    
-176   -64    
192    208    
-64    48     
48     -224   
112    32     
-16    32     
96     64     
32     -208   
64     160    
-128   -192   
288    48     
-32    224    
0      112    
64     112    
16     32     
64     176    
32     -48    
160    144    
-112   -32    
224    240    
96     -304   
-64    48     
64     -368   
96     -16    
-32    -448   
-80    96     
448    192    
-96    96     
-32    224    
-48    240    
304    96     
-480   -256   
128    64     
-80    -144   
192    48     
176    64     
128    384    
160    -32    
64     208    
128    -240   
-160   32     
64     -96    
16     192    
32     -96    
192    208    
-48    128    
112    96     
128    320    
-32    -144   
112    48     
-112   -160   
64     192    
64     -64    
160    0      
-16    -192   
0      80     
96     128    
128    112    
-80    288    
16     16     
224    272    
-96    -208   
144    48     
64     -16    
64     208    
80     -112   
-16    96     
80     -240   
16     48     
96     -832   
80     192    
48     160    
272    -176   
-32    -80    
128    -176   
-32    -848   
32     -224   
48     320    
128    -320   
160    336    
-16    -352   
-48    208    
-48    -432   
128    48     
16     -224   
64     -240   
-16    80     
112    -496   
-112   -96    
-448   -208   
144    -160   
160    -96    
-16    -80    
16     0      
48     -448   
128    -80    
32     240    
-32    0      
16     160    
64     112    
80     -736   
0      32     
1120   -2560  
272    -16    
384    80     
-240   -400   
-160   -192   
368    -1328  
64     272    
304    -240   
96     -224   
-368   -128   
96     176    
112    224    
64     96     
32     -112   
-16    -80    
96     112    
-64    -112   
16     416    
96     -64    
-208   -416   
16     -208   
176    48     
-64    -288   
144    112    
-16    -336   
64     -192   
-16    -32    
48     176    
-32    -64    
-16    80     
-16    -32    
32     0      
-192   -160   
240    176    
-928   -128   
224    80     
-48    48     
176    96     
-16    -256   
64     -688   
-32    80     
80     0      
48     224    
112    0      
0      80     
64     96     
-32    -128   
48     192    
-96    -48    
-16    32     
128    -160   
-256   -48    
96     -240   
-32    240    
-48    -464   
96     96     
-16    -752   
144    160    
160    240    
32     48     
-160   -80    
80     32     
-32    -64    
192    304    
-256   224    
128    -224   
-384   -176   
48     -96    
80     32     
-32    -160   
0      96     
128    -320   
32     80     
224    160    
16     112    
-32    128    
208    528    
-112   384    
240    144    
-368   96     
64     16     
-96    -112   
-16    -16    
-560   -16    
32     -208   
-32    -32    
320    -48    
-176   32     
-304   0      
16     144    
-32    -32    
144    -16    
-128   96     
16     -16    
32     128    
-16    -80    
112    80     
128    224    
-64    -32    
160    -288   
-144   80     
144    -224   
64     -80    
-80    80     
96     48     
-192   32     
0      -128   
-64    144    
0      -80    
0      80     
-16    48     
-16    32     
-32    -240   
0      64     
128    -224   
32     96     
-512   -80    
-16    0      
-16    32     
-224   16     
-160   32     
-112   -16    
-160   16     
176    80     
32     -48    
32     48     
-416   16     
-368   -160   
208    64     
-368   -16    
128    160    
-224   -80    
-96    -32    
0      -112   
-208   48     
-112   -432   
-64    -320   
-16    208    
48     192    
-256   0      
80     -176   
0      16     
128    -16    
112    144    
-112   -128   
32     -64    
0      160    
64     48     
32     112    
-96    -160   
80     80     
-336   32     
48     32     
-800   288    
-144   -208   
304    0      
32     160    
-32    336    
-16    176    
-208   -240   
32     96     
32     80     
0      64     
48     240    
-16    48     
-64    128    
-32    96     
-32    -304   
352    112    
16     144    
-176   96     
32     -192   
-64    -144   
64     240    
32     -16    
-128   48     
80     160    
112    -400   
80     48     
-128   -176   
-16    432    
-160   -144   
-32    160    
0      64     
128    80     
-480   -160   
64     144    
48     -112   
128    160    
48     48     
-80    32     
-64    160    
-16    32     
16     368    
-176   -96    
-32    192    
-144   -112   
-704   -928   
704    1984   
-1280  288    
-448   -432   
-224   -176   
320    560    
-608   64     
-208   288    
-272   64     
480    80     
-400   -96    
-64    -80    
288    512    
-112   0      
-32    64     
0      80     
-112   -112   
48     112    
-80    48     
128    96     
176    -32    
-112   80     
-48    144    
32     -48    
-112   -80    
16     -304   
176    240    
-112   208    
160    96     
-208   -48    
-48    -32    
-16    80     
48     144    
-128   64     
32     64     
-192   -48    
-48    -128   
48     352    
-32    -48    
80     0      
-144   112    
160    112    
-96    16     
-16    16     
-144   16     
32     -16    
-256   32     
320    192    
-256   48     
32     96     
-176   -176   
16     160    
160    32     
0      96     
-32    176    
0      -32    
144    144    
-128   128    
144    48     
0      48     
-16    80     
-96    16     
64     160    
-176   -48    
128    0      
160    112    
-80    176    
-32    64     
80     -48    
144    304    
-256   80     
256    64     
-128   128    
64     32     
80     48     
-48    64     
-80    128    
-32    -32    
-32    -64    
-32    160    
96     0      
96     80     
-48    112    
-176   -80    
320    0      
-160   208    
-112   -112   
256    272    
-400   -128   
256    -32    
-192   32     
16     128    
32     160    
-32    -64    
64     -16    
192    176    
-256   32     
208    128    
-48    80     
48     32     
-16    -48    
0      64     
16     96     
48     208    
-176   112    
112    80     
32     320    
-64    64     
288    224    
-336   -128   
240    48     
-176   48     
192    80     
96     336    
-80    0      
-64    32     
128    48     
-144   -48    
224    -80    
-144   112    
-144   32     
96     -192   
-160   16     
80     16     
112    352    
96     144    
96     80     
96     352    
48     288    
-32    192    
80     80     
16     64     
-96    16     
32     -96    
-176   64     
112    64     
0      -416   
-112   -336   
48     176    
48     -400   
192    128    
-112   48     
16     112    
-16    272    
48     32     
48     192    
0      176    
96     112    
16     128    
16     -96    
0      48     
80     0      
96     -32    
48     144    
-80    -576   
176    144    
-48    256    
176    208    
-112   -272   
-48    176    
144    80     
0      0      
-16    144    
144    160    
-48    -80    
160    -32    
-16    -80    
112    144    
-144   -64    
160    -752   
160    -208   
-48    0      
32     288    
-16    128    
64     -112   
256    112    
112    -48    
-256   -112   
-48    192    
16     -80    
96     96     
176    256    
-64    -336   
-64    192    
112    -608   
32     128    
-16    -432   
0      160    
64     144    
96     64     
-64    64     
64     32     
80     96     
80     64     
-96    256    
-80    -176   
0      144    
80     -96    
-720   1904   
-64    -320   
-512   -464   
1008   -1248  
592    1088   
-416   -1536  
-96    -48    
560    544    
32     64     
-16    144    
-112   144    
-112   128    
-32    -336   
96     256    
-192   -496   
112    112    
80     -96    
208    640    
128    -144   
-240   64     
64     -288   
-16    48     
32     256    
-64    112    
32     96     
-192   64     
96     96     
-32    -48    
64     128    
112    -144   
32     128    
0      -368   
112    48     
32     96     
192    384    
-144   -208   
112    -272   
48     -288   
400    240    
-96    224    
0      160    
112    144    
112    -160   
48     96     
-64    -112   
48     128    
-16    -192   
64     -16    
160    368    
-144   -64    
192    -192   
-272   112    
128    -16    
48     224    
0      0      
-32    -112   
16     -80    
-80    -160   
304    512    
-256   -288   
272    16     
48     64     
16     208    
64     32     
-80    -128   
-144   -848   
-48    -864   
80     96     
0      32     
-128   144    
144    -176   
-16    -352   
16     -96    
48     -400   
64     -80    
80     48     
-32    -528   
0      -560   
96     -496   
64     64     
-96    544    
96     32     
16     144    
144    -784   
224    -528   
-1008  -48    
64     -336   
-32    -32    
208    112    
-80    16     
240    -480   
16     160    
0      288    
-32    -128   
48     -96    
48     16     
176    32     
-208   -112   
-64    -160   
208    80     
-240   -48    
16     -112   
80     -16    
128    -416   
80     -144   
-112   -336   
176    64     
0      128    
16     -144   
144    32     
-144   48     
64     -288   
-80    0      
-48    0      
176    96     
-320   16     
80     -256   
-1216  -240   
16     -224   
96     -144   
-32    -304   
64     0      
112    224    
64     -16    
16     -176   
-16    304    
128    -368   
16     240    
-96    -416   
128    64     
-144   32     
48     -16    
-592   160    
144    -176   
0      48     
96     0      
-320   448    
-128   -480   
16     240    
0      -1856  
128    96     
48     128    
80     112    
48     -144   
-48    -368   
-192   -112   
64     -32    
48     176    
32     -144   
-480   -32    
128    -240   
-96    -288   
48     -304   
64     48     
32     -320   
-64    -80    
144    32     
128    -544   
-144   -16    
80     -48    
-16    192    
-32    96     
-368   -48    
80     -112   
-1168  -400   
-96    -112   
80     608    
-112   -400   
-160   -256   
224    64     
112    0      
-96    80     
32     -80    
128    80     
80     80     
48     144    
0      -16    
-160   32     
64     -208   
-96    64     
80     -32    
-48    80     
176    -48    
-96    208    
-96    -368   
-96    64     
-144   -160   
176    64     
-80    -32    
-16    160    
-208   -32    
80     32     
-192   -112   
304    144    
-384   -144   
272    208    
192    -80    
48     -160   
-496   608    
400    304    
-384   352    
-144   32     
-560   -16    
368    416    
-64    -64    
16     -16    
128    208    
-112   -144   
112    96     
-160   224    
112    -96    
-16    144    
-96    -240   
0      32     
-112   80     
-128   96     
16     32     
-464   -32    
-32    -80    
-784   80     
-48    176    
208    64     
-160   -80    
128    -16    
-192   -128   
-304   -96    
-32    96     
-112   -208   
64     48     
-96    128    
-48    64     
-208   -48    
-240   -128   
-224   144    
224    96     
-160   32     
-1648  -64    
-32    -80    
128    -32    
-256   96     
-48    -112   
96     128    
-208   -192   
80     64     
-48    96     
176    256    
-432   0      
80     -48    
48     192    
0      96     
-64    -16    
-384   0      
-16    -32    
-96    64     
160    144    
-304   80     
96     -128   
112    0      
-304   96     
80     64     
-32    -64    
112    288    
-224   64     
48     -96    
-112   32     
-32    288    
-240   -16    
160    80     
-816   -64    
48     160    
-96    -80    
48     32     
16     -272   
64     192    
-176   112    
160    80     
-112   80     
-64    -96    
64     96     
-144   64     
128    304    
-208   64     
64     96     
-864   -48    
16     32     
176    -272   
48     272    
-112   160    
208    -16    
-80    112    
-32    16     
-16    48     
-144   -48    
80     32     
64     -32    
48     96     
-80    16     
16     32     
-32    -64    
48     80     
-32    32     
288    224    
0      144    
0      32     
-224   96     
240    320    
-64    176    
112    80     
-160   32     
0      112    
32     16     
48     16     
32     80     
-64    208    
48     160    
-256   80     
-160   16     
224    128    
-272   96     
208    96     
-16    -48    
-64    -64    
64     176    
-80    192    
-96    0      
-96    -176   
-256   -64    
112    256    
-144   -16    
-32    128    
-160   -160   
-48    0      
48     224    
-160   208    
304    96     
-16    16     
16     384    
48     -64    
-144   96     
192    192    
-48    64     
-96    0      
-16    176    
48     -48    
80     400    
112    112    
-176   0      
16     0      
128    256    
-48    16     
-32    64     
16     96     
128    416    
-240   80     
48     64     
48     512    
-32    -176   
-112   16     
-32    32     
80     96     
32     80     
0      48     
16     80     
-32    -32    
96     272    
-64    16     
-96    -128   
160    144    
80     112    
48     32     
16     32     
-144   112    
0      -16    
-16    32     
96     176    
64     16     
64     144    
48     112    
64     128    
-16    80     
112    112    
64     -32    
16     368    
-128   64     
-160   -112   
48     160    
256    32     
-80    64     
-160   64     
224    64     
-16    128    
48     272    
-160   -48    
0      112    
80     208    
-752   -1088  
-80    1584   
-176   1360   
-32    288    
96     -432   
128    512    
176    1792   
-1376  64     
976    560    
-448   -176   
272    -160   
-320   -48    
144    272    
208    80     
-144   32     
80     -128   
64     304    
-240   -64    
112    400    
-272   0      
176    368    
-256   -416   
144    -240   
0      -256   
272    144    
-128   -48    
160    304    
-176   320    
144    -80    
-112   -80    
272    128    
-144   112    
-64    -16    
160    320    
-160   112    
208    320    
-272   -224   
496    -48    
-16    144    
112    -224   
128    192    
-192   96     
144    112    
-48    80     
208    80     
-32    304    
-16    16     
-64    -224   
208    256    
-128   -400   
32     160    
-176   272    
256    -32    
-96    320    
-32    -720   
-80    128    
64     208    
112    224    
-96    -192   
-96    224    
224    64     
-16    144    
-96    16     
208    256    
-336   -208   
144    -16    
32     160    
32     32     
0      112    
144    -1280  
128    64     
16     -976   
48     96     
80     432    
0      -48    
96     160    
32     -496   
-64    -544   
512    368    
96     720    
-176   208    
144    160    
112    -16    
176    160    
32     -64    
-48    64     
-144   -352   
480    448    
96     0      
48     -128   
-352   -192   
304    256    
160    112    
-64    208    
-80    0      
-128   -528   
160    -128   
160    144    
-112   80     
-64    -304   
32     -16    
160    -496   
192    144    
-48    -96    
16     160    
-16    16     
-32    -160   
0      -176   
-64    32     
-48    -80    
-48    -224   
-96    32     
32     -16    
128    128    
48     -416   
96     160    
16     16     
80     112    
16     -176   
96     208    
64     48     
64     112    
0      128    
112    224    
96     240    
112    -208   
-48    144    
0      -128   
208    144    
-16    -208   
80     112    
-32    -48    
336    224    
-80    16     
288    176    
-336   80     
192    -432   
32     48     
-176   -240   
192    32     
-32    -240   
272    96     
-96    -256   
112    32     
64     -96    
0      16     
64     -192   
16     -16    
32     -1360  
48     16     
16     32     
48     -1168  
16     -16    
-16    80     
144    -144   
32     -80    
128    -448   
112    240    
-160   0      
240    -128   
16     192    
112    -80    
32     176    
-176   -128   
224    -128   
-288   -176   
272    -784   
16     -96    
-752   -32    
-128   -128   
-48    -32    
160    -384   
-176   16     
240    -592   
160    -80    
96     160    
80     -32    
16     96     
48     48     
96     48     
32     208    
96     -64    
-16    128    
-640   -320   
224    32     
-32    -128   
80     -64    
16     -64    
96     -784   
0      -144   
176    -624   
-48    -64    
48     48     
240    0      
-144   48     
16     16     
160    -176   
32     -32    
-304   -576   
224    -96    
272    528    
-304   176    
-240   -480   
480    592    
-352   -752   
544    448    
-64    -656   
-32    80     
176    -64    
160    96     
-128   176    
16     -272   
32     112    
160    -112   
-48    176    
-960   -240   
-144   32     
192    -240   
-80    64     
336    -176   
-128   -48    
208    -240   
-160   -1184  
176    -32    
32     240    
112    -192   
-192   0      
96     -256   
-128   16     
192    -400   
-208   32     
-48    -176   
-1360  48     
-208   -176   
192    -80    
-64    -208   
160    -16    
64     -1744  
32     48     
-48    64     
96     0      
-16    -64    
48     -32    
-32    144    
64     -16    
16     96     
-240   32     
-32    -32    
80     -192   
-48    -16    
208    -240   
-224   160    
192    -240   
16     160    
-80    64     
240    64     
-64    128    
-80    -64    
0      96     
0      80     
80     32     
96     16     
-224   80     
96     -144   
16     -96    
176    -128   
-112   80     
128    -192   
-48    16     
80     32     
-48    -192   
-672   -96    
112    80     
-48    48     
-112   16     
-32    -32    
192    -240   
-352   -96    
96     0      
-48    192    
16     -112   
288    -16    
208    -384   
-208   -160   
128    -192   
-32    288    
-160   16     
272    192    
-256   16     
128    0      
-96    -16    
-48    -192   
-16    16     
224    32     
0      112    
-144   -272   
192    320    
-368   -160   
-1200  16     
128    80     
-720   -32    
128    128    
-1056  32     
-112   80     
32     64     
96     48     
256    144    
-128   64     
-240   -256   
80     112    
-304   -272   
16     176    
48     96     
-16    80     
112    224    
-144   -96    
32     80     
-512   -320   
-128   16     
240    80     
48     32     
-48    -112   
-112   48     
-128   16     
-80    192    
304    512    
-384   -80    
112    32     
-80    -16    
16     112    
0      64     
-160   -64    
-80    96     
64     128    
-224   32     
-112   -272   
176    240    
144    272    
-96    32     
-176   -144   
208    -112   
-96    224    
32     -32    
64     416    
-240   112    
-80    -48    
-32    16     
-48    -48    
80     16     
-608   -48    
16     -32    
128    -16    
-336   -288   
208    -192   
224    560    
-224   32     
0      16     
-16    32     
112    128    
-128   32     
-224   -32    
0      80     
-32    -96    
-96    176    
-320   -144   
384    176    
-736   0      
112    -32    
-112   -160   
-144   144    
304    -176   
-128   176    
32     -64    
160    176    
-240   64     
160    -16    
-96    32     
-48    0      
48     96     
0      64     
48     80     
-176   -64    
-32    240    
-848   144    
16     16     
-16    64     
128    16     
80     112    
-112   -48    
-16    80     
-160   -32    
192    176    
-144   96     
32     144    
-80    64     
-1392  -384   
1072   1232   
-208   -288   
-624   -240   
-304   -144   
-16    -192   
256    624    
-912   -192   
368    -304   
-64    80     
208    96     
-256   112    
-48    144    
64     -112   
96     0      
-272   -16    
112    64     
-336   -48    
-208   -224   
0      320    
112    -48    
-224   512    
-16    176    
-192   96     
432    -384   
-48    272    
192    -112   
0      528    
-192   -272   
112    224    
0      -80    
0      -96    
-80    352    
32     96     
-32    144    
-160   -144   
192    272    
32     160    
272    336    
-96    -80    
0      16     
0      144    
-48    16     
-96    176    
-48    96     
112    128    
-176   -32    
-32    544    
256    272    
-96    112    
48     -80    
-64    112    
96     -16    
-64    336    
-96    -224   
0      16     
80     240    
-96    208    
-48    80     
160    432    
-304   -32    
-160   -192   
-96    112    
224    64     
-176   144    
-160   -64    
208    32     
112    64     
192    560    
-384   -208   
80     -32    
48     -16    
48     48     
112    112    
-128   32     
32     128    
16     -160   
-48    -160   
192    -16    
192    384    
0      272    
128    208    
-48    -256   
48     144    
304    272    
48     160    
32     160    
-48    208    
80     64     
-64    -96    
80     224    
160    256    
-112   -160   
32     96     
16     -64    
16     -144   
-64    0      
176    336    
-96    160    
-16    96     
-80    32     
144    48     
16     144    
48     112    
-144   -304   
64     -304   
144    192    
-192   -240   
80     160    
-80    -112   
-48    128    
96     64     
80     128    
-16    112    
96     0      
-160   128    
32     80     
128    112    
-48    32     
-64    64     
208    -240   
0      224    
48     -96    
96     48     
96     0      
-48    176    
32     48     
176    336    
-32    64     
112    128    
-48    64     
256    336    
-128   224    
336    224    
-288   -80    
16     -192   
-128   144    
384    -720   
-96    272    
144    96     
-32    176    
16     64     
0      112    
-112   112    
208    48     
-16    -176   
-16    32     
-48    -32    
96     128    
-64    112    
192    -240   
-96    96     
64     -320   
80     144    
64     112    
-64    32     
80     128    
160    48     
-128   320    
-16    112    
0      -48    
176    16     
48     112    
64     128    
48     16     
32     96     
144    112    
48     -224   
-48    160    
64     -784   
80     144    
32     32     
80     352    
-144   -320   
224    48     
96     0      
32     144    
-32    -80    
48     128    
-32    144    
48     -240   
32     176    
80     -336   
16     80     
64     -384   
96     272    
-112   192    
-80    64     
48     -16    
48     48     
96     16     
48     80     
80     208    
-32    -256   
144    176    
-80    -144   
160    128    
-48    0      
1552   832    
-752   336    
784    -528   
-496   -1680  
592    -1248  
-272   0      
400    752    
-368   240    
176    -64    
-272   -128   
336    128    
208    96     
-256   192    
128    16     
-32    272    
16     -160   
-64    -272   
176    32     
-48    -48    
144    -32    
-160   112    
144    144    
32     224    
64     -112   
96     144    
-176   -224   
224    128    
16     32     
224    144    
-80    -400   
-80    112    
96     -128   
144    160    
-16    -480   
-64    64     
32     -240   
112    432    
144    -16    
80     -112   
-32    -624   
64     -64    
32     288    
160    -240   
-32    112    
32     -256   
48     144    
-16    -64    
240    208    
-64    0      
80     -1376  
-16    32     
96     -1232  
32     96     
-480   16     
32     -96    
32     0      
96     -1264  
16     -240   
176    384    
-64    64     
48     176    
0      16     
160    -160   
32     80     
16     -192   
48     80     
16     -224   
16     -304   
-320   -128   
48     -64    
16     -96    
112    -96    
-16    -144   
64     -672   
208    -16    
64     -272   
80     -416   
-16    -272   
-96    -48    
128    -240   
192    704    
48     -32    
160    -128   
-432   -16    
160    -160   
-64    -48    
16     288    
-32    64     
64     -240   
32     -128   
176    -1264  
0      -112   
-32    -32    
32     160    
-80    -176   
-192   -288   
-16    192    
64     -112   
-192   128    
-64    48     
-176   128    
48     32     
112    0      
0      -80    
32     -16    
16     -896   
32     -16    
48     192    
-16    -48    
64     112    
112    240    
-160   -64    
48     64     
-80    -32    
192    -16    
-80    272    
-96    -352   
-48    -304   
-48    -224   
16     224    
16     -528   
64     48     
-80    -1616  
80     64     
-16    -144   
192    464    
144    -32    
32     -144   
-304   -96    
192    144    
64     -48    
-32    -128   
-592   -16    
48     -32    
64     64     
-16    -176   
128    112    
32     -640   
64     176    
80     128    
-96    0      
48     64     
224    208    
-160   -176   
160    -32    
-240   -80    
256    -48    
-48    208    
0      -80    
32     -32    
80     -256   
-16    80     
80     -560   
0      112    
0      16     
112    -48    
-240   -336   
48     32     
-256   -112   
96     -144   
-288   112    
256    0      
-128   -64    
0      0      
-32    -16    
48     -480   
256    368    
160    160    
-224   -144   
160    0      
-32    144    
64     -64    
-80    160    
-112   80     
160    32     
-96    32     
32     -272   
32     16     
-64    -224   
96     32     
128    -16    
-32    176    
-1808  -304   
0      48     
-224   -80    
384    0      
32     256    
96     -32    
-160   144    
32     -64    
320    -224   
0      112    
16     -16    
-816   -64    
96     32     
-112   -160   
64     128    
1504   -1280  
464    -432   
576    784    
-624   -96    
-208   640    
-256   -16    
-512   192    
1120   -544   
-128   976    
-32    -368   
-448   -64    
-576   -720   
448    192    
-208   -336   
272    560    
-112   48     
256    400    
-352   128    
512    -32    
-16    416    
-16    -288   
-192   320    
16     -368   
96     272    
-64    528    
-32    32     
128    64     
-16    336    
144    -16    
-272   -528   
-16    -16    
16     48     
-16    112    
-160   96     
-64    64     
160    304    
-112   384    
0      32     
-144   -160   
48     -128   
288    112    
-80    -32    
240    288    
-192   -96    
-64    0      
-176   64     
112    -128   
16     272    
0      -80    
48     144    
-96    144    
-48    16     
-128   -288   
112    -64    
-1040  -96    
192    0      
-160   -48    
32     176    
-16    96     
64     272    
-176   -48    
128    -160   
48     176    
-96    96     
144    -16    
-48    -80    
128    112    
-80    48     
112    112    
-224   48     
96     128    
80     -48    
32     -48    
64     48     
-128   128    
-48    128    
48     -368   
384    0      
-128   112    
-32    -144   
-80    192    
-144   208    
-112   -224   
224    -32    
-352   -48    
112    160    
-720   -96    
96     48     
32     96     
-64    96     
112    144    
-112   48     
0      -16    
48     0      
-48    144    
-96    0      
128    128    
-128   -32    
64     128    
-416   -160   
64     128    
-352   -64    
-80    144    
80     256    
-112   -320   
176    -112   
-112   144    
320    288    
-208   352    
32     16     
16     128    
-48    -16    
64     0      
-80    176    
-176   -112   
128    64     
-272   0      
176    32     
-16    160    
112    16     
-224   96     
176    160    
32     144    
-32    176    
80     -160   
-240   -144   
-16    -80    
-16    64     
-96    0      
-128   -32    
176    128    
144    272    
-144   80     
288    112    
-240   -64    
176    -48    
0      96     
32     240    
160    16     
-64    32     
-256   32     
128    64     
80     -336   
-144   32     
-96    -16    
256    48     
0      112    
-112   16     
64     48     
96     16     
48     144    
48     128    
48     96     
-80    48     
-16    176    
16     32     
176    -96    
-16    112    
-16    160    
16     -96    
-128   176    
112    -96    
0      160    
48     176    
112    128    
64     224    
-192   176    
80     304    
-144   -144   
224    -32    
48     80     
96     176    
-288   96     
-192   32     
144    -112   
128    96     
16     64     
32     -16    
128    112    
-32    240    
-112   -48    
-16    -32    
112    32     
176    320    
-224   -32    
-64    80     
64     16     
-112   -80    
96     144    
0      176    
48     112    
0      80     
144    176    
-96    80     
128    64     
0      -64    
144    80     
2080   -1456  
-752   48     
1296   -128   
-80    -160   
560    -416   
-224   -112   
-144   -512   
288    272    
48     224    
-32    -192   
-144   208    
192    -96    
-80    416    
240    -400   
-144   304    
240    -80    
-144   240    
144    96     
32     64     
64     -48    
80     32     
-96    -304   
224    64     
-256   -1840  
208    -32    
-96    160    
352    96     
-128   160    
112    0      
16     176    
48     0      
48     128    
48     0      
16     128    
32     32     
80     16     
96     -352   
32     128    
144    -368   
-16    112    
112    64     
-16    128    
112    96     
112    64     
-48    96     
80     144    
16     80     
64     144    
-80    96     
144    112    
-32    0      
32     -64    
80     160    
16     -112   
144    64     
-32    336    
64     96     
64     -80    
0      80     
16     -112   
96     128    
-64    -32    
96     128    
-96    144    
0      -112   
128    176    
48     16     
96     96     
112    -96    
-128   -16    
192    -1408  
0      144    
0      64     
80     144    
-64    -48    
-16    144    
-64    -48    
96     80     
0      64     
-144   -64    
256    -48    
-48    -384   
32     -304   
80     -272   
224    224    
-160   -192   
48     16     
96     -960   
128    208    
-80    -48    
80     192    
32     -32    
48     48     
112    32     
-16    32     
-32    -128   
64     -400   
160    416    
112    96     
-96    -48    
-32    -80    
176    112    
160    -848   
0      112    
-112   48     
128    144    
16     64     
64     96     
96     128    
16     -288   
64     112    
16     -96    
64     48     
96     -64    
-48    80     
176    -144   
-80    16     
112    -2160  
0      176    
128    96     
-64    112    
0      -48    
80     -128   
208    96     
-48    -144   
0      96     
224    592    
-64    0      
96     -304   
32     144    
96     -256   
176    32     
-160   96     
112    352    
16     32     
128    -1136  
-80    240    
-16    -208   
160    192    
-224   -16    
256    -656   
-32    16     
0      128    
48     -80    
80     80     
160    112    
-48    -64    
192    -48    
-32    -224   
64     160    
-16    -96    
96     -176   
-512   16     
96     -320   
176    -16    
-48    -800   
320    -240   
-112   -2272  
128    -48    
32     224    
112    0      
32     176    
-80    -144   
192    -288   
16     64     
128    -160   
32     96     
-112   112    
-64    -192   
112    -64    
0      -32    
80     16     
-64    -48    
-32    64     
48     112    
-48    -112   
0      -112   
128    -32    
176    112    
-80    112    
-32    32     
128    -80    
-192   -32    
128    -304   
-880   -32    
128    -16    
48     32     
32     -160   
32     -112   
112    -528   
-176   -96    
208    224    
-96    240    
176    128    
-240   0      
32     -80    
160    -176   
-736   -1984  
1376   1104   
-128   -48    
400    -640   
-528   -352   
16     -544   
320    656    
224    768    
480    448    
-256   -240   
128    272    
-16    -176   
16     -144   
-176   16     
304    -96    
-112   80     
240    -112   
-208   192    
464    272    
-1504  64     
0      -224   
-112   112    
80     -272   
320    96     
-96    -720   
208    -16    
-128   -192   
0      0      
128    96     
-80    -256   
80     -96    
-48    32     
-16    160    
-48    -64    
-240   112    
208    32     
-208   -16    
-16    -192   
96     64     
96     -336   
-64    128    
-16    112    
80     -64    
-96    96     
-32    -304   
16     -144   
192    32     
-224   32     
0      -208   
-96    144    
144    -48    
128    -80    
-32    -208   
48     16     
208    -240   
-16    160    
64     208    
-80    -16    
48     64     
96     64     
-304   32     
144    0      
-32    112    
80     96     
-272   -96    
64     -256   
96     144    
-48    -192   
144    144    
-96    0      
192    -80    
-48    96     
-144   -128   
-80    96     
32     16     
32     -208   
192    64     
-224   32     
144    -160   
16     16     
16     -80    
-64    112    
-272   -288   
224    224    
-496   -144   
-224   -352   
32     272    
-688   32     
256    -112   
-464   -16    
-32    112    
16     -112   
-96    -16    
96     160    
-192   -16    
0      -48    
-144   96     
48     -192   
96     80     
-48    64     
-80    -112   
64     160    
-64    176    
64     112    
-160   -96    
64     192    
-1104  -64    
96     96     
-48    128    
160    80     
-224   -32    
144    80     
-192   -128   
-48    -16    
-32    -176   
-32    16     
128    144    
48     80     
-64    0      
-320   80     
-80    -16    
-272   48     
-160   32     
320    96     
-32    80     
272    96     
-176   224    
176    -160   
-208   48     
-16    96     
-32    80     
-32    0      
-144   -144   
-272   -80    
-80    0      
80     -224   
-144   -224   
-112   0      
-1520  128    
128    48     
16     -176   
-112   32     
-32    -64    
128    320    
16     16     
-80    16     
-32    176    
-160   192    
176    96     
-112   112    
48     208    
-80    -32    
-224   -16    
-336   -16    
224    16     
-64    -240   
160    -32    
-64    192    
-80    160    
112    144    
-96    -16    
128    80     
0      -144   
32     192    
-64    64     
64     496    
-160   -176   
96     16     
-272   -64    
192    192    
112    32     
64     96     
-112   80     
16     128    
-256   32     
-192   -80    
0      416    
400    -176   
128    208    
-160   -16    
-16    96     
-208   80     
-16    128    
-112   -16    
64     144    
-1232  -224   
112    160    
-144   48     
-128   -32    
16     144    
128    64     
-128   16     
80     96     
208    16     
-176   176    
-16    144    
0      -48    
96     144    
192    -2160  
416    -240   
-288   576    
-688   896    
-656   -368   
624    624    
-288   -112   
80     0      
352    464    
-160   -64    
112    -32    
-192   16     
208    128    
-112   128    
80     -16    
-96    0      
64     192    
0      112    
0      32     
64     64     
16     -80    
-32    304    
-96    32     
16     -16    
-160   -160   
224    112    
-368   176    
192    336    
-160   -80    
-144   -16    
-208   -48    
128    128    
64     48     
-16    32     
0      32     
16     48     
-32    128    
-64    96     
256    192    
-160   96     
112    48     
-192   32     
144    64     
16     0      
0      96     
32     -16    
80     176    
-16    64     
64     32     
48     272    
-32    96     
96     64     
-32    -16    
64     32     
-16    64     
16     416    
-16    288    
368    384    
0      -64    
0      16     
-208   -16    
96     112    
-64    32     
-16    160    
160    -80    
112    176    
-16    192    
-64    80     
-48    96     
-16    48     
48     64     
-32    32     
0      64     
32     96     
32     64     
144    160    
-112   -16    
0      -80    
144    64     
144    304    
-32    240    
-96    128    
16     -32    
96     160    
32     48     
96     64     
-48    96     
32     112    
16     80     
16     96     
48     32     
32     16     
48     128    
64     144    
0      112    
-48    -96    
128    144    
0      112    
112    144    
-80    0      
64     64     
-16    0      
80     192    
-64    -80    
48     -240   
-112   96     
112    16     
-32    64     
-16    16     
0      112    
80     48     
16     80     
16     16     
-16    0      
16     48     
80     256    
-112   -256   
16     144    
-96    96     
192    -448   
-64    0      
16     -1728  
128    144    
96     64     
-80    176    
352    416    
-288   432    
144    -224   
-16    160    
-80    -80    
176    0      
-192   80     
240    80     
0      112    
32     -32    
-48    112    
128    -144   
48     0      
96     96     
-16    48     
80     112    
-96    176    
160    -160   
32     128    
-32    160    
128    144    
64     128    
-448   -176   
-64    48     
-16    -384   
32     16     
144    -128   
112    160    
-48    -3040  
-48    16     
208    112    
48     400    
-224   -96    
144    16     
160    -32    
192    256    
-160   80     
48     -112   
-64    48     
16     -288   
208    192    
-112   -384   
144    416    
-240   -1456  
-48    -48    
80     288    
64     16     
368    64     
48     80     
-32    96     
-32    16     
-112   16     
128    128    
192    112    
-48    -16    
208    272    
96     -384   
80     80     
-48    -96    
192    80     
-32    -64    
32     208    
-32    64     
32     48     
48     112    
240    -144   
-32    192    
208    -528   
48     304    
192    -688   
32     272    
0      -64    
160    1472   
-272   -400   
48     -80    
-240   -480   
-784   -112   
1232   -224   
-432   304    
-224   432    
-32    -512   
112    192    
240    -528   
16     304    
-160   -112   
224    0      
128    0      
-48    -128   
-112   -352   
304    144    
48     -144   
32     -32    
-144   -48    
64     -688   
208    160    
0      -32    
-32    -2384  
-64    -80    
192    176    
64     16     
-16    32     
80     -64    
112    128    
48     -160   
-16    64     
-16    48     
144    -48    
-128   -80    
224    -128   
-272   48     
-912   -80    
-32    -976   
48     -64    
48     -48    
64     -192   
144    -336   
-128   -240   
96     80     
96     -64    
-48    0      
304    -80    
-96    -96    
-80    16     
48     -400   
80     48     
-352   32     
-48    -48    
160    -64    
0      64     
48     -48    
144    -32    
-96    -128   
144    160    
-32    16     
80     -256   
128    176    
-192   -112   
192    -80    
-32    64     
-32    -64    
16     128    
-48    -128   
272    -32    
-48    -288   
96     0      
80     -432   
16     48     
-16    -320   
240    -176   
64     -16    
-80    96     
80     -32    
64     160    
-96    112    
96     64     
-160   -176   
416    32     
-384   128    
-80    -160   
192    -64    
16     0      
48     -112   
160    -1104  
-96    -160   
128    -288   
-160   -112   
288    48     
-112   160    
-48    48     
-128   -32    
-32    -64    
16     96     
32     -32    
80     48     
-112   64     
-80    -128   
128    -128   
80     -240   
112    176    
0      -416   
-16    -32    
-16    -48    
224    -80    
-96    32     
0      -288   
-80    112    
64     -64    
16     112    
112    -128   
-720   48     
208    -192   
-208   -32    
-16    -208   
0      224    
208    -256   
0      -16    
-144   256    
192    0      
112    128    
-160   208    
128    48     
96     -112   
-768   0      
320    96     
-208   64     
112    0      
-304   -128   
160    -224   
16     -48    
144    -496   
-32    -16    
80     80     
80     32     
-128   48     
-144   -48    
-32    -80    
-80    176    
160    592    
-32    128    
16     -64    
80     32     
-80    16     
144    -272   
48     96     
160    -384   
-32    -128   
112    48     
64     144    
-192   -208   
128    256    
48     160    
-16    -176   
48     0      
112    64     
64     288    
-80    -256   
-160   -48    
224    160    
112    384    
-624   -112   
-1264  48     
0      -240   
-1376  -32    
-128   -16    
96     288    
-160   -112   
176    -16    
-128   128    
48     -336   
-272   96     
-960   -304   
128    -48    
-112   -96    
16     160    
32     176    
64     96     
-128   -96    
-208   0      
-64    96     
-448   -16    
-16    96     
192    176    
-448   32     
-176   -224   
48     112    
-80    -80    
64     64     
64     -48    
96     64     
-144   1440   
-368   192    
-192   304    
-432   -128   
-816   -384   
512    -448   
208    448    
-864   -384   
-352   -16    
16     -16    
32     64     
112    112    
0      208    
-32    -160   
192    32     
-192   64     
-32    96     
-48    -96    
-16    64     
-112   -48    
-352   -96    
176    112    
-400   -256   
128    -224   
-576   -32    
352    208    
-176   -448   
-64    -224   
-224   -272   
144    80     
64     144    
0      176    
-16    96     
-80    32     
-48    16     
-16    160    
336    320    
-208   -64    
-48    -240   
-464   -176   
96     112    
-32    -16    
48     80     
64     0      
-32    96     
96     16     
64     64     
32     256    
-160   -16    
-96    -80    
48     144    
48     128    
-96    -64    
-112   -64    
-64    -64    
32     384    
-32    -192   
112    80     
16     144    
-192   48     
-80    176    
-128   -32    
-48    -32    
16     32     
112    112    
-112   48     
16     0      
-64    -64    
32     16     
-160   0      
32     96     
-1216  -16    
-16    32     
0      80     
-128   64     
-32    128    
176    352    
-192   336    
16     80     
256    -32    
-256   128    
-64    -288   
-48    16     
-16    96     
-16    368    
16     128    
-464   -240   
-128   -208   
192    112    
16     272    
-48    64     
-48    144    
16     32     
48     -16    
48     64     
-48    80     
-48    -144   
-112   -112   
160    176    
-192   80     
48     32     
-112   16     
80     32     
48     144    
16     32     
-48    -32    
96     160    
-160   48     
128    0      
-80    176    
16     -48    
112    224    
-208   64     
192    224    
-256   -160   
80     112    
32     -32    
-16    48     
32     -160   
128    176    
80     112    
-48    -96    
0      272    
96     208    
160    96     
-208   -176   
-80    -48    
144    -112   
0      176    
128    160    
0      160    
-80    96     
-16    112    
160    128    
-96    -80    
160    -304   
-224   -16    
-192   -160   
144    -48    
-272   -48    
192    48     
96     224    
-144   -112   
112    144    
-48    48     
0      96     
48     -160   
-64    80     
208    240    
-80    112    
-16    48     
48     112    
64     -16    
-112   208    
-160   32     
80     288    
-336   -320   
256    160    
64     240    
80     48     
0      96     
0      304    
80     64     
0      -16    
112    0      
80     192    
-96    -32    
208    128    
-336   -400   
272    368    
16     128    
80     208    
-112   -96    
128    16     
176    560    
-48    -48    
-32    -112   
272    256    
112    96     
-32    80     
-112   112    
0      -32    
96     256    
112    -176   
128    224    
0      336    
-64    272    
-160   80     
208    -512   
48     0      
32     32     
32     -64    
144    128    
-96    96     
160    96     
-64    32     
112    144    
848    3600   
-1808  -432   
592    368    
-80    -112   
720    240    
-720   -784   
64     112    
448    864    
-16    -2368  
-160   640    
-32    -208   
-32    144    
32     -144   
272    224    
-48    -16    
128    160    
-240   -16    
176    96     
32     208    
160    128    
32     64     
-160   -32    
192    272    
64     -592   
80     80     
16     0      
-96    272    
96     208    
16     112    
64     32     
0      48     
112    -32    
-32    144    
112    48     
-32    112    
128    -48    
80     -176   
-48    288    
96     -800   
-32    -64    
0      -720   
128    16     
48     112    
-16    48     
144    -48    
-160   80     
160    -48    
-144   144    
224    -128   
-16    -128   
-16    80     
96     -112   
0      112    
112    -80    
-32    -16    
48     -1024  
112    48     
96     80     
-80    80     
144    144    
-256   32     
176    160    
48     32     
32     -32    
32     0      
0      208    
16     -32    
96     64     
-96    -16    
96     160    
0      -496   
112    128    
-96    -288   
112    64     
48     80     
32     112    
-96    -64    
160    32     
0      32     
64     112    
-112   96     
144    -368   
0      -64    
32     -832   
144    240    
-208   -368   
176    240    
-32    -304   
144    208    
-48    32     
96     32     
0      0      
64     176    
48     64     
96     48     
16     320    
-144   -336   
224    80     
16     -160   
112    176    
80     -112   
64     224    
-48    -48    
112    32     
80     0      
-48    96     
64     128    
-64    16     
304    544    
112    -256   
-80    64     
-64    -80    
128    32     
176    96     
144    176    
-112   64     
272    512    
-176   -80    
192    -832   
-144   160    
160    144    
160    160    
-960   -240   
112    -448   
64     -368   
80     -2432  
-176   -112   
176    -224   
-160   -208   
96     96     
-48    -208   
80     -96    
-96    -160   
-48    -64    
336    16     
0      -192   
-224   -256   
-1200  -48    
48     -496   
48     -64    
16     80     
64     -96    
64     -560   
16     -192   
64     112    
64     -64    
112    176    
16     144    
0      -48    
0      0      
96     -128   
32     -224   
-144   32     
128    -208   
64     304    
112    -416   
96     112    
-80    -1232  
240    208    
-128   -1536  
176    256    
-144   -112   
-224   -64    
32     -112   
80     -112   
-32    16     
192    480    
-352   -464   
112    64     
176    0      
64     -128   
-144   -176   
112    -480   
144    192    
-16    -368   
32     32     
80     -64    
-16    -32    
-64    -128   
96     240    
-112   32     
112    176    
96     -80    
176    80     
-1184  0      
-16    64     
96     -128   
192    -96    
112    0      
48     -48    
64     80     
192    -1584  
-48    160    
-64    -112   
272    -112   
-48    80     
80     32     
-912   432    
-912   -1120  
32     880    
-432   544    
-1648  -368   
-448   -144   
96     -640   
-48    832    
-192   -656   
880    -1056  
-368   256    
416    256    
-96    -48    
-192   -32    
-144   -304   
352    80     
-96    -96    
-80    0      
240    -96    
-384   -64    
-48    -288   
-320   -112   
0      144    
80     -176   
128    -224   
-80    336    
-176   -64    
-64    -304   
-224   96     
208    96     
-224   48     
-112   16     
-128   -128   
-80    48     
-288   208    
-128   112    
192    -80    
-112   -192   
608    624    
176    -704   
64     80     
-544   96     
304    48     
-256   176    
32     -48    
16     32     
48     -400   
128    -64    
-96    -256   
256    144    
-16    -480   
128    192    
16     -256   
-80    -112   
96     -32    
144    32     
-176   -224   
-368   -512   
240    336    
128    -416   
-32    112    
-80    16     
96     0      
64     160    
-144   128    
-496   -208   
16     32     
-976   -176   
0      176    
-336   -80    
0      16     
0      80     
-128   -16    
-16    96     
-496   96     
16     80     
352    384    
-240   224    
0      -16    
-96    -64    
-464   -32    
160    144    
-80    -96    
64     176    
-48    0      
-64    -112   
0      32     
-208   -32    
-192   -144   
-496   -112   
96     176    
-672   80     
-32    64     
-16    -144   
96     112    
-96    0      
128    288    
-32    176    
-80    -48    
64     -80    
-224   -80    
16     -16    
-96    96     
-48    64     
-48    48     
-128   32     
-336   -224   
96     128    
-48    480    
-16    32     
-80    -192   
112    80     
32     -80    
0      144    
-208   160    
0      -32    
192    96     
-64    224    
-64    48     
-224   0      
-32    -16    
-224   96     
-16    32     
16     48     
192    80     
-192   208    
512    656    
-336   -48    
-48    -192   
-80    64     
160    96     
-32    96     
-80    160    
0      48     
32     48     
-112   80     
0      96     
-16    -32    
-144   496    
64     -48    
-48    -192   
64     -192   
-80    48     
-16    128    
32     64     
32     160    
32     480    
-96    352    
-16    192    
-144   0      
80     96     
-80    32     
48     -160   
-416   16     
80     528    
-16    -128   
96     400    
16     80     
16     112    
-80    64     
-96    -112   
144    176    
-96    80     
32     32     
144    32     
-16    112    
-80    176    
96     400    
-496   64     
192    112    
-80    -48    
96     -176   
192    -80    
-128   160    
96     128    
-144   160    
32     -16    
112    288    
-208   16     
-80    -16    
64     64     
-80    -96    
32     192    
32     -320   
128    304    
-688   -80    
-80    0      
-48    128    
-48    144    
-48    32     
48     64     
96     -16    
-16    80     
-48    144    
-32    -112   
80     144    
-128   48     
-400   -416   
-992   -688   
784    192    
-432   256    
-416   -368   
464    880    
112    -304   
-256   784    
-32    -432   
144    224    
112    -480   
0      320    
-48    -64    
64     176    
-16    128    
64     -96    
-192   144    
96     128    
32     144    
128    -16    
-32    128    
16     0      
-64    336    
64     -176   
-80    128    
48     -144   
32     288    
64     -16    
16     192    
-112   -192   
0      256    
-16    -16    
0      240    
64     0      
-80    112    
64     64     
-32    192    
64     80     
-176   -16    
80     112    
288    112    
-208   48     
-112   -96    
0      192    
0      16     
16     32     
-64    80     
-16    160    
96     -64    
-32    160    
-112   32     
224    112    
-96    80     
144    288    
16     -16    
16     -48    
16     64     
32     112    
32     96     
96     112    
32     80     
96     112    
80     48     
-32    288    
-48    -96    
112    32     
32     80     
144    128    
-128   48     
80     176    
32     -64    
80     0      
48     144    
-64    112    
-32    32     
128    -560   
-128   -16    
224    -160   
64     208    
-240   144    
144    144    
-16    -64    
96     96     
16     304    
-64    -96    
208    96     
-48    144    
96     96     
112    -32    
-16    -112   
-128   -752   
128    192    
16     288    
-16    32     
224    272    
-176   64     
176    64     
-48    -208   
64     -64    
128    32     
-48    64     
192    272    
-96    -128   
64     -96    
-128   -48    
176    128    
-96    -16    
-80    -704   
112    192    
48     128    
32     80     
-80    176    
80     128    
80     112    
16     112    
16     -112   
32     64     
-80    -96    
48     80     
192    512    
-128   -80    
128    80     
-80    -448   
128    -16    
-16    -112   
80     256    
-16    320    
176    128    
80     -304   
-224   -64    
208    160    
176    144    
-128   48     
272    64     
-128   96     
192    -112   
-224   16     
96     0      
160    128    
32     -784   
112    64     
0      512    
64     160    
-112   48     
112    80     
64     -176   
-128   -176   
320    224    
32     64     
0      96     
80     -64    
16     144    
32     16     
-16    224    
64     -528   
-272   16     
112    -1136  
-224   -352   
256    80     
272    432    
112    128    
48     160    
-32    160    
-64    -208   
48     16     
208    176    
-496   96     
-32    -672   
224    112    
272    -240   
-224   32     
32     -208   
48     224    
128    -48    
-96    64     
208    176    
160    144    
-192   144    
-32    -272   
176    144    
64     -48    
128    144    
-112   -320   
48     32     
128    -304   
128    224    
-64    336    
32     96     
-32    80     
192    128    
-32    112    
128    -224   
80     192    
-80    -32    
192    0      
-80    80     
160    192    
-208   80     
-1376  -1360  
-80    -512   
16     784    
384    432    
416    -16    
-48    -528   
208    -960   
-608   -432   
1184   480    
-816   -256   
896    -208   
-336   -96    
160    -128   
176    -48    
80     -176   
64     256    
272    336    
-112   320    
-64    -64    
208    -1392  
224    336    
-144   -304   
0      -240   
-432   -432   
96     -464   
64     -48    
-80    384    
-160   -176   
304    -192   
128    0      
224    32     
48     -112   
-48    -320   
288    32     
64     224    
208    64     
240    -192   
80     -448   
-96    64     
-176   -112   
96     192    
64     -528   
112    -48    
48     -640   
32     16     
-208   -1792  
112    16     
32     48     
-64    128    
48     128    
-144   0      
32     -224   
32     -144   
-128   112    
64     -240   
-768   -128   
16     0      
288    208    
-128   -560   
128    -160   
112    -992   
-64    -208   
-32    384    
128    48     
-160   -240   
32     64     
-224   48     
112    -64    
-48    64     
16     -80    
-1616  -64    
64     -208   
48     -48    
64     0      
96     16     
176    496    
-112   256    
192    -1264  
464    880    
-416   -384   
80     -64    
224    112    
32     -16    
-208   -112   
272    -112   
-720   -112   
112    -272   
-576   32     
-16    -64    
208    16     
-96    -688   
0      -32    
112    -992   
128    240    
-96    224    
0      16     
-176   -288   
-16    -384   
0      -48    
-64    16     
-48    64     
32     -144   
16     112    
-32    -64    
-176   -144   
192    -256   
80     128    
32     -400   
-112   16     
-144   -32    
256    112    
-32    128    
-16    -176   
-16    16     
176    192    
-368   16     
320    -112   
-560   -128   
256    -80    
144    80     
-64    -96    
64     448    
16     -240   
160    64     
-528   -128   
16     -208   
-304   32     
128    16     
-112   -128   
208    48     
80     208    
-112   16     
-32    112    
-160   -272   
96     160    
32     -48    
160    160    
112    -304   
-32    0      
-96    -32    
16     -80    
-176   -32    
208    16     
-112   16     
48     -128   
-112   -304   
80     -80    
-112   112    
-16    -128   
96     48     
-1552  -288   
-16    144    
-112   -416   
-80    -48    
-16    0      
32     160    
80     -224   
-832   304    
-192   16     
80     -80    
64     -64    
80     128    
-96    48     
-432   64     
-288   0      
-224   -320   
48     208    
-16    64     
-16    48     
-96    224    
-336   96     
-272   -80    
-384   -128   
144    -32    
144    144    
-48    96     
0      64     
80     -64    
-16    -112   
-48    224    
-32    -160   
-16    192    
48     16     
-112   176    
-160   -64    
-256   -48    
-32    -48    
-192   32     
-32    64     
-592   96     
-96    -96    
-224   -112   
-64    48     
-80    32     
16     208    
-16    -160   
48     16     
1120   448    
-560   -224   
480    208    
-416   352    
112    -128   
-256   256    
80     -352   
-448   656    
304    -384   
-816   16     
592    -176   
-112   400    
-80    -80    
-96    48     
-16    -112   
224    -48    
-288   288    
224    16     
-80    208    
48     -192   
-192   192    
240    -48    
-272   288    
304    -288   
-528   240    
96     -336   
-160   304    
304    32     
-64    208    
-144   -192   
-144   48     
48     -144   
-80    352    
16     -128   
-112   224    
-16    -128   
48     448    
-80    -176   
-112   96     
-176   -32    
144    192    
-208   -144   
0      64     
-80    48     
96     112    
-32    176    
128    48     
-96    128    
-240   -32    
96     -16    
32     112    
-32    192    
32     80     
-64    128    
-112   -112   
128    240    
-336   -112   
112    192    
-96    80     
112    32     
16     16     
-48    144    
-80    48     
48     16     
32     160    
-80    48     
64     16     
-144   -48    
112    -48    
-256   16     
-144   96     
-208   64     
-208   0      
64     -48    
-64    96     
-96    48     
176    160    
-192   176    
112    16     
64     -16    
-64    112    
-64    64     
-240   -320   
32     48     
-64    -32    
96     304    
-176   64     
304    64     
-208   32     
-96    -80    
128    96     
-48    64     
32     176    
48     48     
48     96     
-208   96     
0      48     
16     0      
0      -112   
-16    304    
144    336    
-288   128    
-48    -32    
16     -80    
80     208    
96     160    
-48    32     
128    128    
-48    96     
32     0      
-16    80     
48     80     
-16    80     
64     80     
-160   16     
32     96     
-48    80     
192    -48    
-304   -224   
16     16     
32     -16    
80     128    
32     48     
-112   176    
0      -32    
64     -80    
-64    -112   
-96    -336   
176    352    
-128   64     
-96    128    
-32    -96    
128    64     
-48    208    
224    720    
-240   112    
-16    192    
128    80     
112    80     
16     176    
-112   -64    
112    160    
-96    48     
64     192    
16     32     
48     288    
-48    -16    
-48    0      
16     48     
32     48     
64     128    
-144   -16    
144    144    
0      112    
-16    16     
16     112    
-112   64     
32     -64    
176    208    
48     144    
-16    48     
-32    32     
256    160    
32     0      
16     80     
-16    -32    
80     112    
-192   64     
176    16     
-128   144    
-64    -80    
176    160    
-96    64     
80     -496   
96     128    
-64    240    
-128   176    
-16    -16    
208    48     
32     112    
-16    64     
-16    128    
48     16     
48     224    
96     -176   
96     160    
48     16     
352    48     
-352   -400   
96     -32    
128    -880   
64     80     
-112   304    
-48    96     
128    64     
64     48     
144    64     
640    1488   
-240   -96    
-80    -736   
-768   16     
368    -352   
240    432    
336    -560   
240    752    
-432   -240   
16     144    
128    -256   
-352   464    
304    -304   
-32    384    
0      -176   
96     416    
-272   -640   
400    528    
-432   -320   
272    256    
-144   160    
336    128    
-224   -224   
304    -448   
-144   224    
208    -2656  
-192   176    
32     -112   
176    496    
-240   -176   
256    224    
-96    -16    
80     16     
128    352    
-16    16     
112    112    
-96    -592   
176    672    
0      368    
240    144    
-112   -288   
96     16     
-64    -480   
32     144    
0      96     
32     48     
64     144    
160    256    
16     -64    
128    -64    
0      128    
96     -224   
-112   64     
144    -368   
80     32     
48     -592   
48     128    
80     -880   
-128   32     
-96    32     
144    112    
-80    272    
0      144    
80     -16    
128    -320   
144    192    
48     0      
-16    128    
48     -240   
96     112    
-16    -448   
112    112    
-48    -512   
-16    48     
-16    32     
272    256    
-208   112    
128    128    
304    592    
-304   256    
144    64     
192    -144   
80     464    
272    64     
-32    208    
16     80     
-32    48     
416    304    
96     336    
32     176    
16     160    
208    160    
-144   -48    
0      80     
80     -16    
96     -272   
80     -336   
-64    48     
96     -320   
160    304    
-32    16     
144    208    
-96    -240   
80     -1232  
64     224    
-32    -384   
272    208    
-1296  -256   
144    128    
96     -96    
0      -1328  
64     -288   
48     -224   
64     -80    
48     192    
-48    -96    
96     -384   
176    112    
0      -64    
-80    112    
32     -288   
272    -176   
-560   96     
-32    -304   
208    -208   
-16    -448   
80     192    
144    -448   
64     16     
-48    272    
64     -192   
64     -288   
-128   -16    
-48    96     
288    272    
112    -96    
-144   -272   
-512   16     
208    -176   
272    -160   
-176   64     
144    -80    
192    -496   
-48    -112   
64     -208   
32     -368   
144    -96    
-80    112    
128    -64    
64     240    
-288   -64    
112    -64    
-400   -128   
64     64     
-304   0      
160    0      
96     64     
-96    -48    
176    -112   
-32    -320   
-16    -48    
-64    -48    
16     -80    
320    112    
-208   80     
112    48     
0      -48    
0      512    
-48    -112   
-352   -64    
192    -240   
80     -64    
0      -496   
-112   16     
32     -240   
320    48     
-320   -432   
-32    -80    
112    32     
128    -112   
-48    128    
-16    -112   
-128   -64    
48     -96    
-160   -144   
192    -160   
-736   -80    
48     -48    
-64    144    
96     -272   
-96    0      
160    -592   
-160   -48    
80     16     
-64    64     
64     48     
32     80     
1120   -480   
-256   160    
-112   480    
-320   304    
64     -176   
64     304    
-352   -928   
208    432    
160    -128   
-32    -64    
192    -64    
-160   128    
160    80     
112    -64    
-16    -112   
-256   -160   
-176   96     
208    208    
-128   -32    
-288   -304   
-64    -96    
176    16     
-64    -16    
64     -144   
80     -544   
80     64     
-240   144    
16     -112   
-16    32     
16     -80    
-80    80     
48     -16    
-176   64     
96     -160   
-288   -144   
32     -336   
16     256    
0      -144   
240    112    
-608   -288   
-704   48     
-160   64     
32     80     
-64    48     
48     -16    
-128   80     
192    48     
32     336    
96     -224   
0      16     
112    -32    
208    128    
-848   -112   
80     -64    
-240   -240   
-304   -16    
16     -64    
-160   160    
0      144    
-896   -80    
48     128    
-96    -16    
-64    80     
80     80     
-144   -112   
80     -144   
16     96     
-16    -160   
48     176    
-80    -32    
16     -96    
0      208    
-240   144    
-96    -112   
-592   -160   
32     -128   
-864   176    
-224   32     
256    16     
-160   224    
-144   -160   
208    96     
-144   -384   
48     176    
144    64     
-96    128    
112    -64    
144    112    
-304   -48    
176    80     
-96    -16    
16     208    
48     0      
-704   -128   
48     64     
-112   -288   
80     32     
64     32     
-96    -16    
0      16     
-80    -48    
16     32     
-80    64     
-48    64     
-64    0      
96     208    
-352   96     
32     -48    
-1488  -192   
0      144    
112    -48    
16     176    
-16    16     
16     64     
-144   -16    
112    256    
-48    208    
-16    80     
-144   -32    
-208   -64    
0      -64    
48     64     
176    256    
-384   -224   
0      128    
-16    0      
288    112    
-112   0      
-32    112    
32     160    
160    160    
-160   -32    
112    -96    
-64    -48    
80     48     
-112   64     
-16    0      
80     144    
-16    -80    
48     112    
-864   -16    
128    -1776  
-160   48     
96     176    
-128   32     
112    192    
16     -144   
112    -48    
160    272    
-160   80     
16     16     
-48    16     
144    256    
-192   160    
-176   16     
-896   -240   
-128   64     
0      304    
-96    -96    
-48    48     
-16    -32    
-32    176    
-240   -32    
192    96     
-48    128    
16     -32    
-80    -96    
-64    304    
-176   -64    
112    112    
-288   80     
112    0      
0      64     
-48    64     
64     -176   
64     112    
-80    176    
128    16     
-80    208    
112    -128   
-32    176    
-16    -48    
96     224    
128    -128   
0      288    
0      -32    
0      96     
-16    48     
80     0      
176    112    
64     -16    
48     64     
208    160    
-272   -112   
32     16     
64     144    
96     256    
-592   1104   
-320   336    
128    208    
-224   -768   
672    912    
-560   528    
-16    -256   
656    -16    
32     64     
-336   -256   
-160   0      
80     16     
48     -16    
-80    16     
32     -336   
-64    -48    
-192   -400   
512    496    
-208   32     
32     384    
16     240    
160    96     
-176   -48    
160    -48    
16     32     
0      256    
48     192    
-32    16     
64     -176   
-80    160    
160    112    
0      32     
16     144    
48     96     
16     32     
16     128    
32     176    
-32    16     
32     -16    
16     96     
64     128    
96     144    
-80    144    
-16    0      
-208   -16    
192    96     
128    240    
96     0      
-96    -64    
128    64     
-32    224    
48     48     
16     -80    
48     128    
80     160    
-112   32     
48     0      
-80    48     
-16    80     
64     -240   
80     -160   
-32    160    
80     272    
-96    -32    
176    0      
64     288    
0      96     
112    -48    
80     64     
0      160    
-48    96     
48     96     
64     0      
16     128    
-32    -144   
176    -128   
-112   32     
64     -704   
48     48     
-64    96     
192    48     
-32    -32    
176    160    
-208   192    
192    176    
16     0      
64     80     
0      -48    
224    48     
-64    112    
0      -192   
112    144    
32     -560   
0      -96    
112    160    
-336   112    
400    320    
-288   -96    
352    336    
-240   32     
272    48     
-16    80     
-32    -32    
80     112    
64     0      
0      -112   
96     160    
-32    -352   
48     96     
-48    -768   
208    176    
-48    128    
176    176    
-128   -208   
48     96     
-64    16     
240    112    
-16    -48    
-32    -96    
64     208    
16     64     
288    64     
-176   -64    
-32    192    
496    -208   
-240   128    
160    -240   
0      272    
128    16     
-16    32     
-32    32     
48     80     
32     16     
-192   -224   
112    64     
-96    -16    
176    48     
304    -240   
-256   48     
96     80     
240    112    
-96    16     
-80    64     
-32    -112   
96     -64    
48     -128   
-128   144    
272    64     
64     -96    
-112   112    
80     16     
0      160    
224    -80    
48     32     
64     -208   
32     208    
80     -512   
-80    176    
240    32     
-32    224    
32     128    
-48    80     
32     80     
96     32     
112    208    
-48    -112   
112    400    
-48    96     
80     -96    
80     -144   
176    112    
-96    -32    
0      288    
112    -32    
192    224    
-16    16     
-32    -240   
48     48     
96     -272   
48     160    
64     0      
-64    96     
64     -288   
128    192    
-128   -496   
32     64     
288    -176   
112    224    
-80    256    
-16    -1168  
-16    80     
-16    -192   
128    -336   
112    -224   
288    -528   
112    -48    
-48    304    
240    -272   
-32    -368   
432    288    
-400   608    
-368   -368   
480    928    
-496   -768   
416    160    
-160   -720   
-32    144    
144    -384   
256    496    
0      -304   
80     -16    
-128   80     
352    -160   
-32    416    
160    112    
-48    176    
32     -112   
0      16     
-16    -48    
48     144    
80     -128   
-240   128    
-80    -192   
80     48     
32     -432   
160    -80    
-112   -240   
224    -16    
-48    -1328  
64     -160   
112    -80    
-144   48     
96     -80    
0      96     
-32    128    
128    -32    
-576   -208   
64     -32    
-256   0      
256    -48    
-64    0      
-80    -96    
32     -128   
128    -640   
-112   -64    
64     96     
-16    64     
-32    -32    
64     192    
16     -112   
128    -32    
-112   -48    
304    192    
-432   -16    
208    48     
96     304    
0      -192   
-160   16     
32     -896   
-16    48     
16     64     
-16    -64    
176    144    
-48    -128   
-144   -64    
32     0      
-240   32     
-48    16     
96     112    
-96    -288   
-912   -176   
0      -128   
368    272    
-224   -16    
-112   112    
432    -2272  
-256   -160   
256    -144   
16     48     
-80    112    
48     192    
80     16     
48     0      
-176   -208   
48     176    
-448   0      
64     16     
-288   96     
96     -80    
-16    112    
48     -352   
64     80     
48     32     
32     32     
64     64     
80     96     
-96    48     
80     -80    
-96    -48    
16     -112   
16     64     
-32    -64    
112    -16    
48     -160   
-48    80     
144    -432   
-16    144    
-32    0      
48     0      
-368   -64    
208    16     
-272   -80    
96     0      
-80    32     
144    80     
-96    -16    
192    -288   
-192   -16    
192    -352   
-144   112    
176    -144   
-192   80     
-16    -320   
80     256    
-432   48     
384    112    
-304   0      
192    32     
-176   0      
80     -64    
-160   160    
-32    -208   
160    48     
-560   144    
112    -64    
-592   -64    
-912   16     
-80    48     
-240   -64    
0      48     
-240   48     
-80    64     
352    -416   
-304   336    
-208   -336   
240    -16    
-480   64     
272    128    
-336   -192   
304    304    
-368   -128   
32     -64    
-352   64     
-128   -192   
176    32     
-144   144    
-160   -128   
-192   -48    
-64    -96    
96     16     
32     176    
-288   -176   
240    336    
-320   -192   
400    96     
-64    208    
48     -32    
-48    96     
-144   -64    
112    320    
-176   -144   
80     48     
-416   -16    
64     160    
-64    -48    
112    192    
-64    -208   
0      160    
-208   -224   
176    192    
64     -32    
-96    144    
-80    -48    
-112   -96    
80     80     
64     80     
0      160    
-144   240    
-144   176    
-208   -16    
-208   -64    
256    -176   
48     144    
16     -128   
304    2064   
-640   896    
-624   -1168  
-192   -624   
224    672    
-64    -864   
352    16     
400    736    
-400   272    
-32    -112   
-496   -176   
-128   -16    
-112   -48    
160    176    
-80    80     
144    16     
-320   16     
80     144    
-160   0      
32     96     
-48    128    
-64    64     
-48    -80    
-48    0      
80     -112   
-112   -176   
128    64     
-384   144    
64     144    
64     0      
-272   48     
160    16     
-96    80     
-16    80     
-16    32     
-176   -64    
160    16     
-144   144    
144    0      
-112   -16    
-32    176    
-32    192    
-1328  -64    
-304   -128   
-112   48     
144    80     
32     160    
-96    -16    
128    16     
-160   144    
32     -48    
-80    32     
0      128    
32     -32    
-48    64     
-32    48     
-160   64     
-704   -80    
-16    16     
128    80     
16     160    
32     48     
16     80     
-48    32     
96     -144   
-16    48     
-160   32     
-16    80     
0      -16    
64     96     
-128   -112   
128    224    
-144   128    
192    64     
0      112    
-48    16     
176    0      
-80    96     
64     96     
32     256    
-160   80     
80     -112   
224    192    
-384   80     
176    112    
-176   0      
96     192    
32     -96    
48     80     
-112   -96    
80     80     
-48    192    
-32    112    
112    112    
-48    -64    
80     32     
-192   0      
160    160    
-144   32     
-16    48     
-80    -48    
128    256    
224    176    
-176   224    
-48    64     
-16    -16    
96     32     
144    160    
-32    96     
16     0      
-160   48     
112    32     
176    240    
-160   80     
-144   -48    
-16    64     
336    560    
16     0      
-64    -64    
-192   80     
224    224    
400    80     
-240   144    
64     48     
32     272    
-128   -112   
48     -32    
-64    32     
-32    32     
144    112    
80     240    
0      80     
0      128    
-64    272    
-64    -16    
272    64     
-48    192    
96     128    
-32    48     
-192   16     
160    16     
-192   -16    
336    -48    
-240   -16    
128    32     
144    112    
-16    96     
16     32     
0      112    
64     64     
32     -16    
-16    64     
112    256    
64     128    
96     144    
-64    32     
160    384    
-128   192    
80     0      
16     -144   
128    -128   
-32    -128   
-16    64     
112    48     
176    48     
256    1072   
-96    -32    
-224   -32    
16     -64    
32     -176   
-80    144    
-112   -112   
32     416    
0      -48    
80     -32    
160    32     
96     112    
-32    176    
32     -16    
176    400    
-96    -112   
-32    144    
16     48     
128    32     
-272   -288   
16     112    
96     144    
112    208    
-16    96     
96     -304   
48     32     
144    -176   
32     176    
-176   -48    
80     0      
208    32     
-560   1536   
-192   1456   
144    608    
-576   176    
560    416    
-32    -528   
-16    -1072  
-416   608    
240    -80    
560    432    
-400   -864   
368    192    
32     624    
-32    16     
16     -320   
-16    128    
48     96     
128    272    
-112   -160   
192    -192   
-288   -80    
272    -48    
-192   256    
208    -112   
-112   48     
288    -400   
-160   224    
224    -1056  
-288   208    
608    -1200  
-416   0      
112    -64    
80     128    
-80    -48    
80     192    
32     144    
48     64     
176    144    
-96    0      
112    96     
32     -544   
-80    64     
160    -224   
176    176    
-16    -208   
16     96     
16     144    
240    240    
-304   -192   
144    112    
-16    16     
176    144    
-48    112    
224    -384   
-48    48     
32     -160   
112    512    
-64    48     
224    208    
16     176    
64     -80    
64     112    
128    208    
-112   160    
96     112    
144    64     
80     -848   
0      128    
48     -336   
16     128    
80     -80    
80     96     
0      -80    
-32    80     
32     -272   
96     128    
-64    -128   
128    48     
160    32     
48     -128   
64     448    
-32    16     
96     192    
-192   -192   
288    96     
-64    -16    
240    336    
-80    48     
0      80     
128    -80    
208    -912   
96     384    
48     -192   
-80    -240   
-704   -160   
128    -96    
48     -48    
128    128    
-16    0      
128    -1888  
-112   -16    
0      -16    
112    -64    
96     -32    
80     208    
-32    -208   
144    144    
-80    -224   
240    -112   
-1120  -208   
240    128    
-64    -32    
192    -224   
-32    -176   
16     -112   
80     -16    
160    192    
0      128    
32     -240   
48     0      
96     0      
64     -32    
-64    -16    
-80    -32    
-16    96     
176    -32    
96     -64    
16     -240   
48     -192   
128    144    
-16    128    
176    -96    
-96    48     
112    -176   
-16    144    
-48    -240   
208    240    
48     528    
-16    160    
-112   -240   
144    -208   
-352   -32    
144    176    
-96    -176   
144    48     
-160   -96    
256    -416   
-240   -80    
208    272    
-160   0      
96     112    
128    -160   
-176   176    
128    -304   
-208   -16    
48     -272   
176    -176   
-96    48     
144    256    
128    0      
-240   -336   
224    -112   
16     48     
-64    -1264  
-32    -320   
256    64     
-32    -192   
-384   -320   
-64    96     
144    64     
144    288    
0      -272   
0      16     
-832   -80    
272    64     
208    48     
64     -144   
-32    112    
48     -208   
48     176    
176    -192   
0      -176   
-128   0      
96     -112   
-144   112    
144    -64    
-208   -64    
192    64     
-224   -288   
96     0      
128    176    
48     176    
-256   128    
80     -672   
-16    -96    
-464   -112   
32     112    
-512   96     
608    2000   
-1424  160    
80     -704   
464    -288   
-256   -208   
560    768    
-480   1088   
96     -688   
160    -368   
-208   -64    
320    -416   
-160   176    
-192   -144   
224    208    
-224   32     
144    128    
-112   -144   
128    32     
-48    64     
64     144    
0      128    
-80    -32    
96     -64    
-352   -288   
144    96     
-288   -128   
-288   64     
-32    64     
-144   -128   
192    16     
-176   0      
112    96     
-64    80     
48     80     
32     -16    
96     224    
-1120  -128   
160    64     
-160   -64    
192    144    
-112   48     
-224   -16    
-32    -16    
80     48     
-176   48     
-656   -32    
0      160    
48     -32    
80     -48    
-64    -32    
-96    -32    
-64    -96    
-128   240    
192    -208   
-16    64     
0      -32    
-96    80     
-96    16     
-48    64     
32     16     
-112   96     
32     80     
-688   32     
-80    64     
-32    -80    
32     96     
64     32     
16     208    
-144   -144   
-16    -80    
-64    -32    
-16    96     
-128   32     
192    256    
-224   160    
-64    -320   
320    -16    
-384   -32    
32     128    
-272   -96    
192    16     
-16    32     
-16    144    
224    -224   
-192   -160   
160    368    
-256   128    
80     -48    
-112   -128   
32     48     
-224   -80    
128    128    
-288   -48    
160    64     
-832   -48    
-16    16     
128    -208   
-80    128    
48     96     
64     80     
-16    128    
-64    64     
-64    -48    
32     32     
-32    160    
80     48     
-96    -48    
48     32     
-192   48     
16     -144   
16     144    
-96    -96    
192    256    
16     -48    
-64    160    
-112   -80    
176    112    
-128   16     
128    256    
-192   160    
192    112    
-304   -48    
-96    -96    
48     160    
-272   -96    
-16    -192   
-1056  -144   
192    192    
80     -16    
-128   0      
-176   -48    
32     224    
0      -32    
64     144    
160    32     
0      -176   
-224   48     
-320   48     
48     16     
80     48     
160    64     
-624   -96    
-208   176    
112    48     
-16    0      
-96    -80    
16     16     
112    176    
16     208    
-16    -32    
-48    80     
-48    80     
64     96     
64     48     
-112   -112   
96     272    
96     256    
-48    240    
32     16     
0      192    
16     208    
-160   -80    
64     96     
-32    80     
-64    80     
-80    -16    
256    320    
-160   -416   
-48    176    
-112   96     
-16    80     
32     240    
96     -128   
32     32     
48     64     
-16    192    
-32    80     
-112   -48    
-16    224    
-48    160    
96     160    
80     -64    
16     -32    
-96    48     
112    16     
144    320    
-80    112    
-16    160    
64     -64    
64     64     
80     128    
-96    96     
304    -128   
-32    192    
48     64     
-144   64     
-96    16     
-160   1344   
464    -256   
-752   320    
-272   128    
112    432    
240    -128   
224    32     
-112   160    
16     240    
-48    -48    
304    80     
32     208    
16     224    
-96    -48    
16     -176   
64     80     
0      -16    
192    160    
-208   -112   
224    96     
-112   80     
288    336    
-208   -224   
336    -16    
-112   64     
176    -32    
352    368    
-176   448    
112    -96    
-288   64     
-16    -32    
128    32     
16     128    
16     -176   
176    96     
0      96     
144    64     
-320   -336   
96     -16    
208    272    
-64    176    
80     80     
192    240    
0      -80    
16     160    
-16    192    
0      -80    
64     192    
64     224    
128    112    
-64    240    
16     80     
96     224    
-32    0      
0      80     
32     64     
240    320    
-592   -448   
16     192    
-112   80     
32     144    
-64    -16    
16     0      
112    -2160  
32     16     
-32    208    
48     48     
48     80     
-16    80     
48     192    
16     96     
-16    -16    
64     80     
32     -16    
-80    16     
144    368    
-64    -256   
288    -64    
80     -1184  
256    304    
16     240    
-144   192    
64     208    
64     80     
0      -16    
48     32     
256    576    
-48    176    
48     -176   
128    80     
96     80     
144    -112   
-128   64     
128    -560   
32     96     
128    -928   
-48    64     
112    96     
32     160    
16     -48    
16     128    
-16    -16    
112    128    
16     -32    
64     -80    
-16    32     
48     -96    
80     128    
-16    -80    
80     96     
16     -416   
48     112    
32     -592   
48     112    
0      16     
0      -16    
-32    -80    
176    144    
-128   64     
256    -64    
-96    160    
96     32     
-48    128    
32     -336   
32     144    
112    -720   
96     144    
-144   -560   
80     48     
-80    -160   
176    96     
-32    208    
144    176    
96     240    
80     608    
160    240    
-112   -320   
64     80     
48     -704   
64     224    
16     -160   
80     160    
-16    -224   
96     48     
-16    16     
48     -160   
32     96     
240    432    
80     48     
-32    48     
112    192    
0      -752   
160    80     
-80    -272   
112    -144   
96     128    
112    192    
192    336    
-272   -592   
96     -112   
240    0      
-48    128    
64     224    
80     0      
112    192    
48     64     
96     96     
-96    -208   
128    -80    
144    96     
32     -96    
160    368    
-112   -432   
32     -2352  
224    64     
80     -288   
80     224    
128    32     
128    -96    
128    -32    
112    208    
-80    160    
-80    32     
80     48     
224    0      
80     -80    
80     32     
0      48     
80     -224   
128    0      
80     -128   
96     -528   
-304   -320   
-64    -176   
64     -208   
64     -352   
-16    32     
368    -2368  
368    -80    
480    304    
176    -96    
640    -496   
-176   64     
16     -64    
304    688    
32     -464   
-160   48     
-80    -16    
112    -336   
-176   416    
336    -576   
32     112    
64     -448   
-32    48     
96     208    
-16    96     
64     -128   
112    96     
16     -240   
128    192    
-176   0      
112    -112   
-224   64     
208    96     
-624   -80    
80     -176   
-96    -144   
208    -416   
0      160    
128    -176   
80     144    
0      -160   
128    144    
96     208    
0      48     
-96    -128   
32     176    
-192   -64    
-64    -64    
-720   -80    
96     -128   
144    -112   
48     112    
-32    64     
64     -656   
-288   -16    
240    -2336  
16     96     
112    80     
16     112    
-96    -32    
0      -240   
-32    -64    
-48    32     
-176   -96    
64     80     
208    0      
80     32     
80     0      
-16    -144   
80     96     
80     -448   
80     -16    
16     96     
80     112    
-112   80     
128    -144   
0      32     
112    128    
-256   16     
208    -160   
-432   -128   
-48    -384   
-960   -128   
16     -240   
224    224    
-16    0      
-128   16     
192    16     
-32    32     
96     -192   
64     192    
-368   -128   
336    -128   
-416   0      
256    -128   
-208   -32    
80     -80    
0      48     
112    -176   
144    384    
-160   -1104  
80     16     
-176   -192   
80     96     
-80    64     
32     -32    
-112   64     
112    0      
-32    208    
-96    0      
96     0      
-16    -16    
0      -160   
16     -128   
-48    208    
144    -304   
96     64     
-80    64     
304    192    
-176   -16    
192    -16    
-80    -80    
-16    64     
144    272    
64     96     
-304   16     
-560   -64    
144    48     
-272   -320   
-80    112    
272    -128   
-112   176    
160    -32    
-688   96     
-160   -160   
-976   -16    
-128   -128   
64     64     
-16    160    
-64    -32    
-96    32     
-704   -96    
-208   -80    
-160   -304   
-32    224    
224    32     
-160   64     
80     80     
-80    16     
16     -16    
-112   48     
96     272    
-576   240    
-16    352    
32     -288   
144    -48    
-464   -48    
176    256    
-64    -352   
96     -144   
224    144    
-128   176    
16     80     
-112   80     
128    32     
-80    208    
-144   16     
-464   -16    
-16    0      
-144   112    
160    560    
-512   -144   
-144   -272   
96     -128   
128    -64    
-64    0      
-128   -48    
48     96     
-16    240    
-128   32     
-96    0      
-80    80     
-384   -240   
-48    96     
-768   64     
192    -16    
64     16     
16     272    
-256   -176   
-176   80     
208    176    
-32    80     
-112   -16    
-128   64     
48     32     
0      48     
80     48     
0      64     
240    -240   
-176   272    
0      48     
-128   -64    
-176   192    
-672   -1296  
-192   -48    
0      240    
208    -112   
336    944    
-944   16     
144    592    
-208   -192   
544    -304   
-528   -160   
400    224    
208    96     
-96    48     
-496   -192   
160    80     
144    272    
-288   208    
-128   0      
-32    -48    
-128   -64    
16     160    
-96    16     
64     80     
0      -160   
-128   -160   
-112   192    
16     288    
336    400    
-960   -16    
-208   -304   
-48    -192   
-128   -176   
80     48     
224    144    
80     336    
0      16     
160    544    
-544   -256   
368    112    
-528   -288   
336    64     
-224   272    
112    -80    
-96    240    
64     64     
64     -96    
-32    -480   
48     -96    
544    368    
-192   96     
256    -128   
16     208    
-192   112    
-16    240    
-112   16     
48     64     
-64    752    
128    -160   
-176   128    
-80    -144   
64     192    
64     -128   
-48    0      
128    16     
-48    0      
-96    64     
32     144    
-16    -16    
-32    64     
-64    -48    
96     144    
-112   -144   
-80    -96    
-32    80     
-80    -240   
-16    -208   
224    32     
-48    288    
160    224    
-80    -16    
-64    48     
160    -48    
128    -96    
-64    144    
16     -32    
112    288    
-272   0      
0      16     
32     112    
16     -32    
64     240    
-112   0      
48     80     
176    192    
-16    288    
-96    -32    
176    272    
-80    160    
384    464    
-320   48     
32     -192   
-48    -80    
128    -16    
128    128    
-176   -48    
64     176    
-64    -64    
64     -144   
-64    -32    
160    112    
16     48     
0      96     
-128   128    
96     96     
-16    48     
80     448    
48     48     
-112   32     
208    464    
-432   368    
320    128    
-208   288    
80     -96    
64     240    
32     -80    
-48    304    
-32    96     
96     544    
160    32     
-192   -176   
-32    -80    
288    176    
-48    -48    
-112   -176   
256    224    
0      80     
192    64     
-144   -176   
32     64     
96     144    
-16    96     
-48    128    
16     112    
64     288    
-160   -112   
320    320    
-128   80     
112    -304   
0      80     
-32    128    
0      80     
0      16     
0      16     
48     192    
-64    80     
64     96     
112    144    
-208   32     
48     80     
16     144    
-32    -224   
32     160    
-48    -1200  
80     112    
112    0      
16     128    
48     -16    
192    -16    
48     336    
48     96     
-32    352    
-80    112    
304    32     
-16    32     
80     240    
32     176    
-112   144    
336    -832   
128    96     
-32    96     
-96    96     
32     -48    
192    256    
-192   608    
-32    -48    
-32    -64    
192    -16    
0      64     
-48    32     
32     96     
64     -128   
48     80     
48     -400   
240    -48    
-32    -416   
0      176    
-240   -144   
176    256    
624    880    
-128   -96    
-464   96     
-112   208    
256    224    
-848   -432   
416    -240   
-272   336    
256    -288   
-224   64     
224    -272   
208    400    
-160   -320   
0      -1840  
16     -80    
-16    128    
128    128    
48     32     
16     48     
160    240    
-128   176    
240    -64    
-192   128    
464    -16    
-288   48     
352    32     
-320   -400   
336    -80    
-208   -208   
128    0      
0      176    
128    -16    
-144   272    
160    -16    
-224   48     
256    -272   
-48    176    
272    -224   
-64    144    
-48    -272   
96     80     
32     -144   
0      -32    
64     -112   
-16    -16    
16     160    
48     80     
240    -48    
-208   -112   
80     160    
176    -176   
-144   176    
256    -320   
-112   128    
192    -128   
32     208    
32     -144   
208    384    
-192   -336   
240    64     
0      144    
-112   -192   
192    80     
-96    128    
160    -256   
96     -192   
64     -2592  
192    -128   
-128   224    
96     -64    
96     80     
32     64     
16     -768   
176    -80    
160    -160   
96     160    
544    -336   
160    -96    
-416   32     
80     -544   
112    -192   
-144   -800   
128    -144   
-160   -544   
-16    32     
-32    16     
240    -160   
112    -544   
32     64     
-48    -64    
32     112    
-16    -32    
64     64     
-736   -64    
16     -112   
-96    -128   
64     16     
192    112    
-128   -96    
-48    -160   
160    -1312  
128    16     
-112   32     
96     128    
16     -256   
48     32     
80     32     
-16    -48    
-128   0      
-16    -64    
16     32     
96     -48    
-16    16     
80     -368   
64     -112   
48     -752   
16     128    
-16    48     
-96    -48    
-112   -112   
-48    64     
64     -48    
-208   -192   
-192   -144   
64     96     
-240   32     
-16    -400   
0      -80    
112    -288   
48     32     
160    -400   
-112   -80    
96     80     
0      0      
96     -32    
128    64     
-16    -272   
-160   0      
128    -80    
-96    -80    
-656   -144   
128    -96    
-96    -96    
176    -16    
64     -112   
160    -16    
128    528    
-16    -1664  
64     64     
0      -96    
144    64     
48     64     
208    -64    
144    816    
-64    -64    
-304   80     
64     -64    
-112   -16    
16     -144   
176    48     
-32    -288   
48     16     
64     -752   
656    256    
-224   160    
-112   -112   
-160   -304   
400    96     
-544   -64    
-80    -192   
-16    80     
-64    96     
-160   -208   
-80    0      
64     -80    
208    -112   
-176   80     
240    -96    
0      64     
16     0      
-32    -96    
-256   48     
-144   48     
48     -64    
32     144    
-32    -16    
-64    -32    
-80    0      
176    -112   
-160   208    
64     -16    
320    224    
-240   -368   
256    32     
-96    64     
192    256    
-720   1040   
-672   -816   
-320   -496   
-80    64     
-240   160    
176    64     
0      -96    
-32    192    
528    16     
-432   16     
352    32     
-960   16     
-1392  -80    
64     160    
-592   128    
48     176    
192    -80    
-128   -208   
-64    -240   
192    -144   
64     256    
160    16     
-368   192    
64     -336   
-560   -80    
112    -176   
-144   160    
-544   -496   
128    -112   
128    112    
-272   64     
-96    272    
-224   -48    
144    176    
272    176    
96     192    
224    -432   
-304   -128   
256    0      
-48    112    
-128   32     
16     128    
128    32     
-256   -128   
-192   -128   
-176   -176   
48     208    
-208   -112   
-368   -96    
-256   -112   
208    64     
16     48     
192    -400   
-240   96     
144    -80    
16     80     
-176   304    
448    224    
240    528    
16     336    
-96    -48    
-96    -208   
-48    224    
-144   -32    
144    32     
-496   -160   
-32    32     
16     -80    
-16    160    
16     -160   
48     176    
-32    208    
-80    112    
-16    0      
-32    -368   
112    -416   
32     48     
-176   288    
-272   32     
-240   16     
-128   112    
208    80     
-144   -160   
32     128    
224    32     
-128   112    
160    400    
16     144    
-16    48     
-80    64     
96     32     
96     160    
-112   272    
-272   -128   
-16    -112   
-240   -304   
320    320    
-144   48     
-96    -176   
-128   112    
336    160    
64     208    
-128   192    
-144   -32    
0      368    
-64    192    
-144   -128   
96     128    
-240   -144   
80     96     
-544   0      
160    192    
-1888  -96    
-160   -208   
144    -144   
48     480    
-160   -80    
144    80     
-224   -256   
224    96     
-128   64     
64     96     
-48    32     
-192   64     
0      96     
128    -80    
-176   16     
-80    64     
-96    128    
128    48     
144    288    
-80    192    
64     64     
-16    32     
-288   -64    
160    32     
-80    48     
64     -16    
-144   -64    
-96    160    
128    -48    
-112   80     
288    112    
-272   16     
272    -96    
-80    416    
-112   16     
128    80     
-112   -48    
32     96     
16     48     
-160   0      
80     32     
-64    160    
-32    -16    
-16    48     
96     176    
-160   112    
128    -16    
-16    96     
64     112    
48     112    
-16    112    
224    240    
-272   128    
48     -32    
160    -48    
64     16     
32     -32    
0      176    
-144   224    
-176   -32    
160    192    
80     -160   
288    240    
-64    16     
16     112    
-80    160    
32     16     
64     128    
96     144    
-112   176    
224    48     
-208   -112   
240    64     
-128   0      
-96    16     
96     112    
-96    192    
48     112    
-128   -48    
112    96     
-48    192    
16     -160   
16     192    
32     128    
-592   -1392  
-448   496    
528    -336   
-400   -288   
48     112    
-480   240    
656    -192   
-448   272    
320    -32    
432    288    
-160   -224   
256    208    
-336   224    
240    -48    
-208   368    
288    -96    
-128   320    
-48    -160   
0      432    
288    -192   
-192   224    
176    -256   
-48    480    
160    -224   
0      416    
96     -256   
-80    336    
-64    -192   
48     224    
48     -64    
-32    144    
-32    -80    
-48    160    
128    -160   
0      80     
32     48     
96     160    
-16    192    
-48    112    
16     0      
64     -16    
-48    112    
64     80     
-16    160    
-64    -64    
0      32     
112    160    
-64    -192   
208    -256   
-384   160    
272    -320   
64     128    
0      80     
80     96     
-16    80     
144    -32    
64     80     
-128   160    
272    48     
-48    96     
0      -16    
64     144    
80     176    
-16    -224   
144    48     
-112   -128   
128    64     
-48    32     
-16    80     
64     48     
-16    96     
16     -192   
-32    96     
-32    32     
208    160    
-304   -80    
144    -80    
16     208    
-64    96     
112    48     
48     -272   
-32    144    
32     -2096  
224    368    
-48    -224   
128    48     
-208   -96    
224    48     
64     -96    
128    352    
-208   -304   
48     -480   
32     176    
112    80     
224    304    
-160   -400   
0      -80    
224    -96    
144    144    
64     240    
-96    48     
128    144    
96     176    
64     144    
16     144    
32     80     
-144   80     
48     -16    
0      -336   
-64    -80    
144    64     
80     80     
96     0      
48     144    
16     -1248  
80     96     
-64    -112   
144    176    
32     208    
240    32     
48     240    
160    -96    
-32    32     
-32    -192   
112    128    
336    432    
-80    208    
32     -480   
-16    144    
32     -864   
0      0      
-16    -80    
112    96     
16     48     
32     -272   
-64    -432   
160    -512   
-48    -96    
176    -64    
-32    480    
-16    -160   
64     128    
16     -32    
144    0      
0      48     
-32    0      
128    48     
112    336    
-32    -48    
16     -256   
64     176    
16     -96    
48     176    
-64    -80    
192    272    
-64    -112   
144    48     
-48    208    
96     0      
80     16     
112    -896   
96     112    
-176   -736   
-16    -464   
-1248  16     
384    -224   
-112   0      
0      -1248  
-32    -208   
-16    352    
128    -64    
48     160    
32     -32    
-16    160    
320    -240   
-176   -656   
144    -80    
-80    -48    
224    0      
-1264  0      
0      -48    
48     -96    
64     96     
224    16     
-80    -896   
352    -64    
112    224    
64     -240   
-144   -352   
144    32     
160    -16    
-144   80     
-48    -48    
-64    224    
-400   -176   
16     -128   
208    -208   
176    1696   
-752   -864   
-208   -784   
1024   512    
688    -1792  
-864   -144   
-208   240    
0      -16    
320    32     
-432   256    
64     -368   
-336   16     
-112   -16    
176    48     
-896   -352   
-80    224    
160    144    
384    -80    
-16    -256   
160    -336   
32     192    
192    -112   
-224   288    
0      -240   
48     -496   
-144   -256   
128    48     
192    896    
-256   -416   
-448   32     
304    -112   
112    -192   
-32    -384   
16     192    
80     128    
112    112    
80     -1088  
96     -32    
32     -240   
176    128    
-160   80     
32     48     
-64    0      
64     -80    
-64    -32    
16     -272   
-224   16     
64     -224   
0      0      
-48    -112   
96     224    
-48    -304   
160    224    
-272   112    
176    -176   
-96    -32    
16     -176   
0      -48    
80     -112   
-272   32     
96     -80    
48     144    
-32    -112   
16     -144   
160    -272   
16     192    
0      -464   
96     144    
-160   -288   
176    -80    
-640   64     
112    -112   
-176   80     
64     0      
0      -48    
96     128    
-144   112    
96     -96    
0      192    
-96    -352   
128    160    
-32    -80    
288    128    
-512   384    
-128   32     
80     64     
-48    -368   
240    -96    
16     48     
-96    64     
80     -176   
-272   -128   
128    -432   
112    128    
-112   -160   
112    96     
-688   -288   
-128   16     
-16    160    
-48    144    
-64    144    
48     0      
144    192    
-80    48     
-128   64     
48     -64    
-80    80     
-720   -176   
-112   48     
-240   -192   
96     112    
-992   -320   
128    80     
-176   0      
112    208    
-48    128    
-384   160    
-96    80     
176    80     
16     288    
80     192    
128    -96    
-304   -48    
160    32     
16     -32    
-48    32     
-32    48     
-32    64     
-32    128    
-256   80     
-96    -128   
-80    -32    
-288   64     
-224   -16    
48     48     
-96    -80    
-176   112    
160    -32    
208    48     
-32    -192   
-336   80     
192    128    
224    0      
-288   160    
16     -32    
-96    -32    
-96    -16    
-160   160    
0      -80    
80     80     
-304   -176   
0      128    
-160   -368   
-64    16     
112    64     
-64    32     
80     64     
-48    -352   
176    0      
-80    160    
-112   64     
32     48     
0      208    
32     -16    
-64    64     
-16    -288   
48     128    
256    96     
-208   128    
144    96     
-144   48     
-16    128    
0      -48    
-176   64     
192    0      
-16    80     
-64    -48    
-64    32     
-80    64     
-32    112    
-480   96     
80     -80    
176    -144   
0      208    
32     -96    
128    64     
-64    128    
-192   96     
48     128    
-96    -16    
64     96     
-224   -192   
16     48     
-128   0      
96     192    
-144   32     
48     208    
1760   832    
-1824  -800   
-144   -1184  
-208   144    
608    288    
304    336    
-688   -432   
848    752    
144    -144   
-272   400    
-16    -304   
-128   512    
160    -368   
-192   272    
16     -208   
-320   -112   
160    80     
48     304    
64     288    
-64    0      
128    0      
-64    -112   
-80    304    
144    0      
16     224    
64     -112   
-176   64     
144    112    
-128   176    
64     -64    
0      48     
0      0      
208    256    
-32    64     
-96    -16    
-176   -176   
112    112    
16     64     
48     192    
48     0      
-48    32     
-272   -16    
128    96     
-176   -16    
208    64     
-48    144    
64     80     
144    128    
-208   96     
176    -16    
32     80     
-16    96     
80     160    
-16    48     
-112   -64    
32     32     
-32    64     
32     160    
48     48     
32     -32    
-128   -16    
-80    304    
208    112    
96     208    
-112   80     
192    48     
64     64     
-80    96     
32     32     
-80    80     
112    96     
32     144    
0      96     
-112   48     
-112   64     
-80    -288   
-48    -192   
128    96     
-144   -96    
-144   -112   
-144   112    
64     192    
80     208    
-64    -112   
-80    -80    
96     -16    
-80    16     
48     160    
144    320    
-160   -48    
48     -16    
128    -32    
32     128    
32     192    
-16    64     
-160   -192   
80     0      
48     272    
16     16     
-16    0      
16     96     
0      32     
32     80     
16     128    
80     96     
96     256    
-176   -112   
128    160    
-16    160    
64     -16    
0      16     
32     224    
96     48     
48     128    
-192   -32    
128    112    
-64    -240   
48     -352   
32     96     
48     0      
0      256    
0      16     
-16    -48    
-32    240    
240    240    
80     -96    
0      608    
-224   -128   
384    64     
-288   -80    
176    -16    
0      -16    
-16    -576   
128    144    
-48    -176   
16     336    
-128   16     
432    160    
-128   112    
256    112    
-272   16     
144    64     
-16    16     
96     48     
48     112    
-32    0      
288    -32    
-48    160    
96     272    
-32    -1008  
96     144    
80     96     
-80    -160   
-80    32     
432    112    
-80    144    
272    144    
-320   32     
368    -16    
16     192    
16     48     
64     112    
-224   -384   
272    0      
-96    112    
208    -272   
224    176    
-400   160    
288    -112   
-208   224    
272    128    
96     -64    
-16    224    
32     80     
48     112    
-80    -288   
272    96     
-16    -48    
144    64     
0      -16    
-16    304    
-112   -656   
32     80     
496    -16    
-96    176    
-80    -320   
256    224    
112    192    
-80    64     
-112   16     
144    176    
32     -128   
16     32     
256    320    
-32    -128   
0      64     
-112   -112   
2832   -1632  
-352   -1328  
608    560    
-400   352    
720    48     
-96    -368   
-96    -32    
384    -48    
192    480    
96     -80    
48     16     
-320   -96    
336    -464   
-48    128    
240    -144   
-64    272    
224    -1392  
-240   -112   
224    -192   
-80    224    
-48    0      
208    192    
16     -32    
96     -384   
80     144    
0      -80    
32     64     
144    -208   
32     64     
48     -320   
-32    32     
80     176    
64     128    
160    256    
-32    176    
16     16     
-48    -416   
64     64     
112    -256   
208    272    
-224   64     
128    48     
-32    -96    
176    192    
80     0      
-128   16     
16     -80    
0      -128   
160    192    
-128   -224   
64     32     
-96    16     
176    -112   
96     112    
-176   -240   
256    32     
-96    -144   
192    -256   
-32    64     
64     -112   
-32    -256   
80     48     
0      -288   
64     112    
112    -160   
16     -336   
-592   0      
128    -192   
112    64     
-16    -112   
32     -80    
144    -1264  
-112   -128   
208    80     
-48    64     
80     -112   
256    16     
-144   -560   
176    112    
-96    16     
112    48     
-32    80     
112    -336   
-32    176    
64     112    
-128   -160   
128    -240   
144    288    
-96    -1232  
192    32     
-64    -96    
64     0      
0      32     
-80    -32    
144    -48    
-80    -32    
-608   -112   
112    -160   
-160   -176   
80     -272   
112    48     
64     -192   
144    96     
-160   -448   
224    80     
-48    -160   
112    96     
160    0      
-160   128    
32     -80    
32     -128   
-272   -64    
160    0      
-352   -144   
-16    -32    
128    192    
400    -80    
-416   -112   
208    -480   
-80    272    
176    -96    
160    112    
-144   32     
48     -128   
144    32     
-48    -288   
-48    64     
-64    16     
80     -32    
-80    -208   
-1376  -208   
256    -80    
-288   80     
464    -208   
-48    256    
-192   -336   
112    -64    
-16    -48    
32     -80    
64     -96    
48     16     
-176   -32    
64     112    
-96    -128   
-112   -144   
-1072  16     
176    -128   
0      0      
48     -128   
128    64     
64     -320   
32     96     
-16    144    
112    96     
-80    32     
48     48     
-16    -304   
-112   -48    
-304   64     
112    80     
-80    -64    
192    -64    
-224   80     
64     -352   
-80    192    
176    -544   
-48    208    
-160   -224   
-144   192    
-48    96     
48     -112   
-160   0      
384    176    
-176   64     
16     -128   
48     304    
64     -208   
176    -16    
128    -256   
96     112    
48     0      
-16    176    
-224   -80    
-80    -176   
-80    -144   
64     -192   
96     96     
48     48     
-176   224    
-16    -112   
-144   64     
112    -336   
224    -112   
-1072  32     
-144   256    
-448   -160   
-944   336    
544    -1040  
416    1184   
-432   208    
-560   -656   
464    704    
96     -240   
-256   64     
336    208    
96     208    
-608   -352   
256    -112   
-80    0      
64     48     
-176   0      
112    48     
16     48     
-480   64     
-48    192    
-384   48     
-112   16     
112    -176   
-48    64     
0      -64    
16     96     
16     -144   
-80    144    
-192   -224   
192    192    
-96    -32    
-48    144    
-80    32     
-224   -16    
48     32     
-464   -16    
16     32     
-480   -64    
-144   80     
80     96     
-16    32     
-112   -224   
0      96     
-128   -224   
48     64     
96     96     
-48    80     
32     0      
-224   64     
0      -192   
96     80     
-224   -16    
160    96     
-160   64     
-384   -96    
-16    80     
-48    -64    
0      16     
-96    0      
32     32     
0      -16    
-160   0      
96     272    
-64    160    
0      192    
0      80     
-128   112    
96     96     
80     64     
-688   -176   
112    144    
-64    32     
80     144    
16     64     
-80    32     
-32    64     
-80    16     
80     112    
-112   272    
-320   128    
-160   -512   
-16    0      
-240   -144   
-48    128    
-464   64     
32     64     
96     -128   
96     192    
32     192    
-112   -32    
-80    -80    
96     96     
192    336    
-16    288    
-176   -176   
96     0      
-32    -16    
96     16     
-80    64     
16     96     
80     96     
-208   -48    
-176   0      
16     -16    
-16    -16    
96     144    
-64    48     
160    256    
-288   -192   
176    48     
-240   80     
128    64     
-112   32     
0      96     
-80    32     
48     80     
-368   -48    
16     240    
-48    -64    
32     128    
32     112    
-32    80     
-64    -16    
-112   -16    
160    224    
-48    96     
144    128    
-80    640    
-32    0      
-144   -64    
-96    160    
192    -48    
16     144    
-144   96     
192    16     
-64    144    
32     48     
48     240    
176    -240   
112    368    
-144   32     
160    48     
-224   48     
64     16     
-48    64     
-96    64     
144    112    
-16    -64    
96     192    
-16    80     
-16    80     
-32    -32    
160    240    
-48    112    
-16    64     
16     -272   
240    208    
-224   -32    
288    400    
-576   64     
224    -208   
-32    80     
208    64     
-112   112    
-208   64     
112    112    
336    608    
-432   -160   
464    -96    
-80    192    
-48    -16    
-96    16     
-80    96     
0      -112   
288    0      
-48    352    
-96    0      
112    32     
336    208    
-112   208    
-304   32     
0      96     
64     -192   
272    80     
-64    -160   
80     384    
224    48     
128    240    
-64    272    
240    112    
-144   208    
0      64     
-48    224    
0      48     
-32    176    
16     -112   
80     96     
32     64     
-576   0      
400    2368   
-1008  512    
48     -448   
-432   32     
-320   -1984  
384    -160   
-496   624    
576    576    
-208   -64    
-32    208    
-32    0      
208    -80    
-48    0      
80     64     
64     160    
64     176    
-160   112    
128    32     
32     0      
96     16     
-32    176    
-16    -16    
16     64     
-176   -144   
208    80     
48     240    
112    32     
0      -96    
-64    176    
208    48     
48     192    
-128   32     
-16    64     
16     64     
80     -128   
208    16     
-96    -992   
128    240    
64     -32    
-64    144    
64     96     
112    176    
16     -48    
48     48     
-144   -160   
208    144    
-144   -144   
304    368    
-224   32     
256    -336   
-128   96     
160    -224   
-32    96     
112    96     
96     128    
-256   176    
80     -48    
128    480    
-64    -16    
128    -32    
16     176    
16     16     
160    -272   
-160   160    
80     -480   
112    -256   
96     -368   
-80    160    
16     -2352  
32     32     
128    -64    
-80    176    
-48    48     
208    80     
-64    -80    
128    -16    
-192   64     
80     -32    
16     96     
48     144    
128    -80    
96     -96    
80     192    
-144   -464   
64     16     
48     -208   
256    144    
-64    208    
48     112    
-16    -80    
80     144    
32     80     
16     -240   
128    144    
-80    -48    
208    192    
-128   -1408  
80     48     
96     -320   
-48    112    
80     -112   
64     112    
16     48     
-80    -16    
96     48     
-48    48     
176    192    
32     -192   
-32    176    
16     -464   
48     176    
96     -400   
48     304    
160    48     
-112   112    
80     -512   
-32    64     
144    -80    
160    64     
-128   112    
400    160    
-48    192    
-16    -256   
0      32     
0      -448   
-32    -48    
32     -320   
64     -32    
64     -16    
208    176    
112    -16    
0      272    
464    176    
-112   272    
-16    16     
112    -48    
-32    -2096  
144    -96    
64     80     
80     -48    
48     80     
96     96     
112    240    
32     -336   
-64    -16    
16     -224   
208    -48    
80     144    
0      -96    
-48    -224   
96     -80    
128    -368   
160    -32    
-48    160    
176    -176   
0      -720   
-48    -176   
208    96     
-16    16     
48     -336   
16     80     
64     -112   
-144   224    
192    -512   
96     -336   
-432   -128   
112    288    
-48    -48    
176    -112   
176    -176   
0      -656   
-16    112    
48     112    
272    192    
32     0      
-128   16     
-96    -80    
0      224    
-160   -128   
96     0      
-208   -80    
144    96     
-80    -192   
48     -128   
32     -160   
256    -64    
-80    32     
-48    -16    
112    -16    
96     -112   
-16    80     
112    -32    
-16    -208   
-96    48     
192    32     
-240   160    
-912   48     
240    1936   
-848   112    
-336   -256   
416    448    
-192   -320   
160    -896   
-16    864    
368    48     
-112   -16    
-192   48     
208    -32    
-48    -48    
-80    -96    
0      112    
64     -224   
-352   96     
192    640    
-160   -16    
-144   -736   
80     -96    
176    -448   
-64    272    
32     -720   
64     -32    
0      -192   
80     -96    
-208   -16    
176    -224   
-192   -112   
272    -176   
-432   32     
112    -176   
-688   160    
112    -80    
16     16     
112    -608   
-80    0      
96     -368   
160    128    
-144   0      
64     16     
-80    112    
160    -176   
-112   16     
112    -48    
-288   -32    
-32    -80    
-512   -144   
-128   -144   
64     -160   
64     32     
48     176    
160    -112   
16     176    
-32    -32    
160    144    
-96    336    
96     48     
-192   64     
-48    -16    
-16    16     
16     -80    
-112   16     
48     -176   
-16    176    
80     -288   
80     48     
64     -736   
96     16     
80     32     
48     32     
-144   -16    
-16    -48    
-48    -48    
112    96     
-240   48     
336    464    
-480   272    
-32    -400   
-96    -176   
96     -448   
176    32     
-944   -176   
-352   112    
0      32     
-736   -160   
96     192    
-16    64     
32     0      
-64    80     
-32    -16    
144    -80    
-144   32     
-480   -160   
80     96     
-176   -64    
64     80     
96     160    
-272   -16    
80     64     
-480   -16    
48     64     
-240   48     
-32    80     
80     64     
-32    -112   
64     -112   
0      160    
-32    -112   
160    144    
-48    -80    
80     112    
-48    48     
-112   -16    
-64    16     
-32    -16    
32     128    
-80    0      
-64    -80    
-1712  -32    
-48    80     
208    96     
-128   -64    
-144   -144   
144    144    
-80    -384   
96     144    
-256   112    
144    -48    
-80    0      
-16    144    
176    -32    
-128   208    
-112   -80    
-144   80     
80     880    
-208   -224   
160    -272   
-32    -112   
208    160    
-224   -48    
-80    32     
128    48     
-48    64     
64     96     
-48    208    
-544   -288   
160    48     
-32    144    
16     0      
16     160    
-672   -80    
160    -176   
192    160    
-368   144    
16     176    
-48    -240   
-64    -192   
64     64     
32     128    
80     -128   
-112   16     
-16    -64    
-64    144    
-160   16     
-208   -80    
-624   352    
-160   64     
-160   0      
112    64     
16     256    
-32    176    
0      -32    
-208   -96    
48     144    
16     -16    
16     256    
-128   -64    
48     336    
-96    -192   
-80    224    
112    -32    
80     144    
16     -128   
-96    128    
-16    -112   
-192   80     
32     128    
16     112    
-32    64     
96     -96    
-48    176    
112    -240   
48     112    
-112   64     
256    64     
-176   592    
-416   -1200  
448    -48    
-368   0      
80     176    
-464   -80    
384    -112   
-320   176    
416    -64    
-144   304    
64     -320   
-64    64     
-192   240    
16     -16    
64     128    
64     32     
-160   80     
-80    64     
112    112    
112    80     
0      0      
0      80     
16     64     
96     48     
48     -96    
-80    -160   
80     352    
-112   176    
128    112    
-96    0      
-128   -80    
64     48     
16     96     
-32    96     
48     48     
-32    64     
272    64     
-176   304    
80     -80    
-48    32     
32     144    
128    80     
-64    112    
-80    16     
-48    80     
-32    -64    
-160   64     
320    176    
-112   144    
-48    0      
-32    -32    
-16    144    
128    16     
-48    96     
-16    144    
0      -32    
32     96     
-112   128    
32     -32    
48     112    
-80    0      
48     112    
32     128    
0      80     
112    0      
112    80     
-48    192    
-32    64     
128    -32    
144    240    
-256   96     
96     -96    
-16    160    
-48    -16    
160    96     
-48    16     
64     208    
-176   -32    
144    0      
-16    160    
48     96     
112    16     
64     96     
-32    208    
224    -80    
0      112    
-240   -208   
288    -64    
-208   64     
96     -32    
80     144    
-96    16     
144    416    
-80    16     
176    128    
-48    -160   
96     80     
0      144    
-48    0      
32     32     
112    192    
-176   16     
160    96     
-192   -368   
128    -368   
-32    48     
160    48     
-144   96     
240    192    
32     240    
48     48     
-48    80     
-48    -16    
160    32     
-16    160    
80     224    
16     -80    
112    128    
32     208    
96     -16    
176    272    
-128   -272   
304    192    
-256   48     
160    -64    
-208   -80    
192    16     
-16    -64    
80     0      
-112   -80    
80     192    
-48    -144   
240    224    
96     256    
-64    -112   
240    176    
-208   -944   
208    -32    
80     208    
16     192    
-16    160    
176    48     
-96    -160   
176    -32    
-32    160    
-48    160    
32     32     
-16    160    
160    128    
-16    -240   
128    64     
-64    -976   
80     144    
96     -1184  
128    64     
-112   -32    
128    80     
128    704    
-16    0      
-128   32     
80     176    
48     -16    
16     16     
-32    80     
176    96     
-192   -48    
-32    -160   
112    192    
96     -1104  
-16    304    
16     -224   
-192   -48    
64     0      
240    -96    
48     -80    
64     384    
-64    208    
-160   -112   
80     144    
32     48     
144    80     
64     -32    
-80    64     
16     -368   
-32    176    
48     -1280  
-48    0      
-32    -224   
256    288    
-128   80     
-32    80     
80     32     
144    -160   
288    144    
-160   -400   
128    80     
32     -112   
192    32     
-288   1568   
-592   -1008  
-48    -416   
160    64     
-112   160    
-400   304    
-304   -1376  
432    720    
240    -176   
240    192    
-160   64     
416    272    
0      32     
-48    -80    
-64    -368   
160    -16    
96     448    
16     128    
-160   -32    
-96    -480   
176    144    
16     -272   
128    192    
-32    -304   
0      -448   
32     144    
32     -224   
-16    128    
0      -208   
48     96     
0      0      
32     112    
-48    -400   
48     -1360  
0      368    
-96    -480   
64     -16    
48     288    
176    -448   
32     -208   
48     -1792  
16     -32    
160    112    
80     -128   
0      80     
48     -144   
192    -592   
48     80     
-144   -352   
144    160    
-16    192    
160    -848   
-1088  -112   
48     -416   
272    272    
128    80     
-16    48     
-208   -1632  
64     -144   
32     -48    
16     -80    
64     -16    
80     64     
160    192    
-128   -48    
-176   80     
-32    -240   
-288   0      
-96    -208   
48     48     
128    -256   
-16    -160   
32     -1216  
32     -128   
48     -16    
-16    80     
432    368    
-496   304    
96     -224   
-208   32     
-32    -256   
48     16     
-240   -144   
96     144    
192    -64    
32     -144   
64     -96    
192    -32    
-64    -64    
224    -720   
-16    304    
16     -176   
-80    -32    
112    -288   
48     -144   
80     112    
-96    -64    
-48    -48    
192    16     
-1088  -80    
32     -208   
64     128    
112    -48    
-48    96     
-128   -336   
192    96     
64     -112   
-48    -32    
160    176    
-80    -32    
-16    -160   
0      -96    
-128   -208   
176    -144   
-736   -64    
160    -48    
-1280  -96    
32     -320   
128    16     
32     -368   
32     -16    
128    -16    
80     80     
32     -48    
192    384    
-336   -208   
320    -224   
-544   -48    
576    128    
-224   160    
-96    208    
-224   -128   
80     -288   
-48    -176   
304    32     
-272   -256   
112    -144   
96     80     
-48    -80    
48     -16    
-368   -96    
240    -32    
-288   128    
288    96     
-144   112    
64     -176   
-272   -112   
224    144    
-64    16     
112    -112   
96     176    
-64    -672   
208    272    
-528   160    
-96    80     
0      -48    
208    464    
-320   -224   
32     -352   
-224   80     
128    -16    
-176   208    
48     -96    
-320   640    
-320   -992   
384    320    
416    -16    
144    144    
-304   -160   
96     96     
-32    -192   
208    16     
-208   -32    
80     -16    
-144   112    
80     32     
16     144    
-880   -224   
64     160    
-1136  -240   
-32    112    
-64    240    
-288   64     
64     -32    
-176   32     
80     -144   
112    96     
-80    -80    
64     64     
96     32     
32     0      
-64    -48    
-16    -128   
224    -64    
-80    -144   
0      144    
-1088  -1984  
800    160    
-400   432    
608    -192   
160    448    
-176   -528   
32     64     
-448   -304   
-64    320    
160    80     
-96    160    
-160   -256   
192    208    
80     -80    
-48    -16    
-144   0      
48     32     
-48    208    
0      16     
32     16     
32     0      
-128   64     
-48    16     
-192   128    
-80    -176   
-48    112    
-64    -288   
160    112    
-208   -32    
48     224    
-16    -16    
-144   16     
32     96     
16     128    
-144   80     
160    64     
-304   112    
112    -32    
-192   32     
-192   64     
32     96     
96     -48    
-64    192    
96     -336   
-128   16     
-128   32     
32     -48    
-96    -176   
320    112    
-320   128    
48     -96    
-144   112    
-176   -80    
80     176    
-448   -112   
112    192    
-256   -288   
256    -64    
-112   240    
-32    0      
304    0      
-192   176    
-16    80     
-16    -128   
144    32     
-128   256    
48     48     
32     -128   
64     96     
-320   32     
-48    64     
16     -32    
16     16     
64     64     
-64    160    
-48    -128   
112    144    
-208   16     
80     -32    
96     208    
-128   64     
80     80     
-192   -240   
0      -32    
-288   0      
-112   64     
-1040  -144   
-144   192    
-240   32     
368    -64    
-256   80     
112    16     
-112   160    
-64    -144   
192    240    
-224   -96    
-112   -16    
-96    -16    
-80    128    
-48    -32    
16     160    
-16    176    
80     112    
-128   160    
32     -224   
208    272    
-48    0      
192    -16    
-144   -80    
224    144    
0      192    
208    208    
-144   -64    
0      80     
-32    96     
96     128    
0      160    
-64    64     
64     160    
160    304    
32     32     
-48    -16    
0      48     
80     176    
-64    144    
0      -16    
16     64     
16     -48    
-160   32     
0      96     
16     0      
-48    -64    
0      32     
-16    48     
160    336    
-112   48     
272    128    
-176   112    
-96    144    
192    112    
-320   -416   
208    192    
-208   112    
112    64     
-256   -208   
192    96     
0      160    
240    288    
-80    80     
-16    -16    
32     192    
16     0      
16     160    
80     96     
48     176    
-192   224    
80     208    
-64    144    
304    112    
-112   96     
64     64     
48     112    
96     64     
-48    96     
16     96     
-128   -96    
224    144    
96     224    
-16    -16    
48     128    
64     96     
64     48     
-80    96     
16     160    
-48    0      
48     112    
0      112    
0      -32    
0      128    
48     112    
48     80     
32     96     
64     96     
32     16     
-128   272    
-128   -80    
64     0      
16     -80    
240    -688   
-144   80     
-64    128    
208    64     
-16    96     
-16    304    
-48    -64    
-16    144    
-48    144    
-672   -192   
-1360  -1296  
848    1072   
-192   1184   
272    -16    
352    -320   
-224   -1824  
272    32     
48     -336   
1200   192    
-608   448    
384    64     
-208   80     
224    352    
-288   -112   
384    -32    
-208   288    
96     0      
-80    320    
80     48     
240    448    
-112   -592   
208    240    
16     -960   
240    384    
-240   -64    
112    240    
-192   288    
64     0      
-32    -128   
224    112    
-160   -256   
-16    80     
64     112    
-64    160    
224    176    
-112   -416   
560    368    
-32    -1536  
64     -16    
128    112    
-128   80     
144    96     
16     224    
208    -160   
48     288    
-96    -64    
-96    -128   
240    176    
-96    -112   
80     80     
0      272    
192    64     
-48    48     
-112   48     
-16    -544   
128    400    
-32    48     
-96    -208   
-32    208    
128    -80    
-64    160    
80     224    
32     48     
-304   -208   
96     16     
64     16     
-48    112    
0      -192   
128    64     
112    -848   
-32    112    
48     -384   
128    336    
-144   -112   
144    160    
16     -80    
-16    -192   
640    448    
80     192    
-304   256    
240    -48    
64     80     
240    -128   
48     96     
-80    -192   
-80    112    
448    304    
-32    96     
-80    -336   
-160   -144   
224    192    
160    160    
-48    176    
-32    48     
0      -208   
96     -80    
144    32     
-64    -464   
112    240    
-32    16     
96     0      
192    -48    
64     48     
32     144    
0      112    
-96    -336   
-32    -864   
-32    -304   
96     -128   
128    112    
0      -64    
16     128    
80     -112   
64     128    
128    -32    
-64    32     
64     -64    
64     -112   
208    128    
-96    -2432  
16     0      
80     -96    
-32    32     
208    144    
-144   -640   
192    -240   
-112   176    
160    -96    
16     64     
80     -64    
-16    -1696  
80     -80    
32     -1408  
256    16     
-240   -592   
128    192    
-224   16     
-288   -528   
80     -96    
48     -1280  
128    -192   
32     -896   
-48    64     
192    96     
-176   -288   
144    -384   
64     128    
48     -16    
-32    144    
64     0      
48     -176   
-512   0      
-80    -96    
160    -64    
-48    -128   
160    -48    
192    -400   
-128   0      
0      -880   
144    -224   
-48    0      
192    -32    
-160   -272   
272    112    
-224   160    
144    32     
-304   0      
208    64     
96     -32    
96     -32    
80     -240   
-64    -64    
-80    -96    
48     -1008  
-96    0      
144    -48    
80     224    
-32    -352   
48     128    
-32    -112   
32     0      
-32    -288   
96     352    
-608   -64    
208    -48    
48     -144   
160    -176   
-224   0      
48     0      
64     64     
-32    80     
80     80     
112    32     
128    -224   
-112   176    
64     80     
-864   -1440  
176    384    
-752   -1088  
-48    -624   
-912   32     
-560   160    
672    448    
-544   -240   
416    -48    
240    -3264  
-16    -64    
-112   -416   
-64    576    
256    -336   
-32    192    
64     -416   
-96    368    
-96    -256   
96     240    
128    -176   
-192   160    
128    -160   
-80    -16    
224    -128   
-112   -1024  
160    -112   
-64    144    
-80    -128   
144    -48    
64     -64    
160    160    
-144   -16    
-80    64     
-48    16     
-80    -96    
48     -112   
208    32     
-80    16     
160    112    
-96    -256   
48     32     
-544   0      
128    -96    
-320   -16    
0      16     
-64    0      
16     16     
-144   0      
80     -16    
-128   -96    
-160   -96    
96     112    
96     -112   
-80    112    
240    -224   
-32    144    
-112   -80    
160    0      
-128   128    
128    -64    
-32    64     
48     16     
-32    -16    
16     -144   
-16    128    
96     -96    
16     64     
-1136  64     
-112   96     
-1072  -176   
-240   -80    
0      96     
-704   32     
64     32     
32     -64    
-80    32     
112    16     
-80    -96    
128    16     
-144   80     
-16    -32    
16     144    
-448   -480   
80     -192   
-64    64     
-336   -48    
-16    80     
-176   112    
-192   48     
-160   -144   
-224   64     
240    -48    
-80    80     
0      -16    
32     -176   
-480   -320   
192    208    
-192   -224   
32     32     
48     336    
192    0      
-144   144    
-128   -64    
-240   48     
-16    144    
96     112    
-208   112    
32     192    
-208   96     
128    96     
-16    -176   
0      -272   
48     48     
-48    -16    
176    64     
-272   -144   
96     256    
-160   48     
48     48     
-32    368    
-176   160    
-192   -48    
-48    144    
-368   -224   
112    192    
32     -96    
-32    208    
176    64     
144    -96    
-416   -32    
208    -48    
-144   240    
176    16     
-32    112    
-112   -144   
-80    64     
-192   -64    
-48    48     
-16    112    
256    128    
-48    224    
-144   -192   
80     -48    
192    32     
-176   112    
160    208    
-400   64     
32     64     
-80    -80    
-112   -64    
80     0      
0      96     
-96    80     
-288   -16    
96     144    
-16    176    
320    -176   
96     400    
-336   176    
-144   -96    
-32    -96    
256    64     
-64    144    
-112   0      
-192   0      
208    32     
-64    224    
-208   -48    
-176   -128   
48     352    
-560   -128   
240    -48    
-128   192    
-16    -64    
32     320    
-112   -112   
352    -32    
-256   128    
112    -16    
-64    144    
16     48     
-240   -160   
48     144    
-416   -128   
32     32     
0      16     
-112   48     
32     112    
0      64     
-112   0      
112    32     
128    64     
-48    112    
-144   176    
48     -48    
-16    96     
-32    -32    
-368   -368   
-1424  -480   
608    656    
-176   992    
464    0      
432    256    
-384   -272   
-272   -80    
624    528    
-112   -32    
144    -32    
-480   -32    
160    -48    
224    336    
-448   -144   
160    128    
-304   -16    
64     -160   
-256   192    
64     -80    
-80    400    
-16    -368   
-96    480    
112    -480   
64     336    
-160   -208   
48     192    
-208   -96    
176    320    
-80    -176   
240    304    
-48    -32    
-32    32     
-16    208    
64     0      
-192   -16    
176    224    
48     112    
240    480    
-112   -192   
-16    32     
96     144    
-32    -48    
16     32     
-144   16     
192    80     
-128   0      
-176   416    
384    368    
-32    160    
64     16     
-80    112    
96     -16    
-16    336    
-48    -240   
144    128    
48     128    
-112   176    
-96    80     
272    320    
-336   32     
96     80     
-16    304    
192    -112   
-208   16     
-160   -48    
176    0      
48     48     
160    384    
-320   -48    
48     -32    
96     144    
-96    16     
96     32     
-96    32     
80     128    
192    256    
-112   112    
272    256    
384    608    
-176   288    
0      64     
-32    -48    
160    160    
208    288    
-240   -64    
224    240    
-96    16     
-16    -256   
288    272    
-64    -192   
48     -80    
-32    224    
208    64     
-16    160    
96     128    
160    16     
64     0      
-160   -176   
96     64     
80     192    
-32    176    
-32    -112   
80     80     
176    288    
16     -224   
-304   -528   
432    -2112  
96     80     
192    320    
-48    128    
-48    176    
96     112    
128    48     
-160   0      
192    -160   
-112   112    
0      16     
208    160    
112    -64    
-208   -304   
128    -128   
208    -528   
-48    256    
-96    224    
224    48     
-16    -16    
0      -96    
48     176    
0      96     
112    128    
-144   0      
-48    -144   
-672   -384   
352    160    
-64    16     
272    80     
-192   -208   
128    16     
-96    -896   
0      80     
80     -112   
176    80     
0      -32    
112    80     
-160   32     
160    0      
32     64     
-48    -32    
160    112    
-48    0      
96     160    
112    -464   
-144   96     
192    -576   
-32    80     
-32    32     
176    448    
-256   -16    
176    -64    
16     -96    
144    192    
0      48     
-32    -128   
160    160    
-48    -272   
32     160    
64     -480   
-16    -48    
128    -608   
64     128    
-32    -1456  
0      304    
-16    -128   
304    64     
16     320    
-32    -64    
96     272    
-80    -208   
64     160    
128    -240   
96     128    
32     -176   
128    -16    
112    -48    
48     128    
-144   -272   
-112   176    
112    112    
48     32     
96     80     
48     -288   
32     192    
-96    0      
144    96     
32     -64    
144    160    
2464   2240   
-1328  704    
-1040  -2736  
112    272    
-192   -1216  
-176   832    
-368   -608   
-32    480    
240    -272   
-256   240    
32     -320   
-112   336    
208    48     
320    160    
-208   32     
144    -272   
-16    352    
112    -96    
0      192    
176    -144   
-144   -1616  
256    -96    
-144   -256   
432    -1456  
-480   32     
368    -272   
-272   192    
368    -1952  
-256   16     
320    32     
-32    16     
64     -96    
48     240    
144    -112   
32     160    
-32    -160   
-304   16     
-48    16     
192    -48    
-304   48     
64     -464   
-80    -112   
96     -496   
112    -80    
64     -1552  
32     48     
128    16     
-160   -112   
160    -272   
-96    32     
128    -240   
0      128    
-16    -16    
-32    -32    
-704   -128   
96     0      
0      -224   
160    64     
-64    32     
160    -32    
-16    -64    
128    -560   
-96    16     
144    -96    
-32    16     
16     -48    
128    80     
-16    48     
-80    -208   
-112   32     
48     -48    
-496   64     
48     32     
64     -32    
48     -112   
16     -16    
-64    -1040  
-176   16     
304    0      
16     208    
112    -224   
-80    -272   
-304   -16    
160    -64    
-96    -128   
-80    0      
-288   -128   
112    -176   
-112   -208   
224    -336   
-256   -48    
144    -64    
48     16     
80     -720   
112    160    
208    560    
112    -32    
-144   -96    
-32    -240   
64     -32    
80     -32    
-176   96     
32     0      
-448   -16    
32     32     
144    48     
112    -64    
-32    -32    
128    -480   
16     48     
0      -48    
-16    -48    
144    -16    
160    16     
-112   0      
-112   -368   
-176   -16    
128    160    
48     160    
-144   -112   
-16    -16    
80     -256   
96     32     
64     -832   
-32    96     
-112   -352   
-80    -256   
-160   144    
224    32     
-368   -112   
16     -208   
-48    0      
128    64     
-192   112    
0      -336   
32     32     
32     -352   
112    176    
-48    -352   
80     -160   
-144   16     
144    96     
-176   -128   
176    -64    
-80    80     
112    -48    
-64    240    
-96    -96    
-64    -96    
48     -192   
128    160    
-64    -80    
128    192    
-976   -256   
-1504  -32    
-224   -48    
496    96     
-384   256    
240    -80    
-96    160    
16     -16    
32     32     
-16    -112   
16     80     
-192   -288   
240    192    
-384   96     
32     0      
48     -272   
96     240    
-144   -80    
-80    48     
-144   112    
-320   -64    
-144   32     
0      -48    
16     -96    
176    160    
-64    -64    
64     -64    
-32    240    
-128   -256   
-16    128    
-16    144    
-176   -144   
176    256    
-128   208    
16     -64    
-144   32     
80     -80    
-80    -80    
-240   48     
-16    32     
-80    96     
64     -64    
128    96     
-128   -112   
2064   -2000  
-688   -672   
640    1120   
-144   720    
-64    -304   
-464   0      
-784   128    
1120   80     
-176   704    
80     208    
-1008  -240   
-80    -176   
208    -112   
192    -336   
-400   64     
80     -16    
240    400    
-272   -848   
32     -96    
-144   -144   
496    416    
-688   0      
176    0      
-192   288    
-128   -416   
-1696  -256   
112    288    
160    160    
64     144    
224    176    
-208   -240   
144    -176   
-192   80     
32     -16    
-64    96     
64     288    
-176   112    
-64    -112   
-64    -16    
16     -80    
-240   -32    
-160   176    
112    32     
-80    -16    
0      64     
80     -48    
112    144    
-176   -304   
160    128    
-240   48     
160    48     
-256   -64    
32     96     
-80    176    
-160   32     
-320   16     
-16    128    
-48    -144   
64     -48    
-144   32     
256    32     
-48    192    
-144   128    
0      -144   
112    0      
-80    64     
-160   96     
-64    0      
64     112    
-48    96     
-176   -128   
32     144    
-944   -128   
96     192    
-128   112    
48     -144   
160    48     
-368   112    
-192   16     
96     272    
-160   176    
80     48     
272    48     
-336   272    
-96    144    
-96    -16    
32     32     
128    80     
-16    96     
112    128    
-32    48     
-112   -64    
80     0      
64     144    
-32    32     
48     96     
-64    64     
32     64     
-48    48     
-16    80     
-112   32     
176    192    
-64    128    
48     32     
-16    -384   
32     32     
-16    112    
240    336    
-224   80     
80     32     
0      32     
-64    -144   
144    288    
-208   128    
48     -112   
-128   -80    
-16    80     
144    48     
-80    128    
192    160    
-144   176    
176    160    
-16    128    
-48    128    
160    -64    
-256   -128   
-80    -288   
256    208    
-256   -64    
48     48     
16     -48    
-32    128    
-16    64     
112    96     
-80    -16    
224    0      
-64    128    
64     128    
160    -16    
-192   96     
-16    144    
176    16     
224    -144   
-304   16     
128    64     
208    80     
-64    64     
-32    -16    
16     -16    
128    64     
-32    112    
48     80     
-80    0      
-96    0      
16     160    
48     80     
160    -96    
-144   144    
-16    -16    
64     80     
-48    144    
144    -48    
-16    144    
16     112    
96     112    
-16    224    
16     128    
144    160    
176    -64    
112    64     
-16    240    
-112   80     
-96    80     
-128   -192   
336    0      
80     80     
-112   -64    
128    -48    
64     224    
16     176    
-96    32     
160    64     
96     144    
48     256    
-256   -16    
192    208    
-48    -160   
112    48     
-32    144    
-32    -224   
80     64     
-80    -64    
128    144    
-96    80     
208    64     
48     -16    
96     160    
2416   16     
-1600  -336   
576    -560   
-304   416    
688    480    
416    496    
-976   -144   
1216   80     
-176   -48    
96     -816   
-352   -80    
288    528    
176    -64    
-32    400    
-128   -208   
48     128    
80     0      
64     272    
32     48     
64     -16    
64     80     
-16    128    
160    144    
-80    48     
144    -176   
0      16     
208    144    
-32    96     
-48    48     
128    96     
-16    -224   
176    96     
-16    48     
32     144    
-96    16     
80     -272   
64     64     
0      -144   
160    208    
-32    -352   
80     64     
-32    -2480  
112    80     
80     144    
32     64     
16     80     
32     16     
-16    64     
16     192    
64     48     
-16    -128   
64     64     
80     32     
0      96     
96     -496   
0      272    
80     -208   
80     -80    
0      -16    
48     48     
0      96     
0      64     
64     64     
0      256    
32     176    
112    128    
64     144    
48     80     
224    384    
-240   -192   
160    32     
64     -96    
32     112    
80     16     
0      112    
-80    64     
-48    -16    
128    16     
48     128    
144    672    
-48    -96    
80     192    
-80    -592   
320    208    
0      -16    
-48    -256   
272    -48    
32     112    
96     -64    
-32    64     
64     80     
112    240    
-64    -64    
96     -368   
48     48     
144    -240   
-176   -80    
32     -256   
112    160    
128    96     
-96    96     
-80    -368   
80     80     
112    48     
96     32     
-48    80     
64     144    
16     -816   
64     -128   
16     -1648  
48     -112   
96     -80    
16     16     
128    96     
-48    -80    
0      64     
192    48     
-16    -560   
96     112    
-16    -224   
128    144    
-32    -416   
80     -416   
-1632  -32    
192    -336   
-96    -352   
208    -608   
-80    16     
112    -592   
64     -352   
-32    240    
48     -16    
176    -144   
-160   112    
208    -352   
-64    0      
240    -64    
-64    48     
32     -144   
48     176    
-80    -32    
208    -272   
-16    64     
32     48     
-32    -80    
32     -176   
128    112    
-160   -192   
144    32     
-32    -112   
176    208    
-48    -48    
192    -96    
-272   144    
-128   -464   
208    16     
-304   -48    
304    -128   
-48    16     
0      -32    
160    -672   
-368   -144   
240    32     
-96    16     
48     16     
0      224    
-144   -80    
48     -144   
64     -96    
-80    -96    
-352   80     
-80    0      
96     -48    
208    -336   
48     -176   
64     -880   
16     176    
-64    16     
-16    -32    
64     -80    
192    48     
-272   -64    
16     -176   
-128   64     
112    32     
-16    -32    
96     32     
-224   32     
80     -64    
48     -96    
416    -320   
-128   96     
128    -880   
-240   192    
272    -224   
112    -112   
-128   160    
1856   -1376  
32     1424   
-144   -48    
-928   -416   
832    -656   
-288   -608   
-224   -96    
592    432    
-368   -288   
176    -112   
336    128    
-224   64     
-208   -320   
176    112    
0      16     
0      32     
-80    -64    
224    432    
-384   -128   
48     64     
-320   -160   
48     -144   
208    -32    
32     -208   
-112   48     
224    -176   
-112   -240   
48     96     
96     -16    
-384   -112   
288    -64    
-208   96     
192    80     
-32    -48    
-128   64     
192    16     
-32    -208   
-80    112    
160    -256   
64     32     
48     -80    
16     32     
16     32     
0      144    
-256   16     
48     -128   
-32    16     
256    240    
-112   -32    
96     -48    
-80    176    
16     -144   
144    32     
-640   32     
128    0      
-160   -144   
-832   -112   
-48    64     
-1392  -96    
-80    -64    
-16    80     
-112   32     
128    -48    
-48    48     
0      -160   
-48    -16    
-448   -192   
112    240    
-208   -144   
112    64     
-96    -32    
-16    32     
-192   80     
-176   -64    
0      -32    
-160   128    
-416   -208   
32     -16    
-224   -96    
80     96     
32     16     
16     -32    
192    368    
-384   -192   
240    -16    
-48    400    
-192   -32    
272    -16    
-272   16     
16     80     
-112   -160   
32     96     
-1040  112    
-48    -32    
144    32     
-192   0      
224    -240   
32     128    
-64    -192   
-96    -96    
16     160    
-48    176    
32     96     
-304   -80    
96     176    
-16    -32    
128    160    
-144   80     
208    48     
-512   -64    
128    80     
-96    -80    
0      -32    
0      -176   
-32    48     
64     112    
128    64     
-96    0      
-16    144    
-128   32     
112    64     
-224   0      
256    64     
-96    64     
-32    96     
-192   208    
192    -32    
-16    128    
-32    96     
-48    48     
80     160    
-80    -112   
-80    16     
-176   0      
96     -16    
-80    -160   
16     -48    
-304   -32    
-80    -32    
-96    -16    
-48    32     
16     -48    
16     128    
-144   32     
96     64     
112    32     
-192   96     
96     64     
-96    32     
160    224    
-96    64     
-80    48     
-288   -96    
48     32     
16     208    
112    192    
-1664  -48    
-144   128    
32     64     
-48    80     
64     80     
48     272    
16     -96    
-80    48     
112    -64    
-304   80     
48     288    
-352   32     
176    48     
-48    80     
16     272    
-816   -224   
0      48     
320    32     
240    304    
-176   -176   
-416   272    
-48    -64    
80     -128   
112    160    
48     0      
32     -32    
32     -48    
16     192    
-128   16     
0      272    
176    -48    
176    192    
-32    80     
-32    -48    
144    256    
-192   96     
0      0      
-80    -32    
80     64     
0      112    
-752   -2688  
496    -144   
-1408  608    
208    -64    
464    1072   
32     -576   
-224   48     
816    -992   
352    768    
-288   -16    
288    112    
-176   192    
336    112    
-64    352    
-96    -208   
-224   112    
-64    -144   
64     272    
32     -32    
96     0      
-32    96     
80     512    
-352   -80    
208    64     
0      208    
288    -32    
-256   -64    
32     256    
192    144    
-160   -32    
-128   160    
48     32     
160    208    
16     64     
-32    96     
0      16     
48     80     
-64    32     
112    64     
96     112    
-64    -32    
0      128    
-128   32     
144    -16    
16     -32    
16     112    
64     80     
-16    272    
16     96     
176    208    
-144   80     
80     48     
16     16     
112    208    
0      80     
-16    112    
32     544    
272    448    
176    304    
-144   -64    
0      -80    
-48    112    
32     -1456  
-32    144    
16     -16    
208    0      
16     176    
16     96     
32     0      
48     32     
0      80     
96     128    
-48    64     
128    128    
-192   48     
96     144    
-64    48     
-32    -848   
-16    16     
96     176    
16     144    
-64    144    
16     160    
-32    144    
160    176    
-144   48     
112    32     
-64    64     
96     128    
-64    -112   
-48    32     
16     -32    
-16    -128   
192    192    
-32    -2208  
64     80     
-96    0      
208    224    
-64    64     
176    128    
-160   32     
112    16     
0      -160   
80     80     
-48    96     
48     64     
160    256    
-48    -288   
144    112    
-16    -288   
64     96     
-16    48     
80     112    
-32    -80    
128    64     
48     -272   
-48    -48    
-16    -96    
32     192    
112    80     
-32    -240   
-112   96     
80     -128   
160    -48    
-16    -368   
-96    128    
448    -480   
-368   -144   
400    -240   
-384   112    
304    -48    
-32    192    
-144   -32    
288    160    
-224   -16    
288    64     
-160   -16    
160    -176   
-32    224    
80     -128   
0      -80    
96     -1808  
-64    208    
16     -432   
96     160    
-32    -32    
400    -80    
-352   96     
64     128    
-176   80     
48     -96    
288    96     
-16    144    
-16    272    
-64    128    
384    64     
-192   -48    
48     304    
-256   -176   
80     -48    
128    -96    
256    32     
-96    -16    
48     208    
-80    112    
160    -688   
32     -80    
432    32     
-224   192    
-192   -336   
0      32     
64     -160   
112    -96    
0      -512   
64     320    
-80    64     
48     -272   
128    192    
240    32     
48     112    
-48    -240   
96     -16    
128    -144   
112    96     
-48    -176   
176    144    
0      -192   
224    176    
-96    -320   
80     48     
-16    64     
-64    96     
160    80     
-16    64     
112    -1280  
144    32     
0      64     
48     3136   
-2064  -1152  
432    832    
448    16     
1024   -624   
-1008  -528   
32     -144   
656    528    
-256   -352   
128    -256   
-272   -96    
144    96     
-32    -512   
96     -48    
16     -112   
64     16     
-64    -368   
64     -400   
64     240    
32     -176   
0      -32    
-16    80     
16     -272   
336    128    
-96    -352   
32     -144   
-464   0      
96     128    
80     -32    
-80    -160   
160    -240   
128    -288   
32     -32    
0      64     
-16    -16    
176    -208   
96     80     
-64    -176   
64     64     
32     32     
32     -48    
-208   112    
96     0      
96     -96    
48     -416   
96     -16    
-80    -480   
192    320    
-128   -1440  
304    96     
-192   0      
96     64     
-64    -144   
224    176    
-256   64     
144    -80    
-144   -96    
-32    -96    
-1536  -128   
96     -80    
0      -64    
64     80     
16     -16    
176    -848   
-32    96     
-16    -256   
224    128    
-192   -176   
336    64     
-288   80     
112    -160   
16     80     
-16    -64    
-656   16     
64     -32    
128    128    
-16    -32    
128    -64    
16     -160   
-32    32     
112    -432   
0      256    
16     -16    
176    96     
128    -256   
48     -96    
-112   352    
-32    -128   
192    -16    
-16    -16    
-1168  144    
-80    -128   
-256   -32    
112    -80    
-80    -32    
208    -928   
-192   48     
128    80     
-64    -272   
32     64     
-48    -96    
-144   32     
80     -80    
-112   96     
80     -480   
-896   -208   
-64    -144   
112    64     
128    -192   
64     -32    
-112   -416   
96     160    
-304   80     
-32    64     
-144   -64    
96     64     
-96    -96    
48     160    
-160   16     
208    64     
-208   -112   
-16    16     
-32    160    
368    -288   
-64    0      
-192   -464   
448    -96    
32     176    
-240   128    
208    48     
0      16     
0      -32    
48     32     
288    0      
32     -32    
-336   -48    
-64    -240   
160    112    
80     -288   
0      64     
0      -80    
-608   -48    
0      112    
-752   16     
-16    176    
-176   64     
112    16     
-128   32     
160    0      
-64    -48    
-176   96     
-704   -144   
32     112    
-80    -64    
48     96     
192    128    
-336   0      
160    480    
-320   -48    
-144   -80    
-448   -48    
64     128    
96     176    
-112   -208   
32     80     
-96    208    
112    256    
-80    -96    
-192   0      
80     -48    
-32    176    
80     -336   
176    176    
-352   0      
-80    96     
-272   64     
48     -272   
-320   64     
-80    -48    
32     32     
-64    224    
48     32     
64     208    
-16    -384   
-112   0      
-16    16     
-208   -48    
-16    -96    
96     48     
208    -288   
-576   -48    
-160   160    
-608   -48    
0      48     
-128   -80    
112    -64    
-80    -176   
-272   3216   
-1360  -1200  
128    -48    
656    128    
1184   144    
-864   -576   
-128   576    
-208   -336   
-224   -848   
-96    -336   
0      224    
-64    48     
336    288    
16     96     
-80    -224   
-64    208    
64     160    
-64    80     
176    112    
-96    -80    
32     128    
-208   48     
96     304    
-400   32     
240    96     
-272   -192   
-16    144    
-464   -304   
224    256    
-16    96     
128    80     
-48    144    
-32    96     
-16    112    
-64    64     
-48    -48    
-192   -48    
16     -352   
-80    16     
256    400    
-352   -112   
-32    160    
-240   -16    
48     0      
-80    112    
-80    80     
32     -32    
48     -128   
-48    -96    
96     48     
32     64     
0      96     
32     32     
64     192    
16     16     
-160   -48    
-32    240    
-16    208    
128    32     
-352   128    
16     -32    
-80    160    
-32    112    
16     224    
-48    16     
80     112    
-48    -16    
64     96     
-112   -16    
64     96     
-64    16     
32     144    
-48    32     
112    96     
32     48     
-128   16     
-32    208    
64     -112   
128    16     
0      336    
112    -96    
-144   208    
-32    208    
0      128    
48     48     
-192   -112   
128    32     
-112   112    
-64    288    
-48    -32    
-32    -96    
176    48     
96     96     
-16    64     
-64    128    
16     64     
-176   -48    
272    208    
-96    176    
176    32     
-288   16     
112    32     
32     48     
16     48     
0      144    
0      0      
128    256    
-144   -112   
192    208    
-224   0      
176    112    
48     208    
32     0      
0      48     
-112   32     
48     16     
-64    -80    
-96    -64    
48     -32    
96     192    
48     0      
-160   -16    
96     288    
32     112    
144    -64    
-320   -320   
144    -240   
96     128    
-112   192    
112    224    
-128   16     
16     96     
48     48     
128    144    
-48    0      
176    -144   
-256   96     
-208   -160   
80     -144   
-320   -192   
288    128    
48     176    
-48    -32    
16     48     
96     144    
-64    80     
80     -944   
16     128    
192    176    
-48    160    
-48    48     
144    176    
48     -144   
48     240    
-160   16     
208    128    
-368   -368   
464    352    
16     208    
96     32     
-48    16     
0      -704   
-48    16     
32     80     
112    0      
112    128    
-112   -48    
48     -464   
-64    112    
240    320    
-32    160    
-16    48     
-48    96     
-32    -16    
176    496    
-272   -176   
0      -160   
128    176    
80     -80    
96     64     
-32    16     
48     128    
64     144    
80     -32    
304    32     
160    352    
-320   48     
-160   96     
96     -48    
80     80     
32     32     
-16    0      
256    96     
-112   -832   
208    112    
-112   48     
112    112    
1888   -1536  
-272   -48    
288    384    
-144   544    
624    -144   
-256   -48    
-80    -304   
688    576    
-224   -352   
64     112    
-64    128    
96     -464   
-240   224    
256    144    
-128   272    
176    -112   
-160   240    
160    80     
-160   -16    
144    -144   
48     96     
176    64     
-128   80     
96     16     
-48    -208   
144    -128   
128    -80    
64     112    
48     -416   
0      -64    
0      -64    
16     -16    
80     144    
16     144    
80     32     
80     240    
32     304    
16     -160   
-32    0      
96     48     
128    64     
16     128    
-80    96     
240    -176   
-144   144    
160    -240   
0      160    
48     -16    
256    192    
-320   0      
320    112    
-80    176    
64     -272   
16     128    
96     192    
16     16     
48     -448   
-16    192    
48     -208   
80     192    
-160   -128   
176    80     
16     16     
128    96     
-32    80     
-176   -64    
16     -112   
208    0      
-176   80     
176    -400   
-48    -32    
176    -256   
-160   96     
192    -48    
16     80     
128    -496   
64     -16    
176    -80    
-16    64     
128    160    
-32    16     
144    144    
0      16     
144    -128   
128    64     
-64    144    
32     -64    
80     112    
16     16     
32     80     
48     -464   
144    -800   
-48    -32    
0      -160   
-48    -16    
240    176    
-128   -880   
96     -112   
96     -112   
-80    -112   
240    16     
0      -176   
160    240    
-112   -208   
112    -912   
-144   -80    
192    -320   
144    176    
-80    -272   
192    -64    
-352   -16    
-16    -352   
192    48     
-96    -32    
128    -16    
-48    -192   
416    64     
-144   176    
144    -48    
64     -288   
0      240    
272    -128   
-80    144    
-192   80     
80     -336   
32     0      
-128   -144   
192    0      
32     -80    
96     -96    
48     -1120  
-16    -48    
304    0      
-288   112    
160    -32    
32     16     
112    32     
-64    112    
-16    -80    
48     48     
-176   0      
64     -48    
-816   -96    
-80    -176   
112    -32    
-16    -336   
0      -208   
112    -416   
-32    -64    
80     -192   
-64    48     
64     -208   
64     64     
-16    -336   
0      128    
-368   -64    
96     64     
-1456  -368   
-32    64     
64     0      
224    176    
-32    96     
0      -256   
32     256    
-96    32     
64     -432   
224    352    
144    -32    
-208   0      
32     -144   
0      -16    
64     32     
-144   -144   
64     32     
160    64     
80     0      
-128   128    
-32    -784   
-16    -16    
32     -1376  
80     -16    
-80    80     
48     -128   
-80    -144   
192    -64    
80     48     
-192   80     
-272   -48    
48     48     
-912   0      
96     -176   
-64    -96    
368    -464   
80     272    
32     -688   
-80    112    
-16    0      
-1264  -64    
-544   -592   
144    32     
80     496    
192    32     
-80    -160   
-160   144    
-944   192    
1056   -48    
-464   16     
368    64     
-16    144    
-80    -448   
336    -128   
-144   -288   
32     32     
-128   128    
16     48     
-144   32     
16     -336   
48     96     
80     192    
-96    160    
-32    -144   
-128   432    
96     -352   
-80    -16    
16     -128   
144    16     
-32    128    
-48    -112   
-32    -32    
-64    0      
-240   432    
-64    96     
0      128    
-128   -112   
320    480    
448    -224   
-176   48     
-736   -288   
224    176    
-192   16     
-144   112    
-64    64     
-384   -320   
192    48     
-432   -224   
160    112    
64     -192   
32     160    
112    16     
-112   -144   
-672   -112   
224    128    
-32    -80    
-416   -400   
160    144    
144    -64    
-48    240    
-464   -96    
112    160    
-192   224    
-80    224    
32     -64    
0      -16    
16     -96    
-32    160    
-144   -48    
64     80     
16     -64    
-160   -32    
-16    64     
-192   48     
-64    16     
192    544    
-144   288    
-208   48     
-16    48     
-496   16     
-16    -16    
-80    -112   
64     144    
-80    -64    
48     -16    
-16    -80    
16     0      
-192   -160   
-80    -96    
96     208    
0      96     
0      80     
-144   -112   
80     128    
-336   16     
112    240    
-208   160    
-16    -80    
64     -16    
-16    80     
112    64     
-112   64     
-16    80     
-16    64     
-32    96     
-80    -128   
160    144    
-96    528    
-48    64     
-144   -160   
64     80     
-528   64     
96     176    
-208   -16    
16     48     
192    80     
-48    160    
-16    80     
-112   80     
64     48     
-96    32     
48     48     
-96    0      
128    16     
-240   256    
480    656    
-640   -32    
96     -112   
-256   0      
224    144    
-64    96     
-64    176    
-48    0      
112    128    
-208   -16    
112    128    
-96    -32    
-16    528    
96     0      
-160   -80    
112    -128   
-336   -32    
64     80     
-512   0      
-112   -80    
64     176    
32     416    
48     160    
-176   64     
160    192    
-16    80     
80     160    
-256   -48    
32     -16    
112    -64    
-80    544    
48     16     
32     288    
96     64     
-48    -176   
0      160    
16     -80    
48     -16    
192    176    
-160   176    
0      16     
-16    16     
-48    112    
288    32     
-48    32     
208    -160   
-224   160    
-128   112    
-32    96     
-16    16     
96     64     
48     336    
-144   -48    
144    96     
80     16     
16     64     
-80    32     
176    192    
-208   160    
-144   48     
144    160    
-256   64     
0      -80    
48     -16    
128    0      
160    112    
-112   144    
-48    64     
160    -80    
-32    176    
16     112    
-240   448    
-336   -64    
304    816    
-272   -176   
-544   -112   
64     272    
448    528    
-592   -48    
656    -224   
-192   128    
416    -80    
-336   240    
160    -240   
-32    464    
192    -144   
-128   144    
-176   -192   
64     288    
-80    -96    
16     64     
0      48     
16     112    
32     192    
32     -16    
16     80     
32     -32    
16     224    
112    80     
-48    128    
-16    -32    
32     192    
-16    16     
-16    240    
32     -48    
-48    176    
160    64     
-160   160    
128    -16    
-240   48     
176    80     
176    160    
-144   0      
32     64     
48     144    
-16    64     
16     -48    
-48    128    
48     160    
-32    -80    
-112   -304   
-48    16     
256    80     
-144   128    
96     192    
80     -16    
32     16     
-32    112    
0      112    
0      64     
112    96     
0      64     
48     112    
144    160    
-160   112    
48     -608   
48     128    
-16    -688   
80     176    
16     64     
64     96     
160    48     
0      112    
64     192    
-48    -48    
32     48     
0      208    
-128   -480   
320    80     
-96    448    
-128   -176   
224    80     
112    -928   
96     160    
-80    16     
208    -96    
80     64     
-32    16     
176    -48    
80     128    
-48    48     
48     128    
-16    32     
64     80     
64     80     
208    128    
-176   -32    
144    -432   
-80    80     
80     16     
-144   48     
0      160    
-80    0      
0      64     
192    304    
-240   64     
96     32     
-80    80     
16     96     
48     -80    
-80    -352   
112    112    
128    -272   
-80    96     
144    -2080  
-80    64     
80     64     
96     208    
-32    16     
160    96     
-144   -304   
224    32     
-160   224    
112    144    
32     208    
144    128    
-176   160    
240    -48    
-64    64     
16     -512   
144    208    
192    -1120  
-96    144    
272    176    
-64    320    
-48    -80    
-80    96     
112    48     
80     -384   
-16    240    
96     -128   
-96    192    
64     -304   
16     176    
48     -1472  
112    192    
176    272    
-176   -16    
0      -224   
-64    16     
224    96     
16     128    
0      80     
48     -144   
64     112    
144    144    
-32    -80    
192    -224   
-208   32     
32     -496   
-128   0      
288    240    
-32    64     
144    192    
128    144    
128    64     
-32    384    
-464   -192   
32     -304   
272    288    
-32    -80    
-240   -16    
96     -16    
144    96     
256    -112   
-80    96     
304    176    
0      64     
-176   48     
144    -240   
144    128    
48     -48    
64     -992   
-144   -80    
112    -2032  
192    -272   
16     112    
-64    -128   
48     144    
32     -16    
160    128    
-64    -64    
224    -384   
-16    176    
-32    32     
224    48     
-592   48     
144    -640   
-176   -112   
-1440  -1216  
-352   -912   
-272   -32    
240    16     
256    144    
112    -352   
-48    -16    
-128   -288   
-112   624    
-192   -272   
144    96     
80     -288   
-576   96     
80     -304   
160    16     
-112   -288   
192    592    
-16    -112   
80     -32    
208    -576   
192    288    
-112   -16    
-144   -48    
-112   -304   
192    -80    
-288   48     
-192   304    
-272   -288   
128    -128   
224    32     
304    -112   
-16    -96    
16     -912   
256    -80    
48     -480   
-48    16     
272    0      
176    32     
-144   -32    
-240   32     
-160   160    
48     -176   
-224   -64    
48     -144   
-448   128    
-176   -432   
144    80     
16     -496   
96     16     
32     -112   
-64    -16    
48     -176   
-16    112    
144    0      
80     -272   
48     -128   
32     80     
208    256    
-176   -320   
-336   -96    
64     -176   
-144   -192   
64     400    
176    -16    
-160   -192   
32     96     
48     -240   
48     -64    
80     0      
80     -16    
32     64     
32     -144   
-160   16     
80     -128   
-128   0      
304    464    
-480   368    
96     -144   
496    272    
-480   -864   
80     96     
256    -1808  
-144   16     
-80    -80    
384    -112   
-368   -112   
112    -32    
-224   -16    
-48    16     
48     -48    
-80    16     
-304   16     
128    -128   
48     0      
-80    -16    
-48    -80    
16     -224   
96     80     
176    64     
-32    -48    
-544   80     
0      -96    
144    128    
-112   128    
0      128    
96     16     
-128   -128   
-80    -464   
-112   -320   
160    -64    
384    336    
-160   32     
0      -80    
64     -48    
48     -128   
-224   32     
48     -400   
64     224    
160    256    
-160   64     
64     -112   
-80    -272   
-208   32     
512    400    
-1328  144    
272    416    
-464   -128   
-1024  80     
16     112    
0      96     
176    96     
-64    208    
192    -16    
0      48     
-80    -96    
-128   32     
-32    -16    
-208   48     
-64    64     
-368   -176   
-16    64     
112    208    
-400   96     
96     112    
-272   48     
144    288    
-1296  0      
192    80     
-96    48     
0      96     
96     0      
0      16     
-128   -80    
128    96     
0      -208   
-96    32     
-112   192    
64     -112   
0      -32    
-320   48     
-272   144    
-400   -96    
-64    64     
-592   -32    
128    -16    
-912   0      
64     -32    
-240   -192   
112    176    
-16    -176   
80     80     
144    -112   
-96    176    
-80    96     
-176   64     
-16    -96    
64     96     
0      128    
-400   48     
-80    -144   
-224   16     
32     0      
-16    80     
-112   -32    
208    48     
-112   -64    
-16    80     
-144   32     
-32    48     
-64    96     
16     64     
-96    -80    
0      112    
-320   48     
16     0      
-1264  -64    
-880   384    
112    848    
-1488  0      
416    352    
-208   240    
-544   -496   
256    1168   
-496   -304   
720    720    
-352   -400   
-16    -176   
-528   0      
208    -160   
192    368    
-496   -336   
-144   384    
256    -352   
-160   480    
208    -288   
-80    288    
48     -96    
0      272    
128    32     
-160   320    
48     -96    
-304   96     
176    -96    
-192   176    
416    80     
-400   -160   
48     128    
-416   -80    
48     80     
-32    144    
80     64     
0      -64    
112    240    
32     192    
-16    64     
-80    16     
48     48     
112    112    
-32    96     
48     96     
-272   -112   
80     64     
16     160    
0      -304   
208    176    
-304   128    
272    32     
-176   -32    
16     32     
112    80     
-48    48     
-32    112    
0      96     
-336   -176   
256    128    
-304   48     
112    -16    
16     112    
0      32     
0      240    
-80    -112   
96     64     
64     64     
64     224    
-128   128    
64     80     
0      -16    
16     128    
-48    96     
32     160    
0      112    
0      112    
-128   48     
240    -16    
-32    224    
-160   96     
96     48     
32     32     
80     352    
-112   16     
80     112    
-160   -144   
240    208    
-272   16     
128    -16    
0      0      
-80    176    
96     48     
48     48     
-48    32     
64     80     
96     64     
128    112    
0      112    
-64    80     
80     -208   
-96    -32    
336    288    
-16    288    
-16    176    
-144   -224   
-64    -16    
112    240    
-32    64     
16     48     
64     192    
32     48     
64     160    
-16    80     
-16    128    
112    192    
80     320    
-16    96     
-48    176    
-48    80     
320    128    
-48    128    
16     64     
-64    96     
-80    -304   
64     -128   
128    144    
0      192    
-32    48     
-144   -208   
-32    64     
160    176    
-16    48     
-48    320    
-32    -464   
16     -448   
208    464    
-64    128    
32     -144   
48     176    
128    64     
-96    48     
32     96     
96     192    
-96    -64    
-16    64     
16     144    
144    64     
-176   32     
32     -240   
96     128    
-16    80     
0      32     
80     144    
-80    16     
176    160    
-32    128    
-16    16     
128    208    
-112   128    
64     32     
-128   -32    
288    240    
144    128    
-48    -416   
0      160    
272    -240   
-128   144    
208    -32    
96     192    
-176   -16    
176    64     
-80    160    
128    48     
-32    -192   
16     128    
-48    -16    
48     16     
208    80     
112    -128   
-112   -32    
16     -736   
160    128    
80     112    
-224   48     
144    192    
-16    176    
192    -368   
-48    288    
-112   -192   
208    128    
32     16     
48     -192   
-240   176    
160    -80    
128    32     
48     -160   
16     48     
2000   -3232  
224    -400   
576    752    
-880   -48    
368    704    
-160   -880   
272    480    
496    -160   
-720   208    
416    -208   
-224   416    
112    -528   
256    368    
-224   -288   
272    368    
-144   -624   
256    -128   
-208   192    
160    48     
-128   96     
64     96     
16     608    
-16    -704   
-32    336    
240    -144   
208    288    
-128   -272   
-32    272    
-32    48     
-96    16     
96     -464   
144    -96    
-32    -1200  
80     352    
-32    -80    
96     64     
-96    -432   
128    0      
32     320    
400    160    
-176   -32    
128    -256   
16     -48    
32     -96    
0      224    
176    -320   
0      -32    
112    144    
80     80     
144    288    
48     176    
80     96     
-64    -896   
80     48     
96     -256   
48     -16    
0      96     
80     176    
-64    48     
-80    112    
80     -112   
-48    80     
96     -336   
144    48     
48     16     
48     -64    
-32    -32    
32     -176   
48     96     
-32    -80    
48     128    
112    -48    
32     160    
-64    -176   
-16    0      
144    16     
-64    80     
144    48     
176    80     
-160   -64    
352    -1264  
48     64     
-144   -192   
448    96     
48     240    
16     -752   
112    -240   
128    -64    
160    48     
96     208    
64     -32    
144    -224   
-48    48     
64     -480   
-16    -256   
144    -320   
128    -80    
-720   -64    
-16    -672   
32     80     
192    -144   
240    272    
-128   -512   
96     -16    
0      -208   
144    -128   
32     -272   
96     368    
-96    -96    
32     128    
-96    32     
160    -32    
-400   0      
144    -112   
80     64     
-16    -192   
32     -160   
16     -1184  
96     144    
224    -416   
-32    -16    
112    -224   
-272   96     
128    -288   
208    -96    
-480   -32    
256    48     
-528   -160   
-32    0      
-1344  32     
128    -96    
0      -112   
-80    -176   
64     -16    
240    -1040  
-32    -48    
-144   32     
96     224    
336    -160   
0      -80    
-192   16     
160    -64    
-32    192    
48     -16    
64     16     
96     -144   
16     112    
-16    -240   
64     -96    
-48    -688   
32     48     
48     304    
128    112    
32     -16    
80     -96    
-80    0      
96     320    
-112   -192   
144    -32    
-480   -48    
80     -16    
-160   -32    
0      -192   
-48    16     
-32    -160   
112    32     
0      -1312  
16     80     
192    -160   
144    48     
-80    160    
-64    160    
-112   -160   
32     96     
-192   0      
96     208    
-304   -48    
416    -48    
-32    96     
48     -224   
-96    176    
64     -368   
96     96     
128    160    
128    -144   
-224   176    
-16    -64    
-64    32     
80     32     
-16    -32    
32     128    
32     80     
80     -416   
48     224    
-128   -288   
96     64     
16     -176   
-336   656    
336    -784   
368    -496   
-256   432    
608    -16    
-1056  -512   
816    432    
-176   448    
208    -432   
-704   32     
480    -816   
-64    656    
16     -384   
-32    752    
-80    -864   
-496   192    
0      -96    
-80    384    
16     -176   
16     32     
-64    -32    
128    32     
-192   80     
208    -96    
-176   144    
96     -96    
48     272    
-752   -80    
48     112    
-96    -112   
-288   -16    
-96    -32    
-128   96     
-32    32     
-976   80     
128    160    
-176   -112   
48     -64    
-160   112    
176    -48    
-16    32     
-80    96     
-32    -208   
0      16     
-48    128    
-192   0      
48     112    
-368   -224   
64     16     
-656   48     
128    -80    
-1264  48     
96     64     
0      128    
-32    96     
-96    -160   
48     96     
-160   -160   
128    -32    
48     32     
-64    144    
0      64     
-64    16     
0      -16    
128    96     
-80    144    
96     176    
-160   16     
64     -64    
32     32     
-144   96     
-96    80     
-16    -160   
80     48     
-64    32     
208    176    
-272   -96    
48     -80    
-176   64     
-80    -224   
144    32     
0      80     
0      384    
-1264  -304   
64     112    
-32    -288   
-112   -16    
-48    96     
0      32     
-128   -96    
-112   16     
-32    -64    
-112   32     
32     48     
-16    64     
-128   80     
-176   -160   
-96    -64    
-272   -176   
64     80     
0      32     
48     128    
-64    16     
80     128    
-16    64     
160    192    
-128   -144   
32     32     
-32    192    
-16    -16    
-112   -32    
-224   -80    
176    144    
-304   16     
112    128    
-160   -272   
-48    -192   
-48    -48    
0      0      
208    256    
32     256    
-48    16     
-320   -192   
112    176    
80     160    
192    48     
-336   0      
112    176    
-240   -32    
48     16     
-1744  -176   
112    16     
64     192    
-64    80     
64     192    
-64    -48    
0      64     
16     16     
0      112    
-16    96     
-64    48     
-192   -80    
160    192    
-240   -48    
176    64     
128    -32    
-48    192    
-144   288    
-112   -16    
64     -32    
96     112    
-32    80     
-96    -16    
32     -80    
272    0      
-64    192    
-208   -80    
112    32     
96     48     
16     112    
0      128    
-144   -32    
144    240    
-128   16     
160    -16    
48     32     
-128   272    
-80    -32    
0      192    
-64    -48    
112    -32    
-96    -32    
96     240    
-80    0      
48     128    
-160   272    
-16    -64    
32     112    
16     16     
64     112    
-32    48     
64     96     
-64    16     
80     160    
-96    -192   
160    144    
-64    0      
240    80     
-240   64     
-64    112    
192    -80    
0      112    
-112   64     
224    -64    
32     336    
192    0      
-144   96     
-752   -496   
320    -1184  
144    336    
-16    704    
-864   320    
0      -48    
464    64     
-192   704    
336    336    
-208   48     
224    96     
144    144    
64     64     
-144   -48    
384    272    
-144   -64    
-112   -240   
-112   16     
176    320    
-144   -256   
-160   64     
336    448    
-96    80     
48     48     
-64    64     
176    256    
-80    224    
48     16     
128    96     
-96    64     
128    64     
-112   144    
32     -32    
-32    96     
-16    -160   
-96    -192   
192    144    
-80    0      
96     48     
32     64     
96     160    
64     160    
-32    16     
48     32     
-64    96     
224    112    
16     208    
64     -96    
-96    -32    
144    112    
-80    32     
80     48     
-16    48     
112    176    
48     128    
-64    16     
96     16     
96     176    
-80    64     
144    0      
16     144    
0      144    
48     272    
-96    0      
176    48     
32     -80    
-16    96     
128    -1552  
64     64     
32     144    
16     160    
-16    48     
96     80     
-80    64     
16     -80    
128    -96    
-32    80     
48     48     
-112   -352   
-48    128    
96     -496   
32     -80    
144    -400   
-48    320    
80     32     
80     80     
16     32     
128    80     
112    16     
16     80     
-16    96     
112    128    
-128   -48    
-64    -544   
64     -64    
-128   48     
400    448    
-304   -192   
304    208    
-288   208    
240    16     
16     -64    
-16    32     
80     32     
-16    0      
64     32     
96     144    
48     16     
48     -96    
-144   -16    
112    -112   
64     32     
144    -144   
-64    32     
-32    -704   
-96    64     
256    -1120  
-16    176    
32     -176   
-112   16     
-64    -128   
160    112    
240    -48    
-336   -208   
224    0      
32     -464   
64     48     
16     -384   
0      144    
112    -32    
32     96     
192    -592   
128    288    
128    256    
-48    128    
128    0      
-128   160    
48     160    
224    -288   
0      112    
-96    -160   
224    48     
176    0      
-48    192    
96     128    
112    352    
64     -336   
-128   208    
-32    48     
288    64
[truncated: 242,011 more chars]
