# Supplementary material for: A Fault Diagnosis Method for One‐Dimensional Vibration Signal Based on Multiresolution tlsDMD and Approximate Entropy
Source: Hindawi journal article supplement (doi:10.1155/2019/3262818), 2019-01-01
Supplement: f1 [file 3262818.f1.zip › 3262818.f1/gear signals/broken teeth fault signal/Data8.txt]

-48    176    
-224   16     
112    160    
-560   -96    
-16    96     
-176   128    
-96    48     
-240   -368   
16     -96    
64     112    
176    -128   
-256   96     
-96    -96    
176    176    
-48    96     
96     208    
-32    -96    
0      80     
-208   -80    
-16    336    
-48    16     
16     32     
160    80     
32     320    
-144   160    
16     80     
64     144    
80     64     
-48    16     
-80    -64    
112    192    
-128   -32    
-80    -48    
-16    -48    
160    816    
-128   -96    
-112   32     
-144   -208   
144    48     
64     16     
-144   -48    
64     64     
64     112    
-48    144    
32     -48    
-96    128    
-272   -64    
96     208    
128    96     
48     320    
-112   96     
112    -64    
96     -16    
-112   144    
144    224    
-80    208    
176    48     
-80    64     
16     128    
128    224    
80     256    
144    16     
-160   -32    
0      128    
144    256    
-16    128    
80     160    
96     160    
-80    64     
48     160    
-32    96     
80     48     
-128   -48    
160    80     
-224   128    
128    32     
0      80     
16     32     
-32    64     
0      64     
80     48     
16     -32    
16     224    
0      -16    
-32    -16    
32     -192   
112    144    
-128   224    
48     176    
-176   -64    
144    240    
-48    48     
176    128    
-128   0      
48     80     
96     80     
-64    128    
16     48     
-16    64     
112    -16    
64     176    
-96    112    
-96    64     
160    -32    
48     176    
0      -32    
64     128    
48     208    
0      160    
-32    32     
48     192    
-48    128    
-112   -96    
144    48     
160    -48    
144    64     
-16    192    
-64    64     
32     224    
-160   -48    
240    -272   
-128   144    
208    -912   
-32    96     
-48    32     
-944   752    
944    -208   
1040   1632   
592    -48    
-400   496    
320    -368   
80     464    
960    -384   
-352   592    
-176   -384   
144    176    
-80    -96    
208    -912   
-272   288    
176    -192   
-48    272    
272    -128   
-64    416    
80     -160   
-176   128    
272    32     
-208   352    
256    -112   
-256   288    
272    -128   
-112   80     
208    16     
-80    -224   
160    -80    
-128   176    
96     64     
112    144    
48     48     
-128   -128   
192    96     
176    112    
16     176    
32     -16    
-48    128    
16     32     
80     -96    
48     48     
16     -224   
-48    16     
96     -400   
16     144    
-64    -80    
112    64     
-48    -48    
80     112    
-32    64     
112    80     
-32    64     
16     -176   
0      80     
32     -176   
80     176    
128    -224   
112    128    
-80    -416   
48     128    
32     -2640  
96     80     
0      160    
0      128    
32     112    
64     64     
-64    -64    
16     -64    
48     128    
32     16     
96     128    
32     -160   
64     48     
176    -528   
-64    -48    
160    -272   
-160   240    
-48    -48    
160    16     
-128   96     
304    32     
144    112    
-112   -432   
288    272    
-96    -336   
-48    208    
128    -736   
64     96     
48     -240   
160    80     
-48    0      
0      208    
-16    96     
-16    80     
-96    -160   
16     320    
144    96     
-96    -32    
16     224    
128    48     
48     64     
96     -112   
-16    128    
80     0      
0      144    
80     -416   
0      176    
48     -48    
64     -160   
112    192    
-400   0      
48     -240   
-16    -208   
128    -1040  
192    400    
-64    48     
0      -160   
-80    96     
320    96     
48     112    
32     -80    
-80    192    
144    96     
32     64     
112    656    
-192   -112   
-16    -816   
-160   -176   
128    -976   
112    -80    
-32    -1792  
96     48     
-32    0      
80     -112   
-80    0      
144    32     
32     -192   
176    112    
64     -304   
-80    -128   
-208   -128   
288    272    
-160   -192   
208    -80    
-128   -160   
160    -656   
80     -160   
-48    144    
96     -128   
32     -112   
48     64     
96     -64    
32     112    
-48    -304   
192    160    
-160   -320   
304    16     
-560   112    
112    -288   
-96    48     
192    -128   
144    32     
-32    -544   
128    208    
-144   -256   
144    112    
336    96     
-304   0      
-80    -224   
64     160    
-16    -32    
48     -48    
-1696  -48    
176    -208   
160    -48    
-128   -112   
176    -64    
-48    -272   
16     -160   
144    -1088  
0      128    
48     -80    
208    48     
-80    112    
96     -112   
-16    64     
-16    0      
-384   64     
-112   16     
-288   -48    
208    112    
208    -176   
-144   -384   
-80    -16    
160    -544   
64     112    
848    1632   
80     624    
-272   -1008  
-400   -416   
208    -176   
480    -208   
304    448    
-640   -400   
-720   -240   
-128   -464   
528    32     
-240   -32    
-112   80     
208    -192   
352    -112   
-48    160    
-32    -336   
384    512    
-352   -96    
-192   -352   
-112   176    
192    96     
-320   -16    
-80    -272   
512    -256   
-512   256    
96     -400   
-160   -112   
-16    -496   
256    496    
-304   64     
64     -80    
-208   176    
48     -16    
-16    16     
-64    -448   
-128   -160   
144    80     
-64    208    
16     80     
-96    128    
112    -80    
112    -64    
48     -256   
-16    80     
48     128    
-144   64     
128    112    
-240   32     
0      -144   
80     -64    
-160   32     
160    192    
-176   -16    
256    0      
-16    256    
-560   -304   
80     96     
-368   -496   
-800   -96    
-160   224    
-480   160    
-128   -208   
272    96     
-272   32     
112    48     
-288   -256   
304    96     
-272   -80    
-304   -256   
-80    112    
-528   -224   
80     272    
-160   -112   
-16    -80    
160    192    
-144   592    
-80    208    
-112   -80    
-80    48     
176    -128   
192    -32    
144    400    
-288   64     
112    -32    
-64    112    
80     -64    
32     112    
-16    0      
-80    -32    
-112   -64    
-32    -16    
0      192    
-16    192    
-144   -64    
-144   16     
-48    32     
176    32     
-128   112    
0      -32    
112    128    
-96    -112   
80     16     
-176   -112   
160    192    
-272   176    
112    -144   
-240   -128   
32     -16    
-64    -64    
-688   -48    
-64    64     
96     144    
-16    16     
96     288    
-304   64     
304    -160   
-320   -32    
128    64     
0      256    
16     144    
-96    16     
-32    -48    
-80    32     
224    240    
-352   96     
96     -80    
-432   112    
192    16     
112    -64    
-272   80     
-16    -224   
-160   112    
-208   -16    
464    272    
-240   128    
-64    -96    
0      64     
-304   -16    
192    112    
-48    -16    
0      144    
-320   240    
128    176    
48     -192   
-144   96     
-16    -64    
176    176    
-64    -16    
-80    128    
-112   -32    
-80    64     
48     -16    
0      64     
-64    16     
32     80     
-112   304    
-128   -176   
80     32     
-176   48     
128    -16    
144    48     
-144   96     
0      -96    
-32    192    
-80    -32    
160    -16    
48     16     
176    320    
-128   96     
-304   176    
-48    48     
144    -16    
208    -48    
-64    240    
-336   -192   
32     64     
32     -32    
0      224    
-160   128    
64     32     
144    -96    
48     176    
-272   192    
112    -96    
-160   32     
128    48     
-32    16     
0      144    
-560   -128   
-112   48     
-48    48     
48     160    
-64    -80    
144    48     
48     48     
-304   1040   
-272   -768   
256    -96    
-352   1344   
-336   -304   
-240   -48    
48     208    
-864   -368   
592    320    
-368   224    
400    -192   
-160   384    
128    -192   
16     528    
-96    -624   
-80    320    
160    -160   
-64    400    
0      0      
64     256    
-32    -96    
-112   48     
-176   176    
304    -48    
-224   96     
336    -80    
-304   224    
256    144    
-208   192    
160    -48    
-80    144    
32     -32    
-32    176    
16     64     
-128   48     
96     32     
-128   -16    
16     112    
0      128    
80     32     
-16    64     
-48    80     
-32    128    
64     80     
112    32     
-16    96     
48     16     
-96    -144   
32     160    
-48    64     
-64    32     
80     128    
0      32     
48     112    
48     16     
128    160    
-160   144    
64     96     
112    -16    
112    64     
-48    32     
64     128    
32     96     
-16    48     
32     208    
16     176    
144    128    
0      0      
80     -32    
-96    128    
-112   48     
160    -80    
16     32     
64     112    
-64    0      
32     -32    
80     0      
16     -32    
80     160    
16     240    
-32    -672   
-32    160    
64     -1264  
240    304    
0      32     
16     16     
224    608    
16     128    
0      192    
32     -16    
48     48     
64     176    
0      272    
32     112    
-112   -112   
0      -352   
224    160    
-144   -2064  
32     -144   
144    160    
112    256    
-48    96     
-112   -16    
144    112    
112    80     
-16    96     
64     96     
-16    80     
16     96     
0      64     
16     32     
32     32     
16     -336   
16     80     
112    64     
-16    96     
48     48     
48     160    
16     32     
16     16     
16     -144   
128    192    
-16    -96    
0      112    
0      64     
48     -80    
32     -272   
96     -416   
-80    144    
32     -2320  
112    0      
-16    288    
0      16     
80     -224   
-32    -16    
192    272    
-192   16     
160    176    
-144   16     
176    -16    
96     -32    
16     96     
32     -224   
48     144    
64     -16    
176    32     
-80    -736   
208    304    
-160   64     
144    112    
-32    96     
160    96     
-144   -80    
192    16     
-64    256    
128    -352   
32     288    
-96    -80    
176    144    
-128   -208   
128    160    
32     -368   
48     64     
80     128    
64     112    
144    -80    
-32    208    
192    112    
-64    -544   
160    176    
64     -192   
80     96     
-64    -288   
-48    160    
16     -400   
-80    96     
112    -512   
144    112    
16     176    
16     64     
-80    -16    
144    176    
48     96     
96     -32    
-144   96     
80     -96    
16     64     
48     -144   
48     48     
32     -112   
-16    32     
192    -928   
-128   208    
192    64     
-240   160    
144    48     
80     -160   
-976   -960   
848    224    
96     -432   
960    -640   
-720   -464   
256    -560   
544    1344   
-128   208    
-48    -144   
336    -16    
128    -240   
-256   -208   
128    -832   
272    192    
-1536  -64    
224    144    
-80    -208   
48     -1696  
-256   -464   
320    32     
-144   -240   
112    64     
0      160    
-16    -192   
-112   -304   
208    -624   
256    112    
-64    -112   
-32    -112   
-528   64     
-160   -64    
192    -64    
-16    16     
80     -96    
144    16     
-48    -16    
128    304    
-16    -288   
-48    -464   
32     64     
192    -80    
-16    96     
48     -112   
160    -288   
-112   96     
48     -16    
-320   -112   
-48    -16    
48     208    
112    -208   
128    -80    
-160   -1520  
176    -224   
192    80     
-240   128    
240    16     
-32    -32    
-48    -32    
48     -256   
-144   32     
176    -176   
-512   96     
-96    -272   
128    -112   
48     -960   
80     80     
16     -528   
48     96     
-96    -64    
144    32     
96     -128   
-64    -16    
0      64     
0      64     
16     -32    
-48    -96    
-1168  -32    
0      -240   
-128   -144   
-32    176    
-192   112    
128    -128   
192    -16    
-192   -384   
-48    -48    
304    224    
-336   -32    
176    -112   
128    -160   
-160   32     
96     -96    
-240   -80    
96     -64    
0      112    
80     -128   
160    240    
-112   -512   
144    0      
64     -1632  
-48    -64    
144    -32    
48     192    
-144   96     
96     -64    
-176   -112   
64     80     
-32    -16    
80     128    
-176   -80    
192    -80    
-1648  -48    
176    -256   
-96    32     
32     -544   
-112   -144   
192    112    
96     -160   
-96    48     
-32    32     
-48    256    
128    48     
-176   -112   
-144   -80    
80     96     
256    -208   
-48    -112   
-144   -112   
224    144    
-64    -160   
48     16     
-144   64     
144    80     
64     112    
-144   48     
48     32     
80     208    
64     0      
32     -224   
-320   -16    
224    -16    
-272   144    
16     -48    
144    -48    
-672   -336   
16     -96    
-176   0      
192    -48    
-288   -64    
208    -48    
0      -64    
-48    -16    
-80    -32    
16     -16    
-64    0      
112    -48    
-192   320    
-32    -400   
0      16     
-1024  -464   
-288   64     
-16    0      
-48    240    
-96    16     
128    -48    
112    -512   
0      0      
0      32     
-32    272    
-480   0      
-272   -80    
-48    96     
-64    -16    
-176   48     
144    -96    
-16    192    
272    -464   
-384   32     
-176   48     
-336   48     
48     64     
-688   64     
80     32     
80     16     
16     176    
-48    -208   
48     144    
32     -16    
32     128    
128    48     
-144   48     
-64    -48    
-48    112    
-128   80     
-416   -48    
80     -80    
-80    16     
-112   16     
-1472  1872   
144    -960   
464    -80    
-144   -448   
-848   -128   
272    544    
-192   64     
416    416    
-576   -272   
64     32     
-240   -112   
96     400    
144    112    
-160   -16    
-112   -80    
-560   -304   
-144   32     
32     -112   
-16    112    
-64    -288   
-16    64     
-160   16     
112    -112   
-80    144    
-48    -288   
160    96     
-240   320    
288    176    
-240   -112   
-80    -48    
-560   -16    
160    64     
32     -32    
32     96     
16     48     
0      -80    
-32    160    
-16    128    
208    176    
-288   -96    
80     32     
-272   48     
128    16     
0      16     
-16    64     
-128   -144   
-16    80     
-48    -160   
144    80     
0      288    
160    32     
32     48     
-80    32     
32     80     
0      0      
-80    80     
32     240    
336    352    
64     112    
0      96     
-240   -112   
128    160    
-480   -112   
-96    -16    
240    0      
-64    208    
-64    192    
-176   48     
48     80     
0      32     
48     64     
-16    48     
-48    32     
-80    48     
0      64     
0      48     
-32    96     
-336   -208   
32     80     
64     240    
-48    80     
-112   80     
-48    -32    
128    224    
-80    32     
64     64     
-80    32     
-16    32     
-32    96     
-32    96     
-128   -64    
16     16     
48     96     
64     144    
-16    96     
-32    -32    
160    224    
0      96     
112    96     
-144   -80    
16     32     
64     32     
32     160    
-96    -16    
128    176    
-240   -16    
160    128    
-32    64     
0      80     
-16    112    
80     48     
16     64     
0      -16    
0      -32    
-16    48     
48     256    
0      -144   
-48    32     
-112   96     
240    96     
-240   -144   
-96    128    
96     144    
64     80     
-80    160    
224    240    
-224   304    
0      -160   
48     192    
-144   -64    
192    48     
-272   96     
224    -16    
-128   48     
48     128    
-160   112    
80     16     
80     32     
80     96     
-64    32     
48     64     
-96    192    
144    48     
-16    32     
-16    160    
128    48     
96     128    
-176   160    
-112   -16    
0      -96    
80     80     
144    192    
16     176    
-112   -48    
-32    48     
192    336    
0      352    
-176   -96    
208    -16    
64     0      
160    240    
-240   112    
48     48     
-160   -176   
0      -176   
240    224    
-144   32     
144    400    
-352   144    
-64    -144   
64     96     
144    16     
304    64     
-32    32     
-96    32     
48     32     
-176   0      
32     144    
80     32     
-32    -976   
128    240    
48     -256   
48     96     
-32    112    
144    16     
48     48     
0      208    
16     112    
-16    128    
0      96     
240    -224   
0      -16    
256    -208   
16     208    
144    -16    
64     240    
0      -32    
-32    432    
176    -576   
-144   240    
16     416    
-640   -400   
880    -704   
-32    128    
176    752    
-176   -496   
-32    -240   
224    48     
288    80     
-160   176    
112    0      
128    -272   
-96    -112   
-48    -1072  
192    -80    
32     144    
64     32     
-128   -64    
-16    160    
96     64     
144    128    
-160   -144   
-64    96     
176    208    
80     -64    
-16    16     
-32    -256   
112    112    
128    -992   
-32    64     
0      112    
48     96     
-80    -16    
192    128    
-112   64     
192    80     
-48    32     
80     96     
48     128    
-16    -160   
144    80     
-128   -176   
160    176    
0      -32    
16     256    
176    -64    
64     160    
-160   -64    
208    96     
-80    16     
144    160    
-144   112    
96     -224   
80     176    
-16    48     
112    96     
-96    -288   
144    176    
-48    -400   
32     -64    
176    -400   
-160   176    
64     -48    
176    144    
-128   -32    
224    224    
-160   96     
176    -112   
-48    112    
80     -64    
80     96     
0      -112   
16     112    
112    -336   
128    80     
-16    -80    
64     -48    
176    160    
-32    160    
96     304    
-352   -240   
320    48     
0      -80    
-112   208    
16     -112   
176    144    
-128   -144   
256    208    
-48    -64    
144    96     
32     80     
144    -64    
64     96     
16     -864   
-16    48     
176    -112   
-48    -1360  
128    16     
48     -1168  
176    -112   
-176   96     
96     -304   
-96    -48    
112    -80    
176    336    
-64    -96    
80     -544   
-128   16     
176    -144   
32     128    
-624   0      
-64    48     
16     -64    
96     -576   
64     -144   
-96    -752   
352    144    
-16    144    
16     -80    
-176   -1104  
448    -48    
-16    -640   
-528   -128   
400    -160   
80     -80    
-400   -112   
240    -160   
-48    -144   
-32    -80    
-48    0      
208    -96    
96     -112   
-32    -64    
-16    -16    
192    176    
224    -16    
48     -112   
-160   32     
128    16     
272    -16    
-560   0      
80     -192   
-1376  -512   
-32    -176   
80     128    
208    -432   
-48    -112   
64     -1056  
-160   -32    
48     16     
96     256    
-176   -128   
160    16     
-32    352    
-32    -144   
-208   -112   
-48    -32    
0      160    
32     16     
-16    -352   
64     -160   
208    320    
-96    -544   
-176   -288   
112    64     
48     16     
32     144    
-128   -272   
-32    80     
256    0      
-176   96     
128    -176   
-160   -144   
192    176    
-784   48     
16     -112   
160    144    
112    0      
64     48     
0      -1600  
-32    64     
144    -80    
32     -96    
-32    0      
128    48     
-336   -240   
48     -176   
32     48     
128    -32    
-368   -144   
-48    96     
-896   176    
16     -272   
-64    352    
-112   -2368  
960    784    
-496   416    
-192   576    
-736   -48    
160    224    
-832   -1136  
128    -224   
528    96     
-144   384    
-96    160    
288    224    
48     -176   
-64    -208   
64     96     
-64    -304   
96     240    
-16    -160   
-32    -112   
-208   96     
224    80     
-272   96     
480    -96    
-208   144    
48     -224   
-144   240    
96     272    
192    320    
128    -176   
-192   48     
96     -272   
64     64     
-96    -32    
176    48     
-304   -48    
80     -48    
-80    288    
288    272    
-176   64     
-64    -160   
-48    -48    
48     -96    
-80    0      
272    -112   
-16    64     
-512   -416   
-176   -16    
48     160    
-400   288    
-48    -64    
-224   96     
0      112    
128    112    
-192   -160   
144    -112   
-48    -16    
-128   -80    
48     112    
-288   144    
-160   64     
128    144    
-304   96     
-112   -96    
-80    192    
-32    64     
-736   -64    
-64    48     
48     32     
-80    112    
112    32     
16     32     
-64    -32    
32     80     
-32    -96    
64     96     
208    208    
-192   208    
-144   176    
-80    32     
-96    0      
-240   -240   
-64    -144   
-848   16     
-96    176    
208    -64    
-176   80     
-240   -624   
80     -48    
32     -32    
96     240    
-128   64     
-80    96     
0      -16    
16     64     
-80    16     
64     256    
-192   -96    
-16    -32    
-64    48     
-112   48     
-16    128    
-128   -96    
96     112    
48     0      
-64    80     
-144   -96    
16     80     
-144   -48    
32     48     
-80    128    
-48    -96    
80     128    
-336   -32    
128    32     
-768   -32    
112    80     
80     256    
0      48     
0      -112   
-64    96     
96     96     
-80    -96    
-64    0      
-32    224    
160    16     
16     816    
-320   -288   
-96    -400   
-192   -48    
-240   96     
64     208    
-224   128    
64     -64    
0      96     
-112   32     
48     48     
64     64     
160    240    
160    128    
16     144    
-80    64     
48     80     
48     256    
0      0      
-96    32     
96     320    
-1136  32     
16     -1360  
-48    -16    
16     80     
176    -16    
-176   80     
32     16     
-16    64     
-48    -32    
192    240    
48     48     
-240   -80    
80     144    
-64    -112   
128    -128   
-224   64     
112    144    
-64    64     
-96    80     
48     128    
-32    464    
-96    16     
-272   -336   
208    0      
-112   112    
144    -48    
-192   64     
48     -96    
16     144    
96     -240   
208    192    
80     224    
16     64     
-144   128    
128    -96    
-112   128    
160    -160   
-128   240    
-64    240    
288    -16    
176    96     
-16    32     
64     16     
-48    48     
144    -160   
0      112    
-64    48     
96     144    
-80    80     
32     160    
96     3360   
-1856  -336   
336    -16    
352    -32    
-432   -528   
112    32     
-800   48     
832    416    
-432   384    
-144   80     
-304   0      
-128   -144   
288    -16    
16     208    
-64    -144   
96     224    
-32    -16    
-16    128    
112    64     
48     160    
144    -16    
-352   128    
176    128    
-208   16     
128    -64    
96     112    
-128   160    
96     288    
-48    -32    
96     48     
-112   -16    
288    144    
-192   128    
112    48     
-112   32     
112    64     
-112   -96    
48     80     
32     208    
176    112    
64     16     
-176   144    
208    16     
-32    128    
48     -16    
80     80     
-96    160    
272    176    
-384   144    
128    -128   
80     176    
-176   -16    
128    48     
32     96     
-16    96     
80     -16    
32     160    
-112   48     
176    64     
-64    192    
256    32     
16     112    
-48    112    
64     96     
-176   0      
96     80     
48     -32    
16     176    
32     -16    
160    -112   
-48    32     
32     192    
48     -32    
128    96     
0      80     
32     0      
32     32     
-112   80     
64     160    
-128   0      
208    96     
-48    96     
0      -224   
64     240    
-208   -752   
192    128    
-160   32     
304    208    
-144   32     
224    64     
-128   0      
96     128    
-80    0      
160    160    
-80    96     
32     48     
112    32     
-80    -256   
64     0      
32     -512   
160    208    
-48    96     
96     80     
-96    16     
112    176    
160    -48    
64     160    
-64    320    
16     128    
-48    -16    
-64    -16    
160    64     
80     -64    
-96    80     
368    192    
-192   80     
272    -736   
-96    64     
32     112    
-64    144    
320    16     
-112   96     
-112   112    
64     0      
112    -160   
-96    16     
64     0      
-64    -192   
-96    -48    
112    -128   
-112   -32    
64     -128   
-176   112    
128    -176   
192    80     
-96    -192   
-16    144    
176    -16    
0      96     
16     96     
16     -32    
96     224    
48     64     
0      96     
64     -544   
64     144    
0      -496   
-48    -32    
64     -480   
80     128    
-80    -96    
64     112    
-16    16     
304    176    
-240   64     
64     48     
0      0      
144    -208   
-96    -48    
80     -464   
128    144    
0      -96    
128    0      
-16    336    
144    176    
96     -208   
-144   -80    
320    288    
-96    80     
48     48     
48     -336   
16     96     
16     -64    
-16    128    
128    128    
-64    32     
-48    144    
240    176    
-32    -1216  
64     -48    
0      96     
32     80     
-64    -176   
160    -96    
160    208    
-32    -32    
-96    128    
128    -64    
16     112    
-32    -368   
-16    16     
80     -320   
432    112    
-192   -288   
128    -352   
-16    112    
224    -288   
160    2432   
-1040  272    
-400   -1456  
112    -864   
80     32     
64     -368   
96     -128   
864    -480   
-576   -656   
320    -672   
144    -32    
384    192    
96     -944   
-48    32     
-64    -544   
224    -160   
48     112    
48     16     
128    0      
48     -256   
0      0      
192    -480   
-64    -80    
-16    48     
-64    -320   
352    -96    
-144   160    
112    -128   
48     16     
-16    -112   
192    48     
-256   64     
-48    -224   
-224   -96    
0      -528   
-48    48     
368    -272   
-240   -464   
192    -800   
-224   32     
304    -64    
-208   -16    
64     -208   
-16    240    
-208   -64    
128    112    
-256   208    
256    192    
-544   -224   
64     224    
128    -192   
64     -16    
128    16     
0      -1024  
-48    -272   
80     -144   
368    496    
-16    96     
-320   16     
80     -288   
128    0      
-192   -80    
208    -48    
-48    -96    
336    -128   
112    0      
128    -144   
-208   -32    
32     -352   
48     112    
96     -2000  
0      80     
-64    0      
64     -16    
-96    0      
-144   -336   
32     -48    
192    -16    
-336   -32    
160    112    
-1200  -80    
32     0      
16     48     
48     -192   
96     64     
16     -1088  
96     240    
128    160    
32     144    
-80    -112   
128    -32    
-80    0      
48     160    
-384   48     
-48    -176   
-144   16     
-160   -176   
32     64     
-80    -48    
128    240    
-32    -496   
-80    32     
0      80     
96     144    
-384   48     
80     -16    
-96    112    
-16    -448   
-48    -192   
0      -16    
128    208    
112    0      
-464   0      
32     -240   
160    -64    
32     -32    
-96    -48    
-48    128    
-16    -48    
-240   48     
-48    -160   
-16    64     
64     -64    
0      416    
-48    -96    
-16    80     
160    -192   
-32    512    
-176   -400   
176    64     
-96    -224   
272    -96    
-208   16     
-352   128    
-192   -112   
128    32     
-144   16     
64     -416   
16     128    
112    48     
-384   96     
-112   16     
32     -64    
-512   -128   
96     -240   
-512   -544   
-16    -224   
0      48     
-336   192    
48     128    
-944   -16    
-48    112    
64     -64    
-96    -320   
304    -160   
-304   -48    
352    32     
-128   224    
208    -16    
-16    96     
-208   -128   
96     -64    
-48    -16    
-48    256    
-288   -64    
-176   -144   
-96    -144   
-480   -144   
16     -32    
-16    144    
48     208    
-288   48     
0      112    
-304   -288   
144    -32    
48     64     
-16    80     
64     -96    
32     144    
-16    80     
-192   112    
-144   64     
128    224    
-256   32     
144    -16    
64     256    
-112   -240   
192    32     
-48    -32    
16     64     
32     288    
-192   16     
128    -240   
16     64     
-240   0      
96     192    
-144   16     
880    -48    
-320   352    
-528   -160   
-480   80     
-384   -176   
432    1136   
-448   -624   
272    176    
-160   0      
176    288    
-384   -272   
16     256    
-48    64     
112    32     
-128   32     
-240   -112   
-96    48     
-848   -208   
-48    160    
0      -96    
-64    128    
80     -16    
-64    176    
128    -16    
-224   176    
32     0      
112    240    
-32    -16    
-64    48     
0      -16    
-224   -32    
144    -64    
-192   160    
176    48     
-432   80     
-192   -112   
128    -64    
-32    96     
240    96     
-176   32     
-32    64     
-64    96     
112    112    
-144   -80    
-48    48     
-128   96     
224    96     
-16    160    
-304   96     
-288   -144   
-16    80     
-32    128    
32     -16    
32     64     
0      144    
-112   128    
-112   -16    
-32    -16    
-16    48     
-16    48     
-16    16     
-48    208    
-240   -256   
160    160    
-400   48     
-32    128    
0      16     
128    96     
-16    -32    
96     96     
-64    80     
80     144    
16     -32    
16     144    
-160   -16    
-48    -352   
128    352    
-416   112    
256    -32    
112    0      
64     112    
-32    160    
-112   -208   
272    96     
-192   96     
32     -144   
48     -64    
32     224    
-160   64     
80     128    
-112   -96    
112    64     
-32    16     
48     144    
-64    -32    
-32    32     
-16    160    
112    192    
-192   48     
48     112    
-112   16     
32     -32    
64     352    
-240   16     
64     16     
-80    96     
160    208    
0      0      
-144   -48    
48     48     
128    144    
-128   80     
96     144    
-32    32     
64     32     
48     112    
0      -32    
112    80     
-240   -192   
48     288    
-112   160    
176    128    
-160   -32    
128    272    
-160   48     
224    -16    
-160   48     
64     -32    
96     160    
112    32     
-112   -32    
128    224    
-48    192    
0      -48    
-112   144    
144    64     
0      -64    
-64    -16    
48     80     
-32    272    
80     -64    
-96    128    
112    -16    
96     144    
32     336    
-16    272    
0      -48    
-160   -160   
208    112    
0      64     
-112   -160   
48     112    
48     64     
144    272    
80     -16    
128    208    
-80    64     
32     -160   
-272   -112   
256    112    
-32    -16    
160    176    
160    80     
32     96     
-80    656    
-240   -304   
32     -160   
208    256    
-224   -912   
-192   16     
96     96     
160    48     
240    64     
-96    80     
224    240    
-112   48     
-112   -16    
272    80     
32     32     
80     48     
-32    128    
-80    -80    
144    112    
192    -1456  
-16    -48    
-16    32     
32     176    
80     48     
80     144    
-96    48     
240    48     
-80    -160   
160    -64    
112    208    
-80    64     
32     144    
-64    -400   
-368   1904   
-560   -1584  
-608   -688   
-48    -1328  
48     -32    
96     64     
96     416    
-288   -336   
16     752    
-512   -176   
704    -144   
-144   384    
144    80     
112    80     
32     -80    
64     352    
256    192    
-64    272    
96     -1488  
288    -64    
144    -512   
-64    128    
-112   -176   
16     -96    
112    -128   
80     224    
-224   224    
32     -384   
-16    -80    
224    16     
256    -16    
-48    -368   
16     -32    
208    -64    
32     160    
192    -496   
256    176    
128    0      
-96    176    
-240   -16    
80     304    
-16    -96    
80     -80    
32     -16    
16     -80    
-192   -192   
96     -928   
32     16     
96     -64    
32     176    
-64    -256   
-16    -48    
48     192    
208    96     
-16    -144   
144    -128   
96     144    
192    -80    
-160   160    
208    -160   
16     176    
96     -352   
96     480    
96     -112   
-160   96     
16     -240   
64     176    
48     -128   
48     96     
48     32     
112    128    
32     64     
16     -208   
80     48     
80     -112   
288    464    
-128   336    
-64    144    
384    -320   
-512   -32    
208    -144   
176    32     
-176   64     
48     -1648  
160    -80    
-160   -240   
64     -1216  
64     -112   
-48    288    
192    -48    
-48    128    
96     -144   
48     48     
0      -256   
0      96     
-48    -176   
80     -320   
80     192    
160    -944   
48     -720   
-64    -32    
0      -208   
144    64     
-48    -32    
80     48     
80     -1168  
-112   -208   
-48    -288   
-16    -288   
160    0      
352    192    
-176   0      
-192   64     
160    -64    
-64    -208   
-320   32     
32     0      
176    48     
64     -48    
-128   -176   
272    -816   
0      -448   
-176   -1168  
352    192    
-192   160    
96     416    
-128   16     
48     192    
0      16     
16     0      
-96    -192   
-96    -16    
64     -160   
176    48     
-48    -128   
32     48     
-160   -64    
176    80     
-80    -208   
96     -256   
16     128    
288    32     
-192   176    
16     -16    
64     0      
0      -176   
-80    -16    
-176   -80    
64     32     
-16    64     
80     -48    
112    -64    
48     -112   
64     16     
96     -224   
64     96     
0      416    
-112   -16    
32     -224   
48     -288   
-176   96     
-144   -96    
-144   32     
48     48     
-1312  -160   
48     -176   
-208   -144   
48     -976   
80     192    
-32    -688   
48     224    
48     -288   
160    -48    
64     208    
-144   -240   
-128   64     
0      -48    
48     32     
48     32     
-1152  -176   
208    -112   
-32    -80    
304    -192   
-160   224    
64     -608   
0      80     
-16    -48    
128    -144   
-64    32     
16     80     
-80    -80    
112    0      
16     -16    
224    -96    
-192   112    
64     -64    
2496   2080   
-1920  48     
512    160    
208    -608   
-112   -640   
320    928    
-288   -288   
-256   208    
624    -544   
-624   16     
272    -80    
-432   80     
112    32     
192    80     
16     -48    
-32    -160   
64     -80    
144    112    
32     -96    
128    -224   
-192   96     
144    64     
80     176    
16     -128   
-160   32     
64     240    
-32    128    
-16    -112   
-96    176    
320    -160   
-112   64     
-752   -288   
96     176    
-144   -16    
-352   80     
-48    -48    
-144   -272   
-48    128    
128    80     
128    112    
-144   -80    
32     80     
80     -128   
144    80     
-1136  -192   
96     48     
-144   -80    
80     336    
-64    -144   
-80    -32    
-160   80     
-32    -48    
-64    0      
-288   48     
-96    16     
-128   16     
-192   -16    
64     32     
16     48     
64     -64    
-64    192    
-48    -144   
16     80     
48     80     
-240   48     
32     -16    
80     112    
0      -64    
32     80     
-192   144    
-192   -80    
64     80     
-16    -112   
96     144    
-128   0      
-16    80     
32     176    
-256   -80    
272    0      
-176   48     
0      128    
-32    32     
80     32     
-400   -64    
32     192    
-320   -112   
-64    -144   
-656   288    
-272   128    
64     -160   
64     96     
0      -64    
-64    112    
48     80     
96     144    
-160   112    
-224   -16    
-32    -48    
-176   -80    
-32    224    
192    480    
-208   128    
-624   -416   
-48    -64    
16     -32    
80     160    
-64    -208   
96     112    
48     128    
0      0      
-80    64     
-16    32     
16     80     
0      0      
0      64     
96     16     
-64    32     
-112   -224   
-224   -144   
-32    48     
48     64     
160    224    
0      16     
32     352    
-128   112    
80     -80    
-160   -112   
128    352    
96     288    
32     128    
-352   -176   
32     -48    
-112   -32    
48     320    
16     288    
-384   -240   
160    176    
-16    320    
-32    -112   
-32    64     
-16    64     
16     32     
-80    48     
-96    16     
-160   -64    
-128   -128   
-16    96     
-160   -32    
64     80     
-544   -80    
-128   32     
-112   80     
48     96     
176    208    
-192   -96    
144    80     
-48    240    
-128   -64    
176    16     
48     96     
128    96     
-160   80     
-64    -16    
80     48     
48     0      
-144   16     
96     32     
-144   256    
32     0      
48     96     
-160   -48    
96     -16    
-48    160    
0      48     
112    -64    
-112   160    
-16    256    
-288   -64    
48     0      
128    160    
0      128    
-48    32     
-144   16     
320    192    
-96    -80    
128    48     
-144   160    
448    -144   
-128   304    
-96    -80    
16     16     
0      -32    
48     192    
-64    144    
112    144    
0      32     
96     32     
-416   784    
-304   288    
-640   -448   
-96    464    
-176   -272   
560    640    
-128   -544   
96     128    
-16    160    
-128   16     
288    -32    
-224   272    
48     0      
176    64     
-144   112    
176    80     
-288   160    
336    -160   
-208   288    
48     -368   
32     384    
160    -48    
-112   528    
-32    -160   
-32    160    
80     144    
-160   144    
-32    -128   
192    -96    
-160   64     
336    80     
-160   160    
-32    -64    
64     96     
64     48     
176    160    
-288   224    
400    480    
-224   32     
-80    80     
144    112    
32     48     
-32    304    
0      96     
112    64     
-160   80     
224    192    
32     112    
-48    0      
0      -16    
-48    -32    
64     32     
-16    208    
0      192    
-16    -320   
112    240    
16     48     
176    48     
-96    -80    
96     160    
80     64     
48     240    
-80    336    
32     96     
32     32     
80     48     
0      -128   
0      64     
-96    -64    
144    -208   
-48    144    
128    -1056  
-48    16     
32     64     
32     112    
208    96     
-80    160    
-16    96     
256    288    
-368   208    
0      112    
80     -64    
176    384    
-112   -48    
-80    -320   
16     272    
-96    -768   
352    384    
-160   16     
32     48     
-48    128    
176    176    
-128   -32    
-64    -48    
160    304    
-112   -416   
128    -304   
160    160    
224    448    
80     -16    
-256   -32    
96     -272   
176    208    
-16    -368   
224    576    
-240   -80    
192    192    
-272   -432   
240    192    
-16    48     
160    144    
-96    -16    
208    0      
-192   48     
112    -96    
-48    96     
176    96     
144    320    
-144   -928   
-112   0      
-48    -2048  
272    64     
16     32     
-96    384    
48     -112   
288    128    
-272   80     
160    -176   
80     96     
32     -16    
-16    224    
64     -304   
64     112    
-224   -512   
240    384    
224    16     
32     32     
-192   176    
80     112    
336    80     
-144   128    
80     64     
224    16     
16     112    
80     -416   
-32    -144   
112    -560   
-112   112    
144    -208   
112    288    
-128   -80    
96     112    
16     -80    
128    96     
-48    32     
176    112    
144    144    
-128   -192   
160    16     
0      -192   
32     -16    
-16    -336   
96     16     
352    160    
-128   160    
112    -2080  
-16    64     
-16    464    
-64    -96    
48     -32    
160    0      
48     -992   
64     -144   
-80    -112   
16     16     
304    256    
-320   -16    
80     -112   
128    -48    
80     80     
-16    96     
-32    -1600  
-32    0      
128    144    
80     -80    
-384   -144   
112    -960   
0      -80    
-32    -416   
96     0      
0      -864   
176    112    
-96    -48    
176    -128   
-112   224    
192    48     
16     -176   
1408   -192   
-320   272    
208    80     
-1280  240    
752    -1216  
-112   -464   
128    -352   
0      224    
352    -1488  
-272   -480   
336    16     
16     -432   
-16    240    
96     -224   
192    48     
-112   -128   
-432   64     
272    144    
-432   16     
160    -272   
0      96     
96     -96    
-16    16     
64     -192   
144    -128   
0      176    
64     96     
-16    -64    
48     48     
0      -176   
80     48     
-96    0      
32     48     
0      48     
-32    -64    
-560   -192   
144    -16    
-32    -112   
272    -96    
-208   48     
224    -80    
-80    80     
96     -448   
16     16     
32     -80    
-128   112    
160    48     
80     272    
-128   -288   
16     -16    
-368   -112   
192    16     
-208   -16    
128    -208   
-240   32     
16     -608   
80     16     
0      -432   
32     144    
32     -96    
192    144    
-128   64     
16     -64    
-80    128    
32     -160   
-64    16     
-16    80     
-960   0      
96     -176   
0      -160   
64     -560   
-16    240    
-96    -352   
160    -80    
-16    -176   
224    -96    
32     144    
-112   -176   
160    64     
-32    112    
160    64     
224    -16    
-352   -144   
-80    -16    
32     176    
-160   -352   
80     -128   
224    352    
-224   64     
-160   -32    
0      -208   
-208   0      
160    -16    
-128   -32    
48     -64    
-144   -144   
96     -176   
-16    48     
-16    -224   
16     32     
112    -176   
96     144    
48     -480   
48     -240   
-160   128    
256    320    
-144   64     
80     -112   
-176   -48    
64     32     
-96    -128   
-64    -64    
96     -80    
112    48     
64     80     
-80    -160   
48     48     
32     -272   
-336   -176   
48     -64    
32     48     
224    176    
48     16     
-272   -144   
48     128    
96     32     
176    32     
-176   208    
-976   -128   
16     64     
-368   -320   
0      -64    
112    32     
-128   0      
80     208    
-496   -96    
-16    -16    
-416   -48    
64     0      
16     80     
-32    96     
80     64     
-224   -64    
-112   -32    
-48    16     
-208   -288   
64     -128   
144    112    
64     176    
-240   -64    
-128   -16    
0      80     
176    288    
-176   224    
-304   -96    
144    -96    
-96    16     
-96    176    
-112   -144   
48     112    
0      -32    
-128   128    
-176   -32    
16     32     
32     144    
-64    -112   
32     16     
-112   272    
0      0      
-928   -32    
-16    96     
64     -112   
0      80     
-16    -16    
112    -96    
48     -64    
-192   48     
64     -16    
-160   144    
96     -64    
-48    80     
0      0      
-16    48     
96     -112   
-208   144    
-80    -48    
-1040  64     
-64    80     
16     -304   
208    64     
-80    -336   
-32    0      
432    -144   
-304   48     
80     48     
-112   112    
-48    128    
-400   1856   
-656   672    
48     -144   
-208   0      
-80    96     
144    288    
-528   288    
624    -368   
-144   144    
-352   -272   
176    -16    
-288   -112   
208    144    
-272   -32    
16     0      
-128   -160   
96     224    
352    544    
-128   -48    
-160   272    
-224   32     
80     -192   
-208   64     
48     -96    
32     -16    
-208   -64    
80     0      
-32    32     
-112   -112   
0      80     
-80    176    
16     -16    
-224   -32    
80     80     
-240   -96    
112    64     
-848   80     
-80    96     
192    144    
-176   48     
0      80     
64     64     
144    224    
-80    96     
48     48     
-192   16     
144    112    
-160   80     
80     32     
-16    -48    
48     144    
-16    144    
-96    -48    
112    -32    
-32    64     
208    288    
-144   16     
192    32     
-64    112    
-48    112    
48     -48    
16     64     
48     -16    
-80    240    
-176   -144   
192    -64    
96     208    
-144   112    
128    80     
-48    0      
96     96     
-64    16     
-80    48     
-48    32     
0      352    
-208   32     
144    160    
-64    -32    
32     16     
-176   0      
-112   -128   
208    352    
-240   -144   
272    -32    
-80    -80    
96     112    
-160   80     
160    240    
-176   160    
144    64     
32     0      
16     64     
32     112    
288    864    
-384   -16    
304    80     
-96    -128   
240    80     
-96    112    
96     -48    
-64    208    
48     0      
128    160    
-48    128    
160    320    
-208   16     
112    -16    
-80    0      
112    112    
240    336    
-208   160    
176    224    
-224   0      
240    80     
-96    112    
176    128    
-128   -16    
0      -64    
208    208    
-48    224    
176    -16    
-80    272    
-128   128    
480    80     
-416   16     
80     80     
112    176    
112    -48    
0      96     
-64    160    
32     176    
32     80     
-144   112    
-144   -64    
48     -16    
-64    96     
256    -16    
32     -224   
-224   48     
144    144    
192    128    
-96    208    
0      272    
32     112    
64     -272   
-64    -96    
80     176    
240    144    
64     80     
-32    96     
-32    -160   
208    -32    
-160   -16    
96     -384   
-48    224    
-32    -992   
176    368    
-128   -48    
128    -32    
16     112    
64     64     
-48    80     
-16    192    
-32    -64    
272    192    
-208   -48    
32     48     
-144   32     
-48    -160   
48     -80    
64     -144   
208    80     
-80    32     
-144   64     
64     112    
128    48     
96     64     
-48    112    
-16    -32    
64     -16    
64     64     
96     224    
-160   -128   
192    192    
144    432    
-176   48     
-80    0      
128    -304   
144    80     
80     112    
80     64     
80     -784   
48     272    
-112   128    
48     144    
-48    -144   
-176   -832   
768    528    
816    96     
112    -448   
-496   -48    
208    16     
-112   32     
560    -720   
-16    400    
-256   -448   
-32    608    
-80    -400   
256    240    
-256   -112   
400    160    
-112   -304   
-128   -32    
-128   -288   
192    80     
64     -96    
144    -80    
32     -352   
-16    48     
-16    -528   
48     -96    
-80    208    
128    -16    
32     48     
128    80     
32     48     
128    -176   
-16    112    
160    -464   
128    112    
-32    -176   
16     48     
64     -688   
32     176    
64     -384   
16     64     
64     112    
112    272    
224    96     
-96    80     
-80    16     
0      -208   
192    144    
64     -64    
-64    176    
96     -272   
-16    96     
48     -96    
144    48     
48     0      
-48    32     
256    336    
-256   48     
64     96     
112    32     
-80    64     
16     -16    
32     -144   
0      -240   
80     224    
-112   -352   
176    240    
-48    -80    
48     64     
-64    -160   
32     -752   
-80    96     
256    -1360  
-224   -96    
-400   -32    
64     -560   
32     -448   
32     -2320  
-320   -80    
320    -80    
-112   80     
208    160    
64     128    
64     -128   
-48    64     
64     -176   
64     96     
0      -160   
48     -112   
-1504  -160   
96     -448   
80     -32    
32     -464   
48     -16    
16     -400   
16     -144   
96     80     
144    -176   
-80    -240   
0      -48    
128    80     
80     64     
96     -48    
0      -96    
-336   -80    
112    16     
32     -48    
32     -192   
96     64     
32     -224   
144    16     
-16    -1168  
64     -32    
16     -144   
128    144    
0      -32    
80     96     
-160   0      
144    -176   
-208   -48    
16     -112   
-32    96     
48     -256   
128    0      
-64    -240   
144    160    
-80    -960   
176    -160   
-192   -48    
48     112    
176    0      
-48    16     
-16    -48    
-48    -256   
48     96     
32     32     
-1328  -240   
208    -336   
-160   -32    
224    -336   
-144   -16    
128    -320   
-16    32     
48     -2928  
0      16     
80     -144   
-64    -192   
352    -112   
-80    448    
-112   -96    
48     -32    
48     48     
-144   -80    
-1216  -80    
-32    208    
144    -16    
128    -368   
32     336    
-112   -1952  
256    64     
-48    80     
192    208    
-304   -80    
64     -16    
48     16     
16     -128   
288    -64    
-64    304    
-256   -80    
336    -80    
-448   48     
464    -416   
-496   -16    
336    -32    
-112   176    
384    -128   
-96    -304   
176    -112   
0      -16    
-336   -80    
160    0      
-80    -32    
32     48     
-96    -240   
48     -16    
80     32     
-16    -208   
64     256    
-32    -176   
112    -16    
80     -32    
224    -80    
-16    48     
336    -224   
-64    336    
0      -64    
-256   -16    
-448   -368   
-336   -672   
-304   -832   
64     528    
-320   256    
0      -320   
288    0      
-256   400    
320    192    
-144   -224   
-368   16     
208    64     
272    80     
-80    -80    
-96    -32    
320    16     
-224   112    
144    -176   
144    112    
240    -224   
192    0      
-1168  -272   
-144   -64    
0      128    
-176   48     
48     32     
-1552  160    
-208   -64    
96     -96    
-128   160    
144    96     
0      -32    
-400   -64    
64     16     
-160   -176   
-64    176    
208    416    
-224   48     
-80    -32    
-176   -32    
0      16     
-240   -96    
-128   64     
-48    160    
-16    80     
-176   -96    
16     96     
-32    -80    
192    336    
-160   -240   
176    128    
-128   144    
-32    -64    
-64    112    
-128   -32    
96     112    
-112   -80    
48     176    
-560   32     
-16    32     
-96    -272   
112    160    
-80    -144   
160    112    
-64    48     
-96    -160   
160    -128   
96     176    
-112   48     
-48    240    
-192   0      
0      48     
-16    -48    
-272   64     
-160   -16    
-944   -80    
80     224    
0      -48    
128    80     
-112   -192   
0      -128   
-64    208    
-192   -176   
240    0      
-32    96     
-16    96     
-96    112    
-48    112    
-400   -96    
240    -16    
-160   80     
64     -80    
-32    16     
-64    64     
192    304    
-192   16     
-80    0      
192    0      
144    208    
-64    0      
-96    96     
-208   -32    
128    16     
-80    -160   
96     144    
-240   160    
96     160    
-144   -48    
112    96     
16     224    
48     144    
-128   80     
-64    -80    
128    112    
-16    144    
-16    176    
-144   -64    
-16    96     
-96    48     
384    80     
-752   -304   
-112   96     
-1024  -208   
224    16     
-176   64     
336    144    
-32    384    
176    128    
-208   0      
64     128    
-160   112    
432    112    
-48    192    
64     -64    
48     304    
-336   -32    
240    96     
-128   96     
16     176    
112    80     
-176   48     
32     0      
-352   -80    
0      -16    
128    96     
-160   48     
48     -32    
-48    64     
-208   16     
64     64     
-96    48     
96     80     
-48    80     
112    -48    
-112   48     
48     -32    
0      128    
144    -64    
-80    112    
-160   16     
64     -32    
-96    -96    
96     224    
-208   240    
144    208    
-128   -96    
304    336    
-400   -224   
-240   -336   
-48    144    
112    -144   
16     96     
-32    64     
160    320    
-176   112    
-64    -144   
112    112    
176    112    
-64    128    
16     160    
112    -96    
-160   16     
48     64     
16     160    
96     96     
-144   -32    
160    224    
96     128    
32     128    
-64    128    
48     128    
-64    -48    
48     80     
48     32     
-48    192    
-144   16     
64     64     
-784   -2816  
1008   1920   
-1376  208    
-96    -80    
544    -752   
208    -160   
-288   272    
16     288    
-64    240    
480    -304   
-272   96     
-192   32     
288    864    
-208   -32    
208    -32    
-256   -64    
304    352    
16     128    
-160   -320   
64     -240   
-64    16     
48     224    
-160   48     
224    224    
-128   -112   
320    128    
-176   -32    
256    -192   
-224   224    
528    240    
-272   -144   
0      -32    
128    176    
-96    80     
128    128    
32     208    
0      128    
48     48     
-16    192    
32     32     
-16    -144   
-112   128    
144    -416   
160    80     
-64    -272   
0      96     
128    112    
160    96     
-272   -96    
112    80     
-48    -32    
112    96     
-128   80     
208    64     
-80    16     
80     64     
64     496    
-176   -128   
240    304    
32     -368   
-16    -144   
80     192    
80     144    
-96    288    
48     64     
48     -16    
80     32     
16     96     
80     80     
-80    96     
48     80     
64     96     
32     -80    
48     80     
32     48     
128    192    
-112   -32    
192    144    
192    96     
48     192    
240    16     
-144   -16    
32     -256   
16     176    
0      -128   
128    144    
48     16     
224    288    
-112   592    
-32    -176   
-80    -192   
160    -560   
112    176    
32     320    
-80    128    
-16    -128   
192    176    
-32    -96    
80     160    
-160   -96    
224    144    
0      112    
32     -272   
-48    -32    
128    -320   
80     -16    
80     -1024  
-16    80     
144    -112   
-32    96     
-48    -16    
80     128    
48     112    
160    144    
-64    128    
0      0      
-32    -80    
112    48     
32     144    
80     -272   
-32    80     
96     -160   
224    160    
-176   -448   
-16    112    
80     128    
160    160    
-48    -32    
128    64     
64     -16    
48     -352   
32     224    
80     -160   
48     160    
144    32     
-176   80     
112    -320   
48     96     
-16    -144   
-96    64     
0      -80    
64     16     
160    208    
-80    -64    
80     -64    
-176   -496   
224    -144   
240    80     
-64    160    
32     128    
-48    48     
0      -144   
192    112    
-16    64     
64     0      
-80    448    
-16    -1440  
496    528    
-400   192    
144    256    
-304   -112   
112    -240   
112    -64    
112    0      
-160   -32    
224    16     
-64    48     
64     112    
-32    160    
192    -1232  
96     32     
16     -384   
448    -384   
-656   64     
-64    -336   
96     -224   
272    -352   
80     -16    
-32    240    
-64    16     
-16    48     
96     32     
80     192    
0      -64    
0      -528   
96     16     
64     -160   
112    -128   
-288   16     
16     -96    
80     -272   
112    -272   
256    -32    
0      144    
64     32     
0      336    
176    -208   
-448   1504   
-2128  -1344  
1312   784    
480    800    
96     -96    
-336   -320   
-1152  -496   
976    96     
256    704    
288    176    
-240   -160   
-112   -288   
224    80     
192    -1280  
-256   -208   
64     16     
144    144    
112    192    
-48    96     
-16    -160   
-16    -160   
-240   -80    
176    -16    
-736   -32    
128    -48    
-16    -160   
-96    -128   
112    0      
-64    -992   
160    16     
-144   0      
208    128    
-16    -16    
64     -64    
-16    -32    
224    288    
-288   112    
192    -144   
-432   64     
112    -64    
-784   64     
-64    -96    
0      0      
160    160    
-64    128    
80     -1008  
-48    48     
80     112    
112    -144   
48     16     
-96    -80    
144    96     
16     160    
-176   32     
176    -208   
16     32     
176    48     
128    128    
80     -176   
-64    48     
128    -736   
-32    96     
-16    48     
64     -32    
-208   16     
208    -240   
-480   -128   
112    -192   
-368   16     
64     -48    
-144   -32    
80     -80    
-816   16     
48     -656   
-96    96     
-80    0      
-80    32     
-32    -80    
128    -96    
-160   96     
-224   0      
-32    0      
192    112    
-320   64     
176    240    
-352   -432   
416    -144   
-224   -32    
240    -112   
-16    96     
96     64     
-32    -112   
-112   80     
-48    -96    
-16    -16    
208    224    
-256   80     
208    64     
0      96     
-48    -192   
16     -16    
16     -64    
80     128    
-128   32     
96     32     
-960   -352   
-352   -16    
-64    32     
-464   0      
-192   -16    
128    80     
-16    16     
-16    -64    
-224   -80    
160    32     
64     112    
-640   -48    
64     96     
-336   -160   
112    -32    
-208   32     
96     112    
112    144    
-32    224    
-32    -80    
-176   240    
-144   128    
528    128    
-240   0      
-64    -32    
-16    128    
192    192    
112    448    
-176   80     
-96    176    
-48    -128   
-160   -32    
160    80     
32     96     
32     64     
-320   -32    
-176   144    
-576   -16    
208    208    
48     16     
-208   -64    
-128   -368   
64     128    
48     0      
-16    0      
0      112    
-128   -16    
32     112    
-48    -144   
-16    48     
-224   128    
64     352    
-160   176    
-64    -80    
-368   -96    
48     80     
-144   -224   
112    144    
64     -32    
-64    16     
-144   32     
16     -80    
-112   -16    
32     80     
-32    64     
-96    96     
64     32     
-112   224    
-80    -16    
-752   -96    
128    96     
-96    -16    
64     192    
64     80     
-48    368    
-256   -192   
-256   -16    
224    80     
-176   32     
-160   -16    
0      -272   
96     16     
-48    0      
-192   112    
-144   -64    
112    160    
32     0      
-96    176    
-16    -144   
-112   96     
32     112    
-480   1024   
-448   1856   
-928   800    
-96    -208   
-304   -672   
96     -48    
160    528    
-64    560    
0      32     
-80    -160   
-1440  -640   
320    16     
144    80     
0      64     
16     288    
0      64     
-16    -16    
-48    32     
0      -48    
240    48     
-160   -32    
-32    48     
0      160    
0      -144   
32     80     
-144   -224   
-48    16     
96     608    
336    416    
-400   -48    
16     64     
96     16     
16     -64    
-224   16     
96     96     
-208   224    
192    128    
-160   208    
-192   -528   
32     -128   
208    272    
-48    144    
-32    96     
16     80     
-16    16     
-16    16     
32     144    
48     112    
144    144    
-64    32     
-128   -16    
-80    -32    
-64    64     
-144   144    
80     96     
48     128    
16     64     
224    448    
-576   -560   
496    -48    
-48    -176   
352    32     
-112   208    
64     -64    
-96    128    
144    64     
-48    80     
48     176    
64     32     
16     64     
0      32     
-48    64     
64     80     
-64    48     
-32    208    
0      160    
144    272    
-128   -208   
192    -112   
-144   0      
240    224    
-176   224    
128    288    
-192   128    
48     -48    
32     64     
224    416    
-144   384    
-32    -160   
32     16     
96     80     
-64    112    
-112   0      
0      128    
64     48     
32     160    
-144   -80    
80     160    
16     32     
112    256    
-48    32     
80     128    
0      16     
96     80     
-64    32     
128    112    
-48    80     
96     80     
0      160    
-64    -16    
96     112    
-64    -48    
80     192    
16     96     
48     176    
32     64     
80     224    
-96    -176   
64     176    
64     16     
128    160    
-64    48     
128    160    
0      176    
0      -32    
32     -48    
-64    176    
96     -176   
128    432    
-16    -48    
80     16     
-128   64     
64     -112   
48     160    
288    240    
-336   240    
16     272    
64     -144   
-112   -144   
-16    208    
256    112    
-48    -16    
-16    -528   
144    336    
128    -1856  
144    416    
-144   128    
64     -96    
-16    144    
32     112    
-32    48     
48     80     
32     -112   
144    64     
-48    160    
-48    32     
48     64     
112    -992   
-80    32     
400    -96    
-112   240    
-144   0      
160    208    
16     176    
144    64     
-256   -160   
160    -240   
176    368    
-64    80     
48     96     
-48    128    
144    -192   
96     -96    
128    432    
-16    -112   
-96    128    
96     496    
-32    -96    
-48    -48    
-48    80     
112    -176   
96     128    
64     96     
-64    224    
-240   -176   
224    -96    
16     144    
48     -48    
-16    160    
-32    -192   
48     80     
64     -2032  
192    128    
0      224    
96     208    
-16    112    
0      128    
-944   -1504  
480    1056   
-784   112    
704    64     
624    992    
-416   -688   
432    1136   
-128   -304   
512    160    
-208   -400   
496    368    
-176   80     
192    224    
-272   -48    
304    16     
-176   96     
192    96     
-16    288    
144    -112   
16     96     
-16    -352   
96     288    
32     -368   
144    224    
-32    -128   
160    128    
-80    -304   
0      176    
32     -128   
80     208    
-48    0      
96     160    
80     48     
-64    -368   
176    80     
-80    -400   
240    64     
-16    16     
128    48     
32     -448   
-96    32     
144    -1056  
96     128    
32     48     
-48    48     
32     -16    
160    -32    
48     96     
144    0      
-176   112    
160    112    
16     32     
96     -176   
32     96     
16     -112   
0      48     
192    48     
-96    -480   
80     96     
96     -480   
-16    32     
-176   -192   
64     -432   
80     -16    
-64    -256   
48     -112   
128    144    
32     -272   
112    224    
-208   -80    
128    48     
48     -128   
160    -592   
-80    144    
144    -896   
96     256    
-432   176    
336    128    
80     -112   
176    -464   
16     112    
-128   -800   
400    192    
-336   -16    
224    -144   
176    -32    
-192   -32    
400    -112   
-224   16     
176    32     
0      -32    
-48    160    
32     -272   
112    -144   
112    -256   
176    288    
-96    -128   
112    16     
112    160    
16     -112   
176    -144   
-112   32     
16     0      
208    240    
-208   0      
144    -208   
-368   -336   
192    -176   
-272   -96    
0      -176   
192    48     
0      -128   
-80    -32    
144    -2000  
-432   -128   
-16    -224   
128    176    
176    272    
-96    0      
-208   -288   
128    -80    
-208   -16    
176    -80    
-96    48     
-176   -128   
272    240    
-144   -16    
432    -16    
-160   -352   
32     160    
0      -544   
16     112    
64     -48    
-64    -224   
-16    -16    
176    -48    
-144   -128   
32     -144   
-240   240    
48     -96    
-64    0      
208    -480   
0      48     
32     -176   
48     144    
160    -544   
48     240    
0      304    
-96    -288   
-112   96     
96     -80    
32     144    
32     -112   
-896   -304   
80     -80    
-272   192    
-144   -32    
128    0      
-32    -112   
144    96     
48     -464   
-48    160    
-160   0      
64     -176   
208    192    
-400   -512   
-416   -128   
-48    112    
32     16     
112    64     
-64    0      
96     -32    
80     64     
64     -256   
80     64     
96     -96    
32     128    
48     304    
-48    -48    
-64    -64    
144    -96    
0      -16    
48     96     
-112   64     
-48    -96    
192    128    
192    -64    
-208   16     
-80    -64    
80     80     
144    -192   
64     96     
-272   -32    
96     -144   
-176   176    
240    -144   
-144   64     
2096   -1312  
-944   -1120  
1296   1392   
-272   576    
208    -160   
-224   816    
-912   -112   
368    576    
-480   -272   
-208   -496   
-416   96     
-464   144    
-128   96     
-480   64     
-192   -160   
176    -80    
-208   96     
64     -48    
-240   -48    
-112   -112   
288    288    
-192   -144   
192    192    
-208   192    
-112   112    
-256   160    
-16    96     
144    560    
-144   112    
-544   -480   
192    -336   
48     32     
-112   160    
-16    160    
64     192    
16     288    
256    384    
-240   32     
-48    -80    
-160   -112   
-64    352    
-16    -64    
32     96     
-112   0      
-160   32     
-432   32     
-64    -48    
-240   -416   
-432   -448   
256    -16    
-240   144    
-16    48     
-112   -16    
336    48     
32     160    
-32    144    
-16    144    
176    720    
-80    -256   
-48    224    
0      -64    
-64    112    
-1296  176    
-208   208    
-96    -16    
64     0      
64     -32    
-96    176    
96     96     
-96    112    
-48    80     
-80    16     
80     192    
-64    64     
16     112    
-256   -256   
-32    -64    
-672   -80    
128    160    
144    48     
-112   272    
32     -16    
-64    240    
-64    -96    
16     48     
-128   -32    
176    80     
-144   208    
-112   -128   
0      48     
-128   -80    
80     160    
-480   -80    
96     112    
48     176    
-80    -304   
192    96     
-304   192    
288    176    
-16    240    
-144   -16    
160    -80    
-80    0      
48     96     
-80    -64    
-224   32     
16     80     
-64    -192   
-32    -96    
-224   -48    
-80    112    
48     32     
-96    32     
-48    96     
96     32     
-16    32     
32     352    
-32    16     
-128   -16    
304    -272   
-144   32     
48     192    
-192   -160   
32     320    
-496   -64    
96     160    
-16    96     
-64    -16    
352    144    
-384   32     
48     64     
192    176    
32     0      
-192   160    
64     16     
-240   -160   
112    -112   
-144   -80    
80     288    
80     224    
-48    96     
208    32     
-144   176    
112    112    
-96    224    
288    176    
-272   -32    
96     -80    
16     16     
-32    -48    
-16    32     
16     224    
-80    80     
80     -64    
-48    112    
64     96     
-64    0      
0      -176   
112    -80    
16     80     
144    -80    
-16    48     
128    64     
32     128    
-128   128    
-16    96     
240    432    
-272   -16    
32     -16    
80     64     
-48    0      
64     0      
-160   112    
-96    0      
64     80     
0      64     
0      -48    
-368   320    
-208   -192   
208    80     
16     -64    
160    224    
-176   32     
176    16     
96     16     
0      160    
16     208    
-32    16     
80     64     
48     48     
-32    64     
144    112    
96     160    
-240   160    
32     176    
80     -160   
144    -32    
-688   1008   
-320   -848   
-96    384    
224    256    
96     -128   
-80    -544   
304    448    
-144   -192   
400    352    
-400   -352   
528    192    
-352   384    
96     -80    
-416   448    
560    -720   
-240   368    
80     -176   
64     416    
-32    -112   
-48    112    
16     -128   
48     304    
16     -80    
192    144    
-192   -176   
128    32     
-272   96     
480    288    
-256   -144   
-16    -192   
144    160    
48     -1296  
32     272    
64     -80    
16     224    
176    -144   
112    320    
144    64     
-32    0      
-112   80     
176    160    
-32    -64    
48     208    
0      32     
32     -112   
32     64     
48     -1808  
16     32     
192    160    
-192   32     
208    32     
64     224    
-16    48     
160    80     
-208   -128   
192    208    
-32    48     
48     64     
192    272    
-192   -448   
272    48     
-48    -880   
-144   -32    
224    208    
-128   112    
48     80     
112    96     
32     -352   
160    96     
-144   144    
96     128    
16     -48    
48     -112   
32     320    
80     -272   
240    432    
128    384    
288    32     
160    -2320  
-32    160    
-80    -256   
144    48     
-128   -208   
336    -64    
-80    32     
48     240    
-192   128    
272    96     
64     80     
96     -32    
-16    -64    
-16    -144   
32     96     
-80    -208   
64     96     
-64    -576   
112    32     
96     192    
32     48     
-64    -64    
80     320    
128    112    
32     -96    
-96    48     
128    -80    
128    240    
64     -192   
-176   32     
32     -240   
80     48     
48     -400   
16     160    
-16    -16    
112    192    
-32    144    
160    160    
16     96     
-64    -48    
208    192    
-16    -480   
64     -96    
16     48     
32     112    
256    160    
-160   112    
176    -304   
-176   80     
240    368    
0      64     
48     -16    
-32    -272   
96     32     
64     0      
48     96     
96     -96    
-96    -80    
64     -400   
144    224    
48     -96    
-80    16     
160    -160   
112    128    
-80    96     
176    -672   
-64    32     
112    -160   
-176   -2256  
192    128    
80     272    
48     0      
128    16     
-32    -144   
128    80     
-240   -720   
384    544    
80     288    
64     -528   
224    80     
16     -528   
160    -528   
-1824  -176   
128    -256   
128    -48    
-64    16     
-112   208    
-16    320    
-16    -480   
352    96     
-16    -64    
-16    -368   
80     64     
32     -192   
96     -16    
0      48     
16     -304   
80     80     
-224   -128   
240    0      
-48    -112   
80     -80    
-32    -1328  
128    -96    
0      128    
32     -96    
144    208    
-16    0      
96     16     
-80    -16    
112    -48    
64     0      
-176   -96    
0      -32    
-432   0      
192    -576   
-16    0      
272    32     
-1424  144    
448    304    
-272   -1232  
1232   -384   
-512   -192   
304    -128   
-304   672    
336    -416   
304    384    
-544   -144   
272    -112   
-1440  160    
624    -80    
32     32     
48     -144   
-160   304    
224    -832   
-176   528    
-128   -464   
176    144    
-256   -336   
112    384    
-288   224    
-16    -224   
128    -480   
0      0      
-80    -32    
-128   -512   
-416   -208   
240    -96    
272    -32    
-80    -320   
128    160    
-96    192    
208    176    
96     192    
-16    -48    
-288   0      
96     16     
176    0      
-16    -192   
-176   48     
368    16     
-992   16     
-80    -224   
-480   -176   
128    -464   
96     -64    
-352   -848   
48     -80    
32     -48    
-96    -112   
0      48     
96     -16    
-160   112    
48     32     
-128   736    
80     496    
128    -32    
-176   -192   
336    80     
-80    -272   
-144   0      
80     -496   
-128   -128   
144    96     
16     -64    
-64    48     
16     -144   
-48    96     
224    -128   
-128   16     
-112   112    
0      32     
48     -160   
-192   -192   
432    -272   
-48    160    
-208   -352   
-64    -48    
64     160    
96     -48    
-208   -240   
32     16     
-112   -96    
112    16     
-176   448    
-80    -112   
-128   -144   
192    -160   
48     48     
-16    -160   
64     160    
-800   -192   
-400   -176   
-16    -112   
-832   128    
128    272    
-160   -272   
32     -96    
192    176    
176    288    
-192   128    
-96    16     
-80    -256   
224    96     
-560   -400   
272    208    
-240   -48    
192    144    
-112   160    
-384   -192   
16     -32    
-768   64     
112    0      
-80    96     
-144   -352   
224    112    
160    112    
-176   304    
-96    192    
96     16     
0      96     
-64    32     
-208   304    
-64    96     
-64    96     
-208   -48    
-48    -96    
-128   -32    
-496   -112   
-144   0      
-16    -96    
48     -16    
96     -144   
-176   16     
16     -208   
-80    192    
128    -80    
-48    48     
-176   32     
176    160    
-48    -256   
-240   16     
-192   -80    
-208   112    
-80    -32    
-528   96     
176    -80    
-48    -64    
16     80     
16     -48    
-48    -32    
16     -112   
-16    176    
64     80     
-112   -96    
0      192    
-288   -80    
128    64     
-128   48     
224    176    
-784   -32    
-80    112    
112    80     
-176   144    
-32    -32    
32     -96    
64     -16    
64     -16    
-48    96     
-112   224    
-144   224    
-240   -80    
240    48     
112    -32    
-80    -16    
-304   -80    
-144   192    
-16    -32    
128    48     
64     336    
-176   0      
-32    144    
-16    -112   
48     -48    
112    32     
-48    -64    
112    64     
-96    176    
-128   96     
-16    16     
96     160    
-272   32     
416    -160   
-192   128    
-32    0      
-1040  800    
416    -288   
-160   64     
304    0      
128    848    
-304   -688   
304    912    
208    -368   
-304   112    
-112   -256   
224    400    
0      -64    
-1184  48     
128    -32    
0      0      
-112   48     
176    32     
-64    176    
-16    -64    
-112   80     
112    -160   
-288   272    
112    -96    
-144   192    
160    -128   
-320   112    
96     -160   
-96    176    
96     -32    
80     288    
16     -16    
-16    144    
16     -16    
0      112    
32     48     
160    32     
-112   -96    
240    256    
-176   32     
128    112    
-96    -32    
16     128    
128    144    
-112   -48    
32     0      
-64    -32    
128    176    
-112   -128   
112    176    
-224   48     
320    80     
-240   96     
144    48     
-96    -48    
-80    96     
-96    -80    
16     144    
-64    112    
144    144    
-80    80     
64     112    
80     128    
-144   32     
80     -96    
-32    80     
-80    32     
-128   0      
32     128    
-144   -112   
128    80     
-192   16     
144    192    
-80    112    
16     -16    
64     144    
-144   -80    
160    -16    
-160   368    
-16    112    
32     -80    
32     160    
-112   64     
144    512    
-160   48     
64     -128   
176    112    
-80    -16    
208    96     
32     544    
-80    16     
-160   -256   
288    112    
16     144    
48     128    
16     176    
-32    144    
80     64     
0      208    
64     112    
96     0      
-48    48     
144    176    
48     272    
-16    32     
80     224    
-32    -80    
-64    128    
-32    -208   
-144   -128   
-64    0      
112    112    
0      64     
96     128    
-208   -272   
80     -80    
-48    64     
48     -80    
112    176    
160    464    
32     112    
64     256    
-16    32     
96     96     
32     112    
64     192    
48     320    
16     0      
-128   -48    
0      0      
80     64     
32     80     
144    128    
64     144    
-64    96     
-144   48     
192    32     
-176   112    
160    112    
-160   32     
32     -272   
48     32     
-48    144    
176    112    
-32    160    
48     -224   
80     96     
-32    -1264  
48     160    
0      32     
64     80     
-32    96     
96     176    
32     80     
112    208    
-224   -128   
192    224    
-192   -48    
208    0      
80     240    
-48    -208   
64     240    
-112   -432   
208    96     
80     -400   
0      0      
-32    128    
16     0      
-112   -128   
224    80     
64     128    
-48    -16    
32     64     
16     -32    
96     176    
-192   -96    
272    48     
-112   0      
240    96     
-144   -32    
64     32     
144    96     
-16    128    
160    64     
-48    96     
224    48     
-16    272    
-192   -64    
-112   -240   
208    208    
96     -48    
-96    48     
112    -272   
144    224    
-80    -544   
64     256    
176    -208   
128    208    
400    1648   
464    560    
-400   -864   
-512   -192   
-240   -336   
496    80     
-128   -400   
128    464    
-336   48     
304    -192   
112    -192   
-240   -144   
192    -224   
160    368    
128    32     
-96    208    
-304   -368   
96     96     
-96    192    
112    -48    
-112   -448   
432    352    
-32    -208   
128    32     
112    -48    
16     112    
-240   -656   
208    672    
208    224    
16     320    
112    -112   
-96    192    
0      -96    
144    -48    
80     -496   
64     -320   
208    256    
-48    -176   
32     64     
-144   -400   
80     48     
112    0      
176    -208   
-64    -320   
96     -2144  
176    224    
-160   -240   
176    288    
-80    -16    
176    -736   
-16    -208   
16     -976   
48     -16    
128    -208   
96     32     
96     160    
16     -128   
-80    -736   
48     -16    
32     -160   
144    176    
0      -112   
176    -368   
-224   80     
-32    -480   
96     16     
32     -112   
48     48     
240    -864   
-128   64     
176    -16    
112    16     
0      -208   
192    48     
-112   48     
128    64     
-144   -112   
32     -288   
-80    -64    
176    32     
-32    32     
176    -400   
-32    -112   
288    -816   
208    0      
-160   240    
144    208    
-128   16     
16     16     
80     -256   
-96    48     
-16    48     
-16    96     
64     -16    
0      -48    
-1392  -96    
64     -64    
48     -144   
-16    -176   
-112   -176   
160    -208   
144    192    
-16    -224   
-16    64     
80     -48    
80     -64    
48     32     
160    256    
-96    32     
-32    -208   
-576   -64    
48     -320   
144    160    
-160   -48    
0      160    
-48    -992   
128    -48    
32     80     
-96    -160   
-32    80     
64     80     
96     288    
32     -64    
-240   -64    
-32    32     
-48    16     
176    16     
-64    -64    
160    -144   
-96    -112   
256    -480   
-144   224    
448    -1280  
-416   -96    
192    80     
96     32     
160    -64    
-64    -128   
-384   16     
240    208    
208    80     
0      0      
-384   192    
16     -192   
48     -192   
80     -16    
-64    160    
224    -288   
0      96     
-16    32     
128    -96    
-272   -48    
80     48     
0      48     
0      16     
-16    32     
-64    -272   
0      -192   
0      0      
-64    192    
16     -272   
96     96     
0      -288   
208    176    
-320   -96    
192    -400   
64     0      
96     192    
-192   -48    
64     -80    
-96    112    
-64    -224   
80     144    
-64    -32    
-48    64     
112    -400   
-16    64     
256    -784   
80     64     
16     240    
-112   32     
-128   -80    
256    160    
-160   16     
112    0      
-16    80     
32     32     
-16    32     
-592   -112   
176    48     
-960   -192   
-48    32     
128    80     
0      -32    
16     160    
-400   0      
-480   656    
-2128  -1104  
96     -256   
-176   1584   
-400   -576   
64     384    
32     -464   
-704   176    
112    -320   
64     608    
16     -560   
-96    480    
48     -672   
160    688    
-512   -480   
16     304    
-272   -208   
16     144    
-48    -208   
96     112    
-432   -96    
-80    0      
-320   176    
400    -64    
-304   16     
128    -288   
-224   272    
48     -80    
-64    192    
16     64     
-32    144    
-80    -16    
-48    192    
-592   16     
-16    32     
-208   -128   
-32    112    
-16    -160   
80     160    
-64    -80    
16     -48    
-112   128    
-48    80     
80     144    
-80    0      
16     32     
-80    96     
-48    -48    
0      48     
-192   80     
-144   -64    
-32    64     
16     0      
80     96     
-16    -224   
-144   48     
-48    48     
0      64     
48     112    
-112   -192   
0      -16    
-48    80     
-160   160    
-240   -16    
16     -32    
-496   -96    
128    144    
-48    -160   
16     112    
32     192    
-48    48     
48     64     
-32    -16    
-112   -80    
64     32     
-96    192    
80     432    
-128   160    
256    128    
64     256    
-32    0      
96     0      
-160   -112   
0      144    
176    192    
-32    64     
64     80     
-128   -16    
112    -16    
-16    112    
0      64     
48     80     
48     256    
-192   -176   
32     64     
32     144    
160    496    
-1312  0      
144    -128   
32     32     
80     144    
-16    96     
-128   128    
64     32     
-16    80     
-16    -80    
-80    -16    
64     272    
-160   96     
32     32     
-80    32     
80     192    
80     112    
-144   32     
64     48     
16     80     
48     64     
32     160    
32     16     
80     96     
-96    192    
48     -48    
0      16     
48     208    
224    160    
-64    -32    
-48    608    
80     -128   
144    64     
-224   96     
208    -64    
-16    64     
-48    48     
48     128    
-96    0      
48     160    
-160   16     
304    240    
-192   64     
240    80     
-416   -48    
112    64     
32     64     
80     16     
32     144    
-48    -96    
240    0      
-96    176    
32     176    
-64    -48    
112    144    
-16    16     
-96    -80    
-288   -80    
304    112    
-240   -16    
256    208    
-256   96     
384    -48    
-48    288    
0      -48    
0      80     
-128   80     
320    64     
-144   144    
352    -304   
-16    256    
-304   80     
176    -144   
-192   192    
384    -32    
-32    64     
32     208    
-32    16     
-16    112    
0      -16    
192    144    
-80    80     
128    96     
-80    64     
-48    192    
-224   -80    
80     96     
288    160    
-208   -64    
224    -208   
96     416    
-32    96     
-64    -16    
16     112    
96     144    
32     -112   
-64    192    
160    304    
-192   80     
0      16     
-128   -96    
2768   -1152  
-816   -384   
656    624    
-432   416    
992    -560   
-528   -48    
16     -128   
480    -480   
-176   240    
400    -112   
-32    384    
256    0      
336    144    
-368   -32    
304    224    
64     112    
-80    -272   
-176   -512   
496    64     
-224   48     
176    96     
160    128    
-112   -128   
160    272    
112    0      
48     240    
32     80     
-48    -48    
80     48     
0      -64    
64     64     
16     160    
-16    -192   
224    224    
-64    -704   
112    112    
-144   -80    
64     176    
16     48     
224    64     
-128   224    
80     64     
-96    -672   
80     144    
64     32     
0      144    
16     64     
-128   -240   
368    160    
-160   0      
208    0      
-128   -240   
96     -16    
240    144    
-240   192    
272    16     
-208   16     
176    -96    
32     176    
-48    -80    
80     176    
16     80     
-16    -16    
32     160    
32     -352   
48     64     
16     -16    
96     96     
96     -128   
-96    64     
80     -32    
128    192    
-160   96     
160    112    
-32    96     
80     0      
96     -80    
32     -384   
128    112    
-64    -144   
80     176    
48     -272   
64     -32    
96     -2416  
48     384    
-336   -48    
160    -80    
112    128    
-144   80     
176    96     
-80    -80    
96     -32    
176    80     
-144   0      
272    -144   
-160   -16    
224    -752   
-16    80     
32     -656   
-16    48     
96     80     
96     112    
144    64     
-96    128    
176    144    
-32    -144   
80     112    
48     -400   
0      96     
-32    -176   
112    48     
0      -64    
64     240    
-32    -144   
192    160    
-176   176    
432    224    
-176   112    
-64    -272   
112    128    
-112   -32    
368    64     
-112   -32    
-160   48     
272    -80    
32     192    
144    32     
112    384    
48     -528   
48     -48    
-208   -80    
176    -1600  
-192   96     
160    -112   
272    96     
-256   -208   
208    -704   
-32    -304   
-64    80     
144    -112   
160    112    
-96    -16    
176    -16    
-16    160    
64     -288   
-112   272    
160    -416   
64     -64    
-288   48     
144    -624   
48     -16    
48     -288   
96     80     
80     -128   
16     -16    
32     144    
208    -480   
-32    -512   
-144   192    
96     16     
-16    -16    
256    -160   
48     -192   
-848   -256   
-80    0      
128    -64    
-80    -208   
-16    -288   
-80    16     
-48    -96    
0      -352   
-80    -176   
384    16     
-192   144    
16     -160   
64     288    
-80    -16    
192    -144   
0      0      
80     0      
176    48     
48     144    
-96    -160   
-48    -384   
128    -128   
80     -320   
224    80     
80     -48    
-16    256    
32     -80    
-48    128    
-16    -16    
160    -368   
0      160    
-80    224    
-464   208    
-464   848    
16     1568   
400    432    
-1056  -208   
-496   -1520  
784    608    
-272   -976   
208    1488   
-448   -112   
432    -96    
-656   -416   
480    -64    
-16    -32    
48     -176   
-432   -48    
80     -176   
-352   -16    
160    112    
16     96     
-64    -688   
32     32     
32     -3184  
-32    176    
80     -96    
16     80     
-32    16     
64     -48    
-288   -32    
80     -80    
-288   -64    
176    176    
-112   80     
96     272    
-160   16     
48     -192   
-80    96     
144    -288   
16     48     
112    128    
64     0      
-80    80     
-32    -80    
-288   0      
0      16     
80     32     
32     -48    
-48    48     
-96    -96    
64     0      
96     -224   
-32    48     
176    -32    
32     128    
-448   -112   
96     -64    
-96    32     
-16    -80    
0      48     
96     64     
-128   -352   
192    208    
-176   64     
16     -64    
-32    64     
-48    -288   
32     96     
176    -48    
-16    -112   
-64    -80    
224    -32    
-128   80     
64     96     
-96    16     
128    64     
-176   16     
0      32     
-224   -400   
112    -240   
-256   -48    
-1376  -480   
352    32     
-496   -256   
-224   -16    
64     368    
-320   112    
-16    -64    
176    -48    
-64    80     
80     0      
-64    16     
64     -32    
64     32     
-112   64     
-48    128    
-240   -256   
48     48     
48     48     
-272   16     
-64    64     
-528   -32    
-112   -32    
-992   -80    
-64    16     
112    -64    
16     96     
32     -16    
32     144    
-448   -304   
0      -128   
-32    -160   
-32    96     
64     32     
-144   48     
80     96     
32     48     
-160   0      
48     224    
-96    -96    
-224   112    
-96    48     
-64    -16    
-32    16     
-160   -128   
192    208    
-64    64     
144    64     
16     608    
-208   16     
32     -64    
-176   80     
112    -48    
80     128    
-208   112    
-240   -80    
-48    128    
-272   -112   
64     368    
64     -368   
224    336    
-272   -192   
112    -48    
-192   128    
0      -64    
16     80     
-144   48     
144    128    
-160   -96    
48     112    
-416   -16    
-80    32     
-384   -112   
176    192    
-64    32     
16     96     
-64    -144   
272    96     
-224   16     
240    320    
-496   192    
192    -144   
-64    -16    
144    64     
16     64     
-224   128    
32     80     
352    96     
-448   128    
64     -208   
64     176    
96     112    
-16    0      
-112   144    
-16    320    
-96    -224   
224    112    
-208   224    
16     -128   
224    -144   
64     208    
-128   160    
-448   -256   
-112   144    
-256   -96    
-48    -224   
128    32     
208    64     
160    -64    
-128   240    
16     -32    
-96    128    
32     48     
-64    176    
-96    0      
-240   80     
-32    -96    
-160   -80    
80     112    
-640   -1808  
800    640    
-176   -720   
320    -384   
-48    880    
-832   -656   
896    1248   
128    1024   
-368   -496   
-128   32     
-176   -176   
-128   144    
160    -48    
-144   -192   
176    128    
112    160    
-32    176    
-96    160    
-80    -48    
224    192    
-80    80     
16     176    
-112   64     
80     176    
-368   -96    
224    48     
-208   128    
192    80     
-128   -192   
-48    -16    
144    80     
64     144    
-80    96     
-32    32     
16     48     
0      -128   
128    -80    
-128   -80    
80     256    
-16    -112   
-16    144    
-80    32     
160    176    
-224   -160   
48     0      
-64    80     
160    128    
-112   -144   
256    368    
-272   64     
352    32     
-176   96     
128    48     
32     128    
-32    16     
112    48     
-160   128    
-16    0      
176    128    
-224   64     
192    0      
48     160    
0      96     
64     -64    
32     144    
-80    112    
160    32     
176    64     
128    192    
-176   80     
-16    96     
-48    -96    
176    160    
-112   176    
64     48     
80     176    
-48    32     
160    -16    
-32    16     
64     32     
0      224    
-144   128    
144    -96    
32     -48    
-96    -96    
32     208    
-48    288    
64     -304   
176    192    
-144   96     
112    64     
-32    16     
128    208    
-48    64     
-48    -144   
240    96     
32     144    
-32    64     
80     112    
-160   -64    
320    224    
-176   80     
128    -16    
-48    96     
32     -32    
32     144    
48     0      
80     320    
48     32     
128    32     
-96    48     
16     112    
0      80     
16     -16    
-16    -16    
32     48     
32     128    
-32    -160   
16     192    
96     -2112  
-80    16     
-160   -16    
272    96     
-16    -32    
160    272    
-160   192    
400    416    
-128   160    
176    16     
-176   -64    
64     80     
64     32     
-128   -304   
0      0      
224    -192   
-32    144    
-48    48     
176    16     
-176   96     
16     128    
32     240    
112    0      
-32    -240   
0      32     
-144   48     
64     0      
-144   -48    
192    -80    
-64    96     
112    -144   
112    32     
0      -1952  
-80    128    
-16    -336   
224    80     
-192   -48    
208    0      
-96    -16    
0      208    
96     -80    
16     16     
96     64     
32     -144   
-16    -48    
112    -80    
-112   16     
0      -736   
144    144    
192    -144   
-32    144    
-80    16     
48     144    
-80    -208   
80     80     
-16    64     
64     0      
-32    80     
144    -288   
32     176    
64     -304   
32     80     
48     -448   
48     128    
64     -1664  
16     48     
0      144    
192    80     
48     48     
16     160    
16     144    
80     -336   
16     128    
-32    -64    
48     64     
16     16     
80     16     
0      -176   
1504   -2448  
-80    240    
1232   784    
-400   -96    
80     272    
-144   656    
-208   -752   
-48    -416   
176    -320   
-320   -160   
352    -48    
-336   240    
192    -336   
-48    128    
16     -496   
-16    256    
192    -288   
128    480    
-16    208    
-192   16     
112    64     
208    160    
-32    32     
0      32     
16     64     
128    -96    
-48    128    
32     -208   
144    0      
144    48     
-144   32     
128    -176   
112    -672   
-16    -112   
176    -784   
-16    -1280  
208    224    
-192   -112   
240    80     
-32    -1408  
144    -112   
-16    384    
0      -96    
80     160    
16     -16    
32     96     
64     64     
80     -432   
-80    -96    
80     80     
128    0      
-240   128    
-48    -592   
32     -224   
112    -448   
144    48     
-96    -608   
-144   -400   
64     -16    
48     0      
-64    -160   
-160   16     
64     -256   
-32    288    
-32    -192   
-80    192    
-720   -128   
48     -208   
16     -160   
48     160    
64     -32    
48     48     
32     -96    
32     -832   
-16    -128   
160    -160   
-208   -368   
416    -192   
160    240    
64     240    
96     208    
-320   80     
80     -16    
16     -16    
64     32     
80     256    
-240   -448   
64     -144   
96     -144   
-176   -16    
128    128    
-16    256    
64     0      
48     -80    
-224   -64    
96     -64    
32     112    
-32    80     
-224   -112   
112    -80    
160    -160   
48     -80    
0      -64    
128    -48    
32     112    
32     -1376  
96     288    
-128   -272   
304    80     
-288   16     
192    -64    
-112   16     
160    16     
-80    -16    
48     -64    
-496   64     
32     80     
64     0      
-16    -160   
144    256    
0      -224   
16     -32    
-64    -16    
80     -32    
176    112    
0      0      
304    448    
-80    -208   
-48    -96    
-96    80     
-16    112    
176    192    
-832   16     
192    -400   
-64    160    
80     -336   
288    -160   
-192   176    
-32    16     
-96    0      
-48    -96    
32     -80    
144    -224   
-112   128    
16     0      
48     464    
-112   -272   
224    240    
-80    -336   
112    0      
16     -208   
32     -144   
0      32     
208    480    
-544   160    
192    -112   
64     144    
-16    -160   
-48    -32    
-80    0      
96     -16    
16     -96    
80     0      
-32    -32    
32     -32    
-336   -208   
-736   112    
-144   96     
-464   -16    
96     112    
64     144    
-144   96     
80     -144   
-272   -48    
48     -16    
-176   -64    
-48    96     
-48    -128   
-240   144    
96     -160   
-48    416    
-208   -80    
-48    16     
-144   -176   
-80    32     
-576   -304   
-64    192    
128    32     
-96    80     
-32    -32    
16     -80    
80     80     
-32    176    
-32    -144   
-48    208    
176    -176   
-464   592    
-336   624    
-432   176    
-16    -48    
-272   -64    
128    448    
-432   256    
-336   272    
-96    -128   
352    96     
-496   -464   
80     48     
80     224    
-192   -48    
16     32     
16     80     
-96    -48    
-48    16     
-48    16     
-144   16     
16     32     
-80    160    
-80    224    
80     -96    
-160   48     
48     -352   
48     0      
-80    80     
96     80     
16     112    
-288   -128   
0      48     
-176   -16    
-16    112    
-144   16     
-16    32     
-784   -288   
192    48     
-2304  -112   
336    64     
-320   -176   
96     208    
64     96     
0      -16    
48     112    
-160   -64    
128    160    
-176   64     
80     0      
48     96     
-96    -64    
-128   48     
-192   80     
-16    0      
32     64     
0      80     
80     64     
-160   96     
16     32     
64     32     
-16    -16    
48     160    
-16    -16    
16     80     
-144   144    
-80    -96    
48     -112   
80     208    
-272   48     
80     -128   
0      -144   
-208   64     
160    32     
-96    144    
0      176    
-48    32     
80     16     
48     304    
-144   -48    
48     -128   
32     112    
-224   48     
80     -144   
48     -96    
-192   160    
112    -64    
176    256    
-288   176    
368    64     
-224   160    
128    0      
-32    48     
-80    -160   
144    48     
32     32     
96     272    
-144   32     
64     80     
-208   -96    
128    128    
-64    -16    
80     128    
-16    160    
128    192    
-208   64     
144    -16    
-112   64     
288    96     
-112   64     
32     -32    
48     64     
-224   0      
160    160    
-64    112    
96     208    
-96    -32    
-112   128    
-112   -48    
336    48     
-48    160    
-160   96     
208    144    
-384   -64    
192    48     
-80    96     
80     80     
112    272    
-176   112    
-32    48     
-48    0      
128    48     
-16    112    
-80    96     
96     256    
176    208    
-224   80     
208    0      
-112   -128   
-256   -160   
80     112    
80     144    
16     144    
112    128    
-160   -224   
0      48     
160    192    
-80    16     
96     96     
-16    128    
16     96     
48     -64    
-64    48     
16     64     
32     160    
-64    16     
128    128    
-256   -192   
16     -48    
224    368    
-16    144    
16     80     
96     240    
-32    112    
16     -48    
32     320    
32     176    
-80    80     
0      64     
80     -112   
-208   128    
80     112    
-64    -32    
16     32     
176    224    
-272   -64    
0      160    
112    304    
64     -16    
96     -32    
-48    80     
-32    112    
0      128    
96     96     
160    320    
-144   -64    
160    240    
-48    128    
16     -256   
-16    96     
96     -32    
128    80     
112    64     
-48    128    
-160   160    
192    -80    
0      144    
48     112    
-1168  -2720  
1888   3440   
-1632  464    
416    -368   
-848   -816   
-400   -368   
-384   592    
464    832    
128    -144   
-16    -528   
256    208    
-144   160    
64     336    
144    80     
80     -144   
-192   -400   
160    368    
-48    80     
368    512    
-256   64     
0      -800   
16     128    
16     -896   
-16    64     
160    224    
-192   -48    
96     48     
-96    128    
0      96     
160    -80    
16     32     
16     144    
80     64     
32     256    
112    288    
-176   -384   
160    -160   
0      -544   
224    -32    
16     240    
-16    144    
16     64     
176    128    
-16    16     
-64    144    
0      112    
16     48     
0      -112   
128    176    
-160   -96    
208    80     
-256   48     
112    -464   
32     192    
-64    -944   
0      0      
-48    -576   
96     304    
272    464    
-224   0      
192    -240   
128    144    
-32    64     
48     160    
-128   -16    
-32    80     
0      112    
96     -208   
-32    112    
64     0      
96     96     
-32    176    
64     80     
-16    32     
0      32     
96     80     
48     112    
-80    16     
416    -144   
96     64     
288    -48    
-176   304    
-48    -112   
96     0      
128    -128   
64     -48    
144    -96    
-48    80     
0      32     
80     208    
-64    -16    
32     -32    
144    112    
128    -912   
-16    48     
32     -240   
0      80     
224    144    
32     128    
-48    -640   
80     128    
64     -48    
96     64     
-80    48     
-16    64     
224    80     
-128   -304   
192    48     
-144   -208   
192    32     
96     -48    
80     272    
112    -192   
-80    272    
-16    -432   
80     64     
176    304    
32     304    
128    144    
-32    -608   
-16    -736   
16     -240   
16     -2160  
0      -32    
64     -1136  
160    -96    
-96    288    
208    64     
224    320    
-64    32     
80     -672   
64     416    
-96    288    
80     160    
-48    -416   
128    -688   
-1632  32     
368    -64    
-208   224    
112    -432   
96     -64    
-112   -448   
144    -128   
160    288    
-96    -32    
112    -48    
-64    16     
96     208    
-48    -48    
-48    -80    
96     -64    
-96    -64    
32     32     
144    -96    
32     -624   
-96    -144   
32     96     
0      -304   
-144   32     
256    0      
48     48     
-112   -96    
-80    -128   
0      160    
80     -176   
-160   256    
-208   256    
-160   -432   
48     -192   
272    16     
32     -112   
-48    112    
304    -80    
112    -2560  
96     -160   
64     48     
-64    -16    
96     112    
-32    16     
16     -80    
144    -160   
-240   -160   
96     32     
-240   144    
-64    -144   
64     48     
128    -576   
304    0      
16     -736   
96     64     
48     -288   
32     176    
-64    -80    
160    160    
-192   -208   
16     -192   
-144   48     
-832   -496   
-624   48     
176    32     
512    64     
288    -576   
-336   -512   
144    16     
-16    0      
96     -560   
-32    128    
64     -48    
-96    -128   
160    -144   
32     32     
48     0      
-112   -16    
80     -160   
80     64     
-464   0      
144    0      
-64    -64    
-48    -112   
208    80     
-64    -224   
96     32     
-80    0      
0      -288   
16     -48    
32     0      
48     192    
64     -80    
-336   -96    
-32    0      
16     64     
-80    16     
400    64     
-192   -336   
192    48     
-112   -224   
80     -16    
-112   112    
160    -48    
-112   96     
160    -48    
-16    80     
-112   64     
-80    -32    
-64    -272   
288    48     
-128   0      
160    -48    
-32    -96    
32     16     
208    -16    
-96    0      
224    96     
-64    -32    
48     -144   
96     96     
-176   160    
352    -160   
-64    144    
0      80     
-64    -64    
240    -304   
-32    256    
-688   16     
112    0      
-400   -208   
-320   16     
-208   -16    
-1376  16     
-32    -64    
-80    -32    
-32    128    
16     -144   
64     -112   
-144   -176   
-80    -80    
-480   -96    
-112   112    
-192   -144   
16     128    
-144   -32    
320    144    
-192   32     
-112   -112   
32     96     
-624   192    
272    -80    
-144   0      
-32    0      
-272   48     
-64    -32    
-32    -32    
-96    16     
-80    -304   
144    176    
-176   32     
-16    48     
0      16     
-48    112    
-16    48     
-544   240    
-32    -64    
-544   192    
-240   -32    
368    272    
-128   160    
192    -48    
-128   112    
32     -192   
-64    -64    
128    32     
-16    96     
16     256    
-144   32     
-192   48     
-160   -16    
240    112    
-464   48     
208    128    
-672   -96    
-80    -64    
64     48     
0      304    
112    192    
-48    -48    
144    208    
-16    160    
-48    80     
48     240    
0      80     
64     48     
-64    16     
-208   208    
16     -80    
-336   -208   
144    240    
-240   -48    
176    880    
80     208    
-80    -112   
16     0      
-96    160    
-48    48     
96     224    
-224   -224   
112    64     
-48    96     
16     -80    
-32    144    
-528   -48    
0      80     
160    -192   
-208   -176   
176    160    
-240   -352   
-256   -32    
-16    64     
-16    80     
64     176    
-128   -64    
-80    -48    
-64    48     
64     160    
-288   -176   
64     0      
-32    176    
-1632  -64    
-32    112    
48     48     
-32    -16    
64     96     
160    208    
-128   0      
96     32     
0      64     
48     -16    
-48    64     
-32    32     
48     144    
-208   -48    
-96    128    
-736   -256   
208    192    
-32    112    
-32    48     
-32    128    
96     32     
144    80     
-144   -32    
-48    64     
80     -16    
176    224    
-48    -16    
128    -64    
368    2336   
-224   -1488  
-544   -1200  
1056   368    
-224   0      
-576   80     
624    -336   
-880   -224   
256    -352   
-336   64     
224    64     
-128   384    
-208   176    
-80    192    
-160   -240   
-112   128    
-48    80     
480    96     
-480   -208   
128    80     
-80    -272   
176    112    
48     240    
112    256    
-144   32     
240    -112   
-176   384    
112    -32    
80     160    
-32    -48    
160    192    
-112   -112   
80     112    
16     272    
272    160    
-192   64     
-272   -208   
240    112    
64     208    
-80    -32    
80     112    
64     -16    
16     0      
-64    96     
128    288    
-48    112    
-16    -112   
-48    176    
112    64     
64     16     
-16    -144   
144    144    
0      80     
112    32     
-16    80     
48     -48    
288    320    
-128   0      
-160   -96    
208    112    
-64    96     
48     128    
176    32     
96     48     
-176   160    
272    176    
-48    -32    
160    144    
-160   48     
16     144    
32     128    
0      16     
80     304    
-128   64     
-32    -800   
128    96     
-112   -176   
480    208    
320    528    
-80    -272   
-80    208    
176    176    
-32    -16    
192    96     
-128   144    
16     80     
-16    432    
240    240    
-400   -192   
176    -704   
48     144    
96     0      
-48    176    
16     112    
96     256    
-144   -160   
240    48     
16     288    
208    336    
-176   160    
-32    32     
32     -224   
112    16     
48     144    
48     -32    
16     256    
-80    -1664  
-48    -288   
16     -176   
144    32     
96     160    
96     160    
-48    32     
0      144    
-48    -144   
64     0      
0      80     
80     80     
256    0      
-384   -272   
304    144    
64     -288   
-64    144    
32     -64    
144    144    
-176   64     
288    32     
-224   80     
144    80     
48     112    
16     112    
-144   240    
144    -208   
-96    176    
48     -288   
272    32     
-464   -656   
432    80     
-48    -160   
16     48     
32     240    
16     80     
96     64     
-48    96     
176    192    
64     192    
-160   -16    
0      -240   
80     32     
48     -144   
64     16     
-16    -320   
128    48     
64     -288   
16     32     
128    -1712  
32     400    
-128   48     
272    0      
-32    144    
160    96     
-16    176    
-144   112    
160    416    
-160   -288   
256    0      
-32    64     
80     64     
-208   112    
-16    160    
176    -160   
-224   0      
192    96     
160    48     
-48    16     
112    112    
32     96     
80     -624   
112    96     
0      -512   
64     0      
48     -32    
-128   -64    
96     -16    
112    0      
0      -784   
32     80     
16     16     
16     160    
144    -32    
-32    -64    
128    240    
32     -336   
32     288    
-128   -32    
192    64     
-80    128    
1024   272    
752    960    
-80    128    
-496   -256   
-240   -80    
608    112    
-784   -304   
912    400    
-480   -144   
304    -496   
-224   128    
288    -176   
-112   496    
240    -336   
-64    272    
192    -96    
-80    160    
192    -32    
-32    224    
64     -400   
-80    176    
128    -336   
96     -352   
-320   -144   
160    -576   
-160   32     
224    -480   
80     160    
144    -768   
-144   -192   
64     -16    
16     128    
208    -80    
-80    128    
48     -464   
240    352    
32     -272   
0      -16    
-784   -208   
144    -112   
32     -48    
48     160    
96     -224   
-32    -624   
32     -288   
-48    -32    
128    16     
48     -16    
208    96     
-256   -144   
128    48     
-80    48     
-16    -64    
192    64     
-96    -16    
32     -240   
128    -96    
-96    0      
224    -160   
32     48     
48     -768   
-32    32     
0      -96    
64     96     
96     -16    
-32    32     
80     176    
-128   -48    
-368   -48    
-16    -192   
-1424  -64    
48     -32    
80     -32    
48     -176   
112    -32    
96     -688   
-48    -96    
144    -80    
-176   64     
80     16     
64     80     
-160   -272   
96     -336   
-304   -48    
48     -48    
-608   96     
-176   64     
-288   64     
336    -32    
-128   0      
192    -544   
-16    80     
-16    -560   
128    -208   
-128   -160   
256    64     
-96    -48    
80     -96    
64     256    
160    -80    
-128   192    
-112   -192   
-688   -16    
48     -80    
-160   80     
48     -80    
64     192    
48     -496   
-64    96     
80     224    
-32    -672   
0      32     
-32    -16    
176    96     
-112   -112   
-144   176    
-64    -224   
-112   -32    
192    144    
-272   80     
192    -160   
64     112    
-96    -912   
96     128    
-496   -160   
48     96     
-32    224    
192    -304   
-464   -64    
272    16     
-144   192    
48     64     
-16    64     
32     -112   
16     64     
16     -176   
0      96     
192    192    
144    -16    
-16    176    
-48    -96    
32     0      
144    -64    
-176   0      
224    -144   
-304   -80    
64     -16    
-96    -80    
0      -160   
96     32     
-192   -256   
-80    80     
-208   -80    
-368   16     
-80    400    
-992   -320   
112    160    
-176   32     
-208   -128   
-48    -96    
144    32     
112    112    
-272   -128   
-560   -240   
144    16     
-96    16     
-272   -32    
160    -48    
-16    256    
-96    0      
-80    -96    
-160   208    
-688   -96    
96     288    
-64    -80    
288    -64    
-160   80     
96     -16    
-160   48     
16     48     
16     -48    
64     144    
-32    80     
-224   -48    
-32    0      
-240   -16    
48     64     
0      48     
-96    64     
-352   -32    
32     16     
-48    32     
-112   224    
-32    -176   
16     176    
-16    -160   
-560   -864   
-944   16     
272    1120   
-160   512    
416    -32    
432    144    
-784   224    
-912   -368   
16     -128   
-368   -16    
464    144    
-512   -128   
96     80     
224    192    
-288   -496   
-96    128    
-272   80     
64     -160   
-304   304    
144    -192   
-144   448    
-96    -464   
-128   416    
144    -464   
80     496    
-96    -352   
128    320    
-288   -240   
208    400    
-128   -256   
208    240    
32     176    
-16    0      
-128   144    
0      -176   
-256   48     
64     80     
-32    176    
16     288    
-96    -112   
-128   -128   
64     96     
0      -80    
80     -80    
-64    112    
80     80     
-80    80     
-272   48     
288    320    
-16    112    
48     128    
-160   96     
48     -48    
-368   256    
112    -192   
-336   48     
176    352    
-16    272    
-64    48     
224    432    
-288   -240   
-32    -176   
-48    112    
272    224    
-176   240    
-208   -144   
192    -64    
-16    48     
48     480    
-144   16     
-96    -32    
32     -16    
-304   -80    
16     96     
-64    96     
-16    48     
80     -96    
-48    -160   
192    -48    
64     352    
32     224    
16     128    
-16    -256   
16     208    
256    320    
-176   -48    
32     128    
-176   -32    
-64    -448   
368    464    
-64    64     
64     240    
-64    -112   
32     -32    
-96    -64    
-32    -128   
-80    -64    
96     144    
-176   -80    
-16    80     
-304   -16    
128    64     
16     160    
144    64     
-32    -96    
16     -128   
-48    -96    
-224   -304   
256    240    
-144   -112   
-32    208    
16     96     
144    64     
-80    144    
16     -80    
-64    80     
-96    0      
240    96     
-112   0      
16     288    
112    192    
64     144    
-272   -112   
0      -48    
272    -64    
-32    160    
-192   -64    
208    304    
-192   0      
208    96     
-112   64     
272    80     
-192   112    
368    64     
-160   128    
96     32     
-272   160    
224    -48    
32     160    
0      -32    
96     128    
-128   64     
48     -16    
-192   0      
160    176    
32     32     
160    128    
-112   112    
128    128    
-80    64     
64     112    
32     48     
-64    144    
-16    0      
128    96     
-112   16     
144    112    
-16    -96    
144    -80    
96     -1104  
-64    224    
-48    176    
32     -16    
80     48     
96     160    
-112   96     
0      32     
96     -16    
32     -16    
48     112    
-16    144    
0      32     
288    -240   
-96    160    
-160   -80    
-112   0      
64     96     
80     48     
-16    48     
144    32     
-48    192    
-16    16     
144    80     
80     16     
-144   160    
32     80     
-96    128    
288    -16    
-48    -144   
32     -176   
16     160    
-16    208    
-112   16     
320    208    
-192   -32    
144    144    
-80    80     
-848   -2480  
-64    -1152  
224    784    
-112   320    
304    240    
-304   80     
96     496    
-864   -416   
192    608    
368    -1440  
48     320    
-80    -128   
-192   400    
256    -128   
96     192    
0      -112   
96     272    
-160   64     
96     80     
48     16     
80     -32    
-16    192    
80     -208   
-64    96     
112    -848   
-96    96     
240    -640   
-144   288    
144    80     
-176   -96    
128    80     
32     144    
32     32     
-64    176    
64     32     
128    -48    
224    224    
0      80     
-192   -80    
80     -112   
112    96     
96     -368   
16     96     
-16    -64    
64     48     
32     80     
64     192    
96     0      
-96    48     
112    96     
16     -32    
96     48     
-16    0      
112    80     
32     96     
144    128    
0      -16    
-112   -32    
208    -144   
-16    16     
32     0      
48     96     
64     0      
0      112    
80     144    
32     -240   
160    160    
16     32     
144    112    
-64    -544   
-32    48     
48     -432   
16     48     
64     -304   
32     128    
-128   -144   
208    -96    
-16    96     
-208   -96    
128    32     
-48    -192   
-48    80     
432    -240   
0      80     
-144   -208   
176    256    
-80    80     
160    48     
176    -816   
16     176    
-32    176    
16     0      
64     96     
80     -16    
0      112    
288    112    
-256   16     
48     96     
80     -128   
128    80     
96     208    
112    0      
-32    192    
0      -224   
112    -176   
-16    0      
80     -96    
48     192    
208    -64    
80     -2192  
64     -176   
48     -304   
0      -96    
-64    112    
112    -48    
160    448    
-32    -80    
16     -1360  
-112   -80    
208    -112   
-16    192    
16     -336   
64     128    
-720   -144   
224    -144   
48     304    
80     544    
128    -48    
-64    -752   
-48    -288   
192    144    
32     -144   
112    -240   
-128   48     
160    -16    
-80    80     
48     -16    
0      -288   
-80    -16    
32     16     
80     96     
0      -224   
144    -208   
16     -80    
32     -80    
0      128    
0      48     
208    -80    
-96    112    
32     -48    
-48    48     
-128   -128   
144    32     
-176   -112   
64     80     
192    -160   
-48    -240   
-128   -192   
352    -288   
-128   96     
144    -544   
-208   -48    
96     -48    
64     48     
-96    -208   
160    288    
-304   -144   
64     -112   
0      96     
48     96     
-736   -240   
-48    16     
272    -160   
32     96     
-16    16     
-16    -272   
80     224    
-80    144    
256    0      
-32    80     
112    -48    
-48    0      
80     0      
-48    -16    
64     -80    
-240   304    
16     -256   
-272   144    
112    -144   
32     0      
-32    -736   
-64    -32    
0      -1424  
352    96     
-16    208    
-16    -32    
-128   -48    
224    1552   
-672   -1696  
-160   -688   
832    784    
-128   -896   
-1184  -112   
416    -640   
-336   608    
-96    -800   
-32    -480   
240    -560   
64     544    
-144   32     
176    368    
-576   -496   
320    160    
-144   -16    
544    -576   
-592   -432   
64     -320   
-320   640    
-144   -416   
112    288    
32     16     
-144   -416   
-64    -400   
160    64     
160    288    
16     64     
176    128    
-128   -176   
32     -112   
16     0      
-96    -144   
-16    -144   
160    320    
-128   16     
80     -80    
80     -48    
-16    -112   
144    -112   
-176   16     
144    176    
-128   -16    
-80    32     
64     -80    
96     -16    
-96    -240   
192    0      
-96    112    
-16    128    
-96    -160   
-32    -32    
-32    -288   
-208   0      
112    -32    
-48    0      
-16    112    
-416   -64    
-64    240    
-576   -96    
48     -64    
-32    224    
-160   48     
192    -48    
-80    -80    
-256   16     
-32    48     
128    80     
-144   112    
80     48     
32     -16    
-112   0      
-336   -128   
-240   112    
-352   -48    
112    -432   
-192   -16    
-256   32     
-48    -304   
-80    256    
-240   112    
0      -176   
224    -112   
-176   -80    
48     112    
-192   -32    
-16    0      
32     32     
-64    64     
-48    128    
-80    128    
-1536  -144   
16     -96    
-64    0      
-32    128    
32     -16    
16     0      
-80    -160   
0      -16    
48     112    
32     64     
-64    80     
16     224    
0      128    
224    -176   
-240   112    
-144   96     
0      80     
-144   -64    
16     64     
-112   -16    
128    -48    
-96    -80    
80     208    
160    0      
-320   48     
160    80     
-32    80     
-192   -16    
-176   -80    
240    80     
-64    64     
32     16     
-656   128    
128    240    
208    192    
-112   240    
272    64     
-144   128    
-128   32     
96     16     
-320   -16    
0      -96    
112    240    
-336   -16    
144    -80    
-96    144    
-64    80     
-176   -208   
-80    16     
-64    -32    
-16    304    
144    48     
-272   16     
-96    32     
96     -80    
144    208    
-32    32     
-32    128    
-16    16     
-48    160    
-16    -112   
64     128    
-128   -144   
64     160    
-608   176    
32     -48    
-80    96     
-80    96     
144    -48    
-96    272    
-32    48     
32     0      
-64    16     
0      -96    
0      -96    
-128   -16    
-16    224    
-128   32     
-96    48     
96     48     
288    -32    
48     80     
-224   240    
-128   -48    
96     240    
-32    16     
-192   96     
-48    -112   
32     128    
96     0      
-208   112    
-80    0      
80     64     
-16    48     
176    64     
-16    112    
-64    128    
48     64     
-48    64     
32     48     
0      48     
32     -64    
48     128    
32     176    
32     256    
1216   -592   
-336   192    
432    592    
-608   288    
-144   -336   
384    1088   
-656   -672   
368    672    
-480   -368   
272    352    
144    16     
0      256    
-112   176    
48     -144   
0      128    
-16    -192   
-80    352    
-128   -128   
-80    224    
128    -176   
-144   224    
112    -16    
-32    96     
48     -80    
112    80     
-96    64     
64     224    
-48    112    
16     -32    
-32    128    
-64    -144   
0      176    
80     64     
16     192    
80     -32    
-80    0      
80     96     
32     96     
16     16     
32     64     
0      144    
16     144    
64     48     
-48    16     
48     128    
16     16     
80     80     
-32    160    
80     144    
-96    -32    
16     -48    
96     32     
16     128    
160    32     
0      240    
-144   80     
0      -48    
96     -64    
-64    16     
-16    16     
-48    64     
64     -784   
-32    16     
-16    176    
16     48     
160    176    
112    48     
208    320    
-256   96     
32     -80    
176    -80    
-48    64     
64     144    
-64    -48    
128    48     
-32    -192   
-16    -1552  
0      160    
0      -32    
224    0      
-48    112    
144    32     
96     368    
144    96     
-64    32     
144    528    
160    256    
48     304    
0      -128   
80     128    
80     80     
32     -16    
16     48     
96     -864   
16     48     
176    48     
-144   -224   
-16    -128   
128    208    
128    224    
-32    96     
-112   -208   
144    112    
48     16     
32     64     
32     64     
32     -80    
16     64     
80     -1008  
0      96     
-16    0      
32     96     
0      64     
176    96     
-48    -432   
64     64     
-112   -32    
96     64     
-48    -32    
96     -48    
112    176    
48     -192   
-48    64     
16     -768   
32     112    
16     -1280  
128    112    
-32    272    
64     64     
48     -80    
0      272    
0      -48    
128    80     
32     80     
128    304    
-144   0      
160    64     
-112   -80    
272    -80    
-32    256    
48     -112   
16     -16    
96     -832   
16     96     
32     -32    
112    0      
-48    272    
0      -32    
48     144    
80     -144   
64     32     
-48    -80    
176    352    
-240   -304   
288    48     
-160   -512   
16     48     
16     -1008  
-64    80     
96     -64    
32     112    
80     144    
16     128    
64     80     
160    -240   
-80    144    
96     -144   
64     128    
96     -112   
128    48     
32     -208   
64     128    
64     -176   
-16    176    
-48    0      
368    -16    
-160   48     
-32    -320   
112    96     
0      -64    
128    160    
-16    -272   
112    160    
80     -128   
96     176    
-64    -32    
32     128    
48     -80    
80     112    
32     64     
-112   -800   
-64    -64    
32     16     
-48    -944   
160    -16    
80     336    
-432   -656   
-528   2096   
-208   288    
-96    -128   
0      -160   
320    752    
-640   -320   
128    -112   
736    368    
32     -208   
-528   -528   
0      272    
144    -48    
0      -480   
368    -1040  
-128   -336   
112    112    
-208   112    
496    592    
-208   -368   
176    -1104  
-272   112    
304    -448   
80     304    
64     48     
112    -224   
-1040  -112   
96     -528   
176    32     
-160   -640   
288    96     
-224   -144   
240    -16    
-128   0      
-48    0      
256    -48    
-144   -16    
-16    128    
176    32     
-112   -128   
-80    -160   
-160   -96    
64     -128   
80     0      
16     -192   
16     -80    
208    -256   
16     -80    
0      -464   
-160   96     
112    -80    
160    32     
-32    -64    
16     -16    
48     -48    
-16    80     
-128   128    
-48    16     
-608   48     
80     -144   
-96    -32    
48     -320   
96     64     
64     -144   
-48    48     
64     -176   
128    128    
-32    -336   
128    -80    
-96    80     
32     16     
48     112    
-96    -160   
-256   0      
64     -32    
-400   64     
64     -16    
112    224    
-32    -256   
144    -64    
64     -912   
-96    160    
64     -80    
96     -144   
16     112    
-80    -176   
128    -160   
-128   -48    
-64    80     
160    -16    
-368   64     
112    -16    
-128   -144   
224    -288   
-80    176    
-32    -1008  
112    176    
-144   80     
240    176    
-192   -64    
-32    -96    
-176   -288   
32     48     
64     160    
-48    80     
192    -48    
-224   -112   
192    16     
112    96     
-96    48     
192    -96    
-160   128    
352    0      
0      128    
-304   -16    
-16    -16    
-80    32     
192    64     
16     48     
288    -16    
-352   208    
304    -160   
-256   112    
112    -192   
-112   -80    
96     -368   
128    -176   
32     -48    
128    -16    
-208   -32    
-80    48     
96     160    
80     -16    
64     64     
-240   -64    
32     224    
-32    32     
192    48     
-144   -240   
-144   0      
-224   -480   
-800   -32    
-48    48     
-320   16     
-224   48     
224    112    
16     -112   
-64    48     
-32    32     
0      -32    
96     144    
-592   -16    
32     128    
-400   -176   
64     96     
48     240    
-288   64     
304    48     
-432   32     
32     80     
-656   -32    
-16    96     
80     128    
48     -64    
-16    -16    
160    -32    
-416   -32    
112    304    
-352   -128   
-112   -48    
48     96     
-144   192    
-144   -128   
-144   16     
224    0      
-128   240    
-176   -144   
-1984  208    
-16    -112   
-1072  -304   
0      16     
-48    -336   
80     -32    
16     -240   
-16    144    
0      144    
-144   -16    
144    0      
16     272    
-48    16     
64     48     
0      208    
-464   32     
0      -16    
-128   -208   
144    192    
-64    48     
-672   -2864  
688    1888   
-1168  0      
-224   -144   
240    208    
288    -816   
-336   464    
336    128    
-144   304    
96     -16    
-320   -288   
0      192    
-64    96     
-112   64     
0      48     
-48    48     
32     -112   
-80    96     
48     -16    
-16    -32    
-64    -16    
-176   -240   
112    -96    
-144   288    
-32    64     
16     -400   
-208   112    
-384   16     
64     32     
-240   -96    
112    128    
112    144    
-96    80     
0      112    
-32    -32    
-16    64     
96     96     
16     32     
64     80     
-80    32     
96     64     
-32    208    
-64    -64    
160    96     
-288   -32    
-80    -64    
64     0      
-176   32     
160    48     
0      192    
-144   80     
112    80     
32     0      
32     112    
80     96     
-208   -96    
-32    -64    
48     -16    
208    384    
0      160    
-32    48     
16     96     
0      112    
-112   -192   
-96    -96    
192    80     
-64    64     
16     -32    
16     32     
32     64     
-208   -96    
32     96     
-96    0      
144    128    
-112   48     
0      48     
0      112    
144    208    
-224   -32    
64     112    
-32    256    
112    128    
-32    176    
-80    -16    
80     80     
-192   -80    
128    128    
-112   96     
80     96     
-48    96     
-80    -32    
32     -16    
32     32     
176    240    
-128   48     
32     80     
-16    32     
128    208    
-144   -48    
80     112    
-160   -32    
144    112    
-144   32     
0      48     
-16    64     
-48    32     
208    224    
-64    0      
48     80     
-16    80     
48     80     
-48    16     
16     80     
-48    -96    
160    160    
-80    112    
-32    -96    
-160   -176   
16     224    
208    80     
-80    32     
-96    128    
176    112    
128    -32    
-112   112    
-64    80     
416    944    
-304   -224   
304    48     
-368   80     
256    -32    
-64    176    
-64    0      
224    160    
-144   48     
240    224    
-176   -32    
128    48     
-32    160    
80     96     
16     -96    
112    160    
-80    224    
-128   -80    
112    144    
-112   -32    
320    -400   
-272   224    
16     192    
-160   -16    
16     -64    
224    0      
48     192    
-112   240    
-128   -32    
288    -48    
-192   16     
128    272    
-368   -48    
48     0      
64     -96    
288    -496   
-64    80     
-48    208    
-144   48     
64     0      
112    -96    
480    112    
-176   272    
-256   64     
-96    64     
16     -48    
48     0      
16     -32    
128    320    
-48    160    
16     -528   
144    128    
192    -560   
96     112    
-32    288    
32     64     
0      64     
96     128    
-144   -32    
144    112    
-48    -32    
208    224    
-128   32     
16     48     
-80    -32    
0      -96    
112    16     
96     -512   
80     16     
128    128    
-16    48     
1216   816    
-1584  -352   
656    1168   
224    208    
816    432    
-1392  -864   
144    160    
608    832    
0      -96    
32     -96    
-96    80     
272    -96    
144    368    
-80    -1104  
64     64     
32     112    
176    496    
-48    -272   
32     -336   
16     32     
368    240    
-64    128    
0      80     
64     80     
32     -48    
80     80     
-48    -432   
144    272    
0      -544   
16     48     
16     -16    
96     80     
32     48     
112    96     
-32    64     
176    208    
-64    80     
80     -48    
-32    80     
128    -144   
32     112    
32     -208   
64     112    
0      -208   
144    96     
-80    -1328  
64     192    
16     -144   
-192   192    
-16    -160   
256    192    
-192   112    
240    -112   
-128   16     
208    -304   
32     288    
-96    -80    
112    96     
16     -160   
80     80     
-64    16     
112    144    
0      112    
32     160    
144    -144   
64     -784   
-128   80     
256    -256   
-160   -16    
256    -112   
-80    128    
96     -48    
0      144    
32     -80    
48     128    
128    -400   
-16    224    
16     112    
208    112    
48     48     
-128   -208   
144    64     
-48    -368   
144    -48    
-128   32     
80     64     
112    -336   
112    128    
-112   -160   
192    80     
-48    -128   
176    -416   
-64    80     
48     -832   
112    -256   
-176   32     
224    32     
-144   -32    
128    -1216  
96     -144   
48     80     
80     80     
-48    176    
32     -64    
160    -800   
96     32     
96     -816   
-32    -144   
32     -208   
-112   -448   
-272   128    
-64    -80    
0      -80    
16     -496   
48     -80    
112    -272   
160    32     
-64    208    
240    32     
-192   -96    
-16    -64    
16     64     
96     16     
96     -80    
-160   144    
-672   -176   
352    -208   
-160   0      
128    -224   
144    -48    
-208   -16    
272    224    
96     -1728  
128    -112   
-240   -320   
64     0      
48     -64    
128    96     
-96    -176   
0      -48    
-400   -64    
176    -16    
-688   112    
128    64     
-16    96     
208    224    
-96    -352   
64     -1760  
144    96     
-48    0      
112    160    
64     32     
96     -192   
-112   -48    
16     -112   
32     112    
-32    -128   
64     256    
32     0      
-80    -288   
160    -192   
-48    128    
80     -416   
-64    -48    
112    144    
176    480    
48     48     
32     -272   
-160   -48    
0      64     
0      -96    
-32    128    
0      96     
-160   -144   
-944   -144   
16     0      
64     48     
32     -80    
-32    64     
96     -576   
96     112    
16     128    
-16    16     
-32    -32    
96     128    
-256   -64    
64     -32    
-48    128    
-64    -176   
-288   16     
208    224    
-16    160    
240    -400   
-128   192    
-48    -352   
-48    160    
64     80     
144    -1904  
848    464    
-272   560    
-352   544    
-208   336    
-272   624    
-96    -1088  
-112   -320   
688    -48    
-240   288    
160    -112   
224    416    
96     -432   
-80    48     
-304   0      
-80    -208   
-208   80     
176    -128   
-192   -48    
112    80     
128    272    
-160   -80    
160    -16    
-144   -192   
16     -128   
-16    -16    
32     624    
288    -96    
112    32     
-368   -64    
16     -80    
-80    -16    
0      48     
112    96     
-64    -32    
-112   -112   
-64    64     
64     240    
-160   144    
-16    -32    
-160   -16    
0      144    
-96    -80    
80     -16    
-48    48     
-752   80     
-64    -64    
96     48     
-32    208    
112    -144   
-112   -80    
-64    32     
80     336    
48     -160   
-80    -176   
64     -352   
32     240    
-224   -64    
-224   96     
-80    -96    
112    192    
32     0      
-480   16     
-128   -16    
128    0      
-64    0      
16     32     
0      112    
-144   -160   
64     48     
-176   -256   
-32    16     
-16    96     
16     96     
-16    32     
224    416    
-128   256    
-96    0      
128    112    
224    128    
-192   224    
-192   -224   
96     288    
80     -192   
32     144    
-160   -80    
48     -112   
-16    64     
-48    112    
-48    96     
-192   -144   
64     112    
32     48     
64     128    
-560   32     
-48    -16    
-256   -336   
192    144    
-96    -16    
208    224    
-128   0      
-96    0      
80     32     
-64    16     
-16    32     
-128   -32    
112    144    
-208   -64    
96     64     
-272   -48    
0      -64    
-416   48     
112    80     
48     32     
-64    48     
128    80     
-176   16     
0      -176   
-80    96     
48     144    
80     160    
-80    -96    
-80    208    
80     16     
80     32     
-256   -32    
128    -336   
-32    64     
-208   160    
64     144    
-16    128    
-160   -48    
192    0      
-16    176    
-96    -272   
16     0      
-208   -304   
-32    -448   
-80    -128   
0      160    
272    96     
-464   32     
64     48     
-16    -208   
192    176    
-128   -144   
-16    160    
48     16     
32     96     
-64    -32    
0      96     
-176   -16    
144    144    
-112   64     
-80    -224   
-48    48     
-16    448    
240    128    
-272   112    
176    64     
80     144    
-64    0      
80     128    
16     144    
96     16     
-48    0      
-64    -272   
240    512    
160    272    
-224   48     
64     -304   
-32    128    
16     80     
144    -64    
-176   -144   
320    336    
-240   -32    
-48    192    
64     192    
96     -160   
64     320    
32     -32    
-64    176    
-160   48     
96     -432   
-32    96     
-272   96     
32     16     
-80    192    
96     0      
32     288    
-208   80     
128    208    
-192   -32    
160    144    
-192   -64    
-704   -1008  
480    1648   
-896   16     
112    -112   
-160   -224   
-112   416    
-144   192    
-384   496    
-192   -112   
560    -160   
-128   -208   
-16    112    
96     384    
-112   -64    
16     96     
-48    -144   
192    192    
-128   176    
64     -128   
144    48     
-304   0      
240    208    
-160   240    
224    48     
-112   -80    
-16    -48    
160    224    
-128   64     
144    64     
-128   -48    
144    112    
-144   48     
192    160    
-272   -16    
176    96     
-112   48     
96     320    
32     64     
-48    -48    
32     208    
96     -48    
64     160    
-176   96     
240    128    
-96    48     
64     -16    
16     144    
-112   -48    
304    176    
-400   -352   
352    32     
-64    112    
48     80     
112    32     
-64    96     
-32    80     
160    64     
-16    144    
48     80     
96     240    
-208   96     
224    -32    
48     80     
-16    16     
48     48     
-32    144    
48     0      
176    144    
-208   112    
192    128    
-32    32     
144    144    
-192   80     
144    32     
-32    32     
0      48     
-48    -160   
160    32     
-64    48     
-32    -48    
-80    16     
128    -688   
-48    -80    
160    -32    
0      272    
-112   32     
128    144    
0      0      
32     144    
16     -144   
48     0      
48     16     
-560   -400   
128    64     
-16    -368   
-64    176    
-16    -352   
128    16     
96     128    
16     64     
80     64     
-80    192    
64     -16    
112    64     
0      144    
-16    208    
96     272    
-208   0      
224    192    
96     -144   
-176   32     
96     -32    
80     48     
80     112    
112    256    
-160   -128   
176    176    
-144   112    
208    80     
-240   -64    
240    128    
64     96     
-128   -176   
64     160    
160    -144   
-16    16     
-48    -432   
128    32     
-160   -512   
48     64     
-32    -1232  
96     -80    
-160   -192   
-64    176    
272    -16    
-48    128    
-256   -112   
288    80     
16     0      
0      -96    
0      96     
64     -224   
80     112    
64     -32    
80     176    
48     -720   
160    240    
-112   -48    
16     80     
32     160    
80     144    
80     128    
0      -128   
32     176    
176    224    
-160   64     
144    -208   
-32    400    
96     -208   
-192   0      
112    -304   
112    384    
80     128    
32     144    
16     208    
64     64     
-16    -288   
0      -176   
128    80     
-32    -80    
112    64     
80     48     
-80    0      
160    -272   
64     288    
16     -592   
-208   -144   
176    96     
240    -1104  
16     -1408  
96     64     
-16    48     
-16    -48    
176    0      
16     -16    
-48    176    
-176   -192   
240    144    
96     -128   
64     -736   
32     32     
-16    -304   
128    64     
-80    -832   
-112   -736   
-16    96     
112    -352   
-1008  -2464  
1600   2736   
-1264  624    
512    -2656  
-784   -912   
-176   -224   
800    640    
-224   -240   
480    -208   
320    288    
-64    48     
-400   -320   
96     -80    
-112   -112   
240    320    
-224   -288   
160    -512   
-96    -208   
112    -1152  
208    176    
224    -32    
-224   -144   
128    144    
144    304    
-256   -496   
-112   0      
-48    208    
160    160    
-560   -64    
80     -16    
64     -160   
32     80     
48     64     
96     -112   
48     -320   
288    -816   
224    -80    
80     -144   
-400   -288   
208    176    
16     -272   
80     -16    
-160   -32    
-112   -32    
96     -48    
-160   -64    
224    80     
-160   80     
112    -128   
-240   -48    
320    -576   
-256   112    
192    -16    
112    368    
-240   -208   
32     -160   
64     320    
432    272    
-576   -416   
160    112    
-304   48     
80     -128   
-192   64     
32     -80    
-176   -16    
16     -144   
48     128    
80     -592   
0      64     
-16    16     
96     48     
-128   0      
112    -112   
-48    -96    
96     -16    
-448   -176   
176    176    
-976   -96    
112    -128   
192    288    
-32    -288   
-16    32     
112    -688   
32     96     
-32    -32    
16     144    
0      128    
256    192    
-96    64     
48     -64    
-288   -32    
128    -256   
0      80     
176    64     
-112   144    
128    -352   
16     -32    
-32    -1136  
224    96     
-288   80     
160    96     
-192   80     
32     -48    
-208   -48    
32     16     
-128   -112   
208    208    
-224   -16    
80     -416   
-16    -256   
96     -176   
176    160    
0      -416   
-64    80     
48     0      
224    -80    
-288   -80    
176    112    
0      48     
0      48     
-32    0      
0      16     
32     16     
112    -48    
-32    176    
272    560    
112    368    
96     672    
-352   -288   
-32    48     
-1136  0      
32     -64    
-16    128    
96     112    
64     160    
-80    32     
160    -16    
-256   -224   
-352   112    
-192   -16    
-64    -112   
-16    -48    
-64    -144   
-320   -16    
-176   32     
-48    336    
0      432    
-640   224    
-16    64     
-16    -176   
-96    -32    
96     112    
16     -32    
-224   480    
-240   -64    
208    160    
-224   256    
-112   96     
-112   -272   
-48    -32    
208    224    
-144   80     
-128   16     
32     -96    
288    96     
-16    192    
-48    128    
48     368    
-112   -144   
144    80     
-160   -192   
32     -32    
192    48     
32     128    
0      160    
-208   -32    
96     0      
-224   80     
-128   -16    
-160   -16    
-32    80     
-112   -80    
-64    80     
176    -112   
-128   192    
16     -256   
32     288    
-144   48     
-96    144    
-112   -32    
-96    -160   
96     16     
64     288    
-224   96     
-192   32     
-208   80     
-624   -224   
-48    -1024  
464    -192   
-32    432    
208    272    
-336   -144   
128    -240   
64     128    
224    -112   
-112   304    
-320   -432   
192    496    
48     -160   
-96    256    
-48    -240   
-384   176    
80     16     
16     80     
-96    176    
0      32     
-80    -96    
176    -96    
-64    192    
176    -16    
-272   240    
240    -96    
-304   80     
272    0      
-352   112    
176    0      
-384   112    
208    -64    
-448   128    
0      -16    
0      176    
-80    -96    
112    -48    
96     128    
96     176    
-208   -176   
-144   48     
48     -16    
-112   64     
-80    -48    
0      80     
-240   32     
128    16     
-64    64     
-112   128    
32     -112   
112    80     
-112   192    
128    16     
-48    112    
-48    16     
-32    176    
80     -16    
-64    160    
80     80     
-80    128    
-112   -96    
-32    192    
16     -16    
80     128    
16     208    
-112   64     
160    -16    
-144   -48    
112    160    
-16    160    
-96    128    
32     -16    
144    112    
-80    16     
-16    224    
-96    -160   
208    288    
-144   224    
128    -336   
112    32     
-176   0      
32     144    
-48    64     
96     -32    
-80    192    
-112   48     
80     0      
-48    272    
-176   -16    
0      96     
96     -32    
-32    32     
80     32     
-32    160    
-32    64     
112    144    
-96    144    
208    128    
96     208    
32     112    
16     160    
-64    0      
160    144    
-96    96     
96     32     
96     144    
-48    112    
192    176    
128    256    
-64    112    
-16    0      
64     336    
-32    128    
48     128    
-32    -32    
32     64     
16     64     
128    -48    
64     112    
-192   0      
-64    352    
-16    96     
112    0      
-96    -48    
128    288    
-144   -80    
192    -176   
-272   -64    
96     -144   
-16    96     
112    32     
-192   -160   
144    224    
-144   64     
64     -1136  
-160   112    
288    208    
-16    0      
16     -32    
-32    48     
0      240    
64     -48    
-112   96     
144    -48    
48     160    
128    240    
-48    256    
48     64     
-256   -256   
240    -160   
16     48     
16     144    
16     128    
0      -16    
144    192    
80     -32    
160    256    
-80    32     
80     -96    
-368   -224   
256    48     
-160   -432   
192    176    
160    96     
112    -304   
-96    672    
-160   0      
64     -48    
224    256    
-208   32     
-224   0      
96     96     
176    64     
224    64     
-176   -336   
240    256    
-176   -32    
-16    64     
272    96     
112    -144   
64     32     
-64    -2416  
-64    96     
128    96     
208    16     
-16    16     
-48    32     
48     160    
96     48     
80     128    
-48    96     
224    16     
-32    80     
32     0      
176    48     
-80    112    
64     -80    
-128   112    
-864   128    
-528   -944   
-464   -384   
112    64     
112    -208   
160    320    
-144   400    
176    -256   
-368   -112   
48     -544   
64     320    
192    -208   
-32    224    
0      -80    
240    64     
-112   -1072  
144    592    
-16    -1248  
96     48     
144    -256   
288    464    
-192   -32    
-64    -32    
-48    -224   
224    -304   
16     112    
-112   144    
48     -160   
32     -512   
144    96     
304    -976   
-80    48     
80     -32    
144    240    
0      -16    
192    96     
240    208    
240    272    
-208   176    
-176   -256   
48     352    
96     -944   
96     -48    
48     -432   
48     192    
16     -160   
16     288    
-32    144    
-16    80     
-96    -64    
160    32     
-96    0      
-96    -48    
32     240    
128    -144   
96     176    
-96    -368   
320    688    
-96    -480   
192    208    
16     -224   
144    112    
-384   -1264  
336    240    
32     -112   
128    128    
-96    128    
128    -16    
48     -992   
128    -64    
64     144    
48     -80    
32     112    
96     -96    
96     176    
32     304    
32     272    
224    64     
432    -1104  
-240   -272   
-144   -976   
384    16     
-32    -128   
-16    -352   
208    80     
-64    -464   
96     0      
-64    16     
-144   -368   
288    64     
0      -32    
32     -192   
0      32     
128    96     
-144   224    
16     -128   
0      -464   
-576   -384   
144    -512   
-64    -80    
128    64     
48     -272   
80     -1296  
-16    -176   
80     80     
144    176    
80     -16    
-144   16     
-80    -464   
-288   -112   
160    128    
-32    144    
-112   -80    
128    48     
80     -80    
-16    0      
32     -320   
-32    -48    
96     208    
304    -256   
16     48     
48     -256   
-272   256    
448    144    
-320   32     
176    208    
96     208    
-112   -32    
32     -96    
-80    48     
256    -64    
-144   224    
288    48     
-224   -96    
160    -384   
-272   64     
144    -32    
192    192    
-32    32     
112    32     
-112   -64    
16     -96    
-464   -80    
144    -224   
-880   -80    
144    192    
0      -32    
160    32     
-368   -96    
160    -384   
16     0      
0      -48    
32     16     
160    -64    
64     16     
-96    80     
96     -496   
80     -112   
-48    144    
-32    112    
-80    16     
64     -128   
64     -176   
208    -48    
-160   -288   
32     48     
208    -656   
-112   96     
96     -48    
48     64     
112    -144   
-16    144    
-160   80     
32     -112   
-80    48     
192    -128   
-96    144    
-144   -112   
-32    -64    
208    32     
-96    128    
112    -416   
0      16     
-192   -16    
112    96     
-320   80     
-48    48     
-96    -48    
-16    -80    
-32    -16    
-16    -144   
32     16     
-16    -80    
0      -48    
192    -16    
-64    32     
-336   -576   
-16    432    
576    352    
-528   -112   
-448   -144   
-32    624    
-272   -736   
-560   176    
112    -832   
128    736    
-448   -512   
-64    384    
128    -112   
64     -32    
-192   80     
240    -176   
-304   176    
208    -240   
-288   320    
240    -240   
-128   96     
80     -240   
-160   320    
304    -256   
-192   208    
384    -288   
-1104  80     
208    -240   
-592   224    
368    -16    
-32    208    
-96    -160   
-160   144    
-144   -96    
-160   160    
32     -48    
-160   0      
32     -64    
-48    128    
192    -128   
-160   32     
-176   -160   
48     128    
-80    -48    
48     16     
-160   16     
-160   -112   
-64    208    
112    -32    
112    80     
-320   32     
112    176    
-1040  -80    
-80    96     
0      -192   
80     160    
-48    -208   
80     304    
-160   -192   
112    32     
-144   32     
16     32     
-16    48     
32     -64    
80     272    
-496   -112   
16     224    
-704   -240   
128    48     
16     48     
-112   80     
96     80     
-80    96     
48     -160   
-128   -32    
-80    -96    
256    336    
-304   80     
16     0      
32     -64    
-144   48     
-96    32     
-304   -48    
80     80     
-544   -64    
96     144    
-272   -512   
224    -16    
48     432    
-160   96     
144    80     
-112   80     
16     -16    
-16    64     
32     224    
64     256    
-80    64     
-32    -16    
-16    48     
-368   -400   
240    608    
0      384    
-176   144    
-80    128    
48     32     
-32    0      
-128   -16    
-112   -96    
96     128    
48     144    
-48    0      
16     176    
-64    -64    
48     112    
-320   -64    
208    432    
-64    128    
-32    0      
-48    -48    
-32    -208   
32     16     
-48    -32    
16     112    
-64    -32    
-144   -224   
-128   -160   
96     192    
-352   -272   
-16    -496   
-480   144    
112    432    
-256   -48    
-176   112    
-64    64     
0      0      
272    768    
-16    224    
-96    -112   
128    224    
-64    96     
32     112    
16     -16    
80     176    
-64    96     
16     96     
144    240    
0      -16    
-32    0      
-32    0      
48     128    
0      32     
-16    112    
96     96     
-96    16     
80     96     
32     64     
16     208    
-32    -176   
160    112    
-208   48     
64     64     
-80    -48    
64     128    
-48    160    
16     128    
-240   -64    
112    64     
-112   80     
16     -64    
48     224    
-64    -32    
144    80     
-336   -32    
176    80     
-304   -96    
32     192    
16     80     
-64    32     
160    96     
48     160    
-64    32     
-48    -48    
128    176    
256    96     
-256   16     
64     16     
-64    160    
64     -96    
-304   256    
64     -64    
80     112    
-64    128    
272    -96    
-176   16     
32     -48    
80     192    
32     80     
-768   -1248  
1184   3376   
-912   800    
672    -656   
-288   32     
544    -176   
-560   816    
48     -112   
352    848    
-96    -800   
-48    352    
-288   -448   
464    512    
-144   -288   
192    512    
-208   -320   
-80    112    
-48    -112   
192    288    
-64    32     
272    -16    
-288   -752   
-96    336    
112    272    
16     -224   
112    272    
272    176    
-112   208    
-160   -240   
320    160    
-16    -112   
-16    112    
0      208    
128    80     
-128   144    
-32    -112   
-48    -480   
-224   -48    
464    352    
-32    -48    
0      64     
16     176    
112    144    
-48    256    
-48    0      
-64    0      
64     112    
160    368    
-128   -240   
240    272    
-672   -64    
64     -304   
-16    112    
48     64     
16     160    
80     -64    
64     224    
-32    -160   
96     -16    
-160   -32    
128    64     
-64    -192   
64     176    
-80    -16    
176    16     
144    176    
16     -176   
32     144    
-144   -2976  
160    0      
-16    128    
-16    160    
-16    32     
48     0      
32     32     
64     160    
-32    240    
-32    160    
48     0      
192    416    
-64    256    
224    -192   
48     560    
0      -560   
0      -32    
-16    0      
16     192    
176    368    
-64    272    
-64    -96    
96     -32    
-112   0      
192    224    
16     32     
128    16     
-48    144    
-96    -576   
112    -208   
0      -144   
208    320    
32     -912   
-112   128    
48     -64    
-16    64     
48     0      
80     464    
0      32     
32     64     
-48    -16    
176    -208   
160    352    
-80    -192   
16     272    
80     48     
-16    0      
112    -656   
-96    80     
288    -64    
-16    128    
-48    -176   
-96    -80    
128    0      
176    176    
-32    160    
16     48     
400    16     
-96    -304   
-80    160    
128    -64    
128    80     
-64    -208   
96     272    
128    128    
-96    112    
32     176    
48     240    
272    -64    
-32    -656   
-272   192    
272    -192   
80     160    
-64    -160   
176    80     
0      -208   
32     160    
0      -128   
64     -176   
16     -96    
-80    160    
224    -48    
-80    128    
80     32     
0      -96    
-64    16     
160    48     
-32    80     
160    -224   
-48    224    
0      -112   
128    80     
32     -144   
144    80     
16     80     
176    32     
224    240    
-32    -1056  
80     -1344  
128    432    
-208   -1648  
-16    -176   
144    -272   
176    -16    
160    48     
-224   48     
192    144    
-48    -80    
160    -160   
-176   80     
-16    -64    
160    -32    
80     -160   
96     -272   
-240   96     
-16    -384   
16     -96    
32     -1216  
128    -96    
32     -1280  
48     32     
-32    80     
48     -288   
48     -336   
160    224    
-160   -16    
384    0      
-256   64     
32     -144   
640    -1936  
-320   -368   
1168   352    
256    -576   
0      176    
816    336    
-896   -480   
1296   -144   
-320   448    
272    48     
-464   272    
80     -448   
32     240    
256    -416   
-160   144    
48     -144   
64     224    
64     -112   
80     -112   
-16    -64    
144    -96    
16     64     
128    64     
48     48     
-112   -64    
-64    48     
144    48     
192    -80    
-80    -64    
48     -32    
-16    32     
32     -224   
-16    -192   
-48    -208   
176    -48    
80     112    
-192   -80    
144    -384   
-80    144    
304    -160   
-144   64     
0      16     
112    -16    
-32    64     
48     64     
0      -64    
-48    -64    
-400   -224   
-16    64     
0      32     
304    80     
-208   -192   
224    -512   
-64    128    
64     -672   
96     176    
16     80     
80     -48    
-32    -96    
48     -32    
-224   64     
80     -80    
-160   0      
112    -240   
-528   -16    
-64    -64    
16     192    
-64    -272   
256    128    
-48    -800   
48     288    
-112   -112   
176    -256   
-80    -32    
32     0      
0      176    
-128   -112   
80     144    
-208   -48    
-144   -288   
-32    -192   
-112   96     
80     0      
0      96     
32     -944   
224    384    
-176   112    
32     -160   
128    48     
48     0      
-16    80     
80     64     
-272   -144   
-16    -96    
48     80     
-32    -32    
80     -16    
-64    -128   
-16    144    
112    -272   
32     112    
-96    -16    
0      -16    
80     112    
32     -16    
16     -144   
16     -240   
16     144    
48     112    
48     48     
-32    -48    
0      64     
368    -144   
-64    64     
-16    64     
-624   -176   
0      -96    
-768   -16    
-32    64     
336    240    
-144   80     
-112   -128   
-144   -112   
240    176    
80     64     
-48    -304   
-304   80     
-416   -240   
48     48     
-48    32     
144    80     
32     0      
-352   48     
-192   16     
-448   48     
32     -48    
32     128    
64     64     
-96    -16    
112    144    
-304   -128   
-32    32     
48     128    
-224   -32    
160    80     
-16    128    
-64    272    
-320   208    
-96    -64    
192    0      
48     128    
-848   -32    
-112   -96    
-16    -368   
304    80     
-192   64     
-16    -16    
96     -80    
0      16     
-112   32     
-128   -32    
-32    -64    
160    240    
-240   48     
48     -128   
0      160    
-464   80     
-64    -64    
-112   64     
112    16     
48     -112   
16     80     
32     144    
16     0      
-16    160    
-128   176    
32     -16    
-32    112    
32     16     
-16    0      
-80    80     
-80    96     
-32    64     
-416   48     
32     -64    
32     0      
48     64     
160    48     
-144   128    
-16    160    
64     -80    
-16    96     
-240   80     
48     -160   
-32    272    
176    16     
-96    96     
-960   -800   
-208   -1280  
-288   -208   
112    464    
-736   -80    
592    112    
-160   -176   
192    1024   
-336   -144   
176    -80    
32     304    
224    112    
-384   32     
-80    -32    
208    16     
-160   -64    
-944   -320   
-176   -224   
-192   224    
240    -240   
-80    144    
240    416    
-128   -80    
96     32     
-144   112    
288    304    
-208   288    
64     -64    
112    176    
-208   -32    
176    64     
-240   16     
144    80     
-48    64     
16     0      
-96    112    
48     16     
-32    -64    
-32    48     
160    80     
-48    128    
48     128    
-112   -176   
80     80     
-192   16     
288    224    
-272   -48    
208    32     
-112   32     
0      240    
-80    80     
64     16     
80     176    
-128   176    
16     0      
-128   -112   
48     128    
-128   32     
32     -64    
-64    48     
32     224    
-160   -32    
0      -48    
112    0      
96     192    
-128   176    
96     -32    
80     144    
-64    192    
64     64     
16     0      
96     64     
-16    80     
64     16     
-160   -80    
96     48     
-384   -32    
16     48     
0      96     
-16    -48    
192    112    
-144   96     
176    288    
-288   112    
304    -16    
16     -16    
128    128    
-192   -80    
128    176    
-256   16     
80     112    
48     128    
32     16     
96     176    
144    544    
-464   160    
208    -112   
-112   -96    
256    256    
-144   32     
144    112    
0      32     
-160   16     
64     80     
-32    48     
-80    160    
144    112    
-80    -48    
-48    112    
64     160    
208    128    
-96    96     
192    160    
-112   -16    
112    112    
-160   0      
208    0      
-48    -32    
-80    64     
208    64     
64     -192   
224    32     
-288   176    
64     128    
304    112    
-320   -64    
192    256    
0      96     
128    80     
-112   32     
-16    -16    
0      112    
-112   -32    
-192   -96    
32     -32    
-32    -992   
176    32     
224    48     
-320   -16    
160    224    
272    80     
-144   112    
-32    48     
-16    0      
-32    -80    
0      -320   
-96    144    
192    -96    
96     32     
-96    96     
80     -240   
32     144    
176    -1488  
-48    48     
128    80     
-48    176    
128    128    
-112   224    
256    80     
-48    160    
32     128    
-48    144    
-64    48     
112    -16    
176    112    
32     288    
64     128    
-64    -16    
-32    16     
48     16     
176    208    
-80    48     
192    304    
-128   -112   
176    48     
16     -48    
0      128    
-48    64     
-16    -144   
96     96     
80     -80    
-32    208    
-64    -640   
128    80     
-16    -160   
-64    80     
144    -64    
224    64     
0      96     
-16    176    
-80    64     
32     160    
80     0      
-112   -144   
128    -192   
64     -320   
32     592    
928    -1744  
160    400    
-48    864    
-336   272    
-176   -352   
640    1072   
-1072  -672   
624    448    
-464   -64    
336    -96    
-144   16     
320    -224   
32     432    
144    -448   
-112   256    
192    -272   
256    784    
-112   -544   
128    224    
-208   -64    
112    112    
-176   128    
320    -64    
-144   80     
240    -240   
-128   240    
224    -672   
-16    288    
96     -464   
-48    192    
48     -144   
64     112    
-80    -208   
32     64     
48     -240   
240    128    
-64    64     
80     160    
-48    -128   
80     -144   
-80    -48    
80     -112   
-160   144    
416    -32    
-128   144    
128    32     
-144   -80    
192    -64    
64     112    
64     -176   
128    176    
-48    32     
80     80     
-160   0      
160    112    
-64    -272   
112    96     
-48    96     
80     -544   
0      16     
128    64     
16     256    
160    80     
80     32     
-64    32     
64     -1232  
64     160    
48     -304   
48     -64    
128    -80    
48     -400   
96     -208   
128    -2240  
-80    -96    
64     96     
-64    -368   
368    16     
-208   -208   
-48    -416   
160    -64    
-16    -48    
-80    64     
32     -16    
0      -160   
-256   -192   
192    -256   
64     128    
-112   -144   
128    32     
32     -384   
48     -160   
32     64     
80     -16    
0      0      
48     96     
0      -48    
176    176    
-80    -48    
32     -416   
-480   -48    
32     -208   
128    48     
48     0      
-16    0      
144    -560   
-16    -48    
16     -2064  
144    144    
-32    -112   
144    128    
0      -16    
96     -112   
-128   -48    
64     -80    
-80    -32    
64     0      
-48    -16    
128    -144   
80     -160   
-96    -304   
176    16     
16     -1104  
192    128    
-48    -64    
192    112    
-16    368    
32     -272   
0      -16    
-96    32     
144    112    
16     0      
-816   -64    
0      -64    
0      -80    
144    -64    
-272   -32    
208    -160   
-48    208    
128    -464   
-32    48     
-80    -64    
48     32     
64     176    
-16    -48    
-16    -16    
144    496    
-272   -432   
336    0      
-368   96     
288    -112   
-112   -112   
192    -48    
-128   64     
192    80     
-208   48     
352    0      
160    -128   
-256   176    
-80    -352   
-160   -96    
32     -80    
-112   112    
-32    -32    
-80    16     
208    -176   
-160   -160   
496    -688   
-176   320    
-16    -192   
64     144    
-32    -80    
368    192    
-416   -176   
208    176    
-176   -32    
224    16     
-208   0      
80     -48    
-640   -32    
48     -320   
48     48     
208    -32    
-80    144    
-32    -112   
48     -48    
-112   -16    
352    -272   
-32    128    
-16    96     
96     -16    
48     -96    
0      -48    
-64    0      
-224   -224   
-32    -32    
112    144    
-928   -464   
-944   480    
1040   1120   
-208   -48    
-560   -432   
128    1920   
-1232  432    
176    -736   
-96    0      
400    -224   
-352   256    
-192   160    
96     -48    
48     -112   
-224   80     
-352   -112   
-64    160    
-128   80     
128    96     
-192   64     
-544   -224   
-32    -48    
-256   112    
64     32     
-48    -48    
-80    144    
80     -48    
16     176    
-352   -336   
96     80     
-336   -48    
128    160    
-128   -32    
-240   80     
32     -32    
-368   -288   
256    -16    
-592   144    
224    80     
-48    32     
64     48     
-16    48     
144    -16    
-192   -240   
48     96     
160    48     
-96    0      
-112   -128   
80     -64    
-160   128    
-96    -96    
0      96     
-224   -16    
224    32     
-688   16     
48     16     
-144   -96    
16     -32    
-16    -128   
80     112    
-112   64     
32     -32    
-16    96     
-112   -48    
80     -32    
-32    272    
-192   208    
-160   -48    
0      32     
-32    -160   
80     112    
0      32     
-48    160    
-16    -80    
192    192    
-208   -96    
96     48     
-112   48     
-32    112    
32     80     
-32    128    
96     -16    
48     144    
-400   112    
-64    -64    
64     32     
-336   -64    
32     16     
144    -32    
-224   144    
192    0      
-96    192    
-96    80     
176    176    
-208   -128   
192    48     
-160   16     
-64    80     
-48    0      
-48    -32    
16     112    
-272   -32    
-16    256    
144    160    
-112   16     
144    64     
-176   16     
144    48     
64     112    
0      -32    
-32    64     
-64    16     
160    224    
-32    128    
32     -16    
16     192    
64     384    
-96    320    
368    0      
-416   -112   
32     -16    
112    32     
256    112    
-352   96     
336    176    
-176   176    
160    288    
-48    32     
-64    -32    
-192   16     
128    128    
192    112    
16     240    
80     32     
-240   176    
64     16     
112    272    
-128   128    
176    48     
-192   32     
-64    -16    
-16    208    
-32    -336   
0      -80    
-320   -112   
176    80     
-144   32     
64     112    
32     80     
0      64     
-80    96     
48     64     
80     224    
16     -32    
96     80     
-176   80     
32     112    
32     192    
-144   48     
128    -80    
-64    64     
-16    -48    
-48    80     
32     48     
80     48     
192    832    
-224   368    
-16    400    
-208   -336   
192    48     
-112   -192   
32     -192   
-64    336    
-80    80     
-80    -16    
128    32     
208    144    
16     0      
-32    80     
-32    176    
144    16     
-192   48     
48     48     
48     -16    
-144   32     
-112   -80    
96     144    
128    192    
32     128    
-96    48     
32     96     
160    -128   
208    112    
-80    192    
-16    176    
-64    0      
0      16     
864    -1248  
384    32     
1008   240    
-384   -368   
-64    560    
-288   -608   
176    112    
336    -80    
96     -512   
-496   -320   
64     272    
480    80     
16     256    
-80    -32    
0      -48    
64     160    
352    240    
-224   0      
-208   -208   
48     -80    
160    -176   
128    240    
-96    -16    
112    -240   
-128   -48    
112    272    
-64    -16    
144    112    
-128   64     
208    -192   
-272   0      
160    32     
48     32     
-48    96     
16     96     
48     240    
16     96     
64     160    
-80    -672   
112    -144   
0      -480   
-96    144    
224    144    
64     96     
-16    16     
32     176    
-48    48     
16     -32    
-96    16     
64     16     
96     160    
-64    80     
160    112    
-80    -272   
16     32     
48     -384   
176    560    
0      192    
144    176    
-176   -32    
-16    80     
112    -128   
64     32     
16     32     
-80    80     
0      16     
16     -256   
48     48     
32     -144   
96     112    
0      -288   
32     112    
48     80     
32     64     
80     256    
208    448    
-112   48     
272    224    
-80    48     
304    304    
-144   192    
-80    -176   
160    160    
-160   -288   
256    64     
-80    -704   
240    304    
80     -208   
-80    336    
-48    -208   
112    16     
32     -48    
80     160    
-48    64     
32     128    
80     112    
-16    0      
144    128    
0      -192   
144    112    
64     16     
32     144    
48     -416   
-32    80     
192    -1136  
0      16     
208    176    
-208   32     
240    128    
-112   112    
208    80     
-128   -48    
144    112    
0      32     
16     112    
-16    -336   
112    0      
32     48     
80     64     
-64    -752   
-48    144    
160    80     
128    112    
-96    128    
0      0      
64     160    
-32    -432   
128    224    
-64    -80    
144    96     
0      -96    
160    64     
32     -256   
32     112    
64     -368   
0      -96    
176    -48    
-48    144    
-32    128    
-32    -336   
16     112    
288    176    
-48    256    
-128   -16    
160    144    
-112   -464   
416    -16    
-160   192    
112    128    
-64    160    
-32    -1184  
112    64     
-16    -176   
144    -848   
128    464    
-256   -512   
320    -208   
304    -1424  
-32    0      
-112   -16    
-48    -432   
320    48     
64     -48    
0      -688   
-144   -96    
144    -1184  
-112   64     
64     0      
96     -320   
-400   32     
128    0      
0      -80    
160    368    
-208   -96    
16     -816   
64     -48    
352    272    
-48    -80    
-144   -288   
80     0      
160    -288   
144    48     
48     224    
-96    -96    
-128   96     
112    -144   
-48    -272   
176    -176   
-32    -48    
32     -64    
-96    -80    
304    352    
208    -256   
64     16     
112    128    
-80    96     
-80    160    
-64    -720   
704    -1600  
-464   384    
-48    -32    
256    96     
96     -176   
592    -112   
656    608    
-400   96     
96     -912   
16     -16    
-16    -144   
-32    32     
304    -16    
32     0      
-112   -112   
16     0      
-48    48     
32     80     
-1008  -144   
48     48     
16     -144   
176    -304   
16     32     
96     -336   
-96    128    
96     96     
32     144    
96     -208   
-16    -176   
0      -16    
64     -64    
-48    80     
144    -64    
-320   -32    
48     48     
-640   -16    
-16    -80    
32     96     
224    -256   
-112   64     
32     -2176  
176    160    
-160   16     
0      -160   
-48    0      
192    48     
-80    -96    
96     -160   
-544   -48    
240    -208   
-240   96     
-16    -32    
256    0      
-48    -400   
176    144    
-64    -912   
0      64     
-16    0      
144    0      
-144   48     
112    16     
-208   -16    
96     96     
48     0      
16     32     
-48    112    
32     -80    
0      32     
128    -432   
16     32     
144    96     
-64    -64    
144    288    
-96    80     
-16    -192   
336    -80    
-208   0      
80     160    
-176   -32    
224    -96    
-48    112    
0      -80    
176    -64    
0      -272   
160    416    
-240   -64    
256    -144   
-368   -64    
208    -96    
-160   -80    
160    64     
-192   -48    
208    32     
-304   -16    
48     -368   
64     -64    
48     -80    
80     48     
-432   -80    
-16    144    
64     -16    
-752   -128   
48     32     
-160   160    
96     16     
-288   -112   
-16    64     
-64    48     
0      -128   
-560   16     
0      48     
32     112    
-16    16     
-16    48     
-32    -32    
144    64     
-576   -48    
128    304    
-128   96     
224    112    
-400   -192   
0      -32    
112    -16    
-48    -64    
-192   -336   
-464   -64    
256    48     
48     32     
32     -272   
-240   -112   
64     144    
0      -64    
64     80     
32     16     
16     -144   
-176   -16    
-144   96     
80     0      
192    112    
-16    -80    
-80    80     
-96    -16    
96     64     
-128   -240   
-32    0      
16     288    
192    208    
-112   80     
-144   -32    
32     -32    
-144   64     
128    112    
48     -16    
64     272    
-592   -80    
96     240    
-192   -192   
-16    32     
96     -96    
0      -16    
-64    96     
0      64     
32     0      
-80    32     
-80    160    
-80    -176   
96     240    
64     48     
-80    -16    
-496   -32    
48     32     
32     176    
32     80     
-16    48     
-16    -32    
-80    -32    
16     112    
-32    32     
64     352    
-256   -80    
-272   -32    
128    16     
-272   -48    
-176   0      
-32    -352   
128    64     
64     -128   
-192   80     
-16    0      
-64    128    
32     112    
-80    128    
16     -112   
16     128    
16     96     
-304   560    
-448   544    
-256   864    
112    240    
-16    -144   
240    208    
-32    -96    
-352   -64    
400    304    
-80    -112   
-176   -128   
32     0      
208    80     
-176   -160   
-160   176    
48     160    
80     112    
64     464    
-208   -272   
-128   -48    
-96    -16    
192    144    
-128   48     
128    144    
-176   64     
80     -96    
-224   128    
-32    -112   
208    -80    
-208   -96    
256    144    
48     64     
-272   0      
-32    112    
-48    224    
-224   -64    
224    176    
-176   208    
304    560    
-160   -80    
-160   -272   
128    160    
-16    112    
0      64     
112    48     
-128   -160   
64     -32    
176    0      
144    0      
-32    32     
-64    16     
16     208    
64     80     
-144   32     
48     176    
-96    80     
176    64     
192    848    
112    80     
-80    384    
-112   -144   
144    272    
48     -160   
16     80     
-112   0      
0      160    
0      128    
16     16     
32     64     
16     0      
48     144    
-16    32     
0      80     
-128   -32    
-144   176    
-96    160    
-208   -240   
64     -304   
-112   96     
-16    16     
-112   208    
0      80     
192    352    
16     -48    
48     64     
48     128    
32     112    
-176   -256   
96     -128   
192    144    
-16    192    
-96    112    
-208   0      
192    112    
32     96     
-32    48     
-32    16     
144    192    
-32    48     
32     64     
-64    32     
-48    16     
112    96     
0      32     
160    128    
-128   80     
80     80     
-64    288    
0      -1376  
80     112    
80     112    
-16    96     
16     80     
-48    64     
112    96     
0      64     
-96    -208   
224    176    
-96    112    
272    128    
-304   -128   
112    48     
64     32     
-48    -512   
144    192    
-160   80     
400    208    
-272   96     
144    -368   
0      64     
48     128    
272    64     
-224   304    
64     -16    
-48    -16    
144    144    
48     -32    
80     192    
112    -160   
32     -96    
-144   -544   
112    96     
192    160    
-208   -112   
-32    0      
-64    -128   
80     144    
96     400    
-32    -96    
0      128    
48     0      
-96    -144   
96     128    
-48    -320   
0      -16    
160    -304   
112    144    
48     672    
-128   48     
-288   -336   
80     0      
128    96     
0      144    
-48    -64    
80     128    
-64    224    
112    80     
-304   -224   
192    16     
96     144    
32     -432   
64     208    
-32    80     
-240   -272   
176    48     
288    112    
64     128    
176    464    
-64    -32    
48     32     
64     96     
32     64     
-80    192    
112    -240   
160    112    
208    112    
-128   64     
80     -272   
80     64     
16     -400   
176    0      
144    32     
-96    208    
-16    160    
-160   112    
112    192    
0      -96    
-784   -1024  
16     -320   
336    592    
-432   -448   
-320   -624   
272    480    
-432   -432   
880    224    
-448   -336   
720    576    
-416   -32    
32     96     
-16    272    
128    -176   
144    144    
-32    -160   
64     -16    
32     -16    
-16    -176   
144    16     
16     48     
0      -16    
-32    240    
160    192    
-48    144    
128    -80    
-96    112    
96     -208   
80     144    
80     0      
48     160    
16     -48    
64     144    
48     32     
128    80     
-128   -256   
320    400    
-80    -80    
80     0      
-64    48     
64     -336   
192    -2704  
32     -192   
-32    384    
112    -64    
32     96     
160    80     
-16    16     
160    -96    
-208   128    
208    -176   
32     288    
64     32     
112    0      
-32    112    
48     -464   
160    -608   
32     -48    
144    -96    
32     16     
48     -224   
64     -176   
64     -896   
32     -48    
-80    112    
128    -112   
176    -128   
-16    48     
112    176    
-80    -32    
80     -80    
16     -320   
-288   128    
-48    -240   
224    -80    
-96    -720   
160    -80    
304    -432   
176    16     
96     160    
-96    224    
0      -176   
496    448    
-352   -160   
336    -48    
-128   96     
-208   -192   
64     -16    
-304   -240   
224    -32    
-96    -64    
80     -80    
16     -288   
96     -16    
80     -400   
-96    208    
-128   -240   
80     64     
80     -96    
64     -32    
0      32     
-48    -48    
-368   -32    
256    160    
-544   -16    
96     16     
-192   -288   
224    -176   
-48    -128   
32     -544   
160    80     
-16    -112   
-112   128    
144    -96    
96     -64    
-80    -96    
176    16     
0      128    
-176   -160   
-48    144    
192    0      
-80    96     
96     -272   
32     16     
-144   -512   
176    224    
-192   304    
352    176    
-144   -64    
112    0      
-208   0      
176    -96    
-32    80     
-80    -160   
-128   16     
16     -528   
-976   -256   
192    0      
80     224    
0      -464   
-64    128    
160    -1184  
32     96     
-176   16     
128    240    
48     304    
16     80     
-192   176    
-144   -320   
-208   -32    
64     176    
48     64     
-16    -64    
96     272    
48     -96    
144    256    
-112   -848   
160    -80    
32     -16    
96     32     
0      0      
32     -80    
-288   32     
32     -304   
240    -112   
-320   -432   
-448   -64    
32     128    
0      0      
112    -144   
48     80     
112    -736   
64     -48    
-144   64     
96     -16    
-112   -80    
0      -64    
-48    224    
-96    -96    
-128   -16    
64     -48    
-160   -128   
48     -144   
32     144    
-208   -272   
224    112    
160    176    
-480   16     
-208   112    
-240   64     
32     -80    
32     128    
-160   80     
128    16     
0      240    
256    -64    
-144   16     
1008   -2112  
416    208    
784    912    
-672   304    
432    -416   
-720   -512   
480    -48    
-144   528    
-176   -288   
160    -368   
80     32     
176    16     
112    112    
-48    -208   
-64    -64    
0      -240   
128    144    
64     -32    
-320   -32    
-192   -176   
-48    -224   
64     160    
-304   -208   
-96    -112   
-32    -400   
128    80     
160    192    
-48    496    
-512   -960   
224    -160   
80     -16    
320    224    
-144   16     
-160   80     
224    160    
-96    64     
144    -160   
-288   -336   
160    272    
-304   -160   
208    -288   
-256   208    
224    16     
-96    80     
-16    16     
-304   -80    
-112   -64    
48     80     
496    480    
-272   160    
32     176    
-144   80     
32     80     
64     -16    
-80    -128   
32     96     
208    512    
-400   -192   
-1792  -208   
272    -32    
-160   64     
-32    32     
-16    -192   
0      -48    
96     112    
-208   64     
-48    64     
0      -32    
64     96     
-16    48     
-48    128    
-80    -32    
64     16     
-1024  -144   
192    128    
16     224    
32     -16    
224    272    
-352   112    
-32    -192   
32     16     
32     240    
112    -128   
64     160    
-80    -96    
64     0      
-272   -144   
144    -32    
80     192    
16     64     
0      0      
-96    16     
32     112    
-128   -160   
0      0      
16     176    
-80    16     
0      48     
-272   16     
80     -48    
-32    272    
-144   16     
16     48     
-96    16     
176    192    
-80    -16    
32     176    
-64    192    
160    0      
-96    48     
-16    0      
80     176    
-32    32     
-64    128    
-128   48     
208    208    
-112   -48    
-80    48     
-416   -160   
-32    448    
0      48     
144    80     
-128   176    
160    16     
-160   144    
80     128    
16     80     
96     592    
-480   -112   
400    48     
-96    192    
-96    -112   
112    80     
32     48     
-256   -16    
96     48     
-16    192    
80     160    
32     32     
0      16     
-48    80     
64     0      
96     80     
-96    64     
-32    -32    
0      -544   
-240   -272   
32     16     
-16    0      
0      160    
160    144    
-96    96     
0      208    
0      -64    
-32    -16    
32     144    
-32    -192   
-32    80     
80     48     
-48    64     
96     -48    
-48    -64    
144    224    
144    96     
-96    144    
-48    80     
208    256    
-176   64     
-32    16     
96     64     
-64    -48    
96     0      
32     32     
-176   80     
64     64     
-48    112    
96     -112   
-64    464    
-240   64     
16     -64    
96     144    
192    96     
-128   80     
80     -64    
128    48     
0      48     
32     240    
-48    -16    
112    144    
-16    -16    
0      80     
80     80     
160    -240   
-192   224    
-64    144    
112    -80    
144    -48    
-560   880    
-64    -704   
-224   304    
64     16     
528    -656   
-16    -480   
224    832    
-320   -384   
208    400    
-464   -736   
496    -560   
-192   64     
-48    128    
-112   288    
448    -64    
-288   272    
96     -112   
48     320    
16     -32    
16     96     
-16    -128   
48     304    
0      -176   
192    208    
-144   -240   
176    240    
-208   48     
384    224    
-208   -16    
48     0      
144    64     
-48    160    
112    144    
-32    0      
48     176    
272    -112   
-144   288    
160    -80    
-208   208    
176    32     
160    -544   
-32    0      
-16    -2800  
48     -32    
0      112    
144    112    
-48    208    
144    16     
-224   80     
112    48     
112    16     
-96    208    
192    16     
-112   -64    
32     32     
80     -288   
32     80     
176    -704   
-32    48     
64     -144   
80     160    
-64    80     
48     -48    
32     176    
32     -16    
112    16     
16     16     
16     112    
-128   -32    
16     80     
176    -96    
80     128    
-80    -144   
80     -144   
48     -1440  
-80    -48    
-48    -1024  
112    80     
-64    400    
-64    32     
224    128    
-32    224    
176    160    
-160   128    
-80    304    
64     -32    
96     -80    
-16    -544   
48     16     
-96    -1296  
-16    160    
176    -272   
64     144    
160    128    
0      80     
112    224    
-48    160    
80     32     
32     32     
16     64     
192    -496   
-112   0      
128    -544   
0      112    
112    -144   
112    224    
-160   -16    
176    448    
-48    176    
64     208    
64     -144   
80     -432   
16     256    
0      -160   
96     16     
-96    -256   
64     64     
128    0      
-16    32     
240    192    
192    480    
176    -448   
-272   32     
16     -144   
240    160    
-96    -32    
256    -64    
-16    352    
-96    -208   
176    144    
-32    -80    
64     176    
-32    0      
16     96     
112    -496   
-192   -160   
256    -128   
144    -144   
-80    -32    
80     -672   
-48    -288   
80     -64    
128    96     
0      -256   
48     -608   
48     -256   
48     64     
192    240    
96     64     
16     -48    
48     -944   
-16    32     
112    -128   
192    144    
96     896    
112    -464   
-624   -96    
80     -432   
96     64     
64     0      
48     16     
-16    -496   
48     -160   
112    160    
464    368    
-160   64     
-32    192    
112    -288   
272    128    
-112   -96    
-80    -176   
96     272    
-112   -112   
192    -128   
-192   -272   
208    -144   
0      -496   
-32    -112   
192    -176   
-16    -32    
160    -96    
-224   48     
144    -128   
-64    0      
32     0      
-64    64     
-224   -48    
-192   -16    
128    -48    
112    -48    
-96    0      
80     64     
0      224    
-96    -640   
96     304    
176    -64    
96     256    
496    1488   
400    -80    
-528   -768   
-544   -208   
-848   -96    
480    -208   
-1200  -432   
736    -192   
-416   464    
496    -256   
-512   -128   
-128   -448   
384    16     
-48    208    
64     -112   
48     -32    
464    -128   
-384   352    
48     -224   
-256   128    
160    -208   
-224   320    
-160   -384   
224    -32    
-128   -192   
224    -96    
-128   -768   
-352   448    
-368   -576   
112    160    
-432   -112   
272    -32    
-208   -64    
160    -80    
48     -112   
128    -144   
160    256    
-112   -96    
-512   0      
16     96     
-144   16     
64     -160   
32     224    
-16    -720   
-160   176    
0      -224   
240    144    
-416   144    
-128   -64    
-288   -112   
240    112    
16     -80    
320    -112   
-304   128    
32     -16    
96     80     
-192   -320   
640    576    
304    224    
-112   -48    
-112   224    
80     -128   
-176   48     
32     32     
48     -48    
-112   -176   
-304   -128   
32     -80    
-144   -112   
80     -64    
-80    160    
256    -192   
-144   48     
80     16     
-32    -256   
96     -256   
-112   192    
-128   192    
48     96     
-304   -336   
304    160    
192    32     
48     -112   
-384   -80    
-672   -240   
-64    -80    
-16    352    
48     144    
-112   80     
-48    -48    
112    0      
-736   48     
-160   112    
0      -80    
-32    0      
32     -144   
-16    -48    
-128   -32    
144    304    
-384   -192   
144    0      
0      -16    
64     128    
-48    48     
-192   16     
160    208    
-528   -160   
-16    112    
-496   -80    
-32    16     
80     80     
96     96     
-48    -64    
-112   -160   
-48    -176   
64     608    
-48    -208   
-48    -80    
-176   -144   
-16    208    
-16    128    
-32    96     
-48    -32    
-32    160    
-48    -32    
-192   -32    
-208   -80    
96     16     
-176   80     
128    -64    
144    288    
-240   -32    
-16    32     
-64    32     
-272   -48    
128    0      
-64    80     
32     -48    
-208   -32    
-160   112    
-464   16     
-112   48     
96     0      
-208   112    
208    -288   
64     464    
-208   0      
128    80     
-128   -48    
0      112    
32     80     
-272   -64    
64     48     
-112   160    
-64    -16    
48     96     
16     128    
-1856  -96    
160    32     
-112   -144   
48     80     
0      64     
0      144    
208    304    
-384   96     
16     -16    
112    -32    
32     16     
96     48     
-160   160    
-208   144    
-112   -16    
-208   16     
192    -160   
240    256    
-80    16     
-16    176    
-96    80     
48     16     
32     48     
48     144    
-192   96     
240    96     
-144   64     
176    -32    
-240   32     
-48    48     
-112   48     
-96    192    
48     80     
-304   -112   
96     112    
-160   128    
96     -224   
-16    240    
-48    160    
-384   -608   
-880   32     
896    464    
-528   112    
-224   -176   
-640   560    
592    16     
-928   160    
624    -64    
96     544    
-32    -368   
-80    320    
-112   -96    
320    240    
-160   0      
112    160    
-80    16     
-64    16     
32     208    
112    -128   
-112   144    
-32    -176   
32     144    
64     -224   
32     224    
64     -176   
32     288    
-80    -128   
64     208    
32     -64    
-64    112    
-32    -64    
-64    272    
96     64     
-112   64     
32     -48    
-96    112    
-80    112    
16     176    
0      0      
80     16     
-64    64     
48     128    
0      128    
-144   0      
32     -48    
0      128    
-48    -160   
272    96     
-576   -64    
192    32     
128    160    
-16    96     
80     80     
-16    32     
48     16     
144    -16    
-224   160    
256    192    
-32    112    
48     0      
48     112    
-32    32     
16     48     
64     -48    
-96    64     
128    64     
-48    32     
-32    64     
32     32     
-32    80     
0      64     
-48    96     
0      48     
176    144    
-336   -96    
160    -64    
-80    112    
-48    256    
32     0      
32     176    
-32    160    
16     48     
192    336    
-16    -16    
144    96     
-208   80     
176    -16    
112    0      
96     240    
-240   -208   
0      -368   
32     64     
128    272    
144    176    
-208   -352   
-16    -32    
208    240    
128    96     
80     240    
-80    32     
128    192    
48     144    
96     128    
-16    96     
-64    -144   
-112   16     
32     -96    
80     -64    
-16    16     
48     16     
64     16     
80     144    
48     128    
32     96     
64     128    
0      112    
80     144    
-16    160    
240    -96    
-32    176    
128    16     
-96    -80    
-32    64     
112    32     
336    336    
-80    192    
32     -1232  
-112   80     
16     48     
32     32     
16     -64    
16     112    
32     80     
16     80     
-160   -800   
0      -192   
-128   -240   
96     -160   
-48    304    
96     -96    
32     192    
-64    -912   
144    32     
-32    176    
64     -16    
64     64     
160    160    
-48    -48    
32     80     
-32    80     
96     48     
-32    16     
16     -80    
0      160    
-16    -160   
48     96     
-48    -160   
224    48     
-64    32     
288    192    
-96    -240   
-112   160    
32     -96    
32     144    
464    48     
-272   80     
176    288    
-176   -288   
192    64     
0      -176   
64     32     
96     -208   
0      160    
208    -816   
-208   -96    
240    352    
-96    96     
208    80     
-128   112    
16     0      
112    112    
0      112    
32     96     
-16    -128   
336    -128   
48     240    
48     -368   
-80    64     
144    -368   
96     64     
-96    -80    
-32    144    
-80    240    
32     -80    
-64    32     
256    -400   
-176   2144   
-592   -1040  
-64    -1040  
1040   224    
208    0      
-432   -112   
-112   0      
64     64     
448    -64    
-352   320    
272    -240   
-352   448    
96     -176   
80     128    
16     -464   
176    480    
-80    -48    
320    304    
-112   -256   
336    208    
-80    128    
192    -192   
-80    160    
96     -112   
-96    -496   
64     -368   
16     160    
304    1056   
-208   -768   
-128   -16    
224    -448   
112    -208   
-16    144    
-16    0      
208    352    
112    -48    
80     -64    
-32    -368   
64     -432   
96     208    
-64    -944   
-16    224    
16     -144   
-16    -752   
144    32     
128    -784   
32     -80    
128    -944   
-144   -48    
-112   -32    
96     48     
0      48     
96     48     
-112   -288   
80     80     
48     -48    
-80    -48    
-16    -176   
-32    -272   
-1856  -80    
48     -128   
144    16     
-96    -160   
128    -112   
48     -1744  
112    0      
32     96     
80     144    
0      -368   
-128   176    
-192   -64    
192    16     
-336   -112   
144    -64    
-48    64     
48     176    
-64    80     
160    -48    
0      64     
64     -384   
128    112    
-48    208    
224    608    
-272   64     
32     48     
208    -224   
-128   -560   
224    -64    
32     32     
16     48     
48     32     
-224   -208   
64     -192   
48     -64    
-128   -112   
-80    16     
64     -800   
16     80     
128    -80    
64     240    
64     48     
48     -128   
48     96     
16     48     
32     -80    
32     -128   
-704   -16    
112    -208   
-80    -176   
176    -176   
-96    -16    
16     -896   
0      208    
32     -352   
192    368    
-112   0      
48     96     
-192   -32    
176    -32    
-320   208    
192    80     
-288   208    
-48    176    
-160   64     
16     -144   
-112   -64    
208    -112   
64     160    
-48    160    
48     112    
48     -32    
160    -16    
-144   128    
304    -128   
-384   -32    
-80    -64    
64     96     
304    -272   
-464   -64    
80     -128   
-80    160    
368    -128   
0      304    
-144   128    
160    -240   
-784   -16    
208    80     
-176   48     
224    -112   
-128   128    
96     -16    
-224   -48    
80     -224   
-320   -80    
272    -144   
-96    128    
176    -160   
-16    -304   
224    -416   
80     112    
-160   80     
64     32     
-80    144    
112    64     
-80    -16    
16     -144   
-112   -96    
192    208    
-272   32     
176    -64    
-16    160    
-1488  -176   
112    144    
-304   16     
-192   80     
-32    32     
-576   48     
-80    -48    
32     112    
-80    64     
0      80     
-48    -80    
224    -128   
0      256    
-512   -240   
192    64     
-176   -80    
48     112    
0      128    
-160   16     
32     112    
-256   -224   
-48    -16    
-1456  -16    
64     144    
16     32     
-16    112    
2768   1200   
-1936  -1280  
-560   -1840  
-368   640    
736    256    
-176   144    
-176   -704   
80     672    
288    -496   
-640   496    
192    -448   
-144   576    
-80    -272   
-400   304    
-240   -272   
-16    -224   
112    192    
-16    112    
48     448    
-64    -48    
-144   -80    
16     -176   
-192   288    
80     -112   
-16    224    
80     -128   
-224   112    
80     0      
-464   160    
0      -144   
-48    -48    
96     80     
176    80     
48     192    
-112   -48    
-208   -128   
96     48     
0      128    
16     112    
-96    -16    
-64    0      
-192   48     
48     0      
-576   0      
144    48     
-1168  0      
112    64     
112    -16    
-224   96     
176    -16    
-16    48     
16     80     
48     144    
16     48     
-112   32     
-32    -64    
-32    0      
0      96     
16     48     
32     -64    
-560   -112   
-32    336    
80     -80    
32     80     
-96    48     
272    96     
16     16     
-48    112    
16     48     
-32    112    
-16    -16    
64     144    
-16    128    
-112   48     
-48    128    
-688   -336   
16     -80    
80     -144   
-192   -304   
-16    -64    
-208   112    
-32    144    
64     224    
-80    -128   
-64    -64    
32     -32    
16     112    
32     160    
-160   64     
-144   -32    
-224   -128   
128    16     
64     48     
0      224    
0      32     
-240   -288   
-16    -128   
128    272    
48     128    
16     80     
-112   0      
-32    64     
96     80     
-128   48     
32     64     
64     208    
-128   -48    
80     112    
-16    128    
64     -16    
-16    -16    
-32    160    
80     96     
80     128    
-192   -48    
32     64     
-96    -32    
112    128    
-48    80     
80     16     
-112   160    
-48    0      
-48    -80    
-32    176    
208    224    
96     -80    
48     560    
-224   -48    
256    -64    
-256   64     
112    48     
-16    16     
16     48     
-16    80     
0      32     
-80    272    
-256   32     
432    112    
-176   48     
288    112    
-272   16     
80     80     
48     48     
96     32     
32     128    
-16    96     
144    -128   
48     256    
-32    208    
-64    -80    
48     48     
64     64     
-32    -96    
-128   -32    
432    96     
-16    112    
256    112    
-320   144    
192    0      
192    144    
-80    96     
0      0      
-208   176    
80     -96    
-16    208    
32     -240   
288    96     
-384   208    
240    -96    
-192   208    
192    16     
80     -48    
-16    224    
16     64     
32     80     
-64    -16    
96     -16    
-16    128    
48     -112   
-16    -2080  
16     288    
-112   0      
0      64     
448    -32    
-128   128    
16     -288   
208    256    
64     192    
-144   -16    
-144   48     
176    208    
48     -192   
-32    176    
-160   288    
-96    -544   
16     32     
-160   -48    
2864   -1504  
-464   48     
592    976    
-480   352    
640    64     
-256   -64    
-80    -96    
432    -416   
-32    736    
272    -208   
64     400    
48     48     
384    -768   
-368   48     
368    -112   
0      48     
16     -160   
-112   96     
448    48     
-224   224    
112    48     
208    112    
-224   -256   
224    240    
0      0      
48     224    
32     16     
0      -288   
48     48     
80     -672   
-16    16     
64     160    
16     96     
208    224    
-64    128    
128    96     
-48    48     
0      96     
32     32     
160    48     
-112   144    
64     48     
0      -128   
64     160    
176    -464   
-16    96     
0      -112   
-96    -48    
368    32     
-176   256    
128    16     
-80    160    
64     -128   
256    176    
-288   160    
304    176    
-256   -32    
192    -272   
0      112    
-48    -1056  
64     224    
16     -560   
0      96     
48     96     
48     48     
-16    -64    
0      112    
64     32     
128    224    
-80    64     
112    -240   
144    192    
-144   -160   
160    112    
-32    -288   
96     240    
144    -528   
64     -64    
64     112    
-80    112    
96     176    
32     128    
16     -64    
32     32     
96     416    
-272   -368   
192    0      
128    -288   
-144   32     
192    16     
-96    80     
80     -192   
96     144    
-160   -64    
288    160    
-144   0      
208    192    
-48    32     
-32    -160   
16     16     
96     -32    
80     80     
176    -96    
-176   112    
224    -64    
-48    112    
64     -80    
80     -16    
-64    -1104  
48     128    
64     -128   
-16    64     
16     160    
64     -128   
176    240    
-128   208    
512    224    
-256   -96    
64     -16    
48     -48    
-48    160    
384    16     
-144   -32    
-128   -32    
320    -800   
0      96     
128    -816   
80     -656   
96     128    
64     -128   
-160   -160   
144    -528   
-224   -16    
144    -16    
288    16     
-240   32     
192    -32    
48     -256   
-128   16     
128    -272   
96     80     
-80    -32    
240    48     
-176   32     
128    -240   
-64    16     
96     -432   
112    -80    
-16    -1712  
128    -32    
80     144    
0      -128   
160    -336   
32     80     
64     -112   
16     112    
-32    -400   
80     -176   
-352   48     
80     16     
0      -112   
192    -224   
128    96     
48     -352   
-80    -80    
80     -1328  
-48    -16    
0      -256   
32     176    
-32    144    
16     -144   
-208   -32    
384    -208   
-416   64     
48     -144   
-80    192    
80     80     
96     -208   
96     -896   
64     -16    
96     -1936  
-16    208    
-64    -48    
-144   -80    
160    0      
64     -16    
80     -48    
96     -32    
-80    80     
32     -48    
-1568  0      
64     -80    
16     -320   
112    -32    
32     272    
-16    -112   
-640   560    
-16    1552   
48     192    
-928   -288   
-384   -1168  
704    320    
-272   224    
288    1552   
-672   -128   
64     -144   
-576   -432   
496    -48    
80     64     
32     -64    
48     -208   
32     16     
32     -512   
64     224    
16     96     
-112   -112   
80     16     
-64    0      
0      96     
80     -16    
-176   0      
64     80     
-96    64     
-112   0      
0      -48    
112    -336   
96     144    
-32    -448   
256    16     
-400   160    
128    -32    
-32    -64    
64     -128   
-80    -48    
48     16     
32     64     
112    0      
-464   -32    
16     -400   
-32    48     
160    -240   
48     32     
112    -96    
-48    96     
-144   128    
-16    -192   
-112   -16    
96     96     
-16    80     
64     0      
-32    -32    
80     48     
-352   -32    
144    -16    
80     112    
48     -240   
208    336    
-64    112    
144    -32    
0      -48    
-80    -176   
-32    32     
208    128    
-192   -48    
16     -176   
80     32     
-48    -96    
0      128    
-544   -144   
80     96     
-336   -160   
0      144    
-256   -464   
-544   -384   
-224   -224   
-576   80     
80     0      
-368   -16    
-16    -64    
112    176    
-128   128    
32     -64    
112    -16    
-128   -144   
112    176    
-320   -128   
-128   -128   
-16    -160   
96     96     
64     224    
-160   -32    
32     64     
-16    48     
112    112    
0      48     
16     64     
-96    -32    
96     160    
-160   -160   
64     128    
-128   -128   
16     80     
-64    48     
64     304    
-176   -16    
-64    16     
-80    128    
-240   -48    
-32    48     
-304   64     
48     64     
-128   -208   
80     96     
-32    -16    
176    80     
-112   -32    
0      112    
-48    48     
-96    -48    
-224   -80    
-96    64     
-16    -304   
0      -176   
-176   224    
-48    -176   
80     16     
-240   -16    
272    80     
-64    -32    
-16    192    
96     48     
-160   -80    
320    416    
-512   -96    
336    -80    
-208   160    
112    16     
-112   -64    
-128   112    
64     0      
32     160    
-144   48     
-16    80     
48     -112   
-112   64     
0      64     
-80    64     
-48    16     
96     64     
48     240    
-208   160    
48     -144   
-432   -320   
160    0      
128    208    
-144   160    
-192   -80    
48     48     
80     -240   
-16    48     
0      160    
64     -288   
192    336    
-224   80     
64     -64    
-256   48     
304    64     
-112   64     
416    -32    
-432   64     
128    -160   
-240   288    
-144   32     
96     32     
48     -144   
496    176    
64     112    
-176   144    
-32    32     
320    400    
-208   48     
-48    -16    
32     144    
208    -64    
-144   64     
-32    -48    
-192   -16    
96     112    
-96    128    
240    128    
-224   192    
112    -16    
-80    96     
256    1824   
-1792  -1136  
960    1520   
544    1040   
784    -1056  
-128   704    
-816   -592   
80     -672   
-128   496    
512    16     
160    224    
-400   -96    
64     304    
128    -64    
-64    16     
96     32     
0      -16    
0      48     
-48    80     
-128   -192   
32     64     
32     16     
128    224    
-128   -208   
144    -80    
-160   16     
128    128    
-16    272    
32     224    
0      -64    
16     48     
-16    64     
48     0      
48     144    
-16    32     
176    352    
-192   112    
80     112    
-32    -32    
64     112    
128    64     
-64    128    
64     80     
16     160    
0      112    
48     0      
-144   96     
96     160    
16     -160   
64     160    
-80    64     
16     -32    
-64    64     
224    128    
-128   128    
96     96     
256    48     
-112   80     
48     -16    
16     48     
-64    128    
32     -16    
64     160    
-80    160    
48     -160   
96     128    
-192   112    
-192   80     
112    0      
176    96     
0      64     
-16    272    
-64    -96    
224    32     
0      192    
96     144    
-144   160    
32     160    
48     48     
0      -16    
96     16     
64     176    
0      128    
-144   96     
64     16     
48     -224   
112    48     
0      208    
0      64     
96     96     
32     96     
0      64     
16     -32    
208    256    
-304   -128   
208    208    
-144   -48    
192    -800   
0      128    
64     144    
-48    64     
112    96     
-80    80     
160    112    
16     128    
-128   208    
-48    -48    
-16    64     
-32    32     
128    192    
32     0      
-48    112    
48     -816   
32     160    
160    -2592  
-32    176    
48     192    
176    176    
-192   48     
224    288    
160    144    
-48    128    
-256   96     
208    112    
112    -192   
-368   -368   
240    160    
80     64     
128    96     
48     -128   
-112   128    
16     80     
-16    144    
-160   48     
224    192    
48     -32    
-16    192    
160    112    
64     224    
-80    64     
0      -80    
64     128    
-16    -64    
128    192    
-96    -416   
144    80     
-144   -3120  
176    112    
32     64     
32     128    
64     0      
112    80     
-80    256    
-48    160    
112    -80    
0      96     
64     208    
160    -320   
-64    96     
112    -112   
96     112    
16     -1008  
96     -48    
-32    -640   
224    128    
-96    192    
-32    -160   
208    208    
160    0      
80     240    
-16    -32    
32     32     
-64    -544   
144    -64    
80     96     
48     176    
-96    -32    
48     -48    
80     -368   
16     48     
0      16     
48     144    
48     64     
16     80     
16     16     
48     -912   
176    64     
0      -128   
32     144    
16     -48    
112    96     
0      48     
-32    112    
-32    160    
48     160    
32     -32    
64     80     
1360   -2448  
32     -272   
1024   672    
-352   -384   
-384   -16    
672    -1104  
-288   320    
496    240    
16     32     
-464   -752   
240    224    
16     128    
80     304    
-80    64     
128    -1040  
32     -1872  
-32    -192   
96     -560   
160    352    
-16    -336   
-64    -208   
176    352    
-48    32     
96     176    
-48    -80    
80     -832   
-32    144    
192    80     
-128   -48    
128    160    
-128   -368   
128    -96    
16     16     
256    -80    
-64    32     
160    -112   
-128   224    
0      -224   
160    128    
-48    -256   
144    -624   
-80    64     
144    -96    
-64    80     
-32    -32    
128    32     
-128   -80    
112    -192   
-64    -112   
-48    -496   
32     -192   
48     256    
64     144    
176    -368   
-160   -64    
256    -208   
-112   256    
288    352    
-16    -16    
-32    -208   
32     -288   
-144   -32    
-32    -224   
240    -352   
224    -112   
-80    0      
-16    176    
-48    -80    
160    -160   
-208   48     
48     96     
16     80     
16     80     
32     -240   
-112   -48    
-48    -48    
48     48     
-208   128    
-1136  112    
32     -432   
-64    -400   
192    -240   
-176   -208   
32     -720   
-16    96     
48     -80    
272    0      
32     -64    
-16    -64    
-96    48     
-96    0      
-176   -112   
112    -64    
-752   -80    
96     64     
-96    -48    
-48    -128   
96     64     
48     -112   
48     64     
48     -1184  
16     128    
32     -16    
32     -64    
0      80     
80     48     
-128   -160   
272    -32    
-96    -112   
256    -256   
-496   80     
144    -32    
-64    32     
144    -336   
-16    64     
64     -2896  
16     96     
16     32     
144    -64    
-64    -80    
80     80     
-48    32     
-32    -80    
-304   -16    
16     -112   
-192   -16    
192    -176   
-176   320    
16     -512   
112    32     
-32    -736   
224    160    
-160   240    
0      128    
-112   -96    
208    688    
-416   144    
288    -208   
-176   80     
192    32     
0      32     
-112   -48    
16     48     
128    0      
-32    32     
288    -480   
-240   -32    
96     112    
-224   0      
-96    -80    
64     64     
-16    -16    
-16    0      
-96    0      
256    208    
-432   32     
128    -160   
-80    -48    
-176   64     
128    80     
-256   48     
-416   32     
-96    16     
256    48     
-64    64     
128    288    
-112   16     
48     -192   
-192   0      
144    -160   
-160   -80    
64     0      
64     -288   
-256   -208   
112    224    
-64    48     
-416   80     
-48    -80    
-256   208    
32     -144   
-752   368    
64     -128   
48     16     
-144   -192   
-48    0      
144    0      
-48    128    
144    48     
-64    32     
-256   -16    
0      48     
16     176    
-32    32     
-480   16     
80     -96    
-32    -144   
-16    -64    
2080   -2320  
-96    -1008  
592    224    
-160   544    
272    -496   
-16    224    
-640   -336   
368    -784   
32     560    
112    64     
0      192    
-352   64     
16     112    
112    0      
-96    32     
-192   80     
16     16     
-80    -80    
48     64     
16     -16    
48     96     
16     160    
0      0      
-64    48     
0      -16    
-96    16     
144    16     
-64    144    
96     -48    
-224   -16    
-96    -80    
64     80     
-720   -32    
32     112    
-64    -48    
-16    -144   
176    -128   
-176   128    
128    64     
-48    96     
-176   64     
112    112    
48     16     
64     -32    
-192   96     
32     -48    
-160   176    
-32    -64    
16     32     
16     -48    
64     -48    
-176   96     
-32    -32    
-48    -16    
0      64     
16     -16    
96     96     
-144   48     
-16    48     
-80    16     
-128   48     
-16    112    
-224   -80    
64     208    
-208   -64    
64     -48    
192    32     
0      240    
-192   -16    
176    -16    
0      208    
-176   16     
48     48     
-80    80     
16     112    
-32    0      
400    272    
-400   96     
96     48     
96     -80    
-32    144    
-64    128    
64     -256   
32     256    
-208   80     
0      48     
96     448    
-208   -32    
320    224    
-240   0      
0      48     
0      -80    
-192   -80    
-112   -128   
192    400    
-272   32     
176    112    
-80    0      
48     48     
-32    -112   
16     96     
-16    96     
192    288    
-320   32     
112    16     
-128   176    
-96    64     
176    112    
-320   -64    
304    64     
-208   -16    
192    64     
96     288    
-128   144    
32     32     
64     32     
-64    -48    
176    80     
-96    32     
-128   208    
128    -96    
-64    64     
-112   -80    
256    304    
-16    192    
144    208    
80     176    
-48    160    
-48    96     
80     112    
48     32     
-112   64     
32     112    
-128   48     
64     320    
-96    -48    
176    80     
-192   -176   
-80    -16    
240    48     
32     192    
48     192    
-32    192    
-176   32     
80     16     
0      80     
0      -16    
48     128    
-96    -128   
48     96     
-224   -128   
80     -128   
144    128    
-32    32     
48     112    
64     176    
-160   -368   
192    256    
96     80     
16     64     
0      160    
48     16     
-32    96     
-32    64     
128    160    
112    144    
16     -16    
112    448    
-80    -16    
48     416    
144    -96    
-32    -32    
16     208    
-80    160    
-304   32     
128    32     
-16    -128   
144    224    
-240   -32    
64     32     
0      144    
32     -224   
96     112    
64     48     
-32    112    
32     -80    
112    16     
-32    48     
-16    112    
64     80     
48     64     
-16    80     
16     256    
-208   -160   
192    144    
128    96     
160    -256   
224    1440   
384    624    
-304   -1152  
-400   -1168  
-112   704    
816    464    
960    1696   
-896   -336   
-336   -96    
-320   -304   
544    400    
144    208    
64     48     
-144   -32    
208    -224   
96     432    
32     -32    
-96    224    
-160   -368   
192    -16    
-16    128    
64     -16    
48     -64    
48     -96    
0      -96    
112    208    
-16    64     
-80    -160   
128    32     
-16    -304   
32     112    
80     -288   
48     16     
-64    0      
32     400    
-224   16     
64     -128   
32     512    
368    320    
-208   -144   
80     32     
0      80     
112    -192   
112    48     
16     -176   
96     96     
112    -64    
144    192    
-240   -1344  
256    288    
-16    -16    
160    144    
-48    0      
-96    192    
176    304    
96     320    
192    368    
64     64     
-192   -272   
272    -64    
-144   96     
128    -144   
-96    80     
176    -80    
176    -64    
-32    96     
-80    128    
48     -16    
-16    80     
-16    48     
112    -64    
32     112    
-16    -432   
48     112    
64     -544   
-16    112    
400    768    
-128   464    
96     -112   
32     -112   
208    -112   
-16    64     
16     -16    
-16    224    
32     80     
-16    -256   
208    128    
16     -144   
64     -48    
32     -16    
32     288    
0      -160   
64     48     
192    -288   
48     192    
-48    -144   
16     96     
112    160    
112    192    
-32    -288   
80     -32    
64     128    
128    -144   
80     144    
-128   0      
352    256    
-160   -144   
240    80     
-48    112    
-16    0      
32     -32    
32     -272   
112    48     
96     -144   
-160   -1232  
112    -336   
64     -1264  
-32    -160   
176    -1504  
-32    -112   
48     -80    
96     16     
48     80     
-32    -32    
112    112    
0      -240   
224    -224   
-512   -448   
-48    -48    
16     -160   
208    -224   
-16    16     
96     -96    
64     -704   
192    -144   
0      208    
-192   -432   
288    -48    
-64    80     
144    -96    
-128   96     
224    -16    
-288   -80    
208    32     
16     -64    
-304   144    
-80    -464   
112    224    
32     -400   
128    32     
0      64     
-16    16     
144    48     
-80    240    
0      80     
-32    -16    
176    432    
48     -160   
-192   -160   
-16    16     
-208   144    
-48    -96    
208    -176   
192    448    
-368   -640   
336    128    
416    320    
64     -1696  
-96    -112   
96     96     
80     -224   
160    96     
0      -16    
-96    -48    
-32    48     
-128   -16    
96     80     
-496   -80    
80     16     
64     -48    
0      -160   
-96    128    
-16    -416   
32     0      
176    112    
160    0      
-160   112    
96     -208   
-16    112    
96     -112   
-64    112    
32     0      
-32    112    
208    -400   
-368   16     
16     -128   
-1104  -1920  
1376   160    
-512   400    
736    -704   
144    464    
-192   -400   
160    -192   
144    -240   
208    368    
-96    144    
64     -80    
-656   -144   
240    -80    
-464   32     
32     -128   
-32    0      
112    -224   
32     256    
32     -1696  
48     -80    
0      -64    
0      48     
112    96     
-128   80     
-16    -144   
0      -48    
-400   -208   
272    240    
-336   112    
128    16     
-16    16     
-48    -224   
80     96     
-16    -272   
0      -96    
-64    80     
-48    -128   
-64    0      
-48    -64    
96     112    
16     -176   
80     160    
-64    64     
-272   64     
-208   -304   
128    -144   
144    -208   
16     176    
240    432    
-848   -208   
208    -16    
-576   -64    
80     -32    
-16    -48    
-48    64     
32     0      
-112   -208   
224    32     
-512   80     
-32    -544   
-48    128    
-384   -80    
112    80     
16     16     
80     192    
-272   -80    
-160   -128   
-96    48     
-144   176    
-112   112    
160    -112   
-64    -16    
-272   -48    
0      240    
-432   -64    
96     -32    
16     128    
-208   -192   
96     32     
-240   112    
-32    -64    
112    64     
-112   -96    
-576   -64    
-256   48     
96     -128   
192    224    
-384   48     
176    -112   
48     16     
-80    32     
48     -80    
-192   -48    
48     32     
80     192    
48     64     
-208   128    
-80    16     
-400   -128   
0      -32    
-768   32     
32     64     
64     16     
-32    -256   
-160   -256   
80     96     
16     -16    
-16    48     
-96    -176   
32     80     
32     64     
0      224    
16     192    
-192   48     
0      -32    
-128   -16    
-128   48     
64     -16    
160    192    
-112   -320   
128    64     
-176   160    
-32    208    
288    240    
-352   -224   
128    -96    
-384   -96    
256    304    
-176   0      
-96    -48    
-96    -96    
-16    0      
-1632  -80    
-80    64     
224    64     
-16    -80    
48     128    
-176   128    
32     -288   
-112   0      
-128   -192   
-112   -80    
-48    64     
128    0      
-112   -224   
-160   -80    
48     -240   
-32    144    
128    336    
0      -112   
0      64     
48     32     
-80    96     
64     80     
-48    -112   
48     256    
48     304    
0      -512   
208    192    
-80    112    
-96    -160   
80     144    
-32    32     
-64    112    
80     128    
-272   -16    
160    80     
64     256    
0      112    
-96    96     
128    144    
-112   -80    
-64    144    
-48    16     
-16    112    
-64    160    
-32    112    
-336   -112   
-16    128    
48     96     
-48    16     
16     112    
48     80     
128    112    
-352   48     
-16    -176   
16     0      
96     160    
-48    48     
-112   112    
-96    -16    
96     160    
-320   -96    
-96    112    
160    -80    
64     176    
-208   192    
-320   496    
-1760  -1328  
-176   -784   
-256   688    
272    400    
-32    400    
-368   -816   
16     -128   
560    112    
336    -32    
-384   -32    
-48    272    
208    -128   
96     416    
-288   -720   
304    128    
-208   80     
80     128    
-288   144    
208    272    
32     0      
-32    -128   
64     32     
112    -48    
-128   320    
-48    -32    
-16    272    
-64    64     
112    -80    
-128   -64    
272    352    
-224   -16    
-48    -32    
112    144    
-96    80     
160    320    
-320   -192   
352    256    
48     128    
96     160    
32     144    
-160   96     
112    64     
0      160    
192    0      
0      304    
-32    -32    
-80    -208   
192    176    
-160   -144   
16     96     
-16    384    
224    32     
-128   256    
-160   -368   
32     208    
80     304    
-80    -64    
-112   -160   
96     352    
32     -144   
0      160    
0      80     
80     80     
-304   -32    
160    96     
-48    112    
16     208    
-64    -144   
80     -864   
64     32     
48     112    
64     112    
16     400    
-16    -112   
112    112    
48     400    
-112   208    
544    192    
32     320    
-288   224    
16     -192   
16     -32    
112    80     
96     -272   
-96    128    
-32    -288   
336    368    
80     -32    
16     -32    
-64    -80    
144    176    
64     160    
-16    16     
-16    32     
48     -208   
48     -64    
64     144    
48     208    
80     112    
-64    0      
112    -1120  
128    80     
0      64     
112    192    
-48    112    
-32    -128   
16     -336   
-128   -160   
-64    -128   
96     128    
-96    64     
0      -128   
64     128    
64     -288   
64     48     
-64    -112   
96     160    
80     96     
304    288    
-256   32     
144    64     
-32    -288   
64     96     
112    192    
-112   0      
176    48     
-112   -128   
160    144    
-32    -160   
80     96     
16     -112   
-64    144    
48     -1824  
96     -16    
-80    -176   
144    704    
160    -128   
-16    208    
-112   112    
144    32     
16     112    
64     -128   
-48    288    
-32    0      
96     288    
192    144    
48     288    
-48    -592   
48     80     
0      -816   
16     64     
96     160    
-48    80     
16     48     
48     64     
48     144    
48     -288   
304    -16    
-48    256    
48     64     
-32    -368   
0      32     
112    -160   
-64    32     
368    -96    
-16    128    
-64    208    
-320   64     
96     -32    
112    -256   
96     208    
160    -384   
-32    240    
256    -176   
80     112    
-32    -160   
80     96     
32     112    
96     16     
32     32     
112    64     
-96    224    
384    -176   
-64    224    
16     -128   
48     128    
16     -176   
64     112    
16     -128   
128    144    
32     96     
-48    64     
144    80     
-96    -96    
224    80     
-32    -112   
-1104  -64    
-192   -624   
-560   -160   
912    32     
-224   -576   
112    -272   
-224   576    
336    -128   
-320   464    
192    -368   
-176   80     
-48    -288   
288    -624   
-96    288    
64     -736   
-128   176    
16     -144   
-112   352    
96     -272   
96     208    
96     -272   
-64    256    
160    -16    
-48    -416   
144    -528   
-192   256    
240    -208   
64     304    
-16    32     
-64    -208   
128    32     
-96    32     
144    -176   
-656   32     
48     -48    
112    64     
16     -592   
32     -48    
-32    -1344  
208    64     
80     -112   
16     -48    
16     160    
96     64     
32     -160   
-64    -432   
-48    144    
-16    -400   
96     176    
-304   -112   
288    -96    
0      -464   
0      -112   
304    160    
-224   96     
192    -1376  
-80    176    
-128   -192   
160    0      
16     16     
16     -128   
64     48     
-32    0      
-608   -160   
128    64     
-608   -112   
80     32     
-48    0      
176    96     
-16    -32    
32     -496   
-48    96     
80     -112   
16     144    
80     64     
-80    -208   
144    0      
112    -80    
-128   32     
192    16     
-208   -16    
128    -144   
208    160    
-112   -176   
-32    16     
128    -976   
80     224    
192    -320   
192    160    
-352   16     
160    -48    
-192   -32    
0      -48    
48     80     
144    192    
-176   -160   
16     -208   
-1440  144    
-16    -208   
-96    -112   
144    -304   
64     112    
256    -992   
-80    16     
-144   -64    
80     -32    
-128   -112   
176    96     
-128   -96    
192    48     
-176   -224   
144    -256   
-96    48     
112    -112   
16     144    
0      -192   
112    160    
128    -272   
-128   -128   
-32    288    
112    128    
0      64     
48     64     
-208   -80    
32     0      
176    336    
-80    -112   
96     416    
-144   -112   
0      96     
112    -288   
48     272    
32     -96    
-48    -32    
48     32     
128    160    
-240   -96    
32     -224   
-32    128    
160    80     
-48    192    
-176   -304   
208    -32    
64     -208   
0      16     
-1072  -240   
-192   96     
-32    -112   
16     32     
-64    64     
-944   -48    
-176   0      
112    -48    
64     80     
-288   -288   
48     -128   
272    480    
-176   208    
-320   0      
-128   16     
-160   -16    
-416   16     
-112   32     
-352   0      
-160   -112   
0      112    
-208   -16    
-304   -96    
48     176    
-48    -80    
-128   -96    
-224   80     
144    -176   
48     16     
-304   48     
336    -96    
-384   96     
32     -80    
-16    -32    
-160   48     
64     48     
-96    -16    
-224   80     
-128   -16    
-160   -96    
-64    48     
0      -96    
32     96     
-96    64     
64     16     
-192   -160   
32     128    
-16    32     
-80    -16    
96     112    
128    96     
-48    96     
2304   -1232  
-1200  -1808  
400    1104   
-48    736    
16     -160   
176    1072   
-960   -544   
912    1184   
-896   448    
336    -384   
-560   48     
352    96     
0      224    
-336   16     
-128   16     
208    -224   
-96    320    
304    -752   
-16    144    
-928   -48    
160    528    
32     48     
-208   0      
208    -176   
-64    304    
16     -112   
48     0      
-304   -96    
-32    -160   
-240   -96    
64     -32    
208    208    
-240   -80    
64     272    
-704   -80    
64     -208   
80     16     
-32    96     
208    160    
-384   96     
160    112    
-32    16     
-16    -96    
-96    224    
176    32     
64     160    
-208   -176   
128    288    
80     192    
48     176    
32     32     
48     32     
-48    320    
0      -16    
-160   -80    
-80    32     
144    336    
-240   -48    
-80    -48    
0      -144   
-384   -192   
64     32     
-128   64     
144    48     
-240   -48    
-96    48     
-48    128    
48     384    
-48    -64    
-112   -64    
112    96     
-16    240    
-48    16     
48     0      
-96    16     
-48    0      
80     208    
48     32     
240    256    
-96    176    
-64    128    
-16    -96    
0      416    
32     16     
16     -80    
-176   -144   
144    0      
-64    16     
192    544    
-336   -112   
208    144    
-48    48     
-128   -16    
144    176    
-96    -80    
48     -16    
96     -32    
48     16     
16     -144   
208    208    
32     112    
48     112    
-80    80     
-80    176    
304    640    
-160   -144   
208    224    
16     80     
-32    48     
336    208    
-192   176    
-16    32     
144    176    
-176   160    
48     32     
64     48     
-176   48     
272    192    
16     64     
-144   48     
-208   -112   
128    48     
32     112    
-80    224    
16     -64    
112    160    
-32    -64    
32     48     
-112   16     
128    64     
-32    -96    
0      -32    
-208   -80    
160    256    
-160   0      
336    -16    
-256   -144   
-16    -32    
-64    128    
112    0      
16     64     
48     48     
80     128    
64     112    
16     192    
-16    48     
16     48     
-128   96     
96     -48    
32     160    
-64    -32    
128    144    
-32    224    
64     384    
-32    48     
-48    64     
240    352    
-224   112    
224    -64    
64     -16    
128    0      
-96    96     
-16    16     
-64    -32    
128    96     
64     -80    
16     160    
-48    112    
128    -2048  
96     176    
-16    96     
-48    -48    
64     32     
320    144    
64     192    
-144   128    
96     -96    
32     288    
16     -112   
112    160    
-16    48     
0      64     
32     -16    
48     -96    
128    256    
-64    432    
-144   32     
80     96     
16     -32    
160    16     
32     64     
112    240    
-64    -80    
96     144    
-80    144    
128    48     
-80    16     
2048   1104   
-560   256    
1232   -752   
-848   -1072  
1120   -1152  
-832   256    
480    96     
-160   656    
224    -352   
-288   -624   
96     -48    
224    -32    
-336   352    
160    -176   
-96    272    
144    -304   
-128   -176   
208    -192   
-96    -16    
192    -144   
-176   144    
208    -32    
48     464    
144    -192   
-48    144    
-64    16     
144    128    
112    128    
96     160    
16     -208   
-48    64     
32     -32    
112    176    
16     48     
-64    48     
-96    -1120  
144    -80    
160    96     
128    64     
-16    112    
32     64     
-64    176    
176    48     
96     192    
-80    -208   
64     48     
-32    16     
192    240    
-32    -208   
48     96     
32     -336   
0      96     
32     48     
16     80     
16     16     
64     32     
16     112    
-48    -80    
160    112    
16     -112   
80     176    
64     -272   
64     96     
112    -256   
16     48     
16     -288   
-32    128    
32     128    
128    112    
0      0      
64     96     
48     -112   
-48    112    
32     48     
96     -112   
256    352    
-128   -144   
224    32     
64     -64    
-96    16     
368    224    
-224   368    
-32    -192   
112    128    
-32    -224   
208    0      
112    -176   
-128   64     
-32    336    
32     -288   
64     32     
80     -304   
-112   32     
64     -96    
-48    -320   
32     -160   
224    -2368  
32     112    
224    -704   
-176   80     
-144   -384   
160    32     
144    -32    
80     -560   
-16    -16    
-16    -112   
48     -208   
32     -288   
-96    -352   
32     -96    
96     -336   
128    -1536  
64     80     
-64    -176   
96     160    
128    64     
48     -48    
128    96     
-96    -336   
96     80     
128    -16    
128    -48    
0      -1920  
48     144    
16     112    
272    480    
-96    -48    
320    208    
-96    -112   
-32    80     
-208   -208   
-16    -304   
-32    -32    
-80    -80    
208    -48    
-96    0      
96     -208   
80     -448   
112    -160   
176    32     
32     192    
-160   -144   
112    112    
-96    -176   
320    48     
-208   0      
-64    0      
-16    -16    
32     16     
16     -80    
-16    -256   
0      -192   
96     128    
144    80     
-176   -320   
128    176    
-48    16     
112    -112   
112    -48    
112    32     
0      -32    
-16    48     
-16    32     
96     -80    
-64    -128   
-96    64     
0      -96    
208    -160   
112    176    
-112   -912   
32     -32    
-80    0      
160    144    
-32    -48    
48     80     
96     -80    
48     16     
-368   -112   
96     -48    
-560   -32    
160    -16    
-224   0      
64     32     
112    -80    
288    -368   
-160   -32    
256    -1312  
-96    144    
112    128    
48     -160   
-416   -128   
144    -160   
-192   -144   
192    208    
-208   -16    
16     16     
-48    -64    
-352   624    
-720   -992   
-160   -816   
16     576    
16     -608   
-336   -1056  
496    -208   
-304   544    
64     -192   
-176   16     
384    -112   
256    336    
-304   48     
96     0      
-240   -320   
112    -240   
-224   -16    
256    -64    
-416   128    
-64    -752   
96     -48    
16     -224   
176    256    
-320   64     
80     -608   
-272   -240   
-96    -352   
16     -112   
-192   144    
96     240    
-64    -96    
96     -32    
-96    -368   
-128   96     
144    48     
-240   -240   
176    -144   
-192   144    
-16    128    
80     -32    
-224   48     
64     0      
-80    16     
96     -96    
-80    0      
-224   -48    
-48    0      
-64    -240   
-96    64     
-16    128    
96     0      
-80    112    
128    80     
-288   208    
-992   -112   
-48    112    
-112   -32    
160    64     
32     0      
16     -80    
-32    -32    
16     224    
-288   -80    
128    -128   
-64    96     
-80    64     
-208   -16    
32     -80    
-128   0      
-64    -48    
-80    48     
-64    48     
-80    80     
-272   -208   
-48    -144   
112    -144   
-16    256    
-320   -192   
80     0      
-32    288    
-272   128    
64     -160   
144    -16    
-240   144    
96     160    
-272   96     
-640   32     
48     144    
-96    -80    
128    128    
-64    -64    
48     32     
144    208    
-192   64     
-96    80     
-80    -96    
80     96     
-64    -64    
64     160    
-192   48     
16     80     
-48    -80    
48     160    
-112   -368   
160    32     
-96    16     
336    464    
-240   16     
32     176    
-96    32     
144    80     
0      -32    
-128   -80    
-96    -160   
-64    -32    
-416   -128   
96     32     
-128   -16    
-448   -16    
208    240    
-144   -64    
-16    16     
0      64     
-192   0      
176    -128   
-80    32     
0      -96    
-64    -112   
-160   32     
160    -80    
144    128    
-240   144    
432    128    
-480   -16    
96     16     
32     32     
-64    240    
96     -32    
64     48     
-160   160    
-64    32     
80     -80    
0      48     
-160   0      
336    176    
16     80     
-352   -48    
32     32     
-320   -48    
192    128    
-48    64     
144    64     
-128   16     
48     -16    
-160   32     
-48    -144   
128    128    
-80    96     
48     16     
-128   16     
-64    80     
-160   -288   
128    64     
-192   80     
208    -16    
-272   96     
256    208    
-144   48     
224    -32    
16     160    
160    144    
-208   112    
-96    0      
-80    -96    
160    -48    
-16    240    
-80    -144   
208    176    
96     0      
-32    304    
-128   32     
-16    -16    
256    32     
-32    304    
-96    0      
-16    128    
-80    -32    
96     -80    
32     144    
-32    48     
80     192    
-144   16     
144    272    
-288   -112   
48     16     
-64    -64    
-576   -1856  
-416   816    
272    496    
-768   96     
176    224    
-512   -160   
-112   368    
-736   -272   
384    656    
-48    128    
16     -352   
-256   224    
272    16     
176    336    
0      -112   
-160   80     
208    16     
-144   160    
112    -32    
112    256    
-80    -32    
80     80     
-176   240    
240    32     
-176   -16    
112    -192   
-160   128    
144    240    
-64    128    
-16    80     
48     0      
-48    64     
144    96     
-96    144    
128    112    
16     128    
-48    0      
80     176    
-192   -16    
192    112    
-144   -96    
80     -864   
-16    128    
16     80     
80     32     
-96    16     
48     128    
64     96     
96     64     
-80    64     
0      48     
16     192    
-48    144    
-96    48     
48     144    
144    -144   
0      -2752  
-32    192    
112    112    
112    112    
32     80     
48     128    
80     112    
32     48     
80     32     
-80    48     
-16    32     
16     160    
-144   -224   
192    80     
-48    192    
16     -400   
0      48     
112    112    
-16    64     
0      80     
144    176    
-32    0      
80     64     
160    448    
-320   96     
144    48     
48     448    
-96    -32    
-1056  -464   
112    96     
32     -192   
-176   32     
32     -1488  
32     128    
64     16     
16     80     
64     32     
144    224    
-80    -256   
-32    128    
176    96     
96     368    
-48    0      
-112   -304   
112    64     
208    -48    
48     160    
-16    -896   
-64    64     
144    112    
16     96     
48     176    
64     128    
0      -96    
80     144    
-16    96     
80     64     
64     160    
-48    -48    
224    160    
-112   -144   
144    128    
-64    -528   
176    128    
-112   -544   
64     48     
80     160    
192    176    
-80    64     
-32    32     
208    496    
-32    192    
160    48     
-32    -48    
0      80     
192    -256   
-96    224    
64     128    
80     112    
0      -560   
144    288    
-160   -544   
240    240    
-352   48     
176    16     
-16    96     
0      48     
80     96     
16     -256   
160    224    
48     -16    
0      -96    
64     -304   
96     240    
48     -448   
-16    160    
80     160    
32     80     
144    80     
-64    224    
224    -112   
16     176    
16     32     
96     -64    
16     0      
80     32     
64     112    
80     -176   
32     112    
-32    -176   
96     96     
176    -32    
-64    144    
0      -48    
-32    160    
64     144    
-80    -144   
16     192    
16     -96    
128    96     
-112   -144   
32     -32    
176    -176   
16     128    
80     -128   
0      96     
32     -16    
128    -496   
-192   -16    
64     -656   
144    -720   
32     16     
80     -336   
32     -80    
-80    -432   
128    -160   
48     224    
240    0      
32     240    
80     -16    
48     -1456  
256    1712   
-1408  -1888  
304    944    
240    272    
336    -560   
-576   544    
32     -448   
160    208    
48     -608   
96     176    
-416   -272   
16     160    
240    416    
-16    -160   
-112   -96    
-96    -128   
144    -32    
-80    -304   
32     304    
-16    -272   
48     -32    
-96    -448   
144    64     
-240   48     
160    -32    
-144   -160   
112    -176   
144    -48    
-96    64     
288    -128   
-112   176    
128    -80    
64     0      
-272   -16    
272    -96    
-400   -80    
160    160    
48     0      
16     -80    
-16    -128   
112    -736   
64     -256   
0      -592   
16     0      
224    -16    
80     224    
-16    -64    
-64    -320   
0      48     
-16    48     
96     -64    
32     48     
-192   80     
208    -288   
-112   144    
80     -336   
32     48     
48     -176   
64     96     
64     32     
-96    112    
48     -128   
-128   16     
-16    -32    
128    96     
-96    -32    
-64    -64    
-800   -288   
208    80     
-48    48     
64     -16    
64     80     
48     -400   
144    128    
-112   48     
48     96     
192    48     
96     208    
-32    -64    
112    -192   
-192   96     
-80    16     
-352   -32    
320    -16    
-368   192    
-80    -224   
352    16     
-96    -256   
-160   64     
176    -784   
144    32     
-48    128    
32     -160   
32     -64    
48     -112   
-96    -16    
112    48     
-144   128    
80     96     
-208   144    
-112   -176   
112    -64    
64     -320   
80     176    
16     -1024  
128    96     
-768   -32    
176    -80    
-240   0      
48     -96    
0      80     
-48    -32    
176    256    
-112   -16    
-80    112    
48     -48    
-144   -48    
160    -176   
-80    0      
64     80     
-224   0      
112    128    
-144   -16    
-80    -32    
-240   80     
128    -32    
32     288    
-48    144    
64     -32    
48     -32    
-176   -64    
192    304    
160    96     
32     176    
-64    144    
-1088  368    
16     288    
-1008  -176   
-160   -16    
80     16     
160    144    
16     -32    
32     -272   
-352   -80    
96     48     
0      -176   
80     -16    
-144   -336   
16     -32    
80     -112   
-240   32     
0      64     
16     64     
-80    208    
-96    -144   
-160   128    
-16    -16    
0      -96    
-160   -144   
64     112    
-96    -304   
32     144    
-176   -208   
-80    80     
96     -368   
112    32     
16     64     
-96    0      
-352   208    
-176   48     
-80    160    
-176   64     
-224   352    
-160   -288   
16     32     
-48    -784   
288    304    
48     288    
-144   80     
-80    304    
-96    -96    
-48    64     
-16    -80    
32     224    
-32    -112   
128    368    
-304   -32    
-144   0      
16     -128   
128    112    
-96    -16    
160    160    
80     -16    
-128   112    
-96    112    
0      -64    
32     128    
400    -1856  
128    80     
144    560    
-560   496    
-640   -576   
720    288    
-544   -688   
480    272    
-240   -96    
96     0      
16     80     
-160   -224   
240    432    
-80    -64    
80     80     
16     128    
32     224    
-96    -32    
0      32     
-32    48     
64     32     
-288   544    
-32    128    
-64    -288   
-272   -32    
208    80     
-112   144    
32     368    
176    112    
-128   16     
-192   -48    
-16    112    
-32    -48    
48     112    
-128   16     
80     80     
-368   -96    
-112   112    
192    96     
-128   96     
64     64     
-48    16     
-48    32     
-16    -48    
-112   32     
-64    112    
208    288    
-144   80     
16     -32    
-80    -144   
-80    128    
-192   16     
-32    32     
128    64     
-16    96     
240    512    
-192   240    
-16    48     
-32    -160   
-16    -64    
80     144    
16     64     
-80    48     
64     272    
-240   -192   
224    32     
-48    48     
-48    128    
-16    144    
16     48     
64     64     
-32    80     
-48    0      
160    80     
0      16     
128    176    
-256   -128   
32     -16    
144    48     
48     -16    
-80    160    
-144   -64    
64     64     
-128   -80    
48     0      
0      0      
48     112    
-64    64     
48     64     
48     80     
-96    16     
-16    80     
-112   -64    
160    144    
-48    64     
32     -48    
-48    -64    
96     144    
16     64     
32     112    
-32    -16    
16     -16    
80     80     
-16    64     
48     64     
-176   -16    
224    176    
-96    48     
96     80     
-96    32     
96     64     
32     48     
0      48     
0      -48    
48     -32    
112    192    
48     16     
-16    -48    
-96    80     
240    240    
-48    -80    
-48    144    
-48    80     
240    64     
-208   48     
-32    -16    
-16    384    
-176   -128   
384    96     
-336   64     
224    -32    
-144   128    
64     0      
128    160    
-32    48     
-16    208    
-64    32     
16     -32    
64     0      
-16    64     
-16    -416   
112    240    
96     240    
0      -48    
16     176    
-176   -208   
176    0      
-32    0      
144    272    
-64    64     
-112   -32    
64     80     
208    160    
0      96     
-80    -80    
0      -80    
272    -32    
32     288    
-128   48     
-32    32     
-16    -32    
192    144    
112    240    
16     32     
0      272    
-112   -112   
48     -64    
160    224    
128    96     
0      272    
-128   -576   
-32    160    
64     -240   
176    32     
48     48     
-64    -32    
-16    224    
112    240    
-48    48     
16     16     
-32    -112   
-32    32     
16     -64    
-32    -304   
-48    0      
32     -912   
144    80     
320    -1472  
-112   96     
48     112    
-80    336    
128    16     
80     336    
32     -192   
64     32     
32     16     
-80    720    
-912   -1536  
720    -336   
-64    400    
304    240    
-112   496    
-352   -144   
256    176    
192    -64    
-16    272    
-240   -240   
-16    224    
272    32     
80     128    
-192   16     
224    48     
48     352    
-64    64     
-192   -176   
160    -352   
96     176    
96     -240   
-32    144    
48     -640   
208    96     
-48    -48    
64     112    
16     128    
96     208    
0      32     
-80    112    
32     80     
112    32     
-16    80     
144    -96    
-128   80     
112    -224   
32     144    
0      -224   
144    144    
-16    -1376  
48     112    
16     112    
48     144    
32     -32    
0      -272   
176    288    
-144   -496   
288    256    
-336   -144   
400    64     
-160   -48    
128    64     
-32    -288   
160    64     
16     16     
64     272    
32     -112   
160    208    
-96    -16    
112    -336   
80     64     
0      -192   
32     240    
48     -160   
144    96     
-80    -64    
48     0      
0      -336   
240    48     
-64    32     
16     -16    
112    48     
16     -2768  
80     160    
-64    -240   
240    352    
-128   -48    
96     -32    
112    -48    
-48    160    
96     -336   
112    112    
96     -256   
-128   -1280  
-160   -48    
224    -816   
160    112    
-80    -1248  
80     48     
-112   -80    
112    -96    
48     32     
16     -864   
192    128    
-176   32     
208    -48    
-32    32     
176    64     
32     -64    
-48    16     
80     -128   
0      112    
-288   -240   
32     -16    
112    192    
224    80     
-48    -208   
96     -432   
-128   -112   
256    -528   
-48    64     
-80    32     
176    -192   
0      -32    
-48    64     
16     32     
160    256    
-96    -32    
32     -288   
-512   -112   
144    0      
176    -48    
0      -336   
-144   128    
208    112    
448    160    
-288   288    
64     -64    
176    -16    
-80    64     
224    128    
16     32     
80     32     
-304   16     
176    0      
16     -128   
16     -96    
80     -80    
-144   64     
192    -48    
-64    -32    
-32    -192   
-112   -64    
-48    64     
48     64     
224    656    
-32    -352   
-176   -112   
-224   -208   
96     -64    
32     -144   
-448   32     
80     -208   
16     -144   
16     -368   
64     128    
64     -944   
-48    224    
240    256    
80     32     
-224   32     
0      -32    
64     240    
-80    -240   
-16    -336   
-48    -144   
-144   272    
-112   -224   
-848   160    
0      -240   
112    352    
-48    -208   
-112   48     
240    384    
80     -112   
-64    128    
48     -112   
-16    80     
48     48     
144    -80    
0      -240   
-16    -96    
144    128    
-208   64     
144    -80    
0      48     
112    -432   
0      48     
-48    -720   
80     128    
-384   -64    
96     -128   
-128   -16    
224    -160   
-144   32     
64     128    
-992   -1696  
1104   1728   
-1648  192    
384    -672   
176    816    
32     -928   
528    640    
-144   448    
112    -736   
-16    -416   
80     -48    
-48    -128   
32     64     
32     0      
192    192    
-272   -112   
288    32     
-592   96     
96     -128   
48     64     
-288   -336   
-128   112    
144    496    
-368   -160   
-32    -304   
96     64     
-16    -96    
-16    -176   
-176   -80    
192    -192   
0      48     
-48    -16    
80     96     
-304   -80    
32     80     
32     -16    
-80    160    
-16    -128   
-528   -368   
144    -96    
-608   16     
-48    192    
-1104  32     
-32    -32    
32     -32    
-144   -32    
-80    -64    
144    192    
-160   -208   
16     -112   
-192   -320   
-48    80     
-80    -96    
-96    -48    
144    240    
64     352    
-400   -80    
80     144    
64     64     
-160   -272   
192    96     
-160   -48    
16     -16    
-144   32     
80     32     
48     128    
-80    -32    
32     128    
-128   80     
32     80     
-96    -80    
-96    16     
-192   -32    
64     80     
0      48     
48     80     
-320   -528   
144    -80    
-80    -96    
-128   -240   
48     80     
96     256    
96     144    
-96    -96    
-112   -16    
-80    32     
64     144    
-96    384    
-112   48     
-656   -208   
0      -112   
-496   -96    
48     96     
-160   -48    
-16    80     
48     80     
-48    -48    
144    368    
-96    -32    
128    16     
-112   80     
144    144    
0      48     
-32    32     
-272   16     
64     112    
-544   0      
32     16     
64     144    
-144   -80    
144    112    
-96    -32    
16     0      
0      64     
-64    112    
128    32     
-144   16     
80     -48    
0      288    
-64    -16    
-32    0      
-720   32     
208    320    
-64    -400   
32     0      
-352   -336   
496    -128   
-368   400    
320    192    
-128   -176   
-256   -288   
48     32     
-48    16     
16     96     
-192   -96    
256    432    
-560   128    
160    224    
208    384    
-192   16     
128    16     
-96    48     
128    -16    
0      32     
-16    128    
-112   64     
224    208    
-176   64     
128    128    
-128   48     
32     48     
-128   -64    
32     128    
-32    288    
0      80     
224    592    
-336   -224   
32     -96    
-48    80     
128    112    
-112   192    
112    240    
0      16     
64     -32    
-128   -160   
112    208    
-192   -96    
192    -96    
-208   -272   
128    272    
112    144    
-32    112    
-128   -160   
128    32     
160    448    
-128   -160   
-48    352    
-144   -304   
96     80     
-48    64     
16     -32    
0      160    
160    144    
32     -48    
272    96     
96     384    
-256   160    
-208   -64    
112    16     
48     0      
32     48     
-128   32     
96     -16    
-48    144    
224    48     
-112   96     
112    112    
1728   -2528  
48     -96    
224    576    
-192   576    
544    400    
-288   -192   
160    304    
480    224    
-144   -320   
-64    272    
160    208    
80     192    
-336   80     
32     16     
-32    176    
48     -48    
-64    112    
112    144    
-32    -48    
0      16     
80     16     
48     80     
-96    144    
0      16     
-32    48     
128    -96    
64     176    
-32    -144   
-64    -624   
64     16     
-32    48     
192    48     
-16    208    
0      48     
-16    0      
-16    160    
48     112    
-48    -32    
32     80     
160    240    
64     -64    
-128   176    
112    32     
80     224    
-64    64     
192    48     
-128   160    
240    80     
-288   160    
48     -64    
224    144    
-128   144    
96     64     
-48    -48    
0      96     
-32    -112   
96     176    
-112   112    
224    -256   
-48    272    
112    -16    
80     80     
48     160    
80     96     
-80    112    
0      64     
48     0      
112    224    
-160   32     
240    144    
-112   -96    
128    176    
-96    -32    
176    -384   
-16    32     
32     -384   
96     -112   
112    16     
48     112    
-160   192    
96     16     
48     64     
-64    -16    
224    48     
-96    208    
48     176    
-96    -112   
176    176    
-96    -48    
144    32     
0      -96    
192    176    
-96    32     
64     48     
-48    -576   
144    288    
-64    -32    
48     96     
96     304    
-80    16     
272    32     
-96    -192   
176    224    
-112   -144   
96     80     
-160   -128   
192    -16    
48     -352   
-112   144    
176    16     
-80    128    
-16    16     
160    192    
-240   -64    
176    160    
-144   128    
480    96     
-176   160    
160    -160   
32     240    
16     -688   
192    16     
-80    -144   
-32    112    
64     -96    
160    112    
-160   -16    
176    64     
-16    64     
80     -224   
16     144    
16     -80    
192    336    
-240   -624   
176    -32    
0      -208   
48     240    
48     -48    
160    96     
-48    96     
64     96     
16     96     
160    112    
-80    96     
128    -64    
0      80     
-32    -368   
80     144    
64     -368   
32     112    
16     -128   
64     96     
0      -80    
160    -192   
-176   176    
0      64     
0      -16    
16     -112   
-48    128    
80     -128   
208    32     
32     48     
48     32     
80     224    
-16    96     
64     -736   
16     272    
336    -32    
-176   96     
48     16     
96     -1104  
96     224    
-32    -592   
32     -1728  
48     -16    
80     -336   
0      320    
32     -880   
0      16     
64     80     
48     -48    
0      144    
-48    -192   
128    -368   
144    32     
80     112    
-128   144    
-112   -112   
0      -96    
-16    -32    
16     -912   
80     0      
448    -1232  
-192   -256   
112    -544   
-48    -16    
208    48     
240    2160   
-192   -176   
-416   -1360  
144    -1168  
-32    592    
-128   320    
-160   80     
-240   -336   
-480   -816   
208    -784   
160    -64    
384    -32    
112    -432   
-112   -192   
176    0      
224    112    
128    16     
-16    160    
176    -80    
32     -176   
-96    -16    
192    160    
-400   -128   
-48    -144   
-80    -448   
352    -288   
-144   128    
160    0      
48     0      
-32    -2480  
112    160    
16     48     
-32    144    
-208   144    
16     -112   
-176   48     
320    -144   
-640   -544   
224    80     
-1744  176    
384    96     
32     -16    
-32    -384   
-80    -16    
-160   -832   
144    64     
112    368    
192    224    
-160   -224   
192    336    
-240   -48    
224    -96    
-96    144    
-96    -224   
-32    -176   
336    480    
-16    288    
-224   -560   
-96    80     
112    -672   
192    64     
48     -48    
128    80     
-80    64     
240    -64    
-16    -32    
80     -32    
-48    96     
0      96     
0      0      
96     -192   
-352   -16    
32     48     
-16    80     
96     -64    
80     528    
144    -352   
16     -288   
0      32     
240    -416   
-256   0      
96     -48    
-240   48     
0      -176   
-48    -112   
0      -80    
160    336    
-16    -176   
-128   160    
0      -480   
80     -16    
48     -192   
64     64     
64     240    
-80    -32    
-48    240    
-224   -320   
48     -128   
-48    16     
0      160    
32     80     
-928   16     
160    -160   
112    224    
0      -256   
96     144    
-80    128    
48     -352   
32     -176   
16     -48    
112    176    
96     -64    
-208   48     
80     -64    
144    0      
0      -16    
-288   -96    
-864   -240   
-48    0      
-128   -80    
-64    16     
80     16     
-208   -16    
-32    224    
-432   -208   
-112   -144   
176    -64    
48     704    
16     -240   
-64    -64    
-80    -176   
112    -64    
-304   -64    
144    240    
-176   -192   
80     16     
-96    0      
-128   -368   
16     96     
-48    64     
48     192    
-160   160    
-32    -96    
-192   -80    
0      -304   
-384   -432   
176    64     
96     144    
160    288    
-160   -128   
-80    -48    
-16    288    
-96    32     
-32    -304   
432    48     
-224   672    
144    96     
-272   272    
-256   -144   
16     -144   
-16    -48    
192    -48    
-32    -192   
128    304    
-304   48     
32     32     
0      -96    
96     160    
144    32     
-176   80     
144    16     
-512   0      
-112   48     
-400   64     
-32    16     
32     -80    
48     288    
-240   -416   
128    64     
80     48     
16     112    
-112   64     
112    224    
-288   0      
32     0      
80     176    
-112   64     
112    -64    
-80    -48    
176    48     
-176   80     
-128   128    
-80    -144   
176    -32    
-80    128    
96     80     
-128   192    
928    240    
-336   752    
224    -288   
-608   64     
-32    16     
528    944    
-928   -640   
560    176    
-352   -288   
560    240    
-368   -80    
176    -32    
-192   352    
96     -160   
-208   160    
32     -160   
0      272    
144    -32    
-96    112    
-32    -112   
-208   128    
-80    -160   
-80    208    
-304   -144   
-64    208    
128    48     
64     160    
-48    -48    
-64    80     
80     80     
-32    144    
32     64     
-48    -16    
-16    80     
48     16     
-208   96     
16     -48    
-96    160    
96     -16    
144    160    
-208   -48    
-32    80     
64     128    
16     128    
32     -96    
-64    176    
48     80     
64     64     
-176   48     
-80    16     
240    96     
-256   96     
96     160    
-144   -96    
-64    -16    
-80    160    
16     96     
16     64     
48     112    
-80    0      
48     0      
-32    112    
-112   64     
160    -64    
-48    112    
-32    112    
-160   -16    
48     64     
16     32     
176    64     
-32    112    
64     160    
-64    -64    
80     112    
-112   96     
-16    -368   
240    176    
-192   448    
16     16     
48     -64    
112    32     
0      112    
-80    -16    
288    16     
-64    64     
0      -112   
112    -96    
64     144    
-144   96     
64     144    
16     64     
80     80     
-32    0      
192    240    
-256   -112   
144    64     
-128   80     
144    48     
-176   32     
-16    64     
-144   -32    
-16    -48    
176    256    
-256   96     
96     80     
-144   64     
-80    128    
-48    -128   
-80    -96    
96     96     
96     -64    
-128   0      
80     160    
-80    80     
128    144    
64     176    
-16    240    
48     48     
-32    -96    
224    -176   
-144   96     
64     176    
96     160    
128    224    
-144   336    
144    320    
-32    -224   
16     -1296  
-64    144    
352    384    
64     224    
0      256    
80     240    
-176   -16    
96     32     
-272   -160   
160    80     
144    304    
64     0      
-96    -224   
0      288    
128    176    
-80    -224   
64     80     
192    112    
-288   -336   
208    16     
48     208    
0      80     
64     128    
-32    48     
32     96     
-64    -144   
80     240    
-352   -112   
144    -32    
-256   -304   
256    -400   
192    400    
128    272    
-64    64     
32     144    
-64    80     
48     64     
224    272    
-464   160    
-144   -192   
96     -48    
400    304    
-48    80     
-32    80     
-64    80     
224    -80    
0      48     
256    -704   
32     160    
-160   160    
-48    16     
144    112    
48     0      
80     -272   
-96    176    
-32    16     
176    -48    
144    176    
-80    -240   
16     80     
-16    -240   
144    96     
32     -336   
128    16     
64     -160   
-192   96     
128    -144   
-80    192    
112    96     
-304   528    
-1616  -1680  
80     -448   
-112   848    
352    0      
368    192    
0      96     
-560   -96    
64     -784   
288    896    
-480   -2208  
464    240    
-32    -896   
176    240    
-192   -112   
144    16     
-16    80     
160    -112   
-112   48     
-80    32     
-32    -16    
112    -112   
-192   224    
96     -608   
-256   -240   
-16    -208   
64     32     
64     432    
-320   16     
288    80     
-176   -16    
176    48     
128    80     
-112   48     
368    -544   
112    304    
96     -240   
48     -80    
-224   -208   
272    112    
-112   -80    
80     16     
0      176    
64     80     
-48    -32    
-32    64     
-208   16     
176    -160   
144    0      
144    -128   
96     160    
-128   -128   
32     80     
192    -48    
16     48     
-16    -128   
128    -64    
144    112    
-128   -272   
32     352    
144    -944   
48     -992   
0      -64    
416    -2272  
-176   -160   
-80    112    
-64    -48    
176    48     
32     -48    
32     96     
64     -256   
96     -1584  
16     144    
32     112    
48     -16    
-320   -80    
64     -384   
-160   -96    
-224   -800   
-208   -928   
48     0      
176    16     
-112   -288   
0      -48    
112    208    
-64    -432   
-32    -144   
80     48     
336    224    
-80    256    
-96    48     
32     -208   
-784   -48    
112    128    
-96    -144   
112    -512   
64     -48    
128    -2064  
352    192    
-16    288    
96     160    
112    -32    
-128   144    
112    -448   
48     -192   
-128   -96    
48     -128   
-384   -48    
160    112    
192    144    
192    -80    
-272   -240   
112    -320   
80     48     
112    208    
-112   0      
112    -224   
32     96     
-32    -128   
256    -288   
-240   -80    
144    16     
16     208    
-48    -400   
-240   -336   
160    -384   
64     -144   
0      -192   
0      96     
-32    -1328  
32     32     
-96    -320   
16     -64    
-224   16     
336    144    
-240   80     
304    32     
-352   48     
-32    16     
-64    -32    
0      -32    
-16    96     
192    -352   
-80    -80    
0      -928   
128    96     
-80    -400   
64     208    
-80    16     
208    -144   
-160   48     
48     -96    
-80    -32    
48     -176   
-144   144    
96     -112   
-528   -48    
112    80     
-224   176    
144    -528   
64     -80    
192    0      
-48    16     
-176   -48    
-16    -16    
48     -176   
112    32     
-48    -32    
64     -48    
-448   -64    
-32    -64    
-192   64     
-64    -288   
64     -16    
288    32     
-64    32     
48     -1472  
-96    -208   
80     16     
176    112    
-160   32     
176    0      
-96    48     
304    -224   
-128   160    
-64    0      
-128   16     
32     -48    
144    128    
96     -128   
64     112    
-160   -16    
160    96     
-48    48     
288    -96    
-80    272    
32     -32    
2192   -624   
-640   -352   
976    -80    
48     -304   
480    192    
-128   -192   
-240   -512   
768    576    
-240   -320   
32     528    
-912   -240   
-16    336    
-816   -256   
112    144    
-208   -48    
32     -272   
-224   320    
256    -80    
-48    304    
-160   -512   
-352   0      
144    -64    
-304   208    
-240   -304   
-144   224    
32     128    
-176   256    
-80    -272   
-304   192    
80     -96    
-112   64     
32     -32    
-80    112    
-160   -128   
-16    144    
-160   -96    
-32    -128   
-48    -64    
80     112    
144    144    
-320   -144   
-48    112    
-112   -96    
192    144    
-176   48     
16     64     
32     -144   
-16    336    
-176   -256   
224    112    
-112   0      
48     112    
-16    0      
-32    32     
-144   -16    
48     64     
-80    16     
64     208    
-80    16     
-272   0      
-192   112    
-496   -16    
-80    32     
64     -64    
-64    208    
-96    -112   
96     128    
-48    -80    
112    -32    
-48    208    
-64    32     
192    176    
-96    -64    
64     16     
-176   16     
-80    32     
-48    144    
-208   208    
-96    -96    
80     48     
-80    32     
-64    80     
-32    -208   
-48    48     
32     32     
48     304    
-256   32     
160    -48    
-176   -32    
-176   -48    
96     96     
-160   -96    
0      160    
-960   -32    
-48    32     
-176   -16    
0      32     
64     32     
-16    -160   
16     176    
-128   -160   
-272   64     
32     96     
32     -16    
-32    176    
16     96     
-224   -64    
32     128    
-640   16     
32     16     
32     80     
80     96     
16     96     
48     0      
-112   -16    
-48    -96    
48     64     
128    -144   
-144   -112   
-96    160    
0      48     
16     112    
48     128    
64     368    
-16    336    
96     -64    
-192   -80    
64     416    
32     144    
32     96     
-176   -160   
64     16     
16     -64    
32     240    
112    128    
-368   -144   
48     128    
112    320    
-192   -224   
-32    32     
-32    64     
16     16     
-80    0      
80     144    
-112   0      
-16    -96    
-80    64     
0      0      
-32    16     
-32    64     
80     96     
-160   32     
112    128    
-16    64     
-176   -96    
144    96     
-16    256    
-64    -16    
224    80     
32     64     
192    128    
-208   32     
80     80     
80     64     
16     0      
-48    80     
-80    -96    
-112   304    
-16    -16    
160    144    
-96    32     
176    64     
-80    144    
-16    80     
112    -112   
16     160    
16     240    
-112   96     
16     16     
96     48     
80     176    
-176   -48    
-80    80     
400    208    
-80    32     
128    16     
-176   128    
416    -208   
-96    288    
-144   -64    
144    112    
-32    -32    
96     192    
-48    176    
-80    16     
16     32     
0      16     
-368   768    
-432   0      
-544   -672   
-112   528    
-112   -368   
608    704    
-16    -464   
160    96     
64     320    
-224   0      
208    -96    
-176   368    
32     -80    
160    160    
-160   -16    
160    192    
-320   32     
336    -80    
-240   288    
80     -240   
32     336    
192    -16    
-160   368    
-32    -144   
-16    160    
32     112    
-96    192    
-80    -432   
352    32     
-160   16     
304    -1792  
-192   128    
16     -16    
144    144    
96     96     
144    160    
-224   240    
400    352    
-176   48     
-96    128    
96     128    
32     32     
-112   176    
16     96     
96     80     
-128   -192   
256    224    
80     160    
-16    32     
32     48     
-64    -32    
64     48     
-32    192    
80     224    
16     -112   
32     144    
16     32     
112    -32    
-32    -176   
128    192    
96     -160   
112    224    
-96    -208   
-48    64     
32     48     
64     48     
96     -80    
16     112    
-80    -224   
176    96     
-112   32     
112    96     
-112   -16    
80     -32    
64     176    
176    -48    
-64    128    
-32    -800   
256    208    
-304   192    
-80    96     
144    192    
128    80     
-320   -176   
80     -192   
-32    208    
-96    64     
256    272    
-176   -208   
48     -16    
-16    -256   
176    224    
-112   -544   
-112   -48    
272    -2480  
-224   -384   
128    -528   
144    128    
192    448    
128    160    
-288   -64    
176    16     
144    208    
-16    -80    
208    560    
-224   32     
208    160    
-192   -448   
272    224    
-16    -656   
160    96     
-128   -80    
288    176    
-192   32     
160    96     
-64    64     
128    0      
144    288    
-144   -880   
-96    16     
16     16     
224    128    
80     -288   
-128   384    
48     -608   
352    96     
-272   112    
224    144    
48     80     
64     128    
-80    96     
48     -368   
160    112    
-240   -160   
224    400    
192    16     
144    48     
-176   -176   
-48    112    
400    -32    
-128   80     
32     -64    
208    160    
-32    32     
64     96     
-80    -144   
192    -160   
-96    96     
64     -80    
224    224    
-96    -208   
96     112    
32     -48    
112    128    
-16    32     
176    128    
128    -144   
-80    -1280  
80     0      
64     -816   
-16    -320   
32     32     
80     -544   
416    80     
-96    384    
96     -32    
16     64     
16     464    
-176   32     
16     -368   
144    -352   
48     -48    
144    -336   
-144   48     
-176   128    
272    -96    
-256   -16    
0      -320   
128    -16    
96     -96    
32     32     
0      -1024  
-96    -176   
0      -16    
32     -80    
176    -416   
128    64     
32     32     
-48    -112   
-32    -48    
-32    -256   
-48    32     
-80    -176   
176    16     
-64    96     
128    0      
32     -320   
1200   -304   
32     416    
176    784    
-416   80     
240    -240   
208    -432   
-160   -656   
-32    240    
368    128    
-288   -224   
288    -16    
32     -336   
96     48     
0      -496   
192    -32    
-16    -208   
-192   -448   
240    304    
-192   -64    
160    -208   
-32    32     
64     96     
-32    128    
-16    -96    
-64    -48    
64     -80    
-1424  80     
64     0      
0      16     
16     -208   
48     32     
48     -416   
-48    144    
64     -224   
-48    32     
-112   -144   
240    112    
-224   80     
432    -48    
-336   -32    
96     -64    
-208   64     
96     0      
128    96     
16     -192   
-64    32     
80     -192   
160    336    
-80    -112   
192    0      
-208   96     
256    -80    
-240   -64    
32     -256   
-80    -80    
48     32     
-432   -96    
112    80     
-512   96     
-16    -352   
112    64     
32     -880   
-16    112    
96     -3104  
-128   -128   
48     -16    
0      0      
-128   -16    
96     80     
-176   -80    
96     -32    
-64    128    
-16    48     
-64    -192   
64     -272   
32     -48    
384    128    
-272   176    
288    -576   
48     96     
-96    80     
208    -32    
-112   -192   
144    176    
128    0      
-48    96     
80     0      
128    -400   
-176   64     
128    -32    
-48    64     
176    32     
0      16     
-112   -32    
0      -112   
-64    144    
176    176    
-32    160    
0      80     
-160   -32    
112    -48    
-112   -48    
128    16     
-160   32     
-448   -272   
32     48     
-752   -80    
-48    48     
0      -80    
-128   64     
64     144    
32     160    
-160   -48    
64     64     
-144   32     
288    304    
-16    368    
160    224    
-16    176    
-368   -160   
-32    -32    
-32    -128   
80     208    
-80    -32    
-416   -48    
-64    144    
-16    -32    
-80    -112   
-192   -48    
0      192    
224    320    
-224   32     
16     -336   
32     32     
48     -96    
80     224    
-80    -192   
96     128    
-80    -32    
-96    -16    
-64    32     
-288   32     
-176   48     
-64    112    
-160   32     
-1920  192    
-144   -128   
-16    -272   
256    112    
-32    32     
-48    32     
-112   -16    
0      16     
32     192    
-272   32     
-16    -112   
48     0      
48     336    
-160   -80    
-160   -64    
-64    -96    
256    304    
-208   0      
32     16     
48     160    
64     112    
-48    -80    
16     96     
64     128    
16     -16    
-48    224    
-32    -32    
-16    32     
-272   -144   
32     112    
-208   -128   
96     224    
-640   -80    
32     176    
-48    -208   
0      0      
48     128    
48     16     
-112   32     
144    96     
-112   32     
32     -32    
-176   128    
0      -32    
144    32     
-64    -16    
80     80     
-16    -512   
0      416    
-80    -32    
-64    80     
-496   -1024  
1280   2240   
16     176    
64     -688   
-512   384    
384    -288   
-64    640    
-448   -336   
336    -176   
32     -80    
-32    416    
-384   -256   
16     48     
256    48     
208    272    
16     400    
-80    64     
192    48     
-288   -272   
-32    32     
192    -272   
-176   208    
64     144    
240    272    
-528   -48    
160    64     
-224   48     
16     80     
80     64     
-48    224    
144    64     
-144   96     
-32    176    
-32    32     
0      80     
64     160    
-80    -16    
-192   -192   
-96    80     
0      -16    
48     96     
-176   48     
64     112    
0      -192   
32     32     
144    80     
-48    112    
-64    160    
-16    48     
112    192    
-80    -16    
0      -16    
0      48     
96     336    
-96    -16    
32     -80    
48     -16    
-144   64     
128    -16    
-32    48     
0      144    
48     64     
16     0      
16     -48    
112    80     
-144   224    
-64    -192   
176    0      
0      192    
-48    112    
-112   48     
80     80     
64     16     
48     0      
64     48     
0      -144   
-128   128    
-80    16     
16     80     
-128   -48    
96     48     
48     144    
32     96     
-208   256    
-160   -64    
192    80     
16     -48    
160    -96    
-48    32     
48     144    
0      192    
32     208    
-48    48     
208    96     
32     -144   
-256   288    
-208   48     
144    112    
0      -64    
160    208    
-160   128    
192    -16    
-80    144    
-32    -32    
96     -192   
0      64     
-80    96     
160    144    
-80    -48    
16     48     
0      -112   
80     48     
80     64     
-16    144    
-32    -48    
128    -192   
-128   80     
224    192    
-16    112    
16     -208   
-176   -80    
112    32     
240    0      
-128   112    
-96    16     
208    80     
-32    112    
-96    -16    
128    112    
192    48     
-32    -784   
96     192    
112    336    
240    240    
64     352    
-16    0      
-144   96     
-112   -16    
208    -48    
160    96     
-256   0      
224    128    
176    96     
-48    -144   
112    224    
-48    -128   
48     144    
0      128    
32     96     
176    80     
32     16     
-96    80     
96     -48    
80     -96    
48     112    
96     64     
-128   144    
64     -96    
-176   -320   
80     -32    
96     -224   
48     64     
64     -1680  
80     224    
-192   -16    
144    -96    
-96    -128   
128    48     
64     144    
48     240    
-160   64     
-16    64     
128    -160   
176    48     
-16    288    
-64    -192   
-16    80     
160    -1424  
32     144    
16     -1504  
-48    128    
32     -64    
160    192    
-48    160    
-16    -144   
144    -32    
176    160    
-96    256    
-64    32     
48     -16    
96     0      
64     -112   
48     -304   
192    0      
240    -32    
128    192    
-112   -144   
-448   896    
352    -1136  
1072   -208   
-160   -16    
-544   -144   
240    -160   
400    -96    
-112   704    
256    -352   
-256   80     
416    -416   
-80    768    
-32    -704   
-224   592    
32     -320   
224    320    
-240   -240   
144    480    
-176   -80    
208    -560   
-48    64     
256    -528   
-128   304    
144    -320   
80     320    
16     -240   
64     400    
64     -656   
64     128    
-48    0      
144    112    
16     -64    
48     160    
144    160    
80     -112   
96     160    
16     0      
16     144    
96     -48    
32     0      
-48    -80    
96     208    
80     -112   
224    192    
-192   32     
48     -576   
-112   -416   
256    -1488  
32     320    
96     32     
-16    -1056  
16     0      
80     320    
16     -256   
48     144    
128    -128   
-112   128    
16     -304   
160    -672   
-176   -208   
64     -1264  
-128   0      
-240   48     
96     -80    
-80    0      
96     96     
64     48     
64     -80    
16     -96    
64     112    
64     32     
144    16     
48     32     
0      -224   
-16    80     
-128   -624   
384    16     
-272   48     
-16    -80    
-96    -112   
0      -336   
48     -64    
32     -208   
32     -112   
16     -720   
176    -32    
96     544    
-128   -144   
160    32     
-16    96     
48     -128   
64     -128   
-32    48     
-32    -96    
-928   -96    
0      -256   
192    96     
-16    -176   
16     -128   
64     -720   
32     -112   
96     144    
-80    160    
16     -112   
128    160    
-16    -64    
16     -128   
-80    16     
-32    -64    
16     16     
16     96     
-64    -32    
96     -48    
0      -16    
96     -144   
0      -80    
96     -496   
64     160    
112    16     
-112   32     
16     32     
0      -320   
128    96     
-48    -128   
208    80     
0      368    
-80    -272   
48     -272   
-464   -32    
288    0      
0      16     
80     -240   
-32    32     
128    16     
96     96     
-320   -96    
240    -176   
-144   128    
128    -48    
-256   -160   
64     -176   
-336   -64    
80     16     
-816   -32    
80     -112   
32     384    
80     -944   
208    208    
-192   -832   
256    -64    
-96    0      
64     16     
-304   -112   
176    112    
-448   -48    
384    -16    
-80    112    
-208   176    
-160   -160   
-64    -240   
176    160    
-64    -368   
-48    64     
112    -32    
224    96     
-176   -144   
320    64     
-432   96     
208    -144   
-128   128    
368    -208   
-224   176    
16     -208   
-160   256    
224    -352   
64     112    
48     -208   
80     128    
-32    64     
128    -240   
-192   -16    
144    -64    
-48    -96    
-16    -96    
64     144    
16     -144   
32     176    
-80    -256   
-240   -48    
208    -272   
160    32     
-1104  -144   
288    -96    
32     304    
32     -80    
-80    80     
-736   -336   
-80    -672   
16     -480   
240    528    
-288   240    
-192   -224   
-592   192    
-176   368    
192    272    
-128   -176   
-320   -48    
-336   -16    
160    128    
-176   0      
16     -16    
16     -48    
-208   32     
-1376  -96    
48     16     
112    32     
288    160    
-160   80     
128    64     
-64    -144   
0      64     
0      -256   
32     208    
-112   0      
0      32     
-144   144    
-128   32     
-144   -80    
-176   96     
32     -16    
160    144    
-160   112    
48     208    
-144   48     
-192   -272   
16     48     
144    112    
-48    -16    
-64    112    
144    96     
0      48     
-192   -112   
-32    80     
32     64     
208    336    
-320   -112   
160    64     
-272   -32    
144    32     
0      64     
-48    96     
160    144    
-128   -80    
128    128    
-192   -32    
112    128    
-112   -32    
144    128    
-80    16     
64     0      
-112   96     
-112   128    
160    -96    
272    272    
-16    -32    
-16    144    
-208   -48    
48     48     
-48    -48    
32     80     
-96    80     
0      -48    
-16    144    
-208   -48    
80     0      
-80    -48    
48     -32    
-976   144    
-176   -64    
128    -352   
-32    80     
-64    16     
-48    176    
-32    128    
-96    80     
240    -32    
-144   80     
-64    -160   
64     80     
-144   16     
112    208    
-96    96     
-368   -112   
144    16     
112    160    
-48    32     
-16    128    
-48    80     
160    48     
-48    -144   
0      144    
-240   64     
64     128    
-160   32     
144    112    
-192   176    
144    176    
-800   -112   
32     -336   
192    176    
32     320    
-80    192    
-48    128    
64     128    
-80    32     
256    -16    
-400   -96    
-96    144    
80     -144   
144    48     
-368   -112   
352    240    
-288   272    
224    144    
-144   -16    
0      112    
-80    96     
336    160    
-48    224    
192    48     
-48    352    
-224   0      
256    64     
-96    64     
144    224    
0      0      
-128   96     
16     -64    
-256   -64    
128    -48    
-16    16     
-112   16     
160    16     
0      112    
16     112    
16     64     
-16    64     
32     32     
-128   0      
192    112    
-128   64     
128    64     
-16    64     
160    0      
-112   128    
-48    32     
96     16     
32     -112   
80     112    
-144   128    
64     160    
-80    -96    
320    768    
-384   -272   
-160   -128   
-128   64     
112    -176   
-64    160    
-32    -128   
64     384    
-80    0      
0      -80    
144    96     
96     48     
-48    208    
16     0      
192    320    
-64    -32    
-48    80     
64     144    
0      -32    
-240   -240   
64     128    
112    192    
112    176    
-64    96     
48     64     
-64    -16    
64     80     
112    144    
-144   128    
-48    -32    
128    48     
-960   -928   
560    2352   
-1040  256    
-368   -432   
544    336    
0      -768   
-176   -576   
112    1424   
16     352    
496    -64    
-528   -320   
352    256    
144    816    
-336   -208   
240    -48    
-256   -224   
256    368    
32     176    
-192   -624   
128    -208   
-80    64     
112    208    
-160   96     
224    144    
-96    0      
368    96     
-208   -112   
272    -16    
-336   208    
576    224    
-288   -192   
48     -160   
160    128    
-128   -336   
128    144    
80     224    
0      112    
96     48     
0      112    
32     48     
-32    -128   
-112   96     
176    128    
128    -48    
16     -16    
-32    32     
48     -240   
160    96     
-288   -1072  
128    96     
16     -912   
128    160    
-80    144    
160    80     
-80    32     
0      32     
80     448    
-80    160    
240    288    
16     304    
-48    -240   
48     -96    
128    208    
-80    -96    
64     48     
128    -800   
112    16     
0      96     
48     16     
0      -240   
80     80     
48     48     
16     112    
0      32     
64     96     
96     176    
-128   -160   
160    -208   
176    16     
32     192    
96     112    
-96    160    
112    -944   
-192   -32    
240    -32    
-32    192    
176    208    
32     432    
-96    256    
96     0      
160    -64    
192    208    
64     224    
-64    -272   
-32    0      
48     -640   
128    96     
96     -128   
16     128    
-48    32     
48     144    
-96    -80    
80     32     
16     128    
144    64     
16     -16    
96     16     
-80    -48    
224    -80    
-176   0      
160    -32    
16     128    
144    -176   
32     80     
-48    112    
80     80     
0      -32    
128    240    
32     128    
96     -384   
-16    176    
160    -64    
160    160    
-128   -144   
64     160    
144    32     
144    160    
-16    -176   
64     48     
80     -496   
96     224    
32     192    
96     112    
32     -336   
144    -48    
-192   80     
192    -160   
96     272    
-80    128    
-80    -64    
80     -336   
64     80     
144    -64    
-112   -64    
144    -112   
-208   -1120  
192    -64    
-608   -80    
48     -160   
16     96     
-16    -32    
80     -160   
128    224    
16     -112   
16     16     
-96    176    
176    -240   
192    816    
-160   -384   
128    144    
-224   -592   
208    0      
-64    32     
80     -48    
-96    -16    
304    -80    
-96    -128   
-32    -656   
-64    32     
336    -1344  
144    96     
112    128    
352    160    
-160   -64    
-240   -80    
144    -96    
160    112    
-224   80     
-32    -32    
-1472  -32    
32     -288   
80     -32    
0      -96    
48     -144   
-16    -544   
128    48     
-16    -192   
-48    -336   
240    -176   
0      -16    
96     -176   
144    -224   
48     160    
96     0      
-736   112    
48     -80    
-32    -32    
-720   -912   
-352   96     
176    -544   
544    -288   
-192   -1584  
32     -128   
-96    -464   
112    32     
336    528    
0      144    
-144   -240   
32     16     
0      48     
0      -96    
-704   -96    
80     -48    
256    -16    
64     -192   
-64    -16    
144    -688   
-64    32     
64     0      
112    128    
-48    -32    
144    -64    
-192   -64    
-96    -16    
32     160    
-48    -224   
-544   32     
-176   -400   
-496   -48    
-48    -224   
32     0      
80     -528   
128    352    
-144   -304   
160    -80    
-224   144    
224    -64    
-112   -16    
0      16     
-384   16     
192    96     
-368   -64    
64     -160   
48     64     
128    80     
144    0      
-64    -400   
16     -16    
192    -1280  
-80    32     
0      -16    
128    -96    
-256   80     
144    -48    
-272   64     
96     -96    
-16    16     
32     16     
64     80     
-32    -128   
64     208    
-32    -496   
144    144    
-160   -16    
96     64     
0      48     
48     -80    
-112   -96    
64     -64    
-176   32     
96     48     
-224   112    
-16    176    
-1424  -144   
240    -336   
0      32     
112    0      
-272   48     
224    32     
-48    224    
-272   32     
176    64     
-176   -352   
400    128    
-320   -48    
224    176    
-144   -64    
112    80     
-160   -80    
-944   48     
-64    32     
224    -80    
-160   272    
-320   96     
96     32     
-16    96     
-544   -32    
176    16     
-32    80     
32     80     
48     80     
16     -48    
-224   -176   
48     144    
96     0      
112    64     
-192   -256   
-304   -16    
-16    0      
-512   -112   
-48    -16    
-48    144    
64     128    
-752   -64    
-96    48     
-32    -112   
16     -112   
-288   -128   
208    192    
-16    -80    
96     304    
-64    -112   
32     272    
-64    192    
368    224    
-160   16     
-256   -32    
-80    64     
160    208    
32     368    
208    256    
-112   128    
-128   -144   
-96    16     
16     -48    
240    176    
48     16     
-96    64     
-96    144    
-128   -112   
128    144    
-128   48     
-160   16     
-80    -320   
-32    16     
-352   16     
96     80     
-32    -48    
32     96     
32     -48    
-32    -48    
48     -64    
-16    176    
32     288    
-160   224    
-32    -16    
-64    96     
-32    112    
-128   -96    
64     48     
-352   0      
-32    64     
-464   -112   
160    160    
-80    -288   
32     128    
32     96     
-112   48     
32     96     
-16    128    
64     32     
32     80     
96     128    
-128   64     
-96    192    
-192   -48    
-16    560    
-496   -256   
-112   -16    
192    192    
-272   -80    
-96    -112   
176    0      
64     64     
64     160    
-96    112    
-64    -32    
48     80     
-80    0      
-80    112    
-64    -144   
80     160    
-224   96     
-256   576    
-480   -448   
288    448    
-176   384    
0      64     
416    -48    
-368   -496   
-112   -96    
240    288    
0      -160   
-144   -192   
160    32     
-16    48     
48     -48    
-672   16     
64     112    
0      80     
128    560    
-160   -192   
144    48     
-144   -96    
208    128    
-160   0      
112    144    
-160   16     
96     -144   
-96    176    
-144   -192   
320    32     
-368   -128   
272    160    
80     80     
-96    96     
-96    144    
32     224    
-224   -48    
176    128    
-160   208    
240    464    
-128   -144   
-288   -304   
176    160    
-240   -16    
0      112    
96     48     
-48    -128   
80     -64    
208    64     
96     -16    
0      48     
-80    -16    
16     208    
96     112    
-272   48     
80     160    
-272   -32    
192    48     
144    880    
32     16     
144    384    
-96    -192   
240    224    
16     -32    
48     -16    
-16    176    
80     160    
0      96     
32     48     
-16    32     
112    64     
-32    64     
48     96     
-16    64     
-48    32     
-112   208    
-32    160    
0      32     
112    -192   
80     32     
-64    -16    
144    304    
-112   272    
160    368    
-96    160    
80     0      
48     48     
256    464    
-336   160    
-16    -256   
144    48     
96     128    
-80    176    
-64    16     
-16    112    
32     0      
48     144    
-96    -80    
112    192    
-80    -16    
144    240    
-208   -96    
32     80     
48     48     
80     -2224  
16     48     
96     144    
-32    48     
80     160    
-32    112    
48     48     
96     144    
64     96     
80     176    
-112   0      
80     160    
-48    -64    
-48    -128   
128    -64    
-16    192    
240    96     
-96    160    
-48    48     
112    144    
-48    -112   
144    96     
-80    64     
240    128    
-96    128    
-64    16     
96     -112   
-48    144    
208    -272   
-144   288    
112    -704   
32     752    
-32    240    
-32    -128   
176    256    
48     112    
-128   -16    
96     112    
16     -96    
144    0      
-256   -128   
160    64     
-112   -80    
144    64     
96     416    
-128   -160   
64     144    
64     -528   
-32    96     
96     160    
80     240    
-48    0      
208    320    
-16    32     
272    784    
-464   -544   
-16    176    
96     32     
64     -16    
64     160    
0      -80    
176    256    
-112   64     
144    64     
-208   352    
192    224    
32     32     
16     0      
160    112    
-32    -16    
-272   -128   
272    320    
240    32     
176    64     
128    336    
-48    -208   
0      -16    
176    -240   
32     96     
-112   -208   
32     -128   
128    64     
304    288    
-192   -16    
80     144    
0      -48    
48     -144   
208    0      
208    -144   
-64    192    
16     -592   
-144   96     
64     -752   
0      80     
-640   -944   
32     768    
-304   112    
-48    -80    
48     -160   
224    -128   
224    32     
416    320    
32     16     
400    384    
-208   -112   
-16    -160   
64     32     
48     -96    
128    208    
-112   -112   
48     224    
32     -48    
-16    64     
128    16     
16     112    
0      16     
80     176    
32     160    
16     -256   
-32    -80    
48     -32    
144    32     
16     -160   
32     112    
96     -144   
0      32     
32     96     
48     176    
0      16     
0      -560   
144    -240   
-16    48     
-32    -1216  
48     -16    
192    -16    
64     32     
-32    64     
16     -80    
288    80     
-64    112    
112    -720   
-64    -96    
128    48     
-96    48     
48     -144   
80     -208   
0      -80    
144    -112   
-32    -16    
144    -1104  
64     16     
-96    80     
144    -208   
-64    128    
96     0      
32     16     
-112   144    
64     -112   
-112   0      
-112   -240   
144    -48    
-1184  -16    
96     32     
128    -176   
144    -448   
16     -112   
-128   -2320  
96     -160   
224    112    
-288   -160   
160    -480   
-128   -112   
208    -80    
-48    192    
-240   64     
208    32     
-1104  112    
-112   -272   
336    -48    
-160   208    
96     -160   
0      -192   
-112   32     
272    -176   
-176   -32    
192    -288   
0      112    
32     0      
-32    144    
-16    -192   
0      -416   
-400   -64    
-16    -192   
-544   64     
-112   -80    
64     160    
112    -80    
-352   16     
208    -1152  
-112   144    
32     96     
256    192    
-416   32     
288    -48    
-160   -96    
-64    -32    
-128   -112   
160    64     
-256   -48    
64     -48    
-144   -208   
48     -272   
192    48     
192    -912   
-464   0      
352    96     
-16    144    
-128   32     
16     -112   
0      32     
96     -160   
-112   -16    
-128   80     
-448   -16    
112    -96    
112    -240   
0      -304   
288    224    
128    16     
96     192    
96     -1200  
48     -208   
-256   -272   
128    80     
0      -16    
32     160    
0      16     
128    -96    
-320   -144   
48     -336   
-48    80     
112    -32    
112    304    
32     -288   
96     -48    
-160   -1488  
176    -64    
0      -32    
-128   -144   
-144   0      
64     -288   
-48    128    
32     -272   
-128   -32    
80     48     
-48    -128   
96     -176   
64     208    
0      -208   
-32    720    
0      0      
192    -272   
0      64     
80     0      
-192   32     
208    16     
-80    -80    
48     -96    
16     64     
80     32     
16     16     
-448   -512   
64     32     
-160   -64    
144    272    
-128   160    
-336   0      
-16    0      
-1296  176    
-224   96     
0      -32    
32     64     
240    0      
-32    32     
-320   -112   
16     96     
-96    -144   
-32    272    
-160   -240   
-64    112    
0      -32    
-1392  -752   
432    800    
-832   -800   
1312   -112   
-176   816    
-560   -448   
-64    432    
208    -480   
192    -80    
-144   80     
-304   112    
-304   16     
80     -64    
-64    -16    
144    0      
-272   240    
144    192    
-96    80     
32     -96    
80     32     
-64    -160   
-144   -16    
-48    320    
-16    96     
128    128    
-112   -128   
80     -16    
-336   -544   
352    160    
208    592    
-48    224    
-96    208    
-160   -96    
-32    -48    
-624   16     
-64    -32    
48     -368   
256    464    
-80    48     
128    256    
-64    -304   
-128   -16    
-16    16     
-48    64     
144    -80    
-96    16     
32     352    
208    480    
-96    416    
-544   -368   
336    -144   
-512   -80    
32     64     
-400   32     
32     96     
96     -112   
-80    -256   
32     -1056  
384    592    
-240   80     
-32    320    
-16    -48    
16     -320   
288    -16    
-112   144    
64     144    
-144   0      
48     48     
96     0      
32     64     
0      -48    
-48    32     
-48    80     
32     80     
-48    112    
192    336    
-112   256    
-48    -96    
48     -16    
-304   -112   
160    0      
-384   -32    
48     -160   
-432   112    
64     80     
-32    144    
-144   224    
32     -80    
32     64     
0      64     
-16    160    
16     32     
-64    -32    
96     224    
-224   -64    
64     0      
16     144    
-80    -64    
-64    0      
-256   0      
176    -48    
144    208    
-48    176    
64     64     
-160   48     
192    160    
0      -32    
64     144    
-80    224    
0      192    
32     0      
-144   -96    
64     96     
-144   16     
32     16     
-144   -80    
48     -288   
32     64     
160    240    
-48    368    
-192   128    
-96    -80    
-16    336    
32     -144   
16     -96    
80     -176   
-224   64     
64     -272   
-112   384    
208    144    
-32    48     
-96    80     
112    176    
-176   -48    
256    144    
-128   96     
192    80     
-144   16     
-96    80     
-128   -64    
48     64     
-160   0      
-48    -48    
192    16     
-64    224    
144    560    
-144   480    
176    304    
-64    80     
112    80     
-80    -32    
80     80     
176    -128   
0      128    
-96    16     
112    192    
-64    96     
128    176    
-144   128    
16     -240   
16     208    
-32    0      
80     48     
-80    112    
16     32     
160    80     
-80    -16    
-32    128    
192    64     
-80    112    
48     160    
-64    160    
-208   -64    
192    112    
-32    96     
192    -16    
0      528    
-128   -320   
208    48     
112    112    
16     -32    
-128   128    
-80    -48    
256    192    
-128   96     
-32    176    
-80    -160   
32     192    
128    80     
-64    160    
32     112    
32     256    
-128   112    
-64    -32    
256    16     
112    64     
96     208    
912    -1952  
416    256    
64     192    
144    -80    
864    -80    
-240   -416   
-128   -64    
224    288    
176    -80    
-128   -48    
-80    336    
240    -352   
-192   576    
336    -624   
-48    464    
128    -96    
-96    368    
96     -112   
-48    -144   
96     -16    
-32    -224   
144    112    
48     160    
112    48     
-208   -112   
176    400    
-48    112    
112    0      
-112   -48    
144    64     
-48    -240   
-128   176    
96     -80    
-32    96     
128    -32    
128    -64    
-240   -192   
176    -1872  
-48    144    
240    160    
48     48     
-48    112    
48     80     
32     -80    
0      128    
96     112    
-48    176    
240    144    
-368   -48    
320    64     
-16    32     
-112   80     
208    -432   
-144   112    
96     96     
64     32     
0      -368   
192    128    
-112   0      
112    16     
-16    224    
-16    160    
96     -16    
48     -80    
-32    32     
112    -336   
32     64     
48     -144   
-112   192    
-32    -2080  
208    -16    
32     64     
-64    176    
16     -176   
160    80     
-96    -32    
-32    -752   
384    144    
32     256    
-128   96     
256    -208   
16     224    
64     -832   
-32    160    
-224   -944   
-32    176    
-16    -80    
224    -80    
96     -128   
80     144    
-48    160    
48     -224   
-16    304    
64     96     
-96    32     
32     -32    
-80    48     
0      -128   
160    144    
-112   -48    
-16    -32    
176    128    
160    288    
-176   112    
80     176    
-96    -288   
112    -128   
96     96     
64     -128   
64     64     
-64    -128   
32     128    
80     -144   
32     224    
96     -112   
96     96     
-16    -272   
96     96     
32     144    
-160   -176   
-144   32     
-32    16     
416    256    
-144   -80    
-48    -48    
96     -112   
16     32     
64     -160   
128    0      
0      -656   
144    -192   
16     224    
48     -224   
48     160    
112    352    
96     -208   
-64    0      
0      -880   
160    64     
48     -400   
160    0      
-32    80     
80     -80    
112    160    
64     16     
160    96     
-144   -16    
80     -256   
-80    80     
-48    -80    
48     160    
224    -48    
0      -192   
-160   16     
32     -480   
-32    -208   
400    -1696  
-112   -208   
96     240    
32     -16    
32     -80    
80     176    
160    0      
-112   -208   
-240   -304   
192    -240   
-304   96     
64     240    
-272   -64    
176    -288   
96     112    
32     -544   
80     48     
-48    128    
176    -16    
-16    0      
-48    -64    
208    -16    
-48    -80    
-16    0      
-64    32     
112    48     
-64    -352   
160    176    
-112   -144   
112    -64    
-48    -80    
224    -48    
48     -176   
-144   48     
224    -112   
-32    144    
-32    32     
320    160    
-112   -112   
16     -176   
-1312  -1152  
208    1376   
-96    1440   
-16    -256   
336    -304   
480    -48    
-240   1056   
-1184  -2496  
704    112    
64     16     
144    0      
-368   -48    
64     320    
144    -224   
-112   -32    
-336   -400   
112    96     
-640   96     
464    240    
-448   -144   
48     -64    
144    64     
16     -144   
80     -208   
32     -16    
128    -64    
-16    224    
512    480    
-176   128    
0      0      
-144   144    
192    -336   
-272   80     
112    -224   
-1072  -80    
-160   -352   
-112   -64    
208    -32    
-208   64     
160    -1568  
96     -112   
-608   -32    
0      -96    
208    64     
256    -144   
-304   -48    
368    352    
-160   320    
96     -48    
16     -112   
112    -224   
48     112    
-32    -144   
112    304    
-208   144    
96     -160   
-176   -656   
192    -496   
192    -16    
368    480    
-304   112    
224    144    
-128   -96    
96     128    
-208   -16    
48     0      
0      80     
144    -208   
-96    -64    
80     -128   
-48    64     
-16    224    
-128   0      
80     16     
64     -16    
-112   -224   
32     224    
-288   192    
160    96     
-112   -144   
-608   -352   
96     224    
-256   16     
-624   -48    
-128   16     
-272   -32    
-320   -240   
-640   32     
-160   96     
192    48     
-128   80     
-32    32     
16     64     
160    -272   
160    80     
-576   -240   
-112   -16    
-176   -256   
208    336    
-32    -16    
-240   -128   
-32    -16    
0      32     
32     -16    
-48    80     
-176   112    
256    240    
-272   32     
-32    -112   
48     16     
-96    -240   
-48    256    
-16    288    
0      112    
-80    -64    
-240   80     
80     400    
-80    32     
-208   64     
112    -352   
-144   32     
-1312  -96    
-32    224    
-96    -144   
64     -208   
32     -64    
-32    160    
144    -32    
-256   16     
-32    48     
-16    96     
-48    320    
-32    32     
-176   0      
-288   -112   
144    128    
-416   0      
144    64     
-192   64     
16     112    
96     -128   
-96    32     
16     224    
16     80     
176    128    
-176   64     
80     96     
64     -64    
-144   208    
-32    16     
64     192    
32     0      
80     192    
-1040  -32    
192    128    
-112   -112   
-16    112    
16     32     
208    0      
-32    112    
-32    112    
-32    48     
-128   32     
48     0      
48     144    
128    -160   
-64    96     
96     368    
-1392  -112   
32     240    
-32    -16    
64     0      
128    -96    
-80    16     
128    112    
-384   96     
144    0      
-112   16     
80     0      
48     64     
-80    96     
-272   -160   
96     112    
-304   -64    
112    160    
-16    256    
-112   32     
80     176    
-96    48     
48     -16    
64     32     
144    96     
-160   0      
112    64     
-176   176    
80     32     
-16    16     
1296   2432   
-1760  352    
-256   -112   
496    608    
64     -448   
-48    192    
-336   -272   
416    304    
64     -64    
-352   496    
64     -544   
-304   560    
256    -608   
-112   672    
-80    -464   
-160   384    
64     -288   
-32    384    
16     -272   
80     224    
-16    -48    
32     144    
-32    192    
144    16     
-192   -64    
128    -32    
-128   240    
304    160    
-176   144    
-48    -192   
-16    144    
144    -48    
96     320    
0      -32    
-32    208    
32     32     
-16    128    
0      0      
48     112    
48     48     
0      112    
32     32     
-80    96     
128    32     
48     112    
-32    144    
48     32     
0      336    
-192   48     
368    32     
-144   128    
-16    -32    
16     144    
16     128    
144    32     
0      208    
-112   64     
0      -48    
16     64     
-16    -16    
-32    112    
16     0      
80     32     
64     288    
-80    0      
160    64     
48     112    
32     144    
-32    64     
16     144    
-64    -144   
80     176    
-96    0      
96     128    
-96    -112   
64     176    
0      64     
176    -176   
0      48     
-80    112    
0      64     
112    48     
-80    48     
64     -80    
-96    160    
-16    48     
128    224    
-80    176    
128    48     
-64    -96    
96     32     
-80    320    
176    48     
-112   32     
272    128    
-80    128    
-32    128    
176    272    
-128   32     
96     -32    
-64    112    
160    176    
-112   -192   
80     -32    
-16    80     
-144   -816   
32     32     
48     -32    
144    -16    
80     176    
0      80     
-16    48     
64     96     
-16    80     
80     128    
0      112    
128    352    
-144   16     
-80    -352   
80     -32    
0      -672   
128    32     
0      64     
-32    48     
0      0      
288    240    
-64    256    
240    160    
-112   -16    
0      160    
-16    16     
48     16     
0      48     
0      -32    
160    176    
-16    -416   
272    -112   
48     -1760  
112    112    
48     272    
0      96     
48     -16    
64     208    
-112   -80    
160    160    
-176   -80    
192    160    
-16    -32    
80     -16    
32     96     
16     -176   
-32    64     
32     -832   
-64    32     
160    -816   
-32    32     
96     -64    
-32    320    
-48    -176   
96     112    
96     16     
64     -16    
-144   224    
-48    -224   
48     128    
320    -352   
-112   128    
48     -240   
-32    112    
-16    -1632  
112    48     
-16    32     
64     96     
-32    144    
384    160    
-176   32     
160    -144   
-80    128    
208    -304   
16     128    
-48    0      
80     80     
32     -112   
208    208    
-144   -448   
272    -16    
96     208    
80     80     
-160   80     
112    80     
80     48     
-112   -208   
-80    80     
16     224    
-16    -64    
0      -112   
192    -16    
752    1632   
-1152  -1120  
208    -384   
944    864    
768    -736   
-864   -48    
-112   128    
-80    -32    
352    128    
-416   -128   
528    -112   
-448   256    
192    240    
96     -208   
0      -288   
80     176    
144    256    
304    240    
-16    -48    
208    16     
48     -1776  
80     -128   
-80    -2272  
96     -352   
-32    -496   
128    -576   
96     64     
400    960    
-272   -176   
-16    64     
176    -256   
128    176    
-64    48     
16     -560   
288    336    
64     -400   
-96    -176   
-128   -80    
80     -96    
128    80     
-64    -352   
-16    -80    
-32    -656   
0      64     
160    160    
80     -240   
48     112    
112    -96    
-144   -272   
-16    0      
128    -32    
0      -32    
-352   128    
-112   -16    
-144   -144   
16     -96    
0      -192   
160    64     
-16    -96    
48     -1648  
-16    -160   
144    -128   
-112   -64    
160    -80    
0      64     
96     32     
80     -144   
32     160    
64     -240   
-416   160    
-176   16     
320    64     
-176   -288   
160    -192   
208    -896   
16     96     
-64    -224   
144    112    
32     96     
64     64     
-112   48     
-64    -80    
128    592    
-224   80     
-208   -96    
96     -192   
-400   -544   
256    -368   
0      -80    
16     -576   
-48    48     
96     64     
-16    112    
64     -32    
-160   -80    
32     -64    
96     -32    
-16    112    
128    -48    
-32    128    
112    -48    
-576   -64    
64     -64    
-32    160    
112    -32    
16     64     
64     -352   
96     -64    
-128   -288   
176    16     
48     96     
32     48     
32     160    
-32    -96    
208    288    
-96    -128   
-64    176    
-32    64     
-96    128    
112    192    
48     112    
96     -592   
-144   192    
288    -448   
176    16     
-176   -80    
80     -96    
256    16     
-64    -32    
-48    48     
32     -224   
32     48     
-128   -112   
-608   -96    
-16    -576   
-144   -48    
-80    -384   
304    128    
96     32     
48     -128   
-480   16     
224    -32    
128    -64    
-160   112    
16     32     
64     144    
-160   -80    
-80    0      
-1184  -112   
176    -112   
0      80     
80     -32    
128    128    
-272   -16    
192    -32    
-160   -16    
128    64     
-64    -96    
288    -144   
32     32     
64     64     
-192   -64    
64     80     
-192   -16    
-176   80     
-80    -144   
-48    -128   
-96    0      
-224   80     
-224   64     
-112   -64    
-832   240    
0      -176   
-96    -16    
-96    32     
-32    -48    
64     64     
-16    64     
48     -16    
-240   -48    
16     112    
-144   -144   
-64    -16    
80     112    
-96    96     
-112   -80    
16     0      
-64    96     
-304   48     
-208   16     
112    112    
0      144    
-112   -112   
-96    96     
-112   -304   
0      112    
-16    32     
-976   64     
688    -112   
576    1264   
480    -128   
80     208    
-96    -352   
-160   512    
496    -624   
-592   496    
-224   -576   
-144   560    
112    -592   
48     544    
-176   -272   
224    320    
-208   -176   
-80    0      
-224   -256   
192    -32    
-416   32     
384    0      
-304   224    
-16    -176   
-1456  112    
32     -304   
-208   64     
208    48     
-16    -48    
176    0      
-144   176    
160    -64    
-240   48     
48     32     
48     160    
144    48     
-16    32     
-256   -16    
-112   -16    
-384   -48    
112    112    
16     0      
-32    128    
-80    -64    
0      64     
-128   48     
0      -16    
-80    112    
80     16     
32     48     
-192   64     
112    80     
-144   -64    
32     0      
-64    -64    
80     80     
-1296  96     
-48    32     
64     64     
-32    96     
16     176    
16     32     
80     16     
-192   96     
16     0      
-128   16     
0      64     
-32    -64    
96     64     
-144   0      
96     112    
-688   -48    
144    128    
-48    16     
-48    32     
176    48     
176    144    
-224   160    
-128   160    
352    320    
-80    64     
32     0      
16     32     
-48    128    
32     -48    
-144   -80    
-96    -48    
-96    64     
96     128    
176    352    
-176   0      
-32    -48    
-16    144    
16     112    
-80    80     
-64    64     
208    192    
-48    256    
-64    144    
-128   -160   
16     128    
0      -16    
32     144    
-48    80     
-80    32     
48     80     
-64    -64    
112    16     
16     320    
-80    48     
-32    -64    
-80    112    
-80    -32    
176    224    
-288   -32    
176    128    
-48    48     
64     96     
-64    48     
32     16     
128    176    
-64    112    
64     -128   
-80    96     
128    416    
32     -48    
112    272    
-304   224    
288    -32    
-80    80     
0      128    
160    0      
-208   -80    
208    192    
-112   48     
192    112    
-160   144    
336    -128   
-288   96     
128    64     
48     192    
-48    -32    
-16    32     
32     96     
-48    16     
-16    176    
-112   -48    
240    208    
48     384    
-128   0      
32     -32    
-16    96     
128    0      
-64    -96    
144    -80    
80     272    
-176   32     
-48    272    
-192   -96    
224    32     
-160   128    
240    144    
-128   112    
48     48     
176    128    
-320   -256   
224    -80    
224    432    
-112   -80    
160    256    
-256   48     
128    96     
144    -32    
16     176    
144    48     
-112   288    
-16    32     
112    176    
-96    48     
128    48     
208    -16    
-64    192    
48     16     
-128   -16    
256    464    
-384   -32    
128    -64    
128    160    
96     192    
-128   0      
-64    176    
-64    144    
16     -144   
160    -48    
208    176    
-64    96     
-144   160    
-480   -336   
16     2176   
-208   576    
-560   -288   
-240   -896   
960    1040   
-656   -96    
32     -16    
80     32     
512    224    
-176   496    
-80    32     
96     160    
-128   48     
80     448    
128    0      
48     -80    
-240   -112   
368    304    
112    400    
-224   64     
16     -96    
-192   224    
48     -48    
64     -48    
-112   -192   
112    80     
-32    -16    
-48    32     
48     96     
192    48     
-144   128    
64     144    
80     -48    
48     144    
128    144    
-48    -176   
-32    80     
32     0      
64     0      
176    -640   
-192   224    
240    -240   
-128   -64    
176    112    
176    160    
-96    32     
-96    16     
80     -160   
96     208    
16     48     
64     -48    
-16    128    
208    -240   
0      128    
16     -496   
-16    176    
-48    -992   
224    80     
-16    16     
96     48     
-64    80     
80     112    
48     64     
-80    64     
144    0      
112    64     
0      128    
32     -416   
128    128    
0      -64    
32     -48    
112    0      
-48    96     
112    -528   
80     352    
-144   128    
192    16     
128    -64    
80     -192   
-48    128    
-32    -160   
48     0      
32     -304   
112    -48    
96     144    
-144   96     
192    -480   
-144   80     
-16    0      
128    112    
-112   16     
96     -32    
176    192    
0      -240   
256    304    
-80    -128   
64     80     
128    -80    
16     16     
80     -496   
-32    144    
-64    -208   
192    96     
-64    0      
240    176    
-128   224    
-16    -864   
64     -1360  
-64    -160   
192    16     
16     -64    
-32    112    
-32    32     
448    16     
-144   144    
-96    64     
416    320    
-192   -560   
256    -64    
-160   -416   
176    80     
-416   -176   
-160   -176   
96     16     
16     16     
128    -96    
48     -352   
16     -64    
160    160    
-144   16     
64     -80    
-32    -112   
32     -176   
320    -32    
-112   -496   
0      16     
64     0      
-128   64     
64     -64    
160    -320   
32     -128   
32     176    
-80    -16    
192    -192   
-96    144    
32     -1024  
96     48     
-48    -240   
64     144    
96     -32    
16     0      
-16    16     
-32    -96    
-576   -32    
32     -320   
-80    -160   
272    -64    
-96    80     
96     -560   
-32    -176   
96     -512   
32     32     
-32    80     
64     96     
32     48     
-96    -48    
128    -544   
-16    -128   
-256   -16    
64     -32    
-48    16     
352    -112   
-96    -64    
48     -176   
-320   -16    
80     -336   
160    224    
208    -80    
80     80     
-144   -64    
16     48     
-288   48     
0      -160   
128    -160   
64     -80    
-1824  -176   
32     48     
48     -64    
-16    -32    
64     64     
0      -224   
16     80     
336    -16    
-48    176    
48     0      
-64    -160   
2016   1920   
-1552  96     
896    624    
0      288    
496    -1344  
-160   64     
-400   640    
-336   528    
480    0      
-192   -912   
304    -128   
-112   128    
32     64     
80     48     
32     -256   
-96    -16    
48     -80    
-304   224    
-48    -32    
-128   -48    
-144   0      
-80    80     
48     -96    
-32    64     
80     -608   
-64    -64    
48     -720   
176    -16    
64     64     
48     96     
-176   -16    
224    48     
-368   0      
144    -64    
-208   64     
352    -64    
-320   80     
48     -112   
80     128    
-48    -144   
0      176    
-16    48     
112    32     
-176   64     
64     -64    
32     16     
-96    0      
0      -32    
96     -96    
-32    32     
64     -160   
-272   32     
0      -80    
112    80     
-320   -224   
80     64     
32     -64    
-1344  -64    
-16    0      
-96    -688   
160    352    
48     112    
-64    64     
112    32     
-192   -144   
48     -96    
-112   320    
-400   -176   
144    80     
-96    -400   
-176   -16    
0      32     
-288   -32    
96     96     
32     16     
-112   -16    
-464   304    
-336   272    
-48    -208   
-192   -256   
-128   -64    
64     80     
-16    -128   
80     272    
-160   -272   
-128   -48    
32     128    
-96    48     
-128   -16    
-256   -64    
-16    240    
-832   160    
-192   -16    
48     -48    
64     80     
-64    -96    
16     48     
-64    -144   
112    128    
-16    64     
-64    0      
-32    32     
-32    16     
-96    -16    
-16    0      
-128   -16    
-32    32     
-80    -96    
128    80     
-208   -48    
32     -128   
-48    160    
48     -16    
48     144    
-48    80     
112    208    
-192   -48    
160    64     
-128   48     
224    128    
-112   16     
-32    64     
64     80     
-272   -112   
16     80     
-16    320    
64     160    
64     -144   
-48    240    
-80    16     
48     -48    
-80    144    
-16    -48    
48     128    
-128   48     
16     -32    
-272   -208   
336    240    
-448   -16    
256    112    
-912   32     
160    176    
48     -112   
-160   64     
-32    -64    
-160   -48    
32     96     
-16    112    
32     0      
-128   -16    
112    64     
-256   -32    
-96    -16    
-400   -320   
352    432    
-592   -144   
368    608    
-480   -16    
528    -48    
-48    144    
112    112    
-32    96     
-240   16     
128    32     
-32    -64    
-224   112    
144    -224   
48     256    
-96    0      
-96    64     
-320   -80    
-32    96     
304    -112   
-16    368    
-272   -96    
288    -96    
-144   256    
112    208    
-368   32     
-48    -208   
160    112    
112    -48    
80     96     
64     -736   
-144   128    
-160   -32    
-16    144    
-112   32     
176    64     
-112   128    
32     -64    
-96    160    
-32    48     
192    160    
-64    176    
176    128    
-208   -32    
2112   -1696  
-48    480    
368    560    
-592   304    
512    -416   
352    -208   
-928   -576   
144    352    
208    576    
48     208    
256    0      
-224   224    
112    112    
48     96     
-160   -96    
16     80     
48     144    
80     320    
16     80     
-16    112    
112    192    
-80    80     
80     0      
-208   0      
304    -144   
-96    160    
224    144    
-208   -48    
-48    48     
-16    64     
160    80     
-144   48     
16     96     
128    16     
-32    64     
272    -32    
-176   208    
48     96     
0      48     
-64    -112   
32     96     
64     64     
-48    -32    
112    96     
-128   160    
176    64     
-288   -48    
160    336    
-304   32     
320    16     
-96    224    
80     32     
-48    64     
-16    -32    
80     96     
64     288    
48     -64    
128    224    
-112   0      
144    -64    
48     224    
-64    80     
48     16     
0      256    
0      -80    
208    -16    
-144   16     
-128   192    
-96    -16    
208    96     
-32    0      
112    272    
-320   0      
288    -16    
-48    -176   
0      -32    
64     240    
-96    -1616  
48     96     
16     176    
-32    -48    
224    80     
-16    80     
-144   128    
-16    176    
-48    -144   
144    -48    
96     176    
-176   96     
112    48     
-48    0      
80     96     
48     -1296  
160    -80    
16     224    
-128   192    
0      32     
144    128    
-32    -32    
144    160    
-240   64     
304    160    
-208   -96    
256    336    
-80    -192   
32     0      
-32    112    
128    -160   
16     -80    
-32    224    
128    160    
48     32     
48     128    
-48    32     
208    224    
112    -48    
-160   112    
64     -112   
80     0      
-160   -64    
-48    -144   
448    128    
-192   -80    
112    208    
-96    -528   
304    64     
-496   -128   
80     32     
-176   128    
240    16     
64     32     
128    288    
0      0      
80     144    
80     208    
-112   -224   
160    32     
-64    -16    
64     0      
144    -240   
0      80     
96     -2608  
112    144    
-112   -16    
240    64     
-64    144    
144    128    
-144   128    
160    16     
96     96     
-64    16     
96     112    
80     -400   
112    96     
-160   -608   
304    112    
-160   -48    
80     208    
64     0      
16     -64    
-16    112    
32     64     
48     192    
48     32     
-192   16     
240    -144   
48     208    
-32    -496   
-128   112    
-32    -256   
96     192    
48     -32    
48     192    
-112   32     
32     -176   
32     112    
192    112    
32     112    
-32    -48    
112    96     
16     -192   
0      144    
64     -48    
80     96     
176    -128   
-64    48     
48     -272   
80     112    
32     -96    
48     48     
-16    80     
0      80     
144    96     
80     -368   
-64    320    
-48    16     
-48    80     
320    -1760  
160    -512   
528    912    
-464   592    
240    576    
-736   1040   
368    176    
-160   -240   
464    336    
-864   -416   
112    -1520  
112    80     
208    -1168  
0      80     
-128   -352   
144    -128   
-208   -368   
112    -224   
288    400    
192    16     
-192   96     
-64    272    
256    -16    
-240   -16    
-384   -240   
-32    -112   
240    192    
32     80     
0      -128   
16     -576   
64     -256   
-32    272    
-48    -16    
16     -160   
16     160    
-16    -80    
-16    208    
80     -240   
96     -64    
-144   0      
112    32     
-48    -16    
240    -144   
-32    -48    
160    -560   
-32    144    
32     -1232  
96     160    
-32    -224   
32     -160   
16     -64    
0      32     
176    240    
-48    96     
-160   0      
-32    -240   
-720   80     
256    112    
-16    64     
-128   -16    
144    16     
16     -672   
-128   -160   
32     -2128  
-128   128    
144    16     
80     48     
-16    80     
80     32     
-80    -64    
80     48     
-576   -64    
-48    -80    
208    -112   
160    -16    
-96    32     
176    -464   
-432   -16    
-80    -1088  
-48    -32    
80     -80    
208    144    
-32    48     
144    -32    
16     176    
-128   -208   
160    160    
96     112    
-528   -32    
64     -112   
16     32     
144    -368   
16     16     
32     -384   
96     48     
64     0      
-48    -224   
-16    -48    
16     0      
-32    16     
16     16     
-176   48     
112    -96    
-368   16     
48     -176   
-720   96     
-80    -240   
176    192    
-176   -624   
208    112    
-80    -736   
112    48     
-160   -16    
96     144    
-208   32     
16     0      
-48    -64    
80     -48    
-32    32     
-32    -80    
0      -112   
224    32     
96     96     
32     -320   
-16    240    
-192   -304   
160    -64    
-32    48     
80     48     
-128   -48    
-144   -208   
-48    -32    
208    -48    
-192   96     
64     -192   
-48    16     
-320   -144   
352    112    
-128   -528   
144    32     
-16    64     
32     96     
-144   48     
-32    -112   
-160   -224   
112    -80    
-96    -96    
272    320    
-176   -128   
112    16     
-432   -16    
-1088  -192   
96     208    
-288   -448   
112    -48    
-96    352    
-336   240    
-112   96     
-272   32     
80     -16    
32     112    
-128   -48    
128    80     
-48    32     
272    112    
-160   -176   
112    80     
160    256    
-48    -192   
-400   64     
-48    16     
-16    48     
-32    224    
-176   0      
-16    0      
-288   16     
144    144    
160    -176   
-128   16     
352    -208   
-272   128    
176    -64    
32     240    
48     208    
-272   -64    
128    32     
-176   -48    
-64    -144   
-80    -32    
0      0      
-336   -320   
-176   16     
-176   -48    
-64    80     
112    -48    
0      272    
-960   400    
-1616  -416   
416    96     
480    128    
752    -96    
-1056  -416   
448    176    
128    944    
-176   -384   
-192   -128   
-224   16     
-544   -80    
-32    112    
-64    -160   
16     112    
-128   -160   
0      64     
112    176    
-32    32     
-32    16     
-176   -16    
-16    96     
16     192    
-64    48     
96     16     
128    176    
-464   -32    
112    16     
-16    80     
64     -16    
32     -16    
16     112    
-32    48     
-32    0      
-64    16     
-32    64     
48     368    
-224   -32    
64     16     
-144   128    
144    -16    
-384   -32    
-32    112    
-320   32     
160    16     
-80    48     
160    96     
-128   112    
64     176    
0      0      
0      80     
80     -32    
32     80     
48     144    
-176   16     
64     48     
-176   48     
160    64     
80     48     
80     144    
-64    -32    
-48    64     
-32    80     
64     -48    
176    32     
-128   192    
-32    144    
-96    -192   
128    112    
-144   224    
32     -96    
144    160    
-176   32     
-16    -128   
-128   -32    
80     208    
-288   -112   
160    96     
-64    80     
64     112    
-112   -96    
112    112    
-208   112    
-48    -96    
160    16     
-16    96     
-320   -272   
144    208    
-688   -96    
240    64     
-176   96     
272    208    
-112   240    
64     16     
-112   -192   
96     32     
-80    176    
160    128    
-48    48     
-128   -64    
112    48     
0      -16    
-48    16     
128    144    
-64    176    
128    112    
-64    144    
-48    160    
256    272    
-160   144    
208    16     
-160   64     
48     -16    
112    96     
0      96     
32     80     
-176   48     
-128   288    
320    176    
256    96     
-272   128    
256    176    
-96    160    
-48    48     
-96    -16    
-80    0      
176    -80    
-160   -112   
32     -16    
-192   -32    
144    128    
128    80     
-128   176    
320    144    
-16    80     
-16    80     
-16    160    
208    -16    
-32    240    
-16    144    
-32    64     
112    128    
-160   -160   
160    208    
-48    64     
96     -112   
-176   -80    
96     176    
48     64     
16     128    
48     96     
96     144    
-16    96     
-112   -32    
112    176    
-96    -208   
96     176    
176    432    
-64    -224   
-32    0      
160    176    
32     -160   
0      64     
32     176    
96     48     
-80    -80    
-48    0      
32     240    
0      144    
272    144    
-192   -160   
-112   -32    
96     112    
144    -240   
-16    -336   
112    224    
-224   -112   
-16    -608   
144    -32    
80     80     
112    272    
-48    32     
-48    160    
160    -160   
32     160    
-32    48     
-16    192    
0      -144   
112    112    
-32    -16    
32     -112   
112    144    
48     -80    
-96    240    
-96    -112   
0      128    
48     48     
-592   2352   
368    576    
-1232  -1280  
912    -384   
-336   1296   
304    128    
-896   224    
464    368    
288    976    
0      -96    
-176   -464   
-256   32     
384    -1696  
-272   176    
-112   -224   
16     0      
128    256    
224    896    
-304   -480   
-208   -240   
256    -16    
-64    0      
80     304    
-144   -16    
224    32     
-192   -160   
144    128    
-32    -512   
144    160    
80     96     
192    32     
-48    0      
-80    112    
48     48     
400    256    
-176   -224   
144    -128   
-64    80     
336    368    
-48    80     
-48    48     
32     80     
16     32     
32     80     
16     -784   
0      64     
144    240    
-16    304    
-80    -224   
-64    112    
80     -256   
0      64     
80     -32    
144    -112   
80     128    
128    240    
-32    496    
272    -544   
-192   -64    
224    0      
-144   192    
96     -96    
80     80     
-64    -240   
-64    144    
112    176    
208    -256   
64     32     
32     -80    
96     32     
48     -48    
32     48     
64     -128   
96     64     
0      -80    
64     80     
368    656    
-48    480    
0      304    
32     80     
160    128    
32     -96    
48     144    
-48    -48    
-32    112    
64     -192   
144    64     
128    144    
-112   32     
192    -48    
-64    160    
64     96     
16     -16    
144    112    
-896   32     
112    -336   
-128   -240   
192    -1232  
80     -48    
-64    64     
0      -176   
160    192    
64     -64    
-16    48     
-64    -768   
144    240    
224    288    
-128   -400   
208    208    
-1296  -160   
192    -208   
-48    48     
96     -144   
224    0      
-128   -656   
16     -240   
96     128    
16     -192   
160    16     
-32    -32    
-32    -80    
80     224    
48     -240   
16     -16    
-128   208    
-144   -272   
368    -64    
-192   -160   
112    -176   
-32    -784   
32     112    
192    -2480  
16     -32    
48     32     
-64    112    
192    496    
0      0      
-96    -304   
80     -528   
-208   64     
144    -96    
-192   384    
-160   -96    
144    -176   
-96    -720   
160    -32    
0      -928   
176    -144   
-128   -32    
128    64     
32     -64    
-64    80     
160    96     
-112   -80    
80     -256   
144    0      
-1184  0      
-32    64     
176    112    
96     64     
112    -144   
16     16     
-96    32     
-80    -1312  
96     -64    
480    480    
-416   -272   
0      112    
96     192    
-32    -16    
32     -288   
-128   288    
-16    -176   
-144   0      
128    -16    
-48    -48    
32     -480   
16     -32    
96     -176   
16     16     
112    64     
32     -80    
0      -16    
144    -48    
-176   48     
-32    -32    
-32    48     
176    -160   
-448   96     
48     -192   
0      -16    
176    -320   
-128   48     
144    -16    
-48    48     
-48    32     
32     -16    
1200   3040   
-1680  -544   
112    464    
-144   352    
144    -352   
-384   -240   
-304   -160   
368    336    
-384   -224   
-112   -48    
-16    48     
112    -144   
-32    128    
-80    -80    
112    -128   
-80    32     
48     -16    
80     112    
-16    0      
0      96     
-128   -176   
-32    160    
32     80     
48     -16    
48     -80    
48     16     
288    96     
-112   16     
-32    -112   
48     48     
64     96     
208    -32    
-224   32     
96     -48    
-96    112    
112    -320   
-64    -96    
112    -80    
-272   80     
-16    -480   
48     176    
-464   -560   
144    32     
-176   32     
32     96     
-160   128    
-864   0      
-96    32     
-96    -240   
208    64     
-128   80     
112    32     
-1392  -144   
224    144    
-1136  -96    
192    32     
-192   192    
-192   -64    
240    80     
-496   144    
-48    -128   
-288   -144   
-80    112    
-16    160    
16     -128   
240    32     
-192   160    
-176   -128   
32     0      
192    -32    
-64    64     
-16    64     
-192   -96    
32     -64    
48     -48    
-128   144    
-160   -32    
16     144    
-272   16     
-48    -160   
-48    -48    
-192   16     
96     240    
-208   80     
176    -48    
0      112    
-32    -16    
208    -64    
-32    256    
-128   112    
176    -16    
-176   96     
16     0      
32     96     
-128   -80    
-560   32     
128    16     
32     64     
0      32     
-80    -128   
-96    -96    
64     48     
-176   16     
256    128    
-48    128    
-16    -64    
-224   16     
112    224    
0      -32    
32     16     
-80    -208   
-16    96     
128    64     
96     96     
-16    -224   
-80    -96    
0      0      
112    96     
-16    80     
-160   -272   
-64    -32    
-80    32     
-16    64     
-160   -112   
64     0      
-496   -128   
32     0      
-1472  80     
112    160    
-96    0      
16     16     
192    176    
-160   96     
96     96     
-16    -96    
-112   16     
-208   0      
240    160    
80     -16    
-240   128    
128    80     
-240   224    
-736   0      
-64    16     
32     80     
-176   16     
112    -144   
-304   -208   
224    160    
-96    144    
64     32     
-16    32     
-16    144    
-112   48     
-16    -336   
-208   48     
112    224    
-192   -208   
0      16     
32     192    
-208   -80    
96     192    
-64    16     
160    32     
-32    80     
96     -208   
-208   -112   
288    96     
-96    16     
-16    64     
-112   112    
64     176    
-448   -144   
32     32     
272    64     
-64    80     
32     -32    
64     128    
64     16     
32     48     
16     64     
-16    64     
0      128    
-32    128    
-176   -176   
144    -16    
176    224    
80     32     
-160   112    
64     48     
192    96     
-32    112    
-64    48     
-128   48     
128    48     
256    64     
144    -192   
2352   -1408  
-1344  -2992  
208    608    
48     448    
-208   -480   
16     976    
-656   0      
208    432    
-80    -240   
-320   304    
-160   -144   
80     240    
-96    304    
-16    -144   
-320   -304   
320    32     
48     176    
192    -288   
-304   -128   
128    -80    
112    336    
80     -48    
-48    144    
208    16     
-112   128    
112    -128   
112    656    
-48    160    
256    32     
-240   -112   
160    128    
-112   -64    
96     16     
0      320    
144    144    
-144   112    
-368   -32    
288    224    
-80    144    
96     80     
16     160    
192    64     
-160   -96    
16     80     
16     240    
-16    176    
-80    -224   
96     304    
64     16     
96     48     
-112   0      
112    96     
80     192    
64     -48    
128    112    
64     64     
128    96     
-288   -224   
176    240    
-64    16     
32     208    
64     112    
-32    48     
16     -16    
32     -1520  
336    0      
-64    96     
112    192    
-144   112    
32     96     
-16    64     
80     48     
128    192    
-112   160    
-96    96     
128    48     
304    896    
-176   80     
16     -128   
-128   192    
384    48     
-48    112    
-80    304    
-112   -192   
256    64     
144    352    
80     352    
-352   -176   
128    144    
0      64     
208    48     
-96    80     
80     -112   
144    192    
48     0      
-128   80     
176    64     
144    304    
16     128    
96     240    
-144   128    
176    16     
-144   -784   
128    112    
-16    -32    
144    320    
-112   80     
192    -96    
48     48     
0      -768   
48     144    
112    -976   
0      112    
-48    112    
32     80     
48     144    
128    64     
-80    32     
112    -144   
-96    -16    
176    160    
64     -16    
16     -144   
-64    -48    
208    16     
-208   144    
256    -320   
-176   96     
128    -640   
96     192    
-80    -80    
-48    368    
96     48     
-96    176    
-16    -16    
304    -336   
-496   -160   
368    -128   
48     112    
-48    -144   
144    272    
16     -192   
96     48     
-96    -1440  
176    144    
-16    96     
-32    0      
-16    -16    
112    -16    
-16    16     
48     -192   
-16    96     
80     160    
112    112    
32     -240   
112    176    
80     64     
-128   16     
224    -416   
32     240    
112    48     
32     144    
-208   64     
208    432    
-288   -176   
288    -448   
48     -32    
208    64     
-64    224    
-32    16     
176    112    
-288   -112   
160    0      
48     32     
-48    -16    
112    -144   
48     32     
-16    32     
112    32     
64     224    
48     -128   
128    176    
-128   -320   
32     80     
144    -352   
32     96     
32     32     
64     32     
-16    0      
176    -2576  
-80    -16    
144    -2096  
-96    -96    
-224   208    
-176   -128   
144    -112   
-160   -576   
816    288    
704    624    
0      -256   
-336   112    
-224   0      
592    288    
-816   -448   
752    -960   
-272   368    
192    -464   
-224   304    
-32    -240   
96     -48    
64     -384   
64     -256   
48     -80    
64     -288   
144    -16    
80     336    
-112   -112   
16     -48    
0      208    
208    -240   
-128   208    
272    -224   
-208   -112   
-368   -320   
80     -32    
-112   -160   
-96    48     
48     -160   
0      -64    
160    -320   
-48    -1760  
32     -192   
240    160    
-112   112    
64     -16    
-144   -96    
112    -48    
16     -48    
-96    64     
112    -32    
-448   48     
32     -112   
16     -64    
80     -160   
32     -80    
336    16     
-224   16     
176    -160   
64     48     
-64    -192   
240    64     
-128   96     
32     -144   
64     64     
-96    -16    
-16    -144   
144    -128   
-64    16     
144    -96    
-112   16     
144    -176   
0      -16    
64     -2144  
128    208    
-112   -96    
112    128    
-80    -32    
80     64     
-112   -32    
96     -144   
-160   -96    
16     -224   
-32    96     
-16    -192   
128    16     
-112   -384   
16     0      
32     -304   
-80    -144   
96     -368   
96     32     
-16    -64    
0      -288   
-304   32     
-176   16     
0      -112   
-16    80     
-224   -48    
96     0      
-32    -112   
96     -480   
-144   -64    
272    80     
16     80     
64     -1024  
96     -16    
16     0      
48     80     
-176   -80    
-64    48     
-48    176    
176    64     
-32    80     
96     -96    
-48    208    
64     -112   
128    192    
-32    -496   
160    160    
-224   -48    
272    16     
-208   -128   
208    224    
-176   -16    
176    64     
0      176    
-288   48     
64     32     
64     -96    
-512   16     
224    -32    
-80    -96    
-48    -208   
96     288    
-16    -416   
-112   64     
208    -48    
0      240    
-48    96     
80     -16    
-64    -64    
32     -80    
-48    48     
64     64     
256    640    
-1232  -144   
-16    48     
-480   -96    
-592   144    
80     32     
-384   48     
-32    -512   
-432   -208   
64     208    
112    0      
-112   128    
64     64     
144    96     
-48    0      
-80    64     
48     -176   
160    768    
-304   -400   
80     -32    
-176   144    
-224   -96    
-240   -128   
0      -48    
128    192    
-1280  -96    
-96    96     
96     -96    
-16    144    
-448   -352   
176    -64    
-96    -16    
64     64     
224    -48    
-144   224    
-96    -160   
160    240    
-208   -32    
352    -64    
-176   160    
-464   -32    
0      128    
-848   -64    
48     16     
-64    16     
-16    144    
-32    -96    
16     48     
-48    16     
-64    0      
0      64     
-160   -16    
128    64     
112    32     
-80    96     
-592   48     
-48    -80    
-480   -48    
144    96     
-352   -80    
-1440  -1520  
704    288    
-416   1040   
544    -48    
288    560    
-576   -528   
208    -80    
144    16     
272    -288   
-96    -224   
-224   368    
192    -128   
-224   224    
-112   -192   
160    48     
-192   64     
-192   -48    
-208   48     
32     80     
-192   208    
-64    -128   
-144   320    
80     -304   
96     192    
-80    -80    
96     144    
-64    160    
-144   144    
0      -192   
-240   0      
176    64     
16     144    
-160   144    
128    16     
-240   0      
160    112    
-64    128    
192    400    
-240   -160   
128    80     
0      96     
0      16     
-240   32     
32     64     
-672   -64    
48     144    
-48    416    
160    192    
-96    192    
-64    -160   
-128   32     
-32    -128   
-32    304    
-64    -208   
80     128    
-112   112    
-64    144    
-384   -192   
256    112    
-464   -368   
-16    -128   
64     368    
224    160    
-208   160    
-224   -128   
320    0      
80     112    
224    496    
-336   -96    
-32    -80    
-160   -128   
160    32     
16     64     
-16    112    
-144   0      
0      -144   
-64    -192   
128    -96    
160    400    
16     240    
144    208    
-80    -272   
112    224    
128    176    
16     64     
-144   64     
-96    0      
-80    -400   
432    560    
-112   -16    
0      240    
48     -112   
32     0      
-16    32     
-16    -112   
-112   -48    
48     112    
-96    -48    
-48    64     
-144   80     
80     16     
-32    112    
-32    -64    
-32    -32    
-16    -80    
-48    -80    
-176   -256   
320    400    
-160   -96    
-16    176    
48     80     
80     32     
0      208    
-16    -80    
80     160    
-144   0      
224    144    
-208   -112   
0      256    
192    288    
48     96     
-256   -144   
-32    -48    
288    -48    
-32    96     
-48    0      
176    288    
-64    64     
112    0      
-80    64     
160    -64    
-176   112    
272    -32    
-80    160    
176    48     
-336   208    
176    -64    
16     96     
32     -16    
128    160    
64     192    
-16    -48    
-144   48     
32     48     
32     16     
96     48     
-48    160    
160    160    
-96    128    
32     64     
16     16     
-32    112    
16     32     
160    160    
-128   0      
192    96     
-48    -192   
128    96     
-32    208    
-48    176    
-32    160    
64     32     
80     64     
80     -48    
-64    128    
0      16     
176    80     
-16    32     
32     144    
-80    16     
32     80     
320    -48    
-208   208    
-192   -160   
32     112    
32     -144   
64     -192   
-16    -32    
96     -288   
-16    160    
32     16     
160    240    
-64    112    
-96    32     
128    -96    
96     32     
240    -48    
0      16     
-64    96     
-16    128    
-128   -48    
16     -224   
288    288    
-112   -320   
144    208    
-96    -128   
-496   -960   
-1376  -848   
896    -160   
-768   896    
464    320    
-336   400    
352    -320   
-672   -128   
176    208    
544    400    
-144   -192   
224    96     
-352   32     
400    -160   
-80    -480   
160    -272   
0      176    
64     -16    
-32    192    
144    -96    
48     80     
48     64     
-32    192    
-16    -160   
160    176    
-48    -288   
160    128    
-176   -240   
192    80     
-208   -368   
256    240    
16     -208   
0      64     
-128   32     
176    112    
64     32     
112    256    
-64    208    
-144   -192   
112    112    
128    -160   
16     128    
0      -192   
32     144    
176    -224   
-16    176    
64     -592   
64     -48    
-32    16     
96     144    
16     112    
96     96     
-112   16     
112    128    
-16    112    
112    -240   
32     96     
-16    -128   
160    208    
-48    -64    
48     64     
-16    -160   
128    128    
-32    80     
96     80     
-16    -32    
176    192    
-16    80     
112    16     
0      160    
-16    -240   
80     128    
32     -240   
0      32     
0      -240   
-112   -144   
272    -176   
-16    272    
-64    128    
208    -496   
-208   -352   
-32    -1328  
352    -464   
-96    0      
-48    -352   
160    176    
-16    176    
128    -240   
208    96     
80     64     
0      160    
16     -368   
80     -1168  
64     80     
32     -640   
368    384    
-496   48     
48     80     
80     -272   
96     -384   
112    -16    
144    -368   
-32    80     
16     32     
96     -16    
64     64     
32     -48    
64     -160   
-48    144    
112    -64    
112    -48    
-16    96     
-32    -256   
-48    -224   
160    -768   
112    192    
-96    -112   
80     -144   
-64    -1648  
240    -32    
96     -1456  
-112   -96    
112    64     
0      -64    
192    -48    
32     288    
-224   400    
80     -192   
-1664  -48    
16     -224   
240    32     
48     16     
48     64     
-128   -1024  
192    -160   
-32    16     
80     48     
-16    -144   
96     80     
-96    32     
80     0      
-192   -176   
272    -96    
-384   192    
160    -64    
-160   -32    
96     -272   
176    -32    
-16    -544   
-192   80     
-16    -1296  
80     112    
112    -32    
-16    0      
-160   -16    
304    -112   
-352   -160   
80     -48    
-48    96     
-80    -96    
-1776  -128   
-48    -160   
144    64     
144    0      
-128   16     
112    -912   
-176   -80    
96     -208   
144    240    
-80    -32    
80     0      
-128   128    
336    -272   
-256   16     
48     -48    
-336   -48    
112    208    
-592   80     
336    -176   
-64    112    
144    -560   
-48    48     
112    160    
64     -48    
0      96     
-80    288    
-80    -176   
64     0      
32     -96    
208    32     
-112   96     
-32    -112   
-112   48     
352    -256   
96     192    
-32    -128   
16     80     
432    1616   
-224   -1360  
-368   -1344  
736    304    
-416   -752   
-720   288    
448    -544   
-384   208    
-208   -800   
256    -64    
16     -64    
48     256    
-144   16     
416    432    
-224   -432   
-64    192    
-112   -240   
640    -352   
-416   -288   
-48    -64    
-256   608    
-192   -256   
176    144    
-16    0      
-352   -640   
-64    -128   
144    64     
208    288    
-432   64     
-1088  64     
-160   -160   
-736   -112   
-16    128    
-128   0      
32     0      
112    48     
-192   -64    
16     -304   
0      128    
-400   -208   
176    64     
-432   -16    
192    192    
-304   -320   
-368   -32    
-32    -16    
32     32     
-176   -176   
-272   0      
-208   112    
160    16     
-112   80     
16     -128   
128    176    
-272   -176   
176    0      
-384   -336   
0      192    
96     -16    
32     336    
-32    -48    
112    -96    
-96    192    
-272   64     
128    -64    
-304   -112   
112    208    
-48    32     
144    144    
-272   -48    
64     96     
32     -112   
16     0      
80     0      
-144   144    
-128   64     
-32    -480   
240    -16    
-208   112    
-32    -144   
-48    176    
-128   272    
-752   -96    
224    -32    
-176   -176   
160    192    
-112   0      
-64    0      
0      48     
-144   16     
48     96     
-80    112    
-64    32     
64     -96    
-32    80     
-384   -80    
-32    80     
-848   -192   
-32    0      
0      -208   
112    96     
-16    -64    
-32    -16    
-64    176    
-64    208    
112    -144   
-192   128    
32     112    
32     -64    
-96    -32    
-80    -16    
-64    48     
-64    -64    
-48    -32    
-240   160    
208    -16    
-256   96     
128    0      
16     112    
-144   -64    
-32    16     
224    80     
-48    64     
-80    -64    
-112   160    
48     128    
240    368    
-256   96     
320    112    
-256   48     
-80    16     
160    96     
-240   48     
144    0      
176    256    
-320   16     
96     -128   
-128   128    
-144   32     
256    0      
-192   -32    
-16    160    
-160   160    
208    80     
-592   -128   
-208   32     
112    -48    
176    240    
-16    32     
16     160    
-48    -32    
-48    144    
160    16     
64     112    
-16    32     
-64    96     
-48    288    
-176   -208   
48     80     
0      112    
144    -48    
80     208    
-96    48     
32     -80    
-128   80     
32     -16    
128    0      
0      64     
32     192    
-80    144    
-224   128    
32     80     
224    -32    
192    32     
-16    352    
-192   -192   
32     160    
-48    -96    
-80    144    
-96    -16    
112    128    
112    -64    
-64    160    
-240   64     
208    0      
-208   -80    
208    80     
-96    80     
-32    144    
48     64     
-48    64     
16     64     
-32    96     
96     -64    
128    144    
48     112    
-16    224    
1200   -1008  
-272   16     
384    800    
-512   464    
-160   -528   
448    1168   
-832   -656   
320    544    
-416   -432   
320    368    
176    48     
96     208    
-240   112    
112    -160   
0      112    
96     -32    
-96    320    
32     -16    
-160   32     
128    -128   
-272   128    
144    0      
-16    112    
112    -96    
96     80     
-64    112    
48     208    
-64    112    
160    32     
-96    80     
80     -32    
-80    128    
96     64     
-112   96     
128    -16    
0      48     
64     128    
32     128    
0      16     
80     80     
-80    96     
48     144    
112    48     
64     80     
0      128    
32     16     
0      0      
-16    192    
64     224    
-64    -16    
48     -32    
64     -336   
16     144    
96     -16    
80     240    
-144   80     
128    64     
64     -80    
80     80     
-80    -48    
64     144    
0      160    
-16    80     
-32    128    
16     -128   
160    160    
64     -1264  
208    288    
-224   144    
0      -48    
160    -80    
0      96     
32     96     
0      -16    
48     -112   
128    0      
-32    -16    
32     224    
-160   -336   
208    -320   
-80    96     
96     -944   
64     368    
224    -80    
-48    16     
32     432    
192    240    
48     272    
32     -48    
16     128    
128    128    
16     112    
32     64     
64     80     
32     -96    
96     -80    
-80    -256   
48     48     
144    -192   
32     160    
-112   0      
-16    32     
160    -96    
144    144    
-96    16     
80     96     
-32    64     
48     80     
64     160    
16     -128   
48     48     
16     -256   
16     80     
112    -704   
-48    64     
96     -1184  
16     160    
32     16     
16     32     
64     -16    
128    176    
-32    -80    
-32    -48    
64     144    
32     -48    
0      -352   
144    -176   
-48    240    
48     -176   
96     64     
-32    16     
64     -16    
64     -1568  
48     80     
192    352    
-208   -32    
224    192    
-160   144    
224    -48    
32     -608   
32     96     
32     -48    
80     208    
48     -32    
192    48     
-64    -688   
160    352    
-160   16     
96     112    
-16    64     
160    96     
-96    -64    
192    -512   
-144   192    
256    -448   
-80    320    
-48    -112   
144    96     
-144   -496   
128    16     
0      -336   
80     176    
32     32     
48     112    
176    48     
-96    512    
144    -928   
16     -224   
112    208    
144    -112   
64     32     
64     -128   
48     64     
-48    -80    
-48    64     
384    -192   
-96    384    
-32    16     
112    -1472  
-48    48     
-656   -96    
0      -1120  
96     112    
176    -160   
128    80     
-80    -2240  
-16    -80    
112    64     
48     32     
96     144    
-176   160    
-48    -288   
-16    80     
112    -192   
32     112    
-368   -48    
-304   96     
-976   528    
-272   96     
-96    80     
64     -816   
544    560    
-736   -688   
-96    -240   
656    192    
80     80     
-464   -720   
240    320    
80     64     
-16    -384   
144    48     
-32    -288   
-128   -48    
-112   112    
512    496    
-240   -512   
192    96     
-176   -32    
192    -208   
80     -176   
0      160    
80     -336   
-192   48     
-16    32     
240    64     
-400   -256   
256    -144   
-480   112    
240    -16    
-128   -16    
0      -16    
224    64     
-16    -176   
-496   0      
192    -128   
16     96     
-32    64     
80     160    
-112   -96    
16     -128   
-320   -336   
80     -176   
112    192    
96     272    
-320   -224   
64     -304   
32     -32    
176    -624   
-80    80     
64     -1152  
192    64     
-16    -112   
32     208    
-128   -80    
96     112    
-144   -128   
-48    96     
-272   -112   
144    32     
-352   -64    
-16    -208   
0      -192   
192    -32    
-64    -16    
144    -144   
-32    160    
32     -80    
144    -32    
-160   16     
176    16     
32     144    
64     48     
-80    -64    
176    64     
-352   -16    
192    -192   
-96    64     
-80    -32    
48     -80    
80     -608   
32     112    
-48    -128   
304    -240   
-272   96     
48     96     
-112   -48    
32     -48    
-112   16     
-16    -80    
144    48     
-64    112    
-128   -112   
160    -240   
-128   112    
240    -240   
-16    112    
-112   32     
192    -208   
-128   48     
160    128    
-192   -32    
176    -16    
-288   64     
208    48     
48     192    
-80    -192   
-624   0      
-160   -144   
224    80     
16     64     
80     80     
-128   80     
-464   -48    
96     32     
112    -16    
224    192    
-112   256    
224    144    
-192   0      
-48    -96    
-112   -320   
-64    0      
96     -144   
144    48     
-80    -112   
-256   -80    
-176   48     
-560   96     
-32    -16    
-544   160    
-352   48     
128    32     
-192   -32    
192    -96    
-208   -96    
-368   -224   
272    112    
-144   -192   
-16    48     
-80    -48    
-128   0      
160    112    
-16    48     
-144   48     
-16    64     
-176   0      
-784   144    
-80    0      
16     -16    
-128   16     
48     0      
64     176    
48     -96    
272    208    
-240   144    
16     48     
-80    96     
64     80     
-48    144    
-128   -176   
-112   48     
208    240    
-320   96     
-160   272    
-176   112    
112    -288   
64     128    
-16    -240   
16     96     
192    80     
192    128    
96     352    
-160   -48    
-416   96     
96     -240   
80     80     
-192   -128   
0      176    
-752   -208   
0      0      
-144   -112   
64     192    
-128   -256   
192    112    
32     256    
-48    32     
80     48     
16     144    
-208   48     
96     32     
0      0      
80     144    
-96    112    
-1120  -2704  
688    2240   
-912   64     
-432   -112   
-144   -1184  
864    608    
-704   80     
496    608    
-416   752    
432    -240   
-256   144    
-192   -80    
416    352    
-384   -304   
80     176    
-336   -32    
240    16     
-384   80     
208    32     
-64    -16    
-80    -80    
-192   -144   
160    -32    
-64    416    
64     64     
32     -336   
-304   -16    
96     16     
-192   -176   
-176   80     
-32    32     
144    160    
-432   -128   
-48    80     
-80    0      
16     96     
80     96     
48     64     
80     96     
-112   0      
80     112    
-112   144    
64     80     
96     48     
0      160    
-160   -128   
96     48     
-496   -128   
80     32     
32     160    
-64    80     
160    144    
-64    -32    
-16    96     
-16    16     
0      48     
-80    -224   
192    80     
64     288    
96     240    
-208   -32    
48     128    
112    208    
-64    -128   
32     -16    
176    64     
-32    64     
0      -48    
0      48     
16     96     
0      64     
32     64     
-48    32     
0      -16    
-112   96     
-80    -16    
64     176    
160    192    
-224   -32    
128    160    
0      240    
48     128    
0      256    
32     112    
112    96     
-144   0      
64     32     
0      80     
0      64     
32     176    
-112   -48    
112    -64    
16     -16    
176    208    
-48    112    
32     64     
-32    32     
160    240    
-64    32     
48     64     
-96    64     
32     -16    
48     128    
-32    32     
32     112    
-128   -32    
96     176    
-64    -48    
32     48     
-16    112    
64     112    
-32    16     
0      64     
-16    -64    
64     96     
64     240    
-144   -176   
32     -16    
-48    160    
176    64     
-96    -16    
-96    160    
208    112    
144    16     
-80    112    
-32    96     
368    928    
-208   -336   
272    112    
-352   80     
320    48     
-128   160    
-16    -16    
128    128    
-112   32     
256    256    
-96    -576   
112    96     
16     160    
16     48     
16     -48    
80     224    
-128   96     
80     32     
0      160    
96     -48    
272    128    
-288   272    
-48    48     
-160   -256   
112    -48    
288    -2320  
-32    224    
-112   192    
-64    0      
352    80     
-160   96     
48     288    
-256   -32    
32     -64    
176    -48    
192    -112   
-80    96     
-32    192    
-112   -160   
80     0      
112    -1088  
480    128    
-208   256    
-336   96     
-16    32     
128    16     
48     -64    
48     -16    
0      144    
-16    176    
64     -96    
192    128    
224    192    
48     -32    
48     304    
-48    -160   
80     96     
80     -816   
-48    64     
128    48     
48     288    
160    -528   
-48    96     
-48    -48    
-32    -48    
0      224    
128    0      
160    288    
-48    -240   
144    96     
32     -112   
1632   -320   
-1376  -1776  
848    1248   
64     304    
448    720    
-688   -800   
-16    -320   
-176   -80    
288    -32    
-208   208    
384    -176   
128    272    
128    0      
-32    160    
-16    -288   
32     208    
272    -496   
-64    -48    
-64    -1024  
80     160    
240    176    
64     144    
-80    96     
80     64     
48     0      
112    0      
-32    160    
112    240    
32     144    
0      128    
-32    16     
48     -80    
112    176    
80     -48    
16     112    
80     96     
-32    112    
16     0      
16     80     
96     80     
48     -192   
48     112    
48     -384   
0      112    
128    -368   
-80    32     
112    -144   
32     -112   
48     -64    
-192   16     
368    64     
-256   192    
288    208    
-208   80     
208    0      
80     -32    
-144   64     
96     -32    
128    128    
-32    -64    
16     112    
80     -32    
48     112    
16     -80    
0      -128   
272    80     
-128   -448   
192    176    
-960   -128   
192    -1184  
80     -32    
-32    -1312  
80     64     
48     112    
32     -32    
16     -32    
192    16     
-64    224    
80     -48    
144    -464   
-80    112    
48     -32    
-96    -144   
-768   -176   
240    -336   
-80    144    
-16    -400   
224    -32    
-64    -1200  
144    -336   
16     48     
112    -96    
32     176    
-80    -176   
240    16     
-112   96     
208    -112   
-144   -80    
-144   -16    
48     -160   
128    -48    
64     32     
16     64     
-80    -208   
192    -224   
48     -1120  
144    112    
-48    -176   
-16    0      
-80    -192   
208    96     
16     16     
32     -176   
-32    80     
48     -96    
-416   0      
208    -144   
-48    0      
224    -208   
-160   16     
0      -304   
16     112    
128    -80    
144    -32    
-192   192    
-48    48     
304    -16    
-144   112    
-144   -16    
160    -192   
-1264  -144   
224    0      
192    64     
192    -192   
-176   -240   
80     -384   
-48    -160   
192    -1328  
96     -32    
-32    -48    
-96    32     
80     -16    
64     224    
-64    112    
32     16     
-64    112    
-64    -160   
-800   64     
224    -80    
-128   -64    
112    -80    
64     96     
64     -464   
80     304    
-144   -48    
208    -112   
-48    400    
-16    -192   
-96    0      
-96    -48    
160    208    
80     0      
-96    -400   
64     -48    
-240   496    
-80    -64    
-160   -224   
96     -80    
48     16     
16     160    
-128   -480   
-96    48     
240    16     
-176   32     
160    -128   
-400   -192   
208    160    
-368   32     
-16    -112   
-144   64     
128    -128   
96     128    
-16    -640   
0      48     
128    96     
-16    -16    
0      16     
144    112    
-304   -288   
0      -144   
128    -48    
96     176    
48     -160   
-48    208    
80     208    
-16    -16    
-192   624    
-208   -640   
672    464    
-272   368    
-208   -1184  
832    224    
-96    400    
-48    -208   
432    512    
48     128    
-176   -272   
80     144    
64     0      
112    -32    
-592   -320   
16     192    
-528   -256   
-528   240    
-48    -224   
-800   -96    
-96    96     
64     144    
-272   144    
448    16     
-336   -32    
112    -128   
-112   176    
-144   272    
80     288    
-176   -176   
-192   64     
-160   -176   
32     16     
-208   0      
-144   64     
-112   16     
-336   -48    
-16    416    
-448   288    
-128   32     
-64    -112   
-16    32     
-352   -80    
-96    48     
128    -80    
-16    80     
-32    176    
-224   -16    
64     176    
-144   224    
-32    -48    
-224   48     
-16    144    
-112   80     
-160   -176   
112    -192   
-16    0      
64     -48    
-80    -32    
80     176    
-192   32     
96     176    
16     80     
-112   -80    
32     176    
-32    32     
-128   -32    
-96    48     
-432   0      
-64    112    
-1232  -16    
32     64     
-144   -160   
0      64     
-96    -272   
32     48     
256    464    
-80    320    
-80    112    
176    96     
16     0      
-240   -112   
-96    -192   
96     192    
0      128    
-208   -16    
-96    160    
-128   -336   
112    -16    
64     32     
32     240    
-96    16     
-96    96     
32     32     
-16    16     
-64    64     
-80    112    
-112   -160   
112    0      
-96    64     
0      32     
-96    64     
-272   -32    
160    96     
64     64     
-48    64     
-96    -16    
64     144    
-160   -96    
160    96     
-144   80     
-32    -16    
48     144    
-128   -32    
96     16     
-384   -48    
144    128    
-176   208    
32     -48    
48     0      
-16    144    
128    128    
-32    -112   
-16    160    
16     192    
208    16     
-16    784    
-80    -400   
16     -256   
-112   144    
208    176    
80     272    
-368   128    
0      -144   
0      80     
-144   -192   
112    80     
0      -96    
112    96     
144    48     
32     192    
-32    16     
0      96     
-32    272    
48     -96    
-96    64     
16     64     
-208   16     
0      96     
0      48     
16     64     
176    48     
-256   -32    
112    -32    
-160   -32    
-80    -240   
144    176    
192    576    
-144   -96    
-160   96     
-32    -192   
160    -80    
-48    16     
208    304    
16     144    
16     -80    
16     32     
-48    -192   
288    608    
-16    -32    
-16    128    
16     -400   
112    192    
-160   144    
112    -208   
-240   -144   
400    272    
-160   -16    
0      256    
48     192    
-16    -192   
112    304    
-32    -144   
96     320    
-208   32     
192    -400   
-96    -80    
-32    272    
-16    -16    
-32    272    
112    16     
96     336    
-192   96     
64     128    
-192   -16    
112    160    
-80    16     
-768   -1760  
1216   2048   
-1056  496    
512    -64    
-592   -768   
384    704    
-416   -16    
160    384    
-320   272    
288    -192   
96     -80    
-112   16     
288    480    
-112   32     
64     160    
-176   -96    
288    144    
-240   80     
144    -48    
16     -80    
-128   32     
176    208    
-16    272    
144    128    
-176   -128   
-32    48     
192    240    
-64    96     
144    32     
-80    0      
160    64     
-96    80     
144    96     
-96    144    
144    80     
-64    64     
16     320    
-80    -880   
16     -128   
-16    -240   
96     -16    
128    192    
-192   96     
208    80     
-64    96     
-64    -64    
144    208    
-208   -144   
432    192    
-480   16     
288    48     
-80    48     
32     -80    
144    16     
-16    -496   
-16    80     
128    64     
-32    96     
-16    80     
208    288    
-208   96     
272    128    
-16    96     
64     64     
16     80     
-16    176    
-80    -16    
192    0      
-144   128    
128    -288   
-48    0      
112    -1120  
-144   128    
96     32     
64     144    
-64    0      
32     -80    
48     -368   
-48    48     
-32    160    
-80    64     
192    96     
-112   -416   
128    -96    
128    -176   
-192   48     
128    -736   
-32    0      
96     128    
48     112    
-32    -112   
96     80     
-48    112    
144    48     
32     96     
-32    288    
-112   64     
208    -240   
16     32     
112    -32    
48     0      
64     -48    
-16    96     
112    -1600  
80     144    
-96    48     
64     160    
-128   48     
304    352    
80     -16    
-96    -48    
-48    128    
112    -80    
192    208    
176    112    
-96    192    
160    -512   
-128   224    
192    -144   
-96    224    
112    -416   
272    192    
-256   -32    
112    160    
0      -32    
80     -224   
-128   16     
192    -368   
-176   -32    
64     -224   
-32    64     
64     -432   
-96    -80    
-128   -224   
304    80     
48     32     
-240   -64    
144    96     
32     16     
48     80     
32     0      
64     32     
16     -272   
32     144    
80     -160   
32     112    
128    208    
-16    64     
-16    -640   
48     80     
32     16     
64     160    
16     80     
112    0      
80     368    
-16    -128   
144    32     
-112   -448   
240    176    
-240   -16    
240    208    
-128   32     
96     48     
-64    -448   
192    -1104  
128    224    
96     -224   
-176   -304   
-1120  16     
64     -656   
96     -112   
-96    -1152  
32     -192   
240    -448   
32     -96    
16     240    
-224   -400   
208    -784   
128    32     
32     -80    
48     208    
32     -128   
-48    -272   
64     -144   
-32    48     
-64    112    
-112   -160   
320    144    
64     -16    
48     -64    
96     -496   
0      -144   
96     -112   
-128   208    
16     -336   
0      176    
128    -336   
-1152  -3136  
1440   3408   
-1216  1200   
192    -480   
-720   -944   
-560   -208   
-48    976    
-368   -96    
96     -320   
976    -368   
-256   -32    
-320   64     
96     -64    
208    208    
112    -80    
-144   -64    
-32    -64    
64     176    
-832   -128   
144    -144   
160    -208   
-224   -416   
176    208    
192    16     
-416   -224   
-32    160    
-32    256    
128    -64    
-240   16     
-64    16     
80     -32    
-176   32     
32     16     
-208   -128   
80     -384   
-1296  -48    
192    64     
0      160    
-384   -432   
0      400    
128    -1648  
80     -48    
-160   32     
128    -48    
112    112    
224    -304   
16     192    
-128   -160   
64     272    
-224   -112   
208    208    
-192   -80    
-96    16     
144    -32    
-112   -96    
-96    -320   
32     160    
576    624    
-240   -112   
-224   32     
0      -448   
32     -80    
-128   -64    
-304   128    
16     32     
-288   48     
-32    -64    
-704   -96    
64     -304   
80     80     
96     -784   
16     96     
-96    -48    
144    -176   
160    0      
16     -112   
-48    144    
272    -16    
-32    -32    
112    32     
0      -176   
-64    0      
-48    48     
64     32     
80     80     
0      -48    
16     64     
176    208    
16     112    
-64    80     
0      0      
-32    -128   
96     -16    
96     160    
-128   -16    
64     0      
16     -160   
-144   -112   
144    -32    
-64    80     
-368   -352   
-320   -208   
-16    16     
-128   48     
-16    96     
144    -160   
16     240    
-176   -224   
-48    -272   
96     -256   
32     272    
160    -64    
-176   64     
-528   -192   
176    -80    
-368   -240   
-448   -64    
144    80     
32     48     
-128   -112   
-800   -80    
-160   -80    
128    144    
16     192    
48     64     
-160   160    
-224   128    
80     544    
32     -448   
-160   240    
144    144    
-64    160    
-144   128    
-144   192    
-48    128    
-144   -32    
96     160    
-800   -288   
224    288    
-48    -128   
-16    64     
0      -128   
32     16     
48     -80    
-96    -96    
64     80     
-144   64     
144    208    
16     272    
-96    64     
-16    48     
-96    144    
-224   -144   
-224   432    
-976   -112   
368    704    
-208   128    
-32    176    
-160   -448   
-64    -64    
112    144    
-144   32     
16     32     
160    -48    
96     208    
48     208    
-80    128    
-208   272    
-16    0      
48     32     
-64    48     
32     -144   
176    80     
0      -32    
-64    96     
-64    80     
32     -128   
16     256    
-240   16     
32     0      
-112   0      
112    -32    
-112   80     
192    32     
-480   160    
-48    -224   
-80    96     
-80    80     
-48    192    
-112   64     
48     -64    
80     -48    
128    256    
-320   64     
0      0      
-176   112    
-16    -16    
-176   -688   
560    64     
-592   496    
176    272    
-1408  -592   
48     -16    
96     160    
224    -272   
-80    416    
-208   -480   
48     496    
-16    -240   
32     352    
16     -304   
144    352    
-160   -176   
48     192    
-208   48     
48     80     
-304   -48    
128    -96    
-48    272    
96     -64    
-320   192    
160    -192   
-176   128    
272    16     
-80    176    
-48    -48    
-128   160    
-32    -256   
0      320    
32     -64    
0      240    
-160   -112   
128    48     
64     144    
32     128    
-144   -80    
-32    112    
256    128    
-144   64     
80     32     
-144   -32    
0      176    
-16    -96    
0      96     
-80    80     
80     -64    
96     80     
-128   176    
144    16     
-48    112    
0      48     
-32    192    
112    16     
-128   96     
128    112    
-96    128    
112    32     
-80    176    
16     16     
-64    -64    
80     224    
-128   160    
160    0      
-48    -48    
144    128    
16     160    
-160   96     
16     48     
144    64     
112    128    
-16    208    
-96    -64    
96     32     
-80    464    
-224   -352   
256    -32    
-64    -16    
112    176    
-48    112    
-32    -208   
32     160    
-272   0      
144    -80    
-16    112    
-48    160    
-208   -16    
160    48     
-192   -160   
144    80     
-112   48     
16     96     
128    96     
-96    128    
144    160    
144    304    
-48    144    
96     144    
-16    64     
128    48     
-16    192    
-48    -32    
96     112    
-64    96     
240    208    
160    288    
-160   16     
-32    16     
64     304    
-48    144    
48     112    
0      16     
48     32     
80     128    
0      -96    
144    176    
-288   -48    
-16    368    
-32    64     
144    32     
-80    -32    
128    272    
-144   -32    
208    -80    
-176   16     
96     0      
32     128    
112    32     
-160   -80    
112    176    
0      176    
16     -112   
-96    176    
144    64     
16     -208   
-32    0      
64     -384   
0      256    
80     -16    
-80    128    
144    16     
96     144    
128    416    
-64    144    
-48    -64    
-96    -80    
208    64     
0      112    
-64    16     
16     16     
80     112    
144    192    
-32    -80    
176    160    
-144   48     
64     -176   
-176   0      
320    224    
-16    64     
112    48     
112    48     
64     0      
16     592    
-400   -224   
-48    -320   
320    240    
-16    -336   
-272   16     
-48    -272   
160    16     
272    64     
-96    96     
208    224    
-96    80     
-112   48     
192    32     
112    112    
112    48     
-32    128    
-112   -192   
144    112    
176    -576   
0      16     
-64    -240   
64     128    
112    -144   
96     128    
-80    32     
224    64     
-16    128    
112    -32    
160    192    
-80    0      
64     144    
-112   -112   
-304   1648   
-624   -928   
-320   -832   
64     -256   
0      -32    
144    -992   
208    32     
-720   -272   
880    96     
-432   384    
464    -112   
-48    416    
-176   -288   
448    304    
-96    -432   
112    496    
96     -16    
-48    144    
-16    -464   
416    -48    
32     -80    
0      192    
-256   -64    
80     -304   
64     0      
128    128    
-112   528    
-96    -848   
192    128    
112    -112   
352    48     
-176   -224   
48     16     
208    -240   
48     144    
160    0      
240    160    
160    48     
-112   128    
-192   -16    
64     336    
64     -16    
48     -80    
80     -16    
32     -32    
-176   -224   
48     -224   
48     64     
48     -16    
0      160    
-32    0      
0      80     
-32    80     
160    448    
32     -96    
-992   -128   
64     -816   
320    272    
-336   -2368  
320    -240   
32     80     
192    -256   
-224   640    
240    -64    
-96    0      
64     -720   
-64    -1024  
64     -32    
0      -128   
96     -16    
-256   48     
64     -48    
32     -16    
80     -400   
96     -16    
208    752    
-16    304    
96     128    
480    368    
-496   -464   
112    128    
288    -384   
-80    64     
16     -208   
304    -80    
-544   -64    
-16    -336   
-48    -256   
-80    -400   
272    32     
0      -176   
-16    -64    
32     -3168  
128    48     
-48    112    
-224   -80    
64     -80    
-272   -208   
160    -96    
-64    -176   
-208   -48    
64     -192   
-1040  32     
48     -64    
64     -112   
80     -384   
112    -80    
32     -1344  
-192   -176   
-160   -224   
336    240    
-16    16     
-48    0      
48     -32    
80     16     
-80    144    
0      -144   
-256   128    
48     192    
288    -16    
-16    -160   
-16    -64    
-208   128    
464    320    
-272   -1120  
288    288    
32     16     
0      0      
0      64     
96     112    
256    192    
-144   144    
144    48     
-208   -272   
-160   -112   
-128   16     
96     -16    
272    -64    
-128   -16    
128    -1120  
-16    48     
48     64     
-64    32     
112    128    
-16    32     
32     272    
-112   -192   
-32    0      
-176   -64    
-320   0      
80     -112   
-1168  0      
0      -368   
128    48     
32     -224   
32     160    
0      -80    
304    -144   
-112   96     
80     144    
-336   48     
112    0      
-64    48     
272    96     
-480   16     
-16    -160   
160    -80    
-112   -128   
144    48     
80     0      
176    -64    
176    192    
-96    16     
-560   -112   
64     -32    
112    16     
112    160    
-208   48     
80     -224   
48     32     
-64    -64    
16     64     
-16    -128   
32     80     
208    -48    
32     64     
-336   48     
96     -160   
-176   64     
176    -16    
-128   112    
160    -80    
-224   0      
-80    -176   
80     112    
-16    -96    
-704   -1504  
-992   336    
224    144    
-896   -768   
-832   64     
-736   240    
32     240    
-544   256    
-512   -128   
208    400    
-96    -544   
-80    448    
-48    -192   
400    176    
-560   -64    
288    48     
-704   64     
112    -224   
-144   128    
-16    -160   
-176   128    
-304   -144   
-176   368    
-128   -256   
-304   192    
272    -416   
-48    384    
224    -112   
-256   192    
-48    -240   
128    192    
32     -256   
-128   192    
16     -16    
48     144    
-48    16     
-208   -16    
-112   -64    
-160   32     
128    64     
-368   64     
-176   64     
-944   -64    
16     32     
-16    -208   
-112   144    
-16    -160   
-32    224    
0      80     
112    -80    
-192   0      
0      128    
-16    -32    
16     112    
-16    48     
32     64     
-160   -144   
-688   112    
-32    48     
144    -16    
-64    112    
16     -16    
-32    48     
64     -64    
-48    208    
-48    -16    
64     192    
-80    -48    
48     32     
-80    80     
-432   -96    
48     128    
-320   -64    
128    112    
0      -16    
-32    -32    
176    368    
-368   16     
160    32     
80     0      
0      144    
-80    16     
-16    16     
16     80     
-208   48     
-80    32     
-144   -208   
160    -64    
128    448    
-784   -128   
192    80     
-112   96     
32     32     
16     80     
80     256    
96     304    
-112   32     
32     16     
-96    -32    
16     -336   
240    512    
64     528    
-288   96     
-96    144    
-656   -64    
64     -640   
0      32     
-80    64     
176    208    
-80    64     
-32    -32    
-80    80     
80     96     
32     96     
-16    128    
32     256    
-64    160    
-208   -96    
-32    -32    
-32    -240   
144    48     
0      0      
16     112    
-112   -48    
-96    -128   
16     -80    
32     80     
-96    -48    
0      -352   
48     160    
-224   96     
0      -16    
-208   48     
64     144    
-240   -48    
352    608    
-176   64     
-48    -32    
144    288    
-96    32     
80     144    
16     0      
128    160    
-160   64     
48     80     
80     192    
-96    -96    
64     48     
0      32     
32     96     
-64    16     
32     96     
96     80     
-48    64     
48     160    
80     64     
-16    128    
-32    -160   
64     0      
0      192    
-16    32     
-80    16     
-64    0      
-16    144    
96     160    
-224   -32    
176    80     
32     208    
32     -80    
80     176    
-144   32     
96     -64    
-112   144    
64     32     
64     64     
-32    128    
64     144    
-240   -48    
64     16     
160    224    
48     96     
-112   -48    
32     112    
256    96     
-272   0      
32     16     
-32    192    
128    0      
-128   192    
-112   64     
32     -96    
-48    240    
416    -64    
-176   128    
-32    -64    
96     192    
0      64     
-1376  -496   
992    1040   
-480   -368   
1184   -240   
-640   0      
464    -16    
-528   560    
-48    -224   
384    256    
-320   -304   
256    64     
-496   -80    
640    64     
-208   48     
224    112    
-272   48     
80     -96    
16     224    
192    48     
-112   256    
208    -368   
-256   400    
-96    336    
144    96     
-96    -416   
144    336    
160    -784   
-80    208    
-224   -96    
336    176    
16     32     
64     -48    
-144   144    
224    112    
-208   64     
128    80     
-64    -128   
-240   -304   
480    448    
64     -16    
16     80     
-112   -528   
304    96     
-144   288    
48     0      
-128   -16    
144    96     
48     272    
-32    112    
192    176    
-96    112    
64     -112   
-48    0      
64     48     
-16    -240   
192    -96    
0      -272   
48     -96    
96     64     
-176   -64    
96     64     
0      48     
80     288    
-32    208    
160    -112   
128    176    
-64    0      
112    224    
-144   -32    
160    -112   
0      160    
16     16     
0      0      
32     -1040  
48     64     
48     128    
64     256    
-80    112    
128    48     
160    528    
-112   224    
160    0      
128    592    
-96    -64    
-80    -160   
16     0      
16     96     
176    448    
-128   16     
-48    96     
128    -560   
-16    80     
128    112    
-16    48     
128    208    
16     192    
-224   -400   
336    -224   
48     272    
224    256    
-64    64     
-128   -240   
96     80     
32     -80    
64     80     
48     -96    
0      96     
0      -128   
16     96     
96     32     
208    336    
-144   16     
128    -32    
0      176    
0      -304   
112    192    
-64    -240   
400    464    
-176   -272   
-48    -112   
-16    -400   
128    80     
144    96     
0      160    
16     32     
368    32     
-48    192    
-128   16     
192    128    
112    -160   
16     160    
112    192    
160    224    
-80    -176   
16     208    
-48    80     
320    96     
96     0      
-320   320    
144    -48    
192    -144   
-48    -32    
160    -112   
32     -80    
-16    -96    
0      128    
80     -336   
144    64     
-144   -32    
240    16     
32     -128   
64     -544   
16     64     
-144   -720   
-64    128    
-752   -48    
208    -192   
32     96     
-32    48     
144    -96    
0      -528   
80     48     
16     448    
-64    -64    
288    176    
-64    32     
112    -368   
128    112    
-112   -656   
-64    -64    
-32    -192   
160    -80    
192    -96    
-96    -816   
128    32     
-32    -464   
176    -64    
80     -496   
-176   64     
144    -304   
48     0      
144    -48    
64     192    
-32    -48    
48     0      
-224   0      
80     -240   
112    -80    
128    -144   
-32    32     
80     96     
-48    -144   
304    -1632  
-224   -128   
352    -304   
-288   176    
16     -64    
576    -2000  
144    -112   
1152   848    
112    -608   
-176   288    
368    176    
-752   -144   
1328   -464   
-384   608    
320    -336   
-256   320    
48     -368   
32     272    
240    -288   
-16    144    
16     -128   
16     144    
16     -272   
32     -48    
-32    -144   
-64    16     
-80    -64    
48     80     
64     -192   
-240   -96    
-48    -112   
144    112    
224    -1440  
-48    -48    
0      -48    
80     -32    
-64    0      
192    -112   
-160   80     
192    -32    
-192   128    
-144   -240   
-704   -128   
-32    0      
160    16     
-32    -192   
-64    112    
96     -608   
48     80     
48     80     
192    0      
-80    96     
-48    -272   
-32    64     
-80    64     
-32    0      
-192   16     
-80    80     
-32    144    
-672   16     
128    -304   
0      112    
-32    -368   
112    -16    
-160   64     
-16    96     
-256   48     
0      -64    
-32    -16    
160    48     
-80    144    
0      144    
-272   -32    
272    0      
-32    -16    
112    48     
-112   64     
64     -224   
176    48     
-304   -64    
240    32     
-464   -144   
256    -256   
-176   16     
-16    -224   
80     -32    
16     64     
-112   272    
-128   -336   
-352   64     
96     -320   
-144   64     
144    -176   
-576   -32    
-112   -64    
-112   0      
-112   -80    
16     80     
-48    0      
112    112    
-288   -80    
0      -144   
-560   -176   
-416   -128   
16     48     
-96    16     
64     112    
-384   -176   
-80    0      
-64    48     
-16    112    
-80    -96    
-624   -16    
-112   144    
64     -32    
-80    16     
-48    -96    
144    160    
-16    -64    
112    144    
-400   -480   
16     -160   
-112   -128   
-240   -96    
192    176    
64     240    
-80    48     
-256   -208   
-80    48     
-304   176    
128    -32    
-160   32     
-32    144    
-240   -112   
16     48     
-176   -336   
160    16     
96     208    
-80    96     
32     208    
-64    -96    
0      64     
-80    -32    
16     112    
-80    128    
-16    80     
-656   -96    
112    144    
-128   -80    
96     64     
48     -240   
-48    -16    
-96    272    
-240   -16    
-64    -80    
80     48     
48     160    
-144   0      
-112   -96    
48     -48    
48     176    
-912   -80    
-16    -48    
144    -64    
64     160    
0      48     
-304   -160   
112    224    
-128   0      
32     -32    
16     -80    
-80    272    
-240   -64    
-48    80     
-240   -32    
80     -48    
-224   -176   
80     192    
160    -112   
112    64     
-160   288    
-80    -80    
16     80     
-32    16     
112    128    
-32    128    
0      48     
-64    16     
144    48     
-80    16     
80     64     
-80    80     
208    32     
-304   48     
32     144    
128    -32    
0      48     
-32    224    
-16    -176   
80     320    
112    -48    
-16    112    
-1248  -1664  
112    -864   
208    288    
160    192    
-400   384    
-240   464    
-320   -496   
128    928    
16     -48    
-96    -240   
32     112    
368    144    
-128   -32    
-240   -48    
144    -112   
-48    -128   
-160   -272   
-32    -176   
192    416    
-176   -96    
48     48     
64     192    
-224   -96    
128    64     
64     64     
96     224    
-32    240    
-16    -16    
144    -16    
-176   112    
192    16     
-80    80     
-16    -16    
32     144    
-112   -80    
64     128    
80     208    
-80    32     
48     16     
-96    0      
64     80     
16     112    
-32    144    
16     0      
-144   128    
96     0      
80     224    
-64    -80    
16     -48    
48     16     
-16    192    
32     80     
0      -128   
112    160    
-16    80     
0      48     
32     32     
96     176    
-240   -64    
112    -64    
-32    48     
-48    160    
-32    224    
-80    0      
64     -144   
64     240    
-96    80     
128    -32    
32     48     
48     128    
-32    128    
32     64     
64     96     
-16    128    
0      -208   
208    128    
48     16     
16     96     
64     80     
-176   -48    
64     -32    
16     -64    
96     112    
-48    256    
32     240    
32     32     
32     16     
48     -32    
144    0      
0      96     
-64    80     
96     160    
-208   -48    
-16    -352   
0      -144   
-128   208    
288    448    
-128   32     
32     64     
-96    32     
32     16     
80     -16    
-16    16     
32     16     
16     -80    
-32    -16    
96     208    
-16    -240   
48     80     
-144   32     
96     16     
80     -16    
128    160    
-80    -16    
32     128    
-176   -16    
304    256    
-16    80     
-16    -128   
-144   0      
-80    -128   
208    112    
112    -64    
-336   -32    
368    128    
32     -1520  
16     96     
-16    240    
144    160    
64     48     
-48    64     
208    224    
224    400    
16     208    
-160   48     
80     80     
-144   160    
128    -96    
80     -320   
-48    208    
0      -352   
208    64     
0      288    
32     272    
-32    64     
-96    80     
-32    48     
-48    224    
96     -144   
112    64     
-96    -16    
-16    32     
64     112    
32     -288   
128    128    
32     -144   
144    304    
-128   -2176  
48     32     
16     32     
16     112    
64     96     
-96    80     
-16    96     
112    16     
176    176    
-96    -144   
-16    -16    
-32    128    
-64    32     
208    64     
-32    -16    
208    -864   
-160   80     
-16    -1040  
112    48     
16     112    
80     144    
-128   32     
80     112    
0      16     
96     -96    
-96    64     
64     -192   
256    368    
-176   -352   
-32    -16    
160    -848   
96     32     
128    -336   
-64    96     
0      192    
16     160    
-128   64     
-32    48     
-16    -160   
-576   -704   
-560   288    
592    -352   
-960   480    
64     -720   
-464   -112   
416    -720   
-544   768    
-96    -608   
272    640    
32     -512   
16     256    
-192   -208   
352    416    
-16    80     
32     -48    
-16    256    
176    -560   
-80    -96    
272    -32    
-64    240    
-32    -224   
-16    400    
144    -496   
-48    -32    
-112   -128   
160    16     
-112   0      
144    96     
-16    -16    
160    -224   
-144   192    
128    -80    
0      208    
32     -208   
-48    80     
112    -176   
48     144    
80     -96    
16     112    
112    48     
48     -960   
-64    -128   
-208   -48    
48     -1184  
80     -160   
144    -336   
224    512    
-96    192    
48     -240   
-48    -16    
192    -96    
48     -704   
80     32     
-32    48     
96     80     
-80    -432   
80     48     
-384   128    
-48    -848   
240    144    
96     -480   
64     32     
48     -608   
64     -160   
144    160    
0      64     
176    -80    
-16    48     
160    208    
-288   -48    
144    -48    
0      -160   
224    144    
-192   -112   
-64    -176   
288    272    
64     -288   
160    -704   
-80    112    
96     -240   
112    -80    
-16    -432   
-192   -48    
128    -224   
-16    64     
16     128    
112    16     
-240   192    
48     0      
-912   32     
32     -80    
96     -112   
144    32     
16     64     
80     -128   
-144   -128   
128    -128   
80     160    
96     -80    
-32    16     
-48    96     
80     -176   
-32    -16    
32     -208   
-16    64     
32     64     
0      64     
80     -80    
48     -64    
48     -304   
32     64     
48     -896   
160    208    
-112   -32    
128    -64    
-192   -256   
160    -48    
-144   64     
224    16     
-304   48     
80     -96    
-144   64     
144    -496   
-272   128    
-32    -560   
272    240    
-304   -672   
480    128    
-336   -208   
240    16     
-80    80     
0      -224   
80     256    
-64    -48    
-64    -176   
-64    128    
-416   -128   
224    48     
-32    96     
128    -80    
16     80     
-16    -336   
112    192    
32     -160   
16     -240   
192    480    
-416   -208   
352    -96    
-128   -64    
-16    -32    
-64    -288   
160    352    
-48    160    
192    16     
-144   -176   
240    48     
208    -704   
32     272    
-288   -32    
80     -64    
-144   -32    
272    80     
-208   -80    
-80    -80    
-80    -64    
-32    16     
160    -288   
48     176    
-80    32     
128    -224   
-192   96     
608    -80    
-256   -64    
128    112    
-96    80     
160    -64    
-16    80     
-16    -32    
-16    128    
-64    48     
16     -64    
-48    0      
128    -96    
-144   0      
-1552  -144   
48     96     
0      -272   
-128   -16    
0      144    
-880   -16    
-176   32     
-32    -16    
-112   80     
0      -192   
-48    144    
112    -48    
-656   1776   
-1056  1088   
320    672    
512    -496   
-320   -1680  
848    416    
-1024  -208   
176    -720   
-144   160    
336    -80    
-96    144    
-208   160    
-1504  -96    
80     -192   
-64    -160   
160    32     
16     0      
-80    240    
80     -256   
-128   48     
-144   96     
-16    80     
-96    96     
80     80     
-112   -128   
-160   224    
-192   -192   
-64    16     
-80    -64    
80     32     
-208   160    
112    144    
-16    16     
-176   -64    
-192   -64    
-16    -208   
96     -160   
48     240    
32     48     
-32    64     
-160   -112   
16     240    
-160   0      
-16    -16    
-912   0      
176    160    
-64    -144   
-32    -16    
64     -192   
-32    96     
-16    64     
64     32     
-160   32     
32     -32    
-144   16     
-48    -48    
80     176    
-144   -48    
80     48     
-544   -144   
16     112    
-48    -112   
128    112    
-48    144    
64     -80    
80     -80    
-176   48     
-288   -16    
64     96     
-32    48     
192    96     
-48    112    
-176   80     
-144   32     
-144   -112   
-96    0      
112    -48    
96     64     
64     112    
-96    64     
80     192    
-192   48     
272    -192   
-128   224    
-112   80     
-64    0      
0      48     
-144   -208   
128    48     
-128   0      
32     32     
-704   -32    
-112   192    
96     96     
-208   64     
48     -128   
176    96     
-80    112    
0      80     
64     80     
-176   0      
48     48     
-80    16     
112    272    
-304   0      
192    224    
-576   -256   
-80    96     
112    224    
0      112    
144    112    
-192   48     
64     48     
-48    128    
240    176    
96     224    
-208   -32    
-112   80     
304    144    
-240   -128   
-240   16     
64     0      
256    48     
-112   48     
224    224    
144    320    
-16    192    
16     80     
-32    32     
-80    112    
0      80     
336    176    
-192   112    
128    64     
-192   32     
-64    96     
288    208    
-160   272    
256    0      
-112   128    
-80    -80    
0      224    
-176   -64    
256    -32    
-176   64     
32     -64    
-32    80     
-64    16     
96     112    
-96    16     
0      112    
32     128    
128    160    
-96    -64    
144    -48    
-80    112    
-16    80     
128    176    
-160   96     
176    -48    
-160   -112   
96     144    
96     240    
48     144    
0      -16    
304    992    
-384   -272   
-64    -16    
-240   -208   
144    -96    
64     96     
32     -208   
240    368    
-112   96     
-128   112    
-64    32     
320    80     
80     80     
-48    16     
-16    224    
80     -96    
-112   176    
64     112    
64     -192   
-16    64     
16     64     
80     128    
96     176    
16     112    
16     112    
-80    16     
96     -128   
112    -256   
16     208    
32     240    
0      48     
-64    -32    
32     1344   
304    -48    
176    96     
-528   -736   
-448   400    
-432   16     
832    544    
-112   16     
64     0      
-416   -416   
144    112    
240    -80    
224    224    
-224   32     
128    -32    
48     288    
240    160    
-192   -80    
-128   -48    
80     0      
48     16     
128    176    
-96    64     
144    -224   
-144   16     
-48    224    
-144   -240   
336    64     
-144   -864   
32     -352   
-224   16     
96     224    
16     80     
176    112    
-48    80     
96     80     
-128   -176   
208    144    
-208   -80    
160    96     
-64    112    
16     16     
16     96     
48     -304   
0      144    
192    -160   
-112   -112   
224    -32    
-64    160    
32     -32    
64     16     
0      32     
96     -48    
48     64     
80     112    
48     112    
-112   -384   
16     128    
16     -240   
-112   48     
144    160    
32     -16    
0      192    
32     160    
0      160    
0      64     
32     48     
112    160    
0      0      
48     -144   
0      96     
32     -80    
48     80     
64     -64    
-16    -32    
208    -352   
112    544    
-160   -432   
16     128    
32     -240   
80     -48    
-96    -64    
272    304    
-192   96     
48     -112   
32     -144   
48     -352   
80     -96    
0      -592   
-80    176    
-96    -1136  
0      -32    
192    48     
96     144    
32     96     
-112   112    
48     112    
48     96     
144    16     
-48    224    
224    224    
48     -224   
96     64     
-112   -320   
128    112    
80     -176   
224    224    
-192   -48    
208    128    
-16    128    
48     32     
-48    32     
48     128    
128    96     
32     -32    
-16    -64    
16     -384   
96     144    
32     -32    
112    -32    
-112   -96    
64     128    
192    -960   
32     48     
-48    80     
0      96     
16     128    
112    144    
-144   -1136  
144    -256   
0      144    
64     -192   
112    64     
-32    -112   
224    352    
-176   -192   
112    -128   
-32    -224   
240    -1056  
0      80     
-32    -192   
176    16     
-336   96     
-144   -704   
80     -16    
-48    64     
256    -336   
112    -1232  
32     -64    
112    16     
-112   -32    
-16    -16    
224    272    
-32    -208   
528    192    
-368   272    
16     -624   
-48    -32    
-112   -400   
256    96     
-272   -176   
176    -80    
32     -144   
336    128    
-256   -432   
304    64     
-64    144    
240    400    
-192   -224   
-128   -112   
112    -112   
-208   -336   
224    144    
-112   80     
160    -80    
-80    -192   
320    -16    
32     32     
-32    16     
0      -48    
160    64     
192    -144   
144    208    
-128   -240   
64     112    
-16    48     
16     -192   
240    304    
-112   -192   
240    -80    
-96    -256   
336    16     
160    -272   
112    16     
96     -304   
-416   32     
-48    -1104  
80     -1552  
352    -1040  
960    784    
-240   240    
288    192    
-544   416    
592    256    
160    160    
-192   16     
-400   -272   
208    -64    
-352   -144   
64     -496   
80     80     
0      -832   
96     112    
0      -16    
96     48     
-112   32     
96     -272   
-112   64     
-96    48     
48     -144   
0      16     
-1008  -176   
32     0      
-304   -16    
80     -128   
0      48     
192    -208   
-80    48     
144    -176   
-64    16     
64     0      
16     -32    
128    304    
-128   80     
-80    -64    
-144   -16    
0      0      
-48    -208   
-224   64     
144    -128   
96     160    
-32    -256   
48     48     
-80    128    
0      -16    
64     -64    
0      48     
-160   16     
112    -128   
-304   64     
176    -432   
-80    -48    
112    -32    
-16    96     
32     -112   
32     48     
160    -464   
-128   96     
64     64     
32     48     
-32    64     
128    -32    
-96    16     
96     -32    
-128   32     
16     80     
-80    -48    
80     -80    
112    160    
-128   -272   
176    272    
-672   64     
-960   -80    
272    -32    
-1456  -80    
-80    112    
-256   -80    
48     -80    
80     48     
-96    256    
224    -128   
-144   -176   
-208   64     
-256   128    
48     -144   
-32    16     
80     -128   
-368   -48    
64     64     
-832   -112   
-16    -112   
-448   16     
-80    48     
240    -96    
-128   32     
32     -32    
-80    -48    
-432   -64    
64     80     
-48    -32    
-16    -16    
64     192    
32     80     
-96    -144   
-48    -64    
-96    160    
80     32     
-16    112    
-304   -160   
144    128    
-256   -224   
16     0      
-256   -192   
208    160    
-80    -80    
160    48     
-176   144    
64     96     
-48    80     
-192   -16    
-176   -32    
144    192    
80     32     
-192   -272   
-176   240    
48     80     
240    48     
-96    -96    
16     -32    
-208   -224   
-304   -272   
128    96     
80     272    
144    128    
-96    -16    
-176   128    
-96    -80    
16     64     
-160   -96    
160    112    
-656   -64    
96     64     
32     176    
-16    304    
32     -80    
-80    -96    
-64    -32    
16     48     
-96    80     
-48    32     
-48    0      
112    64     
-144   -112   
96     -160   
-80    -112   
-80    144    
32     -16    
16     -128   
64     224    
32     112    
16     -32    
32     48     
-160   48     
0      48     
32     128    
32     128    
-64    32     
0      144    
-208   -48    
32     48     
-480   -64    
16     80     
-928   -96    
128    32     
48     0      
-240   32     
160    -64    
-192   240    
-32    112    
112    -128   
32     160    
-240   192    
-112   -128   
-96    16     
144    -32    
-224   -32    
32     96     
-656   16     
80     160    
-64    208    
-144   -112   
32     64     
32     48     
-640   720    
336    2320   
-1328  480    
64     -336   
112    -560   
0      -192   
-64    208    
-96    384    
160    64     
112    -32    
-320   -336   
160    112    
144    112    
112    64     
-16    352    
-96    16     
-16    0      
-16    96     
-64    -64    
240    48     
-240   -48    
128    176    
-208   16     
192    -16    
-96    -48    
64     -144   
-64    -16    
16     368    
400    416    
-496   -128   
208    128    
16     16     
32     -32    
-224   16     
208    160    
-464   -80    
352    256    
-448   96     
128    -304   
-80    -256   
48     144    
80     176    
-96    96     
-32    160    
32     -48    
-16    -128   
144    64     
144    64     
96     16     
80     128    
-176   -80    
112    320    
-80    32     
-128   208    
128    144    
-96    80     
112    32     
240    928    
-272   -416   
352    272    
-96    -176   
352    256    
-80    48     
-32    -128   
-32    208    
48     64     
32     160    
-48    48     
16     48     
64     64     
32     80     
16     96     
64     96     
-32    80     
-80    192    
-48    128    
16     48     
0      -192   
48     -96    
-32    32     
96     240    
-64    288    
160    368    
-64    192    
48     0      
64     64     
240    448    
-144   304    
-64    -160   
48     -32    
160    96     
-48    144    
-32    64     
-64    144    
144    96     
-48    96     
-80    -720   
80     144    
16     128    
160    256    
-96    0      
48     80     
16     16     
128    112    
-48    -16    
96     128    
-16    80     
112    144    
-96    144    
64     80     
-32    -64    
48     -144   
80     176    
-48    -336   
48     128    
16     16     
-48    -128   
48     -80    
-16    256    
176    80     
-80    144    
-48    16     
176    208    
-176   -480   
160    96     
-128   48     
320    16     
-96    128    
16     -576   
64     -48    
-48    160    
240    -144   
-176   304    
176    112    
16     544    
64     192    
-112   -288   
144    336    
64     112    
-48    -48    
48     144    
96     80     
144    80     
-256   -320   
80     -16    
-64    -240   
128    240    
96     432    
-80    32     
-16    -320   
80     48     
-80    16     
128    192    
16     176    
-80    -96    
208    368    
16     -288   
208    784    
-400   -864   
-80    128    
128    -256   
80     192    
0      32     
0      48     
128    32     
-112   144    
80     -16    
-160   48     
144    144    
48     0      
0      0      
176    -96    
-48    0      
-176   -80    
240    432    
192    -624   
192    320    
64     -1760  
-80    -96    
-16    0      
224    80     
32     80     
16     272    
-64    32     
16     -128   
304    224    
-96    -368   
64     160    
16     0      
0      48     
112    -144   
160    -208   
112    -32    
32     208    
-32    112    
32     160    
-16    32     
-1008  -2128  
1168   944    
-608   192    
-96    -80    
-192   -320   
-560   128    
224    -128   
-128   1088   
-288   -736   
608    80     
-512   -272   
320    96     
-96    208    
64     -304   
32     240    
144    -224   
64     480    
-16    -80    
16     64     
112    -304   
0      80     
32     -96    
16     192    
160    96     
16     80     
112    -384   
-64    -1488  
0      16     
144    -432   
16     128    
-656   32     
16     -720   
80     -64    
-16    -2096  
160    -96    
-96    48     
352    208    
-16    352    
0      -256   
-32    64     
16     -80    
192    48     
16     48     
0      0      
64     -192   
-1520  -208   
176    -112   
0      -224   
192    -880   
-208   -64    
192    -608   
16     -144   
112    64     
80     -96    
0      -128   
32     -16    
176    96     
-96    96     
144    -288   
64     -16    
-416   -80    
64     -32    
64     32     
96     0      
-80    48     
96     -320   
160    -64    
16     -2112  
96     272    
-112   -144   
240    48     
48     -240   
0      160    
-224   -80    
240    -128   
-192   112    
144    32     
-192   240    
192    -272   
128    -16    
-80    -48    
-32    -64    
352    -16    
-352   -112   
416    -48    
-16    160    
-224   -224   
352    144    
-432   -80    
240    96     
-192   -64    
128    -80    
-912   -224   
112    -192   
32     -32    
144    160    
16     -80    
208    -416   
-112   -160   
128    -3104  
-16    64     
0      -96    
64     64     
160    272    
-48    -128   
-208   -112   
-208   -448   
-176   -192   
-16    -16    
-816   80     
240    80     
-32    16     
-32    -304   
176    -16    
48     -848   
16     80     
144    112    
192    256    
-160   -80    
-32    -368   
-16    -48    
48     -32    
240    -64    
0      48     
-368   -128   
272    144    
-160   0      
400    -304   
-192   0      
80     48     
-16    80     
-48    64     
80     -240   
-240   -96    
64     -32    
-144   -48    
-48    -160   
16     -64    
112    64     
-336   0      
-112   -48    
160    -112   
64     -48    
-64    112    
128    -144   
64     384    
-272   96     
144    224    
-368   -256   
80     64     
-112   192    
176    144    
-112   -64    
64     96     
-96    16     
192    208    
-640   160    
160    -16    
-96    16     
80     -272   
80     -160   
-176   0      
16     80     
-64    -96    
208    -368   
-272   -272   
128    -96    
-32    320    
0      -96    
64     96     
80     48     
80     64     
-192   -208   
32     128    
-448   -192   
-320   -32    
-64    112    
-64    272    
-304   -192   
-1600  -144   
-96    -96    
208    -112   
-16    128    
32     32     
-160   -112   
80     -208   
192    192    
-512   -336   
-112   192    
-32    96     
32     -48    
-48    144    
-352   48     
112    -48    
-416   224    
128    -16    
-464   96     
2096   -1728  
-96    -352   
464    1200   
-624   352    
368    -32    
-144   -320   
-128   352    
320    32     
-224   304    
-32    -208   
-80    -48    
-144   -64    
160    160    
-16    -64    
-464   -176   
-112   -128   
32     32     
112    224    
-320   -176   
112    48     
224    -112   
-16    16     
-80    -128   
-240   -16    
-32    -304   
-32    96     
-48    256    
96     752    
-496   -512   
-416   -528   
0      -80    
-160   -32    
-16    352    
-80    48     
192    304    
-176   0      
320    256    
-432   -512   
304    272    
-352   -272   
400    -16    
-160   80     
192    0      
-80    80     
-128   -96    
-128   96     
-336   -240   
-112   -96    
368    304    
-64    256    
-48    336    
-224   144    
176    80     
256    -32    
16     -128   
-64    96     
448    752    
-288   80     
-368   -224   
320    -64    
-128   16     
-512   -96    
64     -128   
-416   -144   
256    224    
-32    96     
-176   32     
0      96     
-32    0      
-16    112    
-128   64     
48     48     
32     144    
-48    32     
16     48     
-144   -160   
-128   -256   
240    368    
-1088  96     
48     -208   
-96    192    
32     80     
128    16     
-64    128    
80     -16    
-48    112    
16     -144   
0      128    
-32    16     
-112   -48    
64     128    
48     64     
0      144    
-208   -112   
48     160    
-80    -16    
96     32     
-48    256    
16     -32    
192    272    
-160   96     
80     -112   
-144   -96    
96     48     
16     48     
-112   80     
-96    48     
48     -32    
16     -96    
-48    16     
64     208    
80     128    
32     80     
-64    128    
48     64     
16     160    
96     176    
-128   96     
-64    64     
48     0      
160    16     
-96    112    
48     -176   
144    224    
-80    224    
208    416    
16     96     
-16    576    
-16    -160   
-64    0      
64     112    
176    16     
16     -32    
96     224    
-192   -128   
96     0      
-128   16     
96     160    
112    96     
32     80     
-32    144    
80     -32    
80     64     
-160   -16    
80     80     
16     -528   
-96    -96    
-32    -48    
112    32     
-144   96     
176    176    
-176   96     
0      208    
48     -16    
-80    -32    
48     112    
-64    -192   
32     80     
128    48     
64     208    
48     -112   
16     32     
-16    80     
112    96     
-288   64     
32     112    
256    352    
-192   16     
-32    16     
80     32     
0      -16    
96     64     
-32    32     
-160   48     
128    96     
-16    96     
80     -48    
-272   368    
-144   -48    
64     48     
112    80     
192    144    
-128   64     
176    16     
80     32     
16     160    
32     224    
-48    16     
16     64     
64     64     
-80    0      
192    192    
0      208    
-192   112    
0      16     
128    -432   
160    -16    
-832   1152   
224    -512   
-400   112    
272    64     
-384   272    
304    -208   
-208   368    
336    -256   
-64    304    
-160   -320   
384    48     
-272   368    
96     -208   
-272   192    
384    -192   
-176   -256   
96     -176   
48     416    
64     -96    
-112   96     
48     -144   
48     336    
128    -80    
144    32     
-96    -240   
112    192    
-160   80     
416    336    
-240   -144   
112    48     
128    -64    
-16    144    
32     192    
16     0      
64     144    
336    16     
-112   192    
192    -16    
-272   16     
128    48     
144    112    
16     48     
32     192    
32     -192   
-16    96     
128    -832   
-48    176    
112    -1264  
-176   32     
96     208    
144    64     
-176   64     
224    48     
-192   0      
16     32     
32     16     
48     -48    
224    176    
-64    -224   
80     16     
64     -112   
-48    256    
112    -768   
48     256    
0      -1888  
112    48     
-32    0      
96     288    
-192   128    
96     80     
176    -32    
48     16     
-96    192    
96     -272   
32     96     
-128   -272   
48     -688   
-256   -176   
-80    384    
0      -864   
240    160    
-80    160    
272    464    
-224   304    
16     176    
112    0      
176    -1056  
0      -16    
-80    -240   
-48    192    
0      -256   
176    176    
112    -272   
208    208    
-16    -304   
192    336    
-96    112    
144    128    
-48    32     
48     0      
240    192    
-144   -128   
128    32     
16     -64    
112    48     
144    -96    
-160   16     
144    192    
-32    176    
64     -480   
112    80     
32     32     
48     -2608  
-32    64     
-336   -160   
-16    -560   
48     -32    
176    -192   
-80    -112   
320    -16    
160    192    
176    160    
-176   -64    
-32    -144   
208    -48    
-48    -1488  
240    160    
16     -80    
-192   -32    
-512   16     
-32    96     
144    -64    
-96    -448   
16     -160   
64     -864   
-96    -176   
272    80     
144    176    
-144   -48    
128    0      
-80    -224   
208    80     
112    64     
0      -80    
-800   -144   
32     -368   
48     -160   
176    48     
96     -160   
64     80     
16     -176   
0      -1440  
80     -224   
160    16     
128    1072   
80     32     
-288   -16    
64     -208   
128    -112   
16     0      
64     -160   
-752   -32    
80     -224   
80     96     
464    -16    
-176   -48    
-48    -1264  
144    -144   
320    48     
-48    64     
-80    -48    
96     336    
-336   -112   
192    -144   
-384   32     
208    -16    
-464   32     
0      -192   
176    0      
0      -352   
208    -96    
-80    -48    
160    144    
32     -208   
192    96     
-96    -160   
144    -16    
-320   16     
144    112    
32     48     
-112   32     
-32    16     
0      128    
-1024  -320   
128    224    
176    80     
160    224    
320    1632   
464    -544   
-608   -672   
-448   -320   
-224   -112   
416    304    
-592   -528   
656    112    
-416   192    
240    -224   
-96    -144   
-336   224    
352    -80    
-160   256    
96     -352   
48     128    
384    -640   
-112   416    
-48    -112   
32     96     
0      -96    
240    192    
-416   -240   
288    -192   
-384   32     
304    16     
-160   128    
-320   192    
-1760  -304   
128    -384   
-320   -16    
192    -720   
-80    -16    
16     -48    
208    -240   
-64    -224   
528    320    
-256   -32    
288    112    
-96    192    
-96    0      
-176   -32    
-80    96     
64     16     
-192   0      
112    -112   
176    256    
48     432    
-528   -176   
-176   -304   
64     192    
160    -112   
208    320    
-128   48     
-144   48     
192    -144   
-448   -480   
576    272    
304    432    
-368   -160   
64     432    
-688   -336   
-672   -80    
-80    80     
-608   48     
-272   -32    
32     -48    
-144   -16    
-48    -256   
-208   -80    
-32    0      
96     176    
-256   -128   
144    96     
-560   -512   
128    -256   
-528   0      
-304   272    
-32    80     
-144   -192   
240    160    
80     0      
-112   -144   
-64    -32    
160    16     
16     0      
192    480    
-176   -112   
-32    48     
-176   -272   
160    48     
32     208    
-80    224    
-176   -48    
-112   -208   
-16    -224   
-160   80     
64     224    
-304   -128   
-208   64     
336    144    
112    176    
-80    -32    
32     48     
48     304    
16     160    
-112   48     
-48    -64    
-208   -128   
-128   -32    
-96    160    
-16    128    
16     -16    
-144   -208   
64     -176   
-1536  192    
-192   -96    
128    -32    
-160   -160   
320    -80    
-176   16     
16     48     
48     144    
-48    224    
-112   96     
240    0      
-208   0      
80     48     
-288   16     
-64    -64    
-208   -48    
-128   192    
160    0      
96     176    
-304   -64    
-32    -48    
32     96     
-80    -48    
80     16     
-192   128    
208    0      
-112   -48    
176    0      
-384   80     
240    16     
-192   240    
-176   48     
192    -48    
-64    0      
-16    16     
-48    64     
-96    -16    
16     64     
32     160    
-176   -16    
112    96     
-16    0      
-176   128    
0      -48    
-16    64     
-128   0      
48     96     
-1056  -32    
208    144    
-240   224    
32     0      
144    -80    
80     -48    
128    -32    
-112   96     
-48    288    
-224   0      
64     160    
32     -176   
304    144    
-128   -80    
0      80
[truncated: 338,011 more chars]
