# Supplementary material for: A Fault Diagnosis Method for One‐Dimensional Vibration Signal Based on Multiresolution tlsDMD and Approximate Entropy
Source: Hindawi journal article supplement (doi:10.1155/2019/3262818), 2019-01-01
Supplement: f1 [file 3262818.f1.zip › 3262818.f1/gear signals/broken teeth fault signal/Data9.txt]

-32    32     
256    -160   
-16    -384   
128    32     
-16    112    
160    320    
-192   -320   
16     -240   
128    -32    
272    -240   
-96    48     
-64    128    
-208   -64    
176    -144   
-1280  48     
-32    -112   
192    96     
144    -144   
80     240    
-112   -1216  
32     -80    
256    0      
32     176    
-144   0      
0      16     
-128   -48    
192    -224   
-272   -80    
64     -112   
-352   128    
0      -144   
-512   144    
-32    -640   
176    32     
64     -560   
-80    640    
704    -736   
48     368    
-48    784    
-656   -256   
32     384    
-224   64     
-512   352    
-208   -256   
-48    80     
-160   -304   
272    432    
80     -752   
-112   304    
-112   -480   
96     208    
64     32     
0      16     
-608   -16    
96     -224   
-48    -112   
32     0      
144    144    
-48    -96    
48     0      
-64    -352   
64     192    
-64    -128   
64     128    
160    -240   
-64    0      
-80    -128   
-64    0      
-16    -32    
32     96     
32     -48    
48     112    
-192   -96    
16     -80    
-160   -128   
144    -112   
-16    160    
-480   -96    
-16    80     
-944   -352   
-48    0      
16     -16    
-640   112    
64     0      
112    0      
-80    16     
48     96     
-48    48     
0      -64    
-16    112    
-112   -128   
144    64     
-496   -80    
32     160    
48     48     
-80    160    
-32    32     
-144   80     
0      -16    
-288   -48    
-112   128    
-112   -48    
-64    128    
-128   -176   
192    -144   
-112   -16    
-64    176    
-48    -176   
32     96     
16     48     
64     128    
-96    112    
-240   -80    
-32    -16    
-416   -48    
64     544    
-368   32     
0      80     
-176   -256   
368    176    
-160   -224   
-48    -240   
80     -48    
32     176    
112    144    
-80    32     
-32    -16    
-64    32     
-144   -128   
80     16     
-32    64     
-64    -224   
-160   -176   
-320   -32    
176    256    
-176   64     
-144   16     
-32    -112   
144    32     
80     112    
-208   -48    
0      96     
-64    32     
48     64     
-16    64     
-16    32     
-192   -32    
-48    96     
-304   -112   
96     192    
-80    -64    
208    176    
-192   -64    
80     64     
-112   96     
112    -32    
-160   -32    
48     80     
48     32     
64     0      
-224   -48    
-192   -16    
80     160    
-96    -528   
-64    48     
-80    16     
144    -64    
-48    176    
-176   32     
144    112    
-64    -48    
192    400    
-272   0      
176    80     
-272   96     
144    -128   
48     80     
-16    112    
-96    -32    
48     112    
-1024  0      
128    -96    
32     -128   
0      304    
-96    48     
-16    16     
0      32     
-16    -16    
-80    -32    
80     304    
-192   80     
176    -32    
-160   288    
-240   -48    
80     32     
-496   -64    
48     -80    
-16    48     
32     144    
-32    64     
-16    16     
112    80     
-192   0      
96     0      
-48    144    
-16    80     
-112   -144   
96     -16    
-176   0      
160    -80    
-96    144    
48     32     
224    144    
-224   128    
32     -32    
64     128    
-16    48     
64     96     
-16    80     
-48    16     
224    16     
-32    -16    
16     32     
-48    64     
128    128    
16     112    
-32    64     
-112   64     
160    16     
96     48     
160    144    
-176   144    
-96    -32    
-80    80     
-576   -976   
416    -1760  
-288   -336   
272    544    
-96    48     
32     224    
304    -272   
-448   0      
0      256    
144    240    
-32    -208   
256    192    
-80    240    
-96    -112   
208    400    
-208   0      
192    144    
-16    -432   
-80    224    
224    48     
32     144    
-240   160    
112    -48    
-32    -80    
-16    64     
128    80     
32     128    
-64    112    
64     32     
-96    0      
144    -80    
-64    144    
48     32     
144    112    
-160   160    
128    -64    
96     176    
-96    80     
176    128    
-32    16     
16     96     
16     64     
32     96     
-48    64     
64     -16    
-48    64     
112    240    
16     160    
48     -848   
-80    176    
0      80     
128    -48    
-96    208    
32     -32    
-32    48     
-16    96     
128    64     
32     64     
-64    -16    
80     224    
-112   -64    
160    128    
-192   -80    
80     -416   
112    16     
64     160    
-112   16     
32     160    
-96    144    
112    80     
112    64     
-64    32     
112    112    
-80    96     
32     64     
-128   -128   
144    224    
-208   -128   
32     -336   
-64    352    
-80    -96    
192    96     
112    288    
-240   96     
128    16     
224    352    
-320   -144   
336    16     
-96    80     
80     160    
-64    -64    
96     160    
-16    128    
0      -544   
176    64     
-64    -32    
96     -48    
32     48     
80     144    
0      112    
80     352    
-112   0      
96     -48    
96     64     
0      64     
128    64     
-176   -240   
48     112    
192    -128   
-128   176    
240    -464   
-176   80     
112    -1520  
48     160    
0      32     
-64    128    
-80    -32    
160    48     
96     16     
240    288    
-64    224    
160    64     
-272   144    
160    -112   
-64    32     
240    -112   
32     -80    
112    -784   
-16    112    
-128   -128   
48     144    
160    80     
0      -48    
-288   32     
-80    64     
80     -160   
-48    -304   
48     48     
208    160    
128    64     
160    -16    
-112   64     
48     -224   
144    368    
80     -224   
16     112    
-96    64     
-16    192    
128    112    
-32    96     
96     80     
0      -224   
-48    112    
128    -432   
208    128    
-32    -176   
112    -32    
-256   0      
48     0      
128    96     
80     64     
128    0      
64     32     
-112   80     
32     -48    
176    -160   
48     -304   
96     160    
80     -48    
-192   272    
32     48     
-32    128    
80     -80    
-80    368    
96     -432   
144    160    
256    -448   
-128   -704   
-144   64     
-48    -32    
48     -1632  
144    -160   
112    112    
80     -176   
32     208    
32     -192   
-16    16     
80     -128   
128    64     
80     256    
-64    -752   
96     64     
-48    -1072  
80     -176   
-528   -112   
320    -32    
-64    16     
32     -64    
1136   -3344  
320    -576   
656    -640   
-112   -448   
-720   96     
960    560    
-576   -16    
480    -304   
-416   144    
32     -688   
192    80     
-144   -368   
192    128    
16     -288   
192    -384   
80     -32    
192    -544   
-144   192    
256    176    
-64    16     
112    208    
304    320    
80     80     
-112   -16    
-112   16     
0      128    
-16    -96    
-48    -32    
320    -32    
-64    -160   
-32    32     
64     -320   
144    80     
32     -1248  
-80    -128   
48     -304   
128    32     
-16    -96    
160    112    
-128   -32    
96     -32    
-576   32     
96     -48    
-1504  -16    
-48    64     
80     -64    
96     0      
-64    -160   
112    -336   
-64    16     
64     -128   
112    208    
64     176    
-48    -176   
-16    -48    
80     -192   
16     -144   
-192   -288   
-368   -192   
80     -160   
0      48     
160    -112   
-64    -16    
64     -832   
80     208    
-80    -944   
144    0      
96     16     
96     -16    
-176   0      
64     64     
-32    16     
64     0      
-272   -144   
176    -192   
-1696  -192   
192    0      
-256   -208   
16     -224   
208    112    
144    -224   
-48    176    
-112   -80    
96     -16    
0      176    
-16    32     
0      0      
80     80     
-96    16     
112    64     
-112   -32    
80     -64    
48     -16    
80     -240   
32     128    
32     -368   
-64    64     
-128   304    
0      32     
-48    80     
-80    -128   
-48    16     
128    0      
-96    80     
16     -32    
0      128    
16     -16    
-16    0      
80     -192   
-64    144    
64     -320   
80     0      
-96    80     
80     -16    
-96    112    
16     32     
-144   -176   
64     -48    
-144   192    
144    -48    
-224   -80    
0      -176   
112    32     
112    -160   
-208   208    
96     -160   
-368   -400   
-128   -384   
-576   256    
-176   -64    
304    80     
-288   128    
208    96     
-96    16     
-32    -80    
0      -80    
-320   -64    
-144   144    
-16    -64    
-80    64     
16     112    
-368   -160   
16     16     
-464   112    
-160   128    
-336   96     
-224   -48    
288    -384   
-192   -16    
48     80     
-64    144    
-320   -64    
224    0      
-32    48     
0      176    
-208   64     
64     -80    
-240   64     
-80    176    
-272   0      
-352   -96    
96     -112   
80     -80    
-128   112    
-272   112    
-96    96     
320    -176   
-160   144    
-112   240    
-192   -48    
-48    128    
208    -160   
240    16     
16     48     
-272   224    
-320   176    
-144   -48    
80     224    
-192   -96    
48     -48    
0      144    
-192   -176   
128    208    
-160   -48    
48     144    
-48    32     
-48    208    
-32    208    
-224   -48    
128    -64    
0      -16    
0      80     
-192   336    
-96    16     
-480   80     
-48    -48    
-32    -256   
48     16     
-336   640    
-848   80     
-384   736    
112    -32    
0      400    
-144   -256   
128    -32    
-512   64     
736    336    
-400   -64    
80     -64    
-240   -80    
144    48     
-112   -32    
128    -16    
-64    32     
-112   48     
0      144    
-80    -304   
-32    -192   
32     48     
96     -32    
-192   96     
64     48     
-96    -32    
48     16     
-272   80     
64     128    
64     32     
-144   -48    
0      80     
16     16     
96     80     
-32    48     
-64    112    
32     80     
-112   -96    
-80    -16    
-48    80     
32     16     
-32    48     
-96    16     
48     144    
-320   -112   
48     112    
-80    -16    
-48    16     
112    176    
-80    -32    
192    64     
-336   112    
288    16     
-240   64     
192    192    
-304   0      
96     32     
-176   32     
-112   64     
80     48     
32     96     
-16    112    
-16    80     
80     48     
-32    80     
-16    96     
16     -112   
128    144    
-240   112    
272    192    
-208   -96    
224    112    
-240   80     
112    48     
32     112    
32     80     
16     96     
96     80     
-80    128    
-32    -32    
176    112    
-64    224    
-48    32     
64     16     
-80    144    
32     176    
-160   -80    
64     -224   
80     224    
-144   96     
112    32     
16     128    
32     144    
-48    64     
-32    32     
144    208    
-192   -96    
96     128    
-336   -112   
224    160    
-144   -64    
80     160    
-80    64     
48     32     
0      64     
96     208    
-48    -64    
64     64     
-112   240    
112    176    
-16    -64    
-32    -144   
-112   240    
112    -32    
48     240    
-80    0      
80     32     
16     80     
0      112    
160    320    
-80    64     
0      -176   
-144   -16    
96     112    
80     -32    
32     -48    
-224   112    
112    272    
352    304    
-176   176    
-64    -80    
-32    -2384  
64     32     
48     144    
16     -64    
-32    176    
-256   80     
448    304    
-48    32     
32     0      
-16    192    
-128   32     
288    128    
-112   32     
-176   192    
224    0      
-64    -928   
192    0      
-80    -672   
-48    192    
32     224    
96     16     
80     96     
-32    112    
16     112    
96     128    
80     336    
-256   -48    
144    112    
80     512    
-112   -144   
16     -160   
-96    64     
192    320    
32     128    
-32    -256   
32     160    
192    608    
0      368    
-192   -240   
96     0      
-32    -16    
0      320    
-112   -272   
96     208    
176    352    
-208   -256   
96     -112   
-16    -240   
0      32     
-32    160    
0      144    
112    -112   
80     80     
-32    112    
32     144    
0      -48    
-16    96     
-32    -48    
32     128    
32     48     
48     -160   
192    272    
-368   -272   
-176   -32    
320    96     
32     -96    
-80    224    
16     -48    
32     -32    
-272   1728   
272    -16    
-720   288    
0      -256   
-480   720    
864    400    
272    512    
-16    192    
-560   -48    
-240   -256   
192    -624   
-96    -48    
-48    -208   
-16    272    
192    -80    
-96    -288   
240    144    
-16    -32    
48     32     
48     -112   
240    -128   
48     64     
32     64     
272    -352   
-128   176    
208    -512   
128    256    
-64    -816   
288    112    
-32    80     
-32    64     
80     -32    
-80    128    
224    224    
32     0      
16     16     
16     -224   
-96    96     
272    128    
32     352    
-16    -272   
64     80     
16     112    
-16    80     
-16    80     
32     128    
96     0      
-96    -144   
64     128    
128    32     
16     16     
48     -256   
32     -32    
80     176    
128    144    
80     112    
-144   112    
144    448    
128    144    
-160   -272   
320    80     
-128   0      
0      -192   
-32    176    
112    -160   
32     144    
0      -96    
48     192    
-48    0      
64     192    
80     -272   
32     80     
-32    -80    
112    -256   
48     80     
160    -224   
64     -144   
-144   -208   
-96    -1408  
0      -224   
-80    -688   
-16    -272   
160    -80    
96     -272   
0      288    
112    -144   
-16    -256   
-176   -176   
128    -336   
176    160    
176    -160   
-80    -160   
-448   0      
16     -880   
192    0      
32     48     
16     -96    
-64    -2912  
112    -16    
-16    -208   
128    112    
-80    -64    
-48    96     
176    -16    
-176   80     
-176   -112   
0      -32    
-624   16     
32     -96    
128    16     
-80    -144   
176    -64    
-48    -480   
176    -96    
-64    16     
16     -80    
96     -32    
-160   -96    
48     -288   
-32    96     
-48    48     
-16    16     
-80    48     
0      80     
144    -240   
-96    -16    
-80    -432   
224    208    
-128   352    
256    -320   
-320   -96    
16     -160   
80     -48    
128    -192   
-16    96     
-16    64     
176    448    
-384   16     
400    512    
-912   32     
240    -64    
-144   80     
-16    -64    
32     304    
-144   -320   
128    112    
-16    -128   
192    304    
-48    48     
96     -128   
-144   16     
16     -80    
-80    -16    
-32    -112   
128    -80    
0      0      
-96    208    
192    192    
-336   -288   
96     -912   
-16    64     
32     -1472  
-16    128    
-224   64     
192    224    
-304   -96    
112    -144   
-64    32     
208    -32    
-336   304    
-64    -144   
-240   0      
32     -64    
-48    96     
64     -64    
32     32     
-128   -400   
288    176    
-288   -272   
128    -160   
-16    128    
0      -144   
0      272    
208    -144   
-144   -48    
352    -176   
32     416    
-240   -128   
-256   -176   
128    -224   
112    -64    
96     -624   
0      -288   
-224   -32    
0      0      
176    112    
0      -16    
-80    80     
16     3632   
-2576  -480   
352    496    
-416   448    
-160   -336   
-112   -48    
-496   -368   
752    624    
-336   -544   
144    336    
48     -144   
-112   -160   
-32    176    
224    -128   
-144   32     
32     -176   
0      176    
16     48     
-96    48     
-80    -528   
-128   48     
-1328  -176   
80     368    
112    96     
-96    -160   
-192   -16    
-704   160    
-128   -16    
0      0      
-128   0      
208    112    
-96    32     
128    80     
-192   64     
-192   -192   
-96    64     
-224   144    
48     48     
-80    -32    
-304   80     
0      -112   
-592   64     
-160   -32    
-32    128    
-176   -64    
-256   -48    
-112   48     
-336   -144   
0      176    
-144   -192   
208    64     
-288   -48    
64     -64    
-80    64     
-96    96     
96     48     
-96    176    
-112   -64    
-16    128    
-192   -128   
-928   -112   
-272   64     
-144   48     
80     -32    
16     80     
96     -16    
-80    32     
-240   -144   
176    112    
-176   -64    
80     144    
-144   -112   
128    112    
-256   -64    
128    32     
-96    -32    
80     96     
-48    -112   
144    -64    
0      -96    
-64    192    
0      32     
48     32     
-192   -48    
192    0      
-112   224    
-96    128    
-192   -16    
48     80     
-112   0      
-16    32     
-32    48     
-624   -48    
-32    96     
0      -48    
0      160    
-16    0      
144    32     
-128   128    
-32    -160   
0      -80    
32     144    
-48    128    
0      -16    
-32    96     
-112   -32    
352    256    
-352   192    
96     -144   
-96    -128   
-64    -64    
224    144    
-176   64     
-32    128    
-112   80     
-64    16     
128    32     
-128   -304   
-48    -16    
96     96     
-16    -352   
-256   48     
-352   -32    
160    128    
-176   0      
-240   32     
112    80     
-240   -112   
-16    16     
0      64     
32     80     
-64    48     
-144   64     
-64    -48    
-128   240    
-112   -80    
64     -112   
-368   -48    
208    224    
-16    32     
-48    32     
-32    48     
0      80     
16     16     
-16    192    
32     96     
0      64     
64     304    
-128   32     
-48    64     
-48    16     
64     96     
-96    64     
32     144    
80     32     
-80    160    
224    0      
16     336    
0      64     
-64    240    
-16    0      
-64    352    
64     0      
-128   -112   
-64    80     
0      -144   
-112   0      
-32    32     
160    240    
-96    0      
-16    80     
0      96     
16     32     
0      288    
-80    -64    
-80    16     
-32    112    
128    64     
-32    96     
-80    -16    
-144   -64    
0      96     
-48    -48    
-16    128    
32     32     
64     128    
96     0      
16     144    
-128   80     
0      0      
-96    176    
80     16     
-16    48     
48     16     
272    368    
-352   -48    
208    96     
32     128    
208    64     
528    -32    
1056   1072   
80     -320   
-256   -800   
-32    496    
-48    816    
-144   -144   
544    192    
-752   -512   
144    -80    
160    288    
-112   304    
112    0      
112    64     
-80    -16    
48     144    
-64    128    
-16    64     
16     80     
0      -16    
-112   144    
176    32     
-240   0      
16     32     
176    144    
-48    0      
192    144    
32     -2368  
256    -32    
-16    208    
0      48     
80     112    
144    176    
368    592    
-80    128    
160    48     
-112   64     
144    256    
-192   -160   
416    64     
-176   0      
192    32     
-192   -512   
96     112    
48     96     
144    0      
192    224    
-192   32     
128    208    
-240   -16    
208    112    
-192   144    
48     64     
16     400    
-48    -368   
-144   128    
-128   -32    
560    368    
-240   16     
-48    -256   
48     -256   
144    48     
-144   -112   
32     -96    
96     144    
-48    96     
-16    112    
-112   -80    
48     160    
16     16     
64     112    
-32    112    
16     -192   
192    144    
64     -1520  
32     96     
144    16     
-224   16     
16     64     
-96    32     
-32    448    
96     176    
-80    -128   
80     208    
0      -16    
64     -32    
48     80     
16     -224   
-176   -144   
-16    -336   
144    224    
48     -944   
-16    192    
-64    -768   
208    272    
-96    -112   
240    368    
-224   -48    
80     -32    
32     16     
16     -96    
112    128    
-192   -352   
80     176    
80     0      
-48    112    
128    -496   
-16    160    
-32    -432   
64     -160   
-64    160    
192    240    
16     -48    
-144   80     
96     0      
160    -224   
-80    208    
96     -96    
0      112    
-64    -144   
256    160    
-16    -1840  
192    80     
-176   32     
48     -32    
64     96     
48     -176   
-272   -176   
32     -656   
192    224    
-48    368    
-16    192    
32     -160   
32     -48    
0      -352   
144    96     
-64    -48    
224    128    
-64    160    
144    112    
-208   -160   
112    112    
-80    -160   
96     -192   
112    80     
-48    -16    
160    368    
0      112    
224    272    
-32    -240   
-32    0      
64     -16    
64     128    
48     -688   
-112   16     
48     16     
240    656    
32     288    
16     128    
-48    -752   
80     -240   
64     16     
-16    -240   
112    64     
64     16     
-16    144    
64     -192   
0      -2256  
160    -272   
112    -608   
48     128    
80     -32    
112    224    
16     144    
-112   -624   
96     16     
48     -80    
32     -112   
64     64     
240    -16    
32     128    
-16    -16    
-64    -768   
160    176    
16     -336   
192    112    
-80    -80    
48     -352   
-96    -96    
96     -112   
-128   112    
0      -16    
32     -32    
240    -624   
96     64     
-160   32     
192    32     
-192   -160   
-512   -576   
96     544    
-592   -544   
176    -320   
336    -464   
-656   48     
176    -80    
-112   592    
96     -160   
448    -176   
-192   -112   
144    -368   
-32    -272   
-48    -240   
16     288    
64     -192   
-96    0      
160    -128   
-112   80     
192    -208   
-112   96     
48     -160   
-672   96     
16     -240   
64     -112   
32     -448   
32     96     
208    -368   
-144   64     
32     -80    
-48    112    
32     -48    
224    -96    
-144   144    
176    -80    
-304   -32    
0      -336   
-384   -96    
208    -32    
-16    16     
-176   -96    
48     32     
-16    -928   
144    64     
64     -1248  
-64    144    
128    0      
112    48     
-160   48     
112    -240   
-96    0      
0      80     
-128   16     
80     0      
-144   64     
32     -192   
48     48     
-32    -304   
96     176    
80     -576   
16     144    
-48    96     
96     -96    
0      64     
0      -32    
-448   -112   
192    -48    
-64    96     
-16    0      
-128   160    
-48    -208   
112    -32    
0      48     
-48    80     
128    -560   
112    80     
-448   32     
176    -272   
-48    80     
-80    144    
16     64     
-64    -112   
-240   16     
0      -288   
-192   -208   
112    -128   
-224   -160   
144    -304   
-48    16     
0      -656   
0      -16    
-16    0      
16     64     
-48    -64    
96     144    
-128   -128   
272    176    
-320   0      
208    176    
-112   48     
256    64     
-112   96     
176    -96    
-96    128    
-64    -32    
-240   -208   
144    16     
-112   -48    
112    80     
112    -32    
48     128    
32     -128   
-32    144    
16     -16    
48     96     
-368   -176   
16     16     
-144   -240   
48     -80    
-48    -16    
128    400    
-320   304    
0      16     
-240   -48    
0      -176   
-80    -80    
80     192    
-80    272    
128    0      
0      112    
-496   -192   
272    256    
-96    0      
-16    80     
16     160    
-176   -32    
32     0      
-272   -192   
96     -64    
208    208    
16     -32    
-576   96     
-128   48     
-112   -112   
64     144    
-48    -112   
224    640    
-272   -272   
0      -80    
-144   -32    
96     32     
-32    64     
-128   32     
16     144    
-208   80     
48     272    
-592   -176   
128    160    
-128   -48    
96     -144   
-336   -176   
224    112    
-80    -288   
0      80     
32     -48    
-32    96     
-224   416    
-16    -128   
-16    80     
-32    64     
-272   0      
-976   -192   
-96    -48    
416    48     
96     224    
-224   -128   
-48    32     
-48    -128   
224    0      
112    192    
-144   112    
-80    0      
-48    16     
160    48     
-128   64     
-160   -96    
48     -32    
128    272    
-224   32     
32     160    
-144   -80    
0      -32    
-64    112    
32     32     
80     256    
-288   -128   
240    96     
-48    0      
192    64     
2368   -1488  
-1088  -1312  
656    1216   
-128   720    
80     -192   
-656   -416   
336    0      
-352   -176   
16     -320   
128    80     
-48    160    
112    -368   
-544   224    
256    -208   
32     160    
96     -224   
-80    336    
-112   128    
-16    400    
-224   -480   
432    448    
-112   192    
112    240    
-224   -160   
272    80     
-272   -16    
320    544    
-304   32     
352    -48    
-224   112    
336    -192   
-144   416    
-400   -80    
224    384    
-400   -192   
144    144    
-144   -32    
-80    240    
112    64     
-144   160    
176    96     
-64    112    
80     32     
-256   224    
0      16     
-128   48     
320    208    
-80    208    
176    32     
-288   64     
-48    -32    
0      224    
96     176    
48     48     
-144   0      
80     128    
-16    112    
-48    -208   
-160   96     
144    80     
-176   -64    
32     64     
-128   0      
336    64     
-528   -128   
32     96     
-144   32     
160    144    
-64    0      
48     112    
32     -32    
48     32     
32     128    
-48    144    
96     -16    
48     48     
304    464    
-240   320    
-160   32     
272    80     
-560   144    
352    128    
-16    384    
-16    -96    
-176   -128   
368    160    
-224   64     
144    144    
-128   -32    
-80    -16    
48     -80    
32     160    
-176   112    
48     112    
144    320    
-48    192    
128    96     
16     112    
-128   -96    
0      -16    
-112   16     
128    144    
-48    16     
-96    -16    
48     96     
-112   -96    
48     64     
32     48     
128    -112   
144    384    
128    144    
-304   -64    
80     64     
128    -16    
0      16     
144    288    
-128   -32    
176    336    
-304   32     
224    -80    
-208   160    
-32    64     
112    16     
176    -208   
-272   -208   
160    128    
-112   -16    
64     -48    
32     176    
-96    32     
160    80     
-192   -64    
32     48     
-64    -32    
160    224    
96     80     
144    96     
-128   48     
-80    -240   
80     0      
160    240    
16     160    
16     96     
256    224    
-112   -16    
64     -32    
-112   96     
208    304    
-112   96     
272    -16    
-256   -48    
96     112    
80     48     
-32    -352   
192    288    
-144   -2096  
128    176    
-80    176    
-64    -160   
224    64     
64     176    
32     320    
0      -16    
-32    32     
32     64     
80     176    
-64    -80    
64     48     
96     64     
64     0      
96     -720   
-64    96     
32     224    
-80    176    
-96    -96    
304    80     
0      64     
128    160    
-160   48     
96     16     
128    144    
-48    -144   
160    48     
-16    -304   
240    -96    
-80    -96    
-64    160    
-16    -1088  
80     64     
112    112    
64     64     
-80    32     
-64    64     
80     64     
112    64     
144    272    
-128   -80    
48     80     
-176   1184   
-1584  -48    
272    704    
480    496    
1200   -208   
-800   -528   
64     -336   
608    384    
112    -192   
64     288    
16     -336   
-64    592    
256    -544   
48     352    
64     -128   
-80    -64    
64     -112   
32     16     
128    16     
0      -64    
32     -16    
32     16     
16     208    
80     64     
-112   -32    
272    -208   
16     96     
144    16     
-112   -288   
-16    128    
144    -96    
144    64     
-64    -144   
0      48     
64     16     
96     32     
-144   -704   
48     16     
-64    160    
224    -16    
-176   -32    
64     -80    
16     208    
208    -112   
-32    96     
0      -416   
0      128    
64     -128   
128    96     
-16    -624   
-32    96     
128    112    
48     -368   
32     96     
64     -624   
0      -1504  
80     16     
16     -368   
176    48     
-64    -2320  
96     -208   
64     160    
16     32     
32     144    
32     -96    
144    -464   
-144   48     
128    -464   
96     80     
128    -144   
96     -160   
-208   -16    
176    -64    
-32    -288   
128    -224   
-32    -80    
0      -864   
192    160    
-176   128    
128    -176   
48     -512   
128    176    
32     0      
80     -64    
-224   -32    
64     96     
-768   -304   
-32    -384   
304    256    
-160   -80    
160    16     
80     -304   
16     64     
32     -1504  
32     48     
208    80     
-16    128    
96     -96    
48     48     
-96    0      
64     -448   
16     16     
304    80     
-160   176    
-48    0      
16     -272   
16     -480   
32     -32    
-160   -448   
176    64     
160    208    
-48    64     
96     32     
0      -192   
-112   32     
128    32     
-240   -32    
32     -224   
-64    -128   
128    -80    
144    32     
-16    -432   
-304   32     
144    -272   
64     144    
256    80     
-128   128    
48     -192   
-48    -32    
176    400    
-32    48     
-64    -160   
-80    -96    
-640   -160   
16     32     
-560   128    
96     -208   
-160   -192   
240    -112   
-192   -160   
144    -1168  
32     128    
32     48     
160    -80    
-112   112    
16     -96    
80     128    
-144   -352   
-160   -32    
32     -128   
0      48     
32     -96    
0      64     
160    -240   
-112   16     
144    -1280  
96     112    
-48    80     
176    -320   
16     48     
-16    32     
-112   -96    
-32    -144   
-80    32     
-32    112    
-608   -96    
-176   -448   
144    224    
-112   -416   
192    160    
-160   -208   
240    -80    
-320   64     
64     0      
-128   32     
-96    96     
-48    -96    
96     -48    
16     128    
48     48     
-240   -48    
144    -208   
64     192    
128    -80    
-128   96     
464    -544   
-192   -96    
128    -96    
-80    144    
304    -192   
112    288    
-272   -32    
224    -48    
-176   -48    
144    128    
-224   128    
-16    0      
48     32     
-320   -96    
96     1504   
288    864    
-2032  -752   
-304   288    
-944   -224   
624    -16    
112    -432   
256    160    
-320   240    
-224   -192   
416    -192   
-448   176    
192    -144   
64     112    
-176   -448   
144    176    
-80    -64    
48     240    
-208   64     
176    -128   
-144   96     
-528   -288   
64     -96    
-176   128    
0      112    
32     -368   
-112   112    
-16    -112   
64     -16    
112    -128   
-48    -32    
-80    224    
-144   160    
-80    144    
-160   -96    
-64    -16    
-192   32     
464    576    
-1136  -272   
-80    128    
96     -32    
96     0      
-96    -64    
128    160    
48     -64    
-128   80     
0      176    
32     64     
-160   32     
-16    32     
-128   -112   
-160   -64    
48     96     
-512   32     
16     80     
-48    -176   
0      176    
-32    -208   
112    -80    
-144   64     
144    -32    
-64    128    
64     144    
0      112    
176    16     
16     144    
-144   -32    
-16    48     
-592   -272   
160    176    
-912   -16    
48     144    
-80    16     
112    64     
-48    0      
-96    96     
-64    64     
48     48     
64     96     
-176   -160   
240    -32    
-64    160    
-128   -304   
48     272    
144    240    
144    128    
-80    -96    
-64    -192   
-176   -192   
112    -96    
-64    176    
48     64     
-32    128    
-112   -80    
-176   80     
64     64     
-256   16     
96     -64    
224    80     
96     464    
-320   -160   
-176   -80    
64     -48    
144    208    
-16    96     
160    432    
-288   128    
80     32     
-272   -208   
240    176    
-48    48     
112    112    
-96    16     
-16    144    
-64    144    
-64    0      
-16    64     
0      -144   
144    176    
16     176    
16     128    
-80    32     
192    -32    
-256   160    
-16    -128   
224    -64    
-416   80     
240    176    
-240   -96    
-16    32     
-160   16     
96     -96    
-80    128    
-128   -80    
32     48     
112    -224   
-112   32     
-272   144    
288    -48    
144    -48    
-272   48     
-96    -80    
64     96     
-160   48     
32     16     
-160   -32    
0      80     
48     272    
192    0      
-80    144    
-16    -32    
32     64     
96     96     
112    144    
-224   -16    
128    144    
-288   48     
208    0      
-32    128    
-32    128    
0      0      
-16    16     
80     96     
-48    256    
176    -96    
208    320    
48     96     
-32    80     
80     528    
-272   -32    
80     80     
176    -96    
224    32     
-80    32     
-160   112    
64     16     
-32    112    
160    336    
-176   -48    
240    -96    
32     96     
32     48     
-64    32     
-80    96     
224    0      
-16    208    
16     -64    
16     192    
-272   16     
112    -288   
32     160    
160    80     
-32    192    
-144   32     
256    272    
-208   -128   
224    144    
-112   64     
-560   -1712  
320    1344   
-1264  -944   
336    -400   
448    384    
-128   -96    
48     -464   
288    192    
-32    400    
496    -128   
-384   384    
208    -464   
-288   752    
224    -352   
-144   864    
96     -288   
-160   256    
-16    -64    
64     256    
-80    -48    
144    -16    
-80    -224   
80     144    
16     160    
-32    -80    
112    64     
80     96     
-48    256    
64     48     
-48    32     
80     -48    
-16    112    
-16    16     
-16    224    
32     32     
-32    144    
240    -528   
-96    224    
128    -1120  
-48    144    
-32    -48    
208    192    
-64    80     
96     96     
16     0      
-32    176    
48     0      
176    160    
-208   -304   
-992   -240   
-192   176    
272    -96    
-128   112    
128    -352   
-48    240    
16     32     
128    160    
16     80     
32     64     
48     -16    
80     192    
-80    48     
64     64     
-80    -48    
96     -288   
16     96     
-96    -112   
64     160    
-16    -1344  
208    144    
-128   -1168  
-48    0      
176    64     
64     208    
-48    32     
80     96     
-144   -96    
288    240    
-64    240    
64     -144   
192    272    
-64    -32    
224    144    
-64    -560   
32     -64    
128    -512   
-16    -240   
-64    -144   
160    32     
32     -48    
-48    144    
80     -48    
-16    32     
96     144    
64     -80    
-16    16     
0      -160   
-32    -128   
32     -784   
96     144    
96     -160   
-32    144    
64     -928   
96     160    
-48    0      
128    128    
96     336    
-144   -320   
32     32     
48     -768   
112    160    
32     -32    
-128   -16    
48     -96    
160    144    
16     -672   
-64    48     
-48    -96    
112    16     
112    0      
128    240    
16     176    
-80    -112   
-112   -96    
176    -96    
160    144    
96     -112   
-32    96     
16     -128   
80     -80    
32     -368   
48     256    
192    144    
-112   112    
16     -112   
-16    -3056  
192    -176   
16     -112   
16     16     
80     16     
80     32     
80     -32    
16     144    
128    112    
-64    64     
144    96     
-32    112    
64     -80    
64     -496   
96     16     
256    -528   
-112   -352   
0      -32    
64     64     
192    224    
-80    -896   
-48    -416   
176    80     
0      64     
-16    32     
96     -96    
64     -368   
96     128    
-240   -496   
-96    112    
-160   -32    
208    -208   
-1456  -96    
-128   -16    
-128   -240   
16     -112   
16     -128   
160    -192   
48     -48    
32     96     
80     -16    
128    -176   
-128   176    
176    -144   
32     176    
48     -16    
-16    -192   
-656   -16    
80     -160   
32     -64    
-48    -160   
208    -16    
64     0      
112    -64    
16     -2816  
-192   48     
32     -96    
48     208    
16     160    
-16    -64    
-176   416    
0      -128   
48     -112   
-128   -272   
2208   -1664  
512    1216   
-432   -368   
-464   -192   
368    176    
144    -2368  
-32    416    
560    160    
-256   448    
-176   -320   
48     224    
-176   -560   
208    112    
-64    -208   
48     112    
-928   -160   
160    -32    
96     384    
400    -112   
-208   48     
128    -32    
-96    16     
-112   -224   
32     -16    
0      -80    
224    -128   
160    336    
-128   0      
160    128    
-288   -256   
272    -128   
128    -160   
-16    64     
0      144    
-16    -64    
176    -144   
-96    96     
112    -880   
48     16     
-208   -16    
160    32     
16     112    
144    -32    
-368   -224   
16     -96    
0      0      
64     -80    
-176   144    
-32    -176   
96     224    
32     -576   
-16    32     
32     -864   
48     272    
-96    -64    
16     -96    
48     96     
-48    -32    
-96    -96    
32     64     
-176   80     
128    -16    
144    -16    
144    -256   
-80    256    
-48    -304   
192    48     
64     32     
16     -32    
-96    -48    
16     -144   
-144   80     
-16    -32    
-32    96     
64     80     
-64    224    
192    -128   
-704   32     
128    -384   
64     160    
-32    -144   
-16    64     
-16    -224   
-400   -128   
-16    32     
16     48     
-96    112    
32     -80    
0      16     
160    -240   
-176   -48    
-32    -64    
0      80     
-800   -144   
-96    -288   
-176   -256   
-176   240    
144    336    
-112   -32    
16     128    
-272   32     
96     48     
-544   -48    
-128   -48    
48     -48    
16     -16    
-576   -32    
112    192    
-80    -128   
-64    176    
-144   -144   
-64    0      
-112   48     
96     64     
-96    0      
80     192    
-240   16     
-272   -80    
-112   -48    
48     -16    
352    336    
-192   160    
192    128    
-368   64     
256    48     
160    -128   
-480   -176   
208    288    
0      0      
-224   -64    
-144   -80    
32     -16    
-208   -112   
-208   -96    
-608   -80    
448    208    
-208   -240   
96     48     
-400   -32    
64     64     
272    32     
-208   64     
-32    96     
272    32     
-96    -16    
224    144    
-80    96     
0      48     
-176   160    
-48    16     
176    64     
-688   -192   
-48    96     
64     -112   
16     176    
80     64     
-48    112    
-192   112    
64     208    
-224   32     
80     -160   
48     240    
-64    -48    
-32    144    
-368   -208   
32     32     
-944   48     
16     288    
64     16     
-240   -80    
-64    0      
32     -192   
-80    224    
128    112    
-288   128    
112    0      
-48    16     
64     32     
-128   0      
-224   -48    
144    112    
-448   -80    
32     144    
-96    -32    
144    16     
-16    96     
-96    32     
144    -96    
112    192    
-96    80     
-80    144    
32     64     
-96    0      
-32    48     
16     16     
112    128    
-80    48     
-48    304    
-912   768    
-400   -288   
-1232  -48    
848    512    
704    1280   
-528   -1136  
-96    400    
432    -656   
448    480    
-304   32     
352    160    
-400   16     
304    -16    
-144   192    
32     -144   
-176   0      
112    64     
48     -128   
-16    -304   
64     48     
0      -96    
-96    160    
112    368    
64     48     
-112   -144   
-144   -64    
-160   -32    
64     0      
-240   -32    
80     48     
80     112    
-80    64     
32     192    
-16    16     
-112   0      
16     16     
128    64     
48     80     
16     80     
-176   32     
128    160    
-160   -160   
64     112    
-272   96     
400    112    
-80    144    
16     144    
-144   -144   
96     0      
32     96     
80     144    
32     176    
-112   16     
16     112    
-128   -96    
144    96     
32     48     
-48    144    
0      64     
128    16     
-240   -64    
0      112    
0      -64    
48     48     
32     224    
-144   -96    
144    160    
-224   -64    
0      80     
-128   -144   
-16    128    
-144   96     
160    224    
-112   -80    
128    0      
32     112    
368    288    
-192   160    
-176   80     
352    96     
-144   -224   
192    80     
-80    176    
-32    256    
80     128    
160    16     
-64    32     
112    -592   
-48    352    
-16    80     
96     64     
80     48     
32     128    
-80    112    
48     96     
48     64     
144    64     
-96    48     
96     192    
-32    64     
16     16     
-32    -16    
16     -544   
112    144    
64     240    
-112   48     
64     64     
32     80     
16     32     
64     128    
-48    48     
128    112    
-128   16     
112    160    
-224   -96    
176    128    
-48    48     
208    -400   
-64    96     
64     96     
-80    -96    
128    144    
0      96     
240    176    
-224   -48    
192    112    
-208   -128   
208    -288   
-48    320    
112    160    
32     128    
-80    -16    
0      -304   
-64    -32    
272    368    
-192   64     
224    -64    
16     208    
-64    48     
160    160    
-48    16     
112    160    
48     16     
-64    48     
112    112    
-32    -96    
64     32     
64     320    
-224   -304   
352    -336   
-112   208    
176    64     
-48    -160   
-64    32     
80     48     
64     96     
-160   80     
304    96     
224    256    
-352   144    
176    -288   
-64    128    
240    16     
-144   96     
-48    -640   
160    112    
80     -448   
176    0      
-96    208    
-128   -48    
320    80     
-32    128    
304    128    
-400   16     
256    272    
-80    -16    
352    -16    
-112   -80    
208    160    
-32    0      
96     80     
128    -304   
64     48     
-32    -16    
112    144    
176    -112   
112    144    
-48    -32    
-96    -192   
160    80     
176    128    
48     224    
-112   160    
-32    160    
128    -208   
-160   -112   
256    -224   
128    144    
32     -48    
-304   1056   
144    480    
224    -192   
-128   208    
896    -1056  
-336   -1024  
1120   -528   
-560   736    
16     -160   
112    32     
416    -240   
-64    80     
-112   -192   
240    272    
-80    16     
256    288    
-144   32     
144    48     
-144   112    
128    -64    
160    -192   
-48    -16    
208    192    
16     -16    
-96    144    
176    48     
-112   336    
176    -304   
-16    192    
-64    -112   
176    -688   
-48    64     
128    -128   
112    -1856  
-48    -112   
112    -144   
-240   -288   
128    -560   
128    -32    
112    96     
80     -352   
-48    176    
80     -96    
64     -336   
-32    64     
112    -192   
-192   80     
0      -784   
96     -80    
96     16     
64     -400   
96     32     
-96    32     
240    -80    
-64    -1152  
112    -32    
-16    96     
80     -64    
64     -112   
32     112    
-32    -304   
144    64     
-176   64     
48     -128   
-64    144    
0      288    
112    80     
192    -128   
-48    -80    
160    -688   
-128   16     
112    0      
16     -80    
144    -16    
-144   128    
64     -80    
160    0      
-144   -80    
256    -32    
-128   0      
48     -320   
-32    32     
-64    -496   
304    0      
-112   80     
80     64     
32     -2608  
-128   96     
16     -256   
96     64     
-80    -128   
224    48     
-240   144    
-16    -64    
-496   -160   
-64    -240   
-1264  64     
-80    96     
240    96     
-64    -400   
32     -144   
96     -528   
96     128    
48     16     
-160   -48    
128    16     
32     -144   
160    80     
-96    -160   
-32    -80    
-80    -176   
80     160    
96     -96    
-576   -32    
-64    -320   
192    192    
304    -224   
-304   -288   
-16    -160   
32     256    
112    -96    
-160   -16    
-368   -144   
192    -32    
64     -32    
208    32     
64     128    
128    -32    
-352   -80    
32     -208   
-112   128    
144    -240   
256    256    
80     -1072  
48     48     
-240   192    
128    0      
-64    112    
-112   0      
0      64     
-144   -80    
0      48     
16     64     
384    -128   
-176   -80    
192    48     
48     -144   
0      32     
64     -240   
-32    -64    
128    64     
16     32     
-16    -64    
-64    -96    
-112   128    
96     80     
-112   48     
112    32     
-16    -32    
208    -256   
-64    160    
48     -48    
128    224    
80     64     
-32    16     
32     224    
-176   -208   
64     -352   
-208   -16    
-128   -128   
32     32     
-32    16     
96     -192   
-256   -16    
-192   -288   
-144   176    
-992   -432   
96     128    
64     16     
-576   112    
-80    32     
-272   240    
-224   48     
-16    0      
-48    80     
224    0      
-288   -208   
-304   -352   
-48    112    
16     -64    
64     112    
80     0      
-128   -16    
48     176    
-288   64     
-64    -160   
-144   32     
64     96     
-432   64     
-32    -2240  
784    320    
32     576    
-368   -512   
336    272    
624    1488   
-448   -496   
352    -80    
-512   -32    
320    0      
-224   80     
-176   -416   
-160   144    
-96    -64    
-16    -96    
-48    96     
-672   96     
112    -48    
-144   160    
96     160    
-256   -192   
208    144    
16     32     
16     -128   
-208   -16    
-64    288    
-96    0      
144    32     
-64    96     
-16    -208   
-224   -48    
192    128    
-16    -16    
16     -32    
-48    160    
-48    80     
32     112    
16     144    
-80    48     
112    0      
-144   -32    
-80    16     
32     64     
-16    32     
48     64     
-48    128    
80     144    
-16    240    
-128   -96    
-32    16     
48     -144   
-48    0      
0      176    
16     32     
-32    -16    
-208   -16    
-96    -240   
64     -96    
-48    224    
-128   32     
160    64     
-416   -128   
48     16     
-400   -256   
16     80     
16     48     
0      48     
0      48     
-48    64     
-32    64     
16     16     
-32    48     
32     96     
32     80     
-176   32     
16     144    
-224   -128   
144    224    
240    32     
-16    160    
192    -16    
-320   -112   
96     -32    
-176   -32    
112    -96    
96     192    
112    432    
-16    352    
-48    432    
-96    32     
48     -128   
96     112    
112    240    
-192   32     
-48    16     
0      16     
-16    -80    
144    160    
-64    112    
64     192    
-192   0      
-48    -112   
-32    -48    
16     112    
-80    64     
16     96     
-32    48     
0      64     
-80    0      
-112   -16    
224    176    
-144   0      
160    96     
-112   64     
80     48     
32     64     
-16    32     
-64    0      
80     96     
-64    80     
112    32     
-128   -128   
-16    160    
112    48     
16     64     
-64    96     
-48    144    
0      64     
80     160    
-144   80     
96     64     
0      80     
112    48     
32     96     
-96    48     
96     320    
-208   -224   
160    16     
-80    128    
0      144    
-48    -64    
-64    32     
224    208    
-176   160    
16     0      
64     144    
128    -480   
-16    192    
-208   272    
-64    0      
-80    192    
32     -80    
160    304    
-144   -64    
16     272    
-352   -416   
320    96     
-80    48     
64     -144   
32     -240   
144    224    
320    272    
-240   112    
176    208    
-144   -16    
112    352    
-192   -32    
192    160    
96     144    
-112   48     
-112   -16    
-32    112    
-64    16     
336    -224   
-16    128    
-160   128    
0      48     
112    -96    
160    144    
112    16     
-32    208    
-288   64     
32     -2800  
144    160    
64     80     
16     16     
32     112    
48     64     
80     80     
176    -64    
-64    64     
112    -80    
80     -192   
176    128    
-64    -80    
-16    192    
16     160    
160    -704   
-672   -1488  
-880   -1088  
1168   1168   
560    560    
208    -128   
-208   400    
-384   -80    
544    176    
-112   272    
544    224    
-192   64     
-64    -80    
96     144    
96     16     
-112   -192   
32     64     
64     96     
-16    64     
96     80     
32     80     
-48    80     
112    176    
48     272    
16     64     
-96    -112   
48     160    
112    144    
-48    -16    
80     48     
-96    -336   
272    112    
-144   -1440  
160    128    
-112   48     
64     96     
16     16     
144    208    
-208   -368   
208    32     
-304   -32    
208    160    
-64    -32    
0      -128   
144    128    
32     -224   
16     80     
-48    -432   
112    176    
0      160    
192    48     
-80    192    
144    96     
-80    96     
16     64     
208    0      
-64    160    
192    96     
-96    -32    
64     64     
80     -48    
0      80     
-16    -48    
96     96     
32     -1056  
64     32     
32     -368   
0      64     
-32    96     
128    192    
48     -32    
80     112    
-80    80     
96     -64    
64     16     
32     64     
144    -96    
48     -560   
-64    272    
-96    -1168  
192    32     
128    -32    
-32    256    
-80    80     
240    -64    
-144   176    
32     400    
-192   -192   
320    -80    
0      80     
128    -256   
48     128    
32     -48    
0      48     
96     -32    
-32    64     
128    -16    
288    352    
-288   48     
208    128    
0      -112   
-80    -48    
240    160    
0      64     
96     224    
-32    -128   
208    -16    
-112   -32    
208    176    
-80    -96    
64     96     
-16    -176   
208    64     
-96    80     
144    368    
-16    96     
96     -80    
-96    -2240  
16     -144   
208    176    
0      -64    
224    160    
-48    48     
160    -80    
-240   -272   
-64    -2720  
176    -32    
-96    -816   
-80    64     
-112   -704   
192    -160   
208    -144   
-32    -544   
128    -208   
16     192    
432    48     
224    224    
-32    -304   
16     -960   
-288   -64    
192    -400   
208    -16    
0      32     
-48    32     
-208   -192   
96     -208   
-752   32     
32     -272   
176    -176   
-128   -720   
32     -64    
48     -2112  
-16    -96    
128    128    
-32    128    
0      -32    
96     80     
0      -464   
-16    48     
-80    -416   
64     64     
-144   160    
16     96     
96     -64    
64     -96    
-48    -272   
96     -960   
128    -16    
-112   -544   
64     240    
64     -16    
64     128    
-16    -208   
32     -16    
-112   32     
64     112    
-192   48     
16     -192   
-160   -192   
64     -192   
96     -192   
32     80     
128    256    
-304   -336   
-64    -16    
272    -224   
-16    112    
-160   -48    
176    -288   
112    48     
176    -176   
-112   48     
16     -160   
-160   80     
96     -16    
-160   64     
80     -160   
-32    0      
64     -1264  
-128   80     
96     -1104  
256    496    
496    576    
128    848    
-208   -288   
-16    -128   
-368   -256   
384    -16    
-416   32     
-160   -128   
-1088  -32    
240    -192   
-48    96     
-80    -576   
0      -80    
176    -304   
-96    -48    
48     -32    
-96    -160   
0      -64    
-16    -80    
0      176    
-16    -144   
112    32     
-112   -48    
160    -128   
272    368    
-144   336    
320    -160   
-176   288    
80     -912   
224    -32    
128    -48    
320    -192   
-160   128    
304    -16    
32     128    
80     192    
-304   -192   
-16    -544   
-288   80     
48     -64    
48     64     
-32    48     
96     -48    
16     -848   
32     32     
-64    176    
-96    128    
-240   16     
224    -112   
-272   -48    
112    -80    
32     48     
32     -128   
32     -16    
-80    -720   
208    -48    
-464   464    
-336   240    
224    128    
-704   144    
48     -96    
-352   208    
32     16     
96     0      
-48    -32    
16     96     
64     48     
64     0      
-48    32     
-336   -112   
64     128    
-304   -192   
48     160    
48     16     
-80    480    
-112   0      
48     -64    
-80    96     
-1008  32     
-144   288    
112    176    
-64    352    
48     -192   
32     32     
48     144    
-64    96     
0      -320   
64     -48    
16     128    
-128   80     
-240   80     
-144   16     
32     0      
96     32     
-144   16     
-16    -64    
-144   -96    
-176   -400   
48     128    
-64    -80    
160    256    
-144   16     
32     80     
-112   0      
32     48     
-48    32     
48     0      
-32    32     
-112   48     
-64    0      
-704   -32    
32     176    
16     64     
16     112    
-16    144    
-144   0      
80     -80    
-160   80     
272    208    
-128   80     
-16    64     
-160   64     
16     -96    
-224   -16    
48     80     
-96    96     
-128   -64    
-112   48     
-160   -64    
192    -16    
112    32     
-48    80     
-32    144    
-160   -160   
144    16     
16     -176   
-272   96     
112    192    
-272   -32    
16     128    
-208   -64    
64     128    
-1248  144    
-48    80     
48     -272   
-272   -64    
160    80     
16     208    
-96    96     
-64    32     
112    176    
-32    -48    
48     0      
-32    160    
-176   -96    
-80    -96    
112    -816   
-240   96     
272    32     
-192   176    
-80    16     
96     192    
-16    160    
144    128    
-416   -224   
176    -240   
128    384    
-48    16     
-16    96     
-48    64     
-32    -192   
-32    64     
-320   16     
272    496    
48     32     
64     288    
-64    16     
-240   -240   
-48    48     
144    144    
-32    48     
-144   96     
96     -208   
-144   0      
192    176    
-288   -16    
128    64     
-48    -32    
-48    80     
128    64     
-80    256    
-96    48     
48     160    
-64    -112   
176    112    
-16    -96    
48     -48    
384    -864   
864    144    
-96    400    
-176   496    
-160   -464   
432    368    
-272   -336   
224    320    
-448   272    
288    -208   
64     288    
-16    -240   
-112   416    
-16    -208   
32     192    
80     -16    
-96    144    
112    32     
-128   16     
0      48     
64     32     
-64    112    
128    96     
-144   112    
48     -48    
-160   112    
80     96     
64     80     
32     112    
-96    -32    
64     64     
-48    176    
32     96     
-160   -32    
0      64     
16     128    
-176   -96    
-80    -48    
144    176    
160    144    
-32    0      
-96    96     
64     80     
160    224    
-208   -64    
-80    64     
32     80     
80     128    
80     -48    
-48    0      
80     176    
-48    -16    
32     32     
32     48     
48     128    
16     -32    
144    256    
-144   128    
96     48     
0      -32    
32     144    
-80    -16    
96     144    
-64    240    
-80    48     
80     -80    
80     64     
-16    64     
48     256    
160    -48    
64     96     
0      240    
-176   -16    
144    -48    
-16    128    
-48    -48    
-16    -16    
-128   -16    
-48    112    
-144   -2064  
96     -144   
192    160    
-176   -32    
288    96     
-256   176    
112    -96    
240    208    
-384   32     
464    144    
-272   0      
288    96     
-128   96     
0      80     
144    -16    
128    -80    
-80    240    
144    208    
0      16     
112    0      
-32    96     
48     -16    
48     112    
-48    32     
176    400    
-192   112    
240    -80    
-192   80     
128    -512   
0      160    
-48    -32    
128    32     
-48    -896   
0      48     
128    208    
-144   0      
144    144    
64     48     
-192   -464   
176    32     
-96    16     
320    112    
-176   -96    
208    -128   
-208   192    
240    -160   
224    208    
-160   -1712  
16     128    
-64    192    
272    112    
32     0      
48     144    
64     144    
112    -32    
-80    -64    
48     128    
-144   -48    
128    -64    
240    448    
32     -64    
0      80     
-64    -128   
96     112    
96     -784   
-80    112    
112    48     
96     384    
-80    96     
128    272    
-208   -208   
112    224    
-16    192    
128    -96    
-16    32     
48     -288   
48     160    
144    16     
-96    96     
128    -464   
-80    96     
96     -704   
16     160    
-16    160    
96     32     
48     176    
192    608    
-304   96     
-176   -176   
-160   -656   
320    176    
-32    176    
-16    -368   
192    64     
16     -448   
112    48     
64     160    
0      16     
160    160    
256    -80    
-32    -16    
96     -688   
0      240    
-112   -96    
128    32     
176    -128   
0      320    
-208   -48    
16     32     
128    -16    
288    32     
-80    144    
-112   96     
128    -16    
144    112    
-16    16     
272    -112   
-96    224    
96     -16    
-560   496    
288    2176   
-1024  1056   
-400   -1168  
-16    -784   
368    432    
32     96     
-160   448    
-16    -528   
512    80     
-400   -464   
240    -432   
336    288    
-64    -288   
0      48     
128    -288   
112    112    
0      240    
112    -64    
-48    -112   
96     -272   
48     -1600  
240    208    
-176   -336   
368    32     
0      288    
128    -208   
-80    -144   
48     -448   
208    288    
192    -704   
-64    -48    
112    -1312  
128    -64    
-64    128    
208    -96    
16     -240   
-64    -464   
16     32     
96     240    
-432   -288   
272    -592   
-352   -32    
240    -352   
96     16     
-64    -128   
-48    -96    
-144   -704   
-192   -560   
400    96     
-208   112    
-64    208    
-144   240    
128    -432   
256    48     
-80    -128   
64     176    
-320   -16    
368    848    
-304   -368   
240    -64    
64     -224   
-80    -352   
-80    208    
128    -80    
-176   160    
80     -112   
80     64     
-32    0      
80     -144   
-32    80     
0      32     
-16    64     
0      -144   
-512   128    
-32    -160   
208    288    
-144   -176   
-144   -128   
0      -1024  
16     96     
160    -32    
0      144    
-192   -144   
16     96     
-64    -48    
80     -48    
-416   -64    
128    -240   
-512   -16    
32     16     
-160   80     
32     -128   
48     16     
80     -416   
-112   -96    
128    48     
-32    0      
48     0      
0      -288   
-224   -112   
160    -32    
-224   112    
-16    -112   
-352   48     
128    48     
-16    48     
48     -192   
-80    48     
96     -592   
32     -64    
32     -864   
192    144    
48     80     
32     48     
-608   80     
96     -64    
-48    416    
128    -48    
-240   0      
16     16     
-432   336    
224    -240   
-48    240    
-48    -256   
144    544    
16     -1040  
128    -48    
-800   -48    
128    416    
32     -176   
-224   -16    
64     -160   
176    -32    
-112   96     
-32    -96    
96     176    
-128   -224   
208    -32    
-160   -288   
160    96     
-96    -32    
-80    -32    
-208   48     
32     112    
-64    32     
96     96     
-112   176    
288    304    
-224   240    
80     -80    
-64    -32    
-544   -144   
64     128    
-752   -96    
-80    80     
64     0      
-384   32     
0      80     
-704   192    
0      224    
-176   -64    
-160   0      
96     -112   
32     112    
-32    -96    
0      96     
-272   -144   
224    112    
-432   -288   
-272   16     
-32    112    
-352   -160   
32     16     
-48    -96    
-336   96     
-256   0      
-144   32     
96     -160   
-160   352    
-672   -272   
80     -16    
-96    -208   
160    128    
-144   -32    
176    -16    
80     16     
-112   112    
-64    112    
-192   -16    
64     80     
-16    32     
0      128    
-544   208    
-224   160    
-240   -240   
240    32     
32     -176   
144    208    
704    -1808  
-16    -640   
-144   -176   
-304   -96    
-256   480    
608    -96    
-688   96     
352    -192   
-80    208    
-448   -272   
80     192    
16     -48    
112    256    
-16    -128   
80     -80    
-48    96     
-80    -32    
176    224    
-80    -32    
-80    32     
96     -64    
-32    192    
-128   -80    
-208   64     
-640   -176   
-208   128    
-1200  -64    
-192   192    
64     -176   
-176   -32    
16     160    
16     0      
16     96     
0      80     
-48    64     
-32    -80    
192    192    
-96    64     
128    160    
-208   0      
32     48     
-288   -80    
64     160    
-32    -80    
-80    -48    
16     0      
80     96     
0      -128   
208    144    
-384   128    
144    -112   
16     176    
-112   -96    
224    256    
-400   -48    
240    160    
-608   -112   
48     16     
48     128    
-144   -112   
208    16     
-176   128    
-16    -64    
112    160    
-240   64     
48     -64    
0      48     
-48    -80    
0      208    
-240   -64    
160    32     
-320   -48    
-32    176    
48     64     
112    0      
-224   -16    
0      -320   
0      -208   
-368   176    
80     16     
160    80     
-112   96     
-64    -64    
160    448    
-64    -16    
208    -32    
-112   48     
80     128    
48     224    
-160   128    
0      48     
0      -32    
48     0      
112    -16    
16     -32    
80     64     
-80    0      
16     64     
160    208    
-144   -32    
112    48     
-144   -32    
48     64     
32     -64    
-224   -64    
128    128    
176    240    
32     128    
-240   -128   
-16    128    
0      -64    
-16    -32    
-48    128    
32     16     
-48    176    
80     256    
96     128    
-16    80     
-32    0      
160    224    
-224   -432   
-192   48     
144    32     
176    80     
-80    -16    
-16    64     
32     256    
-64    16     
80     -144   
-32    -64    
64     128    
80     144    
176    128    
-64    64     
0      16     
-32    48     
0      96     
32     128    
96     -176   
-64    64     
144    -16    
-96    176    
-16    -16    
96     96     
-160   -112   
160    16     
-16    -16    
128    224    
112    416    
16     -48    
32     112    
-64    48     
16     0      
80     64     
160    96     
144    1008   
-32    0      
-384   -352   
96     -64    
80     64     
64     -720   
32     144    
32     96     
64     64     
-16    144    
160    448    
-112   0      
176    272    
224    64     
224    64     
-112   32     
-96    112    
16     192    
-16    -112   
272    128    
-144   -256   
160    80     
-224   32     
240    112    
-64    160    
64     64     
48     48     
64     128    
-144   48     
352    0      
-160   -176   
96     64     
0      16     
16     -80    
0      64     
-96    -624   
224    48     
-48    128    
0      0      
-48    464    
-176   32     
48     64     
176    -144   
896    1952   
-1392  -336   
640    768    
336    304    
48     -608   
-512   -208   
-48    -16    
608    0      
-272   -112   
48     -2592  
64     192    
-144   -32    
80     176    
304    -176   
-80    224    
96     0      
48     160    
-32    128    
-80    128    
-176   -464   
-176   -80    
144    128    
-128   320    
16     -240   
32     -464   
64     -16    
176    -16    
576    688    
-192   144    
-64    0      
-64    160    
128    -320   
-272   48     
80     16     
48     16     
-288   -208   
112    -32    
16     192    
-272   -160   
80     -80    
112    192    
0      -1040  
-16    208    
-240   64     
288    320    
-80    -32    
-64    320    
-128   -336   
416    288    
112    208    
176    -112   
-96    256    
176    -368   
-224   -208   
176    -208   
224    80     
16     -192   
288    816    
-336   -224   
-240   -112   
368    160    
-96    -112   
32     96     
48     16     
112    80     
96     -304   
0      144    
-32    -64    
144    80     
0      224    
112    96     
32     -112   
128    272    
-112   80     
64     32     
-32    -432   
128    -336   
48     144    
-96    -128   
-32    96     
-176   -576   
272    256    
240    -144   
16     -32    
-128   -304   
144    64     
-96    -320   
144    336    
160    16     
-80    416    
0      -160   
192    -2816  
16     -384   
32     -128   
16     192    
128    112    
112    224    
-48    -240   
-128   0      
112    -16    
320    144    
-112   -128   
-48    -624   
-16    64     
48     -608   
0      96     
-192   -240   
-16    -80    
144    48     
-80    -336   
176    16     
128    -720   
-96    -160   
112    -112   
-192   128    
224    16     
-80    160    
0      -272   
176    112    
112    -160   
-272   304    
128    144    
0      -96    
112    -304   
-16    -160   
112    -48    
160    -608   
-32    96     
48     -512   
-64    -208   
144    -16    
32     112    
256    -128   
0      224    
0      -128   
-112   -48    
48     -80    
32     48     
-16    -176   
-80    32     
-48    -48    
240    -64    
0      16     
0      -32    
-48    -128   
288    16     
-400   32     
176    -336   
32     80     
-32    112    
144    -128   
-80    48     
48     -80    
-336   128    
0      -144   
256    16     
-80    -96    
176    80     
96     -752   
-48    176    
-32    112    
48     144    
-16    112    
48     128    
-64    -16    
240    -144   
-384   144    
-80    -224   
-176   -128   
80     -240   
-416   -176   
16     -176   
-32    176    
-208   -400   
96     0      
256    -352   
240    256    
-16    -64    
-48    192    
-256   16     
144    -32    
48     64     
48     48     
-112   -352   
144    -16    
-896   48     
208    112    
-1104  80     
16     -80    
64     224    
16     -496   
160    48     
32     -672   
48     64     
176    -336   
0      272    
-272   96     
272    -112   
-352   64     
-272   16     
64     48     
112    320    
-288   352    
-128   -656   
32     496    
208    -576   
-176   736    
176    -1376  
-256   64     
-16    -336   
-32    384    
-176   -80    
16     144    
-48    -192   
-16    64     
-192   0      
144    48     
-112   -128   
192    -224   
-80    128    
80     -80    
0      224    
32     -80    
-32    -16    
16     -80    
-128   128    
144    48     
-80    112    
48     -32    
-64    80     
-128   -80    
96     112    
-256   16     
0      -48    
48     144    
-416   32     
32     112    
-64    0      
-416   -64    
-80    64     
80     0      
0      96     
64     16     
64     64     
-32    0      
16     -64    
48     208    
-176   -112   
288    -80    
-144   128    
-192   -144   
-352   -48    
-128   48     
-112   -16    
-80    64     
112    16     
-96    48     
-1408  112    
-208   -80    
48     -96    
-80    0      
16     -16    
0      0      
-112   -352   
-112   -16    
-112   -352   
-112   -80    
-48    64     
80     112    
-112   32     
-144   128    
-208   -48    
-208   -48    
80     192    
-96    32     
272    448    
-272   -16    
176    64     
64     -144   
16     192    
32     80     
96     -64    
-96    -256   
-112   -64    
-64    160    
-80    -48    
16     272    
-112   16     
32     -112   
-368   -160   
-96    -176   
304    -112   
224    80     
-80    -192   
80     176    
-64    48     
208    400    
-176   32     
-128   0      
0      -64    
-224   -80    
112    96     
-64    192    
-112   0      
-624   -48    
-208   -240   
48     -16    
32     -128   
-192   -320   
-48    0      
32     48     
16     64     
32     64     
-128   48     
48     80     
-96    80     
32     192    
64     80     
-48    224    
-64    -80    
80     256    
-672   16     
112    192    
-64    32     
-144   -368   
-96    -80    
-16    -96    
0      -16    
128    112    
32     96     
-80    48     
16     96     
-16    176    
-192   0      
-48    64     
240    688    
-528   144    
-32    48     
-80    48     
-160   80     
-128   64     
-48    -64    
128    192    
-208   -48    
128    64     
-320   -96    
80     96     
-80    -64    
0      80     
-48    32     
80     112    
-624   -112   
-16    0      
0      48     
80     144    
16     32     
0      16     
-112   96     
160    -16    
-112   144    
224    224    
-112   128    
-160   160    
48     -16    
-112   -16    
224    256    
-368   -176   
144    272    
-64    32     
112    128    
-96    64     
80     16     
-16    96     
-32    80     
-128   -32    
144    16     
-48    224    
-16    -112   
0      160    
-144   -32    
192    112    
-176   32     
-16    48     
-192   112    
-96    224    
-192   -96    
0      -128   
144    192    
144    160    
-192   -32    
0      48     
176    192    
-224   -112   
448    -224   
-256   80     
160    0      
-224   112    
-16    416    
-720   -1056  
16     -352   
-672   -64    
400    64     
-160   512    
224    -16    
176    48     
-48    352    
-288   240    
176    -656   
-128   304    
128    -576   
160    528    
16     -240   
192    528    
-144   -592   
304    256    
-112   -48    
480    496    
-448   -240   
80     -32    
-224   336    
256    -112   
-112   272    
240    176    
64     304    
-400   -240   
-240   -816   
320    240    
160    64     
-176   48     
16     144    
-64    -96    
144    160    
208    -16    
-112   64     
64     0      
176    224    
-128   224    
304    368    
-96    64     
96     -80    
-16    384    
-16    80     
80     32     
-288   -64    
128    0      
-16    -16    
160    80     
-80    64     
144    64     
-80    192    
160    160    
-144   272    
16     80     
-16    80     
-32    -80    
176    -64    
-32    0      
48     176    
-48    96     
112    96     
-80    -48    
128    -48    
0      112    
48     208    
64     112    
-32    128    
192    256    
-208   256    
-112   80     
288    192    
-176   -976   
144    -32    
80     128    
32     96     
16     80     
48     16     
-64    32     
128    144    
-80    192    
32     96     
-16    -96    
64     -16    
256    32     
32     -80    
160    416    
-240   -272   
-128   144    
160    320    
-16    48     
16     32     
32     32     
32     -16    
96     48     
96     208    
16     192    
0      64     
-16    32     
-32    0      
-32    -80    
64     96     
-80    -240   
176    96     
-16    -448   
112    0      
-96    32     
0      -112   
240    -224   
16     112    
80     240    
64     160    
80     32     
-16    48     
32     112    
-112   -48    
160    160    
80     -48    
48     176    
64     -96    
144    96     
-32    -864   
32     32     
288    144    
-16    64     
-112   128    
-32    240    
48     32     
0      64     
64     64     
32     -112   
352    176    
-96    16     
384    64     
-128   -688   
-32    96     
-64    64     
400    32     
-16    -16    
-224   96     
192    192    
256    128    
-48    64     
-64    192    
32     96     
-32    -240   
16     192    
-16    -496   
272    176    
-112   -48    
112    144    
32     -16    
0      96     
16     -32    
48     144    
-64    96     
160    176    
-32    64     
224    48     
-224   160    
64     -304   
80     -64    
-48    -208   
176    112    
-112   -288   
176    256    
64     32     
-16    160    
16     16     
64     48     
112    80     
-32    -48    
64     208    
112    -144   
-32    144    
64     16     
16     80     
80     80     
0      144    
32     -336   
128    80     
48     -96    
-32    176    
-48    64     
144    -752   
48     192    
-416   -368   
80     -1232  
-16    0      
96     -544   
-48    -48    
160    -368   
-48    -48    
96     112    
-96    -96    
272    128    
-48    -16    
64     -320   
2064   -1904  
-1040  -2048  
880    -64    
-48    -64    
880    320    
-176   96     
-32    -832   
528    688    
96     -2288  
-224   48     
112    240    
32     32     
-304   544    
352    -304   
-144   -80    
80     -320   
64     96     
32     -48    
-144   464    
0      -128   
240    -96    
-16    -192   
80     128    
32     -336   
80     -64    
96     -528   
96     -32    
32     -176   
-32    80     
144    -464   
-64    96     
224    32     
-16    -32    
-32    96     
-16    -208   
-960   -32    
256    0      
-64    160    
64     -208   
-48    32     
64     -128   
144    48     
32     -2320  
-16    48     
80     16     
48     64     
144    16     
-176   48     
112    -240   
-48    -128   
-416   -80    
48     -32    
64     -48    
80     -48    
48     -144   
128    -112   
16     -48    
80     -576   
16     160    
48     -128   
64     96     
112    32     
-128   128    
-144   -48    
80     -80    
-272   0      
112    64     
-672   -48    
16     -144   
48     80     
-16    -144   
112    32     
64     -432   
32     48     
160    -304   
-96    -48    
80     272    
96     -240   
80     -288   
-16    128    
240    48     
160    16     
-64    96     
144    -272   
-528   80     
304    -48    
32     160    
16     -240   
16     80     
-32    -720   
96     -256   
-128   -16    
96     -64    
64     240    
-16    -64    
-224   -288   
-96    -544   
-96    -32    
208    208    
-240   96     
-48    -176   
0      64     
240    -320   
16     96     
-96    0      
16     64     
-80    -112   
176    -16    
-208   160    
-32    16     
-112   -112   
0      96     
16     128    
176    144    
-400   -16    
112    -80    
-48    64     
160    -112   
-32    96     
0      64     
64     160    
-208   -80    
112    -80    
-16    176    
128    -128   
-64    16     
-192   -16    
96     -32    
144    -224   
-256   176    
-560   -176   
0      32     
-176   -112   
96     192    
-32    -128   
-272   96     
80     -96    
-528   144    
0      128    
0      16     
-64    -144   
144    -16    
-176   48     
-256   -112   
-64    112    
-176   -112   
112    400    
-352   -416   
-96    -80    
-16    160    
48     32     
-128   -48    
-48    32     
80     32     
-224   -64    
224    16     
64     32     
272    144    
-368   32     
96     32     
32     -80    
0      176    
32     80     
-368   64     
80     -80    
-80    96     
192    -256   
192    128    
-480   160    
-176   -272   
-208   224    
-784   -64    
96     -32    
-96    176    
16     32     
-32    -48    
0      80     
48     96     
-48    -32    
64     112    
0      48     
-192   -16    
-96    -48    
32     32     
-304   16     
-144   -144   
240    368    
-160   160    
-176   -400   
48     48     
128    -64    
-96    0      
-80    432    
-128   112    
-112   -48    
112    -112   
64     96     
-96    160    
-1072  -2000  
1584   1472   
16     -256   
176    -624   
-192   304    
144    -160   
-160   400    
384    0      
112    352    
48     -176   
-400   208    
-288   0      
160    -160   
-128   336    
32     96     
-176   112    
336    64     
-576   -48    
-208   48     
192    352    
-992   -160   
64     112    
-96    80     
64     -144   
-128   -96    
-96    -96    
160    176    
-80    176    
96     224    
-160   -64    
0      16     
-304   -80    
32     64     
-176   64     
-48    96     
-368   -32    
16     144    
-32    48     
128    48     
32     64     
-128   96     
128    -32    
-32    224    
80     96     
-48    0      
-224   -32    
48     80     
96     176    
64     112    
16     -112   
-32    0      
-64    -528   
64     32     
-80    -128   
112    -64    
0      96     
96     160    
-176   160    
16     0      
32     -32    
-96    48     
128    128    
-16    128    
-144   -80    
64     256    
-192   -144   
0      80     
0      16     
64     160    
48     96     
-160   0      
64     -32    
16     144    
-160   96     
144    64     
-32    80     
-128   -48    
240    -48    
-192   -64    
-160   160    
-64    112    
80     144    
16     48     
144    160    
-160   176    
-48    32     
112    -32    
-16    80     
96     176    
80     0      
32     192    
-64    16     
192    336    
-240   48     
272    80     
-16    112    
96     160    
-160   64     
64     64     
-32    -16    
64     16     
112    144    
-16    96     
-16    128    
-96    16     
48     -48    
64     64     
-64    160    
-64    -96    
-112   -112   
-16    16     
96     208    
-32    32     
0      112    
-112   192    
448    64     
-96    320    
-176   0      
304    272    
-192   32     
304    32     
-240   96     
320    176    
0      0      
-144   128    
96     112    
-80    128    
224    64     
-208   -128   
-16    -32    
-16    48     
96     32     
192    16     
16     160    
384    96     
-96    272    
-272   64     
272    256    
-192   96     
208    176    
96     96     
-16    128    
48     112    
-48    -48    
112    32     
-16    0      
176    80     
96     -80    
0      112    
112    16     
0      128    
-144   -112   
192    48     
-48    112    
256    -784   
-16    96     
16     16     
64     160    
64     -496   
80     144    
-64    224    
112    160    
-16    -16    
176    -16    
-64    -112   
112    -80    
-176   160    
112    0      
0      288    
192    -240   
-288   80     
16     -112   
32     -80    
112    -16    
208    208    
-32    64     
112    80     
-96    -16    
160    -288   
-64    208    
-48    128    
-48    240    
-16    -48    
112    -144   
128    -176   
32     256    
-96    160    
144    384    
-32    -48    
160    -16    
112    96     
0      -16    
48     -208   
64     208    
-192   0      
176    -32    
160    128    
160    -176   
-32    208    
1744   -2960  
-80    224    
528    -608   
-176   -32    
-384   224    
480    32     
-480   -128   
528    -80    
-96    352    
-240   -48    
-64    384    
192    -288   
32     496    
0      -432   
192    144    
-32    -144   
240    208    
-128   64     
96     96     
0      -288   
64     64     
0      176    
112    160    
-80    176    
128    -64    
-16    64     
80     16     
160    224    
64     64     
-80    -48    
16     -64    
-112   -64    
176    -992   
48     288    
192    -464   
128    176    
-176   64     
112    128    
-80    -32    
128    96     
80     16     
48     384    
80     128    
16     -240   
-16    112    
16     -336   
176    160    
-64    -64    
128    272    
-80    -160   
112    64     
-32    -16    
96     128    
-32    0      
128    16     
64     128    
-48    -224   
112    176    
80     -352   
0      -128   
0      16     
176    288    
80     80     
32     288    
128    -368   
-80    128    
16     32     
192    96     
64     -16    
96     -864   
16     -1648  
80     -128   
0      -1632  
64     -224   
16     144    
16     32     
288    608    
-128   304    
80     144    
352    64     
-224   -1152  
224    64     
-16    80     
-32    -208   
-416   -208   
128    -176   
-16    -64    
0      -544   
16     16     
192    -560   
16     -176   
-64    -32    
0      -352   
96     144    
-16    -64    
48     -208   
-32    80     
192    32     
-16    0      
-384   -32    
128    -240   
96     48     
16     -48    
0      -16    
0      -352   
144    -32    
48     -1552  
144    112    
-144   -496   
224    48     
-32    32     
32     -16    
32     -256   
32     -128   
80     0      
0      0      
-592   160    
-80    -208   
128    32     
-16    32     
176    -96    
-64    -128   
32     144    
192    112    
-176   -112   
32     0      
-160   -288   
240    -160   
-16    -112   
-96    192    
192    -160   
-736   -96    
16     -352   
64     -176   
16     -80    
64     -16    
0      -304   
320    240    
-400   -1088  
352    -128   
-96    -48    
112    112    
-32    16     
-64    96     
0      -80    
48     16     
16     16     
-32    -64    
-864   -48    
0      144    
112    16     
-112   -368   
80     48     
80     -432   
-32    80     
32     -272   
208    160    
-192   16     
288    144    
-544   -48    
272    -288   
-16    128    
240    96     
-80    96     
-48    -256   
-880   16     
112    176    
-240   -320   
528    -176   
-96    288    
80     240    
-112   -224   
-48    -32    
-16    -240   
176    352    
-336   64     
112    -144   
32     48     
-880   240    
-192   -320   
-240   -160   
352    -176   
320    128    
-128   16     
-144   144    
80     -1680  
-160   160    
-128   -16    
144    -32    
-128   96     
48     -112   
-400   -80    
256    -128   
-160   -32    
384    -272   
-240   256    
32     -208   
64     208    
64     -224   
-576   240    
-176   -1824  
336    416    
-144   752    
80     592    
-688   160    
64     -784   
80     -368   
0      384    
64     -464   
-80    288    
-176   96     
64     -80    
-272   272    
-592   -224   
96     80     
48     -32    
-848   96     
-64    64     
-832   -16    
-144   32     
80     0      
-16    16     
-96    16     
16     -16    
-1408  -112   
112    96     
-384   -368   
-64    96     
-176   -112   
64     112    
-144   32     
-96    0      
-32    -32    
-288   48     
208    96     
-688   160    
64     32     
48     16     
-208   -128   
-240   -48    
48     80     
-144   -16    
32     160    
-80    64     
16     -16    
-128   48     
-176   -48    
32     -144   
-32    96     
-64    48     
-496   -32    
-240   -48    
192    0      
-112   80     
-16    -256   
224    160    
-224   -80    
192    48     
-192   128    
-48    -48    
0      -32    
0      128    
-80    -32    
64     16     
-192   80     
-16    160    
-80    -48    
-400   -16    
16     128    
-112   -96    
-16    16     
32     -192   
-48    208    
-112   16     
48     80     
0      16     
128    -32    
-48    48     
-16    96     
16     288    
-208   -48    
160    -144   
-112   -32    
64     144    
-64    32     
-16    176    
80     -112   
16     176    
-80    96     
64     64     
-32    16     
-48    96     
-96    -160   
0      16     
-128   96     
112    176    
-112   0      
-240   -16    
48     -16    
-240   -48    
32     80     
64     0      
0      112    
-96    -48    
64     32     
-96    32     
-128   -16    
80     -64    
-96    176    
16     -16    
-48    96     
-96    -128   
-304   32     
80     48     
-624   -128   
32     160    
176    208    
0      16     
-64    224    
48     176    
160    128    
-272   112    
32     48     
-48    32     
192    64     
-272   -64    
448    224    
-176   96     
80     160    
-128   32     
64     64     
-80    -80    
-208   -64    
-80    -48    
0      0      
-16    -48    
-32    32     
-32    -144   
-176   -64    
64     48     
-160   -96    
96     32     
-112   -208   
-48    64     
-80    0      
0      128    
32     64     
-176   64     
48     16     
96     32     
-80    96     
-48    48     
64     -192   
-16    16     
-176   96     
256    -16    
-144   272    
-128   -160   
112    208    
-224   32     
16     48     
-48    64     
128    192    
0      96     
-48    -16    
144    80     
80     368    
160    80     
-128   -16    
32     -32    
-80    -80    
112    112    
-64    112    
112    0      
96     192    
0      128    
-32    160    
-32    64     
48     16     
-16    16     
16     96     
0      48     
96     96     
-64    16     
16     48     
0      64     
128    32     
-128   -112   
-16    96     
32     96     
48     128    
-32    160    
-144   48     
-16    32     
-16    80     
48     -80    
-16    48     
1920   -1744  
-528   -288   
832    608    
-576   32     
256    272    
-32    144    
-352   -496   
320    336    
112    368    
-160   -64    
-368   112    
272    -48    
160    448    
112    -112   
-128   48     
0      32     
-48    -16    
-336   -224   
80     64     
352    288    
-16    16     
-128   112    
0      48     
-32    112    
32     80     
80     96     
128    176    
-96    128    
-16    112    
-48    32     
-48    160    
-96    80     
256    336    
-304   -96    
176    16     
-112   160    
160    -1344  
-80    -32    
64     112    
48     96     
48     80     
-16    192    
-32    48     
16     144    
-80    48     
48     -16    
-32    80     
96     80     
32     -160   
80     176    
0      80     
160    -96    
-48    224    
-16    -256   
192    176    
-64    48     
160    400    
-96    256    
-48    -144   
64     160    
64     144    
-48    -208   
16     240    
-144   -64    
-64    -32    
128    192    
112    -144   
144    16     
-32    176    
80     128    
16     48     
112    112    
64     112    
-80    32     
32     -96    
160    80     
-128   16     
288    256    
-384   160    
16     -256   
-32    -64    
48     -576   
176    112    
0      -1264  
32     144    
-16    64     
64     -32    
112    576    
-96    16     
64     128    
-64    112    
-16    -48    
80     48     
0      112    
80     -208   
0      144    
-48    -640   
208    256    
16     -240   
48     32     
112    -80    
-48    16     
64     0      
0      80     
64     96     
80     128    
0      96     
128    240    
-64    -48    
192    16     
-144   96     
128    -48    
-48    80     
128    304    
32     96     
-16    -1232  
48     96     
-32    -32    
96     128    
16     128    
16     -16    
-48    -32    
112    -32    
112    240    
32     -448   
-48    96     
-48    -256   
80     -160   
-80    -160   
-16    160    
128    -176   
-32    80     
48     -48    
-16    304    
-64    176    
112    32     
112    688    
-144   0      
208    -128   
-80    -224   
144    176    
96     -128   
-144   96     
16     -80    
192    304    
-64    -80    
304    448    
-224   160    
160    416    
-160   -64    
176    240    
16     -32    
48     -32    
16     16     
128    -112   
-176   192    
80     -432   
192    176    
16     288    
96     64     
-112   -16    
64     -976   
80     -32    
-96    336    
112    96     
-512   -16    
368    -640   
-192   -320   
96     -880   
176    0      
-64    -368   
64     16     
112    96     
80     -176   
0      208    
160    -144   
48     -1136  
0      144    
256    -448   
112    256    
-624   -272   
112    176    
-144   -368   
96     -192   
48     -80    
128    112    
160    -96    
80     -432   
224    -304   
-32    16     
0      64     
32     -240   
-32    32     
192    -128   
96     112    
-112   -128   
-48    -32    
-448   -224   
-432   416    
272    1728   
-1216  528    
400    -288   
464    -1360  
-144   -528   
144    -80    
-320   128    
224    176    
320    -144   
-176   -64    
96     -272   
32     272    
-16    -64    
-576   32     
32     -32    
0      -208   
48     -384   
16     -112   
160    -464   
112    -48    
0      -768   
-16    80     
80     0      
112    -48    
-128   0      
112    272    
-80    112    
32     0      
-400   -64    
192    -16    
-320   -112   
32     16     
16     0      
80     -16    
32     48     
240    -160   
-224   -16    
96     -352   
-16    208    
144    128    
64     -16    
-96    0      
48     -112   
96     -64    
-32    64     
-176   80     
-80    80     
-32    -128   
96     -224   
-80    96     
240    -448   
-144   64     
96     -48    
32     -32    
0      80     
96     -96    
-64    0      
0      -208   
-160   16     
64     -96    
-240   48     
80     -224   
-400   -16    
0      -576   
32     0      
112    -592   
-32    160    
-64    -720   
192    160    
-96    160    
-96    -128   
80     80     
-80    -96    
16     -32    
32     16     
-352   208    
-96    -96    
128    80     
-16    -208   
16     16     
128    -176   
0      240    
16     -192   
192    -208   
-224   48     
96     96     
224    208    
-272   48     
64     128    
32     -48    
-48    -64    
144    -128   
-16    -16    
144    -272   
32     192    
-48    -288   
32     112    
-80    -80    
-16    32     
64     128    
16     80     
-144   16     
96     0      
-208   32     
64     -192   
48     144    
-128   -96    
240    80     
-576   -256   
224    48     
-1056  -208   
64     32     
-32    32     
-208   -32    
64     -16    
-256   96     
48     16     
128    48     
-144   48     
64     32     
192    144    
-304   48     
416    240    
-608   -144   
80     -96    
-352   -224   
0      0      
32     -80    
-320   -144   
-192   -16    
-304   48     
0      0      
-80    128    
48     256    
16     -32    
32     224    
-272   -144   
240    -16    
-144   -256   
-48    128    
160    160    
80     112    
-96    144    
-96    64     
-288   -16    
64     -32    
0      224    
-80    -112   
-64    48     
-208   -112   
-64    -48    
-16    -144   
96     96     
16     -16    
-64    160    
32     80     
-64    160    
32     160    
-160   -288   
-144   64     
176    96     
-96    -16    
80     80     
-16    0      
-992   -80    
96     -32    
-96    -128   
48     144    
-128   0      
0      176    
272    128    
-336   -256   
-48    -16    
64     96     
160    -192   
-128   48     
0      0      
-400   -48    
-128   0      
0      -144   
48     128    
-64    -112   
-16    48     
-64    -64    
32     160    
-80    0      
96     144    
-16    80     
-48    -32    
-32    -32    
-16    -16    
80     96     
-32    64     
-128   112    
-256   -96    
224    144    
-624   -160   
48     144    
-896   848    
-784   688    
-400   1216   
-416   176    
-304   -1104  
1008   880    
-352   496    
-96    128    
208    176    
160    -624   
-304   64     
-208   16     
464    320    
-160   -288   
80     48     
-48    112    
16     144    
144    624    
-448   -208   
16     -80    
48     192    
-80    48     
160    96     
112    128    
-48    -80    
-32    80     
-176   0      
144    144    
-256   -64    
0      -16    
64     32     
-64    32     
0      80     
-16    48     
160    64     
-80    0      
-48    -288   
-416   -256   
-48    -368   
-80    -16    
32     160    
-256   64     
224    112    
-304   -48    
-64    -16    
128    128    
16     80     
-32    -32    
-16    192    
-96    400    
48     80     
-160   272    
0      48     
64     0      
32     176    
0      144    
-32    224    
48     224    
-240   -416   
144    80     
96     -112   
-32    256    
-48    80     
48     64     
-80    128    
-160   -80    
112    64     
128    -48    
16     192    
-16    0      
48     144    
-112   -32    
80     160    
32     48     
32     96     
-16    -32    
32     80     
208    640    
48     560    
-32    240    
-64    144    
224    -96    
-224   16     
16     16     
-128   16     
32     16     
-64    -144   
176    160    
0      96     
-16    112    
32     208    
-48    0      
-32    -144   
112    128    
96     288    
-16    32     
16     64     
-96    -32    
128    128    
-96    -192   
32     64     
-16    160    
32     48     
80     80     
-64    160    
16     16     
112    112    
-176   -32    
272    256    
-256   -16    
320    96     
-96    272    
0      -112   
48     80     
-192   -144   
240    128    
16     128    
16     -48    
-96    -176   
-80    -144   
144    128    
80     48     
-48    96     
48     176    
48     96     
-16    64     
80     432    
-96    -224   
144    80     
-256   -208   
176    192    
16     0      
16     -2480  
-16    448    
112    -32    
128    112    
-16    -16    
64     672    
-16    96     
0      320    
-48    0      
128    128    
-64    -16    
48     192    
96     0      
-32    -48    
-96    96     
112    -208   
-32    96     
288    80     
-96    0      
48     80     
32     -96    
-64    48     
128    256    
80     -64    
-32    96     
-176   -128   
192    464    
-272   -272   
64     -192   
64     144    
0      -192   
128    0      
-80    -96    
336    480    
-192   128    
-112   -208   
432    192    
112    0      
-176   -304   
112    240    
-96    -48    
48     -32    
-16    256    
-128   -48    
48     160    
-64    -304   
176    112    
0      -1808  
32     0      
0      16     
-16    80     
0      32     
80     112    
176    -32    
144    176    
-112   48     
16     96     
64     -32    
128    -32    
64     96     
80     -144   
144    32     
-48    -160   
96     304    
0      -416   
-80    144    
-16    -64    
1152   2800   
-1728  -384   
544    592    
-208   576    
352    288    
-672   -272   
16     -48    
368    352    
48     112    
-256   192    
48     -112   
112    0      
-128   -368   
112    32     
-32    0      
64     80     
0      48     
144    224    
-192   -112   
160    -272   
-64    48     
-16    -480   
160    176    
-16    -32    
112    64     
-32    -352   
-96    -16    
224    -1648  
-96    192    
160    80     
16     80     
-96    48     
160    160    
32     96     
-16    -128   
96     128    
-96    -80    
64     64     
-32    -96    
208    256    
32     -160   
-16    160    
0      32     
192    160    
-192   -32    
192    -1632  
0      128    
128    -880   
112    -560   
-48    -336   
128    -1200  
-48    -144   
144    64     
-16    -176   
112    112    
-16    -144   
128    112    
-32    0      
96     -1232  
176    160    
-304   -512   
208    32     
-96    -16    
32     112    
-48    32     
224    -144   
16     80     
-48    -1680  
64     -32    
176    32     
80     32     
16     160    
-48    0      
112    -112   
16     32     
-64    -208   
32     -224   
112    144    
-80    -368   
128    -144   
16     -736   
16     48     
80     -464   
32     32     
208    48     
32     32     
-144   -352   
320    96     
-256   -192   
96     0      
112    32     
-32    -160   
-448   96     
-16    -192   
-304   176    
-144   -464   
160    112    
48     -304   
-80    -240   
160    -1184  
-48    -160   
80     -192   
96     176    
-96    -144   
0      0      
-256   -224   
64     -16    
-32    -48    
-128   -144   
-48    -112   
128    -32    
48     -160   
0      -32    
112    64     
64     -240   
80     0      
0      -1056  
48     64     
112    -64    
48     128    
-160   -240   
-48    -96    
128    160    
64     -112   
-304   -144   
128    -176   
-768   112    
64     -352   
64     112    
192    0      
-32    128    
-48    -448   
128    352    
128    96     
64     64     
-176   -48    
-144   208    
80     0      
128    -224   
-304   96     
32     -176   
-512   432    
208    80     
-80    -112   
-32    -144   
16     208    
272    -272   
32     480    
64     -32    
-96    -64    
-48    16     
144    80     
-128   -32    
80     64     
-144   -32    
224    368    
-272   144    
64     -32    
-448   304    
144    -432   
-96    32     
112    -208   
32     112    
64     96     
-32    -80    
-432   16     
64     -144   
64     128    
-80    -80    
-144   -160   
176    144    
48     64     
112    -96    
-32    128    
32     -208   
0      80     
32     -32    
80     96     
-384   -32    
-48    -96    
-176   16     
48     -112   
-64    64     
64     16     
-32    64     
-224   -176   
-176   -192   
192    -192   
0      112    
-32    -128   
-96    64     
-1152  -112   
112    96     
-64    16     
-672   -32    
144    128    
0      144    
-192   48     
-176   128    
-272   1632   
-720   -1136  
-672   -624   
-784   -160   
208    144    
-144   880    
32     -432   
-64    -16    
-160   16     
-128   48     
-112   -64    
112    -16    
-480   -144   
96     176    
0      -208   
192    16     
-48    80     
-48    -560   
128    -224   
192    -128   
80     -16    
144    160    
-112   128    
128    -16    
-48    272    
16     -128   
320    336    
-304   128    
32     -112   
-480   -128   
-96    -48    
256    32     
80     -16    
-48    -32    
64     240    
-352   -208   
-240   16     
256    112    
64     224    
-64    -80    
16     32     
64     16     
-144   -144   
-16    224    
96     224    
-64    64     
-112   -48    
-160   -64    
112    16     
32     32     
96     -176   
-128   160    
64     -160   
96     176    
32     80     
-128   -112   
176    448    
48     176    
-208   -16    
-112   224    
16     32     
-240   -208   
96     192    
96     208    
112    96     
-240   -16    
32     -64    
96     0      
48     -64    
-32    96     
-16    64     
-32    80     
-64    -32    
-32    48     
-176   48     
-48    32     
-384   -208   
-256   0      
-336   -416   
96     192    
48     -128   
-144   16     
64     0      
-80    -16    
0      144    
32     80     
224    672    
-416   -144   
-96    -144   
-128   112    
320    144    
-96    0      
-80    64     
-624   -32    
48     128    
128    288    
-144   -96    
176    112    
-16    192    
176    288    
-192   48     
-16    -16    
-64    -64    
112    16     
0      32     
0      128    
-272   -304   
32     -352   
-400   -480   
-80    -64    
160    128    
-64    144    
-80    32     
16     48     
32     112    
32     48     
-80    80     
32     112    
96     -32    
32     208    
-160   112    
-256   -128   
48     112    
-96    144    
176    320    
-16    96     
0      144    
32     80     
112    144    
-112   16     
80     80     
0      176    
272    -48    
-160   64     
240    96     
-256   288    
-32    -288   
256    320    
-256   32     
240    -64    
-32    192    
64     0      
-64    112    
128    16     
80     192    
-32    -48    
-16    16     
-240   -208   
64     -16    
-96    -48    
96     48     
-48    -16    
-16    32     
48     128    
48     -32    
-48    32     
128    80     
-32    272    
-112   48     
160    16     
-112   32     
112    128    
-256   80     
0      96     
-48    32     
176    -112   
-48    64     
-128   80     
-240   64     
-80    -32    
64     64     
48     -64    
0      0      
272    -112   
0      112    
48     208    
64     208    
-64    80     
32     144    
-112   80     
144    32     
-160   112    
-64    -144   
80     160    
-48    160    
16     -64    
128    80     
64     240    
-80    32     
128    208    
-96    16     
64     128    
96     -144   
16     112    
-144   80     
192    208    
-128   144    
112    64     
2288   480    
-752   -96    
304    128    
-112   464    
-272   352    
176    -16    
-960   -336   
848    336    
-336   16     
112    80     
-224   320    
192    -224   
-128   544    
240    -112   
0      -1472  
32     -144   
-16    224    
192    96     
-96    192    
144    -80    
-64    144    
80     -16    
-64    272    
48     96     
-16    -144   
16     0      
64     144    
-16    -48    
16     80     
-112   -2032  
208    96     
16     112    
176    128    
-160   128    
160    80     
-48    -96    
0      80     
-96    96     
160    176    
80     96     
16     16     
-112   128    
16     -416   
80     144    
96     -1136  
32     144    
80     48     
-48    160    
-32    160    
176    32     
48     -32    
-48    192    
64     -128   
-16    128    
96     0      
32     160    
-48    -32    
176    -80    
-128   160    
176    -656   
0      128    
16     -2752  
80     144    
32     64     
48     176    
64     -144   
16     96     
80     128    
16     80     
112    -16    
0      144    
32     64     
112    64     
16     128    
16     -160   
48     80     
48     -512   
96     80     
112    -928   
16     -32    
160    32     
80     64     
48     32     
80     608    
-64    112    
160    16     
32     -80    
48     -256   
336    176    
-272   -368   
192    144    
-32    -256   
0      112    
144    -240   
-96    -288   
160    80     
192    160    
-64    48     
-16    32     
112    144    
64     48     
-96    32     
128    -272   
-48    -16    
192    16     
48     160    
-16    -80    
0      112    
96     -464   
208    384    
-96    192    
-112   -96    
64     128    
192    112    
32     112    
96     -96    
-16    176    
208    32     
-16    96     
-16    -112   
-48    352    
48     32     
48     144    
-32    -160   
96     80     
-64    16     
208    352    
-96    -32    
-16    -112   
160    0      
-48    -80    
144    0      
48     -176   
-48    -80    
128    -64    
64     224    
16     -144   
48     144    
32     64     
192    -128   
-208   16     
176    -752   
-32    -32    
-1872  48     
64     -592   
48     32     
-16    -512   
112    -64    
176    -672   
16     -144   
-32    128    
96     -96    
160    -192   
-64    48     
16     -752   
96     96     
0      -192   
112    -144   
-208   288    
-176   0      
16     -112   
-32    -704   
208    -144   
16     -1184  
64     -80    
-96    112    
256    16     
-112   32     
-16    -96    
128    208    
-480   112    
112    -64    
0      48     
-272   -256   
224    112    
-160   -16    
256    -304   
-96    32     
80     -256   
128    -112   
-112   96     
128    -208   
32     -304   
-288   96     
144    -144   
176    80     
96     0      
-48    -80    
-80    96     
64     -64    
-416   16     
-64    -32    
32     48     
80     48     
352    -64    
-128   -432   
-32    -128   
64     -112   
96     96     
2192   -1008  
464    -16    
720    480    
-800   -176   
368    352    
-560   -1664  
576    128    
-224   224    
64     592    
-256   -592   
304    -64    
64     -176   
256    544    
-128   -368   
80     144    
-64    -208   
224    240    
336    0      
-64    256    
-192   -64    
192    32     
-512   -128   
272    -336   
-464   -16    
32     -464   
-48    48     
16     -448   
256    288    
160    -240   
112    416    
0      -272   
-48    16     
-96    112    
112    -80    
-176   32     
160    64     
80     -128   
64     0      
-464   -160   
304    208    
16     -48    
-80    -144   
160    128    
48     -208   
-80    -48    
64     -64    
64     -16    
192    480    
-256   -160   
96     -48    
0      -224   
-176   -80    
32     16     
144    208    
-64    -240   
160    80     
128    32     
-192   -128   
-80    -528   
144    -80    
-352   -176   
128    64     
-80    352    
208    192    
-304   16     
-160   -256   
208    -112   
96     0      
-16    544    
-16    -144   
48     32     
0      -368   
240    -32    
48     0      
16     16     
-16    64     
96     -208   
-96    -224   
-64    -96    
-240   -224   
32     -192   
48     208    
128    32     
-176   -16    
192    -192   
64     256    
-832   -48    
192    192    
-16    -32    
-272   -368   
-96    96     
-656   -304   
32     256    
-528   192    
16     176    
96     336    
-128   48     
144    -208   
16     32     
-304   -256   
224    192    
32     -16    
160    144    
-192   -176   
-544   32     
64     544    
-176   -272   
16     64     
144    160    
-240   -16    
-176   -32    
-272   32     
80     -240   
32     272    
-128   -256   
0      -32    
-80    -128   
-32    192    
128    -32    
-160   48     
192    208    
144    240    
-64    -112   
-496   -224   
-48    -128   
-96    144    
-112   80     
-208   288    
-128   176    
176    32     
-48    48     
-128   -64    
256    304    
96     240    
0      -64    
-16    96     
-288   48     
288    320    
-160   0      
48     176    
-304   48     
-32    48     
-224   -32    
80     0      
-96    -112   
80     -16    
16     0      
-64    0      
80     80     
-80    0      
0      32     
-256   48     
64     96     
32     80     
-160   48     
96     96     
-144   0      
-336   -32    
144    384    
-208   -64    
176    -112   
-96    16     
176    96     
0      48     
-192   -96    
32     -32    
-112   32     
-16    208    
0      64     
16     -48    
-32    0      
0      80     
-288   -16    
80     -112   
-32    16     
80     352    
-192   16     
-160   80     
64     16     
-80    80     
112    64     
-32    96     
-48    48     
80     -80    
32     -32    
-208   128    
-96    128    
-32    -112   
336    64     
-320   -176   
-80    160    
-96    112    
-176   64     
-16    0      
208    176    
-144   -96    
96     112    
-144   32     
-416   -48    
-768   -640   
656    336    
-304   1024   
-464   -608   
-208   720    
-832   -784   
-576   832    
0      -416   
176    800    
-96    -720   
-224   336    
224    -544   
128    544    
-32    -224   
32     224    
-144   80     
96     48     
-128   32     
112    -96    
-96    96     
-160   -128   
-160   304    
320    -48    
-192   144    
192    -176   
-368   176    
352    -144   
-176   400    
240    -48    
-144   80     
0      -16    
-144   112    
112    80     
-256   -32    
96     96     
192    48     
-32    112    
16     32     
-32    112    
-48    -16    
32     96     
48     48     
32     96     
-64    16     
-80    0      
16     144    
-80    0      
-16    96     
-80    64     
-32    80     
80     96     
32     64     
16     128    
-32    64     
64     112    
48     80     
16     0      
144    128    
-80    160    
16     16     
32     96     
32     80     
-32    112    
0      80     
-32    0      
-16    32     
128    32     
64     208    
-64    16     
160    176    
-48    48     
112    160    
-80    64     
96     160    
-80    128    
80     320    
-176   160    
192    -48    
128    32     
-96    96     
320    656    
-176   288    
64     160    
368    32     
-32    -16    
-48    0      
48     208    
-32    208    
96     144    
-32    80     
0      208    
-176   16     
112    16     
48     128    
-16    288    
64     -192   
-192   -112   
96     192    
-144   -48    
288    80     
16     288    
80     16     
-32    128    
0      0      
64     16     
32     80     
32     -32    
-144   -32    
160    224    
96     320    
144    208    
-80    96     
16     192    
-96    64     
128    80     
-64    -128   
112    64     
-80    -48    
-16    32     
48     -256   
-16    64     
-128   -16    
96     -160   
128    -16    
-64    -800   
-160   -128   
160    -368   
-176   -64    
304    144    
112    112    
32     128    
-48    144    
-80    -480   
128    32     
0      128    
96     96     
96     192    
-80    -192   
176    176    
-32    -336   
112    16     
128    -1568  
-160   -32    
128    144    
-176   16     
272    -32    
-32    96     
-112   32     
160    80     
16     48     
112    144    
32     80     
-32    -112   
80     144    
144    48     
-112   32     
144    -128   
-176   -192   
256    -16    
0      240    
64     80     
-48    112    
64     96     
208    96     
-32    48     
112    -16    
-176   -112   
368    -32    
320    368    
-320   -224   
176    -112   
0      -288   
128    64     
-48    -560   
-160   112    
256    80     
80     176    
-64    -144   
288    176    
-112   -32    
144    -160   
32     112    
0      -48    
0      96     
32     -704   
-96    -80    
256    -272   
0      320    
112    -144   
-96    160    
96     -16    
384    48     
-224   -32    
16     48     
128    96     
224    -32    
96     80     
16     -272   
1248   864    
-1088  -1584  
544    672    
448    800    
720    -960   
-896   -304   
576    192    
-704   784    
112    -592   
-96    -48    
288    32     
176    608    
-208   48     
176    128    
-528   -704   
144    240    
-144   16     
768    -16    
-512   -144   
128    -112   
0      -432   
-80    -224   
48     368    
80     176    
32     48     
-240   176    
-224   -464   
160    -544   
-448   -752   
416    384    
96     80     
-48    16     
32     224    
128    -176   
16     272    
16     -224   
176    -992   
-48    144    
192    128    
0      32     
-864   32     
112    -832   
80     32     
160    -128   
-16    32     
128    32     
-176   -128   
192    352    
-16    144    
64     96     
208    -48    
-80    -48    
-64    16     
-32    -304   
96     -640   
-208   48     
48     -144   
48     64     
0      -352   
192    192    
-288   -416   
112    -336   
208    -352   
0      128    
-64    -176   
32     -128   
144    -176   
32     80     
-32    -320   
64     80     
-16    -64    
144    -64    
-144   -16    
-16    -128   
-48    -80    
-112   -240   
224    -80    
-112   -240   
-304   -64    
144    -176   
96     304    
-208   64     
144    -64    
144    -16    
-144   48     
96     144    
-176   -144   
-960   -16    
128    -32    
16     -32    
144    -48    
0      -16    
48     -368   
-128   176    
0      448    
-80    16     
144    16     
48     80     
-80    -64    
-64    -96    
-272   -128   
144    48     
-608   -112   
16     -176   
-928   -32    
304    416    
-208   -128   
48     -976   
-288   -112   
192    -1072  
144    144    
48     112    
-16    96     
-16    112    
32     -352   
160    320    
-16    -160   
-96    192    
-48    48     
-864   -80    
-192   -208   
-32    -144   
368    -48    
48     96     
32     -400   
-96    48     
128    -48    
160    -16    
-32    16     
128    0      
-64    112    
16     -32    
96     160    
-80    -64    
-48    32     
-112   -160   
-240   -128   
80     -144   
-16    208    
224    -320   
80     96     
-272   16     
176    -96    
112    -224   
-192   -16    
-224   32     
304    -176   
-160   48     
16     -256   
-240   -32    
224    16     
-48    64     
160    -352   
-112   96     
-80    -544   
64     192    
-16    32     
352    64     
-320   -32    
208    16     
-128   16     
0      -32    
32     -32    
-16    96     
-64    64     
128    -64    
-96    -112   
208    -256   
48     -160   
-576   0      
-1408  176    
32     48     
-1296  -48    
0      -48    
112    80     
-96    96     
-80    48     
64     64     
-32    176    
-160   -80    
-368   -176   
192    -48    
-128   -32    
-96    272    
-32    -304   
48     64     
-96    -16    
-576   0      
-208   -48    
-144   16     
-16    32     
-32    80     
-80    -16    
-16    0      
-48    112    
-528   -64    
96     112    
-128   -128   
-512   -1008  
-624   144    
768    480    
-816   192    
-272   -816   
656    416    
-304   -320   
448    768    
-912   16     
304    304    
-368   -400   
272    256    
128    112    
32     48     
-256   176    
-80    0      
160    144    
-160   160    
16     112    
-64    -64    
16     -80    
-176   96     
32     144    
-96    -112   
-48    -64    
-560   0      
-32    144    
-64    -32    
48     192    
64     -240   
-176   -32    
-16    16     
-64    48     
16     128    
-160   16     
0      16     
-80    -48    
0      128    
-48    -32    
-96    16     
-352   -112   
16     176    
-32    -128   
32     96     
-64    -176   
-32    48     
32     32     
0      96     
32     -48    
-64    -48    
-64    -32    
-16    192    
16     224    
16     0      
-16    64     
-208   -96    
128    112    
-32    48     
32     -32    
64     32     
48     64     
48     64     
-48    32     
32     16     
-80    208    
-32    128    
64     144    
16     176    
-208   -80    
208    256    
-384   0      
16     32     
-1168  -80    
16     -928   
64     96     
-208   80     
-128   96     
-64    -16    
32     64     
0      64     
-224   -256   
96     64     
-80    -80    
-160   -304   
-144   208    
192    80     
-112   96     
-432   -112   
96     128    
128    144    
-32    16     
-16    144    
48     32     
64     80     
112    176    
-112   96     
-128   48     
208    336    
80     384    
80     224    
-304   -256   
96     64     
80     32     
48     80     
0      128    
-160   32     
160    112    
-16    32     
32     48     
-80    16     
48     80     
-16    112    
-64    32     
0      32     
0      160    
-64    -64    
32     176    
16     48     
48     144    
16     0      
-16    -32    
64     96     
64     160    
64     -16    
-144   -32    
32     160    
-16    80     
80     -272   
-208   160    
64     528    
-176   -144   
16     160    
-16    96     
128    -16    
16     16     
32     192    
-96    -192   
128    48     
-64    224    
160    -64    
128    160    
-192   -16    
144    64     
-160   -80    
208    80     
-16    48     
-64    208    
-32    160    
-32    -160   
224    176    
-48    80     
32     80     
-112   64     
80     144    
16     -208   
128    160    
-320   32     
256    -16    
-240   32     
144    64     
144    64     
-112   96     
144    160    
-144   16     
144    32     
-64    112    
32     -48    
-16    208    
-64    0      
48     -32    
48     -16    
-176   80     
16     128    
-96    208    
32     48     
144    192    
0      -16    
192    144    
-32    288    
-48    48     
80     -48    
32     128    
128    64     
-112   48     
-48    96     
96     64     
-192   48     
48     176    
-32    96     
96     -768   
48     112    
16     208    
-128   32     
224    64     
-16    304    
224    160    
-144   208    
96     80     
112    64     
-1264  -464   
16     -528   
48     -688   
736    -384   
-528   400    
-512   -800   
720    1232   
32     304    
192    -64    
-352   -384   
320    384    
-160   272    
320    208    
-160   -128   
192    -144   
-176   80     
256    -48    
-176   16     
320    256    
48     80     
-80    16     
-16    144    
32     -400   
48     128    
32     208    
224    -32    
-256   144    
208    80     
112    208    
-64    96     
160    352    
-96    160    
144    64     
-144   112    
16     112    
192    -80    
-16    144    
0      -128   
80     112    
96     -256   
32     112    
16     144    
48     112    
80     -240   
144    256    
-160   160    
80     48     
-96    -32    
160    112    
0      32     
128    -272   
-64    208    
64     -128   
192    96     
-192   48     
176    32     
64     48     
-48    112    
16     48     
96     -64    
48     80     
-96    256    
0      -48    
32     -64    
96     176    
32     -80    
96     48     
16     -32    
64     16     
192    -304   
-224   160    
32     -1184  
128    160    
16     -16    
176    192    
-144   64     
96     192    
320    112    
32     208    
64     0      
176    -176   
-96    272    
-32    -208   
128    -80    
64     16     
-176   -16    
192    -144   
-112   224    
-80    -16    
224    16     
-80    48     
96     192    
-32    16     
128    -336   
64     192    
0      -336   
224    336    
-160   48     
176    -32    
32     -224   
16     80     
256    128    
-80    304    
-48    -32    
64     0      
-64    -80    
128    -16    
-16    -16    
0      -144   
128    48     
0      -224   
160    160    
0      -208   
-64    144    
256    112    
144    288    
-96    -80    
-96    -1216  
32     -48    
144    -272   
240    224    
-480   272    
240    -208   
-240   32     
64     -2304  
-80    -176   
176    176    
96     -176   
160    0      
-32    -128   
-160   -128   
16     96     
160    160    
0      -64    
-272   -48    
-176   16     
-272   -288   
16     -480   
16     -192   
240    80     
224    0      
96     -224   
-64    -128   
80     -32    
64     64     
96     64     
-32    144    
-32    -48    
-16    176    
128    -240   
64     -80    
-400   -176   
-16    -80    
32     48     
240    96     
112    208    
0      -496   
96     64     
-192   -1648  
112    -192   
96     -128   
64     96     
144    -80    
32     192    
-176   -32    
0      -80    
128    -240   
32     -48    
-480   48     
32     -32    
-320   64     
192    -384   
16     -16    
112    80     
32     -176   
192    -16    
176    304    
256    256    
-384   128    
-128   -48    
80     112    
128    -176   
96     -80    
-704   -96    
48     -128   
-80    16     
-16    -160   
64     80     
48     -320   
-80    16     
-64    -3152  
0      -48    
128    80     
-32    -80    
48     -144   
32     96     
0      112    
-96    -80    
-368   -16    
2192   1664   
-1936  144    
1216   864    
-224   192    
-272   -736   
736    400    
-928   -688   
592    656    
-336   -672   
304    448    
-192   -160   
192    -224   
-224   224    
336    -256   
144    224    
32     -80    
-496   192    
64     -240   
192    96     
80     -272   
-64    64     
48     144    
-176   32     
-32    16     
-64    -128   
80     -288   
-64    32     
-96    96     
208    16     
-368   -48    
48     -48    
-208   48     
80     -192   
16     96     
32     -256   
48     144    
112    -48    
-16    64     
-208   16     
-64    -64    
48     144    
-64    144    
64     96     
64     96     
-160   32     
48     -48    
-48    48     
16     0      
112    144    
32     -112   
0      -16    
-64    -224   
64     192    
-112   32     
80     32     
-16    0      
224    -96    
-320   -144   
-112   -224   
-64    -64    
48     16     
144    240    
-16    -64    
0      192    
-288   -112   
-128   48     
-368   -384   
-208   16     
32     128    
-832   32     
-128   -32    
-1712  -80    
-160   -16    
32     -112   
112    48     
64     -48    
96     176    
-416   -544   
-32    -32    
-320   -208   
160    368    
-48    224    
-80    -16    
0      -32    
-32    144    
-80    48     
-128   16     
-16    112    
-176   96     
32     144    
-32    -80    
-80    -16    
-160   -240   
96     144    
16     32     
48     144    
-80    16     
96     272    
-112   64     
0      32     
-144   -32    
32     96     
96     128    
-256   16     
-64    0      
-16    -16    
32     224    
-48    -80    
112    160    
-64    -16    
-64    -48    
-64    48     
-32    32     
0      32     
16     224    
-32    208    
-48    -80    
-48    16     
-288   144    
0      16     
-480   -96    
0      240    
48     -64    
112    64     
-320   0      
64     0      
-32    -352   
-32    -256   
208    304    
-144   96     
192    64     
-256   160    
128    64     
-16    64     
-96    80     
-208   -32    
80     80     
-96    32     
160    128    
-112   32     
48     144    
-16    160    
32     -32    
128    112    
-208   160    
256    96     
-272   -16    
48     -176   
128    -144   
64     208    
-624   32     
-80    240    
-768   -208   
80     48     
48     192    
-144   208    
-32    -160   
-208   -112   
96     224    
-304   80     
-112   48     
32     -112   
272    48     
-112   -128   
-16    192    
-336   -64    
80     48     
-1024  -192   
480    368    
-240   256    
-320   112    
-144   -32    
32     -160   
96     -16    
0      -16    
-32    320    
-144   112    
192    -288   
-240   32     
176    160    
-32    128    
-32    224    
-48    48     
16     16     
80     128    
-96    -16    
128    256    
-64    16     
-64    144    
-48    16     
144    48     
-96    -32    
112    -16    
-320   0      
160    -48    
-224   128    
96     64     
-48    16     
-832   -1936  
1712   2336   
-784   400    
496    -336   
608    -688   
-368   -352   
384    496    
-16    576    
160    -80    
368    -64    
-480   0      
16     32     
-96    32     
-48    128    
32     224    
-16    64     
224    160    
-64    176    
80     208    
208    160    
-192   96     
64     208    
112    80     
-128   -32    
144    0      
-80    32     
160    128    
-80    96     
0      112    
144    160    
-32    112    
16     112    
16     112    
-16    16     
144    80     
-80    128    
112    208    
16     128    
-80    16     
128    160    
-112   32     
48     128    
-48    48     
16     96     
80     32     
-96    96     
160    240    
-80    -16    
128    240    
-128   -32    
320    128    
-288   64     
192    64     
-272   -112   
176    160    
-144   96     
96     96     
96     80     
16     192    
64     80     
-96    48     
112    144    
-48    128    
48     -32    
160    112    
-144   144    
48     0      
144    160    
-128   80     
80     208    
-128   80     
256    112    
-112   112    
32     80     
112    80     
-96    64     
-48    -16    
192    112    
32     224    
-112   32     
160    16     
-96    144    
-32    128    
-32    -80    
48     -16    
96     160    
-32    -48    
-32    32     
208    -2256  
-112   -16    
128    0      
64     144    
48     96     
-48    176    
-48    -48    
128    144    
-112   128    
160    96     
-112   -64    
80     128    
-16    -16    
64     -160   
48     224    
-80    -272   
64     32     
96     128    
144    448    
80     256    
-96    48     
32     224    
64     112    
224    128    
-112   16     
-160   80     
224    32     
112    192    
64     0      
-16    112    
-96    -528   
144    144    
96     -272   
128    112    
176    0      
80     176    
-240   -80    
288    112    
64     -96    
-272   48     
176    -16    
0      80     
64     160    
80     -96    
-32    0      
-80    -976   
-48    192    
352    -1168  
-112   288    
-64    -272   
160    384    
-64    -256   
240    -32    
-240   48     
-16    96     
160    432    
48     -16    
208    272    
-240   16     
320    0      
-128   -64    
224    48     
-16    -928   
-48    176    
48     -2768  
48     160    
-32    0      
96     48     
160    176    
-48    80     
48     -176   
96     176    
112    272    
32     -208   
-64    64     
80     128    
176    192    
-144   -272   
96     -400   
80     -224   
352    464    
-208   112    
160    144    
-48    -64    
160    400    
-96    32     
-96    -1056  
208    272    
112    -320   
-16    96     
48     -160   
0      144    
48     -448   
64     96     
16     224    
80     -32    
48     208    
-16    80     
128    -64    
0      96     
80     192    
32     -32    
-128   -112   
112    -32    
496    32     
96     -224   
0      96     
96     -32    
112    160    
-16    192    
-416   1440   
-144   1968   
-928   -1472  
80     -128   
-48    -672   
144    -752   
-80    48     
-288   -1568  
480    512    
352    240    
-288   -288   
96     144    
208    144    
144    -16    
-96    -112   
-16    -1312  
0      -32    
176    -368   
48     -112   
-272   -96    
-16    -112   
400    176    
-192   -240   
224    48     
-176   -224   
48     -224   
-240   192    
192    48     
128    192    
-128   48     
-48    -224   
176    32     
0      -64    
176    48     
-1232  -112   
48     -240   
80     -16    
48     -368   
-48    -384   
96     160    
208    176    
-80    -496   
16     -144   
128    -16    
80     112    
0      64     
96     -16    
176    -64    
0      -16    
-256   -64    
-32    -144   
-416   144    
96     96     
112    0      
-64    -720   
96     -80    
48     -912   
32     -224   
16     -48    
-48    160    
176    -112   
-176   160    
-64    -224   
80     -16    
-160   -16    
96     48     
-304   -64    
64     -192   
192    -144   
48     -160   
96     -48    
32     -512   
0      64     
80     -1424  
64     32     
48     -128   
-64    -96    
160    496    
0      -32    
32     -16    
144    480    
-96    -112   
-96    96     
-1008  32     
64     240    
-16    112    
-48    -304   
48     48     
240    -336   
-80    288    
-32    -96    
-32    -160   
112    -64    
160    64     
-64    48     
0      -16    
-176   -16    
-16    -160   
32     320    
0      64     
-112   -48    
-64    -272   
144    96     
112    -464   
-16    96     
48     96     
80     0      
-80    -48    
128    -112   
-400   16     
112    -144   
-144   160    
-64    -192   
80     48     
-80    -288   
80     -96    
48     -544   
32     128    
160    -224   
16     128    
-64    -64    
-32    64     
-288   0      
32     -160   
-16    64     
80     224    
48     0      
-144   64     
-64    -480   
64     -256   
-64    144    
256    96     
32     256    
-48    -32    
96     64     
-336   0      
32     -160   
0      144    
-176   32     
272    -96    
-320   -96    
-48    -64    
144    -32    
-352   128    
304    -16    
-192   144    
-64    80     
-224   80     
-656   -320   
-448   -128   
96     -16    
-736   16     
-48    144    
-96    16     
-80    -16    
80     -96    
48     112    
-32    160    
112    128    
-976   -384   
272    128    
-464   -112   
-176   -80    
96     128    
16     192    
64     144    
-128   -16    
128    32     
-64    64     
80     528    
-352   -480   
16     208    
-16    -192   
-32    96     
80     -64    
-224   16     
-256   -256   
64     304    
-16    -16    
16     320    
0      0      
-16    -64    
-48    400    
-304   -16    
-144   64     
-448   256    
0      -240   
-352   -288   
-256   -96    
16     32     
96     224    
0      0      
32     64     
0      208    
0      -112   
-176   16     
0      -80    
-160   -32    
-64    -32    
1984   -1536  
-512   -896   
496    688    
-2368  512    
-96    336    
-16    0      
-784   -368   
784    -256   
-352   320    
208    176    
-112   240    
-144   0      
16     112    
128    48     
-16    16     
-96    -32    
-224   -32    
-64    64     
-1008  16     
48     -16    
16     0      
-48    208    
80     -416   
0      48     
80     -96    
-176   32     
64     256    
-160   16     
96     48     
-176   -48    
128    80     
-192   -32    
144    176    
-288   48     
160    80     
-304   -160   
128    352    
-16    112    
-96    -80    
-48    192    
64     -32    
64     224    
-192   32     
112    128    
-272   -48    
112    0      
-96    128    
32     80     
-48    112    
-96    32     
176    -96    
-144   128    
80     80     
64     96     
-16    192    
112    16     
-48    240    
-112   -32    
144    112    
-128   -144   
128    32     
-80    128    
0      192    
-224   -112   
64     160    
-112   -96    
80     144    
-128   48     
128    64     
-80    16     
80     64     
-80    16     
144    80     
-112   160    
112    32     
-16    96     
-128   -16    
80     144    
16     -224   
144    128    
-32    176    
-80    80     
160    48     
-192   64     
176    -96    
32     176    
-16    208    
-96    64     
96     176    
-128   -32    
96     48     
-80    -48    
48     176    
-160   -16    
128    208    
-32    112    
-16    48     
48     -48    
-80    112    
80     -48    
32     -48    
128    192    
-80    128    
16     0      
-96    0      
-16    128    
336    128    
16     416    
-80    -160   
-64    -48    
-48    -32    
160    64     
80     160    
-32    96     
-64    160    
-80    0      
176    80     
-256   -400   
0      32     
48     80     
256    -160   
-320   -48    
32     64     
48     -48    
64     112    
-16    192    
64     112    
0      96     
0      176    
128    144    
0      48     
80     112    
-32    224    
144    144    
48     128    
-112   80     
-32    -32    
48     304    
-112   48     
32     80     
64     144    
64     176    
16     160    
80     160    
-64    80     
80     64     
32     128    
80     -16    
-96    -96    
0      128    
96     208    
-80    64     
96     160    
16     80     
32     128    
176    432    
-176   80     
112    48     
-144   -32    
224    160    
-208   48     
208    224    
-224   112    
128    112    
-128   -96    
160    96     
112    224    
80     0      
-208   -256   
64     112    
32     128    
64     176    
-96    -16    
128    48     
96     256    
-112   -16    
64     208    
-176   16     
96     -48    
-144   -160   
128    208    
-128   48     
48     -368   
144    0      
128    -2736  
-16    -32    
80     160    
80     -16    
16     160    
48     224    
0      96     
16     144    
96     128    
48     64     
480    -192   
-48    224    
64     -16    
-112   -32    
144    48     
-16    2192   
-384   -720   
-384   -272   
-144   272    
-960   -224   
816    48     
-112   576    
-320   -272   
-128   0      
272    192    
-128   -96    
0      -80    
96     192    
256    -128   
48     144    
80     -400   
-32    96     
-16    176    
176    208    
-16    48     
208    48     
-144   -80    
64     -192   
32     160    
304    -96    
-80    -64    
-80    16     
208    304    
-64    -16    
0      32     
128    -112   
176    0      
-80    -816   
-80    -176   
112    64     
-192   64     
96     32     
-192   96     
-16    -304   
432    176    
16     -80    
0      144    
224    176    
32     -352   
16     224    
-112   192    
-64    32     
128    -320   
160    304    
-32    -432   
192    288    
-32    -48    
176    -48    
0      208    
272    384    
-144   -176   
64     -720   
144    496    
320    368    
-320   368    
48     -208   
96     144    
0      -336   
64     160    
-16    -432   
64     16     
0      48     
208    176    
16     32     
48     96     
32     160    
64     -224   
64     80     
0      -96    
-32    64     
176    -16    
16     160    
-160   -160   
0      96     
-32    -1360  
32     96     
48     192    
224    64     
-32    16     
-80    -272   
176    256    
16     160    
64     80     
-224   -160   
176    112    
-32    80     
64     96     
0      -128   
32     32     
96     176    
96     -528   
80     208    
-192   -1024  
304    16     
-64    -48    
176    -1056  
-32    64     
-80    -944   
176    -64    
-16    -1424  
32     -208   
176    288    
-96    -64    
48     -1056  
32     -224   
80     64     
144    80     
-32    -144   
-64    -16    
-320   -192   
208    -128   
-144   -112   
160    -560   
16     -176   
96     -384   
-32    -16    
48     32     
128    48     
-16    -304   
64     16     
16     -784   
-48    48     
32     -368   
432    304    
-192   112    
96     -144   
48     208    
16     -208   
-16    32     
64     -64    
80     -64    
0      -544   
16     -80    
80     -160   
-48    96     
208    160    
-80    176    
96     272    
32     -144   
-272   -64    
112    -208   
-272   -176   
-208   -400   
0      -144   
96     -64    
64     -176   
-16    -416   
144    -128   
-16    48     
224    592    
-368   -288   
112    -512   
-256   -128   
192    -32    
-112   144    
-128   144    
-64    128    
-32    192    
48     -272   
160    -256   
-240   -64    
64     -80    
32     416    
-144   -256   
128    96     
32     -80    
64     -496   
64     -80    
-16    48     
128    80     
-48    128    
-48    -32    
128    16     
64     -80    
48     -144   
32     0      
112    -240   
0      112    
144    -624   
-128   80     
64     64     
144    80     
-192   144    
80     -80    
-128   -192   
176    -112   
-784   -48    
-64    64     
-576   -48    
176    -144   
64     32     
96     -128   
-16    416    
320    -912   
528    576    
-192   -80    
-384   -288   
432    -96    
-48    -64    
64     160    
416    336    
-224   -80    
-64    -320   
-192   192    
400    -288   
-176   400    
224    -336   
-160   272    
32     -400   
128    288    
96     16     
32     -48    
-240   -32    
-32    -48    
-32    80     
16     -48    
0      144    
144    -32    
-48    192    
224    -96    
-368   80     
128    -128   
-32    160    
32     -160   
-80    16     
-224   -32    
-16    48     
-64    -64    
-336   -112   
64     -112   
64     96     
240    32     
-80    -176   
-256   -80    
96     -192   
80     144    
-64    -160   
-64    128    
-432   -256   
0      32     
-16    80     
-656   16     
128    0      
-144   208    
16     0      
80     32     
-64    -32    
-32    96     
48     64     
-224   32     
160    192    
-336   -128   
96     64     
-112   144    
-304   -96    
64     96     
16     224    
-144   80     
-32    -64    
-112   -80    
-1920  -16    
96     160    
-192   112    
96     48     
-32    -80    
32     144    
-112   -112   
80     -32    
112    320    
-160   -48    
256    -112   
-48    192    
-272   80     
-160   -32    
-128   -48    
-256   368    
-224   144    
64     16     
80     256    
16     32     
-32    0      
80     -128   
32     16     
64     176    
-48    160    
-128   128    
48     -48    
16     -16    
-128   0      
16     16     
-144   16     
-32    -16    
-416   -256   
96     112    
-144   16     
112    48     
-32    16     
-80    48     
80     48     
-160   -80    
-80    16     
-160   -144   
96     64     
16     96     
-176   176    
-80    16     
-80    0      
-560   -128   
32     64     
-16    0      
208    224    
-48    -16    
-208   288    
-128   64     
-32    -80    
96     160    
48     96     
96     432    
-192   32     
96     96     
-240   0      
80     304    
-176   64     
-80    0      
48     80     
-96    64     
128    -160   
-16    0      
-144   208    
256    32     
-96    -64    
80     144    
-128   -16    
-64    -32    
0      96     
-96    -80    
208    224    
-160   64     
208    672    
-672   -48    
-240   0      
0      48     
32     64     
0      80     
80     0      
-144   -32    
-64    -96    
48     64     
224    64     
-32    192    
256    752    
-448   -64    
-240   -288   
32     -64    
-672   -160   
16     32     
112    192    
-352   -368   
0      -208   
464    240    
96     256    
-160   144    
-176   96     
-80    64     
336    -112   
16     128    
-144   80     
-240   -112   
-32    16     
400    64     
48     112    
-192   128    
-112   96     
-112   32     
256    16     
144    192    
-128   96     
16     80     
-32    80     
48     144    
-48    -48    
-80    96     
48     80     
144    64     
32     64     
32     80     
-256   128    
80     -144   
-64    208    
176    128    
-272   608    
-1728  -2064  
112    -560   
-128   880    
416    416    
-64    256    
368    -208   
-992   192    
304    -688   
528    -16    
-416   288    
32     208    
-16    -144   
64     336    
64     -320   
128    224    
-320   48     
320    768    
-240   112    
288    288    
-256   -224   
448    288    
-304   -144   
48     -272   
-16    80     
336    -288   
-160   208    
-208   -80    
320    160    
-256   -288   
176    288    
160    -16    
64     96     
-16    16     
-64    352    
32     -48    
-64    32     
128    16     
112    320    
-16    224    
32     112    
208    -128   
-80    16     
144    112    
-32    128    
112    64     
64     192    
-48    400    
-192   96     
112    16     
-176   -80    
208    48     
80     160    
96     192    
-144   48     
-112   32     
128    224    
96     96     
0      -480   
320    656    
-288   -80    
80     304    
-80    -48    
304    192    
-320   -32    
112    192    
0      -240   
112    16     
-48    -16    
48     224    
0      128    
-16    144    
64     64     
160    256    
-80    16     
112    256    
-112   80     
208    240    
-352   32     
0      64     
-208   -400   
176    -80    
32     -176   
96     -384   
-144   144    
80     -48    
224    80     
-192   48     
144    -144   
0      224    
160    128    
48     -16    
80     288    
-16    32     
0      16     
128    48     
-32    -112   
16     0      
-224   -704   
16     -96    
112    -96    
16     192    
0      16     
48     64     
32     496    
80     144    
48     48     
144    272    
-112   16     
-32    -64    
-160   80     
-128   -272   
272    272    
-48    -608   
128    16     
0      -2192  
176    304    
32     -192   
32     -16    
-112   -80    
96     240    
96     -112   
-48    160    
144    64     
-16    96     
-16    -144   
64     -320   
-16    -112   
96     -176   
0      80     
32     -320   
96     160    
-112   0      
32     0      
-96    16     
352    208    
-64    96     
256    160    
-160   96     
-32    16     
64     144    
32     -176   
96     144    
208    -976   
-112   128    
32     -320   
64     112    
112    -96    
-96    176    
112    -48    
64     112    
-80    96     
96     128    
48     32     
-16    -64    
160    208    
16     -464   
112    144    
-144   -128   
208    144    
128    -80    
128    240    
-112   -880   
96     112    
-64    32     
192    176    
-80    16     
-16    96     
192    80     
-112   0      
160    48     
32     -112   
176    -48    
32     160    
-144   160    
48     -192   
64     112    
176    -144   
64     304    
-160   16     
160    -784   
128    112    
-128   -144   
80     -2512  
0      -208   
192    16     
32     -32    
-64    240    
-16    -160   
112    80     
-48    -112   
144    176    
-64    32     
160    -208   
-16    96     
64     -464   
112    208    
-1616  -96    
96     -80    
912    -848   
832    928    
96     48     
-768   256    
-160   -448   
496    1200   
-480   -528   
384    224    
-432   224    
416    -480   
-288   192    
192    -336   
-96    64     
-64    -224   
-48    240    
368    -208   
-240   -80    
160    -192   
32     -224   
32     -112   
32     -160   
64     48     
80     96     
-48    0      
-144   -288   
224    96     
-144   240    
336    -48    
-384   -32    
32     -208   
176    -112   
16     -96    
16     -16    
-16    -112   
128    -16    
64     -1520  
-144   -240   
0      -144   
96     96     
272    112    
-128   -48    
-64    0      
16     -32    
144    32     
-96    96     
-480   -64    
16     0      
112    160    
64     -160   
48     -64    
80     -464   
-96    -16    
64     -256   
32     80     
48     -48    
144    96     
-80    96     
-32    -128   
48     32     
0      -32    
16     80     
64     -16    
-304   32     
128    -144   
-400   -64    
176    -304   
32     112    
128    -736   
-80    176    
64     0      
112    -160   
-64    -48    
128    -208   
-96    96     
64     48     
-64    112    
-16    -256   
-656   -16    
0      -128   
-720   16     
96     -256   
64     80     
16     -1376  
48     80     
-16    -112   
144    32     
80     352    
-144   -96    
144    -240   
-32    16     
-416   16     
32     -80    
-304   48     
16     0      
-48    -112   
112    -192   
-80    80     
112    -288   
-16    80     
-144   -16    
288    -192   
-240   -144   
-192   -192   
-336   -176   
64     -96    
-16    192    
64     -176   
128    224    
16     32     
32     80     
16     -304   
0      32     
80     -96    
48     -80    
-64    -16    
160    176    
-96    96     
112    64     
-256   -208   
0      -320   
-96    0      
96     48     
-80    80     
-48    -272   
-16    -16    
160    -256   
144    128    
-368   -208   
-80    -384   
112    144    
-528   224    
-16    -48    
0      192    
-16    32     
48     64     
160    720    
64     160    
-192   0      
-1376  48     
-48    64     
-176   32     
96     80     
64     224    
-240   -32    
48     48     
-480   80     
32     128    
-560   128    
-64    -48    
0      16     
-48    -16    
48     -32    
64     128    
-112   -80    
160    48     
0      0      
0      160    
256    -80    
-240   160    
-80    32     
-64    -16    
48     -16    
-304   48     
-208   48     
-960   -160   
-208   -32    
192    160    
-192   -48    
80     96     
-192   96     
128    -320   
-176   96     
48     16     
80     128    
-144   96     
16     -96    
0      -32    
-16    208    
-96    96     
-560   0      
64     -32    
-352   144    
128    128    
-304   -144   
352    176    
-144   -112   
144    -48    
-144   224    
304    -224   
32     288    
-320   -32    
144    32     
-176   -80    
128    224    
-64    112    
64     128    
-176   -112   
112    96     
-416   560    
304    480    
-1040  -608   
208    512    
-592   -304   
864    464    
-416   -640   
400    -112   
-320   432    
-80    -160   
320    64     
-432   288    
80     -16    
-320   -112   
-96    128    
144    112    
-144   0      
192    80     
-288   192    
112    -80    
-64    272    
208    64     
-208   16     
48     -64    
48     224    
64     96     
-240   48     
-64    -240   
288    256    
-224   -16    
-384   48     
-144   32     
-16    -80    
64     272    
64     128    
48     48     
-160   -512   
208    800    
208    240    
-64    -96    
-144   160    
96     -16    
-128   16     
-48    0      
32     176    
32     -224   
-224   32     
128    48     
-48    0      
192    432    
-16    160    
48     64     
-240   -176   
80     -64    
-48    96     
32     -32    
-112   80     
80     96     
-320   -16    
-128   0      
112    96     
-80    -16    
128    -16    
16     144    
-16    64     
0      128    
-16    32     
128    208    
-32    160    
-80    112    
48     80     
-16    -48    
112    208    
-176   32     
80     80     
32     0      
48     80     
80     112    
-128   -256   
32     -256   
-48    -32    
-16    208    
-144   -544   
48     240    
32     48     
96     0      
-160   -32    
-32    -208   
-224   -32    
32     16     
128    288    
-128   -16    
0      48     
-48    96     
80     -48    
-16    96     
-48    128    
368    128    
32     208    
-48    -96    
-48    64     
16     -144   
-48    128    
16     32     
-64    0      
160    32     
-128   224    
144    80     
32     224    
-32    -16    
192    112    
-160   96     
224    176    
-176   160    
32     32     
128    192    
-128   64     
368    384    
-112   32     
-160   -128   
64     -16    
0      176    
192    64     
-32    144    
32     224    
224    0      
-48    128    
-96    112    
96     128    
64     48     
64     176    
112    208    
144    336    
-80    48     
0      288    
-48    160    
432    64     
-32    80     
-400   192    
304    48     
32     144    
-32    144    
144    32     
-64    48     
48     112    
16     80     
-80    -480   
-80    -768   
-32    112    
288    128    
-96    80     
144    128    
-96    16     
-32    -16    
96     272    
0      16     
192    160    
-144   208    
48     64     
32     -64    
80     48     
112    -80    
64     -400   
160    48     
48     -192   
64     16     
-96    224    
0      192    
-80    256    
352    -32    
208    160    
80     96     
-176   48     
-64    176    
32     -96    
48     112    
192    272    
-64    -400   
272    -32    
-64    -288   
64     16     
-16    144    
-64    96     
288    48     
16     208    
112    96     
48     160    
-160   160    
112    -16    
32     80     
160    64     
80     224    
-192   -48    
272    192    
-208   -128   
256    16     
32     -1664  
-1328  -1120  
688    -48    
-1680  -32    
1088   -288   
32     912    
224    -880   
-192   1056   
736    -704   
-112   688    
464    -720   
-272   672    
144    -368   
112    496    
0      -288   
272    -272   
-320   32     
368    -368   
-96    272    
144    -240   
0      208    
176    80     
0      272    
64     -16    
-48    176    
80     -288   
0      128    
128    -128   
-80    64     
208    80     
-128   -288   
112    -48    
-80    -1200  
112    48     
0      128    
0      80     
64     80     
-48    240    
128    96     
-96    80     
176    176    
80     -480   
-48    128    
32     -192   
112    16     
64     -256   
80     64     
112    176    
-112   96     
128    80     
-144   64     
176    -32    
-32    128    
112    144    
32     -32    
0      112    
144    -320   
80     352    
-64    -192   
176    144    
16     64     
-16    96     
96     -336   
64     0      
32     80     
64     80     
-176   16     
112    0      
16     64     
16     -288   
144    192    
-16    -256   
48     32     
64     80     
-16    272    
0      -160   
80     80     
32     -272   
304    -96    
-208   112    
320    -752   
-64    208    
96     -32    
240    -176   
-16    -320   
80     -640   
176    0      
-96    -16    
208    -144   
192    0      
-96    -160   
128    144    
-32    96     
128    -496   
64     48     
96     -144   
16     -224   
-1120  -160   
160    -256   
128    160    
-16    -64    
64     64     
128    -1200  
112    -48    
32     96     
0      -80    
32     64     
224    368    
-64    112    
16     -144   
32     -272   
96     -96    
-48    -64    
-48    -144   
16     -112   
80     -96    
96     -64    
-16    -256   
-16    -144   
48     -992   
-64    -96    
176    -112   
-32    144    
208    -32    
-176   -48    
-224   -96    
80     240    
-80    -48    
-16    0      
-208   -48    
-16    48     
32     -192   
-48    -224   
144    -32    
176    -240   
-80    112    
48     -48    
32     -32    
80     48     
128    96     
-48    64     
80     48     
-64    48     
-32    -160   
-304   144    
-48    -32    
224    32     
208    224    
128    256    
-112   -368   
-208   16     
176    -2192  
112    144    
32     32     
16     -176   
0      -144   
288    32     
-480   0      
64     -224   
32     32     
64     32     
-1840  -112   
32     -272   
176    -96    
112    -128   
-128   32     
272    -1376  
-32    272    
32     -96    
256    112    
-144   48     
112    -64    
-96    32     
-32    144    
32     80     
48     32     
-384   -64    
144    -336   
128    64     
0      -48    
96     176    
-64    -240   
96     192    
16     0      
48     -16    
-544   -16    
176    240    
-192   48     
160    32     
-112   80     
80     -192   
-144   -80    
0      192    
0      192    
0      -32    
-160   432    
32     -528   
16     -64    
-304   -32    
2688   -1280  
-336   288    
256    336    
-624   304    
656    16     
192    400    
-784   -464   
1008   128    
-640   368    
-16    16     
-96    -400   
-208   -208   
320    -592   
240    -16    
-128   16     
-304   -64    
-64    -16    
112    256    
224    160    
-32    0      
-80    288    
-32    -48    
-368   48     
304    -160   
96     48     
160    -192   
160    368    
-832   -16    
256    176    
-352   -112   
-672   -144   
-32    0      
-1312  -32    
-96    144    
16     -80    
96     16     
-16    32     
0      64     
16     -224   
-128   64     
80     -64    
80     192    
32     96     
-272   -192   
-32    16     
-16    32     
-64    0      
-256   128    
-48    -112   
-976   224    
-240   -128   
128    -128   
-80    0      
0      160    
0      48     
-64    -272   
96     160    
-80    64     
-16    -32    
-48    48     
-144   112    
64     64     
-96    -16    
16     -96    
-48    128    
-192   96     
-32    -176   
160    144    
-48    48     
128    176    
-208   -256   
-48    -16    
-32    96     
-80    32     
16     144    
-16    432    
-176   112    
0      112    
48     16     
-48    -64    
80     208    
-512   0      
144    144    
-160   -368   
224    112    
-96    -240   
-64    208    
-96    64     
208    288    
-48    -16    
0      -128   
-128   -48    
-112   -144   
-80    -48    
-352   -480   
-48    -240   
-352   -32    
48     368    
-160   -96    
-64    64     
-48    80     
96     128    
0      16     
-96    16     
-32    0      
-96    -112   
16     32     
-32    144    
64     -16    
-96    0      
-144   64     
-320   -64    
80     -32    
-96    32     
-160   -32    
112    208    
-240   -64    
240    96     
-144   -64    
16     112    
64     160    
16     256    
240    16     
-176   48     
-272   16     
320    -64    
-400   -144   
128    320    
-1152  48     
144    112    
-192   0      
16     -48    
-96    48     
-144   0      
-352   -176   
32     32     
0      112    
176    16     
144    112    
-448   -16    
208    176    
32     16     
-96    128    
-400   -160   
-144   -48    
0      -64    
272    208    
-48    0      
304    48     
-160   48     
-96    48     
32     96     
-48    -32    
32     192    
16     -80    
0      112    
-16    -64    
48     -32    
-16    -16    
160    112    
-96    208    
128    -32    
-80    80     
64     0      
176    160    
-224   64     
0      -64    
-32    0      
48     128    
64     96     
112    160    
-288   -32    
16     112    
48     -192   
160    80     
32     208    
-96    48     
-64    80     
112    -16    
16     96     
32     96     
0      32     
-48    -80    
128    192    
-288   -16    
160    128    
32     112    
-112   240    
-64    96     
112    48     
48     -32    
96     128    
48     -64    
128    -128   
16     304    
-96    224    
48     144    
-112   -112   
1264   -2592  
320    64     
816    -32    
112    -608   
-80    320    
400    -224   
64     48     
80     -304   
0      176    
-160   -240   
-112   496    
256    -208   
-208   224    
80     -160   
80     144    
0      80     
-64    176    
96     320    
112    128    
16     0      
112    -112   
-80    320    
80     0      
-96    176    
96     0      
0      128    
64     144    
128    336    
-48    16     
-16    48     
-48    80     
80     64     
16     -592   
-32    64     
0      96     
176    160    
16     128    
32     96     
-48    64     
112    96     
-32    64     
48     -144   
-64    48     
160    112    
96     64     
160    240    
-192   80     
-128   -208   
112    112    
128    -96    
64     48     
-48    160    
16     96     
-48    80     
64     -32    
112    80     
128    112    
-64    144    
80     80     
-128   -336   
-48    112    
-80    -112   
-16    -160   
48     272    
32     -272   
0      -32    
48     32     
16     64     
48     -128   
64     -80    
144    208    
80     256    
-272   -688   
16     0      
0      -64    
-128   64     
368    208    
-192   176    
192    144    
0      -608   
-96    240    
144    -16    
48     256    
160    320    
0      192    
-64    -160   
-16    32     
16     96     
176    144    
-80    64     
32     0      
48     224    
32     -144   
144    112    
-48    -400   
48     96     
16     -480   
0      32     
64     192    
128    240    
-112   -32    
32     112    
-32    16     
128    64     
16     48     
0      -96    
80     160    
-16    -96    
80     96     
16     -272   
16     32     
80     -384   
0      32     
128    -624   
-112   16     
80     96     
-32    -112   
128    96     
16     160    
208    208    
-64    -32    
32     48     
-48    -224   
224    80     
16     176    
32     -32    
160    176    
-176   -16    
352    -704   
-240   -32    
240    176    
80     176    
0      -80    
16     96     
64     48     
176    -384   
-192   96     
160    -208   
64     176    
48     -320   
64     32     
16     -96    
32     80     
112    208    
16     48     
32     96     
0      496    
32     -352   
272    -48    
-192   208    
208    -304   
-16    32     
0      -128   
0      16     
64     -128   
-80    112    
304    -32    
176    288    
-320   -48    
272    -224   
-128   128    
224    128    
-160   64     
48     32     
160    -288   
112    -48    
160    -1088  
64     96     
-304   0      
352    -192   
-16    192    
464    -80    
-432   -848   
192    -208   
-48    -2032  
352    -112   
-48    -336   
160    -96    
-720   80     
80     -656   
176    -96    
64     -784   
0      64     
208    -1056  
80     -64    
96     192    
-16    -176   
16     0      
-16    -32    
208    -144   
128    128    
112    80     
16     -320   
-96    -368   
-128   -272   
128    -224   
-16    -240   
-32    32     
576    880    
-1152  -512   
-208   -736   
-48    -336   
-160   816    
-304   -144   
144    -208   
704    384    
-416   112    
16     208    
192    48     
-144   -160   
0      -16    
288    -80    
96     -48    
-96    -464   
-112   -112   
192    -384   
-16    0      
64     -16    
16     336    
80     -16    
-48    -32    
0      0      
80     -192   
-192   -64    
160    -64    
-864   96     
112    -240   
96     -64    
-64    -80    
240    16     
0      -176   
-112   32     
80     -176   
-240   -176   
272    -160   
16     32     
144    64     
-80    -48    
-80    208    
16     -64    
-16    -192   
-48    -272   
-688   48     
224    -16    
-32    48     
-32    -768   
64     144    
-48    -2512  
192    32     
-80    -32    
144    48     
-80    48     
-48    -336   
-48    0      
-112   -128   
-448   -48    
16     80     
-48    112    
80     -16    
64     32     
-48    -336   
192    48     
-64    -352   
64     336    
48     48     
256    -192   
-32    -64    
128    -64    
-96    16     
144    -48    
0      -80    
128    64     
-416   48     
224    -48    
-128   96     
32     -176   
160    64     
-16    -464   
112    96     
-368   48     
0      -16    
-128   -208   
64     -16    
-112   80     
48     -32    
-16    144    
-128   -224   
0      80     
-48    -144   
96     0      
256    -176   
-160   48     
208    -368   
96     176    
-240   -64    
32     0      
-96    48     
80     48     
-48    64     
16     -32    
-272   -256   
16     -208   
64     48     
208    80     
16     144    
-912   -96    
144    112    
-1584  -272   
-1024  128    
-64    64     
-992   0      
-80    -48    
48     48     
144    32     
-288   -384   
-48    -80    
32     240    
400    80     
-784   -32    
-240   64     
-384   -176   
128    64     
48     -96    
64     48     
-16    80     
-208   128    
80     -48    
-912   0      
-240   32     
352    48     
-80    -32    
144    -80    
-16    0      
-640   -272   
320    96     
-256   -32    
192    16     
-16    112    
-160   -32    
-48    112    
-288   0      
176    0      
-272   112    
-32    -96    
80     128    
48     80     
64     16     
-32    96     
-96    -32    
96     144    
80     32     
-128   -80    
80     -16    
-208   0      
-64    -32    
0      192    
-160   96     
32     -80    
-80    -48    
-368   -48    
-32    112    
32     -176   
144    80     
96     512    
-192   416    
96     176    
-144   -288   
128    144    
-64    -160   
16     -16    
-112   256    
-176   64     
-48    -32    
16     -80    
-32    -80    
-128   -128   
0      144    
-16    80     
0      144    
0      -64    
-16    -48    
96     160    
-96    80     
-80    96     
-176   -112   
16     16     
0      -16    
0      0      
48     16     
32     224    
-48    272    
-128   96     
160    160    
-96    -192   
80     160    
2096   1104   
-1536  -368   
1360   1488   
-112   432    
80     -64    
128    752    
-256   16     
176    48     
-176   -112   
-96    176    
144    -144   
-336   -144   
64     80     
368    48     
-256   -16    
224    96     
-256   0      
-64    80     
224    272    
16     64     
-192   0      
80     176    
48     240    
-112   16     
-128   -80    
-160   32     
-288   0      
-224   -80    
-80    -112   
-432   -80    
208    112    
-48    208    
64     112    
32     112    
32     48     
96     0      
-48    96     
-32    16     
-32    -112   
-176   16     
-32    384    
48     80     
-16    224    
-32    -144   
-96    48     
128    0      
-64    -48    
-64    -176   
32     96     
80     64     
-32    96     
16     48     
16     64     
80     48     
-80    64     
64     80     
32     224    
-192   208    
0      -32    
32     -80    
-160   -16    
208    144    
0      48     
-64    384    
-48    80     
-16    -32    
32     48     
-48    16     
64     96     
-96    64     
48     112    
-112   -16    
0      96     
0      80     
0      128    
112    208    
-80    -16    
144    144    
240    96     
-96    176    
224    -32    
-112   -32    
48     -32    
-48    80     
-16    -144   
208    208    
-32    112    
80     400    
-64    512    
-32    208    
-16    -208   
128    0      
64     144    
16     144    
-32    80     
-32    48     
160    128    
-48    -80    
48     160    
-176   -48    
112    256    
-32    -16    
64     0      
16     48     
96     176    
0      -16    
32     144    
-144   -112   
256    192    
-160   0      
112    80     
-32    144    
32     48     
48     80     
-128   48     
96     112    
112    160    
64     240    
0      0      
0      -16    
80     272    
160    64     
-16    32     
-96    112    
96     112    
96     32     
80     48     
-64    32     
48     48     
64     96     
0      -96    
96     112    
-176   128    
144    0      
-80    -48    
144    -48    
32     304    
0      240    
32     -112   
112    -64    
48     176    
96     144    
-48    -208   
64     -48    
-16    96     
-48    -656   
208    560    
-432   -2512  
352    -160   
16     0      
224    96     
16     160    
-192   32     
368    192    
-144   32     
640    -464   
-288   448    
-352   -176   
112    160    
-192   -208   
352    80     
-288   80     
96     -128   
-32    48     
368    320    
-224   -64    
288    176    
-80    256    
288    432    
-224   144    
-96    -144   
112    176    
-176   -320   
368    368    
-192   160    
112    -144   
-32    -96    
352    -384   
0      144    
-112   0      
-32    80     
176    -32    
160    128    
112    112    
-96    32     
0      48     
96     80     
-80    -128   
144    368    
-16    16     
-16    -128   
-128   128    
192    96     
240    -32    
-176   -192   
64     208    
-48    -144   
-80    144    
-112   624    
-368   -2032  
16     1152   
-176   384    
-32    656    
-528   -176   
784    32     
96     -16    
32     416    
48     -480   
0      224    
64     -48    
176    128    
32     96     
144    96     
-16    16     
112    224    
-48    64     
144    80     
-32    32     
80     -128   
112    176    
-32    -64    
96     64     
-96    -64    
112    128    
80     64     
48     32     
16     48     
0      32     
80     48     
48     160    
64     112    
-32    -336   
80     96     
-32    -352   
80     192    
-64    -224   
304    48     
-256   -352   
224    176    
-32    -304   
48     -16    
16     -928   
80     272    
128    144    
-32    -128   
32     160    
-144   0      
288    80     
-48    0      
112    32     
112    48     
-128   224    
128    -192   
-16    16     
144    32     
96     112    
96     -112   
-64    -2928  
112    144    
-16    -1376  
0      64     
-48    160    
-112   -128   
144    48     
-64    -1552  
96     -64    
96     144    
-32    64     
80     64     
112    48     
32     144    
80     -32    
-144   80     
-48    288    
64     -384   
192    -240   
-432   0      
48     -480   
-256   -304   
288    -608   
80     160    
-176   -528   
160    -144   
80     -48    
144    16     
-176   -448   
32     144    
48     -16    
-32    64     
160    48     
0      -48    
-336   -192   
224    -64    
-16    0      
-48    -224   
192    -32    
-80    -176   
192    -240   
0      320    
-32    -32    
64     -112   
48     0      
144    128    
-32    144    
-80    -16    
48     -176   
-64    -16    
192    -112   
-240   96     
-128   32     
240    96     
-160   -384   
288    64     
-144   -96    
304    176    
-96    48     
64     48     
48     32     
112    -192   
-272   -128   
-32    48     
64     96     
112    -48    
-512   32     
-48    144    
336    -160   
80     -112   
-112   0      
-128   -32    
272    96     
80     -608   
400    240    
48     0      
16     16     
-96    -48    
-112   32     
192    48     
208    -112   
-912   -16    
-32    -80    
-544   -128   
80     -48    
48     160    
80     -224   
112    -192   
-112   -864   
32     96     
-48    32     
0      -16    
80     128    
32     -32    
-80    0      
128    -80    
-288   -240   
160    96     
48     -96    
160    288    
-736   144    
0      -272   
96     208    
80     -1024  
-112   96     
80     96     
176    16     
-320   -176   
224    352    
-352   -192   
80     -16    
-48    64     
32     -32    
-544   112    
48     -288   
48     160    
-16    -256   
-64    80     
144    -160   
64     0      
-336   -16    
176    -368   
-288   256    
80     48     
32     -176   
144    224    
-224   192    
-32    -272   
-128   16     
160    -256   
0      96     
16     -32    
0      144    
96     -64    
160    80     
-160   -112   
48     16     
0      48     
-288   1072   
-48    2800   
-1088  848    
-144   -752   
384    -400   
208    -80    
-448   -560   
-192   224    
176    160    
112    -32    
-352   -304   
-480   -16    
224    80     
-576   -144   
-192   240    
-368   128    
-16    0      
128    480    
-416   -336   
288    -48    
-144   -32    
0      -16    
16     96     
-560   -288   
-160   -16    
64     -32    
-144   224    
-192   -240   
112    -336   
-48    80     
208    0      
-64    48     
-240   176    
32     128    
0      288    
-64    -64    
-112   -128   
-80    48     
112    368    
-128   256    
0      -80    
-96    48     
80     -32    
80     -256   
-144   128    
-176   64     
-16    112    
-80    -16    
64     16     
-208   -96    
48     192    
16     -208   
-16    208    
176    -192   
-160   160    
-32    48     
-48    80     
-448   -656   
96     336    
224    16     
-144   240    
48     -96    
-176   64     
-48    -96    
-1344  -128   
-32    64     
-80    -80    
80     128    
0      0      
-96    80     
-48    32     
-64    64     
-32    48     
-16    96     
128    32     
-144   160    
176    624    
-224   320    
-48    128    
-96    64     
256    272    
-192   272    
-192   -128   
96     160    
-128   16     
-112   112    
-48    -32    
368    608    
-112   272    
-128   -80    
-16    -160   
48     -48    
-16    16     
-80    160    
-160   16     
64     112    
112    -64    
-32    16     
48     64     
0      128    
0      64     
-16    96     
-48    -32    
16     0      
-80    -48    
0      48     
-16    16     
-96    32     
96     144    
-160   -32    
80     144    
-160   -64    
-128   128    
64     96     
-16    80     
32     80     
-32    0      
-64    -112   
160    80     
0      144    
192    208    
-176   80     
-80    16     
16     96     
-160   -208   
32     144    
96     96     
96     224    
-176   -208   
80     144    
-128   -144   
96     80     
80     48     
16     48     
96     240    
-80    480    
208    0      
-208   -528   
64     400    
16     0      
-96    32     
32     224    
48     48     
-80    -192   
-48    -80    
-80    0      
32     -240   
64     -32    
144    336    
16     0      
-176   -16    
16     64     
-128   -144   
144    240    
-176   16     
64     -224   
32     224    
64     176    
176    848    
64     -32    
-208   48     
320    0      
-224   48     
0      -64    
64     80     
-112   -16    
208    336    
0      320    
112    -256   
-160   -48    
160    112    
-32    96     
0      240    
208    0      
32     -128   
-48    -208   
0      -128   
-64    -64    
48     256    
176    80     
-16    144    
-96    48     
48     16     
80     96     
112    96     
-208   128    
0      -32    
128    128    
64     96     
16     80     
-48    144    
16     144    
-112   128    
160    -64    
-32    32     
192    96     
-48    16     
-64    80     
752    3744   
-1744  16     
224    288    
240    32     
800    832    
-624   -768   
-112   -16    
-240   48     
624    -32    
-368   160    
144    -224   
128    512    
48     -256   
160    416    
-400   -64    
32     96     
96     112    
64     256    
32     80     
48     0      
-112   16     
224    160    
-64    224    
240    -16    
-128   96     
208    -16    
0      256    
0      208    
-64    -16    
96     32     
-80    -368   
128    96     
-48    80     
16     96     
112    112    
0      -64    
96     0      
0      160    
96     96     
80     -16    
-192   32     
160    160    
64     80     
32     80     
-64    0      
-16    -816   
192    144    
32     -2064  
160    16     
-144   128    
176    160    
-32    64     
48     0      
32     96     
80     96     
-32    32     
192    176    
-128   176    
128    48     
96     96     
-48    -48    
16     96     
96     16     
64     192    
-144   64     
80     -16    
112    32     
32     48     
64     304    
-48    -16    
160    32     
48     64     
-112   64     
-96    -224   
256    48     
-96    -80    
128    64     
208    -176   
256    64     
48     -2320  
-80    240    
48     -64    
240    432    
-336   -80    
432    64     
-112   144    
-192   -64    
208    80     
-288   -32    
320    192    
-176   -128   
128    -80    
80     -96    
-16    16     
0      -336   
96     256    
-64    -224   
160    80     
-32    -96    
144    176    
-64    48     
0      144    
96     192    
144    192    
144    -48    
-32    -80    
-128   32     
224    -320   
-208   128    
256    -416   
64     96     
-96    -352   
80     16     
128    32     
32     128    
16     80     
48     144    
0      288    
208    48     
96     -80    
-336   -592   
320    96     
96     -64    
-64    192    
-64    -192   
128    112    
0      -1024  
48     80     
-176   48     
144    112    
64     64     
16     -384   
-48    -80    
304    -80    
208    192    
48     16     
32     240    
112    16     
-192   -208   
112    -144   
176    112    
-32    192    
16     112    
112    48     
16     -656   
-16    -176   
-48    -208   
112    -1936  
80     112    
80     -240   
64     416    
-48    16     
64     0      
128    288    
-144   -96    
-32    16     
112    48     
48     -80    
64     -96    
-48    -192   
192    -672   
-1280  -240   
64     -416   
32     -32    
-144   -1104  
352    336    
288    -272   
240    16     
-336   -64    
160    -48    
16     -48    
64     160    
32     -64    
32     0      
16     48     
64     -16    
64     -64    
288    -96    
-32    -192   
64     160    
0      0      
-64    -224   
176    0      
208    112    
16     240    
-208   -192   
48     16     
144    -256   
320    0      
-48    112    
-112   48     
-96    -48    
176    -176   
-32    32     
192    -272   
-48    176    
160    48     
-912   -912   
912    1472   
-1424  960    
752    -336   
-256   96     
240    128    
-224   448    
-224   -48    
464    160    
-592   -256   
-352   0      
-576   -144   
416    64     
16     -16    
80     -304   
-112   -64    
240    -432   
-160   16     
80     -32    
224    208    
-160   -208   
48     112    
-176   16     
192    -48    
-496   -464   
-16    -320   
-64    144    
320    672    
-432   -544   
-176   -352   
-48    -144   
192    -432   
64     128    
-16    192    
224    -32    
48     128    
32     -128   
224    480    
-448   -480   
448    192    
-128   -528   
32     -128   
-16    112    
-576   -128   
-128   64     
144    128    
240    48     
-48    160    
-240   -2032  
144    96     
-16    -80    
224    224    
-96    32     
48     -96    
-432   80     
0      -112   
-48    -32    
-96    256    
544    240    
-288   -144   
48     16     
96     -272   
32     -192   
288    -464   
32     128    
16     0      
48     112    
-128   0      
80     -80    
-240   -128   
80     16     
32     64     
80     128    
-32    128    
-32    -224   
-32    -208   
128    -544   
-16    -16    
-96    -160   
208    80     
64     -16    
-48    16     
-144   -144   
224    80     
-160   -16    
96     -16    
112    288    
128    48     
-208   96     
96     -368   
-16    80     
176    -16    
-80    64     
-32    -112   
-32    176    
-128   -80    
-1456  -48    
-256   48     
112    -144   
112    16     
-144   -192   
128    16     
32     80     
-144   16     
-1184  -96    
-112   80     
128    -64    
96     96     
-48    208    
-160   128    
-64    48     
-112   -48    
-32    0      
-240   112    
16     48     
-64    32     
-64    -16    
-208   -144   
112    -16    
80     16     
-32    336    
-208   -64    
208    -32    
-96    320    
-144   -224   
-48    128    
-64    -16    
48     112    
-320   368    
-592   16     
-688   -32    
-208   176    
-64    -112   
96     32     
208    -144   
-192   16     
-16    -192   
-128   112    
48     224    
48     0      
0      16     
-176   48     
-48    -64    
128    48     
-176   -48    
-208   16     
-32    -432   
-336   -384   
48     -160   
-64    -160   
-16    192    
96     0      
-48    128    
0      160    
64     -96    
-160   16     
-80    16     
-96    -96    
-48    -208   
176    32     
-80    256    
32     -64    
-784   -80    
144    160    
80     32     
-112   160    
32     128    
128    400    
-160   32     
-112   16     
80     -48    
0      32     
80     128    
-256   32     
-112   0      
-96    16     
16     80     
-128   -16    
-256   320    
-48    -288   
144    128    
64     -80    
0      64     
-112   80     
112    80     
64     80     
-96    160    
0      48     
-192   -48    
48     16     
-224   -96    
0      192    
-192   128    
-128   176    
-208   -320   
176    32     
96     -32    
80     224    
880    -1952  
256    -320   
80     -32    
-48    0      
-416   320    
544    -64    
-784   112    
688    -192   
-352   288    
16     -288   
-16    272    
-976   -112   
96     256    
32     -80    
-32    -80    
64     96     
-48    16     
160    176    
-80    -64    
-80    64     
96     -80    
48     256    
96     48     
-64    176    
-288   -144   
-16    320    
240    112    
-48    32     
64     16     
-16    0      
-48    112    
-16    32     
16     48     
32     80     
-16    80     
-80    16     
48     -16    
-208   208    
352    112    
-128   96     
-192   -48    
64     160    
32     80     
96     160    
0      48     
-112   80     
96     48     
-16    96     
224    -80    
-96    176    
-112   -80    
176    80     
-224   96     
272    16     
-96    96     
96     176    
16     304    
-144   -80    
176    160    
-64    256    
96     -32    
48     80     
-80    144    
128    -112   
0      176    
-192   48     
144    192    
-96    0      
208    128    
-192   64     
-112   -16    
80     32     
32     80     
-96    -64    
32     32     
112    224    
-192   -352   
320    -48    
32     48     
-80    240    
-96    -16    
144    240    
-192   -16    
240    192    
-176   240    
32     144    
-80    -112   
208    -160   
48     -96    
-48    64     
-32    128    
32     304    
-64    160    
96     304    
32     256    
64     192    
64     256    
-64    64     
64     144    
-32    96     
160    208    
16     32     
-64    80     
144    80     
-16    0      
32     176    
80     224    
-64    -160   
160    32     
-96    16     
16     192    
144    256    
-112   -144   
64     -32    
-80    -32    
64     128    
-32    96     
80     -16    
32     112    
-16    0      
288    688    
224    320    
-208   208    
-272   -96    
320    192    
-80    -16    
176    16     
-192   80     
336    -96    
-80    -48    
192    -1104  
-112   -64    
48     96     
80     112    
16     96     
208    112    
-80    0      
96     -224   
32     -32    
48     80     
-32    112    
144    48     
16     64     
-16    -96    
128    144    
-80    -80    
112    0      
-192   -128   
272    384    
-32    64     
80     112    
48     160    
64     32     
0      -48    
-256   -400   
432    432    
96     320    
160    80     
-64    -160   
16     -32    
96     -496   
-80    64     
112    -560   
96     128    
-112   64     
-176   -64    
144    -160   
288    112    
112    272    
-176   176    
-16    -64    
-16    -176   
64     96     
224    -48    
-208   128    
224    -112   
-16    128    
80     -2176  
96     160    
-48    -16    
32     64     
-48    80     
208    192    
-16    -80    
-32    288    
-160   -48    
160    0      
-32    128    
288    32     
-80    64     
-16    -96    
176    160    
16     -112   
560    -272   
-48    0      
32     -16    
-272   -16    
-240   704    
-1328  -1376  
192    208    
-512   704    
432    -416   
672    864    
-224   -1152  
496    816    
-384   -272   
464    -16    
-320   -416   
144    464    
272    -336   
-160   128    
-160   -224   
496    624    
-240   48     
128    96     
-80    -368   
112    -64    
80     -48    
160    -176   
128    16     
112    -112   
-128   208    
96     128    
-192   128    
-16    -2544  
432    176    
320    80     
336    336    
16     272    
240    32     
-112   384    
160    -320   
208    304    
128    112    
-48    -464   
64     96     
-128   80     
16     -64    
-96    80     
64     48     
272    -224   
-224   -80    
160    -576   
-208   -480   
336    -48    
-272   -896   
32     -320   
-80    -1104  
208    64     
-48    32     
384    -336   
-272   64     
80     -48    
80     -416   
-48    384    
640    464    
224    -64    
-176   -240   
224    -256   
-1488  -96    
80     -48    
48     -16    
288    -352   
-128   -96    
48     -832   
16     -112   
-112   -128   
32     16     
80     176    
112    288    
-48    -336   
128    64     
-96    -160   
240    -160   
-464   320    
112    0      
0      48     
-144   -1040  
144    -32    
224    -32    
128    16     
-128   0      
96     32     
-32    -240   
48     192    
176    32     
-80    96     
-64    -112   
176    80     
-416   0      
48     -112   
-80    -144   
128    -112   
64     16     
-96    -544   
-80    -64    
320    112    
-80    -80    
-80    -272   
-112   32     
144    -48    
32     48     
-80    -96    
240    176    
-48    -64    
-32    16     
-256   80     
0      -16    
80     -32    
224    96     
-176   -32    
-16    -304   
64     304    
-16    -320   
496    384    
-288   -208   
144    64     
-48    0      
112    -112   
144    -16    
-144   -64    
112    -192   
224    -208   
-1200  32     
208    -112   
48     256    
0      -144   
96     96     
-48    -1200  
144    64     
-96    32     
-80    -240   
128    16     
80     160    
-112   -32    
224    208    
-816   48     
416    -240   
-384   -32    
64     32     
-80    -48    
208    -176   
-176   224    
112    -944   
16     16     
16     -32    
112    32     
-160   -48    
-64    80     
-144   -48    
48     0      
-144   -176   
48     128    
-208   48     
96     -160   
64     80     
-16    0      
144    128    
16     -368   
176    -32    
-96    96     
-48    32     
112    176    
-144   48     
-160   -80    
16     -224   
128    -64    
144    -32    
64     160    
0      112    
-96    272    
-160   -384   
208    48     
240    -304   
96     16     
64     80     
-128   96     
-144   0      
144    -48    
-80    224    
-80    -64    
-16    128    
144    -112   
-96    -144   
-1392  -240   
-32    -16    
16     -160   
-112   208    
16     128    
16     -64    
112    208    
-784   -64    
384    -112   
-64    96     
-64    16     
-64    -1120  
544    -144   
-112   192    
304    -192   
144    768    
-144   -592   
256    832    
304    -80    
-64    160    
-272   -416   
208    544    
-80    -400   
-272   464    
192    -208   
-80    272    
-384   -320   
-32    240    
128    -80    
-112   144    
32     -160   
80     80     
-144   0      
64     -64    
-96    112    
-16    -128   
-112   128    
32     -32    
-64    272    
-192   -112   
-96    96     
-720   -176   
-96    144    
0      -224   
64     256    
-80    -240   
112    192    
-208   -384   
96     304    
-80    -16    
64     128    
16     0      
-48    80     
0      16     
-208   -64    
80     32     
-176   64     
128    240    
-304   -80    
-176   224    
-64    -192   
224    176    
-128   80     
80     16     
0      64     
-96    16     
64     32     
-240   32     
-16    16     
-32    32     
48     96     
-32    160    
16     192    
-896   -208   
160    208    
-224   32     
96     144    
-48    96     
-32    16     
16     16     
-16    128    
-112   -32    
96     128    
-48    -16    
96     128    
-48    160    
-160   -16    
32     368    
-624   32     
272    -16    
32     96     
-32    160    
32     48     
0      -192   
0      -16    
336    192    
-80    96     
0      128    
-32    128    
-192   -208   
128    16     
176    96     
160    288    
-400   16     
64     32     
-320   48     
64     64     
32     -32    
-256   -224   
64     32     
64     80     
48     64     
-48    144    
0      -64    
-64    64     
96     48     
240    464    
32     240    
-80    304    
32     224    
16     192    
-64    16     
80     48     
-96    48     
-48    0      
-16    32     
16     80     
-96    -176   
-80    -48    
0      -144   
-64    80     
-80    48     
96     192    
-176   -32    
80     144    
-112   -32    
-32    -240   
-48    16     
192    16     
48     0      
-64    32     
16     64     
16     160    
144    256    
-224   -32    
128    112    
80     544    
112    304    
-208   -16    
-128   48     
192    96     
-80    128    
-80    -96    
144    192    
-176   0      
208    64     
-144   96     
128    160    
-80    -16    
-48    -32    
112    144    
-80    -32    
0      176    
-32    80     
-96    80     
128    176    
0      64     
48     -64    
16     304    
-160   0      
80     0      
-64    -80    
208    -48    
16     208    
-208   48     
64     96     
0      -80    
32     80     
-48    160    
128    128    
-128   32     
128    64     
0      160    
-32    96     
0      128    
336    48     
-112   128    
-48    -48    
32     128    
16     80     
192    112    
-96    112    
64     80     
32     192    
288    -16    
-48    16     
128    0      
192    128    
64     176    
-128   160    
-48    -32    
160    128    
-112   144    
-96    0      
16     432    
0      48     
0      -208   
0      -912   
1408   1232   
-1040  -1568  
208    -208   
624    720    
688    -336   
-1040  80     
320    -208   
64     992    
128    -144   
-368   240    
48     -144   
-16    224    
-304   416    
224    -112   
-192   -416   
176    0      
112    352    
480    -144   
176    336    
-16    -48    
80     352    
48     -192   
32     400    
-80    -144   
-64    -336   
-80    -160   
0      208    
160    592    
400    368    
-592   96     
416    -64    
48     0      
-32    -48    
-96    240    
80     240    
112    -16    
32     32     
-64    -32    
48     -32    
-48    -864   
16     224    
-64    -32    
96     -160   
-48    112    
144    -160   
160    96     
-32    -656   
224    304    
-160   64     
-80    80     
96     96     
16     32     
-32    -192   
-16    32     
-16    0      
176    160    
-64    -48    
112    -32    
-80    96     
144    -208   
-32    80     
80     -384   
-80    -16    
208    -320   
-176   16     
32     32     
112    160    
-16    144    
320    480    
-160   432    
112    48     
176    144    
-128   -272   
176    32     
16     -96    
-16    96     
96     -32    
32     96     
-16    -1056  
128    224    
-16    -1456  
64     80     
16     -144   
96     16     
256    -16    
80     112    
144    352    
-208   -64    
-128   176    
192    -48    
-32    64     
80     -416   
48     160    
32     -608   
48     -64    
208    -368   
-16    144    
-48    16     
-16    -48    
-144   -272   
96     112    
176    288    
-64    -272   
0      32     
176    -144   
64     96     
-16    -288   
96     352    
112    -64    
128    160    
0      -64    
16     160    
0      -128   
144    32     
-48    -224   
32     192    
-16    80     
224    16     
-112   48     
384    -176   
-416   16     
160    -192   
-48    144    
-96    -64    
224    112    
-16    -704   
96     -48    
-160   160    
144    32     
-16    64     
96     -176   
-128   -64    
48     -304   
-192   368    
320    96     
112    -16    
96     -80    
-128   208    
0      -240   
208    -48    
-80    -112   
-112   -1296  
32     -112   
48     -272   
64     0      
160    -32    
-64    -352   
192    -48    
-144   32     
144    -64    
0      -432   
32     -208   
16     128    
256    -80    
-48    -624   
128    16     
16     -240   
16     240    
-448   48     
176    -112   
-160   -48    
112    144    
80     -80    
-16    -272   
160    96     
-144   -288   
144    160    
112    -48    
176    80     
32     128    
-144   96     
192    -48    
-224   16     
32     48     
32     -144   
-80    64     
16     -64    
16     48     
112    -496   
160    -192   
112    -560   
-144   -16    
-80    -1456  
208    128    
80     -16    
-80    112    
32     -96    
-32    0      
-48    -32    
48     -48    
96     0      
-64    -80    
-1328  -128   
160    -112   
96     -96    
96     144    
192    64     
-80    80     
928    800    
-752   -608   
-64    432    
-464   32     
-48    16     
64     336    
-416   -912   
368    1088   
-144   -416   
-288   176    
64     -352   
0      176    
-16    320    
32     -272   
-144   -48    
256    -64    
-176   -112   
336    240    
-224   64     
240    -256   
-432   112    
336    -336   
-192   0      
128    -192   
-128   80     
96     -32    
-128   128    
-48    -160   
48     -112   
-32    -384   
16     112    
192    -1392  
-112   -32    
-48    80     
64     16     
128    16     
80     112    
-176   48     
160    -16    
-160   96     
32     -160   
-544   0      
0      -304   
144    144    
-48    -80    
80     80     
48     -416   
16     80     
-144   0      
-112   -16    
-48    144    
96     64     
16     112    
-16    -160   
64     32     
192    -48    
-128   64     
144    -64    
48     80     
64     64     
16     -80    
96     -464   
32     -128   
-96    32     
32     48     
-112   96     
32     -64    
-64    0      
0      -112   
-80    -112   
32     32     
0      144    
16     -144   
-16    32     
-1040  -336   
176    112    
-208   208    
-416   192    
256    112    
-384   96     
-96    -80    
-96    -48    
-256   -128   
224    144    
-192   -16    
0      16     
-64    16     
-432   -64    
128    448    
-368   -16    
80     176    
-112   176    
-256   32     
-64    -16    
-272   -16    
272    528    
-1056  272    
-144   -80    
64     -80    
64     64     
128    -144   
-16    80     
-240   -192   
16     96     
80     -32    
-48    -32    
192    176    
-176   208    
-96    -64    
-272   32     
-16    160    
48     64     
-48    64     
-96    -48    
-32    32     
-32    -160   
80     208    
-80    -80    
80     64     
-96    0      
-64    -96    
48     64     
32     192    
-16    -112   
-32    48     
-224   16     
128    -16    
16     -32    
-320   128    
32     16     
-16    -64    
0      112    
64     112    
80     -64    
-112   64     
-16    -368   
-64    256    
-112   128    
80     48     
-144   -80    
144    48     
-176   80     
48     112    
-368   48     
-80    -96    
-112   256    
-240   96     
16     -384   
80     0      
160    240    
-32    32     
-80    112    
144    352    
-144   96     
-16    16     
16     -64    
32     -128   
80     112    
-384   -48    
160    -64    
-1216  -208   
224    64     
-96    -32    
-176   -16    
144    80     
-304   128    
224    -224   
-32    384    
-144   64     
64     -64    
-80    224    
16     -80    
96     96     
-240   32     
288    96     
-368   -48    
176    64     
-240   16     
128    32     
-48    64     
16     224    
-176   0      
-96    0      
432    -240   
-16    272    
-144   -208   
176    16     
112    224    
-272   -112   
-144   16     
32     208    
48     -32    
-16    80     
128    352    
32     144    
-64    0      
-208   -16    
2960   -1552  
-464   -368   
512    640    
-512   592    
304    368    
224    -112   
-528   -336   
464    16     
-272   192    
-16    -96    
256    320    
-224   32     
288    -112   
-240   176    
400    0      
-208   288    
336    176    
-400   -80    
432    160    
-224   208    
80     80     
144    80     
-64    -64    
-16    0      
-64    -160   
80     96     
128    48     
0      80     
0      -16    
48     32     
-48    16     
80     160    
-48    64     
160    224    
-80    144    
16     96     
-64    -16    
-16    128    
-32    -96    
144    368    
-192   96     
64     16     
-80    96     
144    112    
32     128    
-192   -96    
-16    144    
80     48     
-80    224    
-144   -160   
192    80     
-304   0      
176    96     
-64    224    
112    -64    
16     16     
128    32     
80     240    
-64    64     
112    144    
-16    112    
96     160    
-48    0      
80     32     
32     48     
0      224    
-144   32     
112    176    
0      48     
112    112    
-96    112    
32     32     
112    -64    
64     112    
-64    128    
0      -208   
64     240    
-80    320    
16     128    
64     32     
32     96     
0      32     
32     192    
-144   48     
32     -240   
256    80     
-160   128    
128    -16    
64     112    
-64    80     
160    176    
0      288    
-176   -32    
320    128    
-112   48     
256    240    
-272   -32    
144    -704   
16     32     
80     16     
80     128    
48     160    
0      160    
0      64     
16     -128   
48     32     
-32    112    
32     64     
0      0      
0      -80    
208    288    
112    192    
16     -336   
-32    160    
144    -640   
192    144    
-368   32     
480    176    
-176   80     
32     0      
-80    16     
-48    96     
160    -272   
112    96     
-192   -144   
96     128    
16     224    
288    16     
-64    192    
160    -640   
-48    192    
-112   -64    
-32    0      
-240   32     
224    -64    
96     -176   
-64    160    
128    -80    
-112   160    
-128   48     
128    -64    
128    160    
128    -16    
-80    128    
160    -1520  
-32    304    
-32    0      
32     144    
-16    128    
64     144    
48     112    
16     160    
-32    80     
-32    160    
-16    64     
32     0      
-64    32     
272    -144   
-112   160    
-16    -128   
0      0      
128    64     
160    144    
-112   -240   
80     80     
-112   240    
-80    160    
320    48     
-112   -16    
0      32     
96     -80    
0      -48    
288    -48    
-128   32     
128    48     
-48    64     
80     -656   
176    144    
240    -1600  
64     288    
-64    128    
-32    192    
-32    224    
240    -128   
224    32     
-32    -304   
-16    128    
-96    -32    
48     48     
32     -288   
112    96     
0      -480   
64     112    
144    352    
-64    112    
96     16     
-16    -16    
112    3168   
-1424  -528   
-192   512    
672    800    
1248   -688   
-656   -272   
-256   -288   
80     -608   
608    0      
-208   192    
464    224    
-272   -336   
96     224    
80     32     
80     16     
-128   -16    
192    64     
0      112    
-16    -96    
160    144    
-16    -144   
144    80     
-32    16     
112    64     
-16    -96    
112    16     
0      16     
208    -1632  
-96    128    
-48    -672   
16     -288   
-16    -160   
144    -400   
64     80     
144    -1520  
128    -128   
-144   208    
128    0      
0      32     
64     -112   
64     -1312  
48     112    
112    -128   
80     0      
-80    -288   
32     -192   
-624   0      
16     -448   
80     32     
-80    -320   
128    32     
0      -544   
32     32     
96     160    
16     -176   
112    -112   
16     208    
-16    -48    
128    80     
16     272    
-256   -384   
-336   -208   
128    -336   
-64    -208   
208    -80    
-32    -80    
80     -1536  
48     -224   
112    -464   
-80    -64    
16     -48    
48     16     
128    -16    
32     48     
-32    16     
32     0      
-48    352    
64     -48    
544    224    
48     80     
-208   64     
304    -352   
-80    -160   
32     -608   
32     48     
112    -16    
64     48     
48     -192   
64     0      
-32    112    
16     16     
-48    -80    
64     -176   
-784   80     
-80    -112   
176    32     
-128   -64    
144    80     
80     -240   
-32    48     
48     -1648  
48     160    
80     0      
96     16     
-96    16     
128    -112   
-304   -256   
288    -96    
-912   48     
144    -128   
-96    64     
16     -192   
144    16     
-32    -768   
0      48     
48     -3248  
64     48     
16     224    
144    -48    
-144   -96    
32     80     
-64    32     
80     -16    
-224   -64    
16     64     
-432   -320   
80     -352   
-48    80     
48     -400   
208    48     
-64    -112   
208    160    
-96    32     
16     -16    
-208   -16    
16     -128   
112    576    
-400   -208   
352    -128   
-176   -16    
-16    32     
-16    -176   
-32    176    
128    -224   
48     160    
112    -64    
-48    -256   
-112   -96    
-16    0      
-256   -48    
-96    -48    
-32    -64    
176    176    
-224   32     
-192   -144   
80     -96    
-256   -128   
384    256    
-320   0      
48     -80    
64     -400   
224    96     
112    32     
-160   160    
0      64     
624    64     
-576   128    
192    -160   
-16    -64    
112    32     
32     64     
-1264  -16    
96     352    
-800   -480   
384    192    
-288   288    
-160   -176   
272    -208   
-352   160    
-16    224    
-752   -80    
-288   0      
352    -80    
32     -272   
240    0      
176    80     
64     -304   
32     336    
0      -304   
16     208    
64     32     
-32    160    
-96    16     
-368   128    
-144   -160   
-640   -64    
-32    48     
-800   -1792  
1280   1680   
-272   -176   
272    -592   
-288   -1168  
-160   64     
352    384    
-256   624    
-240   -272   
-224   48     
-80    -272   
-224   224    
208    -176   
-176   -192   
-32    144    
32     160    
-96    112    
-256   32     
0      16     
160    128    
64     192    
-128   64     
-80    0      
0      144    
-272   -112   
160    80     
-128   128    
112    0      
-96    -96    
-144   112    
-544   -96    
-80    96     
48     -32    
48     96     
32     -96    
48     0      
64     -32    
-176   0      
48     176    
-32    -112   
-112   80     
-16    96     
16     128    
-32    -128   
-80    16     
-288   -80    
160    176    
-720   -64    
192    368    
-176   -320   
224    80     
-176   80     
176    64     
-96    48     
144    64     
112    352    
-304   80     
96     -48    
32     208    
16     -112   
80     32     
0      192    
-176   -80    
208    160    
-240   32     
48     -64    
32     -176   
16     32     
-32    192    
-128   48     
-16    32     
48     -16    
-144   176    
-32    32     
176    64     
-160   -80    
128    112    
-592   -16    
144    144    
-592   -96    
-96    112    
144    -80    
-64    0      
16     144    
-128   160    
-16    0      
-80    -176   
192    144    
-176   128    
112    16     
-320   -192   
0      112    
-336   -128   
48     32     
240    304    
-208   112    
176    0      
-64    32     
-16    16     
208    192    
-272   16     
160    48     
-48    176    
32     32     
-144   0      
144    -16    
-64    160    
-64    -176   
64     80     
0      208    
16     0      
16     80     
-112   -32    
160    256    
64     48     
-176   32     
-48    80     
192    160    
0      16     
16     272    
32     160    
192    176    
-336   64     
0      112    
-80    -64    
80     -16    
-96    32     
384    112    
-16    112    
48     64     
-208   32     
-32    112    
-96    0      
16     48     
-112   160    
-32    64     
144    176    
-128   48     
96     112    
-16    128    
16     64     
-48    112    
-32    112    
16     144    
48     144    
-64    0      
192    208    
-48    -128   
-64    32     
-48    112    
0      -64    
128    112    
-48    176    
32     352    
48     -96    
96     160    
-144   -32    
288    48     
-48    256    
32     -16    
-16    64     
128    112    
-32    128    
16     -32    
176    208    
-240   0      
-48    -272   
-32    -240   
80     208    
0      96     
-32    240    
-48    144    
-144   -64    
64     48     
-48    96     
-16    48     
-16    80     
64     128    
-80    -48    
16     208    
-16    -112   
-16    -352   
80     128    
16     64     
96     112    
96     -64    
-48    96     
112    192    
64     128    
64     80     
0      16     
-80    48     
64     -32    
128    144    
96     64     
-272   272    
48     -288   
-128   -48    
-48    -864   
224    -624   
544    752    
-432   480    
64     544    
-896   688    
720    304    
-304   128    
128    272    
16     -48    
-32    -16    
144    288    
128    176    
32     -336   
-64    -48    
176    -2208  
160    -112   
-128   -272   
0      -80    
64     48     
-48    112    
-32    240    
160    96     
80     -160   
-32    96     
-16    144    
144    224    
32     176    
48     -160   
-208   -176   
304    -256   
32     160    
48     -16    
-96    64     
48     -128   
16     256    
128    208    
64     336    
-48    64     
16     80     
0      96     
32     -112   
48     224    
64     16     
16     176    
-80    -256   
96     96     
48     -1088  
160    272    
-48    0      
192    64     
-32    -112   
48     16     
-112   32     
176    112    
-80    -112   
0      -304   
-32    -48    
208    16     
144    176    
-96    32     
112    224    
16     -32    
144    272    
-192   -1232  
112    320    
-112   -32    
128    64     
-64    16     
160    160    
48     112    
0      -96    
64     80     
160    16     
-112   128    
144    -128   
48     368    
368    32     
208    336    
-128   48     
112    224    
-144   0      
64     80     
-16    96     
0      -144   
160    288    
-176   208    
-32    -16    
128    -144   
32     0      
192    64     
-32    288    
-48    -112   
80     144    
-48    112    
80     64     
160    160    
-16    112    
32     -80    
48     -176   
64     48     
64     -96    
-16    112    
96     -96    
48     96     
32     -144   
160    368    
-112   -256   
208    144    
-160   -96    
176    96     
-64    64     
112    -352   
-16    -1120  
64     -64    
96     -416   
-48    -48    
112    -112   
48     0      
48     64     
0      -192   
0      32     
144    144    
144    -848   
64     208    
-96    -112   
0      -192   
176    -576   
-48    -16    
-80    64     
80     -384   
-48    -288   
64     -784   
176    208    
-144   -640   
208    -448   
-208   160    
16     288    
48     -144   
-64    0      
144    -32    
192    80     
-128   16     
32     16     
-368   0      
80     -480   
64     -384   
144    -928   
128    -32    
-32    -432   
192    144    
-48    -256   
-80    -416   
-128   -368   
160    192    
-48    144    
-16    -32    
-192   0      
160    -32    
-512   -32    
-96    -176   
80     16     
96     -48    
64     -64    
32     -160   
160    176    
-176   -720   
-224   0      
128    192    
160    64     
-208   -128   
112    -32    
48     -208   
96     -256   
-128   176    
16     -144   
-864   64     
-48    -240   
80     352    
48     -448   
-96    480    
80     -1376  
-16    96     
-112   -192   
144    176    
208    -224   
256    256    
-16    -160   
80     -16    
-160   96     
32     -176   
-768   -16    
64     -192   
-176   -64    
128    -64    
-112   -224   
48     -336   
1488   -2208  
544    -256   
96     -112   
-336   -192   
96     224    
576    144    
-592   32     
80     144    
144    192    
-288   0      
336    -64    
-880   128    
112    112    
144    16     
112    -480   
-112   144    
80     -352   
80     96     
-32    0      
64     -32    
16     48     
160    144    
-480   -16    
80     -112   
-272   -32    
64     16     
-32    96     
0      32     
96     -16    
-128   -464   
128    144    
112    -800   
96     -256   
240    64     
32     -80    
-784   -272   
16     -416   
-256   -16    
176    48     
80     80     
-176   -80    
-304   32     
128    -352   
160    80     
-96    -96    
176    128    
-144   -160   
160    -160   
-128   -32    
-16    32     
96     32     
-144   48     
32     -16    
16     80     
-48    0      
64     -16    
-944   16     
0      -64    
160    160    
-560   -96    
32     176    
-96    16     
-368   -48    
-112   176    
-224   -80    
96     -16    
144    112    
-96    208    
-16    -256   
112    80     
-144   -64    
160    16     
-512   -16    
32     96     
-64    -128   
48     16     
-112   96     
-480   16     
48     16     
-48    224    
-272   32     
-1056  -64    
32     320    
-336   -64    
176    -16    
32     -32    
-48    16     
192    -208   
-112   48     
-128   -160   
-48    0      
48     160    
0      96     
-80    288    
-128   -112   
-64    -96    
-288   -32    
-32    96     
-400   224    
-144   64     
144    96     
32     64     
-176   -320   
48     -32    
80     16     
-64    80     
112    144    
-384   -80    
304    176    
-304   -16    
176    160    
-208   16     
-112   -16    
-208   -32    
96     0      
16     48     
16     112    
-112   128    
-16    112    
256    -64    
-176   80     
48     112    
144    160    
-176   -16    
-208   -128   
-176   -64    
16     -144   
-64    -80    
-272   -64    
-208   -16    
-1632  -112   
256    80     
-176   -48    
336    112    
-48    32     
0      16     
-160   128    
288    0      
-32    208    
-96    176    
-32    32     
48     80     
-176   -240   
-112   128    
16     96     
-144   -224   
-48    48     
64     96     
-32    0      
16     128    
-16    64     
48     112    
-96    96     
-32    16     
32     128    
-80    -192   
-160   -96    
160    464    
-112   -192   
32     16     
-16    80     
80     -96    
-304   -96    
0      96     
48     96     
-144   -96    
-32    0      
0      192    
16     112    
256    112    
-224   -160   
-240   -128   
112    48     
32     -304   
240    192    
-224   -160   
-144   16     
-80    128    
96     -128   
80     64     
144    272    
-64    80     
-112   160    
64     -272   
16     64     
-32    32     
-16    48     
96     80     
-48    16     
16     80     
-192   -48    
64     112    
32     16     
0      272    
-144   48     
-32    48     
0      16     
1296   2048   
-1632  -2512  
256    -96    
512    352    
1248   112    
-848   -976   
-64    -384   
720    1008   
-384   -544   
-80    192    
64     -48    
64     96     
-352   -176   
96     80     
-64    48     
272    128    
-176   128    
272    208    
-352   -512   
-48    -288   
128    176    
-160   -112   
144    288    
-272   192    
160    160    
-192   144    
32     176    
16     16     
144    96     
16     128    
160    0      
64     64     
-208   128    
48     0      
304    80     
-32    160    
48     128    
-64    304    
144    336    
-128   -32    
16     192    
-48    48     
0      80     
16     64     
-16    176    
-80    32     
128    240    
-128   208    
0      -288   
-112   240    
128    -176   
-64    224    
32     -80    
160    32     
16     112    
144    288    
-32    544    
288    464    
-256   -176   
208    320    
-208   80     
128    -64    
0      32     
48     -96    
-208   48     
208    128    
80     80     
16     -704   
48     176    
112    48     
16     192    
48     48     
64     144    
32     64     
-16    160    
64     16     
400    848    
-96    432    
48     384    
-112   -48    
240    16     
-48    -64    
0      -48    
-16    144    
-48    64     
96     -48    
112    96     
128    192    
-128   16     
192    112    
-32    176    
96     112    
-96    -32    
192    144    
0      144    
112    144    
-144   64     
144    64     
96     336    
-128   -64    
16     -16    
112    144    
112    128    
-32    64     
-96    32     
144    128    
128    176    
-160   -256   
256    240    
-288   -144   
208    32     
-48    224    
80     -352   
176    192    
-176   -848   
64     -64    
128    128    
48     192    
160    -48    
-96    112    
-32    -48    
176    240    
-16    0      
32     96     
-48    272    
-160   -256   
256    -32    
-128   32     
224    -16    
-64    -208   
32     64     
176    -304   
-48    160    
64     -48    
-32    144    
48     304    
176    80     
-112   -464   
16     -32    
-32    176    
128    -240   
80     512    
-96    0      
192    32     
-160   -992   
160    128    
-16    -752   
160    0      
-192   16     
240    80     
-16    112    
0      96     
32     288    
-80    0      
208    -208   
128    -112   
64     288    
-96    -176   
192    368    
112    -368   
48     -64    
-16    -208   
64     240    
-112   -512   
96     -128   
464    512    
-368   -176   
0      160    
96     336    
48     80     
48     32     
112    400    
-64    -512   
48     32     
144    -160   
128    0      
32     16     
64     96     
48     -16    
64     16     
80     48     
16     32     
64     96     
112    -112   
-16    160    
-64    -784   
48     96     
160    -224   
80     224    
64     -48    
48     128    
112    -16    
-96    160    
96     -192   
0      112    
-96    -128   
80     240    
128    2256   
-1904  -112   
240    48     
240    192    
-112   144    
-112   -400   
-448   -48    
624    128    
-176   -96    
64     96     
32     -32    
-48    80     
16     -416   
176    64     
0      -1248  
16     -288   
48     -48    
160    -640   
-80    32     
224    -1152  
-96    -64    
0      160    
128    -96    
0      128    
80     -16    
16     -160   
-32    32     
112    -368   
16     112    
176    80     
64     -32    
-80    -64    
-32    -32    
160    -16    
-144   -160   
400    -128   
-64    -224   
192    -16    
-160   32     
80     -32    
32     -192   
288    48     
-16    -240   
32     32     
0      16     
-64    96     
-528   -112   
-112   -384   
432    80     
-160   -32    
304    -128   
-96    -48    
96     0      
128    -16    
-96    -64    
208    -16    
-160   -16    
240    -320   
16     208    
-128   -32    
368    -64    
-112   80     
48     -96    
-32    -160   
224    -144   
-48    224    
64     -48    
128    -144   
80     -384   
-80    80     
-48    16     
96     96     
96     16     
96     -48    
-144   64     
0      -208   
176    64     
-192   -224   
-208   -16    
128    80     
-128   -96    
96     -368   
-592   -400   
64     -848   
112    160    
-112   -368   
96     -48    
-272   64     
-256   -80    
112    -80    
-192   16     
64     16     
-96    144    
-416   -272   
240    272    
272    -160   
80     -80    
48     80     
48     -288   
144    112    
0      -80    
32     128    
64     48     
-112   -256   
16     -176   
176    144    
-32    -48    
80     -160   
-624   -208   
144    -192   
-272   96     
96     80     
96     192    
-96    -160   
64     48     
80     -464   
-128   80     
32     64     
144    48     
-224   -16    
144    0      
-592   -48    
-16    -32    
128    128    
-112   -144   
64     -112   
-176   -192   
240    192    
-112   -272   
-112   0      
208    -384   
16     -16    
-112   0      
-80    -32    
176    96     
96     -112   
-128   0      
-96    160    
48     -256   
-32    16     
-32    -112   
-16    -432   
32     64     
192    -384   
-48    -160   
-112   -224   
-336   -352   
-32    112    
-80    352    
0      -32    
0      16     
32     32     
-16    48     
48     96     
-64    -304   
16     160    
-672   176    
16     -512   
16     16     
-16    176    
-96    -64    
-304   -64    
-32    -16    
-528   -16    
32     112    
-528   0      
128    96     
112    176    
-128   32     
-112   -256   
176    48     
-128   -80    
-80    160    
-320   -176   
32     144    
-48    224    
-240   80     
-144   16     
-128   48     
48     128    
-128   48     
-160   16     
-528   -48    
-48    48     
-304   -32    
144    -32    
128    32     
80     192    
-272   -144   
-144   -32    
112    112    
-144   96     
32     112    
-144   0      
176    96     
-224   48     
-240   96     
-1280  96     
-384   1904   
-736   -880   
-384   -896   
176    -368   
128    -48    
-352   -784   
704    -528   
-448   -320   
960    -112   
-544   352    
112    -112   
64     176    
-176   16     
464    256    
-176   80     
-64    272    
-1024  -96    
272    400    
-400   -352   
64     -240   
48     -32    
96     -48    
0      160    
-224   -176   
112    0      
-80    224    
-176   48     
128    -64    
-32    240    
32     320    
-64    64     
-432   -144   
96     144    
-64    -112   
80     272    
0      256    
-336   16     
112    -224   
176    160    
-288   -32    
80     192    
-176   176    
160    -192   
-96    80     
-144   -240   
112    128    
-576   304    
-224   0      
96     112    
-144   0      
112    -64    
-144   32     
48     -160   
32     288    
16     -96    
-16    -192   
-80    272    
96     128    
32     -288   
-32    -64    
112    32     
-304   -240   
80     64     
-640   -80    
-80    0      
-16    32     
-64    48     
-64    112    
16     112    
-48    96     
32     64     
0      112    
-16    -144   
-80    128    
-16    96     
-16    256    
96     64     
-640   -96    
-80    -448   
336    160    
-96    48     
16     160    
80     288    
-288   0      
240    32     
32     192    
0      32     
-384   -112   
272    208    
-176   128    
160    32     
-208   -48    
80     32     
112    128    
-32    144    
-16    240    
0      -64    
112    80     
-128   96     
96     176    
-128   144    
64     112    
-192   16     
96     112    
-112   -96    
160    352    
-288   -64    
160    -48    
48     32     
-32    -48    
80     80     
112    160    
-64    80     
-64    80     
32     48     
96     80     
96     80     
-128   -16    
96     -96    
-160   -16    
224    144    
32     -32    
0      -32    
-80    -48    
192    96     
-208   80     
224    -48    
-160   96     
128    112    
112    160    
-80    48     
-48    320    
64     16     
-128   192    
-80    -16    
288    -112   
-512   -176   
352    16     
16     96     
-80    96     
96     208    
48     80     
80     64     
-160   -32    
192    208    
-64    192    
0      128    
-80    0      
96     0      
-96    -48    
64     -304   
-48    32     
160    64     
96     128    
-32    32     
112    160    
-32    144    
-48    96     
160    0      
48     176    
128    112    
-112   208    
-96    112    
128    288    
-80    -368   
176    -1184  
-80    -128   
-80    144    
-144   160    
0      64     
96     240    
-208   -80    
288    352    
176    16     
-16    208    
80     16     
0      128    
80     -128   
-32    144    
32     144    
80     -336   
-32    304    
16     -80    
144    224    
-48    -16    
-16    64     
96     0      
0      144    
64     0      
64     160    
-96    64     
64     208    
64     -80    
-144   80     
144    48     
112    -64    
32     96     
-240   -1568  
-112   -320   
64     624    
-112   464    
0      -272   
80     64     
-96    -160   
240    752    
-176   -576   
-32    176    
320    -240   
-64    576    
112    -48    
-16    -176   
96     32     
32     80     
-32    144    
112    112    
-96    64     
112    32     
-16    160    
176    -80    
-32    320    
144    -192   
-96    160    
96     -48    
0      16     
80     32     
-144   -256   
128    -16    
-48    80     
224    -16    
-32    -48    
-48    32     
32     -368   
-208   -176   
144    -64    
32     144    
176    -32    
16     208    
96     96     
-80    -112   
80     0      
96     -176   
64     112    
160    -176   
-32    64     
112    -1008  
-288   64     
224    -48    
64     192    
0      112    
160    224    
-208   32     
176    0      
32     160    
32     16     
224    160    
-80    48     
32     16     
96     -560   
-16    160    
48     -96    
80     160    
-80    128    
80     144    
16     -128   
112    176    
-208   32     
144    -624   
16     0      
192    -48    
-64    96     
96     -320   
80     160    
-16    -448   
-16    112    
-80    -128   
192    -16    
-80    0      
144    128    
-64    64     
32     240    
160    -80    
192    -80    
-80    -128   
224    -416   
-16    320    
-160   -240   
288    224    
-64    -64    
112    96     
112    -80    
-64    -288   
208    -96    
208    160    
0      96     
-16    -688   
304    16     
-96    -176   
-80    -96    
64     -192   
32     16     
240    80     
16     144    
16     64     
-16    176    
-48    -128   
96     96     
32     48     
176    32     
96     176    
32     -96    
-16    -800   
64     -48    
80     -176   
80     -352   
0      -480   
176    64     
-192   -976   
64     -64    
48     16     
-16    32     
80     -160   
-16    -80    
16     -256   
48     80     
-528   -848   
256    -112   
-1360  32     
96     16     
128    64     
-32    -448   
112    -144   
48     -272   
32     -112   
112    160    
112    560    
-48    -144   
96     0      
80     64     
144    352    
-320   16     
192    -160   
-496   -320   
272    -64    
160    144    
16     -208   
64     -16    
96     -256   
-16    96     
128    -1488  
0      96     
-16    -240   
448    432    
-256   160    
240    -448   
-208   -80    
208    -128   
-208   -16    
-240   -160   
320    -80    
-32    -160   
240    0      
-144   16     
144    -112   
32     -720   
-176   -16    
176    -288   
0      192    
-64    -80    
160    144    
-320   240    
256    -336   
-208   64     
-96    -80    
-224   64     
-128   96     
48     0      
32     -96    
16     48     
0      -288   
48     160    
112    64     
32     16     
0      48     
176    16     
-32    -80    
32     -80    
-144   16     
16     16     
-112   176    
320    -80    
-1184  -48    
48     -288   
-32    32     
96     -80    
2192   -800   
288    -672   
432    848    
-576   224    
272    528    
432    -864   
-480   -896   
1040   416    
-992   800    
288    -336   
-432   -240   
-688   -368   
288    -64    
-256   48     
32     0      
208    -288   
64     -80    
32     -672   
32     -48    
-320   32     
144    352    
-32    384    
-176   -224   
160    -80    
-112   48     
96     64     
-1008  -224   
-80    128    
96     -112   
80     -160   
80     -48    
240    -480   
-160   -16    
160    176    
48     160    
0      -288   
80     0      
16     -32    
288    80     
-368   -16    
224    160    
-64    16     
32     -336   
-128   192    
-176   -224   
112    128    
-160   -256   
-240   352    
112    192    
-192   160    
-208   -112   
112    -64    
-160   224    
96     -32    
-144   -80    
0      32     
-112   352    
-768   -448   
-80    32     
-400   -496   
-160   -16    
64     160    
112    224    
80     160    
-176   -80    
-256   -48    
-400   64     
48     496    
-16    -96    
-112   -64    
144    -32    
0      272    
-496   -208   
144    48     
-160   -48    
16     -16    
16     240    
-80    -32    
144    144    
0      320    
0      128    
-32    -96    
-128   304    
-560   -80    
32     -48    
-720   -224   
112    48     
-32    -80    
304    752    
-416   -416   
112    272    
-176   -192   
-272   -48    
144    64     
-64    -240   
16     -96    
-352   -144   
-112   16     
-160   -80    
-64    144    
128    0      
32     176    
-112   -160   
-16    208    
80     32     
80     -256   
-144   -368   
336    496    
-176   -64    
128    128    
-240   0      
-176   -128   
48     256    
-112   16     
-48    -112   
-80    32     
-16    176    
144    -96    
-144   16     
256    240    
112    224    
-16    -144   
-432   -288   
144    16     
0      112    
-96    128    
112    144    
-192   96     
64     96     
32     48     
-1104  -144   
48     256    
-96    -160   
320    192    
-144   -96    
-80    80     
-176   -112   
-16    64     
0      -48    
80     80     
0      96     
96     64     
-112   128    
-192   -112   
-64    160    
32     -240   
-32    208    
32     -48    
32     112    
-32    16     
-64    0      
32     64     
48     48     
0      -16    
32     208    
16     32     
-64    -112   
-16    -144   
32     64     
48     288    
-64    96     
-128   48     
112    176    
-112   64     
208    224    
-176   -16    
32     0      
128    64     
-96    160    
-96    0      
-48    32     
32     32     
64     256    
-320   96     
-16    -80    
80     -64    
128    240    
0      -96    
-112   128    
48     64     
-16    128    
32     0      
-16    160    
-96    0      
-176   -144   
128    -96    
96     -16    
32     240    
-160   160    
-32    144    
-240   -96    
-48    -96    
192    176    
-192   144    
256    80     
-96    16     
0      96     
1872   -1136  
-880   -1344  
928    352    
672    192    
448    976    
144    80     
-368   -880   
960    496    
32     -64    
-160   464    
-32    -160   
16     240    
-64    16     
128    64     
-144   80     
240    -112   
-64    288    
112    -32    
-96    192    
-64    -96    
80     368    
-64    -112   
-32    336    
192    -96    
-64    144    
192    -16    
-240   288    
224    -16    
-144   80     
160    32     
16     80     
64     -16    
-32    96     
16     96     
-48    32     
-48    320    
-32    -32    
32     160    
64     64     
16     128    
96     80     
-48    80     
32     96     
32     32     
112    80     
-16    128    
80     32     
-160   112    
112    112    
0      48     
128    48     
-16    16     
16     -736   
-32    48     
-16    64     
112    64     
-16    -16    
176    192    
-96    176    
112    48     
-96    96     
128    80     
-112   112    
112    160    
-48    0      
32     64     
64     -48    
64     -1184  
-80    32     
144    160    
0      80     
64     128    
-16    112    
0      16     
0      160    
-48    128    
-80    272    
-64    -48    
272    32     
-144   -320   
288    240    
-160   288    
-96    -224   
288    64     
16     16     
-80    -48    
48     48     
48     128    
-96    96     
32     32     
-64    -64    
144    80     
-16    32     
112    0      
-96    0      
-32    80     
272    144    
-80    -192   
192    352    
-96    -240   
64     16     
-32    128    
80     80     
80     240    
32     176    
48     -32    
32     0      
32     -16    
-128   -208   
64     -144   
-32    -160   
112    16     
32     -384   
64     144    
-48    -944   
80     0      
-32    80     
224    160    
112    128    
-112   0      
64     -16    
128    208    
64     0      
-80    224    
112    128    
192    0      
-16    160    
16     -16    
112    96     
-80    -48    
64     -16    
16     -720   
160    -64    
0      -112   
16     32     
96     80     
-16    224    
80     112    
-16    96     
48     48     
144    32     
32     208    
48     -320   
32     144    
112    -544   
16     96     
-96    -336   
64     -32    
96     -272   
80     112    
-16    144    
0      64     
48     144    
0      -16    
96     160    
48     -416   
48     144    
-128   -400   
368    208    
-160   -112   
32     64     
-64    -144   
48     160    
144    64     
-112   32     
64     336    
-144   -16    
0      -224   
224    32     
-32    128    
112    -112   
-32    240    
336    -432   
-48    144    
-64    -496   
0      112    
96     176    
-144   96     
288    -480   
0      144    
112    16     
32     64     
48     144    
48     -48    
80     208    
-160   240    
48     -48    
16     -16    
256    64     
16     -16    
-176   48     
272    -96    
0      304    
256    160    
-96    -976   
-32    48     
64     -256   
-1520  -560   
1232   1296   
-288   -944   
496    -640   
-224   -288   
80     -64    
448    944    
-816   -688   
320    -192   
-160   -880   
480    -576   
-80    80     
0      128    
32     416    
176    240    
-192   -304   
-224   -272   
336    720    
-192   0      
192    336    
-224   -528   
336    -352   
48     112    
96     16     
64     -48    
-32    288    
-64    256    
112    -400   
-416   -128   
112    -144   
336    144    
-416   224    
192    -96    
80     80     
80     -32    
-32    -240   
144    -1808  
-144   -64    
240    208    
96     128    
-176   80     
96     -16    
96     -32    
96     -144   
-208   -80    
224    0      
-240   80     
208    208    
-112   112    
32     -144   
208    -176   
-64    -752   
112    32     
-32    -592   
80     -16    
128    -112   
64     128    
160    -192   
16     96     
-160   -240   
-80    128    
-336   32     
144    -432   
-1088  -16    
-160   96     
64     16     
160    64     
112    112    
-128   -352   
112    64     
64     -80    
0      96     
80     -16    
16     -80    
208    32     
208    240    
-336   16     
176    -160   
-144   48     
80     -256   
-384   -112   
96     -96    
64     320    
-80    -528   
176    48     
-16    -1984  
256    192    
-96    0      
48     -144   
-64    0      
-16    -16    
0      -16    
-32    0      
-192   -32    
112    -192   
-784   -96    
-32    -256   
0      16     
144    -192   
-80    112    
48     -624   
48     80     
-112   -80    
144    -64    
304    464    
-176   144    
32     -32    
-144   -192   
-16    -208   
240    -96    
-304   -64    
16     0      
96     224    
96     -96    
176    304    
-176   -576   
496    -80    
-592   128    
64     -32    
32     -80    
96     -16    
-176   32     
80     112    
-48    32     
400    16     
-176   64     
48     0      
224    368    
16     -16    
240    96     
-224   96     
-144   -144   
48     -80    
-256   128    
144    32     
128    96     
-272   -48    
192    -112   
-384   48     
208    -16    
80     16     
-912   -96    
-112   288    
-304   -320   
32     96     
-144   32     
-96    16     
208    128    
-480   48     
-80    32     
-656   -16    
-80    64     
16     0      
112    160    
-176   32     
16     32     
-160   48     
-96    16     
80     -16    
-416   48     
224    80     
-304   96     
-144   176    
-320   -128   
-112   48     
-432   -144   
32     176    
128    16     
-112   -16    
-256   -144   
208    32     
32     -352   
112    16     
128    192    
-208   80     
-160   -32    
96     96     
-208   192    
-128   -112   
32     16     
32     -128   
-64    208    
-1376  80     
-144   -144   
16     -176   
80     160    
-16    -32    
0      208    
-80    -208   
16     80     
80     64     
16     -80    
-32    96     
16     48     
16     32     
-208   176    
-128   16     
-1424  -1552  
800    928    
-1216  608    
224    -352   
-272   -224   
48     496    
-400   736    
496    16     
-336   544    
288    -528   
-384   512    
48     -528   
32     672    
0      -528   
160    496    
-176   -448   
176    368    
-528   -16    
192    112    
-112   -192   
-112   -48    
-48    160    
96     176    
-32    336    
96     -144   
-256   48     
-32    -320   
-112   208    
64     0      
-80    240    
-32    -80    
-16    112    
-416   -112   
-48    112    
48     -112   
0      64     
48     112    
64     256    
-176   0      
32     48     
-96    -32    
112    112    
0      112    
-32    64     
0      112    
-160   -80    
48     192    
-176   128    
128    64     
32     48     
0      48     
144    176    
-112   112    
-48    96     
16     176    
-32    -80    
96     -16    
32     224    
-48    128    
48     96     
-176   -112   
64     144    
-144   16     
64     -16    
96     -64    
-32    -64    
-48    32     
0      48     
0      288    
-16    -48    
144    176    
-96    96     
-16    96     
-64    0      
-48    112    
-176   48     
176    224    
-112   48     
-32    64     
-112   -448   
-16    144    
48     -16    
112    96     
-272   32     
192    64     
-48    0      
-176   0      
96     96     
112    208    
-32    96     
-64    128    
80     16     
-48    -80    
112    48     
-64    128    
-48    -192   
80     0      
96     336    
96     336    
-176   -48    
-48    -64    
0      32     
224    160    
0      96     
-64    96     
-96    32     
64     112    
16     96     
64     96     
0      80     
32     32     
48     176    
0      16     
80     128    
-176   -16    
160    96     
-96    32     
96     32     
-176   48     
144    144    
-240   -64    
0      32     
64     192    
144    160    
0      96     
-80    -16    
256    512    
-128   256    
48     48     
32     32     
32     160    
128    -96    
-64    224    
-48    16     
112    144    
-80    -320   
160    -480   
-96    -16    
304    208    
-352   160    
160    -64    
-32    96     
-16    96     
128    160    
-16    0      
96     208    
-112   -16    
96     -32    
-48    16     
112    224    
-64    -80    
32     -2192  
16     128    
32     -16    
144    128    
-96    112    
288    -64    
-64    224    
16     32     
32     160    
0      -48    
16     80     
48     80     
32     -128   
48     128    
-16    32     
80     -528   
192    176    
-80    128    
64     16     
-64    128    
48     144    
-64    0      
-32    192    
32     112    
96     112    
-144   48     
112    0      
128    -16    
-16    160    
96     48     
-32    -144   
64     160    
80     32     
-176   96     
64     160    
96     144    
16     80     
80     96     
16     96     
-96    80     
80     -144   
64     288    
144    80     
-16    16     
64     80     
64     -128   
-288   2096   
-1008  -2976  
496    144    
720    176    
-160   -1104  
624    416    
48     176    
16     -304   
-400   -208   
256    400    
-80    -192   
-384   -16    
272    304    
192    -112   
-272   -32    
64     -16    
-48    -640   
112    -336   
-112   -2208  
256    0      
32     416    
16     -64    
16     352    
-208   -16    
32     64     
0      192    
192    80     
32     -16    
-16    160    
304    0      
-96    224    
128    -160   
16     112    
-64    -992   
272    64     
-112   -80    
192    256    
-16    0      
-16    96     
-32    64     
192    112    
0      144    
32     -192   
80     -16    
80     -320   
80     192    
-16    -464   
-160   -16    
80     -720   
48     96     
192    -96    
-160   320    
96     -112   
240    144    
-256   64     
224    -192   
16     32     
128    -208   
32     176    
16     -32    
208    32     
64     -256   
-80    128    
96     -496   
96     128    
32     32     
0      160    
16     208    
-80    112    
128    -160   
96     -96    
-16    32     
144    16     
16     176    
64     -80    
-48    -80    
192    80     
-96    -16    
128    0      
-32    352    
-64    -112   
176    144    
112    0      
-144   384    
-48    -2560  
272    224    
-272   -1008  
144    -112   
160    -368   
-48    -80    
64     128    
-16    -192   
112    144    
32     32     
48     32     
192    240    
-176   48     
0      -128   
80     -272   
-16    -176   
240    16     
48     0      
-48    -176   
80     -496   
-16    -208   
144    208    
96     -80    
48     112    
-32    -192   
160    -144   
-32    112    
176    -64    
-128   -48    
144    64     
32     -336   
-416   16     
32     -288   
-48    80     
48     -944   
-176   -128   
16     -816   
-16    -160   
352    -528   
64     64     
224    192    
-272   144    
304    176    
-336   -160   
96     -48    
112    -48    
-784   -16    
-112   -112   
-160   -160   
128    -256   
272    -16    
96     -528   
-48    -272   
64     -608   
128    160    
-16    64     
-208   48     
224    -48    
48     -16    
-16    208    
-128   32     
-400   96     
0      96     
176    -32    
48     0      
-32    -128   
48     -448   
144    48     
176    -144   
80     240    
32     -16    
80     -16    
-32    -112   
-32    -96    
160    80     
64     32     
32     80     
0      -32    
-192   -176   
96     -80    
-352   -16    
32     80     
160    32     
192    -288   
208    128    
48     -1088  
-144   192    
64     -224   
112    448    
-208   -32    
-80    -112   
-272   -608   
352    96     
-240   -160   
-32    0      
-512   144    
112    -48    
-144   0      
96     -672   
112    32     
112    -1632  
16     112    
64     112    
-64    -80    
-32    -240   
64     112    
-144   -112   
208    -112   
-144   176    
64     208    
-176   -16    
-32    -240   
128    96     
-224   3232   
-1184  -880   
-464   -448   
576    720    
1392   544    
-800   -1040  
-784   -544   
640    -256   
48     -448   
-80    304    
48     -144   
48     -48    
-224   16     
256    -256   
-112   96     
0      -256   
-80    176    
176    -512   
80     32     
32     -96    
-48    -48    
48     400    
-224   112    
0      -48    
-80    48     
-32    -192   
-48    -208   
-368   192    
336    -32    
-96    0      
-144   -64    
64     96     
96     128    
-960   96     
-80    32     
-256   0      
48     16     
0      -16    
80     48     
48     16     
-48    -32    
32     112    
-208   80     
-256   -144   
48     48     
-592   -208   
144    96     
-128   128    
-320   0      
144    160    
-336   16     
0      48     
-640   -176   
80     176    
48     32     
16     144    
-16    272    
272    304    
112    112    
-16    112    
-128   -208   
-96    32     
96     80     
-128   -128   
-96    -32    
-192   -128   
-96    16     
96     -16    
-112   32     
-800   0      
0      64     
-96    -160   
32     112    
-64    -272   
-112   96     
0      -96    
32     176    
48     48     
-256   -48    
48     112    
-128   288    
0      64     
-16    160    
-16    64     
-80    16     
-160   -16    
32     -80    
16     176    
16     16     
0      112    
-16    16     
-32    -80    
-16    0      
-32    144    
-96    80     
16     16     
80     160    
-32    160    
-80    -16    
-112   -32    
-64    32     
-16    16     
80     176    
0      -16    
32     144    
-128   0      
96     112    
-112   -32    
-96    48     
0      96     
32     80     
-112   0      
-128   16     
-64    -80    
32     144    
64     240    
-1104  -176   
-32    -32    
-32    16     
128    16     
-112   -48    
-112   176    
208    80     
64     0      
-96    96     
-64    80     
256    736    
-192   -352   
208    144    
-352   80     
336    32     
-448   64     
16     -32    
128    144    
-224   -16    
208    208    
-80    -32    
48     112    
-16    112    
0      32     
16     -64    
32     224    
-144   -16    
96     48     
-208   0      
144    32     
16     256    
-224   336    
32     176    
-80    -96    
144    -32    
160    128    
-176   128    
-112   16     
-32    0      
336    272    
-112   128    
-80    128    
16     -192   
-96    -16    
224    112    
-208   0      
-112   -160   
32     192    
-48    0      
432    -48    
-256   208    
-48    384    
-208   16     
64     16     
432    -64    
160    64     
-176   -16    
-176   288    
-240   208    
16     48     
336    128    
-192   -48    
16     32     
-48    128    
-48    16     
112    176    
-48    112    
128    160    
-16    32     
-32    240    
-64    112    
-240   64     
80     16     
80     -16    
32     64     
-32    -144   
-224   80     
144    -32    
-208   144    
64     -32    
0      48     
-784   -1872  
1648   3120   
-1328  976    
464    -224   
-656   -1264  
960    304    
-128   224    
-208   -192   
288    240    
352    -32    
-96    48     
-160   -48    
64     144    
48     160    
16     144    
-112   96     
64     -288   
-16    96     
320    352    
96     288    
-256   -32    
64     288    
32     144    
-80    -160   
-32    -96    
64     96     
192    192    
-80    -32    
48     0      
48     16     
96     176    
-32    144    
32     96     
-64    64     
192    128    
-128   -48    
192    112    
-176   80     
80     -352   
48     80     
-48    32     
64     128    
16     80     
112    96     
-112   32     
64     0      
16     80     
-48    32     
160    -96    
-176   160    
-64    -48    
160    224    
-48    112    
160    -704   
-128   -32    
128    -64    
112    144    
-64    144    
192    16     
-48    64     
144    80     
16     112    
32     16     
48     208    
-112   128    
128    -64    
160    256    
-240   32     
224    -544   
-96    -32    
208    -32    
-80    144    
48     96     
128    96     
0      144    
-80    0      
112    80     
0      240    
-96    96     
176    -48    
16     176    
-416   -176   
144    32     
32     -592   
240    192    
-144   -1792  
112    128    
128    -48    
144    128    
-160   32     
144    128    
-80    48     
96     96     
-16    0      
112    80     
-32    144    
-80    -64    
128    64     
64     -80    
80     144    
-48    -560   
96     96     
80     144    
-16    144    
80     48     
96     256    
48     256    
48     176    
-96    -176   
-16    16     
-48    208    
192    -80    
-32    256    
48     -64    
48     64     
16     -336   
48     176    
208    -224   
-64    192    
96     -208   
-256   -64    
64     48     
96     112    
144    -80    
-48    48     
-32    176    
512    64     
-96    272    
-80    -304   
128    144    
-48    -64    
192    240    
16     -224   
336    80     
-336   -432   
48     32     
-96    -80    
160    -48    
16     -16    
-112   176    
96     176    
208    -112   
-32    -144   
-96    -208   
-80    96     
16     -96    
288    832    
-32    -480   
48     128    
-272   16     
208    48     
16     -32    
-16    112    
96     96     
128    -736   
48     144    
0      -112   
64     -448   
0      144    
256    448    
48     -112   
-144   64     
64     -48    
176    272    
-176   -192   
96     -384   
112    192    
336    512    
-160   -464   
112    -128   
-48    -96    
272    96     
-64    128    
-160   -144   
192    240    
96     -144   
48     272    
-96    -272   
48     128    
48     176    
16     -432   
0      0      
48     -1072  
192    -384   
-96    -64    
144    -368   
48     -48    
64     -448   
16     -48    
256    384    
-16    80     
-128   32     
16     -96    
256    -96    
48     -32    
-48    -208   
-48    0      
-1024  -2016  
512    -448   
-208   -288   
736    -752   
544    -1136  
-80    336    
-544   -176   
384    -2288  
-16    32     
432    -144   
96     16     
-208   -128   
16     176    
64     32     
-80    -16    
-160   16     
288    -32    
-624   -48    
224    -224   
16     -160   
-32    -496   
-112   32     
176    112    
-352   -80    
208    -880   
0      -16    
112    -336   
-48    -176   
-112   -80    
144    -144   
0      0      
-64    80     
-1056  -80    
-96    -128   
112    -32    
144    0      
-80    -32    
112    -560   
-160   -288   
272    -1344  
-16    16     
0      144    
80     128    
96     -144   
16     16     
-144   -64    
96     -48    
-64    16     
16     -144   
-192   -64    
32     -176   
96     64     
32     -512   
-144   -32    
192    -144   
160    256    
-224   -16    
112    320    
64     64     
-128   -512   
96     48     
-96    -16    
-176   -48    
-16    16     
-176   -96    
80     -64    
-1328  -112   
80     -32    
-48    80     
96     -224   
32     64     
48     -1760  
0      80     
0      -64    
96     112    
-48    0      
-240   -304   
48     -176   
48     48     
-384   -400   
192    96     
48     304    
144    192    
-64    0      
16     -304   
64     64     
176    -96    
128    416    
-48    128    
48     -176   
-352   -80    
144    -64    
32     0      
-64    16     
-64    80     
80     16     
-16    0      
192    192    
-80    -16    
160    -352   
-112   96     
192    -112   
80     -32    
-160   16     
32     -32    
0      16     
112    -48    
-64    -16    
64     96     
-128   -16    
192    32     
-288   -192   
64     -464   
-80    96     
48     -112   
96     64     
-128   96     
-560   96     
-32    288    
0      -176   
-176   -16    
32     80     
96     160    
-16    -192   
-48    -16    
-144   -112   
448    160    
-960   256    
352    176    
-400   -256   
32     -64    
32     -16    
-544   -32    
-48    64     
-528   -64    
192    576    
-48    176    
80     240    
272    400    
-48    128    
-80    -192   
-160   112    
80     -208   
48     160    
-144   -80    
-144   -48    
176    288    
-400   48     
48     112    
-288   -16    
-96    -32    
-784   -128   
-224   0      
-112   80     
0      32     
80     496    
-80    -80    
-192   -512   
-160   112    
160    -112   
-160   64     
144    272    
80     48     
64     -16    
-80    -48    
-80    176    
32     16     
224    304    
-992   -416   
96     272    
80     -112   
16     240    
-112   -448   
144    176    
64     320    
32     64     
-80    176    
144    -32    
-16    64     
-96    48     
-96    112    
-32    -80    
48     352    
-160   -256   
-64    272    
32     352    
256    128    
0      -96    
80     48     
-32    -64    
-112   48     
-16    -272   
-352   16     
-48    64     
-16    112    
-32    96     
-32    160    
-368   3104   
-2352  -800   
576    96     
-48    0      
-80    -432   
-256   -480   
48     576    
512    416    
-144   64     
-224   352    
80     -112   
-208   -96    
128    -48    
112    112    
-176   -128   
-128   -48    
-80    0      
16     144    
-96    64     
224    0      
-128   -96    
-144   64     
112    288    
48     80     
48     -32    
-80    -16    
16     240    
-80    32     
96     128    
-192   -80    
96     48     
-128   16     
64     144    
-224   16     
96     112    
48     0      
-16    80     
16     176    
0      -64    
32     0      
-144   64     
144    16     
-128   128    
64     16     
-16    96     
-64    32     
32     48     
-128   32     
80     -192   
-64    112    
48     64     
80     64     
0      160    
112    16     
0      -48    
-32    112    
112    80     
64     96     
-32    128    
112    160    
-224   48     
-80    32     
32     -32    
-16    -16    
16     32     
48     112    
-48    160    
32     96     
-48    96     
0      80     
-16    16     
80     16     
-16    160    
-64    64     
16     -16    
-32    256    
-112   16     
64     96     
-16    -192   
128    320    
-272   128    
96     32     
16     208    
-144   -64    
336    48     
-240   0      
144    192    
-160   -16    
80     128    
-176   32     
80     64     
-64    -48    
64     160    
-32    -16    
80     -16    
0      256    
-176   64     
176    144    
-32    0      
192    304    
-64    -32    
112    112    
-144   64     
176    48     
64     64     
-144   -64    
0      -32    
-48    -16    
256    320    
96     48     
-48    16     
-112   144    
112    -32    
128    208    
128    -80    
-176   80     
192    592    
-80    176    
160    48     
-112   256    
96     224    
160    64     
-272   -160   
80     96     
-16    -32    
96     0      
-112   -16    
176    -48    
-208   -64    
64     64     
-48    16     
80     -96    
-176   -80    
-144   128    
176    -32    
32     32     
-368   -400   
272    -752   
-16    32     
16     80     
48     64     
32     16     
32     80     
-16    144    
112    176    
48     128    
128    336    
-128   -48    
0      48     
-16    192    
80     128    
32     144    
0      -80    
80     128    
80     384    
-48    -32    
96     128    
-48    32     
160    112    
-272   64     
224    112    
-144   128    
16     192    
-16    32     
80     128    
176    288    
0      32     
-208   -480   
176    112    
-16    -1712  
96     48     
-96    112    
48     32     
192    208    
0      112    
-112   64     
-224   48     
96     32     
176    144    
-48    96     
16     0      
32     48     
16     -688   
160    80     
-80    -800   
0      208    
0      112    
128    160    
80     -48    
16     112    
112    48     
96     16     
-16    240    
-160   160    
208    -112   
-32    0      
144    128    
-896   384    
-992   -448   
-80    1408   
-208   432    
-592   -1072  
352    768    
-432   208    
256    480    
-128   -432   
592    -128   
-800   -496   
400    208    
240    144    
192    -256   
48     592    
0      -32    
32     176    
-240   -1040  
304    80     
-64    -1776  
80     80     
112    352    
-48    304    
80     48     
-32    -32    
32     352    
-80    144    
-16    32     
-160   0      
208    160    
-16    -208   
-80    0      
64     -304   
-128   48     
192    96     
-32    192    
272    -672   
-240   -48    
560    432    
-128   -512   
368    224    
-400   -320   
272    48     
-112   -96    
0      128    
160    64     
-16    -80    
240    -208   
-144   -32    
320    64     
-176   -176   
192    80     
-80    64     
0      -176   
224    400    
0      48     
-208   -672   
-144   -528   
384    32     
224    -48    
128    112    
-96    112    
224    -80    
-32    192    
-16    -192   
32     96     
0      -64    
-48    -64    
16     144    
0      -1568  
80     -384   
16     -64    
48     -560   
160    -16    
16     112    
80     -16    
272    256    
-208   -384   
-16    128    
-96    -384   
0      -240   
144    144    
-16    -208   
-16    112    
48     -128   
48     -800   
96     -32    
-48    -256   
-112   -240   
32     -624   
128    48     
0      -160   
0      0      
16     -64    
160    64     
-48    0      
160    272    
-32    64     
-128   -144   
-192   -128   
-32    -48    
-544   16     
-32    48     
0      -160   
48     -96    
-32    -64    
32     -272   
176    16     
16     528    
-32    -48    
0      -336   
48     128    
128    -160   
48     144    
-224   176    
80     -32    
-704   16     
-64    -16    
112    -80    
16     96     
48     -32    
16     -240   
144    64     
32     -1024  
224    192    
-112   0      
512    608    
-112   304    
288    -240   
-336   112    
304    16     
-160   16     
16     128    
-288   0      
64     0      
-48    160    
96     64     
-336   -128   
192    -1232  
-176   -48    
112    -32    
0      -112   
-128   -64    
224    -80    
-128   32     
208    80     
-48    432    
64     176    
-64    80     
-160   -288   
96     -64    
64     -128   
32     -272   
-96    -592   
80     560    
48     -96    
80     64     
-368   -96    
-32    -448   
-208   48     
48     -112   
128    192    
-32    0      
-496   -160   
224    32     
-2144  -16    
96     48     
16     272    
-48    -64    
176    240    
64     -80    
48     -448   
-16    -64    
0      32     
16     80     
-48    112    
-144   32     
176    16     
-208   48     
16     -272   
-16    16     
80     -96    
48     128    
144    -192   
-64    144    
0      -352   
144    -112   
-160   112    
0      16     
-48    -160   
144    -80    
16     -128   
16     96     
-336   -16    
96     -144   
0      112    
0      -96    
-176   336    
-416   -464   
624    544    
-496   -560   
-352   -240   
240    336    
0      -128   
-208   912    
-80    -272   
96     80     
-112   -384   
112    144    
80     -112   
-608   48     
-272   16     
96     -16    
64     -112   
144    176    
-48    144    
-128   -160   
-192   80     
-272   -128   
-48    256    
144    -128   
-160   144    
128    -128   
-32    240    
192    -176   
-208   64     
-448   -176   
48     256    
-64    -48    
-16    96     
-112   -96    
-256   16     
80     32     
-304   144    
-32    80     
-928   16     
64     16     
256    -96    
-320   -80    
-192   -144   
-32    192    
-64    -80    
-64    32     
-176   -96    
-80    48     
96     48     
-192   0      
-48    16     
160    112    
-176   64     
-64    144    
-32    -16    
-960   16     
-128   144    
32     16     
80     80     
-48    0      
0      80     
80     48     
-112   64     
-32    80     
64     -80    
64     96     
-224   32     
-16    96     
-432   0      
-48    32     
80     -16    
-16    112    
16     64     
-48    -48    
112    -96    
-96    160    
-160   -336   
272    16     
-192   384    
-160   -32    
128    32     
-128   -112   
64     112    
-240   32     
224    -32    
-208   16     
-64    48     
-80    -224   
112    80     
-128   0      
-16    80     
48     144    
48     48     
-16    64     
176    272    
-208   -64    
96     -16    
-48    128    
160    176    
-176   16     
-144   -176   
-96    48     
-432   -192   
224    144    
-352   32     
128    112    
-64    112    
-224   48     
48     -16    
-176   -128   
128    112    
0      -16    
0      48     
-64    0      
-48    80     
-32    48     
32     96     
-608   80     
64     16     
32     -48    
0      -144   
-160   16     
-112   96     
128    176    
80     192    
-96    304    
-16    208    
16     -48    
-96    192    
-80    96     
208    176    
0      208    
-128   80     
0      192    
-128   -96    
32     32     
-304   -256   
208    16     
48     352    
96     -32    
-160   48     
-64    96     
64     208    
-48    48     
80     128    
224    320    
-256   -272   
-16    -176   
-32    128    
80     112    
32     80     
-32    80     
0      64     
0      192    
64     192    
-256   32     
16     -80    
-224   -208   
176    80     
208    368    
-32    176    
-112   64     
-112   32     
-160   32     
32     16     
176    320    
-432   160    
-224   -224   
16     32     
336    160    
112    112    
-64    192    
-160   48     
48     -128   
96     96     
160    160    
48     176    
-176   160    
-48    0      
160    80     
48     0      
128    112    
-176   112    
16     32     
144    -32    
112    144    
-48    96     
32     64     
-112   0      
176    128    
-80    96     
208    0      
48     224    
-192   32     
224    16     
-128   160    
176    176    
-224   240    
-1424  -384   
-368   -1072  
-64    320    
272    192    
48     48     
16     1120   
-576   -384   
928    272    
-432   -160   
112    -16    
-192   320    
128    -272   
96     256    
48     -224   
-32    128    
16     80     
80     912    
-64    -224   
144    176    
80     -416   
400    720    
-208   -16    
-240   -48    
-240   -464   
416    -80    
-176   0      
144    496    
-128   0      
144    -64    
-112   48     
352    -256   
-48    192    
16     -208   
192    240    
16     -48    
208    96     
256    240    
208    240    
-240   -736   
-96    64     
-64    464    
112    -32    
64     -112   
48     -64    
-48    144    
0      0      
-48    192    
-16    208    
-144   -32    
16     32     
0      -48    
0      32     
-96    32     
64     80     
160    32     
64     128    
-48    160    
416    576    
-368   -480   
400    272    
-32    -96    
128    208    
-336   288    
336    -80    
-16    -64    
16     32     
-48    96     
128    112    
32     -288   
112    48     
64     -1376  
16     48     
16     96     
128    64     
96     176    
128    640    
-48    432    
192    176    
448    704    
-352   -288   
-32    32     
368    176    
-144   64     
32     -368   
272    208    
-80    -32    
16     144    
-96    -192   
-112   32     
256    -384   
0      96     
32     128    
32     80     
80     160    
-48    288    
16     -64    
112    -112   
-240   -64    
32     -224   
-80    112    
32     -176   
-32    48     
16     -288   
48     176    
0      -176   
48     96     
96     112    
128    112    
-80    144    
-176   -128   
112    288    
48     -64    
16     32     
96     -64    
112    192    
16     -448   
64     -128   
-64    -560   
64     208    
336    0      
-112   160    
48     288    
-112   288    
256    112    
-272   -160   
144    64     
80     80     
96     64     
-64    -800   
160    176    
160    64     
-96    160    
176    48     
-288   -160   
224    128    
-80    144    
192    64     
160    208    
-80    64     
96     16     
0      32     
-80    -16    
48     96     
112    -336   
32     80     
16     -336   
0      80     
80     48     
-80    48     
144    -16    
32     80     
-64    128    
160    -16    
80     64     
112    -48    
16     64     
144    -336   
16     128    
-48    -48    
16     96     
-48    -192   
144    80     
112    -256   
240    96     
-272   0      
192    -1472  
80     144    
-16    -224   
112    -464   
0      32     
208    -784   
-176   32     
-16    112    
160    -64    
112    112    
96     48     
16     224    
-112   -112   
224    -608   
80     224    
-48    48     
48     112    
-208   -160   
160    -608   
-80    -192   
-48    -464   
0      -96    
128    -384   
0      -48    
144    -3696  
-48    -80    
112    48     
-16    -48    
96     -32    
176    272    
-64    -256   
-16    192    
720    384    
336    1184   
-320   64     
-480   -64    
-240   -160   
800    656    
-896   -592   
464    -480   
-336   -208   
352    -288   
-144   400    
272    -640   
-224   672    
272    -656   
-112   608    
224    -800   
-176   480    
240    -272   
80     192    
16     -304   
0      16     
112    -128   
144    96     
64     -128   
32     -1744  
-224   -144   
80     32     
-64    144    
352    48     
-144   -128   
-112   -96    
128    112    
-512   -112   
-32    -16    
-1312  -224   
128    -32    
352    -48    
-16    -32    
16     -224   
-96    -880   
192    32     
48     80     
96     -16    
-192   64     
176    -96    
-128   112    
160    48     
-176   -32    
-80    -64    
-272   48     
144    48     
-144   128    
48     -48    
16     -80    
16     -672   
112    112    
-16    -288   
176    112    
-144   96     
144    -160   
16     80     
48     -112   
-208   144    
32     -48    
96     64     
-96    -176   
-128   -80    
80     -128   
16     -64    
240    -144   
-128   64     
176    -640   
0      -112   
-48    -32    
48     -64    
-160   -144   
208    -208   
-80    160    
-32    -32    
-128   -144   
80     -128   
-224   96     
-32    -352   
192    80     
64     -240   
272    464    
-240   -528   
128    -160   
-48    0      
-112   -48    
16     -16    
32     -32    
-128   80     
48     -32    
-240   -112   
-80    64     
-176   48     
80     -96    
0      -128   
32     160    
64     176    
-304   96     
80     -80    
48     -16    
128    160    
-48    112    
144    48     
-64    32     
0      -48    
16     -16    
96     32     
-16    96     
-320   -160   
32     16     
-240   -320   
112    64     
-32    64     
-144   -240   
-256   -192   
-880   112    
-32    32     
112    96     
-64    32     
80     272    
-80    144    
128    -144   
-176   -64    
-320   -352   
192    240    
-240   48     
-176   -128   
32     -16    
-16    0      
-48    208    
192    576    
-368   -112   
112    160    
-32    112    
32     -192   
-48    48     
-208   -80    
80     176    
-160   -80    
112    240    
-96    -112   
-160   96     
-160   -80    
-128   -96    
32     128    
16     80     
48     80     
-272   -48    
32     64     
-816   128    
-128   -48    
80     80     
-112   0      
48     -80    
160    144    
0      64     
-128   16     
-48    16     
208    112    
32     -16    
-128   48     
-32    -128   
-368   -16    
-240   -80    
-304   32     
-192   80     
96     -144   
96     176    
-128   -192   
112    80     
0      112    
-48    144    
-128   112    
32     -48    
224    96     
-128   0      
-80    -16    
-16    96     
112    64     
-272   48     
208    80     
48     64     
192    0      
16     128    
-320   -224   
240    96     
16     144    
16     16     
-336   64     
16     160    
16     -112   
-16    128    
32     32     
2144   -1584  
112    -976   
688    848    
-1408  -128   
752    720    
-368   -848   
432    432    
192    288    
-544   -16    
512    -224   
-432   448    
224    -416   
-128   272    
-128   -160   
176    336    
-160   -256   
0      64     
-192   160    
-192   80     
0      -112   
16     144    
80     96     
96     -128   
-144   432    
224    -128   
16     -48    
-64    48     
176    352    
-144   -112   
16     112    
-64    -224   
-48    -32    
32     336    
-112   208    
64     48     
-16    -96    
-80    112    
-16    -384   
-160   -64    
432    160    
-144   -48    
64     128    
-48    -80    
-32    112    
-32    0      
208    176    
-160   -288   
16     128    
-192   -128   
-192   32     
32     80     
16     160    
160    0      
-96    128    
16     16     
48     96     
-160   0      
-16    160    
32     304    
48     48     
0      112    
-112   -208   
112    160    
0      -48    
-112   80     
112    112    
-80    -80    
176    176    
-32    96     
48     96     
144    16     
-16    32     
16     128    
32     128    
112    96     
32     64     
-64    64     
-16    160    
0      -64    
160    176    
-256   48     
16     16     
160    128    
-448   -96    
112    0      
32     144    
-16    96     
96     384    
-304   -128   
-160   -16    
128    192    
-144   -16    
160    240    
-80    0      
144    256    
-32    160    
-304   -320   
352    -48    
48     256    
240    432    
0      80     
-128   128    
-32    64     
80     64     
-32    32     
80     304    
-144   -48    
64     -32    
-32    0      
112    48     
176    304    
-64    64     
48     208    
96     144    
-16    16     
48     144    
-32    64     
144    240    
32     224    
-32    -96    
-176   -80    
96     -192   
96     -848   
32     192    
-16    -48    
320    0      
-160   208    
64     112    
96     -16    
80     96     
-112   64     
0      96     
-32    -48    
-128   160    
160    144    
48     96     
304    32     
-288   -160   
-112   128    
368    64     
-64    208    
64     144    
208    144    
-176   32     
144    240    
32     48     
112    -96    
-224   224    
96     160    
96     0      
-192   -400   
128    80     
-112   -416   
80     80     
80     192    
16     0      
64     160    
-80    176    
16     32     
112    48     
64     80     
224    -32    
48     -352   
160    96     
16     288    
0      -144   
-16    224    
32     -16    
-80    224    
352    -1280  
224    224    
64     80     
-128   112    
-64    144    
144    0      
-48    -128   
176    256    
-160   -160   
320    -16    
-48    192    
96     -160   
-16    144    
-64    -208   
304    48     
-16    -608   
112    112    
48     -1392  
-64    240    
48     -112   
48     96     
96     -32    
128    192    
-224   64     
256    192    
-160   96     
224    -144   
16     48     
-1312  -976   
752    384    
-1568  -400   
752    -208   
-288   -336   
160    -176   
-480   816    
640    -256   
-304   896    
512    -928   
-432   848    
48     -800   
208    864    
-48    -656   
176    496    
-224   -672   
384    208    
-128   96     
144    -80    
0      -112   
192    160    
-64    -160   
96     80     
-48    336    
144    -272   
-112   160    
144    -192   
-48    320    
224    -352   
-144   208    
160    -240   
-112   192    
128    -400   
16     176    
-48    -208   
144    176    
-32    240    
80     96     
-160   -16    
96     144    
80     -128   
-32    -80    
16     128    
112    -144   
64     176    
64     -208   
128    176    
-160   -208   
192    96     
-128   -256   
208    64     
-32    48     
112    128    
0      32     
16     -1200  
176    -1552  
96     384    
-112   -1344  
192    -64    
0      80     
-48    -144   
128    176    
32     -80    
80     128    
32     -80    
-112   -192   
128    64     
0      -112   
64     112    
-96    96     
0      -496   
48     -224   
64     -1200  
64     -32    
-64    -272   
96     96     
-48    -144   
416    112    
-192   224    
96     -176   
128    16     
-16    160    
176    -144   
-32    80     
48     16     
96     -96    
80     256    
96     -48    
-48    -416   
272    -224   
16     48     
32     -512   
128    -64    
0      -544   
80     192    
80     32     
48     320    
80     48     
-16    -32    
-112   128    
16     16     
-416   48     
-32    -112   
160    48     
-48    -48    
80     -208   
-16    -1024  
128    96     
96     176    
64     -16    
16     16     
16     160    
224    96     
-16    -256   
-112   0      
-48    -16    
-32    144    
96     0      
144    80     
16     -48    
-128   -112   
-96    -256   
112    -128   
384    -1328  
0      64     
-48    -224   
-96    128    
16     -32    
64     -160   
-96    -32    
64     208    
-96    160    
-176   -96    
-352   -304   
32     -176   
176    80     
48     128    
-16    -64    
128    -464   
64     0      
112    -80    
0      128    
144    176    
-80    0      
32     112    
-48    -96    
-48    112    
32     -336   
64     -80    
320    112    
112    160    
-16    -288   
-80    16     
224    -528   
-16    336    
-160   -608   
144    -144   
-32    64     
64     192    
-208   -256   
80     -96    
-160   32     
-48    128    
-368   -112   
176    -48    
-320   32     
16     -464   
64     0      
-48    64     
64     48     
96     -1536  
80     -48    
64     -112   
96     -32    
-288   32     
144    -160   
64     128    
-64    112    
0      -48    
-48    48     
-128   -160   
48     16     
112    48     
64     16     
240    -80    
-112   208    
48     -160   
-32    160    
-32    -48    
144    32     
224    16     
16     -48    
32     -176   
352    -32    
-176   -144   
144    48     
16     -16    
144    416    
-608   1040   
-752   688    
112    128    
-1552  -848   
784    1024   
-576   288    
336    96     
560    368    
-96    112    
-480   -752   
32     32     
240    16     
112    32     
-1184  -448   
80     -80    
-352   -528   
-448   -208   
464    448    
-48    32     
48     752    
-208   -144   
-64    -64    
-48    -112   
80     -64    
224    64     
-128   80     
-176   32     
16     96     
-32    -336   
-112   160    
48     0      
16     -32    
32     112    
-128   0      
-112   -64    
-352   -48    
16     192    
-496   0      
80     80     
-160   64     
-32    64     
-80    -128   
0      288    
0      -176   
-96    112    
16     48     
32     160    
-48    -32    
-112   -128   
16     0      
-192   96     
-16    96     
-80    -208   
-32    64     
-624   16     
-80    80     
-112   -240   
160    192    
-128   32     
144    -16    
64     144    
-64    128    
48     240    
-176   64     
128    -112   
128    176    
-96    160    
-64    -80    
16     -80    
-400   32     
0      176    
-240   32     
96     112    
-80    -32    
-112   -16    
192    96     
48     -32    
80     48     
0      128    
-32    128    
-112   -16    
32     -208   
-144   -32    
64     112    
-128   160    
16     192    
-336   -64    
224    128    
64     -224   
64     -16    
-80    80     
112    96     
-64    32     
-240   -528   
-112   -256   
-64    48     
80     400    
-144   64     
-96    0      
-176   48     
64     96     
-256   -176   
48     80     
-32    16     
32     -96    
80     16     
32     144    
48     0      
-80    0      
-160   -32    
16     48     
64     -96    
64     128    
-64    -32    
-112   16     
-176   0      
64     128    
-32    112    
96     16     
-160   16     
-48    16     
160    0      
64     -112   
-352   0      
272    0      
32     80     
32     192    
-160   144    
240    176    
-176   -64    
-16    64     
160    144    
112    256    
48     192    
-368   -16    
0      64     
-128   80     
224    -144   
-16    0      
-48    208    
64     -16    
64     80     
-144   160    
128    224    
-96    -16    
-272   -32    
-208   32     
64     208    
176    -32    
48     80     
-64    48     
0      80     
96     80     
-16    16     
112    80     
-48    112    
144    288    
-224   -32    
32     80     
-32    -32    
64     128    
112    128    
-144   80     
-16    128    
64     0      
256    368    
-208   -224   
48     16     
-48    192    
-64    32     
192    224    
-96    -48    
144    128    
-96    96     
-176   -48    
112    0      
32     96     
64     112    
-32    128    
0      112    
64     112    
48     48     
-144   32     
16     -64    
304    416    
-208   96     
16     -16    
80     -80    
64     96     
-48    80     
-96    128    
64     256    
64     112    
-144   96     
-32    -64    
32     -160   
-208   832    
-320   -832   
240    192    
-480   912    
-112   64     
-416   -224   
528    384    
-1104  32     
416    -304   
-272   176    
304    -384   
-160   352    
112    -384   
48     560    
48     -304   
32     320    
48     0      
240    608    
-256   16     
176    64     
-288   96     
160    -192   
-176   320    
368    -96    
-192   -2384  
272    -208   
-128   144    
192    256    
-16    240    
0      -32    
32     160    
-48    32     
64     64     
-112   112    
-16    -96    
80     64     
208    32     
-16    96     
64     112    
-32    -1312  
112    96     
-64    -48    
64     64     
-176   112    
400    128    
-112   144    
64     208    
-160   -144   
192    48     
0      16     
80     112    
64     128    
-48    -16    
80     208    
-128   -64    
176    144    
-16    -976   
48     208    
-64    64     
112    -288   
-80    -32    
112    144    
-48    176    
160    128    
0      -32    
-80    112    
32     16     
16     16     
32     128    
96     48     
0      -16    
144    -1216  
80     48     
32     112    
-32    48     
80     -112   
-48    -272   
208    48     
-144   224    
-128   -224   
112    224    
32     272    
112    -16    
32     160    
-80    -448   
-16    64     
144    -880   
16     320    
-64    -2016  
96     112    
32     -16    
112    16     
-32    48     
80     208    
-32    64     
64     80     
80     96     
144    -16    
-64    48     
0      -224   
96     144    
64     -304   
80     128    
-80    -16    
80     16     
16     -64    
48     48     
48     0      
48     128    
16     48     
128    -16    
-48    32     
96     -80    
-32    32     
224    -80    
-48    80     
112    -80    
-80    96     
112    -480   
-96    0      
112    32     
80     160    
144    32     
-16    160    
-64    -64    
16     -448   
-48    -304   
304    -64    
-224   176    
384    64     
-144   48     
16     -176   
112    96     
48     -144   
80     224    
-96    112    
112    16     
128    288    
-48    -208   
128    64     
16     -240   
112    176    
16     -32    
16     96     
112    0      
32     96     
80     -720   
320    272    
-304   256    
256    -112   
-128   192    
336    -704   
-256   -112   
192    -352   
-256   -592   
352    -64    
-160   -464   
0      -176   
144    -3056  
144    -64    
-96    112    
64     32     
16     0      
64     16     
224    48     
-240   -48    
320    -720   
-352   48     
-32    -80    
96     192    
16     -144   
96     -144   
-208   -256   
320    -464   
-64    -192   
208    -1024  
-64    -80    
160    240    
-32    -160   
128    -384   
-16    80     
80     -48    
-16    -128   
64     48     
256    -176   
-832   -32    
-16    -240   
-48    -144   
192    -96    
128    224    
16     -256   
-112   32     
16     0      
240    272    
-176   -176   
272    128    
176    48     
80     -96    
-464   544    
256    608    
-560   -704   
-128   -176   
624    -368   
-160   -672   
432    -976   
144    224    
-304   240    
336    -1280  
416    112    
-144   -176   
-128   0      
160    64     
-16    208    
64     48     
-272   -80    
-48    160    
-144   -16    
-944   -400   
-48    -176   
-32    -144   
304    0      
0      -16    
96     -304   
-128   32     
304    16     
-80    256    
128    -144   
-80    48     
32     16     
112    -64    
-80    32     
32     -128   
-256   -96    
16     -320   
-80    128    
96     -32    
80     0      
-96    -144   
96     224    
112    -608   
-64    -32    
-32    96     
80     -16    
64     16     
-16    -160   
-304   -128   
0      -80    
-192   32     
272    -32    
-288   80     
192    -96    
-128   96     
32     -528   
80     128    
0      -1504  
96     80     
48     112    
-48    -16    
-176   -32    
64     32     
-368   -80    
240    64     
-288   64     
144    176    
208    -144   
272    -144   
16     112    
80     -96    
-160   32     
144    -400   
112    -64    
-144   96     
-16    -32    
48     192    
-64    0      
48     -48    
144    0      
-144   -64    
160    -80    
-64    96     
96     -288   
208    -16    
-48    16     
32     64     
-240   16     
-912   -64    
-208   -96    
176    96     
-224   0      
208    -48    
0      96     
-64    -48    
-96    0      
-16    -32    
80     -32    
-560   -64    
80     160    
-704   -160   
-400   -16    
-128   0      
-240   -128   
16     64     
-64    48     
128    176    
-144   0      
-48    80     
224    64     
-48    80     
224    96     
-128   96     
-96    -112   
32     80     
96     0      
-272   80     
-368   -208   
-320   -64    
160    208    
-32    -64    
-304   0      
-1104  -128   
112    -32    
48     16     
176    144    
128    160    
96     192    
-48    -96    
32     32     
-160   -16    
-64    16     
400    176    
-112   80     
48     -64    
-128   144    
-208   48     
144    112    
-208   192    
-912   16     
-224   0      
-176   -352   
16     224    
-32    -448   
128    0      
-160   96     
80     -16    
-64    96     
-64    32     
-32    64     
0      48     
-32    112    
-48    32     
16     208    
-224   -80    
112    112    
-224   -96    
80     160    
32     256    
-96    48     
160    -48    
-192   -16    
48     48     
-208   -144   
0      -16    
64     80     
-32    -128   
-144   496    
192    64     
-640   -176   
128    256    
-64    -112   
80     304    
-144   -128   
-160   160    
192    -32    
80     64     
16     -80    
-128   -64    
-32    208    
-32    -48    
-48    304    
0      -160   
-16    32     
-64    144    
-80    128    
-288   16     
-128   32     
-48    -80    
-64    0      
48     64     
64     48     
48     256    
-80    144    
-64    96     
160    96     
-16    -16    
0      144    
1552   3136   
-1808  -592   
912    1040   
-160   464    
544    -432   
-144   -272   
0      688    
368    304    
-112   -48    
-128   64     
160    -208   
-192   -32    
-80    48     
320    224    
-176   16     
160    128    
-400   -64    
48     160    
-128   192    
-16    64     
0      80     
96     208    
112    144    
-192   -80    
96     80     
-224   112    
272    432    
-336   -80    
208    -144   
-528   144    
304    176    
-224   160    
16     144    
-80    -32    
16     64     
0      -112   
16     80     
-32    96     
16     -80    
16     128    
96     272    
176    176    
-48    112    
-240   -48    
-64    16     
128    64     
-128   96     
-48    0      
160    160    
-80    -16    
80     112    
-48    80     
48     32     
16     64     
48     48     
32     112    
-16    -272   
-112   96     
-256   -224   
32     -272   
112    224    
0      48     
-48    48     
192    32     
-48    48     
-16    64     
32     96     
64     64     
0      96     
-32    96     
-16    16     
0      64     
0      64     
64     144    
-96    96     
48     160    
-64    160    
48     304    
112    64     
-16    128    
64     112    
96     -16    
16     32     
144    240    
-128   16     
208    32     
-144   -80    
144    128    
-48    144    
-176   80     
-128   32     
-112   -288   
48     32     
144    144    
48     192    
-80    64     
128    160    
-64    -32    
112    80     
-112   -48    
272    256    
16     240    
-16    64     
-32    -32    
-32    0      
112    64     
64     112    
0      -1184  
96     64     
48     176    
-128   -48    
80     112    
0      96     
176    144    
-32    80     
-16    128    
-96    -192   
48     80     
48     160    
0      -272   
-48    48     
48     208    
288    -1392  
-128   0      
-64    48     
80     176    
144    128    
0      80     
96     128    
32     -80    
64     128    
0      240    
64     64     
48     160    
112    272    
-192   32     
64     -208   
16     -96    
32     192    
-64    48     
16     16     
16     -32    
208    192    
-64    176    
16     -96    
-208   -448   
160    -272   
288    176    
-128   160    
16     208    
-112   -256   
-48    32     
176    -208   
-16    160    
80     -528   
-96    432    
-96    -192   
512    560    
-288   416    
160    80     
-336   -32    
160    -48    
64     128    
112    80     
-192   96     
240    -192   
-48    112    
-32    -128   
-32    160    
288    -176   
176    32     
144    160    
416    224    
-352   16     
32     -80    
96     48     
240    144    
-96    96     
-64    128    
32     144    
32     -48    
128    80     
-16    80     
96     48     
-16    -32    
80     160    
0      -96    
112    -272   
288    -64    
32     -32    
96     -160   
112    -16    
32     128    
96     96     
-96    224    
48     16     
192    64     
-688   -2368  
1360   1488   
-320   -32    
736    -224   
432    -1120  
-304   -480   
48     -672   
64     496    
368    880    
352    224    
-464   -64    
144    -368   
288    160    
-32    -224   
-48    128    
48     -240   
112    128    
0      -32    
96     176    
96     -480   
-80    0      
64     64     
160    320    
64     208    
16     -16    
-80    64     
48     -336   
96     160    
16     -80    
32     80     
64     -48    
32     96     
48     32     
32     48     
-16    -416   
48     -32    
32     -80    
96     96     
16     160    
272    -944   
-176   80     
128    -32    
96     80     
32     -80    
-16    16     
32     -224   
144    224    
64     -368   
32     128    
-144   -160   
208    -672   
-16    96     
32     -544   
64     16     
-240   0      
192    16     
-16    112    
0      -224   
80     -80    
112    32     
-96    -208   
208    192    
-64    -96    
128    96     
64     0      
32     -32    
144    144    
0      -160   
-48    80     
64     0      
64     16     
-160   96     
-32    -80    
112    32     
0      -448   
144    -80    
208    32     
-48    256    
-48    -48    
64     -112   
224    -80    
-96    192    
-80    -112   
144    -176   
-48    -64    
96     64     
-688   -96    
304    -240   
-16    -96    
160    -208   
-80    -128   
192    -64    
-112   -160   
240    -2192  
-64    32     
-112   -288   
128    -32    
-48    -16    
144    16     
-16    32     
-160   -16    
-336   -64    
-48    -96    
64     16     
-48    -32    
112    0      
32     -160   
160    -48    
16     -1280  
160    80     
16     64     
-112   112    
112    32     
-128   -160   
96     144    
-128   48     
256    192    
-160   0      
-608   0      
16     -192   
304    -64    
-80    -144   
128    192    
304    -32    
16     48     
-96    144    
48     288    
208    -32    
0      -176   
-96    -16    
-112   80     
176    16     
16     96     
-432   80     
0      -48    
-720   -48    
-48    -208   
-96    48     
304    -80    
176    16     
-160   -1168  
-48    -16    
-48    -112   
64     32     
-64    224    
48     64     
-464   -416   
-80    -128   
-240   0      
112    64     
-192   144    
112    64     
-16    32     
0      -208   
112    96     
-96    -544   
256    160    
-32    240    
240    256    
-192   0      
16     -16    
-32    144    
16     -64    
-144   96     
112    176    
64     48     
-48    -240   
112    208    
-128   -384   
160    16     
128    112    
32     16     
-128   0      
-16    -32    
48     16     
48     0      
-64    128    
96     144    
-208   16     
144    -208   
-112   -80    
448    0      
0      128    
-272   -192   
192    80     
112    272    
-288   384    
-256   -112   
-336   112    
16     -32    
112    128    
-112   -64    
0      -32    
-176   96     
-112   -32    
16     80     
-416   -80    
-640   -3136  
208    -272   
-480   -704   
432    -240   
-160   -688   
-448   -176   
-368   736    
224    208    
-1696  -176   
192    48     
96     48     
-176   0      
-160   64     
272    144    
-176   -192   
-144   16     
-32    -288   
-224   -128   
192    336    
-160   -64    
-240   -128   
-208   144    
-80    80     
-256   -16    
-16    -16    
-64    -96    
32     192    
16     592    
96     176    
-80    -160   
-256   -112   
160    -16    
-64    64     
-128   -64    
96     96     
-224   144    
112    128    
-64    -80    
-128   -416   
48     16     
-16    368    
-96    128    
-144   -80    
176    96     
-48    -32    
16     192    
16     208    
0      160    
64     48     
-144   -112   
-112   48     
16     96     
-128   96     
16     160    
48     64     
-224   112    
-48    96     
-16    -288   
-528   -528   
512    -192   
-96    96     
256    -80    
-112   256    
96     -80    
-80    80     
96     -32    
-48    80     
-16    128    
-64    -16    
-32    16     
-640   -240   
16     128    
-896   -32    
0      96     
-80    64     
-64    32     
80     272    
-16    -80    
112    -32    
-48    32     
176    272    
-64    304    
96     336    
-128   208    
-32    -112   
-32    0      
208    448    
-288   96     
16     -192   
96     -32    
80     112    
-32    192    
-192   32     
-16    128    
80     16     
16     96     
-240   -112   
64     176    
-160   -64    
144    144    
-192   -80    
-48    32     
-208   -64    
32     -192   
80     64     
-64    80     
0      32     
64     176    
-48    32     
-32    0      
-16    32     
-48    0      
16     80     
-176   -48    
112    112    
-80    16     
-64    -112   
0      96     
-64    80     
208    16     
-272   80     
144    -16    
48     16     
32     -80    
128    224    
-208   32     
352    304    
-224   -16    
240    -336   
-208   144    
-16    -48    
256    352    
-272   96     
64     32     
-144   -544   
128    -96    
128    160    
-64    -240   
-32    240    
256    16     
-144   0      
16     64     
160    272    
-128   -32    
-112   160    
-144   -176   
64     32     
-16    -16    
144    288    
-16    -48    
-16    16     
-48    -48    
48     -32    
-144   48     
160    0      
-16    -80    
48     32     
-176   -528   
208    752    
192    112    
-160   48     
128    48     
-32    160    
112    16     
-208   -80    
176    96     
32     96     
64     240    
-16    80     
-16    -96    
-32    160    
-160   16     
80     240    
128    192    
-96    112    
-160   -96    
-208   -32    
-96    -128   
112    208    
176    96     
-64    160    
-16    112    
208    16     
32     192    
-128   80     
-144   80     
48     0      
128    144    
-64    64     
16     160    
-112   144    
-144   -96    
96     64     
96     96     
144    -80    
80     192    
112    -48    
-16    128    
512    528    
-432   -720   
384    384    
-176   16     
-384   224    
512    112    
-496   160    
-64    624    
-128   -1056  
16     -16    
336    -48    
-32    432    
64     80     
-64    192    
128    160    
64     -64    
-64    304    
128    48     
-16    80     
0      -32    
0      32     
64     -112   
128    160    
48     -272   
96     80     
0      80     
-16    256    
48     80     
112    144    
-32    16     
112    16     
-32    -16    
-16    224    
128    112    
64     48     
112    -48    
112    176    
48     64     
64     -272   
-144   -48    
64     -624   
128    144    
64     64     
-80    -16    
-32    -64    
128    144    
96     -320   
80     192    
-160   -32    
16     128    
64     16     
48     -240   
32     64     
0      -704   
-16    -16    
160    -320   
-80    176    
144    0      
144    64     
-80    112    
64     96     
96     96     
0      144    
16     80     
112    48     
128    48     
-96    96     
64     176    
16     -64    
192    96     
-64    16     
64     240    
-80    -208   
208    48     
-160   80     
96     -96    
-48    -128   
-64    -32    
-64    112    
-16    144    
176    -64    
32     112    
-64    -224   
368    176    
-320   240    
64     -688   
336    352    
-208   -688   
384    272    
-240   -32    
224    192    
32     48     
-48    208    
48     32     
-16    -144   
96     -16    
80     64     
-112   176    
192    -416   
-176   16     
192    -32    
80     240    
-112   -336   
112    48     
-32    80     
224    176    
176    496    
-208   192    
224    16     
-48    -128   
80     64     
96     -112   
0      96     
-48    -16    
160    16     
-16    -16    
48     128    
0      -320   
-112   32     
336    176    
-48    80     
32     96     
-224   176    
384    96     
32     32     
-64    -96    
-112   -80    
144    176    
128    -48    
80     128    
0      -16    
176    240    
64     -448   
-64    -208   
-48    0      
-128   -736   
96     0      
-16    224    
128    -176   
-32    -160   
-80    -912   
112    -32    
128    -400   
-80    -64    
192    224    
112    96     
-48    48     
96     -160   
-160   -496   
80     32     
32     0      
112    112    
-512   0      
80     -80    
-64    0      
176    -32    
-64    176    
128    -32    
-32    -128   
64     -1712  
64     -80    
0      80     
16     112    
48     -208   
80     -80    
-400   -656   
64     -224   
-208   496    
112    -96    
-1216  0      
64     32     
96     -192   
64     -624   
96     -112   
144    -1136  
48     -64    
-16    64     
-128   336    
96     -144   
-80    80     
144    -192   
144    -32    
-80    48     
-80    -96    
-960   -240   
368    -32    
240    64     
-16    -112   
-128   112    
32     -336   
128    -16    
16     -1344  
-176   80     
192    -48    
-160   160    
176    0      
-80    -64    
528    1840   
-1360  -1248  
864    1088   
368    176    
-256   -960   
-352   128    
-64    144    
480    256    
-496   -288   
544    -1184  
48     64     
-32    -16    
-32    352    
-64    -128   
16     -256   
-288   -48    
304    32     
-320   -176   
0      -208   
-112   0      
144    -208   
-80    -80    
-32    0      
32     176    
304    144    
-208   -32    
96     -480   
-240   -496   
560    432    
-48    -16    
-64    16     
-144   144    
-240   0      
64     -64    
-560   0      
32     -192   
-16    -560   
320    352    
-80    -16    
208    112    
96     -272   
112    -1424  
0      -192   
-48    32     
304    -80    
-96    -16    
-16    192    
208    752    
96     272    
-656   -336   
384    -128   
-176   16     
64     -288   
-128   352    
48     -320   
128    64     
-528   -320   
96     -1232  
192    544    
64     -80    
-160   240    
48     -96    
-80    -352   
240    16     
-144   -64    
128    176    
-704   96     
32     -288   
0      112    
48     -272   
48     96     
-64    32     
-64    16     
-16    112    
80     16     
96     208    
-112   176    
-112   -48    
48     -112   
-176   -48    
208    16     
-48    128    
-816   -256   
-16    256    
-176   -112   
-176   144    
-48    112    
-608   -128   
64     48     
16     -16    
-32    144    
80     32     
-48    48     
176    128    
-192   -80    
0      -192   
96     160    
-320   -224   
112    48     
-224   -192   
-16    -80    
0      272    
-144   -32    
48     16     
-224   -16    
256    144    
-304   0      
-64    176    
48     32     
-64    -16    
-144   -176   
80     144    
96     16     
32     80     
-64    48     
-176   0      
192    48     
-240   16     
0      -32    
-96    -16    
0      -64    
16     48     
64     -176   
-160   -176   
240    -48    
-192   96     
48     208    
-32    -208   
-48    -256   
16     128    
208    -48    
-128   -128   
-160   176    
176    160    
-128   32     
-144   64     
-416   -16    
64     208    
-400   0      
0      32     
0      -32    
-16    32     
240    -320   
-208   80     
48     64     
-160   -320   
-32    -224   
-32    -48    
-16    80     
-16    144    
-32    80     
-32    -32    
32     320    
-192   -16    
144    80     
-864   -208   
208    48     
-96    16     
192    160    
112    320    
-288   64     
64     64     
-16    128    
-48    16     
80     128    
-16    112    
-80    16     
64     -32    
-336   48     
48     32     
-336   -80    
64     -64    
176    0      
-64    240    
80     16     
-176   208    
-16    -496   
112    256    
32     96     
-128   144    
0      192    
-128   -32    
64     224    
-144   -112   
-16    0      
-128   32     
64     128    
-48    32     
-48    64     
32     -16    
-32    96     
-16    -16    
80     80     
48     272    
-224   80     
-144   -32    
-160   -144   
-464   48     
-832   64     
-192   448    
336    160    
-336   -224   
144    -48    
-528   480    
912    64     
-240   496    
128    -208   
-208   112    
-112   160    
336    -48    
-176   272    
32     -336   
-176   416    
288    -208   
-112   304    
-80    -224   
-80    128    
176    -48    
-176   272    
176    48     
-176   288    
144    -128   
-416   0      
384    -112   
-224   272    
240    -96    
-336   176    
240    48     
-64    -16    
48     112    
16     80     
32     96     
32     -16    
240    288    
-80    48     
32     96     
-176   -16    
0      64     
96     32     
16     240    
64     0      
-160   64     
32     -48    
-32    112    
16     -160   
336    144    
-320   128    
192    -16    
96     64     
-80    48     
272    80     
-176   144    
176    144    
16     272    
-176   -80    
192    160    
-208   80     
224    -32    
-112   176    
-48    80     
240    16     
-80    96     
-80    160    
144    96     
-32    112    
144    48     
-48    208    
-112   -32    
112    80     
32     64     
-32    16     
-16    32     
240    320    
-240   160    
272    112    
288    -32    
-96    240    
-160   16     
192    128    
-160   -112   
144    -176   
-224   160    
-32    272    
-144   -80    
144    -112   
32     -80    
32     16     
80     192    
64     288    
-96    448    
-16    112    
32     64     
-16    112    
80     112    
-144   16     
32     0      
32     80     
-16    80     
-64    0      
-32    -16    
304    240    
-80    -80    
-48    0      
-32    -32    
144    96     
112    192    
64     128    
16     32     
-16    48     
80     64     
112    -64    
-80    16     
112    16     
-48    160    
48     144    
64     -80    
-176   -48    
128    -128   
-192   -144   
304    96     
-16    80     
-144   -48    
64     160    
176    288    
48     48     
-208   -64    
96     64     
80     48     
176    240    
-128   32     
160    0      
-144   -304   
48     80     
16     224    
240    -656   
-256   0      
336    -448   
-128   96     
128    208    
112    16     
-112   64     
48     80     
48     -64    
80     256    
144    592    
-192   -80    
160    144    
-32    64     
48     16     
32     192    
-32    32     
416    352    
-544   -528   
320    -48    
128    576    
-80    160    
16     128    
-112   -80    
224    176    
-80    64     
64     96     
-208   -96    
192    -80    
48     176    
48     64     
-288   -64    
224    -272   
32     176    
128    -1280  
96     128    
-96    -1376  
256    0      
-176   144    
144    112    
-32    128    
-112   -288   
80     80     
80     -96    
96     160    
-32    -400   
112    224    
-160   -672   
304    96     
-32    -592   
176    48     
-112   144    
112    64     
192    64     
-32    96     
-48    0      
-256   16     
16     -80    
32     16     
288    16     
-512   1872   
-752   -912   
16     -1024  
1312   352    
192    -448   
-672   -496   
256    928    
-512   -240   
832    -96    
-544   304    
432    96     
-336   64     
208    80     
192    -224   
96     -208   
-96    192    
96     -112   
144    208    
-416   -240   
320    -480   
-288   -256   
160    288    
-128   128    
-80    48     
224    -768   
16     -688   
256    -32    
160    -2096  
-400   -528   
96     -128   
224    96     
-224   192    
160    224    
-48    64     
64     -512   
128    -2176  
-48    16     
-96    -208   
-16    400    
80     0      
-32    -496   
80     -112   
96     -608   
240    48     
-96    -880   
-16    -224   
352    128    
192    272    
-384   -208   
-16    -240   
208    0      
-240   32     
-96    16     
272    352    
-432   0      
64     -336   
-1200  -384   
240    -128   
496    240    
16     -864   
-32    32     
208    -1104  
-112   -208   
48     -32    
48     -112   
128    -16    
-64    16     
112    -272   
-128   -176   
-336   -352   
128    64     
-448   160    
-48    -80    
160    -32    
48     -32    
0      -272   
0      -224   
-240   -16    
144    -144   
-112   -48    
112    -352   
64     208    
208    80     
-160   -80    
-128   0      
112    16     
-496   -384   
320    80     
80     16     
80     -224   
0      64     
-48    -112   
64     -16    
192    -1440  
128    224    
16     176    
-96    128    
-272   -240   
272    336    
0      128    
-128   -320   
-272   -208   
112    -96    
-704   -112   
96     -16    
-208   -80    
272    48     
-128   -144   
288    -624   
-48    -16    
48     -112   
-176   160    
80     -48    
224    32     
-64    -64    
64     64     
-144   -144   
160    192    
-352   32     
448    80     
-832   80     
208    -256   
-16    272    
48     -528   
0      -112   
16     -176   
64     0      
176    -64    
-80    32     
-176   48     
64     16     
-256   64     
64     -192   
-208   96     
176    -160   
0      192    
-16    -144   
208    192    
-208   -48    
224    64     
64     -1888  
-64    -144   
-624   -128   
-32    -160   
-16    192    
-192   0      
128    -304   
-128   -16    
-240   -32    
80     -144   
-160   48     
112    -208   
-96    144    
80     -336   
96     112    
-176   -16    
240    144    
-16    -160   
-64    240    
-96    16     
64     32     
-256   -48    
80     -16    
0      64     
288    80     
-240   224    
-64    -96    
64     -80    
-416   -336   
240    -48    
-32    128    
-352   336    
-288   32     
-528   16     
32     -192   
288    32     
-16    48     
0      0      
-48    224    
-464   -144   
80     112    
-16    -224   
-144   128    
32     -192   
-384   64     
144    -32    
-240   128    
-176   -32    
0      80     
-256   64     
-160   0      
-112   -96    
192    112    
-256   64     
0      -336   
-16    272    
-80    -80    
-80    272    
32     -16    
816    656    
-432   288    
-432   -112   
-592   320    
848    96     
-1120  16     
800    -352   
-336   528    
528    -624   
-256   432    
-112   -576   
160    544    
-16    -320   
208    400    
-32    -96    
-192   224    
0      -64    
-16    96     
-112   -80    
112    32     
80     160    
-480   -96    
0      144    
-432   -272   
-64    128    
224    64     
0      320    
16     -144   
-224   16     
32     -48    
-128   144    
112    -32    
-160   160    
64     -80    
-112   80     
96     -16    
-224   -48    
32     -48    
64     144    
80     48     
-64    0      
16     16     
112    -224   
-176   112    
96     64     
-128   64     
48     144    
112    -32    
0      16     
-144   128    
64     -32    
-64    240    
-16    0      
-144   80     
32     160    
64     -96    
16     0      
0      0      
-176   -48    
144    192    
-96    -64    
48     128    
-192   48     
144    -64    
-96    80     
112    16     
48     160    
0      112    
-208   -112   
64     16     
-624   -80    
48     192    
-48    -96    
48     48     
-48    -112   
32     -160   
0      96     
-240   32     
-48    -96    
80     48     
-16    192    
-80    128    
-208   144    
-480   -336   
384    208    
-400   -16    
208    160    
160    304    
-288   -16    
-224   -384   
304    128    
208    128    
32     80     
-16    144    
-80    96     
208    320    
-144   64     
112    272    
-144   -112   
32     96     
0      16     
-64    128    
-32    32     
-80    16     
-208   -288   
208    176    
-128   -240   
0      -112   
0      96     
-16    -16    
32     128    
16     48     
48     192    
-32    48     
0      0      
144    160    
-64    64     
96     0      
-32    240    
144    32     
-64    -48    
-64    0      
-64    -160   
112    560    
-96    272    
80     176    
-208   -48    
32     128    
-112   -16    
32     16     
64     32     
16     -48    
128    256    
-272   -32    
0      -288   
-64    -192   
384    304    
-112   64     
64     64     
0      32     
48     176    
-64    -64    
128    240    
-192   -80    
48     -64    
-16    112    
112    192    
32     32     
-48    48     
-48    64     
48     144    
112    32     
48     176    
-80    -32    
80     160    
-128   -32    
80     -16    
32     256    
-112   0      
-48    176    
-48    -32    
192    48     
80     160    
-64    -16    
-64    144    
32     0      
-80    64     
304    96     
-16    112    
-144   -48    
48     160    
-80    112    
96     160    
-240   -112   
288    144    
-192   144    
224    80     
-192   32     
144    48     
128    96     
-16    112    
224    80     
48     -112   
160    144    
-224   128    
-16    -32    
-64    16     
224    272    
-16    48     
-80    -1104  
176    192    
-16    96     
144    32     
-48    320    
304    80     
16     0      
1728   -432   
736    32     
352    704    
-608   192    
-128   672    
32     -320   
368    48     
80     -64    
-560   -160   
336    -384   
-128   384    
64     -192   
416    0      
-256   112    
176    128    
-160   64     
0      128    
-240   240    
80     -288   
-224   -64    
-96    -16    
-256   224    
176    -112   
144    208    
160    464    
192    96     
-64    80     
-288   -480   
352    -32    
160    -16    
-176   96     
32     64     
32     -48    
128    96     
192    -16    
0      80     
64     96     
208    320    
-160   112    
400    112    
-128   -1008  
240    80     
208    304    
-80    160    
48     -272   
-144   192    
16     -112   
32     224    
144    48     
160    112    
32     176    
-48    32     
128    -64    
-80    -288   
96     160    
-16    -320   
64     224    
-64    -1456  
176    144    
-64    16     
64     144    
-16    -16    
128    352    
-160   144    
128    -96    
-32    48     
-32    -192   
112    -16    
64     -176   
192    -16    
240    0      
-112   272    
64     -368   
32     240    
-192   -96    
176    96     
0      128    
64     144    
-32    0      
-64    -112   
176    64     
64     -512   
-176   -304   
256    -48    
-32    240    
-80    -304   
144    560    
-96    -80    
128    32     
64     16     
0      112    
48     48     
112    0      
80     -32    
16     -400   
48     256    
48     -64    
16     48     
48     -176   
-160   -112   
64     -208   
96     192    
96     -224   
-192   64     
160    -16    
160    80     
-112   -16    
96     432    
144    208    
0      48     
96     112    
-64    -160   
80     128    
-144   -336   
368    32     
-128   -144   
352    224    
-192   -496   
80     176    
160    48     
-64    -784   
176    -128   
-480   -176   
16     -128   
160    16     
112    -544   
-80    -208   
0      -1376  
144    -64    
0      160    
-32    64     
48     -208   
-64    32     
-112   -32    
400    320    
32     -112   
-208   96     
-96    128    
272    -416   
96     -240   
-176   -160   
-128   -112   
320    -304   
-16    -128   
32     208    
144    -240   
-96    -512   
48     16     
-96    -112   
208    32     
-64    -96    
144    -48    
32     -64    
-16    32     
-208   0      
80     -48    
32     16     
96     240    
-80    -32    
176    -480   
144    -96    
-32    -64    
112    96     
-128   -144   
224    240    
64     0      
48     -48    
-64    -96    
80     -112   
-448   112    
-80    -144   
112    112    
144    -400   
0      16     
64     -432   
-112   32     
128    -48    
0      144    
-96    -96    
112    32     
-112   -64    
128    -96    
-192   192    
-80    -192   
-96    -32    
-64    -208   
112    -160   
0      -288   
160    -64    
-16    -112   
32     16     
128    -704   
-48    -16    
-48    -80    
80     -112   
-64    32     
0      64     
-1376  800    
1504   592    
448    784    
544    -432   
-368   -704   
-96    -704   
544    944    
80     -944   
32     640    
-368   -1120  
240    688    
96     -544   
192    240    
-320   32     
336    -80    
-64    160    
16     -240   
-128   -64    
160    -288   
-256   192    
368    -112   
-448   240    
32     -464   
-96    256    
48     -544   
16     320    
112    -1216  
64     192    
32     -160   
-32    0      
0      -192   
-16    -48    
-224   0      
80     96     
-48    16     
208    -96    
-144   32     
64     -176   
16     64     
48     -160   
0      80     
-64    32     
-32    -32    
-32    96     
-48    64     
-16    -48    
-32    96     
-32    32     
176    -80    
-336   -16    
160    80     
-208   16     
48     -112   
32     0      
-128   -32    
96     224    
-96    16     
-48    -16    
-16    96     
64     160    
80     -48    
144    -64    
-144   96     
96     -32    
-80    16     
64     -16    
-16    16     
16     -48    
-48    48     
-304   -272   
-1152  0      
0      80     
-816   -32    
-16    16     
-64    -16    
96     80     
-288   80     
-160   176    
368    144    
-160   144    
112    -80    
-16    32     
-112   -320   
224    176    
-208   -272   
-64    0      
-80    16     
-16    96     
64     368    
-208   0      
-112   16     
192    96     
-48    48     
16     32     
-32    80     
288    368    
48     400    
-320   -256   
48     -48    
48     48     
128    48     
16     96     
-240   0      
-48    16     
-176   32     
-112   -96    
-432   80     
16     320    
16     -112   
-32    80     
-64    -64    
112    80     
0      -32    
-48    64     
80     96     
-48    16     
16     144    
-112   16     
-16    0      
16     224    
-80    -48    
-192   -16    
-64    208    
-960   -240   
-32    48     
-192   64     
144    96     
96     -144   
-160   160    
80     32     
-64    -48    
-128   16     
160    320    
-80    -128   
80     192    
-192   -512   
64     48     
-272   112    
-16    32     
-80    160    
-96    -112   
-32    112    
0      32     
-64    0      
-160   -144   
192    32     
-48    368    
-96    -64    
-48    -144   
128    160    
16     112    
-80    -16    
128    -48    
-192   112    
-16    160    
-1072  -176   
-32    128    
160    -80    
-48    256    
-240   -80    
96     144    
-96    -112   
288    112    
-160   96     
-96    -48    
96     544    
-480   -80    
320    0      
-352   96     
208    -48    
-368   -144   
0      224    
-32    -32    
48     128    
-64    48     
128    80     
-144   32     
0      16     
0      80     
-48    160    
112    -48    
16     208    
112    192    
-368   16     
240    -80    
-96    416    
-128   0      
-112   -128   
160    96     
176    16     
112    -240   
-64    304    
-16    -64    
-64    -16    
96     192    
256    32     
-32    -80    
-896   1408   
-448   -560   
-144   -288   
-288   288    
-608   -656   
688    640    
-192   -176   
128    544    
-480   -416   
176    16     
-128   -32    
0      96     
-192   512    
304    112    
-192   16     
-64    -320   
16     256    
272    192    
-192   64     
80     -192   
64     112    
0      208    
176    160    
-80    144    
176    32     
-208   32     
48     144    
96     64     
80     112    
-176   80     
176    96     
-96    0      
-96    -16    
96     48     
-64    48     
240    128    
-64    96     
112    96     
-48    80     
-80    -144   
112    96     
32     224    
80     -48    
-144   -48    
-112   -16    
272    208    
-64    48     
-32    32     
160    -48    
0      208    
48     128    
-16    -32    
-96    -80    
160    -80    
-128   160    
144    192    
-208   128    
80     -160   
128    144    
-240   -96    
128    208    
-128   -96    
32     64     
32     208    
0      0      
64     96     
32     32     
48     144    
80     144    
-64    96     
128    -32    
144    208    
-240   80     
176    112    
-48    80     
128    288    
80     -64    
64     -448   
16     192    
-128   64     
80     160    
-16    80     
128    -32    
-32    144    
64     416    
-256   -80    
208    96     
96     240    
-96    32     
144    112    
-96    80     
176    -32    
-80    -2688  
-144   -48    
240    16     
-112   112    
128    144    
16     128    
-32    80     
16     -16    
80     112    
-16    112    
144    48     
-144   128    
144    144    
-32    -128   
96     128    
160    -288   
-112   112    
112    144    
16     -32    
-64    48     
112    96     
-16    -32    
0      128    
32     176    
256    96     
-352   64     
208    96     
80     160    
192    32     
32     128    
-64    -64    
160    112    
128    -848   
80     64     
-64    16     
-160   -64    
96     -288   
-16    64     
80     -48    
160    304    
-32    64     
352    144    
-208   208    
-16    -144   
192    112    
-144   -96    
288    112    
-16    -896   
-48    96     
112    -1424  
0      0      
80     16     
-80    160    
272    -256   
32     224    
-80    0      
32     -16    
-32    112    
128    -176   
-16    64     
16     -384   
64     160    
-64    -464   
176    128    
-96    -272   
-32    112    
288    48     
64     256    
-48    80     
-32    -48    
32     64     
112    -16    
176    160    
208    -288   
-176   208    
-80    -736   
288    96     
80     160    
32     0      
-80    144    
176    -96    
-64    16     
128    80     
16     320    
-16    192    
64     192    
64     -960   
192    -64    
64     -496   
96     160    
-80    32     
-160   -16    
64     -336   
128    48     
112    -320   
80     224    
-64    112    
16     112    
64     144    
16     128    
-48    48     
304    -480   
0      224    
192    32     
-80    32     
2352   -256   
-1328  -96    
1168   -144   
-96    272    
96     -144   
144    -496   
-336   -192   
384    1472   
-48    -400   
-64    -2320  
-32    -2240  
240    288    
32     -992   
224    -128   
-144   80     
144    -64    
-48    208    
144    144    
-64    112    
256    -96    
-96    -560   
144    80     
32     -192   
-128   0      
-176   -96    
-16    -192   
64     -80    
192    112    
80     -64    
-32    -2160  
48     -144   
80     240    
-208   -112   
80     48     
-112   -176   
352    -496   
-160   144    
32     -176   
48     64     
-240   -80    
16     0      
64     -144   
128    32     
48     -128   
0      0      
80     176    
-48    -112   
48     -48    
64     -208   
-16    192    
48     -64    
64     112    
-16    -32    
160    0      
-48    -48    
64     -160   
32     16     
-48    -144   
128    0      
112    -80    
-208   -64    
32     -416   
160    -32    
-96    -144   
208    224    
0      64     
48     128    
-32    0      
128    -32    
-272   -48    
0      -128   
64     -64    
16     -64    
128    -48    
32     0      
32     -80    
240    -464   
-112   -32    
464    -1248  
-48    112    
-160   64     
272    0      
-176   -144   
48     -192   
-80    -80    
96     0      
-112   80     
48     96     
-224   80     
80     0      
-48    16     
0      -272   
48     -112   
256    -96    
-64    112    
176    -64    
-160   32     
80     32     
64     48     
-32    0      
48     32     
-64    80     
64     -48    
-320   64     
-32    -32    
-160   96     
-112   -224   
256    224    
-80    -624   
144    64     
16     32     
32     -48    
80     48     
-32    -16    
-128   -16    
32     -272   
-816   -96    
16     -64    
-16    -48    
-32    -96    
-400   144    
112    -336   
-16    16     
-16    -848   
-16    128    
96     -160   
96     -112   
-208   208    
80     -128   
-32    -48    
-64    64     
128    96     
-64    32     
-48    96     
128    -32    
-64    32     
288    352    
-336   -176   
368    -304   
-176   224    
48     64     
-48    -48    
-144   64     
160    -80    
-80    80     
112    128    
-64    -16    
160    -80    
-128   128    
96     -128   
-160   16     
144    -128   
96     240    
-640   -32    
-416   -128   
144    -32    
-672   -48    
224    176    
-576   160    
-16    -160   
48     -48    
80     32     
208    -48    
-368   64     
-1104  -64    
576    160    
-496   80     
192    -48    
-256   -288   
-112   112    
48     16     
-320   0      
64     352    
-160   -224   
256    112    
-816   240    
-48    -224   
304    -240   
128    160    
32     224    
32     0      
-608   -128   
288    0      
32     -128   
16     -64    
176    64     
176    -160   
64     288    
-256   -32    
-48    80     
-784   -16    
32     160    
-80    -16    
0      272    
-176   -208   
128    48     
-80    -192   
-656   -1712  
304    512    
112    -960   
464    -432   
-128   -752   
-288   208    
240    272    
16     432    
-720   -368   
208    256    
-1136  -112   
-112   192    
80     -208   
-16    -224   
-48    -32    
80     176    
48     208    
-80    112    
-144   -64    
176    96     
-128   0      
-32    160    
-16    96     
128    176    
-352   32     
-160   -96    
-128   192    
112    -64    
16     -48    
-80    0      
48     64     
80     112    
-128   32     
-64    0      
-80    0      
0      -80    
48     -32    
-64    -32    
-144   128    
16     -80    
-256   -32    
0      96     
-48    64     
48     32     
16     -16    
-144   32     
144    80     
-208   -96    
208    336    
-256   0      
336    16     
-288   64     
112    0      
-80    32     
48     32     
-48    96     
-224   176    
-1376  -208   
256    272    
-160   -48    
192    -32    
16     160    
0      48     
128    64     
-176   160    
32     32     
32     -224   
96     64     
16     208    
-64    160    
-112   0      
96     48     
-272   112    
-32    64     
128    16     
0      -48    
32     64     
-32    48     
32     64     
-80    0      
48     272    
-48    -80    
160    -80    
-32    0      
-16    176    
-192   48     
32     96     
16     0      
-16    192    
-48    96     
32     16     
-48    32     
16     112    
-80    -128   
80     0      
-64    144    
160    160    
-112   -16    
-192   -112   
-16    -64    
-112   48     
-16    96     
144    112    
-32    144    
-16    0      
-64    96     
80     32     
0      320    
128    -64    
-48    128    
-48    0      
48     96     
32     -64    
-80    64     
96     224    
-80    16     
64     112    
-128   -48    
144    -80    
-16    -160   
-112   32     
208    80     
208    112    
48     32     
-176   112    
-80    16     
-64    -80    
-32    -80    
-80    -96    
96     144    
96     16     
80     16     
-16    80     
208    128    
16     0      
16     48     
64     16     
-48    80     
48     0      
-96    -32    
144    96     
-16    16     
144    -16    
-96    96     
16     16     
32     -64    
-80    80     
176    368    
-64    128    
128    64     
32     48     
-96    112    
80     -48    
16     0      
128    416    
-112   -16    
304    288    
-320   80     
224    224    
48     224    
32     -16    
16     144    
96     80     
-48    96     
-32    224    
48     -64    
192    352    
-48    0      
-96    0      
32     48     
112    208    
32     160    
192    128    
-208   -368   
64     64     
32     64     
208    -688   
96     144    
-64    -96    
32     208    
64     80     
0      80     
64     0      
96     176    
-32    128    
-32    80     
-256   -192   
208    112    
48     96     
-16    16     
32     16     
48     -992   
96     112    
-16    336    
32     -48    
176    80     
80     192    
-528   1920   
-448   -624   
-736   -320   
848    240    
1264   -464   
-736   -176   
-544   -112   
656    688    
64     -224   
112    -560   
-32    144    
112    -464   
96     256    
32     0      
-16    128    
64     128    
96     288    
48     -176   
-176   -128   
128    -48    
-64    80     
48     160    
-64    -208   
-96    160    
96     -224   
64     144    
112    -752   
-112   128    
64     112    
-48    -48    
-16    176    
-32    192    
224    256    
-256   -80    
48     -144   
-80    128    
240    272    
16     -64    
-16    96     
80     -144   
48     80     
64     -1248  
0      96     
80     -288   
32     96     
0      208    
-48    96     
112    192    
-32    128    
224    208    
0      128    
48     128    
48     16     
-32    176    
112    -176   
0      64     
160    -496   
-192   -160   
32     -32    
128    176    
64     -528   
16     160    
80     48     
-16    416    
-48    32     
256    -224   
96     48     
-16    -208   
96     80     
-32    -240   
0      64     
96     -32    
80     112    
160    -112   
-16    192    
16     80     
96     432    
-80    240    
320    192    
176    304    
96     -32    
-32    -32    
-32    -432   
64     0      
48     -192   
16     0      
256    -32    
-128   32     
80     -240   
16     192    
16     -16    
144    112    
0      176    
64     128    
80     -96    
-80    -128   
224    112    
112    160    
0      80     
112    0      
-80    96     
96     -256   
80     80     
0      -160   
96     -128   
32     96     
16     -144   
32     160    
-1392  -160   
96     -848   
0      -16    
112    -544   
16     -64    
96     -944   
32     -128   
64     80     
80     -64    
32     48     
48     -16    
112    -96    
-16    160    
48     -928   
-192   -48    
-368   -48    
176    -144   
32     32     
80     160    
-64    80     
240    -336   
-16    -208   
128    208    
144    224    
-48    112    
48     -256   
160    -96    
-240   -208   
144    -464   
256    -112   
-48    192    
-16    128    
-144   -32    
16     -464   
160    -48    
192    -384   
-80    -112   
240    -80    
-144   224    
192    -192   
-320   -16    
176    80     
-16    -32    
48     16     
48     -48    
0      80     
-192   -192   
-800   -368   
128    0      
48     224    
0      -352   
-80    -16    
112    -432   
80     -208   
-192   64     
80     80     
48     -64    
288    -144   
-208   -160   
192    208    
-240   -112   
-128   -128   
48     32     
0      48     
-944   128    
-96    32     
112    -96    
80     -64    
80     -96    
160    80     
32     -288   
-96    48     
448    -304   
-320   32     
192    -80    
-112   112    
144    112    
-176   -32    
160    -112   
-1168  -48    
96     -560   
-96    48     
96     -192   
48     0      
-64    -336   
256    32     
16     64     
176    -96    
-144   192    
-752   160    
-1600  -432   
464    -112   
16     192    
352    -880   
-1168  -224   
224    -32    
-240   80     
-320   -208   
256    -112   
-48    -368   
-32    64     
96     -1904  
16     0      
-112   0      
48     -64    
-32    32     
80     112    
-112   -48    
32     0      
-96    -32    
64     16     
128    240    
16     -96    
160    48     
128    -256   
16     48     
96     16     
48     224    
-16    0      
32     64     
0      32     
32     0      
-16    80     
48     32     
80     128    
80     240    
-528   -80    
0      -208   
-16    208    
256    -288   
-64    112    
-64    80     
-128   -48    
-16    -80    
-80    -176   
128    160    
-144   -48    
16     64     
112    -32    
-112   -16    
176    -144   
-192   176    
-1360  -176   
-48    48     
-160   -240   
-320   64     
-16    48     
-352   64     
-48    -16    
-624   -64    
16     80     
16     64     
0      -32    
112    32     
-464   -32    
-720   -176   
112    48     
-288   80     
-64    48     
0      -160   
-384   80     
16     32     
-112   80     
-80    144    
-96    112    
64     48     
-1168  144    
-160   -16    
80     -240   
96     80     
-160   16     
64     -176   
176    -192   
-176   176    
64     48     
144    272    
-384   96     
320    176    
-176   80     
112    -64    
-128   -80    
-512   -192   
32     -16    
16     0      
48     288    
-80    -32    
80     64     
-176   -192   
160    176    
-48    16     
0      112    
16     112    
48     304    
-176   -144   
224    16     
-368   -112   
304    16     
-304   -48    
-32    -96    
-64    128    
-48    16     
128    112    
-128   32     
-32    -128   
-112   0      
112    112    
32     -64    
-112   -80    
-144   0      
48     32     
-96    16     
-96    32     
224    48     
-784   64     
208    144    
-48    80     
48     144    
144    32     
128    80     
-16    64     
-224   -32    
-32    -16    
-160   -192   
48     32     
-16    -96    
80     80     
-224   176    
160    96     
-304   -144   
-64    64     
-1040  -160   
64     16     
64     368    
160    32     
-128   -144   
64     176    
48     256    
0      112    
32     32     
16     64     
-96    0      
-32    64     
-32    64     
32     32     
-80    -48    
16     80     
224    592    
-208   -256   
-16    32     
96     192    
-112   -112   
96     32     
-64    96     
96     112    
-368   -160   
-16    48     
-16    96     
48     -304   
-16    400    
0      64     
-752   -240   
-96    16     
144    -224   
64     96     
192    240    
32     288    
-96    0      
16     160    
-32    192    
16     64     
64     0      
-144   32     
48     144    
-288   0      
64     192    
-352   -160   
16     16     
160    192    
-16    240    
-48    96     
-32    -32    
96     32     
304    48     
-176   48     
80     32     
-16    96     
80     0      
-48    1824   
-624   -1280  
-16    -80    
144    288    
-784   160    
-176   544    
-208   -256   
240    336    
-416   -240   
448    128    
-240   64     
208    -16    
96     64     
-128   -288   
80     32     
208    320    
-80    432    
64     144    
-240   -224   
16     -176   
128    112    
-32    -80    
80     176    
96     160    
-48    -16    
48     0      
112    96     
-128   -80    
16     0      
-48    16     
48     112    
-64    48     
16     64     
144    96     
-48    240    
-240   -288   
-128   -224   
-48    -64    
496    432    
-128   128    
-144   208    
144    32     
16     64     
80     80     
64     16     
192    160    
-176   32     
-32    0      
128    336    
48     -16    
304    -64    
48     112    
32     112    
-48    32     
-112   -128   
80     -368   
48     -128   
336    480    
160    240    
-288   240    
80     176    
96     64     
64     304    
0      -112   
352    256    
-64    0      
-32    128    
64     -48    
48     48     
-16    0      
48     144    
80     32     
-48    96     
80     64     
-48    -80    
-32    -32    
-192   -400   
400    -784   
112    128    
224    176    
48     192    
0      272    
16     208    
80     96     
80     144    
0      0      
16     208    
-192   -304   
208    288    
-208   0      
144    -192   
48     -16    
128    128    
-64    32     
80     0      
-32    64     
192    96     
64     64     
-32    -112   
160    160    
-32    -496   
32     32     
-80    -16    
128    112    
64     80     
-112   -304   
-16    -96    
48     -144   
-32    -48    
208    -464   
-64    208    
80     32     
-16    64     
-16    -256   
160    48     
48     128    
0      240    
-16    -16    
160    144    
-64    128    
144    -192   
16     -64    
-64    -368   
128    144    
192    -656   
-16    304    
0      160    
176    208    
-80    96     
64     272    
32     -112   
256    -144   
-112   -64    
144    176    
-32    208    
16     -576   
-64    -48    
432    0      
-128   64     
176    -176   
-80    128    
-32    -928   
192    32     
80     224    
48     48     
48     64     
-48    16     
192    336    
-16    -400   
-32    96     
160    -224   
-16    48     
96     -608   
112    256    
-16    -144   
-128   64     
192    224    
-144   -224   
16     0      
128    160    
-32    32     
128    64     
-48    224    
368    144    
-176   -32    
-64    144    
368    256    
-64    -592   
64     112    
112    32     
-128   -112   
16     0      
288    128    
-128   144    
32     80     
-80    192    
64     -16    
48     144    
0      -288   
96     80     
16     -112   
112    208    
-112   -64    
-48    160    
96     -80    
112    128    
32     -112   
-96    112    
-32    32     
48     -512   
32     128    
-592   32     
96     -1392  
-112   -224   
240    -2560  
192    -128   
0      144    
0      912    
400    1248   
-496   -112   
-192   -368   
-416   64     
496    -1904  
-48    320    
-48    -96    
96     128    
-928   -416   
224    -448   
-16    0      
128    -144   
-48    0      
176    -96    
-64    -144   
176    112    
32     -160   
32     -416   
-80    32     
48     -160   
32     272    
48     -64    
112    -112   
-272   -192   
96     -192   
-16    32     
208    -16    
-32    -96    
16     -752   
0      -32    
64     -224   
192    16     
-80    -128   
80     64     
-96    144    
192    192    
-192   -192   
96     -192   
-16    -64    
144    -64    
-1408  32     
160    -32    
160    -48    
-208   -240   
144    0      
96     -800   
288    112    
-224   -64    
16     -80    
128    -64    
-96    48     
64     48     
-160   16     
0      -64    
32     112    
-448   -160   
0      208    
-96    -176   
368    -96    
-112   208    
48     -32    
0      -112   
208    -1280  
-96    208    
-48    -160   
192    48     
64     80     
-16    48     
-128   16     
80     -272   
-160   -80    
48     80     
-160   112    
48     -32    
192    16     
-112   -528   
64     0      
112    -1536  
-64    144    
128    16     
112    0      
-128   -288   
96     -272   
-416   -64    
176    -224   
64     416    
-288   -192   
-176   112    
-176   -496   
-768   112    
16     -544   
16     192    
128    -352   
-160   80     
240    128    
96     -48    
-176   -64    
160    -48    
-352   32     
112    48     
80     96     
-112   -144   
16     -32    
32     -176   
64     48     
80     -96    
-128   -32    
64     -240   
32     80     
0      -144   
16     -112   
-288   224    
16     0      
-48    32     
-16    -320   
-64    -32    
96     0      
0      112    
-112   -96    
16     80     
-80    -176   
160    32     
160    -208   
-80    -32    
-128   0      
-16    -80    
192    144    
-160   -224   
-96    -48    
0      -64    
-144   -208   
-144   -112   
112    64     
96     -32    
16     -96    
-272   -160   
96     144    
-1296  -416   
-480   -64    
272    -160   
-704   32     
208    272    
-336   -96    
32     -160   
-208   -272   
-16    -160   
112    336    
96     80     
-1296  -176   
16     112    
-304   -144   
48     128    
-48    -96    
-352   176    
224    416    
-640   -224   
160    304    
-864   64     
-16    0      
-48    96     
80     48     
32     16     
32     -48    
-16    -96    
32     240    
112    112    
-128   -192   
64     0      
-192   -48    
-48    0      
-336   48     
-112   96     
16     -48    
96     48     
-560   0      
-192   0      
160    -128   
-80    64     
0      -64    
80     128    
-112   -128   
-16    192    
144    48     
-304   -128   
48     0      
128    96     
160    64     
-96    96     
-176   -48    
-176   -48    
-160   48     
128    -64    
-208   96     
96     -16    
320    48     
16     -272   
2400   -2320  
-1216  -1488  
704    1696   
-304   1072   
-304   -624   
48     736    
-944   192    
784    512    
-1072  96     
1040   -48    
-1296  128    
416    -176   
-208   -176   
-32    -208   
-32    -272   
272    -80    
64     384    
-48    -448   
352    288    
-144   16     
16     400    
-112   160    
-32    64     
96     -64    
16     160    
-320   -288   
352    448    
-1600  0      
208    -64    
-304   -64    
-16    -96    
272    128    
96     -48    
0      144    
-48    192    
-160   -48    
-192   368    
192    288    
-320   32     
224    128    
-304   0      
272    16     
-720   -32    
144    64     
32     416    
-112   128    
-48    -368   
144    432    
-80    -112   
160    128    
-208   112    
128    80     
16     176    
-96    -192   
96     128    
-80    0      
48     -48    
-544   -272   
80     240    
-64    80     
-80    128    
112    80     
-144   32     
16     -64    
-48    128    
272    16     
-224   -16    
32     48     
-112   -48    
48     144    
-144   48     
64     64     
-400   32     
-48    96     
-80    -16    
112    -32    
160    672    
192    160    
128    144    
-336   -64    
288    48     
-48    16     
-96    128    
16     -96    
96     96     
-32    80     
48     576    
176    128    
-240   16     
192    -112   
128    144    
64     32     
-80    112    
0      160    
-16    176    
-160   -96    
208    80     
16     336    
128    240    
-16    240    
-272   -176   
160    16     
32     32     
48     128    
48     96     
-16    192    
-144   -224   
-64    -336   
-32    -240   
112    64     
80     144    
-48    128    
-96    -16    
-112   -48    
0      96     
-96    -112   
16     160    
128    144    
224    144    
-400   160    
320    112    
-16    96     
-192   256    
128    -16    
-32    48     
-32    -32    
144    32     
-160   208    
32     -48    
48     112    
-96    48     
-112   -160   
144    0      
-192   -96    
176    -64    
192    464    
-320   -176   
288    0      
-112   32     
80     160    
32     144    
-16    0      
80     208    
-48    -64    
192    352    
80     336    
48     272    
0      80     
48     48     
32     16     
32     96     
-32    64     
80     -16    
32     176    
-144   -112   
48     176    
-144   -160   
64     80     
80     64     
32     224    
112    96     
-192   -2512  
64     112    
112    48     
224    -80    
96     288    
-112   160    
-208   48     
-96    32     
64     -16    
64     96     
-32    -80    
272    160    
16     -16    
16     16     
128    96     
-32    -176   
144    144    
-112   176    
112    32     
-48    176    
-80    -32    
64     64     
192    240    
-112   32     
80     64     
80     16     
-16    80     
64     -32    
-16    -32    
16     96     
-32    -192   
112    -16    
-176   -112   
320    16     
-32    128    
64     96     
-992   1072   
112    -560   
-336   192    
256    192    
448    16     
-192   -304   
336    112    
-208   -224   
336    64     
-304   -688   
496    0      
-176   -720   
208    -240   
-192   400    
304    -128   
-160   -272   
64     -112   
-80    240    
112    -128   
-112   208    
208    -80    
32     272    
80     -96    
64     96     
-32    -192   
128    176    
48     112    
48     240    
-64    -384   
176    192    
-16    32     
144    -16    
-80    160    
80     96     
64     96     
-112   -560   
80     0      
112    -160   
176    64     
0      -32    
64     128    
-64    -784   
80     -16    
80     -784   
48     128    
112    144    
-48    96     
80     272    
-224   32     
256    -48    
-96    64     
80     96     
64     -160   
-96    -32    
192    -144   
16     112    
32     -640   
112    144    
-96    96     
144    64     
0      144    
32     160    
0      48     
80     208    
-32    96     
80     -192   
128    80     
96     64     
-96    80     
208    80     
0      -32    
128    16     
-16    80     
80     -736   
80     112    
16     -16    
-64    208    
-112   -240   
0      -208   
-80    0      
96     -16    
-80    160    
0      -416   
192    -144   
64     -272   
-192   -96    
304    64     
-272   176    
160    -624   
128    -2064  
-48    48     
144    -144   
32     32     
-528   -64    
-64    -448   
160    -112   
-32    -48    
80     -144   
16     -160   
224    112    
-80    48     
80     48     
16     16     
128    112    
80     -176   
-112   48     
96     -192   
144    96     
32     176    
-64    -240   
-64    -128   
144    -240   
96     -16    
32     -512   
80     128    
48     208    
192    96     
-96    0      
128    64     
112    -320   
32     80     
80     32     
96     -112   
-288   -128   
80     -160   
-240   112    
16     -32    
448    352    
-432   -336   
224    -80    
-96    -2320  
160    0      
64     -48    
-16    -48    
80     -112   
32     128    
-48    -272   
0      -256   
-224   -32    
192    256    
-400   16     
-176   -176   
256    -224   
80     -160   
16     -160   
128    -656   
-192   -160   
96     -80    
112    240    
16     -80    
64     48     
-80    16     
128    -112   
128    96     
-368   -416   
-384   -320   
256    64     
-16    64     
176    80     
16     0      
224    -48    
-32    48     
32     -976   
0      80     
64     -32    
32     208    
-128   -80    
448    80     
-224   48     
64     -256   
-352   -64    
-112   16     
-192   -288   
-80    64     
96     -112   
272    -256   
-304   16     
208    -832   
32     96     
16     -16    
112    32     
-96    48     
112    16     
-144   -32    
0      128    
-96    176    
48     -96    
-592   16     
112    -80    
128    -48    
-16    -256   
0      112    
-80    -320   
240    176    
64     144    
64     -48    
-80    48     
-1040  1200   
704    624    
-400   -848   
832    272    
-400   -384   
368    400    
-736   496    
160    -192   
288    416    
-32    -160   
0      -192   
-496   416    
112    -176   
-208   64     
240    -288   
-208   240    
128    -160   
32     992    
-400   -256   
144    -80    
-272   -528   
48     176    
-128   -48    
-32    352    
96     -512   
-80    -272   
0      -112   
192    304    
-208   -80    
240    192    
-64    -16    
-128   -256   
32     416    
-80    -160   
48     208    
16     112    
160    -64    
0      128    
-688   -416   
368    384    
-1200  -416   
-624   0      
144    144    
112    96     
-224   -48    
-784   -80    
-96    96     
64     128    
-432   -192   
32     -240   
-32    -32    
112    -96    
0      176    
80     -272   
-64    240    
64     -208   
-480   -384   
32     32     
-224   32     
-176   160    
-320   288    
-32    160    
-592   -320   
-256   -224   
208    -144   
48     208    
-96    -96    
96     -64    
-128   -304   
-16    320    
-96    48     
96     -48    
-128   144    
0      -48    
32     144    
-128   -16    
224    304    
-288   208    
-64    192    
-352   -400   
-224   -48    
-80    -144   
144    16     
-176   16     
-96    -96    
144    64     
32     128    
64     160    
-80    -48    
-48    176    
144    16     
-16    -64    
-304   112    
32     128    
-336   -48    
128    368    
0      -48    
192    304    
-96    -256   
80     16     
-80    -80    
-224   64     
144    288    
-48    32     
-64    112    
32     32     
16     496    
-160   -176   
-320   -64    
-256   -128   
80     -16    
48     -96    
-16    144    
96     -16    
-48    128    
80     64     
-32    -16    
-112   128    
208    48     
-48    -128   
-304   -192   
16     96     
400    160    
-80    240    
-320   16     
176    208    
-320   -224   
48     -48    
-32    0      
-96    80     
176    144    
-272   0      
-80    -144   
-304   -128   
272    128    
-80    64     
208    -32    
-272   80     
16     -16    
-320   -80    
16     96     
-608   -160   
96     16     
32     64     
96     96     
-112   112    
48     0      
-16    64     
-96    48     
48     64     
-48    112    
48     128    
-32    -48    
-144   80     
48     16     
-64    144    
-176   0      
96     336    
-144   16     
128    -112   
-112   0      
208    192    
16     112    
-32    0      
80     0      
-80    0      
48     240    
-144   64     
0      -32    
112    16     
112    144    
-16    112    
-208   240    
192    -144   
272    272    
-96    160    
-96    -16    
64     224    
-48    0      
16     128    
16     -96    
-16    144    
-16    -128   
80     64     
208    80     
176    272    
-256   192    
-240   48     
80     16     
48     -80    
160    80     
16     0      
-48    176    
-128   16     
48     16     
-32    112    
160    64     
64     1856   
-288   1936   
-1856  -560   
48     320    
16     224    
-512   -336   
368    496    
-560   160    
208    -320   
-240   0      
160    -256   
-144   352    
240    -336   
80     512    
16     -208   
-192   128    
144    -32    
-208   208    
192    0      
112    192    
-160   -192   
160    192    
-48    208    
240    240    
-320   -80    
192    112    
-80    96     
304    208    
-272   128    
176    48     
-192   -64    
0      48     
144    208    
16     16     
-64    128    
16     -240   
-32    192    
16     96     
64     208    
16     0      
-32    0      
-32    64     
48     112    
16     0      
-48    48     
0      80     
112    144    
0      144    
80     64     
-16    32     
128    96     
-48    80     
128    112    
-80    80     
112    32     
64     96     
16     96     
-48    192    
32     0      
144    176    
-64    -96    
80     -384   
-80    32     
112    -1552  
48     96     
-32    0      
112    80     
96     80     
-32    32     
112    192    
-16    64     
64     128    
-16    96     
96     160    
0      160    
16     192    
-160   -224   
208    -80    
80     -656   
-32    160    
368    544    
-240   272    
48     224    
400    128    
-32    64     
32     16     
-16    64     
64     224    
-112   32     
16     32     
0      -48    
32     -128   
96     48     
80     -192   
-16    64     
-144   -928   
240    128    
-64    -80    
176    384    
-32    -144   
48     64     
-48    16     
128    112    
-16    192    
0      176    
96     128    
48     -48    
96     48     
-192   -688   
80     -128   
-32    -624   
144    48     
48     -176   
112    192    
-48    -48    
64     -48    
-112   -32    
224    128    
112    128    
-96    -48    
80     176    
96     -128   
112    32     
-144   -160   
144    144    
208    -704   
32     96     
-16    -944   
96     112    
-208   80     
64     -16    
0      -16    
160    -48    
48     208    
32     -112   
128    128    
-48    48     
80     176    
-32    -224   
32     16     
144    80     
64     240    
0      -1680  
32     128    
64     64     
80     64     
-80    240    
64     16     
112    112    
64     -400   
64     176    
-32    -96    
144    240    
-80    -144   
128    128    
0      -256   
224    272    
-272   -64    
352    128    
-80    176    
64     144    
-32    32     
16     144    
144    128    
-160   -480   
208    320    
-128   16     
16     -128   
288    -192   
112    352    
-32    -256   
64     192    
128    -80    
160    80     
-48    32     
-48    -1824  
144    64     
-96    96     
224    -976   
16     -48    
48     -32    
32     -272   
16     144    
16     -256   
48     128    
-16    208    
-96    48     
112    16     
-16    -1616  
176    32     
128    -448   
-112   -48    
96     48     
272    48     
224    128    
0      -224   
16     -16    
816    976    
-736   -1808  
176    -704   
592    592    
80     -880   
-960   -32    
192    -1056  
32     848    
-192   -448   
144    -368   
-192   -64    
128    416    
-16    -160   
288    -192   
-640   -528   
336    -352   
-80    -96    
416    -1872  
-400   -512   
-32    -400   
16     768    
-256   -448   
112    208    
80     144    
-240   -416   
-576   -320   
176    144    
-720   304    
96     112    
224    -128   
-144   -368   
192    -128   
-16    -560   
-32    -160   
16     -144   
176    448    
-128   -64    
-16    -160   
-16    -96    
48     -256   
160    -16    
-160   -16    
192    192    
-128   -128   
0      16     
0      -416   
240    -128   
-16    -576   
272    0      
-32    -384   
0      160    
64     32     
-16    -128   
48     112    
-176   -112   
144    -32    
-96    -144   
-32    48     
144    -256   
-688   256    
-64    -320   
224    -144   
48     -144   
-176   64     
240    -928   
-64    -16    
112    -16    
32     -16    
144    160    
-96    64     
-32    -16    
128    -64    
-160   -128   
80     -96    
-128   0      
-80    -64    
96     -480   
32     -224   
-144   64     
112    -480   
-48    224    
-80    112    
0      -208   
192    16     
-112   -128   
-224   48     
-112   -160   
-208   -16    
80     16     
-48    96     
144    48     
0      64     
48     -256   
96     0      
80     -48    
16     192    
-288   80     
32     -112   
-80    0      
112    -144   
-16    32     
112    96     
-64    96     
64     176    
-352   -208   
288    -240   
-240   64     
368    16     
-16    144    
-112   -320   
-16    64     
-144   -64    
144    -96    
-240   -64    
48     -112   
256    48     
-320   48     
272    32     
-16    96     
-112   -176   
-192   -192   
384    176    
80     32     
16     96     
-1552  -224   
-352   -48    
48     112    
-208   -16    
-32    48     
-160   96     
32     -16    
192    208    
-272   -48    
384    -16    
-224   -16    
-80    -160   
80     48     
-160   16     
144    0      
-80    -224   
-288   -16    
112    96     
-96    -96    
-144   16     
-1264  -48    
112    -32    
240    -96    
-80    32     
-16    -32    
0      48     
-208   -80    
48     96     
-48    -256   
-192   80     
48     80     
-48    144    
112    -160   
80     80     
-208   80     
-32    -80    
-80    160    
-528   0      
48     112    
-16    176    
64     48     
-48    0      
-144   160    
-48    160    
-176   -112   
176    0      
-16    16     
16     -48    
-176   96     
-288   96     
-96    -48    
144    160    
-96    48     
64     0      
-1424  -112   
80     288    
-112   -96    
-64    128    
-16    -144   
352    160    
-144   -96    
-48    112    
-96    -16    
-48    48     
64     48     
-80    96     
-16    48     
-48    32     
-32    -80    
-384   112    
0      16     
-80    -48    
32     16     
-432   -768   
1104   240    
768    864    
416    -624   
592    160    
-128   -768   
256    -32    
656    64     
-144   464    
-112   -320   
-16    32     
-368   -272   
-48    432    
96     -432   
0      304    
64     -64    
-32    272    
0      -16    
80     160    
-32    32     
96     -64    
-48    208    
-96    32     
80     128    
-176   -112   
96     144    
16     96     
112    112    
-1168  -208   
80     112    
16     -48    
-48    80     
96     64     
32     80     
-32    32     
-96    48     
80     48     
-144   32     
64     32     
-64    32     
80     48     
-224   -32    
32     112    
-336   -112   
96     0      
80     32     
16     0      
48     0      
-64    16     
32     16     
-32    144    
16     240    
16     48     
16     64     
-112   -96    
144    96     
-144   96     
16     64     
-48    0      
96     208    
32     64     
-16    64     
64     16     
16     96     
-48    208    
-80    96     
32     192    
-192   -192   
208    -224   
-192   80     
-64    192    
-96    48     
96     96     
80     80     
64     144    
-96    128    
-112   48     
112    16     
64     32     
192    384    
-160   176    
16     32     
-144   208    
384    208    
-224   -32    
128    208    
32     80     
-48    272    
0      -32    
-16    48     
80     32     
0      208    
0      64     
96     0      
48     64     
128    400    
-240   -128   
-32    -272   
48     -32    
224    288    
16     256    
-192   -32    
-96    32     
112    32     
144    96     
-16    64     
32     144    
32     112    
32     32     
0      64     
-32    -32    
80     64     
-16    48     
96     112    
-64    48     
-64    64     
48     48     
-96    16     
128    80     
-64    32     
176    224    
-48    32     
32     16     
-160   48     
208    112    
-96    -240   
208    -48    
-112   160    
160    240    
-192   -176   
-16    256    
32     144    
208    -16    
-128   128    
160    128    
-64    48     
208    -48    
-112   256    
208    -96    
64     208    
-112   192    
224    144    
-208   80     
80     176    
-16    -96    
96     128    
80     336    
-208   -240   
128    -16    
-32    96     
176    192    
-16    48     
176    208    
-112   208    
32     -112   
64     288    
-144   48     
128    32     
-64    160    
0      -32    
32     -192   
32     -16    
160    -1040  
-16    -32    
0      112    
-48    80     
48     48     
96     16     
0      96     
-112   -32    
-80    144    
-32    224    
-16    -48    
160    176    
-32    -32    
160    -160   
-48    320    
-112   -256   
128    -48    
32     144    
192    48     
-96    64     
48     128    
16     96     
0      192    
0      112    
144    96     
-48    96     
80     80     
48     96     
64     32     
-112   -96    
144    -48    
0      160    
224    -1680  
16     96     
48     144    
2000   -1488  
-928   -528   
672    1536   
-160   864    
320    96     
-896   -816   
240    64     
208    432    
-384   -160   
144    256    
-208   -112   
160    144    
80     -960   
-208   112    
-16    -496   
-96    -96    
128    32     
-64    -208   
192    256    
-48    208    
128    -16    
-16    112    
160    288    
-224   0      
96     -16    
-48    80     
112    80     
96     -176   
-48    144    
352    -240   
-96    192    
96     32     
64     160    
-96    48     
272    96     
-144   64     
176    208    
48     80     
-32    -80    
-16    96     
128    -160   
32     176    
80     96     
112    16     
-16    128    
112    176    
-64    -64    
-128   -48    
32     288    
112    80     
240    -48    
-224   -464   
80     -96    
208    -576   
-192   112    
208    -112   
-16    32     
112    -160   
32     160    
-16    -1008  
224    0      
64     144    
-64    112    
80     -32    
80     288    
64     -192   
0      -16    
80     256    
-128   -64    
224    64     
96     -128   
-48    32     
112    -208   
-48    128    
128    -48    
-48    -288   
128    240    
-80    -992   
80     64     
-864   192    
-32    -672   
160    64     
176    -544   
-160   80     
-16    -1552  
304    272    
-304   80     
192    -144   
160    48     
-64    16     
80     -384   
-48    -48    
160    -352   
16     -176   
-320   -112   
256    272    
-192   128    
160    -864   
64     -208   
-32    -816   
176    -80    
80     304    
-64    96     
64     -240   
-48    -96    
160    -176   
32     -32    
80     -224   
-32    -64    
48     0      
-32    96     
192    -112   
-128   -272   
80     -176   
0      32     
288    48     
96     -288   
-48    -16    
16     -256   
-320   -16    
48     -272   
-64    32     
240    32     
192    48     
192    176    
-208   -64    
-512   32     
-304   -304   
272    32     
128    16     
192    96     
-160   -304   
-224   -224   
80     -128   
304    112    
-48    -208   
-32    -128   
-64    128    
176    16     
-176   -64    
-160   -32    
-96    -16    
48     -16    
64     224    
-48    -176   
-304   -16    
-48    -384   
80     -32    
144    -336   
-32    64     
32     48     
16     -16    
0      -240   
96     80     
-128   176    
48     -128   
-176   64     
-48    112    
-208   64     
16     -64    
112    80     
32     -64    
32     -32    
112    -336   
-48    256    
-32    48     
160    -16    
128    -48    
272    -112   
32     -16    
-64    80     
-384   -400   
192    272    
-496   -128   
-80    16     
-336   -304   
336    32     
304    0      
64     -336   
-112   256    
-160   -128   
-64    208    
-112   64     
64     -192   
-336   -160   
64     -16    
16     -16    
-112   -96    
-32    -176   
112    -32    
-224   0      
160    -752   
16     144    
32     -336   
80     112    
-176   -32    
112    64     
1488   3408   
-1872  -496   
272    432    
384    816    
1216   384    
-816   -736   
-320   624    
64     272    
208    -752   
-160   208    
0      -272   
352    176    
-128   32     
224    -16    
-208   -96    
-32    -160   
-16    256    
64     128    
48     112    
128    -16    
-32    -240   
400    224    
-96    16     
64     -32    
-304   -48    
64     240    
-128   -192   
-640   0      
224    112    
-384   -80    
-128   64     
-576   64     
80     80     
0      64     
-16    -32    
64     -80    
-128   48     
-272   -96    
32     0      
-16    -64    
-32    96     
96     80     
-144   48     
-16    80     
-32    -48    
-48    64     
32     112    
48     224    
-944   112    
0      -128   
-48    48     
48     80     
-64    64     
112    16     
-144   -144   
96     176    
112    288    
-336   80     
32     -96    
-128   -80    
48     -16    
-80    -64    
-64    48     
-80    288    
-32    208    
-160   64     
-16    48     
-64    -176   
96     144    
-128   -176   
-80    -32    
16     112    
16     96     
-48    64     
-112   0      
-96    48     
-96    -128   
-80    144    
16     16     
-96    80     
-608   -64    
-32    -80    
-16    -432   
-16    48     
-16    -96    
80     208    
-32    64     
-16    16     
-64    0      
-48    0      
-16    176    
48     224    
-32    0      
0      -48    
0      0      
-592   -64    
-16    -32    
-32    -64    
96     176    
96     144    
-80    0      
-96    48     
-32    -96    
48     144    
-32    16     
128    64     
-208   -64    
48     176    
-64    -64    
32     112    
-160   0      
96     112    
-608   -48    
64     176    
-96    -16    
-96    -112   
64     256    
80     160    
-16    -16    
-80    96     
64     144    
-48    -128   
-112   64     
-112   160    
144    112    
-240   -432   
64     -272   
-752   144    
-80    -16    
256    160    
-208   176    
208    48     
0      128    
-80    48     
80     16     
-48    0      
80     176    
96     144    
-112   0      
112    160    
-48    160    
-32    16     
48     -160   
-272   224    
272    16     
-96    96     
-16    160    
112    -32    
32     16     
144    112    
-32    144    
-96    160    
-48    0      
32     -48    
64     96     
-176   112    
-48    -64    
16     16     
256    192    
0      176    
-160   208    
-176   -48    
128    32     
64     32     
16     48     
32     432    
-288   80     
-48    -16    
-16    -352   
464    208    
-192   160    
-160   224    
112    128    
112    -48    
16     0      
112    80     
16     224    
-80    48     
-48    -64    
-32    80     
224    -32    
-128   112    
96     48     
-48    32     
192    16     
-48    48     
32     16     
-128   96     
-32    128    
160    112    
144    256    
-80    80     
-32    336    
-48    80     
-176   48     
96     32     
-16    -32    
1136   -144   
608    -144   
48     240    
-640   -240   
928    -384   
-304   -64    
608    0      
240    320    
-128   -32    
-64    -176   
-256   -64    
48     16     
80     48     
128    -16    
-112   96     
128    -48    
-208   0      
400    320    
-80    336    
96     -32    
-48    32     
64     192    
192    96     
-96    32     
48     0      
-32    128    
128    144    
16     32     
-32    64     
96     64     
96     96     
-64    32     
16     128    
0      144    
176    112    
-64    -48    
96     112    
-32    96     
144    80     
-48    32     
48     80     
48     144    
32     32     
128    160    
-192   -16    
128    80     
-16    48     
-48    48     
304    -32    
-96    -1232  
16     32     
64     144    
0      48     
64     96     
-96    48     
128    -32    
16     192    
-112   32     
176    128    
-240   -416   
160    208    
-96    16     
80     -224   
160    192    
-160   -960   
80     -32    
128    144    
-112   48     
176    224    
-160   64     
240    64     
-80    96     
0      96     
112    64     
-32    16     
48     96     
112    -64    
96     -128   
-112   128    
32     -336   
176    176    
-48    -544   
160    448    
-240   -48    
256    64     
-16    176    
-144   176    
-48    -16    
192    192    
-160   -48    
288    192    
-48    16     
112    -192   
0      128    
80     -336   
144    160    
-48    -944   
32     96     
48     -400   
-32    80     
48     48     
80     48     
144    80     
-80    176    
0      -16    
-144   -256   
128    0      
208    224    
-48    96     
96     -96    
-144   80     
160    -288   
128    128    
-112   -784   
16     160    
0      48     
32     -80    
80     32     
-96    160    
448    320    
-112   128    
160    0      
-208   144    
320    64     
0      -608   
-336   -96    
176    -208   
128    160    
16     -48    
160    128    
-80    -128   
16     176    
-144   0      
176    144    
208    48     
-48    32     
32     128    
96     -784   
64     32     
112    -400   
-160   128    
16     -128   
320    384    
48     -128   
96     16     
0      -176   
-96    0      
160    80     
192    160    
-48    80     
32     -80    
64     128    
80     -144   
64     224    
-160   -112   
192    64     
-16    176    
48     128    
-32    -1408  
-128   -48    
256    256    
144    96     
0      -144   
-256   -16    
192    -768   
80     256    
-48    -80    
16     -160   
16     -32    
32     192    
0      -64    
0      32     
224    16     
-176   -32    
144    -640   
32     192    
96     192    
-80    128    
-1584  -160   
128    -1184  
96     -32    
96     -144   
0      -112   
32     -432   
96     -112   
-64    64     
32     -96    
128    -336   
-48    32     
160    -560   
-96    112    
-96    -64    
176    -208   
-304   80     
160    48     
-48    128    
32     -48    
96     -1648  
1008   -352   
240    560    
48     1152   
-512   16     
704    896    
-384   -656   
576    -112   
-96    208    
-112   -144   
208    0      
176    176    
48     -192   
-352   -32    
80     -112   
16     -128   
160    -336   
80     -80    
-96    -832   
224    112    
240    16     
-208   256    
432    0      
-96    240    
-96    -176   
-112   144    
0      432    
224    64     
-864   -96    
-160   -160   
224    -16    
64     32     
48     16     
64     -880   
-32    -176   
32     -48    
-112   80     
224    -48    
32     336    
-80    0      
80     -16    
-256   -128   
48     -176   
-64    0      
16     64     
-384   -32    
16     -128   
-32    -112   
64     -256   
96     144    
32     -656   
48     80     
-16    128    
192    32     
-192   -64    
160    -320   
0      336    
80     -16    
-224   -176   
224    -16    
-752   -112   
144    -320   
-240   32     
-32    -304   
96     160    
48     -368   
64     112    
48     16     
-48    16     
-96    -16    
64     48     
-416   32     
16     16     
-224   -32    
32     -96    
-176   -160   
112    -240   
224    -96    
80     -176   
48     432    
112    -704   
-112   224    
80     48     
256    -80    
-304   -48    
96     -112   
160    208    
48     224    
-272   96     
-32    -240   
112    -64    
128    48     
96     112    
-16    -96    
80     112    
16     -304   
160    240    
-16    288    
16     16     
-48    -32    
48     -64    
0      16     
16     0      
-64    32     
48     64     
112    192    
-80    -96    
-16    128    
-448   -144   
80     80     
-576   0      
-944   -32    
128    48     
-1600  0      
96     -80    
-48    -16    
-16    -48    
80     96     
-32    96     
16     -48    
-256   -160   
-368   -192   
-16    32     
-496   -240   
-112   192    
80     -160   
-80    272    
-240   304    
-48    0      
-272   -128   
-192   -16    
64     -48    
32     0      
-128   80     
0      32     
96     432    
-304   32     
336    528    
-432   64     
208    64     
-224   80     
-240   -80    
96     272    
-272   -64    
144    160    
-160   -80    
192    208    
-976   -128   
32     -64    
-160   48     
32     128    
64     48     
0      80     
96     -272   
96     208    
16     416    
160    448    
-480   -288   
176    112    
-64    48     
-304   -192   
48     128    
-448   160    
32     80     
-912   -64    
160    96     
-64    -48    
160    384    
-416   -656   
32     128    
-48    -144   
16     96     
240    176    
-288   -64    
64     224    
-48    96     
-64    208    
80     16     
-96    128    
-352   -32    
176    96     
-144   -288   
-64    288    
64     144    
-336   -320   
208    96     
448    304    
96     64     
-160   240    
-112   0      
-176   112    
256    144    
-160   -32    
-48    128    
-352   -32    
160    160    
-80    -48    
176    1152   
-384   224    
-416   48     
-208   -176   
304    -720   
-96    -224   
-240   -432   
208    384    
-32    144    
80     -192   
-48    -80    
-32    96     
0      32     
-32    64     
-1488  -32    
-144   0      
48     64     
-48    112    
-96    -32    
48     -176   
-64    96     
336    160    
-96    160    
48     32     
-288   -48    
-160   -144   
176    160    
-48    -16    
128    224    
-448   -80    
-96    -16    
-16    64     
64     144    
-16    128    
80     32     
96     256    
16     224    
-112   -80    
-128   -48    
16     144    
48     16     
48     80     
-160   -16    
256    96     
-224   80     
208    -16    
-176   144    
144    -32    
-32    160    
-176   0      
224    64     
-128   128    
48     48     
-16    0      
-48    80     
-80    -80    
128    128    
-288   -16    
176    96     
16     320    
64     -16    
112    80     
16     144    
48     64     
-32    48     
-48    64     
0      32     
160    240    
-32    48     
224    128    
-176   -112   
112    256    
-176   -112   
224    0      
-32    80     
16     80     
96     -96    
32     48     
0      144    
-272   128    
240    16     
64     160    
-112   -96    
144    16     
-112   224    
0      128    
-128   112    
128    160    
-112   -48    
176    96     
-32    32     
32     128    
-112   48     
128    160    
-48    112    
48     64     
16     -64    
-64    96     
-80    -112   
48     -16    
112    112    
-48    160    
80     112    
-80    0      
16     128    
240    -96    
112    256    
-80    224    
64     48     
-48    32     
32     -48    
128    112    
0      -48    
-128   64     
288    240    
-48    112    
-112   96     
-32    -48    
-48    96     
0      48     
128    64     
-176   32     
32     48     
64     176    
32     176    
-112   48     
240    272    
-144   192    
128    48     
48     176    
-112   160    
96     -816   
-128   48     
240    96     
48     96     
32     192    
128    0      
48     208    
-112   16     
96     48     
-32    48     
48     64     
144    -96    
-144   -240   
64     224    
-48    -96    
32     -16    
208    256    
-48    -768   
112    48     
0      32     
48     128    
80     176    
-128   -208   
128    128    
144    144    
32     0      
48     -384   
16     256    
256    288    
-48    112    
80     -80    
80     128    
16     -544   
16     48     
80     272    
32     464    
-112   -304   
96     48     
144    112    
32     48     
16     80     
160    64     
-80    48     
128    160    
-16    192    
272    -528   
-32    0      
80     -592   
80     208    
-16    -192   
144    112    
16     144    
48     144    
-48    -96    
48     -32    
176    96     
48     416    
16     80     
-160   -112   
32     128    
-16    -96    
-240   0      
224    -112   
144    288    
144    -416   
-144   96     
2224   -2384  
-672   -688   
1232   1408   
-576   880    
1360   -1088  
-560   -288   
704    160    
-480   368    
-400   -192   
48     -272   
272    -160   
448    272    
-432   -48    
-96    -576   
208    64     
128    -192   
48     448    
-96    -80    
144    240    
-48    -96    
0      288    
128    48     
-48    64     
16     192    
400    -128   
-144   96     
272    -256   
-16    112    
208    -832   
112    240    
-16    -176   
160    144    
48     -16    
256    -144   
32     192    
-144   0      
-16    32     
-16    80     
176    624    
16     48     
32     -144   
-16    -64    
160    96     
144    -288   
16     192    
-64    16     
-48    64     
-16    -16    
48     272    
112    -192   
0      368    
144    -96    
0      -224   
96     128    
288    272    
-128   -256   
16     -688   
96     400    
496    432    
-272   320    
-16    -64    
128    -1120  
-16    -32    
32     -384   
64     224    
-112   -192   
48     -1584  
128    -176   
32     -1632  
32     -128   
32     64     
80     -80    
-16    64     
16     -32    
-80    144    
0      -192   
-176   -368   
96     -48    
0      -144   
-160   -304   
-752   -16    
0      -176   
144    -192   
16     -128   
64     -144   
160    32     
-32    -336   
80     32     
176    -448   
96     -48    
80     128    
64     144    
0      144    
-64    -208   
256    -160   
-288   -160   
240    0      
-144   288    
48     -144   
48     -80    
-48    -656   
208    -64    
0      -1488  
128    32     
64     80     
96     208    
-64    -240   
112    80     
-16    320    
0      80     
-208   -160   
-32    -48    
-1104  -48    
192    -208   
-64    -48    
-64    -208   
240    48     
-96    32     
-48    -32    
256    -64    
-16    192    
256    -160   
-208   80     
-16    -48    
176    96     
-272   -432   
-128   -272   
-784   -832   
256    128    
112    224    
-16    -16    
-32    400    
64     -256   
-160   80     
240    -2224  
-48    128    
112    -80    
304    -256   
-272   64     
288    -112   
-112   208    
176    48     
-192   128    
96     -80    
-432   -48    
-208   -240   
160    -432   
-112   -576   
224    144    
80     -800   
32     112    
-64    16     
160    -32    
-32    -336   
64     96     
-464   -352   
512    32     
-288   128    
416    48     
-592   48     
-48    -368   
-576   -48    
0      -272   
-16    224    
-128   -656   
128    -32    
-80    -128   
128    -48    
-400   -160   
32     208    
32     272    
-112   176    
-128   -16    
-80    -16    
-176   -128   
96     -16    
64     144    
48     -160   
128    128    
112    -96    
-96    144    
-288   64     
160    64     
-256   16     
288    32     
-16    256    
48     -272   
-32    -96    
112    -144   
80     48     
48     160    
-176   80     
16     -240   
224    0      
-368   -352   
208    96     
-112   192    
960    688    
-752   80     
448    80     
-368   -96    
-208   -176   
192    384    
-656   -752   
512    736    
-176   -704   
240    240    
-960   -400   
256    176    
-832   144    
144    -208   
-256   288    
-64    -192   
-144   480    
-656   -256   
-192   240    
176    -176   
-208   368    
304    -224   
-336   208    
-128   -432   
-176   288    
-96    -224   
64     288    
48     -64    
-96    80     
32     -64    
-672   128    
48     32     
-160   -80    
0      96     
32     32     
-112   176    
64     16     
-288   16     
112    -48    
256    160    
-144   -128   
32     160    
-16    32     
-64    112    
-32    -144   
-160   64     
-48    48     
-112   112    
-96    16     
-1136  -128   
80     -48    
-528   -64    
80     144    
-128   -96    
128    -32    
-96    -112   
-48    48     
16     0      
32     112    
-64    32     
112    80     
16     96     
-144   240    
-64    -176   
-64    -16    
-80    16     
-464   0      
-16    112    
-64    64     
144    0      
-80    -160   
-80    64     
-112   32     
48     0      
0      304    
-224   -112   
272    -176   
-160   176    
-256   48     
64     112    
-32    0      
-96    16     
16     256    
32     -224   
208    160    
-112   112    
128    16     
96     -64    
-32    128    
-112   16     
-48    80     
-80    -48    
-48    64     
144    304    
-304   0      
160    48     
-448   -112   
176    96     
-144   -48    
80     48     
-16    112    
-176   16     
128    -64    
-288   64     
144    176    
-112   64     
-224   48     
48     -32    
0      -32    
-16    0      
-48    96     
-176   -64    
96     96     
-112   48     
64     128    
16     48     
-80    0      
32     0      
112    368    
-32    96     
0      16     
-16    80     
48     32     
32     112    
-128   240    
48     384    
16     -16    
-48    -48    
-672   -112   
192    224    
48     144    
-128   32     
0      48     
-176   0      
240    64     
-464   -192   
272    16     
-48    272    
16     -64    
-128   16     
32     224    
32     176    
0      16     
0      112    
224    -48    
-288   -304   
288    128    
64     192    
-16    160    
16     16     
-64    80     
-32    -16    
-96    128    
96     32     
-176   208    
-64    -128   
-240   -400   
304    240    
224    384    
16     160    
-48    64     
-48    128    
-112   128    
-176   -48    
144    144    
-272   224    
-48    112    
-240   -32    
208    96     
64     -48    
256    192    
-368   48     
-16    -80    
16     96     
288    176    
176    112    
-192   144    
-224   32     
48     0      
16     32     
224    32     
-80    176    
-176   -32    
96     48     
16     48     
32     160    
-64    -32    
-80    144    
128    96     
48     128    
16     -16    
80     128    
-240   112    
80     -128   
-80    208    
192    128    
-368   592    
-1952  -1904  
688    144    
-80    1040   
464    176    
432    320    
-240   0      
-496   224    
-416   -336   
1184   592    
-672   -16    
512    -64    
-224   144    
240    320    
16     -48    
-192   0      
-144   -16    
288    -160   
-144   -96    
-160   192    
-96    144    
-96    0      
-192   288    
96     16     
-160   -224   
-16    176    
64     -16    
-80    496    
-400   32     
240    128    
-272   -64    
80     112    
208    208    
-224   -320   
272    -640   
80     352    
112    -128   
96     -96    
-288   -16    
208    128    
-96    16     
96     0      
16     144    
112    112    
-48    80     
0      112    
-304   -96    
144    0      
32     -112   
128    96     
32     208    
-128   0      
16     -48    
48     128    
176    208    
-64    -64    
96     -128   
144    144    
80     80     
-288   0      
304    -96    
-80    176    
176    -32    
-64    480    
96     -192   
-80    32     
64     -624   
-16    160    
80     -192   
0      32     
112    16     
80     112    
-16    -96    
0      144    
32     -224   
112    112    
176    544    
-64    544    
-32    128    
384    256    
-576   -80    
304    -368   
240    192    
-176   -384   
48     -16    
352    256    
-128   64     
16     -16    
-112   -160   
-96    80     
320    112    
-32    112    
32     80     
64     32     
80     -64    
-48    224    
-32    -160   
128    80     
-240   -656   
96     -48    
-80    -1760  
48     96     
0      -80    
96     176    
0      208    
80     64     
16     48     
96     -48    
128    80     
0      -224   
-160   -112   
192    64     
32     160    
-32    -544   
32     96     
80     -1232  
0      224    
16     -192   
-16    160    
16     176    
368    16     
-144   96     
48     176    
-80    304    
240    -64    
-208   -16    
160    -192   
96     144    
96     -240   
-96    0      
144    -1232  
192    336    
-80    48     
144    176    
-304   -160   
256    -400   
-48    192    
208    64     
144    224    
0      32     
64     64     
0      -160   
-112   32     
80     48     
128    176    
48     -224   
0      -128   
0      0      
96     -320   
-48    64     
304    -128   
0      -1328  
0      -16    
192    -1200  
0      -336   
112    80     
32     -32    
176    -192   
-32    -16    
0      -128   
-16    -352   
-32    -736   
48     48     
96     -192   
240    0      
-688   -32    
224    -272   
48     -16    
-32    -272   
96     -48    
16     -256   
192    -16    
-176   112    
16     -288   
192    -624   
96     96     
64     -608   
0      208    
-48    -96    
192    -192   
-192   112    
-64    -256   
96     32     
16     -160   
144    144    
48     -192   
-32    112    
-16    -2288  
96     -48    
16     -688   
48     128    
-16    64     
48     80     
0      -128   
32     -256   
-368   48     
-80    -48    
-1056  288    
384    368    
592    1008   
-48    0      
-272   -432   
-160   -960   
192    -544   
-208   272    
-368   -288   
528    -64    
-464   -96    
352    368    
-112   -368   
-224   160    
128    -32    
0      128    
-144   -448   
32     -192   
64     80     
272    -48    
-16    -176   
80     80     
64     0      
144    48     
48     -128   
192    -144   
-368   16     
128    -64    
-112   288    
352    -160   
-256   -32    
-16    -272   
64     96     
96     -64    
-32    144    
48     -256   
128    0      
208    -960   
16     112    
80     -80    
-112   32     
128    80     
64     -80    
-64    -80    
-80    -112   
-112   -160   
0      80     
48     112    
96     -16    
-480   -64    
16     -304   
112    112    
48     -864   
32     176    
-48    0      
48     -32    
-16    32     
16     -208   
176    -16    
-64    64     
-48    -64    
128    80     
-224   32     
32     48     
0      -32    
192    -208   
-112   112    
80     -352   
80     176    
-400   -112   
176    -96    
-320   32     
208    32     
-80    32     
96     0      
-64    96     
48     -336   
16     -192   
0      -80    
-128   112    
144    -176   
80     128    
32     32     
-64    -288   
-80    -32    
48     -128   
112    400    
-224   96     
48     -128   
128    -32    
-256   -32    
128    -160   
-112   -48    
96     -64    
-16    48     
-176   -368   
-64    128    
-1456  -416   
-96    -64    
-80    -208   
-240   160    
-144   -208   
-240   32     
16     80     
224    16     
-80    128    
48     112    
128    512    
-656   -144   
48     160    
-336   -160   
96     96     
-336   -32    
-64    0      
80     48     
-192   -16    
-144   -160   
-880   -16    
-16    0      
176    -48    
32     64     
-32    32     
96     160    
0      -64    
160    384    
-224   32     
112    32     
32     64     
-16    608    
-96    -96    
-48    -144   
-48    -48    
-48    -32    
-64    -32    
-352   96     
64     -576   
-608   -400   
112    -16    
-144   -224   
32     128    
48     -176   
-80    80     
48     48     
-112   -32    
128    80     
-224   -128   
32     -80    
0      192    
16     208    
-320   -48    
-16    128    
-208   -80    
0      144    
-16    16     
224    128    
-208   -112   
-32    -32    
80     304    
-272   -80    
160    64     
16     32     
256    112    
-272   80     
0      64     
32     -48    
16     -16    
-416   16     
0      32     
-112   192    
-48    -16    
176    64     
-240   -32    
176    64     
-144   80     
-48    80     
16     -208   
-32    96     
-176   112    
-160   64     
-192   -96    
160    112    
-48    64     
0      48     
-144   -192   
320    256    
-96    -96    
128    48     
-112   144    
480    -176   
-128   336    
-144   -96    
112    80     
-144   -48    
128    272    
-96    96     
112    128    
-128   -128   
96     96     
-288   1088   
-560   208    
-560   -752   
-80    560    
-144   -496   
496    608    
32     -608   
128    448    
-240   256    
-96    16     
336    -160   
-384   480    
112    -144   
-48    112    
-96    -112   
-352   272    
-368   -272   
368    192    
-368   -48    
144    -48    
-112   128    
208    144    
-288   288    
192    -96    
-160   128    
64     96     
-288   80     
-48    -192   
176    -64    
-112   -32    
336    208    
-240   144    
0      -48    
80     112    
112    96     
112    192    
-80    352    
288    432    
-240   -80    
-176   32     
224    64     
-96    0      
96     272    
-80    64     
144    112    
-128   128    
128    144    
32     160    
-80    -112   
0      -96    
-112   -16    
192    128    
-32    128    
32     240    
-128   -176   
96     176    
-96    -64    
288    208    
-144   48     
96     32     
-32    64     
32     -48    
0      288    
-160   80     
64     96     
-64    -16    
-16    -224   
32     48     
-48    64     
64     48     
16     144    
-48    0      
80     176    
-128   -16    
0      128    
48     0      
80     112    
-32    32     
16     -160   
-240   -32    
-176   32     
96     64     
-80    -240   
-64    0      
240    80     
-80    48     
-208   112    
16     -192   
-48    112    
80     32     
48     208    
48     208    
-144   0      
-176   -32    
160    16     
-96    96     
144    96     
320    176    
128    480    
-240   -16    
0      16     
-80    -128   
176    160    
-16    64     
112    0      
-176   32     
128    96     
112    224    
-80    96     
64     112    
-32    -80    
64     128    
112    -16    
-128   -16    
80     112    
32     144    
96     304    
-224   -432   
96     32     
144    -16    
0      144    
32     240    
144    32     
96     272    
-256   96     
496    80     
-208   96     
64     96     
32     128    
112    64     
288    176    
-112   352    
368    -192   
-128   -144   
0      -1200  
-112   224    
368    16     
80     128    
-272   96     
144    48     
64     -64    
-80    64     
-48    0      
112    80     
-48    0      
-16    160    
128    176    
48     -160   
-160   0      
176    -480   
64     112    
80     112    
80     144    
16     -32    
-48    160    
-32    -80    
240    -16    
16     32     
-32    176    
-32    -16    
-64    304    
144    352    
-144   -64    
160    -96    
16     -512   
80     48     
16     160    
48     -240   
144    352    
-208   144    
32     16     
-80    48     
256    96     
16     48     
80     112    
-64    -144   
256    112    
64     240    
-80    -32    
128    -64    
-16    48     
176    -912   
144    192    
-208   -224   
256    96     
-224   48     
64     -48    
176    -32    
0      224    
112    64     
-96    0      
-64    48     
224    16     
-192   -128   
288    -80    
-128   64     
-800   -2512  
352    704    
-208   -1600  
-352   -480   
96     368    
-848   160    
816    544    
-608   416    
64     128    
160    -48    
144    -32    
80     -224   
-144   352    
240    -416   
-48    480    
112    -208   
128    304    
-112   -416   
64     80     
80     80     
48     368    
16     -32    
-48    240    
112    144    
32     -512   
96     0      
16     -176   
0      192    
208    144    
-112   32     
144    -144   
-64    144    
96     -112   
32     192    
0      64     
160    208    
64     304    
-80    -256   
112    80     
-112   -32    
208    0      
16     0      
16     80     
0      -240   
64     64     
0      -144   
240    160    
-192   -208   
240    -1456  
-160   160    
96     -656   
128    80     
-1472  0      
128    -480   
16     16     
176    -592   
48     64     
-144   144    
224    -240   
64     16     
-16    -32    
112    -272   
0      16     
112    -800   
48     -16    
16     -16    
240    -16    
16     48     
16     -80    
128    32     
16     -800   
96     -112   
48     -1760  
128    112    
-48    240    
96     160    
-128   -288   
320    112    
-48    80     
-96    128    
144    16     
-128   32     
-112   -128   
48     -160   
160    -160   
0      -304   
192    304    
80     -48    
-80    -176   
192    -368   
0      -160   
96     -176   
80     160    
0      16     
64     144    
-48    96     
96     256    
-432   -48    
-48    -48    
-48    144    
16     64     
48     -32    
-48    -560   
160    -48    
-32    -784   
48     -176   
-64    -336   
192    112    
112    176    
16     64     
-112   -80    
16     -16    
112    144    
48     48     
16     64     
-64    48     
176    16     
16     -160   
144    -32    
128    -176   
80     224    
0      -720   
-160   -128   
160    -32    
160    -96    
-64    -144   
-16    -64    
-48    16     
128    -160   
-464   -112   
32     -128   
-160   64     
-80    -32    
64     -16    
-16    -272   
32     48     
208    -416   
-96    -32    
176    0      
-32    -48    
80     16     
96     32     
-48    -32    
-80    -96    
-384   -112   
-32    64     
-80    384    
-64    48     
48     -64    
240    -320   
128    224    
-16    -304   
-96    -16    
-160   16     
224    160    
-176   96     
16     -224   
-240   -64    
128    288    
-224   -64    
-48    -144   
-16    0      
320    192    
-192   -32    
48     -448   
48     256    
64     -144   
80     -96    
48     176    
80     0      
32     -112   
-16    96     
-48    -16    
80     16     
-176   -32    
80     -16    
-192   -128   
64     -48    
-288   16     
32     -64    
-16    -16    
96     -144   
-96    0      
-32    16     
-144   -80    
48     112    
-16    -16    
96     48     
-112   112    
32     -112   
208    -112   
-64    0      
160    -112   
528    -368   
-352   144    
80     -16    
-288   -96    
-944   -496   
640    2528   
-880   432    
0      -544   
-816   16     
80     48     
144    80     
-544   368    
224    -112   
32     48     
-336   32     
128    -192   
-224   -192   
288    48     
-48    288    
-144   32     
64     144    
-16    336    
224    384    
-288   -256   
272    160    
-208   -80    
144    -128   
-32    80     
-128   -96    
-16    -368   
-208   -48    
96     -400   
-16    128    
-48    0      
-32    80     
-48    160    
-48    -16    
-96    32     
-176   16     
-16    0      
0      80     
-80    208    
-192   -16    
256    192    
-224   -80    
48     112    
-32    -48    
32     288    
48     80     
-192   16     
-112   16     
48     80     
-48    16     
-96    -80    
32     16     
-208   112    
-16    144    
-1792  -336   
112    160    
-48    16     
128    240    
-32    -64    
96     128    
-160   80     
0      -96    
64     96     
-64    128    
48     240    
-224   64     
48     -176   
-48    16     
-160   96     
-848   -160   
64     0      
-16    16     
16     224    
-32    80     
32     64     
16     144    
-48    64     
224    144    
112    16     
64     -32    
-16    96     
-16    96     
-144   -32    
80     -160   
-208   -48    
144    144    
-320   64     
16     160    
-48    32     
128    112    
64     -48    
96     16     
-64    80     
32     32     
-48    16     
-224   -560   
0      -224   
176    176    
64     352    
-192   48     
-160   -16    
48     -48    
-16    96     
16     48     
0      32     
-32    -16    
-192   -160   
48     -80    
-112   48     
64     16     
-32    0      
-192   -32    
-160   -48    
144    -80    
-256   -48    
-16    16     
-800   -32    
-208   32     
256    192    
-64    64     
32     -48    
-160   32     
-16    32     
240    48     
80     -96    
-304   80     
272    16     
-48    -16    
32     208    
-176   160    
240    192    
-16    32     
-80    64     
256    192    
80     176    
-32    96     
-320   16     
48     128    
16     112    
304    -112   
-176   -32    
16     224    
32     -64    
64     144    
-160   128    
0      80     
-64    -16    
-272   -320   
-80    96     
112    144    
208    -48    
-32    112    
-64    32     
-48    96     
160    48     
-112   -64    
160    96     
-128   144    
192    288    
-256   128    
112    48     
-32    48     
80     192    
-16    144    
-112   128    
32     -64    
176    80     
16     288    
-32    -32    
-96    176    
-112   -80    
96     112    
96     176    
-80    64     
176    240    
-160   0      
96     48     
112    112    
32     80     
-16    112    
0      64     
-16    32     
96     192    
-48    208    
-16    0      
80     16     
-32    368    
-208   -80    
208    -144   
176    112    
-48    208    
16     144    
-80    144    
32     128    
32     -48    
-96    -32    
128    -208   
16     48     
48     352    
1248   336    
-992   -32    
496    224    
-704   48     
96     -144   
96     -224   
144    -656   
160    864    
160    -144   
-336   48     
144    -192   
288    480    
-80    32     
96     64     
-176   48     
352    96     
-128   416    
0      240    
-48    96     
32     -160   
96     144    
16     -368   
144    96     
-48    64     
272    64     
-160   144    
192    400    
-32    224    
80     16     
-176   -32    
112    64     
-32    -64    
48     64     
0      48     
80     -624   
128    160    
-16    -800   
16     144    
48     112    
96     0      
-32    -16    
16     160    
0      -16    
224    112    
-224   -224   
80     144    
-64    -304   
160    16     
16     144    
96     -256   
0      80     
0      -496   
48     96     
64     32     
16     80     
176    160    
-144   112    
32     -160   
192    32     
-192   -64    
48     160    
-48    -128   
80     -96    
48     160    
-64    -64    
112    128    
-48    -160   
16     64     
-80    -944   
32     80     
32     -224   
112    208    
-64    -16    
64     -16    
64     80     
96     -224   
16     144    
-256   48     
272    16     
-160   -16    
272    96     
32     -256   
64     192    
-48    -528   
64     64     
64     -224   
-64    -128   
128    0      
-64    64     
16     -80    
144    192    
16     144    
16     64     
32     80     
16     -176   
64     80     
64     -432   
-16    48     
96     -240   
32     176    
80     80     
32     80     
-64    -64    
112    64     
0      32     
128    96     
80     112    
-16    0      
80     96     
48     -208   
0      32     
80     -48    
-16    64     
208    96     
-80    48     
96     -32    
-64    112    
112    48     
-64    16     
144    64     
-32    -80    
176    96     
-64    -64    
64     64     
-48    -80    
-32    -352   
304    48     
-224   192    
352    -48    
-176   32     
48     -544   
96     112    
0      48     
80     -864   
-80    96     
80     -96    
128    -784   
-64    -176   
160    80     
16     -80    
112    192    
16     -64    
0      96     
128    -64    
48     112    
32     -768   
416    -256   
-320   384    
224    -800   
-96    -1200  
-544   160    
-240   -176   
128    64     
-240   -512   
320    -128   
-64    -256   
-32    -96    
64     -208   
272    176    
-64    128    
112    160    
-112   -160   
0      128    
272    0      
-144   -352   
272    80     
-208   64     
96     -288   
240    -432   
-80    -192   
336    -416   
-416   -160   
384    448    
-112   -64    
368    -192   
-160   -48    
240    -64    
-64    112    
80     0      
144    32     
-608   -80    
-16    -64    
-192   -64    
192    -400   
128    0      
-32    -160   
-32    -48    
64     -416   
192    -128   
112    -32    
0      96     
0      48     
480    -32    
-192   48     
112    -272   
-208   48     
48     -144   
128    1664   
-1152  272    
-528   -1072  
-128   -352   
-384   752    
544    -912   
-832   -240   
1200   -176   
-656   64     
224    -160   
80     48     
-96    -32    
-48    -272   
-32    -128   
96     -288   
-288   32     
-16    -16    
-128   16     
96     -128   
256    224    
-64    -368   
80     144    
-112   -256   
144    -64    
32     -32    
48     -48    
-144   -96    
64     -64    
-64    176    
224    -48    
-368   64     
128    -80    
-1232  -16    
32     48     
-864   32     
0      -48    
176    16     
-80    -272   
176    192    
-16    -144   
64     -32    
-96    176    
288    192    
-400   0      
-80    -192   
16     144    
96     -48    
64     224    
48     -224   
-80    128    
-32    -160   
96     64     
-16    -976   
48     32     
112    16     
64     0      
-384   96     
32     -48    
-160   -48    
96     -208   
-48    96     
-16    -32    
48     112    
-16    -48    
96     -256   
160    -480   
-16    112    
0      -224   
112    208    
-112   16     
160    48     
-112   -64    
-16    112    
-144   -128   
96     80     
-80    48     
112    0      
-192   -64    
0      0      
112    32     
-208   48     
-48    -192   
0      -32    
-1152  96     
-16    96     
-1440  0      
-64    112    
-80    -160   
240    48     
-96    -32    
-48    -112   
96     -32    
-144   0      
-224   144    
-112   64     
-80    -192   
224    48     
32     144    
32     16     
-176   64     
-144   0      
64     0      
-416   -128   
-48    80     
0      32     
-16    80     
-128   -48    
128    48     
48     32     
160    256    
-208   -112   
-48    -16    
48     32     
112    32     
-16    144    
-112   -288   
-112   -160   
-128   16     
304    256    
-1648  -80    
-192   128    
-208   -48    
400    64     
-256   -112   
32     32     
-16    -16    
0      112    
-64    48     
64     128    
-272   64     
240    -160   
-80    -32    
-96    -64    
160    128    
-368   48     
16     64     
144    48     
-96    48     
48     -48    
96     176    
-80    -128   
-208   192    
-192   208    
320    112    
-352   -32    
-112   64     
-48    48     
-128   32     
-16    32     
-96    32     
32     96     
-800   -256   
48     -48    
-176   -256   
32     144    
144    64     
32     -176   
32     48     
-176   176    
48     16     
-32    128    
80     208    
-64    256    
48     176    
-112   -80    
288    -96    
-576   -48    
-16    -112   
-32    128    
48     -48    
16     16     
-192   0      
176    80     
-224   144    
-80    -144   
48     128    
128    112    
-32    144    
-80    16     
64     -160   
-80    112    
-144   16     
-16    160    
176    -32    
-96    -80    
64     16     
0      208    
32     112    
-48    144    
48     80     
-112   -32    
-64    0      
0      80     
-112   144    
-192   0      
32     48     
-800   -3792  
1232   2208   
-2016  208    
-160   -160   
288    288    
480    224    
-48    -256   
-416   -112   
272    336    
336    -64    
-192   192    
-32    272    
256    720    
-368   -48    
368    48     
-608   -176   
448    240    
-80    144    
-80    -256   
80     -96    
-48    -16    
-80    208    
-32    192    
176    192    
-48    -48    
144    -16    
-80    -368   
128    -128   
-144   224    
240    -128   
-272   -256   
-80    0      
256    96     
-144   128    
144    96     
0      128    
-48    96     
-112   -16    
16     32     
-32    64     
-32    96     
-208   -16    
64     48     
-64    -144   
48     32     
-80    -48    
48     -16    
80     -64    
-128   32     
80     80     
16     64     
80     64     
16     112    
128    16     
-48    112    
-32    0      
112    400    
-192   208    
-32    48     
64     16     
-144   -64    
112    80     
32     80     
-96    336    
16     112    
48     -16    
64     64     
-16    48     
96     96     
-64    64     
32     80     
-32    32     
48     112    
-64    0      
16     144    
80     176    
-112   -64    
128    160    
208    96     
-48    160    
256    16     
-192   -48    
80     -80    
-48    112    
-16    -96    
208    160    
0      0      
256    384    
-224   336    
-16    176    
-96    -192   
176    -48    
80     176    
96     192    
-80    96     
-64    16     
144    144    
16     -32    
64     176    
-160   -32    
192    288    
-64    16     
32     32     
-144   -112   
128    -48    
64     0      
96     272    
-64    48     
144    160    
-48    96     
-16    -16    
80     144    
80     128    
128    128    
-96    96     
48     112    
-128   -112   
160    272    
-80    32     
80     -192   
-32    128    
96     -432   
192    144    
-224   0      
0      112    
144    176    
160    112    
-32    -16    
16     -80    
80     -224   
80     224    
-32    32     
16     176    
64     128    
128    -16    
-176   -32    
176    -1568  
80     384    
-32    224    
-96    -64    
32     -48    
128    32     
144    160    
-80    -32    
48     -80    
-192   -160   
368    144    
-176   224    
224    320    
-96    -96    
80     96     
128    -176   
-16    176    
144    0      
-96    96     
-80    16     
352    -160   
-256   288    
-16    112    
32     272    
64     -112   
192    224    
-128   -208   
-16    176    
96     -384   
256    160    
32     -240   
-176   -192   
-48    -896   
336    64     
144    208    
192    -16    
-112   320    
-160   -96    
224    128    
240    272    
-176   64     
-192   -160   
64     64     
160    0      
112    32     
48     -80    
-96    80     
128    -240   
-32    144    
112    -112   
-48    128    
96     -144   
80     224    
112    -112   
176    128    
16     176    
-128   208    
144    224    
-160   -352   
112    16     
80     -16    
-656   -1456  
1424   1552   
-1040  144    
96     -528   
80     -48    
-112   -496   
400    -496   
-544   -80    
432    544    
112    80     
-112   -464   
240    320    
160    -352   
-112   304    
96     -64    
-32    96     
64     -48    
-32    176    
80     -576   
48     64     
-48    -96    
160    272    
16     240    
16     -16    
16     -96    
16     -176   
160    208    
32     -48    
64     96     
-48    -48    
192    80     
-96    -160   
112    176    
-32    16     
48     16     
-16    -192   
160    -400   
-144   208    
128    -112   
0      -1264  
-96    0      
144    -2128  
80     16     
-16    -80    
128    -80    
48     160    
128    -224   
-48    -368   
-96    96     
112    -64    
112    32     
-96    -80    
192    -368   
-848   128    
-48    -384   
128    -112   
-32    -208   
96     -48    
16     -1040  
48     -144   
64     -48    
96     48     
48     64     
80     48     
96     0      
-16    -48    
32     -32    
0      -96    
-32    -16    
96     144    
-96    -32    
144    -128   
64     -112   
-16    -224   
192    -80    
-32    176    
-32    80     
-64    -176   
96     0      
96     -448   
16     192    
-192   -80    
240    -64    
-64    160    
-112   32     
48     -112   
128    -304   
128    48     
-112   -96    
160    64     
32     -16    
-112   -48    
144    -16    
32     256    
-16    32     
80     -128   
16     224    
16     -64    
-96    -192   
-48    -352   
-176   -176   
144    -48    
-48    0      
224    0      
-112   -128   
224    -624   
-48    112    
144    -288   
-96    -64    
32     80     
64     -48    
16     -16    
-32    -32    
64     -16    
-80    -112   
-48    -96    
-16    0      
-704   0      
80     -208   
96     -320   
-96    -176   
80     144    
176    -256   
-64    64     
-224   -96    
304    64     
16     0      
-80    -336   
-112   224    
0      64     
112    0      
-48    -192   
-368   -80    
-128   -352   
-160   -192   
240    -64    
128    160    
176    -432   
-112   32     
-288   16     
176    -208   
-320   96     
16     -48    
208    192    
-16    -96    
-160   -112   
80     288    
-160   144    
192    16     
-80    -16    
16     -240   
96     0      
0      -288   
48     48     
-112   32     
240    384    
-176   -128   
96     -112   
-256   -336   
64     16     
-32    -128   
80     -64    
-32    144    
128    64     
-144   -16    
48     -240   
-96    128    
64     -464   
112    240    
32     144    
-16    -64    
-64    112    
32     -80    
-16    160    
-16    0      
16     80     
48     -32    
16     -96    
112    -256   
-80    64     
256    16     
-288   48     
-96    -16    
144    -64    
-144   112    
-896   -144   
32     -144   
-80    16     
128    -16    
-112   112    
-16    0      
32     32     
-16    32     
-160   -192   
32     -48    
-48    -80    
80     144    
-208   320    
-288   656    
-320   832    
192    176    
-288   192    
-240   464    
368    480    
-928   -32    
208    32     
-128   -96    
-176   -128   
-80    0      
336    128    
-160   -144   
-384   -288   
128    96     
-96    80     
-32    432    
-128   -128   
-96    -64    
-112   -16    
96     208    
-976   16     
-208   128    
-144   -192   
32     48     
64     288    
80     -96    
-192   -496   
16     64     
-112   -112   
32     64     
-32    208    
64     16     
-160   160    
-48    -160   
-272   -64    
-352   -128   
-80    48     
-272   192    
176    352    
-240   -160   
96     -16    
128    -256   
-144   16     
144    176    
80     144    
-48    -64    
48     -64    
64     32     
-16    80     
80     -32    
-160   144    
208    -80    
-528   48     
48     112    
-48    16     
-368   -528   
352    608    
64     -96    
16     224    
-128   -208   
144    256    
-160   16     
0      48     
-112   96     
32     48     
-16    96     
-48    0      
-256   0      
64     80     
-64    48     
-16    48     
0      64     
-80    0      
-32    224    
-144   -144   
0      288    
-304   288    
192    144    
-80    -272   
-112   -64    
-352   -320   
144    0      
-336   -16    
48     192    
-1376  -224   
128    -96    
16     192    
-16    240    
-112   -48    
64     96     
64     96     
128    80     
-96    64     
0      32     
32     96     
-144   0      
96     128    
-160   -96    
160    192    
16     80     
-48    208    
-64    -16    
32     112    
32     32     
80     96     
-16    0      
-32    64     
0      48     
-80    64     
32     32     
-48    64     
64     128    
-128   32     
64     96     
128    304    
-128   192    
64     -48    
-16    64     
96     112    
96     96     
-64    0      
-80    96     
64     320    
-48    -96    
0      64     
-48    -96    
176    576    
-368   -16    
112    224    
-80    32     
64     0      
-16    0      
48     144    
32     112    
-176   64     
240    400    
-96    -256   
-16    192    
224    176    
-128   96     
-96    -48    
96     464    
48     112    
96     144    
64     96     
-96    -80    
0      -48    
80     16     
64     128    
16     -48    
0      176    
-80    32     
208    160    
-144   0      
0      0      
-272   -160   
16     -96    
336    640    
32     48     
-160   112    
48     48     
96     80     
-192   -32    
176    -96    
-96    -96    
256    592    
-128   -16    
-96    48     
-112   32     
-16    -32    
-48    64     
176    320    
32     320    
-176   -64    
-160   0      
-112   -256   
80     32     
240    144    
-80    176    
-48    -64    
192    112    
-16    128    
-64    176    
-176   -16    
176    64     
16     80     
-32    -512   
0      192    
-16    96     
-80    0      
112    64     
128    112    
96     -96    
128    208    
80     -80    
32     176    
512    384    
-496   -800   
128    128    
-96    160    
16     -352   
-64    -1568  
128    -128   
64     496    
-80    160    
112    -224   
192    112    
-176   528    
176    -144   
-144   448    
224    -80    
-80    128    
32     144    
16     32     
64     64     
-16    -80    
16     -80    
144    144    
16     -912   
96     -48    
-32    80     
128    -16    
-32    320    
80     160    
-16    64     
64     16     
-32    -128   
112    -16    
-96    128    
80     96     
128    176    
-128   -208   
16     -96    
64     -16    
240    128    
-32    48     
-80    80     
64     176    
112    96     
32     160    
-16    64     
-64    -128   
32     176    
16     112    
240    -32    
-144   112    
96     -256   
-16    80     
64     -144   
0      112    
112    -464   
-128   48     
128    -192   
0      256    
-80    -80    
160    80     
-16    80     
32     112    
32     -48    
128    -208   
0      176    
-80    -288   
48     16     
96     -368   
64     176    
-112   -304   
128    128    
32     -2992  
176    208    
-128   160    
208    224    
16     192    
16     336    
-96    32     
-16    -160   
160    -64    
48     -128   
-144   16     
288    -32    
-336   256    
304    -992   
224    384    
-320   -288   
416    224    
-272   -48    
352    160    
-176   -16    
96     176    
96     288    
144    -240   
0      80     
96     96     
-64    304    
80     -448   
96     128    
16     -96    
80     80     
32     -16    
144    -144   
-80    128    
16     288    
48     16     
-96    0      
176    -48    
80     0      
-128   112    
224    -192   
0      112    
64     -128   
64     16     
80     96     
-32    96     
304    -1376  
-304   -400   
144    240    
288    -80    
-128   128    
-48    -128   
224    -288   
192    -160   
-128   -272   
192    -96    
-80    224    
256    112    
-16    144    
64     -64    
176    304    
-48    -64    
64     -992   
-48    -16    
64     -96    
-112   -272   
-272   32     
160    -208   
64     -240   
-96    -768   
-16    -80    
96     256    
48     0      
80     160    
96     -80    
16     -272   
-80    -32    
64     -528   
-144   96     
112    -144   
112    -112   
-576   -144   
32     -80    
96     112    
64     -32    
160    64     
0      -1056  
96     16     
-96    208    
224    0      
16     80     
48     112    
0      -96    
-96    32     
-64    -816   
176    -144   
144    720    
-192   -96    
48     112    
80     -208   
64     -48    
-16    -704   
128    0      
16     -1776  
16     32     
32     -16    
112    272    
-16    -16    
-32    144    
-192   -144   
0      -192   
64     32     
112    0      
-1904  -208   
-128   -304   
128    -256   
208    0      
176    48     
-96    -208   
-64    48     
208    -128   
144    112    
-16    -128   
272    96     
-128   144    
80     96     
-832   480    
-848   176    
-32    880    
-448   0      
-1392  -896   
1040   288    
-528   -176   
608    -784   
-32    128    
480    -624   
-464   0      
80     -176   
128    80     
128    -112   
-64    -64    
-80    -160   
240    -64    
-592   -80    
160    208    
-192   -16    
-32    -144   
-384   96     
64     -304   
160    80     
-304   -608   
64     -112   
-16    128    
352    48     
-640   -384   
-32    -176   
80     16     
112    -16    
-224   48     
48     96     
-368   -160   
80     0      
-80    16     
272    128    
-448   -272   
480    -192   
-272   -192   
-176   -32    
-48    176    
-32    -192   
-112   144    
48     80     
208    64     
-368   -352   
-112   -1008  
144    256    
-64    -112   
320    224    
-64    -16    
0      144    
32     112    
-16    -80    
-80    16     
80     576    
464    176    
-208   -64    
-80    -48    
112    16     
16     -192   
256    -208   
-48    64     
48     -128   
32     192    
-384   -320   
32     32     
-736   -544   
-656   -48    
0      48     
-656   -16    
-32    128    
-112   -64    
-240   -320   
80     -352   
32     -32    
-16    128    
0      128    
-240   -320   
-80    64     
-384   -480   
208    96     
-128   32     
16     32     
80     256    
16     64     
-144   80     
-736   -144   
-32    16     
112    112    
-64    80     
64     48     
112    288    
-160   -144   
64     32     
-112   32     
0      16     
384    304    
-384   48     
112    -160   
0      32     
-32    32     
-128   80     
-256   -32    
-224   128    
-96    -48    
16     -208   
-176   128    
112    0      
0      64     
-48    -144   
-128   16     
32     32     
-96    -16    
-208   -352   
-48    -32    
144    208    
-112   288    
-48    -80    
-144   -192   
-96    -112   
128    -192   
-80    80     
128    -336   
-80    272    
-80    -432   
-16    -432   
176    0      
-208   96     
80     -32    
64     208    
-128   128    
-128   32     
160    224    
-144   48     
128    -64    
-192   -64    
144    144    
64     -96    
0      112    
-96    112    
0      96     
16     64     
16     128    
48     384    
144    304    
-144   304    
-96    -192   
-96    -48    
-112   -64    
112    96     
-208   32     
16     64     
80     -96    
-48    144    
160    560    
-176   192    
-16    16     
-32    -16    
-80    32     
-48    0      
-80    -32    
16     48     
80     16     
-144   64     
0      -224   
-464   -64    
112    208    
-672   16     
-112   288    
-48    32     
336    240    
-160   -128   
128    192    
-80    -48    
-16    256    
224    -112   
160    112    
16     208    
-208   -16    
32     -48    
-48    96     
-128   336    
0      -32    
-32    80     
80     -48    
-16    64     
0      112    
-32    48     
48     128    
-64    -32    
64     -32    
160    -32    
-32    320    
-160   48     
-128   448    
304    240    
688    864    
96     96     
-256   -48    
-304   272    
-64    128    
-592   -576   
672    368    
-320   64     
48     -64    
-192   64     
-144   -176   
96     320    
-64    -320   
0      224    
-112   -272   
-80    -96    
160    -32    
-96    128    
96     -48    
32     288    
32     128    
32     176    
-16    -112   
64     64     
-176   -64    
32     224    
32     144    
80     32     
-144   32     
-80    -48    
-16    96     
64     112    
-64    128    
96     32     
-80    16     
320    16     
-16    128    
160    -48    
-224   240    
160    48     
-80    160    
144    48     
-176   0      
0      -32    
-128   32     
48     144    
32     96     
224    128    
-240   64     
144    -32    
32     208    
-64    48     
208    64     
-192   64     
160    160    
-160   48     
128    0      
0      208    
-96    16     
240    160    
-16    160    
-144   -16    
256    80     
-160   176    
80     0      
80     0      
144    -16    
0      208    
-144   48     
128    64     
-16    -80    
32     160    
-80    112    
192    48     
144    496    
-16    272    
496    80     
-16    112    
-112   144    
112    32     
96     160    
-128   -256   
144    32     
-272   144    
32     176    
-144   -32    
224    32     
96     -128   
-32    -1232  
-32    128    
-16    64     
-32    224    
0      96     
-80    32     
16     112    
-80    64     
-48    32     
64     144    
-160   80     
80     0      
-48    -48    
112    192    
-32    160    
80     -176   
0      -112   
-16    -2432  
272    512    
-80    160    
32     240    
-16    128    
-32    -32    
16     144    
-96    32     
128    -208   
0      0      
-48    0      
160    176    
-96    -32    
272    -192   
16     272    
0      -176   
160    144    
-272   -112   
144    80     
0      224    
304    256    
-80    -224   
-160   -80    
128    64     
48     160    
48     32     
-112   -112   
0      0      
16     -368   
-192   32     
224    -304   
192    128    
-128   -2608  
176    64     
-144   32     
112    112    
80     -16    
16     0      
80     -80    
48     48     
128    128    
160    512    
0      -16    
64     -272   
0      128    
80     -320   
64     192    
192    -368   
224    864    
-256   -288   
-112   -224   
-16    16     
272    144    
0      112    
176    240    
-48    64     
48     0      
16     64     
672    144    
-176   144    
-128   -352   
-208   -32    
192    -48    
176    16     
-64    -432   
144    240    
-256   144    
176    -32    
-80    160    
112    48     
112    208    
-144   -112   
224    112    
0      -160   
160    96     
-96    -48    
96     208    
-48    -208   
224    80     
-80    -64    
128    48     
-176   112    
96     224    
48     0      
-144   -32    
96     144    
-48    0      
-48    -192   
144    224    
192    112    
144    -112   
704    1376   
240    -208   
-352   -368   
-432   -544   
-112   96     
336    -368   
-64    -144   
-192   0      
448    -96    
-160   288    
240    -464   
-112   512    
64     -48    
48     384    
0      -624   
128    224    
304    16     
96     416    
32     128    
208    -400   
-16    -80    
128    32     
-96    -944   
320    -208   
-96    -848   
336    -96    
-128   256    
80     0      
-272   192    
-16    -256   
-96    112    
-48    -208   
112    -1984  
80     -128   
80     -1008  
-16    -128   
320    16     
64     -48    
-656   144    
16     32     
0      -32    
64     -80    
-240   48     
288    -480   
-48    112    
288    16     
-112   128    
272    192    
0      144    
16     -304   
-48    48     
160    -32    
16     16     
-496   -16    
-96    -320   
240    -16    
-352   -944   
160    -176   
224    240    
-32    16     
-160   32     
288    0      
-16    48     
-32    160    
112    240    
-128   -64    
-48    0      
0      -128   
-320   -80    
-160   -144   
-848   0      
224    -112   
-16    -224   
112    -928   
-80    -64    
352    -48    
-288   192    
432    64     
0      144    
128    -272   
32     -144   
-240   16     
208    288    
-224   112    
64     112    
-528   -176   
144    -416   
48     96     
32     48     
-96    32     
192    -112   
-48    -32    
48     -960   
16     144    
144    80     
176    0      
-48    128    
-160   -160   
-16    16     
352    -176   
-368   -48    
-112   -176   
-496   80     
96     -16    
-32    -16    
0      -496   
48     144    
96     -2528  
16     112    
16     96     
192    -176   
-176   -16    
48     -288   
-144   48     
176    16     
-528   -336   
96     48     
-144   112    
160    48     
240    -160   
-208   -272   
256    192    
-128   -96    
224    -80    
48     96     
-96    0      
96     160    
-128   -16    
64     -32    
32     16     
-48    -112   
-64    144    
-384   -64    
16     -176   
304    96     
-80    -80    
48     16     
160    144    
16     -16    
192    16     
-208   -64    
16     80     
-48    -64    
80     0      
-128   128    
96     -16    
0      -240   
-80    16     
96     -48    
64     0      
-80    -32    
144    64     
-80    -464   
-112   -224   
-96    64     
16     -16    
0      -80    
80     16     
-128   160    
160    -48    
-128   -32    
144    -208   
-48    32     
-368   -240   
128    48     
-464   -160   
-32    112    
-176   -32    
-112   0      
-32    64     
-128   16     
-16    144    
-448   112    
-384   32     
-80    -80    
0      0      
128    -16    
32     -32    
-96    16     
-48    208    
-144   -288   
256    256    
-96    32     
-192   48     
32     112    
-352   -112   
80     48     
-320   -112   
96     48     
-192   64     
-32    208    
16     64     
288    -192   
-256   -64    
-48    64     
128    -112   
-144   112    
-560   768    
-304   -896   
0      192    
-192   288    
768    -96    
-1008  -752   
704    464    
-1168  288    
464    -160   
-768   -176   
704    -160   
-160   272    
32     -64    
-224   224    
224    -256   
-144   320    
-48    -144   
-16    256    
-48    -144   
-32    176    
144    -144   
-80    368    
-176   -80    
-176   48     
-672   -288   
-96    160    
80     -48    
-32    176    
-32    -48    
48     32     
0      64     
32     -32    
-64    208    
-16    -32    
0      128    
-64    -96    
-80    16     
96     16     
-80    80     
-592   -32    
80     160    
-80    -16    
80     144    
16     128    
-160   -48    
32     0      
0      80     
16     80     
240    16     
-336   64     
32     -48    
-48    128    
-48    112    
48     32     
-272   -64    
112    96     
80     -128   
-144   48     
80     128    
-96    32     
96     144    
16     112    
-144   64     
32     -128   
16     -16    
-128   48     
48     112    
-64    96     
16     32     
-16    -48    
0      80     
-288   96     
-176   80     
16     -16    
16     160    
-160   -176   
64     -144   
-192   272    
-128   80     
64     -48    
48     160    
-48    144    
-80    448    
-96    160    
-240   -288   
192    160    
-144   -64    
144    80     
48     384    
-112   128    
-224   -208   
96     16     
-48    64     
96     64     
-112   80     
-112   96     
144    112    
-208   32     
176    208    
-112   -144   
-48    96     
192    144    
-16    240    
-32    0      
-32    192    
-144   -272   
144    160    
-16    -256   
-96    -160   
-48    0      
-16    32     
96     144    
48     48     
0      176    
16     48     
-80    -80    
160    144    
-96    80     
144    112    
-32    272    
80     16     
-80    -64    
-32    32     
-32    -64    
208    624    
-96    320    
176    256    
-112   80     
-48    96     
-80    0      
-32    -112   
80     32     
16     -96    
144    208    
-304   -240   
16     -192   
0      -48    
256    240    
-176   0      
128    16     
-64    16     
128    272    
-240   -128   
224    176    
-128   96     
160    32     
-80    16     
208    192    
32     32     
80     96     
-128   64     
48     144    
112    -16    
208    160    
-128   48     
32     64     
-48    208    
-96    -192   
256    192    
-64    176    
176    288    
-192   96     
-64    -32    
160    128    
-112   -16    
192    352    
-48    -32    
0      128    
0      -32    
240    160    
-224   -80    
96     64     
0      32     
112    0      
-208   192    
64     -80    
0      176    
96     32     
-32    128    
-112   16     
192    0      
16     96     
176    96     
-224   0      
64     -48    
48     240    
-16    176    
-176   -112   
160    -96    
192    176    
-48    32     
32     -48    
304    240    
-192   -80    
144    160    
112    128    
224    224    
-32    1616   
-112   400    
-272   -1184  
-368   -64    
-336   -704   
672    848    
-496   -1216  
608    784    
-448   -128   
400    336    
-128   -224   
-32    528    
16     -128   
288    256    
-32    96     
160    160    
-336   -304   
224    176    
-112   320    
208    -96    
-16    -160   
400    -48    
-96    208    
64     -400   
-48    -32    
-48    16     
-240   -384   
320    592    
-48    144    
16     128    
128    0      
-64    80     
0      80     
80     -16    
32     -208   
64     -32    
192    80     
-80    48     
96     -976   
-208   -304   
0      -3008  
128    176    
272    -224   
-64    80     
48     -16    
224    288    
-160   160    
208    352    
-48    80     
208    48     
0      128    
16     -48    
-16    48     
64     -208   
112    160    
48     -272   
80     192    
-80    96     
128    112    
-96    -32    
96     176    
-48    16     
208    208    
-160   176    
-32    -368   
48     80     
-16    -256   
48     32     
256    -64    
48     176    
208    -512   
48     224    
16     -688   
112    96     
-224   32     
208    80     
16     48     
32     96     
-16    48     
64     32     
48     80     
144    -480   
-144   -16    
384    -240   
160    272    
-176   -288   
96     320    
-208   -464   
96     80     
48     80     
-64    64     
128    32     
96     -96    
160    64     
-32    -224   
16     96     
32     -48    
48     64     
-96    -384   
-16    -48    
160    -80    
128    192    
-16    -256   
-48    96     
160    240    
112    272    
-16    -2880  
112    128    
32     320    
0      -32    
48     -160   
-32    -304   
144    208    
-128   -160   
224    160    
-48    -176   
160    96     
-96    -160   
-16    -1472  
-176   0      
64     -528   
208    -304   
-656   -144   
-64    -48    
16     0      
240    -512   
32     -224   
-64    -1008  
160    -64    
16     144    
112    144    
48     -320   
160    112    
-416   -400   
336    368    
160    -224   
48     -272   
-464   80     
80     -352   
208    -96    
16     -432   
-208   -16    
32     -608   
128    -112   
-80    16     
16     -160   
48     -80
[truncated: 254,011 more chars]
