# Supplementary material for: A Fault Diagnosis Method for One‐Dimensional Vibration Signal Based on Multiresolution tlsDMD and Approximate Entropy
Source: Hindawi journal article supplement (doi:10.1155/2019/3262818), 2019-01-01
Supplement: f1 [file 3262818.f1.zip › 3262818.f1/gear signals/broken teeth fault signal/Data10.txt]

-240   -176   
32     -272   
224    272    
144    0      
32     -32    
-176   -448   
2544   -1808  
416    -224   
176    320    
-576   176    
208    736    
544    0      
-304   -80    
192    -128   
64     256    
-32    -304   
304    32     
-272   -208   
304    -816   
-160   -192   
592    -864   
-240   80     
0      -1984  
16     176    
544    -80    
-272   160    
16     -112   
192    32     
-352   -192   
208    160    
-208   16     
64     96     
-944   -112   
-16    -240   
64     -176   
64     32     
32     -16    
96     -176   
48     112    
208    -96    
-96    144    
144    0      
32     -32    
-32    128    
80     -48    
80     112    
-96    16     
-224   -112   
-64    -128   
-16    176    
240    128    
-240   -48    
0      -384   
-96    -32    
272    240    
-192   128    
224    -16    
-112   96     
0      -64    
112    32     
-384   -80    
224    208    
-256   -256   
272    32     
-288   80     
32     -176   
-48    -32    
80     -208   
-16    128    
112    -592   
128    64     
-112   -16    
0      96     
-48    -16    
32     48     
-96    -80    
128    80     
-64    160    
-96    -32    
-592   -96    
-16    -256   
80     160    
240    -224   
-16    160    
-144   -144   
-48    32     
-96    112    
32     -48    
128    -96    
-80    128    
-48    320    
-96    -96    
128    32     
112    160    
-48    -96    
224    0      
-80    96     
176    -208   
-112   112    
-96    -544   
224    -224   
-208   64     
176    -16    
-144   96     
16     0      
-96    -80    
160    -48    
-272   -48    
160    -48    
-240   80     
192    -80    
16     80     
-784   -288   
144    208    
-208   16     
-448   -32    
-64    -64    
-576   16     
-48    0      
-64    -80    
-240   -80    
144    0      
64     16     
-208   32     
128    48     
-304   0      
176    288    
-304   -96    
-64    144    
64     96     
-160   112    
48     64     
-368   -16    
-240   -144   
-1408  -144   
-80    48     
160    0      
80     336    
80     32     
320    64     
-480   -128   
-16    -16    
96     -32    
-144   112    
272    96     
-144   -64    
-176   48     
-160   -16    
-192   32     
-224   -96    
-288   96     
-224   -240   
0      128    
-160   -80    
192    144    
-144   -48    
80     0      
-80    -32    
-64    64     
64     128    
-128   0      
64     128    
32     416    
-208   144    
80     0      
0      16     
-160   80     
-96    192    
-208   0      
32     176    
64     48     
160    16     
16     -48    
48     496    
-144   -112   
16     0      
32     48     
128    32     
-48    -16    
-176   -64    
96     176    
-224   -208   
16     -32    
-224   64     
-160   144    
-16    -80    
48     80     
64     -192   
48     96     
16     320    
-256   80     
80     320    
-176   -112   
96     -48    
-48    16     
-96    -32    
-32    80     
80     0      
-768   160    
-144   160    
176    -400   
64     16     
80     144    
-864   1856   
528    -256   
-208   64     
96     -16    
-1072  -112   
-32    512    
-16    -224   
560    -224   
-704   32     
144    -112   
-560   160    
128    -48    
160    288    
-64    -32    
176    64     
-32    -32    
-128   128    
0      -160   
32     80     
-112   -64    
144    -64    
-48    208    
208    80     
-192   -144   
64     96     
-400   -16    
112    208    
-64    64     
-48    16     
16     -32    
0      32     
128    -48    
112    160    
64     192    
48     16     
-192   32     
-32    0      
-32    32     
-192   -144   
64     160    
-16    80     
0      176    
16     48     
-48    -160   
48     64     
80     0      
160    144    
32     160    
48     160    
32     -64    
48     128    
-80    32     
64     80     
-64    -32    
16     16     
32     128    
-48    176    
32     48     
16     48     
176    608    
32     112    
64     192    
-224   16     
32     -176   
-160   -96    
64     -112   
32     128    
-80    128    
32     16     
112    112    
-96    0      
-48    48     
48     144    
48     96     
32     32     
-32    -80    
-192   -368   
208    -176   
-176   112    
192    256    
-96    208    
-128   128    
176    -96    
-128   -112   
0      192    
-32    112    
-16    176    
0      160    
192    176    
32     64     
-80    16     
0      32     
80     160    
-48    0      
144    112    
-80    128    
48     96     
32     80     
-112   -16    
144    160    
64     160    
32     80     
0      112    
-64    0      
160    144    
-48    32     
192    288    
-112   -16    
144    -16    
-48    112    
32     0      
0      0      
-64    160    
64     80     
64     -528   
-16    80     
-16    112    
16     -16    
0      80     
96     256    
112    16     
-48    64     
-96    -48    
208    368    
-48    -96    
224    432    
-192   304    
96     -64    
32     -128   
-224   -640   
144    48     
64     144    
-16    32     
128    160    
0      128    
240    720    
-320   32     
368    -64    
-144   288    
32     -32    
16     -16    
-96    64     
224    128    
32     64     
-64    -224   
0      128    
96     160    
80     144    
64     144    
0      16     
16     -16    
128    208    
16     272    
-144   -96    
144    -160   
80     272    
400    -192   
-256   336    
-208   -64    
192    -192   
-16    48     
112    -736   
-16    160    
-64    0      
-80    80     
128    720    
-400   -160   
320    -256   
-80    160    
160    -64    
-176   64     
-80    -48    
-16    -176   
304    0      
0      112    
-16    -48    
16     -1952  
144    432    
-48    -64    
-272   112    
-176   176    
96     16     
192    16     
-144   400    
128    16     
192    256    
-64    -48    
32     48     
80     160    
80     -64    
144    224    
-80    -176   
96     192    
-48    -304   
176    112    
96     -288   
16     80     
1328   32     
928    1456   
-1104  -304   
-688   -560   
-64    640    
560    -1152  
-304   -64    
576    16     
-672   -32    
384    -464   
80     256    
-32    -1216  
16     336    
-160   -1936  
128    80     
-48    16     
112    64     
16     240    
128    96     
48     192    
64     -64    
48     176    
16     -112   
16     144    
32     -208   
-16    112    
128    -224   
16     -80    
0      16     
48     144    
208    160    
-16    128    
-48    128    
80     -80    
16     112    
112    -176   
32     176    
32     -48    
160    128    
-96    -464   
80     96     
32     0      
112    32     
96     -272   
-64    128    
80     128    
112    16     
48     224    
-288   -112   
240    16     
48     32     
0      64     
96     -144   
-112   48     
112    -272   
128    352    
-96    -128   
320    336    
-272   -64    
288    -2624  
48     112    
-80    -688   
64     -64    
64     144    
-64    -256   
160    -304   
-32    -608   
128    -32    
-96    208    
128    -128   
32     -16    
144    16     
-144   -1440  
176    -32    
112    -688   
-96    -16    
160    -448   
-80    -144   
-176   -16    
64     -144   
0      -256   
240    64     
0      -32    
-48    -576   
-16    160    
-16    -128   
112    -336   
224    160    
-208   80     
304    48     
-112   80     
-80    -32    
16     -80    
-320   -192   
64     -16    
-128   0      
64     -432   
112    -16    
-64    -480   
144    -272   
-128   -1872  
224    0      
-32    -144   
144    240    
64     -176   
-32    144    
-48    48     
128    -32    
-208   -176   
-32    -32    
-16    96     
32     -144   
64     -16    
16     -240   
192    48     
192    -864   
-240   112    
160    -80    
-48    32     
-16    -288   
48     -160   
320    64     
-80    -32    
32     160    
-192   -176   
-736   -80    
-400   -368   
16     -192   
96     -160   
240    0      
0      -528   
128    224    
64     240    
144    96     
272    96     
-112   -112   
32     96     
144    48     
0      -32    
64     -208   
-432   -32    
64     -224   
-256   144    
-32    -80    
160    16     
-64    -800   
-96    112    
96     -3200  
80     0      
-112   32     
48     80     
48     -16    
64     16     
-192   192    
0      -48    
0      64     
-160   -96    
128    0      
-144   -80    
128    -32    
48     -224   
16     64     
96     -416   
-32    32     
64     0      
64     16     
-384   -96    
224    112    
-48    -32    
64     48     
-144   0      
48     -80    
-240   32     
176    -224   
-16    224    
16     -32    
-80    128    
144    -592   
112    16     
-208   -144   
0      -128   
-240   -32    
144    32     
-176   -48    
16     32     
-144   -48    
160    -96    
-208   -128   
32     -96    
0      112    
96     0      
32     208    
-48    -192   
48     16     
64     0      
80     -160   
64     -48    
1008   -2368  
192    16     
480    -176   
-272   -384   
-384   864    
-176   736    
-368   -208   
16     -96    
-992   -560   
-48    16     
80     16     
-1056  192    
48     192    
-464   -176   
-96    -224   
-1088  -16    
-16    288    
32     128    
32     272    
32     32     
32     160    
-16    112    
-48    96     
-224   -224   
-32    32     
-32    -80    
-176   128    
96     64     
-400   -160   
32     304    
-1008  -160   
32     -32    
112    64     
176    112    
-80    64     
64     80     
-288   -64    
-32    -80    
16     -96    
-48    -96    
96     144    
-128   96     
0      -64    
-96    48     
-48    -80    
48     80     
0      32     
-256   -96    
-176   -112   
-160   -112   
64     -64    
-64    32     
16     208    
160    -80    
-288   64     
144    48     
-176   64     
112    304    
-48    144    
-16    -128   
-16    0      
112    48     
-624   -176   
144    -192   
-64    -64    
-160   112    
16     96     
16     112    
48     16     
-128   48     
-32    64     
-48    64     
-64    64     
-96    64     
-16    0      
-80    32     
-128   -320   
-560   -336   
-288   -128   
-160   -192   
48     48     
48     96     
64     160    
64     192    
-16    240    
-32    64     
96     -128   
128    128    
-80    64     
176    16     
-160   144    
64     80     
-16    -16    
-16    48     
-176   -32    
144    192    
-192   -144   
-96    -80    
32     96     
-80    80     
128    128    
-80    128    
0      48     
-48    32     
-32    80     
-48    32     
16     -160   
112    128    
-80    112    
-256   -48    
0      64     
-176   -48    
-128   16     
64     144    
-64    32     
-16    48     
-80    -16    
32     80     
32     48     
-48    -16    
-16    128    
128    208    
-240   0      
-64    64     
-416   -176   
48     64     
96     -80    
-192   192    
-64    112    
96     48     
-112   0      
64     -16    
-80    288    
-16    256    
80     16     
144    656    
-224   352    
32     -240   
-80    -48    
96     32     
80     176    
-48    144    
-80    16     
64     208    
-112   0      
336    176    
-288   192    
192    432    
-368   32     
64     32     
-192   -80    
16     32     
-128   -16    
80     144    
-48    352    
-304   -112   
240    -160   
-64    112    
128    96     
-96    -32    
-64    208    
48     64     
-208   0      
0      32     
0      96     
-16    -48    
32     48     
48     192    
-112   -32    
-80    96     
80     32     
16     208    
112    -48    
-160   64     
-16    96     
32     112    
-128   0      
80     176    
-304   0      
80     96     
-32    -32    
224    176    
-48    16     
-32    -16    
0      64     
16     48     
-16    304    
272    144    
-80    272    
-16    16     
112    96     
16     160    
16     48     
-48    176    
144    -208   
-16    64     
80     -32    
1904   -928   
-320   -2704  
688    624    
176    864    
336    0      
-64    16     
-784   -304   
480    -272   
64     608    
128    160    
176    144    
-272   128    
192    256    
32     -48    
-112   80     
-48    96     
112    -208   
32     128    
16     64     
96     192    
16     128    
-48    80     
48     64     
-48    96     
128    48     
-64    -64    
48     128    
64     96     
80     0      
-160   96     
48     48     
-16    -144   
64     160    
-80    16     
16     16     
0      -96    
432    272    
-192   272    
192    48     
-240   -32    
112    96     
128    128    
-16    80     
96     176    
-64    64     
80     48     
-80    -912   
112    96     
96     -2032  
-48    80     
112    144    
-128   16     
128    -32    
48     128    
32     128    
112    80     
-64    48     
80     96     
16     0      
32     64     
-32    112    
64     -304   
64     144    
32     -304   
64     -16    
96     96     
32     208    
-128   64     
96     16     
160    192    
-176   0      
240    96     
-144   112    
48     16     
64     -80    
112    128    
-144   -32    
80     96     
128    -144   
160    288    
-208   -880   
208    112    
128    512    
-272   16     
288    -48    
-32    64     
-96    -80    
400    48     
-208   64     
176    -16    
-48    96     
160    48     
16     160    
-48    -304   
0      -16    
-16    -1184  
112    128    
0      -688   
208    240    
-176   16     
144    160    
-32    -32    
0      -96    
0      -32    
224    -48    
-48    144    
160    -192   
-224   48     
320    -224   
-112   48     
240    -160   
48     112    
-128   0      
0      -16    
144    -16    
192    272    
32     112    
0      128    
-128   144    
288    -336   
-32    96     
48     -48    
368    336    
-176   -192   
0      -32    
-48    -272   
-32    -48    
-48    -464   
64     0      
-16    48     
64     128    
176    -64    
-112   -512   
192    16     
144    -176   
176    16     
-160   32     
208    224    
144    -144   
-112   144    
-32    -272   
96     112    
-64    -432   
224    288    
-48    64     
16     -464   
-80    -1616  
112    -32    
64     -144   
48     -32    
48     -80    
96     -48    
-16    64     
-16    16     
160    192    
-96    -144   
208    176    
32     -144   
-32    -192   
64     112    
64     -240   
48     -464   
112    0      
48     -96    
96     -192   
-80    -2048  
64     -48    
0      160    
144    144    
304    -96    
-128   -176   
16     160    
64     48     
160    -48    
336    112    
-32    -96    
-80    -32    
-368   160    
48     -560   
112    -128   
192    -480   
-64    16     
48     -1808  
32     -208   
144    128    
-64    -240   
16     -256   
-32    0      
96     -80    
32     16     
-144   -32    
48     0      
-896   -128   
64     176    
-80    -128   
32     32     
48     -32    
1184   2688   
-1968  -2080  
672    96     
112    304    
1408   -1664  
-496   -384   
-64    -128   
624    816    
-464   -400   
160    -224   
-224   -224   
112    -112   
-784   144    
160    -16    
144    160    
112    -336   
-272   -128   
368    -224   
-304   -560   
208    -48    
128    256    
-16    -144   
144    112    
-160   192    
240    128    
-416   0      
128    224    
-832   0      
192    -176   
144    16     
128    -608   
80     -48    
-48    48     
80     80     
320    -1664  
48     272    
-48    -32    
0      224    
-32    320    
112    -32    
-144   16     
32     16     
-288   -96    
16     0      
-576   112    
-32    64     
64     16     
128    144    
-96    -48    
160    -432   
-208   -176   
192    160    
48     -144   
48     32     
96     48     
-128   320    
112    352    
-416   -16    
-128   -496   
144    -128   
64     96     
-16    0      
80     -256   
-48    80     
48     -784   
0      -160   
320    -32    
32     16     
-608   -128   
-16    -96    
-240   -64    
144    -16    
-128   -32    
32     16     
-192   0      
16     -320   
64     -144   
-176   -240   
-352   -16    
80     -672   
-144   48     
32     -128   
96     -32    
-160   16     
16     48     
-32    96     
-48    0      
112    176    
-32    -112   
-736   -128   
48     -80    
96     384    
-176   -80    
-48    -80    
-96    112    
-368   16     
-80    -16    
-32    -80    
-80    112    
48     208    
-16    -32    
96     0      
-64    112    
80     -112   
-32    80     
-544   -64    
256    480    
-400   -224   
336    208    
-368   32     
-672   -208   
-176   -48    
-176   16     
176    64     
-368   112    
-192   -32    
-16    -192   
-144   -64    
96     16     
0      32     
-144   -160   
112    192    
-64    -80    
64     64     
16     336    
-304   16     
224    -16    
-272   -192   
-192   0      
176    -112   
-32    160    
-320   192    
80     64     
-112   176    
0      112    
240    336    
-256   -128   
32     208    
-32    -48    
-32    128    
-64    96     
144    0      
-208   -96    
0      192    
-272   16     
96     256    
-304   0      
64     0      
-48    -32    
32     80     
48     -16    
-64    128    
96     -48    
-80    240    
144    480    
-240   -96    
0      -288   
-48    160    
-16    16     
-80    0      
-32    48     
96     -96    
-208   -48    
-1360  304    
16     448    
-48    -832   
208    176    
320    448    
-240   -144   
-192   32     
144    80     
48     -16    
-64    288    
-240   -32    
-48    160    
-112   -64    
96     48     
-48    112    
-848   -96    
16     112    
-32    -32    
-64    64     
80     96     
32     48     
112    64     
-128   64     
96     176    
-176   -16    
32     -16    
-112   -48    
16     -16    
-128   -112   
0      -16    
0      80     
128    32     
112    160    
-208   -64    
1280   -2288  
112    -176   
320    -80    
-320   144    
-144   384    
176    144    
-352   112    
80     -208   
64     128    
-208   -240   
80     288    
-112   -64    
48     240    
-80    0      
128    -32    
-64    80     
192    176    
0      192    
-16    -16    
-80    32     
-16    0      
144    288    
-16    128    
64     112    
-208   -192   
32     176    
192    112    
96     256    
32     -80    
-112   -64    
-16    144    
80     112    
112    32     
-176   -48    
96     176    
-240   96     
240    64     
-240   -16    
128    112    
-64    -64    
208    144    
-272   96     
128    64     
-16    80     
-96    -16    
112    48     
16     144    
384    416    
-544   32     
240    80     
-112   224    
32     -48    
-224   -64    
16     16     
-32    16     
32     144    
0      16     
-240   112    
96     -64    
176    112    
-256   144    
96     32     
48     -48    
128    256    
-208   128    
96     -48    
96     80     
-32    176    
-32    160    
0      128    
112    -48    
128    128    
-176   144    
48     32     
64     -32    
160    272    
-176   144    
192    96     
-128   48     
0      32     
16     16     
16     144    
112    176    
-96    208    
-128   -32    
128    144    
80     224    
0      -128   
240    176    
-160   160    
192    80     
-96    32     
48     96     
-16    64     
-112   96     
144    112    
16     48     
32     16     
0      128    
-16    16     
16     -224   
64     64     
-80    64     
304    160    
-32    144    
112    64     
-144   48     
176    464    
0      80     
112    128    
-64    -80    
0      112    
-112   -128   
256    112    
-48    -64    
0      -256   
0      32     
48     128    
48     176    
-112   -160   
32     80     
96     176    
64     16     
16     -64    
160    48     
-96    0      
96     0      
128    224    
144    208    
-64    128    
-64    -384   
192    208    
-80    48     
176    80     
-32    -64    
-112   96     
-144   0      
272    144    
64     0      
-176   80     
192    464    
-96    192    
96     176    
-64    144    
16     256    
-64    -240   
192    -176   
-176   -2288  
208    272    
-16    144    
64     48     
80     96     
16     144    
-16    80     
16     -224   
-64    -160   
176    208    
16     -128   
-64    160    
80     144    
-80    -288   
112    224    
-16    -80    
224    112    
-80    96     
144    -128   
-144   -64    
352    496    
-128   -96    
0      -16    
48     80     
128    192    
-192   -80    
64     -192   
272    272    
-64    -112   
16     64     
-16    -416   
96     -32    
0      -2976  
80     32     
16     128    
32     48     
-112   96     
96     32     
240    32     
64     160    
0      128    
-144   16     
112    64     
208    0      
48     48     
-96    -480   
208    -16    
160    -464   
0      96     
176    -464   
-448   3168   
352    -384   
-672   -1136  
1024   288    
-272   -336   
-512   16     
640    -512   
-352   144    
912    -1280  
-784   -16    
224    -368   
-256   48     
416    48     
96     80     
-304   128    
-192   96     
272    80     
176    512    
-80    144    
-64    -336   
-48    -160   
48     -816   
112    208    
-16    -112   
80     -192   
96     32     
-32    0      
352    -144   
-16    288    
240    -528   
16     128    
-288   48     
64     288    
-32    80     
160    -192   
-32    96     
352    -336   
-320   48     
0      -64    
-48    272    
16     -32    
0      32     
144    -304   
96     48     
-176   48     
176    -704   
16     176    
304    -1104  
-368   -512   
288    64     
112    -1296  
-16    -208   
-64    -160   
80     -16    
-32    208    
96     -224   
-96    -80    
128    128    
240    48     
-192   64     
48     128    
-96    -32    
-32    64     
0      96     
-208   176    
-288   -416   
192    16     
96     -672   
144    -144   
-48    -1616  
64     -128   
16     64     
96     -64    
48     -160   
0      192    
48     -208   
-224   -240   
-480   -416   
-256   -304   
-464   192    
-32    -32    
-64    -32    
112    -96    
32     -112   
80     -240   
48     -80    
272    -240   
-384   -272   
304    -32    
-128   416    
80     -112   
48     160    
-96    -64    
160    -16    
-96    -144   
256    -64    
-96    16     
144    -192   
-128   -160   
80     -192   
144    160    
32     -1056  
-224   96     
80     0      
-32    -16    
128    32     
224    208    
-160   288    
160    96     
-448   -128   
0      -288   
-128   -96    
144    -80    
32     -32    
48     -592   
-544   -144   
112    -1104  
-64    -32    
-32    -400   
0      224    
-32    -48    
96     -80    
-144   128    
-144   48     
-32    -112   
256    192    
-560   -240   
256    112    
-400   -64    
288    -128   
-48    0      
80     -48    
160    16     
-96    -128   
160    240    
-16    -208   
-16    -560   
-192   176    
304    80     
64     48     
-176   16     
176    16     
64     16     
-592   -64    
64     32     
80     128    
-80    -240   
64     -80    
48     -1040  
32     64     
64     -112   
-16    16     
-416   -112   
48     -64    
-256   0      
16     -16    
-176   -64    
32     272    
-176   -80    
112    -128   
-48    48     
224    -432   
16     144    
208    -384   
-368   -112   
128    -80    
112    -160   
192    -160   
64     -16    
-64    96     
-16    176    
-96    208    
32     240    
-112   -64    
64     -48    
-112   -160   
240    -192   
-128   -32    
224    -80    
-16    144    
-48    -48    
80     80     
48     16     
-160   -96    
80     80     
48     192    
-16    -80    
32     96     
32     48     
-576   -176   
80     128    
176    -240   
-48    176    
-16    160    
-960   16     
-256   -80    
-1504  -160   
2224   656    
-880   32     
688    128    
-112   80     
-320   -672   
288    80     
-800   -480   
880    160    
-640   336    
192    144    
-416   176    
80     -320   
-336   544    
208    -288   
-480   336    
16     -352   
-176   368    
16     -128   
-288   240    
0      -304   
-288   64     
96     -80    
-48    256    
144    96     
-144   -128   
-96    -192   
-176   176    
128    160    
-32    112    
-192   -96    
48     -64    
-192   48     
112    64     
-1776  0      
-48    0      
128    224    
32     128    
-48    -144   
-128   48     
-32    96     
32     -32    
0      48     
-32    96     
0      112    
-176   16     
-128   -48    
32     32     
-48    -64    
-272   64     
-176   144    
-48    -96    
48     64     
-144   -240   
288    96     
-144   160    
80     96     
32     160    
-208   0      
16     -64    
80     96     
-208   -16    
144    128    
-80    80     
64     80     
32     16     
-368   -176   
80     240    
-96    128    
144    32     
96     112    
-80    32     
16     160    
-32    16     
0      96     
-32    48     
-16    224    
16     144    
96     112    
-160   -16    
80     224    
-624   0      
48     96     
160    -272   
-112   -80    
-160   208    
-128   -64    
128    528    
-256   -272   
320    80     
-272   80     
144    96     
-160   -32    
-80    80     
-48    96     
48     0      
-512   -32    
-96    32     
144    288    
-208   -48    
48     16     
80     176    
48     160    
128    192    
-64    -48    
-32    -32    
16     112    
-224   -208   
272    224    
-144   64     
160    208    
-368   -176   
80     -272   
96     144    
16     16     
32     272    
-32    112    
64     176    
16     64     
-112   80     
-112   240    
16     208    
-48    80     
48     208    
-176   -64    
16     160    
-144   240    
-96    32     
192    448    
-304   128    
80     80     
-16    16     
16     112    
32     -32    
-128   64     
48     48     
80     224    
-80    16     
-16    32     
-240   -272   
96     176    
-112   96     
-192   -112   
272    16     
-16    144    
16     48     
48     96     
-160   -80    
80     0      
96     192    
0      112    
48     48     
-112   32     
112    32     
32     16     
-288   -352   
176    0      
416    544    
-80    304    
208    256    
-112   0      
112    160    
-16    64     
-16    48     
80     128    
-80    -64    
192    320    
-272   -48    
400    -64    
16     128    
16     144    
-32    -32    
-208   272    
288    -192   
128    176    
-320   16     
352    80     
-256   192    
-32    -48    
128    16     
-224   48     
96     128    
-112   16     
0      144    
-48    -16    
32     -32    
128    224    
64     48     
16     112    
-80    160    
80     0      
-16    96     
16     112    
-80    48     
32     16     
96     176    
160    112    
-64    176    
1712   352    
-912   -2304  
304    144    
304    1008   
-64    -704   
-320   848    
320    -336   
-144   688    
-144   -560   
64     -64    
-32    16     
32     624    
-160   144    
16     192    
16     -656   
208    336    
-96    64     
720    -512   
-336   224    
32     64     
-144   256    
192    64     
-16    0      
192    -112   
-80    240    
128    -176   
80     288    
-256   -160   
80     144    
-256   -160   
96     160    
144    80     
-80    -176   
144    256    
80     64     
128    -208   
-32    64     
112    -64    
288    480    
-240   -80    
64     272    
96     80     
-96    -128   
-208   144    
144    128    
128    -16    
-64    -336   
80     32     
368    368    
144    288    
80     112    
48     176    
-32    128    
112    240    
0      -32    
-80    -32    
224    528    
-64    32     
-16    80     
48     -112   
-304   -400   
96     -128   
16     48     
176    272    
128    -176   
-112   -112   
48     16     
-80    160    
288    368    
16     16     
48     192    
-32    176    
48     -16    
128    208    
-64    48     
0      -112   
-80    -224   
176    -416   
-64    -16    
-16    -384   
256    240    
128    -816   
-176   208    
240    144    
16     176    
112    224    
-64    48     
-80    -80    
-32    192    
272    32     
-64    48     
112    240    
-64    64     
32     112    
48     -560   
64     64     
-208   -48    
48     48     
-32    80     
16     16     
16     16     
16     -80    
16     -208   
-48    -496   
80     -160   
-16    -832   
-112   -304   
160    0      
128    -32    
-128   -544   
16     80     
80     -80    
64     64     
32     -32    
16     0      
80     144    
96     176    
32     96     
-192   -96    
192    224    
192    16     
32     192    
-256   -368   
208    0      
176    0      
-96    96     
160    224    
-16    256    
176    -176   
-16    128    
-32    128    
240    176    
64     -224   
176    -208   
-48    -2176  
-16    -32    
224    384    
64     48     
80     208    
64     48     
32     96     
80     -32    
-16    -800   
0      32     
-16    -720   
176    -48    
-112   -48    
128    -64    
144    -128   
32     -768   
-16    -16    
80     -752   
128    -80    
0      -112   
64     -16    
48     32     
-64    -208   
128    -224   
0      192    
32     -304   
-16    32     
-592   -208   
144    -80    
-1328  -96    
272    96     
-80    -64    
128    -16    
160    -48    
-160   -1056  
16     -128   
32     -112   
144    128    
80     -32    
-240   96     
176    -384   
128    144    
-96    -32    
96     -32    
-144   16     
128    16     
0      -16    
80     -272   
16     0      
0      -96    
96     -128   
208    -144   
80     112    
-16    176    
-176   208    
0      -96    
112    -16    
-48    -160   
208    112    
-720   -32    
256    -32    
-416   -144   
80     -48    
2592   -160   
-960   -1712  
368    -144   
400    -1648  
-240   224    
960    416    
-992   -384   
1072   128    
-96    448    
-128   0      
-288   -112   
-272   -80    
272    96     
-576   0      
-32    -48    
96     144    
64     0      
-32    -48    
-16    -416   
32     32     
128    144    
0      64     
-96    144    
288    -144   
-160   -80    
272    -64    
-288   80     
288    0      
-112   32     
240    32     
-880   16     
48     -96    
0      80     
96     -416   
16     144    
-16    -480   
-32    112    
-48    48     
32     -80    
-32    16     
96     -128   
-80    48     
32     -48    
-112   -16    
96     -336   
-560   -112   
64     -336   
-96    64     
176    -160   
-32    32     
112    -1056  
16     0      
-256   48     
-64    -16    
-80    -32    
112    80     
-64    32     
-16    48     
-256   -128   
192    0      
-976   -32    
144    0      
-64    80     
128    -240   
-16    112    
0      -416   
96     16     
-64    32     
48     48     
16     160    
0      -64    
-112   80     
-16    -96    
48     144    
-16    48     
32     208    
-16    -144   
272    -16    
-304   -192   
-48    64     
208    464    
-592   112    
208    32     
176    -16    
-128   -16    
128    32     
-192   112    
64     112    
64     80     
48     112    
-272   96     
-1216  -144   
80     0      
-144   -176   
0      128    
-192   -480   
48     -176   
-48    -16    
-272   160    
144    240    
-32    144    
-112   -144   
80     112    
0      192    
80     -48    
0      80     
-304   -400   
80     80     
-256   -416   
-48    -176   
-96    -160   
48     -16    
-80    64     
-144   128    
16     128    
48     368    
-320   -48    
-352   -160   
-16    112    
-352   -80    
16     272    
64     64     
128    240    
-80    32     
-16    112    
-32    336    
-272   352    
32     96     
-112   160    
-112   -112   
64     -128   
-48    -32    
-432   -32    
-176   128    
0      -144   
80     176    
-128   -160   
80     -16    
-16    0      
0      48     
64     208    
-32    -64    
192    208    
-160   144    
96     80     
-256   -80    
112    -32    
-80    112    
-64    144    
-48    80     
-80    32     
-16    -16    
32     16     
96     48     
-32    112    
304    240    
-464   -32    
256    224    
-224   48     
-32    -32    
-32    -176   
96     112    
48     64     
-48    144    
-1168  -160   
-80    0      
224    -192   
-96    240    
-240   288    
-80    -128   
112    208    
-112   0      
-32    112    
-240   64     
224    112    
16     -16    
-192   128    
-64    -208   
-16    240    
-416   -112   
64     112    
-96    16     
96     96     
32     16     
-192   64     
128    -176   
80     176    
-128   48     
112    0      
-112   96     
0      16     
0      432    
-352   -96    
-64    144    
-144   -144   
240    192    
-16    112    
-528   32     
-1568  -752   
608    -16    
-272   880    
272    48     
416    528    
96     1152   
-992   -80    
752    -912   
-144   272    
320    -304   
0      624    
-336   -224   
336    80     
-304   -320   
256    64     
-80    128    
-384   -256   
-16    160    
160    -48    
272    864    
-368   -128   
-144   160    
192    -288   
-64    192    
-160   -144   
160    80     
-288   256    
208    144    
-96    272    
-256   -32    
192    -32    
16     144    
-112   -96    
-112   128    
96     80     
-48    320    
64     -160   
-128   -64    
16     -48    
128    -48    
0      208    
-128   -16    
-64    96     
80     -80    
-64    32     
192    64     
-80    -80    
80     -64    
-112   -32    
0      240    
80     80     
0      112    
112    96     
-112   304    
-144   -64    
32     160    
-144   32     
192    32     
32     192    
-32    -64    
208    96     
16     192    
-240   96     
112    -96    
0      80     
64     144    
-128   -48    
-32    -96    
0      160    
-48    -48    
96     128    
80     160    
16     128    
-96    160    
-48    -128   
192    32     
-96    128    
-304   96     
112    48     
32     288    
-208   192    
160    -80    
64     -160   
-128   192    
160    112    
-208   256    
96     112    
80     176    
-48    64     
128    32     
32     48     
16     32     
144    128    
0      240    
-32    208    
0      0      
160    96     
-96    -128   
160    64     
-48    16     
-32    -864   
96     176    
64     176    
-192   -288   
96     -64    
-64    272    
208    416    
-80    32     
-32    192    
-80    16     
128    64     
64     -16    
-80    -432   
32     48     
96     128    
-320   -208   
400    0      
-144   -16    
80     144    
336    208    
-64    160    
-160   -16    
112    48     
0      128    
320    80     
-208   96     
80     -48    
-224   -48    
32     -112   
320    48     
-128   96     
80     32     
80     -928   
-336   80     
464    208    
-128   192    
96     80     
112    64     
-176   -80    
96     144    
112    -144   
48     144    
80     304    
112    0      
160    48     
-224   -320   
-144   32     
224    -1440  
16     48     
160    144    
-80    32     
80     256    
0      16     
96     -64    
-32    96     
96     112    
16     336    
-160   -96    
112    -96    
0      176    
96     -208   
192    -32    
-48    -384   
80     0      
-16    -880   
-80    0      
144    -240   
16     -16    
160    256    
-48    208    
-112   320    
0      96     
144    32     
80     -240   
176    288    
-144   -208   
80     64     
64     -528   
-16    192    
-96    -112   
32     64     
208    -1680  
112    224    
-224   208    
208    16     
-144   16     
208    48     
80     176    
-32    -288   
64     128    
-16    -144   
64     96     
16     -352   
32     -96    
112    -528   
80     96     
48     -128   
1504   480    
-960   -240   
512    256    
-704   480    
160    -736   
320    304    
48     64     
-432   128    
384    -336   
-512   144    
704    -256   
-144   -48    
-32    -96    
-64    256    
224    64     
64     160    
-112   80     
80     224    
96     -96    
96     -80    
0      112    
224    16     
-128   128    
288    -160   
-80    48     
96     -48    
-160   144    
176    64     
144    80     
-64    0      
80     -1152  
-32    96     
144    -80    
32     -640   
80     -112   
48     -1440  
64     -32    
32     -1424  
-16    -160   
112    48     
64     96     
80     160    
32     -176   
0      -1280  
0      48     
80     -128   
16     240    
32     -32    
176    -112   
-128   -112   
80     -448   
144    -16    
-48    -288   
192    96     
-64    -832   
128    -176   
64     176    
32     32     
32     -320   
0      80     
64     -64    
144    112    
-192   -16    
48     -416   
-704   -144   
-32    -144   
80     16     
64     0      
-16    -32    
240    -368   
16     -16    
64     192    
-48    32     
48     -32    
112    80     
176    32     
-80    32     
-256   -16    
80     -144   
-624   -160   
176    80     
32     128    
112    -240   
-272   -176   
-16    -784   
80     -160   
-80    -2000  
16     -112   
112    0      
-96    32     
80     -128   
16     -48    
-80    48     
-16    32     
-304   0      
-160   -336   
336    176    
16     208    
48     -80    
-144   -176   
128    -144   
128    -272   
96     160    
16     -32    
-64    80     
112    -64    
80     -64    
32     144    
16     -128   
-64    -48    
80     -96    
-144   0      
80     0      
-144   112    
80     -16    
112    -16    
32     -1056  
48     144    
32     -128   
144    112    
-208   -80    
48     0      
0      32     
176    -96    
-112   -64    
160    384    
-608   -16    
240    -240   
-448   -112   
96     -112   
96     -176   
48     -304   
0      192    
128    80     
-112   -144   
96     80     
-144   -144   
176    -80    
-80    144    
-128   -48    
128    -64    
-192   48     
272    -80    
-240   64     
-32    -96    
48     320    
32     -272   
256    240    
16     -208   
96     -32    
-240   -48    
48     0      
-208   -96    
272    0      
-224   160    
96     -48    
64     64     
16     -16    
112    16     
-48    -48    
112    160    
-48    -112   
0      64     
-96    32     
-48    -112   
160    48     
-64    80     
-16    128    
32     -96    
-144   -48    
64     -144   
-32    16     
240    128    
-16    -16    
160    -128   
-144   -16    
-576   -384   
144    144    
-144   48     
32     32     
0      80     
-176   144    
-64    -80    
48     80     
-16    -64    
128    16     
-16    96     
16     48     
-16    128    
-656   -240   
336    -112   
-144   32     
-48    -256   
-160   256    
-96    -16    
16     32     
-192   144    
1248   1488   
-1040  912    
-192   -336   
-736   -176   
-16    176    
320    -208   
160    320    
400    624    
-304   -144   
32     -240   
304    176    
-304   16     
-112   -112   
192    -144   
-144   256    
112    128    
-336   80     
240    112    
-672   -192   
160    -160   
-96    80     
-80    -48    
48     -48    
0      32     
-16    64     
64     32     
-64    144    
-16    96     
0      32     
-192   -64    
112    -48    
-80    80     
96     160    
-80    -128   
-240   64     
80     -112   
80     192    
-112   16     
192    144    
-32    16     
-80    80     
16     80     
-48    64     
32     176    
-112   16     
-64    -48    
0      128    
160    240    
-96    -96    
-16    128    
-992   64     
96     0      
16     -80    
-320   128    
144    -144   
-96    80     
16     48     
-16    128    
-32    -208   
-32    80     
-160   144    
-80    -80    
-16    48     
-160   64     
32     48     
-272   -176   
32     128    
-16    -160   
176    112    
-192   144    
16     64     
112    160    
-128   -64    
112    48     
-192   96     
96     240    
-32    32     
240    240    
-256   -96    
128    -64    
-112   112    
-80    144    
48     32     
192    64     
-16    224    
-192   -160   
272    160    
-288   208    
32     -32    
16     16     
96     176    
-32    128    
-16    -32    
-176   -112   
-80    -128   
-256   -96    
32     96     
-16    240    
32     96     
16     80     
-112   16     
112    -64    
0      48     
64     272    
0      32     
-16    192    
-256   32     
256    160    
-288   -96    
112    32     
-80    -80    
-64    80     
160    272    
-176   0      
-144   -112   
112    112    
-64    -16    
256    48     
-96    160    
304    144    
80     272    
-80    48     
-208   0      
0      128    
112    -96    
-96    -80    
-80    80     
144    192    
-160   -64    
-16    64     
80     96     
112    176    
0      112    
-160   96     
0      0      
-272   -96    
112    0      
160    240    
-224   -16    
304    160    
-32    112    
-112   32     
144    192    
96     16     
288    224    
-16    96     
80     288    
-224   96     
144    16     
0      48     
32     112    
-32    48     
0      -96    
-176   -368   
128    336    
-80    -192   
288    192    
-32    400    
128    160    
-96    0      
0      64     
-32    16     
16     176    
160    208    
-16    336    
-96    128    
0      144    
192    128    
160    -80    
160    64     
0      128    
-32    -144   
272    208    
-176   -16    
-48    96     
-224   -16    
224    144    
288    128    
96     -96    
-112   256    
-16    -80    
-192   176    
80     224    
0      -208   
32     -1424  
48     128    
144    96     
-128   96     
16     -80    
112    80     
0      144    
144    -112   
-48    32     
-64    160    
32     96     
-96    48     
32     -96    
1936   2384   
-1616  -256   
560    -1680  
80     784    
1232   -48    
-656   -384   
-144   624    
-64    688    
272    -704   
-224   352    
-16    -288   
368    288    
-384   176    
448    -48    
-208   64     
112    -112   
-32    416    
112    -560   
16     176    
160    -336   
-48    16     
432    384    
0      304    
-32    -16    
-16    160    
-48    144    
176    -32    
-48    240    
288    208    
-160   -32    
-32    -80    
16     128    
144    -144   
-16    160    
48     -576   
64     64     
0      16     
-80    32     
80     32     
144    128    
-32    64     
80     192    
-160   -16    
192    0      
-16    -64    
0      -80    
160    128    
-16    -48    
32     80     
128    -256   
-96    64     
112    -1008  
32     -48    
128    112    
16     80     
32     128    
-32    288    
208    176    
224    256    
32     160    
-16    0      
16     80     
64     -80    
-16    -96    
32     -368   
192    64     
48     -176   
96     160    
-96    16     
16     80     
32     48     
112    80     
-32    64     
128    128    
-80    128    
32     -224   
16     144    
128    -80    
-176   -32    
112    -352   
16     352    
64     -48    
-16    160    
16     -16    
96     112    
-112   0      
160    128    
-32    160    
112    -144   
32     144    
-48    -224   
96     16     
32     -224   
224    304    
-80    -64    
48     48     
48     -224   
112    288    
-48    -16    
64     96     
-48    16     
176    112    
16     304    
0      -160   
48     160    
-32    -176   
224    224    
-32    -112   
80     128    
32     -48    
96     128    
0      -96    
80     144    
64     -80    
128    304    
0      192    
-16    -1072  
-16    128    
96     160    
176    -192   
-48    -208   
-48    240    
240    -160   
64     48     
-96    -96    
32     96     
176    0      
192    -576   
0      288    
-160   -320   
304    48     
-48    -608   
128    -448   
64     16     
-64    -368   
160    -320   
64     -752   
-48    -176   
160    176    
0      -96    
144    96     
-32    -16    
48     -592   
16     96     
-32    -288   
288    144    
-304   288    
128    -192   
-480   64     
128    -416   
176    48     
32     -432   
-160   -32    
192    -400   
80     48     
80     -128   
-80    -144   
224    -208   
96     160    
0      208    
16     128    
-416   80     
160    -192   
-1440  -16    
112    -336   
272    224    
-240   -224   
0      -416   
96     -816   
416    -160   
336    112    
-176   64     
-112   80     
-80    208    
112    16     
96     -160   
-176   128    
16     -32    
-240   96     
-32    -64    
-64    -64    
64     -16    
-32    -160   
160    -208   
-32    -48    
-16    -496   
32     224    
-48    -48    
224    -96    
32     -128   
64     -96    
-32    272    
-80    -48    
32     176    
-32    -192   
-928   -192   
48     -192   
-768   -160   
-240   1760   
-384   544    
-256   -400   
-144   -176   
352    1072   
-720   784    
160    -16    
48     80     
320    32     
-304   -256   
-464   -160   
208    96     
-304   -32    
-80    -64    
144    -64    
192    -48    
-64    48     
144    -704   
32     32     
-48    -2048  
80     192    
0      32     
-32    -144   
-16    -112   
48     -80    
-80    -80    
16     112    
-176   64     
160    128    
-96    16     
-32    -224   
80     160    
64     -288   
160    128    
-112   -352   
192    48     
-16    112    
0      -112   
-512   32     
32     -112   
-48    64     
32     48     
-32    64     
64     -128   
-64    -16    
208    -64    
-128   -16    
224    64     
-224   80     
144    32     
-160   -80    
32     -32    
-32    -64    
-48    16     
48     64     
-48    176    
112    -128   
-128   0      
-16    -224   
-880   -32    
112    -160   
0      176    
-80    -64    
80     -16    
-48    112    
-768   32     
0      -64    
0      0      
176    128    
-48    128    
-64    16     
112    0      
-80    48     
96     -16    
-64    0      
48     144    
-144   -96    
-240   -320   
-16    192    
-80    48     
-112   -96    
64     128    
0      208    
-256   32     
-640   -112   
64     -80    
32     80     
-112   176    
32     32     
-176   80     
-48    -96    
-16    48     
32     -192   
-240   96     
-176   -64    
128    32     
-96    128    
-272   -96    
-96    -32    
-1184  -128   
-48    128    
160    -16    
64     -48    
-192   -96    
0      144    
-208   -384   
16     -16    
128    32     
-96    224    
160    64     
-208   96     
-48    -80    
32     160    
-128   48     
-240   160    
32     48     
-208   -144   
0      -48    
-320   -32    
528    336    
-80    112    
112    32     
-208   128    
80     112    
64     48     
-352   -48    
-32    -16    
-16    112    
80     32     
0      80     
-64    -112   
-464   0      
-128   0      
64     32     
320    144    
-96    -16    
-128   80     
48     288    
-80    -80    
80     -112   
-224   80     
-48    96     
400    320    
-96    112    
-112   -112   
-64    -288   
-400   -48    
176    176    
-240   32     
-64    48     
-64    -16    
48     64     
32     160    
96     240    
-224   -16    
176    80     
0      496    
-64    -32    
-48    -112   
-304   -144   
208    288    
16     96     
0      -224   
-320   48     
224    624    
-32    352    
-304   -240   
32     -48    
16     -48    
32     416    
-176   -160   
16     160    
112    192    
-144   32     
48     -112   
0      160    
-16    128    
32     144    
-640   -32    
112    -64    
64     112    
16     176    
-32    16     
0      0      
32     160    
-160   48     
-32    -16    
64     176    
32     128    
32     128    
-304   160    
-352   -80    
208    -48    
-416   16     
144    0      
-32    144    
0      16     
16     -1584  
1008   -1024  
480    720    
128    576    
-256   176    
176    368    
80     -320   
-48    -352   
80     0      
-192   64     
80     288    
80     192    
-48    96     
-16    80     
-48    80     
304    304    
-272   -128   
176    208    
-128   112    
176    48     
-192   192    
128    48     
-336   64     
-192   0      
-176   -64    
-32    176    
-64    -112   
32     -96    
-208   -32    
32     80     
160    80     
-16    48     
96     176    
-112   48     
32     32     
-64    48     
-48    -64    
-96    -208   
80     208    
64     80     
80     176    
-32    48     
64     0      
64     208    
16     144    
-16    32     
32     48     
64     80     
48     112    
32     128    
16     -48    
32     64     
-128   -144   
192    240    
-32    16     
96     112    
48     368    
176    272    
-128   -128   
144    208    
32     -16    
-16    160    
192    160    
-160   0      
112    128    
0      128    
80     64     
-144   48     
0      48     
-32    -112   
0      -1168  
16     144    
32     80     
-16    128    
16     48     
16     16     
32     -48    
240    48     
48     0      
-16    560    
48     64     
-64    352    
-112   0      
208    64     
-128   32     
112    -1040  
288    304    
0      288    
-128   176    
-64    -144   
96     -32    
80     48     
128    192    
-64    96     
0      112    
-48    -64    
272    320    
16     256    
16     64     
16     -16    
32     -464   
160    128    
-80    112    
0      64     
16     96     
160    208    
-128   16     
176    224    
-224   0      
176    64     
-112   96     
0      -80    
80     64     
-624   -224   
192    96     
-96    -304   
160    192    
16     48     
80     160    
-32    80     
-16    0      
80     176    
-16    -96    
-96    -80    
-48    144    
384    192    
-240   448    
-144   -64    
112    -352   
-96    -32    
112    -192   
144    128    
0      -96    
32     240    
-80    80     
144    384    
176    48     
240    288    
0      336    
224    176    
-224   48     
16     80     
144    240    
0      -96    
176    128    
32     -160   
240    336    
-80    0      
64     48     
16     -2608  
80     112    
96     48     
-48    48     
160    -80    
48     144    
80     448    
240    688    
-304   -160   
112    -16    
32     128    
-48    -336   
48     208    
-32    -96    
144    272    
-208   -128   
160    32     
64     -544   
256    656    
-160   -336   
-80    160    
-32    -160   
64     -32    
208    256    
-240   -256   
32     80     
48     -272   
-16    80     
160    -32    
-48    16     
32     -224   
64     432    
-16    -32    
-160   208    
144    352    
-144   -368   
144    -80    
272    416    
144    336    
-48    -496   
-48    160    
-32    -32    
224    288    
-32    -96    
-64    208    
-64    -304   
112    192    
-16    16     
448    1024   
256    -128   
32     384    
-80    -336   
448    -672   
80     -224   
-64    -272   
80     32     
128    0      
80     -48    
240    -128   
-32    272    
160    -336   
-32    192    
176    0      
-112   -1152  
32     -32    
48     -1296  
64     -704   
0      -160   
64     -624   
288    96     
-48    384    
128    -176   
-192   32     
80     -256   
144    160    
112    32     
80     -128   
-48    16     
64     -512   
32     0      
96     64     
48     -272   
80     -32    
64     -192   
112    96     
-32    -1168  
16     -32    
32     128    
176    -16    
16     96     
-16    48     
240    -112   
-320   80     
272    -208   
-240   112    
144    -80    
-80    0      
-1008  -176   
304    -160   
-96    -16    
96     -96    
80     -32    
-16    -432   
48     -48    
64     -928   
-96    -16    
240    -160   
-128   160    
224    -176   
80     144    
-112   96     
128    -96    
-464   -160   
32     -144   
144    -96    
64     144    
112    -64    
80     -48    
0      -144   
64     -816   
96     0      
112    -16    
-16    160    
144    -128   
-16    -32    
-176   80     
16     -16    
-32    -288   
224    -64    
-496   128    
176    -144   
-48    96     
-80    -704   
-240   -64    
-64    -528   
160    112    
16     0      
80     144    
-96    32     
-48    -80    
-48    -32    
32     0      
-80    0      
80     -144   
-400   -16    
-32    -48    
-48    -160   
144    -256   
-128   96     
112    -160   
-16    -16    
96     -48    
-16    -64    
96     256    
-160   80     
16     -64    
-80    -160   
-64    -32    
320    128    
-816   -32    
0      96     
-96    16     
-64    -48    
176    16     
-96    -656   
-16    32     
240    -1424  
144    -304   
-256   -16    
80     80     
144    80     
96     -64    
-384   0      
144    -96    
-160   32     
48     96     
80     112    
-32    -64    
64     96     
64     -224   
160    64     
128    -752   
-96    48     
-96    112    
80     80     
-176   80     
64     -64    
-48    64     
80     -64    
0      160    
128    144    
-304   -64    
80     -480   
-16    32     
48     -656   
0      -32    
-16    192    
112    192    
-176   -64    
96     16     
-176   -80    
0      176    
144    176    
-144   48     
64     -80    
-64    336    
0      -112   
-80    -208   
128    -80    
-224   192    
112    224    
-96    48     
-368   80     
0      176    
-720   -160   
-64    -80    
128    32     
-96    144    
80     -192   
-96    192    
-1072  -160   
208    224    
112    32     
-96    16     
-96    -208   
-240   128    
32     16     
-240   16     
48     224    
-240   16     
-112   32     
-352   -160   
-304   -32    
48     32     
-272   -32    
112    160    
0      48     
-16    -112   
144    -96    
-176   -240   
112    112    
-240   224    
48     -128   
-96    176    
80     96     
-1024  -1584  
432    2224   
-944   1424   
-272   -16    
-496   -1536  
400    896    
-528   336    
64     -32    
-48    -480   
608    48     
-688   -448   
112    192    
224    0      
256    -96    
32     592    
-224   0      
-192   -48    
-272   -352   
64     160    
-144   -48    
32     -112   
128    352    
-160   -16    
160    144    
-128   -48    
32     400    
-240   0      
-176   -112   
-304   -80    
176    -144   
-64    112    
-144   -32    
-32    64     
-464   -96    
128    416    
-496   -96    
208    160    
-336   -224   
464    464    
64     -160   
-80    32     
-80    16     
-32    192    
-64    -16    
80     64     
-16    32     
-128   -272   
64     240    
-272   0      
0      -144   
-192   16     
-112   192    
176    64     
-16    64     
-144   -112   
48     16     
368    592    
-384   -128   
-208   -688   
368    576    
-208   -32    
80     -32    
0      240    
-64    -32    
-64    224    
-16    -128   
32     32     
-32    16     
-208   32     
-128   144    
64     16     
48     80     
-48    32     
-96    112    
-48    32     
0      112    
-16    576    
96     288    
-192   0      
224    192    
-112   -256   
-64    -16    
48     80     
-48    128    
16     80     
96     80     
-64    128    
160    272    
-128   160    
-128   80     
16     32     
16     16     
32     80     
-160   16     
224    304    
-368   -48    
96     240    
-224   -144   
224    32     
-32    112    
64     160    
32     112    
-192   16     
160    128    
32     192    
-32    64     
-64    32     
16     176    
-240   -336   
0      -208   
-112   48     
160    160    
112    80     
-176   64     
-32    32     
80     -112   
16     208    
-80    -64    
128    128    
-176   -48    
96     64     
-208   -128   
128    16     
-144   -80    
112    256    
16     -96    
-128   -224   
96     -144   
80     704    
-32    -160   
16     16     
80     64     
144    -48    
-80    80     
-32    112    
96     -16    
-80    32     
16     64     
96     -368   
-48    208    
208    112    
-80    240    
160    160    
-176   96     
96     64     
32     -80    
-288   -224   
32     -400   
-112   -80    
208    144    
16     80     
0      48     
-16    48     
-48    0      
96     -272   
-64    272    
-256   -176   
528    208    
-112   304    
336    96     
-128   176    
-48    -112   
64     160    
-48    112    
-48    128    
-48    -48    
32     -64    
32     64     
-112   -160   
-80    -1632  
32     112    
48     256    
-64    272    
144    224    
-80    -32    
128    32     
80     80     
16     128    
160    -64    
64     144    
96     192    
-112   80     
-48    144    
128    64     
-112   -128   
224    96     
-128   192    
208    -144   
48     144    
48     176    
-16    224    
16     224    
-16    -64    
336    -112   
-16    208    
-96    112    
48     240    
-112   96     
48     96     
608    -832   
16     144    
-32    -16    
528    -560   
-192   -416   
560    832    
-112   208    
208    208    
-480   -224   
560    176    
-224   -288   
16     -80    
-160   240    
240    -240   
-96    288    
96     -1008  
-32    256    
16     -1936  
16     176    
176    -96    
-64    208    
160    96     
-96    128    
32     -128   
-96    48     
144    64     
32     208    
32     64     
-16    0      
128    -48    
0      0      
80     128    
-16    -256   
16     128    
320    0      
80     288    
128    -464   
-192   80     
-16    16     
208    176    
-48    32     
160    96     
-16    80     
64     0      
128    48     
-64    -64    
-32    64     
224    -672   
-96    128    
80     -400   
80     80     
16     48     
0      144    
16     0      
112    144    
-128   32     
112    32     
80     16     
48     80     
0      112    
128    -112   
48     160    
80     -416   
-32    -32    
160    0      
-16    80     
64     128    
128    256    
-176   64     
144    48     
64     -16    
16     -96    
16     176    
80     -624   
208    352    
-144   -432   
208    -96    
128    96     
-176   64     
160    -16    
-16    48     
192    112    
-112   144    
0      48     
224    160    
0      368    
16     -160   
144    96     
80     -576   
64     176    
32     -176   
-48    208    
0      -224   
176    112    
-160   -80    
192    32     
-160   -320   
128    224    
-64    -32    
176    -224   
16     -160   
32     -416   
48     -160   
-32    -208   
96     192    
16     -208   
-48    -32    
16     -464   
160    160    
16     -608   
-16    256    
160    112    
48     -192   
112    80     
16     -480   
32     -240   
112    -80    
64     -528   
272    272    
-176   -1424  
-32    48     
144    336    
-48    48     
224    176    
-80    304    
256    96     
-64    96     
-144   -176   
-80    16     
-336   -144   
96     -224   
-592   0      
128    -400   
112    -224   
0      -336   
-16    -160   
128    -1712  
64     0      
80     160    
0      16     
176    64     
-16    272    
112    -240   
-144   0      
80     -112   
-176   -336   
-768   64     
-32    80     
112    16     
48     -320   
112    48     
144    -96    
64     208    
-128   144    
16     64     
-96    -416   
96     -272   
320    128    
48     240    
-32    128    
-48    96     
-416   96     
-16    -192   
480    -592   
-192   -464   
112    80     
-64    0      
-288   -64    
160    -608   
-32    48     
32     192    
-256   0      
48     32     
192    -32    
-160   48     
48     128    
-544   -16    
32     -128   
-512   -64    
240    -128   
-16    96     
-160   -208   
48     -144   
96     -512   
80     144    
-48    -64    
16     112    
16     -96    
48     -16    
-304   -80    
112    16     
-336   16     
192    -48    
-16    160    
256    -160   
-160   -80    
1408   992    
-1120  -1856  
432    208    
416    480    
336    32     
-400   -112   
-112   -16    
96     0      
0      -160   
-256   592    
224    -272   
-96    -96    
-480   48     
512    128    
-608   -448   
320    112    
-112   144    
304    464    
-352   224    
304    -1104  
320    304    
-80    256    
-96    272    
-320   -352   
272    -192   
-96    -240   
592    576    
-624   160    
160    80     
-288   -80    
192    -288   
-64    192    
-16    -384   
32     128    
-224   -592   
160    128    
-80    -16    
160    432    
-304   -160   
208    -32    
-48    -400   
304    -16    
-112   96     
32     112    
-112   64     
160    -112   
112    -16    
176    -32    
-48    -64    
-48    80     
-32    128    
-16    112    
16     -384   
-192   -144   
224    112    
48     16     
-32    224    
-16    528    
160    -176   
-224   0      
464    -160   
-112   112    
-80    -240   
-240   192    
32     -96    
96     176    
-32    -32    
-880   80     
-208   0      
-32    80     
-128   16     
80     -96    
-176   -192   
-816   -272   
32     176    
-160   -144   
48     320    
128    -32    
128    128    
192    656    
-576   -208   
128    176    
-48    128    
-144   -80    
-368   64     
-48    384    
-48    -64    
-16    224    
-208   -288   
64     -16    
-80    -80    
32     -16    
32     32     
-48    48     
-32    224    
-96    64     
288    384    
-80    352    
112    64     
-576   48     
16     192    
-128   -48    
-96    112    
16     -32    
128    64     
-32    -224   
64     32     
-32    16     
224    528    
48     464    
-64    16     
-176   -16    
-128   -176   
-16    16     
-144   96     
112    256    
-336   64     
112    -16    
-400   -80    
-16    176    
80     -240   
-160   48     
272    -16    
-16    144    
-64    -160   
16     -224   
-128   -80    
112    -112   
-192   -48    
96     80     
80     176    
-176   16     
96     -16    
-992   -144   
112    -16    
-48    64     
176    112    
192    224    
-128   160    
16     32     
-128   32     
32     48     
-128   -32    
128    112    
-128   160    
64     80     
-384   -160   
176    16     
-432   128    
112    64     
64     80     
-224   16     
-32    64     
-192   -48    
-80    64     
-16    48     
-32    -176   
128    -16    
-176   -32    
0      64     
-96    -80    
-160   -112   
64     128    
-640   0      
64     240    
32     -16    
-32    64     
16     80     
16     -32    
128    112    
-80    112    
16     224    
-208   -128   
16     -112   
176    128    
-48    48     
-96    176    
-80    96     
64     -80    
112    96     
-48    16     
96     80     
-32    32     
256    -32    
-112   288    
-80    64     
16     96     
-48    -64    
128    112    
-48    48     
-16    144    
-240   -96    
96     96     
-176   -80    
112    176    
-144   112    
32     64     
1040   1968   
-1776  608    
160    752    
320    416    
832    464    
-560   -528   
80     112    
208    496    
240    -416   
-368   272    
192    -400   
-160   656    
176    -656   
112    640    
128    -240   
-288   352    
64     -208   
48     288    
128    -64    
64     64     
-64    64     
80     128    
-32    176    
80     80     
-112   128    
-112   -128   
64     176    
32     128    
208    192    
-176   -144   
-96    160    
240    -32    
16     304    
96     -64    
-128   160    
80     -80    
144    432    
-64    -64    
-32    224    
-112   -128   
128    144    
32     112    
48     160    
-144   16     
96     32     
16     80     
112    144    
-48    -112   
-48    192    
-16    48     
16     -48    
48     112    
-64    32     
96     192    
-96    -32    
-32    160    
48     16     
64     224    
-16    80     
80     112    
32     32     
-32    96     
112    32     
-80    32     
208    80     
-96    144    
144    240    
-80    96     
0      16     
224    64     
-144   128    
48     160    
-80    48     
96     32     
64     48     
-48    48     
0      128    
-128   96     
-16    32     
192    0      
-48    96     
0      208    
-112   -464   
112    -64    
-160   48     
80     -112   
-96    16     
288    -32    
112    368    
-224   128    
240    80     
-128   112    
80     80     
64     176    
80     288    
-32    -208   
-112   112    
48     -32    
-16    -160   
32     -272   
272    176    
80     544    
-128   128    
-160   -48    
48     -16    
160    160    
64     -96    
32     304    
96     64     
80     128    
-32    -32    
48     144    
16     48     
48     32     
-16    -48    
144    -224   
32     288    
48     -272   
-48    -48    
128    -208   
16     80     
80     176    
0      160    
-96    -160   
16     -48    
0      -64    
144    256    
0      32     
0      -832   
128    240    
-80    0      
144    -16    
-32    16     
16     16     
96     -1680  
160    720    
-32    -144   
-192   0      
64     16     
64     16     
48     96     
96     176    
96     208    
-160   -176   
112    192    
48     -16    
96     96     
16     -224   
-32    -96    
80     -416   
32     64     
32     96     
160    160    
-16    64     
160    64     
0      48     
80     80     
288    16     
-128   112    
-32    96     
16     -48    
80     -80    
48     -432   
-32    144    
48     -32    
-144   32     
128    224    
-144   32     
176    144    
-128   224    
208    -80    
-96    -112   
64     80     
128    -32    
-80    144    
16     -656   
64     -80    
80     -96    
192    192    
-144   -32    
48     -80    
64     128    
208    208    
-48    48     
256    -112   
-16    240    
96     -240   
32     208    
-80    -128   
368    64     
-144   -16    
128    64     
-32    -96    
112    -16    
144    80     
32     112    
16     112    
0      480    
-1296  -1120  
336    -1472  
-512   176    
784    432    
-496   -160   
608    -48    
-480   160    
256    -864   
624    480    
-464   -368   
464    512    
-96    -256   
96     -64    
112    -608   
16     352    
48     -224   
-800   512    
-160   -1360  
160    208    
-160   -592   
304    256    
-64    -336   
128    112    
-240   -256   
304    -192   
-96    464    
16     32     
-80    -176   
64     -112   
96     16     
144    -80    
-112   32     
48     -160   
-1472  -64    
144    32     
144    32     
-64    176    
368    64     
-272   -1568  
-32    -112   
208    112    
80     0      
-16    176    
-64    -16    
144    -64    
-48    -352   
128    240    
96     -32    
-64    32     
64     -32    
-48    -144   
96     -272   
-64    32     
112    -64    
112    -80    
96     -32    
-48    48     
96     -112   
-64    -32    
160    208    
112    -16    
-80    256    
-32    96     
-288   -160   
48     -224   
32     -96    
192    32     
-32    -64    
-32    -304   
112    -16    
0      -480   
96     80     
-32    -192   
0      16     
0      48     
240    160    
-224   16     
96     -336   
-256   480    
-176   160    
-112   0      
128    -16    
112    128    
-144   -288   
32     -32    
64     0      
-48    -64    
432    400    
-80    128    
0      32     
-32    -96    
144    96     
32     32     
-96    -64    
224    160    
-448   -224   
32     -560   
-1424  -96    
80     -368   
224    144    
-96    -128   
96     272    
144    -560   
-16    -96    
32     352    
48     -128   
224    -80    
-160   -112   
112    64     
64     -96    
32     176    
-48    -176   
-240   96     
128    -144   
48     128    
0      -336   
0      -112   
192    -1696  
32     -80    
-208   96     
-80    16     
240    -128   
-176   208    
-160   -224   
240    -128   
-448   48     
224    96     
-688   48     
-32    -96    
32     112    
32     -352   
-96    -144   
-240   -16    
32     96     
208    48     
96     -16    
-416   96     
160    -48    
224    -112   
-32    -48    
-256   64     
224    16     
128    256    
-576   -224   
16     48     
-800   -176   
80     320    
-32    80     
-368   0      
-224   16     
-384   -128   
-128   64     
160    80     
-64    16     
48     -80    
48     128    
-432   112    
-112   -80    
-80    -304   
32     128    
-288   -96    
-64    64     
64     128    
-272   0      
-176   -48    
-48    0      
-64    96     
-288   -160   
128    0      
240    192    
-160   128    
-64    80     
32     96     
-192   -32    
160    32     
-16    160    
-224   -48    
288    128    
-288   64     
-96    112    
-240   16     
0      -16    
-192   16     
64     224    
-1248  -112   
-16    224    
-144   -112   
32     128    
128    -16    
48     48     
16     144    
-80    32     
96     -144   
-160   96     
-144   16     
80     16     
-112   144    
-1824  672    
736    112    
-1776  352    
160    -432   
480    -624   
-304   -976   
464    1232   
-224   -144   
80     64     
-352   -480   
368    496    
48     -112   
-224   320    
-16    -176   
128    0      
-192   32     
-32    32     
-384   32     
240    -96    
-160   128    
224    -32    
-224   16     
-16    -16    
96     192    
-80    -160   
-112   208    
64     96     
128    288    
-160   -160   
-96    32     
-16    32     
64     128    
-32    -48    
-16    96     
-1488  -80    
96     320    
-144   -144   
64     -32    
-80    128    
160    112    
-80    16     
-144   48     
-32    -16    
48     48     
-32    176    
96     16     
-208   96     
-96    -240   
-32    144    
-416   -112   
272    192    
-176   48     
240    160    
-128   48     
48     -16    
32     176    
32     192    
64     -32    
64     48     
-48    128    
-128   32     
-16    32     
-224   -176   
96     -32    
-192   0      
-48    128    
96     80     
-48    -48    
160    96     
-80    48     
-16    112    
128    48     
48     128    
-144   64     
0      128    
-16    112    
48     -32    
64     240    
-176   160    
144    48     
-256   160    
-48    96     
-16    -16    
32     192    
48     -16    
192    336    
-128   160    
144    32     
-48    0      
80     176    
-80    128    
128    192    
-160   64     
-16    16     
176    240    
-96    80     
224    352    
-48    144    
64     64     
16     240    
48     80     
-64    -48    
-16    16     
16     16     
64     96     
-176   -192   
112    160    
-80    256    
80     160    
-64    -16    
0      80     
208    240    
112    160    
-64    16     
-48    112    
144    304    
96     432    
16     416    
-48    96     
-32    0      
-160   -176   
-48    48     
80     128    
16     32     
64     -48    
-96    240    
80     192    
16     144    
80     48     
-48    112    
144    256    
-16    96     
-80    64     
-32    48     
16     48     
-16    0      
0      80     
32     32     
-48    176    
80     80     
-16    16     
16     32     
32     144    
96     16     
48     192    
-16    96     
-48    -32    
160    0      
80     -64    
176    272    
-160   64     
-16    64     
112    80     
256    272    
-160   288    
-144   -96    
192    240    
256    304    
-224   64     
112    -48    
64     112    
224    80     
-176   128    
-96    -48    
256    272    
-208   -240   
192    -48    
224    176    
-32    -784   
80     0      
-128   192    
-32    192    
128    64     
-48    192    
-48    -48    
192    128    
16     112    
0      96     
32     0      
-32    128    
32     -16    
-96    -320   
16     96     
-16    -448   
16     368    
-16    16     
80     160    
-112   96     
128    80     
16     64     
-112   272    
-32    112    
-32    144    
-336   32     
160    -96    
-128   80     
64     32     
976    944    
-1248  -1056  
880    976    
176    272    
480    -512   
-16    -16    
-432   -16    
544    1408   
-688   128    
96     -64    
176    -208   
-64    160    
-208   80     
176    -16    
-336   -144   
-96    160    
-192   -480   
0      -272   
336    -32    
112    16     
-160   208    
112    -64    
-256   208    
144    0      
0      -32    
144    128    
224    320    
-208   208    
208    64     
-304   -192   
400    32     
80     0      
-16    128    
32     -304   
16     32     
112    -352   
-16    176    
80     160    
48     48     
-112   64     
128    112    
32     80     
-32    -16    
-96    144    
80     -112   
16     96     
32     96     
80     144    
80     -96    
64     128    
-80    -384   
80     48     
16     -128   
176    272    
-144   176    
144    80     
-96    -112   
112    -48    
32     128    
-16    -432   
112    128    
0      -96    
32     80     
64     -432   
144    -32    
80     32     
-176   112    
144    -80    
96     160    
64     112    
-96    144    
96     96     
96     -128   
64     16     
144    -16    
-48    -192   
48     -112   
-64    64     
80     -176   
-112   96     
128    -96    
48     176    
144    192    
-160   336    
-128   48     
192    -16    
64     -208   
96     -48    
-16    -32    
-32    80     
0      208    
80     -48    
0      80     
192    16     
256    272    
-240   272    
-48    -256   
176    0      
0      -784   
192    224    
-96    0      
64     -208   
32     -48    
16     -1728  
80     -320   
128    -1264  
-112   80     
176    48     
-32    -64    
80     192    
304    -320   
-192   -352   
160    192    
-96    -192   
288    160    
-368   160    
240    -128   
-96    -80    
64     -64    
208    208    
128    -176   
176    96     
-112   -192   
112    -80    
272    128    
-320   -32    
48     -304   
112    0      
128    -208   
-144   -80    
-192   48     
48     -160   
-1152  -272   
-304   -160   
-16    -112   
256    -16    
128    16     
240    -1216  
-80    160    
-80    -448   
160    32     
-64    64     
-48    80     
16     -144   
-112   -256   
-16    -16    
112    -96    
48     16     
32     -80    
-160   -16    
80     -288   
128    -112   
0      48     
0      -80    
80     544    
-208   -96    
208    -48    
-16    -288   
32     16     
48     208    
-80    0      
0      80     
-368   -64    
96     -256   
-880   64     
-160   -128   
-208   -240   
176    240    
48     32     
272    -336   
-96    224    
192    -256   
16     32     
-160   32     
336    128    
0      80     
48     -16    
-144   -32    
64     -32    
-272   16     
112    -16    
-192   16     
64     -224   
112    288    
-80    -704   
64     -240   
96     144    
16     176    
-64    -48    
-16    -64    
-64    -96    
0      -96    
-128   -128   
64     -32    
0      96     
96     256    
-704   192    
-1008  -2672  
576    720    
-368   288    
-32    -176   
-48    -1088  
-704   -128   
576    592    
-224   576    
-672   -304   
400    -96    
64     0      
32     -208   
-144   288    
240    -368   
-48    384    
32     -528   
48     304    
16     -528   
176    112    
-112   64     
112    64     
-352   48     
208    144    
-128   208    
144    -272   
-272   32     
240    -224   
-224   48     
208    -112   
-128   112    
208    -112   
-96    192    
176    -176   
32     160    
-240   -64    
-304   -80    
32     -32    
112    192    
32     32     
16     -48    
-96    48     
80     -128   
-64    -128   
-48    144    
160    64     
-496   -176   
80     128    
-912   -176   
-496   -48    
-64    -32    
-288   -16    
160    112    
-592   80     
-80    64     
-80    96     
-16    32     
-32    -16    
0      80     
-208   -16    
16     -336   
-256   -192   
96     144    
-208   -16    
32     112    
64     0      
-192   48     
-48    16     
-512   32     
-96    32     
-768   304    
-96    0      
144    -32    
48     32     
16     -48    
-48    96     
-48    -32    
-32    -208   
208    16     
-176   176    
-128   -96    
0      112    
-48    64     
80     144    
-80    -32    
-560   -80    
-48    -32    
-96    -48    
-48    272    
-240   -448   
128    192    
-80    -112   
112    64     
-32    80     
-32    144    
-32    48     
-32    16     
-16    64     
64     160    
-96    32     
-208   -144   
48     96     
-144   16     
112    128    
-112   -32    
32     32     
48     0      
-80    -96    
-16    0      
-80    48     
-48    16     
160    112    
-80    64     
16     48     
-96    -16    
-16    48     
-16    80     
-256   80     
-32    176    
-656   16     
-64    16     
0      -160   
-32    96     
128    0      
-192   80     
-96    -112   
-32    192    
-160   -224   
208    -144   
-400   16     
144    48     
0      64     
-256   -80    
80     64     
-528   -128   
112    224    
-96    240    
0      -48    
176    208    
-160   48     
96     -64    
-64    16     
64     80     
-16    112    
-48    16     
64     112    
0      80     
-144   -624   
272    208    
-928   256    
256    -112   
-112   256    
240    272    
-224   -16    
48     80     
-288   80     
288    -16    
-192   64     
-96    0      
240    -80    
-16    224    
-64    64     
-160   0      
16     0      
-128   64     
128    160    
-256   -48    
176    144    
-320   16     
384    0      
-80    224    
0      -48    
-48    64     
-192   -80    
112    352    
-144   -176   
96     128    
-160   0      
96     224    
-176   0      
64     144    
16     32     
32     112    
0      32     
128    144    
176    32     
48     0      
16     32     
-96    16     
128    192    
-80    208    
32     176    
-224   128    
32     192    
48     256    
-176   -128   
240    192    
160    96     
48     112    
-192   80     
656    464    
224    256    
-192   352    
1056   -912   
-480   -384   
-144   -624   
-64    -32    
-432   304    
288    -240   
240    -48    
-128   160    
-64    176    
-16    256    
-16    0      
176    256    
-80    32     
80     112    
-80    160    
-16    -80    
-64    -176   
-224   -32    
384    208    
-160   -80    
-16    48     
-64    96     
176    416    
0      160    
128    -80    
-240   48     
208    16     
32     96     
16     80     
48     64     
-16    16     
304    128    
-144   224    
64     80     
-96    -176   
0      112    
144    128    
64     32     
-128   0      
128    208    
80     80     
-48    64     
16     96     
64     80     
-96    144    
-64    -80    
208    128    
-240   32     
192    112    
-80    144    
48     -544   
80     112    
32     -16    
48     128    
64     112    
-128   64     
96     112    
32     192    
-112   16     
192    96     
-240   96     
192    256    
64     0      
272    144    
-16    64     
80     -2224  
-144   64     
144    80     
80     16     
96     192    
-48    144    
192    144    
-112   144    
-32    32     
224    80     
-64    -16    
128    128    
-96    96     
-32    -16    
240    -112   
16     -304   
-64    144    
48     -160   
208    256    
-160   -16    
224    160    
-96    160    
64     16     
240    -144   
-144   64     
144    0      
144    464    
-272   -48    
64     -208   
16     80     
64     -80    
64     160    
-32    48     
-80    -176   
-32    -48    
112    96     
144    -80    
64     128    
-128   48     
208    128    
-176   -96    
288    224    
-16    96     
-48    -48    
32     48     
272    0      
256    176    
-384   -1024  
0      -144   
32     -1312  
256    16     
-144   96     
-288   -32    
32     32     
144    64     
176    112    
160    256    
144    304    
16     0      
64     32     
-192   -48    
64     80     
416    -48    
48     240    
144    -304   
-48    272    
-112   16     
208    160    
-192   176    
272    128    
-192   -16    
0      -96    
0      272    
144    -480   
32     64     
-80    -48    
144    0      
0      -304   
112    112    
0      -896   
0      96     
-32    -32    
64     32     
64     224    
80     192    
80     64     
-112   80     
48     192    
128    176    
-112   80     
176    -240   
-48    80     
160    -160   
32     -16    
0      -368   
144    160    
-48    -112   
-64    464    
288    16     
80     96     
96     208    
-16    -400   
128    208    
-80    32     
-160   288    
192    -208   
144    112    
112    -240   
-96    16     
-16    64     
96     96     
16     320    
144    -304   
96     48     
176    -560   
-64    -1232  
80     112    
-80    -80    
16     -176   
32     64     
32     -272   
80     48     
32     32     
-32    160    
-32    0      
176    -880   
80     -16    
96     112    
928    4240   
-1760  -768   
112    -672   
160    576    
1152   -1392  
-384   -912   
-272   304    
752    400    
0      64     
-48    -32    
32     -160   
-48    -304   
48     -800   
80     192    
144    32     
64     -64    
-336   48     
32     -112   
368    256    
112    -368   
-128   -128   
112    -32    
80     240    
-32    -1088  
128    -144   
-96    -80    
96     320    
-208   -144   
144    -48    
-336   16     
336    -64    
-432   16     
48     -208   
-656   -128   
80     -128   
32     -208   
16     0      
64     32     
96     -624   
16     -128   
96     -16    
96     208    
-64    48     
-112   32     
80     -48    
128    -32    
-176   0      
-16    -80    
-96    112    
-16    -96    
96     32     
32     -80    
48     -192   
96     -848   
96     -64    
32     -1184  
0      -368   
-64    -208   
-160   -240   
-64    -192   
176    128    
-144   16     
-48    16     
128    -80    
64     -128   
-448   32     
32     -128   
96     -16    
48     -176   
48     16     
64     -512   
0      80     
80     -32    
-16    176    
-96    -16    
48     -48    
112    336    
16     208    
-112   -80    
0      -224   
-640   96     
224    16     
-400   16     
288    240    
-192   96     
224    -496   
-240   -192   
112    -368   
48     -208   
-64    0      
0      208    
-368   -224   
64     -144   
-240   -64    
112    160    
-112   32     
128    128    
-80    -80    
144    -240   
-112   -48    
272    16     
16     304    
-64    144    
-64    -96    
-48    0      
112    -48    
-64    32     
64     80     
-48    -48    
176    144    
-144   -48    
128    -144   
-80    -16    
208    -256   
-32    64     
0      -64    
-96    -192   
16     112    
64     64     
-16    -176   
-32    -80    
-144   96     
320    160    
-160   -48    
-80    -16    
-64    64     
208    -96    
-144   -64    
80     -112   
96     -32    
-352   -48    
-304   80     
32     48     
-464   64     
48     320    
-224   32     
96     -192   
16     32     
-80    96     
-32    48     
-160   -80    
-416   -192   
208    160    
-352   -16    
80     -80    
-560   -560   
144    -272   
128    144    
-528   128    
32     224    
-624   0      
-16    -16    
-32    -48    
-176   64     
48     -80    
-112   400    
32     -256   
496    672    
-416   48     
144    80     
-352   -304   
96     -80    
-16    160    
-176   -32    
-224   32     
0      -128   
-160   32     
-640   -176   
-96    144    
400    80     
128    0      
0      -224   
368    192    
-544   -320   
32     -80    
64     48     
224    128    
-128   96     
-176   32     
-64    48     
-64    -16    
32     32     
-48    176    
64     0      
-528   -32    
48     176    
-80    16     
48     -160   
176    -80    
-64    -48    
160    -128   
-64    -128   
0      64     
-32    80     
-128   176    
-32    48     
160    0      
-816   -1904  
-496   -160   
0      -496   
368    128    
224    -528   
-80    320    
-144   -224   
416    112    
-32    560    
240    160    
-272   48     
-128   32     
0      144    
16     -48    
-144   48     
-80    -80    
-48    32     
-400   64     
80     144    
-416   -96    
-80    16     
48     80     
96     208    
64     176    
-48    16     
-112   32     
-16    144    
64     160    
-16    80     
-16    48     
32     32     
0      80     
-48    96     
48     64     
-400   -64    
32     -48    
-16    -112   
-48    160    
32     176    
208    80     
-224   0      
64     144    
80     80     
-96    -32    
-16    -16    
-32    48     
160    192    
-128   -112   
0      128    
-272   -48    
-48    48     
-80    80     
16     -144   
160    160    
-240   144    
128    32     
-208   -16    
16     64     
-32    80     
64     96     
-176   -160   
160    176    
-272   -144   
64     48     
-144   0      
-48    64     
160    112    
-64    128    
0      32     
128    144    
-128   32     
48     80     
-16    64     
48     -64    
32     -48    
-112   -64    
-16    272    
-288   128    
112    48     
80     -112   
160    224    
-256   112    
128    -128   
112    80     
-144   240    
128    160    
-32    -192   
224    96     
-224   80     
160    128    
-144   -32    
112    80     
-112   0      
224    320    
-144   208    
-16    -80    
176    240    
-192   112    
208    32     
64     224    
-144   16     
176    64     
-192   48     
192    144    
-272   -64    
112    96     
-80    160    
112    160    
-144   -16    
64     32     
-64    0      
112    48     
0      48     
-32    0      
48     144    
0      32     
80     96     
-128   -64    
80     112    
16     -32    
-32    32     
-80    96     
176    160    
208    128    
-224   64     
160    384    
144    368    
240    160    
-192   64     
-96    128    
48     112    
208    320    
-16    208    
80     208    
-192   -16    
-96    48     
48     416    
224    128    
128    32     
-48    128    
-176   80     
128    160    
32     16     
144    -64    
-144   112    
192    96     
128    240    
-160   -16    
0      48     
0      48     
-96    0      
112    144    
32     144    
16     -1824  
96     32     
112    0      
-160   -224   
144    -288   
-32    0      
128    320    
64     48     
16     112    
96     224    
-96    -48    
64     0      
80     80     
-128   80     
96     176    
-16    -688   
80     160    
-64    64     
64     112    
-16    128    
48     96     
-48    144    
-32    64     
-128   -48    
112    -48    
16     -16    
-16    144    
112    -128   
-160   -32    
16     80     
160    -576   
64     208    
-112   -656   
96     -80    
64     160    
144    -80    
-32    160    
32     64     
-80    192    
160    176    
-16    192    
-112   0      
48     48     
48     -192   
-368   1072   
352    2000   
-1072  704    
-112   -1456  
432    -848   
-16    -272   
-176   -176   
-80    240    
144    304    
112    -32    
-160   -192   
32     16     
240    240    
32     -48    
-80    208    
64     160    
144    32     
160    544    
-208   -224   
160    0      
-48    -1200  
256    208    
-32    96     
80     112    
-160   -144   
176    0      
-128   224    
-160   -336   
208    -176   
-64    -16    
224    -16    
0      -128   
16     272    
16     -288   
16     192    
48     -176   
-16    48     
-80    -160   
144    224    
-16    176    
160    400    
-64    32     
96     -144   
208    96     
-96    -352   
160    176    
64     -192   
-64    -80    
32     -192   
160    160    
48     -240   
128    144    
-32    48     
176    80     
-128   0      
160    160    
-48    96     
-304   -1616  
80     144    
496    128    
-352   112    
240    112    
-64    176    
144    -160   
-80    272    
16     -288   
16     160    
48     16     
48     80     
-48    96     
80     -160   
64     240    
32     -288   
48     112    
160    -144   
-80    240    
192    384    
-80    464    
-80    -224   
256    144    
160    -304   
-176   16     
-144   -240   
192    -800   
48     64     
-592   32     
0      -576   
304    256    
-32    176    
-16    16     
32     -32    
80     -64    
208    112    
0      -32    
16     48     
64     64     
160    -32    
-96    32     
112    -608   
-64    96     
80     0      
32     -144   
16     64     
64     -256   
0      -144   
128    -160   
64     -96    
32     0      
80     80     
16     80     
48     48     
64     -192   
-80    128    
96     32     
48     -64    
32     0      
64     192    
-640   -272   
176    -592   
-48    -96    
304    -240   
0      -48    
0      -992   
-16    96     
144    -256   
96     -32    
-48    -304   
112    112    
-80    -224   
160    160    
-304   -32    
16     -224   
-448   144    
112    -192   
144    160    
160    416    
112    192    
-16    -288   
16     0      
-96    -1008  
48     160    
48     64     
96     96     
-128   -192   
128    -272   
-160   -48    
160    -160   
-16    32     
96     64     
-640   64     
64     -144   
-176   16     
64     -592   
80     144    
0      -1392  
48     -32    
128    128    
48     160    
48     480    
-208   -720   
-144   80     
224    -288   
-272   0      
64     -144   
-352   -144   
144    192    
-176   -192   
32     -160   
-16    32     
112    -512   
160    160    
48     -96    
48     176    
-112   -240   
16     -240   
144    32     
224    80     
256    160    
112    288    
-368   -160   
144    -48    
-608   208    
16     -240   
-32    96     
224    -384   
64     256    
-48    -240   
48     -48    
-96    80     
128    0      
16     64     
32     32     
-32    160    
64     80     
-176   80     
208    -16    
-96    16     
64     -256   
1920   -1488  
-640   -1200  
992    480    
-80    144    
-64    -336   
608    608    
-864   -448   
1184   -288   
-224   608    
-96    160    
-192   16     
-160   -16    
352    -16    
-144   128    
-80    -336   
-32    0      
64     -304   
96     160    
-48    128    
-16    -32    
-256   -96    
224    16     
-192   160    
192    32     
-304   -96    
176    64     
16     48     
-16    -16    
-80    0      
-1040  -160   
-64    160    
-144   16     
-192   48     
-80    -16    
-96    16     
48     -32    
-944   -176   
-112   32     
208    160    
96     0      
-64    -224   
-144   48     
-80    -48    
96     192    
-144   -272   
-64    64     
-16    -192   
-64    64     
-16    -96    
-64    48     
32     96     
-128   32     
-32    -16    
-240   -32    
0      0      
16     -80    
32     -48    
-16    112    
-64    144    
32     -240   
-16    128    
-80    32     
32     0      
32     64     
-64    160    
-16    112    
-32    -64    
-48    -32    
0      80     
-256   128    
112    -32    
32     -16    
32     32     
-48    272    
-96    -224   
256    368    
-64    224    
112    256    
48     -112   
-16    -192   
-48    256    
-336   -64    
336    384    
-432   -112   
160    -32    
-208   32     
-368   -32    
336    -32    
-256   128    
160    -16    
-144   48     
48     96     
-64    -112   
-16    48     
0      -16    
128    448    
-304   -48    
80     80     
-80    -160   
0      0      
-768   -160   
16     48     
-144   -112   
192    288    
-64    -144   
64     64     
-256   -96    
-48    0      
-176   32     
112    144    
48     64     
-96    176    
0      -16    
80     64     
-96    160    
-208   -80    
80     128    
-144   368    
304    192    
0      -304   
-448   -16    
240    48     
48     80     
-112   112    
-96    -32    
144    96     
-208   -208   
0      16     
-320   -48    
112    96     
-48    -64    
32     -80    
-112   -192   
256    80     
176    144    
-80    128    
-48    112    
64     160    
-144   -176   
32     144    
32     32     
-96    96     
-144   0      
-16    -16    
-16    32     
-96    -208   
-32    -48    
-16    -192   
64     224    
64     240    
48     304    
-48    -32    
80     144    
-16    240    
-128   -16    
-16    48     
48     -16    
32     208    
48     -112   
-32    128    
-112   -48    
128    -128   
-48    48     
16     128    
-16    -112   
272    944    
32     448    
-160   -640   
-48    96     
80     64     
-64    80     
144    80     
16     0      
-80    -80    
96     176    
-128   48     
144    144    
96     -144   
-48    -112   
128    96     
-16    160    
-96    112    
0      -16    
144    64     
144    208    
48     96     
-256   64     
-112   96     
32     -128   
96     112    
-80    16     
-16    128    
80     48     
-144   160    
128    -128   
-64    224    
96     144    
-848   -1616  
1440   2416   
-1008  336    
608    -128   
-80    320    
128    144    
-352   432    
-256   -144   
560    272    
-112   -80    
-144   192    
-224   48     
176    48     
208    192    
-16    64     
-160   -32    
96     -288   
-64    48     
144    256    
112    144    
-224   0      
-176   128    
160    272    
144    16     
-528   -464   
48     -96    
-96    112    
320    240    
-560   -224   
48     144    
-96    96     
32     144    
-48    0      
96     144    
-80    -64    
192    416    
-208   160    
192    192    
-320   -192   
352    -720   
-272   48     
80     192    
0      208    
32     -96    
-144   80     
144    208    
144    32     
-16    -480   
160    -272   
416    464    
-176   128    
224    128    
-96    -144   
-32    352    
0      -64    
0      144    
16     0      
272    960    
-336   -464   
128    208    
-80    -96    
192    192    
0      16     
80     -128   
64     -176   
16     80     
-48    112    
112    -80    
32     0      
-16    -160   
64     32     
0      96     
48     112    
48     160    
-80    48     
-80    -192   
0      -272   
144    0      
-112   192    
96     112    
80     32     
-80    -16    
64     -336   
192    -64    
-64    -1152  
128    32     
128    -1680  
-48    144    
0      160    
48     -16    
32     48     
48     192    
-48    16     
48     128    
208    272    
-48    208    
48     48     
48     64     
-16    -32    
400    208    
-192   128    
144    -448   
96     208    
-48    -112   
176    96     
-256   32     
192    208    
0      0      
96     80     
-128   112    
144    -80    
-16    48     
-48    -240   
32     112    
128    -112   
80     112    
-128   -624   
80     112    
176    -944   
96     352    
-32    176    
128    0      
-176   -16    
224    -112   
-96    240    
160    -384   
-32    288    
-32    -192   
64     256    
352    -96    
-304   96     
224    -272   
96     192    
-48    112    
-32    128    
288    176    
-176   48     
128    -48    
-48    48     
112    128    
64     -176   
64     80     
48     -112   
-32    96     
144    -48    
-80    112    
368    512    
16     224    
80     64     
-160   -112   
48     16     
48     176    
32     16     
48     128    
80     176    
48     -64    
96     176    
80     -256   
-160   -96    
-48    -304   
144    112    
0      -112   
-16    96     
0      -448   
48     192    
32     16     
64     224    
80     240    
176    -176   
128    32     
96     -64    
96     -624   
-160   -48    
208    112    
-80    -192   
144    128    
112    16     
-112   112    
64     -16    
224    -528   
176    128    
-16    48     
-64    -48    
-816   -48    
0      -240   
-48    -80    
64     -496   
96     -32    
144    -832   
0      48     
64     160    
64     32     
-16    -128   
64     -48    
224    -112   
32     288    
32     80     
-160   240    
-384   384    
848    544    
-304   -240   
-16    -192   
-336   48     
-80    -1440  
-272   -640   
432    176    
-96    64     
96     -80    
-80    -32    
80     -64    
64     224    
128    -320   
-144   0      
64     -112   
-96    176    
-1024  -48    
0      -80    
32     -128   
80     -64    
64     144    
176    96     
-64    -112   
304    -176   
-384   96     
176    -208   
-176   240    
208    0      
-64    16     
16     -32    
0      48     
-352   -16    
32     96     
32     -64    
-208   -16    
192    -64    
-32    -96    
304    -96    
-32    -32    
-112   112    
80     -16    
112    64     
32     -32    
32     48     
-320   -176   
16     -176   
-544   -32    
320    -80    
-816   32     
48     0      
-272   -64    
-144   -320   
144    -80    
-32    -832   
176    128    
0      160    
32     -64    
96     176    
-176   -32    
-16    -32    
112    80     
-272   -48    
208    -32    
-96    64     
64     -48    
80     -96    
32     -320   
80     96     
-48    112    
128    160    
16     -16    
112    -112   
-112   224    
144    -192   
320    448    
-112   288    
208    0      
112    -96    
-224   32     
64     -224   
64     64     
-144   -320   
304    -16    
-160   -256   
32     208    
-752   -48    
272    -160   
-80    -128   
16     0      
-144   -48    
32     -112   
-368   -16    
-48    -128   
-128   32     
0      -32    
32     16     
32     -192   
-48    -16    
-64    -304   
16     16     
64     80     
112    256    
-256   144    
96     96     
-64    -160   
32     -80    
0      80     
0      0      
48     80     
-48    -48    
-432   32     
32     -400   
16     192    
320    -96    
-640   48     
-48    64     
-656   0      
-32    64     
-64    -336   
-304   -224   
224    80     
192    144    
-160   0      
0      48     
48     0      
-16    64     
-240   -448   
144    160    
-32    16     
32     80     
112    96     
-256   -112   
-32    80     
-400   128    
-80    144    
-160   96     
48     -96    
48     -144   
-32    -64    
-384   -80    
64     192    
0      -128   
-16    80     
96     0      
0      208    
16     176    
-32    144    
-80    -64    
112    64     
-112   224    
-128   16     
-48    48     
0      32     
96     224    
-288   -576   
128    64     
-32    304    
224    240    
-112   80     
-32    64     
-80    32     
0      48     
48     0      
608    192    
-304   128    
-816   -64    
-304   -48    
-912   -128   
128    0      
-16    16     
208    288    
-352   -144   
32     -144   
-96    160    
96     -16    
-16    176    
-128   32     
128    32     
-96    0      
64     48     
-192   16     
48     176    
-496   -64    
208    48     
-144   -96    
96     64     
-192   -96    
32     160    
64     128    
-208   80     
16     96     
-64    176    
-80    -240   
16     304    
144    128    
112    224    
688    1104   
432    400    
-592   -336   
-480   -464   
-352   -16    
416    240    
-480   -352   
640    -288   
-416   560    
128    0      
-240   -256   
-240   128    
368    96     
96     256    
-304   -224   
-64    32     
304    96     
-48    528    
-624   128    
-176   208    
128    -144   
-16    320    
-112   -160   
64     -80    
-80    -112   
224    192    
-64    192    
-112   384    
-528   -80    
-224   -128   
-192   -16    
-80    -64    
144    -48    
-320   -128   
192    -144   
112    16     
176    320    
32     32     
64     224    
-16    96     
80     64     
-64    -48    
-208   -176   
144    112    
-16    48     
304    192    
-320   144    
224    432    
-256   128    
-48    32     
-112   -16    
176    64     
-64    32     
-80    320    
-48    -192   
80     96     
-144   -400   
-480   -544   
-256   -176   
208    288    
-192   -16    
112    128    
-16    64     
0      112    
-96    224    
48     0      
64     176    
-16    64     
176    208    
-272   96     
-160   -48    
160    -48    
-48    16     
16     144    
-176   32     
288    656    
-240   -96    
464    32     
-16    224    
240    304    
-32    112    
-256   0      
112    160    
176    224    
16     176    
16     80     
176    80     
-256   96     
112    96     
-144   -48    
80     16     
-48    -32    
32     64     
64     176    
32     128    
160    48     
48     288    
64     144    
-272   -240   
304    192    
128    192    
64     144    
-240   112    
96     112    
-64    16     
64     -64    
-240   -144   
144    32     
-112   48     
112    112    
96     176    
-144   -144   
32     -192   
-160   144    
192    -64    
-160   144    
-128   -256   
112    80     
128    96     
-192   288    
-96    272    
64     128    
48     48     
64     80     
80     384    
96     112    
0      256    
-144   -32    
80     -64    
0      -16    
48     160    
48     160    
-48    32     
96     -64    
16     -80    
-112   -32    
96     112    
-16    -784   
208    -32    
-160   144    
-32    80     
192    128    
192    -16    
-192   80     
80     16     
176    160    
80     336    
-128   -48    
112    32     
-176   32     
128    -256   
80     160    
96     -496   
-48    0      
64     160    
32     16     
48     144    
-64    208    
64     -16    
112    32     
-128   32     
208    160    
-112   80     
32     128    
80     368    
-32    -128   
160    32     
176    -256   
-80    80     
-16    160    
-128   80     
16     80     
96     -112   
48     64     
368    208    
-176   -208   
-16    96     
-48    64     
-48    112    
224    16     
32     176    
-48    -32    
48     -32    
48     64     
128    -176   
128    160    
-96    176    
192    224    
-96    0      
0      -16    
64     -16    
240    -32    
-192   64     
16     64     
224    288    
-112   -96    
128    48     
2064   1888   
-1664  704    
512    -192   
80     208    
-64    -1920  
-64    592    
-816   -688   
640    464    
-208   -16    
48     816    
-144   -352   
-304   0      
192    -144   
208    48     
-144   -64    
32     -16    
144    144    
16     -288   
16     -16    
160    -752   
-64    96     
112    80     
-48    288    
208    -32    
-208   48     
240    -80    
-32    64     
208    32     
-128   64     
112    -16    
80     0      
48     64     
48     144    
-48    -32    
80     16     
64     0      
64     128    
-80    80     
96     64     
32     128    
112    80     
-48    16     
96     160    
176    -384   
-48    176    
48     -208   
-32    32     
48     -176   
160    -96    
80     -592   
-48    48     
112    112    
-48    96     
32     112    
160    32     
-32    272    
128    -112   
-32    240    
160    -48    
-16    128    
32     -128   
48     96     
112    64     
0      16     
112    -416   
48     -1792  
80     160    
16     -2176  
-64    96     
-272   0      
96     -288   
-16    -96    
-16    -1424  
-16    -96    
160    -80    
-96    16     
-32    -160   
112    -32    
-96    192    
-16    -176   
0      -384   
32     160    
32     128    
160    448    
-880   -144   
112    -368   
-144   -96    
128    -160   
144    -96    
112    240    
0      -192   
32     -272   
-400   -384   
96     112    
176    80     
-112   16     
16     -32    
80     -160   
240    -32    
-496   64     
48     -112   
-80    112    
80     64     
112    144    
16     -192   
112    -16    
-368   -1136  
272    256    
-64    -176   
-96    -64    
16     -160   
32     -64    
80     -128   
80     -224   
-32    32     
96     -64    
-272   16     
80     -112   
48     -16    
64     -16    
176    288    
-32    -288   
-160   -16    
128    -144   
160    112    
-96    -128   
112    -80    
-256   -144   
176    -128   
112    112    
32     -16    
-192   48     
-128   -224   
-208   -112   
-32    -128   
144    304    
-400   -128   
16     0      
112    -1664  
-16    32     
144    16     
-48    0      
48     -208   
48     80     
-192   -48    
208    64     
-208   0      
16     48     
-128   16     
16     48     
16     16     
128    -352   
-64    112    
80     -768   
-16    -80    
192    16     
-48    32     
240    16     
-176   80     
-48    -80    
80     -176   
-144   -32    
336    64     
-320   96     
-32    -144   
-992   -176   
32     -256   
224    208    
160    -320   
-128   144    
16     -208   
80     -144   
-272   -64    
160    -176   
-640   -112   
224    144    
-288   64     
240    -64    
-528   32     
224    -256   
0      48     
-32    -176   
32     96     
-112   -160   
-80    176    
-352   -176   
80     -144   
48     112    
208    128    
-256   -80    
96     112    
-16    0      
-48    -112   
176    -464   
-32    160    
-16    -32    
-256   -48    
-144   592    
-1248  -512   
-624   -944   
-384   96     
-16    -320   
-544   752    
400    432    
-784   -656   
960    -272   
-592   240    
656    -384   
-608   240    
400    -240   
320    272    
-512   -464   
112    224    
96     -80    
-800   272    
-208   -128   
-224   208    
-16    288    
-592   224    
-240   -176   
64     128    
-128   192    
96     -192   
80     -112   
144    512    
0      224    
-848   -272   
0      208    
0      32     
64     0      
0      160    
-32    0      
-48    368    
-160   0      
-112   -128   
-720   32     
208    48     
368    384    
-176   160    
-304   -176   
-144   256    
-16    -80    
64     -48    
-96    32     
80     -192   
64     -16    
-288   -80    
48     32     
-192   32     
96     112    
32     176    
-176   32     
-288   -128   
0      -16    
32     16     
96     -16    
0      16     
-80    -32    
0      48     
-80    48     
-160   128    
160    -32    
144    304    
-96    -16    
-32    48     
-544   -288   
80     -80    
-1744  -176   
-96    192    
144    0      
-16    160    
-96    -304   
48     16     
48     128    
-32    -64    
128    144    
-80    48     
80     48     
-144   96     
-32    96     
32     416    
-272   160    
32     -128   
-48    -176   
32     -384   
160    96     
-64    -400   
0      160    
-48    160    
160    240    
-176   240    
0      176    
-160   80     
-160   -112   
96     48     
0      48     
144    336    
-64    80     
0      144    
-1712  -64    
96     272    
48     48     
-80    80     
-32    208    
64     112    
-176   -176   
-144   48     
-16    16     
0      32     
80     160    
32     48     
-112   192    
-160   -32    
64     -32    
-928   -112   
112    64     
-80    0      
128    0      
64     144    
192    224    
160    208    
-16    64     
-112   272    
0      160    
192    112    
-160   -48    
48     64     
-64    -16    
256    144    
-80    224    
240    48     
16     -176   
-144   0      
-176   208    
256    32     
96     16     
-208   48     
112    240    
80     80     
176    64     
48     96     
-16    160    
32     112    
80     288    
-112   144    
64     -32    
0      48     
-128   -16    
96     112    
-16    16     
112    256    
-160   -80    
-64    64     
-144   16     
-32    -128   
-112   -176   
128    128    
-80    96     
-32    160    
48     32     
-48    64     
128    192    
-128   64     
64     -208   
160    48     
80     224    
-96    16     
-16    160    
96     176    
-96    80     
96     80     
-48    80     
-64    -32    
0      64     
0      16     
176    32     
112    144    
0      304    
-160   48     
-96    -16    
256    128    
-16    128    
64     192    
0      32     
32     48     
-32    -64    
80     64     
64     16     
-128   144    
32     -16    
128    128    
16     -16    
64     144    
32     96     
-144   560    
256    544    
-656   -176   
0      672    
-624   -416   
-176   208    
400    -672   
64     208    
-336   240    
496    496    
-320   -64    
352    16     
-48    -16    
128    240    
-112   96     
208    64     
0      176    
-144   -16    
368    320    
-176   0      
64     -32    
-208   80     
176    224    
224    80     
-80    48     
48     -80    
-64    176    
128    112    
0      144    
32     64     
0      32     
-64    80     
160    176    
-96    32     
64     48     
-16    112    
64     -112   
16     -304   
-64    128    
112    -272   
16     80     
-144   112    
192    128    
-16    48     
80     16     
-128   128    
112    64     
48     96     
-96    160    
144    -160   
-64    64     
-32    48     
0      -176   
112    176    
-80    -576   
96     16     
144    160    
-48    80     
112    96     
16     80     
48     160    
48     -16    
64     -96    
64     160    
0      112    
32     80     
-16    64     
48     -224   
80     80     
-80    -64    
112    0      
48     -752   
32     176    
-16    96     
32     96     
80     -16    
112    -128   
-32    48     
-112   288    
-32    -240   
-32    128    
-32    48     
96     -144   
0      256    
96     -416   
-64    -112   
-32    -672   
96     96     
64     -208   
192    320    
-160   -64    
80     16     
-32    96     
128    112    
-144   32     
16     -16    
80     -16    
48     -144   
64     304    
-64    -272   
-16    192    
32     -208   
224    224    
32     112    
-16    96     
-32    0      
48     0      
128    0      
64     336    
-16    160    
48     -96    
-48    96     
32     -64    
256    192    
-112   -176   
80     128    
-64    -240   
160    112    
-16    0      
112    96     
176    176    
-48    160    
-16    -112   
0      112    
176    400    
144    -48    
96     352    
-224   -240   
224    0      
-16    -112   
48     192    
128    -384   
-144   -32    
192    176    
-112   -16    
240    96     
-256   -80    
304    -160   
-160   112    
256    144    
-48    64     
32     32     
0      -96    
128    208    
112    -320   
-192   -80    
192    -176   
16     416    
32     -80    
-32    -80    
208    64     
128    -1792  
80     144    
-576   -96    
-176   400    
64     80     
32     32     
-112   -208   
208    32     
0      48     
-112   0      
32     48     
16     -32    
352    128    
-96    -544   
64     16     
16     448    
-400   -128   
-208   -48    
-112   -368   
272    -240   
-48    -624   
-96    -48    
64     -1744  
80     -48    
64     80     
144    -16    
-48    32     
48     -128   
80     -864   
-272   32     
208    -272   
32     176    
-224   64     
-48    -16    
368    0      
-64    144    
-32    -192   
-16    -112   
272    64     
128    -720   
240    -320   
-112   -192   
-96    -80    
48     -208   
160    240    
304    -112   
32     -176   
-112   1792   
-176   0      
-432   -384   
-368   -48    
-416   -400   
336    -544   
144    -48    
32     464    
-272   -224   
0      -240   
64     0      
80     320    
32     288    
64     -16    
16     -48    
32     -256   
-464   -256   
112    192    
176    -80    
-80    -224   
128    -368   
208    -144   
-128   -272   
64     -32    
192    176    
-32    208    
48     -176   
-32    -144   
-80    16     
-16    16     
-16    0      
32     80     
-400   -128   
176    48     
-1376  -96    
256    112    
-32    32     
48     16     
32     64     
160    -1424  
-32    256    
112    -176   
32     -272   
-96    112    
224    48     
-16    64     
16     -240   
-352   -160   
272    0      
-576   224    
224    -64    
-128   48     
112    -384   
192    208    
-160   -560   
240    240    
-160   -160   
288    -144   
-128   96     
-16    -192   
-32    0      
64     -112   
-96    16     
48     -16    
-96    -48    
16     -112   
-48    -80    
80     -320   
0      176    
-16    -416   
112    80     
112    192    
-112   32     
64     0      
16     48     
16     192    
176    -144   
0      16     
-128   80     
-176   -48    
160    48     
-128   -16    
160    -368   
-32    160    
64     240    
-144   -64    
160    16     
128    256    
-96    -80    
176    64     
-128   112    
208    -64    
-176   48     
-112   -208   
144    -96    
-80    16     
-32    96     
32     -16    
16     112    
-304   -336   
-1360  -48    
-224   16     
-880   64     
-208   48     
-128   96     
-96    0      
80     -80    
64     176    
-96    16     
16     -32    
-400   -112   
-48    80     
-80    -240   
-64    16     
-432   -352   
96     -144   
-80    -16    
-48    64     
48     16     
-560   96     
48     48     
-64    32     
-304   32     
240    112    
-16    -16    
-32    -64    
-32    240    
112    -96    
-16    80     
48     144    
48     128    
32     336    
-192   -48    
-160   64     
-544   -144   
160    -16    
-992   128    
48     96     
160    -16    
-192   112    
0      -192   
160    192    
224    -176   
-64    224    
112    96     
240    160    
-288   -80    
-112   -16    
-64    144    
0      0      
32     176    
-240   -32    
-112   16     
-1152  -96    
-80    64     
0      -80    
-128   -224   
144    -352   
128    176    
-48    224    
-112   -32    
-48    -32    
96     0      
64     64     
144    112    
32     96     
-496   96     
-32    -496   
-224   16     
112    208    
-32    32     
-80    224    
112    -64    
-160   -16    
32     112    
-144   208    
16     96     
48     192    
160    0      
16     -80    
-64    -16    
-144   32     
-112   272    
-448   -144   
128    -32    
-128   -176   
112    64     
-16    224    
-176   48     
-32    96     
48     80     
-16    128    
-144   -32    
224    48     
-256   64     
96     16     
-96    -16    
2112   1664   
-1840  0      
624    160    
-320   176    
1056   -1136  
-336   368    
-464   48     
-320   656    
464    -192   
-240   256    
336    0      
-224   160    
-112   192    
240    0      
-160   -16    
16     32     
-32    32     
32     144    
-448   -64    
80     48     
-64    112    
128    96     
-64    224    
-80    -32    
-32    -32    
-32    -64    
32     80     
128    144    
16     160    
-224   -176   
16     0      
-240   -144   
48     16     
-64    96     
-48    -48    
208    96     
-112   128    
16     128    
-64    32     
-16    0      
16     0      
16     96     
0      64     
-16    -16    
-288   -144   
48     272    
-96    48     
80     160    
80     96     
-112   128    
64     112    
-64    96     
16     64     
64     128    
16     96     
48     64     
32     208    
-112   16     
144    112    
80     400    
-192   32     
-48    -32    
80     -416   
-96    -256   
32     -48    
-64    -64    
128    -16    
32     96     
112    256    
-32    96     
-80    112    
48     96     
0      -16    
176    80     
-112   128    
48     176    
-112   128    
16     -192   
336    32     
-48    400    
-64    -32    
192    112    
-144   -16    
-32    -112   
-16    16     
-48    48     
80     -112   
-48    64     
128    336    
-112   112    
-16    -16    
-192   -272   
112    16     
192    240    
-128   96     
112    176    
-48    96     
128    112    
-16    80     
48     96     
32     128    
96     144    
-64    -16    
80     128    
-112   0      
112    112    
16     128    
96     304    
-48    0      
112    96     
-16    160    
-32    -96    
48     64     
0      160    
144    144    
-80    -16    
160    176    
-96    0      
144    112    
-112   128    
96     224    
64     16     
-112   32     
112    224    
16     80     
176    80     
80     272    
-128   240    
64     -128   
48     32     
-48    48     
256    80     
-208   32     
96     128    
64     80     
0      -176   
256    768    
-224   -240   
368    -16    
-224   240    
256    -16    
-112   96     
0      96     
128    112    
-32    80     
64     192    
16     -16    
128    32     
-32    208    
80     80     
-144   -176   
144    96     
48     0      
0      80     
-64    -96    
320    176    
-240   96     
368    336    
-528   16     
240    -160   
-16    -48    
240    176    
80     80     
-176   208    
80     96     
448    128    
-448   0      
512    -304   
-32    160    
112    -1456  
-48    -16    
-80    80     
-64    64     
160    -192   
112    336    
-224   -96    
176    16     
320    -16    
-208   48     
-288   0      
128    -144   
128    -64    
288    -304   
-144   -32    
0      -976   
128    0      
208    656    
-208   256    
176    96     
-32    256    
16     0      
-32    320    
-16    16     
-48    144    
192    -96    
-32    48     
112    112    
-560   -256   
464    2640   
-1008  672    
48     -384   
-608   -1696  
656    48     
-192   -608   
-48    480    
560    704    
-272   -240   
144    48     
-208   -80    
384    48     
48     -304   
16     176    
16     -80    
32     128    
32     -160   
128    80     
128    -560   
112    272    
-80    96     
16     48     
-64    -16    
16     -80    
192    176    
64     -432   
48     16     
48     -192   
-48    176    
256    32     
-48    144    
-64    -352   
32     80     
32     -512   
96     128    
144    16     
-64    208    
96     80     
16     -112   
-32    64     
128    -48    
64     176    
160    -96    
-32    112    
48     -144   
160    192    
-112   -144   
208    384    
-64    -176   
224    112    
-128   64     
208    -1408  
-240   -16    
-64    -48    
128    -1504  
-240   0      
192    -1488  
144    144    
32     -112   
160    -192   
-16    208    
48     -112   
176    144    
-192   64     
160    -592   
-16    -176   
64     -592   
0      -64    
-400   32     
48     -32    
128    -16    
-64    -80    
-16    -176   
192    -1392  
-32    -144   
112    80     
-144   16     
160    96     
-32    64     
80     -32    
96     -96    
128    -112   
80     -112   
-256   208    
16     -320   
48     -240   
288    -352   
-96    128    
128    -672   
48     -32    
32     -736   
32     -48    
0      -112   
0      176    
-128   16     
272    96     
-224   -128   
96     -64    
-272   -240   
-32    -80    
-1488  -112   
192    -32    
16     32     
16     -544   
48     16     
112    -1440  
-352   -96    
144    -256   
-80    160    
0      -48    
96     176    
-112   -192   
48     48     
-128   80     
16     -16    
-176   64     
-144   -96    
160    -144   
-48    -272   
48     -80    
144    -240   
160    48     
144    -640   
-96    144    
-112   -272   
32     -64    
-128   -240   
80     -112   
64     96     
176    64     
-112   0      
32     -16    
-1120  96     
176    -144   
-48    48     
48     -32    
0      112    
208    -704   
-48    64     
192    32     
80     -48    
32     0      
64     64     
-16    -64    
160    -176   
-272   -64    
160    176    
-304   80     
64     -144   
-288   48     
48     -112   
64     16     
96     -592   
-80    304    
-32    -32    
64     0      
-160   -16    
240    -64    
-144   64     
160    96     
-128   0      
80     192    
-128   96     
80     16     
96     -112   
16     -48    
80     400    
-32    -240   
0      48     
-208   -48    
112    -96    
64     400    
32     16     
-112   -16    
64     -32    
64     96     
0      80     
-32    112    
16     -272   
-16    48     
32     -128   
80     0      
0      -64    
64     112    
-80    -32    
-80    -304   
-128   -96    
80     48     
-80    0      
128    16     
-80    48     
80     -16    
-320   -80    
176    -176   
80     208    
-784   -48    
-592   -3824  
832    944    
-1216  -304   
368    -32    
80     1168   
-112   -592   
688    544    
-624   -576   
400    -272   
-352   -240   
384    16     
16     336    
-688   -208   
0      128    
-240   -144   
64     32     
-48    224    
176    496    
-144   208    
-208   -64    
-144   -112   
-272   80     
0      144    
-1616  -96    
32     -48    
0      -32    
144    144    
-176   16     
112    48     
-64    -160   
-80    -144   
-128   64     
144    224    
-224   0      
80     128    
-176   -16    
-16    32     
-192   -192   
-400   48     
16     16     
32     80     
-48    160    
-64    -208   
32     48     
-112   -224   
-32    -16    
48     48     
-16    32     
96     -160   
-112   160    
-96    0      
128    192    
-128   128    
-32    -240   
128    144    
-528   -80    
192    304    
-144   80     
0      48     
-48    -144   
-16    32     
32     -32    
-16    80     
-32    -96    
-144   -16    
256    208    
-48    32     
112    32     
-112   64     
-16    32     
-352   -112   
80     80     
80     -16    
16     64     
-48    16     
48     -64    
-160   -544   
0      -640   
96     -160   
-16    64     
240    192    
-160   272    
-48    160    
-128   80     
64     64     
-80    48     
-112   48     
-96    -80    
160    208    
-112   -16    
128    0      
-32    160    
48     112    
32     64     
-48    80     
16     -32    
96     48     
-96    -48    
-16    -80    
48     176    
-160   32     
96     80     
-240   0      
-48    112    
-16    64     
-32    96     
96     272    
-144   -80    
176    112    
-256   48     
208    96     
-176   -16    
80     96     
0      112    
64     128    
-176   -32    
48     96     
-496   -32    
-48    32     
16     128    
-48    0      
-32    -48    
128    112    
80     80     
-80    -16    
-32    224    
-176   -304   
160    -112   
-176   -112   
112    176    
-160   -96    
-112   -48    
32     64     
192    176    
-144   80     
144    16     
48     208    
-416   112    
320    16     
-80    -224   
240    112    
-48    96     
48     144    
-80    -48    
-16    64     
-96    -112   
208    208    
-400   -160   
240    48     
-240   16     
128    32     
0      64     
0      128    
224    -160   
320    112    
-272   416    
-192   -96    
224    48     
-224   -48    
272    48     
-80    128    
64     -112   
32     96     
16     48     
-32    128    
-80    -224   
32     96     
336    48     
-80    0      
-112   208    
80     -16    
-16    0      
-48    80     
-16    160    
-144   32     
-240   96     
80     -96    
304    192    
-128   -256   
0      368    
32     -192   
48     416    
224    48     
144    64     
48     -128   
-64    96     
80     -384   
80     608    
0      -16    
96     208    
-32    128    
160    -96    
16     240    
80     -64    
16     224    
-64    0      
192    176    
32     48     
96     -352   
-16    208    
944    480    
320    816    
-480   -64    
-96    208    
-240   176    
240    -128   
112    -16    
-112   -128   
176    32     
0      288    
-32    -16    
16     48     
128    112    
-80    48     
-32    96     
64     96     
64     80     
32     96     
-192   -192   
32     -240   
96     80     
128    240    
-32    -16    
96     416    
-16    224    
96     112    
-80    -32    
144    80     
-16    0      
-32    80     
32     128    
-32    0      
80     144    
320    176    
-80    96     
80     -64    
-64    -1296  
0      128    
208    160    
-32    64     
48     112    
-32    32     
32     80     
-64    112    
240    48     
16     208    
-64    -32    
48     128    
-16    176    
144    -144   
-32    80     
32     -880   
-16    -32    
80     -16    
64     48     
16     80     
64     112    
-48    -496   
112    128    
-16    112    
32     80     
64     0      
16     112    
0      176    
64     -224   
96     32     
112    -96    
-96    48     
288    -176   
-176   96     
128    -80    
80     128    
-16    -16    
96     192    
208    -48    
-32    112    
-64    64     
32     -192   
144    208    
-48    112    
-32    -112   
288    0      
-128   256    
-32    -192   
256    400    
-256   -368   
416    336    
-208   -64    
176    224    
-80    0      
160    96     
48     -96    
208    96     
-160   112    
128    16     
16     48     
-16    -240   
0      -48    
80     -224   
80     144    
224    208    
-208   128    
48     -32    
16     64     
-128   -64    
320    256    
-272   -64    
272    -304   
-96    64     
96     -400   
208    304    
-176   -224   
48     64     
128    -48    
-80    16     
176    -528   
-96    192    
-160   0      
288    -32    
-208   64     
64     0      
112    304    
208    -112   
144    64     
-112   128    
16     176    
48     144    
80     32     
32     -64    
-96    64     
-48    -1344  
-144   192    
144    64     
160    -144   
-80    16     
224    -16    
128    -416   
64     -176   
-144   32     
48     -64    
0      240    
256    -96    
-48    208    
-48    -288   
80     224    
32     -48    
80     -336   
16     32     
80     -272   
48     0      
-416   -160   
-16    80     
176    48     
-80    32     
224    64     
16     -1584  
-80    -192   
112    144    
32     -32    
80     -464   
96     64     
48     -400   
96     -96    
-96    -592   
64     -352   
-48    80     
144    -32    
304    -48    
-176   -832   
0      -48    
96     -448   
160    -256   
384    160    
112    -32    
-64    -64    
48     192    
48     -320   
80     96     
176    160    
-48    32     
-80    160    
48     -368   
224    -64    
0      -160   
-16    -176   
64     -480   
64     48     
128    -576   
-32    -128   
48     -256   
-192   16     
0      112    
-96    -16    
-48    48     
80     16     
-304   3840   
-1120  -1088  
-784   -928   
608    -48    
1312   272    
-560   -1056  
-224   -560   
672    224    
-160   -304   
384    144    
-16    144    
48     32     
-160   -32    
176    144    
-144   -496   
48     112    
0      -16    
-32    624    
-32    -16    
-912   -256   
240    -224   
-384   -112   
112    -304   
-16    208    
144    -1296  
-288   -16    
128    -80    
48     -144   
32     48     
0      -112   
-32    -16    
-32    -32    
-96    -32    
80     16     
-576   112    
-112   -720   
-416   -336   
16     -528   
256    -80    
96     -240   
-32    160    
16     0      
176    -128   
-80    32     
-64    80     
-304   64     
96     176    
-496   -352   
48     48     
-560   -304   
320    192    
-160   -48    
64     -48    
160    160    
-32    -432   
-96    16     
-576   -288   
240    144    
400    592    
-176   48     
64     -16    
-96    -48    
64     -80    
64     80     
-240   -96    
208    80     
48     128    
48     -288   
-112   160    
96     -144   
64     48     
-96    48     
96     96     
-64    80     
-64    -32    
-160   -32    
32     112    
-208   32     
544    -64    
-112   16     
416    -160   
-608   256    
128    -336   
16     96     
-64    -368   
-592   -64    
96     192    
-736   -32    
-64    0      
16     144    
-112   -112   
80     -144   
32     112    
144    192    
-192   -160   
-64    -208   
48     96     
-96    80     
32     0      
-160   -128   
32     48     
-80    -16    
-496   -96    
-112   144    
-1040  -32    
176    144    
-176   -304   
208    112    
-240   -176   
272    48     
-64    96     
80     80     
64     -48    
-96    80     
32     -16    
-224   -16    
48     304    
-96    32     
0      80     
-208   48     
-64    80     
-896   -144   
-192   -16    
32     -16    
16     -192   
96     -96    
-96    352    
64     -176   
160    352    
-48    16     
0      0      
-64    464    
-128   176    
80     176    
-128   -112   
64     -352   
-208   -32    
304    432    
-304   240    
16     -16    
-16    -32    
-112   -176   
-16    -224   
-16    272    
-80    112    
96     -16    
-64    48     
-64    160    
16     32     
-192   16     
96     48     
-16    80     
0      96     
-800   -32    
0      -80    
-192   -224   
0      128    
16     -160   
-240   32     
208    48     
-80    160    
-48    -176   
-192   64     
-32    112    
-64    -192   
-128   64     
-64    480    
-176   -48    
-576   -336   
304    64     
-32    -80    
-128   16     
256    0      
128    128    
48     16     
-176   96     
-144   -80    
96     176    
0      0      
80     128    
-16    16     
-48    -64    
16     96     
-304   48     
0      16     
-528   48     
32     -208   
-16    208    
-48    -16    
0      144    
-32    64     
48     176    
-64    16     
96     112    
-64    -144   
0      -64    
-144   64     
-720   -848   
-352   128    
48     80     
-128   -32    
448    -736   
-576   -368   
368    480    
-64    160    
-48    80     
-32    0      
48     0      
-112   -128   
32     -64    
32     64     
-32    -16    
-96    80     
-160   -96    
96     240    
-256   -112   
64     80     
-64    -48    
-96    112    
192    128    
-64    144    
128    64     
-112   -16    
0      -64    
32     -16    
16     160    
48     224    
64     48     
-144   -16    
16     176    
128    128    
-112   96     
400    32     
-112   224    
208    80     
-160   0      
48     32     
-64    112    
128    80     
-16    112    
64     64     
32     48     
-64    176    
-128   -64    
-160   -208   
256    -96    
-96    176    
128    -32    
-48    112    
-32    16     
128    160    
-160   32     
176    96     
-48    128    
-128   -192   
144    208    
-320   48     
288    -48    
-96    64     
0      176    
-32    48     
96     -144   
96     208    
-48    208    
48     32     
64     0      
64     96     
-80    96     
48     192    
-64    -128   
128    64     
-32    96     
-16    80     
160    64     
-128   112    
80     80     
112    48     
-48    128    
32     96     
48     192    
-160   -32    
352    208    
-192   0      
-16    -16    
208    48     
-272   192    
256    -16    
-112   112    
160    160    
-96    112    
-48    -16    
240    96     
-144   0      
128    -32    
16     256    
-112   16     
176    160    
-112   -32    
64     112    
32     64     
96     416    
-96    -400   
192    -368   
-240   0      
320    144    
-64    96     
144    48     
-80    112    
240    240    
80     96     
-48    112    
80     192    
96     288    
48     272    
-112   -80    
0      128    
272    176    
-96    -16    
128    96     
80     -912   
-112   96     
144    224    
80     208    
48     112    
-80    -32    
-32    160    
256    240    
-96    -32    
112    112    
-16    64     
48     96     
-48    192    
-96    -32    
368    192    
-48    -1856  
-32    288    
80     112    
-112   272    
32     112    
-144   -96    
64     64     
80     112    
192    -288   
-32    512    
80     208    
-96    -128   
32     32     
128    -64    
-32    80     
64     -320   
32     16     
272    -1456  
-240   96     
64     16     
16     304    
-96    -416   
48     32     
16     192    
80     16     
-48    -16    
48     0      
0      96     
272    224    
-208   -32    
32     -272   
128    160    
128    -240   
-32    112    
96     -96    
80     16     
-32    224    
32     -48    
48     144    
240    176    
48     -32    
160    -128   
0      48     
64     -48    
64     112    
144    -80    
-48    -112   
176    -416   
112    368    
-176   -896   
-144   64     
192    -64    
176    80     
-32    48     
176    48     
-64    160    
288    -80    
-64    176    
-128   16     
96     176    
-1136  -2944  
1152   3408   
-1056  1600   
432    -224   
-256   -640   
-256   -96    
384    1456   
-1056  112    
624    384    
96     -144   
128    240    
-416   160    
256    80     
0      -128   
192    240    
-32    -128   
64     80     
-48    32     
320    288    
96     144    
-144   0      
-32    112    
112    256    
-112   -48    
208    -272   
-64    144    
16     -96    
256    -48    
0      -128   
384    208    
-16    80     
-80    48     
-128   80     
64     0      
80     -608   
16     -192   
320    272    
-240   -1168  
-288   80     
-64    32     
0      -1568  
96     -192   
96     -64    
192    -176   
-96    -144   
144    112    
-16    80     
112    272    
-192   -576   
-32    160    
160    -464   
176    192    
-80    -224   
112    -96    
-688   -48    
144    -448   
48     64     
-240   -208   
112    96     
192    -768   
-128   -336   
112    128    
80     -224   
-48    -208   
-96    224    
96     -64    
80     208    
0      -144   
48     -224   
-112   -112   
96     -16    
16     -64    
80     -352   
192    48     
-64    -192   
80     0      
256    944    
80     720    
128    -144   
-320   -368   
48     -240   
48     128    
-176   -48    
128    32     
-272   -48    
16     112    
-1040  400    
208    16     
-112   -272   
0      -208   
256    96     
48     16     
-80    32     
48     -144   
80     112    
128    -144   
-64    0      
112    112    
96     192    
128    256    
-112   -176   
-128   -208   
112    -256   
144    0      
128    0      
-240   96     
48     -208   
-64    -448   
-32    -2096  
-16    48     
208    144    
48     16     
-112   16     
64     -16    
-48    48     
48     -192   
-320   -96    
96     -32    
-352   192    
240    48     
-192   -144   
80     -944   
32     -80    
96     -528   
160    240    
-144   32     
208    48     
-144   -16    
64     -96    
-144   -80    
80     16     
-256   48     
32     0      
16     0      
192    -272   
-208   -16    
224    320    
320    -32    
-144   48     
-112   96     
160    16     
32     -320   
-208   -32    
0      32     
48     0      
-32    -240   
112    -96    
80     32     
-224   96     
-16    -64    
32     176    
96     -128   
48     176    
-64    -320   
64     112    
-160   -64    
48     -16    
80     -368   
-64    240    
-128   -16    
112    -32    
-320   -144   
192    -176   
-256   -256   
272    -80    
32     304    
128    176    
-112   160    
32     -320   
208    -80    
32     0      
80     -176   
16     64     
-112   0      
16     -112   
-16    176    
-128   -32    
16     240    
-64    -16    
208    -16    
80     -16    
-1728  -208   
48     -128   
-816   112    
-384   128    
128    112    
-496   -80    
16     160    
-480   -16    
-48    80     
64     32     
-48    -16    
96     64     
-16    0      
-352   -144   
-64    240    
-224   -32    
-576   -128   
-192   832    
-144   -384   
-176   -176   
-672   -128   
-480   112    
288    80     
-528   224    
304    64     
128    128    
112    -80    
-128   -272   
-336   224    
256    -192   
-96    192    
272    -128   
-224   336    
16     -176   
0      208    
144    -128   
-192   96     
-64    48     
-112   240    
-400   -192   
-304   -16    
-80    -320   
-144   176    
32     0      
208    160    
-64    -48    
-208   -64    
-32    128    
-80    48     
64     128    
-48    16     
64     128    
176    112    
-96    208    
-336   -208   
-112   96     
320    -96    
0      224    
32     -48    
32     208    
-64    -288   
-192   -16    
-16    48     
80     112    
0      -80    
-64    128    
-272   48     
112    16     
-112   160    
-32    -32    
-48    80     
-864   -48    
64     96     
-80    -16    
80     48     
128    128    
-272   48     
192    80     
-16    112    
-32    32     
-32    32     
16     0      
-96    16     
-48    64     
64     16     
32     96     
-384   -80    
16     48     
64     -16    
0      112    
32     160    
32     96     
0      80     
64     48     
0      192    
-16    -96    
112    160    
-16    0      
160    208    
-160   480    
-48    192    
-96    -32    
32     16     
16     -160   
304    160    
-384   96     
160    32     
-144   48     
-32    32     
64     96     
-32    -208   
352    304    
-128   -48    
-32    0      
-256   -128   
192    192    
-288   -112   
-48    32     
-544   -160   
-32    16     
160    112    
-112   48     
16     240    
-32    224    
-112   -48    
128    -80    
-64    16     
128    272    
112    288    
-144   -48    
-32    -16    
-32    96     
96     144    
128    -80    
-176   -32    
240    160    
-96    112    
96     80     
0      -32    
-16    48     
-48    64     
0      -64    
-80    -32    
64     208    
128    -368   
-80    -16    
-64    -80    
-32    208    
224    176    
-16    96     
16     -80    
16     -48    
0      -16    
-48    16     
32     -128   
96     320    
96     320    
-160   -128   
112    16     
-192   -160   
208    128    
-336   -48    
144    -128   
16     64     
48     176    
48     -32    
32     128    
0      80     
48     176    
48     80     
48     -64    
96     512    
-112   400    
560    624    
-400   -80    
224    112    
-96    -32    
-128   0      
128    176    
-80    -16    
176    192    
-208   -96    
400    256    
-176   144    
128    -112   
192    48     
0      160    
-96    -112   
-112   368    
-64    0      
400    48     
-384   128    
224    -16    
-128   192    
-112   48     
272    48     
-144   112    
96     192    
-80    0      
-80    112    
-112   -80    
16     64     
-16    112    
128    128    
-64    0      
-80    -1264  
96     -16    
-32    128    
0      128    
-48    32     
96     16     
112    240    
144    96     
-48    160    
976    1264   
-640   -2016  
416    -416   
304    896    
208    -432   
240    736    
-304   -432   
352    624    
0      -1136  
-64    272    
160    -368   
-224   704    
-112   -320   
160    384    
48     -448   
304    640    
-176   -144   
464    832    
-576   -400   
480    112    
-320   -128   
224    -544   
160    480    
-48    -1216  
64     160    
80     -240   
160    544    
64     -256   
-32    288    
-80    -224   
224    272    
-144   -80    
48     224    
-96    -64    
64     128    
192    272    
48     -224   
32     48     
-192   -896   
416    336    
-32    208    
-48    48     
160    144    
112    112    
-112   -80    
144    80     
-112   64     
-64    144    
-288   -144   
0      -192   
32     112    
112    0      
32     112    
48     -416   
0      288    
128    -512   
-112   -240   
96     -48    
208    176    
-96    304    
336    416    
80     112    
-48    -208   
-192   -144   
192    -176   
112    304    
-128   -224   
96     -64    
0      -352   
-32    320    
-48    -240   
144    32     
-112   -1456  
64     16     
48     80     
-16    64     
224    384    
-128   272    
128    272    
96     -272   
-192   16     
48     -160   
96     112    
-80    -400   
16     -48    
96     -1120  
80     176    
96     -880   
16     96     
-16    192    
128    64     
0      -80    
-48    240    
144    128    
144    224    
112    320    
144    -48    
144    288    
64     -288   
176    128    
64     -112   
-96    208    
208    192    
112    192    
-80    64     
240    336    
64     640    
48     -144   
-288   0      
208    -112   
128    0      
96     -112   
-32    112    
160    -192   
16     224    
96     -80    
0      -32    
-144   -240   
256    176    
48     -144   
-176   -160   
96     128    
448    208    
-16    288    
-128   -48    
176    32     
0      -288   
0      -48    
-16    -160   
-32    64     
176    48     
-80    176    
80     -224   
-176   -832   
176    128    
-48    -400   
400    32     
-752   144    
64     -672   
32     -48    
-48    -1392  
48     -32    
112    48     
64     16     
128    64     
-32    0      
80     64     
80     -32    
16     64     
112    112    
0      80     
96     -288   
-976   -64    
-96    -528   
192    32     
-16    0      
-16    16     
192    -96    
-144   -96    
144    -320   
-128   -224   
192    -304   
48     64     
-32    -128   
112    -16    
-288   -160   
128    144    
-304   80     
-64    -176   
-16    -48    
112    0      
32     16     
-112   -16    
112    -384   
320    544    
-16    96     
-48    -192   
64     208    
64     -224   
32     176    
16     -128   
16     -64    
48     -160   
80     -16    
-32    96     
192    -80    
-272   80     
-144   -336   
96     -80    
96     -256   
96     64     
80     -32    
-112   160    
-48    0      
80     -16    
-32    16     
144    -16    
480    1568   
-256   1760   
-2000  -560   
-16    336    
-992   -304   
-640   -384   
416    240    
-400   400    
112    -512   
-240   -448   
128    -368   
-16    288    
240    -272   
-16    416    
16     -304   
-288   48     
96     -96    
-368   144    
208    0      
-160   128    
-112   -208   
96     32     
-16    0      
288    240    
-240   -352   
224    192    
-240   0      
336    64     
-240   80     
208    -112   
-384   -64    
-16    -32    
80     192    
80     -32    
-80    64     
64     -368   
-32    160    
96     -112   
16     128    
128    -224   
-32    32     
-112   16     
64     -48    
-224   0      
0      -64    
-64    -16    
96     64     
-128   80     
128    -288   
-192   -96    
128    -336   
-80    80     
176    -128   
-64    64     
128    -256   
-48    96     
-16    48     
-32    32     
16     -32    
128    128    
-144   -96    
128    112    
-240   -48    
128    0      
-192   -16    
16     -96    
112    80     
128    -64    
-48    16     
-992   -48    
96     -96    
96     144    
-144   16     
64     176    
-16    32     
-16    208    
-112   0      
176    -80    
96     0      
-64    128    
-128   480    
-208   288    
80     0      
368    144    
-80    16     
-160   0      
-16    16     
-256   128    
-112   16     
-416   -32    
-176   -144   
48     -16    
0      16     
112    -64    
-80    -48    
-48    -128   
240    192    
-304   -400   
192    384    
-48    48     
-16    -32    
-32    176    
-48    64     
-32    176    
-240   32     
64     96     
-32    192    
96     240    
-208   -208   
32     16     
-208   -112   
80     112    
-48    -64    
0      48     
-32    112    
-288   -560   
-80    -48    
-32    48     
112    176    
-224   -64    
-32    0      
-464   -32    
96     -16    
-192   -16    
16     32     
160    16     
-48    160    
-32    128    
-64    -80    
-176   112    
-160   -128   
0      64     
-16    -112   
80     208    
-160   -16    
96     16     
-160   112    
-16    144    
-1248  -16    
-16    -16    
48     -32    
32     208    
16     -240   
-48    32     
0      80     
0      80     
-80    240    
-16    -64    
0      32     
-16    0      
-64    32     
-64    16     
80     272    
-464   -128   
128    144    
32     -224   
16     96     
-176   16     
272    96     
-48    256    
-16    80     
-64    -16    
-144   48     
160    96     
-176   -64    
80     352    
-288   -48    
48     -128   
-32    96     
-48    176    
-208   -304   
-128   160    
304    -48    
-128   144    
-128   -16    
-96    0      
64     208    
-240   64     
208    -32    
-96    112    
112    -16    
-176   -64    
48     160    
-160   -160   
48     192    
-304   192    
32     -96    
32     176    
160    -16    
32     64     
-272   48     
160    -96    
-16    224    
336    176    
-112   192    
-96    32     
-112   -48    
-1648  1088   
1008   1424   
-816   -336   
880    -240   
-576   -128   
-272   -192   
-224   -80    
-176   288    
16     496    
448    -704   
-272   560    
272    -64    
80     448    
-176   80     
80     288    
-176   16     
-16    32     
384    688    
-256   16     
-48    224    
-336   -480   
192    -64    
144    416    
0      -32    
-16    -16    
-240   144    
-96    112    
0      -336   
-368   -128   
240    144    
160    224    
-352   32     
32     80     
64     64     
64     208    
-32    -224   
128    16     
-96    144    
208    304    
-48    144    
-224   48     
32     16     
80     96     
112    176    
-112   -16    
224    192    
-304   80     
128    320    
-144   192    
0      96     
208    -64    
-144   48     
96     112    
-112   80     
80     16     
96     112    
80     192    
80     0      
0      208    
-208   -336   
32     224    
-112   144    
96     -48    
272    112    
-176   224    
0      112    
80     32     
112    176    
-176   0      
112    48     
-16    96     
-48    80     
-32    -16    
0      96     
112    -16    
192    352    
-128   400    
112    160    
336    64     
16     32     
64     -96    
144    32     
48     400    
-80    112    
224    112    
-160   -160   
272    160    
-48    32     
48     64     
32     64     
-64    -16    
160    112    
-80    112    
-32    64     
48     -144   
128    32     
-48    208    
48     176    
64     96     
-128   128    
-16    -32    
32     64     
-112   -112   
128    48     
176    384    
-256   -624   
240    -32    
-144   -784   
-16    -80    
224    16     
48     64     
-80    192    
32     96     
32     -32    
48     304    
-176   128    
352    128    
-240   64     
176    80     
0      -176   
-160   -240   
80     128    
320    -528   
-112   64     
96     16     
-80    112    
208    192    
112    320    
32     16     
64     192    
-96    96     
304    32     
-192   96     
192    96     
176    32     
-256   -64    
160    16     
80     160    
-144   -48    
272    -144   
-48    96     
-96    144    
48     -64    
64     -192   
-224   112    
256    96     
176    112    
-32    32     
-112   -80    
0      48     
192    -48    
-16    16     
128    -672   
-16    80     
96     -1360  
-16    96     
-80    16     
208    -16    
-32    144    
64     0      
80     48     
-80    160    
16     96     
192    -80    
-48    160    
224    -128   
-144   192    
224    -96    
-128   112    
224    -512   
96     128    
224    -944   
-80    128    
-80    96     
-80    96     
160    32     
96     224    
-16    32     
224    48     
128    32     
80     -704   
-112   144    
-16    -80    
272    32     
96     -144   
-96    80     
0      -288   
-32    80     
176    -16    
-16    176    
64     16     
112    224    
-64    48     
160    -992   
-144   80     
128    -96    
-32    -32    
-240   256    
-480   -1024  
464    160    
-416   976    
-16    -640   
-192   384    
-96    -288   
-672   -384   
464    336    
-96    96     
224    0      
-112   -16    
208    240    
48     128    
96     -240   
-112   -192   
192    0      
-64    64     
32     64     
-16    16     
80     -1152  
0      112    
112    -1312  
-32    -48    
-80    -192   
160    -432   
-80    64     
144    -1840  
-64    64     
176    0      
-64    -16    
112    0      
-32    64     
64     -912   
0      96     
144    -32    
-48    -16    
64     -240   
80     -32    
-864   -64    
96     -96    
-48    -144   
80     -368   
96     -128   
32     -1216  
16     0      
48     112    
80     16     
-48    -544   
112    80     
-64    -112   
64     -32    
160    -64    
-16    64     
-16    -64    
-16    -64    
-64    -192   
160    -80    
96     -48    
32     128    
-48    -80    
48     -1968  
80     0      
16     -192   
-32    48     
144    -96    
176    80     
96     48     
224    160    
-272   64     
112    -176   
-160   -96    
64     -32    
48     80     
0      -720   
64     -144   
160    -2608  
-128   32     
0      144    
-48    -256   
144    32     
48     64     
-128   -64    
-96    -512   
-192   -256   
144    -160   
-336   -192   
160    16     
112    48     
16     -272   
208    16     
96     -384   
16     80     
64     -224   
-64    80     
64     -240   
-208   -320   
96     0      
16     208    
-16    160    
-192   -128   
-304   -192   
128    -48    
-2464  -112   
80     48     
-112   -16    
112    -32    
64     48     
80     -976   
-32    96     
112    -32    
112    0      
-48    16     
80     64     
-96    48     
48     -176   
160    -64    
16     -176   
-80    160    
64     80     
64     48     
-112   -576   
-32    128    
176    -384   
112    96     
-80    16     
192    288    
-272   -32    
224    -400   
-160   -96    
128    112    
48     -144   
32     -96    
-144   128    
128    -144   
-176   -176   
192    -256   
-192   -16    
304    -352   
-144   240    
-64    -32    
48     -80    
-192   32     
256    -32    
-176   112    
-64    96     
-64    48     
144    -144   
-48    192    
32     -160   
-240   96     
-32    -208   
96     176    
64     -448   
256    -32    
-336   80     
192    -112   
-112   32     
80     128    
144    -32    
-80    96     
-16    80     
-96    -48    
-64    -32    
48     48     
-48    -16    
-448   32     
-112   128    
-688   -160   
-880   -96    
-96    32     
-1184  0      
32     96     
176    176    
-96    -224   
64     -128   
-304   -192   
208    -64    
16     144    
-128   -112   
48     64     
-464   -192   
-32    128    
-32    -32    
-192   144    
64     16     
-128   64     
-48    48     
-608   80     
-80    32     
0      -16    
320    -144   
-64    128    
112    -128   
-272   -32    
144    -32    
-32    -176   
-224   160    
2000   -384   
176    -208   
288    96     
-1040  0      
128    224    
-352   -720   
-32    304    
144    608    
-320   0      
48     -176   
384    352    
-256   -192   
-128   -240   
288    48     
-176   176    
80     128    
-128   -16    
112    400    
-416   -256   
64     0      
-48    96     
-80    -144   
-192   -16    
-64    128    
-400   -128   
64     80     
-208   -16    
192    144    
-64    -112   
-192   -112   
128    -64    
-32    48     
160    144    
-64    64     
-176   112    
112    -48    
-32    128    
-288   -64    
96     16     
-432   -144   
32     128    
16     16     
64     112    
-32    96     
-64    -64    
-32    32     
64     240    
128    208    
-48    -48    
-48    112    
-128   112    
96     -80    
-96    176    
-144   144    
-336   -144   
-16    192    
-96    -80    
0      144    
-16    -240   
-80    144    
-160   128    
32     48     
-48    32     
-32    96     
-64    -32    
-128   -64    
0      96     
-16    0      
208    160    
-464   16     
16     80     
0      -16    
-144   -80    
128    96     
-160   128    
128    240    
16     -16    
160    208    
-112   -64    
128    -112   
32     256    
-128   128    
-80    -48    
256    48     
-192   112    
-80    -112   
288    176    
-224   240    
48     -16    
64     64     
80     144    
-64    96     
-32    -64    
32     16     
-16    -64    
80     0      
0      16     
-208   96     
64     160    
-48    144    
-64    80     
160    -48    
0      16     
64     240    
-16    16     
0      128    
-176   96     
240    160    
-96    0      
0      32     
32     -16    
-128   48     
96     288    
-64    160    
-160   -16    
48     128    
-144   -16    
176    -16    
-48    112    
160    208    
80     176    
160    176    
-192   -48    
-32    64     
-240   -64    
-64    -96    
160    352    
128    160    
16     64     
-96    16     
-160   16     
336    272    
272    176    
96     208    
-16    192    
224    368    
-32    192    
-96    -128   
-208   -48    
32     176    
176    112    
-32    128    
-32    -192   
-96    -32    
-96    -112   
64     -16    
160    -16    
-96    -16    
112    128    
80     0      
-64    80     
80     80     
32     224    
-80    224    
48     16     
-192   176    
224    0      
-128   -240   
-16    -80    
96     176    
64     80     
32     288    
-48    96     
-96    -32    
256    -144   
-64    16     
32     112    
0      304    
-336   16     
208    48     
-16    -48    
176    336    
-96    -224   
112    128    
288    304    
208    400    
-336   128    
-80    -48    
80     128    
128    -176   
96     256    
112    -16    
16     208    
-144   112    
32     176    
-160   -80    
96     128    
0      0      
-32    -32    
-80    16     
96     176    
-32    128    
96     -16    
-48    16     
288    64     
0      192    
-48    80     
-416   480    
656    592    
432    -64    
336    -720   
-208   0      
240    -16    
464    -320   
176    -416   
128    144    
-272   -320   
256    528    
-208   80     
192    0      
-224   304    
256    -48    
-16    192    
0      -272   
32     256    
144    16     
-16    112    
128    96     
-352   -288   
240    -16    
64     -192   
112    -112   
64     112    
-16    448    
224    80     
-192   -128   
32     -176   
128    48     
128    -16    
96     224    
-48    16     
16     -160   
80     -64    
16     32     
64     128    
80     0      
-128   -48    
112    -288   
-64    144    
128    80     
48     112    
16     16     
48     48     
-192   -144   
128    0      
16     -16    
16     32     
112    112    
0      -16    
16     160    
-16    -304   
16     -16    
-48    -608   
80     -272   
80     -1248  
16     80     
112    224    
48     192    
-48    64     
80     208    
64     -192   
48     112    
-80    96     
16     64     
-80    128    
176    -16    
64     80     
-16    -112   
96     48     
48     -320   
112    176    
-32    48     
128    96     
0      240    
96     256    
16     64     
32     -672   
192    112    
80     -176   
-96    192    
144    -256   
0      -48    
176    -48    
0      224    
32     -864   
112    160    
-64    0      
112    16     
0      -32    
144    -64    
-32    176    
16     -96    
0      32     
304    224    
-64    32     
160    -16    
-80    64     
128    -144   
112    192    
-48    -912   
80     80     
48     112    
96     272    
-80    -80    
128    16     
-16    208    
64     -96    
48     160    
48     64     
80     80     
96     48     
64     320    
48     -144   
0      -32    
-16    0      
176    80     
-16    -112   
-16    -288   
80     -1440  
160    -128   
-144   -768   
0      -64    
240    -288   
-256   -176   
416    368    
-288   96     
336    16     
-48    32     
-64    160    
272    -16    
-96    -192   
144    -16    
0      -240   
208    -48    
-240   32     
0      128    
-16    -208   
112    -144   
-112   -208   
224    -1328  
-96    0      
144    96     
128    0      
80     272    
-16    192    
-16    -384   
80     0      
16     -80    
64     112    
-160   -32    
80     -160   
0      -64    
128    -64    
-80    -64    
32     -1120  
304    128    
128    -1296  
-32    256    
-160   -96    
16     112    
-16    -112   
128    48     
-80    352    
-160   64     
-656   64     
-32    -320   
-1088  -192   
144    96     
-32    144    
128    -112   
16     -240   
32     -1136  
112    -32    
32     0      
-112   64     
0      -160   
0      16     
112    -112   
0      48     
-80    -32    
32     0      
16     -48    
64     48     
64     -80    
-80    -64    
16     0      
176    -112   
208    256    
-80    64     
0      304    
-48    -96    
-48    -32    
64     32     
96     -96    
1216   -144   
480    -16    
-96    160    
-576   -432   
-128   448    
768    -192   
-432   -48    
96     -80    
-64    176    
32     -1280  
272    96     
-336   128    
80     -320   
16     48     
32     -144   
-192   0      
-80    -144   
160    320    
0      48     
-48    0      
-16    -16    
48     32     
112    -336   
-144   48     
80     -1088  
32     96     
0      80     
80     0      
-288   128    
96     -16    
-112   -112   
32     -64    
-112   64     
64     80     
0      64     
96     -48    
16     160    
64     -240   
32     80     
48     -352   
80     -16    
-64    112    
96     -48    
-176   0      
80     -128   
-144   -32    
128    96     
-32    -96    
48     96     
-272   -32    
416    -160   
-256   128    
256    -160   
-176   64     
176    -240   
-672   160    
-304   -48    
224    -16    
0      48     
0      0      
-96    -16    
112    64     
-80    48     
48     -16    
-192   -240   
-720   -128   
-176   112    
-16    48     
-176   32     
160    64     
-32    96     
-80    -32    
-304   80     
0      80     
-576   80     
48     -16    
80     112    
-128   32     
304    -48    
16     160    
-656   -48    
144    80     
-416   -400   
80     -16    
-128   176    
16     0      
48     -96    
-240   160    
-112   0      
-272   0      
-176   64     
-800   80     
-64    128    
96     -48    
64     112    
-176   -16    
160    80     
-112   -144   
-48    32     
64     0      
32     48     
48     160    
-256   -48    
-112   -128   
-384   -48    
48     288    
-288   288    
-176   -16    
80     96     
-16    64     
112    -208   
-112   -64    
-272   0      
224    -16    
96     144    
-32    0      
-32    160    
-160   -16    
80     144    
-96    -112   
80     -32    
192    0      
48     -48    
-240   -16    
288    336    
208    32     
-80    16     
-16    128    
-64    32     
-48    144    
0      -112   
-144   16     
-128   -192   
-176   224    
256    -16    
160    272    
-176   -64    
128    304    
-624   -16    
240    16     
48     -64    
-112   160    
272    288    
-48    0      
112    -240   
-144   112    
-208   -256   
32     272    
64     80     
112    -96    
-192   160    
-160   -80    
0      160    
-448   -96    
80     256    
-96    -208   
80     144    
144    336    
-64    -128   
-80    -80    
112    368    
32     208    
-64    -32    
-112   -16    
272    416    
-192   288    
-160   -272   
0      -144   
-144   -144   
192    320    
-1120  -128   
-64    160    
272    -16    
-48    80     
-112   64     
-48    192    
48     -272   
192    208    
-96    48     
-32    80     
-32    208    
32     32     
96     176    
-368   -192   
96     112    
16     160    
-64    0      
16     144    
112    48     
176    -352   
-144   -112   
-96    288    
-144   -32    
-64    -16    
96     96     
192    128    
-176   -32    
592    4096   
-2080  -288   
688    944    
80     864    
368    16     
-320   -320   
-512   208    
336    -80    
-96    96     
80     -128   
-32    0      
16     160    
48     224    
64     48     
-160   -192   
176    320    
-48    16     
-48    96     
96     80     
96     96     
-64    32     
-48    240    
-64    368    
-384   -48    
144    -96    
-48    -80    
0      -208   
-112   -288   
-112   64     
80     -48    
208    144    
-128   96     
0      176    
-80    96     
112    96     
32     112    
-96    32     
80     -16    
-144   -48    
224    32     
-48    32     
-48    192    
16     32     
112    48     
-112   80     
0      48     
80     128    
-48    -64    
48     16     
48     80     
32     112    
80     208    
32     112    
-80    -192   
16     0      
240    128    
-208   16     
32     -80    
272    288    
16     -112   
32     176    
96     112    
-48    -32    
32     80     
144    144    
32     112    
-32    80     
32     128    
-64    128    
32     128    
48     80     
96     96     
-80    48     
32     64     
64     -32    
32     -144   
-144   -352   
16     16     
-96    128    
-96    -176   
-64    112    
192    96     
80     176    
16     -256   
-16    224    
0      -48    
128    176    
-192   -64    
48     16     
0      -48    
192    -240   
32     208    
16     -80    
-144   16     
80     64     
48     96     
192    352    
-96    112    
-16    -80    
64     144    
80     80     
48     176    
-112   16     
80     160    
128    64     
48     -80    
-96    -80    
144    -976   
-64    -32    
192    144    
-32    144    
-32    0      
144    160    
-96    96     
176    96     
-96    -64    
176    80     
16     224    
-272   -160   
64     16     
-16    -224   
160    64     
0      -1072  
48     144    
64     -48    
224    32     
-112   656    
32     -352   
16     -336   
-96    48     
256    208    
96     208    
-112   160    
64     -160   
48     160    
-96    -576   
160    48     
-96    -368   
176    -272   
32     80     
128    304    
160    -96    
-128   144    
80     32     
-16    -64    
80     240    
-80    -80    
-16    208    
80     -64    
80     176    
64     -32    
96     128    
-144   -16    
288    256    
-208   -192   
128    -144   
-160   -352   
176    192    
352    288    
-256   112    
160    64     
128    288    
-64    0      
80     -64    
64     128    
240    -128   
-96    48     
-192   -1680  
128    272    
256    224    
-64    160    
64     -192   
-144   192    
32     -128   
240    320    
-160   -80    
96     336    
-144   0      
32     16     
128    0      
48     -320   
48     -16    
176    64     
64     -96    
64     48     
400    752    
-448   64     
-208   -208   
0      -48    
144    16     
144    208    
-48    -128   
32     112    
176    0      
48     16     
192    64     
80     48     
32     160    
-288   -1104  
752    -976   
224    400    
-48    32     
16     480    
-400   128    
0      -752   
64     -1072  
400    -128   
-272   -880   
96     -80    
32     -368   
80     -176   
0      176    
176    -256   
0      272    
16     -224   
96     -1360  
96     192    
32     80     
64     64     
-80    -272   
224    -288   
-1200  0      
176    -288   
80     96     
80     16     
48     -48    
128    -1472  
-64    -272   
128    80     
16     16     
16     -16    
48     96     
48     -576   
-96    -144   
-144   -176   
48     16     
208    0      
16     80     
-96    64     
128    -352   
48     -32    
-16    -1280  
112    0      
-48    96     
208    80     
-48    192    
128    -96    
32     -48    
-64    112    
16     -64    
-16    32     
-304   96     
64     -272   
64     32     
-64    -320   
160    0      
-80    -464   
192    -144   
-16    -1312  
176    -80    
48     -128   
16     80     
80     -192   
96     64     
-176   48     
112    -96    
-272   -96    
80     -64    
-544   -48    
128    -80    
0      112    
64     16     
-32    -96    
96     -560   
32     288    
48     -64    
144    -80    
192    32     
-160   -48    
64     0      
176    176    
-320   -224   
336    -240   
-352   -16    
192    32     
-576   80     
48     -368   
-64    -80    
48     -576   
80     96     
16     -1280  
-32    -48    
48     -144   
208    144    
-304   -64    
208    0      
-48    80     
-112   48     
-256   -112   
160    -112   
-480   32     
-112   -128   
112    -96    
-128   -272   
144    -112   
192    -1088  
-144   96     
112    16     
32     224    
-128   -32    
192    272    
-256   -208   
80     -48    
-272   -32    
400    -48    
-208   64     
144    48     
-144   -48    
-64    -64    
304    192    
0      -144   
-32    256    
0      -48    
160    96     
-176   96     
80     64     
-64    -16    
48     -128   
0      96     
0      16     
128    208    
-240   64     
240    -16    
64     -192   
48     96     
48     -144   
128    -64    
-32    112    
48     32     
-32    64     
160    144    
-160   -64    
32     -16    
-64    0      
-16    -304   
-96    -96    
160    -384   
64     144    
-1440  -256   
80     80     
-64    80     
-192   160    
-384   -64    
-688   64     
-112   -80    
64     80     
-96    -128   
48     -128   
64     -80    
-64    80     
128    48     
-1056  128    
144    208    
-32    -272   
-112   -112   
240    432    
-416   -160   
0      96     
-224   -64    
16     160    
-96    0      
-64    80     
64     -96    
-48    -32    
0      64     
80     128    
-64    48     
112    -32    
-48    -96    
16     96     
-96    -16    
-48    64     
32     -64    
-288   -80    
0      80     
-288   -48    
-192   80     
-992   -176   
-80    -48    
128    -96    
320    336    
-384   -48    
192    80     
-128   -144   
128    32     
544    1120   
624    1200   
-352   -912   
16     -1088  
-448   960    
320    -720   
144    -112   
608    352    
-592   784    
-720   -272   
-128   128    
112    -304   
208    208    
80     320    
-240   -16    
240    -64    
-96    -16    
-32    400    
-48    -112   
64     -32    
64     32     
-96    32     
-32    -224   
48     208    
-752   -560   
32     0      
-144   -32    
240    176    
-80    48     
-48    0      
128    48     
-80    -48    
-192   0      
-384   -208   
80     -64    
-176   128    
400    96     
-464   -368   
96     -96    
-784   -48    
224    272    
-48    -48    
144    0      
-112   160    
-80    -64    
-16    384    
-192   144    
64     96     
80     176    
-128   64     
256    -32    
-176   -48    
-176   64     
32     128    
-96    -112   
-112   16     
-288   352    
208    688    
-640   -528   
336    112    
0      80     
32     -48    
144    192    
48     -112   
256    32     
-160   16     
64     32     
-160   16     
32     112    
-96    80     
112    80     
-32    80     
-144   32     
0      176    
-16    80     
-144   -176   
128    64     
96     32     
32     0      
64     304    
-160   64     
32     80     
-128   64     
64     64     
-128   -16    
0      64     
144    272    
48     384    
-32    224    
-80    -80    
96     -32    
0      -48    
64     224    
0      112    
-32    16     
0      -112   
-80    -80    
192    128    
-144   112    
-32    32     
-80    128    
16     32     
144    64     
48     144    
-16    48     
96     208    
-128   48     
16     -288   
16     -48    
16     336    
16     -16    
80     -16    
-272   32     
128    -16    
-64    -96    
-96    176    
112    0      
-80    64     
-64    -16    
112    80     
-32    48     
144    -16    
-80    0      
32     96     
80     -80    
-320   -560   
96     -160   
-96    176    
352    -128   
-80    176    
0      64     
192    176    
-112   0      
-32    176    
128    0      
-32    112    
64     80     
128    -320   
-160   128    
240    112    
-112   192    
160    224    
-160   112    
96     48     
80     -16    
-304   -240   
112    -320   
-144   -176   
336    224    
0      80     
64     80     
-144   0      
128    96     
48     -320   
-80    320    
-208   -192   
544    304    
-176   272    
272    -912   
-80    224    
-32    -48    
96     160    
-64    112    
0      176    
-96    -96    
144    -16    
-32    0      
80     -16    
-96    -80    
64     192    
64     320    
-96    240    
-32    64     
-96    -736   
128    0      
96     80     
48     160    
96     -48    
112    128    
64     176    
-32    176    
-96    144    
160    112    
-224   32     
304    112    
-64    48     
176    -144   
112    128    
80     64     
64     208    
-48    -640   
-48    -16    
224    -176   
128    176    
-160   96     
176    288    
-80    96     
720    -208   
-496   -912   
400    80     
-160   0      
-96    96     
112    -32    
-320   -384   
112    320    
256    -1376  
-80    352    
256    -160   
-96    496    
16     64     
0      160    
48     16     
32     208    
-96    -160   
144    64     
-64    176    
64     -112   
-48    208    
128    -560   
-64    352    
272    -432   
-160   272    
144    -2384  
80     320    
48     -208   
-16    160    
-32    -16    
32     112    
208    0      
-48    304    
144    -16    
-160   -16    
128    -96    
96     0      
224    176    
112    -112   
-160   48     
128    -1280  
-32    208    
176    -192   
0      64     
0      112    
96     144    
128    16     
48     192    
-32    -32    
96     -96    
16     160    
96     -112   
16     32     
64     -592   
-16    128    
80     -1648  
-80    112    
128    -464   
-80    64     
112    64     
-16    208    
-32    -32    
80     48     
160    208    
-96    192    
112    80     
-48    -192   
160    128    
48     -128   
-32    160    
0      -96    
176    48     
80     -32    
48     272    
-160   -32    
272    48     
-96    496    
-144   -272   
368    96     
-176   -224   
240    208    
-48    -144   
32     -128   
128    32     
-160   64     
192    -144   
48     352    
-144   48     
16     64     
144    0      
0      -32    
64     128    
-32    0      
16     176    
128    -160   
-96    96     
176    -112   
-64    -16    
192    32     
-48    224    
32     -176   
192    144    
-128   -368   
128    -2416  
112    112    
-48    -160   
176    -160   
80     -112   
16     -464   
128    -16    
-48    -512   
160    -48    
128    208    
64     -144   
32     112    
-16    -608   
80     -1488  
-48    64     
32     -272   
272    -16    
112    -384   
48     -496   
-528   -224   
-16    -240   
144    -336   
0      192    
16     64     
272    -1888  
-144   -80    
-80    224    
176    416    
-48    176    
128    112    
-144   192    
-64    -144   
-80    -144   
-112   -352   
-48    192    
-128   -160   
192    -32    
16     -96    
144    -96    
0      -352   
-48    -160   
-48    -48    
80     -320   
112    -96    
160    304    
-32    -160   
0      48     
-80    -32    
80     32     
-32    -48    
32     -224   
-16    -144   
-80    -288   
80     32     
112    208    
288    272    
-80    -96    
16     -32    
16     -208   
0      80     
-80    -48    
176    -1008  
64     -16    
288    80     
-176   32     
-144   -48    
-128   32     
64     -32    
112    160    
-240   0      
80     -16    
96     -528   
64     48     
160    64     
-208   208    
-112   -32    
112    -144   
64     -64    
240    -48    
-304   -32    
32     -304   
-224   96     
176    64     
-432   32     
0      -192   
128    -144   
112    -608   
-64    64     
144    -1360  
-128   192    
-48    -80    
224    112    
32     -128   
32     -48    
2128   -240   
-1200  -1648  
544    832    
192    336    
-16    -80    
-192   -544   
-80    -112   
448    128    
-272   -208   
128    16     
48     16     
-240   -224   
-288   -32    
320    48     
-160   -256   
208    0      
-128   128    
80     368    
-192   144    
-48    -240   
320    272    
80     -16    
64     224    
-192   -288   
336    -912   
-80    -560   
672    624    
-192   336    
80     64     
-288   -128   
176    -224   
0      224    
-368   -144   
160    80     
-352   -48    
144    32     
-16    0      
208    96     
-176   -48    
64     -592   
-144   -336   
208    16     
-128   80     
-32    160    
48     32     
64     64     
128    -144   
64     192    
-80    -64    
-16    80     
-1632  -32    
16     112    
-240   -448   
-32    -16    
176    208    
-80    0      
-96    192    
-544   512    
-48    -176   
-1232  -128   
176    0      
-48    64     
48     -80    
128    240    
-96    -112   
16     80     
96     64     
32     16     
-96    80     
16     160    
-240   -32    
-32    16     
-192   -240   
32     80     
-16    80     
-48    64     
128    256    
160    80     
224    -192   
240    768    
-464   -352   
208    192    
64     -48    
-160   -112   
16     128    
-48    368    
-32    -16    
32     272    
-32    -192   
-128   -64    
-80    -16    
-496   -48    
0      -48    
48     80     
80     288    
16     64     
240    336    
-144   48     
144    32     
-112   192    
-80    48     
112    80     
-208   48     
48     -64    
-176   -64    
-128   -64    
112    -64    
-32    48     
0      352    
192    352    
48     -80    
-240   -80    
-16    -80    
16     16     
16     80     
64     224    
-48    16     
32     -96    
-256   -16    
-32    -288   
16     -144   
-224   64     
272    192    
-608   32     
-112   -192   
-16    -288   
-64    -160   
64     -48    
-32    80     
-32    16     
64     80     
-160   -128   
16     -32    
-112   80     
256    96     
0      208    
176    80     
-32    224    
-448   48     
32     96     
-80    -48    
64     96     
48     -128   
-80    48     
-96    128    
64     80     
-160   -272   
32     144    
-64    112    
160    64     
-80    96     
-128   -32    
32     96     
-208   -192   
0      208    
-512   -128   
32     -32    
112    352    
-304   64     
16     -48    
-64    -160   
144    128    
-48    80     
16     96     
-176   96     
32     -16    
-112   32     
48     64     
-96    -32    
160    208    
-64    48     
16     192    
-32    -176   
96     0      
224    240    
-112   32     
-80    128    
-64    0      
96     16     
16     48     
-32    32     
80     96     
0      16     
128    -16    
-128   288    
16     80     
-80    48     
96     32     
64     96     
48     80     
-112   80     
-32    0      
32     16     
64     64     
48     176    
-96    112    
-48    0      
1024   2032   
-1888  448    
32     768    
368    368    
-288   -480   
416    208    
-384   80     
16     416    
544    -384   
-304   -192   
272    32     
-320   64     
416    -48    
-160   336    
80     -320   
-304   304    
192    -256   
-64    368    
224    -192   
-16    192    
32     -48    
32     240    
112    32     
-32    288    
96     -16    
-240   80     
160    -16    
-176   192    
352    112    
-272   -80    
-16    64     
192    144    
64     112    
32     48     
-96    32     
64     16     
208    352    
16     144    
0      96     
-96    -48    
48     32     
64     112    
-32    80     
-64    32     
16     32     
32     -144   
64     176    
-48    -160   
48     240    
-64    96     
112    64     
32     48     
0      112    
48     80     
0      64     
-112   48     
96     128    
-32    112    
48     160    
-80    -32    
32     -1664  
-48    96     
96     64     
-48    64     
160    32     
-32    176    
96     208    
-48    128    
-96    -16    
208    16     
-96    48     
32     160    
-80    -128   
96     32     
-16    -32    
-32    -144   
48     112    
-80    64     
-16    32     
192    -16    
16     128    
-80    176    
0      -64    
64     -176   
-160   32     
48     80     
-32    96     
160    -128   
176    352    
-224   128    
240    -208   
-128   144    
48     -1904  
112    192    
0      208    
48     160    
-160   80     
128    80     
-16    -80    
-32    -304   
208    320    
128    496    
-240   48     
-128   -80    
64     16     
128    16     
64     -48    
64     -176   
48     96     
32     48     
0      16     
48     96     
96     128    
-16    -112   
0      -32    
128    240    
-16    192    
48     80     
-32    -96    
0      -272   
112    -208   
32     96     
64     -128   
-16    160    
80     80     
16     32     
48     32     
-64    80     
176    400    
176    128    
-240   -128   
64     -224   
160    144    
-16    0      
64     288    
112    -352   
-240   -384   
240    -64    
-112   176    
64     -720   
48     48     
16     -944   
64     -96    
-32    0      
48     192    
176    160    
-240   -112   
208    208    
32     -32    
32     128    
16     -288   
80     96     
160    -96    
-80    32     
80     -112   
32     64     
48     16     
-80    -112   
208    -64    
32     160    
80     16     
-128   144    
-16    64     
16     -528   
160    176    
-80    -224   
96     80     
96     32     
32     -16    
176    -16    
-80    128    
224    -208   
-96    160    
96     64     
80     80     
64     80     
48     -64    
-96    96     
0      -192   
224    192    
48     -256   
-96    0      
-64    -352   
288    128    
-224   -112   
128    96     
-144   -288   
176    -480   
-112   208    
-128   -720   
128    -688   
-96    176    
480    -912   
-112   32     
-48    -352   
176    0      
-16    128    
-1216  -1568  
1392   2912   
-624   304    
800    -640   
-224   48     
320    -2400  
-256   832    
-176   -544   
496    400    
64     -880   
80     0      
-272   -640   
464    -800   
-144   -432   
304    512    
-240   -352   
48     192    
-16    -272   
272    288    
-32    -48    
336    16     
-272   304    
-192   176    
176    -144   
-496   -336   
0      -496   
224    -32    
-128   48     
-48    -544   
400    -208   
-64    -416   
32     192    
-64    -16    
256    16     
-208   96     
64     -208   
-16    0      
-384   -832   
240    352    
160    160    
-48    -128   
-160   112    
304    64     
-112   -32    
80     -608   
-96    -256   
112    48     
-112   272    
32     -80    
192    384    
-48    -64    
128    -144   
-112   -176   
96     -48    
-32    16     
224    -96    
-288   128    
48     -272   
96     112    
-128   -432   
-80    80     
32     -336   
80     208    
48     -144   
192    128    
64     -32    
64     16     
-16    240    
-32    -80    
-48    96     
-80    -128   
-656   -112   
0      -80    
144    -96    
80     -64    
0      80     
0      -416   
48     32     
128    -2448  
32     288    
176    32     
208    96     
-160   320    
272    0      
-304   -96    
80     -48    
32     112    
144    16     
-272   288    
112    16     
-64    -64    
-48    -224   
128    64     
256    -432   
144    288    
-48    224    
-96    -384   
-224   -208   
-64    -144   
-144   -240   
192    128    
-64    128    
144    112    
-336   -32    
80     -16    
32     208    
192    -208   
-128   96     
16     -624   
176    16     
128    -16    
192    -48    
-320   -80    
144    16     
-32    16     
32     -64    
-96    16     
-80    -400   
-32    64     
272    -32    
-224   128    
224    -144   
-112   48     
64     -832   
128    -128   
-128   0      
-32    80     
64     -48    
-16    -16    
-96    -16    
48     0      
-224   -192   
-80    -320   
-176   80     
304    96     
32     -96    
-1280  -144   
-288   224    
240    0      
-1296  0      
-240   96     
240    48     
144    160    
16     -96    
80     144    
96     -128   
32     128    
-160   64     
112    112    
-80    -16    
-128   64     
-64    -272   
-176   48     
32     32     
80     240    
-16    -64    
-288   96     
-240   96     
112    -144   
-32    -48    
80     16     
128    -48    
80     -320   
16     16     
-112   -16    
0      -64    
-160   -80    
48     224    
-64    240    
144    -32    
192    64     
-64    0      
-128   128    
-336   112    
64     -48    
-416   48     
144    208    
-320   -128   
224    -96    
-96    -16    
80     64     
-80    0      
-192   128    
224    -80    
-160   -16    
-48    64     
64     64     
-16    224    
-96    16     
32     32     
-368   -16    
144    -48    
-208   0      
96     48     
32     208    
-32    0      
112    80     
368    1952   
-1168  624    
-1072  112    
720    560    
-384   -368   
-416   -272   
-128   480    
-224   528    
-400   -464   
-416   -208   
-1040  -368   
-112   192    
400    -176   
-80    416    
-112   -352   
-176   208    
272    16     
192    384    
-144   -80    
96     64     
-48    64     
-48    128    
32     80     
-144   64     
80     16     
-64    -32    
-96    64     
-64    -80    
-32    144    
16     48     
-80    32     
-48    16     
-16    128    
16     48     
-160   64     
64     32     
144    192    
-128   64     
-16    0      
-80    80     
-320   -112   
96     160    
-16    16     
-64    0      
48     32     
-64    16     
144    64     
-256   -240   
96     -32    
-112   144    
32     96     
112    96     
-112   64     
-144   0      
48     176    
-272   -48    
32     0      
-128   176    
160    16     
48     -48    
-16    16     
0      144    
32     80     
64     -32    
0      0      
112    160    
144    112    
-32    128    
-288   -64    
176    192    
-80    -48    
224    192    
-112   -64    
128    0      
-16    176    
-160   48     
-16    144    
-96    -96    
176    16     
-224   -80    
48     -48    
-112   32     
-48    144    
32     112    
-32    128    
-224   80     
64     80     
-128   192    
32     320    
-64    -32    
0      128    
-16    32     
16     -16    
32     96     
-128   -96    
16     144    
-112   -96    
-48    -48    
-64    -80    
192    144    
-304   -80    
48     -112   
16     80     
80     64     
32     128    
112    240    
-112   -160   
0      -112   
0      -64    
96     240    
64     160    
-192   -80    
-16    48     
64     96     
32     80     
-48    0      
-80    -208   
16     -176   
80     -32    
128    192    
32     192    
48     208    
-192   -144   
48     64     
32     256    
64     -48    
-48    -160   
-32    32     
-32    -48    
48     0      
0      96     
32     112    
-16    224    
80     144    
0      32     
-80    -32    
240    224    
-112   64     
144    160    
-160   -32    
112    32     
-16    48     
128    96     
-192   96     
96     -496   
-16    96     
128    528    
-16    256    
-64    48     
80     -160   
128    128    
32     112    
-64    16     
-80    -96    
112    176    
0      256    
-80    -128   
0      32     
64     352    
-144   -256   
-80    -64    
16     -48    
336    352    
-112   144    
-16    0      
48     208    
64     128    
-32    -176   
144    192    
16     160    
160    48     
-48    80     
64     64     
112    80     
-112   -112   
48     64     
176    -1328  
-16    240    
80     -16    
-32    160    
32     -80    
64     144    
64     80     
112    112    
144    -112   
32     240    
-144   -192   
96     144    
-96    112    
176    -608   
208    80     
144    -592   
32     16     
448    -80    
-224   48     
192    48     
-48    192    
160    224    
-560   1792   
-512   544    
160    112    
-16    128    
-288   -48    
496    176    
-608   320    
784    -432   
-288   -816   
-272   -448   
272    32     
-64    -32    
144    48     
-208   -112   
176    -192   
-112   -80    
-80    -352   
560    672    
64     112    
-96    656    
48     -16    
48     -80    
-320   -80    
208    -416   
144    144    
96     -816   
112    240    
32     48     
64     -64    
-208   16     
176    112    
0      16     
80     112    
48     128    
16     -144   
64     96     
48     -16    
0      96     
96     -112   
-48    144    
80     -736   
64     128    
-16    80     
64     48     
-144   64     
144    80     
112    192    
32     -96    
16     -16    
80     112    
-64    208    
64     -320   
80     -16    
48     64     
48     144    
32     -336   
64     0      
64     -304   
-16    112    
128    -48    
96     224    
-64    80     
80     -640   
-48    -48    
208    -128   
16     272    
-32    -112   
176    -16    
-16    -368   
16     96     
-64    -480   
112    64     
80     -128   
48     80     
-48    -240   
160    32     
-128   -80    
16     -48    
32     48     
-48    -112   
192    96     
-16    -80    
160    192    
-192   32     
192    160    
48     -368   
144    96     
-96    -112   
96     -320   
-128   32     
112    -2352  
112    -496   
0      0      
128    112    
224    384    
-336   -1872  
240    -272   
-32    -16    
176    96     
-16    96     
64     64     
80     -192   
-64    32     
16     0      
256    144    
-96    -64    
160    -384   
96     -80    
-80    -672   
128    -112   
160    -896   
-112   -176   
240    -512   
-80    -96    
288    304    
-144   -112   
192    -144   
-176   32     
16     -96    
304    352    
0      128    
240    32     
-640   96     
272    48     
304    -112   
-320   -176   
112    192    
80     -48    
16     -208   
-32    -944   
32     -96    
32     -192   
-288   -112   
-272   -336   
224    80     
-64    64     
336    -80    
-48    176    
-272   -32    
-112   48     
144    -32    
-96    48     
112    -432   
-144   -176   
-16    -528   
240    160    
16     -64    
288    32     
-48    -112   
-96    -224   
-128   -48    
80     -176   
-80    112    
96     -128   
-560   -64    
32     -240   
48     -272   
-48    -448   
240    32     
-48    -272   
112    64     
-96    -320   
48     32     
64     -32    
-64    64     
-144   -160   
112    288    
-144   112    
144    -32    
-160   -112   
-16    -64    
-1152  -16    
16     48     
176    -48    
112    -64    
-32    112    
-16    -1056  
80     64     
0      32     
64     96     
-16    32     
0      -208   
48     96     
48     80     
-224   -192   
224    -176   
0      272    
-144   0      
32     16     
32     -480   
112    128    
64     -1280  
64     -80    
176    48     
160    288    
-400   0      
-48    -32    
-1136  1392   
1232   208    
160    400    
144    -512   
-96    -1216  
-48    -608   
608    1280   
-400   -944   
256    672    
-416   -800   
528    608    
-352   -560   
96     144    
-320   -32    
480    80     
-176   -32    
-96    0      
-80    96     
32     -176   
16     32     
80     -416   
32     240    
-32    -32    
16     80     
-304   -336   
-400   16     
-48    -48    
128    80     
64     96     
32     0      
64     16     
48     -48    
0      128    
112    -128   
-96    64     
-528   -272   
32     128    
-112   32     
112    96     
-144   -16    
-736   48     
-80    224    
0      256    
-272   -16    
-928   -80    
-144   -48    
240    64     
-64    80     
0      16     
-32    -80    
-80    -64    
64     96     
-320   -432   
-96    80     
-160   32     
48     240    
-112   -80    
144    128    
-112   160    
-96    240    
-16    96     
112    176    
-80    160    
-144   -96    
64     16     
112    0      
-96    64     
-128   -64    
-192   -224   
-48    48     
-144   96     
80     128    
-288   -208   
96     80     
-368   -32    
384    512    
-448   160    
0      -32    
176    -224   
64     80     
-32    -32    
0      112    
-112   176    
192    64     
32     176    
-80    -32    
80     112    
-80    240    
-96    64     
-128   -32    
64     0      
-352   64     
-192   -32    
-128   -160   
48     80     
48     -48    
-32    32     
32     96     
80     208    
-80    48     
0      64     
-48    48     
48     64     
96     176    
-192   48     
80     80     
-192   80     
-32    48     
-272   16     
-64    96     
16     -48    
0      112    
-16    48     
-64    48     
-32    32     
-80    32     
0      64     
16     96     
0      80     
80     176    
-144   -16    
-16    96     
-96    96     
-384   160    
-160   80     
80     -288   
-48    240    
-144   48     
288    144    
-336   32     
208    32     
-144   96     
0      -48    
-80    224    
-160   -176   
128    48     
-240   80     
208    -32    
-560   -96    
144    208    
-96    160    
-80    64     
48     64     
112    80     
-32    48     
432    128    
-464   464    
16     -304   
160    112    
-96    160    
112    64     
-208   -144   
208    320    
-320   -224   
256    112    
-208   80     
32     -96    
208    336    
-288   64     
80     -64    
-160   -48    
256    160    
-48    16     
48     96     
-112   -112   
96     208    
-288   -240   
480    368    
-384   112    
112    -96    
-144   -16    
96     48     
-64    224    
48     -96    
-112   16     
32     80     
-32    160    
0      80     
0      128    
-128   -80    
80     160    
-80    -16    
144    224    
64     -80    
32     32     
48     16     
-64    48     
144    80     
16     256    
16     160    
-112   192    
16     176    
160    176    
-256   -144   
160    0      
160    160    
48     32     
-208   1008   
-80    912    
-64    -800   
-176   -208   
688    -64    
-224   -496   
176    -624   
336    736    
-256   464    
160    -32    
320    -48    
-80    48     
-192   -128   
160    176    
-128   32     
80     112    
-144   0      
144    160    
-144   -16    
224    272    
-32    192    
0      112    
-144   16     
64     -80    
32     64     
-48    -112   
16     80     
-96    48     
96     208    
16     -176   
-192   384    
192    48     
64     160    
-16    96     
16     64     
-192   -96    
192    -64    
-48    160    
208    192    
-48    -96    
16     224    
16     208    
160    64     
-128   -80    
-112   64     
208    208    
96     160    
-16    96     
112    -80    
-48    176    
96     96     
-16    48     
0      112    
144    64     
-16    48     
16     128    
-160   112    
64     160    
48     32     
96     96     
16     -288   
0      64     
48     112    
-32    48     
112    -160   
32     16     
-144   0      
32     112    
32     96     
16     48     
48     -80    
112    208    
-144   32     
144    16     
48     112    
-32    -944   
208    64     
-64    -1424  
-32    128    
192    160    
-144   128    
64     -160   
224    160    
-192   208    
144    160    
-32    0      
64     208    
-48    -128   
160    16     
-144   -32    
128    -128   
48     256    
-64    -96    
224    240    
-176   -96    
-16    -64    
112    48     
128    288    
32     176    
-48    144    
16     32     
160    128    
128    16     
-16    64     
-32    144    
32     -32    
-16    64     
192    -32    
64     240    
64     -1856  
-64    48     
-48    -176   
272    208    
32     192    
80     224    
-128   -16    
80     224    
0      96     
256    -64    
-192   -128   
-192   -64    
96     -80    
144    -256   
-128   -32    
336    -192   
112    320    
176    -496   
-64    -32    
-64    128    
-32    128    
400    128    
64     224    
208    64     
80     272    
-176   64     
240    -336   
64     80     
48     -176   
64     96     
-112   -64    
80     0      
-160   -1248  
128    32     
-48    96     
-128   48     
176    64     
16     -544   
48     160    
0      -576   
32     112    
48     -240   
-16    48     
144    -160   
-64    144    
128    -416   
48     32     
96     -128   
-16    192    
-80    16     
176    32     
-16    -112   
80     -272   
0      256    
112    64     
16     -16    
320    688    
-32    -144   
-16    -96    
128    128    
80     -336   
-32    144    
-16    -400   
112    528    
-192   -128   
48     -2192  
224    -432   
64     -64    
32     -960   
48     -16    
160    368    
-112   0      
-32    160    
-32    -288   
176    16     
-64    -272   
-32    -400   
-112   80     
112    -336   
48     96     
144    -192   
0      -368   
0      48     
80     224    
-128   -48    
0      -1168  
80     -256   
-400   896    
-624   -752   
144    352    
-272   384    
-272   -1008  
288    336    
-112   352    
128    256    
-432   -288   
544    256    
-1600  -352   
112    -304   
-144   256    
368    -384   
-80    0      
-80    -784   
128    -32    
112    144    
16     -96    
48     -512   
-304   -96    
368    -112   
-192   208    
112    16     
-16    -48    
-800   -112   
0      64     
144    400    
-192   -112   
352    320    
-144   -112   
288    128    
-80    -2176  
144    64     
-16    -80    
64     -48    
0      -32    
288    0      
-352   -64    
224    -64    
-416   -176   
-16    -16    
-784   -32    
112    -16    
0      -32    
-32    -32    
-304   -80    
192    -208   
-16    224    
32     -80    
-32    80     
48     32     
48     16     
-96    160    
64     -80    
-48    64     
-128   -144   
-32    -80    
192    80     
0      64     
192    -16    
-16    -80    
64     -496   
128    16     
48     112    
160    80     
-32    112    
0      -48    
-32    16     
96     16     
32     0      
112    -16    
-320   80     
16     -176   
-208   -16    
144    16     
-80    -80    
112    -528   
-80    -16    
96     -1888  
16     400    
-112   96     
112    -64    
-304   -160   
192    32     
-96    144    
160    -64    
-224   16     
64     -160   
0      -16    
208    -48    
16     272    
32     -304   
-32    0      
80     -592   
160    16     
-80    -48    
160    224    
-176   0      
144    96     
-368   -224   
96     -48    
48     16     
112    160    
-144   48     
-16    -112   
112    112    
64     -144   
16     112    
-48    -240   
304    176    
-192   -16    
160    -96    
-176   16     
176    -48    
16     96     
48     32     
-80    48     
96     -160   
-144   80     
192    -272   
-64    -32    
-352   -160   
256    176    
-16    32     
-656   -80    
-176   -48    
-672   48     
48     176    
-144   112    
0      -48    
0      48     
-176   -112   
160    -128   
-240   -176   
-176   96     
-176   48     
-96    -208   
64     -160   
128    160    
-256   96     
-176   64     
-48    48     
96     160    
-176   80     
64     0      
-160   240    
320    -432   
-96    -16    
64     144    
32     64     
-144   96     
-32    -240   
-80    192    
0      -32    
448    448    
-464   240    
96     80     
112    272    
-912   -144   
-112   -96    
-880   -176   
224    64     
0      -64    
128    240    
-256   -320   
208    192    
-112   -160   
64     336    
-80    -64    
-16    -64    
112    0      
-32    -64    
-32    368    
-592   -64    
48     -240   
-192   -16    
192    272    
-208   -96    
-224   144    
-80    -336   
224    48     
64     128    
32     176    
-64    16     
0      96     
16     -32    
-304   -128   
-16    384    
-32    -16    
-16    208    
-208   48     
112    192    
-720   -112   
-192   240    
16     96     
-16    144    
-80    160    
128    640    
-464   -1968  
32     1264   
-384   688    
-304   544    
-416   32     
624    -128   
160    352    
-208   432    
-16    -128   
-832   64     
16     -32    
128    -96    
80     64     
16     64     
-144   -64    
16     80     
-80    48     
80     80     
-80    -16    
-48    0      
-48    -96    
-16    128    
-128   -96    
-48    160    
-496   64     
176    208    
-32    -80    
16     48     
-192   0      
160    0      
-80    160    
128    112    
32     96     
-16    48     
-128   -80    
80     16     
-128   240    
112    -64    
0      -16    
-208   64     
80     192    
112    112    
-144   -144   
0      64     
96     128    
96     96     
48     -16    
-176   128    
48     80     
160    128    
-192   16     
96     -16    
-128   112    
32     80     
-256   -48    
16     64     
80     96     
48     80     
-64    96     
48     48     
-96    80     
-16    0      
64     48     
-80    112    
16     32     
-112   48     
112    144    
-112   -128   
32     160    
-224   -32    
112    112    
64     48     
-16    -48    
64     -80    
-16    96     
-96    288    
-64    96     
192    -80    
176    32     
-144   208    
-128   16     
240    -48    
-240   96     
80     368    
-224   -192   
288    -96    
-64    32     
16     80     
32     112    
32     160    
-48    48     
64     96     
64     160    
-80    -80    
256    192    
-272   48     
128    160    
32     96     
-128   64     
208    32     
16     80     
16     112    
48     144    
16     -48    
-16    0      
80     176    
32     32     
-32    16     
-80    32     
0      48     
96     0      
-64    64     
48     -32    
32     256    
-16    0      
-64    144    
32     16     
48     16     
48     -48    
-112   64     
128    320    
112    176    
-16    64     
0      64     
64     384    
304    144    
48     176    
-208   -160   
-64    -1120  
160    96     
112    224    
-96    96     
-96    32     
-160   16     
-80    -16    
368    512    
160    96     
-16    64     
-208   96     
64     128    
144    48     
192    -16    
-208   -128   
96     -752   
64     64     
96     80     
-96    16     
112    -80    
16     64     
-16    -80    
64     128    
64     96     
64     16     
16     64     
-32    -64    
-96    -144   
-64    -224   
-64    32     
208    -304   
-32    48     
96     160    
96     176    
-32    -64    
80     48     
128    192    
16     -176   
80     352    
32     16     
-16    32     
16     160    
128    -80    
96     192    
0      32     
-32    112    
-16    80     
128    -448   
144    352    
0      16     
160    -64    
0      -256   
-112   240    
48     -32    
-16    160    
32     160    
96     352    
-128   -16    
160    -176   
-48    144    
32     -224   
48     32     
64     -560   
144    208    
-16    144    
0      192    
0      -32    
96     32     
1168   -1520  
496    880    
-896   -720   
-224   -560   
320    624    
-192   -592   
-384   -352   
288    -48    
-16    64     
-48    -496   
-128   176    
112    -240   
112    -32    
160    32     
96     144    
-16    192    
352    144    
-240   -96    
144    96     
144    128    
32     0      
64     32     
128    -192   
48     240    
16     -704   
112    32     
-96    -416   
-48    80     
320    -48    
-176   304    
160    32     
112    144    
-48    48     
272    16     
-96    240    
288    -336   
-16    144    
48     -288   
96     160    
-32    -560   
-48    -16    
64     -16    
80     112    
48     144    
-80    0      
-112   -16    
144    176    
64     352    
-128   -48    
80     192    
0      -272   
128    144    
32     -144   
160    160    
-32    -144   
144    112    
240    704    
0      576    
-240   -1040  
480    240    
-208   -48    
240    304    
-144   112    
208    -80    
32     96     
48     -160   
0      160    
32     -16    
64     80     
16     96     
0      80     
80     -352   
48     160    
16     16     
176    -416   
-16    -304   
-32    -560   
384    -1440  
-208   -192   
64     -96    
192    -128   
160    -1056  
16     0      
128    64     
64     -288   
64     208    
-32    -208   
112    -400   
64     16     
128    208    
16     64     
-128   16     
-16    -96    
-480   96     
16     -192   
32     -32    
112    -256   
0      16     
112    -1184  
-16    -96    
80     -16    
32     -32    
160    16     
0      112    
80     -80    
-96    -16    
64     16     
80     0      
-96    16     
64     -32    
16     48     
80     -176   
64     -32    
64     -480   
64     80     
16     -256   
112    -48    
96     128    
80     32     
80     -64    
-160   -176   
80     48     
0      16     
-560   -96    
-48    -16    
160    -112   
16     -160   
-160   -208   
160    -208   
-112   -160   
192    -528   
-144   -160   
32     -48    
64     112    
32     352    
336    32     
-128   -208   
-16    112    
128    32     
-128   -256   
-1248  0      
96     96     
80     -144   
16     16     
-48    -272   
128    -1376  
16     -112   
224    304    
80     64     
-32    80     
48     -64    
-48    -112   
144    112    
-96    96     
80     -304   
80     144    
144    16     
-800   880    
0      -496   
-240   -48    
336    -400   
-112   96     
96     -992   
96     96     
-48    176    
80     -80    
-144   -16    
-48    -224   
80     -192   
192    128    
-496   -80    
32     48     
-1024  -352   
32     -448   
208    32     
176    -16    
160    288    
160    -1088  
-112   -32    
-112   64     
48     176    
0      -144   
0      48     
64     -64    
96     128    
-128   32     
32     -160   
0      48     
160    -80    
96     112    
48     0      
-16    224    
16     -48    
-112   96     
16     -96    
32     32     
-16    0      
1248   -2864  
80     -16    
1120   288    
96     192    
-160   -384   
720    448    
-448   -608   
1488   -224   
-288   432    
160    160    
-384   160    
-80    -192   
144    128    
256    -80    
-176   -96    
48     -64    
-112   -16    
160    0      
-112   128    
80     -16    
-96    -32    
-1488  -224   
64     176    
-1008  -192   
-16    -48    
-112   64     
-160   144    
-48    16     
-864   32     
-208   -144   
-16    -32    
16     192    
96     128    
-16    32     
-1056  -128   
160    160    
-16    112    
-32    64     
-160   -16    
-176   64     
112    64     
-272   -48    
-48    64     
-80    -128   
32     128    
16     96     
-48    128    
256    -112   
-272   -32    
144    -208   
48     112    
32     64     
48     128    
-64    -224   
-160   -48    
32     80     
-128   144    
48     -144   
96     96     
-160   48     
-144   0      
-32    80     
-448   16     
-32    32     
-16    -112   
96     -16    
-112   32     
48     368    
-144   -16    
176    32     
-80    80     
32     208    
-128   -16    
112    -80    
-80    -32    
-368   -80    
80     -256   
80     48     
64     176    
-128   224    
-48    0      
176    0      
-144   112    
304    -48    
-96    304    
-240   -32    
336    144    
-400   -48    
224    64     
-176   48     
32     144    
-16    -96    
-48    0      
32     176    
-608   -224   
112    144    
-32    -272   
64     144    
32     96     
-80    -64    
0      96     
-32    16     
-48    176    
-144   -32    
112    -16    
-96    48     
400    320    
-640   -16    
-32    48     
-1248  -192   
16     80     
48     -80    
96     144    
-144   16     
80     144    
-16    0      
-240   -240   
144    112    
48     224    
96     -128   
-144   64     
192    -32    
-336   0      
128    224    
240    112    
-160   48     
112    48     
-192   80     
128    -16    
-64    0      
0      80     
-96    224    
32     128    
64     224    
-16    48     
-144   112    
-64    192    
32     128    
-80    -112   
64     16     
32     144    
0      112    
-64    80     
-64    32     
16     -80    
-32    -192   
-16    32     
-16    -16    
32     208    
48     384    
-160   -64    
16     48     
64     -64    
48     16     
-176   -48    
-16    -80    
-16    -128   
0      144    
80     176    
-48    96     
16     48     
16     128    
96     48     
-48    272    
240    992    
0      176    
-256   -48    
-32    -352   
176    128    
-192   -112   
-48    32     
96     64     
-32    128    
32     96     
-16    112    
-32    64     
-112   96     
-16    48     
160    240    
176    112    
-112   32     
-16    208    
-176   -96    
160    -128   
80     208    
144    64     
-112   160    
-224   48     
16     32     
80     16     
96     128    
-112   0      
208    192    
-272   0      
240    -16    
-160   0      
144    80     
848    1104   
272    832    
-512   -720   
-192   -800   
144    -384   
0      -384   
544    816    
-592   -128   
128    240    
176    288    
464    240    
-352   32     
-16    320    
-48    96     
240    80     
-176   -144   
160    144    
208    272    
-128   -64    
96     48     
0      -208   
368    448    
-256   -256   
192    -224   
-48    -240   
368    -16    
-48    112    
80     -272   
128    16     
128    144    
-176   -160   
-96    -2544  
32     96     
-64    80     
320    32     
16     176    
-112   -368   
-176   -336   
192    160    
-80    -112   
256    -160   
-96    192    
256    112    
0      -192   
-128   0      
16     32     
-144   -560   
112    208    
368    544    
-160   48     
96     384    
-112   -16    
192    288    
64     -96    
48     80     
32     48     
336    368    
-592   -672   
-80    208    
224    16     
-112   320    
-96    -176   
80     -208   
-96    -352   
256    160    
16     96     
-16    128    
64     32     
112    160    
16     112    
-16    160    
48     -192   
48     16     
-16    -32    
160    -32    
16     192    
48     -208   
176    144    
-96    -640   
144    -144   
16     128    
0      192    
160    16     
64     192    
48     -480   
32     176    
-32    -256   
16     144    
-32    64     
96     -176   
32     112    
96     -528   
16     80     
-32    -1120  
112    224    
-32    -48    
160    64     
-16    160    
96     112    
96     224    
-128   96     
48     -112   
48     48     
96     128    
128    -96    
-96    128    
16     -16    
80     -32    
0      -256   
64     112    
80     -2720  
64     16     
0      -864   
0      128    
96     64     
64     48     
32     432    
128    112    
0      160    
192    -336   
32     48     
-32    -96    
96     112    
-64    96     
0      64     
224    -240   
-64    32     
-16    -352   
448    224    
-336   16     
160    176    
16     112    
144    -32    
-160   176    
176    -80    
-48    80     
80     -352   
48     48     
32     -288   
48     192    
32     16     
208    176    
-176   48     
224    32     
-64    224    
272    640    
-112   224    
96     -224   
-16    -144   
0      -240   
32     112    
48     -48    
144    -128   
32     -32    
-16    112    
192    48     
-48    304    
32     -592   
-176   -160   
16     -176   
176    320    
0      0      
128    16     
48     -1824  
-32    -112   
144    144    
0      -128   
128    288    
80     -96    
144    80     
0      -208   
32     -2064  
-224   -96    
208    -864   
-64    48     
64     -96    
96     272    
-64    -448   
160    -192   
128    -80    
128    0      
-80    -16    
-32    16     
96     -48    
-48    160    
16     -16    
112    -752   
0      144    
128    -32    
-32    64     
-224   -64    
-16    -192   
-384   -240   
112    -128   
256    16     
64     16     
16     112    
2032   -1024  
-624   160    
720    144    
-304   208    
320    0      
-16    -448   
-160   0      
912    384    
-160   -128   
-144   192    
-240   -128   
0      32     
64     48     
256    -400   
-208   -96    
128    -1616  
0      160    
208    112    
-112   96     
80     -160   
32     96     
144    -80    
80     160    
-80    -80    
-112   64     
0      -16    
208    192    
48     -256   
112    64     
96     -144   
16     128    
240    -64    
16     -16    
144    64     
-64    -224   
48     64     
16     -144   
-64    208    
288    32     
80     48     
-208   -160   
64     -16    
-336   -32    
112    64     
-16    0      
-80    0      
64     -80    
0      -16    
96     -192   
64     160    
-64    32     
96     32     
-32    80     
-64    -160   
64     -320   
-128   32     
112    -48    
-288   -48    
160    48     
-416   224    
32     -656   
-16    -48    
-16    -400   
96     -96    
96     -1760  
-96    128    
16     64     
0      -96    
128    -16    
-16    64     
-240   -16    
128    16     
-80    32     
-32    -208   
-448   -96    
208    -128   
-176   32     
224    -224   
288    48     
0      -512   
-32    -112   
80     96     
-160   -272   
80     0      
-128   160    
-96    176    
-64    -256   
128    -288   
16     -288   
-272   -48    
48     16     
128    352    
-32    -16    
32     224    
-80    64     
16     -32    
-64    112    
-16    64     
-48    48     
48     96     
-80    48     
48     -64    
-240   -144   
224    112    
-48    0      
0      -144   
-16    64     
-960   -272   
272    128    
-32    -16    
-224   96     
64     144    
-144   0      
32     -224   
-144   -240   
48     -32    
-80    64     
160    144    
48     -16    
-64    112    
-240   128    
-192   -80    
192    -48    
-176   80     
-48    -32    
-224   144    
160    176    
-448   -32    
-208   -224   
-848   32     
192    96     
32     208    
16     144    
96     -224   
-176   -176   
-208   -256   
-32    48     
336    352    
-272   64     
208    64     
-304   -48    
-16    64     
-288   112    
-256   0      
-272   -64    
-48    -96    
160    80     
32     192    
-192   -304   
-16    160    
-48    -256   
128    160    
-80    -192   
-80    0      
192    688    
-624   -352   
96     -16    
32     240    
144    208    
-128   80     
-48    -80    
-1232  0      
-144   32     
-48    -48    
16     160    
48     368    
-144   288    
-192   -112   
-256   -144   
176    48     
-80    0      
208    32     
-80    96     
-128   -80    
-32    -80    
-192   48     
16     16     
-192   128    
176    -112   
48     144    
-32    -96    
-64    80     
16     -16    
-64    160    
-128   -96    
112    128    
-80    64     
64     -48    
-112   16     
0      48     
32     96     
-32    -96    
0      176    
-944   -80    
272    -208   
-176   -160   
272    176    
-1616  -1504  
1120   1792   
-320   224    
608    -176   
-480   -368   
288    -64    
-224   912    
48     -592   
256    352    
-384   -32    
96     208    
-592   16     
496    80     
-16    144    
-48    -128   
-272   320    
288    -80    
-16    816    
96     -352   
-48    96     
-320   -208   
224    416    
-304   240    
-64    -16    
-48    -320   
128    48     
64     32     
624    80     
-672   -240   
96     -224   
0      176    
-208   -128   
-16    224    
16     -96    
-80    144    
0      128    
-128   -96    
48     96     
-288   16     
112    -32    
-16    288    
-96    -96    
0      -160   
112    144    
192    80     
-176   32     
192    496    
16     336    
192    352    
-192   64     
32     -144   
16     128    
-128   -112   
64     464    
-64    -16    
80     48     
-368   -592   
96     -816   
-48    -224   
352    624    
-176   -16    
208    336    
-16    64     
144    48     
32     16     
-160   -48    
64     96     
32     144    
-112   16     
32     -96    
-48    112    
32     64     
-48    0      
176    96     
16     96     
144    160    
-208   320    
-112   192    
256    64     
-144   64     
48     -176   
-64    192    
112    272    
-96    48     
-288   0      
96     112    
-256   -336   
320    224    
64     256    
16     96     
0      48     
-80    48     
96     16     
128    16     
128    160    
-32    192    
-96    80     
-224   -192   
256    352    
-64    32     
-176   -32    
16     -32    
64     48     
96     64     
48     112    
-48    320    
144    240    
-16    320    
160    64     
-48    16     
-16    -144   
0      304    
32     480    
128    160    
-160   -304   
32     -1040  
272    480    
-176   -112   
-96    64     
-64    -304   
256    0      
0      -48    
32     128    
-208   -32    
80     -160   
48     32     
-64    192    
160    64     
-48    80     
112    144    
32     -2496  
128    272    
80     128    
-16    96     
-80    48     
240    128    
-32    112    
112    -16    
-160   96     
-16    96     
208    96     
16     96     
-16    176    
48     144    
208    192    
-192   -304   
80     176    
144    -128   
-32    272    
64     80     
96     176    
-16    80     
16     192    
-96    128    
208    176    
-32    -144   
48     144    
-96    -128   
-608   -304   
-48    128    
48     -384   
-16    80     
-48    256    
48     32     
48     32     
160    -144   
80     224    
64     352    
-176   -128   
80     272    
-80    -160   
128    0      
48     -112   
96     -80    
112    208    
-320   16     
176    64     
-32    -2272  
64     -32    
144    112    
0      160    
-64    160    
96     128    
-64    48     
112    128    
32     160    
-64    128    
176    256    
-64    32     
80     -16    
64     -96    
256    -32    
-192   -48    
48     16     
160    -864   
-48    64     
80     -192   
2384   1760   
-1520  576    
768    336    
-80    192    
0      -512   
-64    608    
-864   -864   
592    672    
-336   -208   
112    848    
-128   -224   
-288   240    
128    -608   
288    272    
-208   -656   
48     112    
64     128    
80     160    
-32    -32    
240    -256   
-96    160    
128    -336   
-96    352    
352    -288   
-256   80     
320    -496   
-144   368    
384    -416   
-176   176    
48     -160   
32     144    
96     32     
144    304    
-64    -64    
0      -272   
32     80     
0      -16    
-16    48     
80     -16    
48     112    
32     -128   
48     96     
16     -64    
112    48     
144    144    
0      208    
16     -32    
32     336    
-192   -80    
336    -32    
-64    176    
64     -160   
-16    80     
64     -144   
96     32     
48     -112   
-64    64     
80     -80    
32     112    
-16    16     
-16    -384   
32     -112   
96     -416   
96     -48    
-48    0      
208    -336   
16     -48    
96     -1808  
48     -96    
96     192    
48     -80    
112    144    
80     -96    
96     -144   
-16    96     
160    -448   
0      240    
-48    -224   
160    -208   
64     96     
16     -480   
96     -112   
-16    -720   
0      -320   
96     -912   
0      112    
208    176    
-144   64     
64     -384   
-176   -192   
144    256    
80     528    
80     -32    
-32    -256   
0      -96    
144    -112   
64     128    
-32    -96    
-48    0      
128    -2320  
16     -80    
64     -544   
-96    -144   
32     -256   
64     112    
176    432    
240    224    
-352   -336   
256    112    
-144   192    
112    16     
48     96     
-16    -96    
-16    -112   
96     -272   
128    -32    
80     -912   
16     112    
0      -64    
-112   -32    
96     -288   
160    -32    
-96    16     
32     16     
-64    80     
192    -224   
-864   -48    
224    -352   
-80    -96    
64     -144   
64     16     
96     -16    
128    288    
-112   48     
96     48     
-16    560    
336    208    
-352   -288   
48     -112   
-64    -32    
-32    -80    
-960   -112   
128    128    
-320   -112   
240    -176   
-160   16     
208    -160   
-144   48     
16     -144   
64     64     
32     48     
0      64     
-80    0      
-32    -112   
0      160    
-16    -64    
-160   -64    
-32    288    
-128   -32    
96     -128   
32     -112   
144    -624   
32     256    
-128   -480   
96     -64    
224    -96    
-96    -16    
-288   128    
16     -32    
-176   -64    
160    -16    
-64    80     
64     -64    
-224   96     
384    -128   
-208   48     
144    -272   
-32    176    
176    -592   
48     -96    
-672   -64    
128    -176   
-192   64     
176    32     
-144   -176   
304    -80    
-80    144    
64     -112   
-400   0      
160    -224   
64     208    
-112   -240   
-128   128    
-192   224    
160    -128   
-192   48     
224    0      
-1184  2000   
128    -288   
-176   -1392  
928    176    
320    -272   
-592   -144   
-128   -320   
-64    -560   
-96    16     
-928   112    
112    -48    
-320   208    
-560   -160   
272    224    
-592   -192   
-288   160    
-64    -112   
320    256    
256    64     
112    320    
-128   0      
208    96     
-336   144    
128    -384   
-64    -368   
-448   112    
-64    144    
-608   -656   
512    544    
-336   -64    
288    112    
-608   128    
-128   -128   
-48    128    
-192   -96    
-112   -224   
48     128    
-112   32     
-32    128    
-144   -528   
-112   -16    
32     -48    
208    96     
-112   -32    
-64    -48    
144    224    
-272   112    
160    320    
-784   160    
-80    0      
-32    -112   
-16    48     
-48    -16    
112    16     
-64    32     
80     128    
-48    -32    
-32    16     
-112   64     
80     32     
-32    64     
32     64     
-128   -80    
-144   -112   
-224   -64    
0      -64    
112    176    
32     80     
304    416    
-224   368    
-96    -128   
176    96     
-240   -176   
128    -48    
-16    0      
-96    80     
-96    -48    
-80    -16    
-96    -80    
128    240    
-48    48     
48     112    
-16    -96    
0      32     
192    -64    
-48    32     
16     16     
-256   -128   
-160   64     
32     32     
-176   -80    
112    176    
16     208    
-16    64     
48     -64    
-400   -64    
32     64     
-112   -64    
-80    -176   
0      -48    
96     144    
64     256    
-128   -64    
-48    -48    
96     112    
64     224    
-64    128    
144    384    
-272   -96    
224    208    
-672   -128   
-32    96     
-80    16     
176    112    
-112   -80    
0      192    
-192   -64    
112    -64    
-112   0      
80     -208   
-256   -80    
80     -48    
128    48     
-384   -96    
32     224    
-208   -208   
208    48     
-128   208    
32     80     
32     80     
80     64     
16     80     
128    32     
-256   176    
16     224    
128    96     
240    0      
-112   80     
-352   64     
192    176    
32     -64    
-160   32     
-256   64     
-16    -32    
32     96     
-16    -64    
16     -32    
224    64     
-96    208    
-64    32     
80     96     
-128   0      
32     160    
0      -48    
96     80     
-80    -80    
48     128    
144    400    
-176   112    
80     144    
-96    -32    
160    160    
-128   -16    
64     0      
-16    -80    
-80    112    
32     384    
-160   16     
32     -96    
128    128    
0      0      
96     -16    
-32    96     
0      144    
112    80     
-48    80     
16     0      
64     240    
-208   48     
32     16     
176    -144   
160    144    
-32    384    
-176   -272   
96     192    
80     64     
-16    112    
0      160    
-32    48     
16     192    
16     -64    
160    80     
-160   128    
192    224    
-224   -80    
80     208    
-80    -80    
-1136  -2112  
128    -496   
-32    1184   
-128   -192   
416    672    
-720   -368   
80     1024   
-768   -208   
128    416    
48     -64    
240    112    
-224   80     
-80    64     
320    80     
-48    -48    
-32    160    
-144   0      
-48    -144   
-32    -192   
304    48     
-80    32     
96     240    
-80    192    
192    160    
16     -80    
0      16     
64     128    
-208   64     
176    64     
-32    256    
48     32     
96     176    
-80    -224   
128    144    
64     80     
16     16     
16     176    
80     160    
16     0      
-16    160    
80     64     
128    96     
-64    96     
160    112    
-112   48     
112    0      
-16    176    
-32    -1536  
224    128    
-160   160    
208    112    
-48    80     
64     112    
-16    32     
48     16     
16     -16    
32     96     
0      32     
96     144    
-48    -224   
64     -336   
144    272    
-112   -272   
64     48     
144    -1264  
-32    48     
96     176    
64     160    
64     0      
112    272    
-160   128    
160    80     
-48    -64    
16     -16    
96     48     
-48    128    
128    464    
32     -208   
240    -48    
-32    -512   
208    -16    
112    -1072  
32     160    
80     -240   
-16    288    
176    208    
32     176    
-128   32     
96     -48    
16     128    
128    128    
-16    304    
112    -272   
48     0      
96     -288   
128    464    
144    -48    
-32    192    
32     -800   
80     96     
32     0      
112    128    
-128   -112   
112    -16    
32     112    
48     -16    
128    240    
-16    -224   
48     -64    
32     -304   
80     224    
112    -112   
32     176    
-112   -560   
144    160    
64     0      
128    208    
-80    128    
112    80     
-32    32     
-48    -400   
96     64     
208    -96    
96     48     
-32    -240   
-160   224    
96     -592   
224    48     
-112   224    
128    80     
0      32     
64     128    
48     208    
-96    -464   
176    160    
-224   -256   
400    48     
-336   16     
176    224    
-240   -368   
160    48     
32     -144   
192    192    
-112   96     
0      208    
192    144    
-144   -1888  
64     -848   
112    -288   
80     -192   
-32    -64    
-32    96     
-80    -368   
240    416    
32     -512   
96     192    
-160   -160   
272    -944   
-176   112    
96     -1024  
96     128    
160    -816   
80     -368   
-96    -16    
160    -208   
-256   -112   
64     -1312  
544    112    
-224   160    
192    96     
-160   160    
0      48     
336    -448   
-64    160    
112    -128   
-80    144    
-272   -16    
160    48     
-64    -80    
80     -304   
208    -240   
-80    -352   
96     -192   
-64    -848   
176    288    
-352   -32    
64     -256   
176    0      
176    192    
-192   -80    
-64    16     
-192   64     
192    -208   
-224   -256   
80     32     
-32    -80    
-128   -192   
-304   0      
-720   1248   
384    640    
-848   -608   
-144   -240   
944    336    
-128   256    
-368   304    
-32    -464   
512    480    
-112   -272   
-176   -48    
-112   -32    
-464   48     
160    288    
64     -144   
128    -640   
-640   -288   
320    -112   
160    368    
-144   48     
48     96     
-320   160    
80     -64    
-96    -208   
-112   16     
160    80     
32     -144   
-720   -80    
128    -272   
176    -80    
-80    -368   
96     48     
96     -464   
16     96     
160    -48    
-16    48     
-160   16     
16     32     
-32    -64    
192    64     
-336   80     
224    -80    
-416   -192   
176    -16    
-1040  48     
-32    -128   
-128   -128   
208    -272   
0      192    
64     -1248  
32     -112   
-32    80     
224    -32    
-160   128    
80     112    
-80    0      
-16    -304   
144    96     
-48    -32    
-32    0      
-32    -80    
64     112    
80     -256   
-112   80     
192    -928   
96     80     
-256   -64    
112    48     
-336   -16    
80     -144   
-288   -176   
-16    192    
-80    16     
208    32     
-592   224    
-64    -112   
80     -256   
208    -176   
-64    80     
32     -272   
-16    32     
-48    -128   
112    -96    
-16    32     
48     224    
-32    -16    
224    208    
-400   48     
160    -80    
-896   -80    
-48    -320   
96     16     
-32    0      
32     0      
32     176    
-480   0      
0      16     
80     0      
-16    64     
80     48     
-96    64     
-64    -192   
160    80     
-32    -80    
176    320    
-592   0      
16     0      
-256   -272   
-304   -96    
16     64     
-720   -160   
-80    80     
-240   112    
272    144    
-1904  192    
-192   16     
208    -80    
-128   -48    
48     -144   
-144   224    
144    -48    
208    128    
-384   -160   
16     96     
-112   80     
208    0      
-160   -80    
-112   48     
-80    0      
-320   -48    
-80    -112   
-128   48     
144    0      
336    -16    
-224   176    
-32    -128   
-80    112    
-96    128    
96     -16    
64     80     
-160   -48    
-128   176    
-208   -80    
0      192    
-272   -80    
48     160    
-592   48     
-96    48     
16     -128   
16     64     
-64    -96    
32     96     
-48    112    
80     64     
-144   0      
-32    80     
112    384    
-464   32     
-16    -144   
-64    0      
80     160    
-304   96     
-192   96     
-80    -112   
-144   160    
0      -32    
352    288    
-160   -112   
-80    -16    
0      32     
32     -16    
208    192    
-176   96     
80     192    
-80    -192   
-32    -48    
-80    -160   
240    160    
-464   208    
0      192    
-160   32     
-128   128    
160    -64    
224    -48    
0      -176   
-80    176    
-144   176    
-64    32     
32     64     
-32    -48    
-32    16     
-128   0      
304    304    
-736   80     
192    80     
-112   -80    
1008   3200   
-1488  -128   
-80    144    
480    752    
528    640    
-592   -256   
16     272    
-480   464    
864    -400   
-672   288    
288    -240   
-48    432    
-416   -416   
192    400    
-176   -256   
0      80     
16     112    
64     112    
-192   -32    
240    80     
-160   64     
176    16     
-160   368    
32     -112   
-48    96     
-32    -224   
48     176    
96     48     
-48    208    
0      -80    
-64    16     
-16    -48    
-48    -128   
16     128    
-32    -48    
208    112    
-96    176    
32     144    
-160   -16    
32     32     
-176   -96    
64     80     
-16    64     
48     64     
-48    32     
-32    224    
-32    96     
32     96     
0      16     
-96    128    
64     96     
-32    96     
-96    32     
-64    -48    
-16    112    
-112   -32    
112    160    
-48    48     
64     80     
64     96     
-224   -144   
-32    -176   
144    64     
-128   -128   
224    224    
0      160    
128    160    
48     112    
80     160    
-48    96     
-32    64     
128    240    
-112   0      
80     -64    
128    96     
-48    112    
288    592    
-96    352    
336    80     
-128   -80    
-96    128    
160    -64    
-48    -112   
48     128    
48     64     
48     32     
16     224    
-48    0      
-64    0      
32     32     
80     240    
0      144    
-128   -64    
80     80     
-32    32     
80     112    
-128   0      
48     96     
-32    32     
16     80     
-144   -256   
32     -48    
96     96     
48     144    
-48    80     
64     96     
-80    -96    
112    64     
32     288    
0      0      
160    96     
-96    192    
192    80     
-80    48     
-16    96     
160    128    
-80    -352   
112    224    
16     32     
112    -48    
-112   64     
96     224    
160    144    
-160   -80    
-32    192    
-32    -336   
128    -176   
48     112    
-96    0      
176    80     
0      112    
32     -784   
64     -48    
0      176    
-16    16     
-64    -352   
176    48     
-208   256    
80     16     
64     -64    
-48    240    
176    16     
-64    112    
-64    0      
128    16     
80     112    
-144   -144   
80     0      
48     -640   
64     208    
48     144    
-112   -16    
160    48     
48     336    
-192   96     
64     -144   
-288   -160   
240    0      
224    176    
-224   80     
80     16     
48     -80    
128    -32    
80     -224   
48     208    
304    -304   
32     416    
-128   -656   
160    16     
-112   -16    
400    144    
-144   64     
368    176    
-352   0      
400    -288   
0      560    
-112   -240   
208    -128   
192    -512   
400    368    
0      -416   
-320   240    
112    -48    
208    304    
80     -48    
176    80     
64     -224   
272    128    
-32    160    
32     -176   
128    128    
128    -288   
-112   112    
0      -1120  
-208   48     
160    -608   
16     96     
-896   -768   
-672   -880   
640    -560   
704    48     
576    -608   
-32    304    
-224   -192   
448    -176   
-416   -112   
608    -352   
-256   192    
-48    -208   
80     256    
0      -320   
48     32     
64     144    
32     80     
-48    80     
-80    0      
192    112    
-80    -224   
64     176    
80     -416   
272    160    
-208   0      
112    32     
-128   80     
176    160    
-32    -336   
-48    -48    
16     -208   
160    176    
32     192    
0      80     
-16    64     
-16    -272   
128    112    
-16    -224   
64     208    
144    0      
128    96     
-96    -96    
80     112    
16     -128   
192    0      
-96    112    
112    -1456  
-64    -160   
272    -768   
-224   -1168  
272    -112   
-64    -800   
80     -64    
160    336    
-80    -64    
112    -80    
48     -32    
-128   64     
320    0      
-192   192    
80     -64    
128    -128   
-96    96     
-368   -176   
96     -16    
-48    32     
192    112    
96     -80    
208    -224   
-80    -64    
-16    96     
16     -144   
144    176    
-80    96     
80     -240   
80     32     
32     -384   
80     -48    
-352   -64    
32     80     
-1168  208    
-96    -80    
192    -320   
-16    -224   
80     -112   
96     -96    
16     192    
160    -304   
160    256    
-96    -112   
144    32     
-32    -240   
176    48     
-96    -96    
80     -48    
-784   80     
112    -192   
-16    -144   
96     -144   
-112   -144   
224    0      
-96    -16    
160    -2864  
-160   192    
48     -48    
-16    208    
80     -32    
160    336    
-96    -176   
48     -80    
-496   -112   
160    112    
-912   -144   
16     -16    
96     80     
48     -400   
-224   -128   
-192   -1248  
192    -16    
-96    -240   
-96    32     
-80    -32    
224    -48    
0      -48    
0      -64    
-176   48     
128    -64    
-352   -96    
0      -112   
-48    0      
176    -160   
64     -32    
32     -432   
144    128    
208    -48    
96     16     
-32    -32    
32     -160   
64     -32    
-16    64     
144    80     
96     -80    
16     -128   
16     -16    
-256   -32    
256    -64    
-80    64     
176    176    
-96    96     
144    -816   
0      -128   
-240   0      
96     -176   
80     0      
128    272    
-352   -144   
192    -16    
-688   -224   
240    -128   
-48    64     
144    -80    
0      96     
96     -352   
-48    80     
48     -1376  
96     -144   
-32    304    
96     320    
-272   -128   
32     -112   
-48    -96    
128    32     
144    448    
-16    144    
-528   16     
96     -192   
96     96     
16     -144   
16     144    
16     -16    
208    48     
-112   32     
144    -144   
-192   48     
80     64     
-32    32     
0      -112   
-48    16     
96     -80    
-128   48     
176    -160   
0      128    
-400   -80    
-96    -64    
32     64     
-736   48     
-128   48     
-608   -4352  
1216   1200   
-1088  -288   
576    64     
1072   -368   
-640   -544   
-128   768    
224    -80    
-528   -80    
208    -496   
-416   144    
32     208    
112    112    
-96    -112   
-112   -16    
-48    48     
-48    160    
-64    576    
-176   176    
64     -176   
-160   -16    
80     80     
128    176    
-144   -144   
176    0      
-64    -160   
0      64     
-144   128    
64     -16    
-16    64     
-64    -160   
-112   48     
-48    32     
-144   96     
176    144    
-48    64     
64     -112   
-80    -176   
-48    -128   
64     32     
48     128    
-128   32     
16     48     
-48    -64    
0      -80    
-160   -176   
32     48     
-176   -144   
144    -128   
-304   -64    
32     -16    
-16    16     
0      240    
-16    -320   
112    208    
-64    32     
144    256    
-32    272    
0      128    
-128   -64    
-224   0      
80     0      
-32    48     
-64    -48    
-208   -128   
208    240    
-704   -144   
128    32     
-80    64     
64     80     
16     80     
-32    32     
32     48     
-144   -96    
16     -32    
32     -32    
-96    -208   
-96    -704   
-176   -320   
-304   -240   
192    256    
-944   192    
112    320    
32     128    
64     80     
-32    176    
-320   -64    
128    64     
64     208    
-80    -64    
16     32     
-96    160    
-16    32     
-32    0      
-160   -64    
96     32     
-80    64     
-80    -32    
32     -16    
-144   96     
32     48     
0      80     
0      96     
112    128    
-48    64     
-32    80     
48     144    
-96    -128   
160    208    
-224   0      
272    176    
-224   -64    
64     64     
-16    80     
48     80     
16     64     
16     32     
48     112    
-16    -16    
0      32     
-128   -48    
0      64     
240    192    
32     112    
-208   -32    
16     240    
-240   -384   
48     -224   
-16    16     
96     160    
96     64     
-192   -16    
48     32     
80     176    
-144   0      
160    48     
112    432    
-448   -48    
384    -112   
-304   -368   
240    160    
-80    144    
0      176    
64     0      
-48    48     
-32    -48    
144    192    
-448   -208   
304    112    
-256   64     
176    32     
16     64     
-80    48     
224    -160   
256    112    
-272   448    
-48    0      
208    96     
-144   0      
128    -48    
-16    144    
80     -112   
48     112    
32     64     
0      128    
-176   -288   
80     112    
208    0      
0      64     
-176   160    
192    -16    
112    64     
-112   0      
48     192    
-176   32     
-64    192    
64     -112   
352    80     
-176   -272   
16     304    
-112   -272   
128    336    
160    32     
192    80     
-48    -208   
0      112    
32     -288   
240    592    
-16    112    
64     128    
-16    176    
144    -176   
112    256    
-16    48     
80     112    
-144   160    
272    -16    
-320   496    
64     1552   
-1040  672    
464    -736   
432    16     
-336   -336   
128    0      
-544   192    
368    416    
336    0      
-352   -16    
192    -112   
112    448    
-128   -16    
192    128    
-96    -32    
-32    48     
96     64     
16     -656   
144    64     
0      96     
16     160    
-48    128    
64     0      
-128   -16    
112    -208   
80     160    
-96    272    
80     -64    
32     144    
-112   -160   
80     48     
32     112    
32     -368   
-16    64     
0      80     
-128   -144   
192    176    
-64    112    
320    0      
-272   48     
48     96     
128    128    
48     -16    
-16    128    
-32    -16    
0      64     
80     144    
-16    0      
32     96     
0      -512   
80     176    
0      -48    
96     128    
16     112    
48     96     
96     16     
-176   80     
144    80     
48     16     
32     80     
16     -176   
80     48     
0      -432   
16     144    
80     -304   
80     112    
-32    272    
0      80     
128    -336   
-64    176    
-96    48     
192    144    
-128   64     
208    96     
-64    -64    
144    -48    
-96    192    
144    -160   
64     144    
16     -32    
-48    -32    
160    -800   
112    352    
-112   0      
224    0      
-144   272    
0      16     
176    0      
-320   -368   
256    208    
-160   -80    
192    160    
-48    192    
144    192    
-80    -208   
176    64     
0      -400   
16     128    
160    304    
96     176    
-144   -48    
128    144    
-176   16     
144    -112   
176    192    
-176   -192   
256    144    
-224   -448   
240    -16    
-176   16     
208    176    
16     -16    
-80    64     
-32    -208   
-48    112    
176    64     
128    80     
-48    16     
-48    -208   
224    32     
-144   -288   
144    80     
224    -288   
-176   240    
160    -128   
-112   -64    
16     -1344  
32     16     
160    160    
16     144    
-80    -64    
48     288    
0      -352   
0      112    
96     32     
96     0      
-48    272    
208    64     
96     16     
-16    -16    
-16    0      
32     -512   
112    -384   
176    16     
-64    -80    
80     208    
-144   96     
64     -368   
80     -96    
80     -1312  
-48    -96    
96     -768   
32     16     
176    48     
-64    -256   
96     208    
208    -320   
-96    -448   
160    128    
48     -160   
-112   16     
-16    -176   
48     -304   
-80    -208   
16     -224   
80     80     
144    224    
0      128    
112    -2592  
-80    -352   
192    416    
96     160    
64     64     
80     240    
192    -48    
64     -528   
80     0      
112    -128   
-272   160    
16     64     
48     0      
176    -384   
64     -304   
-32    -336   
192    224    
0      -48    
80     48     
128    -176   
64     112    
32     80     
0      64     
-112   32     
320    -208   
-384   0      
16     -192   
-16    0      
-304   768    
-1712  -2336  
592    -288   
464    784    
-176   -3184  
-928   -496   
304    384    
-112   1120   
-128   -208   
16     -80    
-64    -288   
64     -48    
-368   -240   
368    112    
-960   -96    
112    400    
-224   96     
304    32     
-320   -544   
224    -672   
128    384    
-176   -192   
192    80     
64     48     
96     -16    
-144   -16    
144    -48    
-160   80     
48     144    
0      32     
16     -80    
-96    -16    
80     -224   
-64    96     
32     -144   
16     320    
16     -96    
80     -128   
-240   208    
384    176    
-128   -112   
32     -48    
-192   0      
48     32     
-240   -192   
80     -176   
-896   -160   
144    -304   
160    16     
160    16     
32     48     
80     -752   
64     -80    
96     -16    
-80    64     
160    208    
160    512    
-112   176    
-96    -176   
-224   -176   
128    -304   
-256   240    
48     -224   
112    80     
160    -96    
0      80     
48     48     
80     0      
-192   96     
-16    -16    
-48    80     
112    -16    
-144   64     
48     -96    
48     48     
64     32     
-384   144    
496    400    
-464   416    
208    -208   
-192   -224   
144    -208   
160    -48    
48     -96    
48     32     
-224   -80    
-32    -144   
48     16     
128    80     
-112   -112   
144    -80    
-208   288    
-800   -272   
-32    -48    
-48    -176   
-224   112    
-16    80     
-224   -64    
-64    112    
-432   176    
-144   -112   
128    16     
-32    144    
128    -32    
-144   -16    
-960   -160   
304    336    
-384   -80    
224    112    
-112   160    
-160   -96    
0      -32    
-400   -16    
80     80     
0      208    
-144   48     
-160   -208   
-32    16     
144    0      
64     48     
-144   -80    
96     160    
80     16     
0      96     
-160   -16    
-32    304    
-16    -368   
16     112    
-224   -192   
16     112    
-64    -80    
-208   -32    
-160   288    
-272   -80    
32     16     
16     16     
176    320    
-304   -336   
96     352    
-32    128    
48     48     
-48    112    
64     256    
-80    -208   
32     -32    
-80    -48    
16     128    
0      16     
-272   64     
64     112    
80     48     
-48    160    
0      -80    
-96    -160   
-32    -144   
64     64     
224    144    
-224   -528   
192    304    
-128   0      
-64    80     
-48    -48    
144    160    
-32    -32    
-112   0      
-288   -32    
208    80     
-304   -320   
96     256    
-16    32     
-112   -48    
160    320    
-256   16     
32     96     
0      -16    
48     112    
80     -112   
-32    208    
-176   -48    
16     144    
-528   32     
16     80     
128    -112   
80     96     
-64    80     
-80    176    
-112   -128   
96     96     
64     32     
16     192    
-48    208    
-160   16     
32     176    
-16    96     
-224   160    
-144   32     
80     -160   
352    160    
-416   -640   
496    -1248  
80     656    
304    432    
-304   -144   
224    208    
-160   48     
304    160    
16     32     
-128   32     
144    48     
-32    128    
-480   16     
112    112    
48     128    
-64    -80    
-112   32     
128    128    
48     128    
0      -64    
-144   -80    
-32    80     
64     144    
64     0      
0      16     
-80    32     
-176   96     
48     -112   
-32    112    
48     -16    
48     -32    
-112   160    
160    128    
96     192    
-96    -64    
160    224    
0      304    
96     16     
-192   -112   
80     160    
-96    -48    
96     128    
-48    96     
256    64     
-144   160    
48     48     
-16    64     
-240   -176   
336    224    
-272   0      
352    80     
-240   160    
208    176    
-160   -16    
-16    48     
80     112    
-144   64     
352    64     
-112   304    
-64    -64    
192    144    
-48    144    
-64    64     
32     -48    
128    144    
-112   224    
-128   0      
48     -64    
-48    -128   
-16    128    
-64    160    
-64    32     
144    48     
32     96     
-96    128    
32     16     
160    160    
-64    128    
144    32     
0      64     
-32    144    
-16    0      
-16    80     
176    -80    
48     272    
-192   -432   
288    -16    
-208   -64    
96     64     
64     96     
0      48     
96     208    
-64    -16    
128    368    
-256   -240   
144    144    
0      112    
-80    160    
112    64     
-48    64     
64     64     
96     -2256  
-48    16     
-16    16     
128    80     
-96    80     
240    128    
-272   -224   
-16    48     
32     48     
176    208    
-16    144    
128    176    
-272   -240   
240    144    
96     80     
32     -560   
16     96     
64     112    
240    320    
32     16     
-96    224    
-48    160    
208    240    
-96    -16    
96     160    
-208   -272   
192    -112   
-304   -144   
336    64     
-48    160    
16     -16    
-48    0      
16     176    
96     192    
288    48     
-48    160    
-144   -64    
80     80     
80     -560   
96     -80    
-96    -48    
272    80     
-208   -176   
160    -160   
-208   -128   
0      -464   
288    560    
-112   -1712  
96     32     
16     128    
112    48     
64     -112   
16     -80    
-16    256    
240    448    
-256   -320   
240    336    
64     64     
80     -128   
-64    208    
32     -368   
0      160    
96     -992   
128    80     
16     -1616  
112    160    
-144   -464   
160    96     
80     176    
-48    80     
112    176    
32     128    
16     16     
64     -256   
80     96     
64     -48    
96     128    
-32    -32    
80     128    
64     -896   
0      128    
-64    96     
160    160    
-272   -80    
128    80     
112    -16    
208    -208   
-16    176    
-112   -48    
176    80     
-16    -416   
80     80     
-192   -112   
160    96     
272    -352   
176    -128   
2352   -1424  
-1280  -2976  
544    992    
-32    672    
0      -624   
208    576    
-816   496    
464    -48    
-288   -208   
-48    336    
-432   48     
224    -608   
-112   112    
160    -112   
-224   -160   
96     32     
144    320    
304    -448   
80     192    
-32    -48    
192    336    
-16    176    
64     -96    
64     64     
-16    -160   
208    16     
128    288    
-32    160    
48     -112   
-160   -48    
-32    -48    
-16    32     
96     -32    
-16    352    
272    -128   
-80    -16    
-128   -1024  
96     -336   
224    320    
16     -48    
256    48     
32     -32    
16     48     
-80    16     
64     -448   
-16    -112   
128    -272   
-144   -240   
16     192    
128    -480   
160    -128   
-128   -752   
80     -256   
192    48     
64     0      
48     128    
96     -16    
240    -32    
-112   -16    
-16    256    
64     112    
-32    -272   
64     -32    
-112   224    
128    -144   
-864   -48    
176    -256   
176    -32    
128    -352   
-48    -64    
32     -720   
64     -144   
16     -112   
-96    96     
192    112    
-32    80     
-320   -480   
-112   -576   
-480   -128   
416    320    
-336   96     
48     -16    
128    -80    
64     -320   
64     -80    
0      -944   
176    -480   
-160   112    
320    208    
-16    176    
-128   -16    
112    -80    
-16    -48    
0      -16    
-16    -128   
-240   128    
-48    0      
64     -80    
-80    -240   
32     -112   
192    112    
16     208    
-48    -608   
32     112    
0      -208   
96     64     
160    272    
16     368    
112    272    
16     -272   
-96    -128   
32     -272   
-192   80     
64     -32    
64     80     
64     64     
32     64     
-16    -544   
-80    -208   
112    96     
32     64     
32     -32    
128    -112   
-304   144    
48     -192   
64     192    
-192   -304   
96     80     
-208   -48    
-160   -96    
16     -480   
16     320    
144    -832   
-48    64     
192    480    
16     -336   
-48    -112   
-80    144    
-16    144    
144    0      
-288   16     
144    32     
-160   176    
16     -48    
48     48     
48     -112   
-128   -64    
48     -272   
32     16     
0      -48    
48     -256   
-608   48     
112    -128   
-96    -16    
64     80     
-48    96     
80     -128   
-112   208    
112    -384   
144    80     
-16    -80    
160    144    
-48    -112   
160    368    
-464   -144   
368    -192   
-80    -256   
192    -112   
-224   0      
32     -16    
-208   96     
96     32     
-144   48     
0      -80    
-96    352    
-944   -480   
144    224    
-1168  -368   
-432   144    
-112   16     
-64    16     
32     80     
-480   48     
-48    -368   
128    128    
-112   128    
-16    -160   
-48    80     
128    -64    
-96    112    
-432   -256   
112    96     
-464   -128   
-192   160    
-160   80     
32     -32    
-48    -64    
672    2288   
-1888  368    
-448   544    
144    320    
-96    -640   
-112   80     
-496   -560   
720    224    
-352   -144   
96     448    
-176   -416   
-160   80     
48     -48    
-160   96     
-176   -240   
-480   -192   
128    112    
-288   112    
-128   16     
-1456  -256   
-176   0      
-208   -320   
16     352    
-32    -96    
0      0      
-16    -96    
-32    176    
80     80     
-176   64     
-80    -176   
96     16     
16     32     
-176   80     
-176   -64    
-1024  -48    
16     16     
-96    -48    
-16    192    
-80    0      
0      80     
-32    -96    
-64    64     
-16    80     
-16    48     
16     -16    
-144   -48    
144    160    
-240   -192   
192    208    
-544   -80    
336    64     
-80    -80    
64     80     
128    -32    
-272   -48    
64     -32    
-16    176    
-112   -16    
80     64     
-96    144    
-64    -144   
16     80     
-128   -32    
-16    0      
-48    16     
-32    96     
-64    -112   
-80    -16    
128    64     
-96    80     
16     96     
48     48     
-16    64     
-64    80     
32     96     
-64    -128   
176    80     
48     48     
0      144    
0      48     
-144   -16    
-352   -96    
176    288    
-160   368    
16     96     
160    128    
-64    -64    
320    -32    
-144   144    
-112   96     
112    -16    
-32    96     
-80    0      
96     112    
-80    352    
96     32     
-112   -80    
-32    -96    
16     16     
-48    -112   
-48    48     
48     16     
64     192    
32     32     
-240   -64    
48     80     
16     128    
-192   -160   
32     -224   
-176   -144   
112    32     
-160   96     
-144   -48    
64     96     
16     112    
-128   80     
32     -224   
-32    48     
80     144    
-80    -208   
112    16     
0      0      
-80    -80    
128    160    
-48    -80    
112    32     
64     16     
-208   -336   
144    224    
64     144    
32     80     
80     -112   
-160   -48    
48     -32    
80     208    
64     48     
48     144    
-96    128    
240    304    
-320   -208   
128    -128   
32     64     
128    336    
-80    16     
128    -16    
0      416    
176    144    
-144   48     
16     48     
0      16     
32     176    
32     -16    
-48    -16    
48     160    
-336   -32    
48     -112   
-464   -288   
176    -208   
128    32     
144    224    
144    96     
-96    48     
80     176    
0      80     
112    160    
-272   -64    
144    32     
112    288    
-96    64     
128    -96    
16     160    
128    -16    
320    128    
-352   -48    
336    -64    
-32    224    
0      -48    
208    96     
-144   112    
128    0      
-80    32     
64     32     
112    32     
-48    128    
-128   160    
-16    96     
16     48     
-32    64     
240    0      
-80    112    
64     32     
112    64     
-96    96     
-64    192    
-80    -48    
-96    64     
128    32     
-720   -1680  
-432   1056   
400    1776   
-64    -2784  
224    -576   
288    112    
-912   256    
-240   48     
864    1008   
-176   -192   
96     -304   
-272   128    
112    352    
288    -176   
-304   48     
-80    -224   
-32    32     
-128   -144   
-160   -464   
-16    -256   
144    384    
-192   -160   
-64    464    
16     -416   
176    256    
-32    -128   
128    160    
-144   160    
160    96     
80     0      
64     32     
48     -96    
-16    16     
32     -416   
48     0      
-176   -272   
-16    80     
-64    128    
192    480    
-64    -112   
48     48     
64     96     
112    -16    
48     -288   
0      80     
176    96     
80     16     
-240   -144   
288    288    
128    128    
112    -1456  
-128   176    
48     -16    
-80    224    
256    0      
-32    176    
96     352    
64     448    
-32    -32    
240    528    
-352   -256   
-32    -256   
64     64     
336    320    
-80    224    
16     -480   
368    64     
16     -32    
32     432    
96     -112   
16     112    
0      -176   
208    96     
32     128    
-64    32     
48     32     
16     -496   
-80    -192   
48     -512   
-80    0      
48     -128   
112    192    
96     -272   
80     208    
48     64     
64     224    
-16    224    
-64    32     
48     -272   
192    432    
16     -32    
-176   -176   
384    -48    
0      -224   
-32    112    
192    -48    
-288   128    
192    -576   
-80    48     
64     288    
-32    48     
96     96     
-16    64     
80     -160   
-160   -416   
208    -128   
-64    176    
-304   -96    
176    -64    
0      16     
-64    -128   
80     16     
32     -112   
-16    32     
64     80     
16     320    
16     -16    
112    256    
-32    224    
-16    -256   
208    48     
-16    -32    
208    288    
144    -224   
0      80     
-112   -32    
128    96     
112    -16    
144    -1584  
-48    128    
-16    -1264  
128    240    
-224   160    
272    32     
-176   -48    
-64    -336   
32     -144   
448    -672   
-112   16     
144    144    
-64    48     
128    32     
-48    -16    
-48    -656   
128    48     
48     -528   
-32    48     
0      16     
128    -240   
-64    -48    
176    -528   
-96    -32    
80     -544   
64     48     
112    -432   
-80    -112   
144    256    
128    -16    
-48    80     
-32    64     
48     16     
48     -144   
-144   -64    
16     -112   
-912   -128   
-16    -112   
224    0      
144    -64    
-128   16     
64     -1104  
112    -112   
96     -112   
-224   176    
-144   -176   
272    112    
240    -160   
-32    0      
-256   -272   
64     96     
-608   -16    
64     32     
0      32     
32     -80    
-16    -192   
64     -544   
0      256    
0      -736   
-208   96     
96     -128   
48     -48    
128    -48    
32     0      
-16    160    
16     -208   
32     240    
-80    -96    
80     -48    
-112   -240   
256    -16    
-32    -544   
528    -400   
-320   -656   
272    -1072  
0      -560   
544    848    
-384   32     
176    -80    
-480   -288   
528    -48    
-240   -128   
48     -176   
-464   208    
304    -240   
-96    128    
144    -368   
64     272    
112    -1344  
-96    16     
96     -192   
-16    336    
192    0      
-176   32     
80     -96    
-224   32     
-64    -144   
16     224    
112    -32    
-96    0      
-208   16     
112    -128   
64     112    
-16    -384   
32     80     
208    -448   
96     0      
48     32     
112    32     
-256   -80    
144    0      
-96    48     
112    16     
-16    48     
16     -160   
-160   32     
0      -160   
176    144    
32     -176   
-48    96     
-48    32     
64     -80    
-112   -16    
48     -16    
-16    -48    
64     0      
-64    32     
80     -304   
-224   -48    
-48    -352   
-128   48     
-16    -192   
48     80     
-112   -112   
-144   128    
-64    16     
-496   -96    
-48    0      
16     -16    
-16    16     
16     64     
-80    -16    
64     -16    
-192   -96    
160    16     
-112   -80    
-544   0      
-176   224    
-400   -336   
-640   -48    
-256   -288   
-128   -32    
-224   96     
-336   -96    
16     32     
-320   -96    
0      0      
112    -128   
-112   32     
80     -32    
16     224    
-16    -64    
32     96     
-128   -176   
-128   80     
272    544    
-32    112    
16     208    
-432   -576   
-32    -192   
-256   16     
128    128    
-96    -80    
-112   -112   
-128   -144   
128    64     
80     -96    
-112   -16    
160    352    
128    384    
0      176    
-176   16     
32     -48    
16     16     
-16    16     
-192   48     
128    144    
-464   192    
-32    -144   
-176   -208   
16     0      
-144   -160   
-96    -80    
32     -128   
-96    -96    
64     -240   
-256   -240   
-80    48     
64     48     
0      112    
0      64     
-16    80     
-816   48     
96     16     
-48    0      
64     0      
64     48     
-112   144    
-96    96     
-192   -96    
-64    -48    
48     64     
-80    -128   
48     -16    
-160   -32    
-64    -96    
-80    272    
-208   -160   
112    96     
-192   -160   
144    112    
-80    -16    
80     224    
-176   -80    
128    48     
-64    -144   
320    240    
-288   192    
192    0      
-112   160    
-80    128    
-48    48     
-240   -32    
160    112    
-1152  -176   
192    352    
-256   48     
-144   -256   
304    144    
0      304    
16     -160   
-112   112    
224    -48    
-32    32     
-112   32     
-128   -48    
192    240    
-352   -16    
288    0      
-1136  -128   
128    0      
16     -16    
-32    128    
48     -48    
-32    128    
-240   272    
-48    -96    
-32    96     
160    48     
0      32     
-336   -32    
208    -64    
-208   96     
304    224    
-400   48     
-32    16     
16     80     
-1600  -1040  
1360   2416   
-608   880    
496    -688   
-496   -288   
368    -240   
-480   1456   
80     -464   
192    464    
240    -176   
-544   144    
32     -464   
48     432    
80     240    
496    400    
-576   112    
224    -48    
-16    704    
160    16     
112    432    
112    -608   
-32    192    
16     208    
-96    80     
128    -128   
80     496    
64     96     
-16    32     
-288   112    
160    -544   
160    320    
-256   208    
256    64     
-144   256    
128    -64    
-112   112    
80     320    
-48    304    
32     -256   
-80    176    
-64    -128   
80     112    
0      64     
144    192    
-64    128    
0      48     
-96    16     
160    96     
80     272    
80     -112   
112    128    
-128   112    
144    64     
-32    -240   
32     -32    
-80    96     
32     32     
-80    208    
16     48     
224    496    
-272   96     
128    -48    
80     -96    
-32    256    
-64    -48    
112    -64    
32     176    
32     112    
-112   -80    
80     176    
-48    -16    
112    32     
64     160    
-64    -96    
-64    96     
-80    -80    
80     -272   
-144   -304   
-192   0      
64     96     
16     112    
-368   96     
48     -48    
-48    -160   
48     80     
112    192    
-128   128    
32     128    
112    144    
-48    160    
64     16     
112    128    
0      48     
128    64     
80     128    
64     304    
-80    32     
144    64     
16     0      
192    -144   
160    224    
-64    -1168  
112    176    
128    256    
-160   -272   
32     -128   
112    192    
192    560    
-32    128    
-144   48     
-128   32     
160    16     
96     -64    
-80    32     
-48    -416   
48     -112   
-192   -720   
224    80     
96     64     
0      176    
224    176    
-80    64     
-32    -64    
64     32     
-160   16     
320    -64    
-112   16     
32     -48    
-144   -16    
-16    -352   
288    48     
-16    -240   
16     64     
272    -2384  
-368   112    
384    176    
-112   144    
112    -144   
160    80     
-176   64     
64     144    
64     -48    
80     112    
80     352    
112    80     
160    48     
-192   -32    
-144   32     
240    -896   
48     32     
80     -496   
-80    16     
32     64     
112    64     
80     -16    
-32    80     
80     128    
-48    224    
-48    -80    
80     -80    
-16    176    
112    -304   
112    112    
-64    -560   
80     -32    
-64    -368   
16     -32    
32     -32    
96     -80    
16     240    
-48    176    
-176   96     
0      80     
368    0      
96     -192   
-32    304    
-64    -336   
96     224    
-32    -112   
-96    160    
0      -272   
48     112    
192    0      
-80    176    
-192   -64    
224    160    
16     32     
160    -752   
0      112    
16     -208   
64     96     
-16    -32    
80     112    
-32    -160   
128    48     
64     0      
112    192    
-80    112    
640    608    
-480   -784   
736    -192   
-416   496    
112    -1328  
144    256    
368    576    
-624   64     
320    -80    
-672   -48    
752    -192   
-224   -64    
-48    -144   
-112   432    
272    -64    
-32    -1744  
-96    -16    
-288   32     
112    64     
64     -144   
-16    -560   
224    16     
-96    128    
304    -288   
-240   -16    
176    -224   
-208   64     
288    16     
-16    -112   
32     -32    
32     16     
-16    48     
-176   80     
32     -80    
64     64     
48     -160   
112    80     
-32    -1728  
32     -96    
112    80     
96     64     
32     160    
-16    48     
64     -304   
32     -16    
96     -32    
64     -32    
16     -96    
80     -16    
32     -128   
48     96     
64     -64    
32     -224   
80     -32    
16     -144   
176    -48    
-64    -176   
-64    144    
112    -304   
64     160    
16     -32    
112    32     
-128   -64    
80     -128   
-496   0      
-112   -16    
0      0      
-128   -224   
208    -160   
96     -368   
-96    80     
96     -32    
-48    48     
96     -128   
160    160    
-16    96     
0      -16    
-48    -16    
128    -192   
-48    -160   
32     96     
16     0      
176    320    
128    192    
-80    -608   
160    352    
-128   -32    
-16    -48    
80     16     
48     144    
-80    -80    
16     -80    
-64    112    
32     -80    
-64    16     
192    272    
-784   192    
80     -160   
-192   -272   
192    -224   
176    192    
48     -608   
-144   96     
-64    -240   
192    16     
-176   -128   
64     16     
-112   0      
112    32     
-256   -32    
32     -48    
-240   -144   
48     -64    
64     0      
96     -16    
-64    64     
208    -256   
-32    80     
80     -80    
-48    -160   
128    160    
128    128    
0      -48    
-176   -208   
-272   32     
-16    -432   
96     -128   
32     16     
112    240    
0      -384   
-16    112    
-64    -368   
256    32     
-256   32     
128    0      
-112   128    
224    -256   
-192   160    
80     -160   
16     -32    
-160   128    
144    96     
-112   32     
80     -16    
80     -400   
48     64     
32     -16    
-208   -64    
32     -80    
64     -32    
96     144    
48     16     
32     208    
-176   80     
80     -80    
112    320    
-128   -80    
128    -112   
-128   48     
144    -64    
48     32     
-496   -144   
-416   112    
-64    -96    
-384   0      
-176   16     
112    0      
112    -32    
-32    144    
-96    -160   
-16    64     
-128   112    
0      -208   
0      176    
-32    -80    
96     112    
-288   -144   
0      -112   
80     -32    
-192   32     
64     -48    
-352   96     
-112   64     
-1616  -208   
-368   -80    
64     -32    
-16    32     
64     -80    
32     96     
-128   -240   
-144   -32    
192    96     
-144   208    
192    160    
-208   192    
48     -16    
-80    0      
-1344  -1280  
112    -112   
256    -560   
544    -608   
-544   -1072  
224    -336   
80     800    
-160   -80    
-16    -96    
144    160    
160    240    
-256   16     
16     0      
0      208    
-192   -336   
0      320    
32     -80    
-64    48     
-976   -112   
208    96     
0      -96    
-64    64     
-64    -80    
112    -176   
-112   -32    
240    0      
-176   -48    
-208   32     
48     -32    
-128   -112   
-48    -80    
-128   128    
16     96     
-480   -64    
0      80     
0      16     
0      32     
-48    -16    
32     32     
80     48     
-128   48     
16     96     
16     48     
32     176    
-80    -64    
0      -64    
-32    160    
80     384    
-480   -144   
112    32     
-160   176    
80     -128   
16     112    
-96    112    
160    80     
-128   16     
16     240    
-48    0      
96     112    
-176   -112   
-112   160    
-48    -48    
128    64     
-128   112    
0      64     
-880   -160   
160    48     
-112   -80    
48     -16    
-96    144    
0      -16    
96     176    
-208   -32    
96     48     
-128   0      
96     224    
-112   -16    
176    144    
-144   -96    
112    -64    
-112   -48    
-304   160    
144    -176   
112    0      
-128   144    
-32    -224   
208    144    
-352   176    
128    -96    
48     16     
-16    144    
-64    -16    
16     32     
32     112    
-80    144    
-32    -112   
-80    128    
16     128    
80     0      
-32    16     
-192   -224   
128    32     
-80    144    
80     144    
-144   -64    
80     112    
-192   -48    
224    128    
-224   32     
96     0      
-16    96     
-48    96     
160    80     
0      -64    
-160   -64    
48     128    
144    64     
112    144    
-128   96     
-96    -96    
-128   -112   
-320   -32    
224    0      
48     64     
128    128    
240    272    
32     192    
-192   -128   
-16    176    
112    176    
192    96     
-64    -48    
-64    128    
-128   -16    
48     0      
144    160    
208    160    
-32    32     
-80    16     
80     0      
-144   112    
80     48     
64     128    
32     -16    
32     48     
-176   64     
-96    -144   
32     0      
48     48     
32     80     
96     0      
-128   0      
96     160    
64     48     
0      304    
-16    -32    
-16    336    
-80    -32    
80     -192   
16     -32    
80     80     
16     64     
-16    208    
-64    48     
-80    -32    
288    -112   
-240   -112   
48     144    
-32    288    
-320   48     
160    64     
16     0      
112    320    
-32    -176   
64     32     
176    272    
288    464    
-352   144    
-32    -16    
-32    64     
176    -144   
32     160    
128    64     
32     112    
-176   -512   
16     112    
-32    48     
32     80     
-32    64     
-64    288    
0      -80    
128    224    
-160   32     
160    -96    
-96    -160   
336    240    
-208   80     
0      -80    
1616   -3008  
-208   -928   
736    416    
240    -304   
256    -672   
112    96     
288    -48    
-96    -128   
80     368    
-144   -192   
64     544    
-16    -512   
64     208    
-32    -208   
176    -32    
0      144    
160    -416   
-16    224    
224    240    
-48    96     
80     -96    
320    -32    
176    48     
-16    192    
48     -128   
-80    400    
96     -32    
-32    16     
160    -16    
64     -64    
48     80     
-48    -192   
96     112    
0      -560   
112    48     
48     144    
-16    208    
0      64     
0      -16    
192    16     
-80    112    
96     48     
-48    -48    
48     16     
64     -208   
32     128    
144    48     
64     256    
-96    -1376  
64     -16    
-112   -128   
96     64     
32     -112   
112    192    
-16    80     
96     208    
-112   288    
192    80     
192    224    
0      16     
16     0      
0      -112   
96     144    
-32    -528   
64     112    
176    -272   
32     160    
112    96     
-80    64     
-64    32     
64     112    
32     64     
16     -32    
96     64     
-48    -96    
0      96     
16     -272   
224    256    
-176   -64    
96     128    
-48    176    
176    192    
-80    32     
112    48     
0      96     
64     80     
112    176    
0      16     
96     112    
-16    -624   
16     32     
32     -208   
64     80     
96     64     
-64    32     
32     -2960  
128    288    
-96    96     
80     96     
-64    32     
144    80     
112    160    
-16    32     
32     96     
80     -48    
-32    64     
160    -96    
80     112    
-16    -272   
64     64     
64     -16    
32     -1040  
80     80     
48     -240   
-16    208    
-592   -224   
96     -240   
112    192    
112    -288   
16     -144   
32     144    
80     0      
192    0      
-192   -64    
144    240    
112    -80    
-128   -768   
160    144    
-192   -128   
432    -832   
-432   0      
128    -112   
96     -32    
-48    32     
96     -80    
48     -576   
16     96     
-64    80     
144    -48    
32     -128   
64     128    
48     -256   
16     128    
112    -144   
96     -80    
-208   80     
-96    -224   
192    -160   
-48    -256   
160    0      
-64    -128   
-48    16     
48     32     
160    32     
16     -128   
-48    32     
128    112    
64     256    
-144   32     
112    -160   
32     -16    
192    -160   
32     64     
96     -224   
-96    32     
-48    -432   
272    224    
-80    -256   
288    320    
-288   320    
-96    -272   
144    -64    
240    112    
192    112    
-48    -176   
-304   -80    
224    -80    
-272   32     
-128   -96    
-224   -48    
-32    -80    
64     -32    
0      0      
-80    -48    
16     -544   
176    -64    
96     96     
-16    -32    
-240   16     
48     -48    
16     -80    
256    160    
-272   32     
16     208    
-512   0      
-64    -128   
48     -80    
128    -256   
1520   -624   
368    -176   
112    96     
-720   -272   
-256   -240   
608    -1008  
144    784    
352    832    
0      -16    
-528   -32    
208    -176   
-208   16     
64     -336   
80     -48    
0      -160   
96     160    
64     -128   
16     224    
-128   -48    
144    32     
16     176    
96     16     
-240   -32    
16     -96    
-256   -64    
144    -144   
-160   64     
128    16     
-16    80     
48     -304   
-16    -16    
64     -720   
144    144    
-48    -16    
-32    64     
96     128    
16     32     
-160   -96    
32     0      
-64    0      
96     48     
-208   64     
32     -32    
16     32     
112    -160   
48     128    
-16    -80    
288    144    
-368   112    
-144   -128   
-144   80     
64     -176   
-112   -96    
96     -32    
16     160    
80     64     
-48    -48    
-576   -176   
-32    96     
-32    -192   
16     64     
80     0      
-144   16     
0      -64    
-416   32     
-208   64     
-384   -32    
-176   -112   
208    -16    
-144   112    
0      -256   
-112   -48    
-336   -128   
96     112    
-160   -176   
112    224    
-128   48     
-16    48     
-160   80     
-288   -48    
96     -16    
-128   160    
-80    96     
-336   208    
-64    -160   
112    -32    
-48    336    
-192   -176   
272    64     
-160   -16    
144    224    
-80    16     
-208   -32    
96     144    
-160   -80    
128    128    
-240   32     
112    96     
-432   -96    
48     128    
-240   16     
80     48     
-48    -144   
192    240    
-128   -224   
-96    -224   
-272   48     
48     64     
48     32     
-64    -224   
-256   128    
-128   0      
144    112    
-304   -64    
-32    -128   
-176   -16    
64     176    
80     -64    
-96    160    
-48    -320   
-256   -144   
-80    112    
32     0      
112    -32    
-32    -144   
-256   -16    
336    144    
0      272    
-32    -80    
-16    96     
-512   -160   
160    208    
-144   -128   
256    48     
-336   64     
208    112    
-80    16     
64     -192   
-32    -48    
-240   48     
128    192    
192    16     
-192   64     
-128   -224   
-80    -128   
-112   16     
0      -112   
-1024  -48    
-48    224    
-80    -96    
192    32     
-128   -112   
-96    32     
64     80     
144    144    
-192   -16    
32     240    
112    0      
-320   -272   
64     48     
-128   224    
112    192    
-224   -256   
-48    -96    
80     208    
176    384    
-240   -208   
-224   -224   
96     -32    
160    288    
64     304    
-224   -192   
-80    16     
80     32     
-48    48     
48     -48    
0      -16    
-80    144    
-48    32     
32     64     
32     48     
112    112    
32     112    
-48    -32    
0      16     
96     192    
-112   32     
-16    80     
80     128    
-80    64     
-224   -384   
32     352    
-48    128    
-16    -176   
-16    176    
160    144    
-96    240    
-48    80     
16     -1648  
640    -576   
576    784    
160    480    
-80    240    
-304   64     
-288   -672   
192    -272   
128    -144   
-48    16     
16     304    
224    208    
-16    80     
-96    16     
-64    48     
272    176    
-144   -16    
176    160    
-192   80     
192    80     
-160   256    
144    48     
-272   112    
-208   -80    
-32    32     
-96    96     
128    -112   
-16    -160   
-144   -48    
64     32     
128    96     
-48    48     
48     176    
-160   0      
32     64     
-48    80     
32     -80    
-112   -192   
16     16     
112    16     
16     144    
0      80     
48     0      
32     0      
0      80     
48     16     
-64    -48    
16     -48    
-16    -112   
96     128    
-16    192    
32     144    
96     -128   
-64    -64    
-48    -16    
208    288    
-160   -208   
240    304    
-32    192    
-32    -16    
-16    320    
64     -176   
-16    16     
48     -16    
112    224    
-48    48     
96     96     
32     0      
64     64     
128    96     
0      128    
16     80     
-16    32     
32     -16    
-48    192    
-16    128    
-16    -112   
-112   112    
-32    -32    
112    -416   
-272   96     
160    -176   
112    112    
-80    -128   
80     192    
64     80     
0      -160   
-80    -80    
112    -16    
176    272    
48     224    
-64    160    
-64    16     
-16    -608   
144    96     
-32    32     
-144   -352   
16     -80    
144    -800   
16     192    
-16    32     
-128   0      
160    80     
112    160    
16     64     
-16    32     
80     -48    
-48    64     
144    32     
-96    144    
112    16     
96     176    
0      48     
112    -288   
-112   0      
128    -640   
-48    -80    
32     -16    
32     0      
16     144    
112    48     
-160   48     
112    368    
-16    -96    
144    32     
-336   -304   
368    -464   
-144   304    
336    160    
-64    48     
-64    -288   
48     160    
16     -544   
96     -48    
-48    -48    
320    576    
-144   384    
208    144    
32     368    
-16    -304   
80     0      
-112   -112   
224    32     
16     -96    
48     176    
0      -288   
208    400    
-64    -112   
80     128    
-80    -48    
96     96     
128    0      
-80    96     
0      0      
48     -64    
-32    96     
256    208    
160    192    
-160   -448   
48     80     
80     -544   
160    -176   
32     -112   
240    272    
-144   16     
-32    16     
64     80     
32     208    
224    336    
-160   -528   
208    176    
32     -816   
48     144    
-96    -240   
176    -272   
-96    -368   
432    80     
-160   -48    
64     192    
-48    144    
112    -48    
32     32     
32     -112   
64     320    
-112   -112   
320    -416   
-224   -288   
-144   176    
208    16     
96     96     
240    -96    
-16    288    
-96    -704   
224    192    
-64    -96    
160    -384   
-32    0      
-592   160    
-96    864    
-896   592    
416    -2336  
144    -576   
48     -320   
144    96     
-336   256    
160    256    
528    -1056  
-432   -32    
256    -480   
16     336    
-16    -96    
80     96     
-1728  -160   
64     -192   
32     -224   
112    -688   
64     80     
16     -160   
0      0      
-16    64     
112    -272   
32     -256   
112    16     
96     -160   
0      128    
16     -160   
128    -16    
-496   -64    
160    -128   
-16    16     
64     -192   
-16    48     
112    -48    
176    -400   
-48    -976   
80     -48    
128    -160   
-112   48     
-16    -32    
176    96     
-208   -144   
160    -64    
-144   -16    
64     0      
192    16     
-176   -256   
368    16     
-272   -304   
272    -64    
-48    -272   
160    -16    
96     -32    
-64    96     
32     -112   
48     -48    
-176   16     
112    -32    
-48    224    
0      -96    
-416   -192   
64     -256   
48     -80    
0      -112   
16     48     
48     -288   
80     64     
64     -1600  
80     96     
-48    -208   
96     176    
-128   -160   
224    64     
-240   -128   
32     -352   
-544   -272   
0      112    
-1392  80     
-112   -48    
304    -48    
-64    -96    
16     -144   
128    -592   
-128   224    
176    80     
-80    -96    
96     32     
-48    -192   
32     48     
64     16     
-192   -32    
112    16     
-64    48     
64     -272   
-48    -208   
128    -272   
-64    176    
48     -96    
80     32     
-64    112    
96     128    
-144   -144   
64     80     
-448   -112   
128    224    
-400   0      
128    -64    
-640   -224   
96     -192   
256    160    
-128   -208   
-32    288    
128    -592   
-224   -64    
112    -80    
80     -64    
-208   -48    
256    160    
16     -96    
-240   -112   
-64    96     
128    -32    
-32    16     
-32    -96    
192    96     
-112   -368   
0      48     
-48    -192   
80     -48    
80     16     
-32    16     
-16    -48    
-176   128    
64     -112   
112    -160   
-368   16     
224    64     
-16    32     
64     0      
-96    112    
-800   -208   
-16    0      
-368   -144   
-1120  48     
-16    64     
-976   288    
-96    16     
32     -64    
-112   -80    
80     -32    
-80    96     
0      0      
16     -32    
-144   -192   
192    -48    
-624   -240   
32     -16    
48     272    
48     64     
-32    496    
-208   0      
-192   -288   
-656   0      
112    -160   
-144   0      
96     256    
-192   80     
-112   -96    
-272   -32    
96     176    
-336   -64    
64     128    
0      16     
-320   -64    
-16    160    
-128   -64    
32     -48    
-256   -48    
48     48     
-384   80     
-16    -32    
-576   -112   
80     64     
-64    -64    
112    32     
112    -64    
0      160    
-96    48     
-64    80     
-32    -32    
48     16     
-32    -16    
368    -128   
-208   80     
-48    -144   
-272   0      
-80    -80    
176    2320   
-336   -816   
-304   -288   
-128   -720   
-384   240    
-80    768    
-128   0      
32     176    
-288   -128   
480    384    
-208   -80    
-192   -16    
-112   -208   
288    -16    
-16    -128   
160    160    
-192   32     
0      96     
80     32     
0      0      
160    288    
-144   -160   
-112   -80    
-80    48     
496    480    
-288   144    
112    16     
48     160    
-48    96     
48     64     
80     -32    
0      -128   
16     48     
288    -64    
0      320    
-80    -32    
-272   -160   
-64    160    
80     512    
-80    -80    
-224   128    
-48    16     
-112   -192   
208    160    
-576   -128   
32     -16    
-1328  -32    
0      288    
-48    -32    
-208   -176   
-16    16     
-16    128    
96     64     
96     128    
-256   -48    
176    144    
80     640    
-288   -560   
-240   -144   
192    144    
-128   320    
-224   -112   
-16    352    
-64    160    
-176   -64    
64     240    
-48    48     
80     32     
-16    -32    
80     112    
-64    32     
0      48     
-96    0      
96     0      
0      -48    
0      -80    
-16    176    
208    -16    
16     16     
80     112    
96     -48    
-48    32     
-16    128    
32     96     
48     160    
-192   -16    
48     80     
32     240    
240    320    
-176   64     
-16    -64    
48     16     
96     48     
112    288    
-144   -32    
48     64     
-144   -144   
304    208    
-160   128    
96     32     
-96    64     
80     -16    
64     80     
-32    16     
-64    -16    
64     -160   
80     0      
48     16     
112    240    
-48    496    
32     -32    
-32    -112   
-64    112    
208    64     
16     112    
-112   208    
80     32     
-48    32     
-32    96     
0      64     
-32    160    
48     96     
80     144    
-48    0      
128    112    
-144   256    
416    640    
-112   272    
96     -256   
-208   64     
112    128    
-32    96     
-112   224    
80     16     
176    288    
-112   64     
80     64     
-64    16     
-16    352    
128    96     
-64    112    
160    160    
-112   96     
32     48     
-32    80     
0      -176   
-64    -80    
128    304    
144    384    
0      80     
-16    -16    
96     32     
-32    192    
32     32     
16     -272   
304    272    
-272   592    
464    128    
-400   160    
256    -32    
0      80     
-32    -32    
0      48     
-96    -528   
16     128    
-80    -16    
80     -80    
32     128    
80     -32    
-160   -96    
16     80     
-16    144    
0      288    
144    272    
-48    -96    
112    -256   
64     64     
-160   -128   
160    -464   
80     208    
80     -512   
-80    192    
-16    80     
112    0      
48     0      
112    144    
-128   -64    
160    48     
-128   16     
32     160    
-112   96     
48     -16    
96     0      
304    96     
-144   240    
-16    16     
0      192    
48     -64    
-80    -96    
368    -416   
-176   240    
208    32     
-544   624    
-112   -352   
32     -112   
-16    16     
-224   64     
-16    -112   
-160   32     
96     80     
112    -624   
32     128    
96     -496   
80     160    
-48    -16    
16     240    
-32    -192   
16     96     
48     -176   
-16    272    
144    32     
-160   64     
128    -176   
32     -128   
64     112    
160    -496   
-112   64     
128    -512   
-16    0      
16     -272   
80     112    
-96    96     
208    96     
-96    48     
-80    -32    
-16    160    
32     -64    
256    128    
-128   -64    
96     48     
-16    -64    
64     48     
-32    -160   
48     160    
-48    -1424  
128    16     
-32    272    
48     -32    
128    96     
-80    64     
96     112    
48     -176   
16     112    
96     -336   
96     96     
-16    -96    
64     208    
-32    -816   
96     96     
0      -208   
32     64     
96     -16    
0      224    
-80    48     
176    112    
32     128    
16     -224   
160    208    
-80    64     
80     80     
16     -304   
160    240    
-48    -48    
160    48     
128    256    
-304   144    
176    -224   
64     32     
-96    -160   
80     -128   
-80    -192   
272    -64    
-192   16     
128    16     
16     192    
80     128    
-32    176    
224    -64    
-80    32     
80     -96    
16     -528   
-64    -112   
80     -720   
0      192    
-1056  80     
16     -144   
16     -384   
80     -544   
-96    -256   
192    -176   
-144   -160   
64     -112   
-32    -192   
112    160    
0      -192   
0      -32    
-96    0      
80     -48    
144    -48    
-1504  48     
0      -144   
64     -112   
64     -272   
32     -160   
-16    -192   
48     -192   
-16    16     
288    128    
-160   -752   
96     64     
-32    -16    
80     -32    
64     16     
16     112    
-304   176    
192    -224   
-272   -192   
-128   -208   
192    112    
64     -384   
32     -32    
0      -2976  
-64    -128   
224    128    
-240   -64    
336    -16    
-176   224    
32     -208   
-48    -96    
-448   -96    
80     112    
-672   -80    
64     -48    
240    304    
-208   -512   
80     -512   
64     -592   
80     0      
48     32     
-48    80     
64     -144   
32     160    
16     304    
-112   16     
32     32     
-96    -128   
-1264  -384   
16     -32    
176    144    
-112   -96    
48     176    
64     -144   
80     64     
224    -1152  
-304   64     
-176   -352   
32     48     
0      -48    
64     -80    
-176   -80    
64     -208   
304    64     
-48    -32    
-672   48     
-144   -160   
48     0      
400    -416   
176    176    
16     -336   
-176   112    
-16    0      
192    16     
-16    -16    
64     -160   
-96    0      
96     -96    
-448   -16    
-80    32     
-400   -16    
80     -16    
-304   -144   
448    -416   
-240   64     
192    -624   
-112   160    
144    16     
1504   -768   
768    432    
320    -128   
-688   -48    
240    112    
-304   -1088  
1040   224    
-464   368    
-64    272    
-208   0      
176    -256   
192    272    
272    32     
-464   112    
-176   160    
-96    -160   
128    -240   
-208   -80    
-80    -208   
160    160    
-384   -608   
48     112    
-144   -288   
240    272    
-176   -208   
432    80     
16     -400   
-112   -560   
-704   -240   
224    96     
-192   48     
80     -208   
48     448    
-128   -192   
128    224    
-272   -80    
144    -80    
16     -112   
16     -160   
240    -64    
-720   -16    
-32    32     
-224   -384   
-96    -64    
-16    112    
32     -16    
-32    -112   
-320   -112   
-224   -80    
288    -16    
-80    48     
48     80     
-80    -112   
80     160    
144    128    
-288   -320   
-112   144    
144    640    
-528   -608   
208    528    
-544   -192   
-32    160    
-784   -192   
192    208    
-944   -112   
112    176    
144    -32    
32     96     
-256   -176   
64     224    
-48    -64    
32     128    
-80    -32    
-48    0      
-48    -32    
-144   64     
96     432    
-48    160    
96     112    
-240   448    
-464   -144   
-192   -112   
-144   192    
-176   -320   
80     112    
32     336    
-80    -16    
16     192    
-176   -208   
32     -32    
-64    64     
-80    -48    
80     80     
112    96     
-96    208    
-80    48     
-208   192    
32     320    
128    32     
-80    256    
-32    -48    
-32    -32    
-112   64     
-48    -112   
48     32     
-80    -32    
48     0      
-160   -112   
112    240    
-304   112    
96     176    
-512   -176   
48     32     
48     -16    
144    96     
-64    32     
-32    -112   
96     112    
-112   80     
192    -224   
-288   -48    
48     80     
-16    96     
-160   -16    
-112   -128   
0      208    
64     16     
-64    16     
-896   48     
-64    -16    
48     64     
-144   -48    
-64    128    
144    48     
208    144    
-128   16     
16     48     
-256   0      
128    64     
-80    0      
128    96     
-176   -48    
192    192    
-400   32     
64     16     
0      96     
192    352    
-160   128    
96     16     
-112   64     
-80    96     
96     64     
-16    32     
-48    112    
-48    32     
32     32     
-128   0      
-32    -64    
-64    -176   
16     128    
64     272    
-176   80     
32     0      
-144   -16    
176    128    
-176   16     
16     32     
16     -16    
-176   48     
-128   -144   
32     144    
80     -160   
-96    304    
-128   80     
80     -32    
32     48     
144    16     
-16    208    
-160   96     
96     0      
32     80     
-128   0      
-32    16     
0      64     
48     128    
32     112    
-176   160    
-32    32     
96     48     
-48    32     
128    144    
-80    48     
64     0      
-48    48     
80     160    
32     160    
-80    80     
-16    80     
1040   -192   
864    1232   
32     224    
-688   -320   
-192   144    
448    448    
-752   -160   
512    -80    
-304   400    
256    -288   
-256   448    
224    -656   
-272   608    
288    -400   
-128   640    
272    -464   
-288   304    
160    -112   
-32    144    
-16    -32    
48     96     
48     112    
112    128    
128    16     
-128   -160   
-16    -112   
32     288    
240    240    
96     -32    
-272   -80    
112    48     
-64    128    
96     32     
-64    176    
80     -64    
160    320    
0      -64    
-32    48     
-80    48     
208    240    
16     -32    
32     112    
-96    -80    
128    96     
-80    96     
64     144    
48     96     
-16    -112   
-64    48     
48     64     
112    144    
-96    48     
48     112    
-32    0      
0      16     
112    32     
0      128    
-80    -48    
112    176    
-112   96     
112    96     
-16    32     
-48    -384   
128    192    
-176   -160   
128    16     
96     96     
48     16     
32     224    
-96    192    
48     -48    
80     80     
16     64     
0      208    
-16    128    
128    144    
-128   64     
160    -80    
64     176    
-96    -816   
80     16     
80     112    
16     208    
-16    112    
128    48     
0      -48    
272    368    
-240   -128   
208    -128   
-160   96     
64     128    
32     -32    
-16    -176   
48     -48    
-80    -464   
144    48     
0      64     
16     144    
0      32     
-32    80     
128    -336   
-48    -112   
-176   -336   
128    80     
-16    112    
-16    256    
176    240    
48     -64    
-64    128    
32     -256   
48     80     
64     -544   
32     144    
0      32     
96     128    
80     96     
-160   16     
48     48     
96     80     
-96    -192   
112    -16    
48     96     
112    -32    
48     192    
16     112    
16     48     
48     -688   
-48    64     
176    -144   
224    96     
-272   -64    
80     -224   
80     176    
-32    160    
96     272    
192    112    
-224   -320   
64     -272   
-32    208    
64     -224   
48     80     
96     -336   
48     -80    
-112   -656   
64     208    
80     192    
-128   -32    
-32    -48    
48     -32    
160    160    
16     -240   
16     112    
144    -48    
0      64     
176    -160   
0      48     
48     0      
272    48     
-112   480    
0      96     
-16    0      
80     -32    
-32    160    
-48    -256   
96     80     
-144   -64    
112    240    
-112   -80    
128    224    
-176   -48    
256    16     
-176   -32    
176    80     
64     16     
-80    112    
80     -96    
64     -1152  
32     240    
0      -32    
-128   -1152  
160    -144   
112    -1008  
64     -192   
-192   16     
256    -16    
-16    -64    
288    -48    
-128   80     
480    -288   
-48    -640   
-144   -80    
240    -480   
-144   -224   
-208   144    
0      -16    
96     -32    
80     -160   
96     -80    
624    976    
-560   608    
-320   -864   
-256   368    
-240   -1296  
640    496    
-48    -1376  
560    464    
-560   -80    
16     -64    
-32    -288   
-448   304    
272    -400   
32     64     
16     -336   
240    -192   
-160   -368   
272    512    
-304   -144   
288    -112   
-240   128    
352    -176   
-80    -128   
-80    -64    
-48    80     
-704   -496   
-144   -288   
112    -144   
-112   288    
-32    -144   
64     -352   
-32    -160   
32     -960   
-96    160    
0      -128   
32     -80    
0      64     
0      -544   
-64    96     
304    112    
-400   -224   
96     16     
-912   -128   
48     32     
-16    -144   
192    -80    
0      -320   
-16    -400   
16     48     
-112   -144   
80     80     
80     64     
192    0      
-176   144    
32     -160   
-32    176    
-80    -80    
-208   128    
64     -64    
192    192    
-32    -192   
-32    -48    
16     -144   
80     80     
-16    -1328  
128    112    
-64    -80    
128    -144   
-224   -64    
192    -224   
16     0      
0      80     
-592   -80    
16     -128   
-224   16     
64     48     
0      96     
-16    -208   
64     16     
256    -400   
-112   208    
96     -48    
128    416    
-272   -240   
112    -80    
-224   80     
-16    80     
-96    352    
-16    -32    
32     128    
96     -96    
-64    16     
208    -144   
144    144    
128    -112   
-48    240    
-656   -352   
-16    -304   
-272   -80    
64     -160   
80     176    
-144   128    
96     112    
32     -16    
0      160    
48     96     
80     -32    
-112   -144   
-48    -176   
176    0      
64     -48    
-96    64     
-80    -208   
-112   48     
112    16     
-96    32     
112    16     
-272   -256   
176    -144   
96     192    
-96    64     
48     112    
-256   -208   
64     144    
-1088  -496   
-960   32     
-16    64     
-560   -48    
-112   16     
-128   16     
-32    16     
160    -96    
-336   -144   
224    0      
-128   -240   
-272   -208   
-288   96     
-256   -48    
368    16     
-336   48     
-416   -48    
96     32     
-464   0      
-64    48     
-416   -48    
-144   48     
-64    -64    
128    176    
-32    -16    
-208   -48    
64     -32    
16     64     
48     -160   
96     112    
-16    -80    
-112   112    
-96    48     
256    -112   
-112   96     
-192   48     
-32    48     
-656   80     
-32    272    
-208   64     
320    176    
-208   -224   
128    112    
-80    -144   
16     160    
-240   224    
-224   -160   
32     0      
48     -48    
176    16     
-240   0      
-48    240    
208    -144   
-112   208    
-272   -128   
176    16     
16     80     
48     80     
0      176    
-128   0      
-80    80     
-128   0      
48     -96    
96     -32    
-48    144    
-144   96     
96     80     
-128   -112   
112    160    
-1168  -208   
144    128    
-96    128    
96     96     
16     32     
1344   -848   
-208   752    
528    256    
-656   384    
-240   -384   
608    1216   
-944   -560   
496    336    
-464   -496   
224    -32    
-368   -64    
256    -32    
-144   304    
256    -512   
-48    416    
32     -272   
-192   464    
112    -80    
32     224    
16     -208   
-96    256    
32     -208   
-112   272    
0      -224   
-32    256    
-256   -48    
48     224    
-512   -32    
16     -32    
-128   -48    
16     16     
16     112    
64     16     
-96    96     
16     -16    
128    320    
-176   0      
32     -16    
-96    32     
160    128    
-64    -48    
-64    144    
-432   -144   
-80    96     
0      112    
160    32     
-128   80     
-16    -176   
-144   80     
-112   -64    
224    128    
-192   16     
128    192    
-240   -80    
48     16     
-32    48     
48     208    
144    -32    
-32    80     
-32    144    
16     96     
0      32     
16     0      
80     80     
-112   128    
-80    -16    
96     64     
112    32     
-80    -16    
0      112    
-96    -112   
256    48     
-32    192    
-64    112    
80     80     
-16    32     
272    112    
-64    272    
-16    96     
224    336    
-128   176    
112    48     
16     -96    
-64    -64    
192    128    
-64    -96    
-128   -112   
160    -16    
-208   -208   
64     208    
16     16     
48     96     
-16    160    
-32    -48    
-32    16     
0      48     
-112   80     
160    240    
-96    -32    
-32    -48    
-16    32     
16     240    
16     144    
-64    96     
96     80     
64     272    
80     464    
-48    144    
-80    -208   
-32    -96    
128    176    
80     128    
-16    16     
-144   -48    
32     112    
128    -112   
-80    -64    
96     208    
128    320    
48     -16    
0      96     
128    192    
-16    32     
-112   -48    
16     224    
-32    -16    
240    112    
-144   -16    
0      112    
-48    -16    
48     0      
-32    32     
32     144    
144    272    
16     80     
-112   0      
176    144    
-112   80     
160    128    
-128   -32    
112    80     
32     16     
96     32     
-144   64     
32     -272   
32     64     
112    544    
-80    208    
-48    112    
16     -192   
160    64     
32     96     
-32    32     
-48    -48    
64     176    
0      224    
-48    0      
-16    48     
112    368    
-144   -112   
-96    -112   
0      -208   
272    256    
-96    128    
32     32     
16     208    
48     -32    
32     -112   
32     272    
16     -80    
128    64     
-48    80     
96     0      
80     64     
-48    -64    
96     -96    
112    -560   
-128   176    
160    -32    
-16    176    
96     -80    
0      176    
48     -16    
32     144    
240    -144   
-96    160    
48     -112   
32     240    
80     -16    
64     -272   
80     112    
160    -288   
64     16     
0      336    
-16    -192   
176    304    
112    80     
112    64     
-1040  -1056  
128    -688   
448    416    
32     608    
-624   -48    
464    416    
-304   -384   
576    720    
-208   -48    
128    -16    
192    -1104  
112    48     
-176   -80    
-144   -176   
432    624    
-176   -96    
-224   -80    
-288   -80    
176    192    
-16    -496   
-128   112    
528    144    
192    -80    
-16    32     
-112   16     
272    32     
-256   96     
224    -688   
0      288    
112    -32    
16     48     
-80    16     
128    96     
32     48     
80     16     
-32    176    
144    -400   
16     0      
-48    -96    
224    144    
-96    -16    
128    64     
-48    -544   
144    96     
-16    80     
128    112    
-16    -16    
48     16     
48     112    
-32    48     
112    -16    
32     -368   
32     96     
64     -80    
80     96     
128    16     
-160   128    
112    -400   
176    176    
-128   176    
144    64     
0      64     
64     -176   
16     -240   
-96    -64    
176    -16    
160    144    
-160   112    
96     -208   
80     96     
16     -400   
80     224    
-128   -208   
192    -624   
-32    96     
112    -592   
272    -80    
128    -112   
64     -1024  
64     96     
-64    -160   
160    -80    
0      -144   
64     -80    
-112   240    
112    32     
-80    -320   
160    -176   
-16    -272   
176    80     
-32    -720   
48     -208   
32     32     
112    -352   
32     -288   
-80    0      
-224   -80    
240    -720   
-48    -144   
192    192    
-32    32     
48     -112   
16     64     
-16    -128   
16     -32    
144    112    
-96    112    
128    -48    
-80    -192   
48     -128   
336    -128   
-176   -48    
144    -400   
-128   -48    
288    256    
-192   112    
224    -192   
-256   16     
80     -112   
96     240    
32     0      
96     96     
-272   64     
176    64     
-1280  -48    
-240   64     
32     -112   
224    -48    
-16    -112   
-160   -1536  
-16    32     
96     -368   
-128   32     
-112   -48    
288    32     
48     -80    
176    -112   
-224   16     
-96    128    
-432   -48    
176    80     
-176   -16    
192    -224   
-400   16     
48     -272   
160    208    
160    288    
32     80     
-208   112    
-32    -128   
64     -192   
0      -144   
-160   -128   
-16    16     
-16    -16    
112    -144   
-176   -128   
144    -176   
-112   -48    
-16    -224   
-16    96     
80     -992   
64     208    
-160   -128   
0      16     
-16    -112   
176    320    
-112   -256   
-64    48     
-880   -112   
48     -128   
-944   80     
-80    -96    
240    208    
-112   -48    
16     48     
128    -416   
80     112    
-48    48     
16     16     
-192   48     
128    32     
-320   80     
32     -128   
-16    64     
-208   -192   
-16    0      
304    -160   
-16    144    
-16    -192   
-16    64     
32     -208   
80     0      
-64    0      
128    -176   
176    -16    
32     32     
-208   48     
-560   1200   
-96    -1360  
80     160    
-208   512    
-928   -800   
-32    544    
-192   -560   
320    144    
-240   144    
128    -160   
-176   32     
-96    -16    
176    128    
-128   96     
112    -144   
64     -16    
-160   160    
112    16     
-416   -112   
368    -256   
-112   -32    
-1024  -64    
-96    208    
80     -96    
-816   -80    
80     -48    
-224   32     
96     16     
32     -48    
64     32     
-48    -16    
-16    64     
80     -80    
-128   -48    
-128   -112   
80     192    
32     48     
-32    96     
-112   0      
-80    -64    
16     32     
-128   -144   
-128   -96    
0      -32    
64     32     
304    96     
-208   48     
-48    -96    
96     48     
-16    -32    
16     32     
-112   -336   
-160   0      
-112   -32    
32     -32    
48     0      
96     144    
-112   96     
-48    64     
-176   -80    
-640   16     
-80    -80    
32     -64    
-16    176    
-48    -32    
-48    64     
-112   -144   
16     32     
16     -208   
96     -48    
112    80     
-16    288    
-288   16     
-64    -160   
-80    48     
-224   64     
320    336    
-1024  -16    
144    32     
-64    -32    
-64    32     
176    16     
-112   -48    
224    224    
-176   208    
-112   48     
-160   32     
-96    -160   
64     288    
-96    -48    
-64    -32    
-80    160    
-1328  -272   
112    144    
-64    -32    
64     96     
0      16     
-16    32     
64     96     
-80    112    
-48    0      
-32    32     
16     48     
128    160    
-64    64     
-64    48     
0      192    
-96    -112   
160    192    
-32    16     
0      16     
0      96     
-160   0      
112    112    
-112   32     
64     144    
0      0      
48     128    
-48    112    
0      96     
-240   -80    
64     128    
-176   -144   
224    128    
-1344  -240   
-112   160    
-96    288    
16     -224   
-160   -128   
48     32     
160    208    
-144   -48    
-32    -32    
-240   -96    
80     256    
-160   112    
-64    32     
32     -32    
-96    144    
80     -144   
-128   48     
48     32     
80     160    
-64    16     
64     112    
-64    32     
224    -528   
-16    256    
-320   256    
192    -128   
-192   160    
224    224    
-192   -144   
96     192    
-208   -16    
336    32     
-160   80     
-96    -128   
240    224    
-256   128    
32     -80    
-96    -16    
272    112    
-48    80     
-16    32     
-208   -176   
32     80     
-208   -144   
272    320    
-224   128    
128    -64    
-160   -16    
144    240    
-224   64     
160    48     
-256   48     
160    288    
-208   48     
32     64     
-32    48     
-32    -48    
96     80     
-112   96     
-32    160    
-128   176    
32     144    
96     96     
32     96     
-96    256    
-112   32     
0      -80    
0      48     
0      32     
-272   -112   
128    432    
-192   160    
160    112    
-160   64     
1840   -1600  
-224   -624   
-448   0      
-144   464    
224    1456   
-1040  -544   
144    688    
-112   160    
256    -80    
-384   -176   
16     192    
160    320    
-32    128    
-32    16     
48     -16    
-176   -288   
208    -48    
-48    128    
0      112    
48     -48    
96     528    
0      96     
-96    144    
-128   80     
16     -48    
-16    272    
80     -80    
-208   -144   
0      -976   
160    80     
-128   96     
208    240    
-16    80     
-64    64     
-64    16     
-80    -352   
192    -48    
-64    208    
192    144    
0      96     
-16    48     
-64    224    
96     -32    
-32    -448   
32     96     
112    32     
32     96     
-144   -144   
192    96     
-64    80     
112    144    
0      112    
0      64     
112    96     
-80    128    
32     -128   
-48    64     
144    80     
-16    -160   
80     96     
-16    192    
144    128    
-16    96     
80     32     
32     176    
32     208    
80     0      
208    240    
-80    -144   
160    208    
-240   -64    
112    64     
64     32     
64     -304   
-32    112    
64     -1056  
128    272    
-16    -32    
192    96     
-32    128    
48     48     
-64    336    
-112   -112   
272    -48    
-64    208    
16     96     
-16    80     
0      144    
-96    -112   
240    -16    
-128   32     
48     -96    
80     -560   
-96    144    
192    -96    
-144   -64    
-64    -144   
176    80     
96     240    
64     128    
-112   0      
48     -144   
176    128    
240    176    
-48    272    
-16    0      
-96    64     
128    -1776  
96     80     
-32    -544   
32     0      
-48    -32    
48     80     
144    32     
-112   48     
-112   -16    
0      -128   
576    432    
48     -16    
-176   0      
-64    -192   
320    176    
416    -160   
-240   128    
64     144    
0      96     
-96    -160   
-32    -32    
112    144    
32     128    
256    48     
-208   -96    
-64    112    
-176   -1104  
64     -48    
192    -544   
-160   96     
240    48     
80     208    
-48    16     
224    160    
-144   0      
112    112    
-352   128    
256    -32    
-96    160    
-48    -336   
32     112    
96     -288   
128    96     
16     -80    
0      64     
48     -32    
176    144    
-80    -1184  
160    0      
-64    80     
32     -560   
96     144    
-80    16     
144    -1504  
-32    -192   
80     0      
128    -80    
80     48     
144    -16    
0      -80    
-112   272    
288    240    
16     0      
160    -480   
0      -32    
144    -160   
-80    -1136  
-272   32     
208    -832   
144    -80    
128    -256   
-96    -144   
-16    -1264  
32     -224   
32     368    
160    -96    
144    -160   
144    336    
-64    -32    
16     256    
-48    -144   
32     -528   
-832   -112   
32     -240   
96     -80    
-32    -80    
-64    -304   
48     -2016  
208    -352   
96     128    
16     160    
-336   3232   
-1216  -560   
-304   -448   
736    928    
-64    112    
16     640    
-976   768    
288    272    
160    16     
-112   -176   
320    -144   
-352   240    
384    -192   
-64    -32    
192    -112   
-128   -224   
64     112    
96     -160   
32     0      
144    64     
-80    48     
-80    144    
32     -16    
-448   16     
-32    -192   
112    -176   
0      -384   
272    -112   
-48    32     
256    -128   
-80    -128   
-80    -64    
240    -16    
-16    -16    
0      -64    
128    64     
-288   -48    
48     -288   
-512   -48    
80     -64    
256    -272   
-64    -144   
176    -112   
224    -384   
48     64     
0      -128   
-16    112    
240    288    
-144   96     
-32    -80    
32     -32    
-96    128    
-16    48     
0      176    
48     -64    
-288   -64    
-176   -320   
224    -144   
240    -144   
-32    32     
192    -160   
-48    32     
0      64     
160    32     
-32    -32    
192    16     
-288   128    
0      -80    
-64    -128   
96     -80    
-112   16     
128    32     
16     112    
0      -144   
80     80     
176    -480   
-16    48     
80     160    
-240   -128   
-336   -32    
-32    -256   
-176   -32    
32     16     
64     160    
-16    272    
-128   -80    
128    -416   
-80    -128   
64     -736   
-32    -144   
128    -224   
-32    0      
-96    -48    
112    64     
-48    64     
128    16     
-240   -32    
-32    -64    
-160   -80    
96     -64    
-368   80     
192    96     
16     224    
-160   -144   
-80    96     
192    -64    
-384   -96    
192    208    
-1328  -128   
160    96     
-144   -112   
128    32     
-48    80     
96     96     
64     48     
-288   16     
-224   -288   
144    128    
-16    0      
96     64     
-64    -16    
-192   256    
128    48     
-400   -16    
-192   32     
-144   160    
48     32     
0      16     
-176   -160   
128    -96    
-128   64     
-64    -208   
128    96     
-128   -128   
32     96     
-96    -16    
112    -80    
16     416    
-160   240    
0      -80    
-16    80     
32     16     
-848   112    
-336   -208   
176    64     
0      112    
448    464    
-464   464    
32     -112   
-80    0      
80     -80    
0      96     
-80    96     
32     32     
-48    144    
-272   -160   
48     256    
-496   32     
400    -464   
-288   -192   
176    144    
-16    80     
-272   64     
80     -144   
-80    16     
-80    224    
0      0      
-80    80     
-96    384    
-96    112    
-192   64     
-16    -80    
16     -128   
496    32     
-1664  32     
-96    -112   
-80    -352   
240    160    
0      32     
-96    144    
-80    32     
80     64     
32     16     
-96    128    
0      16     
-80    -16    
80     176    
-80    128    
64     -288   
-144   -80    
0      -16    
144    -96    
-16    224    
-64    96     
64     192    
-192   0      
-48    -48    
32     80     
-656   -1040  
-112   -640   
-192   -400   
272    512    
336    208    
-432   -368   
-144   -176   
-240   240    
64     -304   
400    160    
-288   -176   
240    288    
-16    80     
-112   160    
-32    96     
16     32     
-16    80     
-144   -48    
-32    -32    
-256   -112   
0      112    
16     112    
-16    240    
48     -112   
-112   -144   
48     80     
128    128    
-64    80     
16     32     
-48    48     
224    112    
-160   112    
-16    -16    
-128   96     
48     16     
32     32     
80     144    
-128   208    
192    -48    
-256   0      
128    112    
-32    0      
-16    80     
80     48     
64     176    
-64    48     
-64    64     
16     144    
-48    64     
96     -48    
-32    144    
-96    -48    
-112   128    
-48    32     
208    -64    
-128   144    
144    144    
-112   96     
-96    -48    
48     16     
-48    48     
-64    112    
16     64     
64     112    
-160   -64    
96     96     
-272   -112   
48     128    
48     224    
0      0      
128    32     
-80    96     
32     144    
48     16     
16     96     
128    -144   
48     -64    
-112   176    
-96    208    
-16    -80    
160    0      
-96    208    
-64    144    
176    -96    
-64    112    
16     368    
-192   -160   
256    -80    
-32    0      
112    144    
0      64     
48     192    
-112   -32    
64     160    
-32    16     
80     -16    
272    288    
-240   80     
144    80     
-48    -16    
-112   -16    
240    128    
-48    192    
64     176    
-48    32     
112    -16    
-144   64     
128    112    
-64    -16    
-96    -32    
48     96     
240    80     
-80    112    
176    272    
-64    80     
80     0      
-64    -32    
32     80     
160    144    
-48    80     
160    112    
0      240    
160    -112   
-256   -32    
-208   -176   
272    -640   
-128   -48    
0      80     
0      -64    
112    128    
224    32     
-96    96     
128    -96    
0      32     
384    208    
256    240    
-32    64     
0      -288   
-304   32     
208    80     
176    -112   
-32    32     
-112   16     
-48    -48    
0      80     
48     128    
-32    -32    
192    -240   
-144   16     
32     144    
-16    -160   
-32    80     
48     -16    
-16    160    
16     64     
128    -144   
0      -176   
-80    -2944  
160    -176   
48     208    
48     288    
32     32     
96     192    
48     144    
-32    64     
16     -48    
176    128    
-160   96     
80     160    
-16    208    
96     32     
-16    128    
32     -384   
-32    96     
16     -512   
32     160    
-16    48     
-16    -16    
-16    -400   
128    112    
-48    64     
144    352    
-352   -144   
-64    -144   
256    0      
-80    -96    
-112   32     
144    -112   
64     -32    
128    -1264  
-80    80     
48     -128   
16     80     
32     96     
64     128    
-80    -128   
176    128    
-48    32     
-32    -64    
128    288    
336    1056   
416    -208   
192    272    
48     -64    
-80    -384   
-320   -32    
256    -304   
160    80     
-192   96     
144    160    
176    48     
48     192    
-128   -32    
16     -80    
176    128    
-96    -592   
240    144    
-48    -48    
128    -16    
-80    -464   
176    240    
32     -32    
192    48     
-128   96     
192    128    
256    464    
-208   -96    
304    64     
-160   -48    
96     48     
176    -208   
-16    96     
240    -176   
-96    240    
256    -48    
32     144    
48     80     
128    192    
-96    -144   
-48    -32    
16     -48    
96     0      
-48    208    
64     -176   
32     -96    
48     -224   
112    224    
-64    -16    
-64    176    
208    -160   
32     32     
-16    -32    
176    -2096  
-16    32     
192    -336   
-96    -1248  
208    64     
560    -160   
-384   -432   
320    -2512  
-272   -224   
176    128    
0      176    
128    16     
96     -192   
48     -656   
-32    80     
80     -112   
48     0      
48     -240   
64     -368   
272    -112   
16     -224   
80     16     
64     -624   
368    608    
-80    -240   
288    -224   
0      256    
256    -592   
-176   -720   
160    -96    
48     192    
-16    112    
-32    -80    
240    304    
-1232  288    
16     -32    
0      -208   
160    -64    
64     32     
-32    -96    
-32    -32    
64     80     
48     48     
16     -160   
96     160    
16     -336   
48     48     
-128   -96    
-64    -112   
64     64     
64     0      
208    32     
-16    0      
32     -64    
64     -112   
32     -32    
80     -176   
48     64     
80     -48    
0      48     
-48    -112   
112    -96    
16     0      
64     -80    
-192   288    
-32    -608   
-80    -288   
-192   -384   
256    -176   
96     -176   
64     96     
48     -16    
-80    -160   
80     -80    
-112   -128   
272    352    
-96    80     
80     96     
-112   -64    
-32    -176   
-32    -48    
-288   -64    
64     -16    
-272   -48    
144    192    
-16    -240   
16     -176   
192    16     
-48    -480   
80     80     
-96    -144   
160    -224   
0      48     
160    112    
-80    32     
16     -112   
16     80     
80     -16    
-272   48     
16     -112   
160    80     
-16    -48    
64     -64    
112    -112   
16     160    
128    528    
-192   -784   
-32    48     
192    -176   
-368   -48    
80     -112   
-16    16     
64     144    
48     -48    
32     -32    
16     -160   
64     -240   
176    160    
32     -176   
32     288    
32     -96    
0      -240   
-128   -192   
80     -80    
16     192    
128    288    
-96    -96    
64     96     
-192   -64    
192    -128   
80     80     
96     16     
-336   48     
-32    -432   
176    0      
16     16     
32     96     
-80    112    
64     112    
-160   16     
208    -208   
-48    0      
240    16     
-32    16     
128    112    
-176   1920   
-2128  80     
-208   272    
480    32     
352    768    
-576   -832   
-192   384    
-496   -272   
720    -176   
-592   -224   
208    -272   
80     512    
224    -368   
-128   416    
-352   -400   
-64    128    
-304   -96    
16     224    
32     -16    
-208   48     
-112   -32    
-208   64     
-96    80     
-384   64     
-80    -16    
160    -16    
-176   96     
-48    -128   
48     80     
48     -48    
80     112    
-48    -32    
-16    128    
64     16     
-144   -48    
-96    32     
-144   128    
48     192    
-336   -128   
-80    192    
-176   -144   
-112   64     
-48    -192   
-32    128    
272    -80    
-32    208    
-32    -112   
-176   -96    
-80    112    
80     -48    
-16    64     
0      128    
-64    16     
-32    16     
-128   32     
-304   80     
-192   32     
-32    -144   
16     256    
-112   -144   
112    32     
-16    48     
-32    16     
48     -32    
80     96     
-32    192    
-96    128    
0      -48    
80     -48    
-144   64     
-112   48     
112    32     
-480   -128   
16     304    
-176   -96    
192    192    
16     176    
64     320    
96     -16    
32     64     
64     96     
-368   48     
112    -16    
-32    304    
-32    -224   
176    48     
-336   32     
-256   -144   
-192   128    
176    -96    
-96    80     
0      64     
32     16     
-16    0      
0      144    
-176   -176   
-48    -32    
48     -112   
-48    176    
64     144    
-448   -272   
64     144    
-320   -144   
-80    32     
64     -176   
80     144    
96     128    
304    512    
-304   160    
0      16     
-32    16     
16     32     
96     48     
0      80     
-112   144    
48     -112   
0      112    
-128   0      
128    -80    
-176   16     
112    480    
48     -160   
-128   176    
-192   48     
224    112    
-64    64     
16     224    
-176   160    
112    -32    
-64    64     
-48    64     
0      144    
-80    96     
96     0      
-144   -160   
-80    16     
48     32     
32     -16    
16     -80    
-16    192    
-64    160    
-176   0      
96     -96    
-144   0      
16     96     
-96    16     
96     208    
-48    192    
112    400    
-96    32     
48     -32    
112    -144   
-48    208    
128    -16    
-48    -208   
-96    96     
48     80     
-64    -64    
128    144    
16     144    
-16    0      
16     208    
-64    -16    
32     -64    
96     256    
176    848    
-240   256    
-272   -336   
-32    -544   
224    288    
-96    64     
-16    64     
208    32     
-64    -48    
64     0      
16     64     
96     256    
32     32     
48     -256   
0      -32    
112    48     
0      240    
-128   96     
80     0      
96     0      
112    144    
48     80     
-32    160    
-272   32     
208    32     
-80    -16    
64     128    
16     96     
96     48     
-96    80     
240    -16    
-112   224    
96     144    
-672   320    
832    1600   
-1136  -336   
-336   -432   
-32    -624   
112    320    
160    304    
-176   320    
96     -544   
96     -16    
-272   -48    
64     -16    
352    208    
0      32     
32     176    
48     224    
144    304    
-240   112    
-128   -192   
176    64     
-80    64     
128    240    
0      64     
-48    -1424  
368    384    
0      176    
96     320    
-32    -224   
352    448    
-80    224    
96     32     
16     -96    
32     64     
0      -128   
320    320    
-176   -96    
128    -32    
-224   -272   
432    -176   
-192   64     
176    -864   
-128   176    
48     128    
64     0      
16     -16    
-64    48     
-112   144    
48     0      
272    464    
208    384    
-288   -48    
-672   -144   
-96    96     
272    160    
-32    0      
96     -672   
0      64     
368    176    
-672   -784   
144    384    
224    64     
-160   240    
0      240    
32     -304   
-160   112    
192    80     
32     -16    
0      96     
64     -176   
64     128    
16     -416   
-16    144    
64     -464   
96     48     
-16    -112   
128    160    
-224   -384   
64     48     
0      144    
192    256    
80     160    
-144   64     
32     48     
32     -336   
0      16     
144    -496   
-64    -32    
304    -448   
-80    240    
-48    -160   
48     128    
48     -48    
112    160    
-16    16     
208    224    
-16    288    
16     -144   
208    288    
-144   -400   
192    48     
-128   -112   
112    32     
224    160    
-80    304    
64     -112   
-144   80     
192    96     
80     80     
64     224    
0      240    
96     128    
-16    -912   
32     128    
96     -240   
80     144    
16     -192   
-32    96     
304    -400   
-176   112    
32     -32    
112    -288   
-64    32     
160    224    
160    -112   
-192   -32    
288    160    
-176   64     
176    80     
-48    -64    
352    -48    
-144   -80    
256    160    
-96    336    
-16    96     
160    -16    
-96    -16    
64     -96    
-80    256    
144    304    
80     80     
16     -80    
-16    48     
80     80     
64     -48    
-128   48     
224    32     
-112   96     
352    320    
-160   -528   
112    -192   
-144   -592   
112    144    
32     -64    
-16    -256   
64     -64    
96     -176   
32     -160   
80     -784   
96     -48    
-144   -80    
-48    -272   
128    160    
0      -112   
32     -544   
-32    -64    
64     -112   
80     0      
-112   -80    
48     -128   
-80    -160   
96     64     
96     -32    
-64    160    
-32    16     
320    -208   
-144   -224   
208    192    
-48    -240   
64     48     
176    -32    
160    64     
32     288    
-144   -16    
96     -368   
-928   -64    
-192   -32    
48     -80    
32     -272   
96     0      
32     -752   
16     -80    
80     -448   
-16    16     
208    -32    
256    -16    
-96    256    
-96    208    
-96    -208   
112    -240   
-592   -688   
672    -336   
-1024  288    
-176   -176   
48     160    
16     -432   
448    -48    
-80    -976   
16     -96    
-112   -64    
128    -32    
48     96     
32     112    
-32    -96    
192    288    
-144   -16    
-16    32     
-752   -64    
80     16     
-64    -64    
-144   -112   
48     -48    
112    -192   
144    32     
-176   -512   
288    384    
-160   96     
240    -144   
-208   -32    
208    -48    
0      48     
0      -48    
48     -80    
112    16     
-112   16     
0      64     
-96    -128   
-64    -112   
272    48     
160    -512   
-176   -32    
0      64     
48     -112   
16     0      
32     -176   
-432   -96    
80     -96    
-208   64     
240    -176   
-144   128    
48     -336   
112    32     
-144   -320   
256    16     
-48    -80    
160    176    
-96    240    
-80    -192   
-272   96     
-48    0      
64     -64    
0      80     
-128   16     
256    0      
-48    -32    
0      -320   
112    96     
48     -64    
32     176    
48     16     
80     -192   
-128   0      
48     -64    
-128   0      
160    -144   
-160   16     
-32    -320   
144    -32    
-272   -64    
-80    -16    
144    -64    
-80    128    
-128   -128   
144    384    
-160   16     
208    -160   
-96    -112   
64     32     
64     272    
16     176    
-64    -144   
32     -144   
-80    -144   
96     -192   
-96    16     
0      -80    
-96    0      
-384   -208   
0      48     
-64    -128   
112    -48    
-48    128    
-16    80     
16     112    
-1232  32     
-16    48     
144    -32    
-48    16     
96     16     
-16    32     
-96    -160   
-96    32     
-288   -176   
-160   -272   
-32    80     
16     80     
16     48     
-144   32     
-48    16     
-576   -96    
-64    -64    
-496   -192   
256    -16    
-368   0      
-176   -96    
-80    -96    
0      240    
160    16     
-160   -208   
-16    -48    
16     112    
-48    112    
-48    96     
-128   80     
-144   -32    
16     -96    
-880   -208   
80     -176   
64     96     
-32    96     
-64    -16    
-80    16     
96     64     
-64    176    
80     -32    
-224   -80    
-16    -240   
-80    -32    
80     -128   
-48    112    
32     176    
-96    -256   
-96    80     
16     -128   
-112   160    
48     -432   
96     528    
-128   -48    
-32    -144   
-144   160    
80     16     
-144   48     
112    128    
-16    48     
-160   -48    
-320   -384   
-112   -480   
352    -64    
-192   112    
96     144    
16     -32    
-112   144    
-48    -48    
80     48     
-32    176    
160    -96    
-176   160    
0      48     
64     160    
-320   -176   
32     48     
-48    -32    
128    160    
-736   -96    
96     240    
-272   -304   
256    48     
-32    160    
128    16     
-64    48     
48     32     
128    144    
-48    -48    
-32    112    
-400   96     
272    -208   
-160   64     
288    160    
-1712  -960   
240    -336   
528    -80    
592    -320   
-368   -752   
-288   240    
96     288    
-16    32     
-48    16     
0      -64    
-64    -16    
-176   192    
304    -80    
-96    64     
-80    -80    
-272   160    
192    128    
80     624    
368    64     
-16    448    
-112   -16    
144    256    
-208   -208   
112    -80    
-272   -96    
208    144    
-496   -16    
80     -384   
512    352    
144    464    
-112   176    
224    240    
-160   -96    
-160   144    
176    112    
-48    -16    
-64    64     
160    -432   
-64    208    
-160   -64    
128    272    
-256   32     
96     48     
16     128    
-80    32     
-256   64     
0      -176   
176    272    
-192   208    
-64    -160   
-224   32     
176    144    
-48    -32    
256    432    
-160   32     
-128   32     
80     48     
-240   -800   
224    144    
400    880    
-304   -48    
-32    400    
112    32     
-32    80     
-48    208    
64     144    
-96    -16    
16     96     
-32    96     
16     -32    
-208   0      
-176   48     
176    -64    
-64    -16    
48     256    
-32    128    
240    608    
-80    32     
432    32     
-32    208    
192    288    
-16    64     
-208   48     
144    80     
112    176    
64     128    
-32    16     
144    336    
-336   -64    
64     -272   
80     64     
64     48     
-64    64     
0      48     
96     64     
32     -32    
128    -16    
16     224    
192    272    
-224   -256   
64     16     
80     96     
176    160    
-192   16     
64     -432   
80     64     
176    240    
-288   -16    
80     176    
-80    112    
128    32     
-48    112    
80     112    
-80    464    
-112   64     
32     32     
-64    16     
240    384    
-96    -48    
-80    -144   
48     -288   
160    -96    
80     48     
48     128    
-128   64     
64     -128   
32     112    
-96    96     
240    128    
-112   -144   
96     160    
0      32     
-64    224    
32     -32    
32     32     
96     64     
192    -64    
-32    80     
176    240    
-240   208    
272    32     
48     144    
-80    -128   
-64    32     
0      -128   
112    224    
-176   -16    
272    -336   
-256   112    
192    -240   
0      64     
-48    -816   
64     96     
-80    -16    
96     32     
64     192    
-80    32     
192    224    
112    128    
-224   64     
176    16     
-80    0      
112    -128   
48     112    
48     -96    
256    464    
-240   -880   
288    208    
208    -160   
32     160    
112    32     
-176   144    
-112   112    
48     -32    
288    -192   
176    64     
-64    368    
-96    -16    
-32    304    
-16    -192   
192    80     
64     16     
0      112    
208    -288   
-16    64     
-128   -816   
96     256    
-160   0      
112    96     
16     16     
128    32     
160    128    
-32    -32    
-48    112    
336    -128   
-160   256    
48     -256   
96     128    
-48    16     
-1056  1440   
-128   -1584  
-176   416    
112    16     
-384   320    
544    96     
128    -96    
48     432    
32     -656   
-240   -48    
368    -464   
-112   544    
160    -240   
-32    384    
176    -800   
-144   240    
96     -48    
80     272    
0      -144   
16     192    
80     -80    
-16    144    
64     64     
144    112    
-16    -64    
144    48     
-80    160    
240    64     
-32    32     
-48    -144   
64     48     
64     112    
128    -848   
-64    -16    
-16    -16    
32     -336   
32     -32    
-32    -224   
128    -176   
48     -1296  
16     -144   
48     64     
16     -176   
160    -16    
16     16     
32     -752   
-32    -32    
32     -1120  
-176   -208   
160    -576   
-64    -432   
208    16     
-80    48     
96     -16    
144    64     
-16    -48    
128    -208   
-32    32     
144    256    
32     -48    
96     -368   
-16    80     
80     -208   
0      -80    
96     -80    
-80    -112   
-704   48     
16     -400   
0      -80    
48     -688   
32     0      
48     -176   
-64    0      
80     128    
160    112    
-112   -176   
208    224    
-176   96     
64     144    
144    -48    
64     -96    
-768   16     
112    -272   
16     -160   
272    -160   
176    272    
-128   -256   
224    -112   
-32    -2784  
-416   -272   
32     -96    
48     352    
176    0      
256    -48    
-128   -128   
48     -32    
-160   0      
272    176    
-1440  -128   
48     80     
-16    -48    
48     -336   
48     -224   
-48    -736   
64     96     
16     -464   
96     112    
96     -192   
-32    -368   
192    144    
80     192    
-16    96     
64     16     
-784   -112   
80     -112   
-32    0      
80     -80    
64     80     
0      -704   
144    432    
112    416    
32     0      
-176   -208   
112    -96    
-80    -48    
48     32     
-160   160    
128    32     
-944   -64    
48     -32    
-480   -64    
128    0      
64     -48    
80     -320   
0      160    
-32    -1056  
160    -128   
-368   -288   
464    256    
-192   160    
80     112    
-208   32     
-64    -208   
144    32     
-80    128    
128    -64    
64     -160   
-16    96     
0      -368   
64     16     
16     -288   
96     -64    
0      112    
80     48     
-304   -16    
192    112    
-80    112    
112    -96    
-32    304    
-64    -48    
-96    -64    
-48    -384   
160    -48    
144    -80    
-48    192    
32     -272   
432    -160   
-464   -16    
64     -32    
-160   0      
-48    -112   
16     16     
112    32     
-144   -32    
-48    -176   
144    96     
-144   -288   
304    16     
-624   16     
192    128    
-144   16     
-672   -16    
48     0      
-624   32     
-112   160    
112    -48    
192    0      
-32    96     
-256   -80    
-768   -128   
128    176    
-176   -16    
-32    48     
-112   32     
-336   16     
112    -176   
-224   -16    
160    160    
-1360  -1904  
1152   2720   
-624   1456   
112    -688   
336    -48    
-176   -336   
-368   320    
-16    -304   
96     -144   
480    -32    
-416   288    
80     -400   
-64    480    
-192   -176   
112    352    
-208   -256   
0      112    
-944   -352   
16     -80    
-720   -208   
432    -32    
-240   192    
128    128    
-16    64     
-144   288    
112    144    
256    -16    
528    208    
-480   -32    
-256   304    
-80    -64    
-96    -48    
48     128    
144    80     
-64    64     
-32    336    
-96    -64    
-16    -160   
-272   -128   
208    112    
288    544    
-160   128    
16     16     
-368   320    
128    -112   
-96    -32    
-48    -16    
-64    32     
128    -16    
-720   -208   
-16    80     
-848   -192   
96     176    
96     64     
-48    80     
-32    -16    
-16    16     
-16    -64    
-48    112    
-64    32     
0      64     
0      112    
-160   -16    
80     -80    
-480   -112   
-48    -96    
-352   -32    
48     192    
-96    -128   
256    416    
-96    128    
80     -64    
16     128    
48     -176   
64     64     
-256   32     
112    16     
-128   64     
-32    48     
-96    0      
32     80     
-64    0      
112    96     
-208   -464   
32     64     
16     320    
-96    240    
112    576    
0      48     
64     16     
-96    -16    
-16    32     
-176   -176   
96     -16    
32     -32    
16     176    
-400   192    
32     160    
0      64     
112    320    
-144   112    
-16    64     
16     -48    
16     240    
-160   112    
-144   -64    
128    0      
-160   16     
-48    -64    
-96    -144   
0      0      
-32    -16    
32     112    
96     176    
-112   64     
240    112    
-160   -32    
128    272    
-48    64     
144    80     
-128   192    
176    160    
-112   192    
-16    224    
224    144    
0      128    
-112   -80    
176    128    
80     176    
-176   112    
32     80     
32     16     
160    304    
32     208    
288    80     
-272   32     
-208   128    
144    0      
240    -16    
-384   16     
32     256    
128    64     
224    112    
-208   224    
-64    0      
48     144    
-160   -64    
160    144    
64     -16    
-16    128    
-176   80     
128    48     
-176   16     
0      112    
-80    -32    
128    96     
64     32     
48     96     
64     464    
-128   144    
64     144    
-48    16     
64     144    
32     -16    
16     0      
96     144    
-128   32     
96     288    
96     48     
0      -16    
16     96     
0      48     
112    128    
-128   80     
80     224    
0      0      
32     96     
64     32     
-32    96     
64     -48    
160    64     
160    208    
-224   48     
-144   32     
112    64     
96     -2224  
32     192    
0      64     
16     48     
48     0      
48     -32    
144    112    
-144   96     
80     0      
112    80     
32     96     
32     144    
48     160    
16     176    
1504   864    
-1184  -416   
464    32     
-640   336    
-160   -208   
128    816    
-480   -768   
336    1344   
-336   -592   
272    480    
80     -464   
-96    608    
-128   -64    
32     272    
-192   80     
384    -32    
-192   144    
80     -192   
-224   -32    
208    -48    
48     272    
304    -48    
-160   192    
96     -48    
-208   128    
144    -32    
0      208    
96     80     
144    144    
-176   -176   
144    32     
-144   -1024  
144    144    
32     -736   
96     48     
-80    80     
-48    160    
-32    -16    
64     128    
0      -32    
128    32     
-144   96     
96     112    
-80    -16    
112    -176   
-64    160    
32     -144   
224    96     
-144   -192   
96     32     
48     144    
16     128    
16     144    
64     176    
0      -16    
80     192    
-64    64     
80     128    
96     80     
32     128    
-48    128    
-16    -160   
160    0      
32     -144   
-64    48     
80     -16    
-16    112    
80     112    
-32    160    
-32    -112   
80     176    
-48    96     
-16    64     
48     144    
32     -128   
64     144    
16     -240   
-64    368    
256    -672   
-96    112    
-64    -96    
192    64     
-48    -144   
80     112    
112    128    
16     80     
-16    16     
0      -128   
64     -160   
208    144    
48     192    
32     -672   
64     16     
16     -288   
128    144    
240    736    
-64    400    
-64    240    
32     -64    
96     128    
-32    160    
80     -48    
16     16     
128    0      
0      -128   
48     128    
192    160    
-16    16     
48     -224   
48     48     
96     48     
96     80     
-32    -368   
0      16     
48     128    
160    -336   
32     -1632  
0      -192   
96     352    
-48    -192   
192    64     
64     96     
112    96     
-96    -352   
-96    176    
64     -80    
352    0      
-176   192    
96     -96    
16     48     
0      -672   
144    -416   
-80    -416   
224    -496   
-128   0      
224    48     
-176   -160   
320    -272   
-80    -288   
224    -448   
80     256    
16     -80    
-48    16     
96     -416   
192    48     
-384   -256   
176    -512   
-64    304    
0      -384   
16     -192   
288    -448   
112    -80    
0      -2800  
112    304    
-144   272    
144    -48    
160    -80    
0      -128   
192    64     
-240   32     
-144   -96    
-80    -64    
-544   -64    
112    64     
-64    -96    
112    -176   
-272   -96    
304    -416   
-16    336    
-64    -48    
-32    -144   
-32    -32    
32     -112   
128    80     
-112   32     
176    80     
-16    -64    
-48    -16    
0      -128   
0      0      
32     48     
-48    144    
-48    -80    
-48    -128   
208    -496   
-224   -208   
368    -352   
80     304    
128    48     
-176   -96    
-80    -48    
80     -224   
224    48     
-96    144    
-288   160    
-64    -160   
128    -16    
96     -80    
-1456  1184   
-368   -1888  
336    -304   
992    -48    
-352   0      
192    0      
-224   256    
416    336    
-720   -624   
-208   -224   
432    272    
-528   112    
112    -528   
-128   48     
64     -288   
-32    160    
192    -672   
-128   80     
368    -656   
64     240    
-352   -32    
112    208    
-224   256    
16     16     
-128   -192   
16     32     
112    0      
-64    -16    
-112   -64    
48     -112   
128    48     
-32    -32    
48     128    
208    -1552  
-64    -176   
112    0      
32     0      
32     48     
112    -48    
-160   -16    
32     80     
-48    -64    
-16    16     
80     208    
112    -96    
-192   -32    
128    -144   
64     160    
256    176    
-48    -224   
128    48     
-80    64     
-80    -64    
-16    -176   
-160   -256   
96     -112   
48     128    
-48    208    
-816   32     
128    -320   
-32    80     
192    -48    
-32    128    
-48    -32    
16     208    
-112   -48    
64     32     
-64    -16    
96     96     
32     128    
-64    48     
48     -80    
144    -144   
-224   192    
-1392  -176   
16     128    
-464   208    
32     -48    
32     -224   
-464   96     
-208   -16    
-192   128    
-96    48     
-32    -64    
-112   80     
96     192    
-160   -112   
160    -80    
112    352    
-80    -160   
144    208    
-144   -96    
-48    -32    
-304   32     
-432   -192   
32     -112   
-320   -32    
-64    48     
-272   112    
-160   -96    
-240   -144   
48     128    
-48    0      
80     176    
-224   -128   
64     -80    
16     -80    
-112   32     
48     80     
-64    48     
-32    -48    
112    224    
-32    96     
-128   48     
-176   -64    
144    48     
128    224    
-240   64     
368    272    
-224   -96    
16     -80    
-176   -80    
-32    16     
288    64     
-80    128    
-80    32     
-224   32     
144    -80    
-256   -192   
-48    64     
128    80     
-64    48     
-128   -240   
-32    144    
368    -128   
240    224    
-272   176    
192    112    
-288   112    
176    0      
64     16     
-64    48     
-64    64     
-112   -64    
-48    0      
-416   -96    
64     -16    
-400   -256   
64     112    
64     -48    
0      48     
-80    144    
128    -80    
-112   64     
192    -64    
0      16     
80     80     
32     160    
-112   -480   
112    48     
-144   144    
144    96     
-320   -16    
112    -224   
48     96     
-32    -160   
0      176    
0      192    
-112   288    
-32    -240   
-64    160    
-112   96     
-80    -112   
-208   -16    
320    208    
-240   48     
96     -48    
-352   48     
176    -352   
224    288    
-32    208    
-80    176    
-144   192    
-48    -144   
128    0      
192    288    
-224   48     
16     256    
-336   32     
48     -128   
16     0      
16     -32    
-320   -128   
144    16     
-176   160    
-96    32     
304    0      
48     64     
64     128    
704    -2432  
352    -304   
96     -48    
-192   -464   
288    880    
-144   32     
336    336    
16     -128   
0      400    
-320   -496   
-48    336    
208    -48    
96     288    
-176   64     
128    -128   
-160   80     
160    64     
-64    304    
16     -48    
-32    176    
16     48     
-112   64     
96     144    
-80    112    
64     -16    
16     48     
16     80     
112    112    
-16    64     
-80    -96    
-16    -48    
-112   -112   
16     -48    
16     128    
-64    -112   
192    176    
-208   64     
48     144    
-32    64     
48     0      
80     0      
32     144    
112    112    
16     -16    
-80    64     
0      64     
176    112    
-48    160    
176    288    
-208   -32    
144    80     
-48    112    
112    -16    
-16    80     
48     -16    
96     144    
-64    48     
112    144    
48     64     
32     -32    
80     272    
144    240    
0      256    
144    368    
-144   64     
-16    64     
-80    -48    
-32    32     
-48    -48    
32     32     
16     144    
64     48     
112    144    
-112   64     
-48    -32    
-32    64     
144    128    
32     432    
-272   224    
-48    -320   
32     160    
-80    -128   
64     -1792  
-32    288    
32     96     
112    32     
48     16     
144    208    
-32    64     
-16    -96    
16     64     
112    192    
-48    128    
32     112    
80     96     
0      32     
128    160    
16     -64    
64     96     
-16    48     
48     80     
96     128    
48     176    
-16    112    
0      80     
48     96     
16     16     
80     80     
32     336    
0      -48    
48     -48    
-48    80     
112    -832   
16     128    
-32    -80    
112    96     
-16    80     
32     144    
32     0      
16     96     
0      400    
112    32     
-112   -16    
-32    32     
176    304    
144    -176   
128    592    
-80    -32    
48     -112   
48     -1424  
-112   144    
176    16     
48     80     
0      -32    
64     128    
-80    16     
-16    -96    
48     -144   
416    288    
-256   240    
128    -96    
-144   -96    
144    0      
160    96     
-96    144    
32     64     
16     -192   
48     112    
-16    -64    
64     0      
-16    80     
192    224    
-128   -16    
96     -16    
16     176    
-32    96     
-16    -176   
-208   -352   
96     -16    
368    128    
-224   224    
16     -1840  
48     16     
128    -1152  
64     128    
-16    176    
464    -272   
-272   416    
-128   -416   
176    -32    
32     -112   
272    208    
-128   -256   
-80    288    
-80    -624   
496    208    
-288   -48    
112    -112   
352    -144   
64     224    
-80    128    
-96    48     
-160   -96    
352    -384   
0      80     
48     -128   
80     64     
128    176    
-160   256    
160    -96    
-48    272    
80     16     
0      256    
-32    -16    
16     144    
144    -160   
-32    176    
112    96     
-240   512    
-208   2176   
-816   784    
160    -528   
-208   336    
-288   560    
208    -336   
-592   -32    
656    64     
-80    -240   
-240   320    
96     48     
112    48     
64     -160   
0      -128   
-16    -96    
0      -928   
16     -160   
144    80     
16     -112   
48     -16    
0      -48    
80     176    
32     -240   
80     -1760  
-80    -48    
144    64     
-32    64     
-64    128    
128    -432   
-64    -160   
64     -272   
80     32     
128    -336   
0      16     
48     -176   
-160   64     
208    -32    
-32    48     
112    -112   
144    176    
0      16     
-48    32     
-224   -32    
112    -624   
-1296  -48    
80     -128   
176    64     
48     -448   
-128   64     
16     -3184  
224    16     
-144   80     
224    80     
-160   -64    
-208   -96    
208    -32    
-208   -96    
256    128    
-192   16     
-80    -64    
176    0      
-96    -64    
80     -224   
64     80     
-80    -16    
160    -208   
-16    -896   
96     176    
-16    -64    
64     112    
80     -96    
112    80     
-144   -32    
256    -192   
-496   -48    
48     -208   
-80    64     
80     -64    
160    0      
32     -176   
-80    -64    
80     -1008  
64     272    
-80    16     
32     -32    
16     -192   
208    64     
-336   -80    
192    -32    
-304   -48    
64     -16    
-144   -16    
64     -112   
-48    160    
-256   -608   
272    -64    
-128   -1472  
144    144    
48     -48    
-32    80     
128    128    
-16    48     
-80    -32    
160    -48    
-176   16     
128    16     
-112   0      
256    192    
-768   64     
256    -256   
-176   64     
96     -128   
128    80     
-64    -944   
80     -96    
-48    -32    
112    -128   
-448   -80    
176    -16    
-160   -144   
-32    -144   
-224   -64    
240    -96    
0      -16    
16     -16    
-128   128    
128    -192   
-96    -96    
16     -1312  
160    -32    
-16    64     
176    -48    
-208   128    
352    112    
-80    0      
64     -80    
-176   32     
32     16     
64     256    
-16    -208   
128    112    
32     -288   
-160   240    
-48    112    
80     -16    
-128   32     
32     64     
-112   -112   
144    16     
-192   48     
0      -16    
16     48     
48     64     
-176   256    
-112   -400   
128    96     
-256   -288   
320    48     
0      336    
-256   -16    
-48    -16    
-1664  -16    
-160   -48    
128    16     
128    160    
-112   32     
16     160    
-832   -320   
-96    -16    
-128   -192   
64     320    
64     112    
-48    128    
-80    272    
-176   -144   
-48    -96    
-208   -16    
-64    -48    
-16    96     
-176   -48    
128    112    
-96    -16    
-112   -160   
48     96     
-80    -80    
112    128    
-176   -160   
-32    16     
48     48     
112    64     
0      48     
-80    -32    
112    -16    
-144   48     
-112   144    
-736   0      
-48    32     
-176   -208   
-80    2288   
-224   624    
-288   128    
304    240    
-896   -432   
368    -368   
448    656    
-112   288    
48     -464   
-544   -192   
288    16     
-96    400    
-544   0      
0      0      
112    -256   
16     192    
-208   -112   
-16    128    
0      64     
-80    32     
96     192    
112    160    
-48    96     
-80    -32    
-80    32     
-96    -128   
-48    144    
-80    64     
0      48     
32     -240   
240    128    
-96    -64    
32     -112   
64     192    
-16    -96    
144    256    
-96    64     
64     128    
-80    0      
-48    -32    
-32    80     
0      64     
-112   96     
80     144    
-928   16     
-16    224    
-80    -48    
80     208    
-32    144    
64     112    
-16    160    
-48    16     
-16    160    
-240   -192   
224    144    
-144   48     
144    144    
-288   -32    
-64    -128   
-336   -128   
64     144    
48     -16    
-80    176    
-32    -144   
-96    48     
240    176    
-112   80     
80     -16    
-32    112    
0      32     
-80    32     
48     64     
-128   -32    
0      32     
-48    -48    
160    48     
-144   -112   
-32    -544   
-176   0      
80     128    
48     192    
-48    176    
112    240    
16     144    
16     80     
-112   80     
-96    -16    
112    176    
-16    160    
-64    -80    
-112   64     
32     48     
16     32     
-32    32     
0      96     
128    160    
-128   -16    
48     48     
-80    144    
-16    48     
80     96     
-64    128    
-16    32     
64     64     
-192   -32    
32     48     
16     32     
112    240    
-128   32     
192    112    
-112   80     
0      0      
-16    16     
-16    128    
32     48     
-64    32     
80     144    
-288   -112   
64     32     
-16    176    
48     48     
0      -112   
-64    -32    
96     224    
144    192    
32     144    
-192   80     
-80    -336   
144    32     
-80    208    
96     64     
32     144    
-48    -224   
0      192    
16     288    
32     -16    
368    576    
-400   336    
48     96     
16     -80    
112    -32    
80     128    
0      64     
-112   16     
32     256    
-112   16     
368    352    
-400   96     
32     448    
-176   -32    
128    128    
-32    -16    
16     64     
-16    32     
64     -16    
-176   272    
0      -224   
96     -80    
48     288    
128    160    
-160   0      
0      128    
-16    -224   
-112   32     
64     112    
16     144    
336    288    
-208   -112   
80     160    
208    192    
-64    32     
16     80     
96     48     
16     -128   
80     192    
192    80     
48     112    
-48    240    
224    -1360  
112    336    
144    -96    
0      400    
-16    -64    
80     96     
48     -16    
112    32     
144    80     
48     64     
272    32     
-112   304    
16     -128   
48     160    
32     -176   
160    -224   
80     32     
48     160    
-112   80     
144    0      
64     176    
16     32     
-80    736    
736    128    
416    -48    
-288   -528   
-16    128    
-240   -288   
128    -80    
240    -304   
-96    -480   
48     32     
64     -272   
144    64     
-48    64     
144    128    
-16    64     
32     128    
16     32     
112    48     
16     -32    
-32    80     
96     160    
48     128    
160    32     
-176   -176   
80     160    
64     -544   
-64    48     
96     128    
0      -64    
16     128    
64     80     
48     80     
48     176    
0      0      
-32    -128   
-32    -160   
0      -224   
144    224    
160    -224   
-128   -32    
0      -352   
112    48     
192    -3472  
-144   64     
144    96     
-128   48     
32     -80    
176    160    
-112   64     
176    160    
-144   32     
144    -272   
80     192    
48     -16    
112    80     
-16    -160   
96     80     
0      -560   
32     96     
0      -16    
128    80     
0      128    
64     -16    
96     48     
-48    64     
32     176    
32     -656   
128    176    
16     192    
96     16     
128    -48    
-16    32     
128    -80    
-16    208    
-16    176    
80     64     
96     208    
16     32     
0      -272   
96     -272   
-128   256    
64     -336   
224    160    
-192   -320   
176    112    
208    192    
-224   240    
352    -80    
-144   16     
240    -32    
-80    64     
-16    -96    
64     224    
112    176    
-80    -112   
208    48     
0      -272   
32     128    
112    -192   
32     176    
-32    -144   
64     144    
-48    -336   
160    -1168  
-16    112    
320    -288   
-192   208    
-96    16     
112    -112   
16     0      
64     -416   
-32    -96    
240    304    
16     96     
96     128    
0      -64    
-16    16     
112    -96    
80     112    
-112   240    
144    -144   
-48    -48    
-352   -208   
256    96     
48     -112   
176    -48    
-16    208    
64     208    
32     112    
48     -2080  
32     -208   
-112   -128   
0      -112   
-128   -208   
80     64     
176    -96    
-80    -160   
-256   48     
96     -80    
-112   -144   
-160   -64    
112    -32    
-96    32     
208    128    
0      -16    
32     -464   
-48    96     
208    112    
64     -176   
0      128    
96     -80    
80     -48    
-112   80     
-48    -144   
96     144    
48     -96    
16     -128   
80     64     
144    -160   
-16    -16    
0      128    
192    -176   
-144   144    
112    -112   
16     336    
112    128    
48     0      
-160   -80    
112    -32    
-368   -400   
128    208    
-1232  192    
-96    -224   
-96    192    
-224   -320   
128    144    
-80    -2400  
192    96     
112    -224   
0      48     
-176   240    
32     144    
48     -32    
96     -416   
-240   -16    
160    160    
-240   -80    
144    112    
-96    0      
48     -128   
-16    176    
32     -272   
80     48     
336    16     
-48    128    
48     48     
-16    -112   
32     -64    
-272   -496   
192    -944   
240    304    
-480   -880   
992    64     
-432   -32    
752    -1264  
-272   -64    
672    16     
-96    576    
-192   -1456  
416    48     
128    -32    
-256   -80    
-224   -80    
304    112    
-352   -288   
224    288    
-288   128    
48     -576   
160    0      
64     -144   
-80    32     
16     -496   
-16    -64    
-32    64     
112    48     
0      80     
-32    -32    
-80    96     
48     80     
-16    -112   
0      32     
-128   48     
32     -96    
208    288    
16     112    
208    208    
-576   -560   
-80    -128   
96     16     
-48    16     
-96    64     
16     128    
-32    160    
16     0      
-112   -16    
240    288    
-176   144    
112    144    
-208   -112   
336    -48    
0      -16    
-624   -288   
-288   48     
48     384    
0      592    
-48    224    
-368   -496   
128    144    
-384   -224   
112    0      
-48    64     
32     96     
-336   -96    
80     -16    
-304   -176   
-16    144    
-80    -128   
-80    80     
-16    96     
0      80     
-32    16     
-112   16     
-96    192    
-464   192    
0      288    
48     480    
320    80     
-192   128    
320    -32    
-352   -16    
-16    -32    
0      -64    
96     -96    
-80    32     
-128   144    
-128   -48    
-144   112    
-64    128    
-80    -112   
-16    -176   
-1920  96     
16     32     
-112   -128   
32     0      
112    0      
-32    -16    
-160   -192   
-64    32     
-112   144    
-80    -48    
-48    64     
0      80     
64     32     
-192   16     
-32    16     
-384   160    
-32    -48    
112    144    
-112   96     
0      -288   
-96    -32    
16     32     
176    176    
-112   64     
-16    -128   
-32    -32    
-96    16     
80     -48    
-160   -32    
0      128    
-192   48     
32     96     
-656   0      
0      224    
80     -384   
-128   160    
48     128    
16     96     
0      -16    
-64    224    
48     144    
-48    -144   
128    16     
-112   -48    
-16    656    
16     144    
32     128    
-912   -304   
192    128    
-112   -80    
-48    112    
224    128    
-16    192    
-160   0      
48     -16    
-112   16     
192    208    
-96    -64    
-16    64     
48     -64    
-304   -160   
176    96     
-256   96     
48     288    
-192   112    
48     272    
-96    -192   
-32    128    
-16    -16    
-32    96     
160    -128   
-112   64     
240    592    
-208   256    
-128   -768   
48     112    
400    432    
-256   -224   
-32    144    
48     176    
-16    -32    
-144   288    
-192   -48    
32     144    
0      -48    
176    192    
-128   0      
-16    32     
-192   16     
48     48     
-176   -64    
144    192    
80     -32    
48     144    
-144   64     
48     144    
80     -128   
96     112    
64     96     
0      64     
64     96     
-144   96     
80     240    
-160   0      
-160   -16    
-64    -16    
256    3040   
-1984  -480   
448    688    
80     704    
368    416    
-656   -336   
48     112    
416    448    
-144   16     
-192   160    
-48    0      
128    -48    
-128   96     
128    16     
-128   -32    
48     80     
32     64     
96     128    
-80    112    
144    64     
-64    16     
-112   32     
128    176    
-64    96     
144    64     
-32    -32    
-80    -48    
64     16     
-80    240    
48     80     
-48    16     
-80    48     
64     112    
80     144    
-128   16     
80     96     
-144   -32    
80     96     
-128   80     
128    192    
-80    -96    
80     192    
-208   -16    
192    112    
-336   -112   
176    -32    
0      256    
80     192    
160    320    
-112   -272   
144    128    
-96    128    
144    80     
-16    64     
112    128    
-64    16     
112    112    
-80    224    
144    16     
208    208    
-336   -304   
160    80     
48     32     
16     144    
-80    112    
208    -32    
0      112    
-48    192    
0      96     
80     0      
64     64     
48     192    
-144   -16    
128    48     
112    16     
-96    -1120  
0      64     
224    160    
-80    112    
128    64     
0      16     
-16    144    
48     48     
-112   16     
192    -48    
-32    64     
-112   -208   
256    0      
-256   -160   
176    144    
0      -448   
64     128    
48     144    
-16    48     
112    224    
-128   -144   
192    208    
80     144    
-112   32     
192    48     
-144   -32    
128    80     
48     112    
-192   -224   
64     64     
0      -96    
48     160    
128    -1232  
-80    48     
-64    16     
176    112    
0      48     
0      64     
0      112    
144    96     
-32    -64    
16     -112   
64     80     
64     48     
80     208    
-176   -576   
0      64     
64     -624   
96     -16    
16     80     
112    96     
-32    144    
48     -16    
16     96     
176    272    
-96    128    
-64    64     
160    368    
96     -48    
112    64     
-32    -176   
-208   224    
224    -176   
192    32     
0      64     
96     112    
-192   240    
80     176    
-160   -96    
-16    64     
64     64     
320    -80    
-32    464    
192    208    
-144   16     
-32    160    
144    176    
16     -192   
48     160    
0      -160   
64     144    
-48    416    
128    160    
-64    208    
256    48     
-128   112    
96     -400   
96     160    
64     -400   
-80    48     
96     -160   
32     -16    
176    -384   
16     160    
-96    -608   
80     192    
80     160    
16     -32    
16     144    
96     32     
48     160    
-112   -176   
64     80     
48     -80    
-16    96     
112    -80    
0      128    
-16    -160   
-16    80     
128    32     
-80    112    
160    -208   
144    -2320  
144    80     
-32    -1920  
-112   -1232  
112    48     
-48    -1008  
80     32     
64     176    
208    64     
0      176    
-80    -48    
-192   176    
256    1920   
-512   -1184  
-560   -704   
32     -1008  
-544   80     
160    656    
-240   96     
16     480    
-384   208    
-240   -256   
256    -3376  
16     -144   
64     16     
320    288    
-176   -48    
160    48     
-112   -272   
-64    -400   
48     -528   
400    32     
-144   208    
192    16     
-48    -128   
176    -144   
-16    16     
128    -336   
304    320    
-304   -608   
-16    -304   
-288   -192   
-64    64     
112    -32    
176    64     
-48    0      
240    -32    
-96    -16    
-144   -528   
-224   -112   
304    48     
16     -48    
256    -80    
16     -160   
64     -544   
-48    128    
-64    192    
80     -64    
64     208    
192    240    
-272   -112   
272    -208   
-64    112    
0      -288   
-496   32     
48     -48    
-16    48     
80     -224   
-96    -384   
80     -352   
80     144    
-48    -528   
-96    128    
96     -256   
-16    0      
-192   -224   
64     256    
-160   -160   
224    80     
-128   -32    
144    16     
-1040  -112   
112    -112   
-48    16     
80     -16    
176    192    
-96    -192   
112    80     
112    368    
96     656    
448    272    
-128   -208   
-192   256    
160    -64    
-112   -112   
128    -80    
-112   -96    
-16    0      
-208   -304   
384    176    
128    192    
64     -432   
-224   -32    
144    -128   
176    48     
-16    112    
0      -16    
-192   -144   
208    -16    
-240   -16    
80     -208   
-528   -256   
128    -48    
-80    32     
96     -416   
-144   96     
64     -256   
16     112    
192    -2192  
-32    192    
-208   96     
128    -32    
-176   -192   
80     0      
32     64     
48     0      
-144   32     
-16    -112   
-96    -32    
96     -112   
32     112    
208    16     
-272   208    
96     96     
16     -32    
-352   176    
176    -96    
-160   -32    
144    -64    
0      176    
16     -160   
-208   -48    
32     -160   
-48    192    
192    -320   
-176   160    
-528   -208   
128    304    
-368   32     
-896   128    
-208   -64    
-112   -16    
96     128    
0      -96    
-272   -112   
192    -176   
-64    128    
-480   -176   
-16    -96    
-528   -256   
96     80     
-96    -176   
48     48     
-16    16     
-112   80     
0      0      
-176   -144   
-32    128    
-464   80     
-16    16     
48     224    
32     -16    
-256   -64    
-16    80     
0      -208   
-32    144    
-48    -32    
-288   16     
352    -48    
-48    -32    
-112   -112   
-464   80     
-32    128    
-112   48     
32     208    
288    -272   
-48    336    
160    -256   
224    112    
-96    -80    
0      208    
-160   128    
80     -16    
0      48     
-64    -192   
-112   -80    
-160   96     
-192   192    
112    0      
64     64     
-672   -64    
-48    112    
-112   -144   
48     80     
-32    -160   
96     208    
80     -144   
-64    256    
-160   96     
80     16     
-112   64     
896    64     
64     -80    
832    528    
32     560    
-928   -720   
352    432    
-464   256    
672    -112   
-176   144    
-208   -320   
144    96     
-80    -80    
32     128    
-16    64     
80     144    
-144   16     
16     64     
-144   -64    
112    48     
-432   0      
160    64     
-848   112    
32     80     
-48    -48    
-160   -48    
128    176    
-128   32     
0      160    
-80    32     
32     224    
-48    -32    
-32    16     
-208   -16    
16     128    
-144   -64    
320    96     
-720   -64    
160    80     
32     208    
-96    16     
64     80     
-16    16     
64     80     
0      144    
-48    48     
-144   48     
16     -16    
-112   -32    
288    48     
-272   96     
112    32     
-64    -64    
-32    -336   
224    240    
-96    128    
160    144    
-16    80     
-176   48     
112    -48    
32     240    
-48    -128   
144    160    
-176   -48    
48     48     
-80    -32    
-16    96     
-112   32     
-32    -80    
64     160    
-112   80     
-32    48     
-16    32     
-48    96     
-32    16     
112    128    
-80    -112   
144    144    
-368   -128   
144    32     
-208   -128   
32     32     
-96    80     
-96    -48    
32     -224   
80     -32    
-112   -16    
128    304    
-288   176    
48     16     
192    48     
-160   -32    
176    112    
-112   16     
-16    176    
128    544    
-208   16     
96     128    
-48    -48    
80     80     
0      -32    
0      16     
112    96     
32     96     
-64    32     
16     0      
48     16     
112    320    
-128   48     
-96    96     
-224   -224   
112    160    
176    432    
-48    80     
-48    16     
0      -64    
16     160    
48     32     
48     -128   
-96    32     
160    144    
-96    0      
112    32     
0      -160   
16     48     
-112   -48    
32     144    
16     112    
16     192    
288    48     
-304   -48    
224    32     
-96    160    
160    208    
48     80     
-16    -48    
16     -48    
80     160    
-48    32     
0      -96    
-16    -48    
96     288    
80     192    
-192   -96    
192    -96    
-48    80     
16     64     
128    224    
-112   -32    
64     -64    
96     240    
-112   0      
112    64     
-112   0      
144    32     
144    176    
-352   -2000  
128    -208   
-96    -368   
224    224    
224    176    
64     176    
144    208    
0      64     
0      176    
-96    -32    
0      48     
-144   48     
64     -48    
112    -48    
-64    -48    
240    -848   
0      144    
288    -16    
224    208    
-320   -80    
352    112    
-112   192    
256    -96    
48     112    
-48    64     
112    96     
32     80     
-32    16     
160    -128   
-96    80     
48     -224   
112    64     
0      256    
48     128    
0      96     
-32    16     
112    64     
144    128    
-48    -48    
-16    64     
160    48     
80     144    
64     80     
-96    -176   
-832   848    
-480   -1296  
-368   -288   
144    -1360  
-112   32     
448    1696   
-608   -736   
384    16     
-176   64     
480    400    
-208   16     
16     -272   
-192   48     
416    160    
-48    64     
160    -96    
-224   96     
-160   -672   
320    -592   
-128   -112   
192    -32    
176    384    
-272   528    
96     -144   
-96    304    
16     -160   
240    0      
-288   -144   
144    176    
-112   -112   
160    208    
112    16     
-48    80     
176    48     
80     80     
160    -336   
-32    144    
80     -144   
320    400    
-416   -240   
192    224    
80     32     
-16    -48    
-240   128    
80     -368   
176    16     
-96    -368   
-272   -176   
336    64     
48     304    
-16    -128   
48     192    
-48    -256   
96     80     
48     272    
96     32     
-80    -256   
320    208    
128    240    
112    480    
176    208    
32     -256   
-112   -288   
-48    -480   
112    -16    
208    -1680  
-48    160    
16     -112   
80     -16    
-128   160    
64     176    
160    560    
-80    -128   
128    -16    
96     32     
16     80     
224    272    
-144   128    
256    -48    
304    384    
-144   64     
64     -256   
48     96     
-32    -400   
96     112    
-1680  -240   
-32    -1024  
-80    -128   
208    -464   
272    -32    
-272   -1232  
288    64     
-64    -64    
96     -208   
0      32     
0      -304   
-80    -640   
16     16     
32     -752   
128    240    
-480   -32    
176    -176   
-48    -48    
80     -224   
0      -272   
80     -1024  
-16    16     
-272   -400   
304    272    
-64    -64    
-32    -64    
64     -224   
-64    80     
32     -80    
144    64     
-144   240    
112    -112   
64     -48    
32     -160   
32     -224   
-16    -176   
-32    -16    
304    -176   
224    128    
-192   -112   
-320   -32    
128    64     
-32    -96    
192    64     
-176   -80    
64     -48    
-80    -224   
-432   -272   
-128   -128   
128    128    
-192   -80    
464    -128   
-224   -896   
-192   -288   
0      -608   
112    16     
32     48     
-16    32     
32     16     
80     0      
-256   0      
0      -80    
-80    48     
-80    16     
336    -48    
-32    48     
64     -144   
48     -192   
48     16     
48     -912   
48     112    
32     16     
32     -96    
-96    -96    
112    -48    
-16    208    
48     16     
-96    32     
144    -48    
-448   -64    
192    -80    
-48    -64    
160    -64    
112    208    
-192   -144   
0      16     
48     48     
144    48     
-128   160    
-176   -96    
176    -160   
144    80     
-176   -192   
64     48     
-320   -96    
128    -32    
-384   32     
80     -176   
-16    96     
64     -752   
224    0      
304    -592   
-208   16     
-224   144    
48     32     
-48    -176   
224    16     
-256   -80    
-32    112    
-64    80     
16     16     
64     96     
144    -192   
-544   592    
-496   288    
-1376  192    
720    256    
560    752    
-256   -1072  
96     1104   
-208   -256   
384    -32    
-96    -176   
192    240    
-48    192    
160    -368   
-592   352    
192    -624   
-288   320    
304    -336   
-160   400    
176    -144   
-224   48     
-16    -320   
0      224    
96     16     
-96    128    
-32    -208   
-128   16     
64     -160   
0      -32    
0      16     
-1552  -288   
176    160    
-208   -144   
-304   48     
-176   16     
-784   96     
0      -32    
-320   272    
-48    0      
-32    16     
-176   -32    
160    -48    
-224   48     
-240   -48    
64     112    
112    64     
-48    160    
-16    -320   
-400   -112   
0      160    
16     48     
16     32     
-64    64     
-144   32     
-272   32     
-80    -32    
32     -64    
-16    -48    
64     32     
-80    64     
96     -128   
-48    80     
-16    64     
-64    32     
64     16     
-16    0      
-48    32     
-192   0      
-176   -48    
-912   -32    
80     32     
-48    16     
16     80     
-96    -48    
-16    80     
-80    -144   
160    112    
16     16     
112    0      
-16    160    
-160   -48    
48     -112   
-144   -16    
144    -272   
48     0      
-144   112    
-352   64     
-128   128    
-112   -16    
80     64     
-64    -96    
-16    160    
96     208    
32     192    
-96    32     
-96    32     
112    112    
160    192    
-128   112    
80     240    
-416   -480   
-96    -144   
128    208    
96     -64    
-64    32     
-16    -96    
-32    32     
16     32     
-192   0      
-176   -64    
96     208    
128    416    
-48    224    
-128   64     
-144   -176   
48     16     
-352   -32    
-144   -400   
-944   80     
64     256    
80     -32    
-96    -32    
-16    -48    
0      -80    
-32    -80    
0      -80    
32     -64    
208    304    
-96    352    
-64    160    
-64    32     
-128   16     
80     -32    
-272   -112   
176    16     
-80    160    
-32    -16    
144    80     
-64    176    
80     0      
-48    16     
0      16     
16     112    
-32    16     
128    112    
-160   192    
80     80     
-176   64     
-480   -224   
-96    32     
-32    128    
-16    160    
-112   16     
-16    112    
-80    -64    
64     32     
-48    128    
208    144    
-240   80     
192    352    
-208   160    
-208   -224   
112    -112   
-144   0      
80     128    
-128   112    
-80    64     
48     -144   
256    112    
-192   224    
-224   -16    
176    96     
-16    304    
-32    -32    
-240   -144   
48     192    
176    -48    
32     112    
0      32     
176    128    
-240   144    
80     96     
-144   144    
48     32     
64     96     
-16    80     
160    80     
176    -32    
-160   16     
32     -112   
-16    144    
48     128    
48     128    
-208   48     
128    -16    
176    -16    
-32    224    
-160   0      
64     96     
32     112    
912    1360   
432    624    
-48    -1056  
-304   -400   
-192   128    
-272   -944   
576    -64    
-144   96     
-16    1056   
-368   416    
16     -384   
-64    -16    
224    -80    
304    816    
0      -80    
80     336    
32     -80    
-16    320    
112    -176   
352    160    
128    96     
-320   16     
-48    -320   
144    304    
-256   -272   
240    -16    
176    288    
64     496    
288    416    
0      -288   
-48    64     
80     16     
128    112    
-128   128    
16     -112   
-80    0      
96     -144   
-48    144    
192    128    
-16    32     
112    48     
-112   112    
96     -32    
48     80     
-48    48     
272    96     
-96    144    
0      32     
-176   128    
-96    -160   
144    32     
-32    16     
80     -256   
-16    96     
80     176    
48     96     
112    240    
96     48     
16     192    
-16    -32    
-224   144    
-32    64     
112    16     
192    224    
-144   128    
48     -32    
160    128    
32     -624   
-96    -48    
160    144    
48     32     
16     48     
64     144    
-80    -96    
80     96     
-112   -176   
112    -256   
-112   -384   
-240   16     
96     160    
32     -160   
-304   240    
96     -768   
112    -112   
-176   -1424  
240    240    
-224   128    
64     112    
-16    112    
-16    16     
64     32     
0      32     
-16    -32    
80     192    
-16    224    
-96    -336   
112    64     
48     -208   
0      -32    
-48    -464   
-64    -64    
80     128    
-64    -64    
16     -112   
80     112    
288    592    
-48    32     
-16    -80    
-224   -144   
112    -48    
224    48     
-32    128    
0      -32    
128    32     
-48    -464   
0      128    
272    -1520  
-192   128    
208    128    
96     224    
48     -64    
-304   0      
336    176    
128    -48    
-80    176    
-80    -80    
-16    16     
0      -432   
96     48     
-208   -416   
48     80     
64     -128   
48     96     
80     -16    
144    144    
-128   96     
208    80     
-64    144    
272    64     
48     128    
-224   0      
160    96     
224    -192   
0      336    
64     -64    
240    144    
-96    -240   
-128   0      
96     160    
48     96     
48     16     
0      32     
32     160    
-16    -80    
144    224    
48     -208   
112    64     
-64    80     
-48    16     
240    -48    
-80    144    
208    -176   
-80    160    
-64    160    
192    112    
-16    64     
176    -240   
-32    -2768  
176    0      
-192   0      
96     -192   
176    80     
272    -128   
-64    160    
-80    -112   
-32    32     
144    -176   
0      -1808  
0      -112   
192    -496   
256    64     
-1072  160    
-112   -320   
192    -288   
160    -48    
-64    144    
112    32     
-32    -224   
144    112    
48     -256   
-32    -1264  
64     64     
16     -208   
48     48     
32     -128   
96     -592   
-80    80     
112    48     
-48    128    
-128   352    
-256   -1024  
416    -64    
-384   -32    
384    192    
-416   304    
640    -528   
-272   848    
256    -576   
-432   640    
304    -576   
-96    496    
-384   -96    
0      432    
-64    -336   
112    -80    
-64    32     
128    -208   
-16    144    
160    -208   
-48    -112   
48     -160   
0      208    
80     -272   
-80    112    
64     64     
128    304    
96     -80    
-112   -64    
-1232  -128   
-16    32     
160    0      
16     96     
64     64     
48     -240   
-48    -16    
96     -1856  
32     80     
128    80     
-16    64     
32     48     
48     -32    
16     0      
16     -112   
-48    48     
32     32     
-544   112    
16     160    
48     -48    
64     -576   
32     -16    
96     -1072  
-80    176    
64     112    
64     0      
-128   -256   
80     -176   
-128   160    
112    -48    
80     64     
16     -96    
-64    -16    
96     -256   
-1120  -80    
80     -128   
-112   128    
144    -384   
-32    64     
-128   -512   
48     -208   
-192   -32    
128    -32    
-48    -16    
160    16     
-288   -64    
128    -48    
-256   -128   
-16    -160   
32     112    
16     -304   
160    160    
-16    -224   
80     -176   
16     -272   
208    -32    
-32    48     
-48    -192   
80     176    
176    -16    
-160   0      
32     -112   
16     144    
48     -48    
-32    16     
32     -288   
48     16     
-160   -608   
192    160    
-80    112    
80     80     
-304   32     
32     -96    
-160   16     
112    -16    
-80    64     
-16    -32    
-48    32     
16     -208   
32     64     
-144   -352   
48     128    
-320   -224   
-448   -32    
-16    144    
-688   16     
-16    80     
0      0      
64     80     
32     96     
16     80     
-80    -160   
-64    -16    
-1392  -32    
208    112    
-800   -192   
96     160    
-192   -352   
-32    -144   
-96    -144   
-720   48     
-32    0      
-352   -96    
-128   176    
336    96     
-80    144    
96     16     
-160   48     
128    -208   
-64    288    
0      -176   
96     128    
-224   160    
112    16     
-208   64     
-80    0      
48     32     
-64    96     
-96    144    
-1424  -304   
-80    -160   
144    96     
48     112    
-48    64     
-144   112    
16     -272   
176    160    
-128   -192   
128    -32    
-160   144    
80     112    
-64    176    
-48    0      
-32    144    
32     -80    
16     144    
-608   -32    
208    48     
-128   80     
64     176    
-80    -368   
-32    144    
112    48     
48     16     
-32    80     
-160   32     
-96    80     
-192   -32    
304    -16    
-304   144    
-48    -16    
-208   -16    
48     128    
64     -80    
16     48     
-32    -80    
96     80     
96     -16    
-128   -16    
-80    16     
-48    0      
-80    32     
-64    112    
-80    48     
160    0      
16     0      
-112   32     
-176   144    
-240   -32    
-32    80     
-240   992    
400    -320   
-672   -672   
96     640    
-864   192    
688    96     
720    352    
-240   240    
-368   48     
32     176    
144    -176   
-192   80     
-128   -64    
-48    0      
-32    288    
128    96     
-48    16     
144    144    
-368   48     
192    -32    
208    304    
-256   -192   
80     -160   
32     224    
-32    -48    
-16    144    
-192   -32    
192    112    
-928   -32    
-240   -192   
32     -16    
-80    -32    
176    48     
-160   160    
16     80     
-16    0      
16     144    
-48    0      
-16    16     
-128   32     
144    48     
-160   -32    
48     144    
-48    -208   
-80    96     
96     144    
-16    32     
-128   -112   
32     192    
-80    96     
176    -96    
-192   160    
-16    -64    
208    160    
-288   112    
192    16     
-112   -16    
128    96     
-16    192    
-16    -80    
240    64     
-80    144    
0      64     
16     16     
-32    176    
-16    0      
112    144    
16     144    
-32    0      
48     -48    
-16    112    
-64    16     
-48    160    
64     32     
144    128    
-80    272    
-144   96     
96     144    
-16    80     
-64    -96    
176    16     
-80    112    
-64    48     
-16    -96    
32     48     
-32    -32    
64     -96    
-80    208    
-32    176    
208    16     
-64    80     
32     128    
16     48     
144    80     
-32    176    
-192   -96    
80     64     
-112   16     
144    128    
-80    96     
-128   -48    
112    -80    
0      160    
128    272    
-80    -32    
144    176    
-112   96     
240    144    
16     208    
32     -16    
-32    32     
-80    128    
144    48     
96     16     
-176   -96    
112    176    
192    96     
32     144    
-96    112    
-32    -112   
-192   -16    
-192   -16    
320    64     
0      144    
96     64     
-176   144    
112    128    
-176   208    
144    192    
-16    -160   
112    80     
-112   64     
160    240    
304    224    
128    240    
16     112    
176    352    
16     224    
-16    -96    
-176   -16    
64     144    
144    128    
-96    32     
208    -48    
-176   -48    
224    -96    
112    144    
192    -208   
-128   96     
80     64     
48     64     
-32    64     
144    80     
-48    16     
48     -208   
32     272    
-96    -112   
288    32     
0      384    
16     128    
-48    -16    
64     80     
-64    -320   
-16    128    
160    224    
16     368    
-144   112    
96     192    
112    0      
224    -48    
112    -192   
-16    112    
-16    -320   
304    400    
-112   96     
-16    -80    
-240   -192   
208    -128   
304    96     
80     -608   
-112   320    
0      -48    
-128   192    
32     288    
224    32     
48     -96    
80     160    
144    240    
32     -32    
176    -32    
0      16     
0      32     
208    -80    
-96    208    
64     -48    
-16    32     
-16    -560   
128    80     
-976   400    
112    0      
-1168  -432   
512    640    
1296   736    
-704   -1168  
-128   -352   
688    -704   
208    160    
80     64     
64     96     
-176   -224   
96     112    
32     -1248  
-16    96     
-64    -112   
192    112    
32     96     
64     112    
32     -64    
-64    -160   
-80    32     
160    -304   
-48    336    
320    -416   
224    -128   
-128   -288   
144    112    
-80    64     
48     160    
224    80     
48     112    
-80    96     
16     112    
48     80     
16     -288   
64     80     
112    -240   
-64    144    
64     -192   
112    192    
64     -48    
32     112    
-32    64     
112    32     
-64    0      
48     96     
224    208    
-64    96     
80     -48    
144    -192   
-48    64     
144    -352   
-16    0      
64     -176   
160    160    
-16    192    
-32    80     
320    -224   
144    -288   
16     64     
16     -448   
80     112    
-144   -64    
-16    -752   
224    0      
-16    -1104  
64     64     
-48    240    
128    -112   
64     64     
16     -224   
80     144    
-96    -32    
160    -240   
48     112    
112    112    
-48    288    
-304   64     
16     -224   
48     -272   
160    -48    
64     192    
-64    -208   
96     -192   
64     -96    
144    -32    
16     -176   
32     80     
112    64     
-80    -16    
112    -112   
16     -160   
-800   -144   
-48    -176   
-112   -32    
32     -80    
64     -64    
0      -864   
80     -144   
80     -2720  
80     16     
-48    -16    
112    32     
144    -80    
-16    0      
160    -240   
-16    0      
-224   0      
96     -32    
-1536  32     
-32    -16    
64     -224   
32     -352   
-16    -128   
112    -176   
96     96     
0      -80    
32     -32    
-16    -176   
48     128    
16     32     
16     -16    
-64    144    
208    -208   
-416   16     
-64    -112   
352    1008   
-80    -560   
80     32     
-320   -208   
96     -64    
-32    -1776  
-48    48     
176    16     
-32    80     
-32    16     
112    -96    
-320   48     
96     16     
-384   -176   
112    0      
-608   96     
0      -288   
0      -112   
-48    -592   
272    160    
-192   -528   
64     128    
176    144    
64     -112   
64     48     
32     -112   
-240   -64    
144    48     
-96    16     
-16    -160   
-320   -128   
288    -272   
-64    176    
-64    -96    
-64    48     
-48    -96    
160    128    
112    192    
96     -96    
-48    48     
112    -336   
-48    128    
112    336    
-208   64     
-80    -128   
-608   -80    
208    -256   
240    -16    
128    -64    
0      80     
-96    -128   
-80    48     
-384   112    
160    -112   
-240   0      
208    32     
-16    96     
80     -48    
-208   32     
160    -288   
-64    48     
48     -80    
-368   112    
-16    -96    
64     64     
224    -288   
-208   80     
-128   240    
48     32     
-112   32     
144    -16    
-112   -64    
2144   -2544  
592    1120   
-352   -544   
-880   -176   
736    640    
-736   -672   
-800   -768   
-208   272    
160    -80    
-736   256    
32     0      
-208   240    
-16    -80    
-1520  -32    
-192   48     
160    32     
96     320    
0      0      
-144   -80    
-288   -432   
160    -32    
-96    -160   
-96    160    
128    160    
-192   -16    
-16    48     
-272   96     
-112   -96    
-384   -112   
-160   -96    
-736   32     
-32    128    
80     -48    
-176   16     
-64    -272   
16     -16    
48     -80    
-80    128    
80     80     
-16    48     
-112   0      
-16    80     
-16    80     
48     112    
-112   32     
-32    -48    
-16    128    
-160   -240   
320    144    
-384   -16    
224    96     
-80    -16    
0      128    
-32    32     
-48    -80    
32     48     
16     256    
-64    0      
112    32     
-112   48     
-192   16     
0      32     
-288   48     
0      192    
80     -160   
48     176    
-112   -144   
0      -64    
-64    -64    
176    160    
-176   96     
0      32     
-48    16     
-272   -16    
0      -16    
-176   -32    
48     96     
-240   -240   
96     128    
-240   -80    
80     -48    
112    96     
-96    160    
64     256    
-128   -16    
256    80     
-80    240    
-160   48     
160    -32    
-32    32     
-64    16     
144    48     
-256   -64    
64     192    
-944   -160   
176    64     
-32    192    
-16    16     
-32    96     
-112   0      
16     16     
0      32     
16     160    
-112   48     
-16    -32    
-16    -16    
144    368    
-176   160    
-80    32     
-384   112    
16     32     
192    16     
-160   -96    
-176   128    
128    -96    
64     96     
-32    48     
-160   -64    
-80    -32    
-32    32     
144    48     
80     192    
16     -64    
-16    368    
-400   0      
208    16     
-16    -80    
-224   48     
96     16     
0      144    
176    64     
-32    80     
192    -64    
-160   64     
240    144    
-16    48     
-320   128    
-144   -64    
112    176    
144    -96    
-16    112    
-128   96     
144    48     
48     -272   
-192   64     
-112   256    
-96    16     
192    768    
-64    -144   
0      160    
-256   -16    
240    32     
-192   -144   
-32    64     
64     144    
144    96     
-64    48     
48     240    
144    -112   
-272   -144   
48     160    
-16    176    
32     160    
-96    -176   
96     -64    
-80    64     
208    560    
-384   -208   
-208   -192   
112    -64    
144    224    
32     336    
-112   -112   
-32    112    
160    272    
-192   -32    
112    -80    
16     144    
0      48     
16     144    
-80    96     
96     -80    
-16    48     
16     160    
80     160    
16     96     
-16    48     
-48    64     
80     32     
-32    -112   
112    224    
176    544    
-304   -320   
-272   -96    
432    160    
-96    -112   
-112   336    
-32    -80    
144    -32    
-144   1296   
384    560    
-912   -192   
-32    -528   
-528   544    
1120   800    
144    96     
160    320    
-336   112    
-352   -208   
176    -16    
-48    -32    
-32    128    
-16    176    
128    -144   
64     -256   
128    240    
96     160    
-112   32     
-32    -32    
384    160    
-144   16     
224    -16    
80     592    
64     160    
-64    -32    
-32    208    
-48    -32    
288    96     
-224   -352   
240    32     
-32    192    
176    144    
-96    48     
112    80     
-16    96     
16     -16    
-16    -16    
48     128    
80     -192   
80     112    
-112   112    
32     -320   
112    64     
-96    -192   
80     64     
48     144    
-80    -112   
32     -32    
0      16     
-16    112    
64     384    
-32    256    
112    144    
-176   -272   
224    128    
-192   32     
64     -336   
96     128    
96     -240   
-96    -48    
80     304    
192    80     
-96    96     
16     112    
80     48     
48     64     
-64    80     
64     144    
-96    80     
112    48     
64     96     
32     0      
16     112    
-48    -448   
128    48     
64     -1248  
80     160    
272    144    
80     208    
-32    400    
112    192    
-208   -80    
64     -80    
128    -32    
-64    -112   
144    144    
224    256    
-32    272    
-32    -272   
-16    -112   
96     -624   
16     32     
64     32     
-48    128    
-32    0      
48     80     
224    400    
-32    80     
32     -128   
-16    -16    
112    112    
96     -48    
-64    96     
64     32     
64     144    
64     -464   
0      96     
64     -976   
16     16     
160    112    
-48    48     
144    64     
-32    176    
160    112    
32     -240   
-16    112    
32     -112   
48     -16    
32     -176   
112    128    
80     -304   
16     -32    
64     144    
48     208    
160    80     
-240   -352   
80     -112   
192    112    
32     352    
112    208    
80     64     
-96    -144   
16     80     
96     -208   
16     -16    
336    320    
-208   416    
160    80     
128    432    
-144   -272   
128    352    
-176   -96    
112    -112   
16     -192   
32     32     
16     -528   
160    128    
-16    160    
96     -112   
-64    -32    
96     16     
192    160    
-176   -192   
192    -800   
-128   32     
0      -1040  
176    256    
112    560    
192    -256   
-256   -80    
256    -640   
128    0      
-80    176    
96     -16    
80     144    
240    0      
-112   -176   
-128   -32    
96     -80    
192    320    
-80    0      
32     288    
-528   -48    
160    -352   
64     64     
48     48     
-32    -288   
80     -112   
0      -208   
80     -1552  
-32    -176   
176    -720   
160    96     
80     -96    
112    80     
-144   48     
144    64     
96     32     
-32    -336   
-656   64     
-80    -16    
16     -48    
160    16     
16     -224   
-96    -96    
0      -32    
112    96     
-48    144    
192    1008   
96     -672   
-720   96     
-208   -496   
-144   320    
-128   -64    
272    -272   
-32    368    
-48    -288   
112    -448   
32     0      
160    -464   
144    144    
32     160    
48     208    
80     -144   
-80    176    
-48    -64    
112    -144   
-192   -64    
160    -208   
-112   64     
-48    -240   
-976   -128   
-48    -160   
256    16     
32     -272   
96     160    
-32    -1120  
16     64     
0      -80    
224    96     
-144   48     
144    16     
-320   -96    
64     -192   
-544   -256   
16     16     
-32    160    
144    -48    
-64    0      
32     -256   
112    128    
0      -400   
176    64     
-128   96     
224    -96    
-160   0      
176    -272   
-208   128    
16     -144   
-112   48     
0      0      
160    80     
64     -304   
-112   80     
176    -336   
48     144    
-32    -576   
208    304    
-208   -16    
192    -32    
-416   -96    
48     -80    
-16    128    
32     64     
-144   0      
240    -80    
-400   -32    
240    -96    
-112   48     
192    -64    
-224   112    
176    -128   
0      112    
-128   -128   
0      -176   
-80    -128   
80     336    
-240   16     
176    -16    
-112   64     
-48    -176   
48     32     
-80    80     
48     160    
128    -208   
96     112    
-1424  -224   
-1104  16     
-64    32     
128    112    
-16    -16    
112    224    
-144   48     
32     -192   
0      -112   
-32    -64    
176    176    
64     -96    
-80    112    
-256   -176   
128    0      
-160   -64    
-400   -32    
64     32     
-384   -96    
32     -160   
-192   -16    
-304   16     
272    -16    
-112   192    
16     -80    
-16    272    
-656   -496   
64     112    
-480   -400   
656    512    
-144   128    
-64    80     
32     224    
176    -32    
-80    -80    
-432   0      
-128   -32    
96     16     
-128   112    
-64    -16    
-144   -32    
-160   -160   
128    144    
-96    -112   
160    176    
-208   112    
128    -144   
16     -80    
-112   -64    
80     -16    
-32    192    
-96    32     
32     0      
-112   16     
0      -144   
112    64     
-160   -80    
112    160    
-32    -224   
-144   -176   
160    192    
-64    112    
16     32     
-144   -48    
64     48     
-80    112    
-208   16     
-48    -320   
-192   16     
-384   -240   
80     416    
-160   -256   
144    -32    
16     -240   
64     400    
112    160    
16     144    
-96    240    
48     160    
-144   -208   
64     144    
-48    16     
-112   64     
-32    0      
-320   208    
-48    144    
64     -32    
128    128    
-128   -64    
-64    -16    
80     272    
16     0      
-32    112    
48     256    
-48    32     
-176   0      
96     0      
-128   96     
48     160    
-432   -64    
96     160    
-1328  -208   
-80    112    
128    -16    
96     -48    
32     192    
-256   48     
192    -80    
-176   48     
96     96     
-448   848    
-1632  -1712  
176    96     
0      576    
-704   -1168  
448    1040   
-1104  192    
-144   -352   
480    560    
768    240    
-624   -320   
208    384    
368    432    
-96    16     
-272   -128   
64     -160   
96     192    
-192   176    
-48    80     
-32    96     
0      80     
-224   -128   
192    208    
64     -96    
-64    224    
-64    -400   
32     -112   
-112   144    
160    96     
-96    48     
-80    -48    
128    80     
48     0      
-64    48     
-224   -288   
192    64     
-208   176    
144    96     
-416   -160   
-32    -592   
336    224    
176    32     
-160   144    
80     144    
0      -144   
-48    64     
-96    208    
-64    -160   
64     16     
-176   -48    
144    160    
-112   240    
112    160    
80     -48    
-16    -96    
160    304    
48     112    
-176   -400   
-448   -208   
800    688    
-512   -160   
224    160    
-224   64     
192    -80    
-80    64     
-80    16     
64     112    
16     80     
304    240    
-192   64     
32     32     
-16    96     
96     48     
64     112    
-32    64     
-48    48     
112    80     
144    336    
-16    304    
96     208    
96     208    
-96    32     
32     32     
96     16     
-16    96     
80     80     
-128   208    
64     64     
224    384    
-32    112    
-112   80     
-48    -32    
-48    -96    
112    80     
176    272    
-96    48     
64     48     
-160   -192   
288    144    
-32    304    
64     80     
-80    64     
32     0      
128    96     
0      -32    
-96    16     
96     96     
16     -192   
96     0      
128    496    
-48    352    
16     -32    
-64    -48    
96     144    
224    160    
-64    192    
-112   -48    
192    64     
-80    80     
64     112    
-64    -64    
48     112    
-48    -48    
16     -272   
80     96     
144    -2368  
-128   128    
240    688    
128    208    
240    -112   
-256   208    
144    112    
16     48     
48     -256   
32     48     
64     64     
32     32     
-96    -16    
-64    -272   
112    -416   
-32    -192   
176    144    
-80    272    
176    224    
-208   112    
80     64     
64     -16    
-240   -144   
144    -368   
-128   -48    
304    48     
-48    64     
96     160    
-32    -224   
96     176    
288    -464   
-400   240    
-112   -704   
384    224    
-16    368    
336    160    
-160   240    
192    64     
-112   128    
-16    112    
16     -64    
80     80     
160    272    
-96    -128   
32     288    
-144   -160   
80     -96    
-144   -1008  
16     -32    
288    192    
80     160    
0      96     
-16    176    
-16    -112   
-32    224    
-144   0      
16     -64    
32     0      
160    -304   
16     -16    
80     -176   
-128   32     
272    -32    
-80    160    
112    -1744  
48     96     
96     -112   
128    144    
-32    160    
-144   112    
112    -16    
64     0      
160    -16    
-80    -80    
336    2496   
-1296  96     
208    336    
384    80     
560    -480   
-432   -1008  
-176   160    
-144   32     
336    192    
-128   144    
128    -96    
-48    256    
192    -448   
-32    304    
96     -512   
-80    160    
112    -128   
0      64     
16     -96    
96     96     
-48    -1808  
16     128    
0      256    
128    16     
-96    64     
16     -432   
-48    240    
80     -64    
128    144    
32     -128   
96     224    
0      -144   
0      208    
16     -336   
-32    96     
176    -112   
48     32     
80     208    
-208   -880   
0      32     
144    16     
-112   -608   
112    -48    
-16    -368   
80     -192   
16     0      
-48    -80    
112    128    
160    32     
-112   -32    
128    32     
48     -320   
-32    96     
64     -176   
64     -224   
-560   48     
48     -288   
0      -128   
80     -464   
-80    -256   
80     -2544  
-16    48     
0      48     
112    -64    
96     -576   
-112   64     
144    -528   
-176   -96    
112    -32    
192    80     
-336   32     
80     -176   
112    -160   
48     -176   
0      -32    
128    -192   
128    208    
-32    -544   
240    -224   
48     -64    
-64    160    
48     -128   
32     112    
112    384    
-176   -96    
0      16     
-16    -112   
-160   -144   
48     -240   
48     0      
48     -240   
64     48     
-32    -416   
48     32     
192    128    
-16    112    
224    -32    
-176   64     
-48    144    
0      -160   
-128   -64    
-48    -16    
-288   48     
112    48     
-16    48     
128    -240   
-112   32     
16     -528   
176    176    
0      -304   
96     112    
48     -192   
112    16     
-96    32     
96     80     
-48    -16    
48     -32    
-912   -48    
80     -240   
-704   0      
384    240    
-288   240    
208    -80    
-48    64     
-48    -736   
80     -112   
96     48     
-48    192    
224    112    
0      -304   
-240   -160   
160    0      
-32    96     
128    -48    
0      16     
-112   -112   
-128   144    
-240   -528   
224    -32    
-48    -864   
160    32     
-96    160    
64     16     
-80    64     
144    -96    
-64    -16    
224    288    
-320   48     
16     -368   
-112   -64    
224    0      
-16    16     
-16    -240   
48     64     
48     -576   
160    272    
32     -16    
176    288    
-368   -160   
144    16     
-400   -336   
112    -80    
64     0      
160    -48    
-64    -96    
16     -112   
-64    96     
304    0      
144    320    
272    48     
80     128    
-48    64     
-16    -96    
48     208    
-224   32     
-16    -48    
64     -128   
-48    64     
160    -48    
-672   144    
-176   -272   
48     -32    
-240   -128   
192    144    
-304   -240   
-1008  0      
-160   144    
-384   96     
-80    -48    
-96    -64    
48     0      
64     32     
-160   16     
16     48     
-288   -32    
-144   0      
-16    272    
32     -304   
-240   64     
-1536  -128   
880    -64    
-544   -816   
1056   -128   
-544   464    
96     -400   
-432   528    
48     -32    
240    176    
-512   -80    
176    -64    
-688   -192   
432    -336   
-48    112    
32     16     
-368   32     
48     16     
-16    32     
-128   -528   
-96    144    
-784   -368   
-16    208    
-416   64     
224    336    
-160   -208   
32     320    
-288   -176   
80     512    
-464   -336   
96     -192   
-256   -128   
208    -176   
128    368    
-80    -160   
176    16     
-176   32     
80     16     
-48    80     
-112   144    
-1984  -272   
-96    96     
-224   144    
160    48     
176    -272   
0      -80    
-80    112    
48     32     
-224   272    
-80    128    
80     16     
-144   0      
128    48     
-32    48     
48     208    
-864   -240   
-80    0      
96     176    
128    48     
-64    -640   
224    768    
-272   -256   
-144   160    
-32    -80    
128    368    
-144   -80    
-224   32     
48     -112   
-256   -80    
32     144    
-96    96     
64     96     
16     -16    
48     32     
32     80     
-16    -80    
96     160    
-112   128    
208    576    
-112   64     
-32    64     
-48    -480   
-208   192    
144    -208   
-64    640    
-160   -272   
64     160    
-496   288    
-48    16     
112    144    
-160   -80    
128    0      
-32    128    
-64    0      
96     80     
96     112    
16     240    
64     112    
80     224    
80     288    
16     -32    
-96    240    
-336   -80    
-32    64     
-16    112    
16     0      
32     64     
-80    16     
16     0      
-80    -16    
32     16     
176    112    
176    240    
-336   -160   
-32    96     
-128   -16    
176    80     
-144   -32    
-32    -80    
16     192    
64     64     
144    160    
-448   160    
288    80     
32     -192   
-192   64     
192    400    
-176   64     
208    272    
-16    240    
-128   16     
32     32     
32     144    
160    256    
-64    256    
224    96     
-336   -192   
160    144    
-144   144    
176    48     
96     128    
-144   -32    
64     96     
-48    -64    
-96    -48    
16     64     
16     96     
64     128    
-112   -160   
0      -32    
-16    96     
96     64     
80     -32    
-80    192    
-48    64     
176    112    
-64    -16    
-32    128    
48     64     
208    176    
-352   192    
0      32     
-48    -16    
144    128    
-96    80     
144    16     
-64    -64    
32     96     
48     176    
-48    32     
128    176    
-112   -16    
80     80     
-128   -160   
80     144    
240    272    
-288   112    
0      144    
128    80     
160    -32    
32     144    
-176   64     
48     0      
16     160    
32     -32    
112    192    
-96    -144   
288    32     
-96    176    
-16    48     
-16    192    
48     80     
112    80     
80     128    
-96    80     
16     64     
48     32     
240    16     
-64    288    
-48    32     
2592   1440   
-1408  736    
752    416    
-320   224    
1152   -752   
-768   -368   
0      -384   
176    544    
80     -128   
0      320    
-80    96     
96     -112   
-288   384    
512    -352   
-304   416    
144    -336   
-80    656    
80     -272   
-144   240    
144    -1008  
16     368    
112    -3184  
-176   368    
160    -16    
-80    96     
240    -176   
64     272    
80     48     
48     128    
-176   -96    
144    208    
128    32     
32     80     
-80    112    
128    -32    
80     112    
-112   -432   
-32    128    
-16    96     
192    112    
-48    32     
-16    128    
-64    -160   
224    192    
-16    -32    
16     64     
-80    -32    
64     272    
160    112    
16     -144   
-64    112    
32     -96    
112    64     
16     -1216  
16     -32    
16     80     
48     144    
-48    96     
144    160    
-64    0      
96     0      
-48    64     
0      -48    
80     128    
-16    -64    
208    96     
-144   48     
80     64     
64     -160   
48     -96    
160    -864   
-80    112    
112    160    
-64    16     
112    -32    
0      112    
-16    -16    
272    16     
-160   144    
96     -64    
64     0      
32     -208   
-16    144    
16     -544   
-32    48     
-32    -112   
-48    -64    
-128   -80    
336    384    
-288   64     
224    112    
16     144    
16     -192   
48     160    
16     -480   
192    288    
-32    -240   
64     96     
64     -80    
16     80     
96     -736   
-64    0      
240    96     
144    352    
-48    -48    
-96    -368   
0      0      
32     -384   
-96    32     
112    -176   
160    256    
-48    -144   
112    144    
16     -144   
0      176    
176    -96    
-160   -288   
64     16     
128    96     
80     64     
32     160    
-64    448    
32     16     
144    80     
48     0      
192    368    
-64    -16    
48     96     
-96    -96    
320    592    
-48    -48    
48     -656   
-96    160    
128    -240   
-128   176    
-1264  32     
16     -752   
-16    -288   
272    -112   
-208   -224   
96     -1072  
16     -96    
48     16     
48     -272   
32     -80    
16     128    
208    48     
-320   -128   
144    -432   
112    112    
64     96     
32     64     
32     -64    
144    0      
-32    -144   
160    -48    
64     -80    
80     208    
160    -128   
0      -80    
-32    96     
80     -224   
-80    -16    
16     -16    
-32    96     
-32    16     
-144   -224   
144    112    
-96    -32    
160    128    
-144   -112   
256    -32    
-64    112    
80     -80    
160    -32    
-112   128    
80     -192   
64     0      
32     176    
48     -96    
-496   -208   
160    -400   
-752   48     
128    -176   
-160   -48    
240    64     
-16    -224   
288    -400   
-224   96     
512    -352   
-96    288    
-96    -80    
256    -64    
-288   -32    
80     144    
-176   32     
80     0      
-224   -64    
144    64     
848    1440   
-32    1280   
-976   -1120  
-528   -400   
-48    -160   
496    -112   
320    -288   
336    752    
-416   304    
-176   -160   
320    -352   
-352   272    
304    -128   
-144   144    
48     -352   
-48    160    
48     -416   
80     320    
-176   -288   
208    80     
-32    -1056  
192    -128   
-64    -160   
-144   -32    
-32    16     
208    -256   
-144   48     
240    -16    
-304   -208   
176    64     
-208   -64    
-16    48     
32     176    
16     -32    
-48    16     
32     -400   
80     176    
240    304    
-256   -384   
112    176    
160    96     
-80    -176   
-32    -16    
-64    48     
80     64     
-128   96     
128    128    
64     96     
-48    -112   
0      -176   
16     -400   
-64    32     
80     160    
-32    192    
-96    80     
0      -96    
-96    48     
64     -96    
48     -160   
64     176    
128    0      
32     -48    
-16    160    
48     -64    
160    0      
176    -32    
-928   -16    
-128   128    
-1120  -208   
32     64     
-80    -48    
-64    80     
32     16     
64     -16    
48     -128   
-144   0      
-80    -240   
160    64     
-80    -112   
-112   -112   
144    -64    
-416   176    
-208   -336   
-592   368    
-48    80     
0      128    
-112   -112   
16     -112   
-160   -96    
-320   -176   
32     176    
-80    -32    
48     272    
-240   -80    
-96    -32    
80     -32    
-304   -224   
144    128    
192    80     
48     432    
-272   -96    
-208   -48    
-1728  -208   
48     144    
-80    -48    
144    480    
-288   -48    
64     48     
-208   -416   
208    48     
-96    0      
112    192    
-144   0      
32     208    
-128   80     
32     32     
-128   -32    
-368   -176   
144    176    
-192   32     
16     160    
-176   -288   
240    16     
-336   -64    
0      -112   
144    -112   
-208   144    
176    128    
-112   32     
-96    -48    
-64    64     
32     -48    
-272   -32    
-160   -48    
-944   -64    
208    -176   
-208   -160   
-256   176    
320    -16    
176    -16    
-304   64     
-48    -32    
0      16     
-112   128    
16     48     
-64    16     
16     128    
-240   224    
208    64     
-336   0      
-80    0      
16     -32    
64     96     
128    160    
-112   0      
112    32     
-256   80     
64     -64    
32     80     
-96    160    
0      16     
-96    -16    
-240   -64    
-32    288    
-288   -208   
192    240    
-240   0      
16     16     
160    432    
-192   -48    
-96    96     
48     -192   
176    -64    
144    96     
-224   0      
-32    80     
-96    96     
80     256    
-192   48     
80     -160   
224    96     
-944   -64    
-32    -32    
-112   256    
128    -96    
48     128    
-16    32     
112    64     
-112   176    
16     -64    
-16    48     
96     48     
-48    80     
-112   128    
-48    80     
-224   48     
160    0      
16     -16    
-1376  -1792  
624    -288   
-1200  320    
880    -288   
672    208    
-224   -832   
96     976    
240    -336   
-64    688    
240    -688   
-112   672    
-112   -464   
-16    528    
16     -192   
160    432    
-176   -64    
144    64     
-192   144    
256    64     
-160   144    
208    -80    
-96    256    
-16    64     
112    240    
-128   -288   
96     160    
48     16     
-96    224    
64     -96    
-64    144    
80     -32    
48     128    
-32    80     
16     192    
32     32     
-48    80     
128    -32    
-64    208    
32     0      
-16    32     
-48    -32    
64     112    
-16    96     
32     48     
-16    16     
-80    80     
48     48     
144    144    
-192   -288   
112    160    
-272   48     
240    96     
-208   0      
144    144    
-112   80     
96     0      
96     160    
-32    128    
96     32     
48     48     
0      208    
16     128    
48     32     
-32    16     
64     176    
-160   128    
-32    -48    
80     32     
176    32     
-48    80     
64     80     
-96    64     
208    128    
-144   128    
64     48     
144    80     
-192   -64    
320    336    
-336   -32    
208    -64    
-32    -48    
0      80     
96     32     
-48    48     
-16    48     
-64    -640   
-64    144    
144    112    
-80    144    
112    352    
-16    16     
0      80     
-16    64     
96     -16    
32     96     
-80    -96    
32     128    
-32    -48    
-96    -64    
16     -80    
224    -16    
-128   96     
96     -48    
16     144    
80     80     
0      128    
16     -160   
-48    -224   
80     -176   
128    192    
64     256    
64     208    
-160   16     
48     160    
112    112    
112    -128   
-32    176    
208    -992   
48     240    
-80    -176   
-32    -128   
-16    0      
-48    -16    
80     0      
240    224    
-80    -80    
32     176    
-16    240    
144    176    
128    224    
-64    -256   
96     208    
-32    16     
16     -16    
112    -64    
0      48     
176    352    
-160   -32    
64     -432   
80     112    
48     64     
32     176    
-128   -16    
-16    -352   
160    192    
-48    -192   
112    32     
272    -496   
-112   176    
-80    -2832  
-176   128    
-32    64     
64     -16    
112    48     
160    -16    
96     32     
96     272    
-240   64     
112    -128   
368    192    
-96    128    
-16    -16    
0      -144   
256    80     
64     -928   
-32    -16    
32     288    
-160   -16    
224    -64    
304    208    
-80    16     
64     32     
-112   176    
-16    -64    
128    80     
0      32     
0      48     
160    -352
[truncated: 224,011 more chars]
