# Supplementary material for: A Fault Diagnosis Method for One‐Dimensional Vibration Signal Based on Multiresolution tlsDMD and Approximate Entropy
Source: Hindawi journal article supplement (doi:10.1155/2019/3262818), 2019-01-01
Supplement: f1 [file 3262818.f1.zip › 3262818.f1/gear signals/broken teeth fault signal/Data11.txt]

16     144    
-144   0      
208    192    
-256   -48    
112    -32    
-48    -64    
-112   -64    
144    256    
-352   64     
160    -144   
0      48     
-64    48     
224    48     
-80    -32    
0      -80    
-48    144    
-128   -144   
64     -48    
-80    -16    
64     80     
-224   -64    
128    0      
-128   0      
64     32     
0      -16    
-32    -112   
96     112    
-80    -96    
128    224    
-16    128    
-48    -208   
96     176    
64     320    
16     160    
-96    96     
-80    -64    
96     368    
-32    400    
0      288    
-48    -144   
-96    -144   
32     48     
112    80     
-48    -16    
-64    0      
-64    80     
64     -128   
-32    80     
-64    176    
96     352    
-176   -256   
80     80     
32     64     
112    176    
-80    -48    
0      208    
-128   32     
336    336    
-128   48     
240    352    
-64    128    
-32    -64    
-48    96     
-64    16     
192    336    
0      64     
-80    64     
176    112    
-112   32     
112    128    
-128   -32    
64     144    
96     64     
16     -48    
-16    80     
-48    80     
-48    -32    
128    352    
-208   144    
48     176    
-224   -160   
96     -32    
16     160    
64     112    
-144   -144   
176    -32    
128    384    
-32    32     
-128   -224   
32     80     
144    336    
-144   -32    
-160   -32    
320    144    
144    256    
-192   -160   
0      320    
80     336    
-64    0      
144    -16    
96     208    
112    16     
0      96     
0      112    
16     48     
32     96     
16     176    
0      0      
48     32     
0      144    
-32    -112   
-80    -720   
80     64     
112    208    
96     16     
-192   64     
208    128    
-48    128    
176    0      
-144   160    
96     64     
96     -32    
96     128    
0      -208   
496    -320   
-48    400    
-16    -288   
-64    96     
-544   -1008  
1040   2528   
-288   704    
-80    -608   
-384   224    
464    -160   
-144   464    
-576   -64    
144    -192   
128    -48    
-16    112    
-112   48     
-48    80     
32     -544   
176    432    
-48    -1712  
208    240    
16     480    
160    16     
-208   0      
448    112    
-384   -80    
240    -32    
-32    160    
-48    -16    
176    -48    
-160   -160   
224    144    
-48    -64    
48     128    
-48    -176   
32     160    
64     64     
0      96     
32     80     
48     128    
80     -96    
80     240    
-128   64     
256    144    
-208   32     
48     -272   
48     96     
80     80     
32     32     
0      -352   
-80    64     
144    400    
16     80     
80     48     
80     32     
0      96     
48     224    
-32    -208   
144    112    
-16    176    
160    128    
-48    -64    
208    0      
-48    208    
80     -656   
160    144    
-16    -896   
96     256    
-160   96     
96     -144   
192    96     
0      208    
-32    16     
112    -48    
16     128    
48     160    
-16    160    
48     48     
80     192    
-32    -32    
192    112    
192    -80    
128    -16    
32     -336   
32     112    
-32    -32    
112    -128   
-32    -80    
128    96     
0      160    
32     128    
-64    32     
208    -336   
96     -32    
112    -128   
-32    112    
96     -192   
-32    16     
-144   -592   
-48    -192   
160    128    
80     432    
0      128    
-96    -352   
16     80     
128    -176   
16     32     
48     -96    
32     64     
-64    -160   
96     96     
16     -64    
48     -32    
-16    -16    
-112   64     
16     32     
80     -1456  
160    -2144  
-96    -160   
176    -1984  
-224   -64    
320    208    
-32    0      
48     96     
64     -208   
-48    208    
336    -208   
-96    -1056  
-208   96     
304    -336   
-64    -32    
32     -128   
-16    -352   
272    -64    
-96    -560   
-16    -112   
224    -1008  
80     -128   
-48    -1184  
-208   -128   
48     176    
96     -48    
384    -272   
-224   0      
48     -208   
192    -16    
-192   -48    
80     64     
-928   32     
-16    -144   
-176   -416   
-128   -240   
288    48     
208    -1024  
-64    48     
16     48     
48     32     
224    -224   
-112   32     
144    -128   
-48    208    
128    160    
-144   128    
-240   0      
16     -192   
80     -16    
32     -352   
-96    32     
64     -400   
160    64     
112    -112   
16     -96    
-64    -32    
-80    0      
64     16     
144    80     
-224   -64    
256    -80    
-528   -80    
48     -256   
-992   -64    
64     16     
48     -16    
-16    -192   
16     -208   
96     -1776  
-16    112    
-32    -112   
112    0      
48     288    
-96    -16    
-64    -288   
176    48     
-400   112    
128    -16    
-352   48     
112    96     
-160   -64    
-160   -176   
112    -320   
48     -224   
48     256    
1296   -768   
-464   528    
432    432    
-384   304    
-256   -432   
800    1008   
-976   -720   
592    432    
-368   -496   
128    -144   
-32    -240   
384    -144   
64     304    
80     -880   
-160   224    
272    -2656  
-32    432    
-96    -208   
64     192    
-144   -240   
176    144    
-320   -32    
272    -112   
-816   -112   
352    -320   
-432   128    
176    192    
-64    208    
144    -320   
-96    112    
160    -560   
16     0      
-96    -32    
128    80     
32     0      
144    144    
-208   -80    
0      96     
-144   -16    
144    -48    
-64    16     
96     -16    
-80    0      
320    -288   
-384   96     
160    -240   
-48    -176   
144    16     
32     64     
-32    64     
80     64     
-96    16     
32     144    
-96    -16    
176    16     
-80    -48    
0      -64    
-32    48     
224    -384   
-160   -64    
32     176    
-1040  -48    
-16    -64    
-384   -16    
-272   -96    
160    -16    
-32    160    
16     96     
112    496    
-128   -176   
-16    -160   
-528   -128   
48     160    
-48    -64    
48     80     
-80    -208   
160    -48    
-144   128    
-336   -128   
-16    176    
-96    80     
-32    192    
-16    -304   
-304   -272   
-528   -192   
112    128    
64     416    
-144   -224   
96     -64    
-128   16     
-48    -48    
-416   -32    
80     160    
-48    128    
0      48     
-304   -64    
80     112    
224    -32    
-96    -128   
16     -48    
48     192    
112    -16    
-16    208    
-160   -80    
-16    0      
-48    48     
-48    -48    
16     112    
-144   -16    
64     64     
-288   64     
0      48     
-704   64     
-16    80     
-16    -16    
48     128    
-96    -64    
112    192    
0      80     
-128   0      
32     112    
48     -80    
112    64     
-144   -80    
80     96     
-80    608    
64     -160   
-160   -224   
-96    -32    
-608   128    
64     160    
-48    -48    
-64    -112   
112    160    
48     160    
-256   32     
48     -112   
-80    160    
48     0      
-64    -32    
-16    0      
80     80     
-192   96     
-48    -16    
-1376  -96    
-16    384    
288    -288   
80     256    
-240   208    
-32    -144   
16     32     
-160   -16    
16     64     
-112   112    
48     64     
64     -48    
16     368    
-544   -208   
320    16     
-368   32     
208    224    
-272   -208   
-16    80     
160    48     
-80    64     
160    -32    
-80    304    
-224   -64    
224    16     
-144   80     
336    48     
-464   32     
112    128    
-64    192    
304    -176   
-80    112    
160    48     
-80    128    
48     32     
160    16     
80     128    
-32    112    
80     -48    
-80    -16    
64     128    
-96    16     
32     240    
-160   -64    
144    0      
-96    -64    
0      80     
0      80     
400    -240   
16     304    
-16    -96    
-96    128    
-336   272    
704    1168   
-1200  -544   
-352   -560   
-352   -32    
-288   -1376  
768    -768   
-320   336    
480    576    
-400   -80    
-128   144    
352    -16    
112    240    
-96    96     
160    48     
48     32     
-96    32     
96     48     
144    64     
16     112    
336    224    
-272   160    
192    64     
-32    224    
64     32     
64     112    
32     176    
-32    16     
-32    -48    
-32    272    
112    112    
16     48     
-96    160    
96     16     
0      128    
16     176    
48     400    
-48    48     
-48    16     
32     96     
112    16     
-80    -48    
-48    224    
224    176    
-32    128    
-192   -144   
64     112    
-48    48     
144    304    
-240   -192   
192    128    
-176   96     
160    -144   
-64    112    
32     48     
96     80     
48     64     
32     160    
0      80     
96     64     
16     -48    
96     208    
-112   -16    
176    128    
-80    144    
96     -160   
16     -192   
80     -816   
0      112    
64     288    
-96    48     
192    96     
80     96     
-112   160    
0      0      
64     48     
64     192    
80     -32    
80     112    
-128   96     
128    96     
-224   112    
-80    -704   
288    80     
-144   208    
48     160    
-32    32     
0      176    
-96    -80    
224    64     
-160   -16    
32     -64    
16     176    
-96    144    
112    -48    
-112   -48    
-32    -64    
176    -160   
112    288    
32     128    
-48    80     
32     64     
192    128    
272    240    
-48    208    
-48    144    
-16    128    
-64    -160   
224    144    
0      240    
48     80     
0      32     
-48    -464   
256    224    
-32    -1008  
32     128    
16     208    
288    544    
32     96     
144    48     
-352   -704   
-96    144    
320    -208   
-16    80     
-48    16     
256    48     
96     272    
0      -544   
-16    32     
-256   -624   
224    80     
144    160    
64     128    
64     16     
-32    272    
-128   0      
336    144    
-272   -48    
112    80     
-32    96     
64     -144   
96     64     
48     -128   
304    48     
-224   -144   
208    80     
192    -2896  
-80    -32    
64     32     
-32    80     
144    112    
64     32     
-48    32     
112    304    
80     128    
112    -32    
-80    80     
128    320    
-80    176    
144    -64    
48     96     
128    -320   
-16    16     
48     -48    
0      -96    
96     128    
-48    -624   
144    128    
80     -32    
0      112    
-64    224    
16     16     
112    -96    
-112   -144   
160    -496   
192    192    
-32    -80    
-64    48     
-48    -48    
96     192    
-48    -32    
16     192    
160    -64    
112    -144   
64     240    
80     64     
-16    48     
128    -416   
32     0      
80     -160   
64     128    
48     -16    
0      240    
-96    16     
96     -32    
128    192    
208    144    
-16    208    
496    -624   
-464   -1040  
640    768    
-592   528    
-880   -576   
80     192    
176    336    
320    576    
-224   -48    
48     -48    
-64    224    
-112   -368   
240    144    
-48    -128   
192    -928   
0      -112   
-80    -720   
240    32     
80     736    
32     0      
-128   128    
208    -80    
48     112    
-16    -288   
-16    -688   
-144   96     
-48    32     
208    48     
-832   -592   
64     -512   
32     -176   
0      0      
0      96     
144    -208   
16     -80    
128    96     
-16    -80    
128    -256   
-96    48     
64     -48    
-176   48     
-16    -176   
-48    0      
80     -112   
32     -240   
-160   96     
-16    -48    
144    -112   
0      -544   
-16    -48    
160    -1536  
-64    48     
160    -608   
-48    16     
16     -208   
112    80     
0      80     
48     128    
-112   64     
-192   -224   
-368   0      
64     -144   
32     -272   
48     -224   
64     -32    
-32    -512   
32     16     
160    -288   
-48    0      
128    -176   
-48    96     
112    0      
-16    96     
-144   -16    
192    -240   
64     16     
-16    160    
112    176    
0      176    
144    208    
-80    -16    
16     -48    
176    16     
-80    16     
160    -272   
48     64     
208    144    
64     16     
-448   -288   
80     -112   
-96    0      
16     -144   
96     64     
112    32     
0      64     
-48    -208   
-112   -64    
128    -336   
48     -48    
176    -752   
32     240    
-112   16     
48     -560   
-112   -48    
144    -32    
-208   -32    
208    144    
-800   -64    
256    -240   
-1440  -176   
224    -368   
-128   144    
192    -192   
-16    176    
32     -880   
-16    -256   
80     -32    
32     176    
0      -16    
16     -48    
-128   208    
304    96     
-336   -48    
-64    -48    
64     112    
160    0      
-16    64     
-32    -208   
96     48     
80     -656   
64     -80    
32     112    
-64    16     
48     208    
0      -32    
80     -128   
160    64     
-224   240    
32     -96    
-320   96     
112    -192   
160    192    
-224   -336   
224    96     
-192   96     
320    -464   
-320   304    
-128   64     
-144   48     
-112   -128   
-48    -96    
96     144    
-208   -64    
96     224    
-528   -448   
48     -224   
32     64     
-512   -208   
192    -144   
32     240    
112    176    
-224   144    
-272   96     
-256   -112   
208    304    
-224   80     
208    192    
-16    -336   
64     -64    
-48    -16    
-448   -48    
-96    176    
-48    -272   
16     -48    
64     224    
-320   240    
-272   -128   
-112   48     
176    -64    
-176   96     
-64    192    
-96    -32    
16     48     
-112   48     
64     -48    
96     -64    
16     96     
208    -48    
-448   -80    
48     -176   
-176   80     
-128   -64    
-32    -16    
-128   32     
-128   -80    
-80    64     
-1440  -96    
784    1392   
-1520  -880   
1248   1424   
-32    752    
320    -368   
-96    272    
-336   128    
160    -352   
-96    256    
-224   -336   
304    32     
-464   -160   
-48    208    
-144   -16    
-160   -64    
0      144    
176    48     
64     144    
-80    -48    
96     112    
-32    0      
-112   0      
80     112    
0      80     
144    16     
-96    16     
-144   96     
-64    192    
-64    -48    
-160   -16    
-96    96     
-1424  -48    
-32    128    
-16    -144   
0      32     
144    336    
-144   96     
80     -32    
-224   224    
48     16     
-32    -16    
-80    32     
16     144    
112    176    
-352   -112   
48     -16    
-944   16     
112    240    
96     -144   
-80    64     
32     32     
112    176    
-160   96     
128    -160   
-16    48     
32     160    
48     160    
-112   16     
64     -48    
-80    -32    
-32    80     
160    32     
-64    96     
96     176    
-80    -80    
16     48     
48     48     
0      192    
-112   96     
80     16     
64     64     
-32    112    
-176   64     
64     288    
-192   -32    
144    16     
32     -112   
48     240    
-208   144    
-32    96     
80     -64    
64     192    
-144   112    
32     -96    
0      -48    
-48    144    
-96    256    
80     80     
-16    32     
-16    48     
-64    0      
-192   -96    
-96    -32    
128    0      
32     192    
-208   0      
112    -32    
-96    96     
64     64     
128    96     
-272   80     
80     128    
-80    -32    
128    144    
-240   -144   
128    48     
-96    32     
128    224    
48     176    
96     144    
16     208    
-144   0      
96     96     
-272   -80    
272    288    
-64    160    
240    224    
-304   -64    
64     128    
-96    64     
160    64     
-128   160    
96     128    
32     112    
112    144    
-64    224    
16     224    
304    160    
-80    -16    
32     96     
-192   96     
352    112    
-160   96     
432    192    
-144   112    
-48    48     
-16    416    
-32    64     
288    112    
64     80     
-176   96     
0      64     
64     -96    
48     0      
16     224    
-16    48     
224    -144   
-192   -64    
112    128    
0      96     
-96    -16    
112    144    
-80    32     
-16    112    
80     80     
0      -208   
32     64     
144    176    
80     304    
32     128    
-112   176    
144    224    
-112   -64    
-80    128    
0      64     
128    -2192  
-112   -48    
176    368    
-64    -64    
96     -16    
80     160    
-112   -64    
16     80     
-96    32     
128    192    
-128   96     
0      128    
-16    176    
-64    32     
16     -16    
64     -944   
336    592    
48     176    
16     0      
176    144    
32     368    
-64    192    
-48    128    
48     32     
144    112    
32     48     
-48    64     
-64    -64    
160    144    
112    240    
-16    0      
-32    64     
-784   -2096  
0      -752   
304    -448   
576    400    
144    -368   
-528   32     
288    816    
272    112    
-400   -192   
320    240    
16     240    
-96    -160   
-32    144    
272    -384   
-192   -144   
-96    -2288  
64     -32    
-112   64     
224    304    
112    112    
-192   -128   
-96    -192   
96     224    
16     48     
112    96     
-128   -64    
0      96     
224    832    
-64    -272   
112    128    
-208   -416   
192    16     
-32    -928   
-32    0      
208    -480   
-96    176    
64     -64    
32     -48    
-48    -112   
80     0      
128    240    
16     0      
-48    144    
80     32     
96     80     
16     -32    
0      192    
64     -592   
32     -160   
32     -160   
-32    128    
96     208    
32     272    
-32    48     
160    64     
0      112    
-64    -192   
160    -368   
-432   -928   
368    528    
144    -64    
-160   64     
64     -656   
64     0      
48     32     
144    176    
32     -32    
80     160    
0      -48    
96     -112   
48     16     
48     -16    
128    96     
-64    -208   
16     64     
32     -800   
320    592    
-32    -64    
288    96     
0      304    
336    -16    
-208   -160   
128    0      
0      240    
16     -144   
0      -16    
272    384    
64     496    
-64    -48    
-80    -80    
112    -208   
96     112    
32     16     
0      176    
-32    80     
64     48     
-16    -32    
96     160    
16     -944   
144    48     
-32    -1152  
48     -176   
-32    -48    
96     -224   
16     96     
160    32     
-48    128    
48     -240   
32     112    
32     16     
96     -1232  
96     48     
-48    64     
16     144    
48     -48    
32     -128   
0      -304   
32     -800   
64     96     
160    272    
96     96     
-128   80     
96     -16    
-16    -80    
176    16     
0      32     
96     128    
16     32     
-32    -112   
-112   -192   
-48    -528   
144    -304   
16     32     
176    64     
144    464    
-96    -96    
-16    -64    
240    80     
16     -32    
-96    32     
224    -64    
32     -128   
0      -176   
-160   -144   
-400   -80    
0      -16    
112    224    
96     -208   
-144   -144   
80     -528   
32     -32    
16     -336   
16     160    
160    64     
-144   80     
224    -32    
32     -80    
160    592    
-512   -576   
-64    240    
96     -224   
32     -16    
48     -112   
0      -144   
224    256    
-384   -144   
176    -496   
-176   160    
192    -64    
32     288    
0      -128   
176    -208   
-80    64     
-32    -128   
-64    272    
144    -160   
-496   192    
80     -16    
-16    -128   
32     -16    
80     48     
32     -192   
-112   224    
16     -192   
96     64     
240    112    
-96    0      
-128   -16    
64     -128   
-128   -96    
176    -144   
-400   -272   
32     48     
-896   128    
-32    -288   
-48    64     
48     -1104  
-848   -1904  
784    0      
176    1504   
-464   -64    
320    -112   
-720   624    
384    800    
-1136  -144   
256    608    
112    -160   
288    48     
-688   -128   
-80    16     
48     32     
288    -96    
-64    48     
48     -416   
-64    -96    
-240   -64    
64     -32    
-80    32     
-32    48     
0      128    
32     128    
64     -16    
32     -208   
-208   -48    
96     -80    
96     128    
48     -80    
48     80     
-256   -16    
96     -32    
-96    32     
64     -32    
-192   -16    
288    400    
-160   144    
-16    -352   
-320   16     
160    -96    
16     112    
-32    -144   
-32    64     
-1472  -256   
-32    160    
-48    80     
-272   -160   
0      208    
32     0      
64     -32    
64     96     
-192   32     
176    64     
-144   32     
96     -16    
64     272    
-1504  -288   
192    80     
-496   -240   
-112   -64    
16     96     
-128   96     
-48    112    
-448   -176   
0      -32    
128    -32    
-64    144    
96     64     
224    48     
-80    -48    
0      192    
-80    -176   
128    -32    
32     48     
-432   -192   
16     -32    
-320   -256   
-16    80     
-400   48     
-64    -48    
-16    64     
-144   0      
-128   -144   
64     96     
-288   64     
304    128    
-304   -32    
80     96     
80     -48    
-64    -32    
80     16     
-48    128    
-16    128    
-32    80     
-48    -240   
-144   -160   
0      -48    
-784   16     
80     192    
-288   -96    
48     160    
32     32     
16     48     
112    -80    
-160   96     
80     144    
256    400    
-208   96     
16     -16    
-96    80     
-224   16     
48     -32    
-272   176    
-48    -32    
64     48     
-80    16     
-96    -432   
64     64     
176    400    
-320   -96    
192    112    
-112   128    
-32    240    
96     32     
-128   16     
32     -96    
-144   224    
0      144    
32     64     
-1616  -128   
192    192    
-64    0      
128    32     
-64    -16    
0      -48    
-192   48     
112    192    
112    160    
-64    -32    
-128   48     
-48    112    
80     96     
-80    48     
64     176    
-192   112    
-16    16     
-16    16     
0      -224   
-16    112    
-48    -128   
16     160    
-64    32     
0      48     
-16    112    
96     48     
32     176    
16     -32    
-176   -112   
-128   112    
-352   0      
48     176    
48     80     
-16    0      
-192   -240   
96     -560   
384    352    
368    928    
-464   -240   
96     160    
32     64     
-32    48     
-128   64     
-128   -144   
32     144    
-64    96     
0      48     
80     256    
-96    -112   
64     80     
-96    -80    
32     -32    
176    64     
192    160    
-64    64     
-176   -80    
-64    80     
-32    176    
64     -32    
-32    144    
-112   16     
0      48     
96     80     
-80    0      
240    64     
-112   224    
48     160    
-656   416    
-800   1216   
-240   384    
-160   16     
-272   -1152  
1040   224    
-224   240    
-48    -16    
112    400    
400    720    
-256   48     
16     -16    
-32    80     
96     -176   
32     160    
-80    -48    
160    112    
-240   -240   
144    80     
0      48     
-64    96     
-304   -64    
80     0      
224    176    
48     -16    
-32    -16    
-64    96     
64     304    
-208   0      
-112   -16    
-48    -64    
80     -112   
32     160    
-16    208    
160    -224   
-64    96     
112    0      
128    784    
0      128    
-32    -48    
352    128    
-144   64     
160    -32    
-96    192    
32     -16    
48     272    
16     192    
96     256    
-128   224    
-416   -560   
304    80     
-160   -48    
112    272    
240    -192   
-224   16     
192    -32    
48     192    
-368   -432   
656    976    
-16    -112   
128    240    
64     -16    
-128   96     
48     448    
-80    176    
96     -16    
64     144    
-32    -480   
64     96     
32     0      
48     96     
128    80     
80     224    
-32    64     
80     128    
16     -112   
352    416    
-256   64     
80     48     
-64    -224   
112    224    
112    96     
32     -544   
0      352    
-16    48     
-32    64     
112    -96    
192    304    
-80    0      
112    16     
-16    144    
112    64     
-112   -64    
80     128    
32     80     
-48    -352   
192    224    
-208   -384   
160    -64    
-64    -672   
-32    0      
144    176    
-32    272    
32     48     
0      112    
-32    0      
128    80     
16     -32    
0      272    
-32    16     
32     -112   
-16    16     
48     -240   
64     128    
64     -832   
-32    96     
128    224    
-112   -48    
16     -240   
112    80     
-80    320    
80     192    
160    32     
-32    160    
80     0      
-64    96     
96     80     
80     -176   
176    464    
-544   -80    
512    80     
-144   -112   
96     -96    
64     -48    
192    144    
-224   -64    
160    16     
-32    112    
80     336    
96     32     
32     -208   
-16    96     
0      -320   
144    128    
-16    -880   
96     112    
-16    -1136  
-176   -128   
-16    -240   
176    256    
32     240    
176    240    
-112   144    
32     48     
128    -48    
-96    -272   
96     64     
-16    -320   
32     -32    
224    -32    
80     336    
48     -576   
32     128    
128    128    
112    96     
-112   128    
80     144    
160    304    
-128   -112   
-16    80     
64     -192   
64     64     
96     -48    
-96    48     
-128   -144   
64     128    
80     -176   
176    64     
-208   368    
-96    -128   
32     112    
80     16     
144    96     
-48    -240   
240    96     
144    -80    
-16    224    
32     -176   
16     96     
112    -16    
32     80     
16     32     
112    272    
-192   112    
-96    -2432  
208    -48    
192    -1360  
192    352    
800    -1696  
384    384    
336    -240   
-176   -1040  
1088   288    
-448   -288   
176    192    
80     496    
144    -608   
-192   -128   
176    160    
176    -576   
-224   416    
-64    -336   
-48    -80    
224    -224   
-96    -464   
272    32     
-80    -880   
48     -64    
128    -240   
80     128    
112    208    
0      -32    
-80    -576   
64     240    
240    80     
-112   -32    
-64    -96    
64     -32    
0      -64    
16     96     
96     -144   
80     128    
16     -192   
-32    -1456  
16     -336   
-112   16     
320    16     
96     64     
-128   -64    
80     48     
48     -128   
-128   0      
80     -48    
-1152  -32    
80     -48    
64     160    
32     -256   
144    -16    
-64    -576   
128    -176   
-32    -128   
32     -16    
80     -64    
48     160    
128    16     
-112   -176   
32     48     
128    144    
-80    -32    
112    -176   
-48    48     
0      -352   
160    16     
-80    -144   
80     144    
-16    -848   
112    64     
16     32     
-48    112    
-16    0      
64     -96    
-16    144    
0      32     
160    48     
-80    128    
-1072  -16    
368    -160   
128    64     
-112   -144   
112    -64    
-96    -1248  
-48    -224   
224    -192   
-16    160    
-80    192    
16     176    
-96    -112   
240    -16    
-176   -144   
80     -112   
-160   48     
-144   -112   
-256   48     
-48    -224   
128    16     
0      -144   
-64    -16    
144    -464   
-16    32     
32     224    
-32    -224   
-64    32     
48     -256   
-256   -128   
32     -80    
160    448    
0      -48    
-192   16     
-32    -416   
-64    32     
176    -144   
112    128    
80     -192   
48     -32    
0      112    
64     16     
-64    -176   
-128   -560   
-192   -624   
-80    -64    
144    80     
160    -176   
-1648  -160   
48     -176   
64     192    
80     -272   
-144   32     
16     80     
96     96     
48     144    
-64    192    
128    -48    
-16    -224   
-128   -48    
48     48     
176    176    
-192   -32    
0      64     
0      -48    
128    256    
-64    -320   
-80    112    
-64    -80    
-112   240    
16     320    
-304   464    
-224   -160   
48     128    
-80    80     
16     -64    
48     112    
32     48     
224    416    
-640   -736   
416    432    
-48    176    
-528   -160   
-48    -128   
-96    -64    
128    112    
-304   -16    
-208   -64    
-1568  -128   
-64    -80    
-64    -336   
112    -96    
-224   -48    
64     224    
-240   -192   
96     -64    
80     -16    
-16    64     
160    0      
-272   144    
128    16     
-16    160    
-160   -112   
48     32     
32     48     
-400   160    
-144   -96    
-32    -16    
-256   0      
80     -48    
48     192    
144    48     
-160   -16    
-32    16     
64     48     
-96    -16    
-160   32     
-272   272    
-80    -224   
-96    128    
-128   -32    
-880   2384   
-160   -816   
16     -496   
944    0      
-432   -464   
16     656    
-656   112    
656    -240   
0      160    
-64    208    
-160   32     
-512   272    
416    -32    
-48    144    
-368   -336   
-32    496    
-208   -176   
80     576    
-496   -464   
320    0      
-288   -304   
144    208    
80     384    
-80    352    
176    0      
-128   48     
0      -96    
-304   -656   
464    304    
0      224    
176    64     
-560   80     
160    224    
-80    176    
16     352    
-112   272    
-112   112    
-176   16     
160    128    
32     -16    
-48    -32    
48     160    
160    304    
-16    96     
-256   -112   
-48    -96    
-464   -240   
-64    128    
-352   -352   
-64    -336   
112    128    
-96    160    
-16    128    
32     -192   
-80    208    
-64    -80    
96     1024   
-160   544    
336    224    
-112   -48    
48     16     
-352   -208   
112    -208   
-160   112    
-64    -48    
192    80     
-32    -32    
16     0      
16     80     
64     192    
272    -80    
80     128    
-304   144    
16     96     
-144   -96    
-208   -144   
384    -48    
-304   -32    
-128   16     
16     16     
48     208    
32     80     
0      0      
-16    96     
16     16     
0      16     
16     544    
-208   -192   
-80    -64    
144    16     
32     160    
-96    112    
32     160    
0      0      
-16    -176   
48     -80    
-32    64     
192    288    
-96    -144   
-64    -112   
-16    48     
240    112    
-224   64     
80     144    
-16    32     
256    304    
-288   -48    
112    208    
-160   48     
224    128    
-64    112    
112    96     
32     336    
-240   112    
48     -16    
48     224    
144    64     
-32    -96    
112    96     
-384   240    
256    176    
-80    48     
128    -80    
-48    144    
48     176    
128    64     
-80    160    
32     -16    
-16    32     
80     48     
64     176    
160    128    
-112   32     
80     -64    
-160   0      
-48    -64    
80     112    
-16    -64    
160    16     
-224   112    
80     96     
96     64     
160    64     
-128   112    
96     96     
-48    32     
80     368    
-160   -160   
80     80     
-80    144    
176    176    
64     160    
96     32     
-112   96     
64     96     
32     64     
48     176    
-16    176    
80     -32    
32     80     
-80    16     
144    112    
-112   80     
48     80     
160    320    
48     -480   
144    96     
96     240    
-96    80     
-32    192    
-96    80     
16     64     
112    -144   
0      48     
304    192    
-240   80     
16     16     
-16    96     
48     -352   
176    0      
0      -416   
-32    -16    
32     96     
64     112    
112    80     
160    144    
-96    144    
160    128    
-64    128    
-32    32     
48     32     
176    -96    
-112   128    
-144   -256   
384    192    
-208   -272   
48     96     
2416   -1264  
-976   -496   
1088   560    
-112   128    
-192   -448   
224    752    
-880   -496   
1216   464    
-720   464    
496    496    
-448   64     
-64    -336   
-80    432    
512    -208   
-304   368    
192    -848   
-16    464    
80     -16    
-144   304    
256    -240   
-64    368    
160    -192   
-112   448    
240    -160   
-144   192    
288    -112   
-176   272    
256    96     
-64    -304   
32     -112   
-32    -688   
80     80     
96     160    
32     112    
0      0      
48     112    
-64    32     
32     192    
16     16     
48     64     
32     32     
96     -64    
16     80     
-64    -144   
208    48     
-16    -96    
192    112    
64     -80    
-352   64     
240    32     
80     208    
-80    16     
32     48     
48     128    
64     -112   
128    160    
-128   0      
64     64     
80     -48    
16     48     
-32    -16    
64     48     
64     -192   
128    368    
-176   16     
208    224    
-16    80     
64     96     
80     128    
32     -464   
0      0      
192    -304   
48     48     
64     -144   
16     176    
144    -64    
-64    272    
112    -672   
176    96     
-64    272    
0      144    
112    48     
0      -1136  
16     -256   
48     48     
-16    224    
176    32     
-64    208    
32     -304   
48     -144   
64     -176   
160    448    
224    -96    
-80    -832   
176    192    
144    -432   
32     192    
-560   -64    
-64    -512   
112    -176   
32     96     
80     -192   
-80    80     
48     -192   
64     160    
128    432    
224    416    
-176   -256   
320    -160   
48     224    
128    -480   
16     192    
-144   -112   
0      -16    
64     0      
80     -128   
32     -160   
16     -592   
0      -48    
0      -896   
48     -128   
144    48     
-16    -64    
0      -112   
-64    80     
256    -80    
-96    112    
48     -32    
-96    -224   
-464   -208   
48     -112   
96     -32    
144    240    
-112   48     
160    -112   
-32    96     
384    96     
-336   -240   
16     -256   
128    208    
64     48     
96     80     
-32    240    
-64    -256   
-144   -32    
-128   -80    
208    192    
0      64     
0      48     
64     -368   
64     -80    
32     -2160  
-32    16     
80     0      
16     176    
-160   -208   
96     -80    
-208   0      
192    -144   
-208   16     
288    48     
-912   -32    
-80    80     
-128   -160   
128    -96    
352    48     
-224   -688   
96     256    
-160   -192   
160    0      
-96    0      
96     0      
-32    64     
0      128    
80     96     
-160   -208   
-464   48     
-48    -80    
-48    48     
-160   32     
48     16     
160    -144   
-16    48     
-16    176    
96     -224   
304    128    
32     80     
-48    16     
32     -208   
-320   96     
16     -112   
-240   0      
32     80     
-352   192    
144    -256   
-128   96     
256    32     
-1872  -784   
1312   2400   
-656   512    
496    -688   
-480   80     
336    -656   
-640   96     
704    32     
-560   592    
224    -752   
-384   416    
-400   -464   
400    -352   
-416   -224   
320    0      
-32    -176   
-64    -48    
-320   -192   
368    -32    
-160   -80    
-64    -368   
32     256    
0      400    
256    -144   
-208   48     
-80    384    
-32    208    
-688   -1008  
-64    112    
656    -144   
224    240    
-208   -16    
-1376  48     
-48    0      
-112   -224   
-48    48     
48     64     
224    512    
-64    -32    
-160   -48    
64     -336   
128    16     
-96    128    
80     144    
-192   -160   
-240   112    
-176   64     
-512   80     
-64    176    
-384   16     
-32    16     
-32    16     
-192   -224   
192    -176   
-240   -64    
48     80     
48     112    
-288   0      
-32    48     
48     -160   
-96    64     
0      0      
32     16     
48     320    
-80    96     
48     -112   
16     128    
-112   -160   
144    -48    
0      -48    
96     -32    
16     16     
-192   -64    
112    240    
-224   128    
-96    48     
96     144    
-160   32     
96     64     
-384   -48    
-32    -64    
-352   -32    
-48    -128   
-288   -304   
-32    112    
48     96     
144    512    
-112   160    
128    112    
112    144    
64     64     
-256   -208   
-272   -272   
-16    -80    
-96    16     
0      160    
-112   176    
64     128    
-432   -176   
80     144    
-192   -256   
32     32     
-32    -80    
192    224    
-64    -112   
-96    -112   
-128   0      
-16    -144   
208    112    
-192   -16    
48     176    
-160   96     
-32    96     
-432   -48    
-32    96     
-560   112    
112    80     
0      0      
-16    80     
-80    160    
48     -16    
32     176    
48     96     
256    240    
-112   -32    
-96    272    
-144   112    
160    160    
-224   -48    
48     64     
-240   0      
256    224    
-128   192    
304    -16    
-112   -192   
-80    96     
-144   176    
288    16     
-64    -64    
-336   -16    
192    176    
144    64     
64     160    
-16    128    
32     160    
-320   -192   
32     336    
-64    80     
240    48     
-80    112    
32     48     
32     96     
-80    0      
-16    96     
-16    -48    
-32    128    
48     96     
0      48     
-32    -176   
-96    48     
-48    16     
-112   -48    
32     128    
-32    96     
96     96     
-80    0      
208    -64    
-80    -64    
-48    96     
-80    32     
96     160    
-144   48     
-32    16     
-80    16     
32     96     
16     16     
48     96     
0      -112   
112    96     
-96    208    
-96    128    
-112   16     
128    80     
192    80     
-368   96     
112    96     
-96    -16    
112    96     
-48    0      
64     160    
96     144    
-160   32     
208    32     
-32    16     
112    160    
-64    128    
32     80     
-80    112    
656    304    
-64    -304   
1040   -720   
-608   -192   
304    -1264  
-48    336    
192    912    
-320   240    
-128   -96    
-96    -32    
432    160    
48     128    
-160   176    
-96    128    
64     -32    
64     176    
-144   80     
64     -16    
-240   -208   
208    80     
-32    80     
112    96     
-96    64     
0      32     
-128   80     
128    160    
16     160    
16     96     
144    48     
-144   -32    
112    48     
-96    -48    
64     144    
-32    32     
80     112    
-48    -240   
-48    240    
0      0      
80     112    
64     112    
128    48     
-32    112    
-16    96     
128    160    
-32    112    
32     48     
-80    112    
160    256    
-64    -16    
-16    112    
112    128    
48     -848   
32     64     
48     0      
16     96     
0      48     
48     96     
16     112    
64     128    
-32    -48    
144    128    
16     192    
-80    224    
48     -96    
0      48     
192    144    
16     -1200  
-80    112    
176    144    
32     256    
-128   -16    
240    112    
-48    32     
64     -16    
-48    64     
112    496    
-224   0      
176    -144   
112    80     
96     -256   
144    144    
-128   -96    
144    208    
-128   -112   
32     96     
128    128    
-16    96     
144    128    
-128   -400   
64     -32    
112    176    
0      112    
-48    -48    
0      96     
0      -128   
160    896    
16     112    
-144   96     
96     -304   
176    80     
-32    96     
0      -16    
-80    96     
80     96     
64     96     
144    288    
-160   112    
48     -128   
-48    -16    
96     -192   
144    208    
48     -176   
-32    16     
80     -720   
0      80     
96     -176   
-32    208    
64     16     
96     128    
-176   -112   
112    -32    
96     224    
144    240    
-112   16     
-128   -32    
-48    -80    
304    -400   
-48    128    
32     -336   
96     64     
-80    -352   
32     80     
112    -368   
160    0      
-48    192    
176    -256   
-208   160    
16     64     
32     144    
-96    -320   
160    -32    
-32    -656   
192    176    
-96    -64    
-32    -64    
272    272    
-176   16     
32     -272   
96     -32    
256    288    
16     112    
-208   80     
176    96     
48     160    
176    -1312  
96     80     
80     -528   
144    176    
-256   48     
208    -64    
-128   -80    
192    48     
0      128    
-96    48     
64     64     
-272   208    
176    -144   
112    128    
-64    128    
112    -288   
-64    288    
32     -192   
112    96     
-64    -160   
256    64     
-32    -448   
112    16     
64     144    
96     -960   
-48    -16    
208    -592   
-80    -592   
-32    -128   
368    -672   
240    352    
-256   -16    
48     -224   
224    112    
208    64     
-144   48     
96     112    
-48    -192   
48     -16    
288    288    
-64    176    
-1056  -176   
-176   -160   
2704   -1616  
464    -96    
224    176    
-656   -576   
464    288    
352    656    
-480   -352   
512    -368   
-192   192    
400    -416   
80     464    
-224   -304   
160    -352   
-432   -32    
480    16     
-432   96     
80     -288   
-112   48     
528    -464   
-192   48     
0      -320   
288    80     
-160   -752   
96     0      
96     -16    
96     304    
128    -96    
-128   -160   
-16    -112   
64     -32    
-768   -48    
0      -176   
32     -48    
192    16     
-64    -16    
192    -304   
-32    -80    
32     -112   
-64    0      
208    0      
-96    224    
112    -32    
0      -176   
-80    64     
208    48     
-592   -64    
0      -160   
-432   -144   
320    80     
-176   48     
256    -560   
-432   0      
192    -2992  
96     272    
-208   64     
240    240    
-272   -240   
272    -64    
-336   0      
0      -48    
-432   80     
80     112    
-1056  64     
64     -112   
224    -96    
-16    -368   
-64    112    
96     -144   
16     176    
16     -112   
80     -80    
-32    160    
-96    -160   
176    16     
16     16     
-16    128    
288    -304   
-944   16     
-176   -160   
-288   32     
160    -48    
16     80     
128    -656   
-128   160    
80     -1408  
-128   -304   
96     0      
144    272    
-32    -112   
256    0      
-256   -48    
160    -176   
-592   -112   
-128   -176   
64     -80    
-96    -80    
112    80     
64     -592   
-32    96     
48     -2032  
128    96     
-160   64     
176    128    
-448   0      
224    160    
-112   -16    
112    48     
48     48     
-128   -16    
112    -160   
64     -272   
0      16     
96     -112   
96     32     
16     96     
80     128    
112    -16    
-240   -112   
32     -32    
112    160    
64     160    
192    112    
-80    80     
16     -32    
-96    80     
80     -160   
-48    -16    
-528   -240   
128    -32    
-144   -32    
-1376  -112   
-48    176    
-128   16     
336    16     
-32    128    
-176   -32    
240    -144   
-384   -96    
256    -272   
-16    -16    
-400   -80    
48     0      
-400   -48    
80     -144   
-304   48     
-128   -176   
96     112    
-288   96     
176    32     
-640   80     
-48    -96    
48     48     
-112   16     
-48    96     
-80    96     
128    64     
64     448    
-192   128    
-176   -160   
32     32     
-32    96     
-16    240    
-208   0      
-80    112    
-176   -64    
64     -48    
160    -176   
96     560    
-48    -192   
96     144    
16     -208   
160    144    
-64    -80    
-112   -16    
64     208    
-48    -208   
-32    64     
-208   -112   
-224   64     
-352   0      
-32    32     
-192   -128   
176    48     
-64    192    
-128   128    
48     256    
-176   -128   
64     -64    
128    144    
-64    -32    
16     128    
32     -96    
-80    256    
-192   96     
208    -64    
80     0      
-64    -64    
-672   352    
784    688    
16     48     
32     -400   
-1008  336    
64     -672   
96     80     
640    -96    
-784   -400   
16     -96    
-288   224    
96     32     
64     256    
-128   -48    
-80    -64    
96     64     
-912   32     
192    16     
0      16     
-64    -32    
0      -144   
-48    96     
176    96     
-80    -16    
0      48     
-16    144    
48     176    
-336   -112   
16     0      
-112   -96    
128    80     
176    -16    
112    224    
64     144    
-112   64     
-224   48     
160    64     
-16    64     
48     16     
-48    112    
32     48     
-128   48     
-80    16     
96     -80    
-16    64     
80     -16    
16     0      
-208   32     
32     64     
16     -32    
48     112    
16     112    
64     16     
-32    -16    
-48    48     
0      48     
80     144    
-48    32     
16     112    
-96    128    
256    208    
-368   208    
-176   96     
240    304    
-80    48     
48     48     
-160   80     
-128   -48    
64     -128   
176    64     
-64    64     
-16    112    
-112   80     
128    192    
-144   -144   
-48    -176   
16     -320   
112    96     
-336   -160   
128    208    
-48    96     
-80    176    
272    192    
-80    112    
32     160    
-32    176    
-112   -272   
-48    -48    
224    176    
0      144    
32     208    
-32    112    
48     112    
-96    -32    
80     128    
-96    48     
144    64     
48     64     
0      80     
80     128    
-96    16     
16     32     
-64    16     
16     64     
48     96     
-48    48     
160    272    
-176   -176   
48     -96    
32     192    
64     0      
32     96     
-80    96     
112    48     
-16    112    
-32    96     
-96    48     
0      -48    
32     208    
-32    64     
-80    -80    
-112   32     
176    176    
144    160    
48     80     
-16    448    
112    272    
48     -112   
16     128    
-128   160    
160    -96    
32     96     
-32    -32    
96     160    
-144   16     
-48    -384   
48     -48    
400    240    
-192   192    
96     16     
-128   -112   
48     128    
144    80     
-80    128    
0      80     
-64    0      
144    144    
-112   64     
64     48     
0      64     
176    -1248  
-32    144    
-48    -80    
-112   -192   
304    448    
-160   -16    
272    480    
-368   0      
416    32     
-32    96     
32     64     
64     160    
-352   -96    
176    -112   
64     64     
-144   -224   
272    -240   
64     288    
-48    144    
-144   48     
32     -16    
160    160    
496    -64    
-112   368    
-224   -144   
304    -96    
-64    304    
160    320    
-352   -16    
-16    -288   
176    -592   
288    80     
64     -64    
288    -496   
-272   128    
176    0      
32     224    
-64    -16    
80     -64    
-16    144    
64     -16    
-16    208    
0      32     
288    -16    
-80    272    
144    -144   
-96    112    
912    640    
-1456  -1248  
768    1072   
592    1040   
144    -1008  
80     -32    
-448   96     
352    64     
0      432    
-64    -144   
416    176    
-272   -192   
48     128    
160    -96    
16     -32    
48     -368   
64     16     
112    -1712  
-32    64     
-16    -112   
16     48     
144    32     
112    288    
128    -112   
0      -112   
0      80     
48     112    
64     240    
16     -32    
0      -112   
16     -752   
128    160    
96     64     
16     176    
16     16     
-16    144    
48     16     
32     80     
-16    -48    
128    48     
144    48     
-128   -416   
80     64     
0      -672   
112    0      
-64    -288   
64     112    
-16    -336   
240    160    
-288   80     
304    16     
-128   96     
96     96     
176    160    
-64    -272   
96     -64    
16     112    
-112   -16    
336    -80    
-208   192    
112    -256   
144    144    
-32    -1696  
128    -32    
-32    160    
16     80     
128    32     
160    32     
224    256    
-112   80     
32     -240   
48     -176   
144    224    
-64    96     
80     48     
48     -16    
80     48     
64     -96    
32     160    
-32    64     
96     -64    
-16    0      
-592   -304   
16     -1008  
0      -208   
32     -1024  
0      112    
224    -480   
112    80     
-48    128    
112    -144   
-32    -16    
96     64     
-32    -480   
64     80     
0      32     
160    80     
-144   -144   
80     -208   
-16    -224   
80     80     
-32    -48    
192    -336   
32     -48    
32     -528   
-16    0      
64     -256   
96     304    
192    -112   
-128   128    
-96    -144   
144    -304   
-16    -160   
48     96     
-416   160    
64     -256   
32     64     
-128   -320   
192    -112   
-48    -1040  
-96    -80    
160    0      
208    64     
128    -48    
-80    96     
-112   -240   
0      -96    
-144   -144   
112    -128   
-768   -32    
80     -48    
176    -128   
0      -144   
336    160    
160    -128   
-64    48     
96     -2144  
-64    176    
192    16     
-64    64     
112    64     
32     32     
-160   32     
80     16     
-784   -144   
96     96     
-544   -32    
112    192    
96     32     
-48    -288   
-64    -32    
96     -416   
96     48     
96     48     
0      144    
-16    -16    
-48    -192   
-64    -48    
208    -304   
-128   64     
144    192    
-288   16     
32     16     
-368   64     
112    -432   
80     -64    
-96    -608   
112    352    
96     320    
80     -144   
-48    -208   
32     -512   
-112   96     
96     48     
64     -16    
0      0      
-320   -176   
32     -128   
-608   96     
96     -352   
0      144    
-16    -192   
80     208    
-48    -3040  
32     -48    
-256   16     
192    176    
-112   0      
-64    -48    
-16    16     
64     48     
-192   16     
16     80     
80     -192   
-80    -48    
64     176    
16     -144   
-544   1296   
-448   416    
-112   -192   
80     560    
32     -1008  
320    544    
-288   -224   
-608   -416   
112    48     
704    304    
-416   -432   
-16    -96    
128    -64    
112    32     
96     -64    
-96    48     
96     48     
-352   -240   
48     -288   
144    -32    
-32    -128   
32     80     
-160   208    
176    176    
-96    48     
48     -400   
-144   48     
-256   -144   
0      128    
-944   -176   
128    480    
16     128    
-192   -80    
-128   112    
-304   16     
144    208    
-16    -288   
64     64     
16     80     
128    128    
-272   -160   
48     128    
-656   -80    
224    112    
-176   -16    
-80    -112   
-48    160    
-624   -96    
96     16     
-496   -160   
0      -224   
-144   -16    
-80    32     
208    208    
-192   48     
64     0      
32     80     
48     96     
112    272    
0      288    
-192   -160   
-16    48     
-96    -48    
-128   -48    
16     -144   
-128   32     
-784   -304   
-80    48     
-352   -32    
48     96     
-16    -80    
64     144    
-112   -240   
0      0      
48     -80    
64     80     
-96    128    
336    128    
-512   -80    
-112   -304   
-16    96     
-112   160    
0      256    
-240   160    
96     192    
-64    48     
-128   0      
80     64     
-160   0      
32     32     
-32    80     
16     48     
-16    16     
-48    0      
-144   -48    
96     80     
-112   80     
-16    -80    
-432   -32    
16     96     
-80    -48    
-32    128    
-16    -16    
32     16     
-64    64     
16     32     
-32    -128   
-64    -112   
-16    192    
-144   -48    
160    192    
-160   16     
-48    16     
-176   -80    
80     144    
-144   -96    
32     64     
64     144    
32     80     
-16    0      
48     160    
32     160    
144    256    
-144   -32    
-176   -80    
128    112    
0      -80    
160    64     
-464   -96    
272    96     
-224   32     
-16    112    
112    32     
-48    192    
16     -48    
48     128    
224    848    
-96    -48    
112    -272   
-48    0      
176    128    
-144   64     
0      96     
-64    -64    
48     128    
-464   -48    
144    240    
-464   -272   
144    128    
-160   64     
192    -16    
-64    64     
-64    -32    
208    64     
80     464    
-384   320    
-32    -112   
192    384    
-208   -128   
144    80     
-512   -16    
176    -16    
0      208    
32     0      
-64    144    
16     -80    
-160   96     
208    144    
-96    96     
-144   112    
208    144    
48     208    
-96    32     
-48    -32    
-144   32     
0      144    
128    -32    
80     272    
-32    -160   
-128   224    
80     -160   
-32    368    
112    16     
160    192    
0      -64    
-112   80     
-112   -336   
-48    416    
0      -32    
80     160    
-48    80     
224    16     
-96    144    
96     -96    
-64    192    
48     -48    
144    272    
48     32     
48     -544   
0      0      
1008   640    
352    704    
-464   -112   
-128   176    
-176   208    
288    -112   
80     112    
-160   -160   
304    160    
16     304    
-64    0      
32     48     
112    112    
-80    48     
-80    32     
32     112    
144    176    
32     160    
-96    -16    
-80    64     
96     32     
-32    -64    
96     -160   
96     320    
-96    208    
96     128    
-32    112    
-16    -64    
80     64     
-64    64     
32     112    
-16    32     
0      112    
0      -96    
64     48     
0      0      
224    -16    
-288   80     
240    128    
0      112    
32     64     
-48    64     
32     0      
-64    112    
144    144    
32     192    
-176   -352   
48     16     
16     176    
80     -2064  
48     160    
48     160    
16     16     
128    160    
-176   80     
176    96     
48     64     
-16    64     
96     160    
48     -80    
-16    144    
0      -16    
112    -48    
48     144    
-80    -144   
32     0      
240    176    
-192   176    
64     32     
48     128    
-48    32     
192    80     
-144   0      
112    192    
-208   -112   
192    16     
16     176    
0      0      
96     -16    
96     -224   
-16    224    
160    -2432  
80     128    
-224   -96    
192    -128   
0      -80    
-112   -144   
48     32     
-64    48     
144    256    
-64    128    
160    176    
-80    -368   
192    80     
-80    -112   
96     80     
112    -496   
64     160    
-128   128    
128    128    
-144   -144   
192    48     
0      144    
160    32     
-48    192    
-128   -80    
160    128    
-128   -32    
192    96     
0      -80    
-48    32     
96     -32    
-32    176    
96     -1328  
160    48     
0      304    
32     16     
160    80     
-176   192    
432    112    
-16    -96    
-144   48     
64     -32    
-16    32     
-48    -288   
96     -48    
0      -1008  
32     144    
-16    -992   
160    96     
32     -416   
48     160    
160    32     
-112   272    
-80    -32    
112    -208   
48     16     
48     -336   
160    64     
0      -240   
80     48     
144    -128   
-64    176    
16     -208   
-32    192    
112    128    
-32    32     
48     96     
-32    128    
96     160    
144    -272   
64     64     
-16    -160   
48     -32    
-48    80     
64     128    
-16    -48    
-16    176    
80     16     
-16    192    
-64    -16    
160    -64    
-112   16     
-736   -48    
32     -544   
208    -256   
-112   -1440  
160    240    
-32    -160   
16     -272   
192    -112   
-80    -160   
-80    240    
-48    -736   
16     -576   
-16    192    
0      -736   
128    80     
-496   112    
0      -384   
64     96     
32     -448   
16     -80    
32     -720   
112    -240   
96     144    
-64    -144   
96     128    
-16    -80    
112    -64    
0      208    
-48    -64    
160    -112   
-144   -96    
160    -112   
112    1216   
192    64     
-272   -624   
-32    -1344  
-384   176    
-304   -2256  
64     -832   
288    256    
-144   -160   
256    336    
-304   48     
272    96     
144    -192   
-672   -160   
-48    -480   
-384   224    
-64    -240   
192    448    
-48    -736   
-64    -640   
208    -1968  
-64    0      
-32    -32    
-304   48     
-64    -272   
64     -96    
-80    -112   
224    -160   
-208   -144   
32     80     
-640   48     
32     16     
32     -128   
96     -96    
0      -64    
-64    -224   
16     -160   
64     -144   
96     -80    
0      32     
-16    192    
64     0      
128    48     
-48    0      
80     -224   
64     64     
0      -48    
-768   -192   
-16    -528   
-32    80     
320    -32    
-96    16     
-16    -1376  
32     176    
-80    -160   
144    -304   
-64    -112   
256    112    
-96    240    
32     320    
0      -144   
16     160    
-960   -160   
48     -96    
-400   -352   
224    -288   
-80    128    
176    -448   
-16    48     
80     16     
128    64     
-48    -48    
16     -192   
96     -32    
96     192    
-192   80     
-112   -368   
352    96     
272    256    
-16    512    
16     -32    
-64    48     
80     96     
-16    96     
-128   112    
48     -240   
-64    192    
-80    -176   
128    240    
-112   16     
-64    -176   
112    -304   
-48    208    
0      -80    
48     16     
-32    -96    
160    160    
80     -320   
-64    -96    
-64    64     
16     32     
-64    -48    
0      64     
-32    0      
256    32     
-288   -272   
64     -208   
-112   128    
64     -160   
128    208    
-160   -144   
32     32     
-1664  -464   
-304   -128   
112    32     
-32    320    
-112   80     
-96    -144   
-160   224    
64     -16    
-64    -80    
0      16     
-144   112    
-976   32     
176    96     
-912   -16    
80     -16    
-160   -384   
-304   192    
144    112    
-288   -144   
-112   304    
-896   -96    
-192   160    
-96    -32    
288    176    
-288   -240   
320    272    
-240   -48    
96     112    
-224   -80    
160    -96    
-176   -144   
-112   128    
16     16     
-16    176    
-176   -64    
-144   112    
-80    48     
-832   32     
64     128    
-224   -144   
-48    -176   
-80    64     
160    512    
-224   -144   
112    -48    
64     96     
-144   -80    
-16    16     
-64    128    
128    -128   
-176   48     
304    448    
-160   144    
-224   -256   
80     304    
144    -48    
-224   -192   
16     176    
-128   -160   
-80    -160   
128    160    
-288   48     
-16    128    
-144   80     
96     -32    
-144   128    
-80    -96    
-16    32     
-48    96     
0      96     
-16    80     
0      80     
80     -32    
0      -64    
-48    16     
-160   128    
16     16     
32     -16    
0      16     
-64    -80    
-128   -224   
-112   16     
80     32     
160    336    
-368   -128   
992    -1280  
0      864    
0      -144   
-512   -352   
208    432    
32     80     
32     496    
-240   -160   
160    0      
-288   -176   
112    112    
112    192    
96     160    
-160   80     
-80    -144   
-144   48     
-688   16     
48     208    
0      -48    
-64    128    
-16    32     
48     224    
-80    64     
-16    -16    
-48    -16    
16     160    
368    336    
-224   64     
48     -112   
-288   -128   
80     192    
224    0      
-64    112    
-64    -16    
48     160    
-224   -80    
16     -128   
-80    32     
176    112    
-48    32     
16     64     
-144   64     
-48    -48    
-80    80     
16     -16    
80     128    
-480   64     
160    192    
-304   -144   
336    144    
-208   144    
176    -32    
-144   96     
224    80     
-96    96     
16     -32    
112    240    
-336   -64    
288    112    
-96    192    
0      -64    
96     0      
-48    64     
0      304    
-80    -128   
192    48     
-32    128    
0      192    
-144   80     
144    80     
48     16     
32     240    
-192   -32    
144    16     
-112   -80    
32     272    
-64    0      
48     176    
-32    96     
96     -48    
48     112    
-64    80     
160    464    
-224   112    
256    192    
-64    16     
32     64     
112    -192   
-32    144    
-96    16     
32     -16    
0      160    
64     64     
-80    256    
128    -48    
-160   96     
80     -176   
80     208    
-144   112    
240    160    
-176   -32    
64     32     
-48    48     
208    368    
-80    80     
208    208    
-240   80     
192    48     
48     176    
48     -32    
-32    80     
176    176    
32     -64    
64     176    
48     160    
-80    224    
80     304    
-128   -48    
32     176    
272    96     
-112   -16    
112    208    
160    64     
-192   80     
128    128    
80     208    
16     144    
-96    -80    
-80    128    
160    160    
-64    32     
80     112    
0      -176   
-32    144    
16     288    
-48    -1328  
368    144    
-48    176    
-64    256    
176    160    
-160   0      
16     64     
-144   -64    
112    0      
32     -32    
240    -64    
-64    464    
224    336    
-144   -144   
-32    -32    
112    112    
48     80     
16     144    
16     32     
192    496    
-96    336    
48     64     
32     528    
-32    -320   
64     64     
16     208    
64     48     
-64    -48    
-16    -192   
16     80     
240    -16    
-80    160    
-80    -272   
80     80     
144    272    
0      96     
112    0      
64     80     
-80    -256   
-48    -208   
64     64     
208    128    
128    112    
96     16     
48     48     
80     -528   
112    64     
128    -3168  
80     16     
-16    256    
-112   112    
-64    -48    
16     64     
288    32     
80     112    
-128   80     
112    160    
16     144    
0      128    
-96    -96    
32     -96    
-48    208    
-448   336    
-1808  -1808  
640    -48    
192    864    
160    0      
128    288    
-640   32     
-48    32     
208    -848   
592    -448   
144    752    
64     112    
-128   224    
-80    -64    
80     -144   
224    -448   
-144   144    
-144   -1344  
16     144    
32     -128   
288    352    
-256   16     
112    272    
-80    -80    
160    32     
-96    -16    
80     48     
144    192    
160    -448   
192    0      
16     -544   
16     224    
32     -368   
-64    96     
-32    32     
176    128    
-16    -80    
320    416    
32     256    
32     -592   
96     144    
-16    -192   
144    32     
0      -48    
176    176    
-96    -80    
32     -80    
-112   -464   
352    512    
176    64     
-128   80     
0      96     
176    192    
160    336    
-208   32     
32     128    
64     64     
64     48     
-80    -400   
-64    320    
96     -160   
0      112    
80     0      
80     -528   
-288   -144   
144    -2112  
16     208    
-784   -16    
16     112    
80     -80    
128    -816   
0      -96    
80     80     
160    64     
-48    48     
128    48     
32     112    
-64    -320   
704    -1024  
-48    144    
-224   -176   
96     112    
-224   -96    
144    -176   
80     -128   
-96    16     
-160   -416   
384    16     
160    -80    
64     0      
16     -144   
160    320    
32     0      
-16    -64    
-32    112    
0      -256   
112    -224   
-400   -80    
32     -240   
-256   -288   
-16    -96    
128    -160   
144    -16    
-16    -224   
64     -1664  
-48    -128   
-32    -256   
112    160    
80     288    
16     272    
16     32     
16     -48    
-128   -96    
112    -48    
-336   96     
80     128    
48     112    
16     -192   
112    -240   
160    176    
-32    -128   
80     64     
128    224    
32     16     
64     336    
-48    -64    
16     -48    
0      160    
112    -16    
-16    64     
64     -160   
-48    32     
256    -224   
-176   16     
384    -336   
-336   256    
208    0      
448    320    
-320   192    
96     -64    
-64    16     
96     -144   
-144   48     
112    -112   
-112   -16    
-128   -496   
-800   -304   
-48    -80    
160    32     
-48    -16    
64     80     
96     -224   
-32    80     
-48    0      
128    -16    
16     32     
112    0      
-64    -112   
-192   64     
-512   -128   
64     48     
-192   -64    
192    48     
-128   -256   
320    -48    
-240   128    
128    112    
32     144    
240    48     
160    -144   
-128   96     
80     -352   
-352   176    
-48    -208   
-32    128    
-80    -32    
32     48     
64     -176   
-64    -128   
144    -352   
96     32     
0      -208   
128    -128   
-160   304    
-128   -64    
16     32     
96     -112   
-112   112    
64     -16    
-128   112    
96     -128   
-272   -112   
80     -96    
-736   -16    
112    -112   
-64    272    
96     -288   
-544   -304   
-464   832    
608    48     
-720   -240   
144    32     
-448   64     
496    -272   
-448   288    
592    -160   
96     208    
144    -32    
16     -96    
-1296  240    
368    -160   
-464   144    
-544   -304   
-240   416    
-240   -224   
48     384    
-432   -240   
-256   112    
144    -160   
-288   320    
272    -224   
-160   208    
128    -224   
-48    144    
-160   -192   
192    128    
-48    -80    
-208   48     
16     64     
-272   64     
-64    128    
-320   -96    
-96    96     
368    64     
-144   128    
160    -16    
-208   -112   
-208   -272   
32     96     
-192   -272   
96     144    
16     48     
-16    48     
-96    0      
-80    32     
-96    16     
16     0      
-224   96     
-48    96     
-16    32     
-480   -80    
208    80     
-192   32     
32     -64    
48     48     
-64    128    
144    -16    
-160   -48    
-80    64     
-32    -16    
-32    80     
-32    96     
32     48     
-160   -48    
144    208    
-1744  -192   
224    160    
-80    -48    
32     112    
0      -48    
-32    -32    
0      0      
-96    0      
48     304    
-176   -32    
240    304    
-272   -48    
112    16     
-208   -48    
-144   -336   
-16    -368   
48     144    
-48    32     
128    496    
-352   80     
48     -64    
240    16     
-144   64     
144    64     
-112   64     
-32    96     
160    384    
-432   -112   
112    128    
-64    32     
48     48     
-32    160    
-624   64     
32     160    
-16    80     
-176   0      
48     144    
144    48     
-128   -32    
48     160    
-32    -160   
128    96     
-80    -176   
-48    -272   
-48    64     
-240   -16    
176    64     
-1072  -144   
64     80     
96     304    
-32    16     
-64    176    
-16    -48    
32     -32    
-176   80     
32     -32    
-32    48     
128    240    
-176   96     
192    48     
-128   144    
-80    -32    
-176   -112   
-144   32     
80     112    
-80    64     
32     160    
-80    64     
80     112    
64     112    
16     -144   
-304   -272   
112    0      
-48    -64    
48     96     
-160   32     
0      64     
176    512    
-352   -16    
128    0      
-112   -16    
64     16     
-32    48     
48     96     
-80    0      
96     64     
-32    176    
-80    -816   
-32    -208   
176    480    
240    272    
-112   400    
48     -16    
112    208    
16     32     
0      96     
48     0      
176    96     
-208   64     
32     -112   
16     320    
-176   32     
0      64     
-160   64     
0      -96    
32     128    
-208   208    
256    -32    
-144   240    
64     32     
112    160    
-144   176    
128    64     
-32    48     
-32    144    
144    0      
192    48     
112    48     
-128   -16    
64     192    
-160   -32    
80     16     
64     192    
48     128    
32     48     
48     32     
208    192    
0      48     
-16    48     
-96    80     
336    1696   
-224   352    
-416   -1600  
-208   -720   
320    -112   
288    64     
656    784    
-896   -96    
416    -512   
-256   544    
464    -368   
-128   416    
-336   -256   
400    416    
48     -208   
112    400    
-256   -192   
400    464    
-352   -208   
368    -144   
-80    192    
400    128    
-176   400    
-64    -256   
-96    256    
128    48     
128    592    
-160   -224   
32     336    
-208   -240   
288    288    
-112   -32    
272    32     
0      64     
112    16     
64     432    
80     -928   
0      224    
-288   -224   
208    176    
64     144    
-112   80     
16     240    
112    160    
-144   -32    
16     192    
256    576    
288    256    
-288   -32    
-80    -464   
32     32     
48     -832   
256    304    
-224   48     
48     128    
16     -32    
80     -192   
-240   -96    
96     -208   
0      -240   
192    320    
128    496    
-80    32     
-48    80     
-240   -272   
-32    240    
64     -288   
240    208    
-416   -256   
128    48     
112    96     
48     288    
-112   32     
192    32     
-48    16     
176    80     
112    448    
96     224    
208    272    
48     48     
32     96     
0      -224   
16     160    
-16    -448   
80     -48    
-160   -80    
192    128    
0      32     
208    272    
-384   -48    
512    272    
-176   -48    
-144   -128   
192    144    
-80    -336   
96     -80    
144    -608   
32     80     
144    -192   
-64    240    
128    -80    
96     144    
-208   -64    
240    288    
-16    128    
224    -288   
128    144    
272    272    
-144   144    
240    -176   
-96    80     
16     -656   
144    224    
0      -80    
16     -112   
48     -128   
-32    64     
128    32     
48     112    
96     224    
32     80     
32     -224   
-96    -320   
112    128    
64     -912   
32     208    
64     -80    
-160   80     
96     -48    
144    96     
-48    -528   
-64    80     
-176   -128   
384    288    
-112   -32    
288    96     
-336   -160   
80     -336   
-32    -48    
176    -96    
32     112    
128    -192   
16     144    
32     -352   
-32    272    
32     -1008  
80     176    
-112   48     
208    176    
-16    112    
-144   -96    
48     240    
32     -48    
64     -144   
64     48     
16     64     
128    -128   
-64    0      
240    -64    
80     208    
80     -48    
-80    -1136  
32     160    
-16    -768   
160    80     
-112   -48    
16     -128   
112    -112   
16     -336   
32     -64    
-48    -48    
128    -272   
128    176    
-16    80     
-64    112    
32     -160   
224    -96    
-96    -80    
32     -144   
80     -144   
-96    16     
0      -240   
112    -96    
-16    -336   
-176   -272   
64     -1072  
224    -208   
160    512    
-16    144    
-16    -176   
-32    48     
-16    -336   
160    96     
-112   80     
272    -48    
-416   -48    
48     -112   
336    -1600  
336    -608   
1152   752    
544    -432   
336    912    
304    -1056  
-352   -720   
1104   -352   
-48    560    
32     96     
-128   144    
-112   -80    
160    -48    
-160   -80    
-16    -192   
-128   -48    
80     144    
128    64     
-128   -256   
48     -96    
128    -224   
-80    16     
0      -112   
128    -32    
16     -32    
208    96     
-368   32     
224    -96    
-304   -112   
160    160    
-336   0      
96     -48    
-240   -48    
48     -112   
-160   -48    
-16    -176   
-16    48     
48     -384   
-32    0      
96     -48    
64     0      
-80    32     
64     -32    
-64    -32    
160    32     
-544   -16    
32     -128   
-848   32     
64     0      
16     16     
96     -144   
64     128    
80     -288   
-64    32     
48     -144   
112    -16    
-32    0      
192    160    
-96    32     
192    -96    
-368   64     
144    32     
-288   64     
112    112    
-272   0      
16     -352   
144    112    
112    -848   
-112   32     
16     176    
0      16     
192    32     
32     -32    
-160   16     
32     -64    
-128   128    
-64    192    
-80    -96    
224    -208   
-64    112    
384    240    
-192   320    
80     -144   
240    208    
-16    -48    
64     -32    
-144   -128   
128    64     
-208   0      
96     80     
-112   -32    
48     -48    
-48    -32    
112    -192   
-48    48     
16     -176   
240    208    
-144   -352   
-1120  448    
-128   64     
320    -64    
-64    160    
128    -32    
-16    240    
16     -32    
-64    80     
112    48     
32     240    
-176   -400   
80     -96    
32     -64    
112    128    
-160   -256   
-288   48     
-112   64     
-224   -512   
-224   -176   
-32    -32    
80     272    
-128   -112   
-96    -48    
112    -16    
16     -80    
-112   16     
128    48     
112    112    
-16    592    
0      336    
-160   192    
-80    64     
64     -96    
-16    64     
-112   -176   
-96    192    
-928   -112   
144    80     
-16    160    
-16    48     
-128   -64    
16     16     
32     -48    
32     160    
96     -64    
-160   112    
80     80     
-272   0      
-64    128    
-176   -176   
0      64     
-272   48     
16     80     
-896   32     
-32    192    
-128   -208   
80     192    
192    -192   
-240   -176   
-64    -144   
208    128    
-144   160    
-144   -64    
-96    -80    
-80    144    
128    80     
-256   -16    
-192   224    
-1232  -368   
64     32     
32     240    
-176   -80    
80     -160   
-64    128    
352    16     
-352   160    
-128   -16    
32     96     
0      272    
-192   -16    
128    -16    
-80    48     
160    -16    
-288   64     
64     144    
32     0      
-64    160    
-96    48     
0      -128   
-96    144    
128    -32    
-80    80     
-208   -16    
352    224    
-208   160    
0      208    
-368   -176   
128    64     
-96    -16    
-752   -1936  
-1520  2144   
368    1584   
-240   -128   
-80    -608   
-32    192    
160    1696   
-1280  -160   
1024   -880   
-176   -32    
32     -128   
-176   192    
-480   -16    
320    -304   
128    96     
240    288    
-608   112    
-512   -96    
368    432    
256    480    
224    -240   
-400   240    
128    192    
-32    112    
48     -144   
224    544    
16     192    
-16    64     
-176   176    
-80    -592   
144    288    
-336   224    
256    96     
-80    256    
64     48     
-80    16     
208    256    
-80    304    
112    0      
-80    240    
-64    0      
112    32     
-128   16     
240    240    
-176   32     
64     112    
-240   160    
176    256    
-32    176    
-16    -112   
96     -80    
-128   192    
128    64     
-112   -80    
96     -32    
0      80     
48     96     
-80    16     
-32    176    
-32    -112   
-144   208    
-32    32     
128    -160   
208    224    
-176   208    
48     16     
192    160    
112    176    
-208   -16    
96     64     
-128   -32    
32     0      
32     96     
-48    -80    
112    48     
32     288    
-176   -336   
96     -224   
224    144    
0      -48    
48     -48    
-128   80     
-48    48     
-80    -112   
208    32     
-48    -16    
112    176    
-112   64     
80     112    
-176   96     
-80    32     
192    192    
-80    128    
48     64     
80     -16    
64     176    
-112   176    
64     48     
112    192    
-64    128    
64     48     
-96    48     
-160   -144   
128    64     
144    528    
-208   64     
224    -32    
-96    16     
-16    -64    
112    -16    
-16    128    
16     224    
48     80     
-32    64     
48     240    
-32    80     
192    80     
-224   160    
272    -400   
-48    -144   
-176   -192   
96     128    
336    368    
-112   64     
0      -64    
-96    96     
208    208    
176    416    
0      -16    
0      128    
-176   208    
304    16     
-160   0      
144    -32    
176    -32    
-240   -240   
128    -32    
48     288    
-128   -48    
304    0      
-96    80     
-128   128    
32     -96    
-48    -80    
-224   32     
208    32     
192    112    
-64    0      
-128   -368   
16     32     
112    -1792  
-16    32     
176    112    
0      96     
112    80     
-64    48     
-80    -32    
176    -32    
32     224    
64     16     
80     96     
-64    112    
64     96     
144    -160   
0      160    
176    -208   
-112   240    
176    -112   
-144   112    
192    -16    
80     112    
192    -560   
-96    128    
-16    112    
-64    48     
112    -48    
48     192    
-32    32     
224    -16    
176    32     
96     64     
-112   144    
-80    -432   
208    16     
144    400    
-32    64     
32     48     
-64    96     
112    -80    
0      208    
-16    -48    
128    32     
-32    96     
176    112    
-112   128    
80     -176   
-112   -32    
-752   -1456  
-96    944    
288    -80    
-816   -160   
32     -368   
-224   848    
-400   -960   
192    848    
-96    -48    
432    640    
-336   -432   
16     64     
112    176    
224    -496   
-288   384    
192    -272   
128    480    
-32    -400   
16     208    
48     -48    
0      96     
80     48     
-96    336    
304    48     
-240   -544   
176    -112   
-80    -160   
112    208    
48     112    
-48    48     
144    -128   
-112   80     
160    -464   
-144   192    
48     48     
0      160    
0      -112   
-48    80     
80     0      
96     -256   
0      80     
0      -48    
96     144    
80     -112   
112    16     
16     -176   
64     128    
64     -208   
16     112    
-32    112    
0      -288   
144    -48    
-224   -160   
32     -1264  
48     -80    
208    -1232  
-208   64     
32     96     
144    -160   
112    96     
-64    -80    
16     -64    
48     112    
96     -128   
32     208    
0      32     
160    224    
-336   16     
-64    -640   
0      -96    
16     -304   
96     -240   
-32    -1632  
128    -128   
-16    48     
80     -80    
96     -96    
0      16     
96     -112   
64     480    
-80    -176   
64     -112   
-208   -16    
160    208    
128    288    
16     -96    
160    256    
48     48     
64     -176   
32     96     
80     -64    
32     -240   
224    112    
64     -368   
0      48     
48     80     
304    288    
-112   112    
96     -80    
-880   -96    
256    -128   
128    96     
-32    -96    
64     80     
-16    -464   
112    -48    
64     -64    
0      96     
-16    48     
80     80     
-64    48     
0      -304   
-224   -112   
0      -304   
-352   -16    
48     -112   
48     -16    
96     -112   
-32    -96    
32     -1408  
48     -144   
192    352    
112    16     
-112   -32    
-32    -16    
-48    -16    
16     -576   
16     -80    
0      16     
-176   64     
80     -80    
-1824  -96    
16     -160   
128    -160   
0      -144   
112    464    
-112   -912   
240    224    
-176   -96    
272    -256   
-64    64     
64     64     
80     80     
16     0      
-112   -16    
192    -240   
-16    -16    
-64    144    
-80    -64    
0      -240   
112    -16    
144    -944   
32     96     
-96    272    
-208   -96    
240    -64    
-112   224    
-416   64     
-32    -144   
-160   -48    
96     -160   
-192   16     
96     64     
-16    32     
80     -288   
144    112    
-80    -240   
64     0      
-16    160    
48     64     
96     -32    
128    -80    
-128   64     
128    -224   
-176   128    
48     0      
272    16     
-160   128    
-96    -80    
128    -144   
-32    96     
80     16     
32     80     
-32    96     
240    -80    
-80    64     
-16    -64    
-48    80     
96     -32    
16     64     
112    64     
-288   48     
0      -304   
-208   32     
-464   -272   
80     160    
-16    -32    
-928   480    
-1184  -1824  
144    272    
-512   -32    
208    272    
208    1296   
-192   -272   
-352   -32    
432    0      
16     64     
-1088  -944   
80     240    
352    0      
144    -144   
-144   192    
-32    -128   
-592   0      
80     -16    
-96    416    
-176   -240   
-176   272    
-96    -304   
-16    304    
48     -192   
-48    80     
-272   -80    
64     240    
64     -64    
0      144    
-112   16     
208    336    
-144   160    
-80    -96    
-192   128    
-288   -96    
32     -32    
-384   -64    
-64    48     
-288   0      
16     160    
-48    -128   
96     128    
-64    -176   
0      -80    
64     160    
-144   144    
48     16     
-192   -304   
160    144    
-272   0      
64     -48    
-32    192    
-96    144    
-112   -176   
-96    160    
-48    -112   
112    16     
-192   -128   
96     80     
16     176    
16     -112   
32     176    
-272   32     
48     -16    
80     128    
-64    192    
-80    96     
16     48     
-208   48     
128    16     
-64    -16    
-48    32     
144    128    
-160   48     
64     -16    
-16    -176   
32     96     
-240   -16    
176    112    
-176   96     
32     96     
-32    -112   
-32    112    
-432   176    
16     0      
224    128    
-96    240    
96     -176   
144    192    
-352   48     
80     48     
-32    0      
32     160    
-96    96     
-176   -256   
192    320    
-320   0      
160    32     
-176   -16    
-48    96     
-512   112    
-144   192    
-32    96     
0      -112   
-96    32     
-80    -64    
192    48     
-160   48     
-96    -32    
64     96     
-144   128    
144    64     
-32    64     
144    288    
48     304    
-304   144    
-96    64     
-144   48     
112    64     
48     -32    
-272   144    
-48    -64    
240    48     
-128   32     
16     80     
-176   96     
32     48     
32     384    
-32    64     
112    144    
48     48     
-192   32     
192    272    
240    192    
96     128    
-48    64     
256    400    
-96    176    
-48    -64    
-112   -16    
-112   112    
64     80     
64     192    
-240   -240   
-96    -48    
-80    96     
112    -48    
144    0      
-64    0      
96     96     
64     32     
-96    48     
144    176    
144    144    
-64    256    
-16    -32    
-144   192    
32     -16    
0      -208   
0      32     
112    144    
32     96     
64     144    
-96    16     
-48    96     
192    -112   
32     32     
32     208    
32     32     
-320   48     
112    128    
-144   0      
176    144    
-256   160    
-32    -96    
96     176    
208    -128   
-224   64     
-64    64     
-16    208    
-16    16     
64     80     
0      -80    
32     48     
0      176    
96     112    
-112   0      
64     112    
80     48     
16     320    
-96    48     
144    192    
-64    224    
0      16     
-64    -48    
224    -112   
48     160    
-112   128    
144    -672   
816    640    
624    -272   
-16    -576   
-544   784    
320    -880   
448    -80    
320    176    
-208   160    
-240   -336   
144    224    
16     192    
96     0      
-128   80     
128    -64    
112    192    
-48    -48    
0      192    
-16    -192   
16     -288   
80     64     
160    -96    
176    16     
32     160    
-16    48     
-16    304    
96     176    
64     -96    
-32    -64    
112    48     
144    64     
-128   -48    
112    192    
-80    -48    
96     -64    
112    192    
16     -800   
16     112    
-64    16     
176    -16    
-32    128    
128    128    
16     144    
-32    160    
-16    -160   
48     192    
-48    128    
160    128    
-48    144    
16     -160   
48     64     
16     -96    
48     192    
96     64     
48     176    
32     48     
144    192    
-208   400    
128    96     
-80    -144   
160    144    
-48    0      
48     80     
144    384    
-64    -96    
-96    144    
0      -320   
48     32     
160    -400   
-16    64     
16     112    
16     32     
64     -144   
96     192    
-48    16     
32     128    
-96    -192   
32     -352   
240    64     
0      -128   
-32    64     
112    -192   
144    16     
-48    -896   
48     64     
64     -2512  
-48    16     
32     48     
64     64     
96     32     
48     224    
-16    176    
32     -32    
-16    0      
112    16     
0      128    
-48    -496   
64     48     
48     -816   
112    160    
0      -128   
-64    96     
48     -32    
112    160    
-32    -16    
160    64     
-48    64     
48     176    
80     0      
80     -592   
-16    96     
48     -288   
16     80     
-16    -400   
48     -32    
16     -336   
112    320    
64     96     
-48    -48    
-16    0      
160    224    
80     -16    
-96    -112   
32     160    
176    -96    
-128   -288   
256    -352   
-208   336    
256    -256   
64     160    
-112   -224   
288    64     
-144   128    
80     96     
96     112    
112    -64    
-64    -1200  
80     -336   
-32    64     
112    64     
0      0      
160    48     
80     144    
-112   64     
256    176    
-240   -160   
96     -896   
96     -96    
176    -112   
80     192    
-1328  64     
128    -400   
16     -64    
16     -1200  
48     32     
32     96     
0      -160   
144    272    
-208   -128   
-64    80     
32     -192   
320    -352   
-16    -64    
80     -320   
-112   -48    
-912   -224   
96     -176   
560    32     
-128   0      
-192   -160   
-192   -720   
32     -304   
128    -16    
96     -160   
112    256    
-128   112    
160    -480   
96     160    
224    -288   
48     -16    
-64    224    
112    -48    
80     16     
64     -128   
-80    -224   
192    -592   
-16    -48    
128    -1264  
-48    96     
80     -96    
-192   48     
16     112    
64     128    
-112   64     
16     64     
-240   80     
-64    -128   
-2560  672    
-112   -560   
128    -912   
1120   -336   
-416   80     
-80    -1232  
-48    -208   
-64    -16    
160    -96    
-80    96     
-128   80     
144    160    
-128   -208   
0      80     
80     32     
-256   32     
16     -144   
128    -128   
144    144    
-240   -176   
-16    -800   
0      192    
16     -352   
160    144    
-112   -48    
80     -16    
-32    160    
0      -128   
0      -96    
-16    -160   
16     80     
112    128    
-592   0      
-32    -176   
-272   0      
96     -464   
96     80     
-32    -944   
80     128    
96     0      
0      -112   
-80    0      
96     -80    
32     0      
0      16     
-176   48     
-48    -192   
-176   176    
0      -352   
96     80     
-176   -240   
208    112    
-80    -368   
240    208    
-224   16     
128    -272   
16     -32    
-16    192    
16     0      
80     -64    
-272   -112   
64     -32    
-160   -32    
160    -48    
-80    160    
96     -288   
176    176    
-224   -320   
256    224    
-320   32     
224    -96    
32     144    
-16    -48    
16     16     
48     -96    
-128   128    
48     -64    
96     272    
-112   -112   
64     -80    
256    -320   
-160   240    
144    -336   
48     48     
144    -16    
-352   160    
-48    240    
0      -176   
64     -64    
-144   -16    
144    64     
-32    16     
-112   16     
-1312  -176   
-64    -48    
176    -144   
-144   128    
80     -176   
-80    0      
0      96     
-112   -48    
32     -32    
-544   32     
112    160    
0      -16    
16     -48    
-176   -16    
-32    48     
-80    -144   
64     -80    
-112   96     
112    144    
272    160    
-224   0      
-112   -80    
-112   0      
32     144    
144    96     
-144   128    
-272   -112   
-224   -128   
-16    0      
48     80     
128    0      
16     -112   
-272   -304   
128    -16    
96     224    
-128   -64    
0      64     
-144   0      
272    128    
-272   96     
288    16     
-544   -48    
-176   -16    
-80    -48    
144    -16    
0      -224   
-80    176    
-144   -224   
176    -32    
-112   -256   
-256   -16    
-80    176    
32     64     
64     624    
-160   -160   
-112   48     
-208   48     
160    16     
-192   -80    
-32    96     
0      -16    
128    32     
-64    -176   
-64    128    
64     -384   
-112   80     
128    448    
-48    -16    
-144   32     
-176   0      
144    320    
-128   -160   
112    -96    
-480   -624   
112    480    
-16    144    
192    176    
-64    -112   
-48    192    
-144   -160   
-112   0      
80     144    
-16    80     
-64    80     
-80    32     
16     176    
-16    -144   
32     96     
-624   -144   
0      -112   
-400   160    
-16    48     
160    144    
-208   0      
48     176    
-48    -64    
-160   -144   
16     208    
464    144    
0      64     
-16    320    
-96    0      
-112   -16    
-96    0      
-608   -2064  
944    1088   
-1040  144    
224    -400   
-240   -512   
176    224    
368    240    
-16    912    
-96    64     
208    16     
-240   -80    
96     64     
-96    -32    
80     64     
48     96     
-160   -80    
-144   240    
-192   160    
0      -16    
96     -16    
-96    -112   
-176   -16    
16     160    
208    -176   
0      -160   
-16    48     
32     96     
-224   128    
96     272    
-112   -160   
-128   64     
-16    48     
128    80     
-64    80     
48     80     
80     80     
-80    32     
112    224    
-32    128    
80     96     
-96    80     
-16    144    
-32    -32    
-64    160    
-112   -96    
-80    80     
48     160    
224    144    
-96    80     
-32    0      
-96    -16    
-48    176    
48     176    
80     336    
48     160    
0      208    
-240   -48    
80     -192   
-48    -64    
48     208    
-64    64     
16     144    
128    80     
-96    -64    
-16    64     
32     64     
-16    48     
-64    80     
48     128    
-80    96     
-16    -16    
48     64     
-64    32     
48     96     
64     96     
16     48     
256    352    
-208   224    
-16    144    
64     -48    
0      -240   
-80    -32    
160    -48    
-64    96     
80     64     
32     -16    
-32    112    
-112   -192   
80     -16    
144    96     
176    224    
0      192    
-48    176    
-16    16     
144    80     
48     112    
-16    16     
-80    -144   
16     -32    
32     128    
128    208    
-48    48     
-192   -240   
176    112    
32     64     
0      64     
-48    64     
112    208    
-48    -16    
128    112    
-112   80     
112    64     
-16    240    
48     64     
32     112    
-96    -48    
160    160    
-224   -224   
16     -560   
16     112    
112    -1888  
48     112    
48     16     
32     272    
112    16     
0      160    
-304   -624   
416    32     
-80    256    
128    304    
0      224    
16     224    
-80    112    
32     -80    
64     144    
16     -880   
96     96     
-336   -128   
304    48     
-352   -112   
144    144    
192    224    
-112   208    
112    -512   
-176   96     
64     96     
-80    80     
80     -16    
-128   -176   
144    64     
64     -304   
0      160    
16     -1088  
208    240    
-48    80     
272    192    
-224   -448   
80     -384   
-208   80     
240    112    
16     96     
-96    80     
144    144    
-16    -336   
32     -16    
96     -96    
48     192    
-48    -256   
-160   -144   
-96    480    
176    -96    
-224   48     
16     160    
336    48     
-144   176    
80     304    
-144   -240   
80     368    
128    -128   
48     112    
-16    -48    
176    -160   
64     -208   
64     112    
96     -1200  
-96    352    
80     112    
416    192    
32     -176   
-32    160    
-128   16     
-112   -112   
192    96     
-16    -224   
32     128    
48     -288   
112    144    
-48    -80    
96     1248   
-80    272    
-656   0      
-160   240    
64     -448   
320    64     
-240   -160   
400    416    
-96    256    
144    -160   
192    -144   
-144   0      
256    -64    
32     64     
240    32     
-128   96     
48     64     
64     96     
-96    -112   
32     -208   
-32    16     
320    32     
-32    192    
112    64     
-176   0      
32     -224   
160    128    
64     -128   
80     192    
-48    16     
48     96     
0      -640   
128    64     
-32    96     
96     -544   
-64    256    
160    96     
-32    -96    
32     -192   
48     -1600  
160    -224   
0      112    
0      -128   
208    128    
-176   -240   
240    48     
-160   -192   
240    -384   
-144   160    
0      -320   
256    48     
-1040  0      
112    -272   
80     -48    
-48    -128   
96     -96    
80     -656   
-48    -32    
192    64     
-32    48     
240    -608   
96     176    
0      -32    
144    128    
-32    -512   
48     -176   
-416   -64    
96     -48    
80     -32    
144    128    
-48    0      
96     -368   
48     -64    
144    -480   
-32    64     
80     -80    
0      32     
16     112    
-80    208    
-208   -272   
304    -128   
-336   160    
80     -272   
-128   128    
-112   -320   
128    -64    
-96    -928   
192    -48    
-16    -464   
64     -16    
80     48     
-80    48     
112    -112   
0      32     
-64    0      
16     -80    
16     32     
-64    0      
-1232  -160   
48     -224   
0      32     
48     0      
96     -64    
64     -304   
-48    -32    
304    -688   
-128   352    
64     -256   
-176   -176   
80     -16    
288    144    
-208   -48    
32     144    
-336   -96    
-32    96     
-256   16     
-320   -544   
-48    -240   
288    -448   
32     -272   
16     -2352  
-48    144    
224    -48    
160    80     
-144   0      
96     -320   
-176   -96    
80     96     
-336   32     
-64    32     
-432   32     
96     176    
48     -160   
128    -272   
-144   112    
192    -736   
0      192    
-112   112    
64     -336   
16     64     
80     -16    
-16    112    
128    240    
-240   -32    
80     -160   
-176   -128   
32     -400   
32     48     
80     48     
48     192    
0      -176   
80     48     
-432   -16    
-16    112    
208    -64    
-128   80     
160    0      
-16    304    
-112   -272   
64     -272   
48     -176   
96     272    
64     192    
48     16     
-160   144    
96     -432   
-48    -480   
32     320    
-64    -48    
-64    64     
16     -64    
-80    240    
-112   -48    
-48    0      
144    -48    
-128   -32    
48     -224   
-16    224    
-1456  -240   
-16    48     
-1232  -224   
-208   -16    
-48    80     
-16    -80    
-176   16     
0      -80    
-176   80     
96     304    
-144   -16    
96     16     
48     -128   
-1136  -224   
160    128    
-256   16     
-32    -112   
-48    160    
-192   64     
-736   -3024  
1616   2720   
-1104  1792   
-1152  -416   
-480   -384   
1120   384    
-528   16     
688    160    
-272   288    
208    -128   
112    816    
-368   -352   
48     -176   
0      -128   
-16    272    
-256   -96    
-64    -128   
-224   32     
0      -144   
32     80     
-784   80     
-64    176    
-144   32     
-16    -176   
-96    -208   
240    544    
-240   -96    
16     -32    
-240   -32    
288    -96    
-48    64     
64     -16    
-32    48     
-160   -16    
304    208    
-240   128    
112    -32    
-624   -80    
544    368    
-304   -512   
304    336    
-400   -32    
0      -64    
16     64     
0      16     
32     64     
-80    -32    
112    -16    
-192   -32    
80     -112   
-192   -288   
-80    240    
-816   -16    
128    32     
-16    112    
32     160    
80     -144   
-368   -784   
224    368    
224    128    
-256   112    
-48    0      
128    112    
-208   -64    
-96    160    
-32    -48    
0      80     
-720   -304   
272    48     
-80    -256   
128    64     
16     96     
-80    64     
96     144    
0      96     
48     64     
176    304    
-272   64     
-32    32     
-96    -224   
16     -32    
32     144    
-208   -192   
112    240    
-448   -112   
16     16     
0      112    
-208   -224   
-64    -176   
-32    -96    
144    240    
-48    160    
-48    176    
-48    -80    
64     96     
-288   -32    
256    336    
-320   32     
-64    -80    
-240   -32    
-128   32     
128    64     
-80    64     
-16    64     
16     80     
-64    96     
0      -64    
128    176    
-160   416    
-112   -176   
-192   -224   
144    208    
16     112    
48     144    
-176   256    
32     -96    
240    64     
-144   112    
144    144    
-48    112    
16     96     
-48    48     
48     144    
16     64     
144    272    
-240   176    
464    976    
-208   144    
368    64     
-352   144    
224    112    
16     160    
-16    224    
112    96     
96     208    
-128   112    
32     48     
-32    32     
48     544    
48     16     
-112   64     
160    -16    
-336   -144   
160    32     
-96    144    
144    144    
-16    96     
128    512    
144    432    
-256   -96    
48     0      
32     64     
96     192    
-192   64     
48     -256   
336    -96    
-16    736    
-16    16     
-224   32     
64     80     
192    -64    
-80    80     
128    -128   
32     64     
112    224    
-160   64     
96     48     
80     0      
32     80     
128    256    
0      240    
208    320    
-192   16     
-64    -48    
-48    128    
32     -64    
112    64     
64     224    
-64    96     
48     -32    
176    96     
16     96     
-64    128    
16     112    
-208   96     
176    48     
112    224    
16     -80    
128    -16    
64     144    
80     112    
0      352    
-96    0      
96     -144   
144    80     
-112   48     
96     224    
-48    160    
768    336    
-736   -384   
-48    -496   
-128   -160   
368    -400   
160    -64    
144    448    
-416   -256   
448    208    
-480   -112   
432    -80    
-48    224    
64     48     
-112   192    
96     -16    
-128   80     
192    48     
32     96     
-16    -64    
96     96     
16     -464   
112    112    
-80    176    
192    16     
0      160    
80     16     
144    304    
-32    80     
0      -320   
64     80     
-96    -112   
224    -16    
-96    320    
192    -224   
-64    160    
-208   -848   
0      -32    
144    112    
256    96     
-128   16     
0      128    
16     -80    
128    144    
-32    -96    
-32    112    
0      64     
176    96     
96     176    
-144   -160   
160    112    
0      -704   
0      96     
64     -2768  
64     112    
32     208    
0      128    
-64    144    
112    208    
-96    0      
128    96     
-16    160    
-32    48     
112    0      
80     112    
-64    192    
96     32     
-16    0      
160    -80    
16     48     
16     -272   
-32    96     
80     -32    
96     96     
16     240    
-96    64     
160    -16    
-32    96     
-144   -192   
336    -192   
-208   -32    
240    -32    
-32    96     
0      -576   
144    96     
-144   -768   
176    -48    
80     256    
-128   224    
-32    80     
160    96     
16     -48    
128    -112   
0      80     
32     48     
80     160    
0      -80    
96     144    
64     0      
96     112    
48     112    
-48    112    
192    16     
0      240    
32     80     
112    64     
-32    176    
192    176    
208    288    
0      112    
16     64     
-16    48     
80     144    
80     80     
16     -32    
64     16     
96     208    
48     -64    
48     96     
-128   128    
0      80     
192    160    
96     -272   
-96    -112   
128    -160   
-16    -144   
176    -224   
-176   112    
320    16     
-32    176    
-48    -224   
192    -2416  
-96    304    
256    -656   
-192   432    
-352   -160   
384    16     
-192   -160   
272    -1216  
-160   -256   
192    48     
32     -80    
0      96     
128    -64    
-48    -1440  
16     -128   
48     -176   
160    608    
-128   -640   
112    -480   
256    -128   
48     -416   
32     -112   
80     -672   
96     -384   
160    -464   
80     -16    
176    496    
32     304    
-80    -208   
0      -112   
176    -144   
96     -48    
-128   -48    
32     -48    
-160   272    
272    -128   
80     272    
240    -48    
16     48     
16     -288   
-112   -288   
192    -224   
-32    48     
-32    -112   
-96    -16    
32     -160   
240    -48    
0      0      
-16    96     
-176   64     
-80    -32    
-928   80     
144    48     
48     -224   
32     -288   
96     80     
64     -80    
-32    128    
-32    -48    
80     48     
48     -160   
48     -16    
192    64     
-224   -144   
64     -48    
0      80     
-16    0      
1840   -1280  
592    448    
368    416    
-432   464    
704    -160   
-48    -784   
368    -1216  
464    48     
-400   176    
128    240    
-304   32     
112    -464   
-208   128    
144    -528   
-256   128    
-272   -624   
-272   -192   
-64    -288   
144    80     
-160   -576   
-256   -352   
-32    -1184  
256    176    
160    368    
32     336    
-112   128    
-272   -528   
-176   -544   
128    -64    
144    272    
-96    48     
112    -16    
48     112    
-80    -80    
272    -144   
-32    64     
112    -304   
112    -192   
-80    32     
480    -32    
-384   256    
-96    -144   
-160   0      
208    48     
-32    64     
128    -48    
-176   -96    
32     -224   
-96    0      
224    -32    
-32    16     
0      -304   
-32    -272   
0      224    
16     -80    
-336   -160   
48     -48    
32     -320   
-432   -96    
80     368    
0      -160   
-368   48     
112    96     
-64    32     
-48    -160   
96     48     
112    -496   
-256   -48    
-16    112    
48     112    
-80    48     
96     32     
80     272    
-80    -32    
-112   -16    
-48    32     
272    336    
-560   144    
96     96     
-800   -768   
80     256    
-16    -192   
-768   -96    
-176   96     
-352   -128   
224    48     
-640   -64    
32     -224   
0      208    
208    144    
128    32     
-16    272    
-288   -48    
0      -64    
-208   -320   
0      0      
16     -32    
-304   0      
-224   -16    
-64    -192   
-96    32     
-640   -128   
-48    80     
192    128    
0      96     
128    16     
-16    112    
-112   -208   
16     -32    
-304   -384   
64     160    
272    288    
-160   -16    
-16    -16    
-32    96     
16     144    
-96    16     
48     80     
-64    16     
32     272    
-176   0      
-80    144    
0      -112   
96     64     
32     -32    
-112   -160   
-112   16     
32     -96    
-112   32     
-16    48     
96     128    
-96    96     
96     16     
-448   -112   
-64    -112   
-944   -32    
176    144    
208    96     
-96    224    
-16    48     
-112   0      
-32    -32    
-144   -48    
112    48     
-144   208    
32     64     
-160   -160   
32     -80    
-160   112    
64     32     
-240   0      
16     144    
-48    -64    
-32    -64    
-80    96     
16     48     
0      -160   
144    128    
-144   64     
48     128    
-32    -128   
0      -32    
-16    128    
-32    112    
48     240    
-48    -128   
32     112    
-368   -32    
-48    -48    
128    144    
-80    80     
16     288    
-128   -144   
48     -16    
160    128    
-80    32     
-80    176    
-64    64     
64     32     
144    144    
-160   -112   
128    96     
-512   -48    
144    -32    
-96    288    
-80    80     
-80    32     
-16    -32    
96     80     
-32    48     
-80    64     
-112   -64    
48     80     
-208   -112   
128    224    
-352   -80    
48     48     
768    1680   
-1696  512    
-304   352    
512    512    
-400   -624   
320    432    
-48    528    
-128   192    
880    -96    
-592   -320   
400    32     
-560   -48    
464    112    
-32    128    
160    -32    
-272   160    
240    -16    
-80    240    
128    -224   
-32    192    
64     32     
80     240    
-64    80     
-48    224    
-80    -160   
-144   64     
96     16     
48     208    
96     -80    
-256   0      
64     80     
160    128    
-32    32     
-80    16     
32     96     
48     48     
80     192    
-112   16     
-160   48     
-48    16     
192    112    
-112   80     
32     160    
-272   -144   
224    144    
-32    96     
96     128    
-80    0      
32     256    
32     32     
80     32     
64     96     
-32    128    
96     80     
-112   64     
112    32     
-112   64     
80     96     
48     64     
48     112    
-32    112    
64     80     
96     80     
-64    16     
192    112    
-144   96     
128    208    
-64    48     
64     16     
64     -16    
-96    96     
-48    112    
-16    64     
96     64     
64     80     
-128   16     
128    192    
-192   64     
32     -16    
144    48     
-16    160    
-48    80     
-16    -16    
144    128    
-304   32     
96     192    
-160   -320   
240    80     
-96    336    
128    -64    
112    112    
-144   160    
144    32     
64     112    
128    352    
64     304    
-96    -48    
80     80     
0      64     
208    432    
-160   48     
-16    16     
192    80     
80     80     
32     48     
-64    -16    
-32    80     
-32    -288   
96     176    
16     0      
16     128    
-16    160    
-32    -32    
96     176    
48     64     
-64    -16    
112    208    
64     -544   
-32    192    
176    -192   
-64    304    
48     112    
-16    -160   
16     -80    
32     -96    
-48    112    
176    272    
112    0      
16     16     
-480   -208   
480    272    
64     512    
-144   -288   
144    -112   
48     -352   
-80    -32    
240    352    
-208   -48    
144    -112   
96     208    
80     96     
32     192    
48     240    
-112   144    
64     80     
-32    -256   
192    336    
16     -32    
-64    0      
80     -128   
80     48     
-32    -288   
128    96     
16     -160   
192    16     
-96    -96    
80     128    
224    288    
-144   320    
-48    64     
-16    -32    
208    -80    
-64    -96    
-16    64     
16     -208   
-80    -16    
96     -512   
-80    -32    
80     -992   
-128   64     
208    -80    
-112   112    
144    64     
80     144    
-32    160    
64     -368   
96     16     
80     -208   
112    176    
-192   -128   
128    -64    
96     -352   
160    160    
-160   -1120  
272    96     
-80    48     
240    -16    
-96    272    
256    -128   
176    288    
-160   176    
208    48     
-96    -272   
176    160    
96     112    
32     112    
48     -288   
80     96     
-320   -16    
-912   -960   
-208   -512   
48     528    
-528   -176   
624    -32    
-304   -512   
304    -544   
416    144    
-192   192    
384    -144   
-288   496    
208    -224   
80     -112   
-64    -144   
112    208    
-240   -192   
368    192    
-320   -1120  
368    -160   
-96    0      
320    -848   
-144   240    
16     48     
32     -224   
160    96     
-80    -16    
-176   -272   
448    160    
-160   -48    
352    144    
-144   -224   
0      0      
192    -48    
48     -272   
16     16     
-176   -320   
144    720    
160    -1376  
-96    -160   
64     -512   
32     -32    
-64    160    
48     32     
32     -336   
0      -48    
160    -64    
48     144    
-32    -32    
208    0      
-320   0      
96     -400   
-128   -192   
176    -496   
80     -32    
48     -432   
144    32     
48     -48    
-96    -336   
48     -336   
112    112    
0      48     
80     -64    
32     32     
32     -16    
-144   -16    
160    128    
96     -32    
0      0      
-16    0      
0      -336   
128    -144   
0      -848   
16     80     
112    -80    
112    96     
-32    -48    
64     96     
-144   -16    
-32    -400   
272    48     
32     32     
48     544    
288    128    
-176   64     
80     -320   
96     -144   
208    -48    
144    208    
48     144    
-32    -16    
16     -272   
144    -112   
16     0      
176    240    
-96    32     
240    192    
-1264  -160   
32     -528   
176    -352   
112    -96    
16     80     
32     -752   
64     96     
48     -752   
256    112    
0      -32    
112    48     
-128   -48    
96     64     
-192   16     
192    128    
-352   -48    
176    -64    
-288   16     
32     0      
-32    -112   
112    -176   
32     160    
336    -496   
-32    96     
80     32     
-256   160    
128    -176   
224    -80    
-288   32     
352    -16    
-304   0      
-32    -80    
0      64     
64     -192   
-96    -112   
-128   -368   
64     96     
256    -784   
-16    -16    
-208   144    
208    -96    
-336   -128   
-128   -160   
-144   -16    
176    -80    
-144   224    
64     -16    
-80    -48    
64     -224   
48     304    
128    -368   
112    80     
-128   -832   
48     -80    
-176   48     
192    128    
-96    16     
80     -48    
-128   128    
16     160    
-80    -128   
32     -64    
-144   -48    
96     -96    
48     240    
48     208    
-240   112    
-64    -352   
-1072  -64    
32     -32    
-336   -448   
-64    16     
128    208    
-176   96     
16     48     
64     -48    
0      -96    
256    160    
-688   -240   
48     -16    
160    -16    
-176   160    
-16    0      
-528   -80    
-32    0      
16     80     
-128   32     
-992   0      
-128   96     
-32    -208   
-64    32     
128    64     
-112   96     
-160   -16    
-112   0      
48     -160   
-208   128    
368    -96    
-64    192    
-32    96     
928    -1824  
432    -448   
784    512    
144    -400   
272    304    
-272   -64    
-96    80     
480    224    
-144   -144   
-96    -80    
32     400    
16     -416   
-272   496    
336    -608   
-192   464    
80     -336   
-160   528    
-176   -464   
0      208    
-64    -112   
112    224    
-528   -128   
176    224    
32     -96    
-80    -16    
-32    -32    
128    160    
16     96     
-128   -208   
-192   64     
-32    -48    
32     144    
-48    -112   
-80    176    
-144   -160   
-112   160    
-1840  -272   
16     80     
16     -48    
208    192    
-48    32     
-144   96     
-16    0      
64     48     
-48    96     
144    160    
-208   80     
96     32     
-272   80     
-80    -96    
128    96     
-224   -80    
96     240    
-32    -160   
80     32     
0      144    
-48    128    
144    -48    
-80    144    
-64    160    
-64    32     
16     32     
-144   -96    
16     192    
-272   16     
-48    16     
-272   -64    
160    32     
-992   -112   
-64    64     
-160   -128   
208    80     
-112   128    
-16    128    
32     64     
0      32     
208    -16    
-128   208    
-96    144    
176    256    
-144   256    
-240   -112   
80     -48    
-640   -112   
80     16     
80     192    
-64    32     
240    128    
-144   -144   
128    224    
32     176    
80     160    
-48    240    
-64    -32    
80     272    
-32    112    
64     288    
-96    48     
64     80     
96     304    
16     128    
-144   -144   
-48    -16    
-16    -32    
48     96     
-176   -384   
0      -192   
0      64     
96     320    
-144   112    
-96    64     
-96    48     
224    272    
0      64     
16     64     
-16    192    
-16    -80    
-48    -96    
-48    -144   
80     176    
-64    48     
-176   -128   
-80    0      
80     160    
16     -80    
16     -48    
-320   -64    
128    -96    
64     -48    
32     -48    
112    192    
0      64     
0      160    
-32    96     
-32    -80    
128    128    
-32    144    
64     176    
-96    80     
48     80     
48     -32    
-96    16     
16     160    
-16    -16    
96     112    
-16    304    
32     336    
96     304    
-16    -16    
256    48     
-80    96     
16     64     
-16    -16    
208    272    
-256   224    
-96    -112   
144    208    
256    352    
-240   160    
0      -96    
96     96     
288    80     
-128   96     
-160   -80    
112    272    
-176   -48    
176    -32    
192    80     
16     96     
-48    -48    
-144   -896   
-16    208    
112    64     
0      192    
-32    -16    
192    96     
48     160    
-16    96     
64     80     
-32    144    
160    144    
-48    96     
-112   16     
16     80     
16     304    
-80    -256   
96     176    
-80    128    
160    64     
-16    16     
-80    272    
-16    112    
-16    80     
-256   128    
80     -112   
-96    112    
64     176    
1952   -464   
-1040  -1008  
640    960    
-64    656    
672    -176   
-80    352    
-576   -224   
800    1056   
-576   400    
160    240    
-64    -208   
-80    32     
-96    0      
128    0      
-208   128    
-192   16     
16     96     
160    240    
304    -192   
-96    -96    
96     -288   
0      -144   
-208   176    
80     144    
208    16     
-32    32     
272    352    
-224   240    
208    16     
-288   32     
368    0      
128    112    
-16    96     
0      64     
16     16     
112    -320   
16     176    
64     288    
16     0      
-80    48     
144    112    
48     80     
96     176    
-144   112    
128    48     
-64    0      
16     -256   
80     144    
48     -176   
80     112    
-64    -752   
32     48     
64     -848   
144    272    
-144   256    
112    0      
-48    -112   
112    128    
-48    48     
32     0      
112    96     
0      64     
32     80     
80     -112   
144    -48    
96     -64    
-192   64     
160    -176   
96     144    
80     -112   
-96    144    
48     48     
128    80     
48     -16    
96     112    
-48    -208   
96     32     
-48    32     
64     -704   
-96    112    
144    -352   
32     192    
112    32     
-112   304    
-128   -224   
192    80     
-16    -224   
96     -96    
-32    -16    
-32    -288   
16     256    
48     -848   
0      96     
192    -48    
176    176    
-160   160    
-80    32     
208    -224   
-32    -80    
192    -512   
-16    128    
48     16     
64     176    
-96    -96    
96     -256   
144    384    
-80    -112   
144    48     
-48    -80    
96     160    
320    16     
-256   160    
112    -160   
-64    16     
208    224    
-128   32     
176    144    
-112   -1376  
48     -784   
16     144    
160    -1504  
48     48     
-80    -976   
224    80     
224    128    
-304   96     
64     -16    
256    -112   
-16    -240   
-192   144    
160    -112   
16     -96    
-144   -480   
-192   -240   
-1248  -48    
176    -96    
160    -112   
32     -688   
-112   0      
96     -1008  
208    -128   
-144   80     
128    -144   
32     -448   
-112   -16    
240    -96    
176    272    
128    16     
-160   32     
-240   64     
224    -48    
64     -80    
-48    -192   
-48    -64    
48     80     
-16    -176   
112    -304   
112    -400   
64     -32    
-80    128    
32     -80    
-32    64     
128    0      
112    -32    
-256   208    
-160   -416   
-144   -256   
-32    -160   
224    -16    
192    160    
-112   80     
256    -976   
-208   -32    
48     0      
144    80     
32     80     
32     -64    
-192   -112   
96     -64    
0      -32    
32     -48    
-336   -48    
112    -224   
32     64     
16     -288   
384    -112   
-112   -544   
-112   32     
192    -96    
0      48     
128    -32    
-32    -48    
-112   128    
64     64     
-112   96     
-80    176    
-160   -112   
-432   112    
-416   0      
736    688    
-672   160    
-480   -1232  
304    1248   
48     -1984  
-96    1280   
-400   -496   
496    128    
-480   -544   
288    80     
-64    32     
16     -112   
-240   16     
112    -112   
-336   112    
144    240    
-176   240    
240    -208   
-176   144    
192    -416   
-160   224    
256    -96    
-64    -96    
288    -176   
16     80     
-224   304    
16     64     
-336   -208   
16     32     
-112   0      
80     -112   
-96    80     
144    -224   
64     96     
208    -336   
-48    16     
0      80     
64     64     
-32    -80    
-16    32     
-16    160    
48     -48    
96     16     
-176   64     
16     128    
32     -560   
128    32     
64     -288   
48     176    
48     -96    
-48    96     
-80    48     
-144   -80    
-48    32     
144    16     
-192   96     
64     0      
160    32     
-192   -192   
-64    112    
-16    -288   
96     48     
-96    -16    
-64    -16    
96     32     
-1168  -32    
-160   32     
-1536  176    
-160   -16    
80     0      
32     192    
-16    -144   
-96    -96    
128    -32    
-48    -128   
-112   -128   
-176   208    
-160   -208   
-128   16     
144    96     
-192   80     
80     128    
-208   0      
-16    -112   
-112   -48    
-192   -192   
160    -80    
-224   -16    
-256   -160   
128    208    
-80    -32    
48     176    
-64    -192   
-224   -32    
16     64     
0      112    
-80    32     
-128   -64    
64     160    
-64    16     
16     80     
-1248  -176   
64     32     
32     -48    
64     16     
0      -208   
-16    112    
0      -240   
48     112    
-112   16     
32     64     
-144   -16    
128    64     
-192   -32    
-48    64     
-112   128    
48     80     
-128   -48    
-368   -96    
32     144    
96     -112   
-96    144    
16     64     
-32    144    
-96    -400   
272    48     
-288   208    
304    112    
-272   32     
-16    0      
16     80     
0      128    
32     176    
-512   -64    
112    -32    
96     224    
-16    16     
64     16     
-80    16     
48     160    
-112   96     
-32    0      
32     80     
16     64     
144    -560   
-64    272    
-496   112    
128    -176   
-464   144    
288    192    
-112   -48    
32     112    
-272   0      
208    -48    
-224   48     
-112   -176   
208    176    
-144   176    
-64    -80    
-160   -32    
112    64     
-112   -16    
80     112    
-320   -192   
144    192    
-1552  -336   
368    224    
-224   160    
80     -64    
-144   -64    
112    144    
-32    208    
64     -32    
-176   -16    
96     208    
-112   128    
32     64     
64     192    
-192   -144   
64     176    
-16    48     
32     64     
112    144    
32     16     
112    128    
-80    96     
64     240    
-256   96     
-32    32     
-192   80     
80     176    
-272   -32    
48     80     
-16    96     
224    80     
-48    80     
112    -80    
368    -384   
624    912    
-272   704    
1056   -1296  
-512   -320   
-48    -400   
-48    -304   
-208   256    
320    -320   
-48    -112   
-80    336    
-80    112    
-176   160    
80     48     
176    272    
-48    48     
80     192    
-96    96     
-32    -128   
-32    -144   
-128   48     
320    96     
-80    48     
112    -16    
-224   -16    
240    272    
-160   160    
192    -112   
-160   112    
80     16     
64     64     
-48    64     
16     64     
32     16     
-32    -112   
160    192    
-16    160    
-32    -48    
-80    144    
64     224    
112    128    
-96    -96    
32     80     
112    96     
48     48     
-32    96     
-32    -96    
96     192    
-176   32     
160    32     
-208   64     
144    64     
-96    64     
32     128    
32     80     
-96    16     
160    80     
-32    144    
-16    96     
64     112    
80     160    
-80    80     
160    48     
-144   192    
128    304    
-16    48     
240    96     
-16    -16    
144    128    
-288   -80    
80     -1504  
128    -16    
64     192    
-16    160    
128    160    
-144   112    
16     32     
208    32     
-112   -16    
128    96     
-96    160    
48     64     
144    -176   
48     112    
-144   0      
-16    -288   
208    224    
-176   -64    
192    144    
-32    128    
32     -64    
208    -16    
-176   64     
176    80     
144    432    
-144   -48    
80     0      
-32    48     
96     112    
64     128    
-32    -176   
-96    -192   
-64    -1808  
128    48     
128    96     
64     128    
-128   128    
176    48     
-128   16     
256    208    
-16    -144   
-112   80     
-32    -16    
160    240    
208    144    
-368   -624   
-16    -208   
-48    -480   
432    32     
64     160    
-224   112    
-80    48     
176    80     
144    16     
-64    16     
80     96     
112    112    
192    -64    
-144   -192   
-176   80     
192    -128   
-80    0      
128    -208   
112    96     
-240   -416   
352    64     
-144   320    
144    32     
48     96     
-48    -16    
-32    112    
-224   96     
176    -16    
-160   -144   
16     -48    
16     -80    
112    160    
96     -304   
16     128    
-16    -2464  
16     144    
208    48     
-48    0      
160    -32    
0      144    
-16    0      
128    160    
-48    160    
96     -80    
-80    -32    
32     80     
176    192    
32     -112   
64     64     
112    32     
-160   416    
64     -176   
0      -96    
176    144    
32     -64    
-16    -192   
240    448    
-64    128    
-144   -464   
80     32     
176    -384   
144    128    
64     -112   
-48    112    
80     -160   
-144   -16    
16     32     
160    -128   
-64    32     
-16    64     
-112   -80    
80     176    
144    128    
16     -448   
32     144    
160    -400   
208    304    
-112   96     
-16    176    
16     -160   
32     0      
1136   -3104  
560    624    
544    -96    
-224   -480   
-368   736    
768    -368   
-784   -1904  
272    -352   
-112   352    
-288   -224   
256    160    
128    416    
-128   160    
240    -352   
-128   32     
80     -256   
256    -112   
-208   48     
0      -624   
0      -368   
112    -304   
48     -800   
144    -32    
0      -288   
-32    -80    
176    384    
256    -224   
64     272    
-80    -160   
224    -64    
-80    128    
272    -464   
-32    16     
0      -400   
-16    -208   
-1456  16     
144    -16    
0      0      
80     -112   
112    -112   
128    -832   
48     -48    
208    0      
-16    48     
112    64     
-144   48     
112    -48    
-64    192    
-48    -64    
112    -96    
16     -48    
96     0      
48     144    
-48    -384   
96     -160   
0      -16    
128    80     
192    -1696  
80     192    
192    448    
-80    16     
32     -128   
32     272    
-48    32     
32     0      
-176   -32    
80     -176   
-928   -128   
64     -48    
48     32     
64     -64    
144    -32    
-48    -512   
112    0      
64     -96    
-48    160    
-16    -240   
80     -176   
-144   -96    
112    -16    
-32    -16    
-16    -16    
-464   -288   
32     -240   
128    -16    
-16    112    
80     240    
32     -112   
80     416    
48     32     
192    -96    
32     128    
-16    -80    
-32    0      
-32    -240   
96     48     
-32    -32    
96     112    
-48    -32    
-624   144    
-160   -208   
-368   -176   
32     -256   
224    176    
64     -816   
-16    128    
-224   -96    
176    -496   
-144   96     
64     -240   
-64    160    
16     -80    
-224   -80    
-96    -384   
-816   -16    
32     -208   
-256   384    
-64    -192   
16     -32    
16     -304   
80     192    
-256   0      
-208   0      
-48    80     
112    0      
-80    -32    
-48    0      
-144   -80    
208    48     
-208   48     
96     -208   
80     80     
-80    -288   
80     80     
-48    -576   
288    -48    
-32    576    
0      208    
-32    32     
-16    -80    
16     -48    
96     0      
-272   -192   
304    160    
-96    80     
672    80     
-496   432    
32     -128   
16     208    
0      -320   
-352   112    
-144   112    
-144   -96    
-128   80     
-192   -384   
192    80     
-160   128    
16     -464   
48     -352   
-288   160    
-128   -80    
-256   272    
16     -48    
-64    128    
48     304    
-288   -16    
96     80     
160    16     
-112   16     
-400   -32    
-112   160    
-48    16     
-16    -352   
144    -144   
-16    256    
-272   144    
-96    -64    
0      -48    
112    -64    
-32    96     
-112   128    
-160   48     
96     64     
0      208    
-144   -112   
48     64     
-1632  -80    
192    240    
-304   -128   
176    -96    
64     128    
-32    0      
-16    -224   
-224   -96    
112    -32    
-128   16     
96     32     
816    1456   
-1952  -896   
576    1152   
464    880    
-1152  -160   
-384   -704   
-64    384    
480    496    
-432   -256   
-192   0      
304    -128   
-128   -160   
0      288    
80     96     
-128   0      
-32    32     
64     48     
32     -48    
-48    80     
16     64     
-16    96     
-336   -32    
96     128    
-48    -112   
144    64     
16     64     
-112   128    
80     224    
-160   -112   
144    64     
-224   -16    
208    144    
-176   32     
16     80     
-112   -16    
160    352    
-1184  -96    
192    16     
-176   80     
176    80     
32     16     
-144   16     
32     112    
64     160    
-208   0      
-64    -48    
-32    176    
16     160    
64     -64    
-336   -112   
48     64     
-144   112    
-48    128    
112    -208   
-16    48     
64     128    
0      112    
-112   32     
80     0      
64     112    
-96    32     
144    96     
-160   48     
48     128    
-192   -144   
32     64     
48     64     
32     240    
-848   -16    
16     0      
96     96     
-48    80     
-48    144    
80     288    
-16    64     
16     -144   
192    -64    
-112   176    
-176   144    
16     64     
160    -32    
-64    160    
-96    96     
96     -48    
-48    -48    
32     208    
-96    208    
224    208    
-64    -16    
80     144    
-208   -144   
128    128    
-160   -32    
128    32     
-96    96     
-144   16     
-192   -256   
-112   64     
96     64     
192    112    
-208   128    
96     96     
-80    -48    
80     96     
-112   -32    
64     -16    
64     128    
80     208    
96     208    
-32    16     
64     224    
-160   16     
80     96     
-192   -32    
224    256    
-32    128    
192    160    
-240   -16    
-48    80     
80     160    
128    48     
-128   176    
48     16     
64     64     
-80    48     
16     320    
80     288    
240    160    
-64    -16    
-48    80     
-112   96     
304    176    
-16    208    
304    176    
-112   112    
-112   0      
-64    464    
-64    0      
192    112    
-48    0      
-128   160    
96     128    
32     -16    
128    -32    
-48    112    
144    144    
240    336    
-176   -16    
96     16     
-32    48     
-96    -128   
128    224    
-96    32     
32     -32    
-16    -16    
176    -1136  
-80    -144   
80     -240   
0      0      
48     320    
80     -32    
32     112    
64     224    
-96    -32    
64     -48    
144    112    
-96    192    
-32    160    
-96    160    
16     96     
-32    -1136  
48     48     
-32    128    
32     96     
-16    192    
-64    -32    
-16    0      
64     -112   
48     48     
0      128    
64     48     
-224   80     
-144   48     
240    -16    
16     80     
-112   -272   
144    160    
0      16     
160    64     
-48    80     
48     80     
-32    128    
112    192    
80     224    
-160   -48    
-16    -112   
96     96     
-208   880    
432    2832   
-864   1264   
-64    -976   
416    -592   
16     -1072  
-80    -128   
-224   336    
192    320    
112    -144   
-112   -32    
-32    -32    
288    160    
-16    -160   
-144   64     
112    80     
96     80     
96     560    
-160   -608   
48     -48    
-48    -832   
208    256    
32     192    
96     96     
-96    -160   
96     0      
-48    368    
-96    -144   
48     -304   
32     80     
80     -48    
0      -128   
0      304    
32     -208   
-16    96     
96     -480   
-32    80     
64     -880   
64     272    
0      80     
112    240    
-64    16     
112    -16    
192    -16    
-80    32     
160    112    
48     -64    
-48    -96    
112    -32    
96     144    
48     160    
96     32     
-16    -336   
112    -96    
-64    -320   
128    128    
16     64     
-240   -16    
512    512    
320    688    
-576   -256   
224    -64    
-16    192    
32     -176   
0      256    
-16    -736   
0      160    
96     -32    
80     96     
-32    -240   
48     160    
32     80     
48     112    
-48    64     
80     -144   
16     352    
64     -16    
-32    224    
-240   -352   
208    0      
0      -752   
-112   -32    
64     -112   
128    -32    
0      176    
144    176    
-96    112    
160    -80    
-48    224    
32     208    
-48    16     
0      -256   
128    64     
128    -48    
48     80     
16     48     
112    176    
-48    -48    
112    112    
-32    -64    
128    352    
32     128    
48     -336   
32     -608   
16     -144   
112    -1808  
64     -128   
32     -160   
64     0      
32     80     
48     -176   
64     80     
32     -96    
64     48     
32     112    
64     -400   
64     256    
-112   -144   
176    -400   
-32    -16    
336    -64    
16     96     
-16    -112   
-32    128    
128    -1328  
112    -80    
-32    -112   
144    -32    
-64    -672   
112    272    
-48    -96    
32     -80    
-96    352    
128    -432   
-208   288    
208    96     
0      208    
32     -352   
208    -16    
-112   -1184  
160    96     
-16    192    
96     0      
-80    -208   
96     -64    
48     -64    
80     192    
16     -32    
64     -48    
-96    64     
96     -80    
32     -48    
48     -208   
160    -48    
16     -512   
64     -112   
128    -2048  
48     64     
240    336    
-304   -592   
80     -128   
208    -112   
-112   0      
32     -32    
-160   -64    
160    400    
-1248  -224   
32     -224   
16     -48    
144    -192   
96     64     
64     -448   
0      208    
0      -288   
16     -208   
224    -48    
208    64     
112    272    
112    128    
-336   -144   
144    -208   
-304   240    
48     -240   
-64    48     
208    -128   
48     176    
-64    -896   
48     32     
112    176    
112    48     
-16    96     
48     32     
-144   96     
32     -48    
-304   -16    
192    -32    
-176   -64    
64     -96    
1328   -848   
-1088  -1344  
960    304    
256    0      
-272   -400   
768    672    
-1312  -224   
1296   -176   
-128   944    
-240   0      
-464   128    
-48    -160   
432    144    
-192   48     
-80    -160   
-240   -48    
80     -256   
112    144    
48     48     
80     48     
-48    -240   
192    -80    
-144   224    
128    -48    
-144   -128   
80     64     
48     112    
128    80     
-128   -128   
48     -192   
-112   64     
224    80     
48     160    
-32    -304   
16     96     
112    -816   
-80    -256   
-224   -16    
128    128    
128    112    
16     -240   
-304   0      
112    -144   
80     176    
-80    -64    
-128   -16    
-16    -224   
48     112    
-1584  -512   
160    96     
16     160    
-112   96     
48     32     
-144   -32    
-32    -16    
96     64     
-48    -96    
176    160    
-208   160    
-176   -96    
-48    96     
-192   -144   
48     48     
-304   -128   
48     144    
-16    224    
-192   -96    
-96    -16    
32     -80    
-208   144    
-640   16     
32     0      
144    32     
-32    208    
-80    -144   
304    208    
-288   80     
192    176    
-16    -144   
64     -304   
-48    176    
-272   -16    
208    96     
-288   0      
-64    -48    
144    16     
-256   -112   
-416   48     
-272   -48    
-208   -80    
64     96     
-80    80     
48     -64    
-48    -128   
48     -32    
224    416    
-160   128    
16     80     
128    -16    
-64    -80    
80     128    
-48    0      
-64    -64    
208    176    
-160   16     
176    64     
-288   -304   
48     -96    
48     16     
-32    80     
80     16     
-64    96     
-48    176    
16     -32    
96     160    
-176   -64    
144    160    
-192   320    
-144   -192   
-352   -112   
144    176    
-128   -128   
160    16     
-80    64     
-288   -128   
144    144    
-208   16     
192    -32    
-400   -64    
64     64     
-32    0      
-48    80     
-224   -96    
80     80     
-144   -16    
208    256    
0      -64    
-16    -128   
-208   64     
-32    160    
64     112    
80     -32    
-224   -48    
80     80     
-48    -64    
64     -96    
-16    192    
-128   112    
96     352    
-176   -80    
144    16     
-128   -64    
-32    0      
0      -48    
-240   16     
32     32     
-80    -128   
96     96     
16     112    
80     80     
-176   48     
32     112    
-208   -192   
112    256    
-64    800    
-192   320    
-272   -144   
-224   -656   
352    336    
-176   -16    
-80    16     
144    -80    
80     32     
-32    96     
48     48     
-96    -224   
112    176    
-80    -208   
64     192    
-160   96     
160    240    
-48    112    
-80    64     
-80    -96    
208    272    
144    144    
128    -96    
80     16     
0      48     
16     48     
32     48     
48     208    
-144   64     
64     240    
-272   -32    
80     0      
-64    0      
-400   2816   
-1248  -1376  
640    144    
576    -96    
608    128    
-1152  -544   
544    0      
176    960    
-288   -448   
-240   -320   
-160   64     
336    352    
-144   32     
-80    144    
-80    -128   
80     224    
176    448    
-192   -32    
-128   -112   
96     -16    
160    208    
0      176    
-176   320    
-208   -112   
208    288    
-384   -144   
192    288    
-272   112    
208    80     
32     304    
128    0      
48     32     
0      160    
0      64     
-64    128    
-32    -288   
16     -432   
0      176    
256    272    
32     224    
160    96     
-32    16     
-16    80     
32     80     
96     112    
-48    -48    
-48    64     
192    640    
192    624    
-144   -112   
48     160    
-176   -192   
112    96     
80     208    
-80    176    
48     192    
-208   -2256  
48     -1040  
-64    304    
144    -160   
-16    272    
176    -48    
32     -32    
128    208    
-16    80     
-16    112    
-96    112    
144    16     
-32    192    
0      64     
-32    -16    
0      -1120  
16     208    
64     32     
-96    112    
256    288    
-96    208    
336    -16    
-64    320    
-160   -128   
176    272    
-112   -48    
160    320    
-144   160    
80     208    
96     160    
-208   -592   
32     0      
224    -208   
16     288    
-16    160    
16     48     
32     144    
48     16     
-16    -80    
96     32     
-80    64     
208    160    
-144   -48    
-80    -256   
144    176    
-16    32     
48     -48    
-32    -400   
32     80     
160    144    
-32    64     
-16    80     
80     16     
32     160    
48     128    
64     112    
80     160    
-32    96     
0      48     
80     112    
208    416    
16     16     
-128   -784   
80     80     
-112   384    
240    208    
112    0      
-208   160    
304    320    
-128   272    
160    64     
-96    224    
336    368    
-240   -144   
224    80     
-80    176    
32     80     
112    -32    
-128   16     
128    -448   
-128   -16    
80     128    
128    224    
-48    0      
0      128    
16     -16    
128    144    
-144   112    
224    -160   
-176   80     
192    -224   
-192   -144   
128    -960   
-96    16     
80     -48    
64     288    
-112   -944   
80     64     
64     208    
-16    0      
176    96     
-96    -320   
-64    -32    
-16    -80    
128    144    
80     -176   
16     160    
32     -224   
80     240    
0      -528   
64     112    
112    352    
-16    -16    
64     48     
112    144    
208    144    
-176   -32    
32     -80    
-48    96     
64     32     
272    160    
-208   64     
0      48     
96     -64    
160    -144   
32     192    
0      -560   
192    16     
80     192    
-16    80     
-16    64     
80     -48    
112    -144   
64     96     
32     96     
144    -144   
-80    112    
-32    -176   
224    -128   
80     128    
64     112    
-368   352    
-128   -2112  
864    800    
-336   -688   
0      -160   
-288   448    
-112   -1472  
-448   -944   
448    512    
-144   -176   
176    16     
-112   -48    
48     160    
128    96     
96     -560   
-96    0      
144    -288   
-64    176    
128    16     
-32    -352   
-752   -64    
80     -144   
16     64     
112    -400   
-16    -96    
112    -1152  
-192   -144   
48     -128   
32     -16    
192    -16    
-160   48     
128    0      
16     160    
-112   -80    
-32    -144   
-544   -208   
-144   -32    
288    -80    
64     -48    
208    -160   
-160   -320   
112    -144   
-16    0      
112    0      
64     -16    
-64    -16    
0      -192   
0      -16    
-144   -160   
272    80     
-448   32     
208    0      
-80    112    
-16    0      
192    -64    
-144   -160   
192    32     
16     -192   
176    0      
96     128    
-128   32     
256    0      
32     0      
-208   -112   
272    32     
-224   96     
144    -320   
-608   -16    
144    -176   
-64    48     
64     -32    
192    48     
32     -608   
-32    144    
-16    -272   
160    32     
96     384    
-48    -128   
240    -48    
-96    0      
-224   -144   
144    -176   
-512   64     
112    -352   
-240   128    
-176   240    
-48    -80    
64     -1152  
48     -128   
-32    -2528  
-48    128    
0      112    
128    176    
-96    -16    
224    32     
-304   -192   
224    288    
-144   32     
160    64     
-144   32     
-16    -240   
176    160    
-32    -464   
32     16     
32     -176   
176    48     
-128   208    
16     -32    
0      -304   
192    -144   
-160   -96    
208    16     
32     96     
16     -64    
64     -48    
144    -336   
-112   80     
112    16     
32     112    
144    -48    
80     576    
16     336    
80     -176   
-352   -96    
288    64     
-80    0      
112    -112   
-208   -112   
144    -32    
-544   48     
-112   -128   
48     80     
-112   -240   
0      -32    
-16    192    
32     240    
-48    80     
208    224    
-304   -176   
288    64     
-224   -64    
144    32     
-16    48     
0      -48    
112    160    
-1232  112    
192    80     
-1392  -512   
144    -368   
-32    144    
-160   64     
-16    -48    
-608   -16    
112    144    
-832   48     
-64    -784   
144    608    
-16    192    
-16    -288   
-144   96     
96     -160   
-144   80     
-80    -208   
0      -64    
48     160    
-400   -176   
-96    -160   
48     192    
96     176    
-928   -64    
-64    0      
64     128    
-80    96     
64     -416   
112    160    
-160   -336   
32     128    
-272   -144   
288    128    
-176   64     
-16    16     
-16    16     
48     64     
-96    80     
128    -112   
-80    240    
-912   -16    
-160   -48    
-176   -48    
64     144    
-144   -112   
144    16     
32     192    
-240   -144   
48     432    
-240   16     
96     48     
-16    -160   
2368   -608   
-1360  -848   
704    752    
-528   672    
608    -240   
-896   -432   
336    -80    
208    1040   
-192   -112   
-256   -288   
-80    -96    
240    160    
-208   192    
0      -48    
-112   0      
176    80     
-448   0      
-96    -176   
-592   -32    
272    -336   
-432   -96    
-32    -32    
176    304    
16     272    
208    192    
-176   96     
-16    128    
-400   -368   
704    240    
-144   208    
32     -96    
-32    112    
80     96     
-128   128    
96     384    
-208   80     
-32    112    
-272   -64    
160    208    
80     64     
-64    0      
48     192    
32     208    
32     128    
-128   -128   
-128   -176   
368    48     
80     336    
-560   -352   
-112   -320   
-464   -144   
32     144    
16     176    
208    208    
-176   192    
-16    -128   
-192   -64    
-16    256    
400    160    
96     256    
0      240    
-80    -112   
-96    224    
-144   -112   
0      -64    
-128   32     
-16    16     
80     96     
-176   -240   
112    -192   
272    112    
-48    352    
-160   144    
96     96     
48     64     
-96    -304   
-16    256    
-288   96     
48     96     
-144   -16    
16     -80    
16     144    
112    240    
-176   32     
-128   16     
48     80     
-208   -240   
336    208    
-48    112    
-16    64     
-32    64     
-176   0      
144    144    
0      -96    
144    96     
-288   -16    
-128   -32    
-112   -64    
256    336    
-32    144    
-176   -48    
64     32     
16     48     
64     32     
48     80     
-80    208    
128    192    
-80    192    
96     -64    
0      0      
-16    -128   
-64    224    
128    320    
176    208    
-32    -16    
-16    144    
224    464    
-144   -80    
-144   112    
144    -288   
0      0      
32     -48    
48     208    
-160   -64    
32     -176   
128    144    
-32    176    
256    112    
-144   96     
112    144    
-32    80     
-16    320    
48     96     
16     176    
-32    -16    
256    160    
-144   96     
160    80     
-272   96     
48     -816   
224    128    
-80    48     
-32    160    
-16    64     
160    192    
-272   32     
160    -48    
64     32     
-48    240    
-16    -64    
16     144    
-80    0      
-32    224    
-128   -64    
208    -1376  
-96    32     
160    160    
16     -128   
64     192    
-80    144    
128    192    
-96    176    
16     64     
80     96     
-16    -256   
-32    160    
-160   64     
32     96     
-16    -32    
192    -320   
192    48     
160    64     
-160   272    
0      256    
-112   112    
64     -112   
272    96     
-64    -32    
128    176    
-144   -48    
64     112    
32     48     
32     176    
144    -64    
-64    -256   
-16    32     
176    -1104  
-48    64     
48     -32    
16     224    
0      64     
-64    160    
32     -16    
224    352    
-224   -128   
240    208    
-208   64     
-768   -1552  
368    592    
-976   -480   
208    -320   
208    -1072  
-288   128    
448    432    
-368   320    
176    704    
320    -592   
-192   96     
400    -272   
-48    752    
64     -224   
-176   400    
192    -352   
-16    400    
128    -192   
-16    352    
160    -400   
-128   96     
80     -944   
96     224    
0      -64    
96     -48    
-96    32     
176    80     
-192   32     
208    96     
48     128    
96     -64    
-80    160    
32     -400   
-48    208    
160    -384   
16     144    
96     -656   
0      240    
-48    -160   
48     32     
48     -80    
-80    192    
144    80     
32     224    
-96    -48    
48     -224   
0      176    
160    -656   
240    320    
-256   -64    
208    80     
64     -416   
-16    112    
112    -64    
-16    176    
96     -96    
176    192    
-112   64     
144    -16    
48     -16    
32     -800   
32     192    
0      16     
144    -16    
112    -112   
-160   160    
80     -288   
-32    80     
112    -368   
112    112    
-96    32     
80     256    
-64    -176   
96     -432   
96     320    
-96    -288   
384    432    
-256   -48    
160    96     
176    -512   
0      176    
-16    -16    
144    48     
0      -128   
336    272    
160    272    
-112   -1184  
192    -368   
0      16     
32     -960   
144    -48    
96     432    
80     -128   
288    160    
-48    -80    
16     64     
32     -64    
144    -1504  
-112   -32    
16     -384   
-16    240    
16     -192   
16     -112   
0      -176   
176    -560   
112    384    
144    -672   
-96    -160   
320    416    
-16    0      
16     32     
-16    32     
80     -464   
64     48     
48     -224   
-32    80     
16     -192   
16     -64    
-416   -32    
-112   -656   
80     0      
16     -32    
160    -48    
32     -416   
64     16     
-96    -1200  
-176   -384   
48     -352   
272    -96    
-32    32     
48     224    
-368   32     
0      -128   
-1136  -16    
-16    -160   
288    576    
-144   336    
-32    -304   
48     0      
176    112    
80     -1264  
-16    128    
144    -160   
-112   176    
-48    -176   
208    -48    
-96    64     
-16    -160   
-144   -112   
48     -64    
-448   16     
64     -128   
-32    -80    
80     -864   
304    -208   
96     -32    
-48    112    
288    160    
-288   160    
176    -96    
-48    -192   
-80    -112   
272    -112   
-144   48     
-16    -80    
-1072  -224   
112    -48    
-496   0      
112    -208   
-192   0      
112    -128   
-16    144    
112    -160   
96     64     
-160   -64    
176    288    
-208   -48    
240    80     
-176   -16    
256    32     
-320   32     
16     -48    
-288   48     
-64    64     
-112   48     
-112   -592   
128    0      
160    -1520  
144    160    
-144   -48    
112    48     
112    112    
-32    -208   
288    -400   
-48    32     
128    -64    
-224   48     
-192   416    
-864   -400   
-816   -832   
-112   -688   
-16    320    
-720   -336   
528    240    
-704   -720   
1008   -64    
-864   -176   
688    -304   
-800   144    
496    -192   
-32    176    
48     -368   
-224   16     
144    -400   
144    400    
-32    -272   
176    416    
-144   -64    
384    256    
48     0      
-192   -48    
-80    -160   
48     -416   
-144   -128   
128    496    
64     368    
-480   -368   
0      208    
176    -16    
32     -32    
-576   -64    
112    32     
-112   144    
-1408  -176   
-96    -192   
-192   0      
112    -176   
-128   224    
-112   -80    
112    -32    
-176   -304   
128    -144   
16     176    
64     -32    
-144   240    
0      -144   
-128   64     
32     -16    
-112   32     
-16    32     
-80    80     
-48    -16    
-384   -80    
-128   -48    
80     -96    
-48    176    
-96    -96    
16     96     
-48    -96    
16     144    
64     -416   
-128   96     
-144   -80    
128    80     
32     224    
-224   144    
208    368    
-320   144    
32     -144   
192    64     
-80    -288   
-16    -144   
-96    128    
-32    -176   
16     112    
-96    -80    
32     112    
96     128    
-112   112    
96     48     
-240   304    
208    -32    
32     0      
-208   -64    
-704   -192   
-176   -16    
-16    -32    
-80    0      
-48    -80    
240    336    
-16    112    
0      32     
-160   -144   
-48    -144   
-16    -48    
-48    -32    
-96    -112   
16     96     
32     112    
-752   -96    
-48    -192   
-112   -144   
224    320    
-16    0      
128    112    
-80    128    
-32    144    
-32    -32    
-64    0      
-48    -144   
128    192    
-144   96     
32     64     
-208   -176   
-160   0      
-80    -48    
-720   -48    
-96    -16    
-64    -112   
64     80     
-144   -96    
-192   0      
16     32     
128    48     
-48    32     
-160   -80    
80     16     
-112   16     
16     224    
-64    -48    
80     128    
-624   -64    
400    320    
96     -80    
-144   64     
-208   192    
128    64     
144    -32    
-96    0      
-288   64     
-16    0      
0      -96    
-112   48     
16     -144   
-224   16     
160    128    
-288   -128   
208    112    
-64    48     
64     128    
144    -32    
-64    144    
-16    64     
48     80     
-32    48     
144    400    
32     128    
48     112    
0      -16    
-208   -48    
160    144    
-192   -64    
176    80     
-48    144    
64     208    
176    96     
-32    16     
48     192    
-112   -80    
48     256    
144    -16    
-112   80     
-48    32     
48     128    
-64    96     
-16    160    
-96    -64    
160    80     
32     80     
-112   64     
-96    64     
96     -16    
48     240    
16     -48    
-48    80     
-64    0      
32     112    
-160   -96    
160    192    
-208   -48    
128    144    
-272   32     
176    80     
-16    48     
64     128    
2656   -240   
-1168  -960   
720    32     
224    496    
1024   608    
-496   0      
32     -432   
176    960    
256    -528   
-352   528    
144    -304   
32     320    
-224   288    
272    -48    
-192   176    
96     -288   
-48    304    
144    -16    
16     560    
32     -128   
-112   64     
32     -80    
-16    368    
112    -32    
-112   80     
32     -80    
0      176    
96     64     
-64    160    
112    -128   
-48    112    
64     112    
32     128    
-16    144    
32     32     
-64    -48    
208    112    
-128   160    
48     112    
-128   -288   
32     -512   
48     192    
96     80     
-64    64     
192    48     
-48    128    
112    16     
16     192    
-16    96     
96     16     
-16    80     
64     96     
-32    80     
80     144    
16     128    
96     -64    
16     144    
-16    16     
80     160    
48     256    
-80    160    
16     -160   
176    96     
16     240    
-80    32     
-16    80     
16     144    
112    192    
-96    112    
32     -64    
48     -784   
64     160    
-48    128    
32     208    
16     96     
16     -48    
32     -48    
-64    384    
32     240    
-48    240    
-192   -208   
208    96     
-64    -112   
-992   -512   
224    112    
-96    -384   
48     128    
96     -1584  
0      -128   
240    272    
-96    32     
160    112    
16     208    
0      -112   
112    96     
256    384    
-288   32     
80     80     
-48    160    
64     96     
-32    128    
64     144    
64     -112   
96     32     
-16    64     
16     -48    
112    272    
32     432    
96     320    
-48    16     
-16    0      
80     224    
192    256    
-128   -224   
112    160    
0      -80    
176    176    
-112   -864   
112    96     
-16    -1152  
-80    48     
32     -64    
144    160    
240    240    
96     48     
-272   96     
-48    -48    
240    -48    
48     144    
112    160    
80     -96    
32     64     
32     -64    
-80    64     
224    -80    
-208   -48    
320    -592   
-240   -160   
64     16     
-112   112    
32     16     
16     64     
256    176    
48     240    
-64    160    
80     64     
-48    224    
-32    -64    
96     -240   
80     -16    
112    208    
-80    112    
-192   -48    
160    304    
16     0      
112    16     
-192   -1152  
272    96     
-80    -480   
-64    -112   
208    -16    
80     32     
160    0      
-144   80     
96     -448   
-128   320    
-176   -304   
688    192    
-256   160    
208    144    
-128   160    
-64    -16    
304    16     
0      -48    
64     64     
48     -32    
-144   96     
160    -144   
-64    80     
64     -352   
256    0      
-80    144    
48     -240   
-48    -32    
256    -48    
-400   -800   
0      -256   
224    -544   
240    144    
-176   -1840  
-112   -80    
-64    176    
192    -112   
432    -144   
-64    144    
-80    -144   
-96    112    
96     0      
-1328  -624   
320    928    
-544   0      
-560   -896   
624    1040   
32     512    
-288   -944   
272    -656   
240    -288   
144    -496   
0      320    
160    -240   
192    -304   
-512   -112   
304    -416   
-32    544    
-96    -112   
-144   -176   
-544   48     
-64    -128   
-32    -176   
-48    -32    
464    -256   
-224   -320   
80     -160   
192    -592   
-96    160    
160    0      
-112   -80    
160    16     
-32    16     
80     16     
64     -16    
-224   80     
128    -160   
-240   0      
32     -32    
160    32     
64     -624   
16     144    
32     -640   
-48    96     
80     192    
112    96     
-144   -128   
80     -112   
-176   16     
352    128    
-576   -208   
288    0      
-608   48     
192    -176   
0      48     
-128   -224   
64     -272   
32     -400   
160    160    
-64    128    
48     -48    
-80    0      
112    -16    
-224   -80    
80     96     
0      16     
-48    112    
-784   -128   
64     48     
-32    -64    
112    -32    
48     80     
-16    0      
64     -32    
224    -736   
-112   48     
-64    -112   
128    -32    
-288   208    
160    160    
64     -208   
128    -112   
-160   16     
64     -64    
-128   192    
64     -224   
208    32     
0      -528   
-96    -128   
144    -880   
-16    -128   
32     80     
96     96     
-464   128    
240    32     
-176   16     
16     48     
-160   -96    
112    -48    
-112   32     
0      -208   
-48    112    
16     -592   
208    160    
64     -784   
-16    64     
-48    64     
48     0      
-160   0      
112    48     
-112   16     
16     192    
0      160    
224    -16    
-320   112    
-240   -160   
272    240    
16     16     
112    160    
64     160    
-240   -144   
-208   -128   
-144   -112   
32     -32    
128    16     
-224   -64    
112    96     
-64    16     
160    -80    
240    256    
-16    0      
128    176    
-352   -208   
16     -64    
-224   48     
-336   -144   
256    -32    
-1504  -96    
80     -32    
96     16     
-192   0      
80     -176   
-16    -48    
-80    -128   
224    128    
-176   16     
112    48     
-272   -96    
-144   -64    
-112   -32    
-96    96     
48     -16    
32     176    
0      16     
-560   144    
-16    0      
0      16     
0      96     
-48    -128   
-128   64     
-48    -48    
48     64     
-176   -336   
64     64     
16     96     
16     16     
-128   144    
-48    64     
-64    32     
-256   48     
-320   128    
-720   -144   
-80    0      
32     -176   
272    368    
-112   -208   
80     96     
-96    -48    
96     -368   
112    208    
-48    208    
-160   128    
-112   64     
-224   -144   
-16    -64    
208    208    
-672   80     
-16    112    
-448   16     
-80    -64    
96     -48    
48     32     
48     112    
80     -80    
80     304    
-272   192    
80     -128   
16     -96    
80     48     
-864   1632   
352    -416   
-448   0      
-32    96     
-1328  -640   
224    960    
-512   -160   
224    -688   
-256   352    
240    -80    
-144   288    
-288   -32    
336    304    
-240   112    
176    0      
-48    -16    
-128   144    
-144   -240   
48     48     
-784   -48    
64     0      
0      48     
80     80     
16     -96    
-112   -80    
96     112    
64     256    
-16    96     
-96    -32    
-16    -128   
-64    -96    
144    -16    
-32    48     
160    208    
-432   -64    
-144   64     
112    80     
-128   0      
64     16     
32     144    
128    128    
-64    96     
-48    16     
-112   -208   
32     16     
0      -64    
144    144    
-48    64     
64     160    
16     -128   
64     112    
0      96     
32     16     
64     80     
-64    -16    
112    128    
-32    128    
48     64     
-64    32     
112    464    
80     80     
144    368    
-432   32     
240    160    
-384   -160   
-32    -128   
-96    32     
0      64     
16     -16    
128    48     
-48    64     
-16    112    
16     80     
64     128    
-32    48     
-112   -256   
-96    -368   
32     -208   
-176   -144   
160    256    
-64    160    
-48    224    
96     -400   
0      -112   
96     112    
-96    96     
-112   128    
192    288    
160    304    
-80    0      
-208   -112   
48     -48    
64     48     
48     96     
48     96     
-64    144    
128    192    
16     32     
-16    32     
96     80     
64     192    
0      128    
-48    128    
-96    -48    
112    112    
-32    -64    
176    240    
-64    240    
64     -16    
64     112    
-96    64     
96     32     
-80    96     
48     96     
96     80     
-48    0      
16     128    
0      16     
16     16     
32     288    
48     0      
-16    64     
-320   -192   
192    416    
48     -16    
224    464    
-144   352    
64     0      
80     48     
-192   112    
96     112    
112    144    
-64    0      
64     112    
-16    112    
112    720    
-208   144    
48     -128   
-144   -96    
64     112    
16     -16    
-48    32     
192    96     
0      80     
-64    64     
-80    48     
160    128    
48     192    
-80    64     
32     32     
16     80     
48     224    
-64    32     
-208   -656   
416    320    
-144   96     
448    544    
-448   112    
240    -16    
64     80     
112    48     
32     192    
-240   32     
0      128    
32     0      
-144   256    
64     -320   
224    192    
-16    -336   
-64    112    
-160   -80    
144    112    
400    -16    
160    336    
-288   16     
304    -176   
-64    256    
192    384    
-368   -32    
-192   -160   
0      16     
320    -128   
160    144    
32     -1072  
-128   256    
256    -192   
80     16     
-64    80     
176    64     
-48    208    
128    0      
-64    144    
64     96     
128    160    
96     272    
128    48     
-48    -192   
2176   -2400  
656    960    
-96    48     
-512   -96    
160    288    
416    -1056  
-512   48     
272    416    
112    224    
-224   -48    
-16    32     
-16    192    
176    208    
-16    112    
16     -64    
-32    32     
160    64     
48     288    
96     -336   
-16    240    
112    -320   
-16    96     
48     -16    
-192   48     
224    -176   
-48    192    
208    96     
0      112    
80     112    
16     80     
128    48     
-80    -80    
0      96     
128    -608   
0      112    
288    0      
-128   288    
64     16     
32     80     
-64    -112   
160    144    
48     80     
48     -720   
80     128    
-48    -160   
160    48     
-80    -192   
176    384    
-240   -224   
336    64     
-144   48     
128    32     
-80    48     
112    32     
16     96     
96     384    
48     -160   
208    96     
-144   32     
240    -352   
32     272    
-80    -64    
112    128    
-16    112    
112    -112   
112    -368   
-96    128    
-48    112    
-48    96     
176    96     
80     -848   
80     -272   
-96    -336   
240    -1696  
16     48     
48     128    
-64    48     
64     176    
80     -160   
48     0      
64     -144   
112    48     
16     272    
-80    64     
-32    0      
80     -1008  
208    -640   
-112   -112   
32     -256   
112    -32    
64     -288   
0      -64    
0      -128   
208    144    
-224   -64    
320    -16    
-176   -320   
208    160    
0      -304   
96     80     
-208   -32    
160    32     
-1136  -16    
176    -16    
0      -128   
80     -128   
-144   -432   
128    -96    
-128   -48    
240    64     
80     32     
-48    -144   
48     176    
0      -272   
128    48     
-160   80     
112    -16    
-336   208    
-112   -64    
480    128    
48     -320   
-48    -32    
-128   -80    
64     32     
336    -160   
-16    16     
368    192    
64     208    
128    96     
-96    16     
-80    -64    
-64    -64    
-592   -176   
-144   -208   
-32    -112   
-16    -176   
64     -32    
128    -464   
-368   -112   
32     -624   
-80    80     
112    -64    
-80    48     
16     32     
-64    112    
16     16     
-32    -288   
-240   -160   
-80    80     
-320   80     
96     -48    
-32    32     
-16    -304   
16     -64    
176    -368   
-128   112    
384    176    
-208   64     
144    144    
16     -48    
-16    -144   
176    -64    
-16    -64    
32     -80    
-464   304    
-32    -272   
-864   112    
-32    -576   
32     32     
96     64     
112    240    
112    -1232  
-32    -496   
-160   -48    
32     -96    
-96    32     
112    -32    
80     0      
48     -256   
-208   224    
96     -176   
-320   -64    
80     -144   
112    128    
48     -544   
-64    112    
-80    -1872  
176    -96    
-96    64     
-16    96     
-64    -64    
80     -48    
-208   0      
112    256    
-144   -144   
112    48     
-112   160    
-640   2400   
-1040  -608   
32     -768   
688    256    
64     -528   
-192   -848   
144    720    
336    336    
-48    -512   
-192   48     
128    -64    
224    96     
0      32     
80     16     
-672   -96    
240    -256   
16     384    
0      0      
-96    208    
112    64     
-1216  -96    
-96    0      
-16    32     
-176   -16    
96     -64    
-80    32     
160    80     
-240   16     
80     -192   
-128   48     
-640   -512   
-32    112    
176    96     
-336   -48    
112    80     
-288   -32    
96     320    
-304   -64    
0      -16    
128    32     
16     64     
80     128    
-96    -48    
-176   -128   
0      32     
48     0      
80     64     
-112   -16    
-144   -144   
64     240    
-112   112    
112    208    
-240   208    
-160   -272   
-80    64     
-32    32     
64     -32    
-144   112    
-96    -160   
48     -176   
16     0      
80     16     
0      144    
-64    -144   
-32    80     
240    96     
-176   96     
-32    -112   
-128   32     
-560   -112   
-32    48     
-896   -16    
0      80     
32     16     
-16    144    
-48    -336   
-96    -528   
-144   -592   
208    -16    
-16    256    
240    96     
-176   96     
-48    -16    
16     48     
-80    16     
16     48     
-208   -96    
144    128    
16     96     
-32    80     
-48    -192   
-112   48     
80     112    
48     64     
-32    32     
-112   -64    
64     96     
-176   -144   
80     -48    
-32    144    
48     96     
-320   -32    
16     128    
-1520  -16    
0      96     
-32    16     
16     48     
-48    -112   
80     112    
-224   -32    
192    64     
-160   32     
32     96     
0      80     
-64    80     
-80    -16    
-272   -112   
64     144    
-144   -16    
48     48     
48     80     
16     144    
256    304    
-112   32     
-208   -112   
64     160    
16     -80    
192    -96    
-288   -80    
144    16     
-80    96     
-160   48     
112    64     
-160   160    
64     16     
128    96     
192    512    
-224   176    
128    -80    
48     16     
144    48     
32     240    
-80    80     
16     -32    
-80    48     
80     32     
112    256    
-464   -256   
-112   16     
-160   64     
176    -80    
-112   64     
16     0      
224    160    
144    608    
-400   240    
96     -80    
0      288    
16     0      
-16    16     
-192   112    
16     16     
-32    240    
-112   -144   
-64    128    
48     96     
-176   64     
64     272    
0      144    
-176   -112   
144    144    
48     240    
-64    48     
112    80     
-192   -32    
16     -16    
48     96     
-128   64     
160    304    
-96    -112   
128    176    
-32    -112   
-80    128    
112    144    
-16    288    
-112   48     
96     480    
-448   -272   
96     192    
-80    -48    
32     -80    
-80    224    
-64    80     
128    208    
-224   144    
160    128    
-160   208    
16     112    
-416   608    
448    -1744  
-480   320    
384    656    
-768   96     
496    80     
304    432    
48     128    
-480   -304   
16     -48    
240    320    
-176   -192   
128    176    
-16    112    
320    160    
-128   96     
32     144    
64     80     
0      -32    
0      -16    
-32    80     
176    160    
96     192    
96     -112   
-224   -304   
128    320    
48     144    
-16    0      
96     64     
80     32     
-96    32     
48     144    
32     16     
80     128    
16     48     
320    480    
-304   48     
144    -80    
-32    224    
160    -1392  
48     48     
-112   80     
80     64     
64     -16    
-16    176    
16     32     
112    160    
32     32     
-16    -16    
-16    96     
128    128    
-112   -240   
-32    96     
48     16     
16     -128   
32     0      
160    112    
-48    112    
112    176    
-48    48     
112    144    
-16    128    
64     48     
112    208    
-160   -16    
64     48     
112    16     
80     128    
-112   48     
112    -96    
48     192    
-80    -384   
64     144    
0      80     
32     112    
48     0      
272    240    
-176   176    
96     96     
80     16     
-64    144    
-80    64     
224    -256   
-144   224    
-64    -432   
48     16     
176    -176   
-32    -48    
304    112    
-80    64     
144    -224   
-128   -64    
32     -32    
112    128    
32     288    
-160   128    
240    96     
-64    -128   
256    240    
-128   -48    
208    272    
0      -544   
32     144    
-80    -2768  
224    80     
-112   -144   
128    48     
-96    0      
32     -80    
32     -48    
64     192    
160    128    
16     -16    
-160   -16    
112    -32    
192    256    
-32    -368   
192    144    
-272   -640   
144    -96    
32     -880   
-80    48     
224    80     
0      0      
112    32     
80     -240   
-160   -80    
16     -336   
32     96     
80     -656   
48     128    
96     -640   
-80    -16    
128    -176   
224    112    
112    16     
-96    128    
32     208    
208    96     
-112   64     
-80    -208   
176    160    
-48    -176   
192    304    
-48    -176   
32     -336   
-16    -112   
128    192    
80     -80    
16     112    
48     80     
112    160    
-96    -32    
0      48     
128    208    
32     -160   
64     64     
128    112    
32     -112   
32     -224   
64     240    
128    -160   
32     176    
48     32     
80     288    
-80    64     
-32    -64    
32     160    
96     -272   
128    -432   
-32    -112   
-112   -1920  
80     -336   
240    -288   
80     -48    
64     192    
-32    32     
-96    0      
112    -768   
112    -1296  
96     240    
-48    -176   
-128   176    
48     -224   
32     80     
32     -32    
16     -256   
80     16     
112    -112   
160    -48    
64     336    
64     -208   
32     112    
48     160    
-16    -224   
0      48     
96     -112   
-800   1712   
240    848    
-640   -848   
32     -240   
944    1136   
-528   -1040  
-400   -1008  
208    272    
528    -240   
80     -16    
-192   -464   
32     288    
80     -96    
-64    240    
-80    -448   
128    -112   
-80    80     
80     560    
-192   176    
-288   -560   
208    -48    
32     -176   
16     48     
80     -208   
48     80     
-240   48     
0      -96    
192    -160   
-96    -160   
48     -208   
112    112    
-80    32     
32     64     
-336   -48    
64     -48    
-864   -592   
192    -176   
32     -192   
208    -176   
-80    80     
144    -736   
32     128    
96     16     
32     112    
-48    96     
48     -48    
-16    80     
-96    -592   
-80    -240   
-96    -256   
192    272    
0      64     
-112   0      
144    -224   
-48    -32    
-64    -1024  
-80    -240   
112    16     
288    512    
-240   32     
208    304    
-400   -160   
256    16     
-176   96     
-192   -272   
-16    -16    
-48    -80    
-1712  -80    
-64    -176   
32     32     
80     -320   
-16    80     
96     -624   
112    -160   
-160   272    
16     -64    
-96    64     
-208   0      
464    -16    
-32    80     
240    -48    
-368   112    
-48    -80    
48     -32    
80     -80    
64     -160   
192    208    
-16    -320   
16     -144   
32     128    
-32    -16    
-160   -224   
144    48     
32     192    
-16    -80    
-144   -32    
16     0      
176    224    
48     -48    
-16    -48    
112    -224   
32     48     
-80    -48    
-16    64     
-160   32     
320    32     
-352   -304   
224    -80    
-320   0      
208    -176   
-16    144    
80     16     
-112   48     
-864   -352   
80     64     
-1312  -480   
192    352    
-48    128    
-48    176    
-112   80     
112    160    
-48    -64    
-48    32     
-80    -64    
112    -288   
112    80     
-160   176    
256    208    
-288   192    
64     80     
-80    -192   
-176   448    
-112   176    
-176   112    
-208   -80    
-384   -384   
-128   32     
-720   416    
-240   384    
48     -192   
-96    80     
-176   -512   
224    0      
-96    256    
32     160    
64     -128   
-96    0      
-48    64     
-16    32     
-208   32     
-160   -16    
-64    48     
-144   48     
0      64     
-320   -224   
-272   -32    
-160   -112   
160    -96    
-304   -144   
240    16     
-16    224    
-16    -160   
-128   80     
0      144    
0      -80    
-240   48     
0      400    
-352   -128   
-80    -80    
160    0      
32     80     
-144   0      
272    0      
-16    -96    
112    48     
-48    112    
-160   -80    
64     192    
32     -16    
80     112    
-80    32     
32     48     
-176   -96    
-112   144    
-208   -64    
64     112    
-592   -288   
0      208    
-16    -128   
-80    48     
0      112    
96     128    
-80    16     
-112   32     
-32    -112   
-96    -144   
-32    64     
-960   -1344  
256    -96    
-512   -112   
560    -16    
-656   -944   
-336   -128   
256    272    
-48    112    
-128   192    
16     48     
32     -48    
-176   -48    
144    32     
80     112    
32     64     
-96    48     
-32    32     
-176   80     
0      64     
-160   -16    
-16    0      
-32    112    
192    112    
-96    112    
-16    -80    
-80    -48    
-64    16     
240    144    
-224   144    
112    128    
-96    -48    
-80    64     
-16    48     
96     96     
-512   -48    
240    112    
-96    80     
96     16     
-224   0      
96     128    
-32    48     
128    112    
-112   160    
176    16     
-224   32     
-80    -128   
16     32     
-96    80     
368    464    
-560   -192   
336    0      
-208   64     
176    64     
-32    112    
32     16     
80     176    
-144   -144   
160    32     
-256   128    
80     -208   
96     64     
-112   224    
32     -16    
80     0      
128    224    
-208   144    
112    0      
48     16     
128    48     
-112   128    
-80    48     
48     -32    
144    112    
-16    224    
-32    128    
-32    -96    
192    256    
-336   -192   
224    96     
32     208    
-112   16     
96     112    
-144   -160   
144    -80    
-160   64     
-16    80     
240    240    
-288   240    
80     0      
80     112    
-208   -144   
192    192    
-192   -112   
128    -32    
64     176    
128    144    
-32    272    
-80    -48    
160    32     
-32    -16    
32     192    
112    128    
16     176    
-16    -240   
0      80     
-96    0      
176    128    
-80    192    
48     -48    
-48    64     
64     64     
-80    48     
0      144    
64     64     
-32    -64    
-64    128    
-80    -64    
96     176    
64     0      
-112   -192   
-112   16     
48     144    
-96    -176   
160    320    
-96    0      
48     48     
-80    144    
208    304    
16     304    
-16    -160   
16     0      
-16    48     
128    224    
-32    96     
112    -144   
0      -48    
-208   112    
144    16     
256    -1744  
-176   -128   
256    416    
-16    224    
160    192    
16     16     
32     176    
-128   208    
336    80     
-240   -192   
48     -224   
144    208    
-80    64     
0      -16    
0      80     
112    64     
-32    112    
16     -400   
32     48     
240    -368   
-48    208    
112    48     
32     80     
112    -48    
128    96     
-80    80     
96     240    
-176   32     
32     -272   
80     208    
80     -288   
-160   -32    
128    -2224  
0      128    
-32    96     
144    80     
16     64     
48     304    
-240   -128   
-64    16     
-144   -32    
80     128    
-16    144    
-16    -48    
-16    48     
128    -704   
0      96     
240    -864   
80     192    
96     -16    
-160   112    
-80    64     
144    112    
-144   96     
96     128    
80     16     
208    272    
-48    176    
-64    -128   
-192   176    
608    1648   
352    576    
-592   -1520  
64     -992   
480    -16    
-304   -160   
384    816    
-16    464    
-160   -224   
-368   -240   
176    240    
336    96     
0      64     
-32    112    
-112   96     
224    160    
-64    48     
-16    -192   
-16    -80    
112    -592   
112    -32    
64     128    
-48    240    
0      -32    
80     272    
-112   64     
-16    -480   
-48    192    
144    -64    
0      16     
176    -80    
128    96     
80     -192   
112    176    
-208   -240   
48     -32    
144    368    
160    144    
-144   -80    
192    192    
-48    224    
16     16     
80     144    
0      -128   
96     224    
0      -144   
-96    -208   
304    416    
-48    -16    
96     144    
-112   240    
-16    -176   
224    176    
-176   -96    
240    32     
48     -96    
112    -144   
-160   -464   
96     -80    
48     80     
32     -176   
96     224    
16     -48    
64     0      
-80    -48    
368    -2704  
-192   48     
144    -752   
-192   144    
16     64     
32     32     
48     -80    
128    -432   
-64    -80    
16     -944   
96     -128   
64     368    
368    176    
256    -880   
-288   -160   
176    -1552  
16     48     
-16    -96    
32     144    
-144   -48    
32     -672   
112    512    
256    -768   
-320   -304   
160    -576   
128    208    
208    -2400  
-112   112    
16     -32    
16     64     
-48    -288   
256    48     
-32    112    
160    -112   
-480   -192   
32     -448   
-992   -128   
144    -96    
32     64     
0      -16    
32     -304   
16     -944   
-64    -96    
80     80     
16     256    
64     0      
-80    16     
128    -176   
80     160    
-80    -16    
144    112    
-320   -16    
160    16     
64     160    
-32    -192   
16     0      
80     128    
48     -176   
192    -928   
-160   48     
320    16     
-144   160    
16     -112   
32     32     
-16    16     
80     0      
64     96     
-144   -80    
-752   -32    
224    80     
-256   128    
528    368    
-64    128    
-144   -512   
112    96     
64     -160   
-112   96     
144    -80    
64     96     
-64    -144   
-48    -352   
-112   -224   
96     -64    
0      32     
48     64     
-432   128    
192    -208   
-96    48     
96     -576   
-32    192    
32     -48    
48     112    
48     320    
-192   0      
-48    -224   
-64    -80    
-64    -112   
160    112    
-112   64     
-176   144    
-64    -160   
144    -352   
336    16     
208    -96    
64     192    
-32    192    
-16    192    
-176   192    
-112   -192   
-80    208    
-64    -272   
208    64     
-32    -128   
48     64     
-16    -96    
-304   -112   
96     -32    
112    128    
-32    -480   
240    224    
-336   192    
-32    -240   
-160   48     
144    -16    
-144   64     
160    48     
-16    -48    
-64    -32    
-16    96     
-112   0      
-208   -80    
64     -192   
1184   2176   
-2224  -176   
384    752    
240    336    
-48    -400   
-272   448    
-704   -496   
400    112    
-400   -208   
144    400    
-272   -384   
-160   176    
304    32     
112    208    
-528   -336   
48     -32    
-16    0      
-640   80     
-112   -48    
112    -16    
-112   96     
-1296  -144   
-144   352    
32     -128   
-64    -16    
80     -96    
64     304    
192    0      
-208   112    
-192   -336   
80     80     
-64    -32    
64     176    
-112   0      
-144   64     
-96    -128   
-288   -128   
-96    160    
-1056  64     
144    128    
0      -112   
-144   112    
-128   -320   
-16    96     
-96    -288   
80     144    
160    128    
-160   32     
48     192    
-160   -128   
176    -16    
-128   128    
96     80     
-16    96     
-160   -96    
-464   -32    
0      160    
64     -160   
-16    208    
-96    -144   
224    144    
-112   64     
-32    0      
-64    16     
32     96     
-16    48     
80     112    
64     144    
-288   -64    
64     112    
-768   -144   
48     176    
-32    -96    
64     32     
96     -128   
-128   -64    
112    224    
-288   16     
176    96     
-112   -48    
16     -64    
-16    80     
-272   -32    
-176   -208   
144    -48    
-16    -112   
0      144    
-912   96     
-192   176    
256    -144   
-160   -16    
80     80     
-32    48     
-96    0      
48     -240   
-304   16     
240    224    
-80    96     
80     112    
32     240    
32     112    
48     224    
-448   -192   
-16    96     
-16    208    
160    48     
-128   16     
160    256    
-32    160    
48     -16    
-32    -144   
-96    -448   
96     160    
-48    16     
160    80     
-320   -144   
160    192    
-496   16     
16     80     
48     416    
-240   224    
160    16     
-128   160    
-96    -48    
0      96     
32     160    
-64    128    
160    80     
32     -32    
-176   -128   
-160   -192   
-48    144    
-176   0      
-144   128    
16     64     
-112   16     
64     96     
32     64     
-64    -544   
-160   -32    
144    240    
16     0      
-96    -208   
-192   -96    
-32    112    
240    544    
-400   -144   
96     -48    
-32    96     
-32    -32    
-64    112    
80     64     
-48    48     
80     80     
16     192    
-64    -592   
144    -32    
144    832    
144    224    
-96    352    
-80    -16    
144    208    
-32    96     
0      16     
-16    -32    
192    48     
-192   176    
32     -80    
16     256    
-176   48     
0      48     
-80    128    
-64    -112   
144    224    
-224   208    
144    -128   
-112   256    
80     16     
96     96     
-128   176    
176    96     
-32    96     
-64    144    
128    -32    
240    64     
128    80     
-96    16     
64     176    
-128   -32    
176    64     
-112   80     
-32    112    
96     80     
176    32     
144    192    
-16    16     
-32    48     
-80    64     
400    1216   
384    816    
-400   -1520  
-256   -864   
0      48     
384    -144   
448    832    
-880   -320   
416    -464   
-144   336    
464    -336   
-208   528    
-208   -320   
288    496    
48     -240   
80     368    
-112   -240   
144    688    
-224   -384   
352    112    
-128   -32    
400    304    
-224   176    
64     -1632  
-176   144    
144    160    
16     464    
-16    -128   
-144   208    
0      -208   
160    256    
-80    -144   
224    64     
0      -48    
112    176    
-64    160    
224    128    
112    368    
-272   -1216  
48     192    
112    144    
-64    -16    
-16    80     
144    192    
-64    0      
0      144    
80     400    
384    384    
-208   32     
64     -32    
-128   -32    
80     -416   
176    368    
-176   -352   
0      112    
0      -272   
112    -112   
-288   -176   
0      -240   
-64    -64    
192    288    
160    624    
-64    64     
16     16     
-208   16     
-160   128    
64     -288   
208    192    
-384   -352   
144    32     
160    -352   
64     288    
-112   96     
176    0      
-16    96     
208    112    
112    352    
-16    336    
160    208    
48     0      
-48    48     
16     -192   
80     48     
-32    -240   
80     -48    
-112   -144   
320    208    
16     -1440  
16     -208   
-176   128    
288    16     
-128   144    
32     128    
64     48     
32     192    
96     112    
208    -208   
128    160    
-32    -384   
80     128    
80     128    
192    272    
-64    -272   
16     176    
48     336    
144    256    
320    368    
-64    80     
-208   -64    
256    112    
-16    192    
-64    -208   
144    128    
-16    -48    
112    48     
0      -240   
-64    32     
192    -560   
112    112    
-96    144    
-48    0      
112    -48    
112    176    
-96    64     
16     224    
96     208    
-16    -176   
-80    32     
-48    -48    
192    80     
-32    -496   
-32    -16    
-240   -352   
304    368    
-208   -64    
496    32     
-432   -112   
64     -32    
32     32     
128    -144   
16     128    
64     -224   
160    128    
80     -208   
0      256    
-64    -224   
144    112    
-112   -48    
176    48     
16     160    
16     -320   
48     32     
80     -128   
48     -448   
48     -16    
-16    -656   
192    -64    
-80    -240   
208    -176   
64     64     
128    -16    
-48    176    
32     16     
-16    -1376  
48     -32    
16     -384   
-32    32     
32     -80    
176    -64    
64     32     
-16    -480   
16     -304   
80     -416   
176    -48    
-48    288    
-48    -96    
208    176    
-48    -112   
80     -192   
-112   208    
80     -64    
-48    -32    
-80    0      
0      -368   
-176   -128   
64     -640   
48     -320   
192    -336   
64     -80    
128    -1440  
-48    16     
-48    -1424  
96     -128   
-16    64     
96     -48    
96     48     
-48    -96    
-1472  944    
1184   -528   
496    288    
480    -544   
720    -16    
-368   -592   
656    416    
208    -1536  
-48    -464   
-224   -192   
224    320    
144    -112   
-128   304    
-48    -256   
144    -144   
-112   -176   
176    0      
-80    176    
32     -128   
-192   -96    
224    -224   
-48    192    
240    -336   
-576   48     
240    -1504  
-112   112    
320    48     
-144   288    
16     -256   
-128   -64    
-32    -48    
112    208    
-240   -96    
-48    16     
-1360  -48    
160    -176   
32     -32    
80     32     
112    160    
-32    -976   
112    112    
-32    -96    
64     128    
-80    -16    
32     48     
-32    96     
32     32     
-144   -96    
-32    -16    
-240   16     
96     48     
-176   16     
64     -80    
48     128    
32     -256   
16     96     
32     -64    
128    -64    
48     96     
-80    -48    
16     48     
16     -80    
-80    32     
16     32     
-80    176    
-48    0      
64     -96    
48     -272   
0      16     
32     -288   
-16    112    
224    80     
64     16     
-240   -64    
208    32     
-400   -256   
304    -16    
-224   160    
32     -176   
0      -32    
-160   -352   
-576   -192   
-112   -416   
-160   -16    
96     -64    
-128   96     
-128   32     
160    -112   
-176   -96    
80     128    
-16    192    
128    288    
-96    -16    
16     0      
-128   16     
208    80     
-32    112    
96     176    
-384   -480   
-160   -112   
-1008  96     
64     -96    
-1568  -144   
-80    -48    
80     48     
64     128    
-16    -352   
-96    -80    
288    176    
-16    320    
-432   -80    
-96    -16    
-96    -64    
80     48     
-208   -272   
-240   592    
-48    144    
-192   16     
-64    -96    
-352   -80    
-112   48     
-752   48     
-224   48     
48     32     
-160   -16    
-112   -528   
-48    -304   
-240   -464   
128    128    
-64    -160   
-48    144    
-32    96     
-96    320    
0      -80    
-32    80     
-160   -64    
-128   16     
16     176    
-16    80     
-32    128    
-240   -192   
112    64     
-112   -64    
176    0      
-48    64     
0      -16    
48     208    
-208   112    
0      64     
-112   16     
80     96     
-160   0      
160    176    
-1488  -64    
0      -16    
-160   -96    
480    272    
-224   304    
-96    -64    
-32    -16    
-48    112    
48     80     
-208   -48    
-32    80     
-192   -192   
240    112    
-448   96     
-224   -224   
-368   -352   
208    416    
-128   -192   
80     48     
-64    -64    
176    -32    
-64    112    
-304   -128   
160    128    
-32    224    
128    -16    
-32    64     
-48    160    
-48    -64    
-64    96     
-176   -64    
64     176    
-96    256    
-64    16     
16     32     
0      -32    
96     64     
-128   64     
-32    -48    
-32    112    
304    160    
-80    128    
-112   80     
-80    32     
-1328  1824   
816    448    
-688   -976   
688    -192   
-464   0      
-400   -208   
-160   -176   
160    224    
-32    704    
192    -608   
-432   304    
208    -48    
224    352    
-16    464    
-160   -64    
-288   -96    
-208   -64    
640    672    
-848   -96    
-352   -256   
-272   -208   
384    -32    
32     512    
32     -144   
-80    48     
-208   112    
-16    -32    
16     -240   
-272   -96    
176    416    
128    112    
-272   -80    
32     96     
64     -16    
64     176    
-16    -368   
16     -48    
-32    48     
176    416    
-32    48     
-208   144    
32     48     
16     -32    
80     80     
-128   -32    
272    160    
-224   96     
80     208    
-176   64     
-160   0      
144    -80    
-144   -32    
64     128    
-64    224    
64     0      
48     32     
64     192    
48     -80    
-32    144    
-288   -448   
256    208    
-240   144    
16     64     
272    96     
-112   208    
-32    160    
64     32     
96     160    
-160   32     
128    16     
0      64     
-80    32     
0      32     
32     96     
144    32     
208    368    
-288   240    
144    128    
320    64     
-16    -144   
48     -32    
112    0      
64     208    
-144   16     
272    48     
-80    -160   
208    192    
-64    32     
48     64     
-80    64     
-48    144    
-16    64     
-80    128    
0      80     
64     -48    
144    144    
-112   192    
48     96     
128    176    
-96    112    
80     48     
-80    16     
-96    -80    
128    48     
64     432    
-160   144    
224    -64    
-80    -64    
-48    -80    
176    16     
16     144    
-64    176    
48     96     
0      64     
16     208    
48     80     
112    32     
-160   144    
304    128    
-128   -16    
-192   -16    
144    176    
416    -976   
-128   64     
-80    -80    
-32    16     
176    144    
80     288    
64     -32    
-64    112    
-80    48     
352    48     
-208   96     
368    64     
-80    -48    
-224   -192   
128    16     
0      -576   
-16    -96    
208    0      
-144   144    
-32    128    
96     -96    
0      48     
-192   -16    
288    128    
128    160    
-176   96     
-16    80     
-112   -80    
224    -320   
-64    32     
160    -912   
-80    0      
144    240    
-48    80     
80     112    
128    192    
-128   64     
144    0      
0      160    
32     96     
144    -80    
16     112    
48     64     
64     -16    
-128   112    
144    -16    
48     96     
304    -1232  
-64    192    
-112   288    
-80    96     
112    -112   
112    -128   
128    160    
-96    -64    
-48    -80    
32     48     
32     224    
-48    -16    
-16    16     
208    -288   
112    144    
-176   -528   
128    32     
-80    -1152  
176    32     
48     112    
0      112    
16     -16    
0      64     
-16    32     
16     16     
48     -32    
160    -16    
128    128    
32     -128   
1248   -576   
-848   -464   
736    864    
-544   640    
-112   -592   
448    800    
-496   -288   
176    448    
0      -544   
16     464    
336    80     
48     128    
-144   -288   
176    16     
96     48     
128    -64    
-112   272    
112    80     
48     -448   
144    -96    
-144   160    
256    64     
-160   128    
320    -160   
-48    128    
80     -784   
-48    240    
48     -288   
144    80     
-16    -128   
128    16     
-112   -144   
128    144    
-32    -208   
176    -16    
-16    160    
112    112    
-32    32     
48     272    
144    -656   
0      -160   
48     160    
80     -48    
16     96     
32     -176   
48     96     
64     64     
48     64     
128    -160   
-16    -80    
32     160    
144    -992   
0      0      
-432   -64    
-80    -1392  
192    -16    
48     -192   
-16    272    
32     -1824  
112    -128   
16     112    
144    48     
-16    16     
48     -96    
128    80     
-144   32     
32     32     
-96    -48    
-16    -208   
208    -208   
16     48     
48     16     
-32    -208   
0      -1760  
160    -112   
112    16     
32     176    
32     -16    
64     -16    
32     -464   
0      144    
32     48     
208    320    
-384   16     
-64    -176   
256    208    
-176   -240   
16     -272   
112    80     
16     -48    
64     -32    
64     -128   
64     -128   
-128   48     
160    -144   
-16    80     
192    560    
48     320    
-176   16     
-96    -368   
-144   -112   
80     -80    
96     64     
32     -160   
16     32     
32     -144   
-192   -128   
64     -784   
-48    48     
96     64     
32     128    
-112   -96    
48     -160   
-208   -64    
96     -48    
-256   -16    
128    0      
64     80     
96     -304   
-240   -240   
-48    -432   
96     96     
208    -1440  
-32    64     
32     -64    
32     192    
-192   0      
112    -432   
-112   -64    
128    240    
-128   -128   
-112   48     
-48    -64    
48     -128   
-80    -64    
96     208    
-64    -128   
240    -192   
-208   256    
272    -272   
-80    -144   
80     112    
176    32     
-144   224    
-64    -144   
-336   -192   
192    -112   
-144   240    
160    16     
-336   0      
112    -160   
80     80     
272    -896   
16     256    
-192   160    
288    -48    
-144   16     
256    32     
-144   -64    
-96    -64    
-240   16     
16     -80    
64     64     
-32    32     
0      -112   
112    -160   
-64    48     
64     -432   
128    32     
-128   176    
48     16     
-240   176    
32     -96    
80     -64    
32     16     
-48    32     
128    192    
-64    128    
-16    -208   
-848   -32    
176    -176   
-48    112    
16     -80    
-32    128    
80     160    
112    -48    
32     64     
-16    48     
-16    64     
64     -32    
336    -32    
-96    0      
-48    -112   
-176   -64    
96     -48    
16     -48    
-32    240    
2208   -2672  
-160   -336   
176    640    
-1264  656    
560    0      
-880   -608   
-512   32     
688    -64    
-592   -176   
208    -464   
240    512    
-528   -352   
-112   -288   
-144   272    
32     -160   
-432   -288   
80     -16    
-160   544    
-48    -224   
-64    496    
-16    -64    
-16    144    
-768   -16    
-16    352    
32     128    
-64    128    
-368   80     
256    64     
-144   -96    
0      -144   
32     96     
0      -16    
112    96     
-160   80     
0      32     
-96    -144   
48     192    
-144   0      
48     16     
240    16     
32     48     
-64    -112   
32     96     
-32    -288   
112    16     
48     240    
0      96     
-96    -112   
0      16     
-144   112    
32     -64    
-64    64     
-336   112    
96     -96    
-976   80     
0      32     
0      -96    
0      0      
0      -32    
48     192    
-32    16     
112    32     
-160   48     
-16    32     
80     16     
-32    64     
-96    48     
-48    32     
-48    128    
-240   -32    
96     48     
-16    -16    
176    64     
16     128    
-176   -16    
32     64     
240    32     
-16    112    
32     -48    
96     176    
-208   192    
-16    32     
-16    -192   
0      176    
-464   -80    
128    80     
-576   128    
-128   32     
160    -32    
-96    -32    
96     224    
-176   -64    
128    48     
0      192    
-240   -192   
-16    -176   
-272   112    
-96    96     
48     48     
-256   -240   
48     -32    
-544   -144   
-48    -544   
112    208    
32     32     
0      288    
48     176    
240    240    
-224   -32    
112    -80    
-64    -16    
16     144    
32     -32    
-160   -32    
-320   -304   
304    176    
-256   -96    
16     64     
-144   176    
352    256    
112    272    
-176   48     
-192   -32    
16     64     
208    -64    
-112   -48    
-64    32     
-32    64     
-80    16     
-208   -48    
144    128    
-112   16     
-64    112    
-176   64     
144    0      
-336   -192   
96     -96    
64     160    
-128   16     
304    128    
-112   80     
-144   -16    
32     48     
64     -32    
192    96     
64     144    
112    192    
-192   96     
112    0      
64     32     
0      128    
80     80     
-112   64     
0      -144   
96     192    
-224   0      
384    96     
-96    144    
16     32     
-48    80     
32     16     
-32    160    
-16    192    
0      0      
192    160    
-160   -16    
32     80     
80     336    
-144   -224   
192    32     
-48    0      
128    400    
112    -464   
48     144    
80     144    
0      624    
-272   16     
-48    80     
80     -96    
176    -32    
32     128    
48     48     
32     96     
-176   -128   
0      112    
-48    128    
112    48     
-128   96     
-80    128    
48     -80    
48     240    
-96    -32    
128    -112   
48     144    
224    304    
-160   112    
-64    64     
2400   -1520  
-688   -144   
1088   576    
-64    -128   
416    -688   
256    832    
32     656    
-416   304    
112    256    
-112   -32    
240    240    
0      -208   
-80    224    
192    -80    
-16    16     
-16    160    
144    240    
16     240    
32     0      
64     64     
-48    -224   
448    -240   
160    96     
0      -1440  
-80    32     
-16    336    
192    0      
-32    -32    
128    32     
64     112    
96     96     
-176   48     
144    112    
-64    48     
144    48     
32     144    
-32    176    
32     144    
-48    -432   
208    32     
-64    128    
176    160    
0      160    
0      160    
32     48     
48     176    
-16    208    
128    160    
-144   128    
112    -16    
-16    0      
16     0      
80     192    
96     32     
48     192    
64     -816   
128    208    
-224   224    
112    48     
-64    -224   
128    96     
-48    -96    
64     96     
128    336    
-80    112    
-112   80     
16     -176   
48     80     
160    -16    
-16    96     
48     -672   
48     112    
48     -272   
0      160    
48     -64    
32     112    
32     -96    
64     96     
96     -16    
0      -144   
-48    96     
112    -80    
176    0      
-16    -144   
32     48     
64     32     
-48    64     
48     -688   
64     80     
80     48     
64     240    
-16    160    
80     112    
-80    -64    
80     -16    
32     128    
-32    -160   
80     80     
0      0      
128    160    
16     -80    
-80    80     
64     -160   
112    160    
-32    0      
144    48     
-80    16     
48     160    
80     32     
64     -656   
0      112    
32     -176   
48     96     
-16    -144   
80     -48    
32     -160   
96     288    
96     -160   
-112   -48    
32     64     
144    192    
16     -128   
-48    192    
96     112    
144    -272   
-96    -48    
400    -144   
-384   176    
368    -352   
-112   192    
16     -112   
224    48     
-160   -96    
160    80     
32     112    
176    -112   
-128   32     
-336   -256   
-16    -320   
112    -32    
16     80     
160    96     
32     240    
-16    80     
160    192    
-192   -160   
288    -400   
-144   -112   
144    16     
16     224    
-80    -160   
96     16     
-784   0      
16     16     
16     0      
208    -192   
-96    0      
32     -1600  
-208   -64    
-48    16     
160    -240   
272    96     
-16    -80    
48     -32    
-272   16     
224    -304   
-64    -48    
224    432    
-224   144    
-240   -16    
-32    -320   
240    -240   
128    -224   
0      -128   
-112   -688   
-144   -16    
368    -224   
-32    64     
128    -352   
-16    144    
-32    32     
176    -48    
-80    48     
144    -32    
-832   -96    
128    -80    
-16    -176   
-16    -192   
32     80     
192    -128   
0      -16    
96     -64    
-128   160    
160    -32    
-160   176    
0      -16    
32     -80    
-944   -2624  
1792   2656   
-1920  304    
640    -240   
-592   -992   
448    -736   
64     -32    
208    288    
304    304    
-144   -576   
-320   48     
96     -112   
-64    -160   
-48    144    
96     32     
-208   -16    
80     -528   
-448   16     
400    256    
-288   240    
-176   -160   
-144   128    
96     -288   
-48    -96    
-32    -416   
112    96     
208    80     
-80    -192   
-16    -48    
144    -16    
-16    144    
-16    0      
-16    32     
-16    -48    
256    80     
-64    -208   
-288   112    
-64    16     
32     64     
112    -384   
-32    48     
80     32     
32     -80    
0      16     
-32    -48    
-96    -80    
80     112    
-1008  -256   
352    -112   
-544   32     
192    -112   
-144   144    
64     -144   
64     96     
32     -688   
80     16     
-240   160    
-48    -96    
96     0      
-64    32     
0      -32    
80     16     
-176   -32    
32     208    
-96    -80    
176    16     
16     176    
-48    -240   
80     176    
224    -304   
32     160    
-128   96     
176    32     
-16    80     
64     16     
-112   -128   
224    144    
-240   -80    
224    -112   
32     112    
-64    0      
-144   -48    
-48    -272   
80     128    
-560   -48    
-496   -80    
112    -80    
-352   16     
-288   80     
176    32     
-240   32     
128    80     
-64    0      
80     -16    
32     112    
-1040  -240   
160    32     
-304   -112   
0      112    
-176   -192   
-160   0      
-48    112    
32     -32    
16     -64    
-416   96     
-48    144    
96     -128   
0      -16    
224    112    
-192   208    
176    -96    
-48    144    
-80    -224   
176    240    
-96    32     
-256   128    
0      16     
-128   -192   
112    32     
-336   144    
480    336    
-768   96     
96     0      
-192   48     
208    176    
32     -112   
-256   112    
-128   -176   
48     96     
128    -16    
32     48     
-128   -32    
32     256    
-48    80     
144    -16    
-80    -112   
-672   -80    
-96    32     
-400   192    
128    -16    
-96    -224   
-256   80     
64     -304   
-112   256    
-64    192    
-48    112    
64     656    
-16    32     
-16    32     
0      -48    
-192   0      
96     160    
-16    64     
-144   -128   
-80    128    
-112   -96    
112    160    
-176   -336   
96     304    
128    384    
-112   -208   
32     0      
-32    16     
-16    288    
-160   16     
32     -240   
-16    -176   
176    592    
-368   128    
-224   -32    
-160   -304   
48     144    
112    48     
-128   256    
144    -80    
32     96     
-144   112    
-16    -48    
-64    160    
64     -128   
32     176    
-96    -16    
-192   -16    
-112   32     
128    256    
-736   -80    
64     32     
96     128    
-16    -272   
-32    192    
16     480    
96     -32    
-112   -128   
192    128    
-112   0      
-144   144    
-176   -208   
192    0      
-304   1936   
576    144    
-816   -16    
-272   -784   
-336   608    
928    528    
608    896    
-320   112    
-400   144    
-320   -96    
64     32     
-64    -32    
-16    64     
-32    272    
144    16     
-240   240    
32     96     
-560   -192   
48     -16    
16     64     
-352   -32    
400    256    
-288   -336   
112    -352   
-96    80     
224    144    
-144   -208   
-16    -64    
-96    -48    
208    48     
-416   -96    
128    48     
-32    128    
176    128    
-96    0      
144    144    
64     0      
-16    80     
16     32     
80     -48    
-16    144    
48     128    
16     64     
-80    -80    
48     80     
0      -32    
-16    32     
112    -32    
-16    -48    
32     0      
-32    176    
32     192    
80     352    
-128   64     
-64    -64    
80     176    
-96    -192   
-64    -160   
-32    16     
272    144    
-272   64     
128    96     
48     -48    
-112   -32    
48     128    
-16    64     
48     48     
48     16     
80     80     
64     112    
-16    64     
-80    32     
32     48     
16     -16    
48     208    
-96    80     
96     48     
-208   176    
16     -96    
224    -96    
-320   176    
272    96     
64     224    
-96    -96    
32     144    
96     0      
-48    -96    
-48    -16    
112    16     
224    208    
48     256    
-48    304    
-48    96     
32     0      
144    64     
-16    96     
32     -48    
-128   -144   
160    112    
0      240    
96     48     
-80    32     
80     64     
-48    -128   
80     80     
-16    0      
96     32     
-80    112    
144    16     
-32    192    
-32    -64    
160    224    
-96    128    
176    176    
-96    -16    
64     96     
-80    -48    
32     -32    
-112   -224   
144    -96    
80     128    
48     -656   
80     256    
64     240    
96     96     
-240   -96    
-16    0      
320    -48    
-160   64     
144    96     
112    128    
-96    -16    
-64    224    
144    224    
-48    -48    
144    -544   
-240   -304   
-176   -96    
176    192    
-256   48     
320    144    
64     256    
-112   -144   
80     144    
-16    -544   
16     160    
48     -352   
0      128    
224    208    
-32    -160   
-48    64     
80     -880   
32     0      
64     -720   
-192   112    
224    -272   
-320   -176   
400    400    
80     112    
-32    16     
64     208    
-128   -48    
-48    32     
32     144    
112    -304   
144    192    
-80    -208   
144    -528   
224    -80    
144    -16    
-64    -32    
128    240    
-144   -16    
176    -16    
80     176    
-64    -96    
128    112    
-224   -176   
192    16     
80     48     
-32    32     
16     176    
208    -64    
64     -144   
304    -16    
16     -736   
-400   -48    
-192   -320   
224    112    
112    64     
176    112    
-112   64     
192    -192   
-16    176    
256    -272   
-48    80     
128    -800   
1616   -1888  
-208   -656   
432    592    
-224   640    
176    -48    
-240   -384   
368    912    
368    192    
-128   272    
-272   -16    
160    192    
96     48     
-112   -224   
64     192    
-16    -400   
112    128    
48     -112   
80     192    
160    -1408  
32     256    
160    16     
-176   160    
80     48     
32     128    
160    16     
160    -64    
-128   288    
48     -48    
-16    48     
48     -64    
48     48     
224    96     
-80    112    
64     -416   
-32    32     
128    -64    
-64    -1072  
-32    96     
-1104  32     
128    -1504  
-48    -96    
-48    -1104  
208    -176   
-112   128    
224    -128   
-112   160    
96     -352   
96     368    
-240   -160   
368    -160   
-176   112    
128    -16    
-32    80     
-1008  32     
48     -384   
64     0      
48     -128   
176    -16    
48     -112   
-48    -336   
112    -400   
-48    -48    
0      -560   
128    96     
16     -208   
48     64     
112    -208   
-144   -272   
-224   -64    
-32    64     
224    48     
-32    0      
128    48     
-64    -112   
144    -144   
144    -400   
0      272    
-64    208    
0      0      
368    -240   
-224   176    
-32    0      
304    96     
-288   96     
80     0      
-480   -144   
16     -304   
32     -224   
48     -96    
0      32     
80     -256   
-112   -32    
160    -304   
-64    0      
160    -208   
0      -64    
-16    144    
16     176    
-208   -112   
128    -96    
-224   16     
96     16     
-336   -160   
96     96     
80     -64    
96     16     
-80    64     
128    -1264  
-80    -64    
128    16     
256    80     
-96    64     
32     144    
16     -112   
-128   -192   
80     0      
-208   -448   
-176   -272   
272    32     
-48    -368   
16     -240   
-64    128    
240    -416   
144    176    
16     96     
128    96     
-144   -16    
64     -176   
0      -32    
-80    -32    
-208   16     
144    272    
-112   -80    
192    -96    
-1952  -16    
176    -80    
64     176    
-48    -160   
32     64     
144    -432   
80     -112   
-128   128    
144    192    
-320   0      
96     -16    
-96    -144   
-32    -400   
-32    80     
80     64     
32     48     
-16    -208   
96     80     
48     -240   
-112   48     
80     -240   
-80    96     
144    -32    
32     0      
-128   -80    
224    -128   
-64    -80    
272    336    
16     96     
80     160    
-464   64     
-16    -368   
64     96     
336    -144   
-192   -96    
-32    0      
48     80     
128    64     
-144   -16    
-80    -64    
208    -144   
-80    16     
192    0      
-192   -32    
64     80     
0      -32    
-1360  -368   
-16    48     
-1216  -160   
-432   48     
-80    -16    
-384   80     
-16    112    
-80    -208   
-192   -64    
144    0      
-16    224    
-16    128    
-64    -80    
0      0      
-112   48     
-400   -32    
-32    48     
-864   800    
272    528    
-400   -688   
624    -288   
256    1440   
-288   -736   
0      192    
-496   176    
384    544    
-48    -80    
-64    -256   
-384   -112   
96     224    
-48    176    
-192   -176   
0      368    
240    240    
-112   192    
-368   -272   
208    192    
-144   96     
-272   -176   
-448   64     
0      240    
-176   -16    
-208   48     
-192   96     
288    304    
-160   -32    
-256   -48    
-80    -64    
-64    64     
80     112    
-64    64     
-64    -208   
224    224    
0      176    
-288   80     
-592   -352   
-736   320    
240    -160   
64     0      
-96    192    
-48    64     
-96    96     
144    144    
144    240    
-112   -80    
32     48     
48     304    
-176   96     
-32    80     
-16    64     
16     144    
-432   -240   
80     144    
-192   -112   
736    848    
-496   -560   
-192   128    
208    -48    
-176   0      
-176   16     
-112   224    
-48    32     
-64    192    
-64    -16    
-32    176    
-192   -80    
-336   -176   
96     48     
-288   -160   
-32    -32    
80     64     
144    16     
-64    -48    
-144   -64    
160    16     
64     128    
160    176    
32     64     
32     144    
-128   64     
80     160    
-80    64     
-96    96     
-192   0      
208    400    
160    240    
-144   96     
-64    -112   
-16    -48    
112    16     
96     256    
-112   0      
-16    48     
-192   -240   
128    32     
-96    288    
0      32     
-32    80     
-256   -112   
64     64     
-80    48     
-32    32     
32     48     
64     32     
32     -32    
64     80     
-48    496    
-48    -96    
-64    -160   
-224   32     
208    96     
-16    16     
-48    304    
16     0      
144    112    
-128   48     
160    128    
16     224    
64     112    
80     80     
-80    -80    
144    -32    
-80    224    
272    -48    
-320   96     
32     -160   
-64    -224   
176    160    
-128   -224   
160    368    
-16    16     
48     176    
-16    240    
0      64     
80     80     
144    48     
-176   48     
128    48     
0      -112   
-208   -96    
224    96     
-176   0      
160    432    
48     432    
32     288    
16     0      
-256   -128   
160    16     
-96    64     
80     16     
-160   96     
144    400    
-32    -128   
-48    64     
-352   -128   
0      -208   
-128   80     
32     -80    
128    240    
32     48     
64     -64    
112    240    
-96    128    
144    240    
32     192    
-32    192    
128    160    
-112   32     
96     -384   
-112   0      
-32    48     
80     64     
-64    176    
64     64     
16     160    
-144   32     
-64    128    
64     -32    
16     80     
64     48     
48     144    
-112   112    
-16    96     
160    160    
-144   176    
112    0      
16     -64    
96     32     
128    80     
-80    192    
-144   80     
128    -128   
64     48     
112    176    
-64    400    
64     400    
-480   -544   
96     496    
64     352    
-48    96     
-48    -464   
-496   -928   
144    -1024  
256    -224   
32     304    
-32    -16    
144    240    
-48    272    
240    -64    
-144   144    
16     -48    
0      320    
112    128    
16     80     
16     -64    
-96    -32    
176    80     
-96    32     
208    32     
-32    128    
96     112    
128    224    
-32    48     
-16    32     
16     64     
0      -272   
208    128    
-160   -48    
144    160    
32     48     
-256   -192   
80     -96    
32     -240   
304    96     
-144   48     
16     48     
-32    144    
144    112    
48     -240   
-32    96     
-16    64     
208    112    
0      112    
-144   64     
192    96     
-16    -16    
48     80     
48     -560   
48     96     
0      -752   
80     80     
-48    192    
144    176    
-80    32     
112    112    
-48    176    
32     16     
80     80     
96     208    
-64    112    
144    -64    
-16    16     
128    -16    
128    144    
-144   80     
48     112    
96     -592   
48     128    
-48    64     
64     0      
144    224    
-32    176    
128    -112   
176    0      
-176   16     
144    -32    
-16    112    
272    -608   
-160   80     
-16    -368   
176    208    
16     -560   
-80    0      
176    48     
96     0      
64     112    
32     96     
-48    176    
16     -144   
160    48     
-80    -272   
208    80     
-112   -400   
112    160    
-16    -464   
80     -64    
96     176    
-80    -144   
80     96     
-16    64     
112    -16    
32     64     
-64    16     
96     -64    
96     176    
32     -352   
64     144    
64     -112   
32     176    
80     16     
32     -112   
16     0      
96     80     
-16    128    
352    128    
-208   -48    
-864   128    
112    48     
-96    0      
272    -160   
-160   80     
256    160    
-48    -144   
-144   -16    
0      -48    
112    64     
80     -656   
-160   -464   
0      -304   
112    -208   
-16    -32    
-1088  16     
128    -144   
0      -144   
112    -1184  
0      -96    
176    -400   
32     128    
128    48     
-144   -160   
192    -864   
-208   -544   
224    -96    
-144   240    
80     128    
80     -144   
-208   -64    
144    -384   
64     160    
-112   -128   
32     80     
-128   -416   
144    -592   
160    -976   
64     144    
0      48     
-80    320    
0      16     
-80    48     
400    -320   
-416   -464   
128    -368   
0      -80    
0      -176   
144    -16    
96     0      
-64    -752   
-112   -352   
128    -1664  
208    48     
-48    0      
-32    432    
-224   -64    
64     -80    
112    -96    
224    48     
-160   64     
-96    -16    
-288   48     
96     -32    
16     -32    
32     -112   
144    -80    
192    -304   
-32    80     
16     -32    
-32    240    
-128   -272   
304    144    
-32    192    
240    -32    
-240   48     
-1184  1792   
400    -656   
-272   -848   
208    112    
-432   -384   
544    464    
-528   288    
608    -160   
256    -800   
-384   -32    
64     -160   
-336   -96    
576    -144   
32     352    
-192   -256   
-48    80     
-112   -96    
-16    288    
-928   -448   
224    48     
-112   -176   
80     -16    
-64    192    
128    -64    
80     -48    
-16    272    
-64    -320   
80     -16    
272    368    
-32    -64    
-112   -144   
-64    -224   
32     32     
-144   -48    
-128   -64    
80     -160   
-32    -96    
-288   208    
304    32     
-288   -64    
128    384    
-32    -48    
112    -80    
-128   16     
-48    96     
80     0      
176    352    
0      -224   
48     -64    
112    -48    
-16    -48    
96     -16    
80     352    
176    -48    
-144   112    
0      64     
-48    0      
-208   -448   
496    608    
112    48     
-224   112    
-80    -48    
-48    -96    
-112   16     
48     32     
-32    16     
-80    -112   
176    192    
-1584  -288   
32     -16    
32     16     
-32    -48    
48     64     
0      80     
-160   32     
128    -16    
-432   -544   
256    -96    
-176   0      
-1248  -112   
592    240    
-928   -368   
80     -224   
-400   -64    
-336   224    
-256   -192   
-176   80     
16     -64    
-480   288    
-192   0      
-16    16     
-16    32     
128    -32    
64     144    
-240   -288   
96     16     
-32    -80    
80     -32    
304    240    
-192   176    
48     112    
-320   0      
-112   32     
-112   -16    
0      96     
-544   16     
64     128    
0      -64    
-176   -208   
64     -208   
160    208    
-144   -208   
-64    128    
0      80     
112    32     
-240   -48    
-80    -144   
0      160    
0      64     
240    64     
-512   208    
144    48     
-928   -96    
-128   64     
144    64     
-48    256    
240    240    
-176   160    
80     192    
-112   -32    
0      64     
80     -16    
-96    208    
192    48     
48     80     
-608   -144   
-80    16     
-608   -144   
176    80     
-64    -64    
160    112    
-64    -160   
80     128    
-208   128    
48     48     
-16    80     
80     304    
-176   80     
128    -48    
-160   64     
-160   0      
80     48     
-304   -48    
0      160    
0      -96    
32     16     
32     96     
-128   16     
192    -16    
96     80     
64     208    
-64    240    
-16    16     
-144   0      
144    80     
-16    48     
-64    80     
-48    -32    
-96    80     
-784   -48    
32     128    
128    -16    
112    80     
-64    256    
-176   0      
-96    80     
0      -96    
96     80     
-16    96     
-32    128    
0      0      
0      176    
-240   -16    
0      144    
-592   -144   
176    144    
112    0      
-80    176    
16     -16    
-144   48     
64     48     
-64    96     
160    16     
-96    80     
-160   -48    
-144   -96    
16     80     
-1248  -1504  
256    672    
-64    -80    
-480   -304   
224    272    
-464   416    
-416   -64    
-160   -224   
96     576    
448    48     
-320   -80    
112    16     
96     736    
160    -176   
-224   208    
48     -224   
16     240    
0      -32    
0      96     
16     96     
-48    -16    
16     96     
48     208    
48     96     
-208   -208   
336    -16    
32     176    
32     144    
-208   -32    
80     192    
64     0      
64     48     
-48    -64    
-64    176    
192    96     
-48    144    
-80    -48    
-112   48     
-96    32     
112    96     
16     16     
-112   64     
-32    144    
16     -32    
240    128    
-224   32     
32     16     
-80    192    
144    208    
32     -16    
32     48     
16     160    
48     64     
0      48     
-48    64     
176    64     
-64    80     
64     0      
-32    16     
48     96     
-128   64     
160    32     
0      176    
16     -32    
160    256    
-112   64     
144    208    
-96    0      
160    64     
32     64     
-128   80     
-16    128    
0      32     
16     -32    
96     96     
-96    48     
176    272    
-224   96     
16     -48    
112    16     
-48    128    
-80    64     
80     32     
176    160    
-272   64     
48     160    
-256   -320   
320    208    
-144   240    
96     -16    
176    112    
-144   176    
144    64     
48     176    
80     400    
80     288    
-128   16     
128    80     
-64    -16    
96     64     
-80    576    
16     560    
112    304    
-176   -96    
32     -400   
64     16     
16     176    
-96    -48    
224    224    
48     96     
32     48     
-32    160    
16     -32    
96     128    
-80    -96    
80     256    
96     288    
32     80     
-80    -112   
144    -624   
-96    144    
144    -16    
-16    112    
-16    -48    
-64    -176   
48     -48    
80     224    
16     0      
-32    -704   
0      112    
48     272    
48     -128   
-112   272    
80     96     
128    16     
144    832    
-128   -544   
-192   -208   
192    -832   
64     144    
48     112    
128    160    
32     -32    
-128   96     
48     176    
96     176    
-64    -64    
-128   -80    
48     0      
128    128    
48     112    
16     -160   
144    144    
-32    -96    
144    64     
64     -96    
64     240    
112    -352   
-32    192    
-96    -48    
32     112    
-128   -96    
64     48     
-16    176    
96     -64    
-192   32     
176    0      
-128   80     
192    -304   
-96    240    
160    -1024  
-48    128    
-32    0      
192    144    
-80    64     
32     128    
16     -48    
48     -176   
224    128    
-80    -224   
0      -64    
64     -144   
192    208    
128    -256   
176    -112   
-112   64     
64     -48    
96     144    
-176   96     
304    -48    
-80    256    
112    32     
0      -400   
80     0      
160    176    
80     80     
16     64     
-80    352    
-1648  -1632  
624    -80    
-576   560    
976    304    
-496   416    
512    -32    
-560   144    
272    -608   
672    528    
-496   -352   
352    400    
32     -336   
32     672    
32     -704   
80     448    
-80    -384   
112    832    
-320   -352   
320    288    
-368   -304   
416    -352   
-176   -144   
-592   -160   
-272   -224   
352    -160   
-96    -496   
48     -176   
192    608    
-400   -160   
192    256    
0      -32    
160    80     
128    -96    
0      -144   
112    112    
176    -320   
480    48     
-192   64     
-144   -384   
112    64     
-32    -1120  
128    -48    
160    -656   
32     32     
80     192    
-32    112    
48     -96    
64     -32    
-48    -336   
48     96     
-16    80     
144    -240   
-352   48     
32     0      
-48    -176   
80     -128   
-80    0      
288    -224   
96     112    
32     -3504  
16     -208   
96     -480   
128    288    
-128   -64    
64     32     
-128   -32    
32     -400   
-352   -16    
-16    -224   
-1456  16     
48     64     
112    16     
0      96     
-16    -144   
96     -944   
-48    64     
0      -32    
32     16     
288    224    
-288   240    
-112   -128   
160    -208   
-96    -272   
-112   -80    
48     -96    
16     64     
-128   0      
240    -384   
-176   -16    
48     -128   
-32    176    
288    128    
-96    208    
-96    -160   
176    160    
-336   -464   
96     -480   
16     -64    
80     48     
-256   -16    
-128   -176   
-2096  112    
112    -64    
-64    -16    
160    304    
-64    80     
128    -896   
-208   -96    
256    48     
48     32     
80     224    
-32    0      
-112   176    
64     128    
-128   32     
-16    -64    
-272   -144   
192    96     
-272   112    
48     -208   
-80    32     
272    -384   
-144   192    
16     -128   
224    -48    
-208   96     
160    0      
-480   -16    
-32    -128   
-112   32     
16     -144   
-144   -80    
-80    -128   
-32    128    
288    -304   
96     -80    
-368   -16    
128    192    
-16    -32    
-32    -176   
-720   -32    
208    -128   
-96    192    
32     0      
-32    16     
64     16     
-224   272    
144    -192   
-256   0      
-112   -176   
-16    0      
0      -160   
176    160    
-80    64     
96     -128   
-112   112    
-32    144    
-32    -128   
64     80     
-112   0      
80     16     
-560   0      
112    256    
-224   96     
-608   -112   
0      32     
-992   -320   
-624   -448   
-16    96     
-960   144    
-192   112    
-176   80     
64     0      
16     -80    
144    80     
-112   -192   
-48    -32    
16     96     
-176   160    
-256   -240   
48     16     
-48    -32    
-176   48     
-128   64     
-192   64     
-64    192    
-256   -160   
-128   0      
-16    32     
-112   96     
112    48     
-144   -16    
-64    -112   
-160   128    
224    -352   
-16    224    
0      112    
848    -2000  
576    -224   
720    528    
176    -384   
176    -400   
-224   -368   
-608   16     
480    -176   
112    368    
-192   -416   
-160   416    
128    -496   
-96    480    
160    -752   
-96    496    
16     -272   
-80    496    
112    -352   
-16    176    
-80    -208   
144    192    
-304   112    
176    96     
-400   -32    
32     -32    
-48    64     
224    96     
32     32     
-64    -176   
-160   128    
112    -96    
-64    144    
-16    -64    
-48    176    
16     -112   
-144   -48    
-112   -224   
-144   112    
-240   -64    
48     128    
-80    -96    
64     176    
-16    64     
48     48     
-144   -48    
0      96     
-96    48     
192    336    
-176   -16    
128    -32    
-128   32     
0      32     
-48    48     
16     32     
64     208    
-64    -16    
48     32     
32     112    
-80    112    
48     16     
80     48     
32     64     
-64    80     
-16    112    
-112   -48    
64     32     
144    -96    
128    144    
-336   0      
128    208    
-416   -112   
160    176    
-144   -80    
112    -16    
16     96     
-224   -80    
112    240    
-320   -96    
128    -112   
-176   -128   
32     -64    
-48    16     
-128   112    
-160   -32    
-64    96     
-528   -32    
80     128    
-80    160    
112    448    
-16    -80    
-32    48     
-32    -16    
64     -48    
64     96     
-96    -128   
48     80     
-128   -336   
0      48     
-48    32     
160    32     
-96    48     
96     -48    
96     160    
-80    -32    
64     96     
64     400    
32     192    
-48    16     
-16    -160   
0      96     
144    192    
-160   -16    
-80    -32    
16     96     
48     64     
32     -80    
-160   -448   
64     -160   
96     192    
112    288    
32     288    
96     240    
-288   -176   
-96    -32    
-48    176    
128    -48    
-48    -112   
-80    -32    
-96    -80    
16     -64    
-32    64     
64     64     
0      208    
112    128    
0      0      
-48    16     
176    144    
-112   48     
144    128    
-144   -32    
96     16     
64     112    
160    160    
-304   48     
32     -16    
-16    112    
48     528    
96     288    
-96    112    
128    -144   
16     32     
48     64     
-16    64     
-32    32     
16     256    
-32    160    
-64    -192   
16     80     
128    368    
-192   -32    
-96    -64    
64     -32    
208    224    
-144   48     
-32    0      
0      160    
48     80     
-16    -128   
112    288    
0      112    
128    48     
-112   128    
96     32     
112    80     
-48    112    
64     -64    
160    80     
-64    240    
96     -48    
-32    160    
96     -48    
80     208    
32     64     
16     112    
80     -144   
48     256    
-48    -32    
64     48     
-112   96     
160    48     
224    64     
96     48     
-16    32     
480    -128   
-192   96     
160    32     
-80    192    
0      368    
-640   1808   
-576   752    
192    192    
-336   -336   
368    -224   
-48    416    
-512   -288   
880    -384   
-320   96     
-256   -560   
208    208    
0      32     
112    160    
-192   -112   
96     -336   
-80    -32    
48     -80    
496    592    
-144   -80    
48     400    
32     48     
112    -112   
-352   48     
336    80     
16     144    
144    128    
16     224    
-48    -192   
48     0      
-16    192    
144    128    
-32    -80    
80     144    
48     96     
-48    -176   
80     128    
80     80     
-32    48     
48     -880   
-48    192    
96     -160   
96     128    
-48    32     
80     48     
-176   -48    
176    112    
16     96     
80     -224   
16     -48    
80     -80    
-64    224    
48     -512   
96     -16    
16     -176   
16     112    
32     -1024  
112    0      
48     80     
-48    96     
80     -64    
64     208    
-32    112    
112    112    
-64    -48    
176    -240   
32     240    
-64    -432   
144    0      
16     -16    
96     160    
-32    -672   
48     64     
80     32     
64     144    
-16    -240   
224    144    
16     48     
64     80     
32     96     
-48    -48    
176    80     
0      -128   
144    128    
-160   48     
96     272    
48     -416   
128    32     
-16    -112   
176    16     
-48    96     
0      176    
160    176    
-64    -368   
-32    -208   
32     -208   
-192   240    
208    112    
-16    32     
32     -128   
-16    48     
80     -128   
64     48     
-64    0      
64     64     
32     -80    
-80    -128   
64     208    
32     -240   
-80    112    
32     -16    
80     80     
-96    -304   
224    176    
-32    -192   
192    272    
-176   0      
288    -1312  
0      64     
32     -1248  
256    368    
-240   192    
272    -704   
-240   96     
192    -928   
240    -288   
-272   224    
64     32     
128    80     
48     -16    
-48    96     
80     80     
32     -464   
-208   -112   
-304   -432   
208    -144   
-320   32     
320    -208   
160    64     
-288   -112   
240    -80    
112    -208   
-112   -160   
144    96     
-80    -208   
0      -304   
192    256    
0      -208   
272    0      
-80    -144   
-80    96     
-192   64     
80     -64    
96     32     
112    -272   
0      -64    
48     -32    
64     -96    
-96    -1008  
272    -32    
-16    0      
144    32     
-96    -128   
16     80     
160    48     
-48    -128   
-256   -208   
96     -48    
-784   192    
112    -128   
80     80     
32     -48    
-32    -112   
16     -64    
-16    -80    
128    0      
16     128    
48     96     
-16    112    
-80    -112   
48     -32    
-80    0      
-48    -144   
-16    16     
144    64     
-384   -400   
64     -576   
-240   -176   
-64    -720   
-32    128    
16     -2368  
48     112    
48     -176   
16     32     
-112   -112   
320    16     
32     96     
-32    160    
-592   1184   
-240   -1392  
-752   112    
-160   240    
-752   -208   
128    -48    
-384   -112   
400    128    
-32    -96    
96     -16    
240    -256   
-176   576    
272    -16    
-176   416    
16     -400   
-80    0      
-208   -368   
80     176    
-208   -176   
-16    16     
-48    -112   
192    0      
-48    -368   
80     -96    
-176   176    
32     -160   
-592   16     
128    -176   
-448   0      
16     -208   
-128   -48    
-16    -80    
-48    80     
160    96     
-32    -16    
-32    -336   
16     160    
-32    -320   
176    16     
-16    -16    
80     80     
-96    240    
256    16     
-176   -16    
-48    -80    
16     64     
208    128    
-192   -96    
16     -160   
-128   48     
-32    -208   
48     192    
0      -112   
144    0      
-112   32     
-576   240    
-336   0      
160    16     
16     384    
-32    160    
-64    112    
96     -128   
-80    64     
-32    -80    
32     0      
48     -16    
-144   32     
-256   -224   
-656   -384   
-48    -48    
-144   160    
0      320    
-784   -48    
48     -176   
112    96     
96     144    
-176   32     
-160   80     
224    16     
-112   -192   
-144   -96    
-32    96     
0      448    
-96    192    
-112   -64    
-48    -80    
32     -352   
-400   352    
-288   -96    
-240   -48    
0      80     
64     96     
-48    128    
-80    -80    
64     96     
16     -80    
16     64     
-64    0      
80     176    
-16    176    
-96    16     
-96    0      
-224   -144   
96     80     
-80    48     
96     96     
32     32     
-48    96     
48     -144   
-48    112    
16     -160   
-48    16     
-48    48     
80     96     
-112   -16    
-96    -32    
-96    -32    
-16    16     
-32    32     
80     192    
-144   0      
-240   -80    
-96    112    
144    -16    
-128   96     
48     -288   
64     240    
-176   144    
320    240    
-416   -48    
48     -96    
-48    144    
96     80     
-48    176    
-176   -160   
128    -16    
-176   144    
112    -48    
-64    -16    
144    160    
16     256    
-64    64     
-32    16     
48     48     
-16    64     
320    -272   
-256   416    
-384   -160   
176    -112   
-304   64     
208    176    
-240   -96    
176    208    
-240   -64    
240    -16    
-272   48     
-128   -192   
224    192    
-112   224    
0      -48    
-144   -32    
144    80     
-96    -16    
-16    96     
-288   -208   
176    304    
-544   -144   
464    256    
-496   -96    
32     -96    
-160   -64    
32     32     
48     288    
80     -16    
-128   -16    
0      144    
-96    128    
64     48     
16     144    
-48    -80    
80     192    
-144   -64    
144    176    
-128   -64    
16     -48    
112    32     
-16    96     
128    192    
-144   176    
-32    144    
-256   112    
48     160    
-64    208    
-96    -80    
80     64     
192    96     
-192   -16    
-336   96     
496    64     
480    352    
-224   512    
864    -1024  
-160   -288   
576    -576   
-400   432    
-208   192    
416    176    
16     -112   
-192   -16    
-160   -144   
16     160    
-48    128    
208    208    
-208   80     
192    160    
-176   16     
-48    -272   
-96    -32    
16     48     
304    128    
-32    0      
80     -32    
-208   -32    
224    272    
-96    192    
192    -64    
-176   112    
112    32     
64     80     
-96    16     
0      32     
64     0      
32     -96    
128    272    
32     160    
-32    -64    
-112   128    
80     176    
128    96     
-144   -96    
96     176    
80     64     
16     48     
-16    80     
-16    -112   
0      208    
-48    48     
192    64     
-240   48     
144    96     
-160   144    
80     64     
32     80     
0      0      
-112   -16    
80     176    
-96    80     
96     96     
32     176    
-32    32     
192    160    
-208   128    
112    112    
160    -16    
256    160    
0      128    
48     208    
-144   -32    
160    32     
-16    -112   
-48    -240   
0      112    
192    304    
-112   80     
144    -96    
112    144    
-176   -32    
160    208    
-192   80     
192    -64    
96     16     
-128   208    
-64    32     
48     144    
-32    -160   
48     -480   
96     144    
-176   -144   
144    -48    
32     160    
-64    144    
0      144    
0      48     
224    16     
-128   128    
16     112    
128    176    
-64    -64    
32     112    
-32    80     
208    -32    
-48    128    
160    -1248  
-208   16     
160    144    
208    288    
0      192    
144    128    
-208   16     
112    96     
32     80     
224    128    
128    256    
16     208    
-48    224    
256    -112   
-128   16     
-272   -336   
32     48     
320    -32    
-80    112    
80     160    
160    272    
32     16     
112    32     
-176   -16    
-16    208    
160    16     
192    -192   
48     224    
112    -96    
-112   256    
160    -160   
0      224    
-112   -576   
160    144    
-176   -112   
64     112    
-16    192    
448    -128   
-208   -16    
48     112    
48     32     
16     -160   
48     112    
-16    -112   
64     96     
0      -544   
48     -48    
-16    -512   
16     272    
96     -880   
-96    112    
64     208    
128    224    
-48    -64    
96     48     
0      160    
240    48     
0      -64    
0      -320   
128    240    
-192   -656   
-32    -208   
208    -80    
96     224    
64     -272   
16     256    
112    208    
-128   -48    
-96    32     
352    240    
0      192    
48     -368   
-64    16     
-48    -608   
64     176    
80     -336   
256    208    
96     -64    
0      80     
-80    -256   
288    384    
80     -16    
160    16     
-96    0      
32     -128   
160    112    
-80    -144   
-64    32     
96     -16    
208    64     
32     64     
48     240    
-1008  192    
-144   0      
-896   -576   
944    576    
864    -640   
-384   -816   
-272   880    
400    -560   
144    -944   
144    -368   
64     256    
-384   32     
528    32     
-224   48     
288    80     
-320   -192   
240    96     
-32    144    
144    32     
128    192    
64     -368   
-80    -304   
-384   176    
32     -160   
80     -240   
32     -272   
32     -592   
128    -2432  
16     192    
128    -256   
64     -208   
-128   -192   
208    16     
-32    -272   
-160   0      
192    -16    
-48    32     
-416   -48    
32     48     
64     -80    
16     -416   
-48    -128   
160    -400   
224    -96    
64     -64    
16     -80    
144    -48    
16     128    
-144   -224   
64     48     
0      -32    
64     48     
-224   144    
128    -208   
-160   -64    
96     -368   
0      464    
64     16     
288    240    
48     -288   
-208   -176   
80     -80    
96     288    
-16    -48    
16     80     
-48    -48    
160    -80    
-224   -32    
-16    -256   
-688   -16    
-16    -256   
112    -16    
64     80     
128    -176   
128    -944   
-80    144    
-192   -272   
16     -208   
192    -32    
112    176    
48     96     
-96    -80    
0      -48    
-176   -192   
-224   -256   
224    176    
-1248  400    
0      240    
-48    400    
16     -144   
0      -128   
160    -1088  
80     128    
48     -80    
64     -144   
-96    -32    
64     -176   
80     64     
96     128    
-96    128    
-48    -48    
-416   -224   
64     -256   
-608   64     
128    32     
16     32     
128    -560   
-128   -112   
160    128    
-176   -432   
176    80     
-64    16     
304    80     
-48    -144   
-416   16     
128    -272   
-96    176    
0      128    
0      -80    
64     -192   
112    304    
112    -1040  
-112   -128   
-96    128    
192    112    
80     -96    
32     -64    
-192   80     
144    48     
-208   64     
32     -16    
0      208    
-112   -48    
176    0      
-80    -464   
240    -16    
16     80     
96     128    
64     112    
64     -176   
-48    96     
112    -112   
-80    96     
64     -112   
-240   112    
128    -16    
128    544    
-240   -176   
336    -112   
16     -80    
224    -32    
-368   112    
-128   -160   
256    160    
-544   -176   
544    -160   
-384   224    
-288   -112   
16     16     
-272   -352   
352    144    
-512   -128   
-464   -128   
-112   16     
0      128    
-208   -80    
416    224    
-288   160    
192    240    
-304   32     
-160   -96    
-192   176    
-256   -288   
528    112    
-256   112    
64     -80    
-160   -96    
112    80     
64     144    
-112   -48    
-48    96     
16     48     
48     -32    
128    192    
-288   0      
32     64     
-160   48     
-64    -32    
176    32     
-176   128    
224    -80    
-176   160    
160    -48    
128    -48    
16     -240   
-80    32     
-208   64     
-192   144    
-192   -272   
432    -1952  
-320   128    
432    800    
-720   176    
-224   -384   
192    160    
784    624    
-144   496    
-192   -256   
320    288    
-192   -288   
-32    0      
192    80     
32     80     
-112   -64    
-16    80     
-96    64     
16     144    
-48    -32    
-128   48     
16     -32    
-880   16     
144    144    
-112   -64    
-160   160    
176    192    
0      64     
144    32     
-240   -16    
128    -48    
-160   96     
80     128    
-16    32     
16     80     
-352   -128   
160    64     
-544   112    
176    0      
-32    -128   
16     176    
32     160    
80     80     
-192   -192   
-48    -32    
112    160    
32     48     
32     -16    
-240   80     
64     64     
-48    0      
-160   48     
-176   -128   
0      176    
-688   -16    
112    64     
-32    0      
64     48     
32     96     
-96    112    
96     80     
-80    96     
64     32     
-16    0      
-80    96     
-112   -64    
-32    112    
-48    64     
176    48     
-240   48     
-176   32     
128    48     
32     0      
0      48     
80     -112   
-16    112    
-176   272    
-112   80     
208    -48    
96     -32    
-128   256    
-48    128    
-64    -272   
16     176    
32     320    
-224   32     
240    -16    
32     64     
0      48     
64     80     
-16    80     
-144   0      
48     80     
80     160    
-32    16     
48     -48    
-96    144    
-240   -32    
192    176    
-160   16     
160    16     
80     96     
-48    80     
112    176    
-64    -48    
32     32     
0      160    
208    160    
-80    48     
-16    64     
-176   0      
144    48     
-208   -32    
64     -32    
96     272    
-32    96     
-96    64     
-144   -80    
48     48     
-16    -16    
-48    32     
144    320    
144    80     
-176   64     
144    160    
16     288    
224    192    
48     96     
-128   48     
-96    64     
80     96     
240    160    
-64    272    
80     64     
-256   96     
-128   -32    
240    464    
128    80     
0      -16    
-128   96     
-112   32     
256    128    
96     -96    
-48    80     
64     320    
16     112    
128    -16    
-144   -64    
176    -16    
16     64     
-32    -16    
96     128    
-32    0      
80     48     
128    80     
-176   -144   
32     -496   
0      -16    
64     368    
96     80     
-48    208    
64     240    
112    48     
-64    0      
80     64     
128    128    
0      -336   
128    208    
-176   -64    
96     176    
-112   48     
48     -368   
160    -16    
-48    64     
16     80     
-128   80     
112    16     
112    256    
-16    -16    
32     -176   
48     -64    
64     320    
80     48     
-176   80     
96     288    
16     208    
-80    -384   
128    96     
-16    -32    
64     128    
32     16     
64     -80    
160    208    
16     176    
32     240    
16     32     
-16    -96    
1136   -1088  
368    512    
-944   -608   
-224   -320   
304    272    
-352   -512   
-160   -1472  
160    144    
-80    -80    
-32    -128   
-176   112    
160    224    
80     16     
128    160    
80     -48    
32     240    
352    160    
-160   -80    
64     16     
96     -176   
48     128    
96     -784   
80     -112   
-16    464    
64     80     
96     16     
-128   -48    
-96    -176   
272    176    
-176   256    
240    128    
16     80     
-48    -80    
208    96     
-160   -80    
288    32     
-112   -64    
160    288    
80     -1936  
16     -32    
-80    -160   
48     32     
96     32     
48     240    
-48    0      
0      144    
80     96     
160    224    
-112   48     
80     64     
-32    -144   
128    128    
64     256    
144    64     
-96    96     
112    -224   
432    848    
-240   384    
-384   -736   
224    48     
160    272    
-16    224    
-144   -208   
192    128    
32     -16    
-32    144    
-16    -448   
32     144    
32     -144   
48     208    
-32    -128   
80     96     
16     48     
16     96     
-32    -176   
16     -384   
-48    -128   
480    -208   
-144   112    
64     -224   
272    -144   
-80    -96    
96     224    
96     80     
-96    -64    
112    -2096  
192    368    
16     80     
48     -48    
128    16     
160    -224   
112    160    
-80    -32    
64     160    
48     -128   
96     64     
80     16     
48     160    
64     0      
-32    64     
16     -640   
32     -768   
128    112    
16     -80    
-144   208    
64     -208   
80     -704   
64     -176   
32     -1344  
80     -64    
16     144    
48     -144   
64     128    
64     -160   
64     -32    
-32    -288   
128    -336   
-16    272    
64     -640   
16     -320   
-704   -208   
112    112    
112    -32    
64     48     
-80    16     
224    96     
16     16     
-112   32     
112    -48    
-80    -352   
192    224    
128    -464   
-32    224    
112    -320   
-32    144    
352    -32    
48     -32    
-128   112    
256    16     
-128   -96    
48     -1152  
64     64     
80     -880   
32     80     
-48    -16    
-16    -304   
0      -176   
192    352    
-64    -48    
0      0      
-96    -16    
96     -144   
-1200  0      
0      -128   
80     -336   
-16    32     
176    176    
160    384    
-176   -80    
-144   -304   
176    32     
-160   -112   
112    -112   
0      128    
16     48     
-176   64     
176    448    
-912   -528   
16     -48    
256    64     
16     64     
32     96     
144    -480   
-16    -128   
16     -208   
0      -144   
16     -16    
192    368    
0      -128   
48     48     
-224   -80    
160    -160   
-176   64     
160    80     
-128   128    
-16    -432   
32     -48    
144    -528   
32     96     
16     -1184  
16     208    
-160   80     
160    -32    
-176   -112   
256    -64    
-96    -144   
96     48     
1104   2944   
-1808  -672   
-992   -640   
144    -176   
-544   -432   
0      48     
-832   208    
544    192    
-336   -240   
-16    48     
-608   -288   
240    96     
176    288    
112    -208   
-256   32     
16     -96    
144    64     
-112   128    
48     16     
48     -48    
-96    -192   
240    224    
-16    -160   
192    32     
-320   -96    
240    64     
80     112    
64     128    
-128   -144   
96     -64    
-144   16     
160    16     
-16    96     
-48    48     
32     96     
32     -320   
-48    -160   
-48    -112   
224    32     
96     0      
-128   -48    
-48    48     
160    -80    
-160   -32    
-112   -160   
-64    0      
192    32     
-32    112    
160    -368   
-144   80     
-1056  -256   
16     16     
48     80     
64     64     
-16    16     
-640   -16    
32     48     
64     192    
-48    -32    
176    16     
-64    96     
-272   -16    
32     32     
-80    -96    
-64    144    
0      -128   
144    64     
0      0      
-80    208    
-192   -80    
0      -80    
-32    64     
-496   48     
-96    80     
-96    -112   
-128   144    
80     -176   
80     112    
144    -144   
0      272    
-64    64     
-16    -80    
112    304    
-560   -176   
320    -16    
-32    176    
-304   16     
-16    64     
-384   64     
-336   64     
-320   -32    
32     -256   
48     64     
-80    -160   
32     224    
-64    -160   
-144   -144   
112    -32    
-48    -48    
80     144    
-80    48     
-16    112    
-64    64     
-48    96     
-208   -192   
-48    80     
-160   64     
272    144    
-288   -32    
160    64     
-16    32     
-160   144    
16     -16    
192    144    
-96    96     
-144   16     
16     128    
-144   288    
224    176    
0      -336   
-336   160    
-816   -144   
-32    112    
-64    -80    
-32    80     
80     80     
64     16     
-16    160    
-128   48     
48     48     
-128   -80    
16     -80    
-128   -48    
144    336    
112    -16    
-112   64     
-512   -96    
64     416    
0      -160   
112    16     
0      128    
-48    224    
-128   32     
32     16     
-32    16     
16     -16    
-160   -176   
16     -96    
0      32     
-112   160    
0      608    
-32    -16    
16     96     
-576   208    
-176   16     
16     48     
64     96     
-48    80     
48     -176   
-176   128    
176    32     
64     -16    
-112   32     
-32    -16    
-336   -576   
352    368    
304    544    
256    528    
-448   -240   
128    112    
-32    64     
0      160    
-48    32     
64     -32    
-32    96     
32     176    
-80    -16    
64     256    
-144   -48    
-16    16     
-48    -64    
-160   -128   
208    96     
160    128    
-32    144    
-144   -16    
16     240    
-64    144    
112    0      
-48    112    
-16    48     
80     16     
48     112    
16     -16    
192    64     
-128   192    
-48    96     
-544   624    
-880   1232   
-880   512    
144    112    
-272   -816   
176    608    
-48    208    
-32    384    
272    208    
208    256    
-496   -80    
192    48     
160    112    
48     -64    
-128   80     
64     80     
160    160    
-272   -176   
96     -64    
112    144    
-112   32     
16     80     
32     -64    
176    176    
192    208    
-208   -16    
48     240    
-144   96     
-16    224    
32     112    
-48    -112   
80     -176   
96     160    
-32    64     
272    64     
-208   -128   
256    -16    
-80    496    
112    256    
-64    48     
144    384    
-128   176    
16     -32    
16     128    
32     32     
-32    208    
-16    160    
128    176    
112    592    
-304   -192   
80     0      
-112   -112   
80     192    
288    16     
-256   -32    
192    48     
48     240    
-432   -896   
272    -192   
256    80     
112    288    
80     128    
-112   288    
-32    384    
16     304    
64     -96    
-16    64     
-64    48     
48     80     
80     64     
-48    -16    
112    80     
0      96     
-80    -592   
64     144    
128    64     
272    640    
-256   64     
208    32     
-112   -112   
80     256    
160    -48    
16     240    
-16    96     
112    144    
-128   -80    
144    -240   
64     352    
112    -208   
160    224    
-64    -896   
128    16     
-64    80     
80     160    
-16    -16    
16     -80    
176    288    
-176   64     
112    -192   
-192   -64    
32     -96    
224    336    
-64    192    
32     -144   
-32    48     
112    -1056  
16     0      
48     160    
-80    160    
128    48     
16     80     
-16    256    
80     208    
-32    96     
32     192    
-80    16     
160    352    
96     64     
-80    -160   
-48    48     
144    -304   
128    -32    
160    -1312  
-16    -32    
128    288    
-112   288    
192    256    
16     128    
0      384    
-64    -192   
0      96     
48     -16    
112    160    
128    -48    
-64    288    
32     -112   
-32    -64    
16     -256   
112    96     
112    -1200  
-48    192    
-16    64     
224    128    
-176   32     
192    48     
-16    336    
208    144    
-160   160    
64     -32    
16     -176   
48     -304   
48     224    
16     -1360  
112    0      
112    -32    
-48    128    
144    48     
-48    320    
16     -192   
-128   -160   
0      -112   
144    -16    
32     176    
192    -32    
16     176    
-48    -480   
176    128    
32     -144   
64     240    
64     0      
144    64     
32     160    
64     272    
-272   -176   
96     -64    
16     96     
208    -112   
144    464    
-208   -432   
128    -16    
96     -32    
144    -64    
32     32     
-16    32     
128    32     
32     208    
-80    112    
112    -128   
0      112    
144    80     
0      -1456  
32     -144   
64     176    
-160   -208   
16     0      
304    -128   
144    208    
64     96     
1824   -624   
-544   -288   
1280   -976   
-96    48     
-368   -1072  
624    336    
-1248  -480   
1152   -80    
-448   128    
176    -1376  
-464   0      
208    80     
240    288    
80     -192   
-304   -416   
208    -368   
112    224    
144    128    
-112   32     
16     -128   
272    -224   
-672   64     
96     -160   
-48    48     
0      -800   
-112   0      
336    -1120  
-176   -144   
288    -80    
-112   -32    
80     0      
-112   32     
64     48     
32     64     
-304   -96    
16     -336   
-208   -32    
-64    144    
352    -64    
-96    -96    
-48    -224   
96     -224   
64     -16    
144    -1552  
-160   -16    
-96    -80    
64     48     
16     -288   
240    -112   
-400   96     
160    -112   
-112   96     
-96    80     
224    -64    
-128   -80    
160    96     
16     112    
-160   -48    
208    224    
-96    160    
224    -224   
0      176    
-16    -96    
240    -144   
-32    128    
-48    48     
16     64     
-16    -160   
-320   32     
-16    -32    
288    -96    
80     -32    
128    80     
0      -384   
0      32     
160    -1440  
-144   -16    
256    -144   
128    -32    
-96    160    
0      -240   
-64    32     
-112   -320   
-176   -80    
-80    32     
-592   288    
-96    -288   
112    -320   
64     -672   
-80    -16    
80     -336   
80     336    
-112   160    
112    0      
-80    -16    
112    48     
-160   160    
-80    64     
-80    32     
80     144    
-384   -32    
-16    -144   
-32    16     
208    160    
80     80     
32     -48    
16     128    
-80    -80    
304    -144   
-288   -112   
96     128    
96     176    
32     -32    
32     -128   
-144   -464   
64     -32    
-48    -176   
144    112    
64     -176   
32     144    
432    48     
-144   -192   
-32    16     
-176   -48    
-32    48     
-32    32     
112    64     
-48    32     
-272   -208   
-208   -176   
208    0      
-32    -48    
64     112    
80     -144   
-80    0      
-1008  -384   
-160   -80    
160    368    
-144   48     
48     -32    
-64    16     
-64    -48    
112    160    
-208   16     
144    0      
-288   -304   
-1120  -176   
48     16     
-1040  -64    
-48    48     
32     -32    
-160   160    
0      0      
-128   -64    
96     272    
-528   80     
-96    -176   
48     -128   
288    320    
-16    96     
-16    16     
-224   -80    
-16    96     
16     -128   
32     112    
16     480    
-272   304    
-336   -192   
-640   -192   
32     -96    
-288   -80    
160    48     
-1040  32     
-64    -96    
-1088  -32    
-64    16     
160    -64    
-224   80     
224    -112   
-48    144    
-32    64     
-192   96     
48     -16    
-16    48     
-32    -96    
160    176    
-176   0      
-96    -64    
-96    -112   
16     32     
32     112    
32     -112   
48     224    
-272   -48    
192    -160   
-160   48     
80     80     
-1280  -2224  
1520   3264   
-128   1024   
144    -448   
-368   -560   
400    288    
-384   864    
-352   -704   
32     64     
320    -112   
-272   416    
-208   -160   
96     256    
160    -144   
-48    256    
-400   -304   
224    176    
-192   416    
608    64     
-352   16     
0      0      
48     336    
-976   192    
-48    -112   
-16    -512   
64     16     
224    128    
672    400    
-720   -256   
64     -224   
64     112    
-80    32     
-176   288    
-48    16     
-64    96     
-64    32     
-48    16     
-32    128    
-272   -64    
208    -48    
-80    240    
16     80     
-80    -64    
-32    192    
160    112    
-64    128    
16     464    
-48    304    
160    304    
-16    240    
-64    -272   
-64    48     
-224   -112   
-32    432    
-64    -320   
160    112    
-160   -384   
192    -720   
-432   -368   
-128   -32    
16     160    
192    288    
-64    -80    
64     112    
80     16     
-256   -96    
112    144    
-80    96     
-96    -16    
192    0      
-176   128    
-16    0      
16     -48    
176    80     
-32    64     
416    528    
-352   240    
0      176    
160    96     
-48    128    
176    -80    
-224   80     
96     48     
-80    48     
-48    0      
32     64     
-144   -96    
-48    -32    
224    192    
-16    64     
-48    0      
-128   32     
0      -32    
176    32     
128    336    
-64    304    
32     288    
-272   -208   
32     80     
64     336    
-16    48     
-96    -16    
48     112    
96     32     
-32    32     
-176   -400   
96     16     
128    -48    
112    144    
-16    80     
-80    -96    
-192   16     
-96    -320   
208    160    
112    192    
32     240    
-96    -32    
128    224    
-144   0      
368    288    
-368   240    
256    48     
-16    304    
-16    -16    
48     -16    
-112   32     
48     96     
160    -64    
-96    96     
64     96     
-32    64     
-128   48     
48     -128   
80     224    
144    64     
160    272    
-96    16     
176    224    
-336   96     
272    80     
-16    128    
-16    112    
-16    16     
-32    -64    
112    160    
-208   96     
240    -192   
-176   144    
64     96     
32     16     
-96    48     
-96    -32    
-48    80     
0      0      
160    144    
-208   -80    
176    -864   
64     -16    
-80    208    
16     16     
64     176    
16     144    
64     160    
64     96     
176    80     
-192   240    
-112   16     
80     -64    
48     -256   
272    -16    
48     160    
0      48     
-240   112    
32     -752   
64     -128   
272    128    
80     112    
-80    48     
-16    208    
-32    16     
112    144    
128    -112   
-80    176    
144    -96    
-16    112    
112    -16    
112    -48    
-48    64     
80     -1104  
-64    208    
16     64     
-64    0      
112    64     
32     192    
16     -160   
192    272    
-176   32     
-336   -144   
-512   784    
832    0      
-720   112    
128    -32    
-480   528    
752    -976   
-544   288    
528    -1872  
128    224    
48     -192   
224    48     
-176   160    
160    64     
-160   144    
288    0      
-160   192    
112    -48    
-32    288    
224    -304   
-192   224    
192    -160   
32     384    
32     -288   
112    272    
48     -128   
-16    240    
0      -80    
128    272    
64     -96    
-80    208    
16     -32    
32     64     
112    96     
-48    -144   
48     80     
48     -288   
144    112    
-112   -720   
112    64     
48     -48    
-32    144    
64     0      
-48    160    
32     -176   
32     144    
160    176    
32     -208   
128    224    
-240   -416   
272    80     
-32    -96    
64     80     
64     -880   
-48    64     
128    -16    
64     208    
-80    0      
144    80     
32     -112   
-16    192    
80     160    
-16    -224   
192    112    
32     16     
-80    160    
128    -144   
0      32     
128    -160   
80     208    
-112   -176   
112    176    
-32    -64    
160    112    
-48    80     
32     -336   
240    416    
-224   -16    
288    -80    
0      -240   
16     224    
64     -160   
128    96     
-96    -512   
112    64     
-48    208    
176    -2016  
16     192    
80     -192   
48     -1184  
-80    -160   
-128   -512   
368    16     
320    -992   
-48    -160   
64     176    
16     -32    
320    480    
-144   -96    
48     -560   
-80    -16    
96     -112   
0      -80    
-16    -112   
80     -464   
-192   -544   
160    32     
80     -144   
-16    -768   
320    208    
64     -672   
-16    16     
96     208    
16     -208   
80     -400   
-32    64     
208    272    
-80    48     
48     -32    
112    -336   
-1072  -128   
160    -416   
16     -32    
16     -400   
16     -32    
256    160    
-80    224    
176    -576   
-32    -64    
-112   -144   
16     64     
80     -64    
64     48     
-192   -304   
176    -48    
-656   -304   
0      -128   
16     272    
0      -32    
-64    -512   
144    -544   
-16    -208   
64     432    
48     -16    
272    144    
-144   128    
176    -240   
-16    -240   
96     176    
80     -80    
-16    128    
-32    -32    
-320   112    
144    -256   
0      96     
-48    -448   
112    128    
-144   -288   
224    16     
-16    224    
-16    80     
32     160    
-48    -16    
-48    -16    
192    64     
-160   -64    
-80    -96    
-112   -160   
-64    -80    
-368   128    
-48    -48    
-112   -64    
32     -208   
-32    128    
144    -384   
-128   -112   
192    96     
-192   96     
160    0      
-160   -48    
16     -16    
128    -16    
-400   32     
224    80     
48     -128   
160    112    
-192   80     
16     -304   
0      48     
192    -80    
-48    0      
32     -112   
144    192    
0      -48    
256    -80    
-544   208    
352    -48    
-80    -80    
2240   -2080  
240    -240   
272    896    
-432   352    
192    400    
128    -368   
-16    192    
-704   -736   
656    96     
-528   -272   
784    160    
-528   48     
192    256    
96     -16    
-208   -48    
96     -304   
-224   48     
-128   -304   
-16    80     
-16    -288   
-32    128    
-304   -176   
144    -80    
64     176    
-64    272    
128    64     
16     272    
304    128    
-272   -256   
368    -192   
-352   -48    
160    -32    
-32    160    
112    144    
-80    144    
-96    160    
16     -336   
-912   208    
-112   32     
-304   576    
-176   64     
-272   -64    
-336   80     
0      -144   
32     112    
-272   -224   
112    112    
-80    -288   
16     32     
-128   -208   
128    144    
-96    48     
16     176    
-240   224    
-240   -32    
-192   -96    
-1456  -176   
-32    0      
32     -80    
-32    144    
-192   -48    
160    160    
-176   -352   
160    48     
-64    -112   
32     224    
16     80     
64     240    
-128   -176   
-240   64     
-288   16     
16     144    
-208   -80    
-192   -32    
144    160    
-240   -176   
16     112    
-128   -192   
32     208    
64     32     
-48    256    
-80    96     
96     512    
-112   16     
-32    -96    
48     -96    
-48    -288   
128    -96    
-576   0      
-80    32     
-32    16     
304    352    
-32    176    
0      272    
-32    -80    
-32    -176   
-96    -112   
-64    32     
0      -144   
48     32     
144    128    
-144   160    
-64    -16    
-48    -64    
160    48     
-1232  128    
80     208    
64     96     
-224   -16    
176    80     
0      0      
-80    48     
-112   96     
288    80     
-112   -64    
-32    128    
-240   -64    
48     -160   
-144   -80    
144    -192   
-464   -128   
112    16     
64     -80    
-176   16     
48     208    
-64    -144   
192    32     
-208   128    
48     48     
-64    32     
128    64     
-96    32     
128    16     
-336   128    
96     240    
-288   -144   
256    48     
-368   32     
-160   96     
208    16     
32     -32    
-192   16     
-192   -48    
-32    -48    
-16    32     
96     16     
-160   -192   
208    48     
-336   64     
144    32     
-208   -64    
16     80     
0      128    
160    96     
-48    80     
96     -32    
-16    128    
32     336    
-128   240    
96     128    
0      64     
48     176    
0      -64    
-112   -128   
112    160    
-192   -16    
208    368    
16     0      
128    16     
32     112    
-32    16     
128    96     
-128   64     
64     224    
-16    -16    
48     128    
-80    -96    
32     192    
-224   -112   
128    64     
64     -128   
-48    192    
-192   128    
48     -32    
96     144    
32     80     
-48    160    
-80    -48    
-32    32     
-48    -32    
128    -16    
-112   96     
-112   112    
160    0      
-80    -16    
-128   -48    
32     80     
-448   352    
-1088  -784   
832    -416   
-816   976    
48     -16    
-560   320    
480    -688   
-752   848    
144    -624   
192    976    
16     -736   
-128   432    
80     -576   
416    688    
-224   -240   
224    208    
-144   16     
144    96     
224    256    
144    112    
-256   -16    
-32    -48    
-80    384    
400    -128   
-304   144    
224    -256   
-256   272    
144    -16    
-48    272    
80     -80    
80     224    
-80    0      
96     208    
-144   -16    
96     64     
0      32     
192    48     
-64    -48    
32     208    
-48    -64    
64     96     
-208   -160   
160    -400   
16     128    
96     -16    
-64    144    
80     32     
112    192    
-128   48     
176    144    
-64    -16    
96     128    
-128   96     
176    240    
-144   128    
64     0      
128    96     
-32    -112   
96     112    
-16    80     
48     208    
16     -64    
80     -48    
96     96     
32     160    
-32    48     
64     48     
32     -96    
32     96     
-112   -80    
176    16     
32     112    
16     -448   
0      128    
-16    -512   
48     0      
64     -224   
64     224    
-224   240    
32     -128   
-112   96     
-48    128    
0      64     
0      192    
80     -128   
-16    -96    
-64    -32    
32     -240   
64     112    
240    32     
-80    0      
64     96     
16     144    
112    128    
-96    48     
-16    48     
-160   -368   
112    -64    
128    256    
-208   -64    
-64    32     
80     48     
160    160    
48     112    
-64    -224   
16     64     
-96    -1248  
288    128    
0      176    
64     224    
-48    -48    
-32    64     
48     80     
192    208    
-128   16     
64     -16    
0      64     
128    -144   
0      80     
112    -656   
160    320    
-80    -752   
-64    -160   
16     -80    
176    144    
160    64     
64     352    
-192   176    
144    16     
32     0      
96     80     
144    96     
-144   -288   
208    240    
-144   -288   
256    64     
-192   -64    
336    -192   
-80    -2608  
224    144    
64     304    
0      144    
-48    -64    
64     176    
240    32     
-80    -176   
32     -176   
160    208    
80     352    
-96    -32    
80     -80    
80     -96    
320    192    
16     -224   
-160   48     
-80    208    
-16    -16    
-64    176    
-96    -832   
304    224    
-256   -464   
144    240    
-160   -160   
272    144    
16     -48    
-96    -128   
272    48     
-336   192    
160    -224   
96     256    
0      -96    
64     -384   
0      160    
-16    -192   
208    16     
-128   -96    
224    128    
-32    -48    
48     48     
48     -336   
0      176    
32     -192   
176    192    
112    208    
-240   -1056  
16     -336   
208    48     
32     -240   
-288   -144   
-48    -288   
352    -48    
320    -2048  
-48    80     
0      128    
-96    -256   
112    160    
272    0      
272    -80    
-864   1328   
-784   -944   
-128   -560   
-288   288    
-752   -384   
-912   80     
-464   -816   
464    336    
-496   -1040  
304    -256   
192    -464   
96     0      
16     464    
32     -400   
192    48     
-384   -352   
-64    128    
272    208    
-192   -64    
144    -112   
-512   -80    
80     80     
208    -112   
48     128    
176    -80    
-208   -128   
96     32     
304    -2000  
-32    16     
-48    -16    
96     128    
112    32     
-128   16     
-64    -80    
-32    -192   
32     32     
16     0      
-176   32     
-16    64     
-80    -80    
224    -384   
64     48     
112    -1568  
-64    -112   
-16    -48    
288    272    
64     112    
32     -160   
-32    -160   
48     16     
-64    48     
48     -80    
-176   -112   
224    -320   
-16    64     
96     -176   
-368   112    
80     -752   
112    64     
-16    -176   
144    128    
-16    -128   
32     -112   
-64    160    
-32    128    
0      48     
80     -16    
-160   -16    
144    48     
-576   96     
96     -176   
128    48     
16     32     
-16    128    
32     -48    
128    368    
-288   32     
240    -272   
176    0      
-16    -64    
-224   80     
0      -112   
-320   -32    
160    -240   
96     304    
-272   -64    
64     -64    
160    -384   
-256   16     
224    -976   
-16    48     
-176   -16    
304    0      
-448   -96    
176    128    
-80    -64    
112    -32    
-112   -16    
32     0      
-192   0      
32     -400   
160    0      
96     -272   
-144   80     
64     -64    
32     64     
-80    16     
80     -32    
-96    -16    
48     224    
-16    80     
160    32     
48     208    
-176   -64    
144    144    
0      0      
160    160    
64     -32    
-160   -32    
-80    -96    
-1216  -144   
64     -16    
80     -48    
-256   -80    
144    112    
-32    64     
128    -16    
112    256    
-32    16     
112    80     
-736   -64    
16     -64    
-576   -48    
-160   -32    
320    48     
-432   -112   
80     -32    
-336   32     
-160   0      
-336   0      
-16    -64    
-96    -176   
112    96     
32     96     
-32    0      
-288   160    
128    32     
-448   -288   
32     128    
16     0      
-48    144    
48     48     
-48    176    
0      96     
-384   48     
16     64     
320    192    
-240   32     
16     -32    
32     32     
32     -240   
176    288    
-144   -48    
-96    0      
-112   144    
96     80     
64     0      
80     240    
-368   80     
-560   -224   
-64    48     
-96    -80    
112    320    
-96    -224   
96     176    
-96    -384   
160    -224   
0      208    
-64    176    
-112   192    
-144   -32    
-128   -160   
96     -112   
128    304    
-192   64     
48     256    
-448   32     
-112   -192   
-1008  -32    
48     0      
-32    16     
112    -64    
64     368    
-272   192    
144    -112   
16     -112   
64     64     
-960   1648   
496    -560   
-160   352    
-96    32     
-1008  -416   
304    464    
-288   320    
-144   -800   
112    384    
-48    -288   
176    224    
-416   0      
240    96     
-224   304    
256    -64    
-32    96     
-64    96     
-96    -112   
-16    -16    
-160   16     
16     -48    
-352   112    
144    208    
48     -224   
-128   -96    
112    32     
64     272    
-16    112    
0      64     
0      -128   
-48    -48    
128    -96    
0      80     
128    192    
-32    -32    
-144   80     
-240   -96    
48     48     
16     0      
32     112    
112    112    
-32    112    
16     112    
-96    -192   
0      0      
16     -32    
144    80     
32     112    
16     112    
-80    -80    
112    144    
-144   0      
80     48     
48     80     
-32    16     
176    176    
-32    128    
32     48     
-64    48     
64     320    
160    144    
96     416    
-256   112    
224    208    
-336   -160   
96     32     
-208   0      
-32    -32    
80     -16    
112    48     
-32    64     
-48    64     
0      144    
80     144    
0      -16    
-48    -208   
-64    -368   
-32    -48    
-320   -208   
80     112    
-16    144    
-160   144    
208    16     
-80    16     
16     96     
-64    160    
-96    -240   
80     80     
160    208    
80     192    
-64    80     
-16    48     
-32    32     
-64    -16    
48     128    
-80    112    
176    96     
-16    16     
16     64     
96     112    
16     112    
16     48     
16     112    
-64    -16    
128    144    
-64    16     
176    304    
-144   -160   
144    -16    
-64    144    
64     -48    
80     80     
-112   96     
144    80     
32     144    
80     192    
-144   32     
64     -16    
-48    112    
128    176    
-32    -80    
-112   48     
80     128    
160    176    
-160   -64    
-32    -2352  
176    192    
96     -96    
48     192    
-112   160    
128    -96    
-48    16     
96     -16    
64     192    
-48    112    
-96    -400   
144    -48    
288    208    
-176   256    
96     -16    
-112   -160   
160    208    
128    112    
-112   112    
-32    48     
16     32     
32     96     
48     192    
16     -16    
16     128    
48     112    
-64    64     
0      -32    
16     144    
80     416    
-96    -784   
-112   -96    
-16    -96    
528    160    
-176   224    
80     256    
-16    48     
-128   -64    
144    -32    
96     224    
-64    -432   
320    272    
-176   192    
64     48     
-192   32     
336    -224   
96     208    
432    -736   
-432   48     
240    -144   
176    480    
-176   32     
112    16     
32     -272   
544    224    
272    32     
-256   304    
-16    -32    
160    480    
32     -48    
64     -320   
16     -16    
208    -128   
0      192    
48     -96    
64     96     
64     80     
-80    160    
80     256    
-208   112    
128    0      
0      112    
-1168  1120   
-1056  -1024  
224    -144   
800    -208   
-64    0      
-112   -112   
-96    96     
560    -288   
-368   0      
352    -288   
-128   352    
-64    -32    
144    208    
-112   -144   
48     -32    
80     240    
64     -128   
0      128    
-80    -240   
192    48     
-32    -640   
96     192    
80     -32    
240    224    
-160   192    
144    80     
-208   160    
160    128    
-96    -64    
0      16     
112    160    
160    112    
16     192    
-48    -304   
-16    80     
-32    -480   
144    48     
-16    -128   
96     256    
96     0      
32     96     
-80    64     
112    160    
16     64     
112    -208   
-80    112    
192    -224   
-128   -80    
256    -400   
-240   32     
352    -224   
-144   176    
192    -208   
0      128    
0      -16    
128    176    
-208   208    
64     -16    
304    224    
-144   -144   
224    -48    
48     0      
0      48     
192    -16    
-144   192    
128    -128   
80     -48    
96     -256   
32     176    
-48    80     
48     -160   
96     80     
-16    -1280  
0      -784   
144    -112   
-48    -992   
64     -32    
-144   128    
176    112    
0      80     
64     -64    
160    -80    
80     -32    
48     -304   
-64    224    
16     -48    
-48    -208   
288    -144   
-144   -640   
0      -48    
0      -640   
32     -16    
48     -640   
16     -176   
256    688    
-224   -80    
352    80     
-96    0      
80     -560   
224    208    
-208   -304   
64     16     
-160   80     
96     0      
-560   -80    
240    -112   
16     -112   
-48    -624   
-32    -272   
32     -752   
160    0      
32     80     
-96    -16    
176    48     
80     -48    
-80    -96    
-64    32     
288    96     
128    64     
-272   256    
176    -48    
112    64     
-144   -256   
80     -48    
-32    -144   
304    176    
16     -2832  
480    240    
-96    48     
16     128    
-96    0      
144    16     
-192   -144   
-16    -160   
-624   -160   
48     -144   
-1312  -128   
32     -112   
16     -224   
16     -304   
-304   -80    
-32    -1520  
16     16     
-32    -16    
16     96     
32     -48    
240    -16    
-96    -160   
-80    -96    
-80    -48    
192    32     
-368   0      
-16    128    
160    32     
32     -272   
-16    48     
48     -224   
176    288    
-160   -144   
176    64     
-112   -96    
96     -80    
-80    -16    
128    16     
64     112    
-144   -64    
-704   -16    
48     -192   
-224   -224   
16     -128   
128    208    
64     192    
-48    160    
32     -1408  
-128   96     
-64    -160   
160    32     
-144   -16    
32     -32    
-448   -32    
112    -48    
-144   0      
-16    -128   
-80    112    
112    -96    
80     0      
-80    -464   
-16    160    
128    -656   
112    -80    
-32    0      
96     64     
32     -192   
80     16     
-128   80     
96     64     
-96    32     
32     -16    
-1456  1264   
352    -16    
-464   144    
304    32     
-448   -272   
304    -80    
368    160    
-64    272    
32     -560   
-224   112    
304    48     
-96    160    
-16    48     
16     208    
96     -272   
-208   16     
432    384    
32     320    
48     -96    
-64    32     
-32    16     
192    64     
-64    -112   
-1248  -96    
-192   -128   
160    48     
-64    144    
48     -64    
-160   -144   
-304   -256   
-240   -16    
-960   -272   
176    288    
-144   -224   
48     80     
-48    -112   
-144   176    
-176   64     
112    16     
-48    16     
-304   32     
-128   96     
16     -80    
-32    -32    
-80    -128   
144    176    
-272   -112   
64     -16    
-240   -304   
-64    64     
-96    320    
-32    160    
-48    128    
-64    32     
-128   80     
-256   32     
-112   0      
-1360  0      
-32    -80    
-16    -128   
96     128    
-32    -256   
-16    144    
-64    -176   
80     -48    
-32    352    
-32    80     
32     32     
-240   -48    
-32    16     
-624   -96    
-64    16     
-176   0      
48     240    
-176   -96    
112    -32    
-464   -864   
256    -160   
144    240    
48     400    
-32    336    
-176   -48    
64     -64    
-112   -16    
-128   32     
-64    80     
-128   -48    
128    160    
-32    112    
-192   -160   
32     80     
-32    80     
80     80     
16     112    
-160   -48    
80     96     
-160   0      
-80    -96    
-32    -64    
16     80     
80     80     
0      96     
-208   -48    
112    128    
-432   16     
16     80     
64     16     
0      -16    
-16    64     
-208   -32    
48     16     
-80    16     
96     80     
-16    112    
-16    48     
-112   0      
-80    -16    
-128   -64    
80     128    
-480   -128   
80     80     
48     -32    
96     272    
16     112    
-80    16     
-80    32     
-80    -320   
48     -32    
-160   96     
160    80     
-128   48     
16     -176   
-96    0      
96     320    
-240   -96    
352    48     
-416   288    
-32    336    
0      192    
-32    -176   
112    64     
64     128    
-96    -64    
-160   144    
-16    0      
128    -336   
-160   -128   
192    -16    
-176   272    
-320   -128   
128    192    
-48    80     
-64    -64    
-80    -64    
256    272    
-256   208    
-48    96     
-16    -64    
48     -16    
128    80     
-160   -32    
0      176    
-144   -64    
112    128    
-144   -64    
112    336    
-16    16     
-16    64     
-80    224    
80     32     
-144   -32    
48     240    
96     -176   
-64    -16    
96     208    
-80    32     
-144   176    
-176   -80    
-96    400    
32     -112   
-112   352    
176    96     
-32    48     
-112   -144   
32     80     
112    0      
-32    400    
240    -48    
-160   224    
-16    0      
-32    -48    
16     176    
-64    16     
-32    160    
160    -192   
32     112    
16     -64    
1968   -1152  
16     -992   
592    0      
-288   768    
288    336    
-656   -544   
-176   -416   
64     -32    
400    384    
-224   48     
-16    112    
128    128    
112    192    
32     112    
-96    48     
32     112    
128    48     
64     112    
-32    64     
64     112    
48     96     
-32    112    
32     64     
-80    48     
96     16     
-128   -192   
176    -1296  
16     112    
32     -32    
-176   32     
224    80     
64     112    
64     160    
-48    48     
-48    0      
0      -272   
208    -96    
-48    256    
112    32     
48     80     
-704   -64    
208    -544   
48     80     
144    144    
-144   80     
160    112    
-176   48     
112    -32    
80     112    
-64    96     
176    160    
-320   -80    
208    0      
-144   -32    
48     144    
80     112    
48     -48    
32     80     
96     160    
-16    48     
0      112    
32     48     
96     144    
16     176    
-16    -32    
160    64     
16     208    
-48    160    
-16    -64    
176    224    
-176   0      
240    -96    
-112   112    
32     -1392  
112    16     
48     96     
-128   16     
32     48     
112    96     
80     416    
-128   32     
176    16     
160    496    
-288   -32    
304    -192   
16     48     
-96    -448   
368    96     
-224   -592   
176    144    
-64    144    
96     192    
32     -224   
-16    320    
-96    -224   
-16    -96    
128    112    
32     96     
224    272    
-128   -48    
144    96     
48     -176   
-32    -112   
-32    -368   
192    176    
32     -448   
160    192    
-208   144    
288    112    
-128   48     
208    224    
16     0      
-80    32     
-32    0      
176    -16    
112    192    
80     32     
-16    288    
-32    -432   
336    -48    
-160   -192   
160    192    
336    -80    
-160   -64    
32     -48    
80     144    
16     0      
-96    -400   
48     -16    
16     -352   
112    208    
240    -1440  
-192   128    
352    -368   
80     160    
32     -160   
-160   256    
144    -256   
112    224    
-112   64     
32     16     
192    160    
32     -304   
16     352    
48     -208   
128    -224   
-96    -288   
144    256    
32     -160   
0      128    
128    -96    
16     144    
-48    -640   
16     16     
16     160    
128    112    
-48    144    
96     464    
144    -64    
0      -80    
16     224    
208    -128   
-64    208    
96     0      
64     400    
64     64     
0      96     
-16    32     
80     -944   
-112   32     
112    48     
160    -1712  
-16    -224   
128    -2112  
-256   -288   
80     -832   
-64    256    
96     -64    
96     -192   
-16    48     
16     -336   
0      48     
48     32     
144    -176   
-80    32     
128    -400   
48     64     
-1232  -112   
112    -496   
80     32     
160    0      
32     -64    
-32    -1984  
48     -176   
144    -32    
16     -48    
112    -112   
-736   -3648  
1968   2192   
-1136  1568   
80     -256   
32     1296   
432    -208   
-544   16     
144    -112   
368    560    
240    -384   
-160   -1088  
16     96     
256    -16    
96     224    
64     -336   
-176   -96    
192    64     
-208   -672   
256    352    
64     48     
-656   -384   
160    96     
-128   144    
144    -448   
-176   -352   
256    -192   
256    160    
-16    -2560  
-144   208    
64     -336   
-80    -96    
64     -48    
128    128    
-144   64     
-32    -224   
-320   -48    
112    368    
-672   112    
-64    0      
-176   -160   
272    48     
-208   -16    
32     -576   
80     48     
96     -32    
80     112    
-16    80     
240    320    
-64    384    
48     -224   
-96    -240   
32     -48    
-112   160    
0      -48    
-288   80     
160    -208   
80     -32    
-256   -576   
-32    -176   
208    272    
-96    96     
80     128    
-176   112    
80     -16    
-80    -128   
48     192    
-112   -48    
-144   -160   
-96    -64    
-288   -16    
80     -160   
-16    96     
32     -192   
96     240    
-128   -2320  
32     -272   
-224   -448   
192    -896   
-336   -272   
-48    -80    
-176   528    
112    96     
-64    96     
80     -144   
80     64     
32     80     
32     208    
-80    -176   
288    128    
-96    -224   
208    -208   
-64    96     
64     160    
-96    -16    
16     -304   
-144   -32    
208    0      
-128   -32    
-32    -288   
128    208    
32     64     
64     16     
32     -176   
-16    160    
96     32     
0      64     
16     -32    
192    256    
-336   -160   
336    48     
-272   112    
128    -240   
-48    80     
-32    -176   
-16    -16    
-1728  -352   
48     16     
-496   -416   
-16    -160   
32     112    
-48    -64    
-96    -112   
-928   96     
0      16     
-48    96     
80     496    
-144   -224   
208    -96    
-1136  -576   
144    96     
-208   16     
80     -64    
-256   176    
-240   -80    
16     16     
-240   -48    
32     0      
-800   -448   
160    272    
-144   208    
112    96     
-320   0      
16     160    
-272   -496   
160    32     
-48    -112   
112    272    
-32    -224   
-64    64     
0      16     
-32    64     
-160   96     
32     64     
-80    -160   
-160   -272   
-48    32     
-480   -16    
-224   -624   
144    208    
-32    64     
-64    -16    
0      64     
64     112    
48     -16    
-96    -16    
240    144    
160    0      
-320   -176   
160    272    
-112   0      
-48    0      
336    304    
-160   80     
80     32     
80     48     
-80    -112   
128    -16    
0      208    
0      96     
16     80     
-48    144    
-80    16     
-16    -256   
112    96     
0      160    
48     208    
-176   -16    
96     48     
96     -48    
64     48     
-16    144    
-112   16     
32     240    
144    16     
-272   240    
-304   16     
-64    -80    
400    -144   
-256   -736   
384    -832   
368    448    
-352   176    
80     -64    
-1072  64     
80     96     
368    -80    
128    176    
-176   -128   
48     144    
-80    -64    
-48    160    
112    0      
32     144    
16     16     
-144   16     
32     16     
-32    48     
32     32     
-64    -80    
16     192    
176    112    
0      16     
16     -48    
-64    96     
-176   48     
160    48     
32     96     
-64    -32    
48     -48    
-256   112    
176    128    
-48    64     
-16    -48    
-32    192    
64     336    
16     -48    
-144   -112   
0      64     
-16    32     
16     112    
-16    80     
208    64     
-288   32     
16     0      
-112   16     
-48    -48    
80     96     
-208   -32    
144    -32    
-176   192    
208    112    
-176   32     
64     0      
112    192    
-80    -96    
176    128    
-192   96     
112    -80    
80     192    
-80    208    
-32    96     
-16    -144   
96     208    
-240   16     
64     96     
80     -16    
112    16     
-16    128    
-80    128    
32     0      
112    64     
32     192    
-112   160    
80     32     
-16    16     
0      112    
16     -80    
-48    112    
0      160    
80     64     
-80    -96    
176    -16    
-64    144    
-112   -144   
224    192    
-304   -64    
176    208    
-48    -32    
48     128    
-64    -16    
16     128    
-48    144    
-128   -112   
224    160    
64     208    
-128   160    
128    -32    
-96    96     
128    16     
128    176    
-128   -48    
0      64     
-16    -32    
80     176    
80     16     
-160   -176   
-48    -32    
128    240    
32     0      
16     96     
128    128    
-112   0      
144    96     
-16    -224   
80     224    
-32    64     
48     144    
-64    208    
112    80     
-272   -80    
48     176    
0      -128   
-32    -2752  
-64    -96    
0      32     
336    240    
-112   -64    
64     176    
-64    64     
144    -16    
-160   -32    
208    144    
48     -48    
0      48     
-368   -240   
256    144    
96     -80    
-160   -480   
416    96     
-144   192    
240    464    
-208   80     
32     208    
-144   160    
304    -224   
-240   -224   
256    304    
-48    16     
64     32     
16     48     
64     176    
80     256    
-80    -512   
-80    -80    
96     0      
80     -160   
-48    336    
32     144    
-64    16     
160    240    
-32    80     
208    96     
-112   112    
144    -144   
-96    -16    
256    416    
-96    32     
0      -176   
64     144    
112    -1232  
-112   0      
48     96     
272    416    
-176   -80    
32     0      
-144   -160   
112    -16    
-112   16     
80     64     
-96    32     
80     -192   
-64    0      
128    -368   
272    96     
-48    -192   
-16    160    
-96    -2080  
96     64     
96     80     
160    -16    
-80    48     
304    80     
80     240    
-80    96     
144    96     
-1200  -352   
1664   2144   
-1056  -256   
848    -64    
-464   -480   
-64    928    
-960   -2256  
512    208    
288    576    
112    304    
-656   240    
-160   -160   
416    -16    
304    -32    
192    512    
-400   -176   
240    240    
-160   256    
256    128    
-192   -944   
-80    -432   
128    -464   
48     144    
-80    80     
240    -208   
16     224    
112    80     
144    224    
-64    352    
176    64     
-64    -112   
-32    80     
-96    -80    
48     96     
96     -96    
-48    0      
288    16     
-208   64     
-64    -32    
32     176    
-80    128    
16     128    
80     48     
96     -224   
-80    -64    
160    80     
-48    240    
160    336    
-320   -144   
-32    -112   
256    128    
-64    80     
-16    16     
-112   -176   
48     96     
112    144    
-48    160    
-16    32     
208    96     
-80    -2160  
-80    -208   
32     144    
-32    -32    
-16    80     
208    240    
-208   -80    
208    -48    
48     16     
128    16     
-96    -608   
0      80     
64     -432   
32     -176   
48     -96    
160    -256   
32     -80    
224    128    
-80    224    
-448   -288   
96     -416   
128    16     
-48    -240   
80     -736   
16     32     
64     32     
96     32     
80     592    
-352   -384   
-848   -48    
-16    -48    
208    144    
-32    -784   
-16    -32    
112    -2192  
64     -16    
240    592    
-128   -32    
192    -48    
-64    160    
272    128    
-48    112    
-256   -80    
-32    -96    
-64    -96    
112    -64    
64     -16    
112    -48    
-32    -592   
-16    -832   
32     -192   
176    -464   
0      144    
16     -80    
16     -16    
80     -144   
32     -80    
-176   -64    
112    16     
-128   112    
112    -96    
-80    -48    
80     -144   
-32    -176   
160    -432   
128    -48    
-80    -192   
160    160    
-32    -112   
-96    0      
80     0      
16     -32    
-16    -176   
64     64     
-80    32     
32     -352   
-176   -64    
-144   96     
-112   -224   
272    -272   
-112   0      
-16    -1296  
112    112    
96     48     
-80    96     
-160   96     
192    320    
0      240    
160    16     
-272   64     
80     -144   
96     64     
-32    -128   
-288   96     
-48    -224   
32     48     
48     -368   
32     96     
32     -1472  
272    -16    
-192   96     
128    0      
-128   128    
48     -64    
-80    16     
-80    -32    
272    80     
0      0      
-384   -32    
-320   -288   
96     112    
144    -176   
144    112    
224    -1040  
32     224    
320    -112   
160    48     
-128   112    
16     96     
-208   128    
128    -176   
-112   0      
144    -304   
-112   112    
336    -144   
-64    208    
64     -144   
80     96     
112    -1072  
-16    16     
-48    16     
64     80     
-144   48     
32     -96    
0      0      
-16    -256   
32     160    
-32    32     
-1264  -1728  
736    -448   
-1168  -240   
-160   -384   
80     144    
-48    32     
48     752    
-768   224    
48     400    
192    -480   
-112   -128   
-144   -96    
336    336    
-64    192    
48     -176   
-80    96     
-224   -192   
-96    256    
144    -288   
0      256    
96     -144   
-464   368    
32     16     
-80    96     
80     -288   
-1376  192    
288    -32    
-144   240    
112    -80    
-64    -96    
144    48     
-48    -48    
64     32     
-192   -16    
160    64     
-48    -96    
-240   -160   
-144   128    
128    96     
48     -32    
-80    -32    
-64    128    
272    -160   
-128   -48    
-176   -320   
96     128    
-16    -48    
-32    64     
0      240    
32     -144   
80     64     
-160   64     
64     48     
-48    80     
32     -64    
-48    64     
-112   80     
-624   -128   
-64    176    
0      -144   
208    144    
-144   16     
112    128    
-48    16     
-48    32     
-96    16     
0      80     
144    176    
-224   16     
64     96     
-224   -160   
-16    112    
-208   -64    
32     16     
-112   -64    
-16    64     
128    128    
-192   64     
160    64     
-224   -64    
16     -32    
-32    80     
-176   64     
-96    -208   
128    -96    
-48    -48    
-64    64     
-224   160    
-208   176    
-912   -144   
-80    48     
32     -96    
0      80     
-96    -64    
-80    -352   
-240   16     
208    208    
-64    80     
48     128    
16     288    
96     80     
0      192    
-288   -208   
48     128    
-496   48     
144    80     
-176   -80    
208    256    
-16    272    
32     -16    
16     -48    
-160   -432   
64     64     
-48    32     
208    112    
-144   -48    
128    160    
-144   0      
16     112    
-112   384    
-144   272    
176    48     
-128   160    
-64    0      
-16    64     
-16    128    
-80    112    
176    96     
160    128    
-192   -128   
-32    -112   
-112   80     
-48    0      
-16    128    
-80    32     
-160   16     
80     144    
32     32     
-64    -464   
-192   -16    
160    224    
48     16     
-48    -80    
-144   -16    
-128   0      
176    544    
-336   -48    
112    32     
16     64     
-96    -80    
-64    80     
16     0      
-48    32     
96     80     
0      224    
-32    -784   
0      -176   
96     368    
208    240    
-96    432    
32     16     
112    288    
-144   -64    
32     112    
48     -80    
144    64     
-208   0      
144    -32    
-32    368    
-112   0      
-48    48     
-128   64     
48     -96    
96     304    
-240   48     
160    -64    
-176   256    
16     -80    
80     160    
-96    128    
144    48     
-16    112    
-32    128    
160    0      
192    48     
64     32     
-80    16     
96     224    
-32    0      
144    80     
-112   96     
32     112    
-48    32     
288    -80    
64     208    
-16    -16    
-48    80     
-64    80     
640    1040   
704    512    
-336   -1152  
-256   -672   
-16    128    
624    -480   
192    800    
-704   -336   
272    -80    
-272   224    
384    -208   
-464   304    
128    -256   
304    432    
-16    -112   
-80    288    
48     -192   
-32    736    
16     -416   
240    304    
-48    -208   
320    416    
-304   0      
192    112    
-192   96     
128    -1616  
-32    240    
16     -96    
-192   96     
192    -80    
64     208    
48     -80    
112    128    
64     -64    
48     144    
-128   -256   
272    224    
80     368    
-16    -16    
-208   128    
128    96     
64     -16    
-112   -80    
48     240    
80     96     
64     112    
-80    96     
400    464    
0      208    
192    160    
-64    -128   
112    0      
-96    336    
-16    -368   
-32    0      
-16    -224   
256    240    
-304   -2256  
-16    64     
-176   -464   
-80    -64    
0      368    
160    288    
32     224    
32     -96    
-288   -272   
128    176    
32     400    
-144   -320   
32     0      
64     32     
-16    288    
32     -1856  
160    112    
-112   -32    
128    64     
-16    96     
240    -32    
64     16     
160    336    
96     160    
80     96     
-64    352    
112    48     
64     96     
-80    -144   
-16    -16    
-16    -240   
160    736    
-80    -832   
112    352    
64     -128   
-160   -16    
80     96     
-48    -80    
0      -112   
-16    80     
-64    0      
112    112    
-64    96     
64     -192   
16     -64    
32     -416   
-48    160    
64     -1408  
-48    -176   
-256   -1056  
160    272    
176    -64    
-80    128    
-32    16     
96     -160   
64     80     
64     -240   
32     80     
128    -64    
64     128    
64     -256   
-160   128    
48     -368   
192    144    
48     240    
-64    240    
64     48     
160    80     
-112   32     
80     -704   
32     176    
144    -80    
-16    128    
64     48     
160    304    
128    48     
-48    -96    
64     16     
-128   80     
464    400    
-48    224    
80     160    
32     112    
0      96     
32     -48    
112    80     
0      -128   
128    -48    
48     -144   
-64    16     
128    -352   
64     96     
32     -16    
0      128    
64     64     
176    -384   
-96    32     
128    -352   
32     -368   
0      112    
176    -128   
-160   -80    
96     -64    
-32    -192   
176    64     
96     48     
16     64     
144    -224   
-48    -1760  
96     208    
64     -80    
-48    -96    
32     0      
112    -272   
48     32     
-32    -48    
48     -240   
304    -928   
32     160    
-16    -416   
32     192    
48     32     
32     16     
112    -272   
-112   112    
48     -80    
16     32     
64     -144   
208    -128   
-912   -32    
-160   -368   
96     -64    
112    -544   
208    0      
96     -1200  
-96    -16    
-64    -1776  
-32    -32    
96     16     
64     16     
-128   720    
-240   1216   
-1984  -96    
176    224    
-512   64     
-512   -240   
352    320    
-256   416    
-16    -432   
112    -624   
-48    -208   
112    -272   
160    128    
128    -48    
32     96     
-96    -192   
112    -112   
-128   96     
224    96     
-48    32     
-64    -352   
-720   160    
144    -48    
0      80     
-128   -384   
-48    64     
224    -768   
32     240    
64     -32    
-112   -80    
-80    -128   
0      112    
96     -16    
-64    -96    
-112   -112   
64     -80    
-416   -192   
-32    -16    
-32    48     
64     32     
16     -32    
48     -288   
-48    144    
160    48     
-80    32     
16     -48    
96     224    
32     -64    
-16    -80    
-256   -128   
112    96     
-96    -32    
16     48     
-256   32     
48     -160   
64     144    
16     -256   
-144   -48    
256    -720   
-48    16     
80     0      
0      -96    
-512   16     
0      -48    
32     80     
-16    96     
-48    32     
-32    -128   
-208   16     
0      -336   
0      48     
64     -96    
0      64     
112    -896   
32     -96    
-672   -224   
208    -224   
-96    144    
-80    64     
64     32     
-160   -464   
-128   -304   
64     -368   
-320   -32    
-128   -224   
64     160    
32     -208   
0      16     
-96    -64    
80     -16    
-176   48     
80     48     
32     160    
16     48     
0      160    
272    752    
-384   160    
144    192    
-32    -240   
112    -80    
96     64     
-736   64     
-16    64     
-112   -144   
-992   -80    
16     16     
-960   208    
-304   -192   
320    144    
-64    416    
192    192    
-144   96     
16     32     
-32    32     
-64    -224   
-16    -208   
112    -32    
-368   240    
-32    -128   
-320   32     
-80    -112   
-240   -80    
-128   0      
-224   -176   
-208   -64    
-64    -336   
144    -304   
-464   -384   
320    -112   
-240   -240   
16     64     
-96    64     
16     128    
0      -16    
48     80     
-96    112    
48     16     
-208   -32    
-32    224    
-16    48     
-624   -48    
16     -32    
-240   -80    
144    128    
-176   -64    
80     80     
160    160    
-192   48     
-32    112    
-224   -96    
16     48     
32     16     
128    0      
-80    112    
48     16     
-416   -160   
-112   -16    
192    496    
-192   64     
160    -160   
240    160    
64     96     
-192   16     
-224   32     
96     32     
272    -64    
-16    208    
-272   64     
-208   -400   
112    208    
-640   48     
32     -112   
-336   -112   
192    256    
64     -256   
-144   96     
48     -80    
96     192    
-224   80     
48     208    
-208   64     
96     48     
-16    0      
-80    48     
128    32     
256    64     
-144   80     
-560   -112   
-16    112    
48     0      
-16    32     
-320   48     
96     0      
240    16     
0      160    
-160   -16    
-160   -32    
-16    128    
256    1136   
-496   608    
-384   -1712  
48     -128   
-224   -192   
-224   -112   
784    -16    
-1024  -464   
512    -208   
-384   96     
720    48     
16     496    
-256   -48    
144    368    
-96    -416   
-32    64     
-144   -112   
160    64     
-544   -80    
-368   -608   
160    576    
432    160    
-272   384    
-16    -16    
48     -480   
-16    128    
-128   -208   
112    -80    
-224   80     
528    304    
-160   224    
0      -112   
-176   48     
96     112    
144    -48    
-352   -320   
176    -176   
112    192    
176    256    
-112   96     
-96    128    
16     144    
-16    -160   
32     -32    
16     -16    
80     128    
-80    208    
64     -128   
-176   208    
-176   -128   
64     16     
-96    64     
160    352    
-240   208    
144    16     
16     272    
-128   -64    
128    32     
-176   -320   
160    0      
48     160    
-64    400    
-224   -144   
272    128    
-128   208    
80     112    
-112   -144   
240    192    
-112   -16    
80     96     
-32    96     
64     48     
16     208    
-48    64     
192    96     
96     240    
112    576    
144    112    
96     64     
16     160    
272    -48    
176    -48    
112    464    
-96    32     
144    64     
16     96     
64     -16    
32     48     
-32    -48    
128    96     
-176   -48    
80     160    
-80    96     
-48    80     
-80    -160   
128    96     
-32    96     
-96    -80    
-48    -32    
-144   -48    
112    48     
-32    -16    
64     -16    
-112   -32    
352    544    
-416   32     
240    -272   
-272   -224   
240    -1056  
160    192    
-32    80     
16     192    
16     224    
112    128    
320    576    
-208   128    
272    64     
-304   -16    
96     0      
64     288    
0      -32    
-80    48     
-16    -16    
128    -48    
192    336    
-112   208    
192    144    
-144   256    
288    144    
128    112    
-272   48     
112    -128   
-176   192    
-160   -320   
560    384    
-272   16     
176    0      
-16    112    
-224   -576   
320    64     
16     64     
-16    192    
32     272    
256    80     
-144   32     
-224   32     
32     -64    
288    224    
-16    -80    
32     144    
-144   -128   
-16    -240   
208    96     
48     -464   
-16    80     
112    -2112  
-64    160    
80     -64    
-32    144    
32     128    
224    16     
-48    192    
0      144    
16     -32    
-80    64     
48     -64    
0      -48    
48     64     
-192   64     
16     32     
-48    -512   
128    112    
368    -112   
0      224    
-96    240    
0      128    
48     304    
16     112    
-160   -32    
128    0      
96     192    
96     32     
-144   96     
64     -416   
96     144    
64     -448   
96     160    
-32    -1216  
96     160    
16     80     
-16    64     
48     32     
80     -64    
80     208    
16     112    
16     240    
-80    -160   
-1200  1600   
656    -512   
288    -48    
112    -1008  
-176   -64    
144    -1440  
256    704    
208    -368   
144    864    
-352   -352   
336    64     
-304   -32    
336    144    
-352   400    
272    -1120  
-80    288    
128    -384   
16     272    
160    -128   
-64    208    
64     -432   
32     304    
80     -80    
240    144    
-240   -80    
176    224    
-144   16     
336    -256   
-96    32     
96     -224   
-32    144    
96     -112   
112    224    
16     -352   
-64    176    
32     -224   
144    208    
-48    -96    
96     96     
0      -64    
112    -1824  
-32    -816   
48     -48    
128    -48    
80     -80    
80     80     
48     -256   
64     48     
80     -96    
112    176    
-32    -240   
80     -1104  
16     16     
80     -2160  
48     -48    
-192   32     
-64    -400   
80     -160   
112    -224   
48     -32    
0      -1232  
32     -16    
80     64     
64     176    
-48    224    
64     48     
80     -80    
-48    16     
240    32     
-208   112    
-96    0      
112    0      
112    -224   
128    -624   
80     -80    
-48    -48    
-64    -96    
128    -176   
32     -112   
144    32     
-16    64     
64     -320   
-240   208    
512    192    
16     64     
-64    -128   
176    48     
-288   64     
16     -32    
96     64     
96     -128   
-32    160    
16     -368   
48     -256   
128    -592   
96     496    
-160   -112   
144    48     
0      -192   
288    0      
16     160    
-16    -16    
-272   32     
-16    -112   
224    96     
0      -144   
64     80     
48     -656   
-32    -48    
32     -560   
16     64     
96     0      
0      96     
112    -96    
96     -160   
-224   -48    
192    -16    
-224   16     
96     -80    
-352   -176   
208    -80    
96     0      
48     -432   
-160   -80    
208    -1232  
-80    -304   
128    -400   
-48    48     
96     208    
-16    -128   
-80    -16    
-32    144    
48     -64    
-80    -64    
-320   -96    
16     176    
-608   -192   
-32    176    
0      16     
256    -432   
-176   224    
256    -1104  
-80    64     
-80    112    
64     16     
0      16     
96     128    
-400   -80    
128    -208   
-32    -80    
240    64     
-16    64     
192    -80    
-272   240    
80     -576   
144    320    
-16    -1776  
144    96     
-400   0      
64     -16    
-192   -80    
80     -144   
-48    112    
32     -80    
-16    64     
-32    0      
-160   -80    
176    -336   
-16    192    
-16    -192   
-48    160    
-128   192    
0      -128   
-208   128    
48     -48    
64     32     
-96    144    
-128   48     
176    -80    
-208   128    
144    -80    
-720   32     
16     -32    
128    112    
-288   -48    
0      160    
-48    80     
-944   -16    
-48    32     
48     16     
-128   80     
96     -32    
-16    176    
256    -48    
-80    144    
16     -48    
-48    48     
-896   2400   
-992   -1200  
368    -560   
656    -256   
144    -752   
-896   768    
208    48     
-368   -240   
-544   -368   
-96    80     
-336   -144   
-192   -80    
160    480    
272    -384   
-304   192    
32     32     
-144   96     
-272   -640   
-304   192    
288    -288   
-80    96     
-96    -96    
32     192    
-96    -288   
-928   -160   
176    80     
224    128    
-96    144    
-64    0      
144    224    
-176   -144   
112    80     
-32    176    
16     0      
128    112    
-160   32     
-48    80     
-224   -128   
-64    96     
-192   -64    
80     80     
-272   128    
0      64     
96     -48    
-144   128    
16     -256   
-16    48     
64     160    
-128   128    
48     -160   
-48    160    
-240   48     
48     -112   
0      224    
-128   -64    
48     32     
-848   -48    
64     192    
-112   -176   
-32    -32    
128    -32    
-64    160    
48     0      
-16    144    
-96    80     
-32    32     
80     64     
32     224    
-96    -64    
144    32     
-80    32     
-48    -80    
-80    208    
-464   -112   
240    176    
-256   -48    
-192   80     
32     32     
0      128    
-64    16     
80     -16    
0      112    
0      336    
-208   -80    
128    96     
64     208    
-208   -208   
320    112    
-608   112    
208    192    
-80    -32    
-48    160    
-32    64     
16     -64    
144    96     
-144   112    
128    -112   
-144   -64    
16     128    
-16    96     
112    336    
-160   -96    
112    -48    
-208   -32    
-32    96     
144    112    
-208   80     
16     64     
160    64     
-144   160    
192    48     
-128   32     
-32    32     
160    208    
48     16     
-128   96     
-256   -48    
112    0      
-32    -16    
96     128    
0      384    
240    160    
-224   96     
-64    -96    
-208   -112   
-80    48     
80     32     
224    16     
0      16     
-272   -64    
-48    128    
32     32     
144    48     
32     160    
-240   32     
-64    -96    
-144   -32    
112    112    
16     32     
-64    0      
256    112    
-96    32     
-96    0      
80     144    
-192   0      
336    160    
0      112    
-96    192    
64     64     
-80    80     
160    112    
0      80     
-48    -16    
-96    0      
64     48     
16     -112   
144    16     
192    320    
-224   240    
80     64     
-64    48     
64     32     
32     176    
128    96     
-16    32     
144    400    
-224   128    
96     352    
-112   96     
144    -96    
16     32     
32     32     
-112   176    
192    80     
-32    0      
112    272    
-112   352    
-80    -64    
160    -96    
80     144    
96     -128   
0      352    
32     192    
-96    -16    
-80    80     
-48    64     
192    240    
-112   80     
0      0      
-112   16     
240    112    
-304   -192   
80     48     
240    32     
48     144    
16     352    
-16    -64    
16     400    
720    -1104  
32     736    
144    848    
-752   -32    
-192   96     
592    336    
-592   -96    
256    0      
256    368    
-128   -496   
256    48     
-224   0      
224    144    
-48    96     
112    -32    
-48    176    
160    144    
-48    80     
48     -16    
-128   0      
112    0      
80     368    
96     48     
-16    -48    
-128   -800   
96     160    
-48    160    
-16    288    
224    96     
-96    32     
-64    32     
16     112    
-16    -16    
80     96     
-16    -16    
112    64     
-96    112    
16     -80    
192    112    
-80    -352   
128    80     
-64    -320   
64     96     
112    0      
-32    48     
32     -32    
208    240    
-64    96     
112    32     
48     96     
0      80     
80     -48    
-64    -208   
80     48     
144    -96    
48     464    
-128   -336   
368    112    
112    160    
96     160    
-48    -112   
48     144    
-16    -96    
16     96     
176    -48    
64     288    
16     128    
0      -80    
48     32     
112    -192   
32     96     
48     -336   
-112   96     
48     -2128  
80     0      
176    96     
-112   48     
-112   -176   
112    144    
-16    192    
48     160    
-144   -16    
128    -160   
112    352    
-64    -144   
80     48     
80     -448   
32     128    
16     -96    
48     96     
16     112    
64     128    
0      80     
128    160    
0      80     
16     -32    
176    288    
16     32     
80     96     
-80    16     
32     64     
144    -96    
48     176    
0      0      
112    176    
-80    112    
96     96     
16     32     
64     192    
-16    32     
96     -464   
32     128    
64     -384   
96     160    
64     -32    
96     160    
-48    -400   
-48    32     
96     -272   
112    -80    
-32    -80    
-48    240    
192    112    
32     80     
-64    176    
288    304    
-192   288    
256    -224   
-112   240    
80     -112   
96     48     
-144   -176   
240    80     
0      -128   
-16    144    
32     96     
176    144    
48     80     
0      -1552  
16     -928   
112    80     
-144   80     
208    -32    
0      224    
32     -208   
208    112    
80     176    
-128   224    
-48    -112   
0      -224   
48     -64    
64     -64    
-160   -16    
-400   -128   
-48    -880   
240    304    
-176   -80    
-48    -384   
288    -1072  
144    -240   
80     400    
-160   -80    
80     144    
-64    -96    
160    -416   
-64    384    
-128   -416   
-96    304    
-128   -224   
208    -144   
192    -80    
48     304    
80     -48    
32     -256   
-32    -144   
320    128    
80     128    
-64    -256   
0      -112   
48     -160   
256    16     
-32    16     
112    0      
-48    64     
144    -160   
-624   -96    
128    -272   
-80    -80    
80     0      
160    -16    
80     -288   
0      -112   
-64    288    
0      48     
-32    0      
144    16     
80     16     
2032   -2848  
160    320    
416    640    
-768   448    
1088   -1120  
-496   -1056  
224    -432   
784    464    
48     480    
32     -400   
-48    -176   
-64    -128   
416    -16    
-144   -16    
0      -32    
80     192    
32     48     
-48    48     
-256   -80    
160    96     
-752   64     
64     -128   
-224   -112   
0      -80    
112    -48    
112    64     
0      192    
128    144    
32     128    
-32    -16    
-16    -96    
-16    -16    
96     80     
32     48     
-16    -128   
48     80     
32     -80    
-368   -16    
0      -32    
64     80     
96     -688   
0      96     
48     -480   
32     -144   
16     32     
-48    -64    
-32    160    
64     -240   
-544   64     
-16    -304   
240    96     
-192   0      
144    128    
-144   -336   
160    32     
96     -112   
-160   64     
160    -1920  
80     16     
-112   48     
-16    -32    
-80    0      
0      -32    
-128   32     
128    -80    
0      192    
-128   32     
368    96     
-80    -240   
176    128    
-96    -80    
64     48     
-208   96     
80     -16    
-112   64     
160    -80    
-144   144    
48     -176   
176    64     
-48    144    
-128   0      
192    -192   
-80    -32    
-80    -176   
-240   80     
-304   -304   
144    16     
-144   80     
-1088  -16    
48     64     
-624   32     
-48    96     
16     80     
80     16     
-16    0      
-240   -48    
-512   -192   
0      160    
-272   -80    
80     32     
-288   -128   
-80    144    
-224   -96    
-240   -48    
0      112    
32     272    
48     176    
-416   0      
0      32     
64     -64    
144    16     
-112   -96    
-144   144    
-16    -192   
128    128    
-112   -128   
-144   64     
-16    96     
48     128    
64     -32    
-176   0      
128    -48    
-864   -80    
-288   48     
272    224    
240    112    
-32    -80    
-48    112    
-112   -96    
64     176    
48     0      
-176   -16    
-32    -112   
-272   112    
208    -64    
-32    112    
-48    16     
-272   176    
-272   32     
-288   16     
16     -32    
-256   -176   
288    192    
-64    -112   
272    -80    
-16    80     
-240   -272   
32     208    
-48    64     
144    -96    
-176   208    
0      48     
16     80     
16     0      
-112   96     
-32    -16    
-16    16     
176    368    
-112   -192   
-112   -48    
160    320    
-112   16     
-96    -64    
-144   80     
224    400    
-176   336    
96     64     
-304   -384   
-32    -128   
-144   112    
80     160    
-1248  0      
320    144    
-160   16     
-160   16     
0      112    
-32    -384   
144    256    
-144   -16    
-16    80     
-112   128    
48     96     
-80    16     
-160   -80    
-64    -32    
80     192    
-16    -48    
-16    64     
144    144    
192    -368   
-112   -160   
-80    272    
-48    0      
-96    -80    
192    48     
208    240    
-112   144    
656    2896   
-2032  -848   
880    1008   
96     1008   
144    672    
-624   -1760  
-720   -368   
432    128    
176    272    
80     112    
-240   -32    
80     192    
80     320    
-64    -144   
-32    -64    
192    320    
-192   48     
0      144    
-64    64     
-48    -80    
80     208    
80     176    
16     288    
-256   80     
32     -16    
-128   -240   
-80    128    
0      -48    
-48    -16    
-16    80     
16     -48    
-16    128    
-192   16     
-48    144    
16     0      
0      64     
-32    32     
-32    -16    
16     112    
64     80     
16     32     
0      176    
48     96     
80     -96    
16     160    
-128   -48    
112    80     
-208   -16    
160    48     
96     128    
0      96     
64     96     
0      0      
0      -176   
-32    -96    
192    0      
-96    80     
32     256    
64     64     
-16    -192   
-32    128    
64     112    
-128   -64    
0      112    
144    48     
-48    112    
16     80     
80     144    
-128   112    
64     128    
32     64     
0      16     
-16    80     
-48    -48    
80     32     
-16    64     
-208   -256   
112    -144   
-64    112    
0      -224   
272    240    
112    352    
0      256    
-16    96     
-96    -32    
16     -16    
80     48     
208    400    
-96    192    
16     48     
-64    -144   
112    16     
80     64     
16     64     
0      144    
32     112    
64     48     
160    384    
-80    32     
64     -80    
-64    80     
144    112    
128    112    
-96    16     
48     144    
-32    -208   
48     80     
96     48     
48     -784   
-16    -16    
128    176    
-96    -48    
112    -16    
-80    80     
64     128    
128    80     
-64    112    
192    256    
-64    304    
96     -48    
-160   32     
32     -240   
80     -48    
0      -496   
64     128    
64     160    
464    864    
-400   176    
288    -144   
-176   0      
112    48     
48     48     
128    64     
32     32     
48     176    
-128   32     
192    96     
144    352    
48     -176   
256    176    
32     -448   
-16    -64    
-16    96     
96     224    
0      -80    
48     256    
-96    -352   
128    384    
0      -16    
16     80     
64     48     
160    -176   
-160   96     
240    -80    
-144   112    
32     -432   
64     240    
192    448    
192    224    
-288   -16    
240    32     
80     48     
-48    32     
64     16     
96     192    
192    96     
-80    -160   
-160   -224   
224    224    
288    304    
-112   -240   
112    128    
-112   -48    
16     32     
192    272    
-160   -128   
160    384    
-192   -16    
-32    304    
80     -96    
96     80     
32     16     
176    240    
48     -176   
16     192    
416    -64    
-400   176    
-304   -464   
64     -32    
96     0      
272    176    
-80    32     
48     96     
176    96     
48     -80    
224    208    
-16    -96    
-16    352    
-384   -1728  
576    -608   
112    320    
16     112    
-160   112    
64     304    
-320   80     
192    -176   
304    -96    
-272   -32    
224    192    
-48    -64    
48     48     
32     -176   
224    32     
-32    -16    
48     48     
96     -80    
112    240    
0      -960   
0      96     
-32    112    
176    32     
16     112    
160    16     
16     -64    
64     -16    
0      128    
160    -144   
-48    96     
144    -64    
-32    144    
64     -96    
0      160    
112    -48    
128    -416   
-96    144    
112    32     
80     16     
-976   -192   
-80    -1072  
208    -48    
-16    -96    
80     -144   
0      -720   
-16    -112   
192    144    
-192   -176   
400    0      
-224   0      
160    -112   
32     80     
0      -64    
80     80     
-304   -48    
32     -288   
-64    -80    
128    -128   
-16    -80    
128    -256   
-160   80     
64     -16    
96     -112   
48     112    
112    32     
48     0      
-176   16     
208    -224   
-80    -416   
-16    32     
-16    -192   
-16    64     
-112   -144   
112    -80    
32     -208   
96     16     
160    -688   
96     -192   
176    64     
-224   128    
-64    -48    
160    32     
96     144    
16     -400   
160    -16    
-48    -144   
-1280  -112   
32     -160   
0      -48    
128    -176   
48     -112   
128    -16    
-192   -96    
64     -3712  
-128   -16    
176    144    
-96    48     
80     64     
80     192    
-224   -96    
272    -192   
-192   -48    
32     16     
-1232  -48    
96     64     
-16    -272   
160    -384   
-32    304    
144    -1280  
-16    144    
-64    -224   
128    144    
-80    -144   
0      -144   
272    112    
-64    -48    
128    480    
0      256    
-352   112    
208    -80    
32     32     
0      -432   
-96    176    
32     -528   
48     64     
-64    64     
240    144    
-272   -80    
96     -304   
-16    0      
-32    -32    
-64    96     
-160   -64    
-16    -48    
80     -96    
-592   -16    
112    -272   
128    304    
-80    -336   
96     48     
0      -304   
80     -160   
144    -144   
-32    80     
-128   112    
64     -32    
-224   112    
192    32     
-96    -16    
128    -48    
-64    80     
80     16     
96     288    
-128   -704   
208    16     
-112   -16    
112    48     
16     -464   
80     272    
48     160    
-32    -16    
144    144    
0      16     
48     -64    
-16    -16    
-176   -208   
208    160    
-16    -96    
0      -240   
144    80     
16     80     
224    -192   
-48    32     
-224   -112   
48     0      
-32    32     
176    368    
-240   -112   
16     160    
0      -160   
-112   -96    
-1456  -192   
16     96     
-128   -48    
-80    -16    
16     176    
-144   16     
-208   -368   
384    96     
-64    48     
16     160    
-176   144    
-128   -112   
32     32     
-384   -48    
96     48     
-336   -112   
512    3744   
-1920  -1552  
128    -336   
288    160    
1200   -704   
-752   -448   
288    528    
-464   -64    
240    -160   
-352   -144   
0      -768   
160    160    
-80    240    
-64    176    
-48    -144   
48     304    
128    160    
-64    -48    
-208   48     
64     -96    
-16    -160   
-208   96     
0      112    
-96    192    
-304   -176   
-32    -320   
96     256    
16     32     
112    176    
-256   -224   
48     -48    
-80    128    
112    160    
64     320    
-208   -288   
352    64     
-48    64     
160    240    
-608   -320   
288    480    
-112   -144   
240    128    
-208   16     
-32    224    
-96    -64    
64     80     
224    208    
-160   96     
64     64     
-96    160    
0      144    
-48    32     
-80    80     
-48    64     
-64    -192   
-160   64     
-16    304    
400    528    
-512   -224   
-32    224    
144    -64    
-32    96     
-272   32     
-48    240    
-160   -16    
16     304    
-80    -32    
144    320    
-240   -128   
-32    48     
-448   -208   
32     112    
-1184  -160   
80     96     
112    0      
-64    -48    
-48    32     
208    112    
80     96     
144    160    
32     32     
48     144    
-32    64     
-16    112    
96     128    
-208   48     
128    80     
-16    352    
80     224    
-48    112    
-208   -176   
48     -32    
32     0      
144    304    
-160   -32    
48     64     
-272   -272   
288    96     
-240   176    
112    144    
-208   -32    
48     0      
64     -32    
-96    48     
16     64     
16     32     
64     64     
-16    -80    
80     0      
-64    400    
-16    0      
-128   -192   
-112   96     
48     16     
144    112    
-144   176    
-16    32     
112    -64    
-176   32     
192    128    
48     272    
48     80     
96     96     
-112   -160   
144    -80    
-64    0      
144    -320   
-208   -64    
-96    64     
176    -80    
-64    0      
-64    -240   
208    288    
-112   -64    
80     144    
16     208    
-16    112    
64     48     
112    -144   
-192   64     
240    32     
-160   -16    
80     96     
64     -80    
-32    128    
96     384    
64     400    
-144   -32    
-80    -208   
-64    0      
48     -48    
-96    32     
96     -16    
-48    160    
160    816    
-256   -112   
-96    -448   
-112   80     
-48    -176   
16     224    
-128   48     
224    256    
-48    176    
48     -64    
160    128    
-32    128    
64     240    
32     384    
-192   48     
64     -48    
-80    16     
-112   -400   
208    16     
-48    208    
176    64     
-128   192    
0      0      
64     112    
-96    0      
-32    208    
0      64     
64     64     
48     112    
128    -16    
0      128    
-48    112    
0      144    
-48    160    
-64    112    
0      -16    
96     48     
64     -192   
48     128    
32     208    
-80    0      
128    48     
-64    64     
-496   -352   
-832   -624   
944    576    
-544   304    
96     176    
-544   272    
96     -48    
-448   -48    
464    96     
64     -96    
352    -288   
-240   336    
64     -160   
160    304    
144    48     
16     64     
16     128    
-16    128    
16     208    
112    -112   
-112   128    
-16    -48    
32     192    
176    -48    
-160   112    
80     -144   
-64    224    
160    -64    
0      176    
96     0      
32     272    
48     64     
-96    -32    
48     -80    
-112   32     
208    112    
32     224    
96     16     
-224   32     
-32    -208   
304    160    
-96    -400   
80     80     
0      176    
112    112    
-48    -240   
0      80     
-64    -64    
192    96     
-128   16     
0      48     
160    192    
-80    -304   
80     192    
16     -656   
96     144    
-16    16     
112    112    
80     224    
0      80     
0      -16    
192    144    
-48    112    
0      144    
80     -96    
80     128    
-48    96     
80     -64    
32     144    
-48    -64    
192    64     
16     -144   
48     176    
-48    -1040  
80     80     
-112   96     
-64    -224   
272    80     
-144   272    
-16    -64    
96     -96    
16     32     
160    160    
-80    112    
224    -688   
112    16     
0      -512   
48     -176   
48     -192   
-112   176    
64     96     
16     112    
80     -32    
48     128    
176    224    
-144   -32    
96     16     
16     16     
208    192    
-128   -224   
80     96     
16     -128   
16     48     
240    160    
-272   80     
176    80     
-32    64     
-32    0      
144    48     
-16    0      
96     -64    
128    -48    
-96    -272   
144    208    
-80    -144   
160    176    
64     64     
-32    96     
176    -32    
-48    -224   
224    -16    
-112   272    
32     240    
208    -768   
96     -1536  
-176   -144   
224    -960   
-32    -192   
32     288    
0      -80    
240    -64    
64     -224   
-128   96     
64     -176   
144    -1456  
-176   224    
64     -80    
128    80     
-640   -176   
128    -64    
-64    -80    
128    -224   
-32    -144   
176    -112   
80     -96    
160    560    
-80    -208   
-16    -1328  
-80    -16    
224    -368   
0      112    
-32    -304   
0      48     
-416   32     
144    32     
-48    -16    
160    -192   
-64    -176   
96     -368   
-80    -32    
176    -3296  
-96    16     
208    288    
16     80     
112    32     
144    272    
-240   -48    
-160   -496   
-272   16     
48     -176   
-1088  -48    
-96    -96    
-16    -288   
352    -96    
-16    0      
160    -1152  
-192   -128   
32     80     
256    32     
288    -48    
128    96     
-112   48     
-80    16     
-96    64     
48     32     
-720   -112   
32     -32    
32     -64    
144    -32    
-32    96     
-64    -208   
176    96     
32     -1872  
400    -256   
32     -64    
-48    0      
-64    80     
16     -16    
416    1712   
240    160    
-784   -880   
-16    -752   
-464   96     
176    -208   
640    304    
-960   -1344  
656    -144   
-240   -1424  
576    80     
-240   176    
-16    -208   
128    400    
352    -176   
-272   304    
-144   -400   
-48    -32    
336    -256   
-240   80     
16     -176   
-864   144    
-128   -560   
304    128    
112    -272   
-256   -32    
-384   -448   
432    176    
-48    160    
-32    48     
0      128    
-112   -64    
32     -80    
16     176    
-400   -224   
-16    -96    
112    -144   
-128   -96    
224    416    
-80    0      
336    -112   
-80    -1360  
112    0      
-496   32     
-16    -32    
80     144    
-128   192    
-144   16     
80     48     
-96    -176   
112    -16    
-160   128    
32     -96    
112    112    
-48    -304   
-64    288    
-304   -208   
-32    -512   
528    832    
-208   -192   
-64    176    
64     -208   
160    -80    
-224   0      
240    224    
-16    -80    
-112   -32    
-16    -240   
192    192    
-1520  -272   
-48    48     
16     48     
-240   0      
-176   -32    
-224   112    
-240   -304   
80     -368   
-128   -64    
-80    -480   
224    736    
-592   -144   
-144   192    
-320   128    
16     128    
-192   -288   
160    48     
48     32     
-176   272    
48     144    
-992   -80    
96     48     
-16    -128   
-80    96     
16     -32    
-16    -176   
80     -176   
-160   16     
112    32     
112    272    
-32    128    
-16    -48    
-96    64     
-336   -112   
32     64     
-112   48     
48     80     
-128   16     
-208   -240   
16     -320   
-64    80     
160    -48    
-32    32     
48     80     
64     144    
-80    -64    
-192   -112   
-16    -48    
48     192    
16     112    
96     0      
-48    0      
-128   -112   
-128   80     
-208   -64    
336    656    
-64    336    
48     352    
-112   -32    
32     32     
-64    64     
-160   32     
208    272    
16     128    
96     96     
-320   -112   
-32    -32    
-352   -176   
192    -16    
-432   -16    
64     128    
-48    -64    
16     80     
0      -80    
48     64     
-48    128    
-16    144    
144    256    
-96    -112   
16     48     
-176   80     
144    0      
-48    64     
-80    80     
-48    304    
-128   -16    
-960   -80    
-80    -16    
-80    -496   
128    16     
32     240    
-32    176    
-16    0      
-16    96     
-16    64     
96     224    
0      16     
-48    0      
64     112    
-96    -112   
128    16     
-400   -16    
80     192    
-48    256    
-160   -48    
176    16     
48     48     
112    48     
-176   176    
-96    16     
144    64     
0      80     
-48    -96    
16     192    
48     -176   
176    192    
-256   176    
-96    0      
-32    144    
48     0      
32     64     
0      96     
-80    48     
64     32     
-16    32     
48     -128   
-144   240    
-256   -128   
2608   768    
-1504  -160   
1008   400    
-256   48     
48     -272   
528    304    
-608   -96    
400    704    
48     -224   
-96    32     
48     64     
-144   -48    
16     -48    
48     80     
144    128    
-80    64     
32     160    
80     144    
0      64     
-16    -128   
-32    176    
80     48     
80     256    
-16    64     
0      160    
-224   -160   
80     32     
-112   128    
320    240    
-224   -160   
-96    144    
32     -48    
96     208    
64     32     
-128   64     
96     -16    
176    368    
-32    160    
0      48     
-160   -64    
64     0      
64     176    
96     96     
-112   32     
-64    -80    
48     128    
-16    32     
-16    -48    
0      64     
16     192    
64     32     
80     48     
-48    96     
144    160    
0      96     
-32    176    
64     48     
-80    144    
32     96     
-64    -64    
64     80     
-128   32     
144    80     
-16    96     
96     0      
16     80     
64     112    
16     208    
-176   80     
240    80     
64     64     
-16    128    
-112   16     
48     48     
96     16     
64     208    
-64    0      
-16    64     
-128   16     
128    -48    
-16    96     
16     192    
-64    -160   
48     -192   
-48    0      
-64    144    
-64    176    
192    -80    
192    336    
-368   -16    
336    112    
-64    80     
-32    -848   
112    224    
-32    96     
64     96     
-128   96     
80     80     
-16    -16    
0      -384   
224    576    
128    544    
-176   96     
-112   -80    
32     -64    
112    -112   
32     -112   
64     176    
96     32     
64     160    
-16    32     
16     96     
48     96     
48     32     
-16    -48    
160    336    
16     304    
-96    -240   
0      -48    
-32    -448   
48     -192   
80     144    
16     32     
0      112    
-64    -32    
16     -48    
48     96     
16     16     
48     -384   
240    240    
-256   -80    
144    -272   
-64    272    
-16    160    
144    256    
224    416    
-192   -288   
-48    -752   
48     240    
64     -320   
64     64     
128    80     
32     -80    
-80    80     
80     208    
112    288    
-160   -80    
32     -16    
80     80     
128    192    
0      48     
48     112    
128    -32    
-16    16     
112    -160   
64     80     
80     -368   
48     -192   
0      -144   
-16    48     
32     32     
-96    32     
0      64     
-48    48     
128    128    
-208   -128   
176    208    
-128   -144   
240    112    
-96    64     
144    -16    
16     -1456  
0      64     
112    32     
-32    128    
-32    112    
112    -16    
-48    -16    
224    -144   
-64    224    
16     -624   
64     80     
176    -144   
112    112    
208    -592   
-112   208    
48     -368   
128    160    
-192   80     
352    -32    
-128   192    
96     64     
-16    48     
80     -336   
176    224    
80     16     
0      128    
-32    96     
-1600  -1200  
592    -736   
-352   672    
736    -352   
-368   528    
448    128    
-384   144    
240    -800   
592    480    
-400   -96    
320    320    
64     -128   
16     416    
48     -432   
32     144    
64     -208   
80     592    
-304   -304   
224    240    
-288   -336   
368    128    
-96    -576   
288    0      
-416   -16    
400    -96    
-144   256    
32     -144   
80     384    
-288   -48    
160    128    
112    32     
80     -48    
144    -16    
32     -64    
128    -208   
160    144    
336    16     
144    128    
-208   -160   
32     -768   
16     -80    
160    -1376  
112    0      
48     -960   
48     48     
-32    112    
112    -192   
96     80     
-80    -192   
112    80     
-96    64     
160    32     
64     -80    
-320   32     
-32    -272   
-1376  112    
0      -192   
272    0      
96     -496   
64     -16    
64     -896   
96     -176   
-80    64     
-208   -16    
112    -96    
0      48     
112    -416   
64     -112   
-528   -224   
96     0      
-576   96     
144    48     
-48    -64    
16     -288   
80     -80    
192    -544   
-144   -16    
48     -96    
272    608    
-208   48     
96     0      
64     -32    
96     -64    
-208   64     
64     -48    
-320   256    
-16    -272   
208    288    
-176   -288   
96     -16    
0      -176   
208    96     
64     -1936  
-48    -16    
256    272    
-240   -160   
-112   -560   
-128   -48    
-32    -160   
288    32     
-368   -80    
112    48     
-656   -32    
-32    -80    
192    288    
48     -176   
32     -80    
-112   -752   
160    128    
80     -32    
144    256    
-112   80     
80     336    
-80    80     
48     32     
-96    -64    
48     -160   
-416   80     
32     48     
-432   0      
-48    -384   
208    -112   
-144   -400   
16     -32    
192    -144   
-96    96     
32     64     
144    -32    
-288   -32    
48     -16    
-80    -16    
96     -112   
-304   16     
-64    32     
32     224    
304    -352   
-272   112    
-96    48     
320    64     
-512   -64    
-224   -144   
-256   -48    
160    64     
-192   80     
128    16     
-64    -48    
48     -144   
-208   16     
224    -112   
-240   160    
-32    -144   
-16    144    
96     -304   
-16    80     
-64    -64    
240    0      
-96    224    
-64    -64    
64     -32    
0      0      
-176   -96    
-80    -176   
-16    -160   
112    -48    
-80    64     
-176   -80    
-32    144    
-1088  96     
-272   -272   
48     176    
-32    96     
-16    160    
-1488  -64    
-192   96     
48     -16    
160    320    
-192   -16    
240    -48    
-336   0      
-16    64     
-384   -176   
-32    64     
64     -208   
96     64     
0      -96    
-32    96     
-128   80     
-400   16     
-80    32     
-512   -64    
-32    112    
192    64     
-48    -176   
48     -16    
-240   192    
96     -256   
0      80     
-432   608    
-160   -576   
192    -16    
-368   432    
416    -880   
-192   -816   
336    688    
-400   256    
272    -16    
-576   -272   
480    -80    
16     272    
32     32     
-144   368    
224    -176   
-144   256    
-128   -144   
16     400    
32     -256   
-16    160    
32     -16    
48     192    
-432   -64    
64     -32    
-224   -176   
-80    112    
-32    80     
256    288    
-32    -64    
-144   -144   
-96    96     
-16    -64    
16     160    
-160   -32    
-16    112    
144    128    
-144   96     
-128   -144   
-128   96     
64     -112   
144    160    
-112   -32    
32     80     
-80    -320   
-48    112    
112    0      
16     176    
-80    -256   
96     160    
-208   0      
160    80     
-208   16     
32     112    
-80    160    
-128   -80    
112    160    
-416   0      
96     32     
96     -32    
-48    144    
-32    112    
-32    96     
-16    -64    
-16    -208   
-64    16     
-224   0      
80     64     
-48    0      
160    96     
-256   -80    
-80    64     
-768   -128   
16     112    
-32    128    
-32    144    
96     208    
-48    -128   
224    224    
-272   96     
224    48     
-160   80     
-112   160    
-192   -16    
64     144    
-272   -256   
224    336    
-528   48     
128    0      
112    224    
64     80     
64     208    
48     112    
-48    128    
-80    96     
192    240    
-128   96     
112    64     
-288   -192   
144    192    
-64    192    
-32    144    
-32    -32    
-48    16     
80     128    
-32    32     
16     -192   
-16    -256   
16     96     
96     208    
96     288    
-112   -16    
-112   0      
80     128    
96     128    
0      0      
-96    -48    
-48    -288   
64     -208   
16     64     
192    352    
32     256    
-80    -32    
-112   -96    
-96    0      
112    96     
48     -288   
-288   -16    
0      -256   
112    32     
-208   -192   
144    -272   
48     64     
48     96     
-16    144    
32     -64    
144    128    
-64    128    
128    208    
-112   32     
80     128    
0      0      
64     96     
-32    128    
-16    -32    
16     -16    
16     448    
48     464    
16     336    
-48    64     
208    -64    
32     80     
-32    16     
80     -16    
112    144    
0      352    
-240   -80    
176    96     
160    192    
-112   208    
-160   -240   
0      0      
288    96     
-32    128    
-160   -16    
128    208    
-160   112    
112    -64    
256    64     
16     96     
16     32     
-160   32     
-48    208    
32     16     
64     176    
-48    0      
160    32     
96     160    
-64    96     
96     80     
-80    80     
176    192    
-48    48     
-16    96     
-112   -32    
112    400    
-160   -80    
144    144    
-112   80     
96     -176   
0      -16    
-80    -752   
-32    176    
-48    64     
-224   240    
80     16     
-16    144    
-64    80     
2704   -944   
-576   -576   
656    864    
-384   1008   
704    224    
-528   -1088  
-64    32     
736    1120   
-480   -272   
-416   -48    
32     96     
320    -208   
-112   64     
128    -208   
-176   240    
-192   -64    
48     336    
224    416    
240    64     
-192   -32    
208    416    
32     -256   
-224   256    
16     -256   
256    0      
-64    -144   
368    352    
-320   240    
224    -112   
-256   192    
416    48     
64     96     
16     64     
-16    112    
0      16     
128    48     
-16    112    
96     192    
32     -144   
-96    32     
112    -928   
128    112    
64     160    
-112   112    
64     -48    
80     112    
0      -48    
64     144    
0      -96    
16     -16    
-16    64     
48     -144   
48     -16    
128    16     
-96    176    
64     -528   
32     16     
64     -1360  
32     80     
-16    -80    
80     80     
-48    112    
32     48     
48     0      
176    -96    
64     368    
-192   -336   
224    32     
48     32     
96     224    
-80    -64    
128    80     
64     -416   
32     -16    
96     64     
-32    -144   
-32    112    
-32    64     
48     112    
-112   -16    
160    128    
-16    -256   
160    288    
-176   -80    
-48    0      
144    -192   
80     -80    
48     -736   
16     48     
-64    160    
0      208    
48     48     
16     112    
192    144    
112    -256   
-160   304    
-64    -96    
240    48     
-64    -304   
240    192    
-32    -16    
48     112    
48     -16    
0      16     
48     80     
176    608    
-144   64     
272    -272   
-48    -32    
112    16     
320    304    
-240   16     
144    160    
-80    -336   
192    192    
-112   32     
224    176    
-144   0      
112    -240   
32     176    
128    -1248  
64     144    
-656   48     
208    -384   
240    48     
-240   -1184  
96     -240   
208    -2240  
-80    -128   
-144   144    
192    96     
112    -96    
-192   -48    
-96    -32    
80     160    
144    -48    
160    -272   
-160   -48    
-80    96     
160    -192   
160    -176   
-144   -144   
160    -240   
48     -80    
-16    336    
208    -48    
208    32     
80     16     
-192   16     
-80    144    
240    -80    
64     0      
-128   -128   
-48    16     
-1120  96     
16     -192   
112    0      
160    -112   
-16    64     
-16    -448   
0      -96    
0      -128   
128    80     
80     48     
64     352    
-304   -272   
256    -224   
-208   -240   
192    -208   
-496   240    
-96    80     
272    32     
-96    -272   
48     64     
160    -672   
32     64     
0      -144   
16     96     
96     16     
48     112    
-112   48     
80     -144   
-16    -96    
0      -32    
-208   32     
352    -144   
-1120  0      
-64    -464   
144    -112   
48     -112   
112    64     
-32    -1200  
32     256    
112    -96    
-32    48     
-224   16     
-16    -64    
-336   624    
128    -304   
288    992    
-416   272    
-944   -1152  
576    1136   
32     -512   
-112   736    
-32    -160   
368    -784   
-304   -384   
288    -64    
96     32     
-112   96     
48     -32    
-96    80     
128    -112   
-496   272    
-96    64     
128    96     
-112   64     
144    16     
-128   -144   
240    16     
-16    -256   
336    -48    
-400   192    
80     320    
-624   80     
112    -240   
-128   -80    
112    -64    
-64    32     
0      0      
-32    48     
112    -48    
32     80     
-16    -176   
-16    112    
112    -128   
128    -16    
-128   80     
64     208    
32     -16    
80     32     
-288   -16    
144    112    
32     -160   
80     -240   
-112   64     
80     -128   
-192   64     
32     -16    
80     48     
-688   -112   
-48    32     
32     240    
-272   -32    
48     32     
112    288    
-192   32     
48     112    
-16    -80    
64     -112   
-112   96     
48     -176   
224    64     
-80    -112   
32     128    
-496   -288   
-160   -160   
80     160    
-448   224    
-176   -32    
-112   -208   
-96    144    
-64    -48    
-192   128    
-112   48     
240    96     
-192   -368   
240    160    
-304   -208   
96     480    
-48    224    
-112   -128   
-32    -112   
16     -432   
0      288    
-256   -16    
-112   -48    
288    144    
0      80     
0      96     
-16    0      
-144   -96    
112    96     
-64    -144   
-32    16     
112    208    
-64    144    
48     64     
-176   -64    
-48    -96    
-208   -16    
-48    80     
-448   32     
80     128    
-64    -144   
112    80     
-112   -112   
16     48     
-16    -64    
-80    -16    
96     112    
-96    -32    
-48    -16    
-192   16     
0      32     
-80    0      
128    192    
-128   -16    
0      80     
-1264  -96    
208    224    
-192   -16    
80     -288   
32     64     
-160   160    
336    304    
-368   -96    
96     -96    
0      144    
176    80     
-96    176    
-80    -144   
16     -32    
-64    192    
-144   -144   
-32    128    
96     112    
16     256    
0      80     
-48    -32    
80     96     
-64    48     
480    112    
-464   480    
-80    -272   
64     -80    
-32    192    
-16    0      
-128   0      
80     96     
0      0      
-320   -48    
-144   64     
0      -64    
144    336    
-256   32     
128    -112   
-64    -48    
224    128    
-48    -16    
-192   0      
64     -80    
-96    64     
-48    -128   
-160   112    
-144   80     
-896   -256   
-96    -32    
176    336    
-128   112    
192    64     
-320   -32    
160    240    
-272   0      
144    176    
-16    80     
16     -32    
-16    -16    
80     160    
-144   -16    
-16    176    
80     80     
96     160    
64     144    
-80    208    
-192   112    
-160   -128   
-80    48     
48     80     
-160   -32    
192    256    
-64    272    
-32    -48    
-144   80     
1488   -1488  
-176   -1232  
48     640    
-288   672    
752    1024   
-1120  128    
-80    448    
80     176    
-224   0      
-48    -288   
-80    192    
-112   208    
64     272    
-176   -112   
112    -112   
-160   64     
320    48     
-160   0      
64     224    
48     128    
256    0      
-176   80     
304    160    
-16    176    
-128   32     
80     144    
-80    336    
144    -64    
0      32     
-80    48     
128    -48    
-96    80     
32     112    
128    80     
32     128    
336    384    
-288   144    
80     -80    
-112   96     
144    64     
0      -16    
0      16     
-16    160    
144    144    
16     80     
-224   -32    
64     80     
192    304    
-192   112    
112    -64    
32     160    
-48    64     
16     64     
-128   64     
128    0      
32     64     
96     80     
-96    160    
32     16     
-80    64     
128    144    
-48    144    
48     32     
96     240    
-128   -32    
112    -64    
160    -16    
64     208    
64     160    
0      240    
80     16     
-16    -32    
64     192    
-96    -48    
80     64     
144    224    
-48    -64    
176    -64    
-80    144    
-48    32     
144    272    
-176   80     
208    -96    
64     176    
-240   144    
112    80     
-80    -96    
48     -80    
48     -48    
16     -80    
-160   64     
160    -2544  
-16    240    
0      128    
-16    160    
-16    0      
224    32     
-128   144    
64     160    
32     96     
32     80     
-32    32     
48     128    
80     240    
-64    -160   
160    128    
-208   -544   
144    176    
224    240    
-16    192    
176    128    
-176   48     
80     64     
64     144    
240    80     
224    272    
-192   48     
-80    64     
256    176    
16     -160   
-256   -32    
-112   -112   
288    80     
-32    -624   
176    176    
128    304    
96     320    
64     64     
-48    32     
-160   128    
176    80     
352    64     
32     288    
144    96     
-48    96     
48     64     
112    -64    
-112   64     
208    -1328  
-176   0      
16     -1200  
-16    256    
256    -176   
-16    0      
-96    16     
144    48     
-96    16     
96     -96    
0      112    
48     -64    
16     96     
64     -352   
32     224    
32     -320   
112    240    
-96    -352   
96     224    
80     288    
-48    0      
80     -32    
0      144    
192    96     
32     -128   
32     -16    
112    0      
-128   16     
-64    -512   
320    96     
64     160    
64     0      
16     -112   
160    240    
-192   -160   
-80    160    
368    128    
32     192    
64     48     
-80    -672   
-48    64     
64     -16    
48     128    
256    -64    
128    128    
16     -112   
-80    176    
272    64     
32     64     
32     -144   
-16    112    
0      0      
144    80     
-48    224    
-80    -336   
80     128    
240    -160   
48     128    
80     80     
-416   3328   
-1296  -576   
-432   -464   
720    448    
816    -320   
-240   608    
-288   -1440  
176    -160   
-320   144    
-32    -1504  
272    -64    
-384   -1440  
368    -144   
64     432    
160    -144   
-176   16     
16     -144   
16     176    
336    112    
112    -48    
-144   -32    
48     144    
0      112    
-544   -16    
144    -144   
-32    -64    
160    -256   
-240   -208   
208    -1680  
-304   -144   
256    144    
-48    80     
0      -272   
-16    -32    
80     -176   
-176   -96    
32     -272   
16     96     
-144   -128   
-16    48     
-16    160    
48     32     
-112   -144   
-64    -352   
128    -48    
112    -368   
-64    -64    
32     -384   
96     144    
0      -192   
112    112    
32     -80    
112    -96    
-160   -176   
64     -80    
-192   -112   
96     -240   
-128   48     
-80    -208   
-32    -464   
96     -320   
-128   32     
0      -208   
80     144    
16     64     
32     176    
-128   -32    
144    -128   
-224   -96    
112    -32    
-224   -96    
-32    -64    
176    -16    
16     -48    
64     -160   
64     -1120  
128    208    
96     -800   
-64    64     
64     -48    
-96    160    
80     112    
16     -32    
96     400    
-144   240    
-48    -112   
-32    -384   
-208   -256   
112    -368   
112    -16    
32     16     
-80    32     
80     -272   
64     32     
128    -96    
32     -96    
48     128    
-80    -96    
64     16     
-64    -144   
176    64     
96     208    
-112   192    
-64    -80    
-128   -16    
96     -128   
32     64     
160    -32    
-96    -48    
128    128    
-160   -464   
96     48     
-48    -96    
128    32     
32     -176   
-736   -48    
-80    -512   
-96    -32    
64     96     
-448   -48    
0      -416   
-96    48     
336    -368   
0      48     
-192   16     
32     144    
32     80     
80     -48    
-16    16     
96     -128   
-16    64     
0      144    
48     96     
32     -16    
0      256    
-208   -160   
96     -272   
96     -80    
-48    -112   
0      208    
48     -64    
-192   -144   
176    32     
-80    -16    
176    -32    
-336   -544   
368    -80    
-16    -96    
-32    -128   
32     176    
-32    -160   
48     0      
-352   -64    
-448   32     
-208   -64    
-544   288    
144    -336   
224    816    
-144   160    
192    240    
-400   -256   
256    -32    
-336   -80    
-384   -96    
32     -48    
208    -80    
-144   0      
-336   -544   
-32    96     
272    64     
160    160    
144    -48    
-32    272    
-256   -64    
-400   64     
16     48     
16     -48    
-240   96     
-144   -48    
80     160    
0      -224   
48     176    
-144   32     
32     -32    
-64    96     
96     160    
-80    64     
-288   -256   
112    80     
-1024  -192   
80     256    
-80    208    
-128   160    
48     112    
-96    -32    
-64    -304   
32     160    
-608   -464   
528    2352   
-1184  752    
176    -304   
-176   -96    
-160   -528   
432    -272   
-656   128    
416    160    
-880   -400   
-288   -128   
144    0      
160    96     
-144   64     
64     80     
-80    48     
16     48     
-160   16     
80     -96    
-96    32     
16     64     
96     240    
-64    208    
-64    -192   
-448   -224   
128    96     
48     16     
-48    144    
64     80     
-144   -48    
192    64     
-240   64     
96     96     
-176   32     
80     96     
-96    -32    
160    240    
-400   0      
160    -16    
-656   -48    
208    144    
-64    -96    
0      112    
48     64     
64     144    
-48    48     
-112   16     
-32    80     
-32    64     
144    -48    
-144   48     
-64    32     
-112   -16    
-48    144    
128    -160   
-64    80     
-384   -64    
-32    128    
-16    48     
32     16     
112    48     
-32    144    
112    112    
-64    80     
32     80     
32     -48    
16     96     
0      -16    
48     144    
-208   64     
96     16     
-176   -80    
-80    80     
-80    64     
192    256    
-64    224    
64     -16    
128    -160   
16     -16    
-48    256    
-176   -48    
192    -16    
-16    96     
-48    224    
-32    -176   
32     -32    
-112   160    
-288   160    
0      32     
-48    -16    
128    80     
-96    -32    
144    144    
-144   -48    
80     -64    
-96    80     
-112   0      
16     -208   
-48    144    
-208   -144   
128    128    
-32    192    
96     16     
-80    0      
16     48     
32     128    
112    -16    
-96    96     
128    128    
0      128    
32     64     
80     192    
-96    64     
144    192    
-144   0      
336    224    
48     144    
80     32     
-48    176    
-16    304    
16     176    
240    160    
-16    -144   
-240   -64    
384    304    
-112   -176   
112    80     
-320   160    
416    240    
-80    -32    
-144   32     
-16    80     
272    208    
80     240    
224    224    
48     128    
-160   96     
48     -16    
-80    112    
304    32     
-64    0      
-160   96     
-32    64     
48     -48    
96     96     
16     192    
-64    80     
96     -144   
-112   -80    
144    64     
32     32     
-16    176    
96     64     
-48    32     
96     112    
32     0      
-48    -48    
-80    -48    
16     96     
128    400    
16     16     
0      176    
64     224    
112    48     
-80    16     
144    96     
128    160    
32     -320   
96     112    
-112   0      
0      176    
0      80     
-32    -256   
144    -208   
-16    112    
48     -1312  
-96    112    
80     16     
144    288    
-16    -16    
48     -160   
16     -96    
112    368    
-16    -48    
-16    160    
-16    208    
128    352    
-128   -80    
160    -32    
-80    80     
16     -2592  
80     0      
48     -64    
128    208    
-16    160    
32     256    
32     32     
16     -16    
1088   -1248  
480    640    
-1072  -960   
-64    -416   
272    928    
-352   -544   
-288   -64    
208    -256   
-64    -16    
-64    -160   
-128   160    
112    144    
112    0      
16     112    
224    112    
-16    0      
368    288    
-224   -128   
64     -16    
96     96     
64     -176   
32     192    
48     -560   
-64    160    
128    -1664  
80     -48    
-176   -208   
16     -272   
112    192    
-80    160    
144    32     
64     192    
-64    0      
208    64     
-208   -16    
320    -160   
-128   192    
272    192    
0      272    
48     -224   
16     0      
32     -1088  
160    48     
-48    16     
96     112    
32     -96    
16     32     
32     208    
32     144    
-16    176    
192    -192   
0      32     
64     -144   
192    240    
-32    -208   
128    80     
-32    -64    
160    624    
400    576    
-368   -432   
16     -176   
176    16     
16     32     
144    16     
48     112    
128    80     
0      64     
-32    -352   
64     64     
48     -64    
32     112    
96     -480   
64     160    
-112   16     
368    320    
32     176    
96     16     
-96    336    
-16    -80    
32     -16    
-160   -48    
288    96     
-48    -208   
16     -128   
288    96     
16     272    
-256   -1584  
64     96     
0      128    
48     224    
-112   48     
48     -80    
128    16     
112    -16    
32     192    
0      -96    
112    176    
32     -32    
64     80     
80     -112   
48     160    
160    -80    
-112   -560   
112    -32    
-32    -48    
160    64     
-848   -144   
32     -1184  
32     -80    
32     -560   
80     -80    
48     240    
48     -128   
48     112    
32     -144   
0      -128   
96     304    
-64    -416   
176    0      
112    -368   
240    -240   
-304   32     
0      16     
-16    112    
176    -192   
64     -352   
-32    -144   
128    -224   
32     432    
208    -144   
16     -16    
-16    -160   
96     -128   
64     208    
352    432    
-320   -48    
-64    48     
144    16     
-224   -320   
-48    -176   
192    -208   
64     -32    
32     -32    
-32    -80    
192    32     
0      -208   
-128   288    
112    48     
-160   0      
0      -48    
48     64     
-48    96     
64     -96    
64     0      
-64    -32    
160    144    
80     -480   
256    496    
-432   -928   
-416   64     
80     -288   
0      176    
96     -48    
-16    48     
96     176    
-192   -80    
-80    -208   
-160   -32    
32     16     
80     208    
-128   -48    
128    -112   
-96    -16    
-48    -336   
144    272    
240    -928   
176    336    
64     176    
-144   -368   
-80    32     
176    -128   
-96    -48    
-64    32     
-48    -192   
160    16     
32     144    
-176   -192   
32     -64    
128    -192   
64     32     
192    -160   
112    160    
-112   144    
48     96     
-304   -48    
96     0      
-48    16     
-480   -480   
-1472  -1184  
672    -32    
-704   144    
400    -112   
-208   416    
320    -160   
-576   -160   
224    -32    
272    320    
-48    48     
-128   -192   
-96    352    
128    -64    
16     80     
-80    -96    
-224   64     
-80    -144   
-16    -16    
96     0      
64     80     
-48    -176   
128    224    
-32    -592   
112    -64    
-112   -80    
80     -16    
96     112    
112    80     
-144   16     
112    -32    
-128   32     
112    96     
48     64     
0      -96    
-320   64     
96     -160   
96     80     
-48    -256   
80     112    
128    16     
-176   -80    
-224   -48    
64     -112   
176    80     
-48    48     
-64    16     
-32    -128   
-176   96     
160    -304   
-64    64     
-1232  -176   
-48    128    
96     -336   
-160   32     
96     112    
-592   80     
-64    -112   
-480   144    
-192   0      
192    16     
-64    64     
32     -64    
-144   -96    
-240   -192   
16     176    
-192   32     
16     112    
-32    -208   
-160   64     
-192   80     
-96    112    
-32    -32    
160    112    
-112   160    
-1728  32     
-64    144    
48     144    
-96    160    
-64    -240   
128    64     
48     -96    
-176   0      
144    0      
-384   256    
96     -160   
272    192    
-368   -64    
416    144    
-448   -144   
-96    0      
-128   96     
-48    0      
192    256    
16     -80    
-80    176    
80     48     
-80    208    
32     -16    
0      32     
48     96     
64     32     
-80    0      
176    -112   
-144   192    
48     208    
64     32     
-656   -16    
176    32     
-32    -64    
-64    64     
48     -16    
-112   32     
96     -16    
-64    -64    
128    192    
-256   -16    
272    -64    
-320   -288   
96     224    
320    -16    
-272   80     
-640   -48    
112    -32    
128    -144   
-176   80     
176    256    
-112   -16    
144    48     
-288   -64    
64     32     
0      192    
0      176    
16     -192   
-352   -16    
0      16     
-32    -16    
-96    -416   
112    288    
-304   -96    
16     224    
-32    -16    
-48    48     
-16    -16    
0      96     
32     176    
192    256    
-48    128    
16     48     
-160   -192   
16     -528   
-112   144    
112    176    
0      -16    
-192   80     
-32    -16    
16     160    
32     -16    
32     256    
-32    48     
112    192    
-128   160    
-48    -64    
-160   -16    
80     208    
-192   -704   
-304   -400   
0      16     
144    400    
-176   -80    
0      32     
16     48     
-64    128    
96     208    
-96    96     
0      -64    
32     96     
16     -80    
0      96     
32     192    
-96    -80    
32     96     
-224   -48    
-48    192    
-240   288    
-16    176    
-144   48     
160    64     
32     112    
0      64     
-80    80     
160    -32    
48     128    
304    -208   
32     304    
-160   -80    
0      144    
-160   96     
-784   -1520  
976    -736   
-288   208    
128    80     
-48    880    
96     96     
96     -48    
192    64     
224    432    
-336   -144   
176    48     
128    80     
-64    -128   
-80    64     
208    176    
64     416    
-208   128    
-32    -16    
32     -64    
32     96     
32     160    
32     -32    
-16    176    
368    320    
-144   192    
-80    144    
32     80     
0      240    
32     336    
-48    -32    
128    -80    
-16    176    
80     -80    
240    304    
-272   -208   
176    -64    
-176   0      
256    288    
-64    224    
64     464    
-112   96     
16     80     
-16    -32    
80     80     
0      144    
0      144    
32     80     
288    672    
-176   48     
-64    -32    
80     16     
-48    -16    
304    240    
-224   -32    
192    144    
-144   80     
-272   -848   
-128   32     
400    -496   
32     224    
16     176    
-128   272    
0      256    
0      240    
64     -64    
32     64     
-96    48     
112    96     
-16    64     
64     64     
-16    16     
112    208    
-176   -128   
96     -320   
96     -32    
304    128    
-240   96     
224    -48    
-128   -32    
32     256    
224    -32    
-64    192    
64     96     
32     112    
-64    -16    
64     -320   
112    384    
16     -64    
144    32     
-48    144    
112    -768   
-48    64     
32     112    
32     32     
16     -64    
208    304    
-224   32     
144    -48    
-176   -256   
112    48     
160    192    
0      320    
32     80     
0      -160   
48     128    
48     -1488  
112    176    
-48    -1200  
112    128    
16     96     
-16    0      
-16    112    
48     128    
32     112    
-16    96     
112    192    
-96    -80    
32     16     
80     -144   
-48    432    
48     -368   
208    48     
-80    -368   
144    16     
-112   -160   
48     112    
64     48     
192    448    
-544   112    
560    64     
-208   160    
96     -272   
48     32     
144    -16    
-144   32     
128    -112   
0      160    
32     304    
96     32     
-16    -1056  
0      128    
16     -96    
160    160    
-64    0      
128    128    
-32    -496   
-208   -400   
48     -144   
160    144    
32     272    
144    -112   
-48    144    
32     -752   
96     -80    
-64    -144   
96     48     
-48    -240   
64     80     
224    144    
96     304    
64     16     
16     -80    
128    176    
112    -128   
-96    96     
64     -112   
176    304    
-128   -160   
0      64     
64     -160   
48     16     
64     64     
-80    48     
-160   32     
-32    -64    
80     96     
112    -224   
-144   368    
-144   -240   
112    80     
96     -80    
176    96     
-16    64     
240    64     
144    -544   
0      224    
-32    112    
16     -208   
176    112    
-16    32     
0      -1600  
96     16     
-96    400    
-128   -288   
224    32     
192    -176   
144    208    
304    -1184  
736    -80    
608    -416   
240    -1520  
-272   -80    
496    -496   
-368   -128   
-448   -400   
-448   128    
128    -320   
-176   -224   
48     -240   
240    336    
-32    -160   
-128   -96    
-32    -256   
224    -912   
80     352    
80     -176   
-144   96     
192    -352   
48     64     
-96    0      
-32    -144   
-48    -128   
64     112    
224    0      
-80    -528   
160    -112   
64     -400   
-16    32     
32     48     
160    64     
96     -16    
-96    16     
-192   -112   
16     -304   
-464   160    
336    -64    
288    48     
-176   -304   
64     -48    
64     -448   
160    32     
32     96     
-256   -32    
80     -64    
0      80     
160    -400   
-48    128    
-112   0      
192    -16    
-272   144    
192    -224   
-544   0      
112    48     
64     176    
-96    -176   
128    128    
48     -432   
80     -80    
96     -256   
-48    144    
160    -208   
64     32     
-112   112    
112    32     
-128   -48    
192    -80    
-112   64     
32     -48    
-640   16     
112    -16    
48     -48    
16     0      
160    288    
-64    -160   
96     -80    
192    -32    
32     80     
-192   -128   
144    64     
-320   -304   
192    -272   
-304   96     
64     256    
-832   -96    
128    -608   
32     -272   
0      -560   
32     224    
112    -96    
-112   160    
-80    -48    
32     48     
0      80     
128    224    
-272   64     
112    48     
-160   112    
64     -16    
-80    -160   
16     -64    
176    256    
96     -160   
32     160    
80     -48    
-64    -176   
384    64     
-48    -192   
-240   288    
160    176    
-112   32     
112    -112   
-240   -208   
112    -160   
-112   16     
144    -64    
80     80     
128    32     
416    720    
-48    -336   
32     16     
-288   -32    
160    48     
-80    32     
240    -32    
-352   16     
288    32     
-400   -176   
288    -64    
-112   -80    
32     -80    
96     176    
-1040  -288   
208    192    
-1360  -208   
-656   -224   
64     96     
-544   16     
-64    48     
-80    -32    
-112   -96    
16     64     
112    128    
-80    -32    
0      -192   
-304   -336   
176    336    
-144   -144   
64     128    
32     128    
16     128    
-144   0      
-480   -496   
224    672    
-384   256    
-64    -560   
32     -144   
128    176    
112    192    
-112   48     
-128   -160   
176    80     
-32    -48    
-304   192    
176    112    
-240   144    
-16    -48    
-352   -48    
16     48     
-224   80     
-144   32     
16     32     
-240   0      
-64    -144   
-144   32     
48     -192   
64     176    
-160   -112   
-80    -16    
-128   64     
80     96     
32     -80    
96     224    
-96    80     
48     -32    
-128   48     
-544   16     
-112   -80    
-336   -48    
176    224    
0      0      
560    -160   
-352   -32    
32     -112   
-288   32     
-32    480    
-1152  -1568  
160    -256   
-496   240    
688    176    
-256   272    
0      -112   
-160   464    
-400   32     
128    416    
-144   -560   
112    496    
-48    -320   
-16    160    
-32    -208   
352    720    
-336   -112   
304    -80    
-512   -656   
-64    -240   
-144   -320   
64     32     
144    32     
-224   -160   
16     368    
-112   96     
-96    224    
-144   -528   
368    304    
192    224    
192    400    
-144   80     
176    208    
-208   240    
352    80     
0      128    
-32    32     
144    -336   
-368   -64    
176    64     
-48    96     
-144   80     
96     96     
112    112    
-80    -16    
-128   0      
-48    -176   
288    272    
-160   -64    
-96    -240   
-368   -192   
48     176    
96     144    
192    0      
-176   160    
-208   -16    
128    80     
-208   400    
368    48     
368    352    
-80    336    
96     80     
-176   0      
80     80     
-144   -64    
176    160    
-304   -64    
48     64     
-96    -48    
-128   -160   
80     96     
0      160    
32     336    
-64    -32    
128    64     
-80    -176   
240    0      
-240   320    
32     176    
-48    64     
-176   -272   
112    128    
160    80     
-16    -16    
-112   48     
112    64     
-80    -160   
112    176    
208    192    
-112   96     
-16    -32    
144    176    
-112   48     
80     272    
-160   32     
64     144    
-112   64     
-16    -80    
-272   -96    
192    528    
-32    16     
-96    -80    
-64    48     
48     32     
32     112    
-96    -160   
208    224    
96     80     
-32    240    
-48    96     
48     128    
-144   -160   
128    112    
-64    112    
-16    176    
80     464    
-80    -96    
448    352    
-304   -128   
112    112    
96     0      
80     48     
176    112    
-160   96     
-16    -208   
208    -144   
-240   0      
256    128    
48     288    
-32    32     
48     96     
-96    -160   
160    64     
32     144    
-96    144    
272    192    
64     208    
-80    -48    
192    256    
-256   112    
432    112    
-208   80     
64     128    
-80    80     
160    -32    
-192   176    
64     -80    
48     32     
64     64     
80     112    
16     -48    
-96    96     
-16    0      
48     128    
16     -48    
32     224    
-128   -288   
64     -352   
48     32     
-64    -112   
160    144    
-32    96     
112    112    
32     48     
-96    -32    
128    80     
-96    112    
-64    80     
0      -16    
112    -160   
144    112    
0      -16    
0      208    
-48    288    
-176   -416   
192    48     
208    16     
96     48     
80     80     
-112   160    
-32    160    
128    16     
48     112    
-64    64     
0      48     
96     0      
80     0      
112    -272   
-16    -32    
144    -512   
-96    176    
-16    144    
-16    -16    
288    192    
-192   128    
336    -64    
-80    176    
-144   48     
-816   304    
640    -720   
176    352    
256    -384   
-544   -192   
320    -416   
416    1088   
640    -16    
-416   32     
0      -480   
224    496    
16     0      
-48    176    
80     -16    
-48    -32    
16     96     
240    32     
-64    144    
64     -64    
-96    -112   
224    -112   
-192   272    
256    -112   
-192   304    
208    -160   
-128   -288   
192    -112   
-144   288    
160    -32    
48     208    
32     -64    
-48    160    
80     -240   
80     208    
64     -160   
112    96     
-32    -256   
192    288    
-32    -1312  
96     80     
-32    -1664  
96     112    
32     80     
-64    -16    
48     16     
0      64     
176    288    
48     -144   
-64    224    
0      -320   
240    176    
-112   -176   
96     0      
48     -544   
-32    80     
128    160    
-32    48     
16     112    
128    96     
-32    64     
0      160    
96     208    
0      -304   
208    80     
-144   32     
48     128    
-32    -176   
0      48     
96     -96    
80     224    
-64    -80    
192    192    
-80    -160   
144    208    
-48    80     
80     -256   
96     400    
-112   -208   
352    16     
0      -64    
-32    144    
0      -96    
48     -272   
80     -160   
352    416    
-112   -272   
160    -1104  
-80    96     
-64    -576   
64     -128   
432    416    
224    432    
-16    -256   
16     -688   
80     -16    
176    80     
0      -32    
-96    -224   
0      -48    
96     -1024  
48     128    
0      -240   
48     -32    
64     -288   
96     -432   
-32    640    
32     -368   
-16    384    
144    -528   
-80    48     
112    -944   
128    -16    
-48    32     
-64    -176   
64     -336   
80     0      
48     80     
32     160    
48     -304   
-32    16     
-272   96     
80     64     
32     64     
64     96     
-64    -176   
16     -1056  
-48    -240   
160    -48    
80     -32    
64     -48    
-32    80     
112    -32    
96     176    
-320   -16    
96     -80    
144    608    
-32    96     
-1248  -208   
160    176    
96     112    
-48    128    
32     -80    
160    -208   
-144   32     
240    -224   
-80    128    
144    32     
-112   16     
-112   -64    
48     -112   
96     32     
0      16     
-864   -32    
-64    -320   
192    144    
0      -64    
112    -32    
-16    128    
0      32     
112    -2192  
-64    -96    
192    -144   
144    112    
-176   112    
48     -112   
16     -192   
-80    -64    
-272   0      
16     -16    
-1136  -192   
160    -80    
0      16     
32     -640   
-64    128    
416    -1376  
-192   80     
144    -112   
-16    112    
64     48     
128    16     
-176   16     
80     -16    
-240   96     
272    48     
-192   -80    
208    -176   
-400   16     
128    -176   
-224   144    
64     -176   
176    192    
-144   96     
-80    -176   
-144   336    
32     -144   
-32    32     
160    -80    
656    2096   
-224   -1312  
-240   -672   
704    528    
832    -192   
-496   -240   
-176   -80    
480    -336   
-144   16     
-800   -80    
464    -320   
-528   544    
224    -176   
-32    240    
96     -464   
-400   144    
160    -224   
48     208    
-64    -416   
64     208    
80     128    
208    -48    
-432   -256   
-64    -160   
-96    -496   
-112   -112   
112    112    
384    992    
-272   -432   
-160   144    
160    -160   
96     0      
0      -64    
-48    32     
80     224    
-336   -304   
0      -96    
-1280  -496   
-336   -96    
64     -160   
-176   128    
-128   16     
-1552  -288   
-32    96     
96     -16    
144    -32    
64     64     
160    96     
-208   -160   
-144   32     
80     -160   
-32    64     
64     240    
-208   128    
-48    -32    
-208   -32    
-112   -160   
-592   -32    
-128   -64    
-528   80     
-96    48     
128    64     
-192   -208   
128    -208   
-64    16     
-64    -32    
80     80     
32     320    
32     48     
-160   192    
-208   16     
240    144    
-336   -112   
96     -96    
32     80     
-128   0      
-544   -96    
32     32     
-64    0      
192    208    
-48    160    
-80    64     
128    400    
-128   48     
112    -48    
-48    -112   
-96    -192   
0      -176   
-160   32     
-192   -144   
-48    80     
-720   176    
48     288    
0      32     
48     -32    
64     -576   
-112   -144   
-80    32     
-80    -208   
48     16     
128    112    
-48    224    
-224   -128   
-48    -16    
-272   0      
-16    192    
-848   0      
160    320    
-240   -272   
256    176    
-80    16     
-48    48     
-48    32     
176    64     
-128   -128   
0      176    
-256   -48    
64     -96    
-112   -16    
112    -160   
-288   -32    
-144   -240   
80     80     
-256   -96    
144    176    
-16    -208   
48     0      
-144   192    
32     16     
16     32     
16     -16    
-96    -32    
16     -96    
-240   176    
80     208    
144    -48    
-80    -160   
-160   224    
-736   0      
128    -32    
-16    -16    
-208   -16    
-160   -80    
-32    -48    
-16    16     
160    112    
-144   -224   
128    80     
-224   176    
-16    -128   
-32    144    
-160   -64    
16     128    
240    128    
-80    96     
128    16     
-64    112    
16     272    
-96    224    
144    112    
0      112    
96     208    
-16    -48    
-32    0      
-32    80     
-80    80     
112    224    
112    0      
176    96     
-16    80     
16     80     
96     96     
-96    64     
48     208    
-16    -16    
-16    64     
0      0      
-112   96     
-16    -48    
64     -16    
224    0      
-160   160    
-224   48     
112    48     
96     96     
32     112    
-48    144    
0      -32    
-64    16     
32     0      
96     -32    
-48    144    
-192   16     
272    96     
-160   -96    
144    192    
-224   -64    
-224   608    
-560   -320   
336    -272   
-480   976    
-304   -208   
-368   -112   
800    528    
-1056  32     
480    -256   
-320   608    
368    -560   
-144   624    
16     -784   
128    1008   
-96    -576   
-80    496    
80     -288   
0      320    
304    160    
-48    160    
-128   -160   
-128   112    
128    224    
272    -16    
-160   128    
32     -224   
-64    272    
48     -48    
-112   224    
208    -32    
-64    144    
64     -32    
-16    224    
-112   -80    
64     192    
80     0      
176    48     
48     48     
-128   128    
96     0      
-128   32     
-16    112    
96     -208   
-32    -112   
160    160    
-112   112    
128    48     
16     176    
-16    32     
144    112    
-80    32     
64     208    
0      16     
16     112    
-16    64     
-16    -48    
192    224    
-32    16     
48     -560   
32     96     
0      384    
80     -80    
192    16     
-16    192    
0      192    
16     32     
80     32     
144    80     
-112   80     
-16    -48    
224    48     
-64    128    
96     176    
-64    -176   
32     64     
144    -720   
160    128    
-176   192    
-48    176    
240    176    
-80    192    
32     96     
96     64     
-96    -176   
208    224    
-176   16     
-80    -32    
16     64     
128    -96    
32     320    
192    -160   
-32    144    
-48    80     
0      48     
32     -16    
64     192    
192    -64    
-128   128    
-16    -32    
16     288    
-64    -16    
80     32     
96     128    
48     -16    
-16    96     
64     -192   
16     16     
176    -640   
16     320    
64     -224   
-16    80     
48     -16    
160    160    
-32    -32    
16     128    
-16    64     
112    -48    
80     240    
0      -240   
64     64     
-128   -448   
-16    -16    
144    -880   
160    336    
128    -288   
-128   176    
-224   -144   
192    0      
32     -32    
64     304    
80     64     
16     -48    
-48    64     
96     64     
128    -64    
48     -144   
128    -144   
-192   -160   
32     176    
-16    -576   
-96    -160   
64     -96    
16     224    
208    96     
-80    224    
-32    -48    
208    -160   
-144   -48    
128    -256   
96     -16    
256    192    
0      144    
-240   -112   
112    192    
112    -224   
416    16     
32     96     
112    48     
-32    112    
-192   -368   
304    -48    
-128   -144   
176    96     
-48    80     
-16    0      
32     -112   
-240   -144   
432    -272   
-208   432    
64     -720   
-16    112    
0      112    
208    -1264  
0      208    
-64    -48    
224    -160   
-48    -192   
224    48     
-16    -272   
128    80     
16     -208   
-32    288    
-96    -128   
80     -64    
432    288    
-80    -800   
-48    -192   
128    -368   
352    -48    
-592   64     
-208   -608   
-16    -16    
336    -416   
64     160    
-48    240    
-160   -32    
64     32     
-16    -16    
1168   1504   
-1456  -704   
496    544    
144    448    
464    -528   
416    256    
-1088  112    
160    1072   
-416   -784   
32     -160   
336    -336   
-160   16     
32     448    
0      64     
-176   -112   
160    -304   
32     512    
112    -336   
-176   128    
-128   -80    
320    -256   
-1056  -224   
224    -16    
144    16     
0      -144   
112    -192   
80     -240   
128    80     
48     -1440  
-96    -16    
80     -144   
96     176    
80     -48    
16     160    
-48    0      
0      -256   
-96    64     
32     -48    
-128   -16    
64     240    
-144   -176   
80     -384   
64     96     
192    -608   
-96    0      
-80    -128   
112    192    
288    0      
-240   32     
-32    -304   
112    96     
-80    0      
160    -112   
-528   80     
160    -304   
112    -208   
224    -224   
-16    160    
16     -352   
64     112    
0      -3168  
48     96     
48     -240   
64     32     
16     64     
16     320    
-144   -32    
112    144    
-544   -224   
144    48     
-544   80     
112    80     
112    -160   
112    -304   
-64    112    
32     -1408  
112    256    
-112   320    
112    48     
160    96     
48     -192   
-256   48     
80     80     
-240   64     
64     -352   
176    128    
-176   -48    
64     -80    
96     -224   
-80    64     
240    -128   
0      336    
-480   -32    
352    -112   
-400   -32    
304    176    
-336   -32    
160    32     
-64    -80    
144    -80    
-368   0      
64     -144   
0      32     
48     -224   
0      -112   
176    -240   
-64    160    
32     16     
64     -64    
-96    -64    
256    208    
0      160    
112    32     
-176   48     
176    -64    
-48    112    
-176   -96    
368    288    
-160   48     
-16    -48    
-1776  -576   
-32    -64    
80     -48    
80     0      
-96    -48    
-16    64     
0      64     
272    128    
-144   64     
224    112    
-96    128    
-208   -272   
-80    -48    
-368   -208   
352    -80    
-16    16     
-224   -96    
80     16     
-272   144    
-64    0      
-736   -112   
-96    0      
64     -16    
-128   96     
192    32     
-224   176    
-256   -224   
-16    192    
-448   -400   
96     128    
-32    32     
-48    128    
0      64     
-160   64     
0      0      
-256   0      
-32    96     
-400   144    
-240   112    
-144   -96    
-16    -16    
-112   -32    
96     176    
-224   0      
64     32     
-256   160    
0      48     
304    496    
-384   -64    
-64    0      
-176   -32    
128    -48    
96     96     
-208   80     
-96    -16    
-16    -128   
-16    -96    
128    -80    
16     64     
-80    256    
-32    80     
-208   32     
-112   -112   
144    16     
176    112    
-32    224    
-224   0      
-304   32     
16     -176   
-528   -144   
80     144    
-48    -112   
64     192    
96     272    
-176   16     
96     64     
-144   -16    
-1056  -880   
416    -64    
-1216  -128   
592    112    
992    656    
-656   -944   
-144   -288   
224    -1152  
208    -32    
160    336    
160    304    
-256   0      
128    176    
96     -80    
48     128    
-80    0      
48     144    
-48    16     
-128   -64    
-48    32     
64     -16    
-48    160    
32     80     
64     208    
-592   -224   
-112   -80    
80     128    
-16    128    
0      160    
-96    -80    
0      -32    
-144   -80    
272    0      
-128   304    
240    160    
-288   -128   
-112   96     
-64    -80    
-16    16     
-1040  -48    
-16    -32    
96     192    
32     112    
-32    -80    
-128   64     
-16    48     
144    128    
-32    224    
144    272    
-144   96     
-64    -32    
16     144    
-64    -32    
32     176    
80     64     
0      160    
0      176    
16     32     
32     0      
-32    272    
-48    208    
48     176    
48     128    
-16    -32    
-112   96     
-272   -224   
112    -64    
-144   -64    
64     160    
-16    80     
-32    128    
16     16     
-16    -48    
144    96     
-112   112    
32     160    
-224   -240   
112    -288   
80     -128   
-80    240    
80     -32    
16     240    
-64    64     
-80    96     
48     -16    
48     32     
16     -288   
80     208    
112    400    
64     272    
-32    -16    
-80    -272   
112    -48    
96     176    
-80    128    
48     144    
-16    144    
32     80     
-48    48     
16     64     
48     112    
96     160    
0      96     
64     112    
-80    48     
80     64     
-64    16     
176    400    
-112   80     
128    80     
-112   48     
16     -48    
112    80     
-48    144    
112    96     
-32    -16    
128    144    
-16    96     
64     16     
-48    64     
64     208    
64     48     
-160   -16    
-80    32     
144    144    
16     -48    
96     288    
-192   320    
48     -112   
144    48     
-48    64     
256    128    
-160   80     
96     96     
80     176    
48     80     
160    688    
-48    -176   
256    -32    
-208   272    
192    -48    
-128   -304   
112    96     
64     176    
0      32     
0      32     
32     -32    
144    240    
-32    128    
32     80     
-64    -16    
80     176    
-64    176    
-64    -432   
256    -224   
64     192    
-96    -368   
96     352    
-352   80     
336    -176   
-32    176    
288    64     
-112   208    
-128   48     
-16    64     
256    464    
-400   -288   
576    0      
-80    240    
160    208    
-176   -32    
0      -128   
-48    -176   
320    -272   
-144   272    
-32    -32    
160    80     
304    368    
-144   192    
-304   -144   
80     64     
288    -256   
288    240    
-256   -48    
-448   -64    
-16    -32    
240    288    
-208   144    
224    -16    
-64    192    
16     32     
-16    272    
0      16     
0      160    
208    -32    
16     160    
48     48     
-432   304    
-48    2256   
-1008  896    
416    -256   
-640   -1264  
432    -176   
-96    -1392  
-144   352    
784    -1456  
-288   -368   
-32    -208   
-80    96     
240    16     
48     240    
-96    64     
64     96     
-32    32     
48     64     
176    96     
96     -144   
80     320    
-48    -128   
-16    64     
-32    -400   
32     -112   
112    144    
128    240    
-48    -64    
80     160    
-48    144    
224    176    
-112   80     
-16    -80    
64     112    
96     -160   
112    160    
176    -16    
-96    336    
96     -80    
-32    64     
-32    -64    
160    224    
0      80     
192    80     
-128   128    
128    64     
64     128    
-32    -304   
80     208    
208    -544   
-96    176    
80     -80    
96     96     
-32    -592   
128    144    
48     -1056  
-64    64     
144    16     
-16    192    
176    -96    
16     -32    
-64    176    
128    -96    
112    256    
-96    -96    
208    80     
-32    -160   
-48    112    
-144   -272   
224    128    
48     -256   
96     368    
-144   80     
224    -800   
96     -1152  
-128   -112   
224    -16    
-192   -96    
320    -1280  
32     -80    
48     -32    
144    64     
-96    176    
160    144    
0      112    
144    -64    
96     -688   
-32    80     
-64    -144   
192    -448   
-480   -32    
112    32     
32     -64    
32     -80    
16     -32    
48     -1584  
64     -208   
96     192    
0      -80    
144    -16    
-32    32     
112    -256   
-48    -32    
-80    -80    
-80    0      
-384   160    
16     -272   
272    -80    
-272   -288   
240    -32    
32     -112   
32     32     
32     -896   
80     -80    
-80    -304   
48     160    
128    -144   
160    -48    
-112   32     
96     -144   
-160   -64    
-80    -176   
-288   -80    
80     -80    
32     48     
32     16     
336    0      
-192   -816   
-16    -16    
0      128    
144    16     
112    16     
-48    64     
-240   -128   
0      -208   
-96    -96    
-80    -144   
-96    16     
48     -80    
64     -176   
128    -208   
-368   -112   
128    -832   
64     16     
-32    -80    
208    144    
0      -32    
0      176    
-48    32     
96     -48    
-64    -16    
-48    96     
-192   -16    
160    -144   
-384   -32    
-16    -48    
288    32     
-128   -16    
160    -224   
32     -864   
128    272    
0      32     
-80    -48    
96     64     
16     -16    
-128   -64    
256    -32    
-368   288    
240    -96    
-112   -128   
-32    -48    
0      -64    
112    -80    
144    272    
-32    -672   
96     64     
-64    0      
80     176    
-192   112    
48     -272   
-384   0      
128    16     
-160   -112   
112    -48    
-240   32     
96     96     
-48    -80    
48     -752   
-64    32     
112    -832   
96     96     
64     16     
96     160    
-336   16     
-32    112    
-80    -64    
144    32     
-80    -80    
496    -560   
-624   -336   
32     -304   
-80    -320   
-160   0      
400    -272   
0      160    
272    -48    
-80    112    
-352   -528   
80     48     
-48    112    
-16    64     
144    -80    
48     -64    
-80    -48    
-304   -192   
-144   -272   
288    32     
-352   -80    
160    272    
48     192    
-1056  16     
-64    0      
-1232  0      
-96    -112   
-48    128    
112    80     
-16    -128   
-144   16     
208    -112   
-144   160    
-256   -224   
144    288    
-384   -192   
144    160    
-96    -16    
-96    0      
-32    112    
-48    -48    
-80    96     
-48    16     
-16    112    
176    32     
16     -16    
144    16     
32     208    
16     64     
-80    240    
-288   -368   
144    -160   
-64    32     
0      -112   
144    336    
-144   -16    
0      112    
-80    32     
-32    48     
-320   160    
16     320    
64     0      
-32    160    
-16    -96    
80     400    
-176   -80    
-176   -96    
48     64     
-112   32     
16     -48    
-352   0      
-96    -16    
-160   -48    
0      64     
-96    -16    
-80    64     
-432   -32    
288    832    
-304   288    
-32    224    
80     16     
0      80     
112    -32    
-80    32     
-16    -32    
64     -48    
48     48     
304    272    
-160   16     
-96    -176   
0      128    
-1088  -80    
128    80     
-112   -32    
48     112    
128    240    
-144   -80    
80     80     
80     224    
-16    144    
80     80     
-144   80     
-80    -112   
112    64     
-208   -48    
96     144    
-288   -32    
80     224    
-32    80     
-32    -64    
0      96     
-64    0      
16     32     
-32    16     
80     96     
-32    112    
-32    48     
-80    80     
-64    -16    
-144   0      
48     144    
-192   16     
-48    -80    
-1616  -176   
144    64     
160    128    
16     176    
-160   144    
48     0      
240    96     
-112   -64    
112    80     
-64    48     
64     64     
16     0      
-64    160    
-192   -480   
80     -144   
-16    96     
96     336    
-160   48     
80     -32    
-48    32     
16     64     
144    176    
-160   -48    
-48    -128   
112    112    
96     176    
-16    160    
-112   -96    
-160   0      
48     80     
32     160    
32     64     
144    -320   
176    16     
-128   320    
-128   -256   
-128   64     
128    48     
224    64     
-112   80     
80     0      
-160   80     
80     32     
-224   -96    
112    192    
288    -32    
0      16     
128    144    
-80    16     
64     -160   
0      48     
32     192    
48     80     
-80    192    
-112   -80    
448    -128   
-240   -64    
240    208    
-176   -16    
128    224    
208    128    
32     -32    
48     -176   
32     96     
64     -288   
240    496    
-64    192    
-16    -32    
-48    160    
48     -240   
64     240    
-32    -80    
96     192    
-96    128    
176    -48    
-112   496    
-64    368    
-624   800    
672    240    
112    864    
-272   -208   
128    384    
-624   144    
480    16     
-16    64     
-96    -176   
64     -16    
32     336    
-80    -32    
112    0      
0      144    
0      48     
48     96     
-48    32     
208    128    
-32    96     
16     144    
-48    144    
80     16     
-96    -96    
112    -160   
64     192    
-160   -112   
192    96     
-32    96     
16     0      
32     64     
16     96     
-16    48     
16     64     
-32    64     
-16    -80    
160    272    
16     48     
128    -96    
-224   128    
160    80     
48     -416   
80     112    
-64    48     
48     -16    
-80    112    
208    128    
-16    144    
-16    48     
48     48     
-48    144    
16     -96    
32     112    
-48    -32    
48     32     
128    176    
-64    -256   
144    96     
16     -208   
-48    80     
64     144    
80     128    
0      96     
80     -16    
32     80     
0      176    
-64    32     
80     0      
224    272    
-160   128    
256    96     
-144   -192   
64     16     
96     -496   
-48    80     
96     288    
64     -16    
-16    -48    
-32    128    
0      160    
176    160    
-64    160    
-112   -16    
304    16     
-64    0      
-176   -64    
240    -16    
-288   0      
256    -240   
-96    32     
80     -1936  
80     144    
0      -672   
96     -16    
96     -96    
-48    128    
0      128    
96     96     
-128   -128   
80     -320   
0      176    
96     -32    
224    192    
-96    16     
0      80     
208    -1072  
-144   128    
352    -944   
-128   128    
208    48     
-48    48     
-80    -32    
320    256    
-32    176    
80     32     
64     32     
-16    -112   
160    64     
64     -448   
-96    272    
192    -560   
0      144    
-192   -352   
368    384    
-272   -48    
208    240    
176    272    
48     384    
0      192    
64     48     
48     32     
0      -1088  
16     112    
-64    -224   
-48    208    
16     -128   
176    112    
-64    -560   
-48    64     
144    80     
16     192    
-32    0      
64     144    
-112   64     
144    -128   
112    288    
64     -368   
0      128    
64     -176   
16     16     
112    -432   
64     96     
48     240    
-48    64     
112    128    
48     272    
64     96     
0      -80    
112    16     
80     -96    
-16    48     
80     16     
96     112    
0      -240   
160    112    
96     96     
160    304    
-64    -16    
96     -336   
-16    -352   
128    -736   
80     -224   
80     48     
-112   -1440  
112    -224   
240    -672   
32     176    
128    256    
-112   -176   
80     32     
96     -400   
96     -176   
64     80     
-32    -224   
48     0      
48     -416   
128    288    
-384   48     
80     -16    
-16    -32    
80     -416   
32     -96    
-64    -816   
80     0      
128    224    
16     -96    
16     -144   
1696   -1936  
-80    -736   
864    800    
-704   416    
176    528    
80     -128   
256    368    
-384   -368   
-80    432    
-304   -608   
480    -592   
-64    -144   
32     16     
-64    64     
208    -48    
-128   -144   
64     -16    
-160   -272   
128    128    
336    208    
-352   -352   
288    160    
-912   -128   
112    -240   
112    -80    
128    -96    
64     224    
-224   -784   
160    192    
32     -96    
0      -96    
128    -128   
32     96     
-192   -96    
240    0      
-304   176    
0      48     
-496   240    
16     272    
208    -64    
-80    -48    
-112   -144   
80     -480   
48     48     
16     208    
-64    128    
48     0      
64     0      
0      160    
192    272    
-64    -160   
-16    -80    
0      -48    
112    -288   
-752   16     
112    -64    
80     416    
32     -176   
-64    -112   
160    -992   
-160   -160   
96     -16    
-96    -128   
16     80     
-16    352    
-176   -96    
256    0      
-272   16     
112    -128   
-240   0      
48     -16    
80     96     
48     -240   
-96    144    
192    -1248  
80     64     
192    352    
-16    352    
-336   112    
0      -112   
-352   -32    
352    -272   
-16    0      
112    0      
-80    192    
80     -64    
64     64     
192    -32    
-80    16     
160    -256   
80     32     
-32    304    
-32    -48    
-64    -128   
16     0      
32     64     
-16    -80    
-96    48     
96     144    
-112   160    
48     -288   
-48    144    
64     -208   
80     64     
16     -112   
0      32     
144    416    
-432   -160   
256    80     
-256   -64    
80     -96    
32     -16    
-112   48     
288    -192   
-416   32     
-928   -560   
16     -48    
-224   -192   
48     -192   
16     32     
-256   -32    
48     64     
-864   80     
16     32     
-576   464    
-288   -128   
320    -144   
-352   64     
-32    -304   
0      -32    
-320   96     
112    -224   
0      -16    
0      160    
-112   96     
-256   512    
-16    -192   
-272   -272   
32     -144   
-192   96     
48     -16    
-1888  368    
-256   144    
80     -128   
-64    32     
96     0      
-16    32     
96     -288   
-240   80     
160    0      
-160   80     
-32    48     
48     240    
-208   -48    
-112   -176   
-80    -208   
-960   32     
-160   320    
208    80     
0      160    
-96    -240   
48     320    
-64    -64    
-224   -208   
112    336    
464    96     
-352   -288   
96     432    
16     112    
-112   48     
64     0      
16     368    
-192   80     
-656   -144   
80     32     
0      -272   
128    192    
48     96     
0      192    
0      -16    
-16    -32    
-80    -64    
-16    176    
160    0      
0      144    
-64    80     
16     192    
32     -112   
-688   -64    
96     112    
16     -32    
32     80     
-112   112    
32     208    
-80    -32    
-304   -128   
-48    32     
816    2944   
-1776  -352   
208    576    
32     736    
-192   -96    
-384   -336   
-928   -432   
704    464    
-320   -144   
32     368    
-128   -16    
-48    0      
-64    96     
128    -16    
-16    32     
16     64     
-80    -16    
16     64     
-128   32     
16     32     
-96    80     
-224   16     
112    208    
112    -176   
-80    16     
-48    -64    
-80    -80    
48     32     
-64    112    
144    240    
-32    -16    
-64    16     
-112   96     
144    176    
-224   -32    
352    112    
-352   80     
208    144    
-192   0      
0      48     
-32    64     
160    80     
-64    144    
80     48     
0      64     
-160   48     
-16    -96    
-176   -192   
400    192    
-384   112    
288    0      
-352   -16    
96     48     
112    192    
-96    -16    
176    192    
-144   0      
160    -80    
-32    176    
-96    0      
304    16     
-48    208    
-16    128    
48     -32    
32     -96    
16     256    
-96    96     
48     48     
96     0      
48     32     
-80    128    
-16    48     
96     0      
80     96     
0      208    
-48    -32    
208    176    
-240   16     
176    96     
16     16     
-32    128    
-96    16     
-48    -96    
-16    -128   
192    80     
-48    16     
-32    -96    
48     144    
-320   144    
272    16     
-224   80     
176    32     
-208   128    
32     -160   
96     240    
-32    -48    
144    240    
-48    208    
64     -16    
48     64     
-32    48     
112    176    
112    96     
-160   -16    
0      -192   
-48    48     
128    -48    
64     128    
-112   -160   
48     192    
48     -960   
-32    192    
48     224    
-144   0      
16     -16    
0      80     
-176   16     
240    224    
-32    -16    
0      0      
32     32     
96     -64    
-256   192    
336    160    
-224   64     
64     -864   
-160   160    
224    352    
-16    192    
-32    -64    
80     48     
0      48     
-32    128    
-32    64     
176    -96    
48     -80    
-208   128    
-112   -224   
320    -112   
-544   -192   
192    -64    
0      64     
144    112    
96     64     
0      64     
-160   176    
208    -144   
-192   -256   
160    176    
112    144    
-80    48     
48     160    
-80    0      
96     192    
-64    64     
48     -752   
80     160    
224    -2192  
-48    224    
160    0      
32     96     
128    64     
96     96     
-64    16     
80     224    
-176   112    
80     -128   
48     160    
80     192    
-160   -48    
128    -352   
0      144    
-32    -736   
112    80     
48     48     
32     304    
-160   32     
-112   0      
-96    -96    
80     112    
-112   112    
0      128    
-64    16     
112    -240   
16     80     
272    -304   
48     176    
96     -176   
-192   128    
-48    -1808  
160    112    
-112   48     
112    144    
128    -48    
128    272    
-112   96     
16     32     
-112   176    
944    1024   
800    640    
-496   -672   
32     -656   
-32    32     
352    592    
0      -624   
-320   -16    
-16    640    
-160   96     
176    -320   
-192   64     
240    -128   
368    560    
-192   160    
160    224    
-112   -64    
112    96     
-240   -432   
320    -704   
48     -32    
272    -48    
-176   176    
112    -16    
32     336    
-80    -64    
96     -160   
-144   16     
192    -80    
-96    80     
112    -32    
224    144    
96     -288   
96     160    
-176   -128   
16     -48    
80     272    
208    272    
-320   -32    
224    176    
-128   288    
64     32     
0      32     
32     48     
144    320    
-64    -208   
-64    -288   
224    304    
192    160    
-80    64     
0      96     
16     48     
240    176    
-128   -336   
208    96     
0      128    
144    -912   
-176   -2016  
-16    -160   
192    -2576  
-16    -288   
48     224    
64     -112   
96     -32    
-80    -16    
352    144    
-160   -144   
128    -2416  
-112   160    
64     -16    
96     80     
16     -848   
176    96     
-480   -48    
16     -160   
64     -144   
32     -176   
384    176    
320    -672   
-176   -208   
80     -16    
16     -64    
48     -304   
-16    176    
48     -96    
32     -64    
80     464    
272    -272   
-928   -288   
192    -352   
144    208    
176    -16    
-96    144    
16     -912   
0      -80    
-48    -128   
208    32     
-16    96     
-144   144    
-64    -64    
0      -48    
-80    -160   
128    -80    
-208   48     
0      -48    
32     -320   
64     -336   
-48    -32    
64     -80    
80     208    
32     -176   
-96    16     
112    -160   
96     192    
16     -144   
144    112    
-128   -32    
160    48     
-336   240    
-64    -112   
-112   -16    
80     32     
112    -176   
176    96     
-80    32     
304    -176   
-112   176    
192    -224   
0      112    
32     -48    
96     64     
112    80     
-112   -32    
-16    -48    
240    112    
-320   48     
544    368    
-208   128    
-160   -176   
96     32     
48     -816   
-80    96     
224    -752   
16     192    
-32    -80    
-16    -352   
-160   -240   
112    -112   
-64    0      
80     80     
-192   112    
176    -96    
-448   -48    
80     -240   
0      112    
48     -352   
16     112    
176    -128   
-208   80     
0      -176   
-64    -176   
64     -112   
128    112    
96     64     
-224   240    
-576   -144   
192    -208   
-112   -160   
224    -96    
0      224    
-48    96     
-32    240    
32     -224   
-112   -176   
-160   208    
-80    -240   
-16    32     
16     -96    
0      16     
0      0      
-96    -48    
64     16     
160    112    
-16    -320   
144    160    
0      -128   
-128   -144   
48     -624   
160    -16    
-128   32     
112    64     
48     -32    
-80    48     
-48    112    
-96    32     
128    -64    
48     -80    
1184   2448   
-1840  128    
400    432    
-848   -64    
-144   -384   
-128   448    
-1088  -400   
560    16     
-1584  -144   
96     432    
-80    -336   
-144   112    
224    -64    
128    160    
-112   -128   
-128   -112   
-240   32     
64     192    
-256   -128   
208    0      
-96    128    
-272   -144   
-112   352    
-480   -128   
-96    16     
-656   -128   
0      256    
224    48     
-176   112    
16     -304   
16     32     
32     -80    
160    256    
-64    -112   
-80    32     
-64    -32    
-48    -64    
-112   128    
-336   0      
160    144    
-16    -144   
-80    160    
-1744  -144   
-128   16     
-176   -288   
48     64     
144    16     
-48    16     
16     -112   
-320   -96    
224    16     
-176   144    
80     80     
96     176    
-160   -64    
128    -16    
-48    144    
-384   -96    
0      144    
-96    0      
224    -32    
-112   -32    
32     96     
-32    16     
48     48     
-112   64     
80     64     
-16    80     
-208   -32    
-32    112    
-304   -128   
16     96     
-224   32     
0      32     
-1104  0      
-64    -64    
128    -96    
-112   -16    
32     16     
-48    -32    
-96    -48    
96     80     
-80    368    
-192   160    
112    -112   
144    0      
-112   -176   
48     112    
-256   256    
-48    -48    
32     48     
-48    -16    
96     64     
-48    -112   
-128   -208   
-16    16     
144    256    
-32    16     
16     96     
48     192    
16     -64    
64     128    
-448   -240   
128    224    
-416   80     
96     112    
-192   32     
176    176    
32     448    
-128   48     
192    240    
-144   -144   
128    64     
-112   32     
208    160    
-240   -80    
176    208    
-336   -224   
144    240    
-80    112    
-288   320    
192    176    
-96    -80    
-96    96     
80     80     
-96    -48    
0      144    
-32    176    
-80    -256   
-48    16     
0      32     
32     240    
-112   96     
112    128    
-224   -208   
-32    64     
16     64     
16     -32    
-16    -368   
176    368    
0      240    
-48    80     
-48    -240   
64     32     
-16    240    
96     -96    
-320   -112   
208    112    
64     240    
-208   -80    
16     48     
96     160    
-80    128    
0      80     
48     32     
80     592    
160    208    
64     624    
-224   48     
-32    -48    
-96    48     
144    16     
-256   0      
96     64     
-256   -64    
240    16     
-64    336    
-160   -16    
112    32     
-64    208    
96     48     
96     160    
-320   -64    
240    128    
-80    352    
-16    -240   
176    160    
-224   16     
240    48     
-80    208    
112    96     
64     80     
-16    192    
0      -16    
240    16     
128    80     
-80    80     
32     144    
-64    96     
48     -48    
48     32     
112    144    
0      32     
0      80     
240    128    
32     112    
32     80     
-144   96     
-656   1184   
-432   -816   
-240   -848   
240    48     
544    272    
-688   160    
1040   272    
-992   -16    
464    -176   
-176   160    
272    -208   
368    -16    
-608   64     
272    -96    
192    240    
144    128    
-240   224    
272    -144   
-192   256    
112    -432   
-32    272    
176    -80    
64     352    
-336   -288   
32     -80    
-112   -1728  
112    448    
-176   -144   
432    112    
-256   112    
240    64     
-16    272    
64     -16    
-96    176    
144    48     
96     544    
-64    48     
-192   -416   
-112   160    
240    160    
16     -80    
-96    208    
288    288    
64     128    
-144   32     
32     112    
400    208    
-128   -288   
-144   -192   
-48    -96    
32     288    
-32    224    
112    -192   
-80    176    
96     112    
96     -272   
0      -64    
192    -2064  
48     -144   
304    496    
80     320    
112    -128   
-176   -112   
112    -416   
112    288    
96     352    
-192   128    
-64    -368   
192    144    
32     64     
112    -384   
96     224    
-80    -336   
0      112    
48     -176   
96     64     
112    -144   
-224   160    
-64    -208   
-64    0      
48     16     
64     80     
144    48     
80     0      
112    208    
48     112    
160    160    
48     -240   
-64    48     
208    -288   
-272   -144   
288    80     
64     224    
-64    80     
240    480    
-224   208    
272    352    
32     240    
-192   -160   
240    16     
0      -128   
128    128    
48     224    
-240   -192   
304    -2064  
-32    800    
-208   -1856  
-208   -304   
112    -48    
48     96     
-32    -16    
-128   -48    
48     -16    
64     -128   
32     288    
64     -272   
16     16     
96     -112   
96     -32    
-144   -272   
-80    128    
352    272    
208    208    
-272   128    
-48    48     
160    64     
0      -368   
160    48     
-160   0      
128    128    
-16    -96    
192    0      
-80    -80    
0      128    
-192   16     
416    32     
32     352    
-80    -32    
48     128    
-32    32     
64     16     
-16    -96    
160    144    
96     -96    
16     160    
-48    -208   
128    48     
-64    -48    
64     64     
128    16     
-48    32     
96     -144   
80     -160   
48     48     
-16    -848   
32     32     
208    224    
-80    -352   
112    -192   
64     -576   
112    -144   
48     128    
64     -16    
0      0      
-16    -288   
192    -1584  
0      160    
-48    -464   
80     0      
160    48     
48     -336   
-304   -176   
0      -256   
320    64     
176    -512   
-80    128    
80     -576   
32     128    
64     -16    
32     64     
32     -96    
-224   64     
16     -112   
-80    112    
-208   48     
48     -16    
-1408  -144   
128    -192   
80     -112   
208    -80    
16     -16    
64     -176   
16     -224   
48     -432   
-192   32     
176    48     
-112   64     
-48    -320   
464    352    
1120   -512   
-144   -464   
352    -1168  
-336   -432   
704    752    
-208   80     
128    -704   
-416   -528   
480    -16    
128    -384   
-128   64     
-112   -16    
240    96     
-144   -160   
96     -176   
128    176    
64     -96    
-64    -64    
64     -208   
-64    208    
208    -160   
-240   -176   
160    -128   
-208   16     
304    48     
-64    208    
192    -48    
-144   32     
-80    0      
144    32     
-16    16     
-32    -320   
-224   -32    
192    -208   
-144   64     
48     -64    
-80    176    
-48    -176   
80     -16    
-32    -704   
80     96     
16     -1632  
-16    80     
-32    128    
64     16     
-16    -16    
0      -16    
-192   64     
96     16     
-160   16     
80     -32    
-528   16     
48     -272   
0      48     
0      -208   
128    16     
128    -256   
-96    128    
144    16     
32     -32    
-240   48     
32     -16    
16     176    
-16    -32    
16     -16    
48     -192   
-16    -80    
32     -144   
16     96     
112    -32    
16     80     
80     -656   
176    16     
-336   -192   
272    0      
-208   160    
48     -80    
64     -48    
-128   -336   
-16    -224   
-64    -240   
-160   80     
112    0      
-96    96     
64     -336   
32     0      
112    -992   
48     96     
-64    160    
176    256    
-64    0      
32     16     
-48    0      
336    400    
-112   48
[truncated: 338,011 more chars]
