# Supplementary material for: A Fault Diagnosis Method for One‐Dimensional Vibration Signal Based on Multiresolution tlsDMD and Approximate Entropy
Source: Hindawi journal article supplement (doi:10.1155/2019/3262818), 2019-01-01
Supplement: f1 [file 3262818.f1.zip › 3262818.f1/gear signals/broken teeth fault signal/Data12.txt]

80     176    
-112   -32    
240    32     
-304   128    
48     -144   
80     224    
-704   -352   
192    192    
-128   48     
-736   96     
-48    0      
-576   -112   
32     64     
-32    0      
-80    32     
160    -32    
16     64     
0      -48    
144    -64    
-224   -208   
-144   -192   
240    288    
80     224    
112    112    
-128   -64    
16     -256   
-96    288    
96     -16    
-464   96     
-128   -48    
-32    -368   
-32    16     
-320   -128   
16     160    
80     368    
-144   560    
-48    -176   
0      -80    
-288   64     
112    -48    
-80    -64    
16     64     
-32    64     
-192   -288   
-80    80     
-1440  -64    
208    352    
-368   -80    
96     144    
-144   -128   
160    160    
0      32     
-144   -80    
80     144    
-96    96     
128    192    
-272   -48    
0      -128   
-32    -80    
-96    16     
-624   160    
176    80     
64     320    
-144   48     
400    -128   
-288   48     
144    144    
-80    96     
80     80     
96     304    
16     320    
160    96     
-304   -64    
-112   176    
96     192    
96     -48    
-240   128    
-192   -144   
384    48     
-256   -256   
-32    80     
176    96     
-32    80     
16     48     
-240   -160   
0      -96    
-160   32     
64     64     
128    240    
-64    96     
-64    16     
32     48     
-720   -96    
16     144    
176    -32    
48     208    
-144   80     
64     -32    
-48    16     
-176   -64    
-96    -176   
-32    -176   
128    80     
-144   128    
32     80     
-272   0      
128    320    
-144   -192   
144    208    
96     0      
-48    176    
-64    16     
-192   80     
0      16     
176    352    
-192   -16    
192    -32    
-32    160    
-224   -48    
-144   64     
-192   -112   
48     64     
-320   80     
48     -16    
128    256    
-176   64     
-64    48     
112    112    
48     32     
16     176    
64     112    
112    -64    
-48    192    
-224   -32    
192    80     
-112   32     
-1152  1488   
112    -992   
-112   256    
32     80     
256    -272   
-160   -1152  
352    736    
-144   -112   
272    240    
-400   -256   
384    128    
-16    400    
-16    -96    
-80    464    
128    -432   
-80    336    
-192   -368   
-160   416    
240    -336   
-192   176    
288    -176   
-160   352    
16     -128   
-80    112    
-112   -224   
-48    192    
96     224    
64     144    
-48    -64    
-320   -128   
128    176    
96     64     
32     160    
32     16     
0      128    
144    144    
-96    112    
16     -64    
16     208    
176    112    
32     128    
-64    64     
-64    32     
144    112    
-128   48     
176    128    
-112   144    
192    160    
-144   96     
0      -64    
112    80     
-80    32     
32     160    
48     -64    
64     32     
-80    144    
48     112    
0      -32    
32     224    
-48    96     
128    80     
-32    48     
64     0      
64     304    
-112   128    
-48    -48    
80     -48    
160    32     
-32    80     
0      128    
-240   -32    
272    240    
-240   -32    
192    64     
0      64     
-128   -1360  
400    256    
-320   96     
128    -48    
128    224    
-64    144    
224    112    
-64    -48    
80     -128   
64     256    
-96    -208   
0      -128   
-64    -80    
112    80     
-80    112    
112    -480   
-16    128    
80     128    
16     0      
-16    -48    
80     64     
-32    32     
176    192    
80     192    
16     -208   
48     160    
112    320    
-16    -16    
-64    80     
144    96     
48     16     
80     448    
-16    128    
-32    -144   
0      -32    
144    192    
64     96     
-64    -32    
-32    48     
0      96     
80     -496   
-48    0      
48     144    
144    256    
48     -96    
80     -288   
160    176    
64     -2368  
-96    -48    
0      208    
-16    48     
336    304    
-96    32     
160    96     
-16    80     
-16    -64    
0      192    
-16    96     
160    208    
96     144    
-128   -176   
192    96     
-80    -400   
192    176    
-96    48     
48     128    
80     -48    
48     -64    
-32    32     
-48    48     
16     16     
128    480    
-112   320    
0      -96    
-112   -128   
64     -320   
32     112    
96     -400   
-144   -160   
176    -1648  
96     368    
-32    32     
-64    -160   
80     144    
144    368    
-176   -64    
-128   -80    
384    240    
80     -48    
-16    -32    
16     80     
48     368    
-48    -96    
192    0      
96     -480   
96     16     
16     64     
32     144    
64     48     
80     96     
-48    144    
-96    -208   
192    176    
-32    -288   
112    144    
-64    0      
80     48     
112    -80    
112    32     
-160   -336   
208    144    
-80    160    
208    16     
-160   112    
96     96     
128    -80    
80     -256   
64     144    
496    -464   
-96    400    
-16    -416   
-32    112    
-608   -1424  
1200   2432   
-352   480    
320    -512   
96     -944   
-240   -176   
112    48     
-224   128    
96     240    
320    48     
-464   480    
-80    -720   
80     144    
160    -368   
272    544    
-192   -80    
352    416    
-112   320    
-32    -176   
0      176    
496    -2224  
-208   64     
176    -336   
-32    -160   
-80    -144   
160    -1008  
-48    -272   
128    32     
-64    -48    
176    320    
-48    112    
16     176    
16     -96    
48     -592   
32     80     
96     48     
32     32     
-160   64     
-96    -352   
272    -48    
-80    -96    
16     -96    
112    -192   
96     192    
48     -1440  
-64    -128   
-32    80     
144    48     
32     -48    
-96    48     
64     -80    
-32    128    
-192   32     
80     -336   
-384   32     
-32    160    
144    208    
-16    -304   
208    -48    
-80    -208   
112    -208   
128    -1056  
-80    144    
160    128    
-208   48     
208    -512   
192    -64    
-208   96     
32     -128   
144    -112   
32     64     
-32    48     
0      -48    
112    -16    
80     -80    
80     -16    
288    -192   
128    48     
112    -144   
16     144    
0      -16    
128    -48    
-32    -224   
32     -32    
-416   32     
0      -128   
-416   0      
0      -288   
208    80     
96     -240   
112    -48    
-64    -960   
48     80     
-16    -224   
-112   -480   
-96    -192   
192    96     
-96    288    
32     -80    
-352   -144   
16     -80    
96     -64    
32     -32    
144    64     
48     -128   
-80    -160   
96     -480   
48     176    
80     -256   
-16    48     
-112   16     
64     -288   
-80    -176   
192    0      
-272   -48    
112    32     
-240   16     
336    80     
-576   64     
80     -288   
-112   64     
32     -336   
320    96     
-16    -1520  
-224   -96    
144    -224   
32     -160   
-480   144    
32     48     
256    64     
-80    -32    
-656   -128   
272    0      
-496   80     
-16    -64    
-272   16     
48     -304   
16     144    
336    -1040  
-128   -128   
-112   144    
240    48     
-32    80     
32     192    
0      144    
-16    -80    
-384   -368   
-112   -80    
160    144    
176    -144   
16     144    
32     -336   
32     128    
0      32     
32     -80    
48     64     
0      192    
112    256    
-96    0      
32     -16    
32     -112   
-16    112    
96     96     
-112   96     
-208   -240   
192    96     
-864   64     
-112   -32    
-176   64     
-144   32     
-48    -48    
-928   80     
-240   -112   
208    16     
-240   32     
48     16     
0      -16    
64     0      
-16    16     
-432   -160   
-16    48     
-336   -144   
16     176    
-144   16     
-16    0      
-32    288    
-624   -32    
-32    -192   
176    32     
-144   160    
96     96     
-288   48     
-48    0      
80     112    
-224   -112   
96     -192   
-16    -128   
-64    208    
1008   -768   
-320   640    
272    704    
-560   256    
-176   -240   
560    1040   
-976   -480   
-1344  176    
-256   -208   
48     -272   
-144   -32    
352    -208   
112    432    
-32    -336   
-160   240    
128    -176   
-64    480    
16     -16    
96     320    
-192   -192   
32     64     
-208   32     
-416   -112   
-48    128    
336    -240   
-192   304    
16     64     
-80    288    
128    -80    
-112   96     
112    -48    
-48    192    
-32    32     
80     64     
32     16     
0      16     
-48    96     
-224   80     
80     96     
-320   -112   
-16    160    
0      112    
-16    64     
96     144    
-288   0      
128    128    
-128   -288   
48     0      
-128   64     
-16    96     
-16    80     
16     160    
-32    64     
-16    16     
-112   -80    
192    208    
-208   -32    
32     16     
160    128    
-288   -80    
-32    176    
-64    -112   
16     -16    
-96    80     
-80    -48    
96     0      
-80    96     
-352   -160   
160    368    
-336   -144   
192    112    
48     272    
-112   48     
0      -16    
16     96     
-80    -80    
32     32     
-176   144    
192    64     
-224   96     
96     -16    
32     208    
-16    0      
-192   48     
-64    -128   
48     80     
-64    -272   
32     48     
-144   96     
48     -80    
80     224    
-16    48     
32     176    
-144   -48    
0      64     
-80    -16    
112    128    
-112   -32    
48     64     
-48    144    
48     96     
0      64     
-112   -112   
48     0      
32     48     
64     32     
32     48     
-96    64     
-48    -16    
64     112    
-160   -48    
96     112    
-176   -48    
208    160    
-304   -48    
80     112    
-64    128    
112    80     
-80    0      
160    80     
32     128    
160    112    
-160   96     
16     128    
-16    176    
-80    -416   
240    112    
-336   192    
432    192    
-224   112    
-48    -112   
32     64     
96     288    
48     176    
-144   16     
48     -32    
144    352    
-16    -16    
0      -32    
48     96     
0      112    
64     208    
-160   -112   
112    160    
32     48     
352    -336   
-192   272    
-400   112    
176    -192   
-112   144    
176    64     
-96    64     
80     176    
-224   -48    
304    16     
-336   -32    
0      -64    
160    288    
-208   144    
112    -64    
-80    -16    
304    160    
16     80     
-80    0      
16     -80    
48     144    
-64    -80    
240    272    
-240   32     
160    16     
-160   -16    
176    352    
-224   112    
176    -992   
-272   32     
144    272    
-160   80     
144    160    
16     96     
0      -64    
64     64     
-16    112    
64     112    
-80    96     
112    128    
32     -64    
96     176    
-32    272    
-176   -1200  
-80    -64    
-128   64     
144    128    
-176   0      
256    272    
-80    256    
208    80     
-192   48     
1776   -2128  
-160   -1056  
128    768    
-352   608    
656    1328   
-944   -128   
224    224    
0      560    
-256   -432   
-176   -352   
64     304    
-48    256    
96     272    
-176   224    
160    -160   
-176   32     
336    -240   
-192   32     
16     96     
80     -64    
432    224    
-144   160    
144    112    
-80    -944   
-160   -16    
240    256    
-112   304    
176    -128   
32     176    
-48    64     
160    64     
-80    -16    
112    208    
80     96     
-48    48     
160    384    
-368   -432   
208    16     
16     -400   
224    64     
-64    -176   
48     208    
32     -320   
64     -32    
-64    -16    
80     112    
32     112    
80     240    
16     16     
64     -96    
-48    64     
144    -400   
-96    64     
192    -320   
16     112    
32     -608   
96     224    
-96    -96    
224    96     
-32    80     
48     112    
32     32     
112    160    
-16    16     
112    -48    
-16    160    
-80    -48    
-160   48     
64     -208   
32     -48    
144    -416   
-32    160    
-96    48     
80     48     
128    128    
-128   -80    
176    16     
-208   80     
144    144    
128    -112   
-16    32     
224    -192   
64     464    
-176   -464   
256    -80    
48     -400   
96     160    
48     80     
112    304    
-112   48     
368    192    
-192   192    
48     -624   
112    16     
32     -96    
256    448    
-224   -64    
192    128    
-16    -400   
64     64     
96     64     
32     192    
-32    -32    
-96    -128   
48     -144   
32     -368   
208    160    
-64    112    
64     80     
-80    0      
112    208    
0      -48    
64     48     
112    -32    
32     128    
80     144    
-64    -240   
-240   -336   
-32    -1392  
368    208    
-208   -48    
-176   -240   
-256   -208   
368    -176   
-80    -128   
272    -2192  
64     160    
224    176    
0      -160   
-64    176    
-160   -240   
432    -704   
16     224    
224    -192   
48     352    
-224   -48    
336    32     
-80    -208   
160    -192   
32     -32    
-80    -288   
32     -48    
32     -224   
240    -240   
-176   -608   
48     64     
208    -224   
-32    16     
128    -80    
-64    -208   
16     -48    
48     -368   
-512   -32    
112    -32    
80     96     
176    -208   
-80    16     
144    -64    
-80    -48    
224    48     
64     176    
144    112    
-48    16     
80     -32    
-16    -304   
-96    0      
32     -704   
-32    -96    
144    64     
16     16     
-64    -224   
48     -272   
144    -944   
32     -512   
160    -368   
64     224    
-48    48     
0      176    
16     -208   
16     -96    
-48    -48    
48     160    
-64    64     
80     80     
-384   -64    
160    112    
336    224    
224    32     
-32    -112   
0      -544   
64     64     
0      -144   
-128   96     
96     -320   
176    -16    
48     304    
80     16     
-352   -80    
-208   1840   
-192   -992   
-128   32     
-672   192    
-672   -160   
-416   -640   
1024   -80    
-256   304    
304    -784   
-400   -256   
176    64     
416    -96    
-80    80     
-64    -32    
-384   -240   
-128   96     
-64    176    
-48    -192   
-736   -272   
112    -512   
0      -32    
224    -32    
-112   208    
160    -1536  
-144   80     
-320   176    
144    -160   
0      16     
-32    64     
16     -256   
-144   16     
112    64     
128    -192   
144    80     
-32    -272   
-32    208    
96     -112   
64     176    
-112   0      
160    -192   
-112   -96    
48     -16    
192    80     
64     -32    
-16    64     
-16    -64    
48     192    
16     0      
-112   32     
96     -208   
48     64     
0      -64    
48     304    
-240   48     
-112   -160   
-112   80     
16     176    
112    -16    
112    96     
-96    352    
64     -160   
-128   -16    
48     80     
16     176    
-336   -96    
48     80     
-400   -272   
-144   64     
0      48     
128    144    
-32    112    
-160   128    
-272   16     
-624   0      
48     144    
-64    176    
-16    -128   
-176   -256   
0      0      
-48    -144   
48     48     
-160   -112   
-32    -240   
-16    -208   
-192   32     
-64    272    
-80    240    
-64    432    
-656   448    
0      112    
176    -144   
0      96     
-144   -176   
96     96     
-176   -240   
96     48     
16     -48    
112    160    
-112   48     
80     80     
-256   -112   
-112   -144   
-16    48     
96     160    
-80    96     
-1520  64     
-288   -160   
160    -48    
-160   96     
128    -112   
-32    224    
16     -48    
-80    32     
-128   -32    
80     80     
-32    0      
80     304    
-112   -64    
-48    -48    
-96    160    
-192   0      
-160   -80    
-32    -80    
224    208    
-16    -176   
-80    0      
-64    112    
0      96     
160    224    
-192   -112   
80     -48    
-160   96     
112    0      
-176   -64    
-64    -112   
-80    160    
-128   128    
-800   -160   
-32    256    
96     -240   
-48    176    
-96    -64    
80     208    
-16    96     
0      -112   
-176   288    
-80    -64    
336    0      
-160   -192   
176    272    
-128   -176   
-64    176    
-176   -224   
-16    208    
80     -32    
-80    464    
-176   96     
560    528    
-352   208    
64     0      
-304   32     
-96    -192   
80     112    
112    16     
-96    176    
96     -160   
-144   240    
-272   64     
48     224    
144    240    
32     48     
16     48     
464    -16    
-240   192    
-176   -176   
32     -16    
240    80     
64     176    
-128   112    
-96    80     
-272   -96    
128    96     
-80    160    
-32    32     
48     128    
-64    48     
-48    128    
48     -16    
240    0      
-176   0      
128    -208   
48     -64    
0      80     
-160   48     
-80    192    
-128   64     
176    64     
-976   -2016  
528    544    
256    -352   
768    -256   
-32    -592   
288    560    
-416   -176   
336    -16    
192    688    
176    64     
-160   32     
-256   144    
224    112    
-144   -80    
-48    80     
32     96     
80     32     
-32    272    
16     64     
128    48     
-128   0      
48     112    
64     208    
16     208    
16     0      
-128   48     
-16    160    
144    192    
-160   -64    
128    192    
-48    80     
96     80     
-64    160    
80     64     
-16    48     
16     64     
-96    -96    
96     80     
-80    224    
240    64     
-160   0      
0      128    
144    144    
-80    -16    
-64    -64    
16     80     
128    240    
80     16     
48     64     
-160   80     
192    144    
32     160    
16     -128   
176    80     
-192   288    
224    144    
-160   64     
32     0      
48     -32    
64     272    
-64    -48    
144    128    
-96    64     
96     64     
64     96     
-80    32     
176    160    
-16    256    
-32    32     
64     48     
-16    96     
-32    0      
0      80     
80     0      
64     -896   
16     -96    
-128   208    
-192   288    
-16    0      
128    -128   
192    208    
-160   208    
-16    -160   
128    64     
-192   128    
160    288    
-112   -176   
368    144    
-128   64     
192    -304   
-112   16     
112    96     
-32    64     
208    256    
-64    272    
-64    -64    
208    240    
-224   80     
208    48     
112    224    
-112   48     
128    32     
-128   -224   
240    208    
-208   -208   
144    144    
-64    -32    
256    288    
-64    80     
80     64     
-48    16     
64     16     
0      64     
-16    16     
48     128    
96     48     
0      16     
-128   -432   
48     128    
48     -384   
32     0      
-112   -1456  
352    224    
144    112    
-144   96     
144    32     
144    336    
240    160    
-96    64     
-160   48     
32     96     
320    208    
-16    192    
352    240    
-96    -16    
-16    96     
-16    -1168  
128    256    
240    -256   
0      64     
-176   32     
128    96     
-16    -48    
128    96     
-32    128    
96     144    
192    -32    
-192   -112   
96     32     
16     0      
-16    16     
128    -320   
-48    64     
48     -48    
96     80     
-64    -192   
96     128    
80     144    
176    304    
-16    0      
-16    240    
192    192    
-48    -272   
-64    192    
80     -128   
160    96     
-96    -352   
160    320    
-64    -848   
112    -16    
48     -784   
-32    96     
16     64     
0      160    
144    192    
-64    -272   
-32    144    
80     -16    
-64    16     
-16    -96    
128    -144   
320    352    
32     112    
0      -304   
208    160    
16     256    
-96    208    
-16    112    
112    64     
80     64     
80     -208   
-48    96     
48     -16    
224    160    
-32    96     
-16    64     
-32    -96    
-576   -3008  
496    -16    
-144   -1184  
384    112    
800    -2016  
-192   32     
-256   -416   
224    -592   
-128   16     
512    112    
-208   -16    
-64    -768   
128    0      
304    272    
-208   -208   
-80    -32    
176    -32    
-64    -1232  
64     112    
176    -1216  
-320   -96    
-464   80     
32     -48    
112    -48    
32     -272   
16     -288   
-16    -160   
128    512    
288    352    
-192   16     
16     48     
208    -64    
-32    -368   
16     32     
240    -144   
-176   80     
96     112    
-32    -32    
-48    -128   
-64    -496   
-16    -176   
16     -48    
-32    96     
-16    -240   
128    -16    
-16    -448   
80     128    
144    336    
-16    48     
48     32     
-32    -352   
-112   96     
48     32     
-1056  128    
128    -64    
32     48     
96     0      
240    624    
-240   -1488  
-80    -1072  
112    -496   
208    272    
-32    -48    
48     176    
112    -96    
80     64     
-256   -80    
176    -16    
-160   -64    
80     112    
-96    -16    
32     -32    
80     -48    
-16    -112   
-96    -80    
144    -368   
-160   -320   
272    -80    
-48    96     
-176   -48    
240    240    
-144   240    
96     16     
-64    256    
-32    -176   
-192   0      
80     -208   
-448   -32    
144    -256   
-16    -64    
240    96     
0      144    
-48    112    
16     96     
-128   -32    
128    -80    
-96    -32    
96     64     
-240   -128   
64     -224   
-880   -128   
-32    -160   
-560   112    
0      -80    
112    96     
-64    -528   
48     64     
96     -704   
64     -16    
-32    64     
96     48     
-160   0      
64     -16    
-224   -32    
96     16     
16     64     
16     -224   
-64    208    
48     -128   
48     -96    
-272   -448   
128    -96    
144    -192   
80     -144   
0      112    
-96    -64    
272    288    
-208   0      
272    160    
-224   160    
160    80     
32     240    
-288   -32    
112    -224   
-144   -608   
96     80     
176    16     
96     144    
-112   -176   
0      -32    
-64    -48    
-112   -48    
80     48     
48     272    
-64    48     
0      0      
112    -256   
-272   -192   
176    -64    
128    32     
-848   -144   
0      16     
-80    48     
64     0      
128    176    
-160   112    
-112   -96    
-80    48     
-192   -528   
128    560    
-160   -80    
-688   80     
192    96     
-256   80     
16     80     
208    -240   
-704   -240   
96     272    
-64    160    
-80    128    
-400   -80    
-112   -96    
-1392  0      
-48    80     
176    288    
32     96     
-32    64     
112    -48    
-112   -608   
48     304    
-144   -320   
32     16     
-112   192    
-64    -32    
-48    96     
192    -128   
-64    176    
-224   -64    
-32    128    
-112   0      
48     -32    
-80    -144   
112    160    
-160   -256   
-32    304    
0      -48    
48     272    
-128   32     
384    -1536  
576    208    
960    768    
336    208    
-256   640    
400    192    
-144   -288   
1136   -848   
-144   576    
-224   -160   
144    272    
-304   -16    
176    96     
-160   144    
192    -224   
-192   96     
80     -80    
16     112    
-48    64     
-80    112    
32     -32    
-464   -64    
80     176    
-128   0      
32     -48    
-112   -16    
96     128    
32     96     
-32    32     
-128   -96    
16     -16    
80     256    
-32    112    
-48    -48    
-256   -80    
48     80     
-336   0      
-16    32     
-1248  16     
160    160    
0      -80    
-144   48     
-32    80     
128    224    
-96    144    
48     128    
-48    96     
16     16     
-160   -16    
96     16     
32     192    
-144   80     
96     112    
-256   -80    
112    80     
80     128    
-16    -48    
128    144    
-160   176    
96     0      
-32    32     
-64    112    
-96    -80    
32     80     
-64    96     
32     256    
-144   -80    
32     -32    
-496   -128   
-144   -176   
32     0      
48     -16    
96     64     
-48    208    
-128   -16    
272    240    
-112   256    
112    208    
16     16     
64     -288   
32     256    
-400   -80    
416    304    
-448   -48    
32     -32    
256    32     
-272   -48    
352    144    
-256   80     
48     80     
-32    32     
-16    112    
48     -112   
0      96     
0      -64    
320    512    
-208   80     
128    144    
48     -112   
-48    -48    
80     144    
-48    0      
-16    32     
240    192    
-64    112    
96     80     
-224   -112   
-64    -176   
64     -16    
0      64     
96     64     
-112   112    
0      208    
240    112    
0      112    
-96    64     
32     80     
160    336    
-32    -32    
32     -224   
-208   -112   
32     0      
16     -128   
-48    48     
-288   -96    
192    272    
-96    -16    
192    192    
-160   144    
112    128    
32     32     
-80    32     
-48    -64    
240    144    
160    208    
32     144    
48     144    
16     160    
-144   -16    
112    0      
144    160    
-80    32     
-144   64     
144    80     
-32    -32    
64     -32    
-80    48     
48     -16    
32     224    
0      128    
48     640    
48     -144   
-80    96     
160    176    
-240   -96    
0      96     
128    96     
0      -288   
112    -48    
-64    48     
112    160    
48     -96    
64     80     
16     112    
-48    -256   
288    1104   
208    352    
-256   -672   
0      208    
64     -144   
-96    48     
208    112    
48     -400   
64     0      
96     144    
128    336    
-32    16     
176    -96    
-48    0      
176    96     
0      272    
-48    96     
0      0      
144    0      
112    -112   
336    -208   
160    160    
-96    -464   
192    128    
16     96     
96     192    
-48    128    
80     32     
-144   192    
112    -160   
-48    192    
80     128    
-624   -2480  
1680   2864   
-1264  496    
944    -400   
-480   464    
-448   -976   
320    416    
-16    -1216  
832    528    
-304   -128   
-208   336    
-96    16     
240    32     
96     96     
-48    16     
-144   -48    
144    -304   
-112   0      
208    0      
160    272    
-208   -400   
-64    144    
160    -112   
256    80     
-272   -304   
-32    -80    
-112   -32    
144    320    
-288   -96    
-64    -32    
16     144    
-48    -32    
176    128    
-80    32     
160    -256   
64     240    
64     160    
192    704    
-96    160    
32     -1056  
352    32     
-128   80     
224    64     
-96    112    
64     32     
48     208    
-16    -32    
176    304    
-224   -464   
-176   -368   
336    -144   
-128   64     
112    -816   
272    -208   
-208   0      
256    64     
48     160    
-304   -80    
672    928    
64     -144   
-16    368    
208    -64    
-208   288    
288    32     
-128   240    
128    -384   
-16    208    
48     -160   
64     160    
80     -240   
64     112    
80     16     
0      96     
-32    16     
96     240    
48     -128   
320    32     
-256   48     
112    -144   
144    16     
80     128    
80     48     
32     -16    
96     400    
-16    -144   
-16    112    
96     -192   
192    160    
-48    176    
80     176    
48     128    
80     -160   
-96    32     
144    16     
176    336    
-16    -96    
208    80     
-160   -16    
128    -144   
112    -160   
-96    -160   
224    80     
64     -144   
-48    144    
-720   -272   
-64    -592   
112    -80    
160    -608   
16     128    
32     -32    
48     -144   
-64    16     
0      -224   
64     80     
144    32     
0      -32    
64     -112   
-160   -464   
288    96     
-176   32     
-240   16     
144    64     
112    -512   
-48    64     
48     -1568  
-32    -112   
48     160    
128    112    
128    -144   
-480   176    
544    -112   
-352   176    
-80    -192   
80     -160   
96     -80    
-128   32     
128    -96    
32     -48    
0      16     
144    -336   
32     -208   
0      -736   
16     -160   
256    -176   
-320   0      
112    -352   
-160   -608   
48     -176   
32     -112   
80     128    
112    240    
-640   64     
-64    32     
64     112    
48     -64    
16     -48    
48     -112   
-80    -496   
96     -576   
224    256    
112    192    
-16    48     
0      32     
80     -64    
32     -80    
-48    -240   
-48    48     
208    0      
-368   32     
16     -96    
160    48     
-48    -144   
112    -112   
112    -384   
-192   176    
96     48     
-48    80     
16     -192   
64     96     
-368   64     
48     -208   
48     96     
192    0      
-1296  0      
176    -480   
-224   -160   
16     -80    
-16    208    
0      -608   
112    80     
64     -144   
0      -48    
-32    96     
48     160    
-272   16     
128    0      
-240   -224   
208    -16    
-608   320    
480    -16    
-192   48     
96     -400   
928    944    
-512   -880   
368    -208   
944    -112   
-192   112    
-80    16     
80     -112   
-192   160    
48     -128   
-224   112    
112    -144   
-224   112    
128    0      
48     176    
112    -256   
-16    64     
16     -400   
16     160    
128    64     
144    80     
-256   -128   
208    224    
-288   -16    
272    -32    
-352   -144   
160    -64    
-64    0      
0      80     
-1264  -16    
80     -144   
0      80     
176    -80    
-176   -16    
96     16     
-256   128    
160    0      
16     48     
-48    -32    
48     64     
-32    32     
48     112    
32     48     
64     -160   
176    192    
-2016  -224   
384    80     
-16    112    
-832   -96    
48     96     
-480   48     
176    -16    
-928   0      
-32    80     
128    128    
-192   -48    
160    -144   
-160   240    
-544   -160   
144    64     
-64    128    
160    64     
-192   -320   
-480   -48    
-160   96     
-96    -80    
80     128    
16     -48    
0      176    
-976   -80    
96     192    
-32    -64    
-96    -160   
176    160    
-352   240    
-64    -112   
192    16     
-64    80     
-16    48     
144    448    
-144   240    
176    -96    
-64    -160   
0      32     
-64    464    
-192   64     
-320   144    
-16    48     
-16    -112   
112    80     
-128   32     
64     48     
0      0      
16     -96    
112    112    
-112   0      
0      80     
-64    128    
-16    176    
-192   144    
48     48     
-272   -32    
32     -64    
32     -48    
0      -224   
64     -112   
-64    -112   
64     160    
-64    80     
-48    16     
-80    32     
128    96     
-208   176    
96     128    
-208   48     
64     -32    
-464   32     
16     336    
160    -224   
-336   64     
336    96     
-16    64     
-16    -32    
-176   -80    
-16    32     
160    208    
-192   64     
80     112    
16     -80    
-80    -80    
0      192    
-80    160    
96     160    
-192   144    
-304   -256   
288    112    
-208   48     
112    16     
-32    112    
-32    16     
144    144    
-160   192    
32     -32    
-224   -160   
-16    -384   
16     160    
-16    48     
64     16     
-464   0      
192    208    
-176   96     
-64    -896   
128    608    
64     288    
-64    -128   
-256   -48    
192    -48    
-240   -32    
128    64     
-96    0      
32     192    
-304   -320   
0      -144   
-160   16     
272    272    
64     48     
16     64     
-16    192    
-48    64     
0      -96    
112    192    
-32    -96    
-16    128    
-128   32     
192    112    
-112   112    
-112   -32    
80     80     
-32    48     
-80    80     
272    -16    
-160   224    
-80    48     
-48    80     
0      96     
-16    48     
-48    -16    
144    0      
32     176    
-240   -160   
16     512    
-288   -16    
176    96     
64     -160   
1856   624    
-1312  -1648  
640    688    
64     848    
608    -80    
-960   -288   
320    -208   
336    1456   
-240   -80    
-384   -192   
-176   -368   
368    304    
-160   64     
64     144    
-128   16     
192    176    
-256   0      
32     -192   
-448   -176   
432    -224   
32     128    
0      48     
176    544    
-32    144    
208    160    
-224   16     
-32    240    
-304   288    
352    208    
-368   64     
-96    -64    
32     48     
96     96     
-48    112    
32     352    
0      112    
-96    176    
-48    -64    
208    96     
128    -16    
-48    112    
112    224    
16     176    
-64    64     
-48    16     
-192   -160   
368    48     
-112   16     
-192   -176   
-80    -224   
80     48     
-112   144    
64     176    
128    -176   
-80    224    
-64    -144   
-48    640    
-128   608    
384    512    
32     176    
64     64     
-112   0      
48     176    
-96    80     
-48    -64    
128    112    
32     16     
128    128    
-176   -144   
160    176    
224    -144   
144    336    
-240   272    
64     -128   
0      0      
-208   -416   
336    240    
-352   144    
96     224    
-176   -64    
80     16     
144    224    
128    208    
-224   160    
-64    0      
144    80     
-208   -160   
368    192    
-128   -432   
224    192    
-80    64     
0      112    
112    224    
-16    -64    
96     -96    
-48    -32    
-144   -336   
48     128    
240    320    
0      -16    
-176   -96    
160    -144   
48     144    
80     -448   
160    144    
-80    192    
160    288    
-112   128    
256    80     
16     -224   
-48    -128   
-64    64     
128    384    
160    144    
-64    -64    
64     128    
176    384    
-64    -80    
-160   16     
160    -288   
32     48     
144    48     
-16    384    
-48    48     
0      -272   
32     112    
-48    48     
288    48     
-144   80     
128    192    
-16    96     
-160   112    
96     -80    
48     112    
80     32     
208    -80    
-64    112    
176    -2240  
-272   192    
208    -400   
112    128    
-144   64     
16     48     
-32    -144   
112    0      
-160   144    
240    -336   
-96    176    
80     -672   
96     112    
-80    -608   
48     64     
-64    -416   
128    32     
112    128    
-64    96     
160    64     
112    0      
-176   176    
32     64     
80     192    
0      -240   
112    144    
32     -192   
256    192    
-192   176    
-48    80     
96     -96    
64     -48    
160    -96    
64     128    
16     272    
-208   128    
48     112    
96     -288   
320    160    
48     -352   
-48    112    
-16    32     
0      64     
64     -112   
144    128    
-48    -320   
240    112    
-48    64     
144    32     
64     176    
-32    -1008  
64     -1232  
-96    -64    
64     -640   
0      -224   
128    144    
-48    16     
160    -112   
96     0      
-64    192    
-256   -80    
-416   -1376  
1392   688    
-736   352    
0      -208   
624    -240   
176    -1312  
-352   32     
544    -272   
496    592    
-48    -1264  
-32    352    
16     -368   
128    144    
32     -160   
240    400    
-128   -256   
-48    272    
96     -160   
64     -32    
-560   -128   
176    -320   
-144   240    
48     -432   
112    208    
64     -960   
-160   80     
240    -2144  
-16    208    
80     -160   
-144   208    
208    -256   
-80    256    
128    -416   
-96    48     
-160   -80    
48     80     
-736   -96    
-16    -16    
80     -112   
64     -128   
144    -16    
-16    160    
16     -48    
256    -32    
-112   176    
224    -128   
-160   128    
80     80     
176    -144   
16     64     
-48    -112   
-800   -128   
-32    -80    
-80    -96    
32     0      
32     64     
144    -320   
-288   -16    
112    -1168  
-48    -16    
176    64     
-64    48     
0      80     
-16    32     
32     -224   
48     -48    
-160   -112   
128    0      
-1344  0      
48     -64    
-64    -256   
112    -384   
-96    32     
32     -656   
48     128    
-32    -112   
176    -80    
-112   112    
-128   64     
-16    -144   
192    48     
-112   80     
144    352    
-352   48     
-128   -384   
-672   64     
-112   -336   
192    128    
96     0      
-48    64     
-160   -576   
144    32     
-96    144    
80     -192   
-16    0      
32     64     
144    32     
48     96     
-336   96     
0      -160   
-288   32     
272    80     
-48    320    
48     -160   
32     240    
-64    -432   
80     0      
-16    -96    
-160   -208   
-176   -48    
48     -64    
-240   -64    
128    -112   
-240   -80    
96     -96    
-96    -48    
160    -48    
16     176    
-16    -384   
96     64     
-80    144    
32     -64    
48     96     
80     0      
-208   -416   
112    208    
-48    -80    
-32    144    
16     128    
128    0      
-112   128    
-16    -304   
32     96     
-1168  -32    
-16    224    
288    64     
-1488  -256   
272    256    
-384   192    
-112   80     
-80    16     
-48    -208   
192    48     
-144   144    
-656   -272   
48     112    
0      -224   
16     -96    
-48    -128   
-224   16     
0      16     
-672   48     
-96    64     
-1424  -64    
112    128    
-176   144    
-32    -80    
96     192    
-272   -16    
-320   -208   
-128   -112   
16     -224   
224    192    
0      224    
-80    -32    
64     -144   
-176   64     
0      128    
144    128    
-208   -64    
-208   16     
-48    96     
64     48     
-128   80     
240    -80    
-96    192    
-64    -192   
-16    96     
80     96     
-16    32     
-176   96     
-16    32     
-48    160    
128    -48    
-112   -80    
-112   -144   
144    64     
-368   112    
-208   128    
16     -112   
128    224    
-256   -144   
-272   -112   
-176   352    
-80    -80    
-16    80     
48     -48    
-768   2752   
160    -304   
-736   -1408  
752    208    
208    448    
-448   -96    
-272   336    
-96    -512   
512    -144   
-352   208    
224    80     
-272   336    
-16    -320   
160    336    
64     -336   
-448   112    
-144   -304   
416    368    
240    80     
128    368    
-320   -208   
304    48     
-1056  160    
240    -400   
-64    -16    
-176   400    
64     304    
-672   -416   
208    32     
-64    -176   
320    128    
-144   160    
16     176    
-144   80     
-64    -48    
-224   -160   
-48    224    
-96    432    
-112   160    
-48    64     
-160   -128   
32     32     
144    176    
48     128    
-80    96     
-16    160    
-208   128    
96     176    
-176   64     
48     64     
-96    -64    
-32    192    
-288   -192   
128    32     
-128   -32    
176    176    
16     96     
-32    192    
-80    32     
208    96     
-16    64     
-32    16     
32     64     
-112   304    
-48    112    
64     -128   
32     160    
-128   -224   
96     176    
-64    16     
240    48     
16     -48    
-16    160    
112    256    
-272   80     
-48    16     
48     80     
-64    64     
80     48     
-96    48     
-96    -96    
48     64     
-80    -176   
-32    -256   
-32    144    
0      288    
256    560    
-144   320    
48     80     
48     32     
112    112    
-160   -96    
-48    -128   
-96    -96    
80     96     
-208   -32    
48     192    
64     160    
0      64     
112    112    
-112   16     
-32    -32    
-48    -16    
160    128    
-16    -32    
32     -64    
-128   0      
64     -96    
208    144    
-144   -32    
32     176    
48     208    
160    176    
-112   96     
-64    32     
-80    96     
112    112    
96     224    
32     176    
32     240    
176    176    
-48    80     
48     176    
112    128    
96     -16    
-160   208    
-48    288    
144    192    
16     32     
16     16     
0      48     
160    80     
-144   160    
304    128    
80     -192   
-224   16     
-224   32     
272    160    
144    48     
-128   32     
16     240    
112    96     
176    96     
144    304    
-32    160    
176    112    
48     272    
-160   144    
160    96     
-16    80     
0      64     
64     128    
-16    32     
64     128    
32     64     
0      144    
32     -320   
-16    -96    
-16    -176   
64     64     
112    208    
0      112    
32     80     
-16    112    
128    192    
-96    16     
48     -304   
144    64     
-48    128    
-64    -400   
32     192    
80     -432   
-64    48     
96     80     
0      96     
0      32     
80     112    
-48    -96    
208    80     
16     192    
16     304    
-224   -384   
112    64     
80     -48    
-160   -96    
96     208    
112    -208   
48     80     
128    16     
48     112    
128    144    
-144   96     
176    16     
32     96     
48     160    
-16    144    
0      64     
-32    112    
1296   352    
-240   352    
1376   -576   
-656   -624   
-368   -368   
416    -16    
-48    -352   
144    1008   
-352   -704   
224    720    
256    -336   
-32    832    
-144   -352   
-64    304    
-48    -144   
464    272    
-272   -144   
224    112    
-432   -592   
368    -64    
-112   160    
432    -80    
-192   -352   
192    -272   
-224   304    
256    -96    
-32    352    
128    32     
0      176    
16     -320   
48     160    
128    -240   
-80    160    
112    0      
64     144    
192    -192   
96     336    
-64    -2400  
128    80     
-16    80     
112    96     
64     112    
16     48     
64     144    
-48    32     
112    144    
80     -80    
16     128    
80     -96    
-32    64     
96     -144   
48     112    
64     32     
0      112    
32     -128   
224    288    
-80    -16    
160    144    
16     144    
32     -160   
64     -64    
144    -336   
-32    176    
48     -304   
0      16     
144    -160   
96     64     
-64    16     
-64    -32    
224    -16    
-64    128    
48     112    
16     128    
32     64     
176    -96    
144    0      
-64    -144   
-112   288    
288    -16    
-16    288    
64     -32    
48     0      
-64    -208   
272    192    
-144   -48    
-32    -480   
64     32     
-96    0      
32     -416   
176    -224   
-32    -2288  
0      -64    
48     176    
-16    -112   
64     208    
240    -288   
-144   -1040  
32     32     
0      -16    
0      96     
96     144    
-32    112    
-736   -208   
0      -240   
80     -208   
-32    -1136  
240    64     
48     -144   
128    -48    
-112   208    
48     -176   
112    208    
128    64     
-32    -208   
32     112    
80     -80    
112    0      
-576   -48    
96     -16    
128    256    
-64    -16    
0      -208   
80     -240   
320    -48    
112    -1168  
-112   176    
-48    96     
208    -48    
0      -176   
128    192    
176    -112   
-112   -240   
64     224    
-48    -144   
16     64     
-272   -544   
288    -512   
-80    -656   
352    32     
16     -160   
80     -32    
-16    144    
112    176    
224    -48    
-192   -144   
64     -96    
-64    320    
-32    -128   
-32    -208   
-256   -112   
144    -32    
176    96     
144    -48    
-352   208    
32     -112   
16     -144   
-112   -1936  
144    0      
-48    48     
-80    -16    
-64    32     
32     -48    
112    80     
-80    -48    
-128   -48    
-80    512    
-448   -240   
304    64     
-48    208    
208    -432   
-80    144    
-112   -736   
160    -32    
32     144    
144    -64    
16     64     
48     -224   
-16    32     
80     -144   
-288   -64    
256    64     
-112   240    
-16    -176   
0      -384   
384    -192   
0      352    
-32    -336   
-176   32     
272    32     
224    176    
224    -160   
-272   0      
-272   -256   
336    128    
48     224    
160    -96    
-576   -176   
1392   96     
336    80     
-208   -432   
-272   -256   
-368   464    
64     -1120  
368    304    
160    -496   
32     448    
-208   -656   
112    416    
-80    -224   
192    -288   
64     80     
96     -96    
48     160    
-368   -208   
96     48     
224    -16    
144    -304   
-320   272    
464    96     
-192   -96    
112    48     
80     128    
16     96     
-16    -64    
-128   -176   
128    128    
-96    16     
80     16     
48     64     
-320   -240   
208    160    
16     -176   
-736   96     
-48    48     
-112   112    
-112   -16    
-1520  -240   
-256   176    
48     -96    
-144   -128   
64     144    
128    240    
-656   -224   
-48    -16    
-144   -496   
320    272    
-448   -32    
240    -48    
-224   128    
-64    -16    
32     240    
-544   64     
96     208    
-592   -112   
192    48     
-64    128    
-80    0      
-304   -96    
64     96     
-128   16     
96     64     
160    144    
-272   -64    
-160   112    
-64    -96    
-80    112    
-128   -48    
16     144    
-432   64     
-64    -64    
256    -112   
-80    128    
-96    -288   
352    96     
-64    224    
-192   176    
-96    64     
-16    -32    
-16    32     
64     192    
-224   192    
16     32     
-16    -80    
-352   -32    
0      208    
-128   -192   
144    208    
-64    -80    
208    272    
-320   -128   
48     32     
64     0      
-80    16     
-64    16     
16     176    
-48    -16    
-32    -16    
48     112    
-96    112    
48     160    
-256   -16    
96     -48    
-64    -144   
64     16     
112    208    
-160   176    
80     -16    
0      160    
-16    96     
0      -64    
-176   -64    
-208   -128   
144    -128   
-160   -32    
144    80     
-304   -48    
80     160    
-480   -112   
-128   96     
-96    96     
304    80     
-112   -64    
48     -16    
-64    256    
96     80     
-96    128    
32     112    
144    240    
-64    224    
32     -48    
-496   -48    
-32    -80    
-384   -96    
16     224    
112    48     
48     112    
-224   112    
48     32     
64     160    
176    96     
-112   176    
208    112    
48     240    
-240   -80    
80     96     
-144   80     
80     96     
-80    176    
16     32     
16     112    
-64    32     
-48    64     
0      64     
-96    -32    
32     -176   
48     144    
-96    64     
-48    -16    
-112   96     
96     128    
-64    64     
144    112    
-96    288    
-144   176    
320    -48    
-144   -48    
48     -32    
-16    128    
-32    -32    
192    192    
-112   64     
32     176    
-144   -112   
32     -80    
256    208    
48     -48    
48     320    
-48    80     
-32    224    
-112   144    
128    -80    
256    48     
64     -112   
-176   112    
-176   112    
0      32     
32     32     
144    96     
-64    -32    
32     160    
96     176    
-80    16     
144    32     
-96    0      
-448   1744   
-912   -528   
-672   192    
800    192    
1296   -336   
-624   128    
224    496    
-480   -352   
464    -64    
-320   -64    
304    240    
-176   -32    
16     176    
96     128    
64     -48    
-144   32     
96     112    
-16    80     
-80    -96    
80     48     
16     -32    
-16    160    
-160   112    
32     96     
-176   -128   
128    -48    
16     160    
80     208    
-80    208    
-32    -32    
-16    48     
0      0      
368    192    
-80    240    
208    128    
-176   -32    
-96    96     
48     0      
16     32     
48     64     
112    96     
32     208    
-16    96     
32     -16    
-32    32     
32     48     
160    192    
-48    224    
64     240    
-64    -16    
0      -48    
48     224    
48     32     
32     144    
80     -16    
32     176    
0      160    
48     -2176  
96     64     
16     0      
16     304    
128    144    
32     272    
160    224    
-112   160    
-112   -64    
128    -32    
-112   -320   
-16    -16    
0      -80    
-32    -224   
48     0      
96     -304   
144    192    
-96    144    
48     144    
-144   -320   
160    -128   
-112   192    
-256   -432   
384    48     
-160   192    
112    32     
16     240    
-32    96     
32     -128   
112    176    
-112   -272   
176    144    
112    336    
64     112    
32     0      
112    112    
48     144    
-16    96     
-48    -160   
112    64     
16     16     
32     112    
96     128    
16     -48    
16     64     
0      -272   
80     64     
64     -1504  
16     96     
96     224    
-112   -16    
16     -336   
64     144    
-48    -32    
96     64     
-128   48     
16     -256   
128    128    
-96    -144   
128    240    
-32    -416   
48     96     
64     -320   
48     48     
-80    -1536  
16     80     
224    -32    
112    144    
-192   128    
-16    416    
80     -176   
112    -96    
32     176    
192    -32    
-112   80     
-128   112    
224    160    
0      -128   
96     128    
-240   -1152  
304    64     
-48    448    
32     -48    
16     160    
16     48     
96     48     
-64    -192   
-32    80     
96     -288   
144    240    
-80    -32    
64     80     
16     -352   
176    80     
-64    -320   
64     -16    
240    64     
256    576    
-464   -176   
384    160    
-256   -80    
544    -336   
-48    352    
-16    0      
0      240    
-128   -336   
416    240    
48     -176   
-256   -208   
400    0      
-240   528    
-48    -64    
-16    96     
208    -96    
144    -16    
-112   224    
-208   240    
-48    -80    
480    -112   
-272   272    
-112   -528   
80     96     
352    144    
288    240    
-144   288    
-304   368    
-64    32     
80     -192   
96     32     
-688   -112   
48     -96    
-16    -400   
16     -864   
16     -208   
256    -928   
-80    -48    
272    80     
-192   -16    
128    -16    
32     -128   
64     -624   
256    2304   
224    -864   
-880   -384   
-688   -192   
48     1104   
-208   160    
80     -1168  
176    -256   
-240   -16    
272    -480   
0      -1056  
208    -224   
128    -288   
-176   256    
224    -32    
64     48     
96     -192   
0      -48    
0      -64    
64     -224   
-752   112    
80     -16    
48     -16    
112    -400   
-32    -16    
64     -1328  
32     16     
48     -160   
48     32     
16     16     
176    176    
-224   -96    
0      80     
-160   -144   
0      48     
-320   -368   
64     0      
16     -64    
160    -256   
-80    -208   
64     -752   
80     64     
80     -176   
96     64     
-48    -128   
48     112    
-48    -48    
112    208    
-416   48     
272    -32    
-320   48     
32     -80    
-192   0      
-80    -16    
96     -64    
160    272    
-144   -16    
368    -496   
-256   192    
256    -208   
208    80     
-160   128    
112    -112   
-32    160    
-16    -208   
-128   -224   
-64    -336   
-320   192    
-112   64     
64     80     
32     -240   
112    160    
-128   -464   
176    -16    
128    48     
-48    -64    
16     192    
-32    -32    
-64    -16    
80     -16    
-80    -112   
192    -16    
-96    176    
-96    48     
-1088  -128   
64     -752   
80     -32    
48     -304   
-80    64     
176    96     
0      -208   
-192   -48    
32     -64    
128    208    
-176   -16    
144    64     
-80    -80    
96     32     
-32    64     
128    80     
-32    -16    
128    144    
-96    -32    
160    48     
-80    -32    
96     128    
-304   -176   
96     -176   
-128   0      
240    144    
-96    -48    
-128   -128   
-80    96     
80     -160   
96     48     
-96    -160   
112    96     
48     -32    
-1488  32     
320    144    
80     96     
-160   32     
-64    96     
-96    -16    
304    80     
-336   -32    
384    208    
0      240    
224    -16    
-96    144    
-400   -224   
-48    48     
-240   -320   
-160   -16    
-80    -16    
16     -32    
0      16     
-160   32     
-240   -16    
32     48     
-96    80     
144    16     
-80    0      
-320   -144   
-96    256    
-352   -192   
-48    -16    
144    -96    
-208   128    
112    160    
-192   -32    
-112   96     
-448   0      
-32    -64    
-336   -80    
-96    144    
320    -16    
-176   96     
-32    -160   
-16    0      
-48    -272   
192    128    
-16    16     
-64    -64    
16     256    
-224   -144   
32     0      
-336   -320   
48     144    
-112   176    
0      96     
-1136  -208   
-128   -192   
-64    -64    
-32    80     
0      80     
64     -48    
64     48     
-32    -48    
16     80     
0      64     
-32    80     
16     160    
32     32     
-128   32     
-192   0      
-1088  32     
224    224    
-16    -16    
-48    176    
-48    -32    
-144   -112   
-32    96     
128    0      
-96    -48    
128    -48    
48     192    
-256   3952   
-1552  -816   
-112   -224   
608    480    
736    -784   
-496   -544   
-128   704    
544    -208   
-208   48     
176    16     
-192   -48    
-240   -64    
256    208    
112    80     
-272   16     
-80    80     
128    128    
-224   -64    
-80    -176   
-160   -64    
-112   32     
-704   -32    
16     176    
-80    176    
-128   32     
64     144    
64     128    
-80    128    
0      144    
-96    -224   
-48    224    
-64    176    
256    224    
-240   -96    
-48    -208   
-48    160    
-272   192    
-112   192    
0      32     
16     112    
-16    16     
64     128    
-32    80     
-16    112    
0      160    
-16    240    
-64    96     
-32    192    
-80    320    
-48    16     
48     208    
-128   -32    
16     64     
-192   0      
144    0      
-64    96     
0      -80    
-32    48     
16     -16    
-48    -192   
32     160    
-48    16     
-96    64     
64     304    
-176   16     
144    -48    
-48    144    
-80    0      
80     16     
-128   48     
16     64     
96     64     
-32    80     
112    192    
-112   128    
-16    144    
0      48     
-128   192    
480    288    
-80    128    
16     192    
48     -48    
-64    -112   
48     -80    
128    16     
80     64     
96     256    
-96    32     
48     -16    
-64    160    
16     -48    
48     176    
-64    32     
96     128    
-80    80     
-112   -64    
176    80     
128    352    
16     112    
128    64     
-112   80     
48     -64    
80     48     
-48    80     
64     128    
-16    32     
80     272    
-176   32     
96     80     
-144   -16    
16     96     
64     80     
-48    48     
128    112    
16     128    
32     96     
0      160    
48     48     
64     128    
16     112    
-80    64     
-48    -80    
-128   -32    
240    64     
208    128    
16     192    
-96    288    
-32    144    
272    160    
-208   -112   
176    48     
-32    112    
80     144    
48     16     
-48    112    
-144   -624   
80     -64    
144    -320   
112    208    
-48    192    
32     -48    
-112   -32    
48     32     
224    144    
-96    16     
-64    -64    
96     352    
160    32     
0      64     
-80    -128   
48     -16    
48     112    
48     128    
32     -176   
80     -256   
240    -2656  
96     240    
-112   144    
16     96     
128    240    
144    48     
16     128    
64     16     
64     240    
48     48     
-96    128    
112    224    
144    -208   
112    -64    
112    64     
-64    -320   
144    -80    
16     48     
32     208    
48     80     
0      176    
-32    96     
400    -336   
-80    176    
224    32     
-208   96     
176    64     
80     144    
32     -224   
64     -80    
160    -48    
80     176    
288    432    
-80    304    
0      16     
-16    128    
96     -224   
192    160    
-32    128    
128    160    
-192   208    
208    -128   
-496   112    
640    1984   
-992   896    
272    -544   
112    -752   
64     -1680  
112    -176   
-416   32     
368    736    
464    -96    
-304   80     
-16    -112   
256    336    
-128   -16    
192    64     
-48    160    
48     -48    
48     112    
16     -112   
48     -48    
64     -544   
80     272    
48     -336   
48     32     
-160   -80    
144    -144   
128    64     
-80    256    
144    16     
48     32     
-112   -16    
112    -128   
0      144    
0      -320   
16     80     
16     -64    
-128   -208   
192    -352   
-96    112    
256    -32    
-272   80     
112    128    
112    144    
80     128    
-16    -544   
-16    16     
0      -256   
128    112    
16     -32    
16     144    
64     -352   
32     192    
16     -1776  
96     144    
-16    128    
80     80     
112    128    
-144   96     
208    112    
16     -16    
0      96     
80     112    
80     128    
16     -96    
80     0      
128    -80    
32     176    
-96    16     
80     32     
256    224    
-176   -1376  
96     -16    
-288   -192   
-16    -992   
176    -64    
-48    -656   
96     48     
-96    -48    
112    -240   
-16    144    
48     -64    
160    48     
48     16     
-16    -1056  
272    -96    
48     -448   
-240   -304   
-432   -128   
-96    -128   
96     -16    
-16    144    
16     -160   
224    -1296  
32     -48    
144    80     
-16    -240   
144    128    
-16    144    
112    -256   
-64    32     
96     -304   
-32    -64    
64     64     
16     -384   
16     -16    
-32    -496   
336    240    
-176   0      
224    16     
96     -1200  
48     -80    
48     -704   
-272   -64    
144    80     
64     176    
32     112    
32     -176   
-32    -64    
16     -144   
-160   32     
64     144    
64     80     
288    -144   
-224   -32    
240    -448   
-448   -256   
192    96     
144    208    
96     176    
-112   176    
-112   -64    
0      -48    
-64    -64    
64     208    
-80    -176   
-32    80     
-80    -144   
208    0      
48     -320   
-32    -368   
144    224    
96     32     
0      192    
64     -64    
-128   144    
80     -16    
144    0      
-112   -192   
48     48     
-256   -16    
48     -288   
-192   -112   
80     -240   
-16    256    
-48    -272   
64     96     
80     -912   
0      32     
96     80     
128    48     
-64    -16    
-32    16     
-48    -64    
16     -32    
-256   -144   
192    0      
-16    144    
128    -16    
-96    64     
96     -320   
-64    -192   
208    -432   
80     160    
-80    272    
-64    416    
-32    -144   
272    80     
-80    224    
160    48     
-272   160    
80     0      
48     -240   
96     80     
64     -48    
-48    32     
144    32     
80     -192   
96     352    
-176   112    
48     16     
-192   -16    
96     -96    
-128   32     
-128   -64    
80     144    
64     144    
-48    16     
0      -176   
2096   -2144  
-208   -624   
1120   944    
-512   640    
720    -1264  
-80    -544   
144    -160   
368    848    
-112   -112   
-256   -160   
384    -64    
-64    -16    
-304   -528   
32     0      
-16    -352   
96     -32    
-240   -160   
192    -32    
-976   -336   
-656   80     
-160   -96    
64     96     
48     112    
64     208    
96     144    
-80    96     
-80    208    
-240   -96    
288    240    
-240   128    
144    -80    
-320   -32    
-16    128    
-48    -176   
-144   48     
-64    64     
-256   -192   
-80    192    
-336   176    
96     176    
-432   32     
-16    16     
96     32     
-48    16     
32     -32    
-16    96     
-32    -192   
-208   -32    
32     -176   
-16    240    
160    80     
-224   -48    
-112   -144   
-176   -48    
-240   -48    
-560   112    
0      368    
144    208    
48     192    
-224   112    
-32    -128   
-192   -64    
96     -128   
80     240    
-176   160    
-16    64     
96     160    
-96    80     
-112   0      
-16    48     
-208   112    
-16    112    
-704   -112   
-32    272    
-48    -48    
16     208    
176    704    
-112   672    
384    128    
-128   384    
112    -96    
-304   -112   
16     -96    
-96    48     
48     64     
-48    -192   
144    144    
-848   -32    
-32    64     
80     0      
-16    192    
-16    -80    
-80    -48    
64     160    
-176   80     
-16    64     
-128   16     
176    192    
16     64     
-64    -144   
-128   112    
16     80     
-128   -48    
0      192    
-112   -112   
256    144    
-208   -240   
80     48     
-224   80     
144    -16    
0      112    
32     176    
48     80     
-224   -32    
-32    -16    
-16    96     
192    448    
0      176    
16     240    
-864   176    
-32    144    
16     48     
16     160    
-16    -16    
0      -64    
304    304    
-448   48     
304    -128   
-448   80     
384    64     
-128   256    
-96    144    
-224   -192   
0      64     
-944   -272   
80     208    
-192   -288   
-64    240    
64     80     
-96    -80    
32     80     
-80    -32    
192    192    
-320   -64    
224    128    
-208   -64    
112    208    
-320   -272   
192    368    
-160   -128   
112    128    
-16    160    
-16    -16    
32     48     
0      352    
16     176    
80     0      
-64    336    
272    80     
-128   112    
-208   -160   
96     304    
-64    -16    
32     0      
80     496    
-112   -336   
272    -112   
240    560    
208    208    
-336   -48    
16     48     
272    96     
-96    96     
-144   0      
-16    0      
-80    32     
160    144    
-16    48     
16     144    
0      32     
-48    80     
-80    64     
48     -96    
272    80     
64     224    
48     128    
-128   176    
0      -16    
0      48     
96     -16    
-48    144    
-16    112    
-192   64     
64     -48    
-144   288    
-128   176    
-16    -16    
480    96     
-64    -608   
400    -512   
624    512    
32     -128   
-64    -272   
144    416    
-112   432    
336    128    
160    -96    
-224   -64    
304    112    
-32    112    
-80    112    
144    96     
-16    96     
32     32     
-160   -32    
128    96     
128    160    
48     96     
-112   -64    
32     160    
16     80     
112    128    
48     32     
32     144    
-208   64     
224    80     
-16    128    
48     0      
48     -48    
-128   176    
176    144    
48     80     
-32    -64    
48     224    
112    320    
-48    -128   
-80    -160   
48     96     
64     48     
16     128    
-16    96     
240    128    
-208   80     
160    48     
32     80     
-96    -48    
128    208    
-176   -48    
288    176    
-144   240    
256    112    
-160   -48    
96     -16    
80     -1248  
-80    -80    
256    176    
-176   144    
160    -64    
96     192    
-32    256    
-48    80     
32     -320   
64     240    
-128   96     
160    112    
64     -64    
128    -192   
-80    160    
-16    -416   
64     16     
112    80     
16     224    
-144   112    
64     -16    
-16    48     
48     64     
112    16     
-64    144    
-48    48     
128    80     
-96    -160   
160    -320   
-144   128    
16     -368   
224    320    
-256   -2480  
144    256    
-32    -48    
96     192    
16     80     
16     144    
80     64     
-96    -80    
192    128    
96     96     
-48    208    
160    -64    
-48    128    
128    -192   
144    224    
-160   -880   
48     144    
-16    -192   
112    160    
64     32     
-96    -64    
-80    -80    
192    128    
-16    -96    
16     -48    
160    96     
16     -128   
96     32     
-64    -368   
112    192    
80     -336   
32     160    
-64    -64    
112    64     
-256   -16    
96     80     
144    128    
32     144    
0      -48    
48     -144   
304    288    
-48    -288   
32     128    
-48    -144   
208    -16    
-80    -32    
208    160    
64     -416   
-80    16     
-240   16     
256    144    
96     0      
-208   176    
464    160    
-96    -176   
256    416    
-272   -128   
96     192    
-176   0      
288    -272   
-272   -480   
320    352    
-112   -64    
32     80     
112    48     
16     192    
48     176    
-32    -752   
-32    304    
128    16     
32     -208   
-32    144    
112    192    
-112   -192   
160    288    
-32    -224   
224    64     
-48    -128   
96     16     
-32    176    
320    -64    
-208   -208   
-1184  -128   
80     -496   
128    -16    
-96    -144   
112    -80    
320    224    
-96    -448   
64     -16    
16     -96    
144    -704   
-16    144    
80     -256   
-96    96     
32     -352   
-32    -656   
-352   -112   
288    -96    
32     48     
160    -624   
-144   0      
32     -1184  
160    -16    
96     16     
-16    32     
192    -224   
176    224    
48     -128   
-32    -80    
-624   3248   
800    96     
-1200  -1696  
896    64     
-112   -96    
-448   -704   
720    -1120  
-640   -64    
128    -736   
112    -1504  
352    240    
0      288    
-224   448    
-128   112    
16     -96    
-96    16     
48     -32    
-256   240    
-272   -240   
-272   32     
-64    -80    
128    64     
96     48     
112    -16    
112    -368   
-16    -48    
48     -144   
192    304    
-96    112    
16     64     
48     112    
-160   -192   
-48    96     
-16    32     
128    208    
0      32     
112    32     
-240   -544   
-112   -32    
32     -784   
-48    208    
16     -1200  
112    16     
80     -16    
-96    -272   
48     96     
0      -32    
-48    336    
-208   -240   
-304   -96    
320    -16    
-512   -16    
16     -320   
-160   -160   
80     -384   
128    128    
-96    -448   
-48    64     
256    -80    
128    -208   
-304   32     
144    -80    
-144   64     
-32    -96    
-576   192    
-192   -256   
192    32     
48     -16    
176    16     
-32    -144   
32     128    
112    -480   
32     96     
-144   32     
112    96     
-48    48     
464    400    
-656   544    
-192   -352   
-272   -320   
208    -224   
-96    16     
32     -64    
0      176    
112    -288   
96     48     
352    -240   
-400   -160   
-80    16     
48     288    
-112   112    
-144   -256   
-272   48     
208    -96    
-96    112    
336    416    
-160   48     
96     -448   
176    112    
224    -96    
32     160    
0      0      
-32    -32    
32     32     
32     -112   
0      80     
128    208    
-96    -160   
64     -240   
-48    -96    
160    -112   
0      32     
80     -144   
64     16     
-1296  -96    
32     16     
-608   -64    
-608   -128   
0      32     
-1280  -48    
16     96     
-832   64     
-176   -16    
144    -320   
32     -176   
32     32     
0      32     
-144   -16    
-112   0      
128    -16    
16     48     
-80    -224   
-176   96     
-64    96     
-192   -224   
160    96     
-464   -128   
-256   -368   
-1984  -416   
-288   48     
48     64     
32     96     
-32    -144   
-32    96     
-320   -176   
128    368    
16     288    
64     96     
-112   192    
0      -80    
-48    48     
-96    -96    
32     128    
-496   32     
16     128    
-32    16     
64     144    
-160   -464   
272    64     
-192   16     
-48    -16    
-96    208    
64     -32    
16     16     
-192   -96    
272    208    
-208   112    
-128   240    
-512   48     
112    32     
-832   -176   
112    0      
160    -240   
-80    208    
176    -272   
48     304    
-112   32     
-96    144    
-160   0      
-160   -64    
-32    0      
-16    16     
-96    -64    
144    160    
-256   112    
-176   -144   
112    80     
64     -16    
-64    112    
80     144    
-32    96     
-48    -16    
-32    16     
80     32     
48     -96    
0      288    
-32    144    
-800   -864   
-176   1024   
-512   -496   
-400   -448   
96     176    
-480   112    
560    -400   
-368   448    
240    160    
240    -16    
-160   -64    
304    -192   
-272   496    
240    -176   
-224   400    
224    -224   
-336   336    
32     -112   
-32    224    
144    -96    
-624   -64    
-128   0      
-96    256    
96     -96    
-80    112    
32     -80    
-32    32     
-208   80     
176    -16    
-128   32     
16     48     
-128   96     
48     96     
-192   96     
96     0      
-176   -16    
240    192    
-48    192    
64     0      
-128   48     
48     32     
-80    80     
16     96     
48     112    
-48    80     
16     32     
-160   80     
128    96     
-160   -96    
272    144    
-240   160    
224    16     
-48    176    
16     0      
80     144    
-80    64     
48     -16    
-64    144    
64     32     
112    48     
-160   96     
-64    -48    
64     112    
-96    32     
80     96     
64     64     
-80    16     
32     96     
32     -48    
96     80     
-80    64     
48     96     
64     64     
0      96     
-80    0      
32     112    
-32    80     
96     80     
80     176    
-32    0      
208    192    
-128   96     
128    -96    
48     48     
-176   256    
16     176    
192    432    
-272   16     
288    -112   
-48    -64    
0      48     
80     80     
-96    80     
-32    80     
160    496    
-128   128    
0      96     
-32    -16    
32     96     
0      -208   
32     176    
0      -32    
80     304    
16     -16    
-64    80     
144    -48    
96     96     
-48    -32    
-16    -16    
-96    192    
128    272    
176    496    
32     336    
-16    160    
-128   -80    
0      96     
0      -64    
16     48     
64     96     
-96    -80    
48     176    
-272   16     
48     -1312  
80     128    
-64    112    
48     48     
0      64     
112    64     
-224   -80    
272    128    
-112   192    
96     80     
32     144    
16     32     
0      112    
112    192    
-32    -112   
-32    -64    
80     336    
144    -624   
80     80     
-96    128    
128    208    
-96    160    
176    80     
-160   -48    
224    224    
96     144    
-96    176    
-16    -160   
128    128    
-112   144    
80     -48    
32     144    
-32    -2816  
304    912    
-256   320    
336    64     
-464   -320   
176    -256   
-16    -32    
-192   -112   
48     -80    
-16    16     
144    240    
-160   16     
400    208    
-112   -16    
32     -64    
112    -544   
48     112    
80     64     
-64    320    
-144   64     
352    32     
-352   288    
192    -16    
-96    160    
-48    128    
240    -16    
-64    160    
48     208    
-16    -112   
-80    128    
0      -144   
64     96     
112    -608   
144    128    
0      -112   
-96    176    
64     -32    
0      112    
-16    144    
32     64     
-64    -64    
128    0      
192    128    
0      32     
1360   640    
-560   -2688  
32     -160   
224    -32    
272    -240   
-624   -960   
96     -880   
576    1008   
-256   -32    
-160   -352   
96     -160   
-32    768    
240    -128   
-64    176    
0      -624   
496    464    
-80    -656   
416    704    
-608   -128   
464    64     
-224   -16    
208    -272   
128    352    
48     112    
64     160    
-80    -224   
80     320    
-64    -48    
112    352    
-160   -832   
272    176    
-144   -336   
0      176    
32     80     
16     112    
80     336    
272    208    
-32    208    
-64    -240   
112    0      
80     -256   
0      80     
48     -288   
160    208    
-48    -416   
32     144    
48     -16    
176    400    
-128   -32    
-48    -144   
-64    -1184  
128    48     
48     112    
224    -16    
-160   64     
224    0      
-160   -1008  
32     -272   
32     -144   
-208   -912   
256    224    
32     176    
272    304    
0      -224   
-112   -16    
-128   -64    
272    -768   
96     -96    
-48    -608   
-192   144    
-656   -48    
176    -16    
-112   80     
192    -784   
16     32     
128    -1936  
176    384    
-160   192    
208    208    
288    352    
-208   48     
96     -304   
112    272    
-80    -384   
160    -704   
-432   -192   
32     -336   
0      -64    
160    -144   
160    -256   
-224   -400   
352    192    
-144   0      
144    -112   
80     -112   
-80    -80    
176    -160   
-192   -144   
-48    -144   
256    96     
-272   16     
176    48     
-224   -336   
208    -128   
80     -176   
-64    -528   
-16    -496   
64     -144   
272    176    
-32    -32    
0      160    
16     -96    
64     16     
-80    32     
128    -64    
-176   48     
48     -64    
-496   16     
-32    -304   
-64    0      
256    -144   
64     192    
80     -288   
-160   64     
112    -48    
-160   176    
96     0      
240    256    
-80    -16    
128    0      
-304   -64    
240    48     
-368   176    
288    176    
-48    -144   
32     -48    
-96    0      
448    -224   
-112   256    
192    -1680  
-16    176    
48     -48    
16     -32    
-256   -16    
224    -144   
-144   -48    
48     16     
-64    96     
176    32     
-1056  -32    
176    -192   
-208   -48    
80     -144   
80     176    
112    32     
-80    48     
16     80     
160    0      
-128   128    
-16    -32    
-224   64     
112    -96    
-304   16     
64     -96    
-240   -48    
32     -48    
-48    80     
128    0      
-128   224    
32     -384   
96     64     
80     0      
48     96     
-272   -16    
256    0      
48     48     
16     16     
-176   -144   
96     0      
-144   16     
96     -112   
-16    176    
64     -384   
-16    16     
48     -992   
96     160    
-128   256    
-176   128    
-32    0      
80     -144   
64     -80    
32     16     
-96    192    
48     -80    
-112   192    
-48    -64    
192    160    
-80    -160   
-80    -272   
384    -160   
1232   -224   
-352   -240   
800    -656   
-1152  -832   
1088   560    
-224   672    
128    -688   
-464   256    
496    -192   
-80    336    
-496   -400   
-48    240    
-48    -96    
-16    -64    
-96    64     
-48    16     
-160   -32    
-320   -176   
-128   16     
-256   112    
112    144    
-144   -192   
0      32     
-80    -224   
64     160    
-272   -32    
176    80     
-304   -208   
-32    128    
112    48     
16     80     
-128   0      
-32    96     
144    -48    
-64    128    
-48    16     
-1008  160    
-112   -48    
-64    -16    
-80    80     
0      -48    
0      64     
-144   -192   
-144   64     
-64    48     
0      32     
-48    96     
-64    128    
48     32     
-16    0      
-32    64     
-96    48     
-32    64     
-80    48     
16     48     
128    -96    
64     160    
-176   -128   
16     16     
-32    64     
32     80     
-48    112    
-160   112    
-112   0      
-128   -176   
-48    32     
-112   -48    
32     96     
-1152  -32    
96     112    
-80    -160   
32     32     
112    144    
-144   -96    
224    144    
-288   160    
64     -32    
32     96     
-208   -336   
0      -208   
-336   -128   
48     128    
64     112    
-640   -96    
16     48     
64     -48    
-48    112    
128    112    
-64    176    
96     160    
-80    -48    
-32    0      
16     96     
320    752    
16     16     
144    416    
-480   -672   
112    0      
-32    -64    
224    192    
-400   -64    
-48    -112   
-32    32     
16     -32    
48     272    
-160   32     
112    400    
80     384    
-16    240    
-240   0      
32     -96    
-112   -48    
48     112    
-208   416    
112    160    
-240   64     
-112   -224   
-16    -32    
-80    32     
-16    -64    
-32    -64    
0      -192   
-80    -32    
176    -96    
-112   -128   
0      48     
-160   -128   
-16    144    
-96    32     
80     80     
16     208    
128    -48    
0      224    
-32    0      
80     160    
-32    176    
48     160    
-80    80     
-48    0      
64     96     
0      -32    
96     0      
-32    80     
-176   -80    
64     320    
-80    64     
16     48     
0      32     
112    80     
0      48     
48     192    
-144   -16    
32     64     
-64    -48    
304    240    
-240   304    
80     -112   
32     224    
-144   80     
-48    64     
-144   80     
144    96     
-48    -64    
144    288    
-256   48     
-80    -192   
352    64     
64     384    
-80    -128   
-96    32     
288    16     
64     32     
-80    80     
-160   -16    
176    208    
-80    176    
192    -16    
-48    96     
64     16     
80     48     
-16    144    
48     -16    
-48    128    
-192   336    
-160   -192   
64     112    
128    16     
80     96     
-208   64     
112    -32    
48     240    
256    176    
-80    144    
-64    32     
64     96     
-1888  272    
1552   2544   
-1040  -384   
816    -416   
-384   -192   
-464   -464   
512    -144   
-912   160    
128    -80    
224    -560   
368    384    
240    64     
-128   448    
16     208    
240    224    
-384   -176   
112    32     
320    864    
-96    128    
-176   176    
-192   -608   
288    -48    
-32    224    
-16    -96    
144    64     
-112   192    
-16    48     
0      -256   
-336   -80    
272    336    
176    176    
-96    288    
80     64     
144    192    
32     -112   
-80    -400   
16     -160   
32     -16    
224    384    
0      -1040  
-240   64     
32     -32    
64     64     
192    96     
-32    80     
144    192    
-208   192    
48     176    
-80    176    
-144   -160   
256    -32    
-64    112    
96     -144   
-48    144    
128    -1072  
112    128    
80     192    
144    80     
-16    192    
-48    -288   
16     176    
-128   192    
32     -176   
288    256    
-224   192    
80     128    
192    96     
80     -64    
-144   48     
112    -752   
16     96     
0      -848   
112    96     
-48    0      
224    96     
80     -160   
-144   112    
128    0      
320    96     
32     -176   
48     -256   
48     64     
16     -112   
-48    80     
272    -320   
-64    -80    
208    -336   
0      80     
-16    -112   
32     144    
-96    16     
208    192    
-80    112    
0      32     
16     -96    
160    -16    
-80    240    
80     -112   
160    192    
-32    -16    
96     64     
-64    -272   
0      48     
80     -1392  
144    512    
-176   32     
272    -48    
-144   -96    
-16    -48    
160    0      
-16    -16    
48     240    
80     -368   
0      96     
0      -64    
16     96     
208    -816   
-112   256    
240    -16    
-96    -144   
-144   -64    
96     80     
352    304    
-80    112    
-16    16     
-80    -480   
256    208    
64     -288   
48     32     
-80    -384   
-16    64     
336    -144   
-96    224    
336    -64    
-32    48     
-272   -176   
160    0      
32     208    
16     -112   
256    0      
-160   -96    
-16    176    
112    -368   
-32    0      
-240   -208   
368    224    
144    -16    
-48    128    
-112   -672   
48     -192   
128    128    
0      -592   
64     64     
-32    -16    
160    -832   
-64    -48    
16     -1200  
112    -16    
-16    240    
112    -112   
80     144    
-32    -64    
128    -1136  
48     0      
48     -224   
192    208    
-144   96     
192    80     
-1872  -208   
320    -256   
48     -64    
160    -160   
-144   -48    
-48    -416   
0      -432   
256    80     
-80    -272   
0      -528   
192    160    
192    -48    
-16    352    
-112   -320   
32     -128   
-224   -96    
32     160    
80     -32    
-32    -16    
80     -112   
144    -416   
-32    -144   
64     -48    
64     64     
0      -32    
112    160    
-16    -400   
128    80     
-64    -128   
-144   624    
0      -256   
688    864    
-688   832    
-240   -576   
-192   -96    
768    -416   
-1088  -96    
352    -448   
-272   256    
320    -528   
-64    624    
288    -608   
-128   592    
-144   -624   
176    304    
-32    -192   
16     160    
-560   -48    
80     -272   
-80    -288   
144    -32    
-32    144    
96     -896   
-224   96     
256    -624   
-192   176    
240    -128   
-32    272    
64     -144   
-16    48     
-176   -240   
0      -80    
-512   -80    
16     80     
-1184  -80    
96     -16    
16     -80    
32     -128   
0      32     
144    272    
-16    144    
96     80     
80     -32    
-80    16     
16     -32    
-32    -32    
128    64     
32     80     
112    0      
-176   -64    
80     -272   
16     176    
48     -448   
80     176    
-48    -544   
48     -16    
48     0      
32     -128   
-64    -16    
64     -32    
-128   48     
128    112    
-208   -48    
32     -192   
-80    -160   
-16    -288   
64     64     
96     -208   
0      80     
144    -768   
32     144    
-320   112    
48     32     
-64    -48    
112    0      
32     96     
48     208    
-208   48     
80     -112   
-32    -144   
80     -64    
112    128    
80     -416   
-272   -16    
144    -464   
64     -64    
-224   -144   
208    0      
-80    160    
16     48     
-32    64     
32     -208   
-64    64     
0      0      
48     80     
-128   -208   
64     352    
32     -16    
16     144    
-592   -272   
-608   -80    
48     96     
-1056  32     
-80    64     
-336   -48    
-96    -16    
48     -112   
-32    96     
32     -32    
-48    16     
-928   -304   
16     48     
-272   -96    
-16    128    
32     96     
-48    16     
-16    -16    
-16    64     
-48    80     
-816   -128   
-144   -96    
48     96     
144    144    
-32    -80    
16     112    
-304   64     
-48    96     
48     -448   
-128   -48    
128    336    
0      -160   
-256   64     
-96    48     
32     96     
16     32     
16     416    
-864   -304   
96     -16    
-256   16     
240    -16    
-176   -80    
160    160    
96     32     
-224   144    
-144   -96    
-112   -128   
80     144    
-208   160    
48     80     
-176   -128   
-64    -80    
-608   -144   
224    96     
-320   144    
-112   -48    
208    112    
-176   112    
112    -160   
-128   80     
-48    32     
64     48     
16     -32    
128    208    
-96    -48    
16     48     
-112   96     
-112   16     
144    -32    
-128   48     
-64    96     
-192   -96    
-80    256    
-64    -96    
96     208    
0      32     
112    128    
-64    224    
-144   96     
0      -112   
-80    96     
192    48     
-160   48     
-32    112    
-336   -80    
-128   176    
-64    -48    
80     128    
16     80     
-96    96     
0      32     
-240   80     
-144   -96    
-16    112    
176    112    
112    224    
-80    48     
-288   -80    
-832   2672   
-1152  -1504  
480    32     
608    -144   
480    -496   
-320   752    
160    -96    
-96    -112   
-528   -368   
544    160    
-304   -112   
-128   160    
192    640    
80     -304   
-448   -64    
208    176    
-96    32     
112    -96    
-288   224    
128    -416   
48     64     
-144   -112   
0      224    
-32    -272   
-16    -48    
144    96     
176    112    
-256   96     
16     48     
-32    96     
-96    48     
-16    32     
32     192    
48     64     
32     32     
-32    96     
-64    80     
48     16     
-48    80     
80     48     
-16    48     
-64    112    
0      48     
128    240    
-272   0      
112    -32    
-176   -16    
144    272    
-160   160    
176    -112   
16     320    
-128   -16    
128    32     
-16    176    
96     0      
48     -16    
-32    176    
16     128    
96     32     
-144   -128   
96     144    
-208   0      
128    32     
0      256    
-64    80     
128    -32    
112    48     
16     144    
-16    -32    
80     112    
-16    80     
128    160    
-208   48     
176    48     
-80    80     
32     368    
-256   -16    
192    176    
-16    160    
0      -128   
128    32     
-144   112    
64     32     
0      -96    
112    128    
-128   -176   
240    16     
-240   64     
-16    176    
128    -32    
0      96     
96     256    
0      48     
144    80     
-64    192    
-240   -144   
176    32     
-16    144    
96     160    
16     144    
-208   -48    
192    -80    
0      96     
112    304    
-32    112    
192    32     
-144   144    
176    80     
144    272    
-112   0      
128    48     
-176   112    
224    112    
-144   -96    
-112   -224   
-80    -32    
144    144    
80     16     
-48    96     
-48    -32    
208    -64    
32     240    
-240   160    
224    16     
-128   32     
272    176    
-48    -112   
48     -288   
-144   64     
-96    32     
80     112    
192    96     
-96    -208   
-240   64     
-16    32     
64     -560   
-96    -272   
80     -768   
224    336    
128    48     
192    128    
-192   32     
80     96     
256    320    
96     160    
192    208    
-32    240    
-128   176    
192    192    
-48    80     
144    0      
16     96     
-32    -320   
0      64     
144    -32    
0      -96    
176    -64    
-32    288    
-64    -96    
160    224    
-112   -48    
224    48     
-96    -80    
64     80     
64     160    
128    128    
-64    0      
16     -160   
64     48     
208    -48    
-48    128    
-32    96     
-48    112    
176    -16    
-112   160    
-160   -192   
-96    128    
320    -48    
160    96     
-48    64     
64     -368   
-32    224    
-16    -144   
64     176    
96     -304   
-32    48     
112    -576   
96     0      
-32    80     
96     32     
16     48     
-64    48     
144    112    
96     16     
-96    176    
16     0      
64     -32    
96     224    
16     384    
-304   -1888  
240    672    
-560   -1104  
-384   -32    
224    560    
128    352    
-224   -48    
272    -64    
-208   176    
240    -1136  
-32    352    
96     -48    
128    240    
-16    -400   
128    -48    
-128   -160   
112    -16    
-96    64     
96     0      
96     96     
-80    192    
48     -48    
16     -288   
-48    -144   
256    32     
-192   320    
192    48     
32     48     
-64    -320   
32     80     
112    -96    
144    96     
64     -320   
48     112    
0      16     
32     16     
-48    -32    
240    -32    
-176   64     
192    0      
-64    128    
128    -80    
144    112    
16     -32    
144    -64    
-32    80     
128    32     
112    -32    
32     -208   
32     -16    
112    -496   
0      -480   
-128   64     
32     -1040  
-80    -400   
112    -1824  
112    -176   
-64    128    
128    32     
64     96     
32     -96    
32     -96    
80     -272   
80     -224   
-128   64     
96     48     
32     160    
-1456  -112   
64     -160   
32     -48    
112    -304   
-96    -80    
144    -48    
80     -32    
96     112    
32     -80    
80     -80    
-48    64     
96     -272   
144    208    
-96    176    
-112   -128   
-144   -224   
48     -272   
144    64     
80     208    
48     64     
96     -528   
-16    -112   
96     -896   
32     -16    
176    112    
-80    128    
64     -32    
-32    32     
-48    32     
-64    -224   
-176   -64    
32     96     
192    16     
80     -256   
-80    -192   
64     -48    
64     -64    
144    -544   
-32    0      
160    80     
-64    48     
96     -176   
32     112    
-48    32     
80     16     
-64    192    
0      96     
-1456  -272   
80     -32    
96     144    
144    16     
-16    -80    
32     -48    
144    80     
128    -608   
-160   128    
80     -32    
0      -416   
-16    -272   
256    208    
-192   176    
320    -80    
-176   16     
160    64     
-80    64     
-48    16     
32     -80    
32     -608   
80     176    
144    -320   
-80    32     
64     80     
32     32     
-64    -96    
112    -224   
-352   16     
368    -176   
-288   144    
-16    192    
176    -32    
0      -80    
176    -144   
16     -384   
32     32     
112    -48    
-48    176    
-16    64     
-64    64     
-400   -368   
224    80     
-80    -16    
16     160    
-160   -48    
112    -16    
-304   -80    
128    -160   
64     160    
-112   16     
-64    96     
256    -816   
128    -64    
80     96     
-64    192    
-416   160    
-32    -192   
96     80     
320    16     
0      208    
-64    -32    
-16    0      
80     -144   
16     128    
96     -112   
-144   80     
-656   -432   
-544   -32    
-192   -64    
208    -64    
112    256    
128    0      
-240   -16    
96     -48    
-208   -176   
64     128    
0      -32    
-720   112    
16     32     
-1248  -304   
-64    64     
800    1536   
-1872  -1184  
592    928    
288    16     
368    864    
-1456  -672   
-16    176    
-352   -352   
192    -288   
-144   224    
384    192    
-336   96     
48     96     
-224   32     
32     -96    
32     160    
256    304    
-160   -208   
-656   -352   
-64    0      
-176   -128   
16     96     
-880   128    
256    144    
-16    -32    
96     112    
-176   16     
80     192    
0      -80    
-160   -96    
80     -16    
16     48     
-16    144    
-64    -16    
-144   32     
128    -80    
0      64     
-368   32     
-96    0      
-96    -224   
-16    64     
-64    -64    
96     128    
48     -80    
-64    48     
32     128    
-208   -32    
144    304    
-176   -16    
240    64     
-208   80     
160    32     
-192   -32    
128    192    
-752   16     
144    -48    
96     -32    
-16    208    
-32    32     
-16    -48    
-64    -16    
-80    80     
16     64     
112    16     
-112   192    
-240   -208   
144    128    
-640   -176   
288    224    
-736   -16    
192    -16    
16     -48    
0      96     
80     80     
-64    0      
-32    128    
-48    48     
96     208    
-256   0      
-80    -176   
-16    -80    
-96    240    
-96    0      
144    80     
-112   -144   
0      272    
-224   176    
-48    -144   
256    80     
-96    48     
160    176    
-48    32     
-48    48     
48     16     
-96    -64    
96     176    
-112   128    
16     32     
64     16     
-240   0      
-64    48     
-368   -64    
16     48     
160    256    
0      -48    
16     32     
-240   112    
80     112    
-32    16     
32     -128   
-144   208    
96     112    
32     96     
-64    96     
-192   -96    
144    48     
80     192    
80     240    
-144   112    
-32    -176   
-224   -208   
-80    96     
128    -16    
192    48     
-32    -48    
-336   -32    
320    192    
-64    224    
0      16     
-112   32     
16     48     
176    176    
-16    144    
176    80     
-320   64     
176    64     
-16    80     
176    -80    
-128   -96    
-192   80     
0      64     
288    112    
-176   0      
-144   -16    
-176   -192   
96     16     
-16    80     
0      0      
16     288    
-112   -48    
272    96     
-144   -64    
-32    80     
80     80     
128    16     
-128   32     
112    288    
80     -304   
-160   0      
-64    144    
32     80     
-64    48     
-64    128    
144    144    
-32    32     
144    320    
-336   -448   
-128   64     
96     160    
208    256    
-80    -144   
-80    240    
-208   -192   
96     80     
48     128    
80     80     
0      -80    
144    224    
32     144    
16     -80    
96     208    
16     -16    
48     -48    
0      64     
64     96     
80     96     
-48    96     
-48    144    
192    32     
-224   -336   
64     0      
416    144    
96     144    
32     -64    
32     224    
64     144    
32     320    
-208   912    
-208   816    
-496   1312   
576    48     
112    832    
-96    96     
-32    -432   
-736   -592   
800    336    
240    48     
-352   -144   
-16    240    
384    256    
32     -112   
-128   64     
-48    48     
16     -176   
192    240    
16     -208   
-64    0      
-32    -48    
256    -416   
-176   272    
304    -16    
-272   176    
80     -176   
-208   336    
176    416    
144    112    
-96    144    
-96    16     
192    80     
0      192    
112    64     
-64    128    
64     48     
64     -80    
-16    96     
80     -448   
-16    80     
96     128    
96     96     
-48    64     
32     32     
80     192    
-48    80     
16     -32    
16     128    
0      32     
-16    -240   
48     192    
112    -112   
48     112    
16     -592   
144    16     
-48    -80    
288    176    
-128   224    
304    320    
-96    32     
-48    128    
96     32     
32     16     
-96    -48    
48     -128   
240    240    
-32    -48    
144    96     
-48    -496   
112    16     
80     -1248  
16     144    
64     96     
-16    48     
-16    160    
176    96     
-80    -224   
0      -64    
288    -32    
80     144    
-96    432    
256    80     
-176   96     
32     -448   
112    128    
-48    16     
144    240    
208    -256   
-16    304    
-112   128    
-32    -32    
96     -96    
32     -16    
112    160    
16     -48    
32     80     
0      -448   
272    544    
-64    -368   
64     -32    
0      -384   
80     192    
128    -480   
-96    96     
-32    0      
64     128    
96     16     
-16    96     
112    176    
-80    -192   
192    128    
-64    -32    
128    32     
0      -144   
96     128    
128    -96    
-32    64     
48     -208   
32     224    
80     32     
80     112    
16     80     
32     -672   
112    96     
64     112    
192    80     
-32    464    
-208   48     
272    -464   
-240   -160   
208    -144   
128    -16    
0      -64    
80     176    
64     208    
16     -1296  
-16    -2816  
-48    -176   
224    -928   
112    -128   
-304   144    
368    -112   
32     144    
-96    -512   
32     48     
176    64     
32     -208   
0      -304   
64     -96    
256    128    
-64    -464   
-64    -176   
192    64     
96     -144   
0      160    
-128   -304   
288    -288   
-320   -336   
400    176    
48     176    
80     16     
32     -736   
-64    16     
-32    -800   
-112   0      
48     -32    
112    112    
-384   -96    
192    -896   
-16    208    
368    80     
-16    48     
160    -352   
-144   -128   
208    -32    
208    400    
-32    -368   
-32    384    
-16    -384   
80     128    
-32    48     
-32    -208   
-688   -240   
160    0      
0      -352   
112    48     
48     416    
128    -448   
-64    -256   
144    -2864  
128    -80    
16     -144   
80     -144   
-32    -48    
-48    64     
-80    -48    
80     -16    
-176   48     
-640   640    
-1472  -176   
576    -400   
816    48     
80     -624   
-544   -848   
544    64     
32     384    
96     16     
-336   320    
240    -336   
-16    -160   
96     -208   
96     176    
-16    -16    
-128   -160   
-160   80     
-32    -64    
-192   -176   
160    -416   
-208   -48    
256    -160   
-48    384    
96     -1104  
-176   -144   
-208   -192   
208    144    
-48    80     
128    0      
-208   -112   
128    -112   
-976   -112   
176    48     
-656   0      
160    -64    
-64    16     
96     -176   
48     64     
-16    -1424  
48     224    
0      -64    
96     112    
-192   16     
208    32     
-112   -96    
144    -80    
-80    128    
0      -32    
176    208    
-208   -96    
400    32     
-160   -224   
128    96     
128    -432   
-32    80     
-192   80     
160    32     
-272   16     
144    -48    
-32    96     
32     -48    
176    32     
-16    96     
-112   64     
112    -192   
16     -48    
160    -240   
144    192    
-48    -288   
224    32     
-400   -32    
176    64     
-160   -80    
176    16     
-144   80     
48     -160   
-144   -96    
48     -144   
-208   272    
-32    -352   
256    -32    
144    -80    
-48    96     
32     0      
-272   128    
-16    64     
-224   -80    
80     16     
0      16     
-32    64     
16     48     
-112   48     
32     -112   
96     272    
-608   64     
80     -32    
-256   -240   
0      64     
80     176    
-32    -160   
-64    64     
-64    128    
128    -48    
-592   32     
-256   32     
160    -64    
176    128    
48     16     
-16    -208   
-240   -144   
112    112    
112    -192   
-32    160    
176    48     
-336   80     
48     -48    
-144   -128   
-288   -384   
-208   -144   
0      -112   
-1120  64     
-16    112    
128    160    
-32    128    
-160   -32    
32     80     
80     -96    
-16    224    
112    96     
-64    128    
-16    32     
0      160    
0      144    
96     288    
-224   112    
160    96     
16     0      
-112   -32    
48     144    
-16    -32    
48     192    
64     96     
32     80     
96     96     
-208   16     
0      80     
-16    -16    
-32    -144   
-32    96     
16     32     
-208   -16    
-80    16     
-384   0      
48     208    
304    -80    
-240   32     
48     96     
-80    -64    
32     -64    
-320   -48    
112    -160   
32     -160   
-176   128    
48     -48    
-208   304    
-272   -128   
160    0      
-672   -416   
336    528    
-176   -192   
48     64     
-64    16     
16     64     
48     16     
16     96     
48     64     
-16    -16    
16     -144   
128    176    
0      160    
16     -96    
16     144    
32     -48    
-64    96     
-144   -32    
0      -64    
0      32     
-64    80     
224    256    
-144   -32    
0      16     
-176   0      
160    112    
-64    336    
-192   32     
96     128    
96     48     
-112   -16    
1408   -1840  
832    432    
272    672    
-448   32     
160    144    
-16    272    
592    144    
-192   864    
-368   448    
-464   -656   
384    -64    
192    -336   
-128   -16    
16     272    
-208   -48    
48     48     
-96    32     
160    384    
-16    -48    
128    112    
-64    208    
96     160    
-144   160    
80     -144   
48     -32    
48     144    
96     64     
-304   -16    
224    64     
-32    64     
-48    32     
80     0      
0      112    
384    80     
-256   256    
-16    -256   
-192   -80    
304    352    
144    704    
80     -240   
-480   80     
240    176    
-160   -96    
176    144    
-144   -16    
-48    -240   
128    -16    
64     160    
16     96     
-144   -144   
64     -16    
-48    -32    
96     -144   
-48    48     
-64    160    
48     112    
160    624    
-496   -768   
224    256    
192    128    
-128   176    
16     80     
144    80     
32     80     
-112   16     
80     176    
-16    48     
64     -64    
-128   240    
32     160    
-16    80     
16     48     
48     64     
48     112    
-64    64     
144    96     
224    480    
-32    160    
96     240    
-176   144    
80     -16    
-64    -48    
144    -16    
-64    144    
48     0      
-96    96     
16     144    
-64    -160   
-224   -1088  
192    32     
-48    208    
64     128    
16     112    
16     80     
-16    160    
96     48     
48     272    
-160   -144   
192    -112   
-16    240    
48     48     
48     128    
-176   -32    
160    96     
64     144    
0      32     
128    224    
-80    80     
-32    -288   
48     -160   
128    336    
80     96     
-96    80     
-160   32     
192    -48    
96     16     
-112   128    
160    96     
0      -240   
64     -96    
-96    192    
112    64     
64     112    
16     240    
96     128    
0      -384   
0      496    
16     16     
320    128    
-256   272    
128    32     
64     448    
-80    -80    
0      -320   
32     32     
0      -672   
0      208    
-32    32     
48     80     
16     96     
96     256    
-112   320    
208    352    
-48    80     
-80    48     
-16    -368   
0      -720   
-144   -192   
64     -112   
128    256    
-16    -624   
0      -16    
128    288    
-112   -128   
320    -128   
-304   -368   
320    160    
144    80     
208    432    
96     176    
-192   48     
160    -48    
16     208    
32     -16    
64     -64    
64     -432   
-32    48     
112    -1616  
-208   32     
-16    -112   
48     64     
48     304    
304    64     
-96    224    
128    96     
32     144    
-16    -176   
112    64     
160    -144   
0      128    
0      -272   
-16    32     
128    -1088  
80     -144   
208    -176   
-48    -80    
-48    48     
96     32     
16     224    
-64    208    
32     96     
0      -96    
160    0      
176    320    
-176   176    
208    -176   
-144   16     
-896   -2112  
160    -528   
752    768    
-560   32     
400    224    
-336   832    
-240   -304   
-352   -320   
-48    288    
544    -240   
288    0      
-160   16     
-128   480    
256    -288   
96     176    
32     -320   
128    304    
-144   -144   
48     144    
160    32     
-16    32     
-48    128    
112    -80    
128    176    
-16    -288   
-64    32     
64     -80    
16     192    
160    -336   
-96    48     
144    -192   
-16    224    
16     -224   
16     -1248  
16     0      
64     -672   
240    -464   
128    -16    
-112   96     
-80    -48    
304    -688   
0      -64    
112    80     
-16    -176   
64     176    
96     -112   
64     -528   
-32    128    
128    -1200  
-112   80     
-16    -656   
224    -96    
-688   80     
144    64     
0      -96    
112    -160   
-32    -32    
112    -1056  
64     0      
96     112    
0      -32    
160    -160   
-48    112    
32     128    
16     -80    
-96    -32    
-16    -32    
-400   -32    
0      -80    
-16    -192   
208    -864   
32     -80    
32     -208   
-32    -96    
80     -768   
-32    -16    
-96    -496   
208    -48    
-16    192    
-80    0      
144    144    
-32    -96    
64     32     
-32    64     
320    -96    
128    -16    
0      -32    
96     -240   
128    -144   
-80    -336   
0      64     
80     0      
96     112    
64     128    
272    256    
-288   -96    
128    -160   
-32    0      
144    16     
-464   0      
64     -32    
48     -64    
-16    -304   
176    -32    
-224   -768   
128    176    
-16    32     
-16    80     
64     -112   
48     -272   
-128   16     
160    -272   
-288   -64    
192    128    
-736   -16    
80     -160   
-256   96     
-48    -432   
288    80     
-96    -864   
80     144    
-80    -1376  
64     160    
64     48     
32     80     
-320   -80    
208    48     
-272   -80    
208    144    
-448   -96    
144    -256   
-32    -208   
-96    96     
176    176    
208    -240   
-288   272    
400    -816   
-32    64     
-96    -176   
-16    144    
96     64     
112    -144   
-416   -144   
192    -64    
-32    96     
48     -224   
16     480    
96     0      
-240   -208   
272    -352   
-16    80     
-32    -288   
96     -112   
-224   32     
176    112    
0      -176   
240    336    
-144   -144   
32     -96    
-336   -192   
112    -80    
-48    -64    
176    -224   
64     80     
112    -96    
128    992    
64     -224   
16     240    
64     64     
176    0      
-144   -64    
-112   -112   
80     64     
112    256    
-128   32     
-32    -160   
-224   -192   
-48    -240   
288    192    
-432   112    
-80    112    
-160   80     
-624   -16    
112    96     
-672   -208   
0      80     
64     176    
0      144    
-16    -32    
-144   -48    
112    -80    
-96    80     
80     -112   
176    288    
-352   -192   
256    32     
-80    32     
-160   -48    
2448   -2144  
-688   -576   
640    960    
-944   656    
640    352    
128    -928   
-208   -448   
576    1184   
-816   -48    
144    16     
-176   0      
416    0      
-272   64     
-288   0      
-416   -192   
480    -272   
16     128    
-144   -32    
-448   64     
-208   -480   
480    -48    
-384   -336   
240    224    
-96    384    
80     -128   
32     224    
464    336    
-224   272    
-480   -224   
-176   32     
32     -64    
-208   48     
-80    320    
-80    -64    
-256   176    
32     -64    
80     96     
160    384    
16     176    
-208   -240   
0      -160   
224    16     
-64    112    
-80    48     
-176   64     
64     0      
176    48     
-16    160    
-64    80     
-128   -176   
-528   -80    
48     48     
-256   -80    
-160   -16    
-48    -48    
64     64     
-16    240    
-192   528    
416    368    
-272   -336   
-48    192    
48     48     
-80    -176   
-112   400    
144    16     
-80    16     
-32    144    
240    128    
-64    128    
32     144    
-144   -16    
64     16     
-256   -160   
128    112    
-64    128    
112    96     
-160   -48    
272    -48    
-80    80     
16     944    
-128   -144   
32     176    
-272   112    
256    0      
-736   64     
-432   208    
96     0      
-32    272    
96     -112   
-64    -16    
-32    64     
-208   -96    
32     -64    
64     224    
16     160    
-128   -48    
128    256    
-112   48     
256    272    
-128   224    
32     0      
16     16     
-16    112    
32     16     
48     32     
-80    16     
16     -48    
-48    32     
16     0      
272    352    
16     240    
-288   -288   
-224   -80    
144    160    
144    112    
-64    32     
-16    -80    
64     208    
16     80     
208    -64    
-432   208    
224    80     
112    112    
-256   0      
192    240    
-208   176    
368    304    
-272   112    
128    256    
-16    32     
-32    64     
48     -64    
-128   176    
272    48     
64     176    
-96    32     
-64    16     
-192   -80    
64     -32    
-48    16     
16     32     
32     128    
176    240    
-160   160    
112    80     
0      128    
192    368    
-112   144    
240    64     
-144   112    
0      80     
64     16     
-48    16     
-144   48     
176    176    
-32    48     
64     112    
-112   48     
208    -80    
64     128    
64     240    
-32    272    
32     32     
-48    80     
112    32     
-16    96     
-48    48     
176    96     
-160   64     
160    48     
-128   16     
80     -112   
-16    256    
-128   176    
-16    -16    
48     96     
224    16     
-16    208    
-160   96     
-32    -96    
144    128    
-64    96     
96     128    
-64    -16    
112    128    
-64    0      
-48    -720   
-64    64     
112    48     
-16    112    
144    144    
-32    112    
32     -16    
-32    16     
80     128    
128    304    
-96    80     
-16    240    
864    176    
992    992    
-192   512    
-320   -400   
272    -240   
400    -240   
-80    256    
-320   -208   
368    272    
-368   32     
448    256    
-144   -512   
-160   336    
176    -128   
224    368    
-112   -176   
-64    192    
96     176    
160    -288   
48     64     
0      128    
16     160    
128    112    
80     80     
16     -48    
-176   -144   
-48    144    
160    320    
128    -112   
-160   0      
-16    -32    
128    240    
64     64     
-64    -160   
16     -16    
224    -336   
160    192    
80     80     
-48    48     
-48    80     
144    160    
16     -240   
48     64     
-112   -16    
144    80     
-32    176    
208    0      
-48    16     
-48    -80    
0      160    
144    -80    
64     160    
48     -464   
48     64     
-96    -64    
128    128    
-32    32     
192    192    
-32    32     
128    0      
-16    224    
16     -224   
80     160    
-16    -80    
176    144    
-128   -272   
48     16     
64     -528   
32     -32    
160    -1216  
-80    96     
112    160    
-64    64     
16     -48    
32     96     
0      -96    
160    -240   
-48    96     
48     -48    
32     16     
80     -144   
16     160    
-32    -720   
208    16     
0      -32    
144    512    
-160   112    
336    -16    
-160   32     
-112   -144   
272    128    
-80    240    
64     160    
48     -448   
-80    16     
-32    -80    
80     144    
112    16     
16     -80    
0      336    
320    592    
-208   96     
-48    -16    
-64    -144   
208    64     
96     96     
64     -208   
144    48     
-48    -64    
80     -16    
48     -48    
80     16     
32     -400   
0      -48    
-48    -1040  
256    112    
-48    -16    
176    -112   
-272   -736   
96     192    
64     -864   
112    32     
48     80     
-16    0      
16     64     
176    -144   
-128   0      
144    -640   
64     576    
80     208    
-96    -352   
96     64     
160    -368   
32     -1088  
208    544    
-272   -1088  
96     -256   
80     -656   
48     32     
64     160    
-32    -48    
64     -48    
64     -80    
112    -80    
-32    80     
96     64     
-128   -176   
-64    -208   
160    -256   
-336   48     
16     -160   
-48    -128   
112    -816   
0      -144   
96     -3280  
32     -16    
0      112    
80     -16    
48     -176   
64     80     
-144   -160   
80     80     
32     16     
96     -16    
0      32     
208    32     
-96    0      
176    -144   
112    -16    
-112   -672   
144    16     
-32    -528   
32     16     
48     -144   
-64    64     
-16    -208   
64     -160   
192    16     
192    176    
-512   -144   
48     -224   
-160   16     
192    -16    
-80    16     
32     288    
-288   -80    
288    -864   
-304   144    
272    -112   
80     208    
32     96     
96     -48    
-384   32     
208    -240   
-464   -160   
48     -80    
-592   32     
1248   448    
-928   -1376  
752    944    
-112   416    
448    -1136  
-352   240    
-80    48     
-48    64     
32     -48    
256    672    
-272   -256   
224    64     
-480   192    
336    144    
-336   -144   
0      -64    
-16    208    
176    -256   
-32    64     
48     -416   
128    288    
80     -1344  
32     592    
-112   -64    
320    -64    
-144   -96    
288    144    
-176   96     
112    112    
-336   -192   
128    -80    
-64    48     
-48    -64    
112    16     
0      80     
64     -64    
-48    -448   
176    624    
144    96     
0      -48    
-288   32     
144    -16    
-304   -64    
64     -80    
0      32     
-16    -112   
0      176    
112    -16    
-144   176    
48     -512   
96     -16    
16     -672   
112    112    
-208   64     
64     0      
-128   -16    
144    80     
-112   -160   
128    -80    
-16    144    
176    144    
-224   128    
32     -32    
-16    192    
128    -288   
64     192    
0      48     
32     64     
-160   -16    
128    -96    
-112   48     
48     80     
-48    48     
48     -32    
144    64     
112    -64    
-16    192    
-560   -320   
64     16     
-16    256    
-48    144    
176    -48    
-352   640    
-48    -112   
-1056  -32    
-176   -64    
-144   144    
80     208    
-32    80     
-224   -48    
160    -192   
-128   48     
-48    176    
160    144    
-112   -48    
-128   144    
-320   -416   
-32    -352   
-160   -16    
80     -32    
224    272    
-144   224    
64     160    
-1136  -16    
32     128    
-80    256    
64     -32    
-96    -64    
-64    -224   
144    -16    
-112   96     
80     208    
-208   -48    
160    144    
-48    -64    
16     96     
-416   -16    
-64    112    
-752   64     
112    64     
-288   -128   
288    0      
-144   -80    
32     112    
0      -160   
-32    16     
-144   144    
224    16     
-96    -16    
-112   -16    
-48    32     
-192   -160   
-192   -224   
-96    0      
256    176    
-192   -272   
0      48     
-336   -96    
176    80     
128    64     
-176   144    
128    80     
144    112    
-272   48     
112    160    
64     48     
48     304    
-128   176    
80     64     
32     112    
-864   -112   
112    64     
-112   -16    
96     96     
64     96     
-64    0      
-160   96     
-64    0      
80     0      
-80    64     
80     176    
32     128    
80     32     
-432   -64    
-16    48     
-832   -208   
16     96     
80     -272   
-144   -144   
288    -16    
-48    416    
-32    176    
-304   -32    
160    80     
96     32     
16     112    
-160   -48    
80     -160   
-32    112    
-176   112    
-16    32     
16     112    
64     -160   
176    128    
-160   128    
176    144    
-144   128    
-32    32     
240    -96    
-32    176    
96     48     
-80    192    
-128   16     
128    208    
-144   -48    
48     0      
-96    48     
-1072  -1968  
544    240    
-960   -544   
32     -512   
336    720    
-720   160    
464    640    
-336   144    
-224   432    
192    -416   
48     176    
112    -224   
-16    592    
-144   -320   
-80    400    
16     -80    
192    208    
-224   -96    
-64    -64    
64     160    
0      96     
-32    64     
-144   176    
160    208    
-32    -224   
0      48     
-128   -256   
-16    320    
64     16     
-80    80     
64     16     
16     144    
80     -32    
-48    224    
16     48     
80     112    
-32    160    
48     80     
-112   32     
64     112    
64     16     
-64    96     
16     128    
96     64     
32     112    
80     0      
16     112    
-112   48     
144    80     
-112   112    
144    16     
0      48     
-32    64     
64     112    
-128   -80    
112    128    
-48    192    
32     -32    
112    176    
-48    64     
-64    64     
96     128    
0      0      
64     48     
64     80     
-160   -64    
80     48     
-160   48     
64     96     
32     48     
-32    16     
-16    -128   
0      192    
-64    144    
80     0      
80     224    
16     0      
256    128    
-160   64     
160    48     
0      192    
0      224    
144    48     
-64    -128   
96     144    
176    48     
-240   -96    
112    -240   
224    16     
-128   176    
160    80     
-16    192    
80     144    
48     32     
112    112    
32     176    
80     32     
176    224    
80     208    
-176   -128   
64     224    
128    176    
96     -64    
32     80     
-16    0      
16     208    
160    240    
-48    400    
32     80     
-16    -112   
0      0      
112    208    
80     0      
-48    16     
-80    48     
48     96     
144    160    
160    0      
16     352    
-96    -2512  
0      -80    
80     -48    
208    176    
64     192    
-64    48     
-64    160    
144    320    
48     64     
64     496    
-80    176    
128    192    
-64    112    
80     -144   
80     208    
0      -592   
192    384    
-144   -80    
96     64     
80     32     
112    128    
-16    -208   
-32    80     
-96    -48    
208    128    
0      224    
16     -256   
176    -240   
-160   -384   
64     48     
-32    -352   
-128   96     
48     -2560  
64     112    
32     0      
-48    -160   
224    -176   
80     320    
-112   64     
0      -128   
304    64     
144    32     
-16    176    
-256   -160   
144    224    
80     -144   
272    -96    
80     -592   
-160   304    
-112   -448   
0      144    
32     16     
192    32     
16     32     
-128   64     
128    64     
48     176    
-112   240    
176    -496   
32     128    
96     -64    
-16    16     
32     -96    
96     192    
32     96     
-32    160    
112    -128   
112    288    
32     -64    
112    -928   
-64    160    
-32    -400   
144    112    
32     112    
-80    -16    
288    192    
-64    176    
224    -112   
-192   0      
2016   -192   
560    1328   
-912   -352   
-416   -544   
480    384    
-448   -608   
496    -208   
80     -1248  
256    432    
-176   -624   
32     224    
-240   -96    
400    192    
64     240    
16     -288   
128    336    
112    208    
272    480    
-224   -1136  
192    -768   
368    256    
-224   -1648  
272    -32    
-176   -256   
256    -64    
-64    128    
320    144    
-192   192    
64     -288   
-32    -576   
128    96     
144    -256   
32     96     
96     -192   
-48    -176   
112    -208   
48     -480   
96     128    
32     -288   
0      0      
-32    -896   
160    -288   
48     160    
-96    32     
80     -320   
-16    64     
80     16     
16     48     
-224   0      
-16    -80    
-640   0      
48     -224   
80     -112   
128    -240   
-112   64     
144    -224   
-48    -240   
128    48     
16     112    
32     -80    
48     48     
32     -144   
32     -304   
-32    16     
160    -224   
-16    272    
-192   -48    
208    -192   
144    -192   
32     80     
-112   0      
128    -16    
112    -432   
32     -16    
144    -16    
-112   -320   
64     32     
-48    -160   
0      32     
-96    -96    
-96    -64    
0      -336   
-432   32     
-160   -32    
32     -112   
240    -304   
-80    -176   
144    -1168  
-112   16     
16     -48    
-64    176    
-16    80     
16     64     
16     80     
208    96     
-480   224    
-64    -128   
-16    -16    
-32    -112   
192    160    
16     -96    
0      -64    
64     -288   
0      -16    
112    0      
144    496    
-144   112    
160    -224   
-112   64     
112    -48    
208    176    
-208   128    
0      144    
-48    -208   
-336   80     
-96    -80    
160    80     
-144   -336   
96     32     
160    -1568  
144    224    
-80    32     
-112   -48    
-144   48     
256    112    
-560   192    
144    -112   
-128   -128   
-32    -256   
-384   -64    
192    -32    
96     -48    
-160   -160   
-144   -96    
304    -944   
128    -112   
-160   0      
32     16     
-160   240    
176    16     
16     32     
-192   -112   
-32    -96    
96     -48    
-64    64     
240    160    
208    304    
96     -208   
-320   160    
-80    -512   
272    -16    
-48    64     
0      -48    
-112   64     
80     32     
-32    -112   
112    -80    
64     -48    
-32    80     
-48    64     
0      -144   
16     32     
368    -256   
16     160    
-32    304    
-640   -144   
176    80     
-1808  -288   
-48    -96    
272    128    
-256   32     
240    80     
-128   16     
176    -32    
-272   0      
-368   -192   
16     -32    
-112   -160   
-144   32     
48     144    
-160   80     
-48    -16    
-368   -32    
-224   0      
112    32     
272    352    
-144   144    
-224   -128   
96     -208   
48     112    
-128   -16    
-64    128    
32     144    
-96    144    
-144   176    
-176   -160   
-64    -112   
-480   592    
256    112    
944    1040   
-608   448    
-2528  -736   
-64    704    
-272   -192   
-272   928    
-160   -608   
368    336    
-512   -592   
0      16     
48     -224   
-80    288    
-80    -128   
-32    144    
0      48     
-64    336    
-224   144    
-1024  -144   
-192   112    
96     -64    
-208   272    
208    -272   
-112   80     
304    -224   
-80    208    
112    352    
16     288    
32     -96    
-48    64     
0      -16    
-96    0      
-144   128    
-112   -48    
32     48     
64     0      
16     128    
-96    -32    
48     144    
64     64     
-80    80     
96     224    
-80    96     
208    160    
-336   -64    
64     128    
-128   -272   
128    48     
-64    64     
16     160    
-384   -32    
0      128    
-16    64     
-64    0      
80     96     
64     80     
-144   80     
-96    -64    
128    -16    
-288   -128   
16     160    
-96    -80    
32     16     
-304   -112   
-80    -16    
-80    -80    
-32    160    
32     112    
208    304    
-64    64     
144    80     
16     256    
-128   -16    
16     -16    
64     160    
32     64     
-96    -32    
-192   112    
128    -16    
-176   0      
96     48     
-16    176    
128    272    
-240   96     
-16    -112   
-48    -48    
-16    -368   
112    288    
-96    112    
-80    -64    
80     144    
-176   -80    
-16    128    
-144   -48    
48     128    
-48    -16    
0      32     
-80    -16    
32     112    
16     176    
48     112    
-48    32     
-80    -128   
48     32     
-96    16     
48     48     
-64    64     
-32    144    
-16    32     
0      144    
-272   -112   
32     80     
-16    48     
144    160    
-48    48     
48     80     
-48    32     
32     0      
-32    32     
192    224    
0      80     
32     96     
-112   112    
32     96     
-80    96     
0      -336   
32     240    
-96    256    
368    400    
-336   -48    
64     -144   
0      144    
128    112    
-16    224    
-64    -96    
160    16     
-80    192    
176    -96    
-160   16     
160    224    
16     256    
16     128    
-16    32     
32     32     
0      48     
480    240    
-464   432    
-48    -192   
176    32     
-112   112    
96     0      
-240   -96    
144    208    
-16    -112   
192    96     
-144   96     
0      32     
160    416    
-240   16     
112    -48    
0      0      
320    192    
-16    0      
-144   -32    
48     -96    
0      144    
-48    -96    
224    352    
-96    -96    
80     -880   
-80    48     
144    352    
-192   48     
224    96     
-256   32     
224    288    
-176   96     
96     128    
-32    48     
-16    -64    
112    80     
-16    64     
48     128    
-80    112    
64     -1184  
96     192    
96     112    
-32    224    
-144   176    
-96    -48    
-128   64     
128    80     
-192   -32    
272    288    
-112   288    
192    112    
-240   -80    
1824   -2080  
-176   -1008  
16     496    
-224   544    
544    1728   
-944   -480   
512    976    
-48    528    
-160   -512   
-128   -416   
32     368    
16     208    
64     64     
-176   176    
112    -208   
-192   -80    
368    16     
-144   -112   
48     192    
48     -1424  
400    144    
-176   176    
176    176    
-80    176    
-144   16     
192    -96    
-96    320    
128    -208   
48     208    
-112   -32    
144    -80    
-16    80     
48     48     
160    112    
-48    -176   
176    384    
-368   -336   
240    32     
0      160    
256    48     
-160   -128   
64     160    
32     96     
80     48     
-16    96     
48     -240   
96     192    
48     -160   
-48    0      
128    -272   
-48    96     
160    -1584  
-64    112    
112    -96    
48     96     
-32    -48    
176    272    
-112   32     
224    112    
-32    112    
48     -16    
48     64     
80     32     
-32    96     
128    -240   
-32    -48    
-64    -352   
-192   64     
32     32     
16     0      
208    80     
0      208    
-96    96     
0      -160   
176    128    
-144   -912   
240    0      
-80    208    
16     144    
144    -32    
16     144    
80     -432   
288    288    
-304   176    
128    -48    
128    -16    
112    128    
-16    -256   
160    -112   
-176   208    
240    -160   
64     288    
-176   -48    
256    128    
-64    -272   
96     -32    
64     64     
0      208    
64     -160   
48     -16    
32     64     
112    144    
16     224    
288    96     
0      16     
144    48     
-160   80     
240    -208   
-48    -16    
64     -192   
32     160    
-48    -80    
176    240    
48     -128   
-32    -1664  
0      48     
320    -192   
64     160    
160    -16    
-144   -480   
80     -112   
304    256    
112    64     
-112   224    
176    -32    
-256   -32    
64     -352   
32     -624   
-144   80     
384    -464   
-16    112    
-384   -16    
48     -416   
48     -144   
80     -80    
144    64     
-80    0      
224    -128   
-144   -464   
64     -144   
176    80     
96     -16    
176    96     
-240   224    
432    112    
-128   128    
-128   16     
48     -144   
128    0      
64     -80    
32     64     
96     0      
32     -112   
-32    -368   
48     -96    
-32    32     
176    16     
80     -96    
80     80     
-16    144    
80     -32    
-144   80     
32     48     
-256   32     
144    96     
-208   -288   
288    -432   
-208   -208   
-16    -560   
16     0      
16     -480   
80     160    
-48    64     
48     -96    
64     80     
-64    -112   
0      112    
160    208    
-48    -48    
-16    -144   
-1200  -288   
96     128    
-16    96     
48     -112   
96     80     
0      -112   
192    256    
224    -48    
-16    0      
-80    112    
160    64     
-160   -48    
-16    -192   
-16    64     
-16    -16    
-192   32     
64     -32    
-1056  -3280  
1104   1136   
-1568  -368   
512    -816   
512    704    
64     -912   
-224   -512   
-176   480    
368    208    
112    -288   
-288   -368   
-96    96     
320    576    
-384   16     
240    -176   
-1168  -176   
416    -208   
-32    208    
-112   -1248  
96     -224   
-64    -3184  
128    144    
-96    96     
192    32     
-112   0      
240    -128   
-208   64     
336    336    
-464   240    
496    240    
-240   -144   
256    -368   
112    160    
0      -64    
0      64     
0      -464   
-32    -208   
0      48     
-32    48     
112    80     
240    32     
-80    144    
224    -96    
-96    96     
64     -192   
-80    96     
-64    -32    
160    368    
32     -144   
-48    16     
-176   -32    
-64    112    
-192   32     
32     160    
-48    -64    
160    64     
-256   -144   
208    -112   
0      16     
64     -32    
144    192    
-1072  -80    
-80    144    
-688   -256   
32     96     
64     -16    
-160   176    
-80    -48    
0      -48    
16     80     
16     -16    
32     0      
128    192    
-96    0      
160    0      
80     224    
-592   -320   
64     -176   
-176   -224   
64     48     
-32    320    
-272   128    
48     32     
-464   -320   
32     16     
-128   192    
-48    208    
-96    96     
144    544    
128    144    
0      -32    
-48    -240   
80     112    
16     -80    
-32    -48    
-64    48     
-128   -160   
112    144    
-432   16     
16     192    
-320   -96    
0      -64    
-1840  -144   
0      112    
-128   -176   
-32    112    
0      -48    
80     80     
0      144    
-176   -80    
192    144    
-224   -48    
112    80     
-96    48     
64     96     
48     64     
-112   -16    
-368   128    
0      -32    
0      -32    
64     176    
-32    -144   
-160   32     
160    144    
80     64     
16     -16    
-272   32     
-16    144    
80     240    
-256   32     
-112   -208   
-160   16     
-192   -144   
144    96     
-1328  -240   
192    288    
-224   -160   
32     -32    
32     -64    
64     144    
112    64     
-128   128    
112    176    
-128   192    
-176   -32    
64     0      
-272   64     
224    -496   
-48    144    
-240   -224   
80     224    
-208   -352   
224    96     
0      -80    
128    176    
48     672    
-240   16     
240    176    
176    544    
48     208    
-208   -80    
32     80     
0      -160   
112    0      
-352   -288   
96     32     
80     64     
16     64     
48     0      
160    -48    
96     272    
0      96     
-16    272    
-96    320    
32     16     
16     -144   
32     208    
-160   32     
32     144    
-320   32     
256    80     
192    -16    
-144   32     
-16    48     
32     112    
-64    80     
128    80     
-64    80     
-112   -112   
-80    320    
-176   -128   
96     16     
-256   -64    
112    160    
-320   -16    
160    -48    
96     0      
48     16     
1872   -2272  
688    1376   
-416   -272   
-48    64     
80     256    
-352   -272   
-80    -112   
-320   -192   
224    80     
-432   -144   
224    48     
-48    -192   
160    160    
-64    224    
-32    0      
16     48     
128    48     
16     16     
-64    48     
112    80     
48     32     
-48    160    
-80    -32    
64     0      
-32    -128   
208    144    
-64    96     
16     144    
-32    16     
128    -16    
-112   32     
160    80     
0      112    
-64    32     
64     32     
160    240    
16     288    
-16    -192   
16     176    
-192   16     
240    96     
-64    64     
64     144    
144    288    
-64    112    
0      -32    
-32    64     
96     320    
112    16     
48     96     
-128   -64    
192    208    
-192   128    
96     -80    
-48    -96    
48     176    
112    176    
-96    112    
80     48     
32     64     
-16    112    
112    96     
-48    80     
64     176    
32     -32    
0      32     
80     96     
-48    112    
-16    144    
16     -32    
96     -208   
-16    144    
-48    128    
128    336    
-64    96     
160    -16    
272    -96    
48     256    
-224   176    
32     96     
64     -128   
112    224    
-144   48     
128    -48    
32     -32    
32     -240   
-96    320    
192    144    
0      16     
176    160    
-80    0      
112    80     
-64    0      
64     0      
32     256    
-192   -272   
128    32     
-96    0      
64     -96    
144    192    
-224   -160   
128    144    
-16    32     
128    176    
-112   -112   
128    48     
0      80     
176    288    
16     240    
160    160    
-16    16     
-16    96     
32     0      
-176   -432   
224    224    
0      -96    
288    256    
-192   -1616  
16     80     
48     96     
160    32     
-96    192    
192    256    
16     -48    
64     128    
-64    208    
128    352    
192    128    
-48    -112   
-32    96     
-64    -128   
384    208    
-48    -944   
320    208    
-96    -704   
32     144    
32     464    
64     240    
192    -16    
80     80     
-224   80     
80     128    
80     -32    
176    0      
0      144    
32     -32    
240    240    
-192   -240   
128    0      
-64    -272   
0      -32    
96     -144   
-48    64     
-16    -32    
64     96     
48     48     
16     16     
128    -112   
32     0      
80     256    
16     -80    
112    240    
32     -80    
-48    32     
80     -288   
112    112    
-80    -896   
16     144    
-160   112    
128    96     
-48    96     
16     -368   
0      208    
16     -512   
-32    224    
32     -128   
32     32     
48     -288   
80     112    
0      -800   
176    272    
-272   -16    
16     144    
224    -32    
0      112    
-128   32     
144    -64    
64     96     
192    0      
-64    160    
80     -16    
16     144    
48     -128   
48     288    
-144   -272   
96     64     
80     48     
-144   880    
160    2448   
-848   624    
16     -1792  
-64    32     
16     656    
176    -416   
-448   304    
416    16     
-80    -160   
-112   -240   
80     96     
288    -272   
16     -864   
-160   80     
176    -112   
-96    32     
-304   448    
-64    -272   
80     -128   
-32    -96    
208    -48    
96     -336   
64     -128   
-80    -48    
160    16     
32     352    
-96    -272   
64     -448   
16     0      
208    -224   
-32    128    
-128   208    
32     -64    
-144   -64    
160    -320   
-80    -80    
96     -464   
96     128    
16     -560   
160    144    
0      96     
144    -32    
192    -48    
-80    -32    
192    0      
80     -112   
-176   -288   
112    -224   
-352   -64    
96     32     
96     -48    
32     -208   
128    -224   
-80    -528   
96     -192   
16     -416   
-576   -544   
464    416    
416    960    
-224   -352   
-80    -256   
-80    -112   
96     -80    
-112   160    
0      32     
-112   0      
96     -16    
48     -80    
-32    -208   
32     16     
112    -640   
0      80     
96     -80    
64     32     
-96    160    
144    288    
-128   288    
-192   16     
176    -96    
0      -448   
96     -144   
48     -176   
144    -128   
16     -64    
112    80     
-16    -160   
64     -144   
-64    32     
0      208    
-176   -64    
-32    32     
-16    -96    
144    16     
-144   -128   
32     -64    
-432   -16    
-64    -48    
-864   16     
48     -80    
64     48     
64     -288   
0      176    
16     -1792  
48     -64    
48     48     
96     32     
-16    -32    
32     16     
-240   -48    
48     48     
-32    0      
64     128    
0      48     
64     -272   
48     64     
0      -304   
-128   32     
144    -480   
80     48     
-32    240    
0      128    
-144   16     
-16    176    
64     -80    
80     32     
-128   -240   
112    0      
-240   -432   
128    0      
-128   -32    
128    -224   
80     544    
16     64     
48     64     
0      208    
48     0      
-176   -208   
128    80     
-112   -160   
112    0      
-160   64     
96     -64    
-512   -160   
160    -304   
-48    80     
224    -400   
48     64     
96     272    
-640   16     
-64    64     
-16    64     
0      16     
176    112    
-208   -16    
128    -352   
-144   96     
48     128    
144    1056   
-352   -512   
-144   128    
-16    -224   
-208   -32    
0      -96    
-48    64     
-16    256    
-496   128    
-32    208    
-1536  -384   
80     -48    
224    112    
-48    64     
32     96     
0      -112   
-240   -544   
96     0      
-32    -432   
16     224    
80     480    
-80    -128   
0      128    
-208   112    
-32    -128   
-144   16     
176    16     
-16    208    
-144   32     
-112   -176   
96     96     
-48    -224   
48     128    
16     176    
-64    208    
0      96     
-208   -16    
160    -32    
-144   -48    
0      16     
1632   224    
-1440  -2320  
-208   -560   
-304   112    
-592   -896   
544    1424   
-1120  496    
848    1136   
-400   -144   
0      32     
-656   -128   
368    32     
-48    336    
176    -336   
-288   256    
144    -64    
-32    160    
-496   -80    
-80    128    
64     -96    
-80    32     
208    16     
-176   192    
112    -48    
-256   -128   
64     80     
80     80     
16     176    
-128   -80    
16     0      
-224   -48    
112    160    
-144   -64    
-80    96     
-848   16     
80     -16    
-176   -560   
-128   32     
128    144    
208    16     
-160   -16    
48     144    
112    96     
-64    48     
-176   -112   
-112   -32    
144    128    
0      80     
128    32     
-512   -32    
144    144    
-16    0      
-48    0      
48     96     
16     80     
16     48     
0      16     
-80    208    
-112   -64    
144    64     
-80    96     
16     64     
-80    -32    
64     192    
-720   -48    
112    0      
112    32     
0      64     
64     352    
-192   -80    
176    0      
-64    -16    
-32    112    
-144   48     
144    -16    
-64    176    
144    48     
-16    -16    
256    0      
-160   64     
-96    320    
32     0      
304    400    
-304   -96    
336    32     
32     192    
-288   0      
224    144    
-304   112    
240    96     
-256   -16    
80     -64    
-48    -112   
-16    16     
-96    80     
176    384    
-96    16     
96     32     
16     -128   
0      64     
64     128    
-16    80     
32     96     
128    176    
-64    32     
0      48     
-160   -48    
0      -112   
64     48     
128    160    
0      16     
-64    128    
-32    144    
288    80     
32     160    
-80    80     
-96    0      
144    288    
-128   -80    
16     -304   
-64    -48    
32     64     
48     -64    
-32    96     
-192   -16    
160    304    
112    112    
176    128    
-208   128    
128    144    
16     16     
-160   64     
-16    -64    
208    96     
144    240    
80     208    
144    160    
-64    -32    
-304   -48    
144    96     
128    96     
96     64     
-192   80     
112    112    
-80    -80    
64     -64    
-48    128    
48     64     
48     224    
64     48     
32     240    
-32    -144   
-48    160    
64     -192   
-128   32     
0      80     
48     16     
-32    48     
32     96     
0      0      
64     224    
80     80     
64     -32    
-48    192    
32     288    
32     864    
-16    192    
-176   -800   
208    -48    
80     64     
-128   48     
176    0      
80     0      
80     32     
112    144    
96     320    
-48    0      
144    -240   
-80    -48    
192    144    
-32    272    
-32    144    
48     80     
64     -768   
160    -112   
352    16     
144    224    
-96    128    
96     112    
-16    48     
128    160    
-80    64     
48     0      
-192   -64    
80     -128   
-16    160    
32     -160   
-560   -2352  
1680   1680   
-896   256    
896    -768   
-560   -224   
192    192    
112    560    
-224   -144   
592    400    
-336   -528   
-16    272    
-112   16     
208    32     
112    128    
-48    -224   
-96    32     
112    -640   
-32    32     
192    -832   
160    256    
-224   -80    
-112   112    
160    -224   
240    64     
-304   -368   
32     -96    
-144   -80    
160    256    
-272   0      
-48    -128   
128    240    
-160   -112   
192    96     
-128   -128   
208    -240   
48     320    
48     160    
240    688    
-80    144    
-16    -272   
320    -16    
-192   16     
240    80     
0      224    
16     -112   
128    256    
-32    -80    
128    256    
-256   -816   
-112   -256   
304    -112   
-112   128    
80     208    
224    -224   
-208   32     
256    64     
64     176    
-320   -16    
784    848    
-32    -464   
64     320    
160    -528   
-176   272    
272    32     
-112   208    
112    -240   
0      208    
0      -16    
48     160    
64     -32    
64     112    
96     16     
-32    -352   
0      48     
64     16     
64     -96    
336    80     
-256   32     
144    -112   
96     64     
16     -176   
112    80     
32     -208   
32     416    
0      64     
-16    80     
128    176    
240    -32    
-32    192    
64     -128   
32     112    
128    0      
-80    0      
96     -304   
96     176    
-16    -272   
224    208    
-224   80     
128    -2032  
-128   -240   
-976   -400   
272    -1120  
32     160    
-16    176    
-32    -112   
96     -672   
64     -288   
176    192    
-32    144    
112    224    
0      48     
32     -752   
32     96     
80     -160   
64     144    
-128   32     
144    -144   
-112   -176   
96     -272   
96     32     
-128   -1136  
208    -176   
192    -272   
-48    48     
144    192    
-128   208    
224    -64    
80     96     
144    624    
-432   -176   
48     32     
-64    112    
416    -352   
32     -160   
64     16     
-80    -224   
64     -288   
-48    -192   
128    48     
112    -176   
-16    16     
32     -160   
48     -48    
-16    64     
96     16     
-224   96     
160    -224   
-1280  -192   
80     -256   
64     -112   
0      -96    
160    208    
0      -208   
-16    -48    
128    -336   
-112   160    
176    -112   
-80    192    
0      -384   
48     -368   
-16    -32    
112    -144   
0      144    
192    -64    
-80    96     
-64    -64    
160    -16    
96     0      
0      32     
32     -1136  
96     -16    
112    96     
16     240    
-320   -112   
80     -80    
-64    0      
240    -208   
32     432    
-176   -368   
-576   -160   
176    -304   
-128   -256   
-48    -176   
-48    -32    
112    -96    
-64    208    
-16    -112   
112    -48    
-96    32     
112    96     
-112   0      
48     64     
-64    -48    
0      -240   
16     16     
176    32     
0      208    
-16    -64    
1568   2096   
-1744  240    
944    624    
-96    336    
-128   -848   
208    448    
-1056  160    
1088   352    
-160   112    
-288   -144   
-368   -80    
80     32     
368    32     
-32    64     
-144   -240   
64     208    
192    -240   
16     112    
-192   -32    
112    -16    
-112   64     
-32    -64    
-336   0      
0      -16    
-112   -64    
-192   -160   
192    -64    
0      0      
16     -32    
-160   -96    
144    112    
64     -256   
80     144    
-48    48     
64     64     
-48    -16    
208    320    
-64    48     
-32    64     
-160   -80    
192    32     
-176   0      
128    -32    
-176   -48    
-160   -128   
160    48     
-32    64     
64     -80    
128    320    
-1296  -48    
240    16     
-304   144    
16     -32    
160    176    
-240   96     
272    0      
-192   -144   
48     -176   
64     224    
-48    -240   
208    64     
-368   -128   
-96    -192   
80     144    
-528   -48    
96     16     
-160   -64    
-96    0      
-464   -32    
16     32     
32     -144   
-32    80     
-112   -64    
48     96     
32     -272   
-176   -48    
-240   -528   
64     160    
-288   96     
112    -16    
0      96     
-48    48     
-32    -16    
-368   256    
-64    256    
128    0      
16     -80    
16     -32    
112    320    
-96    0      
80     48     
0      -80    
32     -16    
112    96     
-80    -48    
96     80     
-416   -224   
240    144    
-144   96     
-16    96     
-576   -64    
-16    48     
-48    -224   
224    -80    
-160   -272   
-80    32     
64     208    
32     80     
-224   -16    
32     112    
-32    -80    
-96    48     
-64    80     
-80    128    
112    176    
-320   112    
96     96     
-160   -64    
-16    16     
16     -64    
-112   0      
192    144    
-240   48     
16     16     
96     80     
32     -32    
0      48     
-160   -96    
16     240    
48     -112   
-240   -112   
112    64     
-512   240    
80     16     
16     64     
16     496    
64     192    
-192   160    
-80    -48    
112    -32    
96     112    
-16    112    
-80    64     
-64    -16    
16     112    
16     128    
80     368    
-704   -16    
112    -208   
-80    64     
16     -16    
-80    16     
0      128    
80     96     
-16    112    
-32    -608   
-144   -192   
272    416    
-272   48     
96     16     
-192   -160   
224    96     
-704   -112   
-16    -256   
-64    -16    
608    -208   
-320   -128   
-144   -240   
-64    48     
-48    208    
-16    80     
-192   0      
192    176    
-192   208    
96     -64    
-176   64     
48     80     
-32    112    
-192   48     
192    64     
48     64     
112    48     
-192   32     
0      160    
-176   48     
208    -16    
32     160    
112    112    
-240   -64    
48     224    
-96    16     
-128   64     
16     144    
-96    176    
112    -240   
16     336    
112    48     
64     80     
1200   448    
368    720    
-528   -256   
-640   -528   
256    320    
-304   -656   
656    176    
-544   -160   
272    368    
-192   32     
80     -256   
-64    272    
128    80     
96     432    
-64    -384   
112    240    
144    -144   
64     448    
208    240    
176    672    
-32    -96    
112    416    
-160   -144   
96     -112   
-48    -128   
304    48     
16     144    
240    544    
-400   0      
176    -112   
-32    160    
272    -32    
176    -16    
-16    -96    
272    16     
48     -128   
144    -96    
144    176    
48     112    
-112   32     
160    32     
16     48     
160    -176   
-48    80     
-16    0      
144    240    
-208   -80    
208    192    
32     144    
320    320    
-304   64     
128    160    
-16    -192   
-16    320    
96     80     
128    144    
368    208    
-272   48     
-400   -96    
192    32     
-80    -48    
208    80     
-16    -128   
-32    128    
-48    144    
80     16     
0      96     
160    112    
208    32     
-112   256    
-192   -96    
224    -240   
-48    112    
-16    112    
-48    -16    
-64    288    
240    -176   
144    64     
-256   -256   
144    176    
32     208    
64     -160   
-16    -32    
80     -1056  
80     128    
48     48     
128    576    
-256   -176   
48     16     
160    16     
16     96     
-144   64     
16     -80    
48     48     
128    -32    
64     -64    
32     144    
192    320    
-192   -928   
96     -16    
224    -368   
160    144    
-176   96     
112    144    
64     32     
224    208    
-400   -208   
240    304    
-192   32     
240    176    
16     224    
80     -160   
-16    240    
-160   -64    
128    -32    
32     0      
96     -128   
16     128    
144    32     
-288   192    
240    144    
-32    0      
160    -64    
-128   32     
128    160    
144    144    
-64    0      
64     48     
0      -96    
112    80     
16     -272   
256    144    
-96    -336   
48     -32    
-112   16     
128    -80    
-16    96     
48     -80    
64     64     
-176   -96    
192    112    
64     -112   
96     240    
-16    -48    
176    128    
-80    -352   
80     352    
112    -256   
32     176    
-32    112    
144    192    
32     128    
80     192    
-128   128    
160    -80    
0      64     
80     176    
32     0      
192    -176   
-48    192    
64     0      
0      112    
-32    -48    
80     16     
-32    -144   
224    -160   
-16    224    
48     320    
-112   96     
128    192    
96     48     
176    -384   
64     144    
96     -32    
-80    224    
-272   -320   
352    128    
32     -384   
160    16     
-32    128    
0      80     
-16    64     
144    96     
-32    -736   
-16    -48    
-16    96     
96     -208   
48     144    
48     -144   
192    176    
48     -64    
32     240    
-96    -192   
272    480    
-208   80     
272    -384   
-96    -48    
-1200  -1056  
448    -704   
-1744  -320   
624    -272   
240    176    
-208   -528   
320    912    
-384   -80    
432    480    
-192   -816   
160    -80    
96     -512   
304    544    
-80    -416   
112    32     
-512   -176   
224    -128   
-96    64     
160    -144   
48     0      
16     -336   
-80    288    
208    96     
-96    176    
176    -304   
-112   192    
288    -624   
-256   272    
160    -384   
-16    80     
-224   -128   
-80    176    
-320   -96    
-80    64     
128    -128   
64     -192   
96     -144   
-32    16     
16     0      
96     -240   
64     16     
-48    -64    
144    160    
128    -80    
-160   -16    
128    -128   
-96    -112   
-864   -272   
256    -48    
-224   0      
160    -64    
96     96     
32     0      
160    -112   
16     -3200  
48     -16    
176    32     
-80    112    
96     16     
64     -128   
-128   -96    
0      -80    
-96    16     
48     -240   
-1232  -96    
-96    -48    
-176   -96    
-16    -480   
-32    -128   
96     -1680  
-16    64     
48     128    
-96    80     
-16    -48    
160    208    
-272   -144   
384    160    
-336   80     
112    112    
-272   -80    
0      -96    
-768   80     
80     -128   
128    432    
208    -272   
112    112    
-192   -432   
272    -176   
-128   -16    
32     16     
128    208    
192    576    
-848   16     
272    32     
-288   0      
-64    -208   
96     48     
16     -352   
32     32     
112    -384   
80     128    
0      -544   
80     -240   
128    -80    
224    16     
-208   560    
144    32     
-480   -64    
240    -112   
-48    96     
48     0      
-256   96     
96     -208   
-16    48     
80     -592   
32     64     
112    -176   
-16    32     
64     176    
-64    -288   
-128   16     
48     128    
64     -80    
48     96     
-64    96     
80     -512   
-352   -208   
144    -416   
256    32     
-160   -128   
80     288    
-64    144    
-176   0      
64     176    
-192   -272   
-32    224    
48     416    
-32    32     
-144   -224   
192    48     
240    -112   
-16    160    
-512   112    
-160   176    
48     -208   
-400   112    
-16    208    
-192   16     
-160   -16    
-640   -16    
16     -32    
-144   48     
-80    32     
112    -112   
32     -64    
-320   32     
48     96     
0      160    
-160   16     
48     -176   
-160   64     
96     80     
32     -32    
-112   80     
96     0      
-64    -16    
-32    336    
-64    -48    
-16    -80    
-224   -32    
96     -32    
-64    48     
-16    -48    
80     128    
32     64     
-288   208    
-32    -128   
32     176    
0      48     
0      96     
-192   16     
-128   -80    
-16    32     
-624   32     
-112   48     
0      -192   
128    192    
-112   0      
-112   -16    
80     48     
64     144    
-80    48     
64     -144   
64     256    
-272   -240   
80     176    
-16    0      
256    144    
608    1280   
672    880    
-512   -1328  
-112   -640   
-576   -416   
256    464    
208    -240   
352    752    
-688   -16    
-48    -368   
-16    -288   
-144   576    
240    -224   
-128   240    
-32    -80    
-16    16     
-256   -432   
-48    16     
32     128    
32     48     
-288   192    
80     336    
16     -80    
192    112    
-288   544    
304    0      
-224   0      
-144   80     
112    -80    
128    -96    
-608   -256   
208    128    
-96    80     
144    128    
192    160    
-112   48     
48     144    
-48    192    
-176   48     
368    384    
-192   64     
0      0      
-144   224    
-320   0      
96     0      
-368   -32    
208    64     
-320   96     
112    64     
16     16     
0      32     
16     64     
192    80     
-64    160    
-16    80     
-48    32     
-96    128    
48     32     
-16    -16    
48     160    
-96    48     
128    128    
-192   -32    
64     0      
208    256    
-32    224    
-32    32     
112    -16    
-272   -304   
96     -48    
-112   160    
-16    48     
-96    224    
-32    160    
224    224    
-128   0      
0      128    
-16    0      
0      176    
-32    80     
80     176    
-80    112    
256    544    
-256   176    
-96    -112   
144    64     
-144   -288   
352    32     
-240   -64    
-16    128    
-224   16     
272    256    
-16    192    
-16    240    
32     0      
64     -16    
16     -16    
48     160    
16     -48    
128    128    
112    80     
-16    208    
32     48     
16     64     
160    48     
-32    224    
48     224    
144    96     
-304   -32    
160    16     
-16    16     
0      48     
-80    112    
304    224    
-48    96     
48     128    
-288   -112   
96     -128   
-96    -16    
16     -224   
-96    -64    
64     16     
192    96     
-48    112    
-32    192    
16     -64    
208    32     
-144   176    
48     16     
-48    0      
80     32     
-32    160    
192    32     
-240   144    
0      192    
0      -16    
304    48     
-144   96     
-240   128    
176    112    
160    32     
-80    48     
-224   -48    
32     -16    
32     80     
144    32     
-160   -176   
288    64     
-224   176    
112    64     
32     96     
-16    160    
32     128    
176    144    
0      112    
80     0      
16     160    
64     368    
-96    256    
96     80     
-16    112    
96     160    
80     32     
-112   -128   
144    192    
-112   80     
176    -176   
64     -48    
144    112    
16     144    
-32    64     
96     112    
-128   32     
80     240    
-16    -48    
96     160    
-64    160    
80     192    
-16    -80    
176    -80    
160    144    
-80    -304   
-176   16     
192    144    
144    96     
48     128    
-32    112    
80     0      
-16    48     
16     -224   
224    96     
-112   96     
-32    48     
160    0      
48     -32    
80     176    
32     -208   
-128   544    
256    624    
-384   -96    
448    1280   
-816   -160   
-96    -752   
656    576    
-864   -48    
480    160    
-448   240    
288    -448   
-160   400    
320    -800   
-80    1024   
16     -976   
-64    592    
176    -816   
-48    400    
368    160    
-32    448    
-80    -336   
-144   176    
96     80     
320    48     
-192   64     
128    -304   
-112   288    
208    -208   
-112   256    
176    -224   
-48    160    
48     -1104  
16     304    
-96    -2880  
64     240    
64     -32    
224    80     
32     48     
-16    224    
80     -32    
16     48     
-32    96     
160    160    
16     64     
112    -560   
-80    160    
112    -96    
48     192    
0      -48    
112    128    
-48    -32    
112    176    
-48    32     
160    224    
-128   16     
16     -320   
192    224    
16     -672   
128    144    
-16    -144   
32     272    
80     -272   
160    16     
-96    32     
64     80     
-32    -32    
160    96     
32     -16    
-16    128    
-32    48     
240    -128   
-96    128    
112    -192   
-32    80     
48     -288   
160    64     
224    112    
-208   144    
-96    -864   
400    480    
-64    208    
192    304    
0      16     
-16    -416   
176    -1648  
-128   -64    
32     -2000  
-32    -96    
160    64     
-128   -240   
352    96     
-16    -16    
-16    96     
-128   -192   
112    -384   
32     176    
416    768    
-224   368    
-704   -128   
128    -128   
160    -208   
80     -624   
32     -128   
0      -272   
96     -160   
96     144    
128    -48    
-32    192    
48     -112   
16     -528   
-160   32     
176    -176   
112    -144   
-752   -208   
80     32     
-176   0      
160    16     
-16    80     
112    -320   
80     -16    
-96    -2848  
96     -64    
160    192    
112    224    
-128   -144   
-128   128    
80     -400   
320    -352   
-144   112    
176    112    
-480   -32    
-64    -320   
80     -48    
64     -272   
176    112    
-80    -16    
384    560    
-304   272    
368    576    
-112   -80    
160    -288   
-128   128    
144    80     
-160   0      
-64    -288   
-672   -48    
48     -176   
320    -288   
64     -64    
160    320    
-160   -448   
-128   -224   
160    -2544  
80     -64    
16     -128   
256    112    
-320   128    
432    112    
-432   -32    
368    -96    
-352   64     
64     16     
-720   0      
-112   80     
176    -32    
-80    -288   
608    -336   
-128   -352   
-304   48     
304    -224   
-160   80     
272    -160   
16     -160   
-144   128    
96     -96    
-144   16     
112    16     
-288   128    
32     -176   
-896   0      
64     -224   
-128   48     
144    -224   
160    144    
-16    64     
-192   -512   
272    -80    
192    32     
-400   64     
-144   -96    
-144   32     
64     -144   
-160   208    
-64    -48    
-384   32     
0      -480   
128    112    
112    -16    
-1808  1488   
320    -2416  
-336   -752   
1024   -16    
576    160    
-912   -960   
256    208    
272    -528   
352    -48    
-416   -496   
208    48     
-128   384    
192    -160   
160    128    
-144   -400   
176    240    
-544   16     
400    48     
-272   64     
256    -112   
-64    240    
96     16     
-48    304    
112    64     
-48    160    
96     -80    
-192   144    
304    -192   
-160   160    
-656   -128   
-224   0      
16     16     
-1136  16     
-144   -16    
-592   -224   
-112   64     
64     -80    
-160   16     
0      16     
-64    -160   
-368   -208   
-176   224    
-128   -320   
-64    -80    
-32    -176   
176    192    
-80    48     
-272   -256   
112    -144   
-640   192    
0      -96    
32     128    
-16    64     
208    -80    
-320   48     
-176   144    
-32    160    
-320   -208   
192    112    
-64    96     
-64    -80    
-160   64     
-240   48     
32     160    
-304   0      
112    -32    
-288   48     
-80    -128   
-48    48     
-64    16     
80     -32    
16     112    
-144   144    
80     -16    
96     128    
-192   -16    
16     -64    
128    -64    
-48    64     
-240   112    
32     -16    
-288   -16    
-48    -64    
-624   16     
-96    256    
-16    -96    
240    80     
0      48     
-224   48     
192    160    
-144   -32    
0      -16    
144    192    
-240   64     
144    48     
-320   -64    
96     64     
16     64     
0      0      
16     160    
-64    -64    
-32    192    
-112   -176   
48     128    
-32    48     
32     192    
-32    -32    
-48    16     
96     240    
-80    64     
32     0      
-176   0      
16     64     
-464   -240   
96     80     
-1136  -272   
128    64     
-144   -48    
208    0      
176    192    
-112   224    
224    144    
-304   96     
96     96     
-32    64     
-64    48     
128    176    
-160   0      
-256   -192   
-112   16     
-752   -16    
224    192    
32     192    
272    96     
-400   176    
-96    64     
224    176    
-208   160    
224    48     
64     128    
-80    64     
-80    48     
-32    -48    
-176   -16    
80     64     
-160   -64    
-192   -176   
0      128    
64     80     
0      48     
-112   48     
80     32     
-16    112    
192    -48    
-144   -112   
16     32     
-96    48     
-64    0      
80     -128   
144    224    
-336   64     
-48    80     
-192   -64    
96     -16    
144    128    
16     -80    
-16    48     
-160   -288   
-160   64     
240    0      
16     256    
48     144    
-160   96     
-192   -16    
128    16     
-32    192    
96     80     
-16    320    
-144   -48    
48     -112   
128    0      
64     -16    
176    112    
-80    176    
-208   160    
160    -48    
-16    48     
352    64     
64     48     
-96    256    
64     96     
-64    144    
160    160    
-96    -80    
128    -32    
-80    160    
64     192    
-528   784    
-128   656    
576    736    
-624   240    
-592   -1152  
848    704    
-576   80     
256    1488   
-192   304    
272    -224   
-704   -352   
384    0      
192    128    
-128   144    
-80    16     
48     96     
-32    48     
-32    112    
64     224    
-16    0      
48     96     
-16    -32    
0      208    
32     0      
-32    16     
64     64     
-64    112    
-128   32     
160    80     
96     64     
32     176    
0      128    
-272   16     
80     80     
-160   96     
128    80     
208    48     
-128   48     
192    192    
-96    48     
32     80     
-64    64     
112    96     
16     80     
112    160    
-160   0      
80     112    
-32    96     
16     -176   
144    80     
-128   128    
224    112    
-144   -1728  
192    48     
-32    96     
64     96     
16     -64    
-48    112    
32     96     
64     48     
-16    -288   
0      144    
-32    16     
96     64     
0      -48    
128    -96    
-32    320    
176    0      
48     80     
-16    80     
-16    64     
96     48     
160    224    
-96    96     
32     32     
16     80     
288    320    
-96    400    
-176   128    
256    16     
-192   -96    
224    32     
0      16     
128    208    
16     144    
64     16     
48     192    
0      64     
16     -64    
48     -208   
48     -128   
176    368    
-80    224    
16     96     
160    144    
-64    -112   
176    48     
-32    -576   
32     128    
16     -1440  
16     96     
48     32     
32     80     
0      -672   
96     128    
-112   32     
96     80     
-96    -144   
96     128    
32     224    
48     -288   
48     160    
-48    -128   
176    96     
-16    -336   
0      96     
16     -160   
80     64     
-32    80     
128    16     
-32    -16    
32     192    
272    96     
-16    -112   
-80    160    
-224   -144   
96     -496   
112    -304   
160    256    
64     80     
128    176    
-160   -608   
32     80     
128    32     
48     128    
16     80     
0      -560   
-160   96     
-160   -32    
240    -16    
-32    -608   
176    64     
16     64     
-48    16     
48     -320   
128    0      
64     -64    
-80    16     
80     48     
80     48     
112    80     
-64    64     
128    80     
192    112    
48     416    
-224   -352   
352    320    
16     -592   
224    80     
-240   -112   
64     48     
-80    -16    
48     64     
320    224    
48     32     
-272   -32    
384    336    
-416   240    
128    -432   
16     16     
368    -32    
96     208    
-208   -144   
-192   144    
288    -208   
272    320    
-224   -96    
16     -1168  
144    144    
208    432    
-176   288    
-976   48     
-96    -304   
224    -240   
-128   -464   
224    -240   
32     208    
32     -96    
160    80     
64     -16    
16     48     
80     -48    
-16    -176   
32     240    
16     -432   
112    128    
-1040  -112   
-16    -400   
2192   -2512  
912    1712   
-784   -720   
-704   -480   
0      -560   
736    -1072  
224    656    
256    720    
-160   -320   
-256   0      
96     -48    
192    64     
32     -96    
-96    -128   
96     -128   
-704   -64    
48     112    
96     160    
48     -640   
-32    0      
64     -704   
48     -64    
112    -32    
-128   -48    
256    -240   
-32    96     
288    0      
-16    -64    
-160   0      
-32    -16    
-320   -64    
-32    -48    
128    -160   
80     -112   
48     -144   
224    -704   
-352   128    
96     16     
-48    0      
48     -192   
112    80     
-96    -48    
48     32     
-112   96     
16     80     
32     -112   
-80    -48    
144    80     
-16    -272   
272    128    
-80    -48    
128    0      
-128   -384   
256    144    
-80    -32    
112    112    
224    -32    
-48    80     
-64    -112   
128    -192   
-272   64     
80     -208   
-592   144    
-48    80     
256    -48    
0      -192   
32     288    
-64    -624   
96     0      
176    48     
16     32     
-32    96     
64     -352   
0      0      
-48    16     
176    176    
-48    -128   
16     -48    
32     -320   
-352   -176   
64     -496   
-176   240    
144    -384   
32     -80    
144    32     
144    -208   
-32    288    
-144   -208   
64     80     
-112   48     
80     32     
-16    16     
-128   48     
0      -80    
-128   -240   
288    32     
-64    144    
80     16     
64     64     
-720   -64    
336    -32    
-448   48     
112    -48    
0      128    
32     -16    
-144   32     
0      -240   
128    400    
80     -32    
96     32     
-128   -96    
112    128    
96     -304   
-32    80     
-176   80     
96     0      
-64    112    
-144   -128   
32     -128   
-96    -384   
-240   -208   
32     -32    
80     48     
144    -32    
0      96     
-672   -304   
80     0      
-1200  -320   
-304   -80    
96     144    
-80    64     
80     32     
-928   80     
224    160    
144    64     
-96    128    
112    160    
32     160    
-176   128    
-32    64     
-432   -160   
48     80     
0      160    
-160   224    
48     0      
-176   32     
-160   0      
-336   160    
80     64     
-848   32     
-48    96     
112    16     
32     16     
16     -128   
16     192    
32     -160   
-64    -128   
32     -80    
0      -336   
-144   0      
-112   192    
-64    -112   
-352   48     
-32    112    
80     -80    
-64    0      
32     -192   
-48    -64    
48     112    
128    176    
0      -240   
32     -208   
-80    -32    
48     80     
144    48     
-112   208    
-16    -48    
-80    112    
16     160    
32     -112   
-176   48     
-352   -32    
80     224    
-64    16     
64     112    
-32    -224   
0      112    
-16    96     
-112   -32    
0      112    
32     80     
-16    128    
-224   176    
128    -96    
-240   -64    
-48    176    
-160   48     
-32    272    
240    -1408  
496    336    
-80    592    
-544   -720   
320    -112   
448    416    
-224   80     
80     224    
-64    352    
64     -416   
32     -80    
-64    144    
-16    160    
64     -144   
-224   64     
-928   -96    
112    -240   
-16    -192   
112    -64    
48     64     
-128   64     
48     176    
112    80     
16     -112   
-112   144    
16     192    
112    176    
0      192    
-128   -80    
-128   -224   
-192   0      
-80    160    
96     32     
-112   64     
144    -32    
-112   240    
64     432    
-64    208    
48     128    
-16    0      
80     128    
-144   -112   
-32    160    
-304   -80    
-32    176    
-80    64     
64     160    
48     144    
96     176    
-32    112    
0      176    
32     96     
-32    -112   
32     96     
-128   -64    
64     80     
-176   -144   
32     96     
-144   -32    
32     64     
80     160    
0      -96    
-32    144    
-16    144    
96     48     
48     336    
-32    80     
64     32     
-96    96     
-16    48     
48     80     
-32    16     
96     128    
0      208    
-32    96     
112    16     
-336   -656   
288    -64    
192    400    
-16    352    
-160   160    
-64    -16    
48     -64    
0      32     
-160   16     
32     80     
-96    -96    
160    208    
-176   32     
80     -16    
-32    64     
32     176    
64     32     
16     80     
-64    -16    
96     96     
-64    80     
-96    -112   
64     -16    
-64    16     
144    144    
-96    0      
-64    128    
-80    0      
16     112    
16     80     
64     64     
80     64     
16     128    
-48    16     
96     64     
-16    128    
160    112    
16     144    
-48    32     
80     96     
-80    -16    
64     128    
16     -32    
-16    0      
32     80     
144    176    
112    288    
-16    160    
-16    64     
-128   32     
-32    -320   
-48    0      
16     64     
160    80     
-32    160    
16     -128   
-96    176    
48     240    
64     16     
352    448    
-336   272    
16     288    
32     160    
80     -208   
128    128    
64     208    
-128   -32    
-48    224    
-32    -16    
320    64     
-464   -272   
208    48     
-128   224    
48     -1872  
-32    80     
16     -32    
32     96     
32     0      
144    240    
-208   96     
0      48     
112    -32    
16     32     
80     -16    
32     144    
-48    16     
-176   -224   
96     80     
16     -208   
320    -208   
-160   -128   
288    400    
-208   -96    
0      144    
112    144    
-80    128    
16     48     
-192   192    
48     -144   
112    112    
16     -16    
192    384    
-64    -384   
-16    -208   
352    -304   
-240   -16    
256    96     
48     192    
160    240    
-160   -240   
96     -144   
-80    -16    
48     -160   
80     48     
48     160    
96     128    
-80    -176   
272    -16    
-32    -112   
224    48     
-80    -1280  
-864   -96    
-1216  -448   
368    -288   
336    256    
-32    -288   
-112   448    
32     496    
272    192    
-624   -240   
224    16     
112    -256   
-128   208    
-32    -224   
80     192    
-48    -560   
112    80     
80     -512   
48     176    
48     -64    
80     160    
16     32     
48     96     
80     272    
-16    -80    
96     80     
112    -112   
-160   96     
144    -32    
48     272    
96     -144   
-16    128    
32     -336   
-16    128    
80     96     
48     128    
32     32     
-64    256    
80     -80    
-80    16     
128    240    
144    -224   
-128   112    
64     -128   
16     48     
208    -544   
-112   80     
208    528    
-176   112    
96     -48    
144    80     
-64    -160   
208    240    
-128   160    
176    -48    
0      0      
80     128    
32     144    
-32    -48    
48     144    
32     -80    
64     32     
64     -80    
48     96     
48     64     
48     400    
-80    0      
64     -288   
80     -1056  
32     16     
-32    -176   
208    -176   
-80    176    
128    -352   
32     176    
32     32     
32     64     
112    -80    
192    -144   
-32    -16    
80     -1232  
-64    80     
-480   80     
96     -128   
192    -48    
-208   -608   
176    -144   
288    -608   
-224   64     
384    192    
0      48     
176    16     
16     -96    
-80    -992   
144    -32    
0      -96    
128    208    
-160   32     
224    -32    
-144   -176   
160    -400   
0      -64    
80     -64    
32     112    
240    320    
-96    -128   
176    -416   
-240   -96    
384    -48    
-176   -32    
144    -176   
32     -64    
-400   -64    
192    -64    
-864   64     
32     -48    
-32    -64    
112    -80    
-64    -160   
256    -800   
-192   -144   
96     -160   
-80    48     
-288   -144   
256    16     
-128   32     
0      -224   
-192   -32    
32     32     
-176   32     
128    80     
32     -96    
-128   -192   
80     -192   
-32    -208   
112    -80    
-32    160    
256    64     
16     112    
-48    0      
-48    -80    
96     -64    
-32    32     
16     176    
-144   80     
144    -336   
-688   -240   
176    -128   
0      192    
0      -64    
112    64     
112    -736   
-80    0      
96     48     
16     80     
128    -16    
-112   -96    
-48    48     
272    96     
-416   -176   
112    -80    
96     -128   
-64    -144   
272    -32    
0      -176   
64     16     
-112   -1312  
32     160    
160    160    
-32    -48    
80     400    
80     -32    
-368   -112   
-64    -112   
-112   -240   
240    176    
96     64     
128    64     
-896   -32    
128    -48    
0      336    
160    -304   
0      -80    
-96    176    
144    -192   
-592   176    
160    80     
-80    -48    
64     112    
32     80     
48     80     
-80    32     
-16    -80    
96     -32    
384    -256   
-48    160    
64     -96    
-16    144    
-80    64     
-640   -528   
-848   -864   
432    144    
-160   704    
-176   272    
-1056  -160   
-144   -1824  
480    704    
208    -336   
-448   144    
-272   -288   
496    400    
-912   -432   
-144   -48    
-208   -256   
-112   160    
48     544    
-128   -176   
-160   -256   
272    128    
-64    -64    
48     -48    
-96    0      
368    304    
-160   16     
-656   -256   
0      128    
-736   -400   
128    32     
-112   240    
-192   32     
-16    112    
-672   0      
-64    64     
64     64     
-80    -192   
112    -240   
-192   96     
112    112    
-48    32     
-256   -32    
96     128    
32     48     
-32    -32    
16     32     
64     0      
-64    -272   
-112   -576   
16     -64    
-432   336    
224    240    
-96    -80    
80     -112   
-192   -112   
64     224    
-96    -32    
96     320    
192    320    
-112   -160   
208    224    
-288   -208   
256    96     
-304   64     
112    320    
16     -160   
336    0      
-304   -48    
64     96     
-224   -192   
64     144    
48     -32    
-80    64     
0      48     
0      0      
0      80     
-96    144    
192    1040   
16     224    
128    320    
0      -240   
-256   -32    
-704   -416   
112    192    
-144   -16    
96     192    
-112   -80    
32     64     
-128   -64    
16     -224   
-48    176    
-80    112    
-16    32     
-112   -80    
48     176    
-64    80     
-128   16     
-64    96     
160    368    
16     -112   
64     -16    
16     112    
32     48     
16     16     
-48    96     
32     80     
32     160    
-240   -272   
144    192    
-256   -32    
64     -32    
-64    112    
-48    144    
176    208    
32     0      
-16    48     
112    64     
48     368    
128    288    
112    224    
-128   256    
144    208    
16     0      
-288   -96    
16     48     
144    -304   
80     352    
-400   -112   
272    416    
-1184  -128   
-32    240    
-80    -144   
288    -80    
-144   -32    
48     144    
-112   112    
-16    -624   
-160   144    
368    -80    
-48    0      
-96    32     
-96    96     
-160   -208   
80     -128   
-304   96     
48     -16    
144    272    
-128   16     
144    304    
-48    -128   
0      80     
144    192    
-32    16     
96     -112   
16     320    
0      336    
-144   -32    
-32    -144   
112    112    
16     144    
-64    -144   
48     208    
112    -96    
-160   -32    
224    528    
-112   336    
-96    -432   
480    656    
256    240    
-304   -304   
-176   32     
112    128    
0      -80    
32     320    
-224   32     
-32    96     
-48    16     
160    96     
0      192    
-32    -48    
-32    96     
-112   -32    
-16    -32    
32     144    
224    96     
64     96     
-48    144    
-160   -64    
-112   96     
80     -80    
112    80     
48     16     
128    -16    
-48    -32    
-48    128    
80     -64    
-64    288    
-48    64     
1376   -912   
-64    -752   
640    -48    
-448   128    
640    256    
-496   -128   
224    240    
96     336    
0      0      
-304   -112   
-16    144    
192    32     
-32    256    
-48    16     
112    64     
-160   16     
144    112    
-48    32     
-32    32     
144    208    
0      64     
112    272    
-80    112    
64     0      
-48    0      
48     96     
272    256    
-176   80     
80     -96    
-32    128    
32     16     
176    112    
-176   -224   
48     112    
144    240    
32     -48    
-32    -48    
80     80     
176    128    
-32    48     
32     128    
48     80     
128    80     
-160   32     
272    112    
-64    80     
32     144    
-80    -112   
-64    -384   
176    224    
-80    -1280  
112    64     
-112   64     
304    192    
-144   144    
192    48     
0      240    
-32    -80    
160    160    
-96    256    
176    -96    
64     112    
-160   160    
32     -336   
112    -128   
48     -576   
0      224    
64     96     
48     16     
128    0      
-80    144    
-32    96     
64     -32    
32     96     
64     208    
-128   -64    
224    224    
-128   144    
160    -176   
144    112    
-80    -112   
80     96     
0      128    
0      -112   
176    80     
-48    64     
-16    -176   
-48    192    
-288   144    
224    64     
-192   48     
240    48     
-80    208    
16     -144   
176    320    
-16    -112   
96     352    
-48    -1184  
128    0      
64     -224   
48     160    
80     160    
96     112    
-128   -112   
32     -112   
-16    64     
96     -192   
80     160    
-144   -400   
80     176    
128    -192   
-144   112    
128    -176   
-80    64     
112    -1056  
-48    96     
-160   0      
272    240    
32     80     
-48    -48    
80     48     
32     -96    
-96    224    
320    -304   
-80    16     
80     -240   
-128   256    
192    128    
96     208    
-32    -1600  
32     160    
0      -16    
32     256    
16     16     
144    -48    
64     -48    
-208   -464   
16     96     
320    -320   
-144   -64    
240    176    
96     32     
80     0      
96     0      
80     -112   
-144   192    
256    -112   
-176   -272   
128    128    
144    -416   
-64    112    
32     -304   
-16    80     
128    64     
-32    64     
48     -672   
-16    128    
400    -176   
-192   -16    
192    -80    
96     160    
96     -32    
64     -2208  
-80    -80    
288    112    
-64    -160   
32     -224   
48     -176   
128    -32    
-160   -16    
112    -288   
-16    96     
32     -80    
192    -416   
16     64     
64     -624   
-128   32     
-80    -192   
-48    48     
-192   0      
-32    -80    
112    -16    
0      -432   
96     -48    
128    -2464  
304    144    
16     224    
32     112    
-240   -336   
48     32     
192    -48    
-272   16     
80     32     
240    -208   
-160   144    
-112   -128   
112    -208   
-48    -288   
1408   800    
800    640    
-272   -192   
-224   -1872  
368    -192   
-512   -1488  
592    272    
-32    -256   
336    384    
-352   -128   
-112   -64    
-224   16     
320    16     
-176   192    
-32    96     
224    336    
0      -192   
112    0      
-96    -816   
384    96     
80     -176   
176    352    
-64    -32    
96     48     
-32    224    
-48    -208   
96     -256   
-224   -112   
112    16     
-96    64     
-48    0      
304    -256   
256    48     
0      -432   
-128   -48    
32     -512   
-96    160    
256    288    
-320   -224   
0      -48    
-16    -48    
-48    -16    
48     -64    
-208   0      
128    -32    
-1440  0      
0      -464   
-48    80     
352    -144   
32     64     
16     -1040  
16     128    
64     -80    
224    -192   
-160   16     
48     -80    
128    320    
-64    -16    
-304   -304   
288    96     
-96    -80    
-16    128    
256    0      
128    -64    
-112   -48    
208    0      
-144   0      
160    128    
-96    -96    
48     144    
64     -32    
96     -32    
144    -48    
-432   64     
64     -96    
0      112    
-256   -624   
416    112    
416    192    
-32    224    
-80    -736   
96     256    
0      16     
128    80     
-304   16     
-48    -480   
-48    48     
512    352    
-288   -96    
-80    -128   
32     -80    
240    128    
-224   32     
48     -464   
-16    -288   
-32    -464   
160    48     
-112   176    
-16    -192   
-160   -224   
96     32     
64     32     
48     96     
-80    96     
-16    32     
-64    -160   
160    -160   
-32    400    
304    304    
0      288    
-784   -64    
-1024  -192   
32     48     
-416   64     
16     -16    
64     192    
-32    32     
128    64     
-192   -96    
112    0      
-112   0      
192    -64    
224    176    
-416   112    
-48    64     
80     -32    
-416   -128   
256    0      
-608   16     
80     32     
-704   32     
-64    400    
160    -224   
-192   -32    
208    304    
-112   -480   
32     -128   
-128   320    
16     -16    
160    32     
-240   0      
96     16     
80     256    
32     112    
-48    128    
-160   16     
-176   -192   
-96    -112   
32     -32    
0      80     
-16    -80    
-128   -64    
96     32     
-240   -176   
-80    32     
16     144    
48     48     
-64    176    
32     -288   
0      96     
-240   48     
96     176    
-144   64     
192    384    
-1456  -208   
416    -80    
-80    -208   
176    48     
-288   -32    
-16    80     
0      128    
0      128    
0      -176   
-80    64     
80     128    
32     -112   
16     224    
-272   -160   
-80    176    
-384   -160   
64     176    
0      -96    
0      176    
288    -192   
32     240    
-80    96     
0      32     
0      16     
0      -16    
0      64     
80     112    
-32    176    
-144   -16    
80     176    
-384   -160   
288    176    
-64    -16    
-592   -160   
-256   32     
-1056  -176   
1008   400    
32     128    
-64    -80    
336    928    
-880   -64    
96     176    
0      -432   
-144   -352   
-176   272    
400    -48    
-112   464    
-464   -688   
-64    208    
192    -160   
-256   320    
176    -208   
0      272    
48     -208   
-208   256    
112    48     
-240   176    
128    -224   
-224   144    
256    48     
-208   144    
-16    48     
-304   -304   
0      64     
80     64     
112    176    
-144   -16    
48     176    
-32    -224   
-128   0      
-48    160    
64     256    
128    80     
-176   -96    
32     176    
-112   16     
64     96     
32     32     
64     64     
160    176    
-112   -32    
112    272    
-208   -128   
272    64     
-224   80     
176    112    
-16    128    
-64    -32    
-48    -112   
64     192    
-128   -96    
80     160    
-32    48     
160    -16    
-64    144    
16     64     
0      0      
64     96     
-80    96     
96     48     
-48    0      
-80    96     
0      128    
-48    -96    
80     112    
-96    48     
0      96     
128    96     
-80    -160   
112    32     
-96    0      
32     32     
48     48     
-128   -16    
144    96     
48     448    
-176   224    
160    32     
192    80     
-64    -160   
224    16     
-208   240    
-32    64     
80     64     
48     160    
96     64     
0      16     
64     176    
112    96     
160    208    
-64    -16    
16     32     
128    160    
-128   -48    
224    128    
-272   -64    
176    128    
-32    112    
64     96     
16     64     
96     144    
32     320    
-208   80     
144    272    
-112   -256   
32     16     
-64    64     
256    176    
-288   -160   
208    192    
-80    32     
96     192    
208    240    
-304   352    
256    176    
-16    0      
-96    192    
176    160    
16     48     
-96    96     
128    224    
32     -288   
-16    96     
64     64     
-32    80     
96     144    
32     160    
-32    -64    
-96    16     
64     144    
0      -16    
0      -480   
-16    272    
144    320    
-128   0      
16     -240   
-16    -96    
32     208    
224    208    
-432   -416   
272    64     
64     -2128  
-80    16     
32     80     
128    112    
-64    80     
48     96     
32     112    
48     512    
160    -176   
112    672    
-208   80     
-32    -32    
-32    112    
128    -304   
-16    160    
64     -240   
-48    32     
256    16     
-32    336    
-160   -32    
128    32     
16     336    
160    96     
96     80     
-272   32     
192    48     
48     416    
48     -96    
256    -176   
-96    144    
192    -224   
-16    208    
96     -1040  
80     80     
0      208    
0      32     
192    -32    
128    96     
-32    64     
80     112    
-16    96     
-48    -240   
176    96     
128    -48    
16     112    
-128   -48    
128    64     
64     -768   
112    80     
-176   64     
-1872  16     
-544   -1040  
160    -48    
368    0      
416    272    
-704   -576   
896    -192   
384    1056   
-208   224    
-48    -416   
-256   160    
512    -192   
-64    -480   
-144   -240   
304    512    
64     0      
-192   304    
-32    -80    
192    320    
-160   -288   
144    160    
16     -144   
368    192    
-512   144    
240    16     
-240   -320   
144    208    
112    176    
336    -176   
-112   64     
80     32     
96     256    
64     192    
-128   96     
112    128    
192    640    
0      -400   
-80    -192   
-224   -400   
240    160    
128    -16    
-96    128    
192    176    
96     192    
-80    -2480  
16     112    
352    224    
-48    -224   
-160   -208   
-80    -448   
112    64     
0      32     
304    0      
-160   32     
112    160    
144    -96    
16     -96    
96     -224   
-16    -352   
368    384    
96     -1856  
192    144    
-192   -400   
144    -208   
-144   80     
176    -448   
-176   0      
-16    -736   
272    320    
80     -224   
128    -96    
128    288    
-128   80     
80     -416   
-32    32     
144    0      
192    144    
-192   112    
-16    -784   
-944   -304   
0      -224   
64     -80    
96     -320   
-96    -96    
144    -944   
-80    -272   
304    224    
48     112    
0      -656   
-192   224    
272    -240   
-144   112    
32     -160   
112    16     
-80    288    
16     64     
176    -320   
64     -64    
-32    -464   
128    208    
80     -48    
160    128    
16     352    
-32    -176   
80     528    
144    208    
336    352    
-176   -240   
32     64     
64     112    
-16    -64    
112    -64    
176    0      
-112   32     
96     -208   
80     16     
-48    -400   
-192   16     
64     -64    
64     160    
32     -16    
-16    -208   
-144   -128   
64     -48    
-160   -80    
32     -64    
-272   -176   
-64    -96    
-80    -96    
160    -176   
-112   -240   
-96    -688   
-192   -176   
400    -1280  
-208   -112   
368    16     
-368   -320   
-16    -64    
-16    -240   
16     -32    
64     32     
-80    -32    
48     64     
-80    -48    
32     16     
16     -128   
64     -208   
-96    48     
272    -432   
0      80     
64     -112   
80     -32    
16     -16    
64     -96    
-32    160    
16     -96    
-96    -80    
-32    -208   
64     -48    
32     112    
-112   144    
-32    0      
80     192    
0      -192   
160    144    
-336   -64    
48     -32    
256    -80    
16     64     
-192   0      
-16    -64    
-96    -16    
48     -32    
-224   32     
-32    -64    
144    -64    
144    -416   
-48    -112   
32     -864   
64     80     
-96    80     
64     -16    
16     96     
32     -16    
-176   -208   
144    -128   
96     -112   
48     272    
-144   256    
0      -32    
16     64     
16     -352   
192    160    
-128   -80    
224    32     
-112   48     
-32    -32    
2432   32     
-1248  -784   
320    -112   
0      192    
-480   -368   
480    912    
-1152  -144   
432    144    
-352   336    
0      -112   
-448   176    
-16    -352   
-256   544    
80     -448   
-1056  256    
96     -240   
-256   336    
-112   -144   
0      112    
-80    -160   
48     -64    
-192   -112   
-256   16     
304    96     
-304   -160   
208    208    
-256   80     
-32    96     
-176   0      
96     176    
-16    -32    
-192   64     
0      64     
-688   48     
-64    -16    
-208   -160   
32     80     
64     144    
16     64     
-96    -144   
-16    16     
32     80     
-112   0      
64     96     
32     48     
0      96     
0      16     
-160   112    
-336   -64    
32     48     
96     16     
-32    96     
48     -16    
-96    48     
32     -224   
-32    32     
0      144    
-144   128    
-32    -16    
-32    0      
-208   -80    
-64    -32    
-128   16     
-192   0      
0      80     
-1408  -176   
80     64     
-80    -256   
0      64     
0      96     
16     80     
80     128    
-96    64     
0      128    
-112   80     
32     240    
-64    32     
240    -48    
-80    80     
-64    -32    
-256   -48    
-112   240    
352    48     
208    272    
96     128    
0      256    
-80    128    
-16    -80    
112    80     
-80    208    
-16    144    
-144   -16    
112    -48    
-144   32     
64     176    
-96    0      
-304   -176   
96     224    
-128   -80    
176    112    
-160   224    
0      -112   
-144   128    
16     -64    
112    160    
-80    0      
-48    -64    
-224   -144   
-32    -32    
80     192    
-32    -80    
-32    80     
-48    32     
-256   112    
64     32     
0      384    
128    112    
-48    288    
-48    -192   
160    272    
-80    208    
-128   32     
32     224    
-48    -80    
80     240    
-256   -368   
16     -448   
-384   -352   
192    -128   
128    80     
-16    128    
-16    128    
-16    256    
-80    -48    
80     48     
-32    112    
48     16     
-80    -48    
0      80     
32     96     
-256   -80    
112    -32    
16     208    
-16    96     
0      160    
-96    0      
240    80     
-176   96     
-32    128    
-96    16     
0      16     
64     16     
112    -16    
-144   16     
128    64     
-224   -208   
-128   16     
240    592    
-192   48     
128    -80    
176    80     
96     112    
-112   80     
-208   80     
160    96     
336    -48    
-80    160    
-176   112    
-64    -320   
240    320    
-160   128    
64     -128   
-176   64     
160    224    
112    0      
-128   128    
192    -48    
80     224    
-192   32     
-64    112    
-176   32     
64     -32    
80     128    
-64    80     
240    80     
208    176    
-160   -32    
192    0      
0      160    
112    208    
-48    80     
-192   16     
192    64     
272    -32    
-96    176    
-192   0      
-32    16     
80     160    
672    1136   
288    800    
-288   -1440  
-32    -576   
144    -112   
-416   -800   
576    -112   
-144   176    
208    560    
-512   -64    
64     -80    
0      80     
160    240    
240    496    
480    96     
-272   -176   
-48    -560   
464    688    
-288   112    
-288   -416   
-176   240    
720    368    
-576   48     
160    0      
384    -144   
16     240    
-48    -80    
32     -48    
-160   -64    
288    560    
-64    48     
16     -192   
-64    192    
128    -1504  
144    192    
-224   -384   
128    176    
160    208    
32     320    
-176   80     
32     128    
-16    -80    
336    96     
-176   -96    
32     96     
-144   96     
-32    -144   
256    400    
-96    -3136  
176    32     
0      192    
-16    80     
32     -112   
112    -32    
80     112    
176    64     
-80    -16    
96     176    
-64    64     
176    96     
-256   272    
80     -448   
224    -16    
-80    -560   
64     -16    
48     -176   
64     160    
80     176    
112    112    
-128   144    
64     80     
32     80     
-16    -80    
64     0      
64     -48    
-80    96     
176    -512   
304    -16    
-96    -256   
32     -192   
64     -944   
-128   256    
-144   -448   
288    112    
-128   -128   
128    160    
-144   32     
80     32     
-16    80     
-48    -64    
128    176    
48     32     
32     32     
144    -176   
48     192    
16     -480   
64     144    
96     48     
16     304    
0      64     
176    160    
-16    128    
-32    48     
96     176    
16     -48    
336    -96    
-224   160    
96     176    
0      -704   
48     0      
16     -192   
0      64     
128    -48    
-96    0      
48     -80    
320    48     
-320   32     
352    176    
0      208    
0      -400   
-192   -96    
416    -480   
64     272    
-80    -320   
-112   -16    
64     -304   
112    16     
48     -128   
-32    0      
-128   32     
144    96     
192    208    
-48    0      
304    208    
-224   -256   
96     -112   
16     -208   
96     288    
224    -240   
-80    160    
-112   -48    
192    80     
112    -1312  
-240   0      
64     48     
352    240    
-16    96     
0      96     
-64    -2608  
144    -96    
0      432    
160    -64    
-16    128    
-112   -48    
128    176    
0      -64    
288    -64    
-192   80     
96     -320   
48     16     
-48    224    
176    -1232  
-1088  -176   
16     -1376  
144    -80    
0      -768   
48     -16    
128    -752   
224    -384   
144    240    
-64    -176   
64     -112   
-160   144    
-80    -288   
272    160    
112    -272   
-64    -208   
-528   -192   
64     208    
128    128    
-80    -16    
80     -128   
96     16     
112    0      
-128   224    
80     112    
0      -176   
288    144    
0      -144   
-16    32     
80     -48    
-48    -112   
48     64     
-64    16     
-144   48     
64     -496   
144    80     
3008   640    
-1696  32     
544    192    
112    672    
0      -432   
608    544    
-1248  -256   
688    416    
-256   -112   
160    16     
-656   -176   
240    0      
-224   -128   
32     -160   
-80    -256   
48     -64    
128    -32    
48     -224   
-96    -192   
128    -224   
-96    64     
112    -32    
64     208    
-208   -48    
144    -16    
-352   -144   
144    -352   
-448   -128   
16     32     
144    0      
48     16     
144    -176   
16     -80    
16     112    
112    -528   
32     48     
48     0      
144    32     
-128   32     
112    -64    
-64    0      
96     -32    
112    80     
16     -16    
-704   48     
0      -240   
-16    48     
80     -144   
0      144    
112    -240   
64     0      
-48    160    
-32    160    
-144   32     
112    -48    
-560   64     
224    -176   
-176   112    
-48    -64    
-304   -64    
64     -240   
0      0      
112    -112   
-16    16     
64     -672   
32     32     
-64    80     
128    -32    
-96    208    
16     48     
80     80     
-32    -32    
-64    32     
96     0      
-240   80     
16     32     
128    176    
16     -96    
96     96     
-32    -592   
16     -128   
-32    128    
112    -528   
-128   0      
160    -80    
-96    -64    
-16    -48    
64     176    
176    112    
-64    -64    
64     64     
32     -16    
-816   -272   
144    80     
-816   -112   
-416   -320   
-48    -112   
-1216  0      
16     144    
-32    32     
-240   -64    
16     -176   
160    80     
144    16     
-160   0      
-704   -288   
-32    80     
-784   -336   
80     80     
48     112    
-64    64     
-96    96     
-256   -16    
-16    80     
-256   16     
64     64     
-64    -32    
48     16     
48     96     
-16    144    
-256   -80    
-48    -32    
-272   -16    
240    240    
-48    80     
-240   -32    
160    672    
-448   -16    
-32    -96    
-64    80     
0      128    
-496   -96    
-224   16     
-48    -64    
96     64     
112    -384   
-48    384    
-144   -192   
256    176    
-432   160    
80     -112   
-144   -16    
-144   -32    
144    80     
-112   32     
-64    64     
-1040  -224   
64     -160   
48     32     
144    304    
-160   -32    
-32    240    
-304   -304   
192    -240   
160    224    
-64    -160   
96     64     
-144   128    
112    80     
-32    160    
48     0      
16     112    
48     16     
-496   80     
64     96     
-96    -240   
32     144    
128    240    
-144   -64    
112    112    
-32    48     
64     48     
-96    -48    
-192   144    
-64    32     
-80    96     
-32    32     
176    -16    
-432   48     
-16    128    
-48    -112   
64     160    
80     128    
48     -32    
-176   32     
-48    16     
-96    0      
-64    -32    
-48    32     
-32    48     
-80    0      
-16    112    
-112   224    
-352   -64    
-208   16     
-96    -128   
224    16     
-640   -2240  
1312   3408   
-848   720    
704    -192   
-704   -512   
528    -848   
-192   560    
112    864    
416    192    
-448   -336   
304    544    
-32    -128   
-208   -128   
-784   256    
320    -192   
-208   256    
240    -64    
-304   208    
496    -16    
0      496    
16     -160   
-192   368    
-32    -272   
272    144    
-112   32     
320    64     
-352   16     
-16    80     
32     64     
-80    -288   
80     -16    
-80    128    
160    272    
-48    48     
-144   64     
96     80     
-80    -48    
-16    48     
112    80     
0      16     
-80    128    
-80    16     
64     128    
16     144    
-48    -96    
-16    -16    
224    320    
48     368    
-96    -176   
0      112    
0      80     
176    16     
-64    112    
32     128    
80     0      
0      96     
-112   160    
-96    -16    
128    128    
48     32     
-144   160    
32     -48    
128    192    
-32    160    
-32    0      
32     -64    
160    144    
-144   -80    
144    112    
-240   32     
80     64     
0      128    
-80    64     
144    112    
-32    96     
128    288    
-96    32     
192    208    
-64    32     
144    -64    
32     112    
-160   128    
-48    -272   
144    32     
-176   80     
-32    -208   
272    176    
-288   176    
128    48     
144    0      
-32    96     
64     160    
16     48     
240    208    
-128   176    
-224   -192   
128    112    
-80    128    
144    144    
-64    32     
-144   -128   
176    -80    
16     160    
96     256    
-80    32     
208    256    
-96    128    
224    112    
-16    192    
-32    -64    
32     16     
-112   112    
144    64     
-96    -48    
-208   -624   
-16    -736   
96     80     
144    96     
-64    64     
112    272    
192    272    
0      256    
-208   48     
176    16     
-80    64     
304    160    
-48    -64    
-48    -544   
-80    112    
-224   -144   
96     -752   
192    80     
-32    -1344  
-272   0      
-32    0      
64     -144   
-80    -288   
0      16     
240    288    
160    96     
128    0      
-192   48     
48     -48    
272    320    
48     144    
224    64     
32     240    
-112   -48    
192    144    
-80    64     
160    128    
32     112    
-48    0      
-32    0      
128    0      
-48    -192   
224    -64    
-64    288    
-80    272    
176    224    
-80    -176   
192    16     
-32    -416   
80     208    
64     -544   
128    272    
-80    -32    
80     16     
64     -176   
224    112    
-112   0      
-16    32     
-144   32     
240    32     
-80    144    
-80    -384   
-144   -80    
384    -496   
144    320    
-32    -176   
16     112    
-80    128    
16     64     
48     112    
128    240    
-16    0      
112    128    
80     -32    
0      -32    
128    32     
-16    -128   
-80    0      
224    128    
96     256    
-160   -960   
32     64     
32     -1040  
112    144    
-368   1232   
-240   -1408  
16     288    
-368   512    
-576   -400   
352    816    
-128   272    
112    -704   
192    400    
-96    -160   
160    -64    
-160   -720   
112    176    
48     224    
64     0      
96     -96    
-32    48     
16     -16    
-16    128    
64     -32    
128    48     
-192   176    
128    -112   
32     144    
32     -400   
240    224    
-240   128    
224    128    
-16    -464   
16     -48    
0      -80    
160    96     
112    -32    
16     -48    
48     112    
64     -160   
96     128    
16     -160   
176    176    
-144   -224   
192    96     
-16    96     
128    64     
80     -128   
32     -1104  
112    -80    
-80    144    
-48    -16    
64     -32    
0      -432   
80     -272   
48     -2608  
-32    -144   
48     224    
16     -144   
-48    -288   
192    -400   
-16    -528   
-80    -32    
176    -32    
-48    48     
16     -144   
32     16     
-1424  -272   
-48    -96    
-96    -224   
96     -336   
64     16     
192    -96    
-16    -96    
16     128    
80     -208   
-48    -416   
144    96     
48     32     
96     160    
-144   32     
80     -128   
-176   -64    
16     -304   
16     224    
224    160    
-96    -48    
96     -848   
80     -224   
160    208    
16     208    
32     32     
48     96     
48     -48    
32     32     
-224   -144   
144    -192   
-416   -48    
48     -80    
-480   -16    
128    -144   
-48    -192   
128    -512   
48     48     
160    -464   
16     160    
-32    -64    
16     112    
64     -144   
144    -32    
-176   -80    
96     128    
-272   -48    
144    -16    
-864   -16    
80     -112   
80     -32    
16     16     
-80    -16    
16     -336   
96     304    
176    160    
-32    -16    
0      -112   
64     144    
112    -64    
48     -64    
-224   96     
144    -80    
-208   -480   
192    -592   
-864   320    
224    -208   
64     16     
-144   -368   
272    144    
-48    -448   
0      80     
112    64     
192    16     
-224   0      
96     -208   
-144   -80    
176    112    
-176   -160   
160    64     
-336   128    
-16    -112   
-1184  48     
-256   -464   
144    -432   
-16    -400   
208    80     
-32    80     
-80    -16    
80     -96    
-96    224    
-256   -16    
48     96     
96     -400   
-144   0      
-448   0      
-144   -32    
-96    32     
160    -208   
192    112    
80     -128   
-16    240    
-368   0      
240    -192   
-128   -64    
336    512    
-256   32     
-80    144    
-176   -224   
208    -304   
-848   -48    
-16    -16    
-176   320    
-112   -112   
288    -112   
-80    -720   
112    -48    
-32    80     
0      144    
128    112    
48     48     
-16    16     
16     -80    
-64    240    
-16    -256   
-128   80     
160    -64    
112    48     
-528   -352   
32     16     
-192   64     
-48    -32    
-176   112    
-352   0      
-112   16     
-1520  -2720  
1824   3280   
-976   448    
512    112    
-720   -784   
736    1168   
-912   608    
544    224    
-544   -208   
416    -272   
-448   -16    
-240   -64    
-16    160    
48     48     
-128   176    
-1376  -80    
96     -208   
-80    16     
304    384    
16     144    
-288   -16    
32     112    
64     256    
-80    -256   
-144   -144   
48     64     
16     0      
-192   -64    
-128   -80    
48     32     
-272   64     
-96    16     
-528   32     
-208   -48    
112    -224   
-112   64     
64     -32    
-48    144    
-32    -160   
-16    112    
-80    16     
-32    48     
-48    80     
32     128    
-64    -16    
16     -48    
48     160    
-144   -144   
208    112    
-544   -16    
256    80     
-112   96     
96     80     
-112   -288   
-48    -96    
32     32     
-32    256    
-32    -64    
144    64     
-144   16     
-96    0      
16     48     
-208   64     
-16    192    
-704   -112   
96     80     
-64    16     
0      16     
48     128    
160    -48    
-48    96     
-144   112    
80     64     
-80    0      
-64    80     
-160   -160   
144    192    
-304   -80    
176    -16    
-336   0      
-64    192    
32     -160   
80     64     
16     112    
-144   240    
-144   -16    
112    -64    
128    48     
-192   160    
48     112    
-96    64     
16     128    
-32    0      
32     48     
-208   112    
-128   96     
0      -64    
-32    96     
48     96     
0      32     
-32    48     
-32    128    
80     144    
-32    -96    
-16    80     
-16    224    
208    64     
-112   -80    
128    128    
-384   112    
240    112    
-48    144    
-192   -160   
96     144    
-64    48     
-128   176    
-32    32     
-80    -48    
112    -64    
-160   144    
240    288    
64     224    
-128   -48    
-192   80     
-80    144    
256    16     
-176   32     
-64    0      
-128   96     
160    0      
128    128    
-16    -48    
-128   80     
-192   -32    
112    48     
144    0      
-48    112    
-144   80     
160    352    
-64    -32    
96     -64    
-304   80     
0      80     
416    272    
64     208    
64     16     
0      96     
-128   -16    
112    32     
112    64     
-192   -16    
96     224    
-64    -16    
80     96     
-144   128    
-256   -16    
208    32     
-32    384    
48     176    
0      -32    
-240   -16    
304    272    
-32    -16    
16     32     
-32    48     
48     192    
160    368    
-64    16     
32     -64    
-112   -80    
96     400    
48     -48    
-48    320    
192    288    
-192   -64    
144    -64    
-48    160    
0      96     
64     144    
-32    128    
48     -128   
96     176    
0      128    
32     80     
80     128    
0      96     
32     144    
16     -32    
0      304    
128    64     
208    208    
-160   112    
-144   112    
160    -48    
-144   208    
0      144    
-16    160    
0      0      
224    -960   
544    -1824  
112    768    
-128   784    
-240   144    
144    144    
480    80     
-112   -144   
-160   -32    
144    192    
-112   48     
192    192    
16     272    
-80    -48    
0      112    
160    -192   
-208   -16    
96     288    
-80    96     
192    16     
-176   336    
256    -112   
-112   176    
-160   -128   
-16    -16    
0      176    
176    64     
-48    -64    
-64    16     
144    32     
80     -128   
-32    96     
32     -240   
-16    144    
32     16     
96     128    
-64    -32    
32     -48    
32     96     
96     48     
16     -160   
32     176    
0      -48    
96     64     
-32    80     
64     -224   
-32    -128   
224    -496   
16     -48    
64     112    
112    224    
32     192    
112    -160   
16     -128   
-48    -48    
224    -48    
-224   -64    
192    192    
-96    -32    
48     -16    
32     48     
64     -80    
16     -576   
32     48     
240    -192   
-64    112    
144    208    
-16    32     
160    0      
80     112    
-32    112    
64     96     
-16    0      
-16    32     
176    192    
-32    -336   
-16    -256   
96     -224   
0      32     
0      -784   
304    288    
-144   80     
32     -96    
-16    32     
0      32     
112    160    
192    288    
48     352    
-48    -32    
0      -32    
64     -288   
16     0      
144    -240   
0      160    
0      -560   
16     80     
240    -1856  
-80    96     
0      -128   
48     80     
80     160    
176    80     
-80    112    
32     -384   
80     144    
128    -32    
-48    64     
160    -144   
-112   0      
208    -112   
-64    144    
80     -144   
48     112    
32     64     
192    256    
-128   -160   
144    -576   
64     288    
64     208    
64     160    
-16    32     
48     32     
32     -256   
0      176    
80     -80    
416    768    
-368   -128   
176    -288   
-176   -96    
160    48     
96     -96    
48     -240   
80     144    
64     112    
-48    144    
0      -192   
336    176    
16     -224   
128    288    
48     224    
16     -48    
-32    0      
16     -1408  
176    96     
176    -704   
-16    -304   
-16    208    
96     176    
16     0      
32     -384   
16     -112   
128    48     
-64    -144   
208    64     
-112   -48    
80     -480   
16     0      
112    -368   
64     0      
32     -240   
112    -208   
-1056  48     
-32    -224   
128    208    
-80    -608   
144    -96    
16     -224   
192    272    
288    432    
-128   -176   
-16    -64    
-96    80     
112    160    
-176   80     
-64    -288   
-96    -352   
80     -304   
-176   -128   
80     -208   
112    -80    
0      80     
64     -80    
48     -304   
80     -2800  
128    -368   
144    -112   
-304   -80    
-32    64     
32     112    
-64    -64    
128    16     
-96    48     
192    -64    
-1520  32     
192    -16    
-64    -192   
144    -464   
1648   -2784  
176    -1728  
496    272    
-256   640    
944    -64    
-416   -416   
-112   -464   
464    -336   
0      144    
176    -128   
-128   336    
-432   16     
-96    -64    
-16    -112   
80     -192   
-96    96     
16     -736   
80     160    
144    160    
-48    192    
288    -128   
-112   96     
-112   -80    
0      80     
-64    -112   
240    32     
-224   32     
48     32     
-432   -80    
96     -80    
-16    -48    
272    -288   
-128   144    
112    -160   
-64    32     
48     -16    
80     -128   
-144   16     
112    48     
-112   48     
112    -112   
-352   64     
224    -48    
-32    112    
160    -96    
-16    64     
-32    -288   
272    336    
-368   -240   
368    48     
-96    128    
48     -48    
-464   16     
64     48     
-256   -64    
112    -80    
-32    176    
80     -80    
-256   32     
-112   -336   
240    80     
0      -128   
-96    192    
192    -128   
-48    -64    
-336   -64    
144    16     
-208   0      
160    -16    
-48    112    
64     -16    
-224   -112   
144    -144   
-128   16     
64     -144   
112    80     
-64    -64    
-128   240    
-128   -368   
-352   -320   
-48    32     
-176   160    
112    64     
-80    256    
-128   48     
160    -32    
-144   -128   
112    -32    
-112   -16    
-592   80     
48     208    
-816   -176   
128    96     
-64    16     
16     -96    
-16    -64    
32     160    
-80    192    
-1616  -128   
-48    16     
-32    -64    
-32    144    
32     -80    
64     224    
-32    -176   
128    352    
-160   -112   
112    64     
-208   -32    
48     0      
208    192    
-384   -32    
-128   288    
-464   -64    
-336   -96    
112    -32    
-320   -320   
-176   -496   
192    32     
-176   -560   
16     48     
-32    -64    
160    -16    
96     144    
-16    112    
112    160    
-144   -96    
0      32     
16     96     
0      144    
64     64     
-64    128    
-80    -112   
32     208    
-112   -48    
160    112    
-80    96     
-16    64     
-32    32     
-80    0      
16     64     
-48    96     
32     96     
-144   16     
16     48     
-16    -16    
48     -16    
-736   -144   
48     176    
48     64     
64     64     
0      48     
-112   -32    
-64    176    
96     160    
-224   80     
112    16     
-144   272    
-160   -368   
-208   16     
-48    -96    
-256   -112   
-304   0      
-48    0      
32     64     
128    160    
-96    -112   
-192   -80    
96     32     
-48    160    
64     -16    
-96    224    
-80    128    
96     112    
-16    32     
-128   0      
-64    32     
-224   256    
96     16     
-80    -16    
-16    176    
-16    32     
-16    64     
96     -32    
-80    80     
-16    160    
-288   -16    
32     176    
32     -96    
-16    160    
64     -208   
64     -48    
-160   32     
-192   320    
112    -176   
-80    160    
160    112    
-800   -1072  
224    1552   
-432   1504   
-16    288    
-464   -1808  
384    912    
32     96     
208    992    
64     208    
96     -544   
-960   -432   
432    400    
272    80     
-80    -192   
32     336    
-64    -176   
96     -80    
-128   -48    
320    32     
-64    0      
128    80     
-32    240    
-64    272    
-160   -288   
0      -144   
48     176    
272    48     
-192   64     
-32    -32    
224    64     
-32    80     
96     96     
-32    160    
-16    192    
16     448    
-208   -160   
64     -224   
-144   -16    
576    624    
112    240    
-480   -192   
-176   80     
336    112    
-160   -176   
208    32     
-128   32     
-16    -224   
0      384    
16     240    
-32    32     
-32    160    
-144   -48    
128    80     
-48    -64    
-64    16     
-112   -32    
208    624    
-80    512    
-192   -528   
80     384    
112    -192   
64     128    
-48    48     
96     160    
-32    -48    
240    48     
-16    -32    
32     160    
32     -80    
-32    128    
192    -16    
-16    192    
48     16     
-16    224    
0      16     
64     128    
0      48     
48     320    
160    112    
176    320    
-112   256    
-32    -64    
48     144    
-176   -16    
64     80     
112    80     
16     64     
192    320    
-144   80     
-160   64     
64     48     
16     32     
48     96     
32     256    
64     192    
16     0      
-48    0      
-176   -144   
240    0      
0      48     
80     256    
-16    128    
-160   16     
192    64     
112    128    
-32    64     
96     240    
-144   64     
48     -272   
0      -176   
64     352    
64     192    
0      -32    
-64    48     
80     -288   
144    16     
-96    -208   
128    48     
-64    48     
80     112    
240    144    
-96    16     
96     -112   
-112   64     
48     96     
160    -48    
-240   -784   
-112   -112   
144    -224   
368    -352   
-176   336    
48     -896   
96     560    
-32    -32    
-144   -16    
176    -48    
-64    96     
128    128    
176    448    
-304   -128   
208    128    
-112   -160   
-304   -384   
32     80     
160    -48    
160    432    
-64    16     
176    352    
-80    -128   
0      -64    
80     192    
64     176    
-16    -112   
64     240    
352    608    
-448   48     
368    -208   
-256   -272   
64     -144   
80     176    
-64    96     
144    -128   
-96    112    
64     -64    
80     -48    
112    32     
64     208    
-32    208    
64     352    
0      0      
160    80     
-160   48     
-16    -288   
112    -64    
48     -112   
96     112    
-64    -128   
144    0      
-16    32     
-96    16     
64     -1072  
16     -32    
96     -48    
-16    -32    
112    224    
-160   128    
224    96     
-32    160    
16     16     
48     -144   
112    -96    
128    -80    
64     224    
-160   -224   
16     -32    
128    -752   
176    -16    
48     128    
2096   1296   
-1520  -1424  
208    -1312  
528    144    
-656   -384   
416    448    
-480   0      
464    624    
-224   -416   
32     272    
-560   -256   
320    64     
48     64     
176    144    
-112   224    
128    -112   
-80    32     
192    -80    
32     144    
96     -192   
-16    80     
112    -144   
-48    288    
96     -192   
80     48     
64     -432   
-16    160    
128    -48    
-96    -112   
160    -64    
-80    -2064  
112    -240   
64     -16    
0      -192   
176    -32    
-80    -224   
-48    -400   
-96    224    
240    -112   
112    96     
-112   -128   
64     -400   
32     144    
128    -848   
-16    -64    
32     -1280  
48     -672   
-16    -48    
-16    224    
112    -224   
80     -240   
-96    -112   
192    288    
48     -96    
-16    96     
80     -16    
144    32     
-32    -48    
80     -80    
-80    -112   
-128   -80    
48     0      
-544   -96    
112    -448   
-80    -64    
32     -752   
128    -128   
32     -1328  
64     -208   
144    32     
-160   -80    
64     -32    
-160   -128   
192    -48    
-64    96     
-32    -112   
160    144    
-736   -32    
144    -160   
64     -80    
-96    -96    
144    48     
-144   -304   
192    -272   
-144   -176   
160    -96    
0      -112   
16     240    
-64    112    
224    -112   
-144   -112   
80     -240   
-192   -128   
32     -112   
-464   -144   
176    32     
-48    16     
128    -416   
-272   -32    
160    -448   
-112   0      
192    176    
-144   64     
80     80     
192    -224   
-224   -192   
144    -96    
48     192    
32     16     
-400   0      
-80    -336   
-16    144    
0      -288   
64     80     
80     -240   
0      48     
0      144    
96     -48    
-256   -64    
464    208    
-432   288    
192    32     
-128   -80    
-112   -32    
-864   -256   
160    176    
-1152  80     
208    48     
-32    -224   
-176   -304   
176    368    
96     -1136  
64     64     
-32    64     
-144   -80    
272    -112   
-368   -192   
304    -128   
240    64     
-224   -96    
48     -48    
-96    240    
112    80     
0      -96    
144    -288   
176    48     
-128   -784   
240    224    
-336   224    
-16    -32    
-128   0      
0      32     
-160   -64    
16     48     
-48    -32    
-128   96     
-336   -368   
-64    -400   
224    304    
224    -192   
64     288    
-112   -720   
80     80     
-224   16     
-48    -32    
-128   -432   
0      80     
-144   -112   
-128   -16    
0      16     
144    -32    
-32    208    
-144   -240   
128    -16    
-288   -80    
352    304    
16     144    
-336   80     
-272   16     
-1072  -144   
144    -48    
256    48     
-128   96     
-64    -128   
-80    16     
48     -144   
-80    32     
-416   -80    
96     48     
-112   -48    
-32    96     
32     -64    
-48    32     
-128   -64    
160    48     
-192   128    
-1040  32     
-288   -32    
-672   800    
-768   -1328  
80     -304   
192    0      
-352   144    
224    256    
-528   -400   
592    -640   
-320   928    
-480   -160   
96     -208   
96     -96    
256    160    
-128   -96    
-176   -32    
-496   160    
96     656    
-160   160    
64     288    
-144   -272   
272    208    
-320   -240   
-272   -112   
48     -160   
176    -400   
-192   96     
16     176    
336    768    
-560   -48    
128    -64    
48     16     
-288   -32    
-112   -224   
144    304    
80     -272   
16     64     
144    272    
-240   16     
208    464    
-352   96     
256    -144   
-192   -64    
16     64     
-16    16     
-80    32     
-336   32     
-256   224    
-480   -208   
48     256    
-32    -160   
0      208    
-16    80     
16     144    
32     0      
-128   64     
16     256    
-144   -64    
16     -256   
640    608    
-224   -64    
-144   80     
-32    128    
192    -416   
-288   128    
352    64     
-144   0      
-80    -48    
32     48     
240    144    
-48    112    
-16    80     
-16    -16    
0      -144   
-112   -80    
-16    112    
-112   -400   
16     -208   
96     -32    
-160   -352   
304    368    
-80    -16    
-176   48     
176    208    
32     112    
-176   -208   
192    288    
-64    -48    
128    352    
-176   -96    
-160   -16    
32     -48    
48     -112   
-592   -144   
-16    32     
112    -112   
112    64     
-96    352    
256    416    
-128   192    
-64    144    
64     -16    
-48    32     
-16    16     
32     64     
-16    112    
-112   -144   
-16    -16    
-192   -272   
48     32     
176    368    
160    160    
-160   -224   
48     160    
-32    80     
-32    -32    
-96    -32    
64     128    
80     192    
-48    80     
64     16     
-176   0      
160    -32    
-128   16     
-128   -16    
336    528    
-96    128    
-16    288    
-80    144    
128    128    
-48    0      
-128   80     
176    144    
-16    128    
32     144    
-80    96     
-16    -80    
-160   0      
-16    -96    
80     -16    
64     80     
-16    128    
32     80     
144    224    
0      80     
48     16     
-64    128    
176    224    
-112   16     
128    -48    
-144   192    
48     16     
112    80     
-48    96     
176    256    
-256   48     
160    80     
0      416    
-160   -48    
208    -48    
-48    80     
128    272    
-80    0      
0      96     
-144   -80    
176    176    
-112   0      
0      80     
112    128    
-96    -48    
80     64     
-16    -112   
112    64     
160    256    
-304   144    
-48    0      
128    64     
128    -112   
96     192    
-336   16     
80     48     
-32    32     
0      -2512  
112    160    
-96    0      
256    -96    
32     176    
0      64     
-16    112    
16     96     
80     0      
112    128    
-80    112    
48     160    
-48    0      
128    -80    
-480   80     
-32    -176   
448    -1136  
768    -224   
960    -16    
96     -512   
-336   -96    
560    160    
-560   112    
1072   368    
-928   336    
480    -272   
-384   400    
176    -592   
96     528    
-144   -304   
16     -128   
64     0      
176    272    
-64    80     
-16    -32    
32     48     
112    48     
-128   240    
160    32     
-96    128    
16     -368   
48     512    
64     -32    
-96    112    
32     16     
144    -512   
128    -32    
-160   -448   
144    0      
80     240    
80     -16    
-64    64     
0      -272   
-96    336    
288    160    
80     128    
-80    -32    
-48    112    
128    -64    
224    192    
-176   -144   
96     32     
-96    64     
208    160    
32     -160   
48     16     
-48    -112   
0      -16    
48     -48    
64     48     
16     80     
80     96     
-64    128    
-64    -240   
32     224    
-32    -176   
160    128    
-48    -656   
16     48     
112    -1872  
-144   32     
128    -176   
32     48     
64     16     
-32    208    
-112   80     
160    -16    
80     80     
80     -32    
-16    176    
32     -64    
96     80     
32     -352   
192    128    
112    80     
-48    160    
80     0      
96     80     
32     384    
16     256    
64     64     
128    16     
272    288    
-288   -256   
240    -128   
64     48     
-80    112    
96     -224   
48     32     
-64    -192   
16     -32    
176    144    
0      160    
0      144    
0      80     
80     496    
-176   -512   
0      -160   
-144   -288   
240    -16    
80     -96    
-80    160    
144    128    
160    32     
-144   -320   
32     -96    
-16    -960   
112    48     
0      176    
0      0      
80     -16    
16     -256   
-80    192    
144    48     
48     96     
-96    176    
80     128    
0      32     
224    16     
80     -96    
64     432    
-48    48     
0      -1632  
-64    48     
304    -864   
208    -512   
-272   -192   
64     -1136  
208    128    
-64    144    
64     96     
64     -400   
-128   -592   
320    272    
-176   -64    
96     -240   
16     96     
96     -336   
-80    -160   
48     -224   
32     -96    
-384   96     
-272   -496   
144    -32    
80     -256   
48     -96    
32     -2288  
48     -128   
144    80     
-48    -160   
112    -144   
-16    48     
64     -240   
-32    -224   
-96    -32    
48     0      
-176   -32    
-144   -176   
48     -80    
-48    16     
144    -64    
-144   -416   
176    144    
-80    64     
160    16     
-16    -48    
80     -16    
32     -32    
-48    48     
144    48     
16     -64    
-288   -32    
16     -336   
-96    -64    
272    -96    
-80    112    
32     -208   
64     16     
224    -2272  
-80    64     
272    -160   
-112   176    
112    -112   
80     64     
-288   -144   
368    -256   
-384   -48    
112    -64    
-496   -96    
128    16     
112    128    
32     -320   
-80    -48    
64     -320   
-1264  -1456  
880    -416   
-688   112    
912    400    
-640   208    
688    -32    
-512   16     
0      -960   
704    112    
-528   208    
288    -80    
-208   -208   
-80    -16    
192    -208   
-64    112    
-112   -160   
48     -480   
-16    -288   
160    240    
-160   -304   
64     224    
64     32     
-16    -112   
80     -48    
192    -32    
-48    48     
-304   16     
-192   -304   
416    144    
-192   -176   
288    112    
32     -2176  
-80    64     
-144   128    
0      -112   
208    -80    
-112   -112   
-304   512    
80     112    
-64    80     
112    -96    
-128   16     
-80    -128   
80     128    
16     -256   
16     48     
32     -560   
112    32     
-80    -128   
192    176    
-272   0      
128    -32    
-272   -304   
128    -64    
-48    -32    
96     -144   
-960   32     
32     -176   
-48    -64    
-48    -208   
80     96     
-16    -224   
224    -48    
16     48     
64     -16    
-64    0      
0      32     
16     192    
-16    16     
16     160    
96     -320   
-416   -96    
-496   -224   
-32    80     
-96    -144   
64     -32    
-16    80     
-304   64     
-176   -304   
-240   -208   
-224   16     
-64    80     
-32    -528   
-256   -160   
-32    -128   
-32    -96    
-64    80     
-208   -288   
-112   -64    
-144   -144   
0      256    
-80    0      
112    112    
-192   -16    
-96    -48    
-16    112    
-640   -272   
400    80     
-304   224    
-96    288    
-240   -176   
-80    176    
-80    32     
32     80     
-144   -144   
0      240    
-80    48     
-160   -224   
-96    -48    
112    -32    
96     288    
-112   -16    
-112   96     
-80    64     
-64    -80    
80     48     
-16    80     
32     16     
112    272    
0      -32    
-400   -96    
224    -64    
-96    64     
-80    0      
-80    -224   
-48    64     
-320   32     
160    -16    
-336   -64    
-48    32     
-16    -144   
-32    -128   
-336   -560   
48     112    
208    64     
0      -144   
-160   80     
-208   128    
288    -64    
-128   -16    
-240   64     
160    64     
32     112    
-304   -16    
160    144    
80     -64    
-16    368    
0      160    
112    96     
-128   -48    
-80    -128   
-48    -32    
-112   32     
112    96     
-16    -64    
-16    144    
-208   32     
160    -112   
-192   -96    
-48    176    
-192   64     
0      272    
144    352    
-160   96     
112    -96    
-176   -48    
64     16     
32     16     
-112   -144   
-32    240    
-256   32     
-112   -48    
-96    -112   
96     -32    
16     0      
-192   96     
-32    -224   
80     256    
-112   128    
16     -96    
64     224    
32     48     
128    176    
-96    96     
-240   96     
32     112    
-144   -112   
160    -96    
48     128    
-48    176    
-32    0      
-112   -48    
96     112    
-80    -16    
128    -48    
32     320    
-64    112    
-32    400    
640    48     
1024   832    
-368   736    
-368   -400   
64     336    
288    496    
-720   -672   
464    -32    
-416   256    
384    -224   
-368   176    
16     -352   
80     448    
64     -544   
0      288    
-48    -192   
-176   336    
208    112    
-144   96     
112    -176   
-272   0      
112    80     
-208   -16    
-32    0      
144    48     
-160   160    
16     -16    
32     272    
96     0      
0      48     
0      32     
-64    144    
96     16     
-160   48     
112    16     
64     144    
-16    160    
48     48     
-48    -48    
-16    64     
80     48     
0      112    
16     32     
16     48     
-96    128    
192    32     
0      144    
-16    -144   
-112   64     
-112   96     
160    48     
-64    64     
64     160    
-112   64     
48     0      
96     144    
-32    80     
112    0      
48     32     
-80    96     
-48    96     
-48    16     
48     -32    
64     -112   
16     80     
-208   32     
48     144    
32     32     
112    16     
32     80     
-112   -64    
224    192    
-128   112    
16     32     
64     64     
-16    144    
192    48     
0      208    
-48    16     
320    400    
-272   208    
128    -624   
-48    -144   
80     112    
144    48     
-32    -112   
-16    128    
224    16     
-96    -192   
-16    192    
144    64     
0      64     
16     224    
-96    -320   
112    160    
32     64     
-32    -192   
192    192    
96     128    
-48    -80    
80     112    
48     256    
32     144    
-64    96     
96     64     
16     288    
-16    400    
32     96     
-144   -352   
32     -16    
160    192    
96     -208   
-64    -48    
-16    -144   
0      64     
112    -160   
-64    -144   
160    160    
176    368    
32     16     
48     176    
80     176    
48     96     
-112   -64    
0      192    
-32    -16    
288    16     
-96    -48    
96     -832   
-16    -32    
32     32     
32     64     
16     144    
144    240    
-32    -320   
-32    16     
176    112    
-64    128    
96     64     
-112   -336   
80     48     
128    -304   
80     32     
-64    0      
32     16     
16     192    
96     544    
-32    144    
-112   160    
-32    -272   
128    -16    
32     32     
48     64     
-64    -32    
112    -48    
0      272    
48     -352   
0      32     
176    80     
-112   144    
-176   -1120  
-16    -80    
288    -592   
48     112    
16     48     
0      240    
0      64     
16     -160   
176    256    
96     128    
160    32     
-48    112    
64     0      
80     -448   
0      128    
32     -656   
160    96     
-64    144    
96     0      
-48    144    
112    -32    
-16    80     
80     80     
32     112    
304    -368   
-48    224    
16     -608   
64     192    
-96    -144   
192    0      
176    -80    
96     80     
0      -480   
240    240    
-256   -272   
288    176    
-48    -16    
224    128    
-1072  -320   
-48    -464   
480    496    
144    576    
-704   -64    
512    -144   
-304   448    
688    -448   
-320   -144   
-224   -320   
384    400    
112    -128   
-32    464    
-224   -1104  
560    288    
-416   -3088  
160    -272   
16     656    
192    32     
-80    -64    
-128   -16    
448    432    
-160   -384   
176    -1072  
-80    0      
192    -528   
-224   0      
240    -160   
64     -544   
32     -160   
80     -1168  
-80    -80    
176    -384   
-16    -64    
64     128    
-48    -240   
64     16     
16     -208   
32     -272   
160    32     
16     48     
16     64     
-208   -192   
144    -288   
-1008  -48    
208    64     
-16    -128   
96     -288   
-32    -96    
64     -1808  
0      -160   
128    64     
-16    80     
-48    -96    
144    0      
112    -384   
-64    144    
-64    -128   
176    -112   
-240   128    
96     64     
0      -32    
80     -176   
80     0      
-96    -624   
48     0      
208    -112   
-240   224    
-48    -96    
112    16     
96     -160   
160    -32    
-208   16     
160    80     
-704   -16    
144    -160   
-64    -80    
32     -272   
112    0      
176    -160   
-144   96     
112    -1264  
-16    -16    
224    -320   
0      112    
-80    192    
-80    128    
16     208    
-48    -192   
-128   -96    
128    -16    
-608   -128   
96     48     
-272   -80    
80     -144   
368    -368   
-80    -896   
-32    224    
48     -64    
0      16     
-16    -16    
96     -16    
-32    48     
-16    -144   
-32    -208   
96     -256   
-112   0      
144    -48    
-800   -128   
80     -304   
-128   -16    
192    -224   
64     128    
-32    80     
0      0      
-32    -112   
-32    -384   
64     160    
-48    48     
-288   -128   
-208   -96    
80     -176   
160    -144   
-448   -96    
-16    -304   
256    -16    
48     -112   
-176   80     
304    -1808  
208    -256   
-64    64     
16     128    
112    240    
160    160    
-224   64     
-64    -112   
-240   0      
288    -208   
-32    -64    
-128   32     
0      96     
272    -144   
32     208    
16     -256   
32     96     
-32    -192   
-192   -160   
96     64     
272    0      
-48    16     
0      0      
-64    80     
256    0      
-128   128    
224    -224   
-144   352    
-480   -288   
144    304    
16     -176   
-864   96     
-16    64     
240    -32    
-128   -16    
-32    -304   
32     0      
128    160    
-64    224    
176    128    
-336   -32    
-496   -432   
112    -32    
-464   -112   
112    128    
-240   112    
-112   16     
-96    -64    
-640   -16    
-160   0      
-352   48     
0      48     
80     16     
-160   -16    
-336   16     
176    64     
-208   -64    
-160   -48    
16     -96    
0      192    
-192   32     
-304   112    
-16    -64    
-288   -32    
-32    -80    
32     -32    
0      32     
288    48     
-64    208    
-1200  -976   
368    -176   
-1648  -96    
1024   -96    
-32    432    
64     -976   
-64    960    
432    -640   
96     368    
-224   -336   
320    352    
-720   -112   
240    240    
-1168  -16    
16     -192   
-224   -176   
256    128    
-16    -160   
0      -240   
-112   -32    
160    -80    
-208   224    
208    256    
-48    96     
-96    -192   
-240   16     
16     -16    
96     0      
-128   0      
0      16     
-208   -80    
-48    64     
16     16     
80     64     
-144   80     
-80    -16    
96     96     
-32    16     
16     32     
-192   -32    
48     112    
-80    -112   
160    96     
-336   112    
352    -16    
-1392  -144   
96     128    
-32    256    
32     96     
-48    -80    
-224   0      
48     112    
-64    16     
16     128    
-272   64     
80     96     
-144   -48    
16     128    
-416   -192   
112    -368   
-1136  -272   
48     80     
-64    64     
80     48     
16     64     
-144   48     
112    64     
0      192    
-64    48     
224    608    
-192   16     
32     -112   
128    64     
-192   -48    
80     80     
-112   -32    
32     -144   
80     48     
-272   64     
48     -48    
-144   208    
128    80     
32     192    
48     -64    
-304   -64    
64     -96    
-160   -144   
-32    -112   
0      32     
-48    176    
-128   -128   
-32    96     
-32    16     
-32    48     
-48    -16    
0      80     
64     80     
48     64     
-144   -80    
-32    32     
-16    176    
-16    32     
16     48     
-160   -160   
96     96     
-112   -32    
64     32     
64     128    
-96    96     
96     64     
0      128    
-16    16     
16     64     
-48    32     
96     96     
-16    48     
-16    -16    
32     80     
-112   -112   
32     96     
160    256    
-64    0      
16     128    
-80    80     
192    208    
-112   16     
176    16     
-128   192    
48     16     
112    224    
-144   0      
64     32     
32     176    
16     -128   
-112   208    
144    -112   
96     240    
-176   -144   
112    32     
-144   80     
64     160    
-128   -48    
48     32     
160    176    
-144   -48    
0      144    
-304   48     
-48    -96    
448    -16    
-144   128    
64     192    
-192   -112   
32     160    
176    -64    
160    48     
-128   128    
48     32     
-64    224    
-128   -48    
128    -96    
96     160    
64     192    
-224   0      
16     176    
112    -64    
48     288    
-112   -128   
128    320    
-80    -32    
128    0      
-176   112    
144    64     
-288   48     
448    0      
-304   16     
304    64     
-208   96     
112    48     
-32    32     
16     -2896  
16     144    
-96    64     
-16    -16    
112    64     
16     112    
-80    0      
0      32     
32     176    
320    -208   
-64    96     
48     128    
16     112    
-16    -32    
112    80     
-16    -736   
336    -16    
-112   160    
112    96     
-576   -1632  
-560   656    
1168   656    
544    288    
-480   144    
496    1760   
-640   608    
128    -512   
-128   -800   
64     96     
336    192    
-224   -96    
272    32     
-64    160    
48     48     
-128   0      
-16    48     
80     0      
304    192    
-80    -352   
368    352    
-336   128    
208    32     
-144   128    
16     -208   
48     160    
32     -304   
-16    -16    
16     -1296  
-32    288    
176    -32    
-112   96     
16     -80    
96     80     
-64    -80    
48     80     
-320   -176   
352    -16    
-48    176    
224    -96    
-112   0      
64     -96    
-16    160    
96     -240   
0      32     
-16    -1664  
192    96     
0      96     
-64    -112   
96     144    
-80    240    
176    0      
-96    144    
144    32     
-64    32     
16     112    
144    48     
-64    -32    
176    -400   
32     192    
-64    -304   
48     128    
-16    -16    
0      80     
176    112    
-176   160    
80     96     
176    -176   
256    112    
16     -48    
32     208    
-80    -512   
176    0      
80     -368   
-32    96     
-16    -384   
192    352    
-112   16     
208    -64    
16     80     
-48    32     
80     128    
-192   -576   
208    -144   
80     0      
-128   208    
48     -256   
32     128    
0      -320   
112    64     
32     0      
-128   0      
208    32     
-32    288    
0      160    
16     144    
0      -112   
256    -64    
-112   176    
64     16     
96     96     
32     -160   
48     128    
48     -32    
352    528    
-80    48     
176    176    
-240   -96    
240    -416   
0      48     
160    -160   
48     -704   
-144   -48    
160    -2128  
96     -224   
-16    -128   
-32    -160   
240    496    
144    192    
176    96     
-176   -336   
128    -944   
256    128    
0      48     
-48    112    
-80    -48    
-304   -176   
96     -320   
96     -112   
0      -16    
384    -848   
-112   0      
0      80     
-96    -288   
112    0      
144    -80    
-144   -256   
128    80     
224    96     
-48    128    
-48    0      
32     -352   
-528   -128   
-240   -272   
0      -64    
160    -224   
-160   -192   
176    -832   
-32    -112   
96     -400   
0      48     
48     80     
64     -48    
0      -32    
160    -32    
-80    64     
128    -176   
-128   -80    
192    256    
-112   32     
96     -432   
48     -272   
112    -1360  
0      -96    
80     -880   
48     -64    
144    0      
-144   -544   
160    -64    
144    160    
-80    -32    
-64    208    
-160   -96    
160    -48    
-560   -416   
192    -48    
128    128    
-16    64     
-64    64     
-32    -864   
-16    -16    
64     -288   
16     224    
64     32     
64     128    
-96    0      
112    -80    
112    224    
256    64     
-144   -48    
-32    -48    
32     48     
16     64     
-144   0      
288    -736   
64     96     
32     224    
96     112    
-176   -80    
-16    816    
448    -368   
-64    -304   
-608   -432   
-288   288    
-592   -320   
688    288    
-464   -272   
512    -304   
-624   -304   
160    -144   
368    800    
-208   -848   
160    -48    
-80    -32    
112    -16    
-336   0      
-192   64     
96     -240   
-96    -144   
0      -288   
-48    96     
144    -416   
64     -64    
-48    192    
288    96     
272    608    
-112   -672   
-64    -320   
-384   400    
0      0      
96     160    
-16    144    
-32    -16    
112    -144   
-272   -96    
240    -176   
32     128    
176    -160   
-64    128    
80     80     
48     160    
-400   -16    
-192   -64    
-16    0      
80     64     
-144   -128   
32     -160   
112    16     
-32    -48    
16     16     
48     -16    
-48    -32    
160    -144   
-48    192    
80     -304   
96     144    
-192   224    
-560   -80    
64     -192   
-816   32     
16     32     
144    -80    
-224   192    
-16    96     
-48    48     
-816   -112   
176    224    
-272   -224   
160    128    
-32    -192   
-192   -32    
160    0      
-256   80     
-64    -16    
-320   128    
-256   -80    
-656   -80    
96     64     
64     192    
144    -16    
-272   -192   
128    80     
-400   -288   
112    -144   
176    -32    
112    416    
-80    464    
-208   368    
-144   16     
-288   -208   
64     -16    
-144   96     
-32    48     
-1200  -96    
-176   -48    
-160   -288   
176    144    
-48    0      
96     224    
-176   16     
-112   -160   
-80    -112   
16     -16    
-32    64     
16     96     
0      96     
-144   -16    
16     112    
-656   -160   
288    144    
-192   32     
160    128    
-128   -48    
32     112    
48     48     
-112   0      
-64    112    
-16    -80    
32     32     
-16    48     
-48    -112   
-352   -160   
96     128    
-224   48     
48     48     
-336   -16    
0      128    
128    48     
-192   16     
80     -32    
-128   -16    
96     -48    
32     64     
-80    -112   
48     288    
-304   -112   
0      -144   
-16    -80    
-176   64     
128    64     
-1184  -32    
224    240    
-192   48     
-32    16     
128    80     
-304   -528   
368    -240   
-224   144    
64     -96    
-48    304    
-48    -160   
192    256    
-96    -160   
0      160    
-176   144    
-224   -224   
336    48     
176    592    
48     320    
-176   0      
64     96     
48     -48    
32     -16    
-240   -224   
32     176    
-64    224    
32     0      
-80    -512   
-48    -128   
176    160    
-32    208    
-64    304    
-64    -16    
64     -32    
80     160    
-48    240    
-320   -64    
-32    48     
144    0      
80     64     
-96    224    
-304   -128   
16     64     
-272   0      
64     -64    
-208   -16    
-16    32     
224    272    
-368   -80    
176    -96    
80     304    
-64    -48    
32     -32    
-80    192    
160    32     
-32    112    
80     -64    
144    2976   
-1168  1040   
672    896    
176    -80    
-96    -448   
256    208    
-768   288    
336    -336   
32     448    
80     -16    
96     32     
-336   176    
-48    144    
80     -80    
-80    0      
32     112    
-16    -48    
96     288    
-32    112    
64     0      
-128   0      
0      64     
96     208    
32     192    
32     32     
-160   -80    
-32    192    
0      96     
-16    64     
32     80     
-32    80     
-32    -16    
-32    160    
64     80     
32     80     
80     16     
-48    -80    
96     128    
-32    224    
224    64     
-176   -16    
80     192    
80     80     
16     48     
-128   -160   
48     112    
112    176    
-16    -48    
48     128    
-128   64     
224    96     
-80    128    
48     -112   
160    160    
-176   272    
192    96     
-112   96     
-16    -48    
112    128    
-64    64     
-32    -48    
96     80     
-80    80     
48     32     
0      112    
-96    0      
144    64     
-32    160    
-16    16     
144    176    
-192   -48    
80     64     
-80    -32    
0      -64    
0      0      
-16    144    
-128   320    
-176   -2544  
192    -16    
80     -64    
80     272    
-96    16     
176    0      
48     192    
-128   144    
64     0      
144    -128   
48     80     
-96    160    
64     48     
-64    -208   
48     96     
96     -272   
0      224    
32     32     
96     48     
80     240    
96     16     
64     0      
-48    96     
96     32     
128    176    
-112   -32    
176    96     
-208   -144   
160    -48    
-48    64     
80     -160   
-144   -80    
64     -1520  
48     32     
16     96     
-16    16     
208    224    
-80    -16    
-80    -16    
-64    -96    
128    112    
80     48     
48     96     
-192   16     
208    144    
-128   -288   
-32    16     
-32    -1936  
80     -64    
32     -144   
-384   -192   
224    96     
96     64     
128    48     
-208   -80    
-32    48     
48     -16    
-48    48     
304    -48    
112    16     
-304   -368   
-64    64     
48     0      
272    -48    
0      -144   
-144   80     
48     -112   
96     16     
-16    -144   
-64    -112   
-16    16     
80     128    
112    144    
16     -64    
32     160    
32     -176   
48     192    
96     -80    
48     48     
-16    -752   
80     224    
16     144    
128    64     
-80    32     
80     176    
-16    -48    
48     -96    
32     112    
96     -496   
128    176    
48     -528   
144    48     
-144   -256   
96     256    
-48    -288   
128    0      
176    -80    
-48    176    
48     96     
-64    64     
144    48     
128    -96    
48     16     
160    -304   
96     -208   
-96    320    
144    0      
-48    -144   
0      176    
48     -272   
-16    112    
96     160    
-16    128    
-48    16     
160    -48    
48     -128   
96     -32    
-80    128    
80     -64    
80     48     
80     -208   
2128   -1456  
384    1424   
-288   -272   
-256   -368   
528    160    
-224   -544   
-656   -2224  
480    432    
-448   -96    
-96    -224   
0      64     
16     -320   
272    -80    
-176   -1424  
192    80     
48     144    
64     128    
-48    256    
-48    -288   
192    -464   
0      32     
32     -240   
-64    288    
-112   80     
160    -288   
32     -176   
48     -976   
160    -288   
-256   -480   
384    16     
-128   -832   
-16    -16    
80     144    
-80    -16    
80     -96    
32     144    
-32    -96    
80     -224   
-272   -144   
96     -128   
-912   48     
16     -192   
32     0      
96     16     
64     48     
16     -1984  
-80    -176   
96     -176   
16     -112   
64     -144   
16     112    
128    64     
16     144    
-384   -64    
144    -96    
-304   32     
64     -64    
224    -144   
-368   -912   
80     -272   
464    272    
-288   112    
160    -816   
16     160    
112    -64    
-64    176    
48     -208   
176    -192   
-48    -32    
96     -32    
64     32     
80     -112   
112    -32    
0      -336   
-208   -48    
176    -80    
-320   -448   
160    -496   
-176   16     
32     -144   
-48    208    
-16    176    
16     64     
-80    -96    
16     -128   
-352   0      
0      -576   
-944   -272   
112    -288   
96     160    
48     32     
32     96     
-64    -80    
96     16     
32     -144   
128    -32    
0      160    
-16    16     
-80    16     
48     -96    
144    96     
80     48     
-144   208    
-32    -64    
-592   0      
96     -368   
32     96     
64     -784   
0      96     
64     -880   
32     16     
32     16     
64     64     
-112   16     
112    48     
-128   32     
-16    176    
-160   -48    
160    -272   
-112   112    
400    -16    
-16    288    
-16    -32    
-112   304    
0      -256   
48     -192   
-144   -112   
80     32     
-208   -128   
48     -32    
-240   -192   
208    0      
-96    0      
144    16     
-688   96     
-96    128    
320    128    
112    -160   
-160   96     
48     112    
-128   0      
-32    -16    
32     48     
32     -16    
112    320    
-208   0      
128    -16    
-400   -240   
96     -240   
176    208    
-288   16     
32     64     
0      -80    
-624   -208   
32     80     
-512   112    
-64    48     
-656   -112   
160    -256   
-544   -224   
368    208    
-144   -80    
-16    48     
112    48     
32     144    
192    -80    
-288   -96    
-96    -544   
-208   240    
32     128    
-32    96     
-128   80     
128    -208   
-240   16     
-640   -240   
112    272    
208    -16    
80     304    
32     32     
-96    -192   
-224   -224   
128    144    
0      160    
-32    -48    
96     -144   
48     48     
48     96     
-192   48     
48     -16    
-192   48     
16     96     
-1344  96     
-112   208    
-256   -176   
96     256    
-128   -272   
224    112    
-16    -80    
16     0      
528    864    
-1168  -1360  
32     304    
-368   304    
288    -624   
-176   -416   
-288   -656   
-224   -256   
-64    496    
96     -512   
80     304    
-64    64     
64     160    
-240   208    
112    -112   
-80    32     
-48    128    
80     80     
-96    -48    
-64    -16    
0      -80    
-112   96     
-176   -96    
-64    112    
208    -96    
-128   64     
-144   -128   
64     32     
64     112    
-128   16     
16     -80    
48     160    
0      176    
80     32     
-192   -16    
-16    64     
48     288    
-128   16     
0      112    
-688   16     
160    32     
-64    32     
-48    80     
176    192    
-80    176    
16     32     
-128   32     
32     0      
-144   -96    
96     96     
-80    144    
-48    80     
-176   -16    
0      48     
-176   -64    
48     80     
64     -32    
-16    224    
-96    128    
32     -64    
16     64     
-80    32     
16     -16    
-16    96     
-96    128    
-80    16     
112    0      
-304   -144   
176    208    
-496   -48    
160    16     
-16    64     
-16    80     
-80    128    
128    -32    
-32    176    
96     -16    
176    112    
224    -32    
-16    240    
-208   160    
176    16     
64     192    
-224   -80    
272    64     
-64    208    
-80    144    
-32    32     
-160   80     
304    80     
-176   96     
112    -16    
96     224    
-144   32     
-80    160    
-176   -288   
-16    -160   
-32    -48    
0      208    
112    272    
-112   48     
-32    128    
64     80     
-64    -32    
112    -48    
-48    224    
-64    -32    
208    368    
-160   64     
96     48     
-176   32     
128    112    
-160   -64    
48     -16    
-96    -48    
160    128    
-80    144    
192    -48    
-224   -224   
32     112    
368    -64    
-272   80     
176    160    
32     -32    
80     -32    
-96    64     
96     208    
16     -32    
-48    64     
-192   0      
144    64     
32     -16    
-32    128    
112    80     
-208   0      
192    128    
224    240    
48     160    
-160   16     
-96    32     
160    144    
0      0      
-32    -144   
64     16     
0      64     
0      -32    
-64    -96    
-32    48     
32     -48    
0      160    
-64    -176   
144    240    
-16    -48    
32     32     
128    128    
-192   -16    
128    112    
-48    96     
48     -64    
64     96     
-48    -48    
96     128    
0      0      
80     160    
-96    -64    
32     -1024  
144    592    
352    608    
-128   -144   
-160   96     
304    224    
-64    64     
80     288    
-16    -1312  
16     144    
16     64     
16     -16    
-16    128    
96     432    
-32    -16    
-80    112    
96     -192   
128    32     
32     48     
0      272    
-32    80     
-208   -288   
80     -144   
192    -1504  
0      48     
-16    48     
80     48     
-48    176    
-32    96     
0      176    
-224   48     
32     64     
-32    64     
-960   1376   
-1552  -1200  
1456   880    
704    368    
336    64     
-736   -272   
-176   432    
240    -1520  
-48    -368   
272    192    
-96    112    
64     224    
-128   48     
208    -64    
-96    -80    
-80    -176   
208    -16    
16     224    
160    288    
-32    -96    
-80    -96    
-112   240    
64     -320   
192    16     
-384   -1584  
48     -112   
-80    -224   
320    304    
-384   -128   
-128   112    
32     160    
-112   80     
80     96     
-16    -16    
96     -256   
112    -48    
-48    208    
272    -256   
-192   16     
96     -496   
384    16     
-192   0      
272    96     
-80    128    
16     16     
96     240    
-16    32     
144    304    
-224   -432   
-224   -368   
256    144    
-128   -16    
112    32     
352    0      
-256   -304   
240    112    
-16    176    
-352   -640   
576    1056   
176    16     
-96    256    
240    -752   
-192   208    
80     -32    
0      224    
112    -176   
32     128    
0      -48    
32     128    
64     -624   
48     48     
32     32     
80     64     
-80    -64    
16     96     
160    -48    
192    0      
-144   16     
304    -64    
-240   -16    
160    -224   
192    32     
-64    -96    
96     -64    
80     -48    
16     -48    
112    -192   
0      -80    
128    -32    
-1056  -16    
-64    0      
96     -208   
48     -336   
48     16     
-144   -48    
48     -272   
48     96     
0      -384   
64     208    
-112   -64    
192    -224   
-32    224    
-80    -896   
-160   -128   
-208   -32    
144    -32    
48     64     
-48    -240   
32     -304   
-16    -2064  
64     -208   
64     112    
64     -64    
64     112    
-64    48     
96     -64    
-176   -160   
128    224    
-32    0      
-320   -48    
-48    368    
-16    -96    
-192   -288   
112    32     
-80    -768   
128    -320   
80     -528   
-48    64     
64     -512   
-64    544    
80     -480   
48     16     
-16    -560   
0      112    
-48    -16    
224    64     
-944   32     
224    -48    
0      80     
-64    -32    
128    32     
80     112    
-48    -176   
240    -112   
-112   128    
80     -208   
-64    -368   
64     -256   
112    -320   
-80    176    
224    -32    
-16    80     
-48    -128   
48     224    
-16    -128   
160    16     
-144   -336   
80     -128   
-80    -1136  
176    208    
128    304    
-16    112    
-80    96     
16     -128   
-144   -48    
96     64     
-288   -64    
64     -32    
-320   96     
-112   -480   
-464   -240   
64     -160   
272    48     
-80    -336   
0      -16    
-32    -48    
64     -112   
96     288    
-208   -96    
-128   48     
112    -112   
-16    -128   
32     96     
-112   -320   
160    16     
48     208    
-64    -64    
-16    96     
128    -304   
96     32     
48     -160   
32     -144   
64     160    
-16    -48    
32     -96    
224    -176   
-496   272    
0      -80    
-192   192    
624    -448   
736    544    
0      160    
-224   224    
192    -720   
176    -160   
-544   -176   
48     -48    
-240   64     
-128   -448   
32     0      
32     -96    
-144   64     
-80    -128   
32     -64    
16     0      
-16    32     
160    -208   
-80    112    
128    -288   
48     144    
-16    176    
-16    0      
32     -96    
-32    -96    
-80    -144   
-64    288    
224    144    
-112   -32    
-224   -144   
160    -128   
-224   48     
48     -112   
16     80     
-688   -64    
192    80     
-80    144    
-176   0      
-272   0      
-16    -16    
160    96     
0      64     
96     16     
-48    -96    
-112   -48    
-352   16     
80     144    
0      32     
-224   -16    
-400   -256   
-416   -64    
-288   64     
240    -48    
-272   128    
64     -64    
-64    0      
-1824  -144   
80     160    
-80    -176   
64     -32    
-112   96     
32     48     
-64    -208   
-80    208    
64     16     
-16    -16    
-96    96     
-16    64     
-48    -64    
-176   64     
-176   -48    
-608   112    
-144   -32    
144    224    
-64    128    
-48    -144   
96     384    
-464   64     
224    80     
128    32     
-128   32     
80     64     
-112   48     
-96    -144   
128    -192   
64     112    
-96    208    
-48    176    
-624   -96    
272    112    
-64    -272   
64     80     
-80    -32    
-240   -160   
144    16     
-32    32     
-112   -128   
-192   0      
-16    -16    
-64    -32    
-96    128    
16     16     
-80    -176   
-288   32     
16     48     
-32    -32    
-80    48     
32     272    
96     -80    
-32    16     
0      -48    
-16    80     
-16    48     
112    -160   
-288   -192   
192    64     
-144   64     
96     48     
-352   -144   
96     176    
144    -48    
-304   64     
368    48     
-304   16     
80     144    
-176   16     
224    112    
-80    144    
64     -32    
-240   -48    
176    96     
-224   -80    
32     -32    
-80    -48    
-32    64     
-656   64     
-64    -48    
64     -176   
-48    80     
-64    64     
-64    128    
64     -32    
-80    -96    
-48    48     
0      96     
-112   16     
48     -80    
-192   -128   
-80    80     
-32    -16    
-336   -112   
-16    -672   
64     208    
-16    -64    
-80    -32    
208    80     
96     336    
144    0      
-256   -272   
176    112    
-32    144    
48     -32    
80     192    
-80    0      
-16    64     
48     -528   
-128   -256   
176    -16    
80     128    
-64    256    
48     128    
-192   -48    
48     16     
16     272    
-48    -80    
80     128    
-256   -16    
240    224    
-400   -64    
144    32     
112    96     
112    80     
-64    64     
32     80     
-160   96     
64     -112   
64     144    
96     96     
-16    16     
-96    112    
64     160    
-304   -48    
16     128    
-256   96     
80     -144   
144    368    
80     64     
96     112    
1056   608    
224    416    
-416   112    
-512   -16    
-16    32     
352    -560   
160    192    
-368   432    
144    -16    
-160   -16    
96     -368   
64     256    
16     16     
-32    320    
16     -208   
96     288    
-256   -192   
480    432    
0      416    
208    464    
-144   96     
-160   -160   
176    176    
-48    80     
192    112    
-224   -96    
-144   208    
-64    560    
-224   64     
-336   -80    
240    -64    
-64    -64    
64     224    
-96    128    
48     336    
16     208    
-64    192    
-80    -64    
-64    32     
304    64     
-112   80     
80     160    
-16    96     
208    80     
16     80     
-128   -64    
304    320    
80     160    
-176   -32    
-176   -112   
224    -80    
-160   0      
32     112    
128    192    
-32    80     
-16    64     
-96    -656   
176    -576   
-48    -224   
272    320    
-96    112    
176    176    
-80    48     
240    288    
96     32     
32     48     
16     16     
16     224    
-128   -192   
176    -400   
-80    64     
-80    -816   
32     -96    
192    48     
16     128    
400    816    
-384   112    
144    -96    
192    -64    
-32    48     
320    384    
-288   -128   
64     0      
32     144    
128    -80    
112    112    
96     -208   
-80    -224   
48     144    
128    32     
-48    96     
-16    64     
64     -240   
80     240    
-128   -256   
48     112    
16     0      
320    320    
0      0      
-96    -576   
16     288    
208    96     
-16    -16    
80     -192   
-32    -16    
128    320    
32     208    
-80    0      
160    128    
-64    -48    
-16    96     
96     224    
160    208    
144    16     
-224   -352   
160    160    
-16    256    
304    144    
-224   -352   
-16    48     
-64    -1376  
128    112    
208    80     
-96    32     
-32    -96    
240    -160   
-240   96     
240    -112   
16     336    
-64    -224   
96     80     
-96    -592   
32     144    
-64    -448   
48     144    
320    -48    
-96    96     
16     80     
96     336    
80     48     
144    80     
-272   80     
208    64     
128    -64    
-128   -224   
48     32     
224    -496   
0      272    
-32    -96    
112    -48    
-80    -48    
112    144    
48     64     
144    32     
-176   96     
128    160    
64     80     
16     -112   
-16    112    
144    -304   
-16    160    
0      -208   
80     64     
-80    -304   
96     -32    
16     -1936  
176    -192   
16     272    
32     240    
-112   96     
144    208    
96     64     
208    -336   
48     160    
64     112    
-176   192    
-112   -192   
288    96     
64     -160   
160    96     
-80    -176   
48     80     
48     144    
48     -1184  
112    64     
-464   -80    
16     -880   
160    -64    
0      -1200  
48     -64    
32     160    
-16    -128   
-32    32     
96     -176   
32     240    
64     -352   
192    208    
-144   176    
-208   160    
-304   384    
144    384    
-640   -224   
32     -128   
-80    96     
672    -592   
-352   -800   
448    -560   
128    432    
80     -352   
160    240    
-208   -64    
240    -288   
-432   48     
320    -432   
-112   112    
-240   -80    
16     176    
208    -160   
-144   -128   
224    -384   
-64    256    
240    -224   
-160   320    
224    -288   
-192   144    
144    -112   
-128   0      
-32    -64    
160    96     
64     -160   
-80    96     
-16    -240   
-160   -64    
112    -320   
112    -48    
-48    -336   
208    176    
-32    -144   
0      -80    
-16    -272   
-32    32     
112    32     
-80    -64    
0      0      
-16    -144   
16     96     
96     -64    
-624   16     
0      -272   
272    64     
-96    -96    
256    -304   
16     -816   
-32    -32    
112    -432   
-96    16     
64     48     
80     0      
-144   48     
16     -32    
-160   -16    
96     -80    
-48    256    
-144   0      
-128   32     
48     -112   
16     -16    
32     -224   
48     144    
96     -288   
64     96     
48     -144   
32     -112   
-32    -64    
64     80     
-112   -48    
240    0      
-272   96     
-48    -128   
-48    -176   
128    -192   
-256   80     
224    -96    
-224   -32    
64     -240   
-64    32     
80     -768   
160    -160   
-16    400    
-96    -208   
112    -304   
-288   -176   
-576   16     
224    -208   
-336   -64    
32     -192   
-336   -208   
208    -112   
80     112    
48     -752   
16     80     
-176   128    
96     -64    
96     48     
0      320    
96     80     
-48    -32    
48     128    
176    192    
-96    96     
-32    64     
96     32     
80     -272   
-16    32     
16     -112   
208    224    
-144   32     
192    -16    
-64    -128   
-224   -80    
80     -240   
0      -32    
-112   16     
64     -32    
48     720    
-32    80     
144    368    
-48    -192   
-32    48     
-80    -192   
-608   -64    
-64    -80    
-1376  -304   
-80    64     
-1072  160    
-32    -336   
-160   -240   
416    304    
-160   -16    
-320   -64    
-1232  -112   
-112   -208   
-48    -96    
16     224    
-112   -336   
64     32     
-80    -48    
-80    -128   
32     -16    
-176   80     
0      48     
-656   96     
-80    64     
-96    -192   
96     192    
-304   -32    
128    0      
-64    160    
-96    16     
32     -16    
-224   -128   
144    -48    
80     128    
-96    112    
-96    0      
320    -80    
-736   48     
32     128    
-464   0      
-48    -16    
144    0      
96     80     
-80    -208   
-272   -16    
192    144    
-288   -176   
240    48     
-128   144    
144    64     
-464   -32    
-112   -16    
32     0      
16     48     
-1152  144    
112    160    
144    48     
-96    192    
-192   -288   
208    -112   
16     192    
-80    -32    
16     -16    
16     128    
-64    0      
112    112    
-208   16     
-48    32     
-752   -608   
-256   2304   
-160   912    
-64    -464   
32     160    
304    48     
-272   496    
-432   -112   
256    -240   
464    -80    
-560   464    
240    -96    
-80    512    
-128   -192   
160    272    
-112   -64    
-32    352    
-288   -96    
-416   -32    
-96    -80    
192    16     
112    384    
304    256    
-544   0      
144    -96    
16     -448   
-32    -48    
96     496    
80     32     
-592   -144   
144    208    
112    16     
-96    64     
-944   -160   
32     144    
0      -112   
-96    32     
96     0      
0      64     
96     32     
-160   -352   
-32    48     
112    96     
352    -176   
-176   32     
-32    48     
80     112    
-64    128    
-48    192    
-176   80     
96     80     
-96    144    
-16    80     
-16    -64    
80     -48    
64     192    
16     64     
-16    128    
-96    64     
112    128    
-48    128    
-96    48     
32     80     
64     352    
-208   144    
144    80     
-48    32     
-64    -32    
96     -128   
-48    -32    
160    -16    
144    144    
-96    80     
32     240    
-224   256    
64     -16    
-240   -64    
0      112    
112    160    
-32    0      
-64    64     
64     64     
-112   96     
224    384    
-336   112    
-160   -64    
144    128    
-64    -144   
432    224    
-80    16     
16     128    
16     160    
176    144    
-48    176    
-32    256    
-32    -32    
0      -32    
32     0      
64     160    
48     -32    
80     80     
112    64     
-112   112    
32     48     
-32    96     
192    80     
-64    208    
32     176    
112    208    
-304   -64    
208    96     
0      32     
-48    16     
-48    48     
240    160    
-144   -112   
32     144    
-272   -112   
160    -80    
-64    -16    
144    -176   
-336   -224   
96     -96    
48     48     
-128   80     
160    176    
32     -176   
96     48     
-144   160    
144    48     
-64    -16    
144    64     
-160   -48    
64     -64    
-304   128    
336    272    
112    -16    
-64    32     
-144   240    
144    96     
160    -48    
-128   16     
-128   -16    
16     -48    
112    -32    
32     48     
240    288    
-144   -208   
16     192    
-176   -128   
176    -448   
-96    64     
64     -1392  
-16    32     
128    224    
-32    48     
-16    64     
-32    96     
-16    -96    
-48    -96    
32     16     
128    240    
-64    80     
48     96     
-176   -32    
144    -112   
-80    16     
112    -1296  
64     0      
32     160    
-64    48     
16     176    
96     112    
-32    64     
128    96     
16     96     
48     64     
16     32     
16     -64    
144    144    
-80    64     
-16    112    
-64    -336   
208    48     
128    176    
-288   128    
128    80     
80     144    
32     0      
112    144    
-16    128    
48     128    
-112   64     
224    176    
16     80     
0      -96    
0      16     
16     -736   
-48    64     
-896   -240   
1024   576    
1200   -96    
224    -336   
-304   -640   
144    -800   
560    992    
-176   -272   
112    320    
-480   -528   
352    384    
96     -304   
160    -64    
-464   208    
464    -144   
32     -848   
16     -144   
-96    -1568  
32     -368   
-32    192    
352    80     
-64    336    
-96    -32    
-64    128    
16     -192   
80     112    
64     64     
160    160    
112    96     
-48    64     
112    -320   
-32    80     
192    -144   
16     48     
16     80     
0      -48    
-96    0      
64     32     
16     160    
128    -192   
32     64     
-80    -16    
96     144    
32     -352   
32     96     
-32    -240   
32     160    
112    -288   
-32    64     
-32    16     
160    80     
-48    176    
48     80     
48     192    
32     -64    
96     272    
-48    -448   
0      128    
128    -224   
48     208    
-64    -112   
-16    -80    
144    -1104  
48     192    
-128   80     
128    96     
0      64     
144    48     
0      -800   
-32    -96    
48     -240   
48     -32    
16     112    
16     32     
64     96     
64     -32    
64     112    
-160   240    
256    -704   
-16    176    
32     128    
-128   -16    
-560   -432   
96     -320   
176    -96    
16     -288   
0      -96    
0      -1088  
32     -336   
192    368    
0      -144   
32     -992   
48     -48    
32     -560   
16     112    
144    576    
96     304    
-1616  112    
64     -480   
160    -48    
-16    32     
160    -64    
-16    -192   
128    -128   
32     224    
96     64     
144    0      
-16    -16    
96     -368   
0      -16    
112    0      
96     -112   
0      16     
0      -128   
-96    80     
112    -96    
64     64     
0      -880   
96     -16    
-80    -544   
112    -32    
96     -80    
80     256    
-16    -160   
-192   112    
-192   64     
288    -192   
-208   64     
32     0      
-352   -80    
-32    -432   
64     -16    
-16    -336   
144    16     
-32    -176   
-320   -160   
96     640    
-32    160    
64     0      
-16    -32    
160    48     
64     160    
-192   -128   
-64    48     
-64    -176   
0      -240   
-32    -112   
96     272    
-160   240    
-48    -304   
0      48     
160    -560   
272    240    
256    -48    
-304   224    
-240   32     
176    -336   
-208   -160   
256    -144   
-64    144    
-32    -80    
-480   64     
96     -352   
208    144    
-16    -544   
96     160    
-144   -336   
-112   -192   
304    64     
0      176    
-64    -272   
-64    0      
-96    -96    
240    -32    
-192   112    
192    -112   
-304   -48    
176    -288   
0      16     
128    -288   
-64    64     
144    -48    
-144   32     
-144   -64    
528    -272   
-16    272    
-176   -80    
-160   16     
144    -48    
0      80     
-32    -112   
-272   80     
64     -96    
128    192    
144    240    
-80    80     
0      -416   
32     0      
2048   464    
-1280  -608   
656    880    
-160   800    
224    -656   
224    -720   
-304   352    
352    384    
-608   -640   
64     96     
176    528    
304    48     
-416   416    
0      -400   
-48    48     
112    -96    
-416   448    
304    0      
-112   -160   
-176   -160   
320    -32    
-288   64     
176    192    
0      256    
-1680  -208   
64     -48    
-944   -336   
256    192    
-224   -32    
-48    160    
-64    48     
-240   -32    
-144   16     
80     -80    
0      -112   
144    160    
-16    96     
-16    48     
-256   -48    
-432   -352   
272    128    
-416   96     
208    96     
-32    -112   
-160   48     
80     64     
-160   -48    
-256   -384   
96     48     
-128   176    
-976   -112   
-80    80     
64     -96    
208    272    
-320   -16    
64     240    
48     -128   
96     48     
-32    32     
-192   16     
0      -48    
-112   112    
0      -16    
48     112    
-64    -112   
-288   0      
-48    0      
-112   -128   
0      144    
-48    -160   
128    128    
-160   -48    
-80    16     
192    0      
-48    96     
-80    -176   
80     16     
-192   192    
16     320    
-64    -192   
-96    -48    
16     48     
-208   32     
96     272    
-96    -288   
192    32     
-112   -32    
-176   -176   
96     32     
-48    -32    
32     64     
-32    112    
-32    144    
128    32     
-64    32     
32     240    
80     16     
-528   0      
-32    64     
-32    -112   
-80    16     
16     -32    
48     -32    
64     48     
-240   32     
144    240    
-176   48     
32     48     
-32    -32    
-160   -32    
-32    -64    
16     -80    
-400   -160   
0      96     
-16    -64    
0      192    
112    80     
0      -32    
-224   -64    
64     16     
160    240    
176    288    
-64    112    
-144   128    
64     80     
-80    -128   
160    112    
-176   160    
176    176    
-256   64     
-32    32     
144    176    
-48    160    
112    -32    
-304   128    
-80    -96    
160    64     
0      80     
0      -64    
-80    112    
-304   32     
192    64     
16     48     
112    256    
-128   64     
160    80     
-128   240    
32     64     
-16    176    
-80    32     
64     112    
-64    0      
-48    64     
-80    48     
0      48     
-16    16     
16     48     
-160   80     
192    432    
-224   96     
32     -80    
-16    80     
128    144    
80     160    
-80    96     
112    176    
-256   -192   
144    -16    
96     336    
32     208    
0      176    
80     -16    
112    32     
-16    -160   
-192   208    
128    -128   
32     176    
-16    -48    
-16    112    
-352   48     
0      -144   
64     80     
112    -48    
208    112    
-48    176    
-304   80     
128    -48    
-64    16     
304    64     
112    176    
-160   192    
64     64     
-80    160    
32     64     
16     -288   
48     176    
-144   288    
0      288    
-240   32     
1072   -1680  
416    -160   
256    752    
-32    816    
-368   -400   
656    496    
-512   32     
336    -208   
-192   560    
48     -256   
304    272    
-176   -240   
-16    160    
-80    64     
16     112    
144    160    
-16    96     
-96    -80    
80     -144   
-48    80     
64     -16    
-64    224    
144    112    
16     32     
0      16     
0      192    
80     176    
-80    64     
64     64     
-32    48     
160    80     
208    -112   
128    144    
16     96     
-112   32     
-48    16     
112    128    
32     128    
128    112    
-48    48     
32     112    
-96    48     
-32    32     
144    48     
32     64     
192    48     
-144   64     
-16    -288   
128    48     
-16    -496   
112    80     
48     144    
-64    32     
176    128    
-64    32     
-16    16     
112    64     
-96    96     
112    112    
16     -80    
-128   -80    
-48    -112   
176    -128   
-208   -48    
256    -352   
-32    112    
144    144    
0      144    
144    288    
0      96     
-16    96     
96     256    
-144   -96    
192    0      
-48    -16    
48     208    
-32    128    
112    -240   
272    -160   
-96    -672   
80     -32    
48     -1232  
-48    96     
0      112    
32     96     
48     256    
96     -48    
-192   -64    
144    192    
48     224    
-80    -272   
80     -64    
80     -144   
0      80     
32     -400   
-32    32     
96     -336   
80     96     
32     96     
48     112    
-16    16     
0      48     
0      -32    
96     80     
112    112    
-32    -80    
80     112    
-96    -208   
48     48     
32     16     
80     0      
80     160    
-64    176    
128    80     
0      80     
-32    32     
16     -80    
128    112    
32     240    
0      -144   
-32    -192   
48     256    
288    0      
-112   -16    
-16    32     
-144   -80    
304    -656   
-112   -32    
96     -192   
96     80     
-96    112    
0      160    
112    128    
48     0      
112    160    
-16    -48    
368    928    
-368   272    
128    -160   
112    -416   
0      144    
80     -208   
-144   -16    
176    -96    
80     80     
-16    96     
-16    64     
112    -96    
112    144    
32     160    
0      -48    
144    112    
-16    -144   
-32    -16    
-192   -352   
416    416    
-128   48     
288    400    
-352   -80    
384    0      
16     64     
144    -592   
-16    80     
-144   -64    
128    -1152  
80     -192   
-96    -3168  
384    -432   
80     432    
-112   -48    
-208   64     
64     -192   
272    208    
512    -256   
-464   -704   
112    -176   
160    320    
-96    -352   
-1744  -256   
-32    -256   
560    -80    
352    -544   
-256   160    
-48    -16    
32     -16    
272    208    
208    -176   
64     -560   
96     64     
32     -288   
48     -16    
144    -16    
16     -128   
-704   32     
-48    -240   
-48    -144   
160    -368   
48     32     
-480   -1072  
1088   2176   
-864   -1360  
-48    -704   
240    -144   
288    -16    
-144   -336   
-608   448    
352    304    
-96    -528   
-496   -192   
-112   0      
160    -96    
32     96     
-80    16     
80     -224   
16     -48    
32     -1488  
176    32     
64     -64    
-48    144    
-16    -208   
-32    32     
-96    -288   
80     -112   
-256   16     
128    288    
-576   -96    
160    176    
-32    -80    
112    -32    
-192   -48    
64     -304   
80     144    
80     -576   
32     80     
32     96     
64     176    
16     -48    
48     112    
32     32     
-16    -48    
-64    -144   
48     80     
-464   -32    
64     -16    
-80    16     
176    0      
-96    -224   
240    -1536  
-272   144    
336    64     
-144   64     
144    48     
-128   32     
-160   -384   
240    -160   
-496   80     
208    -112   
-336   128    
-96    -64    
144    -208   
16     -368   
-64    -80    
176    -352   
-160   112    
80     -96    
96     -80    
32     64     
-48    48     
-240   16     
32     -128   
112    144    
-112   176    
-144   -112   
144    -208   
-64    -128   
128    80     
-80    192    
80     -144   
32     192    
-16    -160   
208    -96    
-464   144    
-80    112    
-48    64     
32     -304   
112    -96    
16     -48    
-224   -16    
160    -144   
-48    96     
80     -224   
32     80     
192    -16    
-224   -160   
224    -32    
-112   -96    
64     96     
-16    64     
-16    112    
48     16     
-112   0      
-64    -160   
-240   -128   
32     -128   
160    256    
-896   -336   
48     32     
-624   -208   
-240   80     
-64    -16    
-560   160    
112    144    
96     -48    
-16    -64    
-96    32     
48     0      
32     96     
0      128    
-80    -64    
112    176    
-544   -160   
0      128    
16     -80    
-16    176    
16     96     
-272   80     
-112   -32    
-560   -32    
16     64     
144    96     
-16    -16    
-32    -64    
-48    64     
48     -192   
48     48     
-96    -96    
48     128    
32     64     
-192   0      
16     16     
-80    -96    
-48    -16    
-208   160    
-16    -48    
-432   64     
-160   -64    
-848   48     
64     16     
-208   -96    
-32    160    
48     -96    
48     0      
32     32     
-96    0      
16     0      
-160   -144   
64     -112   
160    -144   
-192   -16    
-128   208    
-16    -160   
-64    0      
48     128    
160    48     
-32    48     
-96    96     
-224   -288   
-80    240    
16     176    
16     144    
-48    128    
-144   -192   
-64    -48    
32     160    
-336   -48    
112    176    
-800   -32    
32     48     
-16    160    
48     -16    
-96    -16    
-112   -32    
0      80     
64     16     
96     -16    
-176   0      
-32    96     
0      48     
32     64     
-96    16     
-48    96     
-64    -304   
112    176    
-32    -208   
32     192    
16     96     
-64    0      
-192   1648   
272    -144   
-608   -160   
128    -48    
-352   192    
240    80     
192    64     
-16    336    
-64    -224   
-160   32     
128    272    
-672   -16    
-80    144    
-80    192    
32     -128   
80     64     
0      672    
16     320    
-144   128    
-80    -32    
80     80     
144    192    
-144   -160   
16     80     
-352   -128   
96     112    
-560   64     
64     16     
16     0      
16     320    
-32    -48    
16     -48    
-32    112    
144    176    
-112   144    
-16    -16    
-80    64     
-160   -192   
96     64     
-128   -112   
0      128    
-48    144    
0      48     
16     32     
48     -96    
48     80     
-16    80     
80     192    
-112   176    
-48    -48    
64     -96    
0      96     
16     -32    
0      368    
-16    -48    
64     160    
-32    64     
48     -32    
0      240    
-96    -256   
208    176    
-48    16     
48     224    
-64    128    
-16    64     
48     -80    
-32    160    
-48    -48    
160    80     
-304   -64    
0      48     
96     32     
16     96     
128    240    
-64    192    
16     80     
-80    -448   
-96    -160   
480    320    
-160   224    
112    -96    
-64    80     
-160   -160   
96     64     
-160   -96    
96     48     
-32    64     
80     96     
192    224    
-64    96     
48     16     
-80    144    
96     112    
48     80     
48     96     
-96    -48    
192    144    
-96    -64    
64     -64    
64     128    
16     112    
96     112    
-48    96     
-32    112    
0      32     
48     128    
-16    48     
0      -80    
112    208    
-112   48     
128    64     
-64    64     
16     64     
64     112    
16     128    
-16    16     
32     32     
48     112    
48     112    
-48    32     
96     208    
32     176    
144    224    
-272   -96    
-144   -128   
16     -16    
192    48     
272    480    
-208   -144   
80     96     
-144   160    
64     48     
80     224    
48     96     
208    48     
-64    176    
-144   -272   
368    -208   
-48    80     
-16    -16    
0      208    
-32    48     
112    -32    
-112   -320   
112    256    
80     -128   
-16    0      
256    208    
80     -128   
-192   -128   
48     192    
64     -48    
-32    256    
-64    -384   
-80    -16    
160    -176   
128    112    
32     112    
-144   -528   
160    128    
96     -16    
-16    128    
0      80     
-32    48     
96     48     
32     48     
96     48     
112    272    
-32    -48    
-128   144    
-16    16     
48     64     
48     192    
16     -160   
-192   -48    
160    -144   
128    208    
-128   -1920  
144    336    
-288   -64    
160    80     
224    -464   
0      272    
112    80     
-32    144    
48     112    
-96    -32    
48     -128   
-80    32     
80     -16    
112    -112   
64     240    
48     -272   
-48    0      
256    -288   
-16    48     
208    32     
-64    304    
-992   -1360  
-544   -304   
336    -464   
304    -64    
-256   -368   
0      -208   
112    560    
256    192    
-304   -48    
80     -48    
80     -32    
0      -400   
-80    -64    
-80    16     
176    16     
-32    32     
64     160    
64     128    
48     -128   
32     -96    
48     -368   
96     272    
80     48     
32     0      
-144   -1040  
64     -192   
176    80     
-112   304    
208    64     
32     160    
-80    -96    
128    176    
16     144    
48     -288   
16     32     
16     32     
80     -48    
80     48     
-16    -16    
160    -208   
-192   80     
192    192    
64     128    
48     48     
-48    112    
16     -32    
-80    -256   
272    176    
-16    80     
0      0      
112    -192   
-80    144    
176    -112   
-32    176    
16     -48    
0      -32    
32     128    
144    -1504  
32     64     
112    -352   
-208   48     
-1056  32     
48     144    
48     -64    
64     -224   
-112   -112   
64     160    
112    -176   
144    144    
-80    32     
128    -816   
128    176    
-144   -160   
16     128    
64     -32    
32     -64    
-368   -64    
288    -512   
-16    96     
96     -800   
128    16     
-112   -192   
32     -48    
304    192    
-240   48     
80     -240   
16     32     
176    -32    
192    -80    
96     -32    
16     -112   
-432   -96    
-32    -224   
-32    -80    
112    32     
-128   -48    
32     -352   
128    0      
-32    -3072  
176    80     
-80    -176   
112    48     
112    -128   
-80    -64    
-288   -176   
48     -48    
-272   -32    
160    128    
-176   176    
192    144    
-32    160    
176    -64    
-16    -208   
16     -704   
80     144    
208    128    
-64    16     
16     -16    
-160   -64    
224    -32    
-48    -128   
-48    80     
144    48     
-464   -16    
224    -304   
192    -16    
-16    -432   
64     96     
0      -288   
48     112    
96     -1936  
-16    80     
-80    -64    
80     -128   
-176   -48    
112    -16    
-160   0      
272    -48    
-528   192    
80     -176   
-1568  -176   
32     -96    
48     -32    
-32    -272   
160    160    
176    -2192  
-112   32     
32     48     
96     240    
32     144    
32     -32    
-160   16     
-64    -32    
16     32     
176    -128   
-64    0      
0      32     
32     -96    
-64    -240   
112    128    
0      -512   
0      208    
64     64     
-16    80     
-64    -32    
112    -16    
-256   -16    
160    80     
-32    -112   
144    464    
-128   -288   
-64    -256   
336    -32    
112    -64    
64     288    
-144   128    
-96    -224   
-208   80     
112    176    
-32    0      
-64    96     
-48    -32    
160    -288   
-112   96     
96     -240   
-224   80     
176    -416   
-64    96     
-32    -96    
-48    16     
-208   -144   
-256   -128   
-96    -32    
112    -16    
-80    -32    
16     224    
-176   -32    
32     -16    
-176   -128   
-640   3008   
-1520  -1040  
576    -464   
640    -144   
-496   -176   
32     -672   
-704   192    
-560   -880   
-240   304    
288    224    
-272   -128   
-1360  112    
-48    -16    
128    -112   
-80    -208   
-112   -240   
208    304    
-272   -752   
288    320    
144    -176   
-32    -160   
-64    368    
-400   144    
80     -80    
-432   -368   
48     0      
-128   80     
-208   -16    
-16    160    
0      32     
-160   -112   
80     128    
-128   -96    
-48    96     
-80    -80    
32     288    
-96    112    
16     96     
-208   288    
176    224    
-128   -240   
0      80     
0      160    
-368   0      
-32    32     
-96    -192   
176    48     
-144   -432   
-48    -304   
160    16     
32     400    
208    208    
-224   -128   
112    -16    
-160   32     
-160   32     
64     -160   
80     208    
-80    336    
-16    80     
-1552  336    
32     -160   
-16    192    
-48    48     
-32    -96    
16     -304   
96     96     
-208   0      
128    48     
-96    0      
-32    80     
-16    -16    
-16    32     
-320   -96    
0      0      
-400   -32    
0      80     
-464   -768   
64     16     
0      16     
128    240    
96     -112   
-208   160    
176    -32    
-48    224    
-128   0      
-80    32     
-176   -112   
80     48     
48     208    
-192   -48    
80     80     
80     96     
-80    144    
-32    -144   
-176   48     
160    128    
-48    96     
48     64     
-80    224    
-112   64     
0      -64    
16     80     
-16    48     
64     144    
-560   -160   
176    160    
-1728  -144   
80     -112   
96     192    
-112   96     
64     -80    
-112   96     
64     48     
32     208    
-96    80     
-64    96     
160    272    
-80    176    
112    368    
-240   -16    
80     432    
-752   32     
-80    96     
-48    -128   
32     -256   
240    128    
-272   176    
304    16     
-176   288    
208    16     
-64    112    
-176   304    
-32    -208   
0      128    
-96    -192   
272    288    
-112   -272   
-96    176    
128    80     
-64    -64    
64     160    
0      32     
112    352    
-192   -224   
112    80     
-96    -176   
16     288    
-112   -64    
80     224    
-32    -16    
64     128    
-144   0      
80     128    
-16    -96    
-96    -256   
80     64     
112    224    
64     -208   
-192   0      
32     0      
64     160    
-16    176    
-96    -64    
112    240    
-112   -288   
-176   0      
16     800    
-48    -272   
-224   -528   
256    400    
112    48     
-192   -160   
-16    48     
256    64     
-96    208    
-16    96     
-64    240    
-48    -48    
48     160    
-64    16     
0      16     
-32    96     
16     0      
96     208    
144    32     
80     112    
-112   96     
144    128    
-112   32     
112    -32    
48     112    
80     16     
-16    -64    
-48    96     
80     256    
48     64     
-176   144    
0      16     
1056   2960   
-1760  -656   
832    880    
-144   848    
592    304    
-672   -176   
-16    112    
304    432    
-128   32     
-240   32     
-48    -800   
192    -32    
-112   160    
96     0      
-32    64     
32     112    
16     80     
160    192    
-112   128    
160    96     
-128   0      
-48    48     
96     128    
-16    128    
128    80     
-16    -432   
-96    -64    
176    48     
-112   176    
208    208    
0      32     
-112   32     
112    160    
64     112    
-96    -16    
48     -16    
-16    96     
48     32     
-32    112    
128    192    
0      -448   
16     144    
0      -64    
160    160    
-208   -32    
176    -16    
-80    176    
80     176    
32     208    
-16    -272   
96     160    
-32    144    
48     0      
-64    144    
128    96     
16     -272   
32     112    
-16    -416   
192    -32    
160    208    
-304   64     
208    80     
64     160    
-64    96     
16     48     
160    -32    
-16    224    
-32    112    
16     -80    
112    -64    
112    64     
-16    224    
-48    -176   
128    32     
48     -928   
-96    176    
32     240    
144    176    
-32    48     
192    80     
-144   -16    
64     160    
32     32     
-112   -384   
160    -16    
-96    -96    
0      16     
160    -336   
-272   32     
176    -464   
-16    -16    
96     64     
48     80     
-80    96     
128    -48    
-192   -64    
272    208    
96     80     
32     -96    
160    64     
-80    -64    
160    32     
128    -160   
-112   -48    
224    112    
-48    -16    
128    -2464  
-64    64     
112    304    
-128   16     
80     16     
0      64     
16     128    
48     64     
256    80     
16     -240   
48     272    
-144   -208   
112    144    
96     -32    
144    -144   
-208   -192   
256    144    
160    16     
-16    48     
0      48     
128    -240   
64     112    
-112   -720   
0      48     
96     96     
96     16     
-48    0      
128    32     
-112   -240   
80     320    
-48    -48    
400    80     
-144   144    
-96    -1472  
176    32     
-176   -528   
-48    112    
16     0      
304    32     
48     -320   
64     16     
-112   -752   
128    320    
160    208    
64     64     
32     96     
144    -1136  
-112   64     
96     -544   
-48    -608   
-464   -80    
192    192    
80     -800   
96     -752   
96     -64    
16     -320   
144    -48    
80     80     
-64    32     
112    -144   
-176   64     
160    -560   
160    160    
-16    -64    
-176   -160   
-848   -48    
0      -48    
48     -112   
160    32     
16     -176   
48     -112   
-128   -48    
-64    80     
-16    -96    
16     -272   
-144   64     
64     -176   
-48    48     
16     48     
208    -160   
64     144    
-32    16     
16     -16    
-224   16     
128    -16    
160    -32    
0      -48    
48     -288   
176    -80    
-160   -224   
-64    48     
208    -64    
32     80     
2000   -1776  
544    112    
272    768    
-544   16     
32     -176   
304    864    
-80    416    
-368   -1184  
-128   -288   
608    -464   
320    192    
-144   -16    
112    -80    
-64    -320   
32     -224   
-64    -144   
256    32     
96     48     
-256   -336   
-160   -304   
48     -128   
0      208    
16     -80    
64     112    
80     -1184  
176    176    
112    -1312  
64     144    
-144   -256   
64     -80    
-64    80     
-160   0      
-96    208    
48     16     
96     0      
0      -32    
-592   -96    
-192   -64    
-16    48     
32     -16    
-48    32     
32     -800   
96     128    
0      32     
16     -224   
48     240    
-48    -32    
-400   112    
112    48     
-320   -240   
288    -352   
-208   192    
64     -96    
192    224    
-144   -256   
80     96     
80     -144   
-192   -192   
-288   -112   
16     448    
-560   -208   
0      80     
-80    -64    
64     -32    
-416   -48    
96     -80    
-32    160    
-64    -400   
112    0      
-32    -352   
112    -32    
64     -176   
48     -48    
64     256    
-32    -96    
32     48     
16     -512   
-144   -512   
528    304    
16     608    
-112   80     
-32    -48    
32     -192   
208    192    
32     -48    
-48    112    
-368   -752   
224    240    
240    336    
-784   80     
-464   -144   
208    176    
128    144    
-64    160    
-112   48     
-48    -304   
0      -96    
-544   160    
80     80     
-192   -288   
16     -16    
32     128    
-176   -16    
-192   64     
16     48     
16     80     
-656   208    
-240   208    
304    144    
-48    176    
-16    -32    
32     48     
48     -112   
16     64     
-336   -240   
-48    16     
-32    -48    
-16    0      
0      112    
64     128    
-336   64     
48     80     
-80    48     
-608   192    
128    0      
-208   -64    
80     -32    
-16    -32    
-96    96     
-80    -224   
-160   0      
-32    112    
112    -240   
-192   160    
-112   -112   
144    112    
-400   352    
400    336    
-224   32     
-304   -160   
144    0      
16     0      
-64    -112   
144    32     
16     16     
-16    -48    
-80    -208   
-208   -208   
-32    -64    
-112   48     
-16    96     
-160   144    
64     96     
-336   -80    
-128   -256   
-432   64     
16     128    
0      -64    
-16    416    
0      -64    
96     0      
-64    80     
144    48     
-80    96     
80     352    
-352   -32    
272    -176   
-48    -224   
-144   -128   
-192   80     
-528   32     
64     160    
32     144    
224    -224   
-16    240    
160    -64    
144    80     
-128   144    
-48    80     
-96    144    
80     0      
-48    16     
64     -32    
-96    -112   
208    208    
-496   128    
80     32     
-64    -128   
-16    -16    
-112   48     
0      128    
-48    80     
-48    -64    
48     80     
-32    -112   
32     0      
-304   128    
64     96     
-400   304    
416    720    
-64    -80    
64     224    
-1904  -112   
-160   112    
336    -96    
-656   288    
496    -288   
48     192    
-320   -256   
16     -80    
-32    32     
208    96     
-32    160    
80     -16    
-64    192    
-48    -80    
64     128    
144    -32    
-160   112    
96     -16    
32     208    
112    0      
-192   32     
48     -80    
-48    208    
176    64     
-112   192    
0      -48    
-144   64     
48     80     
-48    0      
0      96     
-16    96     
128    80     
-32    -208   
-16    -144   
96     144    
128    80     
-64    144    
16     0      
-48    48     
-48    -128   
80     192    
-48    80     
64     208    
-256   -96    
96     208    
-64    -96    
176    176    
-144   112    
96     0      
-80    16     
96     -96    
32     192    
16     48     
0      208    
-224   -80    
80     48     
112    48     
-128   128    
160    0      
-80    64     
80     80     
16     16     
0      16     
64     192    
-64    64     
112    16     
0      128    
-80    48     
64     112    
-32    16     
48     192    
-48    48     
-48    0      
112    -48    
80     -16    
-48    16     
176    192    
-128   -16    
128    48     
192    320    
-160   288    
16     64     
208    112    
-64    -208   
144    -16    
-96    256    
-208   -48    
112    -3264  
-16    64     
96     64     
64     -64    
80     -80    
-32    -16    
192    192    
-32    -32    
96     192    
-48    320    
224    64     
-32    224    
-32    -80    
-48    144    
16     128    
96     -272   
64     176    
-64    160    
-16    -192   
112    192    
-48    160    
112    144    
-112   240    
-16    48     
48     0      
-64    32     
0      64     
-80    16     
0      64     
-48    -64    
16     48     
-48    256    
-48    48     
48     240    
-32    96     
0      -128   
0      112    
80     48     
-160   -496   
176    112    
-160   16     
144    112    
80     -32    
-48    96     
32     -64    
32     -448   
112    112    
-96    -464   
0      -208   
128    416    
176    208    
-96    80     
-96    -208   
112    -64    
64     64     
0      96     
144    -144   
-160   -16    
48     -208   
128    112    
-32    -176   
80     16     
-48    -240   
160    0      
160    96     
-320   -176   
176    -64    
112    -144   
160    544    
240    416    
-16    96     
112    288    
-64    -16    
64     -48    
-96    -48    
48     -112   
-80    64     
96     -384   
160    224    
-112   -464   
160    80     
-32    -96    
304    32     
256    144    
-304   -80    
272    48     
-96    208    
256    -96    
96     -48    
-64    112    
176    -112   
32     48     
32     -560   
192    160    
-96    -320   
80     32     
80     0      
32     112    
48     48     
48     160    
-112   -64    
176    112    
144    144    
16     16     
-48    48     
192    -112   
96     160    
48     -320   
-80    96     
-720   752    
-560   -864   
-208   -432   
256    160    
-368   -112   
784    800    
-352   -128   
-32    -64    
-336   -208   
624    -272   
96     160    
80     -672   
-448   32     
288    -240   
176    192    
352    -192   
-320   384    
-208   -512   
432    112    
160    -240   
288    512    
208    160    
-80    304    
-32    -128   
80     288    
-176   144    
32     -112   
-112   -64    
64     -80    
240    64     
80     -256   
128    32     
-32    112    
112    32     
0      160    
144    -1056  
-128   -1360  
176    -80    
208    32     
-208   -96    
80     32     
128    -32    
64     128    
-224   -176   
48     64     
240    -192   
48     -640   
-192   -240   
304    240    
112    288    
64     -160   
32     -928   
-1296  -352   
144    -688   
0      160    
112    -240   
-80    -176   
240    -2976  
80     -16    
-144   608    
272    192    
176    -448   
-80    -96    
80     -320   
-224   -128   
-32    128    
48     32     
-528   -336   
144    -144   
128    32     
64     -16    
144    -96    
-96    -272   
176    -144   
96     112    
0      0      
208    176    
-128   144    
288    -16    
224    288    
-144   80     
96     -128   
-144   -128   
80     -112   
96     112    
0      -256   
32     96     
-112   -288   
112    -304   
400    -416   
0      -112   
-48    0      
288    -32    
48     16     
-64    -96    
64     48     
-240   -80    
-432   192    
32     -16    
-1280  0      
192    -176   
32     64     
144    -128   
-224   -144   
-192   -864   
224    464    
-112   432    
48     208    
-128   -352   
208    80     
-176   0      
128    -48    
-128   32     
208    16     
-384   32     
160    -32    
-80    -48    
-48    -224   
176    64     
48     -240   
80     208    
0      -720   
64     -240   
-176   -176   
64     -144   
112    128    
0      64     
96     64     
-176   32     
-624   -64    
112    -160   
-144   -112   
64     0      
-432   -16    
288    -176   
-32    -48    
-16    -336   
0      112    
64     144    
80     -112   
-160   144    
16     -64    
-96    64     
0      -96    
-320   -64    
32     -208   
-80    32     
-48    -80    
160    16     
16     -544   
48     48     
0      -656   
128    128    
48     96     
-48    32     
80     64     
0      -32    
-256   32     
144    160    
-144   -80    
160    -112   
-944   0      
176    -64    
-32    96     
-48    -256   
128    176    
-112   -240   
-32    -16    
48     -96    
128    -240   
80     96     
-16    -16    
-144   96     
272    -256   
-112   192    
-48    0      
-336   16     
-224   -368   
144    80     
-528   -272   
160    160    
-96    144    
-432   -112   
-16    192    
-272   0      
-160   -32    
240    -224   
0      0      
160    64     
-176   112    
-432   -112   
-96    -32    
-1184  -272   
176    128    
-144   -128   
64     16     
-112   192    
-96    -80    
-32    112    
1088   -464   
-752   -336   
400    624    
-656   688    
240    -432   
48     -352   
-128   -704   
160    496    
64     -288   
-112   240    
16     -400   
-160   304    
-48    -192   
-112   224    
96     64     
-144   -48    
-112   0      
112    80     
-32    48     
-480   -176   
-112   112    
64     96     
208    272    
-224   -304   
0      112    
-96    -336   
64     288    
16     112    
-64    0      
-80    -48    
-208   16     
48     -64    
-400   -48    
-64    48     
16     64     
64     144    
-48    -32    
-48    112    
-96    -176   
64     32     
16     64     
-16    64     
96     112    
-32    -16    
16     64     
-64    48     
-16    16     
-144   144    
48     80     
-80    0      
16     64     
-64    -128   
128    208    
-192   -80    
64     48     
112    112    
0      128    
-112   112    
-80    -32    
96     80     
-128   -80    
80     112    
-64    16     
48     32     
-192   -32    
-64    16     
-240   -48    
32     48     
96     -32    
-32    64     
-48    48     
-160   64     
-112   0      
-16    0      
-48    64     
-64    -64    
160    -112   
-80    96     
-240   16     
-32    -32    
-192   -176   
-176   -464   
128    -176   
-112   -128   
-80    192    
48     160    
16     0      
128    32     
-96    48     
48     32     
-64    64     
16     80     
16     192    
-32    0      
-112   -48    
32     -64    
-16    160    
112    -192   
176    304    
-64    -208   
16     16     
-128   112    
176    80     
-32    112    
32     -64    
-16    144    
-48    -16    
80     176    
96     0      
-160   -192   
16     16     
-160   -32    
80     80     
96     96     
-80    96     
80     128    
16     -160   
-48    -16    
48     -32    
-96    112    
80     304    
112    176    
112    224    
-16    336    
-32    352    
-48    176    
-208   -480   
176    32     
-16    48     
-32    224    
64     192    
64     32     
-64    64     
0      240    
0      -16    
48     64     
-112   48     
32     -48    
80     176    
-160   32     
64     160    
-112   -64    
112    80     
-16    16     
144    -48    
-16    64     
48     16     
64     304    
-64    96     
64     112    
-48    16     
80     48     
-112   -80    
192    288    
-224   -32    
112    128    
-32    -96    
128    64     
-160   224    
240    -16    
16     208    
32     256    
-64    48     
-208   16     
144    32     
16     0      
80     448    
-368   -112   
64     -112   
208    240    
-96    160    
48     -32    
-96    160    
416    0      
-32    240    
-144   32     
-32    112    
64     288    
-192   0      
176    0      
-80    64     
240    64     
0      96     
48     144    
16     -112   
-80    -1376  
-32    0      
80     32     
0      176    
128    32     
-64    -16    
-80    64     
272    368    
-144   144    
-80    96     
-128   0      
272    96     
-64    48     
-336   64     
-1920  -1056  
816    256    
0      816    
240    -272   
96     1056   
-592   -1536  
192    576    
368    464    
224    560    
-464   -416   
96     384    
-16    -96    
400    -176   
-672   -336   
592    48     
16     432    
-48    -144   
-96    416    
-416   -240   
-224   -528   
160    0      
320    304    
-64    224    
-112   0      
352    -448   
-128   224    
-80    -304   
144    0      
-320   -64    
384    592    
-48    208    
32     -272   
-48    224    
80     -1088  
80     96     
32     -208   
80     240    
112    208    
48     352    
-256   -224   
128    128    
0      32     
288    208    
-240   96     
48     -224   
-208   144    
176    -320   
32     304    
112    -1024  
80     240    
-48    -128   
32     96     
-16    -160   
160    112    
-224   -112   
208    -32    
-64    16     
0      176    
48     16     
160    256    
16     16     
176    -288   
0      304    
-64    -288   
208    64     
-80    -32    
48     208    
16     176    
144    112    
32     48     
32     128    
-32    112    
80     192    
96     176    
-64    -32    
16     32     
176    480    
-256   192    
-48    -688   
112    576    
-80    -512   
176    16     
272    128    
-160   208    
16     128    
0      0      
208    64     
48     32     
64     64     
160    -192   
-32    128    
32     -352   
0      144    
-16    -288   
48     -64    
144    -80    
-64    256    
32     -96    
112    112    
-176   16     
0      -16    
-96    -192   
16     -192   
80     96     
160    336    
-176   80     
224    -352   
-16    48     
-80    -288   
128    -32    
-16    64     
16     160    
-16    -336   
96     64     
-128   -176   
64     -128   
-64    -32    
160    32     
192    192    
-64    -80    
192    224    
0      -112   
96     -32    
112    96     
-96    144    
256    -96    
-144   -96    
96     -96    
-176   -816   
48     -16    
304    -208   
-208   -176   
48     -288   
-80    -1984  
-208   -320   
576    -112   
-176   48     
176    48     
0      -192   
-208   48     
288    -192   
112    -416   
0      224    
0      32     
192    96     
-160   -448   
-80    -112   
-1296  -144   
224    -416   
96     -80    
-16    128    
-16    -112   
32     -240   
208    -160   
-32    144    
64     16     
0      -32    
16     -80    
192    -320   
-160   160    
64     -112   
-16    32     
-352   -48    
144    32     
16     112    
128    -176   
128    144    
-32    -496   
96     160    
80     -224   
304    48     
32     48     
-48    96     
-160   32     
-240   -464   
144    48     
128    -48    
-208   -208   
32     -208   
64     48     
80     -192   
-96    -32    
112    -272   
96     96     
-16    -704   
-208   -16    
192    -48    
0      -64    
144    80     
-48    16     
-16    16     
144    -48    
-464   -240   
80     -304   
-832   -96    
96     -48    
48     304    
0      48     
-1264  -1040  
-16    -1600  
-896   240    
1088   -336   
944    448    
-608   -560   
800    864    
-320   48     
672    112    
-448   -224   
272    -32    
-160   -112   
352    -80    
-656   208    
208    -432   
-304   64     
224    -352   
0      224    
112    -1568  
-16    144    
-64    -208   
-16    144    
-160   -16    
112    -80    
-320   -112   
208    -48    
-448   16     
208    32     
-272   0      
64     -256   
16     48     
96     -288   
32     192    
16     -336   
0      64     
-16    -80    
32     48     
-32    112    
0      -16    
-80    -16    
96     -16    
-304   64     
112    -32    
-64    16     
0      -48    
16     80     
48     -96    
96     352    
16     -304   
80     -112   
-64    16     
32     80     
-80    240    
64     -16    
-32    112    
-16    -240   
144    32     
-16    16     
0      128    
112    -96    
80     160    
-144   -192   
144    144    
-32    16     
64     16     
-80    176    
64     -32    
-112   48     
-96    -112   
112    64     
-64    -32    
-96    80     
80     0      
-144   -80    
-1568  -384   
0      144    
-432   -112   
-32    0      
32     0      
-176   48     
-176   -48    
-400   128    
-112   16     
-176   -576   
112    192    
144    0      
-48    -16    
-896   -32    
160    224    
-272   16     
-16    -32    
-128   32     
-224   -64    
0      48     
-240   32     
-160   80     
-416   -48    
128    352    
-48    416    
48     256    
-496   -272   
-128   -80    
32     -304   
192    144    
0      -16    
-96    96     
80     -80    
-80    -48    
-16    -16    
-96    -16    
0      32     
0      48     
-112   -16    
-224   16     
-160   32     
-736   -112   
-96    48     
-48    -48    
80     224    
-64    -80    
16     16     
16     -96    
48     208    
64     32     
-160   16     
-32    80     
16     48     
80     -288   
-160   224    
64     560    
-288   -96    
-48    -48    
-128   -64    
160    80     
-96    -208   
16     176    
-144   -192   
112    16     
-16    272    
48     -64    
96     80     
-208   64     
144    96     
-80    -96    
112    -16    
-32    64     
-32    192    
-544   -32    
16     -96    
176    -128   
64     64     
32     256    
-176   80     
-192   48     
-112   -368   
240    112    
-272   96     
144    -48    
-320   0      
128    48     
-224   -112   
-80    112    
-192   -144   
0      48     
144    0      
-48    96     
0      -32    
-80    176    
-96    -16    
112    -48    
0      32     
-80    128    
-64    64     
-144   224    
-128   -128   
-112   128    
16     48     
32     96     
-80    192    
16     48     
0      -112   
48     208    
32     0      
-96    112    
-80    16     
240    112    
-224   -32    
-32    80     
-176   -32    
112    80     
-112   0      
48     96     
-304   -16    
144    320    
-80    192    
-16    64     
-272   -64    
48     16     
224    48     
-464   -1088  
592    3104   
-784   928    
336    -272   
-704   -640   
656    64     
-688   -640   
48     880    
528    496    
-160   -144   
-368   -208   
192    272    
0      112    
144    -176   
16     336    
96     -144   
-80    144    
-208   0      
144    128    
-192   -128   
128    160    
-144   16     
272    288    
-240   -64    
-96    -48    
-48    176    
32     80     
240    192    
-96    96     
-32    48     
128    272    
-48    80     
-64    -80    
16     176    
128    -64    
32     128    
-112   -80    
64     176    
-80    128    
144    144    
16     48     
-32    64     
-16    64     
16     16     
-64    144    
16     -32    
48     112    
80     192    
80     112    
-64    -96    
-96    128    
-80    64     
176    -16    
-64    80     
144    48     
-80    128    
0      32     
80     48     
48     32     
80     144    
-16    208    
112    -80    
16     96     
-80    80     
16     0      
128    112    
-64    160    
-16    -672   
64     336    
-176   -64    
208    48     
16     80     
16     64     
0      160    
0      48     
80     48     
-144   32     
-80    112    
-16    16     
-64    96     
-80    112    
-64    -384   
32     -2864  
16     224    
-64    -80    
256    128    
-16    0      
80     -112   
64     144    
-176   192    
240    112    
-48    16     
48     208    
32     112    
64     -192   
-32    176    
-240   -128   
256    -400   
-48    112    
64     176    
48     144    
-112   -48    
160    -112   
32     160    
80     288    
0      80     
208    272    
-160   128    
176    128    
112    176    
16     -16    
32     48     
-96    0      
208    128    
32     -112   
-224   -176   
0      48     
224    128    
64     176    
-32    176    
-32    -128   
-16    -16    
-192   80     
256    144    
0      80     
176    -16    
-32    288    
208    64     
-80    304    
64     -976   
128    224    
80     64     
-80    96     
96     336    
336    336    
-16    -624   
-48    64     
16     96     
176    224    
-16    32     
-288   -192   
192    128    
112    -256   
-80    64     
128    -464   
-96    80     
336    -1088  
80     192    
112    64     
-80    144    
48     -16    
80     96     
32     80     
112    128    
16     -48    
32     -192   
-16    384    
-64    -512   
128    192    
-80    -128   
256    160    
-16    -1808  
-16    128    
0      -64    
64     48     
64     176    
-32    0      
-32    96     
160    80     
144    -96    
48     -64    
64     256    
-112   48     
160    112    
-112   -464   
-96    48     
96     -608   
32     -160   
96     -32    
-16    48     
-112   256    
16     -16    
96     192    
0      -144   
176    -128   
64     -96    
96     80     
144    -176   
-64    -64    
64     48     
32     240    
16     -160   
208    208    
0      240    
-160   96     
96     -64    
48     0      
128    32     
-16    -80    
-320   736    
176    1440   
-128   336    
-112   -144   
112    -368   
80     -256   
240    -16    
-176   672    
144    -80    
368    -48    
-400   -208   
288    -96    
-32    -560   
80     -592   
80     208    
16     -2464  
48     -208   
64     352    
-96    -208   
144    48     
48     -48    
160    128    
-160   -64    
112    -976   
-112   0      
32     -1008  
128    224    
-224   0      
176    64     
32     -224   
-16    -384   
16     -144   
128    -336   
144    0      
-32    112    
96     -96    
80     -1472  
48     144    
48     -848   
48     128    
64     -384   
64     64     
-48    -32    
112    -144   
-608   -32    
-32    -272   
48     144    
0      16     
144    48     
-32    -1328  
32     -160   
32     48     
0      112    
48     16     
0      32     
32     64     
64     112    
-160   144    
-112   32     
-576   -32    
-64    -112   
144    -48    
-16    -160   
96     -272   
-16    -80    
32     -256   
48     144    
-112   80     
64     -128   
-80    80     
32     -144   
48     32     
-112   -48    
160    -32    
-16    0      
0      80     
-240   -112   
64     -192   
32     -272   
16     -320   
112    96     
96     -192   
-176   -64    
192    -96    
16     176    
112    16     
-64    -48    
48     16     
0      -80    
-128   0      
64     -48    
-128   -48    
112    -80    
-208   -32    
224    96     
-32    80     
48     -368   
32     176    
80     240    
-16    64     
-16    0      
-16    -48    
16     -64    
96     -48    
-240   -16    
48     -64    
-112   0      
176    -16    
-416   0      
0      -176   
0      -32    
144    -448   
-16    144    
112    -1456  
16     128    
-160   128    
0      -336   
-80    -16    
192    192    
32     64     
-32    0      
-112   192    
32     -48    
-576   -112   
-144   -144   
112    192    
96     -32    
176    64     
-240   -80    
-96    -336   
160    -96    
-144   16     
80     128    
-64    -80    
-16    32     
16     -32    
-48    80     
-48    -144   
-400   -32    
144    -208   
-16    224    
16     -160   
160    112    
-432   16     
240    -144   
-272   48     
80     -112   
96     80     
112    256    
-192   16     
-96    -128   
-192   16     
80     -96    
-256   64     
128    -336   
48     128    
-880   -304   
-80    224    
-112   -240   
-208   64     
80     112    
-224   80     
-240   48     
112    -48    
-48    -80    
160    16     
16     160    
-144   -16    
-48    48     
32     -496   
32     240    
0      -112   
-176   240    
-256   -32    
-192   -224   
32     -16    
160    128    
-112   160    
-1008  -320   
96     288    
224    112    
16     160    
-64    64     
0      -48    
-224   -192   
128    48     
-64    -176   
-48    160    
-80    -144   
-64    128    
-48    0      
32     -64    
-32    32     
112    -64    
-240   16     
288    -112   
-256   0      
-176   -304   
-48    32     
-816   -1600  
1040   2880   
-1184  1024   
288    -144   
160    736    
-912   -800   
576    704    
-352   1152   
528    160    
-240   128    
-448   -160   
-560   -48    
64     144    
-176   -32    
48     192    
-32    -112   
80     400    
-80    128    
-320   -240   
112    -160   
-64    112    
64     64     
-32    -16    
64     80     
-144   -48    
-96    -32    
-128   -16    
112    208    
192    -32    
-48    -32    
-48    -176   
96     112    
32     80     
-80    32     
-80    32     
-48    64     
-176   -128   
80     64     
-160   -16    
-16    16     
-112   64     
-192   -16    
80     160    
-1056  -96    
96     208    
-144   -144   
-32    0      
128    112    
-256   -16    
288    96     
-288   160    
176    32     
-128   144    
160    160    
-160   80     
32     -16    
-80    32     
-112   144    
-144   -208   
176    128    
-112   80     
-48    64     
80     112    
-64    80     
-16    80     
32     -128   
64     176    
-192   128    
256    192    
-160   -48    
176    112    
-304   16     
96     32     
-304   32     
48     112    
32     80     
96     112    
-144   112    
-32    -144   
96     64     
-192   112    
32     -32    
32     80     
-80    192    
16     240    
-48    -64    
-48    -64    
64     368    
-320   -48    
288    -128   
-64    80     
112    160    
0      0      
0      32     
80     16     
-48    -48    
48     192    
-144   32     
32     32     
-48    -80    
32     176    
-96    -16    
128    112    
-64    80     
-96    32     
48     -64    
16     272    
272    416    
96     160    
-32    -96    
-160   80     
96     144    
0      -48    
-176   -80    
-16    0      
96     240    
-112   192    
-16    128    
-256   -272   
144    0      
-80    208    
400    400    
96     224    
32     112    
-272   96     
208    96     
-64    -64    
-320   -32    
0      -48    
-64    0      
272    48     
-128   32     
-48    80     
112    336    
64     48     
256    112    
-208   -80    
0      80     
-48    0      
128    -48    
48     -48    
-64    208    
-80    80     
352    112    
-352   -224   
-32    -128   
-208   240    
128    16     
80     352    
16     80     
-48    112    
-32    80     
224    -48    
-144   32     
176    304    
-64    -48    
128    64     
-160   144    
128    96     
-144   -256   
-96    -16    
32     80     
192    -1104  
-64    32     
-16    96     
48     128    
208    368    
-64    160    
-176   -256   
16     -128   
16     32     
144    240    
-144   -128   
48     240    
256    64     
-64    32     
-96    64     
32     -3088  
16     -416   
192    192    
-80    96     
32     176    
-80    128    
112    144    
112    224    
32     -112   
-48    112    
16     128    
80     64     
-48    0      
32     224    
224    560    
80     -368   
-352   16     
0      -48    
192    192    
144    -96    
-48    80     
-112   -32    
-784   -2688  
1264   1136   
-864   -192   
48     -400   
-48    -368   
128    400    
-752   -16    
-336   1088   
368    64     
-16    32     
-192   -272   
112    192    
176    160    
32     -48    
32     192    
-96    112    
16     -432   
192    368    
16     -320   
-48    -80    
-96    -64    
352    176    
-192   240    
304    16     
-256   112    
64     -1216  
-240   352    
112    208    
176    64     
-176   192    
32     32     
160    -16    
16     224    
16     64     
0      64     
32     80     
160    96     
48     -32    
32     -192   
-32    64     
96     -544   
32     112    
80     -848   
80     96     
96     -80    
-16    144    
80     48     
48     96     
32     16     
16     -16    
32     48     
-16    -160   
32     208    
16     32     
16     144    
48     -192   
-80    0      
272    -592   
-112   -16    
-32    64     
-48    480    
160    -352   
-48    208    
-32    192    
64     -16    
-80    32     
80     -128   
32     48     
224    -112   
-208   128    
96     -224   
64     80     
48     -176   
32     224    
16     0      
64     16     
32     32     
-32    -320   
128    -80    
-16    64     
32     80     
32     144    
208    240    
16     128    
16     -160   
-80    -256   
80     -48    
96     -64    
64     384    
112    160    
48     160    
128    48     
64     144    
80     144    
-32    -192   
80     112    
48     -224   
16     96     
-48    -480   
16     -32    
48     -240   
96     256    
-16    -96    
-64    112    
96     112    
96     -400   
16     48     
32     -384   
32     -656   
48     -16    
128    -288   
-64    -112   
112    -576   
-48    -144   
160    144    
0      -48    
80     48     
32     -128   
64     -1824  
-32    16     
0      -816   
160    48     
-16    80     
64     -176   
-64    16     
-16    -176   
-80    16     
480    -1088  
-208   320    
-32    320    
176    144    
-80    -16    
80     -32    
48     -112   
-16    32     
96     240    
-96    16     
-256   96     
336    -240   
-432   -144   
112    -80    
48     96     
96     -64    
-32    -112   
0      -1440  
144    -16    
192    -16    
-80    144    
16     -400   
0      128    
192    112    
-48    -16    
-176   -96    
96     -64    
-80    80     
0      240    
-48    0      
272    464    
-256   -464   
176    -880   
0      -80    
128    -688   
0      48     
224    160    
80     96     
160    -16    
-96    -304   
-176   0      
96     64     
-192   624    
16     -288   
-1072  -176   
336    -112   
80     -352   
160    -208   
-144   272    
128    -928   
-112   80     
304    48     
-144   16     
-96    64     
16     112    
-80    -32    
80     288    
-224   -16    
0      -144   
-960   -48    
384    -160   
-480   32     
-240   -240   
80     -128   
80     -368   
176    160    
16     -128   
32     96     
32     48     
96     -112   
48     128    
112    -208   
-144   112    
32     -720   
272    -2000  
272    368    
384    944    
-512   -288   
224    464    
-16    -352   
528    -112   
-224   -656   
48     -368   
400    288    
-160   -320   
80     224    
0      -48    
-32    112    
-80    -16    
-16    144    
-16    -96    
0      -160   
-48    -400   
128    16     
224    96     
-112   64     
-48    -1056  
-48    -144   
-256   -16    
96     0      
-80    128    
-32    -48    
-48    32     
16     -64    
112    80     
-96    -192   
-864   -64    
16     -224   
80     -16    
-16    -336   
32     128    
-32    96     
-64    -96    
-304   0      
64     0      
16     112    
64     32     
0      0      
-96    -32    
48     -48    
-192   -224   
320    48     
-192   32     
160    0      
-208   -144   
-48    112    
96     80     
-1328  -112   
-112   96     
-624   48     
-128   160    
192    -144   
32     160    
16     -224   
144    112    
-272   -16    
-64    208    
48     -96    
16     -64    
-160   -368   
-128   16     
-144   0      
48     128    
-176   -16    
0      48     
-96    -64    
-176   32     
-192   48     
48     -48    
0      144    
-192   80     
-32    144    
-32    -496   
144    96     
-272   -144   
48     112    
176    288    
-208   -96    
208    -112   
-144   -48    
48     112    
-304   224    
-64    96     
208    0      
-64    -112   
64     -32    
-80    32     
-144   -240   
0      -32    
160    336    
-256   64     
96     32     
-112   224    
-96    80     
80     0      
16     64     
-32    128    
-64    48     
-80    -32    
-192   -208   
48     -192   
32     432    
112    64     
32     144    
-160   -96    
48     16     
-64    -112   
-144   0      
384    368    
-32    144    
-80    336    
-144   112    
-176   96     
-448   80     
48     208    
-272   -96    
0      192    
-48    -176   
-32    16     
-128   48     
16     336    
16     48     
112    160    
-112   128    
-16    48     
96     208    
-16    64     
112    80     
-272   16     
128    240    
-352   176    
0      160    
-112   -160   
0      48     
80     80     
32     96     
32     48     
-128   0      
32     80     
-112   48     
112    272    
-144   -112   
-16    128    
-112   -16    
64     112    
-416   -16    
0      64     
64     16     
0      400    
144    -112   
0      208    
-112   -128   
48     384    
-96    -48    
-96    528    
80     160    
-144   -224   
-64    160    
32     -224   
-144   -32    
-192   0      
224    400    
0      0      
-32    160    
16     144    
16     32     
64     160    
-32    -96    
-64    48     
32     224    
16     -16    
-32    320    
-48    -112   
-96    32     
16     96     
-160   -80    
0      176    
112    16     
-48    128    
160    -16    
32     64     
16     80     
144    -48    
-128   80     
32     -48    
-96    112    
96     -16    
160    352    
-368   -64    
224    224    
-160   16     
96     -16    
1472   -2016  
880    768    
400    560    
-512   -208   
176    592    
-144   -400   
-288   -512   
480    720    
-176   160    
-176   -80    
32     272    
-32    144    
224    -112   
-160   -176   
16     32     
48     192    
80     176    
32     144    
16     64     
-80    -240   
64     -192   
-112   192    
64     112    
240    384    
-192   32     
-208   -128   
-48    144    
192    288    
-32    176    
-128   48     
32     32     
-80    80     
128    128    
-208   -160   
304    -48    
80     304    
176    144    
-336   48     
-16    -176   
-544   -448   
656    384    
-304   32     
-160   -16    
64     96     
-16    128    
96     64     
-160   32     
64     0      
-32    96     
112    -32    
304    -160   
-192   112    
32     -16    
192    112    
-96    144    
112    192    
192    400    
-336   -1888  
-64    -16    
416    448    
-288   -32    
96     112    
80     96     
-48    288    
-16    96     
112    32     
48     0      
-96    -80    
112    -32    
-48    272    
176    0      
32     192    
-32    -1152  
32     240    
-16    64     
80     128    
-16    0      
112    384    
96     112    
240    224    
-208   304    
160    -16    
-64    128    
64     48     
-32    0      
144    48     
32     112    
80     -208   
0      304    
-80    112    
16     -16    
16     -32    
48     80     
0      128    
-16    -32    
128    -32    
-32    -144   
64     -80    
160    432    
-208   32     
80     -416   
-64    0      
144    -768   
144    144    
-48    -1232  
64     112    
-16    -80    
96     0      
48     320    
64     288    
96     64     
-96    -96    
-16    64     
256    192    
64     208    
-160   -208   
96     144    
0      0      
144    80     
-32    -1584  
16     -176   
-96    48     
160    48     
16     0      
16     224    
96     160    
16     -512   
16     528    
96     48     
288    32     
-192   64     
160    144    
16     -80    
96     -128   
-64    -416   
48     16     
64     -144   
-32    272    
144    32     
160    -224   
-240   0      
240    128    
-144   -176   
32     -16    
128    192    
64     -32    
192    560    
32     272    
-16    176    
0      -384   
-80    -16    
208    -192   
0      160    
64     -32    
-64    144    
96     352    
192    0      
-32    -16    
-160   64     
-64    -256   
0      -288   
144    16     
16     32     
144    -32    
32     -112   
112    304    
-112   -400   
112    96     
64     -48    
176    224    
144    112    
48     288    
96     400    
-160   -800   
-16    48     
-80    -176   
80     -16    
96     -32    
80     176    
64     -288   
96     96     
64     -368   
-32    176    
-64    0      
112    64     
-160   -80    
304    -1632  
-112   -944   
144    -384   
32     128    
-32    112    
0      240    
16     -304   
64     16     
272    -32    
-96    208    
0      -16    
32     -144   
96     -96    
512    -4032  
480    -48    
880    -400   
-32    -96    
432    -800   
-128   208    
16     -368   
576    -1424  
-416   -128   
160    -112   
-304   288    
304    -176   
-64    384    
96     -576   
64     272    
32     -160   
-64    112    
-448   0      
176    -288   
-32    -112   
176    -864   
16     -16    
112    -1200  
-96    0      
304    -1296  
-64    128    
176    -48    
-16    304    
48     -400   
-112   32     
80     -224   
32     80     
64     64     
32     112    
-400   -96    
-144   -240   
128    -32    
-48    -160   
320    -16    
-96    -240   
-16    -240   
96     -400   
176    96     
128    -160   
-64    112    
160    32     
128    0      
-192   -16    
80     -64    
-80    -96    
-80    16     
112    64     
48     -80    
112    160    
-16    -672   
80     -144   
-16    -1408  
96     128    
80     32     
32     160    
-192   -144   
176    -192   
-128   -64    
-48    32     
32     -224   
64     -16    
-1344  -32    
48     -128   
-192   32     
-32    -688   
80     -32    
48     -768   
32     176    
48     -240   
64     160    
-240   -48    
80     -128   
-80    176    
-176   -176   
128    -16    
-128   -144   
-576   -16    
32     -64    
-80    -304   
112    -48    
-96    32     
80     -352   
80     416    
-112   -112   
144    -144   
96     -48    
64     -32    
0      64     
-64    -64    
-208   -48    
64     -176   
-240   16     
176    -128   
-112   -96    
128    -112   
-48    64     
112    -688   
0      256    
0      -2400  
80     224    
-80    -16    
256    -144   
-256   -128   
-64    -128   
-368   -32    
32     16     
48     208    
-96    96     
80     -64    
48     -336   
32     -48    
144    -208   
-48    80     
-80    304    
112    80     
-528   0      
224    -304   
-128   -48    
96     48     
80     0      
-192   32     
48     -112   
-32    -64    
-208   -48    
256    -112   
208    64     
96     -48    
16     32     
-16    32     
-1168  16     
-80    352    
48     176    
224    288    
-224   96     
48     -80    
-16    -112   
48     128    
64     -224   
-48    96     
-64    -144   
80     80     
-192   -608   
-144   144    
128    320    
-656   -144   
-176   112    
-304   -16    
-32    112    
-224   -16    
-64    48     
48     -160   
-224   144    
0      -368   
-128   96     
160    -32    
160    192    
-160   -224   
-224   -48    
32     176    
-96    32     
16     48     
240    560    
-368   -80    
-1072  -144   
-128   48     
32     -112   
48     48     
-192   -160   
96     32     
144    0      
-64    144    
0      0      
-192   -240   
256    32     
288    64     
-80    224    
-368   16     
-208   80     
-384   0      
80     48     
-880   -144   
0      128    
32     -32    
-48    112    
-112   -208   
80     0      
144    112    
-80    32     
16     112    
-272   32     
96     -80    
64     240    
112    -16    
-368   48     
-656   3120   
-1344  -1952  
240    -288   
768    256    
160    -528   
-464   240    
-320   224    
160    -144   
-256   -256   
-160   176    
256    96     
-400   176    
-208   -384   
416    304    
-256   -192   
80     336    
-144   -224   
32     -32    
-112   -208   
464    528    
-288   -128   
192    112    
-128   304    
192    -80    
-128   176    
-192   96     
-192   -16    
-48    -608   
64     256    
432    64     
-192   128    
-384   48     
176    432    
-288   -80    
240    -64    
-80    96     
-80    -16    
304    -112   
-80    320    
-32    -240   
-208   96     
-256   208    
-160   32     
288    -80    
-256   -128   
16     80     
-96    -16    
-80    416    
-208   64     
208    128    
-288   -144   
96     192    
32     80     
144    192    
-32    -48    
-48    -16    
32     240    
-48    -128   
-80    -288   
576    688    
-128   -64    
-336   64     
128    192    
-16    32     
-352   16     
96     128    
128    -64    
64     96     
-160   16     
64     128    
-48    -96    
112    144    
0      144    
144    272    
-208   -128   
176    288    
-256   -64    
272    480    
-368   96     
160    32     
368    -224   
-544   48     
416    -16    
-96    288    
-240   -80    
128    144    
192    352    
-304   -80    
64     -208   
-288   0      
208    80     
-176   32     
0      -16    
96     144    
176    240    
48     384    
16     144    
112    384    
32     192    
16     48     
-80    80     
0      -96    
-48    -16    
-32    112    
-48    -144   
80     64     
-64    16     
32     0      
0      0      
-16    -48    
208    352    
160    352    
-256   -256   
0      32     
112    112    
48     48     
-64    -32    
-80    -96    
64     224    
112    144    
160    352    
-416   80     
144    -16    
-16    -48    
-176   96     
288    352    
-160   64     
272    272    
-64    128    
-32    -80    
-32    -16    
64     144    
80     160    
-64    96     
16     -48    
-224   -80    
144    192    
16     240    
176    128    
16     176    
48     144    
64     -16    
-48    96     
-32    0      
240    96     
-80    -128   
96     -32    
-80    80     
128    144    
-96    32     
192    -32    
-16    64     
-64    -64    
176    32     
0      112    
176    304    
-320   32     
208    96     
-48    384    
-64    0      
192    64     
16     96     
0      64     
16     80     
-16    -112   
-16    112    
160    240    
-16    -1632  
48     64     
32     64     
96     -16    
80     64     
-48    144    
0      304    
-112   -48    
-48    -96    
320    160    
-16    -160   
16     208    
-176   0      
128    -32    
160    192    
-16    -736   
64     176    
64     -112   
112    224    
-192   80     
112    112    
32     -48    
96     32     
16     144    
48     80     
-48    80     
48     80     
144    16     
16     16     
-80    144    
48     -256   
48     80     
-1168  -2672  
912    336    
-1552  -720   
624    16     
-368   -192   
272    544    
-720   -16    
640    400    
-384   384    
800    -80    
-592   272    
256    -496   
32     864    
128    -464   
-160   448    
48     -1184  
128    400    
32     176    
64     224    
16     -64    
32     -48    
-80    192    
256    64     
-160   80     
176    -240   
-80    304    
160    -288   
-128   304    
160    -144   
112    112    
0      -864   
-80    160    
144    -736   
16     256    
32     -64    
-16    176    
240    48     
16     304    
16     -48    
-112   80     
208    112    
16     48     
64     16     
-64    -208   
112    80     
-16    -192   
112    144    
64     -128   
0      176    
-32    0      
96     64     
64     144    
-80    128    
112    0      
-32    -656   
48     -16    
112    -64    
32     160    
-80    -400   
32     176    
0      -256   
192    80     
-48    -704   
-16    32     
64     144    
-64    16     
96     96     
48     48     
144    192    
-96    -176   
64     160    
128    -320   
96     112    
32     96     
-32    96     
80     -144   
112    208    
-32    -240   
240    32     
-128   144    
80     224    
64     112    
64     -2384  
-80    -464   
48     -288   
160    -1360  
112    64     
48     288    
144    -144   
272    208    
-336   -16    
240    208    
-16    -64    
-32    80     
160    224    
32     -48    
-112   64     
-880   -176   
96     -656   
-32    -96    
128    -304   
32     688    
128    -96    
112    -160   
-176   192    
64     -240   
32     32     
-16    -64    
16     -544   
-32    -48    
96     -160   
-48    32     
-256   64     
48     32     
-64    16     
144    -48    
-64    -128   
-96    -32    
128    32     
16     -1184  
96     -128   
160    -432   
-80    64     
176    -96    
64     176    
96     176    
16     128    
144    -48    
-144   -176   
-480   -320   
288    128    
-128   32     
-32    -192   
96     80     
112    -128   
-16    144    
144    176    
-240   -240   
-16    -240   
48     240    
-112   -16    
64     16     
-304   -32    
96     -208   
-1040  -128   
-32    -64    
64     -32    
64     160    
112    -144   
-16    -528   
-32    -256   
160    -352   
-32    112    
128    -16    
64     160    
-176   -32    
80     96     
-128   -96    
80     -16    
-272   128    
16     96     
-560   16     
-32    -240   
16     -80    
0      -496   
-16    16     
80     -272   
112    80     
16     -80    
192    208    
-112   -80    
224    -48    
-128   96     
176    -32    
-96    96     
16     16     
48     -16    
112    -48    
-1056  80     
-80    -96    
-112   -16    
240    -288   
16     80     
16     -32    
-80    -160   
128    48     
16     -208   
96     144    
-160   -16    
-320   -112   
-352   32     
-368   -288   
144    -48    
-208   80     
224    -288   
-48    -16    
160    -368   
112    80     
-16    -1984  
-112   304    
-1664  -624   
272    -576   
-192   256    
432    -96    
-320   592    
-32    64     
-208   208    
112    -880   
544    -64    
-240   112    
16     176    
48     -256   
48     192    
48     -80    
176    272    
-336   16     
-48    -224   
-32    48     
240    16     
16     208    
-144   0      
48     256    
-80    -544   
0      80     
-128   -192   
128    0      
-880   -112   
-464   -48    
-224   192    
-752   -32    
-48    -96    
16     0      
-192   -32    
128    240    
0      -112   
-16    -48    
-176   -128   
-704   -928   
-208   -160   
-48    -16    
16     80     
-16    -48    
-304   -48    
0      -80    
-128   -32    
112    -32    
-32    -48    
-112   -16    
-336   128    
-208   64     
112    -96    
-128   16     
16     128    
-64    256    
-144   0      
16     288    
-64    80     
-96    48     
48     176    
80     144    
32     64     
-320   48     
-64    96     
-224   32     
112    -48    
144    48     
-64    80     
96     -80    
-112   64     
176    -144   
-32    144    
-128   128    
-80    -32    
16     0      
112    80     
-80    144    
-176   32     
-32    -48    
-240   -112   
-80    128    
-816   -112   
112    112    
-272   -544   
272    480    
-16    -144   
224    192    
-80    -48    
48     -192   
16     304    
160    -96    
16     128    
-80    16     
-32    -64    
-80    32     
-112   -32    
-160   -48    
144    528    
-96    304    
224    144    
-48    192    
-176   0      
0      -48    
-64    -112   
48     160    
-96    -32    
112    272    
-352   96     
96     32     
-112   -80    
144    128    
-288   -128   
208    176    
-448   -240   
288    368    
-176   80     
32     48     
-64    32     
-32    -112   
160    272    
-128   -32    
-32    16     
-96    48     
192    0      
-320   16     
-32    -224   
-80    -240   
-160   224    
-800   80     
0      64     
-80    32     
-80    64     
48     -80    
-144   48     
-112   -16    
80     80     
176    -224   
-224   0      
-256   144    
240    -96    
176    32     
-368   32     
80     48     
-416   -96    
-32    32     
32     -16    
-80    -16    
16     112    
48     192    
224    16     
-144   96     
-16    -32    
-80    -16    
144    112    
0      96     
-96    0      
0      144    
-144   96     
0      -160   
-80    128    
0      80     
128    64     
-16    -32    
0      -32    
0      -64    
64     -224   
112    272    
0      32     
-48    192    
-64    336    
-32    160    
-80    -112   
224    -48    
208    96     
-112   160    
-192   128    
32     -48    
16     48     
192    192    
-48    -112   
208    16     
-32    160    
0      32     
-16    112    
-112   -128   
288    64     
-144   160    
224    112    
-112   224    
-80    0      
160    -64    
-48    176    
96     96     
-112   96     
-64    48     
160    160    
-64    -96    
96     224    
-112   192    
-592   32     
112    1680   
-432   -640   
-96    192    
-480   -272   
464    400    
-528   -944   
320    592    
-96    320    
528    496    
-656   -144   
160    -272   
-144   208    
224    -96    
-288   512    
176    -272   
-144   336    
-64    -96    
64     432    
96     -96    
48     48     
-48    80     
128    256    
-32    16     
-64    16     
96     48     
-64    176    
-48    112    
0      160    
96     48     
0      0      
-16    128    
48     64     
0      128    
0      32     
48     128    
240    240    
-128   128    
48     -32    
-64    48     
96     96     
96     112    
0      96     
32     48     
32     112    
-192   -16    
256    128    
-128   128    
144    -336   
-96    144    
-16    0      
144    80     
-80    16     
48     160    
32     -48    
48     64     
-32    144    
96     80     
-16    32     
0      192    
-48    -16    
128    -224   
32     80     
80     -528   
0      304    
-16    -64    
16     48     
144    -64    
128    144    
-64    96     
112    208    
-112   -32    
240    176    
-112   -144   
240    128    
-80    240    
0      48     
-64    112    
80     -368   
112    96     
-96    -96    
128    0      
-96    64     
16     80     
64     384    
192    16     
-112   -672   
240    544    
80     224    
-64    -512   
176    176    
-32    -304   
128    144    
32     -256   
0      32     
112    -544   
48     224    
48     112    
208    192    
0      128    
-128   -128   
80     112    
112    272    
0      -64    
48     96     
48     -32    
0      -48    
224    400    
0      224    
64     96     
0      -656   
-48    48     
48     96     
128    32     
32     16     
0      160    
16     32     
-48    -176   
0      80     
192    288    
48     304    
176    208    
144    288    
112    160    
-112   -80    
-96    -976   
112    176    
160    -960   
-96    16     
32     -160   
80     64     
-16    0      
96     -80    
0      32     
112    -112   
-16    240    
-48    -496   
192    144    
-48    -752   
176    160    
-192   -416   
128    48     
16     -336   
48     80     
-32    112    
64     -32    
-16    48     
-112   -256   
96     -192   
176    -368   
224    80     
176    -144   
16     208    
-80    -208   
16     208    
-96    -240   
80     -128   
224    -1216  
0      224    
-80    -272   
-16    0      
288    320    
144    272    
-128   80     
80     -32    
32     128    
176    -336   
48     336    
-16    112    
-128   -64    
128    -96    
192    224    
160    -208   
-16    320    
-16    -16    
96     -368   
16     80     
-896   -240   
192    -1104  
-48    0      
64     -96    
-16    -96    
144    -16    
96     -16    
64     112    
-48    -160   
256    96     
-64    -112   
160    -464   
48     192    
80     -304   
96     32     
-688   32     
96     -192   
112    -80    
-128   112    
160    -144   
96     224    
208    -160   
16     -448   
-560   448    
-112   -1728  
-336   -368   
64     432    
-544   288    
432    -160   
384    -768   
-176   288    
16     -272   
-320   208    
272    48     
80     224    
-112   -432   
96     -64    
64     -208   
192    112    
-192   64     
144    0      
-144   -176   
224    -48    
304    240    
-176   -416   
192    112    
-160   -80    
-640   -16    
-64    -416   
336    0      
-224   -208   
80     -208   
-64    -128   
160    64     
176    -240   
-112   96     
64     -144   
-80    16     
96     32     
-64    160    
-32    32     
32     -176   
-192   -144   
208    -32    
208    -48    
48     96     
48     -240   
16     -176   
112    32     
96     -1216  
-32    160    
-16    -64    
112    176    
-16    -32    
64     -112   
-128   -16    
-64    -160   
48     -112   
0      0      
64     192    
-64    -128   
144    -16    
-48    -208   
32     48     
160    -224   
16     144    
112    240    
-144   0      
-32    -272   
176    -256   
-240   -80    
96     -16    
-16    -80    
32     128    
-624   -128   
48     -32    
64     -128   
64     -224   
-16    -240   
224    -144   
-96    -16    
48     -368   
16     -176   
-192   -32    
144    32     
-128   80     
208    336    
-448   -16    
160    -176   
-208   -192   
112    -16    
-112   -64    
16     32     
-64    64     
160    -208   
48     96     
-112   32     
64     -16    
160    656    
-64    -128   
160    -208   
-144   -32    
0      -112   
96     -16    
-80    32     
112    0      
-288   224    
-16    -64    
96     176    
0      -592   
48     16     
-96    176    
96     16     
96     32     
-144   -96    
0      0      
144    32     
-208   32     
80     -96    
32     -16    
-64    -128   
192    272    
-1584  -224   
160    16     
-832   -192   
-16    -16    
96     160    
-848   0      
-80    -176   
288    -160   
-80    -16    
-32    32     
208    -80    
0      96     
-288   64     
-192   -96    
-16    -144   
-496   -352   
-32    0      
-112   -144   
-48    -32    
80     64     
-128   160    
-80    32     
-32    -16    
-192   48     
-912   -32    
32     32     
16     -144   
96     128    
-48    32     
160    96     
-288   96     
-96    112    
160    -48    
-80    -48    
-96    -80    
-240   32     
-16    -96    
96     16     
-96    16     
-240   272    
-176   48     
-160   -160   
-32    96     
48     -96    
16     208    
-128   -208   
-48    -16    
128    16     
32     384    
16     64     
-160   176    
-64    -48    
-16    32     
-32    32     
-112   -48    
112    304    
-656   -48    
32     128    
-16    -32    
96     144    
-64    -16    
-128   -16    
16     112    
16     80     
-64    -16    
64     80     
80     112    
-256   -176   
-48    -32    
96     144    
-160   192    
-160   0      
64     48     
16     -96    
80     -80    
144    -224   
64     192    
48     368    
-112   80     
-144   -16    
240    -1920  
880    -128   
560    176    
-144   -512   
-480   208    
112    -656   
-1104  -256   
624    -496   
-1104  176    
0      -80    
-320   512    
240    -112   
-144   224    
112    -272   
128    96     
-144   64     
64     80     
-64    256    
224    96     
-288   0      
256    64     
-320   48     
192    144    
-464   112    
240    -80    
-32    128    
-80    -32    
-224   -48    
-16    -96    
32     112    
128    32     
-64    128    
-80    96     
96     112    
-256   -112   
32     48     
-144   16     
64     144    
-304   -32    
-192   32     
80     96     
-80    -80    
144    80     
-208   144    
336    -16    
-160   16     
0      64     
-208   48     
48     48     
-192   -96    
80     96     
0      128    
-16    128    
-48    0      
-160   16     
128    48     
48     144    
-64    96     
16     64     
160    64     
-272   -32    
-16    96     
16     -48    
64     48     
-80    160    
-16    -48    
80     -48    
-128   48     
-16    80     
-96    -80    
96     80     
80     176    
48     400    
-160   -32    
160    0      
-64    160    
320    384    
-256   144    
-32    0      
208    96     
16     -96    
-112   192    
-16    128    
-80    144    
288    32     
-80    128    
16     48     
176    496    
-272   -144   
32     64     
80     0      
80     32     
-96    112    
16     48     
-144   48     
96     80     
-32    -16    
16     144    
32     224    
16     -32    
16     -16    
-16    80     
80     144    
32     112    
-32    0      
32     16     
0      80     
-96    -128   
160    144    
-128   64     
128    96     
-48    48     
48     48     
32     32     
-32    96     
32     80     
64     80     
-16    48     
0      -32    
16     48     
64     48     
48     224    
-32    -16    
-16    96     
-64    48     
160    320    
-16    -112   
160    48     
-240   224    
352    240    
-192   -48    
96     32     
16     32     
96     48     
-80    -144   
32     -32    
144    368    
-256   -32    
192    64     
-112   -128   
96     -336   
48     -16    
16     -304   
-48    -16    
208    272    
16     0      
32     96     
-144   -96    
416    -128   
80     400    
-64    224    
-96    80     
32     208    
-48    16     
192    208    
-320   -32    
192    80     
16     -192   
-96    16     
160    -64    
160    272    
-48    112    
16     144    
-32    -80    
96     112    
160    -16    
-176   -32    
64     208    
-208   48     
288    208    
-112   -80    
144    32     
-112   -640   
96     144    
-48    240    
224    96     
-160   48     
64     256    
-96    128    
128    128    
-48    32     
48     -32    
0      -16    
48     144    
112    128    
16     -272   
96     112    
112    -768   
80     160    
-48    -720   
-80    144    
-48    -80    
0      32     
80     -16    
-32    64     
0      304    
-192   160    
96     48     
-48    48     
880    768    
-512   -400   
-400   -288   
224    -112   
-48    688    
-976   -896   
352    976    
320    -192   
336    544    
-224   -288   
-64    256    
-16    112    
144    80     
256    -160   
-160   80     
336    224    
-112   80     
-32    64     
80     0      
16     -32    
-16    -976   
-32    64     
112    -608   
272    144    
-112   144    
160    -16    
32     272    
-80    16     
192    64     
-32    -96    
96     272    
48     -112   
-64    176    
96     -496   
160    192    
16     0      
80     448    
-16    -352   
-80    -32    
128    160    
144    64     
48     80     
-112   224    
192    176    
0      -208   
-128   48     
176    -80    
80     160    
-16    -144   
176    -32    
-48    128    
48     144    
32     -256   
32     48     
80     48     
-32    -288   
128    176    
-288   0      
240    144    
0      0      
16     16     
32     -96    
64     144    
-32    -64    
144    64     
-64    80     
80     320    
-64    -416   
224    -928   
-32    -80    
144    -752   
-368   -16    
-672   -32    
112    -304   
80     -16    
-32    -432   
224    192    
-160   -432   
192    -192   
160    112    
-128   -240   
144    -896   
-208   112    
160    -448   
160    80     
-112   -32    
-32    -256   
-176   0      
-16    -544   
112    -128   
0      -352   
-144   -64    
240    -208   
-80    192    
64     -1696  
-32    -96    
-32    -304   
240    64     
-96    144    
0      128    
64     -80    
80     -176   
-304   -80    
32     32     
544    224    
32     -64    
112    0      
-160   -352   
256    -80    
-80    -1200  
96     -240   
32     16     
-112   80     
160    32     
64     -112   
-208   -224   
-48    -112   
32     -208   
80     -272   
-512   -32    
48     -48    
256    224    
208    0      
-304   48     
240    -96    
-16    -48    
-48    -128   
-32    -32    
176    -32    
16     32     
176    96     
-272   -16    
240    64     
32     96     
112    -64    
128    80     
-880   -48    
288    -64    
64     64     
112    48     
-64    96     
-48    -1248  
0      32     
-64    -112   
192    -176   
-144   -144   
16     -112   
0      -192   
-64    -288   
-400   -208   
-32    -144   
-64    32     
112    -96    
-48    32     
96     -464   
0      96     
176    -464   
-64    96     
32     48     
16     -64    
80     -16    
0      64     
-48    80     
0      48     
-96    128    
16     48     
-336   32     
224    192    
-160   -80    
0      -192   
-64    32     
144    -272   
0      32     
-32    -64    
320    144    
-96    64     
-160   -64    
-112   -16    
192    -80    
112    192    
96     -16    
-144   32     
48     -80    
-160   -32    
112    -128   
144    144    
-32    -368   
0      16     
-752   -208   
80     -80    
-16    48     
48     32     
-16    32     
144    128    
-208   -32    
-96    -16    
144    -80    
-48    -32    
96     224    
-224   3040   
-2064  -864   
-1104  -368   
656    480    
48     -144   
32     -96    
-624   -144   
480    480    
-224   -176   
-112   0      
-240   -80    
128    80     
320    656    
-944   -16    
64     -176   
-528   -352   
288    352    
-48    -48    
-592   -336   
144    -208   
-368   32     
64     224    
-752   96     
160    48     
16     64     
240    -64    
-64    224    
256    464    
-640   16     
352    432    
-496   -192   
224    48     
16     144    
-48    64     
-16    0      
-496   -192   
-96    -176   
16     64     
-80    64     
-496   96     
0      432    
-80    -112   
0      112    
-320   -288   
80     96     
-80    -32    
192    -16    
-160   -32    
96     -128   
-96    64     
-80    32     
80     64     
-64    112    
112    -80    
-144   32     
-208   -48    
-160   -16    
-16    432    
0      144    
96     160    
-96    -240   
-112   48     
64     64     
-32    32     
-128   272    
-48    -16    
64     96     
-48    16     
-32    208    
-272   -128   
16     144    
-272   -32    
144    160    
-192   -32    
112    112    
16     -80    
-176   112    
96     112    
-128   -48    
-144   -128   
0      -48    
-96    112    
32     112    
-32    16     
64     240    
-144   304    
-432   -64    
-128   -256   
-160   -576   
160    -16    
112    112    
16     240    
-96    48     
80     48     
16     32     
32     144    
-48    128    
64     176    
-144   -32    
96     16     
-96    -16    
16     80     
64     288    
-544   48     
-16    80     
48     112    
32     -48    
128    176    
-192   -128   
160    112    
-192   0      
16     32     
64     80     
32     176    
16     80     
-96    96     
-176   -16    
144    272    
-352   208    
-144   -80    
-32    48     
32     192    
48     -16    
-128   -224   
-96    128    
96     64     
112    -16    
-112   -64    
-96    160    
-144   96     
-128   128    
-96    -144   
-48    48     
-128   -176   
144    32     
-128   -112   
176    256    
-208   96     
80     -32    
80     32     
48     160    
128    64     
-192   64     
160    320    
-240   48     
192    96     
0      16     
-48    -864   
-112   -128   
-160   -64    
-32    -144   
-160   208    
32     -176   
144    352    
-48    -16    
-80    288    
-256   -320   
128    0      
-48    -80    
96     -672   
64     -32    
128    160    
224    320    
-112   192    
208    160    
-64    112    
16     336    
-192   16     
128    224    
32     288    
-160   -128   
-16    64     
-80    -96    
-48    64     
352    -64    
-112   144    
-240   -48    
16     0      
160    192    
-32    64     
-16    208    
-80    160    
-96    0      
32     144    
160    224    
80     48     
16     64     
80     192    
0      112    
0      -480   
224    160    
-64    -176   
112    288    
-48    336    
-144   112    
128    224    
-160   -80    
128    112    
-96    64     
-256   576    
560    1056   
-1648  -560   
112    -400   
320    400    
-608   -496   
768    400    
-592   336    
576    192    
-368   -240   
-272   -96    
400    224    
-144   64     
-96    96     
176    128    
-112   80     
-48    16     
32     112    
-96    -48    
96     160    
-80    0      
64     -464   
128    -16    
64     176    
96     80     
-48    176    
-112   208    
144    160    
16     0      
128    112    
-144   -16    
96     -48    
-32    176    
80     80     
48     128    
0      0      
-80    -608   
16     176    
-64    160    
304    -16    
-272   144    
208    192    
0      64     
0      -48    
80     160    
0      192    
80     48     
-48    64     
16     96     
64     64     
0      -16    
-128   -576   
176    128    
-80    -256   
96     -48    
32     0      
48     144    
64     128    
-48    80     
32     64     
96     48     
-64    -48    
112    80     
-96    0      
112    112    
48     16     
-16    -176   
144    176    
16     -32    
-64    96     
80     -144   
48     64     
-16    112    
32     112    
96     -144   
80     16     
32     -208   
0      176    
-224   256    
-48    48     
160    -96    
256    96     
-144   192    
16     -400   
144    144    
-112   -112   
112    256    
64     -176   
320    112    
-112   -240   
160    176    
-160   -48    
80     112    
32     64     
48     160    
-32    112    
96     -160   
144    304    
32     -96    
160    64     
-96    -16    
160    80     
96     -96    
-64    96     
80     -80    
0      32     
80     192    
96     80     
16     32     
-64    -192   
32     80     
96     -96    
96     176    
48     -160   
96     192    
16     -704   
288    288    
32     256    
96     64     
-32    112    
32     272    
48     64     
144    160    
112    128    
16     -304   
160    256    
160    -112   
0      240    
144    80     
208    112    
-128   -512   
-64    48     
128    -144   
64     112    
16     -64    
-160   0      
-208   -64    
-80    -64    
240    272    
160    -192   
-160   160    
-144   -16    
272    64     
176    -112   
48     240    
-96    0      
112    -32    
-16    -128   
0      -128   
208    160    
32     -208   
48     -32    
-192   112    
48     -640   
48     -16    
16     -1136  
64     -192   
-96    144    
144    -64    
128    352    
128    -16    
-64    32     
32     144    
176    -16    
-80    -96    
0      64     
80     256    
-16    80     
-80    -336   
128    160    
-64    -1472  
144    -176   
48     64     
-16    16     
80     224    
-16    -112   
144    336    
-80    0      
-32    -352   
16     -48    
128    -80    
-32    -144   
-256   -208   
-176   -16    
16     -48    
192    -304   
48     -32    
-112   64     
192    64     
-16    -2944  
160    -256   
-64    -320   
-16    64     
64     -96    
32     80     
-16    48     
-32    -256   
32     -48    
96     -128   
-1296  -32    
96     -1680  
608    592    
784    464    
-16    624    
-336   -1168  
64     112    
-128   -256   
288    -16    
160    80     
-320   -144   
304    80     
64     -144   
-128   64     
80     48     
-128   16     
64     -112   
272    -144   
-80    -480   
16     0      
160    -208   
16     16     
112    112    
128    0      
64     112    
-32    -16    
32     -176   
-256   -256   
-192   -176   
224    288    
-288   16     
128    -208   
-336   -80    
-16    -128   
64     176    
-160   -320   
288    0      
-80    -880   
128    240    
64     144    
96     160    
64     -96    
16     16     
-16    -32    
96     -160   
-96    160    
160    -16    
-784   -32    
48     -176   
160    160    
-64    -352   
112    160    
-16    -528   
64     48     
-32    -16    
112    -16    
-48    48     
0      -16    
-240   -832   
-208   -208   
352    768    
-48    -112   
-144   208    
32     -208   
48     -96    
48     -224   
112    96     
32     -576   
80     64     
176    32     
80     -208   
-720   -112   
48     -96    
-176   80     
-32    -48    
-176   -16    
160    -32    
-368   -496   
256    -352   
-96    96     
-16    -256   
64     416    
-16    -128   
32     16     
-144   48     
32     -144   
-32    128    
32     -400   
-16    -48    
64     -160   
-96    -32    
80     80     
-272   -144   
-80    16     
96     48     
-640   -32    
112    32     
-1024  -80    
-272   -64    
-64    48     
-768   -48    
16     192    
-80    80     
-32    192    
-16    -160   
-32    -48    
112    -96    
64     96     
-80    -96    
32     112    
-272   -256   
48     128    
-32    -16    
-48    96     
-32    64     
16     80     
-80    0      
-368   -240   
-144   -144   
208    -80    
0      224    
240    208    
-112   160    
-256   80     
16     208    
-112   -400   
-96    96     
160    240    
0      272    
-64    192    
16     -48    
-256   -80    
32     0      
-48    -208   
-80    176    
0      0      
-176   -272   
320    80     
96     240    
-176   96     
112    192    
-192   -64    
96     64     
-96    -64    
64     -32    
-112   288    
80     160    
0      256    
-192   -96    
-176   -224   
16     80     
-112   -80    
16     80     
32     128    
32     0      
96     32     
-144   192    
-32    144    
-112   -112   
160    352    
-528   -656   
208    432    
-96    -64    
0      80     
-128   -32    
-64    -48    
-1040  192    
-144   160    
48     112    
-272   -352   
112    336    
48     144    
-144   32     
96     256    
-160   -64    
16     -16    
-112   -64    
96     16     
-96    32     
-16    224    
64     192    
-176   -16    
16     32     
-32    144    
208    -16    
0      160    
-160   0      
-128   128    
0      -48    
96     144    
-144   0      
-16    128    
-176   -16    
-64    -64    
32     48     
144    -112   
-128   64     
0      112    
-1856  16     
-128   144    
-144   0      
1040   768    
672    624    
48     -496   
848    -496   
-576   -864   
528    624    
-64    448    
64     -416   
-592   -64    
80     144    
-112   -240   
-192   144    
-1312  -288   
32     32     
48     144    
-64    48     
160    80     
-80    160    
32     48     
-32    0      
112    160    
-64    224    
96     48     
-208   -192   
96     160    
32     48     
48     224    
0      -16    
-32    -16    
-16    96     
96     160    
0      64     
-128   48     
128    96     
16     -48    
0      -128   
-144   32     
144    144    
-16    -48    
-112   32     
0      112    
128    128    
48     0      
-144   -112   
-48    48     
144    176    
16     48     
112    80     
-224   64     
64     -80    
-32    32     
-160   -32    
112    192    
-112   -16    
64     48     
-64    192    
-144   -32    
144    0      
-64    96     
0      96     
16     48     
48     112    
32     112    
0      -80    
0      -16    
48     144    
-48    160    
-48    16     
160    48     
-16    160    
-64    96     
-80    16     
176    48     
-16    208    
48     144    
-96    176    
-16    208    
-96    128    
16     -80    
64     -16    
16     128    
-144   64     
288    224    
-384   48     
256    -128   
64     32     
-224   -80    
256    256    
-288   -64    
256    48     
-128   128    
-96    -64    
80     -144   
48     112    
-80    96     
208    176    
-32    -16    
208    80     
-240   -16    
96     -32    
80     176    
-16    16     
112    256    
-112   16     
144    -32    
-48    48     
256    208    
-80    112    
48     96     
-112   -16    
64     32     
-80    0      
48     48     
32     0      
-32    -144   
80     32     
-96    -96    
176    64     
112    256    
224    -16    
-112   128    
304    160    
-288   144    
304    80     
-64    80     
16     240    
-224   -80    
208    112    
80     -80    
-96    -848   
16     48     
128    -192   
48     0      
-144   16     
-32    48     
80     240    
144    32     
112    -144   
-224   16     
-32    48     
128    48     
48     -64    
-64    64     
80     144    
0      -288   
80     -64    
-64    -336   
32     32     
96     288    
0      48     
80     624    
96     -112   
-112   240    
192    288    
-128   32     
16     96     
112    16     
32     128    
128    48     
-128   -32    
176    112    
96     -160   
32     320    
0      -1360  
-80    48     
208    -320   
272    608    
176    384    
-304   -16    
80     48     
80     48     
-128   -96    
-48    -176   
144    144    
-32    -32    
0      80     
96     -432   
32     -80    
96     -544   
48     240    
64     160    
32     64     
32     128    
0      208    
-352   240    
80     192    
-96    -80    
160    -64    
48     176    
64     -272   
-32    80     
144    -480   
16     64     
256    -176   
-240   96     
176    -560   
0      128    
64     16     
128    -336   
-272   -784   
720    1008   
-128   688    
160    -288   
-272   -288   
80     -1216  
160    192    
-128   -352   
160    176    
96     -176   
-64    -16    
16     -112   
96     160    
16     -48    
16     -96    
-16    64     
304    288    
-48    208    
-64    -1104  
256    80     
-176   -256   
272    96     
-96    208    
192    352    
-272   -80    
16     0      
-80    256    
112    320    
-288   -208   
144    32     
-16    32     
0      -160   
0      320    
-224   -304   
48     -64    
80     -528   
16     352    
400    -144   
-160   128    
288    -144   
-32    96     
-32    48     
112    -768   
-48    -64    
144    -1312  
-96    -64    
-272   48     
320    -144   
96     32     
-224   -928   
368    -64    
-80    336    
-272   64     
272    96     
-64    0      
64     80     
288    976    
-240   -992   
96     112    
176    -448   
-112   0      
-192   -128   
208    -464   
32     -144   
96     -112   
16     -176   
112    256    
-16    -240   
80     176    
80     -144   
80     -272   
-16    32     
-16    -144   
16     96     
80     -64    
336    368    
-640   96     
160    -304   
-80    -16    
16     -256   
320    -112   
-128   80     
96     0      
128    -1232  
-64    -160   
128    -448   
112    320    
192    -48    
144    224    
-80    48     
80     -320   
-336   0      
80     -160   
-768   -160   
16     -160   
112    32     
-16    -192   
64     0      
-144   -384   
-32    224    
16     208    
-128   -80    
16     -128   
80     -160   
32     -96    
48     0      
-224   -48    
64     -336   
-368   -192   
80     -144   
64     -96    
32     -560   
240    -112   
-16    -752   
48     48     
16     80     
64     368    
112    -208   
64     32     
-384   -32    
368    -176   
-400   -80    
192    -80    
-176   -112   
256    -240   
-2672  -256   
64     32     
80     -112   
32     -448   
144    -16    
144    -1728  
192    144    
-288   48     
288    -80    
-112   32     
0      -96    
-80    32     
112    80     
80     96     
-48    -176   
-400   0      
128    -48    
64     0      
-144   -288   
192    272    
-80    -688   
352    464    
-112   32     
160    -224   
-384   -144   
32     -240   
-192   0      
16     -160   
-224   -48    
16     16     
-32    64     
-32    -48    
96     560    
-16    -48    
-32    0      
0      -96    
32     -80    
32     32     
32     -32    
-64    16     
64     16     
-144   80     
144    -192   
-208   96     
96     64     
-80    48     
-96    -368   
112    0      
96     -208   
-128   192    
-64    -48    
32     32     
32     -16    
-96    256    
-192   -48    
128    -64    
32     48     
144    -96    
-48    112    
192    -48    
-16    144    
-64    -16    
64     96     
64     -80    
80     144    
-96    -16    
-912   -80    
-144   48     
-448   -288   
-16    -16    
-704   32     
-128   256    
0      0      
1120   1968   
-2048  176    
704    496    
-256   272    
416    -112   
-416   -736   
144    432    
352    0      
80     96     
-592   96     
208    -128   
-96    144    
-112   -272   
-16    272    
-768   -192   
-32    320    
-176   -96    
32     64     
-128   48     
192    -16    
-176   -128   
-224   -80    
-144   336    
176    -48    
-144   112    
160    -80    
-288   288    
-48    -128   
-272   320    
-288   -128   
-32    112    
16     -128   
48     224    
-80    -144   
-16    128    
32     -192   
-224   -16    
144    -48    
32     32     
80     32     
-128   128    
-112   0      
-112   16     
16     112    
-352   -48    
-144   16     
-432   -160   
16     240    
-32    -176   
32     128    
-64    -272   
128    112    
-128   144    
176    -16    
-112   -32    
-64    128    
80     -16    
-48    32     
208    160    
-304   -64    
32     -48    
-352   64     
32     112    
80     -32    
-32    192    
112    48     
-32    32     
-48    80     
-176   64     
0      -48    
80     144    
-16    32     
-32    160    
-64    16     
-48    144    
-32    112    
-96    -32    
48     464    
-192   144    
144    -48    
48     16     
-128   -16    
96     16     
-112   -80    
-48    -208   
112    -112   
0      224    
-256   112    
-48    -144   
-160   -224   
160    48     
-208   32     
80     336    
-1920  -128   
0      -16    
-16    0      
192    256    
64     176    
-128   96     
-16    -16    
48     112    
16     16     
-96    64     
-32    128    
0      64     
176    80     
-80    32     
128    288    
-16    -176   
-48    208    
-64    80     
64     192    
96     128    
-112   16     
-48    176    
80     128    
80     272    
-16    48     
32     96     
-176   -128   
48     96     
-384   -320   
304    304    
-208   192    
144    96     
-80    -16    
80     -96    
-48    256    
96     32     
-144   0      
144    0      
-32    80     
-32    96     
288    0      
-352   32     
80     96     
-128   -352   
-288   16     
208    96     
208    144    
-32    64     
112    208    
-176   16     
48     160    
48     192    
96     -48    
-96    -48    
-48    -192   
16     32     
48     -160   
-80    32     
32     224    
64     -176   
-128   32     
80     -80    
-144   112    
80     -544   
128    464    
-48    112    
-16    -80    
-160   112    
160    48     
-224   0      
256    208    
-16    0      
0      128    
-224   -224   
16     -240   
192    -272   
304    80     
96     176    
32     240    
-112   192    
-16    -160   
80     160    
-144   -16    
208    0      
-240   128    
224    144    
-272   -16    
16     -48    
80     112    
80     144    
-16    128    
64     32     
-32    32     
0      -32    
176    160    
-48    128    
32     0      
96     -16    
80     192    
-80    48     
128    16     
-48    16     
288    -288   
288    368    
-128   -32    
-96    48     
-704   464    
816    2128   
-1024  800    
112    -304   
-80    -464   
512    400    
-224   320    
-96    272    
-64    -80    
368    288    
-384   -80    
304    -560   
80     448    
-16    -32    
-176   96     
32     64     
64     304    
272    -432   
-160   -128   
16     -416   
240    192    
0      32     
432    400    
-256   32     
240    16     
-96    368    
224    -288   
-80    176    
-400   -928   
464    336    
224    224    
-192   -64    
400    224    
0      -16    
96     96     
160    16     
-32    -112   
160    240    
16     64     
64     224    
-112   48     
96     -112   
-32    96     
224    -432   
16     144    
96     96     
224    352    
-208   -96    
224    224    
176    -256   
256    368    
-192   16     
128    112    
-16    -304   
-96    -96    
112    144    
144    -144   
368    768    
-176   192    
-32    128    
160    -336   
-64    -64    
128    224    
16     160    
-160   -48    
-80    96     
192    80     
32     80     
80     0      
-64    -256   
224    320    
240    -320   
224    304    
-224   -112   
80     192    
-80    -2688  
32     -224   
48     224    
-240   192    
160    224    
-32    128    
16     -208   
-48    112    
256    224    
-112   -16    
-48    48     
128    16     
-32    -144   
-32    112    
176    64     
64     -176   
0      96     
-64    -48    
16     -144   
304    32     
-32    352    
16     224    
80     352    
80     64     
0      -368   
-16    -16    
176    -80    
-32    192    
48     -256   
160    144    
-48    -224   
176    384    
-80    16     
32     96     
64     -32    
-80    -160   
-32    160    
224    48     
48     224    
192    -560   
-160   -160   
192    -192   
0      608    
192    -80    
-48    32     
-80    -288   
-80    336    
64     -560   
224    128    
-96    -32    
0      -208   
208    -256   
-128   -128   
160    -752   
176    208    
-160   -32    
160    -64    
-96    -80    
144    -96    
0      288    
-80    -128   
368    256    
-48    0      
48     16     
96     288    
16     -352   
240    -144   
-224   -192   
192    -16    
48     -288   
-64    -288   
-16    -16    
288    -880   
-16    16     
-64    96     
160    -224   
-48    48     
48     96     
96     -544   
-128   -32    
-64    -304   
96     -32    
-288   -128   
48     80     
0      32     
128    -272   
32     -144   
-32    -960   
128    -112   
-48    144    
48     -176   
80     -304   
144    -208   
64     -16    
-32    192    
-176   32     
112    112    
-144   -80    
224    -256   
32     -32    
32     -208   
-160   16     
-112   -720   
288    32     
96     -1248  
112    48     
-64    80     
-16    16     
112    64     
0      176    
64     16     
0      -80    
-288   -208   
176    -112   
-1616  -128   
64     -160   
-16    112    
0      -16    
-32    -144   
128    -1264  
0      96     
112    -272   
208    288    
-80    48     
-64    336    
-48    288    
1328   624    
-784   336    
-112   -176   
-848   640    
736    -352   
-752   -128   
560    -496   
-48    320    
64     -720   
0      368    
-48    -368   
256    320    
-80    -208   
304    0      
-160   0      
64     16     
-64    32     
176    -16    
-352   0      
192    -256   
-1040  352    
224    -352   
-192   80     
240    -288   
-176   336    
304    -1392  
-208   192    
-80    -128   
144    -32    
-32    -80    
16     -16    
-208   -16    
64     -48    
-288   -144   
112    -336   
-320   -128   
208    96     
-32    64     
112    -256   
-112   48     
96     -800   
48     96     
-352   -128   
112    32     
-96    -16    
176    192    
-48    32     
-240   112    
-48    -144   
160    176    
-368   -32    
112    -112   
-16    128    
112    -272   
112    192    
-112   -192   
112    -16    
32     96     
-80    64     
-64    -32    
48     -96    
-32    -48    
0      304    
-64    -96    
192    64     
-128   80     
128    -48    
-48    80     
96     -192   
112    48     
-160   -64    
-864   80     
-192   -48    
-320   -112   
-288   -80    
192    -48    
-96    80     
-112   128    
128    -16    
48     -176   
-400   64     
-464   -144   
272    432    
-80    -48    
80     -112   
-240   0      
-16    -128   
-16    0      
-400   112    
144    192    
-272   608    
-464   0      
288    64     
-16    16     
-32    -288   
-96    128    
-144   -224   
-192   -80    
0      -32    
32     240    
-16    48     
-48    -32    
-96    -224   
-112   96     
-48    -352   
-64    288    
0      -128   
-288   -96    
144    288    
32     192    
-48    96     
64     16     
48     48     
-16    -176   
-160   -32    
16     240    
-160   -16    
-16    -32    
96     336    
-16    96     
-320   -64    
-256   -160   
-1232  -80    
0      32     
-64    -192   
80     480    
48     -128   
-128   96     
-64    -80    
-16    -48    
96     176    
112    -32    
32     32     
-80    96     
-160   112    
256    288    
-304   -176   
240    256    
96     336    
-800   144    
-80    176    
-112   -192   
144    192    
-208   48     
192    -16    
-48    48     
16     176    
-80    96     
-240   16     
16     32     
-32    -32    
-16    48     
-272   -96    
80     64     
-1072  -32    
0      0      
0      -80    
0      80     
240    -16    
-112   144    
144    208    
-208   80     
-128   192    
-128   -64    
64     48     
-16    224    
-256   -144   
-80    64     
-16    16     
-80    48     
-80    96     
0      -16    
32     80     
48     64     
-224   -80    
176    64     
-96    208    
96     -32    
-64    160    
80     80     
80     80     
-96    32     
-112   16     
-176   112    
-240   112    
-128   -96    
32     -112   
64     144    
112    176    
-176   -32    
112    112    
160    192    
-48    -32    
288    -144   
-272   0      
160    -48    
-192   144    
-48    320    
-144   976    
-944   -1136  
0      -608   
448    1248   
-576   -368   
400    784    
-80    -816   
464    592    
-416   -208   
224    112    
-112   -240   
80     16     
-272   176    
224    160    
-224   48     
144    -432   
-448   -128   
176    -320   
160    592    
16     -64    
-32    272    
-480   -192   
368    0      
-16    288    
-160   16     
240    -16    
-16    352    
464    144    
-16    80     
128    -48    
-128   32     
16     64     
-16    64     
96     240    
-80    80     
0      -16    
64     -160   
-16    -64    
32     16     
64     -208   
0      112    
0      32     
0      -16    
144    96     
-112   -64    
304    240    
-320   112    
192    144    
-208   128    
-48    0      
32     96     
0      -16    
-64    -48    
128    -32    
-64    80     
96     32     
0      128    
-112   80     
-48    112    
80     0      
112    144    
16     64     
64     128    
-128   368    
208    16     
160    304    
-32    96     
32     16     
-112   -336   
128    -176   
-96    -96    
-16    272    
32     240    
-96    176    
64     16     
176    80     
128    144    
64     -80    
96     256    
0      80     
160    224    
0      128    
96     96     
-16    368    
336    48     
192    80     
-224   80     
-96    -128   
-144   32     
-16    -48    
-64    -848   
-64    32     
16     112    
192    -32    
112    0      
-48    0      
48     192    
-80    64     
0      48     
64     160    
-208   -48    
80     192    
-16    -208   
32     304    
-144   144    
-64    -320   
208    48     
-144   -208   
-32    -64    
144    64     
-32    -16    
64     32     
96     176    
32     208    
96     192    
64     352    
-48    32     
-80    -112   
0      48     
160    64     
-160   -288   
96     48     
80     352    
160    32     
16     112    
-64    224    
16     -64    
240    32     
-144   160    
48     80     
-32    -64    
160    80     
-32    16     
80     -208   
-208   256    
64     -160   
160    -32    
80     -256   
-208   224    
48     288    
272    -16    
-112   16     
-160   -16    
-16    -144   
128    48     
32     -32    
176    272    
-32    -80    
-48    -32    
32     0      
144    -208   
-64    16     
112    -336   
16     16     
96     -688   
0      48     
-48    -192   
48     96     
-16    0      
48     -144   
-80    -32    
176    240    
-16    -64    
-48    -32    
64     64     
48     -32    
112    112    
256    224    
-128   96     
-64    -384   
32     -16    
160    -448   
-16    64     
32     80     
112    80     
-112   64     
64     176    
16     64     
80     32     
0      176    
-32    -240   
144    64     
96     -848   
-32    160    
-64    16     
176    80     
96     -48    
48     48     
-48    64     
96     96     
-32    48     
48     -208   
96     160    
-48    -320   
160    112    
-64    -368   
128    192    
32     -192   
16     80     
432    1456   
-912   1120   
-1536  -432   
464    96     
-80    -320   
544    128    
-992   1040   
1040   -224   
16     672    
0      -864   
-160   400    
-48    -240   
544    48     
-384   160    
288    -128   
-208   304    
192    -192   
-128   432    
144    -272   
64     240    
96     -192   
-80    -256   
-48    -240   
128    -1440  
96     -400   
160    -256   
-128   0      
48     176    
80     -80    
-32    -64    
-16    -384   
0      -560   
144    208    
-32    -224   
64     112    
32     16     
160    -112   
112    -80    
-16    -256   
144    -64    
-16    64     
32     0      
128    -1632  
16     -192   
96     192    
-80    32     
128    -384   
64     160    
96     -64    
-16    64     
-208   -160   
64     -176   
0      -80    
32     -80    
64     -80    
64     -80    
48     -48    
96     -992   
16     16     
80     32     
0      -48    
144    160    
-112   368    
32     -64    
80     80     
-144   -80    
128    32     
-336   32     
16     -80    
176    -128   
48     -96    
0      -160   
176    -208   
-48    -16    
160    -1904  
-112   112    
-96    -496   
-16    -112   
192    -176   
-64    -128   
-128   -16    
-208   48     
-432   -64    
112    -16    
-1904  -256   
128    -192   
-16    -128   
128    192    
32     16     
48     -304   
80     0      
-48    -176   
144    128    
48     -112   
32     -176   
32     32     
272    672    
-272   112    
0      64     
-336   48     
144    -16    
128    112    
80     -192   
-64    -112   
128    -496   
0      112    
80     224    
160    304    
-96    -160   
64     -304   
-192   -144   
192    48     
-16    16     
-32    -80    
-176   -48    
16     -16    
0      -96    
0      -112   
64     -64    
80     -240   
0      -16    
224    -192   
32     224    
-48    -80    
-144   -192   
-288   -96    
240    0      
208    320    
-144   176    
-48    -64    
-32    -160   
-208   32     
96     -64    
-64    -32    
208    128    
-80    -16    
224    -672   
-240   -816   
96     -368   
-96    -192   
256    48     
16     336    
-48    -64    
-48    -32    
32     144    
192    80     
-160   0      
192    144    
-256   112    
128    -624   
48     -32    
352    -32    
96     -16    
-384   48     
-16    32     
16     -16    
480    -208   
-256   32     
208    -112   
-208   80     
-32    -48    
144    16     
-240   -256   
0      96     
-1200  -288   
112    112    
-96    48     
400    -320   
0      144    
-400   176    
112    -304   
-144   192    
192    -96    
80     64     
-240   144    
-128   0      
-112   0      
-80    -144   
-48    80     
-80    -64    
32     176    
0      80     
-160   -64    
96     128    
-208   96     
-352   -336   
-800   128    
544    144    
192    128    
-176   16     
-16    -16    
128    80     
-16    -48    
-272   224    
-32    -288   
176    -208   
16     208    
-144   -112   
-288   96     
-320   384    
-976   1168   
144    272    
-512   0      
-992   -624   
-224   592    
-544   -112   
-384   208    
320    208    
720    544    
-608   -352   
-64    -176   
-80    -16    
432    -176   
-400   48     
224    80     
-352   0      
48     240    
0      16     
-464   -64    
48     0      
0      48     
112    272    
112    -80    
64     160    
32     32     
-144   -48    
-32    144    
224    208    
48     144    
-128   112    
-48    32     
-80    0      
-128   -32    
-96    16     
-96    32     
80     96     
-16    144    
-32    -128   
-32    96     
160    -160   
-64    288    
0      -16    
-80    -96    
-32    160    
0      144    
-112   64     
-64    -48    
-96    -192   
48     192    
-240   64     
16     -176   
-144   192    
160    -96    
-32    320    
-80    -112   
112    -48    
144    0      
16     160    
-160   0      
80     160    
-48    80     
80     80     
-16    32     
-80    -80    
80     176    
-208   32     
16     160    
16     96     
-64    -16    
144    128    
-160   16     
48     -96    
96     48     
-80    160    
-48    64     
128    336    
-352   160    
-32    -192   
-16    -160   
64     16     
-224   80     
-32    128    
-32    -128   
0      -80    
-16    80     
-32    304    
-64    48     
224    192    
-272   80     
64     96     
-32    16     
-240   -208   
192    48     
-256   -32    
112    128    
-400   -80    
128    96     
0      96     
48     64     
-16    144    
96     144    
-80    192    
0      80     
80     112    
-64    16     
32     -16    
-80    -64    
64     128    
144    288    
128    176    
-96    32     
-224   64     
144    80     
112    -16    
-352   -192   
128    -48    
48     80     
-16    112    
96     128    
-208   -64    
64     -64    
-176   48     
80     48     
16     0      
-144   -16    
32     112    
-96    0      
112    -16    
128    240    
-16    96     
0      64     
-144   -144   
-16    0      
-176   32     
304    96     
144    144    
-320   -96    
144    16     
-416   -64    
224    128    
112    48     
-64    112    
48     80     
-48    -48    
32     -96    
-160   96     
208    -128   
-16    32     
16     48     
128    128    
-80    144    
64     -48    
-48    96     
16     -48    
32     208    
-64    48     
96     128    
-160   -320   
0      -128   
240    144    
-16    240    
0      48     
-32    16     
0      96     
0      -16    
112    192    
-16    176    
-144   304    
176    -336   
-160   -2384  
80     -16    
-16    144    
-64    -80    
224    160    
-64    128    
224    176    
-128   -96    
0      -96    
128    48     
96     32     
0      400    
-48    96     
-80    192    
-80    -144   
208    -336   
240    176    
32     352    
-160   80     
16     64     
128    -112   
80     0      
64     112    
0      16     
112    240    
-160   80     
32     -32    
80     -96    
16     96     
-752   -1072  
288    1328   
-912   80     
224    0      
768    208    
-400   -400   
192    -288   
64     1072   
16     256    
416    -96    
-528   96     
304    -448   
64     576    
-96    -240   
0      304    
-80    -32    
80     -128   
192    208    
32     -1040  
64     112    
0      -16    
-48    144    
160    96     
-64    160    
96     -96    
-48    96     
-16    -176   
-32    224    
128    112    
16     32     
-64    -96    
0      -368   
-48    -64    
144    -496   
48     0      
240    -752   
0      112    
16     -80    
-16    64     
16     -80    
32     80     
192    96     
32     176    
80     64     
-64    -192   
0      96     
16     -160   
176    112    
0      0      
48     96     
16     -400   
64     112    
16     0      
48     -16    
128    48     
-80    96     
112    64     
80     128    
32     80     
-16    -192   
-32    -448   
96     16     
16     48     
128    -464   
64     352    
160    -64    
48     176    
-16    160    
64     16     
112    112    
0      48     
-64    16     
144    208    
-176   48     
144    -160   
144    80     
16     -176   
176    624    
16     -208   
336    144    
0      -352   
-224   208    
304    -16    
-96    -16    
80     32     
96     32     
80     32     
64     -464   
160    192    
80     336    
-48    32     
0      -144   
32     -64    
144    -96    
112    176    
-32    -96    
144    240    
-16    -256   
80     128    
-32    -32    
80     0      
-32    176    
64     -32    
32     128    
80     -48    
48     128    
80     -96    
96     288    
-96    -176   
16     -112   
144    16     
16     112    
64     -112   
-16    -2400  
16     32     
144    -720   
-16    -16    
64     -48    
48     -432   
0      -160   
48     352    
48     -256   
-80    48     
208    16     
144    128    
-32    -176   
-272   -352   
48     -448   
128    -528   
160    272    
80     -32    
48     -224   
-432   -128   
80     -112   
64     -48    
128    -256   
64     48     
352    -544   
-432   176    
16     -112   
128    -112   
32     -32    
0      224    
-80    -48    
48     64     
-320   -96    
16     -176   
-896   -128   
144    0      
112    48     
32     32     
-16    -144   
160    -304   
-64    -16    
-16    -288   
-96    -224   
416    368    
-192   80     
112    -192   
-240   -80    
272    -80    
96     96     
0      208    
-48    16     
-240   -176   
144    -48    
192    112    
80     -544   
224    96     
-48    -16    
-160   0      
-160   -192   
224    16     
288    0      
192    240    
-512   -176   
416    32     
-208   368    
16     -448   
-176   -512   
64     -112   
496    176    
80     0      
-480   128    
64     -880   
96     -208   
400    -144   
368    64     
-64    48     
160    304    
64     80     
-80    -16    
-240   -64    
0      -224   
-224   16     
80     -176   
-240   16     
112    112    
-80    -144   
-48    -880   
-608   -16    
-160   -832   
848    16     
-320   944    
-544   656    
624    784    
-544   -432   
16     -64    
240    80     
-624   -192   
544    -112   
-336   0      
-16    -592   
16     224    
80     -160   
112    64     
16     -688   
48     -208   
48     32     
32     -144   
64     112    
80     64     
-64    96     
-48    144    
0      112    
-32    -112   
-32    0      
96     -512   
80     112    
48     16     
192    128    
-64    -320   
0      -80    
-32    -48    
80     16     
64     144    
-96    160    
-96    -48    
32     -64    
-272   -272   
112    -176   
-384   -32    
96     -96    
0      144    
-112   -16    
48     32     
-528   -64    
-48    -272   
144    -32    
-80    160    
16     -64    
96     48     
-192   -48    
224    144    
-128   -16    
48     -272   
-16    224    
-1280  -128   
272    112    
-1312  -48    
64     -80    
112    96     
-256   64     
96     -16    
-400   96     
-48    -16    
-288   -80    
64     64     
64     96     
-48    128    
0      -32    
32     64     
-192   -64    
-16    48     
-48    -224   
-64    32     
112    176    
-432   -32    
112    80     
-128   -128   
-128   -192   
-880   -32    
-208   208    
192    240    
-32    -16    
-240   -352   
96     336    
-416   -288   
48     80     
0      -240   
-80    32     
48     112    
32     128    
-96    80     
-144   -128   
192    80     
-240   112    
96     96     
-992   -96    
-128   -112   
-64    -176   
64     80     
48     -48    
-32    144    
112    240    
-112   -48    
-112   16     
-176   64     
176    16     
-32    -64    
-112   64     
-32    -16    
16     0      
-464   32     
-64    160    
48     32     
-64    96     
0      -32    
256    288    
-208   96     
304    224    
-64    112    
-80    16     
-192   0      
-96    -48    
208    208    
-208   80     
144    208    
-80    96     
32     128    
-432   32     
160    96     
-160   -240   
-80    -192   
-96    48     
160    -128   
96     16     
-96    -32    
-16    80     
16     0      
-80    16     
96     64     
64     48     
-32    48     
32     160    
-192   -160   
80     112    
-224   -160   
48     112    
144    48     
-112   80     
-32    112    
32     -16    
48     64     
16     64     
-96    -144   
128    64     
-160   48     
-96    -144   
112    80     
-736   -128   
16     112    
144    -16    
-64    80     
32     112    
96     112    
-192   0      
0      96     
-48    -48    
-192   -32    
48     32     
-32    96     
-32    208    
-224   16     
0      256    
-304   -80    
48     -80    
80     192    
64     16     
16     160    
-112   -96    
-16    128    
64     128    
-32    80     
80     112    
-112   0      
-112   96     
64     112    
-32    -112   
-16    0      
32     80     
0      80     
64     32     
-32    192    
-64    16     
48     -16    
-16    192    
32     -128   
64     -32    
2240   -736   
-1136  -1184  
976    1408   
-528   720    
640    -48    
-192   -288   
-672   -192   
416    16     
-336   160    
336    240    
-144   -32    
-80    80     
96     176    
160    16     
-224   -16    
48     80     
112    288    
192    336    
-112   64     
-176   -320   
-32    -64    
-32    192    
112    208    
-96    -112   
208    32     
0      -48    
128    144    
-128   96     
112    48     
0      64     
416    96     
-96    128    
-96    16     
64     288    
-80    160    
160    -32    
-16    -320   
192    -64    
-16    80     
160    112    
-96    80     
48     64     
0      128    
112    112    
80     80     
32     64     
-32    144    
-16    64     
48     144    
-128   -48    
32     96     
96     -32    
64     80     
-64    32     
0      32     
64     96     
0      32     
64     112    
-16    -112   
64     240    
-192   176    
80     64     
-80    -48    
16     176    
-128   80     
144    -944   
48     320    
-32    96     
80     64     
-96    112    
64     128    
64     80     
32     48     
16     64     
-48    144    
-48    32     
112    80     
96     -432   
-208   -272   
-32    176    
96     -496   
-32    16     
16     160    
192    96     
48     272    
-112   192    
-64    -96    
288    48     
-80    16     
-48    64     
32     -80    
64     96     
64     -80    
64     112    
16     48     
96     -48    
-16    64     
48     -1152  
144    304    
32     192    
64     32     
-112   32     
-16    -16    
160    80     
48     128    
-16    64     
80     128    
48     272    
-112   -32    
128    32     
0      32     
64     48     
32     -1280  
-48    16     
128    192    
48     96     
-16    128    
32     32     
16     64     
112    64     
-48    0      
48     96     
0      96     
336    240    
16     176    
-144   -192   
-16    176    
32     -80    
336    -32    
-288   -1568  
288    32     
-48    288    
64     160    
112    112    
-48    192    
144    -16    
64     160    
-32    560    
400    -368   
-128   -96    
-64    -320   
160    32     
-80    -256   
208    160    
-48    -1152  
144    256    
64     -144   
-64    -48    
160    80     
176    -48    
-176   -160   
16     192    
96     -16    
-16    32     
0      -112   
-48    -240   
176    64     
-32    -128   
16     96     
-80    -1504  
96     80     
96     96     
64     352    
-48    16     
-96    -16    
128    160    
-32    -352   
320    -288   
-144   -336   
320    336    
-208   -112   
-16    128    
128    -16    
-16    176    
80     -192   
-96    256    
112    -48    
64     16     
32     64     
256    176    
112    -80    
-16    -16    
192    304    
-192   -368   
160    96     
96     -80    
144    176    
48     -464   
48     288    
256    -144   
-32    192    
-16    48     
32     224    
64     -208   
192    -1216  
32     -352   
128    144    
-128   -768   
192    -272   
-112   704    
64     1520   
-720   1184   
656    -240   
448    0      
-112   -320   
-32    -1584  
-336   32     
320    -192   
176    -416   
-224   -288   
112    -272   
128    224    
48     -512   
16     -16    
64     -1008  
32     -48    
32     80     
48     32     
144    144    
48     -128   
-16    -272   
80     32     
80     80     
128    32     
-320   48     
96     192    
-512   -16    
0      -752   
80     -112   
112    -160   
16     -80    
0      -928   
128    -64    
80     240    
0      -64    
-16    -336   
-64    -144   
64     -64    
96     208    
-32    -48    
-160   -240   
-1216  -96    
112    -32    
192    48     
-128   64     
192    -32    
-144   -112   
112    -336   
112    -560   
-96    144    
240    64     
-176   16     
160    -208   
64     -48    
-64    48     
144    -64    
-144   48     
128    -48    
-176   48     
48     -240   
0      -160   
80     -416   
96     -32    
128    -432   
96     32     
-48    192    
-32    176    
16     -176   
128    -64    
-144   112    
144    -192   
-16    48     
-48    -176   
-432   -96    
-16    -16    
-432   64     
80     -112   
128    192    
16     -272   
48     -112   
96     -1104  
-144   176    
-32    -224   
208    32     
-256   80     
112    96     
96     368    
-208   80     
128    -16    
32     -112   
112    -64    
48     0      
-128   -96    
96     -272   
48     224    
48     -432   
112    16     
64     -32    
-64    0      
160    160    
32     112    
-448   -96    
96     -48    
-240   -112   
256    -96    
-112   128    
32     -176   
-16    96     
-48    -128   
160    176    
-48    -720   
112    -208   
-96    -32    
16     -80    
-448   48     
48     -32    
-176   -32    
192    -48    
-192   96     
128    -256   
-384   224    
80     -384   
144    112    
-112   -192   
224    176    
-208   -720   
240    112    
-32    208    
96     240    
-160   144    
96     32     
-96    16     
-80    16     
-80    -64    
-112   -80    
-48    144    
208    -80    
32     80     
-736   -48    
-64    112    
48     -80    
-1488  -80    
-32    32     
-80    112    
208    112    
0      80     
-144   -384   
48     -16    
0      144    
-16    -80    
-16    144    
-112   -96    
64     160    
-224   -208   
-16    -16    
16     112    
48     48     
-96    -80    
-112   480    
-64    -112   
-432   -48    
-144   16     
176    -160   
-160   144    
-16    -96    
96     320    
-128   16     
-48    112    
-64    -256   
16     -80    
-256   -368   
0      192    
176    288    
-176   64     
16     272    
-544   -64    
-16    144    
32     -320   
240    0      
-224   -176   
16     -16    
-240   -48    
48     352    
48     -144   
16     -144   
-32    64     
112    256    
-160   -80    
-96    96     
48     32     
-176   32     
-32    176    
-704   64     
-16    0      
240    -272   
0      144    
16     -112   
-32    160    
48     64     
-528   -288   
-880   -1504  
288    416    
-384   976    
-1200  -544   
320    1136   
-656   -224   
336    0      
-800   176    
176    -128   
-352   -32    
0      -144   
320    304    
-304   -112   
32     96     
96     256    
-192   -400   
176    576    
0      240    
-64    -176   
-32    112    
-96    48     
-128   -176   
-224   -432   
96     16     
-448   160    
96     288    
-48    96     
-176   -112   
0      -32    
-96    64     
128    -32    
-112   144    
0      48     
112    0      
32     416    
-96    48     
64     416    
-256   0      
80     -176   
-416   -48    
64     64     
-16    -240   
-80    32     
32     112    
-80    80     
-16    16     
-224   16     
48     -176   
0      336    
96     96     
-160   -80    
48     80     
32     48     
-144   64     
-336   -112   
-80    176    
208    224    
224    464    
-256   80     
272    0      
-320   -48    
256    16     
-32    176    
-208   -304   
240    176    
-144   192    
64     48     
-256   32     
32     64     
16     48     
16     96     
32     160    
0      -80    
-112   144    
-64    -16    
0      -640   
32     -1008  
256    288    
32     256    
320    384    
-576   176    
160    -64    
-96    48     
144    48     
-144   176    
-112   16     
-16    128    
144    64     
-96    64     
48     -32    
96     224    
-32    192    
16     32     
-32    32     
32     96     
-64    64     
64     48     
-112   144    
80     224    
-64    -16    
64     32     
-32    112    
144    32     
96     160    
-96    80     
144    368    
-176   -256   
240    176    
-224   160    
160    48     
-80    48     
0      128    
160    176    
-16    80     
-32    64     
144    272    
80     512    
128    288    
64     528    
-80    128    
176    240    
0      64     
-112   160    
-16    48     
304    176    
-368   128    
144    -80    
-272   -272   
32     224    
160    160    
128    -96    
-128   272    
192    -48    
-80    224    
-48    48     
96     800    
-112   -368   
16     160    
-112   -16    
64     160    
-96    16     
80     256    
-144   176    
208    -656   
-176   96     
176    -32    
-64    64     
112    400    
-176   48     
96     128    
0      160    
32     16     
16     128    
144    160    
80     16     
-224   0      
32     64     
192    64     
-192   -128   
96     -96    
80     240    
48     336    
-48    -80    
64     0      
288    752    
-368   -400   
304    320    
256    336    
-32    -160   
-144   176    
-16    16     
224    80     
-80    128    
-16    -736   
0      64     
0      48     
144    112    
96     80     
112    272    
-32    64     
32     160    
-144   0      
112    -176   
-64    -32    
48     128    
-48    144    
16     -512   
144    192    
48     -880   
0      256    
-48    -1280  
48     128    
0      128    
144    128    
-144   -64    
240    96     
208    -368   
-96    96     
160    528    
512    1376   
-896   -224   
144    -912   
-400   272    
480    208    
48     112    
-32    -320   
-48    48     
-16    32     
64     112    
48     272    
96     224    
-128   -16    
192    48     
-144   -64    
96     112    
112    160    
-32    -240   
48     192    
0      -80    
96     336    
-48    -592   
16     16     
0      -1600  
96     128    
176    32     
-96    0      
-32    -48    
144    256    
96     96     
80     96     
-64    144    
160    80     
-48    96     
288    -64    
-112   272    
192    -128   
-64    48     
48     -592   
16     80     
144    64     
0      224    
160    64     
-112   112    
32     -64    
0      -32    
16     224    
336    352    
-240   -80    
352    -176   
-160   144    
224    -80    
-16    80     
64     48     
128    144    
-32    -48    
80     304    
-16    48     
272    144    
-256   160    
112    -736   
112    16     
32     -400   
-16    144    
144    -256   
48     128    
0      48     
64     224    
48     -400   
192    80     
-16    224    
-48    128    
96     -32    
112    96     
-128   48     
16     -32    
160    240    
-48    -96    
192    112    
-32    -112   
48     160    
80     -336   
-96    -144   
144    -640   
-96    112    
16     16     
208    112    
-288   80     
256    -848   
-32    -768   
144    176    
64     -1504  
-32    80     
144    -1392  
-128   -80    
192    160    
32     -112   
80     -16    
80     32     
-32    128    
112    32     
80     -128   
-48    -112   
-48    128    
-16    -272   
144    48     
-112   32     
208    192    
48     -208   
0      -336   
-48    48     
256    32     
-48    32     
160    -16    
-16    -80    
128    208    
144    -64    
-128   -32    
-80    48     
256    192    
-320   -16    
64     -128   
64     -48    
32     112    
32     -96    
80     -240   
-32    48     
272    -624   
-160   160    
48     -336   
64     160    
32     -144   
0      32     
-176   -48    
176    -224   
-208   -112   
-128   -64    
-64    -16    
384    -240   
-144   -64    
288    -64    
64     -96    
96     -960   
32     48     
80     112    
-112   208    
384    560    
-80    -272   
-112   -336   
-16    -112   
-64    64     
16     -144   
-784   16     
176    -272   
16     -96    
208    480    
-224   -384   
-80    -1360  
144    384    
80     -16    
32     192    
-288   -112   
64     -112   
-240   0      
96     -192   
-96    0      
-32    176    
-816   0      
64     -272   
16     -128   
176    96     
-64    192    
48     -48    
-64    16     
112    -1312  
256    288    
-112   -48    
80     -112   
0      80     
144    -16    
-176   16     
48     -208   
-400   -32    
144    -96    
-624   -144   
288    96     
176    320    
-128   -464   
-160   224    
80     -3040  
128    -16    
32     16     
272    -32    
-160   48     
96     112    
-384   -112   
0      -64    
-288   16     
-320   -240   
-544   1136   
272    928    
-192   224    
336    -976   
16     608    
-304   -880   
-64    400    
288    176    
672    208    
-512   -48    
304    -32    
-96    240    
224    -48    
-48    144    
-144   -272   
96     192    
-48    -288   
16     448    
-384   -592   
-112   -240   
176    160    
208    160    
-112   16     
48     -112   
-64    32     
-16    240    
-176   64     
128    176    
-176   64     
192    -112   
32     112    
-48    -128   
96     144    
-288   -112   
-208   0      
-80    -128   
-304   288    
16     112    
-1392  -160   
64     128    
-64    160    
-16    -16    
32     -288   
-48    -32    
-1008  -32    
-80    160    
-160   -288   
-96    192    
208    -96    
-320   16     
48     -224   
-208   128    
-32    -128   
240    208    
-128   48     
-576   -64    
80     352    
192    128    
-48    112    
-672   256    
144    128    
-208   -208   
-48    144    
-112   16     
112    96     
-320   32     
80     64     
192    176    
-208   -128   
0      32     
-112   0      
48     32     
-32    -64    
16     80     
48     80     
0      112    
368    288    
-48    736    
-336   -176   
-112   -368   
144    48     
-80    48     
-48    -48    
-112   32     
-64    16     
-48    64     
304    864    
-736   0      
-320   -576   
-144   -80    
464    304    
-160   32     
-128   -48    
96     -80    
0      48     
-48    -128   
-16    -48    
112    16     
-80    128    
-64    -64    
16     16     
16     0      
-16    -32    
32     96     
-416   32     
16     160    
-32    -112   
80     224    
96     624    
-80    384    
-96    160    
-112   -32    
0      32     
32     96     
-32    96     
-144   -48    
16     192    
-48    -64    
16     64     
-768   -160   
-16    128    
144    48     
-64    -192   
-96    128    
-224   -192   
64     32     
-112   96     
208    -16    
-288   -80    
64     80     
-192   -48    
-32    144    
-144   -448   
32     160    
-448   -288   
256    -48    
-80    736    
-96    0      
144    -80    
-272   -48    
192    112    
-16    32     
-96    0      
112    16     
0      48     
-64    -16    
-16    -112   
-64    0      
96     144    
-208   96     
96     144    
-48    256    
128    128    
-16    0      
-80    -176   
48     272    
-48    64     
64     80     
-64    352    
-48    -16    
48     -32    
0      160    
-32    -64    
0      144    
-144   256    
-368   0      
320    -128   
16     -208   
160    64     
-128   96     
-96    176    
-32    128    
32     256    
144    -192   
16     240    
96     -64    
192    64     
-176   48     
-16    96     
-144   144    
64     16     
48     128    
80     -32    
0      16     
208    160    
-112   224    
16     48     
144    64     
96     80     
-32    112    
-32    64     
32     160    
-96    -48    
64     112    
96     32     
80     -32    
16     336    
-16    96     
-496   64     
240    1632   
-576   -384   
112    -128   
-240   272    
208    432    
-288   64     
-384   336    
48     -32    
560    256    
-368   -16    
64     -160   
-32    304    
320    -96    
-160   320    
240    -96    
-144   320    
64     -32    
-32    80     
96     -128   
-176   96     
48     64     
-16    224    
208    32     
-336   -64    
144    -80    
-208   224    
240    80     
112    208    
-32    -48    
-16    48     
-48    160    
208    80     
0      160    
-80    32     
48     128    
-160   -80    
48     -112   
64     128    
16     -80    
48     -912   
32     144    
-48    48     
48     64     
80     -32    
0      240    
128    96     
-80    176    
128    144    
-256   96     
192    -32    
-80    256    
-32    -48    
80     224    
-96    -96    
128    -688   
32     96     
48     128    
-16    96     
-48    64     
144    32     
-48    160    
32     144    
32     48     
48     224    
-112   -64    
112    96     
64     64     
16     288    
64     32     
160    -352   
0      64     
64     176    
32     64     
96     144    
-48    96     
48     240    
64     160    
176    128    
32     160    
160    128    
-32    192    
0      0      
224    -208   
-48    112    
-144   -64    
80     48     
96     -96    
112    -96    
240    192    
-224   96     
96     64     
64     160    
-48    128    
112    192    
160    352    
112    128    
48     128    
-80    -240   
80     0      
64     -224   
-80    144    
224    -304   
-208   128    
160    48     
-48    208    
128    -544   
64     32     
48     80     
48     416    
-128   -96    
96     0      
-16    -272   
0      -224   
48     144    
224    -128   
-80    0      
112    -544   
128    208    
16     -1184  
0      320    
64     16     
224    -16    
-32    144    
128    16     
-16    -64    
160    368    
-16    112    
272    128    
32     608    
-80    -176   
96     144    
-96    -560   
80     272    
48     -112   
64     304    
64     80     
48     64     
48     16     
128    688    
-80    -160   
64     48     
128    256    
80     112    
-80    160    
160    -736   
-160   -224   
272    176    
96     144    
-112   -112   
112    144    
48     -32    
-16    224    
64     0      
64     208    
-64    -112   
320    640    
-192   352    
480    -16    
-480   -192   
160    -272   
16     48     
-144   -176   
112    176    
-80    -432   
240    304    
-176   -48    
368    288    
-112   144    
240    -624   
128    -1552  
48     32     
32     -672   
-224   192    
112    -112   
352    32     
-288   112    
304    -128   
-208   208    
32     -128   
240    -624
[truncated: 248,011 more chars]
