# Supplementary material for: A Fault Diagnosis Method for One‐Dimensional Vibration Signal Based on Multiresolution tlsDMD and Approximate Entropy
Source: Hindawi journal article supplement (doi:10.1155/2019/3262818), 2019-01-01
Supplement: f1 [file 3262818.f1.zip › 3262818.f1/gear signals/broken teeth fault signal/Data13.txt]

16     144    
128    32     
-48    -48    
272    64     
-128   -1088  
160    -64    
-208   -96    
128    48     
96     192    
48     96     
96     -64    
64     224    
-48    -144   
-64    -64    
144    128    
-32    -272   
0      -48    
144    -144   
32     208    
48     -864   
32     96     
144    -272   
-176   48     
16     -48    
-16    80     
-64    -752   
-176   -256   
48     720    
464    0      
-192   128    
80     -288   
96     96     
-48    -336   
16     144    
32     -96    
32     208    
80     -304   
-32    144    
0      96     
96     128    
0      0      
96     112    
112    -32    
-144   -80    
192    592    
-16    48     
48     -32    
208    -64    
144    144    
-128   112    
-32    32     
144    -512   
-64    176    
16     32     
-32    96     
304    160    
-128   384    
32     48     
-48    -384   
48     -32    
176    -144   
64     144    
80     -16    
0      128    
48     -128   
-16    80     
128    -80    
64     208    
-16    32     
32     176    
-112   -80    
240    -240   
32     -208   
96     32     
32     -288   
48     48     
80     96     
32     -160   
64     80     
48     -240   
64     128    
64     16     
80     -368   
32     64     
48     -1104  
0      -96    
-336   16     
80     240    
96     176    
-128   -640   
-16    144    
96     -784   
32     -240   
-64    64     
208    240    
64     224    
-64    112    
-48    -128   
-32    -112   
96     -80    
64     -448   
-208   16     
96     -240   
-64    464    
384    -48    
-48    -160   
-64    -704   
176    32     
32     -176   
0      48     
48     -128   
112    32     
48     -304   
-112   32     
144    -320   
-144   -192   
16     192    
208    64     
-1152  16     
64     -208   
96     -128   
144    16     
48     -64    
128    -256   
-96    -128   
192    -64    
48     336    
368    256    
-112   -16    
-32    64     
-144   -128   
64     -16    
16     -16    
-528   -160   
160    48     
192    512    
160    -400   
-176   -32    
176    -192   
-240   -128   
112    -928   
208    128    
0      -64    
-112   -96    
-176   -32    
-112   -336   
-64    -112   
224    16     
-16    160    
-32    -192   
-624   16     
80     -400   
-544   96     
-224   -464   
144    -64    
144    -480   
64     112    
64     16     
-64    -32    
-112   -16    
80     -192   
112    -80    
48     80     
-128   32     
0      80     
-288   64     
-592   -864   
864    1904   
-992   560    
-176   432    
384    -160   
-704   -272   
672    704    
-688   -848   
304    432    
-96    -560   
240    112    
96     -32    
-320   -96    
0      160    
16     -96    
-16    64     
112    -48    
-96    -16    
208    0      
80     -192   
-64    0      
-480   176    
96     -144   
-176   112    
48     -192   
-144   -144   
-64    -96    
-80    32     
32     -64    
-32    96     
16     -80    
-16    -64    
48     -144   
-32    128    
176    -112   
-96    -16    
144    368    
112    208    
-96    -80    
-48    0      
-48    32     
224    64     
-64    80     
32     -80    
-96    -48    
16     -144   
-336   192    
64     -336   
112    144    
-1136  -80    
-368   -32    
-64    -16    
-224   -16    
0      128    
0      16     
0      -16    
112    160    
-112   32     
208    -128   
-96    80     
-240   -96    
16     48     
64     0      
32     240    
-544   -288   
-464   -240   
-64    -16    
-96    64     
16     176    
-16    -80    
-16    96     
0      48     
-192   32     
96     -256   
80     144    
-240   -256   
64     -16    
-400   -432   
64     160    
-240   128    
0      -48    
256    80     
-112   -48    
-128   -112   
-144   80     
-288   112    
-416   128    
-352   80     
176    48     
96     144    
-128   -96    
160    144    
-192   64     
80     304    
-16    128    
-128   -224   
16     16     
-144   -64    
-32    160    
-48    144    
-80    112    
-96    32     
48     160    
-720   -208   
64     32     
-192   -16    
144    112    
160    240    
32     80     
32     32     
-144   16     
16     64     
-48    -32    
-96    -48    
-192   -96    
160    144    
-80    112    
32     -256   
-912   -240   
96     432    
208    -240   
-128   128    
96     -16    
48     128    
224    0      
-208   0      
16     48     
-160   -96    
192    80     
-160   0      
64     112    
80     64     
-96    224    
-224   -192   
-80    128    
96     0      
-48    112    
64     -240   
128    144    
-80    64     
-16    0      
-64    64     
128    64     
0      96     
-96    80     
48     160    
-32    80     
-32    96     
-32    64     
-64    -96    
-128   -432   
-240   160    
208    240    
-160   -64    
64     96     
112    80     
32     176    
0      -112   
16     128    
-176   -48    
80     144    
-96    176    
16     -48    
-128   0      
128    128    
-256   -64    
-464   -512   
-176   -416   
256    320    
96     80     
-48    112    
-48    48     
-48    128    
80     208    
-16    160    
48     96     
-96    32     
-48    16     
-32    224    
64     208    
-80    48     
-48    0      
-32    208    
-128   32     
-192   208    
208    96     
64     -112   
32     -16    
16     144    
16     64     
-16    96     
0      32     
32     112    
96     -80    
-208   144    
160    0      
-16    128    
16     48     
0      544    
48     -1824  
48     272    
32     400    
-48    -64    
-272   -192   
160    -304   
0      240    
-496   -720   
224    -16    
32     80     
176    272    
-32    352    
-144   -32    
128    112    
-48    -128   
224    464    
32     16     
-32    0      
48     -32    
32     144    
224    400    
-256   -112   
224    -240   
32     0      
304    16     
48     96     
160    192    
-208   80     
176    112    
-32    112    
-80    -144   
16     256    
-32    224    
128    -16    
-16    112    
-48    -448   
-32    -288   
16     160    
96     -112   
-80    208    
-32    48     
256    80     
-32    80     
-48    -144   
48     64     
96     -96    
-240   16     
256    416    
80     208    
-256   448    
112    16     
32     -112   
-112   240    
48     64     
48     128    
288    928    
-80    336    
-272   -432   
224    304    
16     -240   
-160   80     
256    288    
-416   16     
144    208    
80     160    
-16    -144   
32     192    
-64    -80    
80     208    
0      128    
80     -240   
-16    48     
176    160    
96     304    
-208   96     
32     256    
-240   48     
400    16     
-144   288    
32     48     
-32    80     
-32    -128   
32     16     
32     -80    
-64    80     
240    -2448  
-96    144    
-80    -112   
96     112    
64     -32    
0      144    
32     -16    
208    224    
-96    336    
32     64     
208    208    
-64    16     
208    16     
-128   -176   
32     -112   
288    -672   
32     400    
96     144    
-144   112    
160    128    
48     48     
176    240    
-80    304    
64     144    
48     144    
-32    48     
32     64     
80     64     
48     -64    
-48    64     
16     -352   
144    176    
128    -752   
-144   -336   
304    64     
-32    64     
96     -192   
16     64     
144    -96    
-96    176    
48     112    
-16    112    
-96    -384   
112    -64    
192    160    
192    -336   
-320   64     
320    -1456  
-32    192    
-112   -1264  
128    64     
96     320    
96     176    
-80    -16    
48     96     
-48    -96    
144    -80    
-112   160    
224    0      
-144   -112   
64     -832   
-64    -256   
80     -816   
64     48     
48     0      
32     288    
-128   192    
64     16     
80     160    
-96    -16    
176    144    
-32    -528   
0      128    
-64    -400   
96     112    
64     -464   
64     192    
16     -48    
80     240    
0      -48    
112    112    
48     304    
-112   -112   
80     -16    
96     208    
240    224    
-192   -144   
48     0      
16     -224   
96     48     
256    160    
-272   32     
-16    -176   
224    -80    
240    -384   
-48    160    
-48    -144   
208    112    
32     208    
-96    192    
-32    144    
128    -144   
144    0      
64     64     
48     64     
112    64     
-32    128    
0      -320   
224    -128   
64     -176   
48     256    
-352   416    
-240   -1776  
1136   1008   
-960   256    
32     -1568  
32     -336   
448    -2320  
-432   -80    
304    16     
384    336    
-48    -304   
112    48     
-96    -32    
208    80     
-128   -48    
64     -80    
48     208    
-48    32     
-304   -48    
-16    -80    
48     0      
208    -208   
-64    112    
144    -928   
-128   -32    
240    -16    
-272   -48    
128    144    
-32    256    
176    -416   
-416   32     
160    -448   
80     80     
-80    16     
-16    96     
128    -96    
-48    -128   
192    -144   
160    -224   
112    -176   
-96    -48    
144    -16    
16     -80    
16     80     
48     -256   
-32    0      
64     -16    
64     80     
16     -16    
80     -128   
-448   -144   
160    -272   
-32    128    
144    -192   
80     0      
-64    -304   
0      -32    
16     -64    
192    48     
32     128    
-32    -16    
80     112    
-32    64     
-96    -176   
160    -128   
-496   -48    
144    -112   
32     -128   
192    0      
-32    -160   
112    -672   
-16    -112   
80     -928   
-80    192    
32     -192   
128    64     
-128   128    
80     -304   
-112   -48    
-80    160    
-224   -32    
160    48     
-80    112    
64     -304   
0      48     
-160   128    
16     128    
64     -400   
80     -80    
-128   -256   
0      -80    
-80    32     
160    80     
0      176    
192    112    
-224   -128   
304    272    
-400   96     
32     -80    
-384   112    
16     -80    
96     16     
96     -368   
96     -48    
0      32     
176    -240   
-48    400    
-32    32     
144    256    
48     -112   
-784   -112   
176    -256   
-192   -64    
32     80     
-192   -32    
80     -352   
-96    -48    
64     -624   
64     144    
-144   144    
304    336    
48     160    
32     -32    
-176   -64    
32     -96    
-48    80     
48     -160   
-32    144    
32     144    
-144   0      
144    -240   
0      96     
-32    48     
32     -48    
-112   96     
272    320    
-224   -144   
208    -48    
-320   144    
272    -144   
-208   144    
112    -80    
32     96     
0      -96    
192    64     
-48    -48    
144    -16    
-160   -288   
-416   -256   
-96    0      
-1376  -64    
-48    -64    
-160   32     
80     80     
-112   112    
-64    -976   
224    512    
-144   160    
-576   -256   
-224   -64    
96     -256   
-96    80     
96     -176   
32     48     
-80    96     
-480   -368   
-16    -320   
288    80     
384    256    
-384   80     
-160   112    
-96    -16    
-80    -48    
-128   -160   
128    256    
-48    -160   
0      192    
-128   16     
48     64     
-208   32     
16     64     
48     64     
-80    48     
-96    32     
-656   -176   
-144   208    
-304   16     
-16    112    
32     -16    
48     64     
-112   -288   
160    48     
-80    112    
-80    -64    
-96    416    
-192   -16    
16     0      
-176   -240   
864    1904   
-1120  -1344  
288    -448   
-544   320    
272    128    
-576   -368   
64     -128   
-16    736    
-16    -432   
-336   32     
320    -224   
96     480    
-208   48     
-144   64     
-48    -144   
224    240    
-208   -48    
112    192    
-1056  -240   
272    -464   
-448   -240   
192    -48    
112    496    
16     112    
176    368    
-336   -48    
0      176    
-224   -976   
480    496    
-128   -16    
64     288    
-368   144    
-48    48     
-256   -48    
80     416    
-288   64     
-48    -144   
320    192    
-208   80     
176    48     
-144   0      
16     64     
-112   -80    
128    240    
-32    112    
-112   96     
-80    272    
112    256    
-272   64     
-112   64     
16     -192   
-112   -64    
-32    48     
176    272    
-16    -16    
-64    64     
0      -608   
144    -288   
128    -224   
-96    16     
144    288    
-16    192    
16     304    
64     16     
48     16     
-176   -16    
-16    0      
0      160    
-112   -352   
176    -304   
240    80     
-16    448    
-224   96     
128    32     
16     64     
240    144    
-256   320    
-128   224    
160    112    
-64    176    
-80    -192   
-320   -80    
128    48     
-96    96     
-80    48     
64     64     
-256   -416   
64     -96    
144    208    
32     192    
-48    80     
-288   -64    
80     224    
0      -192   
80     304    
-48    336    
0      208    
-144   -112   
128    0      
64     352    
-96    128    
-128   -32    
224    160    
64     -48    
-16    80     
-112   -208   
-16    -96    
288    144    
-112   -16    
16     208    
48     192    
-208   -112   
80     0      
-32    -32    
224    336    
16     176    
-208   -496   
48     320    
160    32     
16     368    
0      112    
-48    -16    
32     -16    
128    160    
32     320    
-48    224    
112    48     
-80    -16    
-64    48     
80     128    
16     112    
176    -224   
-224   16     
160    48     
80     208    
-224   0      
-64    -16    
112    208    
0      32     
224    64     
-192   192    
192    80     
16     64     
176    128    
-80    128    
224    -16    
144    400    
-192   80     
176    16     
-80    -16    
64     128    
0      96     
16     32     
96     112    
-32    144    
-32    64     
176    112    
48     240    
-144   32     
176    48     
-64    80     
128    48     
0      48     
32     96     
192    368    
-176   112    
128    128    
160    -784   
0      112    
48     -1536  
-128   208    
-112   192    
-16    -80    
192    -128   
192    -80    
64     336    
-192   32     
-96    224    
0      0      
80     16     
96     96     
-96    80     
16     -400   
160    128    
-32    -2128  
176    240    
-144   160    
16     80     
128    224    
-32    112    
160    0      
16     32     
0      112    
-32    -128   
96     64     
-112   272    
160    16     
80     0      
1136   -176   
-192   -416   
448    624    
-512   128    
1040   80     
-656   464    
-256   -608   
336    640    
256    -240   
-176   96     
96     -64    
176    32     
-32    272    
96     0      
-32    -352   
48     -48    
-256   -592   
400    -80    
-224   -1312  
240    -160   
-48    368    
144    -32    
-160   384    
192    -272   
-80    240    
96     -48    
80     400    
-32    -352   
-64    288    
160    -336   
32     176    
96     -112   
0      160    
48     -768   
48     64     
16     -1072  
0      32     
112    96     
-16    144    
96     80     
96     80     
-128   128    
112    -112   
64     256    
32     -32    
16     160    
-16    -96    
32     192    
256    -432   
-176   208    
160    -496   
0      224    
32     160    
128    80     
-160   48     
144    160    
64     112    
32     -160   
64     224    
80     80     
32     208    
48     -336   
-64    160    
96     -256   
80     96     
-112   -64    
48     176    
-32    96     
32     32     
48     112    
-16    128    
144    208    
-48    0      
160    144    
0      -224   
-80    64     
224    -32    
-208   320    
304    -144   
32     64     
16     -1024  
-16    176    
-32    176    
112    144    
320    96     
-32    -16    
96     272    
-48    -16    
-144   -256   
208    32     
368    336    
128    64     
-240   -160   
112    -16    
48     256    
128    32     
32     -928   
-160   -224   
-16    -192   
160    176    
-752   -192   
32     -176   
0      -336   
16     -400   
96     -144   
208    912    
112    -80    
-96    288    
144    -112   
176    -224   
48     -48    
48     0      
32     64     
0      -576   
112    -256   
-1120  -32    
32     -80    
48     -64    
96     -208   
-160   64     
48     -224   
96     112    
16     192    
32     48     
16     176    
80     -304   
-160   -304   
208    16     
-16    -304   
32     -16    
-96    16     
96     48     
-16    240    
-144   -336   
128    -160   
160    320    
224    96     
-272   -656   
64     32     
144    128    
-144   96     
96     32     
96     272    
-208   -144   
240    -32    
-304   16     
240    64     
-240   -32    
0      -96    
64     -48    
96     -368   
0      -32    
0      -80    
-432   -192   
32     -96    
-80    -80    
80     -48    
-80    144    
192    -32    
-32    80     
64     48     
-80    32     
-432   112    
-80    -144   
0      -32    
336    256    
-240   -64    
160    0      
-144   32     
256    -704   
-16    128    
112    16     
16     -16    
-48    0      
0      -160   
-16    -176   
160    48     
-128   -32    
128    96     
-544   32     
208    -304   
80     32     
64     -320   
-256   160    
80     -368   
80     320    
-96    -48    
48     -128   
256    -112   
-96    -32    
-160   -160   
240    64     
-336   96     
208    -320   
-192   96     
-112   -224   
-80    -96    
-576   -160   
-1424  -240   
544    -368   
16     832    
128    -880   
1024   992    
-576   -32    
272    1424   
-224   240    
288    -208   
-688   -448   
368    48     
112    80     
-128   -144   
-112   16     
112    -160   
304    608    
-176   -592   
16     -176   
-80    -128   
432    592    
-112   128    
16     -112   
80     80     
-144   64     
-32    -416   
112    -144   
480    448    
-480   -144   
-32    64     
144    128    
-16    192    
32     -240   
64     -240   
16     0      
96     256    
16     -160   
-208   -368   
-112   -144   
272    0      
-224   336    
-48    -176   
16     80     
-1648  -288   
224    -128   
-704   -368   
192    80     
-528   -192   
-64    -112   
-160   0      
-304   96     
-96    32     
-736   96     
-128   112    
16     64     
32     0      
64     0      
-176   -144   
-544   -112   
0      32     
-112   32     
32     144    
0      64     
-192   -240   
-112   112    
-688   -144   
80     64     
-304   224    
-32    160    
-1360  176    
-336   96     
48     -224   
112    64     
-48    -272   
176    -48    
-224   -16    
224    112    
-96    0      
-144   -64    
16     144    
16     0      
-16    64     
96     16     
-288   -32    
-48    -208   
48     160    
-400   -32    
112    160    
-288   16     
112    96     
-112   -224   
-80    16     
16     144    
48     16     
144    32     
-64    -48    
-32    32     
-80    -16    
-64    -32    
-112   -272   
-64    -80    
-400   64     
96     176    
-128   -384   
-96    64     
16     -64    
48     -16    
-16    0      
80     416    
0      192    
-128   16     
0      96     
-176   -160   
64     128    
-192   0      
208    32     
-864   -128   
288    256    
-208   -160   
80     176    
160    112    
-128   32     
-32    -304   
-304   -144   
-80    -48    
64     -48    
16     64     
-112   -32    
16     64     
-32    16     
-96    80     
-336   -176   
32     -96    
-448   -80    
96     112    
336    48     
-224   -32    
-320   80     
160    160    
208    0      
16     0      
-304   16     
96     80     
304    64     
-288   -32    
144    112    
-32    160    
48     112    
-624   48     
160    -48    
16     80     
-96    64     
96     80     
32     80     
-112   16     
160    112    
-80    80     
-32    -16    
-48    -368   
0      -128   
144    176    
-176   96     
80     144    
-48    -48    
-16    80     
48     64     
-80    -64    
-128   -80    
144    224    
-208   80     
48     -16    
0      96     
16     16     
96     64     
-256   -16    
240    192    
-272   -32    
32     0      
0      -16    
112    144    
-16    192    
-32    192    
80     -64    
176    -112   
-64    240    
0      -112   
160    240    
-64    -16    
112    208    
-48    0      
64     176    
-128   16     
32     -48    
48     144    
-80    48     
48     176    
-16    80     
0      48     
1104   2096   
-688   2000   
-2000  -16    
512    992    
48     0      
240    -320   
-688   480    
496    -144   
112    320    
-160   64     
112    -96    
-224   288    
352    -320   
-160   512    
256    -496   
-208   448    
224    -208   
-32    528    
-144   -480   
0      -32    
48     16     
-96    224    
48     128    
-48    64     
16     -64    
112    32     
-16    128    
16     176    
-16    128    
160    32     
-176   112    
176    -48    
-160   320    
240    -16    
-144   192    
144    -32    
-96    240    
144    112    
-96    16     
-16    16     
48     144    
128    96     
-64    144    
80     16     
48     160    
-16    -16    
112    176    
-272   64     
320    32     
-96    16     
128    96     
-96    -64    
96     -208   
32     64     
32     0      
16     112    
32     32     
0      144    
48     112    
-16    -112   
32     -64    
160    384    
-208   96     
144    80     
128    144    
-32    16     
-16    112    
64     -96    
0      16     
144    -160   
-80    128    
160    112    
16     32     
-64    -48    
176    112    
-96    192    
224    528    
-64    -208   
208    -192   
-112   32     
256    176    
144    192    
-64    -32    
144    48     
-32    48     
240    240    
-32    80     
-96    48     
64     -16    
-16    176    
128    128    
-48    256    
64     -16    
96     96     
-16    48     
80     176    
192    368    
-48    -176   
64     -176   
-16    -1424  
96     48     
0      -1280  
-64    -48    
112    112    
32     96     
-16    192    
144    208    
-128   -240   
0      -224   
-48    48     
160    224    
64     32     
-80    -272   
80     80     
32     -352   
128    80     
0      -720   
48     48     
80     -160   
-64    -64    
64     -32    
112    192    
144    192    
-80    -48    
-208   112    
-16    -16    
384    32     
-128   0      
0      128    
80     -16    
-16    48     
32     64     
-16    -64    
160    -304   
-16    224    
64     -48    
224    640    
-128   336    
112    144    
-48    -48    
256    -208   
48     192    
0      32     
-64    64     
112    -176   
96     112    
-64    -304   
320    144    
16     512    
-80    160    
-112   16     
32     -32    
272    96     
128    -240   
-32    -32    
-48    96     
-128   0      
96     224    
-112   -96    
352    -112   
-160   64     
128    -192   
-80    0      
160    -80    
64     112    
-128   -176   
320    336    
-336   96     
-80    -320   
80     224    
32     -64    
80     64     
48     -64    
-80    80     
208    -96    
-144   96     
224    0      
0      160    
32     -96    
48     48     
-32    112    
80     -272   
160    160    
64     64     
-112   -1648  
-64    -432   
160    -2528  
112    -16    
-64    32     
-160   -32    
176    48     
384    -208   
0      256    
-176   -320   
-32    -1232  
176    192    
288    -400   
80     144    
-2128  1696   
-416   -704   
-144   -784   
-208   -1184  
224    -336   
336    1200   
48     -768   
-80    656    
-96    -176   
96     -896   
0      -320   
0      80     
192    224    
192    176    
48     -256   
-272   -112   
-336   -512   
336    64     
-48    -176   
176    -128   
-192   -784   
368    -16    
-64    -224   
160    -144   
160    -48    
48     112    
48     -16    
-48    48     
16     -48    
-80    -368   
-384   -96    
80     112    
224    -112   
176    -112   
-32    -16    
128    -400   
-16    -176   
16     192    
128    -32    
240    -176   
-64    272    
48     -224   
-16    -112   
-80    128    
224    208    
-320   80     
0      -16    
-656   -224   
320    192    
-176   80     
288    -48    
-128   160    
160    -384   
96     224    
-240   -112   
240    272    
-64    -288   
272    -64    
-96    128    
64     -48    
-64    112    
64     -176   
0      32     
64     -80    
-336   80     
0      -48    
-96    112    
96     -176   
32     160    
16     -640   
96     144    
64     160    
-80    -48    
112    -16    
16     -16    
-112   -176   
304    -144   
-272   0      
-32    80     
-800   64     
96     -208   
-128   -80    
160    -640   
-160   240    
80     144    
0      -32    
16     0      
128    320    
-176   -176   
224    16     
-368   16     
224    64     
-272   0      
-32    0      
-208   -176   
-32    -144   
0      -48    
112    16     
16     32     
80     -240   
128    224    
-48    96     
112    16     
-336   16     
128    -96    
-64    -16    
96     -64    
176    336    
-80    0      
-48    -80    
0      -224   
0      80     
128    -320   
-64    0      
-48    -576   
144    -144   
-288   -80    
80     -48    
-48    -32    
48     112    
32     -96    
-128   -48    
-272   -32    
304    -16    
-144   -80    
160    -96    
-64    304    
0      -128   
-48    96     
-480   -272   
64     144    
16     256    
-272   -48    
-272   128    
-272   -96    
160    -48    
48     192    
48     32     
144    48     
-256   112    
-1184  -144   
144    192    
-128   -240   
-64    192    
160    80     
-80    256    
-208   48     
-304   16     
-48    112    
-768   -16    
16     144    
48     64     
0      96     
48     48     
-128   16     
-80    -96    
-128   -144   
48     -368   
112    192    
0      208    
-128   -64    
-112   -32    
-464   -128   
-32    -16    
-128   80     
-48    192    
-864   160    
16     -368   
-1200  -192   
0      -16    
-96    -16    
-16    64     
288    96     
-112   64     
48     128    
-144   0      
48     -80    
256    224    
176    -80    
96     224    
-96    0      
-816   80     
-288   80     
-352   -208   
272    32     
32     -160   
-144   192    
-240   -16    
-144   -64    
16     32     
-32    16     
-32    48     
-16    80     
208    240    
-208   96     
64     -48    
-256   -64    
-64    2144   
-2288  -704   
-48    480    
608    192    
1328   -464   
-800   -96    
208    720    
-480   -112   
336    -208   
-192   128    
128    48     
-64    16     
-240   80     
80     16     
32     -64    
-128   64     
-352   48     
32     96     
-144   -304   
80     96     
32     32     
80     128    
-16    240    
-16    64     
-32    -16    
64     -112   
32     144    
80     192    
16     192    
-112   -80    
-48    32     
-240   -128   
352    112    
-160   192    
192    64     
-80    80     
-208   96     
128    80     
-144   -48    
96     64     
64     -32    
64     192    
0      96     
48     0      
-272   -16    
16     112    
-48    -16    
0      224    
-736   192    
-96    32     
64     16     
-96    96     
48     32     
-80    192    
64     32     
48     176    
-16    144    
-80    0      
32     32     
-160   -48    
16     272    
-112   32     
80     224    
208    112    
-112   112    
-128   -64    
112    -48    
-96    -32    
-16    32     
64     96     
-48    128    
-32    -16    
16     -96    
160    160    
-160   96     
48     128    
-240   -320   
208    -80    
-144   112    
-176   -128   
384    -48    
-208   224    
176    112    
0      144    
-80    80     
-64    -96    
112    224    
-224   80     
144    16     
16     64     
80     96     
-112   32     
0      128    
0      80     
-16    96     
-48    16     
96     48     
16     48     
-16    80     
32     80     
-48    64     
0      32     
-48    -48    
96     80     
-48    -16    
0      80     
-64    160    
-112   -80    
80     -80    
48     128    
32     48     
96     80     
-112   96     
80     32     
128    144    
-80    112    
112    256    
-128   -144   
96     128    
-96    176    
96     32     
-64    -32    
32     160    
288    64     
16     80     
-208   128    
-64    432    
128    -32    
144    0      
-32    208    
160    16     
-96    32     
-272   32     
208    144    
-16    80     
64     112    
-144   -672   
352    0      
-64    560    
-48    -96    
96     208    
-48    32     
160    192    
-144   16     
-16    48     
-48    -96    
144    240    
-192   -16    
96     96     
-64    -64    
128    -288   
-48    128    
80     -16    
224    208    
160    592    
-432   -160   
352    160    
-144   -272   
384    -32    
-208   240    
-80    32     
-16    192    
-48    -32    
416    304    
-80    -96    
-272   -480   
240    272    
-464   352    
64     -112   
80     16     
320    48     
80     144    
-208   80     
-256   96     
368    -112   
176    256    
-160   16     
16     -352   
48     208    
160    160    
-208   -112   
-400   192    
0      -480   
240    -96    
-128   320    
336    48     
48     176    
16     64     
144    0      
64     96     
-64    48     
96     128    
-96    -16    
96     224    
-16    96     
224    -80    
48     112    
16     -224   
1856   -2080  
784    -368   
-832   -480   
-480   -528   
288    544    
240    -144   
-192   -432   
48     528    
240    16     
-96    64     
-352   -32    
192    96     
144    -112   
80     48     
-16    -240   
64     -32    
32     240    
112    224    
16     -192   
-16    176    
48     176    
32     112    
32     -64    
-144   32     
240    -208   
-80    32     
224    128    
-64    -240   
96     96     
-64    -64    
160    16     
-96    -576   
80     48     
96     -656   
0      64     
208    240    
-128   288    
32     16     
-16    16     
48     64     
160    -144   
48     96     
32     -336   
32     176    
16     80     
128    16     
-80    -480   
96     128    
32     -128   
144    224    
-96    0      
176    112    
-176   16     
288    192    
-80    112    
80     -336   
272    96     
-112   0      
96     -32    
64     -48    
-112   144    
112    -160   
48     224    
-48    -128   
224    96     
-96    160    
160    304    
-48    -32    
176    -288   
32     176    
-16    -80    
48     96     
128    -304   
64     208    
-80    -208   
128    256    
16     -160   
224    16     
-32    -16    
80     -2208  
16     112    
-128   128    
80     48     
96     -128   
128    -176   
96     32     
32     -1184  
-64    -416   
288    208    
-176   -80    
208    128    
0      -16    
112    192    
-32    0      
-96    -448   
208    208    
-96    48     
112    -304   
-224   -16    
-64    -640   
320    64     
-32    -768   
48     -112   
80     -432   
32     -16    
64     96     
0      -208   
224    32     
0      128    
192    16     
-224   0      
160    144    
144    -352   
-384   -144   
16     -144   
48     -16    
48     -48    
-128   -112   
192    -224   
-144   -336   
0      -768   
80     -128   
208    -64    
112    160    
16     80     
-128   -128   
-208   -176   
-80    -176   
-560   -240   
192    48     
0      0      
176    48     
-32    0      
368    144    
80     0      
0      -1328  
144    256    
48     96     
128    320    
48     -112   
128    160    
-96    -16    
16     48     
64     160    
96     -48    
-224   64     
0      -208   
64     -224   
144    -576   
-96    80     
96     -128   
112    80     
48     224    
16     96     
32     -192   
176    -48    
-256   -128   
160    -112   
-96    -304   
-48    -112   
-352   112    
112    -112   
-2000  -48    
48     -64    
160    -48    
-48    -336   
-96    128    
-16    -2144  
80     368    
192    96     
32     96     
-96    -144   
-80    -208   
-48    -16    
192    80     
-112   144    
64     48     
-192   112    
96     64     
96     -48    
32     -272   
-16    160    
96     -416   
-16    112    
128    80     
64     -240   
112    112    
64     -16    
-144   -48    
64     48     
-96    48     
32     80     
-416   112    
192    -272   
-128   0      
16     -32    
64     176    
-48    352    
-144   -1056  
80     560    
64     496    
-736   -176   
144    576    
-720   1120   
464    256    
-528   -176   
512    80     
-528   -448   
32     -352   
32     400    
160    -208   
48     96     
32     -832   
128    -16    
-48    -336   
96     -272   
16     -112   
96     32     
-240   16     
96     208    
32     32     
64     -160   
-128   -32    
0      96     
128    192    
-368   96     
16     32     
-1584  -528   
0      -64    
-64    160    
-288   -16    
-144   80     
-240   -160   
-64    208    
144    240    
-48    208    
112    48     
-96    16     
-48    0      
80     48     
-64    -96    
-16    96     
-128   32     
-336   32     
48     144    
-176   96     
0      176    
-304   -96    
0      -48    
48     -32    
-128   -176   
80     64     
0      16     
-16    -128   
48     32     
-80    -272   
32     160    
0      304    
-32    96     
-48    128    
-16    80     
-64    416    
-128   -128   
0      272    
-80    64     
48     0      
-240   -80    
80     128    
-208   -192   
32     96     
-32    -80    
96     368    
-144   160    
-48    48     
-288   -64    
336    288    
176    384    
-112   80     
-48    80     
-352   -144   
-32    0      
-1440  -208   
48     -32    
64     208    
-128   64     
32     -176   
-80    -32    
-32    -32    
-48    32     
-80    144    
-32    48     
64     128    
-256   0      
48     -16    
-512   80     
-48    0      
-912   -112   
32     80     
-16    -80    
96     80     
-112   64     
80     80     
-48    64     
-32    96     
48     176    
16     -48    
0      64     
-240   -32    
48     -48    
-144   16     
176    128    
-128   96     
32     112    
-16    -16    
16     64     
48     96     
-80    80     
-16    -64    
-32    -32    
64     96     
48     224    
80     224    
-80    112    
-176   48     
-176   -496   
112    64     
-448   -96    
192    144    
-288   -48    
-64    -192   
-80    96     
0      256    
0      -16    
304    224    
-640   192    
112    288    
48     368    
-96    -128   
96     16     
-144   0      
-16    16     
-304   64     
-48    48     
192    -272   
-256   16     
352    448    
-208   368    
-80    64     
-32    64     
-16    -64    
16     48     
-64    80     
48     240    
-192   64     
-176   -32    
-48    -48    
64     -144   
176    144    
32     192    
-48    80     
-144   -16    
112    48     
48     48     
192    -224   
-80    96     
176    192    
-304   -32    
-48    32     
96     64     
-208   48     
64     240    
-400   -80    
80     -32    
80     176    
-112   -64    
160    480    
-288   -256   
96     176    
224    -432   
-112   272    
144    48     
-32    112    
-32    144    
-64    80     
-160   -192   
0      112    
-336   -240   
144    48     
32     144    
0      64     
0      48     
256    -32    
-80    0      
112    160    
-192   272    
-528   2928   
-2064  -80    
256    -64    
368    144    
912    -864   
-880   -176   
352    128    
320    1136   
-320   -160   
128    -192   
-192   96     
144    -80    
-80    144    
96     32     
-48    112    
32     16     
80     144    
-16    112    
32     48     
-112   16     
32     96     
16     112    
96     256    
0      80     
64     48     
160    160    
-144   128    
144    0      
0      256    
48     48     
-16    80     
32     144    
-144   -48    
112    128    
-64    96     
112    144    
64     544    
-128   -32    
16     0      
-48    192    
272    48     
-96    112    
0      128    
64     96     
160    0      
-160   32     
240    208    
-160   96     
160    192    
64     -16    
-48    48     
112    48     
-16    176    
144    192    
32     16     
48     144    
-16    144    
160    112    
-48    112    
48     96     
-32    -32    
128    160    
-64    -16    
112    -16    
48     112    
-128   -416   
64     112    
16     -624   
96     144    
-64    176    
208    -48    
64     192    
-80    16     
144    48     
-48    192    
0      -80    
32     96     
96     208    
-32    16     
80     -64    
32     -272   
-32    240    
-32    -480   
144    -64    
-80    112    
80     192    
224    160    
-240   192    
208    -16    
112    192    
-16    -16    
192    80     
-176   -80    
128    -288   
16     64     
128    240    
-112   160    
256    -304   
-144   -48    
96     224    
-32    80     
64     304    
80     208    
192    336    
-48    64     
80     64     
-176   0      
320    32     
-80    -192   
80     -48    
64     -176   
-80    144    
144    -384   
112    160    
48     -1296  
-32    96     
160    464    
-128   -32    
192    -64    
-128   32     
80     32     
16     96     
-336   -48    
336    -144   
144    272    
48     -320   
48     192    
32     -96    
64     144    
160    -304   
16     144    
-80    -2608  
48     16     
-48    -16    
112    80     
-64    16     
352    112    
-32    304    
0      -80    
64     64     
32     -208   
-64    112    
48     192    
16     128    
128    -272   
0      -80    
128    208    
112    224    
-80    96     
176    32     
48     -16    
-64    -816   
80     144    
0      -96    
192    48     
-80    -352   
32     144    
272    -160   
-96    64     
64     -400   
112    80     
-80    -48    
176    64     
-64    144    
128    -384   
-160   -96    
48     -144   
112    224    
0      -432   
144    560    
112    96     
-208   0      
-112   -432   
112    -208   
224    -192   
96     160    
80     480    
-144   -944   
80     176    
0      -128   
160    -912   
-496   -288   
-48    -144   
128    80     
-64    -1328  
32     16     
32     -16    
0      -64    
176    144    
-64    144    
128    32     
-96    -16    
128    -48    
336    48     
-112   -128   
160    32     
-544   -16    
176    -320   
368    1824   
-720   -1328  
-144   -224   
-256   -368   
-112   400    
-880   -160   
128    -1776  
784    368    
-352   -320   
224    128    
-400   128    
320    48     
224    32     
-592   -224   
64     -144   
256    16     
-144   -240   
272    352    
-96    -80    
-16    -240   
272    -1504  
-64    48     
32     -144   
0      208    
-32    -80    
48     -48    
16     0      
224    -336   
-32    80     
-64    0      
-384   32     
0      96     
64     0      
48     -432   
0      -144   
0      -1600  
-144   -64    
128    -112   
48     32     
32     176    
-32    32     
16     -96    
80     -48    
-144   -16    
48     48     
-80    144    
32     -16    
-80    -208   
-96    -672   
-144   -256   
96     -544   
32     160    
0      176    
-128   224    
16     -400   
176    -224   
-192   -304   
80     -16    
144    496    
-256   -80    
240    48     
-208   16     
-160   -128   
-128   -80    
352    -128   
-48    128    
-16    48     
192    -1072  
0      128    
32     32     
80     16     
80     32     
0      -96    
-96    -144   
160    -64    
-112   -112   
-304   -720   
-80    -432   
-96    -112   
160    0      
192    -320   
-160   528    
112    -208   
16     208    
-80    -112   
80     112    
-720   -208   
144    48     
-128   16     
80     -144   
-112   -112   
112    176    
-80    176    
-80    -464   
-80    -96    
128    -416   
-16    80     
0      -320   
-16    80     
-48    192    
96     -32    
-128   0      
16     144    
-32    -16    
128    64     
-160   112    
256    400    
-224   -160   
304    -64    
-112   240    
112    -160   
-64    -16    
-80    -272   
-496   -128   
-128   112    
-64    -256   
-96    -224   
-48    -144   
48     -368   
112    48     
-160   -208   
96     -48    
32     192    
240    144    
-48    544    
-832   -240   
336    80     
-288   192    
-224   -416   
-48    -240   
-112   192    
64     -176   
-1440  32     
-96    64     
16     -16    
-144   336    
160    -192   
-256   -176   
-160   -240   
48     224    
-288   -368   
-16    240    
-16    192    
-32    48     
-192   48     
-32    -32    
-128   -16    
-96    128    
-288   -16    
96     64     
-48    64     
-80    -64    
80     240    
-16    -160   
80     -192   
-256   -240   
-32    160    
0      -192   
-224   96     
80     -112   
-144   128    
-112   -240   
-512   -16    
32     224    
-128   -32    
-352   704    
-160   224    
-272   -400   
-112   -624   
368    272    
48     16     
-224   -144   
256    32     
16     -32    
-16    -48    
-96    96     
-144   -48    
-32    112    
-112   -64    
-16    48     
-96    0      
-112   -16    
64     352    
-208   -112   
64     -96    
144    144    
48     -256   
-64    240    
-48    16     
-32    96     
112    32     
0      16     
-32    0      
16     80     
32     -256   
48     128    
-688   96     
-912   -2080  
1104   480    
-256   0      
448    -176   
736    -384   
-448   -112   
400    80     
-224   144    
16     304    
272    -176   
-80    32     
-96    16     
48     256    
80     48     
-352   48     
-16    64     
0      -16    
-16    144    
-48    0      
-16    -80    
48     48     
0      48     
160    192    
-208   16     
-16    -96    
-80    16     
16     144    
16     304    
0      208    
-400   -224   
48     48     
-1632  -48    
272    48     
-224   64     
224    48     
-64    48     
96     -80    
-272   16     
144    224    
64     64     
0      96     
-176   144    
16     16     
48     128    
-176   -144   
144    128    
32     256    
80     80     
-80    -32    
224    32     
-192   224    
160    16     
-80    112    
0      112    
80     96     
-112   0      
144    176    
-272   32     
304    -64    
-128   224    
-160   80     
272    96     
-48    176    
-112   80     
-16    -48    
160    64     
-112   224    
16     144    
48     32     
128    -96    
-32    48     
-64    224    
-160   -48    
160    48     
-80    0      
-96    160    
-48    64     
176    192    
-96    64     
128    16     
-16    48     
0      144    
64     64     
-48    16     
224    -48    
0      128    
-112   -272   
160    -96    
-96    16     
-128   16     
16     128    
-48    -16    
96     176    
0      48     
80     384    
-144   -96    
64     96     
64     160    
-160   208    
48     64     
-32    16     
48     80     
16     32     
48     112    
-64    16     
48     16     
0      64     
128    176    
-128   -16    
160    208    
0      64     
-32    32     
144    80     
-112   64     
-32    112    
32     0      
64     128    
-112   48     
-80    32     
32     112    
256    288    
80     16     
-144   160    
48     0      
16     96     
48     -48    
-96    192    
16     64     
288    -16    
-128   -16    
96     208    
48     64     
-80    0      
-128   -432   
144    224    
112    48     
96     48     
-320   32     
16     64     
80     -64    
-80    224    
368    -16    
-160   64     
304    240    
-240   0      
16     -112   
-288   -32    
160    -384   
-144   -624   
320    240    
-128   128    
32     96     
128    32     
-32    224    
80     112    
-48    -368   
16     208    
64     320    
-96    -272   
16     256    
48     160    
-80    32     
160    336    
-32    -240   
224    48     
-32    -1120  
48     -224   
48     272    
304    320    
-176   -144   
0      32     
80     160    
112    144    
-96    -112   
64     144    
272    336    
-752   -336   
64     48     
-48    -128   
128    -16    
-16    -192   
64     48     
0      144    
96     32     
-96    64     
96     64     
304    144    
-64    128    
-32    128    
-80    112    
0      -32    
112    -160   
192    16     
-64    -16    
336    48     
16     -288   
-112   64     
96     -352   
-1152  -1696  
1648   3520   
-1136  1136   
480    -304   
-272   -448   
-192   128    
368    1648   
-1200  0      
1248   928    
-752   -96    
336    -240   
-368   -368   
320    -256   
384    80     
96     160    
-224   48     
240    -1024  
-192   64     
80     -192   
192    176    
176    96     
-32    448    
-48    256    
-112   0      
176    128    
-128   -128   
96     -32    
192    -1072  
192    16     
336    16     
-32    16     
-80    192    
32     160    
-48    80     
32     0      
128    -16    
32     48     
208    384    
32     -16    
32     112    
112    -176   
-64    112    
80     -192   
0      176    
80     -16    
-96    64     
144    -32    
112    -144   
-16    224    
320    176    
-240   -32    
32     -16    
80     64     
112    208    
-32    112    
-112   -64    
176    384    
32     -64    
-80    0      
-192   -384   
304    0      
-112   -304   
-16    304    
256    400    
-256   -1856  
-64    -80    
96     -64    
64     -1024  
32     -32    
32     128    
144    -112   
64     128    
48     0      
176    336    
-112   -128   
96     128    
96     -80    
-48    -736   
608    240    
16     -240   
-144   -416   
144    -96    
64     -448   
240    -128   
-32    -432   
-32    -112   
-144   -1408  
384    208    
48     288    
16     -288   
128    -336   
96     304    
80     -592   
-192   128    
-208   -240   
-48    -304   
-288   -240   
176    208    
-144   -240   
-32    -480   
-16    -288   
144    -688   
160    64     
16     -48    
-16    64     
32     -176   
-16    -16    
96     -48    
-96    144    
-48    64     
-16    -48    
-304   -160   
32     -176   
80     -48    
48     -208   
64     64     
48     -48    
144    80     
-16    -3040  
16     -224   
144    -112   
0      144    
64     80     
128    32     
-272   -160   
256    -160   
-784   32     
80     -96    
-848   -16    
32     48     
48     32     
64     -256   
32     224    
64     -960   
-80    336    
-80    0      
192    -608   
-288   -48    
192    -160   
80     16     
-32    176    
96     144    
-16    16     
-112   -32    
0      80     
-16    64     
64     32     
-112   -176   
48     -208   
80     -32    
96     -112   
-32    -64    
32     -80    
192    -32    
48     32     
0      -128   
48     96     
16     256    
-720   -64    
288    -224   
-544   144    
208    -112   
-128   80     
0      -144   
176    480    
-64    -1376  
160    -96    
-176   -192   
96     0      
-304   208    
32     -16    
272    160    
-48    -128   
0      112    
176    -192   
-160   192    
112    -96    
-32    32     
112    -560   
-48    96     
16     -944   
96     80     
-272   128    
112    -96    
-32    176    
-32    -32    
-368   -16    
144    -80    
-96    48     
64     -16    
-1008  96     
-16    -144   
0      176    
176    -240   
-96    64     
208    -256   
96     -48    
16     80     
-528   192    
-576   -912   
176    304    
-256   272    
576    528    
-752   -480   
928    144    
-1168  352    
560    -416   
-720   16     
304    -384   
-48    640    
112    -336   
-304   384    
32     -224   
-1504  208    
0      -128   
0      160    
-176   -224   
144    64     
-112   -96    
128    -32    
-352   112    
-560   -336   
-160   80     
48     -112   
32     272    
32     48     
-320   0      
48     -16    
-64    208    
240    -112   
-608   224    
-112   -80    
144    112    
-256   -336   
128    -144   
-16    80     
64     -64    
64     176    
-208   -160   
-96    80     
16     -48    
-96    -64    
16     128    
0      144    
-64    96     
-400   112    
-288   64     
-464   -80    
-16    112    
0      48     
208    192    
-256   -64    
160    -16    
-128   -96    
-64    48     
160    64     
-16    176    
-144   32     
64     -16    
-192   64     
-480   -96    
0      128    
-272   48     
48     128    
16     -176   
80     128    
-304   -224   
176    144    
-16    0      
144    144    
-96    48     
48     32     
16     128    
0      -96    
-80    96     
-208   -32    
80     48     
-400   -64    
96     48     
-832   0      
64     224    
112    -160   
208    16     
-208   -112   
128    -112   
-176   224    
-144   16     
144    128    
-176   32     
144    80     
-32    0      
-80    -128   
-224   -64    
0      0      
-336   0      
144    224    
16     32     
48     128    
-96    -96    
80     48     
-128   -32    
112    192    
-96    128    
32     48     
-128   -48    
80     32     
64     224    
-288   32     
-192   16     
-352   -288   
-144   -32    
128    -176   
48     160    
-32    64     
128    352    
48     -16    
0      144    
64     -48    
-48    160    
16     80     
-48    -96    
-80    80     
-48    16     
80     288    
-176   112    
336    496    
-352   -96    
112    208    
-112   128    
48     224    
80     -32    
-112   32     
80     96     
-32    192    
16     112    
-16    64     
-80    -256   
-224   48     
272    208    
-560   -176   
224    -16    
-64    48     
32     0      
144    384    
-208   -48    
32     -112   
48     224    
-64    16     
48     64     
-16    48     
48     0      
112    176    
-528   -288   
224    -96    
-112   -368   
272    432    
240    288    
16     160    
160    208    
-80    0      
32     176    
16     0      
64     64     
-112   80     
0      -16    
272    144    
-80    128    
80     -16    
-80    80     
-64    16     
544    48     
-256   80     
144    -112   
48     208    
-96    32     
224    48     
-144   112    
112    48     
-16    -16    
0      16     
16     -16    
32     160    
-224   96     
32     176    
-16    48     
-32    80     
208    -16    
-32    112    
32     16     
112    48     
-48    160    
48     224    
-112   32     
-48    48     
64     32     
-896   -2320  
416    2640   
-256   1760   
160    64     
-48    -688   
-16    -352   
32     1760   
-1456  -560   
1568   -720   
-48    320    
-16    336    
-144   -592   
-272   288    
656    -240   
-32    624    
-512   -304   
48     416    
-288   -624   
496    -432   
-176   -288   
528    352    
-288   160    
-32    528    
-96    -112   
432    112    
-16    160    
288    32     
64     352    
-112   -32    
112    272    
-256   -16    
16     128    
-80    48     
-16    -352   
160    144    
-112   32     
64     -64    
-144   64     
96     144    
16     32     
-48    64     
-32    144    
176    128    
96     -272   
16     -16    
-96    -192   
96     64     
-96    -304   
-160   -576   
240    -32    
112    240    
32     288    
16     256    
0      -176   
128    176    
48     32     
224    320    
-144   208    
192    -112   
80     304    
192    160    
96     176    
64     -224   
16     -112   
80     -208   
80     -1328  
144    304    
-48    256    
-144   160    
448    416    
-80    64     
32     -272   
176    208    
-80    96     
48     176    
-96    16     
112    -192   
80     -80    
-240   -400   
-32    -128   
16     -720   
-48    48     
48     -208   
80     -128   
-192   144    
160    -80    
-128   64     
224    144    
112    112    
-96    -240   
-176   64     
160    -240   
0      160    
32     32     
96     128    
224    448    
-160   224    
192    80     
48     208    
-160   -320   
320    176    
16     96     
176    256    
-48    336    
-96    128    
240    688    
0      528    
288    512    
-240   -464   
128    224    
80     16     
64     208    
-112   -352   
192    32     
-176   -128   
144    48     
64     16     
-48    48     
144    176    
112    96     
-48    160    
-64    -144   
80     -208   
32     -160   
-16    160    
48     -640   
112    224    
-64    -224   
0      80     
-80    -256   
176    80     
-48    -128   
-80    96     
-240   -80    
384    128    
-112   -64    
288    -176   
-400   -192   
160    -80    
-48    0      
208    -112   
80     128    
144    -16    
-48    144    
-16    -128   
0      128    
112    -80    
-16    256    
0      -16    
224    0      
-16    -112   
32     -224   
80     112    
112    -96    
-32    0      
112    144    
80     48     
-80    -144   
48     -32    
32     96     
80     64     
32     128    
-16    -240   
128    -2144  
0      -256   
256    -1936  
-48    -208   
96     -880   
128    96     
-144   0      
32     -288   
64     64     
80     -160   
48     -96    
-128   -16    
224    -192   
-16    208    
0      -848   
80     224    
-1392  -96    
80     -176   
64     -48    
96     16     
16     -240   
96     -1600  
192    -160   
160    96     
-224   112    
-128   0      
32     128    
112    -400   
144    16     
-64    -128   
0      64     
-176   64     
80     -96    
32     48     
160    -272   
1088   1856   
-800   768    
-1920  -656   
160    704    
-16    -176   
-576   -224   
-128   64     
-240   432    
48     -432   
-208   32     
-16    -368   
-192   304    
160    -560   
144    208    
-32    -448   
-16    -80    
64     -80    
-80    144    
224    -2128  
-144   0      
-176   -336   
80     160    
112    160    
208    48     
-352   -112   
96     -112   
-272   -32    
160    -16    
-912   32     
80     -160   
16     -32    
-16    -16    
176    -16    
16     -496   
16     96     
96     -16    
112    64     
-16    -16    
80     -64    
-48    16     
64     -112   
-64    32     
48     -32    
-96    48     
-48    -160   
-448   -144   
128    -320   
128    -64    
32     -528   
-16    48     
144    -1504  
32     48     
-128   -64    
96     16     
-80    0      
96     32     
-48    96     
-80    -128   
144    16     
-64    -176   
-176   -128   
0      -48    
96     32     
0      -224   
80     112    
16     -1984  
96     96     
-144   -80    
160    32     
16     80     
16     48     
-192   64     
32     -32    
-96    -64    
16     -48    
-128   -128   
208    -32    
-80    208    
0      -64    
240    144    
-224   -384   
32     -592   
-32    -208   
-80    -64    
-160   112    
96     -16    
-48    -112   
128    -96    
-240   -80    
96     -16    
-32    80     
96     0      
80     272    
-16    -256   
64     48     
128    -112   
96     144    
-32    -192   
192    64     
-144   -208   
48     -144   
-192   112    
208    -80    
-48    64     
80     -80    
-880   -32    
-128   -336   
112    160    
-976   -272   
-96    -80    
16     -16    
-192   -48    
-48    -64    
-944   -32    
-112   48     
64     112    
-192   112    
48     -96    
128    224    
-416   -256   
112    160    
-512   -80    
240    -16    
64     -32    
80     192    
-32    128    
-288   656    
96     240    
-544   -16    
-160   0      
80     192    
32     32     
-384   -256   
80     112    
-320   -192   
160    32     
-176   -128   
160    160    
-48    -240   
-32    -64    
112    144    
-240   16     
-48    32     
32     176    
-80    -48    
48     48     
-336   -224   
-544   -160   
32     112    
32     -16    
80     128    
-64    0      
-128   48     
-64    -144   
0      80     
-80    16     
208    320    
-144   -256   
16     -16    
-224   144    
-64    -80    
-96    96     
208    48     
176    128    
-320   48     
-96    160    
-160   -464   
352    256    
160    432    
-400   -128   
288    -48    
-96    256    
128    32     
-272   80     
-176   48     
208    32     
112    192    
-128   -96    
240    112    
-400   -112   
160    64     
-48    -16    
-176   32     
48     96     
-64    192    
-208   -144   
144    16     
-80    224    
-64    0      
-144   96     
0      16     
432    -32    
-464   -96    
-80    0      
-960   -128   
272    176    
48     16     
16     112    
1808   -912   
-1200  -2784  
560    784    
-352   1136   
304    256    
64     368    
-160   -640   
-80    416    
-304   -400   
-176   240    
48     -192   
128    384    
-128   0      
-272   -416   
-528   -656   
272    -80    
160    400    
736    -48    
-736   32     
192    -240   
-32    576    
-16    -80    
-208   400    
16     208    
-240   -288   
-208   -64    
16     -16    
48     -16    
-112   -64    
80     384    
64     112    
64     208    
-96    16     
112    80     
32     144    
-96    -528   
-128   -144   
-32    64     
160    368    
-32    16     
-144   128    
-256   -160   
96     16     
144    80     
48     128    
192    208    
-208   128    
64     208    
-128   192    
-48    -64    
224    -64    
-32    80     
48     112    
-80    256    
-64    -160   
160    96     
0      96     
80     16     
-16    192    
-160   -320   
352    224    
-240   176    
-16    32     
288    96     
-176   160    
16     240    
32     96     
-80    0      
-16    0      
-64    -32    
0      144    
-64    32     
48     48     
64     128    
80     80     
160    240    
-128   720    
-80    160    
144    96     
96     96     
-64    -80    
192    -48    
0      272    
-176   144    
112    -32    
-48    -128   
288    208    
-32    96     
-16    -16    
80     112    
-112   48     
96     112    
-32    128    
-32    96     
80     -80    
80     16     
-64    176    
-16    112    
128    80     
-128   128    
-16    32     
48     80     
-64    16     
80     0      
224    448    
-192   128    
256    -16    
-192   -144   
-64    -160   
240    96     
-16    0      
64     272    
-16    80     
16     64     
-16    320    
-160   -2112  
320    160    
-208   240    
192    80     
-48    -192   
-80    -80    
48     48     
192    352    
-112   -16    
128    96     
-96    96     
240    272    
48     512    
96     128    
-80    -16    
-64    -528   
208    16     
0      128    
80     64     
192    -32    
-160   96     
144    -16    
96     240    
-208   64     
336    64     
-48    0      
-160   176    
-32    -96    
160    64     
-224   64     
80     -64    
144    96     
144    -480   
-96    160    
0      32     
16     80     
0      80     
144    96     
96     160    
64     112    
-80    16     
-32    32     
-16    -64    
112    272    
-32    64     
192    -128   
-144   160    
32     -1312  
208    0      
-16    160    
192    64     
-80    208    
144    400    
-272   -480   
128    -80    
96     -16    
208    -128   
-144   64     
-32    16     
-96    96     
112    -384   
112    192    
48     -160   
256    160    
144    -1952  
144    208    
-112   -160   
-48    64     
192    -32    
176    240    
-64    112    
-16    160    
-32    80     
144    -160   
0      144    
48     -112   
96     192    
-16    96     
128    208    
-48    -1008  
96     64     
-64    -704   
-640   -224   
-672   -96    
1024   784    
-832   368    
240    -512   
-112   624    
16     -272   
-560   -336   
448    176    
48     320    
112    -768   
-192   144    
240    -576   
176    224    
-32    -96    
-80    64     
192    96     
-64    144    
32     48     
0      -192   
80     -32    
32     160    
-48    208    
240    -288   
-144   48     
272    -336   
-192   160    
208    128    
16     288    
32     -96    
48     64     
-64    -16    
192    192    
-64    0      
48     128    
16     96     
32     -128   
64     208    
16     -112   
112    80     
0      -32    
48     144    
16     80     
64     80     
80     -1408  
64     144    
48     80     
32     -32    
-16    -224   
32     32     
-16    288    
96     -352   
96     80     
-48    -64    
112    16     
128    64     
-176   192    
48     -320   
128    -16    
-48    -48    
-32    -1952  
64     80     
96     -176   
48     -432   
32     48     
80     -656   
192    -16    
64     -592   
128    48     
16     144    
64     -144   
176    -240   
-64    -80    
96     -288   
16     48     
96     -80    
128    80     
-304   -112   
0      -400   
-768   -384   
128    -224   
80     192    
80     -784   
-80    256    
224    -2880  
-16    -80    
-64    -368   
224    256    
96     16     
-192   0      
48     -48    
112    128    
-240   -48    
32     -128   
-448   48     
32     -176   
-96    -352   
96     -384   
-48    -160   
192    -432   
-32    48     
0      -32    
-160   0      
112    -64    
80     96     
-64    -176   
112    16     
-144   32     
96     48     
-192   48     
80     -32    
-80    -16    
48     0      
48     -32    
48     -32    
-64    -48    
176    -240   
-128   32     
112    -160   
-32    112    
288    224    
-16    -32    
-112   32     
-80    -96    
96     64     
96     -128   
-32    144    
-272   256    
208    384    
0      -224   
32     -48    
-16    -672   
160    0      
48     0      
0      192    
-112   -272   
224    -48    
-160   128    
112    -416   
-32    0      
-160   -48    
-80    0      
-32    -144   
-368   -64    
64     -144   
0      48     
16     -80    
-80    -64    
288    -1376  
32     16     
48     112    
-64    -80    
-336   -16    
-96    -112   
32     -96    
-48    128    
-80    32     
16     -96    
-800   -16    
176    -208   
-32    160    
80     -32    
-64    112    
96     -608   
16     -32    
-256   -48    
160    0      
-192   128    
32     0      
96     -16    
0      -112   
-16    96     
96     -208   
-16    192    
208    -240   
32     160    
-32    -288   
144    128    
128    -960   
-32    0      
-80    -80    
112    48     
-144   64     
112    -64    
-304   -16    
144    48     
-16    32     
128    48     
-336   64     
32     -112   
16     48     
256    -416   
-144   224    
-96    -80    
-224   112    
240    -32    
-112   80     
-144   112    
2112   -2736  
-160   -1152  
704    656    
-384   1120   
688    688    
-320   -800   
-2224  -832   
512    288    
-304   272    
-208   -16    
-32    112    
-144   -16    
96     32     
-304   112    
-16    -128   
-1216  -16    
32     144    
-32    -16    
0      0      
48     80     
16     192    
-48    -64    
224    208    
-224   112    
-176   -128   
-64    112    
-208   -48    
144    0      
-416   48     
224    80     
-128   112    
32     -64    
-64    64     
-224   -96    
-80    -224   
0      48     
0      144    
-32    16     
-64    -144   
-160   -16    
128    64     
-48    64     
-32    80     
96     -16    
-96    208    
-48    16     
-112   -80    
-528   -48    
-48    240    
0      -128   
176    112    
-304   128    
144    -64    
0      192    
-208   -160   
160    96     
-160   -16    
64     240    
-160   -32    
-32    -32    
-112   -32    
-128   112    
-288   -112   
96     192    
-304   -48    
64     16     
112    -64    
80     208    
-128   -48    
96     0      
-80    64     
48     16     
-176   128    
-80    -80    
48     96     
-256   96     
-128   96     
-112   -64    
16     224    
-1360  -144   
160    32     
-128   -128   
112    320    
-144   -96    
256    128    
-48    48     
48     -144   
112    96     
-160   288    
176    80     
-96    16     
96     272    
-208   -64    
80     -16    
-176   -48    
-80    96     
176    -144   
-48    80     
64     176    
-64    112    
112    304    
-80    -80    
48     -16    
64     192    
16     112    
64     112    
-208   96     
-144   -48    
224    208    
-448   64     
240    32     
-144   96     
32     80     
80     160    
-80    -128   
-128   32     
-96    32     
160    16     
32     32     
112    272    
-16    352    
192    192    
-432   32     
112    -32    
-240   -96    
160    96     
-32    -192   
32     -288   
-64    96     
-144   16     
32     128    
176    64     
0      -96    
-288   -16    
-112   0      
-16    -160   
-64    -208   
-16    16     
240    336    
32     -48    
48     80     
-176   48     
0      64     
160    304    
112    112    
80     64     
-144   32     
-32    208    
112    128    
-16    96     
32     16     
-16    48     
-144   64     
128    176    
-32    -32    
-80    -96    
64     -16    
-272   128    
48     32     
80     64     
-16    32     
176    32     
-16    -48    
-112   128    
80     160    
48     -96    
80     -16    
-48    32     
64     -96    
0      240    
-16    112    
-64    176    
-48    16     
-80    208    
-16    -32    
16     48     
16     -496   
160    112    
0      320    
-80    0      
-160   224    
32     0      
-48    -32    
144    128    
192    272    
48     -16    
96     -16    
64     144    
48     112    
176    80     
-64    208    
0      16     
144    256    
-96    160    
-160   32     
48     -144   
128    128    
0      160    
-800   2064   
-352   -672   
-176   160    
-160   -112   
-608   320    
128    208    
-272   16     
368    224    
-192   240    
0      208    
-16    -32    
-80    368    
144    64     
16     -16    
-128   -160   
208    -2208  
-48    160    
16     80     
-48    80     
80     -32    
48     96     
-16    16     
80     32     
96     -64    
-64    128    
64     224    
48     304    
144    -144   
0      0      
96     48     
144    -208   
-48    144    
128    176    
-48    64     
96     0      
80     144    
0      272    
16     128    
-80    48     
208    32     
-64    32     
144    160    
-112   96     
-16    144    
0      16     
0      -160   
112    64     
128    -1824  
-48    128    
64     0      
-64    32     
64     96     
80     112    
-16    208    
16     160    
16     -32    
80     464    
-128   48     
240    -32    
-48    32     
112    0      
-48    32     
80     -1824  
32     464    
48     -112   
16     64     
-16    96     
32     64     
-64    16     
16     112    
32     80     
48     64     
112    -16    
48     64     
32     192    
-64    -80    
64     64     
-48    -528   
144    64     
48     -752   
96     -208   
-160   -96    
192    160    
-80    80     
112    224    
-96    0      
64     16     
16     96     
16     -192   
96     176    
-48    -112   
112    160    
-48    -160   
112    80     
32     -432   
32     80     
-144   -1824  
160    224    
-80    64     
144    80     
-160   16     
48     32     
144    112    
64     -128   
32     112    
0      -336   
128    240    
0      -240   
144    128    
0      -160   
48     80     
32     80     
64     160    
96     16     
144    224    
0      144    
-48    -48    
-80    -48    
80     -512   
176    96     
64     -256   
-112   176    
64     -128   
176    16     
-16    -16    
-64    128    
128    448    
304    -176   
64     272    
-176   224    
272    -16    
-96    -208   
96     64     
128    48     
-16    16     
16     -400   
96     16     
16     -112   
128    208    
-32    -96    
112    0      
-64    144    
112    -1616  
-16    -32    
-16    -1648  
368    -720   
-96    416    
64     -800   
-16    144    
-32    -288   
224    -64    
32     16     
-16    -208   
256    80     
32     -16    
64     -512   
-80    64     
240    -112   
144    -80    
112    80     
112    -336   
-112   48     
112    -384   
112    80     
64     -544   
224    240    
-96    112    
96     -144   
-16    112    
336    -192   
320    112    
-16    96     
-160   96     
-80    48     
-48    -64    
240    -544   
-944   -80    
-16    -688   
32     96     
-48    -32    
80     -80    
-80    -1488  
-16    -112   
64     400    
-80    -48    
96     -128   
16     192    
80     -96    
80     64     
-304   -80    
160    -48    
-320   -96    
240    16     
48     -64    
176    -16    
112    -192   
80     -992   
32     112    
-464   -2416  
880    -432   
256    64     
-224   688    
-336   896    
-592   64     
544    -112   
-32    -128   
96     -160   
-48    -496   
-32    208    
176    -128   
192    0      
-48    -176   
-16    -48    
-32    -512   
-48    80     
112    -368   
32     -160   
-64    -96    
128    -112   
-112   80     
192    96     
-48    -48    
0      -176   
-1008  -16    
128    16     
0      64     
-16    -80    
0      -48    
112    -368   
96     64     
48     0      
-64    96     
32     64     
-80    -48    
96     64     
-32    -32    
32     -48    
-32    -16    
-96    48     
80     112    
-384   0      
144    -128   
-144   -16    
144    -384   
32     80     
32     -544   
256    -16    
-64    144    
16     -112   
144    32     
48     -48    
-16    80     
-48    -32    
16     -112   
96     128    
-176   0      
160    -256   
-128   48     
96     -64    
0      64     
80     -992   
96     -112   
-144   -32    
240    -192   
-96    112    
-48    0      
-96    160    
-16    -160   
208    64     
-112   -144   
-80    -16    
80     -192   
-16    64     
0      -240   
112    80     
32     -848   
0      -64    
16     -64    
0      144    
-128   80     
128    -80    
-144   -144   
272    128    
-128   192    
-64    -128   
144    32     
-64    -80    
80     -48    
-704   -160   
0      64     
-16    160    
-672   -144   
128    48     
144    128    
-16    48     
112    -96    
-48    32     
32     -112   
64     16     
176    48     
-16    240    
-112   -256   
160    16     
32     -128   
-608   224    
-112   -48    
-112   -32    
-128   -112   
-208   80     
-64    -48    
-288   0      
-96    48     
128    128    
-80    48     
-256   96     
-160   80     
64     -192   
-400   -128   
-64    -336   
16     208    
112    -32    
-96    0      
-160   128    
0      112    
256    16     
96     112    
-32    96     
-256   112    
-112   32     
192    96     
128    112    
-144   -80    
-304   112    
224    64     
-80    -16    
96     -64    
-272   -80    
-64    192    
-16    48     
256    112    
-416   -176   
-112   -64    
-144   80     
176    -32    
0      144    
80     80     
-112   80     
64     144    
176    -64    
-256   -48    
112    112    
-176   -64    
96     0      
-80    224    
-80    -96    
-272   -336   
-64    80     
-352   16     
32     -176   
192    -64    
64     176    
-96    -144   
176    -64    
-224   -208   
-192   0      
208    192    
-128   176    
224    96     
-240   -48    
144    64     
-176   -224   
144    16     
-32    176    
0      160    
-448   304    
96     -16    
-48    -128   
-80    192    
-16    64     
-112   64     
64     32     
-128   32     
48     0      
-64    0      
-16    128    
80     304    
-80    -112   
-288   16     
192    144    
96     16     
16     240    
-224   320    
48     -48    
224    96     
-16    80     
2064   -2320  
-176   -480   
704    560    
-688   448    
272    -160   
-288   -224   
-528   -592   
48     224    
192    400    
32     -16    
-16    -32    
48     128    
0      288    
0      32     
48     0      
112    -32    
-144   208    
224    288    
-208   144    
112    0      
160    -80    
-48    16     
64     -144   
128    448    
-176   96     
112    64     
-16    368    
-80    160    
192    128    
-240   80     
64     -16    
112    96     
64     112    
-48    64     
48     112    
-112   -80    
112    144    
-176   16     
128    160    
-96    192    
-112   0      
48     16     
-64    80     
-48    112    
80     80     
16     176    
0      112    
-128   192    
-160   80     
112    112    
-80    -144   
112    144    
-112   -64    
96     272    
32     192    
0      0      
160    208    
48     224    
-32    80     
-96    64     
240    16     
-160   -80    
-128   288    
144    272    
-64    16     
16     64     
16     80     
160    112    
-240   144    
64     144    
64     64     
96     64     
-16    176    
16     112    
-80    48     
48     64     
-96    48     
288    48     
80     336    
-48    16     
192    -96    
-80    64     
-80    -64    
64     160    
16     96     
-48    144    
80     32     
64     240    
-112   32     
0      64     
-64    -64    
64     16     
64     48     
16     80     
48     176    
-96    16     
32     -32    
64     96     
32     -688   
80     -32    
-96    64     
128    80     
144    112    
-48    80     
0      144    
96     112    
32     64     
48     0      
0      160    
0      0      
144    96     
-80    -16    
144    64     
-80    -224   
32     96     
80     64     
0      96     
160    192    
64     432    
32     16     
-32    208    
-32    96     
32     -32    
-64    -176   
112    64     
32     208    
512    752    
-352   144    
192    -864   
-192   -32    
192    32     
160    128    
64     80     
80     -48    
-32    144    
-48    -48    
192    432    
240    384    
-112   -128   
288    144    
-176   -64    
-112   -416   
112    -80    
160    -256   
96     32     
-16    -1984  
-144   -128   
96     368    
64     64     
-80    32     
64     -48    
176    112    
-128   128    
240    80     
-176   64     
32     -192   
-64    112    
176    -128   
208    272    
-192   160    
176    -560   
32     288    
-64    32     
80     -32    
96     272    
272    240    
-96    -48    
-80    48     
-112   -432   
320    624    
48     144    
-48    336    
-80    208    
48     -304   
176    368    
-48    -192   
-32    16     
-64    -1104  
48     16     
48     -128   
48     192    
0      -352   
96     176    
80     -16    
160    96     
144    736    
-208   48     
192    64     
32     -176   
0      0      
48     -32    
-112   32     
144    -96    
0      -32    
64     -16    
96     224    
128    80     
32     240    
336    16     
256    -272   
-352   64     
-64    352    
-272   -176   
592    0      
-336   -384   
592    704    
-192   144    
-176   -576   
320    -112   
-128   80     
192    224    
96     80     
192    272    
-176   -128   
16     -672   
48     64     
32     80     
64     -112   
-112   -144   
272    64     
0      -48    
128    96     
-144   -288   
-64    16     
256    -288   
64     96     
128    32     
-160   -144   
144    -32    
0      -48    
160    160    
-16    -48    
128    80     
128    -48    
64     304    
32     -336   
-16    16     
16     -80    
80     96     
112    64     
-16    -416   
160    32     
-144   -912   
240    -640   
-112   112    
176    -368   
-32    64     
-80    -2800  
240    -48    
-128   160    
144    16     
32     96     
0      -16    
48     -224   
48     128    
-32    -144   
160    32     
-48    160    
240    -400   
128    -128   
-16    -448   
80     -160   
-48    -496   
48     -160   
112    -1040  
96     112    
96     48     
112    0      
-16    -64    
-32    176    
80     -176   
96     80     
-176   16     
64     -96    
-1376  -80    
-16    -32    
16     160    
64     -352   
256    -16    
-112   -80    
16     -288   
-16    -192   
-224   144    
208    0      
-112   0      
224    -16    
-48    -272   
-80    48     
64     64     
-432   -16    
128    -96    
128    32     
128    -48    
64     -176   
160    -640   
48     80     
64     -1248  
-16    -80    
48     144    
0      176    
80     -160   
48     -144   
-176   -112   
272    224    
-432   272    
112    -48    
-1008  -192   
112    -288   
240    128    
-96    -432   
-32    208    
80     -1184  
-160   -160   
240    -144   
-224   -352   
-240   -480   
272    -32    
-192   -352   
128    -64    
-112   32     
112    -96    
-1072  -48    
-32    48     
160    80     
-48    -176   
80     32     
-48    -144   
80     144    
80     -1072  
-48    32     
-48    -48    
-16    96     
48     -16    
80     -144   
-464   16     
272    0      
-240   -32    
128    -16    
-160   80     
32     -160   
0      0      
-32    -384   
48     112    
128    -2176  
176    288    
-48    -16    
-16    -80    
-400   -48    
128    0      
-80    32     
-16    16     
-80    0      
144    288    
-112   -160   
64     -80    
-64    -96    
272    -16    
-96    96     
64     -416   
-16    -176   
-224   -224   
-80    -96    
32     -80    
48     96     
176    608    
-96    -320   
-80    160    
64     -128   
-32    160    
-96    -272   
64     64     
208    128    
-64    176    
64     160    
-112   -32    
-160   -176   
0      32     
48     176    
-80    -48    
-16    112    
192    -208   
0      80     
-48    -96    
112    128    
-96    -144   
-48    -64    
-816   -96    
64     144    
-112   208    
-112   32     
-208   112    
-704   -352   
112    224    
-176   -112   
-160   64     
-32    -144   
-640   208    
-720   -1136  
384    320    
-336   416    
-528   224    
-288   576    
-672   -256   
320    432    
-336   -368   
0      -304   
-96    -160   
64     192    
-1040  224    
-128   -240   
208    240    
-16    -16    
-192   224    
-112   -48    
80     -16    
-144   -32    
128    -176   
-128   64     
96     -208   
-144   208    
320    -48    
-400   -240   
-32    80     
-224   160    
-176   16     
-608   96     
80     -48    
16     -96    
-48    16     
-144   -304   
304    128    
-224   272    
160    176    
-576   -304   
144    -688   
112    400    
352    0      
-320   -96    
-160   128    
0      -64    
-272   64     
-112   288    
-176   -240   
48     -96    
-128   -144   
128    128    
-176   240    
48     128    
80     96     
-80    32     
160    336    
-128   -176   
0      -384   
-112   656    
288    80     
-560   -80    
80     144    
-96    0      
-96    112    
-144   16     
-32    112    
48     -64    
-96    -16    
64     288    
96     32     
-32    128    
-96    176    
0      -16    
-112   -48    
-48    96     
-128   128    
32     96     
-288   -272   
-64    -16    
-64    -384   
64     -112   
-80    208    
16     16     
192    112    
-112   16     
-128   0      
80     -48    
-176   -80    
-32    -80    
160    160    
-112   0      
128    160    
-224   -128   
16     32     
-128   -80    
192    160    
-80    208    
272    352    
-144   256    
0      -96    
16     -48    
-32    0      
192    80     
-64    128    
-16    32     
-144   16     
32     -64    
-144   32     
0      304    
128    -16    
80     -160   
-48    -80    
-32    160    
160    80     
-48    176    
-112   16     
128    112    
32     80     
-16    112    
32     144    
-240   -304   
112    96     
-32    64     
64     80     
48     448    
-48    208    
96     368    
-80    384    
32     352    
208    96     
-208   288    
-48    -96    
64     304    
-256   -96    
176    240    
-128   0      
-16    48     
-80    112    
-64    0      
0      192    
112    112    
64     240    
0      112    
112    272    
-16    80     
-144   -48    
32     -320   
-32    -560   
-160   -80    
128    224    
48     192    
80     96     
-32    -16    
96     160    
-128   -96    
272    -112   
-256   -224   
240    32     
112    16     
144    320    
80     240    
-176   0      
144    48     
0      176    
32     144    
-144   -240   
112    96     
-80    16     
128    16     
-256   32     
-64    -80    
0      80     
-16    208    
256    -16    
-80    256    
144    112    
-80    96     
-16    -112   
32     -80    
96     208    
-224   -32    
32     224    
48     32     
112    224    
48     -224   
240    112    
-128   48     
-96    64     
48     32     
32     304    
-112   96     
32     48     
96     16     
48     -32    
128    304    
-160   -16    
144    -560   
-96    32     
-704   -752   
-1072  -1440  
1280   512    
-384   672    
416    304    
-128   448    
-48    -624   
-416   -560   
-272   -32    
528    576    
80     -208   
-112   176    
-192   144    
320    -1040  
64     320    
96     -144   
-16    272    
-80    16     
32     192    
160    -16    
-64    96     
-48    0      
96     304    
64     -48    
-16    0      
-80    -160   
16     -16    
96     64     
48     -1296  
-16    32     
96     96     
16     176    
48     128    
0      48     
-32    48     
128    112    
160    288    
160    224    
-240   -16    
-16    112    
240    80     
-32    -16    
64     48     
-48    -144   
128    176    
48     -352   
16     112    
-64    112    
144    64     
-80    112    
-32    48     
176    144    
-64    128    
96     144    
16     32     
-48    -64    
-16    -48    
112    192    
64     -80    
96     144    
-32    -800   
160    128    
-16    304    
16     224    
48     -256   
96     112    
-96    16     
96     96     
-112   -32    
32     128    
192    32     
48     -48    
32     192    
-32    -192   
32     16     
48     -688   
-80    -128   
288    -416   
0      336    
-96    32     
240    192    
-80    -32    
208    176    
0      160    
224    48     
176    64     
-16    -64    
48     -176   
48     -80    
-80    240    
32     -80    
64     176    
128    -144   
64     192    
192    288    
-144   16     
80     -48    
32     128    
96     112    
-144   -192   
16     64     
64     -1040  
-16    64     
176    -208   
-224   48     
144    -208   
-48    32     
32     -624   
64     16     
-16    -32    
16     192    
128    -16    
-112   64     
192    272    
-80    -128   
16     96     
192    80     
-64    -80    
288    0      
-144   -304   
112    48     
-64    288    
64     -144   
208    128    
-32    224    
-112   64     
192    16     
-176   -864   
176    -1104  
144    -64    
144    -48    
16     -160   
-16    272    
80     80     
192    0      
-224   160    
304    160    
80     32     
32     -832   
-32    112    
-32    -880   
224    -64    
-720   -256   
176    -528   
64     16     
0      -240   
112    272    
48     -1104  
-176   -512   
256    192    
48     0      
-32    96     
64     48     
32     -624   
112    112    
64     -480   
144    480    
-240   -128   
64     -64    
-352   -224   
96     -224   
144    -160   
144    -432   
160    -96    
96     -672   
64     816    
112    -64    
-16    160    
256    -32    
-16    32     
64     -128   
-144   -176   
144    96     
96     80     
-384   -64    
-48    -384   
-16    -208   
256    -240   
288    112    
-96    64     
-80    -16    
-96    -416   
-16    96     
192    0      
-16    -128   
64     32     
64     112    
-256   -16    
-48    -96    
-336   -176   
96     -80    
16     32     
128    -112   
304    64     
-288   -400   
-96    -208   
-48    -400   
256    96     
2096   -1296  
304    288    
416    448    
-448   448    
416    112    
480    -704   
-144   -336   
240    1120   
-1232  -208   
800    -576   
-240   192    
240    32     
-304   32     
-288   -368   
384    272    
0      -176   
-32    -240   
-224   -112   
224    -160   
112    176    
-96    -400   
352    384    
-16    -208   
256    176    
-128   128    
-624   -64    
-368   -432   
-192   -560   
400    16     
240    224    
-32    -1488  
288    -336   
-96    288    
-48    -192   
160    272    
-48    -112   
144    -304   
288    -240   
-464   -608   
736    96     
-704   96     
64     -112   
-16    -16    
176    -336   
16     128    
128    -1392  
80     -160   
-192   80     
-16    -16    
-384   -208   
96     16     
-224   32     
144    -320   
-144   0      
144    64     
96     -176   
-16    -128   
256    736    
-480   -560   
-48    -176   
80     0      
112    -16    
-320   -80    
352    224    
-192   -96    
144    96     
16     112    
112    -16    
-192   -128   
144    -208   
-368   64     
32     -208   
0      192    
-32    -64    
128    128    
-80    32     
-16    320    
-32    -80    
240    -144   
304    352    
-272   -64    
160    112    
-64    288    
-240   -176   
80     -224   
144    448    
-480   -288   
128    192    
-400   -320   
320    96     
-160   -32    
-352   -128   
-16    16     
-96    272    
48     320    
-592   192    
48     272    
-240   -64    
-128   -368   
-256   -160   
48     128    
0      16     
-16    176    
-192   -96    
64     64     
-32    -32    
-160   176    
32     192    
256    544    
-240   32     
-400   -416   
144    208    
32     64     
80     144    
-64    128    
80     256    
-80    -144   
48     -80    
-96    128    
-32    -272   
80     32     
-112   80     
176    0      
-32    0      
-208   -368   
-208   -368   
0      -80    
-624   -112   
-48    128    
-240   -432   
128    96     
-288   -592   
64     16     
-64    80     
384    240    
-160   96     
128    32     
-256   64     
-96    64     
-48    48     
0      96     
48     128    
-48    48     
-176   160    
-48    -112   
80     112    
0      -96    
-128   160    
176    32     
-144   32     
-128   64     
-16    -64    
0      16     
-112   48     
128    176    
-80    -80    
32     80     
-576   -16    
224    0      
-96    -32    
64     240    
-32    144    
-16    16     
-144   0      
240    16     
-32    0      
-96    112    
144    32     
-176   32     
48     16     
-96    -64    
64     -192   
-160   112    
-112   256    
-368   -80    
64     128    
192    -32    
32     144    
-176   96     
-16    16     
144    64     
-16    144    
32     112    
-16    32     
48     64     
112    160    
0      192    
-208   32     
112    64     
-368   -96    
176    144    
-16    112    
32     80     
0      64     
0      16     
112    224    
-112   64     
-576   16     
-640   -176   
1376   944    
-864   384    
192    -96    
-416   80     
480    -624   
-720   32     
64     -592   
720    224    
-176   32     
192    592    
-96    -320   
-96    96     
-48    -80    
272    256    
-304   0      
64     -128   
-80    256    
208    -48    
-320   -80    
128    -64    
-240   224    
224    -96    
-96    176    
256    -96    
-352   176    
0      -112   
-160   432    
400    -64    
-144   112    
-32    -96    
-16    240    
0      -48    
-16    224    
-64    -96    
64     160    
144    32     
96     48     
0      -16    
-176   32     
112    192    
80     80     
80     112    
-192   -48    
96     64     
-64    128    
208    160    
-112   -112   
-64    64     
-80    64     
160    128    
16     112    
-16    144    
16     16     
-80    80     
96     128    
16     96     
112    112    
-16    32     
48     -16    
-96    160    
48     32     
-32    96     
16     32     
0      16     
-128   96     
80     64     
0      160    
96     -96    
160    96     
-112   144    
128    192    
-64    0      
64     -32    
16     64     
-48    -16    
192    32     
-256   16     
64     64     
-96    -160   
64     192    
0      144    
-32    -144   
64     -80    
-64    32     
16     144    
-128   -16    
400    256    
-304   96     
80     16     
160    112    
-96    16     
-80    64     
64     112    
16     112    
-80    -592   
48     0      
64     80     
-16    32     
-80    144    
288    464    
160    176    
-16    -240   
-128   -80    
96     -32    
16     64     
-112   -272   
32     16     
48     80     
208    176    
-16    -784   
64     -32    
-48    32     
16     32     
96     160    
176    400    
80     160    
-32    272    
-32    48     
176    -80    
32     -64    
80     96     
-160   48     
-112   -128   
224    -80    
0      112    
128    144    
-16    -528   
-64    -320   
-112   96     
384    176    
-80    64     
-48    192    
32     -96    
-160   -336   
224    640    
96     496    
-16    -144   
16     -256   
64     64     
-32    -432   
16     192    
128    -208   
-16    -32    
16     96     
96     -144   
160    64     
32     240    
-96    -176   
64     80     
-16    -96    
176    128    
80     208    
-144   -256   
64     144    
0      -48    
112    96     
32     -752   
0      96     
-32    -16    
0      128    
208    192    
-80    32     
16     48     
80     176    
112    32     
-16    0      
304    208    
-112   -48    
224    64     
-64    96     
128    48     
0      -96    
-16    160    
64     -432   
96     112    
144    80     
32     192    
-224   -64    
144    112    
64     128    
-48    -32    
-48    80     
128    0      
-208   48     
128    -144   
-48    224    
0      -368   
176    272    
-256   -208   
192    16     
-192   80     
448    -80    
-192   0      
-96    16     
128    160    
16     -192   
-1072  -1632  
1696   2800   
-864   384    
992    -496   
-352   704    
192    -960   
-160   1312   
-384   -624   
608    608    
-576   -864   
624    176    
-416   -32    
528    464    
-96    -320   
240    32     
-48    -288   
128    80     
-80    432    
96     160    
0      192    
112    -128   
0      400    
-176   -384   
320    192    
-256   -240   
-48    64     
48     144    
-144   -1248  
272    64     
-144   -208   
288    -1456  
-240   -16    
96     144    
192    -288   
-48    80     
96     -288   
112    192    
64     -336   
-352   -560   
64     -256   
144    -448   
-464   64     
-112   -64    
144    -192   
32     32     
64     -176   
32     112    
-48    -192   
64     -176   
128    80     
-16    -96    
-16    160    
112    112    
160    -48    
-112   160    
0      -400   
16     192    
-144   32     
192    112    
192    32     
64     -176   
0      -112   
128    -144   
32     176    
-176   -16    
112    96     
48     96     
96     -32    
224    32     
-64    32     
96     -80    
96     -80    
0      16     
80     -16    
-512   -144   
80     -336   
96     -176   
0      -256   
48     -80    
208    -176   
-144   144    
-96    -480   
-16    64     
112    -128   
-272   -80    
32     -336   
16     160    
-272   -144   
256    -80    
-464   -96    
112    -48    
-112   48     
208    272    
-32    192    
-144   -336   
144    16     
-112   -1888  
64     -400   
240    -16    
112    240    
224    240    
-176   -144   
-176   48     
160    -192   
-64    -16    
192    352    
-352   192    
112    -240   
-400   -240   
224    -112   
16     32     
192    0      
-144   0      
176    272    
-64    144    
-96    -48    
-48    -160   
-112   -160   
272    192    
-144   -32    
16     16     
-320   -128   
240    -368   
-1424  -64    
0      -320   
160    -96    
-96    -224   
96     224    
160    -2288  
32     64     
-112   32     
16     -176   
-160   -144   
-64    -48    
-400   16     
336    80     
-80    -240   
-240   16     
-208   160    
336    -144   
128    160    
-160   -160   
224    96     
-16    144    
-32    -16    
16     128    
80     -16    
-160   160    
-16    0      
96     -48    
16     64     
-96    16     
16     64     
0      32     
96     -256   
32     0      
160    -272   
0      288    
-16    -112   
176    32     
-160   48     
96     -32    
-224   -48    
0      -192   
-208   48     
-80    -80    
16     48     
64     -16    
-48    -240   
176    -464   
144    288    
-1008  -16    
-80    256    
16     -16    
32     16     
48     -16    
-352   0      
-208   -96    
400    128    
-224   144    
0      96     
-176   -32    
-144   -240   
64     48     
-672   -32    
80     160    
-224   272    
-320   -160   
-16    0      
-144   16     
-96    48     
-480   80     
-80    16     
-1152  48     
-208   64     
240    -272   
-48    48     
-176   -144   
-352   -784   
912    -544   
784    224    
96     -1072  
288    784    
-176   -544   
240    304    
608    96     
-592   16     
-160   -288   
-96    416    
-128   -240   
-144   112    
64     -304   
80     80     
32     48     
-112   -144   
0      -96    
32     -64    
-128   32     
272    48     
-160   256    
144    32     
-112   112    
-64    -112   
-80    160    
96     112    
-176   80     
-32    -64    
-144   -16    
192    80     
-64    -48    
-48    -16    
-16    160    
64     16     
16     80     
-160   -128   
-80    48     
-96    96     
128    112    
-64    0      
-64    160    
-304   16     
96     96     
-160   -80    
112    160    
-176   16     
160    160    
-176   96     
80     -64    
16     48     
-96    -64    
0      144    
-32    -144   
16     32     
-144   96     
-96    -16    
-576   -192   
16     240    
-1088  -96    
96     160    
-48    -16    
112    48     
16     256    
-224   160    
-80    -80    
80     -80    
128    64     
-48    144    
32     128    
-208   32     
192    128    
-304   -144   
192    80     
-128   80     
-128   0      
384    240    
-464   -32    
96     -96    
-48    96     
-48    112    
144    96     
-64    16     
-112   -224   
32     256    
-240   -336   
-16    -128   
-224   -144   
144    224    
-512   -32    
144    -192   
-96    48     
80     32     
-32    -48    
-32    -64    
16     64     
-112   -80    
64     16     
-32    96     
0      -112   
-112   96     
112    304    
-48    112    
-16    80     
-160   -32    
16     368    
16     384    
0      16     
-32    -144   
-16    -16    
128    176    
64     128    
-64    -48    
-16    48     
-16    80     
0      -112   
-16    192    
-32    96     
112    304    
-208   -256   
32     64     
80     128    
176    192    
-32    -48    
-64    128    
-192   80     
352    288    
-96    80     
192    240    
-80    128    
-32    -32    
-32    96     
-112   -16    
176    272    
64     96     
-80    48     
16     48     
-48    0      
32     112    
-32    32     
32     112    
-16    32     
48     -32    
16     80     
-160   48     
-128   -304   
144    112    
-96    -112   
80     160    
-144   144    
32     0      
0      128    
112    160    
-96    -48    
128    -176   
144    288    
-80    96     
-112   -272   
-80    -128   
352    416    
-80    160    
-128   128    
160    32     
80     176    
32     -80    
0      208    
0      304    
-96    80     
176    -112   
48     144    
80     64     
32     64     
-16    144    
-80    16     
48     80     
-16    128    
0      -16    
160    112    
-48    112    
48     112    
-64    32     
48     32     
112    176    
96     32     
-96    32     
192    144    
-160   112    
176    -16    
-176   144    
96     80     
112    -160   
112    96     
32     144    
544    -976   
-208   304    
64     -32    
-80    160    
-224   -432   
784    2176   
-640   560    
48     -368   
-48    -832   
400    480    
-272   224    
-160   224    
-336   224    
320    -320   
-320   208    
-208   -544   
112    320    
128    -128   
288    592    
-224   -16    
288    448    
-256   288    
176    32     
-192   48     
416    240    
-128   144    
224    176    
-256   160    
112    16     
64     -48    
48     -528   
-176   240    
0      -960   
80     240    
32     176    
48     96     
16     0      
80     144    
0      -336   
32     32     
-16    32     
144    240    
-96    80     
144    -400   
-112   144    
64     -864   
96     128    
0      -560   
16     32     
-112   112    
112    48     
80     96     
112    0      
-32    48     
80     96     
0      144    
0      160    
176    -48    
0      64     
0      144    
48     48     
48     -64    
96     128    
-48    112    
96     -896   
32     176    
0      160    
128    256    
-128   -96    
224    80     
-32    240    
-64    -64    
192    -96    
48     -48    
32     176    
-16    -160   
80     96     
80     -240   
32     160    
0      -816   
176    80     
-48    0      
144    176    
0      0      
-48    80     
112    -16    
-80    -144   
176    144    
-128   -48    
208    240    
16     -656   
96     32     
48     -192   
224    32     
-48    -64    
-16    192    
160    112    
-32    96     
-16    -208   
16     -16    
-96    240    
240    208    
16     80     
16     0      
-32    16     
80     -240   
128    192    
-64    -48    
32     64     
64     -48    
-16    192    
64     192    
48     0      
-96    48     
-16    112    
112    80     
-64    -336   
176    96     
-48    -384   
96     224    
-160   -128   
256    96     
64     -96    
16     80     
224    16     
64     176    
256    144    
-192   -1008  
32     112    
-736   -112   
-336   -624   
144    64     
80     -960   
64     -160   
-128   208    
144    -96    
16     -48    
-176   -384   
-272   -1680  
224    0      
64     -512   
304    48     
112    -112   
-224   80     
32     -96    
64     -384   
-176   -32    
144    -352   
-64    -112   
112    -160   
256    288    
32     -752   
176    -112   
-160   -112   
0      32     
128    80     
-16    32     
80     16     
160    -176   
-400   32     
176    -224   
-16    -96    
-32    -224   
144    -48    
-64    -832   
160    -416   
-48    -720   
128    -64    
192    240    
-288   48     
80     -208   
-80    -112   
112    -80    
208    48     
-112   160    
-16    48     
-912   0      
16     -304   
144    -80    
80     -160   
32     32     
-48    160    
80     -64    
112    -448   
16     128    
16     -240   
16     -16    
64     176    
16     96     
32     48     
144    -48    
-112   224    
-128   -144   
-448   -32    
96     -176   
160    96     
96     -272   
144    -224   
16     -1392  
-16    288    
80     112    
-32    -32    
-240   -944   
944    -464   
624    -32    
96     -1040  
544    -256   
-352   -512   
144    224    
416    48     
-416   -224   
16     -688   
0      560    
112    -1296  
-192   288    
192    -496   
288    480    
-240   -240   
64     32     
80     -32    
160    240    
-224   -176   
176    -32    
-608   112    
112    -256   
-96    0      
160    -400   
80     288    
160    -112   
96     464    
64     -16    
-64    -208   
-224   -80    
144    48     
-128   48     
-32    0      
-32    48     
112    -48    
-80    -32    
80     -112   
-64    48     
176    -128   
-64    80     
208    -448   
-144   144    
-32    -160   
-128   32     
144    112    
-64    80     
-304   -352   
160    64     
-192   -48    
176    -112   
-240   80     
112    0      
-432   80     
192    -208   
0      144    
128    -240   
-16    64     
80     112    
-16    160    
-16    -32    
64     -144   
-160   -80    
64     128    
-96    48     
-16    -32    
0      80     
176    -32    
48     -144   
-752   -128   
208    64     
-208   160    
-800   64     
64     -80    
-544   112    
-288   -160   
64     32     
-192   128    
144    80     
-112   -128   
16     240    
48     16     
-80    192    
32     -80    
-80    -144   
0      208    
-144   -224   
-80    192    
0      -32    
-64    0      
-96    -48    
-336   128    
-32    48     
-752   -32    
-128   -16    
64     -80    
-32    32     
-112   -208   
0      48     
128    96     
0      144    
-64    32     
-192   -48    
-16    -96    
96     64     
-64    96     
-16    144    
-96    128    
-32    -16    
0      64     
16     -80    
64     96     
-80    -80    
160    208    
-144   -96    
64     144    
-112   -176   
-48    0      
-16    32     
112    160    
-64    128    
-144   -128   
-208   0      
-320   -80    
32     224    
-224   -112   
160    464    
-272   -64    
320    -48    
-352   -272   
176    80     
48     96     
0      96     
-80    -240   
48     32     
80     160    
-320   16     
-16    -80    
-32    -16    
32     160    
-416   -112   
0      160    
-304   -288   
176    304    
-96    -224   
16     112    
-96    544    
96     -240   
192    16     
-160   352    
16     -32    
32     96     
-208   -16    
208    48     
-112   128    
-224   32     
160    16     
-688   224    
-208   -64    
400    0      
-160   176    
160    208    
-272   -80    
-112   32     
192    96     
-32    112    
176    16     
-176   192    
-112   -16    
160    64     
-400   -64    
368    256    
-1024  -64    
304    240    
-160   96     
368    -144   
-144   16     
144    80     
-48    144    
64     16     
144    80     
-48    32     
-96    64     
-176   -192   
80     48     
-176   64     
32     48     
-272   -192   
-32    0      
192    48     
64     -16    
80     288    
-48    144    
240    240    
-288   -112   
272    -48    
-80    128    
96     80     
272    1632   
-560   -48    
-208   -656   
-192   -144   
-224   1184   
224    368    
-736   -176   
624    -464   
-352   272    
144    -272   
288    112    
-272   64     
32     128    
-32    0      
96     112    
48     176    
-144   160    
48     48     
0      176    
-80    -304   
16     48     
-96    -16    
384    144    
-48    80     
48     -64    
-240   16     
176    208    
-128   272    
176    -160   
-80    144    
-16    -64    
96     112    
-176   -48    
64     96     
144    80     
224    32     
-16    288    
-16    16     
0      16     
-48    160    
112    128    
48     32     
-32    16     
32     208    
32     80     
-144   -48    
64     96     
48     32     
-176   160    
48     0      
224    160    
-160   80     
144    64     
-176   192    
128    48     
64     112    
0      0      
0      144    
0      48     
-32    128    
-16    64     
64     224    
-112   -48    
160    192    
-208   48     
128    192    
160    -16    
224    144    
16     160    
0      208    
-80    -16    
80     -32    
48     128    
-80    48     
32     128    
128    304    
-48    112    
208    -16    
16     128    
-32    -16    
160    192    
-192   96     
160    -80    
96     16     
-160   192    
16     -16    
-16    80     
64     16     
0      -16    
112    128    
-208   -48    
224    -80    
64     256    
-96    -112   
32     144    
0      48     
272    32     
-144   96     
80     160    
128    160    
32     48     
-32    80     
48     160    
128    304    
-48    112    
16     48     
-240   -208   
176    144    
176    -144   
48     160    
128    160    
-144   48     
112    144    
48     176    
272    176    
160    288    
-96    304    
-96    240    
176    -112   
-48    -64    
-320   -112   
48     -112   
320    64     
-128   -416   
160    208    
80     -976   
96     176    
96     48     
-192   -16    
0      160    
224    80     
112    -80    
96     224    
0      64     
-160   272    
272    48     
-64    96     
0      -128   
128    -192   
-96    16     
80     -48    
48     160    
368    -96    
-256   64     
64     112    
112    80     
-64    -16    
96     112    
-64    64     
64     112    
32     112    
32     -160   
16     144    
16     96     
96     224    
-80    -64    
144    112    
64     -960   
96     -48    
48     288    
-16    208    
192    128    
-64    -16    
-128   -80    
96     -80    
-208   64     
-32    -464   
128    64     
48     -64    
80     -16    
-16    -240   
160    208    
-144   -112   
-32    -80    
304    272    
-48    208    
16     144    
-64    80     
-96    -32    
64     160    
176    -96    
176    16     
80     240    
-32    -640   
48     176    
208    192    
272    112    
96     0      
-112   16     
-32    64     
160    64     
-128   32     
-48    112    
96     128    
80     32     
-32    160    
32     -128   
-1008  -2736  
928    64     
-1120  -96    
688    -512   
1072   -480   
-448   -1120  
-240   -224   
384    864    
48     416    
352    -336   
-352   -112   
144    -864   
336    544    
-256   -768   
240    -192   
-352   -16    
320    80     
80     224    
-64    -384   
80     -176   
-144   -240   
48     -2224  
16     160    
240    -144   
-48    16     
-144   -192   
-96    -1120  
272    0      
-80    -1424  
464    -16    
-176   -624   
80     -144   
256    208    
-64    -32    
144    112    
-32    144    
-16    -320   
-144   64     
-16    64     
96     32     
-272   -352   
-32    -224   
272    -160   
224    -144   
48     -80    
32     -80    
16     -128   
176    -3488  
-128   -192   
48     -464   
0      0      
64     144    
-48    80     
80     -80    
-32    -256   
-80    -112   
-80    112    
-976   -80    
224    128    
16     192    
176    -160   
32     -96    
32     -816   
96     -192   
80     0      
64     64     
112    -32    
-16    -32    
-16    -112   
192    16     
-208   16     
192    16     
-464   160    
-32    -224   
160    -16    
16     -112   
-48    -128   
80     -432   
48     80     
96     -1152  
-16    400    
-48    32     
128    48     
-352   -352   
128    -64    
-96    128    
80     176    
-592   -48    
112    320    
-1504  80     
64     -128   
32     16     
80     0      
-32    -16    
32     -368   
-16    64     
80     -160   
176    128    
-32    112    
96     208    
-272   -128   
16     -160   
-16    -112   
96     48     
-144   80     
16     16     
-192   0      
-64    -480   
128    160    
-160   -224   
336    192    
-80    96     
176    48     
-80    0      
48     -16    
160    48     
64     144    
32     224    
64     -96    
-272   -48    
112    48     
-304   -128   
-144   -416   
32     128    
208    -480   
128    -64    
16     -688   
48     -80    
192    48     
-96    0      
-160   -32    
48     128    
-224   -32    
192    -208   
-176   -320   
256    -288   
-128   224    
128    32     
112    112    
16     -320   
224    192    
-112   -96    
128    96     
32     80     
-240   112    
64     -32    
0      640    
32     -144   
128    -160   
-32    128    
240    -112   
-16    256    
64     -272   
192    224    
-608   -384   
736    592    
-496   176    
-208   256    
112    32     
-288   -64    
-112   -144   
-112   -192   
16     -16    
48     -160   
64     176    
-368   -272   
320    32     
-480   -288   
320    480    
-224   -160   
-64    224    
-64    -16    
-384   48     
-48    272    
-672   32     
-128   -368   
48     16     
304    224    
48     -32    
-272   96     
-64    -288   
208    -96    
-272   -96    
176    144    
16     80     
-48    272    
-16    0      
-192   0      
-176   304    
-80    -16    
-96    208    
-208   -32    
64     80     
144    -80    
-240   64     
16     -32    
16     128    
-128   64     
368    1184   
-352   -1696  
-800   432    
-192   96     
-592   128    
224    -416   
160    -240   
176    448    
16     208    
-192   -112   
32     -64    
128    -48    
144    48     
96     176    
32     16     
-192   -128   
-16    128    
-176   -16    
32     64     
-64    -96    
96     48     
96     64     
-128   128    
-400   -112   
-144   48     
-384   -64    
240    176    
-32    -64    
176    176    
-288   -272   
112    -80    
-144   112    
112    112    
0      64     
-16    80     
-224   -256   
80     96     
-144   160    
176    -80    
-192   0      
16     96     
32     128    
64     -144   
0      -80    
0      176    
96     160    
-48    -80    
16     0      
-192   160    
144    -32    
-48    144    
-192   -144   
160    192    
-192   208    
176    32     
-528   -208   
128    96     
-1344  -64    
32     192    
-96    64     
224    128    
-96    80     
0      0      
48     96     
-208   64     
80     48     
-176   -16    
64     80     
32     -16    
-48    160    
-304   -208   
128    96     
-80    -48    
16     -128   
-16    0      
-160   304    
-144   176    
80     -16    
192    -80    
16     144    
-176   224    
64     32     
176    32     
-304   96     
176    304    
-144   -288   
352    -32    
-336   -32    
64     96     
0      144    
32     144    
-80    64     
0      144    
112    128    
64     -32    
272    288    
-304   128    
96     96     
96     96     
-80    48     
96     0      
16     192    
48     160    
16     112    
64     -16    
-128   0      
144    160    
0      -32    
-16    -16    
-160   -48    
-32    -16    
-16    16     
-16    96     
-80    16     
-16    16     
-208   -416   
-96    80     
112    32     
48     16     
16     -32    
-176   48     
128    32     
128    64     
-112   48     
-32    -48    
-32    0      
224    32     
-192   128    
0      16     
192    112    
-48    -48    
-352   0      
16     -176   
-192   -16    
128    32     
-64    96     
160    -272   
-176   -48    
-128   128    
48     64     
240    144    
-16    64     
-16    304    
-144   0      
112    32     
-112   -112   
-16    48     
240    224    
0      256    
48     96     
16     144    
-48    48     
64     128    
32     224    
32     128    
-128   160    
96     80     
80     272    
-80    -208   
-48    64     
80     -48    
48     80     
0      144    
32     144    
32     208    
32     112    
-144   -192   
176    16     
48     112    
32     160    
16     32     
-64    64     
0      0      
-16    128    
208    32     
48     128    
-16    80     
112    224    
-112   112    
112    272    
-16    384    
400    32     
-80    112    
64     80     
-16    -64    
176    32     
16     208    
-16    64     
-16    32     
48     -512   
128    96     
-64    -368   
-64    112    
128    176    
64     144    
64     64     
-32    64     
-944   -928   
-768   -656   
448    -752   
560    208    
-16    -400   
-320   48     
336    704    
144    -544   
-304   32     
320    -112   
-80    160    
48     -64    
-16    224    
256    176    
-224   -32    
-32    64     
96     80     
-80    32     
176    160    
64     0      
-112   32     
80     208    
32     160    
112    16     
-32    -224   
0      -208   
-16    -960   
32     480    
320    272    
-304   0      
128    -64    
224    80     
-32    -16    
32     144    
64     352    
-144   0      
256    288    
-96    112    
208    256    
-80    -432   
-16    -160   
-48    -368   
0      112    
112    -48    
0      160    
16     -64    
96     256    
32     176    
112    240    
-48    -16    
0      -192   
16     208    
80     -128   
32     48     
80     -48    
96     128    
128    -80    
-96    592    
448    112    
-96    -512   
-256   128    
288    0      
-32    288    
-32    192    
80     80     
-32    -48    
16     112    
176    -16    
64     96     
32     -240   
112    208    
32     -112   
48     176    
0      -704   
32     80     
128    304    
-224   -256   
80     -160   
-240   208    
80     -96    
-64    -592   
80     176    
48     -96    
64     -48    
16     -288   
96     192    
0      -752   
16     -128   
48     -368   
64     336    
32     112    
48     192    
-128   -144   
144    48     
64     80     
112    -128   
64     192    
-16    -112   
64     96     
16     -256   
112    208    
64     -32    
80     336    
-64    -368   
32     96     
48     0      
112    -1584  
64     -64    
176    48     
80     -864   
16     48     
80     -2144  
64     -64    
64     160    
48     -32    
64     128    
48     272    
-80    144    
96     -288   
16     -112   
320    384    
112    -32    
-80    160    
-320   192    
128    -384   
96     -96    
-64    -1040  
0      -32    
64     -944   
80     96     
-16    -64    
112    -224   
16     -224   
160    144    
48     64     
48     464    
96     176    
-48    -320   
-224   -16    
48     -240   
80     64     
-32    32     
80     112    
64     -80    
96     -160   
-48    -2240  
128    -384   
-112   -160   
176    320    
160    64     
-16    144    
80     -160   
64     -288   
-112   -48    
0      -224   
-432   -272   
16     -48    
192    192    
80     608    
256    96     
-144   -384   
48     0      
-128   32     
80     96     
0      112    
-112   -80    
16     48     
192    384    
0      -416   
-144   -160   
-160   80     
0      -384   
48     48     
208    -400   
-16    0      
-64    -496   
-128   128    
-128   -2256  
-80    -80    
240    -64    
16     160    
-160   -224   
80     112    
16     0      
-16    128    
-464   -240   
208    -64    
-1184  -32    
80     64     
64     96     
-48    -64    
64     64     
144    -896   
128    64     
48     -16    
64     16     
0      176    
32     80     
-1136  -2976  
1296   960    
-784   1008   
-368   0      
304    288    
-640   224    
624    1360   
-768   -720   
256    672    
64     -1376  
240    368    
48     -64    
96     256    
-128   -144   
256    -64    
-560   -128   
112    -16    
-240   80     
240    -16    
-48    96     
0      -176   
-80    0      
176    -208   
-80    208    
192    -272   
-96    16     
-48    0      
112    64     
-176   64     
64     80     
-96    -16    
-16    48     
32     112    
80     0      
-80    -80    
-96    -272   
80     384    
176    16     
-96    0      
-32    -16    
96     64     
-32    32     
-48    -16    
-128   0      
208    80     
-80    176    
112    112    
-128   -160   
48     64     
-80    -48    
160    -96    
48     144    
64     -48    
112    144    
-528   -304   
-1056  -128   
-64    240    
-1504  -160   
112    64     
-288   16     
-16    -48    
48     -80    
-160   32     
80     -80    
-16    -64    
-272   -192   
48     112    
-480   -176   
48     -48    
176    32     
-144   96     
-16    224    
-96    16     
48     -32    
-176   144    
-224   -144   
-272   48     
-160   32     
-48    176    
-144   -96    
-48    -224   
176    144    
-240   -192   
176    16     
-224   288    
64     -96    
304    224    
-416   -32    
352    160    
-608   -96    
288    32     
-704   48     
0      112    
-256   80     
80     48     
-80    -80    
112    304    
-32    80     
112    48     
16     32     
-48    32     
16     0      
-208   0      
160    -32    
-256   224    
-48    128    
-304   0      
-304   -208   
-768   -160   
112    192    
-112   -48    
160    192    
-160   -80    
96     128    
-192   48     
224    224    
-160   -32    
208    304    
-240   -16    
-64    -160   
-96    192    
-112   0      
48     176    
-240   -128   
-160   -32    
192    -32    
64     160    
224    64     
-144   160    
-144   32     
176    16     
-112   48     
16     80     
32     208    
-224   -80    
112    96     
96     128    
16     256    
-176   -48    
-80    -16    
-272   112    
32     0      
-48    80     
32     -64    
-32    64     
-32    -48    
-32    0      
-80    64     
0      128    
-48    96     
-112   224    
64     32     
-32    -96    
-176   -144   
112    -16    
-704   -128   
144    32     
-48    64     
-128   80     
144    160    
-128   16     
16     32     
-64    176    
80     32     
-96    256    
16     192    
400    672    
-64    112    
-176   -272   
16     112    
-64    -80    
-64    -16    
160    96     
-192   -16    
-32    0      
-32    64     
16     128    
-112   -16    
-48    32     
-80    32     
32     16     
-160   32     
96     112    
-112   -32    
480    -160   
-192   48     
-128   176    
-160   192    
-32    16     
-32    64     
96     80     
-16    0      
-96    16     
-32    160    
-80    -32    
224    192    
-64    -80    
128    160    
1408   -1728  
560    320    
-48    160    
-480   144    
32     -208   
720    -912   
-176   352    
176    0      
-160   48     
-176   -64    
224    32     
-16    160    
-32    16     
-16    80     
80     -16    
-144   -32    
-48    -272   
304    208    
-96    144    
0      -32    
208    -160   
-48    128    
224    -144   
-80    128    
64     -64    
-80    80     
-16    48     
128    128    
176    -256   
128    48     
-240   -96    
192    160    
-112   96     
0      -48    
352    368    
16     208    
336    528    
-80    288    
-160   -224   
-32    64     
-160   160    
96     0      
112    176    
-192   -64    
128    160    
-192   64     
192    144    
-112   -448   
-240   -224   
128    352    
112    -240   
-32    256    
0      128    
0      -64    
48     64     
176    128    
-224   -80    
64     784    
416    96     
-384   144    
320    272    
-128   -160   
-96    256    
144    -288   
-160   96     
96     16     
96     112    
32     48     
0      128    
-16    48     
32     176    
-32    -128   
16     80     
112    16     
48     208    
48     160    
-144   128    
-144   -208   
368    96     
-160   112    
144    64     
-64    80     
-16    -256   
80     192    
-64    48     
-64    144    
208    384    
-48    176    
-96    -144   
64     -112   
80     -32    
-16    -192   
32     -48    
240    256    
0      304    
32     48     
128    272    
-80    -64    
240    -96    
-192   -160   
80     -80    
240    144    
48     400    
80     112    
-176   -128   
144    128    
64     -32    
192    256    
-80    336    
80     176    
16     144    
0      64     
0      160    
80     48     
64     -16    
-16    80     
-80    -208   
128    176    
112    256    
-192   -432   
352    64     
-96    -304   
112    32     
-16    -736   
176    -32    
-160   128    
96     224    
0      112    
-96    -336   
64     16     
192    144    
112    -320   
-480   -144   
352    48     
0      64     
-96    48     
128    -368   
112    272    
80     -352   
-64    48     
80     -736   
32     16     
128    64     
-112   176    
160    32     
-112   -256   
48     -432   
48     -208   
64     64     
128    -64    
64     368    
-16    -160   
-32    288    
16     -544   
144    208    
-128   -1072  
192    96     
-96    -544   
112    128    
-16    144    
144    176    
96     304    
32     -80    
-16    160    
80     -528   
-32    0      
96     -160   
64     240    
-192   -320   
96     -16    
80     -160   
208    -112   
-112   96     
-64    32     
-16    48     
48     96     
224    -208   
-80    48     
-128   128    
-80    -144   
224    48     
128    48     
48     192    
176    -336   
128    128    
144    96     
-64    176    
-48    128    
64     32     
144    64     
48     -64    
80     -64    
16     48     
16     320    
-32    0      
112    -64    
32     -208   
-1088  -2144  
912    336    
-640   352    
-96    -304   
480    -384   
-304   16     
272    -1200  
-352   208    
-448   48     
576    -160   
-288   -256   
384    -1744  
-176   288    
208    -672   
32     144    
128    -160   
64     224    
-48    112    
32     16     
176    -960   
-224   -16    
112    -512   
32     48     
-192   48     
48     -32    
144    -256   
-32    32     
144    -144   
64     -656   
-96    -32    
240    -32    
-80    64     
128    -640   
-112   240    
160    -176   
-64    160    
176    -112   
-32    160    
-544   -160   
112    -128   
32     -176   
-64    48     
96     -32    
16     -304   
96     0      
192    -1456  
-64    -16    
80     -64    
-112   256    
192    -128   
0      112    
-144   -48    
224    -96    
-416   16     
80     -160   
-1072  -208   
32     -16    
80     -48    
0      -48    
160    -288   
-128   -1152  
64     -80    
160    -16    
-16    144    
32     -32    
112    -16    
-80    48     
144    -48    
-208   16     
160    -112   
-240   96     
80     32     
64     -16    
128    -80    
112    96     
-128   -608   
192    -48    
0      -400   
48     96     
160    -272   
80     -64    
-80    -48    
176    -144   
0      176    
176    -32    
-64    -176   
32     -48    
-1824  16     
176    144    
0      112    
32     -64    
-48    -112   
96     -1056  
0      -80    
48     -48    
160    -48    
-336   -160   
256    0      
0      144    
32     -288   
-16    -128   
96     -192   
-208   -64    
160    48     
-352   -32    
16     -336   
0      -80    
144    -608   
-160   -48    
-16    96     
64     -144   
-240   -32    
32     32     
-96    -160   
64     128    
0      32     
112    48     
-80    80     
0      -96    
144    0      
-272   -800   
-64    256    
224    -320   
80     144    
-304   -80    
112    -64    
-160   208    
304    16     
-160   -128   
192    -32    
-64    96     
128    16     
192    32     
-112   -96    
112    64     
-48    -432   
-144   160    
224    -32    
80     -336   
-240   -16    
32     -64    
-320   48     
96     80     
64     -32    
-32    16     
-32    -64    
16     112    
-432   -16    
160    272    
-48    -32    
0      32     
-16    224    
-800   -384   
-144   96     
80     48     
-16    832    
-288   -576   
-544   -32    
128    288    
240    208    
-144   128    
128    96     
-208   16     
-128   16     
-32    32     
448    272    
-160   176    
-240   32     
-256   0      
16     -32    
-32    -96    
-80    32     
-160   272    
-320   0      
-1424  -160   
-144   176    
160    -16    
-80    96     
-48    -64    
176    128    
-96    -208   
112    96     
-144   80     
-32    144    
-64    64     
80     -48    
-128   96     
-144   -64    
-176   64     
-512   192    
48     96     
-112   -96    
-16    80     
-240   -224   
288    0      
-128   208    
192    64     
0      -32    
1840   -1312  
688    144    
-272   576    
-672   80     
-96    496    
416    -832   
-160   656    
-112   -528   
-1056  336    
-224   -304   
64     144    
-64    -144   
96     112    
-48    16     
-48    -32    
-224   -48    
112    -304   
-128   -208   
368    80     
144    448    
240    80     
-400   240    
48     -112   
-800   -80    
128    -240   
48     112    
-16    48     
-192   816    
-240   -256   
-256   64     
240    -112   
-32    -208   
144    224    
-112   80     
-16    144    
-32    144    
-64    288    
-80    -112   
-208   -80    
272    64     
-128   -64    
64     176    
16     320    
-64    96     
-48    0      
-96    -192   
288    192    
-192   -128   
-208   -208   
-128   -336   
208    -64    
-192   48     
96     144    
32     -80    
-16    176    
-128   -144   
-224   208    
16     368    
416    128    
32     336    
32     160    
-112   -32    
-80    144    
-64    80     
-48    -96    
64     96     
32     -16    
80     128    
-304   -400   
224    48     
-80    -32    
48     384    
-224   272    
80     64     
32     32     
-32    -224   
-64    256    
-304   160    
240    240    
-192   64     
96     -192   
-464   -224   
208    160    
-352   -144   
-112   96     
144    144    
-240   -416   
208    112    
16     128    
112    256    
-64    64     
-48    160    
48     224    
192    -48    
16     224    
-16    288    
-144   80     
-128   -64    
128    48     
176    336    
-112   144    
-128   -64    
208    144    
16     -80    
48     96     
-160   -224   
64     -32    
176    112    
-32    -16    
-48    128    
48     176    
-272   -112   
144    48     
-48    -64    
176    240    
16     176    
-192   -496   
-48    240    
176    16     
112    400    
32     48     
-80    -16    
-64    -80    
160    160    
-16    256    
-48    192    
112    16     
-64    16     
-192   -48    
64     128    
16     112    
240    -96    
-160   96     
208    32     
128    256    
-256   -64    
48     64     
64     176    
16     16     
176    0      
-144   208    
64     -32    
-16    112    
208    128    
-96    176    
256    -16    
80     448    
-192   64     
160    -16    
-64    -16    
16     112    
128    192    
-16    48     
112    144    
-80    96     
-16    32     
32     128    
80     288    
-48    48     
160    112    
-16    96     
80     -32    
-16    32     
-32    32     
192    240    
-208   16     
304    144    
112    48     
-16    192    
-80    32     
-128   224    
-80    -32    
112    -240   
288    -144   
48     144    
-96    288    
-144   48     
16     272    
96     -112   
192    96     
64     112    
-48    48     
64     -160   
16     128    
-128   64     
80     320    
-208   32     
96     -144   
112    64     
48     -1504  
176    48     
-64    192    
0      192    
224    -192   
-80    320    
-144   32     
208    80     
-112   -176   
-400   112    
-496   -800   
416    368    
-320   656    
-64    -720   
-112   -336   
736    432    
144    288    
128    80     
-464   176    
432    -384   
-176   720    
160    -96    
-224   656    
96     -528   
-144   480    
128    -448   
32     512    
32     -272   
-16    128    
176    -96    
-128   112    
160    0      
-80    -432   
112    -16    
16     112    
64     144    
16     176    
-32    128    
192    0      
-80    128    
96     -128   
-32    160    
144    -32    
32     112    
160    -64    
-96    80     
192    160    
-48    -608   
112    -16    
-64    -768   
96     64     
80     96     
-32    -48    
48     32     
-32    80     
64     176    
16     -80    
-32    256    
-112   -208   
256    112    
-176   48     
176    -80    
0      0      
16     16     
80     -192   
-64    16     
16     80     
96     0      
-96    128    
64     112    
96     192    
16     -528   
176    160    
-208   -416   
48     128    
-32    -240   
32     32     
80     16     
112    208    
0      80     
160    112    
16     16     
160    176    
-32    160    
176    176    
-16    208    
128    -432   
144    144    
-112   128    
80     176    
64     -16    
-16    -96    
0      -400   
0      224    
32     -256   
96     160    
-32    256    
176    80     
-32    -144   
-16    -144   
64     -1408  
256    0      
-208   -16    
288    -64    
-32    80     
0      -176   
240    448    
-16    -224   
80     0      
-112   48     
208    -720   
-112   32     
96     -1312  
-48    32     
-784   -672   
-96    -48    
128    -208   
-48    -192   
112    48     
64     -1616  
32     -32    
128    160    
64     80     
80     64     
80     144    
160    -112   
-112   16     
16     -400   
384    -208   
-144   96     
48     -576   
-32    -64    
64     -944   
80     -144   
288    -240   
112    176    
16     144    
-80    96     
48     -112   
192    16     
96     -112   
-160   96     
64     -112   
96     144    
-256   -768   
-48    -336   
304    224    
16     -48    
-48    0      
112    -416   
32     16     
-16    -704   
112    -272   
-32    -80    
16     -32    
16     -224   
32     48     
64     80     
80     48     
-160   -48    
160    -112   
-448   -32    
48     96     
-144   -80    
160    -192   
-32    -16    
224    -304   
48     0      
-112   -48    
192    96     
-80    64     
112    160    
32     -96    
0      -96    
-144   -144   
-32    -272   
48     160    
112    -32    
64     96     
-64    -304   
80     -32    
96     -416   
112    112    
-144   -1584  
224    144    
-112   112    
208    -160   
-208   48     
144    -48    
48     16     
-32    32     
-208   -32    
-256   -144   
-336   192    
-64    -240   
-224   -176   
192    -128   
288    192    
-160   -416   
16     0      
128    128    
16     -64    
352    -432   
-64    288    
-64    -80    
-208   -32    
-672   608    
-1568  -960   
-656   -912   
64     -128   
32     128    
-224   240    
16     320    
-688   -1968  
976    -176   
-240   768    
-32    208    
-336   -160   
224    -80    
224    208    
96     -160   
-224   224    
160    208    
112    288    
-128   -304   
32     16     
160    -48    
208    224    
-16    -560   
-48    0      
-160   -80    
144    -496   
-368   -144   
560    448    
-656   -224   
-48    -240   
-16    384    
192    128    
-160   48     
-48    -496   
-240   16     
64     -160   
176    -32    
-176   -496   
-464   -16    
160    64     
-656   304    
-160   -160   
112    32     
-160   -144   
240    -48    
-16    0      
192    -80    
-608   -176   
-912   -352   
-48    64     
-128   0      
-16    128    
-224   -16    
-496   16     
-64    0      
-256   0      
-16    32     
-144   -32    
32     128    
16     -96    
-16    64     
48     -48    
16     48     
64     -352   
0      144    
-144   -176   
128    96     
-48    192    
-224   32     
128    112    
-416   128    
-48    -80    
-128   0      
-128   -160   
-384   -240   
-272   32     
176    48     
16     80     
0      0      
64     224    
-32    -176   
-16    96     
112    0      
-16    336    
128    -64    
288    32     
-320   -96    
-32    -208   
-208   -16    
-16    128    
0      96     
-208   0      
176    240    
-176   32     
128    224    
-272   -240   
-80    -32    
112    0      
32     32     
-80    64     
-64    80     
80     144    
32     144    
-48    160    
-96    0      
16     288    
-432   -48    
208    144    
-208   -304   
-48    112    
64     -48    
-32    -48    
-16    0      
32     96     
-80    224    
-16    96     
0      -64    
-160   -112   
32     -112   
-272   -176   
-224   -80    
-192   -176   
320    352    
-48    -144   
-144   144    
-32    176    
192    96     
-16    0      
-224   -48    
16     48     
0      128    
144    304    
-32    160    
240    48     
-704   -80    
320    320    
48     48     
144    64     
-704   -32    
-80    16     
304    112    
-16    0      
-208   112    
-96    -16    
96     -32    
-176   -32    
16     -48    
-160   -32    
160    112    
-336   0      
208    96     
-240   -32    
48     144    
-688   -160   
-224   64     
-80    80     
64     112    
-16    48     
112    448    
-208   128    
16     64     
-16    -208   
-80    80     
96     64     
-160   -64    
128    176    
-144   272    
-48    160    
-1008  -224   
0      0      
160    128    
-64    0      
16     48     
32     48     
0      80     
-48    64     
48     64     
48     64     
-16    96     
-288   16     
128    0      
-80    0      
192    48     
32     240    
-288   -32    
192    80     
-64    160    
96     -96    
-16    144    
48     96     
-16    160    
16     112    
80     240    
16     -16    
-192   96     
80     0      
-80    64     
-64    16     
-928   576    
1360   -192   
976    -240   
96     -176   
-624   912    
80     -432   
96     512    
352    -16    
-400   240    
-224   -64    
16     112    
-144   32     
400    -256   
-496   256    
368    -304   
48     448    
-16    -224   
-128   144    
64     -416   
-96    288    
336    0      
0      320    
-144   -64    
-48    176    
-64    -144   
144    160    
32     160    
192    160    
80     48     
-112   16     
96     48     
-64    16     
192    320    
-16    16     
32     176    
-48    -144   
0      64     
-16    -32    
80     240    
64     0      
80     64     
-176   32     
80     160    
80     32     
32     96     
-48    64     
32     96     
64     32     
-64    -32    
0      128    
64     -48    
48     160    
-64    48     
128    128    
-16    0      
80     112    
-192   -192   
16     -336   
144    48     
0      -96    
-16    96     
-32    336    
192    -16    
112    80     
-128   176    
160    144    
32     192    
-64    32     
208    144    
-80    80     
16     16     
96     96     
-48    -208   
128    128    
-32    208    
-48    128    
0      16     
144    -112   
-144   -336   
16     -96    
-48    176    
0      240    
160    288    
-160   -32    
32     -240   
176    160    
48     160    
80     -32    
48     128    
-192   -2096  
112    -16    
96     96     
0      96     
48     288    
16     16     
-192   -576   
64     -112   
-16    -272   
160    -112   
0      128    
48     80     
-64    128    
32     -240   
48     128    
80     -352   
32     240    
-128   32     
80     16     
-16    64     
160    144    
-32    -80    
-64    80     
32     96     
160    144    
0      16     
-48    -48    
32     48     
64     -80    
0      112    
128    80     
96     352    
-16    -976   
-80    -96    
-32    -176   
336    144    
144    32     
16     576    
-176   -32    
192    -32    
-144   16     
144    -208   
128    160    
32     -192   
-80    256    
16     -272   
-32    -128   
-16    -704   
304    64     
80     -848   
224    448    
-208   32     
160    224    
-32    -64    
128    96     
96     176    
-32    -320   
224    144    
-160   16     
48     256    
-16    -720   
160    128    
272    -16    
-80    224    
-80    80     
-160   208    
-80    -176   
320    176    
-176   -64    
496    240    
-256   192    
240    -208   
-64    208    
160    -208   
96     208    
-32    -208   
656    432    
-528   64     
336    -80    
160    -160   
-32    32     
176    -64    
-176   240    
80     96     
192    -32    
-128   128    
160    -48    
-160   96     
112    -128   
-16    144    
48     -80    
192    -32    
32     -48    
16     80     
-176   -832   
16     208    
304    192    
-32    -1536  
-176   16     
160    -16    
208    -1296  
-48    -128   
-288   -672   
128    -144   
400    -208   
80     112    
-80    0      
-128   -80    
-208   -1280  
-912   1088   
256    48     
-368   -16    
224    -224   
-560   -736   
-240   -80    
-128   224    
432    240    
432    192    
-240   -240   
96     -1696  
64     -368   
208    -112   
-160   -128   
176    -272   
64     464    
-32    0      
-208   96     
128    -16    
16     -128   
-240   -48    
-32    16     
224    -80    
-64    -400   
-160   -352   
192    -624   
16     96     
256    80     
-160   -112   
176    64     
-112   80     
128    -256   
-112   96     
-176   16     
16     0      
16     16     
48     32     
160    -80    
32     -80    
-128   48     
256    -608   
16     240    
96     96     
32     -208   
-48    -288   
288    240    
48     80     
80     176    
-16    -160   
80     32     
-272   0      
128    -176   
-256   -128   
128    -192   
128    -32    
48     16     
-160   144    
0      -288   
80     -48    
-48    -128   
176    96     
0      128    
32     -176   
-64    112    
-48    -192   
48     16     
80     -80    
-176   112    
128    -80    
-624   64     
48     -496   
80     -128   
-48    -1008  
-16    64     
48     -560   
160    384    
-144   -96    
256    -208   
0      -32    
16     -272   
-80    144    
16     112    
-208   -176   
64     -112   
-160   240    
-240   -128   
144    -128   
128    -144   
-192   112    
240    -224   
-96    112    
-96    -192   
128    -160   
-336   -96    
208    -32    
-176   96     
160    48     
-416   16     
16     -176   
-288   -160   
160    16     
0      96     
112    -96    
-144   80     
272    -80    
-16    96     
-32    16     
128    112    
-240   -32    
112    16     
-128   -224   
-32    -96    
-176   -144   
128    -48    
-80    96     
144    -80    
112    -16    
-128   -224   
176    80     
128    0      
288    128    
-32    128    
-80    144    
96     112    
96     16     
80     16     
-80    112    
-224   -144   
64     -64    
-128   0      
176    -208   
112    448    
-240   -304   
160    176    
-800   16     
-352   -32    
32     272    
-912   0      
208    16     
-144   32     
-48    80     
176    96     
48     -48    
-32    -96    
-144   64     
-368   -176   
-224   48     
48     -160   
96     224    
-64    48     
-320   -16    
-128   -32    
-256   -128   
-48    112    
-624   -32    
48     112    
-352   -416   
-48    -272   
224    16     
-224   192    
-48    -176   
0      48     
-112   -160   
64     64     
16     80     
-80    176    
-256   176    
-16    -432   
-112   48     
-80    32     
-144   48     
-1120  -32    
128    80     
-112   -16    
128    144    
-128   16     
128    -80    
176    80     
96     -144   
-16    192    
-64    48     
-80    192    
-224   128    
96     -144   
160    -32    
-16    -80    
-560   0      
-160   112    
-304   -112   
80     32     
32     -144   
-16    48     
-64    -192   
112    208    
-112   160    
80     48     
-144   -16    
-784   272    
-688   -1200  
-272   112    
560    48     
336    -272   
-352   48     
-864   304    
224    -576   
16     -128   
80     208    
304    48     
-320   304    
272    -112   
-64    176    
-32    -64    
-160   32     
0      80     
-16    128    
-16    -96    
-112   -80    
48     0      
-224   0      
-32    240    
32     -32    
-16    80     
144    -32    
-16    176    
64     192    
-144   96     
-48    32     
-16    80     
48     96     
240    256    
-112   208    
-64    -96    
-208   0      
-384   -16    
96     96     
-1392  -64    
-32    80     
80     64     
-128   80     
-48    48     
-32    0      
32     64     
16     0      
128    144    
-272   -32    
0      64     
-144   -160   
32     0      
-48    80     
48     160    
-1200  -208   
0      0      
-32    48     
-48    32     
48     96     
80     64     
-80    -176   
-16    176    
128    64     
-80    272    
80     432    
16     160    
16     64     
-16    96     
0      48     
-64    -32    
0      64     
-48    64     
48     -48    
176    48     
-96    96     
-16    128    
-112   -32    
128    32     
48     320    
-240   192    
-32    -400   
32     208    
-208   -112   
208    208    
32     192    
-32    96     
32     0      
80     224    
-32    -96    
-80    -112   
32     -144   
64     48     
160    288    
-112   192    
0      64     
-32    -16    
-16    -16    
-32    -80    
0      48     
80     144    
32     80     
-32    96     
0      16     
64     64     
48     64     
96     128    
-64    64     
64     96     
-128   -176   
144    96     
-128   128    
128    -16    
80     160    
-80    176    
176    80     
-64    80     
0      80     
16     -16    
64     48     
-16    160    
48     64     
0      -16    
-48    96     
96     48     
96     48     
-128   128    
-224   0      
64     -352   
176    -224   
144    288    
-16    176    
192    160    
-128   112    
-32    112    
64     -16    
-48    48     
-48    -32    
-16    -688   
-160   192    
-192   208    
208    -48    
-48    -928   
128    112    
-48    80     
-32    32     
64     112    
80     32     
48     256    
-64    -16    
48     48     
64     48     
112    96     
-48    -16    
80     112    
192    336    
-64    272    
-256   -944   
336    288    
128    -304   
96     208    
-336   80     
80     32     
-64    0      
96     80     
288    240    
-32    32     
-224   112    
256    480    
-544   -144   
160    -208   
16     0      
320    -304   
-16    208    
-224   -896   
-192   0      
416    -80    
96     352    
-160   -96    
96     -48    
96     240    
128    160    
-336   -80    
-352   208    
-96    -160   
304    -96    
-96    304    
368    -128   
48     160    
16     -1696  
192    112    
48     80     
-32    96     
144    144    
-16    32     
0      16     
-64    32     
144    -32    
112    96     
-48    64     
1616   -1200  
720    2032   
-912   -544   
-576   -720   
64     -304   
368    -64    
208    -1216  
16     352    
-80    -192   
-64    -112   
-224   48     
320    64     
0      224    
32     112    
32     112    
-16    -336   
80     224    
0      -112   
64     80     
-48    32     
96     192    
-16    -448   
16     -32    
-160   -176   
176    -128   
-80    64     
208    160    
-48    -16    
128    32     
-16    240    
176    -144   
-64    128    
-16    -128   
160    48     
32     -368   
304    0      
-144   -896   
64     32     
32     112    
-32    -128   
96     144    
96     144    
32     48     
112    112    
-80    256    
160    -128   
0      128    
176    144    
-256   64     
272    -80    
-80    176    
128    -192   
-48    96     
80     16     
64     112    
80     352    
-16    -96    
208    384    
-272   -368   
288    -80    
144    256    
-160   80     
144    -432   
-32    224    
96     -448   
112    16     
-96    -80    
32     208    
-48    -1664  
128    160    
0      -80    
112    272    
-160   32     
224    -112   
80     -80    
-64    -224   
48     272    
-16    -112   
64     128    
80     16     
96     0      
144    16     
-32    208    
-128   -208   
64     -2688  
32     -160   
128    -576   
96     272    
-400   -32    
256    -1056  
-80    -48    
96     -1040  
32     -16    
208    80     
-64    128    
0      160    
-16    -144   
160    96     
-80    16     
96     -224   
-368   64     
240    -48    
-48    -480   
-368   -32    
64     -848   
-32    128    
-48    -176   
160    -128   
-48    -1184  
48     80     
160    64     
-48    -144   
32     -336   
-80    160    
176    -112   
-64    32     
-272   16     
240    -64    
-1040  -96    
272    80     
32     -64    
112    64     
-128   -144   
144    16     
96     -144   
-256   -544   
208    176    
80     -48    
224    96     
-64    -48    
-64    16     
48     128    
80     16     
-160   96     
80     48     
-656   -32    
48     -288   
160    16     
-48    -80    
80     80     
-64    -160   
-16    32     
64     64     
32     80     
0      64     
112    -96    
-144   -208   
176    -128   
-288   0      
144    64     
-208   -96    
-16    -32    
-96    48     
16     -48    
0      -144   
32     -256   
0      -256   
80     16     
-112   -48    
64     -192   
16     -32    
48     96     
80     -336   
-80    -112   
192    96     
-256   0      
32     -288   
-432   -192   
240    144    
80     48     
32     -400   
16     16     
-16    -640   
160    96     
-64    48     
16     -16    
-144   -160   
112    -160   
96     96     
96     -128   
-80    48     
64     -16    
-160   144    
64     -272   
-304   -32    
0      -128   
112    256    
144    -672   
0      48     
-96    80     
80     -128   
-48    -32    
0      -128   
96     -128   
-96    -48    
-64    -192   
64     -272   
1344   816    
-1408  -896   
800    832    
16     160    
928    -896   
-192   -1632  
160    352    
192    -160   
-224   288    
160    -48    
-144   -48    
-240   -48    
336    192    
0      -80    
-128   -32    
-304   96     
240    48     
-144   0      
-64    -608   
256    48     
-192   -368   
96     80     
-64    160    
32     208    
32     -32    
48     -64    
-32    48     
0      -16    
-16    96     
-64    -160   
-160   256    
48     -96    
272    224    
-512   -320   
224    -16    
-64    176    
112    336    
-80    64     
-1344  -160   
-160   0      
-112   -64    
-32    80     
-16    0      
-32    160    
16     16     
-256   80     
-560   -192   
64     240    
-192   -48    
256    208    
-32    208    
-80    -80    
-16    64     
-240   -96    
176    48     
-176   -32    
112    -64    
-48    32     
-144   -80    
-80    -368   
96     208    
-80    -96    
96     272    
-48    -48    
-32    176    
144    -16    
-176   -16    
16     -32    
-32    32     
-64    64     
-320   64     
16     48     
-912   32     
48     240    
-48    96     
48     128    
-80    -384   
-48    -144   
464    -64    
-192   176    
48     -96    
-208   -64    
-64    -80    
-32    -144   
32     96     
-160   -32    
-96    80     
-128   -112   
64     144    
-288   -16    
144    32     
-144   -16    
80     96     
16     48     
-16    96     
-80    -48    
160    112    
-80    48     
0      -112   
-64    48     
-112   32     
96     16     
-16    64     
-32    128    
-720   -16    
64     176    
-96    48     
-32    -112   
128    144    
-192   64     
224    112    
-144   0      
16     96     
-32    32     
-16    96     
-80    -16    
48     80     
-48    0      
64     96     
-560   -192   
64     32     
16     0      
208    304    
0      144    
-208   -80    
-80    160    
-32    -176   
96     -320   
-224   -112   
176    80     
-64    176    
-64    128    
-144   -112   
32     224    
-240   -112   
224    96     
-560   512    
-224   240    
32     -256   
80     -32    
112    0      
0      320    
16     224    
80     -32    
-48    144    
-16    -32    
160    160    
-640   -320   
320    208    
-80    224    
128    16     
-16    304    
-48    -32    
192    96     
64     448    
-288   304    
-32    288    
16     80     
-160   -144   
32     -32    
-32    112    
144    96     
-144   144    
160    64     
-240   96     
80     240    
-240   -48    
48     240    
16     208    
-208   -16    
240    112    
-64    144    
-48    32     
112    112    
-80    -48    
-64    -176   
128    192    
-288   -144   
192    480    
-400   -288   
160    112    
-96    -208   
-192   128    
192    128    
-32    288    
0      128    
0      336    
-128   0      
0      80     
64     -48    
-16    32     
0      96     
-96    0      
160    320    
-256   32     
48     272    
-112   -16    
176    128    
384    480    
352    2256   
-1104  0      
-368   -832   
-192   64     
816    112    
-224   -208   
-32    688    
240    32     
-336   -16    
240    64     
-64    64     
80     208    
-48    -32    
208    32     
-80    96     
-16    64     
80     32     
-96    -16    
64     32     
-48    96     
112    240    
-144   -64    
16     64     
-128   -16    
-16    0      
272    112    
-96    80     
144    80     
-176   -80    
144    80     
96     192    
160    176    
-16    64     
-32    0      
-80    -256   
272    -48    
-176   240    
256    64     
-32    -144   
-176   -224   
224    160    
-16    48     
176    176    
-160   80     
192    128    
-176   16     
144    -64    
32     128    
-64    112    
224    128    
-192   80     
112    0      
64     160    
-96    32     
80     -304   
-16    144    
64     160    
128    96     
0      80     
-16    96     
0      0      
48     96     
-16    80     
64     -48    
64     16     
16     224    
-192   -240   
80     -16    
128    240    
-144   -512   
272    64     
-96    -2272  
64     64     
80     32     
32     144    
-192   -48    
80     48     
32     80     
160    288    
-128   -160   
192    112    
-80    352    
-64    -32    
320    64     
-48    64     
-96    -48    
144    -816   
-336   160    
160    16     
-160   160    
240    272    
16     272    
-48    -144   
64     -160   
-32    -192   
16     208    
64     192    
32     -96    
-64    -16    
32     -432   
144    64     
-64    -416   
32     64     
-32    -1760  
112    192    
112    208    
16     224    
192    112    
-16    304    
128    0      
-64    96     
-16    16     
144    -48    
176    160    
-80    -176   
80     240    
-160   -48    
320    80     
112    -32    
-32    224    
272    -1248  
-192   208    
160    96     
0      128    
-48    96     
384    384    
-32    160    
240    176    
-32    112    
112    -288   
-48    272    
48     -176   
112    272    
64     -272   
-224   80     
224    -192   
144    112    
-224   -128   
160    48     
-48    80     
80     112    
48     320    
-16    -928   
80     16     
48     -176   
144    352    
64     -144   
-32    112    
80     -528   
112    112    
-64    48     
128    128    
-64    160    
208    80     
-144   -256   
64     -208   
288    272    
-112   -224   
112    208    
96     -208   
-64    32     
176    -368   
-48    128    
144    16     
-160   16     
32     96     
112    160    
16     -496   
16     -224   
176    400    
-128   32     
-16    -1152  
160    -320   
112    0      
-32    16     
64     480    
-160   -144   
64     208    
-16    112    
160    -864   
16     -112   
-48    -368   
64     192    
0      -80    
0      -160   
-304   -48    
48     -592   
128    -80    
-80    -1280  
144    -16    
-32    80     
112    -64    
144    176    
-128   -192   
144    -176   
64     48     
208    -272   
480    1456   
16     80     
-272   -384   
-592   -944   
176    -352   
-128   -768   
624    -1200  
-80    32     
464    16     
-176   288    
-144   144    
480    192    
80     -224   
-208   192    
16     -160   
256    208    
-224   -304   
112    176    
-128   192    
0      -336   
240    112    
-16    112    
-48    -128   
-112   -944   
0      -240   
128    -560   
-80    64     
288    0      
-96    96     
0      -48    
32     -176   
-80    -64    
64     -32    
-176   64     
64     -192   
-608   -320   
-96    -80    
160    -240   
-144   -864   
-176   48     
128    -208   
16     0      
32     -128   
-48    64     
32     -96    
-16    96     
-144   128    
160    192    
-336   112    
48     -384   
-1136  48     
96     64     
-144   -16    
-112   272    
128    -112   
128    -240   
-96    -192   
-48    -848   
112    352    
-32    -416   
352    496    
-96    -272   
272    -80    
-320   -64    
368    16     
-432   80     
176    -144   
-496   16     
32     -48    
32     16     
48     -448   
64     16     
32     -736   
64     -16    
32     96     
96     16     
-304   -496   
-144   -608   
-752   -272   
240    -528   
-160   272    
112    320    
-400   64     
128    -192   
-80    -96    
112    -112   
-48    -48    
176    -416   
32     128    
-32    -16    
80     -80    
-112   208    
80     128    
-192   -96    
-32    -32    
-16    48     
80     -32    
-112   -144   
-32    -160   
16     240    
128    -80    
-32    112    
16     -192   
80     -144   
-144   0      
-64    32     
176    512    
-80    -64    
224    64     
-64    112    
-16    -64    
-16    -160   
-80    32     
256    -80    
32     176    
-64    -352   
-16    -160   
-96    -208   
288    -416   
64     64     
-192   -192   
32     64     
112    48     
-16    48     
-16    240    
-352   -160   
400    -16    
-368   208    
-224   -544   
-64    -208   
-32    -256   
128    -176   
-48    112    
-80    128    
-16    192    
-320   352    
48     -256   
-16    -176   
-112   -176   
96     176    
32     -16    
-144   128    
48     176    
-416   -176   
-128   112    
0      -192   
-256   -48    
160    48     
-304   80     
80     112    
-96    -32    
-96    -48    
-80    208    
-32    0      
352    -256   
16     16     
-32    224    
-80    -224   
-112   -16    
144    80     
80     0      
-176   -160   
-32    128    
-208   0      
64     -352   
48     960    
-496   32     
-528   -592   
-32    -80    
112    192    
-112   -48    
-320   144    
96     -32    
64     -32    
128    -16    
16     -80    
-64    -32    
16     0      
-32    128    
64     0      
112    208    
32     0      
-16    32     
-224   112    
-336   -272   
16     64     
-208   -96    
176    16     
32     96     
0      96     
0      176    
0      144    
-112   48     
192    256    
-48    64     
-48    -96    
0      112    
-128   1568   
-1408  176    
-64    48     
320    432    
16     -944   
-672   -192   
192    480    
96     160    
-48    16     
-208   -32    
144    64     
-176   -80    
96     -48    
-48    80     
16     -16    
-192   0      
16     32     
-32    128    
0      80     
-80    -48    
-64    32     
-176   -96    
192    64     
-48    160    
80     80     
-80    -48    
-160   -112   
80     0      
-112   176    
192    224    
-16    32     
-80    48     
-160   64     
160    144    
-336   -96    
240    96     
-128   288    
208    96     
-160   48     
0      96     
16     0      
80     48     
-80    176    
144    64     
-64    112    
-96    -80    
-16    -32    
-304   -128   
384    368    
-464   -32    
400    64     
-272   128    
192    -32    
-48    96     
0      -16    
80     176    
-144   -128   
176    32     
-176   192    
-48    -176   
128    -48    
-128   240    
0      -16    
112    -48    
-16    80     
-160   256    
96     16     
48     -32    
48     -32    
-80    176    
-64    64     
144    48     
80     48     
-16    192    
-16    176    
-32    -128   
240    336    
-224   16     
224    48     
-32    96     
-112   48     
96     96     
-64    -176   
32     -96    
80     80     
-112   64     
-48    -112   
-112   192    
-272   96     
240    32     
-224   48     
240    80     
-224   112    
48     -128   
48     160    
-80    -64    
128    288    
32     304    
96     32     
48     -16    
-64    80     
16     112    
112    112    
-208   -48    
112    -160   
-80    -16    
96     -32    
-128   -80    
-160   -224   
208    224    
64     160    
-16    192    
80     144    
-176   32     
96     0      
-32    0      
-80    128    
288    272    
-16    64     
16     16     
64     80     
48     96     
-160   144    
272    -592   
-64    0      
16     -16    
-160   144    
192    304    
16     224    
-32    -32    
48     128    
0      16     
-48    176    
-144   -96    
224    -32    
-32    -160   
-192   208    
-112   -96    
320    -560   
-160   -96    
208    272    
80     112    
64     48     
64     -48    
96     32     
-144   128    
176    -160   
-208   -352   
64     160    
192    160    
-96    -16    
48     160    
-16    96     
64     -336   
-48    80     
32     -1600  
16     192    
400    48     
-208   96     
192    -16    
80     144    
80     16     
80     144    
-80    -32    
128    256    
-208   64     
80     0      
64     160    
32     -256   
-192   -32    
160    -832   
0      80     
0      112    
160    128    
16     64     
32     240    
-144   160    
-80    128    
-32    -48    
80     128    
-144   48     
-16    -80    
-16    48     
160    -32    
48     96     
272    -336   
32     144    
16     96     
-256   112    
-64    32     
208    128    
-128   80     
112    160    
80     -112   
64     272    
-176   48     
48     -48    
-160   208    
1184   992    
912    832    
-384   -1248  
-80    -672   
-208   -608   
544    432    
-48    624    
-400   480    
-336   320    
-160   64     
464    -432   
-80    320    
288    -80    
224    640    
-288   -144   
256    320    
-96    -48    
144    -160   
-256   -512   
480    -32    
128    256    
272    192    
-128   256    
80     -96    
64     400    
-80    -80    
224    -128   
-288   64     
240    -80    
-160   176    
-64    -688   
304    112    
176    48     
48     112    
-144   -336   
-32    0      
-176   96     
240    336    
-352   -112   
208    128    
-128   80     
96     -176   
48     32     
80     -176   
96     256    
-16    -16    
-16    -144   
48     160    
320    352    
-48    -400   
48     0      
64     -816   
48     320    
64     -192   
96     160    
32     -64    
128    -144   
-208   -64    
-48    -448   
416    256    
-48    -176   
16     320    
208    -64    
32     -16    
-128   -176   
304    288    
-176   -96    
112    -992   
-16    96     
48     -384   
64     -2064  
32     -64    
128    -368   
-32    16     
16     -2672  
96     -208   
-32    -176   
464    32     
448    656    
-160   112    
0      -1056  
48     192    
80     -448   
-32    224    
-16    -1056  
32     -608   
176    304    
384    496    
-320   -416   
48     -304   
192    -80    
160    -272   
-192   32     
80     -208   
0      -496   
16     -752   
224    128    
-16    -192   
-64    -80    
0      -208   
64     -160   
-608   -64    
96     -256   
0      48     
0      -304   
64     -16    
144    -336   
-176   128    
-48    -688   
-48    0      
48     -96    
-288   -112   
176    80     
16     144    
-176   -128   
48     -48    
-192   -96    
80     -64    
-640   -416   
48     112    
128    -48    
96     -864   
64     48     
-144   -720   
80     -48    
304    96     
-144   -64    
336    -32    
-208   16     
-16    0      
48     16     
-320   48     
160    -16    
-496   64     
48     128    
176    -320   
-128   -1008  
-176   0      
384    -224   
64     144    
-80    64     
144    96     
64     64     
32     -80    
-80    144    
144    112    
-96    16     
64     -176   
-448   -80    
32     -192   
-304   -112   
-16    0      
128    112    
0      -208   
32     112    
16     -320   
48     64     
-128   -96    
320    -224   
-112   224    
48     -96    
-64    80     
-48    -160   
-416   224    
-240   -288   
368    -16    
-48    -192   
48     32     
-304   -624   
-32    64     
144    -1568  
96     144    
160    -272   
-16    32     
176    -96    
160    80     
-320   -16    
48     32     
-144   80     
112    0      
-16    32     
112    -192   
-16    96     
256    -160   
-64    240    
80     -208   
112    0      
-368   0      
0      -64    
-128   0      
32     32     
-144   0      
80     32     
32     128    
64     -384   
32     208    
-16    -128   
-912   -1360  
416    576    
-800   -544   
240    -624   
208    32     
-368   112    
624    192    
-480   224    
288    400    
384    -192   
-80    -32    
-48    -400   
-48    416    
-32    -368   
-16    208    
192    -80    
-448   176    
-48    -80    
80     208    
-160   -128   
-160   32     
-656   160    
-16    208    
192    16     
-112   0      
48     -48    
-48    -80    
-128   112    
272    -16    
-48    80     
48     48     
-608   -128   
32     48     
-48    176    
-208   -48    
-32    160    
112    128    
-112   160    
-864   -96    
-192   16     
80     32     
-16    112    
96     96     
96     112    
-112   -112   
32     32     
-208   -112   
16     -32    
-48    -16    
160    48     
-320   144    
-16    -96    
-240   48     
-528   -144   
16     144    
-1216  32     
16     16     
-192   -64    
80     32     
32     -240   
-224   80     
96     -128   
16     96     
-48    80     
16     -16    
0      48     
-160   16     
-48    -48    
48     -48    
16     128    
-368   0      
-96    -32    
-144   -96    
0      128    
-32    -64    
80     160    
-64    32     
16     0      
-144   -16    
-16    -176   
32     112    
48     80     
112    176    
-112   384    
-64    176    
-112   0      
0      -144   
-288   -288   
240    128    
-272   16     
240    144    
-128   80     
-48    48     
32     48     
-80    -112   
192    112    
48     64     
-128   -80    
-96    32     
80     320    
-400   -128   
-32    192    
-96    -256   
32     160    
176    -176   
-96    112    
-32    160    
-64    128    
64     48     
160    -112   
-176   -16    
0      -144   
-64    -112   
48     128    
16     16     
48     144    
32     160    
-80    112    
-160   16     
272    0      
-48    -128   
112    0      
112    32     
16     48     
-64    0      
64     128    
-112   48     
-16    176    
288    64     
-272   96     
80     16     
-112   224    
-128   -128   
0      160    
-32    -64    
16     -64    
64     176    
-112   0      
-32    -144   
-96    16     
96     240    
-32    96     
-240   -96    
112    -144   
32     80     
-192   -32    
128    -64    
-432   -176   
160    -112   
144    240    
-64    112    
32     -32    
-96    64     
80     -64    
128    64     
-368   -400   
400    288    
192    464    
-64    336    
256    464    
-208   -16    
112    208    
-192   -80    
16     64     
-16    16     
-16    -64    
0      192    
-64    -16    
432    112    
-128   80     
176    64     
-176   -64    
-176   64     
400    -128   
-96    192    
-48    -144   
176    224    
-384   -64    
208    -32    
-96    96     
32     32     
64     48     
-16    32     
128    96     
0      96     
-160   176    
-80    128    
-32    0      
-64    48     
240    32     
-96    48     
16     48     
96     48     
-48    128    
96     240    
-80    64     
-16    96     
32     32     
-752   -2336  
544    2848   
-496   1584   
336    -208   
-160   -576   
-560   -480   
128    -368   
0      608    
-48    -176   
768    -176   
-736   496    
320    -480   
64     592    
336    -432   
-176   704    
-384   -448   
96     512    
-224   -688   
608    464    
-352   -304   
432    320    
-352   240    
-64    224    
-160   -688   
496    48     
-112   128    
384    -16    
16     464    
-16    -48    
0      272    
-144   -32    
32     160    
16     16     
-128   -128   
176    144    
-208   0      
32     -112   
-144   48     
64     -320   
144    96     
-96    96     
-64    112    
208    128    
272    -160   
-16    0      
80     32     
64     48     
-144   -352   
-144   -128   
288    112    
160    208    
32     304    
0      240    
-64    -368   
160    96     
0      -944   
240    432    
-176   224    
256    0      
0      272    
144    208    
0      32     
96     -240   
80     16     
112    -128   
16     176    
-16    -32    
16     304    
-128   -64    
384    336    
-128   -816   
64     -48    
160    80     
-64    96     
-32    112    
-48    48     
80     -48    
48     -208   
-176   -16    
-16    -192   
-32    -112   
0      -144   
48     112    
96     -208   
-16    128    
144    -208   
16     160    
112    176    
176    160    
-224   -352   
48     192    
32     -144   
80     144    
-16    128    
64     112    
176    272    
-256   80     
192    192    
16     128    
-160   32     
336    -16    
-32    96     
160    -64    
16     208    
-160   64     
304    400    
-80    672    
-48    352    
-272   -416   
272    256    
-64    112    
144    0      
-80    192    
64     -336   
-80    208    
64     -512   
80     112    
-48    -416   
176    288    
48     -448   
-176   64     
-240   -144   
272    160    
176    176    
-160   224    
-48    -16    
208    48     
-48    -48    
144    -224   
-128   64     
112    -128   
48     -32    
64     -272   
-208   -64    
80     192    
-112   32     
432    0      
-64    240    
-64    -208   
32     -704   
-32    16     
80     -240   
64     128    
192    80     
48     176    
16     64     
-32    128    
128    -128   
-96    128    
144    -352   
80     176    
-48    16     
128    -32    
48     160    
80     -448   
-16    48     
0      -96    
256    304    
-144   16     
160    0      
0      -432   
112    -32    
16     -16    
32     128    
-32    -16    
32     -256   
96     32     
32     -1232  
-16    -96    
176    -16    
128    -80    
0      -16    
-48    -1632  
32     -240   
256    176    
64     128    
-96    96     
192    -48    
-16    -144   
80     -32    
48     -160   
-96    0      
-160   -48    
32     -352   
-752   64     
-64    -336   
64     176    
32     -400   
224    -112   
80     -2000  
112    32     
-16    224    
-16    128    
176    -320   
-224   192    
48     -128   
64     176    
-224   -112   
-1184  864    
16     -192   
1120   -272   
16     -320   
352    0      
-448   -704   
656    736    
176    -224   
48     -464   
-592   -384   
176    80     
80     -256   
64     256    
-320   -96    
96     -64    
-48    -32    
-144   -144   
96     208    
-208   -208   
-80    128    
240    -48    
-112   -64    
144    -320   
-160   -1184  
160    -160   
16     144    
96     32     
96     192    
-16    -320   
-64    144    
128    -176   
64     16     
-16    -32    
-112   112    
176    -64    
64     160    
-32    -464   
-176   112    
16     -400   
96     96     
64     64     
16     48     
-64    0      
-16    -128   
-48    64     
80     144    
-96    0      
-32    -32    
-272   48     
80     -144   
-1472  -96    
80     -64    
64     128    
-16    -624   
48     128    
80     -1376  
-16    0      
96     80     
-64    80     
32     16     
16     64     
-208   -16    
0      -16    
-192   96     
48     -48    
-240   64     
192    -48    
48     96     
-32    -208   
128    160    
32     -400   
128    -128   
80     64     
80     -16    
-240   112    
-96    -240   
-96    112    
-192   -16    
144    -32    
80     160    
-16    -144   
-80    -272   
-336   -96    
112    -336   
-96    0      
16     -528   
48     -48    
-80    -32    
-112   -48    
-64    -32    
-48    48     
48     80     
64     -128   
-80    -48    
144    -64    
144    592    
96     -384   
96     336    
-192   -736   
-32    48     
96     96     
-560   16     
-288   48     
-32    -112   
-96    32     
224    16     
48     288    
48     128    
-80    272    
128    112    
48     176    
-112   -80    
80     -16    
-336   0      
0      144    
-288   -368   
-768   -160   
-16    176    
-448   -80    
-80    -48    
-64    -32    
-80    -160   
48     -224   
-80    -224   
112    -192   
304    256    
32     224    
64     304    
-192   -160   
-192   0      
0      -80    
64     0      
64     -64    
-16    160    
-112   0      
-480   -64    
-160   160    
-48    -48    
-32    96     
-48    -128   
144    144    
-112   -64    
144    -96    
-192   -112   
64     80     
-112   128    
-48    128    
16     -64    
-32    48     
48     48     
-16    32     
32     112    
-496   160    
-48    -16    
-80    96     
336    -32    
-528   -432   
80     -128   
272    112    
-128   224    
-48    32     
-160   -112   
16     128    
48     96     
-112   64     
-320   256    
-80    -64    
-208   0      
0      464    
-368   -288   
176    32     
-80    32     
400    208    
-240   176    
-160   -16    
-16    16     
-176   160    
-192   -96    
80     -32    
-16    96     
192    16     
-176   128    
-416   -96    
80     32     
-1536  -96    
48     0      
80     -176   
-64    160    
96     -48    
-144   -16    
-32    32     
192    416    
-112   128    
-128   112    
-112   -80    
160    32     
-96    0      
-496   -688   
-1760  -224   
656    1120   
48     720    
288    -576   
352    656    
-864   -864   
224    848    
352    16     
544    672    
-480   -240   
-48    208    
-64    32     
64     -768   
-64    -16    
352    240    
96     624    
-576   -544   
128    288    
208    64     
160    816    
-432   -144   
-96    -16    
640    -96    
-576   -48    
48     32     
48     -32    
80     496    
-16    256    
16     112    
-336   -304   
-32    64     
-80    -96    
-32    -16    
-16    48     
16     96     
256    624    
32     -112   
-128   -224   
-64    -32    
288    80     
32     144    
16     176    
-144   112    
16     -64    
-160   -80    
192    80     
-48    -112   
112    32     
-16    64     
-32    240    
0      48     
-16    32     
272    80     
-176   176    
-48    128    
32     128    
-160   48     
32     -80    
144    480    
-352   -48    
304    96     
-32    80     
-256   48     
160    -48    
-80    -80    
64     80     
-80    48     
0      80     
-16    32     
112    64     
-32    0      
-16    176    
-112   32     
-64    192    
-160   -320   
240    80     
-96    16     
-256   48     
48     96     
32     368    
-192   224    
256    -112   
224    176    
-256   96     
256    208    
-256   80     
160    80     
16     96     
32     16     
112    64     
-64    -16    
96     16     
64     240    
16     288    
-112   -16    
96     64     
32     80     
-32    -80    
-32    80     
-64    64     
16     48     
48     64     
-48    -96    
-32    -32    
128    208    
-256   128    
272    -160   
-160   -32    
192    208    
96     176    
80     176    
-32    144    
-48    224    
96     80     
320    560    
-352   48     
352    176    
-304   32     
208    64     
-240   -176   
112    -1072  
48     160    
-48    -32    
112    32     
160    304    
-32    256    
192    288    
-64    272    
304    144    
64     192    
-288   -64    
112    48     
-240   0      
128    -16    
240    256    
-160   96     
160    -48    
-112   112    
-32    80     
320    48     
-64    80     
-16    192    
80     176    
160    48     
-240   80     
-64    128    
176    32     
144    80     
64     80     
-16    144    
-32    -176   
0      144    
224    -1792  
-48    144    
32     96     
-16    160    
48     -112   
192    32     
-208   112    
144    0      
-64    160    
-32    96     
96     48     
16     -64    
80     64     
160    -576   
-80    176    
64     -192   
-144   -176   
208    -48    
64     48     
64     48     
-96    208    
-304   -32    
176    64     
144    96     
96     -32    
64     -16    
128    -64    
96     256    
-64    -16    
32     96     
16     -272   
240    256    
-112   -400   
16     240    
-80    -192   
144    80     
0      64     
32     112    
48     -16    
16     112    
112    160    
-16    -128   
176    128    
16     -240   
160    144    
2496   -1376  
-704   176    
1200   -2224  
-176   416    
1056   -528   
-528   64     
-352   -960   
480    784    
-240   -464   
256    208    
-208   160    
320    128    
-144   256    
304    -672   
-208   352    
304    -656   
-96    432    
144    -304   
-48    160    
112    -1248  
32     192    
0      160    
160    176    
-208   80     
144    -592   
-32    144    
288    -256   
-112   128    
112    0      
16     192    
96     -112   
112    128    
16     -80    
-16    192    
80     -64    
128    80     
0      0      
96     192    
0      128    
64     -240   
48     64     
16     -368   
112    80     
48     -128   
0      96     
48     -32    
0      176    
32     -144   
32     160    
64     -128   
48     0      
96     256    
0      -400   
0      -704   
64     -128   
-16    -1168  
176    -208   
128    224    
0      0      
96     96     
0      -496   
16     64     
64     -608   
32     -1392  
80     -32    
48     -448   
32     112    
112    -416   
-16    -32    
-32    -48    
144    -192   
32     -16    
64     -848   
96     -48    
-64    48     
-16    -32    
192    240    
16     16     
112    -32    
192    336    
-192   -464   
-80    16     
-16    80     
-224   -384   
-1296  -128   
112    160    
-80    -288   
-144   -176   
240    -192   
16     -160   
-16    -96    
48     128    
112    0      
96     -128   
-128   48     
64     -80    
240    544    
96     256    
112    176    
-464   -208   
96     -176   
208    -160   
96     -144   
112    48     
-128   -112   
176    64     
32     -192   
144    -32    
-16    -128   
96     96     
48     -16    
-32    -48    
48     48     
16     -48    
16     -16    
48     32     
-448   -64    
128    -32    
0      64     
80     -272   
-304   -176   
144    -2272  
144    32     
32     32     
-144   32     
32     64     
32     -560   
128    -224   
-16    -112   
-128   80     
160    -144   
-256   96     
-64    -192   
144    -64    
16     -416   
-48    288    
-64    -544   
240    192    
-224   -80    
272    32     
-112   32     
32     0      
-128   -48    
-16    160    
-80    -80    
240    -32    
-144   208    
-144   176    
-1808  -176   
-32    -336   
224    -48    
128    -48    
64     240    
-96    -688   
-112   -272   
48     -96    
32     176    
240    112    
-48    -16    
0      64     
96     -224   
-96    80     
0      -224   
-16    96     
112    -176   
-32    176    
112    -352   
0      176    
32     -560   
16     -16    
-96    -48    
96     96     
128    0      
320    -16    
-240   -32    
192    -96    
-352   -16    
64     -48    
80     -80    
128    -128   
-16    112    
48     -400   
-16    240    
80     -464   
128    160    
-96    -64    
128    16     
-112   48     
160    16     
-144   112    
16     32     
0      0      
288    32     
-688   -48    
48     -64    
-160   96     
-32    -144   
48     192    
320    1792   
-528   320    
-640   -576   
-1168  -16    
-144   288    
-16    304    
208    -192   
-528   192    
-48    32     
336    -192   
-384   -240   
-416   112    
-112   288    
16     -272   
0      496    
-144   -32    
-208   -160   
208    -208   
-608   0      
80     -176   
-560   48     
-256   -48    
272    -400   
-192   -192   
32     -176   
48     176    
-80    -96    
-48    176    
-112   -304   
-256   48     
144    -192   
-96    128    
48     80     
32     80     
-224   80     
-304   -64    
-16    64     
0      80     
48     80     
-32    -16    
16     112    
-112   -64    
64     96     
-80    112    
-160   -112   
0      32     
48     208    
80     96     
-144   -48    
-160   96     
-80    48     
96     -128   
-1088  224    
-16    32     
32     -80    
-64    112    
96     -96    
-32    80     
32     -80    
48     192    
-112   80     
96     80     
-160   -16    
-208   48     
-32    -80    
-32    16     
-112   80     
-288   -64    
128    176    
-1344  -32    
48     64     
0      16     
32     -32    
96     176    
-160   48     
96     176    
160    32     
112    192    
-112   -16    
160    32     
-96    224    
-64    48     
-208   -304   
208    96     
-1280  -80    
16     -144   
0      208    
-208   112    
160    -64    
-64    32     
80     224    
-96    0      
80     16     
48     224    
-160   -176   
48     -112   
-160   128    
-144   64     
64     96     
-656   -192   
48     -64    
160    -80    
-320   96     
96     128    
-144   -64    
-32    272    
16     48     
288    256    
-336   -160   
112    -32    
-336   -80    
112    112    
-208   -224   
-160   -128   
-256   -272   
352    160    
64     32     
-48    144    
-128   96     
128    208    
96     16     
-144   16     
-80    16     
176    80     
256    208    
-240   112    
-32    16     
-320   -192   
80     48     
-112   -32    
192    112    
-112   -64    
-288   -112   
-64    -64    
272    32     
-224   -112   
-128   -208   
64     272    
80     128    
80     160    
-304   32     
128    144    
-176   -16    
208    256    
-208   64     
-64    144    
-64    112    
112    48     
96     144    
-32    32     
-16    80     
-32    80     
80     16     
48     112    
32     304    
-176   -272   
-16    160    
-256   -80    
304    80     
0      176    
16     96     
0      64     
-16    0      
112    176    
-32    48     
-32    176    
176    64     
96     -64    
112    64     
128    96     
-224   32     
96     -256   
32     384    
-80    128    
16     160    
-256   -352   
288    160    
240    16     
48     0      
-64    304    
96     -32    
-144   224    
16     240    
128    32     
-16    0      
-16    0      
240    176    
-48    -16    
32     -96    
-16    176    
-64    -48    
192    -176   
64     112    
0      336    
-16    48     
0      32     
0      -16    
80     3088   
-1568  -704   
-112   288    
464    304    
1504   -496   
-896   -112   
160    368    
-128   256    
-96    -192   
-64    -160   
0      -48    
208    128    
-96    96     
48     192    
0      16     
-144   64     
-48    -64    
112    144    
16     16     
176    32     
-224   0      
-32    -576   
0      240    
-48    160    
112    224    
80     -144   
-80    32     
-16    80     
176    48     
-208   80     
0      112    
96     64     
112    192    
-48    -304   
-32    16     
64     64     
80     -576   
80     48     
48     48     
-48    48     
80     80     
-64    160    
64     96     
208    96     
0      144    
0      16     
16     -176   
-160   144    
48     -80    
80     64     
-48    96     
96     -352   
80     224    
48     -1744  
96     48     
0      64     
16     -80    
32     16     
-32    112    
-32    32     
16     96     
64     144    
48     288    
16     -112   
0      -176   
64     160    
96     -64    
176    96     
32     -496   
16     112    
32     112    
96     96     
0      80     
64     128    
0      48     
64     128    
16     32     
208    336    
-80    128    
64     -32    
-176   272    
304    -144   
-16    16     
16     -112   
-16    128    
112    -416   
64     272    
-64    -48    
96     144    
-48    80     
80     48     
-32    -32    
80     32     
112    224    
-16    -176   
80     112    
80     176    
-16    208    
80     -544   
-16    80     
112    -96    
144    208    
0      128    
16     96     
64     144    
-48    64     
128    0      
64     -32    
-16    96     
64     -80    
144    128    
-16    256    
96     80     
48     -368   
-32    272    
0      -208   
128    144    
96     288    
192    224    
-32    -112   
32     208    
16     112    
272    -336   
-128   64     
48     48     
80     48     
-112   -1200  
112    192    
-160   208    
368    32     
-96    -32    
64     128    
128    80     
16     112    
-48    80     
80     -80    
112    288    
-96    -64    
144    96     
48     -208   
96     176    
16     -32    
160    128    
48     80     
64     -32    
-16    -128   
-288   -256   
192    112    
176    -1792  
256    96     
48     -368   
-16    -96    
80     128    
96     -800   
-48    -112   
-64    -368   
96     -32    
480    -16    
-64    240    
-16    80     
-16    -96    
-48    0      
48     80     
160    -16    
32     16     
-560   -176   
48     -864   
144    -112   
96     -32    
0      80     
16     16     
-240   16     
96     -3056  
272    -288   
160    64     
96     -32    
-160   -192   
-32    48     
272    -16    
96     96     
-336   -32    
-16    -32    
-1440  -48    
64     -48    
0      -96    
128    -464   
-96    -224   
96     -1552  
64     0      
-16    64     
112    96     
272    -304   
-96    64     
240    -256   
-160   -64    
176    80     
64     128    
64     48     
432    2080   
-656   160    
-80    -112   
-400   -368   
-624   -320   
992    -1184  
-144   -992   
160    912    
-48    -592   
-288   -16    
224    -192   
176    -48    
-160   128    
160    -96    
-192   -80    
32     -304   
-2000  -112   
416    48     
48     304    
48     -192   
-80    -80    
0      -1472  
112    16     
-80    -80    
48     32     
-16    144    
96     0      
-80    -96    
16     -320   
-80    -32    
64     -80    
-240   32     
16     32     
-32    48     
160    -128   
32     -128   
112    -272   
16     80     
112    0      
-16    32     
48     32     
48     -96    
-48    0      
112    32     
0      -48    
-48    -64    
-64    112    
-32    -304   
32     48     
-208   -208   
288    48     
-128   -80    
208    240    
-128   -272   
80     -304   
-16    32     
-96    -48    
-48    -48    
192    112    
-208   48     
80     -64    
-240   -80    
0      -224   
-96    96     
48     -384   
112    80     
-48    -96    
160    224    
-176   -1952  
224    -192   
-144   48     
-16    32     
32     48     
48     48     
-160   0      
0      -128   
96     96     
0      192    
-336   -32    
96     32     
-96    144    
128    -208   
32     -208   
-128   -64    
-32    64     
64     48     
80     -128   
-32    96     
-64    -144   
-16    -48    
-64    -64    
64     176    
32     80     
-48    64     
-896   -64    
-80    128    
-960   -288   
0      112    
-64    64     
-240   0      
-32    32     
-304   128    
-240   -144   
64     -48    
-16    32     
160    288    
80     128    
-512   -192   
-64    112    
-656   -224   
160    48     
-192   -192   
-208   48     
128    -96    
64     32     
0      48     
-192   -32    
-16    -16    
-624   80     
144    160    
48     64     
144    -48    
-256   32     
-144   96     
208    112    
208    0      
-304   -80    
-144   -16    
-64    96     
16     32     
0      48     
-240   -128   
-160   -32    
-160   96     
352    64     
-432   0      
-80    16     
64     240    
32     144    
176    -176   
-144   64     
-160   0      
192    288    
-48    208    
112    64     
-240   240    
80     -32    
-128   160    
-304   -288   
-96    -16    
-224   0      
64     96     
-32    0      
16     96     
-112   -176   
176    0      
-96    32     
64     240    
176    208    
-16    -112   
-32    -32    
-64    80     
32     64     
-16    32     
-128   -208   
-224   -352   
320    560    
-576   176    
-224   112    
-112   -304   
-96    192    
272    16     
0      160    
-160   80     
48     192    
16     80     
-32    192    
-144   -48    
-32    48     
16     192    
-144   -208   
32     144    
-1536  -112   
128    272    
-112   -64    
144    48     
0      96     
-48    32     
-96    -64    
-208   528    
0      208    
80     -112   
16     32     
-16    320    
64     -192   
-288   -64    
48     128    
-1568  -1488  
768    1376   
-912   384    
176    -336   
288    -1664  
-144   -224   
-32    -80    
80     992    
-176   352    
480    -16    
-272   64     
-32    -96    
64     144    
0      -96    
64     224    
-336   16     
-32    448    
48     208    
-64    -64    
112    16     
-192   32     
80     16     
-80    208    
464    -208   
-112   -80    
80     -48    
-16    96     
-128   448    
80     160    
192    48     
-448   -160   
-80    0      
32     32     
-112   32     
96     80     
-16    48     
-32    32     
48     224    
0      112    
-80    0      
-32    144    
-96    16     
112    80     
-272   -64    
224    64     
-288   0      
0      144    
224    304    
-96    80     
80     128    
-80    16     
16     -48    
-32    80     
-64    368    
64     160    
-64    16     
-48    -48    
224    256    
-176   -144   
80     -48    
112    288    
16     -128   
-32    256    
64     288    
-80    -64    
112    48     
32     80     
32     0      
0      96     
-48    -48    
96     64     
-144   0      
64     112    
-192   -80    
64     144    
112    48     
-48    -32    
-16    160    
368    64     
64     304    
-208   656    
240    -112   
-224   96     
64     -160   
96     96     
-96    112    
48     112    
224    432    
-80    160    
-64    176    
-80    -16    
32     -112   
32     -32    
128    160    
64     160    
-16    96     
0      64     
176    400    
16     208    
-80    -32    
16     -16    
32     144    
224    112    
-96    80     
-64    128    
80     144    
96     112    
-32    32     
144    208    
-112   48     
128    32     
-64    80     
-32    -128   
80     80     
-16    80     
160    224    
-112   -16    
160    384    
16     320    
32     -1152  
48     144    
0      48     
64     -32    
32     -80    
-32    208    
64     0      
320    864    
-352   176    
240    -320   
-272   -224   
240    -16    
-32    -208   
48     32     
64     144    
96     -160   
-32    144    
-32    -624   
128    -16    
96     128    
208    256    
-144   144    
240    96     
-16    144    
48     -224   
0      96     
208    80     
-32    224    
-32    -368   
128    192    
160    16     
-32    160    
-96    -240   
48     80     
64     112    
-32    256    
-96    160    
272    -144   
-384   -544   
336    240    
-96    16     
128    144    
0      176    
-32    -48    
48     80     
0      -432   
96     32     
80     -304   
-80    48     
240    -464   
-304   -384   
352    224    
80     176    
0      144    
-48    -128   
128    -32    
208    496    
112    16     
-80    -128   
240    144    
16     -272   
64     64     
-32    -48    
112    -112   
32     -112   
96     -224   
-32    304    
-32    432    
160    192    
64     -16    
160    64     
-192   -256   
-16    0      
144    -256   
-80    64     
0      80     
112    64     
32     16     
80     160    
-608   1312   
-1072  -80    
464    -128   
704    -128   
-208   -752   
-192   128    
-160   176    
528    -512   
-240   384    
-96    -128   
160    -144   
-224   -320   
304    48     
48     -656   
-16    32     
-128   -256   
208    64     
-144   112    
176    96     
112    -80    
-128   -16    
16     -64    
112    192    
128    176    
-112   -304   
-112   16     
208    -48    
48     160    
112    -128   
-32    64     
80     -176   
-32    80     
112    144    
-16    128    
144    48     
0      0      
160    240    
80     112    
-32    -192   
16     0      
48     -16    
160    16     
-128   144    
240    48     
-64    112    
80     -144   
48     -384   
-80    -64    
336    -320   
-336   64     
144    -32    
-96    -160   
96     -224   
112    -752   
-64    -208   
32     -1344  
144    16     
-64    80     
96     -32    
112    208    
-48    -320   
256    -320   
0      144    
-16    -16    
96     128    
-192   -112   
128    -272   
128    80     
-80    -368   
224    48     
-80    0      
160    128    
-64    -1392  
160    -144   
0      128    
-16    -144   
16     -304   
32     -48    
48     304    
-144   -224   
128    -192   
112    0      
-400   -64    
128    -96    
-80    192    
64     -112   
176    -80    
128    -1360  
48     -32    
80     -384   
-48    96     
96     144    
-64    -16    
240    96     
-16    -80    
-64    -48    
0      -160   
-336   -32    
112    32     
-96    -208   
48     -336   
0      -80    
128    -272   
272    64     
-176   -1552  
16     160    
336    80     
-48    144    
-208   -304   
-16    -48    
-64    0      
192    -80    
-640   -80    
240    -224   
-2160  16     
176    64     
-32    -336   
-208   -368   
304    64     
144    -784   
48     208    
32     48     
144    192    
-32    96     
80     96     
-48    -32    
240    -80    
48     256    
128    -80    
-208   96     
80     -32    
-176   192    
32     -208   
208    208    
-240   -896   
80     192    
112    32     
32     96     
-80    48     
128    -32    
-144   0      
48     16     
-160   16     
144    32     
-352   -64    
80     -48    
-576   -96    
-48    -528   
48     48     
80     -400   
64     112    
-16    -400   
96     -64    
-176   112    
304    -272   
-416   -16    
48     32     
-80    -96    
16     -176   
-80    80     
224    -320   
-144   -224   
-128   16     
224    96     
-16    240    
96     80     
-48    -480   
-160   -224   
192    224    
-176   32     
32     0      
48     48     
48     128    
-32    -160   
-176   -80    
96     0      
32     0      
112    272    
48     112    
-352   -192   
96     32     
-112   -80    
96     80     
-32    -48    
96     48     
96     0      
16     -80    
-192   -32    
192    -112   
-176   32     
80     -64    
-112   80     
-32    -384   
96     416    
-1344  -592   
-112   80     
-32    48     
160    64     
880    -800   
272    928    
-176   -80    
-144   -544   
-48    560    
256    -896   
48     -320   
-368   -624   
-128   624    
-16    0      
-64    400    
-464   -64    
288    -16    
80     288    
-592   -272   
-48    0      
-448   -16    
32     272    
-368   -64    
144    112    
32     240    
-16    0      
-256   -48    
16     -112   
64     32     
96     208    
96     32     
-208   0      
80     -16    
0      80     
-128   0      
32     -32    
-32    128    
128    -48    
-320   288    
-592   -384   
-240   -64    
192    32     
240    736    
-80    -480   
-224   144    
64     32     
-208   -96    
176    48     
-80    80     
0      -192   
160    96     
112    96     
-64    -16    
-176   -96    
16     -192   
0      80     
128    -96    
16     96     
-64    80     
-48    48     
-16    16     
-656   -432   
608    656    
-144   -336   
-48    144    
-80    0      
-16    -48    
-32    64     
-80    64     
-144   32     
16     80     
-896   -32    
160    240    
-80    -80    
-96    128    
16     0      
-16    96     
-32    16     
-272   80     
0      0      
-224   -240   
-208   -32    
-96    -208   
48     -80    
-240   96     
48     32     
-880   -96    
-48    48     
-48    112    
192    80     
-128   0      
32     -128   
192    160    
-16    48     
48     96     
-32    80     
0      32     
-144   -80    
160    112    
-288   64     
288    400    
-400   128    
32     -64    
80     0      
0      -32    
192    96     
-144   64     
-48    0      
64     128    
0      -96    
32     32     
32     336    
0      80     
128    -80    
-208   -192   
48     240    
32     16     
-16    176    
-128   96     
16     48     
-16    0      
64     192    
0      96     
-144   -64    
112    128    
-32    176    
-16    96     
-80    288    
-96    240    
144    784    
64     432    
-80    544    
112    32     
-80    128    
32     -32    
80     80     
-96    80     
224    336    
-48    224    
-80    48     
0      96     
-160   -288   
160    304    
64     224    
0      144    
80     80     
80     224    
-32    16     
-144   -144   
112    -208   
32     -416   
32     80     
96     336    
-32    144    
112    64     
-64    64     
144    144    
-240   -432   
288    -112   
-240   -176   
240    304    
48     128    
80     208    
128    192    
-128   -48    
32     16     
-16    80     
-16    128    
-16    -48    
96     -16    
-96    -48    
160    -208   
-320   -64    
-64    -80    
-64    -64    
96     464    
224    96     
-64    224    
64     112    
-16    16     
-16    -64    
112    0      
128    208    
-32    80     
48     256    
-80    -16    
144    272    
-64    -224   
304    96     
-96    0      
-48    96     
80     80     
16     240    
-128   160    
48     48     
48     16     
112    0      
176    336    
-208   16     
176    96     
-224   -80    
-832   -1440  
-752   -1392  
1440   656    
-384   496    
480    672    
-224   560    
-176   -544   
-320   -448   
-96    240    
512    416    
208    -112   
-128   96     
-256   272    
336    -128   
-16    256    
112    -144   
0      256    
-80    32     
16     176    
160    -2432  
-32    112    
0      96     
128    272    
112    64     
-48    -48    
-64    -32    
48     128    
32     80     
128    112    
-96    -32    
160    192    
-80    176    
32     0      
16     80     
0      -320   
112    128    
192    112    
144    208    
-208   -16    
-80    96     
240    112    
16     128    
80     -240   
-48    160    
16     16     
112    48     
-32    0      
-64    -48    
112    80     
-16    32     
-16    64     
192    -272   
-128   112    
144    208    
32     48     
80     -160   
-32    160    
48     -80    
96     80     
-16    -16    
-16    48     
144    128    
32     32     
32     192    
48     -480   
32     80     
0      -256   
96     96     
-16    -64    
16     112    
192    -208   
80     144    
0      128    
-16    0      
32     48     
32     192    
-80    -208   
224    -160   
-96    288    
0      -112   
160    160    
-32    -256   
176    176    
0      -352   
224    32     
32     -128   
16     64     
16     -224   
0      192    
-128   176    
96     -96    
48     80     
144    -208   
48     160    
224    -224   
-80    16     
80     -192   
-16    144    
144    -768   
-160   -32    
-16    0      
32     144    
16     0      
192    288    
-240   -32    
80     -112   
0      -32    
32     -112   
128    96     
48     96     
0      160    
112    -16    
-16    96     
32     -160   
32     64     
16     48     
176    304    
0      -96    
112    144    
-96    48     
-160   112    
160    64     
176    -160   
-32    144    
32     -64    
-48    -32    
160    -288   
-176   64     
288    -16    
16     176    
32     160    
96     -912   
-128   176    
208    -1136  
96     464    
-176   64     
496    -288   
-208   -192   
128    208    
-224   -192   
272    -32    
64     -32    
32     80     
80     0      
-16    -736   
-112   -64    
64     -272   
128    352    
-96    0      
16     -320   
0      -128   
32     -496   
80     -192   
160    -96    
48     -464   
80     96     
-16    -192   
64     64     
32     544    
240    -784   
-64    96     
160    -176   
-16    -16    
-64    48     
-64    -128   
32     -1168  
32     -496   
176    64     
160    -320   
-80    112    
96     -1600  
48     48     
48     16     
-304   128    
64     -80    
160    16     
96     96     
128    128    
-720   -32    
-96    -288   
-784   -272   
224    -112   
224    80     
-48    0      
96     -224   
-48    -496   
48     -80    
32     -208   
16     80     
192    -64    
64     96     
-64    -160   
96     128    
-336   16     
208    -112   
-48    224    
224    -96    
-16    16     
976    1616   
-896   -2528  
432    -672   
256    448    
224    -752   
256    64     
-464   -864   
1184   848    
-688   320    
-64    480    
-176   -496   
48     128    
96     -32    
240    256    
-1200  -480   
368    -48    
-64    32     
304    464    
-368   304    
128    -304   
96     512    
64     -400   
0      464    
-304   -304   
400    -224   
-64    -16    
576    704    
-160   208    
-144   0      
-1152  -16    
384    -176   
-512   144    
32     -256   
96     192    
-256   -480   
80     160    
0      -16    
-160   480    
336    272    
-336   -304   
48     128    
48     -48    
-224   -208   
-128   240    
-112   -16    
112    -32    
224    224    
96     -336   
176    -48    
208    144    
32     -96    
144    144    
-48    80     
304    224    
-64    -48    
-48    160    
16     0      
-128   -640   
224    64     
304    592    
-16    -400   
-80    -16    
128    -32    
96     -128   
-96    -240   
64     96     
-128   -112   
96     -80    
-48    64     
-32    16     
32     32     
48     -32    
-64    96     
-160   -96    
-96    -48    
64     -160   
-128   -224   
0      -112   
-192   208    
-1360  -1168  
-736   96     
-128   -80    
-496   -80    
-176   272    
240    192    
-144   -368   
32     80     
0      -160   
368    272    
-208   112    
96     16     
96     80     
0      -64    
-16    -64    
-512   -416   
-336   -160   
-64    -112   
0      80     
240    368    
-464   80     
32     192    
-912   -144   
0      0      
144    80     
-64    144    
-224   80     
-16    -16    
-112   -336   
-96    -400   
32     -288   
208    304    
32     144    
-448   32     
0      32     
16     -48    
-128   -112   
-656   32     
0      144    
192    -16    
-80    352    
-112   -192   
176    32     
-288   -384   
-112   240    
432    496    
-288   176    
224    432    
-224   96     
-32    -32    
64     160    
0      80     
16     320    
-192   256    
-272   80     
-288   -176   
32     -112   
-128   112    
48     -64    
224    208    
-112   0      
-64    16     
-96    -64    
-144   0      
0      96     
64     240    
-64    128    
-128   112    
-112   -48    
-640   -16    
-96    96     
176    -64    
32     96     
-112   32     
112    -96    
-16    32     
32     32     
-80    176    
32     -224   
0      48     
-224   160    
-32    48     
-160   -192   
32     0      
-48    0      
224    128    
-528   -16    
128    16     
-16    -48    
-96    64     
16     48     
-48    192    
96     224    
-272   0      
80     -80    
192    -64    
64     192    
-48    48     
-48    224    
-80    -48    
256    80     
-304   16     
-48    80     
-32    80     
-32    0      
32     256    
-96    80     
-64    32     
32     16     
80     48     
-32    80     
32     128    
-48    -16    
112    -32    
-256   -16    
48     208    
-336   80     
-96    -32    
80     0      
1104   16     
-992   -240   
208    -48    
-672   432    
528    64     
-544   -384   
112    -32    
464    448    
-224   224    
-352   384    
16     -624   
-224   368    
-80    -224   
0      448    
-64    -144   
80     80     
-112   224    
112    128    
-144   16     
80     -128   
0      192    
128    48     
-144   240    
112    -192   
-256   128    
112    -176   
48     560    
272    -112   
-304   64     
80     -48    
-16    160    
128    -48    
-80    256    
32     -16    
-64    160    
192    32     
-208   144    
-32    -16    
-112   160    
288    160    
-128   -32    
16     48     
-80    48     
112    32     
-32    192    
32     80     
0      48     
-48    128    
0      64     
48     0      
64     112    
-192   96     
160    80     
-160   64     
64     0      
-32    48     
64     96     
0      96     
80     64     
16     272    
48     48     
48     128    
-64    48     
128    112    
-112   160    
48     96     
48     80     
112    0      
80     -16    
-16    240    
-224   0      
144    112    
64     -32    
112    64     
-64    112    
-80    48     
224    304    
-224   96     
192    64     
-128   16     
128    240    
-48    16     
64     -112   
-224   -64    
-64    208    
-64    -112   
-48    -144   
240    368    
-240   176    
208    48     
-16    144    
64     112    
-48    128    
48     192    
160    144    
-16    32     
-96    -80    
128    112    
-80    -64    
64     -160   
16     -16    
320    -2352  
128    64     
-80    144    
48     -80    
-16    112    
0      -96    
-96    192    
64     -32    
96     224    
-16    80     
32     144    
0      96     
0      80     
176    80     
-16    320    
48     -896   
0      144    
32     96     
336    -176   
-96    96     
48     80     
-112   64     
-160   -48    
208    -64    
32     160    
112    144    
32     176    
-144   -368   
-240   -336   
416    128    
-48    -240   
-32    192    
112    208    
-176   -352   
256    688    
16     448    
64     -48    
16     64     
16     0      
0      96     
-80    80     
176    272    
-160   -128   
48     -128   
112    -48    
192    -160   
0      192    
-64    -624   
48     64     
16     -16    
176    112    
64     16     
-160   0      
64     112    
48     80     
48     112    
64     272    
-32    160    
0      -64    
-80    80     
240    0      
0      48     
0      -48    
48     144    
208    -240   
-48    0      
336    96     
-128   64     
96     -80    
16     192    
64     48     
64     0      
0      176    
48     -176   
96     80     
160    -240   
96     224    
-192   -304   
96     64     
112    -112   
16     128    
-96    -384   
64     16     
-256   0      
112    -32    
-32    224    
-144   -112   
368    288    
-256   32     
128    -16    
-64    -16    
352    64     
-16    -176   
-160   -16    
160    -304   
0      112    
-1616  -304   
1232   528    
-336   -384   
1200   -192   
-240   448    
-288   -1472  
208    976    
-608   -784   
784    -16    
-560   -16    
432    -128   
-208   64     
352    192    
-16    64     
144    -224   
-80    0      
272    -176   
272    624    
-144   -176   
160    416    
144    -576   
-16    464    
-224   -192   
304    0      
-80    -432   
-48    240    
32     0      
-112   16     
112    -976   
368    400    
48     -32    
-176   -736   
16     112    
-336   80     
-80    -704   
128    -32    
32     -592   
-160   -624   
32     -16    
240    48     
192    272    
-32    32     
80     192    
-112   144    
80     -1200  
16     80     
144    -1072  
32     240    
-112   -80    
208    64     
-80    0      
160    -208   
32     -208   
64     -1456  
112    -48    
96     -176   
-16    -48    
-16    -16    
48     -80    
-80    -176   
0      80     
16     32     
80     -176   
-256   -208   
144    -112   
-144   -160   
48     -400   
64     -48    
-32    -416   
208    128    
-64    -928   
80     -176   
16     -432   
112    -16    
112    -32    
32     176    
32     0      
128    -16    
-240   -32    
-32    16     
-384   -176   
160    -48    
-144   -368   
224    272    
272    -16    
288    -528   
-128   -240   
144    -32    
96     352    
272    64     
48     144    
-112   -80    
-32    -464   
-48    -128   
144    -32    
-320   80     
416    304    
-224   496    
-32    -272   
64     -160   
-208   -336   
112    32     
64     -1536  
64     48     
16     48     
-96    -336   
-96    -64    
16     -160   
192    352    
-208   -176   
-80    32     
-128   -192   
-1456  16     
-64    -224   
0      0      
32     80     
64     80     
16     -944   
-128   -96    
160    -64    
272    176    
-16    128    
-16    128    
16     -32    
192    48     
-608   0      
448    -96    
-336   -80    
96     48     
0      32     
176    0      
224    176    
-80    -64    
368    144    
-32    -224   
-64    -48    
-112   176    
400    -32    
-592   16     
-288   -48    
16     -48    
128    -144   
-240   64     
128    80     
-160   -32    
16     -272   
-128   -16    
208    -288   
-16    80     
-528   0      
240    16     
-640   0      
144    -64    
-160   -32    
96     -80    
-144   160    
112    -16    
80     -48    
-64    16     
-112   -48    
64     -368   
-128   48     
64     -320   
80     160    
192    160    
-80    48     
-80    32     
16     0      
-32    448    
-112   64     
-64    -160   
224    -128   
-112   -16    
16     -160   
-176   112    
-32    64     
320    304    
-432   -64    
-336   -256   
48     128    
-1104  -48    
-128   176    
0      64     
32     -16    
192    80     
-48    -208   
192    -96    
-16    128    
-432   -16    
64     144    
96     -144   
0      96     
128    -192   
-80    -224   
-32    224    
-272   80     
144    -48    
-208   0      
-160   -192   
-832   -736   
224    320    
-368   656    
464    -688   
-448   -784   
64     -96    
-112   384    
272    80     
-368   -16    
256    -240   
16     672    
16     -112   
-64    544    
-112   -288   
-128   224    
-416   -128   
192    432    
-192   -128   
16     16     
-208   -32    
240    80     
-224   0      
208    -80    
-112   192    
-16    -48    
-32    208    
48     80     
-64    96     
-64    -224   
-96    144    
80     -32    
48     176    
-1248  -96    
-64    96     
176    -64    
-32    208    
64     -160   
-96    64     
-32    -16    
80     80     
-48    64     
-32    -16    
-48    0      
-128   96     
112    48     
-160   32     
-224   -208   
-496   -224   
-96    144    
160    -96    
-112   96     
48     -16    
-144   80     
32     -48    
32     160    
-32    48     
96     48     
32     16     
-96    144    
-48    96     
-80    32     
-32    -32    
-16    -128   
32     128    
-208   48     
80     160    
-16    -32    
32     -32    
-32    64     
-176   -16    
240    176    
-176   80     
48     16     
-80    0      
-64    112    
112    16     
-48    176    
-112   -16    
304    400    
-416   32     
160    144    
-80    -192   
16     160    
144    16     
-64    -112   
-32    -16    
96     -32    
-208   -208   
-64    112    
64     16     
-48    80     
32     192    
-304   -128   
48     160    
-416   -96    
80     320    
112    128    
48     32     
-48    64     
160    96     
16     176    
-32    160    
-32    48     
96     96     
32     128    
48     368    
48     256    
-208   -160   
-48    -48    
-64    96     
176    176    
48     32     
-80    -16    
-32    96     
80     80     
32     368    
48     288    
64     240    
-64    -176   
32     16     
-64    -16    
224    208    
-128   -96    
32     192    
-192   96     
304    192    
-112   32     
112    208    
-80    96     
48     -16    
-48    32     
-32    64     
160    224    
16     80     
-144   32     
-16    -16    
-16    96     
-16    48     
-32    48     
16     112    
80     48     
64     -80    
48     192    
-64    0      
96     32     
80     368    
-176   96     
-80    96     
-208   -112   
112    -16    
-48    32     
64     80     
-160   -224   
144    32     
-32    368    
-64    -32    
-16    -64    
80     272    
-16    224    
-192   -112   
-96    -144   
240    176    
80     144    
-16    16     
-16    288    
-96    128    
0      -80    
-16    0      
80     208    
160    48     
-48    176    
0      48     
96     32     
-16    64     
-16    32     
128    -16    
0      224    
64     16     
-80    112    
48     -16    
-32    48     
128    128    
16     112    
176    -48    
48     224    
-48    0      
96     96     
-144   128    
160    -48    
208    48     
128    96     
0      0      
480    -128   
-288   -16    
304    16     
-176   48     
96     352    
-416   2176   
-560   -96    
160    -368   
48     -288   
16     512    
-192   112    
-240   336    
336    0      
240    224    
-592   -400   
32     -48    
-80    -496   
224    -80    
48     128    
16     -576   
96     304    
-32    -1392  
432    176    
-240   48     
144    416    
48     192    
288    288    
-240   96     
272    176    
-272   -32    
224    352    
-288   112    
288    -64    
-208   -112   
96     -336   
144    144    
-48    -864   
64     176    
80     -560   
80     128    
-48    128    
112    208    
-176   -32    
144    48     
-32    112    
176    144    
48     128    
0      -32    
80     64     
-144   -80    
272    160    
16     -32    
144    96     
-160   -704   
160    160    
-128   128    
112    64     
112    -144   
-128   256    
96     -16    
0      16     
80     112    
0      80     
80     -16    
32     -32    
32     160    
16     -224   
64     -32    
64     -896   
64     208    
-48    -1312  
128    -48    
112    128    
-144   208    
96     32     
96     16     
32     -48    
-16    0      
96     32     
-48    -48    
48     64     
-160   -240   
96     32     
32     -64    
16     16     
64     0      
-48    112    
224    288    
-96    -16    
208    -208   
-16    80     
176    80     
-224   -64    
128    160    
-112   -656   
160    128    
16     -224   
64     64     
96     32     
352    720    
-288   -368   
240    -176   
-128   -32    
256    112    
0      48     
32     160    
128    128    
0      -224   
-16    80     
272    48     
-48    48     
160    -160   
32     256    
0      -176   
176    96     
0      -192   
16     160    
96     96     
-80    32     
176    96     
144    -128   
-144   -304   
80     -240   
-80    112    
48     -112   
64     -144   
-112   -112   
48     -64    
176    -176   
-16    192    
192    144    
96     -1248  
-96    96     
-80    -480   
176    32     
224    -112   
96     -1200  
32     320    
400    -288   
160    304    
-32    -2672  
-208   -48    
-80    0      
224    -160   
80     -144   
-224   112    
272    -160   
192    160    
0      -96    
48     224    
-256   -304   
-32    -304   
-32    64     
208    -272   
176    -160   
16     -400   
-96    -112   
192    -32    
-48    80     
160    -64    
-16    288    
-16    -272   
224    400    
-48    -224   
176    -64    
-144   32     
112    -32    
160    48     
-32    -80    
32     -176   
240    16     
-16    272    
64     -224   
-176   -32    
0      -368   
16     -144   
64     -112   
208    160    
-112   16     
16     -32    
-96    16     
128    -160   
-208   -16    
-32    -80    
48     48     
64     -112   
96     80     
112    -176   
-160   -272   
112    -288   
64     304    
0      -224   
160    32     
-16    0      
48     -160   
-192   -32    
96     -160   
-176   272    
-16    64     
-320   -112   
160    -304   
192    -128   
2672   192    
-1536  256    
768    -1136  
224    608    
320    288    
208    -192   
-480   -400   
624    352    
48     48     
-272   576    
-288   -672   
16     416    
-1168  -128   
96     256    
-272   -368   
-32    -48    
112    64     
352    288    
-160   -32    
208    -128   
-96    -48    
48     -64    
-16    224    
16     32     
144    128    
-176   -208   
-96    16     
-336   -80    
64     -48    
96     32     
112    -112   
16     80     
32     -656   
-16    208    
-144   -48    
128    -160   
-96    -48    
64     64     
-160   -64    
128    -32    
-224   -128   
96     176    
-112   -80    
224    -64    
-224   160    
336    -176   
-160   -16    
192    -512   
-128   176    
32     16     
128    16     
-304   0      
192    16     
-96    -160   
208    -16    
-112   32     
128    192    
-48    48     
176    16     
-384   400    
144    -240   
0      32     
144    -176   
-32    208    
-48    96     
-160   -112   
-48    64     
96     -80    
-16    -304   
128    -112   
176    160    
160    352    
-352   -16    
208    -304   
-176   160    
-64    -208   
416    304    
-416   -64    
0      0      
-64    -32    
-736   160    
128    -96    
-1136  224    
176    -48    
-16    96     
-144   80     
32     -64    
-224   -16    
-224   -144   
-16    96     
16     -224   
48     272    
-80    -112   
-16    32     
-112   -16    
-112   80     
16     32     
-144   0      
-80    0      
-560   224    
-144   -48    
-64    16     
-64    32     
144    0      
128    144    
-80    -80    
48     208    
-96    112    
-16    16     
48     128    
-32    32     
32     64     
-160   -96    
96     144    
-336   -160   
64     128    
-48    -192   
112    80     
-64    -112   
192    192    
-112   -128   
-80    -32    
-160   64     
112    64     
48     240    
-176   -144   
96     224    
-368   48     
304    80     
-656   -80    
160    80     
-1008  16     
64     96     
-144   -288   
32     0      
96     -96    
-144   160    
16     32     
128    0      
0      160    
32     32     
-16    112    
-192   -80    
208    272    
-80    0      
16     32     
-240   512    
-176   -96    
320    -304   
32     288    
144    112    
-80    -112   
-160   64     
-112   -96    
176    112    
-160   96     
208    112    
224    64     
-336   304    
16     -240   
-80    64     
-96    48     
32     192    
-176   -64    
32     -48    
208    160    
-192   -176   
288    64     
-416   96     
192    48     
-96    80     
304    -96    
-336   64     
-32    -144   
-272   160    
128    -80    
-32    -32    
64     32     
-816   -32    
-176   48     
48     -112   
64     160    
192    96     
-32    32     
-48    -16    
48     144    
-32    112    
160    256    
-176   16     
0      80     
0      32     
64     -128   
112    128    
224    -336   
32     320    
-176   -48    
32     112    
-400   -160   
-224   -1008  
-272   -608   
352    304    
-448   320    
-288   -512   
352    48     
-128   208    
224    352    
-224   -368   
-272   240    
192    112    
320    208    
-192   -128   
16     -32    
128    80     
-96    64     
0      -96    
96     96     
0      96     
352    176    
-176   208    
80     -80    
-80    192    
-160   -48    
80     96     
96     160    
-16    -16    
64     0      
-32    336    
96     64     
-16    48     
0      144    
144    80     
96     240    
-112   64     
-48    304    
-96    -160   
-16    32     
96     128    
48     -64    
48     96     
-80    192    
208    192    
-64    64     
-128   -16    
144    160    
112    160    
-32    208    
80     -128   
-48    96     
-16    144    
48     16     
-48    80     
96     48     
-128   0      
112    128    
-160   48     
96     64     
16     32     
48     48     
32     112    
0      64     
-16    64     
-32    16     
16     -160   
0      0      
-224   -64    
16     144    
48     0      
64     96     
16     80     
80     208    
-48    48     
192    80     
-48    96     
-112   -112   
208    160    
-224   80     
96     80     
80     224    
-80    32     
112    32     
80     368    
-48    128    
224    32     
-48    160    
48     64     
144    112    
-144   96     
16     -16    
128    160    
0      304    
16     32     
128    -64    
-96    -192   
160    208    
-288   -64    
240    -208   
-80    -16    
-80    -1936  
112    128    
112    144    
112    320    
-80    112    
160    80     
-48    -32    
288    128    
-160   0      
16     16     
-176   -256   
128    80     
0      16     
96     -16    
-64    -64    
-144   -688   
0      -16    
448    256    
80     64     
-224   32     
32     352    
432    176    
208    256    
-304   256    
128    176    
-16    96     
-48    -224   
0      -32    
16     112    
176    112    
240    -64    
-240   0      
-32    -1008  
-160   -16    
144    80     
144    -32    
-96    -208   
32     80     
0      -112   
-80    80     
288    112    
32     160    
208    80     
-112   160    
144    224    
160    16     
-48    160    
16     -128   
112    208    
32     -112   
48     176    
-16    -16    
96     176    
96     -80    
-96    -16    
80     -64    
16     -224   
-16    -64    
48     -256   
64     192    
64     16     
-32    96     
16     -144   
144    272    
48     -560   
16     80     
240    576    
-160   208    
0      176    
-32    -16    
112    -32    
-32    -80    
32     80     
304    288    
-96    160    
-176   128    
64     16     
208    -560   
304    240    
32     144    
-112   112    
32     -32    
-80    112    
16     48     
176    16     
-80    176    
-128   -496   
-16    144    
176    -288   
176    112    
0      -128   
48     96     
160    -448   
160    224    
-112   464    
0      128    
-64    -96    
32     64     
2192   -2320  
32     -336   
1040   672    
-400   560    
-352   272    
-304   -1024  
48     416    
272    -144   
128    336    
-320   -144   
96     144    
32     -1040  
-16    64     
224    48     
48     48     
96     96     
-208   -32    
-64    -320   
400    0      
-32    -176   
176    -128   
-48    192    
160    -192   
-32    192    
0      -128   
128    320    
192    384    
-208   -240   
-16    -176   
-64    -32    
48     0      
-32    0      
-128   -400   
80     -128   
64     -48    
-48    -240   
160    -1248  
16     -32    
96     32     
-16    -176   
0      -16    
80     80     
-48    0      
-112   32     
144    -192   
96     -128   
-352   -224   
16     16     
224    128    
16     -160   
144    -112   
32     -144   
0      -256   
96     -288   
80     32     
80     16     
128    64     
-96    -112   
-112   -112   
160    -336   
-80    16     
112    16     
48     -288   
144    224    
-32    -224   
0      -32    
48     -352   
192    96     
-128   -176   
128    16     
80     -48    
-80    32     
192    -48    
32     144    
-224   0      
112    160    
-256   -16    
128    -48    
-912   -176   
32     -416   
64     -48    
96     -64    
64     32     
96     304    
-96    -112   
224    -720   
64     -80    
48     144    
-208   -368   
-176   -64    
-16    32     
-64    -96    
48     32     
-240   16     
112    80     
-656   48     
112    208    
-112   -240   
160    -240   
-80    -32    
224    -288   
16     176    
64     0      
-32    -128   
32     80     
96     -112   
64     64     
-80    -64    
128    64     
16     48     
-384   -160   
112    -192   
-480   32     
208    -48    
-80    96     
48     -272   
0      -160   
160    128    
64     -288   
-80    -160   
32     80     
48     144    
208    128    
-480   -112   
0      -144   
-16    64     
224    -96    
-96    0      
-32    -288   
160    176    
32     -368   
160    112    
-544   128    
80     -48    
-112   64     
64     -208   
96     128    
-64    96     
-112   -16    
-112   -240   
-96    -112   
144    -32    
144    64     
160    -160   
-112   144    
32     -128   
256    352    
-432   480    
256    32     
-64    112    
112    -32    
32     288    
-192   -80    
304    96     
-144   -80    
576    -336   
-272   176    
-368   -224   
-272   -400   
32     -240   
-320   144    
-608   -64    
0      144    
-400   0      
208    304    
-272   -80    
288    224    
-64    208    
112    368    
-272   0      
-304   -304   
-144   -144   
-112   -112   
-224   -64    
-112   144    
-64    -80    
-240   -80    
128    48     
-176   -80    
-16    16     
-112   32     
32     112    
96     96     
64     144    
-112   -176   
64     112    
-304   -160   
48     -32    
192    224    
-160   144    
64     -96    
-384   96     
240    160    
-16    -160   
16     96     
112    176    
-160   80     
-1312  -16    
-144   -928   
592    -960   
1248   1184   
-592   544    
160    752    
-848   -368   
512    144    
432    736    
-176   512    
-288   -272   
-96    16     
48     192    
-32    -112   
112    96     
-576   -80    
16     16     
176    0      
48     192    
-80    -48    
-16    16     
-160   -352   
32     -112   
32     144    
64     160    
-32    96     
-128   112    
64     112    
-80    64     
16     -64    
-192   48     
144    -16    
-352   48     
48     144    
0      -96    
32     96     
-192   -208   
112    0      
-64    272    
96     16     
-64    -96    
-128   96     
-16    96     
0      48     
-80    -176   
-96    32     
96     224    
-544   -144   
80     -16    
-80    -16    
176    144    
128    192    
-192   -32    
160    0      
-240   176    
16     16     
0      -16    
-16    -32    
80     96     
32     128    
-240   0      
48     64     
-336   -80    
80     80     
-192   -16    
-48    144    
32     32     
-96    0      
112    80     
128    48     
-48    160    
-80    16     
128    48     
0      32     
-96    -144   
-96    -160   
-32    304    
-208   160    
64     64     
96     -112   
-64    16     
-112   224    
-64    0      
176    -16    
-160   176    
128    320    
-80    -192   
256    -80    
-112   -32    
80     96     
-80    80     
128    208    
-144   0      
64     160    
-256   -16    
-32    -48    
240    256    
-240   128    
160    112    
64     96     
-192   -32    
48     -48    
-32    96     
-96    96     
32     128    
-16    -80    
-48    64     
-64    -16    
-16    -32    
-32    -32    
-16    48     
-16    -16    
48     48     
-16    96     
0      64     
-64    -32    
-96    -304   
-112   80     
128    48     
48     32     
-128   -160   
-144   64     
32     -32    
80     64     
-48    64     
-16    -32    
-16    32     
208    48     
-208   48     
-16    32     
192    96     
112    64     
-256   80     
-80    -240   
-176   0      
-64    -112   
16     160    
48     -112   
-16    16     
-144   96     
-112   64     
224    80     
128    80     
-48    128    
-128   80     
32     64     
48     0      
48     240    
112    128    
32     208    
-64    32     
128    128    
-128   16     
144    176    
0      112    
48     176    
-64    208    
112    112    
-48    -16    
-32    -176   
16     96     
-32    -80    
-16    48     
64     160    
0      16     
-32    80     
48     64     
-48    112    
80     160    
48     176    
96     160    
32     48     
96     144    
-32    144    
-16    -32    
128    48     
96     80     
64     112    
32     -128   
-32    160    
80     256    
-112   288    
128    -224   
-48    -64    
80     128    
-48    -64    
144    -224   
32     0      
0      144    
-16    48     
32     96     
96     80     
-16    112    
-176   -128   
96     208    
16     48     
96     -272   
0      80     
-848   352    
-1712  -1552  
1040   784    
656    720    
0      64     
-544   -384   
48     688    
304    96     
-320   48     
272    48     
-128   208    
0      0      
-32    256    
208    -16    
-224   -208   
-16    -496   
80     80     
-64    -48    
176    240    
32     48     
-96    32     
-16    176    
32     224    
-16    -112   
32     -16    
-32    -208   
-32    256    
144    624    
256    96     
-160   64     
-48    -784   
192    -16    
0      -1264  
-16    16     
224    256    
-208   16     
224    96     
-48    160    
112    -16    
-16    16     
-80    64     
0      32     
-48    144    
-64    16     
112    -32    
-48    -192   
64     240    
160    -304   
-32    32     
64     -128   
-48    -64    
0      304    
64     224    
-80    208    
160    176    
-16    48     
64     -48    
288    736    
-272   -464   
-32    -448   
288    160    
96     96     
80     -368   
16     128    
80     -512   
32     224    
16     0      
176    80     
0      16     
64     128    
-16    48     
16     -32    
96     128    
-16    208    
-96    0      
160    -544   
-96    128    
208    -304   
144    240    
-128   32     
368    224    
-240   112    
160    192    
16     384    
-32    64     
16     48     
96     304    
16     192    
112    -112   
-48    -176   
192    -432   
48     160    
-32    32     
0      160    
0      -1232  
96     64     
-32    48     
128    224    
-16    -16    
80     -192   
0      80     
-64    -192   
176    128    
0      -144   
128    144    
-48    -16    
64     96     
80     160    
48     64     
0      -80    
112    -1008  
0      64     
80     -1296  
32     32     
272    -48    
80     -1056  
-80    -496   
96     -1008  
64     -112   
144    -160   
-272   -256   
144    -112   
112    -256   
128    -16    
-16    -32    
-64    -512   
320    384    
-48    -80    
272    80     
-832   80     
352    -288   
-16    352    
-112   -48    
48     -224   
-80    -1088  
144    -192   
176    -48    
176    64     
-32    -304   
192    208    
16     -32    
0      16     
80     -352   
144    -16    
-32    64     
128    0      
32     -16    
0      -144   
32     -80    
32     -432   
128    96     
48     -896   
-32    96     
0      80     
144    256    
-16    16     
-64    -32    
-336   -176   
0      -560   
64     288    
208    368    
-608   64     
128    -288   
16     -144   
80     -880   
224    -16    
-192   -432   
240    240    
32     144    
-96    208    
32     -320   
-16    -80    
-16    32     
16     96     
32     240    
112    -48    
-96    176    
240    32     
-128   -64    
-128   -80    
-192   -128   
192    -64    
-96    176    
-16    32     
64     80     
304    -64    
48     80     
-64    16     
64     0      
-48    -96    
160    -224   
-16    48     
64     48     
-64    96     
-96    96     
96     -128   
48     -160   
-64    32     
960    -3456  
-304   -608   
848    672    
368    400    
-912   -336   
880    1184   
-880   64     
1504   -672   
-736   928    
-16    -288   
-480   128    
-112   -560   
160    352    
112    -560   
128    16     
0      -448   
160    48     
16     64     
0      16     
-256   -16    
128    32     
-144   32     
112    144    
-128   48     
48     -352   
-464   48     
288    16     
48     128    
112    -112   
-96    -80    
112    -304   
128    240    
-112   96     
96     -80    
-48    32     
144    112    
-48    176    
16     -80    
-144   80     
160    -32    
32     -16    
-80    -32    
-160   112    
272    -32    
-16    160    
96     -224   
48     -96    
-80    -48    
-128   0      
208    16     
16     80     
-128   48     
80     -80    
-160   -32    
48     -48    
80     144    
32     -128   
112    16     
-1632  -160   
64     48     
-1280  -240   
-352   112    
-64    -16    
-176   32     
-80    0      
-144   128    
-256   -64    
64     -80    
96     -80    
0      224    
-144   64     
32     -128   
144    -16    
-272   64     
-96    112    
304    208    
-192   240    
0      128    
-48    0      
80     -288   
-256   80     
-240   96     
416    112    
-160   144    
0      -208   
160    -80    
-416   -304   
336    128    
-160   -80    
0      80     
48     32     
-80    96     
-32    -144   
48     0      
32     0      
208    432    
-208   144    
-512   -16    
16     -96    
-176   -272   
112    176    
-80    -128   
-16    64     
176    -16    
-128   16     
64     32     
-304   -208   
-64    -144   
48     -16    
96     144    
-32    0      
-64    112    
-400   128    
144    80     
-512   16     
-80    80     
48     0      
160    368    
-112   -176   
-48    -368   
-64    -32    
-32    -48    
144    -16    
-112   0      
-208   -48    
0      256    
64     80     
112    176    
-208   192    
48     96     
48     32     
-176   -128   
16     64     
192    96     
48     192    
32     128    
16     96     
16     272    
-320   -48    
112    -16    
-16    -32    
16     160    
-224   48     
112    80     
-736   -304   
80     -16    
-480   -336   
32     32     
64     112    
32     176    
32     640    
64     -128   
-208   64     
96     224    
-160   16     
-48    64     
144    80     
-96    0      
128    -80    
-288   -48    
192    160    
128    -224   
16     176    
32     0      
-304   -416   
320    352    
240    544    
160    256    
-384   -128   
192    176    
-64    32     
0      192    
-208   -112   
128    32     
-128   48     
64     64     
80     16     
80     320    
-80    -144   
16     48     
-96    -48    
-16    -32    
160    112    
112    144    
-96    192    
-288   144    
-208   64     
-144   0      
256    48     
-112   32     
-32    128    
96     0      
48     96     
80     -64    
240    144    
-160   128    
80     160    
-416   416    
-752   976    
-896   864    
192    -112   
-240   -272   
384    560    
-176   336    
-320   192    
240    96     
512    416    
-592   -64    
128    -80    
320    192    
16     -160   
-128   176    
176    160    
80     336    
-224   16     
16     48     
96     96     
-160   -96    
96     128    
-64    -96    
-48    48     
336    320    
0      256    
80     320    
-128   -32    
48     128    
32     160    
-128   -16    
128    -144   
-64    352    
32     -208   
224    304    
-432   -240   
192    -48    
-352   -256   
256    240    
80     256    
-96    352    
144    -112   
-128   128    
48     16     
80     64     
-32    112    
96     96     
-80    48     
272    576    
64     176    
-256   -224   
256    80     
16     -32    
-32    352    
112    -96    
-32    128    
-16    0      
240    -240   
-528   -480   
-96    368    
304    0      
-336   208    
256    256    
-80    -368   
-32    304    
144    64     
32     112    
-80    112    
80     32     
48     96     
0      64     
32     128    
160    224    
-80    96     
0      -80    
64     -96    
-96    32     
144    48     
128    336    
-256   0      
240    -304   
-96    -256   
64     144    
80     240    
16     16     
176    16     
64     208    
-144   -240   
80     32     
80     288    
0      16     
32     112    
112    160    
0      96     
-112   -96    
-48    -48    
16     -336   
80     -32    
-16    -80    
-96    112    
144    240    
-64    176    
-112   -80    
48     -128   
16     64     
240    64     
-48    -240   
-16    160    
-64    -160   
64     -112   
80     64     
48     -112   
96     80     
80     -656   
-48    128    
16     80     
80     16     
192    320    
-128   80     
-96    -256   
432    224    
-288   -336   
96     144    
16     144    
-64    -128   
0      32     
240    -80    
-64    16     
64     -1632  
368    400    
-272   -1168  
160    64     
-96    272    
240    128    
-208   64     
368    64     
-144   96     
208    128    
16     96     
-160   -16    
160    112    
0      -32    
64     160    
96     -352   
48     16     
-48    -96    
64     272    
-96    -272   
160    160    
-64    32     
128    288    
16     -80    
-16    -16    
224    16     
-160   -48    
176    32     
-48    -32    
64     -32    
192    -112   
112    112    
128    -96    
-96    208    
64     -608   
64     112    
-96    -144   
160    208    
0      128    
-32    -48    
192    -16    
-16    -160   
32     144    
48     -352   
96     -48    
160    -288   
96     288    
-32    -416   
-32    256    
-16    -624   
336    256    
32     160    
-160   176    
32     160    
64     80     
96     272    
48     -32    
16     16     
240    -96    
80     160    
-96    -144   
0      64     
80     -64    
96     128    
-16    -144   
112    80     
-16    288    
-48    240    
-80    -128   
0      -128   
-656   -1152  
512    784    
-1168  240    
128    -128   
416    336    
-368   -32    
80     288    
-224   -176   
272    656    
160    -1168  
-160   -768   
128    -112   
64     -112   
160    -224   
-48    96     
-64    -176   
192    -144   
-128   -1104  
160    -192   
144    80     
-96    -160   
-16    208    
160    -160   
64     -992   
112    -176   
128    -144   
16     128    
112    -96    
48     -128   
-960   -48    
240    -800   
-112   16     
144    -704   
-80    128    
160    -192   
16     32     
80     32     
-48    0      
-144   -240   
160    64     
160    -64    
-96    192    
-48    -48    
32     -192   
-384   -160   
160    -48    
0      -48    
64     -64    
-48    160    
272    -432   
-80    -128   
16     -240   
224    0      
-96    32     
96     16     
64     -160   
48     112    
-32    16     
0      0      
80     -32    
-144   96     
-112   -16    
128    -144   
-32    -16    
112    -80    
80     -64    
48     80     
96     96     
-64    16     
80     64     
0      -208   
64     80     
-96    -16    
128    -16    
80     240    
-64    -96    
-224   -32    
0      288    
-160   -32    
144    -16    
64     160    
32     -160   
128    0      
0      -304   
176    -16    
128    -208   
64     64     
-96    128    
176    144    
-48    -96    
32     -256   
-704   -240   
80     -224   
-1424  -208   
0      -192   
128    112    
-240   -640   
32     0      
64     -1088  
96     -16    
-16    16     
96     64     
-16    -48    
112    256    
-256   16     
-32    32     
-192   -368   
32     -16    
0      -32    
48     -144   
16     -160   
-32    -240   
48     80     
112    -96    
-32    208    
16     64     
112    -64    
-96    0      
32     -96    
80     96     
-176   -320   
-240   -48    
176    64     
112    96     
-144   -320   
48     96     
-32    16     
432    272    
-112   -416   
112    -80    
-288   48     
80     -16    
112    -48    
-144   32     
16     0      
-48    -320   
-288   -64    
208    -64    
-96    -272   
-96    -80    
176    112    
-128   0      
64     160    
-400   -416   
-128   -32    
80     -32    
0      176    
64     96     
160    432    
-144   -96    
96     96     
-272   32     
32     -192   
0      160    
-496   -48    
320    880    
-1056  -784   
16     32     
96     192    
176    256    
-64    176    
-208   128    
-144   0      
16     -32    
-32    -32    
736    416    
-208   192    
-160   176    
-256   48     
-112   -352   
96     -80    
-240   -224   
224    368    
-384   -32    
144    -16    
-144   144    
16     -96    
-208   48     
-448   -96    
160    128    
-288   64     
96     32     
-32    16     
-144   144    
-48    -240   
224    112    
-176   -80    
128    80     
-144   96     
-96    160    
-48    0      
-128   -80    
-48    80     
-176   -16    
304    16     
-400   384    
64     -32    
-272   -192   
2224   -2208  
432    -192   
-80    736    
-768   -128   
336    512    
80     -512   
-144   464    
144    -400   
-400   704    
-64    -272   
16     144    
-256   -144   
-224   96     
32     48     
-1232  -96    
-160   -32    
160    -416   
32     -48    
336    64     
-32    368    
176    32     
-240   416    
112    -176   
48     64     
0      -320   
0      160    
-144   -16    
32     720    
-608   -112   
-560   -96    
224    -32    
-80    -416   
208    112    
-80    -48    
112    -32    
96     32     
96     160    
64     64     
96     -32    
0      -32    
0      96     
32     128    
240    256    
-224   -64    
-240   -160   
0      0      
96     -240   
-192   -64    
208    48     
208    192    
-128   256    
-32    160    
80     -128   
-128   64     
48     112    
64     96     
304    704    
-304   416    
-48    304    
208    -48    
-192   -144   
-320   -160   
-192   -176   
-48    128    
-112   0      
240    112    
-16    64     
48     64     
64     480    
-96    336    
-96    -224   
80     -240   
-368   -32    
-32    96     
-352   -272   
-112   48     
432    -96    
-16    80     
-288   -80    
80     -112   
-16    224    
256    224    
-112   32     
80     192    
16     64     
-32    -32    
144    608    
-240   -144   
0      48     
32     -32    
96     112    
-96    96     
-48    -128   
-16    32     
80     -192   
64     -48    
-16    176    
240    288    
-192   -144   
-32    -48    
48     64     
144    128    
-224   32     
144    176    
-16    -64    
144    304    
-288   48     
16     176    
0      96     
64     32     
16     64     
32     48     
-96    304    
-112   80     
-80    -112   
0      0      
304    448    
-224   -160   
16     112    
-416   -432   
304    80     
64     0      
80     -16    
-160   80     
112    -208   
144    144    
-64    176    
144    80     
-96    0      
144    128    
-16    48     
208    400    
-112   32     
32     48     
-112   32     
240    32     
-16    192    
128    -64    
-32    176    
-160   64     
272    96     
-48    64     
16     176    
32     112    
160    176    
-224   16     
80     96     
64     -96    
16     288    
48     112    
64     112    
-16    0      
-96    176    
-48    96     
192    32     
-96    48     
80     96     
64     -80    
32     48     
-96    144    
-32    32     
-48    160    
-80    -64    
64     64     
-16    -208   
80     -16    
-144   176    
-16    144    
-64    16     
240    176    
224    -16    
160    64     
-192   160    
-112   224    
-112   112    
-16    -64    
288    112    
0      -48    
80     80     
-112   112    
-16    -304   
80     144    
80     240    
144    64     
-64    -32    
32     16     
160    16     
-32    48     
-32    -48    
64     272    
-48    16     
-32    96     
80     32     
144    -240   
-32    -144   
192    -432   
-160   112    
-672   -1120  
-384   400    
208    -112   
-512   -160   
352    224    
-272   368    
608    -336   
80     512    
48     16     
336    96     
-256   32     
352    -272   
-160   640    
160    -304   
-176   448    
272    -224   
-176   352    
128    -144   
-64    416    
224    -416   
-192   240    
128    -112   
96     416    
16     -224   
48     224    
32     -144   
64     112    
-48    32     
112    208    
48     -16    
0      80     
16     80     
48     -16    
48     176    
48     -208   
80     176    
0      -64    
112    224    
-128   -80    
80     0      
80     112    
-48    -64    
128    64     
-64    -256   
80     -144   
-48    -416   
144    144    
80     -272   
80     160    
-208   -64    
304    96     
-128   80     
176    80     
32     128    
-112   -128   
192    -16    
-32    -112   
32     16     
144    -80    
16     32     
-16    -400   
112    112    
-64    48     
176    144    
-48    240    
80     160    
112    80     
48     64     
192    112    
32     -192   
-48    16     
96     -192   
128    80     
48     64     
-32    -32    
80     -224   
32     32     
16     -720   
128    96     
-176   160    
32     48     
128    -16    
64     16     
32     -32    
-192   -128   
-192   -80    
352    -32    
-128   48     
176    -112   
144    416    
-160   -208   
-240   -160   
240    320    
144    304    
-48    -96    
0      -80    
-112   -48    
256    64     
16     -352   
144    128    
-16    -320   
16     -96    
240    176    
0      80     
16     -32    
48     144    
-64    -224   
48     16     
96     -496   
-160   -176   
0      -160   
96     -224   
-144   112    
160    -384   
-48    -112   
112    -544   
-48    -240   
192    -1344  
32     16     
112    448    
192    0      
48     224    
-64    -128   
128    -336   
80     0      
-16    -192   
128    144    
-736   -144   
-144   -336   
144    32     
128    -144   
64     -32    
96     -48    
48     -80    
0      160    
-80    -144   
304    -416   
-176   -272   
448    176    
-64    160    
-80    160    
-32    48     
-304   -304   
224    -48    
-288   16     
176    -176   
32     -32    
48     -176   
-48    -192   
16     -816   
-32    48     
112    -80    
16     160    
48     64     
-128   48     
48     32     
32     -144   
16     -80    
32     176    
-320   -32    
128    -192   
-64    -256   
208    -432   
-48    96     
-16    -560   
-64    32     
320    -144   
-128   112    
48     80     
32     -16    
-240   -144   
160    -112   
-80    16     
48     -80    
-240   -16    
384    -112   
-416   -288   
224    -272   
-112   80     
192    -176   
64     112    
-64    -560   
48     64     
-16    -48    
144    160    
-48    -176   
320    -80    
-16    128    
32     80     
-528   -48    
144    16     
-496   112    
-80    -64    
-144   80     
-240   -256   
96     -144   
-16    -832   
176    176    
-1728  1104   
992    752    
-192   -480   
608    -416   
48     96     
-496   -512   
-208   112    
448    -688   
-240   -144   
-64    -96    
-48    192    
-112   -368   
208    80     
192    -208   
160    64     
-336   32     
64     -368   
-512   96     
416    -48    
-320   160    
16     -464   
32     112    
0      144    
304    -288   
-144   -80    
-144   496    
224    48     
-528   -704   
448    80     
160    64     
-112   -224   
-48    -16    
-96    128    
112    192    
-80    -32    
48     144    
-368   32     
272    336    
-576   -128   
80     -112   
192    160    
-32    160    
16     32     
-528   -112   
-416   16     
-128   0      
16     80     
160    80     
48     112    
48     16     
112    -80    
-144   16     
176    -80    
160    160    
-272   -48    
32     96     
0      -112   
64     240    
-96    -144   
-464   0      
0      -32    
-64    112    
-80    96     
-1232  128    
64     -160   
224    112    
-80    32     
-16    -112   
-48    -224   
-288   -384   
128    32     
-144   -128   
64     256    
-64    192    
-16    160    
160    32     
-48    80     
-112   -96    
96     144    
-224   -32    
-624   96     
-64    80     
48     64     
176    240    
-368   -16    
176    16     
-64    -160   
-32    -80    
304    32     
-96    -64    
48     176    
-176   32     
64     48     
-176   112    
96     176    
-272   48     
16     96     
-144   -80    
64     80     
96     240    
16     128    
32     48     
-16    64     
80     272    
-112   -160   
-64    48     
-176   224    
128    128    
-192   -192   
-128   16     
-240   -96    
-64    -32    
-1680  0      
128    192    
-80    32     
0      192    
64     -16    
-160   -80    
32     -16    
-112   -112   
80     0      
64     144    
192    368    
-80    48     
-128   112    
-256   176    
128    128    
-192   80     
-48    48     
0      0      
0      96     
160    288    
-64    208    
384    96     
-432   -32    
176    224    
0      64     
240    16     
-432   -112   
-128   64     
176    96     
160    128    
-336   48     
-48    128    
-1616  -144   
-160   -80    
-16    -32    
-32    96     
208    128    
-240   64     
128    64     
-112   -16    
-64    80     
48     -16    
-32    96     
-160   16     
80     160    
-320   -144   
192    544    
-272   -48    
16     48     
48     -80    
-32    96     
112    96     
-160   -64    
96     160    
96     384    
64     256    
48     32     
48     0      
-16    48     
-64    0      
-144   64     
128    16     
-64    112    
32     112    
48     48     
32     144    
-48    128    
-128   -16    
128    16     
32     64     
0      96     
-144   144    
0      -48    
-48    64     
-64    64     
-32    -32    
0      176    
80     112    
-96    16     
112    112    
-32    160    
128    64     
-208   48     
256    32     
-96    32     
-16    32     
32     -1792  
-208   -1136  
1120   752    
-48    -96    
896    816    
-640   -48    
272    208    
432    400    
-272   -384   
-112   80     
-32    224    
144    -256   
-320   800    
144    -368   
0      528    
-64    -352   
64     384    
-32    -32    
224    608    
-304   -144   
128    64     
-208   0      
16     96     
32     144    
176    16     
-80    80     
80     16     
32     192    
48     80     
-80    16     
96     -48    
32     240    
96     -48    
-96    224    
48     -64    
-32    0      
176    -16    
0      224    
112    128    
0      32     
-32    0      
-32    160    
112    80     
-48    0      
112    96     
-80    32     
48     128    
0      -208   
-80    -560   
112    96     
96     96     
16     128    
16     128    
96     112    
16     80     
80     128    
-32    96     
32     112    
64     64     
48     80     
-144   0      
-64    80     
144    -48    
64     160    
-128   160    
112    160    
0      80     
-32    32     
144    160    
-80    128    
96     80     
64     128    
-32    80     
64     176    
-32    160    
-128   -224   
48     -64    
96     176    
-80    -864   
-48    -32    
-288   -480   
0      112    
160    208    
-32    -112   
80     -80    
16     112    
48     96     
16     160    
-16    288    
-32    -160   
-112   -112   
208    80     
48     240    
48     -352   
32     -16    
-48    -608   
-192   -112   
224    128    
64     272    
-32    64     
-16    160    
-16    160    
144    208    
0      64     
64     64     
-80    -176   
64     64     
64     416    
128    208    
48     48     
-16    -448   
32     192    
192    384    
-32    80     
48     128    
-80    96     
160    32     
0      240    
48     32     
112    208    
-176   48     
0      -304   
48     80     
288    80     
208    96     
-208   -656   
-96    144    
192    -1120  
64     176    
32     272    
144    208    
32     64     
48     224    
-160   16     
208    112    
-192   -144   
272    -176   
-112   -288   
128    -96    
-48    224    
-64    -464   
48     96     
208    -304   
96     208    
-16    -336   
48     64     
0      160    
-160   112    
64     -272   
144    144    
192    240    
64     192    
-256   48     
112    -656   
-160   96     
176    -272   
16     176    
64     -224   
288    320    
-320   -368   
240    128    
-48    0      
256    64     
-32    96     
32     -208   
320    720    
-480   -1072  
672    -64    
-16    176    
48     32     
80     -80    
-208   256    
192    -128   
80     144    
-112   -272   
192    144    
-224   32     
160    192    
-96    16     
48     -272   
208    -48    
0      -32    
16     96     
-112   -240   
32     240    
288    -32    
-64    128    
-128   -288   
160    272    
224    0      
-16    -592   
-272   96     
64     -1600  
320    -1216  
80     208    
-48    -1808  
-144   144    
-400   -1872  
-272   1968   
-128   1024   
-464   -368   
-80    192    
-272   -432   
288    -400   
-384   1264   
-80    -560   
352    368    
-272   -304   
208    16     
-1536  -336   
-112   -256   
176    -32    
0      -816   
400    -64    
-304   -864   
192    -32    
32     96     
-80    -240   
0      -256   
0      -32    
352    -320   
-128   -80    
-224   0      
160    0      
-320   64     
16     -176   
-16    -112   
176    -176   
32     80     
64     224    
208    48     
-80    352    
112    -144   
-32    -176   
32     112    
144    -48    
96     96     
-80    256    
-112   -64    
-112   -96    
80     -112   
-208   96     
-112   -304   
96     16     
64     -48    
400    352    
-352   -944   
272    96     
-144   64     
160    144    
64     224    
-240   -16    
32     -208   
48     -160   
64     -32    
-16    16     
-400   -80    
96     16     
16     0      
80     -480   
-288   -96    
96     -240   
-96    128    
144    -416   
64     144    
16     -176   
32     0      
-96    -48    
0      176    
-80    -128   
224    48     
-752   -64    
16     -144   
-912   -80    
-160   64     
144    256    
80     -400   
128    80     
96     -576   
16     96     
16     128    
64     -240   
144    -16    
48     208    
-112   32     
112    -240   
-144   0      
-16    -112   
-176   80     
96     144    
112    176    
96     -80    
-48    160    
80     -608   
96     96     
16     0      
48     -160   
-48    96     
16     -128   
-160   -64    
96     -96    
-240   -48    
16     -32    
-64    -16    
16     -96    
80     0      
64     -176   
-16    208    
-16    -560   
192    -32    
-48    240    
-272   -80    
80     64     
32     112    
16     96     
64     144    
-192   -96    
48     -48    
-304   -128   
192    -256   
80     0      
-160   -368   
160    176    
-16    -224   
112    -80    
48     320    
-144   80     
64     112    
-96    -64    
-16    -32    
-176   32     
0      0      
320    -64    
-256   -16    
160    -256   
16     96     
-160   -48    
128    48     
32     16     
-1232  -96    
16     176    
-1360  64     
-80    0      
-416   240    
128    48     
-32    -144   
-32    0      
80     -64    
-64    80     
-16    -64    
48     240    
-16    -48    
-80    128    
48     80     
64     240    
-240   80     
-240   32     
48     0      
-144   -16    
-16    240    
32     16     
-80    48     
-400   48     
240    96     
64     -80    
304    576    
-192   -192   
-144   -240   
-32    64     
112    -80    
-16    208    
-176   -96    
80     224    
-400   -320   
32     -32    
-1152  16     
-32    192    
-64    128    
32     64     
16     -304   
176    16     
48     144    
-176   48     
64     400    
-128   -48    
16     -144   
96     32     
-96    -112   
32     64     
80     -16    
-368   272    
-192   48     
-208   -224   
80     -48    
32     -160   
-656   1136   
208    -288   
-48    -16    
-320   -304   
-416   112    
512    -128   
0      528    
-224   -432   
-112   -48    
-304   -240   
-48    144    
32     64     
-224   64     
-160   160    
240    -176   
-32    48     
-48    64     
96     80     
32     128    
-160   0      
80     -128   
-32    112    
160    128    
0      -16    
-64    80     
-192   0      
48     112    
-544   16     
16     80     
112    80     
0      48     
128    128    
-336   64     
-16    32     
-240   128    
224    -48    
-16    80     
-80    64     
-112   48     
-96    48     
-144   -16    
-32    64     
-256   -32    
112    144    
-1104  -208   
16     48     
-128   96     
-32    32     
112    32     
-48    112    
32     16     
0      48     
-128   64     
80     16     
-48    48     
0      -48    
96     112    
-320   -16    
144    96     
144    304    
-176   -144   
-32    -64    
144    0      
-192   -144   
96     32     
-112   64     
96     80     
48     176    
32     224    
16     96     
-192   -32    
112    288    
-352   -144   
112    -16    
64     144    
0      192    
0      272    
-80    -160   
304    48     
-96    224    
-80    128    
176    16     
-128   16     
0      0      
16     -16    
-80    -80    
48     -80    
-48    -16    
64     304    
-48    48     
-16    -64    
32     -64    
32     -48    
176    160    
-48    112    
112    224    
-48    96     
64     80     
-64    0      
48     80     
-32    80     
160    208    
-32    64     
32     96     
-32    96     
32     48     
-80    -32    
176    368    
-64    272    
144    16     
-16    160    
-96    -64    
176    96     
-128   96     
96     112    
-96    -96    
144    128    
32     176    
32     -16    
48     -16    
-16    288    
144    112    
-112   -96    
-48    160    
-16    32     
320    0      
-32    32     
-176   208    
-48    -112   
160    48     
-272   -16    
304    208    
-48    80     
32     48     
64     176    
16     80     
272    784    
-224   -272   
336    -192   
-144   320    
176    -16    
-64    64     
0      48     
96     128    
80     112    
-64    -32    
-16    -1552  
160    224    
-64    160    
112    112    
-96    -16    
128    192    
-96    112    
-16    -128   
256    -304   
160    352    
-176   -48    
96     416    
-320   32     
368    -112   
-112   208    
208    -336   
-144   272    
-80    -48    
0      96     
112    320    
-208   -304   
512    64     
-48    384    
96     256    
-272   -16    
-96    128    
128    -32    
176    400    
-320   160    
160    -64    
-16    -112   
128    624    
-176   -2288  
-176   96     
240    -272   
512    64     
80     256    
-208   240    
-144   160    
-224   64     
96     -160   
-96    80     
-32    160    
96     64     
16     144    
160    -384   
-16    112    
192    -304   
112    240    
16     96     
64     96     
0      96     
-320   -1968  
272    -352   
1088   512    
-512   -128   
48     208    
320    400    
256    -64    
112    -32    
-64    16     
-96    80     
496    48     
-288   112    
144    -160   
-96    176    
160    144    
0      240    
-48    -224   
128    64     
-32    -32    
128    16     
-128   64     
144    -80    
48     224    
160    64     
-112   160    
96     -528   
-96    144    
144    -2256  
48     112    
-48    -128   
192    224    
80     64     
48     160    
-32    32     
64     128    
-80    -208   
192    -32    
0      208    
144    -32    
-64    112    
64     -96    
32     176    
16     -784   
176    48     
-80    16     
128    224    
48     0      
80     208    
-304   48     
176    0      
112    192    
-48    -208   
160    144    
-112   -320   
48     -16    
128    -32    
-192   96     
368    -16    
-240   240    
48     -80    
288    176    
-176   64     
96     -48    
48     176    
-64    -64    
160    -96    
-32    -672   
128    256    
-64    -64    
80     144    
48     -192   
160    176    
-144   -80    
144    48     
80     -464   
-64    -64    
208    208    
-96    32     
32     144    
48     16     
16     -1968  
192    -128   
16     64     
-64    112    
16     240    
0      -144   
128    -96    
224    0      
-272   112    
272    -32    
-32    -80    
64     48     
64     -416   
96     -304   
-144   16     
-128   -704   
64     -80    
128    -768   
-48    -128   
64     -368   
-128   -208   
208    240    
-32    -96    
144    -144   
48     -32    
0      48     
-32    -128   
160    -672   
-48    -176   
-1520  96     
160    0      
0      -32    
16     32     
32     -80    
144    -1520  
-16    16     
0      288    
192    64     
-112   -64    
288    176    
80     -80    
16     80     
-208   16     
96     -96    
-16    160    
-224   -256   
352    192    
80     -80    
208    32     
-112   -496   
32     16     
32     -1648  
-16    -128   
-96    -48    
-32    16     
16     -80    
16     64     
48     -48    
-80    -96    
-352   -80    
-48    -112   
80     -144   
0      -112   
96     -64    
-80    80     
192    32     
-32    -768   
144    0      
-112   -96    
176    112    
96     -80    
-96    96     
-48    -80    
48     -48    
32     -80    
-112   -16    
176    176    
-208   48     
208    0      
32     -208   
-64    -304   
176    -208   
96     128    
16     -352   
32     272    
-96    -128   
160    288    
-128   -112   
-112   -112   
16     64     
176    160    
80     176    
112    -176   
-1008  -96    
64     -80    
-80    -112   
192    -176   
160    144    
-32    -352   
-48    256    
32     -96    
48     -416   
0      -80    
80     64     
-128   112    
112    0      
-816   -352   
96     -384   
-720   48     
64     -160   
80     32     
96     -256   
96     144    
-64    -144   
64     -48    
-64    64     
48     128    
-1008  -2640  
1056   800    
-1072  0      
672    -304   
-160   -16    
48     -336   
-592   -64    
544    464    
-96    208    
-96    -496   
256    272    
32     -144   
64     -96    
-48    64     
-48    -32    
-48    -16    
16     32     
96     560    
144    112    
-80    -112   
64     -176   
32     64     
112    -16    
-16    -64    
144    -304   
64     -80    
-16    -144   
-128   80     
32     16     
-48    -144   
240    -144   
-96    64     
-96    48     
0      112    
0      192    
144    -176   
-256   -432   
-176   -400   
0      64     
-480   -16    
-16    144    
-16    96     
-128   48     
80     -96    
-224   -48    
48     -96    
112    160    
-144   -64    
224    -80    
-272   -144   
96     -336   
16     352    
-336   -16    
224    192    
-192   -16    
-128   -48    
96     224    
-160   48     
64     192    
-96    176    
-160   -96    
-224   -16    
96     -48    
-1712  -128   
64     -176   
0      -48    
272    0      
48     -16    
-16    144    
16     -192   
-208   -96    
-32    48     
-32    0      
-96    -96    
96     -112   
-16    -64    
-96    -32    
224    448    
-800   -96    
80     -208   
-64    16     
96     128    
-64    -80    
0      128    
16     112    
-96    192    
0      -32    
80     304    
-192   -112   
16     -16    
-208   48     
64     16     
16     64     
-32    64     
32     96     
-880   48     
-64    32     
80     -48    
16     320    
16     80     
144    112    
-112   64     
-32    16     
80     0      
-128   0      
48     48     
-48    -32    
112    256    
-336   0      
192    112    
-1136  -80    
64     48     
16     -48    
32     160    
16     32     
16     48     
16     48     
-176   80     
-16    0      
-48    64     
96     208    
-16    -32    
-192   -176   
-224   -192   
96     160    
-304   -64    
48     112    
80     672    
112    160    
-80    96     
-48    0      
64     -32    
80     192    
64     -80    
96     64     
-144   160    
-80    -480   
400    -176   
-112   192    
-128   112    
-144   192    
-32    48     
64     -80    
-80    0      
112    144    
0      112    
-32    480    
224    240    
-112   -48    
32     -176   
80     160    
-32    -48    
0      176    
-16    208    
-80    272    
-192   -272   
336    -16    
32     -112   
-32    256    
-48    256    
-112   64     
112    224    
-64    16     
144    160    
-224   -32    
112    -32    
-16    224    
-272   -128   
-256   -64    
144    240    
-288   -176   
-192   -64    
96     32     
240    352    
144    208    
64     128    
-96    -128   
-64    -32    
-80    400    
208    176    
-96    336    
-128   240    
-16    -48    
-80    16     
-144   48     
32     32     
128    -48    
192    208    
192    112    
0      64     
-128   112    
80     0      
-48    112    
48     80     
-64    160    
208    -96    
-176   -128   
176    16     
1584   -2928  
416    80     
304    0      
-336   160    
16     64     
464    128    
-960   -320   
304    -432   
32     352    
176    224    
208    112    
-320   192    
160    96     
-96    -16    
96     16     
-160   96     
64     32     
80     144    
-16    48     
96     112    
32     128    
32     160    
0      64     
16     96     
64     32     
-144   -96    
192    144    
0      96     
64     -80    
-96    32     
144    32     
96     -240   
144    160    
-48    32     
0      32     
-16    -208   
368    64     
-176   320    
224    0      
-80    0      
-48    96     
176    128    
32     48     
128    160    
-128   80     
64     48     
-176   -1536  
160    0      
32     144    
-32    112    
176    144    
-224   48     
112    -64    
0      128    
16     96     
112    64     
-48    80     
80     80     
-32    48     
32     80     
32     112    
48     -272   
32     112    
64     176    
64     -16    
128    48     
16     192    
-96    160    
80     -32    
128    192    
-160   16     
144    48     
-48    144    
-32    16     
80     32     
32     80     
-128   -192   
64     48     
64     -1024  
112    288    
-112   16     
208    80     
80     544    
-176   32     
320    16     
-16    80     
-128   -144   
272    80     
-320   16     
192    -16    
-80    112    
80     -176   
16     192    
-32    -1328  
0      -16    
0      -112   
112    144    
-16    160    
192    192    
-176   32     
144    48     
96     -32    
-32    -80    
-96    -80    
80     -64    
96     224    
144    -48    
-112   192    
272    -256   
-96    224    
208    -368   
0      64     
-96    -496   
80     64     
144    32     
32     112    
0      128    
-80    160    
224    160    
240    -32    
-128   240    
304    160    
128    240    
-80    16     
-64    -16    
-64    144    
368    352    
-160   -592   
160    128    
-80    -16    
176    64     
80     176    
-80    272    
352    192    
-80    0      
-160   32     
32     -208   
192    -128   
-192   -1152  
112    144    
48     -64    
144    208    
48     -608   
-64    -16    
32     0      
176    416    
-80    -32    
48     -112   
16     64     
16     -96    
160    128    
-32    -384   
64     112    
48     -112   
64     48     
48     16     
64     224    
16     -624   
96     272    
16     144    
80     96     
32     384    
48     -144   
32     64     
32     -256   
112    128    
48     32     
64     112    
16     304    
160    -112   
-64    -64    
-16    96     
-96    -48    
64     -48    
64     144    
192    -880   
96     -1200  
208    -240   
96     -624   
-48    -64    
64     176    
64     32     
144    112    
80     -448   
-64    128    
208    112    
-48    -960   
80     144    
128    -176   
96     96     
-16    -144   
32     -352   
-48    -192   
416    -144   
32     32     
16     48     
0      16     
-32    -544   
-1088  -1952  
0      -224   
432    448    
-528   -208   
-512   -224   
1024   352    
-352   1040   
-192   -544   
208    256    
-784   -352   
144    16     
-16    128    
304    -192   
0      -144   
112    -496   
-16    80     
256    560    
-224   -192   
-16    -96    
208    320    
-128   -112   
192    80     
-144   0      
240    128    
-368   0      
112    -160   
-80    0      
48     -304   
240    -96    
0      -480   
48     -96    
32     -1264  
-160   0      
64     -224   
-112   96     
-48    -496   
64     -176   
-96    -32    
352    224    
-304   -16    
-64    192    
-320   -96    
128    -144   
16     -64    
64     32     
48     96     
48     -720   
-176   -192   
96     -368   
0      192    
272    224    
-64    -16    
-64    48     
64     -96    
-288   -288   
176    -464   
-192   -160   
160    48     
288    480    
-160   112    
240    -144   
-112   -720   
48     -176   
-48    -400   
304    -112   
0      160    
-32    -64    
64     -64    
-32    -64    
-96    -64    
80     -48    
-112   0      
32     -192   
-1920  -176   
160    -80    
-64    0      
-304   -1056  
416    160    
192    -1296  
160    736    
0      -48    
-160   160    
-80    16     
-32    112    
-128   0      
96     96     
-224   -16    
48     -144   
-112   128    
-16    -112   
96     -96    
48     -256   
80     272    
16     -240   
96     -112   
-144   -32    
144    -48    
-16    -64    
-16    -128   
-16    112    
64     64     
-48    -176   
-32    64     
0      0      
304    112    
-176   -240   
176    -224   
-208   128    
176    -400   
144    32     
-48    112    
112    -32    
-160   -16    
32     -272   
-64    -16    
80     16     
-144   32     
64     -80    
-112   128    
256    -128   
-80    -96    
-880   -336   
80     288    
144    144    
48     384    
-368   -64    
-272   -160   
-320   -320   
0      -48    
144    -16    
144    304    
-208   -128   
192    48     
-96    80     
-1168  -192   
96     848    
-208   -464   
-16    80     
-96    32     
-208   64     
-64    32     
-336   160    
-64    144    
-1248  -64    
-80    96     
80     -16    
-80    48     
-32    -224   
-160   112    
224    -16    
0      80     
-32    -112   
48     208    
-144   -112   
-112   -368   
-64    -32    
-16    336    
-128   -256   
-256   112    
16     -64    
-400   16     
-288   -224   
-48    -16    
-16    208    
144    -432   
0      928    
-496   -160   
-336   -512   
0      -208   
368    240    
0      96     
-176   32     
208    -16    
-192   16     
32     -80    
-368   96     
-112   -48    
32     16     
32     48     
-16    -112   
80     176    
32     128    
-16    160    
-208   80     
-48    -160   
96     144    
-32    -336   
32     208    
-144   -16    
-64    112    
-144   64     
48     96     
-736   -96    
160    224    
-32    -352   
160    112    
-32    160    
-1008  -2336  
896    256    
-144   192    
432    -32    
784    -656   
-560   -128   
432    208    
-128   144    
-128   112    
96     -80    
-144   -144   
-80    64     
0      48     
112    96     
0      96     
32     64     
0      80     
64     224    
-32    16     
16     -16    
-16    0      
-48    48     
192    160    
-208   32     
48     -64    
-256   -48    
32     176    
160    288    
-96    176    
16     -16    
-96    -64    
-80    128    
176    80     
-144   80     
64     -16    
-16    -16    
-128   -224   
-80    32     
-96    96     
176    144    
-160   -48    
-48    192    
64     96     
80     64     
-208   -64    
128    -16    
-32    272    
112    144    
80     256    
-48    -336   
-32    144    
-80    -16    
160    96     
-224   0      
176    144    
-160   -48    
64     80     
0      272    
-16    -48    
224    80     
-304   144    
128    32     
80     32     
-16    96     
-48    144    
128    -144   
0      0      
-16    176    
-16    224    
0      80     
48     -112   
-32    32     
-64    160    
48     128    
64     -32    
16     64     
16     -32    
64     -64    
-80    80     
-48    112    
64     48     
16     112    
0      160    
96     304    
-64    160    
48     -48    
0      368    
-48    -64    
336    96     
-224   32     
144    80     
-64    48     
48     0      
16     160    
80     -64    
0      128    
-272   -176   
-32    -96    
-176   -144   
64     272    
-16    -32    
32     128    
-64    0      
240    304    
-48    192    
128    160    
-112   80     
144    176    
144    256    
-16    48     
-64    112    
32     128    
80     64     
-160   80     
0      96     
112    112    
224    336    
-128   -32    
-128   -32    
64     32     
336    256    
-32    112    
48     272    
-144   16     
-16    16     
80     -16    
-48    320    
16     176    
96     -208   
-160   -80    
144    304    
-32    -16    
-32    112    
-64    -112   
32     144    
96     192    
224    176    
-192   64     
-144   -192   
0      112    
32     -64    
80     -256   
-224   -32    
256    240    
-208   -1680  
144    80     
-240   -208   
32     -32    
112    464    
160    80     
-48    48     
48     160    
80     -16    
48     192    
80     64     
-64    -304   
144    448    
-112   160    
128    272    
128    -288   
32     192    
-112   80     
176    224    
-32    128    
112    -64    
16     80     
-16    48     
144    208    
112    -192   
-80    -112   
96     144    
-16    144    
32     -80    
-32    32     
64     -208   
256    -48    
-112   -448   
48     -64    
0      64     
64     32     
48     160    
64     128    
-80    144    
0      80     
-144   64     
-80    -80    
224    -112   
80     -64    
144    112    
-144   -64    
0      48     
160    -80    
96     48     
-32    -288   
208    -48    
224    144    
16     80     
128    -96    
-592   3312   
-704   -1456  
160    -848   
816    304    
96     432    
-752   -624   
368    -608   
224    512    
192    -320   
-512   112    
-304   -224   
-96    272    
224    160    
-16    400    
112    -128   
-80    256    
64     -128   
80     368    
-144   64     
224    96     
-80    64     
128    -128   
0      128    
16     -640   
144    -112   
-48    -592   
-16    144    
160    352    
16     320    
32     80     
64     112    
-128   -112   
-80    192    
48     64     
112    -144   
32     -16    
224    -224   
-64    144    
-64    -656   
16     160    
-16    -304   
16     96     
144    48     
96     16     
-32    -160   
112    352    
-80    176    
-32    128    
-32    96     
-160   -336   
320    144    
-80    96     
32     128    
32     -416   
32     96     
144    16     
-80    -32    
-48    -608   
176    64     
176    48     
-160   80     
192    160    
48     -240   
-128   -224   
144    208    
-64    16     
224    -32    
0      80     
96     -96    
-16    128    
32     -64    
96     48     
-16    32     
48     -1808  
80     144    
16     -912   
416    528    
-96    784    
-48    -1616  
-144   -704   
224    -720   
16     -96    
16     16     
-64    48     
128    -16    
96     -496   
400    -192   
-400   -32    
0      -656   
-16    368    
112    112    
-128   -448   
-96    64     
224    -768   
64     240    
336    128    
-48    48     
64     -2544  
176    96     
224    144    
80     48     
-32    -48    
80     96     
144    48     
48     -48    
-432   -32    
64     -384   
-1280  -592   
64     -416   
32     -128   
160    -576   
208    96     
0      -864   
112    -80    
16     96     
176    -16    
-96    -64    
64     64     
128    112    
80     -16    
-272   -96    
64     64     
-80    -96    
112    -64    
176    96     
-128   -80    
208    16     
-80    -32    
48     32     
112    -800   
-16    0      
32     -176   
-48    -16    
96     -80    
96     -400   
-64    0      
208    528    
64     -208   
64     -352   
-1040  -32    
176    -208   
80     -48    
16     -64    
-144   160    
32     -160   
16     64     
192    160    
64     368    
-16    96     
32     32     
-16    128    
64     -144   
-96    48     
-48    -128   
-416   96     
32     -160   
-496   96     
160    -528   
-160   240    
-32    -960   
176    -16    
-128   256    
240    64     
-240   -320   
256    -16    
-160   240    
112    208    
-144   144    
48     48     
128    -64    
160    64     
-576   -320   
0      -80    
-192   16     
48     -96    
-80    112    
96     -352   
80     112    
-144   -80    
144    -96    
96     -48    
32     0      
0      -16    
-64    160    
-96    0      
192    -176   
-96    -64    
-16    -96    
64     32     
32     -16    
128    -16    
32     -224   
96     -16    
-128   -160   
80     48     
-208   144    
128    0      
-400   272    
160    -32    
1040   688    
-432   176    
-1136  -160   
112    -288   
288    -192   
-672   -352   
832    -64    
-160   272    
352    -160   
-192   256    
-16    -160   
96     368    
192    -176   
-80    96     
0      32     
-112   80     
160    96     
32     0      
48     -144   
80     80     
-592   -80    
176    -112   
-160   176    
0      -208   
-288   208    
-48    -80    
-16    160    
32     -48    
-144   96     
64     -96    
-16    288    
160    0      
-96    64     
-96    -208   
256    400    
32     -32    
16     -80    
-144   -32    
-48    64     
-112   0      
-512   -64    
-80    16     
-352   48     
-96    -16    
-32    0      
48     48     
-80    -304   
208    128    
-432   -48    
256    112    
-128   -32    
-48    48     
80     48     
-96    112    
0      -96    
-176   176    
0      -48    
-32    144    
-224   16     
192    0      
-80    0      
-208   -80    
96     64     
-16    16     
-64    80     
48     48     
-64    -144   
16     96     
-208   16     
32     64     
48     48     
-32    128    
-256   -16    
16     80     
-416   -48    
128    32     
0      16     
80     -16    
144    128    
-16    64     
64     16     
-96    128    
-208   256    
-16    112    
128    192    
-208   -16    
272    -96    
-208   -64    
0      -16    
32     96     
-80    96     
-992   0      
144    464    
-64    -48    
48     176    
-96    -64    
64     0      
112    -80    
-128   0      
0      16     
-48    192    
96     -32    
-16    16     
48     -48    
-64    192    
16     144    
-288   -64    
-96    112    
48     80     
144    448    
128    368    
16     128    
-192   -64    
80     128    
-32    16     
16     -128   
-64    112    
32     64     
-96    384    
-304   32     
32     0      
-256   0      
16     128    
-16    16     
-48    0      
48     -32    
-336   -512   
336    96     
-208   80     
80     16     
16     144    
0      0      
-32    -64    
-32    80     
-192   -144   
-16    112    
-144   80     
176    160    
-16    64     
-96    32     
80     -16    
-80    0      
112    48     
-144   112    
192    128    
-48    0      
-32    128    
-48    -144   
96     160    
-128   80     
48     160    
-48    0      
0      -128   
64     528    
-64    352    
496    640    
-432   -48    
176    32     
-128   48     
-208   -128   
-64    48     
-96    -48    
48     160    
-144   -48    
272    240    
-144   160    
0      -224   
80     32     
0      96     
16     16     
-224   288    
32     -96    
352    112    
-368   48     
288    0      
-288   128    
0      32     
192    0      
-80    160    
-64    48     
0      48     
-80    112    
16     0      
32     144    
96     224    
64     64     
-48    80     
-96    80     
96     0      
16     112    
0      128    
-48    0      
48     -32    
160    272    
16     48     
0      192    
416    2176   
-48    -1856  
32     -992   
336    704    
144    -448   
-592   128    
768    -400   
-528   128    
352    -704   
-96    -256   
176    80     
-176   704    
-48    128    
-48    160    
256    -384   
208    416    
-48    -96    
336    1152   
-544   176    
320    416    
-336   -160   
272    -176   
80     144    
-80    224    
-112   -160   
-48    -32    
-96    176    
16     -176   
-80    144    
-112   -496   
272    176    
-128   16     
-48    256    
64     224    
32     48     
-16    64     
320    336    
48     128    
80     -16    
16     16     
160    0      
-80    0      
32     96     
16     288    
-48    -1520  
0      96     
-16    272    
192    480    
112    480    
-32    192    
-160   -224   
48     0      
32     -64    
160    128    
-96    0      
160    128    
-160   -240   
-16    16     
-64    96     
-48    -1216  
-16    48     
32     -320   
224    320    
0      256    
-112   288    
-272   -64    
192    32     
96     0      
0      -240   
-336   48     
256    -48    
0      208    
-64    -96    
192    128    
-80    -80    
160    96     
208    352    
-128   304    
224    288    
208    400    
-144   144    
160    112    
0      128    
0      -48    
96     144    
-144   -48    
48     -32    
-80    -64    
128    160    
192    -96    
-256   -16    
240    -48    
-32    0      
144    -176   
-32    96     
64     -32    
272    0      
-64    -112   
32     48     
112    32     
-144   112    
192    128    
-96    -208   
144    32     
96     -272   
-96    -144   
-112   -688   
128    -32    
352    -432   
-128   -32    
64     64     
-16    112    
80     -64    
0      160    
80     -16    
32     208    
0      80     
176    -144   
-32    32     
-48    -176   
256    80     
80     -80    
128    320    
128    -848   
64     -64    
-176   80     
80     80     
176    432    
64     160    
64     144    
-96    -112   
144    352    
192    336    
176    288    
-192   -176   
16     256    
64     -80    
448    336    
-208   32     
208    96     
-16    96     
48     48     
-32    128    
-16    144    
144    80     
0      -64    
0      96     
16     -96    
80     144    
-48    -304   
176    128    
-96    -336   
112    144    
64     48     
80     96     
-64    0      
48     160    
256    256    
-112   384    
48     -256   
64     -176   
160    16     
80     -48    
32     64     
0      -368   
0      80     
176    -128   
48     176    
-64    112    
112    -1600  
128    128    
48     -944   
-96    -80    
-32    -160   
304    -288   
192    128    
-80    -1088  
48     -224   
32     -432   
64     -96    
64     160    
48     48     
48     64     
-48    -192   
32     -608   
-48    256    
16     96     
-144   48     
-16    -112   
64     -480   
176    -80    
0      -80    
16     128    
80     -480   
32     144    
-48    -2064  
144    16     
-80    -144   
-720   240    
1392   320    
1424   0      
0      -464   
256    -608   
-736   -864   
944    880    
-1424  -80    
32     -320   
-384   -48    
432    112    
48     -48    
-112   -224   
-192   -16    
272    -320   
-96    48     
64     -32    
176    224    
48     -224   
-32    -144   
16     -48    
-16    0      
32     -48    
-192   -64    
48     -112   
16     -272   
144    0      
64     -272   
48     -96    
-48    -1328  
48     80     
192    -16    
-32    80     
0      0      
160    32     
-16    96     
-64    64     
-128   16     
48     -96    
-1600  -128   
64     -128   
-48    -48    
144    -48    
-64    -80    
96     -352   
0      96     
48     -144   
-64    64     
-64    80     
112    48     
-32    32     
48     -48    
16     64     
-32    -32    
-240   16     
64     16     
-32    -16    
192    112    
-80    96     
160    -192   
-32    112    
144    -144   
-32    80     
64     144    
16     -64    
-32    -32    
176    -112   
-384   96     
-80    -32    
144    144    
48     -16    
-112   80     
-16    -112   
32     80     
16     32     
16     176    
-32    -384   
80     -256   
0      -64    
-32    -16    
-16    576    
-112   256    
16     80     
256    -160   
-192   -208   
-32    -400   
-384   -32    
80     -400   
32     0      
48     -96    
16     48     
-32    64     
48     16     
32     -16    
32     80     
-288   -480   
64     -32    
-192   -288   
128    464    
64     -32    
16     -96    
-256   48     
176    -80    
64     288    
-64    -96    
-32    144    
-64    -288   
192    -112   
-144   -288   
64     -224   
-80    -160   
160    -112   
-96    96     
-32    -48    
-48    32     
240    400    
-192   96     
-160   -160   
16     144    
0      -160   
32     288    
16     160    
32     192    
0      240    
-752   352    
-320   16     
-784   -48    
-160   -176   
128    176    
80     -80    
0      112    
-16    80     
-112   -16    
-160   64     
-208   -288   
0      160    
-48    -48    
64     -16    
-48    -16    
0      32     
-32    144    
-16    -96    
128    240    
-64    160    
112    160    
-368   -192   
208    -48    
-144   -176   
0      192    
-128   32     
-144   16     
48     128    
-128   -96    
96     32     
-112   0      
224    256    
-432   80     
320    304    
-464   32     
-48    -64    
48     -288   
64     160    
80     0      
-64    128    
-112   32     
-208   -160   
192    -48    
-288   96     
-384   208    
-80    -160   
112    224    
-128   0      
-64    32     
-400   -144   
224    64     
16     -64    
-128   128    
96     -240   
-128   144    
96     80     
-48    48     
-144   32     
160    48     
80     48     
16     16     
160    -256   
-96    128    
-192   -32    
-160   -144   
16     160    
-144   96     
-160   336    
-144   -192   
-80    -144   
192    48     
32     112    
-80    112    
-176   288    
-1632  -448   
-320   -1248  
-80    -416   
352    384    
-32    208    
128    1856   
-640   -256   
-544   0      
-272   -240   
528    144    
-96    48     
208    384    
-64    384    
-384   32     
-384   -512   
0      -368   
-96    224    
-256   -144   
-32    48     
304    -64    
-256   0      
-16    48     
-16    368    
-192   -144   
-192   -384   
112    -48    
-32    0      
160    48     
-192   112    
320    480    
0      144    
32     -112   
-64    64     
-80    64     
176    32     
-336   -160   
176    -160   
-176   80     
144    -80    
112    64     
-208   80     
0      80     
-112   -96    
176    32     
64     64     
224    208    
-208   144    
128    -16    
-352   16     
80     64     
-16    -32    
-16    128    
64     352    
-336   96     
144    -16    
16     208    
-80    -48    
144    96     
-96    -208   
128    -64    
112    208    
-224   320    
-48    -96    
112    16     
-112   240    
32     32     
-160   0      
176    96     
-96    -32    
64     48     
-16    192    
64     96     
112    240    
0      16     
144    128    
16     208    
32     448    
128    272    
0      -16    
-16    144    
192    -224   
192    16     
-64    480    
32     16     
192    80     
16     128    
128    80     
-96    -48    
64     32     
-16    48     
-32    80     
64     144    
-32    128    
-32    32     
0      -96    
-80    16     
16     112    
32     112    
-64    144    
-96    48     
144    96     
-80    16     
-64    -96    
0      32     
208    544    
-160   16     
16     -272   
-176   0      
80     -128   
160    192    
-80    128    
32     224    
32     208    
48     16     
320    464    
-80    48     
144    224    
-16    256    
160    48     
-176   0      
64     64     
112    128    
-32    16     
64     -32    
80     256    
80     288    
224    -544   
-80    272    
272    128    
32     144    
-272   0      
112    64     
-160   32     
160    -48    
176    208    
-208   144    
96     -80    
-16    144    
-96    -32    
368    96     
-64    48     
-64    -1168  
80     208    
192    64     
-224   80     
-48    96     
160    0      
112    176    
0      32     
-64    96     
0      16     
-96    -128   
272    112    
-64    96     
-624   -304   
16     160    
-16    -912   
240    -64    
-80    336    
80     80     
128    96     
-96    256    
96     112    
48     192    
-96    -160   
176    48     
-64    0      
16     320    
-384   -16    
112    -176   
48     -160   
144    -80    
272    96     
-128   -240   
-96    48     
48     160    
160    224    
96     -48    
16     0      
112    -48    
32     144    
-16    64     
-64    96     
240    -64    
96     -144   
96     144    
0      -144   
-32    64     
112    -528   
48     96     
0      -368   
112    144    
48     -16    
16     272    
-48    -64    
-16    224    
-32    -96    
-1216  240    
1264   144    
1040   208    
224    -928   
704    128    
-432   -912   
704    -304   
736    160    
-48    192    
-80    -16    
112    -144   
-112   16     
0      176    
-64    16     
112    16     
0      48     
112    160    
48     -32    
48     80     
16     -208   
176    48     
-64    160    
192    160    
16     0      
-80    48     
64     64     
144    240    
128    160    
16     32     
32     -16    
-48    160    
160    160    
32     -832   
32     96     
-64    -96    
112    16     
80     -224   
-32    96     
112    -128   
16     80     
96     32     
-16    144    
48     16     
144    64     
32     80     
80     -128   
48     16     
0      -176   
16     128    
160    -16    
-16    -16    
112    -288   
-64    96     
64     -448   
112    96     
-32    288    
96     -1360  
80     -160   
0      -400   
0      -2608  
48     -96    
48     -256   
96     64     
32     -32    
32     -80    
128    112    
32     80     
80     64     
208    224    
-32    -272   
16     16     
48     -16    
32     -64    
-112   -96    
-32    -272   
-32    0      
32     -224   
64     -192   
16     -736   
-96    -304   
128    256    
112    112    
-192   -32    
384    112    
-32    -560   
-64    -368   
336    288    
-16    128    
-208   80     
64     -64    
-240   -16    
-48    0      
32     -240   
160    -112   
32     -64    
96     -64    
-144   -288   
0      -1984  
64     -112   
272    -80    
-16    272    
-48    64     
-32    -96    
16     -64    
192    -144   
-304   -32    
64     32     
32     80     
112    -64    
16     -48    
16     -1168  
112    -32    
0      -144   
48     64     
16     48     
-32    64     
192    176    
-16    -192   
16     -80    
48     -208   
-176   160    
80     -128   
-16    -80    
-128   -192   
208    48     
-32    -624   
0      -208   
-80    -1696  
192    416    
0      -208   
-192   144    
-80    -64    
240    -80    
-272   -16    
176    144    
-304   -208   
320    32     
-1632  96     
288    -208   
64     144    
-64    48     
176    96     
-144   -288   
96     112    
160    -144   
96     144    
-112   160    
-32    -256   
32     -112   
112    32     
64     64     
48     -16    
-1120  112    
0      -288   
48     32     
0      -64    
240    16     
-48    -336   
-16    48     
144    -1696  
96     -96    
-80    64     
96     -64    
-32    0      
80     -16    
-272   -144   
112    -64    
-96    128    
-96    -32    
-64    -16    
-32    -336   
80     32     
48     -656   
-176   208    
96     -1504  
-32    -16    
-160   64     
224    -80    
-32    128    
0      0      
-80    -32    
96     96     
16     96     
192    -48    
-16    -48    
112    -128   
-48    80     
96     -112   
-64    80     
-32    32     
16     -80    
-64    224    
-16    96     
-80    128    
-176   -80    
48     16     
256    -48    
-560   -2256  
1520   2704   
-800   176    
768    -576   
-528   -128   
352    -208   
-624   -272   
96     448    
-1376  16     
-48    -528   
16     384    
-80    64     
-80    32     
-48    -80    
368    -208   
-416   -112   
208    -208   
-224   288    
400    96     
32     400    
-544   -160   
-224   176    
16     16     
112    144    
-80    96     
-112   64     
-336   -16    
-272   -16    
-48    0      
0      -208   
112    32     
-384   64     
208    320    
-256   -256   
-64    96     
-32    -208   
-160   -112   
0      144    
96     32     
48     96     
-512   0      
32     80     
-464   0      
0      -80    
176    -64    
-128   160    
112    112    
-144   -144   
144    -240   
-80    208    
112    -128   
64     176    
-144   80     
48     -160   
-128   0      
-96    128    
32     16     
-320   0      
96     32     
-720   224    
-192   -32    
48     -64    
-64    160    
48     -160   
64     96     
-64    96     
32     96     
-64    -64    
80     240    
-80    0      
96     16     
-48    16     
64     112    
-176   64     
-432   -144   
96     -112   
-96    -80    
-128   -48    
80     -80    
0      64     
-96    144    
48     -32    
48     80     
32     352    
-128   0      
160    64     
-112   400    
-128   -208   
288    64     
-512   80     
160    16     
-272   -128   
96     176    
-80    -96    
-144   -192   
224    336    
-272   128    
160    32     
-48    32     
-48    96     
80     128    
-80    224    
-160   16     
64     -96    
-224   -48    
-16    -32    
-192   -80    
-112   48     
-32    48     
80     160    
-96    128    
176    48     
-96    64     
176    352    
-80    272    
16     112    
-32    160    
-144   -16    
192    32     
-112   32     
32     272    
0      48     
240    208    
-192   -64    
-80    80     
-176   -160   
64     -176   
64     240    
160    192    
-32    16     
-96    0      
-32    112    
176    240    
208    224    
-320   32     
32     128    
-320   -96    
96     -16    
0      80     
-272   -16    
272    96     
0      32     
-144   -32    
48     128    
0      80     
256    128    
0      128    
-32    112    
-96    176    
-32    -48    
48     112    
-64    16     
80     144    
-32    -80    
0      -224   
64     272    
-144   -128   
336    160    
-80    304    
192    128    
-96    48     
0      32     
-96    -112   
80     192    
64     128    
112    352    
-128   112    
112    96     
112    80     
144    -96    
176    48     
0      96     
128    -96    
240    160    
-144   176    
-128   -16    
-160   0      
96     48     
304    176    
-32    -176   
64     336    
-16    -48    
-128   160    
48     272    
96     -48    
0      16     
0      32     
224    80     
-48    -16    
48     -112   
-64    144    
-16    32     
32     -272   
96     112    
-176   160    
-16    80     
-48    48     
64     64     
304    2992   
-1728  -320   
144    368    
416    528    
480    -48    
-400   -352   
-336   240    
320    208    
-128   -192   
32     416    
112    -160   
-48    128    
-160   -528   
208    0      
-96    96     
0      -16    
-96    32     
64     144    
48     80     
128    -32    
-144   80     
32     112    
-48    160    
-32    192    
-16    48     
144    -160   
-48    64     
16     -2144  
144    32     
-224   16     
32     112    
144    112    
80     144    
80     144    
-16    0      
-32    0      
112    144    
-32    16     
80     32     
-128   48     
128    96     
-48    192    
128    -976   
144    96     
-16    128    
48     16     
80     32     
-128   128    
112    80     
16     64     
-32    -16    
96     176    
32     176    
64     32     
64     64     
-16    -240   
80     -96    
-48    -464   
-96    -16    
80     -320   
0      96     
128    192    
16     192    
48     -16    
48     -144   
-96    96     
192    48     
32     0      
128    192    
-80    32     
32     -128   
96     112    
-32    -80    
64     112    
32     -464   
48     48     
64     96     
-64    176    
16     -64    
32     0      
64     -496   
160    208    
0      48     
64     160    
-80    -32    
144    -192   
0      0      
112    -176   
16     80     
48     -672   
112    112    
16     -1520  
48     192    
-80    -16    
80     96     
16     32     
64     -96    
-48    -176   
96     0      
0      160    
160    112    
-32    64     
-64    -272   
144    96     
32     -352   
112    112    
-80    -144   
160    224    
-80    -32    
144    80     
-48    128    
96     48     
32     -48    
0      -80    
80     -80    
64     -416   
96     192    
80     -336   
-32    -48    
-96    -176   
192    256    
144    -448   
-64    128    
-128   48     
240    144    
48     48     
224    400    
-288   368    
-32    -496   
224    16     
-176   -16    
256    16     
-144   -80    
96     96     
112    32     
32     208    
-48    -128   
48     48     
80     -240   
112    160    
-32    48     
128    192    
-32    224    
192    -48    
80     272    
-176   -64    
192    112    
96     -192   
-144   16     
32     -192   
-80    144    
0      -48    
48     208    
48     -96    
160    32     
-80    64     
160    -1360  
-128   -1088  
-160   -208   
160    -1200  
80     -112   
176    -736   
-96    -16    
112    80     
-112   -256   
64     -128   
192    320    
-112   -352   
16     320    
-128   -240   
-128   -112   
-208   -192   
288    -320   
208    128    
16     -112   
-160   -272   
192    -352   
16     -128   
-48    -208   
96     -80    
16     64     
352    128    
16     0      
48     112    
16     -256   
112    0      
-48    32     
-80    -160   
-736   0      
48     -176   
80     -16    
0      -496   
-32    96     
64     -112   
64     0      
-32    32     
-144   -80    
32     -80    
1680   -2752  
544    -272   
224    32     
-624   384    
864    -848   
-752   416    
128    -112   
352    -624   
-368   480    
160    -208   
304    16     
-352   -288   
432    -1232  
-96    16     
80     -240   
32     288    
192    96     
-32    208    
-352   -224   
128    64     
-160   64     
64     48     
-1024  -16    
64     -16    
48     -144   
144    -240   
-80    32     
128    -368   
-16    128    
64     -64    
-16    48     
-16    -32    
80     -48    
64     -16    
16     32     
32     192    
0      48     
-48    -80    
0      -288   
-160   -32    
64     -176   
32     80     
80     -208   
-16    32     
144    -32    
-64    -192   
32     128    
16     -352   
-240   80     
80     -224   
-48    80     
-144   -144   
-32    32     
-48    -272   
-144   0      
80     160    
-128   48     
176    -992   
16     160    
64     -3136  
-16    48     
32     112    
-16    96     
-160   -16    
144    -48    
-224   112    
-16    -96    
64     96     
64     -16    
96     96     
-112   -80    
176    96     
-16    -256   
-16    96     
64     -608   
192    80     
-160   144    
96     -208   
-48    32     
-80    -16    
-16    -16    
192    -80    
-128   144    
208    224    
-848   -80    
208    -560   
32     144    
-80    -112   
128    64     
96     112    
-48    112    
-176   48     
0      -64    
96     112    
-48    -16    
-64    -16    
64     -32    
-144   48     
32     -256   
-32    0      
-816   -160   
80     176    
-528   -256   
-176   80     
-96    96     
-272   -48    
-64    -224   
-432   48     
160    192    
128    128    
64     -32    
-96    160    
-32    16     
-560   -176   
64     -48    
-384   -16    
-96    -64    
-224   -368   
-496   -64    
304    272    
-32    272    
128    80     
-272   288    
-48    144    
-320   0      
-16    -128   
-224   -96    
16     112    
-16    80     
240    112    
-112   -80    
32     -48    
-176   -32    
48     16     
288    80     
-304   48     
-64    0      
-336   176    
-96    32     
-64    -224   
-240   32     
-256   -16    
272    368    
-48    144    
192    144    
-336   -64    
128    -32    
-80    192    
96     -64    
-16    16     
-112   128    
32     80     
0      64     
-80    32     
-192   144    
112    -32    
-288   0      
112    480    
32     -96    
-64    -144   
-16    -80    
-32    80     
48     64     
-32    -16    
-112   -144   
-224   -32    
352    624    
144    64     
-208   -48    
-160   -128   
64     352    
-64    -416   
160    384    
-160   -64    
112    192    
16     0      
32     -112   
-96    96     
-64    -80    
-64    224    
-144   -80    
16     208    
16     176    
96     16     
-224   -16    
-32    48     
-336   -64    
0      96     
-128   96     
304    432    
16     112    
-128   0      
-80    -80    
144    64     
48     -112   
-48    48     
-32    32     
-976   -2448  
624    -192   
-416   -496   
192    -352   
-112   -800   
-176   -144   
80     576    
624    560    
-496   -320   
112    -304   
208    160    
-80    -32    
48     64     
-16    144    
48     -48    
-240   -112   
256    256    
-224   128    
160    192    
-64    -16    
-112   -160   
-896   16     
-16    208    
-112   16     
112    -192   
32     80     
160    -48    
-128   64     
-144   48     
256    -64    
-128   80     
-64    64     
-32    80     
-112   96     
-48    16     
64     80     
-272   -32    
112    256    
-48    112    
128    16     
-112   48     
-80    80     
96     96     
-48    160    
16     -32    
0      80     
48     144    
128    -16    
-80    64     
-176   -64    
0      64     
0      272    
-16    128    
144    48     
-80    32     
96     240    
-224   0      
176    -128   
0      112    
80     288    
-112   -80    
0      208    
96     48     
-64    -144   
-80    144    
16     48     
96     80     
-192   16     
176    112    
-128   80     
64     48     
48     48     
0      112    
-80    80     
96     128    
-48    -32    
224    352    
-320   96     
-16    64     
-80    -224   
96     -272   
-112   144    
176    48     
32     208    
80     80     
64     80     
-48    64     
-32    -224   
48     -48    
48     32     
128    160    
64     224    
-48    192    
-48    48     
48     48     
32     80     
32     -48    
-80    -192   
64     16     
48     112    
144    208    
-80    -48    
-96    96     
128    96     
64     112    
32     64     
-64    80     
0      112    
0      32     
128    128    
-112   -1456  
160    96     
-32    224    
112    80     
0      48     
-16    32     
32     128    
-96    -160   
0      -112   
-32    0      
48     -32    
48     128    
-80    208    
32     336    
96     -48    
-80    -1808  
-256   -720   
112    208    
16     560    
272    368    
-192   208    
16     192    
16     112    
0      48     
16     112    
-32    32     
240    400    
-192   128    
-64    32     
-112   112    
256    -512   
-160   48     
80     32     
64     448    
-16    144    
208    80     
16     -80    
208    352    
-272   -240   
96     -32    
48     160    
112    208    
-32    240    
-32    -304   
192    -16    
80     -256   
112    736    
96     -2048  
-208   -16    
128    112    
-32    0      
0      -32    
32     144    
-96    -64    
96     272    
-192   -16    
144    -16    
48     128    
192    544    
32     -80    
-160   -304   
48     -16    
-48    -224   
272    192    
-192   112    
-32    -208   
-16    48     
208    -80    
-112   240    
96     32     
64     16     
16     384    
64     208    
-112   -192   
80     368    
64     -480   
192    -96    
-64    -320   
32     208    
-16    -1008  
64     64     
96     -48    
80     256    
144    32     
-48    192    
112    48     
-96    -128   
64     48     
1424   -3136  
352    -320   
320    -720   
-256   784    
192    -80    
0      -384   
448    752    
288    48     
-16    160    
-304   16     
144    336    
128    96     
-176   -32    
16     -288   
48     32     
160    -128   
0      64     
96     -272   
80     128    
16     -48    
240    80     
-192   -144   
112    80     
80     192    
160    80     
96     80     
-128   272    
48     208    
-32    -112   
128    48     
0      -176   
176    208    
-48    -112   
80     96     
32     -112   
128    32     
16     -160   
48     224    
64     0      
128    -16    
-112   128    
176    304    
48     -976   
16     -432   
144    144    
-80    -208   
192    96     
-160   -192   
320    64     
-80    -144   
48     16     
32     -448   
0      -416   
128    64     
0      -496   
-112   96     
-848   -48    
64     -48    
-32    -80    
192    -112   
-176   0      
240    -464   
64     -288   
0      112    
32     -112   
32     128    
48     -16    
176    0      
-112   64     
224    -560   
-96    16     
32     -32    
-128   -224   
288    -16    
64     -32    
0      -128   
32     -928   
32     -256   
48     208    
-176   112    
64     -48    
224    32     
-16    -192   
0      -64    
32     16     
-112   -192   
-176   48     
48     -96    
-464   -96    
112    -256   
32     -64    
96     -352   
-32    -80    
208    -544   
32     224    
112    -64    
-272   -80    
128    -224   
64     160    
-48    -208   
32     16     
-144   128    
96     -160   
-800   -96    
-144   -224   
112    -32    
320    208    
48     112    
-48    -288   
-240   -160   
48     0      
128    48     
0      48     
240    -16    
-272   64     
144    -176   
-192   -176   
-240   -560   
-32    -16    
144    -288   
-256   144    
96     16     
304    176    
-16    -368   
-80    272    
112    -1232  
160    160    
64     176    
16     64     
-176   -32    
112    -112   
-144   32     
48     -48    
-64    208    
-144   -16    
-208   -64    
48     -240   
272    -16    
80     -160   
32     112    
112    -176   
64     112    
112    0      
16     176    
-144   -48    
96     -128   
32     64     
96     -16    
-128   -96    
64     -48    
-32    48     
32     -240   
-64    64     
96     -176   
192    576    
-144   -96    
160    256    
64     -1312  
128    160    
-96    -224   
192    192    
-208   80     
-16    -208   
80     -16    
-16    -352   
64     128    
144    560    
-128   32     
-48    16     
112    -96    
144    -176   
32     -16    
-144   48     
208    -112   
-48    192    
176    16     
-176   -32    
240    -352   
-160   0      
112    -96    
32     160    
-48    64     
-240   16     
-32    -352   
16     160    
-464   -256   
80     128    
80     80     
-496   -80    
0      16     
-48    32     
-112   -32    
-64    112    
-272   -48    
288    176    
-128   144    
128    -128   
-224   -32    
832    2912   
-1824  -1568  
800    512    
112    384    
640    -864   
-1136  -784   
-304   -48    
-352   -304   
560    832    
-80    208    
176    224    
-112   32     
-96    432    
-304   -304   
-32    48     
-128   48     
352    288    
-96    48     
-256   0      
80     -80    
-288   -224   
-160   96     
80     160    
112    432    
-1200  -128   
-480   -96    
0      80     
176    176    
-144   16     
-64    128    
-80    -144   
-64    128    
80     144    
-160   -80    
112    -176   
320    144    
32     192    
-256   192    
-512   -432   
-128   448    
352    -256   
32     -48    
-80    320    
-80    -64    
-48    240    
32     -160   
128    192    
-48    -192   
64     32     
160    272    
-128   144    
112    176    
-288   176    
-80    176    
80     -176   
-32    48     
-320   -288   
352    768    
-64    32     
-272   -448   
320    -208   
-80    0      
0      -80    
96     -16    
-16    16     
-240   -32    
-176   32     
-64    256    
-224   32     
-80    -112   
96     48     
-512   -208   
-16    80     
-160   -256   
128    112    
48     -112   
0      -272   
-80    -96    
-64    -128   
96     304    
-32    160    
16     80     
-48    80     
80     96     
-80    160    
-48    -144   
-224   -16    
-32    192    
192    224    
16     160    
16     64     
-112   -48    
-16    -32    
-64    -144   
0      16     
-48    80     
-48    16     
144    336    
-128   80     
-16    -208   
-48    16     
-80    -16    
224    208    
-80    -128   
16     96     
0      64     
-96    -192   
128    64     
-16    624    
16     336    
0      -48    
-48    -32    
32     160    
96     96     
-192   64     
-64    80     
64     -48    
48     240    
-448   -48    
-64    -64    
80     176    
64     224    
32     160    
80     224    
32     80     
-176   352    
400    960    
-112   320    
208    544    
-432   96     
320    48     
-304   16     
-16    -16    
128    144    
160    240    
-32    112    
64     96     
-64    -32    
-48    432    
176    128    
-80    48     
112    64     
-96    96     
112    -96    
-208   -32    
128    -80    
-208   -192   
128    512    
112    384    
-16    64     
64     -16    
-64    -48    
32     256    
-128   32     
16     -288   
384    160    
-176   544    
336    112    
-176   224    
48     -96    
32     144    
-208   -48    
240    -144   
-48    96     
16     96     
-128   -80    
128    -128   
-48    -32    
112    -80    
-48    -80    
16     224    
112    368    
-128   176    
144    320    
-224   -128   
176    64     
48     32     
-64    16     
208    -48    
0      160    
0      160    
-48    160    
0      96     
144    80     
-96    32     
256    32     
-128   112    
80     -160   
80     128    
-112   208    
0      224    
-128   -48    
0      -16    
320    128    
-96    240    
-48    48     
32     320    
-48    16     
-400   256    
1504   256    
960    1040   
-64    -272   
736    -112   
-384   -496   
304    -256   
688    112    
-16    656    
-128   -1136  
352    176    
-160   288    
128    -16    
-192   224    
144    -96    
-48    240    
208    -64    
-64    240    
16     32     
-96    80     
208    -32    
-80    160    
160    -48    
-80    112    
0      -432   
-48    48     
208    144    
16     144    
48     48     
0      160    
80     -32    
80     176    
16     144    
112    64     
-128   -48    
272    80     
32     224    
208    -48    
-160   48     
-32    -256   
192    192    
-16    48     
80     32     
-64    80     
80     192    
96     48     
-96    80     
-80    -32    
208    16     
-224   64     
112    128    
112    64     
-16    -64    
-32    144    
64     -896   
64     112    
-48    -2064  
80     128    
64     48     
16     176    
0      -192   
96     64     
-32    64     
112    176    
80     -112   
128    96     
-48    112    
-16    -80    
128    272    
-96    -112   
160    48     
16     48     
0      128    
0      -384   
96     16     
48     240    
64     32     
208    80     
32     272    
-64    96     
32     -160   
0      128    
224    16     
-176   176    
160    -64    
96     288    
80     -496   
80     -80    
144    -736   
16     64     
48     160    
0      96     
-64    176    
16     -48    
0      -32    
-48    -112   
176    80     
-128   -272   
176    192    
32     0      
112    -64    
128    -144   
-32    -64    
128    -176   
32     96     
192    80     
128    96     
-64    48     
48     64     
80     192    
48     -528   
-16    128    
144    208    
16     176    
64     -304   
32     -112   
-112   -224   
192    272    
32     0      
320    176    
-304   80     
96     176    
80     128    
-64    208    
288    256    
-112   80     
288    160    
-176   -80    
64     16     
-16    -224   
112    64     
112    64     
-144   80     
112    -720   
32     -80    
-160   -16    
80     464    
128    -64    
-384   -48    
-64    128    
16     -112   
112    -560   
16     -80    
208    192    
-96    -80    
240    352    
-144   -368   
48     32     
16     -304   
144    -560   
16     48     
112    112    
-16    80     
-912   160    
-96    -640   
176    160    
16     -304   
352    -144   
-160   -880   
32     -80    
0      208    
48     -32    
0      -112   
160    16     
272    768    
-240   384    
112    80     
128    -320   
-144   -224   
160    -160   
-16    -16    
16     -128   
256    -192   
80     -80    
64     -64    
-272   -1088  
0      -144   
224    -144   
384    96     
112    96     
-144   224    
-144   -224   
64     -16    
-160   -16    
128    -16    
-656   -16    
80     48     
144    -80    
16     -544   
-80    0      
160    -560   
-16    64     
48     -80    
0      368    
-128   -128   
64     32     
-208   -80    
-1056  -2016  
1696   3344   
-688   1408   
0      -432   
-480   -1152  
-304   -224   
816    480    
-896   -304   
432    -192   
32     -448   
320    -432   
-192   -144   
48     368    
0      -240   
192    320    
-96    -80    
-32    176    
-144   -320   
432    -144   
160    0      
-352   -224   
288    544    
-144   240    
144    -352   
16     -112   
-96    -816   
0      -608   
48     0      
432    544    
64     -64    
-64    32     
-288   -176   
96     -64    
-160   -64    
32     96     
-112   32     
-96    -48    
-336   -336   
-16    -240   
352    464    
144    -32    
0      96     
64     48     
-16    -112   
48     48     
64     0      
32     -64    
144    -272   
0      -96    
144    32     
176    16     
-80    -192   
-240   -176   
240    112    
64     224    
128    -192   
-16    32     
-368   -272   
-256   -944   
80     320    
304    -112   
-176   -16    
0      0      
224    112    
-176   -240   
-304   -64    
32     -80    
144    -32    
0      -240   
-48    -32    
112    -336   
-96    144    
0      256    
-112   112    
0      -32    
48     16     
96     176    
-128   288    
-272   16     
288    -320   
-352   80     
208    128    
0      416    
-32    -64    
96     -64    
-864   -352   
-1584  -64    
144    176    
-240   32     
-64    176    
-704   -80    
-144   16     
144    176    
48     16     
-80    -48    
-96    64     
-816   -256   
-64    -208   
-336   -480   
128    0      
32     128    
48     176    
-64    64     
-256   0      
-112   144    
-384   -80    
96     272    
-144   96     
0      224    
-160   -160   
-288   -224   
64     -160   
64     240    
-192   -96    
112    96     
48     208    
-224   64     
64     -160   
-256   64     
-16    -208   
-64    128    
-144   112    
-16    224    
-32    48     
-176   -400   
-80    -144   
-192   -288   
160    -80    
32     16     
-192   -96    
192    64     
-176   -176   
-96    -16    
-144   -80    
80     144    
64     240    
16     112    
-176   -32    
-176   48     
-64    -112   
144    64     
-48    -48    
64     96     
224    -96    
-192   -160   
48     -96    
-128   -32    
80     96     
-112   80     
112    -48    
-224   -48    
-208   32     
-32    -32    
16     112    
-224   -80    
-176   192    
64     -96    
128    464    
-256   -64    
224    0      
-48    32     
144    224    
-96    48     
-32    32     
-80    -32    
32     64     
128    176    
-80    48     
128    176    
-224   -144   
64     160    
-176   -320   
96     64     
272    256    
-272   224    
-80    176    
-64    0      
64     -112   
96     48     
-192   192    
-64    -16    
80     208    
0      -64    
96     160    
-336   -128   
240    -64    
-128   80     
32     128    
16     112    
-80    80     
16     -64    
0      64     
-80    96     
-32    144    
32     16     
48     -80    
32     160    
-176   16     
1216   -1344  
-64    -560   
1296   224    
32     -240   
-688   -432   
560    304    
-640   -48    
880    544    
-896   192    
480    -80    
-336   416    
112    -368   
-160   560    
0      -512   
-176   288    
112    -256   
144    480    
-16    -32    
-288   -16    
-64    -80    
64     224    
-16    48     
80     208    
-32    128    
96     112    
-240   -96    
160    -64    
-160   208    
384    192    
-288   -176   
0      64     
-48    112    
144    112    
-32    96     
-112   -80    
16     96     
240    304    
0      240    
-80    -80    
-144   80     
112    -16    
0      160    
32     16     
-128   64     
64     -16    
48     208    
-48    -32    
-32    -32    
-32    176    
48     96     
144    16     
48     112    
-48    128    
96     48     
0      64     
80     16     
16     224    
32     80     
128    160    
-80    -48    
-16    112    
-16    -16    
80     96     
-16    48     
128    128    
-144   128    
144    192    
-32    80     
0      -16    
112    32     
-48    80     
96     208    
-208   -96    
112    64     
-80    -64    
16     48     
112    144    
-256   176    
-16    16     
96     32     
-16    64     
-64    80     
48     0      
112    -32    
-160   96     
-48    48     
-224   -256   
112    -64    
48     432    
-64    -64    
128    144    
-128   112    
160    -48    
0      160    
96     272    
128    208    
-48    48     
96     112    
-48    0      
160    160    
-192   112    
80     96     
272    208    
32     48     
112    -48    
-96    -48    
0      128    
112    -1472  
-48    64     
32     48     
80     96     
0      144    
48     16     
-16    64     
64     144    
-48    -64    
16     192    
64     0      
-32    256    
128    352    
32     -352   
-64    16     
96     -496   
64     0      
96     208    
48     112    
48     80     
80     48     
32     592    
16     -144   
-16    48     
80     32     
-64    -208   
128    80     
-128   -32    
160    -656   
-112   128    
320    0      
80     48     
-112   64     
128    80     
-64    0      
64     128    
0      80     
208    96     
-144   -48    
96     48     
-48    128    
112    336    
16     48     
96     112    
32     32     
-112   -176   
80     96     
128    -928   
-32    32     
128    128    
-112   32     
32     -384   
240    112    
16     16     
176    256    
-112   16     
224    176    
16     48     
112    -144   
48     0      
-16    -208   
-96    16     
224    -288   
-112   160    
64     -1248  
48     160    
-112   -112   
112    80     
32     64     
-48    208    
-80    96     
0      -304   
352    48     
-48    -208   
16     48     
-16    64     
176    112    
-48    -464   
192    256    
-112   -480   
176    16     
-32    288    
-112   -112   
240    64     
48     208    
-16    -32    
-128   0      
112    128    
128    176    
32     144    
16     -96    
2416   -1872  
-544   -992   
656    1120   
-384   224    
400    -112   
-192   112    
-208   160    
624    592    
-656   48     
864    -336   
-352   288    
176    -368   
16     96     
-48    -208   
240    128    
-144   -288   
256    448    
-400   -224   
464    96     
-80    -224   
112    160    
16     16     
80     240    
-160   160    
128    -80    
16     -128   
192    80     
272    -16    
112    32     
-80    -352   
160    64     
64     0      
32     128    
0      -48    
144    32     
-48    -80    
16     -816   
256    992    
-160   144    
-192   -784   
-32    -64    
192    -1744  
32     -32    
96     128    
48     64     
96     16     
32     112    
-16    144    
-80    -64    
-16    -640   
48     -32    
48     64     
128    -208   
-400   16     
48     -704   
80     48     
96     -272   
224    -64    
32     -384   
128    80     
112    160    
16     -64    
0      240    
0      96     
256    -176   
64     160    
-16    -96    
128    48     
-592   -112   
224    -224   
-160   -32    
16     64     
32     0      
48     -240   
128    -352   
16     -576   
-32    -32    
64     -128   
16     48     
96     272    
-16    32     
288    -208   
-96    -48    
144    192    
256    208    
-208   80     
-32    -128   
192    -48    
96     48     
48     16     
112    -192   
-48    -48    
80     -224   
192    208    
192    16     
-144   144    
48     -48    
-176   160    
-320   -160   
160    -352   
-752   16     
176    -16    
80     -32    
32     -96    
-176   96     
-32    -336   
192    176    
0      -224   
192    240    
-112   -64    
96     32     
-176   32     
112    112    
-176   32     
192    16     
-320   -16    
96     16     
-1104  -224   
16     -64    
112    224    
224    -144   
32     256    
-16    -304   
96     0      
160    -16    
-256   144    
352    80     
-80    -240   
-96    -16    
0      -64    
-176   48     
208    -16    
-80    128    
336    -64    
-688   -320   
-64    -432   
-176   160    
352    16     
192    96     
-336   64     
112    -208   
-32    -144   
-64    -144   
-256   32     
176    -64    
-144   32     
-80    -16    
80     144    
96     -112   
-448   -112   
176    -272   
0      80     
144    -224   
112    128    
-224   -160   
-48    112    
-240   -48    
272    -96    
-80    64     
-16    128    
-128   -16    
-48    96     
-128   272    
0      160    
32     16     
0      -192   
112    144    
64     -192   
32     -48    
-128   288    
-160   -144   
80     -32    
128    -16    
208    128    
-32    -192   
-48    208    
32     -416   
-32    272    
-80    -32    
32     -16    
-176   -80    
32     64     
-160   -144   
-336   16     
-176   96     
-144   32     
-32    -80    
-512   -96    
-128   112    
-64    48     
-16    0      
-48    -80    
0      112    
-400   -240   
160    -16    
-240   -48    
0      128    
-112   80     
1120   -64    
192    464    
96     736    
-560   80     
320    -544   
208    -432   
-736   -560   
576    240    
128    320    
-32    -272   
-304   -64    
32     -336   
-16    256    
80     -384   
208    384    
-176   -176   
-224   240    
256    176    
-112   128    
-192   -288   
-192   176    
-336   96     
48     96     
-512   -112   
128    32     
-128   112    
64     96     
16     48     
-48    -48    
32     16     
-96    -32    
-112   112    
0      32     
-32    96     
-96    -32    
0      -32    
-400   -16    
-16    -16    
-1152  -208   
-80    0      
64     48     
96     192    
-64    -192   
-80    -16    
-128   32     
-32    32     
160    112    
-64    0      
128    0      
-160   128    
64     80     
-240   16     
16     64     
-208   144    
48     128    
0      -32    
-16    160    
32     48     
-16    -128   
-16    16     
-96    128    
32     176    
-176   32     
0      48     
-48    32     
48     176    
-48    144    
-128   16     
96     16     
-32    16     
80     32     
112    112    
-16    48     
-48    16     
-16    16     
176    224    
-320   0      
224    80     
-208   48     
-16    -240   
0      96     
-176   48     
112    432    
-368   -192   
0      48     
-128   240    
16     160    
-64    -128   
224    176    
-64    32     
80     192    
32     32     
-48    0      
0      128    
160    112    
-80    128    
-16    -128   
-128   -32    
-48    80     
80     48     
-48    144    
-80    48     
-16    0      
48     64     
-32    64     
0      -176   
-16    -160   
32     80     
80     192    
48     128    
-80    32     
-256   -96    
208    288    
-64    16     
128    112    
-128   -64    
-96    -320   
-32    -192   
-48    -32    
192    272    
0      224    
-64    -16    
-112   -80    
16     64     
128    48     
80     -160   
-352   16     
64     -128   
48     -32    
-16    -32    
128    48     
-16    48     
32     80     
-16    208    
-32    -96    
192    144    
-96    64     
64     144    
-144   64     
48     64     
32     16     
0      80     
80     240    
-96    -160   
96     96     
-48    448    
-16    352    
112    224    
16     -32    
288    -16    
-64    112    
0      48     
64     16     
192    256    
-176   320    
-144   -96    
96     64     
320    352    
-336   112    
-16    -112   
64     80     
304    64     
-32    96     
-128   -32    
96     224    
-208   96     
192    -96    
304    128    
-16    80     
-48    -64    
-80    128    
-224   96     
160    80     
-16    160    
-32    16     
192    112    
64     112    
-64    96     
48     48     
-32    96     
160    160    
-32    112    
-16    112    
0      32     
-80    272    
-64    0      
48     96     
-32    144    
176    64     
0      32     
-112   304    
-80    48     
16     80     
-352   32     
224    -128   
-112   112    
48     192    
1072   896    
-944   -112   
736    784    
48     1104   
720    64     
-688   -544   
-240   -352   
512    304    
-320   272    
128    288    
-208   112    
224    144    
-144   32     
64     -288   
-64    144    
-240   -176   
192    176    
128    -256   
80     384    
-112   16     
-224   -400   
144    176    
-112   -848   
288    160    
-96    176    
64     -32    
32     240    
0      -16    
208    32     
-224   -112   
320    -80    
-16    192    
32     80     
-64    176    
96     112    
112    -16    
32     112    
0      -96    
32     0      
-48    112    
224    80     
-48    112    
96     144    
16     -400   
64     160    
160    -16    
48     128    
-112   80     
-48    64     
192    112    
-32    -80    
64     96     
64     -368   
-64    224    
80     -1152  
48     -96    
192    144    
-144   80     
192    -112   
32     128    
-112   32     
160    96     
-16    -16    
96     -48    
16     272    
-48    -208   
128    -80    
144    -176   
-128   176    
160    -480   
16     16     
64     -144   
0      128    
-16    112    
96     128    
32     384    
-112   160    
96     176    
48     -32    
64     48     
96     48     
-112   80     
224    -240   
-80    -128   
224    -288   
-112   -160   
144    -320   
-144   128    
256    336    
-224   176    
176    -32    
48     32     
48     48     
48     -432   
224    640    
-128   -512   
448    32     
-112   -208   
80     112    
-48    -192   
96     112    
48     -256   
-16    -48    
176    160    
48     144    
-32    16     
80     -112   
32     128    
80     -96    
192    64     
-48    -64    
-16    48     
176    -240   
48     160    
-16    -224   
160    112    
-160   -272   
240    240    
-80    128    
80     -16    
-176   -208   
-192   -240   
192    -32    
64     -192   
-208   -160   
240    -176   
176    80     
-16    -48    
-16    304    
192    144    
80     32     
-96    -48    
320    -960   
272    400    
96     -256   
-272   48     
-1088  80     
-16    -32    
288    -336   
-80    -1184  
16     -112   
192    -288   
80     -96    
16     176    
64     96     
0      -336   
-192   -400   
-128   -176   
144    144    
192    -304   
-32    -16    
-208   -48    
32     -80    
192    16     
-16    -336   
112    -80    
16     80     
176    -128   
-48    -176   
240    -160   
-48    -320   
-48    128    
16     -96    
-112   128    
160    -160   
128    -48    
-48    16     
176    144    
-304   144    
64     -288   
128    32     
96     -400   
-48    16     
112    -1152  
32     -48    
128    -48    
32     80     
80     112    
0      160    
-112   -160   
64     -192   
-128   -64    
-32    -208   
-288   32     
160    -80    
-96    -256   
48     -464   
224    -16    
-160   -320   
-32    32     
64     -16    
80     64     
96     -272   
32     -128   
-48    -96    
176    272    
-144   80     
-64    80     
-1280  1392   
480    -704   
-432   -160   
0      -528   
-560   176    
304    -640   
-352   336    
240    -992   
-128   192    
176    -400   
224    176    
-192   208    
304    112    
-272   176    
352    -336   
-304   48     
16     -32    
-480   128    
-48    -224   
48     -48    
32     -368   
64     240    
16     -448   
32     -32    
-160   -16    
144    -16    
32     192    
304    320    
-256   -144   
16     -160   
-336   -64    
256    32     
-112   160    
-32    -96    
-48    -64    
64     -304   
112    128    
32     -288   
-16    128    
0      0      
96     96     
128    -112   
-32    112    
-240   -64    
192    -64    
-160   16     
48     48     
-80    96     
144    -288   
32     160    
48     -224   
32     192    
-16    0      
48     144    
-176   -80    
96     -112   
48     64     
80     0      
48     0      
-80    -208   
-80    16     
96     -208   
-128   32     
176    -48    
-224   80     
32     -128   
96     64     
-848   -96    
-1472  240    
-208   64     
-48    -208   
96     -32    
-32    128    
-160   48     
224    -64    
-384   -256   
224    -304   
-80    80     
-112   -64    
32     -64    
-112   -256   
-16    144    
-48    -240   
-368   -48    
16     -96    
-16    128    
-240   -160   
-688   208    
-128   0      
16     80     
-64    80     
16     64     
-64    64     
-208   -80    
16     96     
-112   -112   
80     160    
-80    -32    
-80    -64    
128    192    
-336   64     
-64    80     
-528   -112   
-64    -96    
-1296  -16    
-48    112    
80     -16    
0      208    
-128   -272   
128    160    
-128   -176   
112    80     
-64    -32    
48     80     
-80    0      
16     16     
-144   -128   
-80    -80    
-64    -16    
-48    80     
-48    160    
-416   -272   
-96    112    
-144   -240   
160    352    
-160   -368   
240    128    
-304   192    
400    256    
-368   -32    
48     32     
-16    80     
96     64     
16     80     
-208   -112   
96     -48    
-1056  0      
48     128    
48     -96    
16     208    
64     64     
-64    64     
-224   -80    
0      144    
-16    48     
48     48     
16     672    
-272   -176   
288    -192   
-208   192    
112    80     
-752   -144   
-96    112    
80     -96    
144    160    
-128   32     
128    48     
240    208    
-400   160    
160    -176   
-128   80     
80     128    
-320   -80    
-160   -16    
0      -80    
128    160    
-64    -144   
64     176    
-1792  -192   
272    -1456  
-80    80     
320    112    
-384   32     
208    80     
-128   208    
304    -144   
-48    0      
160    64     
-64    160    
0      -16    
160    48     
-64    -16    
80     160    
-1040  -160   
-128   16     
0      160    
-16    0      
-48    32     
-80    -32    
176    32     
0      -80    
224    240    
-48    128    
400    16     
-384   -64    
192    -64    
-336   32     
96     160    
320    1328   
-1472  -400   
-304   -736   
-288   -176   
-400   -192   
288    -1296  
-224   416    
368    688    
-96    224    
-560   -384   
320    -64    
-208   144    
96     160    
-192   32     
48     80     
160    144    
-224   96     
208    176    
-48    48     
-16    -32    
80     176    
-80    64     
176    -112   
-16    64     
96     -112   
-128   32     
64     80     
-80    320    
48     -160   
80     144    
-48    32     
112    0      
-48    80     
-80    32     
48     32     
0      -256   
256    256    
-112   96     
112    32     
-208   48     
128    336    
-64    32     
48     -48    
-128   -16    
-64    64     
80     48     
-32    96     
0      -160   
64     240    
-80    112    
208    32     
-224   64     
160    32     
-112   192    
-16    48     
160    160    
-208   -128   
144    112    
16     80     
16     144    
48     128    
80     160    
-80    48     
192    112    
-208   128    
160    320    
64     96     
240    64     
64     48     
32     112    
-144   32     
80     -16    
144    80     
64     160    
-16    112    
224    336    
-192   112    
144    0      
80     80     
-64    -16    
112    128    
-112   144    
32     -80    
224    -112   
-208   112    
-32    64     
-48    0      
128    -272   
-80    -32    
192    144    
-96    160    
96     -144   
192    128    
-208   112    
112    96     
80     272    
80     -32    
-80    0      
32     144    
48     160    
32     80     
-96    -16    
-32    -560   
-32    32     
16     -1136  
128    128    
-112   64     
64     176    
208    224    
-16    128    
208    208    
-80    80     
-16    80     
32     160    
256    240    
256    304    
-352   64     
-144   -96    
240    144    
32     -384   
-272   -32    
-64    -32    
224    16     
-48    32     
160    224    
48     336    
112    240    
112    0      
-112   0      
-96    96     
176    96     
304    224    
64     32     
64     128    
-160   -368   
240    80     
-32    -1568  
-96    -160   
144    112    
-128   32     
48     -160   
32     176    
400    -128   
-272   32     
0      -96    
48     -240   
-32    32     
64     -144   
-32    80     
48     -304   
0      96     
64     -896   
16     96     
32     176    
96     272    
-96    96     
144    144    
80     32     
160    -16    
16     144    
-16    128    
208    208    
-64    -64    
-80    16     
112    64     
-224   32     
0      -800   
48     80     
16     -448   
48     -16    
-64    96     
192    224    
-160   32     
-16    -96    
272    256    
-96    16     
48     240    
0      -80    
-16    0      
32     -48    
160    -160   
144    -112   
96     176    
-48    -592   
48     176    
160    304    
272    112    
96     80     
-80    32     
16     112    
128    -192   
-80    80     
-80    -112   
96     128    
112    48     
-48    160    
64     16     
-1040  -2384  
480    -688   
-576   -592   
608    -416   
688    -1072  
-192   -160   
32     656    
176    80     
-48    112    
256    -144   
-32    48     
-176   336    
512    384    
-304   224    
240    -240   
-336   16     
352    96     
80     160    
-176   -272   
144    -1136  
-128   -64    
-32    64     
80     -1472  
192    80     
0      208    
176    -336   
-112   -64    
288    -144   
-64    352    
384    -128   
-128   -32    
32     -208   
256    -320   
-128   48     
176    -32    
0      -48    
-384   -32    
80     64     
-16    -32    
112    -352   
208    -432   
-80    -784   
288    -272   
240    160    
0      -176   
48     -352   
-32    224    
240    48     
-144   80     
80     -240   
0      -80    
-32    192    
16     -80    
48     96     
0      -400   
128    -48    
-96    -64    
192    -16    
160    64     
-48    32     
240    -160   
160    0      
-32    176    
128    -32    
16     0      
80     -112   
-352   -80    
-16    -304   
-96    -240   
112    64     
-32    -32    
192    -96    
64     80     
-16    -1072  
-32    -16    
32     48     
-128   -32    
112    -288   
-160   32     
0      -96    
16     304    
-80    -16    
96     16     
-224   -256   
96     32     
-64    160    
48     -160   
-160   -160   
272    -304   
208    192    
80     -336   
32     80     
80     -16    
80     -64    
-96    -48    
48     -32    
-48    -96    
192    128    
-96    80     
112    64     
-496   -112   
48     -352   
176    -48    
96     -288   
32     128    
0      208    
48     112    
16     -112   
144    -80    
-272   -128   
320    64     
-208   32     
208    -112   
-448   -80    
96     -160   
-160   112    
80     80     
-448   128    
48     -352   
16     32     
176    -512   
16     -96    
-352   -160   
144    32     
160    96     
112    -144   
-672   -128   
16     32     
0      144    
-128   80     
64     -48    
0      160    
-48    -80    
176    -240   
-96    -208   
272    -144   
-64    256    
-48    208    
192    -48    
-304   -16    
208    48     
-176   -16    
112    32     
16     96     
-208   48     
144    0      
16     432    
112    -112   
112    -576   
64     176    
288    -368   
-80    128    
-80    -272   
304    112    
-128   -144   
624    496    
-624   240    
64     224    
-80    -80    
-208   -96    
-176   -80    
-224   -368   
64     64     
-32    -240   
240    256    
-704   -560   
176    128    
-176   32     
-320   464    
-160   48     
176    128    
-32    -16    
0      -16    
0      320    
-112   -32    
-64    -272   
-800   -80    
384    288    
-96    -160   
-160   160    
32     -48    
-128   -160   
144    96     
-64    160    
-48    16     
-192   224    
-48    -48    
32     -80    
-80    304    
96     -64    
-48    224    
-256   -128   
192    128    
16     -288   
-176   112    
80     144    
-96    32     
-64    128    
384    512    
320    1376   
-1264  -368   
-336   -1088  
-1664  384    
944    48     
-320   -256   
-272   112    
-144   -640   
-96    96     
144    -480   
-32    144    
176    96     
-32    240    
112    48     
-256   48     
-64    0      
-64    32     
64     -16    
48     48     
96     32     
-816   144    
-96    64     
-96    -240   
-80    -32    
176    0      
64     96     
32     96     
-160   48     
-96    -48    
-192   -64    
64     128    
48     64     
-32    80     
-256   -32    
-16    -112   
-800   80     
-32    -96    
144    -112   
-208   160    
240    144    
-96    16     
-64    -16    
32     144    
-48    128    
0      -16    
-112   -32    
-16    272    
-112   -48    
-48    -48    
-160   -48    
-208   -48    
-16    384    
-80    -112   
128    -48    
-64    96     
64     96     
-48    128    
32     112    
0      -16    
32     208    
-32    32     
-48    32     
32     192    
-176   -96    
144    144    
-160   -32    
80     64     
-864   -16    
-112   -16    
112    48     
-16    112    
-16    160    
112    288    
-192   208    
-16    144    
192    -208   
112    -80    
-80    192    
-80    256    
-96    -96    
32     -32    
-16    368    
-1072  -176   
80     -160   
-48    -48    
80     240    
-160   48     
-32    32     
-32    48     
-160   -64    
80     128    
-64    48     
-80    -80    
64     -32    
-80    112    
-320   -256   
160    96     
-80    -16    
96     0      
-16    192    
-64    176    
48     0      
-64    -32    
0      160    
-16    80     
128    80     
-64    80     
32     112    
-80    -16    
192    240    
-208   112    
224    240    
-160   64     
240    176    
-128   272    
240    256    
-112   112    
0      32     
96     256    
208    144    
0      176    
-256   64     
-48    64     
160    64     
-48    256    
-128   144    
208    144    
0      16     
48     16     
-208   112    
304    144    
-32    304    
400    192    
48     208    
-80    32     
-32    560    
-176   80     
320    96     
16     48     
-112   96     
-192   16     
48     -64    
224    128    
16     128    
48     112    
192    336    
-192   16     
64     16     
-96    -32    
-32    -32    
128    192    
-112   32     
96     48     
-96    -16    
128    112    
-32    16     
16     -288   
32     176    
128    320    
16     -96    
32     96     
80     192    
-80    -48    
64     -80    
16     64     
-16    192    
32     16     
-96    32     
0      32     
48     80     
16     80     
-16    80     
64     144    
-16    48     
64     64     
-16    -32    
64     112    
-48    224    
96     80     
-16    512    
-240   -256   
-208   -80    
320    128    
-176   -96    
-16    -640   
80     352    
0      112    
144    112    
-80    -32    
16     64     
112    32     
0      80     
144    16     
16     -64    
64     128    
96     192    
-144   16     
160    -1968  
384    32     
816    768    
-432   64     
16     -1136  
512    656    
-16    -48    
208    128    
96     64     
-176   32     
384    -48    
112    160    
-128   -144   
-64    -112   
128    64     
96     160    
-80    48     
128    -224   
-112   -16    
176    -720   
-80    112    
160    272    
32     -16    
80     -16    
-48    144    
64     416    
448    192    
-192   128    
240    16     
-96    -32    
-80    64     
96     144    
80     -160   
32     32     
112    80     
64     -80    
128    -1328  
-224   -64    
128    -48    
16     64     
0      -32    
112    208    
-64    144    
160    64     
-192   96     
80     64     
80     0      
16     -48    
-32    128    
48     -176   
-64    304    
32     -224   
0      208    
0      0      
48     48     
16     0      
480    624    
-448   -48    
-304   -640   
288    512    
64     48     
-16    128    
-48    80     
160    16     
16     -128   
-48    112    
-48    -608   
64     128    
32     -480   
48     192    
-80    -64    
64     80     
0      96     
-16    96     
96     0      
96     -368   
-112   -224   
448    -592   
-224   208    
160    -384   
208    -64    
-32    -176   
96     96     
160    -64    
64     64     
32     48     
-144   256    
240    -336   
96     176    
112    0      
112    -480   
0      208    
16     -208   
32     96     
64     -48    
80     64     
144    -16    
-32    128    
16     -160   
32     64     
96     64     
144    240    
0      128    
-16    -48    
32     240    
0      -224   
112    32     
64     -32    
64     0      
32     -80    
64     0      
-16    -464   
48     96     
32     0      
48     -992   
32     160    
272    336    
-144   0      
-80    -256   
-16    -576   
160    -32    
224    -1152  
-64    -112   
128    288    
64     64     
80     -336   
-144   -112   
128    -784   
320    544    
80     0      
-80    16     
-128   -32    
224    -688   
-368   32     
240    -384   
-464   -96    
224    -384   
0      32     
32     -1024  
16     32     
96     96     
144    -16    
-48    -144   
0      48     
224    -96    
16     240    
32     192    
96     0      
-192   -48    
96     -160   
16     -128   
0      -576   
80     -192   
96     -384   
-80    128    
160    -800   
64     128    
160    576    
-336   -592   
0      -304   
80     112    
-32    112    
128    80     
-304   -176   
160    112    
-1584  96     
128    144    
-320   -352   
208    -64    
208    208    
-64    -1088  
144    160    
-160   -304   
0      -80    
64     -80    
256    -48    
-64    64     
192    144    
-64    64     
64     -160   
-336   -32    
64     160    
160    -144   
208    -416   
192    -16    
16     -688   
-80    64     
176    -240   
64     96     
96     32     
80     32     
-320   -64    
64     -144   
-64    48     
80     -192   
112    80     
80     -160   
-2368  -144   
944    1328   
-1008  -816   
336    -544   
-416   -400   
1152   -1152  
-560   -144   
464    112    
-192   800    
-48    -464   
-272   -96    
240    -16    
176    -16    
-192   224    
-16    -192   
-784   176    
96     -288   
-16    240    
160    -176   
48     128    
64     -400   
48     96     
16     128    
144    -32    
-192   112    
112    0      
-160   32     
48     64     
-80    64     
96     -96    
-64    48     
112    -64    
-16    16     
16     -352   
128    192    
128    -992   
0      64     
-80    208    
112    32     
-64    -48    
-160   -176   
-112   64     
144    -96    
-64    16     
-80    -64    
-48    -96    
112    -96    
32     144    
64     -208   
-128   0      
32     -416   
112    128    
-64    96     
48     32     
-128   -80    
-16    -144   
-64    0      
0      160    
48     -32    
144    16     
-160   32     
112    -96    
80     96     
-848   0      
80     80     
112    0      
-304   -112   
-112   192    
-1040  144    
-128   32     
128    -80    
-64    112    
64     160    
-144   -64    
-288   -256   
-112   -64    
-320   -256   
96     -176   
-64    -128   
48     112    
-128   240    
-80    -176   
48     112    
-224   -144   
288    80     
-400   336    
-192   -32    
-1216  176    
-416   -144   
400    144    
-224   48     
-32    16     
96     48     
-256   -144   
0      48     
-192   -96    
-96    -80    
0      -16    
-48    160    
64     112    
-144   0      
48     48     
-224   144    
-80    -16    
-48    -16    
48     32     
0      32     
352    496    
-256   80     
-128   16     
0      16     
16     16     
80     96     
-176   -112   
0      96     
-112   -144   
32     16     
-256   -96    
144    32     
-336   192    
320    96     
-288   -160   
320    192    
-288   -208   
256    32     
16     112    
-128   -64    
-288   -80    
64     -144   
96     -80    
-160   64     
32     96     
-64    112    
-80    -128   
-1392  -208   
-16    -32    
-128   -128   
-80    -64    
160    160    
192    112    
-80    96     
-192   64     
32     96     
80     112    
-32    32     
32     144    
112    256    
-64    16     
96     368    
-336   -192   
128    240    
48     -256   
-112   288    
144    32     
-80    0      
48     80     
16     144    
-144   -48    
208    320    
-64    112    
-16    48     
-32    0      
-272   -48    
32     64     
0      16     
368    800    
-1360  -560   
-240   -448   
32     192    
224    96     
-96    80     
-64    112    
80     0      
-16    16     
32     32     
-48    -16    
32     -48    
-144   0      
96     16     
-96    0      
80     192    
112    96     
-16    48     
-16    80     
-96    -48    
160    224    
112    -16    
208    -64    
112    32     
16     144    
-80    64     
80     112    
-64    128    
-32    112    
-128   64     
-256   32     
160    48     
-80    0      
-512   2944   
-1936  -1472  
768    448    
496    304    
640    704    
-992   -416   
416    1056   
-384   448    
208    -592   
-96    256    
240    16     
16     112    
-304   112    
80     -16    
-112   -96    
-16    112    
112    336    
-224   -64    
-48    16     
80     16     
96     80     
80     64     
-400   272    
64     16     
-64    32     
-48    -64    
128    224    
-208   64     
160    -176   
160    128    
176    80     
112    -32    
-16    304    
64     80     
-96    16     
-16    -304   
-144   -480   
-112   -96    
432    384    
-16    224    
48     352    
16     -64    
-128   0      
112    128    
16     -32    
64     128    
-80    0      
208    704    
96     352    
-64    -112   
-128   208    
0      -160   
32     -48    
112    256    
-48    80     
-32    144    
-64    -48    
64     -784   
-400   -240   
512    336    
-192   -112   
144    352    
64     -192   
16     384    
48     0      
0      144    
80     48     
-32    112    
48     80     
-112   -16    
64     -928   
0      80     
192    240    
-64    128    
-176   -64    
240    320    
-128   -48    
336    16     
-160   64     
-16    192    
16     176    
64     144    
-16    304    
0      176    
-64    96     
144    -128   
-208   -272   
144    -192   
224    272    
-16    96     
48     192    
-64    -64    
128    192    
16     32     
-48    -112   
0      -64    
-32    -16    
-32    -16    
-16    -144   
-64    -64    
160    80     
-48    256    
-32    -320   
0      32     
64     16     
176    144    
48     80     
-64    128    
112    -32    
32     -32    
-48    -304   
176    144    
48     96     
48     192    
-32    144    
48     -544   
224    528    
-112   -1888  
-32    -96    
208    464    
-416   352    
416    336    
-80    208    
-176   -208   
240    576    
0      96     
128    192    
-112   144    
240    768    
-112   -112   
32     -112   
-64    272    
208    -112   
-16    128    
-144   -480   
272    80     
-192   0      
128    -80    
-80    -80    
176    128    
0      80     
48     80     
-48    80     
-96    -176   
176    240    
-32    -48    
352    640    
-112   16     
128    224    
-96    -1088  
-48    -80    
64     -1824  
80     -16    
16     80     
80     144    
-16    80     
80     112    
128    496    
-128   -64    
48     -32    
16     -112   
32     -32    
32     128    
0      -48    
96     -176   
128    80     
-16    -384   
80     240    
112    -64    
128    224    
16     48     
48     320    
-96    144    
336    -496   
0      0      
112    -176   
80     320    
-160   -320   
176    32     
272    -112   
112    208    
-144   -144   
32     -80    
32     160    
-64    352    
-144   -16    
80     -240   
176    16     
96     0      
16     176    
32     -160   
48     176    
32     -144   
96     -48    
176    -144   
-80    384    
-16    -288   
0      256    
528    224    
-480   -496   
160    672    
-384   208    
1424   -1088  
-448   -720   
0      -432   
288    560    
176    -224   
32     -240   
80     256    
160    -448   
-112   384    
80     -304   
144    -256   
48     -16    
-80    -176   
192    -400   
-288   -32    
224    -1440  
0      128    
64     -400   
-64    48     
208    32     
-96    -176   
0      -64    
-112   224    
240    112    
-16    16     
-96    -80    
48     96     
32     -128   
64     -64    
-528   -64    
128    -464   
128    -16    
80     64     
160    -192   
-128   -2384  
16     -208   
224    112    
-80    32     
144    -128   
-208   64     
16     -288   
64     192    
-16    -16    
112    48     
-288   -80    
96     -32    
144    16     
-128   80     
256    -144   
-128   -208   
96     -96    
144    -272   
-80    -32    
240    -128   
-96    48     
112    -304   
32     224    
-48    144    
112    -80    
-208   144    
0      -96    
-656   -64    
16     -224   
176    240    
-64    -80    
160    96     
80     -1232  
-32    16     
-64    48     
48     -160   
48     64     
-64    -144   
112    -256   
-144   -256   
-416   0      
48     -240   
-128   16     
-64    -48    
96     80     
-64    128    
-192   80     
80     -640   
112    -128   
128    16     
-224   128    
80     32     
32     64     
-32    80     
224    144    
112    192    
-80    -112   
128    192    
80     96     
-784   -32    
-80    -272   
64     -96    
128    -368   
16     -32    
48     -768   
-96    144    
64     128    
64     -224   
144    160    
-208   -256   
160    -32    
-32    -144   
-16    48     
32     -144   
-176   32     
112    0      
240    48     
-112   -112   
128    160    
0      -608   
0      48     
-528   192    
272    256    
80     -288   
-272   32     
208    48     
80     -64    
-272   -144   
-64    -208   
-224   16     
288    -128   
-160   112    
96     -144   
-48    16     
32     -592   
112    -32    
80     32     
160    192    
-48    192    
-160   -512   
-32    32     
16     -16    
-32    112    
176    128    
-96    -128   
144    112    
-128   192    
48     -16    
-112   32     
64     16     
-16    48     
128    -16    
192    240    
-128   -80    
128    240    
-144   -32    
272    -304   
-272   -176   
416    320    
-32    448    
-64    -384   
64     -32    
-352   -256   
208    224    
-144   128    
-96    -32    
-352   -128   
-384   -16    
-224   -208   
368    -32    
-320   64     
48     48     
-96    80     
224    -256   
64     96     
-192   -176   
192    32     
-208   -16    
240    144    
-128   96     
-144   -112   
-32    16     
-96    96     
-16    96     
16     0      
-48    176    
-48    -192   
128    0      
-160   16     
112    48     
-32    -64    
80     128    
16     0      
-48    -128   
-16    176    
-496   128    
368    -208   
-272   0      
176    144    
-1664  -1792  
1552   2080   
-1712  -272   
1120   -352   
-784   -240   
512    -256   
-400   720    
144    -768   
112    144    
-112   -352   
-128   464    
-176   -48    
288    224    
-80    -80    
-32    -64    
-432   96     
352    112    
-224   832    
624    -240   
-96    304    
-64    -144   
32     192    
-320   192    
-48    -32    
-48    -336   
256    64     
96     128    
640    640    
-624   -256   
176    -32    
0      128    
-176   -176   
-128   256    
112    192    
-528   -96    
-16    48     
-80    -112   
-96    512    
112    32     
-192   16     
0      160    
0      16     
-80    48     
-192   80     
96     144    
16     160    
-256   224    
-32    -64    
80     320    
-384   176    
160    288    
-32    96     
-64    64     
-176   -16    
160    16     
16     16     
-48    192    
144    144    
-464   304    
160    96     
-304   -464   
-112   -160   
-128   -288   
64     80     
-240   192    
96     0      
-1232  144    
-176   144    
48     48     
176    592    
-192   128    
48     -208   
128    -80    
32     128    
-96    -80    
64     96     
-176   -128   
304    -256   
-96    16     
-96    -32    
0      208    
176    256    
64     48     
-96    16     
128    80     
96     64     
32     304    
128    272    
-192   -96    
32     96     
-176   16     
128    32     
48     16     
-96    80     
-304   -160   
64     -192   
-16    -192   
288    272    
48     192    
-80    -192   
-208   160    
240    96     
-64    -16    
-32    96     
-64    16     
112    240    
128    304    
-208   -144   
128    176    
-256   -112   
0      -16    
128    288    
176    208    
80     128    
-176   -96    
80     112    
64     496    
224    192    
-160   -64    
-48    64     
-272   112    
144    160    
48     -16    
-96    -48    
-128   -192   
128    -240   
-112   128    
96     32     
240    448    
-192   0      
144    64     
-144   -48    
224    80     
-32    160    
-144   48     
160    128    
128    208    
-112   -48    
240    160    
-288   176    
384    64     
-192   16     
-16    64     
-48    -16    
128    0      
-144   176    
32     -48    
64     16     
-64    80     
64     128    
48     -16    
-48    64     
-32    64     
96     96     
48     -80    
0      224    
16     80     
112    -32    
48     144    
-48    64     
112    80     
-80    64     
96     96     
16     96     
-48    160    
160    256    
-128   208    
-64    -16    
16     -544   
64     -16    
80     16     
32     96     
-16    336    
-64    96     
-128   -16    
416    96     
192    16     
-64    96     
-48    112    
-112   192    
-16    -32    
112    176    
0      80     
32     -880   
128    192    
240    -192   
112    144    
-48    144    
64     160    
0      208    
-96    80     
128    32     
208    -96    
-128   144    
-96    80     
272    144    
-160   192    
144    144    
2528   368    
-1056  -48    
1088   -432   
96     304    
-96    -32    
-336   480    
208    -992   
-448   608    
64     -336   
-272   672    
64     -352   
-160   288    
0      -208   
144    304    
-192   -112   
176    0      
16     160    
96     -144   
-48    16     
288    208    
-128   192    
176    48     
-160   432    
320    -448   
-256   160    
240    -208   
-64    480    
304    -96    
-144   80     
64     -144   
32     -192   
128    16     
64     0      
-48    -16    
48     -576   
32     -16    
80     -400   
-112   -16    
64     64     
64     144    
80     16     
-32    144    
-48    32     
160    -256   
16     176    
80     -240   
-32    -16    
32     -160   
192    -80    
16     -128   
0      -80    
128    112    
-32    112    
80     192    
128    -16    
32     160    
96     32     
32     192    
96     48     
112    32     
32     -112   
48     144    
48     -336   
32     -80    
96     -48    
-16    16     
112    144    
32     80     
-48    64     
80     64     
-16    64     
16     -160   
-48    112    
48     -48    
176    176    
-160   -304   
288    128    
-112   -64    
32     176    
208    -144   
32     16     
-48    208    
64     64     
192    256    
80     112    
80     0      
-256   -32    
256    -32    
16     -48    
80     368    
128    48     
160    400    
-464   -144   
256    208    
208    96     
-144   0      
0      -992   
16     -784   
96     48     
128    -1200  
96     -384   
-32    64     
96     -400   
64     -32    
144    -288   
64     464    
128    192    
-32    128    
256    128    
32     -112   
48     48     
-64    64     
128    -240   
96     32     
16     -320   
32     -672   
240    -352   
0      -544   
192    96     
-128   -688   
80     -48    
0      512    
128    -304   
64     176    
64     -64    
-64    -1328  
-176   -144   
32     -240   
208    -16    
-576   -96    
64     -16    
-528   -16    
80     -80    
144    160    
-32    -288   
176    320    
-16    -48    
80     -288   
-128   -96    
208    -80    
160    0      
0      112    
288    16     
-256   96     
-32    -96    
32     64     
64     272    
-16    144    
-16    16     
16     -240   
112    -32    
-48    -832   
16     64     
160    -1360  
224    32     
-48    80     
48     64     
144    176    
-160   -128   
96     -32    
-16    64     
64     16     
32     -240   
-1888  -64    
48     -288   
0      -96    
128    224    
-96    -48    
-48    -832   
-112   -32    
288    -128   
-112   -16    
112    -48    
96     16     
80     80     
-160   304    
-64    -240   
112    128    
-336   -48    
112    48     
-480   16     
160    -32    
48     -80    
320    -640   
-80    112    
96     -112   
80     224    
-32    192    
-112   -144   
80     64     
192    16     
-112   -16    
128    -176   
-32    368    
-96    -224   
192    192    
128    -96    
208    64     
688    1216   
896    640    
-464   -1776  
-192   -656   
-224   144    
112    -416   
320    -288   
-144   -160   
-240   400    
32     -16    
-80    -128   
-160   368    
-528   -608   
64     64     
-32    -144   
112    -96    
-320   -528   
16     -480   
-96    -112   
16     16     
-272   -192   
384    624    
-16    -96    
160    32     
16     640    
80     0      
-208   -448   
-1008  160    
400    -16    
0      -16    
-16    -240   
160    112    
32     -176   
96     -48    
0      -112   
-48    32     
224    320    
96     96     
-224   80     
304    -288   
-128   80     
240    48     
96     240    
-160   16     
32     64     
-992   -240   
0      48     
-16    400    
-256   64     
112    0      
-368   16     
-64    0      
96     -144   
-80    -48    
96     128    
-96    32     
48     96     
-160   16     
-656   -80    
-112   96     
-272   -112   
32     32     
96     416    
-496   144    
112    0      
-64    -32    
-80    -32    
-400   -80    
80     352    
144    112    
240    16     
-80    -48    
80     64     
-112   208    
-176   -96    
0      -16    
-112   16     
48     48     
-256   -160   
-64    -16    
-160   0      
32     144    
-304   -512   
96     32     
-352   160    
-48    144    
288    288    
-64    192    
128    -192   
48     80     
-48    80     
-160   -128   
48     -64    
16     -96    
-64    96     
0      224    
-32    144    
-256   -16    
0      208    
-368   -144   
-80    48     
-80    -224   
160    160    
-272   -32    
64     64     
128    16     
-192   0      
-48    192    
128    16     
-32    128    
-32    112    
-112   32     
16     80     
-240   -176   
48     -96    
-208   64     
96     224    
-32    368    
32     -48    
224    416    
16     160    
32     160    
-320   64     
208    96     
112    112    
-256   -144   
112    96     
-32    48     
-32    192    
-112   80     
16     -32    
-560   -128   
-80    176    
320    -176   
-112   -96    
-176   64     
-112   96     
304    48     
16     -16    
-64    128    
-224   48     
224    96     
208    224    
-160   192    
-80    -32    
-16    224    
-96    48     
-160   112    
32     -96    
-64    96     
80     96     
32     80     
-16    80     
-160   0      
176    80     
-64    96     
160    96     
-64    -384   
32     -48    
-32    48     
-16    176    
-96    0      
64     96     
64     160    
-16    64     
-48    -128   
-160   -144   
128    208    
-208   96     
96     64     
-48    112    
80     112    
48     0      
-144   32     
64     80     
-32    128    
-64    -48    
16     16     
144    128    
-48    160    
-96    160    
16     -96    
224    -144   
-48    208    
32     -64    
-16    112    
-96    -32    
0      112    
16     48     
-80    48     
0      144    
-208   -272   
0      64     
-48    64     
64     192    
16     112    
32     80     
1216   2432   
-896   1456   
-1728  -464   
208    768    
496    352    
-128   -640   
128    800    
-48    80     
400    208    
-592   -48    
336    -256   
-128   448    
256    -560   
-80    592    
208    -656   
-192   416    
160    -224   
96     528    
-176   -480   
208    160    
-128   -48    
176    304    
-144   96     
80     96     
-32    -16    
192    -16    
-16    224    
0      64     
-128   80     
192    0      
-224   128    
224    -64    
-224   272    
240    -16    
-112   192    
0      -128   
16     368    
-32    64     
-16    48     
-32    32     
32     128    
176    128    
-48    128    
-16    16     
96     160    
48     80     
160    96     
-144   336    
160    -16    
-48    32     
0      0      
32     112    
32     64     
-16    -688   
64     64     
32     112    
32     80     
32     128    
32     144    
80     16     
80     160    
128    112    
-160   192    
-32    48     
192    32     
-112   16     
96     208    
32     80     
-112   -416   
112    80     
-80    64     
144    96     
32     0      
-64    -16    
128    80     
-32    208    
128    432    
-96    -96    
160    -288   
48     160    
128    -32    
256    224    
-80    48     
112    -352   
-32    336    
240    272    
-16    96     
-80    64     
80     48     
-112   0      
96     96     
-48    128    
144    -16    
96     128    
16     112    
-16    -288   
304    416    
16     32     
32     -176   
32     128    
64     -848   
48     80     
-32    -80    
80     160    
16     96     
48     176    
112    304    
-16    -128   
-128   -336   
32     112    
144    128    
48     -96    
-128   -80    
112    -48    
16     48     
128    -400   
-80    96     
64     -1728  
32     32     
0      -368   
224    112    
32     208    
80     80     
-208   -160   
-144   112    
144    16     
368    0      
-192   208    
32     -208   
80     112    
-32    -160   
64     160    
16     -416   
192    144    
-96    -48    
144    48     
48     544    
112    304    
32     112    
16     64     
288    112    
16     128    
0      16     
-112   16     
160    48     
64     -352   
-16    -80    
224    -224   
32     544    
-144   -592   
-48    32     
0      -48    
352    176    
112    -304   
-80    -16    
-112   336    
-80    -496   
80     288    
-80    -720   
368    224    
-192   -160   
160    304    
-176   -320   
224    160    
32     -32    
-64    -64    
240    400    
-288   224    
32     -256   
16     -272   
80     16     
80     -32    
0      224    
-48    -224   
192    64     
-128   -192   
224    128    
-16    -112   
48     96     
32     -608   
-48    80     
144    -32    
128    304    
16     112    
-176   80     
192    -192   
192    368    
112    112    
-240   -176   
-48    48     
256    -112   
432    -80    
-160   160    
-128   0      
96     -112   
192    -544   
208    0      
48     -272   
464    448    
-48    544    
-448   -1488  
-160   -576   
-624   -432   
-144   -464   
768    128    
-320   224    
464    864    
-64    -688   
-192   -288   
-48    -320   
432    -864   
48     272    
32     -416   
160    96     
-192   -336   
96     -176   
64     -304   
96     -96    
-224   -144   
432    -976   
160    -96    
144    96     
-80    -64    
96     -272   
-32    176    
32     -304   
128    32     
-96    -144   
48     -320   
-112   0      
48     -32    
176    144    
-48    80     
48     -32    
32     -464   
-32    -16    
160    -352   
240    240    
-240   -32    
112    -16    
0      -32    
96     176    
-96    -32    
-128   -288   
80     32     
224    -16    
-320   80     
32     -416   
96     -144   
-96    -1184  
128    -96    
-96    -1072  
96     -144   
16     -208   
192    32     
32     0      
0      -96    
-16    96     
-32    48     
-32    16     
80     -160   
-1600  -80    
80     0      
0      0      
48     -64    
48     128    
-48    -304   
160    160    
-64    -144   
80     16     
224    -144   
32     48     
-48    64     
96     -208   
-192   176    
0      32     
-96    -16    
160    -96    
16     96     
32     48     
0      0      
48     -624   
96     -160   
144    -80    
-240   144    
160    -160   
32     32     
-224   -64    
160    -80    
-272   -96    
32     -160   
-272   -48    
-48    -128   
-144   288    
-80    -176   
96     -16    
64     -464   
64     16     
80     -560   
-16    16     
-144   -64    
160    -32    
-16    -112   
208    208    
-336   128    
64     -96    
-144   -208   
16     -48    
-144   96     
-16    -256   
48     160    
80     128    
272    304    
-16    112    
-16    -208   
32     128    
-32    0      
48     -16    
-128   32     
208    96     
208    64     
-320   32     
112    48     
-224   96     
208    -208   
-304   -144   
16     -208   
48     64     
-128   -320   
-96    -272   
-112   48     
464    -48    
48     176    
-272   96     
208    112    
-224   -48    
0      -48    
240    -176   
-176   80     
192    -208   
0      -32    
-768   -416   
-16    96     
32     -80    
-560   -112   
16     48     
0      128    
-112   -16    
-496   64     
-80    -160   
-16    -16    
96     -96    
-32    32     
112    112    
-320   -64    
-96    -176   
48     -256   
96     256    
32     128    
16     48     
-64    -208   
-112   -32    
16     -64    
-736   0      
-64    160    
-80    -96    
-144   -176   
64     -96    
-32    368    
-112   -272   
-160   160    
208    -112   
-96    144    
-64    -80    
112    256    
0      32     
288    0      
-16    96     
16     -80    
-64    208    
-224   144    
-128   0      
16     -256   
80     64     
-224   -160   
-32    112    
-112   192    
0      80     
16     48     
-64    32     
0      -16    
224    -112   
-160   288    
-128   128    
-128   160    
-16    -160   
304    -2096  
896    -384   
-192   736    
-400   -112   
288    272    
-128   640    
336    -576   
32     640    
-304   80     
288    176    
-48    -48    
-16    -48    
-160   64     
16     32     
-480   144    
208    16     
-256   112    
-80    -144   
-32    -224   
-32    -80    
-96    160    
0      112    
64     160    
-112   -64    
-32    -128   
0      48     
64     144    
-128   112    
64     64     
-272   -192   
64     -16    
-592   -32    
272    272    
-64    -256   
96     -144   
-224   96     
96     144    
0      64     
-16    -32    
-48    16     
48     96     
32     128    
96     64     
-80    -64    
-144   -16    
16     144    
-64    -16    
112    144    
0      16     
-64    -96    
64     208    
-96    48     
16     96     
-80    -16    
-64    -32    
80     192    
48     192    
32     32     
16     96     
-176   304    
144    80     
-320   256    
-176   112    
240    32     
-192   -176   
96     -32    
-112   0      
-160   0      
128    16     
64     64     
-32    64     
0      128    
-144   -64    
48     80     
-112   -64    
-32    -208   
-208   -368   
176    64     
-368   -96    
368    176    
-192   240    
-48    112    
240    -64    
-16    80     
0      128    
-64    144    
-128   -208   
-48    0      
272    272    
-16    80     
-16    96     
-144   -32    
48     80     
-48    16     
-16    80     
-96    96     
176    128    
48     64     
-16    32     
96     144    
-16    64     
48     64     
-64    48     
16     80     
64     64     
32     96     
128    288    
-128   -128   
112    -80    
16     224    
0      -16    
64     64     
-160   64     
96     -16    
32     96     
-16    160    
-64    128    
0      -96    
48     144    
-96    112    
32     -48    
-112   32     
96     128    
176    208    
144    80     
-80    464    
96     336    
32     -224   
64     144    
-160   176    
224    -80    
32     112    
-112   -96    
96     192    
-80    48     
-64    -624   
80     -16    
400    208    
-272   176    
144    16     
-144   -128   
80     176    
160    112    
-96    128    
32     64     
-112   -32    
144    128    
-48    160    
48     16     
-80    0      
160    -448   
-64    80     
-48    -128   
-80    -112   
256    480    
-208   -32    
80     112    
-208   -48    
560    64     
-96    96     
0      208    
0      128    
-256   -336   
208    32     
0      64     
-144   -1040  
448    32     
0      384    
-96    144    
-224   0      
144    -16    
224    176    
576    32     
-480   240    
-80    -352   
256    192    
-64    240    
16     176    
-96    16     
208    -96    
304    -352   
160    208    
-16    -544   
240    48     
-400   -32    
64     -16    
16     160    
16     -48    
32     128    
96     80     
0      96     
48     176    
-64    0      
128    -208   
-144   192    
48     -96    
-48    96     
-480   2448   
-1872  -1472  
736    1248   
624    560    
160    144    
-208   -96    
-144   96     
448    -128   
-480   -96    
304    -64    
176    176    
-96    -192   
176    384    
-80    -256   
16     -16    
-64    -544   
112    -48    
-16    -2656  
0      -32    
176    16     
0      -80    
48     112    
96     224    
208    112    
-176   192    
112    48     
-80    192    
160    240    
-64    -64    
32     -80    
-16    -16    
176    112    
48     -64    
0      48     
16     0      
16     -96    
48     32     
32     -16    
64     176    
128    128    
80     112    
-96    -144   
80     80     
0      -64    
144    -16    
-80    -16    
144    112    
-96    -832   
288    160    
-304   80     
368    0      
-128   128    
96     80     
64     176    
-16    -208   
48     -128   
144    32     
-208   -16    
352    -272   
-176   304    
-32    -256   
224    144    
-96    -96    
128    -48    
32     128    
-16    160    
192    128    
112    144    
160    -16    
-32    0      
-16    80     
64     -32    
192    96     
-32    112    
0      112    
144    -160   
16     80     
176    -144   
-16    16     
80     -64    
48     192    
-176   144    
192    -608   
32     304    
96     -144   
64     176    
64     224    
-48    -128   
256    -96    
-224   144    
176    -192   
-16    16     
128    64     
32     176    
-176   -288   
336    -1184  
-192   48     
112    -1184  
112    -48    
-32    -16    
336    -64    
-64    -96    
16     -1408  
112    -176   
32     64     
112    0      
-16    16     
176    160    
16     -480   
208    32     
-128   -544   
80     144    
96     32     
0      -144   
-640   0      
16     -576   
48     -96    
-64    -576   
144    32     
32     -736   
112    48     
-32    96     
80     0      
96     -48    
-48    176    
32     48     
176    80     
-176   -80    
-80    -240   
-448   -64    
112    -192   
0      -128   
-16    -128   
96     -80    
112    -800   
80     -320   
-32    -1808  
-176   16     
16     -112   
-48    32     
176    16     
128    -112   
0      -96    
-80    -48    
-320   -112   
256    -48    
-128   -16    
240    384    
48     -64    
64     -336   
-144   -48    
32     -880   
96     32     
48     48     
128    416    
-48    -304   
208    128    
-272   48     
272    224    
-128   176    
128    -32    
-544   -64    
96     -112   
-144   64     
48     -16    
80     -32    
32     -816   
160    448    
-96    -160   
16     48     
16     -48    
96     0      
160    272    
-64    -192   
64     32     
80     -384   
-864   -48    
96     -208   
-64    48     
0      -32    
96     0      
32     -848   
96     96     
-32    -2544  
16     96     
-16    48     
160    -128   
-144   16     
-48    64     
-288   -32    
128    -32    
-176   16     
176    32     
-208   -144   
112    -128   
112    160    
16     -160   
-880   -944   
240    576    
-912   448    
176    -304   
-304   -208   
320    -208   
-432   -656   
-336   96     
112    416    
144    -112   
-144   -64    
48     48     
160    -144   
-48    128    
32     32     
-64    16     
16     -272   
-160   64     
176    128    
80     0      
-128   -128   
32     48     
-96    112    
160    16     
-112   -64    
48     -352   
-688   80     
32     32     
128    96     
-112   -128   
368    368    
-112   0      
-624   16     
-112   192    
64     96     
96     48     
32     -416   
32     -80    
16     -80    
144    112    
-32    0      
0      80     
-448   0      
256    -32    
-144   -176   
160    -32    
96     192    
-400   -64    
144    32     
-320   -112   
0      -112   
-1168  176    
-64    128    
256    112    
-128   64     
112    -32    
112    256    
-160   -32    
112    256    
-128   -144   
-592   -240   
16     0      
48     -64    
-208   -48    
64     -272   
-160   32     
-400   -144   
-80    80     
80     16     
112    96     
-112   -96    
48     112    
-128   -224   
-64    -96    
128    -336   
80     16     
-32    64     
336    352    
-640   -224   
128    -144   
-128   96     
-96    96     
80     240    
-224   176    
-32    64     
-96    48     
-48    -16    
48     176    
-112   48     
112    0      
-144   80     
0      0      
0      0      
-64    16     
-112   -16    
96     96     
-144   16     
64     0      
-432   -16    
-48    64     
-48    -64    
-80    128    
16     -16    
112    64     
-96    64     
16     0      
-16    -144   
0      96     
-112   128    
80     80     
-48    112    
-144   -64    
-16    16     
-448   -16    
32     48     
-128   -48    
48     112    
-64    -32    
32     48     
-32    32     
48     256    
48     48     
-48    -48    
-96    -80    
0      80     
176    0      
0      32     
128    784    
-48    112    
-16    144    
-352   0      
96     -32    
0      80     
-48    -112   
160    64     
-160   192    
-64    -512   
336    -96    
16     272    
-272   0      
16     224    
-128   16     
80     -48    
-144   -16    
112    144    
-240   32     
-48    208    
384    288    
-112   -128   
48     -80    
16     192    
48     -32    
-144   160    
-48    -144   
-176   -224   
160    -208   
160    16     
16     -32    
-384   -192   
112    224    
-128   64     
-32    32     
64     32     
80     128    
0      32     
-16    16     
64     320    
0      160    
-160   -144   
32     176    
80     64     
-192   -144   
96     336    
-96    -288   
16     48     
144    224    
-16    96     
-96    160    
-176   -304   
-80    256    
-48    -192   
32     80     
224    128    
32     96     
-208   -96    
16     80     
-64    -96    
-32    32     
0      -16    
32     224    
-96    -16    
112    112    
32     96     
-80    48     
-48    -48    
128    -32    
208    48     
16     112    
1088   1904   
-1808  -1024  
672    768    
432    1008   
144    -48    
-352   -112   
-464   -48    
832    -128   
-656   208    
240    0      
64     304    
-96    48     
128    240    
128    96     
-80    96     
-16    48     
32     0      
80     208    
0      48     
128    208    
-176   -32    
0      -288   
80     192    
16     112    
176    64     
112    64     
-16    160    
96     -64    
32     128    
-80    64     
144    112    
32     128    
16     64     
-48    48     
48     144    
-32    16     
144    -1424  
-160   -16    
80     16     
-144   192    
240    -32    
-64    112    
-96    64     
16     80     
128    0      
-48    96     
112    112    
-144   112    
-32    16     
144    -16    
-144   -16    
160    -288   
-64    176    
128    128    
48     -16    
16     144    
-16    144    
80     112    
32     160    
48     48     
-16    -32    
16     80     
48     80     
64     32     
48     256    
-80    80     
144    -464   
80     32     
-16    128    
-48    -16    
240    32     
-48    208    
96     32     
64     160    
-48    144    
32     16     
64     48     
128    288    
0      16     
96     16     
16     192    
-128   -992   
160    -32    
144    -2272  
-192   176    
208    48     
128    384    
-144   80     
352    48     
-256   -192   
336    80     
-160   -16    
-16    32     
-64    64     
64     -64    
16     192    
208    -448   
-16    80     
-48    -336   
224    288    
48     240    
-32    16     
64     16     
-80    -48    
192    -80    
112    160    
-80    -112   
64     112    
-96    144    
96     0      
-48    144    
128    -32    
64     16     
-32    -112   
-80    -32    
80     -1424  
48     48     
192    -144   
16     240    
80     80     
128    256    
-192   96     
448    208    
-144   160    
-48    -208   
48     144    
64     -32    
48     48     
64     -304   
-112   96     
128    -784   
64     160    
208    -992   
48     320    
32     -176   
64     176    
-240   0      
112    -144   
-16    -48    
48     -80    
128    256    
176    -528   
-16    176    
-16    -224   
-96    144    
160    -224   
144    160    
-128   -208   
80     64     
-48    0      
112    64     
32     -32    
80     -144   
160    272    
-64    -416   
64     96     
64     80     
64     176    
48     0      
128    208    
64     -192   
-32    176    
32     -224   
48     112    
-16    -64    
192    160    
96     176    
80     -80    
-80    16     
192    -176   
64     -96    
16     -336   
-48    224    
48     -64    
0      400    
112    -432   
256    240    
-32    336    
144    336    
-160   112    
96     -368   
144    -1488  
0      176    
96     -1008  
-32    176    
176    272    
80     -80    
-16    288    
-48    -160   
64     192    
16     -96    
0      -880   
32     64     
-64    -528   
112    208    
-224   48     
80     -480   
-16    -80    
2368   -1840  
-624   -880   
1392   -208   
-288   672    
736    -976   
-80    -816   
112    448    
464    544    
-624   -1136  
224    384    
272    0      
32     -144   
-336   -64    
240    -112   
-1168  240    
64     -432   
-48    -128   
272    -400   
-192   -416   
336    -1120  
0      -112   
48     240    
80     32     
80     -144   
96     224    
-176   -96    
64     224    
-336   -80    
400    128    
-944   16     
192    -208   
0      0      
-48    176    
112    -96    
256    160    
-64    -240   
96     -672   
48     288    
176    64     
176    128    
-160   144    
48     -144   
-64    -96    
0      -208   
-160   -48    
-16    -64    
-352   -16    
-192   64     
96     -288   
32     -320   
-32    -176   
-48    -976   
0      48     
256    128    
-112   48     
-96    32     
48     272    
16     80     
128    -48    
-176   192    
-48    -208   
-848   112    
48     -432   
32     -32    
-192   -432   
-16    -80    
288    -528   
-80    144    
112    32     
-16    80     
-64    48     
64     32     
-16    48     
32     272    
-16    112    
48     128    
32     864    
-48    544    
-64    16     
0      288    
-32    -288   
64     -512   
-16    -160   
80     -1696  
-16    144    
96     -112   
192    0      
112    144    
-112   -64    
-96    0      
-16    96     
-48    48     
48     0      
112    144    
64     32     
112    80     
-48    -176   
176    352    
160    -1312  
-64    -256   
0      16     
96     -16    
-304   -48    
-32    -128   
-288   -32    
336    -32    
-176   -224   
176    -128   
-240   160    
96     -448   
48     -16    
0      -128   
112    112    
-64    224    
-64    64     
-48    80     
192    240    
-16    256    
80     320    
-80    64     
80     336    
0      128    
-48    -128   
-656   -272   
112    -640   
208    112    
-304   112    
256    112    
80     512    
-304   96     
-64    -112   
-448   96     
-32    96     
80     192    
-80    -64    
192    -224   
-208   32     
416    288    
-176   400    
-224   -288   
48     128    
-128   -432   
80     -176   
-240   144    
-176   128    
-16    48     
-144   -32    
-48    80     
-272   80     
-240   -16    
144    -96    
-16    48     
-336   -80    
192    224    
-240   64     
-128   160    
-320   -432   
176    464    
-160   -80    
48     32     
-80    128    
-16    112    
-192   -48    
80     -64    
96     608    
-576   -480   
304    576    
288    416    
-16    -240   
-336   -400   
112    224    
-32    -208   
112    80     
32     80     
-32    48     
-80    112    
-80    0      
64     176    
-256   -112   
16     128    
-352   -48    
-16    144    
48     160    
-16    -64    
-16    -240   
128    144    
80     -80    
-144   208    
-48    0      
-160   0      
48     32     
-208   -96    
-32    0      
-16    48     
144    -192   
-352   112    
-48    160    
-1232  -1936  
1024   960    
-800   -48    
560    -192   
128    96     
80     -320   
32     -384   
-144   -368   
0      464    
320    288    
-32    -48    
-208   64     
32     80     
48     32     
32     144    
-544   -48    
128    160    
32     208    
-64    -32    
32     -48    
0      -64    
32     48     
112    192    
-80    96     
-96    -128   
0      -16    
-160   32     
160    288    
-192   112    
112    0      
-192   -80    
-16    160    
160    80     
-192   32     
-16    -32    
0      -16    
48     -80    
-80    16     
16     240    
96     80     
-80    -48    
-80    144    
0      96     
48     64     
-224   -32    
-320   -208   
-16    208    
96     144    
160    336    
-80    -256   
160    160    
-80    96     
144    64     
-144   64     
112    96     
0      64     
0      -48    
96     272    
-192   0      
256    -16    
-368   48     
16     16     
176    48     
16     112    
16     272    
32     -144   
96     -64    
-144   32     
64     240    
-96    160    
144    0      
-32    -32    
-16    128    
-144   144    
64     48     
32     -48    
48     64     
48     -80    
32     64     
-80    176    
-48    -48    
96     128    
-80    96     
208    288    
-240   112    
32     16     
-64    320    
-128   160    
320    0      
-64    128    
128    0      
32     128    
16     -48    
32     176    
64     -80    
96     160    
-64    80     
-16    -144   
176    -16    
-16    144    
-64    96     
64     32     
16     112    
224    64     
-96    304    
48     240    
-96    80     
32     64     
160    256    
-192   -48    
112    112    
32     0      
-96    16     
160    144    
-96    32     
48     224    
48     -80    
-160   -128   
160    176    
-128   -16    
-128   32     
-48    80     
240    0      
-112   192    
48     96     
-64    48     
224    128    
-208   -80    
32     128    
0      48     
192    -16    
-128   112    
240    208    
-32    -48    
-64    -1760  
48     160    
-80    128    
368    80     
48     400    
-64    0      
144    288    
-80    160    
128    208    
-64    80     
48     160    
64     176    
192    512    
-32    256    
-16    -304   
-96    -48    
144    144    
0      112    
0      64     
128    128    
32     64     
144    224    
-208   -336   
336    768    
-352   -192   
64     144    
112    96     
32     -144   
16     240    
0      48     
32     -48    
0      -64    
-32    0      
-96    64     
128    400    
48     80     
-48    80     
-80    0      
-16    64     
112    112    
-80    -64    
48     256    
-48    16     
0      -96    
64     112    
-48    -384   
0      48     
96     -2512  
16     160    
32     144    
256    -112   
80     304    
-80    240    
-64    32     
-128   64     
176    48     
176    128    
-16    -32    
-64    0      
208    0      
-176   -64    
-64    32     
240    -288   
48     144    
1920   -1184  
816    448    
304    848    
-400   160    
592    352    
-736   -1216  
656    272    
256    -352   
400    352    
48     -176   
0      208    
-32    -96    
336    -32    
64     -368   
80     144    
192    -4240  
160    224    
192    -224   
-64    -288   
224    128    
80     112    
64     224    
0      128    
112    128    
32     96     
80     -80    
256    -80    
-336   -80    
112    -320   
-176   176    
-80    -336   
336    176    
144    64     
96     192    
96     64     
-80    96     
-192   -160   
176    224    
-128   48     
176    112    
144    -16    
112    -48    
-64    0      
144    -64    
32     144    
48     -144   
-32    -144   
-144   32     
288    400    
112    -80    
-32    -64    
80     0      
16     -656   
288    192    
-64    -336   
96     -16    
176    336    
0      176    
-16    -160   
32     384    
96     -256   
-64    -16    
128    -272   
192    336    
-80    -96    
-32    240    
-16    -48    
256    -80    
-176   16     
64     -176   
48     96     
48     -48    
48     16     
128    -96    
80     -32    
48     -528   
-336   -592   
288    -256   
96     336    
240    368    
-176   -1424  
112    -208   
144    -32    
128    -1216  
-48    112    
-48    -416   
0      -448   
432    368    
224    144    
-64    96     
-112   -224   
272    160    
32     48     
0      -48    
-256   -256   
-176   -368   
16     64     
208    304    
-48    -672   
0      -336   
32     -784   
144    -160   
-80    -1312  
48     -80    
-16    -48    
80     0      
176    336    
-16    752    
144    240    
-96    192    
-128   48     
-128   -144   
-96    48     
80     -64    
112    -80    
0      -16    
48     -32    
64     -160   
-32    -336   
-48    -256   
240    16     
96     -256   
-112   160    
16     -48    
32     -272   
144    128    
-48    -160   
-272   -16    
-272   -288   
256    32     
-32    -128   
-16    -176   
128    96     
96     112    
-48    -720   
160    -16    
-160   -480   
-208   -208   
432    -96    
-80    16     
-176   64     
176    48     
-480   -80    
-32    -128   
-464   64     
192    240    
80     224    
64     -400   
-400   -32    
64     -1984  
16     96     
-16    -144   
112    208    
-160   48     
96     80     
-176   -80    
80     -80    
-80    -384   
208    192    
-544   96     
160    -128   
-128   16     
160    -240   
-32    -192   
144    -192   
208    384    
32     256    
-112   256    
-288   -48    
224    -352   
112    -80    
96     -272   
0      128    
-176   -128   
-128   -80    
0      16     
-912   -96    
80     112    
-32    32     
192    -160   
80     32     
32     -2528  
112    -304   
-112   224    
-96    -32    
-64    0      
96     -48    
-112   32     
32     -144   
-416   -16    
48     -128   
-176   -64    
112    -48    
32     0      
96     -112   
-96    256    
128    -576   
-352   240    
-240   112    
1248   864    
-640   416    
-48    -128   
32     -272   
272    -256   
-736   -128   
800    -160   
-32    320    
272    -464   
-112   304    
-64    -576   
144    384    
64     -112   
128    80     
-160   64     
-16    -16    
16     96     
192    -96    
-224   64     
128    -48    
-64    240    
224    -288   
-256   208    
-576   -496   
-288   272    
-208   -288   
-112   176    
80     -32    
-1264  -64    
-112   -112   
-1632  96     
48     16     
-32    0      
0      32     
224    208    
-48    96     
-48    -240   
-112   112    
96     -192   
16     176    
-80    -160   
-160   80     
0      -144   
-272   48     
0      32     
-208   144    
0      -128   
-176   160    
-304   -128   
224    -32    
-256   32     
-48    -48    
-80    128    
16     -48    
32     144    
-112   -80    
0      -96    
16     176    
-320   16     
224    112    
-208   64     
0      32     
-288   -80    
-96    96     
176    0      
-32    -144   
64     -80    
-32    128    
0      -208   
16     48     
32     32     
-128   80     
48     96     
48     144    
-144   -96    
-48    -16    
-240   -80    
-144   -96    
-96    48     
-96    32     
64     208    
-64    256    
48     96     
80     -208   
-16    -144   
32     -176   
144    144    
-272   96     
160    80     
-112   96     
-32    96     
80     48     
0      -112   
176    112    
-80    0      
32     64     
-928   -32    
224    416    
-160   -80    
-128   112    
96     -192   
-96    64     
288    32     
-160   112    
-16    80     
-112   112    
112    64     
144    -64    
-224   16     
-352   -256   
-16    -192   
-1008  0      
128    80     
80     192    
0      48     
160    368    
-224   -128   
144    112    
48     -416   
96     128    
64     64     
0      -80    
-144   96     
64     96     
-160   64     
-32    224    
416    384    
-336   -48    
192    160    
-304   96     
96     160    
64     0      
-80    48     
64     32     
0      224    
0      64     
-48    48     
-208   -400   
-80    240    
128    144    
-240   -16    
-16    -48    
-144   0      
80     -16    
80     416    
-64    0      
0      -144   
128    336    
-128   -48    
112    80     
-176   -64    
112    32     
32     112    
-320   -96    
-48    -224   
-32    -304   
48     208    
224    128    
16     96     
192    208    
-16    0      
48     224    
-32    -64    
16     64     
-144   32     
-16    16     
384    160    
-192   80     
128    32     
-304   -96    
-64    80     
272    -112   
-208   112    
160    -96    
64     224    
-176   48     
256    -16    
-112   112    
64     32     
48     80     
-32    64     
160    80     
-48    48     
-112   208    
-112   160    
48     0      
-16    112    
144    16     
64     112    
-32    -16    
48     80     
-96    64     
208    208    
-64    128    
-16    128    
-32    48     
-1680  -1328  
1456   2768   
-1040  1360   
464    -464   
-256   -336   
160    -448   
96     2064   
-1200  -624   
752    -240   
48     -64    
160    448    
-80    -576   
-368   304    
272    -352   
192    464    
-576   -368   
112    416    
-288   -528   
560    160    
-160   -64    
448    176    
-272   320    
-48    224    
-96    240    
496    -192   
-32    320    
256    -192   
176    544    
-240   -192   
176    240    
-80    -48    
-32    80     
-96    144    
96     -32    
96     -960   
-160   -176   
64     -128   
64     96     
272    672    
16     -32    
0      -32    
-48    176    
192    128    
16     -176   
-16    -64    
160    -16    
16     288    
-160   0      
192    288    
240    -80    
128    336    
-80    256    
0      112    
-128   208    
176    16     
-64    32     
240    256    
-128   336    
64     64     
320    656    
-432   -16    
0      64     
-48    -64    
192    64     
16     -272   
80     -160   
240    64     
208    160    
128    832    
-208   -80    
32     80     
-64    -112   
176    -80    
80     128    
-144   16     
48     48     
80     -128   
-16    -128   
240    -48    
80     -336   
96     80     
128    -736   
48     -80    
96     288    
208    224    
16     272    
96     272    
-160   -48    
96     -320   
288    496    
32     80     
-160   48     
240    -304   
32     96     
-128   -464   
64     -96    
-112   -496   
176    336    
-80    32     
64     432    
-112   -800   
96     176    
-48    -16    
16     -80    
-80    -48    
144    -176   
-16    128    
-496   -464   
320    288    
-80    -256   
-32    32     
80     -256   
64     96     
-48    -304   
128    144    
16     272    
64     112    
48     48     
32     112    
-16    -160   
32     -208   
-32    160    
352    384    
224    304    
-112   -80    
-144   80     
160    -160   
144    304    
96     -32    
16     112    
-48    80     
176    320    
144    176    
160    304    
-240   -128   
-64    -64    
96     128    
432    -176   
-144   272    
192    -112   
-64    112    
0      -272   
0      144    
-48    -96    
240    96     
-64    -16    
32     128    
-48    -96    
112    128    
-48    96     
192    -160   
-48    64     
64     -144   
64     208    
96     -160   
-32    64     
64     32     
192    176    
-96    128    
0      128    
16     -64    
128    32     
96     80     
64     336    
96     -800   
0      0      
176    -1696  
112    16     
-80    224    
16     -112   
128    96     
64     -16    
128    288    
-144   -192   
208    -144   
176    48     
16     -96    
-32    -80    
-192   48     
-16    0      
64     -192   
16     -848   
96     -96    
-32    -912   
48     -64    
112    352    
-64    0      
-112   176    
32     -160   
64     -848   
192    16     
64     -192   
-64    176    
-704   -288   
64     96     
16     -64    
208    -176   
-48    -32    
1056   -432   
272    128    
1392   -400   
-640   -592   
16     -912   
176    -336   
496    -208   
-224   208    
192    -384   
-320   -144   
304    -96    
0      176    
48     -272   
-224   352    
304    -256   
-112   -352   
-16    -192   
112    128    
96     -96    
80     -32    
-176   -16    
96     192    
192    96     
-96    -176   
128    -16    
-208   -32    
240    64     
-256   48     
192    -96    
-112   -272   
-32    0      
176    32     
96     48     
32     -192   
32     -560   
16     -176   
64     -96    
32     32     
80     176    
-16    -32    
-48    48     
-48    16     
80     16     
64     -48    
-480   -48    
16     -32    
112    32     
224    80     
-48    -64    
-32    -480   
80     96     
96     -16    
48     64     
-32    80     
64     -192   
-64    48     
48     -208   
-32    -80    
160    16     
-848   96     
144    -16    
-416   -16    
112    -288   
32     16     
32     -512   
-112   80     
32     -16    
32     -112   
16     -64    
48     -144   
-176   48     
96     -32    
-192   0      
144    -80    
-160   80     
48     -400   
0      -128   
-48    -288   
-144   -48    
160    -464   
-240   -128   
240    -2400  
-16    -192   
-112   240    
304    240    
-176   48     
48     48     
16     -32    
112    80     
-80    32     
96     0      
96     208    
80     -48    
32     192    
96     -352   
96     32     
-448   128    
224    -96    
-400   -48    
224    -64    
32     192    
112    -224   
-112   -48    
-48    -96    
16     0      
48     112    
48     -48    
-48    -64    
304    176    
32     32     
96     128    
-128   0      
128    16     
-16    32     
48     -48    
16     512    
0      -48    
-208   -96    
-16    48     
96     80     
-96    16     
-112   144    
-1232  -80    
16     64     
-144   -128   
-32    -480   
-48    -192   
-192   -128   
48     160    
-240   32     
0      96     
-16    48     
-48    288    
128    -80    
-96    32     
-256   -272   
144    48     
-48    -16    
0      160    
-96    32     
-256   -80    
64     32     
-48    96     
112    -48    
-256   48     
32     -16    
-16    160    
-16    224    
48     -32    
-80    48     
48     -80    
-16    80     
160    16     
-96    32     
0      -48    
-224   16     
272    64     
-336   240    
-64    -32    
32     -64    
-64    128    
-240   -48    
-128   48     
-1056  0      
-192   -160   
240    0      
-16    320    
-256   -400   
256    -96    
176    368    
-160   -32    
16     -32    
0      64     
208    -16    
-32    112    
-256   -176   
-48    0      
0      208    
0      -64    
48     64     
-80    48     
96     32     
-96    -32    
-144   -80    
16     176    
-160   336    
-64    32     
-32    -32    
64     48     
0      32     
-160   80     
-80    -160   
96     192    
-96    112    
-16    192    
-1888  -160   
80     128    
-1856  1168   
1488   1520   
-912   -1072  
592    -240   
-336   -32    
240    -160   
-176   1680   
-272   -480   
48     16     
-64    -912   
192    464    
-416   -160   
256    464    
-688   608    
224    336    
-544   -32    
-144   -320   
272    816    
-432   -208   
0      144    
-48    -336   
384    384    
-128   416    
32     -32    
80     -32    
-176   256    
-256   -80    
-16    -352   
-576   -160   
224    96     
240    448    
-224   192    
128    64     
-16    192    
128    112    
-16    -304   
96     -176   
-160   208    
192    304    
-192   32     
-240   48     
-48    -80    
112    96     
96     112    
-128   64     
96     176    
-320   16     
128    240    
-16    160    
112    -32    
128    -48    
-176   112    
0      -16    
-128   -128   
48     -48    
160    160    
-112   64     
96     192    
-480   -96    
96     -144   
-208   192    
-64    32     
240    -80    
112    288    
-144   64     
80     -16    
112    128    
96     160    
-144   80     
64     128    
32     16     
-80    -112   
144    96     
-32    -80    
80     48     
16     224    
-32    -480   
96     -192   
64     -64    
48     48     
0      -32    
-192   176    
-96    0      
112    -208   
-128   0      
80     160    
-288   -16    
32     160    
96     128    
-64    144    
48     16     
96     144    
-64    32     
112    -16    
0      64     
0      240    
16     64     
0      -48    
112    224    
-96    -96    
192    256    
-160   128    
128    144    
128    256    
-176   -160   
64     -64    
96     160    
192    528    
-64    160    
-80    48     
-96    64     
128    32     
-16    -144   
64     32     
-128   -176   
64     32     
-288   48     
256    32     
-32    -16    
-16    112    
304    352    
-96    64     
48     -32    
64     64     
-112   80     
192    0      
-208   -48    
-16    -144   
-80    -80    
-160   -48    
336    112    
-16    32     
-80    -2032  
128    128    
-288   144    
432    224    
-112   144    
80     112    
32     -32    
-208   32     
96     144    
192    64     
-48    112    
96     448    
64     16     
144    -656   
-208   80     
-80    -256   
272    224    
32     32     
112    160    
-64    16     
16     144    
96     48     
64     80     
-16    64     
144    160    
-96    160    
112    -96    
-80    64     
-16    32     
192    48     
-64    112    
16     144    
48     112    
-80    0      
96     -16    
0      64     
0      208    
-272   160    
16     112    
48     -144   
80     0      
304    112    
-144   288    
-96    -80    
48     160    
144    -288   
112    192    
-16    -864   
112    16     
32     96     
32     176    
-64    -80    
272    -64    
0      -32    
80     176    
-32    64     
-16    64     
112    128    
48     -96    
32     96     
96     -208   
112    48     
-16    -304   
32     80     
-64    -832   
64     -80    
-560   -816   
1024   -128   
768    64     
-16    -784   
496    -432   
-80    -400   
96     176    
480    -480   
-80    1088   
-16    -752   
-32    480    
-16    -784   
240    480    
-112   -880   
256    240    
32     -608   
80     160    
-32    128    
128    64     
-144   -64    
240    -272   
-160   368    
320    -368   
-160   288    
32     -304   
-64    256    
256    -176   
48     288    
0      -288   
32     128    
0      16     
192    128    
-16    80     
64     96     
-112   64     
176    -352   
80     48     
48     -80    
96     160    
16     -272   
64     80     
16     -288   
96     112    
128    -1456  
0      144    
48     32     
64     128    
-48    96     
48     160    
112    64     
32     -112   
128    176    
-32    48     
32     144    
96     -112   
-32    224    
128    -144   
176    48     
-32    0      
16     160    
-16    -48    
64     -832   
64     112    
-912   -48    
64     -832   
112    -96    
32     -272   
112    -224   
112    208    
-16    -96    
128    160    
-16    -32    
96     128    
96     -288   
-64    -1296  
-48    64     
192    -240   
-96    96     
-176   16     
48     -800   
-96    -128   
32     0      
208    -464   
-144   -48    
208    -32    
48     -128   
-128   -96    
128    288    
192    16     
-48    -528   
-128   176    
112    -160   
16     32     
80     32     
-64    -64    
48     -160   
144    -32    
64     160    
160    96     
-128   -96    
-64    -1696  
32     -144   
192    48     
240    176    
-80    -16    
80     176    
16     -128   
64     -272   
-32    -112   
80     -16    
-368   32     
-16    -80    
48     -80    
96     -144   
0      -96    
128    -16    
-48    -112   
144    -32    
-48    160    
112    -240   
-160   -32    
64     -304   
112    80     
112    112    
-96    16     
-208   0      
80     96     
128    -576   
-32    -240   
80     96     
176    48     
160    80     
-208   -880   
96     208    
112    -208   
272    320    
-368   96     
208    -80    
-80    288    
-48    -352   
-16    -80    
-144   -192   
-736   16     
96     96     
-32    96     
160    -96    
32     -352   
192    -96    
-128   224    
16     112    
-80    -128   
16     -96    
176    -144   
64     240    
-208   -48    
-144   -48    
-192   128    
-528   0      
64     -96    
-1840  -160   
80     -496   
0      32     
128    -256   
-32    96     
96     -1440  
240    -48    
-160   96     
80     -240   
-16    96     
64     128    
-64    0      
144    -16    
-176   80     
176    -240   
-400   48     
80     -160   
320    32     
-160   48     
0      0      
-128   0      
96     -224   
-80    112    
64     -64    
-224   64     
256    -64    
-32    48     
16     -112   
-80    48     
176    -176   
16     80     
64     -48    
-192   144    
80     -336   
64     -48    
48     16     
32     0      
-128   96     
-16    32     
-1024  -1632  
896    -672   
-592   -128   
288    288    
-672   -304   
640    256    
-368   -160   
-160   304    
464    400    
-1664  -608   
-48    -128   
288    176    
-112   256    
-432   16     
0      144    
-592   208    
208    32     
-192   -448   
224    -64    
-192   -96    
-400   -208   
-288   288    
-128   -528   
-112   -16    
-672   -304   
-80    192    
240    128    
-272   160    
-144   -64    
-112   192    
-144   -64    
-368   -112   
-32    160    
288    -48    
-96    144    
48     -128   
-48    112    
-80    -80    
96     208    
48     32     
-64    96     
-112   -16    
-176   -16    
-48    112    
-320   64     
-32    -96    
-448   176    
144    224    
-240   -80    
-48    32     
-240   16     
32     32     
64     0      
-208   256    
128    -160   
0      80     
-16    16     
32     96     
0      -112   
64     64     
-96    144    
-16    -64    
0      -32    
-272   16     
-32    96     
16     -48    
80     128    
0      48     
96     0      
-112   112    
-176   -32    
144    160    
-160   16     
160    48     
-160   0      
80     176    
-288   -144   
240    128    
-544   0      
96     -48    
160    -16    
0      208    
-16    32     
-64    -192   
176    208    
-272   32     
320    -112   
-64    304    
-336   48     
96     -80    
-80    -16    
-96    112    
-32    48     
-48    -208   
144    208    
-1696  -80    
144    16     
-32    160    
-48    144    
176    288    
-144   192    
0      -48    
64     -96    
-80    176    
-80    -32    
80     112    
-160   112    
144    160    
-272   -96    
64     80     
-640   -112   
-32    96     
240    400    
-32    160    
16     64     
-16    96     
-80    -48    
128    -48    
-32    176    
144    256    
192    224    
-128   48     
-208   -64    
-304   -80    
-48    -192   
-176   -288   
-16    96     
224    208    
-80    -80    
-112   16     
-64    48     
240    272    
160    224    
-144   224    
-32    64     
-112   -48    
-16    -80    
16     96     
-384   -144   
336    112    
-128   0      
-144   16     
48     64     
-96    -48    
240    96     
32     144    
144    208    
-144   112    
128    48     
32     96     
16     96     
16     64     
-32    112    
-32    -192   
96     208    
-128   96     
352    32     
-32    192    
16     32     
16     128    
-32    0      
16     128    
-32    192    
0      32     
160    160    
-208   -16    
-32    80     
128    384    
-192   -208   
224    128    
32     48     
144    288    
224    -304   
-32    80     
80     144    
64     592    
-288   80     
-16    64     
32     -48    
192    -48    
0      128    
-96    -112   
64     144    
-384   -288   
16     96     
-48    176    
64     -16    
-16    160    
-112   80     
48     -48    
48     192    
-80    0      
144    -96    
80     128    
96     176    
0      160    
-112   32     
2320   -1520  
-560   528    
1120   640    
-304   544    
-176   336    
144    -320   
-720   -80    
816    576    
-416   -64    
224    208    
-16    80     
0      -176   
-64    208    
208    -192   
-160   80     
144    48     
128    288    
0      224    
160    112    
0      48     
48     -16    
336    128    
176    64     
-16    80     
-64    48     
-32    208    
176    48     
-128   48     
240    96     
-48    -80    
48     112    
-64    128    
96     -768   
0      96     
80     80     
32     96     
32     96     
-32    112    
64     16     
160    112    
-96    96     
160    192    
-112   64     
48     112    
-48    -112   
-16    -208   
160    144    
32     -336   
-48    144    
176    128    
-80    0      
48     80     
32     64     
-32    160    
48     112    
64     128    
16     448    
64     32     
256    208    
-192   -80    
64     -256   
-32    48     
112    -320   
-32    432    
32     -96    
80     48     
-64    48     
64     96     
-96    80     
16     96     
16     -64    
64     80     
32     -96    
16     112    
32     160    
-64    -80    
80     144    
-16    -768   
32     16     
96     -880   
128    -144   
-176   80     
192    192    
16     96     
96     160    
-144   -32    
128    16     
-48    48     
48     64     
96     192    
-64    32     
160    144    
-64    -240   
160    96     
0      -176   
64     80     
0      -208   
128    240    
-64    128    
144    96     
-176   0      
80     16     
128    80     
32     32     
32     160    
-32    -208   
128    240    
-32    -224   
112    112    
32     -224   
48     80     
0      -944   
48     144    
64     -32    
144    176    
16     288    
-16    -112   
-128   -80    
80     -16    
192    160    
48     -128   
-144   144    
144    -32    
224    0      
-64    -192   
-64    160    
208    -176   
272    -240   
80     208    
-272   240    
320    32     
-80    64     
32     -16    
160    -160   
-16    48     
96     -32    
64     -48    
48     32     
96     208    
-16    -160   
128    -16    
-48    32     
64     -128   
32     -64    
-16    -16    
288    32     
48     592    
0      256    
16     192    
-96    -96    
224    -80    
96     80     
-64    -352   
192    128    
16     16     
192    384    
-48    -16    
144    352    
144    -128   
112    -1232  
-32    0      
-1296  64     
80     -208   
112    112    
48     -736   
304    -80    
-144   -544   
0      -448   
0      64     
352    -48    
320    160    
144    -208   
-176   -320   
-112   160    
16     -272   
176    -16    
112    240    
-32    48     
-48    0      
-80    -656   
128    -96    
-48    -960   
32     32     
64     -144   
-48    -64    
48     96     
64     224    
48     48     
144    160    
-128   -16    
160    -112   
-640   -16    
224    -48    
-352   -16    
176    -48    
64     -32    
48     -80    
0      208    
-656   -3408  
1088   96     
-80    -32    
-48    496    
-480   -160   
240    -464   
128    -96    
432    336    
-192   112    
-144   -432   
-496   256    
208    -208   
144    144    
0      -112   
192    -64    
-32    96     
-32    64     
-64    -528   
144    -208   
112    -16    
128    -32    
-80    48     
240    -48    
0      80     
0      -96    
-64    80     
128    -32    
-224   0      
-16    -272   
-128   -48    
112    -32    
48     64     
32     -1168  
-48    96     
80     -48    
-112   -64    
96     80     
-32    48     
96     16     
0      -176   
-240   -64    
64     -80    
-400   -64    
160    -64    
-96    0      
144    -80    
16     16     
32     -576   
208    -16    
-96    -48    
80     16     
-48    48     
128    32     
-208   -16    
0      -128   
-80    -208   
48     176    
-368   -48    
224    80     
-80    0      
48     -176   
64     32     
80     -368   
112    240    
-32    -1120  
208    -176   
-208   128    
112    32     
-224   -64    
144    -128   
48     128    
-96    48     
32     64     
80     -224   
0      16     
16     -368   
240    160    
0      96     
176    0      
0      48     
-96    0      
-128   -32    
64     -352   
-144   -144   
112    112    
-64    144    
32     -176   
-16    -64    
-144   -192   
-368   -80    
0      -208   
112    96     
64     -16    
-48    0      
48     128    
80     48     
16     -16    
16     16     
-48    48     
96     32     
0      0      
64     112    
-160   -48    
48     -128   
144    80     
-816   336    
160    400    
-1312  -272   
-752   -144   
-16    -32    
-688   32     
-64    -96    
-576   16     
112    -32    
160    128    
-144   -16    
64     160    
16     80     
192    96     
-112   32     
-64    -304   
192    -32    
-176   -272   
-368   -96    
352    256    
272    96     
-160   -32    
-336   -16    
-160   0      
-1504  -16    
16     -32    
-64    -160   
-128   -128   
-512   -112   
368    96     
-160   -208   
-16    80     
80     320    
-96    128    
224    -48    
-208   -16    
-240   48     
96     400    
0      240    
16     -32    
-176   240    
-144   -352   
-48    208    
-48    -208   
144    32     
-144   128    
48     128    
32     96     
-112   -16    
0      192    
-96    -176   
-16    64     
144    464    
128    0      
-448   -224   
64     160    
-560   -48    
32     32     
-32    -64    
32     48     
-32    160    
336    448    
32     -128   
-304   -176   
-96    -64    
128    240    
96     -240   
208    320    
-336   -48    
-176   32     
-64    32     
-256   -336   
64     208    
-48    -80    
32     304    
-128   -240   
64     144    
64     192    
80     -32    
-112   80     
64     160    
0      -16    
-80    32     
-96    224    
320    -16    
32     -48    
-336   96     
-64    -16    
-560   -240   
48     32     
48     64     
-112   16     
-880   -912   
-224   -256   
-16    -464   
272    -176   
-48    -192   
-288   -128   
128    800    
544    288    
-400   -384   
-80    -400   
288    160    
-288   -192   
144    112    
-48    176    
80     -112   
-128   -96    
256    144
[truncated: 332,011 more chars]
