# Supplementary material for: A Fault Diagnosis Method for One‐Dimensional Vibration Signal Based on Multiresolution tlsDMD and Approximate Entropy
Source: Hindawi journal article supplement (doi:10.1155/2019/3262818), 2019-01-01
Supplement: f1 [file 3262818.f1.zip › 3262818.f1/gear signals/broken teeth fault signal/Data14.txt]

-400   -448   
464    528    
-64    -48    
32     336    
144    -32    
64     -288   
48     96     
-16    48     
64     80     
112    64     
-64    -144   
64     160    
80     -160   
16     160    
96     -512   
-64    112    
-96    -1216  
224    144    
-304   -272   
224    96     
-112   64     
80     176    
0      400    
-80    144    
-16    64     
80     -16    
0      -16    
64     -32    
48     -352   
112    -64    
64     -112   
80     -208   
80     208    
64     -208   
-112   240    
48     0      
16     128    
112    16     
64     256    
-48    32     
32     -16    
32     0      
112    144    
64     144    
64     144    
-32    0      
-16    -80    
80     48     
48     -384   
96     32     
16     128    
64     96     
-16    80     
64     112    
80     208    
48     16     
96     112    
32     -576   
0      -144   
-16    -384   
144    64     
16     -128   
224    256    
-176   -432   
-112   256    
32     64     
96     -64    
-192   80     
208    416    
80     368    
-16    0      
96     48     
-48    -352   
128    144    
-16    -528   
16     160    
96     -224   
-48    -592   
-160   -784   
288    336    
-96    96     
112    336    
-32    -16    
112    64     
80     -240   
16     -208   
32     128    
224    -48    
48     352    
-16    80     
80     240    
-80    -48    
96     -160   
-16    80     
16     -736   
112    144    
96     0      
-16    -400   
304    32     
48     -464   
64     544    
-304   -432   
-16    -112   
176    176    
32     -48    
80     176    
-16    -272   
64     -256   
-32    256    
32     288    
-432   -240   
144    48     
144    -240   
-416   -112   
128    240    
-48    -128   
64     -16    
-64    -128   
160    -64    
-112   -256   
96     240    
128    80     
128    -256   
-32    64     
64     64     
208    -16    
-224   16     
-64    -176   
-160   64     
64     -208   
144    96     
48     -16    
32     48     
0      -96    
-80    -144   
160    208    
192    -80    
208    -32    
-32    144    
144    -80    
-32    208    
-80    736    
976    -64    
736    448    
-16    -928   
624    48     
-608   -1536  
1072   736    
-192   -16    
208    -1040  
-256   -512   
576    80     
-32    368    
-272   -48    
80     0      
32     16     
32     -48    
-144   80     
-48    -96    
-48    160    
-144   -16    
16     -48    
80     -64    
-64    160    
176    -32    
-96    -624   
32     160    
176    224    
64     176    
16     -96    
16     -80    
-80    80     
224    -112   
-64    -16    
-64    -144   
16     16     
112    -128   
208    -48    
-32    -64    
112    80     
112    -368   
-112   32     
128    -752   
144    128    
-16    -32    
-48    -144   
-160   -80    
224    0      
-144   -112   
128    48     
-400   0      
224    -64    
-576   -64    
48     -160   
80     144    
16     -224   
80     48     
48     -160   
-64    32     
80     -32    
-48    64     
-96    -16    
80     0      
-96    96     
48     64     
-96    -128   
64     -112   
-272   0      
0      -48    
-16    16     
272    -16    
0      176    
96     -240   
32     -80    
-16    0      
-16    144    
-16    80     
0      128    
-80    176    
-32    48     
-96    -144   
160    -176   
-48    128    
-80    -64    
224    208    
-240   -112   
304    -144   
-736   -192   
-272   -240   
224    192    
-352   -112   
224    112    
-64    0      
-272   -112   
144    -272   
-96    16     
-32    16     
176    176    
-1312  -208   
176    64     
-336   -208   
48     -32    
-16    128    
32     -64    
48     192    
-496   0      
-32    -96    
144    -16    
112    80     
-112   0      
-16    64     
48     16     
0      0      
-96    -112   
0      0      
-48    -16    
-48    -32    
64     32     
-224   -64    
-32    -160   
-192   208    
128    368    
-416   -80    
192    416    
-896   48     
144    32     
-304   -192   
48     272    
-256   -128   
288    -16    
-112   -176   
-112   80     
-80    48     
-96    144    
-32    16     
-176   -48    
-48    64     
96     192    
32     48     
-336   -176   
-416   -80    
64     16     
112    48     
32     -32    
-64    80     
0      -128   
-32    -32    
-32    -144   
-112   -32    
0      32     
-16    144    
0      112    
-48    512    
96     -16    
-320   80     
112    240    
-640   32     
0      64     
0      -96    
32     224    
96     16     
-224   48     
176    128    
-32    -112   
64     224    
-112   -16    
-128   64     
-48    -304   
160    288    
288    592    
-368   -16    
-512   80     
64     64     
-128   -80    
0      80     
112    80     
-64    80     
16     128    
-16    -16    
-80    -96    
48     112    
32     224    
-64    -64    
-16    32     
-16    160    
-80    128    
-1136  32     
0      64     
-320   -192   
128    96     
-32    176    
-96    96     
-96    80     
96     96     
-48    0      
288    -16    
-224   128    
80     -16    
-32    160    
-128   -64    
240    48     
-80    288    
48     272    
352    336    
-208   1040   
-688   -176   
32     -288   
128    -32    
384    448    
-240   128    
-192   32     
64     48     
0      16     
-16    80     
-224   -96    
32     -48    
-176   80     
224    192    
-32    144    
-32    -96    
192    -16    
-272   -16    
192    -48    
-160   224    
112    256    
-224   64     
-48    16     
-48    224    
144    416    
-416   -208   
80     32     
-80    320    
32     80     
-48    192    
-240   80     
48     0      
112    128    
112    400    
80     80     
-96    112    
384    -144   
-64    192    
-48    0      
64     256    
-16    96     
80     112    
-320   -16    
288    640    
-80    336    
-256   -288   
224    272    
-128   -240   
-16    64     
160    336    
-96    16     
-32    160    
-64    144    
144    -256   
-528   -80    
256    -160   
-48    -96    
-64    128    
96     128    
-48    80     
144    112    
-80    80     
-16    96     
48     80     
-64    48     
0      96     
80     64     
80     80     
-208   32     
48     144    
-128   128    
-48    -176   
240    -48    
-112   0      
0      112    
272    224    
-80    144    
48     48     
64     -32    
112    320    
-80    64     
-16    16     
128    160    
80     80     
-16    272    
0      -80    
64     128    
80     96     
-48    -16    
32     144    
16     -16    
32     16     
224    160    
-160   80     
80     -112   
-176   -144   
32     -64    
224    320    
-80    192    
0      96     
-128   16     
176    -176   
16     -48    
96     240    
-160   32     
144    80     
32     96     
32     80     
48     160    
96     96     
-32    112    
-16    16     
96     192    
64     176    
-48    144    
-160   -160   
416    -64    
-224   -128   
128    160    
48     192    
-16    80     
16     80     
272    160    
-64    64     
-32    -352   
400    272    
-336   160    
256    80     
-272   112    
304    128    
-112   176    
336    -80    
-112   288    
224    -416   
-16    64     
-144   96     
192    144    
-32    96     
64     176    
160    32     
-32    144    
-64    0      
96     -176   
-48    240    
192    112    
-16    272    
160    176    
32     112    
-48    -448   
96     272    
-144   48     
208    96     
-144   96     
208    16     
16     -304   
160    96     
128    336    
0      176    
-16    176    
0      -48    
32     48     
80     -144   
-64    -16    
64     -1120  
80     144    
-128   -1616  
16     16     
64     0      
224    192    
-128   192    
80     48     
-112   64     
96     112    
240    400    
-240   -48    
48     128    
128    -144   
192    64     
-32    48     
64     -160   
64     176    
-64    304    
-112   -1056  
48     64     
96     -48    
112    80     
0      144    
80     112    
-16    128    
32     -208   
224    -80    
144    48     
-64    400    
32     -80    
64     -32    
752    -896   
-288   -256   
432    432    
-288   416    
288    48     
16     -352   
-144   -368   
112    624    
96     16     
-96    -304   
288    80     
-64    272    
128    80     
32     -64    
192    208    
-96    -368   
-64    128    
112    128    
128    176    
64     -16    
-144   64     
176    -112   
-32    32     
272    -16    
-176   -256   
256    352    
-176   32     
368    48     
-288   -288   
192    16     
96     96     
32     96     
16     -208   
128    0      
-32    80     
144    304    
-256   -80    
80     0      
80     -576   
224    16     
-80    -224   
32     -224   
64     112    
64     16     
96     176    
-32    0      
64     64     
16     64     
16     -1552  
48     128    
-32    -512   
176    -240   
-256   96     
192    -224   
32     -96    
32     -304   
80     144    
-96    -592   
208    -64    
16     256    
144    -368   
64     -112   
-48    112    
208    -176   
-64    160    
-32    16     
128    -80    
-16    -80    
192    -112   
32     -64    
48     -400   
48     64     
80     -96    
-32    -176   
80     400    
-48    -80    
-16    -224   
304    -80    
-224   80     
64     112    
-176   -96    
0      0      
-448   -96    
272    224    
-16    160    
176    16     
16     -352   
128    -928   
48     -48    
-96    -240   
0      0      
32     -112   
80     0      
176    -128   
48     64     
128    0      
-160   -208   
192    208    
128    224    
-1168  -96    
112    -48    
32     -64    
32     -240   
176    -64    
-144   -400   
-32    160    
-16    -144   
192    256    
-144   -400   
192    -112   
-64    16     
48     -48    
-96    96     
64     -224   
-368   192    
176    32     
-448   80     
0      -64    
0      48     
144    -512   
-336   -512   
64     160    
176    32     
96     112    
-16    -208   
0      48     
-16    -16    
32     80     
-128   -400   
-704   -160   
64     16     
80     112    
256    -128   
-208   -64    
80     -432   
-16    -96    
-256   -1296  
304    80     
128    176    
-16    64     
-16    80     
-144   -32    
-368   48     
112    32     
-112   -64    
-32    -48    
-464   -176   
0      -272   
144    -48    
-64    -304   
128    304    
112    -592   
-112   96     
112    -128   
-48    -48    
-432   -304   
160    352    
-192   32     
64     -160   
-160   112    
208    -112   
-240   -48    
208    -112   
112    80     
32     -16    
-320   -352   
112    -800   
320    -96    
288    128    
112    0      
-144   96     
-80    160    
-112   -16    
272    -96    
-176   16     
112    -208   
-176   64     
32     -16    
192    224    
-512   -288   
32     96     
-176   -368   
-624   112    
-96    16     
224    208    
-336   32     
304    32     
-144   64     
128    -48    
-112   -48    
32     -32    
176    192    
-432   -64    
0      128    
-480   0      
128    -208   
-48    160    
0      64     
-1392  496    
-592   -528   
576    -240   
-192   -272   
-80    -624   
-688   -432   
736    272    
-288   352    
192    -32    
-256   -224   
-80    -64    
-192   -16    
336    -80    
80     32     
-208   -80    
-208   160    
-288   -64    
48     560    
160    32     
-112   272    
-1456  -128   
128    160    
-320   -304   
112    -128   
-448   -288   
192    0      
-256   32     
64     416    
272    0      
-272   -240   
96     -16    
16     64     
-208   -80    
-64    144    
160    96     
-592   -16    
-112   80     
-304   -704   
16     288    
-112   -32    
192    208    
-208   80     
48     -48    
32     240    
-64    -48    
-48    -80    
-96    -272   
128    352    
-240   -144   
-128   -272   
-576   -416   
112    208    
-1280  -32    
160    576    
-176   -96    
-32    128    
-16    -16    
-320   -496   
368    -192   
240    688    
-272   272    
64     336    
-160   -16    
-80    128    
0      192    
-112   0      
-32    32     
-80    16     
-48    96     
-208   -640   
-256   -160   
-16    272    
0      64     
96     -16    
48     192    
48     240    
144    544    
-208   144    
336    -112   
32     208    
208    400    
0      160    
-320   -160   
112    144    
-256   80     
-32    176    
-16    112    
112    -48    
-224   144    
-32    48     
0      48     
48     -16    
-176   -96    
16     0      
224    224    
-32    176    
160    176    
-80    240    
0      208    
-416   -528   
304    208    
128    240    
-64    -32    
-128   0      
-16    0      
48     96     
160    96     
-304   -128   
48     64     
-160   128    
-192   -80    
80     240    
-208   -64    
32     400    
-96    192    
16     -32    
0      96     
256    256    
-128   -128   
-16    80     
-64    -384   
224    -32    
32     32     
-80    -32    
-144   96     
-16    -240   
48     144    
0      96     
208    112    
-112   -16    
32     128    
-32    48     
-128   64     
0      -64    
96     224    
144    128    
16     144    
-96    80     
80     160    
-208   176    
160    -48    
-16    144    
-192   -32    
-48    -16    
128    -176   
-48    160    
32     80     
288    224    
-320   80     
112    0      
-32    0      
-128   -32    
48     208    
-112   -48    
192    144    
-128   0      
-80    80     
176    96     
48     224    
-80    32     
176    112    
-16    96     
144    32     
0      0      
0      0      
144    288    
-176   -16    
384    192    
32     -16    
-16    256    
-48    128    
-144   176    
32     16     
128    -64    
304    -48    
-48    240    
-240   256    
-96    32     
80     160    
128    -112   
176    176    
-32    144    
0      64     
48     160    
-112   128    
-144   64     
-16    -384   
-16    -48    
160    48     
-16    -80    
48     32     
-16    208    
-96    208    
32     0      
224    224    
-192   112    
224    -112   
-64    160    
-96    -16    
304    -1232  
608    -512   
608    -384   
176    -192   
192    528    
-96    -448   
192    784    
480    64     
16     304    
-192   -304   
80     608    
96     -368   
-144   448    
144    -320   
-16    192    
48     -176   
-16    304    
32     -176   
-32    96     
-32    -144   
160    144    
-32    208    
48     176    
96     144    
-64    -112   
-144   128    
192    160    
-16    128    
96     -48    
-128   16     
240    32     
-16    224    
96     -704   
-160   160    
96     -752   
64     112    
96     96     
-64    224    
0      32     
64     96     
64     -80    
-80    192    
112    96     
160    128    
-240   -16    
112    -224   
-96    192    
192    -336   
272    272    
-256   -592   
208    48     
48     128    
-16    128    
128    0      
-32    96     
96     0      
192    112    
-160   96     
128    48     
16     0      
64     -64    
32     208    
0      16     
176    80     
48     16     
-128   112    
80     -48    
16     80     
96     176    
80     224    
-144   -96    
176    160    
-48    -64    
160    160    
-64    64     
128    -64    
224    272    
-176   -352   
240    32     
-144   -608   
32     144    
176    -992   
48     160    
-80    -1584  
-160   16     
-224   -96    
400    224    
-144   32     
240    240    
208    496    
-288   -352   
-224   -208   
304    -496   
112    352    
48     -192   
-80    96     
16     -288   
144    -96    
16     144    
224    240    
-80    96     
96     160    
96     224    
64     224    
32     80     
80     -512   
336    320    
-16    16     
48     304    
112    144    
16     64     
32     -80    
64     32     
16     -16    
-48    64     
96     96     
32     192    
-32    128    
48     -176   
32     -80    
-240   48     
96     128    
144    16     
-32    128    
16     -208   
-16    160    
160    -400   
-160   0      
208    -80    
32     -1456  
-16    80     
16     -2096  
80     -176   
96     128    
-96    -144   
160    -80    
-96    -1856  
448    -80    
-176   -144   
-160   -288   
128    208    
64     0      
144    -432   
-16    288    
96     -720   
-16    224    
-48    -336   
160    -144   
-240   240    
112    0      
80     -16    
48     -1248  
112    -208   
-16    -320   
112    176    
-96    64     
48     -128   
32     -304   
64     0      
160    -128   
-208   128    
128    160    
-48    -96    
-48    -16    
96     -272   
80     0      
-48    -512   
-32    -224   
224    -512   
112    -48    
32     -1120  
-144   -160   
64     -192   
-48    64     
128    -32    
-128   0      
-96    96     
-144   -80    
32     -112   
-80    0      
240    16     
48     128    
0      -48    
16     -80    
-32    -96    
-96    -1072  
-80    -160   
176    -160   
128    272    
48     -32    
-32    -240   
0      16     
112    -80    
80     -128   
208    80     
-592   -64    
256    -112   
-96    80     
176    -64    
-96    1840   
-384   -912   
-720   -640   
192    464    
-416   0      
464    320    
144    -688   
112    704    
-272   -368   
112    256    
192    -320   
-832   416    
-336   -416   
512    112    
-16    -144   
176    -336   
-272   -480   
256    112    
112    -224   
128    48     
-368   272    
-176   32     
224    32     
-48    0      
-160   432    
240    -16    
-240   336    
-80    -976   
336    160    
224    -80    
-272   -80    
128    -400   
64     272    
112    -400   
208    336    
-64    32     
176    -256   
-64    192    
32     -32    
128    448    
-80    48     
-48    96     
-160   16     
-32    48     
112    -16    
-112   -96    
144    -368   
96     -208   
112    -416   
-80    -16    
-80    80     
16     -80    
-128   224    
-192   32     
-112   16     
32     -80    
-176   -80    
144    -208   
-96    -80    
64     -336   
-64    80     
112    -112   
-80    -96    
208    -448   
-160   0      
-64    -48    
128    80     
-16    176    
256    448    
-272   368    
-16    -48    
32     -64    
0      -160   
48     16     
-176   -176   
16     112    
-512   -32    
-16    80     
-48    -96    
-624   -16    
-64    0      
-944   32     
-96    -208   
-240   -400   
80     176    
128    160    
160    480    
-272   224    
16     128    
192    -16    
96     112    
-224   -464   
-64    -144   
-48    -32    
-32    64     
16     176    
-128   160    
-64    80     
-256   -64    
0      48     
-32    -16    
-48    -16    
-144   -16    
192    288    
-96    -368   
-16    -16    
-320   -192   
-80    -80    
160    112    
-112   32     
48     240    
-80    64     
0      96     
-272   112    
-128   144    
-112   192    
80     64     
-176   -144   
96     192    
-272   -224   
192    80     
-48    16     
144    240    
112    208    
-144   -16    
-160   272    
-144   80     
160    144    
-48    0      
32     112    
-256   16     
160    304    
-160   80     
464    112    
-368   -112   
112    272    
48     144    
176    -64    
-320   -16    
-128   -48    
192    112    
48     16     
-192   144    
-208   -32    
-32    -32    
-304   -96    
16     -192   
-1152  -64    
208    176    
-160   0      
208    128    
-128   -32    
-48    96     
112    64     
-208   96     
96     96     
-16    80     
-16    64     
16     176    
96     48     
-80    -16    
16     128    
-432   48     
96     208    
-112   -64    
-16    96     
-48    -256   
-16    0      
272    176    
-144   176    
80     128    
-160   -16    
0      144    
-48    -96    
-128   64     
96     32     
-16    192    
-576   -208   
16     48     
-64    -64    
32     192    
-112   160    
80     -80    
192    0      
-160   128    
-32    -64    
96     208    
-96    -32    
64     176    
0      32     
-144   96     
-16    80     
-240   -240   
16     240    
0      144    
-16    64     
-16    176    
16     -16    
-896   -1072  
544    688    
-1792  816    
496    -64    
416    704    
-80    -1056  
80     528    
448    -368   
128    800    
96     -784   
-128   544    
224    -240   
16     448    
-64    -192   
160    304    
-240   32     
96     112    
-96    336    
-48    -400   
32     0      
64     32     
-48    432    
-112   -96    
64     224    
-16    -256   
-32    144    
48     16     
-144   208    
192    48     
-144   96     
96     -96    
-144   160    
192    160    
-112   16     
-16    16     
-320   -128   
16     48     
-16    0      
-32    112    
-32    0      
-64    80     
-80    112    
48     128    
96     32     
16     16     
-48    96     
80     128    
112    112    
-208   64     
128    96     
-16    64     
112    80     
-80    176    
96     160    
0      80     
-48    64     
192    192    
-64    32     
192    96     
-64    64     
64     176    
-128   -144   
96     -48    
-192   128    
80     0      
16     16     
128    160    
-144   -96    
96     -224   
-16    96     
96     16     
-32    176    
48     144    
16     80     
-48    -32    
112    16     
192    240    
-192   224    
-80    64     
480    416    
-112   272    
160    144    
-160   -128   
-32    -784   
192    224    
-128   80     
64     144    
-32    32     
144    128    
-144   -112   
288    16     
32     208    
-48    48     
-176   -80    
112    48     
-112   128    
320    816    
-160   208    
-112   -224   
160    16     
112    32     
80     192    
-96    -32    
0      144    
96     96     
64     176    
144    240    
-176   80     
-48    -224   
48     64     
-16    -16    
128    128    
0      16     
-128   -368   
144    176    
-32    64     
112    128    
-96    32     
80     48     
0      80     
48     -64    
96     224    
-32    192    
-32    -160   
-160   -80    
96     112    
256    0      
176    384    
-224   -384   
224    0      
-48    -800   
48     48     
192    176    
32     -48    
-64    224    
-16    -48    
-16    -160   
16     0      
272    80     
112    -48    
192    288    
-208   0      
176    272    
-16    -128   
32     64     
80     -80    
0      -160   
96     192    
-224   144    
96     240    
-16    -64    
128    176    
304    176    
-176   128    
-16    208    
-368   112    
80     -288   
176    112    
32     -128   
288    336    
-288   -880   
240    64     
16     -1600  
208    80     
0      48     
64     96     
64     624    
-288   -224   
608    -80    
16     288    
80     112    
-16    -16    
-160   240    
320    -256   
32     176    
-64    -192   
112    128    
-176   16     
128    192    
-32    -320   
32     64     
192    -48    
-96    192    
48     -32    
-96    80     
144    240    
-176   208    
-64    -32    
-16    -240   
240    208    
112    0      
-112   160    
-160   -112   
208    64     
400    -880   
-64    256    
-128   -80    
-80    240    
224    64     
-1200  -2480  
1040   480    
-368   -128   
480    464    
-464   160    
400    -64    
-688   -64    
208    -544   
-176   -544   
80     -320   
432    400    
288    176    
32     96     
-176   -368   
224    144    
-288   -384   
96     256    
128    -32    
144    128    
16     -176   
272    224    
-48    -16    
160    -128   
-16    -528   
256    64     
-64    224    
-48    -32    
192    192    
112    -736   
-32    -192   
0      -64    
96     -80    
-48    -128   
160    -1344  
-16    -128   
224    176    
-32    -48    
48     112    
16     16     
224    -144   
16     240    
64     -80    
144    -64    
64     112    
192    16     
-112   80     
-16    -560   
-112   -384   
288    -16    
-160   -144   
272    -432   
-144   80     
176    144    
64     224    
-192   -368   
0      16     
144    -304   
144    128    
-128   80     
128    80     
-608   64     
80     -112   
64     -64    
80     -224   
176    64     
-16    -16    
-32    80     
96     -896   
-32    48     
128    -160   
-48    160    
64     16     
144    -176   
96     -16    
-80    -144   
0      -384   
144    -160   
-96    352    
32     0      
128    64     
80     -224   
48     -48    
48     -784   
0      64     
176    -320   
192    144    
-192   48     
208    -208   
-32    -96    
-48    -32    
64     64     
0      -80    
-864   -144   
336    -176   
-80    -304   
320    -112   
-240   -144   
176    -528   
-48    32     
96     -64    
0      128    
-240   -224   
-32    -144   
-80    -64    
48     16     
16     272    
-80    96     
0      -208   
-64    -144   
-976   -80    
240    16     
-16    -48    
-16    -336   
48     160    
336    -144   
-144   176    
-32    -112   
-16    -176   
96     0      
272    208    
-192   224    
272    16     
-464   80     
48     -256   
-32    0      
48     -16    
144    256    
-64    -336   
80     64     
-80    -880   
160    160    
-16    96     
96     32     
-224   32     
-432   -96    
-320   -48    
80     -16    
-144   48     
272    -80    
-352   80     
0      -48    
208    144    
-32    -336   
128    320    
80     -144   
176    96     
-144   208    
32     64     
-96    -64    
16     112    
-16    -64    
48     176    
0      64     
112    160    
-128   0      
-16    -192   
48     144    
304    48     
-192   128    
-32    80     
-800   32     
-32    -48    
96     288    
-128   16     
64     112    
-144   96     
256    0      
96     -80    
352    480    
-208   -48    
-672   -288   
0      96     
176    -176   
-16    16     
-192   -144   
-544   160    
-144   -320   
-192   160    
-304   -64    
-864   48     
-144   128    
112    -256   
-16    -48    
176    -192   
-208   208    
-320   -176   
144    320    
-96    -448   
128    112    
-64    128    
-96    32     
0      48     
16     160    
-192   0      
-112   -112   
0      32     
-16    16     
-80    128    
2032   -720   
-880   416    
992    528    
-272   976    
-16    -96    
-368   -352   
-480   -144   
224    336    
128    128    
-272   176    
-144   112    
160    -256   
-64    400    
-416   -224   
64     64     
-32    -144   
192    272    
-128   -256   
32     32     
-32    80     
64     112    
16     176    
-16    128    
-160   64     
32     -144   
-96    -48    
-16    80     
128    256    
-112   96     
-144   -32    
-32    -224   
-64    112    
256    0      
0      320    
192    112    
-144   64     
-176   16     
64     32     
-80    -32    
64     96     
80     64     
48     224    
-16    96     
-176   -96    
-80    112    
-336   -112   
192    176    
-80    112    
32     32     
-16    -64    
-80    -64    
64     80     
-48    96     
16     48     
80     0      
16     96     
-224   -128   
32     128    
-80    -48    
0      -96    
-480   -16    
144    224    
32     176    
0      320    
16     128    
-48    -32    
32     192    
80     80     
-16    32     
-96    -32    
0      48     
-64    -48    
64     176    
-272   -80    
128    96     
-336   -48    
304    496    
-96    352    
-240   16     
368    16     
-288   256    
240    -32    
16     208    
-240   32     
96     -32    
0      64     
-80    0      
144    352    
-80    128    
128    96     
-192   -96    
-48    96     
64     0      
-32    32     
96     208    
-16    64     
16     128    
-16    80     
16     48     
-80    0      
112    96     
0      128    
64     192    
-224   -32    
16     80     
-224   -32    
-64    16     
192    304    
-112   48     
96     -32    
16     144    
-144   -32    
96     16     
-64    144    
32     48     
128    112    
-144   64     
-32    128    
-112   -176   
-16    176    
-80    144    
96     -32    
-128   32     
-16    128    
144    128    
160    96     
-144   400    
272    160    
32     -64    
16     96     
-128   144    
128    -128   
32     112    
-48    -80    
64     240    
0      64     
-80    -608   
96     128    
304    192    
-192   336    
160    0      
-80    -96    
64     176    
144    144    
-192   64     
48     64     
-16    64     
16     160    
-64    32     
48     16     
32     144    
32     96     
0      16     
112    80     
64     384    
-208   176    
64     -208   
-336   -64    
208    64     
-32    144    
-208   128    
-48    -192   
144    112    
112    -16    
-96    144    
0      128    
512    -32    
-384   352    
112    -128   
176    -80    
112    96     
208    64     
-160   112    
-288   -48    
176    -64    
288    416    
-336   -96    
224    96     
208    16     
-16    304    
-208   32     
-208   208    
64     -176   
304    112    
32     208    
-160   -80    
-96    -32    
128    336    
16     128    
96     336    
-64    320    
-112   16     
48     96     
48     64     
80     -640   
176    128    
-48    96     
48     32     
-32    176    
-624   -176   
432    768    
688    -48    
-368   752    
32     640    
-112   528    
-256   -192   
256    96     
320    192    
-400   160    
304    -512   
0      160    
64     -912   
0      112    
144    160    
64     208    
-128   -32    
128    0      
-16    -32    
128    -80    
-112   -32    
176    224    
96     208    
128    96     
-64    128    
80     -208   
-80    128    
128    -336   
80     48     
-48    0      
176    176    
64     112    
64     128    
-64    96     
80     80     
-176   -160   
224    -16    
-48    128    
112    -128   
-64    160    
32     -224   
64     160    
48     -640   
176    64     
-112   0      
160    192    
48     -608   
160    320    
-384   144    
240    0      
-16    144    
0      16     
96     80     
-32    -192   
96     160    
128    176    
-144   -48    
336    -272   
-224   192    
176    -1728  
208    272    
-208   64     
176    80     
-48    176    
128    -16    
64     0      
-48    224    
32     160    
32     64     
112    96     
48     32     
64     256    
-48    -848   
240    0      
-16    160    
96     320    
-160   48     
160    96     
80     -48    
48     -32    
64     16     
-96    -16    
80     352    
32     -768   
144    -64    
112    -336   
112    304    
-224   -192   
272    96     
-96    -128   
128    144    
0      128    
64     112    
48     240    
-208   -224   
384    128    
-160   -128   
192    208    
48     -160   
96     240    
240    64     
16     128    
-16    -160   
112    48     
0      -96    
128    64     
-64    -304   
112    336    
-64    176    
352    -1776  
-96    -464   
32     -96    
144    -2032  
16     -112   
48     96     
-32    16     
96     112    
-96    -272   
128    128    
0      -240   
128    128    
-48    16     
144    -304   
160    80     
32     -128   
-64    -208   
112    -240   
-112   -256   
-48    -128   
192    -544   
96     -160   
144    128    
-16    -16    
320    208    
80     32     
48     -176   
112    240    
64     -336   
-48    224    
-560   -128   
192    48     
-192   0      
16     224    
112    32     
64     -32    
-48    -96    
-32    -1344  
112    -80    
160    96     
-96    112    
64     -96    
160    80     
32     -176   
96     192    
-96    -208   
176    32     
-1040  48     
272    -304   
-16    64     
-32    -304   
-32    -80    
160    16     
32     64     
96     -1584  
160    176    
-128   -64    
80     176    
-48    -176   
-48    -64    
-16    48     
64     64     
-480   96     
-96    -176   
-96    -48    
-16    -80    
-64    -240   
128    -48    
-160   -208   
80     -976   
-80    176    
112    -64    
0      32     
80     80     
48     -32    
-48    -16    
144    -64    
-432   -16    
32     64     
-304   32     
144    16     
-80    32     
32     -160   
48     -256   
160    -208   
160    64     
64     96     
16     128    
-112   -80    
-304   -208   
192    -1120  
-240   432    
144    80     
-176   224    
80     -64    
288    -96    
-816   224    
-144   -80    
144    16     
80     80     
-16    64     
48     -208   
-64    128    
0      -160   
144    -64    
192    576    
160    352    
-48    -16    
-176   -352   
-704   -80    
144    -240   
-416   -112   
-64    -128   
-32    32     
208    -256   
-80    160    
64     -1120  
64     -48    
-16    336    
-96    0      
0      -96    
144    80     
0      -16    
48     64     
-128   -48    
-80    144    
-144   -208   
192    -64    
16     16     
176    -240   
-64    160    
64     -240   
32     64     
-48    48     
208    -32    
-160   16     
112    -144   
-176   -80    
-48    -16    
64     -128   
0      112    
-560   128    
304    -192   
-224   128    
-64    -160   
-16    256    
-48    160    
-240   80     
-160   48     
-480   -160   
-96    80     
0      0      
96     -48    
-80    112    
-128   48     
16     16     
-336   16     
-432   -192   
0      144    
-256   -112   
-96    48     
-16    32     
-128   -64    
-160   0      
-144   80     
336    720    
-608   432    
-272   -128   
144    -192   
-192   192    
224    -208   
-80    144    
-112   -80    
128    -16    
-48    -48    
48     144    
-192   -16    
16     -96    
-16    176    
-144   80     
128    32     
-464   32     
-48    16     
80     128    
-160   -32    
112    -32    
144    352    
-16    32     
128    64     
-272   -192   
-96    -192   
112    64     
-160   16     
48     96     
-48    16     
-16    320    
-192   -64    
32     0      
-208   96     
32     -16    
-48    -80    
0      64     
0      -128   
48     96     
-32    96     
0      48     
32     96     
0      16     
-32    0      
-144   -96    
-176   -80    
208    112    
144    224    
-208   80     
-96    224    
-976   -368   
160    -320   
-144   -256   
256    176    
64     256    
-96    80     
-16    -16    
-80    112    
-48    32     
112    -16    
128    528    
-240   208    
144    -112   
-304   -144   
112    0      
-352   96     
80     208    
80     -144   
-112   128    
0      16     
-64    176    
-496   -304   
176    80     
-64    224    
32     -48    
-48    288    
-128   -112   
176    144    
-80    400    
-288   352    
-528   -16    
192    272    
-64    0      
64     32     
-160   112    
128    32     
-64    240    
112    0      
-80    160    
32     224    
-288   80     
-64    144    
-80    128    
-208   -16    
192    160    
-208   160    
-16    48     
176    144    
-160   0      
0      -144   
128    240    
-176   -16    
128    320    
-128   0      
80     -48    
-128   -96    
-128   16     
160    144    
-112   192    
-16    176    
-160   400    
-384   -112   
16     16     
32     16     
48     0      
-80    144    
-16    16     
48     304    
-192   128    
-32    368    
-144   0      
-64    128    
64     1568   
128    272    
-1232  -32    
-960   -1248  
240    48     
128    192    
448    -16    
-32    752    
-112   -64    
32     64     
-96    -16    
-48    48     
144    272    
16     48     
16     48     
-64    96     
-112   32     
176    96     
-128   -80    
64     0      
48     192    
-16    208    
-16    16     
-112   -16    
64     64     
-144   -112   
304    160    
-128   48     
96     -32    
-352   -32    
224    128    
-64    112    
80     160    
0      48     
-32    32     
80     48     
320    288    
-224   192    
160    -32    
-160   16     
48     64     
160    112    
-144   -16    
80     160    
-112   -80    
32     96     
32     64     
48     192    
80     208    
16     -32    
32     80     
80     64     
32     128    
80     224    
16     48     
16     64     
-48    144    
64     96     
0      144    
-16    32     
64     0      
-32    -16    
-48    -128   
96     64     
32     192    
-144   192    
144    48     
80     16     
64     128    
-32    64     
176    -48    
16     208    
32     16     
144    160    
-128   128    
64     80     
128    64     
144    240    
48     48     
96     16     
16     208    
-160   64     
176    -64    
96     192    
-240   176    
192    64     
128    416    
-176   48     
416    64     
-320   -528   
304    80     
-80    128    
-64    -352   
32     176    
80     144    
-16    192    
176    -32    
-32    96     
-80    64     
256    304    
32     256    
16     0      
0      -48    
-80    -112   
144    -32    
64     144    
96     32     
-64    80     
-32    112    
128    208    
-96    128    
112    80     
32     32     
-48    96     
-48    48     
0      -48    
32     16     
192    64     
-16    240    
80     96     
112    144    
-80    160    
336    -416   
-176   80     
-16    -1216  
48     160    
128    192    
64     32     
96     224    
-160   96     
112    -112   
32     160    
176    64     
80     336    
-48    -144   
32     16     
-144   48     
272    -96    
-80    -48    
32     -48    
160    304    
160    -1552  
-32    192    
-32    -320   
-144   176    
144    48     
128    240    
-80    -128   
48     144    
16     16     
64     -112   
48     64     
112    0      
112    288    
-48    0      
64     144    
32     -160   
96     288    
-16    -720   
96     208    
64     32     
-32    96     
48     144    
48     -112   
0      -80    
128    -128   
96     80     
96     160    
-112   -64    
144    -416   
304    64     
-128   -128   
-64    96     
-32    -544   
112    -144   
208    112    
96     16     
-176   -176   
0      -144   
64     -144   
112    -80    
128    304    
-64    -560   
-16    256    
160    -384   
-64    112    
48     -928   
80     144    
16     80     
80     -16    
64     -16    
160    128    
144    96     
16     48     
-32    192    
160    -272   
16     160    
96     -16    
-1040  -1280  
1184   2016   
-1248  768    
512    -1056  
976    -336   
-480   -288   
496    -192   
-288   1696   
176    -336   
-288   -2032  
112    -16    
256    -912   
-64    64     
80     64     
288    272    
-112   64     
-32    32     
448    320    
-512   -800   
448    -368   
48     208    
-208   -80    
144    80     
-688   -64    
256    -96    
32     -32    
160    -272   
-80    80     
-48    -16    
144    -128   
32     -1312  
96     -16    
96     -256   
-32    48     
64     -32    
-32    288    
-64    -272   
-32    -48    
-288   160    
384    32     
-560   -128   
80     -32    
32     96     
32     -832   
48     -128   
32     -1824  
128    -16    
96     -288   
96     -224   
208    -16    
48     336    
288    -96    
-144   -336   
16     -160   
64     80     
-288   80     
144    -240   
96     -80    
304    80     
16     -16    
160    -416   
-192   -160   
288    -1984  
-272   144    
144    -320   
32     -288   
304    -32    
-96    80     
112    64     
-80    32     
-128   -16    
128    -208   
144    -112   
48     -192   
128    64     
192    64     
-32    32     
-176   -880   
624    432    
192    288    
192    624    
-144   -96    
-48    -240   
-32    -48    
-64    -224   
-64    128    
32     -64    
-256   176    
32     -192   
112    256    
-16    -128   
32     -160   
80     -512   
96     272    
-32    32     
64     -32    
-128   -32    
144    -176   
-80    -176   
-16    -272   
-80    176    
80     64     
-80    -32    
-32    -80    
-1552  -176   
320    -208   
-208   -96    
272    -128   
-160   80     
256    -128   
0      240    
-32    0      
80     -112   
-224   -48    
144    -128   
80     160    
16     -112   
-128   -208   
-80    -160   
-192   -432   
192    -144   
-16    -64    
96     -48    
96     176    
144    -688   
48     336    
-384   -112   
336    -96    
-272   96     
64     -336   
-160   -192   
48     112    
64     -352   
-32    96     
80     192    
-16    80     
16     16     
240    -208   
-192   -304   
-208   -112   
64     96     
16     16     
-48    64     
-144   -208   
176    64     
-352   -64    
176    -176   
-160   -32    
128    336    
-496   48     
-480   -320   
-64    32     
-1504  -320   
-16    32     
144    160    
-128   96     
-256   96     
160    -112   
192    160    
-240   -48    
80     -64    
96     64     
0      192    
-592   -336   
16     64     
32     352    
-480   -272   
-48    128    
176    192    
-80    -208   
-448   16     
-96    64     
-256   -272   
-32    144    
-544   32     
-64    96     
-32    -48    
-16    112    
112    -48    
16     96     
-144   -16    
48     16     
-128   -112   
-48    32     
192    -48    
-32    128    
-64    16     
-64    272    
-112   -48    
-32    64     
-16    -80    
-96    48     
-272   0      
-80    32     
80     -160   
-64    128    
-224   320    
32     112    
272    256    
-192   896    
-48    768    
672    -144   
-176   -400   
80     -144   
-384   160    
-256   496    
-48    128    
304    -160   
-448   -192   
224    128    
-48    -160   
-32    64     
32     0      
-16    96     
0      112    
-112   -32    
80     -16    
32     144    
-48    32     
-128   -16    
-128   160    
96     -32    
16     64     
-784   -144   
0      144    
-208   -128   
0      -32    
-64    16     
160    112    
64     -16    
-208   32     
-32    112    
32     96     
-112   -64    
112    224    
-64    272    
-208   -160   
-96    -32    
-512   -48    
32     80     
16     -64    
-48    112    
240    112    
-224   48     
16     -48    
-48    16     
-96    48     
32     224    
-128   -144   
176    160    
-224   160    
112    0      
-176   48     
-128   -32    
96     208    
64     -32    
-80    160    
-160   -64    
160    -16    
-128   240    
-16    128    
32     -48    
32     80     
-160   208    
-128   -160   
80     64     
-144   -32    
16     208    
-400   32     
144    -16    
48     64     
-48    160    
-16    80     
32     16     
144    144    
-192   64     
192    0      
-80    80     
-112   64     
-16    -80    
48     176    
0      32     
-128   224    
-448   -112   
80     128    
128    224    
-16    -48    
352    192    
-144   112    
192    144    
-32    112    
-48    64     
80     64     
-112   128    
176    128    
16     -32    
0      -96    
32     112    
-112   -16    
16     96     
96     80     
-96    80     
256    208    
-48    80     
112    32     
-208   64     
176    448    
-96    -16    
64     16     
-112   -16    
80     176    
-80    128    
192    128    
48     16     
16     320    
-144   -16    
16     96     
80     112    
112    -48    
-256   -48    
240    96     
128    32     
-96    48     
-16    32     
-64    176    
80     192    
-208   -272   
-32    -16    
112    256    
112    0      
-32    192    
144    0      
-64    96     
64     320    
-64    240    
352    64     
-32    112    
-176   160    
288    96     
-336   -320   
-16    160    
-48    112    
192    32     
0      -128   
112    -32    
-192   -128   
224    416    
32     208    
0      0      
80     160    
0      16     
-32    128    
-48    -80    
-48    -128   
80     240    
192    368    
-176   -512   
288    -128   
-64    256    
32     16     
80     256    
128    64     
-144   64     
64     80     
-144   -80    
224    160    
-32    32     
-96    -16    
0      144    
176    48     
0      16     
64     192    
32     -448   
64     144    
-48    240    
-48    32     
-32    144    
-48    96     
96     240    
16     48     
0      144    
32     64     
96     176    
-192   64     
-96    -224   
192    64     
240    160    
80     16     
-192   112    
32     80     
0      192    
48     80     
-80    128    
112    0      
128    176    
-176   224    
-112   224    
-1008  -160   
-896   -1232  
16     224    
80     416    
224    224    
-64    1120   
-336   80     
544    48     
-416   -256   
384    96     
80     304    
-32    -32    
-32    320    
192    -272   
-48    96     
-144   -192   
64     304    
-80    96     
256    112    
-208   -256   
224    -512   
-16    16     
160    -368   
-48    16     
112    192    
-64    240    
-128   -192   
80     192    
-112   -16    
160    -32    
192    176    
64     48     
144    144    
-48    -160   
-160   32     
64     -208   
64     352    
208    -48    
-176   -144   
128    -128   
-80    288    
-48    -144   
128    112    
-80    48     
128    288    
-64    208    
32     -144   
192    400    
64     -192   
-32    112    
16     -96    
32     160    
192    -192   
-128   -160   
160    -976   
48     144    
112    -16    
-192   -64    
-32    -96    
304    112    
-128   16     
96     96     
64     64     
16     -368   
32     48     
400    -80    
-192   112    
96     -544   
-16    272    
0      -208   
80     128    
0      64     
208    272    
-128   16     
32     160    
0      176    
80     16     
496    368    
288    272    
-288   -32    
160    -336   
32     128    
0      48     
-32    256    
-16    -112   
80     -80    
208    64     
256    448    
-384   -272   
272    -128   
144    208    
144    240    
-96    -128   
0      -208   
16     0      
-64    -432   
160    192    
-48    -96    
128    32     
-80    -384   
80     -1088  
48     0      
96     -2432  
0      176    
-496   -32    
48     -240   
128    -48    
32     48     
128    288    
32     -128   
16     -32    
-80    32     
128    -64    
128    176    
48     -400   
64     -128   
64     144    
80     16     
-96    -304   
-96    80     
144    -368   
80     -176   
-16    -368   
-16    -48    
96     -544   
176    96     
-16    -2992  
144    -96    
-176   128    
272    128    
-32    48     
0      -128   
144    80     
32     128    
-336   -272   
272    -80    
-1936  -288   
-160   -288   
400    -176   
0      -112   
-80    -32    
128    -960   
32     -192   
-64    -16    
-208   112    
160    224    
0      304    
112    -64    
-48    32     
-32    -64    
64     48     
-160   -112   
128    0      
-32    112    
48     48     
0      -144   
80     -272   
96     -400   
176    -688   
-144   224    
160    -96    
-160   144    
192    -144   
-32    -208   
160    -96    
128    256    
-336   256    
-96    -64    
-384   -64    
240    -224   
176    -32    
112    -144   
32     96     
-128   -496   
48     32     
-32    96     
16     48     
0      192    
-16    -112   
64     32     
96     -144   
-160   -16    
112    -208   
-464   192    
-96    -80    
288    32     
64     -656   
-80    32     
112    -1328  
-16    224    
112    -128   
32     16     
-16    176    
80     -416   
-208   96     
-128   96     
-176   -16    
-64    224    
704    -80    
1152   992    
-352   48     
-240   -304   
-144   48     
240    -432   
-592   -64    
992    208    
-288   -80    
176    -160   
-160   -48    
-96    -144   
112    336    
176    -192   
-80    208    
128    -80    
-16    -64    
128    -160   
16     -32    
16     16     
32     -96    
160    16     
-144   16     
48     -192   
-80    -80    
-96    96     
128    32     
16     144    
-240   -192   
-32    -96    
-160   -16    
192    -16    
-576   0      
-112   -96    
144    64     
-368   -144   
160    -96    
-112   128    
224    -96    
48     144    
64     80     
-112   48     
80     -48    
-32    -64    
16     80     
128    128    
-32    80     
80     160    
-1648  -224   
256    0      
-1216  -192   
48     64     
80     224    
-288   -48    
112    48     
-992   16     
-48    48     
96     16     
-112   160    
64     -32    
64     208    
-32    16     
48     64     
-160   -32    
-80    96     
-32    -112   
-80    16     
48     224    
-560   -176   
64     112    
-544   -192   
64     96     
-752   -64    
16     48     
-32    48     
0      208    
-480   -112   
128    112    
-48    -96    
-16    176    
64     176    
-144   16     
32     -272   
32     -160   
-144   128    
-192   -32    
208    480    
-160   16     
176    0      
-80    -80    
-32    -16    
0      -112   
-48    128    
16     160    
128    128    
-80    0      
-112   16     
-16    96     
-48    48     
-176   -208   
96     304    
0      -16    
-112   128    
-144   -32    
-288   -160   
64     64     
112    80     
112    64     
-80    -464   
-272   -64    
256    336    
-80    208    
304    256    
-32    208    
128    208    
-176   80     
80     32     
-272   -80    
128    96     
-160   -384   
-16    0      
-1056  80     
16     -96    
-80    -32    
144    176    
-80    -144   
16     128    
-128   64     
-16    128    
144    -16    
-48    96     
64     80     
-96    208    
144    112    
-112   -48    
-32    112    
-432   -96    
0      96     
96     96     
96     128    
-64    160    
-96    96     
128    -96    
-32    16     
-80    160    
208    -96    
-256   16     
208    144    
32     176    
-384   -128   
64     64     
-432   64     
-48    0      
64     112    
32     144    
0      192    
192    -80    
96     752    
-208   64     
-64    -32    
-48    32     
144    -16    
-80    64     
16     32     
-256   -144   
240    64     
-464   64     
128    -368   
16     320    
-224   16     
16     80     
-224   64     
32     -112   
192    352    
-288   48     
240    0      
-320   160    
32     -32    
96     176    
-224   48     
144    0      
-48    96     
-96    80     
160    80     
64     48     
32     80     
-48    32     
128    192    
-32    -32    
80     208    
-224   0      
-16    80     
-32    176    
304    64     
-256   0      
-16    32     
32     96     
48     96     
2464   -1200  
-144   -384   
64     1152   
-352   576    
480    320    
-208   -768   
112    896    
-64    -512   
-224   320    
-80    -352   
288    656    
-96    -576   
-112   640    
-128   -128   
144    448    
-240   -416   
272    416    
400    -320   
48     240    
-336   -112   
160    384    
-192   96     
48     -224   
64     64     
112    -240   
112    48     
-48    -240   
0      544    
64     0      
-112   400    
-32    -128   
176    96     
16     112    
128    112    
-16    144    
320    512    
-32    112    
-80    -32    
-128   -192   
176    144    
64     144    
-80    -64    
96     112    
160    288    
-16    112    
64     32     
-32    240    
-112   240    
-160   -112   
-128   -448   
-16    -224   
64     48     
-64    48     
160    64     
-112   32     
160    48     
-208   -192   
32     -48    
80     128    
-304   -672   
320    336    
64     208    
192    320    
16     352    
-144   144    
-144   32     
192    128    
64     -80    
-32    -416   
-160   112    
144    -80    
112    288    
-144   -656   
272    96     
-112   16     
160    160    
144    400    
-80    240    
240    160    
256    400    
-176   128    
160    176    
-16    32     
64     32     
16     176    
-128   -400   
0      16     
-96    -176   
144    96     
224    112    
-256   -96    
256    384    
-128   -80    
112    -32    
-16    0      
-80    -96    
80     32     
-144   -192   
48     0      
288    304    
-240   -144   
144    192    
-80    -224   
80     -192   
80     -1968  
-32    -288   
-32    -272   
-96    -112   
368    368    
-96    80     
-32    -64    
0      64     
80     -48    
-16    96     
176    96     
0      192    
48     144    
112    -240   
-16    32     
-96    -560   
192    0      
32     -48    
256    320    
144    80     
-32    96     
-224   16     
192    144    
112    224    
144    128    
64     224    
-64    -144   
48     256    
160    -336   
96     208    
-128   -368   
-128   208    
256    -192   
304    352    
-240   96     
160    144    
-128   -16    
80     32     
-80    144    
128    -48    
128    160    
16     -48    
-16    176    
96     -448   
-32    160    
80     -208   
112    144    
-64    -480   
96     144    
-32    96     
112    64     
-48    128    
32     64     
112    240    
-112   -304   
192    32     
48     -112   
64     112    
-16    0      
48     224    
-80    -64    
96     128    
-48    -128   
64     80     
48     -32    
96     176    
32     128    
-16    128    
80     64     
16     -192   
-48    144    
-48    -96    
80     -16    
160    -32    
-16    -80    
32     -96    
64     144    
32     -16    
32     48     
64     160    
64     -96    
-48    -192   
112    -2144  
208    -448   
80     224    
-80    -208   
-16    -128   
80     160    
48     -352   
208    160    
-128   32     
256    160    
-48    -224   
112    -576   
2416   -208   
-976   -1360  
400    -96    
-464   144    
560    288    
128    80     
-256   -1408  
928    368    
-96    -368   
-144   352    
64     -208   
144    272    
16     -48    
128    -112   
0      -400   
192    48     
16     80     
48     64     
-240   16     
128    -272   
-48    -16    
224    -256   
-176   208    
368    -208   
-160   80     
304    -2080  
-208   48     
256    16     
-208   144    
320    -208   
-32    48     
-48    -96    
112    96     
-448   -128   
-32    -32    
-1808  -288   
48     96     
80     0      
80     32     
48     -224   
48     -320   
64     -112   
16     -112   
128    160    
16     -48    
48     48     
96     16     
64     -64    
-16    -32    
0      -96    
176    48     
16     0      
80     -48    
-16    -272   
80     -96    
112    -336   
32     208    
-144   -2256  
160    112    
64     48     
0      -32    
-96    -64    
-16    -64    
-16    32     
96     64     
-176   -96    
48     -128   
-1520  -112   
176    -160   
-16    -32    
-16    -112   
112    96     
-16    -480   
96     80     
16     -112   
-16    -16    
32     -160   
208    112    
-272   64     
128    -160   
-272   -336   
-112   -400   
-288   -96    
144    160    
-432   224    
112    112    
16     112    
128    -336   
112    176    
96     -272   
16     48     
-32    -64    
176    -176   
-96    48     
128    -112   
272    544    
-112   176    
16     304    
16     -464   
-288   144    
112    -128   
144    96     
-32    -16    
-32    -112   
112    -384   
64     -192   
-80    256    
80     16     
-112   464    
112    240    
-32    224    
-48    -48    
-192   -96    
80     -304   
-192   -32    
-48    -768   
176    256    
-80    -192   
160    112    
-272   -96    
48     -64    
-224   -112   
32     -80    
0      -112   
-32    -80    
-96    -32    
416    304    
-336   -80    
336    -80    
-192   32     
80     -48    
0      192    
-1024  -336   
144    112    
-144   32     
128    -32    
16     144    
-304   64     
80     160    
64     -192   
64     32     
48     32     
-176   -48    
-96    64     
-160   -64    
80     80     
-112   48     
-144   -304   
-272   -144   
-16    32     
0      48     
-32    48     
-400   64     
-144   32     
-208   -16    
-336   -80    
192    160    
-240   -160   
16     -272   
112    240    
-176   16     
-80    96     
-224   -128   
112    32     
144    160    
96     240    
-368   -128   
272    -48    
400    160    
-512   96     
-48    -160   
128    80     
48     176    
-192   -224   
-272   192    
-64    -112   
304    112    
-160   96     
48     -32    
-144   64     
-144   -64    
160    64     
-256   64     
-32    96     
176    64     
-96    48     
-144   -160   
144    224    
-64    -96    
0      224    
-96    -112   
336    -64    
32     224    
-160   -112   
-320   -16    
-176   -64    
176    48     
64     96     
2560   -2112  
-1104  -368   
720    1536   
-1104  848    
128    1120   
400    -528   
-112   288    
400    -224   
-496   464    
176    -80    
80     -80    
-352   -48    
32     224    
48     64     
96     160    
-224   0      
32     16     
-16    -720   
32     -128   
336    416    
-240   208    
-368   -304   
128    -368   
-256   224    
-32    -464   
-64    64     
160    144    
64     384    
112    80     
144    224    
-256   -96    
176    -112   
-80    96     
-144   -144   
80     112    
-1168  -256   
-128   -48    
-48    0      
128    176    
32     -64    
16     96     
-208   128    
16     -64    
-96    0      
-48    48     
272    144    
-80    160    
32     112    
-320   -64    
-48    160    
32     -192   
-16    48     
96     128    
32     240    
0      48     
-16    32     
32     208    
112    0      
48     112    
-208   -144   
464    64     
-192   176    
-144   176    
80     -128   
-48    160    
-112   144    
0      80     
0      80     
-64    -16    
80     96     
-48    96     
16     112    
48     48     
48     128    
48     64     
128    240    
-208   592    
-32    240    
96     32     
128    192    
-128   -64    
208    -112   
112    336    
-224   64     
192    112    
-144   -144   
288    176    
-48    48     
32     32     
-48    0      
-112   80     
-16    32     
0      160    
-160   48     
32     -64    
160    96     
-112   160    
-16    96     
16     -48    
-96    96     
32     32     
-16    -80    
-80    -64    
64     -16    
240    496    
-224   208    
160    -64    
-96    -112   
-96    -112   
256    112    
32     128    
-96    160    
64     160    
16     64     
-16    80     
-48    -96    
128    32     
-160   128    
256    128    
-96    -32    
-192   -32    
-64    48     
448    352    
-208   16     
-192   -32    
16     -192   
256    256    
-16    160    
48     -48    
-112   144    
48     32     
288    176    
-48    256    
352    176    
-368   128    
-16    32     
-32    -48    
64     288    
-80    -144   
112    64     
-128   176    
0      32     
144    -16    
-16    64     
-128   0      
368    96     
16     48     
-176   32     
16     16     
-96    0      
272    160    
-96    32     
176    160    
-48    48     
32     -96    
-32    80     
128    128    
48     288    
-96    0      
160    48     
-48    160    
80     32     
96     -16    
-96    112    
16     -64    
16     176    
-96    16     
208    0      
64     0      
128    -464   
-144   208    
-112   160    
96     160    
320    0      
96     0      
-32    256    
-144   16     
-64    176    
-32    -16    
-160   16     
64     0      
-32    -48    
128    -208   
-80    96     
-64    -448   
192    112    
64     144    
112    112    
-80    128    
64     96     
80     128    
-16    96     
96     176    
112    -112   
16     304    
16     64     
0      304    
-80    -176   
-1152  1568   
560    -432   
128    80     
-64    -1184  
-192   -32    
160    -768   
288    816    
160    -624   
64     880    
-272   -432   
304    112    
-400   0      
400    192    
-272   416    
272    -464   
-128   352    
80     -464   
0      272    
80     -1712  
-32    192    
128    -64    
-32    272    
144    160    
32     96     
-112   96     
80     144    
80     208    
208    112    
-112   64     
112    -176   
-48    160    
192    -208   
0      192    
96     -144   
-128   192    
160    -800   
80     96     
-48    -48    
128    160    
-48    16     
144    112    
-48    80     
96     32     
96     64     
32     0      
64     112    
48     -176   
-16    80     
16     -80    
128    208    
16     -544   
48     32     
-112   16     
112    128    
64     48     
0      304    
-32    16     
96     144    
0      64     
-16    -496   
16     112    
32     -96    
80     160    
0      0      
64     144    
48     32     
32     192    
80     16     
160    240    
-64    80     
96     160    
-16    112    
64     -96    
144    128    
-64    -16    
-16    144    
128    -160   
16     144    
32     -272   
0      -272   
-112   32     
48     96     
176    -336   
-64    -128   
144    -48    
48     -512   
-48    -2016  
112    208    
208    -1296  
-64    -192   
16     32     
112    -176   
32     80     
144    48     
-48    144    
0      -16    
256    272    
64     272    
176    -352   
-352   -192   
-592   -112   
192    -352   
192    -32    
112    -272   
-144   -208   
128    -1760  
0      -192   
112    80     
16     -80    
96     144    
48     -48    
-16    -256   
-144   32     
32     32     
96     -48    
-48    96     
-48    -96    
128    -32    
16     -256   
80     -224   
-64    -336   
96     80     
160    -176   
192    -32    
-144   -304   
-80    96     
32     -448   
192    -336   
-144   -32    
64     80     
16     -48    
64     -144   
-1152  0      
176    64     
80     -64    
96     336    
-96    -80    
304    -1504  
-256   -96    
288    -224   
32     112    
0      112    
144    128    
-80    80     
0      -224   
-96    -176   
240    -64    
-736   304    
0      16     
-32    -112   
160    -352   
128    -64    
128    -64    
-128   240    
-160   -1936  
112    -48    
64     16     
224    144    
-288   -176   
128    0      
-80    -96    
-16    272    
-400   -16    
-32    64     
-1552  -160   
-48    -32    
80     -160   
48     0      
-16    272    
64     -368   
48     -16    
112    32     
144    -112   
192    96     
-16    -64    
160    64     
-96    -96    
-48    -64    
160    -160   
-48    64     
32     0      
-16    16     
16     96     
48     -16    
48     -720   
32     -16    
128    -208   
80     48     
32     96     
-32    80     
-192   -48    
256    -304   
0      112    
176    -128   
-256   160    
-64    -64    
-672   -64    
48     -208   
1552   1008   
-288   304    
-16    -160   
-512   -368   
-288   16     
48     144    
272    64     
336    400    
-224   -16    
48     -192   
384    160    
-368   -64    
-48    -400   
496    80     
-160   -144   
144    128    
16     -112   
320    544    
-464   160    
288    160    
-160   112    
128    -160   
32     -16    
208    208    
48     336    
-64    -128   
-272   128    
144    -144   
-96    96     
0      -368   
192    16     
224    16     
-288   -16    
-288   48     
-1504  -64    
-16    -80    
272    96     
-128   80     
144    -160   
-128   48     
96     -208   
-160   -32    
-672   -144   
48     -16    
-32    -176   
80     240    
-528   -400   
-208   -96    
80     64     
-96    144    
128    -112   
-208   144    
-64    -16    
-336   80     
-336   128    
16     -96    
-32    128    
-144   -32    
0      208    
-272   -240   
240    64     
-64    112    
-192   16     
112    0      
-48    144    
-96    64     
-176   0      
0      240    
-608   -80    
208    80     
48     16     
-16    32     
0      0      
-32    64     
112    -144   
-160   -32    
160    160    
-224   -48    
-80    48     
-272   80     
-80    -80    
64     -48    
48     400    
-384   -32    
224    80     
-528   224    
-176   -160   
272    -112   
-112   240    
0      48     
16     -80    
32     96     
-48    112    
-80    -64    
144    48     
-64    320    
48     0      
96     -16    
-16    80     
-64    64     
0      256    
-64    176    
-32    -144   
96     96     
-64    -32    
-16    0      
-96    48     
-144   -16    
96     16     
-64    176    
144    160    
-48    80     
-64    96     
176    320    
240    320    
-560   16     
-160   96     
-704   0      
304    80     
-48    -80    
-368   -64    
192    80     
0      64     
-96    -48    
-192   -160   
-240   -80    
144    96     
144    176    
32     -64    
-48    64     
-352   -48    
192    208    
-160   -96    
336    256    
-288   144    
-128   -16    
-16    32     
144    176    
-96    0      
-96    -48    
192    64     
-128   -80    
-48    48     
64     128    
-96    208    
160    32     
144    304    
-512   16     
-64    112    
-112   128    
192    176    
64     112    
-128   -48    
-96    32     
32     -96    
64     -64    
192    -96    
16     288    
-304   176    
192    208    
-352   -128   
160    48     
-368   -96    
80     192    
16     160    
80     304    
-176   -16    
48     48     
32     48     
208    64     
-80    128    
-80    -80    
-128   80     
0      -16    
-80    128    
-208   -80    
-16    432    
336    -32    
160    144    
-32    112    
32     0      
-112   240    
0      128    
32     208    
16     208    
-32    -32    
80     192    
16     -16    
-64    16     
80     32     
80     48     
-112   48     
176    128    
160    0      
-32    240    
-48    176    
64     -48    
80     96     
592    -2624  
1168   560    
-48    832    
-464   432    
-272   -48    
304    240    
128    544    
-208   -128   
96     -128   
-272   -32    
112    96     
32     -96    
64     304    
16     128    
96     -32    
-96    -96    
-80    -48    
64     48     
-16    16     
64     80     
16     64     
-96    112    
-96    -128   
-128   48     
80     -160   
144    208    
-144   288    
160    112    
-80    -128   
-80    -48    
96     48     
128    128    
128    160    
-64    128    
48     112    
16     -96    
48     176    
48     112    
80     128    
-64    -128   
64     32     
0      96     
96     80     
32     128    
-32    112    
96     128    
-176   16     
192    16     
-32    16     
-32    0      
-48    -64    
48     192    
64     160    
32     176    
-16    80     
0      -144   
160    -32    
-192   0      
64     -96    
64     208    
48     128    
-48    -112   
32     304    
112    -128   
-96    256    
-96    -160   
64     80     
-48    -16    
176    -240   
-48    64     
64     192    
16     48     
112    64     
48     176    
0      96     
48     96     
-48    -96    
128    160    
144    80     
-16    128    
-144   336    
96     -32    
96     -64    
0      -336   
48     96     
32     176    
-16    80     
32     32     
0      64     
96     48     
48     208    
-16    160    
64     96     
-64    -48    
128    112    
0      128    
0      -320   
32     16     
32     -80    
144    208    
48     -416   
-96    96     
0      -80    
80     144    
16     -224   
144    48     
-64    96     
0      176    
32     -64    
80     160    
-32    96     
48     -112   
48     112    
-16    -384   
96     -48    
48     -256   
64     320    
128    -1680  
-80    -16    
16     96     
144    192    
48     -80    
-64    160    
96     32     
96     32     
-16    208    
416    624    
-272   16     
288    -320   
-320   208    
176    -400   
192    64     
-144   -32    
160    144    
64     48     
176    304    
-128   -16    
144    -16    
-16    224    
96     -32    
48     -16    
16     -400   
-64    224    
112    -608   
-16    176    
96     -368   
400    272    
-400   -624   
144    64     
-224   144    
64     -48    
176    272    
-112   48     
160    144    
16     -368   
416    416    
-256   -16    
-64    192    
80     -96    
80     0      
192    16     
80     96     
32     -320   
16     176    
-48    112    
416    -48    
-176   272    
-16    192    
-96    -928   
-16    80     
224    -224   
400    32     
0      144    
-192   320    
-240   224    
-16    -128   
416    176    
-192   -416   
-32    0      
-16    144    
64     -1232  
64     176    
-400   -112   
128    -1456  
0      -32    
-32    -464   
112    112    
-160   -2384  
192    -80    
64     64     
32     -64    
16     208    
-80    32     
144    -704   
-96    0      
32     -416   
-32    16     
-784   -64    
-272   1568   
-112   192    
-336   128    
-352   -416   
-16    656    
-752   -288   
384    448    
112    368    
656    368    
-480   -64    
-96    -256   
208    352    
112    -176   
-128   144    
0      -112   
192    48     
-112   -32    
0      -256   
96     -160   
0      -352   
32     48     
160    -656   
64     -96    
112    -176   
128    0      
96     -32    
64     256    
-32    48     
16     0      
-384   -112   
32     -160   
-1648  -32    
48     -144   
96     16     
-32    -96    
48     32     
112    -256   
-96    -160   
176    -96    
-32    64     
32     -16    
0      128    
-64    16     
144    -80    
-192   -64    
256    48     
-656   48     
128    208    
-208   -80    
240    -128   
-320   -16    
192    -256   
-64    -32    
176    -320   
-16    192    
144    -64    
128    16     
-16    128    
48     -64    
-32    -16    
128    32     
-208   64     
112    -208   
-736   48     
-128   -160   
128    -112   
160    -128   
-96    -32    
176    -240   
-208   64     
272    -48    
-32    -80    
-48    -16    
112    0      
-128   -48    
112    -16    
-224   -208   
112    -48    
-608   -16    
112    -272   
-368   96     
-48    -48    
112    352    
-64    -736   
304    144    
-16    -32    
-112   96     
64     -32    
160    208    
-384   -128   
304    48     
-144   -112   
144    48     
-208   -80    
192    -128   
128    176    
0      -144   
16     96     
80     -144   
-48    96     
16     16     
96     16     
-96    240    
0      -48    
-48    -80    
0      -208   
-96    160    
80     48     
-96    0      
0      -288   
128    144    
112    -192   
112    112    
-16    -144   
80     48     
-96    -16    
320    128    
-400   -80    
224    48     
-416   -192   
-16    -160   
-112   160    
192    -176   
-224   -64    
-176   -144   
64     176    
-192   -208   
48     128    
-96    -80    
-256   144    
-64    48     
48     112    
32     80     
-688   64     
-336   96     
352    112    
-64    -16    
160    -160   
-336   -32    
-112   128    
240    128    
48     64     
-144   -208   
-208   -176   
-160   -32    
144    -336   
-208   192    
80     96     
-240   144    
32     48     
-400   -96    
-192   32     
176    128    
-96    -48    
144    -48    
-80    224    
64     -96    
-80    -176   
-144   -96    
-64    192    
112    48     
-128   0      
-48    64     
-384   -16    
80     128    
-784   -256   
-336   -256   
128    -176   
96     96     
80     144    
-192   -80    
-32    48     
176    -144   
-32    32     
-64    144    
-16    112    
-96    -144   
224    64     
-48    64     
0      48     
-96    176    
32     16     
-912   -16    
-64    -64    
-80    -96    
32     208    
-80    -128   
-32    -80    
160    112    
272    -432   
-80    -48    
-272   176    
-80    -32    
16     -176   
64     128    
16     32     
-48    80     
-848   1824   
-1792  -800   
576    624    
400    512    
496    240    
-624   -368   
-368   208    
608    -304   
-368   -496   
192    -16    
-160   64     
-96    32     
128    96     
-144   -48    
-48    -112   
-112   -96    
240    96     
-1232  32     
160    112    
80     80     
-112   -128   
-208   240    
64     496    
-288   192    
128    -176   
0      -16    
16     -144   
-32    -160   
-448   -128   
240    16     
-96    96     
48     160    
-176   80     
-224   -16    
32     160    
-16    80     
-32    144    
96     160    
-160   0      
80     -80    
-64    80     
-160   96     
144    112    
-48    80     
-80    128    
-144   -64    
64     208    
-304   -176   
-96    -64    
-48    -48    
32     64     
16     272    
0      128    
32     -64    
-144   -160   
224    208    
-240   0      
80     -32    
-32    64     
96     288    
-368   -144   
192    320    
208    32     
-240   -128   
160    192    
32     96     
0      32     
-128   32     
80     128    
-96    80     
64     80     
0      48     
16     144    
-128   0      
176    208    
-64    -16    
224    544    
-160   272    
96     144    
32     0      
160    -304   
-160   160    
64     -96    
80     256    
160    16     
32     160    
-160   -96    
96     -176   
-288   -256   
128    80     
-16    112    
16     80     
-32    144    
0      48     
112    96     
0      96     
16     -160   
64     -32    
64     224    
-32    112    
48     32     
-144   -80    
64     144    
80     96     
-32    112    
-112   -16    
80     192    
-16    48     
80     160    
-64    128    
48     32     
128    112    
-96    96     
176    96     
-128   -16    
112    48     
-32    128    
80     -16    
-80    112    
64     64     
160    128    
-80    48     
48     288    
-48    64     
-64    -16    
-64    144    
368    176    
-272   400    
-80    96     
192    176    
-144   -16    
80     96     
128    144    
32     -48    
-16    192    
0      112    
48     496    
416    176    
0      368    
128    352    
64     320    
-160   -160   
96     -48    
-48    -192   
192    16     
160    192    
-112   -208   
32     336    
-32    -240   
-16    -16    
-16    -96    
32     16     
48     64     
0      -16    
-16    96     
-80    64     
176    -384   
-64    -32    
272    528    
-32    16     
160    224    
-80    -48    
-48    96     
-48    32     
16     48     
128    32     
32     -1072  
-64    32     
112    -608   
-16    48     
384    304    
-32    144    
112    240    
-128   -96    
96     -192   
208    512    
0      -112   
-32    400    
32     -176   
96     -272   
80     160    
-48    -688   
16     0      
128    -16    
48     -144   
-32    224    
48     448    
80     176    
-48    -16    
64     -112   
32     32     
-64    -16    
160    -128   
-16    160    
0      -64    
160    64     
80     16     
48     224    
-448   2336   
-1584  -384   
320    -16    
624    0      
736    16     
-896   -432   
576    592    
32     656    
-32    -304   
-256   336    
112    -192   
-16    -128   
80     -48    
176    80     
48     64     
-64    -160   
16     128    
0      -1504  
64     96     
208    -48    
-96    48     
48     112    
128    384    
96     112    
-128   -272   
-128   0      
144    160    
80     144    
80     -352   
-48    0      
48     -384   
-32    112    
128    16     
0      144    
112    32     
-16    96     
96     304    
32     160    
-16    -16    
48     -80    
48     -16    
160    -112   
-128   96     
192    -176   
-64    80     
112    -368   
64     192    
-16    64     
240    224    
-256   0      
368    112    
-160   192    
176    128    
64     80     
16     -96    
64     128    
96     64     
-112   48     
160    32     
-16    16     
96     -128   
128    160    
-16    -656   
-16    144    
80     48     
112    -160   
112    48     
-288   -96    
48     -64    
80     -208   
-16    96     
80     -32    
48     16     
80     16     
0      96     
32     -192   
64     128    
48     -80    
48     -144   
128    -128   
224    -208   
-272   128    
-288   -16    
240    112    
-128   -160   
368    -240   
-48    -96    
224    -1120  
-96    -128   
48     144    
16     -192   
80     -912   
144    64     
32     -80    
-160   -112   
48     -848   
224    96     
-464   0      
256    -112   
80     96     
-96    -160   
80     -80    
176    -768   
112    160    
-112   128    
176    -32    
-160   -496   
208    -64    
224    -16    
-272   96     
224    -80    
64     96     
-112   -32    
176    416    
-320   -320   
-96    -496   
-48    -32    
496    -272   
-272   -160   
64     -720   
-96    -160   
112    -160   
-16    16     
16     -128   
-32    48     
-32    -96    
48     144    
-272   -160   
-144   -160   
-1856  -256   
208    -112   
-48    -192   
0      64     
-192   -16    
208    -48    
304    -112   
-128   -384   
64     96     
208    48     
-80    80     
48     16     
-16    -160   
-32    96     
80     -272   
-64    16     
96     0      
-544   96     
64     144    
-272   -16    
-16    -848   
48     48     
32     -1632  
80     160    
128    144    
-144   -240   
-64    -128   
176    -32    
-160   -32    
160    -416   
-48    272    
80     128    
-1840  -80    
352    -128   
-528   48     
160    -448   
-160   16     
-32    -1088  
256    512    
80     -368   
16     -112   
-16    -64    
64     128    
48     -144   
32     0      
-320   16     
224    0      
-464   48     
304    304    
-256   -128   
96     -64    
48     192    
128    -288   
16     272    
-80    32     
96     16     
-368   0      
80     64     
128    192    
32     -352   
-336   48     
48     -144   
-16    240    
-80    48     
-64    -64    
320    48     
-240   176    
160    -96    
-144   -64    
-16    3248   
-1232  -1568  
160    -880   
624    32     
64     1248   
-64    528    
-928   496    
832    -544   
-368   -304   
192    32     
-176   496    
-32    -112   
160    352    
32     -288   
-800   -96    
-48    144    
-96    304    
-176   64     
-288   -144   
96     32     
224    -16    
-256   48     
80     144    
128    288    
-1424  -224   
-304   288    
-400   -16    
192    224    
-192   0      
-240   32     
-96    32     
-400   0      
-32    48     
-1072  -240   
208    -48    
352    192    
112    160    
-192   -16    
-544   -368   
-272   -320   
720    336    
-112   -96    
-192   224    
64     16     
-96    48     
80     -16    
-192   208    
16     -240   
-48    16     
48     48     
-640   -192   
-80    144    
0      48     
-64    192    
192    -96    
-64    144    
-320   -624   
32     0      
320    656    
-272   -608   
272    144    
-64    80     
48     -176   
0      -112   
-16    48     
-160   -16    
-64    112    
-208   0      
-32    176    
-48    -112   
144    112    
-144   -224   
-192   32     
80     -16    
32     160    
32     -48    
0      -240   
-144   -192   
-112   -48    
-16    96     
-48    112    
0      112    
-64    -48    
112    160    
-96    16     
0      -80    
16     0      
-176   -48    
288    336    
-16    80     
-48    -32    
-96    -96    
-96    -48    
-96    -160   
0      32     
-160   80     
-16    0      
-176   240    
-144   -16    
80     -304   
-64    48     
96     64     
144    176    
-128   -16    
-16    32     
-32    64     
-32    -112   
160    176    
-48    576    
16     80     
-288   -208   
-16    0      
64     96     
160    176    
-272   176    
-48    -16    
192    80     
-208   32     
96     96     
-144   -96    
0      80     
32     112    
16     272    
-80    192    
64     400    
-176   160    
304    960    
80     304    
112    608    
-752   -64    
128    -256   
-48    48     
-48    -240   
112    144    
144    240    
-112   -16    
80     80     
-160   -16    
-128   176    
112    112    
-160   96     
64     208    
-160   80     
32     80     
-464   -112   
80     -208   
-48    -272   
144    240    
176    368    
64     160    
-64    0      
48     -16    
-48    160    
-32    144    
16     -320   
368    144    
-112   736    
208    0      
-224   224    
128    16     
32     64     
-48    80     
144    -48    
-48    48     
16     112    
-96    -48    
80     -80    
64     0      
160    -32    
0      64     
-96    128    
176    528    
-304   80     
64     144    
-128   32     
64     -48    
96     64     
-16    160    
64     -96    
48     64     
64     144    
-48    128    
-64    128    
0      32     
-224   48     
144    -64    
48     224    
32     -224   
128    112    
16     208    
-32    192    
-64    128    
-16    -64    
288    0      
16     256    
-64    160    
0      320    
-128   -64    
-416   320    
1008   624    
272    736    
-96    -368   
496    -1216  
-272   -432   
752    1152   
-80    176    
-32    352    
-496   -384   
448    192    
-80    16     
0      96     
-176   48     
144    80     
-144   176    
160    -16    
-144   192    
16     64     
0      80     
144    -80    
-64    224    
208    48     
-144   192    
80     -112   
-128   48     
176    96     
-48    128    
48     32     
-32    192    
96     -128   
48     256    
-80    -112   
0      -1440  
-32    48     
304    128    
96     320    
192    160    
-192   32     
32     64     
144    160    
-16    48     
112    48     
-32    112    
112    208    
80     32     
-96    112    
-16    -96    
176    -160   
-64    192    
112    -832   
64     80     
-16    128    
-32    144    
48     -32    
64     128    
-16    112    
112    112    
0      16     
-16    176    
0      -96    
112    64     
-32    112    
64     32     
128    -64    
80     -1408  
-48    128    
-16    64     
64     256    
-48    96     
176    80     
-16    144    
-48    64     
-64    -816   
160    80     
-64    144    
128    0      
256    160    
-80    -96    
96     160    
-16    -176   
64     176    
208    96     
-144   176    
272    160    
-32    208    
112    -368   
64     -48    
64     16     
-32    208    
128    208    
32     208    
-48    160    
128    -64    
32     96     
16     -96    
16     144    
-32    -192   
-48    -96    
-32    -80    
48     240    
0      32     
80     80     
-80    48     
64     80     
144    112    
-128   -208   
-32    96     
48     -112   
80     80     
176    176    
-96    48     
80     -1312  
128    32     
0      -2528  
64     224    
-64    160    
192    256    
32     112    
-272   32     
240    -128   
48     -144   
112    144    
160    16     
-64    112    
128    -448   
-64    80     
0      -192   
256    288    
224    -176   
-144   -16    
-64    144    
0      96     
176    96     
160    208    
-80    224    
464    64     
-64    176    
-80    -384   
16     48     
64     -16    
96     64     
-48    -80    
144    112    
-80    -64    
128    432    
64     80     
-16    -16    
-32    0      
144    -112   
-32    160    
160    -160   
-80    80     
-32    -240   
112    128    
224    -304   
80     352    
288    656    
-368   -160   
-48    -272   
32     -144   
64     -48    
48     -560   
192    160    
-448   -656   
208    -672   
336    -224   
128    -560   
240    112    
96     112    
-80    80     
320    -160   
208    -112   
-160   -64    
-80    -96    
-48    -560   
352    -16    
112    -112   
-128   -448   
-48    -64    
-160   -848   
192    -160   
208    -128   
48     48     
16     -1376  
16     48     
64     160    
16     -32    
-32    -32    
112    96     
160    64     
64     32     
112    -144   
-288   -96    
-960   -400   
-80    64     
192    32     
-160   336    
-1856  -1568  
96     -384   
432    416    
208    -272   
-480   48     
272    -640   
-480   896    
-32    -464   
560    224    
-304   -336   
368    448    
176    -64    
16     320    
-816   -320   
352    128    
-32    -128   
448    -176   
-320   176    
80     -368   
-192   16     
128    -80    
-288   0      
192    -416   
-272   144    
-64    -80    
144    336    
288    800    
320    64     
-1088  -672   
272    -384   
256    -176   
64     -192   
224    64     
320    -48    
-16    -96    
144    -912   
208    336    
64     352    
16     224    
-368   -32    
160    -240   
-96    -96    
128    0      
-464   -176   
-16    0      
-400   112    
-96    80     
-80    0      
64     -432   
-128   -96    
112    -1536  
32     80     
16     272    
96     96     
-256   -16    
0      -336   
-96    -352   
-80    -832   
544    1056   
-96    0      
-624   64     
64     -64    
272    80     
-304   -384   
192    112    
128    -128   
32     32     
-160   0      
224    -16    
-48    -112   
48     112    
96     32     
256    256    
-272   -96    
176    48     
-176   -16    
96     -368   
-208   96     
48     96     
-192   -304   
112    -32    
-32    -160   
-208   -176   
-240   -128   
80     -16    
176    -80    
-224   -64    
112    -432   
-64    208    
96     -112   
-32    64     
128    48     
-64    112    
-80    -352   
48     -112   
112    -608   
-16    -320   
-272   -320   
144    -64    
112    32     
160    160    
-80    96     
48     32     
32     192    
32     64     
80     208    
80     32     
-64    0      
-1584  -560   
-240   -304   
-704   16     
64     480    
-208   128    
-432   -48    
-80    64     
-80    32     
-112   -32    
192    96     
-160   16     
48     320    
-48    144    
-16    -48    
-32    64     
-112   -176   
112    32     
0      16     
-368   -144   
64     -144   
-512   -128   
112    128    
-320   16     
-96    112    
-32    -80    
-288   0      
80     -208   
-208   32     
0      -288   
176    240    
-240   -32    
64     128    
-128   64     
-48    16     
-48    -144   
-32    -32    
-48    128    
144    64     
-144   -240   
-608   32     
-160   64     
112    -96    
-16    160    
-128   0      
128    128    
-112   -352   
-48    48     
-64    48     
-16    0      
48     432    
-208   128    
48     48     
-128   -160   
48     160    
-528   -112   
-48    16     
-80    48     
96     80     
-48    128    
112    112    
-160   -176   
96     176    
-48    -16    
16     -16    
256    -64    
-80    256    
-160   32     
-224   0      
-96    -128   
64     -48    
-48    96     
-400   32     
32     96     
-32    -32    
128    208    
-32    48     
-32    48     
208    144    
64     0      
-80    176    
16     64     
-96    32     
80     64     
-16    128    
80     128    
-32    96     
-576   -176   
160    208    
-144   -144   
-752   -560   
-592   -96    
992    512    
-752   240    
384    112    
-256   912    
-32    -736   
-320   -192   
-160   96     
656    240    
-432   -128   
240    240    
-176   160    
288    -32    
-1232  192    
192    -192   
-112   288    
-80    -320   
-80    336    
16     -112   
-96    48     
16     -32    
-32    256    
0      -128   
-80    0      
-16    -144   
-144   224    
-272   -144   
-96    368    
80     -112   
-128   48     
-112   -32    
16     144    
48     144    
64     128    
-64    16     
64     0      
32     96     
176    32     
-64    -16    
-240   -64    
128    288    
32     64     
96     192    
-160   -80    
16     0      
-64    176    
224    192    
32     -48    
-128   32     
-48    160    
48     0      
16     112    
-48    112    
48     96     
-176   -32    
128    192    
-208   -80    
176    160    
-16    16     
64     16     
-16    192    
16     64     
16     80     
-48    16     
112    96     
-192   48     
64     64     
-16    160    
96     -80    
16     -64    
-112   160    
0      64     
-80    -32    
128    32     
0      128    
0      -48    
112    -32    
-176   80     
16     32     
32     0      
80     208    
16     176    
-144   -176   
128    -32    
-112   -112   
112    336    
-144   16     
304    112    
-224   48     
-144   0      
240    96     
-128   -16    
80     160    
64     80     
-80    48     
-128   96     
80     16     
-32    0      
0      -16    
-80    272    
368    640    
-80    128    
-64    -160   
-80    -112   
96     128    
96     192    
-128   -224   
176    32     
0      144    
144    -16    
-64    176    
32     -48    
-64    16     
64     32     
-32    32     
256    272    
-48    144    
80     320    
-192   48     
16     240    
80     -32    
144    128    
-80    -32    
-192   -128   
32     -80    
64     208    
96     80     
-32    64     
-144   -112   
32     128    
176    48     
-16    -272   
-16    464    
128    -112   
-144   -176   
224    464    
-64    336    
32     32     
48     96     
16     112    
-48    -48    
48     176    
48     160    
-64    16     
-48    -80    
80     -384   
192    0      
-48    -1984  
-80    -112   
96     80     
0      64     
112    80     
64     224    
-160   -48    
128    208    
-32    32     
112    208    
-48    32     
-80    176    
0      16     
-80    -128   
240    192    
16     -1424  
32     64     
32     144    
144    144    
-32    -32    
384    176    
-112   96     
112    16     
-16    112    
48     80     
112    48     
-16    208    
32     0      
128    32     
128    16     
96     -384   
-192   16     
48     -464   
160    192    
16     160    
-32    112    
16     -48    
-160   160    
-16    -160   
96     272    
-208   -16    
384    112    
-192   256    
96     -304   
-64    208    
320    -112   
32     96     
-224   -304   
176    144    
-32    -960   
-1680  176    
800    32     
-304   -240   
1232   -448   
-272   416    
-464   -592   
208    672    
-560   -352   
720    -352   
-496   176    
464    -336   
-240   240    
496    -96    
16     288    
-32    -272   
-16    16     
304    -128   
368    672    
-272   -192   
208    416    
128    -96    
16     304    
-240   80     
288    -176   
-160   -176   
16     -160   
16     352    
-208   -64    
192    -336   
368    400    
80     -48    
-192   176    
96     208    
96     160    
-32    -32    
96     80     
80     -144   
-144   -688   
-160   -672   
256    80     
256    -192   
-208   192    
80     -80    
-80    144    
80     -1968  
48     64     
96     -64    
0      208    
64     16     
208    48     
-96    144    
128    0      
64     32     
80     -192   
16     112    
128    -176   
-112   -32    
-80    -16    
80     128    
-144   -400   
0      -3040  
-16    16     
128    -480   
96     -64    
-224   144    
0      -688   
32     -16    
80     -416   
48     -128   
160    272    
-32    16     
96     32     
32     -160   
128    -704   
32     0      
32     -224   
80     16     
160    -80    
32     -288   
-624   -416   
224    -832   
0      -160   
-32    -432   
160    176    
128    -240   
336    96     
-48    16     
64     -160   
16     -432   
272    112    
48     48     
-48    48     
0      -400   
-64    -240   
-240   -96    
112    -96    
368    448    
-32    608    
96     -80    
80     -16    
-272   -240   
144    -1056  
-16    -224   
112    16     
16     96     
80     -352   
-144   48     
-80    0      
288    112    
-240   32     
96     80     
-672   -160   
112    -80    
224    0      
-128   -608   
160    48     
32     32     
112    352    
-96    0      
-64    -224   
32     -144   
-48    48     
32     208    
192    -16    
-176   368    
-96    -112   
-368   -32    
-272   -240   
272    32     
-48    -64    
64     48     
144    96     
-64    272    
288    -2128  
-256   -48    
80     112    
160    176    
272    -16    
-176   -32    
-336   -64    
384    -192   
-640   -96    
-80    16     
-128   32     
16     16     
-16    -16    
-96    -528   
160    -32    
-32    -336   
-32    64     
144    112    
16     48     
64     80     
48     -160   
0      -48    
-16    16     
-32    32     
192    -48    
-224   176    
96     -224   
-752   -112   
-80    -544   
48     64     
96     -448   
384    208    
-176   112    
160    -16    
-128   -16    
96     304    
-336   64     
-32    -144   
112    -96    
128    -176   
-368   -64    
-160   -192   
-32    96     
352    -176   
-224   192    
32     -752   
96     112    
32     -16    
-16    64     
-192   96     
32     0      
32     80     
80     -112   
-16    -32    
144    64     
-288   0      
48     32     
112    32     
16     -112   
208    176    
-96    -528   
160    128    
-224   176    
208    -96    
-16    32     
592    -128   
-576   -848   
240    -176   
-688   528    
992    -1056  
-960   -144   
160    -320   
80     832    
-96    -448   
-416   144    
16     -576   
-432   304    
-48    128    
-160   80     
-96    16     
-1424  -80    
-288   192    
352    128    
-176   -16    
160    -128   
-256   128    
-352   -384   
-80    288    
-16    -512   
-32    224    
-64    32     
-48    176    
96     48     
-128   80     
-48    -80    
-384   80     
-32    32     
80     64     
-16    80     
32     -64    
112    112    
-192   16     
64     48     
-112   -144   
-16    16     
144    144    
-192   48     
0      48     
-240   -80    
-64    96     
-160   48     
176    128    
-464   -112   
128    0      
-160   32     
144    112    
-128   -16    
96     112    
-48    96     
-80    16     
0      0      
-112   64     
-48    48     
16     -160   
-16    48     
-144   80     
-112   32     
-848   -144   
-64    -112   
64     -144   
32     208    
16     80     
-64    32     
112    16     
-80    -32    
-48    80     
80     80     
0      96     
-80    32     
32     64     
112    224    
-272   -16    
224    160    
-144   96     
-560   -224   
-32    128    
-176   -48    
96     304    
-80    48     
-48    -64    
272    496    
48     352    
0      16     
-48    48     
48     96     
-160   80     
112    112    
-160   -16    
16     160    
-96    32     
-32    144    
192    80     
-32    0      
0      160    
96     160    
64     64     
-160   -144   
-128   16     
16     -32    
-16    32     
-176   -208   
48     -64    
-80    208    
160    208    
-96    -32    
-64    80     
-1072  32     
112    224    
0      64     
-48    112    
80     192    
160    144    
-48    64     
32     32     
48     192    
-16    80     
-144   -64    
-64    64     
32     176    
48     -64    
0      112    
-320   96     
32     -48    
112    80     
-80    -64    
160    320    
-48    80     
-32    128    
-32    128    
-32    -80    
0      144    
0      80     
-48    -16    
-64    144    
-48    48     
48     32     
0      112    
-96    16     
96     0      
-64    128    
-112   -176   
112    -112   
96     -64    
32     0      
80     224    
-272   -16    
-16    96     
32     96     
112    384    
-320   -96    
96     -112   
80     288    
32     192    
-80    -144   
192    128    
160    240    
128    208    
16     -16    
-240   160    
-64    -128   
96     16     
64     272    
-32    128    
16     -16    
-112   -48    
-112   112    
160    32     
64     128    
-64    128    
0      32     
48     96     
-176   16     
208    16     
-64    128    
112    128    
-128   16     
0      0      
-32    -16    
176    112    
-192   32     
144    96     
-64    176    
144    0      
-64    80     
-16    112    
128    -32    
32     112    
64     96     
368    -240   
-64    400    
-224   -48    
32     64     
-480   -1600  
1216   1776   
-128   128    
32     -560   
-240   -416   
368    64     
112    496    
-128   -336   
16     320    
320    -272   
16     448    
-272   -224   
400    432    
-144   -16    
192    400    
-176   208    
336    -64    
-192   576    
-192   -128   
32     48     
432    240    
-192   64     
288    -16    
-304   112    
16     -80    
80     -48    
-80    64     
32     272    
-48    -16    
128    240    
-64    240    
32     -464   
48     -32    
-16    0      
80     96     
32     -16    
48     112    
96     256    
-128   48     
112    32     
-80    160    
48     16     
112    160    
-64    16     
96     80     
-144   32     
112    -768   
128    128    
112    -2320  
-48    32     
128    128    
-64    224    
32     96     
144    96     
-144   176    
128    96     
-32    32     
160    96     
0      80     
0      0      
96     96     
0      48     
16     128    
80     -240   
64     -32    
96     176    
-96    272    
0      16     
176    128    
-80    304    
128    96     
-112   -224   
192    32     
-32    0      
64     -144   
-48    80     
16     -80    
-144   96     
32     -784   
32     80     
48     -2368  
32     208    
-48    -304   
192    288    
-144   -192   
224    -160   
-96    -32    
160    208    
-176   48     
0      80     
-112   80     
192    -32    
16     48     
96     -80    
48     80     
272    -32    
-80    16     
288    -1536  
-144   32     
160    0      
80     192    
-32    128    
144    96     
80     208    
-32    -48    
208    432    
-16    -176   
80     16     
48     -112   
48     144    
176    -96    
0      208    
96     -224   
128    192    
-176   48     
128    80     
192    80     
-176   48     
160    96     
-64    -256   
-64    -176   
-96    -432   
-64    32     
224    -368   
-32    112    
-112   -368   
288    224    
48     -432   
-128   144    
48     64     
336    96     
-112   96     
-16    -112   
160    368    
288    144    
16     224    
-64    -192   
-192   160    
176    -288   
128    -32    
-16    -112   
-64    144    
256    0      
16     256    
-64    16     
32     -176   
16     -256   
-192   -48    
176    368    
304    32     
16     -16    
-32    0      
16     144    
176    64     
-96    112    
208    80     
-144   368    
160    32     
64     -112   
144    -112   
160    -272   
48     -1008  
-160   48     
32     -224   
32     -368   
160    -2336  
0      -112   
0      144    
304    160    
-112   160    
144    -288   
96     -288   
32     -48    
144    -176   
-368   160    
304    -64    
48     -80    
112    32     
-16    -192   
0      -64    
128    -80    
112    -48    
16     -80    
48     32     
208    192    
0      -96    
-112   -544   
112    80     
80     96     
-96    64     
-128   144    
112    -272   
-304   16     
0      -144   
80     0      
96     32     
128    160    
32     0      
-512   208    
-192   -368   
-1472  -160   
704    -272   
-192   -352   
-32    400    
-400   672    
400    -64    
-112   160    
-128   -784   
-320   336    
-704   -272   
400    272    
-16    -416   
16     -688   
-80    -336   
272    -80    
-128   -176   
176    -192   
-96    64     
288    -192   
-176   160    
160    128    
-64    144    
-32    -304   
-208   -32    
-544   -208   
96     -80    
-16    -128   
112    -80    
48     -80    
-16    -224   
64     256    
160    -912   
-112   96     
48     -112   
80     -16    
80     96     
80     -48    
-80    -16    
128    -32    
-64    -80    
144    -96    
-304   144    
384    -64    
-112   -16    
128    -320   
32     288    
128    -1248  
-64    48     
-16    -48    
192    160    
-64    16     
112    32     
-144   0      
144    -16    
-240   -96    
112    80     
-224   0      
48     -416   
0      -48    
144    -144   
-16    224    
112    -768   
80     0      
-144   112    
96     0      
16     64     
16     0      
176    448    
-144   48     
48     -144   
224    -96    
-128   144    
48     -192   
0      96     
64     -96    
160    0      
-32    0      
-16    -64    
128    -96    
-32    160    
80     32     
-32    -32    
0      -80    
128    32     
-96    -96    
128    288    
-160   -112   
112    -96    
-80    112    
48     -288   
80     96     
-288   -240   
-1488  0      
0      0      
-176   32     
80     160    
0      -16    
-128   -144   
160    -48    
-80    112    
160    -80    
-160   128    
-960   -208   
112    112    
-1040  -416   
32     0      
-16    32     
-176   32     
160    96     
-128   64     
0      32     
-656   -64    
-64    32     
32     0      
48     144    
-160   144    
112    176    
-352   -208   
32     48     
-80    -16    
224    64     
-16    128    
-192   64     
-16    192    
-400   -480   
224    -48    
-528   -64    
192    208    
-208   80     
0      96     
-160   -144   
-16    304    
-96    32     
-48    176    
-16    -208   
144    224    
-144   16     
0      -112   
-112   -32    
-32    16     
16     112    
-368   -32    
-64    32     
-688   -16    
0      -736   
-48    -96    
-336   528    
0      -336   
-80    112    
160    -32    
32     64     
-32    176    
-368   32     
240    16     
-160   16     
-48    -96    
160    0      
-48    288    
-64    -16    
-80    64     
-480   -144   
96     160    
144    96     
-240   0      
208    208    
-320   48     
352    112    
-160   128    
112    -16    
-128   0      
-48    -80    
0      304    
64     -112   
64     64     
-96    96     
-768   112    
32     48     
64     64     
0      32     
0      160    
-48    -16    
144    112    
48     48     
-32    0      
-80    -48    
-64    48     
-144   -32    
-48    96     
-48    112    
-208   224    
-576   16     
-80    96     
-16    -304   
224    224    
128    128    
-48    112    
0      -240   
608    640    
464    624    
-304   624    
-384   -1136  
-96    -1008  
896    832    
-96    464    
-512   0      
112    32     
224    288    
-256   64     
-176   96     
64     128    
112    0      
-96    272    
-80    -64    
80     32     
-64    112    
112    160    
-128   -160   
-64    112    
224    160    
16     112    
-368   -48    
-16    112    
16     432    
128    -16    
48     16     
-272   16     
208    0      
-16    48     
-16    64     
48     96     
64     112    
240    272    
-288   240    
-96    -128   
-32    64     
-32    48     
48     48     
32     16     
-32    112    
128    208    
-64    64     
-96    48     
32     80     
240    288    
-272   80     
32     -48    
0      16     
-64    80     
112    128    
-112   176    
48     -32    
0      80     
112    48     
-48    160    
96     160    
-112   96     
112    112    
-16    144    
-48    -16    
96     208    
-192   48     
176    112    
160    48     
192    144    
32     176    
-112   0      
-176   -64    
160    48     
32     96     
32     112    
-32    80     
192    384    
-240   16     
208    -64    
0      96     
-64    -32    
64     160    
-176   144    
-16    -192   
224    -16    
-128   224    
0      0      
32     80     
96     112    
-64    -32    
176    128    
-144   144    
96     -208   
224    144    
-224   128    
112    160    
0      240    
112    -32    
-80    -16    
16     176    
144    224    
0      96     
16     80     
-64    -48    
-48    16     
-48    16     
176    160    
-128   64     
32     176    
80     80     
-32    96     
80     128    
0      160    
-80    16     
32     -304   
224    272    
224    256    
-384   -112   
-144   -96    
112    192    
240    -48    
-192   48     
-240   -48    
112    16     
32     -16    
160    240    
16     224    
160    320    
80     48     
16     -1504  
-192   144    
48     -16    
448    208    
64     208    
128    80     
-80    224    
-16    64     
144    224    
-128   128    
272    64     
-112   96     
-64    -16    
-48    256    
64     -160   
112    -320   
-144   80     
80     -976   
48     128    
112    96     
64     112    
-32    96     
0      112    
16     16     
144    240    
-32    -32    
144    176    
-144   32     
16     16     
64     336    
-96    -112   
192    -80    
-112   -144   
112    80     
64     -16    
16     16     
96     0      
0      -96    
-80    320    
336    128    
-96    -96    
160    240    
-96    -80    
80     -160   
-80    96     
-32    96     
224    48     
96     -720   
16     -80    
-96    -3136  
48     272    
96     160    
80     320    
64     -144   
112    128    
0      256    
-48    48     
96     176    
-192   -160   
-32    -32    
-32    -160   
80     64     
80     -240   
96     224    
-64    -32    
-32    112    
256    -608   
-16    80     
16     112    
1072   2208   
-1744  560    
800    1232   
240    784    
384    192    
-48    336    
-464   144    
96     -48    
-352   -400   
112    336    
304    -320   
-336   -208   
112    -80    
192    384    
-160   -64    
144    80     
-176   144    
144    160    
256    352    
96     -80    
0      208    
96     48     
32     272    
-112   -64    
160    32     
-80    -304   
160    192    
-336   32     
176    0      
-288   128    
304    96     
-96    -112   
-96    80     
80     80     
64     -32    
64     -80    
48     -16    
112    160    
32     -144   
32     144    
-16    0      
80     160    
-160   -144   
-112   208    
192    144    
128    80     
-176   -16    
-80    -304   
240    -432   
32     32     
96     240    
32     -224   
-16    32     
80     -256   
80     112    
16     0      
128    0      
-160   160    
-48    -336   
48     -288   
-32    32     
176    0      
-80    -304   
144    16     
-32    -32    
112    -496   
16     -96    
176    -256   
-112   -48    
208    160    
32     -144   
32     -416   
64     144    
32     -192   
-16    32     
112    208    
-16    -96    
-320   160    
240    -128   
-32    0      
112    -928   
48     16     
128    -128   
0      64     
16     -160   
208    32     
160    -144   
-32    416    
-96    64     
-96    128    
-288   -160   
144    -384   
-1040  -176   
80     -80    
160    0      
-32    -112   
112    80     
0      -624   
128    -128   
-64    -1264  
-64    144    
0      -16    
0      80     
-16    -96    
96     80     
-32    -128   
144    64     
-512   -192   
272    96     
-416   32     
96     -80    
80     0      
96     -304   
32     -96    
-96    -208   
80     112    
64     -112   
96     288    
80     -96    
48     -160   
-48    80     
144    112    
160    192    
-176   -128   
-400   16     
192    -16    
448    -80    
32     -224   
-16    -192   
160    -112   
0      240    
224    -1280  
-224   176    
80     -112   
96     80     
-48    -272   
240    160    
-192   144    
176    -16    
-752   -192   
64     -400   
-832   0      
64     -64    
32     -48    
-48    -192   
-32    208    
208    -624   
-512   384    
176    0      
-32    -16    
16     48     
240    144    
-592   -32    
304    -32    
-416   -112   
592    -448   
-544   240    
-256   -272   
-80    80     
32     -576   
224    272    
-160   -224   
96     48     
-32    48     
416    224    
-512   -64    
416    32     
-176   224    
224    448    
-208   144    
-64    -128   
-208   16     
0      -464   
112    336    
-128   -80    
48     -32    
32     -272   
368    208    
16     -128   
32     16     
-192   -64    
128    -112   
128    112    
176    160    
-144   0      
48     32     
-272   -112   
16     -288   
96     384    
-176   -112   
-112   160    
-240   -16    
80     16     
32     -112   
-800   128    
48     112    
48     96     
-112   160    
128    -80    
-448   -1600  
528    1280   
-720   -64    
288    304    
-272   288    
96     -464   
256    480    
-80    160    
16     -176   
-176   48     
-144   128    
144    128    
-624   -64    
-32    96     
32     -144   
32     112    
-16    32     
112    80     
-32    -48    
144    48     
0      16     
-320   -16    
-64    -16    
-256   -32    
144    64     
-32    16     
-48    32     
-272   96     
-192   -64    
96     -48    
-32    128    
-480   16     
-64    96     
-176   -320   
48     -80    
-112   -112   
-64    -80    
176    -96    
-240   176    
160    96     
-176   -16    
-112   -64    
96     208    
-32    192    
-80    0      
-112   16     
-80    208    
48     64     
64     -64    
-96    -16    
144    176    
-96    272    
0      -96    
-96    -112   
-48    80     
-32    96     
-64    144    
-64    16     
48     0      
-208   48     
0      48     
-1584  -112   
96     192    
-16    -96    
128    128    
-32    64     
-32    48     
-128   96     
48     -48    
112    64     
-80    128    
-48    96     
16     304    
-176   64     
-64    -176   
352    -144   
-672   80     
-192   240    
-16    64     
32     -144   
112    144    
-192   112    
48     -80    
0      -128   
-16    192    
-112   272    
64     160    
-96    32     
64     64     
-128   -80    
160    176    
-288   16     
0      -32    
-112   -64    
-288   -64    
-16    -80    
0      96     
-48    32     
48     -16    
-96    144    
-96    112    
32     -16    
-32    48     
0      112    
-80    0      
144    128    
-176   0      
64     176    
48     64     
64     192    
-96    160    
128    144    
-208   -48    
144    144    
-176   224    
192    256    
-128   96     
-32    32     
32     176    
-32    -64    
-16    224    
-336   -80    
-32    80     
272    112    
-16    256    
0      288    
272    176    
-80    0      
-64    64     
-144   112    
384    192    
-16    256    
224    112    
-48    208    
-144   -32    
32     592    
-48    80     
208    96     
64     112    
-176   64     
-16    160    
-16    -80    
160    48     
-48    96     
96     176    
160    432    
-144   144    
0      0      
-96    -32    
-80    -80    
144    192    
-160   0      
32     0      
-48    -16    
64     112    
-64    -16    
64     -272   
-80    -32    
160    304    
16     -80    
-32    -32    
0      176    
-48    0      
80     -32    
-112   -32    
-16    192    
112    64     
-96    -48    
144    160    
16     48     
0      112    
16     64     
32     96     
-48    16     
32     112    
64     48     
48     112    
-64    128    
112    112    
-64    400    
-256   -144   
-80    64     
240    32     
-48    144    
-112   112    
80     160    
48     48     
144    0      
-144   80     
80     80     
16     80     
96     144    
-96    80     
32     -48    
-48    32     
16     -336   
-48    272    
224    336    
128    1264   
384    -176   
-320   480    
80     144    
240    -192   
-464   -112   
496    240    
-16    -80    
-160   48     
112    96     
256    96     
-144   -64    
-128   -320   
208    112    
48     160    
-64    224    
64     -48    
-64    0      
112    64     
64     240    
192    192    
-32    16     
-112   -96    
96     160    
48     336    
368    80     
-112   128    
176    -336   
-128   -96    
-32    176    
80     144    
32     64     
16     48     
192    64     
-48    -80    
80     -80    
-272   -240   
16     -112   
160    336    
0      128    
128    208    
16     176    
80     -352   
-112   144    
128    -720   
-48    64     
-64    -16    
96     224    
0      80     
16     272    
-16    32     
128    208    
-160   -32    
48     80     
-64    0      
208    -336   
-544   -464   
-48    96     
528    0      
-288   80     
240    -176   
-32    224    
0      -80    
96     0      
-16    128    
-48    80     
96     32     
-32    112    
80     144    
-16    80     
16     -64    
160    256    
-32    -64    
-80    80     
80     144    
80     240    
256    -1824  
0      208    
128    256    
-112   304    
-64    0      
192    320    
-48    96     
32     144    
-16    16     
352    384    
0      480    
16     -224   
-16    64     
128    -1008  
176    112    
32     -416   
16     160    
16     -384   
64     64     
-32    -64    
128    144    
0      80     
0      128    
48     48     
-16    -224   
144    96     
16     -544   
96     192    
-16    -160   
48     176    
112    -160   
32     176    
80     48     
32     160    
32     16     
96     160    
48     64     
80     -80    
16     -352   
48     -1136  
96     192    
80     -32    
0      80     
-192   -112   
48     256    
144    -160   
16     0      
-144   -560   
240    512    
32     240    
-80    160    
-32    -160   
16     -240   
144    112    
80     -672   
-80    96     
144    -288   
0      -32    
320    -576   
64     208    
-96    -400   
208    448    
-112   -32    
96     48     
-16    32     
144    -1008  
32     -224   
-48    -64    
80     -496   
-176   -224   
208    -800   
160    16     
-48    160    
64     -224   
96     48     
48     -112   
32     -336   
32     -64    
-80    -752   
128    64     
80     -560   
368    -48    
-368   32     
48     16     
-128   0      
128    -384   
48     112    
-32    -992   
80     80     
240    560    
208    -224   
-176   0      
160    48     
16     -288   
32     176    
112    0      
32     48     
-608   -112   
-64    -224   
-144   -400   
0      -816   
192    -32    
64     -416   
32     -144   
48     -592   
48     -96    
0      64     
-368   -128   
208    -96    
32     80     
-16    64     
32     64     
-272   -80    
48     -112   
160    -368   
192    16     
48     -32    
128    -48    
-32    -64    
64     -1264  
-1200  -2768  
1600   1520   
-880   1152   
-144   384    
576    0      
-800   -80    
608    1152   
-848   -688   
352    464    
-176   -464   
432    80     
0      16     
112    -176   
80     224    
224    -448   
-128   64     
128    -32    
-112   256    
272    -64    
64     -32    
-240   -112   
-16    -16    
-64    -48    
48     192    
0      -64    
96     -224   
-240   -112   
64     -400   
0      0      
144    -144   
0      64     
0      -1632  
32     128    
-16    16     
176    96     
-192   -80    
208    384    
-16    288    
0      -128   
-208   -96    
32     -176   
-640   32     
16     16     
16     -64    
96     -128   
16     128    
192    -320   
0      -80    
64     80     
-128   -32    
272    32     
64     -64    
-160   48     
128    0      
-176   16     
48     -96    
32     176    
-64    32     
176    -16    
32     -352   
0      80     
64     -1088  
96     -16    
-304   208    
-16    0      
-96    -160   
160    -64    
-176   -48    
96     256    
-96    -160   
240    0      
-128   48     
-32    -176   
-32    -32    
240    -320   
-176   64     
96     -64    
144    112    
128    -48    
0      208    
-256   48     
192    0      
80     208    
-256   0      
352    -32    
-112   176    
-496   -112   
208    -48    
-288   112    
128    48     
-208   96     
112    -80    
-176   -16    
-144   -64    
-1536  48     
32     -96    
48     -112   
112    0      
48     -96    
-48    80     
-48    -208   
-128   144    
-64    -64    
64     288    
0      -208   
16     160    
-208   96     
16     -64    
-272   64     
16     80     
0      64     
-528   64     
-128   -32    
192    0      
-160   -80    
-144   -48    
0      80     
64     112    
288    192    
-96    -336   
-512   0      
368    128    
-240   32     
48     160    
-112   112    
64     0      
0      -128   
-160   160    
-704   112    
112    176    
-64    -80    
0      -16    
-80    -128   
224    288    
64     -112   
-80    -48    
-16    80     
-16    432    
-64    -32    
-16    -48    
-48    96     
-192   128    
-64    64     
80     32     
-48    0      
-96    -96    
-112   0      
-32    -160   
48     -16    
0      192    
0      400    
144    32     
-240   -32    
48     192    
-208   80     
-96    -32    
16     -16    
-32    160    
-400   -160   
-208   48     
-1808  -208   
96     -112   
-32    64     
16     64     
-224   -160   
112    -176   
240    256    
336    544    
-448   -48    
112    112    
32     96     
32     192    
-48    16     
-160   -96    
0      144    
-320   -32    
128    128    
112    272    
-64    -112   
-32    112    
-240   -112   
-16    -16    
96     112    
128    176    
-96    160    
-224   224    
-320   -112   
0      48     
160    -96    
64     128    
-256   32     
144    80     
80     112    
48     -16    
256    16     
-160   112    
80     160    
-640   336    
16     2016   
-1376  1120   
96     -368   
-336   -656   
336    240    
-176   192    
-160   432    
-16    304    
416    320    
-432   16     
-16    -64    
336    256    
-32    -144   
-48    160    
0      112    
192    192    
-224   -112   
96     0      
128    128    
-128   16     
-112   -32    
96     -64    
-48    -96    
80     -368   
64     208    
-96    112    
32     240    
-272   -192   
-16    0      
-80    64     
32     -80    
144    64     
-48    240    
96     -336   
32     320    
-48    32     
192    784    
-128   256    
-64    -224   
320    -48    
-112   128    
128    0      
-80    112    
-32    -48    
128    208    
-48    192    
144    160    
-240   -192   
-400   -464   
320    224    
-320   0      
128    272    
48     -320   
-288   16     
272    64     
32     208    
-336   -96    
784    864    
-112   -176   
160    336    
144    80     
-272   16     
80     480    
-144   48     
96     -16    
-64    96     
32     48     
48     128    
48     0      
16     64     
64     48     
80     96     
-96    0      
64     112    
64     -64    
208    432    
-208   -16    
208    0      
-96    0      
48     288    
96     -16    
-64    192    
-16    160    
80     160    
-96    16     
176    -336   
176    368    
32     160    
48     48     
-80    96     
96     -96    
-48    64     
80     112    
-80    0      
32     -48    
64     32     
-144   -512   
128    0      
-272   -160   
112    16     
176    304    
-16    256    
-48    48     
-80    -64    
208    304    
48     16     
112    256    
-48    192    
80     48     
48     96     
16     80     
32     96     
128    160    
16     160    
0      96     
96     400    
-128   -16    
0      -80    
64     112    
96     -80    
144    64     
144    320    
-128   112    
160    224    
-32    384    
208    368    
0      -400   
16     672    
-256   -208   
128    -16    
-80    96     
224    240    
112    224    
-32    192    
16     -64    
-64    -96    
-64    -704   
112    64     
112    96     
-176   -16    
0      96     
256    -736   
-208   -32    
144    -1232  
32     288    
224    688    
-96    224    
64     208    
-32    -224   
-80    -176   
16     32     
80     144    
192    -48    
0      96     
0      -48    
176    128    
-112   128    
160    224    
-192   0      
0      -176   
0      0      
64     32     
144    352    
-48    128    
32     32     
160    192    
-112   -80    
208    304    
64     48     
96     -176   
32     160    
0      -32    
48     -48    
208    -16    
16     -16    
144    -3568  
-64    288    
176    -192   
224    256    
32     16     
80     144    
-176   80     
64     160    
-16    176    
-144   -160   
128    48     
176    -144   
0      128    
16     -48    
-16    64     
80     -192   
0      32     
144    -928   
144    288    
0      208    
-64    176    
-96    -144   
784    2032   
-1232  752    
-608   -304   
464    320    
-320   -336   
-672   80     
496    464    
-288   208    
320    -704   
-240   128    
160    16     
-112   304    
160    -240   
96     352    
-96    -64    
144    32     
48     160    
16     -256   
-32    48     
176    -96    
0      80     
-16    -16    
48     176    
80     -48    
112    64     
-192   -544   
144    80     
160    0      
80     -160   
-128   -736   
208    -128   
64     -800   
64     -80    
16     96     
112    0      
48     96     
160    64     
16     176    
-160   -208   
32     192    
176    80     
0      -192   
96     160    
32     -160   
48     -368   
176    -96    
32     -1200  
32     -32    
64     -320   
0      -208   
160    224    
-64    -16    
208    48     
-80    112    
0      -320   
160    16     
0      -208   
-96    80     
-112   -48    
96     -384   
-1216  -48    
-16    -496   
144    -128   
80     -208   
-48    -240   
176    -640   
0      -240   
64     48     
-48    -48    
176    0      
-256   112    
64     -144   
-96    64     
-16    -48    
160    128    
-352   -128   
144    -176   
64     256    
-32    -304   
160    -96    
80     80     
32     -48    
192    -480   
-32    112    
224    -288   
192    -128   
48     -128   
0      64     
144    320    
176    48     
-48    0      
-48    -320   
144    -192   
48     -304   
48     -112   
224    -48    
-320   -256   
288    -1136  
176    176    
16     -144   
0      64     
48     80     
112    -48    
0      80     
-224   -240   
-608   -48    
16     -736   
-752   16     
-48    -176   
96     48     
32     -384   
-64    -80    
48     -304   
0      0      
32     176    
144    112    
0      48     
-16    0      
-128   -16    
176    -192   
-496   -576   
-112   96     
208    -64    
80     128    
-96    -224   
64     -208   
0      192    
320    -48    
-144   -112   
144    -560   
32     192    
64     96     
272    -144   
-240   0      
112    -16    
-192   -208   
-144   -160   
-32    48     
192    -256   
-496   64     
224    -112   
-160   144    
64     -80    
128    0      
-16    -1584  
128    -80    
-272   -32    
176    96     
-304   336    
32     -32    
-64    96     
16     -48    
-240   -160   
80     -32    
16     16     
336    720    
-144   -256   
-144   -592   
176    96     
288    -128   
-16    80     
-96    160    
-16    -16    
0      16     
96     -16    
272    608    
-192   224    
-64    368    
-80    0      
208    -144   
176    -304   
-48    96     
176    112    
-320   -16    
224    -16    
-176   160    
96     32     
-64    16     
-32    0      
192    32     
-32    64     
128    -32    
-128   96     
48     96     
-80    32     
112    -256   
-48    192    
-112   -112   
-80    112    
-96    208    
-128   -64    
-208   -16    
-768   0      
-272   -16    
-48    -128   
-128   320    
224    -16    
-128   48     
1760   -1248  
704    48     
-544   208    
-432   96     
-16    288    
176    80     
-544   0      
448    -512   
-752   176    
304    128    
-400   224    
-320   -176   
48     -16    
-464   -80    
-112   0      
-464   -272   
64     112    
144    48     
352    688    
16     272    
-96    224    
-224   -16    
96     -16    
-32    16     
80     -128   
-80    -16    
-288   16     
144    592    
-2480  -256   
-144   -96    
240    -64    
48     -112   
160    -96    
-32    -16    
144    -48    
96     -32    
80     -64    
160    96     
80     -16    
16     -80    
32     128    
-112   16     
144    176    
-512   -176   
0      16     
48     -16    
80     -128   
-176   -400   
160    80     
288    288    
-128   336    
32     256    
-160   -96    
-80    -64    
-32    128    
64     112    
256    896    
-320   400    
-128   256    
160    0      
-912   -400   
32     -48    
64     -160   
-96    192    
-80    80     
128    32     
64     96     
-32    0      
16     336    
-96    352    
32     -144   
128    -144   
-112   208    
-208   -32    
-80    0      
-704   -96    
464    -48    
-48    -48    
-304   -128   
112    -64    
-32    160    
96     160    
-160   -64    
112    128    
-16    32     
80     64     
-128   480    
-144   -128   
-416   -304   
176    48     
-368   -32    
32     208    
0      48     
-288   -64    
48     -304   
16     -128   
-32    48     
240    320    
0      128    
-160   -208   
48     16     
128    128    
-112   96     
-48    80     
192    96     
-16    368    
-144   176    
-32    224    
-48    16     
128    64     
-80    -64    
128    208    
-160   272    
80     208    
-160   -112   
32     64     
160    480    
-64    -64    
-208   32     
-16    -448   
-32    -112   
80     -16    
64     80     
-208   64     
48     -272   
80     80     
-32    160    
128    96     
-160   16     
80     112    
0      80     
16     304    
32     128    
-176   -32    
16     0      
112    16     
-80    176    
144    -64    
-112   144    
-64    112    
208    112    
0      32     
-48    208    
32     144    
160    144    
-192   80     
-48    48     
208    -48    
-160   80     
48     144    
96     176    
32     32     
16     208    
-112   80     
176    96     
-48    64     
48     160    
16     -48    
160    96     
-112   144    
80     64     
-112   48     
0      112    
0      -32    
48     48     
144    -160   
0      160    
16     272    
-144   0      
80     288    
-16    -16    
192    -32    
0      0      
80     176    
-192   112    
-288   48     
256    128    
48     32     
48     -32    
-16    -16    
0      48     
0      96     
64     144    
-80    -32    
-32    160    
-64    176    
48     -96    
48     48     
-16    -48    
144    80     
48     160    
-48    224    
-48    96     
224    192    
-256   -672   
192    32     
-48    32     
-1232  -1488  
624    -16    
-1424  304    
64     -288   
416    320    
-352   -16    
192    672    
-208   -128   
448    752    
-16    -672   
-144   320    
320    -400   
128    80     
0      -288   
16     368    
32     -304   
80     416    
0      -48    
32     320    
96     -64    
-16    32     
0      256    
112    240    
-48    128    
64     -304   
-80    192    
256    64     
-208   -64    
192    32     
-48    192    
176    16     
-128   176    
112    -16    
-64    272    
128    32     
0      96     
112    96     
-128   80     
32     64     
48     48     
64     -32    
-48    176    
128    -176   
112    112    
-128   -656   
144    0      
-96    144    
144    -112   
240    112    
-176   160    
0      -80    
144    160    
-80    48     
160    64     
-32    96     
80     -112   
128    64     
-64    -112   
128    112    
64     -368   
48     80     
32     -1632  
96     144    
-64    -640   
112    -16    
-96    -16    
144    160    
-48    32     
-16    80     
64     96     
32     -240   
32     160    
-64    -144   
64     48     
176    -16    
-176   48     
240    -432   
-96    192    
0      128    
240    80     
-32    -32    
16     208    
16     48     
272    480    
64     144    
144    -64    
-256   0      
272    -144   
-16    80     
80     -832   
160    272    
144    -32    
-480   80     
240    144    
160    208    
-160   -32    
48     96     
-64    -368   
80     -720   
64     256    
128    -48    
-32    160    
64     -240   
64     96     
128    -208   
32     512    
208    -16    
-32    144    
112    16     
112    176    
32     32     
-32    128    
16     64     
64     -144   
32     80     
32     -112   
112    -224   
16     -32    
176    320    
-112   192    
80     144    
0      80     
176    112    
80     48     
112    -160   
-128   -448   
-64    -1168  
-64    -16    
256    -256   
96     -288   
64     0      
16     288    
-80    -64    
192    208    
-32    -192   
368    800    
-288   64     
96     -704   
-48    144    
96     -192   
16     128    
-16    -32    
240    -672   
-96    -16    
0      -160   
144    48     
64     -576   
0      32     
0      160    
-48    -256   
96     80     
-16    -368   
0      -432   
144    112    
112    -208   
-64    128    
-560   -48    
304    -80    
-1504  16     
192    -240   
32     -80    
80     -272   
192    -256   
32     -912   
-48    -144   
-48    -32    
128    256    
128    -80    
144    112    
-224   -304   
176    16     
-240   -48    
144    -128   
144    80     
64     -80    
-48    176    
-80    -384   
176    64     
0      -224   
224    112    
-144   160    
64     64     
48     -16    
32     64     
-48    -48    
-32    -352   
-16    -16    
64     160    
-176   -96    
0      -272   
48     -64    
96     -256   
64     -144   
272    -208   
-224   -96    
272    -2016  
-192   96     
176    80     
-16    1696   
-448   48     
-704   -1136  
64     -80    
-736   -416   
256    384    
-528   -1232  
-48    16     
208    192    
160    592    
-176   -400   
0      272    
48     -960   
304    352    
-16    -32    
-64    -208   
16     48     
256    0      
160    336    
-112   -288   
16     0      
400    336    
-624   16     
112    -256   
-272   32     
0      -160   
-48    -416   
192    288    
-176   0      
48     -1168  
176    -64    
-48    -80    
-64    -192   
-128   -80    
96     -288   
-176   16     
160    272    
-144   176    
0      -144   
-176   -496   
-80    -64    
192    64     
400    0      
-192   192    
48     -624   
144    -96    
-224   0      
96     448    
-80    96     
112    96     
-240   0      
16     -48    
-176   -304   
112    -160   
144    112    
16     -16    
16     208    
-48    -256   
48     272    
-48    -176   
112    48     
-48    0      
160    288    
-192   144    
144    -16    
-128   -32    
16     -128   
80     -96    
112    144    
48     0      
384    16     
-192   112    
-624   -224   
-16    384    
-160   -32    
0      64     
-128   32     
-912   -64    
-160   -160   
-16    -48    
-96    -32    
0      48     
-96    -448   
0      32     
-240   112    
-736   -48    
48     432    
-160   -128   
96     16     
48     80     
-144   96     
-208   -176   
48     -80    
-32    -16    
-160   96     
32     320    
-16    144    
-48    16     
-176   64     
-144   32     
-64    -80    
64     64     
-48    208    
-176   96     
-80    -16    
32     -176   
-96    64     
-224   144    
128    80     
-128   48     
96     80     
-1200  -16    
64     112    
-288   -288   
352    32     
-192   -16    
352    336    
-160   272    
-32    16     
80     240    
-16    144    
48     192    
-304   128    
288    112    
-256   32     
-192   -64    
-288   64     
32     128    
-192   16     
0      128    
-112   -288   
80     160    
-128   128    
256    -32    
-144   -32    
-240   96     
64     128    
240    -64    
-144   -48    
-32    240    
-144   128    
272    208    
112    368    
-272   96     
80     208    
-176   -80    
208    304    
-144   80     
128    -32    
-176   128    
112    48     
-32    80     
-160   0      
-128   0      
64     48     
-16    80     
-16    32     
80     -16    
-928   -224   
112    176    
-144   -80    
32     96     
0      0      
32     48     
96     16     
-64    112    
-160   144    
-224   80     
-96    -96    
128    32     
-32    80     
-160   -240   
-16    128    
-384   -128   
160    192    
-112   -64    
-48    48     
48     144    
-208   96     
-32    32     
80     -112   
176    112    
32     352    
-112   -128   
-32    64     
48     80     
-192   0      
48     144    
-128   -16    
0      224    
80     -16    
48     80     
-128   144    
48     128    
-96    -32    
-16    144    
48     16     
-912   -2496  
80     -1184  
-432   736    
-352   64     
848    272    
176    -64    
192    -112   
224    288    
-96    256    
592    -224   
-224   -32    
240    -112   
-272   400    
352    -464   
-176   512    
-128   -272   
-144   240    
-240   -128   
32     -16    
64     -128   
80     112    
-336   0      
-48    112    
128    160    
0      -96    
0      -32    
64     160    
-128   160    
192    80     
-160   112    
160    -16    
-80    224    
128    -16    
-48    224    
-64    -128   
-112   176    
64     0      
-64    48     
32     80     
176    176    
-32    16     
-144   112    
32     96     
64     32     
-16    -32    
-32    112    
48     128    
16     -32    
-112   128    
-32    16     
16     144    
80     64     
-16    176    
112    144    
-80    48     
0      112    
48     80     
-96    32     
144    48     
-16    48     
-16    -64    
-80    112    
-48    -144   
160    144    
-48    80     
64     64     
32     144    
-32    96     
64     32     
80     96     
-48    64     
176    96     
0      48     
32     128    
32     144    
-144   -80    
80     -128   
176    32     
-64    256    
-304   -336   
32     -432   
-16    112    
112    144    
144    144    
-160   -32    
224    144    
-16    160    
48     144    
16     64     
16     -160   
-144   64     
96     -16    
48     0      
176    304    
-80    96     
-16    -608   
-128   -320   
0      -128   
240    368    
-112   144    
0      144    
-64    64     
160    112    
16     112    
0      64     
-112   48     
80     0      
16     -448   
96     160    
-32    240    
128    -448   
32     144    
-32    112    
224    240    
-96    16     
64     160    
-96    16     
160    144    
-16    64     
144    144    
112    224    
-32    112    
-80    -176   
-32    -80    
112    208    
256    -160   
-48    304    
-112   -400   
160    16     
-32    64     
32     208    
144    96     
-80    0      
96     208    
-112   -32    
176    -16    
-304   -432   
144    -304   
-208   -176   
288    128    
-48    -160   
80     -48    
-16    -1440  
48     192    
176    128    
-160   -64    
192    48     
-224   304    
0      -336   
32     -160   
320    96     
128    256    
-48    224    
32     432    
-144   256    
112    -416   
272    -16    
-16    -336   
160    128    
-224   -480   
160    16     
-80    -144   
112    64     
112    112    
0      160    
64     64     
-288   368    
224    -208   
160    208    
-16    192    
112    -224   
-96    224    
80     -320   
176    128    
-80    -864   
240    64     
-48    -1376  
160    0      
48     96     
128    80     
-48    48     
96     128    
-128   64     
0      -192   
320    -368   
160    80     
-176   64     
-16    -272   
-16    -16    
240    -496   
48     32     
0      -16    
-64    -48    
64     64     
272    448    
0      160    
-32    -176   
-144   -16    
3072   -1856  
-416   -16    
448    80     
-688   512    
576    224    
-560   -1136  
160    -336   
560    96     
336    352    
80     0      
16     640    
112    368    
80     48     
-224   -352   
304    320    
-240   -96    
496    464    
-224   -208   
256    112    
-224   32     
352    -64    
-176   -192   
320    16     
-176   32     
0      -1696  
160    224    
176    -432   
-80    -176   
16     -288   
96     -1168  
32     -208   
112    304    
32     -80    
96     224    
-48    48     
48     -32    
0      -640   
64     -352   
96     -16    
96     64     
-272   48     
-80    -48    
16     32     
160    16     
-48    -304   
-48    -272   
160    -128   
304    224    
-320   -32    
64     -336   
64     192    
-32    -80    
176    -496   
-176   176    
272    -208   
-32    -80    
64     -64    
0      -128   
-672   -128   
96     32     
-32    32     
144    -112   
48     -128   
16     -560   
112    16     
-16    48     
64     32     
144    208    
-64    -48    
176    48     
-80    -144   
-32    -48    
128    -240   
16     64     
-64    48     
48     -352   
80     -304   
-128   64     
96     -1184  
128    -16    
32     144    
32     96     
64     160    
-112   0      
144    -464   
240    -80    
-272   80     
224    -80    
-400   -96    
16     -128   
-192   -16    
128    176    
-112   -48    
304    32     
48     16     
272    -272   
-192   96     
160    -112   
-32    -32    
64     16     
128    80     
16     112    
80     -80    
-96    32     
80     -384   
-720   -32    
-32    -48    
64     192    
80     -96    
32     -112   
192    -480   
0      144    
192    112    
-96    112    
0      -32    
64     -16    
-288   -48    
384    48     
-272   -96    
-64    -224   
-272   -160   
32     16     
-1008  -112   
112    -80    
-80    -80    
-32    -576   
64     128    
304    -960   
-32    192    
128    144    
-48    96     
-192   -240   
-32    -64    
-352   -16    
352    -128   
-64    16     
0      -176   
-752   -112   
-128   -256   
16     80     
192    -96    
32     96     
48     -368   
-16    32     
-16    80     
-96    80     
-16    32     
32     128    
-128   16     
112    16     
-48    16     
16     -16    
-48    16     
-16    16     
80     64     
-16    -160   
-32    128    
-128   96     
-160   -64    
-48    -96    
32     -96    
48     160    
96     80     
-176   112    
64     -128   
-320   48     
160    48     
368    560    
-304   -224   
16     64     
-448   -352   
144    -64    
112    48     
-80    144    
112    160    
-256   -208   
-144   16     
80     -160   
-144   32     
0      256    
-64    160    
-368   64     
48     -16    
-80    -128   
208    192    
-336   16     
-240   0      
-96    80     
0      -144   
-16    0      
-352   0      
-64    -16    
-1120  112    
32     192    
-32    32     
96     48     
-320   -224   
-544   -1008  
144    -1056  
-960   336    
816    -80    
240    528    
-528   -512   
640    1104   
-384   -544   
272    -96    
-448   128    
256    96     
-192   128    
-1376  -224   
-96    256    
80     -224   
-176   80     
80     -112   
-48    112    
-32    -160   
-16    16     
16     -96    
-16    128    
-64    208    
80     80     
-64    16     
-240   -144   
-16    176    
-288   96     
-48    176    
-144   -128   
-48    32     
-48    -48    
336    144    
-48    288    
96     16     
-144   64     
-208   80     
160    80     
-208   -96    
32     48     
-176   -144   
64     128    
-608   32     
64     48     
-352   0      
0      160    
16     -96    
-48    112    
128    240    
-128   16     
64     112    
-112   32     
0      64     
-48    80     
-32    32     
-48    48     
32     192    
-352   -32    
112    96     
-960   80     
-16    192    
-48    -192   
0      64     
80     -160   
-112   -112   
-176   16     
112    -96    
-96    -32    
-16    128    
0      112    
-16    144    
16     112    
-96    -144   
192    144    
-480   -16    
48     192    
-144   -48    
112    -160   
160    16     
-240   256    
16     16     
-16    128    
0      80     
-16    112    
-48    48     
-16    32     
64     -16    
-240   -32    
80     240    
-80    160    
48     0      
0      -64    
64     -32    
64     224    
-112   96     
0      48     
-16    80     
80     80     
-48    48     
16     48     
-208   -48    
80     128    
-128   -32    
112    112    
-192   16     
16     64     
80     112    
0      240    
-16    -96    
128    112    
-64    160    
48     -48    
48     32     
-144   64     
144    80     
-128   32     
192    288    
-80    -16    
128    48     
-32    192    
32     208    
48     -16    
-256   -80    
112    176    
224    96     
224    176    
48     448    
-144   448    
16     -208   
80     32     
-112   0      
304    224    
-224   -64    
96     96     
-16    160    
0      48     
224    768    
-32    -288   
288    -16    
-336   240    
208    -112   
-240   -64    
32     48     
80     192    
32     48     
-144   0      
64     -48    
-48    128    
-32    -80    
80     96     
-64    0      
144    224    
-48    144    
-16    -144   
208    -288   
128    304    
-64    -16    
32     384    
-288   96     
336    -80    
-96    112    
256    80     
-240   192    
-96    -48    
64     176    
96     336    
-144   -304   
464    32     
-96    352    
128    224    
-240   16     
-16    96     
80     -32    
160    304    
-288   176    
16     -112   
32     176    
96     608    
-128   -112   
-256   48     
192    -224   
448    -48    
128    240    
-192   240    
-208   48     
-208   -48    
144    240    
-144   32     
-64    256    
32     112    
-96    -128   
112    0      
48     144    
112    -784   
192    160    
-16    128    
112    112    
-16    288    
-752   -272   
288    800    
720    -16    
-224   1008   
128    352    
-576   -32    
-16    -80    
320    224    
256    -96    
-240   336    
112    -640   
-16    64     
0      64     
-16    64     
208    160    
-16    176    
-112   144    
160    -32    
-16    64     
112    -48    
-64    16     
80     112    
64     -16    
0      -288   
0      64     
80     -128   
-32    32     
128    -688   
-64    0      
32     16     
-80    32     
64     96     
144    160    
-48    16     
64     80     
-144   112    
112    48     
48     96     
64     -96    
144    176    
-48    -96    
0      -16    
16     -592   
64     32     
16     192    
0      80     
160    128    
-16    -208   
144    144    
-240   128    
272    48     
-112   160    
256    192    
-176   -48    
16     -224   
224    -160   
-112   240    
64     -384   
64     160    
-176   144    
208    32     
16     64     
-64    0      
144    0      
-96    208    
16     0      
112    -144   
144    128    
48     -128   
32     112    
-32    -224   
128    32     
16     -144   
0      160    
32     -640   
32     -112   
304    112    
-128   160    
-64    80     
96     352    
-112   16     
176    -192   
64     -48    
0      -160   
48     336    
-16    128    
-32    -48    
400    16     
-272   96     
208    -160   
0      112    
32     96     
160    192    
-64    -144   
336    320    
-368   176    
192    -112   
32     112    
-32    -256   
96     32     
32     -80    
112    160    
32     -224   
128    336    
-48    -192   
16     32     
144    160    
128    288    
96     -96    
-80    -560   
80     32     
144    -48    
64     144    
-112   -32    
240    208    
176    -144   
-224   112    
16     -160   
80     16     
-272   -192   
32     -608   
272    80     
-80    -1264  
112    192    
-608   -256   
80     -80    
-336   -208   
-48    -544   
160    -336   
192    384    
-16    -144   
224    336    
112    224    
144    224    
144    240    
-64    -160   
80     224    
160    -256   
80     160    
-48    176    
-16    -96    
64     -32    
160    -208   
-16    -48    
96     -752   
-32    -16    
-16    -1264  
192    32     
64     -80    
-16    48     
144    -128   
112    80     
-32    128    
0      96     
-16    -144   
144    16     
-1744  -448   
192    -32    
-176   -176   
80     -144   
16     32     
144    -608   
48     -112   
-32    -432   
48     192    
-48    -32    
-80    -352   
64     -144   
272    112    
-16    96     
-16    -64    
-464   -80    
-16    -32    
128    -16    
16     -80    
0      112    
-64    -272   
96     -96    
112    -128   
80     32     
16     -144   
0      112    
-64    -16    
64     -208   
-32    0      
0      0      
160    176    
144    -32    
-96    0      
-32    32     
-192   32     
16     -112   
-48    32     
288    -400   
-112   16     
144    -112   
-32    128    
1408   1264   
-1440  -192   
832    864    
64     496    
176    -576   
-288   64     
-1088  0      
224    -464   
-272   192    
240    128    
32     -32    
-208   -1024  
240    240    
160    -144   
-176   -16    
-64    128    
240    32     
-336   -96    
-80    -368   
-240   -160   
16     48     
-272   0      
0      176    
-80    160    
64     -432   
64     96     
112    -320   
-48    144    
112    -512   
0      48     
-224   -96    
0      -80    
224    160    
-176   -176   
112    48     
-112   16     
192    384    
-64    -192   
16     16     
16     -272   
80     64     
64     -32    
112    32     
-160   192    
48     -80    
-272   -16    
-48    -192   
-144   48     
80     -144   
128    288    
-80    112    
-48    -48    
16     16     
-1008  -320   
240    -144   
-32    32     
192    -176   
-96    112    
-224   -112   
-128   -208   
16     176    
32     32     
48     208    
48     -64    
-48    256    
208    -176   
-96    -32    
144    -144   
16     128    
-192   -48    
80     144    
-272   -240   
0      16     
16     176    
-96    144    
48     96     
-384   -512   
-64    -448   
112    176    
-48    352    
192    -208   
-128   80     
80     -32    
48     48     
-288   -208   
48     0      
-96    -272   
-16    80     
48     208    
-64    64     
32     -16    
-464   16     
-32    32     
-1072  -64    
-16    48     
64     -80    
112    128    
-192   -272   
80     -64    
-112   -128   
16     128    
32     64     
16     128    
-16    96     
-112   -16    
-80    64     
-160   112    
-96    -160   
-80    176    
-192   32     
304    64     
-192   16     
0      -48    
32     128    
-64    32     
64     80     
48     48     
-64    16     
32     80     
-80    -64    
0      16     
-80    128    
256    352    
-112   96     
-272   -144   
-1136  -48    
64     -80    
144    -352   
-224   -112   
240    -96    
-112   128    
-80    96     
-48    0      
-96    176    
48     -32    
128    96     
48     832    
-48    64     
-192   -496   
112    48     
-64    -192   
32     304    
64     0      
96     16     
-112   -112   
64     0      
96     448    
-368   -96    
112    160    
80     96     
48     0      
-96    192    
-16    -48    
32     368    
64     624    
-384   112    
224    -16    
-224   48     
112    224    
16     208    
-320   0      
208    192    
-80    224    
176    64     
-240   64     
64     160    
-336   32     
-48    144    
-32    240    
-80    -16    
0      48     
32     240    
-560   -96    
208    288    
-32    32     
-16    -144   
96     224    
-224   -160   
160    512    
-112   -160   
80     192    
-112   -176   
-176   32     
48     64     
-80    224    
-256   -128   
96     432    
-416   -256   
0      128    
48     -16    
16     48     
-112   80     
16     16     
80     304    
-144   112    
0      416    
-176   -16    
16     112    
-48    1296   
256    -320   
-1184  -32    
-576   -1056  
96     64     
208    192    
384    -112   
96     720    
-304   -176   
144    160    
-32    32     
-80    0      
112    176    
-160   -32    
192    128    
-240   -32    
48     176    
48     48     
-32    -32    
32     -16    
32     64     
160    288    
-16    32     
-32    0      
-144   64     
112    64     
208    80     
-192   48     
96     64     
-112   -128   
-64    80     
64     144    
80     96     
48     112    
0      32     
-48    -48    
-48    -160   
16     -32    
112    272    
240    112    
-240   32     
32     112    
80     0      
144    96     
-64    192    
112    96     
-96    112    
-48    -192   
0      -32    
-16    160    
160    80     
-64    176    
80     32     
32     0      
-64    96     
64     32     
144    112    
-48    160    
96     160    
16     48     
-32    48     
16     96     
-32    144    
16     288    
-112   160    
144    -16    
96     16     
-16    208    
-144   -80    
128    0      
-64    240    
-48    16     
96     128    
-112   32     
80     96     
-112   -144   
176    224    
0      144    
96     -112   
112    224    
-128   160    
80     64     
224    240    
-256   224    
144    32     
64     48     
80     32     
192    -80    
16     16     
0      96     
112    48     
-64    96     
32     48     
48     -192   
-96    272    
-48    32     
224    80     
-80    -16    
288    320    
-160   160    
192    240    
16     -32    
0      -64    
-48    64     
288    128    
-144   48     
-16    -256   
-96    48     
16     -1488  
-48    -64    
112    240    
128    96     
0      176    
-144   -16    
112    -48    
112    112    
-144   -112   
208    224    
-224   128    
208    -64    
-208   -64    
16     -160   
208    144    
-80    -448   
288    48     
96     -448   
-160   -112   
-64    0      
16     0      
48     -112   
96     208    
96     -208   
-144   -16    
48     -32    
256    16     
128    16     
-128   80     
160    256    
192    48     
-64    160    
-128   -160   
112    160    
0      -272   
240    160    
-32    0      
-32    -256   
0      176    
160    240    
16     80     
64     128    
48     128    
112    32     
-64    32     
-32    -80    
160    176    
-80    -352   
48     -16    
96     -304   
-32    -16    
64     -32    
64     80     
16     -112   
80     144    
-32    112    
96     -16    
-64    32     
-32    -336   
48     224    
16     -352   
128    464    
32     -80    
16     96     
48     -112   
144    -224   
48     16     
64     144    
-112   -16    
0      48     
128    -80    
64     -112   
128    352    
-48    -544   
0      240    
176    -256   
-32    112    
48     80     
48     144    
0      -384   
48     64     
80     0      
144    112    
48     112    
96     144    
-64    208    
32     -272   
-16    144    
48     -96    
-832   -432   
544    560    
-592   -896   
848    -560   
704    1728   
-256   -304   
-656   -208   
544    464    
112    704    
64     -224   
-112   -320   
-144   -1408  
368    16     
32     32     
-16    -240   
-80    0      
240    64     
-112   224    
352    16     
-240   -80    
160    -16    
16     -1392  
0      256    
160    -272   
-144   64     
-336   -176   
128    -128   
80     -16    
0      -208   
112    -208   
32     -368   
-48    -80    
128    96     
16     128    
-16    96     
-64    -224   
112    -320   
112    -160   
80     -464   
-80    -384   
128    -96    
-48    32     
144    32     
96     -368   
16     -128   
128    -176   
80     32     
176    -1360  
-64    32     
-176   -1776  
-16    -80    
80     -144   
-48    208    
32     -64    
96     64     
-240   -144   
-32    -368   
-1152  -368   
160    48     
144    48     
128    368    
-80    -224   
144    -32    
16     0      
-144   -448   
192    160    
-272   32     
112    0      
-80    96     
48     -224   
-96    -48    
32     -208   
-416   80     
48     -304   
-80    48     
64     -288   
64     -832   
16     -1472  
-208   -112   
48     -592   
320    736    
-128   208    
-16    256    
-112   -96    
192    -112   
-144   -32    
64     64     
-336   -64    
224    -16    
-1248  -48    
128    -352   
0      -288   
48     -160   
32     16     
16     -848   
-32    48     
128    0      
-32    -32    
-112   -288   
112    96     
-80    160    
32     -48    
-80    0      
32     48     
-256   -48    
0      -48    
-912   -128   
224    240    
-176   -112   
304    -592   
-96    304    
128    -208   
16     0      
-144   -128   
224    -16    
16     80     
112    32     
-16    -80    
-32    -224   
0      320    
144    -64    
-256   -128   
144    64     
144    64     
32     -320   
112    304    
-112   -96    
336    -208   
-272   -544   
336    -176   
-688   160    
32     -144   
-144   64     
48     -96    
16     16     
272    112    
-224   -256   
-80    -688   
288    32     
-144   -48    
144    160    
-80    160    
176    128    
-336   -160   
192    -80    
-96    -48    
48     144    
-48    0      
48     176    
-192   -128   
128    -128   
32     96     
96     -16    
32     -16    
-656   -208   
-1216  0      
48     128    
-1328  -656   
208    256    
16     0      
-64    64     
16     80     
96     96     
128    -80    
-240   -48    
240    -176   
176    -128   
-240   -64    
256    480    
-224   -304   
-368   -80    
112    176    
-560   0      
-64    80     
-336   -16    
16     64     
-848   -96    
-192   16     
80     64     
-16    32     
-64    48     
-48    80     
0      -464   
112    160    
-112   -160   
-64    176    
-64    48     
96     32     
64     96     
48     16     
-80    160    
-288   32     
-48    240    
208    -144   
-256   288    
-288   80     
64     -64    
208    -80    
-128   -560   
480    -128   
880    624    
288    240    
-384   -560   
176    496    
-448   256    
480    -48    
-80    -32    
-160   -64    
48     80     
-128   16     
-112   -144   
112    64     
-16    -64    
48     112    
-96    16     
48     -32    
96     192    
-240   -16    
-48    0      
-144   80     
96     64     
-160   32     
96     16     
-208   -48    
-192   48     
96     -208   
-16    112    
64     -80    
96     -32    
-192   80     
-48    96     
80     144    
-112   -32    
144    224    
-32    304    
80     0      
-272   -96    
-64    64     
-272   -48    
96     96     
-576   64     
240    128    
-160   96     
48     -32    
-32    64     
-208   -80    
128    208    
-176   -144   
272    144    
-336   96     
208    112    
-416   -80    
80     16     
-64    144    
-32    -96    
-384   96     
-144   128    
144    -64    
-48    160    
-80    224    
-32    32     
112    -48    
-80    176    
-144   64     
32     0      
16     -80    
16     32     
-96    144    
-176   32     
112    32     
-768   -80    
-64    160    
-48    128    
48     16     
0      112    
80     48     
128    96     
-160   80     
64     64     
48     64     
-96    -192   
64     -32    
-144   96     
-112   -144   
128    352    
-352   -16    
96     176    
-16    -32    
16     192    
32     -16    
-128   160    
96     32     
-208   -80    
240    176    
144    400    
-32    256    
-48    -64    
16     128    
-48    -96    
176    304    
-240   -240   
-48    32     
-32    -64    
16     112    
96     16     
-224   -160   
-32    32     
128    128    
0      -80    
-80    32     
48     128    
-208   -144   
160    112    
-272   -368   
64     144    
160    320    
-16    96     
-144   16     
80     80     
-144   16     
64     112    
144    112    
16     144    
16     -80    
-112   -208   
288    320    
-80    112    
96     144    
-144   80     
160    48     
-144   64     
192    48     
16     -96    
-176   -16    
-128   144    
208    128    
112    -64    
-272   128    
352    464    
-80    64     
80     128    
-208   64     
112    192    
-160   16     
192    32     
-304   -352   
224    128    
-64    176    
112    48     
16     96     
-48    16     
32     112    
112    192    
-272   -288   
160    144    
32     -240   
-288   48     
176    80     
-64    32     
96     192    
0      -32    
176    256    
-64    80     
304    64     
-208   -32    
320    576    
-96    112    
-16    32     
0      16     
48     0      
16     0      
-96    -32    
64     256    
32     144    
128    80     
64     64     
176    48     
-16    112    
16     64     
48     128    
112    16     
-48    0      
176    192    
240    320    
-208   16     
-112   208    
-32    -32    
144    -48    
32     64     
176    -576   
-112   112    
192    160    
-48    144    
-144   112    
176    96     
-1024  -1856  
1248   2912   
-1024  1888   
416    -544   
-480   -1024  
48     496    
-608   624    
80     -80    
512    1056   
288    -416   
-336   192    
-192   -352   
544    96     
128    -16    
112    240    
-176   48     
224    80     
-288   0      
64     -128   
-16    -64    
400    176    
-32    432    
-64    48     
-112   112    
144    -80    
-64    32     
32     -160   
128    -240   
240    -16    
240    48     
-64    0      
-96    256    
48     96     
-32    192    
-96    -192   
176    16     
48     0      
240    0      
16     448    
0      -224   
128    128    
0      -864   
32     48     
-16    -720   
48     240    
-64    -16    
176    0      
0      -272   
64     160    
320    176    
-224   -112   
32     112    
48     -96    
96     512    
-32    -320   
-160   48     
144    208    
16     224    
-32    -560   
-224   -80    
304    80     
-64    16     
-48    256    
192    432    
-256   -160   
80     -112   
48     240    
80     16     
0      144    
32     -48    
176    32     
32     0      
80     144    
112    256    
-48    16     
48     16     
96     -416   
-16    -496   
528    400    
96     752    
-48    208    
48     32     
16     -896   
208    192    
48     80     
-32    112    
-224   -848   
208    240    
304    48     
208    96     
-224   -144   
160    256    
224    144    
16     320    
0      96     
-128   -512   
64     -80    
0      96     
0      -32    
-176   -336   
16     0      
144    -176   
80     128    
-96    -160   
-16    160    
96     96     
64     -192   
80     416    
-624   512    
128    -624   
-64    0      
48     -1840  
32     -16    
96     -64    
0      -32    
16     16     
32     -112   
144    80     
-48    -16    
64     -96    
-96    128    
224    -288   
-240   -128   
-784   -160   
-96    -416   
224    0      
-160   -288   
192    -480   
-16    -1376  
32     -192   
160    128    
0      -48    
0      112    
144    80     
-144   -144   
-160   0      
192    -592   
-528   -352   
176    -160   
160    112    
-48    128    
128    -16    
32     -112   
64     -288   
-16    -112   
224    -320   
48     256    
0      -208   
-96    32     
80     -272   
64     0      
16     -272   
32     -16    
128    112    
80     -144   
-816   -144   
96     -304   
-48    -64    
16     0      
208    64     
-48    -688   
160    -16    
-128   -352   
-64    96     
112    192    
112    -176   
112    80     
-144   -256   
-176   -96    
-192   -32    
-352   -112   
112    32     
32     -32    
272    0      
160    -80    
80     -400   
-256   -192   
-16    -1536  
80     96     
-64    128    
32     16     
-80    48     
-32    -176   
16     -128   
160    16     
-336   16     
64     -16    
-1440  16     
-32    -32    
112    -144   
16     -240   
-16    128    
16     -624   
192    32     
-96    -144   
352    -112   
-160   32     
80     -64    
-1008  496    
608    -496   
-304   304    
192    -448   
-752   272    
-240   -704   
1072   1568   
-80    -64    
160    -144   
-480   -768   
496    304    
-96    144    
192    -256   
-448   272    
352    -192   
-496   96     
272    -320   
-224   112    
112    -400   
-416   112    
320    -256   
-96    304    
128    -272   
-48    208    
16     -336   
144    240    
-144   -48    
16     224    
-64    -16    
160    256    
-64    -64    
80     -64    
-208   64     
144    -48    
16     144    
160    -192   
-208   -64    
256    -304   
112    208    
-32    -272   
48     112    
0      32     
144    0      
-16    80     
128    80     
-80    80     
-96    -64    
32     272    
-48    -64    
208    96     
-128   -80    
0      0      
-704   -224   
32     -64    
-32    -80    
-320   64     
-48    -48    
-208   -64    
-224   -80    
-208   -64    
-192   128    
112    32     
-144   16     
64     -48    
-144   -96    
-448   -272   
96     176    
-96    64     
32     0      
48     -96    
-224   -32    
16     80     
-160   0      
0      32     
-224   48     
48     224    
-288   112    
16     -16    
80     80     
-48    96     
-224   80     
-48    80     
-32    -288   
32     -128   
-112   144    
-224   -144   
240    448    
-304   -16    
304    96     
-192   0      
-16    0      
-176   -96    
-128   48     
64     128    
-48    -32    
-80    -80    
0      80     
0      -80    
-16    32     
-48    -32    
96     48     
-48    240    
160    48     
-224   96     
-80    -112   
-48    64     
-304   0      
112    176    
-432   128    
160    224    
-288   -176   
176    128    
-160   -112   
32     -80    
0      64     
-48    32     
0      16     
64     -48    
-240   64     
-32    320    
16     256    
0      96     
0      80     
-256   -80    
16     48     
80     176    
-80    64     
80     224    
-192   -144   
0      144    
32     -32    
-96    240    
32     -128   
-128   32     
48     112    
80     240    
16     32     
-128   80     
-752   -288   
16     32     
-448   208    
-160   -144   
144    144    
-224   -48    
64     -16    
16     256    
-128   -112   
-16    -16    
80     256    
-128   -48    
48     48     
-192   -96    
48     16     
-144   96     
-272   -80    
112    -208   
-224   -1632  
208    224    
64     0      
32     176    
176    160    
-80    48     
32     240    
-112   -64    
32     128    
-208   -32    
-32    -80    
352    240    
-208   144    
160    32     
-256   16     
-64    -16    
496    96     
-384   0      
320    -16    
-32    256    
-80    -32    
144    -32    
-208   112    
80     -48    
48     112    
-64    -16    
192    96     
-256   -16    
-96    192    
-288   16     
16     -16    
16     80     
208    -32    
16     144    
-64    16     
64     64     
-112   0      
144    224    
-96    96     
-48    144    
-112   -48    
-1232  -1568  
976    2752   
-752   1744   
400    -240   
-224   -288   
208    -336   
-96    2128   
-1280  -768   
1136   -656   
-32    112    
48     592    
-208   -640   
-272   304    
528    -368   
128    496    
-544   -288   
48     384    
-240   -464   
720    288    
-128   16     
368    224    
-240   240    
32     352    
-128   160    
448    -208   
-128   208    
304    -16    
112    416    
-304   -208   
80     272    
-80    -32    
-112   64     
-208   32     
128    48     
80     80     
-160   -304   
96     16     
96     128    
352    656    
16     -96    
-80    -160   
-64    192    
16     0      
-64    -144   
-64    0      
144    32     
64     176    
-176   192    
192    432    
208    544    
48     240    
-16    176    
32     16     
-144   304    
112    32     
-80    64     
240    288    
-128   288    
-32    112    
288    592    
-480   -176   
48     -80    
-32    16     
224    224    
16     304    
64     -224   
112    -64    
192    224    
80     912    
-256   -176   
-80    96     
-16    -112   
224    -64    
32     128    
-240   32     
128    -448   
96     -128   
-48    -688   
224    -48    
80     144    
112    128    
64     144    
48     48     
112    208    
112    320    
0      256    
16     192    
-224   -208   
160    -336   
336    464    
-176   -256   
32     304    
272    -1152  
16     16     
-64    32     
-32    -96    
-16    -32    
32     80     
-32    -80    
288    400    
-288   -128   
160    208    
-160   -112   
64     -176   
32     -48    
-48    -336   
-112   -464   
-48    -704   
432    432    
-144   -208   
48     176    
16     96     
112    48     
-16    208    
112    16     
-96    -64    
48     176    
128    128    
16     0      
-128   48     
256    -256   
112    224    
-80    -528   
48     64     
192    -1280  
-64    144    
0      80     
240    368    
-112   -384   
192    144    
-96    64     
224    304    
-80    224    
304    32     
-160   16     
96     -48    
-160   240    
400    -176   
-32    240    
80     -1088  
48     176    
48     576    
32     64     
-176   96     
240    96     
-32    0      
128    80     
-96    96     
128    -48    
-80    96     
128    -48    
-16    80     
48     16     
80     144    
80     -624   
-80    32     
64     -64    
144    144    
-96    192    
48     192    
-48    -32    
112    32     
96     96     
48     32     
144    16     
16     -288   
160    128    
112    -480   
-112   224    
-16    -272   
112    80     
96     -144   
112    240    
-128   16     
272    176    
144    16     
48     224    
16     -32    
64     112    
0      80     
80     -464   
32     192    
96     -208   
0      64     
64     -64    
48     384    
-80    -784   
-80    176    
80     -48    
80     16     
176    -16    
0      -32    
80     -304   
0      -288   
64     272    
-96    -96    
240    112    
-48    0      
944    -64    
176    688    
1616   -528   
-464   -560   
-560   -992   
416    176    
256    -144   
224    384    
-1104  -784   
0      -112   
320    -432   
-112   -1440  
80     -528   
-192   336    
240    -432   
48     400    
-96    -352   
192    -1200  
0      -112   
112    -288   
-128   32     
176    -192   
0      144    
-928   -416   
16     -320   
-32    -128   
160    224    
128    0      
96     -560   
-80    -416   
-64    320    
208    -128   
80     64     
-48    -64    
16     80     
160    -144   
96     0      
48     -336   
0      176    
-16    -176   
160    64     
-80    -272   
160    -80    
0      -288   
48     -48    
0      -1264  
16     32     
224    80     
-224   16     
16     48     
16     32     
-48    -48    
32     16     
-64    32     
48     -112   
-1568  -16    
32     -160   
160    -112   
80     -272   
-96    32     
144    -96    
16     -48    
96     -352   
-80    80     
-16    -16    
-32    112    
-48    -16    
32     -32    
0      -32    
48     -64    
-144   -16    
80     64     
-16    16     
112    -32    
128    96     
-64    -448   
160    80     
-160   -1232  
32     16     
144    -32    
-272   -384   
96     -384   
-160   -288   
-16    80     
240    -48    
-64    128    
32     16     
-496   -32    
80     -80    
80     48     
80     -304   
48     224    
64     -576   
0      128    
128    0      
320    144    
-128   64     
224    96     
-480   -352   
176    -128   
272    176    
192    -288   
-944   0      
0      -384   
-384   -16    
128    -240   
128    208    
112    -64    
160    464    
-80    192    
32     -256   
-240   -16    
112    -128   
-16    48     
80     32     
-288   -192   
48     -80    
-192   128    
128    -256   
-48    0      
16     -144   
-32    -64    
48     -480   
0      -144   
-368   -96    
352    -48    
-32    144    
64     160    
-16    0      
-80    -112   
-48    32     
80     -96    
112    16     
64     -96    
-64    128    
144    -240   
-32    320    
48     -304   
128    16     
-144   -80    
160    112    
-128   64     
128    -320   
-224   -32    
128    -112   
-192   32     
0      160    
-16    -96    
-16    -144   
80     96     
-1040  -208   
48     112    
-640   0      
-112   -80    
32     144    
-80    -144   
-272   -32    
-432   -176   
288    96     
0      240    
-80    112    
0      -112   
-192   16     
-144   -192   
0      64     
-176   208    
-160   0      
64     -80    
-48    352    
-224   -32    
-112   -96    
-96    128    
-80    16     
-144   192    
-496   -48    
-48    112    
96     224    
-256   48     
96     -112   
-16    128    
192    -112   
32     160    
-112   64     
-96    -96    
-208   48     
-208   96     
48     -96    
-176   96     
176    48     
-320   -144   
-288   -80    
80     176    
-32    272    
-32    80     
-160   16     
-48    -272   
32     64     
-288   -2144  
-336   2400   
384    1504   
0      208    
128    -928   
432    560    
-896   -112   
-48    272    
304    336    
144    480    
-576   192    
-64    -368   
-16    336    
96     -912   
416    704    
16     96     
-16    368    
-560   -736   
352    288    
128    160    
304    560    
-416   -16    
-80    -192   
352    32     
-336   80     
160    224    
-16    -192   
80     640    
48     192    
32     144    
-384   -272   
-128   -32    
0      16     
-96    -48    
-128   48     
-48    64     
128    576    
64     -192   
-160   -240   
-496   -256   
320    96     
-1088  80     
80     224    
-160   80     
-32    -80    
-64    -16    
96     48     
-32    -32    
48     -96    
-80    112    
-32    224    
0      16     
-144   -16    
288    224    
-304   112    
48     192    
-192   32     
-256   -16    
160    16     
64     384    
-176   80     
208    -64    
96     112    
-272   128    
128    -48    
-144   -112   
96     96     
-144   -64    
16     64     
-112   64     
112    112    
-448   -16    
-80    96     
0      80     
-112   160    
0      -160   
160    48     
-176   -32    
-272   128    
32     48     
-64    288    
-176   144    
80     -176   
192    64     
-464   -48    
272    224    
-224   112    
80     64     
48     144    
16     48     
112    96     
-80    -16    
16     0      
48     64     
-32    256    
-96    48     
144    48     
16     64     
-32    -16    
-16    -96    
48     112    
48     144    
80     128    
176    144    
-192   -96    
176    32     
-336   160    
288    48     
-48    128    
80     224    
-96    48     
176    96     
-48    48     
-96    272    
-16    64     
256    480    
-288   128    
400    128    
-304   -80    
128    96     
112    352    
80     128    
-192   32     
-112   -128   
176    32     
128    272    
-224   240    
0      -32    
-144   192    
112    0      
176    128    
-288   -64    
32     -32    
-160   48     
32     -32    
384    240    
-240   160    
176    -16    
-16    80     
-192   64     
272    32     
96     80     
-96    208    
32     352    
336    144    
-160   32     
-160   96     
16     -48    
304    256    
32     32     
16     176    
-64    -32    
-16    160    
128    48     
64     160    
-48    48     
48     160    
-96    80     
208    -48    
-48    192    
0      80     
160    64     
-128   240    
80     112    
16     144    
-96    0      
48     -32    
-64    16     
-64    192    
-272   96     
16     -32    
64     -128   
16     -16    
272    -928   
-144   336    
-112   -1840  
32     176    
176    240    
144    208    
-48    -16    
96     32     
16     160    
48     160    
-112   96     
272    -64    
0      48     
112    176    
-80    48     
-48    -112   
128    128    
32     -576   
16     112    
64     128    
80     -32    
-16    288    
48     80     
-48    176    
0      -48    
-1056  496    
1152   -320   
896    -32    
160    -768   
752    432    
-400   -736   
544    -96    
752    -1520  
-176   464    
-64    -160   
64     -16    
-48    -64    
16     320    
-48    -32    
96     160    
-32    -48    
128    256    
0      0      
96     128    
0      32     
176    -176   
-64    256    
192    -384   
-32    144    
-64    -816   
32     160    
208    80     
144    208    
-32    -144   
32     32     
-16    32     
176    192    
32     96     
16     -48    
-32    128    
96     -112   
128    64     
-32    0      
144    112    
32     -48    
112    64     
-48    -560   
64     80     
64     -16    
32     80     
64     64     
80     -32    
-32    -16    
0      -128   
112    176    
-16    -96    
80     -16    
-32    -272   
112    112    
48     -368   
0      256    
-48    -528   
48     -144   
32     -32    
48     160    
-48    32     
48     96     
64     64     
80     -208   
0      272    
64     -16    
48     208    
-32    -560   
240    160    
-48    -128   
0      96     
64     -160   
64     32     
112    48     
32     192    
-64    -32    
-48    -16    
96     48     
48     -240   
-64    192    
208    -16    
64     160    
-208   32     
400    96     
-128   0      
48     -272   
272    -240   
-48    176    
-16    48     
96     48     
80     144    
0      96     
32     -304   
144    -336   
16     -1648  
48     -48    
-128   -176   
0      -320   
64     16     
272    112    
-48    224    
-80    -368   
-48    -352   
112    16     
192    -80    
-64    32     
-976   80     
32     -176   
144    -80    
16     -352   
0      -64    
128    -768   
0      -48    
144    112    
-16    -48    
-32    96     
192    112    
-16    0      
160    80     
32     -432   
144    64     
-160   32     
80     -176   
-176   -32    
176    -112   
-32    -368   
240    -384   
-96    -64    
272    -672   
-32    -320   
0      -208   
-16    128    
304    32     
-128   64     
160    -32    
-32    -208   
96     -128   
-144   192    
-16    -176   
128    -96    
-144   32     
288    -368   
-160   -48    
32     -1808  
96     -64    
112    80     
-80    256    
-160   -272   
-16    -176   
-192   -192   
272    96     
-224   112    
32     352    
-1872  -32    
192    -240   
48     128    
256    -192   
80     128    
-64    -480   
128    160    
80     -720   
16     80     
96     -128   
80     -144   
-16    112    
-48    -80    
128    48     
176    -64    
-544   16     
96     -336   
16     144    
80     48     
64     -16    
-112   -448   
128    112    
16     -2688  
-112   144    
192    -96    
176    64     
-112   80     
64     -144   
-144   -16    
64     -112   
16     -48    
-176   -96    
-144   32     
48     -96    
32     -128   
0      -592   
-32    96     
-64    -720   
176    160    
48     224    
176    0      
-288   0      
-16    -96    
32     -32    
-768   -2176  
1488   1056   
-416   -272   
576    -592   
-192   224    
-48    -16    
448    1088   
-304   80     
592    -160   
-320   -160   
176    240    
-80    -448   
-144   -64    
160    272    
-48    -160   
112    368    
144    -64    
-32    32     
-320   -48    
208    16     
0      -272   
-32    64     
-48    -48    
176    -464   
-112   0      
208    -48    
16     16     
-208   112    
32     112    
-96    -96    
-16    -192   
-176   -96    
112    -176   
-32    80     
96     -64    
80     192    
-320   -432   
-32    0      
-784   -384   
-384   0      
-64    64     
-144   128    
-48    16     
16     208    
-256   -64    
80     -96    
64     112    
224    384    
-224   64     
-288   -144   
-16    256    
-272   -368   
112    112    
-32    48     
96     48     
-32    96     
-144   80     
-112   16     
-784   -16    
-32    -80    
-16    80     
-16    64     
208    -16    
-80    224    
-96    -192   
112    0      
16     -112   
-32    64     
80     0      
-160   80     
-160   -16    
0      32     
-272   0      
-144   0      
48     128    
-704   192    
-304   16     
112    64     
-96    80     
-128   -224   
192    80     
-176   -64    
16     16     
-64    -144   
96     128    
-128   -112   
176    -80    
-64    208    
-96    192    
224    64     
-224   -16    
-32    176    
-464   -160   
128    64     
-32    96     
-176   -32    
192    -192   
-112   16     
64     208    
-32    128    
48     208    
64     -80    
32     64     
-32    144    
-48    64     
-224   80     
-208   144    
-112   32     
176    192    
-176   0      
256    32     
-224   112    
-48    16     
128    176    
80     0      
-144   64     
-224   -32    
112    -16    
0      -64    
48     256    
-160   240    
240    192    
-528   -16    
112    -32    
-240   -288   
112    32     
-64    -176   
208    -96    
-16    96     
-176   16     
-112   96     
96     48     
16     -144   
-144   80     
-96    64     
-48    -192   
-48    -272   
-272   -16    
224    272    
-640   -48    
208    144    
-176   64     
-32    0      
176    368    
0      80     
128    96     
-64    176    
-96    176    
144    192    
-80    80     
-96    -16    
32     80     
-352   -112   
48     128    
-464   -80    
64     -128   
128    -128   
-208   160    
-96    176    
160    160    
-80    16     
144    32     
-16    -96    
-64    160    
48     128    
-64    80     
-32    -32    
-48    -80    
144    48     
176    176    
-160   80     
-64    16     
-144   16     
112    160    
-112   96     
-96    -32    
-80    176    
352    0      
-16    176    
-48    0      
-48    128    
-48    176    
-64    32     
112    208    
80     208    
-64    -64    
176    192    
48     0      
48     96     
48     -32    
96     96     
-224   -32    
176    112    
96     16     
-80    240    
-112   80     
112    -16    
-48    16     
496    -2272  
896    448    
96     896    
-256   400    
-256   -304   
752    240    
-512   -64    
208    224    
-176   -304   
-64    112    
0      96     
96     -272   
-160   272    
80     -96    
-96    -96    
-80    -160   
64     160    
48     32     
64     96     
16     32     
128    112    
-48    224    
192    64     
-96    -32    
32     -96    
16     96     
-96    288    
16     112    
80     -32    
-160   -80    
48     64     
96     112    
32     64     
32     112    
-32    48     
64     -64    
-80    176    
0      80     
144    96     
-192   -48    
32     -32    
-48    128    
64     16     
128    96     
16     80     
48     -16    
-64    80     
80     16     
80     128    
-16    176    
96     96     
16     112    
-48    96     
16     64     
48     48     
-160   -160   
80     -288   
64     16     
32     -416   
192    256    
-80    144    
16     160    
96     80     
0      -80    
240    304    
-144   224    
80     144    
-16    128    
144    80     
48     96     
32     128    
96     176    
-144   -48    
128    -224   
-16    128    
144    -704   
-32    352    
160    160    
16     32     
0      -160   
208    96     
-16    240    
-64    128    
112    16     
32     -144   
64     -48    
32     256    
48     160    
64     -256   
0      0      
80     -560   
48     112    
64     160    
-64    96     
-32    16     
0      32     
224    256    
-64    -64    
64     -448   
-32    128    
80     16     
64     208    
-64    96     
128    -64    
16     96     
128    -224   
-96    -16    
128    432    
-16    64     
112    96     
-16    208    
64     48     
96     112    
-64    80     
32     96     
-32    -112   
144    256    
128    304    
96     -96    
-64    96     
-64    -208   
192    32     
80     -416   
-160   176    
96     -128   
48     -352   
128    -432   
-240   256    
176    -144   
144    112    
-256   176    
320    -48    
-48    64     
-16    -256   
64     96     
112    -128   
-80    144    
112    -528   
-32    64     
112    -2496  
-16    -48    
128    80     
32     176    
-80    160    
240    208    
-224   80     
208    -736   
0      32     
224    -256   
128    208    
-128   -64    
208    48     
-64    -464   
-80    128    
16     -1280  
64     -416   
0      -48    
112    224    
-128   176    
-96    144    
48     16     
208    48     
32     -48    
32     32     
-16    96     
-48    -368   
112    -144   
448    32     
-96    192    
-128   -128   
-192   224    
-16    -128   
160    0      
32     32     
96     -512   
-160   128    
64     -352   
176    96     
192    -16    
64     144    
-48    -128   
80     48     
112    32     
80     48     
16     -112   
64     496    
-96    -112   
112    -2112  
-144   128    
176    -96    
16     -144   
-32    -48    
80     240    
-64    -288   
48     96     
48     32     
-16    112    
-896   -832   
336    -208   
0      -688   
864    -752   
336    1024   
-1056  -928   
112    -288   
-304   864    
192    -656   
-112   -96    
-464   -336   
304    160    
-160   -1328  
96     80     
96     192    
-16    -96    
-80    -224   
64     48     
240    272    
32     96     
-96    -32    
48     112    
-896   48     
32     -288   
-80    -256   
48     -48    
128    16     
-32    -512   
96     -160   
80     -2592  
96     -32    
0      -80    
-112   96     
-64    -32    
112    48     
-208   -160   
176    -48    
-352   -32    
80     -32    
16     32     
-16    -16    
112    32     
32     -272   
128    0      
-32    -624   
64     0      
48     16     
16     -32    
272    -240   
-64    128    
-80    -16    
144    96     
-80    96     
176    64     
-240   -128   
112    -352   
112    64     
-80    -176   
240    -64    
0      -208   
32     32     
128    -1584  
-16    64     
96     224    
-80    -256   
80     -112   
96     160    
-224   32     
272    96     
-480   -272   
192    -176   
-1776  0      
128    -176   
144    48     
16     -304   
-112   -32    
176    -1904  
-112   176    
80     -80    
224    -32    
-80    224    
0      -272   
32     -112   
-48    -352   
-304   112    
-176   96     
160    -64    
144    0      
-16    96     
-80    -288   
96     48     
-96    -384   
64     112    
0      80     
208    -16    
-224   80     
48     -160   
32     -80    
48     -96    
-112   64     
-16    -112   
-112   96     
96     48     
-48    -96    
96     -288   
48     352    
336    16     
128    160    
-656   -240   
-32    0      
-176   32     
96     -80    
-144   -144   
96     16     
-80    96     
-32    -32    
-176   -48    
160    -16    
80     -64    
16     -160   
-256   32     
144    -192   
112    -80    
-256   -144   
-64    176    
240    64     
272    400    
-80    112    
-128   64     
-144   -48    
160    -16    
-16    -48    
0      -176   
-160   144    
-1200  -96    
496    288    
-432   -208   
-416   16     
-96    112    
-384   48     
304    32     
-496   80     
-256   128    
272    96     
-144   -128   
192    0      
-80    -672   
-480   0      
96     288    
-64    -224   
176    112    
-144   16     
-208   64     
64     96     
16     128    
-368   -128   
-800   32     
16     240    
-112   -208   
32     -80    
-32    80     
112    -16    
-432   -336   
80     -48    
-224   -96    
160    608    
-192   96     
-240   -304   
48     -128   
80     208    
-32    240    
-432   -160   
16     32     
-48    160    
-176   0      
-176   -208   
-16    -64    
16     160    
48     112    
-48    64     
16     80     
48     80     
-64    16     
-80    -80    
-128   -32    
64     192    
-192   32     
-16    64     
-256   128    
-80    -48    
-64    -208   
16     176    
-64    64     
176    -64    
-112   80     
16     96     
-128   208    
-80    64     
432    -656   
448    672    
608    224    
-464   -64    
16     -288   
-192   352    
-320   -896   
-352   -144   
400    336    
-144   -112   
0      272    
272    192    
16     -32    
-176   96     
-32    0      
160    16     
0      112    
0      -32    
-208   -48    
64     -16    
288    272    
-80    160    
112    192    
-192   112    
16     -256   
-224   368    
208    224    
-16    176    
-144   96     
-128   32     
144    32     
-112   64     
144    80     
-96    80     
16     48     
-16    112    
-96    80     
-384   -288   
64     192    
-784   -32    
-32    96     
-32    80     
0      0      
80     192    
-96    48     
-32    64     
-64    -48    
48     32     
0      48     
80     160    
-112   -64    
16     48     
-256   -352   
192    144    
-640   -128   
160    208    
-176   176    
192    208    
-128   16     
0      208    
80     64     
-64    -144   
80     368    
0      -48    
128    160    
-144   -16    
160    96     
-96    -16    
112    80     
64     48     
-16    112    
16     80     
-48    80     
-80    144    
96     32     
16     -224   
-128   -112   
192    -112   
-144   96     
-160   336    
192    48     
-128   224    
-64    -176   
96     112    
-80    0      
80     192    
160    368    
16     304    
-48    160    
-80    -80    
80     -160   
-48    -80    
96     112    
-80    64     
-16    112    
-80    0      
240    432    
-160   112    
-64    0      
-48    -32    
48     176    
176    112    
-48    128    
-64    16     
48     128    
128    128    
-144   0      
160    208    
-208   32     
208    48     
-96    64     
32     -80    
32     64     
-96    48     
192    144    
-80    32     
96     176    
-48    192    
96     160    
-16    80     
-64    80     
32     240    
0      -48    
-144   16     
0      160    
240    160    
-176   432    
-128   64     
192    80     
-160   16     
112    32     
144    96     
80     -32    
-80    144    
-16    80     
160    704    
288    240    
-32    544    
-128   144    
128    224    
-352   -192   
128    -48    
0      208    
144    0      
160    240    
32     -176   
80     496    
-48    -144   
-16    64     
48     0      
112    128    
-16    176    
-32    -80    
80     -80    
80     32     
112    528    
96     -64    
-112   80     
32     32     
16     -16    
0      48     
-16    192    
0      144    
80     320    
-160   0      
96     -64    
-32    48     
272    672    
112    176    
-160   -16    
-16    32     
-16    -352   
96     272    
-208   -2176  
-16    -128   
16     112    
176    -112   
-32    304    
-32    -96    
32     16     
32     336    
-32    96     
-32    -32    
48     176    
112    -272   
128    -48    
-112   -288   
48     192    
32     -160   
48     64     
128    176    
48     240    
144    64     
-64    160    
128    0      
-48    64     
48     0      
912    -2000  
368    -688   
-352   48     
-192   160    
880    64     
-288   -416   
96     -352   
16     -16    
160    -80    
64     -96    
0      480    
256    208    
-96    -48    
-48    96     
64     0      
80     144    
-64    32     
48     16     
112    -16    
-48    -48    
240    32     
-16    -496   
-64    64     
-48    -512   
80     16     
224    -16    
0      192    
-32    160    
-16    64     
0      -80    
32     112    
160    112    
-32    -32    
64     64     
-32    -224   
32     -32    
64     -128   
-16    64     
144    -32    
96     128    
80     0      
-144   144    
160    32     
-48    112    
208    0      
-32    224    
32     80     
208    240    
-288   -48    
352    -64    
-128   176    
128    -112   
0      96     
48     -16    
32     16     
64     32     
48     176    
160    16     
64     208    
-144   -176   
192    112    
-64    192    
-80    -688   
192    96     
0      -208   
64     80     
96     -96    
-144   64     
96     -464   
-64    128    
112    -1232  
16     48     
112    144    
-48    208    
48     80     
128    -80    
-16    304    
-80    128    
160    64     
336    -272   
-48    224    
-80    -112   
208    288    
-64    80     
128    112    
176    -80    
16     -1552  
16     48     
0      -944   
32     -1616  
144    96     
16     -384   
176    48     
16     112    
160    -160   
80     -80    
96     128    
-48    256    
48     -16    
48     32     
-64    -64    
64     -96    
-112   -48    
80     48     
16     -288   
-368   288    
-32    -272   
112    -80    
-176   -496   
80     -160   
256    -2272  
-64    -32    
16     368    
32     -272   
-160   -592   
176    0      
-256   -704   
-96    -272   
80     -32    
-96    -432   
-1088  -64    
112    -64    
96     -240   
160    -32    
-32    96     
224    -224   
-64    -176   
128    240    
16     -80    
80     -16    
64     128    
64     48     
64     112    
-96    64     
-32    -144   
-96    -80    
-64    -32    
-64    80     
-16    -48    
96     112    
64     -688   
32     16     
112    -1184  
0      64     
144    16     
16     160    
144    144    
-112   -48    
-160   -144   
96     -16    
-224   -48    
64     96     
-496   -80    
64     0      
224    176    
-96    -176   
32     64     
-80    -256   
128    48     
-80    -400   
96     288    
-176   -352   
48     -32    
-208   -144   
272    80     
48     144    
32     144    
-688   -416   
192    -96    
-688   112    
160    -48    
-96    80     
32     -256   
256    208    
32     -848   
0      144    
-176   32     
96     64     
128    112    
96     96     
-144   96     
32     -176   
-144   -48    
128    -48    
-192   64     
32     128    
-64    -32    
-32    -464   
160    16     
128    -192   
112    128    
48     -48    
16     64     
-432   32     
320    -176   
-416   -32    
144    0      
-560   656    
-1184  -368   
-80    1024   
-32    -160   
-512   -1088  
-80    -784   
640    -16    
-512   288    
-144   -624   
400    112    
-544   -304   
144    416    
208    96     
-64    0      
-112   272    
-48    -128   
16     -48    
-144   -240   
240    48     
-112   32     
-96    -208   
192    336    
336    272    
-256   176    
-320   -192   
-64    -368   
448    64     
-224   0      
128    48     
192    16     
-112   48     
64     -112   
-96    16     
-160   -64    
-128   368    
-480   -224   
32     128    
160    -80    
-640   144    
80     640    
-608   48     
-208   48     
-448   16     
-64    -144   
48     -96    
-208   -112   
128    48     
-160   256    
-64    64     
32     160    
-416   0      
256    160    
-96    80     
-48    144    
-192   -96    
112    -144   
-80    240    
176    400    
0      64     
-688   -160   
448    -64    
-32    192    
0      48     
32     -192   
16     48     
112    -272   
-192   80     
64     0      
80     64     
-16    16     
-80    32     
-64    64     
-32    32     
16     144    
-304   96     
80     80     
-512   48     
96     160    
64     32     
176    368    
-144   32     
64     32     
32     208    
-288   -64    
-64    0      
-176   -48    
-64    16     
48     304    
-112   240    
-320   -32    
-64    -64    
-1136  -304   
80     32     
-16    128    
144    176    
16     32     
-48    -208   
-160   -128   
224    64     
-144   176    
32     192    
-96    96     
-112   64     
144    -16    
-64    48     
-96    0      
-416   208    
-80    16     
48     -144   
16     144    
16     432    
-80    -48    
-80    -112   
-144   64     
192    -32    
80     64     
-192   64     
64     64     
-96    32     
-80    0      
240    240    
-288   32     
96     64     
0      -144   
-64    -432   
0      0      
-128   -272   
-320   -336   
96     -368   
-336   240    
128    160    
-32    144    
-176   128    
112    96     
-368   -176   
224    96     
-304   -80    
128    32     
-784   384    
-240   -96    
112    -48    
32     0      
-112   48     
112    -80    
160    176    
48     368    
-32    304    
80     448    
-64    16     
-224   -240   
160    160    
-176   -32    
0      -32    
32     208    
304    640    
-448   32     
352    -256   
-288   -112   
48     -240   
80     256    
-144   80     
176    208    
-112   128    
32     112    
-128   -160   
48     192    
-64    176    
0      224    
-16    368    
-16    48     
96     -16    
-224   -80    
-80    -192   
112    -80    
96     144    
48     112    
-80    160    
16     -144   
-48    240    
-304   -64    
64     96     
-144   -96    
192    48     
-64    -48    
160    176    
-224   128    
128    -48    
-80    256    
-16    80     
-64    96     
96     -112   
80     32     
-80    80     
-64    128    
-64    0      
160    144    
16     -112   
48     96     
2320   704    
-1264  -1920  
-240   -1456  
528    32     
-608   -16    
448    320    
-320   352    
400    256    
-256   -336   
-64    80     
-544   32     
160    -32    
128    176    
80     48     
-48    192    
64     -128   
-64    96     
208    144    
32     80     
80     32     
-80    64     
96     48     
-48    240    
128    96     
-16    0      
80     112    
-128   48     
144    224    
-80    80     
160    0      
-80    32     
64     80     
96     176    
-16    144    
144    96     
-80    -32    
-80    -80    
-112   224    
240    144    
64     48     
-64    96     
16     0      
0      -256   
96     64     
-16    16     
32     176    
-48    80     
112    32     
0      352    
64     -32    
128    64     
-96    128    
112    48     
16     -32    
-80    48     
128    96     
48     48     
-64    -512   
96     240    
-64    -48    
112    32     
-32    144    
0      96     
80     32     
16     208    
-112   48     
96     64     
-128   64     
32     -80    
80     0      
-32    208    
0      208    
-16    -992   
176    128    
0      -2912  
-32    -64    
144    128    
-208   112    
16     16     
272    64     
-224   80     
144    176    
-144   -64    
144    -80    
0      112    
-112   -96    
48     64     
-48    -224   
-112   320    
80     96     
64     0      
16     128    
80     16     
80     128    
16     48     
224    96     
-80    176    
144    368    
48     144    
-48    64     
-96    -128   
176    96     
0      -48    
16     160    
80     -560   
64     128    
-80    -528   
80     208    
-32    -544   
192    96     
-32    48     
160    64     
-80    32     
144    128    
32     -32    
32     96     
64     400    
64     -80    
-16    80     
32     -560   
112    -96    
112    -576   
16     32     
32     32     
-128   -208   
176    -160   
-160   112    
32     96     
160    64     
144    128    
-80    -64    
32     112    
96     -96    
176    96     
160    -48    
64     288    
336    -16    
-224   352    
-48    -112   
0      16     
96     128    
80     0      
-112   -16    
64     96     
0      48     
0      -544   
160    336    
80     -1104  
-32    -128   
32     -128   
-32    96     
160    -32    
-80    112    
-96    -496   
144    -32    
192    96     
16     288    
96     560    
-176   -160   
112    128    
32     -496   
112    64     
16     -160   
112    240    
-384   -480   
128    -64    
320    -464   
144    384    
-64    32     
-16    144    
-48    64     
416    -1456  
112    288    
-144   -240   
-64    192    
144    -32    
416    128    
-48    48     
-288   128    
-96    -128   
32     48     
336    -64    
64     256    
-96    64     
32     -272   
-16    80     
96     112    
16     -624   
64     -112   
128    -96    
80     16     
112    -640   
80     -80    
-288   -1296  
192    -544   
-96    160    
240    32     
-160   64     
-1856  -1376  
-32    -1104  
400    720    
240    -32    
448    -16    
-816   160    
160    -384   
400    864    
672    -112   
-400   -176   
112    -224   
528    64     
16     208    
-144   -288   
-48    -240   
-16    80     
288    -288   
-272   -176   
-320   -208   
16     -224   
-576   32     
-16    -320   
304    32     
-288   -80    
16     352    
-80    0      
144    336    
-224   -1360  
416    0      
-160   -64    
-160   176    
256    256    
-16    128    
80     -192   
-16    0      
-304   -160   
160    -368   
-1312  192    
-48    -880   
176    -112   
-160   -192   
112    -48    
128    -768   
-64    -96    
128    -32    
-80    -48    
128    160    
0      96     
-192   -256   
-16    64     
-176   -16    
64     -32    
-192   -400   
32     -16    
128    -368   
128    -192   
64     160    
160    -32    
-432   -576   
208    -704   
64     176    
64     -144   
-256   256    
416    320    
-160   -272   
0      160    
96     64     
-336   -96    
80     -224   
64     -80    
48     -144   
64     32     
32     -144   
128    80     
48     -976   
192    608    
-144   320    
80     -112   
304    688    
-336   -192   
176    -48    
144    -64    
-432   -160   
16     -304   
-32    176    
-64    -48    
80     112    
-144   -752   
-64    -64    
320    -848   
-16    160    
-32    128    
128    160    
64     272    
-16    176    
-160   48     
64     0      
-320   -352   
64     -64    
-96    -48    
112    -192   
48     -16    
64     -128   
48     80     
96     -272   
48     128    
144    272    
96     240    
-320   128    
-160   -288   
-80    -96    
240    176    
-16    0      
48     -48    
144    240    
-48    -112   
64     -144   
-96    16     
144    -80    
-464   -48    
-1584  -16    
112    160    
-256   -48    
-144   -240   
-80    -192   
-160   -144   
160    -160   
-160   -128   
-224   -464   
32     -16    
-1488  -224   
-96    80     
-16    -240   
0      80     
176    240    
-272   144    
-16    80     
-384   160    
-48    64     
16     32     
-128   48     
32     -16    
64     0      
-304   -192   
112    16     
-80    -160   
96     112    
-208   -176   
192    48     
-32    -16    
-528   80     
48     80     
48     128    
-48    -96    
-224   0      
16     48     
-464   64     
-224   304    
-16    -64    
-32    0      
48     -160   
-16    32     
48     -240   
-128   32     
-128   -16    
160    192    
-112   0      
-64    32     
-176   -32    
-368   96     
-80    0      
-672   -80    
288    -64    
-144   64     
-80    240    
-176   -160   
0      16     
224    -224   
48     272    
-128   80     
48     160    
-112   -32    
96     112    
-160   128    
0      -64    
64     -16    
-64    128    
-32    -48    
-1088  -48    
32     16     
0      -128   
128    176    
-128   192    
-64    64     
-32    80     
64     -128   
-16    64     
-848   640    
608    -96    
352    208    
-176   -384   
240    64     
-592   -736   
-368   336    
496    112    
-112   352    
-320   96     
112    -304   
-288   208    
240    -64    
-368   448    
48     -416   
-96    384    
160    -176   
-288   288    
-80    -304   
-320   0      
128    -48    
-336   224    
80     48     
48     -80    
-208   -176   
176    368    
144    256    
128    112    
-352   -80    
160    160    
96     -16    
-144   -16    
-160   64     
0      48     
-32    96     
144    16     
-288   -48    
-16    0      
32     -48    
112    80     
-112   -16    
-64    0      
16     160    
208    64     
-160   208    
16     -80    
-96    128    
64     128    
64     176    
-64    -64    
48     240    
-304   -128   
128    32     
-48    -16    
48     16     
32     128    
-32    128    
-112   -32    
64     112    
-80    144    
80     0      
0      144    
-80    16     
144    240    
-352   -48    
160    80     
-112   -96    
112    32     
80     160    
-96    272    
0      0      
112    32     
32     0      
48     208    
-64    96     
16     64     
128    336    
0      16     
256    160    
-288   48     
96     112    
-32    0      
160    320    
-128   256    
16     224    
-48    -48    
16     -128   
-48    128    
-32    64     
336    128    
-160   112    
112    288    
-80    -32    
-48    80     
112    80     
192    176    
16     128    
16     64     
-48    48     
112    -128   
-368   -176   
272    272    
144    432    
32     128    
96     96     
-208   -32    
128    320    
-144   -80    
32     80     
-112   80     
96     16     
80     208    
-16    80     
-64    96     
240    160    
-176   -176   
0      48     
112    -32    
64     112    
208    240    
-112   192    
0      64     
112    112    
112    32     
224    336    
-96    -1152  
32     144    
-112   80     
384    640    
112    0      
-80    32     
-96    -16    
192    0      
-128   224    
32     64     
-80    -288   
-16    -160   
176    272    
-272   -16    
0      -160   
48     -624   
32     16     
80     32     
64     16     
0      208    
160    32     
-240   48     
144    144    
64     288    
0      112    
-16    64     
80     112    
32     -256   
-32    32     
-80    128    
32     -256   
128    80     
-48    -16    
176    -80    
0      208    
144    96     
-80    96     
-16    80     
-64    176    
160    144    
-160   -144   
144    176    
-48    80     
112    16     
128    176    
-48    -96    
160    32     
-160   -1136  
112    80     
64     64     
64     208    
64     176    
-80    32     
64     48     
144    256    
-64    0      
16     -64    
-16    128    
272    -96    
-32    0      
96     -128   
-176   96     
272    -240   
-368   272    
112    -80    
96     112    
-144   64     
208    64     
-144   -272   
160    144    
112    96     
32     144    
-368   -240   
-1200  768    
416    240    
-336   -96    
368    -832   
928    208    
-704   -320   
576    -1440  
-144   784    
784    -288   
-656   -144   
64     336    
384    -144   
-112   64     
-48    -32    
208    512    
-288   -80    
-32    -16    
48     32     
288    -128   
-128   -96    
96     -208   
192    -272   
176    -16    
32     144    
-80    -224   
16     176    
80     192    
-32    448    
-336   -96    
128    256    
64     -64    
32     96     
160    -176   
-32    176    
32     -656   
176    192    
192    96     
176    416    
64     208    
-192   -48    
32     -80    
128    80     
96     240    
-48    32     
64     80     
-48    -32    
192    208    
0      -304   
-16    -16    
96     -80    
-80    128    
144    32     
0      272    
32     32     
80     32     
144    352    
240    128    
176    -16    
160    112    
128    256    
64     -96    
96     272    
-96    32     
112    48     
80     -32    
80     128    
48     -256   
112    80     
-32    -208   
80     80     
-32    160    
144    144    
16     -1952  
-32    -240   
112    -2880  
112    -32    
-16    400    
80     -160   
256    432    
-256   0      
144    80     
176    -144   
160    -1600  
-112   160    
-48    -608   
-48    192    
0      -848   
352    240    
-208   -160   
80     -336   
-32    -64    
224    -112   
96     -240   
64     -640   
144    80     
-144   -112   
48     -640   
-96    -80    
112    16     
272    64     
-48    96     
48     176    
176    -64    
-64    32     
144    -64    
160    32     
80     -336   
-112   -144   
128    -1408  
112    32     
16     256    
48     144    
-48    16     
-16    64     
96     -48    
-64    16     
-128   -192   
176    32     
-304   32     
272    128    
-32    -32    
176    -432   
-320   -112   
144    -432   
160    -176   
-160   -368   
-112   48     
48     -144   
-80    -16    
64     -96    
64     -160   
-176   -112   
-48    -144   
-64    -80    
240    -256   
-1072  -128   
-272   96     
256    16     
352    -32    
-160   32     
-80    -272   
192    128    
32     112    
32     96     
64     -48    
128    -32    
-32    304    
80     -96    
96     -32    
-64    -32    
-64    0      
16     48     
-64    16     
16     -144   
16     -160   
128    32     
-64    240    
112    -2176  
48     144    
-80    32     
112    48     
-144   64     
32     112    
-368   -16    
48     -128   
-320   16     
80     -144   
0      -528   
96     -112   
-416   192    
-128   -240   
-32    208    
224    -1088  
0      64     
64     48     
-128   -384   
-80    -48    
288    192    
-512   128    
80     -16    
-352   -144   
144    -64    
-32    16     
-96    -32    
64     144    
48     64     
-64    -64    
96     -480   
112    -96    
-96    96     
112    48     
-176   -64    
192    -16    
-304   16     
368    -256   
-160   160    
64     32     
1120   -1824  
128    -816   
1552   256    
240    -464   
-208   128    
672    -384   
-608   -176   
912    -336   
-352   464    
-32    0      
-32    304    
-160   -416   
16     192    
96     -368   
0      336    
-864   -224   
96     -128   
112    -128   
-848   -112   
0      -80    
144    112    
-368   176    
144    48     
-944   64     
-80    -32    
16     160    
80     80     
112    -16    
-128   -96    
0      32     
0      48     
-384   -96    
96     80     
-496   16     
96     64     
-64    -80    
-128   -144   
-128   48     
16     128    
112    112    
-576   32     
-96    112    
80     32     
64     64     
-144   -96    
64     128    
-160   -16    
224    288    
-288   -64    
64     -80    
-80    -16    
-160   -32    
-16    112    
16     -80    
-32    32     
-592   -32    
-16    48     
-2128  -176   
-128   192    
-32    -48    
112    112    
-80    -160   
112    80     
-112   -32    
-112   144    
-80    -48    
-32    -64    
96     0      
-48    96     
-64    96     
-64    64     
112    160    
-400   -48    
96     32     
0      32     
-112   0      
240    48     
-288   80     
128    -16    
-16    208    
-48    144    
144    80     
-128   -96    
-80    -96    
64     144    
-192   -352   
-64    -192   
-80    -48    
64     48     
-1648  -32    
160    80     
-128   -64    
112    192    
-16    -80    
-48    0      
-32    48     
-288   -128   
-16    -32    
16     32     
-48    -112   
-48    144    
32     208    
-48    32     
-80    80     
-464   -32    
112    304    
-16    240    
-64    64     
-32    -64    
-160   -16    
96     176    
-32    16     
-64    -48    
16     64     
-64    80     
16     -160   
-176   -144   
-224   -112   
112    240    
-16    -240   
32     112    
160    16     
112    96     
-64    -48    
-16    160    
-208   0      
352    240    
-112   0      
144    272    
-80    64     
-32    -128   
-48    16     
-144   -32    
192    352    
-64    48     
-96    48     
128    16     
-256   0      
80     128    
-80    -16    
32     112    
32     48     
0      -80    
-64    48     
-144   32     
-32    -96    
96     336    
-240   80     
64     160    
-416   -256   
160    -32    
32     112    
64     144    
-144   -160   
176    -64    
48     336    
-96    16     
-96    -240   
0      96     
160    336    
-128   64     
-112   32     
96     112    
176    144    
-112   -128   
-48    240    
16     320    
-80    32     
128    -64    
96     160    
128    32     
0      64     
-32    80     
16     80     
32     64     
-144   80     
32     -64    
0      16     
16     160    
-16    64     
-64    16     
48     32     
112    160    
80     16     
-160   48     
160    96     
-112   160    
192    -48    
-176   160    
16     32     
48     -112   
112    80     
-48    64     
416    -320   
-80    464    
-80    -32    
-16    96     
-400   -1696  
1056   1712   
-192   16     
80     -528   
-256   -576   
368    224    
32     480    
-80    -416   
-48    80     
368    -224   
48     496    
-192   -272   
288    432    
16     128    
176    352    
-96    368    
288    208    
-128   432    
-304   -144   
160    48     
320    -112   
-304   -96    
192    -64    
-176   -48    
-16    -112   
224    0      
-368   -1392  
208    128    
-96    192    
256    304    
-176   192    
32     128    
-32    32     
-48    32     
-32    48     
80     32     
32     32     
48     160    
-240   48     
192    144    
-240   -192   
-32    -1600  
112    64     
112    256    
64     128    
-32    96     
-80    32     
160    160    
16     32     
112    112    
48     64     
0      144    
-16    160    
64     -160   
64     128    
0      192    
80     144    
-32    -32    
144    112    
-96    112    
112    16     
80     144    
-16    144    
112    288    
-96    -16    
176    32     
0      176    
-48    192    
80     -48    
96     48     
16     144    
-48    -160   
-16    96     
144    -2368  
48     160    
16     -160   
208    128    
48     0      
112    160    
-32    -192   
-64    32     
112    -80    
16     0      
64     32     
-96    64     
112    320    
48     32     
32     -16    
176    -896   
128    -16    
96     128    
-80    112    
128    96     
-80    144    
-64    -432   
-32    -176   
16     176    
96     432    
-16    64     
-96    -112   
-64    32     
128    -32    
64     96     
-16    -208   
48     16     
-96    -1536  
32     160    
64     80     
112    -16    
-96    16     
-64    32     
32     -96    
32     -16    
192    224    
-16    -192   
112    208    
-208   -112   
352    304    
-48    -400   
32     128    
64     -1856  
-32    240    
272    -320   
-144   144    
-112   48     
256    -160   
-240   -144   
-64    48     
80     96     
224    0      
-144   64     
32     -432   
96     64     
-32    -512   
-224   -80    
48     -320   
-16    192    
352    48     
240    224    
-384   0      
256    208    
160    64     
-96    -400   
-16    48     
-16    -752   
48     0      
160    32     
-64    64     
352    -128   
-80    96     
-48    0      
80     192    
32     -96    
176    224    
64     -64    
16     128    
48     -16    
64     -304   
-96    -16    
272    -432   
-96    240    
112    -272   
-64    128    
64     -176   
256    160    
-96    -192   
-32    -192   
48     96     
128    -1232  
160    80     
96     -656   
-16    -160   
-48    -96    
32     32     
192    -112   
112    112    
16     -32    
0      192    
64     -160   
96     112    
32     -208   
48     -624   
-32    -32    
112    -64    
144    176    
-32    -320   
64     -560   
224    48     
-192   -240   
64     32     
64     -144   
96     -32    
80     -736   
48     -224   
128    80     
160    224    
80     -32    
32     176    
-1168  1232   
768    384    
272    64     
-16    -976   
240    -976   
-464   -1072  
992    528    
96     16     
-32    -240   
-224   -1440  
608    96     
-192   -416   
96     -16    
-144   -96    
240    0      
-80    -208   
16     96     
-112   -144   
-112   -80    
-176   -80    
64     -224   
112    -16    
-64    -48    
96     -128   
-144   -80    
80     -112   
112    -736   
128    192    
0      -208   
48     0      
-112   -80    
176    64     
96     160    
-16    -160   
-272   -64    
0      -176   
-48    80     
48     -96    
32     64     
32     -160   
-208   32     
-16    -1056  
-32    112    
16     -16    
176    0      
-224   -32    
144    32     
-96    224    
32     -192   
-384   32     
-16    -80    
-272   -16    
-48    -32    
64     -16    
-48    -256   
-64    -240   
144    -560   
16     112    
80     -1728  
-32    -112   
16     80     
64     -16    
-96    0      
128    0      
-176   64     
144    96     
16     64     
16     16     
-224   336    
-160   -64    
0      0      
112    -304   
32     176    
-16    -432   
176    48     
-32    112    
-128   -208   
16     -32    
32     48     
-48    400    
-48    -16    
-128   -48    
-16    -480   
-16    112    
144    32     
48     64     
-16    -64    
128    -272   
80     -416   
64     -144   
-96    80     
64     -16    
-16    -32    
32     32     
-16    -32    
0      -48    
-32    96     
32     16     
-96    -128   
144    -160   
-32    160    
160    -368   
-128   64     
-64    -32    
160    -16    
-80    48     
48     0      
-16    32     
-96    -32    
16     -16    
-16    128    
32     -16    
16     0      
-48    48     
-736   -96    
48     48     
-64    -64    
-16    -48    
16     96     
-144   -96    
-112   192    
-560   -96    
-16    80     
-80    -144   
240    288    
-144   -352   
240    -160   
-496   48     
352    528    
-112   -128   
-96    -144   
-208   -128   
-224   -64    
208    480    
-288   -176   
16     -224   
-288   160    
-144   144    
-160   -48    
-64    64     
144    80     
0      80     
-720   -256   
96     80     
0      -48    
96     32     
48     256    
-528   32     
176    -208   
0      -32    
128    240    
0      -48    
-112   272    
-256   48     
256    80     
-1312  0      
128    96     
112    -256   
-144   400    
-192   -160   
48     0      
-48    48     
80     96     
-128   80     
-208   -112   
272    208    
-208   -112   
416    -32    
-368   160    
80     128    
-464   0      
80     -96    
224    192    
-96    -16    
48     32     
-48    112    
160    32     
-80    0      
48     48     
-80    128    
-16    -176   
-112   0      
176    48     
-144   16     
-112   -112   
80     80     
32     128    
-976   -128   
-128   160    
-112   -160   
-32    80     
32     -80    
64     96     
256    -96    
160    256    
-208   0      
16     80     
-496   -912   
-432   -688   
608    32     
464    112    
-544   352    
704    304    
-432   320    
-224   -736   
352    -528   
48     -32    
208    64     
32     112    
-32    304    
-80    -16    
192    64     
-64    64     
-160   48     
64     -48    
32     16     
32     128    
-144   272    
-208   240    
256    176    
-272   32     
-80    -32    
-32    32     
48     96     
-48    0      
16     32     
-112   272    
80     -48    
-144   48     
-80    80     
-48    -32    
96     240    
-112   -16    
-80    160    
176    -16    
-96    160    
160    144    
-16    -64    
64     128    
-48    224    
160    80     
-176   -80    
-128   0      
80     96     
80     128    
-96    128    
144    -80    
-192   80     
-48    112    
64     64     
-96    0      
160    80     
-48    144    
160    144    
-272   32     
128    32     
0      0      
32     64     
32     192    
32     80     
-80    32     
16     32     
-96    -176   
-48    0      
-144   0      
32     112    
32     48     
48     32     
0      48     
-16    128    
-64    16     
128    64     
-32    128    
-192   -192   
288    272    
-384   16     
96     32     
96     240    
-80    -32    
240    96     
0      368    
-64    64     
208    32     
-80    144    
16     32     
160    144    
-112   144    
-32    0      
96     128    
-48    304    
64     0      
144    -96    
0      -80    
112    160    
-144   192    
176    144    
-64    -32    
-96    -48    
112    176    
96     128    
64     160    
-160   -64    
240    144    
-144   -96    
304    144    
-176   -32    
-16    0      
-32    -80    
96     96     
-16    32     
32     112    
-128   -32    
-48    16     
-48    -32    
304    96     
96     32     
-288   16     
64     320    
384    96     
192    256    
-400   -64    
80     -1072  
16     -16    
-144   -240   
-48    -48    
64     272    
176    96     
208    128    
-256   -32    
-80    16     
-176   -80    
80     48     
192    -16    
-128   0      
80     48     
32     48     
-128   -528   
352    128    
-16    128    
224    64     
-128   368    
176    208    
112    128    
16     128    
0      48     
128    208    
16     112    
96     144    
-80    80     
80     176    
112    -32    
-96    -672   
208    80     
0      96     
-16    -80    
16     -80    
80     160    
32     176    
32     192    
-48    144    
112    288    
-64    -256   
16     112    
112    352    
-192   -192   
32     192    
-64    -384   
96     -80    
32     -3184  
32     80     
320    128    
-64    160    
-160   176    
16     96     
160    128    
320    224    
-48    -16    
-80    144    
16     -48    
-96    96     
80     128    
80     -480   
-64    160    
-96    -640   
144    240    
208    240    
112    160    
0      272    
16     80     
112    -224   
224    144    
-144   208    
0      192    
16     16     
-48    -240   
864    -1632  
256    -496   
496    32     
-640   -656   
-160   352    
-400   -3184  
304    320    
-32    -256   
240    176    
-496   -224   
64     128    
336    512    
-160   16     
240    -96    
16     32     
144    80     
48     0      
-176   192    
176    -176   
-64    -112   
240    -432   
-80    64     
176    -96    
64     224    
-32    16     
352    320    
224    320    
32     192    
-96    -80    
288    -128   
-64    224    
352    0      
48     160    
0      -368   
0      32     
-80    -192   
192    96     
-112   64     
208    128    
16     80     
192    96     
112    144    
160    -240   
-64    96     
112    -208   
16     96     
96     -224   
-16    224    
48     -96    
32     64     
32     -144   
96     192    
-80    -416   
-32    176    
0      -176   
64     128    
16     -224   
176    -240   
-96    -400   
112    32     
192    192    
-48    -208   
-48    208    
176    -272   
64     64     
80     -112   
32     -1568  
80     48     
-96    -1152  
48     64     
128    -176   
-32    -176   
112    32     
0      -144   
-48    -96    
48     -1792  
224    416    
0      352    
-128   -112   
96     -64    
-48    32     
176    -16    
16     112    
256    288    
-224   208    
-192   -256   
-176   -512   
240    -624   
128    -1056  
112    -16    
80     192    
-112   0      
48     -1040  
32     -240   
112    160    
48     -32    
144    144    
-144   96     
80     -144   
-32    -64    
80     -16    
112    208    
32     112    
-32    -32    
-32    -32    
64     -80    
32     -208   
192    176    
-96    -256   
304    -144   
-144   -32    
128    -48    
-48    32     
112    -224   
128    -80    
-112   16     
-64    -208   
0      -96    
64     0      
80     16     
64     -304   
-144   -304   
272    64     
176    112    
-16    -464   
-80    80     
32     -16    
128    48     
128    176    
32     -240   
-32    0      
-16    128    
112    -80    
32     -80    
-128   -32    
-128   32     
-32    -352   
208    -384   
-128   -32    
224    -352   
-64    192    
0      -272   
64     224    
-48    0      
192    0      
-368   -672   
288    -208   
80     -304   
-16    -240   
32     80     
32     -128   
-208   -48    
208    -112   
16     144    
64     -496   
-224   576    
240    -768   
384    992    
-368   208    
64     64     
-224   -176   
192    -192   
80     0      
160    -96    
-192   -64    
304    -128   
-1248  -32    
-48    -752   
32     80     
400    -320   
192    208    
176    -432   
320    240    
-288   -16    
112    -48    
-80    -128   
224    64     
-224   96     
-80    -112   
-176   16     
144    -176   
-240   -32    
32     -128   
48     32     
64     -112   
112    224    
-16    -1552  
48     -480   
96     80     
224    0      
16     128    
-64    240    
-256   80     
128    80     
-368   -48    
64     -128   
0      80     
-512   -1440  
768    352    
-1264  -1280  
-144   -160   
624    -288   
-592   -448   
672    -480   
-416   512    
-176   112    
768    -32    
-464   -224   
176    -80    
32     160    
160    96     
-96    176    
-272   -128   
32     144    
-368   -176   
-608   -80    
-16    32     
-176   16     
64     240    
-208   160    
-128   -176   
16     -272   
-16    64     
272    64     
-80    80     
80     -128   
-144   0      
-144   -352   
-144   144    
-96    -96    
-96    64     
16     80     
-80    -48    
48     32     
-256   96     
96     -48    
-608   0      
48     176    
0      32     
-96    -32    
48     -96    
64     240    
-48    -16    
0      80     
16     96     
-208   -32    
112    -32    
-176   -16    
-80    0      
-96    80     
-96    96     
16     -128   
-192   64     
-560   -96    
-160   128    
-64    -128   
112    64     
32     -128   
16     176    
48     32     
-96    48     
-32    48     
112    -32    
-96    64     
32     0      
-48    80     
-336   -32    
-48    -112   
-400   -144   
32     192    
-80    -16    
224    352    
-144   48     
160    -32    
192    -208   
0      48     
-32    256    
-176   0      
192    16     
0      160    
-64    128    
176    -192   
-96    -96    
-96    208    
-240   176    
-976   -80    
0      16     
0      -112   
-112   -64    
176    192    
-80    -16    
48     -32    
-80    80     
-96    80     
192    -112   
-64    96     
-128   0      
192    64     
-112   112    
16     80     
-432   -144   
0      48     
96     160    
144    -32    
-48    -48    
-160   -32    
-16    -16    
-64    16     
-64    64     
-96    112    
224    224    
-64    -16    
48     96     
-352   -208   
240    224    
-272   32     
144    288    
-128   224    
176    176    
-192   -128   
-160   32     
128    144    
0      -144   
-16    -176   
-416   64     
240    240    
-32    -80    
64     48     
-320   -160   
64     192    
48     80     
32     144    
208    16     
-112   96     
-240   -240   
-144   64     
224    96     
176    -64    
-80    112    
-224   0      
48     144    
48     -64    
-16    112    
-256   -32    
48     -128   
-192   -112   
64     80     
48     80     
-32    176    
0      48     
32     112    
80     112    
0      -48    
-64    80     
80     160    
64     416    
-16    -32    
-32    96     
-48    128    
-48    -32    
-128   -64    
80     160    
80     112    
128    176    
32     -400   
96     48     
-96    144    
32     192    
-96    16     
96     48     
160    -128   
-64    144    
32     64     
-240   -48    
144    80     
160    192    
0      80     
48     -128   
112    336    
176    144    
32     64     
-144   16     
240    224    
80     -176   
32     48     
80     -32    
-64    80     
64     176    
-80    16     
32     -32    
256    48     
-96    96     
80     176    
-64    80     
0      32     
848    -384   
16     -272   
-912   -432   
-288   -480   
176    16     
-96    -208   
192    320    
112    240    
-320   -16    
80     16     
-160   64     
-48    112    
64     64     
48     48     
224    80     
-16    176    
336    240    
-176   -96    
0      32     
80     32     
112    192    
32     80     
80     48     
0      272    
96     -1136  
96     -80    
-288   -304   
-16    -304   
-16    192    
96     208    
208    144    
16     160    
-48    32     
128    288    
-160   -112   
240    80     
-128   112    
240    256    
96     400    
32     -608   
64     32     
-32    -16    
96     0      
-80    80     
160    160    
48     -96    
-128   0      
48     64     
96     240    
-112   -272   
272    16     
-192   -128   
32     -384   
112    144    
48     -208   
112    48     
-48    -448   
160    80     
480    848    
-304   -96    
208    192    
-32    -192   
64     128    
128    160    
16     80     
192    0      
0      64     
-80    -96    
112    128    
16     -128   
16     128    
80     -1680  
-16    48     
0      32     
272    384    
-16    96     
176    48     
-272   160    
144    144    
-48    -96    
-48    336    
144    96     
0      -128   
0      48     
176    -320   
32     304    
-192   -1184  
64     128    
-16    -576   
80     288    
-144   -16    
-16    48     
-16    -80    
160    80     
-16    64     
16     112    
80     192    
0      -224   
32     64     
128    -128   
64     144    
144    32     
-80    112    
112    -544   
-16    128    
144    32     
48     176    
-16    0      
64     160    
16     48     
96     16     
32     128    
32     32     
48     128    
16     48     
16     112    
48     -48    
80     -96    
0      -288   
112    432    
160    208    
-144   240    
48     224    
32     48     
96     -160   
-16    48     
96     112    
112    -16    
-160   -304   
96     -160   
-48    160    
304    -672   
-128   304    
128    -288   
0      576    
160    288    
64     368    
16     -32    
80     288    
-32    -128   
128    -160   
48     208    
112    160    
-32    128    
-128   -336   
-32    -176   
160    -208   
64     192    
128    32     
-16    128    
96     -112   
-16    -432   
64     -64    
64     -2384  
96     -80    
112    16     
144    -128   
0      -400   
288    736    
-96    -176   
32     0      
96     48     
0      192    
112    16     
-112   -992   
144    160    
144    -416   
-176   32     
-224   0      
112    -672   
16     -48    
16     -336   
64     -320   
0      -2080  
-48    -192   
16     144    
-160   -176   
0      80     
96     -128   
208    -560   
-80    112    
16     -288   
144    32     
-96    80     
-80    -176   
-336   0      
80     -96    
128    16     
64     -16    
48     96     
0      -1040  
-80    -320   
160    -304   
80     16     
208    -176   
96     240    
176    -64    
16     -96    
768    688    
-240   -496   
160    96     
-256   -896   
1120   -768   
-800   -736   
752    848    
-416   288    
0      -1056  
-352   -320   
384    144    
96     208    
-144   112    
0      -80    
80     48     
-128   -304   
-32    160    
80     0      
48     96     
16     -208   
112    -256   
32     16     
112    0      
-352   -16    
112    -240   
-112   64     
64     16     
64     112    
-48    -48    
16     48     
64     -16    
16     32     
-208   64     
144    32     
48     -128   
32     -272   
64     176    
128    80     
112    -32    
-112   -336   
64     176    
112    -32    
48     64     
-144   48     
96     -144   
16     96     
128    0      
16     96     
-16    -112   
-496   48     
112    32     
-224   64     
32     -48    
32     -48    
32     -1056  
16     -48    
64     -1184  
48     0      
144    -16    
-32    -96    
-80    32     
64     -144   
-208   80     
112    32     
-80    -16    
48     -176   
-640   48     
112    80     
-208   80     
208    -320   
32     96     
32     -1120  
-32    -112   
-320   -176   
80     -144   
-176   -96    
208    -256   
32     0      
112    112    
-208   208    
-32    -176   
112    32     
-128   -192   
320    -32    
-80    176    
-208   16     
272    256    
-304   -240   
240    240    
-112   -96    
128    160    
160    16     
-128   192    
96     -96    
-208   -112   
-48    -192   
16     16     
-32    16     
96     160    
-944   -288   
48     64     
-96    144    
-1248  -128   
-64    -48    
128    64     
-48    80     
352    432    
-272   128    
16     -80    
-80    -16    
-64    -64    
112    112    
-704   -304   
48     160    
-736   -544   
64     0      
-144   -64    
208    -16    
32     240    
176    192    
-272   -48    
-768   192    
-352   48     
352    64     
32     144    
-672   -64    
-208   80     
-128   -144   
192    16     
-208   -32    
-112   80     
112    176    
0      -128   
-16    96     
-592   -32    
-240   -112   
-336   -80    
240    336    
272    48     
-64    32     
-240   -80    
112    192    
32     48     
-80    96     
80     176    
-16    96     
-80    -48    
0      16     
-256   -224   
0      0      
-16    160    
144    240    
48     224    
-512   160    
-160   -16    
-64    -176   
-112   144    
128    -16    
-48    32     
-48    32     
-16    80     
-112   -112   
-80    128    
-80    -128   
176    -336   
-384   -544   
112    112    
128    528    
-368   -160   
160    112    
-16    112    
112    288    
-112   -112   
-96    16     
64     16     
-32    -192   
-64    80     
48     416    
48     -16    
-192   32     
112    -112   
-64    -112   
0      96     
-416   256    
-32    80     
-1136  -96    
240    -48    
192    -80    
-80    64     
-80    64     
-32    -16    
-32    192    
-176   80     
192    192    
-208   128    
80     -32    
-160   16     
1232   176    
-560   208    
496    1168   
-384   688    
400    -448   
16     -384   
-560   32     
464    272    
-352   16     
432    0      
-80    160    
-32    -64    
144    336    
-96    -80    
128    96     
-128   192    
64     192    
-112   32     
-496   -320   
272    208    
160    240    
-128   -80    
-32    480    
-64    176    
240    384    
-320   96     
176    240    
-112   272    
48     32     
-192   16     
144    -64    
-144   -48    
64     240    
-272   96     
-208   16     
-64    -224   
16     -496   
-80    128    
256    336    
-128   224    
272    0      
-48    96     
-192   -64    
48     128    
-160   -48    
64     112    
-176   32     
368    704    
-208   368    
-144   -240   
96     224    
-112   -192   
32     48     
192    256    
-96    80     
16     160    
-160   -16    
-48    -944   
-208   224    
224    -80    
-96    160    
112    208    
48     -64    
32     400    
32     48     
16     80     
32     96     
64     96     
0      96     
-32    112    
0      32     
0      32     
80     320    
16     96     
-192   -48    
208    192    
-240   -96    
352    128    
-176   160    
-64    -48    
80     224    
-16    16     
80     384    
-64    96     
-32    176    
128    32     
-208   -416   
-16    -16    
288    160    
-64    112    
16     208    
-176   -112   
80     272    
0      -48    
0      -80    
32     32     
-144   0      
208    96     
-144   128    
0      -64    
80     160    
-32    192    
0      -48    
-16    48     
0      0      
208    160    
-16    -64    
-32    160    
128    -16    
-16    -16    
80     96     
112    176    
112    176    
16     160    
-16    144    
80     112    
160    608    
-112   16     
-160   -160   
80     320    
-272   256    
352    288    
64     -672   
-224   96     
240    480    
-64    240    
176    96     
-80    256    
336    544    
-272   -160   
144    64     
-80    368    
48     272    
48     224    
-208   -176   
160    -608   
-144   -48    
32     -1552  
64     144    
80     176    
-80    80     
160    96     
32     80     
-176   96     
256    288    
-176   128    
368    352    
-144   112    
208    -16    
-208   -112   
-64    -160   
112    256    
-16    -176   
96     160    
64     304    
16     48     
128    112    
0      128    
-208   -96    
-64    -64    
16     -48    
112    48     
16     144    
48     96     
0      144    
64     -208   
48     144    
112    160    
-32    -64    
80     -2448  
64     96     
96     256    
-128   208    
144    -448   
-32    80     
64     -80    
208    416    
-336   0      
80     96     
208    -64    
192    -80    
-48    176    
32     -512   
96     176    
32     -304   
-128   144    
32     -960   
144    80     
128    -16    
48     208    
16     0      
112    208    
-48    80     
48     16     
256    -96    
48     224    
16     224    
-288   352    
-448   -400   
656    -528   
-128   480    
64     -272   
432    -432   
336    -912   
-480   -208   
320    32     
320    480    
0      -272   
144    176    
-48    -112   
96     128    
-128   0      
96     -544   
-16    208    
0      80     
176    160    
-48    -480   
16     80     
160    64     
-64    288    
112    -32    
-80    96     
160    -32    
-288   -528   
96     176    
-16    64     
240    0      
-144   -80    
112    64     
64     -176   
32     144    
-48    -2544  
112    48     
-80    64     
224    48     
96     112    
144    48     
-64    272    
96     -224   
16     144    
112    48     
80     64     
0      -144   
16     64     
16     -96    
80     32     
208    -160   
-160   112    
144    64     
64     -1136  
-16    0      
-1344  -192   
-144   144    
208    -48    
48     -576   
112    -224   
112    -1136  
-96    -368   
192    112    
16     144    
-112   -32    
240    -144   
-112   -448   
96     16     
128    -112   
0      16     
-576   48     
64     -144   
160    32     
32     -192   
48     16     
0      32     
224    -128   
208    400    
-96    -64    
432    96     
-32    -144   
-16    -592   
160    -32    
64     -48    
-160   -80    
176    -160   
-96    -96    
128    16     
-80    -128   
128    -192   
160    -368   
0      32     
0      -336   
48     0      
-48    -480   
-112   -16    
-48    -16    
-16    80     
-80    48     
-32    -224   
-64    -32    
-112   -352   
-752   -16    
176    16     
96     64     
-32    0      
64     0      
192    -416   
-304   -336   
352    320    
-192   160    
80     80     
-48    96     
80     -144   
80     32     
-240   -80    
16     -80    
-32    -96    
48     -64    
176    48     
80     0      
112    -208   
-256   -480   
144    96     
96     -912   
-80    32     
80     96     
-32    -32    
128    160    
16     -80    
-192   -16    
240    240    
-80    80     
128    -80    
-160   0      
32     -144   
112    112    
-224   -336   
336    16     
96     -96    
-16    128    
16     48     
-80    -192   
-32    0      
96     80     
-32    -80    
-48    -48    
-272   -256   
-16    -192   
-192   -112   
-32    -80    
-608   224    
112    -400   
-112   48     
112    -560   
-32    96     
144    -1344  
192    304    
-288   -112   
128    -320   
-176   112    
176    -16    
-224   -16    
128    16     
32     0      
16     144    
-208   160    
-16    -400   
240    384    
272    -48    
288    48     
-192   112    
-80    48     
-80    176    
-32    -256   
192    64     
-80    16     
96     64     
-176   32     
208    80     
-16    -128   
-288   -32    
160    -288   
16     144    
-32    -48    
240    -80    
-96    160    
-32    -64    
48     0      
-80    32     
16     64     
-16    -32    
64     -64    
16     -64    
-272   -128   
224    320    
-512   96     
96     -144   
16     -128   
1760   -1360  
-704   -1024  
832    928    
-1408  352    
336    -480   
-384   288    
-272   -48    
880    320    
-800   144    
208    -272   
-256   224    
-96    -320   
32     336    
128    -352   
-48    320    
-464   -416   
-96    128    
-288   -80    
-928   -176   
80     -544   
-32    48     
-240   160    
-912   272    
0      192    
272    -96    
-208   224    
16     -32    
-416   -96    
480    -256   
-160   336    
-64    0      
-80    208    
32     48     
-80    128    
-96    352    
-64    208    
-96    192    
-496   -176   
-48    144    
128    80     
-96    -48    
-208   -128   
64     224    
-208   -128   
-32    -16    
-112   -144   
304    176    
-144   112    
-256   -208   
-224   -336   
32     -192   
-112   48     
64     176    
176    -32    
-288   -32    
-16    -32    
-96    208    
144    384    
368    -16    
-32    272    
144    352    
-240   -112   
-64    192    
-272   -64    
32     -96    
32     80     
64     -16    
-48    64     
-48    -256   
-304   -96    
304    112    
-16    352    
-96    304    
32     0      
-96    -16    
-224   -400   
48     144    
-352   224    
80     192    
-208   -32    
-80    -320   
80     80     
-48    48     
-208   32     
-368   -128   
208    144    
-1392  -384   
368    288    
-112   64     
144    224    
-80    64     
-48    112    
96     272    
64     -80    
16     48     
-144   80     
-112   -64    
-160   -160   
240    336    
48     336    
-144   -48    
-544   -176   
240    256    
-16    -64    
48     80     
-176   -192   
224    160    
32     64     
80     -48    
32     112    
-112   -144   
-160   96     
0      -112   
192    192    
-64    48     
64     224    
-528   -352   
144    208    
-32    96     
256    416    
-368   288    
128    -48    
-64    144    
64     80     
-16    112    
-128   48     
80     48     
-48    -272   
-16    176    
-128   -32    
64     128    
-240   -304   
32     0      
112    224    
224    224    
-176   144    
0      32     
128    224    
-128   128    
288    64     
-128   112    
-32    64     
-128   -128   
112    -128   
-144   32     
64     144    
336    112    
-304   112    
128    80     
0      32     
-64    48     
16     144    
-16    32     
96     48     
48     80     
-160   64     
208    128    
-32    16     
-96    144    
48     -32    
16     112    
48     112    
16     32     
0      48     
240    272    
-224   176    
64     112    
176    16     
-64    -80    
160    -48    
-192   48     
-64    320    
-192   -48    
208    32     
64     -272   
208    288    
-128   64     
-112   208    
-64    48     
144    80     
80     80     
32     96     
-16    -144   
144    80     
-48    160    
144    240    
-96    192    
-48    80     
128    224    
-144   16     
144    -64    
32     80     
32     240    
-64    -160   
80     112    
-112   272    
224    -16    
48     144    
1328   176    
-656   240    
256    496    
-544   544    
832    0      
-704   448    
-32    -624   
240    720    
320    -192   
-224   400    
128    -304   
64     224    
-48    96     
16     240    
48     96     
-16    16     
-192   176    
208    -64    
-144   176    
128    -112   
0      240    
128    32     
-96    -624   
144    -224   
-80    192    
32     -16    
128    400    
16     -80    
-112   224    
128    -112   
-32    128    
112    32     
-48    -16    
32     48     
-16    48     
80     -32    
16     80     
96     -512   
0      160    
64     112    
112    96     
-96    160    
128    32     
80     208    
-16    80     
0      128    
-64    -16    
0      160    
352    32     
-176   112    
48     -128   
48     160    
-16    16     
96     32     
-64    -64    
112    160    
80     80     
32     96     
0      176    
64     16     
48     144    
16     96     
-48    64     
64     48     
160    0      
48     -384   
112    128    
80     -384   
-16    64     
64     -1392  
32     32     
112    176    
-64    144    
32     48     
96     160    
-144   -32    
224    48     
-128   272    
-32    112    
80     -64    
96     48     
16     192    
128    336    
-160   128    
-112   -1088  
192    96     
-80    -816   
176    144    
32     400    
0      144    
-192   -160   
64     128    
-144   176    
144    -96    
-48    48     
48     16     
80     -128   
-16    -80    
256    320    
0      -368   
-16    96     
176    -80    
96     288    
0      -48    
96     176    
128    160    
-64    208    
112    16     
-32    -16    
-80    96     
112    -176   
64     160    
96     -48    
-80    32     
112    -80    
-32    0      
128    -384   
112    224    
32     272    
176    48     
48     144    
64     0      
128    144    
64     -256   
0      -272   
64     -352   
96     112    
-176   -160   
144    224    
144    -16    
80     176    
80     -160   
64     16     
0      -144   
-32    160    
224    0      
-256   -112   
384    240    
-64    -48    
96     176    
-48    -16    
-48    -16    
240    -32    
-128   96     
160    -304   
64     96     
-16    -48    
16     -608   
48     80     
16     -576   
-32    32     
-1760  -64    
112    -352   
-64    -32    
192    160    
48     0      
48     -752   
96     80     
-80    64     
96     -144   
-48    -672   
176    -80    
208    -16    
-48    160    
0      -560   
304    -128   
-560   -32    
32     -32    
48     16     
-112   -464   
176    -64    
64     -480   
32     -48    
0      -192   
352    112    
-160   -112   
144    -112   
16     0      
48     96     
64     -32    
-64    -128   
-80    -48    
0      -16    
256    -64    
-64    -352   
224    -272   
144    -144   
96     -16    
-144   -128   
96     -160   
80     -160   
-112   64     
-32    -80    
-160   304    
112    -96    
-16    -16    
64     -32    
-688   2688   
-368   -592   
96     -1104  
576    128    
640    -560   
-720   -400   
48     -608   
-336   -64    
416    -1200  
-192   16     
448    -96    
-16    480    
-192   -160   
192    240    
32     -272   
-160   -16    
16     0      
576    368    
-144   -80    
160    -112   
-128   64     
320    -160   
-240   288    
0      -1264  
144    -224   
-256   -48    
16     64     
96     656    
-240   -576   
-384   -256   
352    208    
-96    128    
-32    -192   
-640   -16    
0      -464   
64     -96    
16     -160   
64     -48    
96     -496   
0      -256   
64     -16    
-48    -96    
112    48     
96     -240   
-64    -128   
224    96     
-608   -80    
128    48     
-1136  -160   
-64    -80    
144    64     
32     -48    
48     160    
16     -576   
48     48     
192    -448   
80     -176   
-64    0      
32     32     
48     16     
16     -48    
-160   0      
32     -240   
64     48     
-128   80     
0      -96    
112    -224   
48     176    
288    -272   
-144   368    
-144   16     
288    80     
-208   -144   
176    -112   
-240   -208   
-48    -16    
-80    16     
16     0      
-80    -64    
160    -16    
-992   -16    
144    -224   
0      -96    
96     -176   
336    16     
-48    80     
-208   -208   
-144   -96    
-160   0      
32     32     
-48    -16    
16     112    
80     96     
16     -16    
48     -144   
16     -16    
-864   -48    
16     64     
-384   -272   
-352   -96    
96     128    
-816   64     
-64    -16    
-336   -16    
208    176    
48     192    
-112   48     
176    224    
-352   -208   
352    96     
-32    32     
-144   -48    
16     64     
256    -144   
-400   -144   
-32    176    
-256   -64    
64     -128   
-128   16     
160    -160   
-720   -240   
-48    -256   
176    -64    
-192   48     
0      48     
112    -208   
16     -336   
-240   176    
80     -16    
-32    16     
96     48     
-96    112    
48     -32    
-208   160    
0      224    
-176   -96    
176    16     
-528   64     
-80    96     
80     -144   
32     -16    
-192   -160   
-160   -112   
-32    -48    
80     32     
144    80     
-368   -480   
144    80     
-304   112    
160    64     
-144   96     
32     48     
-816   16     
160    176    
-80    -96    
80     64     
-48    -32    
96     416    
-160   240    
80     48     
-112   0      
-32    112    
-32    -16    
-112   -80    
80     128    
-224   48     
128    400    
-352   -288   
176    32     
-112   -32    
16     80     
80     -32    
-96    80     
-32    144    
-32    -16    
-16    144    
16     -16    
64     256    
-160   -16    
16     16     
96     -192   
16     160    
-208   160    
48     -48    
-608   80     
80     80     
-80    128    
-16    -16    
-48    32     
-48    128    
80     16     
96     128    
-144   176    
112    128    
-176   -64    
-64    80     
16     32     
-896   -2592  
-32    -1520  
-240   720    
-512   -208   
720    -752   
240    192    
-320   -256   
256    496    
-96    448    
528    -512   
-304   240    
32     -336   
-192   576    
256    -496   
-80    560    
-128   -224   
-80    368    
-480   -176   
-176   -112   
128    -192   
96     112    
32     272    
-32    48     
0      176    
-16    -176   
-64    80     
144    32     
-208   240    
160    32     
-48    224    
0      -144   
-80    192    
0      -48    
16     192    
96     48     
-112   112    
0      32     
-64    16     
-16    0      
64     160    
48     64     
-48    96     
-64    96     
48     16     
-32    64     
-48    -32    
0      208    
64     -64    
80     144    
-16    32     
32     112    
-32    64     
-32    96     
80     80     
0      48     
0      128    
-96    -48    
-48    96     
-16    0      
48     -32    
-80    -112   
32     384    
0      64     
160    64     
48     144    
0      64     
80     176    
32     128    
0      16     
96     128    
-64    80     
16     -32    
16     32     
-48    48     
128    160    
-192   -64    
112    16     
160    32     
-48    48     
-288   -240   
112    -96    
80     208    
48     160    
144    80     
-224   -48    
256    144    
-32    192    
16     128    
-16    16     
16     -192   
-176   -64    
0      -64    
80     16     
160    256    
-64    96     
64     -160   
-128   -304   
-32    -176   
224    336    
-144   128    
32     144    
-80    48     
208    144    
-48    16     
0      80     
-32    96     
48     -80    
144    48     
64     160    
-48    208    
96     -32    
0      128    
-64    96     
256    224    
-144   32     
112    208    
-112   -16    
144    144    
-80    0      
144    144    
192    320    
-64    -128   
-16    -80    
-48    96     
160    224    
224    64     
-32    272    
-112   192    
208    16     
-80    16     
16     224    
80     240    
-80    -48    
96     240    
-144   -224   
288    112    
-336   -1296  
288    -304   
-160   64     
256    128    
-16    416    
64     16     
-16    48     
0      176    
112    16     
-160   -80    
144    -64    
-80    416    
32     -16    
0      -480   
256    32     
112    -192   
160    256    
160    320    
-304   384    
-112   112    
240    -80    
-160   -112   
208    16     
-80    192    
-80    48     
0      80     
0      -16    
320    256    
-48    -32    
112    112    
-80    512    
-240   -48    
320    -464   
-32    272    
176    80     
-32    128    
-160   32     
144    16     
32     160    
64     32     
96     96     
-64    -176   
96     160    
48     -96    
-64    -16    
272    -64    
-48    288    
-16    -288   
-16    -208   
336    -128   
96     432    
16     0      
-224   112    
32     -80    
240    144    
160    -96    
-208   -144   
0      -112   
304    48     
192    288    
144    -240   
-160   -32    
2352   -2352  
144    -176   
160    -224   
-800   -336   
576    128    
-80    -464   
448    176    
16     -48    
176    352    
-128   -736   
176    32     
-128   -640   
432    -192   
-160   -64    
400    32     
-192   192    
192    224    
-144   -144   
192    -144   
-112   128    
-32    -192   
144    16     
176    48     
16     96     
-48    -256   
128    256    
128    -80    
-80    -64    
64     -400   
32     -64    
48     -80    
96     144    
32     -864   
160    288    
-64    176    
32     176    
0      80     
-112   16     
176    -400   
176    240    
-256   224    
160    -144   
-32    128    
208    64     
48     112    
-112   -288   
96     160    
128    32     
-96    -1200  
-48    -160   
224    -32    
-80    32     
-816   -64    
-48    -992   
64     -160   
80     -352   
176    -64    
80     -336   
0      0      
144    160    
-80    -48    
96     160    
48     -80    
80     -80    
64     96     
-16    -80    
-32    -192   
-336   16     
-64    -272   
144    -16    
-64    -400   
80     -128   
112    -608   
128    -144   
-80    496    
0      -416   
192    160    
-96    336    
16     16     
32     48     
80     -160   
48     -16    
-80    272    
-64    -16    
-336   -320   
208    -64    
-144   64     
192    -144   
192    -112   
-16    -320   
96     0      
192    -32    
-160   96     
304    -176   
0      112    
208    288    
-128   32     
64     32     
-16    -240   
-528   -112   
128    -208   
80     80     
80     -48    
32     112    
80     -592   
-48    48     
-48    -2000  
112    208    
48     -32    
16     32     
80     128    
32     -64    
-96    -16    
-96    16     
-576   -144   
32     32     
96     0      
352    208    
-288   -112   
-48    -368   
-128   -208   
64     -592   
176    -32    
112    48     
-112   -80    
-192   0      
96     16     
112    160    
-48    144    
32     160    
-64    96     
-1440  -368   
-64    -288   
-208   -128   
368    -256   
16     80     
0      -240   
128    64     
-112   -144   
16     -144   
128    0      
64     -32    
64     240    
16     96     
112    80     
-112   32     
16     80     
48     -48    
-96    16     
96     -64    
48     64     
0      -496   
80     64     
-224   16     
128    -112   
-96    32     
32     96     
-48    208    
-176   -80    
-272   -128   
16     -272   
0      160    
64     32     
-208   96     
64     -224   
-192   48     
176    -320   
304    656    
-176   -16    
48     96     
-80    -96    
176    -176   
-32    -96    
-128   112    
80     64     
16     -128   
-80    48     
80     -336   
-128   240    
0      -32    
16     144    
-144   -80    
96     -192   
176    112    
-1376  176    
-64    304    
-256   -80    
-32    32     
256    -224   
-16    80     
80     32     
-128   -16    
-928   -96    
-32    128    
-304   -304   
128    96     
-16    -96    
-752   -2592  
672    208    
-1520  -192   
400    -320   
128    608    
-240   -768   
640    32     
272    -304   
192    256    
-240   -16    
-32    -48    
-208   112    
144    -112   
96     192    
-32    160    
-272   -80    
0      32     
0      176    
16     0      
-80    -16    
16     32     
-432   128    
-32    80     
144    32     
32     16     
-16    48     
112    224    
-208   -48    
-16    48     
0      64     
48     96     
0      128    
48     304    
-80    128    
-304   -48    
-176   0      
-144   -64    
32     64     
-800   64     
16     112    
48     64     
-48    144    
-96    -144   
-160   -16    
96     64     
0      -16    
96     64     
-224   0      
-96    -144   
0      -48    
-208   -64    
-48    -16    
-64    128    
-208   -160   
48     48     
-80    -256   
-16    -32    
-48    -112   
64     80     
-32    -64    
-112   -112   
0      48     
16     160    
16     336    
64     240    
32     128    
48     256    
48     96     
-304   -48    
-32    48     
-112   -32    
96     48     
160    176    
-128   32     
32     64     
-112   -16    
176    32     
-16    416    
-288   192    
128    -320   
64     80     
-144   16     
176    128    
-352   48     
32     192    
-896   -112   
128    160    
-16    0      
-176   -80    
-32    -144   
16     -48    
96     176    
0      208    
-112   -16    
16     0      
-160   -80    
0      -96    
-48    48     
-144   16     
48     128    
-176   0      
-224   32     
0      48     
-48    32     
112    144    
-64    64     
80     192    
-128   -144   
96     80     
-96    160    
32     -64    
48     96     
-112   144    
96     -16    
16     144    
-400   -64    
16     0      
16     -32    
0      160    
48     144    
-32    -16    
-112   48     
128    96     
160    -16    
-96    112    
-272   80     
16     0      
240    -288   
-128   160    
16     224    
256    80     
-208   64     
-96    64     
144    96     
-32    64     
-64    -16    
-192   -800   
64     32     
-192   448    
112    -96    
-16    240    
-224   -96    
176    176    
-288   -144   
0      144    
112    0      
80     240    
-96    -16    
96     64     
32     0      
160    112    
-96    16     
128    32     
176    320    
16     432    
-320   -192   
192    112    
0      -272   
304    16     
-336   192    
32     32     
-96    96     
48     0      
320    272    
-32    -16    
-240   32     
240    352    
-432   192    
96     -96    
-80    -16    
304    64     
16     160    
-208   64     
-320   112    
240    -160   
256    224    
-192   48     
-64    -288   
48     96     
304    80     
-48    368    
-368   336    
-208   16     
112    -112   
-80    496    
320    80     
-160   64     
32     144    
80     -64    
48     112    
32     -48    
176    208    
-16    96     
48     208    
-128   16     
176    48     
16     48     
48     112    
560    1200   
16     -288   
-832   176    
-592   -960   
-272   144    
544    64     
288    -48    
240    32     
-464   -176   
288    -336   
0      352    
96     160    
32     384    
-160   160    
208    112    
-32    32     
-16    -192   
96     144    
-32    -96    
16     -128   
-16    144    
64     -160   
16     16     
16     128    
16     80     
-16    80     
64     176    
64     -48    
48     -16    
-64    112    
192    176    
-80    -288   
-16    192    
-16    -80    
16     -80    
128    -192   
16     -1760  
0      80     
128    144    
-80    -32    
112    64     
48     208    
96     32     
128    64     
-112   112    
160    176    
48     32     
128    304    
-320   160    
192    -192   
80     144    
-64    -272   
144    144    
-64    -832   
96     32     
128    304    
-240   64     
288    352    
-272   208    
64     -32    
288    144    
-192   128    
-16    -192   
80     240    
-96    -256   
176    -96    
-16    -400   
128    240    
-48    -400   
80     144    
16     -912   
144    128    
-192   0      
144    96     
96     -16    
-64    -128   
224    176    
-176   -64    
48     128    
64     176    
-48    32     
208    -160   
0      -16    
-32    -336   
0      304    
-32    -432   
0      -48    
400    208    
-272   112    
208    128    
-16    112    
48     80     
112    96     
-80    -160   
336    336    
-304   224    
176    -144   
16     80     
-48    -496   
112    48     
32     -384   
96     144    
48     32     
128    320    
-80    -128   
0      0      
208    400    
48     -48    
160    0      
-96    -336   
80     240    
128    -352   
32     64     
-112   -208   
224    240    
176    -64    
-192   32     
-64    -160   
112    -16    
-304   -80    
32     80     
304    192    
-32    -176   
160    208    
-112   -496   
224    32     
-448   -272   
-80    -80    
112    -160   
224    32     
-32    -112   
208    256    
48     256    
144    -1904  
176    272    
-800   16     
96     -816   
80     -16    
96     -2448  
112    -16    
16     192    
80     128    
176    256    
-32    -128   
208    -1088  
-112   -16    
-48    -64    
112    208    
192    -48    
-128   144    
-1520  -144   
176    -400   
48     -96    
-16    96     
16     -96    
256    -224   
-192   -256   
304    -32    
-96    -192   
160    256    
80     112    
-48    -48    
0      160    
16     -128   
48     -192   
-176   16     
32     16     
352    352    
48     -80    
-48    -192   
32     -256   
144    -32    
176    -944   
48     -208   
176    112    
-16    64     
16     -112   
48     96     
-112   -224   
16     -128   
-16    64     
16     0      
-96    32     
-64    -208   
64     64     
80     -352   
112    -32    
-32    -320   
112    16     
96     -64    
64     32     
144    64     
-160   112    
-192   176    
176    0      
-112   0      
96     -304   
-576   -432   
448    -384   
64     -320   
-224   -688   
-192   816    
432    176    
-1104  -672   
0      -3488  
64     -176   
-192   -192   
432    224    
-240   288    
32     96     
-128   -160   
96     -368   
-256   0      
16     -96    
-1200  272    
80     272    
160    -208   
96     -336   
64     160    
48     -1344  
64     128    
-16    -32    
128    -64    
-128   80     
224    -128   
-96    -80    
16     64     
16     80     
112    16     
-800   -64    
208    -64    
-896   96     
160    -240   
-144   128    
80     -528   
80     32     
64     -32    
0      64     
-176   -48    
64     64     
-368   0      
64     -64    
32     -96    
96     16     
-816   -96    
-80    -96    
-80    -192   
176    -448   
-32    112    
112    -288   
256    240    
-96    -16    
224    80     
-288   160    
144    112    
32     176    
48     80     
-112   -128   
80     48     
-128   -16    
160    48     
-144   160    
64     -16    
64     144    
-80    -272   
208    -48    
-96    128    
48     16     
32     80     
64     0      
-160   -64    
0      -112   
-32    64     
480    656    
-304   464    
-208   -256   
16     -176   
-96    -240   
160    176    
48     -128   
-160   80     
16     -16    
-320   -16    
208    64     
-1888  -80    
-128   -64    
128    32     
-128   96     
160    -64    
-128   48     
-160   -288   
160    240    
-304   -272   
48     112    
48     208    
-144   176    
32     0      
-272   -16    
-144   -48    
-320   48     
-64    -16    
-480   128    
-16    32     
16     -96    
-16    256    
-144   -192   
208    160    
-208   32     
112    112    
-48    32     
-32    0      
0      80     
-160   -16    
16     160    
-16    -48    
16     112    
-1056  -32    
-80    128    
-16    -240   
-160   -16    
32     -128   
224    96     
48     -48    
0      448    
-112   320    
192    176    
-240   -192   
48     0      
-64    80     
80     128    
-32    -112   
-320   0      
-224   -688   
-640   -80    
192    32     
-48    -96    
-16    160    
-96    -432   
-144   -64    
-64    -16    
208    144    
-32    16     
-32    -48    
64     272    
112    0      
0      144    
80     -112   
80     16     
-32    112    
80     128    
-64    144    
16     -240   
272    -16    
-32    288    
-128   16     
-80    16     
32     192    
80     -64    
0      160    
-16    16     
32     272    
-80    -16    
16     224    
-224   128    
128    -128   
-80    0      
144    192    
-64    -16    
112    -80    
0      -16    
-32    96     
112    64     
-96    176    
-96    48     
304    -352   
-160   96     
-16    -96    
-224   128    
-480   -96    
160    288    
-1136  -128   
48     -80    
48     48     
-64    -208   
96     224    
-64    240    
64     32     
32     128    
96     -112   
-32    208    
32     -128   
-96    -16    
112    -16    
32     64     
80     320    
-496   464    
-352   800    
944    144    
240    288    
-256   -80    
-96    96     
-128   304    
208    0      
96     -304   
-432   -192   
208    -16    
-96    208    
32     -16    
-48    96     
96     144    
-80    48     
-16    0      
32     80     
128    176    
-16    144    
-96    0      
0      16     
-16    32     
128    0      
-160   32     
80     480    
-256   64     
192    96     
-224   -176   
144    192    
0      0      
-16    112    
-32    80     
80     96     
48     96     
336    320    
-144   304    
80     -96    
-32    16     
-80    96     
256    176    
-192   -80    
64     160    
-256   -128   
128    -176   
-48    112    
272    192    
-16    256    
-96    -16    
64     96     
-80    144    
192    64     
-48    192    
16     80     
0      -48    
80     176    
-96    -48    
112    128    
-64    32     
-48    64     
96     144    
-16    64     
0      32     
-32    -80    
-32    64     
-64    176    
32     48     
64     -32    
80     320    
-224   -16    
288    128    
-288   48     
112    64     
128    128    
-48    112    
80     272    
112    48     
-48    48     
-16    96     
64     -96    
112    160    
-112   160    
-96    -208   
224    48     
-240   224    
0      32     
176    336    
-272   64     
368    352    
-208   -16    
160    192    
80     48     
64     64     
64     -112   
192    176    
-176   112    
80     128    
0      48     
-32    -64    
-32    -96    
48     224    
-96    16     
208    -672   
-160   224    
16     96     
112    112    
0      -16    
272    256    
-240   0      
224    80     
-48    16     
-16    112    
224    112    
-32    224    
-32    48     
224    176    
-256   -80    
192    -176   
-112   176    
-64    -400   
240    -80    
-224   -48    
-16    32     
304    400    
-80    0      
112    32     
16     272    
32     48     
128    256    
-48    0      
96     -32    
-160   128    
80     -144   
-144   192    
112    -96    
144    96     
0      16     
48     256    
0      -16    
160    0      
-176   96     
80     96     
-48    240    
128    -16    
-32    96     
-64    16     
208    384    
0      -32    
80     144    
-16    -96    
32     96     
112    -400   
-16    16     
-16    128    
192    176    
-128   -512   
80     16     
16     -64    
-80    0      
80     96     
32     -112   
64     48     
96     -272   
0      144    
64     -432   
-48    -32    
0      -240   
80     240    
0      -48    
112    432    
16     16     
32     128    
80     80     
160    -160   
0      48     
64     64     
-96    160    
-32    -128   
176    -48    
64     96     
96     224    
-48    -368   
32     224    
96     -1344  
-32    112    
0      48     
64     240    
-16    80     
128    32     
80     80     
112    -128   
112    96     
32     -496   
-80    192    
144    -416   
16     144    
48     -512   
-1024  -2400  
1440   1552   
-1264  208    
896    -368   
992    240    
-640   -640   
80     -336   
304    704    
128    -176   
432    112    
-304   -224   
48     224    
96     16     
192    112    
112    -16    
-208   -112   
224    176    
32     -432   
288    208    
112    240    
0      -144   
128    128    
-32    256    
144    -272   
-176   -224   
176    -400   
64     160    
16     16     
-16    128    
144    0      
-16    64     
48     -176   
160    432    
-112   80     
16     -1072  
-208   64     
-976   400    
224    -128   
-64    -304   
-240   -2432  
384    -144   
-48    32     
64     -32    
128    64     
0      -240   
96     144    
-32    32     
368    -240   
-192   176    
128    -448   
0      -176   
-1808  96     
128    -256   
48     -96    
128    -32    
128    -208   
128    -144   
-272   -384   
-80    -208   
240    -32    
-128   -288   
176    80     
-80    32     
160    112    
32     -512   
80     96     
-592   -144   
144    -208   
-96    64     
112    -16    
80     -32    
32     -704   
32     16     
112    -3280  
-176   -96    
80     96     
-16    -144   
224    -656   
-496   -400   
-64    -288   
-64    352    
-144   16     
0      240    
-352   -160   
144    48     
-16    -256   
16     -608   
32     -176   
240    -464   
-64    0      
160    -48    
-80    192    
64     64     
-80    -48    
-144   -192   
48     -96    
64     176    
-32    -128   
-896   -208   
128    96     
0      -16    
64     -80    
48     112    
112    -144   
80     96     
-128   -1456  
112    144    
64     208    
32     -144   
96     192    
-48    32     
-48    -160   
-16    -112   
-192   -64    
224    0      
-560   112    
48     -208   
-64    -192   
0      -560   
96     -80    
128    -1440  
-48    80     
208    128    
160    64     
-160   -32    
80     96     
-208   -336   
160    -128   
-272   -512   
176    -208   
-608   -48    
112    -256   
-1200  144    
80     -448   
96     112    
192    -64    
48     272    
-288   -240   
144    112    
-208   112    
240    16     
-224   80     
144    256    
-32    -80    
32     -192   
-208   -128   
80     -64    
96     48     
0      -80    
96     80     
112    -112   
-96    32     
0      96     
32     -144   
-176   -192   
80     32     
80     192    
-32    -784   
16     224    
80     -128   
-16    112    
-32    -112   
32     96     
208    -32    
-176   -224   
272    -368   
192    -48    
-544   -336   
160    320    
32     128    
32     80     
-48    208    
-48    0      
-112   -64    
96     -48    
16     112    
128    -144   
16     176    
-672   -224   
32     144    
-880   -224   
-272   32     
48     -128   
-288   80     
-64    32     
-688   144    
-144   -160   
176    80     
64     32     
112    176    
-112   208    
-128   -112   
48     240    
-80    -272   
-240   320    
-144   192    
0      -144   
272    176    
-480   -896   
560    -864   
304    736    
288    640    
-960   -384   
176    464    
-80    208    
480    -80    
-144   -128   
-112   -80    
192    16     
-32    64     
-80    96     
32     -32    
-64    64     
-112   -32    
-176   -16    
16     -48    
96     224    
-112   -48    
-80    0      
-496   -160   
128    80     
-80    -96    
128    48     
-48    -16    
-240   32     
128    0      
-128   -32    
32     32     
64     -16    
-112   96     
-64    96     
112    176    
-304   -32    
48     128    
-608   128    
176    80     
-64    -160   
80     192    
-160   -64    
48     -48    
-144   80     
128    0      
-112   128    
32     32     
-32    48     
-368   -272   
288    256    
-416   -96    
288    48     
-544   96     
224    160    
-112   -144   
16     48     
96     144    
-176   48     
288    -48    
-112   320    
-144   -32    
176    64     
-80    144    
-208   48     
32     -80    
112    64     
-112   192    
-480   16     
48     48     
48     -320   
128    128    
-96    192    
-128   80     
128    16     
-16    16     
-96    128    
-112   32     
224    176    
-96    112    
112    16     
-96    -32    
16     160    
-208   0      
192    320    
-288   -80    
144    160    
-128   48     
80     -208   
224    144    
-288   -64    
144    224    
-128   -112   
128    192    
16     80     
64     96     
-192   -32    
0      32     
-208   -224   
112    112    
-672   144    
-16    -80    
-16    112    
-80    -80    
224    368    
-96    192    
96     208    
-128   0      
80     112    
48     144    
-144   -16    
-208   -48    
144    144    
-192   -112   
64     112    
-48    112    
-16    128    
304    224    
-240   -224   
128    112    
-32    64     
112    112    
-144   112    
272    272    
-256   96     
128    128    
-80    -32    
272    336    
-208   80     
-32    -32    
-16    -48    
176    112    
-64    96     
64     224    
64     112    
-176   64     
16     208    
192    144    
160    112    
-256   32     
64     224    
16     -144   
-48    -208   
-128   32     
80     80     
-32    112    
144    80     
-32    16     
0      464    
208    336    
-304   -176   
176    48     
16     32     
16     80     
32     -32    
32     -64    
32     400    
128    320    
-368   -464   
144    240    
64     144    
48     96     
-16    240    
16     -96    
-32    144    
64     -16    
96     80     
-32    416    
0      -64    
-192   -288   
224    240    
-48    96     
32     64     
96     208    
32     112    
32     64     
96     -48    
48     80     
48     128    
128    48     
-112   160    
112    96     
48     80     
32     112    
-112   128    
224    16     
-256   224    
-80    0      
96     64     
128    -48    
128    176    
-80    64     
144    32     
-80    160    
96     96     
-224   48     
144    48     
224    -48    
208    0      
2016   -1680  
-560   -1280  
848    1440   
-256   512    
48     352    
576    -688   
144    784    
-128   16     
-176   -160   
16     -80    
352    -32    
112    48     
-176   128    
-208   32     
-192   -176   
-16    -128   
224    192    
144    -32    
-176   64     
-48    -80    
96     -96    
-80    128    
80     384    
64     48     
16     -96    
208    80     
64     352    
144    112    
-240   -144   
16     64     
32     128    
-160   96     
32     192    
48     -48    
368    288    
-16    -352   
160    -144   
-96    -48    
144    208    
-32    176    
32     288    
-64    -256   
96     16     
-80    160    
-96    0      
128    0      
-32    288    
96     240    
-176   -384   
32     160    
112    -352   
-32    176    
-16    -880   
-112   -48    
112    256    
128    128    
-160   -112   
192    192    
176    208    
-128   -96    
-32    240    
144    -96    
-144   16     
0      64     
336    432    
-336   -288   
240    144    
176    -32    
-16    112    
-64    -144   
64     144    
48     -96    
0      16     
16     -16    
208    240    
48     112    
48     -16    
-144   384    
-496   -576   
112    -288   
144    -80    
-16    -64    
112    -544   
-48    64     
96     -1136  
80     48     
224    384    
-400   -224   
64     -96    
16     384    
80     272    
-160   -688   
32     112    
160    -352   
96     208    
240    208    
48     112    
64     -544   
112    160    
176    320    
144    160    
-32    96     
16     96     
96     -192   
128    -448   
16     160    
16     -304   
80     -368   
-160   -496   
16     -80    
144    -176   
64     176    
16     -64    
48     192    
32     -432   
112    160    
-128   -64    
128    -1136  
32     192    
128    160    
32     144    
0      -96    
160    224    
16     -64    
160    384    
-80    -144   
96     96     
-16    128    
112    144    
-32    -176   
48     -2064  
-32    64     
240    -368   
-160   -16    
-640   -16    
-320   -80    
320    272    
528    -160   
-368   224    
144    256    
64     -80    
96     -48    
-32    16     
112    -240   
128    96     
-112   -432   
288    -192   
-32    -176   
176    -224   
-176   48     
128    -224   
64     32     
32     -400   
-64    -112   
128    -384   
112    96     
144    192    
208    176    
-320   -80    
128    0      
64     32     
0      32     
176    -32    
-192   -160   
-192   336    
-432   -464   
352    -224   
112    -240   
400    192    
16     -464   
-96    -32    
128    -880   
-272   -80    
192    80     
80     64     
-64    -128   
64     16     
-128   -192   
96     -32    
-208   -32    
-16    144    
-1360  0      
16     112    
48     -240   
224    16     
-32    -48    
-32    -544   
64     -32    
64     -16    
16     0      
176    -80    
-32    -96    
-112   64     
208    -48    
-144   0      
240    0      
-960   -32    
48     -160   
-848   448    
-224   -624   
-80    368    
-32    -144   
848    592    
-672   -3136  
912    304    
-432   304    
576    -128   
-800   -128   
544    -64    
-224   320    
160    -480   
-640   288    
208    -336   
-224   192    
112    -208   
-16    208    
32     -688   
0      176    
224    -608   
0      304    
-32    48     
160    -16    
-240   -32    
304    48     
-336   80     
144    64     
-384   16     
240    176    
-144   64     
112    -160   
-112   96     
144    -432   
16     176    
240    -304   
-16    128    
160    32     
128    112    
-528   16     
96     -16    
-128   -32    
128    -32    
32     208    
128    48     
-240   96     
-48    -224   
48     224    
80     -352   
112    224    
-96    -560   
128    -32    
-224   -144   
144    -176   
-192   48     
64     32     
-16    16     
-48    16     
-160   -144   
240    -128   
-304   16     
192    -320   
-48    96     
96     -272   
48     32     
-1424  -400   
-320   160    
-80    80     
96     -16    
16     80     
16     80     
-80    16     
48     16     
-128   32     
0      32     
-32    96     
-224   0      
256    96     
-112   -80    
160    272    
-80    80     
-48    -64    
128    -16    
-128   128    
-64    192    
-560   16     
-64    192    
128    -288   
192    96     
-208   0      
144    96     
0      -80    
-64    160    
-80    -160   
176    320    
-48    80     
-16    112    
-96    -16    
-176   -64    
-208   -224   
-240   256    
0      -144   
-896   240    
-64    -96    
-48    -16    
48     -16    
-48    -144   
48     32     
-96    -272   
-192   -16    
320    416    
-64    112    
224    176    
-144   128    
144    192    
-256   80     
128    80     
-480   -16    
176    144    
-80    -480   
-64    -64    
32     48     
48     -64    
64     112    
48     112    
-80    -160   
-32    64     
-240   48     
-64    144    
208    32     
-112   144    
128    16     
-608   112    
112    32     
-672   -112   
0      112    
-16    -96    
64     128    
80     192    
64     128    
-144   0      
-160   128    
144    32     
16     96     
-128   144    
32     -384   
-272   -96    
16     192    
16     128    
-400   -64    
80     48     
0      0      
-48    0      
0      112    
-16    112    
-16    336    
208    0      
176    704    
-272   128    
-112   -112   
-112   -32    
160    16     
-32    128    
64     80     
-224   -16    
272    80     
-176   32     
-64    -176   
112    304    
-192   96     
112    96     
-160   80     
-160   -192   
144    240    
-256   208    
256    -64    
-128   240    
-64    -64    
176    144    
-672   0      
176    32     
-1120  -16    
-144   128    
144    16     
144    32     
64     32     
-112   0      
16     144    
-96    -48    
128    176    
-80    144    
-80    96     
-160   -80    
304    32     
-192   48     
-48    16     
-32    80     
-16    96     
1440   1040   
960    640    
-368   -416   
-176   -352   
240    320    
-224   -480   
928    768    
-1088  -624   
656    496    
-448   -96    
272    0      
-16    80     
208    -96    
-80    288    
0      -48    
-144   112    
112    -144   
-176   704    
80     -368   
160    592    
16     -304   
128    752    
-448   -480   
368    208    
-176   -112   
336    480    
-160   -48    
-16    192    
-144   -160   
320    -48    
0      80     
176    -48    
-80    144    
80     64     
48     96     
-176   -672   
-112   -160   
48     -112   
256    512    
-368   -96    
112    96     
-96    -16    
16     -112   
-192   80     
48     -32    
208    32     
48     -352   
128    -96    
272    464    
176    592    
64     288    
112    240    
-80    -64    
144    224    
-128   16     
0      112    
144    400    
-48    176    
112    48     
224    384    
-208   32     
80     -224   
-16    176    
-64    -64    
432    368    
-112   -240   
-32    192    
-16    288    
192    320    
-240   -112   
-32    224    
-16    -16    
64     -32    
0      192    
16     64     
-128   32     
-128   -304   
240    -128   
-48    -80    
32     176    
160    160    
80     256    
-208   -80    
288    224    
-112   -80    
336    176    
-128   160    
-48    16     
-176   -224   
352    176    
-80    -144   
64     224    
32     192    
-16    160    
16     -32    
-80    -16    
-96    176    
16     80     
-80    16     
192    112    
-32    -432   
-16    16     
144    256    
-192   0      
-16    32     
32     32     
-192   -16    
-224   -256   
336    96     
-192   64     
48     208    
112    176    
-16    -32    
48     80     
112    160    
16     -272   
48     -16    
-16    -784   
-80    112    
48     -112   
-16    -160   
64     304    
256    368    
-48    144    
-32    0      
16     112    
112    128    
-16    32     
112    -16    
-16    96     
80     -96    
16     240    
144    -320   
-144   -32    
128    160    
-96    128    
464    192    
-128   208    
80     144    
48     80     
-80    64     
80     128    
96     32     
16     0      
144    112    
-16    96     
80     80     
48     -192   
-16    96     
96     -864   
0      112    
96     -64    
112    176    
-128   0      
240    128    
-112   64     
96     112    
144    320    
-80    -96    
144    -112   
-64    -368   
192    160    
0      -512   
-48    -48    
32     -64    
-64    48     
0      -1344  
64     96     
0      -64    
208    80     
0      80     
16     64     
16     160    
208    -224   
176    448    
-144   -320   
-16    192    
80     -112   
0      144    
96     -304   
112    48     
-16    -720   
128    -96    
-32    -80    
64     304    
32     304    
-224   -640   
48     48     
192    -592   
112    0      
80     -192   
48     192    
-144   -16    
112    96     
-48    -336   
144    176    
0      -224   
-960   -304   
672    1472   
-1648  1184   
416    -48    
576    208    
32     -640   
16     864    
-224   -128   
224    256    
288    -432   
-96    144    
208    -96    
-64    160    
64     -144   
176    -224   
-288   -304   
240    16     
-112   -2192  
48     -64    
-16    -144   
96     -272   
-64    208    
304    -400   
-96    -48    
0      -256   
-192   0      
400    -32    
-80    336    
128    -656   
-160   -48    
176    -848   
16     160    
192    -608   
-112   -64    
-336   -48    
160    0      
192    -64    
-32    -1200  
-16    -176   
48     -1984  
80     -16    
48     112    
32     64     
128    -432   
-96    32     
96     -288   
80     208    
192    -144   
-32    -128   
-1024  -96    
96     -160   
80     -160   
0      -432   
112    -112   
80     -192   
80     32     
32     272    
-112   -464   
224    -112   
-192   -32    
192    -112   
-64    112    
16     64     
0      32     
-16    0      
32     32     
80     64     
-32    -80    
160    48     
-16    -144   
0      -128   
80     -32    
112    -48    
96     -48    
32     64     
16     -176   
160    0      
-128   128    
-16    -112   
-80    16     
-240   -176   
-480   -480   
80     -272   
-64    -64    
-64    -336   
-64    144    
96     -544   
96     -16    
0      0      
48     128    
32     -32    
112    -144   
-48    96     
-32    -80    
16     32     
320    416    
-480   240    
0      -416   
-96    -352   
-80    -512   
-16    -96    
16     -320   
96     80     
16     -3360  
16     80     
-176   -112   
80     224    
0      0      
144    352    
-192   0      
0      -16    
-304   -256   
96     -144   
-224   -96    
80     96     
16     -240   
64     16     
-80    -48    
192    -400   
-64    -128   
32     -48    
-64    -32    
80     -32    
208    -96    
-16    -48    
48     -32    
160    464    
-80    112    
240    224    
-112   -112   
32     64     
64     -112   
-48    -64    
224    -352   
-64    96     
-64    96     
80     96     
-256   48     
144    -16    
-176   -176   
176    48     
-80    160    
-128   -80    
-256   32     
-160   -320   
320    208    
-48    -176   
0      32     
128    -240   
80     64     
48     48     
48     48     
-80    80     
48     128    
96     96     
-112   32     
128    192    
-144   -176   
-64    -272   
160    -160   
48     304    
-752   -48    
16     128    
-368   -288   
-704   48     
192    192    
-1072  0      
144    -48    
496    -32    
-240   176    
-80    -224   
32     -16    
80     144    
112    0      
-416   -64    
0      144    
256    -176   
-128   192    
-80    -112   
-544   -32    
-80    -48    
256    32     
-96    96     
-800   -16    
32     48     
48     -80    
16     -144   
256    144    
-32    80     
-144   0      
-64    48     
128    -416   
-32    176    
-16    -32    
-272   64     
-64    32     
160    48     
-16    16     
2240   -1600  
-176   -128   
480    528    
-576   544    
-32    256    
48     -96    
-304   320    
880    -288   
-368   928    
-16    -320   
-64    240    
-448   -288   
224    272    
0      64     
240    496    
-240   96     
112    144    
-448   -448   
304    -128   
224    272    
144    0      
-432   -448   
256    -176   
-240   256    
48     -224   
-64    160    
80     208    
16     352    
96     176    
48     -272   
-272   -16    
224    -128   
-160   112    
-160   -128   
-448   -144   
48     480    
-144   -112   
-16    -96    
16     -16    
0      -112   
240    80     
-336   176    
48     -16    
-48    16     
16     64     
192    32     
0      112    
-192   -256   
-48    128    
-224   80     
144    48     
-64    -80    
112    176    
96     224    
-112   80     
16     16     
0      208    
96     -16    
64     64     
-160   96     
240    -144   
-16    208    
-320   160    
160    -48    
-64    48     
-16    192    
-176   -16    
-112   0      
-16    16     
32     48     
0      128    
-32    64     
0      48     
0      96     
16     96     
48     96     
16     688    
-240   112    
80     96     
-192   64     
-64    80     
240    -128   
112    368    
-208   176    
112    128    
-96    -64    
240    112    
-32    16     
-16    0      
96     96     
-16    128    
48     80     
-128   32     
-16    160    
-144   -208   
192    112    
-32    176    
-16    80     
32     -96    
-144   16     
-32    -32    
-64    -128   
-48    -48    
96     0      
352    528    
-416   160    
240    -16    
-272   -288   
32     96     
160    80     
0      64     
-48    176    
0      96     
0      48     
-32    208    
-32    16     
176    0      
-176   208    
160    48     
-64    -112   
-400   -160   
128    192    
272    288    
-32    128    
-176   -16    
-64    -128   
272    304    
16     256    
112    16     
-48    224    
0      96     
304    192    
-16    288    
304    96     
-224   160    
-240   -96    
160    48     
16     272    
0      -16    
144    0      
-144   64     
-64    32     
112    -96    
0      -48    
-240   -32    
384    160    
48     16     
-128   64     
-80    -16    
-16    80     
192    112    
0      64     
32     48     
-32    16     
96     64     
-48    96     
112    112    
96     288    
-96    16     
80     -32    
-64    128    
-48    -32    
128    -16    
-112   80     
48     -32    
-80    128    
-96    64     
16     -160   
112    -2912  
240    288    
-112   240    
-96    240    
-16    160    
288    16     
128    -96    
80     272    
-112   16     
-48    176    
-80    -80    
-64    192    
-96    -64    
96     112    
96     80     
-80    -128   
-80    -32    
144    64     
48     96     
96     48     
-64    144    
32     112    
96     112    
-48    96     
96     176    
-48    -192   
64     272    
-48    -176   
48     288    
-32    80     
-1072  1344   
368    288    
-32    -64    
-48    -352   
112    -720   
-128   -688   
496    560    
-16    -128   
192    800    
-480   -400   
288    -176   
-176   -192   
144    176    
-272   208    
416    -112   
-128   64     
48     -96    
48     -912   
144    -32    
-32    176    
160    -32    
-48    256    
96     112    
32     -80    
-96    80     
64     128    
64     224    
192    192    
-144   -80    
96     -32    
-80    -112   
192    96     
32     176    
96     16     
-96    160    
128    -32    
80     160    
-32    80     
96     -64    
48     112    
48     32     
0      128    
-16    0      
64     -256   
32     80     
48     -32    
48     -32    
0      -144   
-16    128    
64     -1120  
16     -16    
48     -208   
-48    80     
48     96     
96     96     
-80    160    
16     112    
112    -96    
64     -128   
0      112    
32     -224   
16     64     
64     -368   
48     256    
32     -528   
128    192    
32     176    
64     80     
128    160    
32     144    
16     80     
32     144    
64     80     
128    48     
-16    160    
-32    0      
48     96     
48     -208   
64     112    
-64    -304   
32     256    
-32    -16    
32     -352   
96     192    
80     112    
-16    -80    
32     48     
160    224    
160    -144   
-64    -80    
48     -32    
96     0      
16     -128   
160    96     
-80    -320   
16     -96    
80     -1680  
144    320    
160    320    
-96    32     
-160   -48    
48     -128   
224    -80    
160    -16    
-128   32     
96     48     
16     48     
64     -112   
64     64     
64     -128   
80     128    
-16    112    
96     -1232  
112    192    
-16    -768   
192    -992   
-96    -160   
144    96     
-16    64     
80     -128   
-64    -80    
32     48     
16     -240   
352    192    
-80    -32    
-48    160    
80     448    
192    -784   
-160   -128   
0      16     
208    -672   
0      48     
-240   112    
128    112    
48     -688   
272    112    
-272   -2192  
224    -144   
-80    304    
-16    -240   
288    -576   
-208   -32    
176    -352   
16     80     
-208   48     
160    32     
-384   -352   
112    144    
-80    48     
16     -160   
-96    -208   
32     -448   
208    -80    
240    368    
-208   48     
192    -144   
-208   240    
128    -64    
64     16     
-48    -16    
112    -224   
-496   -48    
112    -32    
-16    -48    
128    -32    
176    48     
-64    -32    
112    -112   
80     -1104  
-208   64     
144    -80    
96     32     
48     160    
240    -224   
-224   32     
80     -192   
-64    0      
-144   96     
-880   -112   
128    48     
80     -96    
80     -96    
-144   -160   
-48    -1552  
224    0      
96     -32    
32     48     
-16    32     
192    -80    
-48    32     
64     0      
-336   80     
176    -144   
-208   -64    
272    32     
-208   48     
-80    -128   
0      48     
-656   -1568  
1056   -1360  
-576   -1056  
304    672    
224    -16    
-96    -112   
0      -832   
16     224    
480    400    
-384   -96    
-592   -288   
528    208    
-496   240    
-256   -128   
560    400    
-272   -32    
176    112    
-48    -1392  
-16    -16    
-80    -352   
144    -96    
-368   32     
224    -272   
-992   -336   
144    -256   
-64    112    
272    -96    
-368   176    
0      -128   
160    288    
-32    -560   
-80    -112   
16     -192   
288    -80    
-144   64     
96     48     
-224   -32    
96     48     
-96    32     
64     -16    
-96    32     
32     64     
-768   16     
80     -144   
-32    144    
32     -304   
64     128    
192    80     
0      -64    
0      32     
-112   0      
-96    16     
160    -48    
-272   176    
208    -32    
16     64     
0      -160   
-64    112    
-240   -336   
144    80     
-560   16     
0      16     
80     32     
-272   96     
-160   16     
-384   -80    
-112   32     
144    96     
96     16     
-80    32     
-176   -16    
208    64     
-336   -48    
-496   -144   
-16    16     
-208   -64    
-176   48     
128    80     
-96    48     
32     -48    
240    0      
-64    192    
-224   224    
32     -96    
304    112    
-320   16     
368    -144   
32     336    
-288   0      
224    128    
-192   -192   
-64    96     
-112   0      
-48    -144   
192    336    
-144   160    
112    0      
-448   64     
-144   64     
-80    224    
-48    240    
80     32     
96     -80    
-176   -128   
0      -16    
32     -224   
-304   -16    
48     48     
32     128    
-128   128    
-32    -48    
-112   32     
-224   304    
0      320    
48     112    
-48    144    
-528   -224   
240    32     
-112   -96    
-96    144    
32     48     
208    96     
-208   -128   
-176   32     
-192   -272   
-16    -128   
96     320    
160    224    
0      0      
-112   0      
-96    96     
-192   128    
272    256    
-128   112    
-32    192    
32     64     
112    -16    
0      64     
-416   -48    
240    112    
16     16     
-64    32     
-32    64     
-128   -16    
-16    -32    
48     192    
-720   128    
-80    208    
144    -64    
0      80     
-32    112    
-16    80     
-144   64     
-16    -160   
96     160    
-208   16     
320    16     
-144   80     
-32    0      
-192   16     
32     80     
-128   32     
48     240    
-176   -192   
160    224    
-224   -48    
-16    128    
64     288    
-80    -160   
272    32     
16     32     
128    320    
48     -432   
-16    160    
112    160    
96     736    
-416   -96    
48     192    
80     -64    
144    -32    
-16    160    
128    32     
0      144    
-208   -64    
-32    112    
-144   96     
-16    32     
-32    96     
-64    208    
-32    -144   
64     256    
-176   -48    
128    -80    
48     16     
256    192    
-64    144    
-80    80     
1280   -2272  
64     224    
1056   -176   
-464   -208   
896    -688   
-496   -576   
-192   -416   
448    192    
-336   80     
160    -304   
-320   496    
192    -352   
112    272    
-80    -272   
224    192    
-16    112    
240    288    
-64    208    
160    144    
-64    64     
48     -112   
288    224    
96     -16    
16     112    
-112   -16    
-48    240    
256    48     
-96    80     
144    48     
-48    48     
32     144    
-32    144    
96     112    
-96    0      
48     96     
-96    -16    
48     144    
-128   32     
112    32     
128    96     
-48    128    
112    160    
-144   80     
64     16     
48     -16    
0      80     
112    160    
-32    208    
-128   16     
160    128    
-176   48     
128    96     
-64    -32    
16     160    
0      80     
48     144    
32     384    
176    288    
176    288    
-112   16     
96     0      
-16    16     
48     16     
-32    368    
96     -64    
0      80     
0      32     
16     176    
-128   -1200  
0      64     
48     64     
80     144    
48     160    
0      80     
48     112    
-80    64     
80     64     
-96    -144   
0      0      
96     144    
80     -128   
-144   16     
96     96     
-16    -336   
128    320    
-80    80     
48     -48    
0      48     
0      112    
64     176    
-80    96     
64     32     
-32    -48    
96     48     
80     224    
-96    -256   
-64    -48    
160    224    
-32    -96    
144    48     
-176   -128   
80     0      
128    64     
16     112    
32     112    
0      96     
96     192    
-16    -32    
64     -16    
32     208    
48     32     
32     32     
48     128    
48     -144   
96     256    
16     -1280  
-48    -144   
-64    -96    
64     144    
176    112    
32     -16    
-176   -16    
128    160    
192    0      
-16    144    
-144   80     
160    320    
368    -384   
-16    32     
-272   240    
368    -160   
-128   64     
0      -272   
112    128    
-48    -592   
48     64     
48     -176   
16     240    
112    128    
-16    32     
16     -64    
-64    -16    
96     -128   
32     -64    
-32    -64    
352    -48    
-64    608    
64     -336   
-32    384    
-112   -144   
240    96     
80     48     
-16    -16    
128    32     
32     176    
224    416    
-64    0      
112    80     
192    -208   
112    208    
128    -496   
-96    224    
80     -16    
112    224    
48     -112   
336    288    
-240   128    
0      -208   
-32    -32    
432    32     
432    160    
96     112    
-240   144    
-112   -848   
80     112    
208    -320   
48     144    
16     128    
0      224    
-48    0      
112    48     
-96    -48    
0      112    
0      48     
-16    -64    
16     -16    
80     -160   
64     96     
80     -176   
-144   80     
112    -128   
48     80     
224    -64    
32     16     
176    -272   
128    112    
32     64     
64     160    
-416   -1664  
1184   -912   
-176   -528   
32     416    
-400   -48    
288    -704   
416    288    
192    240    
-80    -128   
-208   -528   
192    -16    
208    -80    
144    32     
0      -16    
176    -336   
-64    -352   
0      -32    
112    -1696  
64     -160   
32     -528   
160    -288   
-32    224    
208    -48    
16     80     
-16    -240   
-64    -416   
128    112    
112    -464   
-176   -128   
-448   -48    
96     -400   
-272   0      
0      -80    
-16    16     
128    -48    
-32    -192   
112    -80    
32     -64    
128    96     
-48    -16    
80     -64    
80     128    
48     -144   
96     144    
-96    -32    
-16    -96    
32     48     
-32    -112   
256    -80    
-144   -192   
224    -48    
-64    -960   
176    224    
-96    112    
96     -48    
96     -144   
-128   160    
16     -144   
176    -160   
-240   32     
96     -32    
-160   -112   
48     -160   
80     32     
64     -416   
128    -16    
-48    -80    
192    224    
-192   -2032  
-32    32     
48     -80    
-96    16     
96     -32    
64     96     
-144   48     
32     -144   
32     0      
-16    -128   
-512   -96    
64     192    
-112   80     
96     -96    
48     -320   
48     -272   
-160   96     
192    -128   
48     -32    
64     96     
-80    -208   
32     -48    
-80    -160   
-80    96     
32     16     
-160   96     
32     48     
-896   0      
144    -368   
-64    0      
48     -80    
80     48     
64     -1472  
64     224    
-192   -192   
112    -192   
-80    0      
112    208    
16     32     
-48    32     
-736   -80    
48     -128   
-112   -160   
-80    -176   
-112   32     
192    -336   
192    16     
112    -528   
-64    -176   
-16    48     
144    -16    
208    176    
0      176    
80     -48    
-144   128    
-128   16     
304    48     
16     -128   
-176   -80    
32     128    
-16    -240   
256    128    
32     -704   
48     -256   
-112   -16    
16     48     
352    80     
-176   16     
-128   -32    
112    272    
-48    64     
256    -48    
-208   80     
-80    -160   
272    416    
0      0      
224    176    
-224   240    
272    -48    
-96    192    
-48    -240   
-208   -48    
-32    -80    
16     64     
48     16     
-96    64     
32     -16    
0      -48    
-848   -352   
80     320    
-400   -16    
-64    -80    
0      -80    
-272   96     
16     48     
-576   -96    
-144   -192   
64     -176   
320    592    
288    288    
-416   -96    
-368   -304   
-16    256    
-48    -224   
0      192    
-128   16     
-160   176    
-32    48     
-256   112    
-208   -112   
-160   80     
32     208    
-112   -192   
-32    64     
240    -112   
80     192    
-112   -128   
208    112    
-80    -48    
96     144    
-144   -368   
-208   240    
-32    192    
224    -48    
-16    80     
0      240    
112    -80    
-304   0      
-48    112    
-1584  784    
144    1744   
-1104  64     
80     -480   
-208   -800   
32     80     
288    144    
-592   224    
512    672    
128    144    
-368   -256   
80     176    
144    208    
-192   -176   
-80    208    
-288   16     
-16    96     
48     112    
48     -112   
-96    -272   
0      96     
416    288    
-208   144    
496    48     
-288   80     
48     -64    
-288   288    
96     448    
176    240    
-96    128    
-240   32     
80     80     
-1008  -96    
112    128    
96     -80    
-80    32     
64     80     
-224   0      
0      -32    
-128   144    
96     160    
0      80     
-64    48     
-64    -64    
96     192    
-304   -64    
0      96     
16     -160   
80     80     
96     -32    
32     144    
0      64     
-32    16     
-80    -256   
96     112    
-16    -16    
224    176    
-160   160    
176    192    
-96    96     
-256   80     
176    176    
-128   -192   
64     288    
80     -16    
64     160    
-32    64     
64     32     
0      -32    
80     32     
80     96     
-80    64     
0      64     
-80    -32    
-16    128    
-16    32     
16     -208   
-352   -256   
80     -96    
-64    128    
-80    -160   
208    144    
-128   256    
16     0      
-80    112    
-64    -128   
32     80     
96     176    
-16    288    
-32    192    
-112   -128   
160    0      
-288   -144   
16     128    
-48    96     
0      96     
48     80     
208    400    
-48    16     
32     -96    
-32    128    
128    96     
96     96     
-160   16     
48     112    
0      32     
112    16     
-128   -32    
48     208    
-48    0      
176    112    
-112   64     
96     -16    
-32    128    
64     96     
96     192    
-96    16     
128    336    
-32    224    
64     192    
-48    64     
16     112    
80     -80    
32     16     
0      240    
144    64     
128    576    
-352   0      
336    -128   
-288   -240   
224    48     
16     -144   
-64    16     
-224   64     
112    336    
-160   -48    
16     -736   
-144   -112   
48     -128   
224    176    
-256   16     
320    160    
80     288    
-32    -32    
-48    176    
64     -64    
-32    240    
112    -240   
-112   32     
256    208    
32     336    
-112   -416   
-16    112    
80     96     
-32    352    
-64    128    
208    384    
-320   -176   
192    -352   
-160   240    
160    16     
-80    64     
192    320    
0      32     
48     -32    
-96    -288   
0      -1904  
64     144    
240    464    
-400   -656   
192    272    
208    112    
-32    160    
192    -192   
48     176    
32     32     
96     224    
-64    -208   
320    32     
16     176    
32     112    
-48    -448   
144    32     
-128   128    
144    0      
-208   160    
-64    112    
464    0      
256    176    
96     224    
32     96     
-80    -80    
208    176    
-240   32     
112    80     
-80    32     
16     32     
-32    80     
-848   -2912  
1136   720    
-32    112    
624    -384   
-112   -720   
-32    -64    
432    800    
64     -112   
64     560    
-288   16     
320    -48    
-224   -64    
336    112    
-64    -256   
32     32     
-272   -2256  
256    16     
-144   160    
192    -32    
112    -16    
-160   -16    
128    -16    
64     256    
0      -48    
-96    -128   
-96    16     
240    -64    
0      208    
128    -336   
-112   -16    
112    -464   
-16    128    
160    -1296  
-48    96     
144    -48    
-64    64     
80     336    
112    96     
-64    -16    
64     192    
64     -16    
128    48     
-112   96     
208    48     
-96    80     
112    -128   
64     208    
-16    -1536  
240    176    
-272   -368   
384    128    
-160   144    
160    96     
32     -16    
16     128    
16     112    
96     0      
-80    64     
128    128    
80     160    
-16    -592   
224    80     
0      -880   
0      144    
32     112    
64     16     
128    -48    
176    224    
-176   -48    
224    128    
-80    96     
144    -80    
-80    32     
192    -496   
-32    128    
32     -528   
16     -64    
32     -144   
16     432    
-160   64     
224    -48    
64     32     
-64    48     
96     -48    
-80    224    
16     160    
176    0      
160    80     
32     -128   
48     112    
32     -48    
96     240    
-32    -64    
240    272    
-48    64     
128    160    
-64    -96    
144    -624   
64     -1152  
-64    -112   
64     -2496  
0      0      
80     48     
160    -64    
-144   112    
96     0      
304    368    
-96    -96    
-48    -2336  
0      -16    
-32    -608   
32     -16    
16     -544   
192    -576   
-128   80     
144    -544   
-48    -672   
-80    -128   
288    64     
64     -64    
208    -96    
-16    112    
96     -16    
32     -160   
80     304    
-48    -400   
208    96     
-96    192    
128    -336   
80     64     
32     -176   
192    160    
16     -192   
272    96     
-304   -1184  
96     -64    
112    -112   
64     96     
32     0      
80     96     
80     -32    
-16    112    
-112   -96    
128    -32    
-80    -80    
64     64     
48     -144   
16     -448   
32     -208   
64     -560   
112    16     
-32    -1008  
-64    80     
48     -80    
256    96     
-192   -224   
80     64     
-128   -80    
32     0      
-224   -128   
208    -288   
-80    -208   
-96    -48    
272    48     
-32    192    
320    96     
112    -848   
-272   -304   
384    192    
-176   48     
176    -16    
32     32     
64     48     
-48    -176   
-320   -96    
112    -208   
-272   -48    
16     112    
-112   304    
32     48     
0      -192   
0      -400   
-16    112    
0      -16    
96     144    
96     16     
48     -80    
-208   -96    
208    80     
-128   -64    
32     -128   
-80    48     
176    -64    
-496   128    
-224   -560   
208    16     
144    -768   
128    112    
928    -3120  
1104   896    
-176   -240   
-176   -528   
160    368    
208    -656   
-320   -320   
832    96     
-640   432    
-144   -176   
176    384    
-192   -144   
304    16     
80     16     
-80    -64    
32     -560   
-32    -128   
48     160    
0      -96    
0      -64    
48     320    
-64    32     
-32    -32    
-224   -48    
144    -112   
-80    80     
176    -32    
16     144    
112    -160   
64     144    
-144   -48    
96     -112   
-32    96     
496    48     
-272   256    
48     -240   
-336   -176   
208    80     
16     624    
16     -256   
-656   64     
224    -192   
-160   0      
-112   -112   
-48    96     
-32    -176   
-416   48     
32     160    
-240   16     
-240   -192   
32     -64    
-80    -32    
176    -64    
-80    144    
80     80     
-48    224    
-1216  96     
-496   -720   
480    240    
-48    -32    
0      160    
-320   -48    
64     16     
-240   16     
-160   0      
-800   48     
-32    64     
32     -48    
48     272    
0      -96    
-64    128    
-208   -224   
96     144    
0      -64    
-224   64     
64     -32    
-192   0      
-256   16     
-80    16     
-192   64     
-144   0      
-64    0      
-1184  -144   
-144   80     
-400   -288   
112    160    
-80    -48    
32     -112   
-160   -320   
96     16     
-64    208    
-64    128    
-16    48     
0      96     
-48    176    
-32    -32    
-64    80     
-1840  -352   
128    -64    
-80    160    
176    176    
-48    16     
-112   112    
80     192    
-80    32     
-16    64     
64     256    
-16    -16    
-160   -336   
0      -64    
-128   144    
80     0      
-336   -16    
-96    64     
-144   -128   
96     128    
-176   -128   
48     -64    
-112   64     
96     96     
-80    96     
-96    -112   
-32    -16    
-128   -256   
80     -64    
-144   -608   
-144   -512   
-144   -544   
144    416    
-608   -176   
192    144    
-96    -192   
128    144    
-128   32     
32     -32    
16     80     
-64    96     
96     144    
16     -176   
-80    -48    
160    96     
-192   80     
-96    32     
160    208    
-208   -16    
144    384    
16     240    
-224   -128   
-64    -256   
-32    16     
80     96     
-112   0      
96     96     
-96    144    
160    688    
-480   -256   
16     -464   
-192   -176   
272    208    
-448   208    
-96    64     
192    208    
-128   112    
64     -16    
48     32     
-80    112    
16     240    
16     448    
-304   48     
112    64     
-176   -80    
-80    -496   
-48    -32    
-16    192    
-32    0      
-80    -160   
16     32     
32     112    
-208   0      
-32    160    
32     0      
80     80     
48     80     
80     0      
-48    112    
-160   176    
64     96     
-176   208    
64     80     
-48    -192   
80     16     
112    64     
-80    160    
-80    32     
128    -96    
0      0      
0      128    
0      416    
-176   1248   
-1232  -480   
0      256    
-112   256    
0      -160   
384    96     
-640   -240   
-208   -128   
336    -48    
-304   -80    
112    32     
128    -48    
-96    336    
144    48     
-16    112    
-128   48     
48     224    
-16    -48    
0      80     
-96    -128   
32     144    
96     96     
-32    112    
144    64     
32     128    
-32    112    
112    176    
-80    80     
96     64     
16     96     
-32    32     
128    48     
-128   112    
160    176    
-64    32     
-240   -128   
64     -96    
64     112    
288    112    
-112   48     
0      96     
-48    128    
160    128    
80     -48    
-80    128    
0      96     
208    112    
0      128    
-160   48     
144    -96    
-64    -1088  
48     48     
16     32     
32     64     
0      224    
32     96     
-80    80     
112    128    
-160   -16    
48     32     
-96    112    
16     48     
64     -16    
32     272    
-48    96     
160    -3088  
-48    0      
128    160    
112    112    
-128   192    
32     48     
112    48     
64     96     
-16    208    
16     16     
176    208    
-48    272    
80     -208   
176    208    
-240   16     
160    -496   
-32    96     
176    144    
-128   128    
-16    112    
176    208    
-32    304    
32     16     
192    48     
80     -16    
16     320    
16     112    
-144   64     
-960   -336   
64     -16    
-64    -192   
176    48     
-176   256    
160    176    
16     128    
96     -64    
64     240    
-16    -96    
96     0      
48     128    
112    -112   
112    112    
-96    -16    
48     -48    
64     128    
64     -288   
-48    112    
176    -1424  
32     64     
80     48     
48     -16    
-112   32     
224    320    
0      16     
64     448    
-192   96     
32     112    
208    256    
-16    16     
224    336    
-48    -16    
256    128    
-160   -288   
208    256    
32     -1536  
32     -128   
160    48     
-128   64     
112    -304   
48     -96    
-144   192    
192    192    
96     -112   
112    -192   
-64    160    
-16    -112   
64     192    
32     -256   
224    176    
-144   -848   
192    496    
-96    -432   
-96    -144   
16     128    
192    80     
-48    80     
112    -128   
-32    48     
48     80     
16     240    
256    -336   
80     224    
336    -144   
-384   -160   
16     -896   
16     0      
48     16     
64     80     
240    112    
-144   -224   
64     48     
336    -688   
192    16     
304    -64    
16     128    
-192   32     
224    -160   
320    96     
-64    128    
-64    -32    
-144   0      
304    -32    
208    112    
-128   64     
-128   176    
-128   32     
224    -48    
240    208    
-32    -64    
32     96     
16     -256   
96     176    
48     -64    
-64    80     
96     -48    
160    160    
32     0      
128    -1248  
-352   64     
96     -624   
-64    16     
176    48     
-224   192    
-1824  -1568  
320    -64    
240    432    
144    -80    
-336   192    
80     -432   
-176   608    
48     -1104  
816    288    
-688   -128   
288    384    
48     64     
64     -176   
-320   -240   
304    -192   
-16    -64    
480    -832   
-288   160    
-16    -176   
-96    48     
64     192    
-192   -112   
208    -336   
-352   160    
-32    32     
96     272    
144    752    
160    -288   
-528   -768   
224    -304   
224    -192   
64     -224   
80     -48    
400    -624   
-80    -192   
160    -224   
272    272    
112    384    
-128   128    
-224   -352   
16     -112   
-160   -64    
192    80     
-688   -192   
32     64     
144    16     
-64    112    
32     48     
144    -80    
-208   -272   
224    -688   
80     160    
96     240    
-80    -112   
32     -240   
96     32     
-48    64     
128    240    
560    592    
-208   -416   
-496   16     
112    -64    
64     -640   
-64    -80    
400    160    
80     -144   
-128   0      
128    48     
192    48     
16     112    
16     -32    
-48    -16    
48     -160   
-208   -96    
48     -176   
-256   -400   
-32    -448   
-80    -32    
-48    -640   
320    384    
-80    -672   
-64    272    
160    128    
144    192    
-160   -160   
256    144    
16     64     
224    352    
-96    0      
-112   -112   
-96    -32    
32     -112   
-560   -16    
48     -192   
160    -112   
192    -384   
-32    224    
320    -416   
32     192    
48     192    
112    -96    
-416   32     
80     -96    
32     48     
-16    48     
-128   64     
16     -160   
-64    -208   
0      -384   
176    240    
208    80     
-112   -96    
160    -736   
16     -64    
-416   -128   
-96    -160   
64     48     
144    128    
0      64     
256    -240   
-240   -48    
80     -384   
0      -80    
-16    -240   
320    608    
128    224    
-160   208    
-32    16     
192    96     
-96    144    
0      96     
176    240    
128    80     
-128   -16    
-160   -144   
-128   -128   
0      -64    
352    64     
-64    -32    
80     144    
-656   -240   
-48    64     
-96    16     
-400   32     
0      256    
-688   64     
-32    96     
240    -160   
-128   160    
32     0      
128    80     
-304   0      
48     80     
-64    -64    
-64    48     
-80    -160   
-320   -368   
160    -160   
-112   48     
0      160    
-544   -160   
-144   -80    
-304   80     
-48    64     
112    160    
-64    -32    
-240   -112   
64     80     
0      -192   
112    96     
-96    -32    
-16    320    
-160   -160   
-48    -112   
288    160    
-32    -16    
-48    240    
-96    48     
80     48     
-192   64     
-160   -64    
-80    -128   
-32    32     
128    -160   
-32    288    
-80    128    
-144   48     
0      -16    
48     32     
48     80     
-144   112    
-64    -32    
0      16     
32     16     
-704   80     
-208   112    
32     -64    
2272   2272   
-1680  496    
-608   -688   
240    416    
-224   -128   
16     -16    
-112   656    
-544   -144   
496    64     
-464   96     
-128   -304   
-336   48     
16     -320   
160    416    
-64    -336   
-48    368    
64     -304   
-176   336    
160    -144   
0      128    
-112   -64    
80     256    
64     128    
-128   112    
0      0      
-208   -128   
-32    -16    
-16    176    
304    192    
-1376  -192   
-96    96     
112    -80    
0      144    
64     -16    
-96    128    
80     -32    
80     368    
48     16     
-208   32     
-48    0      
64     96     
64     80     
-112   32     
-128   -16    
-240   -96    
0      112    
112    112    
-64    -80    
-16    176    
-48    48     
80     -16    
-32    64     
-48    112    
48     128    
0      64     
-96    32     
64     64     
-176   80     
80     96     
-96    -48    
64     48     
-16    96     
64     32     
-64    16     
144    16     
-128   80     
48     112    
0      176    
-96    0      
208    64     
-144   -16    
16     176    
-160   16     
96     64     
-64    -32    
32     96     
-16    -48    
-96    32     
-176   16     
96     -32    
0      64     
16     208    
-64    -80    
-48    -320   
-80    -16    
-64    48     
32     176    
48     -64    
224    336    
-464   48     
160    80     
-64    16     
-112   112    
160    176    
-16    128    
32     96     
-176   32     
48     32     
-128   -64    
-48    -272   
256    448    
128    624    
-176   80     
-112   240    
0      0      
48     16     
16     0      
-96    16     
192    112    
16     176    
0      64     
-16    144    
-16    0      
48     112    
80     160    
48     256    
128    272    
-112   -112   
80     176    
144    0      
-64    240    
96     96     
0      64     
-112   -64    
-208   -192   
0      -48    
160    288    
224    64     
-64    -208   
-448   -96    
144    80     
320    576    
-144   -112   
0      32     
112    -48    
-32    256    
256    336    
-224   48     
224    96     
32     80     
48     192    
16     96     
128    336    
-288   -16    
160    176    
-224   -192   
256    368    
-32    64     
-80    -832   
64     128    
-16    0      
-16    160    
96     96     
16     144    
208    -16    
-32    128    
0      96     
320    128    
-256   224    
96     96     
0      -16    
160    -64    
0      224    
-80    -1552  
48     80     
-176   -16    
160    256    
-96    -32    
144    320    
-192   80     
272    0      
-112   112    
64     112    
128    112    
-48    176    
-48    -128   
160    -32    
96     128    
160    -672   
-192   128    
64     -128   
80     224    
160    144    
-48    80     
192    -192   
-80    192    
96     -64    
64     240    
-96    -80    
384    96     
-272   48     
144    -352   
-48    -48    
160    -128   
96     256    
48     -1968  
16     112    
48     96     
-1040  -1120  
656    -224   
-608   -288   
448    208    
-176   496    
64     -128   
96     320    
-480   -864   
1216   160    
-880   256    
496    16     
128    128    
-240   -976   
128    -144   
-112   464    
64     -176   
-32    592    
16     -368   
-32    352    
-80    -336   
96     336    
-16    80     
16     80     
-64    -160   
464    256    
-128   16     
-32    96     
-208   -656   
384    336    
-224   -1296  
304    176    
-32    64     
-32    176    
32     208    
16     32     
80     -32    
-16    -208   
0      544    
48     160    
160    352    
144    -192   
-16    96     
-32    -288   
80     128    
16     -432   
32     80     
48     240    
144    208    
-16    -128   
176    160    
16     176    
96     -64    
-80    -96    
144    -864   
80     16     
0      -272   
80     48     
-16    -176   
-96    -96    
-32    -352   
160    176    
-16    112    
96     -32    
80     64     
16     80     
0      80     
32     -880   
0      208    
48     -64    
16     208    
32     -144   
112    96     
0      -304   
32     112    
96     -80    
112    112    
-80    80     
112    176    
-48    16     
-32    -320   
288    128    
-32    -80    
0      256    
384    144    
0      336    
32     -272   
112    48     
160    -144   
144    272    
0      -256   
80     -384   
-80    -176   
32     -1296  
176    160    
192    -352   
32     -224   
288    512    
-352   -432   
16     -320   
-96    -2272  
64     80     
160    -16    
-32    -80    
80     160    
-16    -384   
256    -608   
-48    96     
304    320    
-128   -80    
32     0      
-96    -384   
192    -64    
96     -368   
0      -272   
160    -336   
32     -16    
0      -160   
-32    -288   
16     80     
176    192    
144    -144   
-112   384    
-128   -160   
144    0      
-112   112    
-128   -96    
144    -64    
-176   -48    
16     -32    
80     -192   
144    0      
64     -64    
32     0      
160    -400   
0      -128   
-176   -32    
96     224    
416    -224   
-64    -144   
-224   16     
160    -192   
-112   0      
48     -144   
160    -48    
0      -144   
-16    64     
96     -768   
96     -48    
0      -784   
-32    -16    
64     -48    
32     96     
0      64     
-48    -176   
-32    0      
-160   64     
-144   -112   
64     -160   
-1520  0      
176    -192   
-96    -64    
96     -96    
144    320    
80     -1088  
192    192    
16     -96    
48     -16    
-32    112    
-176   -64    
-144   192    
-32    -224   
-240   -288   
320    -144   
-1056  -64    
80     80     
-992   112    
128    32     
-96    96     
-48    -480   
272    0      
80     -48    
0      -64    
-16    240    
112    -96    
16     16     
16     -208   
112    -96    
64     64     
-320   80     
96     -48    
-320   48     
176    -368   
-64    96     
-48    -464   
128    224    
-80    -1456  
176    16     
1072   2704   
-1696  640    
-1120  -448   
560    384    
-400   -304   
-512   -144   
-352   -80    
-96    400    
192    -496   
-208   -304   
-128   -384   
-144   32     
368    -208   
48     -384   
-192   -432   
-128   128    
288    -32    
64     352    
-96    -48    
80     -16    
-48    -32    
-32    32     
80     32     
-384   0      
80     -112   
192    -64    
-64    16     
32     64     
0      240    
128    -144   
-32    16     
-32    -80    
32     144    
64     48     
-80    96     
128    -80    
80     176    
-32    32     
64     96     
-192   -176   
32     64     
-368   -144   
-112   -32    
-128   -32    
-416   -48    
-64    64     
-288   48     
-272   -96    
0      -192   
-224   48     
64     -48    
64     64     
-48    -80    
32     176    
-368   -240   
144    32     
-80    -256   
-192   64     
144    16     
-80    0      
-96    -80    
-32    128    
-112   -16    
-16    0      
-32    0      
-16    112    
192    192    
-208   -64    
-32    112    
-112   -208   
32     48     
16     16     
32     144    
-32    160    
-144   -48    
32     240    
-448   -80    
288    96     
-208   112    
144    144    
-192   112    
-128   128    
112    -128   
-16    112    
176    64     
64     -16    
-16    224    
112    80     
16     -256   
-160   96     
-16    48     
0      112    
80     192    
-128   -32    
-80    0      
-224   0      
-16    -32    
48     32     
128    224    
-112   -64    
-16    128    
64     64     
80     -16    
48     80     
-160   16     
0      144    
160    336    
-80    240    
16     -80    
-128   -144   
-160   0      
112    144    
112    -32    
-16    0      
-112   -48    
-48    0      
112    160    
16     256    
48     224    
-144   -16    
0      48     
-64    -80    
144    176    
-48    64     
-32    -16    
-144   176    
80     192    
-928   -32    
64     336    
-96    144    
-16    64     
-96    48     
-32    -144   
144    192    
-64    32     
80     288    
-272   -192   
32     112    
0      32     
80     96     
-192   -16    
16     176    
-608   -192   
192    240    
-96    96     
64     16     
256    48     
-192   160    
-144   224    
-160   48     
-80    -16    
64     -16    
80     112    
-32    -96    
128    -112   
96     -32    
-160   288    
-256   -112   
144    -112   
96     144    
-96    64     
-96    0      
-16    -64    
160    176    
32     -16    
224    240    
-160   272    
16     112    
32     -144   
96     112    
-64    -64    
48     96     
-384   96     
32     112    
48     80     
-96    0      
64     16     
144    64     
-112   96     
80     144    
-112   0      
48     160    
-16    0      
-144   32     
-32    0      
0      320    
-64    80     
128    144    
-128   112    
64     48     
32     -16    
-96    320    
-48    160    
0      64     
-304   240    
112    -16    
-64    80     
-32    96     
1968   -800   
-144   432    
176    272    
-400   576    
416    -96    
-48    -720   
-80    16     
544    960    
-448   176    
0      32     
-176   288    
48     -256   
48     304    
0      -144   
48     384    
-384   -144   
336    224    
-48    448    
16     128    
-144   128    
112    320    
160    336    
-192   544    
112    160    
-128   112    
-112   64     
176    352    
-160   64     
176    -208   
-240   -32    
208    -128   
0      176    
-48    80     
-32    224    
16     32     
112    80     
-16    96     
16     96     
16     -32    
-96    32     
208    64     
112    192    
32     128    
-160   -208   
32     96     
96     32     
96     176    
16     192    
-48    -240   
144    128    
-80    16     
48     32     
48     64     
0      320    
48     -48    
48     -112   
80     144    
-32    128    
16     -64    
48     128    
-96    48     
128    80     
64     64     
32     -2368  
0      208    
-64    48     
128    -96    
128    112    
-64    160    
112    144    
-32    -32    
16     48     
0      96     
-64    -48    
80     112    
0      368    
-144   -64    
80     176    
32     -496   
48     32     
96     336    
-48    64     
176    240    
-144   -96    
224    32     
-64    -160   
96     256    
-128   160    
208    336    
-208   176    
112    -48    
48     -160   
-16    16     
112    -336   
272    720    
-224   -992   
320    16     
-48    -96    
32     16     
112    32     
96     144    
32     96     
0      16     
128    112    
64     192    
64     128    
64     -320   
48     144    
48     -16    
224    128    
-16    -1280  
-48    144    
160    -48    
16     144    
0      -32    
160    96     
-240   -144   
176    128    
-176   -96    
64     -160   
-96    -32    
-112   -240   
144    64     
96     -560   
-144   32     
176    -144   
240    48     
64     -432   
-64    368    
160    160    
144    32     
-80    0      
224    272    
272    400    
160    192    
-112   48     
-128   32     
-64    144    
272    -288   
-80    -48    
32     144    
192    112    
112    32     
-32    128    
48     64     
16     16     
-144   -256   
-112   128    
240    96     
176    -496   
-80    112    
-16    -320   
16     192    
176    -320   
0      16     
128    -80    
0      288    
144    -432   
-128   176    
224    48     
0      160    
16     144    
16     112    
-64    160    
144    -400   
144    192    
0      -48    
160    416    
-16    80     
32     -32    
96     -320   
96     64     
-48    -32    
144    256    
32     32     
128    -128   
48     64     
48     -3056  
0      -720   
32     -64    
64     272    
112    -32    
0      144    
80     -128   
160    192    
-144   -176   
48     64     
304    -192   
-16    112    
-64    256    
48     -512   
-208   112    
-80    -208   
96     -16    
112    -208   
256    -224   
32     -64    
80     -528   
352    -304   
-16    -464   
512    -48    
-416   0      
864    -1648  
-528   -528   
672    1040   
-48    240    
144    -176   
-768   -176   
576    -96    
64     -80    
64     32     
-80    -208   
112    -320   
48     -64    
-192   -256   
112    -80    
-32    -176   
192    -48    
-16    -112   
176    112    
-64    160    
144    -160   
-80    -16    
-48    -144   
-208   -64    
128    -272   
96     -16    
128    -160   
0      -48    
64     32     
128    0      
16     0      
-176   -32    
0      -16    
64     160    
64     96     
128    -96    
-224   -96    
176    48     
-288   -80    
112    0      
32     0      
160    -160   
-96    -160   
144    -512   
192    288    
-16    -1616  
48     48     
-32    80     
160    32     
-160   -16    
96     -32    
-160   64     
16     -112   
48     -48    
80     0      
-288   -288   
144    -64    
48     64     
32     96     
48     144    
128    -944   
0      112    
192    0      
0      176    
-80    112    
208    16     
-208   16     
-32    16     
0      -144   
16     -176   
-240   80     
80     -160   
-160   288    
-240   -64    
256    -48    
80     -272   
128    336    
-96    288    
48     -96    
-176   -240   
320    -96    
16     160    
64     -64    
-304   208    
-16    -272   
-208   -96    
64     -160   
-192   -16    
64     -352   
-16    -48    
48     -832   
64     48     
48     -1744  
64     -16    
-208   192    
0      -128   
-336   -144   
64     48     
-64    0      
64     128    
-32    144    
0      -16    
80     -96    
32     -208   
48     128    
0      -64    
96     48     
-16    128    
48     0      
-240   80     
-80    -144   
16     96     
0      -48    
176    272    
-16    64     
-16    80     
-80    -416   
-384   80     
16     -112   
320    176    
-352   -208   
208    144    
-288   176    
-480   -176   
64     -144   
-256   -96    
208    224    
-64    -16    
-48    -128   
-128   -80    
-16    -208   
128    0      
48     176    
0      -160   
-128   224    
-336   -48    
-160   -208   
-48    -16    
-48    32     
48     96     
-304   64     
0      80     
-208   -640   
208    -96    
128    144    
-128   224    
128    -64    
-64    -128   
-96    208    
336    -64    
-176   192    
-224   -112   
0      176    
-272   64     
-64    0      
80     -128   
-112   224    
-976   96     
-240   0      
176    160    
144    64     
-16    128    
-64    -64    
-48    112    
-64    16     
160    -32    
-272   80     
128    64     
-368   48     
336    -160   
-592   -64    
128    -16    
-464   -16    
0      64     
-976   -48    
-32    96     
-128   -208   
-32    224    
-208   -256   
32     112    
32     128    
-48    96     
-48    -48    
-144   112    
48     -208   
16     -32    
16     0      
304    112    
-112   144    
-512   -144   
-320   240    
80     -336   
-64    192    
128    0      
-960   432    
-512   2304   
752    1184   
384    -96    
-288   -1504  
-528   1152   
576    896    
112    0      
-352   -208   
320    192    
-64    64     
-144   80     
240    -96    
128    336    
-336   -96    
144    176    
-240   16     
-80    -16    
64     80     
-16    144    
-288   -416   
-32    -16    
96     80     
64     32     
-128   128    
-32    -160   
128    224    
-496   48     
208    64     
-32    16     
-256   256    
160    32     
-176   48     
0      32     
192    64     
-64    208    
208    384    
-304   -32    
0      -96    
-96    112    
80     128    
16     48     
-256   -64    
112    144    
64     80     
-80    -16    
32     96     
-32    144    
176    240    
-272   -16    
208    48     
-160   112    
128    64     
-16    112    
-48    64     
-96    16     
16     48     
-560   -48    
-96    16     
128    80     
-80    -16    
128    112    
-128   -16    
112    96     
-96    128    
80     48     
-16    -32    
208    240    
-160   -80    
112    272    
-368   -128   
144    96     
96     64     
0      144    
-16    64     
16     16     
48     240    
48     -96    
128    80     
-48    144    
80     16     
-64    208    
-176   -192   
128    -112   
-48    192    
-64    128    
16     160    
0      128    
-96    -64    
272    0      
-112   80     
-112   -192   
192    48     
-96    176    
144    240    
-80    128    
-272   -144   
304    48     
-64    80     
96     208    
-112   80     
96     -80    
80     112    
80     96     
-80    160    
-96    80     
64     176    
-144   16     
192    160    
-32    224    
64     176    
-112   -16    
48     16     
80     160    
32     304    
-80    96     
0      240    
144    352    
-48    176    
208    -32    
-224   -112   
-224   96     
304    16     
-16    48     
-32    -16    
224    288    
208    336    
192    0      
-112   -64    
-240   96     
112    0      
176    176    
64     160    
48     224    
0      320    
-16    -16    
288    112    
-208   16     
144    48     
-48    96     
0      96     
-16    32     
160    144    
192    144    
-256   64     
208    96     
128    -496   
-48    -16    
64     48     
-32    80     
128    64     
32     48     
-16    80     
80     96     
64     32     
128    176    
-176   -48    
32     160    
-32    -32    
192    16     
-16    192    
80     -2080  
-64    64     
16     208    
0      -48    
32     112    
144    -32    
-112   -32    
48     128    
-96    96     
-16    0      
16     160    
144    256    
192    -288   
0      128    
-80    192    
-64    -560   
144    224    
144    64     
-48    -32    
-32    80     
64     96     
0      80     
16     208    
-32    -384   
64     96     
0      64     
336    304    
112    208    
16     -144   
0      144    
-16    -304   
64     -96    
208    -944   
-16    192    
-80    224    
48     48     
-144   -224   
256    16     
64     320    
-64    -144   
-704   -656   
-384   144    
-112   -656   
128    -144   
-16    48     
496    320    
-544   -176   
160    -704   
304    448    
-64    -2480  
96     -64    
112    144    
0      64     
160    32     
-176   224    
112    -144   
-336   -432   
304    -80    
-128   0      
208    -80    
16     16     
-16    80     
272    -1232  
304    464    
-16    32     
-112   -144   
176    320    
0      240    
288    176    
0      272    
16     32     
32     -32    
-128   -112   
176    -208   
-64    112    
176    -976   
0      112    
160    32     
192    304    
-16    -208   
-192   144    
176    0      
80     112    
-112   -48    
32     128    
224    176    
16     -192   
96     80     
48     -64    
16     64     
80     -240   
48     48     
64     -80    
64     -32    
-48    -2912  
-160   -48    
64     -256   
64     224    
128    -64    
-64    -96    
240    96     
-32    -176   
96     144    
16     -32    
128    128    
-48    -64    
192    144    
-16    -64    
32     96     
48     -128   
64     112    
0      96     
96     -544   
-32    112    
-1552  80     
160    -1312  
0      -112   
32     -1072  
112    -64    
112    112    
32     -32    
-32    -48    
224    -192   
128    -32    
64     272    
-144   -288   
-80    16     
-144   -208   
-80    -144   
-608   -64    
80     -352   
112    112    
16     -48    
80     48     
0      -224   
176    -64    
-64    48     
192    160    
0      -48    
32     16     
-16    -736   
160    176    
128    -304   
176    -48    
-224   -144   
224    112    
-128   16     
112    -240   
80     -16    
48     -304   
160    32     
-80    -416   
96     80     
48     0      
-48    128    
64     -48    
0      -16    
64     96     
128    48     
96     48     
-160   -128   
-128   -64    
192    -32    
224    -112   
-16    -96    
-16    -80    
96     -64    
-16    16     
192    -96    
-256   112    
96     -208   
-16    -16    
112    -160   
160    224    
-368   -16    
208    96     
-1024  -288   
112    32     
64     -96    
80     128    
128    -64    
-192   -336   
144    -32    
192    -144   
-96    336    
272    -176   
96     272    
80     -144   
64     176    
-176   -224   
336    -16    
-112   -112   
704    320    
-784   368    
-16    -368   
-80    32     
-208   -288   
96     64     
-176   -544   
64     176    
-48    -144   
240    144    
-208   -272   
304    96     
-144   -32    
320    432    
16     -16    
64     0      
-384   -160   
80     -160   
-816   272    
-32    -192   
0      -240   
64     -528   
352    336    
64     -112   
-208   -208   
80     -48    
256    -160   
-112   80     
112    16     
-48    32     
0      96     
-96    16     
-16    96     
-176   208    
144    -48    
-48    224    
-64    -416   
112    64     
192    64     
-224   -32    
32     80     
112    -48    
-224   80     
944    -1472  
-640   -1328  
-752   -32    
-544   0      
112    640    
-576   -96    
384    -464   
-320   0      
240    -400   
-64    -112   
32     48     
128    -32    
112    64     
0      96     
-16    -48    
-32    -64    
-32    32     
64     -32    
-48    -32    
80     -336   
112    64     
-144   -192   
-80    0      
-656   -224   
-32    -48    
176    48     
-864   32     
-64    80     
32     48     
-16    -112   
32     112    
48     80     
96     16     
-208   16     
-272   -128   
224    272    
-208   144    
0      -112   
-176   -144   
-400   16     
96     64     
-448   -80    
-48    96     
96     208    
-112   128    
-1472  -160   
-64    64     
144    144    
16     -16    
32     -48    
-16    0      
80     48     
-96    192    
48     -176   
-160   -64    
-32    128    
48     96     
-128   48     
-208   0      
-64    -16    
-336   -32    
-112   -64    
48     -16    
64     160    
-32    -128   
96     112    
-80    -144   
48     160    
-96    112    
32     0      
96     128    
-64    128    
-80    80     
96     368    
-144   96     
-128   -48    
288    -144   
-368   208    
-176   224    
-112   -48    
96     -80    
32     16     
-208   96     
64     -96    
0      -128   
-48    144    
-112   272    
-16    80     
-96    32     
64     96     
-48    -32    
128    144    
-432   -96    
0      -16    
32     -32    
-128   32     
0      -192   
32     32     
-64    0      
-128   -96    
-176   96     
-176   32     
-16    -64    
-32    16     
-64    48     
0      -32    
0      32     
-384   -64    
80     192    
-128   -48    
128    256    
-96    160    
96     144    
-160   -16    
160    208    
-128   208    
352    368    
-144   64     
64     96     
-96    96     
96     -16    
-64    192    
-80    96     
-48    48     
-448   48     
64     304    
-16    336    
192    128    
-48    -32    
-48    96     
-128   112    
304    240    
-16    304    
192    112    
-96    160    
-96    32     
16     544    
-144   80     
240    96     
-416   -112   
-336   48     
16     128    
48     -64    
112    16     
-80    96     
80     128    
176    416    
-224   96     
48     64     
-96    -48    
-96    -80    
96     192    
-208   -48    
64     48     
-400   -144   
64     224    
-64    -80    
80     -208   
-144   -176   
112    336    
16     -80    
48     48     
32     240    
16     16     
64     -48    
-112   -16    
-32    176    
-64    -32    
-80    48     
144    144    
0      16     
32     128    
-32    32     
32     144    
-32    0      
48     96     
32     0      
48     96     
-48    128    
48     112    
-144   368    
-256   -176   
-240   -32    
272    80     
-64    144    
-176   64     
80     176    
0      0      
128    80     
-128   16     
64     80     
32     32     
0      96     
-64    -48    
96     -16    
-64    64     
80     144    
-176   64     
400    -800   
736    1152   
384    -128   
-240   176    
-64    -96    
416    144    
-352   -176   
304    96     
160    16     
-192   -16    
240    112    
224    192    
-112   64     
-96    -32    
48     -96    
96     160    
-64    192    
64     -48    
-64    0      
160    32     
0      192    
144    176    
-64    -16    
-64    -112   
16     128    
48     288    
416    80     
-240   192    
224    64     
-160   -112   
-80    96     
80     80     
80     112    
-32    32     
176    64     
-32    -64    
96     -64    
-288   -272   
32     -96    
176    288    
-16    96     
80     192    
-80    -112   
96     32     
-48    160    
112    -512   
-64    64     
-48    0      
112    288    
0      96     
48     272    
32     16     
128    240    
-160   32     
80     80     
-32    -64    
144    -144   
-544   -512   
160    544    
128    -128   
-48    -288   
0      -96    
16     96     
-32    -48    
80     144    
-16    160    
0      224    
80     16     
-80    160    
48     128    
16     32     
48     16     
64     192    
0      -144   
-112   112    
96     -576   
112    288    
128    -1936  
64     208    
128    384    
-128   320    
-128   -80    
144    208    
-128   -384   
32     128    
-48    0      
368    416    
-16    512    
0      -272   
-16    64     
80     -656   
192    80     
64     -736   
16     160    
0      64     
64     48     
16     0      
128    160    
48     128    
32     112    
-16    -16    
16     -80    
176    176    
-32    -128   
96     224    
-48    -16    
48     192    
96     -592   
32     144    
48     -1360  
0      144    
32     16     
80     160    
16     0      
80     128    
-32    -304   
64     -288   
48     208    
64     -48    
-32    16     
-192   -240   
48     128    
160    -848   
16     64     
-144   -192   
192    480    
32     160    
-64    144    
0      -320   
0      80     
112    64     
80     -336   
-112   64     
144    -240   
-16    -208   
352    -384   
64     240    
-112   -160   
240    496    
-48    -288   
64     192    
-32    -32    
160    160    
-32    208    
-16    144    
128    -80    
-176   -336   
144    96     
176    48     
-32    144    
32     -128   
112    48     
80     -32    
32     32     
32     -272   
-80    16     
144    -288   
96     -16    
320    688    
-16    -64    
-16    -192   
-128   -128   
112    144    
32     -64    
-16    -112   
96     0      
240    528    
208    -192   
-176   144    
80     -208   
0      -320   
32     176    
272    0      
-96    240    
-1632  -144   
-80    -640   
-96    -320   
-32    -160   
176    -16    
48     192    
48     -256   
-16    128    
80     -192   
-48    -240   
-64    -160   
240    -208   
32     64     
80     128    
-64    -272   
-320   -112   
128    -944   
240    -208   
48     -32    
-16    32     
-16    -496   
16     112    
32     160    
-992   -2624  
816    224    
-96    976    
-144   96     
576    0      
-464   416    
688    880    
-992   0      
224    448    
64     -544   
112    -64    
240    -288   
-32    80     
-32    -208   
384    96     
-112   -160   
48     -80    
-160   112    
256    -192   
0      144    
80     -112   
-80    -32    
144    80     
-48    96     
-304   -272   
-160   -176   
128    -96    
80     48     
64     96     
32     128    
144    -48    
-32    -96    
80     144    
80     -160   
0      0      
-96    32     
144    96     
96     -96    
-80    -112   
-144   128    
160    -96    
-32    32     
-32    -32    
-32    64     
288    -464   
-48    112    
48     -256   
-96    -16    
32     176    
208    -80    
-80    0      
64     -160   
-256   -16    
128    -112   
-176   -16    
144    128    
-352   112    
112    -384   
-48    80     
-96    -416   
128    32     
48     -256   
64     112    
128    -144   
64     -48    
-224   48     
64     -32    
-80    -48    
64     -192   
-336   80     
-80    80     
-224   32     
48     -208   
128    80     
-64    -16    
160    240    
-16    -16    
48     368    
-96    32     
48     -224   
32     -32    
16     48     
-272   16     
304    112    
-496   96     
288    -400   
-96    160    
-208   -176   
400    256    
-336   -336   
304    144    
-48    -544   
16     80     
128    -32    
160    80     
-80    208    
272    256    
-224   160    
128    -112   
-144   -16    
112    -112   
32     48     
-48    -80    
-480   64     
-128   -144   
48     80     
96     -240   
-176   -336   
112    32     
176    176    
-128   96     
160    64     
-176   16     
176    144    
-224   80     
272    288    
-128   -32    
288    208    
-224   -16    
-1600  -320   
-32    240    
-256   -32    
-192   48     
16     0      
-816   -160   
144    -16    
-944   -80    
304    160    
-96    192    
-144   32     
256    -16    
-192   -64    
48     -112   
16     368    
-160   -64    
208    160    
16     -32    
-224   144    
-96    -16    
-192   -144   
160    176    
-176   -64    
-16    112    
-1696  -32    
-208   -32    
80     -336   
-256   -208   
-160   -208   
80     -112   
-16    -16    
-16    -272   
32     240    
0      0      
-16    64     
0      144    
-128   32     
48     64     
-176   48     
-224   -48    
-32    32     
-176   -144   
112    160    
-112   -128   
96     208    
-192   -288   
-144   -976   
32     128    
320    608    
80     160    
-272   -48    
224    144    
-160   0      
16     240    
-416   -80    
-16    112    
-1168  -48    
176    -16    
-176   -112   
80     400    
0      -192   
-144   48     
112    -64    
128    0      
-32    80     
-224   176    
-112   0      
-160   -96    
192    -16    
80     16     
-96    112    
-448   0      
96     32     
-112   64     
-96    128    
272    304    
-192   192    
176    32     
-112   16     
576    1552   
-576   928    
496    1264   
64     592    
672    -640   
48     592    
-656   144    
-48    304    
-496   -32    
560    48     
16     96     
-112   -128   
80     384    
-48    -64    
-16    64     
-80    176    
256    336    
-176   32     
-144   -160   
192    128    
32     -48    
80     96     
-368   288    
96     112    
-432   16     
-192   -96    
112    64     
-192   64     
32     -256   
160    128    
112    96     
96     16     
16     176    
-112   -48    
-192   128    
-192   -400   
-96    -288   
-176   -432   
192    272    
-384   64     
-208   400    
-64    0      
-96    48     
80     16     
48     -16    
32     128    
-64    -64    
16     240    
240    416    
48     128    
-352   160    
192    -64    
-112   -64    
-128   352    
144    112    
-176   176    
0      32     
160    96     
-576   -416   
400    32     
-128   -224   
32     176    
208    128    
-176   -48    
224    96     
-144   48     
64     128    
-160   16     
32     48     
0      144    
96     64     
0      64     
48     272    
-16    144    
-128   -16    
-16    -128   
48     -192   
240    272    
-208   176    
48     16     
-144   -96    
80     80     
-16    -48    
80     -96    
-48    160    
208    80     
-96    -16    
-176   -80    
160    -48    
48     240    
0      64     
0      128    
32     240    
-64    -96    
192    192    
-112   128    
-96    32     
192    240    
-96    336    
352    432    
-128   272    
-80    -224   
48     32     
16     0      
240    128    
-96    -32    
-48    96     
-16    32     
0      -176   
-80    16     
96     112    
48     128    
0      32     
-64    80     
64     48     
48     112    
-112   -432   
192    192    
96     320    
32     -112   
240    16     
-224   -128   
-48    -208   
176    112    
-112   -288   
48     -208   
-112   96     
128    -16    
32     -656   
96     112    
48     208    
112    80     
-240   96     
128    -128   
128    32     
-32    208    
112    192    
96     320    
-80    128    
48     80     
64     -48    
-112   -176   
0      -160   
272    128    
-96    144    
96     -48    
-160   -544   
-48    -160   
16     -16    
64     128    
176    320    
144    240    
-32    176    
-96    32     
80     -32    
-128   32     
16     -224   
48     -272   
16     -960   
256    160    
64     400    
16     64     
0      176    
80     144    
112    80     
-112   80     
-16    -416   
176    112    
-256   -208   
48     144    
48     128    
32     -192   
80     160    
-112   -352   
-96    64     
32     -352   
80     64     
144    96     
-224   304    
-128   -176   
128    16     
80     0      
176    -16    
0      112    
272    80     
144    176    
-80    48     
64     176    
-16    -528   
160    160    
-16    -64    
48     144    
96     448    
-112   256    
-176   -256   
272    0      
96     -16    
176    304    
48     -976   
720    -240   
1120   112    
480    -608   
-1072  224    
320    704    
-608   64     
1024   160    
-688   240    
272    -576   
-272   160    
-80    -320   
224    464    
48     -528   
-224   144    
160    -208   
192    96     
96     144    
0      -96    
-48    48     
160    -304   
48     240    
160    -384   
-96    64     
-96    -64    
160    272    
352    160    
-160   112    
96     16     
80     32     
16     96     
16     16     
112    16     
48     -272   
48     48     
16     -400   
16     -48    
-128   240    
352    112    
32     272    
-128   -16    
48     80     
80     96     
96     128    
64     80     
-80    112    
80     -320   
64     144    
128    -544   
-32    208    
32     -368   
176    64     
-128   80     
240    0      
-48    -576   
80     176    
32     240    
-80    -112   
112    128    
32     192    
112    -608   
96     -48    
-32    368    
160    -336   
0      208    
-48    16     
160    192    
-16    -32    
160    176    
-16    -128   
48     -2576  
64     48     
96     -576   
32     16     
-832   48     
208    -336   
-64    -144   
208    -512   
208    -64    
16     352    
-32    -128   
128    208    
-160   -192   
176    -64    
-96    32     
32     -32    
-240   0      
176    -240   
0      -608   
-448   -240   
96     -592   
112    144    
-80    -192   
128    144    
32     -144   
192    -112   
48     432    
-32    -32    
80     -112   
-128   160    
128    -112   
-96    32     
16     -112   
144    -16    
16     -32    
96     48     
368    272    
-96    -384   
240    -96    
-96    -400   
176    48     
64     -240   
-16    0      
80     112    
16     48     
16     -32    
32     48     
0      16     
48     -128   
-112   16     
336    432    
-656   80     
-144   80     
-16    -32    
128    -240   
32     -112   
144    -400   
-384   -144   
416    48     
-80    32     
64     -48    
-32    -16    
-144   0      
128    -16    
-128   32     
240    112    
-208   32     
-128   -176   
-1440  128    
144    0      
-48    48     
224    -272   
-128   -32    
80     -320   
112    176    
16     32     
160    112    
-272   -112   
96     -320   
-144   -128   
144    -80    
-112   -64    
144    224    
-112   -96    
-48    16     
48     -288   
128    -32    
400    224    
-272   -512   
64     -32    
144    16     
80     -144   
32     160    
64     32     
-176   -64    
304    -448   
-32    -240   
240    32     
-288   80     
-240   -112   
-128   16     
-48    -256   
176    48     
192    -112   
-208   16     
-16    64     
-80    -80    
-32    -16    
-80    64     
-112   -32    
80     -64    
-64    32     
80     -96    
-48    -112   
0      48     
-96    -112   
176    -272   
-64    112    
240    -896   
-80    -48    
-96    48     
96     176    
-80    0      
560    -48    
-496   -80    
288    -48    
-368   -48    
112    288    
-704   -304   
-96    -288   
-512   -80    
416    208    
112    240    
160    48     
-144   -144   
288    128    
48     448    
-48    -448   
112    368    
96     -528   
16     48     
-80    -256   
288    640    
-256   -112   
-48    288    
-480   -192   
-160   -400   
-192   -464   
96     -368   
-496   64     
48     -48    
-288   192    
-192   144    
32     112    
-208   -80    
-176   -128   
352    80     
336    336    
-480   -208   
160    -48    
-144   160    
16     48     
16     48     
0      -128   
224    400    
-272   48     
144    -32    
16     96     
-176   -32    
-96    32     
-464   128    
80     128    
-208   128    
256    80     
-336   64     
176    480    
-48    128    
-192   -224   
0      -64    
-48    -176   
-16    400    
-192   64     
-80    48     
-80    0      
-240   -736   
-240   -288   
-96    160    
-432   160    
208    448    
16     112    
-16    304    
0      -32    
0      32     
-160   -32    
-80    -64    
-64    64     
-112   -304   
-272   -48    
-192   64     
-32    -64    
-576   -224   
-48    144    
-960   64     
224    544    
-272   -32    
384    -64    
-32    176    
208    416    
-96    112    
-256   -80    
128    128    
-32    192    
-64    128    
-96    32     
64     -208   
-144   144    
32     80     
-240   16     
160    80     
-192   -304   
64     48     
144    208    
96     320    
192    240    
16     320    
-176   80     
-256   -384   
384    224    
-48    176    
-128   16     
-128   0      
112    32     
-304   -48    
48     -144   
16     -288   
224    -608   
-144   96     
48     144    
48     128    
-192   -144   
-48    -160   
-224   80     
144    -128   
-128   128    
-208   -304   
80     128    
128    144    
-224   320    
-160   256    
-272   80     
-64    80     
128    48     
64     400    
64     144    
-48    304    
-112   -96    
96     32     
16     32     
-48    80     
-32    96     
-192   -80    
80     -32    
-64    32     
-96    -16    
32     32     
-160   80     
272    -32    
-192   96     
-128   48     
208    160    
160    48     
-160   128    
64     64     
128    112    
-16    240    
-224   -80    
176    -48    
-160   96     
96     144    
64     192    
64     -112   
-128   32     
0      96     
48     48     
16     96     
-80    240    
-32    -96    
16     32     
-176   -32    
208    96     
-176   16     
96     80     
-48    256    
-16    96     
160    -16    
112    192    
0      0      
0      144    
-192   112    
-16    16     
48     -208   
64     64     
240    128    
-240   176    
32     96     
-160   16     
80     96     
96     -48    
0      160    
-16    32     
32     48     
-64    0      
32     176    
0      240    
-128   0      
144    240    
-16    64     
160    -32    
0      -32    
128    192    
-336   -80    
112    112    
-112   192    
96     16     
128    16     
32     1712   
-912   624    
-1584  -48    
880    592    
160    144    
-240   -320   
272    832    
-848   -336   
512    176    
-400   -464   
160    -240   
-192   176    
544    -48    
-96    352    
192    -288   
-240   224    
288    -144   
-96    368    
192    -128   
48     352    
48     -176   
-192   416    
176    -48    
-128   160    
176    -240   
-96    368    
240    -640   
-80    224    
32     -16    
96     144    
32     0      
-16    112    
64     192    
0      112    
16     112    
64     -16    
0      144    
48     112    
-128   176    
160    16     
-16    -48    
-144   -128   
144    160    
64     -352   
-112   80     
96     -32    
-80    224    
144    -112   
208    224    
-288   48     
240    96     
-48    64     
96     112    
-16    -352   
-32    96     
-32    -128   
128    -352   
-112   112    
224    -576   
32     64     
0      16     
0      176    
32     96     
128    48     
32     48     
-96    128    
64     0      
-32    80     
0      -16    
96     192    
-80    80     
128    32     
-32    48     
144    -800   
0      144    
0      -1040  
336    448    
-224   96     
272    32     
32     0      
48     224    
-16    112    
112    48     
-112   -224   
240    48     
112    288    
0      -208   
80     208    
0      -496   
-64    -240   
32     -432   
48     224    
336    -32    
112    -80    
-144   -336   
96     128    
-64    48     
416    432    
-288   -48    
-16    -128   
48     208    
32     -176   
80     32     
-96    -208   
48     128    
32     -400   
-80    -96    
144    -48    
-96    16     
32     48     
144    192    
-32    16     
112    176    
80     96     
64     -16    
0      112    
48     16     
128    32     
-64    -368   
160    -32    
-32    -32    
176    32     
-32    -208   
-64    32     
16     -32    
176    720    
-48    336    
192    224    
-16    64     
-64    -272   
48     128    
112    -512   
128    48     
0      -352   
144    224    
-240   -656   
64     -112   
-144   -352   
400    320    
-112   -96    
144    96     
-48    -128   
-176   -272   
160    32     
96     96     
-32    48     
176    -288   
-48    32     
112    -240   
112    32     
16     0      
16     80     
64     -64    
144    32     
-96    48     
80     -1248  
160    192    
-192   -144   
208    -464   
-96    96     
64     -2928  
-128   -176   
112    -48    
192    96     
96     192    
-48    -16    
96     -784   
16     -80    
0      -400   
256    128    
-128   -80    
128    -208   
-992   96     
16     -656   
16     -208   
304    -1024  
-64    -80    
-48    -992   
96     -48    
32     112    
224    -192   
-64    -96    
-16    80     
32     -208   
256    -16    
0      -112   
96     -112   
-592   -144   
128    112    
-112   48     
64     -272   
112    64     
-80    80     
-16    -192   
-64    -752   
0      -240   
112    -208   
-32    -80    
496    2224   
-592   -1232  
-32    -432   
416    192    
512    -752   
-720   -368   
112    272    
-176   640    
128    -32    
-288   -32    
272    -352   
112    -32    
-288   160    
368    272    
-112   -128   
-144   -176   
160    272    
368    160    
-16    16     
-224   -128   
-96    -64    
-480   48     
-144   192    
16     -576   
160    -336   
-448   144    
48     -304   
-224   736    
-80    -704   
-176   -224   
304    -32    
80     64     
-192   80     
32     128    
-208   -160   
112    -208   
-832   -16    
240    160    
-1648  32     
-32    -96    
48     -144   
32     -16    
208    320    
96     -1472  
-80    16     
128    160    
-48    96     
128    352    
-96    96     
-48    0      
112    -240   
-144   64     
64     -336   
48     32     
-48    -160   
192    96     
48     -352   
0      128    
-16    48     
192    176    
0      16     
48     0      
-80    -16    
48     256    
-304   -16    
128    -240   
-96    96     
48     -144   
-112   288    
-112   16     
240    -64    
128    -432   
32     160    
144    -288   
-240   208    
80     0      
48     -112   
-288   -96    
112    -160   
-112   -16    
96     0      
-144   32     
-16    -224   
-96    -368   
16     -96    
48     240    
240    368    
-160   368    
48     -224   
224    32     
16     64     
-64    -144   
-112   -128   
144    32     
-32    80     
160    48     
-144   64     
80     -80    
-48    16     
80     -64    
-80    96     
-576   -160   
-32    32     
-720   -96    
-1648  -128   
-96    -80    
-800   -32    
16     -112   
80     80     
-272   -144   
176    144    
-112   112    
128    16     
-128   48     
-576   -176   
16     192    
-320   -368   
128    144    
-48    160    
16     192    
176    80     
-192   96     
-48    0      
-448   176    
-112   -80    
-160   224    
-64    240    
176    96     
-16    32     
-240   -96    
-16    48     
240    96     
-112   304    
416    48     
-256   -160   
-48    112    
-240   64     
320    -80    
-528   -48    
-208   96     
-304   224    
224    192    
-64    -16    
-32    272    
-64    -80    
-64    -16    
32     16     
-48    160    
192    96     
-288   -16    
64     64     
-32    -16    
-64    96     
0      16     
-96    48     
-816   -16    
-48    48     
-1232  -192   
176    416    
-240   -64    
80     128    
-64    -224   
-48    -16    
48     16     
-96    -32    
80     160    
32     480    
-96    112    
-112   -48    
48     -48    
-64    32     
-80    -16    
-544   16     
80     48     
-48    64     
0      128    
0      48     
0      16     
-48    128    
-192   32     
96     -16    
0      16     
64     64     
-96    208    
-176   -80    
64     80     
-112   160    
-352   -112   
32     176    
-48    -80    
-48    128    
32     80     
0      208    
112    32     
-224   48     
128    -96    
-176   0      
-48    0      
-1296  -112   
560    -832   
832    912    
-368   -320   
-896   672    
240    224    
-784   16     
640    -144   
-608   304    
0      -208   
-256   384    
80     -400   
112    656    
-224   -256   
144    288    
16     0      
0      32     
-272   16     
288    192    
-416   -80    
320    32     
-960   160    
-16    -64    
-64    256    
144    -160   
-96    160    
48     -16    
48     176    
48     16     
-64    112    
48     -64    
-16    176    
64     16     
-48    144    
-160   -64    
0      -32    
160    0      
0      192    
80     128    
16     -16    
-96    16     
-64    144    
112    96     
-32    16     
48     64     
-80    80     
16     64     
-16    -208   
-48    112    
0      0      
96     144    
0      80     
0      96     
16     128    
64     48     
32     160    
-16    112    
-16    48     
48     48     
16     176    
-128   0      
-64    -64    
112    -32    
80     256    
-256   -32    
80     128    
-32    96     
32     80     
96     128    
-80    48     
64     144    
48     96     
-32    64     
32     192    
-80    64     
-48    -240   
-16    -160   
-48    272    
144    592    
-240   96     
-224   0      
-32    -80    
80     -48    
64     -32    
80     -64    
-64    96     
48     64     
32     176    
80     192    
96     16     
-160   -112   
160    32     
-16    64     
0      -64    
80     96     
176    368    
176    384    
32     224    
-64    0      
32     -16    
-16    224    
144    112    
-16    80     
32     0      
16     128    
-16    -64    
160    240    
-112   272    
144    112    
16     0      
0      144    
16     112    
112    208    
-112   -16    
96     64     
48     112    
128    160    
-64    160    
-32    -16    
-16    80     
-128   -64    
112    96     
80     208    
112    -336   
16     -32    
-288   192    
112    -272   
240    64     
-176   224    
128    96     
64     48     
-48    96     
0      224    
-64    -32    
208    224    
-240   -112   
400    192    
-432   -80    
96     -848   
-208   -160   
176    -400   
16     32     
112    208    
16     112    
-32    192    
208    288    
-160   160    
128    16     
80     -160   
16     192    
-64    128    
-48    192    
-160   -64    
176    192    
112    -64    
224    -96    
-240   16     
272    160    
-144   176    
-32    -96    
176    160    
80     80     
144    192    
-112   -48    
112    144    
-256   -48    
0      -240   
640    256    
-240   -48    
192    144    
-192   -192   
-48    144    
336    -2288  
-64    208    
96     32     
-48    144    
-112   -176   
128    144    
-96    -32    
48     32     
160    -16    
-144   -64    
144    16     
64     -96    
192    208    
-432   -272   
-64    -144   
128    -16    
224    112    
16     400    
-96    64     
-80    48     
240    96     
336    -112   
-128   160    
-112   -16    
-32    160    
336    96     
-1280  -1888  
1216   400    
-272   -80    
704    800    
-672   -16    
384    96     
-592   -1280  
320    -544   
32     -112   
80     -288   
288    400    
288    64     
112    128    
-176   -560   
320    320    
-208   -288   
96     352    
-64    -160   
224    176    
-64    -336   
208    208    
-208   80     
160    -128   
-160   16     
112    -144   
32     160    
-48    208    
272    288    
-96    -96    
160    288    
-32    -48    
96     64     
-112   -80    
0      48     
0      -304   
144    128    
-16    -48    
192    64     
-32    32     
-112   96     
224    -64    
-16    96     
80     80     
-32    -240   
-128   -64    
256    80     
96     240    
96     -16    
64     -64    
48     112    
-16    128    
112    -64    
-16    -1120  
96     -96    
112    -832   
-224   80     
-112   96     
0      -432   
160    -96    
-48    -2352  
192    -176   
-32    160    
16     -256   
64     192    
-16    -80    
144    160    
32     -144   
64     -432   
-32    64     
-16    -112   
96     -208   
-656   -80    
16     32     
32     -80    
0      -112   
144    128    
-240   -400   
304    -128   
208    32     
32     -176   
32     -176   
32     64     
64     -240   
160    -32    
160    176    
-240   -160   
-304   -160   
128    -448   
-160   -96    
176    -128   
-16    96     
-64    -272   
256    -48    
-112   -2560  
176    80     
80     0      
-80    160    
32     0      
32     144    
-256   -240   
64     -240   
-432   -256   
144    -192   
-192   0      
224    144    
0      32     
32     -32    
0      -320   
-64    -1792  
64     96     
128    -64    
48     112    
112    192    
48     64     
48     128    
160    192    
-48    -16    
-128   16     
-80    0      
80     0      
32     -112   
192    -256   
-144   -48    
-16    -192   
256    224    
80     48     
-112   -80    
-160   -368   
144    -208   
-96    -16    
16     -144   
-32    208    
-16    -32    
400    48     
-64    48     
-1168  -80    
160    -128   
-176   48     
304    -64    
96     16     
-64    -848   
32     64     
-16    -96    
112    -176   
-208   80     
224    -240   
-48    16     
-16    -112   
-96    64     
-48    16     
-336   -48    
16     -48    
16     -144   
96     -400   
-128   32     
192    -192   
-64    -64    
-48    64     
304    -160   
-128   32     
80     0      
-368   -208   
-16    32     
-32    32     
176    112    
16     -64    
-224   -128   
-176   -400   
208    -240   
112    304    
0      -48    
-128   352    
64     16     
-48    -32    
-32    -64    
48     320    
-64    -32    
160    224    
32     -48    
208    -208   
-112   -32    
80     -288   
-16    320    
-64    -288   
80     16     
-80    -432   
144    16     
-208   160    
-80    16     
-112   64     
128    0      
-80    64     
-16    -48    
128    32     
0      -16    
-48    -16    
-32    -144   
1472   2240   
-2224  336    
688    784    
-48    608    
1104   -960   
-832   -288   
-288   -160   
48     528    
-352   -288   
-16    160    
-96    -80    
144    0      
-80    112    
160    -96    
-16    -32    
48     64     
80     0      
0      32     
-96    -16    
-160   32     
-32    112    
-224   96     
0      240    
-192   -48    
-64    -64    
-16    -128   
32     80     
240    224    
48     160    
-160   -240   
-32    0      
-208   -192   
80     -80    
-64    304    
176    0      
-96    80     
-240   48     
64     32     
-304   -160   
48     48     
-624   -64    
32     176    
-16    -128   
32     -32    
-224   -336   
16     128    
32     -64    
16     208    
96     240    
-176   -64    
-16    32     
-240   64     
16     80     
-80    176    
64     64     
-64    176    
-128   112    
-656   0      
144    80     
-32    -16    
128    352    
0      0      
-96    80     
80     -16    
-160   -128   
-112   -16    
64     -64    
-64    -64    
-32    0      
-16    80     
-272   -48    
16     -16    
-864   -112   
128    208    
-80    32     
80     128    
-240   -288   
80     -160   
-224   112    
-176   -128   
272    -80    
-192   240    
80     -16    
-96    32     
-192   112    
-128   -128   
96     144    
-240   16     
112    16     
-176   -96    
16     -48    
128    176    
-48    208    
-48    64     
16     64     
-80    -32    
112    48     
32     48     
-16    64     
16     96     
-48    64     
80     80     
-176   -32    
48     48     
-704   -32    
-112   0      
112    288    
-128   -208   
112    -64    
-80    160    
-48    -16    
112    80     
-112   128    
112    64     
64     144    
-160   16     
112    128    
-208   -208   
0      160    
0      96     
16     -16    
-80    64     
16     48     
160    -64    
-128   48     
-320   16     
-80    -160   
256    -352   
-16    272    
0      160    
0      -80    
-144   48     
-288   -80    
160    160    
48     96     
16     48     
-80    -608   
-144   224    
-240   176    
272    -16    
-48    160    
64     32     
64     144    
-192   -80    
64     80     
-16    -32    
80     288    
-96    -48    
32     48     
48     48     
96     96     
-80    -96    
80     160    
96     352    
-32    208    
-80    -272   
160    224    
336    -112   
-192   224    
-352   0      
48     -32    
16     -32    
-16    48     
128    144    
-80    48     
-176   80     
144    624    
-384   16     
224    -272   
64     96     
272    112    
-192   128    
-304   32     
-32    -112   
560    48     
-208   320    
80     -208   
16     176    
32     304    
-16    160    
-416   112    
-320   32     
192    -48    
320    -64    
-80    -224   
128    96     
128    176    
96     -48    
128    256    
112    112    
-160   96     
32     32     
16     80     
0      128    
48     80     
176    176    
64     96     
16     112    
2064   -2544  
464    1056   
-224   -256   
-480   -64    
176    -432   
112    -544   
-32    368    
-32    256    
-48    -400   
128    288    
-224   16     
-32    128    
48     -32    
224    16     
-32    80     
32     48     
-16    256    
128    208    
-64    64     
0      128    
-48    80     
96     0      
16     -32    
-112   -208   
192    -160   
-80    64     
224    64     
48     224    
32     224    
-64    48     
112    0      
-96    80     
176    80     
-32    80     
48     64     
96     320    
-16    208    
48     128    
-48    -368   
80     176    
144    96     
-16    80     
32     48     
0      192    
0      112    
96     32     
-80    96     
32     -80    
144    -192   
0      192    
-32    -16    
112    128    
-96    96     
224    -160   
-112   48     
48     -352   
320    160    
-128   96     
160    -32    
-64    144    
-128   80     
176    -96    
16     224    
-64    -80    
192    160    
-160   32     
128    -176   
80     80     
144    -16    
32     176    
0      -656   
16     32     
160    -1744  
0      272    
-80    144    
160    208    
16     0      
208    -16    
-64    -32    
64     96     
16     240    
-128   64     
208    -64    
16     -144   
64     48     
112    -304   
16     352    
-16    -1520  
256    224    
-160   64     
192    112    
-64    16     
128    208    
-32    -64    
-32    -64    
240    208    
-80    80     
80     48     
80     -192   
-112   16     
336    -160   
-32    64     
96     -784   
64     208    
16     -1168  
-16    64     
-64    -128   
224    592    
64     -32    
96     96     
-144   64     
128    -32    
128    -16    
32     -400   
-16    192    
96     -48    
32     176    
-128   -192   
128    -80    
-80    -272   
-48    16     
128    32     
208    144    
64     240    
0      -320   
-96    -144   
32     -576   
-128   -80    
112    -240   
128    224    
80     0      
192    224    
-32    -16    
384    336    
-32    -96    
32     240    
144    240    
64     128    
96     272    
32     -256   
128    320    
0      -112   
-16    304    
144    16     
80     112    
-80    -192   
0      176    
80     -272   
128    128    
-112   -32    
80     -896   
112    16     
16     -416   
96     -48    
-48    -288   
192    -48    
-176   -96    
272    -304   
48     -96    
-32    -320   
32     -32    
128    96     
64     48     
64     -240   
192    48     
-48    -368   
-80    96     
-48    -960   
96     16     
16     208    
48     -64    
-48    -144   
-144   -432   
128    -144   
128    -304   
-96    80     
32     160    
-16    0      
96     -112   
32     128    
64     -16    
-96    96     
32     96     
16     0      
-80    -80    
80     -448   
0      -128   
80     -80    
80     -16    
96     -128   
-16    16     
32     -2896  
-32    -80    
240    -144   
-32    64     
-48    128    
112    128    
-208   -144   
416    -2064  
848    -960   
64     624    
-1120  1152   
-640   -336   
576    176    
416    480    
64     -112   
-128   -768   
-128   32     
128    -16    
32     80     
48     96     
144    -224   
-112   -32    
128    -32    
304    416    
-128   -96    
64     -160   
-96    -288   
48     -32    
176    -176   
16     -96    
0      -992   
-48    128    
128    480    
64     192    
-16    -128   
96     -144   
-64    -304   
-48    -16    
-16    -16    
224    128    
-176   -192   
112    -240   
-1600  -208   
128    -80    
-144   144    
144    -224   
-16    48     
176    -1392  
0      128    
-96    -80    
32     32     
-64    80     
112    112    
-224   0      
128    -208   
-144   -96    
96     48     
-320   320    
80     64     
-16    64     
64     -304   
0      128    
80     -144   
-48    48     
-192   64     
16     -208   
-320   -48    
48     48     
16     -240   
0      16     
-80    -32    
272    48     
-160   176    
48     -32    
48     16     
32     -368   
0      96     
64     -160   
64     -16    
-48    48     
64     48     
-240   -96    
144    -96    
-320   -528   
-48    -320   
-128   80     
208    80     
-240   -32    
0      -208   
112    80     
96     -64    
-160   256    
-112   -560   
-368   -32    
-80    48     
16     32     
16     -16    
-16    80     
-16    48     
112    32     
-224   -112   
48     16     
-240   64     
-880   -160   
-32    -80    
-224   -32    
48     176    
96     112    
-208   80     
-48    16     
-320   -16    
16     112    
-176   16     
-160   -224   
256    32     
-288   -48    
288    -32    
-112   112    
0      -64    
64     112    
-160   -176   
16     64     
-80    -80    
-144   112    
-16    80     
0      96     
-64    32     
-336   144    
0      176    
-128   -80    
-192   -96    
-64    -192   
128    64     
176    288    
-224   368    
-96    -208   
-80    -48    
32     -80    
64     304    
-32    304    
-96    -80    
16     0      
-160   -16    
224    320    
96     -160   
-144   -320   
80     112    
16     48     
-128   -96    
32     176    
144    64     
-64    48     
176    400    
-176   304    
-16    -48    
-208   -80    
96     128    
-80    -208   
32     192    
64     -16    
-32    256    
-800   48     
272    -176   
80     -80    
112    336    
112    112    
-144   96     
-80    16     
0      32     
-112   128    
-32    64     
-64    144    
224    176    
-224   -16    
-112   -144   
144    192    
-384   -320   
80     64     
112    -16    
128    -32    
-16    176    
16     208    
-144   -144   
48     288    
208    -224   
224    256    
-64    -64    
48     224    
-288   -48    
-48    -64    
32     112    
-32    48     
96     16     
32     336    
-16    -176   
-16    96     
-128   128    
64     0      
-16    48     
144    -32    
-48    304    
16     32     
-208   176    
-32    -112   
-736   -1584  
1664   1248   
-832   -64    
384    -304   
-656   272    
-784   -320   
560    -16    
-704   272    
656    336    
112    160    
-208   -112   
0      64     
-16    96     
-128   64     
144    80     
-224   16     
64     192    
-48    -16    
16     96     
16     -32    
16     0      
48     272    
64     192    
48     0      
-192   -80    
48     -112   
64     16     
-96    336    
176    128    
32     96     
-304   -160   
176    192    
-64    64     
80     32     
-48    48     
0      64     
-240   -208   
240    16     
-128   176    
336    32     
-224   32     
32     176    
96     128    
-32    -16    
64     160    
-192   -96    
112    192    
-176   0      
32     -32    
32     192    
-64    -32    
80     144    
-144   -32    
112    0      
-32    112    
64     96     
32     32     
-240   48     
-16    -64    
64     48     
-128   -16    
64     192    
-80    0      
-32    112    
96     96     
160    -48    
48     96     
-48    176    
32     64     
144    80     
-208   160    
-48    0      
144    96     
-112   0      
160    64     
-80    -64    
96     176    
-144   32     
80     -48    
-16    160    
32     128    
176    0      
48     176    
-32    288    
208    -80    
48     80     
-224   -256   
176    -48    
-96    16     
-48    16     
-96    64     
-64    48     
176    304    
-16    112    
112    112    
-32    -224   
128    64     
-64    208    
64     32     
-16    48     
96     -96    
-64    32     
64     96     
-48    -96    
-16    96     
-112   144    
336    -224   
-144   272    
224    192    
80     288    
16     64     
0      64     
-16    16     
64     144    
48     144    
32     128    
-16    -64    
144    64     
-96    -64    
176    208    
48     368    
176    32     
112    240    
-144   208    
144    48     
-176   -80    
208    272    
176    272    
80     352    
-64    128    
144    96     
-128   16     
144    176    
48     48     
64     64     
-64    256    
-16    -272   
176    112    
-96    -576   
-64    64     
192    112    
80     128    
-48    160    
0      176    
-176   48     
144    64     
0      128    
176    80     
-112   96     
-16    -288   
32     32     
96     -624   
96     96     
48     -336   
-16    208    
96     128    
-64    32     
128    192    
-32    -48    
-48    160    
128    96     
-64    -16    
96     288    
64     32     
-48    -176   
112    -48    
0      -160   
64     224    
-80    -48    
144    272    
320    384    
-160   80     
-96    0      
48     112    
96     -256   
304    176    
16     -80    
-96    -32    
-128   64     
32     -400   
144    160    
160    80     
-96    80     
32     -256   
112    -272   
16     -464   
64     192    
16     -1248  
96     80     
-16    0      
144    16     
0      -16    
48     96     
112    64     
-48    160    
-48    32     
16     -144   
0      80     
-464   1664   
-896   -880   
-48    -752   
976    128    
1328   -864   
-656   -1120  
-304   -432   
736    880    
-176   64     
256    -112   
-112   -112   
-32    -16    
16     176    
144    -192   
0      -112   
-32    -192   
192    320    
-32    352    
208    320    
-288   -656   
224    96     
-48    112    
16     208    
64     -16    
80     -32    
-96    -16    
48     -192   
16     64     
96     -64    
64     0      
80     -96    
-32    64     
80     -240   
16     208    
-64    -544   
-16    128    
32     256    
176    -864   
-16    -1456  
-176   -464   
384    112    
-96    80     
112    112    
160    -96    
-32    80     
112    -80    
32     144    
320    208    
-128   -32    
192    48     
48     -432   
-16    256    
112    -672   
16     -624   
128    -32    
224    -144   
160    160    
-224   -176   
-144   -576   
160    -2512  
-176   -112   
208    176    
-160   64     
256    -128   
80     112    
0      240    
-144   -64    
-176   -112   
-80    -208   
-336   -64    
32     -288   
48     -64    
32     -912   
96     0      
-112   -1872  
0      0      
48     112    
400    96     
-672   -256   
-32    -240   
-176   -560   
320    80     
-32    208    
176    -32    
-208   224    
48     -96    
-16    -96    
128    -176   
160    80     
-16    -560   
144    96     
48     -816   
48     96     
-48    -432   
80     0      
112    -48    
96     64     
-80    32     
0      -16    
-80    64     
32     -144   
-880   -16    
16     16     
208    -80    
112    32     
-176   -16    
304    -464   
-240   -32    
304    64     
-192   256    
128    -112   
32     -96    
-176   -112   
272    -64    
-224   128    
-80    0      
-160   -256   
80     16     
-128   80     
128    -416   
-320   16     
176    -48    
112    144    
-80    -240   
-96    96     
0      -32    
336    -48    
-320   272    
320    432    
-208   -32    
48     0      
-976   -80    
208    -224   
-832   -176   
128    -160   
-16    32     
-64    368    
176    384    
-16    -1536  
64     -192   
32     -48    
-48    -96    
-48    16     
224    16     
80     224    
0      -128   
64     0      
0      -176   
48     80     
-48    -160   
112    144    
32     -224   
-16    32     
144    -784   
96     96     
-384   48     
-128   0      
48     528    
-128   -304   
-256   0      
64     -64    
-240   -48    
176    -48    
-224   16     
416    128    
-272   -16    
-48    -48    
400    288    
16     -720   
-32    -96    
96     64     
-16    -64    
-96    -128   
208    80     
-272   64     
48     80     
-176   192    
112    -16    
-704   16     
16     -304   
16     64     
-208   -128   
112    160    
-16    48     
-288   96     
32     -80    
-848   64     
16     48     
-80    64     
-80    0      
144    -48    
32     32     
80     -272   
-96    -144   
-800   -128   
288    144    
48     192    
-128   112    
512    -1584  
-160   1184   
-368   -384   
-912   -704   
432    272    
-688   -32    
368    432    
-160   -176   
-32    -80    
-288   -416   
48     144    
128    48     
80     160    
-368   -224   
32     -96    
-240   -48    
48     112    
-32    80     
-16    0      
-32    64     
-240   0      
48     240    
-128   64     
0      0      
-144   -80    
64     160    
304    208    
-112   160    
-48    -288   
-208   -32    
80     144    
160    48     
-16    96     
-112   32     
32     208    
-272   -176   
-16    -80    
-64    -48    
128    112    
-16    -48    
32     208    
-48    -176   
176    80     
-144   32     
160    80     
0      176    
-48    96     
-64    -128   
-192   -304   
64     208    
-128   -80    
112    32     
-160   48     
208    176    
-416   -176   
160    48     
-64    64     
-32    -48    
208    160    
-144   240    
160    -144   
16     32     
-96    176    
-16    32     
96     -128   
0      144    
0      176    
-64    0      
16     64     
-80    -96    
-32    160    
0      64     
0      -64    
96     16     
-112   80     
-80    0      
80     32     
-112   144    
48     48     
144    80     
-160   48     
0      96     
-160   -128   
-16    16     
-112   80     
-16    48     
-80    -112   
0      32     
-352   96     
128    -64    
-112   80     
32     -32    
-32    176    
-144   -144   
192    144    
-336   -160   
80     96     
-176   208    
32     48     
-192   -16    
-16    48     
16     208    
16     48     
-160   0      
16     -176   
48     80     
32     -48    
112    0      
-208   -176   
192    208    
0      144    
-16    192    
16     144    
-144   48     
-64    -96    
0      48     
-160   0      
240    224    
0      112    
-16    -128   
144    128    
-96    32     
-112   96     
224    0      
-96    -16    
0      64     
-176   80     
96     144    
80     224    
-208   -144   
0      32     
48     144    
-16    160    
-48    0      
96     -144   
32     -112   
-272   128    
-32    16     
256    -32    
-176   -112   
192    288    
80     208    
32     0      
48     -80    
-32    64     
-144   160    
320    144    
-256   -304   
192    64     
64     128    
-16    128    
16     144    
-32    96     
112    176    
-80    112    
-160   -416   
32     96     
320    96     
-208   128    
224    -16    
16     64     
112    16     
16     112    
-32    48     
48     240    
-64    96     
32     -16    
48     208    
96     192    
-160   0      
0      0      
-64    48     
-80    48     
144    128    
0      64     
-48    160    
-112   32     
-64    96     
48     112    
48     48     
-96    96     
-32    48     
-64    48     
-16    16     
112    80     
208    16     
80     208    
-144   48     
-272   -2400  
64     96     
224    96     
-96    96     
96     160    
208    0      
48     208    
-208   64     
48     16     
-176   208    
1024   1200   
-384   176    
-640   -608   
-272   -176   
-48    32     
176    -656   
448    240    
32     944    
-352   352    
-320   160    
80     -400   
80     368    
128    -16    
272    272    
-144   -96    
208    208    
-48    64     
16     -240   
16     -352   
464    208    
208    -80    
208    224    
-16    176    
32     -48    
80     320    
-80    -64    
160    -192   
-224   80     
240    128    
-144   160    
-160   -16    
304    160    
96     16     
16     160    
-144   128    
0      -256   
-144   192    
224    -32    
-288   -32    
128    112    
-64    176    
112    16     
48     -48    
80     -48    
80     256    
-32    144    
-16    -272   
64     336    
368    272    
-48    0      
16     -224   
64     128    
64     176    
144    -48    
32     -224   
64     32     
208    336    
-160   64     
-96    -512   
384    304    
-96    -80    
48     272    
144    128    
16     -144   
-112   -96    
240    80     
-128   32     
176    -320   
-80    144    
48     160    
16     64     
-32    64     
160    240    
-48    176    
-16    16     
16     48     
-96    -416   
496    192    
336    352    
-80    272    
0      -64    
80     272    
64     -432   
0      288    
-48    -320   
32     -336   
80     384    
432    512    
-160   -112   
112    32     
16     32     
224    448    
-80    160    
16     -96    
32     -176   
-32    -80    
64     208    
0      -704   
16     -96    
-32    -272   
64     144    
144    -32    
64     176    
-64    48     
32     192    
16     -80    
112    -80    
0      496    
144    384    
48     304    
-16    -112   
-64    64     
128    -208   
80     160    
80     -80    
96     256    
-32    -96    
112    112    
-112   -112   
80     224    
32     16     
96     -112   
208    80     
-144   16     
32     16     
272    160    
-128   -96    
352    64     
-128   144    
208    -80    
32     112    
64     272    
112    384    
32     96     
192    -240   
0      -1184  
224    -112   
-112   -1392  
144    64     
272    -448   
-160   32     
112    64     
128    32     
48     192    
48     0      
-32    -464   
-96    -160   
48     -64    
-32    16     
48     -240   
0      -288   
144    0      
80     -240   
16     -80    
80     32     
32     -32    
96     -2816  
-96    -32    
80     -112   
128    -128   
-48    -176   
208    144    
-80    -80    
160    304    
-800   -128   
304    -176   
-304   -336   
336    -128   
-32    0      
0      96     
0      16     
64     -880   
80     -48    
48     -64    
112    224    
96     -336   
112    176    
-48    -416   
80     240    
-96    0      
80     -16    
48     32     
64     -96    
288    -304   
64     -48    
-64    112    
64     -480   
80     32     
64     -1264  
-208   48     
128    0      
-16    208    
0      -48    
144    64     
-112   -128   
240    32     
-672   -160   
-1008  -1408  
-1024  32     
-1344  -320   
720    -128   
176    80     
128    -208   
224    432    
-704   128    
144    176    
288    -560   
-64    -192   
-80    -96    
224    272    
16     48     
-112   -128   
32     -16    
-80    32     
-80    128    
96     -80    
64     -224   
48     -240   
-64    -48    
144    96     
32     144    
176    -128   
-176   144    
256    -48    
-208   208    
160    -160   
32     32     
112    48     
64     64     
16     -128   
-160   32     
160    -144   
32     0      
-48    -112   
-16    160    
128    -1248  
16     -352   
-240   16     
32     -32    
16     128    
128    0      
-400   112    
112    -176   
-112   -32    
64     -192   
-176   176    
336    -224   
-128   176    
80     -224   
64     32     
-96    -816   
240    -288   
-160   144    
48     -144   
0      80     
-48    64     
-48    -176   
64     -16    
-352   -128   
144    32     
-1056  64     
128    -32    
128    48     
-32    -160   
80     240    
32     -160   
192    -32    
-96    96     
80     -16    
-64    16     
48     -16    
-80    16     
48     -32    
80     240    
64     -48    
32     256    
-112   -304   
224    192    
-544   -96    
96     -80    
0      -32    
-432   224    
-144   112    
-448   256    
-352   -48    
272    -112   
0      0      
-48    -32    
80     80     
-96    -96    
-128   128    
-464   160    
-128   176    
-160   -32    
-80    16     
16     48     
-32    -224   
-144   0      
32     -48    
-32    224    
80     0      
-32    96     
128    -144   
-64    96     
-352   -112   
-32    96     
-224   -32    
176    304    
144    384    
16     240    
64     160    
-288   -80    
32     160    
-240   32     
0      -144   
-288   48     
-32    -16    
-608   144    
-112   128    
0      -144   
16     176    
0      32     
0      16     
-32    -16    
0      -80    
-272   -528   
320    80     
-176   160    
0      -48    
0      112    
-160   -176   
16     -64    
-208   -96    
-32    32     
-96    -128   
80     -128   
32     -112   
48     192    
-160   -64    
96     -48    
-48    -16    
96     128    
-208   64     
64     -16    
-112   0      
-48    96     
32     -48    
-32    112    
32     112    
32     0      
80     48     
16     -208   
-192   80     
112    320    
528    1008   
-352   0      
176    128    
-144   -64    
-224   -144   
32     64     
-32    -16    
128    192    
-352   -176   
272    368    
-880   -160   
416    -16    
80     16     
0      112    
-48    -48    
-464   208    
304    -208   
160    160    
-368   -80    
368    128    
-416   160    
32     -48    
64     0      
-352   -128   
160    128    
-224   -64    
48     144    
-80    -64    
0      144    
32     272    
-48    0      
-32    80     
16     48     
144    32     
-48    64     
0      48     
-208   -64    
160    80     
-64    128    
96     144    
-128   128    
-1616  1104   
1232   1216   
-1040  -400   
848    -64    
-544   -272   
-224   256    
48     448    
-368   560    
-160   -144   
464    -416   
-480   368    
368    -160   
-224   224    
112    -240   
208    208    
-400   -48    
160    272    
-320   -96    
528    80     
0      288    
240    -64    
-144   352    
-80    48     
-288   160    
400    -336   
-144   304    
288    -112   
48     304    
-304   -176   
16     0      
-32    -48    
-16    -32    
-48    144    
80     16     
128    48     
-176   -144   
96     -128   
48     80     
304    704    
16     -96    
-48    -32    
0      256    
48     -32    
16     -352   
48     -64    
160    16     
96     144    
-240   -128   
160    256    
224    304    
96     304    
-96    208    
32     96     
-176   96     
208    128    
-144   -32    
288    400    
-192   336    
144    160    
272    960    
-304   -80    
16     112    
-144   -368   
176    -16    
0      80     
128    16     
112    48     
64     272    
16     720    
80     80     
-224   80     
48     -160   
176    -32    
-32    80     
-48    208    
0      0      
112    -96    
-64    -224   
64     -96    
0      -128   
96     80     
48     112    
48     16     
0      144    
160    192    
48     288    
128    304    
-128   128    
48     -1424  
192    464    
80     208    
-208   -32    
352    64     
48     144    
-96    112    
128    128    
-336   0      
256    368    
-96    32     
32     256    
80     112    
-16    144    
-592   -64    
16     -368   
-224   -144   
272    112    
-48    464    
-464   -112   
32     -112   
128    48     
-128   32     
64     16     
32     192    
-16    -80    
48     240    
-48    64     
80     96     
48     32     
64     -400   
64     16     
-144   -336   
-128   16     
320    352    
128    224    
-160   224    
-96    -16    
224    128    
-32    16     
144    16     
-96    128    
0      32     
16     -48    
160    16     
-128   -96    
96     224    
-240   -496   
464    112    
-48    144    
-96    16     
128    112    
-32    32     
16     -320   
16     144    
48     16     
96     176    
-16    128    
-48    0      
112    64     
-112   -192   
128    32     
48     -240   
-16    32     
80     448    
48     64     
64     -736   
-32    112    
-32    -112   
208    208    
-176   0      
224    48     
32     32     
80     -224   
-16    144    
16     -160   
-48    80     
80     -336   
48     64     
0      -368   
16     -48    
160    128    
80     144    
-48    96     
64     -16    
-48    16     
112    128    
-48    240    
0      -176   
192    256    
-48    -144   
144    176    
32     -80    
48     112    
-32    -208   
64     176    
-16    32     
-64    -16    
80     48     
272    -160   
112    96     
-64    64     
-16    160    
0      240    
16     0      
272    -16    
-96    112    
240    -336   
-64    48     
48     -176   
1408   -1696  
-864   -1968  
544    560    
-496   192    
768    -304   
-544   544    
-240   -656   
624    336    
-144   -288   
-80    16     
-144   -224   
192    -80    
-112   352    
192    -464   
16     336    
192    -288   
-32    400    
128    -128   
-32    208    
112    -16    
32     128    
144    -80    
-128   144    
304    -208   
-48    112    
192    -112   
-128   224    
128    16     
-96    128    
208    112    
112    -928   
-128   64     
112    -1328  
112    144    
64     16     
0      -432   
32     -80    
80     -656   
48     -224   
96     -1728  
32     -192   
96     128    
32     -64    
80     160    
16     -352   
96     -368   
0      32     
-32    -192   
48     32     
0      -48    
80     -240   
-160   -16    
144    80     
-96    -96    
96     16     
96     0      
64     -2128  
0      16     
16     48     
176    -48    
-64    -400   
32     112    
-48    -112   
48     64     
-208   -144   
48     -384   
-480   16     
112    96     
-16    0      
144    32     
16     -64    
144    -432   
-32    32     
112    16     
-96    96     
96     224    
-192   144    
224    -176   
128    -160   
-176   -16    
384    464    
-272   304    
288    144    
256    -176   
0      -432   
-48    -128   
80     -16    
-32    112    
128    -1728  
-96    112    
0      -128   
-96    112    
96     -112   
128    80     
-64    112    
-64    -432   
-192   -336   
64     -112   
-1696  96     
288    32     
64     96     
0      -32    
0      32     
48     -768   
96     64     
32     -128   
80     0      
-16    176    
80     -112   
112    112    
192    0      
16     192    
0      16     
-416   32     
128    -64    
-464   320    
144    -160   
-112   160    
-16    -448   
80     272    
48     -144   
-80    -48    
-80    96     
-48    -352   
-112   -128   
-128   -464   
-64    -368   
-80    -272   
-48    -16    
64     -160   
-896   48     
32     -240   
32     192    
-16    -224   
160    112    
32     -352   
192    0      
-288   -32    
144    96     
-240   -16    
64     -80    
-16    -48    
-80    144    
-176   -48    
-32    -160   
-416   -32    
272    -144   
-128   160    
48     -48    
48     -16    
48     -400   
144    -48    
64     -80    
32     112    
16     80     
-16    -192   
-112   0      
272    384    
-240   96     
144    -160   
240    32     
96     0      
0      80     
-256   -352   
128    96     
128    -208   
-272   160    
-304   80     
144    -256   
144    160    
-128   80     
-128   -176   
-144   -176   
80     192    
272    -112   
-176   112    
-1456  -352   
208    176    
-640   -208   
64     192    
-208   64     
-48    48     
64     64     
-944   16     
16     -48    
-96    32     
-240   -16    
192    -32    
-16    112    
-176   128    
16     128    
-320   -176   
176    32     
64     -160   
48     160    
-160   48     
-256   -32    
-48    64     
208    1312   
288    688    
-1056  -1232  
176    -544   
-416   0      
256    928    
48     -608   
-48    -128   
-224   -224   
64     576    
144    -560   
-384   496    
-176   -192   
624    800    
-32    -176   
-192   112    
-176   -496   
320    304    
-496   -240   
-752   -352   
-240   288    
480    224    
-336   -16    
272    -32    
400    320    
-16    144    
-80    -16    
-224   -224   
0      -96    
-128   400    
208    96     
-96    272    
-64    80     
64     208    
-48    96     
-48    -160   
-48    240    
240    256    
-128   48     
-96    176    
16     48     
96     -48    
176    160    
-64    176    
-32    112    
-240   0      
16     -48    
16     224    
-16    48     
0      64     
-64    192    
-352   -16    
32     -192   
16     -208   
-32    64     
144    0      
-48    48     
0      160    
-112   0      
112    128    
-368   160    
64     -240   
128    -16    
-96    208    
-48    -160   
-16    48     
-1328  -128   
128    160    
16     -80    
-48    112    
80     64     
0      80     
-96    -96    
32     64     
-96    112    
-80    32     
128    -304   
96     48     
-96    64     
-64    -320   
-64    160    
-304   176    
-16    -240   
160    128    
-144   0      
48     96     
-208   -48    
16     64     
0      128    
0      128    
96     144    
0      80     
-112   -112   
112    80     
-128   144    
48     240    
-144   -16    
96     208    
32     144    
80     32     
96     240    
64     288    
0      144    
0      144    
-176   -240   
320    0      
-320   64     
144    160    
-176   -64    
-96    -112   
48     64     
-96    -48    
-32    208    
-80    160    
-64    -352   
208    48     
-224   0      
272    -32    
-96    176    
208    336    
-240   32     
96     80     
-48    64     
48     304    
48     144    
-160   -128   
-256   -352   
80     -80    
-256   -64    
64     128    
160    0      
0      112    
48     -64    
-32    160    
16     80     
160    64     
-128   128    
144    32     
160    0      
-336   112    
80     112    
272    64     
80     160    
-128   144    
272    80     
16     48     
-272   -48    
96     144    
-96    -80    
128    192    
-64    48     
128    96     
-272   -128   
64     32     
-112   -16    
144    -64    
192    384    
-256   0      
304    48     
-80    160    
80     32     
96     96     
-96    192    
48     80     
32     64     
-208   -160   
192    16     
-64    -240   
96     192    
-240   160    
48     16     
64     112    
192    -96    
224    208    
-48    64     
-112   176    
112    48     
32     336    
-176   -64    
80     64     
80     -144   
128    112    
-112   160    
48     -16    
-32    -176   
112    -2896  
16     128    
-80    96     
16     32     
80     112    
80     96     
48     -16    
-32    160    
-32    48     
16     112    
-32    256    
0      48     
-704   -2560  
560    560    
-624   320    
-224   -1776  
336    496    
-944   -432   
784    1072   
-624   -96    
512    176    
-80    480    
240    -128   
-304   64     
128    -112   
304    112    
-32    224    
-80    -176   
128    304    
-32    128    
80     -272   
128    208    
32     144    
48     208    
-112   208    
288    112    
-128   -32    
192    -48    
-80    160    
144    336    
-16    80     
-32    64     
-32    -80    
-80    -80    
224    112    
-96    -128   
48     80     
-32    -464   
32     -16    
0      144    
64     96     
96     80     
16     96     
-48    -112   
32     176    
16     0      
128    96     
64     160    
64     -96    
48     -16    
-48    -400   
64     128    
-80    -784   
48     64     
96     64     
32     160    
48     -16    
48     256    
-160   112    
160    80     
32     -32    
16     80     
-48    48     
64     -16    
64     112    
-16    -64    
32     176    
112    -64    
192    240    
64     -240   
128    128    
-64    -16    
128    80     
64     -32    
16     144    
64     80     
-48    -160   
64     80     
144    -208   
-32    144    
0      -608   
-32    -80    
32     -272   
64     224    
96     -848   
-112   256    
176    16     
16     112    
-128   -272   
256    256    
32     32     
-16    -240   
-64    64     
128    -256   
-16    128    
80     -192   
16     176    
48     -336   
-112   -128   
256    -160   
48     368    
176    128    
-192   48     
-32    -80    
96     96     
176    -32    
64     32     
-64    96     
112    -64    
48     48     
64     -176   
16     128    
48     -80    
112    192    
32     0      
80     176    
0      -336   
32     -800   
96     64     
-16    -288   
112    224    
32     16     
176    -480   
-80    -272   
-32    -160   
80     -48    
224    144    
16     0      
112    640    
-144   -32    
256    -2320  
-96    -144   
48     -1216  
0      32     
112    -208   
-32    -64    
64     -64    
0      -304   
80     0      
-192   -16    
336    -192   
-144   240    
160    -48    
32     16     
-16    -112   
240    -144   
-128   240    
-96    -528   
-32    -128   
-64    -80    
64     -32    
64     128    
-80    -608   
-32    -32    
128    -624   
352    -224   
48     -976   
-192   -80    
240    64     
-320   32     
272    -48    
0      112    
-32    -48    
96     -80    
-240   -208   
160    -32    
-528   -144   
64     -112   
16     112    
16     -256   
96     -384   
96     -1488  
-80    -128   
-16    -144   
-112   256    
0      -128   
176    176    
32     -192   
208    80     
-128   160    
-80    112    
-320   -128   
64     0      
208    -32    
0      16     
-32    -48    
80     -192   
-192   48     
16     -960   
64     160    
32     -272   
80     80     
-96    -176   
48     160    
-160   -48    
80     48     
-96    48     
304    96     
-832   -16    
-64    -16    
224    2128   
-1360  -784   
832    1328   
96     -480   
704    -752   
-640   240    
-304   -192   
-16    64     
-176   128    
208    304    
-368   -768   
-224   128    
272    256    
128    -96    
-288   64     
-160   64     
-64    -80    
48     -480   
-96    -336   
48     -208   
176    -16    
-144   -16    
160    96     
-160   -192   
-112   -288   
144    144    
96     0      
0      128    
-288   -64    
224    320    
-976   -112   
144    -288   
-48    64     
64     -32    
256    128    
48     -512   
0      16     
-32    -64    
-32    -64    
-64    16     
176    -32    
-80    128    
80     -16    
64     96     
-160   -80    
-528   -128   
32     -160   
192    240    
-80    0      
128    -96    
0      80     
-176   -80    
-112   -112   
32     96     
-32    -96    
80     64     
-144   64     
64     48     
-208   -80    
0      -192   
48     96     
0      -16    
144    32     
-1472  -80    
-96    48     
112    -32    
160    64     
-48    32     
-112   -48    
-16    128    
0      0      
16     80     
-160   -80    
80     0      
48     64     
16     256    
-624   -48    
160    192    
-80    -192   
-240   -176   
160    32     
-256   112    
64     -16    
-688   -240   
16     112    
-1472  -224   
192    16     
-48    128    
-64    128    
304    -16    
-128   96     
16     -64    
0      48     
32     -144   
-128   144    
-256   -128   
128    -48    
-160   48     
0      32     
-32    64     
-480   -48    
64     -128   
0      80     
16     192    
-96    -176   
208    336    
-352   -112   
176    176    
80     208    
-96    -48    
32     -48    
-224   -16    
64     48     
-64    -160   
-192   -320   
-96    16     
144    80     
-1056  -80    
-144   16     
-96    112    
288    208    
-64    208    
-112   112    
192    144    
-48    64     
336    320    
-192   0      
-160   -400   
-64    160    
-48    64     
-208   -32    
64     -128   
-400   -176   
-256   -80    
128    -96    
176    48     
16     -128   
-144   -96    
128    224    
176    0      
-128   96     
-112   96     
64     144    
16     16     
16     -16    
-240   0      
-128   -144   
-464   -32    
192    64     
-144   -16    
96     -16    
-224   -256   
16     80     
160    176    
80     240    
-80    -16    
-16    176    
-224   64     
96     -96    
32     16     
32     80     
160    64     
-96    48     
-96    80     
-208   0      
192    -160   
-32    16     
80     144    
-48    -16    
-176   240    
32     112    
-192   32     
64     96     
-176   240    
64     -48    
16     128    
128    -512   
-160   16     
-32    224    
-592   64     
0      240    
48     -32    
-16    -16    
48     0      
64     128    
64     -16    
-80    32     
-32    112    
-16    -16    
96     240    
-288   32     
80     64     
-336   0      
-32    96     
-384   -144   
192    -16    
32     176    
-64    64     
-640   1248   
-144   -368   
-16    -96    
-256   -544   
-624   320    
736    688    
-160   304    
-48    64     
-112   352    
-336   -240   
336    128    
-320   112    
96     32     
-48    0      
112    -80    
112    224    
16     144    
-32    160    
32     32     
-16    48     
-80    -16    
32     -112   
0      32     
160    64     
-176   0      
80     272    
80     240    
112    -48    
-80    0      
96     32     
128    48     
-64    128    
48     144    
-112   -32    
64     16     
16     96     
16     272    
-96    80     
0      80     
32     -48    
-16    128    
96     112    
16     144    
-32    144    
0      48     
0      128    
32     112    
128    192    
-64    96     
64     0      
-80    16     
96     96     
-48    0      
16     64     
-144   32     
48     176    
80     480    
-16    240    
160    160    
-112   0      
128    48     
16     16     
-64    0      
160    400    
-16    -80    
-80    -80    
-16    48     
-64    16     
32     176    
-144   -32    
64     16     
32     144    
48     96     
-48    80     
16     112    
-80    112    
96     64     
-128   -112   
-16    -32    
112    112    
-16    -224   
-112   80     
16     64     
32     208    
112    208    
-128   -2496  
80     32     
64     128    
48     144    
48     144    
-96    64     
128    48     
-16    -48    
112    128    
0      144    
0      32     
32     0      
112    256    
16     160    
96     64     
-160   -992   
128    32     
112    128    
16     96     
0      144    
-32    96     
144    192    
-16    0      
64     64     
32     176    
32     48     
16     128    
-48    0      
48     -368   
80     256    
48     -864   
-32    -128   
-80    -128   
80     144    
192    96     
-16    -48    
-176   160    
176    112    
144    -16    
-16    144    
-112   -64    
128    320    
336    -432   
-32    176    
-144   160    
352    -352   
-144   128    
96     -1568  
112    128    
-64    64     
64     16     
112    -128   
-16    224    
144    176    
-32    32     
64     -80    
0      224    
96     -160   
16     0      
0      -80    
368    -64    
-80    576    
48     32     
0      368    
-48    -2416  
240    96     
80     48     
-32    -32    
128    -32    
48     176    
144    304    
-48    128    
112    64     
192    -288   
80     160    
96     -352   
-96    192    
80     48     
96     224    
80     -512   
304    304    
-192   144    
-16    -176   
-32    -80    
400    16     
320    80     
128    128    
-240   192    
-96    -208   
32     144    
192    -208   
112    224    
-32    80     
0      176    
-80    -496   
64     -16    
-80    80     
32     96     
48     128    
-32    128    
-32    16     
96     512    
16     96     
96     -16    
-112   64     
112    -96    
-48    224    
176    -32    
32     192    
112    -320   
64     64     
16     0      
16     576    
-1072  -1760  
1344   240    
-160   192    
-32    -112   
-304   -272   
1072   -1104  
-992   -272   
192    -112   
160    -368   
64     -496   
272    208    
240    80     
0      224    
64     48     
64     -208   
0      176    
-64    -192   
-96    -576   
160    -240   
96     -80    
80     -64    
48     -992   
160    -80    
144    96     
0      -112   
-32    144    
112    176    
112    -720   
0      16     
-32    -560   
32     112    
-112   32     
48     -16    
0      16     
32     -1040  
-48    -176   
192    -1696  
-48    -16    
224    80     
-16    16     
32     128    
16     -16    
16     -336   
-64    64     
-112   64     
192    176    
-176   16     
96     32     
224    -288   
128    -288   
-128   -96    
192    -320   
-48    -32    
128    -1312  
-112   -128   
80     -432   
80     80     
-16    48     
80     80     
-64    -16    
112    112    
-352   -112   
112    -176   
-816   64     
-96    -48    
224    -96    
112    112    
-48    -112   
-16    64     
-64    -240   
304    -400   
-160   112    
112    16     
64     80     
0      -176   
0      -240   
32     -80    
32     32     
-288   16     
144    -128   
-144   96     
-16    -176   
112    -96    
-16    -432   
272    176    
32     -1120  
-96    64     
240    -32    
-64    32     
-80    -192   
224    -32    
-128   -64    
112    208    
-576   -160   
192    -272   
-320   -80    
64     -192   
16     -48    
64     -128   
0      16     
128    -320   
32     128    
-16    0      
-32    16     
128    -32    
96     192    
-48    288    
0      -96    
-208   -80    
16     -144   
-112   80     
112    -96    
-160   80     
96     80     
80     160    
48     -768   
272    352    
-128   -240   
272    192    
-432   -224   
-16    -176   
48     80     
224    -256   
-288   -16    
64     128    
80     192    
352    0      
-96    112    
-16    -192   
-144   176    
64     -288   
160    160    
112    -608   
-96    48     
-816   -32    
320    32     
-432   -64    
144    -96    
-288   48     
128    96     
112    16     
48     -128   
-368   -192   
-80    -496   
64     -32    
224    -560   
-240   32     
112    112    
-64    160    
80     16     
80     48     
-240   -48    
144    160    
-128   -112   
144    48     
-336   -128   
192    -96    
16     -32    
-192   -240   
32     224    
-96    144    
-848   -96    
-48    32     
-1040  48     
208    384    
-128   80     
-176   -208   
48     -320   
32     -32    
272    256    
-192   -112   
96     288    
256    -144   
-80    -128   
-64    128    
-96    -256   
-128   -160   
176    32     
-144   48     
0      48     
-160   144    
-80    -80    
-352   0      
-272   -176   
96     16     
-48    144    
-128   -128   
80     80     
48     -256   
128    -240   
-176   -304   
-32    272    
-64    48     
-112   -64    
32     64     
32     64     
-112   48     
448    2704   
-1744  0      
1232   1504   
128    928    
352    64     
-432   -368   
-704   -32    
240    -432   
80     96     
224    224    
-240   -96    
-96    112    
240    288    
-112   -192   
-128   -48    
-96    144    
32     96     
-1760  -80    
32     32     
-16    -208   
-16    112    
-80    176    
-16    480    
-432   32     
0      -304   
-112   -112   
-208   -192   
64     -208   
-224   48     
128    -48
[truncated: 236,011 more chars]
