# Supplementary material for: A Fault Diagnosis Method for One‐Dimensional Vibration Signal Based on Multiresolution tlsDMD and Approximate Entropy
Source: Hindawi journal article supplement (doi:10.1155/2019/3262818), 2019-01-01
Supplement: f1 [file 3262818.f1.zip › 3262818.f1/gear signals/broken teeth fault signal/Data15.txt]

32     -128   
240    160    
-96    32     
304    0      
-176   224    
-16    -96    
176    96     
-128   -512   
176    112    
-96    -144   
80     160    
-16    96     
32     112    
48     -160   
208    208    
48     112    
-192   -160   
-192   -48    
624    240    
160    304    
-96    16     
-64    96     
160    -192   
96     112    
-96    48     
-128   48     
-112   -192   
240    0      
80     96     
48     176    
-848   -2752  
2064   2256   
-784   -32    
704    -480   
0      624    
-208   -192   
-64    384    
464    -768   
496    736    
336    -528   
-288   592    
-416   -416   
96     -224   
128    96     
224    320    
-352   -80    
400    0      
-224   -176   
176    -240   
32     96     
-64    -416   
-48    160    
32     -208   
160    320    
-96    -528   
-32    112    
48     96     
144    48     
-144   -80    
64     0      
112    0      
64     224    
32     160    
208    240    
-32    208    
128    -304   
-48    32     
32     64     
128    144    
112    -464   
-32    384    
-48    -928   
128    64     
16     256    
144    176    
-144   -160   
32     -352   
32     240    
304    256    
-208   -144   
272    -32    
-192   176    
256    -192   
-16    208    
-176   -288   
240    -32    
16     -176   
144    160    
-48    176    
80     -256   
48     64     
48     -160   
80     -1056  
64     -16    
112    -960   
-48    -48    
160    128    
96     0      
32     112    
80     48     
80     144    
0      144    
64     -432   
160    96     
-16    -576   
0      -32    
-112   -48    
-208   32     
144    224    
128    -1184  
96     -128   
80     -64    
64     32     
48     256    
64     -112   
256    48     
-16    144    
-32    -96    
112    -32    
96     -32    
32     -16    
-384   64     
16     48     
176    -48    
16     -304   
96     112    
80     -192   
176    64     
-32    352    
48     -240   
-80    -336   
16     -80    
176    -208   
64     80     
-16    0      
192    112    
-176   -96    
16     -80    
-48    -256   
16     -32    
80     96     
112    -64    
128    -16    
80     -496   
96     64     
128    16     
96     256    
80     -48    
-128   96     
-16    -16    
112    -80    
-64    -96    
128    -32    
-64    32     
-32    32     
192    160    
96     -336   
-176   -176   
-176   -384   
-80    -80    
-16    -80    
64     32     
80     224    
112    -48    
192    16     
-176   64     
-64    -80    
144    -16    
-272   0      
352    -64    
80     -176   
-64    -176   
48     -48    
16     -304   
16     -32    
-48    -848   
288    -112   
-64    -96    
64     -16    
48     176    
-32    48     
16     0      
32     -64    
-384   -96    
64     80     
-624   16     
224    16     
-304   -176   
32     -80    
256    32     
64     -624   
80     112    
-80    -128   
-32    80     
80     80     
224    32     
64     -176   
-208   16     
-240   -304   
272    0      
48     336    
16     -96    
-320   272    
32     -512   
-80    128    
144    -960   
48     400    
32     176    
-16    16     
-320   -128   
208    -336   
-336   -144   
160    -144   
-112   240    
-192   0      
-80    -32    
112    -368   
144    -64    
160    -112   
-64    160    
48     -368   
32     80     
-112   80     
-64    -80    
112    -48    
96     64     
32     48     
32     80     
1712   400    
-1264  576    
720    592    
-144   608    
-160   384    
128    -128   
-864   -48    
176    752    
-592   -144   
96     224    
-1504  -320   
-32    32     
-32    208    
256    -160   
-64    -32    
-32    -32    
96     96     
-64    -16    
-592   -96    
176    112    
-224   -48    
112    112    
-96    160    
-288   -64    
-80    -80    
-208   -32    
-16    0      
16     176    
-64    32     
-176   -144   
-160   -144   
-48    -64    
144    -112   
-304   160    
176    0      
-64    -192   
-144   160    
80     112    
-144   -48    
64     32     
-80    -48    
-16    80     
-48    64     
-32    -48    
-672   32     
0      144    
-80    80     
80     256    
80     80     
-128   48     
16     -80    
-160   96     
48     144    
-48    176    
16     112    
-64    64     
-32    192    
-64    64     
96     80     
-208   416    
-80    144    
-960   -64    
-48    -48    
-96    -464   
0      -64    
-48    -144   
112    -80    
-32    0      
-32    48     
-80    96     
-144   64     
16     -32    
32     -64    
80     128    
-352   -32    
-32    96     
-1232  -352   
128    -240   
48     -192   
16     448    
-80    64     
80     144    
-128   0      
0      64     
-48    48     
16     80     
64     32     
-112   0      
0      32     
-64    48     
-32    -16    
-64    -64    
160    128    
48     96     
-64    96     
0      64     
-64    0      
80     112    
-112   16     
48     96     
-80    64     
64     80     
-176   -96    
48     64     
-112   -16    
16     96     
-32    176    
0      64     
-1904  -320   
64     96     
-128   64     
-32    0      
-48    64     
0      48     
96     64     
-176   64     
112    272    
-112   -96    
32     64     
-112   176    
96     144    
-240   -256   
-80    64     
-1440  -144   
192    96     
0      240    
80     880    
48     240    
16     -144   
-96    80     
160    -16    
48     128    
-160   -16    
112    160    
-64    16     
96     128    
-192   272    
480    -240   
48     480    
-192   48     
176    -48    
-224   32     
208    96     
-32    128    
-32    32     
-16    -32    
128    80     
-16    240    
0      48     
-112   -16    
80     32     
-64    224    
-32    0      
128    -96    
352    96     
-256   240    
144    -80    
-368   192    
336    -144   
256    224    
-96    160    
-16    144    
-464   -48    
272    -16    
-16    0      
-160   -384   
64     -128   
0      512    
-128   336    
-96    -48    
-96    -96    
336    176    
96     128    
-192   432    
-288   -112   
384    -80    
-224   352    
-112   -400   
32     -64    
192    128    
464    64     
-32    384    
-352   128    
-208   80     
-32    384    
176    144    
-48    48     
-32    288    
-208   -224   
48     0      
-32    -112   
272    144    
-112   128    
240    96     
-304   64     
128    -32    
-16    160    
96     80     
-240   928    
-320   -1728  
-224   272    
-304   0      
-64    880    
-336   16     
80     -544   
384    192    
-352   -304   
64     -416   
144    304    
64     208    
48     416    
-192   112    
256    96     
-32    48     
48     -96    
80     160    
112    32     
16     128    
-80    160    
112    256    
-16    48     
96     240    
-128   16     
112    96     
-96    48     
144    -400   
48     32     
-16    128    
112    160    
80     80     
-48    160    
48     48     
16     112    
0      -208   
80     96     
-48    80     
192    160    
-96    -256   
32     128    
0      112    
48     -144   
80     16     
-80    -1424  
48     128    
80     96     
32     176    
-240   160    
176    -16    
64     96     
-112   64     
80     48     
-128   64     
48     -112   
192    304    
-256   112    
352    -144   
-240   176    
16     -544   
336    64     
-96    208    
48     -48    
80     208    
-112   0      
144    -128   
0      -48    
96     128    
16     160    
64     112    
32     -32    
144    176    
-160   -16    
160    64     
112    -32    
-80    -96    
240    -800   
-96    176    
0      112    
48     320    
-64    -304   
272    96     
-16    32     
-96    208    
-80    112    
-48    -352   
96     -64    
240    80     
-192   96     
256    -144   
-64    96     
32     -1936  
64     128    
128    128    
-16    288    
-112   80     
64     16     
64     32     
-32    64     
-64    -160   
-80    -112   
208    256    
-32    -48    
160    208    
80     -288   
-32    304    
-96    -336   
272    16     
-64    -368   
0      208    
112    0      
32     32     
-16    144    
16     192    
192    96     
16     64     
-16    256    
192    64     
-112   80     
272    48     
48     16     
80     -224   
-96    176    
80     -272   
128    80     
-288   -64    
336    352    
112    96     
192    112    
-112   192    
0      -832   
48     160    
-48    -368   
-96    112    
128    -80    
16     96     
0      -192   
128    96     
-96    -160   
32     112    
-80    96     
80     48     
-16    -64    
48     -400   
-48    272    
160    -144   
-32    32     
144    -144   
-128   160    
192    -112   
64     64     
-96    -160   
16     48     
48     -32    
160    160    
-128   80     
384    -1248  
-272   -16    
192    0      
48     -1568  
32     -240   
96     -1056  
96     32     
16     144    
32     96     
16     -16    
176    352    
-16    -128   
-144   -160   
32     -64    
112    224    
128    128    
160    -48    
-752   -128   
80     -208   
80     -176   
176    -160   
128    -128   
-48    -368   
32     -48    
128    96     
0      -64    
128    -544   
16     96     
64     -80    
-64    -16    
-32    -224   
80     -96    
-208   96     
64     -80    
112    -112   
64     -288   
112    -16    
-16    128    
144    -64    
192    224    
16     80     
-400   -2624  
464    -512   
-592   -480   
512    -400   
256    -288   
-448   -896   
448    464    
176    160    
-16    -208   
-288   -480   
416    272    
64     -112   
144    -80    
0      -896   
-320   -112   
160    -48    
-80    144    
320    672    
16     320    
-144   -96    
16     -208   
32     -32    
64     -48    
-304   -80    
80     -144   
112    -176   
80     -192   
-272   0      
96     -1488  
-80    -48    
384    -96    
-96    112    
48     -128   
32     176    
-96    112    
160    -128   
-224   -496   
0      -304   
0      -32    
256    0      
-16    -48    
48     -112   
64     16     
144    -256   
16     -48    
144    -1088  
112    224    
-64    -176   
224    -240   
-256   -240   
160    -112   
-48    256    
32     96     
96     208    
-80    -128   
-368   -32    
176    128    
-16    240    
128    -32    
-16    112    
-80    -816   
112    48     
-96    -80    
-96    -80    
96     -240   
48     32     
-144   -32    
144    -96    
-432   -64    
48     0      
-112   0      
96     -32    
48     48     
-32    -336   
80     -192   
176    -448   
-64    112    
256    352    
-464   -208   
-64    -272   
64     96     
-32    16     
128    160    
-96    64     
112    160    
-16    208    
-16    -288   
160    256    
-48    -352   
128    80     
-64    -96    
48     0      
64     16     
-160   -16    
-112   48     
144    64     
-144   0      
128    32     
-32    208    
16     -48    
64     80     
-96    -144   
32     96     
-560   -160   
0      128    
-32    -128   
-1024  -176   
-16    64     
-880   -48    
32     48     
-128   0      
-64    0      
80     -32    
-144   64     
48     -176   
-80    -16    
-512   -160   
0      176    
-176   -176   
0      128    
48     192    
-96    -64    
-192   -176   
-288   -32    
96     208    
144    160    
-160   48     
-320   416    
48     112    
-336   80     
-16    80     
0      -144   
16     112    
16     -464   
-128   160    
-192   64     
-80    -1008  
-208   -48    
64     544    
-64    288    
-464   16     
16     -48    
-992   -96    
-64    -80    
-32    16     
0      96     
-64    -704   
160    64     
176    -480   
-176   160    
-80    48     
112    160    
-112   112    
-176   -160   
-192   -128   
128    64     
-96    112    
-144   176    
-176   -144   
-1072  -144   
192    208    
-144   -160   
16     96     
-80    -144   
112    96     
48     48     
64     16     
96     176    
-112   -160   
-176   0      
80     80     
-96    0      
-16    304    
-48    -48    
-672   -256   
192    112    
64     160    
-80    96     
16     144    
-352   -48    
96     -112   
32     -288   
208    176    
64     128    
-64    80     
16     160    
-32    0      
-304   -160   
0      48     
-688   -48    
144    112    
32     64     
80     96     
-112   32     
-16    -208   
48     80     
80     16     
-32    272    
-528   2656   
-2512  -384   
688    832    
272    496    
64     -464   
-448   320    
-304   384    
608    448    
-2560  -176   
128    -128   
-128   48     
-32    -48    
-112   128    
160    80     
-64    96     
-32    -32    
0      64     
-16    112    
80     0      
-64    80     
0      128    
-48    64     
64     288    
-752   -128   
16     -48    
240    304    
-304   16     
272    80     
-144   192    
80     -64    
-128   48     
48     112    
-144   64     
144    176    
-48    48     
80     80     
-272   -32    
112    -64    
-96    224    
128    144    
96     16     
-208   128    
48     48     
-64    -16    
176    80     
-160   32     
224    224    
-320   48     
128    32     
-80    -96    
-80    48     
16     96     
-144   160    
144    80     
32     -16    
16     192    
16     112    
-32    112    
0      112    
48     64     
32     16     
48     160    
-64    0      
80     144    
-64    256    
32     32     
64     -96    
48     96     
48     176    
-48    -128   
128    48     
-128   160    
176    32     
48     176    
0      144    
-16    -48    
112    64     
32     160    
112    80     
16     48     
48     256    
-192   -32    
128    16     
144    256    
-224   112    
176    16     
112    304    
-112   64     
320    64     
-272   -96    
160    32     
-176   16     
-96    -48    
48     160    
0      112    
0      144    
208    -16    
-64    112    
-80    64     
208    304    
80     208    
16     32     
32     64     
-144   -208   
176    -16    
64     144    
144    48     
-144   144    
48     160    
64     176    
-80    112    
96     64     
16     32     
-32    160    
-64    48     
64     80     
-80    -96    
208    64     
-96    144    
176    192    
96     336    
32     224    
144    192    
-112   208    
-48    -176   
-96    -192   
192    288    
128    96     
64     224    
-160   48     
144    64     
-48    144    
208    160    
64     304    
32     -80    
-64    192    
-80    48     
112    -64    
-64    -128   
-16    160    
160    32     
160    160    
-16    -1536  
16     48     
-160   144    
176    80     
112    304    
-16    -112   
0      112    
-48    -96    
-16    16     
48     96     
48     48     
176    272    
-32    32     
32     -128   
128    272    
-48    -592   
128    192    
112    80     
80     64     
0      144    
48     0      
-48    48     
80     64     
112    -32    
208    272    
48     64     
-64    0      
80     96     
-128   -576   
176    -80    
128    -48    
16     288    
-80    -992   
32     -16    
160    128    
96     320    
80     96     
-96    224    
64     80     
128    -208   
-32    144    
96     -96    
-48    256    
176    -192   
64     112    
32     -144   
-32    96     
64     -1104  
-32    32     
-16    224    
32     96     
-80    -16    
160    320    
-112   176    
112    80     
-176   -32    
1712   -32    
-1040  -928   
1616   1296   
-112   832    
1072   -1568  
-416   -464   
-112   256    
320    736    
-224   -288   
272    304    
0      -192   
176    -112   
-256   288    
80     -16    
160    224    
96     112    
-96    16     
448    -288   
-288   -448   
32     -736   
160    176    
-80    -128   
64     368    
-32    208    
256    352    
-352   112    
160    208    
-96    -48    
128    -48    
-16    160    
144    -112   
0      144    
-48    -192   
112    112    
224    176    
-48    -256   
96     -304   
-96    -16    
320    -528   
192    480    
-256   64     
64     144    
128    80     
16     -144   
48     -1232  
0      -80    
80     160    
-272   -272   
208    96     
-224   -176   
288    256    
-144   -176   
32     96     
144    -272   
-16    80     
32     64     
-48    -128   
352    32     
160    256    
-128   -816   
16     -224   
192    -848   
0      -192   
208    -272   
-240   -272   
288    -96    
-48    32     
-16    -416   
-16    160    
48     -192   
128    128    
48     -720   
32     -16    
-1168  -256   
112    96     
64     0      
0      288    
64     256    
432    -672   
-32    144    
224    0      
-176   -416   
96     -368   
32     -16    
144    0      
48     -32    
64     128    
-48    -192   
-304   144    
96     16     
-48    -96    
-16    -496   
96     -48    
208    -144   
48     80     
0      -1568  
-16    16     
208    64     
-48    32     
-32    -128   
16     176    
-16    16     
160    -16    
-496   32     
-96    -160   
-16    -48    
-160   -368   
224    -64    
-176   -112   
240    -80    
48     -496   
-128   64     
144    -96    
-144   112    
16     -16    
96     128    
80     368    
144    160    
-304   160    
-32    112    
-592   176    
112    -80    
0      48     
-16    -176   
96     -368   
160    -208   
-176   272    
288    -304   
160    592    
48     192    
96     -48    
-176   160    
0      -144   
48     176    
-48    -144   
112    -224   
-16    32     
-16    608    
-176   144    
-16    -144   
-16    -240   
0      -224   
192    -992   
-128   304    
16     64     
128    -112   
-160   -48    
64     -160   
0      48     
-80    16     
32     -32    
96     -304   
-208   -144   
112    -32    
96     208    
-96    16     
96     -48    
144    96     
-16    -112   
80     -16    
-48    -16    
-128   176    
-16    32     
-80    -80    
208    560    
-512   -576   
368    160    
240    528    
144    -64    
-288   -96    
48     -256   
240    -64    
80     -304   
0      -112   
-80    48     
0      80     
-96    128    
128    16     
-160   0      
48     -48    
-64    -64    
-32    32     
16     192    
320    -256   
80     256    
112    -208   
16     304    
-96    -176   
32     80     
-16    -32    
32     32     
-272   -96    
80     -64    
-256   -192   
288    0      
-64    272    
48     176    
-288   -96    
-96    1952   
-896   544    
64     -752   
-160   -624   
208    -16    
96     48     
-464   416    
-144   272    
304    -336   
-288   -80    
0      64     
208    272    
-80    -16    
32     -16    
-48    -32    
-240   48     
48     128    
-96    -128   
32     16     
48     64     
80     16     
0      224    
-400   0      
-96    -64    
-144   16     
0      144    
-1440  208    
-96    160    
0      -176   
16     64     
-16    16     
160    80     
-240   -112   
0      -112   
-128   -32    
0      -192   
-272   80     
112    224    
80     48     
-416   -96    
-176   128    
-944   -112   
-64    96     
-192   -160   
160    128    
-64    48     
112    112    
-160   -224   
224    -48    
-176   160    
176    80     
0      112    
-64    96     
-16    -16    
-176   -32    
80     112    
-272   272    
160    -112   
96     192    
-352   112    
176    -96    
32     144    
-64    112    
-64    16     
224    -48    
-176   128    
-32    176    
-80    96     
96     -80    
16     0      
-64    144    
-144   144    
64     48     
-1008  -240   
-16    128    
-112   -112   
256    176    
-112   144    
16     32     
0      0      
-128   96     
-48    64     
80     288    
96     16     
160    144    
-144   -96    
-16    -272   
144    144    
-496   -176   
192    240    
-144   -176   
128    208    
0      48     
80     144    
-96    -16    
-32    16     
-112   -176   
0      96     
0      176    
-48    -96    
-64    112    
-224   -144   
240    384    
-144   128    
144    192    
-592   -80    
96     112    
144    288    
-64    0      
-48    48     
48     192    
16     32     
-80    64     
-80    64     
0      16     
256    352    
-224   -144   
0      48     
-112   0      
352    256    
-96    -16    
32     240    
-176   16     
80     96     
32     0      
16     304    
-64    160    
-80    -208   
-96    -96    
144    192    
-64    64     
-160   32     
-16    0      
-368   -64    
80     144    
256    144    
-64    80     
-176   -64    
32     80     
96     -48    
48     -240   
-144   16     
304    80     
-160   64     
128    0      
-208   -208   
-96    -48    
272    592    
-128   -96    
48     0      
0      112    
80     48     
64     176    
-64    -64    
-32    -224   
144    528    
-224   80     
96     368    
112    96     
-160   -16    
-96    144    
-48    -32    
-32    176    
0      -112   
16     64     
-48    64     
96     256    
0      -240   
16     -112   
64     128    
48     160    
64     240    
-128   16     
-16    16     
128    -16    
32     112    
-96    -64    
0      48     
64     80     
112    112    
32     80     
-16    64     
-16    176    
-16    160    
-240   -96    
192    -32    
80     144    
176    32     
-80    176    
-128   -16    
240    112    
-80    48     
64     128    
-48    32     
208    112    
208    64     
176    -64    
1072   864    
-1008  -1600  
1168   912    
16     752    
896    -448   
-496   704    
-320   96     
240    96     
-256   64     
448    192    
-416   -1152  
-96    32     
-192   352    
272    128    
-112   -16    
32     64     
32     -64    
176    96     
96     432    
112    368    
-16    288    
-16    64     
-16    96     
32     0      
0      -208   
-48    -304   
32     144    
320    432    
-128   192    
48     80     
-48    32     
-128   64     
-96    256    
112    112    
48     128    
32     -64    
288    208    
-320   -48    
-112   96     
80     192    
-112   64     
16     112    
96     -560   
128    -16    
-80    -128   
80     240    
-64    144    
80     496    
-176   64     
-160   -112   
176    -272   
48     288    
-48    -16    
-272   -208   
32     -32    
160    -176   
-48    -16    
-272   -1584  
48     -128   
256    304    
-208   -32    
160    160    
48     64     
-144   -528   
112    400    
-112   -80    
224    256    
-80    -32    
240    -16    
-144   160    
96     -272   
112    48     
16     -64    
48     96     
64     -272   
0      80     
304    768    
-32    992    
-160   -128   
-112   -448   
192    32     
16     160    
-16    16     
-32    -32    
48     -80    
96     -32    
304    880    
-208   32     
-32    -256   
-80    -784   
192    208    
-64    -1248  
-48    64     
48     -240   
64     192    
64     16     
32     64     
144    -48    
48     96     
208    256    
-16    -32    
48     -32    
80     -224   
96     0      
96     -528   
0      176    
-48    -448   
32     -272   
-192   -320   
64     16     
96     32     
0      160    
0      96     
48     -32    
64     112    
112    -160   
-64    128    
112    -272   
64     -80    
144    48     
32     80     
-16    96     
160    240    
96     160    
64     320    
96     144    
-112   32     
80     208    
144    32     
0      208    
16     0      
16     112    
272    224    
-64    144    
208    416    
-208   224    
160    -400   
0      144    
-128   -16    
352    112    
-192   256    
192    48     
-32    -304   
160    -160   
16     240    
16     -176   
16     0      
-80    -160   
80     48     
0      -304   
96     -1856  
-48    0      
80     -112   
48     96     
80     -144   
32     -288   
144    -16    
32     432    
-160   -288   
336    -304   
-32    80     
192    256    
-48    -144   
-128   208    
192    240    
-224   -416   
224    -112   
-16    -320   
288    176    
-352   80     
-16    -128   
-464   240    
-144   -96    
208    288    
128    -112   
-16    0      
176    -1232  
0      -128   
128    128    
16     16     
0      96     
0      96     
-32    -16    
-32    -96    
-64    96     
-16    -48    
-400   32     
128    -96    
0      80     
64     -208   
128    -32    
-32    -688   
0      0      
192    -1280  
-240   -48    
224    -192   
-16    80     
64     -192   
-1136  672    
480    -384   
-256   48     
-128   -208   
816    256    
-768   -592   
1136   1056   
-448   240    
320    -112   
-480   -128   
608    -448   
-144   256    
32     -304   
-192   400    
240    -192   
-112   16     
96     -48    
48     112    
-64    -144   
-16    -80    
-96    -192   
-48    144    
96     -16    
96     16     
-192   -96    
208    -432   
-96    64     
96     -192   
-16    144    
176    208    
32     -48    
-160   -96    
32     -192   
-96    -80    
16     0      
304    48     
-96    80     
-768   -64    
32     0      
-80    -160   
64     -352   
48     0      
80     64     
80     160    
-16    112    
0      -48    
-128   -64    
64     -16    
176    -32    
16     208    
-272   -64    
96     -48    
-416   -128   
208    -112   
0      128    
96     16     
48     128    
-96    -64    
112    -128   
-96    112    
-144   -80    
160    32     
-32    16     
0      80     
80     -80    
-176   0      
96     32     
-160   96     
144    -112   
48     160    
16     -96    
64     64     
64     -624   
48     32     
-80    80     
96     48     
-128   64     
304    -32    
-96    64     
192    0      
-304   -128   
64     -96    
112    -48    
-128   -144   
-192   176    
-272   -416   
48     304    
-32    -208   
-336   144    
-320   48     
-416   0      
-64    32     
-32    48     
-16    96     
208    288    
-32    64     
112    144    
-32    16     
-1200  -288   
-80    -144   
-176   32     
144    -32    
-16    256    
-32    -32    
-176   32     
-96    -144   
16     48     
-1120  -80    
-32    -32    
-208   -48    
320    480    
0      64     
256    256    
-96    -16    
208    240    
-128   -32    
176    128    
-304   -96    
0      64     
16     -400   
-464   -112   
48     144    
-240   -144   
-32    128    
-112   80     
-208   -256   
-16    -64    
-144   128    
-48    -64    
224    112    
-112   -32    
96     112    
-176   176    
144    0      
-64    -80    
-48    64     
0      48     
-32    64     
16     -32    
-144   144    
-208   -16    
-128   -32    
208    80     
80     32     
-64    144    
144    -304   
-304   -144   
224    288    
-16    80     
-96    48     
16     16     
64     112    
-144   -96    
-16    64     
-48    96     
16     448    
-240   -32    
160    496    
-336   -16    
16     -64    
-128   0      
96     -48    
80     160    
-48    32     
-112   32     
96     -32    
-192   176    
-240   -160   
112    176    
-352   144    
64     32     
-624   -64    
-192   -96    
208    48     
-256   240    
240    -112   
0      224    
-64    0      
144    48     
-288   128    
96     16     
-16    112    
-64    160    
80     16     
96     -64    
160    80     
-480   -80    
32     192    
-80    -32    
160    64     
48     144    
-64    80     
16     16     
128    0      
144    176    
-96    -32    
32     80     
-160   32     
624    1024   
-16    336    
-384   -1184  
-272   -464   
304    -64    
-368   80     
608    832    
-1264  -992   
720    -320   
-448   816    
496    -240   
-288   96     
-144   -176   
480    320    
-192   -112   
-32    304    
-208   -144   
64     576    
-48    -272   
384    208    
16     16     
272    208    
-160   240    
48     -16    
-192   176    
16     288    
112    368    
-208   -256   
64     240    
-112   -16    
128    208    
-16    -64    
208    32     
-112   16     
32     64     
-32    256    
224    256    
-16    544    
-304   -288   
144    224    
96     96     
-144   0      
-176   16     
208    368    
-80    160    
0      272    
96     480    
336    608    
-336   48     
-144   -192   
-16    -144   
48     -128   
192    352    
-304   0      
32     48     
-48    -144   
176    -16    
-320   -64    
32     96     
-304   -448   
64     48     
-176   304    
-32    176    
80     496    
-64    -48    
-80    176    
-32    48     
240    368    
-496   -464   
128    48     
80     48     
48     352    
-64    -16    
160    -16    
-144   16     
192    128    
-48    256    
256    160    
176    208    
64     240    
112    160    
48     32     
-112   272    
64     96     
64     160    
-96    32     
-32    -16    
-128   -96    
224    784    
-240   -128   
144    304    
0      -64    
-224   -1232  
144    64     
-96    -192   
80     -144   
64     80     
-128   -80    
224    464    
-80    112    
-32    96     
-16    -80    
-176   -432   
48     128    
48     -304   
48     -352   
-256   -544   
368    -1296  
0      32     
48     96     
-16    48     
80     16     
80     208    
48     144    
-16    -32    
64     192    
80     144    
64     0      
-144   80     
16     144    
272    288    
128    304    
-400   -416   
176    -32    
240    96     
-176   112    
192    304    
-96    240    
144    96     
96     96     
-80    96     
208    272    
16     176    
240    96     
-192   -272   
32     256    
64     0      
160    -48    
-32    96     
160    -304   
16     80     
16     96     
-128   64     
64     48     
-16    80     
144    0      
-80    192    
-16    -320   
144    176    
-64    -16    
16     -16    
96     112    
112    -240   
-16    32     
80     -496   
32     48     
-80    -352   
96     -32    
0      112    
16     272    
-64    80     
32     112    
64     16     
48     128    
240    160    
-80    16     
112    160    
80     0      
-128   48     
0      -112   
32     16     
96     -304   
48     304    
-208   -368   
144    -64    
96     144    
32     -48    
64     128    
-16    64     
80     176    
0      -224   
80     64     
0      -224   
80     32     
176    -304   
160    -48    
-48    -160   
-64    256    
-32    -1168  
32     32     
64     -16    
96     -16    
112    160    
-192   144    
224    112    
-32    -32    
176    192    
2960   1344   
-1184  96     
-576   -1392  
0      704    
1008   -1232  
-528   -208   
32     -1232  
48     656    
96     -304   
-144   464    
32     -320   
176    -320   
32     -304   
208    112    
16     48     
112    -208   
-96    192    
144    -16    
-32    96     
176    -64    
-128   144    
256    -48    
-96    416    
352    -80    
-224   144    
256    -80    
-240   64     
320    -16    
-256   112    
288    96     
-16    -32    
-16    0      
64     -80    
144    80     
-48    -16    
16     -144   
32     -304   
96     -1600  
0      64     
112    -2176  
32     -320   
64     0      
80     144    
64     -160   
64     -800   
48     -272   
80     80     
-64    -32    
128    80     
48     -320   
112    -1584  
-64    112    
160    -496   
-160   32     
112    -80    
112    -560   
64     48     
-64    -560   
48     -144   
160    -352   
-32    -80    
144    32     
-48    32     
112    80     
0      -208   
16     -64    
80     96     
80     16     
-32    48     
-128   48     
32     -112   
-1632  -80    
-64    -224   
112    64     
0      -64    
64     128    
-64    -1120  
304    -272   
80     -96    
-64    -16    
288    272    
-32    368    
352    160    
288    16     
-48    -144   
-96    -96    
-560   128    
48     64     
160    -16    
-32    -32    
-16    -16    
0      -208   
96     -32    
112    -592   
0      144    
-144   -576   
-48    -112   
0      -208   
64     224    
112    112    
32     16     
-144   -128   
64     -16    
-560   112    
112    -272   
48     -144   
48     -128   
-32    64     
-112   -352   
64     -96    
144    -32    
144    160    
32     64     
-32    80     
-48    48     
208    256    
-176   32     
144    -64    
-640   0      
128    -32    
-192   256    
16     -224   
112    96     
-64    -896   
160    224    
-64    224    
-112   176    
-16    16     
48     160    
-112   -144   
128    -80    
-256   -96    
128    112    
-240   -32    
128    80     
-256   96     
64     -224   
-16    -48    
80     -320   
16     112    
48     -16    
64     -80    
48     320    
0      0      
-80    96     
-112   -192   
-144   0      
32     80     
-48    160    
-16    -80    
-336   -80    
144    -176   
112    0      
80     -96    
48     96     
80     -576   
-96    -320   
-288   400    
-128   0      
-176   -144   
176    -112   
-16    80     
112    16     
-432   -80    
16     -176   
-1280  -304   
240    -112   
-176   224    
-160   -272   
96     160    
48     -224   
96     -144   
-304   -64    
64     112    
256    0      
64     48     
-208   -48    
272    -16    
-224   144    
112    64     
-288   112    
32     -48    
112    112    
-1456  -272   
80     80     
240    -112   
-624   96     
-48    -48    
-32    0      
32     112    
176    64     
-368   176    
0      -96    
-16    -48    
288    64     
16     112    
-448   -128   
-144   176    
-1216  -336   
-432   -912   
-176   -368   
240    -64    
-320   112    
-224   640    
-192   -512   
-1200  160    
-256   -464   
384    608    
-128   -64    
16     336    
-272   288    
-176   208    
-336   -432   
-320   -528   
-80    -48    
128    128    
-400   -32    
-96    -800   
160    368    
288    80     
-432   496    
-32    -256   
288    -272   
-304   -128   
-192   -720   
32     -144   
-256   -240   
304    752    
32     32     
-32    96     
-176   48     
0      80     
-16    176    
-96    -352   
-208   272    
144    224    
0      400    
-432   32     
-80    80     
48     -144   
208    192    
-48    48     
80     144    
-224   96     
-48    -64    
96     368    
-48    32     
160    64     
-144   144    
-16    80     
-128   -272   
-32    -80    
-432   -16    
176    -32    
-784   -16    
48     192    
-80    -96    
128    208    
-304   160    
144    -224   
160    64     
-80    160    
144    -48    
-112   -16    
-16    80     
32     32     
96     160    
-160   32     
112    112    
-80    16     
16     -32    
-32    -80    
-96    96     
-64    16     
176    -288   
208    48     
-144   64     
48     -144   
-112   96     
-224   240    
-128   -272   
240    112    
-224   -32    
64     96     
-512   -128   
48     128    
32     0      
-192   80     
128    160    
-128   64     
32     -16    
32     0      
0      176    
-48    128    
32     16     
-16    160    
-16    96     
-112   -64    
112    288    
-224   128    
80     192    
16     160    
-224   -256   
272    32     
-256   48     
336    224    
-144   32     
-64    32     
-48    0      
112    80     
-64    128    
48     176    
48     -208   
-48    -16    
0      144    
80     64     
-192   48     
176    336    
160    192    
-176   -128   
-192   -112   
16     80     
416    304    
-240   -80    
-160   -128   
96     32     
-96    112    
144    32     
0      112    
-336   -224   
48     -96    
-224   64     
288    16     
16     272    
-64    96     
224    80     
-240   96     
80     128    
128    -32    
-64    128    
-224   224    
208    240    
-144   80     
-80    128    
-192   -80    
208    192    
-80    176    
48     96     
-16    48     
0      96     
0      64     
80     192    
96     96     
-48    64     
-64    16     
-48    -16    
160    240    
-160   0      
208    96     
-112   160    
32     128    
240    16     
-16    176    
144    0      
-96    160    
128    368    
-224   16     
64     -32    
144    48     
208    -96    
-176   32     
-16    240    
-240   48     
64     -80    
176    208    
-32    80     
208    128    
80     16     
80     176    
-128   176    
-16    -16    
192    80     
128    272    
-192   -16    
-64    80     
-176   -48    
192    80     
-96    -80    
32     -1360  
80     176    
-80    80     
128    192    
-80    32     
128    48     
16     32     
-192   736    
192    -128   
816    640    
-256   944    
-256   48     
-16    -144   
640    1008   
-1168  -368   
416    -1440  
-288   112    
384    -16    
-16    320    
128    -288   
-32    480    
16     -480   
80     352    
32     -240   
-16    432    
-96    16     
144    112    
-128   -272   
112    176    
96     160    
16     -736   
32     32     
96     -480   
-32    160    
0      48     
-48    144    
160    0      
-80    128    
32     -64    
-48    176    
48     -16    
32     192    
32     -144   
48     144    
128    64     
16     -64    
-32    48     
128    -320   
-16    144    
112    128    
48     96     
0      32     
16     96     
32     64     
96     352    
0      32     
128    48     
-80    -64    
48     32     
80     160    
112    -16    
64     176    
-32    -640   
128    -32    
64     32     
48     288    
80     -112   
64     144    
-16    64     
176    176    
-80    -32    
64     -16    
32     80     
0      -64    
80     96     
-32    -208   
64     -48    
80     -272   
-16    240    
32     -752   
-16    80     
64     -96    
112    112    
16     112    
-16    224    
48     64     
176    48     
192    176    
0      -144   
64     64     
128    -80    
-224   80     
112    -448   
208    592    
-192   -352   
-16    16     
48     160    
96     192    
48     96     
-16    128    
16     176    
48     0      
112    144    
144    336    
-160   160    
64     -224   
-64    -96    
240    -112   
192    336    
-16    -272   
-128   80     
-64    -32    
224    176    
0      16     
80     176    
-64    64     
96     -208   
-16    112    
0      -224   
48     80     
80     -112   
80     80     
32     -288   
-64    96     
176    -112   
16     96     
64     -576   
-64    -16    
96     160    
112    176    
48     -64    
-192   -144   
144    192    
-16    -416   
176    -96    
-112   -336   
192    384    
-16    -240   
32     128    
-160   112    
304    80     
-64    -64    
144    -624   
-80    240    
256    -880   
-32    -96    
32     -128   
224    -688   
-208   144    
304    -416   
-112   0      
-48    128    
64     0      
96     112    
96     288    
-192   -320   
32     -128   
48     -272   
256    192    
208    -176   
128    80     
-288   112    
128    -688   
96     192    
32     -400   
160    0      
-112   -256   
128    16     
32     32     
64     -240   
144    -272   
48     -32    
96     -32    
-128   16     
-32    16     
208    -224   
-1792  -16    
32     -240   
-48    -48    
16     -16    
16     -128   
-80    -320   
80     -112   
96     -656   
-80    96     
64     -160   
192    64     
48     48     
80     -176   
-176   48     
16     -160   
80     16     
-192   -176   
32     48     
48     -48    
112    -64    
16     -624   
-16    -112   
-80    -1408  
208    176    
32     272    
144    256    
-112   16     
-16    -112   
-48    -112   
-608   -2272  
1392   928    
-48    -448   
-864   -592   
-256   -432   
-144   -688   
272    544    
-80    -176   
-128   -1312  
448    144    
128    464    
-240   -128   
32     80     
144    240    
-64    -160   
16     192    
80     -96    
-32    128    
-352   128    
240    208    
-1248  -112   
-32    128    
-32    -144   
352    -352   
-96    48     
288    -48    
-32    128    
-144   32     
96     64     
-48    -176   
32     -224   
-64    32     
144    32     
-32    64     
48     0      
-160   192    
-32    -112   
80     -64    
64     -336   
80     32     
16     -240   
0      16     
64     48     
64     48     
-448   -160   
96     -192   
-128   112    
224    272    
-176   -112   
128    -48    
-288   16     
80     -576   
0      112    
16     -384   
224    64     
-16    0      
80     192    
-112   -64    
96     -16    
-176   -112   
-16    144    
-80    -48    
192    64     
-112   224    
-32    -80    
-1168  -128   
176    -128   
-48    16     
160    -64    
-32    160    
-128   -16    
0      48     
-256   0      
192    -32    
0      144    
96     272    
-224   80     
176    64     
-128   48     
32     -304   
64     64     
-160   -32    
64     -16    
0      -272   
64     160    
-208   -208   
272    -48    
-208   144    
-272   80     
240    16     
-128   32     
-96    160    
0      -112   
96     0      
-432   64     
-256   -112   
16     -112   
-16    112    
-208   -16    
-80    80     
-32    160    
48     -128   
32     64     
-208   192    
-64    32     
16     208    
-256   128    
96     16     
128    192    
-192   48     
176    16     
-464   -192   
128    160    
-48    32     
80     -80    
-112   96     
-112   64     
80     -16    
64     -32    
96     256    
-272   288    
256    176    
-496   64     
64     -64    
-464   -240   
0      -64    
-48    -304   
320    176    
48     16     
-160   -16    
-192   96     
48     16     
-64    -64    
-224   32     
-176   80     
-112   -208   
-64    -192   
-112   32     
-32    32     
-48    -256   
240    112    
-224   -160   
32     64     
144    304    
-48    64     
160    96     
-48    208    
-128   176    
96     192    
-128   64     
32     48     
-64    0      
-432   -80    
0      96     
32     -128   
32     -80    
144    -192   
-224   224    
-160   208    
112    48     
-96    16     
160    48     
0      -48    
-64    112    
48     144    
-64    224    
-80    -80    
-64    -80    
128    80     
-480   96     
-48    112    
-112   -160   
-192   -64    
112    112    
-160   16     
-160   -96    
-112   224    
304    -48    
48     208    
-32    -32    
-80    112    
-96    128    
-128   96     
64     240    
-304   48     
-32    -16    
144    224    
-80    0      
48     96     
32     16     
96     48     
-176   0      
144    64     
144    0      
-16    240    
-48    224    
16     -64    
-112   -32    
896    -2144  
1104   480    
0      1040   
-352   336    
-48    -176   
384    16     
-240   352    
96     -16    
-144   -80    
-176   -128   
128    224    
32     -272   
16     352    
-96    -16    
16     -80    
-48    128    
32     176    
-64    64     
64     16     
-16    64     
32     -32    
-48    480    
64     112    
0      -160   
-160   -16    
0      48     
64     240    
-208   192    
208    112    
-224   -64    
-32    64     
-96    32     
-16    32     
48     32     
-16    48     
80     0      
-80    128    
-32    176    
208    112    
-80    96     
112    64     
-112   64     
-80    32     
112    32     
-32    16     
112    64     
192    240    
-64    112    
80     96     
32     224    
64     128    
48     96     
-80    0      
32     -48    
96     96     
-64    288    
0      256    
256    160    
128    272    
-160   -112   
32     144    
48     144    
-112   16     
64     304    
160    64     
-48    288    
-64    144    
0      144    
32     -32    
80     32     
-16    96     
80     144    
-224   -96    
144    80     
-144   -64    
160    192    
-112   80     
-128   -112   
160    0      
32     320    
16     64     
-80    80     
0      -32    
128    240    
-16    144    
64     32     
128    192    
-48    80     
112    208    
-96    32     
32     -944   
64     0      
48     128    
80     160    
-32    80     
16     16     
160    336    
0      160    
144    96     
-112   -48    
-16    48     
176    144    
-64    -96    
32     48     
112    192    
-16    -896   
0      16     
64     112    
-32    144    
32     48     
80     128    
16     128    
48     64     
16     208    
48     304    
-48    -64    
-80    -80    
-128   -16    
240    256    
16     -96    
-112   -192   
32     144    
272    -160   
-144   128    
-96    160    
48     -288   
48     0      
272    112    
-240   304    
432    128    
-144   112    
-16    272    
144    -16    
-96    -48    
0      -48    
32     -160   
112    192    
112    -192   
-48    48     
0      96     
16     224    
16     -32    
112    16     
-176   -80    
320    48     
-128   144    
-48    224    
240    -144   
-48    -80    
240    64     
-16    -32    
32     64     
80     -1584  
-80    144    
64     -80    
-112   160    
112    -128   
144    176    
112    0      
48     224    
-160   -64    
96     96     
64     48     
112    -32    
80     176    
-208   -48    
80     80     
160    -1056  
272    32     
288    -768   
32     368    
-272   224    
-64    -64    
64     0      
320    144    
112    192    
-64    160    
176    160    
16     16     
80     160    
80     -192   
-96    128    
112    -192   
0      112    
-80    -432   
304    32     
208    -592   
144    144    
-176   48     
144    96     
-80    -48    
16     -128   
112    112    
-32    96     
112    80     
48     -320   
0      96     
352    2544   
-1840  -688   
1072   368    
160    144    
272    -144   
-528   -832   
-96    64     
64     -144   
-128   -352   
-160   -352   
256    240    
160    -112   
-16    48     
64     -128   
144    112    
-32    -336   
-16    -112   
32     -448   
176    96     
-144   -32    
160    160    
-32    256    
0      -992   
80     -2736  
-96    -288   
48     48     
64     128    
32     0      
48     -144   
48     -16    
176    -32    
16     208    
16     16     
-48    208    
160    96     
48     -384   
96     80     
-64    64     
112    -144   
64     -96    
-48    -48    
112    -16    
32     -768   
96     -128   
-64    32     
112    -96    
48     128    
-32    -192   
288    -304   
-160   96     
144    -560   
0      160    
-400   48     
112    64     
-96    -160   
128    -192   
96     16     
-96    -160   
256    -160   
-48    -1552  
144    32     
96     144    
16     32     
32     -96    
-48    -96    
160    -176   
-16    208    
-160   0      
176    0      
-480   -160   
96     -176   
-128   0      
176    -128   
64     16     
64     48     
-16    -112   
192    -896   
-384   -16    
176    -96    
128    80     
-48    208    
96     -96    
-144   -48    
64     -336   
-592   48     
-144   -160   
112    -64    
128    -80    
-96    -16    
80     -608   
-96    -112   
64     -1776  
-48    96     
48     -64    
224    224    
-320   -80    
224    -80    
-224   -32    
16     0      
16     -32    
32     48     
-1504  48     
48     -48    
160    -176   
-112   -160   
-16    -32    
0      -720   
96     -32    
208    224    
-48    176    
96     64     
-16    48     
-48    64     
224    80     
-144   -64    
0      -64    
-288   -96    
64     -640   
0      48     
-32    -96    
400    416    
80     48     
32     192    
-128   -640   
368    -32    
-432   -64    
-224   -192   
48     -48    
192    -80    
-32    -48    
-32    -32    
-448   32     
288    112    
-16    80     
176    -160   
-304   -16    
112    -480   
64     0      
144    -48    
112    -320   
-192   208    
48     -32    
128    80     
-208   -192   
-256   -48    
-16    192    
160    80     
144    208    
32     32     
-64    -160   
48     144    
240    -272   
-80    96     
176    160    
-80    -128   
144    -48    
-32    144    
-48    -144   
16     -256   
32     192    
160    144    
16     -176   
-16    -112   
-1056  144    
32     -144   
112    -160   
-96    -528   
0      224    
176    192    
-112   160    
160    -32    
-176   -192   
160    176    
-96    -272   
128    -16    
80     16     
-240   -32    
112    0      
-96    -160   
-800   -144   
48     304    
-256   -176   
-272   -16    
-32    0      
-224   16     
0      -32    
-48    80     
-80    80     
-512   288    
-224   -64    
-144   -128   
32     48     
-400   112    
-16    256    
-560   144    
144    112    
48     -224   
-224   0      
1648   -1008  
-400   496    
912    528    
-464   528    
160    -144   
-880   -496   
-672   -160   
-48    -48    
432    688    
192    -48    
-208   -160   
96     16     
192    304    
-160   -128   
-16    -32    
144    240    
-240   112    
16     224    
-128   -48    
-32    -32    
16     144    
-64    48     
176    96     
-144   128    
-16    -32    
-160   -64    
-96    128    
80     144    
96     128    
-80    128    
112    -16    
0      128    
48     96     
-16    80     
16     16     
0      32     
-48    -80    
-176   -96    
80     352    
64     176    
-16    16     
-32    32     
32     112    
48     -80    
-16    128    
-16    80     
48     -16    
-128   64     
0      64     
144    192    
-128   -48    
80     0      
-448   -256   
16     144    
-448   144    
32     112    
-48    16     
-64    192    
0      -96    
-368   -240   
192    208    
-176   -96    
-96    128    
112    48     
-16    16     
-128   -32    
-16    96     
-272   -48    
-32    160    
-1104  -80    
80     96     
32     80     
-48    64     
-16    -32    
112    -64    
80     128    
-240   -368   
48     -128   
-176   -16    
-96    -224   
0      336    
208    240    
-96    272    
32     -16    
-304   -80    
64     0      
64     128    
-16    288    
32     96     
16     16     
192    80     
-48    80     
64     128    
-224   -48    
48     80     
-32    64     
144    416    
-208   64     
-32    -64    
-416   -112   
-32    144    
16     128    
-48    32     
-32    128    
64     0      
32     128    
-144   -160   
112    208    
-112   -32    
144    96     
-96    112    
-16    32     
-48    16     
-64    160    
16     -16    
-80    64     
128    96     
32     288    
64     32     
-16    64     
-32    176    
128    32     
16     -48    
32     128    
80     336    
96     -80    
-128   528    
224    -400   
16     -96    
-128   -48    
256    80     
16     -32    
-112   80     
-16    176    
32     240    
-112   -400   
96     -224   
32     -256   
144    -288   
48     96     
-144   352    
240    96     
-192   96     
112    -96    
0      32     
-112   208    
-128   -144   
-48    96     
224    208    
32     336    
32     -64    
-64    96     
-96    -32    
192    272    
-208   96     
64     48     
-304   -160   
32     -480   
112    48     
-112   48     
160    112    
-64    288    
32     128    
64     32     
-16    0      
208    224    
-32    96     
-16    176    
-208   -512   
16     368    
160    0      
-160   368    
-64    96     
176    -16    
16     96     
160    448    
0      -112   
-96    224    
208    0      
-48    0      
-64    160    
144    -192   
32     16     
0      208    
192    112    
-192   304    
-80    32     
352    160    
48     -2384  
80     144    
-32    128    
-48    16     
128    144    
-64    -48    
32     80     
-32    64     
144    176    
-32    176    
-64    -384   
576    -464   
-976   -208   
192    208    
-96    80     
176    -256   
-160   -16    
480    432    
-256   384    
48     -192   
256    -16    
-80    176    
256    240    
-112   48     
240    224    
-208   160    
80     64     
16     128    
-32    32     
128    -16    
-112   0      
256    48     
32     144    
64     80     
-64    -32    
-112   80     
224    192    
64     112    
112    -144   
-160   32     
128    64     
-16    128    
144    96     
-64    -112   
112    96     
160    -240   
0      304    
32     -512   
-16    16     
-32    32     
32     128    
112    16     
-80    32     
176    -144   
-160   160    
160    0      
-64    160    
16     -64    
128    -128   
-208   32     
304    -96    
-112   192    
128    -208   
-32    48     
48     256    
16     16     
112    144    
-64    192    
144    32     
80     400    
16     -16    
144    32     
16     128    
32     64     
16     80     
32     0      
16     64     
160    160    
0      80     
192    -432   
-96    16     
128    192    
-16    -16    
160    0      
-16    112    
-16    0      
80     -240   
160    112    
-16    96     
-288   176    
224    -688   
128    128    
-160   -464   
192    80     
-80    -240   
0      256    
-128   48     
176    208    
-64    -96    
224    64     
-64    48     
16     224    
-32    160    
160    -192   
16     208    
64     -80    
32     0      
64     -16    
80     176    
32     -160   
240    112    
-96    64     
64     128    
32     80     
112    128    
48     -112   
48     -16    
0      288    
144    16     
32     112    
-32    -128   
128    192    
32     -368   
80     256    
384    384    
-128   96     
416    624    
-80    544    
-32    176    
320    320    
-128   -2000  
48     -304   
-32    -1056  
16     -128   
16     192    
-48    16     
272    304    
-256   -288   
128    48     
64     16     
16     -944   
96     224    
-112   -96    
224    -48    
-128   -80    
-16    -128   
96     -192   
48     0      
-48    -128   
128    -432   
-80    -272   
96     32     
112    -208   
-16    -304   
112    128    
32     -368   
-16    -16    
288    32     
0      96     
-16    -64    
-16    -144   
32     96     
112    -112   
-176   -272   
160    -864   
96     32     
48     -1616  
96     -144   
-32    48     
128    -80    
80     -272   
208    448    
96     64     
96     96     
-320   -64    
-64    -240   
-1360  -96    
320    96     
-112   -112   
128    -272   
32     64     
272    -208   
-64    0      
16     -2224  
128    80     
0      -96    
256    496    
-160   -48    
32     -16    
-176   -32    
176    -224   
-720   48     
16     -96    
-32    32     
-32    -32    
80     96     
48     -32    
16     -224   
-32    -1072  
32     96     
96     64     
-96    128    
-16    -32    
240    64     
-336   80     
128    -112   
-288   -96    
224    2640   
-1776  -1280  
480    -400   
640    304    
1040   560    
-656   -960   
336    384    
-64    688    
384    144    
-240   -160   
112    -256   
-64    -16    
-272   96     
-144   16     
-192   -384   
48     112    
144    288    
16     -64    
-592   -272   
288    -192   
48     -208   
128    -304   
16     288    
240    -224   
-128   -176   
-368   -240   
288    96     
0      96     
96     112    
-240   -64    
32     -96    
-208   -64    
128    0      
128    64     
0      -224   
288    160    
96     -272   
192    320    
-416   -1040  
272    512    
48     -176   
80     64     
-64    16     
-80    0      
-160   0      
192    16     
96     192    
-16    -112   
80     96     
80     -80    
-112   240    
240    -288   
-96    112    
96     32     
-16    -304   
-112   -112   
-80    80     
496    720    
-496   -304   
-64    336    
16     -208   
64     128    
-224   48     
-128   128    
-128   -320   
0      256    
-1216  -224   
160    400    
-288   16     
-288   64     
16     -32    
-64    0      
-48    -16    
96     48     
48     -32    
32     0      
-112   -96    
336    80     
-32    144    
-32    16     
16     144    
96     0      
-208   96     
-48    80     
-400   96     
-192   144    
-880   32     
176    336    
-16    192    
-80    80     
-16    -144   
-48    -64    
32     -64    
192    304    
-128   -160   
80     112    
-352   -560   
224    32     
-144   272    
-16    0      
-112   32     
-64    -64    
160    144    
-1248  -176   
-112   0      
0      -112   
-32    -80    
32     -112   
64     256    
-144   352    
112    80     
-144   -160   
-112   96     
112    80     
128    80     
-112   176    
-32    -32    
32     112    
-176   -16    
48     128    
96     160    
16     192    
0      -80    
96     32     
-112   -368   
-112   352    
304    416    
-208   176    
32     -48    
-320   80     
240    112    
-304   32     
-112   224    
96     0      
64     256    
-240   64     
112    80     
-96    -256   
112    544    
-16    -80    
-16    0      
48     32     
-176   -32    
96     -192   
-208   0      
16     -48    
16     144    
80     576    
32     368    
-176   -48    
-272   -144   
32     80     
-240   48     
-144   160    
-16    -320   
448    112    
-64    688    
32     64     
-192   64     
-32    0      
128    0      
-16    192    
80     -128   
-176   -80    
64     160    
-288   -112   
112    32     
-16    -112   
192    112    
144    176    
-32    240    
208    432    
-224   96     
-32    -16    
-64    112    
16     -32    
-16    16     
32     240    
-208   -160   
144    80     
-48    16     
32     144    
-272   16     
176    224    
-368   48     
32     -64    
160    192    
-80    -112   
176    -48    
0      96     
48     96     
-160   160    
-96    -32    
128    -176   
112    224    
-176   64     
96     336    
-528   -192   
304    -320   
400    304    
128    -240   
-288   -368   
768    -896   
-336   -640   
608    928    
-48    592    
96     208    
-464   -208   
592    -64    
-64    304    
-208   -64    
-48    128    
-80    -64    
16     192    
96     48     
32     112    
-80    48     
0      16     
112    16     
-48    96     
112    128    
-128   32     
0      48     
-144   -64    
176    128    
-208   -32    
80     112    
16     128    
96     -48    
32     144    
-32    80     
32     32     
-80    64     
288    176    
32     304    
144    64     
-320   -16    
48     64     
-16    32     
64     112    
16     -32    
-32    176    
96     144    
96     48     
-160   64     
16     -64    
256    32     
-208   240    
224    64     
16     80     
0      144    
-144   64     
128    -16    
32     96     
32     112    
-64    64     
64     0      
-64    160    
80     48     
80     96     
-16    128    
112    64     
112    -64    
-32    112    
-80    64     
-32    96     
-32    160    
64     96     
96     48     
-16    208    
-208   -224   
64     -80    
96     128    
-80    112    
176    -64    
176    208    
-96    176    
144    112    
-64    32     
16     160    
96     240    
-112   80     
320    160    
-224   -64    
128    -112   
80     -32    
0      -1936  
-80    240    
128    144    
32     224    
-16    80     
144    256    
-32    192    
160    96     
-96    176    
80     272    
-112   -32    
0      -32    
-112   80     
96     -48    
16     192    
-16    -160   
80     32     
32     192    
-128   0      
48     208    
0      80     
144    112    
64     80     
48     16     
-48    112    
16     -368   
128    48     
-32    144    
16     208    
112    64     
-96    -768   
144    -320   
16     -160   
112    288    
-64    -16    
-16    144    
-112   -304   
208    -16    
-272   0      
192    160    
32     -192   
64     64     
-48    144    
80     -192   
128    64     
160    -496   
0      336    
192    -528   
16     272    
-160   208    
224    -112   
-128   -32    
208    128    
-48    96     
16     80     
-96    -32    
96     80     
96     -384   
64     48     
240    480    
32     -192   
-32    224    
32     -432   
128    176    
-64    64     
-32    0      
80     -240   
128    336    
-64    -32    
32     32     
-48    160    
320    304    
16     -16    
32     -192   
48     144    
-48    96     
-272   0      
0      -592   
32     208    
32     -1120  
-336   32     
0      0      
240    32     
352    112    
-48    224    
-192   -128   
0      -144   
352    272    
304    144    
-192   208    
-304   -224   
96     16     
112    -416   
304    112    
-64    -96    
-112   48     
32     32     
144    112    
0      80     
-16    80     
112    80     
144    112    
16     128    
160    -208   
32     208    
-48    -352   
288    80     
-192   80     
224    176    
-128   -80    
-816   -640   
-304   -672   
-32    128    
96     128    
240    672    
-528   272    
528    -96    
112    288    
512    -608   
-240   144    
-96    176    
272    -112   
0      16     
64     -208   
160    -80    
0      80     
112    832    
-96    -1008  
208    352    
-128   -144   
384    368    
-160   -48    
-96    -1424  
-16    -528   
288    -400   
-80    -80    
416    480    
368    624    
-336   48     
16     -464   
512    -1248  
0      -16    
80     -560   
208    272    
-192   -320   
144    -224   
256    272    
32     0      
32     528    
-304   -928   
208    -192   
80     -1488  
144    16     
-64    32     
32     -48    
192    80     
-208   272    
16     96     
80     -160   
-624   -304   
176    32     
160    48     
80     256    
16     -64    
-32    -672   
32     96     
96     -1792  
-32    -576   
720    864    
-240   -112   
112    48     
-64    32     
272    -304   
-224   -48    
128    96     
48     16     
-480   -128   
-32    -96    
272    -96    
48     -160   
32     112    
16     -80    
240    16     
-80    -960   
112    208    
-64    -256   
0      -208   
16     16     
-96    -160   
-64    224    
224    16     
-320   96     
224    -368   
-656   32     
64     -272   
176    0      
32     -208   
-176   -144   
304    -432   
-160   48     
192    -16    
80     288    
-144   64     
-96    -368   
-32    -368   
144    -400   
-192   -320   
48     -224   
-64    64     
144    64     
176    48     
32     -112   
0      0      
144    -768   
-48    96     
160    128    
32     48     
-176   -304   
-96    -640   
-240   -304   
384    352    
48     304    
-80    96     
-448   -48    
16     -192   
-64    -96    
48     -304   
288    304    
-112   -240   
304    400    
-80    -256   
32     -128   
64     -48    
80     -112   
-160   432    
144    320    
-176   160    
192    -96    
-224   96     
176    16     
-288   112    
288    208    
96     256    
-16    -240   
-160   -32    
-256   -160   
0      48     
192    0      
-64    80     
48     112    
32     -80    
-112   16     
-32    -48    
0      32     
48     96     
-32    96     
192    -128   
48     -64    
-48    -352   
-16    64     
32     -32    
-16    112    
0      32     
48     272    
-240   -144   
160    80     
-288   -336   
144    -176   
16     80     
144    128    
-32    32     
-1504  -144   
48     192    
-256   -80    
-1216  80     
-32    -32    
-560   16     
-96    32     
-1520  -112   
0      -48    
16     16     
-16    320    
-128   -112   
-48    -48    
0      -96    
48     16     
-208   144    
-176   64     
48     -64    
208    112    
-128   -32    
-128   32     
-160   -96    
-176   -80    
-112   224    
-464   80     
-32    64     
96     -112   
-80    -16    
-560   -176   
-48    128    
-144   -224   
96     128    
80     48     
48     192    
-176   0      
32     32     
1104   1984   
-1488  1392   
-1216  -528   
384    512    
-160   48     
48     -352   
96     480    
-560   -480   
752    -224   
-496   32     
320    -80    
-496   128    
0      -496   
240    448    
64     -176   
-160   256    
16     -192   
-64    384    
0      -240   
-16    128    
-496   -112   
112    288    
48     64     
0      208    
-48    -144   
-240   -224   
80     -32    
-32    160    
208    80     
-416   -64    
-128   16     
16     -80    
-112   80     
-208   -128   
-80    112    
-16    -80    
160    384    
-384   -304   
-160   96     
-96    -176   
96     128    
16     64     
-16    144    
-176   -64    
208    128    
-112   80     
112    64     
-112   32     
-32    208    
48     16     
-80    -176   
32     176    
96     -80    
64     112    
32     80     
80     80     
16     64     
-48    80     
32     64     
-32    32     
-64    32     
16     80     
112    80     
-112   -16    
160    112    
-368   16     
112    208    
-528   16     
32     48     
144    32     
-208   0      
-32    112    
-160   -48    
32     16     
16     16     
16     48     
16     0      
-256   48     
-272   -64    
128    0      
-112   16     
-32    208    
-288   -128   
80     -256   
-112   -16    
-32    144    
-112   48     
240    16     
176    320    
-336   144    
224    80     
-160   16     
-96    48     
80     192    
-16    112    
-16    80     
-80    96     
-176   -80    
-16    -16    
-64    -240   
400    384    
48     464    
-208   32     
-112   176    
-80    -48    
112    128    
-32    -64    
-16    288    
64     160    
48     144    
-192   -80    
32     128    
32     48     
-32    48     
0      80     
112    320    
0      208    
-64    -96    
0      -16    
-160   -352   
48     48     
16     176    
80     160    
-208   0      
-80    -112   
-192   -144   
208    256    
16     16     
-32    -672   
-128   256    
144    256    
64     208    
-144   224    
0      16     
112    160    
176    640    
-80    176    
-192   -64    
32     80     
80     16     
-48    112    
80     112    
144    240    
-160   112    
96     128    
-32    128    
96     96     
48     112    
-96    -112   
80     160    
-16    -32    
-112   32     
160    176    
-144   0      
176    16     
-64    80     
-16    192    
256    -80    
-112   240    
32     64     
32     96     
-32    -48    
16     176    
-48    96     
48     64     
-192   16     
80     176    
-96    16     
96     192    
-96    160    
224    -32    
-96    160    
32     96     
176    112    
-80    160    
0      -16    
112    -80    
64     128    
208    128    
-208   112    
16     -80    
64     144    
256    192    
-48    176    
240    -144   
32     208    
16     -1328  
112    176    
-160   80     
400    16     
-160   160    
128    32     
-32    -16    
144    16     
128    272    
48     80     
-64    112    
-64    352    
-1520  -1344  
896    -448   
-512   416    
800    -576   
-192   752    
352    -432   
-272   528    
-32    -1040  
1104   688    
-1040  -128   
720    416    
-112   64     
16     672    
-208   -880   
80     528    
0      -336   
96     592    
-272   -368   
240    -128   
-256   -288   
336    96     
-48    -48    
128    16     
64     192    
240    112    
-240   288    
16     -16    
-112   224    
-96    -48    
0      208    
256    80     
-32    0      
64     128    
-32    -240   
-16    48     
176    -144   
-48    512    
256    720    
96     512    
-128   -528   
144    32     
-16    -96    
96     384    
-96    32     
112    144    
-80    128    
208    208    
32     224    
-32    -224   
80     96     
-64    -64    
128    96     
-128   -880   
48     -16    
16     -128   
96     288    
240    48     
112    -16    
0      64     
144    80     
128    240    
32     208    
-48    48     
224    -112   
32     48     
96     -432   
144    32     
-32    -816   
32     48     
-48    96     
16     144    
112    112    
-16    64     
0      80     
128    208    
112    144    
-48    -544   
112    96     
128    352    
-128   112    
256    -224   
128    64     
80     400    
320    368    
-80    320    
-80    64     
112    -96    
336    480    
32     176    
-48    -352   
16     -80    
80     -400   
32     -176   
176    -224   
160    432    
-16    -240   
224    384    
-432   -64    
32     -224   
-144   -208   
96     336    
96     -80    
16     0      
80     128    
32     -448   
224    32     
32     -112   
288    512    
-80    -352   
32     144    
-64    -304   
176    176    
96     -624   
-48    -496   
160    112    
0      -240   
32     112    
-48    -176   
-48    -400   
64     -32    
128    -720   
-80    224    
96     -80    
96     144    
96     352    
80     -16    
160    192    
-224   16     
96     -48    
80     32     
128    96     
112    304    
-816   -32    
80     -272   
-96    -240   
-112   -144   
272    0      
304    -576   
-320   -32    
0      -1664  
176    -192   
-64    0      
112    -16    
96     -160   
32     48     
-16    -96    
96     -144   
-208   -112   
-32    -32    
-560   -80    
16     -16    
160    48     
64     -128   
-80    -272   
128    -592   
-128   16     
256    -144   
-32    176    
-32    -112   
176    64     
-16    -304   
128    -112   
-16    208    
192    -176   
-80    224    
16     -80    
96     -16    
128    48     
-176   -48    
-16    -544   
32     -256   
256    -352   
48     96     
-192   -128   
0      32     
-144   80     
192    160    
-272   0      
96     -208   
-192   -96    
48     -128   
-64    -32    
-48    128    
336    -112   
80     -176   
-64    -128   
192    -1216  
-48    240    
16     -224   
80     80     
-16    -32    
192    112    
-320   -48    
80     -160   
-528   -48    
96     -32    
-416   -64    
-1088  -240   
-32    -208   
-1712  -272   
992    224    
80     -464   
144    -400   
-368   1408   
576    -704   
-96    624    
208    -896   
-160   512    
-32    -384   
128    384    
-96    -160   
16     16     
-320   -320   
368    -128   
-112   -192   
64     -256   
-32    64     
192    32     
-80    272    
96     -368   
-16    240    
112    -480   
-192   144    
144    -208   
-64    240    
80     -176   
-320   32     
48     -128   
16     48     
48     -176   
16     160    
48     -176   
64     48     
-512   96     
128    -48    
-432   48     
208    96     
16     32     
64     -16    
-272   48     
64     -192   
-64    80     
128    -112   
-32    144    
-80    -64    
160    96     
-352   -144   
192    48     
-176   0      
112    48     
-32    64     
80     -80    
-32    48     
112    128    
-96    -112   
112    112    
-32    112    
-16    0      
128    160    
-1136  -256   
80     112    
-816   -112   
-496   -32    
64     -16    
-592   -16    
-16    48     
-1376  16     
-176   -32    
64     -160   
-128   128    
48     64     
32     -80    
-864   -288   
-16    -48    
-48    -384   
-176   64     
-112   -144   
0      176    
-16    160    
-64    16     
-208   -288   
-160   96     
64     128    
-352   -192   
80     -128   
320    512    
-368   48     
144    -48    
-32    48     
-112   0      
96     128    
0      0      
-160   -80    
-48    -64    
-288   -144   
48     112    
-176   -144   
0      64     
-176   -80    
96     96     
-528   -112   
0      128    
-32    48     
336    464    
-96    -32    
-80    -176   
-48    -16    
32     96     
32     -32    
-128   -96    
-64    -32    
0      96     
-16    -32    
-304   -288   
-208   -256   
-640   -144   
-32    0      
64     -96    
96     80     
96     0      
-64    -96    
-128   64     
-80    208    
192    -16    
-48    48     
-64    144    
16     80     
-48    16     
-128   -160   
64     -16    
80     96     
64     144    
-160   0      
0      -16    
-64    80     
48     64     
32     128    
0      128    
-32    160    
-144   -32    
96     224    
-144   -32    
176    64     
176    384    
-48    416    
-432   240    
-128   96     
-272   -192   
112    80     
64     96     
-32    -144   
0      -80    
48     48     
-192   160    
-128   -128   
160    32     
-80    128    
-48    32     
-208   -144   
80     -16    
-160   -64    
80     32     
-688   160    
-176   -144   
80     -64    
224    80     
48     80     
32     -16    
-112   96     
-112   192    
64     64     
48     128    
-160   -48    
16     -80    
128    192    
-240   16     
96     112    
-336   48     
112    192    
-48    64     
-80    96     
-48    16     
-48    352    
-48    -16    
32     160    
-128   96     
48     -16    
16     32     
-272   176    
16     80     
-128   48     
-368   64     
-176   -304   
-160   32     
80     144    
320    1344   
-688   192    
512    800    
112    448    
464    -768   
-272   -256   
-368   0      
336    1456   
-560   32     
96     416    
-240   -16    
208    128    
-240   -64    
112    -80    
-32    208    
-288   0      
144    80     
144    -64    
112    480    
-112   96     
-160   112    
192    384    
-192   624    
224    96     
-112   160    
-192   -144   
192    272    
-112   64     
240    -48    
-272   -144   
416    -16    
-16    192    
16     128    
-64    240    
48     0      
144    112    
-96    96     
16     112    
-96    -96    
-64    32     
48     32     
80     144    
32     112    
-176   -128   
48     32     
112    96     
64     80     
-32    144    
-48    48     
16     112    
-64    16     
-64    -32    
112    80     
-80    256    
16     96     
96     -160   
80     144    
-32    128    
48     0      
16     32     
-16    112    
48     64     
64     32     
64     0      
64     176    
-80    224    
-64    -224   
272    128    
-112   144    
144    272    
-32    32     
96     0      
32     80     
-48    96     
64     112    
48     400    
-176   160    
0      80     
16     64     
-80    -64    
128    240    
-128   0      
192    320    
-176   -208   
240    -944   
-32    -144   
80     -3008  
-112   128    
240    320    
-192   208    
160    32     
48     -16    
-32    16     
128    -48    
192    688    
-192   128    
304    0      
-16    -48    
-48    -80    
64     -272   
96     64     
32     -240   
-32    -16    
208    208    
32     176    
16     144    
64     -80    
64     112    
48     176    
208    32     
48     304    
-112   112    
208    160    
-32    32     
16     0      
144    160    
-96    -208   
32     0      
-80    160    
80     -128   
0      32     
-112   -16    
48     96     
176    -80    
-128   -48    
176    304    
208    -128   
80     48     
-112   288    
64     48     
192    64     
-80    -400   
272    256    
208    -800   
224    336    
-64    -256   
32     128    
-288   -432   
96     -112   
96     -208   
-16    240    
16     -16    
256    96     
48     256    
48     -64    
48     32     
-208   -496   
-16    112    
48     -192   
208    0      
64     -1392  
-32    32     
-16    96     
144    144    
32     -16    
160    96     
-32    208    
144    144    
-64    144    
96     -64    
48     48     
64     288    
16     96     
-96    16     
80     -80    
128    -336   
16     320    
32     112    
-64    256    
-48    -128   
64     64     
176    144    
-80    -304   
208    272    
-48    -384   
96     64     
80     -320   
32     128    
16     -160   
-32    80     
16     -192   
112    112    
-48    112    
32     80     
96     16     
-48    48     
16     112    
256    -272   
80     208    
-32    112    
48     80     
-16    -48    
96     80     
96     -144   
48     -32    
208    -240   
48     112    
64     192    
1008   -1328  
-256   -624   
240    832    
-400   -80    
192    -112   
144    -1632  
96     -496   
-240   512    
448    -176   
-432   64     
400    -304   
128    640    
-112   -176   
32     -720   
-64    -160   
320    -480   
-208   160    
-208   272    
-48    16     
128    -272   
0      -1136  
64     -288   
80     -1600  
80     -160   
240    208    
-96    -16    
-32    224    
0      -32    
112    -800   
80     0      
224    -48    
0      64     
-32    -48    
96     16     
96     -80    
112    -128   
-32    -32    
0      -160   
128    -128   
64     -1248  
0      -384   
-16    -144   
256    80     
-32    -112   
16     48     
112    -80    
128    -128   
-128   -144   
0      -32    
-656   -80    
-16    -80    
48     80     
144    -208   
32     48     
-32    -1008  
256    192    
-96    -64    
192    192    
48     320    
-16    256    
-192   0      
64     -272   
-240   -48    
-32    -32    
-192   -96    
224    -112   
-96    -208   
-48    -64    
-128   -368   
32     -464   
32     128    
128    -16    
-64    -48    
176    -112   
-96    144    
240    144    
-176   160    
-208   0      
288    -224   
-736   -352   
304    -224   
-16    64     
32     224    
64     208    
-32    -144   
112    -16    
112    -496   
-16    384    
-48    -160   
160    -48    
80     144    
48     160    
-32    112    
48     -64    
-144   -16    
144    -96    
-176   -16    
64     16     
-80    192    
16     -352   
48     48     
-16    -1552  
16     0      
160    80     
-64    96     
64     64     
80     -64    
-224   -32    
176    -80    
-176   16     
80     -64    
-240   80     
16     -96    
-304   0      
0      -384   
0      0      
64     -416   
0      32     
-96    32     
224    96     
-480   -112   
80     0      
-352   -48    
256    176    
-144   16     
112    -112   
-464   96     
-16    0      
320    160    
-272   -112   
144    144    
16     0      
208    48     
-304   144    
80     -288   
-32    80     
-64    16     
208    -32    
-80    64     
64     240    
-48    -112   
-128   -32    
112    -80    
-128   96     
112    -144   
448    640    
-1536  144    
-80    -352   
-128   0      
32     80     
-48    32     
-64    -48    
-64    112    
192    -176   
-112   -64    
-32    -112   
-32    48     
-480   208    
-192   64     
-176   -320   
-32    -64    
-592   -256   
-16    -16    
-192   -32    
144    -32    
-32    96     
-144   -208   
32     288    
-176   -16    
80     16     
-112   48     
208    336    
-448   -112   
224    128    
-480   -160   
224    288    
-176   48     
32     160    
-16    80     
-96    -96    
-16    0      
-336   48     
48     80     
-544   48     
32     32     
144    176    
0      96     
-176   112    
-160   272    
-112   -160   
-176   80     
48     80     
-160   -80    
144    112    
-208   224    
144    64     
-336   -16    
1056   -1456  
-624   -1136  
224    752    
-1072  256    
560    1248   
-1360  -816   
960    176    
-288   624    
-64    -16    
-64    -304   
-112   -16    
-192   272    
48     368    
-176   96     
160    -16    
-224   64     
192    -208   
-224   0      
-544   -80    
144    160    
192    176    
0      288    
-48    -80    
-256   -16    
-272   -112   
256    176    
-96    176    
208    0      
-128   112    
-112   -112   
96     32     
-272   -64    
48     176    
-128   80     
-64    176    
144    64     
-272   -176   
176    80     
-32    144    
224    16     
-176   -80    
48     192    
16     96     
-80    -96    
-208   -48    
32     96     
0      64     
32     208    
-320   -160   
144    128    
-656   -64    
160    48     
-112   112    
144    -16    
16     80     
-48    -16    
96     176    
-160   32     
176    144    
-144   0      
112    128    
-80    16     
144    80     
-256   -48    
80     -16    
-128   -208   
64     -16    
-96    112    
48     96     
-96    96     
192    64     
0      160    
-176   128    
32     64     
128    48     
-64    -80    
48     -128   
-16    160    
-208   0      
144    160    
-160   128    
-80    -32    
288    144    
-352   128    
-112   -64    
112    16     
32     48     
-16    -16    
176    112    
-368   48     
64     -80    
-144   80     
-208   256    
80     48     
-32    16     
32     -112   
96     144    
-80    176    
48     32     
0      -80    
48     80     
64     144    
-48    144    
192    176    
-16    -96    
80     192    
-160   48     
240    96     
-160   -112   
112    0      
32     112    
-80    -16    
80     176    
128    -80    
-64    -128   
-96    -16    
112    48     
48     -80    
48     64     
-80    96     
256    352    
144    96     
-192   256    
-32    -16    
-16    -32    
-272   -16    
-16    -144   
32     176    
64     144    
256    64     
-224   48     
-16    -80    
-80    -112   
80     80     
128    16     
-96    112    
-32    -48    
176    256    
-176   0      
112    128    
112    112    
48     64     
-256   80     
-32    176    
304    224    
-224   0      
144    240    
32     144    
96     208    
-48    16     
16     128    
-16    -16    
16     112    
112    48     
-32    48     
96     16     
48     48     
112    -112   
-112   176    
-16    80     
96     -16    
32     -32    
128    80     
48     272    
64     64     
16     48     
208    288    
80     -32    
32     96     
32     80     
96     80     
-64    112    
-16    -96    
64     464    
-32    -48    
16     -48    
112    112    
-96    -80    
48     192    
64     112    
80     368    
-144   -96    
-16    -592   
32     0      
128    -2800  
16     80     
-144   -80    
-192   -48    
80     64     
96     96     
96     48     
48     48     
112    240    
-64    288    
-32    -208   
208    160    
16     32     
48     -48    
592    -1904  
1024   -304   
480    816    
-224   -160   
544    352    
304    1408   
-480   -624   
528    -192   
-336   256    
320    192    
-48    176    
-464   -256   
272    192    
-128   -128   
192    -224   
-112   64     
80     -272   
224    128    
80     720    
96     240    
-64    272    
80     80     
176    -320   
-48    -48    
-16    -208   
-96    272    
-144   112    
224    144    
-112   -336   
144    -192   
0      112    
-16    -176   
-48    256    
208    -1584  
-64    192    
112    -192   
32     192    
96     0      
-96    96     
32     96     
-16    176    
-96    112    
-48    48     
112    176    
80     16     
112    48     
-144   -304   
192    -48    
48     -48    
0      160    
112    -720   
32     112    
48     -208   
80     64     
32     80     
144    128    
-32    48     
16     80     
128    240    
-224   -448   
48     224    
160    -80    
-48    -80    
80     -160   
16     144    
-96    -1728  
32     112    
48     48     
0      128    
-32    80     
48     160    
48     128    
80     -496   
16     96     
144    -144   
144    176    
-160   -368   
304    272    
-32    -272   
176    352    
-160   -1888  
48     160    
128    -64    
-32    -240   
208    64     
32     256    
320    496    
-48    480    
-48    320    
16     -64    
176    -16    
128    -16    
0      192    
32     -192   
-96    32     
144    -80    
32     16     
192    144    
-80    -1360  
192    224    
-480   -208   
16     -752   
-16    -144   
208    -720   
64     -96    
16     192    
-128   -480   
144    64     
-64    64     
96     -16    
112    32     
32     -256   
112    80     
-80    -240   
96     128    
-368   -48    
240    400    
-16    -96    
32     -208   
-16    96     
192    -624   
16     -144   
-160   16     
144    112    
160    -496   
96     -48    
-128   -784   
64     144    
224    -96    
-128   -112   
-80    -160   
-32    -288   
64     -48    
128    -448   
-48    -224   
176    -464   
-80    384    
176    -640   
-16    48     
128    -208   
-96    128    
0      -16    
0      80     
16     176    
48     -208   
-160   752    
-272   -112   
-320   -192   
-64    -384   
304    -16    
80     -240   
-112   -208   
224    -752   
-96    -32    
176    16     
-96    336    
-160   144    
544    80     
-560   224    
176    -160   
-352   32     
-80    -208   
-304   16     
176    -64    
-48    -64    
192    -448   
-48    -256   
112    -64    
48     224    
144    -544   
96     112    
112    -16    
400    -128   
-256   80     
32     -272   
-16    -80    
272    32     
-64    128    
-112   -112   
-896   32     
80     -288   
48     16     
112    -192   
32     32     
80     -608   
96     176    
0      32     
64     -544   
208    192    
160    -208   
-32    -48    
48     192    
-464   0      
80     -48    
-288   16     
64     -80    
96     -32    
-304   -2016  
176    -1104  
-80    -1200  
512    368    
16     -752   
320    304    
-64    64     
80     -112   
-240   144    
688    -64    
-464   -80    
-96    -48    
-112   96     
240    112    
-128   0      
48     -352   
112    144    
-64    -192   
256    16     
-352   32     
16     16     
96     208    
96     144    
-112   -96    
-32    -272   
0      128    
256    80     
-16    144    
16     -192   
-32    32     
128    -208   
-80    128    
112    0      
64     -64    
-272   32     
16     -272   
-96    -96    
-80    144    
128    48     
0      0      
-160   80     
112    -112   
-80    -64    
0      -336   
112    160    
160    -48    
32     80     
-1136  -384   
-976   32     
-16    -96    
-288   -16    
-208   48     
304    128    
-192   208    
160    -160   
-112   -48    
48     -80    
-160   32     
-368   0      
112    48     
-288   -128   
32     160    
16     96     
-272   -32    
-16    128    
-112   -64    
16     128    
-528   -64    
-48    48     
144    -16    
0      0      
-16    -48    
0      176    
-32    -32    
160    160    
-192   96     
112    128    
144    -240   
32     0      
-16    192    
-208   16     
48     -64    
-224   64     
-96    160    
0      -160   
0      -128   
96     96     
-304   64     
-192   -208   
0      0      
32     -128   
-112   0      
176    176    
-32    -32    
-16    -80    
-32    80     
-112   16     
160    -80    
-48    112    
-272   16     
208    48     
-592   48     
16     64     
-48    -160   
16     64     
64     192    
80     -16    
-48    -96    
-224   -96    
16     -16    
-48    16     
16     32     
-64    80     
192    272    
-32    -64    
-32    16     
-656   -240   
256    208    
48     16     
160    272    
-160   208    
144    112    
-224   -192   
-208   16     
96     160    
-64    -208   
80     -144   
-592   -128   
144    224    
-48    -128   
-16    32     
-656   -160   
64     208    
128    -80    
80     160    
192    -32    
-192   128    
-240   -304   
-144   96     
160    80     
208    -48    
-176   64     
-192   48     
32     144    
64     -16    
0      112    
-304   -48    
80     -128   
-608   -224   
-16    48     
64     128    
16     240    
32     64     
-16    96     
32     96     
-32    -112   
-16    112    
112    240    
80     416    
64     64     
-80    80     
-240   -16    
0      -16    
-496   -32    
64     128    
32     48     
64     160    
-16    -240   
64     0      
-144   128    
16     192    
-128   -16    
80     128    
80     -144   
-80    32     
32     32     
-240   0      
80     80     
112    -32    
-16    144    
32     -128   
208    400    
192    16     
-16    64     
-160   0      
288    224    
48     -224   
16     32     
16     32     
-96    -48    
32     192    
16     80     
-64    144    
304    -112   
-16    128    
16     128    
-64    112    
-112   -16    
-288   -48    
-176   -992   
336    1280   
-320   464    
272    416    
-80    352    
16     16     
0      -16    
32     240    
-160   -176   
272    80     
-80    304    
-64    240    
48     48     
-32    -160   
160    144    
48     32     
-48    16     
-96    16     
64     -128   
-112   80     
48     192    
32     80     
0      -160   
-112   -32    
144    80     
432    512    
-144   512    
240    160    
-208   32     
-112   -32    
112    48     
0      128    
128    -80    
32     96     
144    16     
-32    -48    
-240   -112   
-64    -272   
80     32     
80     240    
32     272    
0      96     
80     112    
-224   32     
16     224    
64     224    
-80    80     
-48    144    
32     -64    
-64    352    
0      -16    
32     256    
-48    -32    
32     80     
16     96     
304    592    
-528   -320   
-192   64     
464    0      
-288   160    
176    -96    
-16    192    
80     -128   
-32    80     
-16    144    
-64    -96    
16     -592   
0      144    
48     144    
16     144    
48     48     
16     128    
-16    -32    
-16    16     
128    -80    
16     96     
304    -32    
0      288    
128    512    
-64    256    
-128   -112   
144    0      
80     96     
-64    -1168  
16     -16    
256    496    
96     240    
48     -48    
96     16     
80     -80    
160    96     
-80    96     
-16    160    
80     -32    
96     48     
32     80     
32     -96    
64     112    
-32    -784   
16     -16    
-32    -32    
208    160    
-32    96     
80     192    
-112   96     
96     160    
80     144    
32     144    
32     32     
0      144    
48     0      
48     -272   
32     64     
96     -320   
48     -160   
112    -368   
32     256    
80     80     
-128   -32    
-208   -32    
128    96     
144    0      
80     112    
-160   80     
160    240    
32     176    
-80    32     
80     -256   
-16    -16    
160    64     
32     -1360  
-160   48     
112    -416   
-64    -352   
272    -256   
112    224    
-192   0      
256    496    
-112   -80    
48     16     
32     48     
64     -80    
32     224    
-32    -384   
112    -176   
-192   -400   
128    96     
176    -32    
-16    144    
-32    -96    
112    16     
16     -16    
32     32     
64     -80    
-80    -160   
176    176    
80     -48    
320    576    
-48    -256   
48     0      
-96    -16    
112    112    
32     -48    
-32    -64    
96     144    
176    672    
64     -448   
-96    128    
176    176    
-16    -224   
48     336    
192    -464   
16     -32    
-32    -240   
16     0      
-96    -384   
112    64     
160    -80    
128    224    
-80    -16    
144    128    
32     80     
160    -192   
-144   -64    
32     -144   
96     144    
64     -16    
112    144    
-16    -80    
-16    128    
-80    -256   
240    -48    
-16    -400   
224    -1360  
-16    128    
96     -576   
-320   1360   
352    1632   
-1296  -1168  
112    48     
-80    -144   
-1024  -1136  
880    448    
-288   -112   
176    -528   
-32    -64    
400    -544   
80     400    
16     -496   
176    336    
-160   -1008  
160    -368   
-336   208    
16     -32    
128    -16    
64     -224   
-80    -96    
96     -624   
-48    32     
208    176    
-64    -64    
272    -160   
-80    144    
80     -16    
-32    0      
160    64     
-16    -160   
-64    -16    
48     -96    
32     -96    
192    -320   
-64    -240   
208    -224   
48     240    
16     -160   
-16    -128   
0      -256   
96     160    
80     -16    
-48    -96    
-16    -64    
32     16     
-160   160    
64     -160   
-1424  -48    
-144   -112   
208    -16    
64     -16    
32     0      
96     -1552  
128    -48    
48     -336   
112    224    
-48    0      
192    0      
-32    32     
16     -64    
-208   -64    
96     -16    
64     176    
-32    16     
160    -112   
160    -208   
-416   -64    
64     -80    
-48    -112   
256    -1296  
-64    96     
-48    96     
16     -304   
64     -112   
-112   -208   
80     -112   
144    -112   
-176   16     
32     144    
-784   -64    
176    -368   
112    96     
-176   -400   
384    64     
-64    -944   
-96    0      
112    -32    
-192   -16    
272    96     
-192   16     
48     -144   
32     96     
-944   -128   
-64    0      
-272   -368   
-16    -160   
96     -80    
32     0      
96     160    
-32    -480   
0      208    
80     96     
-16    32     
-32    -64    
0      64     
-352   64     
288    128    
-384   48     
176    -128   
-64    64     
32     64     
16     -32    
144    -304   
-64    -80    
96     -528   
32     128    
0      32     
336    240    
-16    304    
-368   -96    
160    80     
-160   -32    
-16    208    
176    80     
-176   -96    
144    -320   
-320   32     
208    -208   
80     112    
0      -208   
176    32     
-160   80     
240    112    
0      32     
-32    -160   
-208   16     
32     208    
224    192    
64     -64    
-352   32     
-256   -96    
128    80     
-1216  -96    
48     96     
-144   -16    
-720   -112   
-80    16     
-112   -224   
-80    144    
208    -272   
-16    240    
48     -48    
-80    96     
32     0      
-112   -80    
-80    -48    
48     176    
96     -128   
-128   112    
128    0      
-208   -48    
-32    96     
-32    0      
-176   112    
-208   -816   
0      0      
-864   592    
-336   -32    
96     32     
16     80     
-48    -96    
-16    128    
-80    -416   
-16    112    
-64    16     
-16    96     
32     16     
144    128    
-32    112    
-256   -64    
-112   -16    
-272   128    
32     176    
-304   112    
-160   160    
-96    -224   
176    96     
32     -48    
-112   32     
-112   96     
160    0      
64     80     
96     -304   
96     208    
-448   -80    
-32    96     
-480   176    
432    2352   
-2128  784    
-768   -1008  
-256   -1056  
368    400    
288    -16    
-96    480    
-192   -176   
192    208    
-432   -160   
160    -64    
208    176    
-144   -176   
-112   16     
160    112    
16     400    
-512   48     
-16    64     
-48    -320   
96     48     
64     288    
64     160    
-160   192    
400    304    
-32    352    
-16    320    
16     -192   
368    448    
-176   96     
48     -80    
32     -80    
-32    0      
48     -16    
224    304    
-240   -160   
128    -160   
-176   -240   
400    528    
-240   80     
256    672    
-320   240    
64     -48    
-128   48     
16     16     
-48    256    
0      128    
-48    32     
160    640    
-384   -496   
16     -32    
-32    -64    
-48    96     
336    336    
-288   -160   
128    32     
-144   32     
-400   -1088  
-224   160    
176    128    
80     160    
0      240    
-400   48     
-48    272    
80     256    
-16    -32    
0      64     
-80    80     
112    128    
16     32     
-16    16     
32     48     
80     224    
-16    64     
64     -32    
-16    -128   
160    448    
-144   -32    
160    160    
-240   -144   
176    -32    
176    48     
-96    240    
112    -128   
0      192    
0      -64    
96     16     
-80    96     
144    -16    
96     368    
-144   -64    
80     80     
-64    48     
48     80     
-144   -112   
0      -48    
32     96     
-32    -64    
0      208    
-240   0      
144    160    
-16    208    
-128   -32    
-128   -176   
0      48     
176    80     
16     112    
-160   128    
-48    -144   
64     -80    
32     64     
80     128    
48     80     
80     208    
-48    112    
48     96     
16     32     
160    320    
-256   16     
-32    -48    
384    32     
-160   -160   
32     160    
16     160    
-16    144    
-16    128    
272    256    
-64    96     
32     -96    
352    208    
-336   -16    
96     -32    
16     336    
144    224    
-176   160    
192    -64    
-96    96     
128    -32    
-64    -32    
-80    96     
144    192    
-16    112    
112    192    
-48    -80    
80     -48    
-64    176    
192    592    
-64    432    
32     112    
32     128    
-112   48     
-32    -512   
32     48     
272    -32    
-112   192    
128    48     
48     224    
-48    32     
224    384    
-96    208    
144    144    
-80    96     
64     -80    
0      16     
-32    16     
64     80     
16     -32    
-16    -144   
160    112    
128    64     
48     240    
-48    80     
-16    -80    
176    -16    
208    304    
-32    16     
-64    160    
-64    -112   
240    -368   
160    256    
-48    96     
32     -32    
-64    96     
80     -2128  
-32    112    
-80    -64    
176    48     
128    96     
-64    96     
-16    64     
32     48     
0      -496   
0      -16    
96     0      
80     368    
-48    224    
-80    -576   
-32    -48    
-944   -1344  
496    864    
-1104  112    
160    -48    
128    352    
-832   -304   
336    1120   
-720   -432   
352    384    
0      16     
304    224    
-480   -112   
176    -48    
128    240    
176    -160   
-80    400    
160    -112   
-112   -928   
96     80     
144    -64    
-64    -32    
-80    16     
96     192    
112    192    
128    -48    
-16    -112   
48     -16    
208    144    
-64    0      
-48    160    
224    -128   
-48    64     
32     -1056  
0      112    
80     -1456  
32     80     
32     96     
64     160    
-272   -64    
192    32     
144    32     
-96    16     
128    160    
48     -112   
48     96     
176    -368   
-64    128    
48     -320   
-64    288    
240    -80    
-16    112    
-32    96     
272    96     
-208   208    
160    48     
80     0      
96     -160   
64     176    
-48    -656   
208    96     
-144   -192   
64     96     
144    16     
-32    176    
64     -288   
112    112    
-32    32     
176    160    
-128   48     
80     -64    
16     128    
96     -144   
-32    80     
128    -304   
112    320    
-80    -256   
192    112    
0      160    
96     80     
64     -2224  
64     160    
16     -48    
144    160    
16     96     
240    -32    
240    -1376  
48     128    
-64    192    
192    192    
240    112    
48     -32    
-16    -16    
96     -288   
48     -80    
-16    -96    
224    -1632  
-240   -160   
304    -464   
144    -736   
128    -176   
32     -192   
32     32     
64     -352   
176    32     
-176   -1456  
-16    32     
32     -144   
224    208    
-144   -128   
144    112    
48     -352   
-176   16     
48     0      
48     -416   
-272   112    
128    112    
112    32     
-16    -368   
-32    -192   
96     -1488  
-240   -784   
160    208    
208    16     
32     16     
32     -32    
112    -176   
-64    256    
-192   0      
16     -80    
-16    0      
-16    -48    
96     -96    
144    32     
32     -80    
32     -208   
-32    -96    
80     272    
-16    64     
16     -592   
48     -32    
176    -160   
-32    208    
-32    112    
112    -64    
-64    0      
192    -128   
-432   160    
80     -32    
64     144    
96     -32    
64     16     
-32    -352   
-160   64     
128    64     
96     144    
96     -80    
-304   -528   
176    192    
0      112    
-112   -64    
-128   -208   
-176   -32    
-32    -64    
48     16     
32     -240   
672    -176   
-176   -320   
-128   80     
-304   -608   
80     16     
208    -64    
32     16     
112    96     
-208   -48    
-64    -144   
64     96     
-96    -16    
176    112    
-560   -32    
224    -208   
80     -96    
160    -288   
-96    96     
96     -176   
-48    96     
80     -128   
112    64     
16     48     
64     -48    
-32    112    
144    48     
-288   64     
48     -48    
-144   304    
-176   -432   
112    304    
48     -64    
272    320    
304    112    
-448   -208   
-800   -880   
-64    400    
64     -352   
368    352    
-240   -608   
160    160    
-192   16     
144    -16    
0      -368   
64     400    
-144   32     
256    -112   
-32    -176   
192    -256   
192    288    
-48    448    
16     240    
64     224    
48     -128   
-112   -32    
-112   144    
-128   -208   
-64    32     
-192   -128   
112    64     
-432   96     
96     -448   
112    -64    
-32    -128   
320    240    
176    16     
112    16     
224    -16    
224    16     
208    304    
-192   -48    
176    160    
16     112    
-256   -48    
-1008  -304   
-144   -16    
-192   64     
0      224    
272    96     
-432   48     
208    560    
-464   128    
-176   -80    
-880   -160   
96     -64    
32     336    
-160   160    
-64    -96    
-64    -16    
-592   -896   
320    -224   
-176   -240   
-96    304    
144    368    
16     192    
-128   272    
-128   32     
112    192    
-336   -16    
-48    -64    
-1440  -16    
-192   -368   
64     16     
80     272    
0      192    
32     0      
-16    -32    
-96    -96    
112    -16    
-384   256    
112    368    
64     240    
-208   -304   
-192   -160   
32     -16    
-400   -112   
-112   0      
32     -32    
0      -128   
96     48     
224    288    
-192   -192   
-32    -16    
80     112    
128    384    
-96    208    
-304   -64    
-64    -64    
-176   -48    
-144   -240   
-304   -128   
176    544    
-1424  -32    
-32    -128   
-112   -192   
32     64     
-16    176    
0      -64    
208    240    
96     112    
-192   48     
-32    208    
-64    80     
16     -48    
240    192    
-96    64     
0      176    
-336   304    
-16    -96    
288    240    
-160   112    
96     208    
128    -64    
0      16     
16     -16    
-176   144    
48     64     
176    -96    
-288   -64    
256    128    
-256   64     
144    80     
-192   -128   
-64    -112   
144    48     
-16    144    
-16    144    
208    96     
-48    176    
-16    -32    
80     304    
-176   80     
368    32     
-432   -32    
64     112    
-272   -272   
128    -16    
-432   32     
256    80     
-448   -144   
-32    160    
0      64     
96     0      
-144   64     
80     48     
32     128    
64     -80    
-16    176    
-96    96     
96     -32    
-80    16     
-16    160    
80     64     
-32    128    
80     144    
-16    32     
-144   -16    
128    16     
-32    96     
-48    160    
-112   16     
-16    0      
16     80     
192    -16    
96     256    
-128   256    
-224   128    
-160   -112   
240    32     
112    64     
96     0      
-64    192    
-112   112    
16     -32    
-16    288    
-80    0      
-96    80     
64     -48    
32     -64    
176    96     
-272   -224   
128    144    
-240   80     
0      144    
80     -48    
224    272    
-224   32     
320    -80    
-160   176    
-48    16     
-352   -816   
752    -80    
1264   688    
256    -512   
-672   -288   
256    112    
160    752    
816    -160   
-560   464    
128    -304   
96     464    
-16    -336   
-112   448    
208    -304   
-128   288    
128    -192   
144    288    
-16    80     
-80    64     
0      -80    
32     64     
-32    240    
96     144    
-48    96     
16     0      
-32    32     
16     32     
16     288    
112    16     
16     80     
16     -32    
-32    128    
32     16     
-16    160    
96     32     
-16    96     
0      96     
112    304    
0      48     
64     80     
-16    32     
96     96     
64     128    
-32    -32    
48     0      
-48    112    
128    176    
64     64     
-240   208    
96     0      
96     192    
-160   -544   
128    0      
-16    96     
16     96     
64     64     
-48    112    
0      112    
80     32     
-64    80     
16     144    
96     192    
-16    0      
32     160    
-160   192    
-128   -128   
-112   -160   
0      48     
112    48     
80     160    
-96    48     
144    160    
-32    -64    
176    176    
-48    224    
80     112    
48     208    
32     0      
208    -128   
0      288    
32     208    
16     -112   
16     -224   
128    -3072  
368    384    
-32    144    
80     176    
-48    176    
-144   -144   
96     -96    
400    512    
144    560    
-96    -16    
-160   32     
112    272    
176    96     
16     0      
-96    -48    
-160   -672   
192    64     
-16    176    
96     176    
-48    -32    
-16    -64    
0      -544   
-64    -160   
80     48     
16     16     
0      -128   
208    64     
16     80     
32     -64    
16     80     
16     -464   
96     128    
32     -1728  
192    32     
-176   -496   
16     144    
-80    80     
80     32     
48     16     
-64    96     
-112   -16    
0      -272   
224    288    
-80    -128   
304    144    
0      -64    
-112   96     
48     -224   
80     112    
96     -1680  
-80    80     
128    64     
-80    112    
384    128    
-80    208    
-80    -80    
96     128    
48     112    
112    192    
-32    256    
0      -304   
144    160    
-144   -432   
160    176    
16     -16    
80     128    
80     80     
64     128    
0      0      
16     80     
-32    32     
160    -144   
-32    48     
80     -368   
-64    192    
144    -240   
32     128    
240    16     
-16    192    
-128   96     
-64    -32    
32     -16    
336    288    
-240   -128   
128    96     
-128   -16    
256    -16    
16     128    
80     -320   
64     96     
48     -48    
48     144    
16     -224   
224    256    
-48    -464   
160    192    
-224   0      
160    -352   
96     -800   
64     64     
-160   -2672  
96     -32    
240    272    
-64    -16    
0      0      
224    -64    
48     192    
-112   -240   
112    -1504  
0      160    
0      -176   
160    32     
-112   -64    
96     -144   
-400   -1616  
112    1744   
512    1360   
-320   -704   
240    -112   
304    -800   
0      -320   
-368   384    
272    -864   
448    -816   
-336   160    
352    -32    
-224   352    
32     -304   
16     224    
-576   -336   
128    528    
-304   -240   
16     16     
-208   -576   
352    -16    
-160   -80    
160    176    
192    48     
-80    144    
16     0      
336    -304   
352    368    
-688   -752   
336    176    
-160   96     
-128   -144   
32     16     
256    -192   
0      64     
48     224    
-16    32     
-64    -352   
-224   -32    
192    0      
128    496    
0      -16    
0      -16    
-272   208    
144    0      
-160   -64    
-48    -272   
-448   -352   
176    -512   
16     -224   
64     -80    
-144   -48    
192    -224   
-48    224    
16     48     
-112   -48    
160    0      
64     0      
64     -32    
-16    -64    
-144   -112   
96     32     
-80    -16    
0      -320   
160    -16    
48     144    
96     -112   
48     -496   
-144   -16    
224    -928   
-240   -16    
-80    144    
144    -48    
-144   -192   
192    -336   
64     16     
160    -80    
-112   64     
64     64     
-224   128    
96     -144   
16     48     
144    -304   
128    432    
64     -912   
256    -16    
-304   -400   
80     -576   
16     -208   
64     -32    
-448   32     
0      0      
-16    256    
-16    -64    
-128   32     
-112   -288   
0      0      
112    -240   
80     112    
32     -864   
112    -192   
-96    96     
128    64     
-64    -80    
32     0      
64     256    
-16    64     
48     80     
-144   -304   
-80    96     
80     -144   
32     16     
64     -176   
128    176    
-32    -96    
96     16     
-48    -96    
-32    -80    
-96    -144   
16     -64    
-240   -80    
64     -32    
80     224    
-32    -176   
-192   48     
96     -96    
272    144    
-480   -384   
-64    16     
-384   -208   
-1072  64     
-32    176    
-1088  -48    
-64    96     
-160   -48    
240    240    
176    -160   
-192   128    
-64    48     
-304   -32    
-192   -320   
-144   -16    
-384   -192   
128    -176   
16     -32    
-96    80     
-16    -96    
-576   -176   
-160   32     
-80    64     
80     -32    
-96    96     
32     80     
-176   -80    
-48    16     
112    -16    
-32    80     
-80    32     
-96    -192   
208    16     
-16    16     
-16    112    
-32    96     
48     112    
-416   48     
32     112    
-1824  -384   
-96    -96    
240    -64    
-112   192    
48     -16    
0      80     
32     64     
112    0      
-224   -16    
-16    32     
-80    128    
-16    -64    
-16    0      
80     80     
-48    160    
-512   32     
-112   -96    
16     -320   
32     256    
0      -128   
192    160    
-112   0      
0      96     
-32    96     
-16    0      
16     160    
-64    -112   
96     96     
-96    16     
80     192    
-112   32     
16     112    
2160   2144   
-1408  1184   
-1120  -1360  
368    880    
512    -96    
-352   -256   
-208   -96    
32     480    
224    -336   
-368   272    
240    -320   
-208   608    
80     -496   
64     464    
32     -272   
-208   -48    
160    160    
64     128    
0      112    
112    64     
-128   -32    
96     -48    
-96    288    
96     -48    
-112   128    
112    -96    
-160   192    
112    32     
-512   -144   
144    -160   
-768   -96    
224    32     
32     64     
64     48     
-64    128    
-32    -64    
64     288    
-64    160    
16     96     
-64    -32    
16     128    
64     144    
48     48     
-192   -80    
176    128    
-144   80     
192    48     
80     176    
32     16     
-32    32     
-16    16     
-16    64     
-32    112    
32     80     
0      48     
64     128    
-112   32     
48     96     
-80    80     
80     272    
-128   64     
64     -112   
-80    96     
-80    160    
-16    -112   
-48    128    
0      96     
128    144    
-112   48     
-128   -64    
-16    96     
-96    48     
0      16     
-128   32     
80     64     
-144   32     
-96    144    
-128   272    
272    432    
96     336    
-80    176    
16     -144   
-16    -144   
112    144    
112    48     
-64    64     
32     48     
64     160    
-16    0      
144    192    
-224   -96    
16     16     
128    144    
32     -96    
128    128    
80     416    
144    512    
-80    192    
-32    -128   
96     64     
64     208    
64     32     
-32    128    
-64    -64    
32     128    
64     -16    
64     176    
32     352    
32     112    
-16    -16    
-64    96     
48     96     
80     208    
-144   16     
128    128    
0      48     
-32    32     
-32    192    
-64    -32    
32     128    
-80    48     
32     32     
128    272    
160    80     
64     -16    
-256   176    
-16    -112   
336    -48    
-80    208    
0      64     
112    80     
-64    32     
32     304    
-112   16     
192    64     
-224   -32    
384    144    
-336   -48    
144    144    
-192   -96    
112    64     
32     64     
80     112    
16     112    
-112   128    
192    240    
-176   160    
48     32     
16     -464   
0      -1312  
-16    144    
-32    160    
-208   -32    
224    400    
16     16     
80     80     
-128   80     
208    64     
-64    240    
-112   -128   
208    240    
0      -304   
240    176    
-128   64     
96     -288   
-64    320    
-256   -272   
736    80     
-96    224    
128    80     
-128   112    
-112   208    
272    0      
0      224    
-16    -16    
128    144    
-288   16     
192    144    
-32    160    
32     -16    
240    0      
-32    -800   
48     32     
-176   -96    
64     208    
160    160    
-48    96     
-80    160    
192    240    
160    -208   
-48    176    
-336   80     
48     -96    
288    -160   
208    160    
-64    16     
-160   -208   
-384   -368   
160    2544   
-160   768    
-448   -528   
144    208    
-112   -496   
176    -80    
-112   592    
64     240    
592    496    
-272   256    
32     288    
64     -400   
-128   -16    
224    -208   
-32    0      
384    -576   
-400   -224   
144    48     
-16    -32    
-48    -112   
-112   -16    
0      80     
256    240    
-16    -64    
-128   32     
288    240    
32     -16    
-48    -32    
-48    -208   
208    32     
0      -592   
48     160    
208    -208   
-16    224    
112    64     
-16    48     
-32    96     
80     160    
144    112    
48     -16    
-144   176    
192    -512   
16     144    
192    32     
16     80     
-48    -272   
-16    -240   
368    240    
-256   16     
304    -16    
-112   192    
112    32     
176    -224   
-240   272    
176    0      
64     16     
64     -192   
112    208    
-32    -96    
160    64     
-96    16     
96     64     
128    -544   
0      -32    
80     176    
64     128    
-16    -48    
64     -16    
32     96     
160    0      
80     128    
-176   -64    
112    0      
160    -48    
32     160    
96     0      
256    -80    
-64    -208   
-96    288    
48     80     
16     -192   
96     -1952  
112    -64    
-128   -832   
-32    -96    
160    -1280  
128    0      
-160   96     
128    0      
16     0      
-64    -336   
176    -1008  
-192   -64    
160    32     
-320   0      
128    -128   
64     -16    
112    -144   
-16    80     
112    -112   
-80    -528   
-16    -32    
176    -784   
-16    -128   
80     192    
0      -240   
112    -48    
112    160    
16     -48    
64     32     
-224   -96    
0      -208   
160    -288   
160    -272   
-48    -208   
48     -432   
-80    -48    
240    -336   
112    160    
48     -320   
144    144    
-144   32     
96     112    
-16    -96    
-80    32     
-16    144    
32     -80    
-192   -128   
-96    -96    
192    48     
128    -32    
48     -176   
256    -736   
-432   48     
160    -416   
176    224    
-16    16     
240    16     
-64    -16    
-64    48     
64     64     
0      -16    
-48    96     
48     -64    
-1296  -16    
112    -96    
-32    -16    
144    -112   
-48    96     
48     -240   
64     112    
0      -128   
160    -16    
16     -224   
112    -32    
48     112    
-64    -320   
-16    -96    
96     144    
-128   64     
16     -32    
-144   -176   
176    16     
112    -16    
48     -656   
-32    128    
-80    -1488  
-96    32     
240    48     
0      320    
-96    -32    
-208   -240   
-80    -208   
32     -48    
-224   32     
144    128    
-176   304    
96     -464   
16     -96    
176    -816   
32     96     
96     -1008  
-128   80     
-224   -176   
208    -240   
-48    64     
272    -16    
-128   160    
-48    112    
-48    16     
-16    64     
-464   -112   
112    -608   
80     224    
-64    128    
48     304    
-112   432    
704    96     
512    48     
320    464    
-816   -304   
848    704    
-1024  160    
480    592    
-336   128    
320    -240   
-736   -256   
272    -160   
208    128    
-48    32     
-112   16     
128    -736   
112    16     
-48    96     
80     160    
48     80     
48     48     
-16    -32    
16     48     
-144   -80    
0      -64    
-144   0      
16     -80    
-144   96     
-144   -192   
16     16     
32     80     
-432   48     
-176   0      
-512   64     
-240   16     
192    0      
48     -48    
-64    0      
112    160    
0      96     
16     48     
-208   -176   
32     128    
-336   -192   
176    160    
-80    112    
-256   96     
-48    128    
-144   -160   
64     64     
-272   16     
160    96     
-80    96     
144    64     
-48    -16    
64     64     
-96    -336   
-80    96     
0      -32    
0      64     
-144   -400   
-176   -48    
-48    -160   
-288   -80    
-16    80     
48     224    
-112   176    
-1008  176    
-64    48     
-176   -128   
16     64     
-32    -144   
80     272    
-112   -224   
48     32     
-128   16     
224    464    
-160   368    
-64    64     
336    256    
-400   192    
272    -16    
-320   96     
-240   32     
32     -64    
96     96     
16     -32    
96     288    
-32    176    
32     208    
-32    64     
-128   -16    
-16    0      
32     80     
96     192    
-256   -144   
0      96     
-512   48     
96     112    
-1376  -80    
80     112    
16     -96    
80     160    
-80    96     
-64    32     
48     96     
-80    -48    
48     112    
-32    384    
-48    64     
-48    -16    
-144   80     
-32    -112   
64     176    
-480   -32    
144    112    
-208   -288   
96     192    
0      80     
80     16     
-64    176    
112    112    
112    32     
-272   -80    
80     336    
32     -80    
272    0      
-416   112    
128    144    
-32    -176   
-144   160    
-16    160    
144    144    
-32    32     
0      80     
0      80     
240    528    
-448   432    
48     -240   
224    112    
-160   64     
160    112    
-352   -96    
112    128    
-192   -32    
96     144    
-64    160    
16     32     
0      48     
0      96     
48     0      
-80    -112   
80     224    
-32    240    
-192   -112   
-48    -256   
32     240    
320    -80    
-320   352    
-336   -144   
192    96     
-16    -128   
112    208    
-16    80     
-80    128    
-96    16     
48     640    
-208   -208   
160    -128   
80     144    
112    48     
-208   128    
-256   0      
304    -80    
288    112    
-272   128    
160    -256   
-80    256    
192    384    
-128   288    
-432   -32    
-320   -16    
240    -96    
240    -32    
16     -400   
-144   32     
160    80     
64     -64    
128    272    
144    144    
-112   160    
0      -32    
-48    112    
-48    48     
160    112    
96     224    
32     16     
-32    80     
1920   -1152  
192    1216   
-16    -96    
-208   272    
240    -592   
-48    -656   
-96    432    
128    512    
16     272    
48     272    
32     80     
-144   176    
32     -96    
224    64     
-16    64     
32     112    
-16    112    
64     64     
0      112    
-80    16     
0      -48    
160    0      
128    176    
-48    -128   
128    -96    
-80    64     
176    112    
32     176    
16     224    
0      -16    
64     0      
-48    80     
64     32     
48     144    
0      -160   
64     80     
-64    192    
16     48     
-16    -32    
0      208    
176    80     
-80    80     
32     32     
-32    160    
48     64     
-48    -16    
-64    144    
0      -176   
176    -64    
-240   32     
112    -608   
64     160    
-96    96     
224    144    
-80    64     
32     -144   
224    256    
-208   32     
208    -80    
-96    224    
-192   0      
272    48     
-96    192    
96     -16    
64     160    
-128   -160   
192    192    
112    -16    
160    192    
-48    160    
-16    32     
-32    -32    
192    96     
-80    256    
-16    96     
96     80     
64     96     
32     -128   
-64    -384   
32     112    
48     -176   
-112   32     
256    -2000  
0      0      
0      48     
48     272    
0      224    
176    -16    
112    144    
-96    144    
112    -96    
-16    32     
32     128    
16     -368   
16     -16    
96     32     
16     192    
48     -416   
96     96     
-144   -16    
288    160    
-16    32     
160    96     
-48    160    
16     32     
-64    48     
80     32     
176    544    
128    -32    
96     96     
-160   -96    
144    208    
96     -96    
64     144    
0      -368   
96     112    
-32    128    
-128   -48    
96     -144   
-48    -208   
-48    -32    
112    112    
192    128    
96     -16    
16     128    
-160   -320   
48     -16    
-144   -432   
128    -128   
112    -528   
96     80     
128    -48    
-32    144    
336    160    
-16    144    
-16    144    
32     -64    
32     176    
96     -112   
16     48     
160    -192   
48     112    
-32    144    
128    224    
80     -224   
-32    96     
-80    96     
160    128    
128    80     
-48    144    
-16    48     
128    -544   
48     128    
80     -32    
0      -64    
144    -160   
-144   -80    
208    -192   
128    48     
-144   -96    
96     208    
96     -16    
64     144    
-16    112    
240    48     
-64    96     
-80    -224   
0      -112   
144    192    
224    256    
32     -144   
-48    -80    
-80    -464   
144    48     
160    -32    
-48    192    
-32    -16    
-16    -672   
80     64     
80     -1936  
32     80     
-16    64     
144    96     
-64    -80    
80     -432   
96     -208   
128    208    
48     96     
0      48     
64     -16    
48     -16    
0      80     
-16    -432   
128    -64    
-144   64     
16     -16    
48     32     
-80    -384   
272    -608   
720    -32    
240    448    
-128   96     
-112   64     
720    960    
-384   -240   
384    -224   
32     400    
-464   -448   
304    16     
64     96     
-16    -32    
32     -48    
-48    -160   
144    -16    
-176   -640   
16     -368   
256    -64    
176    -48    
-144   -16    
-176   128    
224    32     
0      -64    
-48    -80    
-64    0      
32     112    
64     -32    
-400   -16    
-240   -352   
400    144    
32     112    
32     -192   
0      -416   
96     -240   
48     256    
80     416    
64     256    
32     144    
-16    -224   
48     -144   
-80    -48    
96     48     
64     160    
-48    80     
-496   -32    
160    -48    
96     160    
160    112    
-144   -48    
240    -1008  
0      32     
48     -208   
48     48     
-16    0      
-32    -112   
-32    -96    
-16    -288   
-64    48     
176    80     
-1104  -16    
32     32     
80     -16    
176    240    
-144   -96    
112    -208   
-112   64     
144    -368   
16     80     
0      64     
64     -176   
-64    64     
48     -16    
-32    224    
-48    64     
-64    96     
16     464    
96     272    
80     128    
-176   -160   
176    -576   
-48    0      
32     -480   
80     64     
80     -16    
192    112    
-416   96     
-32    -144   
144    48     
-32    -16    
-64    0      
48     16     
-64    48     
144    -48    
-16    112    
-16    -208   
240    304    
64     -256   
64     -80    
-192   -16    
-32    -160   
-128   -32    
16     -16    
0      80     
64     16     
-128   16     
128    64     
-288   -128   
256    -64    
-112   112    
128    -144   
-64    48     
32     80     
64     -16    
-96    64     
112    64     
-96    48     
80     16     
-160   48     
112    0      
-112   -176   
-112   -192   
32     80     
-672   160    
272    304    
-544   -80    
-96    80     
240    64     
-576   112    
32     112    
-256   48     
-32    -16    
288    -320   
16     256    
-96    -64    
32     -768   
-432   -192   
192    560    
-224   208    
-176   0      
-208   -368   
-320   -16    
-80    -112   
-144   128    
-48    16     
0      -400   
80     -32    
-432   -176   
-128   144    
16     80     
96     128    
-288   32     
-64    -112   
-352   -480   
256    -16    
48     -32    
0      160    
-96    -32    
32     48     
48     96     
-176   -96    
-64    0      
-96    64     
48     48     
-48    0      
0      256    
-128   -112   
-128   -96    
0      160    
64     32     
-176   -80    
80     176    
32     -128   
-16    16     
144    288    
-128   -96    
-48    128    
-224   -208   
208    464    
-896   -128   
-96    304    
112    -144   
16     128    
-160   -160   
96     64     
96     -128   
16     64     
64     64     
-32    96     
-48    144    
80     32     
-48    112    
-144   -32    
-224   64     
96     -272   
0      -16    
-1072  -144   
1968   -2096  
416    400    
272    128    
-336   224    
-352   -224   
672    -288   
-960   32     
320    -304   
-288   80     
208    16     
16     -16    
-176   256    
-16    176    
-16    32     
-208   -48    
-32    208    
-16    -96    
-48    32     
0      64     
80     112    
48     112    
-32    128    
-32    32     
-128   -32    
32     16     
-256   -48    
336    144    
-176   96     
160    -32    
-816   -176   
192    144    
64     128    
32     144    
-48    48     
16     0      
-16    -272   
208    -80    
-208   240    
144    -16    
32     16     
-224   80     
208    112    
-208   -160   
208    176    
-432   -96    
240    176    
-208   80     
128    -96    
48     80     
-112   96     
224    112    
-224   96     
112    -32    
32     48     
-16    112    
16     0      
112    144    
-176   16     
192    176    
-96    0      
32     128    
16     64     
0      48     
32     304    
-160   16     
176    -16    
96     96     
-48    288    
-112   -176   
192    64     
-240   96     
32     16     
-48    48     
16     128    
0      0      
-32    -64    
96     208    
-64    80     
112    32     
64     208    
-160   80     
64     32     
160    368    
-384   16     
128    -32    
-96    -80    
128    16     
128    -64    
0      64     
16     96     
64     32     
-80    64     
0      64     
32     352    
-64    128    
-16    -32    
144    80     
-80    0      
256    272    
-128   144    
144    144    
112    0      
-208   -272   
0      -48    
192    160    
32     128    
48     160    
-128   144    
192    96     
-160   -16    
128    224    
32     64     
-48    48     
-32    0      
176    -32    
-48    0      
0      80     
-64    128    
-16    0      
320    48     
-128   144    
208    208    
240    176    
-224   -112   
48     -16    
16     176    
80     48     
-112   32     
-16    -96    
16     48     
48     96     
240    96     
-304   112    
384    -416   
16     144    
-16    -16    
-112   224    
224    -32    
32     224    
-16    144    
48     48     
176    208    
-48    -128   
-16    208    
16     80     
96     -80    
-80    -160   
208    208    
32     -464   
48     160    
64     64     
16     128    
0      160    
-16    -32    
80     144    
80     160    
-32    48     
48     352    
32     -112   
80     64     
48     96     
144    -96    
-32    112    
16     -544   
64     224    
-16    256    
-64    0      
16     96     
16     -112   
-144   176    
112    256    
96     112    
64     80     
48     -112   
-128   48     
-32    160    
-96    48     
32     16     
160    -448   
48     144    
48     -432   
-16    32     
16     96     
112    160    
-64    96     
16     48     
16     176    
48     128    
32     -48    
80     80     
48     32     
96     -48    
32     176    
-96    112    
144    -32    
0      -288   
112    112    
-912   -3184  
1488   2240   
-1120  528    
304    -560   
-352   -672   
608    672    
-368   672    
32     -336   
416    384    
256    -352   
-432   -64    
-128   -128   
528    432    
-80    -992   
208    80     
-288   -1184  
352    352    
-192   -640   
416    416    
-160   -64    
64     -144   
64     304    
-16    224    
144    -16    
-128   -336   
80     -32    
64     -144   
-16    144    
64     -96    
96     -80    
48     -272   
16     80     
80     -400   
32     224    
-80    16     
-16    16     
80     176    
96     -176   
64     -384   
-32    -496   
224    144    
-80    -80    
144    160    
32     0      
16     128    
48     -528   
32     144    
112    -160   
-96    112    
80     0      
80     96     
16     48     
-80    -544   
64     112    
208    -64    
-48    -16    
32     -416   
-256   -272   
160    -256   
144    224    
64     -32    
-144   256    
144    0      
-16    240    
-64    -336   
96     -1840  
-192   -176   
80     -192   
-176   -192   
112    -16    
112    64     
-48    -80    
48     112    
112    0      
-176   96     
32     -64    
0      -1584  
32     -848   
0      -1728  
80     -48    
-16    -176   
112    112    
48     208    
128    -16    
96     48     
-16    -784   
32     -224   
64     224    
224    16     
-96    80     
144    -16    
128    128    
-32    224    
-128   -368   
-160   -128   
-112   -80    
160    16     
-176   -208   
-112   -224   
176    0      
16     -656   
48     -192   
0      -496   
144    -96    
176    208    
-224   -144   
208    -96    
-80    208    
96     -128   
32     192    
-96    -64    
80     -160   
-320   -96    
112    -112   
192    80     
-48    96     
-16    -304   
16     -384   
16     -144   
144    -560   
96     -64    
-16    -192   
144    128    
128    64     
0      16     
-112   288    
144    -448   
32     48     
-192   -496   
80     -128   
48     -144   
96     -48    
-112   -160   
-112   -144   
112    -512   
16     16     
96     272    
-192   -144   
112    224    
-32    -16    
16     -64    
32     64     
-32    224    
128    -32    
-608   -144   
32     -368   
-32    -48    
96     -576   
-128   -80    
160    48     
32     64     
-48    -144   
80     192    
-144   -96    
48     -256   
-96    -96    
112    192    
-16    -336   
16     64     
48     16     
144    48     
-1056  -48    
80     -48    
160    192    
64     -608   
-48    -32    
144    640    
-272   -352   
-288   -352   
352    192    
176    128    
-96    -64    
-112   48     
288    -208   
-64    128    
96     0      
-144   112    
-16    -144   
16     32     
48     -288   
32     48     
16     -1200  
176    160    
-544   0      
-96    64     
-320   -96    
112    -208   
-224   -16    
48     -144   
-112   256    
0      -16    
-192   64     
0      -224   
256    240    
-224   -336   
112    144    
112    -112   
16     48     
-528   96     
464    -624   
-912   64     
384    -32    
-352   208    
16     0      
352    -272   
208    256    
-160   64     
-80    -352   
160    64     
80     16     
32     208    
96     128    
-176   16     
-64    -96    
0      80     
48     144    
80     80     
-80    -64    
-64    -176   
48     64     
80     112    
160    80     
-80    -176   
48     144    
-480   -96    
-80    -80    
-176   16     
-288   -240   
-80    -16    
-128   176    
144    96     
-1568  -128   
-144   -128   
-128   32     
320    144    
-96    -128   
16     64     
-224   -112   
128    48     
-368   -144   
96     16     
80     80     
-208   -16    
-16    0      
32     144    
176    384    
-832   -48    
80     -112   
-176   256    
16     -48    
48     -16    
-80    48     
-48    -80    
16     128    
32     -16    
-256   80     
96     -48    
160    64     
-272   160    
16     -112   
-16    -64    
-336   192    
-128   96     
-560   -48    
16     80     
-48    0      
-96    144    
-32    -176   
192    16     
-16    160    
-96    80     
-16    0      
0      -32    
48     176    
-272   48     
144    96     
-160   32     
-16    -16    
-176   -64    
-48    160    
64     208    
-112   208    
16     -32    
80     160    
128    112    
96     -144   
192    112    
-240   96     
160    -16    
-96    144    
32     32     
-16    144    
-96    -32    
-128   -48    
16     -112   
-560   -96    
-48    96     
16     16     
-64    16     
48     -16    
-160   32     
320    240    
-80    144    
96     32     
-240   112    
208    464    
-144   16     
-48    -128   
-160   -48    
144    192    
-16    64     
192    128    
-32    16     
-64    304    
-144   32     
-16    48     
64     112    
64     -32    
-272   -112   
176    112    
96     -32    
-224   -16    
64     48     
0      176    
96     160    
-816   -432   
0      48     
80     224    
32     16     
0      240    
128    80     
-16    96     
-80    208    
-144   176    
352    64     
16     144    
-128   256    
192    96     
-320   -256   
96     192    
-288   -80    
176    0      
0      48     
320    80     
-64    368    
208    400    
-240   -80    
-96    -96    
160    192    
-16    80     
48     144    
-96    0      
176    176    
-192   320    
64     96     
-144   432    
80     -80    
-16    32     
0      112    
32     0      
16     -16    
-48    16     
80     64     
80     192    
-48    64     
-128   -208   
-144   -176   
320    400    
-128   48     
112    64     
-64    16     
-16    112    
-80    -32    
-16    32     
176    96     
64     16     
64     192    
48     80     
80     96     
-32    64     
128    128    
16     -48    
-16    304    
-112   0      
-32    0      
0      64     
336    32     
16     128    
-144   112    
128    128    
-32    96     
0      272    
-192   -112   
32     160    
-16    128    
-368   400    
-1200  320    
320    1312   
-256   240    
144    -320   
-160   0      
448    -608   
-784   384    
304    -272   
256    -192   
-368   32     
400    240    
-160   144    
160    112    
-512   -256   
416    112    
-336   96     
64     48     
-32    368    
-160   176    
-48    288    
-144   -208   
96     0      
16     -144   
32     80     
16     -96    
80     320    
16     512    
96     64     
-112   -16    
256    400    
-64    -160   
128    144    
-64    32     
0      -240   
48     336    
-64    144    
64     80     
-80    -16    
144    208    
-144   80     
-48    128    
32     64     
96     -128   
0      -64    
96     48     
48     -96    
304    208    
-208   -336   
192    -592   
-128   208    
48     96     
16     0      
-112   -176   
304    384    
-160   32     
96     -160   
-32    352    
240    320    
64     -448   
224    176    
32     -32    
-64    -64    
160    400    
80     -144   
-48    -64    
-16    -48    
160    176    
-80    192    
192    -32    
16     64     
48     64     
0      16     
-32    224    
-16    128    
144    160    
-64    -416   
16     -992   
32     -32    
224    432    
80     176    
-48    -272   
144    144    
176    192    
16     480    
-16    192    
-128   -624   
80     16     
288    240    
256    32     
-208   112    
16     96     
176    0      
32     208    
16     -16    
-80    -32    
112    -576   
-64    224    
64     16     
-208   -96    
48     -96    
112    192    
48     80     
-80    192    
-32    64     
80     144    
64     224    
80     272    
272    560    
176    256    
-112   144    
32     -416   
32     64     
112    -464   
-16    128    
0      0      
96     160    
96     16     
0      96     
-48    -96    
-48    16     
192    192    
-16    -112   
16     80     
-112   -400   
208    144    
-176   48     
256    -144   
-80    -64    
80     64     
80     16     
16     96     
-192   32     
256    96     
-192   128    
80     -688   
208    -64    
-624   -688   
432    0      
-48    -496   
32     112    
192    80     
0      192    
0      -352   
-32    16     
128    112    
144    304    
16     192    
48     128    
80     48     
0      -400   
0      -16    
32     -208   
224    112    
16     0      
-16    16     
96     48     
-48    192    
-48    -272   
240    144    
-96    176    
272    80     
-208   144    
32     -2464  
176    -272   
-48    -288   
208    -1792  
-112   -192   
160    176    
-176   80     
48     80     
48     48     
-64    16     
208    256    
176    -128   
32     192    
144    -224   
-144   96     
-64    -192   
-16    32     
16     0      
112    -384   
-64    80     
80     -864   
192    64     
-48    -320   
-32    -96    
160    16     
-16    64     
128    -304   
48     96     
-16    -384   
-80    96     
-144   -64    
-112   16     
-160   -80    
80     -32    
64     -128   
-640   272    
-16    -1056  
-160   80     
-32    160    
1136   -384   
-576   -368   
912    368    
-672   304    
336    -496   
-496   -240   
560    16     
16     208    
-288   -224   
-224   -64    
208    -144   
-48    -160   
128    -96    
48     176    
0      -112   
32     -2240  
0      -64    
80     80     
-16    80     
96     -48    
-48    -80    
0      48     
0      -64    
-464   -16    
-32    -144   
176    32     
16     -64    
128    -112   
-32    -368   
-80    -208   
96     -2416  
-176   -368   
112    -176   
128    192    
96     0      
-16    80     
-144   -16    
-32    48     
48     -112   
64     80     
-288   128    
128    -48    
-96    -64    
128    128    
-240   -16    
368    -176   
-128   144    
112    -64    
48     112    
-208   -112   
160    -144   
-64    64     
96     48     
80     80     
-48    80     
-208   -80    
80     48     
-736   48     
96     -128   
-16    160    
-48    16     
96     80     
80     -880   
96     16     
-224   0      
256    32     
-144   -80    
176    96     
-912   -128   
112    -240   
-64    32     
32     -96    
-256   96     
-112   -160   
112    32     
-160   -496   
96     128    
-80    -1936  
64     -304   
96     -112   
160    48     
-336   -112   
272    16     
-400   128    
32     0      
96     96     
-32    64     
64     0      
80     -288   
-128   0      
-48    -304   
-16    16     
16     112    
144    160    
-80    -16    
160    32     
-48    -112   
80     144    
16     16     
32     32     
-80    16     
96     -16    
-272   -48    
336    -144   
80     352    
-224   48     
-272   32     
0      -224   
-560   -128   
0      -160   
-960   -48    
-112   -32    
160    224    
-16    16     
-80    48     
-96    -64    
-288   0      
16     96     
-480   -112   
-48    144    
-176   -192   
32     304    
-112   48     
160    400    
-368   -64    
0      96     
-144   64     
-528   224    
-64    -48    
-48    -160   
-48    16     
-448   -16    
0      128    
-112   32     
-48    -144   
-128   -128   
-64    112    
-288   -160   
192    -16    
0      112    
-112   -48    
0      96     
-432   -176   
48     0      
128    176    
0      64     
64     -16    
-48    96     
64     -240   
112    160    
-480   -400   
80     -192   
160    192    
48     208    
208    208    
-272   -112   
80     96     
-160   -80    
0      112    
-800   -48    
-16    32     
-128   16     
0      -48    
288    -144   
-80    176    
96     -16    
-128   48     
-160   96     
432    -96    
-256   48     
-48    -112   
80     176    
-224   48     
272    0      
-240   64     
80     48     
-160   -80    
-16    96     
144    32     
-64    32     
-80    192    
-48    160    
-48    -32    
-96    32     
192    16     
-32    96     
-32    0      
-16    48     
-160   16     
-336   80     
-16    96     
-1024  16     
16     80     
-1056  -1888  
1200   3088   
-624   2016   
224    -736   
-320   -208   
16     -624   
528    1568   
-1504  -896   
1024   -576   
-272   -128   
-16    320    
-192   -608   
-128   384    
-224   -240   
96     480    
-464   -320   
144    352    
-304   -400   
528    -32    
-128   -96    
320    128    
-208   368    
-112   320    
-144   128    
320    -256   
-48    208    
192    -256   
336    576    
-544   -192   
160    -496   
-32    -32    
-32    48     
-128   64     
64     16     
96     96     
-240   -272   
144    64     
-16    128    
416    656    
-208   -304   
112    16     
16     176    
64     80     
-448   -192   
-48    16     
96     32     
0      192    
-112   176    
192    336    
144    432    
-64    208    
-32    96     
-48    16     
-80    304    
-32    -96    
-16    80     
-96    16     
-80    304    
-288   -64    
352    624    
-496   -192   
80     -16    
-80    32     
160    224    
-48    288    
16     -304   
240    16     
208    144    
160    848    
-400   -288   
80     160    
-144   -192   
256    16     
48     128    
-96    80     
64     0      
48     -208   
-96    -176   
112    -128   
96     112    
112    128    
128    208    
-32    -112   
96     256    
-16    128    
96     368    
-96    208    
-96    64     
80     -352   
352    608    
-64    64     
-160   96     
352    -48    
-16    64     
-96    48     
-48    -80    
-192   -96    
64     208    
-64    -32    
48     272    
-16    16     
-48    144    
0      48     
-32    -256   
-80    -80    
160    -176   
-96    0      
-480   -384   
384    320    
-48    48     
-112   -32    
32     0      
64     64     
0      128    
128    128    
-16    304    
32     80     
96     112    
-16    80     
-16    -80    
64     -80    
-32    160    
352    416    
128    160    
-48    128    
-208   96     
192    144    
96     288    
144    128    
-80    192    
-48    128    
128    336    
160    -400   
144    272    
-208   -32    
-80    160    
64     96     
368    240    
-256   192    
176    128    
-112   80     
0      32     
-144   80     
48     144    
48     -160   
-16    -336   
48     144    
32     -256   
64     96     
-48    80     
160    96     
-64    80     
96     112    
48     224    
80     112    
-112   0      
32     160    
128    224    
-112   112    
48     -48    
48     -96    
192    0      
64     -304   
48     0      
-64    -816   
0      64     
80     176    
48     160    
-64    144    
112    48     
96     240    
32     80     
-48    -240   
-16    64     
176    64     
80     -176   
-64    64     
96     -784   
-48    256    
112    -640   
64     192    
32     80     
-32    80     
0      -224   
-48    192    
-192   32     
80     256    
0      -112   
208    0      
32     112    
112    -112   
0      208    
-16    -64    
160    16     
-16    176    
48     -64    
112    -592   
-144   16     
-1360  832    
1296   -16    
944    192    
432    368    
-272   368    
48     -432   
192    640    
464    -656   
-144   688    
-176   -400   
208    384    
-144   -1072  
288    352    
-416   -672   
384    -64    
-176   -240   
224    -96    
-48    416    
144    -176   
-208   144    
224    -208   
-128   464    
224    -384   
-288   304    
256    -1008  
-80    304    
208    -224   
-16    448    
128    -336   
-96    160    
32     48     
192    96     
-48    32     
0      128    
160    176    
176    -48    
-80    112    
80     -144   
16     160    
32     -432   
80     128    
16     -144   
144    208    
-48    -1488  
48     160    
16     16     
48     176    
32     0      
0      224    
48     80     
80     -160   
96     96     
64     0      
0      128    
48     32     
48     128    
-16    -64    
208    144    
-64    -560   
48     -96    
0      96     
48     -656   
16     64     
-960   64     
-32    -304   
64     -112   
112    -448   
64     -48    
-32    16     
112    -32    
16     80     
96     -144   
32     80     
64     -240   
112    -448   
-128   -64    
112    -192   
-240   128    
80     -176   
64     80     
-16    -272   
-112   -288   
-224   -32    
48     80     
64     -176   
16     -1248  
64     -160   
144    80     
-112   32     
192    -272   
-16    112    
160    -240   
48     0      
-80    -144   
144    -64    
336    560    
160    112    
16     0      
-128   -1088  
112    -128   
160    -1024  
144    144    
-48    112    
-80    0      
32     -32    
128    32     
96     96     
80     -48    
-128   80     
48     -48    
-208   -208   
-32    -400   
160    -96    
224    -192   
16     48     
-112   -432   
-32    -128   
208    -224   
96     48     
-96    -384   
-32    32     
0      112    
192    48     
-144   80     
48     -48    
-64    96     
-32    -192   
16     208    
32     0      
-16    48     
64     -112   
0      -64    
144    -1312  
-32    144    
48     -16    
112    64     
-48    192    
80     -144   
-32    16     
32     -320   
32     128    
32     -16    
-48    -160   
-96    -48    
32     32     
-32    -496   
-80    144    
112    -848   
48     112    
128    112    
48     -16    
-144   -32    
48     0      
-144   -144   
64     16     
176    -48    
-176   -64    
-688   -144   
272    -192   
-1504  80     
-32    -288   
-80    -32    
-32    -96    
256    96     
16     -576   
-32    176    
-288   -96    
112    -80    
224    368    
-64    -112   
-144   -80    
-96    144    
448    -80    
-48    48     
-128   -48    
16     -80    
80     304    
-160   -352   
256    -16    
-192   0      
224    -112   
-48    80     
32     96     
32     -16    
-16    80     
-272   128    
32     -256   
-32    112    
272    48     
-64    16     
-192   -176   
320    32     
48     -96    
224    240    
-208   80     
-48    -32    
32     64     
-960   -2112  
1360   3216   
-496   1008   
208    -464   
-144   -80    
-256   -624   
832    768    
-1488  -448   
-656   -1088  
-192   -528   
-640   -304   
-64    128    
-320   256    
-240   -432   
320    400    
160    176    
-128   160    
-192   -256   
336    192    
208    432    
-240   -496   
-1344  -80    
64     144    
-336   -32    
80     128    
128    512    
-16    160    
-80    208    
-464   -16    
144    -480   
-304   48     
-192   112    
-688   304    
-144   112    
144    -96    
-144   272    
288    272    
-16    320    
-16    -304   
-48    192    
48     32     
-32    0      
-48    16     
96     128    
-144   80     
-80    16     
-144   32     
-144   -64    
-16    112    
-240   -160   
0      144    
-144   64     
144    80     
-128   -464   
48     64     
16     80     
-32    -16    
-48    176    
-16    64     
176    256    
-368   144    
16     -80    
-64    -192   
-64    192    
-288   -80    
112    -16    
64     112    
160    144    
-304   -112   
-16    80     
16     32     
16     16     
48     112    
-176   -176   
48     80     
-64    160    
-16    -320   
-80    -128   
160    16     
-272   -64    
-16    -48    
-304   0      
-48    80     
-32    -256   
128    -16    
-32    64     
-16    128    
-48    112    
-112   0      
-96    176    
-112   32     
208    208    
-160   32     
16     -16    
-288   -176   
64     240    
-1824  -80    
128    96     
144    256    
-48    160    
176    208    
-144   96     
-80    48     
0      96     
-32    128    
-80    -48    
176    64     
-80    128    
-128   -64    
-192   -144   
-32    144    
-176   96     
64     -48    
64     16     
-176   -256   
80     -96    
-160   16     
208    96     
0      48     
-32    144    
112    64     
-112   -48    
-32    -80    
112    208    
-288   16     
160    -208   
-240   -16    
-176   -48    
-48    -144   
-192   16     
208    16     
96     128    
-80    144    
192    144    
-384   144    
144    32     
-80    64     
-96    144    
128    16     
-208   -48    
-16    208    
-112   -144   
80     16     
0      128    
-32    32     
336    48     
-112   80     
-208   16     
64     -16    
16     32     
208    144    
-80    64     
48     64     
-16    16     
-32    16     
-16    128    
128    112    
32     208    
-80    0      
112    0      
-48    160    
16     0      
128    -112   
-112   80     
96     0      
80     288    
-144   112    
48     -32    
48     96     
208    144    
-80    192    
-32    352    
-128   80     
80     64     
96     -224   
240    240    
-176   -96    
-16    -16    
-16    0      
64     208    
-208   112    
32     -32    
-64    -144   
80     208    
-320   96     
160    -64    
-32    80     
160    80     
32     112    
-80    112    
48     64     
32     96     
0      64     
16     144    
32     -80    
64     112    
112    80     
-16    272    
1376   -576   
-400   -336   
352    880    
-480   864    
192    -64    
256    -96    
224    96     
-576   -64    
128    -16    
-288   192    
656    224    
-208   64     
-224   -32    
-48    368    
208    -16    
48     224    
-112   128    
80     240    
-32    -128   
96     -64    
-16    176    
224    128    
-128   64     
48     -144   
32     32     
-48    48     
0      144    
-16    96     
128    80     
-80    -288   
96     48     
-16    96     
32     -656   
32     144    
80     16     
32     64     
64     176    
32     64     
0      64     
96     48     
0      144    
64     176    
48     -48    
32     128    
-64    32     
16     -64    
64     208    
-48    16     
144    112    
-80    -48    
64     64     
96     160    
64     176    
64     96     
-32    144    
-48    0      
176    48     
-16    128    
-32    160    
-96    -48    
48     -16    
112    128    
-16    0      
-32    48     
96     -192   
128    112    
80     144    
112    96     
-48    80     
128    32     
32     -256   
-16    176    
-32    16     
32     48     
128    96     
160    -112   
-16    272    
0      -368   
48     32     
0      -512   
48     192    
96     80     
-64    -112   
64     -32    
48     80     
-64    -320   
16     32     
128    -48    
96     208    
-80    16     
64     -16    
16     0      
48     -48    
0      64     
128    -176   
-80    -48    
192    -880   
64     448    
32     -16    
-144   -96    
96     48     
176    208    
32     128    
-80    -160   
-48    96     
80     -224   
80     0      
16     0      
32     96     
80     -160   
64     112    
-32    -608   
64     160    
16     192    
96     128    
0      48     
16     48     
32     112    
48     -128   
64     64     
-80    -112   
48     176    
160    -32    
144    112    
-32    -288   
64     528    
-48    -80    
256    -176   
-112   -32    
144    256    
128    -64    
32     64     
-32    224    
128    -80    
-64    16     
112    96     
-176   0      
368    -176   
-208   256    
112    -288   
64     32     
-48    32     
272    80     
-96    192    
-96    112    
-32    48     
128    -288   
224    496    
96     80     
-16    192    
-96    -320   
-32    112    
160    -416   
288    240    
-256   80     
208    32     
-176   -240   
160    -2080  
128    0      
-112   -960   
128    160    
-592   16     
144    -352   
-16    -112   
-32    -1008  
112    16     
-48    -496   
16     0      
112    16     
-16    -208   
16     -992   
16     48     
64     -112   
256    0      
32     -128   
0      -16    
-224   48     
96     -352   
-48    32     
32     -816   
96     64     
96     -176   
48     16     
-96    -2464  
112    0      
80     -96    
96     112    
-32    32     
16     80     
48     -48    
384    -320   
-608   16     
64     -144   
-128   16     
208    -32    
192    -32    
-16    -256   
2112   -2848  
-80    -2608  
768    80     
-608   608    
560    1056   
-192   -528   
-720   -304   
672    -272   
-272   -160   
16     -416   
208    384    
-608   -160   
32     -288   
112    144    
80     -288   
16     16     
96     -368   
112    144    
80     -656   
32     320    
64     64     
224    240    
64     176    
48     320    
-64    112    
32     0      
-128   16     
224    -288   
-416   64     
32     -304   
-128   96     
160    -16    
112    0      
-144   -768   
80     64     
48     -64    
160    144    
-96    64     
144    -64    
-208   -64    
144    -144   
-32    -32    
48     -64    
-144   -112   
112    -16    
-176   128    
32     -576   
-176   -128   
112    -352   
-32    112    
256    -96    
-48    224    
-80    -160   
240    -112   
-464   16     
272    -64    
-80    0      
128    96     
-144   -16    
32     -112   
192    -48    
64     -160   
-96    64     
160    -320   
96     192    
48     -576   
48     -96    
-208   192    
-80    -160   
64     48     
64     16     
-96    -16    
112    -48    
-288   0      
176    -288   
-176   -96    
256    -48    
-144   -48    
112    -176   
-96    240    
-96    -16    
176    -48    
-80    288    
-224   -16    
80     16     
176    352    
-496   -336   
448    -192   
-176   64     
16     128    
-368   -96    
48     -160   
0      144    
-928   -464   
176    80     
0      464    
-80    64     
112    -96    
80     -32    
-144   0      
256    304    
-224   192    
32     -80    
-32    -64    
-80    -112   
64     48     
-368   -336   
0      64     
-1056  -288   
-384   160    
32     208    
-416   64     
-224   0      
-736   304    
96     288    
80     32     
-192   64     
32     144    
208    64     
-160   -368   
-176   -112   
16     -208   
304    144    
-48    -48    
-160   -16    
-272   -80    
16     400    
-288   -48    
208    64     
-16    48     
-480   16     
0      176    
80     64     
416    160    
-544   -128   
96     480    
-64    256    
256    -16    
-272   -112   
-224   -16    
80     48     
128    0      
-64    80     
-80    -48    
-272   16     
96     144    
0      -160   
-880   -16    
-64    -16    
-80    32     
160    160    
-16    32     
-160   -16    
-144   80     
-144   -48    
32     144    
0      32     
320    112    
-368   16     
112    96     
-352   -32    
32     80     
-336   64     
112    32     
-16    -32    
144    304    
-256   -144   
0      320    
-272   -16    
80     -144   
32     48     
-16    64     
-112   96     
16     -32    
16     -16    
48     240    
-48    224    
-512   -16    
128    -112   
-48    -16    
128    -96    
-16    -16    
64     112    
-48    32     
-80    96     
-32    112    
32     64     
-80    80     
-96    0      
-32    112    
176    80     
-128   64     
-272   -160   
240    32     
-512   -128   
160    352    
-32    96     
-512   960    
256    2848   
-496   208    
128    -144   
-896   -1040  
896    176    
-896   544    
208    128    
80     208    
48     -224   
-480   -320   
48     16     
144    176    
16     128    
-64    112    
-112   48     
128    272    
-96    160    
-32    -16    
-48    -16    
64     32     
-192   224    
64     352    
-224   64     
144    -192   
-208   -176   
0      64     
96     160    
-112   288    
80     144    
16     64     
-80    48     
-80    96     
-48    80     
48     64     
-32    80     
64     16     
-16    96     
-128   160    
112    144    
16     192    
96     144    
0      64     
-96    64     
32     0      
-64    96     
32     240    
256    240    
-80    80     
-32    -64    
48     80     
-160   0      
112    32     
-144   -80    
112    96     
-48    -16    
224    448    
-128   448    
176    208    
64     32     
-96    -32    
96     112    
0      0      
-64    112    
48     224    
-96    -80    
128    64     
-64    160    
-64    48     
-16    112    
-96    -144   
48     96     
48     144    
-64    0      
128    64     
32     16     
96     -48    
-128   -224   
-32    -48    
160    80     
176    368    
-224   176    
48     -48    
32     64     
32     224    
16     128    
48     16     
80     96     
-16    64     
48     64     
0      96     
-32    96     
-16    80     
32     48     
144    144    
16     112    
-32    -128   
16     16     
16     160    
64     96     
-64    0      
-80    -16    
80     32     
80     112    
-32    32     
64     128    
-128   128    
112    128    
0      96     
-96    64     
-64    48     
-16    -80    
16     128    
-32    16     
64     128    
32     160    
80     176    
-64    -144   
-96    -16    
80     224    
192    -16    
0      -16    
-128   160    
192    144    
16     -32    
-96    208    
64     592    
16     224    
240    -48    
-256   0      
192    0      
48     224    
-208   192    
224    80     
32     128    
-80    64     
32     64     
112    128    
32     112    
-16    128    
-16    0      
48     160    
-80    64     
96     -80    
-80    -304   
144    -32    
160    0      
-16    608    
112    256    
-208   -16    
144    64     
112    -112   
-48    160    
128    0      
0      -144   
32     64     
-16    272    
-32    16     
64     -64    
240    -96    
176    80     
-16    -304   
-96    0      
112    352    
0      16     
144    160    
-32    432    
-48    144    
-112   0      
96     -112   
304    112    
144    64     
-80    368    
48     80     
-16    -64    
64     16     
272    32     
32     288    
-80    -128   
-32    -48    
32     -320   
272    -80    
-80    0      
160    144    
-48    112    
16     176    
112    0      
16     -16    
64     16     
16     -144   
0      64     
-16    -176   
64     144    
-16    80     
96     128    
-16    -560   
80     -80    
-48    -32    
2016   -2368  
-192   -48    
608    320    
-384   736    
1056   560    
-1344  -800   
128    -112   
384    832    
304    -192   
-208   288    
16     -576   
128    240    
192    -656   
-80    0      
-32    32     
112    176    
208    432    
0      0      
-96    -256   
96     -16    
208    128    
112    -464   
-48    176    
176    16     
16     64     
96     -256   
-48    224    
144    -240   
16     112    
-32    -64    
80     32     
32     80     
80     160    
128    80     
-48    -144   
144    208    
0      -96    
32     48     
48     -224   
96     128    
32     -48    
0      128    
80     -576   
32     64     
48     48     
96     -2240  
-16    176    
-1248  96     
-272   -368   
192    -96    
48     -224   
0      -272   
80     96     
64     -224   
80     192    
80     272    
-48    0      
96     -48    
-16    -864   
128    -16    
-32    -112   
96     160    
-112   32     
112    -368   
112    64     
-48    -592   
16     -144   
80     -1360  
112    -48    
32     192    
-80    -48    
256    128    
-112   -64    
112    -176   
-112   48     
160    112    
-96    -16    
-336   -128   
80     -208   
-96    -48    
80     -656   
128    16     
-16    0      
240    320    
-144   -2880  
160    -304   
48     -64    
-128   0      
224    -32    
48     176    
16     64     
32     -80    
-640   -192   
224    48     
-160   -112   
160    64     
32     16     
96     -144   
64     -208   
96     -592   
-32    48     
112    -32    
-32    -80    
240    96     
-48    64     
-112   -304   
-176   -352   
0      48     
352    96     
144    16     
80     -144   
-64    176    
288    -144   
-32    -48    
-64    -288   
64     112    
16     -1040  
-64    -96    
32     -16    
224    240    
0      144    
16     176    
-144   256    
272    256    
-432   -304   
-224   -448   
-656   -192   
160    -48    
-16    48     
208    -32    
-160   32     
288    -2016  
-96    176    
368    -160   
64     96     
-368   -112   
-48    16     
96     64     
144    -64    
-256   -16    
-192   32     
-288   -48    
192    32     
-272   160    
96     96     
-128   128    
384    -48    
-16    48     
144    -160   
-112   80     
0      32     
96     -32    
-48    0      
16     -48    
-48    16     
256    64     
-240   32     
112    208    
-224   128    
0      -256   
16     -144   
32     64     
112    176    
-80    -128   
16     -272   
80     -128   
432    592    
128    320    
-208   -160   
-144   -256   
64     288    
80     -320   
96     -16    
-256   -32    
96     -64    
64     64     
144    -160   
-64    64     
-176   -16    
64     192    
-96    -176   
80     80     
0      144    
144    16     
-192   -16    
160    -48    
-96    32     
32     -32    
-64    112    
272    448    
16     400    
-112   -304   
-1696  -208   
0      -16    
96     -160   
-48    48     
-112   -16    
-672   -2752  
384    -816   
-400   -448   
288    -464   
576    -176   
-1008  -224   
400    464    
416    784    
-400   -192   
0      -720   
-224   32     
0      -80    
-64    -32    
-64    144    
-992   -80    
-304   -192   
160    144    
-208   128    
128    48     
-32    96     
-160   -272   
-160   144    
-32    96     
32     32     
0      -192   
128    112    
96     -64    
-224   16     
-128   64     
32     -128   
-80    32     
-416   0      
80     96     
-128   96     
0      80     
-112   -160   
-32    160    
16     64     
-112   -48    
64     -208   
-176   48     
-96    144    
-16    80     
-48    128    
-192   -32    
-32    48     
-96    96     
80     144    
-1424  -128   
-32    -64    
-64    -48    
80     304    
64     64     
-32    -128   
-144   -176   
64     48     
-288   0      
-16    -224   
96     160    
96     160    
-144   -16    
-464   96     
48     -96    
-896   -112   
208    144    
48     48     
16     80     
-224   -160   
32     32     
-64    128    
64     64     
-16    32     
16     80     
-32    64     
80     128    
-48    -16    
96     224    
-272   240    
64     32     
80     80     
-80    -272   
-48    -48    
176    -48    
-64    96     
80     192    
96     64     
-80    80     
-144   -288   
16     -128   
0      32     
144    224    
-80    208    
-16    192    
-224   -48    
160    80     
-736   -80    
48     -64    
-128   -256   
-96    0      
16     112    
112    160    
-112   -48    
-160   64     
96     96     
0      48     
32     48     
-160   -16    
96     176    
-240   -160   
160    128    
-1120  -16    
96     64     
-32    208    
32     80     
64     112    
-96    0      
80     96     
-160   -128   
64     -128   
-16    96     
144    96     
-80    16     
32     48     
-80    240    
144    0      
-64    80     
-400   -784   
352    16     
-80    336    
80     240    
-16    176    
-16    224    
-160   80     
16     112    
-48    0      
32     32     
-144   -272   
-304   -192   
160    -304   
-320   32     
192    0      
176    176    
-208   208    
176    -80    
-224   128    
112    64     
-32    160    
-16    -256   
-80    80     
32     -32    
96     240    
-160   48     
16     64     
16     96     
32     -208   
176    256    
-176   -80    
96     224    
-240   -48    
192    112    
0      80     
-144   -80    
160    96     
-32    256    
-64    48     
32     112    
16     48     
64     128    
-48    240    
-384   -416   
208    112    
-160   -112   
128    192    
256    64     
-176   -112   
64     144    
32     144    
-80    64     
240    304    
-64    112    
-64    0      
-48    192    
48     -32    
-320   160    
144    224    
-128   -96    
80     -192   
320    192    
64     -64    
48     256    
-64    96     
16     128    
112    240    
-16    -80    
-144   160    
-16    -32    
-80    64     
-32    64     
-240   1424   
-80    1072   
-640   32     
-352   -544   
1024   0      
-448   -144   
320    -336   
-176   544    
288    -32    
-208   -240   
0      0      
128    176    
96     224    
-144   48     
192    240    
-48    -16    
-48    48     
128    160    
-128   -48    
96     -112   
64     128    
288    224    
-64    176    
-80    -32    
-160   -144   
144    48     
224    208    
16     176    
-16    16     
-64    -224   
80     80     
16     -400   
128    144    
-16    96     
96     48     
-48    160    
48     128    
-128   -16    
0      32     
16     144    
144    32     
-112   48     
80     128    
-48    -32    
-80    -416   
208    112    
-128   -192   
320    192    
-352   96     
224    0      
16     240    
-48    64     
48     64     
16     96     
0      32     
96     96     
-32    160    
32     -32    
176    144    
-160   -144   
352    96     
-32    -80    
-64    192    
112    240    
-32    -16    
32     48     
160    160    
-64    192    
160    32     
-64    128    
96     128    
-16    0      
32     -144   
-16    160    
48     -48    
112    128    
-112   -544   
-112   208    
80     -1360  
304    -160   
32     112    
-112   192    
192    224    
-112   208    
80     32     
192    64     
-48    0      
80     16     
-32    64     
0      -48    
80     192    
-16    -96    
160    112    
-16    -192   
144    -48    
48     -560   
48     224    
-80    176    
96     64     
64     64     
-64    176    
32     128    
48     -48    
112    256    
48     -16    
32     80     
32     0      
176    208    
-48    -288   
96     144    
208    -208   
-96    112    
16     224    
144    16     
-240   -336   
176    48     
-16    -96    
-208   -448   
112    64     
-16    -720   
-96    32     
192    0      
64     64     
128    -144   
-64    240    
176    -16    
-96    -176   
48     -16    
-32    48     
16     32     
80     80     
-16    64     
0      -176   
-32    272    
64     -144   
96     0      
-176   -256   
224    160    
-32    -448   
96     144    
32     112    
64     96     
32     80     
-32    -544   
144    48     
-816   -80    
160    -720   
-80    -80    
-48    -1600  
48     -48    
80     -208   
32     16     
0      80     
64     0      
192    64     
-32    -80    
160    96     
-80    -48    
192    -512   
-112   -112   
-544   288    
-176   -304   
0      -160   
-80    -528   
224    -144   
144    -464   
48     96     
-240   -368   
160    -32    
16     176    
96     -96    
-80    -64    
-224   64     
272    112    
32     16     
-208   64     
-144   -160   
64     0      
192    -288   
32     -32    
48     240    
16     -16    
64     -1296  
112    -160   
-16    -304   
-16    224    
-48    16     
-32    -64    
48     -16    
80     -80    
64     -48    
144    -240   
-384   160    
-176   -64    
272    -160   
16     32     
144    48     
-752   176    
-624   1392   
-336   1728   
-256   -96    
-384   -560   
-336   -208   
672    -448   
-256   928    
16     -48    
272    -272   
-896   -592   
416    -32    
128    -256   
32     -368   
-336   160    
304    -368   
-144   160    
-112   -272   
288    288    
-32    -224   
-192   -192   
-32    80     
240    336    
-96    192    
-128   -240   
-416   -176   
432    -80    
-336   -64    
112    -112   
272    -96    
64     -112   
32     96     
48     -992   
32     160    
-96    288    
-16    -144   
-32    144    
208    -16    
48     192    
64     464    
-480   -16    
-80    -272   
96     64     
96     -160   
96     -32    
-64    -240   
112    80     
-48    -32    
48     176    
32     64     
-224   224    
128    0      
-48    -112   
-128   48     
-48    -128   
-160   -256   
48     288    
176    448    
-160   -368   
-64    176    
128    -784   
128    224    
-96    -656   
320    96     
0      -96    
304    -32    
-320   -16    
64     -16    
48     96     
64     -48    
64     0      
16     128    
-48    -32    
16     0      
-64    32     
176    -80    
-80    112    
208    96     
144    112    
16     352    
0      16     
-192   -48    
96     112    
-48    32     
96     96     
-16    16     
64     -48    
112    240    
-32    176    
-224   16     
-416   -96    
32     16     
-352   -272   
-336   80     
80     112    
-1120  -16    
-16    -64    
-288   -160   
208    80     
-80    -96    
-96    -16    
0      -128   
-192   16     
-16    -144   
16     144    
-176   -128   
80     240    
-208   -16    
-144   -368   
-80    -192   
-96    240    
80     144    
-416   -96    
-256   -32    
160    -48    
112    -32    
16     96     
16     48     
-96    0      
32     96     
16     -192   
-48    0      
80     -144   
-192   -64    
32     -224   
48     -96    
-400   -640   
-560   -432   
80     -480   
-320   192    
80     416    
32     96     
16     432    
0      -176   
-224   -64    
208    -128   
-160   48     
80     16     
176    448    
-464   -176   
144    -32    
-144   -48    
-144   16     
-16    128    
112    256    
80     352    
-528   -32    
160    288    
-128   -112   
48     -192   
-16    -80    
-16    160    
16     -80    
0      176    
336    464    
-480   32     
336    -144   
-240   -96    
64     -112   
-32    16     
-176   48     
-416   48     
-48    208    
-32    80     
112    0      
-16    144    
16     224    
-32    160    
-128   336    
-32    80     
64     -16    
-128   -32    
-128   -144   
112    -64    
48     96     
48     112    
-352   48     
128    -80    
-80    176    
-144   64     
48     -16    
-208   -32    
128    0      
-96    -64    
224    128    
-240   208    
-16    -160   
-176   192    
-160   32     
-80    64     
112    -64    
-48    -80    
48     160    
-1632  -16    
-96    0      
96     96     
16     -32    
128    112    
2448   192    
-1296  -1648  
592    -368   
240    224    
48     752    
560    160    
-624   -400   
656    -32    
-80    80     
80     224    
-528   32     
-48    176    
240    -32    
-80    288    
64     16     
-48    -48    
-80    16     
208    144    
48     128    
16     -32    
-32    128    
-32    -96    
-80    336    
-80    -160   
32     128    
176    48     
-112   208    
160    176    
-176   48     
208    -48    
-208   32     
96     32     
32     176    
16     96     
80     112    
-32    -48    
-288   -176   
-64    192    
48     64     
192    96     
-80    80     
32     32     
-48    144    
80     48     
0      0      
0      176    
0      96     
80     32     
0      352    
-48    -144   
176    32     
-240   80     
192    112    
-16    -96    
-32    48     
96     96     
80     112    
-48    -32    
64     192    
-48    0      
96     32     
0      160    
-112   -16    
80     -16    
-64    112    
0      128    
16     16     
16     224    
-96    -176   
144    64     
-96    144    
-32    176    
16     -16    
160    112    
-48    144    
-80    -112   
128    176    
-288   80     
48     -16    
208    -32    
-160   128    
-80    32     
-80    -64    
96     -144   
-32    144    
-96    -48    
96     48     
-48    96     
-128   272    
64     80     
32     0      
16     96     
80     16     
128    160    
-32    16     
272    256    
-192   80     
192    368    
48     144    
16     144    
-96    48     
144    128    
-48    176    
-48    160    
96     16     
32     80     
0      64     
64     208    
-32    64     
80     48     
16     0      
16     -32    
-48    -16    
80     80     
112    64     
16     160    
0      320    
80     32     
-80    32     
112    -304   
16     -32    
80     288    
-112   -32    
32     112    
-208   -624   
240    -32    
-240   48     
128    -128   
176    64     
48     -1664  
-32    112    
32     16     
128    80     
160    80     
48     432    
64     208    
256    256    
-320   192    
160    -80    
-64    64     
208    176    
0      0      
-128   -400   
32     80     
32     -32    
32     16     
176    352    
64     256    
-32    -192   
48     64     
-48    176    
160    96     
-128   48     
0      -16    
64     -80    
288    80     
64     256    
272    576    
-400   64     
64     -272   
-32    -208   
80     -1600  
48     64     
80     176    
-416   -432   
64     -368   
496    192    
224    288    
16     224    
-224   -16    
-128   -224   
432    -96    
304    128    
-176   96     
-112   -416   
-64    0      
384    -560   
112    80     
-160   384    
-208   96     
-160   0      
256    16     
208    128    
-32    144    
-64    80     
32     32     
144    176    
64     0      
-80    64     
48     -160   
144    176    
64     -448   
96     144    
-288   -160   
64     -160   
-112   144    
192    112    
-336   464    
-1472  -352   
800    1152   
-304   560    
80     -880   
432    544    
-592   -352   
-80    304    
-400   -80    
896    -256   
-560   32     
560    288    
80     96     
-128   176    
-272   -32    
304    128    
0      -32    
304    64     
-240   -368   
-144   -32    
-176   0      
32     272    
-304   160    
96     -96    
-224   -400   
0      272    
96     -208   
144    592    
-240   -560   
208    -304   
256    368    
-208   -96    
272    48     
-96    -96    
320    -224   
-32    176    
112    -32    
176    -256   
-48    176    
-112   -656   
128    80     
-160   -96    
160    -560   
144    -48    
64     -1232  
-176   64     
-176   -304   
96     -928   
16     112    
48     -720   
128    144    
48     160    
16     -224   
32     -272   
32     -96    
144    -128   
112    96     
64     -64    
208    768    
-368   -832   
176    -128   
-864   -96    
0      -32    
-240   224    
400    -368   
-128   -400   
80     -1440  
0      -32    
64     96     
112    -64    
48     -96    
32     0      
96     -336   
-16    32     
176    -48    
16     32     
-48    320    
64     -32    
160    -96    
240    288    
-64    -288   
-16    -352   
240    -192   
112    -1248  
16     -176   
96     16     
-128   144    
112    -16    
-16    128    
-256   -208   
224    -80    
-576   0      
-16    -176   
-336   80     
112    384    
64     112    
128    -352   
96     208    
-16    -560   
-128   -144   
-32    -144   
-48    -32    
32     -80    
32     64     
-112   -144   
112    -64    
-240   -176   
224    96     
-320   400    
128    528    
128    240    
-288   -512   
160    -176   
176    -544   
-16    64     
256    -48    
-64    48     
240    112    
-272   -112   
176    -48    
-240   -96    
-112   96     
288    144    
-64    64     
-64    -368   
-1120  -80    
-272   -304   
112    -96    
48     -112   
-48    -48    
80     -864   
-128   -112   
48     -48    
-32    -240   
-16    144    
160    128    
112    112    
-32    -48    
-16    -80    
64     -240   
-416   0      
-32    -160   
-144   96     
304    -64    
-112   16     
112    -1040  
-112   112    
32     192    
-16    -16    
304    -80    
-128   112    
-112   -16    
128    -64    
-288   48     
272    128    
-384   32     
272    80     
0      400    
-112   -240   
208    32     
32     -352   
160    96     
-176   64     
32     -32    
-416   -128   
160    -32    
-160   48     
32     -96    
32     144    
64     -32    
0      80     
48     -400   
80     144    
48     -80    
-272   112    
144    -240   
208    64     
112    -80    
0      64     
-272   -32    
160    -64    
-112   0      
144    -80    
-64    208    
112    -352   
-256   16     
-192   -160   
0      48     
-768   -64    
32     48     
-288   -128   
-64    96     
-144   -16    
-272   48     
-48    32     
192    16     
-96    240    
48     32     
2976   864    
-1424  -816   
544    -176   
224    144    
-768   -368   
176    368    
-32    208    
208    832    
-560   -832   
-32    0      
-112   80     
64     160    
-464   192    
176    -144   
-976   192    
48     -256   
48     336    
16     -96    
-16    112    
160    -96    
-192   0      
128    32     
-16    256    
-48    -32    
-16    208    
-192   -208   
-32    0      
-576   0      
144    176    
-704   -320   
-144   128    
112    -32    
112    160    
-144   -240   
-32    64     
-112   -272   
176    384    
-48    144    
0      0      
-160   -32    
-16    32     
-16    144    
128    32     
-240   16     
208    0      
-48    176    
-304   -48    
0      -32    
-112   -128   
48     192    
48     -64    
48     80     
-48    128    
-48    64     
-16    32     
-192   -16    
16     128    
-16    160    
16     144    
-144   -64    
-48    32     
-416   -80    
112    112    
-48    -112   
160    112    
-144   112    
0      64     
-128   48     
-320   -64    
128    0      
-112   16     
32     144    
-192   0      
-16    -16    
-96    -80    
16     64     
-272   -80    
-176   112    
-144   -80    
144    0      
-48    64     
-176   176    
0      -64    
48     -240   
-192   16     
0      80     
-160   -80    
224    -64    
48     336    
-496   -48    
320    144    
-144   32     
-48    48     
-272   80     
-80    144    
32     128    
-144   16     
112    32     
-32    16     
-48    -288   
240    608    
80     576    
-144   128    
-144   192    
-64    -64    
64     32     
-160   -80    
-112   32     
-48    -112   
-16    144    
16     32     
0      160    
48     -16    
-16    80     
-32    80     
-64    224    
112    304    
-96    -64    
16     80     
-112   -208   
-32    128    
-80    -16    
64     144    
-112   -48    
-112   -208   
-32    -48    
176    304    
48     16     
-128   -464   
-384   16     
336    176    
160    528    
-160   160    
32     0      
-32    -112   
0      576    
112    304    
-160   80     
240    144    
-16    64     
80     160    
32     80     
128    320    
-192   112    
96     112    
-64    -96    
208    288    
-64    80     
-96    -32    
-48    80     
48     16     
-144   48     
80     64     
-16    96     
176    -64    
-48    112    
-32    64     
304    128    
-144   256    
48     96     
-32    16     
48     -96    
-80    128    
-16    128    
-80    32     
-112   0      
144    240    
-128   -48    
80     272    
-144   96     
256    0      
-128   112    
112    96     
144    128    
-96    192    
-16    -176   
96     -48    
64     144    
192    160    
-272   64     
112    -48    
112    176    
176    144    
-80    112    
240    -32    
-32    160    
112    -64    
-16    224    
-16    -128   
352    160    
-208   128    
192    32     
-96    -80    
208    160    
-48    224    
-32    -912   
16     112    
64     80     
-560   -608   
-208   -256   
-400   -272   
400    576    
-320   -112   
576    480    
-160   -32    
48     -912   
688    448    
-992   -16    
672    208    
-496   336    
80     -400   
0      -96    
32     80     
368    128    
-256   432    
80     -48    
-224   288    
128    -304   
64     480    
0      16     
-144   208    
-48    -192   
384    240    
-48    224    
-176   112    
-160   -480   
464    336    
-272   -688   
320    160    
-32    96     
-32    80     
80     240    
32     64     
80     -32    
-32    -272   
-32    240    
80     464    
208    320    
96     192    
0      16     
-80    -208   
80     112    
16     0      
16     64     
80     272    
160    208    
48     -16    
112    128    
-32    -416   
96     64     
-144   -144   
160    -16    
32     -64    
-16    -256   
144    80     
0      -320   
-128   -64    
0      -288   
176    192    
-32    -1456  
64     -80    
128    -96    
0      32     
80     0      
96     176    
-48    144    
80     96     
-64    112    
-16    -80    
80     112    
-16    -144   
80     144    
96     0      
144    112    
-64    -352   
112    128    
80     -240   
-96    96     
272    64     
64     96     
-16    352    
448    416    
-48    464    
-32    -112   
128    48     
256    208    
144    272    
-64    -64    
-16    -80    
0      -944   
16     -208   
192    -192   
160    400    
-80    32     
224    400    
-512   0      
48     -224   
-48    -80    
112    -48    
112    48     
16     -256   
32     128    
48     -544   
272    96     
-16    -16    
288    496    
-144   -560   
112    160    
-176   -224   
240    176    
48     -112   
0      -288   
176    160    
16     -192   
0      112    
-16    -384   
-16    32     
208    192    
128    144    
-48    352    
-64    16     
96     176    
128    240    
-48    80     
240    -128   
-208   128    
16     -368   
96     -1232  
112    -256   
96     256    
32     80     
160    32     
-64    -240   
-176   144    
160    -208   
336    -80    
-144   -96    
-112   -448   
144    0      
16     -400   
32     -144   
-272   -128   
0      -432   
0      16     
80     -80    
224    -64    
-32    128    
16     -352   
112    48     
128    -80    
96     -48    
-80    64     
128    -208   
-128   96     
208    -768   
32     -272   
-304   64     
176    -320   
0      32     
80     112    
96     320    
-32    -1344  
208    80     
-48    176    
128    -48    
128    32     
-80    -16    
-16    -16    
-224   -192   
16     -96    
336    -192   
-240   64     
128    64     
-112   -144   
128    -240   
16     -64    
-112   -16    
224    -80    
80     -2320  
80     -32    
48     0      
-128   -112   
96     -128   
-32    0      
48     -112   
96     112    
-240   16     
32     -96    
48     -144   
64     -144   
128    32     
-128   160    
400    32     
-176   -384   
80     144    
2832   544    
-1552  32     
640    -384   
368    368    
-560   -416   
0      784    
-832   -560   
720    592    
-352   -16    
0      288    
-176   -240   
-96    32     
-240   -112   
336    -528   
-336   112    
192    -688   
80     400    
352    -112   
-128   80     
-32    -400   
-48    112    
-32    0      
192    224    
-368   -208   
16     96     
-1200  -112   
80     16     
48     -224   
-80    -240   
96     96     
176    -1136  
0      32     
-64    0      
64     64     
-32    -32    
0      -176   
-48    -112   
-32    144    
-160   112    
32     -64    
-304   0      
16     64     
128    96     
128    -64    
-32    32     
16     -176   
-80    64     
160    288    
-80    -80    
48     16     
0      0      
64     48     
16     -144   
0      -64    
0      -64    
-48    96     
32     -80    
96     112    
-32    -64    
80     80     
112    -416   
48     -96    
32     96     
64     240    
-192   128    
64     -160   
-16    -208   
176    -80    
-224   16     
48     64     
-112   64     
224    -112   
-448   -80    
304    -416   
32     112    
-640   -368   
-128   272    
-432   0      
-560   -144   
-112   16     
0      32     
64     80     
-32    -32    
16     -96    
80     192    
-320   -208   
-1040  -480   
-16    0      
-144   128    
-144   96     
176    128    
-320   -48    
-16    48     
-928   -128   
-80    -80    
-1392  0      
-32    -128   
-16    -144   
-32    16     
112    -144   
-112   48     
64     -96    
96     176    
-80    -224   
112    128    
32     304    
-32    80     
-64    -48    
-384   -160   
16     80     
-144   112    
-112   -96    
-416   -208   
-96    0      
-256   -112   
112    -128   
-192   -384   
32     -64    
-160   -208   
0      -160   
80     64     
96     176    
80     96     
-80    -48    
-112   192    
-208   -32    
320    144    
-304   -64    
160    320    
-192   -64    
32     -32    
-240   -256   
64     128    
32     -48    
0      64     
-144   64     
144    128    
-128   64     
64     48     
-144   16     
-32    64     
48     96     
-80    -96    
32     112    
-1104  -32    
32     -32    
48     128    
-64    304    
16     160    
-160   -208   
80     -32    
-16    144    
-16    64     
-432   -272   
64     -128   
96     272    
-16    80     
-144   -208   
-96    80     
-368   48     
0      80     
-224   -80    
272    144    
160    128    
32     -32    
-16    240    
-80    304    
-80    -32    
112    -32    
48     144    
112    64     
-16    48     
-224   -48    
32     96     
-112   -16    
-16    176    
-32    -48    
128    96     
-48    64     
-32    16     
-96    0      
16     -32    
112    176    
32     0      
-112   80     
80     -16    
-80    176    
-32    -160   
-112   208    
-128   -32    
256    16     
-928   0      
-144   16     
448    -416   
-128   368    
-80    -48    
-112   112    
-208   -1136  
848    1616   
-336   -240   
-160   -688   
-288   -624   
224    32     
80     384    
-288   -160   
-288   112    
336    -16    
-112   320    
-272   -208   
64     288    
80     -16    
256    448    
-256   128    
208    272    
-160   560    
-128   -64    
-48    16     
352    192    
-160   32     
0      -128   
-256   48     
48     -96    
160    -64    
-144   16     
48     208    
-16    32     
32     208    
-96    176    
-16    128    
64     -32    
-32    64     
64     96     
-112   -128   
96     96     
-96    96     
-96    128    
176    112    
-112   144    
0      32     
16     48     
48     224    
0      64     
-96    80     
-16    32     
192    160    
-144   -144   
96     80     
-128   -96    
32     224    
-160   32     
160    -32    
-16    160    
-32    128    
-32    64     
64     -32    
64     176    
-64    64     
144    48     
-32    128    
-32    112    
0      128    
0      -48    
128    96     
0      256    
16     144    
144    -48    
0      192    
-32    96     
-16    48     
64     0      
160    128    
-32    48     
0      -128   
-16    -48    
-112   16     
48     128    
48     48     
-112   0      
208    -1712  
-128   112    
176    176    
-224   208    
224    144    
32     -32    
160    80     
-128   -96    
128    48     
-128   144    
-48    64     
192    176    
-96    80     
80     64     
16     -176   
-352   -1488  
240    288    
-16    0      
96     304    
-16    16     
96     176    
96     208    
-112   -16    
-48    16     
224    112    
-112   160    
128    144    
-16    -112   
-96    128    
-16    64     
48     -304   
-48    48     
176    240    
-32    -80    
144    272    
-32    96     
144    16     
48     128    
-32    64     
368    512    
48     176    
192    224    
-336   208    
288    192    
224    64     
-256   -224   
176    288    
32     -1184  
-64    32     
-80    48     
176    48     
64     -16    
-272   -128   
-80    -176   
272    112    
0      -48    
320    80     
-256   224    
-32    224    
240    48     
-80    -560   
-144   144    
256    -912   
-64    0      
160    32     
112    496    
128    112    
-32    112    
-208   -96    
176    112    
80     64     
16     48     
0      32     
96     -48    
-32    192    
176    -192   
-160   240    
128    -176   
-112   176    
48     -288   
96     64     
-48    256    
128    112    
-32    224    
-112   -48    
224    96     
-64    -112   
-96    -48    
48     -240   
0      320    
-16    -224   
-32    208    
160    -208   
-16    32     
-80    -1728  
-16    80     
48     -1648  
160    48     
-16    112    
80     112    
-32    -32    
144    144    
96     192    
-144   -240   
192    208    
160    112    
-112   -48    
96     -368   
96     128    
112    -176   
80     208    
80     -560   
128    272    
-80    160    
-32    0      
0      -80    
-48    -848   
2336   -720   
-896   -256   
1648   416    
-240   224    
544    880    
304    -352   
-784   -448   
1136   -32    
48     384    
-32    176    
-240   -208   
144    352    
112    208    
64     320    
-64    -240   
-96    176    
64     -208   
384    528    
-96    -352   
64     32     
-96    -80    
96     64     
-32    32     
80     112    
96     -464   
176    -80    
-64    144    
48     -976   
-64    96     
16     -112   
96     -464   
128    -160   
0      -224   
-32    -16    
112    112    
128    -16    
-16    -16    
48     -672   
16     -480   
128    80     
-80    -1312  
160    224    
-48    -160   
224    -608   
-176   -16    
288    -16    
-128   -80    
64     -416   
-32    64     
112    -1168  
128    -32    
-160   112    
160    -80    
0      -528   
192    -16    
32     -16    
-160   160    
32     -160   
144    -128   
-832   112    
32     -64    
-16    -64    
48     -112   
16     -144   
16     -192   
-16    -288   
16     64     
80     -128   
96     -288   
80     -80    
256    -80    
48     400    
-288   0      
176    -144   
-176   80     
-128   -48    
336    0      
-144   0      
128    -144   
-16    -1056  
16     112    
112    -592   
112    272    
96     -80    
-80    -32    
16     -64    
-48    -16    
-32    160    
80     -112   
64     48     
32     -144   
-368   128    
48     -144   
160    80     
-16    -32    
-176   48     
96     -768   
-112   -160   
112    -80    
80     224    
16     64     
80     0      
-144   16     
32     -368   
112    -48    
-16    -64    
-480   32     
64     -64    
-80    -32    
128    -64    
-80    -128   
128    -400   
-64    -32    
192    -256   
-48    48     
16     80     
-80    -192   
-112   -112   
0      -96    
32     32     
64     112    
-64    -48    
-80    64     
-816   -48    
192    80     
-48    -176   
208    240    
-208   96     
448    -1008  
-240   -96    
144    128    
144    -48    
64     0      
-32    -256   
-16    -48    
208    112    
-336   48     
176    -304   
-560   -32    
96     -208   
48     16     
48     -112   
-32    -32    
208    192    
-16    -16    
-384   16     
-32    496    
-96    -304   
256    32     
-336   224    
112    -144   
-192   -112   
-96    -128   
0      -80    
32     -80    
-48    64     
256    -160   
256    320    
-304   -976   
256    -160   
-128   96     
272    208    
-224   64     
-96    -32    
64     -48    
208    112    
128    -48    
16     176    
-320   16     
304    -144   
-48    128    
-544   -96    
-336   96     
112    16     
-432   240    
336    -160   
-816   32     
64     -16    
-16    48     
-96    -32    
160    -48    
112    112    
176    96     
-48    -64    
-880   -192   
112    144    
-256   -48    
112    272    
-176   80     
-112   48     
-64    -96    
-32    -64    
-48    64     
-784   -288   
-16    336    
-16    -144   
-144   80     
-256   368    
288    -352   
-1536  -1728  
144    -80    
-336   320    
288    1776   
64     928    
-816   -864   
448    432    
-144   48     
-80    -208   
-96    -16    
80     240    
96     -112   
-16    96     
-32    -176   
64     128    
-160   -96    
272    144    
-112   -48    
16     288    
-144   208    
0      80     
-208   -96    
-48    -80    
160    -48    
-320   -32    
16     48     
-400   -16    
-112   160    
144    -144   
-96    160    
48     -96    
96     144    
-96    48     
-96    -16    
-256   -192   
192    -16    
-80    224    
192    16     
-208   -96    
-144   208    
-80    96     
-208   -64    
-128   -80    
-16    16     
208    160    
-16    -64    
-96    -64    
176    80     
-112   224    
144    32     
-176   96     
-16    -32    
80     64     
-128   96     
96     144    
-224   16     
96     48     
-32    48     
-192   -96    
0      208    
-80    -144   
0      128    
80     -16    
16     80     
-48    96     
-240   -64    
0      48     
-64    -32    
112    64     
-80    80     
48     208    
-144   -112   
128    128    
-304   -48    
-16    -80    
96     160    
-176   80     
160    -16    
-144   144    
-80    -96    
144    0      
-64    320    
32     0      
240    64     
-208   192    
-32    -48    
-32    32     
-192   64     
0      -32    
208    352    
-160   192    
192    -32    
-80    -160   
48     -32    
144    256    
-256   176    
224    96     
-64    -32    
-112   -48    
-64    96     
32     16     
-144   -208   
-80    -160   
208    112    
48     64     
160    112    
-192   -16    
0      -16    
-80    -80    
192    208    
0      80     
-48    64     
-176   -80    
0      96     
32     16     
-240   -416   
-80    -224   
-64    224    
208    -16    
192    80     
-288   96     
-128   80     
128    64     
160    -48    
-160   48     
-16    80     
112    240    
256    -16    
-144   112    
-272   0      
144    256    
-224   -208   
144    32     
-48    -96    
-208   176    
304    64     
-96    352    
160    48     
96     112    
-112   -80    
32     128    
-288   64     
432    128    
-176   144    
-96    -80    
64     192    
16     64     
144    176    
16     160    
-16    96     
48     144    
128    96     
-128   -64    
144    -48    
-32    144    
-16    -16    
48     32     
-80    128    
96     32     
-192   -128   
48     240    
80     208    
80     192    
32     112    
160    480    
-208   96     
0      176    
-80    -80    
176    112    
48     -16    
16     -112   
208    272    
-112   96     
-192   80     
-64    -16    
224    64     
128    96     
48     -2176  
-96    144    
48     -48    
-224   0      
64     96     
112    -112   
-16    112    
-96    16     
0      32     
128    272    
80     128    
64     112    
0      80     
192    -48    
96     160    
-144   -784   
-16    128    
-16    0      
0      32     
976    -2272  
208    -880   
848    32     
-528   32     
256    -512   
544    -32    
-368   112    
-48    -432   
-48    272    
-16    0      
64     16     
0      -176   
-112   256    
256    -96    
48     272    
96     0      
48     112    
-144   208    
320    32     
-160   -128   
320    -64    
-192   -240   
256    -48    
-176   48     
32     96     
256    336    
288    80     
-64    320    
-96    -624   
240    432    
16     176    
320    240    
-48    192    
16     64     
0      -16    
-80    -64    
160    16     
-48    112    
144    16     
32     64     
192    160    
192    112    
64     32     
-128   -432   
128    64     
0      -112   
96     208    
32     304    
176    192    
-16    64     
80     -16    
16     144    
32     240    
0      112    
48     -112   
80     128    
-32    -544   
208    96     
-160   -272   
64     80     
144    -752   
-48    -16    
-128   -208   
112    -160   
-16    -80    
128    160    
-48    32     
96     64     
-32    80     
80     -144   
16     96     
0      -224   
0      80     
48     -128   
0      128    
32     -240   
160    448    
-80    128    
-80    -96    
64     -128   
-16    144    
112    192    
32     112    
240    416    
-144   80     
96     -16    
-176   -48    
64     -400   
208    -576   
192    128    
32     224    
-112   128    
-16    -16    
48     64     
144    128    
96     96     
0      112    
-48    0      
48     48     
80     32     
32     48     
112    -64    
96     176    
16     -352   
-64    16     
32     16     
-48    -32    
224    304    
-160   -32    
288    96     
-128   112    
64     -32    
0      -48    
32     96     
160    0      
16     80     
64     -96    
48     -80    
48     -96    
64     272    
112    -96    
-128   -128   
48     -448   
272    -2768  
-16    -144   
-16    -1440  
-32    -576   
176    32     
176    -1024  
-128   -112   
144    -368   
-48    16     
144    112    
64     -16    
0      -80    
64     112    
-80    112    
160    -208   
16     16     
16     48     
64     144    
-16    -240   
16     -160   
48     -384   
80     -288   
80     -384   
-128   -144   
448    -1856  
-112   -416   
304    128    
-16    -352   
-96    -656   
224    64     
0      16     
48     112    
-336   288    
-64    96     
-1040  352    
-384   288    
144    -96    
-128   112    
-16    -272   
64     -912   
176    -320   
-64    -304   
272    -32    
-128   -160   
32     -112   
64     16     
224    224    
80     32     
160    -80    
224    144    
-128   96     
80     -80    
96     -336   
208    64     
16     -80    
-144   48     
-16    -1472  
48     -16    
-16    -16    
16     160    
80     -112   
48     -48    
-80    32     
32     80     
-80    -416   
176    160    
80     -96    
112    -32    
-64    64     
-128   48     
32     80     
-80    -576   
0      -32    
80     -64    
-368   -640   
672    -16    
-1120  -928   
80     -176   
192    -1104  
-144   -112   
544    -144   
-512   -112   
-32    32     
448    -64    
-128   0      
-16    32     
96     -112   
80     144    
-16    -576   
48     32     
112    224    
-112   -128   
176    -32    
-64    -96    
0      80     
112    144    
-272   192    
32     -176   
-384   -128   
48     -16    
48     -32    
-16    -480   
48     112    
-80    -1168  
224    80     
-208   112    
192    -64    
-192   -16    
32     -80    
-176   -96    
224    48     
-304   112    
240    -240   
-448   -80    
96     -256   
32     64     
64     -224   
64     80     
96     -64    
32     -144   
-192   -96    
80     16     
-208   16     
208    -16    
-64    64     
-32    32     
-16    -16    
-64    48     
-608   -160   
-64    -48    
128    128    
-32    -32    
16     80     
32     -352   
96     -64    
-64    128    
144    -32    
16     80     
0      16     
32     -64    
16     -48    
-64    -48    
80     -32    
-240   96     
0      -144   
64     96     
-304   -208   
-16    32     
128    304    
-176   160    
96     -128   
-256   -208   
-144   0      
112    176    
-272   -128   
272    -80    
-80    176    
0      32     
192    -144   
-544   -432   
48     336    
-352   -256   
48     48     
-112   0      
128    80     
-128   -48    
16     144    
-144   -128   
-112   -48    
-112   80     
-80    -48    
256    0      
-80    32     
-96    -32    
-32    -112   
0      192    
-64    -128   
-64    -48    
48     80     
-128   80     
96     -64    
-224   -48    
-16    112    
-176   32     
48     112    
-48    48     
-64    128    
-336   80     
-16    32     
144    144    
16     224    
160    -16    
-32    144    
-32    240    
-112   112    
128    144    
-144   -176   
-208   -64    
208    256    
-112   -144   
-288   -80    
-384   48     
240    80     
80     96     
-144   -160   
16     160    
224    288    
16     192    
96     256    
-64    160    
-160   80     
96     48     
-96    112    
224    0      
-16    48     
-400   0      
64     80     
-208   -176   
64     96     
-64    112    
32     176    
80     48     
-256   -176   
96     -128   
-16    64     
16     96     
-64    32     
-32    -32    
-64    -128   
112    112    
-288   -160   
80     64     
-288   -288   
256    544    
64     -144   
-96    32     
80     224    
16     -16    
-96    -48    
48     -16    
0      0      
16     160    
-80    64     
-80    -80    
16     16     
-192   16     
160    -16    
-128   16     
-80    32     
16     80     
-240   96     
176    80     
32     192    
0      64     
160    -80    
-80    -368   
-160   304    
160    64     
-80    128    
0      128    
-208   96     
16     128    
-64    96     
-64    128    
32     80     
16     -32    
64     -80    
32     192    
-144   64     
112    176    
16     48     
48     48     
1744   -1600  
880    608    
-512   -592   
-432   -448   
192    240    
144    -368   
-496   0      
464    480    
-256   -144   
16     -80    
-96    64     
-16    96     
192    -16    
-96    48     
144    128    
-80    208    
0      -16    
-112   96     
-48    -32    
144    176    
-80    48     
-48    96     
-64    0      
-16    256    
128    96     
16     112    
-240   -400   
0      -432   
-224   -80    
160    64     
176    240    
-128   96     
64     96     
32     240    
-48    -32    
16     -144   
-160   32     
256    176    
96     448    
64     368    
-48    -80    
16     -48    
32     32     
-64    16     
128    192    
112    80     
-208   -176   
0      -16    
-64    144    
-80    -16    
208    144    
-112   -48    
64     16     
48     80     
48     80     
32     16     
-16    -272   
-32    -464   
352    848    
-288   -32    
288    256    
-304   -320   
192    128    
-96    48     
128    128    
176    48     
16     48     
0      48     
80     112    
16     0      
0      80     
96     32     
80     160    
-48    -48    
96     176    
128    -32    
288    672    
-240   320    
224    0      
-112   -880   
0      48     
96     -208   
16     48     
-48    -48    
192    256    
-16    112    
128    192    
-64    400    
32     240    
-160   -16    
0      -64    
16     96     
160    64     
32     176    
-32    -1744  
0      96     
48     48     
48     128    
16     80     
112    224    
-16    32     
32     48     
-112   -16    
96     32     
-32    32     
144    112    
-112   -32    
32     80     
16     192    
32     -1168  
64     160    
32     112    
80     208    
48     80     
-32    112    
0      64     
-96    -272   
96     -32    
48     320    
144    224    
-16    160    
-256   32     
112    80     
0      -160   
64     -304   
-16    320    
304    240    
-32    256    
-176   -608   
32     80     
80     32     
336    -48    
-304   272    
208    48     
-80    128    
272    240    
-80    96     
112    -192   
48     320    
16     -400   
48     64     
64     -336   
80     240    
-32    -128   
-144   16     
0      -400   
96     -64    
-48    -96    
192    208    
-112   32     
112    96     
-112   -80    
128    -64    
-16    80     
112    -352   
96     64     
80     -208   
-16    -256   
272    320    
0      80     
-32    -272   
160    144    
-48    48     
128    112    
-128   -16    
128    144    
144    432    
-144   -160   
32     96     
80     -304   
64     144    
-16    -112   
32     48     
0      -336   
-64    -112   
64     -1856  
-224   -128   
16     112    
160    160    
192    224    
16     160    
0      144    
176    -544   
144    144    
-32    -288   
-48    192    
-32    -176   
96     128    
-16    -352   
48     160    
-64    32     
-64    -16    
80     48     
128    112    
80     -144   
96     64     
112    -32    
80     80     
960    416    
-512   -496   
336    -288   
-400   -1120  
1024   -1376  
-496   -512   
800    1392   
-544   912    
-160   -528   
-96    -96    
528    160    
-16    96     
-128   256    
-64    -48    
240    304    
-32    -96    
-16    0      
192    96     
0      -16    
32     16     
128    80     
-32    -48    
160    48     
-112   48     
160    48     
-112   -128   
32     -16    
96     -48    
144    -240   
-96    -208   
160    -608   
-48    -272   
32     192    
192    48     
80     32     
80     -144   
80     -128   
80     96     
80     -224   
-176   0      
48     128    
128    -128   
-16    -64    
-144   -320   
96     -288   
160    -336   
144    64     
64     -576   
-112   -48    
32     96     
80     -96    
128    -240   
80     112    
64     -96    
32     -16    
-80    -16    
32     -80    
-1072  -48    
208    -336   
-80    16     
96     -128   
80     32     
0      -400   
64     0      
144    -464   
-32    -112   
80     48     
48     400    
-160   96     
96     -352   
-128   -160   
0      -208   
-672   0      
112    -240   
64     -80    
-16    -64    
272    -208   
144    -400   
80     -48    
-16    -1840  
-128   0      
304    -48    
-80    176    
336    -304   
32     224    
-368   -144   
384    32     
-448   -32    
320    -32    
-1936  -192   
32     0      
64     -224   
0      -16    
16     64     
-80    -432   
96     96     
112    -256   
80     208    
-112   -80    
32     -32    
-32    96     
112    -80    
-80    160    
-16    -192   
-240   -96    
-16    -224   
-224   64     
-96    -80    
32     112    
80     -592   
64     80     
-32    -2944  
96     176    
32     96     
32     80     
-80    -80    
16     128    
80     144    
16     -80    
-560   -208   
208    96     
48     -112   
-80    -48    
80     96     
288    -416   
-96    -48    
208    -576   
-128   272    
64     -16    
96     -112   
-208   -96    
-48    80     
-304   208    
176    208    
-32    64     
80     64     
-400   80     
144    48     
-32    -48    
272    -96    
48     160    
80     -448   
80     0      
-224   32     
96     -160   
-144   -208   
48     16     
16     -160   
96     144    
-208   -256   
176    80     
-176   -32    
80     -224   
48     80     
-32    -144   
112    80     
-128   64     
-1056  -96    
32     80     
-32    -48    
48     32     
16     64     
16     80     
-80    0      
-160   -704   
432    528    
192    624    
-336   -304   
-160   96     
-800   -448   
-64    96     
32     0      
-864   -32    
-80    64     
-80    32     
-96    -16    
-736   64     
-80    48     
-80    -64    
-80    32     
-464   64     
112    128    
-176   -32    
432    0      
-400   -192   
-352   64     
-96    16     
-48    0      
64     112    
-384   -16    
-112   -48    
-1040  -80    
-80    192    
176    -80    
160    272    
48     -96    
96     176    
1408   -2000  
1024   208    
-992   -800   
-400   -320   
336    608    
80     -224   
-80    176    
112    -32    
-80    512    
-496   -368   
32     -48    
-544   64     
-128   -112   
48     0      
16     32     
-192   -80    
-96    64     
304    160    
-96    16     
16     64     
192    0      
-176   -64    
176    -112   
-144   112    
-112   -288   
0      0      
-48    192    
-48    48     
48     -624   
144    -48    
-48    -32    
208    64     
-80    208    
-112   -32    
272    80     
64     416    
288    384    
-224   0      
-160   -240   
-192   -240   
144    192    
-464   16     
288    160    
-720   48     
-80    -160   
48     16     
-48    -16    
-224   -144   
320    464    
-48    112    
-80    352    
-32    16     
-144   -272   
256    304    
-320   0      
-48    112    
160    896    
-64    432    
-560   -400   
208    16     
-144   -336   
48     32     
16     240    
-320   48     
144    224    
0      64     
48     0      
-64    64     
-16    64     
64     176    
-48    160    
-16    -96    
80     16     
-272   0      
144    256    
-176   -32    
-48    16     
-80    208    
208    96     
0      224    
-288   160    
96     -96    
-224   160    
64     -112   
48     160    
-32    -48    
112    304    
-112   192    
-240   -240   
128    192    
48     48     
32     96     
-64    -16    
64     80     
0      368    
-80    -32    
208    240    
-144   16     
288    304    
-112   208    
-48    -96    
32     -96    
32     304    
-32    32     
-32    0      
-48    144    
16     16     
192    144    
-112   112    
64     208    
64     64     
-32    -48    
-80    16     
-16    32     
-48    -64    
32     0      
-96    -16    
208    224    
-16    192    
-240   272    
224    176    
-304   -192   
128    96     
0      0      
64     -176   
-16    -144   
-32    48     
32     -192   
-128   304    
176    288    
-16    48     
-16    -336   
-32    32     
64     128    
192    240    
-160   128    
256    192    
-16    224    
-96    0      
0      -48    
0      32     
0      64     
128    64     
-112   176    
-16    -64    
32     -320   
-176   -32    
192    32     
-80    64     
176    208    
128    256    
-80    80     
48     304    
-96    -16    
144    112    
-160   32     
208    64     
-48    -80    
192    48     
16     240    
0      112    
-16    272    
-16    -240   
16     80     
64     176    
-16    -32    
16     64     
96     32     
-128   64     
80     64     
16     112    
272    -64    
-144   64     
0      96     
-128   -32    
48     176    
96     -336   
-32    -1504  
-112   144    
-112   64     
112    64     
64     48     
32     192    
192    -160   
144    160    
48     208    
-80    160    
-112   48     
64     48     
32     0      
96     112    
128    32     
-64    -1600  
-48    128    
0      -96    
128    -16    
64     192    
-896   -928   
-240   384    
224    880    
-336   208    
528    0      
-192   368    
-304   -432   
-464   -576   
160    704    
448    160    
-176   -496   
-16    -128   
-48    672    
352    -112   
96     272    
-176   -80    
112    0      
-64    176    
96     128    
128    32     
-96    0      
112    160    
-80    240    
192    -128   
-112   -64    
368    -144   
-160   192    
176    -576   
-160   416    
128    -32    
48     16     
-80    80     
112    112    
-64    48     
64     128    
-16    -16    
-96    -16    
-16    -112   
-32    -272   
256    128    
48     -128   
-80    160    
48     -640   
64     160    
128    -160   
80     144    
-64    80     
0      144    
0      -16    
432    192    
-272   16     
128    112    
176    160    
-48    64     
224    16     
-144   -64    
176    240    
32     -240   
32     -16    
144    -1008  
-192   80     
272    128    
32     240    
-240   -176   
272    112    
-112   112    
144    128    
128    144    
80     -192   
-16    112    
32     -80    
128    112    
16     -464   
48     160    
-16    -144   
208    48     
128    416    
-48    160    
432    48     
-16    192    
-64    0      
128    -160   
48     176    
-160   -288   
112    -80    
-176   64     
16     208    
-48    -128   
112    -176   
80     -192   
16     112    
-64    80     
80     192    
-32    288    
16     64     
-128   -32    
0      -192   
-160   64     
-16    -320   
160    256    
-144   -64    
64     176    
160    64     
112    128    
-112   -48    
112    96     
144    -16    
-176   -96    
240    368    
-128   -736   
80     -1840  
0      -192   
48     -352   
0      64     
32     32     
0      -288   
16     32     
-32    -384   
144    176    
80     32     
208    -816   
-144   64     
0      -416   
128    16     
-672   -240   
96     -240   
0      -64    
256    208    
32     64     
-176   -944   
224    -32    
16     128    
64     48     
-16    112    
-16    -32    
160    -96    
-256   -160   
384    -256   
32     384    
-128   64     
-32    -32    
-512   -48    
96     -528   
80     96     
192    32     
-144   -48    
48     -1056  
-80    -176   
208    32     
-80    -64    
112    48     
-16    -96    
-112   -64    
128    -32    
-240   -16    
96     -496   
-1392  256    
-96    -176   
-16    -400   
-80    -32    
272    -144   
-80    -128   
160    -112   
64     -2032  
-32    112    
-176   -288   
-32    -336   
352    -80    
480    176    
16     112    
-80    16     
-384   0      
64     0      
224    -96    
160    128    
-32    -160   
64     -672   
-208   -128   
272    -400   
-96    80     
80     0      
96     80     
128    -128   
-48    32     
144    -176   
-16    32     
-112   32     
128    16     
-784   112    
64     -128   
-112   -96    
192    -224   
-32    112    
-64    -800   
144    592    
-80    112    
128    48     
-176   -336   
2048   -992   
-800   -896   
912    1056   
-544   320    
608    -544   
-816   -16    
-128   -208   
192    496    
-624   -112   
192    -208   
64     -16    
-144   -144   
16     -2240  
224    -352   
-160   144    
16     -256   
-96    192    
-160   -112   
-944   -160   
-16    -752   
-272   -96    
-160   32     
288    368    
16     112    
272    48     
-192   -176   
96     48     
-256   -2240  
464    -224   
224    368    
208    -224   
-352   256    
64     0      
-112   272    
16     160    
-160   352    
-64    -48    
-144   -80    
160    -64    
16     112    
0      -352   
64     160    
-16    64     
80     256    
-208   -160   
-80    -224   
128    64     
32     272    
-384   -288   
-112   -336   
64     -176   
0      -64    
-512   80     
240    0      
-112   64     
16     -224   
-48    -192   
128    80     
-368   -176   
16     400    
-80    384    
-128   64     
-64    96     
-64    32     
112    -192   
-48    80     
-48    -224   
0      112    
-432   -400   
240    -144   
176    -32    
-16    496    
-144   208    
-496   0      
-16    48     
-192   -240   
-48    320    
-848   208    
112    208    
-144   -96    
-80    -352   
0      16     
208    224    
-176   -16    
-112   16     
80     -128   
-640   -464   
240    208    
-112   128    
128    288    
-80    -32    
-128   64     
-32    112    
-48    -128   
112    64     
-112   192    
-80    -128   
-144   -112   
32     -144   
96     336    
-208   -80    
-32    -80    
176    224    
0      -48    
32     80     
-384   -208   
160    144    
0      16     
160    16     
-112   128    
-48    -32    
-224   16     
64     -96    
48     16     
176    224    
0      240    
-192   -240   
144    288    
-208   -64    
288    384    
-528   144    
192    48     
-80    192    
144    192    
-16    -128   
-96    48     
64     -208   
144    -32    
-128   80     
80     96     
-80    112    
-176   -288   
0      -112   
-64    112    
208    208    
-160   144    
-48    32     
-64    96     
-272   0      
32     -176   
-64    144    
-32    -16    
64     0      
-16    -160   
-48    16     
-16    96     
96     -64    
-288   112    
80     96     
32     16     
-80    64     
48     112    
-96    -32    
80     -16    
-80    0      
-80    96     
32     80     
112    16     
-160   112    
-16    -48    
16     112    
-32    160    
64     128    
0      80     
176    0      
-240   224    
-112   96     
48     -64    
-16    -32    
96     -64    
128    80     
-416   192    
-176   128    
-32    160    
-32    -192   
272    144    
80     64     
-96    48     
-176   80     
-32    32     
0      48     
80     112    
-144   128    
224    48     
-208   -80    
176    64     
-416   -48    
-64    -96    
80     128    
-96    208    
32     0      
-48    -32    
96     128    
-160   96     
144    -144   
112    320    
-48    48     
-128   416    
-96    -112   
96     176    
48     1136   
-288   0      
752    -624   
320    -192   
-768   -160   
624    112    
64     304    
320    -240   
-160   528    
-32    -480   
16     480    
16     -288   
48     368    
-16    -192   
-208   272    
192    -96    
32     208    
-64    -128   
96     128    
16     48     
-16    80     
80     96     
16     -48    
-160   80     
192    224    
-64    144    
48     -16    
-256   16     
176    48     
-128   176    
160    32     
-80    144    
64     -48    
0      144    
192    32     
-48    112    
64     48     
32     208    
80     16     
-48    112    
-80    -48    
208    96     
-112   112    
224    144    
-224   32     
48     160    
64     -64    
144    96     
-112   144    
208    80     
-64    240    
-64    -16    
112    112    
-80    96     
64     64     
96     80     
0      96     
-96    16     
144    128    
-208   16     
160    112    
-48    288    
112    112    
144    112    
16     -16    
160    80     
-16    160    
-112   32     
96     48     
80     32     
32     96     
-64    -16    
64     -32    
176    224    
-112   -48    
240    -2416  
-128   80     
80     144    
112    48     
80     96     
-144   -336   
16     16     
-64    128    
272    128    
-64    224    
80     112    
64     -48    
-272   -80    
-32    -304   
544    192    
208    -816   
-128   -48    
32     128    
-16    96     
336    528    
-96    112    
0      64     
0      128    
-32    16     
96     48     
-144   192    
48     128    
-16    -96    
-112   -240   
144    128    
-32    -80    
48     0      
48     448    
-16    48     
96     144    
64     64     
48     128    
-16    96     
0      64     
80     112    
-80    -112   
80     -208   
-160   80     
176    -288   
0      0      
-112   -176   
0      -48    
272    -496   
-80    384    
192    192    
96     176    
-80    -160   
16     160    
-16    -112   
112    96     
0      -112   
192    128    
-208   -240   
80     -96    
208    384    
16     16     
0      -32    
160    -272   
16     96     
80     656    
-96    64     
272    16     
-128   96     
160    64     
-16    16     
96     112    
128    0      
112    128    
-96    -64    
128    192    
64     -240   
224    128    
-128   -448   
144    144    
-64    -592   
0      -80    
224    -832   
-64    128    
128    192    
-160   160    
-128   -32    
160    -16    
0      32     
80     96     
0      48     
-96    -160   
304    96     
144    -208   
-80    -16    
32     -112   
64     176    
96     160    
-160   -32    
224    64     
-144   208    
208    64     
-144   176    
96     64     
160    -928   
32     128    
288    -144   
80     32     
208    16     
-112   336    
-64    -48    
-144   -48    
208    272    
96     80     
-80    -96    
112    208    
64     160    
160    -384   
-80    320    
336    -336   
96     64     
1600   -1296  
848    336    
288    368    
-720   -112   
-192   -144   
304    64     
32     48     
192    -992   
-288   176    
304    -864   
-64    176    
-192   -192   
336    -1088  
-16    -272   
128    -128   
112    -96    
-192   32     
-144   -304   
16     -64    
64     -144   
-112   -480   
-32    208    
192    -416   
-16    256    
-480   160    
304    -128   
-128   416    
-160   -1168  
336    -64    
352    -1152  
-288   -176   
64     -64    
128    224    
128    208    
256    144    
-64    -192   
208    48     
32     0      
-144   64     
-128   320    
-64    -112   
-464   32     
-48    0      
-128   -64    
112    -1024  
-224   -112   
176    -368   
16     0      
208    16     
16     -32    
64     -208   
-48    64     
192    -32    
-96    240    
-32    -32    
-32    -32    
-1648  -32    
80     -80    
144    -144   
16     -80    
64     -48    
128    -32    
-48    -16    
96     -1216  
224    192    
-32    -80    
16     64     
144    -96    
-160   -256   
128    -192   
48     16     
-240   -80    
0      128    
-320   64     
288    208    
16     128    
48     -480   
-32    32     
-48    -1088  
-48    112    
112    128    
-64    112    
176    128    
-272   112    
-320   -144   
128    -80    
-288   0      
416    48     
-720   -48    
32     -16    
-208   -48    
128    -176   
-64    -32    
32     -160   
48     80     
96     128    
-16    64     
32     128    
96     208    
-128   80     
32     32     
0      16     
16     224    
-352   -48    
-48    -336   
-304   -96    
-80    -96    
0      -176   
240    -80    
-80    -80    
128    -1952  
96     80     
32     128    
0      -64    
320    144    
-224   -80    
128    256    
-16    0      
-192   -16    
-144   64     
-16    192    
192    384    
-160   96     
384    -288   
-80    80     
-64    -1808  
240    0      
-16    144    
-112   80     
-112   16     
80     -176   
-48    160    
0      80     
160    16     
-240   -128   
-304   48     
256    -224   
176    -32    
-144   -304   
32     304    
-16    112    
336    208    
-144   224    
-48    64     
-192   16     
-96    -176   
176    256    
96     32     
32     96     
-144   -16    
-32    16     
-128   -96    
48     160    
-960   -112   
160    16     
80     16     
-560   -16    
64     208    
-848   -32    
16     160    
-96    -144   
48     144    
64     -112   
-64    -32    
-672   -288   
-128   176    
-272   128    
-144   112    
-112   -304   
112    32     
-64    -32    
-112   -96    
-160   48     
-368   80     
0      32     
-384   -16    
-160   -64    
112    64     
-336   16     
-160   -160   
144    -96    
-144   -16    
16     352    
-128   -544   
-32    96     
-48    -16    
-48    96     
-16    48     
0      80     
-48    96     
80     -96    
32     112    
-32    80     
128    128    
-192   -112   
64     176    
-80    -144   
-720   -2656  
-416   -2032  
480    1008   
-544   448    
896    -224   
144    272    
-48    -400   
-144   576    
-496   112    
592    -64    
-240   16     
304    -80    
-304   384    
400    -352   
-192   352    
32     -240   
-176   352    
16     -112   
-112   48     
96     -192   
-48    80     
-96    -16    
-80    192    
-32    48     
-48    -80    
-608   -80    
48     96     
-240   -160   
224    96     
-176   0      
208    32     
-80    208    
32     -48    
-96    144    
-32    -32    
-160   112    
-16    32     
-32    32     
48     48     
48     112    
-176   -112   
-32    176    
-368   32     
160    144    
-64    -144   
-48    16     
-32    128    
-16    -80    
-112   112    
-16    0      
48     144    
16     32     
-48    176    
-176   16     
-48    80     
-176   -16    
64     64     
-736   -48    
160    80     
0      -16    
-144   -96    
-112   128    
32     -96    
144    96     
-32    112    
16     32     
-48    0      
-80    -16    
-32    -48    
64     112    
-160   -16    
192    64     
-304   -48    
48     160    
48     96     
-80    -48    
64     -192   
224    96     
-128   224    
-336   -320   
16     -160   
-96    32     
160    160    
96     208    
-160   -96    
64     0      
32     208    
-352   -32    
-80    48     
0      -144   
-64    48     
96     -64    
0      80     
128    224    
-144   80     
48     -112   
-112   -256   
64     0      
112    256    
-80    160    
-160   16     
0      80     
64     80     
32     48     
-16    96     
-48    96     
16     -64    
0      -80    
-48    176    
-48    144    
96     16     
-96    80     
-16    96     
32     96     
-96    64     
-32    64     
-48    80     
144    176    
-32    96     
112    96     
112    256    
-80    64     
0      -96    
-80    128    
160    256    
176    48     
-96    240    
-128   112    
144    -16    
-16    80     
-48    176    
128    0      
-128   16     
80     272    
-16    -80    
128    144    
-288   -432   
256    -176   
-256   48     
256    0      
-80    320    
16     -144   
-48    96     
32     144    
192    144    
-272   -144   
160    112    
-208   240    
64     -288   
32     -192   
272    208    
96     240    
-32    128    
48     432    
-176   208    
64     64     
80     -80    
-16    -32    
128    0      
-160   224    
-80    -112   
-80    0      
80     16     
256    240    
-80    144    
144    96     
-272   448    
-48    -224   
224    176    
-32    224    
192    -96    
-128   192    
-48    80     
48     -48    
-16    208    
192    16     
48     -1216  
16     0      
64     144    
64     48     
-64    -32    
256    208    
-96    192    
-16    144    
-16    -320   
400    96     
-48    240    
32     32     
-336   -32    
144    64     
240    128    
240    -288   
-240   96     
-64    -160   
256    208    
176    256    
128    112    
-112   -16    
2000   -960   
112    80     
48     64     
-816   -480   
224    1184   
-304   -1040  
480    96     
192    368    
592    -432   
-160   -192   
-256   -160   
-112   -96    
432    -128   
32     96     
240    112    
-176   224    
80     112    
-176   -64    
224    -208   
-48    160    
-64    -112   
128    -96    
64     32     
-48    -32    
32     0      
96     -160   
80     224    
-80    -96    
96     -96    
0      192    
16     48     
64     96     
80     192    
96     224    
-16    192    
-16    -64    
0      -176   
32     144    
192    -96    
160    336    
-224   -480   
208    -16    
-48    -544   
160    224    
16     -48    
-96    -64    
64     144    
208    256    
-240   112    
48     -400   
112    160    
-64    -48    
176    64     
-80    128    
128    -32    
0      -256   
192    64     
80     -144   
-16    80     
112    160    
-32    160    
96     112    
32     16     
0      32     
176    112    
-16    192    
-64    176    
144    176    
-64    -240   
144    112    
-80    -144   
80     192    
80     -96    
176    96     
-96    128    
48     -320   
144    112    
-48    400    
-80    128    
112    -288   
48     96     
80     -448   
112    464    
-160   -112   
144    -48    
144    -176   
-64    224    
160    16     
160    -80    
-48    64     
80     128    
176    336    
-128   192    
224    80     
32     -144   
144    144    
-144   -256   
192    160    
-16    -240   
80     32     
144    80     
128    256    
48     -400   
-32    128    
64     -160   
144    -544   
-80    96     
192    -1104  
48     -1312  
48     -224   
80     -880   
32     0      
240    272    
-112   -96    
64     48     
96     -64    
-64    80     
336    176    
-160   176    
-96    -64    
32     -208   
-128   80     
-240   -256   
160    -384   
-96    -192   
32     -352   
64     0      
304    -64    
-64    -80    
192    96     
-32    -80    
-16    -96    
-32    -96    
-208   16     
272    -80    
96     0      
-32    -128   
-16    -32    
-96    48     
-832   32     
224    -32    
16     -48    
64     192    
0      64     
208    -288   
-64    144    
48     112    
0      176    
16     -256   
16     128    
96     -320   
16     32     
-16    16     
-16    80     
-464   -48    
0      -32    
-80    -64    
208    -240   
-64    80     
48     -64    
48     -96    
64     -1552  
96     32     
48     0      
16     48     
-160   240    
-16    96     
144    -32    
-80    -272   
-416   -192   
16     -176   
-448   -144   
304    16     
-96    80     
128    -400   
-176   -304   
144    -1152  
176    96     
272    -32    
16     368    
-128   48     
-80    80     
-160   16     
240    -256   
64     -32    
16     -16    
-464   64     
-80    32     
32     -256   
64     -416   
64     80     
48     -512   
32     144    
176    208    
-112   -48    
16     -64    
-112   -128   
-368   -64    
-304   -736   
-560   384    
736    16     
592    848    
-928   -768   
832    864    
-496   -672   
608    -64    
-352   -336   
496    160    
-112   -2608  
48     -304   
-80    112    
160    -64    
-464   0      
160    64     
-128   -48    
-16    -208   
-496   -96    
80     -160   
48     80     
16     80     
96     112    
0      -480   
32     -80    
-160   128    
224    224    
-144   176    
-48    -64    
-192   -80    
0      -48    
240    -16    
16     256    
112    80     
-64    16     
-272   128    
192    -64    
-128   -64    
256    -176   
0      0      
80     160    
96     80     
0      0      
-96    -48    
-80    96     
80     16     
0      144    
176    256    
-160   64     
128    32     
-192   32     
304    -224   
64     160    
-256   -128   
-160   48     
64     208    
-864   -32    
32     16     
-688   384    
-240   16     
64     0      
-112   -112   
-48    -304   
-144   -224   
-224   -320   
144    -48    
-160   -208   
112    224    
16     -96    
-64    112    
-64    -32    
-240   -80    
48     16     
-304   80     
-32    128    
-192   -16    
64     -240   
272    -112   
-128   304    
-192   -16    
176    208    
-128   -32    
80     112    
-96    16     
-16    -16    
0      -96    
-208   -80    
64     176    
-80    176    
0      -16    
-368   -272   
96     -16    
-352   160    
-144   112    
48     16     
-16    96     
80     -80    
0      96     
-48    16     
-112   48     
16     96     
16     64     
32     80     
-80    0      
-32    16     
-224   16     
32     272    
-224   -48    
96     128    
-80    32     
32     -32    
-80    -272   
-96    80     
96     64     
-32    32     
112    192    
-80    64     
64     48     
-128   96     
48     192    
0      -16    
-144   -16    
-144   144    
144    64     
-144   48     
80     336    
-192   176    
-16    -176   
16     32     
-112   32     
256    80     
-224   -16    
-32    64     
0      112    
16     80     
176    640    
-128   -144   
160    -208   
-256   272    
-112   -112   
-96    80     
-16    64     
192    96     
0      32     
-32    96     
-32    -96    
80     128    
-64    144    
64     64     
-144   -16    
0      80     
-80    128    
-528   -272   
112    -256   
80     128    
-128   96     
112    352    
-656   80     
256    -208   
-16    128    
224    64     
-16    256    
-240   16     
-32    96     
192    512    
-384   -320   
464    -32    
-48    160    
256    256    
-320   0      
-288   80     
-80    -144   
256    160    
-144   272    
-112   -96    
64     112    
176    512    
-96    192    
-512   -32    
-64    -16    
144    -256   
320    192    
-160   112    
-96    -32    
-336   -240   
160    288    
32     96     
80     320    
-64    192    
-64    80     
-128   64     
-64    32     
-64    -32    
208    16     
-32    160    
0      16     
-240   992    
-448   2800   
-512   704    
32     -640   
-480   -480   
288    -288   
256    96     
-96    224    
208    368    
224    192    
-128   176    
0      -80    
-48    0      
32     112    
-144   -16    
176    192    
-240   0      
16     240    
160    -16    
48     192    
32     96     
-48    48     
-32    64     
64     -96    
0      -80    
80     64     
80     288    
-16    -80    
64     160    
-208   16     
272    208    
-208   -16    
-16    48     
64     64     
32     112    
16     128    
112    208    
-128   256    
64     -64    
16     96     
16     64     
32     208    
-144   -96    
160    176    
-176   80     
128    96     
-96    0      
-16    112    
32     32     
336    32     
-272   208    
176    80     
16     112    
80     96     
0      80     
16     352    
-48    -112   
160    144    
-112   144    
224    -176   
-16    224    
-144   192    
240    32     
-64    160    
32     0      
144    192    
-128   288    
64     160    
-128   -64    
208    112    
0      32     
48     240    
-112   0      
288    64     
-160   208    
-80    96     
208    368    
-64    -2672  
208    80     
16     64     
80     -64    
16     256    
-144   112    
176    160    
144    -48    
96     48     
48     384    
-272   -32    
80     -16    
64     -176   
-96    -32    
128    112    
80     -480   
32     128    
-16    240    
144    -96    
-32    16     
96     208    
0      16     
208    448    
-144   80     
144    240    
-128   -112   
144    0      
-160   -32    
176    272    
32     0      
80     -336   
-272   96     
192    160    
64     32     
32     64     
-64    224    
112    192    
0      -64    
-160   128    
48     64     
288    0      
64     320    
0      288    
208    112    
0      208    
-96    -320   
80     0      
-80    -400   
272    352    
112    208    
224    272    
-176   -448   
-16    176    
-48    -48    
128    -16    
-48    64     
-96    -16    
48     16     
160    -400   
-64    16     
80     -304   
0      0      
0      -224   
144    112    
0      144    
144    112    
-16    -32    
-32    0      
208    144    
80     208    
0      176    
-48    16     
144    16     
48     -48    
-96    128    
176    -64    
128    -32    
32     -848   
-64    160    
224    -672   
-128   240    
96     -224   
112    256    
64     288    
128    160    
-192   -48    
80     -384   
32     112    
-96    -432   
256    144    
112    80     
208    240    
-176   -608   
-32    -32    
96     -208   
160    256    
48     304    
-32    -64    
128    -96    
80     80     
112    224    
16     -16    
-16    -80    
80     -16    
96     160    
-16    -144   
64     112    
16     32     
96     240    
-16    -16    
16     0      
0      112    
144    144    
64     80     
80     48     
160    160    
-16    -64    
64     224    
80     -128   
16     224    
32     -128   
-528   1568   
-288   624    
-288   -96    
-272   -592   
-608   -64    
864    -912   
-272   -1120  
224    720    
-352   -496   
-16    -112   
320    32     
-16    -560   
-16    16     
-64    -928   
128    -272   
112    176    
192    256    
144    480    
-128   -320   
-144   -896   
96     144    
160    16     
16     -48    
-928   -112   
-32    -64    
208    -64    
0      96     
48     -144   
80     -368   
224    240    
-208   -1728  
112    -320   
144    -208   
144    32     
32     80     
64     -48    
-80    -240   
-96    -496   
-96    -64    
-48    -192   
-384   80     
-48    96     
96     -112   
-48    -272   
48     -128   
160    -928   
32     -96    
64     -160   
-16    -112   
64     96     
-48    16     
-128   16     
16     64     
-16    -144   
-128   48     
-400   -32    
-16    -112   
80     64     
64     -256   
-16    -368   
32     0      
32     -112   
-48    -1680  
64     -288   
144    -48    
-96    160    
-64    128    
-16    32     
-16    16     
32     64     
-384   16     
80     0      
-1456  -32    
-96    -160   
96     -128   
160    -64    
208    -32    
-384   -1248  
-112   -96    
336    -128   
-32    32     
64     256    
144    64     
16     208    
-16    48     
-128   -96    
208    -144   
-512   96     
0      16     
144    16     
-96    -64    
96     -16    
80     -784   
-32    16     
160    128    
80     64     
-208   -128   
64     -48    
-160   0      
112    -112   
80     32     
-16    16     
-80    32     
0      -272   
-528   16     
48     -496   
-128   -112   
240    -400   
-80    0      
256    -1392  
-80    -256   
-208   -16    
32     32     
-32    16     
48     48     
-48    -48    
80     32     
-224   -160   
80     -80    
48     16     
48     80     
96     160    
-96    -192   
-64    -16    
-432   -16    
176    -16    
64     544    
-96    320    
80     176    
-96    -176   
32     -80    
96     128    
16     192    
48     -240   
96     64     
-112   -464   
320    64     
32     -464   
-64    -352   
-64    176    
192    -96    
-128   32     
-64    32     
96     112    
16     -16    
-80    64     
48     288    
64     16     
-32    -16    
-48    96     
-928   -384   
32     160    
-592   -224   
-144   224    
-160   96     
80     -208   
-16    16     
-64    256    
-48    32     
-16    112    
-80    0      
112    32     
-144   112    
16     -48    
32     176    
-192   -64    
-160   -48    
144    128    
112    208    
-48    -112   
-112   64     
-32    16     
-192   -64    
-16    256    
-304   176    
-128   -112   
112    32     
176    -16    
32     -176   
-16    80     
208    32     
-336   -32    
112    16     
-48    32     
0      32     
-208   -96    
96     224    
64     48     
-16    48     
-496   48     
-80    16     
0      -240   
64     32     
32     144    
48     192    
-128   128    
-112   -64    
-576   -2128  
1552   432    
-800   -64    
160    -448   
608    -992   
-400   -160   
448    -64    
-400   128    
240    256    
-512   -48    
-176   32     
-16    16     
240    256    
-176   -128   
112    16     
-64    128    
-48    96     
48     32     
-48    16     
-32    -32    
-80    -80    
-16    224    
-128   48     
48     -16    
-288   -176   
80     -160   
-96    -112   
-176   336    
208    -128   
-80    -32    
-64    -16    
192    208    
32     64     
-80    16     
-112   -32    
-64    32     
-160   -208   
128    160    
-112   32     
-32    -192   
-288   96     
-464   -64    
96     128    
80     64     
-96    112    
-48    -16    
-64    160    
64     48     
-48    64     
-32    112    
48     32     
64     208    
-112   -80    
96     48     
-160   32     
80     64     
16     32     
-272   48     
176    112    
-32    -32    
-32    48     
-32    96     
64     112    
-64    96     
64     112    
176    -64    
32     96     
-176   112    
16     48     
0      -48    
-160   224    
-208   -32    
176    96     
-192   48     
96     0      
-16    -112   
48     80     
-128   80     
128    16     
-80    80     
-176   48     
32     -96    
-32    16     
16     368    
64     -128   
128    64     
-272   -128   
112    -128   
32     48     
-144   -144   
208    192    
-144   32     
128    240    
-112   112    
144    192    
-96    -176   
208    32     
-144   160    
48     80     
-48    80     
144    112    
-80    32     
0      16     
-48    -176   
80     -48    
32     160    
128    80     
-112   208    
-16    64     
160    256    
-160   48     
144    64     
-80    -64    
0      144    
-192   -64    
96     16     
0      -48    
224    80     
-48    240    
80     96     
96     288    
-80    112    
320    240    
-192   128    
0      -192   
-64    0      
112    224    
-112   -176   
144    176    
-256   -32    
160    80     
32     176    
208    112    
32     304    
64     -112   
48     208    
-192   112    
272    0      
-32    16     
16     144    
-16    128    
208    160    
-128   112    
80     -128   
-16    224    
64     128    
64     48     
-144   -64    
176    96     
-96    -16    
128    112    
-64    80     
80     144    
144    48     
-16    -32    
-32    96     
128    224    
-128   -256   
160    256    
0      80     
-64    -16    
80     160    
-80    0      
-16    128    
112    128    
16     96     
96     176    
48     -48    
-16    336    
-80    -64    
-96    -64    
368    32     
16     -160   
96     -272   
-176   208    
-144   -2528  
128    -64    
192    112    
96     128    
-96    96     
16     96     
48     0      
64     32     
16     96     
16     240    
112    32     
16     0      
96     272    
-160   -64    
32     128    
0      -240   
80     128    
0      80     
-160   32     
128    128    
128    272    
112    48     
0      96     
1568   -1984  
848    -96    
928    672    
-416   192    
416    48     
272    -240   
352    1312   
-400   -128   
-640   -528   
-32    -288   
464    208    
80     -208   
-144   80     
64     -368   
368    512    
-224   -304   
64     128    
-160   -336   
240    352    
256    288    
-240   -224   
320    288    
-48    -304   
-48    -112   
48     -1584  
48     112    
96     128    
80     192    
16     -64    
0      64     
16     32     
160    0      
-80    112    
64     112    
48     -16    
272    224    
80     368    
224    32     
-320   -240   
32     -288   
192    160    
16     -1008  
16     48     
0      160    
96     208    
-16    96     
-32    112    
176    240    
-128   256    
144    64     
-240   -96    
208    224    
0      -32    
-48    160    
64     -384   
48     224    
-48    -896   
-256   -288   
64     -208   
80     -144   
368    160    
-112   80     
320    80     
-176   -176   
288    592    
-256   -176   
304    -64    
64     -112   
176    16     
32     -384   
16     80     
128    -176   
48     112    
80     208    
128    -32    
64     -128   
-32    -112   
-304   -320   
-320   -544   
256    -416   
-64    112    
272    544    
32     -80    
112    144    
-48    -208   
128    224    
-32    -608   
176    256    
-96    -96    
224    -1440  
0      144    
-16    304    
0      -928   
-80    -304   
0      -2000  
160    -80    
48     160    
-32    -208   
-32    176    
32     48     
80     32     
0      -336   
64     -2016  
16     -16    
96     -80    
-128   160    
-160   400    
-48    -208   
288    32     
-144   -48    
128    -224   
-48    -1056  
0      -32    
336    112    
-16    16     
0      -112   
-32    -288   
-32    -352   
128    -224   
144    -96    
-16    -176   
-272   16     
96     -304   
128    -16    
48     -224   
-192   -128   
304    -208   
-224   -80    
16     -1120  
80     -288   
80     96     
80     -128   
112    16     
-80    96     
112    80     
80     560    
-304   -368   
-144   -576   
-400   -128   
16     -144   
160    -16    
112    -624   
-80    0      
112    -1760  
-96    -112   
80     -80    
-16    64     
144    -272   
-176   128    
64     48     
0      -144   
-208   64     
128    288    
-576   -128   
224    -256   
144    -144   
-48    176    
96     96     
48     48     
96     48     
112    -352   
-64    16     
144    0      
-112   -144   
32     -224   
448    512    
-544   -304   
-96    -304   
-48    192    
272    -48    
-800   -112   
0      240    
-48    -64    
64     -176   
144    16     
128    -608   
0      48     
96     -16    
96     64     
16     -80    
144    112    
-96    -112   
16     -240   
-544   0      
-32    -96    
-880   -112   
48     0      
96     -160   
128    -64    
48     80     
48     -480   
64     224    
-112   80     
208    304    
-160   144    
-48    -208   
-240   -16    
528    2368   
-2080  -48    
272    464    
-32    448    
128    -64    
-1712  -368   
-416   -256   
608    416    
-368   -304   
112    416    
32     -112   
16     -48    
-576   32     
208    -64    
-48    16     
0      -16    
-48    16     
160    16     
-160   48     
240    16     
-224   -16    
48     -80    
32     192    
112    -192   
32     128    
-336   -128   
16     -176   
-240   -96    
112    -32    
32     160    
80     32     
-208   -48    
-64    -128   
-144   48     
80     -80    
128    144    
-112   -48    
160    112    
-1520  -352   
-240   0      
-48    64     
-160   0      
-64    96     
64     96     
-16    32     
-48    32     
-208   -160   
-80    -320   
208    48     
-320   160    
256    -32    
-400   -80    
-16    48     
-240   -96    
-256   -64    
112    160    
-48    -16    
144    -48    
-288   96     
-224   -16    
384    -128   
-80    208    
32     160    
64     -96    
128    -160   
-96    256    
-112   -208   
96     0      
16     -48    
-80    144    
-208   48     
144    0      
-64    -64    
-32    32     
-96    112    
-400   -96    
144    208    
-176   32     
48     -32    
80     -128   
-80    96     
-48    -96    
0      -64    
-16    -80    
208    96     
-160   -32    
-32    -128   
-80    160    
-352   128    
304    -48    
-144   144    
64     -16    
-992   64     
-48    -144   
144    128    
-128   -16    
48     80     
-80    144    
-96    80     
32     -16    
-32    -16    
-112   144    
80     112    
-160   160    
80     -176   
-224   80     
-48    -96    
-816   -144   
32     80     
192    112    
-64    144    
144    16     
-160   -176   
-144   -80    
64     0      
64     16     
32     224    
48     96     
-128   -48    
96     208    
-112   32     
-128   48     
-448   160    
208    144    
-128   -192   
96     -112   
-144   16     
240    336    
-240   112    
0      0      
96     80     
-112   -96    
-160   48     
-160   0      
240    80     
-16    -144   
-16    192    
-288   32     
240    -224   
-32    -112   
160    160    
-16    80     
112    80     
160    -48    
-96    -112   
-240   32     
-64    -400   
-96    -304   
272    336    
112    176    
-224   -16    
64     80     
-304   -32    
80     80     
-1008  -96    
80     -384   
176    336    
144    -464   
0      16     
112    112    
-16    0      
80     32     
48     16     
-112   64     
64     176    
-368   -32    
160    96     
-144   112    
32     144    
-448   -112   
144    96     
-48    16     
-32    112    
48     64     
16     112    
32     272    
-80    112    
-80    96     
-48    48     
96     144    
-192   16     
32     144    
-128   -16    
128    128    
-80    64     
112    -32    
144    128    
112    112    
-176   112    
-112   64     
144    96     
-160   128    
80     96     
-64    48     
160    160    
-32    112    
-96    192    
-288   48     
-32    1488   
-1120  -848   
-512   -544   
16     240    
144    -48    
-224   -528   
304    -96    
480    -32    
-64    400    
112    240    
-368   -144   
-128   80     
64     32     
720    432    
-336   -48    
144    240    
-160   48     
128    144    
-112   -160   
192    -240   
240    176    
128    112    
-48    224    
-48    -64    
48     240    
-128   96     
-16    -96    
-80    112    
128    176    
-128   -64    
112    192    
128    96     
80     112    
96     144    
-208   48     
48     -32    
64     144    
176    144    
-16    -96    
128    160    
-32    144    
-80    64     
0      144    
-80    112    
80     144    
48     160    
-80    -112   
320    368    
-288   -112   
224    80     
-112   272    
48     144    
208    304    
-304   -96    
240    -32    
-32    192    
0      -96    
-304   -288   
80     -16    
48     64     
-32    192    
112    224    
-16    -16    
-16    -160   
112    176    
400    96     
-224   112    
0      -80    
0      128    
16     128    
16     64     
80     80     
64     208    
-112   -192   
0      192    
48     -1648  
128    480    
416    304    
224    336    
-336   -96    
272    -16    
-64    64     
16     336    
-128   64     
48     0      
32     96     
240    608    
-112   192    
-400   -512   
320    16     
128    -64    
16     192    
-112   160    
0      -112   
16     16     
-80    -192   
160    80     
-32    64     
112    -80    
-16    0      
-64    -128   
64     48     
160    96     
48     -112   
16     112    
64     -320   
16     -96    
-272   -192   
-80    -192   
32     16     
96     -32    
-80    -80    
128    144    
-32    96     
96     80     
80     192    
16     128    
112    96     
-112   -64    
128    208    
-32    -16    
80     96     
240    -656   
-80    256    
16     -16    
288    304    
-192   -32    
288    128    
-64    48     
128    160    
16     64     
96     368    
48     96     
0      -240   
176    464    
-64    -688   
272    16     
-192   112    
32     96     
240    -1632  
-64    192    
96     -16    
80     192    
0      80     
80     208    
-80    -224   
-48    -272   
48     32     
112    -304   
64     96     
-32    -256   
96     208    
16     -160   
32     32     
64     -448   
16     144    
48     48     
-16    432    
-16    -112   
176    128    
-128   128    
208    -512   
-48    160    
224    -160   
-336   32     
160    -192   
96     -48    
320    -144   
80     112    
-16    64     
-48    240    
16     288    
0      256    
-80    96     
0      -112   
64     -192   
176    96     
-128   -80    
192    -16    
0      128    
48     -336   
96     160    
16     -80    
176    -272   
160    112    
-96    272    
-16    -96    
16     -944   
16     -48    
176    -128   
128    -176   
48     112    
-32    -48    
144    -32    
-144   -48    
272    -224   
-16    48     
-1152  -768   
144    -96    
-1120  32     
912    -480   
-240   -208   
272    144    
-576   384    
-16    32     
-384   208    
400    -576   
-272   -448   
-128   -144   
384    -1296  
-112   -16    
48     -80    
-64    64     
256    -416   
-112   176    
240    -384   
-208   160    
192    -128   
-80    336    
-128   -48    
-16    -96    
192    -368   
-128   -288   
288    -112   
-160   -272   
128    -208   
0      -1584  
96     -208   
64     -176   
-224   48     
-80    32     
96     112    
80     -112   
-144   -112   
-320   64     
80     16     
-576   -192   
-32    -16    
32     48     
80     -176   
80     -96    
48     -304   
64     -48    
32     -16    
-16    112    
80     192    
224    -64    
-80    16     
-48    -112   
32     -32    
-32    -80    
-320   -64    
16     48     
48     32     
160    -112   
32     48     
48     -496   
272    80     
-48    -592   
128    96     
32     -32    
96     -32    
-48    -64    
112    -112   
32     160    
-80    -112   
-96    16     
16     -288   
-1072  -64    
16     -288   
64     -48    
112    -400   
-48    64     
160    -864   
-256   48     
272    -80    
-160   -64    
-32    -48    
32     -16    
-160   -128   
96     -304   
-144   -64    
16     -80    
16     144    
-144   128    
-96    96     
368    -256   
-144   80     
160    -480   
0      16     
16     96     
144    -288   
-320   -96    
144    -160   
-32    0      
96     16     
-240   96     
320    192    
-144   112    
64     0      
-80    16     
64     -192   
112    96     
80     -176   
-16    144    
16     -80    
224    -16    
-224   -272   
-32    -320   
-448   -128   
32     -80    
96     -64    
-80    -96    
-176   0      
144    32     
-16    0      
32     -80    
96     144    
176    -192   
-16    32     
-16    0      
64     -112   
80     144    
-16    160    
224    144    
208    240    
-336   -32    
224    -192   
-288   0      
208    -80    
-16    160    
-1040  48     
-48    96     
-608   -80    
-944   -96    
-32    -272   
-288   -48    
272    272    
16     -80    
-80    -96    
-32    -16    
-128   80     
320    512    
-384   16     
-240   -112   
0      96     
-176   -112   
16     112    
-128   -64    
-528   -112   
16     128    
-352   144    
16     -720   
-304   -320   
-192   272    
16     -288   
-160   240    
208    -48    
80     240    
-144   -176   
-80    112    
-48    -336   
160    160    
-112   -80    
208    48     
-176   336    
-112   -96    
-160   0      
-272   0      
64     -48    
-704   320    
-176   -64    
192    48     
-336   160    
48     -112   
-64    224    
-112   -144   
32     -80    
-48    80     
-48    48     
48     80     
-32    48     
-16    -16    
-272   -32    
128    160    
-32    16     
48     224    
-1792  -160   
-32    96     
0      16     
384    0      
-112   0      
-112   -32    
-64    48     
-32    16     
1744   128    
784    400    
64     288    
-688   -304   
-80    672    
832    -768   
-352   352    
-1120  -720   
-176   160    
64     160    
16     -64    
-448   -224   
272    176    
240    160    
-240   80     
-320   -160   
288    144    
-80    -16    
112    -176   
-128   240    
160    -160   
96     592    
-368   -224   
192    176    
-48    -96    
192    336    
-32    -128   
32     384    
-192   -192   
336    112    
-64    48     
128    -112   
0      160    
-32    -112   
-48    128    
-192   -576   
160    160    
80     432    
32     208    
-784   -128   
-16    32     
96     144    
-80    -304   
16     208    
16     112    
80     16     
-48    -208   
288    160    
64     336    
240    544    
-48    224    
96     160    
-432   -32    
0      48     
-704   -144   
-48    32     
224    272    
-304   48     
32     176    
-176   -400   
-240   -64    
-16    -224   
80     256    
0      352    
256    160    
-368   -144   
16     144    
0      432    
-176   -144   
-48    -80    
16     112    
-16    288    
-112   -144   
64     112    
-112   -16    
32     96     
-176   -96    
320    0      
-32    -64    
112    272    
-32    112    
128    256    
-288   160    
256    144    
-80    192    
96     144    
-144   16     
-80    -80    
0      384    
80     80     
-32    48     
96     128    
-224   -16    
-64    0      
-80    -208   
-80    -208   
16     144    
-176   -64    
128    368    
-16    64     
-64    80     
48     -16    
32     -288   
-80    80     
80     -176   
-48    -224   
-256   -480   
240    400    
64     -16    
-80    96     
-16    0      
112    96     
-80    16     
0      64     
16     0      
32     208    
96     128    
80     64     
-176   48     
48     144    
224    192    
80     352    
-272   64     
112    -48    
256    80     
-288   48     
240    304    
-128   224    
160    48     
96     96     
-64    128    
240    320    
-16    208    
128    0      
-144   -112   
-48    208    
128    160    
80     176    
-80    128    
160    176    
-160   -64    
32     192    
-64    48     
80     64     
32     -48    
128    48     
-96    160    
112    0      
80     144    
16     48     
0      128    
128    96     
128    96     
-128   -16    
128    176    
0      -32    
-96    144    
144    64     
-128   96     
48     160    
-32    32     
48     96     
128    48     
32     64     
224    128    
-80    96     
64     128    
112    288    
-176   48     
80     80     
48     -16    
64     -288   
16     256    
-192   -2416  
176    -48    
80     240    
16     -64    
80     192    
-80    32     
32     144    
0      0      
32     -192   
48     128    
32     -32    
240    32     
144    -16    
-80    -64    
-80    224    
0      -304   
16     0      
112    80     
80     -16    
96     192    
-224   112    
176    96     
-64    96     
160    128    
3136   1760   
-1296  480    
-912   -1168  
192    912    
880    -624   
-448   -368   
112    -720   
-128   592    
304    -528   
-336   288    
144    -272   
144    560    
128    -464   
128    512    
-48    -96    
160    272    
-192   0      
80     -16    
-48    32     
144    -48    
-96    96     
256    -80    
-144   304    
384    -1632  
-208   160    
288    -624   
-224   272    
304    -48    
-224   240    
224    -32    
0      112    
-64    -48    
112    64     
112    32     
-64    -192   
32     -144   
32     -224   
64     192    
48     -352   
96     80     
16     32     
64     160    
16     80     
96     160    
32     80     
80     144    
96     64     
-64    176    
112    48     
32     -176   
96     64     
-16    0      
144    112    
-64    -64    
96     48     
64     32     
64     160    
-112   96     
80     32     
144    160    
-64    16     
144    144    
-96    -192   
144    128    
16     -192   
-16    16     
80     -48    
96     64     
-32    -352   
128    192    
0      -2192  
112    160    
-80    80     
128    208    
-64    160    
64     64     
-48    224    
304    -240   
48     96     
-16    -48    
384    576    
-128   208    
384    304    
288    -128   
16     80     
-48    -96    
32     -1520  
48     176    
144    -368   
-64    96     
16     -128   
48     -928   
96     -32    
96     -848   
-32    0      
-208   -512   
96     -272   
-96    -160   
96     368    
160    240    
32     0      
-80    -112   
80     0      
96     -160   
96     -176   
-528   16     
0      -192   
0      -64    
-176   -880   
96     -320   
128    -2128  
176    0      
32     192    
-64    64     
0      -224   
144    320    
32     -192   
-112   64     
32     -96    
112    128    
-144   192    
80     32     
96     -32    
-128   -16    
224    64     
16     64     
-32    288    
112    -144   
-16    -16    
32     -240   
128    96     
48     -160   
112    224    
-144   0      
144    -80    
-96    -16    
32     -336   
-368   -160   
16     -80    
48     80     
48     0      
48     -160   
192    -96    
-304   96     
144    128    
-160   16     
272    -32    
32     112    
-176   64     
0      -96    
-288   -144   
144    32     
-304   -112   
64     -64    
48     -80    
144    -448   
-528   -208   
320    -640   
-128   96     
32     -1664  
80     -96    
128    32     
192    16     
-224   48     
-32    -96    
-112   -144   
320    16     
-400   208    
-224   64     
-1616  -96    
112    48     
96     -16    
-80    -224   
-64    128    
336    -304   
16     0      
-256   -16    
208    -240   
-96    176    
144    0      
-32    96     
-64    -32    
-368   16     
112    -48    
-240   16     
304    -208   
-320   208    
-32    -224   
64     -32    
16     -160   
144    144    
-400   256    
-48    -64    
-256   -64    
240    -112   
-592   -16    
-48    -160   
-624   80     
-1312  -1104  
-544   -944   
48     -48    
144    192    
-176   -128   
-32    1040   
-144   -832   
432    -48    
-240   -560   
512    368    
112    16     
-16    384    
-288   208    
-224   -48    
-256   -544   
128    -48    
-32    160    
64     -192   
-256   -80    
0      -800   
192    320    
224    -48    
-32    384    
16     -192   
112    -624   
-192   -112   
16     -608   
48     -144   
-160   -32    
432    736    
0      -128   
0      -48    
-224   -80    
96     128    
-144   -48    
-192   -512   
-288   -288   
32     240    
80     272    
-1440  16     
-256   32     
-880   16     
16     -96    
80     128    
-144   -32    
48     0      
-192   64     
-320   208    
-144   176    
-144   -208   
16     160    
-48    80     
-16    -48    
-96    -144   
-176   80     
64     80     
-96    48     
-16    48     
-848   -224   
32     -112   
-320   256    
-16    96     
160    -176   
32     256    
-128   -128   
144    192    
-112   -32    
96     128    
48     32     
-48    80     
-32    64     
48     -32    
-64    -48    
-640   -80    
80     176    
-32    80     
240    240    
304    -128   
32     208    
-128   -320   
96     -144   
0      144    
-240   144    
272    96     
-224   -112   
32     96     
-192   -48    
-32    -16    
-96    16     
-96    96     
-1632  -16    
-16    176    
-160   -192   
160    0      
-16    112    
16     224    
-16    96     
16     144    
-144   192    
-240   16     
96     80     
-16    96     
-128   -64    
-80    48     
-48    16     
-144   -176   
-160   176    
0      -16    
32     -16    
48     0      
-64    -16    
-16    32     
-16    16     
-160   112    
-176   -256   
304    96     
-400   -64    
288    0      
-256   48     
160    128    
-656   -256   
224    192    
240    96     
-16    48     
-48    32     
-352   -128   
-64    -176   
112    16     
-192   -32    
-64    96     
96     16     
-16    160    
-64    -32    
-96    80     
-80    64     
32     -112   
-48    176    
-288   -96    
96     -96    
-192   160    
0      96     
272    48     
160    32     
-192   32     
288    64     
80     64     
-208   -32    
64     128    
-80    -64    
208    192    
-176   -16    
128    96     
-432   -64    
-112   -16    
80     112    
96     96     
192    160    
-336   -16    
192    32     
-112   48     
0      80     
160    32     
-96    160    
-128   16     
112    80     
-336   -48    
160    32     
48     -160   
208    192    
-16    208    
-80    32     
0      256    
32     -80    
112    48     
144    160    
-80    128    
-96    -160   
-48    96     
-416   -16    
64     -16    
-112   -80    
160    48     
16     256    
-96    -64    
-80    0      
192    80     
32     64     
48     208    
-112   32     
96     80     
80     64     
-112   -96    
96     80     
-144   48     
160    80     
0      224    
16     96     
-608   912    
-368   272    
-1712  -272   
544    144    
-32    0      
-848   -336   
640    576    
-352   -288   
432    -224   
-176   0      
128    128    
-192   -144   
-16    64     
336    0      
-48    256    
48     -144   
-16    240    
0      96     
144    80     
112    144    
-144   32     
96     96     
-128   208    
128    144    
-64    -32    
48     -48    
0      16     
48     192    
0      96     
-48    128    
96     16     
-64    96     
160    128    
-80    128    
144    112    
-32    48     
16     80     
32     160    
-16    112    
64     32     
-16    32     
-32    -48    
32     -880   
16     64     
96     0      
0      80     
64     128    
80     112    
96     64     
-16    112    
0      112    
160    128    
-48    -32    
16     112    
16     64     
144    0      
-128   -64    
-112   -192   
176    16     
176    48     
-16    80     
-48    64     
48     80     
16     80     
128    224    
-176   96     
144    96     
-128   -16    
-32    32     
-80    -48    
48     64     
160    64     
0      -224   
80     112    
-48    -1872  
112    80     
80     -32    
48     -64    
64     128    
48     208    
48     0      
64     48     
-64    176    
272    128    
-128   16     
48     64     
240    608    
-64    -208   
-32    -16    
0      -448   
176    144    
-16    160    
144    160    
32     112    
-16    128    
-64    32     
224    48     
-112   -224   
0      -96    
80     80     
208    -16    
-16    128    
-112   -432   
48     80     
128    -144   
80     64     
48     -480   
16     176    
0      -48    
48     112    
-32    0      
48     64     
32     48     
32     80     
48     -16    
-32    -112   
96     96     
64     0      
32     96     
32     -192   
128    96     
128    -1360  
64     16     
-144   -592   
0      128    
96     64     
32     -496   
-48    64     
-32    368    
96     64     
80     -96    
-80    192    
48     -48    
192    96     
0      -896   
112    368    
-48    -304   
224    288    
-240   -416   
432    64     
-80    176    
128    176    
0      0      
0      208    
80     80     
224    -128   
144    96     
-112   -304   
-48    -32    
-16    -320   
176    32     
160    16     
48     208    
-144   32     
-128   -80    
160    -80    
-64    208    
256    208    
-144   -128   
96     112    
112    -272   
-64    128    
80     -416   
-48    160    
128    -128   
0      224    
64     -160   
64     144    
0      -1632  
16     64     
96     16     
128    80     
112    80     
320    -160   
-112   -1968  
176    -144   
0      208    
-64    -48    
160    48     
160    0      
80     160    
-32    -192   
-16    416    
64     0      
176    32     
0      -32    
112    -384   
64     -320   
-64    -176   
-32    -144   
0      -48    
64     -800   
272    -64    
224    -1648  
128    -160   
-192   80     
-16    -112   
16     -400   
-80    1360   
192    -864   
-1264  -192   
-144   -384   
-80    -1152  
-608   -48    
752    64     
-608   384    
32     -128   
176    112    
-64    -752   
272    288    
-32    320    
176    -48    
144    240    
-128   112    
160    -48    
112    -176   
-192   -16    
144    -368   
-192   0      
-192   -256   
240    -240   
-112   -768   
144    -208   
64     -64    
240    96     
-64    96     
48     -16    
96     112    
48     -48    
-16    -176   
32     144    
144    32     
-48    -32    
-192   0      
-64    -112   
-368   -16    
80     -160   
112    -48    
64     -48    
16     32     
64     -624   
-208   48     
-16    -144   
-80    -80    
64     48     
224    272    
-224   -112   
80     -48    
-480   16     
80     -144   
-304   16     
-208   192    
272    -176   
48     -48    
32     -144   
80     -368   
-16    -48    
160    -192   
-16    224    
0      -48    
144    -144   
-80    64     
0      -112   
16     -16    
48     32     
-96    80     
256    -32    
-128   64     
-32    -224   
144    48     
-96    -272   
176    48     
-48    -288   
128    64     
-256   -80    
224    -32    
-240   32     
48     -160   
160    16     
-16    128    
-256   48     
128    -288   
-160   32     
-176   -16    
400    -176   
32     128    
-256   64     
288    -304   
0      32     
-16    128    
-48    -48    
32     -128   
240    368    
-320   128    
192    -64    
-96    32     
-16    32     
96     256    
-48    208    
48     96     
112    -496   
-64    48     
0      -656   
208    -128   
-96    16     
48     16     
112    112    
-80    80     
-48    32     
0      0      
96     336    
-32    256    
128    224    
-48    -16    
-352   64     
112    -224   
48     -144   
-208   -144   
48     -128   
272    160    
112    -192   
-96    -96    
-224   -96    
128    112    
96     416    
-80    208    
96     -32    
0      -48    
-1600  -320   
224    304    
-112   -32    
80     176    
-128   128    
192    384    
-48    144    
-384   -240   
-272   -32    
-560   96     
160    80     
64     144    
-80    -256   
-160   -144   
-48    -32    
-576   -64    
192    96     
-144   -48    
64     80     
16     32     
-400   0      
64     32     
-160   144    
16     96     
-128   32     
-112   176    
-1536  -144   
-32    -48    
-32    -160   
48     208    
0      -64    
-16    224    
-128   -176   
-112   -64    
96     -48    
-256   -48    
-32    80     
-112   240    
-304   -128   
256    -80    
-112   -128   
-80    272    
-32    -304   
32     144    
288    256    
112    400    
-336   64     
-208   -256   
-48    48     
160    -112   
48     192    
128    32     
-80    128    
-160   -16    
-16    80     
-80    96     
-96    96     
48     80     
-720   144    
0      0      
0      32     
-48    192    
0      16     
-64    -64    
272    80     
-64    96     
-32    96     
-432   -208   
176    -336   
224    -240   
-240   -480   
-112   -48    
208    -160   
-672   -240   
512    -816   
-80    576    
-64    -272   
176    464    
-336   96     
288    32     
-400   128    
224    -192   
-48    240    
-32    -144   
-48    224    
16     -80    
-208   -128   
80     32     
-608   -240   
96     64     
144    -32    
-16    48     
-16    224    
-160   240    
112    -64    
-128   -96    
96     0      
112    32     
-48    112    
16     128    
-128   0      
-64    -48    
96     112    
-32    208    
80     144    
-208   -48    
48     -112   
-32    64     
16     80     
80     112    
-48    128    
16     144    
-112   64     
-80    16     
0      -32    
-32    64     
-144   -144   
16     32     
-64    48     
96     144    
-32    48     
-32    64     
32     48     
64     192    
-224   48     
0      -144   
-64    80     
0      64     
-16    -64    
-96    144    
224    144    
-304   -32    
-32    -80    
-160   -128   
-48    -16    
144    256    
-96    32     
96     160    
-16    128    
112    96     
-32    112    
16     80     
-16    32     
0      -144   
224    208    
160    304    
-160   48     
-48    240    
16     32     
128    0      
32     48     
-32    64     
32     208    
-64    32     
16     32     
-48    -16    
80     32     
48     224    
48     272    
-112   -32    
-64    -32    
0      0      
32     144    
-48    -80    
-48    16     
64     144    
96     144    
32     64     
-144   32     
48     0      
96     160    
0      48     
0      -64    
-64    64     
-192   -32    
144    80     
-80    96     
16     48     
64     96     
0      80     
0      -48    
16     -64    
32     96     
64     208    
96     16     
-112   0      
32     144    
80     64     
48     0      
-160   160    
224    16     
80     80     
-48    160    
400    848    
-240   -32    
304    -96    
-400   240    
224    -32    
80     16     
-160   48     
144    48     
16     144    
32     256    
48     -48    
-80    0      
96     208    
-48    240    
32     -656   
16     160    
-64    176    
128    128    
-96    128    
144    -112   
352    416    
-352   176    
32     144    
-192   112    
64     -128   
208    240    
-160   -16    
112    160    
-96    -64    
352    -96    
-144   224    
-32    208    
64     -96    
64     16     
192    112    
112    96     
48     176    
-32    224    
-16    128    
336    -160   
-112   288    
-112   224    
-160   64     
-64    192    
208    -336   
400    96     
64     -912   
-160   368    
-256   256    
-64    -32    
384    112    
-112   64     
-16    -32    
-32    160    
-16    -176   
192    240    
32     64     
176    144    
32     144    
-112   -64    
80     176    
-176   -416   
256    32     
32     96     
48     96     
-16    208    
-96    96     
80     -464   
-80    64     
-48    -128   
16     96     
-464   448    
-336   2064   
-1008  592    
144    -352   
-400   -896   
1296   64     
-80    912    
-512   -2368  
176    -32    
304    112    
208    32     
-176   -32    
64     416    
128    -48    
112    288    
-192   -64    
128    96     
-32    192    
-80    -160   
96     -112   
96     128    
48     144    
64     -176   
128    144    
112    144    
32     64     
0      80     
128    304    
-32    96     
32     112    
-32    16     
32     -96    
80     160    
48     -48    
64     144    
32     -432   
-48    48     
96     -672   
0      160    
176    112    
0      80     
-16    64     
80     128    
32     -64    
160    96     
-128   128    
240    96     
-32    80     
96     -144   
48     -64    
144    -64    
-128   64     
192    -112   
0      80     
64     112    
-16    160    
96     -64    
128    128    
-64    128    
144    32     
0      64     
64     -256   
16     96     
96     -176   
128    240    
-160   -48    
192    48     
144    48     
-96    64     
16     0      
-128   -16    
272    48     
-96    -192   
64     112    
80     -16    
-48    -1552  
16     -240   
160    -96    
32     16     
-96    96     
176    -144   
32     192    
-64    -128   
96     -1632  
-48    -112   
368    -640   
-80    272    
-64    -592   
192    -256   
-272   -32    
-48    -912   
288    -112   
16     -224   
160    16     
-160   -384   
192    -272   
64     176    
-16    -160   
48     -192   
64     64     
32     -320   
96     16     
-16    -16    
16     32     
-656   0      
208    -272   
48     -16    
-32    48     
48     -176   
0      -1216  
-16    -192   
80     192    
64     -16    
96     80     
-32    128    
96     -32    
0      32     
-112   160    
-128   -176   
-160   80     
-320   -288   
-32    -272   
48     -112   
176    -272   
-96    -128   
48     112    
192    -320   
112    -16    
16     32     
-144   64     
-112   -64    
16     -64    
64     112    
112    -32    
-336   80     
-144   -32    
-704   80     
64     -208   
96     -144   
-224   -48    
128    176    
224    -80    
16     160    
-32    -400   
-96    -128   
128    -128   
272    -416   
-208   48     
192    -16    
-128   96     
208    -208   
-224   -96    
-96    -80    
96     160    
-16    -128   
96     16     
-96    -512   
208    160    
-48    -336   
-16    -32    
128    272    
176    -32    
-176   -96    
48     -112   
-96    160    
288    -32    
-352   -96    
-272   -496   
-640   -224   
144    -416   
240    320    
-208   -800   
32     496    
176    -1056  
80     64     
-192   32     
32     -208   
-96    -48    
288    48     
-160   80     
48     48     
-240   128    
64     -96    
-352   -48    
-80    -256   
64     64     
112    80     
16     16     
80     -464   
128    -224   
80     -368   
-48    -240   
-304   288    
48     64     
-256   32     
160    0      
176    64     
64     -80    
1104   1584   
-1328  240    
1280   1472   
96     720    
704    -32    
-528   -1168  
-528   -16    
32     -336   
240    368    
256    112    
-272   -336   
-64    80     
288    288    
-240   -192   
32     -144   
-64    208    
-112   -64    
64     240    
-448   -208   
-16    0      
64     160    
-656   192    
32     208    
-768   0      
0      -48    
-16    -144   
-48    96     
112    0      
16     96     
-16    128    
-80    0      
-1088  -112   
48     160    
32     -112   
48     96     
16     48     
-208   -96    
-96    -144   
-368   176    
144    368    
-480   -32    
0      160    
32     0      
64     -112   
96     80     
-48    48     
-160   -144   
-64    64     
-16    -112   
0      32     
-80    -32    
-224   -96    
-64    -160   
-416   -176   
-32    176    
-32    128    
-208   144    
-1808  96     
0      -80    
-240   -496   
224    256    
-128   -208   
-112   96     
80     -160   
0      16     
0      48     
-64    64     
0      80     
-64    128    
32     128    
-48    32     
-64    -32    
-384   -32    
32     -48    
-32    -144   
48     112    
-304   -480   
144    -144   
-224   -144   
-160   -384   
128    352    
160    336    
32     368    
-128   16     
-112   16     
-176   -128   
48     96     
-16    320    
16     176    
-592   -128   
128    48     
-32    -144   
112    160    
-144   16     
-16    80     
-16    64     
-32    336    
-16    272    
-112   -128   
0      0      
-80    64     
64     144    
-32    32     
-64    112    
-736   -144   
112    160    
-96    -272   
128    160    
-80    48     
112    80     
32     128    
-160   -80    
80     48     
-144   128    
144    32     
-32    80     
80     64     
32     240    
64     240    
-320   -160   
-48    208    
128    -16    
32     -64    
16     16     
-48    224    
240    32     
48     976    
32     -192   
32     -416   
-160   -80    
208    16     
80     -48    
-160   -16    
16     144    
-48    192    
-112   -368   
176    -112   
-32    -224   
112    -48    
272    160    
-192   352    
32     32     
16     32     
-16    64     
48     -80    
-144   288    
-96    -128   
-96    224    
160    96     
-176   64     
48     -112   
48     128    
-160   0      
224    176    
-192   64     
48     -96    
-128   48     
128    -96    
160    336    
-240   64     
96     16     
96     320    
-176   0      
160    0      
-128   0      
192    144    
-80    32     
-128   -64    
-16    -64    
304    560    
-80    96     
-80    352    
-64    96     
-48    -16    
160    352    
-176   -16    
80     144    
-272   64     
-16    64     
-128   -224   
96     176    
-32    -96    
112    272    
144    -80    
-16    96     
224    192    
-224   320    
-96    -16    
0      0      
-80    48     
48     16     
-48    0      
-80    -96    
112    144    
64     -48    
176    272    
48     32     
-16    560    
-496   -576   
768    -32    
304    368    
-176   320    
-208   -32    
256    80     
-480   16     
736    -384   
-80    176    
0      -112   
224    192    
-224   112    
96     96     
64     32     
160    -32    
-80    336    
64     80     
144    80     
96     144    
-144   208    
96     128    
-128   112    
64     -128   
112    160    
96     -48    
32     -400   
-112   96     
80     96     
48     -32    
0      96     
64     144    
32     160    
-64    64     
-32    -16    
-32    80     
-144   -144   
96     16     
-48    176    
224    144    
-176   -96    
-80    -784   
64     128    
64     80     
-16    -32    
96     96     
-48    160    
176    112    
-80    240    
192    -96    
48     128    
-48    128    
176    32     
-96    128    
192    160    
16     128    
16     48     
-80    16     
208    80     
-64    -64    
80     -112   
-64    256    
-32    128    
80     48     
48     80     
112    32     
0      -16    
-32    128    
16     -64    
80     112    
0      64     
48     -128   
96     16     
-16    -2448  
-16    80     
48     48     
32     144    
80     256    
48     176    
112    -16    
208    48     
-192   32     
96     128    
160    288    
-176   -144   
352    32     
-64    -272   
256    144    
-128   -832   
80     128    
-16    -16    
112    112    
80     0      
112    208    
-128   -144   
96     -80    
80     -48    
-64    144    
160    176    
-16    -144   
-16    96     
-16    -64    
192    -16    
128    -48    
-176   112    
96     -624   
288    240    
32     64     
-16    -224   
-144   32     
112    96     
160    80     
-16    128    
208    32     
-240   -320   
80     32     
-64    -288   
-112   -368   
192    -128   
64     -48    
-80    -880   
160    208    
64     -160   
-32    96     
48     272    
48     48     
160    80     
16     352    
208    176    
32     64     
16     48     
160    -160   
16     240    
272    -112   
-320   128    
96     -720   
128    96     
64     112    
-16    80     
112    80     
64     176    
0      32     
80     -336   
96     160    
-48    -272   
80     176    
32     -128   
-16    -192   
48     -176   
112    96     
80     0      
-16    80     
96     -304   
48     208    
208    -80    
-192   -16    
-16    128    
16     -272   
-16    -48    
-16    -128   
112    -112   
0      -416   
-32    240    
224    -80    
-32    336    
128    16     
32     -400   
-144   -288   
352    -1504  
-224   -16    
128    -480   
0      -176   
160    176    
-80    -304   
-16    -304   
96     -1712  
96     -96    
96     448    
96     16     
0      112    
48     -144   
16     -944   
48     112    
48     -160   
64     96     
272    -288   
64     -432   
-320   -48    
208    -480   
-48    -64    
16     -576   
-48    -64    
224    -896   
416    224    
-320   64     
160    -160   
-48    -336   
272    80     
208    1296   
-80    944    
-672   -912   
-192   -1184  
-656   -32    
368    -160   
208    1360   
-464   64     
80     224    
-448   -1008  
416    -208   
-16    -688   
-112   192    
400    192    
-208   -160   
80     -336   
-80    -144   
-80    128    
112    -80    
-160   -112   
288    0      
-192   -304   
96     -224   
48     32     
544    -304   
-160   -112   
16     -192   
176    224    
0      -112   
48     48     
192    -208   
240    -144   
-144   -64    
-48    -272   
-48    32     
-144   -176   
-160   -64    
-336   -336   
208    -48    
16     -288   
368    416    
-352   -240   
208    -16    
80     -160   
-16    96     
-16    192    
0      16     
-32    -96    
-48    32     
16     -16    
-192   80     
-176   -16    
192    -64    
16     16     
144    176    
-48    -368   
0      -1408  
80     592    
224    -1616  
-176   288    
0      32     
80     160    
-128   -128   
16     -48    
48     112    
80     -48    
-112   0      
-64    32     
-272   160    
-32    -48    
0      80     
32     -304   
64     64     
64     48     
-16    176    
32     32     
-208   -576   
-16    -176   
48     -384   
-144   -16    
32     144    
-64    48     
208    -32    
-112   -32    
32     -144   
272    16     
-96    -224   
80     -112   
352    64     
16     -96    
-112   -32    
32     80     
0      0      
-160   -144   
128    32     
0      16     
16     288    
-144   -256   
-48    -144   
0      -208   
48     0      
240    -208   
-240   96     
176    -640   
16     80     
-96    -144   
128    64     
-96    240    
176    -32    
-32    -192   
-48    -96    
-48    80     
272    -16    
-96    208    
-144   -48    
128    144    
-480   -224   
64     144    
0      32     
-576   -192   
0      48     
-208   48     
32     96     
96     368    
-112   208    
192    272    
48     416    
64     400    
224    48     
-304   80     
-48    -16    
16     48     
-144   -48    
144    208    
-160   128    
-144   -64    
-432   64     
-208   -192   
-240   96     
0      112    
128    160    
-48    144    
0      192    
-48    64     
-144   -336   
80     -320   
-128   -704   
-16    -32    
-16    64     
0      192    
32     80     
-256   16     
96     112    
-208   -288   
208    -144   
-784   -224   
144    0      
-112   -240   
224    304    
32     96     
-96    32     
48     -64    
-96    80     
-32    80     
-144   -176   
64     16     
-96    -32    
160    -144   
-320   -80    
-80    -96    
-528   -144   
64     432    
192    -32    
-48    240    
64     32     
16     48     
-80    -64    
-64    -128   
112    176    
-112   0      
0      208    
-80    -16    
80     224    
-128   -288   
208    -16    
-672   -64    
-64    128    
-1552  -144   
48     320    
-224   -80    
96     96     
-48    -16    
128    -32    
112    272    
-144   16     
144    112    
-288   -16    
-912   -848   
-864   -416   
880    1072   
-448   352    
96     64     
-912   16     
-32    -192   
16     1024   
-608   -576   
432    576    
-240   -544   
112    176    
-208   -32    
416    -16    
-320   240    
208    -240   
-256   336    
176    -48    
-288   192    
192    -160   
-576   0      
144    -16    
-48    416    
128    -160   
-176   112    
16     -160   
32     256    
64     -48    
-48    48     
-80    -16    
112    288    
-80    112    
-32    -16    
-208   -112   
48     112    
-48    64     
32     144    
48     176    
-240   -16    
64     64     
208    144    
-144   64     
64     16     
-64    208    
112    32     
-48    -16    
-160   80     
96     112    
-48    0      
-96    96     
-48    16     
208    -112   
-112   112    
48     64     
64     0      
16     64     
-80    192    
112    96     
16     128    
-16    -48    
16     16     
-16    0      
-48    208    
-80    -80    
160    64     
-256   80     
-80    80     
32     80     
16     64     
-16    -32    
192    80     
-64    144    
32     80     
16     -48    
0      96     
-144   96     
-96    -272   
160    176    
-336   -16    
256    32     
-304   -144   
96     96     
32     160    
-112   -96    
272    112    
-144   32     
80     -112   
16     16     
-112   288    
-96    96     
160    80     
-16    -64    
112    144    
-48    -16    
144    128    
48     80     
48     176    
64     160    
160    160    
16     160    
-112   16     
-32    112    
128    -32    
96     256    
-64    16     
64     80     
-128   112    
96     112    
-48    128    
-80    -32    
112    112    
-80    144    
208    112    
-80    -48    
48     64     
48     224    
-32    0      
144    128    
-80    80     
-176   112    
224    32     
16     -144   
96     16     
-192   -192   
32     -496   
96     -192   
32     176    
16     128    
208    -32    
-160   -16    
-32    240    
176    608    
-32    144    
64     -96    
-160   288    
32     -112   
192    -176   
-272   80     
272    512    
-32    -304   
144    32     
-32    64     
80     128    
80     128    
-48    80     
-48    80     
48     64     
144    272    
96     272    
-80    -64    
0      32     
48     208    
80     80     
96     -80    
0      -704   
96     96     
-128   -400   
0      176    
0      496    
208    208    
-128   48     
48     -48    
0      -32    
96     144    
-160   128    
320    -672   
-144   -304   
-208   -176   
-80    192    
-336   -496   
80     16     
144    -2352  
144    288    
-352   112    
-48    16     
208    32     
192    208    
192    320    
-304   192    
-192   -80    
192    -16    
192    -48    
192    112    
-96    80     
80     16     
0      192    
112    -592   
-32    80     
-16    -592   
176    48     
80     -208   
-64    80     
32     64     
-160   144    
96     -128   
176    336    
256    48     
48     48     
1056   944    
-1136  -1792  
800    736    
288    480    
880    -176   
-1088  -1648  
576    128    
-528   96     
224    -224   
-336   480    
336    64     
-48    128    
-400   80     
464    224    
-160   -384   
448    288    
-144   -96    
256    640    
-208   272    
224    96     
112    128    
208    96     
-48    288    
-144   -336   
336    -80    
-48    -240   
816    880    
-96    464    
-160   272    
-608   -576   
432    0      
-208   48     
-32    240    
16     96     
-256   -112   
64     -288   
48     0      
128    0      
208    400    
-304   -80    
128    -160   
192    80     
48     -1216  
-64    144    
0      -272   
176    112    
176    -128   
64     240    
128    -48    
-112   -144   
-32    16     
112    176    
256    -112   
-112   -112   
0      -176   
64     112    
-16    368    
-96    48     
688    688    
-208   -416   
16     256    
80     -320   
0      -96    
-48    -80    
192    160    
144    -256   
48     80     
160    176    
0      -1376  
-32    112    
112    -608   
64     -368   
-32    -112   
112    -80    
48     32     
128    -2256  
-224   -384   
384    16     
0      32     
-32    880    
192    -176   
-48    80     
-96    -176   
272    -96    
-32    256    
-608   -16    
160    64     
-48    96     
272    -240   
-160   -304   
-16    -208   
64     -112   
16     -272   
176    48     
112    240    
48     -112   
80     -32    
16     256    
224    208    
-80    304    
-112   -160   
-64    -272   
-368   -96    
64     -272   
112    -32    
-48    0      
32     -80    
128    -128   
128    96     
368    -688   
-160   224    
-320   -640   
160    -80    
144    16     
80     -80    
-96    96     
96     -176   
128    176    
-32    -112   
368    -192   
-208   -272   
192    -64    
208    -544   
-96    -144   
16     -304   
112    -16    
240    64     
-96    64     
192    112    
-48    -240   
-112   -96    
-16    -240   
-160   -16    
64     -160   
0      64     
-128   -240   
160    16     
-192   -192   
64     -48    
32     -448   
48     96     
96     -160   
208    144    
-400   -32    
96     32     
-16    16     
144    -144   
-240   112    
208    -48    
-768   -80    
-32    64     
-1184  0      
0      -80    
-48    80     
144    -80    
48     64     
96     -1312  
-128   272    
48     128    
96     -16    
32     48     
96     48     
-192   -32    
-96    -208   
-112   32     
144    -48    
-272   208    
128    -128   
-160   48     
208    -192   
-32    64     
128    -944   
272    48     
-64    176    
-48    -80    
-240   -16    
112    -224   
0      -48    
64     32     
-256   80     
80     -96    
-544   -16    
112    -272   
-16    80     
-64    -336   
192    176    
144    -336   
16     160    
-240   16     
-16    0      
-80    16     
64     80     
64     0      
48     80     
-208   -16    
112    -48    
-160   -16    
-1392  -2448  
400    -176   
320    960    
-624   48     
608    160    
-912   464    
-96    -112   
-560   -208   
304    720    
384    -48    
-304   -224   
160    -224   
32     656    
304    -304   
-176   272    
-480   -416   
64     464    
-656   -432   
80     192    
-128   16     
-448   16     
-16    64     
-448   128    
-128   64     
192    -320   
16     -80    
240    -32    
-80    80     
32     -144   
-224   160    
-192   -208   
112    176    
-304   -544   
-176   160    
80     32     
0      176    
-16    -160   
-144   160    
-128   -16    
-496   160    
-32    -96    
16     112    
-128   96     
-16    -32    
208    112    
-208   -176   
80     32     
-208   0      
0      192    
96     -32    
-64    -16    
-48    128    
-80    -16    
-48    0      
-96    64     
176    16     
-1168  64     
0      -32    
48     -96    
48     80     
-128   -16    
176    80     
-16    144    
0      -32    
32     208    
-128   -16    
16     112    
-160   -48    
144    32     
-128   48     
-192   32     
-80    112    
-96    0      
-64    -48    
32     16     
-64    -64    
176    352    
-320   128    
112    32     
48     48     
-48    80     
-48    48     
96     32     
80     48     
-320   -32    
-48    48     
-592   -400   
288    96     
-416   384    
32     -32    
80     64     
-224   112    
96     -32    
-48    208    
80     304    
32     192    
-112   16     
0      -32    
-48    0      
-160   -336   
192    736    
0      608    
16     224    
-880   48     
80     112    
-48    -208   
-64    -16    
-112   -80    
128    96     
-16    128    
-32    -48    
-80    128    
-80    -112   
48     128    
-112   32     
64     320    
-96    160    
0      0      
-112   -128   
32     -144   
-32    128    
48     144    
64     128    
-112   16     
-144   -224   
-64    -80    
96     288    
-32    -48    
-64    -656   
-128   176    
192    272    
-112   176    
-112   288    
16     -80    
128    80     
144    672    
-16    288    
-208   48     
144    64     
-32    0      
-32    96     
112    80     
112    192    
-112   160    
-112   32     
48     160    
-176   -96    
128    128    
-272   -160   
64     96     
0      0      
0      96     
80     96     
-64    48     
128    -16    
16     128    
-32    176    
160    -160   
-112   176    
-128   -16    
64     112    
-144   -144   
64     192    
-176   64     
48     112    
-224   0      
176    224    
-144   -16    
160    208    
-96    192    
176    -16    
-64    128    
-48    32     
192    96     
-144   128    
16     32     
16     -144   
96     144    
256    112    
-160   96     
0      -64    
48     112    
272    192    
16     112    
192    -160   
-80    144    
0      -48    
64     112    
-208   64     
336    -32    
-96    224    
-32    -64    
0      48     
128    0      
96     240    
48     48     
-48    144    
-16    128    
-1184  -1568  
768    -416   
-656   304    
720    48     
-320   608    
416    -208   
-288   176    
-112   -1216  
816    464    
-944   -128   
704    192    
-176   176    
32     624    
80     -288   
-128   416    
32     -240   
32     512    
-64    -336   
80     304    
-144   -288   
208    416    
-144   48     
0      64     
-64    16     
368    -160   
-128   288    
-48    16     
-208   -208   
368    224    
-208   -112   
352    96     
-80    176    
-80    16     
96     224    
-64    -32    
128    80     
-192   -304   
160    848    
112    496    
96     -720   
32     48     
-16    -48    
-48    176    
32     112    
80     176    
-32    64     
144    432    
16     240    
-16    0      
80     128    
32     176    
64     48     
-144   16     
144    -64    
96     -512   
32     32     
208    -672   
0      -32    
-48    0      
32     96     
144    192    
-16    320    
-16    0      
192    112    
-16    -96    
80     176    
64     0      
0      -80    
32     32     
16     32     
0      128    
128    -720   
-32    16     
16     96     
144    128    
96     96     
-48    64     
96     32     
144    432    
-176   32     
288    96     
-16    16     
80     224    
432    368    
-48    384    
-32    48     
80     -352   
272    400    
64     96     
-48    144    
-32    -208   
64     -160   
-16    -192   
224    240    
0      224    
32     112    
192    256    
-384   -48    
64     -192   
-32    -272   
128    288    
128    -448   
16     -16    
16     -496   
80     -256   
288    112    
0      80     
176    384    
-80    -80    
64     144    
-128   -144   
224    192    
32     -176   
48     -32    
160    -48    
-16    96     
-48    -96    
16     -112   
16     16     
192    320    
80     -912   
-16    432    
-112   -48    
144    160    
96     272    
0      48     
240    128    
-256   -992   
0      96     
112    -256   
144    112    
112    96     
32     240    
96     -688   
-64    -32    
-224   80     
208    224    
288    -160   
-160   112    
-160   64     
176    -352   
-16    96     
112    -304   
96     32     
32     -64    
-48    144    
80     -304   
208    64     
-64    -384   
96     0      
32     64     
144    -80    
64     80     
-80    -3136  
176    -144   
-144   -32    
240    128    
0      112    
-48    128    
176    -64    
-16    32     
64     -128   
64     304    
192    -256   
272    -688   
-16    32     
112    -320   
176    464    
-192   -864   
-48    -48    
80     -352   
288    -320   
160    32     
-192   -1008  
32     -144   
0      224    
192    160    
-176   64     
80     -208   
192    -192   
32     112    
32     -400   
-96    192    
16     -192   
112    96     
-112   -96    
176    16     
-32    16     
0      -656   
96     -192   
48     64     
176    64     
-80    -48    
32     0      
-32    64     
16     0      
160    -80    
-1056  256    
320    720    
-1632  -304   
-704   -192   
256    16     
-560   -720   
416    240    
-480   -544   
448    80     
-272   -688   
80     304    
144    32     
464    96     
-80    176    
112    -224   
-160   32     
224    -144   
-80    144    
-224   -320   
96     176    
-256   -64    
64     144    
48     -32    
-32    48     
64     -432   
80     -112   
0      16     
64     96     
112    176    
-80    -48    
64     -96    
-272   -32    
112    48     
-336   48     
16     96     
-544   48     
112    160    
-112   -48    
-32    -192   
-32    48     
96     -144   
128    144    
16     0      
-48    16     
48     32     
80     -96    
160    96     
-160   -160   
112    -16    
-80    -48    
-192   48     
144    -208   
-432   48     
48     0      
32     112    
176    -272   
32     208    
-128   -1152  
176    -192   
-80    -48    
16     -64    
-32    144    
16     -112   
-144   -128   
80     -192   
-208   64     
256    96     
-192   128    
0      -112   
48     0      
64     -704   
0      48     
48     -896   
48     128    
-144   64     
96     240    
-304   -64    
400    0      
-240   48     
64     80     
80     32     
-128   80     
112    -16    
48     -16    
240    192    
48     -240   
80     352    
240    48     
48     -400   
-336   96     
48     -128   
-96    96     
112    112    
-96    -16    
112    64     
-16    128    
80     -256   
240    128    
112    -64    
-32    128    
-144   -48    
128    176    
-80    16     
-592   -48    
-144   -64    
48     16     
16     112    
32     304    
16     16     
0      -240   
-176   -48    
144    -80    
32     64     
-320   -192   
32     144    
-304   -128   
192    224    
80     320    
-96    192    
-192   -16    
-432   0      
-64    -48    
-320   48     
112    160    
64     -80    
-176   144    
-144   64     
144    128    
64     208    
-32    160    
-48    -176   
-240   32     
-48    -16    
-160   64     
-80    -16    
-16    304    
-224   -16    
-48    0      
-48    32     
16     32     
-16    80     
-32    -48    
48     96     
16     -160   
64     240    
-48    16     
32     -448   
-64    -160   
-128   80     
-48    48     
-464   -112   
-96    16     
-320   0      
80     224    
-704   -48    
-32    -112   
64     -176   
-16    240    
-160   -336   
80     -16    
96     160    
160    240    
-336   32     
-128   192    
-48    -16    
304    -96    
64     -16    
-256   224    
-224   32     
-576   16     
-16    32     
-112   -208   
96     16     
-80    112    
0      80     
112    128    
-336   208    
-16    -80    
-48    16     
32     48     
16     48     
-64    112    
-32    48     
-16    -16    
-288   64     
48     -192   
-192   160    
96     16     
160    -16    
-192   80     
-112   32     
48     -128   
-32    176    
-144   -16    
304    112    
-128   304    
224    -16    
-240   -80    
-96    448    
-352   -1568  
-160   400    
-416   304    
-224   288    
144    -176   
272    32     
-128   -192   
48     32     
32     128    
304    0      
-176   416    
-48    -112   
48     352    
-48    -48    
144    480    
-272   16     
32     -144   
-304   -96    
224    -16    
-224   -160   
-128   -112   
336    -256   
-256   144    
160    -160   
64     -32    
-64    -32    
144    176    
-96    384    
128    160    
-208   48     
-112   -192   
80     112    
-288   -80    
-80    128    
64     64     
80     -128   
64     112    
-16    112    
176    208    
-288   48     
48     16     
0      64     
144    176    
-80    144    
-80    16     
-224   -16    
32     96     
16     80     
-96    48     
160    64     
16     64     
-32    -64    
64     -80    
-96    64     
192    352    
-240   16     
208    48     
-16    144    
-208   32     
208    96     
-144   0      
32     128    
96     160    
-16    -80    
224    48     
-144   352    
-128   32     
128    16     
32     48     
-64    144    
32     208    
-16    -16    
144    144    
-112   -32    
80     16     
224    64     
-16    160    
80     0      
-32    176    
-16    16     
144    112    
-80    -144   
160    224    
-208   304    
128    240    
-208   16     
336    144    
-160   -96    
160    80     
-16    224    
-160   -32    
32     160    
-80    -16    
-64    -176   
384    -48    
-160   224    
32     48     
-64    128    
-16    0      
-16    0      
32     128    
96     96     
-16    160    
0      -176   
80     -64    
-48    32     
112    0      
16     -48    
96     128    
-128   160    
224    64     
80     208    
-144   32     
64     80     
128    64     
-176   96     
224    64     
-64    176    
-112   -256   
-96    -80    
-48    32     
208    -896   
-80    80     
-64    128    
320    224    
32     160    
-176   96     
64     80     
288    64     
-32    112    
16     240    
64     256    
224    288    
-16    -128   
0      16     
-240   128    
48     -736   
224    -64    
16     112    
-192   176    
336    144    
128    224    
-48    144    
48     272    
-16    -272   
0      -16    
-16    -96    
224    176    
160    64     
-16    32     
-64    128    
176    -800   
-96    160    
128    -448   
-96    320    
16     64     
224    464    
-96    -160   
144    112    
-80    96     
144    160    
-48    0      
-64    32     
0      -32    
160    -80    
0      320    
64     -384   
-208   48     
16     -992   
144    -112   
64     288    
112    112    
-192   -16    
128    64     
32     64     
192    128    
-32    48     
-16    112    
80     96     
64     -144   
96     176    
48     -64    
16     -144   
112    -336   
-16    240    
80     -2112  
160    112    
48     112    
64     224    
16     32     
80     160    
-48    240    
16     80     
0      -16    
128    -80    
144    112    
2336   1232   
-1552  432    
480    64     
112    960    
176    -144   
496    448    
-1248  160    
976    192    
176    352    
-96    -32    
-688   -144   
256    128    
352    320    
-16    112    
-48    -224   
-128   -128   
160    16     
288    128    
-64    -48    
64     -336   
-48    16     
80     32     
48     208    
-32    32     
96     192    
192    32     
-64    -144   
160    288    
-64    -96    
16     0      
-32    -112   
208    80     
16     -96    
-32    128    
48     -208   
112    80     
-16    32     
64     112    
-32    144    
144    96     
-16    128    
96     -272   
-32    160    
128    -320   
48     176    
112    80     
-64    96     
-128   -464   
144    144    
48     0      
112    16     
-96    144    
96     -336   
48     160    
64     -336   
96     -1856  
64     -272   
32     64     
80     -192   
-96    -80    
-64    -128   
48     -48    
32     -208   
128    176    
-112   -80    
112    -688   
80     0      
64     -320   
0      304    
-512   48     
160    -240   
96     -144   
-64    160    
-32    -32    
224    -176   
-144   -320   
16     -80    
176    -96    
-48    80     
160    176    
0      -368   
0      0      
0      -496   
64     0      
-96    -16    
32     64     
32     -112   
128    -384   
112    -16    
64     -480   
48     80     
0      -432   
64     32     
96     -32    
64     0      
0      -80    
-16    128    
48     16     
48     -224   
-160   -80    
80     16     
-400   -32    
32     -128   
-16    -96    
96     -272   
16     0      
64     -512   
128    0      
-80    32     
-160   80     
64     -64    
32     48     
80     -48    
-32    32     
-80    0      
16     -112   
-720   64     
16     -96    
-192   -32    
-48    -176   
144    128    
48     80     
256    -16    
-256   -1744  
192    112    
-128   -144   
176    -144   
-48    128    
-16    16     
48     240    
-128   -288   
-112   -32    
-64    -48    
192    224    
-176   -48    
192    -176   
256    -368   
-224   128    
224    -368   
-16    -32    
128    176    
64     144    
-272   -64    
16     -64    
-80    80     
-80    -496   
160    0      
-272   96     
-32    -32    
112    -240   
-1760  -32    
112    0      
192    16     
-160   -400   
192    48     
-32    -1712  
16     80     
-16    -176   
288    0      
-224   256    
160    16     
-736   -80    
272    96     
-208   64     
-96    32     
-48    -32    
16     0      
224    -48    
128    -160   
-144   176    
128    -176   
-224   -96    
544    16     
-160   32     
112    -32    
-192   -48    
-144   -32    
16     -112   
32     80     
-16    96     
-96    144    
-32    -256   
32     64     
80     -224   
-16    144    
-128   -48    
32     80     
112    -208   
128    -80    
-80    -80    
224    0      
-176   48     
80     -96    
-400   80     
176    -288   
-896   0      
240    -384   
-928   624    
-1776  1968   
704    1296   
336    -224   
-1088  -1792  
-1056  320    
-160   624    
400    208    
-272   176    
192    96     
-48    288    
-352   48     
-144   -240   
144    304    
-1008  -32    
240    240    
-224   -64    
-320   16     
16     48     
-528   16     
-304   -448   
-208   -32    
160    176    
-752   80     
-160   96     
48     -240   
-32    176    
-144   0      
192    48     
-32    -96    
-32    304    
144    -208   
-224   -48    
-128   -64    
208    -16    
-64    144    
176    384    
-416   -80    
-288   -112   
-336   -64    
336    48     
-128   -48    
-96    -64    
160    176    
-16    -48    
-16    0      
-48    48     
-64    96     
208    256    
-176   -16    
176    16     
-272   128    
96     -16    
-64    80     
-64    16     
-224   96     
-16    48     
32     48     
0      64     
-80    -192   
-48    0      
192    192    
-112   0      
144    96     
-96    96     
80     -16    
0      32     
160    240    
-32    0      
96     256    
-496   -48    
128    80     
96     -128   
-16    160    
0      -112   
-16    32     
16     240    
112    -144   
-16    64     
-208   0      
80     -16    
-224   160    
-112   -224   
160    -64    
-256   192    
-512   -32    
32     80     
-720   -80    
-32    -80    
208    -144   
-192   -16    
48     -176   
0      160    
-192   192    
208    224    
-144   -80    
-48    -80    
160    64     
-16    112    
-64    80     
-208   -80    
128    32     
-128   176    
288    512    
-112   304    
-112   96     
-96    64     
0      16     
96     64     
32     176    
48     32     
-192   -96    
-16    16     
-32    48     
-16    64     
-128   -64    
16     112    
464    592    
112    288    
-144   -96    
-320   128    
176    48     
416    176    
-304   112    
16     80     
-96    144    
-32    -224   
-64    -160   
-96    144    
-48    96     
256    -16    
-128   0      
-192   -208   
-176   96     
112    64     
128    16     
64     80     
-48    96     
16     -112   
-160   32     
224    80     
16     144    
208    96     
-48    352    
32     240    
64     -32    
32     176    
-64    -32    
48     176    
48     64     
112    128    
16     64     
-32    128    
96     -16    
-64    16     
176    96     
0      128    
-48    -80    
-112   -144   
144    176    
-128   112    
64     256    
-48    128    
32     240    
16     16     
-48    32     
160    240    
-256   -48    
32     80     
-112   80     
64     -48    
-32    48     
80     80     
144    -32    
-32    160    
-224   64     
16     80     
176    128    
192    192    
-16    -64    
-48    160    
16     -32    
-96    144    
64     160    
32     -240   
-16    128    
-128   -16    
160    240    
112    240    
112    192    
-16    64     
-32    48     
192    -112   
128    144    
-128   224    
-32    128    
16     16     
-96    -16    
992    -2160  
272    -976   
784    -128   
-640   -32    
-96    496    
736    192    
-784   -480   
-400   -672   
112    592    
-224   -48    
384    112    
-48    416    
-192   224    
272    -80    
-16    240    
32     32     
32     48     
-176   240    
272    -16    
-96    -96    
128    -64    
-96    80     
208    -112   
-48    -384   
64     112    
224    368    
272    464    
-96    304    
-96    -240   
224    480    
16     192    
320    192    
-64    224    
-32    -16    
16     80     
-144   -176   
208    96     
-64    96     
208    -144   
48     96     
160    128    
160    208    
48     64     
-96    80     
128    48     
16     48     
32     176    
64     240    
64     -80    
64     80     
48     -48    
64     112    
0      192    
16     -272   
64     16     
48     -928   
-48    -224   
192    64     
-160   96     
16     -64    
144    272    
-160   -592   
-48    -16    
176    -224   
48     48     
80     176    
-16    -304   
96     32     
-16    -304   
80     80     
64     -512   
0      96     
48     80     
48     144    
-96    -208   
80     176    
48     304    
128    480    
0      16     
48     80     
-80    240    
176    -96    
16     96     
112    224    
-64    96     
224    -16    
-64    -192   
96     -240   
-80    -112   
-96    32     
-112   80     
-48    -176   
64     48     
80     96     
64     -32    
-48    112    
64     48     
-48    -32    
160    -48    
-112   -32    
240    -1184  
32     208    
64     -384   
-64    0      
48     112    
112    0      
96     96     
0      128    
80     32     
32     64     
-48    -16    
160    0      
-16    96     
224    -208   
-64    96     
48     -160   
-80    -192   
48     -64    
112    176    
96     -80    
-48    80     
16     208    
352    288    
-128   -32    
-112   96     
128    208    
304    -112   
0      80     
-64    -256   
256    32     
-32    64     
192    80     
-16    64     
-16    144    
160    304    
-160   -32    
240    32     
-32    224    
64     192    
-48    -64    
-48    16     
64     -352   
96     144    
32     -224   
160    112    
-240   -16    
256    112    
-336   -320   
208    720    
-144   -16    
16     -704   
192    128    
-752   112    
208    -768   
-240   -160   
176    -1120  
224    -272   
-304   -208   
192    -112   
160    272    
208    -432   
144    432    
64     -144   
-64    -80    
304    16     
-64    80     
144    16     
-480   64     
-48    -464   
-32    -112   
0      -144   
112    48     
-224   -192   
160    -144   
112    320    
208    112    
-48    48     
-32    -112   
208    176    
192    64     
80     64     
-48    -272   
-400   -192   
32     -96    
-192   0      
112    -160   
64     -144   
64     -48    
32     -320   
0      -176   
128    16     
48     48     
64     80     
64     -192   
112    -64    
128    -96    
-64    -16    
-192   192    
80     288    
80     544    
800    -256   
-224   1056   
-368   -64    
112    304    
-80    288    
848    -240   
-336   -1120  
-336   112    
416    -32    
-48    144    
-288   -176   
256    -80    
-96    80     
144    -48    
-224   -80    
64     -176   
-64    64     
96     -64    
32     112    
-80    -224   
272    -112   
32     -2016  
96     -16    
-64    112    
0      144    
-16    48     
16     -144   
-64    -16    
48     -208   
-64    -32    
-96    16     
0      48     
32     -96    
0      240    
48     -368   
0      16     
0      -336   
176    16     
-32    -16    
16     144    
16     128    
-96    -320   
-208   -208   
48     96     
144    144    
32     48     
-96    -80    
-64    80     
192    -96    
-144   -112   
112    -144   
240    0      
-96    160    
192    -1168  
-112   -288   
48     16     
112    -48    
-64    80     
32     48     
-96    32     
64     -96    
48     -16    
96     -144   
-80    16     
128    -80    
96     160    
32     -304   
144    32     
-176   16     
128    32     
-16    -32    
176    352    
16     -176   
192    -400   
-32    48     
-160   16     
48     224    
-32    -192   
-320   48     
-80    -32    
16     -48    
288    -512   
-112   64     
-80    368    
-80    160    
112    64     
-32    -16    
16     32     
-64    -96    
32     128    
-16    -96    
144    64     
-96    32     
-304   -160   
-1296  -192   
-112   240    
-1088  -208   
-160   0      
-32    128    
-624   -48    
-128   -96    
-416   -48    
-32    128    
240    -32    
-176   32     
80     128    
-64    48     
80     -64    
32     112    
-96    0      
176    240    
-80    -176   
-112   160    
-96    80     
48     0      
-48    176    
-192   160    
-64    160    
-880   96     
-240   -224   
-112   -192   
128    192    
-448   -544   
64     16     
-400   -32    
336    272    
64     -16    
-96    0      
-160   32     
80     240    
32     128    
32     256    
64     48     
-208   80     
-224   -272   
-1536  -48    
256    64     
64     -96    
-144   112    
-144   -32    
112    128    
128    32     
-192   32     
-128   80     
32     -224   
-96    -80    
-128   -48    
32     64     
-304   128    
16     64     
-1008  -16    
80     112    
32     -144   
-32    16     
160    0      
-16    224    
128    176    
-128   -16    
0      112    
-96    16     
-80    -32    
-16    64     
-64    32     
0      80     
0      -288   
-64    -32    
-80    176    
-816   64     
-48    32     
48     16     
96     -160   
48     144    
-48    -16    
-128   64     
16     32     
64     -16    
-48    80     
0      -112   
224    416    
224    80     
-272   -64    
-112   0      
-672   64     
48     -192   
16     48     
-32    16     
96     80     
-80    128    
48     128    
-144   48     
272    -128   
-16    112    
32     160    
-144   80     
-144   -16    
-400   -16    
-208   -1152  
-544   1056   
-256   432    
336    320    
-208   48     
48     96     
-128   -128   
64     272    
-80    -144   
176    80     
-112   256    
-96    208    
-176   -80    
-64    -128   
-48    32     
128    32     
-448   -64    
-240   0      
224    -32    
-160   -16    
144    224    
0      48     
144    16     
-96    0      
96     -32    
320    576    
-112   496    
112    96     
-176   144    
-192   -80    
192    96     
-32    32     
48     -144   
32     176    
160    80     
96     48     
-240   -16    
-80    -272   
16     -96    
80     208    
-48    176    
0      80     
16     96     
-224   32     
-192   112    
96     240    
-64    112    
-144   96     
112    16     
-112   288    
128    64     
-48    160    
-48    -32    
-64    64     
16     80     
352    688    
-496   -224   
-368   0      
368    -64    
-320   32     
128    -80    
-16    208    
96     -64    
64     96     
-96    128    
-32    128    
0      32     
0      112    
80     176    
-16    176    
0      16     
32     64     
-96    -96    
-32    48     
32     64     
80     176    
352    80     
-96    240    
176    464    
-144   304    
-80    -48    
128    208    
48     80     
-64    160    
-16    -32    
224    464    
64     432    
-48    -112   
64     16     
48     -112   
144    80     
-32    80     
-80    96     
64     48     
48     48     
48     64     
48     128    
32     128    
-64    48     
0      -32    
-112   -144   
192    144    
-64    48     
112    192    
-48    16     
32     176    
96     160    
48     144    
112    80     
0      160    
32     80     
48     96     
32     32     
16     64     
32     -240   
48     -128   
80     240    
0      -176   
32     112    
-192   -48    
32     -320   
128    32     
48     64     
-144   176    
128    304    
16     208    
-160   16     
32     -144   
-64    -64    
192    144    
16     -416   
-128   144    
16     -160   
-48    -304   
352    -32    
80     -496   
-64    48     
192    368    
-112   -16    
64     96     
-32    112    
96     64     
32     240    
-112   96     
160    -80    
-304   -368   
160    96     
96     96     
-16    -64    
32     32     
128    -256   
64     96     
0      -208   
48     -32    
-96    -32    
160    112    
96     192    
304    576    
-96    48     
64     16     
-192   64     
128    128    
-16    272    
-16    -208   
96     112    
128    -16    
272    -192   
-208   -528   
144    96     
16     64     
48     240    
224    -176   
32     80     
-96    -144   
-32    144    
-208   -256   
80     32     
112    112    
128    -48    
-32    0      
96     -96    
48     112    
160    96     
-192   112    
16     -2080  
48     160    
-16    -80    
80     160    
-80    112    
0      112    
-32    -80    
176    -240   
0      96     
224    -80    
-16    160    
64     128    
-736   448    
528    1216   
-1184  432    
-32    -240   
-16    64     
-1200  -784   
1296   736    
-480   96     
416    -464   
-144   96     
416    -336   
-64    192    
16     -80    
208    320    
-64    -112   
80     48     
0      -240   
-16    192    
128    -32    
112    160    
-80    16     
48     240    
-96    32     
224    208    
-16    16     
176    -128   
-32    176    
64     -368   
48     32     
112    -352   
-32    80     
48     -112   
32     112    
32     0      
192    96     
-96    -96    
224    368    
-48    288    
32     -64    
48     96     
16     48     
128    256    
48     -160   
16     -48    
128    -112   
32     176    
192    208    
16     -48    
32     -832   
-80    -2992  
160    16     
64     -592   
0      96     
-80    112    
16     -848   
32     -64    
112    -48    
-64    -80    
192    176    
0      48     
32     80     
48     -80    
80     160    
16     48     
0      -368   
128    -32    
144    0      
-64    -144   
-288   112    
192    -784   
160    -112   
-64    -96    
-64    -16    
96     -288   
192    48     
-208   -1152  
112    -240   
-128   -112   
112    128    
-112   112    
0      16     
352    -112   
-80    -192   
-320   -224   
144    48     
-1008  96     
368    144    
-224   0      
128    -368   
160    -272   
-32    -1920  
192    -112   
16     128    
48     320    
-16    -16    
0      -208   
32     -112   
-16    -192   
16     160    
176    64     
-240   80     
64     -64    
80     32     
0      -432   
144    -32    
-32    -48    
96     -16    
256    640    
-64    96     
96     -160   
-112   32     
-48    32     
64     -96    
-80    -96    
-32    -80    
-224   -80    
-16    0      
-1184  -368   
112    -112   
16     352    
176    -192   
0      -16    
112    -1760  
16     112    
256    -32    
-160   48     
80     48     
-96    -96    
80     -48    
-48    -48    
-288   -48    
208    144    
-208   160    
112    -80    
-80    48     
64     -496   
-144   -16    
112    -384   
272    256    
32     32     
-32    -48    
-80    16     
192    -128   
-32    32     
64     16     
-16    160    
112    96     
-208   32     
80     -288   
-288   -144   
192    -864   
-176   144    
240    -112   
0      16     
80     -928   
160    -160   
-112   48     
128    -208   
-80    112    
-48    48     
96     64     
0      64     
-80    -192   
48     -224   
-496   32     
-64    -560   
-304   -304   
176    -336   
80     256    
-224   -48    
32     -16    
-80    -16    
-16    112    
64     96     
48     48     
-64    16     
16     112    
-192   -272   
112    0      
96     256    
160    -112   
48     96     
-288   -64    
-352   -16    
-384   96     
-128   32     
240    32     
128    112    
-304   112    
-48    -96    
-112   0      
208    -32    
0      96     
144    -384   
-112   224    
-368   -336   
-80    160    
-400   -128   
-608   -720   
128    752    
-336   -80    
-160   -208   
-304   48     
-48    -240   
32     -32    
-144   -224   
288    208    
-160   32     
-448   -208   
128    208    
-576   -272   
-144   -16    
112    -48    
-80    -64    
64     288    
-48    128    
-144   -176   
48     16     
-64    16     
-208   464    
-336   16     
304    -192   
-160   32     
112    -80    
64     -32    
144    -32    
80     560    
48     144    
-96    16     
-144   48     
-32    -128   
-32    128    
16     80     
-32    16     
-528   -672   
-48    -208   
-592   224    
-144   96     
96     -272   
16     224    
64     -176   
16     96     
-160   32     
0      64     
-128   -64    
48     288    
208    416    
-304   -128   
64     128    
-656   -320   
-64    160    
-256   -128   
-16    80     
-64    -112   
400    688    
-624   -640   
-224   -16    
192    -128   
-192   160    
80     -64    
96     -160   
-176   64     
96     224    
-64    64     
-48    48     
16     -64    
-160   80     
80     112    
-176   0      
112    -32    
16     64     
64     -48    
96     224    
-144   -112   
112    48     
-80    256    
-16    224    
-16    -208   
-80    320    
-48    -112   
32     368    
-288   -80    
176    64     
-1632  64     
64     -176   
-96    80     
-48    0      
48     48     
-32    112    
48     64     
-128   64     
-48    -48    
16     272    
-48    -64    
144    80     
-112   256    
-16    224    
160    368    
-576   -112   
-64    -160   
32     32     
16     112    
144    -48    
-144   160    
-80    0      
128    -64    
-112   -144   
64     112    
48     64     
-144   -160   
16     144    
-160   48     
144    112    
32     -112   
48     400    
48     144    
-96    32     
128    384    
-160   16     
-112   -64    
96     240    
-80    64     
-64    -144   
160    -64    
-192   -64    
112    -304   
160    464    
-96    304    
-272   -256   
-64    -48    
80     128    
-160   32     
320    128    
-128   176    
240    160    
-128   112    
-208   -96    
-80    -160   
0      96     
-32    160    
128    -16    
-272   -48    
-32    80     
96     64     
-32    384    
112    32     
-80    128    
128    272    
80     16     
-112   -32    
144    128    
-144   144    
112    32     
-64    144    
0      -64    
128    240    
-16    -96    
80     256    
-64    128    
96     208    
32     176    
-64    -112   
128    144    
-80    0      
16     16     
96     -32    
0      112    
-32    64     
32     80     
-32    -272   
128    96     
-112   96     
-80    0      
0      224    
16     -432   
240    240    
-96    176    
-192   96     
32     176    
48     32     
80     224    
32     -16    
-48    -48    
208    96     
-16    112    
-64    128    
16     96     
80     80     
64     96     
0      -48    
80     96     
16     304    
-80    144    
-16    -32    
32     16     
-1424  -1856  
944    480    
-976   1024   
0      -64    
288    368    
-592   -112   
-48    976    
-688   -576   
416    608    
-80    -112   
256    288    
-208   -64    
128    160    
144    240    
304    -176   
-304   208    
256    -80    
-256   160    
128    16     
48     80     
-32    -544   
-112   192    
48     -416   
96     240    
144    -80    
-64    -48    
80     96     
128    144    
-16    16     
-128   176    
176    -48    
-16    128    
16     -208   
0      112    
-64    -16    
-16    -576   
144    240    
16     -208   
-176   16     
80     32     
144    48     
-32    176    
64     192    
32     -16    
32     96     
192    -48    
0      208    
-32    -64    
16     352    
48     -112   
112    0      
-32    96     
144    -336   
-32    192    
-64    16     
160    0      
-80    -64    
64     48     
16     48     
80     -144   
-16    64     
-48    160    
96     -112   
112    272    
-112   16     
208    -160   
32     96     
48     -416   
-16    128    
112    -384   
64     112    
-16    -224   
-32    96     
64     -224   
112    48     
-272   -128   
48     -224   
16     112    
-256   0      
144    16     
96     0      
0      112    
128    -96    
160    336    
128    -400   
272    0      
-32    -592   
64     160    
96     336    
80     176    
32     32     
32     0      
96     -16    
192    -64    
48     48     
272    -48    
-96    0      
352    -304   
144    224    
-80    -144   
160    112    
-16    -272   
0      48     
160    -144   
-16    -32    
16     80     
192    352    
112    48     
-96    -272   
48     160    
128    16     
96     112    
0      -112   
32     112    
112    -96    
32     176    
48     -144   
0      80     
-32    32     
64     80     
48     192    
304    288    
-160   192    
-16    -96    
112    96     
64     -224   
48     48     
-192   -416   
288    432    
32     -176   
16     48     
0      -128   
-16    144    
112    -16    
64     -1584  
176    288    
-16    224    
-224   -1680  
32     16     
176    -2176  
32     -48    
144    176    
-96    -128   
128    176    
96     64     
48     176    
144    176    
-80    -144   
0      -192   
0      -336   
-96    64     
-336   -48    
144    -32    
-64    -272   
-64    -1008  
48     -560   
128    -592   
384    96     
-208   -80    
64     -80    
64     -176   
0      -48    
96     -80    
16     160    
-48    -80    
192    -400   
-272   -256   
304    32     
16     80     
-288   64     
112    -32    
16     64     
192    -48    
160    -1184  
-208   -208   
240    -240   
-144   48     
224    -144   
-16    160    
0      -176   
48     -80    
-208   -16    
208    -144   
-656   -112   
80     272    
-48    -16    
128    -80    
-64    80     
288    -1344  
-32    -96    
-32    -16    
192    208    
48     -16    
528    -304   
-208   112    
48     -400   
-448   -112   
-240   480    
-1376  -1040  
208    -496   
-192   480    
352    -928   
304    896    
-272   -624   
112    752    
-336   -240   
720    -32    
-384   -256   
304    576    
32     -240   
-240   32     
-224   -288   
640    496    
-528   -112   
192    -80    
-976   -736   
-80    -256   
112    -240   
224    96     
256    0      
160    -944   
32     192    
16     272    
-144   -32    
-128   -528   
368    -32    
336    464    
304    336    
-112   128    
64     32     
-592   160    
304    112    
-224   128    
16     -352   
48     -384   
-16    -864   
208    48     
144    48     
-80    -80    
0      0      
240    176    
-112   -192   
32     -224   
-128   -272   
272    288    
-272   -240   
-16    -416   
-336   -400   
256    -96    
64     112    
336    -416   
-288   -80    
16     112    
96     -176   
-16    496    
576    -16    
112    256    
64     448    
-48    240    
-128   -208   
-80    -80    
80     -208   
208    64     
-144   -176   
128    96     
128    -144   
-160   112    
96     16     
160    96     
80     288    
-64    -16    
80     0      
0      -432   
-32    -432   
32     16     
-224   240    
80     -16    
-416   -352   
320    80     
240    80     
192    -432   
-1552  -112   
112    -16    
-64    -16    
128    368    
208    160    
-240   96     
32     -96    
-64    -48    
272    192    
-240   32     
-816   -272   
0      -112   
-688   -704   
128    48     
-272   -368   
-272   224    
-272   0      
240    64     
-32    96     
-672   96     
-128   80     
80     128    
96     240    
32     -32    
-64    16     
-272   -16    
-16    16     
16     96     
192    240    
64     128    
-112   -96    
64     112    
-144   288    
144    192    
-688   -224   
-160   0      
-912   192    
176    176    
176    0      
-176   -96    
-96    -368   
112    -240   
-80    0      
32     0      
240    352    
-304   -80    
144    48     
-224   -32    
128    160    
-32    96     
-176   -48    
-208   112    
16     32     
-192   -192   
112    0      
-400   -48    
304    80     
48     -144   
-144   80     
32     272    
0      -80    
-48    80     
-160   -96    
144    176    
144    112    
-160   64     
32     0      
-48    -48    
-288   -32    
144    160    
48     80     
32     80     
-208   -80    
-64    0      
0      0      
-64    128    
48     112    
32     16     
-32    48     
-64    -48    
-64    32     
-96    -160   
288    144    
-352   48     
-64    256    
80     80     
-96    128    
32     -96    
64     -80    
208    0      
-128   176    
-272   176    
-192   -112   
96     112    
-112   -272   
48     112    
-128   64     
-48    16     
-144   -32    
-96    80     
-2080  -160   
0      -2624  
-128   -48    
112    80     
-16    -16    
112    0      
80     112    
-112   208    
-32    32     
304    -48    
-128   320    
-80    -112   
128    112    
-368   -80    
-1168  544    
224    -448   
576    656    
32     -304   
-416   -496   
-144   -496   
752    1424   
128    -176   
-192   112    
-464   -256   
320    192    
-96    80     
96     96     
-80    208    
-112   -272   
-112   224    
80     -96    
-48    336    
32     -240   
-176   80     
112    -112   
-192   416    
128    -128   
-112   224    
144    -128   
-112   160    
-32    -112   
-112   224    
112    16     
0      80     
-32    16     
48     96     
16     112    
96     112    
16     96     
112    16     
-80    160    
224    256    
-32    32     
0      -16    
-128   32     
128    80     
0      112    
-48    -32    
16     32     
-16    128    
144    256    
-32    -32    
-144   224    
16     -32    
208    192    
-160   64     
144    -48    
-32    64     
0      64     
16     48     
-32    96     
-80    48     
112    32     
-208   32     
-32    48     
80     208    
-96    -80    
144    112    
-176   160    
-32    64     
-128   32     
-16    16     
16     16     
96     176    
-144   -16    
176    160    
-144   -144   
208    208    
-176   96     
80     64     
48     272    
128    -32    
272    0      
-64    288    
-16    160    
16     64     
32     -256   
96     0      
352    416    
-112   144    
144    192    
-176   144    
-16    -96    
80     -128   
272    464    
256    816    
-80    16     
-144   64     
80     144    
144    96     
16     224    
-16    16     
-240   -80    
160    0      
-80    96     
64     112    
-128   -144   
32     -48    
80     80     
-64    -48    
192    176    
-64    -64    
0      -112   
240    272    
16     48     
0      112    
-16    96     
-48    32     
112    128    
-32    96     
208    128    
-240   -176   
0      -416   
-16    176    
48     -224   
80     48     
-80    112    
0      48     
16     32     
176    272    
-160   96     
240    112    
-32    48     
-80    96     
32     -16    
96     112    
48     112    
-112   -80    
160    48     
-112   -96    
416    128    
-80    176    
-112   -112   
96     144    
16     96     
80     128    
-16    272    
-16    -80    
160    192    
-192   -32    
176    128    
32     112    
16     -112   
128    144    
48     -32    
64     64     
-16    -1520  
0      32     
48     112    
0      48     
16     -208   
-48    144    
112    -144   
-16    160    
144    144    
-64    176    
-112   240    
0      -224   
128    144    
240    -112   
-176   -64    
112    -880   
-96    0      
288    -256   
-32    112    
80     32     
64     128    
0      80     
-32    64     
64     -80    
112    240    
48     0      
48     16     
-128   64     
160    -160   
48     112    
48     128    
-256   176    
112    -288   
144    352    
-80    -112   
16     32     
224    0      
16     160    
-48    -64    
128    -16    
16     160    
112    -32    
128    192    
-80    -320   
0      64     
-592   -544   
-592   1424   
544    -32    
-480   64     
304    -928   
704    848    
-336   -96    
64     416    
-96    -512   
592    560    
-448   96     
304    -240   
-144   608    
208    -112   
-64    368    
32     -480   
192    880    
-176   -240   
-32    288    
-304   -448   
336    496    
-144   16     
48     32     
-16    80     
16     96     
48     -176   
352    -112   
560    752    
-480   -480   
224    336    
-128   64     
0      16     
-48    0      
240    80     
-32    144    
32     192    
-48    16     
-448   -496   
-32    -1728  
240    0      
112    -400   
0      -256   
16     160    
-320   -80    
192    -32    
112    -48    
64     0      
32     -192   
112    -384   
-96    -80    
80     -640   
-64    32     
-160   64     
16     -80    
80     16     
-16    -224   
112    -48    
48     -192   
144    -64    
-64    16     
64     -32    
64     48     
0      112    
112    -528   
-32    80     
-80    -144   
208    -96    
-80    240    
-64    -80    
208    80     
-304   -400   
32     -32    
176    -384   
32     -208   
176    -1616  
-112   -80    
224    -128   
64     80     
48     -64    
176    192    
48     16     
80     -64    
-400   -208   
-48    -96    
-544   -128   
224    32     
-256   -128   
32     -224   
-160   -208   
112    -400   
-240   -112   
-48    -128   
80     208    
128    -32    
160    160    
-192   -128   
0      -48    
-112   -144   
80     64     
-384   -208   
112    32     
96     32     
80     -176   
80     -368   
-128   -640   
224    288    
80     -16    
112    64     
32     0      
-16    -80    
0      -48    
32     -16    
-112   -128   
96     0      
-80    96     
176    -64    
-576   -96    
64     -176   
-192   -160   
80     0      
-32    -48    
0      -1952  
112    96     
-16    -208   
-144   -80    
16     -64    
256    112    
-144   -80    
-48    -224   
-208   -48    
-32    -112   
-528   32     
96     -176   
-784   48     
-272   -240   
400    352    
128    -928   
-128   80     
-192   80     
208    16     
80     -64    
-96    -32    
-672   -112   
96     -240   
-80    -128   
48     96     
32     -192   
-80    -80    
96     48     
-32    -192   
208    48     
-96    -160   
32     144    
112    128    
-16    -64    
-208   64     
16     -64    
-80    64     
32     112    
128    16     
144    16     
-16    64     
16     -160   
80     128    
-80    -224   
80     176    
16     -304   
160    224    
176    32     
0      0      
-96    80     
-32    -128   
-96    240    
192    -32    
-272   -32    
144    -16    
-96    16     
96     -128   
-32    112    
208    -144   
112    128    
-432   -224   
-272   -16    
-80    -160   
-608   96     
-32    144    
160    -80    
0      144    
16     32     
-16    112    
-16    -128   
64     160    
-320   -128   
160    112    
-240   -48    
224    160    
-48    32     
-304   48     
2368   -560   
-1648  -1824  
480    -176   
-1104  304    
544    -288   
-928   880    
-496   -480   
336    560    
-144   -336   
-160   128    
-16    -96    
48     -96    
-224   448    
144    -192   
-80    240    
-48    -336   
-224   240    
16     -32    
-16    448    
-80    -64    
-1120  -96    
-80    -144   
-160   224    
128    16     
-160   -176   
0      -16    
-96    -192   
64     48     
-48    112    
32     -80    
-32    64     
-48    80     
0      16     
-64    144    
-48    -32    
-16    0      
160    112    
-96    96     
96     144    
-176   -144   
32     64     
-16    64     
80     48     
-112   32     
16     -16    
-64    96     
-16    -48    
48     80     
-128   64     
80     80     
-192   -32    
-16    64     
-960   -16    
32     128    
32     0      
112    144    
-16    144    
-64    -32    
16     96     
-16    96     
-112   48     
-144   -144   
144    0      
-64    176    
-240   -48    
-64    0      
-80    64     
-224   -16    
112    160    
-32    -64    
80     128    
32     96     
-112   32     
32     224    
-112   48     
-32    -240   
-32    -224   
48     272    
-128   208    
-208   -48    
-320   -128   
80     80     
96     144    
-80    -64    
-1008  -240   
-16    16     
112    176    
-48    160    
64     432    
-144   -16    
32     -64    
32     16     
-32    256    
16     144    
16     0      
-224   -256   
-48    -96    
-16    64     
32     224    
-880   -112   
-64    16     
48     176    
112    112    
-32    48     
-128   -64    
16     64     
-208   -160   
128    224    
-48    192    
80     64     
-256   -160   
0      192    
-64    -96    
32     128    
-16    112    
0      96     
64     48     
48     144    
32     80     
80     112    
-32    208    
0      -16    
-16    0      
48     256    
208    48     
-64    -112   
-112   560    
16     -128   
176    144    
-96    176    
96     0      
48     -48    
-32    176    
-112   64     
160    80     
-240   -272   
192    -80    
-16    -176   
80     -16    
96     384    
-256   -80    
144    176    
-64    -48    
80     144    
-48    128    
-64    -144   
64     128    
-208   160    
48     -144   
32     32     
128    224    
128    96     
-304   112    
-80    192    
-48    144    
-48    -128   
80     208    
-144   -272   
368    352    
-320   16     
304    64     
-112   80     
240    32     
32     128    
-32    48     
528    416    
-480   96     
336    -96    
96     112    
48     96     
80     -48    
-208   224    
64     80     
128    48     
-128   80     
176    80     
-112   64     
48     112    
0      112    
-32    0      
48     -16    
160    160    
96     144    
-208   -208   
-176   64     
496    64     
176    224    
-48    80     
-112   64     
112    128    
80     0      
-48    448    
-160   -16    
-208   32     
112    -80    
144    144    
32     128    
-1056  -2512  
1568   912    
-208   -32    
688    -320   
-256   -656   
304    336    
-96    672    
128    -80    
-256   -80    
16     -608   
208    448    
-304   16     
320    -80    
-48    208    
144    64     
-96    352    
-96    -672   
-64    -32    
96     -176   
144    -64    
-144   96     
64     -656   
-96    304    
80     272    
-32    32     
64     192    
-96    128    
112    -80    
-160   32     
64     -128   
128    112    
-32    -16    
48     128    
96     -16    
64     -224   
80     80     
16     -560   
-48    64     
-16    112    
96     -48    
176    80     
-240   240    
208    16     
-80    -64    
96     32     
176    256    
-144   -80    
-48    -288   
176    -32    
-32    -32    
160    -48    
16     -32    
16     144    
240    -1648  
-192   160    
80     304    
16     64     
0      32     
160    96     
-96    48     
128    32     
-80    96     
32     -48    
144    208    
-112   -80    
192    32     
16     -32    
-16    -32    
48     -624   
32     80     
128    -96    
112    32     
-144   240    
48     -16    
144    80     
32     320    
-16    48     
224    -272   
48     48     
-112   -64    
64     144    
-32    -48    
64     -32    
112    -640   
-128   240    
16     -336   
160    -48    
48     144    
-208   96     
80     80     
48     16     
-48    -80    
144    -128   
-96    96     
144    -352   
-192   48     
96     -144   
32     96     
128    -112   
0      176    
64     96     
-64    160    
-48    0      
192    112    
-16    32     
112    192    
-16    0      
48     -928   
96     176    
0      -16    
32     32     
-112   -96    
48     80     
16     -352   
96     32     
-64    -496   
64     64     
-112   -32    
240    16     
80     256    
16     16     
144    48     
-176   -272   
160    112    
-16    -224   
-48    64     
160    64     
0      128    
80     -432   
-96    16     
144    -112   
112    128    
0      112    
288    -1104  
-624   96     
-16    -80    
176    -272   
0      16     
272    -368   
-48    16     
-64    -224   
176    -64    
0      32     
112    -16    
32     -128   
224    112    
128    -608   
-128   112    
160    -736   
0      -592   
-384   -64    
112    -320   
0      0      
176    -320   
32     -64    
80     -1472  
64     -48    
-80    -224   
224    -64    
64     224    
16     96     
32     -176   
-128   -192   
176    -64    
176    -160   
-176   -16    
-16    32     
-112   -336   
-80    -528   
208    -176   
-32    96     
64     16     
-160   -1808  
224    -96    
-16    -160   
-192   0      
192    128    
48     304    
112    -112   
96     -16    
-176   -160   
48     16     
-1344  128    
-96    -80    
-48    -304   
144    -128   
16     -16    
176    -432   
-32    192    
-16    -64    
64     96     
0      32     
64     -48    
112    -320   
32     64     
-304   96     
16     16     
-384   128    
992    -1648  
1120   496    
-32    512    
-592   400    
352    -272   
-176   -112   
32     -256   
-160   128    
352    16     
-320   -272   
96     -80    
96     -400   
-192   64     
-96    -208   
80     80     
176    -16    
32     -96    
-80    -224   
176    -64    
48     -208   
16     192    
32     -272   
48     64     
-32    -112   
96     -192   
-128   16     
64     0      
96     224    
112    -16    
-208   -224   
0      -128   
-624   -144   
176    64     
48     32     
208    -256   
64     64     
0      -336   
64     112    
32     -16    
32     -144   
80     80     
96     64     
128    32     
-64    -96    
-96    16     
48     48     
-32    128    
112    0      
0      96     
48     -432   
128    176    
-32    -528   
32     240    
-480   -16    
64     -16    
-48    48     
-48    0      
-224   -32    
128    -64    
32     368    
-80    -16    
-16    -112   
-64    -304   
-16    -128   
48     -336   
0      -96    
160    -352   
-16    80     
0      64     
-64    -32    
-80    -32    
0      -16    
-96    16     
48     112    
16     0      
96     -144   
-288   -576   
224    -336   
-64    208    
-448   -80    
0      240    
-448   -48    
-160   -272   
16     -64    
-1312  -16    
-48    80     
-112   -16    
-32    48     
144    0      
-48    0      
-16    -176   
-112   32     
-32    0      
-32    64     
32     -48    
-96    64     
32     80     
-96    -32    
-80    -16    
-128   32     
0      80     
-272   32     
-112   16     
-1680  -96    
16     32     
0      -80    
144    208    
-128   -304   
112    -64    
-192   -176   
-32    -112   
16     48     
-160   64     
112    48     
-48    64     
32     192    
-208   -48    
32     -32    
-192   64     
144    144    
-32    -128   
-80    64     
0      0      
128    64     
-64    -80    
-208   176    
240    96     
0      -32    
-32    160    
-240   16     
128    -112   
-208   -80    
64     16     
-192   144    
0      64     
-400   -672   
176    -32    
192    160    
-160   240    
192    -304   
-192   -64    
160    192    
128    16     
-208   64     
-80    -32    
0      32     
-128   16     
0      96     
-208   -112   
-96    48     
-1296  -160   
-48    32     
-16    -224   
64     256    
-96    304    
-48    -208   
-272   -224   
48     -64    
352    112    
-208   224    
-48    -16    
-32    0      
64     -48    
-48    -32    
80     224    
160    -512   
-112   448    
-272   -64    
112    -80    
-160   -48    
320    0      
48     64     
-144   384    
-256   -240   
400    208    
-208   272    
32     -144   
32     -320   
16     -32    
368    224    
-64    -16    
-432   208    
-1600  -272   
208    -112   
384    192    
80     192    
-64    -128   
160    304    
-16    -144   
-16    0      
64     -16    
-112   64     
-32    144    
-192   64     
-64    32     
-144   -112   
80     112    
-224   -1296  
912    1008   
-832   -432   
96     -288   
-192   -928   
-80    32     
992    1184   
-528   432    
-208   112    
80     -48    
64     -48    
-32    0      
64     0      
-160   96     
-16    144    
96     112    
-48    128    
48     176    
80     16     
112    144    
-48    192    
-32    80     
-64    32     
0      -144   
-80    -208   
112    112    
-96    128    
32     -32    
-80    80     
-160   48     
224    144    
-176   -32    
-48    16     
0      32     
64     96     
-64    64     
80     224    
-80    176    
32     -32    
-192   -32    
112    112    
-192   64     
64     0      
-96    48     
-80    80     
64     48     
-32    16     
80     80     
-80    -128   
336    192    
-304   176    
304    32     
-192   80     
160    80     
-224   -32    
-16    -128   
160    -96    
0      224    
-160   -144   
176    32     
-256   176    
64     -16    
160    144    
-144   48     
240    64     
-128   128    
-32    80     
64     -16    
112    80     
16     80     
48     112    
-112   -16    
160    0      
64     160    
-96    128    
0      32     
0      -64    
304    128    
-128   80     
-32    80     
32     240    
-144   96     
96     -16    
96     -96    
-48    0      
16     352    
-176   80     
0      -1168  
352    160    
-288   112    
192    112    
-32    64     
48     128    
96     160    
-112   -192   
304    240    
-304   208    
160    48     
32     128    
-128   -240   
96     48     
-32    -16    
96     64     
0      80     
128    160    
0      -128   
0      0      
32     336    
176    240    
112    -64    
-112   32     
64     176    
48     -48    
64     144    
-160   -160   
224    176    
160    128    
-224   -144   
32     -48    
0      -1184  
-192   -80    
-16    -96    
272    160    
-80    48     
176    256    
-128   -208   
-64    -32    
-192   48     
16     32     
176    -64    
112    144    
-48    128    
160    -368   
64     224    
-16    -1664  
80     288    
-32    128    
32     224    
160    112    
64     240    
0      -16    
-48    144    
0      48     
64     176    
64     80     
-48    32     
64     144    
-32    -352   
128    -32    
-64    0      
112    192    
144    96     
-32    160    
-96    0      
16     32     
48     -208   
-80    192    
192    -48    
-64    144    
0      16     
-32    -256   
-16    -112   
112    -128   
64     16     
0      -208   
144    320    
-80    -624   
128    0      
-128   -1584  
112    128    
48     208    
96     192    
-32    -16    
-32    -208   
-16    128    
-48    -112   
0      128    
80     -160   
160    96     
16     -304   
80     192    
0      -192   
16     96     
112    0      
112    128    
48     80     
-16    96     
-80    -48    
192    208    
80     144    
-32    -544   
32     64     
32     -256   
32     144    
192    -208   
-80    -48    
176    -32    
16     272    
272    2704   
-1552  -128   
320    288    
368    352    
720    -768   
-608   -176   
-256   304    
608    -64    
-208   -16    
192    64     
144    -16    
-176   -64    
192    112    
64     -128   
-192   -16    
48     -16    
144    288    
-16    144    
-176   -528   
16     -192   
0      0      
16     -16    
-32    -128   
-96    144    
80     -144   
112    112    
80     -128   
-112   128    
80     -336   
32     208    
-112   -240   
0      -336   
208    224    
-112   -352   
192    -256   
-128   -256   
96     -1248  
-96    -224   
112    -176   
32     -80    
144    -64    
-16    80     
96     16     
-32    -80    
48     -80    
0      32     
80     -128   
80     -16    
176    -400   
176    176    
-592   -48    
176    -16    
-48    80     
-48    -800   
208    -224   
0      -2640  
240    -112   
-160   208    
-96    -256   
80     -304   
-48    208    
16     -224   
64     128    
-32    -128   
-16    96     
96     96     
80     -32    
224    -64    
16     16     
48     -80    
32     -560   
112    0      
112    -448   
48     80     
32     -160   
64     128    
-64    -656   
-48    -544   
288    160    
48     368    
144    80     
-80    48     
16     -80    
96     0      
48     32     
32     0      
-96    -80    
160    -816   
32     192    
-48    -96    
80     48     
-64    48     
128    -16    
-16    -16    
-48    -288   
-32    -176   
112    -128   
-432   -240   
96     -208   
-16    64     
112    -96    
-400   -48    
-32    -752   
32     80     
0      -400   
48     160    
32     -144   
16     -192   
-64    128    
-80    -128   
64     32     
-80    -32    
-48    16     
16     64     
-1312  -16    
48     -256   
0      -176   
80     -32    
64     160    
32     -928   
32     80     
16     80     
256    144    
-160   -80    
-176   -224   
-96    48     
224    -48    
80     16     
-208   -272   
32     -16    
-16    -48    
-32    112    
160    -128   
16     304    
96     -752   
80     176    
-192   800    
304    -96    
-544   -528   
128    -32    
128    -32    
32     96     
-336   -96    
96     -16    
-144   96     
96     -64    
96     480    
-176   -352   
16     80     
144    -640   
64     0      
-160   144    
64     32     
144    304    
80     544    
-368   144    
112    -32    
16     144    
64     64     
0      16     
-96    -96    
-208   176    
-64    -64    
112    80     
-96    -176   
144    144    
-304   48     
-144   112    
-64    112    
-48    -144   
48     48     
48     64     
-48    32     
288    128    
-144   -96    
80     -480   
112    240    
-896   -288   
192    336    
-144   -16    
144    32     
-192   -224   
-752   -80    
48     48     
-112   176    
-48    32     
144    192    
-176   32     
32     -96    
-176   -64    
-336   -144   
-48    80     
-288   -176   
160    272    
-224   96     
-48    224    
-304   -80    
64     112    
-368   880    
112    -288   
-1216  -192   
-304   -832   
144    256    
-496   -272   
640    128    
-368   480    
112    144    
-128   -192   
-240   -160   
-96    208    
32     112    
-112   64     
160    16     
-96    80     
-320   -16    
16     0      
-1296  -272   
-32    0      
48     16     
128    288    
-48    -112   
-32    0      
-176   -192   
-144   -32    
288    16     
-160   144    
176    16     
-240   -160   
-32    64     
-16    0      
64     144    
-128   -16    
-96    0      
-688   -304   
160    -160   
-144   -96    
144    112    
144    64     
-240   64     
144    128    
-16    0      
144    112    
-160   32     
128    112    
-224   32     
128    -112   
16     32     
-112   112    
-112   -32    
-144   128    
32     -144   
64     64     
-16    128    
-16    48     
80     96     
-160   16     
96     96     
-96    -16    
48     128    
-16    48     
32     96     
-208   208    
-112   32     
-384   -128   
96     128    
-80    160    
-112   -176   
144    112    
-256   64     
96     -64    
-80    16     
-32    96     
16     16     
-32    -32    
-272   -160   
-64    -64    
-208   -176   
80     352    
-256   -96    
224    48     
-1152  368    
-400   -48    
304    -16    
-64    -32    
-96    -112   
288    128    
-368   32     
176    16     
-128   96     
32     208    
16     160    
-128   176    
16     -192   
-112   -144   
32     176    
16     192    
16     -16    
-96    -16    
48     -16    
128    16     
-80    80     
-32    16     
-176   16     
96     160    
64     224    
0      240    
128    192    
0      304    
-16    -96    
-48    -16    
-32    64     
80     96     
160    160    
-160   0      
32     160    
-208   0      
240    32     
16     96     
-80    208    
176    128    
-224   176    
32     48     
-48    32     
-160   0      
336    416    
-48    128    
192    288    
-48    96     
80     0      
-128   224    
32     16     
64     224    
112    80     
-208   96     
128    -96    
32     144    
-368   -224   
224    112    
-48    128    
64     112    
32     320    
-96    -176   
64     16     
80     80     
64     288    
0      64     
-64    96     
16     16     
64     96     
-176   -32    
144    96     
-80    224    
128    80     
-48    -16    
-32    96     
128    -496   
-32    176    
48     160    
-16    -32    
16     304    
48     -64    
-16    144    
-96    -192   
32     80     
-32    144    
96     192    
-128   224    
192    176    
-128   -96    
-16    128    
-32    64     
16     -48    
144    192    
176    80     
16     -208   
80     112    
48     80     
-80    256    
112    176    
16     -80    
112    160    
-16    -144   
-160   -1424  
144    320    
-48    16     
48     128    
64     144    
0      192    
-48    80     
-16    48     
48     16     
400    -16    
-176   48     
96     80     
-144   -112   
160    64     
-240   320    
-368   -2272  
48     208    
-224   992    
-1040  32     
-112   560    
-320   -928   
704    720    
16     560    
112    -96    
-272   0      
224    -16    
288    80     
-320   -192   
96     128    
224    272    
-112   -144   
224    384    
-144   -336   
16     -240   
192    128    
-16    80     
-16    48     
96     32     
48     -32    
240    96     
48     96     
176    208    
-48    0      
-64    0      
32     96     
-32    -112   
64     112    
144    -416   
-32    -16    
64     -192   
-144   -160   
80     -304   
80     -48    
64     96     
-32    160    
48     48     
144    80     
-64    0      
80     -32    
64     144    
-48    -80    
0      144    
-80    144    
176    0      
-160   -320   
112    144    
-80    -240   
0      160    
-80    0      
48     160    
-32    80     
-256   -448   
32     -176   
112    -560   
352    192    
-96    -272   
272    128    
-160   -96    
176    544    
-208   -1136  
320    -48    
0      0      
208    32     
32     144    
16     128    
48     64     
80     112    
-48    112    
96     -160   
112    80     
320    48     
-384   -64    
-400   -1296  
128    -368   
-240   16     
368    304    
0      128    
112    144    
-96    -48    
160    112    
16     -128   
80     -608   
-112   -80    
208    96     
16     208    
96     128    
-16    32     
32     -384   
16     192    
144    -64    
-32    128    
80     240    
64     400    
-112   -16    
64     0      
-16    -16    
128    -112   
48     112    
-144   -128   
192    128    
80     -80    
16     -48    
160    128    
-96    48     
160    -160   
-80    192    
96     48     
272    -208   
-160   112    
16     144    
112    -1456  
80     144    
208    0      
-96    -256   
16     192    
176    -16    
48     64     
-80    16     
48     -112   
64     -176   
128    256    
-16    16     
336    -80    
-96    224    
64     -368   
192    -272   
-144   48     
192    -208   
-112   -64    
112    -1568  
80     96     
304    672    
-160   240    
112    -16    
-64    -272   
-32    -848   
208    -64    
-128   64     
80     160    
-112   -112   
-16    -224   
-1568  -240   
128    -32    
-80    16     
112    -64    
96     16     
-48    -816   
48     -80    
160    272    
-64    192    
208    0      
-160   448    
208    -256   
-48    80     
-160   -80    
64     -240   
-112   208    
64     -64    
-48    -48    
224    -336   
64     -464   
48     -752   
256    432    
-80    -304   
-32    80     
256    144    
-80    80     
16     32     
64     -192   
-16    0      
144    -128   
-176   0      
48     -96    
144    -144   
80     -64    
32     32     
128    -272   
-448   16     
-16    -496   
-16    224    
32     -320   
80     128    
128    -64    
48     208    
-144   112    
48     96     
-144   112    
384    64     
-848   -16    
80     64     
144    -240   
80     144    
-96    -1200  
768    -1968  
-64    912    
720    288    
-640   -144   
144    208    
112    -144   
304    -16    
-48    160    
-160   -32    
224    -16    
-704   112    
32     48     
-208   96     
64     -32    
-16    -48    
80     -192   
64     160    
128    -272   
-16    16     
-224   -144   
128    -128   
-128   16     
160    -64    
32     -112   
64     80     
-256   16     
288    -128   
-496   -32    
-16    -464   
0      -16    
0      -80    
176    112    
-16    -640   
16     48     
-544   160    
416    128    
-208   -64    
64     32     
-96    0      
160    -48    
-336   0      
192    -96    
-576   -64    
-80    -128   
16     80     
144    48     
192    464    
-448   -528   
320    -112   
-224   288    
160    -96    
-80    32     
0      -80    
32     48     
48     -80    
32     160    
-240   -32    
80     -64    
208    32     
-256   96     
-736   -432   
48     -16    
-80    224    
-80    -112   
80     -32    
-688   48     
-80    144    
-224   0      
-80    -80    
160    -32    
-112   160    
-32    32     
-144   -64    
-800   -272   
64     208    
-544   -272   
112    144    
-96    64     
16     -48    
-64    80     
-32    48     
64     384    
-688   64     
256    144    
32     32     
-16    -32    
224    -208   
-144   144    
-80    -176   
80     -16    
-128   -16    
64     32     
-96    64     
-16    -128   
-128   32     
-368   -176   
16     112    
-352   80     
80     112    
32     -160   
-112   48     
192    -96    
80     240    
64     -96    
128    208    
-112   -144   
96     -128   
0      112    
80     -16    
-224   48     
144    208    
-48    -96    
-352   -160   
-32    -32    
-144   -112   
-48    176    
32     -64    
-32    32     
16     -32    
192    224    
-192   0      
-144   240    
144    64     
-112   -64    
80     -144   
-208   32     
192    384    
-192   144    
-80    -96    
-160   48     
16     64     
-784   32     
-48    32     
176    -176   
96     -96    
-288   128    
-64    -32    
336    -48    
-192   -160   
192    368    
-112   16     
80     16     
-48    -80    
64     112    
-352   80     
288    192    
-1072  -448   
176    -32    
32     -48    
-48    128    
0      128    
-64    48     
96     144    
-48    64     
-48    -240   
-160   -64    
304    496    
-304   -48    
160    -32    
-144   -16    
112    48     
-784   -80    
0      64     
-16    128    
-16    0      
-16    -32    
-64    112    
96     288    
-64    64     
-64    32     
-80    -32    
48     80     
80     112    
-32    0      
-160   16     
-64    64     
-128   32     
80     144    
-32    64     
-160   48     
64     80     
-128   48     
0      64     
192    -48    
208    208    
-112   208    
-16    96     
-288   16     
112    80     
64     32     
-48    32     
-112   112    
240    -32    
-48    144    
-256   32     
64     -16    
-96    160    
1536   -336   
896    656    
-32    128    
-720   -448   
656    80     
-912   -1088  
656    272    
-208   -112   
416    240    
-384   -224   
16     32     
-32    192    
400    -32    
-192   -176   
96     32     
48     144    
128    208    
128    -80    
-432   -528   
176    -16    
-16    -80    
64     272    
-176   64     
208    192    
-272   -144   
128    0      
160    320    
-240   32     
-64    -80    
-192   -16    
32     128    
-112   96     
96     80     
-96    112    
256    80     
-96    128    
-64    -352   
96     0      
144    224    
48     128    
240    48     
0      64     
16     0      
-128   240    
-80    0      
48     -64    
32     272    
0      -16    
-144   -96    
288    112    
-16    272    
-80    -64    
-112   -96    
160    272    
0      288    
32     -16    
-64    -96    
256    272    
208    400    
-256   0      
32     240    
48     -64    
-144   176    
-32    224    
288    320    
-448   -176   
208    112    
160    80     
32     -448   
-64    16     
-32    96     
112    -64    
-32    -16    
16     -16    
128    240    
32     48     
144    272    
-176   320    
-576   -432   
240    -80    
-32    64     
0      -32    
32     32     
-80    -2016  
96     208    
16     16     
304    512    
-448   -224   
144    -160   
-112   320    
128    224    
-272   -192   
48     96     
64     -112   
64     256    
176    224    
16     80     
48     -224   
96     -608   
256    368    
144    128    
-32    32     
0      96     
96     16     
112    16     
-16    128    
-96    -288   
32     -464   
-160   -624   
80     -64    
96     -96    
112    144    
48     96     
48     -64    
16     112    
112    -464   
-96    48     
80     96     
80     80     
176    400    
-48    64     
-32    32     
144    128    
-48    -32    
160    448    
-96    80     
16     -160   
-32    192    
128    -80    
-48    80     
16     -832   
-32    96     
320    80     
-160   96     
400    240    
-384   240    
240    0      
464    416    
-496   32     
320    144    
-128   208    
176    -160   
-16    64     
112    -400   
96     160    
-96    -416   
64     -144   
0      -960   
80     64     
-64    -112   
128    64     
-48    32     
64     160    
-96    80     
144    0      
80     128    
96     -16    
176    384    
-272   -192   
256    32     
16     176    
96     96     
80     -272   
-224   112    
192    -848   
-352   -96    
208    -176   
32     64     
272    176    
0      208    
-48    224    
112    48     
-224   64     
208    80     
80     16     
0      -288   
160    96     
-16    -848   
80     112    
0      0      
16     208    
64     64     
-16    240    
-48    -112   
208    -48    
-64    80     
-32    -64    
144    -16    
0      -16    
64     16     
144    -128   
-64    144    
-16    -96    
160    80     
-128   96     
240    48     
-16    64     
48     160    
-1104  912    
304    -1024  
-352   208    
208    -48    
688    0      
-336   -768   
496    512    
-208   -480   
432    352    
-352   -304   
480    272    
-224   192    
320    -1456  
-400   336    
432    -1696  
-208   -288   
176    -352   
-64    -192   
112    -400   
-128   -1712  
320    -352   
-96    432    
80     -336   
32     272    
16     -352   
144    -2080  
-112   -32    
128    -912   
-144   16     
160    -144   
16     -48    
16     -112   
-16    -288   
176    -112   
-32    -240   
304    32     
-144   304    
224    -80    
16     288    
-48    -208   
48     -208   
0      -32    
96     -144   
96     112    
-160   64     
0      -336   
-992   -128   
64     -256   
224    -96    
0      -336   
-16    -48    
96     -176   
-48    -176   
208    -144   
-32    80     
64     112    
64     80     
-96    48     
32     -64    
-80    32     
-160   -192   
-384   -16    
-48    -64    
96     0      
64     -272   
-16    -192   
48     -816   
-16    -48    
160    -1120  
80     128    
0      32     
0      48     
48     -192   
64     0      
-160   32     
48     0      
-112   -32    
288    0      
-752   16     
224    96     
-64    -32    
128    -32    
160    64     
-160   -112   
-48    160    
192    -96    
-48    80     
208    -112   
80     16     
-240   0      
240    -80    
-272   16     
48     -112   
-272   0      
176    240    
224    112    
112    64     
-80    -48    
96     -496   
0      48     
-32    -464   
208    64     
-256   -32    
176    -64    
-208   16     
144    -192   
-128   -112   
96     -144   
-208   192    
-224   -80    
-352   272    
0      -384   
128    64     
16     -240   
240    160    
-112   -624   
176    128    
-160   -16    
176    96     
-96    208    
-240   160    
96     112    
32     -32    
-176   48     
192    -32    
-752   -48    
-64    -352   
144    192    
208    -464   
-64    128    
128    -32    
-16    112    
-64    32     
0      -128   
16     0      
-80    -16    
64     112    
16     -64    
-128   -544   
-80    0      
96     240    
32     -320   
16     -16    
-48    -128   
-32    144    
240    -464   
-160   -240   
16     -80    
16     -16    
32     32     
32     80     
-160   -16    
112    -32    
-192   0      
32     -16    
0      -304   
-464   -240   
-16    -368   
-1152  -496   
-128   160    
112    0      
-16    224    
16     48     
-384   80     
144    -48    
-64    64     
16     -176   
64     160    
-272   0      
-160   -160   
0      128    
-368   -160   
112    304    
-320   -48    
160    -160   
-256   160    
-128   -64    
-16    160    
-512   16     
208    -64    
-1600  0      
0      144    
48     16     
-160   112    
-208   -64    
-32    64     
64     -144   
160    160    
-48    -112   
-224   64     
48     -16    
-144   48     
-128   64     
-112   -48    
-32    -80    
-112   144    
96     96     
-336   80     
144    1568   
-832   -1584  
16     -128   
480    640    
128    128    
-752   16     
208    -144   
80     1264   
32     -208   
-640   -320   
192    -464   
0      720    
64     -400   
-112   192    
-32    -512   
368    576    
-160   -320   
96     672    
-368   -176   
608    224    
-304   -240   
240    -208   
128    336    
-160   320    
80     96     
-176   80     
0      368    
-80    -304   
-176   160    
-240   -288   
288    240    
-432   -80    
16     208    
-48    32     
-32    -32    
-80    -128   
160    272    
48     336    
96     96     
16     -144   
-48    -64    
0      160    
-272   -144   
-48    208    
-240   80     
-32    160    
-1120  -32    
64     352    
64     80     
-32    224    
-112   -48    
48     16     
0      0      
-80    352    
32     -48    
-64    128    
128    224    
-144   224    
-96    32     
192    480    
-432   -128   
-112   -208   
-16    64     
160    176    
-96    240    
80     -144   
96     -32    
112    208    
-16    768    
-240   -224   
-144   96     
16     -144   
192    -32    
-112   112    
-256   -48    
64     16     
-160   -112   
-48    -176   
-64    -64    
-160   -256   
64     -64    
0      96     
32     96     
32     48     
-16    48     
64     144    
0      128    
-64    96     
112    176    
-416   -304   
144    176    
-144   -304   
16     256    
80     240    
-48    192    
224    496    
-240   208    
208    -48    
64     208    
-224   -240   
112    96     
64     80     
16     128    
-16    528    
-128   96     
160    560    
32     256    
192    288    
-208   -192   
0      128    
144    192    
48     144    
-48    96     
112    64     
-208   80     
16     -16    
80     64     
-112   64     
160    48     
-112   48     
192    384    
32     96     
-48    -288   
-160   -192   
64     16     
208    192    
-160   112    
112    80     
-304   16     
80     80     
96     0      
-16    48     
-32    144    
16     176    
48     -128   
-64    -112   
0      224    
32     32     
112    144    
16     144    
80     160    
-16    48     
48     128    
-128   64     
80     48     
-48    -48    
160    80     
-208   64     
144    16     
-64    48     
-16    0      
0      144    
144    160    
96     128    
-112   32     
112    112    
-32    0      
-48    208    
128    240    
-144   96     
0      -80    
32     16     
64     64     
144    48     
-80    -112   
128    -2000  
-80    112    
16     192    
48     224    
-80    -96    
112    80     
96     64     
0      64     
-64    224    
144    -192   
144    320    
-64    64     
-112   176    
48     208    
16     48     
80     -1552  
96     -32    
0      192    
128    -128   
16     -48    
32     272    
0      368    
-128   -16    
0      -48    
176    -48    
64     48     
64     208    
-64    160    
-112   80     
240    112    
-128   -176   
160    176    
-96    -16    
-1184  -2480  
0      -1360  
512    400    
-544   -16    
480    160    
304    320    
-672   -304   
624    64     
-288   384    
752    112    
-448   -176   
208    -384   
-352   320    
368    -432   
-32    272    
-32    -432   
112    640    
48     -96    
-48    128    
96     -96    
96     224    
-16    128    
-16    0      
-96    48     
192    32     
-48    -256   
224    144    
-272   -144   
256    16     
-176   -1456  
192    80     
32     208    
16     0      
-96    80     
224    16     
-48    32     
-112   48     
128    176    
16     96     
80     48     
80     32     
16     96     
32     -80    
0      112    
160    -240   
-48    112    
48     -80    
0      128    
96     80     
64     64     
-64    0      
64     144    
-48    48     
64     112    
64     80     
16     -208   
48     96     
128    -160   
-16    16     
192    -176   
-128   96     
112    -16    
0      96     
48     48     
32     64     
-16    80     
0      96     
-32    -16    
-16    -96    
96     80     
16     -352   
32     112    
48     -240   
16     80     
112    -80    
176    160    
-48    -240   
224    80     
-160   192    
-48    -48    
144    64     
-240   -256   
272    -208   
-64    0      
32     224    
256    192    
-112   144    
48     -64    
144    32     
0      -176   
144    144    
64     32     
96     288    
32     -320   
48     80     
96     48     
336    -80    
0      432    
176    112    
-272   -272   
112    -144   
192    176    
176    -272   
-80    80     
-32    -304   
48     144    
112    -32    
128    336    
48     160    
96     -384   
32     160    
-32    -1328  
-32    -496   
96     -128   
176    -176   
64     -48    
-96    -480   
-96    -320   
176    112    
112    -80    
-16    -192   
32     -80    
80     -720   
160    32     
48     -96    
112    144    
64     352    
-16    48     
48     240    
16     -288   
16     -128   
32     -944   
16     -32    
176    -576   
-48    80     
96     -160   
64     -48    
0      0      
-16    -80    
64     -48    
48     48     
-144   112    
0      -208   
-1376  -128   
-208   -144   
224    32     
-160   -560   
112    -112   
112    -448   
48     -160   
64     0      
-256   -16    
64     -48    
0      16     
80     -64    
48     48     
128    112    
-288   -160   
112    32     
64     16     
0      32     
32     -272   
48     -144   
224    -80    
-16    -16    
-144   -672   
-160   -112   
336    -80    
-64    256    
-272   -80    
-64    -288   
0      96     
80     -80    
32     128    
-192   -16    
-432   48     
128    -192   
-80    0      
144    -208   
-48    192    
112    -496   
16     128    
-80    -48    
112    64     
-16    -48    
80     -96    
240    -112   
-16    128    
-144   -80    
32     -304   
-752   -16    
128    -368   
-656   128    
48     -160   
96     -112   
256    -448   
16     112    
-48    -384   
-128   80     
-576   608    
-560   -1120  
-368   -544   
320    400    
-624   -32    
320    176    
-800   -704   
192    448    
-688   -608   
0      -64    
0      -64    
272    -256   
-96    208    
-144   16     
272    128    
-64    -48    
80     128    
64     384    
144    112    
-560   -320   
0      48     
384    368    
-144   -240   
208    112    
320    496    
144    240    
80     48     
-64    112    
112    -272   
-224   -448   
-288   -32    
16     16     
-176   -32    
112    144    
-208   32     
352    368    
-208   384    
160    -176   
-1632  -224   
32     -112   
240    96     
96     -176   
64     224    
-240   0      
-48    16     
-112   -128   
240    16     
-96    -192   
240    48     
-112   144    
-16    -32    
-80    -32    
32     -272   
64     192    
-1312  -64    
128    48     
-656   -192   
0      144    
16     -16    
-288   352    
0      -112   
-32    -48    
-128   240    
48     -144   
160    -80    
-112   -192   
-16    144    
80     0      
96     192    
-48    -80    
48     112    
-112   -256   
-480   -64    
0      144    
-96    64     
-112   -80    
-64    -64    
-368   48     
-800   -192   
48     304    
-192   208    
32     96     
208    -80    
-240   240    
-208   -144   
64     96     
-112   -192   
-16    64     
-32    64     
80     96     
-80    -32    
-208   -128   
-48    -32    
-192   64     
-16    -16    
-112   64     
-128   -16    
-128   -160   
96     -64    
-32    -96    
-32    96     
144    48     
-48    0      
16     80     
16     -32    
-176   160    
-80    80     
96     96     
-112   160    
160    352    
-864   -240   
16     80     
-48    -128   
64     80     
176    352    
-176   224    
240    80     
-272   160    
-64    -48    
80     -240   
-48    32     
-16    144    
16     144    
-256   -160   
128    96     
-288   48     
128    160    
-800   336    
48     144    
112    -32    
-176   128    
176    0      
-64    112    
112    16     
48     -48    
-208   64     
128    -16    
48     224    
-288   -64    
272    0      
-256   -48    
-160   128    
-32    -240   
80     0      
-336   -96    
128    128    
112    64     
-48    80     
-112   144    
-80    16     
48     64     
-96    -48    
80     80     
-80    -16    
96     80     
-224   64     
32     -32    
-384   -64    
-48    208    
16     -32    
0      80     
-80    128    
112    -128   
-16    0      
-64    16     
144    176    
-352   80     
144    64     
-80    32     
304    144    
-352   -48    
-16    320    
-816   -176   
64     64     
144    -160   
304    224    
-176   -32    
-64    -96    
-48    0      
-16    160    
-112   192    
32     16     
160    64     
-144   48     
-160   160    
32     -128   
0      112    
48     0      
0      128    
-48    144    
0      0      
-48    80     
-16    48     
-32    -16    
80     16     
96     208    
32     144    
-80    128    
-256   176    
-320   -528   
336    96     
-320   480    
-16    -512   
-64    -768   
288    -64    
-48    320    
176    208    
-384   -48    
448    -48    
-336   352    
160    -112   
-304   640    
112    -304   
-192   224    
-48    -64    
48     112    
144    -16    
64     176    
-80    -48    
160    192    
-96    224    
256    0      
-224   128    
176    96     
-96    272    
256    112    
-224   -16    
96     -32    
-64    112    
160    96     
-144   80     
96     -240   
-32    224    
16     -32    
112    160    
-96    48     
144    112    
0      80     
96     64     
-80    80     
48     80     
64     32     
48     64     
-48    16     
80     -64    
-112   -64    
-64    128    
80     208    
-32    32     
64     0      
-80    16     
16     80     
0      0      
-16    240    
16     80     
96     -64    
-144   0      
48     96     
-112   -32    
0      48     
-48    -16    
48     -1456  
80     128    
64     128    
16     176    
80     96     
160    208    
-32    144    
96     80     
-16    80     
80     80     
0      48     
-80    128    
-96    16     
128    192    
64     144    
32     -1200  
16     -208   
-144   128    
32     0      
112    -144   
-128   96     
272    112    
32     144    
-240   -128   
80     192    
208    48     
-64    64     
-64    32     
48     -128   
32     48     
80     -1536  
-96    80     
0      208    
240    416    
80     432    
96     208    
-240   -192   
48     32     
144    272    
144    144    
-16    16     
-112   80     
96     16     
48     -176   
48     64     
-16    -160   
112    128    
32     -448   
-32    16     
64     80     
16     176    
64     16     
16     176    
-32    -80    
112    176    
-16    48     
64     16     
-16    0      
96     16     
160    16     
-32    -64    
-80    96     
16     -384   
48     -528   
16     -336   
-64    304    
96     -96    
128    0      
-160   64     
80     80     
80     -16    
48     160    
-16    96     
80     -176   
112    288    
-112   -336   
336    160    
-192   -208   
160    96     
0      -352   
48     80     
80     -16    
160    192    
48     416    
-96    160    
96     -96    
-48    -224   
272    208    
-16    48     
-176   160    
-192   -192   
192    0      
-32    -304   
112    96     
128    -448   
-16    144    
160    -64    
-80    192    
128    64     
-112   160    
64     48     
0      -48    
-32    -80    
144    336    
-96    96     
0      -144   
112    48     
16     32     
16     192    
-64    -128   
16     160    
224    -32    
-16    128    
16     0      
112    272    
16     128    
-80    -512   
0      0      
144    -272   
64     96     
0      -80    
-64    0      
-32    -128   
48     112    
48     -112   
-48    64     
80     64     
80     48     
16     208    
-128   -1168  
80     -1120  
128    -96    
304    -16    
0      -64    
-32    96     
-416   2160   
-1488  -1056  
832    864    
416    368    
432    -80    
-416   -96    
0      192    
-160   -144   
32     48     
-64    176    
-304   -1152  
144    272    
112    192    
48     -144   
-160   -368   
160    0      
48     32     
112    48     
-160   144    
112    -64    
64     -272   
-144   -64    
48     -192   
64     -336   
-240   -176   
176    -224   
208    80     
-128   -144   
32     -160   
-16    -512   
64     -224   
0      336    
80     80     
128    16     
-16    -80    
64     -80    
-288   -64    
32     -96    
80     -16    
-96    16     
-32    -16    
-1920  -48    
64     -32    
0      -64    
32     -368   
32     -64    
176    144    
48     112    
-16    -496   
-64    128    
32     -128   
192    48     
-16    144    
80     -176   
-48    -32    
-32    -160   
-240   48     
-96    -256   
176    128    
80     -80    
-128   48     
192    -416   
64     64     
80     -3424  
64     32     
-32    0      
80     128    
-144   -128   
144    96     
-224   -96    
208    -160   
-256   -80    
160    -64    
-1216  48     
16     -416   
-96    -208   
0      -176   
-16    -112   
80     -816   
80     96     
-64    112    
112    16     
16     48     
112    256    
-160   -16    
240    128    
-208   192    
160    -224   
-432   96     
-352   -48    
-96    -64    
0      -240   
48     112    
-64    -304   
16     -96    
320    192    
-112   32     
128    -48    
32     32     
-48    80     
208    288    
-464   144    
48     -48    
-528   -208   
-48    -16    
-64    -48    
176    -16    
-176   96     
128    -352   
16     80     
-16    -384   
144    -192   
-32    48     
192    384    
-816   -32    
0      -256   
-320   -32    
-48    -192   
64     -32    
0      64     
240    304    
208    -240   
-32    64     
-176   -544   
-32    192    
272    -112   
-208   -160   
-288   -256   
224    128    
-144   -144   
-144   -16    
64     -32    
64     -48    
-208   -160   
-256   -224   
-208   32     
-32    -448   
-48    -128   
-112   224    
176    192    
48     128    
-1888  -64    
16     64     
48     -112   
128    128    
-48    -48    
-96    80     
-80    -144   
48     -112   
-160   -96    
48     16     
-192   -144   
32     64     
-16    0      
-736   64     
-112   32     
-320   80     
-288   48     
-592   -288   
-16    -64    
-752   176    
-112   -16    
48     0      
-48    -16    
-352   -144   
-32    -144   
-192   -288   
-16    32     
-32    -128   
-416   0      
-48    64     
-64    16     
96     288    
16     -64    
-32    128    
-192   -32    
96     192    
64     -160   
-288   192    
-64    -128   
144    64     
0      -112   
144    112    
80     48     
-128   -176   
-64    112    
-96    128    
32     0      
-208   48     
-64    32     
-176   16     
128    96     
-416   32     
-32    16     
64     -224   
16     80     
48     48     
32     112    
-272   848    
448    1408   
608    544    
-336   -32    
-832   -320   
432    624    
-768   96     
-80    784    
-320   -304   
112    -176   
-576   -336   
96     -144   
112    240    
-80    -112   
-64    224    
80     -80    
-80    16     
-96    48     
-256   16     
-32    -80    
80     96     
48     48     
-80    320    
112    16     
-416   -176   
-96    -32    
-592   96     
-64    304    
16     80     
-16    -128   
-64    -80    
-192   0      
128    96     
0      112    
0      96     
-32    32     
16     -112   
-272   32     
-64    32     
-32    32     
-112   -112   
-368   -64    
-48    128    
96     16     
0      48     
-48    96     
-16    48     
-144   32     
128    0      
-16    32     
-160   -64    
64     64     
-128   32     
48     160    
-144   -16    
-16    96     
-672   -240   
96     -48    
-256   -96    
-16    -272   
112    128    
48     160    
-32    -48    
0      192    
144    16     
-224   48     
-32    -64    
-32    32     
-64    0      
48     128    
-48    64     
-208   32     
-64    48     
112    80     
-32    96     
32     112    
-112   16     
-48    -208   
80     -32    
176    272    
-64    96     
0      64     
-96    -112   
192    16     
-144   96     
64     304    
-128   64     
-16    16     
48     64     
-80    32     
64     80     
-96    32     
-16    32     
-96    -96    
176    128    
-16    144    
0      80     
-368   -272   
176    208    
-208   16     
112    64     
-128   48     
16     16     
128    80     
-16    64     
-16    96     
-32    80     
144    176    
-16    -16    
48     96     
-80    32     
128    144    
-112   64     
112    128    
-16    80     
96     336    
16     144    
-96    0      
-48    160    
112    112    
160    0      
-48    80     
-96    240    
192    -112   
-112   80     
-96    144    
112    96     
-288   -896   
-48    224    
-176   208    
384    0      
-160   192    
16     112    
192    64     
-80    80     
0      96     
112    16     
-128   256    
-112   -48    
80     32     
-16    -128   
96     224    
-16    -32    
64     208    
-96    256    
112    64     
-176   272    
-112   -144   
112    -128   
-48    -192   
256    224    
-96    32     
-80    192    
32     176    
112    160    
-16    32     
-112   64     
16     144    
144    304    
-128   176    
-16    -576   
0      96     
144    80     
-32    224    
80     -32    
-80    96     
-64    -224   
208    240    
-48    144    
112    384    
-288   192    
-160   -128   
-80    -64    
336    64     
352    288    
-32    -768   
-208   48     
16     16     
-48    160    
-80    -112   
128    -16    
-32    48     
272    112    
-48    144    
96     96     
-112   -288   
128    192    
-16    0      
-96    -96    
48     112    
16     -256   
32     96     
-16    -432   
48     96     
0      272    
64     32     
-16    256    
64     -96    
-32    -96    
2032   -1424  
-304   -496   
1056   144    
-128   1200   
-16    32     
48     -160   
-192   -96    
416    -48    
16     -416   
48     -176   
80     400    
128    -80    
336    32     
-128   -32    
80     -64    
-32    128    
96     0      
48     -112   
0      -192   
-176   -320   
352    64     
16     -80    
-64    160    
224    -64    
-48    -32    
-16    240    
-96    160    
80     -48    
32     0      
-64    -32    
144    64     
32     160    
64     128    
0      96     
0      -96    
128    -80    
96     -64    
-64    96     
144    -240   
64     48     
-16    -2272  
64     176    
48     96     
144    80     
-112   64     
160    176    
-176   -48    
80     -16    
112    -48    
144    80     
-64    64     
160    -752   
-96    160    
144    112    
-80    16     
64     -240   
176    112    
-112   176    
144    -16    
-16    -16    
96     64     
64     48     
48     16     
96     304    
-144   -880   
192    -48    
48     32     
-192   96     
256    176    
-32    -96    
192    -176   
-144   128    
80     16     
96     112    
-16    80     
32     0      
160    208    
-64    -144   
48     64     
192    -400   
-16    224    
-16    -160   
160    48     
32     -368   
-48    240    
-240   -928   
240    -16    
64     32     
-16    320    
-16    -32    
-256   16     
-64    -1456  
64     -128   
-16    432    
288    160    
-144   128    
144    -16    
48     96     
-16    -96    
80     48     
-32    -16    
112    -160   
16     96     
112    -304   
-96    48     
-832   -32    
80     -544   
112    -192   
128    -320   
-64    48     
176    -544   
-48    -128   
-16    64     
160    -112   
-32    -288   
-64    80     
16     -144   
-128   -224   
176    -384   
-128   -208   
288    272    
112    160    
32     64     
-160   144    
384    -160   
-240   -304   
-288   -96    
80     -704   
176    -32    
208    -64    
-48    80     
-96    -96    
192    272    
128    -144   
192    -80    
-352   -64    
64     -32    
-768   -128   
128    -384   
32     -192   
-32    64     
48     -48    
368    -16    
-240   -240   
-80    -160   
-208   224    
256    -240   
32     224    
112    96     
-112   16     
-96    16     
176    -304   
-688   -112   
176    -192   
-96    -128   
208    -112   
-80    96     
144    -304   
-560   -496   
0      -3136  
64     256    
128    64     
-64    -16    
-64    -16    
64     128    
128    160    
-128   32     
-512   -400   
80     -192   
-816   0      
320    256    
-144   -240   
64     -128   
192    -48    
16     -496   
-96    80     
48     48     
0      -272   
192    144    
-48    -224   
-32    32     
-96    32     
128    64     
128    0      
-224   -192   
32     -160   
-32    16     
96     -368   
-32    -16    
160    -608   
416    -224   
0      -624   
-240   80     
-96    -144   
160    -288   
-16    0      
144    32     
-160   -32    
-384   368    
-1664  -960   
640    704    
336    288    
816    -352   
-624   -368   
-160   -32    
784    208    
-512   -656   
272    -240   
-176   96     
16     -80    
96     48     
16     48     
-32    -160   
-64    -160   
144    160    
-128   64     
240    80     
96     -176   
-128   -128   
-192   -160   
16     368    
-128   -48    
48     -272   
32     128    
192    -80    
-272   0      
-64    -48    
144    -128   
16     0      
-48    96     
80     16     
-368   64     
160    -144   
64     32     
-688   -176   
-1040  320    
-32    64     
-672   -256   
-224   -176   
64     -112   
-96    64     
-64    -48    
112    -16    
-80    16     
-80    64     
144    -192   
-64    96     
-432   -32    
32     48     
-176   -240   
-144   64     
-112   272    
64     144    
-192   -144   
-352   -144   
0      176    
-480   96     
-64    -48    
-464   112    
-128   -128   
-64    -32    
224    160    
-240   -80    
144    144    
-144   -112   
-32    -80    
-128   0      
-304   -32    
48     64     
-48    48     
-16    64     
-384   -48    
-128   0      
96     48     
0      16     
-80    -464   
-16    -48    
-32    -208   
-16    -480   
-16    112    
16     240    
48     192    
-160   64     
-16    0      
0      32     
-96    -144   
-32    -112   
-32    16     
144    48     
144    256    
-80    128    
-96    128    
-96    -272   
64     32     
32     64     
-48    -96    
-64    -144   
48     96     
-16    192    
-32    0      
-192   0      
-48    32     
80     160    
-80    -16    
-16    80     
112    -32    
-32    48     
64     -80    
-128   192    
32     -32    
-16    128    
-64    48     
0      96     
-80    0      
48     80     
-64    -32    
48     -32    
-16    0      
-656   -96    
128    32     
-880   -32    
112    304    
0      -96    
32     -48    
-304   -16    
272    -256   
-304   240    
176    448    
-16    80     
-224   48     
96     176    
-48    -64    
80     -128   
-240   -64    
64     496    
-608   224    
192    480    
-48    304    
128    144    
-192   -112   
-96    48     
96     -112   
0      336    
64     -16    
-96    48     
-112   128    
-48    160    
-16    128    
-160   -208   
96     32     
96     32     
-304   96     
160    80     
-192   16     
64     -192   
-48    144    
144    48     
144    256    
-224   192    
64     -48    
16     256    
-160   -16    
144    -32    
-64    32     
256    240    
-400   -112   
-128   32     
-128   -224   
224    528    
-64    16     
-80    480    
-64    128    
64     -32    
16     224    
16     176    
-16    -64    
-112   160    
176    16     
-224   -144   
0      208    
128    -256   
-32    48     
64     208    
112    128    
-48    384    
-144   48     
288    80     
-16    16     
48     80     
-32    144    
-64    -16    
32     80     
-64    -16    
-96    80     
16     32     
112    208    
-80    112    
-368   944    
256    112    
-1248  -16    
-496   -512   
-96    640    
-240   -384   
592    384    
-496   304    
192    -112   
-272   -208   
224    224    
32     272    
80     112    
-176   176    
176    32     
48     96     
-128   32     
96     96     
-48    -144   
0      0      
80     80     
48     144    
-272   -112   
0      -64    
-96    -32    
384    160    
-208   96     
0      160    
-96    48     
80     -16    
-32    96     
240    144    
-80    128    
96     48     
-16    80     
16     -96    
16     0      
0      16     
224    288    
-16    -32    
32     112    
-80    96     
128    32     
-96    64     
208    48     
-96    192    
144    32     
-48    208    
-48    -144   
128    176    
-128   -16    
160    112    
-112   112    
128    224    
-96    -272   
0      96     
112    48     
112    -2112  
-80    112    
160    144    
-240   80     
80     96     
16     -64    
48     16     
0      208    
-48    80     
32     144    
0      48     
-64    176    
16     -16    
16     -240   
96     80     
-64    -240   
80     64     
64     112    
-16    64     
80     -64    
16     -112   
48     64     
-128   288    
-112   16     
208    96     
-112   -192   
64     -64    
0      112    
-208   32     
224    176    
16     -336   
64     48     
48     160    
32     64     
64     160    
-48    128    
160    176    
48     336    
0      16     
-64    -32    
160    -48    
32     192    
-32    -32    
32     -128   
-16    208    
0      -1040  
128    64     
-160   -992   
64     176    
320    320    
-16    176    
-80    0      
-48    64     
-64    64     
144    -16    
-64    16     
240    0      
-224   -128   
96     -240   
-112   128    
-80    -720   
64     16     
96     -400   
-160   192    
96     -400   
96     208    
-16    64     
0      48     
112    48     
112    96     
-128   -48    
32     -144   
-80    96     
192    -112   
-48    80     
16     -80    
-64    176    
64     -128   
208    -32    
-112   -880   
144    144    
144    96     
-16    96     
16     48     
16     96     
-32    96     
48     -256   
48     128    
64     32     
80     208    
80     32     
48     80     
-48    -720   
144    112    
0      -304   
48     128    
80     112    
-128   -192   
80     -16    
144    112    
48     48     
192    -400   
0      320    
64     -112   
48     96     
352    -96    
-48    160    
128    -160   
-176   16     
-80    -304   
240    336    
144    80     
-80    96     
96     -80    
64     272    
224    -144   
-96    -16    
48     80     
144    -32    
-48    96     
208    208    
-112   16     
48     80     
0      48     
192    -320   
16     240    
-32    48     
96     -144   
-80    32     
-704   48     
-48    -592   
96     -16    
-112   -2432  
32     -80    
176    0      
-48    -32    
192    112    
-192   -64    
-128   -80    
-16    -32    
144    -192   
-800   -1184  
1056   2240   
-1168  832    
-1088  -912   
-272   -336   
768    -240   
-320   -720   
544    240    
32     464    
256    -192   
-128   -496   
-16    -160   
128    -256   
16     -48    
80     160    
-32    48     
176    -160   
-16    -352   
-32    -48    
48     -112   
-16    -96    
160    16     
224    320    
-16    -704   
-16    -288   
-96    -3952  
352    -96    
-112   80     
240    80     
192    -192   
-80    16     
96     32     
-32    -16    
-336   -16    
-128   128    
-1488  -112   
-48    48     
336    -112   
-144   -368   
0      32     
96     32     
-352   -288   
240    -176   
80     64     
-16    -64    
-112   32     
16     304    
-128   128    
-64    48     
48     0      
-448   -224   
400    32     
-176   144    
-32    0      
-48    160    
-32    -16    
-224   -416   
480    -1408  
272    416    
-272   -432   
416    112    
-144   272    
144    -192   
16     48     
-32    -224   
160    112    
64     -32    
48     16     
-80    32     
304    80     
32     -112   
-64    48     
-16    -448   
0      80     
48     160    
-16    48     
-32    -32    
-240   -464   
-96    -240   
32     -240   
-240   -64    
80     192    
-848   -48    
128    -336   
-1056  -176   
-32    -640   
224    0      
-80    -576   
-48    -288   
224    -320   
128    16     
-16    80     
32     128    
-80    -64    
-64    -32    
-128   96     
64     80     
-32    352    
-128   -208   
176    -208   
32     -32    
128    112    
144    48     
-160   64     
160    112    
80     -64    
-32    64     
128    240    
-160   -48    
-16    -464   
-96    -208   
64     48     
112    48     
-64    -80    
-208   16     
160    -160   
112    144    
-80    -336   
128    80     
-96    0      
128    16     
-112   80     
32     -176   
-128   -96    
-64    -400   
-96    -224   
-32    -304   
-176   -576   
0      -464   
160    640    
-656   -256   
192    128    
-544   -448   
0      128    
-144   160    
-128   -32    
-16    224    
-656   0      
0      0      
160    112    
-208   -32    
96     0      
-32    -240   
-1248  -416   
160    96     
-432   -192   
144    352    
32     320    
-96    432    
16     336    
-368   -160   
32     -48    
-96    32     
80     80     
-784   64     
48     -48    
384    0      
-144   432    
-176   -144   
-16    -32    
-64    -64    
96     -48    
-16    192    
-32    -256   
-96    -96    
-176   80     
-144   -16    
-224   -16    
0      -144   
-32    -32    
64     64     
-848   48     
160    448    
-256   0      
32     64     
-208   -144   
64     -32    
16     32     
-32    96     
32     -112   
96     128    
-48    112    
-48    128    
-208   0      
-304   32     
-352   -96    
304    48     
32     240    
80     -224   
128    96     
-80    32     
-160   128    
-32    96     
-64    -80    
288    208    
-192   96     
-48    48     
-128   128    
-112   -96    
-1040  0      
912    464    
288    1072   
256    -320   
288    -1376  
-144   -192   
448    512    
0      -160   
-160   352    
-256   -304   
80     352    
-64    -240   
32     208    
-208   -176   
192    320    
-192   32     
96     32     
-608   32     
128    16     
-1520  -112   
288    -64    
-144   336    
192    -48    
-304   192    
160    -320   
-176   144    
128    16     
0      224    
0      -16    
0      176    
-16    -128   
-48    192    
-64    -80    
-48    80     
-64    0      
128    -480   
-160   16     
16     32     
-112   96     
192    80     
-48    128    
48     -48    
-64    144    
0      64     
-32    48     
-96    -32    
-128   176    
0      -160   
96     416    
-560   -112   
144    16     
-144   64     
48     48     
-16    -112   
-32    112    
64     64     
16     80     
-112   -48    
-16    112    
-96    -80    
-48    -64    
16     176    
-160   -96    
96     112    
-768   -64    
-16    32     
112    32     
16     128    
32     -32    
144    240    
-144   48     
0      16     
-16    -96    
16     192    
-32    96     
112    112    
96     352    
-336   0      
272    -16    
-48    96     
-32    96     
0      112    
16     32     
208    224    
-320   0      
240    208    
-160   128    
112    160    
80     -96    
208    112    
-208   16     
96     80     
-224   -16    
32     32     
128    240    
-176   80     
80     64     
32     -64    
-80    -112   
64     80     
112    144    
64     16     
-128   48     
0      -144   
-32    64     
0      176    
-128   80     
-48    80     
80     16     
-48    -16    
64     144    
64     -112   
-16    64     
128    176    
-144   32     
32     96     
128    208    
-96    -80    
176    64     
-96    -288   
80     64     
-128   256    
80     192    
160    176    
0      128    
-192   -64    
208    -32    
-208   16     
160    256    
96     224    
144    64     
-96    -272   
-160   256    
80     -16    
304    240    
-384   240    
480    400    
-80    208    
-16    -144   
-208   128    
160    32     
80     48     
-96    -16    
112    16     
-80    80     
-80    -32    
-32    288    
144    464    
-112   0      
96     0      
-160   -192   
16     -880   
48     48     
144    -800   
32     -352   
128    96     
-64    0      
0      176    
16     448    
224    224    
-64    112    
16     32     
48     80     
-32    96     
-96    128    
448    -624   
-256   -496   
64     160    
-96    -144   
-288   16     
64     0      
128    64     
0      240    
-256   16     
48     64     
208    176    
-32    112    
-32    448    
-416   -208   
176    -64    
240    0      
240    -16    
-112   160    
-176   -96    
80     112    
112    160    
48     80     
-32    -32    
160    64     
176    80     
-80    112    
-32    128    
-48    208    
-176   -32    
304    320    
-48    176    
192    -64    
-240   16     
-1248  -1792  
1072   880    
-688   -1440  
1424   -304   
-448   128    
0      -224   
-176   352    
-32    -64    
272    160    
-480   -64    
320    0      
-512   -112   
544    -304   
-32    0      
-48    -32    
-256   -144   
144    160    
-80    -48    
96     -384   
16     -336   
-80    -272   
-48    112    
-48    128    
208    336    
-176   -16    
176    416    
-368   -64    
-32    -112   
-192   -784   
528    0      
-32    -32    
-48    160    
256    80     
-32    112    
208    -1152  
-80    176    
64     -16    
272    -48    
16     480    
-240   -288   
-64    192    
-272   176    
112    0      
272    -384   
-48    -16    
64     -80    
32     32     
-80    -288   
-32    272    
224    48     
-160   32     
160    176    
80     160    
112    304    
-112   -192   
32     -80    
96     144    
80     16     
-32    -240   
544    640    
-224   -336   
112    288    
96     -160   
176    32     
-192   -256   
304    256    
16     -48    
-48    -48    
-64    -16    
160    -112   
80     64     
16     64     
32     80     
176    -80    
-96    16     
112    -32    
-64    32     
32     -144   
-96    128    
-80    -208   
-176   -656   
112    224    
-32    -80    
272    -224   
-944   -16    
208    -256   
80     -272   
-64    -640   
112    -416   
80     -48    
-16    -128   
192    128    
80     208    
0      144    
-128   -48    
80     -464   
-32    64     
64     -336   
-256   -496   
-96    -208   
192    -320   
128    144    
64     0      
32     -16    
80     16     
80     -64    
96     128    
48     32     
32     144    
64     48     
-160   -224   
-16    -144   
368    320    
-64    -16    
-416   -80    
64     -96    
-48    96     
64     -64    
112    -96    
-128   -320   
-16    -336   
112    -2976  
96     16     
128    -160   
96     176    
-80    -288   
32     -400   
-96    -384   
16     -240   
-272   -16    
32     -80    
-704   -16    
-64    -80    
-32    -192   
80     -192   
352    80     
-64    -496   
96     96     
-160   64     
64     32     
16     -192   
96     96     
0      16     
176    112    
-160   64     
144    0      
-224   64     
192    96     
-224   32     
240    -192   
-208   80     
112    -96    
112    32     
-48    -1984  
-16    32     
128    -16    
96     -16    
-96    32     
-48    -272   
112    -272   
48     64     
-160   48     
-80    -80    
-736   -48    
64     -16    
192    48     
-144   -400   
48     0      
144    -608   
-96    144    
144    -16    
0      112    
112    96     
-192   80     
-160   -48    
256    -80    
-112   64     
112    48     
-160   176    
-16    -112   
-96    -48    
0      -112   
-32    96     
16     -240   
48     64     
32     176    
-64    -32    
32     -128   
128    -48    
-96    -48    
48     96     
-32    32     
80     -112   
32     0      
-96    -16    
-144   64     
96     -16    
112    -64    
64     -96    
-896   368    
608    -368   
272    352    
-160   -304   
1056   -256   
-800   -864   
240    -320   
656    16     
-192   256    
-224   -80    
160    -416   
-240   448    
256    -416   
-64    432    
160    -848   
-864   192    
-32    -128   
128    304    
-128   -80    
96     -96    
-64    -112   
-64    208    
-48    0      
48     -16    
-64    64     
64     112    
80     112    
-1424  -256   
80     160    
-1024  -336   
-960   -32    
-16    112    
128    144    
32     16     
-1104  -96    
-96    -16    
176    240    
0      112    
-288   -48    
-96    16     
-48    -96    
48     144    
96     -160   
-144   32     
64     48     
16     112    
16     80     
-368   -160   
-144   64     
-576   -48    
0      -80    
48     64     
-64    64     
96     0      
-16    32     
-192   -144   
16     160    
0      -16    
64     128    
0      48     
-64    64     
16     32     
80     64     
-48    0      
0      144    
-96    112    
-48    160    
-208   -32    
0      -208   
64     96     
-240   -112   
96     176    
-64    -80    
-16    80     
-32    0      
-144   -48    
144    352    
-352   144    
176    80     
-32    48     
-48    64     
-288   -80    
48     32     
32     192    
-96    192    
96     -16    
-16    -176   
-48    -64    
-304   64     
240    -32    
-80    64     
-128   16     
96     112    
-64    -64    
-16    -32    
16     80     
-192   -96    
48     176    
-112   -32    
128    288    
-144   -512   
-144   -544   
16     48     
240    224    
160    112    
-64    208    
-32    144    
304    544    
-240   0      
-80    -16    
-96    64     
0      -16    
64     208    
-144   -32    
64     32     
-464   -16    
48     32     
-64    -96    
144    -96    
-224   -128   
-80    224    
0      112    
48     112    
32     80     
-80    -96    
-16    0      
80     144    
-96    80     
-272   -432   
-16    160    
-896   112    
-16    304    
-80    -320   
16     176    
0      -80    
-80    -80    
96     272    
-144   176    
80     80     
16     48     
-48    64     
-160   -160   
64     192    
-144   80     
-16    0      
-352   -80    
64     32     
256    80     
-48    176    
-112   -96    
48     64     
-32    32     
80     64     
48     160    
-224   -64    
64     144    
-176   -96    
112    112    
-64    112    
16     128    
-64    48     
-64    64     
176    128    
-64    -16    
-16    64     
48     160    
48     0      
-64    -64    
208    224    
-176   -96    
176    80     
-144   96     
208    48     
-112   80     
-32    144    
96     0      
32     144    
16     176    
-80    112    
-48    0      
160    160    
16     16     
-112   -64    
-48    48     
224    96     
-64    -32    
16     80     
-160   128    
-16    -224   
-400   144    
32     -32    
128    112    
-128   128    
176    16     
-80    -96    
144    224    
128    80     
-16    112    
-320   384    
-1008  1392   
-656   624    
144    336    
240    -640   
704    992    
-832   224    
368    608    
-368   -160   
912    -432   
-688   320    
240    224    
336    16     
-368   128    
176    -16    
48     384    
-240   -64    
-96    176    
16     -176   
64     128    
32     -16    
32     208    
128    240    
-128   -16    
-32    -48    
256    64     
-32    256    
-64    96     
-160   -224   
352    224    
-288   -176   
288    -16    
-48    208    
-96    -16    
128    320    
64     16     
64     64     
-32    -432   
32     496    
32     512    
320    256    
-48    32     
32     -16    
0      -112   
48     112    
16     272    
80     64     
48     -48    
112    80     
80     -464   
96     256    
64     368    
64     80     
64     -80    
32     80     
64     48     
32     -64    
-128   48     
0      176    
-80    64     
-48    -16    
16     48     
16     -128   
16     -64    
-32    -208   
-32    112    
112    -368   
-80    48     
144    208    
-96    64     
-32    64     
144    16     
-64    -32    
96     208    
-80    -176   
112    64     
-96    -32    
96     176    
-32    96     
32     -288   
192    240    
-192   -368   
112    48     
208    544    
-368   48     
-48    -160   
16     80     
32     -16    
192    528    
-320   -192   
32     160    
32     -80    
32     64     
160    288    
240    160    
96     288    
-96    112    
-128   -256   
0      -1824  
-128   48     
176    0      
288    448    
-128   112    
48     112    
16     -80    
96     192    
-64    32     
256    80     
-48    224    
-16    -448   
64     144    
96     -656   
-32    160    
-32    -944   
-80    160    
224    -896   
-64    64     
48     0      
16     -64    
-144   -112   
192    256    
208    240    
48     112    
-96    112    
112    -160   
144    176    
-224   -112   
432    128    
-112   -112   
64     112    
-48    -768   
144    96     
192    144    
-80    288    
352    112    
-64    -176   
-32    176    
-48    -64    
400    48     
0      144    
-272   80     
272    -80    
48     32     
-128   -288   
224    96     
16     -176   
0      96     
-112   -160   
208    -16    
-80    -32    
32     112    
240    208    
-48    -304   
80     144    
48     -288   
80     80     
-32    0      
176    96     
112    -80    
-160   144    
128    -64    
-16    48     
-48    -16    
32     -848   
48     -144   
240    -32    
-96    -544   
176    16     
-32    224    
64     128    
128    -144   
160    -272   
144    176    
-48    112    
-48    0      
-128   96     
112    -1872  
96     208    
-96    -320   
192    16     
-624   96     
32     112    
-32    -32    
128    -512   
80     -32    
16     -240   
96     48     
32     320    
-144   -64    
32     48     
160    80     
16     -128   
32     128    
-48    -128   
224    80     
-816   -32    
256    -144   
16     -32    
16     -144   
960    -2064  
32     -240   
1392   -144   
432    -416   
592    256    
-336   -160   
48     -304   
368    176    
0      -16    
-256   48     
112    320    
-752   -448   
-240   176    
224    -640   
-64    416    
176    -240   
48     384    
288    -304   
-64    -240   
32     -272   
96     144    
-48    128    
176    48     
-96    16     
80     16     
64     -96    
-64    32     
-16    -16    
-32    32     
0      64     
192    -80    
-64    -112   
96     -144   
0      -144   
-16    -64    
32     112    
256    32     
-48    128    
176    -256   
-240   -80    
16     -144   
32     144    
112    -16    
-368   -96    
-16    -240   
-64    -48    
208    -160   
-208   -144   
144    -336   
16     160    
32     -1680  
80     64     
-16    -144   
64     32     
-48    80     
192    16     
-96    176    
-96    -80    
-144   -80    
-32    -112   
-112   -112   
96     128    
16     -32    
128    -112   
16     0      
-80    -880   
128    96     
48     -16    
16     0      
32     80     
32     -128   
-80    -112   
0      -32    
-112   80     
96     -192   
64     176    
48     -208   
256    32     
-192   -368   
208    96     
96     -432   
32     176    
176    16     
-144   -336   
-576   96     
160    32     
-528   -352   
160    -256   
128    496    
-240   -32    
32     112    
-64    -320   
80     64     
96     -272   
-32    -16    
32     -80    
64     0      
-128   -128   
128    80     
-112   -96    
48     16     
0      -80    
144    112    
-48    16     
80     48     
-112   64     
288    160    
-112   0      
48     -288   
32     96     
-896   -176   
-32    -144   
-160   -144   
160    0      
-16    112    
144    32     
-208   -240   
-48    -320   
32     -144   
16     -176   
128    96     
-112   96     
128    144    
-336   -288   
-96    128    
0      96     
112    -144   
-256   -16    
-16    -112   
0      -48    
-1104  -48    
-32    0      
96     -128   
-64    48     
0      48     
-64    -80    
32     -16    
-48    128    
-144   -240   
-144   80     
64     96     
-80    -32    
0      80     
-160   128    
0      -80    
-128   96     
-176   -176   
-352   -176   
80     -80    
64     -64    
176    224    
-192   -80    
-80    80     
-16    32
[truncated: 236,011 more chars]
