# Supplementary material for: A Fault Diagnosis Method for One‐Dimensional Vibration Signal Based on Multiresolution tlsDMD and Approximate Entropy
Source: Hindawi journal article supplement (doi:10.1155/2019/3262818), 2019-01-01
Supplement: f1 [file 3262818.f1.zip › 3262818.f1/gear signals/broken teeth fault signal/Data16.txt]

176    -112   
176    368    
112    144    
288    464    
-288   -96    
0      -144   
-64    -112   
-384   -272   
80     -160   
-16    -80    
16     -128   
16     -16    
96     -336   
0      -160   
240    96     
-112   80     
-176   -48    
-32    -64    
-128   16     
224    -80    
-144   80     
-64    -368   
-64    48     
-96    48     
160    80     
16     -368   
16     144    
160    -544   
0      -64    
-128   16     
16     112    
-128   -32    
144    -96    
-336   -80    
384    -112   
-192   176    
-128   48     
96     -64    
16     -128   
-112   160    
48     -256   
0      96     
48     -352   
64     80     
-16    96     
64     96     
-224   -16    
80     80     
-96    16     
160    96     
-32    624    
-112   160    
-16    -16    
-784   96     
-80    16     
32     -192   
256    400    
-192   176    
-272   32     
-96    16     
48     0      
-32    0      
16     -64    
96     64     
0      48     
-96    -48    
64     32     
-112   48     
32     -192   
128    112    
-144   -80    
32     144    
32     -64    
-224   48     
-96    -32    
-208   -32    
-96    -16    
-112   -80    
144    224    
-800   96     
48     32     
-96    -224   
-32    0      
160    80     
96     -16    
-64    -48    
-32    64     
-48    0      
112    448    
-272   160    
336    144    
-240   208    
-32    -48    
16     -240   
-496   -48    
32     128    
32     144    
-32    -48    
144    80     
-16    208    
48     0      
64     368    
32     144    
80     64     
-160   144    
0      -96    
-16    32     
-128   -64    
192    -16    
-384   160    
96     32     
160    80     
-224   96     
224    -96    
32     -16    
-224   112    
-16    48     
64     80     
-272   0      
-32    80     
16     16     
96     112    
-224   48     
32     48     
-240   -16    
-32    48     
-1296  -176   
80     160    
-64    -160   
-64    96     
-64    -48    
144    32     
-32    224    
-128   -32    
112    64     
-160   144    
64     0      
144    16     
-48    128    
48     -32    
-160   208    
-80    160    
-80    64     
128    -80    
80     144    
96     128    
-288   64     
-80    224    
-176   -96    
272    -64    
0      160    
-48    -48    
32     32     
32     48     
-256   112    
-48    64     
-16    -112   
192    160    
-1120  160    
0      -16    
-96    48     
48     32     
112    32     
-80    112    
0      64     
-16    128    
-128   16     
32     112    
-80    -48    
32     -32    
0      64     
-368   768    
-288   -528   
240    -464   
-112   1152   
-384   96     
144    416    
528    -944   
-144   -96    
-288   -352   
496    256    
-192   32     
384    480    
-64    48     
-64    0      
-144   224    
-64    -96    
160    240    
-128   96     
0      208    
0      -128   
16     -112   
0      176    
48     144    
64     0      
-64    -64    
128    64     
-192   64     
80     96     
-160   96     
144    48     
-208   -32    
16     -16    
16     112    
16     128    
-16    96     
0      -80    
32     48     
-48    64     
16     48     
-64    16     
96     64     
-208   48     
96     128    
-160   -64    
0      80     
-128   16     
16     96     
64     304    
32     128    
112    48     
-48    -16    
48     144    
96     112    
96     128    
16     192    
-80    -96    
0      -96    
64     160    
-32    240    
80     160    
48     144    
-48    96     
128    144    
-48    48     
64     -80    
16     80     
-16    64     
0      64     
0      32     
64     -80    
96     48     
-80    208    
48     208    
-96    48     
96     48     
128    80     
32     144    
-16    256    
80     80     
144    32     
48     0      
0      80     
16     16     
48     -64    
-256   16     
176    112    
128    528    
-272   -240   
-16    -208   
112    -1040  
16     112    
32     112    
0      48     
48     144    
0      0      
80     96     
112    336    
-32    400    
64     208    
-112   -160   
160    0      
128    224    
64     192    
-176   -16    
-96    -144   
160    176    
48     -128   
64     112    
-32    96     
96     80     
-16    128    
16     48     
32     16     
96     192    
0      32     
96     128    
-192   0      
208    176    
0      112    
48     -96    
-96    -64    
64     -192   
96     144    
112    -16    
-160   32     
80     160    
0      -304   
112    -144   
-112   96     
128    -144   
0      0      
-96    32     
-128   240    
336    48     
-112   -336   
112    192    
-48    -1632  
208    -112   
-80    368    
128    -48    
144    144    
-208   208    
224    64     
-112   128    
-48    48     
144    48     
48     48     
48     224    
-224   -32    
16     -336   
112    48     
224    80     
144    160    
-32    -96    
-224   144    
144    208    
-32    336    
112    -112   
128    224    
-144   0      
160    208    
-128   -96    
80     -224   
128    144    
48     -240   
48     160    
-128   -160   
176    80     
160    -1104  
-80    240    
16     -2368  
-64    128    
-16    160    
0      32     
-128   80     
48     144    
144    112    
-96    0      
-16    32     
160    -128   
96     224    
112    -208   
-64    96     
-16    -336   
240    144    
-256   -80    
-16    112    
32     112    
112    64     
-16    -16    
64     96     
-96    32     
144    -368   
32     320    
272    -80    
48     272    
-48    -304   
64     80     
-1264  1440   
-800   -656   
256    400    
304    -288   
256    -1168  
-480   -160   
656    1360   
-96    144    
48     224    
80     -112   
-112   -48    
-80    -32    
240    384    
224    -32    
-320   -64    
224    240    
32     32     
16     -496   
-96    128    
192    48     
-16    -16    
-160   16     
-48    -128   
208    0      
-32    -288   
192    -112   
192    -48    
-96    176    
64     -16    
-16    -16    
32     -400   
32     -2256  
48     112    
96     -64    
64     96     
80     112    
0      -656   
-16    -144   
-16    -384   
144    -32    
32     -368   
-16    96     
112    -144   
48     48     
-112   -48    
96     -176   
64     -64    
160    400    
-48    -80    
112    32     
-464   16     
80     -384   
-960   -80    
0      -416   
224    -112   
0      -288   
48     0      
0      -1616  
80     -224   
16     -32    
-16    16     
64     -144   
80     96     
-16    -64    
-96    -48    
-48    -128   
144    64     
-224   -96    
128    16     
-16    64     
64     -16    
160    32     
-144   -192   
176    -16    
64     -800   
80     256    
-32    -192   
160    256    
-32    -208   
32     -128   
144    -16    
-128   48     
-48    -48    
32     -304   
-288   48     
-64    -512   
320    -16    
-144   160    
64     112    
336    -1040  
-80    80     
48     96     
0      0      
272    48     
-96    80     
-240   -208   
272    -48    
-240   -48    
160    -160   
-400   -96    
-80    -144   
208    -176   
96     16     
-96    128    
32     -720   
176    256    
-144   -368   
192    144    
112    224    
-16    -96    
-16    -32    
-112   -240   
64     -32    
-80    -96    
0      -272   
-16    32     
-816   -64    
176    -144   
-32    -80    
0      0      
128    160    
32     -256   
-128   64     
144    48     
64     -96    
400    208    
-64    -128   
-256   -560   
0      96     
-320   64     
208    -80    
32     -144   
-144   -224   
-240   -64    
144    -208   
160    -80    
-16    -752   
-128   48     
-32    352    
176    -32    
-160   0      
-80    16     
-80    48     
112    144    
-288   -96    
-32    -128   
-176   -80    
32     -80    
160    112    
-32    -176   
-32    0      
48     -528   
32     48     
32     64     
224    16     
-192   -32    
176    32     
-400   16     
112    80     
0      64     
48     0      
80     -16    
48     -240   
32     160    
-192   -144   
48     128    
-48    -144   
-64    16     
96     16     
-736   240    
-192   80     
-64    32     
-112   -48    
112    160    
-176   -48    
-144   -160   
-32    -144   
-544   -208   
96     352    
-288   -272   
-32    336    
-80    -64    
-32    64     
-80    -32    
-32    96     
-32    -128   
-976   80     
-80    0      
80     48     
48     32     
48     -32    
-240   -16    
-64    -96    
0      128    
-208   -64    
-48    -32    
80     16     
-96    48     
-672   -80    
16     -768   
-96    464    
-128   528    
-528   -336   
848    768    
-608   -272   
224    304    
-144   -64    
0      128    
112    -160   
-112   128    
32     160    
0      -16    
-64    -16    
32     -192   
-240   0      
128    0      
-144   80     
-16    -80    
-1056  64     
-272   -16    
96     -32    
48     0      
48     -208   
160    128    
-192   96     
128    -32    
-80    -128   
-96    -128   
80     16     
48     80     
64     96     
-96    64     
-48    -32    
-240   -160   
-16    96     
-1040  -16    
128    112    
-208   -432   
96     64     
-80    80     
144    96     
48     96     
-80    80     
16     16     
-176   32     
128    16     
-64    32     
-32    16     
0      80     
0      176    
-528   0      
64     144    
-48    -80    
-128   -256   
32     -320   
-64    -48    
96     96     
96     144    
-80    128    
-128   32     
128    144    
16     -256   
96     288    
-304   16     
144    160    
-560   -64    
224    160    
-64    16     
16     80     
16     80     
-64    -48    
80     160    
-96    16     
112    144    
-112   272    
144    224    
-144   -48    
-64    -144   
-192   -80    
64     288    
-304   -32    
160    -32    
-32    -160   
112    96     
-32    128    
-32    80     
0      16     
32     32     
80     80     
48     176    
16     144    
-160   -16    
64     32     
-128   -16    
272    256    
-208   -64    
144    80     
-32    144    
80     48     
0      192    
-80    32     
80     144    
16     96     
128    80     
-240   -80    
96     160    
-144   -80    
160    144    
-160   80     
112    96     
-160   -32    
48     16     
0      112    
-48    -96    
96     272    
112    256    
48     -32    
-144   16     
0      192    
64     -128   
0      16     
-208   224    
192    80     
-112   -448   
32     -272   
-224   128    
80     -32    
192    192    
-320   80     
368    64     
-64    144    
-48    32     
128    96     
16     48     
-16    160    
80     144    
-176   0      
144    176    
-160   -80    
176    48     
64     112    
-112   160    
304    160    
-272   144    
32     -400   
144    -144   
176    208    
144    192    
-112   288    
80     -16    
0      64     
-144   64     
48     192    
-128   -224   
16     -32    
112    256    
-128   176    
-128   96     
-96    -96    
224    112    
0      -96    
48     144    
-32    96     
-96    0      
-16    -224   
464    112    
-192   96     
-80    96     
-384   128    
-64    -1424  
80     -64    
64     -48    
176    256    
-128   176    
0      -112   
144    208    
176    208    
48     96     
-128   192    
-32    -48    
80     96     
32     16     
80     16     
-64    16     
0      -1472  
112    224    
-64    176    
224    32     
-48    96     
16     96     
-32    144    
-16    -64    
-16    64     
64     208    
-64    96     
-848   -1600  
960    -32    
64     -256   
496    -400   
736    -320   
-1216  -272   
528    -240   
-176   784    
112    -80    
96     32     
-480   -16    
288    240    
-192   -128   
-32    144    
48     224    
48     176    
-112   -160   
32     112    
144    384    
208    144    
-192   64     
64     -464   
16     240    
16     -48    
-96    -64    
32     112    
192    192    
-32    16     
64     48     
-32    -112   
144    160    
-32    128    
32     -16    
-80    112    
208    0      
0      -16    
112    -240   
-96    96     
144    -224   
96     48     
-32    80     
64     176    
32     -208   
128    96     
-128   -32    
128    96     
-64    0      
64     -128   
208    32     
-80    -144   
32     16     
80     -192   
-32    128    
160    -928   
-64    -48    
64     -592   
112    160    
-96    -16    
240    16     
-96    -16    
160    128    
80     128    
64     -224   
32     320    
-48    -384   
192    48     
-32    32     
-96    80     
208    -64    
80     -96    
80     16     
-144   128    
144    64     
96     112    
32     144    
16     0      
160    208    
-112   -16    
144    80     
128    -160   
-32    240    
96     -208   
128    112    
0      -400   
-128   208    
-224   -32    
240    48     
48     32     
-32    240    
-32    -48    
16     -752   
-48    128    
80     -368   
32     144    
272    32     
-176   112    
160    -320   
0      128    
48     -64    
80     64     
-32    -144   
80     208    
16     -64    
96     -64    
-112   -96    
64     32     
192    48     
96     -96    
112    192    
-96    80     
208    112    
0      -32    
-48    -32    
112    128    
48     96     
-32    -320   
32     -1248  
-48    -96    
176    -2064  
-144   -320   
464    320    
160    -384   
48     -64    
-160   -1200  
224    -144   
64     48     
-240   -128   
80     -16    
-16    -32    
176    48     
80     48     
-32    -272   
-96    144    
-32    -128   
224    -416   
112    -240   
-80    -512   
-32    -160   
192    -304   
160    -128   
64     176    
-240   48     
320    96     
64     -48    
48     -64    
-48    112    
80     496    
-48    80     
-80    -80    
48     -224   
-1744  -112   
144    -16    
64     -32    
144    -64    
-16    -112   
-32    -880   
160    16     
-144   -496   
144    304    
176    192    
-16    -80    
128    -80    
0      80     
-16    208    
-64    -256   
-32    -336   
112    -256   
416    592    
112    32     
-176   -96    
32     -1200  
112    176    
176    -1328  
-208   160    
256    -96    
128    144    
-64    48     
80     -128   
-176   -64    
144    -272   
-192   112    
0      -16    
-1104  -160   
80     -224   
144    -144   
16     -112   
32     -48    
96     -128   
32     -160   
-112   32     
32     144    
272    -96    
112    -64    
16     144    
-32    0      
-48    -16    
96     -128   
-448   -96    
288    -704   
448    592    
-784   -688   
-464   -1216  
176    -128   
480    240    
64     -400   
240    624    
-80    80     
-256   -256   
64     176    
-48    -112   
-112   -144   
48     96     
64     -192   
16     -416   
240    160    
160    -112   
-272   0      
112    -288   
256    -80    
-32    -144   
304    144    
112    416    
-48    -160   
-96    -80    
96     112    
-480   288    
288    0      
-272   80     
0      -112   
-336   -16    
32     -240   
48     48     
64     -272   
16     64     
96     -448   
-16    -112   
-240   288    
0      176    
-192   -128   
144    -16    
-144   80     
-16    64     
-176   -112   
32     -64    
-1520  -192   
0      16     
48     144    
192    80     
-32    0      
80     -448   
64     -160   
112    288    
64     -32    
-144   -144   
112    80     
-80    240    
48     -48    
-160   192    
208    -64    
-160   32     
80     144    
-48    192    
-960   -352   
32     128    
-80    -48    
-272   16     
-96    48     
-80    80     
16     32     
-80    16     
-192   -48    
112    0      
-16    -16    
32     48     
-288   -128   
-432   -288   
0      80     
-128   -368   
352    64     
-96    416    
-48    224    
-32    256    
-176   -96    
-144   16     
-656   -48    
128    352    
-32    192    
-48    -48    
-96    -128   
0      -80    
-256   -112   
48     160    
-112   0      
-64    48     
-48    48     
-16    304    
-48    64     
-32    -144   
-144   96     
0      32     
128    112    
-48    16     
-64    80     
48     -112   
32     112    
0      -144   
32     240    
-16    -128   
64     96     
-160   -96    
-48    -48    
-128   48     
0      32     
32     0      
-160   32     
128    208    
-128   224    
-112   -176   
-240   -64    
64     128    
64     -224   
64     -64    
-80    112    
64     128    
304    896    
-208   128    
64     -416   
-208   0      
160    -80    
64     0      
0      -32    
-128   32     
16     224    
-704   -288   
192    -48    
-16    -192   
96     16     
432    304    
-176   320    
-32    48     
0      32     
48     416    
-48    -176   
-112   256    
-224   -144   
80     336    
-112   -64    
-80    0      
-208   -144   
208    144    
-144   -80    
176    64     
-160   64     
0      -224   
-16    224    
112    320    
80     208    
-288   48     
128    -48    
48     144    
-112   0      
-16    -48    
64     144    
-64    -112   
-80    -16    
-144   -384   
112    272    
336    528    
-192   64     
112    144    
-176   80     
-32    128    
144    320    
-208   -96    
64     256    
-64    160    
-192   -96    
64     -32    
-112   112    
-16    32     
144    336    
16     -80    
-32    128    
176    16     
-208   272    
-208   32     
64     32     
-128   64     
144    80     
-112   -16    
48     0      
16     80     
80     -16    
16     192    
64     16     
-32    544    
-368   -288   
800    32     
384    352    
-384   256    
864    -416   
-464   496    
-560   -192   
896    -496   
-176   144    
-144   -192   
48     176    
-192   -32    
-16    0      
-80    -64    
272    144    
-272   128    
112    0      
96     160    
144    192    
-96    112    
0      -32    
-48    64     
192    96     
-64    144    
144    16     
-272   176    
112    176    
-96    -16    
128    -16    
-144   48     
128    80     
-48    160    
80     64     
-96    112    
48     64     
208    -32    
-128   224    
48     48     
0      16     
0      16     
-192   96     
256    96     
-48    16     
144    64     
-112   160    
48     64     
64     96     
-160   -16    
368    96     
-336   96     
240    64     
-80    96     
16     128    
-48    80     
64     80     
-112   -16    
64     16     
64     176    
16     16     
112    176    
-176   144    
144    32     
64     32     
48     80     
48     112    
32     160    
-112   -176   
208    128    
-192   0      
176    176    
-96    -144   
192    -336   
-128   112    
160    80     
32     80     
32     112    
176    144    
176    -112   
96     48     
-80    160    
-48    80     
112    32     
16     160    
80     -176   
112    160    
-336   80     
32     -1440  
-32    128    
-48    0      
64     16     
48     -48    
128    176    
-80    -16    
0      48     
-96    -64    
128    352    
-176   0      
112    64     
16     288    
0      80     
240    64     
-48    -656   
16     176    
16     -368   
128    128    
-144   -112   
96     -112   
32     448    
-16    144    
80     144    
-48    64     
32     16     
64     192    
48     64     
304    432    
-160   48     
608    288    
-224   224    
32     -144   
288    80     
-176   -64    
80     -16    
-64    96     
80     -16    
-16    16     
-48    224    
96     -16    
-176   -64    
-80    -144   
128    -112   
-48    -16    
64     -192   
-208   -16    
176    -992   
224    32     
-96    96     
80     32     
176    -176   
-96    32     
64     16     
0      80     
32     32     
48     -16    
32     48     
80     64     
48     176    
96     96     
80     144    
-48    -720   
128    80     
32     -944   
64     160    
112    16     
-80    16     
0      112    
144    64     
0      96     
176    -48    
112    320    
80     192    
-64    208    
96     -128   
32     64     
48     -768   
64     80     
64     -16    
112    576    
-160   -2064  
144    64     
80     112    
64     96     
16     16     
144    -48    
16     176    
176    -96    
-112   128    
336    -320   
-144   -80    
160    -80    
112    192    
32     -672   
96     192    
-48    -352   
112    176    
-64    16     
96     64     
176    176    
-48    -320   
64     192    
32     -48    
48     144    
-48    64     
-96    32     
272    -16    
-96    208    
160    -448   
-208   32     
912    1696   
-1392  -1216  
1040   1104   
224    704    
1168   -288   
-1024  -864   
464    688    
-352   400    
32     -624   
-176   -304   
80     -80    
288    48     
-176   304    
-48    -160   
144    128    
-32    224    
288    0      
-144   16     
-80    -448   
128    -240   
64     -272   
112    -672   
0      64     
160    -1168  
-144   -464   
-96    0      
224    0      
128    272    
16     -176   
-80    -2000  
64     64     
32     -752   
-32    80     
224    -176   
16     -320   
272    64     
80     0      
192    144    
-384   -768   
288    352    
-16    -384   
128    160    
-112   192    
-80    16     
64     -416   
48     80     
240    -128   
-128   96     
128    112    
-48    -272   
-1008  48     
16     -336   
-144   -144   
304    -272   
-144   -368   
-32    -768   
240    528    
416    96     
-576   -576   
432    432    
-272   128    
208    32     
-144   160    
-208   32     
-128   -80    
-192   176    
48     -176   
208    272    
-192   -208   
80     -48    
64     -864   
16     -128   
112    -1952  
-96    64     
96     -112   
16     0      
160    80     
288    176    
-176   16     
256    240    
-256   16     
144    48     
-1632  64     
48     -80    
64     48     
-96    96     
128    32     
192    -64    
-64    96     
32     -144   
-64    -32    
-48    -96    
112    -80    
176    272    
-64    -96    
48     16     
-128   -512   
-432   -112   
96     -16    
-624   112    
48     -16    
-48    64     
128    -144   
48     160    
32     192    
64     96     
32     112    
48     -160   
-176   -160   
48     -32    
80     32     
16     -256   
-560   -16    
48     -80    
-48    -64    
16     16     
-160   -80    
288    -336   
-96    80     
176    -288   
32     160    
-16    -16    
32     -96    
-288   -384   
160    -176   
-160   -256   
-16    -608   
-160   -320   
96     -544   
-96    -304   
240    -80    
-80    -96    
240    48     
-112   80     
16     -16    
176    128    
-96    16     
176    96     
0      -80    
-208   -96    
64     -32    
16     -160   
-112   -112   
160    -48    
-32    96     
208    272    
128    496    
16     176    
48     272    
-256   -144   
-144   -240   
-96    -32    
144    -112   
-240   64     
80     384    
-16    -16    
80     112    
-288   -16    
128    -256   
-144   16     
-320   -336   
160    272    
-752   -256   
80     16     
96     192    
-256   80     
32     128    
80     48     
-16    208    
368    48     
-96    16     
240    -192   
-192   32     
-592   -64    
112    176    
-144   -64    
144    112    
-112   160    
-672   -176   
144    64     
-176   -80    
32     128    
-128   -16    
112    96     
-1296  80     
-48    80     
240    -16    
-128   192    
48     -240   
96     0      
-16    -224   
80     192    
-96    -48    
-176   -144   
160    -32    
-144   64     
80     128    
-80    144    
848    992    
-1344  -608   
272    -96    
-752   240    
112    32     
208    -224   
-96    368    
-432   32     
352    -128   
-432   -192   
384    -64    
32     160    
-144   80     
-64    112    
-48    32     
-80    32     
-32    160    
144    64     
-144   96     
32     -16    
-272   -64    
192    32     
-112   96     
208    0      
-80    208    
-80    -16    
64     256    
-144   -48    
-48    64     
-16    0      
-64    128    
-64    -160   
-144   160    
-336   -80    
16     96     
-768   -144   
48     -32    
112    32     
128    0      
-160   0      
-64    32     
-128   112    
144    64     
32     -32    
-144   128    
-16    80     
-32    -32    
-48    160    
-336   -144   
192    112    
-880   48     
96     64     
-112   -272   
-64    80     
-16    144    
-16    128    
-144   48     
128    160    
-112   32     
16     80     
-96    128    
-32    -16    
112    128    
-64    144    
48     16     
32     -80    
-48    96     
80     80     
32     224    
-176   144    
96     16     
16     64     
-112   32     
-16    64     
16     -64    
128    320    
-128   -48    
288    32     
-208   64     
-192   160    
-240   -80    
48     80     
192    352    
-208   128    
176    96     
0      224    
48     144    
32     -96    
128    32     
-32    48     
64     192    
-144   0      
-96    176    
-176   -224   
48     16     
-208   -112   
144    80     
-208   -96    
64     0      
16     -16    
96     48     
-16    192    
32     -32    
0      64     
-16    64     
192    -64    
-192   -144   
-16    48     
0      80     
64     96     
48     64     
-208   80     
160    176    
-48    0      
80     -48    
0      -16    
-48    64     
176    288    
80     48     
-224   320    
-32    48     
-48    16     
208    272    
32     32     
64     352    
-16    -48    
96     64     
-160   96     
192    192    
192    64     
-176   -224   
-64    176    
-192   32     
240    80     
48     96     
-160   208    
368    176    
-112   208    
-368   -96    
160    48     
-16    160    
64     16     
-80    16     
192    144    
-48    64     
128    400    
64     128    
-128   -64    
0      -16    
96     0      
0      144    
48     -32    
-80    64     
-144   -64    
32     112    
288    0      
80     288    
320    784    
-496   -32    
-48    -48    
-64    -256   
128    0      
48     16     
208    224    
-384   -464   
112    -224   
432    144    
224    272    
-16    240    
-176   -2144  
-160   96     
352    -160   
304    192    
-224   80     
-128   -32    
-160   -32    
336    64     
144    48     
-176   128    
-256   32     
-112   48     
144    -96    
256    224    
-80    128    
0      -1504  
-16    64     
112    176    
112    112    
-80    32     
48     80     
144    176    
16     64     
96     80     
-272   160    
0      -64    
-48    192    
96     48     
-304   512    
-1328  512    
576    1248   
-448   144    
-64    -1104  
880    912    
-672   -336   
32     704    
-544   -192   
1024   -128   
-624   -32    
512    448    
64     192    
-64    240    
-320   -80    
304    -240   
-16    80     
240    -448   
-208   192    
-160   -1248  
-160   336    
80     208    
-224   368    
16     -272   
-192   -64    
-208   -352   
320    288    
64     448    
-176   96     
-320   -304   
32     -208   
208    64     
80     -80    
-16    64     
336    -1952  
32     128    
176    32     
224    240    
144    384    
-320   -64    
-160   96     
-224   432    
96     -192   
208    -96    
16     -96    
0      128    
16     -96    
-80    144    
0      224    
112    -320   
-48    64     
176    -32    
32     144    
16     176    
-144   -208   
64     -192   
128    288    
-64    176    
256    672    
176    64     
-112   -160   
128    144    
-16    -192   
-240   -400   
352    -96    
112    16     
32     -80    
-80    16     
160    80     
192    96     
32     96     
48     48     
48     176    
32     -288   
64     112    
16     -256   
64     -208   
16     -240   
272    16     
-16    -64    
480    176    
-304   -400   
160    96     
112    240    
144    160    
-64    128    
288    288    
0      224    
112    -48    
-48    -32    
48     -176   
160    112    
0      -144   
80     256    
64     32     
160    80     
144    -16    
96     448    
112    -352   
-48    160    
-80    112    
32     -944   
32     -448   
0      -272   
16     96     
48     0      
16     -96    
144    -144   
96     352    
96     64     
320    432    
-208   -288   
-112   -272   
240    80     
-64    -672   
80     48     
-80    -1456  
160    -432   
-48    -16    
208    96     
-144   -128   
128    -480   
192    -256   
16     128    
-128   -80    
240    208    
112    0      
16     -208   
16     32     
160    -496   
-128   64     
-272   -32    
208    -176   
-96    -16    
128    -432   
16     -192   
48     -576   
-176   -80    
80     -1280  
80     -112   
176    160    
-16    -64    
80     -32    
288    208    
48     -16    
16     80     
-144   80     
224    80     
-1600  -176   
96     -240   
-112   -16    
160    -144   
16     -48    
0      -192   
256    160    
-208   -224   
-16    96     
-80    -48    
-64    -96    
256    -32    
32     144    
-112   176    
-32    -48    
-256   -32    
48     -48    
176    112    
16     32     
32     -96    
144    -208   
-32    -128   
80     -896   
16     -48    
128    0      
-48    368    
-160   -256   
208    -144   
64     32     
224    -96    
-96    144    
-112   -32    
-576   -16    
32     -80    
144    -112   
48     -160   
96     -256   
224    -656   
-64    240    
80     -16    
-16    112    
-48    -64    
160    -48    
-48    96     
-96    -16    
32     64     
48     -160   
-16    -256   
-32    -256   
-480   16     
2864   32     
-1344  -800   
688    -608   
560    352    
-640   48     
80     848    
-448   -64    
208    592    
-528   -560   
256    192    
-160   -32    
48     32     
-400   32     
416    -128   
-144   288    
256    -432   
-32    592    
80     -560   
-64    336    
208    -768   
-112   144    
80     -80    
32     320    
192    -144   
16     112    
-336   -336   
80     16     
-64    80     
272    288    
-32    -288   
-80    -128   
16     64     
176    -80    
64     80     
48     -48    
0      -80    
-64    288    
32     -16    
-96    -112   
-80    -144   
-80    -32    
64     128    
144    16     
-96    -80    
-1776  -176   
64     -128   
64     96     
96     -336   
48     64     
-144   160    
-16    -16    
16     64     
32     0      
32     160    
80     32     
-80    128    
64     -48    
-144   0      
0      -112   
-80    16     
-1392  -176   
-16    112    
-112   -64    
64     112    
-64    -96    
-64    -16    
-32    16     
-320   224    
-240   48     
336    32     
32     16     
16     -64    
-96    112    
64     -64    
96     112    
64     96     
-112   -80    
160    -288   
-592   -64    
32     -48    
-16    48     
16     144    
-160   -80    
-48    -128   
-576   -112   
-64    32     
208    240    
-64    0      
128    -112   
-240   176    
-16    -240   
32     -48    
-128   112    
48     32     
-144   -96    
32     16     
-176   16     
0      32     
-112   -48    
-128   48     
272    32     
96     -16    
-288   -224   
-128   -160   
32     64     
-32    128    
80     -96    
144    384    
-32    80     
64     128    
-144   -64    
0      16     
-96    64     
-32    16     
-64    -16    
128    288    
-400   0      
-16    -48    
0      -208   
-112   -352   
128    -64    
48     192    
128    128    
-80    96     
-144   -32    
-128   -32    
64     192    
-144   -16    
-64    -656   
0      256    
-48    256    
-400   -112   
-128   240    
-1088  -112   
96     224    
208    352    
-176   96     
-144   0      
16     48     
-32    -48    
-16    96     
112    112    
80     144    
-176   96     
-48    32     
80     240    
-304   -112   
144    80     
-432   -192   
96     128    
-80    -128   
-80    64     
144    176    
-96    32     
96     16     
16     96     
16     224    
16     -256   
-16    80     
-112   32     
96     96     
-192   -64    
80     176    
-496   16     
112    112    
-256   0      
112    224    
-144   48     
208    96     
-96    208    
80     -80    
-16    128    
-240   0      
192    32     
-128   96     
-80    128    
-128   -304   
64     112    
-448   -96    
-256   112    
-32    -64    
32     80     
224    192    
48     64     
128    -208   
-80    192    
-16    -32    
128    96     
-304   16     
288    -80    
-64    208    
-16    -96    
-32    16     
32     -96    
96     272    
64     32     
-64    160    
-64    176    
-1408  -800   
720    -1136  
-336   176    
480    -192   
96     704    
-288   -112   
80     224    
0      -464   
752    -112   
-720   96     
224    272    
320    -112   
-256   368    
64     -240   
48     528    
-160   -160   
-48    304    
16     -272   
144    224    
-208   -208   
128    128    
-80    32     
16     80     
-80    0      
208    0      
-80    304    
0      80     
-96    160    
-48    -128   
-32    320    
240    80     
-32    112    
-16    0      
48     128    
-16    0      
192    112    
-80    448    
256    432    
-80    384    
-272   -448   
224    48     
-64    48     
112    384    
-96    112    
112    96     
-144   80     
224    336    
-48    80     
0      96     
16     32     
-80    80     
32     -16    
-32    240    
-48    -32    
32     -80    
128    352    
160    112    
144    -48    
-16    64     
48     192    
32     112    
48     256    
-112   144    
144    16     
-48    -64    
112    96     
-48    -112   
32     64     
-112   -96    
80     -2400  
-32    144    
128    112    
-32    64     
-64    48     
80     96     
128    128    
-48    96     
80     80     
160    480    
-272   144    
288    64     
16     -128   
32     432    
480    368    
-32    208    
-96    48     
64     0      
288    400    
96     192    
-48    160    
0      -96    
80     -112   
-48    -160   
256    208    
-16    96     
32     112    
64     112    
-320   -64    
64     -192   
-64    -896   
128    240    
176    240    
-48    0      
0      112    
32     -256   
224    48     
-32    -16    
176    544    
-96    -32    
64     128    
-128   -64    
192    96     
-64    -384   
128    -16    
128    -208   
16     128    
-16    -688   
-16    -144   
0      96     
240    288    
64     112    
-32    400    
-208   16     
176    96     
96     240    
-64    192    
192    144    
-176   -128   
-48    96     
64     -48    
192    112    
16     0      
64     208    
160    -384   
-48    -80    
-192   -128   
144    240    
224    -64    
48     96     
-256   48     
176    32     
0      48     
0      -112   
112    32     
16     -160   
16     176    
32     -80    
192    32     
-32    -832   
-32    32     
128    160    
48     128    
16     96     
-80    80     
96     48     
-224   -80    
176    -16    
80     -16    
-64    160    
128    -304   
0      80     
64     -432   
112    432    
16     -336   
240    208    
-112   96     
144    0      
176    208    
-208   0      
-80    192    
0      -208   
256    -32    
256    -256   
-224   64     
128    32     
-16    160    
128    128    
-128   128    
0      -96    
240    -16    
16     48     
48     96     
-32    224    
128    -32    
80     96     
32     -208   
224    32     
16     -64    
-64    112    
80     -144   
64     80     
128    -352   
-48    96     
-48    -160   
160    240    
-144   32     
224    128    
912    2720   
-1120  512    
-1360  -1920  
368    416    
48     192    
-240   -720   
48     288    
-464   -160   
464    -144   
-304   -64    
48     -368   
-192   192    
464    -1168  
16     688    
-96    -432   
-144   288    
16     -128   
160    -368   
-48    -128   
160    -384   
-80    -32    
64     -368   
112    16     
-16    32     
16     -80    
208    -48    
-64    160    
96     -96    
0      224    
128    -192   
-16    64     
-320   -112   
80     -96    
-80    0      
-16    -208   
144    -112   
192    -368   
-32    -96    
48     -1072  
-128   -48    
128    64     
96     48     
32     -176   
-144   -32    
96     -144   
96     0      
80     32     
-176   -128   
-1520  -144   
-128   -32    
128    -96    
128    -16    
16     -32    
48     -16    
64     -32    
208    -32    
64     256    
-96    -144   
208    64     
16     -48    
-16    -96    
48     112    
0      -304   
-112   -80    
32     -304   
-160   16     
192    32     
32     80     
0      -336   
192    -64    
32     -2976  
16     -16    
64     96     
-16    160    
-64    -48    
128    144    
-256   -160   
400    -48    
-352   16     
192    -48    
-384   96     
-64    -64    
-240   -176   
-64    -112   
224    112    
64     -816   
0      176    
256    128    
112    -144   
-160   128    
128    -16    
-80    80     
144    128    
-128   -48    
96     0      
-384   0      
80     -208   
-1328  -16    
160    64     
-48    32     
64     -272   
128    96     
112    -32    
96     -96    
-64    -32    
32     160    
208    272    
-16    304    
-240   -144   
32     -192   
-528   -16    
112    -48    
-48    -32    
-16    -96    
64     128    
80     -400   
96     64     
64     -112   
16     64     
-288   -80    
96     -96    
-432   -48    
272    -32    
-288   -48    
-80    -176   
-272   192    
208    -32    
-96    48     
48     -176   
0      144    
80     -528   
-192   -112   
16     -16    
176    176    
-48    48     
112    176    
-192   -144   
48     64     
0      32     
64     16     
-48    80     
16     16     
-32    32     
160    -64    
-96    48     
320    -64    
208    384    
-80    336    
-1728  272    
-240   0      
-144   -208   
32     32     
112    16     
-64    -96    
64     -176   
192    32     
-304   16     
-64    -16    
-48    -160   
96     176    
-16    -96    
-688   -144   
-48    -96    
-560   48     
-96    -32    
-800   64     
-176   176    
-720   0      
64     -32    
48     32     
-64    -96    
-112   -96    
-96    176    
-144   -80    
64     112    
-256   -256   
48     -32    
160    96     
-160   80     
96     112    
-80    -48    
16     144    
-432   -48    
-112   64     
80     -96    
112    272    
-80    16     
144    128    
-144   -64    
0      112    
16     -16    
-208   240    
-48    208    
-16    80     
-192   464    
-208   -80    
32     80     
-384   -48    
2384   -1344  
320    1120   
-736   -192   
-544   -432   
528    112    
-160   -608   
0      48     
496    160    
-384   304    
16     -32    
-240   256    
-144   -208   
-16    208    
32     -80    
-192   96     
-448   -80    
80     -64    
128    464    
144    -16    
-192   112    
80     80     
160    288    
-256   432    
16     -112   
-16    16     
-336   16     
320    320    
-304   128    
176    -112   
-352   32     
384    -16    
-256   96     
48     96     
-480   128    
48     48     
112    64     
-144   96     
48     80     
0      -80    
-160   -48    
96     32     
96     160    
32     128    
-160   -144   
-256   -80    
112    80     
-80    0      
0      176    
-336   -64    
96     176    
-96    -32    
144    -32    
16     32     
-48    336    
-16    48     
64     -176   
32     112    
-112   96     
48     -32    
-48    0      
-96    144    
-64    -48    
64     64     
-352   -144   
64     224    
-80    96     
0      -288   
208    144    
-80    160    
96     224    
-64    -32    
64     16     
-48    16     
-16    80     
0      80     
96     336    
-288   80     
80     128    
-192   0      
-80    -48    
96     208    
-128   64     
208    352    
-208   -112   
176    -16    
-96    -192   
144    96     
-112   144    
176    288    
-240   144    
192    96     
-64    -96    
-16    64     
-32    -96    
240    736    
-224   160    
256    48     
-64    -112   
32     -16    
32     64     
48     -16    
-16    192    
-112   -64    
192    160    
-240   -16    
64     176    
-208   -336   
32     144    
64     176    
224    144    
-32    160    
-96    64     
176    96     
-16    96     
-16    128    
176    192    
-112   16     
0      -16    
-80    16     
-32    -272   
0      16     
-176   -80    
96     128    
176    -112   
-192   0      
192    304    
192    -64    
16     16     
-80    256    
48     208    
160    16     
-80    80     
208    144    
256    432    
144    320    
-112   96     
-48    -16    
-224   112    
32     -112   
144    -64    
-16    224    
16     16     
272    128    
16     256    
-32    192    
-48    -16    
-208   64     
16     32     
-48    256    
144    -48    
112    128    
-192   -144   
-16    80     
64     176    
16     16     
128    112    
-16    96     
112    352    
-80    80     
16     32     
16     48     
16     160    
32     144    
-64    144    
-64    -32    
160    80     
144    432    
-176   -1104  
32     80     
0      208    
-48    0      
208    240    
-96    -16    
192    240    
-96    48     
16     64     
160    64     
-48    48     
32     112    
-112   0      
48     96     
128    144    
-32    -176   
-64    0      
80     16     
48     240    
-176   64     
160    -96    
128    96     
-16    272    
-32    80     
-16    160    
-48    -400   
144    64     
-96    -64    
144    -272   
48     48     
128    -256   
1264   -592   
-512   -1376  
224    560    
-464   752    
208    256    
48     -368   
-16    -480   
-224   496    
496    144    
-480   -96    
416    -256   
-96    640    
64     -160   
-80    304    
-80    -464   
240    256    
-160   -896   
128    272    
-48    64     
240    48     
-128   -144   
192    16     
-64    224    
160    0      
16     160    
-96    96     
-64    32     
64     -352   
80     160    
16     -304   
144    48     
-16    -448   
96     128    
64     336    
32     32     
-48    -32    
32     144    
-32    128    
160    48     
-48    -16    
112    112    
-64    240    
272    -64    
-144   16     
64     -48    
32     64     
176    -304   
64     208    
-32    -2368  
96     -80    
-80    128    
112    112    
96     48     
32     160    
-80    -32    
160    144    
-48    16     
160    48     
32     288    
128    -320   
80     176    
32     -64    
-16    112    
-32    -48    
96     -32    
176    128    
-112   80     
-128   -16    
-112   -208   
-32    -16    
-16    16     
128    192    
-48    -432   
144    144    
-80    -96    
352    240    
-272   96     
0      80     
304    -80    
-208   -240   
240    -32    
-80    208    
-16    288    
144    368    
-48    64     
96     -160   
128    80     
-16    -32    
-48    64     
112    -128   
96     112    
48     80     
16     176    
16     -240   
64     80     
112    64     
0      144    
64     96     
112    192    
0      -1488  
80     -112   
0      -2208  
96     -64    
160    176    
-80    48     
128    144    
48     -64    
-32    80     
160    -48    
-80    -240   
128    32     
16     96     
80     96     
-688   -80    
32     16     
-32    -208   
112    -704   
0      0      
144    -368   
112    96     
-96    128    
-16    -128   
0      80     
272    112    
-64    64     
64     208    
-208   -144   
176    -368   
-160   -128   
16     -64    
160    272    
48     -64    
128    -48    
-208   -304   
288    -144   
32     -768   
-64    -176   
224    -192   
-176   48     
176    -16    
-160   -112   
80     -176   
224    48     
-48    32     
80     48     
-112   784    
-272   -592   
608    -48    
-176   -272   
176    -112   
-160   -464   
64     176    
144    -208   
272    -128   
-192   -48    
96     48     
-16    208    
-64    144    
-96    -128   
240    -224   
-400   0      
48     -96    
-80    -112   
-32    -272   
240    176    
-64    -240   
-288   32     
-368   -2736  
208    -192   
0      16     
64     144    
-80    224    
64     -224   
-128   0      
-48    -304   
-16    0      
-80    80     
-240   0      
64     -16    
-64    -64    
80     -64    
-48    176    
-96    -704   
-80    112    
96     96     
48     0      
-96    -16    
-112   -288   
64     -128   
96     -192   
128    64     
16     32     
-448   16     
-96    96     
-144   -48    
112    -208   
-80    32     
960    32     
-336   -496   
-416   -864   
112    -416   
624    480    
-560   -48    
-304   528    
32     -112   
-112   112    
-80    -304   
-400   -96    
-176   -272   
-32    32     
352    -640   
-80    160    
-16    -352   
272    128    
-240   0      
176    -32    
-208   -16    
288    464    
-128   128    
0      -64    
-192   -64    
-32    -160   
208    240    
0      -64    
0      32     
-32    -192   
96     48     
48     -304   
-32    224    
-48    64     
96     96     
-144   112    
80     -176   
-176   -256   
160    208    
16     48     
224    48     
-160   -16    
96     192    
48     -32    
-544   -272   
-80    80     
-528   -32    
-1184  0      
-48    -96    
-720   -128   
-208   48     
-928   -144   
16     32     
-128   -48    
256    -16    
-160   64     
48     64     
48     -208   
-32    -32    
-64    -80    
32     80     
-112   -96    
-64    -16    
-16    64     
-112   -64    
64     80     
-272   224    
-128   128    
-608   48     
-16    64     
32     -192   
-64    -16    
-144   -96    
32     112    
-16    -32    
64     160    
-128   -144   
-32    112    
-336   64     
-80    -32    
0      80     
-240   -80    
192    112    
-432   224    
-80    -96    
16     -176   
-96    64     
80     16     
32     144    
-16    208    
16     -16    
208    256    
-400   -48    
48     -128   
-16    -128   
-16    112    
96     384    
-352   0      
-48    -64    
-128   -64    
-304   -16    
112    208    
-64    0      
32     -16    
-320   -416   
32     -48    
-32    112    
208    64     
-144   160    
48     96     
-128   160    
112    112    
-112   112    
-96    -32    
112    144    
-176   160    
160    256    
-128   -272   
-128   -272   
-160   -128   
176    144    
0      -112   
-320   64     
-160   -80    
160    -48    
-96    -64    
256    112    
96     432    
240    208    
-128   32     
-752   -16    
-160   144    
144    -48    
48     336    
208    48     
-48    320    
-192   -64    
224    80     
-96    32     
64     160    
0      32     
-176   0      
64     48     
-208   -112   
160    -128   
-368   -176   
0      128    
-592   -144   
-16    80     
48     32     
-80    48     
0      48     
-32    -48    
-16    0      
80     192    
16     144    
96     192    
-160   -96    
16     320    
-128   64     
128    16     
32     160    
0      0      
-176   0      
-48    -48    
-16    -112   
128    144    
-112   -272   
224    144    
-16    288    
64     96     
-176   128    
-64    -48    
0      272    
-48    -64    
32     -48    
144    192    
-352   -64    
-176   96     
-112   -96    
0      144    
48     -96    
16     144    
192    160    
0      16     
16     224    
80     160    
32     144    
80     80     
-16    16     
-208   -96    
48     112    
-48    80     
-64    128    
64     -208   
176    80     
112    336    
64     96     
-96    16     
-560   128    
304    -576   
-672   336    
-128   576    
-688   16     
-224   -1312  
736    672    
144    1104   
-160   -208   
-96    -112   
-64    160    
416    -112   
80     416    
-144   -32    
96     -176   
-32    240    
112    240    
-32    -96    
-256   -128   
48     -32    
-80    96     
160    128    
-16    224    
128    -48    
-224   16     
0      144    
32     16     
112    48     
-32    160    
64     -112   
-224   112    
112    48     
-96    -272   
32     192    
-176   -80    
144    272    
-32    16     
-32    208    
80     48     
80     48     
-16    -64    
48     80     
208    -32    
64     48     
-48    112    
-80    -16    
224    400    
-16    192    
16     112    
-48    -16    
128    16     
32     80     
-16    272    
0      80     
32     96     
48     80     
-32    -16    
224    -16    
-64    128    
16     272    
176    144    
-160   -16    
64     208    
80     -48    
-80    -64    
80     192    
16     32     
48     -2144  
-32    80     
48     48     
80     112    
16     80     
0      64     
-48    48     
-16    128    
0      112    
144    368    
-160   48     
-48    -64    
48     -176   
-64    -112   
112    240    
32     -368   
256    400    
-128   160    
128    48     
-208   -224   
160    -256   
208    -176   
112    144    
0      336    
-80    16     
-64    -96    
96     80     
96     128    
32     -16    
128    192    
-96    -384   
96     32     
-48    48     
176    160    
96     304    
96     240    
-48    16     
-16    64     
16     -80    
96     96     
32     288    
-16    -32    
272    256    
-240   -208   
112    96     
-80    -928   
192    144    
0      -1040  
-16    128    
-128   -240   
112    128    
32     -32    
112    -48    
-160   -96    
-16    224    
320    240    
-16    -32    
-128   160    
16     -80    
288    96     
-16    -272   
-32    16     
272    -240   
0      272    
96     48     
16     144    
-96    32     
160    416    
-208   -32    
240    96     
-48    192    
16     -64    
-48    112    
-80    -224   
96     80     
112    48     
96     0      
80     -256   
-176   192    
304    -816   
-384   160    
208    336    
-96    32     
0      208    
240    176    
-320   144    
272    -240   
-208   64     
368    -880   
64     64     
-368   -656   
112    -16    
96     -608   
304    0      
48     -96    
64     32     
-144   288    
384    128    
-224   144    
352    96     
-64    304    
48     -80    
-144   48     
-112   -336   
-32    208    
-208   -368   
208    128    
-16    -80    
192    192    
-32    80     
80     16     
176    176    
160    48     
-16    16     
48     256    
112    64     
16     32     
-48    48     
96     -64    
48     48     
0      -96    
336    320    
-96    144    
32     -80    
-96    -16    
336    -848   
16     -96    
144    80     
128    112    
-128   48     
-80    -288   
32     -1904  
592    -1312  
816    672    
-384   816    
-16    112    
-80    336    
128    16     
864    480    
-544   208    
-16    -224   
96     -16    
16     -416   
-48    32     
-976   -160   
-16    -256   
64     -208   
32     -192   
32     -16    
80     32     
16     -144   
32     -1312  
128    -272   
112    -240   
32     112    
48     32     
-240   128    
224    0      
96     -256   
16     -96    
-112   -288   
208    -64    
-32    -208   
16     48     
112    -496   
48     -144   
-80    -2080  
192    32     
-64    80     
-80    -32    
48     -128   
0      144    
16     64     
112    16     
-384   -288   
64     0      
-592   144    
48     -208   
80     -256   
-96    -176   
112    16     
176    -544   
-368   -96    
256    -224   
-112   208    
48     -192   
32     16     
-80    -80    
144    48     
-16    80     
-48    48     
-32    16     
-16    -64    
-64    -48    
128    -32    
-160   80     
96     -48    
-80    -16    
112    -1200  
176    80     
16     -48    
-48    64     
96     32     
96     0      
-160   -208   
192    -288   
-144   192    
-144   192    
0      32     
240    -80    
96     48     
-96    -64    
16     0      
208    -336   
-224   144    
208    320    
-32    -288   
224    -64    
-16    -176   
0      -32    
48     -48    
-16    96     
-16    -16    
-352   64     
48     -352   
-192   -208   
288    -352   
-256   112    
240    -752   
96     160    
-64    -352   
208    16     
-144   48     
80     112    
-144   16     
192    -48    
-176   -32    
160    80     
-304   -128   
0      -144   
16     16     
48     -160   
80     64     
64     96     
-48    96     
-160   -128   
-112   -432   
-160   0      
208    64     
-16    128    
160    48     
-208   64     
160    -304   
-224   -112   
96     -144   
0      0      
-32    -208   
144    64     
-144   -400   
80     48     
144    16     
176    -32    
-368   -64    
-16    -272   
-288   -160   
192    -160   
-256   16     
272    -128   
-192   -48    
-144   16     
-80    96     
-144   -272   
0      144    
-496   -160   
-112   112    
32     -80    
-208   -32    
-64    128    
-624   144    
-128   160    
64     80     
48     48     
-32    0      
48     128    
-1072  -176   
32     160    
-560   32     
192    208    
-128   -16    
-192   -304   
-112   -64    
-160   -16    
64     32     
-16    48     
-80    80     
-816   48     
0      48     
32     208    
-48    0      
48     32     
112    192    
-32    -192   
160    224    
-112   48     
-112   -96    
-16    -80    
-192   -16    
-48    64     
-224   -144   
-80    64     
-48    272    
-176   288    
240    -368   
-128   32     
-64    -64    
-16    -16    
80     -464   
96     144    
-80    48     
16     32     
-16    96     
96     32     
-112   112    
-96    144    
-80    32     
-224   64     
-80    -16    
32     -48    
-400   1200   
-1168  608    
1264   2384   
304    288    
208    -272   
-464   -128   
-320   304    
160    32     
-80    64     
144    48     
-272   0      
-96    0      
-128   256    
96     -64    
-512   -256   
-16    128    
0      -176   
-16    16     
80     224    
48     -64    
-176   -64    
-16    144    
64     256    
0      64     
-128   -192   
-48    -160   
160    496    
80     864    
48     256    
-576   -96    
-272   -240   
-624   -176   
32     144    
-96    -16    
64     112    
-128   208    
176    160    
-48    -64    
-80    -464   
0      -144   
144    336    
0      192    
-128   64     
96     144    
-112   -176   
32     112    
-288   192    
64     -512   
64     -144   
80     64     
-112   16     
112    144    
-80    96     
-48    112    
80     176    
-80    96     
32     160    
-48    336    
-400   -640   
240    144    
-192   96     
-160   128    
-96    176    
32     -96    
-48    112    
64     96     
-16    16     
80     128    
0      0      
16     112    
-32    0      
-32    96     
-96    -48    
-32    112    
-256   32     
128    240    
-736   -304   
256    96     
-32    128    
16     96     
160    448    
-160   320    
64     160    
0      320    
-80    -64    
-64    48     
80     160    
-64    64     
80     -112   
-64    -112   
176    240    
32     112    
-160   112    
16     112    
80     48     
80     64     
-144   -16    
64     160    
-80    0      
64     16     
-96    48     
-64    -16    
96     128    
16     96     
0      16     
-160   64     
64     64     
64     240    
16     48     
16     80     
48     80     
-16    32     
16     16     
-80    -16    
80     96     
16     80     
-64    -224   
-176   96     
96     160    
48     -144   
-336   48     
64     -16    
144    -16    
144    16     
48     256    
-96    16     
288    224    
-192   112    
256    -16    
-272   192    
224    0      
144    432    
-320   -48    
64     -64    
-80    -624   
192    0      
144    48     
96     160    
-16    80     
144    16     
-112   160    
80     -48    
80     240    
80     240    
-144   160    
-48    -176   
0      -144   
-128   -176   
192    240    
0      96     
64     128    
-16    -16    
-16    16     
-80    48     
160    176    
-80    48     
-112   -144   
-144   -288   
16     352    
304    592    
-80    160    
-80    16     
0      -16    
128    -928   
-80    -16    
176    -2080  
-128   -272   
304    496    
-32    208    
-96    112    
-80    64     
16     -128   
80     96     
96     288    
144    352    
-144   -80    
112    272    
-48    -272   
-64    -240   
-64    32     
-48    -640   
144    96     
96     336    
-112   80     
-64    80     
48     112    
64     32     
80     160    
16     -112   
16     144    
16     -208   
16     96     
64     112    
32     -304   
80     224    
-64    -432   
128    240    
-80    160    
-752   224    
1008   832    
672    688    
336    -832   
-16    784    
-96    -864   
496    240    
1040   -384   
-144   592    
-160   -304   
256    304    
-224   32     
128    -464   
-272   256    
416    -1776  
-224   144    
160    -64    
128    208    
48     -16    
-80    128    
112    0      
-128   144    
208    64     
-112   128    
160    -64    
-160   0      
112    240    
128    -32    
160    112    
-112   32     
112    -16    
48     -208   
48     288    
128    32     
0      48     
144    112    
80     496    
32     0      
-32    -176   
-16    128    
128    -144   
0      32     
-32    -256   
144    -112   
96     -288   
80     192    
48     -1120  
16     64     
-192   0      
160    96     
48     48     
48     224    
32     96     
-16    -128   
16     16     
96     16     
16     160    
144    -240   
16     112    
-48    -432   
128    96     
32     -112   
-48    96     
96     48     
176    96     
-64    80     
-96    208    
64     112    
96     -272   
208    144    
-128   176    
128    240    
64     -304   
176    144    
-176   -64    
160    -96    
-96    -272   
-144   0      
-112   80     
48     -224   
192    -160   
-128   -160   
-32    -208   
208    112    
-288   0      
176    -256   
256    256    
-64    -320   
320    176    
-224   -32    
208    160    
80     -448   
-16    32     
176    -32    
64     -1312  
-80    80     
-304   192    
-16    -128   
208    0      
-128   -672   
160    -160   
112    208    
-48    -208   
80     96     
-32    -16    
256    160    
64     -32    
0      32     
16     16     
64     -112   
96     -144   
-64    32     
48     -112   
-96    -16    
192    32     
-64    -48    
128    -48    
-80    -304   
-96    -480   
192    320    
96     112    
-48    208    
48     0      
64     112    
-112   -32    
160    -16    
-528   -16    
304    -336   
-400   -96    
176    32     
-16    16     
128    -96    
16     -16    
-32    -2496  
0      -96    
176    16     
144    144    
80     -336   
-240   80     
-144   112    
80     -160   
-384   -176   
-48    0      
-416   48     
0      0      
80     -208   
64     32     
112    0      
64     -416   
32     -48    
160    48     
-112   0      
112    -160   
0      -16    
-192   -96    
96     -32    
-80    -48    
128    -96    
-480   -16    
80     -288   
-128   96     
128    -272   
112    0      
32     -48    
64     -16    
256    -1632  
48     368    
-256   -880   
160    32     
-64    32     
-48    -128   
96     -96    
48     -240   
0      -80    
96     -32    
-592   -48    
208    32     
288    0      
-80    -608   
128    64     
32     -608   
-64    112    
128    -48    
112    64     
128    304    
112    112    
-256   16     
-32    0      
0      -48    
128    64     
-160   112    
-16    32     
-128   -32    
-224   -176   
64     -96    
16     -80    
160    128    
-576   -1072  
-336   -1232  
352    -128   
896    336    
-336   704    
-352   -144   
16     352    
96     -192   
288    -16    
-144   -416   
-272   112    
-48    32     
208    64     
224    80     
-112   -32    
-384   -16    
80     -320   
-192   -128   
128    16     
80     192    
-128   0      
-144   48     
128    -240   
-96    -112   
-224   -544   
-320   -176   
-16    -96    
176    512    
-432   -880   
-736   96     
-96    0      
112    -64    
-144   96     
32     160    
128    -192   
-144   64     
-16    -16    
272    656    
-288   -32    
112    -16    
288    -464   
-464   -112   
0      16     
-176   -224   
-976   -96    
128    176    
-32    128    
128    272    
-1744  -544   
-96    -80    
224    -144   
-208   320    
192    0      
208    -272   
-208   -32    
96     128    
32     -80    
-368   -512   
528    832    
80     -16    
96     192    
-272   -32    
-192   80     
-832   384    
-96    128    
-128   -128   
32     80     
-32    32     
0      48     
-192   -160   
48     80     
-16    -112   
64     192    
32     96     
32     48     
-16    -32    
112    512    
-176   128    
-80    -176   
-160   -224   
112    112    
128    96     
-240   -64    
80     96     
-80    -112   
-48    48     
96     -304   
32     320    
64     32     
0      144    
-16    96     
-16    -128   
-32    128    
-64    112    
-80    -80    
-192   -208   
32     224    
-208   -224   
112    80     
-320   -176   
224    64     
-16    80     
-192   -16    
-96    -32    
-192   -80    
208    272    
0      -48    
0      208    
-224   -96    
96     -16    
-272   -96    
0      128    
48     64     
144    192    
-160   -48    
32     96     
48     192    
80     32     
-176   0      
-16    32     
224    -144   
64     -128   
48     144    
-64    -144   
0      240    
-64    256    
288    400    
-144   64     
0      224    
224    -256   
-192   -16    
64     96     
32     256    
144    96     
-368   96     
192    -80    
-208   -16    
80     -32    
-32    -64    
-128   80     
96     112    
16     128    
-192   32     
-96    32     
-768   -96    
-224   144    
272    720    
-112   336    
32     96     
-16    48     
-96    160    
-32    -96    
64     16     
144    -96    
-64    96     
-128   -96    
176    144    
-304   -64    
176    352    
-528   112    
64     48     
-32    224    
-16    -16    
64     -16    
-128   -32    
128    80     
64     176    
-64    -128   
112    0      
16     112    
-128   64     
48     48     
-48    64     
176    -144   
240    304    
-112   16     
48     176    
-128   64     
304    -80    
192    176    
-64    128    
-48    128    
-64    96     
-64    128    
-48    144    
-176   -48    
144    0      
32     -32    
0      128    
-32    96     
-48    0      
32     96     
-32    0      
144    -32    
32     208    
-80    192    
-144   0      
-32    -32    
-320   1008   
-352   896    
-1200  -320   
272    80     
-224   80     
-784   -384   
496    1040   
-560   -480   
560    -32    
-544   -96    
320    128    
-320   128    
192    -288   
64     576    
112    -320   
-96    464    
160    -64    
-192   96     
96     32     
32     80     
-96    -32    
-64    256    
80     128    
64     224    
80     -96    
-80    -112   
80     128    
192    96     
48     32     
-128   176    
112    -48    
16     16     
-176   96     
64     112    
112    144    
16     48     
112    224    
-16    128    
-192   32     
64     -16    
144    80     
-64    128    
64     192    
32     -64    
16     128    
16     16     
0      208    
-48    32     
32     336    
16     -112   
128    96     
-16    112    
160    64     
-48    176    
-16    48     
176    32     
-16    0      
0      48     
-16    128    
96     -64    
16     96     
-32    144    
144    0      
48     144    
-64    -32    
144    -752   
-16    80     
96     80     
-32    144    
96     32     
96     96     
-16    96     
-32    112    
64     16     
144    176    
-240   -80    
112    -144   
-80    32     
-320   -240   
128    16     
80     -576   
-16    80     
128    80     
80     224    
144    64     
160    -48    
-80    112    
80     144    
64     48     
112    192    
-16    64     
-16    -80    
48     -64    
112    -336   
64     -16    
288    -240   
-224   -128   
288    128    
160    288    
-32    -48    
48     48     
64     48     
80     32     
112    32     
-208   80     
-32    64     
96     32     
128    160    
-112   -144   
128    160    
16     -288   
16     32     
0      -1200  
64     -32    
48     400    
176    192    
80     144    
0      112    
-64    -48    
128    64     
-304   -624   
-16    -48    
288    192    
80     -224   
-32    -64    
48     -512   
-16    304    
144    -1488  
-80    -176   
224    -1328  
-48    112    
96     96     
224    192    
-96    48     
80     112    
-112   -192   
-16    16     
96     192    
96     -352   
32     16     
144    -192   
-80    224    
64     -208   
96     32     
-32    -608   
176    64     
32     160    
144    288    
48     240    
144    96     
48     96     
-32    -160   
96     128    
80     160    
208    208    
160    288    
-288   -384   
112    -416   
64     368    
288    -112   
-144   80     
144    144    
-32    48     
80     0      
80     32     
672    368    
-224   -96    
-64    368    
-240   -320   
464    64     
144    -80    
-48    32     
16     32     
-240   160    
240    -512   
-32    224    
32     -48    
64     176    
-80    32     
240    -48    
64     -912   
112    -64    
-64    224    
96     0      
32     80     
224    -320   
-80    144    
128    -48    
-96    112    
48     144    
128    -1552  
-128   48     
112    -352   
-192   160    
-48    -368   
48     304    
192    -32    
112    -176   
992    768    
-32    1200   
-560   -304   
-512   128    
208    -80    
608    -496   
-240   -48    
-128   -128   
288    -112   
160    0      
112    -352   
16     272    
-112   96     
64     128    
48     -640   
96     -16    
144    -224   
416    400    
64     640    
-16    112    
0      -336   
-112   96     
32     -112   
96     -128   
-96    -64    
272    -48    
-688   144    
80     192    
-384   -96    
-176   -320   
16     -16    
64     -128   
224    -192   
32     -800   
160    -304   
304    -192   
176    256    
224    256    
-64    32     
48     16     
96     0      
-176   -112   
-64    -416   
64     96     
128    112    
352    256    
-288   -240   
240    304    
112    -496   
64     192    
-144   -16    
176    64     
-80    -32    
32     96     
-128   -224   
144    -32    
-48    -336   
-400   -96    
-544   128    
-80    -752   
-224   -288   
224    -80    
16     64     
-32    -96    
-48    160    
160    -1776  
-16    176    
32     -112   
288    304    
-336   32     
-64    32     
48     -288   
16     0      
-592   -32    
64     -48    
64     432    
224    -80    
240    -208   
-144   -144   
272    400    
192    -368   
-176   0      
-16    -80    
240    64     
16     176    
80     -64    
80     400    
-208   -240   
-64    -32    
96     -128   
128    64     
-96    -80    
64     -80    
96     -352   
80     16     
160    -1024  
32     368    
-272   208    
-176   -416   
-272   0      
256    128    
-208   32     
-128   16     
-96    16     
128    -80    
-16    48     
-304   -544   
256    128    
-160   -320   
128    192    
64     128    
-64    -80    
32     80     
-96    16     
16     -96    
-32    128    
-64    -96    
128    16     
48     -32    
-320   192    
-32    192    
112    -48    
-16    -64    
0      -64    
32     352    
-1056  -32    
-432   160    
-112   -64    
128    -240   
48     96     
0      112    
144    208    
0      96     
32     -192   
0      16     
-160   -128   
-496   16     
-48    80     
64     -160   
-240   144    
-64    -16    
176    32     
16     80     
-80    112    
48     0      
-480   80     
-208   96     
-112   -176   
32     -96    
-48    96     
112    96     
-96    0      
96     -32    
-400   -240   
32     80     
32     32     
-48    80     
-64    208    
64     0      
-32    -16    
-128   -16    
80     64     
-768   80     
32     32     
112    416    
-80    16     
0      -240   
96     176    
-272   -224   
-112   48     
-144   112    
-16    32     
128    -144   
-80    0      
192    64     
-512   96     
48     64     
-240   64     
-16    48     
272    -128   
-16    176    
-80    -240   
64     112    
-32    -96    
32     176    
-48    192    
-224   -64    
64     192    
-192   0      
16     -80    
32     16     
80     112    
-400   -64    
0      -16    
-1344  64     
112    96     
112    -96    
208    1968   
-368   1648   
-1776  -208   
304    272    
128    112    
-240   -352   
64     992    
-480   -336   
848    768    
-720   -496   
-16    -64    
-32    -176   
-160   272    
112    96     
160    -160   
-176   112    
240    80     
-224   224    
176    -112   
-16    208    
32     -96    
-128   304    
176    -16    
-224   80     
112    -256   
-208   224    
224    -48    
-288   160    
112    -32    
-512   -48    
0      -112   
-96    112    
16     64     
-112   96     
64     80     
32     0      
-16    96     
-112   144    
-80    64     
112    16     
-128   -48    
-80    160    
-112   16     
128    96     
-1568  -128   
144    -64    
-80    176    
176    -96    
192    176    
-304   48     
112    32     
-48    96     
-16    112    
128    -16    
-32    128    
0      -64    
176    96     
-352   32     
208    64     
80     32     
0      32     
16     208    
32     64     
16     -48    
-16    -48    
-144   80     
64     16     
-32    48     
-48    32     
16     80     
-192   -16    
48     144    
-224   0      
112    64     
144    224    
-160   -16    
224    176    
-208   176    
64     192    
192    32     
-32    0      
-48    128    
48     32     
96     384    
112    160    
-48    -80    
-224   16     
160    -96    
-32    48     
80     320    
112    240    
112    384    
-528   -48    
256    128    
160    240    
-160   32     
-16    48     
-48    -320   
32     16     
96     192    
16     112    
-16    112    
0      32     
32     64     
144    192    
0      464    
192    336    
-32    64     
192    112    
16     128    
-16    80     
-80    48     
80     64     
-48    32     
48     48     
-48    32     
144    -48    
-64    32     
176    272    
-96    240    
32     160    
-48    112    
96     96     
64     160    
-32    192    
-16    -448   
-320   -208   
128    144    
128    128    
-16    0      
-192   -32    
-16    160    
80     48     
64     208    
48     -96    
16     32     
80     208    
288    384    
-288   -128   
192    48     
144    96     
-16    -16    
176    288    
-208   -16    
304    176    
-208   64     
96     96     
-16    32     
128    176    
64     16     
48     96     
-96    32     
96     160    
96     16     
224    112    
-128   96     
64     64     
16     240    
-128   -320   
288    192    
-112   128    
176    48     
-160   144    
-144   304    
160    112    
-16    32     
32     320    
96     64     
-96    48     
208    80     
176    112    
-192   -64    
16     48     
16     192    
112    192    
-160   -48    
272    0      
-192   192    
208    -848   
-160   48     
96     112    
144    48     
16     112    
256    128    
64     16     
224    96     
-160   176    
0      80     
-160   -32    
208    336    
64     64     
-48    -240   
96     240    
16     80     
208    32     
-128   16     
384    16     
16     64     
1760   -1264  
560    -16    
0      880    
-688   -320   
112    1024   
320    -880   
-32    736    
-96    -608   
192    496    
-176   -320   
320    -80    
-144   -80    
240    -640   
-272   96     
272    -528   
48     512    
-192   160    
-192   416    
-256   -592   
-32    48     
-80    -256   
64     144    
-16    0      
160    240    
-96    -160   
320    -112   
64     272    
384    224    
-80    -320   
288    -752   
-128   96     
32     -96    
96     96     
96     176    
272    400    
0      224    
176    -368   
-48    128    
80     -192   
192    400    
-48    -768   
0      128    
-144   -288   
96     176    
96     96     
-16    -112   
0      0      
128    -96    
16     32     
-80    16     
160    96     
0      -560   
176    336    
-176   32     
112    112    
-16    -224   
0      -16    
112    -144   
32     48     
-16    -144   
48     128    
80     144    
-64    -128   
160    32     
16     -48    
32     208    
128    -160   
32     304    
-16    -288   
-80    128    
-208   -32    
256    208    
-208   -400   
128    -128   
128    -48    
48     256    
48     128    
112    -1088  
-96    240    
192    -32    
32     -160   
64     32     
128    -512   
32     -16    
288    0      
48     -176   
-32    -208   
48     -176   
-144   144    
112    -48    
-16    -48    
16     208    
80     16     
0      -816   
-432   -160   
128    -800   
-32    -16    
16     -240   
0      -368   
-32    -3232  
176    16     
64     288    
48     -128   
48     -560   
128    176    
16     -240   
-112   -48    
96     32     
112    64     
144    96     
-16    32     
112    -176   
32     -176   
48     -352   
-48    -368   
96     192    
-64    -224   
336    64     
-128   -96    
352    352    
-272   -48    
64     -64    
-400   -192   
160    -112   
112    -144   
48     -464   
0      256    
32     -224   
144    0      
48     -336   
112    0      
-80    -1024  
-208   -64    
-112   -128   
496    144    
-64    -112   
-128   80     
-128   144    
192    -16    
-384   -192   
-96    -192   
-848   -144   
208    -16    
224    -64    
64     -240   
240    160    
16     -736   
-128   96     
32     16     
176    80     
-48    -48    
160    16     
-192   -144   
96     64     
-144   -32    
16     80     
-32    -16    
-48    -144   
-112   -288   
160    -144   
32     144    
96     -48    
0      96     
32     -1168  
112    192    
-80    -80    
80     -256   
160    -48    
112    144    
-48    -32    
32     144    
-128   32     
-64    -208   
-224   32     
48     -112   
80     96     
128    -64    
-16    64     
272    -320   
64     176    
-48    224    
-80    -144   
-16    -32    
208    0      
-192   -32    
96     -16    
-176   -16    
0      -112   
16     -48    
80     -80    
176    32     
-112   -592   
64     -32    
96     -1296  
96     192    
-240   96     
112    96     
-224   48     
2304   1424   
-608   240    
1408   -384   
-1120  -672   
-400   -1008  
1056   1328   
-544   -576   
432    848    
-464   -960   
272    432    
112    -384   
160    544    
-160   -144   
16     0      
-368   0      
448    -160   
-288   352    
192    -160   
-368   80     
272    -288   
-592   304    
448    -448   
-160   192    
-128   -432   
-128   384    
-160   -288   
32     208    
-80    -32    
-1040  64     
-160   -176   
112    16     
-32    -80    
0      0      
-192   32     
160    -80    
-240   -64    
-560   16     
-32    16     
-32    -80    
48     128    
48     0      
-160   48     
-64    16     
32     176    
-48    16     
0      64     
-128   32     
144    240    
-144   -64    
32     32     
0      112    
-80    -96    
0      48     
-240   -288   
32     96     
16     48     
-32    48     
80     144    
-80    128    
0      48     
80     176    
80     128    
-448   64     
48     32     
-80    -16    
144    64     
0      -128   
-16    192    
-48    -128   
0      112    
-176   32     
160    96     
-64    -16    
-144   -128   
-32    48     
-64    464    
-256   112    
80     -224   
144    48     
192    0      
304    384    
-336   -160   
16     -48    
-80    48     
32     96     
112    160    
-96    -16    
48     0      
-144   -384   
112    208    
48     160    
-64    -16    
-208   16     
-32    144    
-1136  -128   
0      -240   
-128   -208   
80     144    
96     112    
16     96     
-16    64     
-288   -48    
0      64     
-16    64     
64     112    
32     240    
-176   -80    
-208   -208   
-64    32     
-288   0      
80     16     
-32    -32    
-48    80     
176    128    
-144   -48    
-32    48     
-112   0      
80     32     
-16    144    
-80    -112   
-16    96     
-64    96     
-160   -112   
-112   32     
32     144    
224    -16    
-992   128    
-240   144    
240    -80    
-96    48     
0      112    
160    112    
-16    -96    
-32    208    
-32    -64    
32     336    
-304   -128   
384    192    
-112   -80    
176    96     
-192   144    
64     128    
-128   0      
64     -64    
112    176    
-48    -64    
176    -32    
-80    208    
16     288    
-96    -80    
-16    16     
160    96     
-32    -48    
-144   112    
32     -48    
-64    176    
272    128    
-288   0      
464    -16    
-128   272    
80     -32    
-112   80     
-144   64     
160    48     
-64    144    
656    -224   
-304   320    
-480   -160   
304    16     
-320   0      
384    -256   
-16    112    
-144   176    
128    -16    
-112   32     
96     64     
16     112    
-16    112    
64     128    
32     96     
-160   -80    
224    128    
-48    64     
-80    64     
-272   -160   
560    208    
112    224    
-96    80     
-144   32     
96     128    
96     0      
64     480    
-112   112    
-336   -16    
32     -144   
-64    32     
144    192    
-1536  -1312  
1040   -368   
144    -32    
704    -272   
-192   -832   
176    160    
16     720    
400    -368   
-304   -304   
-32    -352   
512    272    
-400   208    
192    -336   
176    144    
-32    -16    
0      256    
-272   -416   
208    48     
32     48     
176    32     
-48    336    
112    224    
-32    352    
80     240    
-48    176    
16     0      
-80    112    
160    96     
-128   96     
128    176    
48     80     
32     80     
32     96     
-32    0      
160    32     
48     160    
80     64     
-64    64     
-80    32     
16     -112   
288    32     
-176   304    
256    112    
-176   -112   
0      48     
176    128    
-64    -384   
0      -32    
-64    -224   
96     320    
16     -112   
128    128    
-128   128    
208    -64    
-96    160    
48     304    
-128   32     
0      16     
0      112    
-48    48     
112    80     
-48    -432   
80     160    
96     224    
-144   32     
128    -48    
64     224    
32     0      
80     160    
16     64     
144    96     
0      -32    
-64    272    
-48    -16    
224    176    
32     336    
0      -240   
176    -208   
32     -1696  
-64    128    
64     144    
0      144    
32     -112   
112    48     
-192   192    
16     240    
48     -160   
208    256    
-272   32     
-80    -32    
64     32     
-80    -480   
128    -32    
-96    -640   
96     -16    
-32    256    
64     112    
0      96     
80     16     
-16    -128   
96     128    
-96    64     
-64    32     
160    16     
0      -144   
192    368    
-96    -112   
80     16     
16     -96    
32     144    
160    -1312  
-64    0      
-48    176    
16     64     
320    224    
-144   272    
16     -64    
48     96     
64     -16    
240    176    
-48    304    
320    112    
-112   192    
-16    224    
176    208    
-80    -16    
176    112    
-176   -368   
48     16     
-48    -16    
64     80     
192    32     
0      208    
496    112    
-160   112    
-192   160    
272    160    
-224   144    
144    -560   
192    144    
-112   64     
64     128    
0      -336   
-64    16     
-48    16     
160    48     
16     -112   
16     -48    
64     160    
80     -160   
-16    128    
48     -304   
32     112    
176    -288   
96     144    
32     -64    
112    144    
-160   -64    
256    -64    
64     208    
48     256    
16     80     
-48    -224   
144    -48    
128    -208   
64     -32    
0      32     
-112   -176   
-16    -16    
288    112    
-48    112    
80     176    
-208   -32    
176    16     
-16    64     
-16    -160   
176    -1888  
112    48     
32     -2320  
160    -208   
144    -1168  
48     -64    
32     272    
-144   -240   
-80    -32    
208    -400   
0      -304   
224    80     
48     144    
-144   128    
96     -576   
0      112    
-720   -16    
112    -784   
64     112    
-112   208    
48     64     
-224   80     
384    272    
1152   1056   
-176   224    
-464   -224   
512    656    
-608   -432   
-160   480    
-448   -336   
544    64     
-720   -464   
224    144    
176    -208   
176    144    
-240   -288   
224    -784   
80     64     
112    128    
-32    128    
272    16     
-48    -16    
176    -160   
-64    224    
-16    -112   
-64    96     
-368   -144   
-64    -224   
-160   -96    
176    -288   
80     -144   
96     -80    
-32    16     
-112   -1024  
-96    -32    
-48    -192   
144    32     
256    -80    
-48    96     
16     128    
0      -80    
-272   -192   
0      -80    
-352   -16    
176    16     
96     80     
-32    64     
-128   -16    
48     -240   
16     16     
96     -112   
-48    128    
192    96     
-64    -64    
16     160    
-112   -144   
48     -16    
96     -80    
-352   96     
64     -32    
208    32     
0      -416   
-224   -112   
32     -848   
64     -16    
32     -1712  
144    176    
-160   -96    
240    -64    
-160   32     
80     -80    
-80    0      
112    -16    
-272   -48    
80     -48    
-304   -48    
64     -48    
224    352    
-128   -144   
288    -64    
336    -160   
-256   -48    
240    112    
-160   32     
-128   -272   
176    -112   
-192   32     
48     64     
-128   144    
16     32     
48     224    
64     32     
-48    64     
16     -240   
160    160    
144    -32    
0      -64    
-48    80     
96     96     
112    80     
16     -160   
-176   -16    
64     -16    
0      96     
32     48     
-48    32     
128    0      
16     0      
160    -144   
-16    320    
80     -208   
160    32     
-176   -16    
160    -96    
-128   32     
80     -32    
-32    32     
-48    -80    
0      160    
96     -64    
-96    -80    
128    -256   
112    80     
-1120  -192   
-128   -16    
80     240    
-96    -80    
128    400    
-1248  288    
-32    -160   
0      32     
-288   112    
224    64     
16     64     
-16    -96    
-64    32     
-656   -16    
176    800    
-448   -128   
480    64     
-304   96     
-208   -144   
-128   -48    
-544   -48    
224    112    
-80    48     
-64    96     
-256   -160   
64     112    
-112   -64    
48     112    
-128   -144   
160    176    
-64    -32    
-112   -64    
-288   -352   
240    272    
-192   112    
256    464    
-544   96     
-64    -112   
-16    -48    
-1296  -80    
-80    144    
-320   -64    
112    64     
64     -64    
-240   96     
256    -416   
-32    208    
16     144    
-176   16     
-144   -32    
160    128    
592    -96    
-224   336    
-304   -336   
352    80     
-176   304    
16     96     
-192   208    
-208   -464   
288    96     
304    64     
16     160    
256    -176   
-528   48     
64     -144   
32     176    
-128   -80    
-32    112    
32     160    
-64    -32    
-48    192    
-896   -160   
240    240    
-128   48     
64     128    
-80    80     
-800   2416   
-1424  -336   
1344   1872   
256    560    
288    -112   
-448   -96    
-304   32     
240    -192   
-432   -112   
240    80     
-784   -96    
-64    48     
256    144    
-80    -176   
32     48     
-224   64     
80     32     
-16    112    
-48    -16    
144    80     
-16    32     
-48    224    
-48    64     
-144   80     
-192   32     
16     64     
-16    240    
-464   96     
-256   -224   
0      112    
16     64     
112    128    
-112   64     
0      16     
16     80     
80     32     
-48    -144   
-32    80     
-48    112    
112    -16    
-208   48     
80     144    
32     144    
-16    -112   
-80    32     
0      32     
160    160    
-160   64     
48     336    
-80    -240   
160    112    
-192   96     
240    80     
-240   -32    
224    112    
-96    240    
-272   144    
160    -48    
80     272    
-16    -160   
256    96     
-144   144    
64     -16    
112    224    
-256   0      
256    48     
-48    -80    
-16    112    
-256   -32    
160    112    
-144   -112   
32     128    
-112   144    
112    32     
144    80     
-160   -16    
176    96     
-288   64     
208    208    
0      48     
80     16     
128    -32    
-16    192    
-96    160    
-16    144    
16     -64    
64     -48    
64     128    
-192   80     
240    -16    
-128   32     
16     176    
16     0      
0      128    
176    368    
-272   0      
112    -80    
-64    160    
-96    -80    
304    352    
-256   48     
144    112    
-80    112    
112    -32    
-176   48     
224    224    
-32    64     
112    -96    
-208   32     
96     160    
48     48     
32     32     
-48    160    
-16    144    
96     -64    
-96    160    
-32    0      
320    64     
48     256    
-32    272    
192    192    
-32    144    
-128   -32    
96     80     
-80    48     
288    352    
32     160    
256    320    
-256   -16    
-64    -1088  
-64    48     
128    -96    
-32    96     
-128   -32    
96     -16    
112    -32    
-128   -32    
48     -64    
-64    0      
-48    -80    
176    128    
-64    -32    
192    144    
-96    -160   
-32    -944   
192    128    
-16    176    
32     208    
-32    192    
160    0      
16     64     
-112   128    
192    64     
96     -80    
16     112    
-64    112    
288    -80    
-176   192    
176    -128   
16     0      
128    256    
112    -208   
-96    128    
64     112    
-16    64     
-48    0      
192    144    
112    352    
256    256    
-176   -144   
0      -64    
16     -96    
176    208    
128    224    
128    -368   
160    144    
16     -1424  
0      240    
16     32     
32     32     
0      64     
64     128    
-48    64     
80     64     
-160   32     
64     160    
32     64     
144    -80    
-64    -32    
32     -368   
48     96     
64     -224   
32     224    
-96    -1616  
-64    208    
128    112    
-16    -48    
80     -64    
848    -1968  
400    224    
480    -48    
-320   -320   
-224   16     
352    -192   
-160   96     
-48    -96    
336    224    
-464   -336   
208    -1792  
-16    144    
48     224    
112    -32    
128    -64    
-64    192    
-32    -256   
-160   -128   
208    224    
192    -64    
96     160    
128    -32    
-96    128    
96     -944   
0      48     
64     -1408  
-16    192    
224    -544   
-16    128    
-48    -80    
304    224    
-32    176    
96     -96    
112    288    
-16    -96    
208    288    
0      -208   
192    160    
0      -272   
112    96     
-96    -128   
64     64     
32     224    
176    48     
-48    16     
128    64     
0      240    
112    160    
-80    320    
-16    -384   
192    -144   
-48    -176   
144    48     
176    304    
-64    16     
208    80     
-64    -48    
144    -544   
224    448    
0      240    
32     48     
16     128    
32     0      
64     656    
-144   -192   
96     32     
-32    -192   
-32    96     
176    -112   
-32    144    
0      -176   
112    416    
-16    -16    
112    -2496  
-64    0      
16     32     
160    112    
0      304    
-112   -496   
0      -384   
48     -448   
144    -256   
-48    -16    
80     -256   
80     -16    
96     -688   
288    -928   
-112   80     
112    -368   
-32    192    
48     -352   
160    -512   
-544   -16    
48     -176   
128    176    
-48    -384   
192    0      
96     -1056  
48     -80    
144    128    
-128   -16    
160    -128   
48     80     
0      16     
16     64     
-160   -112   
64     48     
-416   16     
144    -128   
-16    32     
80     -272   
32     -160   
16     -544   
96     0      
48     -304   
112    -16    
64     -48    
32     48     
48     -176   
16     176    
-160   16     
16     -176   
-192   -48    
192    80     
160    -32    
-16    128    
-208   -304   
144    -176   
208    96     
80     -352   
160    256    
-16    -448   
0      96     
128    -96    
-80    96     
32     -176   
-16    -352   
-224   -80    
368    288    
-176   -64    
32     -96    
-48    0      
128    48     
16     0      
-32    -672   
-64    -176   
128    -128   
80     112    
240    240    
-32    -144   
16     0      
32     -144   
-192   0      
48     -176   
-160   -368   
112    0      
-976   192    
-112   -240   
-96    -64    
160    -480   
240    80     
-16    -1536  
64     16     
-48    32     
96     -160   
-256   -208   
160    112    
128    -240   
48     -96    
64     176    
16     -144   
-496   -176   
16     -240   
-48    144    
112    -32    
-48    224    
80     -464   
320    -288   
-240   32     
208    -96    
-288   96     
208    224    
0      176    
16     -144   
16     -32    
0      -288   
-144   -144   
48     -96    
96     288    
96     -112   
0      112    
80     -1040  
144    -80    
-112   -16    
128    -64    
-160   64     
144    -160   
-432   944    
-304   2080   
-1024  480    
784    -320   
-1152  304    
368    -272   
-48    336    
-192   -592   
496    32     
-288   -416   
-208   80     
-80    -16    
32     208    
-256   -16    
224    16     
-208   112    
80     48     
-64    16     
96     48     
96     80     
-1504  -128   
-16    144    
-1168  -112   
144    64     
-16    -48    
-144   -240   
208    192    
-1296  144    
240    96     
-880   -176   
-32    -16    
128    176    
112    128    
-80    -112   
-208   0      
-240   -80    
160    -64    
-112   224    
16     -48    
160    0      
-496   80     
208    96     
-336   -80    
16     64     
-80    64     
-32    -48    
-144   32     
16     -32    
-112   -224   
-112   64     
-32    -176   
-32    224    
32     -192   
-16    48     
-96    96     
-16    -48    
48     112    
-256   64     
112    96     
-48    48     
-112   0      
-784   64     
-32    48     
-64    0      
64     32     
128    -48    
16     208    
-144   80     
-80    -160   
208    224    
-336   160    
64     0      
0      96     
-144   0      
-16    -64    
-128   -16    
-192   80     
-128   -48    
-176   -160   
-48    176    
0      -176   
192    48     
-16    144    
-128   144    
272    -96    
-80    128    
-272   -304   
112    -80    
-272   -48    
-48    -112   
0      112    
-176   96     
176    352    
-1136  -64    
128    112    
-80    -416   
64     80     
-80    176    
208    64     
-64    0      
64     -48    
-128   16     
48     64     
32     -16    
-64    96     
-32    80     
144    224    
-208   208    
112    0      
80     288    
-16    -48    
0      32     
-80    0      
16     128    
16     224    
-64    80     
32     32     
32     32     
80     272    
96     112    
48     288    
-144   32     
144    224    
-432   16     
224    16     
-400   -224   
192    224    
144    128    
-80    128    
-128   80     
48     80     
0      80     
128    208    
16     240    
-112   -112   
-80    256    
-224   -16    
240    128    
-240   -176   
-16    80     
208    128    
96     176    
-80    224    
48     32     
-208   64     
160    48     
32     144    
-96    -160   
16     48     
-144   -144   
80     32     
-32    64     
112    144    
-48    112    
-128   -32    
32     96     
32     208    
-32    32     
96     176    
144    112    
-16    -16    
0      128    
-80    -64    
-16    160    
0      -64    
176    176    
96     256    
96     96     
-224   80     
-80    -16    
-112   -160   
304    112    
48     64     
-16    224    
-192   224    
-80    -80    
144    16     
96     272    
128    160    
-224   96     
64     80     
-80    -272   
112    176    
32     64     
-32    256    
176    80     
16     16     
64     288    
-160   128    
48     128    
-32    96     
64     96     
-16    96     
-160   16     
64     64     
64     288    
48     0      
-16    80     
1776   -2032  
480    -256   
1232   720    
-576   192    
688    -608   
-48    -144   
320    624    
-432   -32    
16     416    
-144   -272   
160    -64    
0      -192   
-48    320    
-144   16     
272    320    
-80    -128   
-64    -128   
96     48     
-64    -128   
336    160    
-192   32     
160    192    
-48    112    
-112   224    
16     128    
-112   144    
16     144    
64     80     
-64    -16    
0      -2576  
128    0      
96     96     
-144   208    
48     16     
320    128    
32     64     
208    320    
-16    400    
-64    176    
16     -112   
80     208    
-32    32     
-16    16     
-128   0      
16     -160   
32     80     
48     48     
-144   176    
160    -128   
-192   128    
128    -96    
-96    208    
128    32     
128    112    
-16    16     
112    272    
-160   176    
368    464    
-96    208    
-32    -240   
-48    112    
144    -1552  
-128   16     
192    -32    
-208   -48    
224    -32    
64     272    
-16    96     
96     144    
-64    -128   
64     208    
16     0      
16     0      
-48    -16    
96     80     
48     64     
240    -240   
0      624    
128    448    
-112   208    
160    -64    
64     -176   
-16    -144   
48     0      
-48    96     
96     -80    
176    160    
64     80     
-96    96     
96     0      
-64    112    
32     -560   
64     80     
176    -784   
160    208    
16     32     
-112   32     
128    112    
240    272    
-80    -80    
32     112    
80     96     
160    -160   
-32    128    
-176   -224   
288    144    
-160   -400   
256    48     
-224   -288   
208    32     
16     176    
48     208    
96     64     
-144   128    
0      32     
96     176    
160    432    
144    -32    
-16    192    
32     0      
96     288    
80     -384   
16     176    
-16    -800   
96     -96    
176    144    
-208   176    
320    48     
-64    416    
112    128    
80     -256   
-160   256    
192    -416   
-16    176    
16     -368   
288    288    
-192   -432   
224    224    
64     -48    
-16    64     
32     32     
48     16     
96     80     
-256   144    
224    -48    
0      -256   
64     192    
32     -320   
112    208    
-64    -352   
160    112    
0      -240   
64     64     
-16    -80    
64     112    
48     -192   
144    112    
-80    384    
224    256    
-64    240    
32     -32    
48     -512   
128    32     
128    -272   
-96    -336   
304    48     
-48    -608   
-144   -16    
256    400    
64     -2496  
-112   112    
208    -576   
-80    112    
32     -32    
64     -64    
48     32     
176    -448   
32     -32    
64     -320   
80     0      
96     176    
32     112    
112    -144   
32     -48    
-16    -288   
16     192    
0      -176   
16     64     
16     16     
80     -416   
-448   -48    
-16    -784   
32     128    
304    -672   
-160   256    
-112   -992   
112    -240   
192    144    
224    -1184  
832    -880   
656    1024   
-256   272    
-80    -240   
-112   528    
144    -448   
352    112    
-240   -48    
-80    -16    
224    0      
-32    -272   
-48    -784   
192    -160   
-16    -688   
112    0      
-32    -48    
48     128    
160    64     
16     -240   
-144   -64    
32     32     
0      144    
96     -112   
80     -160   
64     -64    
-224   16     
288    -336   
64     64     
32     -784   
-32    -16    
-48    80     
128    96     
16     0      
-32    -192   
-96    240    
256    80     
-224   -128   
-48    -128   
-784   -80    
80     -144   
-192   48     
16     0      
176    16     
-160   -464   
80     64     
96     16     
80     112    
-160   80     
0      -96    
48     160    
-112   -112   
48     -64    
-160   -64    
-128   -32    
48     128    
-32    -64    
64     144    
-144   -96    
352    -576   
-128   272    
80     -448   
48     0      
96     112    
-112   -16    
16     -128   
160    -48    
-224   80     
0      96     
-48    48     
208    -64    
-176   0      
0      -192   
48     48     
80     -192   
176    128    
-112   -688   
240    -32    
-304   64     
-64    -144   
-32    -16    
48     48     
-96    -48    
-64    64     
-432   -96    
144    -112   
16     176    
32     -288   
304    208    
-224   -112   
304    144    
0      -1088  
32     -16    
-48    0      
-80    112    
96     32     
64     0      
-16    -96    
48     32     
-176   -48    
64     -32    
16     -32    
-32    -16    
352    288    
-1248  -80    
64     48     
-192   128    
416    336    
16     112    
-128   -128   
-176   64     
224    48     
-80    -48    
160    -144   
-48    32     
80     272    
-32    224    
-304   -240   
0      112    
32     -176   
-144   -32    
160    96     
-48    80     
-208   48     
-512   -16    
0      64     
-816   48     
-144   -176   
-192   -48    
160    208    
-48    -144   
-80    -80    
-416   -304   
-112   144    
-144   32     
-80    96     
304    48     
-176   176    
-160   0      
160    192    
-256   -416   
-208   -32    
-80    128    
384    96     
-96    -256   
16     -176   
-160   -160   
128    336    
96     256    
-64    -208   
0      112    
-16    48     
-128   48     
-64    -48    
-96    -208   
112    432    
32     256    
-48    -176   
32     32     
-96    128    
-16    -80    
128    240    
96     -16    
-64    112    
48     48     
-208   -192   
192    224    
-144   -96    
-80    -80    
16     96     
192    64     
-256   -112   
-112   96     
-368   -192   
-48    112    
-208   128    
16     112    
-144   -112   
-48    112    
80     128    
-16    -16    
-48    96     
64     96     
64     112    
-256   48     
-32    -176   
80     -16    
112    80     
-48    80     
-160   112    
-320   32     
-16    176    
-16    -112   
-240   32     
96     -48    
32     160    
-144   224    
-192   176    
-1312  -1456  
592    -560   
-432   576    
224    80     
-144   368    
192    -176   
-112   -160   
80     -720   
304    -16    
-528   -32    
-48    192    
64     -48    
48     288    
16     -432   
160    240    
-224   16     
64     208    
0      336    
144    576    
-64    128    
0      -80    
32     32     
32     -128   
-96    -48    
64     16     
-128   272    
-128   144    
240    256    
-80    208    
48     112    
176    -48    
160    48     
0      48     
-16    96     
-112   112    
-176   64     
-96    -272   
176    -208   
192    0      
-64    -48    
224    144    
-224   160    
176    80     
-128   -16    
240    -64    
80     176    
80     592    
64     -176   
-464   -208   
272    -48    
112    336    
-96    -112   
-96    -304   
16     64     
32     0      
80     -112   
-288   -320   
144    -16    
416    640    
-384   32     
176    192    
16     -96    
-96    -96    
80     176    
192    208    
96     -128   
-96    176    
-256   -176   
208    144    
-112   64     
64     192    
48     112    
48     48     
-112   -32    
-32    128    
16     0      
256    1120   
-128   272    
-64    -368   
-16    128    
48     -32    
48     -32    
64     320    
-192   -144   
160    112    
144    464    
128    384    
-336   -112   
-192   -176   
240    208    
192    240    
-112   -80    
-16    48     
-80    0      
176    464    
-208   -32    
144    -112   
0      112    
208    368    
48     320    
-48    32     
-80    32     
112    64     
48     48     
48     80     
32     0      
-128   -416   
-176   -352   
-160   -272   
192    32     
-32    0      
144    112    
32     112    
-32    112    
16     112    
80     48     
-48    96     
96     96     
256    432    
-208   96     
160    64     
-48    96     
-160   176    
272    80     
-80    96     
80     -144   
32     -704   
-64    192    
128    32     
-32    0      
16     96     
208    -48    
-304   32     
176    -112   
80     48     
-160   512    
336    336    
112    160    
-208   32     
208    224    
-96    -80    
-64    -496   
240    16     
0      112    
64     0      
-48    80     
112    128    
32     32     
-32    48     
80     112    
48     224    
32     64     
-48    160    
-48    -48    
16     112    
48     64     
-48    -416   
304    96     
-208   -368   
208    16     
-80    128    
48     64     
208    48     
-16    -192   
96     256    
-160   192    
80     288    
16     160    
144    -80    
80     -80    
-32    -16    
0      -32    
144    80     
-208   -1568  
-48    64     
-96    176    
240    -96    
-64    208    
96     48     
32     32     
-32    48     
32     16     
96     144    
-160   176    
112    -208   
208    192    
-80    -336   
32     96     
64     -592   
-32    0      
32     -2032  
224    -144   
-80    -128   
16     80     
96     48     
-80    96     
48     32     
2448   -624   
-864   -624   
944    -16    
272    384    
-528   -432   
432    880    
-880   -1200  
1232   496    
-848   -784   
336    496    
-192   -704   
96     -112   
-144   400    
368    -128   
-256   368    
48     -480   
32     464    
240    -272   
-96    432    
128    -800   
16     336    
96     -256   
-16    368    
144    -544   
-96    144    
176    -480   
-48    304    
160    80     
32     208    
0      -64    
64     -256   
-64    160    
128    -448   
80     144    
0      -80    
176    384    
48     -304   
48     112    
-96    -320   
16     144    
48     160    
80     64     
-16    112    
96     128    
-80    -240   
-48    -160   
128    160    
48     -208   
272    112    
-208   -96    
176    -16    
80     -144   
-16    16     
224    -560   
-112   144    
160    128    
96     -800   
-176   32     
128    -400   
176    -1392  
-112   -128   
192    -480   
-80    -80    
96     -768   
96     -112   
-48    80     
64     96     
-16    96     
160    32     
32     -144   
-16    112    
64     -176   
48     96     
-240   48     
48     -32    
48     0      
96     -864   
288    -96    
-48    -1952  
224    48     
-32    -32    
64     -80    
176    32     
-176   -288   
-32    -128   
160    80     
96     208    
48     -128   
80     0      
-256   32     
-640   -64    
16     -208   
-64    -16    
160    -272   
96     16     
-48    -80    
-32    -240   
80     -1552  
16     -32    
-64    -288   
160    304    
48     16     
288    128    
-368   -64    
-16    -160   
-368   80     
64     -32    
128    64     
-48    -272   
176    48     
64     -128   
160    176    
96     -512   
-32    -16    
16     96     
-64    112    
96     -336   
80     -160   
-304   -144   
-32    16     
-32    96     
16     -224   
-128   128    
112    -336   
-32    -208   
80     -528   
96     -80    
-80    -752   
192    288    
-64    -112   
80     32     
-128   -208   
0      -128   
-48    32     
112    224    
-304   32     
0      -16    
-224   -80    
176    -48    
-128   -160   
176    32     
16     -96    
112    -288   
-64    -16    
160    -160   
-16    448    
128    96     
-80    -64    
32     48     
80     -96    
-64    112    
112    -192   
-112   80     
-16    -112   
-192   48     
176    160    
-624   -32    
208    -944   
-80    -16    
240    -944   
48     96     
-144   -16    
112    80     
-112   -32    
80     0      
-560   -176   
128    80     
-304   192    
32     -224   
-272   16     
96     -208   
336    -32    
64     -128   
-224   -96    
432    -384   
-208   32     
336    -192   
0      112    
-272   -64    
192    32     
-112   80     
176    0      
0      48     
-80    -64    
-352   16     
96     -192   
64     96     
80     48     
144    128    
-240   0      
144    -64    
176    -16    
0      96     
-176   160    
0      -48    
16     64     
128    -80    
-256   -128   
-1456  -192   
208    1120   
-80    304    
432    -336   
224    96     
-224   816    
-656   16     
-384   1072   
-608   -128   
592    -464   
-480   304    
400    48     
48     176    
-272   -448   
96     112    
-16    -160   
16     192    
-752   144    
-160   160    
-624   -480   
-432   -224   
-192   112    
304    -256   
-208   32     
64     -128   
-80    272    
-944   -80    
160    224    
176    -176   
-48    208    
-240   -64    
128    272    
-208   -80    
-16    80     
-128   -80    
-240   -96    
-192   -32    
-192   -432   
176    560    
-464   -160   
-80    96     
-640   48     
272    32     
-16    -160   
96     0      
64     -160   
48     -336   
-160   -496   
128    -112   
48     176    
-112   192    
-32    208    
-64    -512   
48     160    
-80    -80    
176    64     
-400   96     
208    176    
-1008  -336   
304    336    
-80    -32    
112    -176   
-176   -160   
128    -160   
96     256    
48     352    
-96    192    
-208   -448   
336    432    
-96    48     
128    64     
-80    80     
-64    128    
-288   16     
0      80     
-224   80     
128    224    
-304   80     
-128   -224   
-176   -144   
-80    -96    
48     64     
-48    -144   
-64    96     
32     -96    
-64    64     
80     80     
48     176    
-304   -448   
-48    96     
-160   -64    
-112   192    
0      16     
32     80     
192    416    
-192   192    
192    -64    
-96    32     
-176   -208   
-16    48     
64     48     
-48    128    
-96    352    
-192   112    
112    464    
-144   -240   
320    256    
-144   64     
-96    80     
336    112    
-16    112    
-80    0      
80     144    
-192   32     
64     -16    
32     96     
-64    112    
192    48     
-272   -64    
208    336    
-240   160    
160    -48    
-368   -256   
64     -64    
272    208    
-256   80     
96     80     
-240   16     
144    112    
128    48     
-48    112    
32     160    
32     176    
80     -80    
-112   -64    
-160   160    
-48    -48    
64     144    
-16    64     
112    112    
-64    0      
-16    128    
-160   64     
64     64     
-96    -16    
144    -48    
-224   80     
96     16     
16     48     
0      48     
-128   32     
96     112    
112    32     
-48    0      
80     176    
48     64     
-128   48     
128    -64    
-96    144    
-48    224    
-16    80     
-112   -32    
176    128    
-32    -16    
288    160    
-64    80     
48     128    
80     224    
-160   -16    
64     80     
64     16     
64     176    
-64    272    
-144   0      
192    -64    
64     256    
-48    -80    
144    240    
-272   -96    
96     160    
0      16     
64     32     
16     64     
128    0      
144    112    
32     16     
-224   240    
-160   48     
80     96     
16     -80    
144    96     
-48    -16    
-32    192    
-208   -64    
0      16     
48     208    
160    32     
-672   1104   
496    2928   
-1728  1056   
64     528    
-176   -464   
-16    -256   
-368   896    
0      224    
128    352    
256    -672   
-320   496    
80     -320   
224    400    
-32    -192   
64     160    
-176   -48    
192    64     
-64    272    
128    -16    
32     144    
80     -48    
-80    304    
96     -64    
-64    192    
48     -256   
-208   208    
416    -48    
-160   -704   
144    -48    
-208   0      
144    80     
-16    144    
128    32     
-112   160    
96     128    
80     64     
176    224    
-48    208    
-80    -32    
-32    -16    
128    48     
0      144    
48     -288   
16     48     
64     80     
80     144    
80     112    
128    -96    
-96    64     
80     128    
48     80     
112    96     
-96    48     
112    176    
16     80     
64     -48    
0      -32    
32     -208   
48     224    
32     -1136  
128    80     
-96    48     
160    128    
-48    64     
112    96     
32     -80    
176    192    
-32    -16    
112    176    
-48    16     
0      -160   
48     96     
96     -112   
32     96     
0      -1152  
32     80     
160    272    
-192   160    
240    256    
128    272    
-176   -16    
384    400    
-256   336    
0      144    
-96    32     
-64    -368   
224    16     
32     -48    
-112   128    
-32    -272   
64     64     
80     -3424  
64     112    
-16    48     
48     32     
-112   -368   
80     -32    
144    128    
48     272    
240    32     
-32    32     
-128   -144   
128    0      
144    144    
48     -528   
0      176    
0      -16    
16     -32    
-80    -432   
-144   -288   
-64    -160   
96     48     
128    64     
112    32     
-64    112    
16     -64    
112    0      
48     -128   
160    128    
-48    -80    
96     192    
96     -336   
160    80     
-96    16     
16     336    
32     112    
272    752    
64     192    
64     -48    
-128   64     
112    -48    
16     0      
16     -208   
224    176    
-64    -160   
224    48     
-144   -288   
80     32     
96     -112   
112    64     
192    224    
-48    240    
-16    -48    
112    -48    
-48    16     
240    16     
-112   0      
80     -48    
144    192    
32     -304   
96     112    
-16    -48    
-32    80     
112    144    
80     112    
-64    0      
128    -752   
-96    -2096  
240    -128   
0      -672   
16     -160   
-64    -976   
80     -240   
288    144    
-32    -32    
-16    192    
-32    -352   
368    -224   
192    336    
-192   -1104  
-32    -112   
-176   128    
288    -80    
-96    -32    
-144   -112   
208    -128   
112    -768   
-32    -288   
352    304    
32     -96    
176    112    
-64    -64    
-32    -224   
-32    48     
32     64     
-128   -32    
144    144    
32     160    
-176   -128   
-112   -128   
96     -112   
416    -352   
-192   -16    
32     -480   
-16    -48    
288    -16    
-80    64     
160    48     
1344   -640   
-736   -1040  
1056   704    
-496   656    
496    -1408  
-1280  368    
-512   -304   
848    576    
-512   -208   
672    64     
224    -80    
-80    176    
-112   -1168  
80     -448   
-384   -448   
192    -64    
304    352    
496    -576   
-112   64     
-208   -432   
-32    304    
-304   -464   
48     80     
-208   0      
-48    -672   
-288   -704   
80     -160   
336    320    
-32    112    
448    624    
-336   -160   
256    -80    
-160   -32    
-16    -192   
96     80     
32     -192   
16     -128   
-48    -48    
112    -32    
-64    -224   
144    -32    
-160   112    
176    -432   
-32    0      
32     -16    
160    32     
-16    32     
-48    -512   
-48    32     
-160   -32    
-160   -48    
32     -208   
-416   16     
128    112    
-256   32     
48     -96    
-16    128    
112    -640   
112    32     
-80    -464   
416    -16    
-96    240    
-96    112    
-256   -208   
32     16     
-224   -48    
16     16     
-48    48     
32     32     
48     0      
48     -112   
32     144    
48     -288   
32     176    
64     -864   
112    0      
-192   576    
-144   32     
-64    -32    
112    208    
-144   32     
256    -144   
208    288    
-240   -96    
-80    64     
0      -304   
96     96     
64     -208   
48     64     
0      32     
-32    -16    
-208   -144   
112    -32    
-96    48     
96     -32    
64     32     
-64    -48    
-128   -48    
80     -272   
-240   48     
64     -96    
144    64     
-816   -144   
-144   -96    
112    -96    
-304   112    
0      128    
-288   80     
-112   48     
272    320    
-16    -32    
128    0      
-64    64     
-576   16     
256    272    
-752   -64    
336    176    
-320   -48    
-544   -112   
160    176    
0      96     
-16    64     
-416   -32    
-48    -32    
-480   144    
-208   -80    
-64    -128   
256    160    
-96    64     
240    80     
-160   -112   
-176   -80    
-48    -256   
-288   48     
256    32     
-16    224    
-144   48     
32     -80    
-272   48     
-224   48     
176    0      
176    32     
-80    368    
0      -16    
48     96     
-288   -272   
-32    48     
208    208    
-48    144    
48     128    
-160   -64    
-48    48     
-128   16     
64     192    
-48    80     
-48    64     
-496   176    
-80    -16    
128    -16    
-112   128    
176    -32    
-48    208    
-48    176    
96     -64    
-80    96     
-128   -240   
64     160    
-16    144    
-160   32     
-192   -32    
160    0      
-288   -384   
16     32     
-80    48     
-160   160    
-48    -96    
224    112    
-128   192    
32     -144   
48     96     
32     -16    
-144   160    
-96    32     
160    -48    
-144   0      
-144   48     
-176   -16    
-64    48     
-368   -64    
80     160    
48     96     
96     -16    
-96    128    
80     128    
16     128    
0      208    
-80    -48    
-752   -3056  
256    128    
-288   1008   
-224   -80    
240    320    
-880   -448   
48     928    
-1024  -144   
560    896    
-80    -128   
96     -240   
-256   96     
128    80     
352    240    
-128   -48    
-240   -64    
112    80     
-160   160    
192    -16    
-48    224    
-48    -16    
-368   -32    
-160   192    
208    144    
-96    -16    
96     -80    
-112   48     
0      176    
-144   32     
-80    64     
64     -16    
-64    64     
64     64     
-80    160    
-144   -64    
-16    112    
-240   -32    
32     144    
-32    96     
128    48     
-80    32     
32     80     
-48    96     
32     80     
112    0      
-16    64     
48     64     
-80    -80    
112    96     
-112   48     
0      112    
16     16     
-16    -16    
-48    80     
16     16     
160    32     
-160   176    
-32    112    
128    -48    
144    96     
-80    32     
64     80     
-32    32     
32     80     
16     160    
-80    112    
128    112    
-112   32     
-80    -16    
-48    0      
-16    16     
96     80     
-32    64     
48     64     
-96    -48    
-16    0      
112    0      
-16    -32    
96     112    
-32    352    
-16    48     
112    112    
0      288    
96     16     
-64    0      
64     96     
176    416    
-208   -112   
-32    -160   
64     112    
112    48     
16     160    
32     112    
96     160    
-144   32     
-32    128    
256    336    
-16    -112   
64     -128   
-32    16     
224    288    
96     144    
-16    64     
-32    96     
32     80     
160    64     
48     80     
-96    32     
-32    112    
96     96     
0      192    
0      32     
48     112    
16     128    
96     64     
-16    160    
-16    32     
96     160    
-16    80     
64     -16    
-80    -80    
128    208    
64     80     
-32    80     
-96    112    
96     -896   
-16    -512   
16     64     
-48    272    
128    80     
48     16     
-80    240    
48     48     
96     48     
32     128    
-16    256    
16     -16    
112    272    
-176   -160   
416    128    
-112   -448   
112    112    
16     16     
16     160    
96     16     
176    64     
176    256    
-176   352    
-48    -128   
32     -16    
160    64     
112    176    
-112   112    
-160   16     
0      -48    
176    -944   
-96    144    
288    -1840  
-48    80     
112    96     
64     -32    
-96    112    
112    96     
-112   -112   
128    48     
-64    192    
80     -80    
-32    32     
0      -16    
32     96     
80     -144   
112    112    
80     -128   
272    16     
-80    112    
160    64     
48     224    
-64    144    
64     -16    
176    112    
16     64     
32     80     
16     176    
16     -64    
192    144    
16     -112   
48     80     
16     -128   
176    112    
-16    -96    
16     128    
-32    48     
272    48     
64     -16    
288    160    
-240   80     
-32    -64    
32     144    
-96    -1040  
624    -1600  
-672   -224   
240    448    
160    -784   
-192   16     
208    -880   
144    704    
-176   -320   
0      48     
-32    -224   
304    400    
-96    240    
64     -80    
224    352    
-96    -368   
128    160    
240    -336   
-80    160    
80     -320   
32     144    
-224   -352   
224    -80    
-144   -160   
192    48     
48     48     
176    112    
-16    208    
-16    -640   
-80    32     
192    -640   
-32    176    
112    -16    
192    96     
-160   0      
112    32     
0      -240   
16     208    
96     80     
112    96     
-48    80     
64     192    
64     -1584  
-32    -224   
64     16     
32     -192   
96     320    
144    -64    
64     0      
-96    -224   
-16    144    
160    -304   
0      -272   
-80    16     
208    -112   
-48    64     
-576   -96    
16     -352   
96     -208   
96     -400   
-48    96     
128    -800   
0      -64    
32     160    
112    -192   
64     96     
-80    32     
96     -64    
192    160    
-144   -736   
16     48     
-32    32     
16     -112   
144    64     
-144   -240   
176    112    
48     -496   
208    96     
-112   -16    
256    -112   
-32    176    
-32    112    
16     -256   
272    0      
-80    32     
32     -528   
144    160    
-224   48     
-752   -176   
80     -464   
112    32     
-48    -384   
144    -80    
112    -720   
-144   -304   
320    -400   
0      48     
128    -96    
0      -16    
16     -256   
64     -64    
80     -64    
-32    48     
-352   80     
112    -80    
16     144    
48     -32    
304    192    
-176   -224   
144    -224   
-80    -224   
128    144    
16     -320   
-112   -96    
-192   -160   
352    0      
48     -64    
64     -112   
-112   48     
0      64     
-528   -112   
-112   -288   
0      32     
304    -160   
224    272    
-144   -624   
96     144    
-176   -272   
64     112    
-80    -128   
272    -32    
-432   -176   
-160   -176   
-16    -64    
272    32     
-784   -160   
-80    -144   
-80    112    
272    32     
-96    112    
-128   -256   
144    192    
96     32     
160    144    
-240   -80    
48     112    
-96    -192   
80     -64    
-208   -48    
96     -112   
-160   -16    
64     -64    
-400   176    
80     80     
-16    160    
48     -272   
-144   176    
192    -1664  
128    -64    
-80    224    
32     48     
-48    112    
128    -80    
-208   32     
-80    -416   
16     -144   
112    -144   
64     16     
-128   -80    
-80    224    
16     -336   
96     320    
-128   -16    
32     208    
-32    16     
176    -96    
-176   -128   
-144   -32    
-192   48     
112    -192   
48     240    
160    -160   
-176   -96    
112    -368   
0      208    
64     -192   
-80    -16    
48     128    
-64    112    
-208   -48    
128    -64    
-144   160    
-112   32     
96     32     
16     0      
-16    32     
-144   16     
-704   -512   
112    1376   
-1168  -464   
160    -688   
-704   -928   
624    -208   
-752   512    
240    864    
-1440  560    
240    -176   
-368   -192   
-16    -144   
464    64     
-304   -64    
-336   -32    
-16    128    
336    144    
-64    224    
-80    -304   
-48    -80    
-48    -48    
-320   256    
64     160    
-48    224    
96     -272   
-1072  -144   
-176   -16    
240    96     
-144   176    
-64    32     
160    96     
-176   -112   
-48    128    
-96    32     
-48    16     
-32    112    
128    64     
64     112    
-128   144    
-32    16     
32     96     
16     112    
144    64     
-32    64     
-96    -96    
-16    160    
-128   16     
208    208    
-32    80     
-16    -32    
32     32     
-112   64     
32     -16    
-144   -64    
32     64     
-64    48     
224    416    
-560   304    
16     160    
-112   -320   
-16    -16    
80     64     
-80    -32    
-64    192    
80     176    
-144   -112   
32     48     
-144   96     
-16    64     
-48    64     
48     -32    
-48    96     
-800   -128   
-48    -16    
-224   -128   
64     48     
48     -176   
-96    -224   
-80    -128   
192    96     
64     384    
-128   128    
-64    -48    
32     -16    
48     192    
-80    128    
48     -16    
-80    -16    
16     160    
-112   112    
0      112    
-16    -16    
-96    -96    
32     112    
-64    80     
16     80     
-48    -16    
144    256    
-144   64     
64     64     
-320   -160   
0      48     
-16    0      
64     192    
-304   -80    
112    176    
-64    144    
-96    0      
64     80     
-96    128    
64     48     
-16    80     
-48    32     
-32    -16    
0      192    
-80    224    
48     96     
-272   -176   
-16    192    
-112   48     
16     -144   
-128   144    
48     160    
288    64     
-224   128    
-80    112    
64     -272   
-48    -144   
256    240    
-192   288    
384    48     
-192   272    
-192   64     
256    48     
-320   -16    
32     -64    
16     -16    
80     160    
96     224    
-96    64     
-16    64     
0      176    
16     0      
128    -16    
-128   48     
144    -80    
-16    208    
-224   192    
320    16     
-48    96     
288    112    
0      128    
-128   64     
-48    -128   
-48    64     
96     128    
-112   64     
32     -144   
48     160    
16     112    
-208   32     
-112   16     
16     0      
112    16     
96     64     
32     128    
-256   80     
112    -32    
272    -416   
144    80     
208    80     
-112   368    
-368   112    
-144   -160   
112    64     
240    96     
128    272    
-144   80     
176    144    
0      96     
16     112    
-16    112    
-144   64     
112    128    
-48    64     
-64    -144   
160    16     
160    224    
160    80     
-160   128    
48     -32    
16     80     
-256   0      
112    64     
-80    304    
128    32     
64     176    
-16    32     
-208   3088   
-2144  -432   
592    1072   
32     176    
848    -864   
-464   432    
-112   544    
272    -192   
-656   -48    
560    -256   
-64    -384   
-160   144    
16     64     
80     80     
0      128    
32     80     
-48    -32    
64     -64    
96     80     
-96    0      
96     64     
0      176    
-128   -16    
192    -112   
-64    -16    
64     -352   
-96    176    
112    144    
16     0      
-80    -48    
176    80     
64     240    
48     144    
-16    64     
32     112    
48     -416   
48     96     
-128   48     
128    16     
80     96     
-16    -368   
16     160    
64     80     
96     64     
-32    80     
144    208    
-144   0      
144    224    
-160   -448   
256    160    
-224   0      
240    144    
-240   80     
240    -144   
-128   80     
80     -1408  
144    48     
-64    -2384  
128    -16    
128    96     
-32    48     
64     80     
64     64     
112    144    
-144   144    
128    -112   
176    224    
-224   32     
256    128    
-160   -32    
272    -144   
-64    144    
64     -16    
144    96     
-32    80     
-16    48     
48     -208   
80     240    
-112   48     
160    -32    
32     128    
-96    176    
144    32     
16     -288   
320    128    
-144   176    
144    144    
112    -928   
144    128    
-192   -1152  
240    128    
-80    0      
32     96     
16     -64    
64     64     
-32    128    
-112   -96    
192    48     
48     -80    
80     176    
-48    -160   
96     80     
64     -192   
0      144    
144    -336   
64     288    
16     288    
128    144    
-112   -208   
32     0      
-64    224    
192    -528   
96     160    
16     -192   
-48    128    
96     -448   
96     208    
224    160    
-16    224    
96     -240   
-240   -64    
0      -48    
176    0      
96     -176   
-32    176    
48     288    
432    192    
-16    272    
-32    -384   
-48    144    
64     -192   
128    240    
32     -64    
64     160    
-320   -416   
352    288    
-16    -32    
112    48     
-96    32     
-272   -80    
256    176    
112    -240   
-240   -928   
144    -176   
-32    -112   
192    -160   
-48    -288   
-16    -160   
48     288    
16     -272   
192    -688   
-80    -16    
16     -240   
96     80     
-384   -96    
-192   -496   
192    48     
224    -80    
-256   -256   
176    -768   
80     192    
64     144    
-112   -320   
96     -240   
80     240    
160    304    
-464   -304   
-192   -496   
16     48     
-176   176    
0      -368   
-176   -176   
64     -192   
112    -96    
0      -1408  
80     -128   
48     -1424  
192    192    
-16    16     
80     -32    
128    96     
64     48     
80     -384   
32     -32    
-224   32     
176    240    
-1200  -48    
80     0      
192    -160   
-240   -400   
144    -320   
432    224    
96     96     
16     -64    
112    80     
80     -176   
48     288    
-480   1248   
144    2656   
-912   528    
432    -352   
-864   -768   
0      -752   
384    272    
-560   -160   
576    592    
208    48     
-304   -272   
256    -624   
16     192    
64     -208   
32     208    
-176   80     
-16    -48    
-144   80     
16     -768   
0      -112   
-32    -128   
-672   48     
-80    128    
720    0      
-80    -384   
-96    -256   
-64    -304   
64     656    
208    128    
48     48     
-272   0      
144    -32    
-96    -16    
48     0      
-16    -80    
48     16     
-192   -64    
48     48     
-128   64     
0      -288   
-32    -128   
144    -352   
-32    112    
48     -208   
272    32     
-160   0      
32     -16    
-64    0      
80     48     
32     144    
80     -96    
-176   -128   
64     -144   
-48    320    
192    -32    
-160   -96    
176    -368   
32     288    
-304   -160   
16     -240   
-240   16     
0      -32    
-112   128    
176    -80    
-256   -112   
96     -32    
-208   0      
48     -64    
144    96     
0      -160   
16     64     
48     -320   
48     96     
16     48     
-32    32     
0      16     
192    112    
0      144    
224    64     
-80    0      
224    400    
-80    368    
-96    -80    
-208   144    
112    -240   
-80    240    
-480   -272   
208    96     
16     144    
-1056  176    
-112   0      
48     -176   
-32    0      
240    80     
48     112    
-16    80     
-112   -192   
144    -240   
-32    272    
-1072  -224   
32     128    
-208   -192   
-32    48     
32     64     
-144   -80    
-96    32     
-688   112    
-112   16     
80     48     
-48    96     
64     -112   
-16    16     
-496   -208   
176    112    
-192   -112   
144    0      
-48    176    
-112   -224   
-96    48     
64     -64    
32     48     
-96    16     
-32    192    
-480   112    
-112   -176   
-160   64     
80     -128   
-192   160    
-32    400    
144    208    
-288   32     
-32    144    
16     -16    
128    -48    
-176   -16    
64     144    
-48    624    
128    256    
-368   448    
-160   160    
-304   -112   
-208   -32    
128    -272   
112    640    
-128   -256   
112    64     
-64    -112   
64     160    
-224   -256   
0      -96    
16     224    
-80    96     
-96    176    
-96    -96    
112    0      
-176   64     
144    640    
-16    208    
-352   -80    
48     -144   
-80    16     
-16    0      
112    112    
-32    240    
-32    176    
-208   -48    
32     -32    
80     144    
144    800    
-80    -224   
-384   -112   
48     -48    
-304   -96    
320    176    
-256   80     
-80    -208   
0      144    
16     -48    
-208   0      
0      96     
64     144    
-80    272    
48     208    
-240   -16    
16     224    
-176   -448   
192    -112   
-256   64     
48     32     
-48    304    
0      -16    
0      176    
-16    176    
96     32     
-176   128    
80     80     
-128   16     
-32    -32    
640    -2032  
48     -800   
368    464    
-192   304    
-336   368    
32     -848   
448    1168   
-112   -144   
0      -32    
-304   -48    
192    416    
144    112    
-144   -64    
-192   144    
144    -64    
-48    112    
16     48     
16     176    
96     -144   
-368   16     
208    48     
-160   160    
-80    -32    
64     96     
96     48     
256    176    
-288   128    
0      208    
-128   -64    
128    16     
-112   32     
240    192    
-256   -32    
96     64     
-48    32     
64     -96    
-16    -48    
0      64     
112    272    
32     -64    
0      80     
-192   80     
160    64     
-112   48     
176    16     
-224   128    
112    64     
-112   208    
-176   -48    
336    176    
-192   112    
160    32     
-48    96     
96     224    
-48    -32    
32     80     
80     112    
160    80     
-32    160    
-32    -112   
-64    -64    
-48    192    
-96    0      
96     48     
32     48     
16     64     
16     176    
-112   16     
64     128    
-80    112    
112    96     
-48    0      
112    208    
-128   64     
144    112    
-48    176    
80     320    
-80    128    
128    -112   
256    112    
-304   112    
48     80     
112    224    
-112   -64    
288    48     
-224   -16    
112    160    
-128   0      
32     112    
-16    144    
32     16     
32     32     
32     128    
-16    32     
64     16     
-32    336    
-128   80     
272    96     
-64    -64    
144    304    
-32    -48    
80     80     
-112   112    
96     -16    
160    112    
-192   128    
-16    96     
-112   -32    
304    288    
128    16     
-112   80     
-96    176    
96     -32    
80     192    
240    224    
-64    368    
160    352    
160    592    
0      112    
16     288    
128    -32    
-64    -736   
-80    -16    
112    -800   
160    0      
-128   -160   
144    144    
256    272    
-112   96     
64     64     
-16    96     
240    -64    
-160   96     
112    -304   
112    48     
-80    176    
-64    -288   
160    96     
-16    -384   
32     80     
48     -48    
-16    48     
64     80     
128    96     
16     80     
96     0      
-128   96     
128    480    
64     272    
-32    -32    
48     64     
0      -16    
80     80     
80     -240   
0      -336   
160    -1088  
-80    112    
80     144    
-48    16     
16     -112   
32     -16    
192    144    
16     256    
-64    -32    
96     48     
-128   16     
32     -560   
336    624    
-16    -256   
-32    176    
0      -672   
96     176    
64     48     
-80    -32    
-96    -160   
96     208    
0      16     
160    256    
-192   -176   
16     -304   
32     144    
32     -336   
96     144    
144    -160   
0      112    
224    -432   
80     -32    
64     -1184  
112    16     
-112   96     
80     48     
16     64     
160    112    
416    112    
-304   -48    
192    16     
-128   -32    
192    96     
112    1376   
-640   368    
-752   -976   
-144   -112   
-224   288    
80     976    
-304   -32    
640    672    
-272   976    
144    144    
-144   -96    
-224   48     
176    112    
304    16     
-304   -464   
208    -336   
80     80     
176    -64    
128    112    
32     -208   
192    128    
-144   -192   
144    -224   
-64    192    
496    80     
-80    112    
-96    -144   
144    240    
16     -128   
32     16     
176    -160   
208    64     
-80    -48    
-64    -192   
64     -1104  
-176   -272   
64     80     
-240   320    
160    240    
-64    -176   
400    -272   
-416   -64    
272    -288   
0      -224   
48     112    
-64    112    
16     32     
96     -64    
-64    80     
208    -80    
-192   -976   
160    208    
176    -48    
-128   48     
160    96     
64     -352   
-144   -688   
128    192    
256    112    
-224   -1120  
160    -128   
32     304    
-64    -496   
48     -208   
0      32     
112    -432   
-16    48     
32     -192   
96     0      
-240   -64    
48     -16    
0      -48    
80     0      
80     16     
-80    -80    
192    -80    
0      -1312  
-224   -112   
96     -160   
-176   -32    
0      0      
32     144    
176    -384   
-64    -128   
-96    -128   
224    16     
-416   160    
32     -272   
-64    -288   
240    -592   
-16    128    
80     -704   
32     48     
-64    -80    
96     160    
112    32     
112    400    
-320   -240   
256    -160   
-176   64     
192    -32    
-976   -80    
-128   -144   
160    -112   
48     -64    
32     -96    
112    -160   
0      96     
112    -848   
-32    -224   
-32    32     
160    160    
48     32     
-64    96     
-80    -80    
224    -64    
-336   0      
144    64     
-384   16     
-80    -176   
16     32     
48     -464   
224    96     
32     -112   
64     224    
128    96     
80     384    
0      480    
304    0      
-320   240    
0      -112   
112    320    
-144   -144   
192    176    
32     0      
32     -64    
48     -208   
-96    -176   
160    -544   
160    272    
96     160    
80     -240   
-32    160    
16     -288   
-304   -224   
96     -352   
-224   -480   
64     -112   
-192   128    
144    -96    
-224   16     
-64    -304   
160    192    
-64    -704   
288    -32    
-448   -160   
240    -144   
-144   -48    
176    144    
16     208    
-32    0      
-192   -144   
16     -64    
-400   -48    
0      -240   
-48    48     
0      -96    
96     80     
-224   -320   
0      64     
-128   -32    
32     192    
128    16     
-16    96     
64     128    
-16    -112   
-64    -112   
160    -144   
16     240    
-16    -96    
64     240    
-576   -368   
96     256    
-1072  -640   
-96    48     
-16    -16    
-448   64     
32     -16    
-1056  224    
-240   48     
96     32     
-144   -96    
208    -16    
32     256    
-288   -176   
240    144    
-672   -224   
-720   -1680  
-944   -1024  
832    1376   
-240   432    
448    -32    
-480   608    
-464   -640   
-448   -560   
-368   128    
464    400    
192    -192   
-192   0      
-448   192    
416    -176   
-64    176    
32     -144   
48     304    
-224   -16    
-32    160    
16     -160   
-48    112    
-240   48     
96     240    
-64    -32    
-96    -144   
-320   -192   
16     96     
16     -16    
128    112    
-80    -160   
16     48     
-112   112    
-80    32     
-80    -16    
-112   -96    
-16    176    
64     192    
64     208    
-592   -208   
-48    48     
128    -16    
-48    96     
32     -48    
-16    192    
-96    -288   
-16    -112   
-80    112    
-48    64     
32     96     
-64    0      
-32    0      
128    112    
-224   32     
-80    0      
0      0      
-432   -64    
-32    192    
16     32     
80     112    
32     -432   
-144   -16    
128    80     
-32    144    
-64    48     
-16    -128   
-112   96     
-192   -16    
96     128    
-80    0      
-32    16     
-368   -48    
-48    128    
-272   -80    
16     -32    
48     80     
-64    208    
-96    -288   
208    -64    
-160   352    
-112   -16    
176    32     
-96    -64    
80     128    
-112   112    
128    -96    
-224   -160   
0      112    
-368   -240   
144    80     
-48    192    
-96    80     
112    128    
16     32     
16     144    
192    368    
-256   32     
128    -32    
-32    48     
-160   -128   
-64    16     
-64    32     
96     48     
-16    -16    
112    -64    
-208   64     
144    144    
-112   48     
-96    16     
96     16     
-32    16     
96     160    
-80    -192   
0      80     
0      80     
-96    48     
-80    64     
128    192    
-464   32     
112    64     
-80    -240   
128    16     
-160   160    
32     240    
208    176    
-112   96     
-240   32     
-16    -128   
-112   16     
-64    224    
144    192    
16     -192   
-80    -176   
-96    272    
64     128    
160    0      
-240   192    
320    256    
48     144    
-96    -256   
-48    144    
0      128    
80     -32    
-48    -16    
96     32     
48     192    
-144   -224   
16     368    
48     240    
-192   -288   
288    160    
-32    64     
-32    112    
-16    64     
48     16     
112    32     
112    48     
80     208    
48     192    
-16    96     
-272   -144   
-80    -272   
112    -64    
208    80     
160    48     
32     160    
-176   16     
240    0      
-48    256    
112    192    
-304   80     
-192   32     
-144   -80    
304    160    
0      192    
-128   80     
-160   -32    
-32    -64    
272    -16    
320    192    
-80    112    
-16    96     
-144   64     
208    112    
192    208    
-64    32     
-80    0      
-112   48     
208    144    
-64    128    
-48    128    
16     64     
48     144    
64     16     
432    -112   
-192   160    
96     -32    
-96    192    
112    48     
1024   688    
16     992    
-720   -656   
-384   -400   
-336   -128   
640    304    
-208   64     
976    816    
-1184  304    
320    -64    
32     -80    
-80    240    
416    -16    
-288   112    
80     128    
-64    176    
64     -608   
16     -16    
48     -320   
160    432    
-464   -656   
256    -208   
16     -176   
448    -720   
-144   352    
160    384    
-496   -368   
320    32     
80     224    
304    224    
-176   240    
16     -128   
80     416    
-176   -32    
352    320    
-224   160    
128    -144   
80     -288   
240    -224   
192    272    
-96    320    
-144   -32    
0      48     
208    112    
64     96     
160    112    
-96    -48    
16     48     
-160   -128   
192    48     
32     32     
80     32     
-160   128    
288    48     
-64    160    
-48    -3008  
48     0      
96     0      
-448   -272   
160    128    
0      96     
0      -16    
192    640    
-112   -144   
-112   -112   
96     48     
112    -192   
-176   64     
80     -256   
80     112    
-16    -272   
16     64     
192    384    
-112   32     
96     96     
-48    144    
112    128    
-176   224    
48     176    
-288   -544   
240    240    
16     -272   
176    -48    
-176   128    
96     -96    
208    -240   
-96    64     
112    -544   
144    320    
16     64     
144    144    
96     240    
-128   96     
-128   -240   
112    -272   
80     0      
-32    80     
-112   -256   
96     -144   
224    208    
128    96     
-16    128    
16     -496   
176    240    
0      80     
112    272    
-144   -48    
-16    -80    
-64    -432   
-192   -448   
336    384    
288    176    
-144   144    
64     -528   
-16    32     
96     -48    
-48    -32    
208    -1104  
-112   96     
96     336    
16     160    
-80    144    
48     -272   
176    160    
80     -80    
96     208    
-176   -288   
288    48     
-224   -240   
272    240    
96     128    
112    272    
144    96     
-80    -1296  
-80    -32    
-32    -976   
128    208    
192    48     
-112   -256   
64     -80    
-32    -832   
16     -160   
-48    -16    
128    -224   
32     256    
80     -96    
0      48     
96     -368   
-96    -1200  
128    64     
48     64     
0      128    
-448   -32    
-16    -16    
-64    -64    
96     160    
-16    -368   
240    -480   
-32    48     
64     176    
32     -240   
64     -112   
96     112    
128    -160   
0      208    
16     -80    
80     -320   
-32    -16    
80     -224   
128    -32    
-16    -208   
32     288    
-96    -448   
112    -112   
320    -464   
-16    -160   
48     224    
-160   32     
192    16     
144    144    
-192   -112   
144    -128   
-352   -144   
256    -160   
-896   96     
64     -128   
16     -112   
48     -384   
96     -96    
48     -1344  
-96    0      
0      -80    
64     80     
112    -208   
0      224    
-288   -144   
112    32     
-512   1104   
-336   1232   
-1680  -288   
272    112    
32     80     
-288   -464   
64     896    
-512   -544   
912    416    
-576   -608   
224    -208   
-400   -176   
352    -320   
240    400    
64     -272   
-320   336    
192    -512   
-368   320    
224    -432   
-352   224    
32     -224   
32     304    
128    -192   
-32    208    
16     -1152  
128    -64    
224    128    
128    16     
-48    -144   
-176   -16    
-16    -144   
224    -64    
-1040  -112   
16     -64    
-240   96     
160    -48    
-96    -176   
48     -496   
-96    144    
208    -432   
48     80     
-48    0      
-48    112    
32     -96    
192    112    
-224   -112   
144    0      
-224   128    
128    160    
-224   -128   
0      -224   
48     80     
128    -160   
-16    80     
64     -128   
160    96     
-32    -32    
32     -16    
-16    -48    
128    48     
-128   64     
160    48     
-32    64     
80     -112   
0      224    
16     -48    
-208   160    
-32    -144   
256    96     
-16    -224   
32     -160   
-32    16     
16     -112   
48     64     
48     16     
-64    -48    
176    224    
-336   48     
272    -144   
-64    32     
48     -48    
-96    16     
-1184  -208   
96     320    
-512   -208   
-512   64     
-208   -256   
-48    128    
-128   272    
-208   -128   
-32    32     
-160   64     
112    -16    
32     -32    
80     144    
-224   128    
-16    80     
-16    -96    
0      48     
112    400    
-192   -416   
-48    -400   
192    112    
112    32     
-160   -16    
-192   -80    
-336   32     
224    0      
-176   -96    
-32    -64    
-48    -80    
16     48     
-48    -80    
48     96     
80     128    
-96    -16    
-192   -32    
-48    176    
-112   32     
0      368    
-48    32     
-384   -32    
0      -48    
0      -32    
96     192    
-144   48     
80     -48    
0      -48    
0      656    
16     -16    
-128   -112   
-96    -256   
64     176    
0      0      
-64    144    
176    -336   
-544   -336   
240    48     
-1216  -48    
0      96     
144    -32    
-80    80     
-32    -144   
-112   -96    
160    176    
-192   0      
0      -32    
-160   112    
96     160    
-16    32     
32     144    
-272   -112   
-128   96     
-480   32     
192    272    
-144   -128   
144    160    
-128   32     
-80    -128   
160    48     
-16    48     
144    176    
-176   -16    
144    128    
-144   -112   
64     32     
-16    -48    
-80    192    
-592   -96    
240    48     
-496   -192   
80     32     
64     128    
-128   96     
112    32     
48     144    
-128   80     
-112   80     
-32    -96    
288    112    
-48    32     
-128   0      
32     176    
32     -64    
-96    128    
112    0      
-144   176    
160    0      
-48    256    
-176   -160   
144    64     
-32    80     
-48    -48    
-224   96     
128    176    
160    48     
-144   -16    
-32    48     
1600   -1856  
-144   -1936  
160    1024   
-704   576    
544    -48    
32     -112   
-528   224    
416    480    
-704   -208   
912    -176   
-160   528    
16     -176   
-160   208    
-240   -384   
240    400    
-304   -224   
224    528    
-240   -16    
224    224    
-48    -208   
112    112    
32     -112   
80     288    
-80    288    
224    -64    
-96    32     
80     32     
176    256    
32     -272   
32     160    
16     -176   
96     288    
-64    32     
-48    192    
80     48     
-64    0      
48     160    
304    928    
-160   -192   
-304   -560   
80     208    
128    144    
16     128    
-48    -112   
128    16     
-16    -48    
16     192    
-144   32     
-80    144    
-48    -80    
16     -32    
-80    32     
112    208    
-160   192    
-48    96     
32     256    
-64    144    
128    96     
-96    -96    
128    272    
-176   -64    
80     96     
-48    128    
32     224    
128    -16    
96     144    
-64    64     
160    144    
-48    64     
240    48     
0      112    
-48    112    
64     128    
-112   -96    
128    112    
16     144    
64     224    
64     80     
-48    16     
144    416    
-96    96     
240    48     
-64    448    
192    160    
144    256    
0      64     
-64    64     
208    240    
-32    192    
0      112    
112    -32    
-80    48     
48     -16    
192    240    
112    112    
-112   96     
48     -112   
-160   -160   
-144   0      
32     -288   
176    384    
0      272    
0      144    
-64    -160   
16     80     
-48    16     
208    160    
-16    176    
48     -16    
80     160    
96     -96    
48     208    
-128   -144   
-16    208    
160    96     
-48    64     
48     16     
-96    -176   
0      -32    
224    144    
112    336    
144    -176   
-96    96     
16     0      
192    0      
-320   224    
304    80     
48     -48    
-64    64     
-64    -272   
192    96     
176    -128   
-144   144    
288    64     
128    -400   
-144   -112   
-112   48     
160    144    
208    48     
-192   96     
-16    16     
128    -16    
-48    -48    
-48    112    
112    -48    
16     112    
-176   0      
128    -176   
80     64     
-144   -192   
224    48     
80     -944   
32     128    
0      -3056  
96     -32    
16     288    
16     64     
256    0      
-16    144    
-80    144    
128    80     
-128   96     
128    256    
32     272    
320    48     
-96    80     
96     -16    
112    80     
32     -176   
-192   288    
-144   -336   
176    -96    
80     32     
112    160    
-48    -32    
32     256    
160    -160   
-96    176    
-112   32     
144    -288   
80     160    
0      -640   
0      336    
-32    -624   
0      144    
0      -1232  
80     16     
176    -80    
0      176    
-80    112    
144    80     
-48    48     
176    -32    
-80    -16    
192    -208   
-16    288    
80     -112   
96     272    
1376   1088   
-992   288    
0      -112   
-752   304    
1280   -416   
-736   256    
-16    -544   
304    752    
288    64     
-16    -272   
32     112    
64     -320   
-16    448    
160    -544   
80     416    
0      -672   
-160   512    
304    -16    
-112   224    
192    -320   
-144   352    
48     0      
64     -48    
48     -112   
96     0      
-32    80     
64     32     
-16    32     
128    -160   
0      96     
112    -112   
0      208    
64     -320   
64     -2208  
-96    -96    
0      -1600  
0      208    
-48    -64    
176    -48    
-144   -80    
128    -1040  
64     -112   
128    -528   
0      -176   
-32    48     
-16    -64    
272    -656   
-48    224    
208    -272   
-112   160    
64     -560   
64     -80    
-192   48     
48     -256   
-48    -48    
80     -1136  
64     64     
-16    -736   
144    -64    
64     32     
-16    16     
80     -240   
-48    128    
48     0      
176    176    
-80    176    
16     -16    
-288   -112   
176    -16    
-48    -160   
128    208    
-16    -32    
112    -288   
48     -96    
-32    -464   
176    -96    
-288   16     
240    64     
-32    -32    
-96    -176   
0      -80    
0      0      
-48    336    
-208   -128   
-224   16     
160    32     
-144   -48    
-80    -336   
224    -16    
-48    -720   
128    96     
32     -64    
48     96     
80     -16    
64     48     
-112   0      
64     -160   
-176   -112   
48     -48    
-240   32     
0      0      
48     16     
16     -256   
96     144    
0      -224   
176    80     
16     -768   
16     16     
32     96     
144    -80    
-80    -16    
0      -112   
64     128    
32     -176   
-272   -64    
-128   -496   
-384   -288   
32     -272   
32     -64    
272    -176   
64     240    
64     -1168  
-208   -160   
-16    0      
192    80     
192    -80    
-192   -32    
-80    -96    
112    -48    
-224   -64    
32     -96    
-112   16     
144    128    
32     48     
-16    -304   
80     16     
64     -528   
176    160    
-96    64     
80     80     
-64    48     
16     -96    
-256   112    
16     -48    
112    48     
192    352    
-112   336    
-16    112    
-96    -64    
224    -256   
32     144    
32     -176   
-16    -272   
-144   -160   
304    -48    
-352   32     
32     -112   
32     16     
48     128    
-96    -32    
-48    -176   
-128   -112   
160    -64    
-96    48     
256    -80    
-64    272    
-32    -224   
320    32     
-96    96     
192    -96    
-32    0      
-80    128    
0      96     
80     64     
-272   -96    
64     -192   
96     48     
-176   -32    
176    144    
-560   -176   
48     176    
32     0      
-160   16     
-96    0      
-368   16     
32     224    
-416   48     
-80    112    
-48    -16    
-64    -16    
80     160    
-32    224    
-96    -96    
128    592    
-256   -224   
192    80     
-288   -80    
1520   -704   
336    384    
-1104  -288   
-400   -480   
96     576    
-192   -416   
512    -48    
96     -1136  
-48    -192   
96     -336   
-224   32     
-320   96     
32     -112   
64     320    
-16    -336   
64     240    
64     80     
208    432    
-288   -384   
-128   -224   
160    368    
-272   -272   
288    -64    
-400   -64    
272    -64    
-160   16     
208    80     
-160   48     
-48    -80    
32     208    
-112   48     
192    -32    
-176   16     
64     48     
-224   16     
128    0      
-112   -32    
0      224    
-1648  -128   
160    208    
-208   -16    
144    80     
32     80     
16     128    
-16    128    
-208   -48    
-48    64     
-32    64     
128    160    
-176   -96    
32     32     
-48    48     
-32    -96    
-272   -128   
-80    160    
160    240    
-208   -16    
160    32     
-48    128    
-80    16     
112    96     
-80    96     
-16    112    
48     112    
-16    -128   
128    32     
-240   304    
-112   80     
80     -16    
16     80     
-128   0      
-16    112    
0      16     
112    128    
-16    64     
64     0      
272    112    
-160   80     
96     -16    
-64    160    
-32    16     
48     80     
-16    -96    
32     128    
-160   336    
-400   128    
-368   0      
320    176    
-192   -160   
224    96     
-96    112    
-32    80     
-32    96     
-80    -32    
-224   -320   
288    16     
-400   80     
192    112    
-400   -32    
48     32     
-48    144    
64     80     
96     96     
-144   80     
80     -272   
-32    -32    
-96    112    
208    144    
-16    -96    
-64    80     
-32    -64    
-80    -128   
112    176    
-112   -32    
96     48     
0      48     
0      80     
240    352    
-128   16     
208    16     
-336   16     
256    -32    
64     128    
-112   64     
-16    -208   
-96    -160   
-144   64     
-16    112    
80     -144   
16     128    
-160   96     
-48    112    
96     48     
-192   80     
-64    -32    
-112   32     
32     96     
192    16     
32     -16    
-320   160    
224    128    
80     48     
-208   144    
-288   32     
-16    -16    
160    0      
-144   -80    
176    160    
160    112    
-80    64     
-32    160    
80     32     
64     240    
-96    32     
64     160    
-128   112    
80     32     
80     32     
176    0      
80     240    
-16    144    
64     192    
64     80     
0      -112   
176    144    
-80    128    
32     208    
288    272    
-144   80     
64     -160   
192    112    
-96    32     
112    -32    
-176   192    
304    96     
48     160    
16     96     
-64    16     
-32    80     
112    64     
16     96     
16     80     
-16    32     
224    144    
-176   64     
-64    -176   
64     16     
0      64     
-48    112    
-48    144    
96     0      
-16    48     
-48    -48    
80     96     
96     176    
144    320    
-64    304    
-816   -1024  
336    304    
-1520  -304   
208    -336   
112    432    
-1248  -656   
1136   1040   
-608   -32    
208    80     
-176   128    
400    64     
-80    32     
-16    112    
272    48     
-144   240    
-32    -208   
112    288    
-112   -288   
128    -64    
80     96     
48     -512   
-96    224    
224    -1792  
-48    160    
96     -112   
-144   96     
96     48     
-80    -32    
0      16     
96     128    
96     -48    
-80    128    
0      128    
112    144    
32     80     
32     -320   
0      96     
80     -128   
96     96     
0      64     
48     48     
48     32     
128    0      
16     192    
32     -16    
112    -16    
32     0      
176    544    
-112   -80    
96     -16    
-32    -144   
96     64     
96     -64    
112    0      
-16    -1040  
48     128    
-48    32     
112    96     
32     160    
64     208    
208    176    
80     160    
16     160    
16     -80    
80     176    
48     -64    
16     240    
144    -48    
32     144    
64     80     
-96    160    
16     -848   
144    -64    
160    160    
-80    96     
-48    0      
192    352    
64     64     
208    -80    
-112   224    
96     -560   
112    -32    
-32    -336   
48     304    
128    -432   
64     32     
112    48     
144    208    
-32    144    
64     160    
-16    128    
48     -48    
80     32     
80     -224   
48     176    
64     -400   
-16    80     
144    96     
0      128    
48     -208   
80     80     
-16    48     
192    144    
16     208    
-48    48     
112    128    
0      -272   
48     16     
80     -128   
-64    48     
224    -64    
-16    160    
96     -160   
16     80     
64     -208   
48     96     
64     -176   
16     208    
112    192    
-32    -1456  
-128   -176   
112    16     
160    -976   
160    32     
-176   -176   
128    96     
-96    32     
352    -304   
-192   48     
192    32     
128    144    
-112   -80    
32     -304   
-48    112    
208    -368   
-80    -448   
16     -144   
176    32     
-128   -32    
176    -1520  
-48    -176   
128    -1088  
64     0      
0      64     
96     80     
0      80     
32     -624   
336    -224   
-496   560    
256    -288   
-96    64     
-176   208    
-48    -224   
48     -80    
-240   -80    
384    -96    
-128   -2192  
-48    -112   
192    -64    
192    192    
-80    -448   
-240   48     
80     -320   
32     112    
96     112    
-208   -80    
-320   -48    
-128   -224   
544    -16    
-96    96     
112    -160   
-112   -128   
112    -48    
64     -48    
160    -128   
-16    -176   
-32    208    
16     0      
32     80     
-64    96     
48     -320   
-240   -16    
0      -96    
-80    64     
192    32     
16     -64    
112    -128   
96     80     
48     -80    
-272   192    
-16    32     
-240   128    
64     48     
-32    -96    
-32    -160   
160    128    
80     -48    
16     -32    
208    -1408  
752    224    
416    688    
-272   352    
224    -1264  
64     -384   
272    320    
224    -224   
-656   -96    
352    -176   
384    64     
-240   272    
-144   96     
-48    176    
256    -176   
-400   112    
224    -192   
-656   0      
16     -112   
208    128    
80     -112   
16     256    
160    -544   
0      80     
-352   -80    
272    48     
-112   320    
320    -112   
-112   128    
-96    -160   
-32    16     
16     -80    
48     160    
160    64     
0      160    
224    -16    
-336   -80    
192    -896   
-64    192    
112    0      
-64    -128   
-208   48     
64     -128   
-432   -176   
-32    -192   
-96    96     
112    32     
16     144    
-32    -352   
-16    128    
-32    -528   
176    48     
-96    -512   
224    0      
-96    -16    
16     -64    
16     48     
-80    0      
64     80     
-32    16     
0      80     
48     -32    
-592   -96    
-16    -240   
144    16     
0      -272   
-48    64     
-800   -48    
-1152  96     
-160   -48    
352    -16    
-96    128    
-48    64     
0      48     
128    32     
-160   -208   
304    -160   
-352   64     
-448   -64    
144    128    
-128   -64    
96     32     
160    320    
-912   -16    
64     -176   
-160   -32    
-16    32     
-336   32     
32     80     
-208   48     
96     -112   
16     208    
-256   64     
208    -48    
-80    -64    
32     -240   
-48    112    
-48    128    
-64    -48    
-48    -112   
16     144    
-16    112    
-32    32     
64     80     
-944   -160   
80     160    
-176   48     
208    80     
-176   -208   
16     -48    
-160   -112   
-64    0      
32     144    
96     -112   
-160   -112   
-144   -96    
16     16     
-112   -160   
-32    48     
-400   112    
240    304    
144    32     
-304   208    
80     -144   
32     32     
-304   -192   
-48    -192   
0      112    
-32    96     
176    64     
-432   -64    
0      -48    
-80    -80    
144    64     
-256   16     
-272   48     
-1680  -192   
96     208    
-112   -96    
160    128    
64     96     
16     32     
-352   -48    
-64    32     
128    144    
-240   -48    
112    176    
0      96     
32     176    
-144   -80    
16     96     
-496   -96    
0      96     
96     64     
-16    176    
32     0      
-80    -16    
160    32     
-304   128    
48     32     
64     16     
0      -112   
-144   -144   
-32    80     
-128   -64    
96     80     
192    464    
160    -48    
-192   32     
0      -16    
16     80     
-144   80     
0      -16    
-80    368    
-32    -176   
0      16     
64     64     
-192   -96    
-112   0      
-64    0      
80     448    
-400   -48    
48     96     
-624   -304   
96     96     
16     48     
-176   32     
-192   -96    
32     80     
16     64     
64     16     
16     96     
112    208    
-48    240    
-144   -192   
160    80     
-160   -16    
-48    864    
368    880    
864    704    
-64    288    
-528   16     
-336   -208   
-48    -208   
272    672    
144    16     
32     368    
-288   -288   
-144   0      
-224   -96    
384    112    
-368   -128   
160    112    
0      -160   
32     304    
80     160    
96     160    
-224   -64    
240    160    
-288   96     
96     64     
-32    -16    
-32    -272   
0      240    
-112   512    
-32    144    
-96    -96    
16     192    
304    272    
-112   -16    
-16    160    
-112   0      
64     -144   
-16    -64    
240    192    
-176   -32    
176    160    
0      304    
48     192    
32     64     
-16    48     
-48    96     
-128   64     
-64    -48    
112    144    
256    256    
-96    96     
32     144    
-48    48     
112    96     
-144   144    
96     48     
0      112    
-32    -144   
48     -96    
64     0      
32     -128   
80     208    
96     240    
-128   -160   
192    128    
-64    64     
160    80     
-64    128    
0      32     
48     96     
-32    96     
0      64     
128    112    
-112   0      
32     -864   
32     48     
80     16     
0      -16    
272    448    
-208   32     
16     64     
-112   -160   
160    48     
0      160    
128    208    
0      432    
-208   -96    
128    -224   
-288   -368   
128    -816   
112    -16    
112    288    
-80    96     
-48    -48    
80     64     
112    144    
128    160    
-144   80     
112    144    
-96    -16    
208    32     
-208   -48    
224    240    
48     224    
64     -96    
-144   16     
32     64     
64     -32    
256    224    
-272   48     
224    144    
-48    128    
16     0      
-16    96     
-80    -16    
176    96     
-64    80     
16     -128   
64     -32    
64     -272   
48     160    
48     -2864  
-160   80     
160    240    
240    144    
-96    16     
-128   304    
-80    48     
176    64     
-80    96     
16     -16    
160    128    
0      48     
144    112    
48     -128   
0      176    
64     176    
-48    -16    
80     -224   
-96    96     
128    80     
32     112    
-160   -160   
192    160    
-48    224    
32     16     
32     64     
-208   -944   
336    -96    
-224   128    
112    96     
-112   -272   
-48    -96    
208    -2480  
-160   -16    
112    144    
-80    304    
-32    -144   
384    96     
80     240    
144    352    
-112   -96    
48     64     
160    16     
80     0      
-96    -128   
96     -400   
-32    160    
96     -2032  
16     -32    
224    -384   
192    224    
112    0      
64     208    
-64    256    
32     176    
16     -192   
32     96     
320    176    
48     -64    
-176   176    
176    -224   
240    -112   
176    -128   
144    144    
64     -272   
-48    176    
64     0      
16     16     
-96    336    
160    320    
-16    224    
-144   48     
112    144    
160    -464   
-32    192    
96     0      
64     192    
-32    32     
176    688    
-192   128    
-416   128    
-336   -848   
224    -112   
80     -144   
-224   -128   
-144   -336   
112    80     
240    -192   
112    -256   
-192   112    
320    -96    
-80    176    
208    -352   
-112   112    
16     16     
48     192    
160    -32    
-16    -384   
128    -2416  
112    208    
-48    -2240  
16     -144   
-96    -144   
160    0      
192    192    
48     48     
96     256    
-176   -288   
160    -768   
-16    144    
208    80     
-16    48     
64     -384   
-48    -320   
-304   0      
32     -160   
240    -144   
-160   -48    
192    0      
16     -1120  
32     -240   
96     64     
64     144    
144    -160   
-80    -176   
80     -288   
-112   96     
64     -112   
-80    -64    
-784   -112   
144    288    
-192   48     
224    -160   
-48    -160   
176    -272   
96     64     
48     288    
-48    -48    
144    -144   
-64    112    
80     -208   
96     160    
-224   -16    
208    16     
-304   -16    
96     -176   
144    -32    
-32    -48    
64     -48    
112    -208   
32     80     
-16    -816   
-320   -96    
-64    272    
-64    64     
272    -112   
112    -128   
-64    160    
-176   -128   
-256   -112   
160    32     
-608   -48    
272    -16    
-80    -368   
352    -256   
-144   -176   
192    -1008  
-112   16     
128    -16    
-32    112    
80     80     
-32    -16    
80     -160   
240    208    
-464   -32    
272    32     
-416   32     
-32    16     
256    16     
-32    -96    
96     96     
32     -320   
144    96     
-144   -832   
176    144    
-128   -112   
0      -208   
-96    -48    
112    -80    
32     32     
48     160    
-256   64     
112    -256   
-336   -272   
0      -80    
176    160    
96     -96    
144    192    
16     -992   
96     -96    
-208   -96    
128    -48    
16     -112   
-32    -128   
-160   -64    
-208   -128   
-464   -160   
160    -144   
-144   -48    
-240   -144   
0      -272   
-128   -304   
96     -48    
16     -464   
320    -304   
-80    16     
-176   -32    
-192   80     
352    -16    
-64    64     
32     288    
-160   80     
112    -176   
-96    -32    
48     144    
240    144    
32     -144   
-80    112    
144    -64    
-32    -48    
-32    176    
48     64     
-32    48     
48     240    
80     80     
-96    -32    
-160   -336   
48     -32    
-16    32     
96     -192   
64     192    
-96    -160   
0      96     
-16    48     
-928   192    
-192   -192   
-1744  80     
-80    48     
16     -208   
80     144    
-32    -32    
-32    80     
144    -192   
-96    48     
-240   -176   
32     -32    
-288   -144   
176    320    
-96    352    
16     -224   
-144   48     
-240   48     
-112   -80    
0      -320   
16     128    
0      -32    
-112   -48    
-320   -128   
160    80     
-112   16     
-16    160    
0      -48    
-48    64     
16     64     
-384   -64    
-400   1216   
-1472  64     
1168   1984   
-64    384    
464    -192   
-2368  -384   
-224   384    
16     -96    
96     176    
80     -80    
-160   112    
-80    -272   
-96    256    
48     -144   
-304   -176   
-64    64     
0      16     
-192   -80    
176    240    
0      -32    
-448   -80    
-96    192    
16     176    
16     128    
-144   -320   
0      -32    
192    512    
128    752    
-16    112    
48     -32    
-400   -352   
112    32     
-48    112    
-128   -80    
80     64     
-160   192    
128    128    
-544   -320   
-64    -480   
-32    -64    
304    416    
-80    176    
-80    -16    
144    144    
-64    -96    
48     176    
-16    240    
-32    128    
32     -144   
96     80     
-272   -32    
128    160    
-256   -112   
48     128    
112    64     
-64    96     
0      160    
-32    336    
-432   -640   
288    224    
-224   -32    
208    176    
-96    144    
-32    -192   
-16    128    
-128   -48    
48     80     
-272   0      
96     48     
-64    16     
48     16     
-16    96     
0      32     
-32    96     
-144   80     
96     240    
-160   -208   
304    96     
-48    192    
-16    96     
-16    416    
-160   256    
16     112    
80     320    
-32    -48    
-64    80     
48     -48    
-64    0      
128    -176   
32     0      
96     240    
-112   0      
-160   112    
-64    32     
64     64     
-32    0      
-32    64     
-256   0      
16     96     
16     -64    
-16    112    
-32    -16    
128    192    
-96    80     
96     176    
-128   48     
16     48     
16     160    
0      -16    
64     144    
-176   -96    
32     64     
-160   -160   
-32    96     
80     96     
80     128    
48     64     
-16    368    
48     -96    
32     -112   
-224   16     
224    16     
80     0      
0      64     
112    480    
-64    -176   
112    112    
-176   -64    
256    672    
-160   176    
176    128    
-96    256    
-16    -192   
-48    32     
-16    -128   
-16    -144   
-128   -160   
96     272    
-64    -192   
112    288    
-32    48     
0      112    
80     64     
16     224    
48     208    
96     112    
16     272    
-16    16     
-16    -32    
0      32     
64     64     
-112   -32    
-32    160    
-80    48     
112    304    
-96    208    
64     80     
-128   48     
-144   -528   
-64    240    
240    336    
-160   112    
176    64     
-48    112    
112    0      
144    288    
-176   -96    
32     -80    
-112   320    
176    208    
-160   -144   
48     -736   
48     -80    
-176   0      
240    160    
224    144    
112    128    
256    416    
-96    176    
0      32     
-16    48     
16     48     
0      176    
-96    -32    
96     208    
80     -224   
16     -464   
96     48     
16     96     
32     32     
112    48     
-48    144    
-16    224    
48     112    
-160   112    
144    48     
-48    16     
80     64     
2128   -1424  
-864   -1392  
1248   656    
48     128    
-704   -176   
688    1520   
-1248  192    
1280   368    
-576   272    
352    304    
-368   -96    
80     16     
0      384    
336    -336   
-176   320    
128    -112   
112    272    
80     96     
-16    -128   
48     16     
-16    -1760  
208    160    
-96    288    
208    -32    
-176   -16    
144    128    
176    128    
16     160    
-16    -128   
32     0      
-16    64     
176    128    
0      64     
-80    -496   
48     112    
80     -1120  
-16    -224   
-80    0      
160    240    
160    16     
-96    16     
-64    64     
144    112    
32     144    
-112   -16    
-64    -32    
96     -128   
80     128    
192    -208   
-64    112    
80     -96    
0      48     
48     -2560  
64     96     
16     32     
48     32     
128    128    
16     224    
-16    128    
176    32     
-16    144    
16     -112   
96     128    
16     144    
-64    160    
144    -272   
112    96     
-16    -848   
96     336    
-160   -48    
240    32     
-16    0      
48     208    
-112   -16    
128    -272   
-16    256    
192    -128   
336    256    
208    -720   
96     224    
-128   48     
80     0      
288    144    
-288   -32    
416    -16    
-16    240    
-256   -160   
336    192    
-368   80     
304    -96    
-128   80     
96     -304   
32     32     
-32    -272   
-32    160    
144    16     
-64    -16    
144    -64    
64     -48    
0      112    
80     160    
-48    96     
80     144    
160    320    
48     -128   
16     144    
-160   -160   
160    -16    
-80    -64    
176    144    
96     -64    
-48    192    
0      -240   
320    128    
-96    -512   
0      -880   
48     160    
192    288    
192    -272   
32     -384   
-416   -1024  
416    -80    
-96    96     
64     64     
32     128    
128    -112   
96     -32    
-112   -96    
48     -1376  
112    96     
64     -352   
144    -80    
0      -432   
192    -176   
256    -80    
-64    -32    
-80    -48    
80     416    
144    -80    
80     -608   
-48    -128   
32     64     
48     32     
80     -32    
96     96     
112    -192   
-48    -48    
-32    -48    
48     -336   
-448   144    
112    -224   
32     224    
64     -656   
-16    -80    
32     -1552  
32     -112   
144    144    
32     64     
112    0      
-336   48     
240    -16    
-48    96     
-128   -32    
48     -16    
-192   -48    
96     -960   
160    -48    
528    656    
-320   -240   
128    96     
64     64     
80     176    
-208   64     
112    -208   
-64    48     
64     0      
96     16     
64     64     
144    64     
32     64     
-80    -192   
-160   -112   
160    48     
80     160    
-240   0      
-240   32     
96     -368   
144    80     
176    16     
-16    96     
-160   16     
208    -80    
32     48     
128    -224   
192    96     
-160   -64    
16     80     
-416   352    
64     2624   
-1088  96     
-592   -1312  
-224   -976   
384    752    
64     -464   
-64    336    
-64    192    
384    192    
-560   -240   
112    -192   
368    128    
-112   -288   
-352   32     
208    -272   
-640   304    
-80    -384   
-48    -48    
96     -704   
32     32     
48     -96    
128    48     
-192   96     
384    176    
-320   224    
-32    272    
-64    -304   
544    496    
-384   16     
192    -176   
-96    -192   
80     -160   
16     -32    
320    176    
-160   -64    
160    -1040  
-208   -320   
32     560    
-256   -112   
400    656    
-368   208    
0      -112   
-96    -48    
-192   -48    
32     240    
96     96     
224    112    
160    576    
-320   -800   
304    112    
-64    -400   
208    144    
240    176    
-256   -64    
16     -112   
16     16     
-464   -1024  
-144   80     
320    304    
160    176    
-464   96     
-272   128    
-96    368    
-416   48     
0      -64    
32     80     
-320   48     
64     64     
-448   0      
-80    32     
128    -16    
16     192    
16     48     
0      48     
112    -144   
16     496    
-352   -144   
64     -128   
-416   -352   
80     208    
176    16     
-384   112    
48     48     
-384   80     
-144   32     
-416   -288   
48     288    
144    -16    
0      144    
16     -64    
96     -48    
-80    -80    
64     160    
-64    -224   
-80    -208   
-16    176    
-416   -160   
96     -16    
-432   -160   
128    -16    
-16    160    
-208   48     
-528   -128   
-192   -32    
48     96     
48     -16    
64     80     
-48    208    
96     16     
-64    16     
-32    32     
16     80     
96     80     
0      128    
-160   64     
-16    288    
-336   -112   
-48    -32    
64     192    
-320   112    
272    112    
32     48     
-80    128    
144    192    
-192   224    
240    304    
0      160    
128    656    
-608   -176   
304    48     
-304   16     
96     0      
-48    -112   
48     272    
-1696  -160   
48     -64    
-112   -288   
144    96     
96     272    
16     176    
-32    96     
-32    -96    
-112   32     
32     80     
-64    128    
64     -176   
-304   -144   
-96    64     
160    -16    
-688   -176   
-32    144    
0      64     
16     160    
32     -80    
-144   80     
112    32     
-80    16     
-16    -96    
32     -16    
32     32     
64     -64    
-64    80     
-16    -80    
144    256    
-480   -16    
192    192    
80     352    
-128   -16    
144    48     
0      48     
0      80     
-16    176    
-224   176    
-96    -80    
160    176    
-16    -48    
48     176    
-560   48     
96     -48    
-16    -16    
80     16     
80     -32    
-96    16     
112    16     
-64    176    
-112   208    
-16    16     
32     80     
32     80     
-64    64     
-112   32     
16     208    
-272   80     
-48    -48    
32     -64    
64     48     
32     240    
976    -1296  
176    -592   
1136   336    
400    -16    
-704   -256   
816    720    
-976   64     
1024   592    
-528   80     
288    -16    
-400   224    
160    -128   
0      384    
-48    -560   
-112   176    
176    -208   
112    304    
96     96     
-64    32     
-144   -48    
176    64     
64     208    
96     112    
-128   -16    
-112   16     
0      288    
320    192    
-208   0      
48     32     
64     0      
16     80     
-32    176    
80     -112   
-48    160    
16     -16    
0      160    
-80    -144   
-96    240    
96     -64    
96     224    
-208   -144   
16     160    
64     32     
144    192    
16     64     
-16    80     
0      80     
128    240    
-128   0      
224    144    
-80    144    
48     -80    
-48    224    
-16    -96    
128    144    
-96    80     
128    80     
-16    -16    
16     96     
112    144    
-144   80     
176    -96    
0      192    
-80    -32    
176    128    
-112   80     
0      112    
-32    48     
-16    -32    
144    160    
-128   64     
32     -1712  
64     16     
48     240    
0      144    
160    176    
48     560    
-208   288    
224    -80    
96     16     
-128   0      
80     32     
-16    -16    
-80    -192   
240    0      
-16    160    
48     -864   
32     256    
32     32     
320    112    
-16    -16    
16     -48    
-64    128    
-208   -208   
144    -48    
-48    -32    
16     -128   
0      144    
32     112    
48     64     
16     64     
112    32     
-32    -32    
144    48     
16     -80    
-32    -64    
-96    48     
144    288    
-48    128    
48     112    
48     80     
-48    -368   
48     128    
96     -16    
16     32     
112    96     
-16    -368   
32     144    
48     -2912  
-176   -288   
-128   -656   
32     272    
272    224    
176    48     
-128   -96    
-16    192    
144    224    
48     -64    
-176   32     
80     64     
80     160    
160    -224   
-80    144    
192    -640   
-48    -128   
-64    160    
16     240    
288    432    
-288   -48    
304    112    
-48    112    
80     192    
96     0      
-128   144    
112    -16    
176    192    
64     128    
96     416    
-112   -272   
192    208    
-80    -944   
80     48     
32     176    
-16    64     
400    896    
-592   -192   
144    -144   
32     320    
64     144    
-48    -160   
0      -48    
128    -16    
-32    64     
64     80     
16     192    
0      -48    
-128   432    
-288   -1344  
0      -128   
336    144    
48     144    
112    -96    
-112   -64    
32     32     
208    -320   
-96    112    
272    -160   
-144   48     
160    -352   
-16    160    
16     -336   
-32    144    
144    16     
16     80     
64     -32    
144    288    
-96    -192   
80     -304   
80     64     
112    64     
-16    80     
160    -224   
32     208    
-128   64     
352    64     
-128   -48    
224    128    
-864   -1216  
1216   2688   
-928   928    
928    -400   
-544   176    
576    -560   
-256   544    
-80    -1056  
272    -32    
176    -384   
-176   416    
64     -144   
240    448    
-32    -224   
-32    -1280  
-240   -272   
352    224    
-256   96     
896    48     
-144   368    
224    80     
64     -320   
48     -272   
48     -1072  
-128   -528   
352    176    
-48    96     
160    960    
160    0      
-16    -32    
-112   -144   
384    -608   
-352   -352   
-192   -96    
0      -128   
-272   -352   
-16    -576   
-304   144    
224    64     
-432   16     
48     -416   
0      80     
48     96     
-160   -128   
128    48     
0      192    
-240   96     
112    -368   
-16    -64    
208    -160   
-112   352    
-48    -16    
0      32     
-96    -800   
320    32     
96     -416   
144    16     
128    304    
-128   416    
256    16     
-96    -368   
-128   -576   
288    -112   
-176   -32    
80     160    
112    -96    
64     96     
48     16     
192    -176   
112    416    
0      -96    
112    -208   
128    32     
-16    96     
96     -224   
112    -80    
-48    -384   
352    -224   
-160   -48    
0      -112   
-336   176    
320    -64    
-352   -144   
-48    -80    
224    80     
176    -48    
64     272    
176    -160   
-64    32     
16     32     
-32    128    
16     -48    
176    0      
-192   48     
-112   -368   
-192   -192   
32     -384   
-176   176    
64     16     
-80    -336   
-96    0      
288    16     
48     -1008  
-16    176    
-32    -1440  
208    416    
-64    128    
0      -16    
-16    -48    
-16    -160   
-160   -48    
128    160    
-112   144    
208    16     
-880   -320   
96     -320   
64     464    
48     -288   
160    96     
-192   -608   
32     -48    
-16    96     
176    32     
-224   -112   
32     -176   
-32    -32    
96     96     
-352   -176   
320    80     
-576   -96    
288    -96    
-32    208    
160    -128   
16     176    
-160   -1056  
96     -32    
-32    0      
48     -96    
32     16     
-272   64     
160    16     
32     -256   
-320   -48    
64     -64    
0      -80    
-48    -80    
-64    -96    
-64    -480   
64     176    
-96    48     
128    0      
-192   -32    
64     96     
-16    16     
112    -48    
-80    80     
-48    96     
16     -128   
80     0      
-48    160    
48     -32    
0      96     
-416   -192   
48     96     
-144   0      
112    48     
-160   144    
-912   32     
-144   -80    
-96    -112   
32     -16    
192    16     
-16    304    
-416   128    
-160   -16    
240    -144   
272    0      
-128   -144   
-96    64     
-176   176    
-64    -16    
-48    16     
-64    144    
-112   -32    
-192   144    
48     -192   
112    16     
-176   0      
-48    -144   
48     176    
-304   -48    
96     80     
144    -240   
-32    208    
-224   -16    
352    48     
-320   112    
0      64     
1968   -1040  
-1008  -864   
1088   112    
-176   64     
-624   144    
192    1136   
-944   -720   
608    512    
-720   48     
448    352    
-224   -32    
-160   -80    
-256   256    
528    -112   
-416   256    
256    -320   
-128   384    
48     -96    
-352   272    
144    -240   
-192   192    
192    -16    
-96    320    
288    -128   
-304   112    
64     -288   
-144   432    
176    64     
-96    144    
-112   -240   
-96    48     
-96    -80    
48     144    
-368   0      
48     48     
-1088  0      
48     128    
-80    -112   
32     0      
-64    80     
48     32     
32     128    
-16    32     
-128   16     
96     -16    
-32    208    
80     64     
-32    352    
-432   -96    
336    144    
-480   0      
144    -16    
-80    16     
-48    96     
128    80     
-32    80     
-176   96     
48     -48    
16     176    
-208   -48    
64     96     
16     -64    
48     80     
-240   112    
-16    112    
-48    16     
32     128    
80     144    
-80    80     
16     144    
0      -16    
16     64     
-16    48     
48     64     
-48    0      
96     176    
-256   -48    
240    -128   
-272   -80    
-32    160    
-64    -16    
112    48     
-48    96     
-48    -256   
-176   32     
48     208    
64     112    
-48    192    
192    48     
-80    -80    
-144   -32    
-112   -224   
304    288    
-224   -32    
320    32     
-208   32     
32     48     
192    448    
-64    64     
-16    -16    
-32    96     
208    144    
-96    64     
16     32     
-128   0      
-64    -272   
-288   -144   
192    192    
-64    -48    
-32    32     
-224   -16    
0      48     
80     112    
16     112    
-16    80     
64     80     
-16    272    
-32    96     
-96    -80    
256    -48    
0      112    
-48    -32    
48     48     
-256   -160   
144    0      
96     480    
192    352    
-192   -32    
0      96     
128    96     
16     48     
96     96     
-160   112    
128    32     
-16    192    
336    -16    
-432   -112   
80     80     
16     176    
-16    80     
112    96     
-16    160    
112    -64    
0      112    
-112   16     
160    48     
0      64     
16     144    
16     112    
-112   48     
16     112    
0      -32    
-16    112    
32     160    
-176   0      
176    16     
-96    112    
192    -16    
48     112    
-144   80     
112    0      
-80    48     
192    64     
128    96     
-144   16     
16     -48    
-224   -160   
272    224    
80     -16    
-64    -1360  
-96    32     
96     160    
64     96     
96     64     
-128   -32    
224    208    
-112   176    
144    -32    
-64    176    
80     32     
144    144    
-80    -64    
16     128    
-256   80     
96     96     
-64    176    
-16    -96    
64     96     
336    208    
-80    16     
-48    -32    
224    176    
0      96     
240    -144   
64     160    
0      -16    
-240   16     
-464   304    
-1696  -1008  
624    -784   
0      896    
480    96     
144    880    
32     -752   
-384   848    
128    -528   
384    624    
-592   -448   
176    368    
64     -416   
384    496    
-336   -160   
96     -48    
-32    608    
192    96     
-192   160    
-16    -2848  
16     400    
96     -96    
64     32     
-48    -176   
160    224    
64     -352   
160    80     
416    896    
96     384    
-560   -304   
176    160    
176    224    
-112   -224   
96     0      
0      -464   
0      272    
112    -544   
-112   -352   
-144   -304   
256    -32    
-112   352    
64     48     
-16    96     
-304   48     
304    -16    
80     0      
96     -48    
-64    -368   
128    -112   
-64    -432   
48     128    
32     -384   
80     144    
-48    0      
112    160    
-32    -64    
96     192    
-16    -80    
160    176    
-80    0      
80     -128   
64     176    
0      -128   
128    -208   
32     -176   
-112   16     
192    -1504  
48     288    
-112   128    
160    144    
-304   -16    
48     128    
128    -16    
-32    -96    
160    -128   
0      0      
192    80     
64     -32    
48     112    
160    -16    
128    144    
0      -96    
160    64     
48     192    
224    112    
240    48     
-224   -64    
128    -112   
-96    -400   
32     192    
96     16     
-112   48     
112    96     
48     144    
112    -144   
-80    -48    
-96    -96    
48     0      
80     16     
-48    -160   
-16    -96    
144    304    
176    192    
-32    -144   
0      -224   
64     64     
112    -32    
160    -288   
64     208    
32     96     
16     48     
32     -288   
-32    -624   
128    160    
-32    -240   
128    96     
-256   -112   
80     -272   
-96    -208   
128    -176   
16     -144   
-32    -2352  
-16    -176   
80     -48    
-128   64     
144    48     
208    -16    
-80    -448   
-16    0      
208    -80    
-16    112    
-208   144    
32     -144   
112    -96    
-352   -256   
464    176    
80     -384   
-32    -16    
-128   -496   
96     -128   
224    224    
-48    -144   
-208   -64    
16     -16    
144    -160   
-32    -48    
-64    -288   
-16    -160   
-352   -32    
-128   -80    
224    -16    
-80    -176   
80     32     
208    32     
-48    -64    
48     48     
0      128    
80     -64    
176    544    
-112   -144   
112    -128   
-16    -112   
16     -32    
176    32     
-96    -96    
176    112    
112    128    
0      16     
-16    -496   
16     -16    
144    -320   
-96    -32    
80     64     
48     16     
-160   -32    
80     16     
-48    0      
112    128    
-272   48     
-64    -224   
-1088  -80    
48     -176   
160    -48    
16     -32    
96     -80    
96     -880   
-144   0      
176    -224   
-64    128    
-48    16     
-48    48     
32     64     
64     112    
-304   -80    
-128   -48    
-64    -96    
32     16     
-896   64     
-256   -1520  
-352   -1136  
864    400    
-48    256    
528    -432   
-368   -272   
416    128    
-16    -400   
-64    32     
-160   -224   
32     288    
64     -496   
-208   928    
192    -416   
-688   416    
0      -784   
-16    336    
16     -448   
160    480    
-192   -1472  
304    80     
-320   -96    
48     -96    
-224   64     
224    -80    
-272   0      
208    -32    
-96    128    
176    -144   
-176   -128   
240    -464   
-192   224    
288    -208   
-112   224    
-16    -128   
-48    -160   
-192   -144   
80     112    
32     128    
128    32     
-16    -48    
-96    112    
-64    32     
96     -48    
-48    16     
16     -80    
48     160    
112    -192   
-144   48     
-112   16     
-672   -80    
16     80     
-32    112    
48     48     
48     32     
-176   -80    
32     -16    
-48    96     
144    -48    
-64    -160   
-496   -112   
16     384    
80     -272   
-96    -80    
-160   112    
-256   48     
-32    80     
-512   -16    
0      48     
-752   0      
-48    -64    
160    16     
-160   64     
-48    16     
-64    144    
-400   -480   
0      -112   
-128   -256   
-288   -272   
-64    -176   
-224   0      
16     224    
16     368    
-288   -144   
-480   -48    
16     16     
144    192    
0      96     
-240   80     
-144   -32    
-160   -224   
144    96     
16     192    
0      192    
-16    -16    
-272   -288   
-80    -80    
80     128    
-16    112    
-80    32     
-80    80     
-688   48     
64     96     
-64    -96    
32     64     
0      -64    
-48    -64    
96     208    
-128   144    
-16    -48    
-80    -32    
-96    144    
112    112    
-96    48     
-160   0      
-112   16     
-560   -48    
0      160    
-16    -16    
96     160    
-96    112    
-16    -80    
-16    -16    
48     224    
176    -16    
-32    16     
-176   448    
160    -80    
80     96     
-208   80     
80     -32    
-64    -128   
32     272    
-624   0      
240    128    
-368   -416   
240    -32    
-176   -48    
192    80     
-32    208    
-144   -48    
80     144    
-16    -32    
96     160    
-192   96     
48     16     
-64    128    
-144   80     
-192   -416   
112    192    
-32    176    
-64    64     
-288   64     
96     288    
-64    80     
-112   -112   
-112   64     
32     -112   
48     400    
-304   -208   
208    144    
-304   -224   
352    144    
-640   -96    
48     96     
-16    400    
-288   -272   
688    80     
-144   176    
80     48     
-144   96     
-192   192    
304    32     
0      144    
-112   0      
80     128    
-384   0      
176    176    
-112   64     
16     64     
272    -32    
-144   176    
32     -16    
-176   -48    
112    304    
-176   112    
-64    -80    
-80    80     
208    208    
-48    -96    
-144   160    
-464   -16    
192    64     
176    -256   
80     272    
-144   -48    
-176   144    
-336   400    
-192   2240   
-848   656    
256    -176   
-368   -432   
208    16     
-304   -384   
-352   192    
272    224    
464    400    
-480   -112   
64     32     
80     64     
-32    32     
112    192    
16     -80    
336    624    
-272   32     
32     -32    
32     96     
-16    -48    
-112   0      
-80    -48    
240    96     
-192   -208   
-16    64     
176    192    
48     128    
0      48     
-48    0      
160    80     
-48    112    
64     112    
96     80     
-96    192    
80     32     
0      0      
-32    96     
128    144    
16     0      
-96    336    
16     0      
64     48     
32     240    
64     112    
-144   -144   
64     64     
-16    208    
272    400    
-160   -160   
112    112    
-192   96     
80     -80    
-16    208    
-208   -160   
224    -64    
-48    48     
96     160    
-32    176    
80     -32    
32     128    
80     96     
48     112    
32     48     
112    128    
-176   48     
176    80     
0      80     
32     112    
128    176    
-16    -576   
-32    64     
64     -64    
96     160    
-144   48     
80     80     
64     144    
-288   128    
256    144    
144    -32    
16     16     
16     160    
-16    96     
32     96     
176    -128   
64     -928   
-160   176    
16     -80    
128    -96    
-80    64     
64     96     
16     144    
-80    80     
176    0      
-80    -16    
144    144    
64     32     
112    96     
-48    -96    
32     144    
-48    -432   
80     0      
80     32     
96     144    
-96    128    
160    176    
-48    64     
48     128    
-32    -16    
-32    32     
48     176    
112    80     
32     32     
-32    128    
80     128    
160    48     
32     288    
192    -1520  
-176   144    
80     32     
144    240    
48     16     
208    96     
-64    96     
-64    80     
256    144    
80     48     
-96    -48    
-80    -64    
144    -16    
-32    -48    
-64    -48    
128    -96    
-64    80     
464    -1056  
-160   224    
-16    -160   
128    64     
-256   32     
336    160    
48     -16    
-96    160    
144    112    
-32    -208   
64     -48    
-112   -112   
256    -144   
80     -752   
-80    80     
192    -576   
32     128    
16     -16    
32     112    
-16    -32    
80     80     
-80    128    
160    96     
0      112    
-112   -80    
304    48     
0      272    
80     176    
-32    -112   
16     48     
32     -96    
208    112    
160    -80    
-96    128    
-112   112    
272    -32    
112    272    
-16    -752   
-16    304    
0      -528   
-48    144    
48     -80    
64     208    
-32    96     
-64    80     
-80    -640   
176    -112   
64     -96    
128    144    
-16    160    
-192   48     
16     64     
176    -32    
176    -80    
160    128    
-80    160    
48     -48    
64     80     
48     -128   
-112   -16    
208    -144   
128    144    
160    80     
16     -2096  
1584   -1776  
-144   -2336  
1312   -320   
-400   -224   
864    -1232  
-480   -624   
-208   -704   
896    896    
-176   -64    
32     -160   
-464   192    
432    -224   
-16    -416   
112    -336   
32     -576   
-80    -64    
-272   16     
208    -64    
48     208    
48     -256   
112    96     
-16    -736   
192    -144   
-80    160    
112    -80    
-64    128    
64     -160   
80     -272   
-80    -16    
80     -304   
32     16     
16     80     
-176   -16    
80     -176   
-32    -320   
320    -176   
-32    -96    
64     -16    
16     -272   
48     -128   
16     -192   
16     48     
160    32     
48     160    
48     80     
48     16     
-192   0      
48     -144   
224    -80    
-48    -64    
112    32     
48     0      
-80    48     
144    -480   
-16    -80    
32     -176   
-144   160    
-16    32     
96     96     
96     160    
-272   -384   
-208   -304   
192    16     
-384   -160   
272    272    
48     0      
144    -128   
96     48     
112    -816   
-16    -80    
32     -160   
48     64     
16     -64    
128    64     
-128   0      
64     0      
16     304    
160    -64    
144    240    
-48    16     
-640   0      
224    -128   
-224   -80    
144    -208   
64     -64    
128    -272   
80     32     
48     -48    
80     256    
-16    144    
32     -128   
-32    -160   
128    -112   
96     128    
-32    -80    
-32    32     
-112   -80    
-16    96     
80     0      
32     48     
32     -368   
64     160    
64     -288   
96     0      
-96    16     
128    -48    
-272   -48    
176    176    
-464   -48    
192    -112   
-224   48     
80     -160   
-208   16     
16     -496   
64     64     
-32    -720   
144    176    
-192   0      
160    -16    
-336   96     
112    64     
-48    -96    
-80    -80    
-96    160    
128    48     
176    192    
96     400    
-96    176    
64     -432   
-80    128    
48     -192   
192    112    
-272   32     
112    -80    
-16    48     
0      -96    
32     480    
224    -256   
112    224    
-224   48     
96     -176   
-192   -64    
64     48     
176    0      
-64    80     
-368   -112   
48     -32    
0      176    
-320   -32    
-96    32     
-96    -64    
80     128    
0      112    
-192   -64    
80     -432   
48     64     
-1008  -160   
208    336    
-768   -32    
304    -144   
-96    -96    
64     32     
-64    192    
-368   32     
32     128    
144    528    
-448   -192   
-352   -96    
-80    144    
272    96     
-176   -32    
-192   16     
-64    -112   
144    -272   
-16    400    
-512   -320   
80     0      
224    208    
-32    256    
-320   0      
-368   48     
-16    -208   
-16    32     
-16    -80    
144    176    
128    -16    
160    96     
48     208    
64     -112   
-48    272    
-32    -16    
-160   176    
-16    64     
-336   -32    
128    -176   
-288   -16    
48     48     
-512   832    
16     2480   
-1136  416    
-224   -816   
-320   -496   
64     -304   
48     -112   
-336   112    
496    480    
-80    -80    
-176   144    
-96    -16    
80     48     
-80    240    
-32    64     
96     160    
-176   32     
-832   -32    
256    -32    
-112   -80    
96     16     
-32    -16    
-16    32     
64     -48    
-64    -48    
-16    32     
16     160    
-64    -64    
48     272    
-32    -16    
-48    -80    
-144   32     
-240   32     
176    128    
-1168  0      
48     80     
-48    256    
-32    32     
-32    -32    
-96    112    
96     96     
-16    144    
-48    -16    
-48    160    
-96    16     
-96    -16    
-48    32     
-64    80     
32     -96    
-160   80     
-272   176    
256    80     
-160   80     
192    112    
-128   64     
-16    112    
128    -160   
-32    176    
-144   -128   
272    16     
-256   144    
16     144    
144    64     
-80    160    
-64    -160   
48     0      
-64    304    
112    208    
-64    -64    
176    64     
-48    48     
0      160    
-96    -16    
192    16     
-32    208    
-160   16     
208    400    
-272   -256   
240    144    
-560   -16    
-32    -112   
64     208    
-192   64     
160    176    
80     -144   
80     80     
-80    272    
-176   48     
-32    -64    
144    -16    
-240   16     
112    144    
-144   16     
32     144    
96     320    
80     -16    
-64    -48    
48     176    
-32    -48    
192    384    
-144   112    
176    176    
-112   0      
128    0      
-128   32     
16     224    
32     -16    
80     -32    
-224   144    
192    208    
-16    16     
80     48     
-96    192    
112    96     
-32    -48    
-48    144    
-80    -32    
272    0      
-80    192    
16     288    
96     144    
16     160    
-144   -16    
48     16     
-96    64     
272    256    
-32    176    
432    368    
-112   192    
-32    192    
-128   16     
16     -96    
-32    64     
-192   -80    
96     16     
0      -48    
64     128    
-96    -64    
16     -64    
-32    0      
96     80     
-16    96     
112    0      
-96    -16    
-48    48     
144    96     
144    112    
-16    -16    
-64    80     
32     80     
144    -48    
-32    128    
-32    144    
112    208    
64     -48    
0      208    
16     96     
208    160    
-208   256    
160    144    
-64    16     
48     32     
-48    80     
48     16     
128    208    
-320   -288   
192    208    
-32    0      
-48    -880   
-48    -16    
0      240    
48     240    
-64    176    
32     224    
-112   64     
16     -64    
32     64     
80     32     
-112   -16    
-16    192    
48     0      
16     0      
16     112    
16     -960   
112    80     
96     96     
-128   80     
16     96     
112    144    
144    128    
16     48     
-16    16     
160    -112   
64     32     
144    160    
64     176    
-64    -32    
-48    -32    
-432   176    
48     400    
-768   -48    
-304   -1024  
-208   -64    
400    -160   
560    704    
48     640    
-432   -560   
288    352    
144    176    
-112   224    
16     80     
-16    -96    
64     -64    
112    -160   
272    672    
160    -528   
-160   -16    
-192   -144   
48     128    
176    -96    
128    -48    
-80    -64    
-48    160    
160    128    
64     176    
-16    -16    
80     -128   
208    128    
-144   -128   
144    16     
144    -496   
-80    -80    
80     -1456  
16     -192   
144    240    
-128   176    
112    0      
-48    48     
160    -32    
-32    112    
48     -32    
80     144    
32     80     
48     32     
0      80     
96     -224   
64     112    
80     128    
80     448    
48     0      
-16    -16    
-16    -80    
96     208    
-32    64     
0      -16    
-80    16     
-80    -768   
112    208    
16     -976   
48     0      
80     64     
-32    192    
192    -96    
-128   368    
-64    48     
112    80     
-96    64     
112    160    
80     128    
0      -192   
32     80     
112    0      
0      208    
128    -112   
-320   -624   
256    -272   
240    416    
64     -2640  
-32    192    
-96    80     
208    80     
16     80     
0      288    
0      -16    
-96    -144   
176    128    
-16    -64    
224    32     
16     48     
16     192    
80     -96    
16     48     
0      -160   
192    256    
-112   -48    
16     -464   
16     32     
-1392  -176   
160    -2320  
-64    -144   
48     -384   
96     -96    
96     -944   
0      -240   
-32    -144   
208    -176   
-96    112    
160    -160   
16     -336   
16     64     
128    -624   
-112   64     
-512   -48    
48     -320   
80     48     
80     -256   
112    -144   
-64    -496   
96     -64    
192    384    
64     16     
-48    64     
-128   -96    
80     -368   
320    192    
-192   -48    
64     -80    
-128   96     
-32    -160   
208    160    
-64    80     
16     -48    
144    -336   
-32    480    
192    128    
128    -224   
-48    -1392  
16     96     
112    -32    
-48    96     
-80    160    
144    144    
-32    -32    
256    144    
-272   144    
96     -128   
-64    -48    
96     -96    
16     -208   
64     -128   
64     -176   
64     -576   
-192   256    
160    -400   
16     -48    
160    368    
160    -32    
-416   -160   
-64    -128   
-144   -96    
16     64     
32     96     
16     96     
336    32     
-192   -576   
272    224    
224    96     
-48    0      
144    64     
0      -16    
48     -96    
80     112    
32     96     
-96    -176   
64     128    
368    -64    
384    -80    
0      -368   
128    160    
-304   -416   
128    96     
128    -288   
112    80     
0      -80    
160    160    
0      -32    
32     0      
-160   96     
64     48     
0      -48    
-32    -176   
-224   0      
16     -80    
-816   160    
-64    -176   
-592   -2480  
1328   -688   
-224   224    
272    -1424  
768    -176   
-896   16     
672    336    
-496   -160   
256    -336   
-96    32     
272    16     
-176   240    
-48    -176   
16     160    
144    -192   
0      64     
80     -48    
48     80     
-48    -32    
32     0      
-80    16     
80     48     
-208   128    
112    -144   
-240   -96    
144    80     
-176   -16    
144    208    
-96    96     
176    -240   
-128   48     
80     -96    
16     160    
64     96     
16     -64    
-160   0      
-256   -272   
224    -96    
-160   112    
272    32     
-176   -64    
-176   96     
160    -320   
-80    -48    
256    -256   
-128   0      
-80    16     
-336   80     
16     -96    
-816   80     
-112   -64    
32     192    
-176   0      
192    0      
-144   -16    
64     48     
16     -48    
-496   -128   
144    112    
-240   -64    
48     80     
-192   -32    
-208   -32    
-128   48     
-368   16     
160    -80    
64     80     
-160   192    
-1632  -80    
80     -16    
-176   32     
-80    0      
160    0      
-96    128    
48     -160   
32     -48    
-16    80     
-304   -16    
112    -48    
-64    128    
-48    112    
16     -64    
-80    16     
-368   128    
176    -112   
-288   32     
-272   -224   
128    -224   
-64    32     
-144   -240   
80     176    
-96    48     
144    352    
-48    80     
64     80     
-80    -288   
64     96     
-128   160    
-144   0      
-32    32     
-368   -112   
-64    80     
-128   -112   
32     -32    
-144   -80    
-112   64     
304    320    
-272   160    
224    128    
0      256    
0      64     
-48    0      
-96    0      
112    144    
0      160    
-176   -80    
48     32     
48     -96    
96     256    
144    -272   
-32    240    
64     64     
-208   16     
-272   -16    
96     80     
-336   -128   
160    224    
192    208    
-208   80     
-112   96     
-464   -112   
0      48     
32     80     
128    192    
16     96     
-192   240    
-32    -16    
64     64     
-160   -128   
0      32     
224    112    
-64    112    
-112   128    
48     192    
-192   32     
80     -32    
96     304    
-288   -128   
0      128    
-16    -96    
-48    -48    
64     64     
80     112    
64     224    
-112   48     
16     64     
-80    112    
32     208    
-48    -64    
144    192    
-64    -16    
0      80     
-384   -64    
-144   32     
-16    -128   
112    64     
160    224    
96     240    
-160   -144   
48     160    
-144   -320   
96     144    
96     144    
-176   128    
-64    304    
-32    -144   
224    208    
-384   176    
64     224    
-144   144    
112    96     
48     -256   
0      208    
32     128    
-64    192    
192    64     
48     112    
-16    208    
-208   16     
80     224    
-176   -80    
16     48     
32     112    
-64    16     
112    272    
-112   160    
64     48     
-64    -32    
1824   -560   
-784   -752   
1696   1472   
-320   720    
1056   -1168  
-688   -464   
48     672    
-96    576    
-48    -96    
144    160    
-48    -208   
144    -144   
-240   352    
16     -16    
144    256    
80     80     
-112   -32    
304    560    
-368   -576   
80     -112   
32     96     
-48    48     
-96    256    
-96    192    
192    304    
-224   112    
128    128    
-64    64     
48     32     
32     224    
32     16     
-32    16     
-96    80     
48     96     
288    368    
-112   -336   
144    -192   
-64    -112   
336    368    
0      208    
-80    32     
128    176    
32     96     
32     48     
-64    64     
0      112    
32     272    
-96    -256   
48     400    
-288   -272   
176    320    
-176   -128   
-32    160    
32     128    
80     96     
-64    -96    
-128   -368   
80     0      
368    688    
-240   -80    
240    0      
-16    48     
192    64     
-112   192    
-128   16     
48     272    
-160   48     
64     16     
-160   -784   
160    96     
80     112    
-64    96     
96     144    
64     176    
-96    320    
64     256    
-48    -496   
32     -32    
576    48     
-64    256    
400    208    
-320   336    
32     48     
48     0      
144    -96    
0      112    
128    176    
-48    64     
176    144    
-48    176    
16     -16    
-64    -176   
128    256    
16     32     
-32    32     
-48    32     
112    -80    
80     0      
-16    -640   
0      80     
32     448    
32     48     
80     96     
-80    176    
64     32     
80     112    
-256   -544   
224    352    
-272   -112   
384    144    
-160   272    
112    -400   
48     96     
-160   -288   
224    48     
48     -544   
160    272    
64     0      
-112   -144   
96     288    
176    160    
-16    -48    
80     288    
16     32     
64     -96    
160    288    
-240   -144   
304    -160   
-336   48     
416    160    
64     -80    
-176   112    
48     -976   
48     144    
32     -128   
256    336    
-240   -288   
160    240    
80     -80    
-80    -96    
48     96     
32     -160   
176    80     
-304   -160   
272    96     
-16    -336   
48     112    
16     -352   
160    176    
-128   128    
192    112    
0      96     
-16    32     
0      144    
112    128    
16     272    
64     -64    
128    528    
48     -432   
0      32     
32     0      
48     208    
64     -112   
48     16     
32     304    
0      -320   
144    -336   
320    560    
304    464    
-160   -224   
-80    48     
272    -176   
-16    144    
-64    -80    
64     96     
0      -32    
112    128    
64     -32    
80     176    
16     -112   
48     96     
-16    160    
64     -16    
208    0      
48     -96    
80     128    
0      -48    
-32    16     
128    -32    
80     16     
64     -112   
-32    80     
16     -16    
80     -16    
-16    304    
-176   -32    
112    80     
-352   160    
160    0      
96     672    
1088   448    
-352   496    
-144   -640   
224    288    
-256   0      
640    -432   
-160   -288   
-96    -112   
176    -256   
-32    -80    
0      -288   
160    -528   
-752   16     
64     -768   
-48    -64    
80     -336   
192    144    
-16    -448   
16     -64    
-64    128    
224    16     
16     -32    
96     -16    
48     48     
-224   80     
288    -80    
-16    -304   
-400   -48    
80     -128   
-64    48     
64     -256   
160    32     
-64    -48    
192    160    
-96    -448   
144    -96    
-32    -176   
32     160    
-48    -160   
80     16     
-192   48     
240    32     
-432   48     
128    -32    
-512   -80    
-96    -432   
336    176    
-224   -256   
368    80     
-192   224    
272    0      
-96    -384   
80     16     
176    0      
-128   64     
320    -32    
-96    192    
-112   -128   
272    0      
-192   96     
-16    -48    
-80    -144   
112    96     
-304   128    
144    -208   
-16    -240   
240    -432   
-128   160    
16     128    
64     -32    
-32    -64    
128    -224   
-304   16     
32     -112   
-16    128    
-96    -16    
-112   -64    
-16    -256   
-16    16     
128    -384   
0      80     
272    -304   
48     192    
-112   -432   
320    -112   
-368   -80    
32     -80    
80     16     
-80    -16    
-240   160    
32     -96    
-64    96     
-80    -304   
64     32     
-32    -208   
-32    176    
48     -128   
48     48     
-32    48     
64     0      
-32    32     
64     -16    
-32    32     
32     -64    
-80    80     
0      -256   
0      272    
16     -32    
48     208    
80     -64    
-80    128    
-16    -288   
128    48     
112    192    
32     112    
-176   -32    
48     0      
240    208    
64     -208   
-224   96     
16     0      
16     48     
0      -64    
-384   256    
32     -256   
64     -176   
-160   -464   
368    192    
-176   96     
-64    -96    
-96    -48    
80     96     
-32    80     
320    112    
-208   64     
-128   -112   
64     96     
144    -192   
-16    -256   
-1728  -192   
336    160    
-240   -112   
-272   -64    
-272   -224   
-544   64     
256    544    
-272   -208   
48     -16    
48     64     
48     16     
96     32     
-80    -80    
-240   -208   
256    544    
-560   -352   
176    368    
48     96     
-272   -48    
-128   96     
32     -48    
-128   128    
-112   -128   
-48    48     
-1552  -160   
32     272    
80     -336   
-128   -240   
-160   -144   
96     160    
-80    32     
-112   32     
16     32     
224    32     
-48    64     
16     -16    
-48    16     
-16    0      
-16    32     
-80    16     
-96    16     
-128   32     
-48    176    
-208   -176   
288    80     
-64    -112   
-48    -16    
-192   96     
-80    -32    
176    112    
48     32     
-112   32     
0      -128   
176    192    
32     16     
192    -80    
-1664  2032   
-512   -1104  
336    -576   
960    400    
400    -240   
-704   -224   
240    -32    
32     64     
16     48     
-320   448    
-432   -128   
-176   -64    
128    80     
288    192    
-352   -208   
-240   32     
112    16     
-16    -64    
0      -128   
304    288    
96     144    
176    272    
-80    192    
-48    16     
96     -112   
-64    144    
-112   -112   
272    -64    
0      96     
336    272    
-320   -48    
0      128    
-496   160    
112    -48    
160    160    
-64    -16    
352    368    
-544   -256   
-48    144    
-80    176    
-112   128    
0      128    
112    112    
16     -176   
-176   -64    
-128   32     
16     160    
-560   448    
-384   -128   
-112   16     
-80    80     
80     96     
-224   -96    
-96    -64    
-16    32     
96     176    
-176   -176   
-288   -224   
-96    -128   
208    112    
-368   -48    
128    32     
-384   -144   
-144   -144   
176    432    
-240   -112   
192    240    
-16    0      
192    -16    
-128   32     
-16    0      
48     0      
-16    176    
-48    -16    
80     208    
-112   -48    
336    896    
16     944    
-32    -16    
-224   -496   
144    64     
32     112    
-32    16     
-16    80     
-48    -112   
64     96     
160    832    
-32    96     
-304   -432   
-64    0      
64     144    
0      96     
-64    32     
0      -128   
16     112    
144    272    
-64    0      
80     -160   
-16    144    
256    240    
48     176    
-80    -48    
48     96     
-32    -80    
160    96     
-112   48     
-80    -272   
32     -384   
-176   -304   
-32    -80    
160    32     
0      112    
0      64     
48     192    
16     128    
128    160    
-208   -64    
128    160    
16     64     
304    432    
-224   32     
48     144    
112    0      
0      96     
160    384    
-112   80     
144    96     
-128   96     
224    208    
-128   -48    
48     32     
-80    96     
224    -48    
-128   0      
336    -16    
-336   160    
176    320    
496    208    
-512   96     
176    80     
0      208    
144    -48    
-80    0      
48     96     
64     32     
-128   -144   
-16    -176   
80     112    
-16    48     
32     112    
80     48     
-16    80     
16     144    
-48    96     
144    48     
16     80     
96     96     
176    352    
-304   -32    
256    -16    
16     208    
64     48     
128    128    
-320   64     
240    128    
-304   -144   
208    -1072  
-16    16     
288    192    
-32    192    
-80    176    
128    320    
-224   48     
240    384    
48     -48    
32     64     
48     240    
16     32     
-16    -16    
32     -224   
-16    176    
112    -928   
-16    304    
-16    -112   
208    272    
0      64     
-48    160    
96     -32    
16     128    
-48    -304   
176    112    
-128   0      
16     208    
224    48     
-128   -80    
96     80     
112    -528   
-16    96     
-256   -272   
0      -1072  
-96    -64    
-112   272    
1152   -576   
-528   -384   
720    448    
-736   0      
416    -176   
-480   -16    
720    144    
-208   256    
80     -176   
-192   -48    
304    -80    
-96    128    
96     -80    
-16    448    
0      -48    
32     112    
128    -48    
64     144    
16     128    
48     -16    
-64    -160   
144    160    
0      -160   
96     160    
-80    -112   
128    112    
-16    -688   
160    -80    
-80    -1520  
16     48     
48     32     
-112   -368   
64     -80    
112    192    
80     -48    
-16    -80    
80     112    
-48    -80    
112    -32    
64     -240   
64     176    
144    -272   
-128   64     
128    -368   
-256   48     
352    48     
-112   224    
16     80     
112    176    
-112   -16    
128    -96    
0      128    
80     -64    
144    144    
-80    -320   
96     32     
16     -32    
0      128    
64     -128   
48     224    
-112   16     
176    112    
32     96     
80     208    
-80    80     
224    48     
-16    0      
144    -128   
-48    48     
112    -336   
32     128    
0      0      
-96    176    
-144   -1072  
176    32     
-208   -32    
112    160    
-80    128    
-16    -144   
224    -720   
64     -96    
-144   -160   
288    -80    
-240   240    
160    -32    
208    160    
-64    -64    
144    80     
0      -592   
-80    -1808  
-64    0      
64     -272   
-16    112    
-160   96     
16     -560   
128    48     
-48    -928   
96     112    
80     -704   
64     80     
0      48     
48     -48    
-32    -16    
272    80     
96     240    
-80    208    
-272   -160   
48     -576   
-1360  -304   
160    -800   
-16    -32    
16     -32    
144    112    
96     -144   
-96    -208   
-16    720    
64     96     
48     -32    
32     160    
16     -144   
-112   -64    
192    112    
48     -224   
-208   -96    
64     -80    
16     16     
128    48     
0      -240   
64     -608   
16     -224   
144    0      
96     64     
16     64     
48     128    
176    -176   
-208   -64    
112    80     
16     -160   
48     192    
0      -176   
32     32     
0      176    
224    96     
-64    -336   
64     32     
64     48     
112    160    
144    16     
0      112    
-16    -32    
32     48     
64     224    
-528   -32    
16     -240   
-80    -176   
-176   0      
64     -16    
-304   -64    
112    48     
-32    16     
64     -576   
-128   -16    
128    0      
-112   256    
48     -208   
208    144    
0      96     
368    -144   
-224   48     
-176   -240   
224    192    
-160   48     
96     -112   
-48    32     
-16    -48    
192    -272   
-16    112    
144    -416   
80     112    
-32    -16    
32     -112   
-16    -64    
64     -96    
16     64     
128    -16    
-272   -32    
144    -16    
-192   -112   
0      -144   
-416   80     
32     -272   
64     96     
128    -96    
-144   96     
-1728  -1024  
576    416    
80     560    
512    -32    
256    384    
-192   -416   
-288   400    
704    -720   
-32    176    
160    -384   
-128   368    
-96    -432   
464    240    
-192   -800   
288    400    
-384   -192   
208    0      
-496   560    
256    64     
-192   144    
64     -704   
-144   16     
480    -368   
-432   480    
32     -320   
-128   496    
-176   -368   
384    480    
-144   -480   
-160   208    
-128   -48    
192    160    
-112   192    
112    -192   
-208   32     
-64    -128   
-240   -144   
-32    -400   
240    624    
-768   -224   
64     160    
-144   -128   
272    32     
-128   -208   
-208   -16    
112    80     
-304   -336   
-320   -432   
-16    -288   
32     128    
16     208    
-48    224    
64     -560   
-144   96     
-304   -336   
240    128    
-432   0      
272    192    
32     -32    
304    400    
-32    160    
0      -320   
-96    16     
-48    -160   
112    240    
-592   272    
-128   176    
-288   -480   
288    384    
-208   -64    
224    64     
32     64     
-16    144    
-32    112    
-112   -80    
32     160    
-64    32     
-288   144    
-64    -304   
-128   -96    
-496   -96    
32     112    
-16    -192   
-32    112    
48     -96    
48     176    
96     -32    
48     128    
-352   -464   
-80    0      
80     -112   
-128   176    
0      160    
-128   -16    
176    432    
-640   -16    
160    -16    
-336   0      
-160   -112   
160    -96    
48     80     
16     -112   
-80    416    
-128   160    
192    672    
-48    352    
224    224    
-352   -288   
96     144    
96     176    
0      176    
-112   80     
-128   -144   
-192   80     
48     -128   
96     112    
-112   64     
176    176    
0      64     
-16    240    
-64    48     
-80    -304   
-112   -144   
-16    96     
128    96     
-32    128    
-80    -32    
-336   -112   
-48    32     
368    -64    
-64    -80    
-192   0      
-160   -144   
320    128    
-240   -96    
208    64     
-416   -240   
64     -16    
-112   -16    
112    16     
-32    0      
112    48     
-112   80     
0      144    
-384   80     
-96    -32    
48     128    
-144   32     
256    32     
-80    32     
16     32     
48     160    
16     0      
-48    -64    
-16    144    
-160   -64    
80     80     
-192   -32    
320    112    
32     160    
16     112    
-144   144    
-64    176    
-32    96     
128    64     
32     16     
-16    64     
16     -64    
-48    96     
32     96     
-128   48     
112    32     
-160   64     
0      112    
-96    112    
16     -192   
112    256    
-112   -96    
128    160    
0      144    
-32    96     
-128   -32    
80     144    
-96    96     
0      -128   
-64    0      
176    -64    
-96    48     
-48    -32    
16     96     
16     96     
0      -16    
208    144    
-208   96     
208    64     
-96    -16    
32     112    
1616   -1296  
-1280  -1744  
304    -464   
-176   -176   
1088   640    
-544   288    
96     -608   
448    656    
64     -256   
-336   192    
-48    -32    
336    80     
-368   320    
384    -256   
-128   432    
240    -432   
-240   464    
192    -240   
-208   304    
96     -144   
-144   352    
192    -192   
-160   416    
240    -160   
-96    144    
176    -96    
-208   320    
160    -64    
-128   160    
176    128    
0      0      
-80    16     
48     112    
16     112    
128    64     
-64    144    
0      48     
-16    224    
48     0      
32     176    
80     -16    
0      144    
32     96     
16     112    
64     48     
80     144    
-32    -16    
-96    128    
-16    16     
64     -128   
96     -16    
0      112    
48     160    
-32    32     
48     96     
64     80     
0      48     
112    128    
-96    160    
144    16     
-48    160    
32     -32    
-16    160    
16     0      
-48    -224   
32     48     
128    -1344  
112    176    
-80    32     
144    208    
-32    48     
80     64     
-16    64     
64     96     
-16    112    
-64    128    
-192   -32    
16     32     
256    32     
-16    0      
336    384    
-272   -384   
-80    80     
192    -16    
-112   -176   
-64    -64    
96     96     
96     224    
-80    48     
16     0      
-64    -32    
80     -32    
112    144    
80     32     
-16    80     
-112   -32    
288    -640   
-160   -208   
48     304    
0      144    
80     16     
-16    240    
16     0      
80     288    
-32    -16    
112    160    
-64    -144   
-32    -224   
-176   -384   
48     -416   
-32    -48    
80     -352   
64     144    
48     -720   
-32    128    
32     112    
-64    48     
192    -64    
128    224    
-112   -80    
64     224    
96     112    
128    -32    
-112   224    
160    32     
224    432    
-48    272    
64     336    
32     32     
-32    96     
32     -2352  
16     0      
176    -48    
-32    224    
32     32     
144    160    
-64    64     
96     -128   
16     80     
48     -160   
144    240    
48     -240   
144    -64    
-144   -704   
160    192    
-64    32     
0      160    
96     -64    
64     176    
64     144    
0      128    
0      64     
96     -208   
80     32     
32     -304   
256    128    
-224   -400   
128    -96    
272    -144   
-48    192    
-16    -272   
-16    16     
48     144    
208    96     
-144   16     
-160   64     
32     -64    
128    -32    
16     496    
-80    -464   
128    144    
-80    -80    
400    80     
-192   64     
16     96     
32     -400   
-80    160    
-192   0      
208    -208   
80     64     
112    16     
-16    -512   
48     16     
128    -2432  
-128   -128   
-16    -16    
160    -32    
-48    176    
240    -32    
-80    -576   
-96    -80    
352    -176   
-48    192    
-80    -128   
-128   -960   
80     -96    
48     -752   
-128   -1168  
-368   1600   
336    1136   
-496   -256   
128    -1040  
912    784    
-464   -64    
288    -112   
224    256    
336    592    
-512   0      
208    -352   
-48    128    
-128   -816   
416    352    
144    32     
96     400    
-464   -640   
560    16     
0      -320   
592    -640   
-416   -224   
48     -592   
336    160    
-16    0      
176    352    
144    -32    
0      608    
-96    112    
96     96     
-528   -240   
128    -160   
128    176    
-32    -704   
0      16     
16     -464   
16     496    
208    -64    
-80    -144   
-112   -288   
272    48     
-208   0      
64     0      
-336   32     
96     -96    
-304   -80    
176    -288   
48     -208   
64     -528   
-192   16     
-48    -80    
48     32     
0      -48    
208    272    
-144   64     
96     16     
-112   80     
-80    -16    
80     -32    
0      -224   
-720   -272   
176    32     
192    48     
-80    32     
224    -16    
-32    -32    
80     48     
-48    -1488  
80     64     
0      -48    
144    -16    
0      128    
64     32     
-16    176    
0      -48    
0      -80    
80     64     
-400   384    
48     80     
0      -112   
-48    -256   
128    -112   
288    -528   
16     336    
-128   48     
256    144    
-192   -16    
144    -16    
-432   -80    
48     -80    
-32    0      
-80    -128   
-208   -16    
64     -48    
0      80     
-16    -400   
48     96     
96     -16    
-48    -64    
-16    -64    
-32    -112   
-256   -16    
-16    -32    
-48    -128   
0      -32    
192    400    
-128   32     
176    -320   
-144   -208   
160    144    
160    -32    
112    192    
32     -176   
-16    112    
-32    64     
320    416    
-304   32     
304    128    
-240   96     
176    -112   
-288   128    
128    -32    
-48    80     
-64    -160   
112    -16    
-528   240    
-80    224    
-528   0      
-1824  32     
192    112    
-256   144    
-352   -80    
-96    -80    
-240   -64    
160    -176   
112    208    
-176   -32    
128    -80    
-256   -64    
-64    64     
-16    -416   
-192   48     
-80    112    
-112   192    
96     0      
-304   16     
-112   0      
-560   -16    
0      144    
32     32     
-64    112    
-96    -32    
0      144    
-144   -80    
-16    160    
-16    -64    
-16    160    
48     -112   
128    48     
-192   128    
0      -128   
-112   128    
-496   -32    
128    96     
-576   160    
80     32     
-576   32     
-160   112    
-48    160    
-96    -160   
176    -112   
-80    32     
0      48     
-176   208    
-352   0      
16     -144   
160    64     
16     -112   
0      -32    
-816   -32    
-192   208    
-384   -288   
112    80     
-16    -160   
176    304    
-224   -96    
32     128    
-64    -64    
48     -32    
0      160    
-96    80     
64     48     
-48    16     
80     128    
-80    -48    
128    80     
-592   -144   
144    144    
2400   -272   
-1360  -144   
816    -16    
-224   1024   
368    416    
576    400    
-1152  -208   
976    352    
-192   96     
-48    -64    
-368   0      
96     336    
272    -80    
-496   320    
-64    -160   
16     16     
80     -32    
64     288    
-96    -176   
96     -16    
-128   32     
-16    112    
-48    144    
-192   -48    
-112   16     
-16    -16    
64     48     
-64    32     
-368   -64    
128    80     
-96    -144   
80     16     
-48    128    
0      160    
64     48     
0      16     
-16    128    
32     96     
-16    128    
0      16     
0      48     
-160   0      
144    128    
-256   -80    
16     144    
-752   64     
16     256    
16     272    
-48    48     
32     -48    
-80    -64    
64     176    
-80    208    
48     128    
16     64     
-80    -16    
16     -160   
80     272    
-224   128    
80     112    
-32    32     
-16    48     
0      48     
-32    -80    
32     -64    
48     48     
0      96     
64     96     
-16    144    
-96    16     
112    112    
-160   0      
80     144    
-80    48     
-48    112    
0      112    
144    256    
0      144    
48     64     
48     -160   
-144   80     
16     -48    
80     -112   
-208   80     
192    112    
16     176    
-240   -160   
144    192    
80     128    
-128   32     
-16    112    
32     -32    
32     32     
128    96     
-32    144    
-48    48     
176    192    
0      432    
96     288    
-208   -160   
48     32     
0      64     
208    160    
-144   -48    
-208   0      
128    96     
32     16     
48     48     
-64    0      
96     80     
-32    96     
-48    32     
16     48     
64     240    
-48    -16    
144    176    
-256   -112   
128    144    
-16    112    
80     32     
-80    16     
32     112    
96     32     
176    80     
-192   16     
-16    144    
48     -96    
208    -384   
-160   0      
32     224    
208    -32    
-48    144    
-176   112    
224    192    
-32    -48    
192    496    
-224   16     
288    112    
-304   64     
256    -96    
96     192    
-32    96     
32     64     
-48    160    
-96    64     
208    -32    
32     -208   
48     -32    
-128   112    
-32    -48    
32     0      
144    32     
112    96     
-16    352    
-192   48     
256    32     
-208   224    
96     32     
96     64     
-128   0      
176    -80    
-208   0      
128    -736   
-32    112    
80     -1216  
160    160    
-112   96     
128    -16    
32     240    
64     144    
128    0      
112    -16    
32     96     
192    -32    
-144   80     
64     48     
288    144    
-192   112    
-48    0      
128    -16    
80     96     
64     144    
16     48     
-64    64     
288    32     
96     48     
16     64     
-32    128    
176    80     
16     32     
80     144    
-240   96     
112    -208   
16     48     
304    -384   
-64    128    
-32    208    
-48    96     
-832   -1920  
784    -592   
112    -160   
384    576    
-432   144    
384    720    
64     -288   
224    144    
320    432    
-576   -336   
0      -32    
528    -592   
-16    304    
-320   -1200  
496    224    
-304   256    
224    80     
0      -352   
-48    -16    
-80    -208   
96     0      
-176   176    
128    -160   
-64    -80    
-32    -224   
80     208    
240    -208   
0      176    
-32    -432   
128    320    
32     -560   
-16    -16    
-16    64     
256    80     
-96    96     
160    160    
-48    64     
112    -80    
48     176    
80     -832   
64     144    
16     -80    
80     112    
16     -112   
-32    96     
0      -752   
16     176    
144    224    
32     -16    
64     64     
-64    112    
96     48     
160    -416   
-192   272    
208    -288   
64     112    
0      -112   
64     160    
64     -208   
112    128    
-48    -48    
16     80     
96     64     
32     192    
-32    -112   
96     -432   
32     128    
80     32     
256    144    
-96    64     
-16    64     
176    32     
-96    32     
192    -48    
-80    96     
128    96     
-112   -640   
224    96     
-128   -880   
64     -2384  
128    -48    
0      -464   
32     64     
224    -2256  
32     -176   
-160   -16    
448    -176   
-80    432    
-176   -32    
240    80     
32     96     
0      -512   
-64    -32    
144    -160   
-32    -224   
0      -32    
128    -80    
-16    32     
48     -480   
144    0      
-32    -640   
112    -176   
96     32     
80     -32    
80     -944   
32     192    
-176   16     
272    224    
-160   -112   
160    -176   
-1072  -144   
32     -160   
176    192    
-48    -512   
-32    -64    
128    -512   
16     -32    
224    -1184  
-64    96     
352    240    
160    240    
32     32     
-224   -48    
-128   32     
144    -432   
-480   -416   
-80    -208   
256    80     
0      -160   
-144   -16    
160    -480   
192    -64    
-32    -2064  
-352   0      
160    -48    
-112   -64    
208    -224   
-32    64     
-320   -160   
416    0      
-48    16     
-16    -64    
-928   112    
128    0      
272    -32    
-32    -160   
32     224    
32     144    
192    96     
48     -144   
-32    112    
80     -80    
-16    -144   
-32    -224   
176    144    
-224   -112   
352    -16    
-240   160    
96     -144   
-256   48     
64     -128   
0      0      
112    -16    
96     96     
224    -752   
-224   48     
0      64     
176    32     
80     -208   
256    -112   
-224   16     
32     -336   
240    -176   
-48    -48    
-144   48     
-80    144    
-768   16     
208    -240   
80     -160   
80     -720   
-64    -96    
-96    144    
80     0      
-48    -192   
16     -96    
-128   -16    
192    0      
-192   80     
-16    -32    
-144   -48    
32     0      
80     -160   
144    -320   
-32    256    
240    32     
-112   16     
-32    80     
1840   1232   
-1456  240    
1568   1184   
-416   528    
1328   688    
-1008  -592   
288    80     
-448   1056   
0      -1040  
-16    608    
-144   -608   
576    288    
-288   -208   
320    -176   
-368   48     
240    -256   
-144   368    
176    96     
-80    208    
224    -64    
-192   -32    
384    144    
-384   128    
16     -240   
-64    64     
-304   -96    
160    -16    
-1392  -352   
48     112    
-112   -48    
-656   96     
-96    128    
160    80     
-80    80     
64     -80    
-48    0      
80     -64    
-16    96     
64     -128   
144    160    
-272   -96    
112    176    
-144   96     
0      -80    
-16    -32    
-160   96     
128    144    
-624   48     
-80    80     
160    80     
-160   96     
128    -16    
-16    -16    
16     -64    
16     96     
-144   -96    
-80    336    
192    336    
32     320    
-176   -32    
-32    -112   
-64    -16    
-336   -128   
-80    224    
-832   80     
16     160    
-160   -144   
112    144    
-240   -416   
32     128    
-80    -176   
32     96     
-48    64     
32     -32    
-80    80     
-192   16     
-48    16     
-160   -48    
-48    -96    
160    176    
-112   208    
-112   32     
80     112    
-160   32     
160    96     
-96    32     
32     32     
-16    144    
-96    16     
-16    112    
-128   -32    
80     0      
-32    -32    
128    208    
-368   32     
32     48     
-1136  16     
160    304    
-64    -64    
96     96     
-144   -16    
48     0      
48     112    
16     48     
0      96     
-96    48     
144    176    
-176   -112   
-32    48     
-112   -32    
112    144    
-320   -32    
96     112    
-48    -80    
32     272    
48     176    
-144   -80    
-112   32     
112    192    
176    0      
-144   -48    
-176   192    
176    -48    
96     48     
-208   112    
48     144    
-16    0      
368    -128   
-576   208    
-112   0      
288    64     
-176   208    
192    -48    
-16    160    
-144   16     
32     -112   
48     32     
-48    208    
240    160    
-240   -32    
176    0      
-256   80     
96     -160   
-16    80     
-112   -128   
352    144    
-256   288    
16     192    
-64    144    
128    -160   
112    128    
32     96     
-208   0      
32     -32    
-128   -160   
144    -48    
-320   -176   
192    0      
112    192    
16     208    
-16    48     
-208   96     
48     80     
64     160    
96     -16    
112    320    
-64    -192   
0      -80    
0      64     
144    -48    
224    288    
-208   80     
-224   80     
16     -48    
112    -48    
208    16     
-144   16     
64     192    
48     320    
-16    80     
32     -16    
-160   16     
-112   -16    
0      112    
-160   16     
96     16     
-176   0      
80     144    
-16    192    
-80    96     
96     96     
160    -320   
128    112    
96     -192   
112    112    
80     48     
32     128    
0      160    
0      -1712  
608    -1680  
16     368    
-240   -352   
688    704    
-384   576    
288    -672   
112    -32    
-48    -48    
144    272    
-144   -16    
128    112    
-176   176    
176    48     
16     224    
16     -96    
-208   16     
416    176    
0      416    
32     16     
-64    48     
32     208    
160    80     
-80    -16    
48     32     
-80    192    
176    112    
16     32     
-16    32     
0      0      
80     112    
0      144    
-32    -544   
-48    144    
144    112    
-64    -96    
16     80     
16     80     
112    64     
-64    32     
32     112    
32     96     
-16    -16    
64     176    
-144   -64    
0      112    
80     48     
-96    -192   
256    128    
-192   144    
240    16     
-112   160    
176    208    
-96    112    
64     32     
80     64     
-112   144    
-16    32     
208    112    
-160   96     
96     144    
64     64     
16     -224   
16     208    
16     -912   
128    32     
-112   176    
240    304    
-272   0      
208    64     
48     144    
-80    48     
48     0      
48     112    
-16    80     
-16    -16    
208    176    
-48    -400   
176    32     
96     -800   
-112   112    
80     64     
32     -304   
0      -80    
-32    176    
64     16     
112    -64    
64     160    
-112   -32    
112    -80    
-32    -192   
80     96     
32     -16    
-16    80     
96     -112   
-80    96     
160    -32    
-64    80     
32     48     
112    80     
80     64     
96     288    
-144   -96    
80     16     
32     64     
160    352    
208    272    
-112   0      
-32    80     
32     -176   
240    96     
-48    -592   
-144   112    
176    -16    
240    112    
32     16     
-16    160    
-32    32     
112    112    
96     128    
64     96     
272    16     
-32    -32    
-208   112    
256    -160   
176    -16    
-272   -496   
64     128    
-16    -304   
144    96     
16     -80    
64     -32    
-80    -16    
48     192    
416    96     
-272   -32    
-80    16     
176    208    
112    64     
144    -192   
-240   144    
80     -288   
240    256    
-64    160    
96     368    
-208   144    
368    352    
-32    -16    
112    -304   
-128   160    
80     -400   
80     96     
32     -96    
16     176    
64     -112   
224    144    
-96    -128   
64     48     
112    192    
80     224    
64     -240   
-48    -96    
96     144    
112    -48    
-96    -288   
16     -528   
336    480    
352    368    
-176   160    
-16    -576   
-48    192    
384    -80    
-16    128    
-160   112    
208    -464   
16     16     
144    -96    
-112   -608   
-48    16     
80     -128   
32     -208   
64     -832   
96     -128   
144    -48    
-64    -176   
176    48     
16     80     
64     -400   
-96    128    
288    -96    
0      272    
-64    -752   
-64    -512   
0      48     
128    -240   
-48    -80    
0      -656   
-448   -2832  
368    -1360  
-336   -112   
224    -272   
480    -448   
-208   384    
496    672    
432    624    
-512   -320   
96     -416   
160    96     
-832   -256   
80     -352   
80     -48    
96     -448   
-96    -176   
224    144    
-112   80     
128    -768   
96     -64    
-128   -384   
-208   -16    
160    240    
192    0      
-144   -288   
128    16     
-288   -32    
-128   80     
-256   -16    
208    -112   
-32    -48    
-48    0      
128    -240   
-128   -1600  
160    112    
48     -64    
-16    32     
224    384    
64     -64    
-160   -304   
-112   -224   
-32    16     
144    32     
-304   32     
160    -208   
-64    -16    
80     -304   
-48    128    
32     16     
32     224    
16     -240   
32     96     
80     48     
112    144    
-112   -128   
0      -144   
-96    -144   
208    160    
-288   -176   
64     -16    
-192   -208   
32     -128   
176    192    
-32    -528   
32     48     
128    -64    
-16    48     
-128   0      
48     112    
-96    64     
64     -64    
-144   16     
80     -48    
-736   -48    
-48    -112   
-304   32     
160    80     
128    272    
240    -240   
80     112    
208    -496   
-48    416    
-80    -32    
64     112    
16     -32    
0      48     
-272   -96    
272    0      
-80    128    
0      96     
-80    -16    
64     -272   
16     -32    
224    -272   
-16    144    
32     -640   
-32    -128   
-224   96     
112    224    
-336   0      
32     -128   
-160   0      
176    32     
-80    32     
-48    -48    
-240   0      
144    -128   
-272   0      
160    -160   
-112   112    
176    -368   
80     48     
-224   -144   
112    16     
-256   0      
160    48     
-144   32     
160    128    
-144   208    
96     16     
-112   16     
-224   -144   
64     192    
-176   -144   
-96    128    
-128   64     
272    496    
-368   528    
-1040  -128   
48     -32    
-336   -64    
48     -48    
176    -176   
32     -16    
-224   32     
0      128    
32     128    
384    112    
-112   -32    
176    384    
32     304    
-144   -208   
16     -64    
-304   96     
112    80     
-448   16     
-80    -192   
80     288    
-160   -160   
-48    -112   
48     16     
-16    -128   
64     176    
-320   -416   
112    -48    
-16    16     
112    272    
128    336    
-176   -80    
-16    64     
-240   16     
-32    -32    
-704   160    
-96    144    
48     208    
-96    64     
-64    -208   
96     176    
112    320    
192    240    
-176   16     
-64    -16    
-80    -32    
-16    160    
-176   144    
-176   -160   
-128   80     
16     128    
-224   -160   
-512   -160   
192    176    
-16    -96    
32     352    
-16    -96    
-96    128    
144    -352   
32     64     
-176   0      
-160   128    
-112   112    
-48    -48    
-16    144    
-656   -224   
96     48     
-1552  -240   
240    224    
-112   -144   
144    128    
2352   -992   
-800   -640   
800    400    
-240   1056   
32     304    
-272   -832   
176    752    
400    256    
-384   -16    
-336   176    
176    224    
-304   -112   
-176   144    
80     -48    
16     -48    
64     48     
-176   64     
64     160    
48     96     
32     160    
48     48     
-240   32     
-96    16     
144    256    
-48    -80    
64     96     
-352   128    
96     224    
-112   -112   
-96    -16    
-32    32     
128    160    
-96    48     
48     64     
-80    0      
-16    -80    
16     -16    
-96    176    
32     80     
-16    -144   
-32    176    
-112   -48    
112    160    
0      -16    
128    128    
-112   80     
176    96     
-128   96     
144    -96    
48     96     
-96    16     
144    80     
-64    144    
112    160    
-192   -176   
32     128    
-48    -80    
48     144    
-48    112    
80     48     
-160   16     
-16    160    
16     -16    
48     48     
32     96     
-16    128    
48     160    
-128   -16    
0      144    
-240   -16    
144    64     
-80    -64    
0      160    
-64    96     
64     16     
-32    176    
-16    144    
0      80     
80     -160   
208    240    
-368   112    
112    64     
-128   16     
-32    -64    
160    -32    
-240   0      
176    224    
-144   -32    
144    208    
-64    64     
80     64     
0      0      
64     144    
-48    -16    
32     -16    
-64    256    
-128   80     
144    48     
0      -16    
112    256    
0      32     
112    112    
-144   64     
112    32     
160    64     
-144   -16    
-112   -128   
-16    -48    
272    288    
96     80     
-48    16     
-112   224    
0      -80    
208    224    
16     -32    
-96    -16    
256    640    
-48    368    
0      144    
112    272    
-256   96     
96     80     
-80    96     
112    32     
-80    -16    
32     -48    
-32    80     
16     -176   
-160   -32    
-32    -192   
16     -704   
80     -96    
-112   -64    
-64    48     
352    48     
-16    112    
-240   -96    
320    192    
-32    16     
64     96     
-32    32     
64     48     
-64    0      
32     192    
64     96     
48     -80    
112    368    
16     304    
-64    48     
-32    -64    
96     144    
16     160    
0      112    
80     16     
64     304    
112    -128   
0      128    
16     -64    
224    352    
-16    112    
80     400    
-16    48     
-112   -176   
-128   32     
192    -96    
0      96     
192    592    
64     0      
-128   0      
112    80     
-16    16     
-80    -64    
16     16     
192    0      
-16    144    
32     -720   
-64    96     
-16    -1392  
-80    80     
112    224    
-96    64     
64     192    
160    -16    
112    176    
-64    64     
112    80     
112    64     
-16    64     
32     -64    
32     96     
48     48     
160    112    
-64    -176   
448    -256   
208    320    
-64    0      
-112   -16    
-16    64     
-432   -1296  
528    -528   
112    416    
-32    560    
-400   -304   
672    -624   
-496   -16    
128    -256   
80     -688   
-80    -384   
256    0      
160    -912   
-96    160    
-224   -416   
464    400    
112    304    
112    528    
-224   -144   
208    288    
-80    -16    
-48    32     
368    528    
-128   -80    
144    32     
-112   -688   
384    -64    
-144   -208   
272    192    
32     -592   
16     48     
80     80     
0      128    
-48    160    
-288   -64    
80     112    
-16    -224   
272    144    
-48    -608   
80     512    
-320   16     
96     256    
272    -240   
16     0      
128    -240   
-144   80     
176    0      
0      384    
160    176    
80     -192   
-288   288    
240    -336   
-32    -32    
80     -16    
-48    16     
64     -272   
96     512    
192    48     
-288   -384   
-64    -128   
80     -304   
192    176    
-112   -32    
352    -592   
48     -112   
288    -1072  
16     -176   
80     64     
16     -16    
176    80     
96     -192   
0      176    
112    -416   
32     400    
-48    80     
160    -416   
-96    -224   
256    -960   
208    -400   
144    64     
144    -688   
-32    16     
80     -480   
48     -48    
64     304    
80     -64    
112    160    
32     48     
208    256    
-32    288    
-80    -320   
-64    -112   
-240   -224   
80     112    
-1136  -96    
64     -80    
-16    -432   
32     -1392  
256    -80    
-112   -656   
112    32     
-128   192    
32     -80    
192    -128   
-160   -16    
128    -224   
32     240    
-160   -128   
80     96     
-288   320    
176    240    
-32    -208   
-64    -288   
32     32     
272    -464   
64     48     
-80    -528   
128    0      
-32    -352   
-16    80     
272    -16    
48     32     
16     -16    
-96    -48    
-160   -416   
48     -144   
-96    -64    
-304   -400   
192    -528   
-240   224    
240    208    
80     -784   
-144   80     
256    -128   
-112   0      
160    0      
48     48     
-112   -160   
48     224    
-160   -176   
-48    -224   
-656   -96    
32     -144   
80     -192   
64     -368   
-256   48     
112    48     
48     480    
160    192    
112    192    
-176   -16    
32     -48    
32     48     
80     -80    
-176   48     
0      16     
-272   400    
-64    -48    
240    16     
16     -384   
48     -48    
48     -336   
-16    16     
144    -768   
64     64     
-16    64     
128    -208   
-48    144    
128    -336   
80     16     
80     -64    
-144   -16    
144    80     
-304   176    
-96    -176   
32     80     
48     -128   
64     256    
-64    -1648  
304    0      
-128   0      
112    0      
-304   96     
112    0      
-176   160    
80     -208   
-16    128    
0      -112   
0      0      
176    -288   
-48    256    
32     -240   
-144   144    
-16    -960   
208    80     
-240   128    
288    0      
-336   16     
-960   -448   
784    1408   
-1344  336    
176    -208   
-64    -480   
-96    288    
-272   384    
272    560    
-176   -176   
304    -192   
-448   176    
-432   -240   
-144   400    
-640   -320   
-48    128    
-32    -208   
192    96     
-128   48     
128    64     
96     112    
-224   -208   
176    0      
144    128    
48     128    
96     -240   
-304   192    
64     -144   
-208   288    
-128   -176   
-160   48     
128    -112   
-112   192    
176    -128   
-208   96     
208    -304   
-176   16     
-208   96     
80     176    
-96    -160   
-304   -80    
-16    -32    
0      96     
0      -16    
-176   32     
-96    144    
-176   32     
-32    -16    
-736   32     
-64    -96    
96     0      
-128   160    
96     -32    
0      80     
-48    -32    
-144   0      
48     -32    
-16    48     
96     160    
-128   0      
32     96     
-304   -96    
48     96     
-480   0      
-80    320    
0      -224   
176    80     
-96    -160   
80     32     
-96    48     
-16    160    
112    -48    
48     16     
-80    112    
-80    0      
16     16     
-48    176    
-208   0      
-128   -176   
32     208    
-352   -144   
224    144    
-128   -288   
128    96     
64     304    
64     -80    
160    80     
-240   64     
112    -32    
80     -64    
0      160    
-112   80     
112    192    
-160   -16    
0      128    
-432   192    
-208   48     
80     -96    
-16    32     
-64    -32    
-112   -64    
64     112    
-48    -96    
-64    64     
96     16     
-208   64     
176    176    
-144   32     
-288   -64    
64     -32    
-160   -32    
112    160    
64     -160   
-48    -48    
64     160    
-192   16     
0      16     
64     160    
0      -32    
80     80     
-240   -304   
-224   48     
-144   208    
-128   -96    
112    96     
-384   -16    
-96    -48    
128    -96    
-336   16     
192    192    
80     176    
112    112    
-96    -176   
-192   256    
160    0      
144    256    
-384   112    
512    336    
-320   112    
96     96     
-432   -64    
304    64     
32     64     
-112   -16    
112    48     
0      192    
-64    -128   
0      448    
144    560    
-224   -224   
112    48     
-144   -48    
48     240    
-80    -16    
96     -96    
-176   -448   
112    96     
0      48     
48     272    
48     528    
-96    -64    
-192   -224   
80     -208   
80     -64    
128    96     
-48    160    
-112   -528   
240    80     
-96    288    
0      176    
-544   -32    
16     0      
144    48     
240    240    
-224   208    
-160   -16    
16     -32    
128    48     
320    128    
0      272    
-240   -32    
-112   -112   
96     16     
240    128    
0      160    
0      -32    
-16    96     
144    208    
64     112    
-64    128    
-48    0      
80     80     
-32    96     
144    64     
96     256    
-240   -64    
192    80     
16     112    
240    64     
2208   -1824  
80     -800   
960    1312   
-752   304    
1040   -208   
-704   -608   
496    144    
-240   48     
-144   -224   
640    -112   
-352   368    
176    64     
-432   256    
128    -240   
96     64     
144    -272   
32     384    
-160   256    
-32    400    
-128   -240   
352    352    
-192   112    
48     272    
-176   -208   
240    -208   
-80    -288   
1008   576    
-288   256    
-176   -272   
-288   -224   
160    -400   
64     416    
-176   -80    
240    176    
-400   -32    
176    112    
-16    64     
80     480    
128    112    
32     32     
144    -288   
240    64     
-112   224    
-80    224    
-16    48     
160    96     
192    0      
96     144    
48     0      
-64    96     
-128   192    
48     80     
320    144    
-176   -256   
112    64     
32     144    
-48    320    
-160   -112   
704    576    
-352   -352   
224    -32    
-16    -48    
80     -128   
-144   192    
256    176    
128    128    
0      128    
144    176    
-48    208    
16     144    
0      16     
64     112    
-64    -32    
64     32     
64     208    
48     -304   
-160   -192   
304    -560   
-16    144    
-16    992    
208    -128   
-176   0      
16     -64    
112    96     
64     272    
-176   48     
176    112    
-128   112    
288    -128   
-160   -16    
-64    -176   
48     16     
80     -432   
160    272    
0      -1152  
80     64     
-16    -464   
272    208    
272    336    
-48    336    
64     32     
-96    32     
80     96     
96     -304   
48     112    
-32    -96    
16     -32    
48     -272   
-64    -176   
208    -1152  
224    416    
-160   -128   
-64    80     
96     112    
160    64     
-128   -96    
-32    64     
48     256    
208    16     
192    336    
-336   0      
368    160    
-144   -768   
-176   160    
336    144    
-160   320    
320    576    
-48    256    
-16    32     
96     144    
-64    96     
224    -144   
-64    336    
304    -224   
-32    -16    
-16    -416   
-144   128    
-16    -384   
256    112    
-32    -144   
144    176    
-48    -32    
96     240    
-176   -16    
208    272    
-96    64     
256    288    
-112   64     
208    0      
-192   80     
176    -160   
48     80     
0      -48    
64     96     
96     -176   
64     144    
0      -16    
-32    80     
224    -64    
48     -1056  
64     -96    
-80    32     
80     -272   
0      -80    
240    64     
0      0      
-32    128    
176    16     
-128   64     
176    -64    
16     80     
176    -128   
80     272    
-192   208    
-336   -80    
64     -544   
192    -176   
128    -240   
-192   -32    
80     -640   
176    -16    
-80    352    
96     -176   
0      16     
96     -80    
80     -304   
16     192    
-16    -96    
-112   16     
-416   -128   
160    48     
-464   16     
144    32     
16     -96    
48     -48    
176    80     
-112   -864   
-144   416    
224    -544   
112    704    
336    656    
-496   -112   
0      -384   
672    -832   
-304   352    
-240   -464   
384    -16    
-224   -160   
464    368    
-32    -800   
-208   320    
240    -240   
240    288    
-32    0      
-224   0      
96     160    
176    16     
-16    -80    
96     -160   
-160   96     
208    -96    
-384   -80    
48     -304   
-528   -240   
32     -80    
48     224    
368    -240   
-352   -144   
-16    -1216  
96     224    
80     -64    
-32    144    
48     -112   
128    144    
48     64     
96     -64    
-208   -112   
-32    16     
-224   112    
112    32     
128    64     
-112   -384   
128    -80    
-16    -192   
176    144    
-16    -112   
-96    96     
-32    32     
176    -48    
-80    64     
96     16     
-112   -48    
-16    0      
0      112    
80     -80    
-256   80     
-48    -224   
80     -80    
96     -16    
0      112    
80     -144   
-48    -16    
80     -80    
-128   -128   
-112   -64    
64     64     
-128   -96    
192    32     
-512   -32    
192    -112   
-608   -64    
144    -272   
16     144    
32     -416   
144    -112   
64     -624   
-48    -160   
-80    -32    
112    112    
-48    80     
-16    -48    
16     -112   
48     -112   
80     336    
-144   112    
-16    -224   
48     -112   
-160   32     
240    -256   
-160   64     
-176   96     
64     -80    
-208   -112   
64     64     
32     96     
96     0      
-48    -176   
112    256    
0      64     
-336   -48    
-80    128    
160    -368   
32     224    
-656   -272   
176    416    
-48    16     
-96    128    
-96    -80    
64     48     
-64    32     
80     16     
-64    -48    
0      16     
-96    -80    
64     -112   
-16    -256   
-976   -480   
112    272    
-320   -80    
160    128    
48     160    
-144   272    
-112   192    
-384   -96    
-240   -96    
-528   80     
256    416    
48     48     
-368   -256   
32     -112   
96     32     
-80    48     
320    384    
-416   -304   
128    -16    
-112   128    
-96    -256   
144    112    
-368   32     
96     80     
-240   0      
48     192    
-560   -80    
-80    16     
-176   -128   
160    32     
80     32     
96     128    
-16    -144   
-224   -48    
32     64     
0      112    
-80    -16    
48     96     
-224   -96    
-224   -96    
32     0      
-1376  -48    
-48    96     
-128   -64    
272    208    
-80    -320   
64     80     
48     -32    
-112   192    
-64    -32    
208    96     
-208   80     
-32    -16    
-48    144    
-208   32     
96     32     
-128   80     
-32    80     
-64    -80    
144    16     
224    16     
-176   -80    
-48    64     
64     128    
192    112    
-224   16     
48     176    
-240   64     
224    16     
-160   224    
-80    -128   
64     64     
16     144    
-688   -192   
-240   128    
144    64     
80     16     
32     128    
-112   16     
1856   -1696  
-352   -1936  
864    976    
-608   592    
672    -128   
-288   -288   
-240   112    
32     624    
-576   -224   
512    -304   
-288   448    
208    -128   
-224   192    
-64    -192   
112    384    
-96    -208   
128    528    
-224   -96    
272    320    
-48    -272   
16     192    
16     -192   
-16    192    
-96    304    
16     -16    
-48    32     
80     80     
96     208    
96     -304   
0      176    
16     -96    
64     192    
-32    128    
-112   144    
80     48     
-160   -80    
48     192    
176    640    
-128   -272   
-352   -640   
-48    128    
112    96     
-16    64     
-32    -96    
64     -48    
160    48     
-64    48     
-160   -64    
-176   0      
-80    -80    
-32    -80    
-32    48     
64     224    
-80    272    
-288   -32    
16     304    
-96    112    
80     160    
112    112    
128    208    
-64    48     
64     32     
-64    64     
32     144    
16     0      
96     80     
-48    112    
48     48     
-64    112    
176    32     
64     80     
0      80     
32     112    
-32    32     
80     32     
-16    80     
48     176    
-16    80     
-16    -32    
208    336    
-320   112    
224    64     
-16    576    
-80    112    
32     64     
-80    -16    
48     144    
128    416    
-192   -64    
-96    48     
96     -64    
-16    80     
128    208    
112    160    
64     208    
-144   96     
-96    -256   
64     -224   
-48    160    
128    -16    
272    400    
-160   272    
-32    64     
64     32     
112    208    
-64    240    
128    80     
-16    208    
-208   -320   
224    176    
16     -64    
192    144    
-240   -240   
128    256    
96     80     
-64    32     
80     80     
-128   -160   
192    176    
208    352    
-16    288    
208    224    
-160   48     
-80    -32    
128    -96    
-256   144    
160    144    
160    -48    
-112   -464   
-128   64     
96     96     
176    -64    
-176   64     
272    48     
176    -32    
-192   -144   
-176   112    
128    176    
160    0      
-112   80     
-128   -352   
160    0      
0      128    
-112   -176   
208    112    
48     112    
-112   176    
96     256    
96     32     
-128   0      
128    0      
32     80     
96     160    
0      160    
96     -16    
-80    112    
-64    -80    
304    -32    
48     0      
-48    160    
64     272    
-64    208    
160    448    
-48    208    
176    -32    
-16    64     
16     112    
112    48     
-64    -112   
-48    336    
-288   -32    
80     -208   
112    64     
240    -192   
0      -16    
64     -800   
16     -240   
128    288    
-128   160    
64     -32    
96     224    
-16    0      
112    288    
-112   16     
-80    144    
64     128    
0      -224   
176    -48    
48     -128   
-48    176    
128    -352   
-96    32     
128    -1952  
-32    96     
160    -304   
16     240    
-48    96     
64     576    
720    448    
-592   368    
32     768    
-656   224    
976    -752   
-256   -496   
-272   -96    
464    -128   
272    384    
-16    -992   
64     432    
-96    -1584  
128    576    
16     -480   
272    544    
-96    -240   
-176   160    
272    192    
-48    -192   
128    -208   
-64    -16    
0      144    
96     -288   
-32    64     
160    -480   
-144   224    
112    32     
-48    240    
80     -48    
16     96     
16     -64    
-32    32     
80     96     
32     -48    
16     0      
160    -192   
-32    208    
112    -384   
16     -48    
-48    -832   
176    160    
48     144    
112    96     
-16    32     
-48    160    
112    80     
176    96     
-64    -192   
144    -96    
-112   176    
176    -192   
-64    96     
80     48     
-32    224    
48     -64    
96     208    
16     48     
80     -1632  
80     -48    
16     -640   
-16    -368   
48     -96    
-16    -720   
64     -352   
112    240    
-16    -80    
112    176    
-64    -96    
192    96     
-80    -784   
32     -1648  
96     32     
80     -464   
-128   64     
-128   48     
144    192    
-144   -176   
352    0      
-144   48     
208    -320   
-96    16     
-80    320    
80     -32    
16     176    
-16    -192   
288    48     
112    384    
128    -48    
48     80     
32     -32    
48     0      
48     0      
-64    -32    
16     48     
192    -144   
-32    0      
224    -160   
0      32     
64     -208   
64     192    
160    96     
-128   -16    
16     -96    
80     -144   
-176   -80    
-128   -384   
-272   64     
32     208    
96     -144   
-16    -512   
0      -176   
176    -208   
112    16     
-32    -192   
48     128    
176    112    
80     432    
80     128    
48     96     
-192   0      
-32    -96    
-736   -112   
272    16     
-224   -80    
144    -176   
-224   16     
160    64     
64     32     
160    -592   
-32    144    
144    -64    
-80    64     
-48    32     
80     64     
64     96     
-16    -128   
-240   -80    
48     -224   
-272   112    
80     -64    
32     80     
48     -112   
48     -48    
160    -720   
-112   96     
16     -288   
128    64     
-64    64     
176    48     
-320   -48    
32     -416   
-160   32     
240    112    
-352   96     
-80    -176   
-1824  -16    
144    -16    
16     -96    
0      -560   
128    304    
144    -224   
16     160    
32     -64    
144    128    
-224   -144   
96     80     
-80    336    
0      32     
16     -96    
16     -160   
-752   -16    
112    -368   
16     112    
32     -64    
64     112    
112    -752   
-96    -160   
16     -48    
-16    64     
80     64     
0      48     
-128   -16    
128    16     
-48    0      
-208   -160   
32     0      
0      16     
128    64     
48     -240   
-32    144    
-144   -144   
48     -32    
-32    -16    
224    -16    
80     160    
-128   -48    
-160   -64    
-672   -1888  
480    -32    
304    -80    
112    -368   
-48    -448   
-48    224    
-1424  192    
0      -704   
-192   128    
432    -272   
352    304    
-528   -48    
32     96     
64     48     
-48    -16    
80     432    
144    80     
-480   464    
-256   -144   
-336   -160   
432    176    
-528   -352   
160    -144   
-112   80     
-352   -96    
128    -32    
-400   -208   
112    96     
-784   -32    
96     224    
-128   48     
-48    112    
0      -240   
32     80     
16     -48    
64     -32    
80     -80    
-64    160    
-144   80     
48     32     
-176   64     
-160   0      
0      32     
16     240    
-48    32     
-784   -48    
-208   -48    
48     -96    
-16    48     
96     -128   
80     32     
-32    192    
-112   112    
48     -176   
0      96     
-112   128    
64     176    
-32    -80    
32     64     
-160   80     
-80    -112   
64     160    
-96    48     
96     272    
-176   -128   
240    32     
16     144    
-192   80     
112    -64    
0      -32    
-32    96     
-112   112    
0      16     
0      -48    
-16    160    
-336   -192   
176    128    
-224   -32    
96     160    
-32    -80    
-208   -80    
112    64     
32     -96    
32     96     
-224   128    
64     256    
-80    32     
-112   -16    
16     -128   
160    -32    
-144   16     
-16    144    
-224   -128   
-64    96     
-80    -288   
-32    -160   
-64    224    
48     448    
-112   48     
-96    128    
-144   -16    
96     112    
64     160    
-80    32     
16     32     
-112   -176   
0      176    
-320   64     
96     -16    
-80    32     
-80    64     
80     -16    
-80    -96    
80     128    
-96    -112   
64     144    
-144   32     
256    208    
-160   48     
0      160    
-112   96     
-16    192    
160    -48    
-144   160    
-32    160    
160    -240   
-288   -128   
64     288    
0      32     
208    80     
-272   48     
16     0      
-112   16     
-160   -128   
-192   -32    
-128   -128   
-64    208    
192    16     
192    112    
-288   -16    
144    224    
224    64     
-224   80     
-128   -16    
112    -64    
-48    -32    
128    -48    
-144   16     
224    0      
-16    112    
-160   48     
112    160    
-64    -32    
64     144    
-16    -16    
80     48     
0      144    
96     -16    
-144   176    
256    80     
-96    176    
64     64     
-32    80     
-80    112    
208    32     
-112   96     
-32    -16    
160    272    
-48    192    
80     -16    
96     112    
16     96     
-160   48     
80     80     
0      -32    
144    144    
-96    80     
-32    160    
-64    -48    
80     80     
-144   -48    
32     144    
-16    0      
128    112    
112    240    
-128   -128   
112    -64    
160    144    
-160   192    
32     128    
0      -16    
0      80     
96     -80    
-32    -96    
160    16     
128    192    
80     192    
-80    144    
-992   1200   
880    272    
416    -176   
-32    -496   
544    -1040  
-416   -1200  
864    464    
0      784    
-80    16     
-256   -96    
640    96     
-272   192    
112    32     
-240   320    
288    -80    
-64    96     
-144   -80    
0      80     
-80    -32    
208    32     
-32    -32    
160    64     
-112   304    
64     -96    
-48    96     
-128   -96    
48     32     
144    -16    
48     -1200  
96     0      
48     16     
16     128    
144    208    
32     144    
-32    0      
-64    32     
32     144    
32     144    
80     16     
0      112    
96     80     
-80    -96    
208    176    
-160   -448   
96     32     
-64    80     
192    224    
96     288    
-48    48     
32     -112   
-48    192    
96     48     
112    96     
-32    0      
-32    96     
-48    32     
-48    -272   
96     176    
0      -352   
208    384    
112    144    
32     208    
-16    144    
16     -16    
80     64     
240    208    
-112   -320   
16     160    
-32    -192   
-160   32     
-112   32     
176    -144   
-16    0      
128    -128   
-16    48     
368    -512   
-352   128    
224    48     
192    176    
48     -144   
0      304    
-96    48     
-48    16     
304    96     
32     192    
48     32     
128    304    
-48    160    
144    -176   
32     -48    
16     -192   
80     96     
16     -512   
0      144    
48     -96    
80     96     
-64    32     
96     240    
32     96     
0      -80    
80     128    
32     -192   
112    144    
96     32     
-80    80     
112    -368   
64     192    
32     -464   
96     128    
-128   -64    
160    112    
-16    160    
128    192    
-128   0      
128    -80    
-48    32     
192    -112   
-16    224    
144    -144   
32     240    
-64    -240   
16     128    
64     -224   
208    256    
-48    64     
320    368    
-304   176    
320    -48    
-128   0      
144    -192   
112    336    
32     -16    
112    96     
-176   -128   
288    16     
-32    80     
-16    -80    
192    64     
-128   112    
160    240    
-96    -64    
64     96     
208    304    
-32    64     
48     16     
96     768    
-144   -400   
576    160    
-272   -96    
272    0      
-192   -352   
128    288    
112    -112   
208    -336   
-208   -16    
224    -944   
-144   224    
-624   80     
32     -96    
224    -32    
160    -1056  
-16    -128   
0      -800   
-32    -192   
240    272    
-48    -48    
96     336    
-400   16     
288    -976   
-64    128    
112    -144   
-96    224    
80     -192   
-16    -384   
32     -176   
80     -400   
-96    -16    
112    -1008  
64     48     
32     -128   
32     192    
-80    -32    
-144   -16    
-16    -128   
64     128    
48     -80    
-32    16     
-192   -112   
192    -192   
288    -176   
256    -112   
-16    32     
-32    -192   
-208   160    
-64    -1120  
48     -176   
16     -176   
192    1536   
48     192    
-592   -304   
288    -256   
240    368    
-464   -224   
176    448    
16     16     
-16    320    
96     0      
-240   -128   
-112   -240   
208    -688   
480    -368   
-320   128    
192    -32    
80     48     
-64    0      
16     -32    
0      -80    
-144   256    
32     -80    
0      112    
32     -240   
16     -96    
80     112    
112    -32    
-80    -96    
48     -48    
96     -256   
-48    112    
112    160    
16     16     
-144   48     
32     -112   
-48    -320   
256    -160   
-352   144    
256    -304   
-1520  -16    
32     -96    
-192   176    
144    -272   
-48    -16    
64     -400   
192    128    
0      -32    
-96    -208   
160    96     
-96    112    
96     -64    
0      80     
-496   -112   
304    48     
-384   0      
208    128    
-48    -16    
144    -400   
48     48     
112    -560   
-48    80     
160    -400   
48     -16    
0      -16    
64     -16    
32     256    
48     96     
-80    128    
32     -80    
16     0      
-32    -144   
32     0      
64     -240   
80     80     
48     -48    
16     16     
48     240    
-128   -128   
-160   -80    
-32    -96    
-96    -160   
208    16     
-240   224    
48     -160   
-96    -96    
-80    -80    
-816   112    
48     -80    
-32    320    
112    -304   
240    288    
-336   -48    
240    -112   
-32    -96    
96     112    
80     384    
-208   16     
96     -48    
32     -144   
-64    64     
112    80     
-64    144    
-944   -128   
-176   -160   
-608   -336   
-384   16     
208    80     
-272   96     
112    112    
-336   144    
112    176    
-64    80     
-64    -80    
176    48     
-96    224    
112    144    
-96    -80    
-400   -560   
-64    48     
-16    -224   
0      -192   
-288   48     
-224   -64    
176    -16    
-128   -112   
240    96     
-1200  336    
208    112    
-160   -48    
-144   96     
-320   -128   
304    192    
-32    -80    
144    112    
-64    352    
-112   -48    
208    128    
-160   -32    
48     96     
-64    -16    
-208   -32    
64     48     
32     80     
-544   -64    
-304   -112   
-64    -48    
192    48     
-144   -96    
80     32     
-48    96     
32     -16    
0      -16    
-112   -32    
16     144    
-16    48     
112    240    
-144   -80    
-32    288    
-1056  -144   
224    112    
-48    16     
128    240    
-80    -48    
-80    16     
-32    -144   
16     48     
-96    -592   
48     128    
48     176    
-32    144    
-160   96     
-96    -96    
32     256    
-352   -528   
192    224    
48     48     
-16    192    
-160   -128   
48     0      
-64    48     
-16    -96    
-48    128    
144    160    
32     176    
-96    48     
96     32     
48     80     
288    352    
-48    -16    
48     160    
-384   -32    
16     128    
-48    0      
112    -368   
96     112    
16     272    
112    128    
-304   -64    
-752   1936   
-336   192    
-592   192    
-272   -240   
-208   720    
272    -32    
-208   -496   
-800   64     
112    0      
-80    -256   
384    144    
448    288    
-192   160    
16     -16    
-48    -96    
16     192    
0      64     
-96    64     
-288   -528   
96     -96    
-192   -304   
160    176    
-496   -16    
224    48     
-192   16     
192    176    
144    112    
128    128    
-160   64     
208    -16    
-208   208    
208    -32    
80     32     
-192   16     
48     16     
-80    96     
224    128    
-224   64     
128    80     
-16    64     
16     -96    
0      80     
112    -96    
16     96     
32     48     
-32    0      
-16    288    
48     288    
-112   48     
32     32     
0      -80    
80     144    
16     304    
-64    80     
0      48     
48     32     
-32    -32    
224    -16    
-48    176    
-48    224    
144    112    
-272   -176   
80     256    
-32    -128   
32     112    
-48    128    
48     48     
48     32     
-64    64     
64     96     
32     80     
32     64     
16     64     
16     128    
-80    96     
32     112    
160    336    
-112   80     
-80    -112   
112    -80    
-208   32     
80     160    
32     96     
240    352    
-96    208    
48     0      
-176   -176   
16     -368   
224    -160   
144    144    
32     400    
-128   16     
-32    0      
-16    -16    
208    176    
-64    64     
16     160    
-80    112    
80     32     
-16    -32    
64     64     
64     272    
48     176    
-48    0      
-80    16     
48     96     
-48    -16    
96     336    
-176   -176   
256    272    
-176   -16    
144    112    
-48    64     
160    128    
16     48     
16     128    
-144   -224   
64     96     
80     224    
80     -80    
-80    0      
-160   48     
400    288    
-32    -48    
-128   176    
0      192    
240    -976   
32     32     
-80    64     
192    -16    
16     240    
80     160    
64     96     
-16    144    
128    368    
-192   112    
128    0      
0      160    
-64    32     
-16    -352   
-64    -48    
-16    -1616  
112    112    
32     16     
144    64     
-320   -208   
352    -16    
-128   96     
160    432    
-160   96     
-16    192    
160    64     
-80    256    
64     -32    
-144   -288   
32     -144   
368    -512   
-208   144    
64     -832   
64     368    
48     -208   
224    352    
-32    0      
32     304    
160    -208   
64     224    
48     -128   
-160   0      
-64    -80    
192    -96    
96     112    
176    -144   
-144   224    
16     -112   
192    304    
160    272    
16     0      
-64    48     
112    192    
32     48     
192    144    
-128   -48    
-48    -16    
64     16     
-48    16     
128    48     
-32    -384   
128    352    
-80    -400   
16     240    
64     -304   
-16    48     
128    -48    
64     144    
80     -176   
160    160    
-80    -32    
-16    192    
288    1024   
624    848    
592    -352   
-16    800    
-560   80     
288    80     
-160   480    
832    -256   
-320   160    
-304   0      
384    144    
-64    32     
-112   -16    
256    48     
0      -208   
64     96     
-16    -320   
32     144    
96     64     
16     48     
48     16     
16     48     
160    -80    
0      208    
48     -48    
-144   224    
80     160    
80     128    
64     -16    
32     -320   
96     48     
48     -96    
-80    128    
160    -144   
32     64     
16     -176   
128    128    
-48    -96    
96     96     
144    -48    
-64    64     
-32    192    
192    -1296  
-96    -896   
0      -176   
32     -32    
288    144    
32     64     
0      -64    
-96    192    
240    -112   
-176   144    
144    -320   
224    -1424  
-144   128    
208    -128   
-80    0      
-144   0      
96     -544   
0      32     
48     -112   
64     -112   
48     -368   
64     -176   
128    160    
-64    0      
128    128    
64     16     
48     0      
96     32     
-32    -64    
96     112    
-16    -80    
192    96     
64     -224   
240    -672   
80     64     
-176   -560   
192    144    
-48    80     
224    128    
-80    480    
-16    -224   
208    -320   
-176   112    
80     240    
-64    32     
-160   -32    
-48    -144   
-64    -80    
-64    -208   
128    32     
32     -32    
192    64     
-96    -816   
0      -304   
160    -112   
-144   224    
96     -128   
-16    32     
16     0      
160    -224   
-224   -128   
144    -160   
-320   32     
224    -96    
-112   128    
256    112    
16     48     
16     -896   
-32    32     
48     224    
32     112    
16     -80    
192    288    
-32    80     
0      -160   
-192   -80    
-16    -80    
-272   -112   
0      -128   
80     -160   
32     -432   
-144   -48    
48     -160   
48     208    
0      -1136  
320    240    
-48    -64    
-144   -80    
-80    64     
352    272    
0      320    
112    176    
-256   80     
-80    -64    
-656   112    
160    32     
-496   64     
-48    -96    
-128   80     
176    -320   
48     -192   
-16    -128   
80     208    
32     80     
192    -96    
-240   -96    
160    -192   
-240   -16    
32     -16    
-96    48     
16     -32    
-16    0      
112    -96    
-128   -192   
112    -688   
-32    -144   
256    -1120  
144    160    
-96    64     
64     -16    
-688   -144   
32     -304   
-80    16     
128    16     
48     -160   
96     32     
-528   -160   
96     -432   
-32    112    
160    -320   
160    144    
-176   -16    
96     160    
-128   -16    
176    -32    
-48    192    
48     32     
32     -224   
-16    -304   
-304   160    
176    -192   
-288   48     
128    80     
48     352    
0      -96    
144    192    
-208   48     
-144   -80    
0      -32    
80     -192   
48     176    
-64    0      
80     112    
32     -96    
-48    0      
1616   -1824  
544    368    
-688   -1248  
-144   -352   
112    -256   
-432   -720   
-224   128    
-480   320    
-288   -272   
-560   0      
-192   64     
0      -48    
-48    -160   
96     -64    
160    160    
-608   16     
304    160    
-576   -304   
80     64     
48     80     
-64    80     
-64    -64    
-16    48     
0      368    
-304   -32    
-80    -112   
-432   -336   
-160   -224   
240    304    
-32    240    
80     -32    
-32    48     
32     -176   
272    304    
-176   32     
256    48     
-48    240    
144    352    
64     240    
-272   -336   
-16    48     
-464   80     
80     96     
-256   208    
-80    -128   
-208   -416   
64     208    
96     208    
-288   -16    
-16    160    
-16    -272   
48     288    
-128   -64    
32     64     
32     -16    
32     96     
-64    32     
176    672    
-368   -464   
192    208    
-144   -304   
48     368    
-112   -160   
128    128    
-48    -48    
32     -16    
-64    32     
-80    144    
48     0      
16     96     
-16    80     
16     32     
-48    0      
-192   48     
224    80     
0      -16    
-16    -320   
-48    32     
-160   -128   
32     -112   
-272   288    
336    144    
-64    128    
64     -64    
0      16     
32     224    
-432   -544   
64     -64    
-64    112    
48     176    
-720   16     
-96    112    
96     64     
32     -16    
-16    96     
-32    48     
80     160    
-64    32     
32     -48    
-64    -48    
32     144    
80     176    
-48    144    
-144   -48    
0      64     
-560   -112   
32     16     
-16    16     
16     -16    
-16    160    
64     0      
-16    80     
-32    32     
80     128    
-48    64     
32     160    
144    512    
-48    0      
-80    -128   
-32    80     
-16    48     
-16    32     
32     128    
0      240    
64     96     
-32    -208   
-160   32     
144    48     
208    672    
96     160    
-144   64     
-208   352    
240    64     
-208   32     
320    288    
-400   240    
112    128    
-32    16     
-112   -144   
16     224    
96     16     
64     80     
-112   0      
32     0      
16     80     
-48    32     
-208   192    
80     384    
-240   -48    
80     80     
0      48     
-48    80     
144    64     
32     224    
-96    144    
256    256    
-32    160    
192    864    
-416   -592   
-48    0      
112    160    
48     144    
112    128    
-64    -16    
64     192    
-112   304    
96     400    
-416   -352   
128    240    
240    320    
-64    -32    
80     352    
-176   -96    
-128   -160   
48     -144   
256    144    
-112   -48    
192    352    
-128   112    
176    112    
-16    192    
16     160    
0      128    
208    -128   
48     160    
48     48     
-32    64     
0      80     
16     64     
-32    80     
128    192    
-144   128    
-32    16     
-32    48     
-64    -64    
192    192    
32     0      
80     288    
512    -16    
-704   -992   
464    496    
-368   608    
848    -896   
48     -160   
256    -32    
-496   176    
128    -64    
-240   80     
416    -32    
-144   -96    
16     320    
64     -32    
80     352    
-32    -48    
-64    224    
112    96     
96     128    
64     -48    
-32    128    
32     192    
80     96     
16     -176   
-80    -144   
0      64     
0      -720   
16     112    
-96    -48    
64     48     
64     144    
48     80     
-64    32     
-48    128    
80     0      
16     -64    
-80    -64    
32     160    
128    64     
-64    -320   
-32    144    
80     -336   
112    48     
-144   160    
64     -64    
48     32     
80     208    
80     128    
16     64     
-128   16     
96     192    
128    32     
32     208    
48     48     
0      -160   
48     -64    
16     160    
32     144    
192    -944   
0      64     
16     128    
64     64     
0      272    
80     160    
64     16     
48     0      
32     0      
96     416    
-224   128    
80     -336   
176    -32    
-16    -176   
-96    176    
80     -896   
96     -16    
-32    -48    
288    -32    
176    0      
176    144    
-80    288    
-160   64     
240    -16    
-32    96     
288    -160   
80     208    
-304   -48    
336    -208   
-224   32     
224    -544   
16     80     
32     -400   
32     16     
16     32     
32     240    
-128   -128   
96     48     
32     -176   
64     160    
-16    48     
32     -16    
16     160    
80     -752   
32     240    
-16    -240   
208    64     
-64    -16    
288    224    
-144   80     
32     144    
16     0      
64     64     
32     128    
96     -144   
32     96     
48     -992   
96     96     
-64    -176   
384    240    
48     32     
208    112    
-144   -352   
256    192    
-304   80     
352    96     
48     32     
-112   128    
-112   176    
112    -240   
272    64     
-48    -192   
32     176    
192    80     
112    -144   
-48    -272   
32     96     
-176   -928   
48     -16    
192    240    
176    -432   
-16    48     
-640   -32    
192    -2256  
80     32     
-80    -256   
128    144    
128    352    
32     32     
96     320    
-176   -320   
112    288    
0      -240   
80     128    
128    112    
16     0      
-192   96     
-1280  -64    
-96    -752   
240    112    
-64    -176   
128    -80    
32     48     
0      -112   
48     112    
64     -80    
320    400    
-608   -656   
-80    -976   
0      512    
208    -416   
-32    16     
-288   80     
112    16     
48     0      
96     -128   
144    -48    
160    -16    
-64    -64    
0      -224   
96     128    
128    -80    
160    112    
80     -128   
-16    64     
-64    -304   
144    -208   
224    16     
272    -32    
-208   -80    
-48    -240   
-48    -48    
144    -464   
16     128    
-32    -672   
80     128    
-256   -128   
128    32     
-96    -48    
-272   1888   
-1552  80     
1376   1808   
224    144    
384    -1136  
-1184  -336   
16     16     
144    336    
-96    -512   
416    64     
-16    -1328  
-224   -80    
-16    336    
64     -64    
-112   -48    
-64    -16    
96     96     
-80    -16    
-144   192    
-32    -144   
-336   -80    
64     240    
-64    176    
208    -96    
-224   -416   
192    -224   
112    96     
80     -864   
-32    128    
288    16     
80     32     
-112   64     
112    -256   
64     16     
-192   80     
176    160    
-256   -64    
-1184  -768   
112    -272   
208    -64    
-144   336    
-176   64     
64     -528   
80     64     
48     -48    
128    -160   
-112   -176   
80     -336   
608    576    
-32    -128   
-496   -32    
128    -352   
-160   48     
-144   256    
-64    16     
-16    -48    
0      112    
288    160    
-656   -496   
304    -16    
-128   -96    
160    80     
80     208    
-272   -144   
192    -80    
-64    16     
16     16     
80     144    
16     16     
16     16     
112    -304   
-16    64     
0      -432   
-64    128    
80     64     
16     -176   
-144   -208   
272    144    
16     384    
48     -16    
-144   0      
112    -48    
64     -48    
112    -192   
-272   96     
192    -144   
112    352    
-352   -128   
-512   -48    
-128   32     
-1568  -192   
-160   112    
0      -80    
0      80     
208    288    
-160   112    
32     -192   
-112   192    
-1600  -352   
352    240    
-576   -48    
96     -96    
-528   -48    
16     -32    
48     48     
-368   32     
-64    96     
-320   32     
-16    80     
-80    112    
-64    16     
0      32     
-176   -64    
-320   -16    
176    48     
-112   48     
-16    -192   
-160   80     
80     32     
96     -144   
-160   192    
-48    144    
-384   -192   
16     176    
-656   -208   
-64    -80    
0      -208   
160    96     
80     -320   
-368   176    
416    32     
-64    160    
-240   80     
-16    -128   
224    80     
-224   192    
-32    80     
-208   80     
-80    128    
-112   16     
-64    -32    
-560   -32    
0      -80    
96     -64    
-64    64     
-32    -288   
-128   -464   
0      -64    
48     192    
-32    -64    
48     48     
32     96     
-96    128    
-32    192    
16     -32    
-16    48     
-368   -16    
32     -192   
-112   -112   
192    64     
16     112    
32     -64    
64     80     
-16    192    
112    112    
-256   48     
0      48     
160    240    
-208   64     
-160   -48    
16     48     
-448   -160   
96     48     
-16    144    
-208   48     
112    16     
-64    0      
96     -144   
-176   304    
-272   48     
64     -16    
0      112    
32     16     
-16    48     
64     0      
144    -16    
-256   112    
-16    176    
-1360  -48    
128    112    
-64    48     
-112   48     
16     160    
-48    272    
-208   -32    
144    32     
32     -128   
80     96     
-752   -560   
832    464    
-48    160    
368    -624   
816    256    
-752   -432   
-96    -176   
928    592    
-608   32     
192    -48    
-224   -192   
160    288    
-32    32     
16     -128   
-192   112    
96     16     
-128   80     
144    144    
-208   -64    
-32    -32    
-80    -128   
144    240    
32     144    
16     -16    
-208   16     
224    416    
96     160    
-32    -80    
-80    32     
112    -16    
-48    80     
-160   32     
128    32     
-160   0      
32     16     
0      192    
-128   -112   
-32    192    
192    80     
96     176    
-112   -32    
-32    112    
48     32     
128    176    
0      80     
0      128    
-64    -16    
160    272    
-224   -64    
240    48     
-80    144    
48     -48    
-80    208    
-16    -80    
144    96     
-48    128    
64     240    
-80    -16    
48     64     
16     128    
-144   48     
64     -128   
48     192    
-176   -96    
112    112    
-176   80     
48     128    
-32    32     
16     16     
96     128    
-112   112    
96     112    
-32    -80    
0      208    
-160   80     
240    240    
-96    432    
0      368    
96     -208   
112    80     
-128   -16    
144    64     
-64    -128   
32     -208   
176    -32    
-64    192    
32     272    
16     112    
48     16     
256    96     
16     0      
-48    -64    
-48    128    
-192   -208   
96     -96    
-48    -32    
16     -96    
-48    128    
64     96     
64     32     
-64    -16    
128    176    
-96    -64    
144    80     
0      -48    
32     -48    
-192   -128   
224    304    
-48    128    
64     160    
16     48     
32     96     
32     80     
96     32     
0      160    
80     80     
16     208    
-16    96     
64     0      
-208   -384   
-80    -592   
-32    176    
240    64     
208    48     
-64    -1776  
-16    192    
176    320    
48     -96    
-96    112    
16     112    
112    176    
176    16     
-160   32     
224    80     
-96    -304   
0      80     
32     256    
272    144    
-240   -16    
336    -336   
-80    64     
112    224    
64     16     
-80    96     
128    128    
144    112    
96     272    
16     240    
-32    0      
112    144    
-48    16     
80     16     
16     -160   
-32    64     
336    272    
-576   -272   
160    -832   
-16    256    
48     32     
-48    112    
-32    -672   
96     176    
-96    0      
96     96     
-16    112    
-208   16     
-144   384    
-288   -272   
-16    -96    
368    -48    
32     128    
160    -1232  
-112   144    
-32    -80    
224    144    
-128   64     
272    144    
-128   32     
128    64     
-48    112    
48     -48    
-48    128    
96     -80    
48     112    
32     -208   
160    256    
-64    112    
96     80     
32     -320   
128    128    
-16    32     
160    16     
-64    128    
-208   208    
320    -80    
-112   -112   
272    176    
-944   -1680  
1456   1696   
-240   -128   
1024   -576   
-512   -192   
16     -240   
288    464    
-432   -480   
544    -272   
0      -32    
32     336    
64     176    
288    96     
-16    -208   
-80    48     
-128   -128   
240    176    
-64    192    
704    144    
-64    384    
-112   48     
176    -48    
-224   80     
48     -80    
-80    -192   
288    16     
64     224    
480    960    
-224   112    
-112   -96    
-80    -128   
176    -416   
-208   -96    
64     -112   
-64    -160   
-96    -48    
0      -208   
112    480    
-96    -16    
-48    -16    
32     256    
48     -16    
-32    -960   
-144   -160   
224    608    
32     96     
-144   352    
48     -400   
336    448    
16     128    
336    224    
-144   -32    
64     -496   
-240   48     
352    -304   
0      -320   
-1584  80     
64     -96    
-512   -160   
-144   -560   
80     -256   
16     -1424  
256    -112   
16     128    
112    64     
96     -240   
64     208    
32     96     
96     32     
208    224    
-176   -64    
-32    -288   
144    -288   
64     32     
48     -416   
320    352    
-224   -400   
384    -336   
0      -544   
48     32     
272    400    
48     96     
-32    -208   
64     192    
-16    -48    
128    0      
-64    224    
-160   -384   
-240   -176   
112    -144   
-32    -80    
-32    -608   
80     -320   
224    -800   
-80    80     
80     -112   
0      176    
272    16     
-80    -272   
-112   -144   
224    272    
32     112    
64     -80    
-1184  -48    
-64    -128   
208    160    
-256   -96    
176    160    
16     -192   
16     -32    
80     -112   
0      -80    
-16    -80    
176    -48    
0      0      
112    -320   
-224   -160   
-192   -160   
352    128    
-128   -64    
80     -192   
-48    -48    
32     -112   
176    16     
64     368    
-32    -304   
256    160    
-160   48     
128    -112   
-128   32     
16     -80    
320    96     
-144   96     
-80    0      
32     0      
-1680  -272   
96     -320   
-432   -96    
128    -256   
64     96     
-112   -336   
288    48     
-272   -16    
288    240    
-112   128    
256    -32    
-320   320    
0      -32    
0      16     
-80    -64    
-160   32     
80     -32    
-64    16     
96     48     
64     224    
32     -624   
-16    112    
16     160    
16     -144   
-32    160    
48     -16    
-96    -16    
48     -192   
-176   -48    
112    -32    
-176   -64    
432    -48    
160    128    
-64    -80    
64     208    
-112   -224   
16     -240   
64     -96    
320    -224   
-128   160    
-160   64     
-304   -64    
80     32     
-48    -208   
192    96     
-32    80     
-16    -144   
224    -144   
-992   -192   
-64    112    
-112   64     
-304   -32    
160    80     
-224   32     
-16    -32    
80     0      
-160   160    
48     80     
272    -272   
-16    304    
-288   -16    
-864   -272   
-144   144    
-112   96     
528    -480   
112    -464   
-640   16     
-48    -416   
-752   -704   
752    960    
-336   -112   
192    80     
-736   128    
448    -272   
-144   432    
176    -192   
-448   512    
128    -448   
-112   288    
144    -176   
-80    352    
-208   -400   
-176   144    
16     -176   
-160   352    
48     -64    
-64    144    
-928   -240   
-176   64     
-160   -128   
-16    160    
-48    -64    
176    112    
-160   -208   
32     -32    
-112   176    
96     -16    
-48    96     
128    -80    
-144   64     
144    96     
-208   48     
-16    -112   
-48    96     
-656   0      
144    176    
-128   -160   
80     64     
-144   -144   
-16    128    
0      -32    
0      224    
-112   -32    
112    16     
-208   144    
96     -192   
-16    160    
-112   -64    
32     128    
-368   -48    
32     160    
32     -272   
0      176    
16     112    
48     208    
-112   -64    
128    16     
-256   80     
-48    0      
-112   80     
-112   -32    
16     32     
-32    48     
-80    64     
-128   -16    
-32    16     
128    16     
-32    256    
32     48     
64     288    
-48    32     
320    0      
-64    208    
-32    160    
32     80     
16     -256   
64     80     
256    240    
-80    112    
16     32     
-80    160    
-912   -288   
192    0      
320    384    
80     320    
-272   -144   
-64    80     
48     224    
144    80     
32     192    
-304   -320   
-96    -80    
-16    -32    
16     176    
-144   48     
-16    -32    
-176   -80    
0      16     
-16    112    
160    160    
-96    -32    
32     -16    
240    288    
-80    -80    
0      96     
-128   -32    
-16    48     
-48    16     
48     144    
-16    64     
-144   -96    
-48    96     
-32    192    
-16    -16    
80     64     
-80    32     
-48    80     
-48    -48    
240    288    
-144   128    
144    96     
16     144    
-176   -16    
64     96     
-48    -80    
16     64     
-16    64     
112    144    
-160   -448   
176    -176   
-16    320    
-80    0      
-16    208    
48     32     
128    144    
-160   64     
160    32     
-208   48     
64     0      
-64    -48    
32     48     
80     128    
64     80     
-16    128    
96     16     
-112   32     
-32    32     
0      48     
32     16     
16     96     
-176   -16    
192    32     
-240   16     
224    224    
-224   64     
-80    176    
96     -32    
48     144    
176    208    
-240   -192   
192    272    
16     32     
208    176    
-160   48     
112    80     
0      80     
48     112    
-192   -48    
192    32     
80     320    
32     -80    
-32    176    
-96    0      
240    96     
-16    96     
0      128    
-288   128    
160    320    
16     336    
-48    -32    
-32    16     
320    128    
-112   16     
0      -16    
144    176    
-16    96     
224    -80    
96     272    
-80    -16    
-144   16     
-528   496    
-1488  -192   
848    448    
-704   432    
752    -432   
-352   816    
192    -416   
-448   512    
-64    -912   
448    784    
-528   -320   
176    352    
-32    0      
400    432    
-208   144    
48     128    
0      896    
112    208    
-224   256    
-32    -272   
-96    256    
80     -144   
240    240    
-208   -416   
256    112    
48     -1440  
128    80     
208    688    
272    528    
-656   -240   
208    304    
224    208    
-96    -64    
-64    -320   
80     112    
-96    -96    
128    80     
32     -128   
-112   -224   
208    -32    
-304   -1472  
16     32     
96     112    
0      -400   
144    -16    
-16    144    
304    160    
-144   128    
48     80     
-48    64     
-32    0      
80     208    
32     128    
-48    -240   
112    64     
80     -304   
64     160    
48     -1264  
-16    192    
64     80     
0      64     
-32    96     
32     96     
224    96     
-208   240    
-80    -144   
96     -32    
16     160    
80     16     
256    464    
-112   16     
192    -48    
64     -240   
112    -64    
48     48     
-224   16     
176    -32    
32     128    
-16    -16    
96     128    
-16    -16    
32     -144   
96     64     
-224   -352   
352    -80    
-16    128    
-112   128    
112    -1248  
-176   176    
144    -208   
48     128    
-64    128    
48     96     
48     -96    
160    16     
64     144    
48     160    
80     128    
48     -368   
64     96     
-160   -512   
-16    128    
-16    -560   
192    48     
-272   80     
128    96     
192    32     
-128   80     
-128   144    
288    144    
48     224    
32     80     
48     144    
96     -32    
-160   -144   
368    -256   
-176   96     
400    288    
-48    304    
80     112    
224    352    
-32    144    
128    16     
-400   -96    
320    -160   
192    32     
-128   -240   
96     96     
112    -176   
-32    176    
0      -64    
0      -32    
48     -144   
-112   128    
272    -320   
48     -1664  
-176   -48    
-32    -240   
208    96     
144    -96    
16     -752   
-176   -208   
320    -1424  
240    144    
-80    208    
96     -16    
-96    272    
176    -32    
-160   -848   
256    16     
-32    -80    
48     96     
80     -176   
48     -720   
-960   -144   
224    -640   
16     32     
128    -224   
0      -432   
128    -448   
64     -128   
-16    160    
16     -128   
32     -176   
112    144    
96     16     
-16    -16    
-96    -192   
144    -128   
-560   -16    
160    -224   
32     96     
144    -352   
128    -96    
-64    -640   
176    0      
-80    -464   
80     -80    
0      0      
48     176    
0      -192   
-48    -16    
-48    -176   
176    112    
-272   0      
32     -64    
-352   144    
-32    -224   
80     0      
32     -512   
48     112    
64     -512   
80     -48    
-16    -16    
48     208    
-32    -160   
32     160    
-48    -64    
-912   -720   
976    1504   
-1360  864    
-464   16     
608    368    
-16    -1200  
-144   480    
432    -208   
-128   -768   
432    -560   
-208   -2272  
176    -176   
48     416    
16     -448   
64     384    
-176   -256   
-80    96     
-64    -16    
-592   -288   
192    -240   
-800   48     
0      208    
128    -192   
-80    -496   
48     -224   
16     -1760  
192    16     
-176   272    
192    -80    
-48    160    
48     -80    
-16    112    
-64    -32    
32     80     
48     -16    
-448   -16    
0      -128   
48     64     
-16    -368   
32     176    
80     -592   
160    112    
-128   48     
160    -80    
-192   48     
112    -64    
-160   160    
-48    0      
80     32     
-48    -80    
-64    32     
32     -32    
48     48     
48     -176   
80     16     
48     -624   
48     0      
-304   32     
32     -48    
-16    -80    
112    32     
80     272    
-176   -48    
-160   -128   
144    -240   
-208   16     
80     -16    
0      144    
-32    -192   
48     192    
-32    -384   
176    -48    
-48    -16    
16     -16    
48     64     
-32    128    
80     352    
48     -192   
-16    -464   
96     144    
160    96     
208    144    
-128   128    
-400   -352   
-32    304    
-64    64     
-704   48     
-96    32     
-608   -32    
-176   -144   
-1776  64     
-112   96     
176    -32    
80     176    
0      80     
0      -256   
-128   -480   
16     -48    
0      -16    
-48    144    
32     96     
-176   0      
-112   -96    
-64    -48    
-96    0      
-480   32     
96     160    
-192   -160   
-64    -176   
16     32     
80     0      
-224   -144   
-64    -48    
112    -48    
32     112    
16     48     
-112   16     
16     0      
-16    32     
-16    -16    
160    48     
-16    160    
-480   -112   
-144   -112   
-304   48     
176    80     
192    48     
-288   224    
16     -80    
0      -64    
-96    128    
0      48     
-48    -144   
48     176    
-96    144    
0      -80    
-176   352    
0      -80    
-144   192    
32     16     
224    144    
-64    32     
48     32     
-160   64     
16     -96    
-32    48     
-64    -160   
208    240    
0      336    
-112   -80    
-144   -96    
-80    64     
128    32     
-48    -304   
-432   -128   
64     208    
-208   -192   
-80    272    
-48    -144   
256    240    
-224   48     
112    288    
-304   -64    
160    48     
32     80     
-112   -64    
240    400    
-416   160    
128    -112   
-224   96     
128    -32    
64     -32    
-176   160    
-16    16     
48     64     
-160   16     
160    64     
-96    80     
-16    48     
16     80     
-80    96     
128    -16    
-112   80     
112    128    
-752   32     
80     -256   
-864   304    
48     192    
-256   -16    
-160   -48    
240    16     
320    -128   
-80    256    
-80    32     
-160   -112   
-32    80     
208    32     
112    -16    
-1056  -80    
400    -688   
-896   -160   
-560   112    
-416   160    
672    608    
80     -208   
-272   608    
-400   -112   
256    144    
48     -80    
80     240    
-192   368    
96     16     
-128   176    
32     -464   
-208   96     
384    288    
-16    128    
96     -96    
80     240    
112    224    
48     16     
0      128    
112    -16    
-176   16     
-64    128    
112    160    
128    112    
-176   48     
48     112    
-160   -16    
-16    0      
80     32     
-64    128    
224    256    
-80    48     
16     64     
-96    32     
0      -176   
96     192    
-48    128    
48     -144   
-96    48     
-144   64     
192    208    
-320   -192   
-112   -176   
256    240    
-128   272    
224    16     
-128   80     
16     -32    
256    48     
-224   256    
208    256    
-160   48     
128    -80    
32     176    
-160   -96    
112    224    
0      96     
32     128    
16     112    
32     0      
0      64     
-64    0      
80     96     
48     160    
-48    48     
112    16     
32     192    
-208   0      
192    112    
-64    48     
112    368    
128    -96    
48     16     
0      112    
-80    96     
80     160    
-48    64     
176    -128   
-128   176    
0      416    
-192   -128   
80     0      
0      176    
-176   0      
192    208    
-112   -496   
64     -96    
0      -16    
-144   -32    
208    16     
-96    176    
64     112    
64     160    
-32    64     
32     -32    
112    144    
-16    112    
80     176    
-96    80     
64     144    
-80    -496   
80     128    
128    48     
-144   32     
128    128    
96     16     
-48    96     
-48    -32    
80     96     
16     192    
80     32     
96     32     
-240   -128   
272    96     
-64    224    
192    0      
0      128    
-144   -176   
144    112    
48     80     
144    112    
-240   0      
-112   -144   
64     -32    
-48    64     
64     16     
144    400    
0      -64    
160    224    
-272   96     
192    -320   
144    288    
-96    -368   
384    96     
-144   112    
-48    112    
192    112    
80     0      
-16    32     
48     192    
256    -48    
-96    144    
-32    0      
128    128    
32     64     
32     -32    
32     48     
16     -272   
64     96     
-128   128    
176    144    
-128   -448   
48     0      
256    -96    
0      272    
0      80     
-32    -48    
-16    16     
112    -112   
192    112    
80     -336   
-192   208    
-80    -688   
240    128    
96     -288   
0      16     
-16    48     
96     -32    
-112   80     
80     64     
48     288    
48     192    
96     176    
48     -192   
224    -16    
64     -112   
64     144    
-32    80     
-128   -32    
96     -448   
96     -64    
96     -2416  
80     256    
-80    96     
64     144    
48     16     
32     192    
-48    48     
256    -288   
32     208    
144    -48    
-48    48     
1920   448    
-1200  624    
1312   416    
-400   448    
1200   -1184  
-688   -208   
80     -352   
-48    1216   
96     -368   
-176   -240   
32     -304   
352    80     
-224   96     
304    -144   
-128   128    
192    -224   
-32    240    
64     -144   
-32    224    
240    -80    
-64    208    
80     32     
64     -176   
-48    0      
64     -144   
-48    96     
64     -128   
192    144    
80     -192   
-16    -48    
0      -240   
-16    48     
64     -192   
80     240    
96     -48    
224    -1024  
-144   144    
112    -992   
-16    -96    
112    -64    
16     -144   
64     -16    
144    -2272  
48     -64    
-64    112    
0      160    
32     160    
64     -48    
144    -48    
-112   48     
144    0      
-256   160    
48     48     
112    16     
-960   -64    
64     -160   
32     16     
-16    -288   
144    -80    
128    -96    
-224   -208   
-32    -96    
32     -320   
-16    -496   
64     160    
0      -48    
48     -48    
-112   -48    
96     0      
-544   -80    
16     80     
80     -80    
80     0      
160    16     
-32    -368   
64     0      
-16    -1312  
144    -208   
288    -32    
-32    432    
-16    -128   
192    176    
-160   -80    
112    -176   
-32    0      
160    0      
-80    -48    
0      -224   
96     80     
80     -304   
32     -144   
32     -992   
192    16     
176    240    
-144   112    
96     -48    
-32    -144   
48     64     
32     -32    
-32    32     
16     -80    
-496   -64    
80     -176   
96     -32    
32     -128   
-16    48     
112    -544   
-64    0      
32     -1760  
80     128    
0      -32    
144    16     
-128   0      
112    128    
-80    -48    
-48    -32    
-208   112    
0      -128   
-496   48     
0      160    
96     -16    
0      -336   
-48    96     
272    -736   
128    112    
-48    208    
-32    240    
128    -160   
0      -32    
-128   80     
336    -192   
-224   48     
0      -80    
-208   96     
-16    -256   
64     48     
-112   -1072  
256    128    
-272   -336   
320    -80    
-112   128    
64     -144   
-544   0      
-48    16     
-80    -64    
128    -96    
-128   160    
-32    -176   
-304   -48    
-16    -400   
160    64     
-16    -160   
64     -16    
240    -304   
336    448    
-720   -80    
320    32     
-400   -144   
640    -112   
-112   288    
-32    -32    
-288   64     
-48    -160   
304    176    
80     -208   
-304   -176   
368    0      
-320   400    
-16    -400   
-496   -96    
80     -16    
224    176    
-144   32     
-256   272    
-144   -192   
464    -48    
-352   208    
48     -480   
-16    -48    
-224   80     
272    224    
-672   160    
-288   64     
-128   48     
-16    256    
112    64     
-304   -32    
-128   160    
-1648  -352   
-176   -112   
96     -160   
192    112    
0      16     
176    112    
-784   -240   
112    -16    
-160   -240   
128    112    
480    1152   
-720   -1696  
-528   416    
-496   -64    
-448   -32    
112    112    
176    -48    
304    0      
-448   -112   
0      48     
-208   144    
-112   -144   
96     368    
-80    -48    
80     16     
-112   16     
32     64     
16     160    
-144   48     
-64    176    
-352   80     
16     128    
-288   -80    
-304   -32    
224    -336   
-32    208    
192    -48    
-16    80     
-48    -112   
-64    80     
64     -80    
-128   -32    
-144   32     
96     16     
-64    96     
256    160    
-304   176    
-256   -16    
-128   -64    
-224   -176   
112    176    
64     -64    
64     80     
-16    96     
-96    224    
144    16     
-80    80     
128    368    
-176   -80    
240    128    
-240   48     
96     -64    
-304   -32    
208    80     
-272   96     
80     224    
80     -272   
96     384    
-208   -48    
192    -32    
-80    272    
-80    -48    
128    144    
-256   80     
240    -48    
-160   80     
0      208    
-160   96     
48     0      
-240   -16    
0      96     
-32    -32    
-112   -192   
160    16     
-112   176    
96     288    
-240   16     
96     160    
-96    -96    
0      -80    
0      0      
-64    240    
-160   192    
32     -80    
-256   -208   
64     -32    
144    176    
-176   -64    
272    128    
-176   0      
48     96     
-32    80     
0      32     
0      352    
-240   -160   
432    208    
-224   16     
16     64     
48     96     
-144   144    
304    240    
-48    80     
-80    0      
80     0      
-32    32     
64     16     
-32    -48    
128    288    
-16    176    
208    16     
-224   -16    
-16    176    
-32    -16    
112    48     
-112   32     
0      128    
16     80     
-112   32     
64     64     
-96    -64    
32     16     
-96    112    
144    16     
32     48     
0      224    
-128   16     
96     -112   
-256   -128   
-112   0      
32     32     
96     80     
96     32     
-32    160    
336    144    
-64    80     
0      0      
32     96     
48     64     
-48    48     
0      32     
112    96     
96     80     
-48    144    
64     272    
-48    -64    
0      16     
-48    64     
144    336    
64     112    
-16    32     
-48    96     
0      48     
96     48     
32     48     
48     224    
48     -32    
-64    32     
-224   -32    
304    -80    
-96    48     
176    128    
16     112    
0      160    
0      176    
48     -112   
112    16     
-160   -128   
112    336    
0      272    
144    160    
-112   -256   
32     -176   
-112   0      
96     -848   
224    160    
32     176    
-16    0      
-48    160    
32     144    
48     0      
32     80     
0      160    
128    176    
-176   0      
80     112    
0      16     
176    192    
-96    16     
-80    -240   
80     96     
0      112    
-16    128    
16     176    
32     -256   
-96    128    
112    208    
-16    112    
-544   1456   
-16    2368   
-640   528    
224    -320   
32     304    
304    -240   
-128   -816   
-608   32     
304    80     
592    16     
-640   -336   
320    64     
128    384    
-16    48     
-48    256    
-48    -16    
-64    -128   
-192   -272   
240    96     
192    176    
160    144    
-32    -160   
0      144    
176    -160   
16     32     
0      -160   
-80    144    
144    272    
112    160    
-48    -16    
144    544    
64     -16    
-32    96     
-160   96     
112    80     
112    240    
-16    -144   
32     224    
64     -16    
208    240    
-128   16     
32     160    
-48    80     
208    144    
-16    48     
96     48     
-96    176    
144    128    
-16    80     
-80    -160   
-16    32     
64     -224   
32     128    
32     -304   
-64    112    
64     -640   
-48    -128   
128    -96    
144    176    
112    240    
48     64     
-96    0      
80     240    
-32    -32    
272    80     
-208   -48    
176    -96    
-48    96     
80     -336   
32     112    
80     -80    
80     160    
0      272    
16     96     
48     192    
-32    64     
80     96     
32     560    
320    352    
16     96     
-96    -96    
144    -128   
-64    -48    
16     -176   
64     64     
16     -752   
176    192    
-112   -784   
0      32     
96     80     
16     48     
128    32     
-16    -112   
-32    96     
112    -640   
-32    112    
0      -80    
208    272    
16     -144   
96     0      
64     -560   
32     80     
80     -16    
-32    96     
80     64     
96     128    
-16    64     
144    48     
-16    16     
176    -32    
-96    96     
144    -64    
-48    80     
160    -272   
32     80     
32     -160   
80     128    
-16    -784   
112    160    
32     48     
96     -2976  
-112   -32    
-80    -224   
80     144    
224    80     
224    352    
-176   -48    
-112   -224   
272    -192   
-16    256    
112    64     
96     144    
-112   -320   
128    -704   
80     304    
-48    -256   
208    -464   
-432   0      
96     80     
144    -96    
-176   -1088  
64     -208   
256    64     
-16    -96    
-16    176    
16     -16    
80     -928   
-32    -208   
176    -352   
-16    176    
-96    64     
128    128    
-1904  -32    
-32    -336   
-80    -352   
320    128    
32     32     
80     80     
-96    -80    
144    112    
112    -96    
16     -288   
-80    32     
32     -48    
144    16     
-16    16     
96     32     
-544   144    
-144   -544   
-16    96     
96     -288   
-96    -64    
160    -48    
0      -400   
-16    -2832  
240    240    
64     -48    
-48    224    
-144   -288   
16     144    
-192   -352   
32     80     
16     -48    
0      -48    
-256   -192   
96     0      
64     -192   
-48    -224   
112    -128   
64     -496   
32     80     
128    -48    
0      272    
48     -192   
-112   -32    
80     -96    
112    -64    
96     48     
2224   -1264  
-1120  -608   
1136   432    
64     784    
-384   -80    
224    -192   
-576   -160   
640    304    
-384   -528   
112    -48    
-160   -16    
-80    64     
176    112    
144    -80    
0      0      
-80    -64    
-160   -96    
48     32     
32     48     
160    48     
0      32     
-16    -80    
16     112    
80     -1392  
96     96     
-320   -96    
304    16     
-128   64     
144    -256   
-352   -112   
240    -32    
-80    48     
96     0      
-320   32     
48     -192   
16     -192   
448    -192   
-320   208    
288    -416   
-208   48     
128    48     
176    -32    
-224   0      
176    112    
-240   -64    
144    -16    
-208   -16    
192    48     
-352   80     
48     -240   
96     160    
-128   -192   
256    16     
32     80     
16     -96    
-272   -32    
-16    -32    
80     32     
48     -80    
-32    80     
32     -16    
32     64     
0      -128   
-448   -96    
144    -320   
48     144    
-224   -80    
-64    -48    
-16    16     
-288   144    
-176   -192   
272    -16    
-272   80     
128    -16    
-80    -32    
48     48     
-384   -176   
128    -96    
-96    32     
-560   16     
16     -32    
-336   -160   
-96    240    
-112   -96    
208    0      
-128   64     
-32    -16    
64     128    
-1232  48     
208    -32    
-160   96     
144    192    
16     208    
-64    16     
-352   -400   
64     -32    
-320   -128   
-64    128    
80     16     
-112   -16    
48     -16    
-128   0      
-144   -48    
-432   0      
-48    80     
208    160    
96     192    
-416   176    
272    304    
-160   32     
144    48     
-128   -96    
-64    -16    
96     64     
64     96     
-176   -48    
-112   0      
-240   144    
128    112    
176    112    
-192   176    
160    128    
-288   -160   
112    144    
-240   -160   
-16    160    
416    416    
-192   32     
112    176    
-160   16     
64     -32    
0      240    
-64    128    
160    256    
-32    112    
-528   16     
160    16     
-544   -144   
-272   -16    
192    48     
64     208    
32     144    
-80    112    
-144   -208   
-96    -16    
128    320    
-80    80     
32     16     
-208   -16    
-32    48     
-224   -96    
-48    96     
-240   -16    
64     240    
16     -48    
-96    16     
-32    160    
-96    -512   
96     368    
-16    144    
-48    -32    
16     336    
-112   -80    
-16    0      
0      32     
-16    32     
128    368    
-160   -32    
64     320    
-96    -512   
48     16     
256    432    
-160   96     
0      128    
-144   112    
96     64     
-80    -336   
288    144    
32     16     
-32    96     
-96    80     
48     320    
0      -144   
80     -80    
-16    80     
128    272    
-96    -64    
80     0      
112    -48    
16     32     
0      160    
-48    160    
-48    80     
240    -144   
160    192    
-288   -96    
0      144    
-720   1056   
-1040  -608   
544    912    
-144   320    
-224   96     
-496   32     
-304   560    
-736   -32    
848    1040   
-192   80     
-96    -208   
-336   -176   
-32    16     
48     80     
-80    -240   
64     304    
-16    144    
80     512    
-336   -400   
80     80     
64     304    
-192   0      
256    96     
32     144    
176    128    
-96    112    
-16    16     
16     128    
-112   -80    
80     16     
32     -32    
-32    96     
112    112    
-48    48     
112    48     
32     304    
-128   -224   
-96    -144   
-16    288    
240    368    
-96    -48    
-48    96     
64     96     
-48    80     
64     80     
0      80     
96     112    
16     128    
-64    -160   
64     48     
112    160    
304    -80    
-80    48     
112    0      
-80    128    
16     0      
80     -320   
112    80     
240    480    
80     256    
-16    320    
-176   128    
128    224    
-176   80     
112    -96    
320    -96    
-48    96     
-32    112    
256    -48    
-128   128    
96     48     
80     96     
32     16     
-96    32     
240    -544   
112    288    
-64    192    
-288   -208   
640    96     
112    368    
112    384    
96     208    
-160   -16    
96     288    
-80    112    
16     176    
-64    -128   
32     272    
-96    -176   
144    128    
-128   16     
96     -80    
64     -80    
96     256    
-80    32     
64     -96    
-32    128    
160    -64    
32     -48    
-272   -240   
192    272    
-48    16     
48     80     
-48    160    
48     -320   
304    160    
-192   -112   
176    240    
-112   144    
224    64     
32     176    
-16    48     
64     -48    
-96    64     
32     -160   
224    176    
-16    -16    
16     -96    
-64    -16    
-48    -640   
208    112    
0      -448   
16     160    
64     208    
144    128    
32     576    
-240   0      
224    -128   
-208   -112   
-16    -144   
144    -16    
64     224    
-80    -368   
112    32     
-16    -64    
64     80     
48     336    
-32    -304   
-176   -160   
64     -64    
0      128    
112    32     
64     352    
-48    208    
80     80     
-48    48     
32     48     
16     -48    
96     -208   
-64    0      
176    256    
16     -256   
-32    176    
128    -336   
-128   -48    
208    -400   
64     80     
-32    144    
144    416    
48     96     
144    144    
80     80     
-80    -16    
96     256    
-96    -192   
128    -192   
304    656    
-448   -144   
-224   -512   
16     112    
368    -256   
64     160    
-112   208    
80     16     
16     -16    
176    80     
128    96     
-16    -48    
16     -16    
32     -464   
96     16     
96     -208   
16     80     
128    64     
-128   272    
-96    -1120  
32     128    
48     -192   
128    192    
-32    48     
48     -336   
64     160    
16     -144   
-16    96     
176    32     
16     16     
176    -112   
-48    224    
-1040  -3408  
784    -400   
-400   272    
320    176    
176    -208   
80     144    
16     272    
96     -208   
-320   208    
336    -192   
160    -128   
-176   64     
224    112    
144    -80    
0      80     
0      -160   
64     176    
-16    176    
144    64     
48     -16    
64     -368   
48     -848   
240    -128   
-64    -336   
64     -224   
48     -816   
-16    -16    
224    352    
-128   -208   
80     0      
-16    -96    
-16    -368   
144    96     
-16    -752   
48     -144   
48     -384   
64     -256   
128    32     
64     224    
176    -16    
-16    -592   
16     -96    
32     -96    
192    0      
-160   0      
176    -48    
32     0      
96     128    
128    -320   
0      -240   
-32    96     
-48    -64    
-304   64     
-64    -80    
176    0      
-16    -96    
64     -48    
64     272    
0      -32    
304    -112   
-320   -80    
128    -240   
48     48     
48     128    
-16    128    
64     -208   
48     -96    
-912   48     
96     16     
64     -208   
224    -176   
-96    64     
64     -560   
96     -48    
32     -2848  
-272   48     
-16    -208   
272    160    
-80    128    
64     -32    
-128   -144   
-16    -32    
-224   -80    
208    256    
-1168  -48    
224    96     
-144   -208   
224    -432   
80     16     
-160   -816   
208    208    
-48    -208   
128    240    
64     -80    
48     -48    
-112   -96    
80     -144   
-160   -112   
48     80     
-144   144    
64     -304   
48     -32    
0      -368   
112    256    
48     -304   
144    112    
-16    80     
160    208    
-96    -16    
144    144    
-128   -32    
96     160    
-144   32     
-16    -80    
-784   -16    
160    -176   
-272   208    
-16    -64    
-80    -32    
32     -432   
320    288    
-32    -2288  
16     256    
-128   0      
128    0      
-112   0      
48     256    
-176   96     
96     -288   
-224   -208   
288    208    
-192   96     
-80    -112   
0      0      
64     -96    
96     144    
304    0      
-64    32     
-160   -112   
128    0      
-128   -112   
48     -352   
-288   -64    
384    16     
-240   -48    
192    -96    
-352   -288   
64     -112   
320    640    
-64    -256   
80     16     
64     -112   
112    -64    
-64    16     
16     -192   
-64    -128   
272    448    
-368   -208   
208    256    
-32    32     
16     -240   
-336   16     
128    -480   
-32    144    
-992   -288   
16     80     
-48    80     
-896   208    
-112   -304   
-688   -160   
-16    80     
128    160    
-48    144    
-64    -32    
-128   -32    
-400   -48    
-32    96     
-144   -144   
16     64     
-272   -48    
-432   -64    
-80    0      
-464   -80    
-48    112    
-16    96     
-208   -144   
-112   -64    
32     80     
176    -112   
-176   144    
-192   -112   
208    112    
-128   -96    
16     80     
-32    -304   
160    64     
96     0      
80     -176   
432    1520   
-1248  -1552  
1008   880    
-400   320    
384    -1184  
-608   720    
-528   -208   
368    16     
-496   0      
192    144    
-256   16     
-160   -240   
-256   128    
288    128    
-112   -80    
32     64     
48     0      
64     32     
112    400    
64     160    
-112   256    
0      128    
-144   16     
48     0      
-96    -416   
64     144    
-64    16     
368    240    
0      416    
-48    16     
-16    64     
-288   16     
-64    304    
-32    80     
144    112    
-464   32     
304    128    
-1072  -336   
-32    160    
-80    176    
-48    240    
-48    96     
32     -80    
-64    -32    
-208   -160   
48     96     
-96    112    
256    544    
-480   -224   
-16    80     
-560   0      
112    16     
-672   -96    
32     -32    
-96    -32    
64     128    
-48    -128   
-352   -224   
192    160    
48     0      
-128   64     
64     0      
-48    -32    
-240   -240   
80     368    
-272   -128   
208    304    
-128   -48    
240    48     
-192   80     
-128   -64    
96     16     
-112   128    
32     48     
0      160    
0      32     
160    816    
-16    944    
80     48     
-272   -544   
64     16     
96     128    
-400   -112   
0      80     
-32    -144   
-16    80     
224    816    
-128   96     
-176   -352   
-144   32     
208    256    
-64    -16    
-80    32     
16     -176   
32     160    
-32    208    
-16    64     
-160   -320   
32     128    
320    320    
64     160    
-64    -16    
16     80     
80     32     
80     32     
0      112    
-16    -240   
48     -416   
-144   -304   
80     64     
48     -128   
176    176    
-64    -32    
48     128    
0      128    
64     48     
-128   -32    
80     64     
96     240    
128    192    
-64    80     
32     112    
-48    -32    
-48    -192   
128    224    
-256   48     
224    112    
-208   -16    
48     96     
-16    -16    
-16    -32    
0      48     
-112   -96    
32     80     
96     -160   
-192   16     
80     640    
352    80     
-368   96     
112    96     
-112   32     
0      -48    
96     48     
-80    160    
96     0      
-112   -96    
160    128    
80     144    
-16    80     
-64    112    
96     144    
16     80     
16     160    
-112   16     
128    144    
-80    0      
112    160    
208    -176   
-224   368    
16     16     
192    32     
-176   144    
240    0      
-208   -208   
144    48     
-80    256    
64     224    
-16    160    
0      64     
224    64     
-80    -64    
64     -272   
-32    256    
-112   -48    
32     224    
-176   -16    
144    64     
-16    144    
-48    32     
80     96     
96     16     
-64    112    
192    -112   
-176   288    
-96    -16    
224    176    
48     -816   
48     240    
32     16     
0      256    
32     48     
-32    -16    
96     128    
32     0      
160    96     
-96    256    
0      64     
-416   528    
-624   -368   
848    1216   
-240   352    
-96    -272   
-256   -176   
400    -320   
-832   224    
944    -160   
-80    496    
224    -320   
-80    448    
-192   -176   
240    304    
-48    -160   
192    32     
-192   208    
16     -160   
96     224    
208    -848   
-240   128    
160    -176   
-128   416    
208    -256   
-144   336    
224    -336   
-288   304    
0      -176   
112    304    
96     -16    
-64    208    
-32    -96    
-32    -80    
128    80     
0      -224   
32     96     
368    -304   
-32    208    
32     16     
-64    48     
48     96     
0      128    
96     80     
64     208    
-32    16     
0      48     
-128   48     
144    -64    
16     -80    
240    96     
-240   144    
256    -224   
-48    128    
16     -176   
144    112    
-64    144    
96     -48    
-16    160    
64     80     
128    0      
-128   96     
112    96     
96     -64    
-16    112    
96     -176   
80     80     
-80    -1440  
128    192    
16     -176   
160    112    
-64    80     
80     96     
16     32     
64     128    
-32    48     
48     16     
96     336    
64     -192   
288    336    
-160   -16    
256    144    
-32    -240   
96     -80    
112    -240   
-208   176    
-32    32     
192    432    
-336   48     
272    -80    
128    64     
-80    -48    
192    112    
-96    -256   
64     160    
224    192    
-368   32     
80     -64    
-16    64     
128    -80    
-112   -80    
240    -192   
-16    16     
80     320    
16     16     
32     144    
128    -448   
96     192    
-80    -432   
96     -80    
128    -16    
64     256    
64     112    
-96    272    
-16    -208   
16     -16    
-80    0      
80     -1744  
64     160    
64     -656   
-48    -1008  
240    -320   
32     -192   
0      -64    
192    -672   
-48    -144   
80     128    
64     -160   
144    16     
-96    240    
128    -736   
-32    112    
-16    -16    
-128   144    
-336   0      
80     -624   
0      32     
96     -48    
64     48     
112    464    
-208   -240   
192    -1392  
160    336    
128    320    
-208   112    
144    -32    
-64    -224   
176    176    
32     224    
-368   -240   
208    -16    
-1376  -48    
-48    -16    
128    -64    
64     -288   
-16    -304   
528    -416   
-320   16     
32     -528   
16     -208   
48     -128   
160    64     
-160   -48    
112    -48    
-96    48     
304    48     
-912   -80    
208    -80    
96     80     
-176   80     
64     -176   
48     48     
80     0      
176    -1488  
-352   320    
224    -448   
-48    208    
-144   -80    
272    80     
-272   128    
224    -224   
-32    -48    
64     32     
-496   16     
-32    96     
96     128    
0      -560   
-144   -48    
144    -208   
48     48     
-16    176    
-48    48     
-96    64     
80     16     
96     -48    
-144   -304   
-112   -32    
144    -16    
0      96     
2128   -1952  
-816   -1344  
1024   1104   
-512   720    
192    -1008  
288    1024   
-768   288    
1168   -176   
-1040  272    
416    -80    
-496   0      
-32    -160   
-32    576    
288    -464   
-384   336    
-96    -464   
240    288    
320    16     
16     992    
16     -416   
128    336    
-16    -1552  
352    64     
-224   -32    
240    -80    
-32    -96    
16     352    
-208   -16    
-48    -128   
-128   32     
192    -272   
-208   64     
-48    16     
80     256    
-16    -272   
160    320    
160    -800   
-16    -80    
-448   -496   
432    288    
-208   -96    
-112   -112   
0      32     
208    128    
-192   -48    
80     -80    
-864   96     
80     -16    
-240   -32    
-16    -832   
-16    -80    
80     16     
192    128    
16     -128   
48     0      
80     -80    
-144   -240   
-176   -208   
144    48     
-272   -704   
304    256    
-48    208    
416    -16    
-160   32     
-1264  -416   
32     176    
160    80     
-656   -96    
-176   -464   
-384   192    
-32    -64    
224    224    
-144   64     
224    -48    
-80    64     
112    -96    
32     464    
-320   192    
224    336    
176    112    
-384   -48    
-96    -96    
16     240    
-160   -224   
-192   48     
-176   -80    
-480   -128   
-160   -80    
192    128    
-80    -144   
-272   -160   
208    176    
-144   -176   
160    32     
-256   -240   
16     48     
144    32     
-160   -128   
32     -32    
128    16     
-192   128    
16     16     
-128   -112   
-256   64     
96     48     
-240   -128   
-64    -320   
64     0      
80     64     
-16    144    
-144   64     
-16    128    
64     32     
96     240    
-128   -160   
-128   96     
-464   -64    
224    112    
-528   -64    
-80    144    
240    0      
96     224    
-80    -48    
32     64     
160    -96    
-128   112    
0      80     
96     208    
-160   48     
64     0      
-176   48     
112    272    
0      288    
144    272    
-336   -64    
-896   -16    
-32    192    
336    -64    
-128   288    
112    112    
-48    80     
-96    48     
-48    32     
-112   96     
192    16     
-80    48     
16     96     
-48    80     
-80    -96    
-112   96     
-464   -64    
-16    80     
48     32     
-32    192    
48     80     
-160   0      
-16    112    
192    112    
-160   144    
-64    48     
16     -48    
-16    -112   
112    96     
-64    -32    
32     0      
-256   48     
128    160    
32     112    
-304   64     
64     -48    
-16    80     
0      48     
-48    0      
-64    0      
176    96     
64     112    
-320   32     
96     -64    
-128   208    
80     -16    
-224   0      
32     144    
16     0      
-32    112    
-32    80     
-128   208    
48     192    
-64    0      
80     -96    
-80    16     
64     64     
-80    160    
0      192    
80     -48    
-32    256    
-144   -144   
-16    80     
-112   16     
-1264  816    
1184   656    
784    1024   
384    576    
352    64     
-384   -560   
464    944    
304    -528   
-160   592    
-320   -528   
-16    496    
112    -496   
-144   592    
-288   -304   
288    224    
-48    -64    
32     64     
-32    160    
64     -16    
-160   80     
224    96     
-160   272    
160    -144   
-384   160    
288    -128   
-208   160    
128    32     
-16    368    
128    -192   
-64    224    
48     16     
64     80     
0      32     
-32    192    
160    80     
128    304    
-112   32     
16     80     
-144   -16    
48     128    
16     80     
96     48     
32     144    
-80    -32    
96     176    
0      48     
16     160    
-48    -16    
64     192    
0      32     
32     48     
16     16     
48     160    
-32    0      
48     144    
-64    16     
-32    32     
224    128    
-128   160    
48     48     
0      128    
64     48     
-32    96     
0      160    
-48    -48    
64     64     
64     16     
112    208    
-160   -48    
160    192    
-192   -112   
80     384    
0      96     
96     80     
16     144    
-96    112    
-96    256    
-32    48     
256    32     
-32    240    
320    416    
-256   176    
-96    144    
128    -128   
-64    -160   
-32    -32    
112    -928   
48     208    
-80    48     
64     96     
-112   -64    
96     64     
48     112    
80     64     
-32    128    
-112   -80    
176    112    
-128   -160   
-32    192    
80     -48    
96     48     
-80    -384   
48     48     
64     272    
32     64     
80     128    
-16    -96    
-16    -64    
-208   -400   
48     -208   
48     16     
80     0      
64     160    
-64    128    
-48    0      
144    288    
-32    -128   
176    128    
80     -256   
-48    112    
48     272    
80     96     
112    96     
-112   128    
208    -32    
144    432    
-80    448    
112    272    
-48    128    
16     -96    
80     16     
16     -176   
176    96     
-112   -208   
112    64     
48     128    
-16    48     
16     -256   
16     48     
16     80     
96     240    
-16    -48    
240    192    
-128   176    
192    -48    
-192   0      
112    -208   
128    96     
0      -304   
0      128    
-112   -192   
80     96     
64     48     
48     48     
-16    80     
224    256    
-352   -192   
272    48     
96     144    
16     -80    
16     -96    
48     -144   
208    192    
32     -832   
-112   64     
-144   -576   
288    32     
0      272    
-240   336    
-112   -96    
80     240    
16     -16    
176    -64    
-208   144    
160    256    
32     16     
-128   -672   
128    -32    
-16    -16    
128    112    
80     64     
-96    144    
80     48     
96     80     
-80    32     
256    -96    
80     160    
-80    -208   
112    0      
-64    -368   
144    144    
-96    16     
-64    64     
-160   -176   
128    -16    
192    -16    
0      96     
-256   192    
-1744  -1184  
1040   256    
-288   752    
288    -800   
448    496    
-176   -448   
96     -48    
352    -432   
304    336    
256    -192   
128    336    
128    -128   
256    -208   
-624   -1648  
480    192    
0      -816   
-96    128    
-368   256    
-64    -512   
64     176    
-128   -1824  
-64    112    
272    -1280  
-112   -48    
16     -432   
32     -112   
64     112    
304    64     
-112   -32    
128    -16    
128    -80    
16     -160   
-688   -112   
-192   -800   
112    -208   
-144   -384   
304    -304   
-112   -160   
208    -192   
80     -3776  
-80    -80    
80     208    
-128   -192   
128    -80    
-144   -32    
288    -128   
-160   96     
-144   -272   
-208   64     
-1456  -32    
192    0      
-80    -96    
176    272    
-144   -16    
192    -432   
16     96     
-48    -160   
176    64     
32     -432   
192    -32    
32     16     
-80    176    
0      -96    
176    64     
-400   144    
160    -144   
-112   -96    
160    -160   
0      -80    
128    -80    
-96    128    
96     -2272  
-16    240    
32     -32    
112    32     
96     128    
80     400    
-32    128    
32     -176   
-304   -48    
224    -320   
-1328  -224   
48     240    
-80    16     
240    -16    
-80    -48    
128    -1040  
48     48     
48     -176   
96     96     
-176   -80    
80     32     
-144   80     
0      -80    
-256   -144   
96     -16    
-96    64     
0      -112   
0      -16    
-32    -192   
112    16     
0      -256   
48     -32    
-32    -224   
304    192    
-256   192    
272    -336   
-208   -64    
160    112    
-240   64     
160    96     
16     96     
-32    -16    
-128   32     
240    224    
-352   64     
432    -160   
-224   64     
192    -1312  
80     -128   
-208   80     
-96    -144   
-160   -96    
176    -48    
112    304    
-272   -80    
-112   -96    
-176   -112   
176    0      
208    -96    
-288   -48    
48     -400   
-96    32     
-352   -160   
448    176    
-288   96     
128    -64    
-80    32     
-112   -16    
144    16     
16     0      
-96    144    
176    352    
-144   48     
-112   -80    
-160   96     
128    -240   
208    256    
-32    0      
112    144    
-32    -16    
80     32     
-48    0      
96     -96    
-64    64     
80     32     
-16    128    
192    -144   
-240   144    
-208   -176   
128    48     
-512   0      
80     64     
0      48     
-336   -112   
16     -32    
-608   -96    
-96    80     
-176   0      
-48    -16    
16     -160   
16     64     
240    -384   
-48    320    
-448   -192   
32     144    
48     144    
-16    96     
-112   -32    
16     0      
-112   176    
-272   96     
-112   48     
176    -128   
64     160    
32     32     
-32    16     
-272   -64    
112    96     
-112   -32    
-16    128    
64     96     
-112   -224   
16     208    
-144   48     
16     192    
-112   48     
-832   736    
1088   -384   
576    -624   
-288   -784   
-160   -1248  
-208   -192   
480    272    
496    -320   
-320   528    
-272   0      
16     -160   
-80    -240   
0      320    
-48    -96    
-16    96     
-112   -32    
-480   -32    
-64    16     
-160   -32    
-16    48     
0      -112   
128    176    
-240   -160   
96     48     
-160   -64    
144    80     
-112   112    
176    112    
-48    -16    
0      -16    
-64    16     
-32    80     
80     160    
-112   16     
48     144    
-816   -112   
144    160    
-64    0      
-80    0      
64     144    
-80    48     
0      96     
-112   0      
0      -32    
-80    -32    
64     80     
0      128    
112    48     
-208   -160   
80     96     
-560   48     
64     144    
16     96     
0      128    
-32    -96    
32     -80    
-128   96     
-144   144    
128    96     
-32    112    
-32    64     
-32    64     
-64    -32    
-96    -160   
-16    96     
-432   -16    
48     96     
-48    0      
80     -96    
64     32     
-80    240    
48     224    
-16    80     
48     0      
48     48     
32     128    
-96    176    
80     48     
-16    -96    
32     32     
-48    32     
48     16     
64     -48    
-288   0      
144    96     
192    576    
-320   -256   
48     0      
16     224    
-80    96     
16     96     
-96    -16    
64     160    
-112   -32    
128    144    
-208   128    
-176   192    
0      64     
-112   -144   
160    16     
128    288    
16     144    
-160   -32    
-96    0      
112    96     
32     32     
-32    64     
-16    144    
-80    -48    
32     144    
0      16     
16     32     
64     160    
112    112    
0      112    
-144   48     
112    112    
32     80     
64     80     
-64    -32    
96     176    
16     96     
112    16     
-352   -80    
144    192    
16     -288   
144    -144   
-176   144    
160    224    
0      -64    
-96    96     
-128   224    
272    32     
-112   80     
64     144    
-48    144    
80     -176   
-96    272    
64     -144   
96     160    
-192   192    
240    112    
-160   96     
-16    64     
80     48     
48     64     
96     368    
-240   -48    
0      -96    
-32    -48    
256    272    
80     32     
16     272    
-304   32     
160    16     
-32    352    
64     -32    
176    144    
-160   48     
192    128    
-64    0      
96     64     
128    144    
-32    -32    
-16    96     
-128   80     
144    32     
160    32     
-64    208    
0      -144   
-80    160    
-16    192    
-32    0      
-48    160    
64     144    
112    64     
-112   192    
-112   -16    
160    -16    
48     176    
144    80     
-176   -64    
32     144    
160    112    
-288   -1504  
-16    128    
80     176    
128    48     
16     64     
16     80     
-176   -48    
176    48     
-16    304    
288    176    
-64    192    
-16    48     
-96    -64    
-1328  -96    
-288   -320   
288    -144   
432    -528   
32     -1168  
-304   -480   
720    1568   
-112   -112   
-112   -48    
272    144    
-32    192    
-96    112    
176    336    
144    160    
-160   -144   
128    160    
96     -32    
0      32     
160    288    
176    -752   
-64    16     
-80    128    
-80    -48    
336    -208   
-80    112    
176    -192   
16     176    
-144   16     
96     160    
-48    -176   
128    -288   
-32    208    
112    -208   
-16    48     
-32    -416   
80     144    
0      -96    
16     32     
32     -256   
160    64     
-96    64     
-16    160    
96     48     
16     192    
-48    -128   
32     -224   
128    272    
128    96     
-48    -128   
48     -208   
-32    112    
192    -960   
0      208    
-16    32     
192    80     
-32    160    
80     240    
-64    0      
112    -32    
80     64     
-112   64     
128    32     
144    176    
-16    224    
48     -240   
64     0      
80     -112   
-32    -64    
144    112    
-112   160    
96     -16    
128    192    
-112   32     
144    -16    
-16    128    
176    -160   
-16    96     
176    -112   
-32    64     
144    -816   
80     144    
-176   -48    
80     -112   
128    16     
-176   144    
16     -224   
288    288    
-400   240    
320    -144   
64     48     
-16    32     
0      0      
128    -176   
176    336    
-96    -224   
176    0      
-128   -144   
64     160    
144    -48    
-16    64     
-144   -144   
144    128    
16     -208   
80     32     
-48    -1520  
0      -96    
80     64     
160    32     
-48    48     
256    48     
-128   192    
144    -256   
32     -928   
80     -112   
-64    -128   
32     128    
-224   96     
-64    -144   
-16    -176   
-48    -480   
-96    -272   
-128   -448   
320    32     
48     96     
112    -192   
-192   368    
256    48     
80     -64    
32     208    
128    0      
176    0      
-352   -80    
160    128    
192    96     
128    48     
-48    48     
304    384    
32     96     
-16    -2496  
-128   -240   
-16    80     
208    80     
48     64     
112    -192   
-96    -64    
160    -64    
-80    0      
160    -96    
-496   -16    
128    -96    
112    32     
-48    -64    
160    -80    
48     -1184  
16     32     
64     -16    
0      160    
288    -32    
-32    -48    
-48    -128   
80     -144   
-80    0      
-16    80     
-224   80     
16     -304   
272    -64    
-144   -448   
-16    16     
-64    -96    
-160   -256   
336    -1632  
48     16     
112    -16    
144    -448   
-32    112    
272    144    
-64    528    
-192   48     
-640   -16    
128    -208   
-1728  -112   
-32    -80    
0      32     
80     144    
-96    -96    
-16    -576   
16     96     
192    16     
-32    160    
-112   16     
144    -144   
-32    112    
16     -288   
16     -160   
0      0      
192    224    
-96    64     
-432   80     
2144   -656   
-1024  432    
1632   -16    
-528   400    
1312   -1008  
-592   -208   
144    208    
-480   224    
-448   -832   
320    464    
-288   -240   
368    -64    
-496   112    
336    -464   
-80    128    
192    -512   
48     432    
64     -256   
112    320    
144    -704   
0      -256   
240    96     
144    80     
-144   0      
0      -32    
-176   128    
192    -64    
-80    112    
208    -16    
-112   -16    
64     0      
-16    160    
160    -128   
96     112    
64     0      
112    0      
-16    96     
0      80     
-32    -32    
224    32     
-192   0      
128    -64    
-160   80     
96     -48    
-128   -32    
32     16     
160    208    
-192   -32    
-32    112    
16     0      
16     -32    
48     32     
96     -64    
-128   64     
32     -48    
-32    80     
64     320    
80     288    
160    160    
-192   0      
-912   -464   
16     32     
-912   -608   
-240   224    
48     32     
0      112    
-160   -16    
-336   80     
-192   -48    
-48    32     
-16    48     
64     112    
-48    80     
-160   -160   
16     160    
-416   -176   
96     80     
-240   -176   
-144   -112   
144    144    
-208   48     
-144   64     
-336   -64    
-64    144    
-48    64     
-80    32     
192    -80    
-64    112    
32     -80    
80     176    
-160   -176   
80     -16    
0      -16    
96     160    
-160   32     
32     -32    
-144   48     
-176   224    
-64    -16    
-272   -16    
-272   -80    
-288   -160   
64     128    
-144   -96    
16     144    
-80    -64    
128    128    
-64    -32    
32     48     
-48    48     
160    144    
-48    80     
32     48     
-48    16     
48     304    
16     160    
-416   -208   
-96    16     
112    64     
224    32     
-256   -288   
-240   128    
224    -48    
0      64     
-112   160    
-32    80     
-16    -208   
272    -144   
-176   336    
-16    -32    
208    144    
-224   176    
272    16     
-944   16     
-32    64     
64     -368   
-16    80     
-48    144    
272    176    
-160   -32    
0      -48    
-144   112    
-48    -240   
-64    16     
-48    -160   
224    224    
-544   -144   
144    128    
-976   -144   
272    0      
112    240    
32     32     
-144   80     
80     -16    
96     0      
-48    -144   
-80    0      
176    -48    
48     224    
-48    112    
-64    80     
-416   -96    
112    128    
-80    80     
160    16     
32     352    
-128   -320   
64     -16    
-48    -32    
368    96     
96     256    
-176   112    
-192   48     
48     -32    
32     -112   
192    48     
-256   -64    
96     240    
-336   176    
-112   0      
80     16     
-192   -16    
-64    64     
-48    112    
-112   48     
0      -32    
-16    192    
16     32     
16     176    
-256   -16    
160    80     
-192   48     
256    96     
-224   96     
176    -32    
-64    48     
48     0      
16     544    
-800   -1184  
976    0      
256    144    
-272   512    
-336   944    
-416   752    
368    -208   
208    -96    
-48    48     
-80    -288   
-32    240    
80     -80    
320    208    
-144   48     
224    16     
-128   224    
16     48     
-176   -208   
64     -272   
80     176    
64     48     
-32    80     
128    160    
-112   0      
-96    -80    
-16    48     
64     256    
64     176    
-32    48     
-80    16     
-16    96     
64     128    
16     16     
32     112    
-64    64     
16     96     
-80    -16    
-32    144    
32     32     
-16    48     
32     128    
32     96     
-16    48     
96     32     
-144   96     
240    192    
-112   96     
128    160    
0      -48    
96     112    
-144   64     
112    32     
-32    64     
112    96     
-64    128    
64     16     
112    64     
-16    240    
64     80     
-32    64     
96     176    
-48    96     
-16    -144   
144    192    
-304   48     
176    80     
96     80     
-128   -32    
224    256    
-256   144    
240    64     
-112   80     
96     96     
112    96     
-80    -16    
64     192    
-16    -144   
112    64     
-112   144    
16     -96    
208    144    
-112   -64    
160    640    
-176   -16    
208    -528   
16     64     
-96    208    
0      0      
240    240    
-208   16     
256    128    
-32    96     
80     32     
80     96     
0      -224   
272    224    
-144   128    
64     -112   
80     64     
-32    -16    
96     160    
48     48     
144    48     
-144   160    
96     80     
16     0      
64     -32    
160    240    
-80    176    
160    -32    
-80    144    
0      48     
128    96     
48     64     
-80    -48    
16     32     
-48    -2112  
96     32     
-192   80     
512    368    
96     208    
64     96     
-288   16     
304    80     
-192   -96    
-256   -48    
96     -32    
48     -80    
144    48     
128    -656   
-32    -16    
-48    -208   
-64    80     
208    192    
176    -64    
-112   144    
16     112    
160    304    
176    16     
-16    0      
-208   64     
288    128    
208    128    
48     208    
-32    -192   
64     448    
-64    64     
208    96     
48     -496   
-80    64     
64     32     
96     112    
32     96     
64     224    
-160   32     
208    -64    
-80    240    
128    64     
-16    208    
-160   -592   
272    240    
96     -128   
16     64     
-80    -800   
128    240    
144    352    
240    384    
-32    -32    
-160   -224   
-32    272    
160    272    
0      128    
80     48     
-64    16     
144    -176   
-64    240    
-16    -304   
64     208    
32     -208   
112    -64    
64     144    
80     192    
32     -32    
48     96     
48     48     
32     16     
112    32     
-48    80     
224    192    
144    208    
-336   0      
-176   -240   
288    -32    
-128   112    
128    240    
-96    32     
112    -224   
64     -2208  
368    -1248  
336    -1264  
-240   -48    
384    -1088  
112    32     
480    192    
-304   -576   
0      256    
208    96     
-48    16     
144    -16    
160    -384   
-208   16     
256    -144   
0      224    
-272   -112   
112    32     
-48    -16    
160    -240   
-32    48     
160    96     
-160   -16    
-112   -64    
32     -48    
-16    -704   
144    -48    
32     -720   
-160   -32    
96     -112   
224    0      
-96    32     
128    -96    
-48    -16    
0      -288   
112    96     
16     -304   
0      -240   
128    -2704  
144    32     
32     48     
-224   96     
128    -80    
48     64     
32     48     
16     -304   
-384   -224   
80     -256   
-1568  -288   
80     16     
64     64     
48     -48    
0      -464   
96     -464   
80     -208   
208    192    
-224   -16    
288    144    
-80    144    
-48    160    
96     32     
-112   -176   
224    128    
-224   48     
144    80     
32     -64    
144    -224   
16     -128   
48     -32    
16     32     
32     -1408  
32     96     
64     -144   
-64    64     
-32    96     
16     -336   
0      -416   
144    -80    
-32    -64    
-80    -336   
-672   64     
112    336    
160    0      
32     16     
-16    -176   
208    -208   
208    224    
64     144    
-128   -160   
0      -96    
224    32     
-64    32     
0      -128   
-160   -80    
96     -176   
-512   -32    
240    272    
-368   -80    
128    -400   
-32    96     
192    -832   
48     64     
-32    -48    
32     -32    
0      48     
96     -128   
-192   -96    
64     32     
-128   -128   
192    80     
-400   32     
176    16     
-16    16     
96     -304   
32     128    
48     -192   
48     128    
64     16     
16     -112   
-176   0      
160    48     
-16    -112   
64     80     
-48    256    
224    -64    
-160   -112   
-144   -336   
240    -96    
-96    -352   
224    192    
112    -144   
-160   160    
-112   32     
192    144    
-128   -160   
160    -320   
-368   -16    
-80    -304   
-144   -432   
-128   -416   
48     112    
176    0      
-64    32     
-64    -176   
192    32     
-16    -240   
-432   -272   
-96    64     
-368   224    
-16    240    
-128   -16    
-144   112    
192    16     
-144   288    
-48    0      
128    16     
-752   -256   
400    304    
-16    16     
176    112    
-464   -144   
-272   80     
-16    80     
-272   -48    
96     -16    
-240   64     
-128   -48    
-816   -336   
-288   -160   
432    224    
-80    80     
192    160    
-176   -128   
112    -240   
192    496    
32     -64    
-128   -16    
224    336    
-80    0      
-112   -64    
-288   32     
48     -160   
-352   272    
48     -208   
16     176    
-192   176    
-16    -160   
-16    -96    
48     -208   
128    48     
48     48     
64     -80    
-112   0      
-144   -16    
64     -32    
-48    112    
48     176    
-1200  400    
-944   -304   
320    320    
144    -16    
816    -144   
-1072  -416   
816    816    
-368   240    
48     -80    
-560   -32    
480    -176   
-368   64     
224    0      
-80    224    
80     -16    
-464   -96    
64     -16    
-928   -32    
160    16     
96     -192   
-144   32     
128    96     
-16    256    
0      -64    
-224   -224   
-80    48     
128    208    
-16    96     
-48    -32    
-192   -80    
-96    -48    
-128   80     
32     48     
-80    80     
-192   -16    
-16    80     
48     304    
48     32     
-96    -64    
112    208    
32     -32    
96     208    
-144   48     
112    112    
-112   -16    
80     0      
16     208    
-208   -96    
256    208    
-608   -144   
368    64     
-176   144    
64     64     
64     48     
-16    96     
-48    96     
80     224    
-144   16     
64     48     
16     128    
-48    -32    
256    128    
-160   64     
0      112    
-336   0      
-144   -96    
96     80     
16     224    
-96    -16    
96     16     
-192   -16    
0      144    
-16    -16    
80     96     
-64    80     
-176   -128   
64     80     
-288   -32    
16     352    
-112   -112   
192    48     
-64    80     
-32    96     
192    304    
-208   -48    
288    -16    
-48    0      
192    144    
-176   16     
32     80     
-160   -32    
112    176    
16     -32    
64     208    
-32    -32    
-32    -176   
176    112    
-224   64     
224    144    
16     112    
-96    96     
0      16     
160    16     
0      160    
-144   128    
48     -32    
-32    48     
48     -144   
160    64     
-224   128    
176    80     
64     160    
-80    32     
144    272    
-176   -144   
-112   -144   
-160   176    
288    -32    
-208   -96    
48     160    
-192   -48    
0      80     
-16    -16    
48     128    
-48    112    
80     -64    
64     192    
-96    -144   
-16    -64    
-48    0      
96     -16    
-96    16     
64     48     
-160   80     
32     144    
96     -80    
-16    -96    
-64    96     
112    64     
16     112    
32     96     
96     80     
0      208    
-16    224    
32     64     
32     80     
80     256    
96     128    
-144   -160   
0      32     
16     128    
48     48     
32     128    
48     -64    
96     528    
-176   128    
112    48     
32     224    
128    256    
144    48     
48     240    
-128   192    
-64    -128   
0      -48    
0      -192   
112    64     
128    512    
-48    416    
-128   -384   
112    80     
112    176    
0      -16    
16     16     
192    16     
96     240    
160    64     
-176   64     
320    -96    
-128   -16    
208    80     
64     176    
0      -80    
96     144    
-80    -736   
96     144    
-80    64     
80     48     
256    256    
-48    -176   
16     144    
32     96     
-16    96     
-64    144    
-192   -48    
288    336    
-176   80     
176    -272   
-224   16     
880    1680   
-1568  -1344  
992    960    
368    864    
1152   16     
-960   -736   
464    1312   
-336   880    
-144   -592   
-496   -336   
128    -320   
240    352    
-320   272    
-80    -176   
0      -160   
80     -96    
304    432    
16     -1632  
-192   32     
80     -80    
64     -144   
144    128    
0      304    
128    80     
-96    -176   
-160   -144   
272    256    
96     272    
16     -64    
-96    0      
112    -48    
32     96     
48     -528   
160    128    
32     -320   
288    128    
80     64     
160    272    
-416   -288   
96     448    
144    -32    
-80    -176   
96     48     
-64    -16    
64     96     
176    -128   
208    304    
-96    -944   
112    192    
80     -480   
-144   224    
80     144    
-144   96     
-16    32     
176    16     
-144   16     
-224   -192   
528    736    
-288   -416   
16     384    
48     -480   
128    128    
-112   -448   
80     -96    
48     -448   
-32    176    
-32    16     
-32    32     
176    -48    
32     96     
144    80     
48     -560   
-48    -16    
128    -512   
176    80     
32     -48    
-16    -352   
-64    -560   
80     -16    
-80    -400   
272    128    
-16    192    
-16    -80    
96     192    
48     -32    
0      32     
-32    -160   
-64    -80    
272    80     
128    144    
80     -208   
32     64     
32     -320   
112    48     
-48    -144   
-32    32     
0      -32    
304    -1216  
-64    -32    
-384   -224   
-80    -304   
144    -48    
208    -640   
-96    -176   
80     224    
64     -80    
0      -112   
208    -48    
64     624    
48     288    
16     -176   
-112   -32    
160    -688   
192    96     
-624   48     
-48    -64    
144    -32    
32     -368   
0      -128   
80     -1600  
96     112    
64     240    
144    80     
80     112    
48     -192   
-96    272    
432    800    
-32    192    
176    448    
-624   96     
320    -464   
-112   -128   
-64    -400   
240    -48    
96     -656   
-64    48     
160    -288   
-96    -256   
32     224    
128    64     
64     -128   
64     0      
-208   -80    
96     -192   
-272   -80    
48     -240   
-1328  -128   
80     208    
144    16     
0      -112   
192    48     
-16    -1216  
-64    64     
0      -64    
-48    -208   
432    16     
-192   528    
304    -64    
-208   -64    
64     32     
96     -80    
-320   0      
208    -144   
-48    -16    
80     -176   
-272   -80    
96     -320   
-32    16     
128    -1824  
16     80     
-32    96     
48     256    
-352   -32    
96     -16    
-224   -80    
160    -32    
-336   48     
32     -80    
-1504  -160   
96     -112   
96     32     
0      -32    
-48    128    
192    -624   
-304   80     
304    -176   
128    176    
-32    -192   
240    -48    
-80    112    
80     80     
-304   16     
-48    -128   
-528   -272   
80     128    
-352   80     
160    160    
-96    16     
880    -528   
-240   -224   
-48    -800   
-448   -32    
1264   -656   
-656   -736   
112    752    
-64    736    
192    -464   
-304   0      
608    -64    
48     384    
-384   32     
96     -240   
48     0      
32     -288   
64     112    
-48    32     
-128   16     
-256   -96    
0      -80    
-64    -112   
-16    96     
112    -32    
-96    176    
-112   -112   
160    -32    
144    -32    
16     -208   
64     16     
-32    -176   
160    -128   
-48    176    
128    -96    
-192   0      
-80    -128   
-16    0      
208    144    
32     -32    
-64    -96    
-112   -48    
-48    -64    
192    80     
-672   -144   
0      256    
-112   -32    
-304   -48    
-32    176    
-1584  -112   
112    96     
16     80     
80     48     
32     -96    
-128   16     
32     -48    
-16    112    
-480   -80    
176    176    
-240   -96    
128    64     
-192   96     
-176   -80    
48     16     
-16    192    
-144   64     
-96    -32    
-176   -80    
-1168  48     
-16    48     
-144   48     
-16    48     
144    -48    
80     128    
-80    -128   
-64    -64    
144    144    
-192   304    
32     -288   
240    80     
-304   -16    
48     112    
-96    32     
-224   -112   
-64    192    
-192   32     
208    16     
-192   144    
-64    176    
-112   -96    
208    32     
-48    -32    
0      48     
0      96     
-176   0      
48     32     
-96    112    
48     128    
64     224    
64     192    
-512   32     
-48    80     
96     -128   
0      192    
48     -80    
0      32     
-96    112    
96     80     
32     160    
-208   16     
0      64     
-144   224    
160    128    
-240   -80    
-80    -32    
-560   -112   
48     48     
48     -112   
-16    96     
-96    256    
32     64     
144    -32    
48     -160   
-240   -96    
48     64     
48     -208   
0      48     
-96    32     
160    -128   
-224   -32    
-128   208    
176    480    
-80    176    
128    -64    
-128   416    
-208   -176   
288    -80    
-400   64     
256    496    
-144   -112   
160    0      
-160   -32    
-32    80     
-64    16     
-64    144    
-368   -80    
112    176    
-464   288    
0      192    
-112   -128   
-144   -32    
48     176    
0      -16    
32     -112   
-64    -400   
16     0      
-208   -160   
-16    240    
-48    560    
144    144    
-272   -160   
112    -96    
-432   -160   
48     112    
-128   160    
176    -656   
64     0      
96     320    
-144   144    
-400   32     
64     -48    
160    48     
224    272    
-496   32     
-48    0      
-64    -128   
192    112    
256    160    
-192   224    
-144   -16    
48     -48    
144    0      
240    176    
-112   112    
-32    -128   
48     128    
160    192    
32     128    
-224   0      
32     0      
0      32     
-16    80     
112    96     
-16    288    
-208   -112   
192    128    
0      48     
224    80     
2112   -1760  
-432   -928   
1232   1616   
-592   768    
-16    288    
-32    400    
-80    -16    
-80    -672   
256    112    
112    736    
-288   48     
64     -144   
-80    368    
192    64     
-112   32     
0      -80    
32     208    
0      368    
-288   240    
-32    -144   
288    144    
0      160    
-112   240    
-176   -96    
160    -384   
128    -32    
928    592    
-128   528    
-240   -240   
-96    -48    
112    -192   
32     160    
-96    80     
160    48     
-240   144    
80     48     
48     160    
112    400    
-80    -16    
208    -64    
64     -288   
240    128    
-80    112    
0      96     
-48    64     
192    96     
128    -112   
96     112    
-32    16     
32     80     
-160   128    
48     48     
240    -176   
-160   -192   
240    160    
64     64     
-128   272    
-16    544    
336    128    
-304   -112   
208    80     
16     48     
64     -304   
16     432    
48     96     
80     64     
80     -16    
176    256    
-48    -48    
64     256    
-48    32     
64     96     
-112   -112   
128    128    
80     96     
16     64     
0      240    
320    144    
16     -112   
400    720    
-352   -144   
320    32     
-112   368    
-48    -560   
16     96     
16     496    
-32    -16    
48     384    
-48    -208   
48     -16    
0      96     
-48    -160   
80     80     
112    160    
112    416    
16     160    
80     -256   
-16    240    
48     -512   
-32    64     
16     -96    
96     64     
16     160    
-16    -32    
96     128    
-16    0      
64     48     
176    256    
112    448    
304    480    
-208   32     
-288   -400   
208    -16    
96     96     
112    208    
32     320    
48     -16    
64     144    
-16    32     
256    -336   
-160   -48    
160    112    
160    208    
-144   -32    
-32    -272   
192    -128   
272    -48    
-192   -48    
256    -16    
-80    -16    
32     -240   
-32    -80    
-64    -2160  
0      32     
352    128    
-32    160    
80     0      
-176   96     
0      0      
48     -64    
80     80     
64     0      
288    272    
-192   -32    
112    96     
32     -384   
144    80     
-80    -192   
256    64     
-96    96     
0      144    
96     -16    
0      80     
16     128    
128    192    
80     80     
16     -768   
-128   224    
80     -256   
112    32     
48     32     
64     272    
-32    -112   
-96    64     
128    -48    
144    64     
-96    160    
128    48     
-64    80     
144    -400   
32     64     
160    -448   
160    256    
-96    64     
-64    48     
-16    -16    
192    -32    
80     -400   
-176   112    
0      -64    
160    128    
-64    64     
96     -64    
0      -1088  
96     -208   
128    160    
48     32     
-48    112    
64     -192   
0      112    
160    -96    
-32    128    
128    -16    
16     -800   
16     64     
192    -1248  
-288   80     
-736   448    
160    -656   
288    752    
224    128    
-400   -256   
-48    -1392  
640    -608   
-288   512    
-400   -416   
432    -112   
-320   0      
544    160    
-160   -416   
-112   48     
176    -544   
-80    64     
-64    -192   
-32    -112   
80     128    
176    -288   
0      -768   
48     -160   
-16    224    
192    -64    
32     -48    
64     -32    
-288   -352   
0      80     
48     112    
368    -144   
-368   -64    
-16    -64    
128    80     
80     32     
16     -64    
32     -176   
192    144    
176    -64    
128    -96    
-16    -400   
-160   96     
128    16     
96     80     
-16    48     
-80    -128   
96     16     
-16    -64    
-608   32     
-16    -240   
-112   0      
64     -96    
176    48     
16     -256   
-176   64     
-16    -128   
-48    48     
112    80     
48     96     
16     80     
-16    -256   
-96    -224   
32     -128   
-704   0      
32     -32    
-48    -80    
176    -128   
-144   -80    
112    -864   
0      80     
144    -2240  
96     96     
-112   -16    
240    112    
-208   -128   
160    -128   
-144   32     
32     -96    
112    -80    
-160   32     
-2608  -272   
96     -160   
-16    32     
32     -32    
0      -176   
48     -320   
-64    32     
64     16     
-64    -128   
320    240    
-272   32     
-32    0      
192    -32    
16     -80    
16     -16    
-128   80     
0      -112   
-160   32     
112    -224   
48     80     
0      -1120  
-48    144    
384    448    
0      -80    
-272   -304   
-96    -144   
-32    -80    
176    80     
-384   -544   
176    0      
-160   -16    
192    64     
-32    48     
96     -368   
-16    48     
48     -480   
16     96     
48     256    
16     144    
-128   256    
-144   0      
-128   -160   
80     -48    
16     48     
-48    -32    
-192   -160   
80     -288   
128    192    
96     -144   
32     96     
-160   -448   
48     144    
256    384    
48     -224   
-64    160    
32     -144   
-64    -224   
224    304    
-128   224    
160    -16    
0      128    
-32    -192   
-48    -16    
32     -48    
80     240    
-48    -224   
-224   -128   
0      96     
-640   -80    
-160   96     
64     -96    
48     64     
32     -16    
-64    16     
64     -16    
-240   -128   
-176   -80    
0      96     
80     -80    
64     240    
-160   64     
-80    -48    
-304   -32    
112    176    
-32    16     
32     -16    
-96    64     
160    64     
-224   -144   
272    32     
-64    96     
32     -96    
0      160    
-16    -128   
192    96     
-80    144    
-176   -112   
112    80     
32     80     
64     192    
-672   -192   
0      32     
-1056  -32    
0      96     
-160   -48    
48     80     
-144   -64    
0      -16    
-48    -80    
-272   -32    
304    256    
-224   160    
64     -48    
-272   144    
256    0      
-256   48     
-288   -128   
-288   64     
0      96     
-1424  272    
208    -352   
256    -80    
832    -528   
-192   -768   
-512   -144   
336    688    
-336   -144   
208    -64    
-448   144    
240    -208   
-192   80     
192    144    
80     80     
-144   -208   
-288   -96    
224    0      
112    144    
-16    -32    
48     336    
160    -128   
-144   400    
-432   80     
304    -64    
-272   -304   
112    256    
64     224    
-48    80     
-256   -272   
272    288    
-304   -64    
0      128    
32     160    
192    160    
-128   64     
-80    -48    
-16    112    
-352   -832   
208    240    
256    352    
256    192    
-464   32     
48     -32    
-352   0      
32     48     
-272   -112   
144    64     
-448   176    
64     0      
144    240    
-112   128    
144    176    
-16    32     
32     -16    
-64    -48    
96     48     
-160   -80    
-32    80     
-16    160    
0      0      
-128   -16    
48     64     
-528   -112   
-16    -176   
16     192    
0      -16    
16     112    
-64    64     
64     0      
-64    96     
-32    80     
48     32     
48     48     
-16    32     
32     96     
-128   -16    
16     48     
96     80     
16     64     
-64    -208   
112    -32    
-96    112    
-96    -192   
-160   -160   
-96    -112   
432    320    
-128   -16    
-80    48     
-192   -256   
320    176    
-64    112    
32     144    
32     112    
-64    -160   
-16    112    
16     -32    
208    672    
-144   432    
176    48     
-16    192    
-240   -16    
48     -160   
128    16     
-64    80     
-32    64     
-32    -224   
-48    80     
16     0      
192    304    
-160   64     
16     176    
-192   -112   
208    208    
112    -16    
-48    -32    
48     144    
-80    32     
192    288    
-352   -112   
112    -32    
-16    16     
-96    48     
48     256    
80     0      
64     448    
-160   0      
496    96     
-336   -16    
96     160    
-32    32     
176    80     
32     240    
48     336    
192    128    
-176   -64    
32     208    
96     224    
288    80     
-128   96     
-192   80     
336    16     
-32    16     
-96    80     
192    80     
-16    64     
32     48     
-160   -160   
240    16     
-128   80     
-48    -512   
288    192    
-96    96     
80     144    
-16    0      
96     48     
-16    128    
144    112    
96     16     
-112   144    
96     32     
48     64     
-176   -64    
80     96     
-16    -96    
320    16     
-128   128    
160    256    
16     96     
48     512    
-240   16     
-48    -64    
192    0      
96     80     
32     48     
-160   -16    
80     256    
192    -112   
-208   224    
-80    -160   
160    -64    
64     112    
-16    -320   
-48    224    
-48    0      
64     144    
32     -80    
176    96     
144    128    
-64    144    
-64    112    
112    48     
-64    64     
192    224    
-80    -32    
208    -32    
-96    240    
128    -128   
80     128    
1824   960    
-1040  288    
208    -32    
-832   320    
1040   -528   
-944   480    
192    -656   
336    928    
176    -192   
-208   272    
128    -288   
48     -128   
0      144    
192    0      
0      0      
-48    -480   
-80    336    
288    -16    
-176   96     
160    -336   
-160   352    
160    -32    
-64    272    
-16    -288   
48     -128   
32     16     
32     -96    
-16    -48    
80     -16    
64     32     
80     -544   
-16    112    
0      -2496  
64     128    
-32    48     
64     -16    
32     256    
112    80     
160    48     
-144   -128   
160    144    
48     80     
160    96     
-16    -80    
-32    32     
-48    -528   
304    144    
-32    16     
256    -16    
-96    160    
32     96     
-32    0      
48     96     
96     144    
-80    -448   
80     -48    
64     -240   
-48    144    
112    -176   
96     -32    
32     0      
80     144    
0      -48    
32     208    
96     32     
128    208    
-112   96     
-32    -112   
144    176    
-48    -96    
144    240    
-64    -112   
96     16     
96     -112   
-32    -80    
240    -32    
-176   176    
80     -400   
144    96     
-144   0      
272    -144   
112    192    
16     -112   
-208   -1248  
112    -32    
-80    -144   
-112   -224   
64     336    
-64    -160   
80     112    
0      -272   
32     16     
112    -32    
48     -80    
16     16     
32     -272   
-48    -448   
-1600  -240   
0      -208   
48     -144   
32     -720   
112    16     
48     -1408  
80     32     
-32    80     
224    -80    
-16    -80    
0      -144   
64     0      
-80    112    
32     -672   
-80    -144   
-656   -32    
48     96     
128    -32    
-128   -432   
-32    -384   
64     -720   
0      -256   
224    144    
128    64     
128    -160   
-160   -160   
-32    -352   
64     192    
304    -272   
-128   -96    
-144   0      
64     0      
48     -32    
0      -336   
112    -80    
112    -336   
16     48     
0      -1344  
96     -16    
48     32     
128    112    
-32    0      
80     128    
-176   16     
-16    -48    
-240   112    
-16    -208   
-528   -176   
208    -32    
-48    192    
0      272    
-96    -32    
208    -320   
-16    -16    
64     -80    
-80    -80    
80     -224   
352    16     
-144   160    
-16    -96    
0      -32    
96     32     
-368   -16    
-48    -96    
144    -48    
176    112    
-16    -128   
240    -448   
-64    240    
-16    -704   
112    96     
48     112    
176    -112   
-16    -48    
-48    16     
16     96     
96     16     
-192   64     
16     -80    
160    96     
-48    -128   
16     32     
-80    -352   
48     144    
144    -1088  
0      128    
-192   -96    
192    -384   
-80    80     
128    -160   
-160   80     
-96    16     
-192   -64    
96     16     
-528   144    
-32    -176   
-16    512    
32     -272   
112    64     
-160   -720   
2112   -976   
496    448    
-1008  -384   
-528   -576   
336    288    
32     -320   
240    48     
144    -896   
-304   -48    
-80    -384   
16     144    
-304   -48    
224    80     
64     160    
96     -640   
-128   -16    
64     48     
272    608    
-64    -112   
-80    -240   
288    368    
-144   -224   
112    160    
-272   -16    
272    -64    
-128   -64    
224    176    
-352   -256   
80     -144   
-32    -256   
128    32     
96     0      
-1200  -32    
-32    16     
-32    -16    
16     -144   
-48    96     
64     256    
128    -16    
-16    0      
-608   -224   
112    112    
-848   -128   
48     128    
-48    112    
-48    -16    
-32    48     
-80    -48    
64     64     
-656   -80    
16     96     
96     80     
32     -96    
96     -32    
-224   128    
160    32     
-160   -48    
16     0      
-32    208    
-48    -16    
32     0      
-112   80     
-288   0      
48     80     
-112   -128   
144    160    
-320   208    
-128   -16    
96     -112   
-96    48     
-80    16     
80     176    
-16    -80    
-16    16     
-64    -32    
-80    -288   
208    96     
-160   96     
48     16     
-240   96     
-16    -64    
-192   -32    
-80    -80    
64     224    
-160   192    
208    64     
-208   -48    
128    -480   
-176   -160   
112    80     
-64    192    
16     144    
-64    128    
16     96     
-192   -384   
-32    96     
-336   96     
336    176    
-544   48     
160    144    
-160   32     
144    48     
32     96     
-160   -112   
128    -80    
-16    128    
-144   192    
48     -112   
-128   -80    
-192   16     
256    32     
-208   -16    
64     128    
-368   -176   
144    64     
-160   -128   
176    144    
64     224    
-16    0      
224    352    
-208   176    
224    80     
-160   144    
-16    160    
128    16     
-400   -144   
-160   -16    
96     16     
-512   -304   
-80    176    
-272   32     
80     -48    
-128   -96    
-192   -144   
0      0      
-16    16     
176    144    
224    64     
-32    304    
-208   128    
240    -16    
-288   -48    
-112   -32    
-96    -64    
-16    -32    
-160   128    
0      0      
80     96     
-64    0      
-224   80     
112    128    
112    64     
-64    160    
-48    32     
-48    288    
-128   -48    
48     80     
16     -256   
16     128    
64     224    
16     16     
-96    112    
96     0      
96     -32    
128    224    
-176   16     
16     -112   
16     96     
64     16     
128    -64    
-80    304    
0      -208   
16     128    
-368   -112   
256    144    
-96    144    
16     0      
16     112    
48     64     
64     112    
-16    144    
-32    64     
80     -32    
48     224    
-112   80     
224    -48    
-208   112    
0      208    
-96    -160   
-80    -48    
128    80     
-16    48     
48     192    
-128   96     
48     128    
-96    256    
-64    112    
-704   -2048  
-112   704    
144    592    
-480   -224   
112    48     
-192   496    
160    608    
-832   -576   
-48    512    
-16    96     
688    48     
-528   80     
16     176    
96     160    
160    112    
-176   -64    
80     96     
-16    -96    
16     16     
-64    -16    
32     112    
-32    160    
96     256    
64     80     
-16    -176   
-96    -80    
144    16     
176    256    
-48    192    
-32    0      
16     16     
-80    128    
16     64     
0      144    
-112   16     
48     48     
192    80     
48     96     
32     32     
-48    96     
112    192    
32     -16    
96     112    
-176   192    
320    96     
-160   32     
96     160    
-32    128    
160    80     
-128   -192   
-80    -1264  
160    160    
-48    48     
48     224    
-128   128    
176    176    
-144   -64    
48     176    
-80    -16    
64     -400   
-48    -80    
176    160    
-32    -32    
144    160    
-16    -144   
-32    -272   
48     144    
-16    144    
32     144    
272    592    
-64    96     
144    -48    
16     112    
48     112    
80     16     
0      80     
-16    -48    
176    -16    
-128   144    
-16    -32    
192    112    
-16    288    
96     -160   
-16    -144   
-176   -256   
160    48     
96     112    
-16    160    
-32    -112   
32     144    
-32    -176   
144    80     
-64    0      
64     192    
16     112    
16     -208   
16     64     
96     -496   
-16    64     
0      -304   
80     160    
80     144    
112    96     
-112   32     
16     32     
16     -32    
112    64     
32     16     
-16    16     
64     80     
144    -128   
-64    16     
80     -288   
-80    32     
224    -976   
-32    80     
80     48     
-32    96     
48     -16    
-64    -16    
160    96     
96     160    
144    112    
-128   -32    
16     128    
-48    32     
-32    -368   
224    112    
-192   272    
368    -176   
-256   32     
96     -1392  
16     192    
128    80     
-16    224    
-32    -96    
208    80     
-112   192    
224    -240   
-32    144    
96     16     
0      160    
32     -624   
96     112    
32     -688   
48     96     
480    -144   
-464   560    
96     -304   
160    80     
-96    80     
80     0      
-80    0      
144    208    
144    -64    
96     -192   
-96    80     
112    -288   
128    416    
-208   -128   
144    16     
32     16     
416    272    
-64    -112   
-144   -16    
80     -80    
16     48     
80     0      
48     336    
-96    32     
144    -240   
-96    128    
272    160    
-224   16     
208    96     
-256   96     
192    -416   
-176   240    
80     144    
48     64     
-64    16     
80     -112   
48     -96    
16     -240   
-32    -1312  
96     -160   
144    272    
112    -96    
-96    352    
-144   -96    
-64    -432   
-112   -128   
160    -672   
-128   0      
240    32     
-48    144    
-656   -112   
-80    -240   
1312   -1776  
-384   -1296  
464    752    
-192   16     
1152   16     
-592   0      
-48    96     
-560   -320   
-208   -96    
-48    -624   
272    80     
-192   -48    
16     32     
-544   -96    
272    -240   
-192   16     
336    -384   
-96    48     
144    -496   
96     -32    
240    224    
-64    224    
112    -32    
-48    112    
-208   -208   
320    144    
-272   80     
272    -272   
-320   64     
-16    -240   
144    -48    
0      -416   
48     -64    
128    -960   
-80    -32    
112    -1680  
-144   -272   
192    48     
-48    144    
304    -192   
-176   -64    
-128   96     
128    32     
-96    -112   
-32    -64    
-1488  16     
80     -80    
16     -176   
64     -176   
-96    96     
16     -272   
208    80     
-112   -176   
240    16     
-64    -96    
64     -16    
32     112    
-16    -32    
16     0      
0      -112   
-304   -32    
80     -144   
-848   16     
-16    -64    
144    48     
32     -272   
-80    176    
-128   -1536  
32     128    
-48    -96    
160    64     
-144   16     
-48    -80    
-128   -128   
128    80     
-656   -240   
256    32     
-272   64     
176    -112   
48     -128   
-48    -288   
176    32     
256    144    
-288   32     
176    -96    
80     32     
0      16     
128    -32    
48     144    
-192   96     
192    64     
-128   208    
-960   -160   
272    -272   
-64    -112   
224    16     
-208   80     
96     -96    
64     -48    
-272   -112   
128    0      
-144   128    
0      0      
112    112    
96     -144   
32     160    
-48    -128   
96     16     
-16    -256   
16     -96    
-48    -128   
64     48     
80     -304   
96     -288   
-240   -128   
16     -128   
-32    48     
112    -112   
-96    -16    
16     0      
-64    144    
224    -64    
-384   176    
208    -144   
-64    0      
-1792  -432   
16     -80    
-480   -176   
-512   160    
176    64     
-624   0      
-128   -112   
48     -144   
-64    -64    
256    0      
-208   80     
128    -16    
32     160    
-1328  -160   
160    192    
-144   -112   
32     48     
-272   96     
-304   80     
272    208    
-368   -160   
32     144    
-1488  0      
16     128    
96     -48    
-32    128    
16     -96    
-64    64     
-128   -320   
-48    80     
-32    -112   
-96    48     
64     -224   
-224   160    
-192   32     
-144   -64    
-128   -80    
-32    160    
-80    208    
-144   112    
-240   -128   
-144   256    
-240   -112   
-128   -224   
16     208    
16     -192   
-32    80     
-80    -144   
112    208    
-192   -16    
-96    -112   
80     48     
32     80     
32     160    
-128   -48    
96     192    
-240   -64    
-80    80     
-16    48     
112    48     
-96    -272   
-128   -32    
-48    160    
64     64     
-16    160    
48     48     
-32    96     
-112   64     
48     176    
-640   -48    
32     32     
-384   16     
-640   496    
176    2320   
-912   -144   
-48    -496   
-368   80     
-544   -576   
224    -1472  
-96    768    
224    240    
384    320    
-720   -560   
208    64     
-16    224    
96     144    
-448   -48    
32     16     
-48    -336   
16     336    
80     112    
96     -80    
-256   -112   
208    64     
-320   144    
80     32     
-32    0      
176    16     
-32    144    
96     640    
-160   96     
-176   128    
-112   176    
288    160    
-160   0      
64     96     
-192   16     
32     -224   
-112   -128   
224    112    
-224   0      
240    160    
32     272    
-32    176    
-144   -32    
16     80     
-288   -64    
-64    112    
-1616  -96    
64     272    
128    256    
-144   32     
-32    64     
-80    112    
96     64     
-64    256    
16     0      
0      64     
-160   -208   
16     -80    
112    -32    
-192   -80    
240    256    
48     96     
-176   16     
240    16     
16     64     
224    48     
16     224    
16     96     
0      32     
-64    112    
-16    48     
112    112    
-80    16     
96     96     
-48    -32    
-32    16     
-112   -80    
144    0      
-208   -96    
96     48     
-80    272    
0      128    
48     128    
-128   -64    
112    272    
-240   112    
144    -16    
-288   -80    
48     -176   
64     -112   
144    224    
0      192    
-16    96     
-16    48     
16     64     
128    96     
-176   -96    
128    160    
-128   64     
176    208    
-288   -80    
160    96     
-48    16     
96     176    
-64    0      
-32    128    
80     64     
128    128    
-48    112    
-48    0      
192    144    
-128   0      
160    64     
-96    128    
128    96     
-48    32     
32     32     
-96    32     
112    32     
32     144    
176    96     
-48    -48    
-208   48     
288    128    
64     16     
-32    128    
-208   80     
176    80     
32     240    
-176   128    
32     -80    
0      96     
-80    -32    
192    -1312  
-64    -80    
112    240    
-160   48     
48     -192   
32     -128   
208    224    
128    160    
-112   128    
64     -16    
48     176    
-192   160    
64     64     
-208   208    
464    -400   
-16    -1296  
32     144    
128    96     
-208   64     
112    -48    
96     288    
96     16     
304    608    
-352   128    
176    64     
64     32     
-48    128    
-48    -16    
-160   32     
160    128    
-16    -496   
128    176    
-64    -112   
224    224    
-32    -16    
192    368    
-32    32     
64     144    
48     16     
80     32     
16     224    
-32    128    
-144   -352   
-16    48     
336    256    
80     -160   
-176   128    
80     -528   
192    -96    
176    144    
128    96     
32     48     
-48    160    
144    112    
0      48     
-224   128    
128    32     
-80    96     
-112   -192   
112    160    
240    -256   
-144   144    
128    -1488  
48     176    
-48    -128   
-80    352    
-400   -1408  
-432   672    
-512   -384   
464    672    
-528   -144   
544    -288   
-224   192    
224    -32    
64     -32    
32     -240   
144    192    
272    32     
-80    224    
128    -288   
-16    112    
80     -96    
64     112    
0      -16    
48     144    
96     -32    
144    256    
-64    80     
0      -304   
-96    16     
160    -208   
176    176    
48     -128   
112    256    
-160   -992   
160    16     
-80    -2016  
160    144    
-32    32     
80     96     
-144   -272   
144    192    
32     112    
224    -288   
-192   80     
224    96     
0      128    
48     -368   
32     -32    
64     -240   
128    208    
-80    -160   
64     48     
-112   192    
336    96     
-64    160    
-64    -624   
224    208    
-160   160    
160    48     
-16    -336   
144    112    
128    -144   
16     224    
-96    -192   
144    176    
-16    32     
64     80     
96     96     
-112   128    
96     -16    
-64    -144   
64     96     
176    -128   
0      192    
-16    -288   
96     80     
48     -160   
-32    -80    
160    -208   
0      384    
-192   -336   
192    -2400  
128    -96    
80     -2320  
-128   -112   
96     -48    
224    -320   
-256   -32    
224    384    
-48    -496   
336    16     
-80    -192   
160    128    
32     -80    
128    -1376  
-64    64     
80     -688   
-64    64     
208    -432   
288    320    
-896   48     
272    -432   
64     -48    
-96    -480   
224    0      
-32    -1040  
96     192    
16     64     
192    -208   
-128   -96    
128    144    
32     -144   
-16    16     
-80    0      
80     -64    
-1472  -144   
16     -48    
-16    -80    
64     -240   
-64    -288   
-64    -304   
208    -112   
80     -160   
64     -80    
-16    -16    
176    32     
-16    -16    
48     64     
-64    -128   
-32    -112   
-176   -32    
-192   0      
144    0      
160    -16    
176    -96    
-224   -96    
-32    -352   
-160   -1024  
240    -48    
0      128    
320    128    
-16    -272   
-160   -240   
-128   96     
320    -64    
-48    80     
32     256    
-688   96     
96     -240   
16     -192   
0      128    
208    176    
16     -224   
0      112    
128    -32    
-64    0      
96     64     
48     -80    
-48    64     
48     224    
48     80     
-48    -208   
-144   -416   
-48    -464   
-752   -32    
112    -80    
32     64     
16     -400   
-16    96     
48     -3392  
-32    176    
-32    -112   
96     208    
16     128    
16     -96    
-16    96     
-16    -144   
-240   80     
128    -112   
16     112    
80     96     
16     -144   
-48    -320   
160    288    
-32    -720   
208    -64    
-112   96     
32     -96    
-96    -96    
208    -336   
-144   144    
32     -48    
16     96     
80     -48    
64     0      
-32    -192   
-64    112    
144    -96    
96     192    
80     -128   
32     -128   
-656   640    
-1216  64     
1216   1920   
416    400    
400    -336   
-496   -176   
-320   304    
112    -208   
-416   -16    
224    -128   
-144   64     
-32    -48    
96     384    
144    -672   
-192   -240   
-160   16     
112    -16    
-160   0      
208    288    
32     -32    
-112   -128   
-144   48     
128    64     
-32    64     
64     -256   
0      -80    
-416   304    
144    880    
16     240    
-416   -32    
-336   -288   
176    -32    
-16    112    
-48    -96    
0      80     
-112   80     
144    176    
0      -48    
-128   -368   
-336   -400   
160    336    
-128   -128   
-80    128    
-48    160    
-80    -128   
-48    -32    
176    176    
16     192    
-784   -320   
-16    64     
-48    -128   
128    304    
-32    0      
-144   144    
-32    -176   
0      176    
-96    -160   
304    848    
-112   -192   
-80    320    
-224   -128   
96     256    
-96    -96    
-96    96     
-64    112    
144    208    
-16    0      
-80    -16    
48     16     
-16    -16    
80     96     
0      64     
-80    -16    
-32    128    
-192   -32    
-32    288    
-432   -544   
96     -144   
-352   -144   
128    -48    
-592   -304   
96     -64    
-16    208    
64     -112   
-48    32     
128    96     
0      -176   
-64    -464   
-48    -64    
-32    272    
-16    96     
-80    64     
-112   0      
48     -16    
-48    32     
-288   -48    
-48    64     
-656   16     
48     96     
-48    -176   
80     160    
-16    64     
64     208    
-112   -16    
16     144    
-32    32     
80     128    
-64    -64    
-16    -64    
-16    80     
-48    48     
80     80     
32     -32    
80     192    
-32    32     
-32    32     
96     400    
-96    272    
64     -96    
-96    0      
64     16     
144    80     
-80    -32    
-112   128    
32     240    
64     -64    
-160   -16    
-176   -112   
160    480    
-32    32     
-160   144    
-96    -272   
80     272    
16     16     
32     176    
48     224    
-144   176    
128    272    
-128   -112   
-176   -32    
-32    -80    
-64    112    
-544   -176   
-64    -16    
208    -112   
96     208    
96     384    
112    160    
-80    -48    
32     32     
48     96     
0      160    
0      112    
32     16     
-80    112    
-16    -96    
128    192    
-32    128    
240    304    
-240   -464   
-48    0      
192    -112   
-64    112    
-32    -32    
112    64     
64     400    
32     144    
-16    32     
-208   -320   
208    64     
96     112    
0      96     
-64    304    
-128   -256   
-96    -272   
112    -32    
48     -192   
32     176    
96     80     
96     192    
32     16     
-160   176    
-16    -96    
-128   0      
176    80     
48     0      
32     112    
-128   -48    
-64    160    
96     32     
80     176    
-16    112    
-48    176    
128    48     
-128   16     
240    160    
-96    -16    
96     112    
2096   1920   
-1424  -96    
288    -288   
-48    176    
-416   -320   
176    1072   
-512   320    
208    240    
320    -304   
-192   128    
-80    -16    
96     192    
-96    80     
304    0      
-160   144    
112    -144   
0      288    
-48    48     
48     112    
64     0      
-80    48     
272    256    
-224   176    
240    -64    
-288   -32    
240    48     
32     192    
32     144    
-48    -80    
128    64     
-192   0      
224    256    
-128   -32    
-48    -848   
112    128    
80     -48    
80     -128   
-80    144    
128    144    
176    48     
-128   64     
80     176    
112    80     
-128   -16    
-64    -32    
-16    -16    
192    192    
16     64     
128    -272   
-176   112    
128    80     
0      48     
48     32     
64     176    
16     80     
32     32     
64     144    
-80    176    
48     0      
128    96     
-64    0      
32     48     
80     128    
-16    -752   
-96    48     
160    -320   
128    112    
16     32     
64     384    
-16    -80    
192    64     
-80    48     
-32    176    
-48    -48    
240    128    
-272   -112   
208    -256   
96     32     
224    -208   
-32    352    
-80    -512   
272    96     
48     96     
-176   -16    
304    48     
-160   304    
64     -96    
0      128    
-208   48     
368    192    
-240   -16    
160    -160   
-32    128    
0      32     
-64    240    
48     -432   
-64    -80    
80     -288   
16     112    
96     -128   
-48    128    
0      112    
128    176    
-80    80     
224    0      
-176   96     
-16    32     
288    240    
-192   -48    
144    32     
-16    -224   
-16    192    
64     -176   
112    176    
0      16     
48     112    
-112   -16    
144    176    
304    224    
64     416    
-288   64     
384    -32    
-128   96     
48     -240   
208    176    
-32    -352   
176    64     
-144   -80    
144    208    
80     64     
0      80     
144    64     
-16    192    
64     144    
160    160    
-32    -80    
-128   -336   
80     256    
288    32     
48     32     
-112   -48    
32     208    
112    -256   
32     112    
16     64     
96     176    
-16    16     
-16    48     
-16    -144   
-16    -96    
112    -112   
32     64     
64     80     
16     -48    
32     192    
16     -336   
128    208    
64     -304   
80     16     
-160   -752   
256    96     
32     0      
16     192    
-16    32     
-144   -256   
192    -576   
304    208    
512    928    
-368   -288   
144    144    
112    -96    
80     208    
-32    64     
80     32     
-16    -16    
32     -2048  
96     0      
224    -368   
64     -1216  
80     48     
-112   -672   
48     -80    
160    -464   
128    -16    
-64    272    
-192   176    
-64    32     
112    0      
304    80     
16     64     
-128   -128   
112    32     
-48    64     
0      -256   
-704   16     
-96    -224   
128    -64    
-448   416    
-432   1824   
-960   -640   
272    -240   
-288   32     
512    784    
-928   -352   
224    416    
-112   -384   
672    144    
-912   -48    
224    32     
-1344  64     
32     -288   
-192   -384   
224    48     
256    240    
-64    -592   
16     0      
-32    -880   
144    80     
32     16     
192    112    
-64    96     
368    144    
-192   144    
0      -16    
-416   -320   
480    368    
-160   16     
208    -192   
96     -208   
112    -352   
32     -160   
304    -1648  
-304   -64    
144    -160   
-208   -64    
544    464    
-224   -208   
272    496    
-336   112    
-16    -112   
-80    -48    
-1168  -80    
48     80     
64     -112   
192    -160   
64     272    
-304   -1472  
304    96     
-80    -64    
176    96     
320    96     
-240   -112   
64     0      
32     16     
-368   -928   
-144   -64    
-304   384    
80     128    
-544   96     
-64    160    
-32    352    
128    192    
0      -64    
80     -1712  
-48    64     
80     64     
48     48     
0      32     
112    -48    
-64    96     
80     0      
32     0      
16     -96    
320    448    
-144   80     
-32    -272   
-48    -688   
96     288    
192    -1504  
-32    -80    
16     176    
32     -80    
-192   -64    
160    -432   
-352   128    
48     -96    
-32    64     
32     80     
-80    -64    
-64    -320   
32     32     
64     -448   
32     -80    
208    -80    
-144   -128   
48     -80    
-192   -256   
32     -112   
176    176    
-112   192    
48     96     
-160   16     
96     64     
-1840  -192   
208    -96    
-48    336    
160    48     
48     128    
-96    -32    
112    -64    
-64    0      
112    -16    
-128   80     
128    256    
-256   -80    
128    -176   
32     112    
-224   240    
112    160    
272    -64    
-112   288    
-224   -48    
-96    192    
16     0      
-1168  48     
64     352    
-1008  64     
528    144    
-624   96     
-176   -96    
112    -160   
-64    48     
-144   0      
-32    -32    
-144   -160   
128    160    
-96    -128   
-48    64     
-32    32     
-80    -80    
32     64     
-240   112    
-96    32     
-400   -384   
-304   -80    
144    128    
96     -48    
-144   -32    
16     192    
-96    -48    
0      192    
-208   -304   
-128   64     
144    64     
-80    -48    
-32    -64    
-48    -144   
-16    48     
-16    -112   
-32    112    
-96    96     
112    208    
-336   -176   
144    112    
-32    128    
-112   -16    
160    80     
-64    96     
16     48     
-80    64     
-288   96     
-176   -176   
112    160    
-64    -32    
80     272    
-480   -48    
32     -128   
128    -112   
32     -16    
16     -144   
16     80     
160    48     
-80    160    
-160   128    
-32    -96    
-32    80     
32     144    
-64    80     
0      128    
-64    112    
-576   -48    
-32    -64    
-144   -48    
128    176    
48     160    
1600   -1072  
-176   -544   
1184   320    
160    48     
-192   624    
624    144    
-944   -176   
960    704    
-256   -144   
-144   -288   
-368   240    
192    96     
-256   128    
-272   48     
0      -256   
32     -80    
16     112    
0      144    
0      0      
-128   -16    
96     -16    
48     176    
0      112    
-96    -32    
-144   32     
80     256    
240    192    
-480   -208   
32     112    
80     -80    
-32    176    
16     48     
96     80     
32     128    
-48    32     
-16    96     
-112   -112   
-64    160    
208    144    
96     160    
-240   -112   
0      144    
-160   -48    
128    176    
48     80     
-16    96     
16     80     
112    288    
-224   -32    
208    64     
-144   160    
16     -48    
0      224    
-80    -32    
176    64     
-256   48     
112    160    
-128   -16    
-48    32     
144    128    
-208   80     
128    -96    
-32    112    
-128   16     
176    80     
-112   80     
-48    128    
-80    16     
-160   -160   
128    112    
-240   32     
80     160    
-64    -96    
64     304    
-64    128    
96     96     
0      544    
-224   272    
176    -48    
144    48     
-64    32     
96     64     
-64    -48    
-96    -256   
304    -16    
-80    112    
64     336    
64     272    
-16    -32    
256    96     
-16    -64    
32     -32    
-64    96     
-160   -208   
32     -128   
-64    -48    
-16    -144   
-32    128    
0      48     
112    48     
-112   -32    
160    208    
-80    -64    
80     0      
32     -48    
-16    -112   
-64    16     
192    240    
-80    112    
0      32     
-32    32     
0      64     
48     128    
48     64     
80     240    
-80    0      
0      96     
48     208    
48     -32    
-112   -384   
-112   -416   
208    272    
32     208    
288    128    
-112   64     
0      176    
176    288    
64     -128   
-192   80     
16     160    
16     80     
176    -880   
-96    112    
208    96     
-64    -192   
-16    112    
32     240    
192    176    
-208   48     
320    144    
-64    128    
16     128    
80     32     
-176   0      
144    112    
160    96     
80     -144   
48     320    
-96    -64    
112    192    
-112   -80    
112    16     
32     176    
48     80     
224    912    
-480   -160   
-48    -176   
0      112    
144    96     
-16    176    
64     -16    
32     -576   
-16    48     
112    48     
48     160    
-80    400    
-96    432    
-256   16     
32     -128   
256    80     
64     96     
128    -16    
-112   160    
32     16     
112    -16    
-64    48     
192    -96    
-128   16     
192    -48    
-32    160    
-16    96     
-96    112    
176    16     
16     -16    
80     32     
96     368    
-64    16     
64     96     
0      -48    
80     -256   
-80    32     
176    -256   
48     192    
-32    -368   
320    160    
-128   48     
144    96     
-864   -1120  
1536   1840   
-400   352    
656    -528   
-352   304    
16     -240   
352    752    
-544   -512   
448    -304   
176    -160   
-160   352    
144    -1040  
64     320    
32     -1200  
-48    160    
-96    -208   
240    288    
-240   -96    
688    256    
-224   272    
256    432    
48     368    
80     -80    
48     0      
-96    -512   
272    128    
-64    -224   
112    720    
368    -112   
-48    448    
-48    -304   
400    -96    
-416   -416   
-16    80     
0      64     
-304   -384   
-48    -48    
-400   -32    
304    368    
-496   -336   
48     112    
32     112    
48     48     
-80    -128   
64     80     
96     80     
-256   96     
192    -352   
96     -80    
176    96     
272    64     
-64    160    
16     -336   
-64    -560   
256    16     
128    96     
128    -16    
160    960    
-32    -16    
16     -80    
16     -176   
-32    -176   
240    128    
0      -112   
80     -1872  
160    -96    
32     -112   
-16    112    
176    112    
64     480    
64     96     
80     -272   
112    144    
-48    -176   
96     -464   
48     -144   
-16    -208   
304    -80    
-176   -80    
16     -464   
-96    64     
320    -32    
48     -128   
-48    -336   
160    -128   
192    64     
16     -64    
224    352    
16     -96    
-48    -192   
-32    80     
128    -384   
16     96     
-448   80     
-144   -176   
-80    -144   
0      -528   
304    96     
128    -80    
-32    -240   
-224   -2160  
352    80     
96     208    
16     80     
-48    -208   
160    224    
160    -128   
0      -16    
32     32     
-32    -32    
-640   -96    
128    -144   
160    16     
128    -48    
-80    -176   
64     -80    
64     368    
272    -176   
-288   -144   
-80    -128   
-224   208    
176    112    
240    -80    
-240   -176   
0      -352   
-320   -400   
-64    -160   
-384   -48    
240    176    
-192   -144   
240    -816   
-240   -256   
256    -1120  
-80    208    
-80    -128   
272    208    
144    16     
0      -80    
80     32     
-240   -48    
256    -48    
-208   0      
-848   32     
0      -64    
176    -160   
-128   -224   
208    -128   
96     -528   
-16    112    
112    -16    
112    32     
-192   -32    
112    -112   
-16    -16    
80     -192   
-16    160    
32     16     
-400   -96    
64     -160   
-1040  32     
160    -48    
-32    96     
112    -128   
48     96     
-96    -2416  
144    112    
-224   64     
-16    48     
-80    -64    
96     -48    
-256   -64    
160    -144   
-368   64     
-96    64     
-544   -80    
224    -80    
288    -32    
48     -304   
96     80     
-96    -1280  
32     -96    
128    80     
64     304    
-144   -80    
80     80     
-96    -224   
176    -32    
-64    -32    
32     -96    
48     96     
-112   0      
48     96     
128    -528   
240    336    
-288   -64    
464    -112   
-320   144    
16     -32    
0      -1456  
448    48     
1216   992    
544    -400   
-688   -128   
256    928    
-816   48     
992    -96    
-960   320    
704    -432   
-128   432    
0      -416   
-384   480    
272    -592   
-480   288    
112    -512   
112    432    
-48    -160   
-16    240    
-96    -304   
-16    -48    
-240   0      
-1520  -96    
192    80     
-96    -336   
112    -32    
-64    144    
-112   160    
-16    -32    
-208   16     
-64    -80    
64     192    
48     -32    
32     48     
-112   -176   
-640   -32    
32     112    
-208   96     
80     0      
-64    -112   
-256   -80    
-16    80     
-80    32     
-80    48     
128    48     
-16    176    
-176   16     
-48    272    
-336   -144   
320    64     
-96    96     
112    -48    
-112   -96    
16     96     
0      -176   
-48    0      
-224   80     
64     -16    
0      112    
-240   -16    
-80    32     
-112   -80    
-32    -16    
-240   256    
-224   48     
64     16     
0      80     
-32    -96    
64     112    
48     176    
0      -32    
80     96     
48     16     
32     64     
-144   0      
112    144    
-176   96     
272    -208   
-144   48     
-96    240    
16     -64    
96     64     
-112   -192   
16     -224   
16     272    
-32    208    
112    144    
-240   160    
96     -16    
-160   -224   
128    288    
128    672    
144    176    
-544   -144   
144    64     
-400   -32    
80     272    
48     208    
-240   -80    
0      -144   
-128   112    
64     64     
-208   -80    
0      -96    
-48    32     
-176   -464   
-160   -112   
16     16     
-304   -352   
112    144    
-352   0      
80     144    
16     128    
-128   80     
-16    32     
-32    96     
32     352    
-48    80     
-128   -16    
144    -112   
-32    -32    
-64    -176   
-48    -80    
-144   -16    
96     -64    
224    544    
80     304    
-48    -48    
-112   176    
32     32     
16     32     
80     0      
-176   16     
16     -48    
-64    64     
-48    -560   
-224   -304   
0      64     
0      64     
-16    192    
-432   -128   
64     -96    
-48    48     
112    64     
-112   80     
64     -48    
-48    -48    
48     80     
0      64     
-16    32     
-32    160    
32     -16    
-48    80     
-160   -128   
16     96     
-64    -112   
-32    112    
-32    64     
208    32     
-96    112    
208    208    
-96    144    
-96    176    
112    -16    
32     160    
224    224    
-304   -224   
208    304    
-144   -64    
272    176    
-160   32     
80     96     
64     96     
0      64     
-112   32     
32     -64    
160    320    
-16    -32    
80     192    
-192   16     
160    64     
-80    32     
48     112    
-272   144    
144    80     
272    384    
-112   32     
-32    -16    
144    0      
32     128    
-48    -64    
48     128    
0      160    
-112   112    
-16    -144   
-144   16     
16     64     
-432   -1472  
544    2800   
128    1632   
-240   -416   
-32    128    
592    224    
-64    272    
48     -64    
64     -464   
432    192    
-352   352    
192    -128   
-96    544    
32     64     
0      400    
-160   -144   
-144   352    
-432   -384   
64     144    
-336   -400   
400    -16
[truncated: 302,011 more chars]
