# Supplementary material for: A Fault Diagnosis Method for One‐Dimensional Vibration Signal Based on Multiresolution tlsDMD and Approximate Entropy
Source: Hindawi journal article supplement (doi:10.1155/2019/3262818), 2019-01-01
Supplement: f1 [file 3262818.f1.zip › 3262818.f1/gear signals/broken teeth fault signal/Data17.txt]

-160   -480   
496    352    
-416   -144   
128    16     
-144   48     
288    0      
-80    288    
192    -192   
-80    464    
64     -48    
-80    32     
144    48     
-64    96     
32     32     
48     224    
-16    80     
-32    -144   
-112   0      
48     128    
48     160    
0      176    
-48    0      
112    64     
-96    80     
112    128    
-16    32     
48     16     
-112   80     
-64    -16    
48     -144   
16     176    
0      176    
112    48     
-160   16     
0      96     
64     160    
224    224    
-160   160    
0      -64    
-16    128    
48     80     
224    48     
-128   48     
64     208    
-32    16     
128    112    
-16    112    
112    192    
-64    16     
96     176    
0      208    
48     -16    
80     96     
32     96     
32     96     
96     16     
32     256    
-48    112    
64     112    
80     -64    
96     240    
-272   -16    
32     64     
176    -80    
-32    -672   
-32    256    
0      -32    
144    128    
-80    160    
240    208    
112    -48    
176    160    
-16    224    
-256   80     
208    -160   
16     304    
80     -304   
128    48     
-336   -48    
336    -208   
-240   80     
224    128    
0      96     
16     96     
16     80     
32     96     
64     256    
-160   -48    
64     -16    
-80    -176   
0      240    
-32    48     
0      0      
48     144    
112    -192   
-64    -16    
-16    -400   
96     176    
64     144    
352    448    
-208   240    
64     96     
-32    -80    
48     48     
64     64     
96     64     
-96    144    
128    -304   
16     144    
-48    -496   
144    -80    
32     144    
272    448    
-144   -80    
144    320    
-208   -192   
240    48     
-80    128    
32     240    
-144   256    
256    112    
64     80     
48     -64    
0      192    
176    -112   
96     16     
-128   -304   
48     112    
-48    -160   
64     -16    
48     -16    
112    224    
-16    96     
-80    112    
144    48     
48     16     
-32    96     
80     96     
96     336    
64     144    
80     368    
-128   -240   
96     240    
16     -336   
48     256    
80     -80    
32     32     
16     144    
192    208    
-208   -160   
208    144    
-48    176    
96     -32    
48     96     
16     -16    
48     0      
80     -176   
304    944    
-336   -112   
-176   176    
-144   -512   
384    304    
-32    80     
-16    32     
112    32     
96     -240   
112    144    
48     32     
16     144    
128    -272   
144    -160   
-16    -272   
128    160    
160    64     
-16    176    
16     16     
16     0      
160    160    
192    288    
-64    0      
-64    16     
176    -1008  
144    -64    
32     144    
-32    32     
64     80     
-112   128    
96     -64    
16     -208   
64     -1712  
-752   -1472  
-560   -1408  
992    752    
688    336    
-96    192    
-400   -336   
96     144    
0      -272   
304    -1088  
-32    -224   
-64    256    
-96    -112   
176    96     
224    -80    
-64    -256   
128    0      
96     -416   
-128   -48    
-608   16     
128    32     
-304   -128   
-64    32     
144    32     
224    -32    
-288   -544   
0      -2000  
32     48     
272    160    
-544   -240   
-64    80     
-32    96     
96     -144   
-48    -128   
-160   80     
176    -336   
-400   160    
96     80     
336    736    
-368   -608   
304    -128   
-32    -880   
384    -32    
-64    128    
144    -48    
-16    48     
48     -16    
240    64     
64     -128   
-448   -704   
160    144    
-80    -80    
32     288    
0      -176   
176    -736   
48     112    
80     -512   
-32    64     
-304   -1936  
608    816    
144    -128   
64     112    
48     -16    
-16    96     
16     400    
0      64     
-272   -192   
48     -80    
-1344  -48    
80     48     
-48    0      
48     48     
64     48     
80     -544   
32     128    
144    -32    
48     48     
208    608    
-96    128    
-48    -128   
-224   -528   
-32    -16    
288    -64    
-48    160    
96     -48    
-624   48     
0      -240   
48     -64    
-32    -16    
128    0      
80     96     
64     -96    
-32    -64    
16     -48    
-80    32     
-96    -256   
-112   -128   
48     64     
-176   -128   
80     -32    
-288   -240   
240    -352   
-64    192    
-32    -416   
48     -32    
-32    -896   
272    128    
80     -32    
0      96     
-96    -160   
96     -64    
-96    16     
96     128    
-48    48     
128    64     
-16    48     
48     -80    
80     160    
176    32     
0      16     
-112   -96    
320    -320   
-80    -144   
144    224    
32     -64    
64     144    
-144   32     
240    224    
-160   80     
48     -96    
240    48     
-432   -144   
144    64     
-704   -32    
128    128    
-336   96     
128    -64    
-112   32     
272    -128   
-192   -112   
-48    -80    
0      80     
-32    16     
80     160    
-112   -128   
-16    0      
-720   -192   
208    704    
-400   112    
-320   96     
-80    64     
-64    128    
-128   -96    
-592   -16    
80     -160   
-32    112    
-80    -64    
128    112    
-160   64     
-672   0      
-16    144    
-336   -208   
-16    240    
-16    0      
32     48     
-160   -48    
-272   -16    
-80    96     
-128   -176   
208    80     
-368   48     
32     96     
48     -112   
-16    -16    
64     -272   
160    304    
-128   -128   
16     208    
-64    -288   
256    80     
-80    192    
-400   -96    
0      128    
-112   48     
16     192    
-64    -48    
-64    -64    
-32    -64    
16     96     
-208   0      
-48    64     
16     -112   
48     112    
-32    -48    
64     -48    
32     256    
-112   192    
-80    -32    
-16    -32    
-1200  -320   
192    272    
-1456  -272   
-16    48     
112    288    
-816   -432   
448    1600   
-704   -544   
176    176    
-288   -112   
-16    -96    
-80    64     
16     96     
240    240    
-112   -288   
-272   224    
176    -160   
-128   224    
-144   -48    
128    160    
-448   -256   
-160   240    
128    -720   
-16    240    
144    -160   
-208   -16    
144    64     
-32    144    
32     -64    
-336   144    
208    -32    
-48    144    
0      48     
-352   -96    
64     80     
-560   -80    
128    144    
-48    112    
-208   48     
128    16     
96     -16    
-160   80     
-48    160    
64     -48    
-32    128    
176    112    
-192   112    
48     16     
-160   192    
192    -112   
-224   96     
48     80     
208    96     
-176   64     
80     64     
-16    -128   
64     144    
-16    48     
-32    112    
96     64     
-128   96     
-112   -80    
144    96     
-240   32     
160    16     
-304   -16    
-112   48     
96     240    
-64    48     
48     -32    
32     96     
-32    160    
0      0      
32     48     
0      224    
-64    -64    
80     192    
64     592    
-80    -48    
96     -48    
-240   -112   
0      -80    
128    48     
-160   -16    
320    -112   
-16    -80    
-16    208    
-64    192    
224    240    
160    32     
0      112    
-80    -112   
16     -32    
-112   -64    
-112   0      
96     144    
-240   -224   
176    48     
80     192    
80     0      
-128   0      
16     320    
96     128    
80     192    
-240   64     
48     144    
-48    -112   
112    144    
-256   -160   
128    128    
16     -48    
-32    32     
32     128    
0      -32    
-32    192    
96     48     
96     64     
-32    96     
0      48     
-32    -64    
-272   -224   
-448   -240   
224    352    
64     64     
-224   0      
48     48     
-32    304    
192    224    
-144   -320   
144    48     
0      160    
112    144    
192    128    
-144   32     
0      32     
-32    -160   
-160   96     
208    128    
32     -192   
-112   64     
192    64     
-208   96     
96     144    
32     48     
-32    -64    
128    48     
16     48     
80     176    
112    384    
-80    -16    
96     224    
-64    -16    
48     64     
128    192    
112    -400   
256    1008   
-160   0      
-256   -240   
96     -16    
256    208    
-96    64     
64     112    
-16    0      
96     80     
-48    32     
352    560    
-240   96     
160    336    
112    -64    
400    -1504  
-48    80     
-112   80     
64     336    
-128   0      
304    16     
-208   128    
176    64     
-128   80     
96     112    
80     48     
48     48     
16     -16    
-48    -48    
32     224    
128    32     
144    144    
-144   80     
176    64     
-192   128    
80     176    
64     48     
32     48     
48     -112   
-128   -16    
256    -48    
-80    368    
144    -48    
-48    -80    
1856   -2224  
384    -1024  
288    768    
-736   -592   
832    640    
-592   -864   
384    560    
-112   304    
144    224    
-208   -416   
160    192    
-160   96     
112    288    
-32    -16    
-16    -256   
-32    128    
192    -416   
-192   16     
-176   -448   
416    96     
96     -64    
-64    448    
-16    128    
80     400    
128    -208   
-96    240    
128    -96    
-192   -752   
128    64     
160    64     
176    16     
-48    160    
96     304    
16     -16    
0      256    
0      -688   
-80    96     
-32    -48    
-80    240    
224    -16    
32     112    
48     96     
16     -304   
272    336    
-32    -240   
-112   -80    
304    -96    
160    672    
-112   -240   
-224   -96    
48     -736   
112    144    
-112   80     
256    464    
-96    16     
0      48     
-48    -608   
128    -896   
-32    -208   
-32    -320   
288    480    
144    272    
-112   64     
16     -160   
176    80     
-32    -16    
64     112    
0      176    
-64    96     
64     -256   
-48    144    
0      0      
64     -112   
144    112    
48     48     
384    656    
-304   256    
48     32     
288    -224   
96     240    
320    64     
-256   -96    
144    -16    
64     -432   
-64    112    
96     -576   
-16    -1728  
-160   -320   
160    -2528  
112    -176   
-48    160    
-96    -176   
64     -96    
208    -16    
16     384    
80     48     
80     -256   
80     48     
0      -992   
-48    -48    
224    272    
0      -160   
96     -272   
80     -576   
-80    -336   
208    496    
-240   -144   
176    224    
48     -64    
-48    -272   
64     80     
64     -192   
-96    160    
272    -48    
-16    -336   
-80    -224   
0      240    
-64    -144   
288    -352   
-224   -288   
80     48     
48     176    
160    -3504  
-48    -160   
-16    -208   
-16    48     
176    0      
-112   0      
288    32     
-224   -80    
64     -160   
16     16     
-1296  80     
96     48     
-208   -176   
144    -80    
144    0      
32     -1312  
160    -64    
-240   -96    
272    96     
0      -96    
-80    80     
-176   -16    
112    -192   
-240   48     
32     -160   
-208   32     
0      48     
96     16     
144    -48    
-64    -64    
80     48     
16     64     
144    -1056  
16     160    
0      -80    
96     -64    
16     48     
0      16     
96     64     
32     -80    
-32    64     
64     -112   
-1168  -16    
128    -16    
-144   144    
32     -128   
32     -48    
80     -608   
32     64     
112    0      
-16    176    
-128   80     
-64    -144   
224    -16    
256    -144   
-256   -80    
48     -48    
-576   80     
144    -144   
-288   112    
-16    -528   
80     32     
160    -848   
208    -96    
128    208    
-96    -16    
32     240    
0      -32    
-240   -128   
176    -96    
64     -16    
-160   -64    
-32    16     
144    176    
-80    0      
272    -160   
1504   3024   
-1360  544    
-864   0      
976    928    
-208   -448   
-432   288    
-864   -160   
-176   224    
16     -144   
-128   128    
48     -400   
-528   416    
416    -560   
-80    368    
48     -592   
-128   272    
304    -208   
-48    320    
-80    -240   
128    112    
-224   -144   
-16    112    
-16    16     
0      -16    
-128   -224   
32     -48    
0      -32    
0      -208   
16     80     
80     -144   
48     144    
-528   -240   
-320   192    
-80    -48    
-32    144    
48     -80    
-96    192    
-144   32     
16     96     
0      -80    
64     -48    
-112   144    
-848   48     
96     96     
-1216  -352   
80     32     
-208   -160   
-336   -96    
128    192    
-320   48     
208    112    
-496   -16    
0      -16    
-64    -32    
-96    80     
176    -16    
48     96     
-208   -32    
192    -16    
-64    -160   
-16    80     
16     128    
32     80     
80     32     
-224   32     
-176   64     
-464   -112   
-176   16     
-224   -32    
0      192    
-144   -48    
16     32     
-304   -272   
128    128    
-96    -176   
192    64     
96     288    
-160   -64    
224    -48    
-160   16     
-32    96     
80     48     
16     80     
-32    -304   
-224   -112   
-336   -144   
384    272    
-192   80     
224    208    
16     0      
-400   -192   
-112   -368   
336    112    
96     128    
-176   -32    
16     128    
-80    48     
224    320    
-160   96     
-32    32     
-400   -64    
32     64     
96     48     
64     256    
-64    -208   
-80    112    
-32    -80    
-192   80     
16     16     
-80    -64    
-144   -32    
0      64     
16     128    
-32    -16    
-128   16     
-64    0      
-16    32     
-160   64     
80     224    
-16    304    
128    128    
0      112    
64     0      
112    112    
-32    64     
-48    -368   
-16    -48    
112    96     
-80    0      
48     96     
32     48     
32     144    
-384   -32    
112    224    
-112   64     
16     64     
224    320    
-176   32     
64     -48    
-144   16     
144    144    
-144   80     
-32    -16    
176    160    
-208   64     
-32    -160   
-96    144    
-416   80     
-48    48     
-32    80     
0      64     
64     32     
-80    64     
16     112    
-144   64     
128    176    
-48    64     
32     -32    
-112   160    
-32    48     
-64    -80    
64     0      
-160   -64    
0      272    
-176   -16    
48     48     
320    -48    
-192   160    
32     256    
-144   16     
80     64     
0      48     
32     16     
-48    0      
0      208    
96     112    
-48    -80    
256    160    
-144   80     
176    160    
-240   32     
64     32     
112    96     
64     96     
-240   192    
0      -96    
192    128    
-48    176    
-64    -32    
160    -16    
-80    80     
0      0      
48     128    
-32    144    
-16    128    
192    48     
-144   0      
80     160    
-496   -1472  
816    2704   
-800   1040   
672    -240   
-384   -160   
720    -32    
-528   576    
-160   -656   
128    32     
544    -176   
-224   656    
96     -208   
224    624    
-304   -256   
192    208    
-176   -176   
192    416    
-400   -128   
96     -160   
-160   32     
304    160    
48     592    
48     -64    
-192   384    
48     160    
0      96     
192    -96    
528    928    
144    352    
-608   -352   
112    96     
112    112    
32     48     
16     48     
80     48     
-128   256    
144    80     
-112   -304   
-80    16     
192    -48    
-32    528    
-64    -16    
0      48     
-288   32     
208    -64    
32     240    
48     -112   
-48    16     
-48    -272   
-16    80     
-96    80     
80     128    
64     112    
-16    128    
80     144    
0      48     
80     192    
32     -48    
-16    176    
-64    -48    
112    64     
-48    128    
32     160    
128    80     
-128   160    
-96    -144   
112    -240   
-16    160    
0      -1104  
240    448    
-96    192    
208    -80    
64     64     
96     -64    
48     0      
-208   80     
144    16     
48     128    
-64    -64    
96     160    
-16    16     
48     -320   
128    48     
-208   -992   
416    -112   
32     256    
-160   64     
96     288    
-224   176    
144    96     
0      112    
-48    64     
80     160    
32     -64    
224    96     
32     96     
-16    64     
48     80     
80     -96    
16     -48    
-128   -1088  
64     128    
48     128    
128    -80    
-208   -144   
96     48     
192    16     
-48    64     
-112   240    
240    240    
-48    192    
16     64     
0      80     
64     -240   
-144   -112   
288    -192   
-128   96     
400    192    
-112   240    
48     144    
304    320    
-80    80     
0      -240   
-288   -80    
160    -48    
224    96     
-32    -144   
-48    48     
160    -368   
0      144    
-48    0      
-32    -16    
64     -96    
-112   144    
176    -80    
176    48     
-240   -80    
-48    176    
112    160    
176    -176   
48     48     
-224   -96    
272    160    
352    -16    
-144   208    
128    -224   
-96    160    
80     -1264  
-160   128    
256    -16    
48     176    
0      128    
80     112    
32     -64    
-128   -288   
208    176    
96     -176   
80     96     
32     -336   
96     64     
16     -160   
-16    64     
48     -128   
32     96     
144    128    
32     80     
-16    48     
-80    0      
64     224    
-176   -304   
192    16     
16     0      
144    -16    
112    -176   
-128   80     
160    -256   
-96    80     
48     16     
0      112    
-48    96     
0      0      
64     -80    
-208   -64    
112    -528   
-112   -80    
112    -592   
80     32     
-64    -16    
64     -128   
16     32     
48     64     
80     80     
80     -112   
-16    -96    
0      160    
-32    -224   
-16    144    
-160   -112   
-912   -720   
768    1440   
-1456  928    
384    336    
64     -32    
208    -864   
-448   1008   
752    -256   
-64    688    
256    -832   
48     528    
-96    -256   
160    384    
-80    -368   
112    192    
-240   -272   
192    -96    
-64    -144   
-32    -384   
96     -336   
144    -64    
-32    -1232  
160    -336   
-64    32     
80     -304   
0      128    
176    -48    
-272   256    
192    -208   
-480   96     
16     -304   
-1776  16     
-48    -96    
112    80     
64     48     
112    -144   
-48    -608   
16     -16    
-64    -96    
80     176    
48     -48    
160    96     
-208   32     
160    -128   
-192   64     
112    -224   
-240   192    
32     -224   
192    96     
-48    -416   
80     -48    
0      -560   
48     96     
48     -1712  
-16    16     
0      -16    
0      16     
-192   -16    
48     -32    
-16    -176   
128    -208   
-240   400    
-48    16     
-1424  -96    
80     -160   
-80    -64    
96     -48    
48     96     
0      -784   
144    192    
-64    -144   
192    -64    
-64    -16    
48     0      
-16    64     
-32    -48    
144    32     
224    -144   
-304   -176   
-192   -208   
-160   64     
160    96     
32     144    
96     -512   
-128   96     
320    48     
16     80     
32     48     
32     16     
-528   -368   
64     -64    
-16    -96    
96     -48    
80     240    
-32    48     
-112   -352   
-96    -656   
32     -64    
224    112    
-64    160    
-48    64     
-64    0      
-272   32     
80     -48    
-256   -32    
16     -32    
-32    -64    
96     -64    
-144   128    
-64    -208   
128    -144   
-16    -192   
-32    128    
240    -80    
-192   48     
-64    16     
-48    -96    
-32    32     
16     64     
0      48     
176    176    
-176   48     
32     -192   
-192   32     
128    16     
240    16     
112    208    
-144   144    
-288   -144   
-304   -32    
-64    80     
-1392  -144   
-176   16     
224    272    
-16    -112   
192    32     
-368   -496   
304    -256   
-352   48     
-208   -80    
-96    240    
48     -256   
-48    112    
0      128    
-64    16     
-256   -160   
-96    112    
-256   208    
-288   -384   
-96    -192   
-48    144    
-16    128    
-32    32     
-16    416    
-336   16     
128    80     
-192   -208   
16     -32    
144    80     
-288   128    
144    -48    
-256   -48    
48     -16    
160    192    
-208   80     
-240   -32    
-416   160    
336    -128   
32     288    
-256   -208   
128    16     
-272   48     
80     -80    
160    128    
-112   112    
224    32     
-208   32     
64     -32    
-80    48     
64     48     
-128   64     
16     304    
-480   -112   
0      64     
272    -528   
128    384    
-224   -208   
128    -32    
-80    48     
32     16     
-144   0      
-272   144    
-32    -112   
32     96     
128    320    
-320   48     
-176   -32    
-944   -304   
2336   -864   
-352   -448   
864    112    
-480   688    
560    -48    
-192   -384   
-624   -416   
272    224    
320    368    
-64    240    
-240   192    
80     112    
-320   352    
-256   -160   
16     128    
-96    -16    
256    464    
336    384    
-272   144    
-128   16     
208    -176   
-192   -48    
304    80     
-32    64     
-64    -64    
64     -32    
48     144    
-16    144    
-128   112    
-80    64     
64     128    
-256   -144   
-112   16     
-112   -32    
-32    -64    
32     144    
48     128    
-48    32     
-112   -16    
-96    -208   
192    -16    
-32    272    
0      48     
-32    -16    
-304   -144   
288    224    
-608   -32    
-48    32     
-64    -240   
128    288    
-48    0      
160    32     
-144   128    
112    -80    
-16    208    
32     272    
-16    128    
-224   -160   
192    128    
-288   -112   
128    96     
-80    80     
80     160    
80     144    
-144   16     
128    -64    
0      160    
16     32     
16     112    
16     64     
96     48     
16     0      
-288   112    
48     80     
64     64     
-32    112    
96     -48    
96     -112   
-48    64     
-176   32     
80     80     
-48    64     
64     64     
96     192    
-208   208    
-48    -96    
240    -16    
-96    304    
-96    80     
96     48     
-96    -208   
0      16     
144    256    
-176   176    
144    256    
-208   -16    
64     48     
80     32     
48     64     
-32    96     
-32    128    
-48    96     
160    96     
96     208    
-160   -64    
-32    80     
48     -32    
64     112    
160    208    
64     96     
-32    160    
-176   48     
192    48     
128    176    
-288   0      
144    0      
-16    160    
-96    48     
64     160    
-128   -80    
96     64     
-208   -16    
224    112    
128    32     
-224   -16    
192    144    
-16    0      
176    112    
64     400    
32     144    
16     16     
-144   -96    
-48    -32    
-176   80     
288    112    
176    176    
-160   32     
96     -128   
-128   96     
-32    80     
304    64     
-32    128    
0      128    
-32    32     
64     0      
-208   0      
16     -16    
160    -272   
-64    128    
96     128    
32     -144   
48     48     
-32    128    
16     96     
32     48     
0      160    
96     144    
176    384    
-208   112    
224    0      
-32    0      
128    144    
-96    16     
-48    -256   
64     208    
176    48     
160    64     
-112   32     
32     336    
240    -160   
80     288    
-128   -32    
32     240    
-96    -336   
-32    112    
-80    32     
128    160    
48     400    
-16    -336   
16     32     
192    -400   
80     64     
48     208    
0      192    
-192   -16    
80     -32    
64     32     
144    32     
16     208    
-64    128    
0      128    
96     80     
-32    96     
-16    -176   
256    192    
-96    128    
112    144    
-96    -144   
1280   2752   
-1664  608    
880    976    
-32    816    
1296   -192   
-896   -256   
288    576    
-624   640    
528    -672   
-336   416    
416    -448   
64     480    
-192   -624   
240    224    
-32    -736   
48     80     
32     -864   
-16    -16    
-144   -128   
304    96     
-96    -48    
160    80     
-112   368    
160    -112   
-16    96     
64     -288   
64     208    
208    -192   
48     256    
-48    -432   
-16    0      
-32    -144   
384    144    
-128   240    
256    112    
-208   0      
-80    112    
160    128    
-16    -96    
112    128    
80     -624   
48     208    
48     -160   
48     16     
-16    -80    
112    48     
176    32     
-32    176    
64     128    
16     -48    
48     -32    
96     96     
128    176    
-16    -848   
144    64     
80     -192   
0      32     
128    -32    
96     96     
-16    -480   
160    416    
128    -80    
112    320    
48     320    
-16    80     
-96    16     
128    0      
32     192    
16     -256   
48     80     
48     -48    
128    112    
64     0      
-16    48     
64     -240   
-16    160    
192    32     
32     -208   
-224   272    
16     -1888  
32     32     
-752   -112   
176    -448   
-96    160    
112    -352   
48     -32    
96     144    
128    32     
0      144    
64     112    
32     -736   
96     96     
-16    -192   
-80    16     
208    -80    
16     -656   
-624   -32    
-16    -144   
80     0      
48     -304   
64     -128   
48     -1552  
48     -128   
32     128    
32     -32    
48     -384   
0      -64    
144    -272   
48     416    
64     -256   
128    32     
-240   -16    
144    -16    
32     -48    
0      -96    
128    -112   
-32    -80    
144    160    
64     -560   
64     -96    
0      -48    
32     80     
64     -112   
-160   0      
128    272    
160    -144   
160    256    
-160   128    
-864   -160   
64     -64    
-224   96     
192    -32    
112    48     
0      -1248  
-160   -64    
16     48     
112    704    
-144   -112   
464    96     
-400   48     
240    -208   
-288   -128   
-48    -112   
-320   0      
-32    0      
-48    32     
48     -304   
288    -16    
32     -464   
80     16     
16     -240   
160    224    
-48    -32    
16     -144   
-272   -432   
368    208    
-320   -32    
144    0      
-464   -176   
624    16     
-2352  -48    
16     -32    
-80    -80    
-128   -112   
208    32     
144    -448   
0      -272   
336    -16    
-144   112    
80     -16    
-208   -16    
208    32     
144    32     
352    80     
-384   -176   
-32    -144   
48     336    
-16    -16    
112    -272   
96     -64    
512    -208   
208    16     
-288   176    
0      -176   
-48    512    
-16    -16    
-192   32     
0      -80    
-32    -128   
-80    -160   
16     -96    
80     0      
64     32     
32     -272   
48     240    
-160   -816   
-32    -32    
-80    48     
-528   -2208  
-240   -1552  
912    496    
368    240    
800    -384   
-288   192    
48     352    
-160   208    
-432   -288   
272    -64    
64     -368   
-144   144    
144    -128   
112    -304   
32     96     
144    -16    
-64    160    
32     0      
-32    80     
224    192    
-48    160    
-48    96     
-96    64     
-96    -160   
-96    -128   
-352   -64    
16     288    
-512   -176   
-192   -256   
-144   112    
-1120  32     
-16    64     
48     -48    
-32    16     
176    64     
-96    32     
192    -176   
-240   144    
-144   -176   
32     0      
-240   -112   
112    160    
-64    48     
-112   -96    
-160   96     
-80    16     
32     144    
-208   64     
-64    128    
-688   -256   
-144   112    
-64    0      
128    96     
-208   -32    
160    128    
-96    224    
-144   -32    
96     64     
-208   80     
192    -208   
-96    96     
-176   128    
-32    -48    
-128   160    
-864   -128   
128    112    
-144   144    
48     208    
-208   -272   
240    80     
-48    -208   
-48    128    
-176   -48    
160    -32    
-16    80     
-336   -48    
96     256    
-336   -176   
224    64     
-272   0      
-64    -176   
96     64     
-160   160    
0      -16    
112    -48    
48     -96    
-32    272    
-208   64     
0      -96    
128    -80    
-144   144    
48     64     
0      80     
32     96     
-64    288    
-48    -64    
-416   -224   
64     192    
-96    -176   
224    400    
-208   64     
80     128    
-144   -16    
48     -32    
-160   32     
48     304    
16     16     
64     0      
-304   80     
96     64     
-80    16     
-272   -80    
-64    208    
-16    -16    
16     -32    
-96    80     
-336   -64    
208    -64    
-80    192    
-64    96     
32     32     
-176   0      
-192   -96    
64     48     
-80    16     
144    272    
-16    48     
96     160    
-1632  -144   
-80    96     
-48    -32    
128    -96    
48     160    
-64    80     
96     64     
0      16     
-224   -48    
16     -64    
-96    -48    
-96    -96    
160    160    
-112   -16    
160    160    
-272   16     
-16    -64    
160    64     
-32    112    
32     128    
-112   112    
128    -48    
-64    0      
-144   80     
112    32     
64     -128   
-128   96     
-32    112    
144    -80    
-208   176    
160    -96    
-80    96     
80     32     
16     64     
-64    64     
48     192    
-32    64     
-64    -80    
144    144    
-48    160    
192    208    
-208   -32    
32     -64    
-160   -160   
144    144    
112    192    
160    0      
64     112    
-32    80     
-48    160    
32     48     
48     32     
0      32     
48     112    
-80    -48    
80     48     
-176   0      
64     128    
-16    32     
96     64     
-48    -32    
-32    32     
16     48     
16     80     
16     208    
-128   80     
-64    176    
64     80     
-48    -96    
0      -176   
704    -1776  
272    -208   
512    -112   
-464   -288   
-144   48     
288    704    
-416   -160   
-192   -784   
-48    448    
-224   -352   
224    32     
-272   160    
128    192    
16     -64    
-32    -192   
-96    64     
-64    -304   
-192   -16    
224    256    
144    96     
112    96     
32     160    
-32    144    
64     192    
16     0      
32     -48    
-48    144    
192    192    
32     144    
-144   -256   
336    224    
-128   112    
112    -96    
64     272    
-32    -96    
208    288    
-16    64     
192    208    
-96    -64    
96     80     
-128   80     
96     80     
-96    192    
160    -48    
-128   -16    
144    112    
-80    -64    
80     -80    
-96    336    
0      -448   
128    -64    
-80    -16    
112    16     
112    400    
-32    -32    
128    112    
-80    -176   
16     -144   
208    448    
-16    208    
0      80     
-144   64     
64     -16    
32     304    
-128   -224   
160    -32    
-16    -32    
-48    64     
160    32     
-32    128    
-32    64     
128    64     
-32    96     
144    96     
-64    80     
16     160    
112    352    
-16    80     
48     176    
-80    -144   
64     80     
96     -160   
-64    -80    
80     -32    
64     80     
16     -480   
240    208    
-160   -16    
160    64     
-96    112    
112    80     
144    144    
-64    -128   
64     80     
64     -96    
-48    0      
192    -912   
0      96     
-32    -32    
64     80     
-112   -64    
128    80     
-16    48     
48     128    
-80    -32    
64     -224   
16     192    
-16    -288   
128    160    
-128   -192   
192    96     
-80    -304   
112    96     
80     -1616  
0      96     
-16    64     
64     48     
-16    80     
64     112    
-32    32     
-16    -160   
16     96     
288    176    
80     128    
-160   -272   
-96    144    
112    -736   
144    -64    
-128   -160   
144    96     
-48    0      
-64    160    
80     -32    
64     304    
64     0      
112    -656   
80     944    
320    -464   
-128   -384   
32     -704   
208    208    
16     32     
16     0      
32     128    
32     160    
16     48     
80     496    
0      128    
32     112    
144    96     
16     -128   
48     144    
0      -160   
176    416    
-80    368    
-112   -16    
240    -48    
208    224    
0      -336   
-64    80     
-192   -32    
80     192    
80     256    
176    80     
-112   -1440  
64     -192   
-48    96     
-160   -128   
112    256    
48     80     
0      80     
-64    -112   
32     -32    
208    320    
128    -576   
32     -16    
0      -368   
-112   -1968  
-464   288    
80     -1472  
-16    144    
32     -1040  
-128   -224   
64     272    
-64    -96    
112    96     
32     -112   
128    -320   
160    144    
64     -560   
-48    144    
32     -528   
112    0      
-496   48     
-48    -80    
224    128    
-48    -192   
208    -96    
1376   -3808  
576    1296   
-688   -272   
-80    -512   
-304   -448   
1008   -16    
-592   -272   
192    -208   
-224   -128   
96     -112   
-112   96     
-96    0      
96     32     
128    -192   
96     -32    
-80    -688   
80     16     
80     -1920  
0      48     
144    0      
-272   80     
16     -128   
16     128    
-112   16     
160    16     
-192   -320   
144    32     
-272   -160   
0      -224   
-128   -48    
224    -176   
80     0      
0      -672   
-112   -16    
64     -144   
96     144    
192    320    
-224   -48    
64     -80    
-144   32     
48     -112   
16     -48    
-224   16     
32     32     
224    -64    
0      16     
-64    0      
-112   -624   
48     128    
176    -368   
-32    64     
208    -64    
-64    0      
16     80     
64     -224   
-32    112    
-32    80     
-32    0      
16     32     
-64    -16    
32     -288   
160    48     
32     -160   
48     96     
48     -896   
-80    0      
96     -144   
48     -224   
-160   80     
96     -256   
-144   48     
-144   32     
64     -112   
0      -32    
-80    16     
64     -352   
96     -16    
16     -80    
96     48     
48     -848   
-80    240    
-144   -208   
208    -16    
-256   256    
144    -64    
-32    -96    
-176   -224   
-144   -288   
0      -16    
-1344  -176   
208    0      
-128   96     
224    96     
-32    128    
160    -400   
-16    -352   
48     80     
-96    144    
80     0      
-32    -192   
-48    -144   
-48    -128   
-16    64     
144    48     
-96    160    
-32    -144   
224    336    
-80    -320   
256    160    
32     -96    
80     -32    
-192   0      
0      -96    
80     112    
-16    48     
-80    16     
64     -80    
-112   -32    
176    -16    
-128   32     
-1120  -288   
144    -96    
-768   -336   
-80    -48    
224    352    
-240   32     
80     -16    
-336   304    
-64    144    
-48    144    
-16    32     
48     -96    
-160   -32    
48     -240   
-240   64     
112    -144   
176    64     
-224   -128   
112    352    
128    0      
-80    -96    
-336   -16    
0      -48    
-64    176    
128    144    
-112   160    
-1312  -240   
-48    224    
64     16     
32     144    
-64    0      
96     112    
-16    -48    
-128   -96    
-112   48     
64     96     
-128   -80    
16     0      
48     144    
-624   -352   
-64    -16    
-1536  -80    
-32    -176   
-32    16     
0      160    
-32    64     
-80    96     
-256   -416   
-48    64     
0      -192   
-96    464    
0      -48    
-96    -64    
0      -32    
48     144    
-272   -48    
128    304    
-192   432    
-368   -208   
112    96     
-144   -144   
-32    96     
0      144    
32     -48    
16     128    
-48    0      
96     144    
-192   -80    
16     -64    
-16    -96    
16     80     
-160   80     
-16    208    
-304   -80    
256    -96    
112    48     
-16    64     
-32    96     
-352   720    
-928   -368   
848    976    
-544   -16    
-640   -1504  
912    752    
-48    288    
48     288    
-224   -288   
208    -320   
-512   0      
80     -32    
352    192    
-64    -192   
-112   -64    
32     96     
80     160    
-16    256    
-96    144    
-112   -192   
128    80     
-96    -16    
112    128    
-256   -80    
208    -16    
-80    0      
224    160    
-512   48     
-160   -32    
16     -32    
64     0      
-32    96     
-32    96     
-16    96     
96     48     
0      64     
-176   -400   
-256   -160   
-64    -128   
336    304    
-176   -16    
-128   240    
112    32     
-80    -48    
-32    0      
64     64     
80     112    
-48    160    
-160   -32    
-96    464    
-16    -128   
0      400    
-96    -48    
-112   48     
48     192    
-288   -64    
32     32     
-112   -208   
-304   -608   
288    256    
64     -224   
240    112    
-128   -128   
256    16     
-144   144    
16     416    
-192   -80    
336    64     
-112   16     
224    96     
-192   0      
-16    80     
128    80     
-16    80     
-64    16     
80     80     
16     16     
368    464    
-304   48     
-320   -160   
96     -64    
-512   80     
304    -64    
-192   64     
48     32     
-64    64     
32     48     
80     64     
16     192    
-160   -80    
160    144    
-96    96     
16     160    
48     0      
80     192    
64     176    
-64    16     
-80    16     
32     272    
192    304    
-48    -48    
16     48     
16     32     
112    80     
0      96     
-224   64     
288    80     
-128   -256   
224    0      
-224   192    
144    -80    
-16    48     
48     192    
128    112    
-80    176    
-48    80     
48     96     
160    384    
96     144    
-16    96     
-80    192    
48     128    
64     -80    
0      128    
-64    -48    
96     -128   
96     96     
-176   160    
224    -304   
-160   -784   
128    176    
112    144    
-192   192    
160    0      
-16    160    
-16    -192   
208    256    
-160   -304   
96     144    
64     -64    
-112   176    
-80    -80    
48     64     
-16    16     
-240   -656   
224    80     
-32    -80    
48     272    
80     64     
-48    224    
48     80     
144    112    
-96    160    
128    64     
-80    -160   
32     -112   
32     160    
176    160    
-48    -416   
256    256    
-80    160    
16     192    
-32    48     
32     16     
208    80     
-96    -336   
80     64     
80     384    
-352   -352   
-208   -640   
304    352    
80     48     
-32    144    
-16    192    
240    -448   
48     160    
48     -96    
0      48     
-32    80     
-16    32     
32     128    
32     80     
-112   -160   
96     288    
-144   -64    
-32    192    
-48    -32    
48     -96    
80     160    
-16    -256   
-32    224    
16     -272   
32     128    
32     -784   
208    304    
-240   -64    
288    208    
112    48     
-80    32     
-464   416    
224    1984   
-1136  -240   
-144   -848   
112    720    
-16    -32    
144    288    
-272   -256   
320    224    
-208   -880   
176    208    
16     -1008  
144    160    
-176   208    
256    -64    
-144   -48    
128    176    
32     144    
32     -208   
-48    96     
32     -272   
144    304    
-112   -1392  
128    64     
-112   -416   
-16    176    
352    -224   
-16    208    
16     -112   
-48    0      
-48    -16    
160    176    
112    96     
-48    -48    
176    240    
-128   -304   
256    0      
-80    -368   
128    112    
32     -208   
112    192    
-128   -112   
208    96     
-128   0      
160    112    
0      64     
16     -80    
112    176    
-192   -384   
256    240    
-96    -96    
208    48     
-192   -32    
240    160    
-128   32     
176    64     
0      0      
-80    -48    
208    96     
-80    -32    
96     -160   
64     -144   
-32    -16    
32     -336   
80     -512   
32     -96    
0      192    
112    -176   
96     0      
64     -176   
-144   -768   
96     48     
64     -320   
48     80     
32     -112   
-32    0      
336    -64    
-144   -64    
112    -176   
176    -256   
-112   32     
112    64     
0      -432   
-16    -64    
192    -160   
-96    -112   
32     0      
-48    -112   
-224   112    
432    -704   
-192   -64    
-224   -48    
-48    -128   
0      -176   
192    112    
-96    -64    
96     -1152  
32     112    
-48    48     
192    -16    
0      64     
16     176    
192    16     
-272   -160   
-160   -384   
64     -192   
-176   -112   
128    -16    
-224   -304   
240    -16    
96     64     
16     -272   
0      128    
-64    -1584  
144    -112   
0      -128   
-256   -16    
160    -48    
96     96     
-144   -304   
-32    48     
-352   0      
64     -256   
112    -160   
-80    -208   
96     -32    
-112   16     
160    80     
96     -16    
-32    -80    
48     -160   
48     208    
208    160    
32     -16    
32     -112   
16     -112   
-320   0      
272    -208   
-176   256    
-96    -336   
-80    288    
0      144    
96     64     
-80    -656   
32     192    
32     384    
336    576    
-320   -32    
-16    -384   
-160   -16    
112    -32    
-192   -96    
-32    -16    
0      -32    
16     -96    
-720   144    
-208   -496   
240    464    
-272   -336   
80     96     
112    -608   
48     160    
-128   32     
32     -160   
-144   32     
80     -80    
0      112    
-160   -192   
-128   80     
272    160    
-496   -16    
-16    -400   
96     64     
128    0      
16     0      
96     -608   
-32    80     
-144   80     
96     -80    
-48    32     
64     -16    
80     32     
16     16     
-128   48     
304    -304   
-208   96     
-64    32     
96     48     
80     -96    
160    128    
16     -240   
80     -144   
-208   96     
176    -32    
-240   -16    
96     -48    
112    -96    
80     -80    
1712   -2432  
160    -976   
1072   1472   
-688   224    
976    48     
-320   -384   
-48    48     
432    -880   
-736   48     
672    -32    
-992   288    
-288   -256   
176    272    
-240   -240   
240    400    
-192   -64    
336    208    
16     320    
368    432    
-128   128    
-1136  32     
-112   192    
32     160    
-208   -80    
48     -192   
-1008  -16    
-112   -112   
-752   0      
16     288    
352    224    
-176   32     
-32    -176   
-112   320    
-144   -336   
64     128    
-160   -224   
240    304    
-544   -304   
-32    32     
-176   64     
-352   48     
16     48     
-144   112    
80     -128   
-800   -208   
-80    64     
-144   -224   
16     464    
-208   -176   
-208   80     
48     -64    
192    192    
-208   -176   
-32    48     
-80    16     
32     192    
64     288    
-448   -368   
-80    -144   
-272   208    
-224   -160   
-32    -16    
160    144    
-224   -416   
-48    336    
-48    -16    
-16    208    
-144   32     
96     -16    
-144   112    
80     -48    
0      96     
-32    16     
96     288    
-368   -16    
64     128    
-720   -16    
64     64     
608    288    
-48    352    
-240   112    
208    128    
-112   64     
112    144    
-32    16     
-256   -16    
-240   -528   
224    288    
96     352    
0      -160   
-224   -112   
-944   -48    
272    176    
-192   -64    
-48    32     
-96    -64    
64     48     
-80    224    
0      -80    
-240   -224   
-80    0      
112    48     
96     128    
-112   64     
-128   48     
64     144    
-128   96     
48     496    
240    608    
176    432    
-96    128    
-48    -48    
-16    16     
-48    -32    
0      160    
-112   0      
32     32     
48     32     
-64    64     
-96    -192   
-192   48     
16     64     
96     -48    
-1024  0      
-160   -144   
32     32     
-128   16     
176    16     
-304   -112   
112    48     
80     96     
-96    80     
-96    -320   
-32    -64    
-112   -176   
224    -16    
-192   544    
-16    16     
256    176    
-192   64     
128    128    
-112   -64    
-32    -16    
176    144    
-16    0      
-32    -80    
-48    64     
16     80     
48     64     
-96    32     
96     112    
-64    80     
80     96     
-80    96     
32     16     
-32    128    
64     112    
-16    48     
144    144    
-224   32     
144    -32    
-112   160    
48     48     
176    96     
-96    -112   
-112   272    
-272   -80    
80     0      
192    -64    
208    80     
0      176    
-160   112    
-96    256    
-128   208    
-32    64     
-32    144    
96     -176   
48     160    
-128   -96    
-48    32     
32     128    
64     -16    
48     160    
0      112    
272    -224   
32     192    
-144   256    
48     -80    
-16    80     
96     48     
64     96     
48     80     
-128   128    
32     0      
16     192    
-48    -48    
240    208    
-48    96     
-1152  -2576  
688    304    
-1168  -144   
816    -160   
0      -208   
192    464    
-560   432    
128    32     
-400   480    
736    -256   
-256   320    
-48    -304   
-80    -976   
240    -320   
-224   400    
80     -128   
48     240    
-48    0      
80     176    
16     -32    
0      16     
-128   256    
48     0      
80     144    
-32    -128   
-32    176    
-32    -112   
-128   -2048  
256    -32    
-32    192    
16     -176   
-112   256    
160    16     
48     272    
0      -128   
-48    192    
320    176    
32     272    
0      -96    
-80    256    
144    0      
0      208    
48     -160   
48     128    
-16    -256   
16     32     
-32    224    
192    80     
-80    16     
0      64     
-112   96     
256    64     
-176   32     
240    0      
-256   128    
128    -80    
80     240    
-16    -144   
192    112    
32     -512   
-208   96     
160    96     
-48    176    
16     48     
64     112    
-128   112    
128    144    
-112   -336   
96     96     
-208   -16    
176    -48    
-32    48     
176    -96    
-80    80     
112    -1056  
16     192    
0      -96    
-80    160    
-128   -144   
192    64     
-224   -32    
96     240    
-144   112    
-16    -208   
176    -144   
-16    0      
-144   0      
240    -16    
-288   192    
240    -480   
-32    176    
16     -112   
176    80     
-96    -464   
32     176    
-160   -208   
-64    16     
-32    48     
144    192    
-32    112    
-64    -288   
224    240    
-80    -144   
272    240    
-176   -80    
-64    -32    
64     -80    
64     80     
80     -2672  
-128   -352   
112    0      
112    112    
96     352    
96     256    
-16    80     
16     48     
-64    144    
112    -112   
-80    48     
112    -368   
112    -384   
128    -192   
64     96     
0      -112   
112    208    
96     192    
-48    -192   
64     128    
-208   -896   
64     208    
224    -176   
-32    144    
112    -16    
-96    160    
176    -336   
-32    -16    
0      -128   
112    64     
32     -48    
64     96     
80     144    
-32    160    
-64    -80    
144    -272   
80     160    
-128   -112   
288    144    
-416   -576   
288    160    
48     -32    
-48    96     
32     -64    
32     80     
-48    -448   
96     256    
-16    96     
32     -2432  
128    -272   
-32    256    
224    16     
-48    96     
96     -576   
144    0      
-16    80     
-128   -112   
192    32     
96     -96    
16     -592   
160    96     
-208   -80    
32     -80    
16     0      
-48    -304   
288    48     
-176   -432   
112    -240   
-32    -656   
-160   -32    
272    0      
-176   128    
160    16     
16     -80    
16     -64    
48     48     
-32    16     
-32    144    
-224   -208   
128    -128   
-1552  -32    
48     -112   
-128   0      
64     -64    
0      -96    
48     -336   
48     -144   
-48    -336   
80     96     
160    16     
64     192    
896    464    
-832   -1328  
864    848    
-240   656    
64     -1200  
-240   880    
-512   -304   
848    880    
-640   -336   
432    -1120  
-80    -288   
-32    -368   
-144   -16    
480    -224   
-176   240    
224    -112   
32     -112   
-80    -224   
176    80     
448    -192   
-48    32     
-32    -160   
80     144    
-192   80     
224    0      
-224   -32    
80     -128   
256    -64    
80     240    
-144   -96    
336    -32    
-192   -160   
-112   16     
112    16     
-16    -112   
-96    -304   
-96    144    
192    80     
-432   384    
-96    -528   
64     16     
112    -448   
-112   -48    
48     -464   
16     224    
0      96     
80     144    
-416   -64    
288    -48    
-96    -16    
112    -32    
-288   96     
80     0      
-576   192    
176    -96    
-16    112    
192    -96    
144    496    
32     -880   
128    368    
16     224    
64     -32    
-128   -464   
80     -128   
-144   48     
176    32     
48     192    
32     64     
-736   -144   
288    -160   
-176   80     
176    -240   
64     128    
-48    -336   
16     144    
-384   -64    
112    48     
64     224    
-80    272    
-224   -112   
-80    -336   
-288   -224   
64     -176   
-80    -96    
-96    -128   
64     -144   
-64    -336   
160    80     
80     -784   
160    -160   
-464   -128   
304    192    
-192   16     
-48    16     
48     64     
64     112    
-80    16     
144    32     
-368   -160   
144    -112   
-16    96     
-1424  -80    
-64    144    
-96    -80    
-1136  144    
-16    -160   
-624   -224   
-48    -112   
224    192    
-240   -112   
288    -64    
-160   0      
80     -48    
64     320    
-464   -64    
-16    -16    
-224   -160   
64     96     
48     -48    
-112   64     
32     176    
112    48     
64     208    
-1840  48     
48     -64    
288    -32    
-208   112    
208    192    
-176   144    
-208   -320   
-16    48     
-224   -80    
176    256    
64     176    
-192   -64    
-96    -32    
-336   80     
336    288    
-304   128    
-32    160    
-576   32     
-192   -48    
-160   -64    
160    16     
-96    -16    
128    64     
-112   0      
16     -16    
-32    80     
-256   -48    
16     48     
-144   -32    
80     128    
-256   80     
-144   64     
64     -48    
-256   0      
48     -96    
64     368    
-112   -208   
240    -16    
-112   0      
64     128    
-32    -16    
-176   -16    
-16    80     
-80    32     
-64    112    
-128   -96    
-112   -160   
-80    16     
-64    160    
-400   -48    
144    -160   
-16    -32    
-32    288    
-160   -32    
32     128    
96     -32    
-16    64     
176    32     
-128   192    
-80    -16    
112    208    
-112   32     
-64    -32    
160    32     
-304   -96    
192    176    
-160   -208   
-144   176    
0      80     
-32    64     
64     32     
48     176    
16     -160   
16     192    
-112   32     
-304   704    
-1312  -224   
-768   -832   
32     1088   
-784   -736   
-336   -96    
512    720    
-752   -96    
288    352    
-272   192    
336    -288   
-336   272    
-32    -272   
48     560    
96     -368   
-304   464    
160    -352   
-320   208    
48     -176   
-128   48     
16     -176   
-80    144    
48     144    
192    224    
-128   -128   
176    48     
-272   176    
240    -32    
-160   272    
224    0      
-272   -80    
48     32     
-240   176    
160    0      
-112   64     
32     0      
112    160    
-16    -32    
64     80     
32     32     
-64    80     
16     96     
0      128    
32     -32    
-32    48     
-128   -64    
16     208    
-112   32     
192    144    
-128   -16    
-80    96     
-32    80     
64     0      
-64    80     
32     64     
-16    128    
0      32     
-16    32     
112    -32    
-48    192    
-176   0      
112    176    
-144   -32    
80     144    
-176   -16    
-64    48     
80     144    
80     64     
48     112    
-80    48     
80     96     
-32    32     
0      32     
16     80     
80     64     
16     112    
-128   -32    
-80    176    
-176   160    
256    48     
16     208    
-48    -176   
-160   -112   
-240   64     
48     -48    
16     -80    
-96    0      
128    64     
32     96     
-128   64     
64     -16    
-64    0      
32     -48    
64     96     
32     -80    
64     96     
16     336    
208    208    
-128   -144   
-48    112    
64     112    
64     -16    
-96    176    
-80    -16    
80     208    
-96    -48    
80     128    
-112   -272   
-16    -1088  
-272   -368   
16     -176   
32     64     
96     64     
0      160    
-16    176    
-32    112    
128    400    
-48    272    
64     80     
48     96     
-16    176    
64     288    
-32    -16    
32     -800   
-96    -48    
192    96     
-144   -64    
-48    -80    
48     -16    
48     64     
64     -16    
64     112    
32     128    
-32    208    
-80    -16    
48     16     
-16    128    
176    112    
-64    -160   
96     224    
-64    128    
32     -16    
96     16     
-80    224    
96     64     
-32    96     
-48    32     
272    144    
-192   0      
32     80     
-80    -160   
48     -304   
144    112    
32     -96    
-32    176    
144    -80    
-48    -16    
16     128    
64     448    
-128   0      
144    -80    
144    224    
144    80     
-112   32     
-96    112    
160    80     
384    -96    
-176   240    
-80    -160   
320    -144   
32     -256   
-176   0      
80     64     
-208   112    
240    -80    
80     0      
-48    96     
208    -32    
-64    176    
-80    16     
-48    112    
-80    -80    
208    80     
48     -240   
-32    96     
240    -656   
0      160    
-80    -896   
272    176    
-32    -96    
112    160    
-160   -96    
176    -64    
80     144    
112    -48    
-128   224    
-128   -208   
176    96     
96     -128   
1776   48     
32     -80    
80     336    
-800   -800   
560    240    
-480   -896   
688    544    
-128   -128   
96     528    
-432   -192   
208    -208   
-320   368    
80     -240   
272    496    
-288   -1168  
208    256    
96     -48    
208    -448   
-48    -704   
288    192    
240    256    
-480   -240   
192    -144   
-144   416    
-80    -640   
-32    -368   
192    0      
224    128    
224    368    
240    176    
-160   -16    
192    -560   
16     64     
-64    -432   
112    64     
-96    -480   
128    -80    
-64    96     
208    288    
0      -96    
48     32     
-80    176    
144    -96    
32     128    
16     -144   
256    192    
-48    -80    
96     272    
-224   -80    
-48    128    
160    -112   
16     -2864  
16     80     
48     -1984  
112    -464   
80     -48    
80     -624   
176    -64    
0      -416   
-80    -432   
16     192    
-112   16     
208    -32    
192    208    
-144   -800   
80     32     
112    -240   
64     176    
-256   -112   
144    144    
-144   -32    
80     -1024  
48     -272   
-48    -1760  
160    -112   
128    208    
-96    -496   
128    -80    
96     -256   
144    -512   
144    48     
-176   -16    
-128   0      
-80    -256   
160    -128   
-1664  -64    
-80    -96    
32     32     
112    -48    
-64    16     
80     -304   
96     -224   
16     -384   
208    64     
-16    -80    
-32    208    
112    -32    
32     -128   
-208   -128   
160    -160   
-128   96     
-16    -16    
32     64     
64     -144   
-80    -288   
160    -320   
-160   128    
256    -1072  
-80    16     
96     240    
-64    80     
208    0      
48     -176   
-288   -16    
112    -48    
176    384    
-368   112    
-224   -32    
-240   -80    
144    -80    
-32    128    
-16    0      
-48    -688   
-160   -128   
176    -144   
192    384    
-64    -16    
224    128    
-240   80     
336    16     
-48    80     
-224   -208   
-1088  0      
-32    -128   
-176   -64    
0      -16    
-160   -48    
208    -304   
-64    208    
48     -1072  
272    32     
-272   48     
48     16     
-16    -128   
0      -176   
-336   32     
256    -96    
112    96     
48     32     
-128   48     
32     -80    
-16    -16    
80     -480   
112    64     
-96    32     
80     48     
-48    64     
256    -304   
-368   80     
16     -128   
-192   -32    
-112   16     
96     -80    
32     0      
-400   -48    
144    -256   
-96    32     
144    -320   
48     -192   
240    -144   
0      48     
-368   -16    
32     -64    
-96    -240   
224    32     
32     112    
-176   160    
-32    -64    
32     48     
-1424  -32    
224    -208   
112    48     
32     -96    
-32    256    
-48    -208   
160    16     
-64    -16    
0      48     
-112   -16    
112    -48    
32     96     
144    -96    
-16    48     
-48    -48    
0      192    
-240   -64    
80     176    
-288   -416   
-720   -1536  
-752   -240   
304    416    
-560   176    
-144   256    
-800   -256   
800    528    
-1008  32     
576    -192   
-240   448    
-368   -400   
-128   416    
-192   -272   
160    416    
-352   -464   
-368   -32    
64     176    
-240   128    
-64    80     
-128   -32    
-96    -192   
-272   144    
-96    128    
224    -96    
-112   0      
-96    -128   
-128   128    
-48    -128   
32     240    
32     -224   
-48    80     
16     32     
-80    80     
-32    96     
-144   -48    
-32    -96    
-208   32     
16     144    
-848   32     
-96    16     
16     -160   
-16    176    
-96    -96    
64     112    
-32    32     
-32    48     
-32    64     
-32    208    
-32    32     
32     -96    
-48    -16    
-144   144    
0      96     
-640   -144   
-64    48     
-192   -352   
144    80     
-112   -16    
16     64     
128    16     
-16    112    
-32    0      
32     112    
-32    -32    
0      192    
-160   144    
16     64     
-80    64     
-432   -176   
208    160    
-48    96     
-16    96     
-16    0      
-80    -48    
64     32     
-112   64     
-80    128    
-128   -32    
64     16     
-96    48     
-192   -96    
-16    16     
-64    0      
-224   -560   
224    352    
-224   0      
-48    96     
-48    -80    
48     160    
144    112    
-192   -80    
-16    112    
48     -16    
-32    -32    
-32    -16    
-96    64     
-80    32     
128    224    
-64    384    
144    288    
-560   -272   
0      32     
112    144    
80     128    
-16    80     
-192   80     
112    80     
0      16     
0      64     
-96    0      
112    112    
-16    96     
-80    16     
-128   -64    
32     192    
-64    -144   
80     176    
-48    64     
64     144    
-16    48     
-16    -80    
-16    -16    
32     160    
128    0      
-80    32     
-112   128    
-16    64     
48     -384   
-240   64     
0      480    
16     -96    
-16    32     
-160   128    
96     -48    
64     0      
-112   128    
-96    -160   
144    0      
-80    224    
64     -144   
144    112    
-416   -80    
192    96     
-208   -144   
192    128    
-112   -32    
-80    224    
-64    208    
0      -112   
192    32     
80     192    
64     160    
-96    32     
-160   48     
144    -160   
224    80     
-224   96     
240    16     
-352   80     
144    -32    
96     112    
-144   48     
160    144    
-112   -64    
224    160    
-80    80     
112    -32    
-160   192    
0      0      
80     -16    
32     64     
-96    80     
-32    80     
-240   112    
0      32     
48     176    
-16    -32    
144    176    
-32    240    
-64    96     
48     -112   
48     144    
96     32     
-80    64     
-64    80     
176    144    
-320   -64    
0      144    
-96    16     
96     -16    
32     112    
32     80     
-144   0      
160    48     
-16    256    
256    128    
-96    224    
-64    16     
112    80     
-1136  -1200  
-208   -864   
464    -128   
368    -208   
-16    -672   
-176   -944   
240    944    
-16    64     
-144   0      
64     144    
240    80     
-240   176    
176    304    
-64    16     
144    -128   
-160   -16    
128    -128   
-96    0      
288    544    
208    368    
-48    -976   
-96    176    
-64    -48    
288    112    
-48    176    
176    -48    
-224   80     
0      16     
48     128    
-32    -48    
96     96     
-144   208    
112    112    
-80    32     
-80    144    
112    -640   
96     32     
-16    176    
144    96     
80     80     
-96    160    
64     96     
80     80     
-16    -64    
208    160    
-208   192    
128    96     
-128   -208   
128    16     
-64    96     
208    -128   
-80    240    
0      16     
240    96     
-272   128    
144    96     
48     -64    
-64    128    
64     -144   
48     48     
64     16     
-32    256    
-80    -48    
96     -240   
0      144    
32     -176   
80     64     
-16    -224   
32     48     
208    0      
-208   160    
32     -224   
144    192    
-64    -128   
192    192    
-208   -32    
128    256    
160    64     
128    160    
-112   0      
240    -176   
-80    112    
-16    32     
-16    -144   
144    -704   
-128   128    
160    0      
-96    272    
-160   16     
320    -64    
-96    128    
96     240    
-16    0      
144    32     
48     256    
-48    -240   
304    176    
-320   -112   
208    96     
64     -256   
-48    -64    
32     -1648  
64     240    
-96    112    
112    32     
-16    -64    
64     -112   
128    -48    
96     -448   
-16    32     
80     -128   
16     160    
112    -64    
-128   -16    
112    -688   
80     224    
48     0      
-80    48     
-192   16     
176    48     
-112   -176   
64     -512   
80     128    
272    -112   
-80    112    
-128   -224   
-224   -16    
320    80     
128    208    
176    -416   
64     48     
-208   144    
192    240    
96     176    
384    128    
-240   112    
-64    -112   
64     64     
208    -80    
-240   -48    
32     -128   
272    208    
16     -224   
-32    80     
64     -96    
-48    96     
224    80     
64     -336   
-80    224    
256    64     
-112   -496   
112    16     
32     -432   
-48    -176   
-64    -1024  
224    -416   
64     -48    
112    -304   
-128   208    
-80    64     
176    -496   
-16    -32    
176    -240   
-144   -112   
-304   64     
80     16     
16     -16    
96     -320   
160    -96    
176    -240   
80     176    
-144   -112   
-48    64     
0      128    
-32    160    
-48    -592   
-160   -144   
96     -608   
208    160    
-112   240    
-64    -48    
-816   192    
80     -432   
96     -48    
96     -128   
128    176    
112    -304   
32     16     
0      -752   
-256   48     
96     80     
-112   176    
96     32     
48     32     
-96    -112   
-32    -368   
-464   -288   
32     -112   
0      -32    
-592   384    
64     256    
-32    -1408  
-16    -752   
-480   -2640  
112    -496   
32     320    
368    -528   
-144   496    
-128   -624   
96     384    
-288   144    
304    32     
-304   128    
-1184  -336   
64     64     
48     -272   
-48    -224   
64     -80    
48     -816   
64     -16    
400    32     
128    224    
-112   -16    
-16    -224   
-128   176    
208    -48    
0      80     
64     -96    
-592   -32    
0      -112   
-480   64     
144    -160   
32     96     
32     -80    
0      32     
144    288    
-48    0      
-48    -48    
112    0      
-96    48     
16     112    
-192   -48    
192    -176   
-160   -160   
32     -32    
-112   64     
-48    -80    
48     80     
112    -128   
-32    128    
144    -528   
32     -32    
-160   48     
80     -48    
-224   -48    
-16    -288   
-160   -48    
128    128    
-16    160    
0      32     
0      80     
144    0      
-48    -96    
32     -304   
208    144    
128    32     
160    -80    
-64    64     
-16    -48    
16     48     
160    -48    
-96    32     
80     144    
-80    32     
128    -48    
-992   48     
160    -96    
64     288    
-112   -256   
144    -368   
32     -48    
-32    -16    
-48    128    
-112   -128   
0      0      
48     -32    
-48    32     
-16    -80    
-48    -80    
112    -112   
-304   80     
176    -112   
-48    0      
-48    -48    
-16    80     
-32    -176   
-880   -144   
16     144    
16     48     
-32    48     
-96    -32    
-64    -64    
128    32     
-288   -80    
-448   -16    
-80    176    
-144   -16    
64     128    
-304   -80    
-288   -32    
64     80     
-64    32     
64     80     
-144   128    
-48    240    
-224   -96    
-192   -160   
-80    -16    
144    192    
-32    -224   
-112   192    
-80    -160   
256    80     
-336   -144   
-144   64     
48     -528   
-32    -256   
112    240    
-176   144    
352    48     
-656   176    
80     96     
48     64     
-224   32     
32     -224   
16     -16    
-192   -160   
80     208    
-128   -32    
48     144    
-16    64     
112    -48    
0      -16    
-256   80     
272    144    
-272   144    
0      -336   
128    -192   
144    208    
96     0      
-144   288    
-16    -144   
-96    128    
-48    208    
-112   112    
48     -96    
-256   -48    
32     224    
-208   80     
-80    32     
-16    -96    
224    64     
-96    -96    
0      176    
-160   16     
80     -16    
96     -96    
240    512    
-288   208    
-464   112    
-128   -176   
224    -112   
80     0      
-80    64     
-192   224    
-448   -112   
160    -256   
-608   -208   
160    80     
-608   16     
-48    128    
128    112    
32     32     
48     32     
-32    80     
-80    240    
0      80     
-176   48     
96     -128   
80     16     
-48    -32    
96     224    
-208   0      
176    48     
-400   -32    
0      -64    
-48    64     
-576   -144   
672    2336   
-1296  112    
240    -448   
-384   -1088  
448    0      
-304   -176   
-624   -48    
112    432    
352    240    
80     -64    
-160   48     
-48    16     
192    -144   
0      192    
-64    32     
-32    208    
-128   144    
-80    -176   
16     -256   
-16    64     
16     112    
64     0      
-48    80     
80     96     
-144   -80    
-32    64     
-48    128    
80     160    
16     32     
-32    16     
-32    96     
48     112    
32     16     
-32    112    
64     96     
-144   32     
112    0      
-160   16     
160    112    
-192   -48    
48     144    
32     128    
64     0      
80     144    
-176   48     
64     128    
0      16     
-64    96     
224    48     
-112   176    
80     0      
-48    144    
-16    80     
-96    64     
-32    32     
144    96     
-144   160    
-48    -48    
144    112    
-208   48     
64     144    
0      48     
16     112    
-112   48     
80     -128   
-48    16     
-96    160    
192    208    
-176   -16    
96     16     
-128   96     
64     48     
-48    80     
32     80     
48     128    
80     96     
-16    160    
0      48     
96     16     
-80    128    
-48    32     
192    112    
-96    144    
224    432    
-400   -64    
192    -176   
48     176    
-144   64     
176    112    
16     160    
16     160    
-48    96     
32     16     
128    128    
-112   -128   
128    192    
-144   32     
96     112    
32     32     
32     160    
-64    160    
112    32     
32     80     
112    224    
0      -48    
0      48     
-272   160    
128    176    
16     48     
64     -112   
-224   160    
112    96     
64     48     
32     112    
-112   80     
80     -1024  
32     128    
192    304    
0      176    
80     -192   
-288   -64    
-64    64     
208    -16    
-48    -144   
-48    160    
-16    112    
496    400    
-112   208    
-32    -80    
-64    160    
32     -192   
64     64     
32     -128   
-128   144    
-160   80     
480    288    
-16    48     
32     176    
-96    208    
48     48     
192    -32    
-208   64     
-128   80     
432    128    
48     176    
80     -336   
-16    -16    
-144   -352   
208    112    
112    112    
-112   48     
-16    176    
96     96     
16     -208   
0      208    
-192   -16    
224    144    
-160   -48    
240    32     
80     288    
-144   -432   
208    32     
48     -128   
80     320    
-96    -64    
-48    -272   
112    -96    
432    624    
64     176    
-160   32     
48     -384   
64     240    
176    48     
-208   -192   
288    64     
176    160    
-80    144    
64     -32    
16     -128   
96     -720   
64     288    
-48    -16    
-32    112    
16     -16    
64     128    
0      -16    
64     0      
-32    96     
160    112    
-144   0      
-48    -256   
176    272    
368    -144   
-160   192    
-208   -320   
176    80     
240    96     
48     160    
1440   336    
-816   48     
1392   1040   
-32    960    
624    240    
-608   -1088  
-624   48     
208    -880   
64     272    
400    128    
-288   -96    
160    0      
240    368    
-64    -64    
32     0      
48     32     
176    112    
-48    192    
160    16     
32     64     
-80    -416   
-48    432    
16     288    
-208   0      
128    -240   
64     160    
32     -384   
96     16     
-160   -48    
256    -48    
-16    -32    
-16    208    
112    -48    
-96    -32    
80     -16    
112    -144   
-32    80     
176    352    
16     144    
-64    -384   
-144   -32    
144    -496   
80     -560   
-112   -48    
288    -160   
-128   16     
-352   -96    
64     -352   
80     -32    
32     -272   
128    -160   
64     112    
0      -96    
-48    192    
192    -80    
-128   -688   
176    -32    
-64    -160   
144    144    
48     -240   
64     224    
-336   -80    
32     -176   
144    144    
-48    -160   
112    -16    
16     16     
128    -144   
64     -272   
64     -16    
96     -48    
16     80     
32     -112   
-48    48     
80     -128   
-16    -176   
-128   128    
144    32     
-1216  -32    
32     -304   
240    -320   
-320   -464   
128    -512   
160    -592   
-32    -96    
112    -48    
-32    64     
-16    -288   
-112   -64    
128    -16    
128    240    
-128   -96    
-16    48     
-832   -128   
176    -80    
16     0      
80     80     
-208   -240   
160    -912   
160    112    
144    -1984  
-128   64     
-16    -96    
240    160    
32     16     
-32    16     
-128   0      
112    64     
-160   -80    
96     64     
-720   -16    
176    -32    
-160   -96    
128    -208   
-80    48     
32     -1520  
48     64     
32     80     
192    288    
-64    160    
16     -224   
-256   32     
64     -48    
80     -128   
48     -16    
-736   96     
272    -336   
-160   512    
112    -592   
-32    -304   
-80    -720   
368    128    
96     -624   
-96    32     
-224   96     
96     -64    
-48    -144   
48     -192   
-496   -304   
224    -352   
-784   -272   
128    -48    
272    240    
-192   48     
240    -288   
-112   -176   
112    240    
0      64     
0      -352   
208    16     
160    208    
0      112    
-64    16     
-192   -80    
192    -16    
16     16     
144    112    
32     320    
160    32     
-304   -64    
208    -320   
-48    96     
-96    0      
80     144    
48     208    
0      96     
-272   -192   
128    -112   
-32    32     
176    736    
-80    -256   
-128   -16    
-928   -128   
-32    -272   
224    160    
-176   -128   
-128   -208   
-128   64     
-256   48     
-336   -208   
208    32     
-16    80     
-32    -16    
16     304    
32     -112   
-128   64     
-224   -448   
160    176    
-1216  -112   
-16    224    
-80    0      
-80    -16    
-32    64     
-384   -96    
112    80     
-368   16     
224    176    
-48    -48    
16     48     
1920   1056   
-1392  -544   
816    608    
192    1120   
-352   -16    
224    -208   
-704   -272   
448    736    
-656   -32    
-64    160    
0      -288   
-96    64     
32     128    
-336   -112   
-128   96     
112    -144   
-160   16     
-32    -32    
112    288    
-32    -352   
-144   32     
0      96     
-32    304    
80     16     
-128   -160   
-176   0      
64     208    
-48    0      
32     -16    
-160   -48    
-80    32     
-48    96     
64     96     
-32    64     
-32    -112   
-32    112    
-16    224    
-16    -16    
-64    -16    
16     112    
0      -16    
-176   80     
-112   48     
-80    112    
-64    -48    
-368   -64    
-32    176    
32     -144   
48     192    
-64    -272   
128    32     
-192   144    
64     0      
-128   16     
-16    96     
-48    80     
-96    112    
-128   -112   
80     112    
-144   -128   
-560   -288   
-64    208    
-128   -48    
64     16     
-32    -208   
112    64     
-16    144    
-112   -112   
144    32     
-128   32     
32     96     
-16    -16    
160    144    
-224   80     
80     16     
-208   -48    
64     144    
-272   -16    
240    -32    
0      32     
-112   32     
-16    64     
32     64     
-112   0      
160    -16    
-80    272    
-80    160    
-80    32     
32     112    
-96    32     
32     0      
16     32     
-512   64     
0      80     
32     176    
-96    48     
32     128    
48     -64    
-64    112    
-16    -32    
-96    -96    
-16    -64    
-144   96     
-80    -64    
16     96     
-192   0      
432    224    
-560   128    
-272   -176   
-16    48     
-80    -48    
80     96     
48     64     
0      16     
-192   96     
-112   -208   
240    96     
-384   -496   
-48    -128   
144    80     
-192   -384   
96     144    
-96    -16    
48     32     
80     96     
-80    80     
208    80     
-224   -224   
32     96     
-48    32     
48     128    
-16    64     
-64    64     
-48    -64    
-16    208    
-160   -64    
80     32     
-160   96     
224    176    
-64    64     
32     48     
-32    64     
-16    32     
0      48     
-80    144    
96     96     
-80    48     
144    416    
-144   32     
-112   -32    
-80    -16    
80     112    
0      160    
-48    96     
64     0      
48     336    
192    -48    
-64    144    
64     128    
144    272    
-48    32     
-64    512    
96     48     
-208   -304   
-48    96     
64     -192   
-80    16     
192    544    
96     96     
-80    64     
64     80     
16     256    
-16    32     
48     112    
-16    -16    
-64    96     
-48    144    
48     80     
48     -80    
-160   -32    
-160   -96    
-32    16     
80     48     
64     112    
64     80     
-32    64     
208    32     
-32    -32    
16     160    
32     32     
-128   144    
-16    32     
16     48     
32     -16    
288    320    
-320   0      
240    -480   
-32    128    
176    80     
368    480    
-448   656    
-560   96     
-240   -224   
32     848    
-464   16     
800    480    
32     736    
-496   -528   
-160   -352   
64     464    
256    352    
112    -304   
-48    192    
112    0      
-80    128    
-128   64     
80     112    
-96    -48    
0      -16    
-80    208    
176    208    
-192   416    
32     80     
48     -32    
-144   -192   
448    272    
64     -480   
128    0      
-80    144    
16     128    
16     144    
160    224    
352    544    
-48    176    
160    96     
-128   96     
144    240    
-160   -496   
656    336    
-496   -320   
608    80     
-208   -304   
64     96     
0      -496   
96     16     
240    192    
-112   64     
144    16     
-176   48     
160    256    
-128   -48    
-96    80     
288    288    
-48    -256   
-144   -192   
32     352    
336    256    
-368   -112   
272    192    
-64    -144   
80     32     
-128   240    
-64    -304   
32     160    
-80    176    
16     64     
-16    64     
-64    -112   
48     80     
64     -80    
80     64     
-32    -64    
112    48     
144    -432   
0      80     
-48    -464   
-48    -96    
32     -80    
-16    -160   
192    80     
0      160    
-112   -224   
80     -96    
0      128    
80     -160   
-48    64     
-48    -768   
80     96     
112    -688   
80     224    
48     -224   
32     128    
0      -80    
128    112    
-112   128    
192    320    
16     336    
-128   -288   
112    32     
16     -544   
144    128    
0      -208   
-16    192    
48     16     
0      144    
16     -48    
128    336    
-48    -128   
48     -288   
-128   -160   
160    224    
256    224    
-32    -64    
-176   224    
128    -336   
192    128    
-80    -304   
112    192    
16     -144   
48     16     
-80    -336   
48     80     
-16    112    
112    416    
128    -64    
-400   -384   
160    -416   
128    560    
96     -976   
32     -112   
0      16     
256    16     
-16    192    
-80    -208   
112    96     
0      -224   
96     -1632  
208    32     
-240   0      
256    144    
-448   -208   
64     -752   
32     80     
96     -528   
128    128    
-112   -896   
112    -64    
-128   -16    
112    -208   
96     80     
32     112    
16     -64    
-112   224    
384    288    
-384   -240   
-128   224    
-112   -112   
-32    128    
80     -560   
-96    -192   
192    -624   
-48    -144   
48     -2400  
176    -64    
80     96     
16     32     
96     -32    
-32    160    
336    -416   
192    64     
-272   -112   
112    64     
160    -144   
-96    64     
-32    -128   
64     -64    
160    256    
-128   -448   
256    -48    
64     -80    
144    -16    
32     -192   
32     -32    
-160   368    
-80    -96    
224    208    
-32    -192   
-992   -144   
208    -352   
0      32     
16     80     
0      128    
-16    -144   
-16    32     
-80    -2416  
208    -48    
-144   32     
-1072  -144   
720    1104   
-1344  80     
448    -80    
288    176    
-336   -432   
-400   576    
-32    -640   
160    736    
-64    -368   
-160   -32    
32     -240   
96     -432   
-96    48     
160    -96    
-272   112    
304    -112   
-160   192    
-64    -208   
64     96     
96     -176   
-192   320    
-80    -128   
-64    96     
144    -496   
-192   -144   
192    -80    
0      192    
208    -64    
-48    -144   
64     -224   
-112   160    
144    -32    
-32    64     
80     -96    
-160   80     
240    208    
192    128    
-192   -144   
-176   -48    
208    -80    
0      16     
64     -400   
32     16     
-240   96     
64     -240   
-256   128    
64     -32    
-288   112    
16     -176   
-400   0      
208    -208   
-192   144    
128    -64    
48     -16    
-16    -256   
-16    176    
48     -304   
-48    32     
-112   0      
16     -48    
96     128    
32     112    
-208   -176   
160    -48    
-336   128    
112    -16    
-96    96     
128    -32    
48     48     
-192   -144   
-64    128    
-480   -240   
96     -32    
-16    176    
-1024  -48    
64     -32    
64     272    
-96    -240   
272    -128   
-176   32     
160    112    
-64    80     
-672   -448   
-64    224    
-592   -304   
208    112    
-160   96     
-112   144    
-48    -32    
-144   -96    
-192   -32    
-528   0      
-144   64     
-144   -64    
64     64     
-48    -16    
-16    -48    
-416   -208   
224    304    
-16    16     
128    64     
64     256    
-112   -160   
-48    0      
-112   48     
96     -96    
-96    16     
-80    0      
-64    16     
-16    48     
-32    -208   
-64    144    
32     32     
16     96     
16     -96    
-16    -48    
-48    16     
-16    144    
16     -16    
-176   448    
-112   128    
-64    48     
96     160    
-128   -112   
-32    304    
-528   -48    
160    128    
-128   0      
224    320    
128    -96    
-336   -272   
-16    208    
-160   64     
160    144    
32     80     
-160   144    
256    64     
-288   16     
-432   16     
48     0      
-368   80     
112    -32    
-256   -352   
64     96     
-176   -320   
0      -96    
96     304    
32     240    
-96    -176   
-48    112    
-112   -48    
32     80     
-80    64     
-112   -112   
64     -144   
-112   192    
-16    48     
-176   -224   
80     384    
272    352    
-48    -96    
-32    -16    
-144   0      
-208   128    
-240   -96    
48     256    
-528   112    
-80    -16    
-160   -96    
336    64     
-272   -48    
48     224    
-1456  -32    
192    -16    
80     80     
144    208    
-112   96     
-272   16     
64     -16    
208    64     
80     80     
-144   48     
-240   16     
-112   -96    
112    64     
-224   -144   
-32    80     
-32    32     
-112   96     
-48    144    
-96    16     
48     128    
16     48     
448    -208   
-128   176    
-16    -48    
-128   112    
32     48     
1120   496    
-224   464    
-512   -416   
-496   -112   
176    -160   
-208   -112   
208    -224   
384    1024   
-560   592    
176    208    
-96    -240   
80     144    
80     48     
-224   176    
-144   -112   
-192   80     
16     -32    
-192   288    
-288   -64    
32     208    
96     -384   
-64    208    
16     64     
-32    128    
-48    -544   
288    160    
544    368    
-128   512    
-240   -240   
80     112    
-80    -160   
80     -16    
-176   -32    
272    64     
-336   16     
160    160    
64     144    
-80    400    
224    160    
-144   0      
224    -112   
160    96     
0      80     
-224   208    
0      112    
-48    0      
224    208    
16     64     
96     -16    
-48    192    
-64    -16    
96     240    
-16    272    
96     80     
-240   -48    
48     96     
64     224    
-16    -112   
-176   128    
32     80     
-32    -32    
0      112    
-96    144    
224    -48    
-240   0      
96     80     
-96    32     
176    112    
-112   -16    
-16    -48    
96     64     
-64    0      
48     32     
-112   96     
160    0      
16     112    
208    624    
-144   384    
-96    144    
304    176    
-592   -32    
336    256    
16     352    
-96    -80    
-80    -224   
384    144    
-304   32     
208    256    
-144   -80    
0      48     
0      -128   
32     128    
-16    256    
128    144    
-16    352    
0      144    
80     256    
80     128    
-224   -192   
-64    -128   
-16    32     
144    160    
64     144    
-64    64     
16     64     
-96    -128   
-16    -624   
176    160    
160    -176   
96     464    
256    272    
-320   -336   
-80    -144   
256    112    
-64    96     
208    160    
-176   -48    
112    240    
-48    -320   
144    176    
-144   -112   
112    -272   
144    -32    
-64    -224   
-64    64     
160    416    
208    288    
-80    352    
32     -48    
144    128    
-64    160    
-16    112    
256    352    
112    160    
16     144    
-80    -32    
-112   -48    
0      112    
304    -176   
-64    144    
48     -272   
0      48     
-16    96     
-48    -16    
32     -80    
0      224    
32     -64    
-16    32     
80     48     
-128   -48    
208    80     
-32    -80    
0      80     
80     -512   
-48    -48    
16     -272   
64     112    
64     -656   
48     288    
-192   -48    
112    0      
32     -112   
96     240    
0      32     
-64    -32    
-48    64     
128    -224   
16     192    
64     -160   
-48    64     
80     -48    
32     32     
96     -560   
256    64     
-32    192    
-96    160    
-112   112    
80     -16    
160    80     
-96    32     
16     48     
112    16     
0      144    
80     96     
0      16     
80     -560   
96     128    
16     -208   
-64    96     
32     48     
0      128    
112    80     
-32    96     
96     32     
16     -624   
48     144    
112    32     
-64    96     
16     -272   
1328   768    
-640   160    
544    528    
-656   32     
368    -320   
432    80     
-256   224    
-256   -176   
80     -16    
-192   -64    
480    -288   
64     -208   
-416   176    
352    -112   
-16    -32    
144    -80    
-192   208    
128    -32    
16     -64    
144    160    
0      112    
64     -1808  
16     128    
-528   -192   
-16    -464   
64     192    
32     -2512  
160    -240   
-224   96     
144    16     
160    112    
16     48     
32     -1472  
-32    128    
96     -592   
48     -64    
-16    -208   
-96    240    
-1248  -32    
32     -448   
-16    -160   
-32    -768   
176    -80    
208    -320   
-128   -176   
32     112    
-48    -176   
144    -1216  
128    0      
-160   64     
144    32     
64     -48    
-16    -112   
-128   0      
64     -224   
0      32     
64     -64    
-32    -16    
48     48     
-32    -208   
176    -1648  
-48    -16    
64     -144   
112    48     
112    -176   
-96    16     
-80    -128   
48     -144   
-288   -96    
192    -48    
-144   -32    
96     48     
-80    -16    
64     -96    
64     -80    
64     -512   
-128   0      
-112   32     
-96    -16    
192    -112   
-64    112    
-160   32     
80     -160   
0      -112   
-192   -64    
-1024  -96    
-176   -576   
256    -224   
64     112    
-80    -128   
256    -368   
-208   128    
176    -3328  
-48    -16    
144    -16    
80     288    
-112   -16    
112    48     
-256   -112   
160    176    
-416   -432   
80     -272   
-1008  112    
80     32     
224    -16    
-80    -544   
-32    128    
320    -944   
-256   -48    
80     -48    
32     128    
-48    -64    
96     -48    
-80    -64    
80     -224   
-240   160    
-64    -224   
-80    -48    
160    -336   
-736   -160   
64     -112   
-16    128    
160    -192   
96     192    
80     176    
16     64     
0      -48    
-192   -144   
-608   -592   
240    528    
32     128    
-112   32     
-880   -416   
96     -48    
-48    -48    
112    160    
-48    192    
-16    -96    
-16    112    
80     -80    
48     80     
-240   -32    
112    144    
-80    176    
-32    16     
-128   -112   
128    -16    
-48    -64    
0      -48    
-96    -48    
144    -112   
-80    128    
96     -272   
64     64     
-272   -112   
176    96     
-96    80     
112    16     
-48    160    
-64    -16    
-64    0      
-80    -96    
160    192    
-16    -112   
-64    32     
-480   -192   
128    128    
-272   -432   
-1120  80     
-192   0      
-592   -16    
-128   128    
-768   -128   
-32    16     
-64    -16    
16     -64    
128    96     
-112   144    
-448   -128   
-32    -32    
-272   -192   
80     112    
-80    -16    
-64    48     
224    96     
-528   -48    
-32    -48    
-512   64     
48     -80    
-128   144    
-80    -16    
32     -16    
-240   144    
-64    -112   
-80    -96    
96     -16    
112    192    
64     144    
-576   -288   
16     2288   
-1104  592    
192    -64    
-752   -480   
1152   400    
-1408  -464   
336    576    
-320   240    
992    -304   
-800   0      
112    304    
496    -272   
-320   256    
16     -16    
-16    336    
-304   -112   
-128   128    
96     -128   
-32    16     
-176   -144   
-64    -16    
32     144    
-208   -128   
64     48     
0      -160   
48     320    
-144   -240   
-96    -32    
-16    -144   
-80    288    
144    80     
-112   128    
-32    -48    
-32    64     
-16    -48    
-48    48     
-144   160    
16     576    
-96    304    
-416   -304   
256    128    
-32    160    
-160   208    
-32    64     
32     0      
-48    48     
64     448    
0      160    
-128   0      
32     192    
-160   64     
32     -16    
-288   -96    
128    -16    
-128   -80    
32     64     
176    144    
32     -16    
-144   -64    
-128   -16    
112    112    
-144   128    
-32    -80    
48     32     
32     -16    
16     112    
-48    64     
-528   -176   
-64    32     
-1072  16     
32     96     
48     96     
-32    176    
-48    128    
-80    32     
-32    -16    
16     48     
64     96     
-32    -128   
16     -240   
16     80     
-32    144    
-144   -592   
-112   32     
-80    16     
64     16     
-16    64     
-192   -288   
-112   32     
-96    -16    
144    240    
-64    32     
96     176    
-192   -16    
64     80     
-272   -64    
-16    192    
256    0      
16     208    
16     352    
-16    -176   
-160   -112   
-16    16     
112    160    
16     48     
48     304    
-128   96     
0      -176   
-192   -48    
48     16     
80     368    
-64    48     
-96    176    
80     192    
-64    80     
80     16     
-64    96     
96     208    
160    256    
64     80     
-304   -112   
208    -32    
-16    48     
-96    64     
48     -96    
-64    -112   
-64    304    
-32    -48    
48     -32    
-48    64     
-16    112    
-48    -112   
-128   -128   
-16    160    
272    112    
-16    -112   
-144   48     
-112   224    
256    48     
128    112    
-272   16     
96     96     
16     16     
-208   48     
192    160    
96     64     
-32    320    
-96    128    
112    -16    
-176   16     
16     32     
96     80     
0      112    
-80    16     
80     -16    
-192   32     
-16    112    
224    -48    
80     80     
-80    192    
48     80     
-96    160    
144    464    
-32    208    
272    144    
-128   16     
48     64     
112    64     
-112   128    
-208   320    
-192   -160   
176    -64    
160    112    
16     64     
0      -16    
-64    192    
272    64     
-272   240    
-16    -32    
160    128    
16     96     
-80    80     
-48    240    
-16    -64    
128    224    
0      -272   
192    -720   
64     112    
-80    112    
16     144    
64     0      
0      112    
112    160    
0      -192   
32     224    
-192   160    
160    -16    
-32    112    
-416   304    
1024   -624   
496    -368   
-240   -112   
704    -368   
-832   -1392  
1008   816    
-144   752    
240    -304   
-496   208    
448    -96    
64     704    
-80    -112   
-16    464    
64     -304   
-80    160    
-16    144    
80     160    
32     -288   
-16    64     
128    -208   
64     144    
-32    224    
144    0      
-112   96     
32     16     
-32    224    
240    32     
-128   144    
80     0      
-80    64     
112    0      
80     192    
0      -48    
80     128    
-32    -736   
0      0      
-80    -992   
112    240    
160    32     
-48    112    
-64    16     
64     144    
64     16     
64     80     
-96    64     
-96    -112   
224    368    
-16    -400   
160    0      
-64    -928   
80     160    
16     -128   
112    112    
0      144    
-32    96     
-16    -48    
48     160    
-16    144    
112    16     
64     80     
16     -48    
112    224    
48     -96    
64     80     
96     -192   
192    80     
96     -288   
-64    96     
32     -528   
48     64     
176    128    
-64    -48    
160    48     
16     240    
-80    112    
-48    -128   
48     0      
128    -496   
-176   96     
96     -464   
-48    48     
0      -848   
208    320    
-32    -304   
-32    144    
240    496    
-32    288    
-192   -304   
288    128    
-80    96     
144    -272   
48     80     
16     -32    
80     192    
80     64     
64     256    
96     -144   
16     176    
80     192    
96     208    
48     224    
-48    16     
112    64     
-48    -64    
64     -16    
64     -80    
32     352    
96     -64    
0      -16    
0      -192   
80     192    
160    -48    
-16    32     
-32    96     
32     -576   
160    112    
32     -1488  
-240   16     
-1120  -192   
96     -272   
96     -112   
208    -2144  
80     -176   
-80    48     
-144   128    
176    96     
96     -32    
-16    176    
-16    -64    
48     -528   
-144   -128   
96     -368   
128    -64    
-1472  16     
0      -192   
48     -272   
-16    -160   
176    -16    
-32    192    
64     -16    
-32    112    
48     -208   
64     -336   
0      -64    
176    -192   
-64    336    
0      -80    
208    -112   
-208   -208   
272    -304   
-64    0      
-16    -160   
128    16     
208    112    
-144   192    
-64    -3440  
112    64     
176    160    
-16    -32    
48     64     
64     112    
32     -16    
128    -208   
-400   -16    
-112   -96    
-1200  -224   
128    96     
64     -48    
80     -416   
-64    -272   
-32    -1136  
224    -32    
96     16     
-80    128    
80     -64    
96     96     
-288   -48    
224    -96    
-256   64     
144    16     
-848   -48    
-16    -96    
176    -16    
128    -192   
-160   -96    
144    -544   
0      144    
176    -624   
-32    48     
0      -160   
240    -224   
-48    80     
80     -112   
464    -320   
-64    224    
-112   -112   
16     -128   
-1040  -160   
-32    464    
-464   -1040  
-32    -544   
-128   336    
-208   -1648  
432    80     
-48    160    
-160   -160   
48     -144   
-416   -176   
-384   -288   
288    80     
-80    -112   
0      -16    
-96    -496   
160    144    
-1200  -448   
432    -176   
-64    224    
-80    -1280  
256    432    
112    192    
-128   -112   
32     -176   
16     128    
-48    336    
-32    96     
-48    -192   
176    -48    
-192   48     
160    -272   
-32    224    
96     -272   
48     128    
48     -16    
-48    176    
-320   -96    
80     -144   
-240   64     
240    -32    
-80    160    
64     32     
-80    0      
96     -176   
-160   32     
144    -160   
-48    96     
48     16     
112    160    
16     -336   
16     -176   
-48    32     
32     -96    
-16    -96    
-48    32     
96     208    
-160   -16    
-160   -208   
128    16     
-672   16     
208    -48    
16     80     
-336   -80    
32     80     
-960   -464   
0      64     
-208   336    
-432   -32    
96     32     
-464   64     
-208   0      
80     80     
-16    -80    
96     64     
16     -32    
-80    -272   
80     96     
-464   -192   
80     80     
-176   128    
48     0      
0      176    
192    80     
-224   240    
-448   -192   
144    32     
-16    -192   
80     32     
64     16     
-160   160    
-48    -112   
64     48     
-64    -96    
192    64     
288    768    
-368   160    
144    -16    
-144   -224   
-64    -32    
-336   -16    
112    48     
-576   112    
-96    -48    
64     -16    
-80    112    
-128   -272   
64     -112   
-32    16     
48     64     
160    -16    
-224   -96    
-144   -80    
0      -16    
64     160    
0      -16    
48     48     
-304   -80    
192    256    
-960   64     
80     160    
-128   -16    
-48    48     
224    -96    
-144   0      
-144   192    
176    -160   
-272   -112   
32     240    
-32    64     
16     -64    
-208   48     
-368   -144   
64     -48    
-960   -320   
-48    -144   
160    48     
80     128    
240    32     
-192   272    
-192   112    
192    -16    
-112   -48    
-160   96     
240    0      
-128   -16    
96     80     
-176   16     
64     64     
-544   80     
-48    64     
64     -160   
-64    0      
-96    48     
112    48     
0      176    
32     112    
0      80     
-176   112    
224    240    
-160   -48    
112    0      
-80    240    
112    64     
-240   64     
-80    -16    
-672   -64    
64     112    
-16    320    
112    96     
-144   48     
-80    32     
144    -176   
-64    224    
112    -64    
-160   208    
208    64     
-64    16     
64     160    
-352   -96    
16     160    
-48    -16    
80     112    
-32    48     
-32    -16    
160    144    
-112   112    
-32    -176   
64     112    
-32    240    
-112   16     
-144   0      
-144   -144   
-16    16     
-160   -48    
0      64     
64     160    
16     304    
-112   160    
-768   -2384  
-32    784    
48     80     
-384   -160   
-112   32     
-640   304    
-192   -848   
224    1040   
-608   -96    
784    256    
-400   -96    
160    112    
-112   256    
48     -352   
-48    560    
48     -176   
144    416    
64     80     
-16    432    
-32    -112   
0      256    
-208   -48    
96     208    
-32    -48    
16     48     
-112   -64    
112    0      
48     480    
96     160    
-16    64     
-32    32     
16     96     
32     -48    
-80    128    
32     -32    
48     160    
-16    -16    
0      224    
-144   32     
128    112    
-32    -32    
16     96     
-16    256    
320    224    
-192   16     
16     0      
-48    96     
224    208    
16     256    
-16    80     
16     -64    
-96    80     
96     80     
-48    -48    
64     256    
-80    32     
16     128    
32     -80    
48     144    
16     -176   
256    288    
128    224    
96     240    
32     272    
64     -176   
-48    160    
224    128    
16     80     
-64    128    
208    112    
-96    160    
64     -16    
16     -160   
-80    192    
-64    96     
176    64     
-160   -64    
-64    -176   
176    96     
-224   -32    
112    160    
32     -80    
0      48     
64     80     
-64    -992   
32     -16    
32     160    
-128   48     
64     128    
32     80     
80     192    
48     80     
-48    144    
-16    64     
96     48     
0      144    
0      -32    
64     80     
-208   -80    
64     -272   
64     224    
-64    112    
16     80     
0      64     
112    64     
48     64     
48     160    
16     112    
16     96     
16     -80    
48     160    
-32    -48    
112    160    
-32    48     
160    -224   
-80    16     
80     80     
-32    -64    
80     176    
64     208    
160    208    
-112   16     
-48    -192   
-16    48     
256    -16    
-32    96     
48     32     
0      304    
160    -208   
48     -272   
-32    112    
288    -64    
16     -64    
16     -1536  
-160   0      
192    240    
16     336    
-144   32     
240    96     
-192   64     
192    -48    
-96    16     
64     -64    
96     144    
32     -48    
96     112    
-48    -208   
32     -512   
256    -320   
-384   592    
192    -96    
-96    112    
112    256    
48     16     
-16    160    
-256   64     
384    160    
-144   -112   
-32    0      
176    -224   
64     352    
-48    128    
-48    96     
112    -544   
80     208    
112    -1296  
-160   -16    
-64    -64    
16     -48    
416    192    
-192   192    
144    -16    
-176   -272   
192    208    
0      -432   
176    112    
-192   -208   
48     288    
-48    -432   
80     176    
-16    16     
64     0      
32     32     
80     160    
0      48     
-16    -480   
80     112    
112    16     
80     176    
-96    144    
-128   272    
-80    -272   
16     48     
160    -208   
-96    32     
160    16     
-128   288    
176    32     
-112   96     
1312   -1376  
-624   -1392  
96     240    
-160   128    
1120   288    
-864   -464   
192    464    
0      -304   
-80    -16    
-112   -560   
96     208    
-368   192    
336    -608   
144    -432   
112    -128   
-128   -512   
384    64     
-112   -48    
96     -112   
-16    -64    
32     128    
-16    160    
32     -80    
-16    96     
80     -112   
80     128    
64     -96    
-32    -16    
-32    -112   
96     -368   
-64    -320   
-256   160    
48     -208   
-80    -112   
32     -384   
64     -416   
240    -544   
-80    240    
208    64     
-32    -32    
80     16     
-16    96     
128    -112   
-16    80     
-32    48     
128    -176   
-832   -176   
-80    -336   
192    96     
-112   -288   
304    -48    
-144   -560   
128    -48    
80     -2768  
-112   -176   
208    -176   
-128   0      
160    16     
-48    96     
-16    -80    
16     -96    
-224   -16    
-32    -16    
-1056  -16    
-16    112    
112    -208   
112    -144   
144    -48    
112    -1024  
48     256    
-96    -160   
128    64     
112    -48    
-32    -96    
-32    -96    
32     -80    
-144   32     
288    -96    
-368   144    
48     -112   
128    144    
-128   -240   
0      -112   
224    -96    
-192   224    
240    192    
-16    80     
-16    16     
112    -208   
-96    16     
-96    -144   
80     0      
-64    144    
-400   -64    
192    -272   
-1904  -320   
112    -48    
-96    64     
240    -16    
-64    0      
-80    -1136  
96     112    
32     64     
160    208    
-224   48     
224    32     
-304   -192   
320    96     
-272   -80    
48     -160   
-272   -160   
128    16     
80     48     
64     -320   
-64    -96    
-112   -576   
16     80     
48     -400   
96     -208   
-240   192    
336    160    
0      0      
-192   16     
-272   48     
144    48     
64     -48    
0      -128   
-16    0      
240    -16    
240    48     
-32    -32    
-192   -32    
128    256    
80     -160   
-400   -32    
48     -112   
-272   64     
176    80     
-272   176    
288    -176   
-320   -48    
-144   -416   
-64    176    
-32    -448   
192    -80    
-160   -224   
-16    -144   
-112   112    
112    32     
-64    112    
16     32     
-80    64     
64     -32    
-96    64     
0      176    
-320   96     
-80    -112   
32     128    
-432   96     
48     -80    
0      64     
-272   80     
48     96     
-704   -208   
-128   -32    
-80    96     
-224   -32    
-48    -224   
160    32     
-352   16     
96     64     
-144   32     
32     112    
-352   -224   
160    80     
128    80     
-384   160    
-80    -16    
-128   272    
-48    -80    
-368   16     
-48    -416   
-32    112    
16     176    
16     -128   
16     192    
-96    -144   
208    144    
144    -96    
-32    128    
-48    96     
32     112    
-96    -48    
-64    32     
16     16     
-256   48     
-80    80     
64     80     
-736   -1376  
560    976    
-1680  -528   
224    -768   
-288   -368   
704    240    
128    864    
-576   -368   
224    32     
432    -192   
-384   -144   
112    -32    
176    496    
32     48     
128    288    
-336   -112   
-832   -176   
-32    240    
64     32     
-32    -144   
-144   -96    
48     32     
-144   112    
-208   -16    
-16    -128   
0      -80    
16     160    
-80    560    
-64    -80    
-432   -352   
80     0      
-208   176    
-32    48     
32     160    
-16    64     
-16    -112   
-144   -112   
48     112    
-112   -32    
-16    112    
-64    64     
-16    112    
-144   128    
-80    -96    
-144   64     
80     80     
-144   160    
-144   -64    
-16    -288   
-64    -64    
32     96     
0      112    
16     112    
96     -16    
-32    112    
-128   -64    
16     112    
-176   240    
48     192    
-16    0      
0      0      
-176   -80    
128    96     
-1808  -160   
48     224    
-64    16     
48     128    
16     80     
-32    -16    
32     -16    
-32    48     
-48    112    
-16    64     
0      96     
-144   -64    
80     128    
-272   16     
64     -16    
-144   -160   
-64    -48    
128    -48    
0      -32    
64     176    
-32    0      
192    192    
-96    192    
32     48     
-176   -48    
0      -448   
96     -128   
192    160    
-32    240    
-80    112    
0      -48    
0      16     
144    144    
0      32     
64     144    
-128   80     
64     32     
-48    -16    
128    128    
-16    208    
112    208    
-208   -16    
-16    96     
-32    -16    
80     80     
16     224    
-48    -64    
144    176    
-160   -48    
128    112    
-48    80     
144    112    
-176   -80    
-16    96     
-288   -320   
96     240    
-80    48     
96     -32    
-128   80     
48     144    
256    176    
-208   -16    
-80    112    
240    16     
192    80     
-128   32     
32     -48    
16     144    
0      224    
112    112    
-208   144    
64     -32    
0      -48    
128    -48    
-32    208    
48     144    
240    64     
-48    0      
64     128    
64     80     
48     64     
48     96     
-304   112    
144    96     
-176   368    
448    -304   
-64    -192   
64     176    
192    0      
-208   32     
160    -48    
16     208    
112    -16    
16     576    
-208   -64    
288    80     
64     256    
16     288    
-96    -16    
-32    16     
144    64     
0      -144   
-160   -1152  
160    96     
-48    288    
-48    -48    
-48    -432   
176    -48    
192    192    
160    240    
-16    336    
-64    48     
112    -16    
80     96     
-144   32     
-128   96     
48     96     
16     48     
144    64     
32     352    
-112   32     
-16    128    
48     160    
96     160    
-64    96     
-64    96     
336    288    
-384   -128   
48     -16    
16     -16    
32     -32    
128    96     
-144   -688   
224    96     
-64    -1456  
144    80     
-672   2176   
-1488  -64    
1456   1792   
320    400    
-208   -112   
320    368    
-1104  -400   
832    416    
-272   192    
400    256    
-16    -224   
-240   -208   
96     128    
352    -544   
-160   16     
48     176    
64     64     
-48    112    
112    0      
32     -176   
-16    160    
48     240    
32     288    
0      -144   
-144   -336   
48     160    
224    16     
32     160    
0      -96    
-48    16     
208    -720   
-112   160    
128    -240   
-32    48     
64     48     
64     112    
48     272    
-32    96     
96     64     
-96    -80    
208    128    
-32    -112   
16     128    
112    -272   
-96    96     
48     -336   
0      112    
128    176    
64     32     
0      0      
-32    208    
128    64     
-192   112    
176    -144   
144    96     
-112   112    
96     -208   
-48    32     
128    -640   
96     96     
-64    -320   
48     128    
16     80     
32     144    
112    0      
-96    144    
80     16     
-112   -272   
64     64     
160    -384   
-64    144    
32     -128   
128    112    
16     -80    
-32    -208   
0      -64    
-96    432    
-64    -528   
240    16     
48     -32    
64     288    
-176   -16    
192    -368   
80     352    
-192   -416   
256    -80    
-80    -176   
160    112    
-160   -96    
112    128    
-64    -176   
16     80     
80     -416   
0      80     
-48    -96    
128    384    
-224   -96    
32     -432   
48     -704   
-32    -208   
144    32     
-96    -32    
48     192    
32     -304   
128    176    
-144   -528   
208    0      
-16    64     
160    -720   
-32    112    
144    -688   
32     -16    
16     -16    
128    -464   
-80    -48    
32     -784   
80     -160   
160    464    
-96    -96    
64     96     
112    -128   
-16    144    
64     48     
192    -80    
-176   128    
-208   -160   
208    -16    
-1024  -160   
-48    -608   
-96    64     
-48    -352   
256    -160   
-48    -96    
-48    -112   
-64    0      
16     -128   
288    -416   
16     -112   
-128   -400   
-176   64     
-192   32     
288    -32    
-464   -80    
-112   48     
-48    16     
272    -128   
-32    96     
-96    96     
160    -80    
-16    -784   
0      64     
96     -144   
0      272    
64     -32    
64     -96    
-32    48     
128    -272   
-432   -272   
176    -288   
-144   96     
256    304    
16     -64    
-32    -16    
128    80     
48     -368   
-32    -64    
160    16     
112    208    
64     -272   
160    112    
-224   -224   
48     -208   
-112   64     
192    -288   
-176   192    
-64    -256   
32     -48    
64     -560   
-208   -128   
32     -768   
32     112    
240    80     
-192   -160   
-384   -208   
128    -48    
-128   96     
-32    -144   
-16    -432   
160    -128   
-336   128    
32     -48    
-1600  -48    
144    -128   
-48    128    
-16    -80    
64     128    
176    -1536  
16     96     
-112   -64    
-464   -240   
-1072  -64    
1392   2160   
208    464    
496    -528   
-832   -624   
32     320    
16     -80    
64     -240   
208    96     
-176   -608   
32     48     
112    -352   
160    96     
-640   -144   
-32    -64    
-32    32     
-64    -240   
16     0      
160    -208   
-336   -64    
-48    32     
-16    128    
176    -128   
-32    -96    
0      -400   
-32    -32    
64     -304   
384    304    
-336   80     
256    144    
-48    0      
32     32     
-144   80     
64     256    
-144   16     
192    144    
-352   48     
240    272    
-128   64     
48     -480   
112    128    
-64    144    
80     -240   
-176   192    
-704   64     
-80    -80    
80     -96    
80     96     
128    0      
-64    112    
80     -144   
48     80     
-304   -336   
-96    96     
-256   -64    
16     80     
-400   -896   
-416   -192   
272    352    
-976   128    
-48    240    
-1184  160    
32     -208   
64     0      
-96    -16    
-48    -32    
-48    64     
-288   -96    
-16    96     
-208   -112   
0      16     
-16    32     
80     48     
-112   -16    
-48    -96    
-80    -384   
-384   -240   
384    80     
-304   144    
16     0      
160    -352   
32     208    
-32    -112   
144    32     
-192   -224   
0      48     
-304   -160   
176    -240   
0      208    
-32    32     
-48    208    
-352   -96    
48     160    
-304   -64    
80     144    
-64    -96    
80     208    
-64    -224   
64     64     
-64    16     
16     144    
112    176    
-128   64     
-48    -32    
-96    -16    
0      0      
-112   32     
-32    32     
-112   48     
-32    96     
-1040  -176   
0      192    
-48    -16    
32     192    
32     80     
-48    144    
-96    -352   
16     -80    
-96    208    
208    240    
0      128    
-192   128    
80     176    
-272   -240   
32     -32    
-560   16     
336    224    
-80    96     
-128   -528   
-96    32     
64     0      
256    -48    
-368   160    
96     0      
-112   -320   
288    256    
-96    112    
80     -96    
-224   0      
80     -144   
-464   16     
48     16     
80     96     
0      288    
-112   112    
-64    -144   
-48    -288   
-96    -192   
128    208    
-144   16     
64     80     
-176   -112   
-16    16     
-272   32     
224    224    
-192   -16    
-32    -64    
-112   -16    
-112   0      
272    480    
-48    160    
-144   48     
128    -32    
-32    112    
0      112    
80     -16    
-304   -192   
112    176    
-144   272    
64     80     
-288   -144   
144    80     
80     -112   
-240   48     
304    144    
176    176    
48     112    
256    368    
-96    128    
-16    0      
16     64     
32     64     
-32    144    
-256   -112   
96     208    
-112   -240   
16     80     
112    32     
-48    80     
-16    16     
96     96     
-80    128    
-64    144    
80     144    
-176   0      
208    176    
-240   -160   
80     128    
1872   2032   
-1312  160    
576    432    
-240   112    
32     0      
528    -96    
-448   400    
800    -32    
48     224    
-176   32     
448    0      
-144   384    
192    -80    
-48    288    
-160   -48    
-80    0      
176    176    
16     128    
-32    64     
64     32     
-80    64     
48     176    
-96    176    
240    96     
-208   48     
288    -16    
-176   176    
112    16     
-112   16     
224    160    
-128   112    
96     48     
-64    144    
16     48     
80     96     
16     16     
64     480    
16     240    
-48    -96    
-144   -32    
64     64     
32     48     
-16    80     
-80    -16    
272    176    
-240   128    
32     -112   
-112   -80    
-16    144    
144    32     
80     48     
32     208    
-32    96     
96     48     
-32    -32    
64     240    
-32    112    
96     48     
-48    64     
-48    96     
-16    -64    
16     -592   
64     64     
80     32     
64     176    
-96    192    
48     112    
48     -64    
0      -16    
0      144    
-80    128    
144    -48    
32     32     
-64    288    
-48    32     
192    192    
0      128    
192    512    
128    48     
112    32     
48     112    
-272   128    
176    -16    
176    384    
-32    -176   
272    16     
-384   -16    
192    -80    
-128   48     
32     -16    
144    176    
-80    -560   
0      80     
32     -2464  
32     272    
-144   -80    
128    16     
-16    -128   
64     160    
-64    80     
64     32     
-64    64     
112    128    
16     128    
-32    -96    
176    128    
-64    -336   
336    304    
-160   64     
64     96     
48     80     
-16    48     
16     80     
128    16     
-128   -64    
96     16     
32     112    
-80    -112   
176    -48    
16     32     
240    352    
-176   -352   
128    304    
-224   -64    
288    48     
-32    -48    
0      272    
-80    -384   
224    96     
0      32     
48     160    
-32    80     
128    240    
128    112    
-192   -352   
-16    80     
128    -64    
112    16     
-16    -1072  
-64    176    
64     -1600  
-48    32     
160    -32    
-48    96     
96     80     
16     80     
32     16     
112    272    
80     240    
32     160    
48     -32    
128    -448   
-128   96     
112    -608   
0      -48    
-96    -192   
144    208    
-80    -32    
144    112    
-64    -48    
96     96     
0      128    
112    -800   
112    48     
-16    -400   
-80    -448   
368    736    
192    528    
0      -528   
-160   -96    
160    -16    
-16    144    
80     160    
48     0      
-16    0      
-16    144    
-16    160    
96     -208   
240    352    
0      -128   
64     192    
-128   -96    
32     -32    
144    0      
112    144    
-224   -240   
-96    128    
48     -96    
144    128    
176    96     
-64    -1472  
-144   -368   
224    -192   
128    -480   
208    -288   
144    240    
-144   -32    
80     128    
-256   -256   
432    1904   
-960   -96    
-464   -1072  
-224   -688   
320    496    
144    128    
64     32     
16     -624   
256    -32    
-288   -320   
336    -16    
256    -256   
-96    0      
-112   -80    
80     -96    
0      -96    
80     16     
208    -192   
48     32     
112    -288   
-176   -176   
-368   48     
-80    -128   
-1360  -320   
128    -224   
288    -96    
176    128    
-112   -192   
336    -2176  
112    -144   
-64    32     
336    16     
16     48     
-112   80     
192    -64    
16     112    
368    608    
-192   -112   
-128   32     
-16    -288   
-112   288    
32     -640   
176    48     
0      -208   
-16    16     
-16    -1520  
256    176    
0      -512   
-144   32     
240    64     
128    -256   
64     -64    
-160   32     
-496   -64    
48     32     
-624   -176   
32     -816   
176    -240   
560    320    
-640   160    
96     -496   
32     -64    
144    -496   
240    80     
-96    80     
80     -16    
-16    16     
48     -160   
-80    32     
48     16     
-144   16     
48     32     
48     192    
16     -128   
-192   -16    
272    0      
0      304    
336    -144   
-176   64     
-224   -208   
240    -144   
-144   48     
160    64     
-64    240    
-48    16     
-16    160    
-112   -496   
-880   -64    
160    -64    
64     128    
32     -208   
-32    32     
64     192    
0      -64    
-16    32     
0      -112   
-224   -32    
256    112    
-224   256    
352    128    
-560   64     
-48    -624   
-608   -32    
48     -208   
208    96     
-112   -240   
-48    128    
80     -1040  
96     -48    
-320   -16    
208    112    
-176   32     
-16    -16    
-144   0      
112    -48    
-64    -16    
32     -368   
-304   32     
176    16     
128    -256   
-32    -64    
48     128    
16     -288   
-48    192    
48     128    
-64    0      
-144   -128   
80     -64    
32     640    
-480   -32    
464    144    
-208   80     
16     -16    
32     -288   
96     160    
0      -208   
-112   -48    
48     -48    
-320   -48    
-32    96     
-560   96     
-192   -96    
176    80     
-304   16     
256    16     
-208   96     
-352   528    
-256   240    
-576   -16    
32     128    
-352   -32    
-288   -112   
48     -16    
64     -64    
-192   112    
0      32     
32     80     
-464   32     
16     176    
80     0      
-48    16     
-272   -80    
112    48     
-128   144    
-96    -48    
64     112    
-256   -64    
-16    16     
80     96     
-208   0      
-128   0      
-16    128    
48     -96    
-192   64     
-1008  16     
-96    -48    
48     16     
272    16     
-224   48     
-144   96     
0      -256   
48     -128   
-64    96     
-80    -128   
192    48     
-64    176    
-208   128    
-240   -16    
16     -16    
-80    -64    
-32    144    
32     -176   
64     160    
-176   -208   
112    -48    
128    -96    
-96    304    
0      160    
16     128    
704    -176   
736    1088   
160    368    
-848   48     
400    272    
-400   64     
-400   -384   
-416   64     
-240   -240   
208    -128   
-112   128    
288    -48    
-288   384    
192    -464   
-48    400    
-32    -32    
-128   176    
48     -32    
-96    96     
96     -48    
-512   -48    
192    48     
-832   -16    
224    32     
-224   -144   
192    384    
-96    144    
48     -48    
-176   -96    
-64    -16    
64     48     
-144   192    
128    -48    
-144   128    
-32    -96    
-144   16     
-48    -112   
-704   64     
128    112    
80     64     
-96    -16    
-16    32     
0      64     
64     112    
0      128    
-48    32     
0      112    
32     -32    
-32    -112   
-48    144    
-80    -32    
160    16     
-352   112    
272    48     
-80    176    
-32    0      
16     368    
-112   -80    
144    176    
-48    128    
160    -96    
-112   64     
-112   144    
128    -16    
-128   176    
-80    0      
176    144    
-192   -128   
96     0      
-32    128    
-32    -64    
80     112    
-16    96     
-16    48     
16     -96    
-176   16     
-144   -352   
-80    -208   
-432   0      
128    160    
-96    64     
16     128    
-144   -160   
96     176    
176    80     
208    -64    
-64    160    
-16    144    
128    320    
144    112    
16     48     
-16    -144   
48     -48    
-64    -80    
0      16     
-64    64     
-144   -96    
32     -64    
48     96     
128    144    
-160   64     
-64    192    
128    208    
80     208    
-288   64     
112    176    
16     -128   
-80    -80    
64     224    
-80    112    
-80    176    
-64    176    
32     32     
-16    144    
16     -32    
-16    -64    
-64    16     
0      80     
128    176    
48     192    
128    320    
64     -48    
-80    64     
-160   -64    
-32    64     
32     48     
96     32     
16     16     
64     448    
-64    16     
96     16     
-32    48     
-64    80     
48     192    
32     128    
128    240    
0      64     
64     96     
-288   -400   
272    192    
-224   -112   
112    -112   
128    192    
-96    -128   
112    240    
-64    272    
176    304    
-80    144    
64     336    
-112   -16    
160    48     
-80    128    
112    64     
16     304    
-16    80     
432    928    
-672   -1392  
192    -112   
16     304    
112    96     
-32    192    
0      -48    
0      16     
0      48     
96     80     
16     176    
-336   288    
48     288    
-128   -480   
272    32     
128    208    
-48    -336   
-32    192    
-96    112    
304    80     
-112   144    
48     16     
144    48     
16     16     
112    144    
-64    112    
-80    -80    
16     128    
112    80     
32     -64    
-80    272    
-80    -240   
160    48     
-64    16     
192    112    
-48    32     
0      176    
16     192    
64     80     
352    -224   
-272   -16    
208    112    
-144   96     
48     272    
-528   -992   
-48    -224   
16     -320   
240    352    
0      -784   
-144   -32    
-48    -32    
448    32     
16     480    
-96    -160   
32     16     
160    -240   
-16    192    
144    96     
-48    160    
-96    -384   
80     496    
-32    -112   
320    656    
-352   -176   
144    64     
-160   -832   
144    -32    
0      -400   
16     -80    
128    176    
-80    208    
288    480    
-352   320    
-224   48     
-48    -48    
-176   -256   
48     -80    
0      -16    
-96    64     
16     -112   
16     -368   
320    256    
176    -848   
112    48     
64     144    
96     64     
224    320    
-272   -304   
-32    144    
112    -272   
96     -64    
-32    -240   
-128   -192   
176    -720   
128    112    
-144   -336   
128    224    
32     -272   
-32    176    
32     -64    
-32    -240   
112    320    
496    -208   
320    656    
0      -112   
-80    -96    
80     -496   
16     192    
80     -288   
16     160    
96     -512   
16     112    
-144   -32    
128    -320   
64     32     
0      272    
-16    160    
144    -16    
32     192    
304    352    
-256   368    
-48    -128   
336    32     
112    176    
272    160    
-256   -672   
144    96     
48     96     
16     -576   
64     80     
80     96     
-192   -1008  
128    -192   
128    -1664  
-32    -128   
-32    144    
96     -304   
128    160    
-80    -32    
96     144    
32     -352   
256    -416   
-64    -128   
-64    -768   
64     272    
-160   128    
96     -16    
32     -16    
-64    -304   
192    240    
0      80     
48     -16    
64     -976   
-32    -160   
-16    96     
176    80     
16     -112   
176    144    
-96    -304   
0      -16    
-96    320    
336    -240   
-528   -80    
-160   -432   
-96    256    
176    -448   
256    -128   
-160   -2032  
32     -192   
224    -400   
-192   48     
240    -16    
128    352    
-112   -192   
176    -240   
-272   -288   
144    -80    
-112   112    
-32    -48    
352    64     
32     -272   
0      -112   
96     -272   
-48    0      
272    32     
-480   32     
336    -160   
64     -128   
-80    -192   
-48    -16    
224    96     
-16    96     
-192   -80    
160    -320   
-272   -64    
80     -16    
112    80     
160    -80    
-96    -16    
80     -576   
112    48     
0      -32    
-48    144    
64     0      
96     48     
-144   64     
96     -240   
-112   -16    
96     -192   
-448   144    
128    -208   
48     176    
32     64     
-128   -16    
80     -112   
-80    0      
208    -112   
80     64     
-80    96     
-80    16     
-400   -96    
336    -32    
-64    -96    
176    -48    
0      112    
0      -112   
-2144  -96    
16     -176   
-112   -32    
-64    -656   
-32    32     
208    -320   
16     0      
-32    -64    
128    80     
-208   112    
-32    0      
-48    48     
144    304    
-160   -144   
240    48     
-368   32     
-576   -1488  
-704   -224   
1168   176    
-816   -48    
400    -1136  
-816   368    
736    240    
-688   144    
624    32     
-16    368    
-160   -288   
112    -32    
-368   192    
320    64     
-224   192    
208    -224   
-64    240    
112    -304   
-64    256    
48     -208   
-192   -16    
144    -112   
48     320    
80     -176   
-48    64     
-32    -320   
-112   -32    
80     -32    
16     128    
-400   -96    
32     -160   
32     32     
-1088  -208   
32     96     
-32    16     
-80    64     
-80    64     
-208   -16    
-16    -64    
-16    48     
16     32     
64     64     
-64    80     
-576   16     
144    144    
-464   -144   
32     -16    
-192   -48    
-256   -16    
256    176    
-400   32     
80     16     
-320   64     
32     0      
-896   -32    
-176   64     
144    -32    
-48    96     
-64    -128   
96     128    
80     -80    
48     208    
48     0      
-176   0      
16     -80    
-208   0      
-208   -80    
-272   96     
-96    -32    
-48    32     
-48    80     
-1168  -16    
0      96     
-160   -176   
160    192    
-80    96     
64     128    
32     208    
-48    0      
240    -32    
-48    304    
32     128    
64     64     
-96    -368   
-320   -160   
256    352    
-160   192    
80     176    
-176   144    
0      -96    
-96    -336   
224    528    
128    640    
-128   -32    
-160   32     
48     96     
64     64     
-96    112    
80     224    
-432   -224   
64     32     
-144   112    
144    224    
0      -112   
0      -64    
-112   -144   
-192   -432   
-160   -80    
64     160    
48     -16    
-112   -64    
-32    80     
-64    16     
32     80     
-80    48     
16     64     
-224   -32    
-32    -96    
-448   0      
0      80     
144    80     
64     192    
-32    160    
32     144    
-16    32     
96     80     
-288   -384   
96     16     
-144   112    
96     -128   
128    192    
-48    16     
0      240    
-432   48     
80     176    
32     -144   
112    496    
-80    320    
128    64     
-240   -144   
112    -64    
96     112    
-112   -16    
256    240    
-416   -128   
224    144    
-336   0      
80     208    
-512   -32    
128    192    
0      0      
128    48     
-192   32     
32     112    
16     0      
240    48     
-144   96     
0      48     
-48    128    
-224   -192   
272    176    
-176   32     
176    304    
-432   32     
-128   0      
144    96     
-48    0      
-32    144    
64     64     
-112   64     
352    128    
48     64     
-160   -32    
-32    96     
-64    176    
112    144    
-96    -176   
176    208    
-336   -16    
128    32     
-128   48     
224    112    
48     96     
-64    128    
80     144    
240    -256   
80     224    
-256   80     
128    -48    
-96    96     
80     208    
-112   -112   
32     48     
-80    224    
-48    -64    
112    464    
-96    96     
160    48     
0      -128   
1200   192    
-896   -336   
640    736    
-336   496    
720    -752   
-864   48     
0      -208   
384    496    
-592   0      
160    -32    
-80    0      
-32    -48    
64     752    
224    -176   
-240   352    
-160   -384   
288    368    
64     -112   
160    288    
-48    -48    
16     -144   
64     160    
-32    256    
336    -48    
-112   80     
-96    432    
96     304    
-512   -688   
-640   -752   
704    560    
-32    96     
-272   -32    
64     208    
96     -32    
-32    176    
-128   160    
0      208    
16     80     
-96    96     
48     256    
272    176    
-32    320    
0      -16    
96     384    
-112   240    
80     -128   
-176   -16    
112    -128   
16     64     
48     -128   
96     -144   
-96    64     
192    144    
16     -80    
80     176    
-48    0      
96     144    
0      0      
96     112    
-144   32     
128    -16    
16     144    
32     144    
48     -144   
-16    96     
-192   -112   
176    -384   
48     208    
-48    -224   
240    432    
-208   128    
192    -32    
64     64     
48     -128   
112    -64    
-224   144    
176    32     
80     128    
-96    -80    
112    176    
0      -32    
64     -128   
96     64     
-176   -720   
272    -48    
-112   256    
-96    96     
96     448    
-64    144    
176    48     
-48    96     
48     32     
64     80     
-16    -160   
160    64     
-48    80     
96     112    
128    144    
64     -368   
80     416    
-32    -336   
-16    96     
32     -80    
96     304    
-64    80     
64     96     
48     64     
16     224    
128    -80    
-176   -144   
64     0      
128    -64    
0      128    
-48    -64    
192    272    
64     176    
0      64     
-112   -160   
-16    -144   
48     -80    
64     -176   
-96    -176   
128    48     
272    144    
-144   160    
-32    176    
80     -528   
176    64     
-240   -96    
208    144    
16     -848   
144    32     
-144   -1248  
32     -48    
-304   64     
384    304    
96     -64    
48     64     
-176   160    
32     -32    
256    -16    
-64    -64    
-112   0      
128    -272   
320    80     
48     -240   
112    256    
16     -864   
-160   176    
0      0      
224    112    
-64    48     
144    160    
-16    -16    
0      -544   
64     144    
32     96     
160    80     
-144   -288   
160    -112   
-80    0      
96     176    
64     -192   
-32    112    
96     16     
48     128    
32     32     
176    16     
-96    64     
-48    -96    
64     128    
96     16     
48     32     
32     -288   
80     64     
-32    -112   
64     144    
-32    -16    
80     368    
-16    176    
-32    -2592  
96     96     
-496   -128   
-32    -16    
32     -80    
112    -1408  
16     -112   
0      -944   
160    -176   
16     192    
64     96     
-64    -208   
112    -80    
16     -544   
112    48     
-64    -128   
160    176    
-176   64     
96     -144   
2768   1248   
-1616  -1104  
-384   -1472  
0      -192   
464    112    
608    944    
-944   -176   
896    288    
272    96     
-368   -16    
16     -128   
-32    416    
272    -448   
-704   224    
192    -400   
-16    48     
112    -96    
96     208    
-144   -448   
256    -272   
-48    -1456  
128    32     
16     96     
-48    -32    
-112   -32    
160    -64    
16     -48    
48     -32    
-288   -80    
208    -16    
-400   32     
144    -64    
-160   80     
176    16     
64     16     
128    -432   
-160   112    
64     -288   
-48    128    
64     -112   
80     64     
-64    32     
0      -64    
-16    64     
16     -64    
48     -16    
32     -112   
-176   -48    
16     -32    
64     0      
128    -80    
-16    32     
32     -656   
32     224    
16     -80    
16     80     
-64    -48    
-32    64     
32     -16    
80     -224   
-176   -144   
-48    -464   
-512   -128   
48     -16    
160    160    
80     -144   
-32    32     
16     -992   
32     32     
32     -96    
80     16     
-112   112    
80     0      
-176   -64    
32     -48    
-256   -64    
272    352    
-448   144    
32     0      
448    368    
32     -48    
176    128    
-80    -256   
16     -240   
80     -352   
-16    -16    
16     96     
-32    -208   
208    0      
-112   -384   
-16    288    
80     96     
-48    0      
-16    -208   
-16    96     
16     -336   
-80    -352   
-112   -400   
96     160    
-208   64     
64     -112   
-144   -16    
-32    0      
-32    48     
64     32     
-112   -16    
32     -96    
-256   -192   
160    -80    
-864   192    
112    -192   
32     48     
0      -96    
176    160    
-80    32     
64     80     
-112   32     
144    64     
-16    176    
64     48     
-16    64     
-64    -16    
-64    -64    
112    128    
112    80     
-688   -176   
-256   160    
-1184  -512   
256    -48    
-128   240    
-688   -32    
48     48     
-496   128    
-64    64     
48     -112   
16     192    
-48    -48    
320    480    
-608   16     
128    176    
-192   -368   
272    160    
0      -144   
-64    0      
-112   32     
0      16     
-64    48     
-528   -256   
144    80     
-1440  368    
-80    32     
48     -80    
-112   48     
-96    -224   
160    -176   
-432   -256   
-112   224    
-16    -80    
-96    192    
80     -112   
32     192    
-192   -64    
-80    160    
-192   -48    
0      192    
-16    48     
-576   -80    
-192   448    
-288   -288   
240    96     
-160   160    
288    -128   
-128   192    
-336   -80    
192    0      
-224   96     
96     48     
-96    64     
80     -32    
-272   16     
48     -16    
-576   -32    
32     304    
-160   -48    
16     80     
384    -400   
-48    224    
-256   -192   
-64    -48    
-16    0      
144    176    
-128   0      
-208   96     
48     -128   
32     192    
-80    352    
-288   -32    
-48    16     
-192   -144   
784    1712   
-1088  -752   
944    384    
48     960    
640    -784   
-160   320    
-720   -128   
416    -400   
-320   -288   
352    464    
-96    48     
-144   112    
-96    256    
224    0      
-624   32     
144    32     
-352   -304   
576    416    
-192   272    
48     -16    
32     240    
-80    80     
-48    224    
-32    224    
32     176    
-80    16     
-128   16     
-80    -144   
-48    96     
-288   -48    
144    128    
-48    96     
0      96     
144    32     
-80    64     
64     0      
-160   -48    
-80    80     
16     144    
112    80     
-64    176    
-224   96     
-96    -192   
-16    240    
-272   48     
-128   -48    
32     48     
-64    112    
224    352    
-240   -128   
224    48     
-208   96     
160    144    
-48    80     
-128   -112   
64     -112   
48     80     
-96    96     
-32    160    
32     -96    
-32    112    
96     128    
-64    64     
16     32     
-16    144    
-64    32     
96     80     
16     144    
-96    0      
80     160    
-208   -32    
96     16     
-16    32     
-48    224    
32     80     
-32    80     
80     256    
64     -80    
80     -48    
48     128    
-48    96     
-16    160    
-112   32     
96     -112   
-112   192    
-64    416    
-32    -80    
-144   -112   
96     336    
-64    -32    
224    144    
-112   80     
224    96     
-160   112    
-16    16     
96     -32    
-96    112    
-80    32     
144    224    
-16    16     
-16    16     
160    208    
-80    80     
16     112    
-80    112    
96     -144   
112    16     
-112   0      
192    336    
-48    112    
48     -16    
-16    112    
48     128    
208    176    
-32    128    
-80    -16    
64     144    
-272   -16    
400    192    
-224   64     
96     -48    
-128   0      
48     96     
208    -16    
-128   48     
64     176    
-64    144    
112    16     
-160   0      
-16    160    
64     32     
-144   96     
128    -16    
-80    160    
384    112    
208    176    
-272   96     
160    80     
-208   112    
32     64     
304    32     
-80    112    
-16    112    
-80    -96    
16     16     
-16    64     
128    48     
144    -16    
-64    -480   
48     144    
48     0      
16     96     
32     48     
0      128    
144    0      
64     176    
-64    -32    
128    160    
-176   -416   
224    128    
-112   160    
32     -224   
0      32     
16     -384   
80     112    
96     -48    
-64    112    
0      208    
-64    48     
0      -64    
-16    112    
-112   224    
32     -64    
-32    160    
336    256    
-64    32     
112    -448   
32     176    
16     -496   
256    192    
16     -32    
0      80     
-32    240    
16     -112   
176    208    
224    208    
-128   112    
16     176    
-160   64     
16     -16    
160    112    
16     -64    
64     96     
160    -400   
0      368    
-208   -144   
288    -96    
32     -16    
160    112    
-1024  1648   
-32    -112   
-400   -16    
16     -16    
-880   304    
480    112    
-336   496    
400    -336   
-288   240    
96     -448   
-112   160    
-160   32     
272    240    
-256   80     
320    -224   
-96    80     
-112   48     
208    304    
16     96     
-48    32     
32     -32    
80     272    
16     -160   
32     -16    
-32    -160   
64     16     
0      -272   
144    112    
-48    -1456  
48     -16    
-32    16     
128    160    
-144   144    
128    112    
-48    64     
224    -16    
-16    240    
48     -96    
0      96     
32     -320   
64     32     
32     16     
144    160    
16     -224   
-16    80     
-32    160    
144    144    
32     256    
160    320    
-96    96     
112    -416   
0      192    
64     -128   
16     240    
80     -80    
128    176    
-64    -368   
160    160    
96     -96    
80     144    
160    336    
32     112    
-128   -48    
176    -240   
-128   -176   
0      -16    
160    240    
-80    -192   
32     80     
0      -256   
32     144    
80     -64    
112    176    
-32    -64    
64     -2192  
0      112    
64     -976   
-48    176    
-496   64     
0      -1024  
208    -32    
-96    -880   
160    -16    
0      -1008  
-32    -48    
48     32     
112    -64    
144    208    
-16    -48    
48     -192   
-16    32     
144    -144   
-16    112    
-192   16     
160    -112   
16     -112   
144    -288   
-48    -112   
64     -480   
48     -80    
96     384    
48     -48    
48     -208   
0      48     
32     -144   
16     96     
16     -144   
176    144    
-256   32     
128    -208   
-64    -112   
-64    32     
128    -96    
-16    80     
64     -32    
112    -384   
16     -80    
-16    -48    
128    32     
0      64     
96     208    
112    -224   
-96    -144   
-176   0      
176    -80    
-480   16     
-96    336    
192    16     
64     -464   
-64    -32    
112    -1056  
304    -176   
-80    288    
96     16     
32     128    
-32    32     
-208   -624   
224    -144   
-96    288    
-32    -16    
0      -112   
-176   -96    
-96    32     
16     -80    
-336   -96    
144    -464   
64     112    
-80    -1344  
64     0      
16     -160   
32     128    
-80    -16    
16     -16    
0      48     
96     272    
-448   64     
176    -208   
-1376  0      
320    112    
-80    128    
-160   -144   
80     -128   
240    -352   
304    160    
-176   128    
-48    -112   
528    384    
-448   48     
336    -192   
80     -208   
-128   64     
32     -80    
-640   0      
-176   -160   
176    32     
48     96     
-144   -80    
176    -352   
128    448    
-32    -576   
-240   -160   
-192   -112   
368    -288   
-240   112    
-80    -16    
-352   192    
-240   -208   
16     240    
-208   -512   
-16    112    
80     -512   
-32    96     
160    -320   
80     112    
0      -192   
32     128    
-256   -64    
128    -16    
-160   32     
-432   -1760  
720    64     
800    736    
-848   784    
320    848    
-656   368    
-144   -1104  
288    -160   
32     160    
240    -48    
-544   192    
-144   -96    
96     288    
-192   80     
176    48     
48     16     
-64    48     
96     96     
-192   64     
48     96     
0      96     
-96    -32    
80     16     
-368   -416   
-224   -288   
-128   64     
-64    16     
-32    96     
-640   64     
-160   -48    
32     -128   
-192   -16    
96     -48    
32     32     
-32    -96    
144    320    
-320   -32    
48     112    
-288   -240   
112    144    
96     96     
-32    32     
-64    32     
-208   112    
-64    32     
-704   -16    
-80    96     
48     -256   
192    64     
-352   -16    
224    32     
-144   -160   
-32    112    
112    112    
-112   -16    
32     -144   
-80    176    
-224   -32    
144    48     
-272   208    
-80    -96    
144    160    
-592   0      
112    32     
-224   -32    
32     64     
64     -368   
-32    0      
-32    176    
-112   16     
-112   -32    
-112   -112   
-112   160    
-128   -16    
80     48     
-176   -96    
64     32     
-1024  -160   
144    192    
-64    -192   
48     -16    
192    -160   
-96    176    
32     288    
-16    -16    
80     -96    
32     160    
-160   96     
0      32     
96     -112   
-240   16     
-32    64     
-208   -16    
-16    192    
-64    96     
224    64     
-144   -304   
0      128    
-48    0      
-16    112    
32     96     
-32    144    
32     -32    
-64    32     
48     176    
-288   -208   
96     -16    
-192   176    
16     144    
-1104  -144   
-80    32     
-16    96     
-16    32     
48     96     
-192   96     
160    144    
32     80     
-208   128    
-144   -32    
16     48     
0      80     
112    192    
0      80     
-160   80     
-496   -48    
96     -176   
-256   -96    
160    320    
128    176    
240    96     
-64    80     
-128   48     
-48    -48    
-64    -48    
-208   16     
80     32     
144    80     
-304   -48    
176    64     
-368   80     
-48    96     
-16    144    
64     -16    
80     -112   
-208   -64    
64     96     
144    16     
-96    64     
80     160    
-112   128    
-32    -96    
48     48     
-240   -16    
80     16     
32     -16    
80     320    
-32    0      
112    208    
-304   16     
192    0      
-32    80     
128    144    
-16    0      
-32    144    
-16    144    
-80    -160   
96     64     
-224   -128   
112    288    
32     240    
128    192    
48     -112   
-48    -144   
-128   -112   
176    64     
144    208    
-80    128    
-64    -16    
-112   80     
128    160    
-32    80     
48     48     
-112   48     
64     112    
-64    96     
16     48     
128    -64    
0      80     
112    240    
0      48     
64     128    
-96    0      
0      64     
-16    -128   
208    224    
-32    0      
16     240    
-112   48     
-176   -64    
-144   -752   
528    -1168  
-272   544    
448    320    
-384   16     
368    384    
240    32     
-16    496    
0      -336   
96     336    
16     240    
-176   -32    
16     160    
-240   -64    
208    0      
80     144    
80     400    
160    416    
-64    240    
-160   -160   
16     112    
208    144    
32     96     
-48    112    
-80    -32    
144    32     
-128   128    
192    128    
32     16     
-80    32     
240    176    
-64    144    
48     -208   
128    288    
0      -16    
224    256    
16     144    
128    192    
-32    16     
32     32     
-80    96     
32     48     
-32    0      
96     128    
64     -2144  
-16    160    
-32    96     
80     192    
0      144    
144    176    
-16    192    
48     16     
-112   48     
-144   -192   
144    -128   
-16    128    
112    112    
-112   -432   
-192   -192   
144    -1088  
64     176    
-16    176    
64     208    
32     -48    
-64    208    
160    96     
80     64     
176    -288   
32     160    
80     80     
48     128    
80     96     
0      -208   
-96    -64    
112    -352   
208    32     
16     16     
464    784    
-464   -32    
64     -336   
-80    -96    
192    -32    
48     80     
16     96     
-48    32     
-16    48     
176    64     
16     -16    
-80    -48    
112    -176   
-64    48     
128    -672   
0      160    
-80    -176   
112    160    
-32    48     
0      32     
112    224    
32     96     
32     -80    
0      -48    
96     80     
144    0      
-48    112    
32     -256   
96     112    
0      -272   
48     -64    
144    48     
-32    160    
16     -32    
96     80     
-48    96     
176    144    
-48    96     
0      16     
16     48     
64     -96    
64     160    
112    -848   
-48    32     
32     -32    
144    352    
64     48     
-80    32     
-176   -144   
192    96     
224    512    
-16    368    
32     144    
-64    -176   
64     -16    
128    -928   
48     112    
-16    -272   
16     112    
-112   -672   
208    -240   
0      -240   
192    512    
-32    0      
0      64     
-96    32     
112    192    
192    32     
-32    -400   
-32    -48    
80     -304   
-96    0      
224    -64    
-96    48     
112    -192   
48     96     
0      -800   
128    -272   
384    192    
-208   272    
-16    144    
-16    -320   
-144   -2496  
160    -80    
128    208    
144    224    
-16    240    
144    -112   
-80    128    
-16    144    
-160   48     
80     384    
48     0      
-96    -32    
128    80     
-176   -96    
-1296  -176   
320    96     
48     -96    
80     -624   
48     -112   
-128   -592   
160    304    
0      80     
208    48     
-80    -144   
-144   -80    
96     -496   
-128   48     
160    -272   
64     -256   
-224   112    
128    16     
64     -80    
-16    -304   
0      -240   
112    -624   
-16    112    
-32    -432   
224    160    
-48    -432   
192    160    
1664   -2784  
368    1520   
-608   -400   
-16    -352   
-368   -384   
960    -352   
-1024  -304   
304    -544   
-400   -16    
160    -240   
64     96     
-80    -784   
112    -32    
176    -224   
16     96     
-48    -16    
64     48     
-32    112    
16     -144   
-48    -32    
0      -192   
-976   -32    
64     0      
32     -16    
128    -304   
336    -32    
-160   -80    
-144   -128   
-64    288    
48     0      
96     32     
-32    16     
-304   -32    
144    48     
-208   -128   
96     0      
-544   -80    
208    -80    
-288   48     
208    -32    
96     -176   
-144   -64    
80     96     
80     -528   
112    128    
-32    -144   
176    16     
-256   16     
128    -144   
-16    144    
16     -64    
64     96     
-96    -192   
-912   -80    
16     -240   
-368   16     
160    -144   
-192   96     
160    -96    
48     48     
32     -48    
64     16     
-64    64     
16     16     
-112   -80    
160    -176   
-288   64     
0      -96    
-256   -112   
144    208    
-208   48     
304    -240   
-144   112    
32     -1168  
96     64     
-160   32     
128    224    
176    0      
-80    32     
-256   48     
128    -176   
-64    112    
-48    16     
-32    -128   
32     112    
-144   208    
96     -208   
272    528    
-64    -288   
352    320    
-256   0      
240    16     
-320   -240   
96     -64    
-80    0      
112    416    
-192   -16    
272    0      
-224   -64    
224    64     
-368   112    
208    32     
-16    80     
-16    -400   
-1152  -192   
112    0      
-960   -144   
-48    0      
-80    -80    
128    144    
-48    16     
0      112    
16     -192   
-240   -176   
48     -368   
224    128    
-288   -112   
16     96     
-128   -240   
-80    128    
192    64     
-288   160    
208    112    
-240   128    
0      32     
-96    16     
-64    48     
208    336    
-112   96     
-192   112    
-48    96     
-64    -160   
-64    160    
-80    -48    
-160   -16    
144    144    
-384   -32    
224    0      
-624   144    
-144   -64    
-272   -144   
-160   32     
64     -32    
-64    176    
0      80     
96     48     
-48    -400   
80     240    
0      208    
-64    80     
64     32     
0      64     
-208   -64    
-80    32     
-176   -80    
-192   0      
-96    0      
-496   -96    
176    704    
-304   -304   
-16    64     
-64    32     
-16    -80    
32     256    
-64    0      
64     208    
-240   -64    
-96    -80    
-32    -16    
144    -96    
-256   0      
208    448    
-592   -528   
64     48     
128    -96    
-64    32     
-160   80     
-128   -304   
32     80     
-144   192    
-16    -128   
-64    112    
16     176    
0      -48    
0      48     
-96    0      
48     32     
-320   -208   
192    224    
-96    48     
16     64     
-16    128    
-80    -16    
-64    32     
-368   -80    
128    80     
-48    224    
64     80     
-192   -64    
1792   -1648  
-128   -416   
1440   880    
-816   464    
688    -368   
-1088  -224   
-160   512    
-176   192    
-128   256    
-176   -224   
272    -32    
32     -128   
-176   384    
-112   64     
0      -80    
-32    112    
-208   -16    
320    752    
-240   -208   
-64    -144   
-256   16     
-384   -32    
-48    224    
-48    0      
176    112    
-176   48     
96     192    
-128   80     
-32    32     
0      -208   
64     64     
-160   -16    
144    128    
-320   64     
-64    -32    
-400   -160   
-112   208    
48     -80    
0      -256   
-48    112    
48     240    
-224   128    
96     0      
16     16     
-16    64     
16     128    
-112   -208   
304    432    
-256   -304   
384    336    
-80    -176   
80     448    
-64    32     
16     112    
-48    64     
208    208    
144    576    
-32    256    
-192   -432   
-112   -48    
48     -256   
-112   128    
-16    -80    
96     32     
112    240    
-32    -96    
208    144    
-48    64     
80     32     
-176   112    
32     48     
112    64     
-80    32     
32     64     
16     -160   
0      128    
-96    0      
48     656    
128    144    
0      448    
112    288    
-96    16     
-64    -304   
16     384    
-32    64     
-32    240    
-16    -80    
-48    128    
-64    -64    
80     192    
-96    112    
-32    -160   
64     48     
-160   0      
-80    64     
-16    -160   
16     144    
176    -64    
48     32     
-144   -64    
64     288    
48     16     
-48    32     
-48    144    
32     32     
224    128    
-208   80     
240    512    
-80    -48    
256    128    
-176   160    
80     -16    
0      48     
-112   16     
304    96     
-112   144    
0      -208   
0      32     
16     176    
112    128    
16     112    
-208   -208   
80     96     
96     0      
-32    112    
0      -128   
0      -48    
160    144    
-16    224    
240    64     
-240   64     
32     -112   
192    240    
-208   256    
48     80     
-32    208    
0      -528   
32     -16    
336    384    
-144   -1168  
96     0      
-48    96     
-16    -160   
176    -96    
-160   256    
192    208    
16     208    
-64    -64    
-16    -224   
160    176    
-96    224    
112    32     
96     48     
-96    -32    
64     -544   
96     352    
32     304    
32     16     
16     544    
208    -32    
-48    80     
-48    96     
-48    -224   
160    224    
80     32     
-64    -256   
304    96     
-64    -384   
-304   -144   
80     -96    
192    336    
32     -608   
80     272    
-160   144    
144    48     
0      -448   
80     80     
48     0      
-32    128    
-48    32     
-368   -320   
48     128    
-16    -176   
160    320    
-96    -144   
-64    192    
0      -1008  
64     0      
64     -128   
0      0      
-48    160    
48     48     
0      112    
64     -32    
48     176    
-176   -368   
336    208    
96     80     
-96    64     
432    -1200  
16     1632   
-320   -400   
-288   -672   
448    -192   
-128   96     
320    336    
-368   48     
112    -112   
-64    -192   
32     144    
192    64     
64     176    
-160   -96    
160    -16    
-96    -384   
80     48     
112    -112   
-48    64     
112    32     
-16    48     
48     224    
16     128    
0      0      
80     144    
0      64     
128    -48    
-64    0      
48     -336   
128    256    
80     -80    
80     48     
-80    32     
96     160    
-48    -528   
240    208    
-256   224    
144    112    
-32    -80    
96     192    
0      48     
144    -128   
-32    224    
160    -160   
-48    48     
0      -208   
48     64     
16     -48    
336    464    
-336   -560   
352    80     
-208   112    
240    -784   
-80    64     
0      -224   
64     -1664  
-48    -448   
144    256    
-112   -64    
288    80     
-192   -80    
48     96     
128    -192   
32     192    
-32    48     
160    -320   
32     112    
-64    -432   
96     -48    
-1520  -208   
144    -112   
-96    32     
64     -64    
48     -112   
80     -368   
-16    -224   
-32    80     
192    0      
-96    -304   
144    96     
-16    -48    
-64    112    
144    -256   
-64    -672   
32     -64    
-32    -32    
-64    -192   
272    -240   
-336   -160   
288    -352   
-32    -32    
48     -128   
48     64     
-16    -16    
16     176    
-112   -192   
128    176    
0      96     
-16    32     
-256   -80    
48     80     
16     -176   
176    0      
-96    -128   
96     -352   
-32    -80    
112    -1088  
-32    -160   
80     112    
-208   -176   
128    -160   
16     -16    
-96    144    
112    160    
32     -64    
16     -96    
-864   80     
-80    -112   
128    96     
80     -16    
160    -32    
-256   -656   
288    160    
128    -144   
-112   -16    
112    16     
96     272    
32     80     
-96    -320   
-176   -16    
192    80     
32     -96    
-16    -144   
-192   16     
-64    -304   
32     160    
64     -352   
368    96     
-176   -544   
-112   -176   
192    128    
-16    -304   
-160   -192   
80     -32    
112    -16    
16     -240   
-160   -64    
-16    -576   
-784   -160   
320    112    
-928   -32    
-16    -304   
64     128    
-32    -320   
48     160    
-176   0      
0      -544   
-96    112    
400    464    
-352   -208   
192    16     
-208   -80    
80     16     
-528   -48    
32     32     
16     192    
48     -192   
-32    64     
-96    -464   
64     192    
256    224    
0      0      
-336   -96    
160    32     
-352   64     
48     -192   
80     -48    
48     0      
48     96     
96     -144   
-80    96     
96     -288   
80     80     
32     -560   
-16    -16    
48     80     
-192   -144   
80     -64    
112    -48    
-16    -32    
0      80     
-256   -48    
176    32     
-144   0      
32     -256   
64     0      
240    -256   
112    80     
-64    -336   
-592   2160   
-960   -1072  
448    128    
400    144    
64     -288   
-384   -336   
192    48     
-144   416    
16     -224   
-576   128    
-1328  -224   
208    -64    
-352   -272   
368    48     
-320   -112   
128    -96    
-48    80     
-864   -112   
128    48     
-608   128    
288    512    
-96    -16    
64     192    
-112   -272   
144    -16    
-96    -96    
176    224    
-80    288    
0      144    
-288   -160   
144    48     
-96    16     
-144   80     
-80    240    
-192   -160   
-80    320    
-1248  -176   
-208   -32    
80     -432   
160    256    
-240   -192   
-16    160    
-272   -240   
128    32     
-96    -176   
112    32     
32     48     
16     592    
80     -320   
-384   -96    
64     -96    
-384   464    
-208   -208   
208    -16    
-48    32     
-16    -160   
96     240    
-400   -704   
-48    -16    
240    416    
-224   0      
-16    272    
-144   96     
-16    -96    
-208   -288   
80     160    
288    48     
-192   128    
-448   -192   
-48    176    
-144   -48    
80     160    
0      0      
32     112    
32     64     
-112   0      
-64    -80    
-400   -624   
368    64     
256    672    
96     64     
-336   176    
32     144    
-320   -176   
112    64     
0      16     
-16    32     
-128   -560   
160    192    
320    608    
-16    272    
-304   -144   
-32    -112   
128    160    
96     208    
-16    192    
96     368    
-48    128    
0      -32    
16     32     
-368   160    
96     192    
-48    128    
-176   64     
32     48     
48     16     
48     112    
-48    -64    
64     -400   
-144   -368   
-16    -16    
-16    -80    
192    160    
-48    -32    
112    112    
-816   -32    
-96    64     
-192   -32    
-32    -16    
64     16     
272    416    
-240   112    
0      48     
0      48     
-128   32     
64     336    
-64    16     
-48    144    
-256   -96    
240    192    
-176   -48    
96     112    
-32    128    
272    144    
-64    192    
80     208    
-256   160    
144    -544   
-192   240    
-16    -48    
256    0      
-256   128    
240    192    
-224   0      
96     32     
-48    128    
128    192    
144    288    
-64    96     
32     112    
0      -16    
0      96     
-48    64     
64     64     
48     80     
48     192    
-240   -96    
48     144    
-240   -288   
224    32     
-96    224    
48     16     
32     48     
-176   80     
192    -16    
48     -176   
96     176    
-176   208    
0      336    
-128   -32    
208    -16    
32     16     
-32    48     
-176   80     
32     336    
-176   16     
-80    112    
-48    0      
240    64     
-128   64     
176    64     
0      208    
-16    -96    
96     144    
-64    112    
32     -128   
144    144    
0      336    
-64    -48    
-80    80     
128    80     
0      32     
112    80     
96     224    
-128   0      
160    208    
-192   48     
208    80     
-16    48     
-1248  -1296  
464    96     
-1200  128    
960    272    
-48    -352   
128    192    
-208   752    
256    -32    
-176   592    
160    -464   
-32    176    
-192   -96    
224    176    
-160   144    
80     -96    
-224   144    
368    -48    
-336   432    
176    -976   
-112   304    
224    -176   
-208   512    
256    -144   
-32    352    
96     -272   
-16    288    
32     -80    
-16    384    
160    16     
16     144    
-80    -208   
-80    176    
112    64     
160    64     
-64    64     
0      -576   
-128   288    
272    48     
-176   32     
0      -16    
112    144    
96     176    
16     80     
-80    -48    
112    -16    
-112   80     
176    160    
48     128    
48     -64    
-304   80     
240    -1168  
-32    176    
-16    80     
160    96     
-224   32     
160    32     
-48    144    
48     32     
48     160    
-48    80     
48     32     
32     176    
0      160    
48     -192   
32     208    
-32    -448   
144    96     
64     -432   
32     224    
48     0      
176    192    
-48    -80    
96     176    
0      32     
128    144    
-112   64     
80     128    
-16    176    
176    -128   
0      176    
-16    -112   
32     176    
32     -688   
112    -64    
-144   -272   
-96    144    
32     16     
128    416    
16     -176   
288    160    
-336   64     
240    -176   
0      80     
-80    -32    
176    192    
224    160    
0      96     
16     -2128  
-16    0      
80     -1456  
0      -112   
-64    192    
192    -16    
-176   96     
112    0      
-16    144    
144    -208   
64     128    
80     -64    
48     336    
-272   -320   
288    448    
0      -288   
224    192    
-64    192    
192    80     
-112   -48    
192    224    
-144   0      
224    208    
128    512    
-304   -80    
224    176    
0      -224   
-96    16     
144    -128   
112    240    
-64    64     
240    256    
256    -1248  
-224   80     
192    32     
-96    112    
144    0      
-64    -48    
96     224    
-32    -224   
96     176    
16     -448   
80     0      
-208   -192   
272    192    
144    96     
-16    272    
-192   -400   
128    -144   
-64    -144   
208    -176   
-32    80     
-192   -272   
208    -64    
16     -96    
-32    -448   
128    48     
64     160    
0      -144   
384    688    
-208   80     
496    -2064  
-288   -48    
64     -208   
64     112    
-192   -432   
160    -112   
-832   -144   
272    64     
-176   -80    
368    -416   
-144   32     
288    -144   
144    -144   
16     128    
32     -96    
-240   32     
192    -128   
288    128    
-272   -64    
400    -48    
-304   -288   
-592   -256   
144    -112   
-48    -32    
192    -176   
-64    -64    
144    -352   
0      -112   
-16    -96    
-16    112    
48     -176   
-192   48     
272    -208   
16     64     
-128   -128   
112    32     
-112   -16    
48     192    
96     -176   
0      -176   
32     -272   
-224   -1024  
128    2608   
-784   64     
224    -624   
-16    -448   
192    48     
-432   528    
96     -544   
176    -160   
304    -128   
-576   336    
144    -736   
-352   672    
192    -368   
48     240    
-224   -400   
112    416    
208    -1024  
304    768    
-288   192    
352    128    
-160   -32    
432    -192   
80     -64    
-144   -384   
0      -48    
-48    -48    
-400   288    
-80    -176   
-192   -16    
0      -144   
16     -80    
64     -304   
48     48     
-16    112    
144    112    
-48    432    
-16    -32    
-144   -112   
-192   -256   
144    176    
0      96     
-352   48     
80     224    
-1216  128    
-208   -400   
64     16     
272    256    
128    176    
-176   -304   
-48    -112   
80     0      
-16    -208   
144    400    
-256   -112   
32     80     
0      -32    
-128   -128   
-256   -368   
-32    -112   
-96    -512   
-96    -48    
48     80     
80     256    
80     -128   
-80    -192   
-448   -96    
-80    0      
-48    448    
-96    -368   
-128   -32    
-16    -144   
-64    160    
32     -272   
32     32     
-16    -80    
48     96     
-160   -864   
32     -176   
-96    -832   
80     0      
144    272    
208    288    
-240   -384   
160    48     
-176   -64    
352    48     
-256   64     
96     80     
16     -256   
32     -96    
192    128    
-688   -240   
64     80     
-272   -32    
-48    96     
16     288    
-1248  -192   
-208   -112   
272    -32    
-64    0      
176    0      
-176   208    
96     -112   
48     208    
-112   -208   
-16    240    
-400   -256   
448    400    
-336   -176   
-16    160    
-128   160    
-64    96     
-96    64     
0      80     
-208   -192   
128    64     
-320   -64    
272    -144   
-144   48     
-144   -48    
240    192    
64     -32    
-16    160    
0      48     
96     -80    
-144   96     
-128   48     
128    304    
-176   80     
64     48     
-336   32     
0      144    
64     32     
112    224    
-192   -32    
-96    144    
16     -96    
160    160    
-256   32     
16     16     
-160   32     
-16    16     
-48    128    
-144   16     
48     48     
-512   96     
-96    0      
-112   0      
-48    144    
64     -96    
64     80     
-144   -32    
0      64     
-32    96     
16     -32    
-64    112    
-144   -64    
-16    144    
-416   -192   
176    0      
-16    96     
16     144    
-672   -80    
-16    192    
-208   -208   
160    128    
-64    0      
64     80     
48     -16    
-80    112    
-32    80     
-80    16     
48     112    
-32    176    
-192   160    
-80    -80    
112    16     
-336   -64    
96     -32    
-160   32     
-32    32     
32     112    
-48    -32    
-48    96     
32     -96    
192    32     
-80    0      
-48    224    
-176   176    
0      96     
-112   -112   
176    48     
-160   -144   
32     160    
128    80     
-64    16     
-80    160    
48     -64    
-384   1744   
224    2560   
-2016  336    
-16    496    
-272   -336   
-368   -528   
112    560    
-336   288    
368    208    
-224   -512   
-80    224    
-464   -144   
112    128    
-16    32     
48     64     
-128   0      
112    160    
-80    224    
64     16     
48     32     
-160   -144   
-48    240    
32     0      
0      144    
48     -64    
-160   16     
272    32     
-192   128    
192    -48    
-224   96     
176    160    
0      48     
16     112    
-144   128    
128    64     
-32    -32    
-176   80     
48     0      
-16    128    
-80    -64    
0      32     
-32    48     
-96    112    
32     128    
128    112    
-96    48     
-32    -16    
-64    112    
96     96     
32     64     
-64    0      
-16    128    
-96    -32    
48     128    
-144   -64    
0      16     
32     112    
80     112    
64     -32    
48     64     
-128   112    
48     112    
0      80     
64     128    
32     176    
-144   -16    
96     176    
-48    -16    
64     160    
-80    80     
128    112    
16     80     
0      32     
64     112    
32     64     
0      160    
-128   64     
-64    288    
-112   16     
272    32     
-208   128    
368    480    
-320   176    
-32    144    
272    32     
-112   -144   
-96    -48    
48     96     
0      176    
16     48     
0      128    
-96    64     
16     128    
-16    16     
112    192    
-96    128    
-96    -400   
-208   -208   
112    -416   
-48    80     
176    128    
0      272    
32     -48    
16     192    
-32    80     
112    96     
-16    32     
64     112    
-32    224    
112    336    
64     384    
176    336    
-16    144    
-96    -128   
-48    32     
128    96     
0      -144   
128    80     
-32    32     
-16    -16    
64     16     
-16    -32    
-64    32     
48     64     
240    32     
-160   48     
-128   64     
160    -160   
-256   -272   
304    208    
0      -80    
48     160    
-80    96     
-48    -48    
176    80     
-16    192    
160    32     
-48    112    
-64    96     
144    -32    
-64    -112   
128    240    
-32    208    
16     -160   
96     272    
-96    -928   
256    144    
-144   -80    
128    48     
128    224    
0      160    
0      80     
0      144    
-80    32     
176    160    
-48    16     
-16    64     
64     160    
272    -304   
-80    208    
-144   -656   
-48    -112   
-32    -16    
208    176    
96     112    
-112   96     
-224   -288   
336    176    
-112   192    
-96    -128   
208    -96    
144    176    
-32    -48    
64     -256   
-48    64     
304    -448   
-16    80     
-128   -512   
144    240    
-80    176    
112    80     
-48    -32    
96     160    
96     16     
96     176    
48     -16    
48     16     
-144   224    
112    -176   
-16    112    
192    -256   
64     64     
-192   -256   
320    208    
0      -1360  
48     240    
-176   48     
32     64     
16     48     
-160   -1328  
944    2704   
-848   560    
752    -240   
-448   -432   
784    176    
-160   672    
-80    80     
224    256    
48     -64    
-320   16     
16     -160   
272    112    
16     -144   
64     272    
-240   -928   
240    -32    
-288   -272   
-96    0      
-16    -480   
176    272    
-32    -160   
-16    112    
80     -80    
-96    64     
64     -1360  
-208   0      
-48    -656   
192    48     
-48    240    
352    320    
112    224    
-32    -384   
64     208    
-128   -288   
240    16     
-16    -480   
-48    0      
48     0      
208    176    
-192   -16    
16     -448   
64     64     
192    -400   
-48    -160   
64     32     
-80    -464   
-16    -256   
176    -2544  
-16    -112   
240    208    
-112   -16    
144    64     
32     -288   
112    -544   
-144   64     
208    -224   
32     96     
-16    32     
112    -128   
240    -16    
96     -928   
160    -288   
-64    -288   
-96    -192   
272    -928   
-112   -208   
48     224    
32     -256   
128    -128   
-32    112    
96     -16    
-48    128    
-208   0      
80     160    
-1008  -96    
32     -80    
160    464    
-256   176    
-16    -176   
80     -160   
-96    -192   
224    -1264  
208    336    
-144   48     
96     144    
32     -240   
160    64     
-112   -32    
48     -96    
48     48     
-32    80     
-48    -48    
0      -96    
-32    -16    
96     -496   
160    80     
-80    -144   
48     64     
160    64     
-144   0      
176    -80    
-64    -176   
32     -32    
176    64     
-96    208    
-48    -256   
0      -160   
112    -16    
-64    64     
80     -144   
-64    80     
-16    -640   
16     -128   
128    -432   
-48    -144   
192    -160   
-208   -112   
240    32     
-128   -160   
-320   -32    
400    240    
-496   -176   
-112   -80    
-624   -64    
32     16     
320    80     
-272   -304   
304    -16    
-176   -176   
112    32     
240    128    
-224   -176   
-48    -64    
-128   -144   
0      -128   
352    160    
-384   32     
112    -128   
-752   48     
-80    -272   
352    16     
-80    -384   
-96    224    
16     -288   
144    48     
-336   0      
80     -32    
-144   -16    
128    96     
32     16     
-32    32     
-240   -64    
32     -32    
64     -48    
-64    -192   
32     112    
32     -144   
112    -176   
16     -112   
-32    -96    
-208   -96    
-96    48     
32     -80    
96     128    
-128   32     
176    64     
-304   32     
32     -96    
-16    -112   
320    -96    
48     240    
-48    -16    
-16    176    
-288   -336   
64     -144   
272    176    
-32    96     
-144   -32    
48     32     
-304   112    
144    -224   
64     16     
128    32     
-32    240    
-112   -192   
32     32     
-848   -224   
32     112    
-96    144    
-224   -48    
16     80     
-288   -64    
-80    -64    
-912   -32    
-160   32     
48     -64    
-48    224    
32     -96    
-816   -3296  
16     -176   
-32    672    
-496   -992   
176    560    
-976   -384   
560    -16    
-512   208    
224    144    
16     0      
-432   -96    
-48    -16    
112    256    
144    -128   
-368   272    
0      -176   
16     256    
-16    0      
-80    96     
-64    -112   
16     -32    
-144   128    
-32    128    
-48    -96    
-64    -112   
16     80     
-16    80     
-1024  -16    
16     144    
-64    -160   
48     32     
0      -32    
48     80     
-48    16     
-64    -48    
-48    16     
-32    -16    
16     128    
-48    0      
-96    16     
-96    -16    
-176   96     
-480   -64    
-32    0      
-144   -112   
32     80     
-48    -32    
112    288    
48     64     
64     -96    
-48    32     
16     144    
64     144    
-16    -16    
-32    96     
-112   -48    
80     32     
-32    80     
16     32     
-96    -48    
80     208    
-128   -144   
128    128    
-32    -32    
16     176    
-96    192    
-32    80     
-64    96     
-176   -48    
192    80     
-176   128    
-64    112    
-32    32     
32     48     
-112   -80    
16     176    
-128   -48    
-144   -64    
32     32     
-80    64     
-128   16     
32     128    
-160   -80    
-224   -544   
192    288    
0      16     
-96    64     
-336   -144   
112    208    
-368   -64    
-48    16     
-240   -48    
192    0      
32     48     
96     64     
-80    64     
-48    112    
144    320    
96     432    
112    192    
-256   -224   
16     32     
-32    48     
160    128    
-128   16     
-96    80     
144    96     
-32    16     
16     96     
-128   32     
80     80     
-32    80     
-32    48     
-16    48     
-16    80     
-32    -64    
0      128    
-80    -16    
96     160    
-128   -16    
48     32     
80     80     
0      128    
64     -32    
-176   32     
-32    160    
96     80     
96     -80    
-304   320    
96     528    
-64    -128   
-16    112    
-208   32     
256    32     
-160   -96    
16     208    
-112   -208   
192    48     
-80    208    
224    -16    
80     128    
-208   64     
176    -16    
-128   -64    
176    80     
-16    80     
-32    256    
-176   176    
32     -80    
112    -16    
96     208    
48     176    
-112   32     
-80    80     
64     -112   
256    96     
-224   160    
160    -64    
-192   128    
64     16     
128    32     
-128   160    
64     64     
-128   80     
112    64     
-48    128    
80     -80    
0      304    
-112   -16    
32     32     
64     16     
-112   96     
-16    80     
-96    160    
-16    48     
32     96     
16     48     
16     64     
48     -64    
-48    144    
0      -80    
32     96     
176    128    
-64    0      
-32    112    
128    128    
-144   80     
-48    64     
-64    112    
128    32     
-32    64     
64     64     
-256   -32    
144    -256   
32     272    
192    192    
-80    224    
-64    0      
80     64     
-784   -1824  
96     -384   
352    -352   
224    -432   
-160   -784   
112    -320   
-16    704    
256    48     
-272   -144   
112    -672   
272    384    
-192   80     
112    208    
64     -224   
208    16     
-96    -80    
128    -48    
-160   208    
192    432    
160    256    
32     512    
-160   192    
160    144    
128    224    
64     -528   
128    48     
-240   -736   
112    112    
96     160    
0      96     
128    224    
-176   176    
128    48     
-96    64     
-48    96     
160    -16    
80     16     
16     176    
96     96     
64     -80    
-80    160    
112    -512   
80     96     
32     -64    
144    208    
-144   208    
112    64     
-112   -304   
160    272    
-64    -64    
240    128    
-176   144    
0      -48    
240    128    
-208   -48    
144    64     
96     -512   
-48    112    
80     -1600  
32     -16    
112    -48    
-64    272    
-48    -192   
112    144    
-128   -48    
96     96     
80     48     
-32    16     
32     16     
192    -128   
-192   160    
64     -288   
64     176    
48     -384   
160    192    
-160   96     
128    192    
176    32     
112    304    
-80    -32    
240    96     
-112   160    
-16    -16    
64     -112   
-16    -16    
-112   64     
272    48     
-272   224    
32     -512   
288    -16    
-208   48     
112    112    
16     -64    
80     192    
-16    112    
112    -256   
144    384    
-224   -272   
240    -32    
32     -128   
-32    96     
192    80     
-96    304    
0      -576   
48     -16    
-112   -32    
192    144    
16     -96    
-32    64     
112    -48    
-112   -320   
224    112    
-64    -144   
0      144    
368    256    
64     288    
16     -128   
-224   64     
128    -176   
208    144    
272    208    
-16    336    
192    224    
-144   16     
-64    0      
-64    -192   
192    160    
-32    -400   
96     -208   
128    0      
-176   128    
32     -48    
192    80     
16     -160   
-272   -336   
16     -64    
224    -1072  
0      -160   
-112   -832   
320    288    
272    0      
16     -192   
-144   -224   
64     -560   
144    -224   
32     48     
-96    0      
0      -112   
160    -320   
-80    -304   
-32    32     
144    -352   
-48    48     
16     144    
192    32     
-320   96     
32     -64    
-32    96     
112    -160   
160    -144   
-48    -432   
80     64     
48     -144   
-64    0      
64     -352   
-64    32     
272    176    
-176   16     
-144   48     
-64    0      
-976   -400   
304    -352   
80     0      
128    -160   
208    -224   
-144   -736   
80     16     
-96    -1344  
-16    64     
208    176    
96     -96    
80     176    
-16    -336   
-272   -48    
16     -80    
-272   -224   
80     -128   
240    0      
176    -240   
-16    -176   
128    -560   
192    -48    
-16    -1408  
192    -64    
-64    128    
-16    128    
48     -112   
-48    -16    
-16    16     
-400   -1936  
-272   -1184  
-928   512    
352    48     
1216   1152   
-944   -1152  
496    -144   
384    -416   
304    48     
-64    160    
384    -256   
-176   288    
-16    -160   
48     64     
-144   -32    
32     -80    
128    128    
32     -32    
-112   -112   
112    -160   
-480   32     
-112   208    
192    176    
-16    -128   
240    -176   
32     -752   
-192   80     
112    176    
16     16     
0      64     
144    -192   
-368   16     
-32    -144   
-64    -32    
80     -16    
-304   32     
64     -240   
-64    96     
-48    -336   
160    160    
-48    -928   
176    80     
-240   32     
80     -112   
-272   -112   
16     -64    
-48    -96    
16     160    
-160   -64    
80     16     
16     -16    
192    -80    
16     192    
-32    -160   
0      112    
80     -128   
0      -336   
-112   -320   
-96    -208   
-32    96     
208    240    
-16    160    
-48    -48    
16     112    
192    -128   
-880   16     
16     -224   
16     64     
-144   -144   
64     240    
-208   -80    
-272   -32    
-256   16     
80     64     
-64    0      
112    80     
-208   0      
-16    -240   
-64    -96    
128    16     
48     48     
-496   -160   
-128   32     
32     -336   
-48    192    
16     128    
-400   0      
16     -16    
16     128    
-48    128    
-1008  64     
-160   -32    
80     -128   
-16    -16    
208    208    
-48    128    
64     -128   
16     192    
-144   80     
-288   -32    
-16    48     
-48    16     
80     96     
-464   64     
-128   16     
-80    0      
-80    48     
80     16     
32     80     
-464   -32    
32     0      
80     -80    
-48    96     
48     -80    
-48    80     
-16    112    
-80    -144   
16     96     
32     224    
0      -16    
-544   -128   
-16    304    
-160   -16    
-64    -32    
-448   -256   
224    128    
-32    -224   
112    480    
-304   416    
-48    -224   
64     -48    
-336   16     
160    -128   
-160   80     
0      96     
16     32     
-128   160    
-144   -32    
208    160    
-160   -160   
96     224    
-96    -144   
96     304    
-208   32     
112    -64    
-128   0      
32     -112   
144    192    
-80    416    
160    224    
-368   -160   
80     96     
-96    -272   
32     128    
-976   -288   
0      192    
16     -96    
-112   0      
-128   -192   
-32    96     
-64    176    
-80    160    
-192   0      
16     -48    
-80    -160   
-80    0      
-80    112    
-304   -144   
160    -96    
288    -96    
-48    256    
-160   -80    
-256   176    
-80    -80    
48     -80    
16     -48    
176    208    
-144   160    
0      -256   
-32    80     
176    160    
128    208    
-240   80     
128    80     
-160   -128   
96     48     
32     64     
-112   224    
0      64     
-160   96     
64     -48    
112    32     
-32    64     
112    96     
-160   80     
128    -80    
-128   80     
-192   -176   
0      144    
-640   -272   
656    2352   
-1088  224    
304    -368   
-528   -144   
0      -272   
576    416    
-672   -208   
496    464    
0      64     
288    16     
-304   -96    
144    144    
-144   -80    
128    128    
-256   -16    
-80    -16    
-64    80     
112    -208   
48     -64    
64     48     
64     0      
16     192    
112    144    
-64    -32    
-32    16     
-208   80     
48     80     
16     0      
-32    32     
-16    48     
-32    64     
96     48     
-80    32     
-48    96     
160    144    
32     -48    
-48    144    
48     32     
0      32     
-32    48     
-64    48     
128    128    
-64    0      
-16    128    
16     64     
-176   -16    
192    144    
48     64     
-48    80     
-144   -32    
208    160    
-192   48     
176    16     
-112   -16    
112    96     
32     304    
-80    -16    
-64    0      
16     128    
96     48     
-48    96     
80     160    
-48    48     
48     0      
64     160    
-64    224    
32     0      
16     -16    
192    32     
-80    176    
-112   0      
240    128    
-192   16     
80     -144   
0      64     
128    240    
-80    160    
112    64     
0      80     
-80    0      
144    48     
-48    224    
0      112    
80     224    
272    -32    
-32    48     
-32    336    
16     -176   
160    -400   
-96    112    
128    208    
-32    -16    
-16    48     
80     -64    
48     160    
-32    176    
-80    48     
96     16     
-48    0      
48     128    
-16    128    
96     176    
64     144    
-64    -1872  
32     32     
0      288    
272    144    
80     32     
16     0      
-112   224    
208    96     
-48    128    
-80    -32    
96     144    
48     112    
-48    160    
-16    96     
0      -128   
32     -304   
-96    96     
384    -720   
112    176    
-32    112    
-144   256    
320    0      
-96    128    
-448   -96    
224    -32    
80     -32    
160    144    
-112   16     
-80    -144   
240    240    
64     -224   
176    144    
-288   -912   
96     160    
112    -80    
48     16     
-144   0      
-16    288    
192    -32    
160    176    
-128   -368   
-144   -32    
0      -64    
288    -608   
-176   80     
192    0      
-64    256    
240    -464   
-16    112    
-32    -688   
96     160    
0      48     
48     320    
-48    -128   
160    112    
64     304    
0      -64    
-112   -16    
96     256    
112    224    
16     -160   
-64    32     
272    -48    
-64    496    
176    -576   
-16    -160   
-80    -160   
80     112    
16     112    
112    -224   
160    208    
-80    224    
16     128    
32     -128   
80     -128   
-16    -160   
0      64     
80     -352   
-48    -48    
80     -192   
64     144    
80     -880   
-80    80     
112    32     
16     144    
16     80     
-32    0      
16     480    
64     -224   
96     -288   
-48    -64    
144    288    
224    -288   
-128   96     
-32    -320   
-720   1072   
256    1920   
-1040  -144   
48     -656   
-80    -352   
-128   -64    
416    -240   
-560   -528   
608    624    
272    320    
-288   -256   
160    240    
208    -112   
48     -16    
-64    -416   
-48    112    
80     -144   
144    -16    
16     -112   
-16    -1488  
64     -656   
352    272    
-64    -64    
0      176    
-128   160    
-48    -416   
-160   112    
192    -352   
112    64     
-96    -128   
16     80     
192    64     
-16    -352   
208    80     
-16    -432   
-48    -208   
112    128    
112    -432   
-64    -368   
112    -48    
192    176    
-32    96     
48     -96    
96     80     
48     -176   
32     -784   
64     -32    
144    -784   
-112   48     
-80    -80    
-32    -64    
-160   112    
16     64     
64     -192   
-64    -624   
128    32     
144    256    
0      -128   
64     144    
-96    -48    
96     -128   
-160   160    
96     -160   
-64    -16    
32     -48    
80     -160   
-448   -192   
64     -336   
176    -192   
48     -272   
96     0      
80     -288   
0      -96    
0      -2640  
288    48     
0      -64    
0      144    
112    288    
192    -32    
-160   -32    
64     304    
-48    -224   
-160   160    
-272   -112   
80     128    
-48    -192   
-32    -160   
-48    -224   
176    -480   
-64    256    
32     -112   
0      64     
48     -160   
160    -80    
-144   32     
32     -32    
-48    64     
80     192    
80     208    
-16    -288   
-160   -32    
80     -176   
32     112    
80     16     
-112   128    
128    -80    
48     144    
-240   -224   
160    64     
-176   -96    
176    -16    
-208   48     
48     -128   
-96    16     
-32    -192   
-928   48     
16     -32    
128    64     
-64    -848   
16     -128   
32     -416   
112    176    
0      64     
32     16     
-128   192    
176    -144   
16     -16    
-352   -800   
-80    -80    
48     480    
-16    304    
-112   -80    
-48    96     
16     -288   
0      -64    
64     -352   
112    80     
-48    560    
32     192    
144    624    
-208   32     
176    -64    
-144   -96    
64     -176   
176    544    
-368   -16    
208    -368   
-16    -80    
128    -192   
-160   -112   
96     -624   
96     160    
-176   32     
64     48     
-352   -192   
208    -64    
-80    -16    
192    112    
0      240    
-32    -192   
-144   16     
48     -288   
32     -16    
-208   -224   
-96    80     
-48    240    
208    -16    
-160   -144   
64     16     
32     -800   
288    672    
-16    -48    
-80    0      
-112   -48    
-240   16     
32     64     
-96    304    
-112   -64    
-400   -160   
-192   192    
-128   -96    
-48    -64    
-16    144    
-32    -80    
96     288    
-1552  -336   
-48    176    
-16    144    
16     128    
-128   -144   
176    16     
80     -80    
0      32     
32     -288   
-112   -48    
-64    0      
64     -16    
-64    144    
-272   96     
-1024  -2288  
112    -176   
-176   272    
112    -352   
352    -928   
-128   192    
240    672    
-320   -352   
-64    272    
48     -592   
240    -64    
-256   240    
224    48     
-208   160    
64     -16    
-320   0      
48     48     
-240   224    
112    -176   
16     64     
-224   -80    
160    320    
-160   -112   
112    -80    
0      48     
32     96     
128    96     
-240   16     
-16    80     
-96    -64    
96     96     
-64    112    
64     80     
-544   -64    
0      112    
-256   -64    
16     -64    
16     -64    
-64    176    
160    128    
-176   -32    
-144   48     
16     64     
0      -16    
48     32     
-96    96     
-144   -48    
-16    0      
-880   -272   
400    112    
-1392  0      
240    80     
-144   -32    
32     64     
-16    0      
80     0      
16     -48    
48     192    
-96    80     
112    16     
-48    224    
-32    64     
112    -16    
-192   112    
112    144    
-368   -48    
96     48     
48     160    
-160   80     
128    16     
16     64     
0      128    
-32    64     
128    32     
-176   48     
-16    128    
-32    112    
-16    288    
-240   112    
208    128    
96     -160   
32     112    
-96    128    
64     352    
-112   32     
240    -48    
-176   -32    
0      64     
-96    0      
16     48     
-96    160    
16     64     
-16    96     
-80    -16    
-32    32     
-48    -160   
16     256    
-144   96     
224    112    
-80    -48    
144    272    
-16    -16    
112    96     
-112   80     
48     -64    
160    144    
-208   128    
16     240    
-272   -112   
208    304    
80     -96    
-160   80     
-80    112    
112    -48    
64     144    
32     336    
48     352    
32     -368   
0      80     
32     -16    
-16    -224   
64     64     
144    224    
-80    112    
-16    96     
48     208    
-80    48     
224    64     
-16    336    
80     128    
16     192    
0      16     
64     176    
-64    144    
64     144    
-240   96     
-128   -128   
32     16     
48     144    
96     112    
48     80     
16     128    
0      64     
48     176    
-48    144    
80     32     
-48    96     
48     224    
80     240    
-144   -176   
-16    32     
96     160    
32     64     
-96    48     
48     80     
-128   -176   
80     96     
144    112    
0      80     
208    -384   
-96    256    
80     96     
0      -16    
384    368    
-112   16     
176    224    
-320   -96    
-64    -160   
32     -80    
208    448    
-128   48     
48     -16    
48     240    
160    112    
-160   96     
-16    32     
80     128    
-48    0      
-16    -144   
96     176    
128    240    
-144   -48    
144    272    
-32    32     
-16    -528   
160    16     
-48    160    
-48    224    
-112   0      
32     0      
176    32     
96     192    
32     64     
80     -16    
-96    144    
-80    144    
256    -128   
-32    192    
144    192    
-368   544    
-1168  480    
336    880    
-368   -144   
-400   -480   
704    -112   
432    928    
-576   -112   
0      -144   
112    256    
-400   -416   
352    128    
48     160    
16     112    
48     128    
-48    -528   
128    240    
-64    -80    
64     176    
128    128    
32     128    
-144   64     
256    352    
-144   -496   
96     48     
176    -112   
144    32     
-256   32     
144    -240   
-112   176    
-96    -704   
160    128    
176    -576   
-80    0      
-160   -240   
-16    32     
-208   -48    
96     144    
-208   48     
80     656    
-176   -160   
400    400    
-496   128    
176    -208   
144    -80    
32     0      
-96    96     
32     -672   
0      112    
-112   -112   
224    144    
-352   -96    
192    224    
144    32     
-112   -144   
-112   32     
352    304    
-144   192    
-144   -544   
240    304    
-192   -352   
96     304    
-96    -208   
64     112    
16     400    
-96    -16    
80     224    
32     112    
128    176    
-112   48     
16     16     
16     32     
96     64     
16     32     
64     0      
80     -320   
0      0      
-48    -576   
256    64     
64     -160   
80     160    
176    48     
-48    112    
-48    -48    
176    192    
0      304    
0      -336   
-48    144    
-80    -480   
208    192    
112    -400   
64     144    
48     128    
80     112    
0      -352   
112    80     
-144   112    
240    368    
0      352    
-112   -64    
112    32     
16     -240   
176    128    
16     -176   
-48    192    
96     128    
16     144    
64     16     
-48    240    
64     -768   
16     -320   
-144   -48    
272    144    
160    32     
-144   -736   
-128   -1424  
272    -224   
80     -368   
96     16     
32     256    
-48    -160   
208    32     
-16    -224   
144    -16    
-144   -16    
48     -688   
96     32     
48     -1072  
-368   -272   
-176   -544   
128    -720   
-96    112    
128    -176   
-64    -64    
192    -736   
-80    -128   
112    448    
48     80     
160    -144   
-32    -16    
208    112    
-176   16     
32     -48    
64     -16    
-160   -288   
32     -16    
-480   -112   
112    -80    
-48    -96    
272    -80    
64     -96    
-16    -1056  
-16    -32    
96     0      
96     32     
-160   -656   
240    96     
16     -80    
128    16     
-64    -96    
96     144    
-128   96     
16     -96    
-48    -112   
80     -128   
32     0      
0      -64    
80     -64    
-16    -1136  
176    32     
-208   -256   
-80    144    
32     16     
64     144    
96     -96    
32     -96    
-16    112    
-48    -80    
-208   -80    
144    -16    
-64    192    
16     -144   
0      112    
32     -1504  
112    176    
96     -320   
224    224    
-256   80     
-16    -224   
-224   0      
-80    -304   
32     -96    
112    0      
-320   -64    
80     -208   
48     -48    
224    -400   
-48    64     
128    -192   
48     288    
720    464    
16     720    
208    208    
-832   -80    
-128   0      
576    896    
-576   -544   
704    -288   
-800   -16    
160    16     
-320   -448   
128    48     
-48    272    
336    -208   
-208   176    
176    80     
16     0      
96     32     
-96    96     
0      -64    
112    -32    
-224   -16    
96     16     
-144   -80    
0      0      
80     16     
112    -96    
16     32     
0      -432   
32     -16    
80     -816   
80     -32    
-352   16     
-16    -48    
-352   -64    
176    144    
-160   -96    
80     -32    
-192   96     
224    80     
64     32     
96     -352   
-112   112    
16     -288   
96     16     
0      128    
0      48     
64     -32    
64     224    
-224   -144   
224    -80    
-176   80     
128    0      
16     -16    
-16    -128   
-128   112    
-112   -208   
-16    -32    
-928   48     
-32    16     
-16    0      
-640   32     
-96    0      
-1312  32     
-240   192    
160    -80    
112    96     
16     -64    
-48    0      
304    -16    
-96    0      
96     -176   
64     80     
-112   64     
-416   -112   
32     192    
-400   144    
-96    -48    
-176   -80    
-240   128    
-1392  32     
-144   -96    
112    -96    
64     272    
-544   -304   
256    128    
-128   16     
208    48     
-176   -528   
-32    96     
-208   0      
144    144    
0      48     
16     128    
96     304    
-464   -80    
48     -48    
-128   64     
-32    0      
-176   -112   
80     160    
-176   -192   
16     16     
144    352    
-272   64     
112    -48    
-128   -16    
-48    16     
-48    16     
-96    64     
-192   -112   
32     304    
-352   48     
-16    96     
-80    -160   
64     112    
32     -192   
96     -80    
16     128    
-160   224    
0      96     
112    -32    
32     -176   
-336   -144   
-48    64     
32     -192   
-48    160    
-432   -16    
144    -32    
-448   -352   
-112   192    
160    432    
-32    16     
-16    -80    
0      -80    
32     -240   
48     -96    
-272   16     
128    304    
176    -112   
-64    192    
-64    32     
-192   48     
80     288    
-400   64     
-32    80     
144    128    
-304   -288   
48     -16    
-32    192    
16     112    
-16    48     
64     64     
-48    32     
48     368    
-144   208    
192    48     
-272   -16    
432    128    
-592   -304   
0      -64    
16     80     
0      -32    
32     -80    
128    112    
-336   -416   
80     -288   
528    192    
-160   224    
-96    144    
-560   -176   
0      48     
384    -160   
176    256    
-864   -144   
-48    -336   
32     32     
368    64     
-48    160    
-320   48     
-64    48     
16     -16    
240    64     
-80    112    
-128   64     
-96    -48    
144    208    
-176   0      
0      16     
-128   -96    
64     112    
-16    128    
112    48     
-16    144    
112    -48    
160    112    
-288   32     
128    144    
-128   -32    
-80    1232   
-848   -432   
-352   -240   
-288   48     
176    -224   
-160   544    
224    -432   
576    0      
-192   672    
-112   144    
-272   -80    
-48    -352   
16     -80    
288    16     
-112   80     
-192   -16    
-384   -240   
176    -144   
-32    32     
208    112    
-176   -16    
192    -144   
-32    320    
160    176    
16     448    
48     -64    
32     -272   
160    -288   
32     160    
-64    -112   
-16    144    
144    16     
64     496    
-160   32     
272    272    
-128   64     
112    48     
272    192    
-240   -160   
320    -32    
-208   128    
80     64     
-176   -64    
272    48     
-80    96     
240    64     
144    -128   
144    64     
-176   0      
32     -32    
-64    208    
-96    -48    
192    -176   
-160   -144   
208    160    
64     208    
-176   272    
-144   -64    
560    272    
-272   -48    
144    208    
0      -64    
48     -16    
-256   -16    
160    192    
144    80     
0      128    
96     32     
0      208    
-16    128    
64     48     
16     64     
0      160    
112    144    
-96    96     
112    16     
-192   -288   
-32    -128   
-144   16     
-240   -992   
592    608    
-240   -80    
224    64     
-192   224    
224    336    
-64    -352   
-32    176    
0      -64    
320    352    
-304   -48    
96     176    
-64    -256   
144    -128   
16     16     
-48    -448   
-144   48     
-48    -64    
16     -160   
-112   -272   
64     48     
16     176    
224    144    
-128   -16    
64     80     
-32    32     
48     16     
16     160    
144    96     
160    432    
-16    -576   
-144   -80    
-96    0      
240    160    
16     64     
64     128    
80     272    
0      96     
176    464    
-304   80     
96     -96    
-176   176    
-112   48     
176    -96    
224    -112   
-224   -400   
128    112    
-48    16     
16     32     
16     160    
64     0      
64     -96    
-192   32     
112    96     
48     80     
96     128    
96     16     
16     -16    
-240   -112   
112    64     
32     -160   
144    160    
16     -320   
32     112    
-128   192    
96     32     
-32    96     
64     96     
128    32     
112    -16    
-208   112    
80     144    
128    96     
-80    -32    
96     64     
16     -128   
-16    128    
64     -1232  
48     -128   
192    -112   
-96    160    
48     80     
64     -112   
48     144    
80     128    
0      144    
-96    144    
128    16     
16     32     
80     16     
-32    -336   
96     208    
-16    -192   
64     96     
240    -176   
80     192    
-96    112    
-128   112    
-80    -80    
192    80     
16     144    
-16    48     
128    80     
-16    -208   
80     240    
-32    -352   
64     128    
144    -96    
80     128    
-64    -80    
48     32     
-80    32     
160    144    
-48    64     
128    112    
0      128    
0      -80    
208    80     
-96    -208   
-224   544    
176    -192   
512    1280   
128    512    
-448   -144   
-256   -176   
32     -64    
-304   48     
48     -1392  
288    -128   
-1152  -224   
176    -1360  
96     -448   
-240   -128   
384    -256   
-48    592    
320    -576   
-384   512    
288    -368   
80     368    
64     -448   
-32    16     
144    0      
64     80     
144    -96    
-832   -304   
-32    -464   
112    336    
368    -112   
-32    0      
-128   -848   
112    -128   
128    -112   
0      -224   
-48    32     
80     -16    
112    0      
0      -224   
-112   -320   
112    80     
-176   128    
16     -192   
-304   48     
64     -64    
224    80     
-80    -240   
80     -112   
-64    -192   
80     32     
192    -128   
-64    176    
64     -176   
48     0      
-16    -288   
96     -80    
16     96     
80     0      
160    48     
-48    -464   
80     80     
-48    -288   
144    -16    
32     -160   
0      48     
96     -432   
-16    -32    
32     -80    
32     128    
0      144    
-144   0      
48     -48    
48     -176   
-912   -128   
-48    -192   
-224   -96    
112    -64    
80     48     
48     -320   
0      -64    
-128   -1168  
144    -16    
32     32     
-48    160    
-16    -16    
80     -224   
-352   -48    
80     48     
-192   -192   
272    -64    
-592   368    
-160   -80    
160    -80    
-112   -160   
80     -96    
80     -224   
128    384    
160    240    
-80    -48    
16     -16    
0      -112   
64     208    
-128   48     
-32    128    
320    160    
-320   -16    
144    -160   
-928   -208   
32     -32    
272    144    
-208   -512   
32     48     
64     -1088  
32     -288   
-96    16     
64     -112   
0      -16    
-32    128    
-400   -304   
64     -224   
-192   -256   
32     -256   
-256   192    
32     -64    
128    224    
96     -256   
32     80     
-320   -16    
192    32     
-256   -32    
64     -416   
-32    432    
192    176    
-240   64     
-32    -416   
-64    80     
48     16     
48     -272   
240    272    
-32    256    
128    -224   
64     128    
-96    32     
64     -16    
-16    112    
96     64     
-112   -80    
80     -64    
32     -128   
208    -48    
48     352    
-48    16     
64     176    
-848   -272   
80     64     
-48    -160   
-736   -32    
16     128    
-1184  -96    
-64    32     
-528   16     
-80    -96    
0      16     
0      112    
96     0      
-256   -112   
-976   -160   
128    224    
-336   -288   
80     96     
80     16     
-80    -96    
80     96     
-96    64     
64     -64    
-112   112    
-64    32     
-544   16     
-96    208    
16     -16    
-128   -32    
-48    -192   
96     240    
-48    -112   
-16    16     
80     112    
208    16     
-32    -96    
-48    96     
-208   16     
288    -48    
-368   176    
-640   -160   
-48    112    
-416   -16    
48     32     
16     -208   
144    272    
-16    -80    
16     192    
-224   288    
-1424  256    
16     -304   
-16    320    
96     -256   
240    688    
-560   -128   
0      320    
-160   -672   
64     -128   
-960   192    
176    -128   
160    160    
-288   -80    
64     -144   
-48    352    
-160   -96    
-32    -112   
-32    -80    
-80    96     
-176   16     
-192   240    
64     384    
-128   -304   
-240   80     
208    144    
-16    -32    
-144   64     
-80    112    
-176   272    
-96    -64    
16     0      
64     -80    
-224   96     
-112   240    
16     32     
-48    -16    
-96    96     
96     -624   
-384   -448   
192    416    
-1808  -32    
80     112    
0      0      
16     -128   
-16    0      
96     16     
-48    176    
-192   -48    
-112   112    
-96    -96    
-64    -128   
-144   -80    
48     160    
-288   48     
16     192    
-544   -80    
64     240    
64     -96    
48     -176   
-32    96     
80     64     
32     160    
16     176    
-16    112    
144    48     
0      144    
-160   -96    
144    112    
-144   -176   
224    240    
-240   16     
-48    64     
16     112    
0      80     
-96    48     
0      112    
-16    32     
32     32     
-16    32     
-112   -208   
176    -16    
-144   160    
-16    -32    
-176   -256   
-128   -16    
224    80     
-160   -48    
-176   224    
-96    -368   
64     64     
-112   16     
0      48     
48     272    
-192   144    
-192   -16    
240    256    
-288   -336   
144    -224   
16     32     
64     192    
240    208    
-192   -32    
-32    64     
96     16     
80     64     
32     304    
48     96     
64     32     
-96    -64    
16     64     
64     48     
-176   160    
144    128    
-272   -32    
240    32     
16     96     
16     80     
-48    32     
-64    -224   
32     160    
160    352    
112    192    
0      352    
-112   48     
16     64     
112    320    
-128   112    
176    112    
-224   0      
-160   128    
128    16     
48     96     
144    288    
32     256    
48     16     
-80    112    
-160   192    
256    128    
128    -48    
-384   32     
32     96     
160    32     
-16    144    
64     32     
-32    32     
64     160    
-80    96     
112    -304   
-32    128    
-32    176    
272    144    
-128   64     
48     80     
-80    -32    
-64    16     
96     240    
16     0      
144    176    
-144   208    
0      -16    
128    64     
32     64     
176    80     
-16    -272   
80     -32    
0      192    
112    0      
-128   224    
-16    -32    
0      80     
448    -16    
-32    64     
-48    304    
-256   -32    
160    -1072  
64     48     
16     80     
-16    -32    
288    0      
32     224    
-208   32     
96     96     
-16    64     
192    -16    
-128   160    
-144   64     
-32    96     
-160   -256   
128    -48    
144    -16    
-48    176    
64     144    
-112   16     
64     144    
16     64     
160    -64    
96     256    
-96    128    
176    288    
1344   240    
-480   704    
320    720    
-672   192    
96     -304   
656    1104   
-1120  -832   
752    752    
-336   -368   
208    -80    
-32    160    
80     -64    
0      464    
240    -880   
-176   496    
96     -432   
-176   592    
176    -288   
96     0      
16     -128   
-32    -720   
144    -96    
-16    -672   
128    -80    
-32    160    
-64    -48    
48     192    
112    48     
0      -48    
32     96     
-16    80     
80     160    
112    32     
-80    -112   
192    16     
-32    -176   
48     -16    
-80    -128   
192    160    
112    -96    
-16    32     
-48    160    
80     80     
96     160    
64     32     
-32    112    
-80    -32    
240    304    
0      -80    
176    80     
-96    32     
176    192    
-64    -480   
144    128    
-48    -1312  
48     80     
-16    0      
32     160    
32     112    
112    -16    
32     0      
48     -128   
48     224    
96     -64    
96     144    
80     -640   
256    224    
16     -32    
-32    96     
96     -160   
64     32     
80     80     
48     0      
48     64     
-48    208    
64     272    
-112   -112   
352    160    
-32    -96    
16     160    
96     -272   
-160   64     
48     -192   
80     272    
288    -848   
32     -16    
48     352    
272    320    
32     -224   
0      144    
128    -176   
64     32     
128    240    
-32    -320   
80     48     
32     -80    
64     -16    
80     -32    
144    224    
-48    -256   
96     -1664  
48     -32    
176    -272   
-80    96     
-1344  -32    
16     -592   
256    160    
-48    -1152  
48     -368   
48     160    
80     -32    
80     0      
-64    -432   
32     64     
0      -288   
160    -1104  
-128   -160   
-32    -400   
-16    0      
-1072  -192   
256    -160   
128    128    
96     -64    
-112   -224   
-80    -208   
160    0      
320    -272   
-144   -144   
-48    -224   
80     16     
80     -128   
96     96     
112    -320   
32     -160   
-384   -16    
-16    -224   
-80    64     
-32    0      
192    64     
-80    -80    
96     -16    
-16    -1808  
48     0      
64     160    
-32    16     
96     48     
-144   -16    
80     -336   
208    -160   
64     -16    
144    176    
-592   -48    
-16    -320   
176    -32    
112    -496   
-144   -48    
64     -272   
128    192    
80     -144   
-80    -16    
48     -64    
48     160    
-48    80     
160    64     
-160   96     
16     -192   
-80    80     
-32    240    
-288   -112   
128    -176   
-128   16     
192    -112   
96     80     
-16    -1632  
16     32     
96     -32    
-80    16     
96     -48    
192    80     
-128   -32    
112    -80    
-336   -112   
144    -64    
0      144    
32     -112   
112    -80    
80     -320   
-64    64     
160    -576   
-128   160    
176    0      
192    32     
-112   -192   
112    -96    
-80    16     
-160   -224   
-288   48     
48     80     
-32    -16    
-688   368    
352    816    
80     -464   
-64    -432   
128    240    
256    576    
-320   -1872  
368    528    
16     240    
-144   -144   
128    96     
224    -32    
-32    64     
48     -112   
0      608    
-160   -432   
16     80     
-176   -80    
96     80     
144    -144   
-304   -400   
64     160    
336    -144   
-176   160    
-32    -80    
96     -96    
-96    -224   
96     64     
-128   144    
176    16     
-176   16     
-176   -80    
144    0      
32     64     
-32    -288   
96     64     
-48    -144   
128    128    
64     112    
176    176    
-272   -48    
64     -96    
-176   -64    
144    128    
32     112    
-96    -96    
16     112    
-592   -288   
80     96     
-480   -336   
-480   80     
0      32     
0      -32    
-96    128    
-192   80     
-32    -64    
0      -32    
16     96     
32     48     
-64    -48    
-256   -64    
-16    160    
-48    -256   
96     48     
128    96     
-192   208    
-96    -240   
80     16     
-112   64     
-336   160    
-64    16     
-704   -32    
16     96     
80     -144   
-32    144    
-16    96     
-160   144    
48     0      
64     112    
16     -64    
-64    144    
-176   -64    
-32    16     
-144   -160   
112    112    
-192   -144   
-256   160    
-192   32     
144    144    
-16    -80    
0      -144   
-16    96     
32     -128   
-176   -32    
-144   -480   
-64    -272   
144    224    
16     448    
-80    144    
-128   48     
-96    16     
-32    -16    
48     112    
-512   -80    
64     48     
16     -64    
-80    144    
0      0      
-64    -32    
-112   80     
-96    96     
176    112    
-80    80     
0      96     
-208   -176   
48     144    
-16    48     
96     -80    
-368   -96    
-96    80     
176    368    
160    208    
32     -192   
-400   112    
320    32     
-48    208    
-112   64     
-32    144    
16     80     
-320   -64    
112    64     
-16    -16    
80     160    
-624   48     
240    160    
-1952  -16    
48     -16    
-208   128    
-128   -48    
96     -32    
96     112    
-240   112    
224    112    
16     160    
-192   224    
0      112    
-128   -128   
-16    0      
-144   64     
320    96     
-352   16     
0      144    
-16    128    
16     96     
-144   64     
32     80     
-192   128    
112    16     
32     -16    
80     -16    
-16    256    
-192   -160   
16     208    
-48    -128   
112    32     
-176   80     
-208   48     
-48    -128   
128    176    
32     16     
224    -32    
-96    304    
112    -160   
-80    160    
-240   -80    
80     80     
-256   -16    
32     16     
-64    48     
48     80     
48     160    
-32    64     
16     96     
32     48     
-32    128    
0      32     
256    176    
-208   128    
32     48     
192    -32    
-16    64     
32     112    
0      160    
-80    144    
32     192    
-96    112    
-48    -80    
64     -112   
16     752    
624    -432   
-160   160    
-272   896    
-480   320    
208    160    
160    400    
-784   -752   
496    592    
-224   -112   
16     -48    
-128   -64    
112    160    
144    336    
96     -256   
-288   192    
192    -160   
-240   176    
16     -80    
80     288    
16     -176   
-96    64     
96     0      
-64    48     
32     32     
-80    -176   
-192   240    
48     -80    
-16    16     
128    32     
16     16     
48     -64    
64     224    
112    144    
-16    144    
32     -32    
-96    64     
144    176    
-80    96     
32     48     
-16    16     
64     144    
32     -32    
-112   -16    
96     64     
96     96     
64     128    
-128   128    
-80    -176   
32     48     
32     208    
-32    -64    
16     176    
-64    64     
32     32     
80     -48    
112    48     
64     192    
64     128    
48     208    
-80    144    
-16    48     
-64    -80    
48     -16    
-176   -48    
176    240    
-48    16     
-16    144    
16     -48    
32     -592   
32     -80    
-16    -1712  
16     128    
64     -16    
208    208    
-144   80     
-32    112    
224    336    
-32    64     
176    64     
-32    208    
-48    0      
176    0      
-128   -128   
64     -48    
176    256    
48     80     
160    32     
48     240    
16     144    
16     160    
-32    128    
32     -80    
80     32     
48     -64    
48     176    
-64    -96    
0      96     
144    176    
-32    -96    
16     -16    
96     -208   
32     128    
80     96     
-80    32     
-32    16     
96     128    
64     -112   
64     128    
-96    0      
96     128    
0      32     
-16    48     
64     80     
-32    -128   
160    144    
-16    -608   
16     48     
32     -560   
32     64     
80     176    
160    288    
-32    96     
16     160    
-144   32     
240    272    
-16    16     
288    320    
-208   192    
256    -160   
-112   -64    
64     -112   
80     256    
160    -416   
16     144    
-144   -1072  
224    112    
-64    192    
160    -32    
-64    176    
0      112    
64     16     
-48    -192   
80     224    
64     -160   
-32    80     
48     -416   
-224   -464   
368    -432   
-80    400    
-64    -448   
208    32     
-64    16     
160    336    
240    -32    
-176   336    
192    48     
32     -176   
-64    80     
176    -448   
208    112    
-176   -96    
64     64     
-80    -304   
272    320    
80     -128   
-48    80     
80     160    
32     -16    
480    -80    
-256   304    
16     32     
48     -32    
224    -112   
96     32     
16     -48    
-48    -16    
112    64     
128    -32    
144    80     
48     -80    
64     144    
96     -64    
112    -832   
128    96     
160    -96    
32     336    
112    112    
0      16     
-48    -80    
-64    16     
240    -112   
192    -16    
240    176    
-32    208    
320    -1328  
-192   -464   
144    -144   
-64    -304   
32     -16    
-448   2080   
-832   -432   
-288   -752   
-352   -752   
608    128    
-32    -848   
-160   -208   
288    256    
192    -128   
-16    -1392  
32     96     
32     -256   
112    272    
16     -16    
368    -32    
-1104  0      
-64    -144   
128    -192   
128    -320   
-64    48     
192    -192   
-48    96     
288    -1040  
-64    -48    
-160   -288   
144    176    
-32    256    
176    -48    
0      16     
-80    -288   
-128   -48    
-32    -48    
-272   -16    
144    32     
-48    -16    
48     -992   
-160   -480   
144    -1952  
96     32     
176    -48    
64     -16    
-16    160    
112    32     
-96    -96    
-32    -48    
176    96     
64     80     
-528   -208   
192    32     
-112   48     
240    -80    
48     -64    
-64    -608   
272    144    
-112   96     
160    128    
-64    -272   
128    32     
-16    -16    
80     48     
-112   48     
176    0      
-176   -32    
128    -32    
-240   32     
32     32     
-16    112    
208    -80    
0      0      
128    -1392  
-176   48     
144    -48    
112    -96    
-48    96     
32     64     
-112   -112   
64     -112   
-496   -208   
80     -48    
-928   32     
176    -112   
-160   224    
-64    -784   
272    64     
-176   -624   
112    160    
80     48     
-32    112    
-64    -160   
192    32     
-304   -160   
208    -64    
-224   144    
-32    128    
80     48     
-16    -368   
112    -16    
-64    -256   
208    192    
0      -192   
-80    16     
96     160    
96     -32    
-160   192    
-80    -128   
80     32     
-96    -96    
272    192    
-32    -112   
-16    -80    
-160   -336   
176    112    
112    -16    
64     96     
-32    -336   
64     112    
-256   16     
-256   -560   
-336   -272   
-48    160    
160    64     
96     -48    
-480   -96    
32     -144   
-208   -64    
192    -32    
16     400    
144    64     
112    288    
-1088  -272   
-544   32     
-64    -16    
352    240    
176    224    
32     128    
-272   112    
96     0      
-112   64     
-48    -80    
160    32     
-528   -48    
48     112    
-848   -32    
464    -64    
-656   -160   
-384   0      
64     176    
-128   16     
-16    32     
-656   0      
-64    48     
64     48     
112    0      
-16    48     
-64    0      
-352   -96    
0      160    
32     -256   
32     -16    
144    48     
-240   224    
16     32     
-208   0      
-32    192    
-80    80     
48     144    
-1232  -144   
288    224    
-128   -80    
-112   -64    
-160   -112   
64     -64    
-80    -96    
0      32     
0      272    
-176   -96    
-96    -144   
-32    160    
-112   -192   
-64    208    
-16    16     
-16    384    
-208   32     
-368   -128   
16     32     
112    32     
32     272    
-160   -80    
-208   -128   
-32    -16    
-80    16     
16     16     
-32    96     
-16    208    
-80    -32    
64     -16    
-368   144    
16     48     
-752   -48    
-304   -512   
512    -736   
-384   624    
-256   592    
-944   -128   
-368   -1088  
1056   1040   
-64    800    
-208   -272   
-192   -96    
-48    128    
368    -48    
-64    304    
-160   16     
-304   -336   
48     352    
-48    48     
16     -64    
-368   -240   
160    -112   
-16    16     
144    192    
-48    208    
112    -32    
-208   16     
64     96     
128    32     
80     32     
-16    240    
-32    -224   
-192   128    
-512   -176   
192    -80    
-32    224    
16     16     
64     288    
80     48     
-128   192    
64     0      
0      96     
-48    -128   
0      96     
80     -80    
48     160    
-240   0      
-32    -32    
-976   304    
32     304    
64     192    
-64    -32    
64     -80    
-48    80     
-16    128    
16     32     
16     64     
-16    80     
-32    -144   
-176   -160   
-160   112    
-272   -384   
208    272    
-208   -128   
-48    -32    
176    -160   
-64    48     
0      112    
-16    96     
48     48     
-48    160    
64     80     
16     80     
-32    96     
-64    0      
80     96     
-80    32     
96     272    
-144   -112   
32     -48    
240    80     
-64    144    
224    64     
-112   0      
128    32     
-256   -112   
128    -16    
-96    160    
64     400    
-32    272    
-16    416    
32     0      
160    -32    
128    288    
16     224    
-64    48     
-16    -16    
64     128    
-16    -32    
144    176    
-144   32     
32     144    
-208   -80    
80     80     
32     80     
80     160    
-160   -64    
-16    144    
32     48     
176    160    
-96    128    
48     64     
128    176    
-80    -32    
64     80     
-96    80     
192    112    
0      80     
16     -96    
-64    -112   
64     176    
-80    48     
32     -16    
-80    96     
112    272    
224    128    
-112   80     
-128   256    
0      144    
160    96     
-80    80     
96     16     
-16    144    
48     96     
80     96     
-48    112    
112    240    
-32    112    
144    -16    
96     256    
-128   320    
-16    48     
-64    48     
32     -32    
128    192    
-160   -128   
272    160    
-176   64     
576    624    
-560   432    
96     112    
80     176    
80     -80    
160    208    
-16    64     
128    0      
-32    176    
144    144    
-16    304    
-304   160    
448    -416   
-352   96     
96     0      
-48    192    
-208   -32    
112    -256   
112    96     
-64    192    
160    48     
-48    -32    
208    352    
-48    256    
112    352    
64     128    
80     64     
288    48     
-80    160    
48     -128   
128    -48    
160    240    
48     -544   
-176   112    
-32    -656   
112    16     
-80    32     
64     256    
0      0      
0      112    
96     192    
-16    176    
0      -160   
-48    32     
208    32     
160    352    
-64    240    
-160   -48    
160    160    
32     -144   
112    32     
-64    64     
-128   800    
80     1712   
-1456  -656   
368    -480   
208    -816   
-208   -272   
528    -80    
-192   176    
240    96     
304    -176   
-272   32     
208    160    
112    176    
-128   32     
208    -256   
16     128    
80     112    
-16    80     
80     96     
16     128    
-48    -32    
48     128    
64     32     
160    16     
32     208    
80     -176   
-144   192    
64     -176   
80     160    
96     -416   
-16    128    
96     -1536  
0      112    
-80    80     
160    128    
-16    32     
-112   -48    
176    112    
-64    -16    
208    16     
-64    -368   
48     208    
48     -144   
144    112    
48     -464   
0      192    
96     -656   
32     -48    
96     -48    
-144   240    
192    128    
32     176    
32     -16    
160    -32    
-256   208    
208    -160   
0      0      
176    -16    
96     160    
16     16     
-64    64     
112    -160   
-80    160    
48     -32    
128    272    
-160   48     
224    208    
-80    64     
80     -320   
64     160    
32     -256   
96     96     
16     -144   
16     128    
160    -96    
-256   288    
-80    -112   
384    -48    
144    0      
-96    -1136  
-16    -16    
-80    -192   
240    -432   
-80    -16    
80     -480   
112    -272   
-32    208    
-16    128    
48     112    
16     16     
128    160    
-64    -16    
208    -320   
-80    16     
144    -192   
64     -272   
-704   -64    
144    -400   
-80    -96    
128    -272   
128    -48    
-160   -384   
112    96     
32     -16    
176    176    
-144   -16    
176    64     
16     -272   
80     272    
-16    48     
144    -80    
-736   32     
16     -176   
80     -192   
-48    -240   
16     -112   
128    -112   
144    -80    
-64    -240   
48     -192   
176    -528   
-256   48     
96     -32    
112    128    
-32    64     
-208   -48    
32     64     
112    -336   
16     -352   
-64    112    
-32    32     
272    -240   
-64    -288   
-32    -1392  
-112   -80    
48     -128   
256    32     
240    -144   
-112   48     
-256   -64    
-48    -192   
160    -96    
128    -144   
-336   80     
0      48     
272    64     
-48    -288   
-144   -80    
144    -304   
0      64     
112    -64    
80     112    
64     128    
0      96     
-48    -112   
32     -64    
0      -176   
-32    -272   
-128   -80    
112    32     
288    240    
-32    -272   
-128   48     
80     -112   
48     48     
64     -1568  
80     96     
144    16     
96     -224   
96     112    
-160   -160   
-16    96     
16     0      
-272   -160   
192    64     
-1056  0      
80     80     
48     16     
176    -288   
112    352    
48     -848   
176    -144   
-112   -336   
-64    304    
160    16     
-32    -32    
144    176    
48     336    
-192   -80    
160    176    
-224   80     
64     -16    
96     -48    
48     -288   
-32    192    
-32    -272   
176    192    
0      64     
96     -80    
1296   -192   
96     960    
48     320    
48     272    
128    -640   
0      -448   
-720   -112   
336    0      
144    128    
64     -192   
128    384    
-80    -320   
128    16     
-32    -176   
0      32     
-80    64     
-32    -80    
-64    208    
208    320    
-48    -80    
-16    -160   
-1264  16     
80     16     
48     128    
96     -272   
64     -128   
192    224    
-1136  768    
208    368    
-384   -144   
-128   -144   
272    -32    
-48    48     
-32    -16    
-80    240    
-144   -64    
272    336    
-560   256    
144    160    
-192   -416   
-80    80     
0      48     
-800   0      
-80    -32    
-96    48     
-112   -64    
-992   -80    
144    96     
96     80     
-128   -128   
96     0      
-80    144    
-16    -96    
0      -176   
-144   -240   
64     208    
-32    128    
-432   -384   
448    576    
16     -96    
-64    144    
-304   -192   
32     -16    
-656   0      
-16    80     
-64    -32    
-48    144    
-112   -112   
32     112    
-112   -128   
-80    128    
64     80     
-96    80     
16     64     
-160   32     
-96    48     
32     464    
0      304    
-64    192    
32     208    
-240   208    
-112   384    
-208   -304   
112    304    
16     -112   
-80    176    
-64    -80    
112    400    
0      112    
-96    -144   
16     64     
128    16     
32     112    
-464   -96    
-48    80     
-1264  -192   
80     80     
-16    -48    
16     192    
32     0      
-48    0      
-48    -16    
80     96     
64     144    
-96    144    
-16    80     
-112   80     
48     16     
-176   -16    
48     -32    
-224   112    
64     96     
-16    -48    
32     144    
80     112    
0      64     
32     80     
112    544    
16     -112   
-64    -16    
-16    32     
64     64     
0      96     
-128   176    
-32    -16    
-128   -32    
-16    64     
-1808  -32    
80     80     
-176   -272   
96     -32    
-144   128    
192    -192   
-48    160    
32     256    
-96    320    
64     224    
-32    384    
-176   -160   
160    112    
-400   -240   
80     -32    
-1520  -96    
64     160    
32     240    
-176   -32    
-32    -96    
16     -240   
0      -80    
144    256    
-64    96     
80     144    
0      32     
-112   -144   
-80    112    
64     -16    
-64    -96    
64     80     
-64    -352   
160    736    
176    288    
-112   -48    
-48    0      
32     64     
80     176    
-64    96     
-16    -352   
-112   -112   
144    368    
-64    144    
-240   -64    
-16    192    
32     32     
16     -160   
48     336    
208    272    
0      64     
64     320    
256    16     
-176   176    
-16    0      
-160   -80    
80     16     
-192   192    
-32    16     
-80    96     
112    -16    
48     48     
64     48     
32     48     
16     96     
112    16     
-16    192    
0      192    
48     160    
-192   32     
128    80     
-16    32     
32     32     
2496   1120   
-1360  272    
768    224    
-416   496    
1264   -864   
-912   32     
-384   -832   
528    960    
144    -128   
-176   224    
-160   -224   
256    288    
-80    176    
480    -240   
-464   272    
240    -64    
-80    416    
112    32     
-64    160    
128    -48    
-64    144    
80     160    
-160   112    
208    16     
-96    128    
176    -48    
-48    208    
0      -32    
64     112    
32     96     
-64    176    
112    48     
16     144    
16     144    
160    64     
-32    48     
160    480    
16     304    
0      -112   
0      96     
48     96     
112    144    
-64    -32    
0      64     
208    144    
-80    256    
96     192    
-96    -64    
0      192    
96     16     
128    32     
48     208    
-32    144    
128    96     
0      16     
48     160    
-16    208    
16     -96    
96     192    
-176   16     
96     -528   
48     96     
0      16     
64     -16    
32     128    
-32    224    
32     128    
96     -16    
-16    -112   
-32    112    
-192   64     
224    16     
-16    -32    
48     304    
-80    32     
160    -272   
48     256    
256    -320   
192    128    
144    16     
112    192    
-272   112    
176    -16    
112    288    
64     -128   
240    80     
-288   64     
176    -128   
-128   176    
96     64     
48     0      
-16    64     
16     -336   
48     80     
64     256    
-96    -64    
32     -48    
0      -64    
16     32     
32     160    
-32    -16    
64     160    
16     48     
-32    -304   
16     -48    
128    -16    
48     128    
352    -560   
-192   240    
64     -1904  
0      64     
32     -32    
112    128    
80     16     
-80    128    
48     -64    
48     176    
-48    -128   
64     -240   
32     352    
288    304    
-96    16     
48     -176   
-96    112    
192    -688   
-64    144    
48     192    
-64    272    
256    48     
-32    64     
80     112    
-16    192    
144    208    
128    64     
-128   -64    
0      128    
112    160    
96     80     
32     -176   
-48    -96    
96     304    
-64    -160   
192    16     
-96    0      
112    96     
-16    64     
144    96     
112    256    
64     320    
48     240    
48     -560   
128    -32    
-128   -48    
144    96     
-32    -544   
-80    -32    
112    16     
-32    32     
112    112    
16     0      
16     -96    
64     -224   
112    -96    
80     -272   
0      80     
-96    -624   
464    800    
288    384    
160    64     
-304   -576   
208    144    
16     160    
80     224    
0      48     
96     48     
-64    96     
48     0      
64     -2288  
160    96     
112    -1056  
80     176    
-112   80     
64     -304   
128    176    
80     64     
-304   -928   
-80    64     
224    -32    
64     112    
32     -288   
-112   -432   
-1232  -64    
288    0      
64     -112   
304    -1040  
48     80     
-80    -368   
16     -176   
-128   112    
400    1088   
-272   368    
-672   -864   
48     -912   
576    176    
-464   304    
160    -496   
-400   -32    
464    384    
96     80     
48     -160   
80     80     
80     144    
-64    48     
96     160    
-48    -320   
176    -192   
288    224    
48     -208   
48     64     
0      -160   
240    176    
-112   -208   
128    -512   
176    -320   
320    -48    
144    272    
-112   -416   
320    -416   
112    -1008  
-304   -16    
272    -160   
16     256    
-96    64     
288    80     
-144   64     
432    208    
-576   -400   
128    -16    
-448   -288   
176    352    
0      -224   
272    -448   
-208   -176   
-64    -1104  
-176   96     
160    -240   
-96    -576   
96     192    
144    -48    
-176   -160   
176    -80    
-352   112    
16     0      
32     64     
144    -16    
16     -800   
240    272    
400    176    
-224   128    
112    48     
96     -400   
64     -288   
288    -176   
-128   -96    
48     64     
80     16     
-32    32     
80     -80    
-80    16     
48     -160   
-1152  16     
16     16     
80     176    
-80    -144   
224    464    
48     -288   
272    304    
-272   -32    
-160   -400   
112    16     
-16    64     
-544   64     
-16    48     
-544   -64    
176    32     
-144   -368   
16     -80    
128    48     
80     -160   
-32    128    
16     -496   
64     224    
-48    -112   
128    48     
-272   128    
-96    -32    
144    144    
-80    320    
256    320    
-16    304    
-176   -160   
96     -336   
-16    -16    
256    -352   
-32    -32    
80     -96    
-32    -32    
-64    -288   
-48    -128   
144    80     
96     0      
-48    64     
-16    176    
-64    16     
128    -48    
-176   -432   
272    32     
-64    192    
-160   -128   
336    -32    
-144   -496   
-176   -384   
64     0      
-1840  -464   
48     -272   
-48    -16    
96     -64    
96     -832   
-32    144    
16     -16    
-208   -48    
-480   80     
96     64     
-432   -80    
-32    160    
16     160    
-256   144    
-48    192    
48     16     
-48    -64    
-128   112    
-128   -176   
80     16     
-304   -96    
32     -16    
-32    -480   
-224   -144   
112    192    
-144   -176   
64     48     
32     128    
-176   128    
0      176    
-16    -144   
-96    64     
-144   0      
-48    -16    
-1184  -112   
80     -64    
16     16     
144    0      
-128   -160   
96     48     
96     -96    
-256   -32    
128    128    
-64    144    
-16    -48    
-32    80     
-128   48     
64     16     
-48    224    
-144   -112   
160    16     
96     32     
64     96     
-112   176    
-64    -288   
272    -32    
64     112    
-16    16     
-112   80     
-112   48     
-80    144    
-160   64     
16     16     
128    -48    
-80    80     
-64    112    
-480   -128   
64     144    
-64    -32    
64     -64    
112    176    
64     64     
-80    224    
-48    0      
1600   2576   
-1600  352    
544    784    
-176   352    
-128   -352   
208    32     
-784   288    
-64    192    
288    384    
-304   -448   
0      128    
-128   176    
336    -144   
-320   368    
0      -208   
-128   288    
160    -80    
-96    128    
-96    -144   
-32    48     
-112   -80    
-112   176    
-384   -32    
80     240    
-112   -320   
-288   -160   
80     64     
160    80     
16     -16    
-144   240    
160    32     
48     48     
-144   128    
-64    -64    
-48    160    
32     0      
112    240    
-176   -32    
-192   96     
-656   -176   
112    64     
-64    144    
48     224    
80     0      
-112   64     
128    80     
-208   80     
16     48     
-112   192    
272    -32    
-208   32     
16     128    
32     -80    
-112   144    
160    64     
0      0      
64     112    
-16    80     
-64    64     
96     160    
-160   16     
96     80     
112    176    
-240   0      
192    32     
-240   32     
48     80     
-16    176    
64     48     
80     80     
0      112    
32     128    
48     -32    
48     128    
0      224    
192    48     
224    480    
80     448    
400    80     
64     112    
-128   0      
128    48     
-48    80     
-176   -176   
112    -16    
-320   176    
16     160    
-80    16     
192    -96    
16     -32    
-16    144    
-64    144    
48     160    
-144   176    
64     144    
-176   0      
80     208    
-160   64     
-64    -32    
80     176    
-96    96     
112    -144   
-32    -16    
144    32     
-144   0      
112    48     
16     208    
-112   80     
0      336    
-16    176    
-64    16     
96     16     
32     32     
-16    144    
96     32     
80     -32    
-96    96     
48     96     
32     144    
80     240    
0      672    
208    496    
112    -80    
-368   16     
272    96     
-48    -64    
128    192    
-128   -48    
0      112    
256    96     
-176   96     
48     112    
-32    -128   
64     128    
96     160    
96     -48    
64     208    
0      256    
-160   -480   
96     304    
-16    -240   
96     -560   
144    208    
-48    -160   
0      160    
32     224    
128    192    
32     192    
32     352    
-112   16     
176    80     
-144   -32    
128    80     
0      256    
48     112    
288    1040   
-576   -496   
128    -96    
-16    272    
192    128    
-32    224    
48     -32    
80     96     
16     48     
96     48     
16     144    
-240   368    
-64    448    
-208   -32    
192    -48    
288    224    
-48    -64    
112    48     
-192   -160   
160    48     
112    192    
-64    32     
240    96     
-80    16     
160    256    
-64    176    
-16    16     
0      144    
160    32     
-32    -336   
144    256    
-112   -64    
32     16     
-16    -240   
192    80     
48     16     
-112   48     
128    144    
16     96     
432    -240   
64     304    
-80    -80    
-96    80     
-480   480    
-576   1200   
-720   496    
192    -256   
224    96     
752    320    
-672   240    
416    -880   
112    0      
208    416    
-448   -128   
32     32     
80     32     
176    48     
144    112    
144    416    
-80    -80    
448    128    
-480   -128   
-16    -336   
-48    -528   
336    -80    
192    320    
-32    -16    
208    160    
-64    -32    
192    144    
16     144    
-544   224    
-256   -448   
192    -144   
-128   -112   
336    336    
224    -672   
128    32     
256    -272   
352    224    
192    64     
32     96     
32     64     
-16    48     
144    16     
0      64     
64     -560   
80     -64    
224    192    
240    -416   
-224   -16    
64     -208   
256    384    
256    272    
-192   80     
176    -64    
32     -288   
32     496    
96     80     
176    160    
416    928    
-256   432    
-144   208    
-80    -320   
-32    -432   
144    144    
128    32     
-112   176    
-96    -64    
240    128    
0      -80    
80     128    
96     32     
192    -144   
80     -80    
128    -384   
-80    -704   
-16    -176   
-32    -880   
-256   -544   
384    -1744  
-160   176    
-176   96     
-48    -688   
-32    64     
320    112    
0      -1056  
-112   64     
32     -304   
-16    48     
-208   -688   
384    -176   
-256   48     
208    0      
-32    0      
-16    -96    
112    -64    
160    -1280  
176    48     
-64    304    
-16    -16    
-80    -576   
208    128    
224    96     
-176   0      
-208   -176   
208    -208   
48     -80    
32     -128   
32     -336   
-16    -672   
176    -32    
112    -1232  
48     128    
64     64     
-160   -48    
160    -32    
-208   48     
208    80     
48     48     
-288   -400   
-144   0      
-96    -128   
16     -160   
352    -320   
-128   -128   
0      -96    
224    -320   
32     176    
-32    -2432  
112    32     
-144   -224   
96     32     
16     80     
48     16     
192    224    
-64    160    
16     -80    
-112   -80    
-560   -192   
112    48     
48     -64    
224    -208   
-64    -48    
128    -240   
144    48     
-64    -80    
112    256    
80     -64    
96     -80    
-240   -144   
208    -64    
-64    112    
32     0      
-48    48     
0      -112   
-208   32     
96     -48    
80     -32    
32     -16    
-64    208    
80     -448   
112    80     
-96    64     
112    -32    
-112   -80    
112    16     
-16    16     
-48    -128   
-256   -48    
0      -224   
-1520  -48    
32     -240   
64     64     
112    -272   
144    128    
-16    -688   
-112   208    
-240   -128   
320    -48    
256    -32    
16     -16    
-128   32     
-128   64     
-64    -64    
96     48     
-112   80     
160    -32    
128    240    
304    -432   
160    256    
-80    -352   
160    80     
-64    144    
-32    -64    
-32    16     
224    -144   
-272   -112   
96     -96    
-16    208    
-16    64     
352    48     
1280   2864   
-1264  944    
-864   -592   
704    880    
-80    -272   
96     80     
-608   160    
-352   -176   
32     -144   
-272   160    
64     -480   
-416   528    
336    -560   
-16    496    
-480   -592   
-224   160    
272    -128   
-128   208    
112    -176   
80     272    
-336   -144   
-112   224    
-416   32     
-96    -48    
64     -128   
-48    112    
224    112    
-128   -16    
0      48     
128    -16    
-720   -48    
48     -16    
-32    192    
64     0      
-112   176    
-80    -128   
-64    176    
-160   -48    
-112   144    
-400   -128   
0      96     
-128   -16    
32     128    
80     -144   
-32    -32    
-64    -32    
144    208    
-16    -208   
-64    32     
-224   -128   
80     16     
-160   48     
160    32     
-128   128    
-432   -64    
64     32     
-688   48     
-16    -64    
96     0      
-32    96     
-160   -224   
144    176    
-208   -272   
64     144    
-80    160    
224    48     
32     128    
-48    0      
64     64     
-160   -16    
-64    -16    
-112   16     
80     80     
16     112    
-32    -48    
-16    0      
-96    -32    
96     -16    
-160   144    
-112   80     
-64    -240   
48     144    
-160   96     
96     624    
-224   64     
-48    -256   
32     32     
-80    -64    
-240   -144   
0      352    
80     96     
-80    -96    
-32    48     
-160   160    
112    -16    
-96    -48    
-16    128    
16     -144   
-192   -32    
192    256    
-32    32     
-176   -80    
16     80     
-496   -160   
64     176    
64     -64    
256    528    
64     160    
-112   64     
80     176    
144    176    
-48    32     
48     64     
-32    80     
-112   -16    
64     96     
-160   0      
160    -64    
-272   -48    
32     144    
-112   -48    
48     16     
80     176    
-80    16     
0      80     
-48    0      
208    288    
-240   128    
176    80     
-112   64     
-112   80     
-32    64     
112    48     
-112   -32    
32     128    
48     160    
-208   -512   
-64    -144   
-144   -64    
96     -48    
-96    192    
32     112    
0      176    
-144   48     
32     16     
-96    80     
16     -112   
32     -16    
-256   -80    
48     112    
-32    80     
-48    144    
176    32     
-80    96     
48     176    
-176   16     
48     -48    
-64    112    
208    16     
-112   144    
-96    96     
-16    -144   
0      32     
144    -32    
80     160    
-32    96     
-80    -64    
80     192    
112    112    
32     48     
-304   32     
128    48     
-16    160    
96     32     
-48    -16    
32     128    
-272   192    
0      -80    
0      160    
0      48     
144    112    
-192   48     
112    16     
0      48     
160    64     
-192   96     
0      -96    
0      160    
-64    192    
-224   -224   
96     176    
-16    144    
96     96     
96     32     
-16    272    
16     -112   
80     256    
128    80     
144    240    
832    1536   
-112   576    
-400   -128   
-480   -32    
-144   -32    
432    -304   
336    0      
-304   800    
304    -608   
-16    208    
112    -128   
32     560    
-320   -176   
96     320    
144    -80    
240    64     
-464   -176   
160    128    
-144   160    
144    -16    
-256   384    
-160   -80    
-16    208    
-48    -336   
-80    192    
96     0      
64     480    
288    896    
-192   -480   
48     -208   
-256   -128   
144    32     
-48    192    
80     48     
176    352    
-80    0      
112    -208   
-208   -144   
112    -320   
192    416    
-96    208    
-16    144    
-128   -160   
160    256    
80     272    
112    -144   
-32    64     
208    -48    
-144   128    
-112   -32    
16     -16    
48     48     
112    256    
-128   -96    
112    96     
32     48     
16     16     
32     48     
-32    80     
112    112    
64     96     
-16    176    
-16    -48    
128    -160   
-96    112    
-16    -64    
80     176    
0      208    
288    -256   
-176   464    
0      -1712  
160    64     
16     -80    
128    96     
-160   -80    
32     80     
48     -464   
32     128    
-80    -64    
208    224    
-48    64     
112    -128   
0      -288   
16     -480   
224    80     
16     -112   
304    480    
-208   416    
16     128    
160    0      
32     112    
32     32     
0      64     
64     -32    
144    176    
96     256    
32     0      
96     112    
-32    -64    
64     -16    
32     -144   
16     0      
-80    -624   
160    48     
-32    -272   
176    64     
-144   128    
16     0      
64     -96    
32     128    
176    304    
-32    0      
80     192    
0      -16    
32     96     
-80    96     
208    160    
48     -1328  
32     208    
-80    -368   
176    96     
80     144    
288    384    
48     128    
-48    -112   
-224   336    
48     128    
256    192    
-96    -288   
80     96     
0      -720   
304    320    
-96    -48    
448    64     
-304   -96    
80     112    
-16    144    
336    64     
-112   -48    
-160   -400   
224    272    
224    -112   
-32    144    
-176   -192   
48     0      
-32    -176   
128    176    
48     64     
272    144    
-208   -208   
112    128    
-64    -16    
48     64     
208    144    
-64    -112   
16     -592   
-16    -192   
0      32     
224    336    
-256   32     
176    -96    
32     16     
-16    -256   
160    192    
-192   -160   
240    -1024  
112    384    
0      -416   
48     -432   
96     -112   
112    -464   
-64    -224   
64     -480   
112    -64    
-32    192    
80     32     
16     64     
96     -112   
32     -224   
-16    48     
160    -80    
96     96     
0      -368   
48     -96    
-64    -16    
80     176    
-48    -16    
224    -320   
0      16     
112    -352   
-80    -80    
112    160    
48     128    
112    96     
-96    80     
272    -64    
-96    96     
-48    -64    
480    -2496  
-1360  -1664  
528    -208   
-128   -144   
1184   -32    
-496   544    
-16    -1024  
288    -80    
176    -464   
-176   -176   
-192   256    
176    -416   
-240   688    
272    -592   
-128   512    
16     -464   
-240   432    
96     -320   
160    432    
-144   -144   
208    -80    
-112   32     
96     64     
48     -704   
144    16     
-64    -32    
144    16     
16     96     
96     -112   
-64    -16    
96     -208   
-192   128    
96     -240   
80     96     
-16    -256   
64     144    
272    64     
-320   112    
80     -240   
-112   80     
112    0      
128    160    
-64    -32    
32     -32    
-96    0      
96     -240   
-128   -80    
-80    32     
144    -96    
32     -16    
80     0      
64     -432   
-48    -96    
96     -1040  
80     96     
64     -336   
-16    160    
-16    16     
48     -256   
-96    -96    
128    80     
0      112    
-192   208    
-512   -80    
128    -160   
-944   16     
64     -112   
96     128    
-16    -160   
112    224    
-32    -384   
144    16     
16     -48    
-16    -96    
-48    64     
0      128    
48     384    
32     -224   
0      -400   
96     64     
224    160    
176    144    
-80    96     
112    -320   
-48    256    
240    -304   
32     16     
-224   -16    
64     16     
-176   -368   
96     32     
-224   -128   
80     -192   
0      224    
-32    48     
16     -208   
-32    -464   
32     80     
112    -96    
-48    96     
-96    96     
-32    0      
144    96     
64     48     
-128   16     
48     48     
-144   -176   
176    16     
-16    352    
16     128    
16     -64    
-672   -128   
48     192    
-1200  -128   
-112   64     
48     144    
-320   -16    
48     160    
-800   -16    
-32    32     
-112   144    
-96    0      
80     48     
-32    224    
192    -160   
-16    0      
-448   -176   
224    16     
96     -112   
-528   176    
48     32     
-16    -48    
-256   16     
-432   32     
32     -80    
-160   160    
160    16     
-224   208    
-112   96     
-192   -160   
-16    -112   
96     -64    
-16    192    
32     -144   
-80    80     
-16    -32    
32     352    
-112   -176   
128    80     
-48    208    
-64    48     
-144   -128   
-528   -128   
16     -144   
16     -112   
352    160    
-80    32     
304    176    
-304   64     
-16    -48    
160    64     
-96    192    
80     16     
-336   160    
-16    -80    
-208   64     
304    -320   
-560   144    
-480   128    
288    -208   
-208   224    
176    -288   
224    48     
-288   192    
16     -32    
32     80     
-16    48     
32     80     
-224   -16    
0      112    
-48    16     
-112   0      
64     32     
32     128    
-1472  -144   
-176   -144   
400    48     
16     176    
32     160    
-112   16     
48     80     
-16    0      
-128   384    
-256   0      
-192   0      
160    -64    
48     160    
-96    48     
-640   -1936  
816    752    
-112   16     
192    -560   
-192   -400   
160    -464   
224    512    
272    240    
80     656    
-304   -464   
96     224    
32     240    
-48    -80    
-176   208    
48     -96    
-176   160    
-112   384    
-464   -112   
64     -256   
-16    96     
-48    -48    
-48    64     
32     48     
80     -48    
-112   -176   
16     32     
80     144    
32     176    
-16    80     
-192   -96    
128    112    
-144   16     
80     112    
16     144    
-144   32     
32     32     
16     32     
32     176    
96     32     
48     64     
-224   80     
176    -64    
-112   208    
128    112    
-112   -80    
-128   -32    
64     112    
-80    176    
112    96     
80     -112   
32     240    
-96    96     
128    0      
-128   -80    
160    0      
-64    48     
80     176    
-160   160    
96     32     
-64    -48    
-80    112    
32     48     
-64    112    
16     32     
0      208    
16     -16    
48     144    
-32    32     
32     112    
64     112    
-96    64     
112    -16    
-96    48     
-112   128    
-96    -80    
16     80     
80     240    
192    -64    
-32    16     
-32    112    
-64    144    
32     144    
-32    80     
208    112    
-160   272    
-16    320    
64     -96    
-16    32     
112    368    
-80    -128   
208    192    
-48    112    
224    208    
-208   144    
32     0      
32     32     
16     144    
-112   80     
160    160    
-32    -48    
-32    16     
128    176    
-48    96     
80     96     
-96    64     
80     -96    
96     32     
-96    48     
112    176    
-16    -16    
48     0      
64     208    
16     96     
176    160    
-96    176    
32     0      
64     240    
-224   16     
464    272    
-336   -272   
160    -1552  
-128   96     
144    128    
192    32     
-112   80     
48     192    
16     208    
112    32     
-32    64     
0      128    
176    96     
-112   112    
32     -144   
-48    176    
320    128    
224    -752   
-272   160    
176    32     
-160   128    
-32    64     
320    48     
-16    112    
-16    160    
0      -16    
-16    16     
-32    32     
112    16     
32     -144   
0      16     
32     208    
96     -112   
16     80     
-48    -16    
0      112    
160    -32    
80     160    
-48    48     
128    160    
-144   -240   
272    64     
-112   96     
32     192    
-64    -64    
32     -208   
128    96     
96     -464   
-64    80     
16     -2240  
-16    64     
16     -16    
32     96     
-64    256    
16     -96    
-32    0      
320    272    
-16    0      
144    0      
0      128    
16     -288   
240    208    
-64    64     
-16    96     
-32    -112   
80     -160   
176    -32    
224    240    
-96    -48    
48     240    
-144   64     
48     0      
144    96     
48     16     
80     96     
128    -240   
-80    304    
-144   -272   
336    -48    
96     -608   
160    224    
-800   -1472  
192    -416   
-64    -288   
96     -288   
-880   688    
336    -576   
-48    272    
672    368    
-112   160    
-112   -640   
-176   336    
128    -128   
320    304    
-192   -560   
288    -32    
-16    -896   
0      128    
224    320    
96     176    
-16    32     
96     208    
-16    224    
96     48     
-32    96     
96     -352   
0      80     
32     16     
112    128    
0      -256   
80     80     
32     -48    
112    224    
-144   128    
128    32     
-128   -16    
336    144    
-32    144    
48     -112   
0      160    
64     -128   
32     48     
0      -160   
176    160    
32     -160   
-16    96     
16     192    
0      112    
48     64     
160    80     
-144   80     
160    -192   
32     80     
16     -80    
80     -656   
32     -208   
112    16     
0      -112   
80     144    
176    32     
112    544    
-80    -800   
0      -336   
-80    -96    
192    -1696  
16     240    
-16    -288   
176    -528   
-96    -224   
128    -160   
-48    -48    
32     -2144  
64     16     
160    176    
-48    -32    
32     48     
-16    -16    
-64    -736   
16     -192   
-320   -240   
-96    -208   
-288   -112   
-128   16     
304    -192   
128    144    
-96    32     
48     -64    
144    -208   
16     -528   
16     -160   
32     -80    
16     -16    
208    32     
0      240    
-80    -176   
112    32     
-288   -112   
224    -112   
-544   -48    
48     48     
48     0      
48     -160   
96     -80    
64     -192   
0      -32    
112    -656   
128    96     
80     -240   
0      32     
112    208    
32     -80    
64     -16    
-80    16     
16     16     
160    16     
-64    -64    
96     -192   
-48    -336   
176    -288   
-192   64     
128    -256   
-96    160    
160    16     
96     32     
-128   -96    
144    240    
0      -48    
384    112    
-656   208    
96     -288   
64     -80    
-240   -48    
64     0      
80     16     
-80    -64    
176    -720   
-112   128    
96     224    
-128   -224   
464    160    
-272   112    
112    -64    
-160   -192   
-416   0      
320    32     
-176   32     
16     0      
208    -48    
112    -64    
16     128    
64     -464   
-16    64     
208    -560   
-32    80     
0      -64    
-64    -368   
192    384    
-128   -208   
80     -96    
-208   -256   
320    192    
-48    -128   
-1040  112    
-48    -416   
-64    -32    
256    -304   
64     256    
112    -1024  
272    16     
-160   144    
144    -96    
-528   -64    
320    -48    
-80    128    
320    208    
-864   -176   
384    -304   
-288   256    
64     -256   
96     -112   
144    -320   
432    288    
192    -576   
-336   208    
-224   -80    
128    304    
96     144    
48     224    
-128   -112   
256    64     
-240   -96    
160    -128   
-16    48     
96     -16    
0      224    
-16    -160   
-240   128    
-144   -112   
16     32     
-336   -2512  
0      -1296  
416    -352   
416    192    
608    -176   
-96    80     
176    512    
-288   336    
-416   -96    
-416   -368   
96     32     
-560   -208   
32     -16    
48     32     
-48    96     
-16    16     
-1136  32     
-144   48     
-592   -48    
64     112    
64     144    
-144   64     
-240   -256   
32     -112   
-496   -432   
128    160    
-208   64     
0      -64    
-16    80     
-112   48     
128    48     
-224   16     
-160   0      
-96    96     
16     64     
0      96     
-96    80     
-208   32     
48     -48    
-64    32     
96     80     
-64    96     
-96    -80    
32     160    
-192   -16    
16     16     
-144   0      
32     144    
-320   -160   
304    160    
-1008  16     
208    112    
-192   -16    
224    128    
-96    -32    
16     0      
160    -112   
-208   96     
-48    -96    
128    16     
-288   144    
80     64     
48     96     
-352   -16    
32     -48    
-416   112    
-48    96     
160    16     
128    48     
-32    -80    
0      112    
32     64     
16     -32    
112    112    
-144   176    
-16    0      
32     48     
128    -48    
-112   -32    
0      64     
-64    128    
-80    208    
-400   -128   
160    -80    
0      -192   
-96    256    
16     320    
-144   0      
288    64     
-288   16     
96     128    
-48    32     
32     112    
0      144    
-112   -96    
304    -32    
-240   192    
-416   -80    
80     128    
-32    -240   
64     0      
-64    96     
32     48     
-64    64     
48     160    
-144   -144   
64     32     
-80    160    
48     32     
-48    -64    
-256   -112   
64     176    
-208   -144   
64     240    
-64    128    
176    224    
48     32     
-256   128    
-16    -64    
48     96     
48     160    
80     160    
192    144    
-288   0      
48     160    
-192   -272   
-48    -16    
-80    112    
0      32     
176    128    
16     48     
-48    112    
0      80     
16     80     
-208   32     
144    160    
-16    -32    
-112   160    
-32    -16    
80     224    
-96    48     
-16    176    
-224   -64    
-16    -32    
-48    0      
-64    144    
128    160    
-96    -32    
176    16     
-96    128    
0      80     
64     0      
-80    64     
-144   80     
48     32     
64     64     
-176   112    
144    -112   
-224   32     
96     256    
16     112    
64     48     
96     112    
-16    -64    
-48    0      
112    304    
-64    0      
192    112    
-96    -80    
32     80     
-160   0      
112    256    
128    240    
128    -64    
-128   48     
32     64     
48     0      
64     32     
80     48     
-48    -16    
96     240    
80     112    
-16    48     
-16    0      
128    160    
-32    96     
0      96     
-64    -32    
80     32     
112    160    
0      64     
80     32     
0      64     
96     144    
-48    336    
112    32     
-64    0      
-32    224    
-736   -2768  
720    -432   
-1440  -176   
848    -32    
192    128    
-176   -592   
400    -688   
-16    -32    
608    384    
-368   -128   
512    368    
-48    160    
96     -144   
-128   0      
64     -16    
0      16     
80     112    
224    752    
160    -496   
-96    -192   
-64    -240   
96     160    
96     192    
80     80     
48     -16    
16     -160   
0      160    
-32    288    
64     0      
-16    -80    
336    192    
-112   128    
0      -64    
-48    -240   
128    224    
144    176    
-80    -400   
32     -112   
-64    -32    
240    112    
-64    112    
48     48     
-16    192    
144    -208   
32     32     
0      -80    
16     -16    
16     64     
112    -128   
-144   -32    
80     -32    
-16    96     
64     128    
192    448    
-128   144    
32     144    
64     -32    
176    160    
128    240    
64     224    
-128   -80    
64     0      
64     96     
-128   -176   
192    16     
-272   -1792  
176    144    
-16    128    
32     144    
64     128    
112    128    
-16    16     
64     144    
-32    32     
128    304    
-128   48     
96     32     
96     656    
80     -240   
16     176    
-144   -1392  
176    0      
-96    96     
16     64     
16     48     
0      -32    
80     0      
-96    176    
-64    -48    
144    144    
16     48     
176    -112   
16     208    
0      -176   
112    128    
-48    -176   
96     96     
80     -416   
-32    -64    
80     -80    
32     96     
112    96     
96     112    
-80    112    
64     16     
112    128    
0      -112   
32     -80    
144    16     
-16    160    
96     -80    
64     80     
16     64     
144    144    
-16    112    
32     96     
-16    0      
96     96     
-16    80     
128    -448   
-80    0      
32     -368   
176    336    
144    32     
-64    64     
-192   -432   
80     32     
272    -208   
-128   368    
-32    64     
48     64     
-48    -224   
176    400    
0      320    
32     -304   
160    128    
-144   -32    
320    256    
272    -384   
-160   -128   
160    -16    
112    192    
-80    64     
-64    144    
192    224    
16     -2880  
112    224    
0      -2416  
224    -960   
64     112    
128    -704   
64     -240   
80     288    
80     -160   
96     240    
-160   16     
272    -144   
16     -16    
240    -736   
48     128    
-32    -592   
-192   16     
-96    0      
32     32     
32     112    
96     -96    
192    224    
-80    -2224  
80     -304   
352    288    
64     -80    
48     64     
160    -336   
64     -272   
0      160    
160    -96    
-176   0      
-32    112    
320    -816   
224    -48    
64     -192   
-80    64     
160    160    
64     64     
16     -1408  
112    -208   
16     -64    
16     -112   
160    48     
112    240    
32     16     
32     -80    
-32    -176   
192    -64    
-704   16     
144    -256   
64     112    
128    -384   
-32    448    
-224   272    
-112   800    
880    -224   
-432   1296   
-384   112    
160    288    
-304   32     
608    -432   
-528   -192   
16     -144   
-64    96     
-32    -144   
160    -128   
16     -144   
80     -16    
32     -208   
-224   -32    
96     -560   
128    32     
0      -192   
0      16     
32     48     
80     64     
-48    32     
-96    16     
48     240    
80     -16    
-320   -128   
96     -16    
160    16     
64     32     
-32    0      
128    -224   
48     160    
112    -80    
-96    16     
-48    -240   
112    48     
32     192    
240    -80    
-304   -80    
96     -80    
-64    -32    
208    48     
-256   160    
224    -16    
-112   64     
96     -496   
144    32     
-112   -1072  
304    48     
-224   80     
128    -224   
-16    -48    
-16    -16    
-128   -64    
80     16     
-176   48     
128    0      
-624   -128   
32     -480   
-16    16     
80     -288   
0      112    
80     -1088  
160    -224   
-256   128    
-64    -176   
-48    -32    
0      208    
-160   -112   
304    32     
-288   16     
96     -96    
-96    -32    
80     80     
-128   16     
128    -16    
-32    80     
-176   -64    
96     -208   
-96    128    
-48    -240   
128    -80    
-32    64     
-16    160    
192    0      
-384   80     
128    0      
64     128    
-64    -96    
224    32     
-848   -240   
160    -128   
-128   144    
-1296  192    
-192   32     
368    -32    
-240   0      
176    48     
-272   -32    
64     -80    
-32    96     
-128   64     
32     0      
-224   -64    
-288   16     
-112   -192   
-288   -64    
32     0      
-112   112    
96     144    
-208   16     
-176   16     
-464   -112   
-112   48     
240    96     
112    96     
-528   -112   
-48    16     
-288   -176   
-160   80     
192    0      
-32    112    
-64    32     
-128   48     
-112   16     
-240   -224   
0      0      
-512   48     
96     144    
80     32     
128    144    
-48    80     
-16    32     
96     16     
-128   240    
240    -112   
-192   16     
-192   0      
-96    32     
96     80     
-224   128    
48     -64    
-224   32     
48     48     
-880   80     
-176   -112   
-32    -176   
-16    -16    
48     -112   
48     112    
48     32     
80     176    
-96    32     
16     80     
16     176    
-16    224    
-16    32     
-16    32     
-64    -64    
-624   -80    
80     176    
0      16     
64     -96    
32     -96    
0      80     
96     304    
-272   -336   
208    224    
48     -432   
16     304    
32     176    
-96    144    
-160   -112   
256    80     
-128   -144   
-80    0      
-944   224    
-48    -144   
96     -160   
16     176    
-144   48     
-128   192    
48     -240   
-32    16     
-32    144    
-80    -48    
32     48     
-80    0      
96     -16    
-32    -32    
96     80     
-608   -48    
-112   192    
16     -64    
-32    160    
32     96     
-720   -2192  
896    592    
-912   -512   
896    -384   
240    1408   
-192   -240   
-336   64     
592    -112   
-32    352    
-16    -336   
-336   160    
-64    224    
224    -16    
32     320    
-16    -96    
-208   -64    
224    160    
-48    -480   
224    112    
80     224    
16     -32    
-32    160    
-64    160    
0      -144   
-80    80     
-288   -80    
48     -32    
-80    96     
0      160    
48     176    
-192   -48    
64     80     
160    160    
-80    48     
-192   16     
0      48     
-80    432    
160    384    
-288   96     
-48    -48    
-48    -96    
32     48     
-112   96     
128    0      
32     32     
-16    128    
48     96     
32     -96    
176    192    
-128   -304   
128    288    
-144   -64    
208    144    
-80    -64    
-112   192    
160    128    
64     112    
272    432    
352    528    
-176   -288   
192    192    
-256   64     
80     112    
-160   176    
64     -64    
304    -224   
-96    224    
-16    96     
112    -64    
-176   80     
64     112    
160    32     
-16    112    
16     64     
208    32     
32     128    
-80    80     
-368   -144   
576    192    
96     416    
160    480    
-80    48     
-128   -48    
-112   160    
-48    80     
0      208    
32     -80    
32     256    
-16    -80    
112    272    
-112   0      
112    -16    
96     -32    
128    240    
-160   16     
80     -96    
-64    64     
192    -32    
16     0      
-112   -128   
144    288    
32     96     
32     48     
-96    112    
80     32     
256    160    
-176   -48    
192    288    
-160   64     
192    64     
-32    192    
-64    48     
96     32     
-96    64     
112    -1616  
128    176    
0      0      
-16    -80    
-96    -32    
48     -80    
160    144    
32     16     
-128   80     
16     176    
0      48     
64     608    
-288   -192   
304    16     
-224   -96    
32     -1184  
96     -32    
96     432    
16     -368   
64     80     
96     304    
-16    192    
-64    208    
96     -240   
-176   -320   
64     -144   
-16    320    
96     -16    
-80    0      
64     160    
112    0      
-160   0      
192    -16    
-48    128    
160    352    
-176   32     
160    80     
-64    80     
0      96     
80     240    
32     64     
16     -128   
-208   -160   
32     -96    
-80    -256   
-48    -416   
208    112    
16     -2608  
32     48     
-80    16     
48     224    
128    -16    
-416   176    
176    336    
0      32     
-144   -400   
144    112    
96     0      
16     -112   
272    80     
80     -272   
80     32     
0      -528   
-32    48     
160    -1616  
-32    16     
64     160    
16     64     
-16    -16    
0      352    
48     -96    
192    112    
144    96     
176    -64    
-80    208    
48     -48    
32     128    
144    -672   
0      64     
112    -96    
-96    112    
272    -224   
80     320    
-80    176    
-448   -928   
560    736    
-1024  -80    
848    -608   
32     -16    
96     -336   
256    -464   
-32    176    
128    256    
176    256    
-96    -960   
-16    192    
16     0      
224    112    
-48    144    
16     80     
48     192    
32     -592   
48     -16    
128    -208   
64     96     
144    -80    
16     288    
96     -496   
-48    -16    
128    -1984  
-16    96     
64     160    
144    256    
-32    -80    
160    224    
0      160    
80     -112   
-112   96     
336    160    
16     128    
208    -32    
-256   256    
160    -96    
0      0      
80     80     
-80    192    
112    48     
-16    -1584  
48     -32    
-1920  -160   
80     -256   
16     0      
-112   -512   
448    64     
-208   -1312  
256    -160   
-80    160    
160    -32    
16     80     
-16    -192   
192    -992   
-128   128    
368    -416   
-128   304    
-368   -144   
352    -176   
-80    144    
-32    -352   
80     -272   
128    -16    
-144   16     
144    144    
80     -160   
192    160    
-144   96     
112    -512   
64     128    
64     -144   
128    176    
-32    96     
64     -224   
208    64     
-48    -208   
176    -32    
-64    -304   
32     64     
176    -352   
-96    -240   
256    -800   
16     96     
-16    -304   
288    272    
-288   -48    
288    -112   
-240   -96    
-16    -48    
-496   16     
48     -176   
112    128    
-128   -288   
160    128    
128    -624   
-96    16     
80     -688   
32     160    
64     -16    
160    192    
-96    -464   
-16    -144   
-240   -176   
112    48     
-112   -144   
-128   -288   
48     -48    
176    -16    
96     -224   
32     -592   
48     64     
96     -640   
128    80     
-64    -304   
-16    112    
48     160    
48     -96    
-144   -144   
96     16     
-160   64     
96     -208   
176    -48    
64     -368   
-16    -80    
48     -304   
224    320    
64     -144   
-16    48     
-32    32     
272    112    
-160   32     
208    0      
-96    -144   
-192   -32    
-304   -64    
320    -112   
-336   -16    
-160   -160   
-624   672    
64     0      
-80    -112   
-96    -1104  
48     256    
208    -1040  
240    432    
-304   -400   
0      -32    
-96    64     
160    16     
-160   0      
64     16     
-32    64     
304    496    
-288   -288   
96     -256   
96     288    
-128   -336   
128    -16    
-160   160    
0      -96    
-128   -112   
112    -96    
-32    0      
288    464    
-320   -80    
64     16     
-16    -16    
272    176    
-112   -16    
240    -288   
144    96     
-32    16     
-16    -64    
-64    48     
224    48     
-176   -16    
64     32     
-32    32     
160    112    
-112   48     
128    -240   
-192   -112   
-16    -64    
-272   -64    
-320   -272   
0      112    
-144   -112   
-48    128    
-272   32     
80     64     
-144   32     
-192   224    
-144   -128   
80     112    
-128   96     
-272   544    
-1376  304    
-608   1152   
-256   -208   
-48    -368   
208    320    
-160   -672   
-400   272    
128    192    
192    -208   
-464   128    
-128   32     
16     480    
-1440  -48    
16     208    
112    -16    
-16    272    
-112   -176   
320    544    
-288   -48    
128    128    
-112   -256   
80     -16    
-32    -80    
-80    -128   
-48    -144   
-288   224    
-256   112    
-48    0      
-80    176    
112    320    
-16    -96    
96     -160   
16     64     
-96    -144   
96     224    
48     256    
-160   -240   
352    -160   
128    -16    
-160   -128   
80     192    
-160   160    
192    64     
-32    -16    
-128   -240   
48     64     
-32    400    
16     -320   
-256   -32    
-16    -64    
176    336    
-208   -192   
128    -272   
32     80     
64     48     
16     -96    
-304   -240   
96     112    
400    416    
-528   -80    
176    144    
80     -112   
-32    -48    
256    256    
0      16     
96     -112   
-304   0      
-176   -64    
192    112    
-144   96     
0      128    
0      48     
-144   -64    
-160   -16    
-208   16     
80     144    
-1152  816    
160    352    
96     64     
-432   16     
352    0      
-112   64     
0      144    
-160   96     
0      0      
16     176    
192    400    
-240   80     
-400   -480   
64     -96    
288    384    
-176   144    
-128   208    
-80    -96    
-48    -128   
-64    -160   
96     112    
-16    96     
96     48     
-96    48     
-112   -16    
96     64     
48     64     
16     112    
-272   -64    
32     -48    
-400   -144   
-112   -304   
32     192    
16     96     
-32    -80    
-240   -160   
16     96     
0      144    
48     0      
48     224    
48     128    
-96    -32    
-64    -192   
-16    112    
-32    160    
-416   -112   
240    112    
-80    176    
0      64     
160    336    
-192   -16    
240    -48    
-32    208    
112    128    
-16    48     
0      272    
80     -208   
-144   176    
-16    32     
144    96     
-128   -272   
-192   64     
336    96     
-96    16     
-48    128    
144    144    
0      128    
-48    64     
-32    160    
80     192    
16     96     
-176   64     
112    144    
-80    32     
48     96     
-48    16     
128    96     
-80    96     
48     112    
0      80     
32     96     
16     -128   
176    16     
-144   288    
80     -128   
-112   224    
0      -112   
80     -32    
-176   -112   
208    336    
-32    304    
-96    112    
-160   112    
192    32     
128    32     
64     -112   
96     176    
-240   -64    
16     144    
-160   80     
160    32     
-16    192    
-48    16     
0      64     
32     32     
16     176    
176    -64    
-144   352    
-112   -48    
256    80     
-64    -48    
-16    224    
64     16     
0      240    
16     16     
48     48     
-32    96     
64     -64    
48     224    
-176   208    
160    64     
-32    192    
1008   224    
160    1040   
272    384    
-640   112    
-208   -288   
688    304    
-976   -272   
848    624    
-496   -304   
64     -496   
-128   224    
368    32     
-224   176    
368    -464   
-336   496    
336    -224   
-112   496    
224    -192   
-48    448    
80     -256   
-128   288    
288    -80    
-96    288    
128    -144   
-64    112    
32     16     
144    144    
-80    -112   
0      -32    
0      160    
48     64     
96     144    
80     -32    
-144   256    
160    -48    
-320   -96    
224    -224   
-32    192    
240    -128   
-112   272    
80     -288   
-80    208    
96     -528   
96     288    
48     240    
96     240    
-144   -32    
96     304    
-192   -80    
272    176    
-224   128    
192    -16    
-144   96     
112    -80    
48     240    
48     -400   
48     224    
-32    -352   
0      144    
256    -2528  
-176   208    
128    -16    
32     144    
32     64     
96     128    
-32    -64    
96     224    
-48    64     
176    96     
0      128    
16     -16    
80     144    
32     -112   
16     176    
16     -496   
32     96     
176    -1200  
256    304    
-96    96     
240    304    
-48    -80    
112    64     
144    224    
-112   176    
112    144    
160    0      
0      48     
320    -480   
-16    208    
-176   -720   
208    80     
-32    -448   
32     112    
32     -64    
192    544    
144    160    
176    272    
-128   -80    
112    -48    
80     80     
-32    -320   
240    144    
-208   -448   
160    32     
16     32     
176    80     
32     -320   
64     96     
16     320    
-144   128    
208    304    
-64    -160   
192    176    
64     32     
192    80     
-96    -48    
208    224    
-64    -80    
192    192    
112    272    
-272   336    
240    32     
16     112    
-80    -256   
144    96     
80     176    
-64    128    
208    144    
240    -656   
-208   96     
256    -128   
-128   160    
192    -80    
-64    112    
48     -80    
-48    112    
112    -192   
48     -96    
32     -272   
-192   -1280  
176    160    
-1216  32     
16     -736   
-144   -48    
96     80     
80     112    
48     -608   
96     -304   
-96    -80    
192    -288   
32     -416   
-64    16     
144    -64    
32     128    
0      -224   
432    240    
-624   48     
160    -528   
-32    -80    
-64    -688   
128    -64    
-160   -240   
176    -32    
-16    96     
304    144    
-144   48     
304    48     
-32    -16    
-256   -64    
224    -256   
32     16     
-96    -64    
0      208    
-160   -96    
416    -336   
-320   -96    
160    -304   
16     0      
-96    -176   
336    -112   
-80    -48    
-16    160    
32     -160   
-128   80     
48     0      
16     -32    
-64    48     
144    -16    
-48    -144   
-112   -112   
128    -80    
32     0      
48     80     
-16    -32    
32     -192   
112    -144   
144    112    
80     112    
288    1392   
-608   -1504  
304    160    
400    912    
112    -528   
-416   416    
-96    80     
0      896    
176    -688   
-400   32     
240    -1184  
-48    512    
-16    -400   
224    400    
16     -368   
240    592    
-144   -288   
32     304    
-368   -352   
640    32     
-304   -128   
304    -32    
-464   272    
-144   -288   
160    -160   
16     -288   
272    320    
224    -576   
-64    384    
32     -432   
384    224    
-336   -224   
16     64     
-48    128    
64     -64    
-432   -128   
336    192    
80     32     
192    64     
32     -128   
96     -128   
64     192    
-48    -368   
64     112    
-16    -864   
32     -16    
48     144    
-176   128    
208    224    
64     32     
-496   -80    
32     -144   
64     16     
-80    448    
96     -48    
-16    -144   
144    288    
64     -128   
-64    96     
176    704    
-224   -64    
-208   -48    
-80    -336   
160    208    
-32    208    
-208   -160   
224    -128   
-48    128    
128    544    
-128   -176   
-96    -384   
0      -144   
224    -240   
-16    112    
-176   96     
-112   -16    
0      -16    
-48    -288   
-240   -128   
-16    -384   
0      16     
176    112    
-16    128    
16     -128   
80     80     
384    144    
32     240    
-16    112    
-752   16     
-304   -176   
-944   16     
-144   -144   
-1008  64     
-48    144    
32     112    
144    160    
-304   -64    
176    64     
-704   96     
-64    288    
160    -48    
64     176    
-32    -224   
-256   64     
-192   -64    
64     448    
-112   656    
32     352    
-448   -368   
-1328  32     
-80    80     
128    -144   
-176   64     
-80    -304   
-128   160    
-48    -240   
112    112    
-176   0      
128    224    
-16    0      
-48    160    
-160   -16    
48     -192   
-64    -160   
-368   96     
32     -64    
0      128    
16     16     
-96    -48    
-80    32     
32     -192   
0      -16    
-112   112    
-128   -80    
448    176    
-368   -176   
128    128    
-496   -352   
96     144    
-336   0      
192    128    
-560   16     
64     128    
-128   32     
64     112    
-80    -80    
128    -64    
-96    192    
-32    -48    
64     32     
-32    -96    
-64    32     
-32    80     
64     -16    
-144   -32    
-32    144    
-336   -48    
-80    0      
32     -240   
128    208    
-80    -256   
0      64     
-80    48     
-32    144    
-16    -16    
160    80     
-96    32     
80     112    
96     128    
-272   -64    
-32    -16    
-112   -144   
128    240    
-608   256    
-176   128    
160    -96    
96     128    
-32    32     
-16    32     
-96    128    
32     112    
16     112    
-16    -80    
-32    112    
64     -96    
192    64     
-48    16     
-16    192    
-672   64     
64     176    
-32    0      
-32    -32    
16     -64    
96     176    
-176   128    
48     -16    
-112   64     
0      0      
2032   3232   
-640   2624   
-1920  -1312  
-208   624    
-144   -464   
-352   -208   
-688   304    
128    480    
416    96     
-272   -272   
-32    80     
64     176    
224    0      
-192   192    
144    -48    
-240   128    
144    -96    
-48    384    
-80    -144   
64     192    
-176   -288   
96     240    
32     160    
96     160    
-128   -96    
-32    160    
160    32     
64     224    
-96    128    
64     -96    
64     80     
-240   -48    
144    176    
-192   -112   
-32    160    
192    144    
128    224    
-16    64     
-80    64     
0      -80    
-48    96     
48     80     
48     144    
16     48     
-144   -32    
80     32     
-96    96     
160    80     
-128   -80    
16     96     
32     112    
48     32     
16     80     
16     96     
80     112    
96     160    
16     176    
-144   -64    
176    176    
-160   -48    
128    32     
-48    32     
80     112    
-48    96     
16     96     
48     96     
96     112    
-64    48     
144    160    
-32    96     
-32    32     
64     80     
-48    0      
80     80     
-64    16     
0      -128   
112    -32    
-64    304    
-192   16     
160    48     
-240   -208   
-64    -368   
304    48     
-192   96     
-128   64     
96     304    
64     16     
80     -48    
-48    64     
0      112    
80     96     
-144   -16    
128    224    
-32    96     
112    80     
256    432    
32     368    
16     -176   
176    112    
-16    -32    
80     16     
-32    240    
144    80     
16     80     
32     -80    
48     144    
-32    192    
64     64     
96     80     
-48    -976   
16     -16    
-128   -176   
128    -16    
96     48     
48     128    
-48    48     
-16    -64    
-48    64     
256    288    
-144   -208   
0      96     
-48    112    
160    -112   
112    96     
-96    -912   
32     112    
320    336    
-192   128    
336    256    
-96    48     
48     112    
-64    96     
-128   -64    
288    144    
-128   -32    
240    96     
-48    160    
0      -128   
144    -32    
48     -576   
192    208    
16     128    
-144   32     
160    176    
-144   32     
336    112    
-112   64     
-16    -16    
208    176    
16     96     
112    128    
-64    80     
-48    -80    
160    160    
96     0      
-80    16     
112    -208   
-128   -64    
256    -128   
32     304    
-16    112    
48     96     
0      128    
256    128    
0      96     
112    0      
-192   -112   
368    -112   
336    288    
-272   -192   
160    -80    
-64    -1136  
160    96     
-16    -576   
-208   224    
144    48     
144    208    
-144   -64    
320    112    
-112   -64    
128    -160   
64     80     
0      -16    
-16    112    
80     -16    
-96    -32    
224    -320   
48     384    
64     -16    
-48    192    
16     -16    
400    16     
-192   48     
32     112    
-112   -16    
272    80     
160    112    
112    16     
1552   -1040  
-672   -944   
816    896    
-432   592    
672    480    
-528   -576   
-96    272    
416    480    
-112   448    
256    -368   
48     256    
176    -80    
128    96     
-96    -432   
48     -384   
-96    -96    
240    64     
416    -96    
-304   -288   
-208   -192   
0      -2752  
-112   -144   
-16    224    
-48    272    
-64    -224   
-400   -80    
64     -624   
208    -176   
-112   -32    
384    752    
-288   -48    
288    16     
-128   96     
96     -480   
64     160    
-16    -1024  
112    -2032  
-80    128    
176    -208   
80     -112   
-592   -16    
0      -224   
128    -48    
16     -624   
32     16     
256    -1584  
-48    32     
32     288    
-208   -64    
-80    96     
192    -112   
0      -80    
64     144    
48     16     
112    -784   
-1200  -192   
112    -384   
192    -80    
48     -224   
-144   -544   
128    -592   
-160   -16    
160    16     
224    112    
-160   128    
80     112    
128    -192   
-64    176    
-48    -400   
176    0      
-416   0      
80     80     
112    -112   
0      -48    
224    -144   
208    48     
-176   0      
240    -272   
304    16     
64     -512   
80     16     
96     -176   
-96    176    
-48    -64    
320    32     
-112   -112   
192    -48    
-448   0      
80     -144   
-16    96     
0      -288   
208    208    
-16    -96    
32     -192   
80     64     
64     208    
48     32     
80     48     
-48    48     
64     -208   
-128   48     
-80    16     
-80    -64    
96     176    
-32    -192   
48     -304   
64     -48    
160    80     
-128   96     
96     -240   
-128   112    
64     -80    
0      -224   
16     -96    
32     -320   
16     -144   
-272   -112   
208    32     
-112   -80    
-384   48     
368    160    
-112   -32    
-32    -416   
32     64     
-16    16     
224    0      
-192   -160   
176    -256   
-176   0      
0      -96    
320    80     
-128   -16    
-416   0      
-32    -80    
-304   -48    
496    48     
-400   64     
112    -96    
80     48     
-176   -256   
240    160    
16     -48    
-16    0      
64     432    
240    64     
-96    16     
-192   -64    
-192   -96    
208    32     
-64    0      
64     32     
-16    -32    
32     -112   
112    112    
96     -544   
0      48     
-64    80     
32     -48    
192    -48    
-96    96     
-48    -96    
80     96     
-288   -64    
208    48     
-48    176    
96     -64    
48     240    
-80    -112   
64     384    
-32    -384   
272    -16    
-64    80     
-16    112    
-240   272    
-256   -160   
112    -96    
288    -32    
-96    -64    
112    -48    
-96    144    
-736   0      
0      -16    
-192   -192   
96     64     
16     32     
-368   -80    
32     112    
-624   -192   
48     64     
-1376  64     
-96    16     
112    32     
-112   -32    
144    -48    
-288   -48    
-48    -240   
32     16     
-112   48     
2208   2528   
-1696  320    
-528   -544   
-160   944    
144    -528   
464    608    
-1264  176    
720    560    
-640   -96    
-32    -368   
-240   32     
176    240    
64     -144   
-64    320    
-96    -304   
32     208    
32     -160   
-128   272    
-80    -144   
112    0      
-144   48     
16     144    
16     208    
-544   32     
0      80     
0      -80    
16     48     
-16    -32    
-48    160    
80     -144   
-112   16     
0      -32    
-32    144    
0      112    
96     64     
-96    -48    
-96    112    
-80    96     
-192   16     
48     0      
-592   -64    
80     112    
-80    -128   
-80    48     
-80    -256   
-16    32     
48     128    
64     160    
80     -16    
-64    48     
-16    48     
80     176    
-48    32     
-16    96     
48     112    
-432   -160   
-64    224    
-144   -112   
176    80     
144    112    
-16    64     
48     96     
-64    -16    
-16    64     
-64    96     
-96    128    
96     80     
-32    128    
-128   -48    
-48    112    
-224   -112   
192    0      
128    -64    
144    160    
-80    0      
48     -16    
0      -16    
-64    -64    
-96    112    
-96    -256   
192    112    
-144   -16    
0      112    
-48    256    
128    160    
-208   -48    
-48    -272   
-736   112    
48     96     
16     -16    
-64    128    
32     64     
48     96     
48     48     
-32    48     
64     16     
-192   -128   
192    320    
-160   320    
96     64     
-208   -144   
112    96     
32     48     
32     128    
-80    64     
-80    96     
112    80     
0      0      
16     64     
-48    32     
96     112    
-16    80     
32     0      
-48    128    
64     208    
-160   -48    
0      80     
48     64     
-32    112    
48     112    
-32    -80    
-16    0      
-48    160    
112    48     
-80    -32    
-32    176    
-64    -64    
112    -112   
-192   -224   
48     208    
-96    -32    
176    80     
-224   256    
176    96     
-16    48     
0      128    
-32    336    
80     -144   
0      144    
-80    80     
304    16     
-272   192    
256    160    
-160   48     
-64    160    
0      -16    
0      -48    
112    304    
-208   96     
96     -32    
-80    -64    
160    224    
192    96     
112    144    
-304   160    
80     -48    
-16    288    
-128   16     
208    48     
-128   144    
48     0      
-64    16     
64     -16    
176    240    
-48    -64    
80     160    
-176   64     
160    80     
176    0      
-144   160    
-48    -48    
-160   64     
16     240    
-64    0      
0      160    
32     64     
112    144    
-80    256    
-48    80     
144    -32    
64     208    
144    64     
-80    64     
-16    96     
144    144    
-224   48     
-64    96     
96     144    
48     -16    
48     96     
32     96     
-160   -16    
176    16     
32     288    
272    192    
-32    256    
-48    48     
-32    32     
-1360  944    
-1008  -1296  
912    752    
272    -64    
176    -720   
-480   -144   
752    736    
-176   16     
-80    -1312  
208    304    
-32    -48    
-112   160    
208    400    
32     112    
-96    -144   
32     144    
96     -112   
64     256    
48     304    
192    368    
-160   0      
-112   -192   
-64    -48    
400    -1584  
-64    96     
192    -128   
-80    112    
-32    48     
112    176    
-48    -160   
192    96     
-160   64     
208    256    
-80    -48    
-32    144    
128    112    
32     -144   
-16    112    
96     -688   
96     64     
-80    112    
16     160    
96     96     
0      32     
144    -384   
-64    192    
80     176    
-32    -48    
96     -96    
-32    240    
160    -32    
128    -64    
-80    176    
144    -336   
16     80     
16     -496   
112    128    
-128   48     
144    128    
0      -112   
-128   96     
144    112    
0      176    
48     -48    
112    -48    
-32    96     
64     -16    
0      -16    
144    -16    
-48    112    
176    -752   
-16    96     
128    -1872  
-32    112    
0      32     
176    -80    
64     48     
-48    80     
32     -48    
96     -48    
32     288    
-16    16     
80     64     
176    176    
-160   64     
224    16     
-16    384    
-144   -352   
400    16     
-240   96     
128    128    
-48    -128   
96     128    
0      256    
0      -224   
320    272    
-288   -208   
272    80     
16     -880   
-48    80     
80     -128   
16     240    
0      64     
48     -80    
-176   -96    
16     -32    
176    -16    
-16    128    
-32    32     
192    0      
-96    112    
176    -144   
-96    96     
336    -96    
-64    208    
128    144    
112    176    
-208   -2240  
64     112    
-16    -176   
64     32     
-80    -16    
304    192    
0      -1584  
-32    -112   
-352   144    
272    -304   
144    560    
16     160    
80     96     
80     -96    
-112   16     
272    224    
208    -912   
64     192    
-96    160    
208    336    
224    -96    
0      -1632  
-256   -256   
112    -528   
208    -80    
48     -512   
96     -336   
-128   64     
256    -256   
16     176    
144    176    
-48    144    
64     80     
96     -208   
-32    0      
-704   -16    
16     64     
16     -160   
144    -16    
-64    -32    
304    -688   
-16    -224   
-64    144    
0      -16    
112    -32    
-16    80     
96     64     
48     80     
96     160    
-192   -256   
-240   64     
32     160    
48     -320   
336    -384   
32     -64    
48     -688   
208    -464   
-48    64     
208    128    
-48    480    
-80    0      
192    80     
80     -80    
-32    32     
-32    -176   
-96    48     
48     -32    
-1216  -192   
32     -336   
80     -48    
176    -208   
-48    48     
0      -368   
-144   -176   
48     -224   
48     -192   
112    -80    
-64    224    
128    112    
-80    16     
-272   -80    
1648   2560   
-2400  272    
1120   1056   
-176   672    
1600   -144   
-928   -240   
272    -80    
-336   912    
0      -1440  
48     512    
32     -464   
416    160    
-512   80     
432    -336   
-304   176    
144    -352   
-128   272    
192    112    
80     160    
240    -416   
-240   0      
208    -96    
-160   272    
48     -832   
0      240    
208    -80    
128    -64    
-208   128    
240    0      
-224   -144   
16     112    
-256   80     
144    -48    
-560   16     
48     -208   
-16    -48    
144    -256   
16     32     
160    -240   
32     64     
-144   0      
-16    176    
-112   32     
240    -48    
-32    48     
48     -48    
16     16     
-48    -32    
-16    0      
128    80     
-32    144    
144    -80    
16     48     
80     -192   
80     -160   
-64    48     
16     -176   
128    96     
176    176    
-48    144    
0      -128   
-80    16     
160    144    
-112   -128   
128    128    
-64    224    
-96    -192   
176    16     
-848   -368   
0      -48    
-16    64     
-16    -16    
-112   32     
192    48     
-208   -32    
144    -32    
-16    160    
112    208    
-192   48     
-1664  -368   
-64    144    
-832   -448   
64     112    
32     32     
-48    64     
16     64     
-144   16     
-112   0      
-576   16     
-128   -16    
144    96     
-16    112    
128    128    
-144   64     
-224   -160   
64     96     
-64    176    
-64    16     
80     80     
-336   -32    
96     64     
-336   48     
-96    64     
-48    32     
64     112    
-608   -32    
-32    -96    
64     -32    
-112   48     
32     -112   
48     96     
-32    -96    
80     64     
-64    80     
-48    32     
-112   -144   
0      80     
144    336    
-96    -16    
-176   -128   
-736   128    
0      -32    
48     -112   
-240   80     
160    112    
192    64     
-368   -656   
-176   112    
-160   64     
416    16     
-368   160    
128    -64    
80     112    
-128   80     
128    64     
-48    -16    
-16    288    
-944   -80    
128    128    
-112   -304   
80     224    
-144   -256   
0      160    
-16    192    
48     16     
-144   240    
-352   -320   
128    -176   
-80    -224   
256    304    
-160   112    
-96    112    
-144   64     
192    128    
-16    -32    
-128   96     
64     208    
112    224    
-80    144    
-80    -176   
-80    -96    
0      -112   
-32    160    
32     32     
-80    112    
-192   -304   
144    32     
-576   -64    
96     384    
-480   160    
-272   -160   
48     80     
144    -48    
352    128    
-16    0      
-64    64     
-144   32     
-80    0      
80     32     
128    16     
-208   -32    
192    144    
-96    112    
64     32     
-592   0      
64     32     
0      -16    
-128   16     
-64    128    
-32    48     
112    32     
0      384    
-128   112    
-32    112    
-288   -32    
0      16     
48     208    
-64    0      
560    0      
352    1424   
-1200  -112   
-448   -1216  
-48    112    
80     -288   
336    656    
-32    704    
-16    416    
-192   48     
80     -96    
-160   192    
176    -272   
64     128    
-144   -112   
16     224    
96     160    
48     352    
-144   -112   
80     48     
96     192    
64     16     
32     16     
-48    -32    
16     128    
96     96     
80     80     
-48    96     
0      144    
-64    -32    
32     -288   
32     64     
-32    112    
112    96     
0      64     
144    208    
-112   112    
48     32     
0      80     
80     96     
-16    96     
64     80     
-128   -16    
0      64     
-48    0      
-48    -16    
128    272    
80     96     
-240   96     
-16    -96    
128    144    
-96    -32    
112    96     
-16    0      
96     128    
-112   160    
48     -48    
-96    32     
0      128    
192    80     
-96    96     
48     128    
-32    0      
96     32     
32     192    
-48    176    
144    0      
-64    -64    
192    64     
-128   192    
0      -16    
208    160    
-128   16     
144    176    
48     64     
96     224    
-80    128    
112    80     
-16    112    
-16    32     
176    96     
-160   144    
32     96     
96     224    
256    -64    
-32    112    
-16    400    
-16    -208   
176    -560   
-96    160    
128    224    
0      0      
-16    64     
112    -16    
-64    16     
64     208    
-176   80     
192    32     
-16    -16    
64     192    
-64    -32    
112    96     
-80    -32    
0      -576   
128    -80    
32     400    
-32    336    
144    192    
-96    -112   
0      -64    
-80    256    
176    16     
48     112    
32     0      
-80    128    
80     16     
48     192    
208    272    
-16    -64    
128    -144   
-256   -592   
0      48     
160    -16    
96     -96    
-128   128    
128    304    
464    416    
-80    272    
-64    -144   
16     176    
-64    -48    
112    192    
112    16     
-16    -96    
-240   96     
400    -560   
64     80     
64     288    
-80    144    
-64    80     
272    128    
-48    -544   
-208   176    
144    96     
-16    -48    
128    -48    
-80    -624   
-48    160    
64     -96    
80     32     
64     -800   
0      80     
32     -848   
112    144    
144    240    
-256   -96    
224    32     
112    496    
-128   0      
0      -80    
-160   16     
240    80     
64     160    
-16    -368   
64     160    
208    448    
0      576    
-176   -96    
-16    -224   
0      -1184  
96     496    
-80    -96    
64     144    
144    336    
-96    32     
128    -48    
-32    -48    
0      112    
48     16     
16     128    
144    -288   
64     112    
0      -736   
48     160    
64     -304   
0      96     
-16    96     
144    64     
-80    64     
224    192    
160    544    
-400   -144   
-128   -48    
352    -240   
-80    0      
-16    -64    
-32    -48    
112    -96    
-496   1472   
176    -528   
-912   128    
-304   -816   
208    896    
352    112    
528    272    
-144   432    
-464   -336   
-144   64     
32     -48    
-32    48     
32     32     
32     240    
224    -160   
-64    -256   
208    -112   
48     -80    
64     0      
48     -1136  
144    -224   
16     32     
160    -1776  
192    0      
-32    -368   
192    -144   
64     288    
-96    224    
224    80     
32     32     
-80    -2640  
96     -32    
-16    -704   
112    128    
64     -384   
48     -192   
304    -80    
-32    288    
176    176    
-80    -944   
-32    -160   
160    -896   
16     48     
-48    192    
80     -336   
64     -1088  
48     -64    
-16    -16    
96     192    
208    176    
-64    -288   
-848   -64    
64     -448   
160    160    
-48    -96    
-64    -304   
176    -336   
-16    128    
176    -432   
-48    144    
144    -128   
-32    224    
48     144    
-96    144    
-144   -176   
64     -240   
-464   -192   
144    32     
48     16     
112    64     
48     -144   
48     -448   
48     -144   
80     -288   
112    -32    
-16    0      
-304   -272   
320    -192   
-48    32     
-176   -432   
192    176    
0      384    
96     368    
-48    -144   
16     -272   
64     -112   
176    -480   
80     432    
-48    -64    
-32    -48    
160    -160   
80     80     
128    -128   
-48    -16    
-16    80     
64     48     
96     240    
80     112    
-320   -144   
80     -160   
224    -16    
112    80     
0      64     
-32    -576   
80     32     
112    -496   
-32    -64    
160    128    
0      0      
48     16     
64     -112   
-144   -112   
128    -64    
-304   32     
176    -48    
-480   -16    
160    -112   
-80    -32    
96     -480   
-16    64     
64     -352   
192    112    
0      -48    
-16    208    
-96    112    
256    -96    
-784   -608   
320    -240   
-64    160    
32     16     
16     112    
-32    -96    
-176   112    
0      -224   
112    112    
80     48     
112    48     
-320   32     
224    -224   
-784   -192   
208    -368   
160    224    
-64    0      
176    -224   
-176   -224   
0      32     
-64    -224   
32     -144   
80     -64    
192    208    
128    -480   
-48    -16    
-64    -80    
208    80     
-64    48     
208    160    
-240   -64    
112    -208   
-384   -80    
176    -48    
-96    -16    
-64    -176   
160    208    
0      -32    
-144   32     
-464   -448   
-384   128    
-16    32     
-432   496    
-432   -480   
-80    96     
-160   -288   
128    112    
240    -32    
-128   -144   
64     112    
-512   -32    
-16    80     
-336   32     
128    144    
-48    64     
-176   368    
0      -112   
-800   192    
48     160    
-1232  -272   
-16    -272   
304    176    
48     -96    
48     240    
-112   32     
-256   0      
112    288    
-64    -192   
-96    240    
-16    -48    
-96    64     
-80    -32    
16     -896   
96     -304   
336    608    
-80    -160   
-1280  256    
320    -800   
320    1232   
-224   -176   
-32    -272   
-240   -176   
192    208    
16     112    
-96    -64    
-208   160    
160    -192   
-112   160    
0      -64    
16     192    
32     -256   
-160   192    
128    -16    
-352   32     
48     16     
48     80     
96     64     
144    16     
-336   128    
-96    192    
-208   -96    
144    16     
-144   48     
256    160    
-224   0      
96     16     
-784   -160   
64     -64    
-1152  -80    
48     176    
128    64     
64     0      
-48    80     
-80    32     
96     80     
-96    0      
160    64     
-208   48     
64     -48    
-208   48     
-16    -160   
96     112    
-160   80     
32     -32    
-64    160    
32     48     
16     0      
-32    64     
144    96     
96     160    
-112   112    
80     64     
-240   -16    
64     96     
32     -32    
64     64     
-16    80     
-32    144    
-224   -96    
48     96     
-416   -32    
-32    80     
112    32     
16     64     
-80    160    
-48    32     
96     64     
-64    128    
-16    0      
48     -48    
0      -48    
-32    144    
-160   128    
0      -32    
32     -80    
-272   -192   
48     192    
-288   16     
144    112    
-128   -32    
32     144    
0      64     
0      -16    
32     16     
-144   64     
32     64     
-144   96     
16     320    
-320   -48    
256    32     
0      112    
-48    96     
80     16     
-16    160    
-64    0      
128    32     
-48    128    
-16    256    
64     336    
-224   176    
96     96     
16     -80    
-128   144    
-32    32     
144    80     
96     48     
-80    176    
16     224    
32     -384   
-64    -32    
48     0      
0      -176   
64     16     
80     208    
-32    96     
-16    96     
128    256    
16     128    
48     -32    
96     416    
96     192    
0      208    
0      64     
224    192    
-64    240    
304    240    
-336   144    
16     128    
96     112    
32     48     
-48    80     
-32    -32    
80     128    
-192   0      
96     48     
128    64     
-48    16     
64     128    
-48    -80    
-48    -96    
176    176    
48     80     
32     48     
-16    80     
16     16     
32     224    
48     -336   
-112   96     
32     208    
16     -64    
-48    -80    
-80    144    
128    -112   
16     0      
-16    352    
128    64     
16     368    
0      96     
0      -480   
-208   -64    
400    288    
-288   48     
96     -400   
48     192    
48     96     
-64    16     
-48    0      
80     80     
96     32     
16     240    
256    320    
0      144    
16     -96    
-48    64     
-80    -32    
-32    48     
32     112    
80     -1072  
-16    160    
-32    -64    
96     272    
64     32     
0      112    
-16    128    
64     96     
-144   176    
-48    -64    
224    208    
112    144    
48     -32    
1472   -2016  
496    80     
512    -336   
-416   -144   
528    -736   
-144   -432   
-16    -128   
928    448    
-400   400    
-96    -400   
-16    128    
16     96     
448    272    
-16    160    
-112   208    
-32    128    
0      -32    
-80    -320   
-112   -32    
64     -1024  
-80    144    
192    160    
-112   320    
-16    32     
160    64     
-144   -80    
480    304    
16     -16    
176    64     
-96    64     
32     144    
64     160    
176    96     
448    464    
-96    32     
208    112    
-160   32     
208    368    
-64    -256   
576    192    
-576   0      
592    -32    
-176   160    
272    144    
-144   144    
32     -96    
192    112    
-96    128    
64     32     
-64    -528   
128    -48    
-32    -688   
208    128    
-32    16     
-96    16     
224    272    
-16    432    
-368   -736   
384    400    
-144   -160   
144    272    
-176   32     
176    -128   
48     160    
-128   -336   
112    272    
32     -544   
240    144    
-240   -1120  
16     48     
0      32     
32     64     
112    112    
16     112    
-64    96     
144    -256   
272    480    
0      -288   
112    384    
80     -48    
-160   0      
128    -272   
192    64     
-32    128    
16     -128   
16     128    
128    176    
192    384    
-272   16     
112    -16    
-48    -688   
96     -32    
0      -112   
128    128    
-16    0      
128    48     
-48    -384   
-96    -112   
240    -16    
16     176    
160    96     
-64    208    
-64    16     
128    -16    
16     112    
80     -48    
160    304    
-16    -336   
-64    -272   
-16    -432   
144    304    
128    -80    
-112   112    
-96    -384   
192    -1552  
128    80     
-112   -800   
128    -1648  
16     32     
48     -464   
0      -64    
48     -928   
80     -48    
0      144    
160    -16    
16     -528   
-96    -288   
240    -320   
176    560    
32     -592   
0      -112   
160    -112   
128    -304   
-496   -48    
80     -192   
112    32     
-16    -272   
192    96     
-16    -1456  
32     32     
176    272    
-144   -16    
160    208    
112    240    
32     16     
112    80     
144    16     
-144   -384   
-400   -416   
0      -544   
64     -80    
80     -464   
48     -112   
0      -384   
32     480    
-128   -288   
112    -240   
-176   -160   
96     -32    
-80    -80    
-48    48     
48     80     
-64    16     
-288   -96    
176    48     
16     0      
112    272    
80     48     
-32    -480   
240    -208   
144    -1296  
32     -192   
96     -16    
-112   112    
112    -96    
-16    -128   
16     -64    
48     224    
-224   -144   
192    48     
-320   -80    
144    -112   
-32    0      
256    -160   
-176   64     
-112   -144   
160    96     
-112   144    
96     -112   
192    -160   
96     -112   
-32    64     
-32    80     
-176   -176   
240    -192   
-800   -16    
240    32     
-336   128    
896    720    
-784   -336   
592    48     
-464   208    
224    -720   
48     -176   
-144   0      
-144   480    
240    -304   
-384   -96    
160    -240   
144    208    
-608   0      
80     48     
-624   32     
96     -48    
-64    128    
288    -336   
-96    176    
208    -336   
-144   176    
224    -64    
-96    144    
192    -112   
-112   128    
-224   -80    
64     176    
48     -48    
-32    80     
32     144    
-96    -96    
16     -144   
0      -176   
112    112    
144    -448   
-208   -160   
256    -112   
48     0      
-288   -16    
16     -112   
-128   32     
-16    96     
80     32     
64     -224   
-192   0      
32     -192   
224    16     
64     80     
-240   32     
288    -304   
-32    128    
-176   0      
80     -128   
-96    96     
48     192    
-48    208    
-64    -80    
64     48     
-96    16     
-16    0      
48     64     
-48    80     
-176   -128   
64     288    
-112   48     
-464   -80    
-80    -64    
-432   80     
80     160    
-192   32     
-48    0      
176    -160   
-48    48     
16     96     
16     -32    
96     96     
-96    192    
-16    -576   
64     160    
-336   32     
0      128    
-16    -16    
192    144    
-288   112    
-720   -16    
112    192    
64     240    
-32    0      
144    -32    
64     16     
-176   -192   
32     112    
-272   -192   
-16    -80    
112    48     
-144   64     
160    32     
-272   -112   
64     32     
-96    32     
96     64     
-208   272    
48     -80    
-160   -112   
32     112    
112    -176   
-48    -32    
-160   -160   
32     64     
48     80     
-144   -176   
-112   112    
-32    48     
-16    48     
64     -16    
-16    -48    
-368   16     
64     176    
-272   -144   
-64    448    
-96    48     
48     96     
160    224    
0      -32    
32     352    
-96    16     
144    112    
-208   32     
176    272    
64     -16    
-208   -224   
-304   176    
-208   32     
-896   -80    
128    96     
-192   144    
368    144    
-144   -48    
-96    144    
-48    -32    
96     128    
48     48     
-64    -16    
96     80     
-128   80     
96     496    
-48    0      
-96    -128   
-192   0      
128    64     
-128   -48    
48     -32    
-160   -32    
-176   -64    
128    80     
240    16     
16     160    
240    864    
-480   -80    
-128   -144   
-96    -240   
-64    -144   
112    80     
-16    80     
-448   -400   
-256   -368   
336    320    
128    416    
-160   128    
-176   -32    
48     16     
352    -112   
64     160    
-352   64     
-128   -32    
-32    -48    
144    -96    
112    112    
-288   -16    
-128   128    
-64    48     
256    32     
176    208    
-160   80     
-64    64     
64     64     
96     160    
32     48     
-80    48     
64     80     
112    96     
-176   -112   
144    160    
-384   16     
96     -96    
-80    224    
112    80     
-368   592    
-1600  -720   
864    1200   
-400   336    
-16    -560   
704    912    
-752   -672   
16     704    
-592   -336   
1584   -112   
-1040  224    
112    32     
80     -32    
-32    192    
-16    -144   
240    160    
-336   96     
336    512    
-160   368    
112    192    
-224   -64    
400    272    
-240   128    
48     -304   
-144   -96    
176    -352   
-224   80     
-48    64     
160    272    
-384   -352   
128    288    
224    -144   
-128   -144   
-112   -112   
96     224    
-128   -144   
128    -32    
0      224    
48     240    
-96    192    
80     -64    
240    -160   
32     128    
176    272    
-32    128    
64     112    
48     144    
-160   256    
-144   32     
32     16     
-64    -16    
176    128    
32     128    
96     384    
-176   -96    
-32    32     
-32    80     
240    -80    
-64    -752   
304    656    
-160   -80    
80     320    
-80    32     
368    368    
-368   -272   
160    160    
64     48     
-64    64     
-144   80     
-16    208    
64     -576   
16     272    
-16    0      
160    256    
-48    -48    
96     256    
0      112    
80     208    
-208   160    
16     288    
-416   -512   
240    304    
-144   -352   
256    -32    
-320   16     
144    -144   
176    48     
-64    80     
144    -224   
64     304    
32     48     
96     112    
96     288    
-64    64     
-64    -128   
-16    -224   
96     48     
0      -192   
-144   -208   
128    -16    
160    -464   
144    368    
0      -16    
16     96     
112    256    
48     112    
48     128    
64     176    
-64    64     
48     -48    
-288   -400   
96     32     
240    384    
-96    160    
80     16     
-16    -864   
128    176    
64     -1056  
0      -128   
-32    96     
-96    208    
192    -48    
-48    192    
160    -336   
112    224    
-32    -208   
96     -160   
48     -272   
80     -16    
-64    0      
176    32     
48     144    
-112   -384   
16     -80    
-192   -16    
256    192    
0      32     
272    144    
-48    0      
-96    160    
0      -32    
16     144    
0      16     
272    -48    
-112   112    
48     -128   
112    112    
-32    -608   
-32    240    
144    -992   
96     112    
-96    80     
128    64     
-32    0      
16     48     
16     64     
96     32     
112    208    
-160   176    
32     96     
160    -256   
48     208    
0      0      
-32    112    
-64    -112   
160    80     
144    -1440  
-48    224    
48     -32    
-32    112    
128    192    
64     32     
128    32     
240    0      
-112   288    
-128   -432   
-32    144    
176    -320   
224    160    
-128   -48    
-16    80     
160    -144   
0      176    
64     160    
16     32     
64     64     
112    -400   
32     160    
-64    -640   
112    48     
-32    -208   
144    128    
-32    -32    
128    80     
-16    -368   
-48    64     
160    -656   
-64    112    
-368   432    
-656   -624   
496    608    
0      624    
-48    -64    
-176   -400   
560    -656   
-304   144    
-144   -592   
576    -160   
-144   128    
320    432    
-64    -368   
-112   272    
192    -576   
192    96     
-96    -2368  
64     -1328  
48     224    
192    -352   
-64    48     
176    -1984  
-48    96     
240    -16    
-32    32     
128    -112   
-368   16     
64     -192   
16     384    
336    -208   
-208   32     
32     -96    
96     288    
-96    -80    
-16    -112   
0      -352   
96     -1120  
176    -112   
112    -496   
-96    -112   
16     176    
96     48     
144    -80    
-48    16     
-32    -432   
64     144    
-160   112    
240    48     
-384   -128   
-128   -48    
160    -96    
112    -80    
0      48     
96     -112   
0      -64    
-16    -1008  
96     0      
80     -368   
144    160    
0      16     
128    64     
-48    96     
0      -32    
-128   -64    
80     -208   
208    112    
-112   0      
112    32     
32     -640   
208    -176   
32     -272   
-144   16     
240    160    
-96    -64    
208    0      
-80    -208   
-160   -160   
240    -160   
-368   48     
160    -240   
-432   -16    
16     -16    
32     -96    
48     -624   
-480   -176   
-32    -816   
-32    -32    
-48    -224   
304    416    
-496   -48    
176    -64    
-16    64     
16     80     
-96    48     
112    80     
-1072  -32    
-80    -96    
-160   -288   
128    -64    
-64    -16    
-16    -256   
304    320    
304    224    
-16    16     
-208   64     
96     -112   
32     48     
0      -96    
-224   16     
128    -80    
-304   208    
-16    -208   
48     96     
-16    -48    
16     144    
160    -448   
-16    192    
96     -832   
-16    112    
48     112    
320    -32    
-96    -96    
48     -96    
-288   -16    
-80    -128   
0      -64    
-64    0      
80     128    
16     -128   
16     -128   
-272   -592   
272    0      
16     -432   
160    16     
-192   0      
-112   -80    
-176   0      
192    48     
64     -128   
-96    -16    
144    160    
16     48     
-96    -48    
160    -288   
96     32     
-16    48     
160    -96    
80     -176   
32     96     
-16    112    
48     80     
-32    48     
128    16     
64     16     
-64    0      
-48    32     
16     -144   
-48    16     
-32    32     
64     16     
-80    -144   
0      144    
32     112    
-832   -224   
-128   16     
-1376  96     
32     0      
-208   -80    
112    176    
-80    -176   
96     0      
-80    48     
112    -48    
-160   0      
-96    144    
-48    -464   
-192   64     
-96    112    
-224   64     
-112   -48    
-32    176    
32     80     
-464   -16    
-208   -32    
288    16     
-288   -48    
-208   0      
-64    176    
-32    -160   
-16    208    
-288   -96    
0      -96    
-160   224    
368    -128   
-176   80     
-224   -176   
16     160    
-464   -80    
-896   -1456  
480    1536   
-192   432    
800    -816   
-592   -400   
640    -272   
-352   880    
128    -400   
80     416    
-320   -544   
304    48     
-496   -96    
336    400    
-16    -352   
-336   224    
16     -160   
-48    272    
-192   -128   
-192   64     
48     32     
176    96     
-224   192    
-48    304    
304    96     
-240   -192   
-192   96     
64     128    
-64    176    
16     -352   
304    304    
-96    -192   
-208   144    
-64    224    
-416   -16    
-96    96     
-32    -96    
80     144    
-144   -784   
-192   -80    
256    240    
208    224    
-320   176    
160    -32    
-112   16     
-80    16     
-48    0      
48     -64    
-64    192    
-528   16     
192    144    
-112   -16    
32     96     
0      -16    
112    16     
-16    16     
80     128    
-144   -112   
-192   0      
-32    240    
-208   -16    
-112   0      
-128   -48    
96     0      
-32    -192   
-64    176    
-272   -208   
80     128    
-80    48     
144    144    
-32    96     
-32    80     
0      16     
0      48     
64     144    
48     144    
64     176    
-80    -16    
96     80     
-192   -112   
16     -224   
-48    -16    
-176   208    
96     112    
-192   -288   
-384   -192   
176    -192   
-64    128    
-192   128    
-32    -352   
-112   64     
64     64     
-160   48     
128    256    
-272   0      
-112   144    
240    240    
-192   80     
96     -96    
224    160    
-16    336    
16     -32    
-240   -144   
48     0      
176    272    
-112   16     
192    288    
-320   16     
144    176    
-288   -64    
208    112    
-64    64     
176    -96    
-128   32     
400    160    
-288   16     
208    160    
-96    112    
96     240    
80     240    
-208   -320   
-96    -96    
-208   -80    
192    80     
160    112    
-144   272    
16     -96    
176    128    
-224   96     
224    160    
128    128    
0      80     
-48    272    
-16    64     
80     112    
-352   0      
288    336    
112    112    
96     64     
-176   80     
-112   32     
352    16     
-128   128    
32     112    
192    128    
-96    96     
0      32     
-80    -128   
128    -48    
-112   176    
64     32     
192    240    
-320   -64    
128    -48    
96     -32    
96     96     
0      96     
144    128    
64     128    
-176   32     
160    16     
0      48     
0      32     
-64    -80    
48     48     
144    176    
-112   96     
64     0      
-32    -64    
48     432    
96     -160   
176    176    
16     144    
-32    192    
-48    -144   
-16    208    
0      128    
160    368    
-336   -96    
368    -16    
-160   64     
48     112    
-64    224    
32     -128   
96     112    
64     160    
64     -48    
96     224    
-64    128    
-32    96     
128    160    
32     32     
16     160    
-16    32     
176    -160   
-48    256    
-144   128    
240    32     
-80    -816   
-1072  800    
1632   -128   
1024   592    
0      -112   
-224   -160   
-272   -720   
800    1232   
48     -224   
16     176    
-432   -48    
416    32     
-64    464    
128    -256   
-128   640    
128    -752   
-144   384    
208    -672   
-96    448    
160    -272   
-64    272    
128    -144   
16     272    
-16    -128   
144    224    
-96    -48    
16     160    
-16    112    
160    16     
-32    64     
80     -176   
16     128    
64     -176   
96     176    
-16    32     
96     144    
32     160    
-64    48     
-16    -32    
32     288    
160    -48    
-32    128    
-64    64     
64     -192   
144    144    
32     -64    
80     128    
-160   -544   
176    304    
-128   -1120  
160    -32    
80     32     
-32    48     
80     128    
96     0      
0      0      
16     160    
96     176    
144    0      
-16    224    
-32    -32    
160    112    
-32    -176   
96     48     
80     -32    
-48    208    
-32    -48    
48     -80    
144    16     
32     144    
16     64     
-80    48     
240    160    
-192   -128   
160    96     
96     -304   
-80    0      
400    80     
-304   64     
192    -320   
192    256    
-144   112    
304    128    
-112   -64    
112    -64    
128    80     
-64    -368   
-16    -208   
160    -144   
64     80     
-48    -32    
160    64     
-48    -80    
144    240    
32     -160   
0      32     
16     -224   
32     -80    
64     -48    
80     -128   
48     -144   
16     -112   
96     224    
96     48     
-16    80     
112    0      
112    368    
32     0      
48     64     
32     -208   
64     144    
48     16     
32     -928   
-64    -32    
128    -544   
16     -160   
48     -336   
-64    -1040  
48     -256   
80     -2256  
112    -320   
144    304    
32     0      
16     -96    
-144   -160   
48     -272   
112    32     
336    -192   
-400   -64    
-432   -96    
96     -96    
-160   32     
96     96     
-16    64     
160    -64    
0      -144   
-48    -1152  
224    112    
-64    32     
176    128    
-48    -464   
32     80     
144    -336   
80     112    
-128   48     
176    112    
32     -32    
64     -80    
32     -192   
112    -624   
240    80     
96     160    
0      32     
-80    -512   
-80    96     
176    288    
-176   96     
48     -192   
48     -96    
-128   240    
48     -288   
-1056  -240   
64     -400   
80     -96    
-96    -112   
128    -32    
-16    -160   
160    -320   
48     -1856  
-112   288    
128    -32    
-32    128    
48     16     
176    -112   
-64    16     
16     64     
-96    -288   
112    112    
-528   96     
208    0      
-48    32     
176    -256   
-112   -16    
64     -416   
16     144    
352    -80    
-64    208    
-16    -128   
32     112    
16     -112   
144    32     
-64    64     
160    -16    
-48    32     
-32    80     
160    -304   
192    96     
160    -16    
144    -320   
-800   -624   
560    -304   
272    192    
-32    240    
-64    144    
32     176    
-160   -160   
160    816    
240    -112   
-288   -16    
320    -160   
-288   32     
16     -128   
-32    -48    
400    448    
-192   -80    
0      -1248  
-192   -304   
144    112    
144    16     
-512   -352   
256    240    
80     -160   
0      48     
-400   -96    
240    32     
-176   -32    
256    -112   
-32    432    
240    -352   
-176   112    
-32    -560   
224    80     
-64    96     
128    32     
-144   64     
144    -256   
-112   -16    
96     32     
224    240    
-112   0      
-96    -48    
48     -304   
64     144    
144    -112   
0      80     
-48    80     
-752   128    
16     112    
-160   32     
-16    -128   
32     96     
-80    -112   
144    -80    
-208   -48    
224    240    
-464   -16    
-1104  -272   
80     208    
-576   -32    
176    64     
-96    0      
-96    48     
-64    48     
-336   -80    
192    0      
-176   368    
-192   16     
192    -48    
-64    -16    
-672   -64    
48     192    
0      -48    
112    160    
-208   -160   
-48    -224   
224    64     
-512   64     
80     16     
-336   208    
0      -48    
-640   32     
-16    -160   
48     192    
-240   96     
224    128    
-160   -48    
208    -320   
0      -32    
-64    -80    
-128   128    
-16    96     
-64    64     
160    208    
32     -176   
-304   176    
-544   -16    
256    80     
-1136  -192   
144    240    
-112   -48    
144    32     
-240   -256   
32     -16    
-16    128    
96     336    
-144   176    
96     -32    
-112   32     
-16    96     
192    192    
-208   128    
96     112    
-336   -32    
176    208    
-80    64     
112    96     
-208   -240   
-32    -48    
48     160    
192    160    
-80    192    
-224   96     
64     48     
-176   -16    
-16    400    
192    0      
144    -16    
-288   -48    
-96    192    
-1568  -80    
16     32     
128    0      
80     128    
192    240    
-64    48     
32     -48    
-240   48     
-176   80     
208    -128   
-48    112    
-240   -128   
192    64     
-112   16     
-96    240    
-336   16     
-64    224    
48     -32    
-64    176    
64     48     
176    16     
-64    96     
16     32     
32     176    
0      0      
48     96     
-80    -48    
48     304    
-160   -48    
16     80     
16     -48    
48     176    
16     128    
-128   64     
-32    112    
80     16     
192    384    
-208   -160   
-16    80     
-80    160    
-96    -32    
144    176    
-96    -16    
144    208    
-48    64     
-32    -96    
176    96     
-16    96     
-16    80     
16     96     
0      112    
16     64     
-128   96     
-144   -80    
112    64     
0      256    
-224   0      
208    -64    
-144   -96    
0      272    
-272   -96    
-32    144    
32     80     
144    0      
16     -48    
160    -128   
48     48     
16     240    
1056   -192   
-432   -448   
160    128    
-608   368    
320    -400   
-304   80     
288    464    
-544   336    
576    96     
-736   -128   
640    -96    
-96    288    
16     16     
-208   272    
112    -80    
160    224    
-208   -144   
16     176    
-96    -32    
256    32     
-144   0      
240    112    
-48    256    
48     -80    
0      112    
-128   96     
-64    -16    
32     -64    
80     128    
32     -48    
16     0      
-16    96     
96     160    
-48    96     
64     0      
-80    32     
96     176    
32     160    
112    48     
-48    80     
128    144    
-48    176    
144    224    
-144   16     
48     0      
-112   -16    
64     80     
112    464    
0      -16    
48     32     
-160   112    
128    0      
0      144    
16     80     
16     192    
-48    -16    
96     32     
32     64     
48     -176   
144    176    
224    192    
64     336    
80     256    
-48    -144   
-16    128    
96     80     
-16    -1264  
-32    176    
176    400    
-144   112    
16     -64    
64     -64    
-64    112    
32     240    
112    32     
96     208    
-288   -96    
368    -32    
-96    32     
160    512    
-96    272    
-16    -464   
0      -240   
160    -112   
96     128    
96     176    
-48    144    
32     -96    
240    128    
0      80     
64     144    
-48    48     
80     96     
16     -32    
80     0      
16     96     
32     96     
48     160    
32     -32    
48     -16    
16     160    
96     176    
32     144    
32     96     
-16    0      
32     80     
16     -64    
144    144    
-112   48     
80     -64    
32     128    
64     -912   
48     128    
-64    -720   
160    176    
16     16     
144    288    
-80    16     
48     48     
-128   -208   
176    144    
-16    48     
288    176    
-336   -160   
192    -240   
-96    160    
80     -272   
112    112    
-160   -192   
304    256    
-176   -80    
16     64     
-112   -304   
304    16     
-112   128    
64     160    
256    96     
-224   208    
160    144    
32     -112   
48     176    
96     96     
-48    48     
16     -368   
32     160    
-176   -1296  
304    80     
-144   160    
96     0      
192    48     
-80    192    
96     256    
144    -144   
16     272    
96     -64    
64     208    
-144   -144   
32     -32    
336    -560   
-128   256    
176    -160   
-224   0      
256    -512   
144    128    
-96    64     
-16    0      
-112   80     
144    -336   
240    128    
-160   -224   
112    64     
-256   -560   
592    80     
-176   -224   
256    64     
-112   -32    
144    96     
-16    32     
80     80     
-16    -64    
64     128    
-16    64     
160    -32    
80     176    
-64    -144   
0      48     
0      -64    
400    -288   
64     0      
0      80     
80     -112   
-160   80     
64     -32    
-144   128    
240    -192   
-144   -272   
192    -1136  
-800   -448   
-256   -96    
896    1408   
480    -80    
-224   -848   
688    496    
-560   240    
448    192    
-512   -816   
544    -880   
288    208    
-304   -224   
176    16     
-352   336    
-128   -80    
112    80     
-160   -176   
176    80     
208    -336   
-48    0      
-128   -656   
16     -144   
224    240    
224    64     
-64    -64    
80     -64    
160    -32    
-112   48     
-176   -128   
32     -192   
-176   224    
240    32     
-80    -48    
-16    -512   
240    -48    
0      -208   
320    288    
-240   96     
112    -80    
-112   -64    
208    208    
16     -176   
0      -192   
-96    32     
112    -64    
-1008  -64    
48     -208   
-32    -160   
240    -256   
-144   -128   
272    -704   
-176   80     
224    -48    
32     128    
-16    -288   
160    128    
16     -240   
160    112    
-80    -32    
96     -16    
-256   -160   
192    96     
-32    -112   
192    32     
-16    96     
112    -16    
0      -96    
240    -1504  
64     48     
112    -32    
-160   32     
128    0      
128    -48    
-160   16     
32     -96    
32     -32    
64     48     
-48    -32    
112    -64    
-208   96     
112    -464   
-112   96     
-144   -464   
224    0      
-32    128    
-80    176    
-80    -32    
-16    -64    
-320   -112   
336    -384   
-208   112    
-64    -176   
-208   -32    
-112   -160   
-16    128    
0      -256   
-80    -112   
224    -320   
48     208    
64     -1696  
32     80     
-16    -16    
160    -96    
-208   -144   
112    64     
-112   112    
176    32     
-848   -48    
128    -80    
-288   144    
240    0      
-96    144    
80     -192   
128    240    
48     -240   
144    64     
-416   96     
0      -16    
-160   112    
336    -16    
-256   -176   
-208   -48    
16     -64    
224    -64    
-128   32     
416    96     
112    464    
352    -176   
-224   16     
-240   48     
-144   32     
192    128    
96     240    
-16    0      
-48    192    
-176   -112   
256    16     
-64    64     
192    32     
-176   -16    
-144   -336   
96     48     
-288   -400   
256    -16    
-272   -80    
-32    96     
80     -16    
-32    -16    
-144   -80    
48     16     
0      0      
32     32     
-16    32     
-336   32     
16     80     
-1168  0      
-48    -48    
-192   304    
-112   -48    
192    64     
-336   64     
48     160    
-544   -32    
-48    -16    
-16    -176   
80     176    
-48    -592   
48     176    
48     -48    
64     128    
-160   80     
32     16     
32     112    
48     -416   
160    128    
16     80     
-96    80     
-272   240    
16     -80    
-336   80     
-96    -192   
-80    32     
16     48     
-160   16     
0      192    
16     -64    
112    160    
224    240    
-32    -32    
-48    64     
-16    80     
-32    96     
-48    48     
64     -336   
-128   32     
16     272    
-1248  32     
-160   0      
-528   976    
-272   -448   
-400   160    
-96    288    
-96    672    
288    352    
-256   -496   
-320   256    
16     -112   
-288   -224   
512    272    
-112   16     
-48    256    
-224   144    
176    -208   
-144   336    
-16    96     
-16    -224   
-336   -288   
192    0      
-96    0      
224    336    
-128   128    
160    -96    
-336   -64    
64     176    
-128   -48    
160    64     
-288   96     
16     -256   
-2016  -256   
176    32     
32     -176   
112    224    
-48    96     
16     320    
-64    48     
-32    176    
-64    0      
64     -64    
-32    -32    
-80    64     
112    128    
-112   -32    
48     128    
-432   64     
160    256    
-80    112    
-192   -80    
-32    -64    
-16    32     
-64    16     
32     256    
-144   80     
-48    32     
-32    64     
32     304    
112    0      
-48    16     
80     320    
-624   -224   
0      128    
176    176    
-256   304    
-16    -16    
32     208    
-16    0      
0      64     
-64    80     
-64    16     
-32    64     
-176   -48    
48     112    
-112   -16    
64     192    
-304   112    
-16    16     
-128   -128   
-64    -80    
112    -112   
48     0      
48     208    
0      -16    
176    128    
-128   160    
32     48     
-144   64     
-32    -400   
80     -192   
208    192    
-48    192    
-96    112    
-80    -16    
32     64     
208    128    
48     32     
-16    96     
-80    144    
48     32     
96     96     
-32    48     
16     112    
80     192    
-112   -48    
-16    80     
32     224    
-48    32     
192    272    
-208   -64    
288    176    
-288   16     
80     0      
-128   0      
128    96     
64     96     
0      48     
-272   -272   
80     -32    
-80    160    
144    112    
-16    32     
-160   -32    
320    176    
128    16     
-96    64     
-112   192    
208    112    
112    96     
-48    176    
80     -128   
32     144    
-96    112    
224    144    
-80    144    
96     320    
-160   192    
96     -64    
16     80     
-128   -16    
64     224    
-48    0      
-16    32     
48     96     
0      0      
16     -32    
-240   -160   
240    -32    
-64    32     
32     384    
-144   32     
-32    176    
96     112    
-112   224    
160    48     
-144   0      
112    -224   
224    -128   
-352   -144   
96     0      
64     320    
176    -144   
96     336    
-32    16     
-32    304    
240    -2528  
-48    288    
160    96     
-112   160    
-96    -80    
0      -48    
-112   -32    
16     -64    
-240   80     
144    -16    
112    272    
160    272    
-128   -272   
32     96     
240    224    
128    -128   
144    176    
-32    160    
-16    -64    
32     64     
0      80     
80     32     
16     -16    
80     224    
272    192    
-208   -208   
16     -32    
-128   -16    
288    -48    
16     112    
96     -656   
96     192    
32     -16    
-80    208    
144    -1952  
640    -560   
800    992    
-272   1232   
-432   -80    
64     224    
-160   -48    
880    400    
-496   400    
-48    -208   
112    96     
-32    -672   
96     112    
160    -2896  
32     256    
32     32     
32     144    
-16    96     
144    160    
-32    -96    
128    80     
128    80     
-16    208    
32     16     
-32    -112   
-48    80     
208    -160   
80     128    
144    -240   
-176   48     
176    16     
-48    176    
144    -176   
48     128    
32     32     
-32    -176   
96     192    
32     160    
192    -32    
-160   -176   
176    224    
-16    -64    
80     -16    
80     -320   
48     240    
112    -832   
-64    -128   
80     16     
-80    208    
256    48     
-48    112    
0      -96    
176    48     
-224   208    
160    -112   
16     0      
208    -80    
96     96     
-16    48     
-32    64     
176    -80    
-64    128    
32     32     
160    224    
-176   32     
192    144    
-128   64     
80     -480   
160    176    
-48    32     
80     48     
48     -432   
48     144    
16     -496   
-144   160    
-144   256    
208    -48    
224    -80    
32     80     
0      208    
-144   16     
256    160    
96     -48    
-176   64     
240    -448   
-48    -112   
176    -176   
-208   48     
160    -16    
0      144    
0      -176   
80     160    
-64    -176   
-48    -16    
160    32     
-64    -1136  
-16    80     
144    -128   
-48    272    
128    -240   
-16    96     
16     -16    
80     48     
80     -80    
-32    144    
32     -96    
112    -928   
32     160    
32     -160   
144    112    
-176   -80    
-80    -784   
144    -128   
-64    -704   
144    96     
0      -400   
304    160    
-144   -128   
80     -128   
-96    -64    
64     -144   
-96    16     
192    208    
288    48     
-224   -16    
-400   80     
64     80     
144    0      
-96    -464   
32     0      
-80    0      
144    -112   
32     -1264  
112    -192   
-208   -16    
32     128    
64     224    
176    96     
256    -96    
-16    -80    
-192   80     
128    96     
-672   32     
224    -64    
-160   -128   
208    -128   
192    192    
-144   -640   
160    48     
-48    -368   
-80    -96    
144    -240   
32     96     
80     -224   
48     -64    
48     208    
-144   -224   
-64    -224   
-208   -480   
128    208    
128    -16    
128    64     
32     -288   
-32    16     
80     -1376  
32     48     
-32    16     
0      -96    
-80    256    
176    80     
-224   -80    
32     -384   
-368   -144   
48     -112   
-608   -32    
48     -64    
0      -64    
80     -256   
-32    -48    
80     -544   
48     624    
-304   -320   
-160   -32    
144    -32    
-96    0      
-272   -48    
128    128    
-144   -128   
176    144    
-224   16     
96     -16    
16     -144   
80     -288   
16     64     
96     -304   
96     176    
80     -528   
-48    -32    
352    -560   
816    1136   
320    -32    
-400   112    
-16    -304   
208    208    
-720   -416   
464    -48    
64     -80    
-112   -208   
256    224    
192    -160   
-112   16     
-96    -2256  
240    -112   
-400   112    
-16    96     
16     -16    
-64    -32    
-160   -80    
80     160    
-64    -112   
-80    -96    
-16    -48    
112    -16    
64     400    
144    -368   
-176   0      
16     -160   
-96    -208   
64     176    
96     80     
-80    32     
48     -32    
0      -128   
-160   -256   
-96    -112   
-32    -256   
-64    368    
-48    208    
-208   32     
-1584  -336   
208    208    
-128   -96    
-464   208    
48     288    
-1232  -144   
-96    -80    
224    128    
48     64     
208    96     
-112   112    
304    48     
-400   32     
-208   -240   
0      -16    
-96    -624   
-704   -560   
256    496    
-240   64     
-48    288    
-816   48     
48     -112   
192    80     
0      -16    
-32    64     
-112   64     
-256   -208   
-48    128    
-80    -128   
32     160    
-32    -144   
32     64     
-48    -112   
-160   16     
-128   32     
-96    64     
288    0      
-192   192    
16     384    
0      -80    
-208   -16    
0      16     
96     64     
-160   -48    
80     0      
128    416    
16     -96    
0      -16    
-16    32     
112    64     
0      64     
-112   64     
-112   -80    
0      0      
-640   -176   
48     96     
-16    32     
96     128    
-64    -192   
32     -32    
-48    -16    
96     112    
-80    80     
16     208    
-112   48     
0      48     
-32    112    
-128   -32    
16     64     
-656   32     
48     0      
-64    -80    
48     96     
-64    -224   
16     -80    
128    80     
-32    288    
64     16     
-176   -32    
-80    32     
96     -80    
32     -48    
48     272    
-16    208    
-128   64     
-176   112    
-784   -32    
352    48     
-96    160    
32     48     
-16    240    
-144   48     
-32    -112   
-64    -816   
-160   -304   
112    288    
-48    80     
112    272    
-64    0      
-256   64     
96     -64    
-592   16     
128    288    
64     192    
32     272    
-288   -160   
0      -208   
96     144    
-96    64     
0      64     
80     240    
-16    -96    
-96    -160   
-112   112    
-432   -192   
16     32     
80     -1056  
112    304    
352    352    
-192   48     
-160   32     
96     96     
16     208    
128    48     
-320   -192   
-32    -464   
240    432    
-288   48     
80     0      
-64    144    
208    -224   
-224   176    
64     336    
64     432    
-160   -32    
288    368    
-80    16     
0      -64    
-112   0      
80     -224   
-112   48     
32     16     
-192   192    
-64    -64    
48     128    
-16    32     
-48    16     
-32    80     
-32    16     
80     0      
176    -160   
-32    224    
16     96     
-64    64     
-32    96     
-48    48     
-896   -3008  
1040   864    
-144   1152   
-384   -144   
480    -16    
-832   544    
928    992    
-944   144    
560    224    
48     16     
96     48     
96     -48    
32     384    
32     -144   
192    352    
48     -144   
-96    240    
-32    192    
16     -64    
32     64     
-16    80     
-16    128    
112    96     
0      256    
80     -16    
-16    0      
16     80     
16     112    
128    128    
-16    112    
0      96     
-96    0      
96     80     
-80    112    
160    64     
-80    16     
160    432    
-48    304    
-48    -144   
-32    48     
16     80     
160    128    
-32    80     
-16    -96    
80     -32    
32     240    
48     224    
16     -80    
16     192    
-64    80     
176    32     
64     80     
-48    112    
112    160    
0      48     
64     48     
16     240    
-80    -48    
160    32     
-128   64     
96     80     
0      112    
80     176    
48     128    
16     -160   
0      16     
80     96     
0      144    
64     48     
272    64     
-32    96     
0      256    
-96    -16    
160    16     
48     256    
-128   -80    
-80    -336   
-288   -688   
32     176    
-144   -1056  
96     0      
288    128    
-176   -32    
32     -80    
32     240    
-112   144    
368    208    
-320   144    
160    96     
80     -96    
0      48     
48     0      
16     -32    
48     352    
-48    -240   
96     -176   
32     128    
-16    112    
-16    112    
144    160    
-80    128    
64     144    
64     80     
-64    -128   
64     32     
-16    272    
112    80     
288    272    
-80    80     
144    -16    
-144   80     
64     -1360  
112    16     
32     192    
112    16     
0      -32    
-112   48     
80     -528   
0      48     
144    384    
224    112    
-80    48     
0      -32    
112    128    
256    -80    
-160   80     
192    -96    
-64    224    
208    400    
0      112    
-32    -160   
160    272    
0      256    
112    -112   
-320   -96    
144    -64    
-48    32     
112    -640   
160    320    
48     -176   
0      0      
-32    -960   
192    144    
16     -656   
48     144    
48     208    
144    272    
16     144    
96     176    
-112   -208   
224    -544   
-144   240    
224    -96    
-16    -16    
160    -464   
176    112    
48     -96    
112    64     
48     -224   
-32    64     
112    176    
-16    208    
0      -32    
64     144    
128    160    
112    64     
-352   -336   
-256   -864   
240    384    
224    -160   
-64    -16    
-16    -224   
-16    32     
176    32     
48     128    
16     128    
48     224    
-192   -64    
32     112    
176    224    
176    -128   
32     160    
0      96     
-16    112    
-80    -112   
144    160    
112    -48    
-32    160    
-112   -16    
48     -464   
144    80     
160    -2432  
16     64     
-192   -256   
-128   -752   
48     -112   
0      -336   
-16    -96    
-80    -928   
320    784    
-80    240    
-16    -288   
224    288    
-112   -176   
0      -592   
0      -256   
320    96     
-176   32     
208    80     
128    32     
80     -16    
-224   -672   
240    16     
16     -1408  
160    128    
160    240    
-64    -288   
32     80     
-64    -352   
368    -288   
-336   48     
384    -112   
80     64     
80     -96    
0      -272   
80     -704   
528    496    
16     64     
-32    80     
64     -128   
176    -1008  
-80    -208   
256    -384   
-48    96     
-192   -720   
48     16     
224    -48    
-80    -128   
96     -400   
0      224    
112    -144   
0      32     
-112   -96    
16     0      
-80    -48    
272    16     
112    144    
-64    64     
144    128    
-80    16     
64     112    
48     -128   
48     -144   
-144   -64    
464    688    
-640   -208   
-272   -288   
336    -288   
-96    -256   
96     -144   
176    -800   
0      48     
192    -512   
-32    112    
32     -32    
64     -48    
-48    112    
96     80     
-112   144    
144    -112   
-160   -112   
128    -64    
128    16     
-48    -112   
160    0      
240    320    
80     256    
64     -736   
-80    208    
80     -112   
112    144    
0      144    
192    0      
-80    80     
128    -224   
-48    16     
32     -160   
144    48     
32     96     
-400   48     
16     -112   
-16    -32    
144    224    
0      -48    
256    240    
-96    -48    
144    224    
112    16     
-240   -224   
128    -288   
-128   48     
96     48     
0      -96    
-16    -96    
-256   -112   
176    -496   
-96    -96    
96     -432   
128    96     
-400   -64    
16     64     
-144   48     
128    -48    
-80    -96    
-16    80     
96     144    
32     0      
-576   336    
96     48     
-80    -96    
96     48     
80     -112   
64     -432   
-32    -64    
-272   16     
160    -128   
-368   48     
384    176    
-64    -32    
128    -432   
-240   48     
224    -32    
64     240    
-32    -96    
144    160    
-480   32     
144    192    
-288   -384   
-400   -112   
-48    -64    
-336   0      
-272   128    
-656   -16    
-352   -416   
48     -352   
-80    -176   
128    0      
-48    0      
-240   0      
-16    192    
-80    -32    
-64    -32    
16     -48    
-432   32     
128    160    
-272   -224   
-48    -64    
-144   64     
-64    -96    
-144   96     
-32    48     
112    144    
-16    192    
-96    -224   
112    112    
-336   80     
-48    -64    
192    128    
-96    96     
240    0      
-464   80     
-48    16     
-192   -96    
128    128    
-112   208    
-320   64     
-352   -96    
128    -96    
0      -112   
-32    80     
32     -144   
224    64     
-64    224    
-240   32     
-96    96     
-16    -128   
64     32     
-48    144    
32     32     
-32    -32    
-176   64     
-1696  -160   
176    -128   
-32    32     
32     240    
-400   448    
-608   112    
544    912    
-48    -48    
-304   -160   
-560   320    
-80    -208   
192    576    
-576   304    
432    -320   
-320   64     
32     -32    
32     240    
-16    64     
96     112    
-64    -112   
16     -32    
-176   160    
96     -16    
48     80     
-48    32     
-96    240    
-128   -16    
-16    32     
-80    -160   
128    144    
-496   -144   
-16    288    
-1824  -128   
192    96     
-144   128    
-48    32     
-48    32     
-16    128    
-16    128    
112    -64    
-128   64     
80     -16    
80     160    
0      -80    
-128   240    
-272   -160   
32     192    
-880   -240   
-16    96     
16     -32    
64     176    
112    144    
-48    32     
48     48     
-96    64     
144    80     
-96    224    
144    48     
-144   32     
-64    96     
16     -128   
-16    128    
208    32     
48     112    
0      0      
0      160    
-48    128    
0      -48    
64     144    
-80    64     
128    0      
-80    32     
48     192    
-224   80     
16     96     
48     -80    
48     208    
-240   96     
64     -144   
-48    80     
-224   -144   
-32    -416   
-336   -128   
-64    256    
-32    64     
48     112    
-192   32     
240    512    
-336   208    
304    -16    
-32    -208   
144    64     
32     416    
-192   144    
96     144    
0      -48    
128    48     
128    16     
32     192    
96     128    
96     112    
48     16     
224    224    
-80    16     
80     32     
-16    208    
96     240    
-128   32     
-16    96     
144    176    
0      -32    
112    112    
-80    -288   
144    48     
-128   -128   
112    192    
-80    96     
64     160    
-32    64     
272    224    
-240   32     
64     160    
-80    96     
128    -16    
-48    -512   
-128   -336   
96     400    
0      128    
288    144    
-96    -48    
16     192    
-32    80     
16     -208   
48     208    
-144   128    
48     160    
96     -112   
-16    64     
176    128    
-16    -176   
96     240    
-32    240    
48     -192   
-64    160    
224    112    
-16    144    
0      128    
0      -160   
-96    96     
96     208    
160    256    
16     192    
80     448    
-160   -48    
176    112    
-48    64     
64     80     
64     352    
-48    80     
496    864    
-656   -288   
112    -176   
64     336    
-96    -64    
48     176    
-16    -32    
80     48     
-64    48     
16     0      
0      176    
48     464    
-144   432    
-320   -96    
96     -144   
288    192    
-48    128    
64     -224   
-32    240    
-64    -160   
224    -336   
-192   96     
256    -784   
-80    80     
128    80     
0      128    
16     128    
-96    80     
144    16     
-32    32     
112    -16    
96     304    
-96    80     
144    80     
0      16     
64     -48    
-32    80     
176    -288   
16     224    
-80    192    
352    96     
-160   -32    
176    96     
-912   -1200  
1376   2208   
-736   800    
960    -432   
-576   144    
496    -64    
-112   848    
-336   -816   
496    -160   
48     -464   
-144   336    
32     -2672  
224    256    
-16    96     
-80    96     
-144   -272   
256    176    
-192   192    
816    208    
-192   432    
112    192    
128    448    
16     -208   
64     64     
-176   -784   
304    144    
-48    -480   
144    896    
288    464    
-64    464    
-112   -176   
432    -224   
-432   -288   
0      -16    
-48    32     
-304   -320   
-48    -32    
-352   176    
224    304    
-464   48     
16     240    
48     -112   
16     80     
-160   -672   
144    304    
32     -288   
-208   240    
96     -432   
224    208    
64     224    
368    352    
-128   80     
0      -48    
-144   -304   
368    32     
112    128    
80     -32    
144    800    
-224   224    
352    416    
-128   -448   
-144   -336   
176    -64    
224    304    
-16    112    
128    -544   
64     176    
48     128    
192    32     
64     288    
48     96     
128    -320   
96     80     
-16    -64    
64     16     
112    -176   
16     -240   
288    -144   
-112   48     
-16    16     
-144   96     
352    400    
64     -80    
-64    80     
224    -176   
176    128    
32     -48    
224    464    
96     112    
-80    -528   
-32    16     
128    -352   
16     144    
-1088  16     
-176   -736   
-16    -256   
0      -768   
288    32     
80     -688   
-48    -272   
-224   -16    
352    48     
112    288    
-96    0      
-16    -1344  
144    240    
176    -128   
-32    -32    
-224   64     
0      -48    
16     -112   
112    -240   
144    -32    
160    -176   
-80    -208   
0      -128   
48     256    
240    -160   
16     32     
-160   -528   
-208   256    
160    160    
192    32     
-272   -224   
-16    -416   
112    -208   
64     -208   
-48    -80    
288    160    
-256   -32    
288    -1760  
-48    112    
208    80     
0      208    
-160   -128   
32     96     
64     -32    
-16    -128   
16     -128   
-256   -80    
-80    -32    
64     -112   
-96    0      
160    -320   
-32    -256   
128    -736   
-144   -176   
256    112    
48     192    
0      -96    
96     64     
-224   -128   
0      16     
-80    32     
112    48     
-288   -16    
-96    16     
96     -112   
64     -160   
144    48     
96     -128   
80     16     
80     192    
0      0      
0      -256   
-16    -320   
128    96     
-48    112    
-128   96     
160    48     
-208   -32    
160    -224   
144    32     
96     -16    
-240   208    
-128   -80    
112    0      
160    -464   
128    -32    
64     80     
-16    96     
-32    -48    
256    -112   
-400   -80    
-96    -112   
-448   -64    
16     -208   
-48    -48    
0      -144   
-848   -16    
32     -304   
-64    240    
48     -240   
448    -16    
-208   224    
144    -160   
-112   -16    
-128   0      
-1008  784    
1392   336    
336    656    
224    -352   
-784   -512   
-80    336    
-608   352    
624    -480   
-688   576    
432    -544   
-64    368    
-256   -144   
240    272    
-272   -176   
-16    32     
-48    0      
256    48     
-112   112    
64     -144   
-192   16     
160    -240   
-176   352    
144    -272   
-16    240    
112    -400   
64     -16    
-80    -320   
16     16     
16     -80    
144    128    
-32    -80    
-32    48     
-144   -64    
112    -80    
-80    -64    
144    -176   
-80    112    
-992   64     
0      32     
-144   -288   
-560   0      
-64    48     
256    48     
-96    -96    
-144   16     
-192   32     
176    176    
-144   -48    
-176   48     
0      -96    
-64    144    
-64    48     
16     -240   
-32    144    
-64    32     
-48    32     
-128   48     
-48    48     
32     0      
-208   0      
0      96     
-1312  48     
-48    -64    
128    192    
-192   160    
-32    -176   
-48    80     
-32    -288   
64     80     
48     144    
-80    32     
112    112    
-128   -96    
48     112    
-208   128    
-32    0      
-176   224    
32     -64    
176    -32    
-64    288    
-96    -64    
48     64     
-96    -480   
16     0      
400    368    
-176   80     
80     48     
-176   96     
-176   -288   
128    16     
272    368    
16     272    
-368   -144   
-416   -80    
0      176    
80     -32    
64     192    
-224   -352   
-112   -112   
160    128    
-96    80     
0      112    
-16    -112   
32     96     
16     64     
48     336    
-16    -32    
-96    96     
-272   -64    
224    256    
16     -112   
64     80     
-64    -688   
-128   -16    
48     80     
-160   64     
80     -80    
-112   -128   
16     -16    
-208   64     
-32    -16    
-128   32     
-32    80     
-464   -16    
-48    112    
96     -288   
-128   112    
208    96     
-64    16     
-96    96     
48     80     
16     16     
-16    16     
-80    48     
80     80     
-48    -96    
240    -48    
-16    336    
-48    0      
48     240    
-784   -80    
16     64     
-48    192    
32     -64    
32     160    
-160   -96    
112    -16    
-16    -16    
64     144    
16     80     
16     176    
-64    0      
-32    48     
-240   -192   
160    144    
-768   -64    
0      96     
-112   128    
128    -16    
-80    112    
176    208    
-96    144    
-160   160    
80     -64    
16     112    
304    176    
-464   -224   
176    304    
-320   -160   
256    176    
-64    112    
112    64     
48     96     
0      112    
-64    48     
32     -96    
160    288    
-16    0      
96     192    
-224   32     
160    48     
-64    32     
48     112    
-304   128    
160    96     
240    320    
-128   80     
-16    0      
176    -32    
0      160    
-32    -32    
64     128    
-48    144    
-64    112    
144    -16    
-160   16     
80     112    
-544   -1600  
640    2672   
-336   1008   
160    -656   
-64    -512   
160    176    
-96    352    
-32    -48    
-48    -96    
656    -480   
-576   576    
208    -384   
128    928    
-272   -272   
96     528    
-192   -256   
-32    384    
-432   -96    
160    192    
-336   -320   
512    160    
-112   320    
208    16     
-80    448    
-48    352    
48     288    
368    16     
480    672    
-208   64     
-480   -304   
112    160    
-16    16     
-32    16     
224    128    
96     80     
-32    432    
0      64     
-96    -304   
-128   -16    
192    96     
208    640    
-32    128    
-80    -32    
-224   368    
48     -16    
112    144    
-16    -160   
64     -64    
80     -144   
-48    -80    
-16    96     
-16    16     
128    144    
16     208    
80     256    
-96    -48    
112    176    
-80    -144   
128    176    
-160   -80    
192    -304   
32     144    
16     160    
48     -160   
64     64     
-96    64     
224    32     
48     288    
-96    128    
176    208    
-400   -32    
80     64     
96     -144   
0      -64    
160    -144   
-80    -32    
160    128    
48     -672   
48     80     
144    224    
144    160    
-16    112    
160    64     
-16    320    
304    64     
176    -64    
-208   64     
128    -160   
-144   176    
80     112    
48     -192   
-112   96     
160    -128   
16     128    
144    192    
-32    -32    
-112   80     
16     32     
80     -256   
-48    -144   
-128   -176   
144    144    
64     96     
32     -128   
-128   48     
64     -240   
224    16     
-32    -80    
-48    288    
224    -2880  
-64    192    
-16    192    
0      64     
48     80     
-144   -112   
272    16     
-144   96     
416    288    
-144   80     
96     272    
256    240    
16     256    
64     -208   
-320   -112   
144    -272   
256    144    
-48    -560   
16     80     
112    16     
16     192    
-96    64     
0      16     
16     -48    
-112   16     
256    112    
176    -176   
-176   0      
-96    -144   
160    272    
208    -400   
48     0      
-224   -368   
176    144    
352    80     
-112   160    
64     96     
32     240    
48     48     
-128   -176   
224    32     
96     -32    
-16    160    
80     -176   
16     -16    
-80    -240   
160    208    
64     -176   
112    112    
-96    -400   
288    32     
48     224    
16     192    
32     96     
16     -32    
128    144    
16     -32    
64     -144   
0      -80    
256    208    
-224   -192   
128    96     
0      -80    
80     192    
192    -48    
-96    80     
176    48     
-16    -64    
112    -1424  
-32    -32    
112    192    
32     -32    
0      112    
160    -288   
160    144    
-144   -128   
112    -32    
96     240    
-64    -1408  
32     96     
32     -1456  
-16    64     
176    -144   
96     -416   
-16    80     
16     -112   
-32    -144   
32     -256   
32     -304   
-912   -640   
944    1728   
-1472  800    
-32    144    
-144   -560   
-480   -768   
192    -192   
-240   -480   
288    304    
160    -432   
-32    256    
16     -784   
48     400    
304    -1456  
-64    416    
-64    -160   
-16    192    
96     -272   
-144   0      
240    -288   
-48    96     
80     192    
48     32     
-560   48     
64     -432   
-16    -96    
208    -144   
-112   48     
224    -368   
-32    176    
144    80     
-48    -128   
64     -256   
16     176    
160    -112   
-32    160    
-128   -16    
96     -64    
-192   -96    
144    112    
-688   -96    
32     16     
-16    64     
144    -128   
-48    -128   
96     -128   
32     144    
144    -128   
48     224    
32     -48    
128    96     
-32    -80    
48     -48    
-32    48     
-32    16     
-128   -64    
80     16     
0      0      
96     -208   
-160   -128   
112    -288   
-32    432    
96     -160   
192    160    
96     16     
0      -128   
-112   48     
0      -112   
-80    -48    
144    -112   
-368   -48    
176    -304   
-160   -240   
80     -448   
-32    48     
0      -304   
64     -192   
272    -1136  
-160   192    
-304   -576   
112    -96    
-64    112    
176    160    
-16    128    
-96    -224   
-304   -80    
48     32     
-208   64     
48     16     
80     16     
-96    -224   
144    -48    
48     -288   
144    192    
-128   96     
96     -16    
-96    32     
96     128    
-432   112    
16     -224   
-144   32     
144    48     
96     144    
32     -80    
-48    80     
64     -256   
0      -112   
240    -240   
16     432    
-192   32     
96     -64    
-112   32     
112    -48    
-32    32     
-128   -16    
32     48     
-16    16     
-64    48     
-16    -48    
32     48     
160    48     
-64    80     
48     -176   
16     96     
-32    80     
128    -80    
-224   224    
0      64     
240    0      
-144   144    
-80    0      
144    -192   
-432   -96    
224    -16    
48     -80    
-64    96     
-160   -400   
32     -80    
-688   80     
176    48     
-912   64     
112    -80    
-288   112    
80     160    
96     16     
-256   -160   
256    16     
-224   224    
-80    -352   
64     -16    
112    96     
80     112    
-112   0      
-320   256    
-96    176    
96     48     
-16    -48    
-144   -176   
96     32     
-2576  0      
80     -96    
-96    -80    
64     16     
80     48     
-144   128    
16     -272   
-368   256    
240    -144   
80     272    
-80    80     
112    -112   
-256   160    
32     -144   
48     64     
-224   128    
256    64     
-240   0      
112    16     
-64    -64    
96     64     
-96    -64    
-64    272    
-128   16     
-96    0      
368    -304   
-32    288    
-288   -144   
-128   -80    
48     80     
32     144    
-112   16     
-1008  -16    
16     -80    
64     -64    
208    416    
48     64     
-64    32     
-256   -96    
2464   -1168  
-112   448    
480    224    
-656   352    
528    240    
-96    -624   
-560   -416   
272    448    
-224   176    
32     400    
-192   352    
176    128    
-16    128    
-288   -192   
128    112    
-240   -16    
416    624    
-80    176    
0      64     
-224   64     
112    -240   
-128   16     
112    32     
-192   48     
64     -32    
176    160    
112    224    
16     80     
-64    -80    
96     48     
-32    64     
80     144    
-64    80     
32     112    
-160   16     
-48    -128   
-48    112    
64     64     
0      48     
48     272    
-1328  -96    
48     32     
-48    176    
96     96     
-112   16     
-32    -144   
48     224    
192    304    
-384   48     
112    -48    
-144   224    
-16    -128   
80     144    
-400   -96    
336    -48    
-112   -64    
64     160    
-48    144    
96     16     
16     128    
-48    64     
32     48     
16     -16    
16     112    
32     96     
32     176    
-64    -80    
32     272    
-112   -128   
144    240    
-64    48     
80     80     
128    -32    
-64    128    
-32    64     
32     112    
-176   224    
64     288    
80     16     
-16    -64    
16     64     
-96    -48    
-16    96     
-64    -192   
112    -208   
80     256    
-240   112    
208    -144   
-64    80     
-96    128    
128    160    
-48    80     
-80    -48    
192    16     
-160   -128   
288    288    
-224   64     
96     96     
0      16     
0      16     
48     144    
0      32     
-80    48     
160    80     
0      32     
112    224    
-80    192    
-16    -112   
0      -144   
-128   -16    
288    304    
-48    48     
32     160    
-224   80     
320    112    
-96    320    
-64    16     
368    368    
-192   64     
272    96     
-208   176    
288    144    
64     96     
-128   144    
48     192    
64     192    
16     0      
0      176    
0      112    
144    112    
-192   96     
128    -48    
-64    112    
304    48     
208    160    
-400   48     
208    -64    
-208   64     
-64    144    
208    -48    
32     144    
-240   0      
16     -256   
-64    0      
-32    176    
-16    -48    
16     -96    
48     -64    
-16    176    
64     80     
96     128    
-16    64     
16     96     
80     -32    
48     32     
0      112    
112    176    
-48    64     
80     -80    
144    32     
-48    192    
80     128    
-112   80     
64     -16    
192    208    
16     -48    
32     96     
-48    64     
-16    208    
192    112    
80     128    
112    144    
-192   -400   
-64    96     
80     -2912  
-32    208    
32     -16    
96     208    
-256   128    
96     -128   
128    80     
16     0      
48     -304   
-48    208    
-176   144    
240    96     
0      112    
192    -304   
144    64     
-48    -80    
64     144    
-16    160    
96     224    
-96    -144   
144    -32    
-16    432    
0      384    
-752   48     
-192   1568   
192    208    
-560   -560   
-272   -16    
32     560    
-800   -624   
464    784    
-752   -320   
816    -1136  
-640   -352   
208    -368   
-48    192    
352    -64    
-160   224    
80     -16    
32     336    
16     32     
0      64     
16     -80    
80     32     
-16    32     
48     96     
48     32     
48     -368   
-16    128    
144    192    
-208   112    
48     -64    
48     80     
224    112    
16     224    
-112   96     
-48    -16    
-32    32     
80     -128   
240    64     
-64    -704   
112    208    
0      -672   
64     160    
-80    -304   
80     96     
48     80     
176    144    
-32    64     
80     80     
-32    112    
16     -368   
160    160    
-96    -448   
192    144    
-112   -112   
192    128    
-144   48     
80     48     
-16    -96    
-32    96     
-32    32     
64     144    
-176   -400   
48     192    
160    192    
112    -32    
144    288    
0      -112   
32     80     
304    80     
48     48     
48     -224   
16     128    
80     -608   
48     128    
32     48     
64     208    
-16    64     
352    400    
-80    -848   
176    80     
192    -64    
-224   -64    
272    0      
-16    64     
-80    64     
144    -208   
80     128    
80     128    
96     -304   
32     192    
128    -288   
32     -384   
32     0      
-16    -608   
80     -16    
208    -640   
-32    -48    
144    -480   
-80    -32    
112    112    
48     -16    
80     112    
32     80     
64     -336   
-176   96     
96     16     
32     -400   
-560   -144   
96     0      
64     368    
0      -224   
176    -112   
-96    -688   
144    -160   
48     128    
0      16     
128    -192   
-208   -160   
160    -176   
-112   48     
-80    -176   
-48    112    
-272   48     
176    -160   
-128   -176   
112    -16    
-16    -240   
320    -192   
-272   112    
160    -240   
128    -208   
-192   -48    
96     160    
208    -32    
-48    64     
80     96     
16     -16    
16     544    
-336   16     
64     -256   
-128   16     
96     -64    
80     -96    
-144   0      
208    -368   
48     0      
-16    16     
32     96     
144    96     
64     16     
-64    -16    
32     -160   
-96    -112   
64     192    
-160   96     
-192   -240   
352    -192   
-16    -64    
464    176    
-368   -784   
-80    -112   
272    -528   
32     -16    
112    128    
-144   -16    
-96    -16    
96     -240   
-240   400    
208    -352   
-304   64     
32     64     
-288   -32    
-160   -160   
80     64     
464    -272   
160    304    
-336   -704   
384    -144   
-208   272    
160    48     
-208   240    
-240   -272   
160    16     
400    -176   
-144   64     
192    -672   
-336   -16    
208    -96    
-224   112    
32     0      
128    144    
-32    -32    
-32    -16    
-160   96     
16     -160   
96     64     
128    112    
-368   16     
0      -176   
272    1792   
-544   1152   
848    1024   
80     224    
112    -560   
-80    -480   
-96    512    
128    -608   
32     160    
32     -32    
-16    128    
-224   -16    
304    192    
-208   0      
-16    0      
-160   32     
144    -112   
-384   32     
0      -240   
64     -32    
-128   -352   
96     240    
-272   64     
-656   80     
-352   80     
-1600  -64    
-192   144    
144    128    
-48    0      
48     -80    
-48    128    
176    -64    
-128   128    
-976   -224   
64     96     
-288   -272   
96     16     
-112   -96    
-624   160    
-48    -32    
-256   -64    
-208   48     
-416   80     
-80    0      
176    -112   
-176   16     
144    0      
-224   -256   
96     112    
-272   128    
96     -128   
-160   160    
96     48     
-160   80     
0      -80    
16     0      
-176   176    
-48    -64    
192    112    
-1408  -16    
144    -128   
-32    128    
-32    80     
128    0      
-128   160    
-16    -208   
-96    -256   
32     48     
16     176    
0      160    
-80    16     
-16    -16    
-32    128    
-144   80     
-672   -48    
-16    -16    
16     -96    
48     16     
-80    -144   
16     96     
-64    -16    
-32    -96    
128    -48    
-32    112    
-192   160    
-112   -16    
-32    -160   
-32    16     
-80    288    
64     -32    
16     -16    
-1600  -128   
32     48     
-32    -304   
160    160    
-256   144    
240    144    
-96    -16    
0      16     
16     -16    
-272   -16    
80     48     
32     192    
32     112    
-288   -160   
224    144    
-432   0      
128    32     
-96    -32    
32     224    
64     32     
16     48     
-64    -48    
-64    160    
128    -48    
-224   64     
48     112    
144    64     
32     80     
-240   240    
128    192    
-240   0      
-208   128    
-144   -80    
-16    0      
48     48     
-320   96     
528    400    
-64    176    
32     176    
-224   32     
-96    -96    
-96    -112   
-272   -64    
-32    -128   
144    64     
-96    16     
32     160    
-528   -288   
-32    -32    
80     64     
-80    48     
96     32     
-64    16     
-48    -48    
144    80     
48     128    
-64    -80    
-64    64     
-48    48     
208    16     
-240   32     
32     112    
80     32     
64     -112   
-96    208    
208    48     
64     336    
-208   -80    
128    128    
-96    48     
96     176    
-112   80     
96     96     
-80    128    
-176   0      
96     -64    
80     288    
16     128    
-208   -64    
-32    64     
48     0      
112    240    
-64    176    
-16    -48    
64     -32    
80     96     
0      64     
-32    80     
-272   -144   
112    192    
-80    64     
-32    48     
64     112    
32     80     
32     208    
-112   48     
-32    -64    
32     80     
160    144    
96     96     
32     16     
32     0      
-64    64     
-80    208    
208    128    
-144   128    
112    -48    
-288   1104   
-368   -288   
-224   -80    
-320   -608   
-480   768    
784    -400   
-592   -240   
112    544    
32     -400   
-320   -208   
480    304    
-224   224    
0      160    
-96    128    
96     -144   
32     176    
48     272    
256    560    
0      208    
-128   -48    
0      112    
160    160    
-64    -96    
-32    128    
-128   16     
208    64     
-128   80     
112    64     
0      -64    
128    480    
-160   -112   
96     -16    
16     128    
240    160    
-16    304    
80     48     
-224   64     
-80    -256   
176    96     
-128   -80    
144    224    
-176   -16    
48     -784   
-64    144    
96     0      
128    128    
0      16     
80     -16    
-112   0      
-64    80     
96     -176   
80     224    
-16    176    
240    112    
-240   176    
208    144    
-144   112    
208    112    
160    240    
-48    -64    
0      16     
128    80     
-80    -16    
208    -64    
16     80     
48     96     
-32    160    
-128   0      
96     48     
-144   -208   
64     144    
96     112    
0      -240   
-64    -64    
-32    -2768  
32     80     
368    672    
-144   480    
-272   0      
64     -304   
-48    32     
160    16     
-32    -80    
96     96     
32     -128   
80     0      
352    192    
-112   -112   
64     32     
-16    -208   
-16    64     
192    -48    
16     144    
0      48     
160    224    
-128   -432   
144    112    
112    304    
48     112    
128    48     
-112   -224   
48     64     
144    -304   
16     112    
32     -272   
96     128    
32     -2400  
0      176    
64     -48    
16     176    
48     32     
64     96     
-16    0      
112    176    
-16    16     
64     -16    
48     160    
16     -80    
48     80     
96     64     
16     192    
-16    -960   
-96    32     
144    -816   
304    176    
32     224    
-208   -32    
112    -32    
208    128    
64     32     
160    176    
32     -144   
48     64     
96     48     
-96    176    
48     -96    
16     -896   
-240   64     
320    608    
-48    0      
0      -112   
-16    112    
80     112    
176    64     
-16    16     
-32    -64    
128    -16    
-144   -800   
208    16     
0      -400   
128    112    
16     32     
112    240    
16     -672   
384    -144   
-160   176    
-80    192    
-144   -288   
-64    -64    
224    192    
208    -240   
32     -32    
-16    -384   
144    0      
32     -96    
-96    -176   
48     -160   
352    384    
-176   -48    
48     128    
112    -32    
128    0      
-64    -1968  
32     0      
-64    -2128  
128    128    
96     -208   
64     384    
-144   -160   
144    288    
80     -144   
-48    32     
192    -1136  
32     112    
64     -112   
-48    112    
128    16     
-176   -32    
16     -128   
96     -448   
112    -64    
96     -272   
-64    112    
256    -1344  
-32    -208   
80     144    
112    -48    
48     -240   
0      -1344  
784    -848   
432    704    
-480   224    
16     608    
-944   -144   
224    48     
208    -384   
256    -32    
-80    -272   
240    -80    
16     -176   
176    240    
-128   0      
288    -128   
96     64     
-16    -96    
64     80     
0      -48    
0      -176   
0      -16    
128    -16    
112    -48    
112    -192   
-96    -80    
128    32     
-192   112    
256    -400   
-240   -144   
96     32     
48     64     
32     -32    
-32    48     
-32    96     
128    -112   
-224   320    
-368   -240   
-1232  -192   
-64    32     
192    -64    
80     -240   
-144   -16    
112    -928   
-64    -80    
112    -128   
-80    32     
240    96     
16     144    
-128   -176   
48     -64    
-448   -48    
208    -48    
-400   48     
80     0      
80     -64    
32     -144   
192    -96    
16     -320   
64     176    
-16    -992   
144    128    
-32    80     
64     -128   
-16    0      
-96    -128   
-64    -48    
176    -48    
-32    208    
-128   -80    
240    -128   
96     -16    
-256   16     
208    -96    
48     144    
16     -864   
80     80     
224    144    
-128   -80    
16     -48    
112    -32    
-576   80     
-32    0      
-48    -272   
-112   -16    
-544   -80    
144    -192   
144    336    
-16    -256   
288    256    
-192   -592   
208    -320   
-80    -208   
112    -48    
-80    32     
160    384    
-368   0      
256    -32    
-144   -80    
128    112    
-144   -32    
160    208    
-16    64     
144    -16    
-64    48     
192    -640   
-16    -48    
-176   -64    
192    64     
-320   -240   
160    -96    
-160   64     
176    32     
64     192    
-128   -32    
-64    -32    
208    -80    
-208   96     
-720   -416   
-192   96     
-656   -352   
-1072  -16    
-160   32     
-1232  32     
-256   -32    
288    -224   
-128   -80    
-192   -96    
-48    -16    
48     -144   
-96    -48    
-704   -288   
64     -64    
-448   -256   
48     64     
80     -96    
80     32     
-208   80     
-112   128    
80     80     
-256   160    
-112   -32    
208    128    
-256   -240   
-176   0      
-32    96     
-144   -400   
-48    32     
144    64     
-96    16     
-32    48     
-96    48     
0      64     
-256   80     
-80    -32    
-96    96     
-32    0      
-1808  -112   
32     288    
-80    -320   
48     48     
48     32     
80     -160   
-64    -192   
-176   48     
-32    112    
-160   0      
-96    -48    
32     176    
-48    -64    
160    528    
-224   -240   
-320   -96    
80     0      
176    -112   
-32    64     
-64    -16    
-96    192    
-80    -160   
112    -16    
16     96     
64     192    
-48    -32    
-64    96     
96     32     
-80    -16    
-48    32     
32     208    
32     128    
-672   -80    
112    64     
0      -80    
96     80     
-32    160    
-112   176    
112    -64    
-16    96     
0      96     
-864   -2144  
896    832    
-928   -496   
688    -512   
-256   -32    
272    592    
-784   384    
208    -432   
464    720    
16     -320   
-272   -176   
-320   -16    
576    368    
-256   48     
96     -48    
-368   -480   
192    96     
-96    -224   
320    368    
-336   -32    
32     -176   
-400   192    
-32    208    
160    -64    
-48    176    
-192   -96    
-16    -96    
-176   16     
32     176    
112    -64    
0      0      
16     80     
112    112    
-144   112    
-304   -128   
128    64     
-128   448    
32     48     
0      -432   
-48    32     
48     256    
-208   96     
160    32     
16     0      
16     48     
-80    64     
-16    -112   
112    192    
-64    -192   
320    336    
-128   -144   
-16    208    
-80    0      
80     112    
32     80     
144    112    
160    336    
-352   -64    
-272   -528   
176    240    
-272   144    
16     192    
-112   0      
224    32     
-96    32     
-144   112    
-144   -112   
0      96     
-80    96     
-32    96     
32     32     
0      144    
-48    48     
80     48     
-96    -32    
16     16     
64     112    
320    0      
-560   -80    
64     -240   
-208   -48    
16     -160   
96     112    
96     -128   
80     272    
32     96     
-80    32     
48     48     
80     80     
80     -16    
144    160    
-48    400    
-96    32     
-16    -48    
48     -48    
96     224    
32     128    
-48    128    
0      224    
128    192    
-16    -64    
0      32     
0      160    
176    16     
32     160    
-208   -16    
192    432    
-304   -304   
288    176    
-304   112    
192    64     
16     80     
-32    96     
208    192    
-16    272    
-80    32     
-32    -80    
32     224    
208    272    
96     0      
-288   96     
96     48     
48     16     
32     -32    
-160   32     
0      -832   
224    160    
-192   256    
480    624    
-336   0      
32     -112   
-32    176    
352    -80    
-160   -80    
96     -48    
-48    80     
-96    48     
80     320    
96     -128   
64     -432   
48     -416   
-64    48     
-32    0      
144    160    
48     192    
32     -16    
64     16     
-96    16     
192    240    
-80    32     
96     96     
80     0      
-48    -288   
64     128    
128    352    
-32    -496   
-64    -64    
224    624    
-304   -320   
128    16     
64     208    
16     48     
144    96     
-112   96     
272    528    
-272   32     
48     -80    
512    432    
208    480    
-160   -192   
-64    16     
-48    -144   
128    -1680  
96     176    
-128   160    
0      80     
-32    176    
176    80     
64     272    
-16    96     
-32    16     
32     144    
16     -32    
32     -16    
208    160    
176    -336   
-16    128    
16     -480   
-32    96     
64     32     
48     112    
64     32     
144    -16    
-176   -320   
64     128    
160    -48    
-16    288    
-16    -16    
1984   -1072  
-752   -1152  
944    96     
-16    656    
-448   -208   
432    -176   
-736   -1440  
704    528    
-384   -128   
160    112    
-192   -80    
240    224    
-112   272    
176    -128   
96     112    
-16    -96    
32     176    
160    48     
-128   160    
192    112    
-64    48     
80     -496   
16     224    
96     -96    
48     112    
-48    -16    
144    48     
-80    -48    
96     96     
80     192    
32     -176   
112    64     
-32    -528   
80     160    
64     -448   
240    192    
-192   -272   
96     144    
16     -32    
80     160    
16     64     
112    80     
0      16     
80     -112   
144    128    
-64    -160   
32     16     
-80    -672   
384    160    
-208   -96    
272    48     
-64    48     
48     32     
144    256    
-16    16     
144    96     
-128   32     
208    -128   
-32    48     
-48    -16    
352    -224   
-96    240    
64     -48    
144    -48    
128    32     
-96    304    
160    -96    
112    -112   
80     -64    
-96    -240   
32     -64    
208    80     
64     -416   
80     48     
-32    -848   
80     -256   
224    -576   
-192   -144   
208    48     
32     96     
-48    32     
160    -160   
-64    -784   
16     -48    
-32    96     
-176   48     
256    -240   
-288   -144   
208    -368   
192    -48    
-160   -176   
208    -144   
-48    -32    
112    -32    
208    160    
32     112    
48     144    
160    16     
48     48     
160    -144   
-96    96     
64     -80    
112    -208   
-208   -400   
-80    -144   
16     32     
112    -80    
-32    -32    
-64    -1664  
-32    -96    
160    -96    
-16    48     
96     96     
0      176    
112    -64    
-112   128    
-192   -224   
48     -64    
64     80     
-96    -192   
-96    -160   
0      0      
256    -192   
-32    -320   
0      -96    
32     16     
-16    176    
48     -240   
16     304    
160    -208   
16     -144   
-80    64     
304    304    
-64    80     
-80    -320   
-752   48     
16     -144   
320    -16    
64     256    
-128   16     
112    -304   
-80    272    
208    -80    
-32    16     
144    96     
64     192    
208    560    
-160   144    
-112   -320   
-80    -224   
144    48     
16     -64    
-160   112    
160    -112   
-112   -176   
208    64     
-128   -224   
144    -688   
-208   48     
48     48     
160    -32    
-16    176    
0      -160   
-208   0      
48     -80    
-64    -48    
96     208    
-704   -96    
-128   -720   
160    -96    
64     -448   
96     64     
144    -272   
-48    144    
-112   -112   
160    -128   
-96    0      
64     96     
-144   -80    
-16    80     
-112   -32    
80     -64    
32     -32    
16     -112   
272    48     
-128   -32    
0      128    
144    -976   
144    -176   
-48    64     
-32    -16    
-32    0      
-48    80     
80     0      
-176   -80    
96     -32    
272    -192   
368    -16    
2208   -2176  
-256   -1088  
1408   1264   
-576   784    
384    -16    
-272   -544   
-80    -256   
176    64     
-368   32     
128    -352   
-368   208    
192    -144   
-160   272    
-304   -288   
-112   16     
-32    -160   
272    272    
-320   -176   
176    496    
-80    32     
-144   352    
-96    16     
-704   128    
-32    -48    
-112   -96    
96     0      
-32    352    
160    336    
96     224    
-144   -112   
-336   -192   
-224   -48    
-352   -112   
-80    288    
240    80     
-96    320    
-128   -528   
-368   80     
-64    128    
-384   48     
256    96     
-32    -48    
16     32     
-128   240    
-64    48     
-16    -272   
64     224    
64     -64    
-288   -16    
208    -32    
-128   160    
-304   -240   
-464   48     
-32    112    
-272   176    
-16    16     
-1184  -512   
0      112    
144    128    
-208   -96    
32     48     
-32    -48    
-192   -128   
-112   208    
272    352    
-480   -160   
160    160    
80     -48    
80     -64    
-160   -16    
-112   16     
-224   -48    
-80    144    
-48    -80    
80     256    
-16    -64    
224    992    
-32    816    
32     80     
-352   -640   
144    160    
64     0      
-160   0      
32     48     
-128   -192   
-48    64     
-112   608    
160    272    
-1424  -288   
-80    -400   
128    -224   
208    384    
0      112    
-96    48     
-80    80     
-64    -288   
-64    -32    
16     16     
-48    128    
16     48     
-64    80     
-64    -144   
144    128    
-448   -192   
96     160    
-96    -64    
-112   -176   
16     -192   
-240   -304   
-16    -96    
0      -16    
-128   -16    
-16    64     
16     112    
48     48     
96     192    
-208   16     
96     144    
-160   -224   
192    336    
16     48     
0      80     
112    80     
-64    160    
96     352    
-48    32     
-48    48     
-128   16     
240    272    
-176   0      
0      80     
-208   -32    
384    0      
-432   64     
352    96     
-304   208    
16     -160   
240    144    
-400   32     
112    -16    
0      128    
224    0      
-160   32     
48     48     
-64    32     
-64    -48    
-144   -224   
80     128    
-80    64     
32     112    
16     16     
-64    16     
-32    64     
16     128    
112    48     
0      64     
64     80     
32     432    
-288   -160   
208    -16    
-16    256    
64     0      
32     144    
-304   80     
192    416    
-256   -144   
224    -64    
-32    -128   
112    144    
-176   224    
-112   64     
128    208    
-256   -96    
240    288    
160    -96    
96     256    
-176   -80    
0      128    
112    64     
32     96     
-16    128    
80     80     
-80    208    
32     -112   
192    240    
-96    64     
-32    144    
112    -48    
-16    144    
-32    -48    
128    96     
-160   -16    
-16    208    
224    -16    
-144   144    
128    64     
128    96     
-32    112    
-464   128    
128    -1056  
-176   -32    
32     256    
976    544    
-800   -608   
928    416    
-720   288    
512    16     
-576   -96    
672    0      
-224   464    
128    -384   
-224   560    
272    -224   
-160   336    
128    -16    
-48    384    
-16    -176   
48     112    
80     -32    
32     192    
0      160    
128    -16    
-176   -1952  
224    16     
-96    176    
144    48     
-144   144    
208    112    
-112   192    
160    -176   
-208   176    
80     -80    
-64    160    
176    -320   
-160   16     
240    16     
-48    -80    
-48    -1088  
48     96     
-64    80     
144    16     
48     272    
112    96     
-32    160    
-48    -96    
16     272    
160    -96    
64     304    
-64    -16    
112    16     
-64    0      
160    112    
-32    -336   
48     176    
96     112    
-96    144    
-16    -48    
240    192    
-224   64     
176    64     
-64    80     
80     80     
16     -48    
0      32     
-32    160    
32     144    
128    48     
80     -144   
-16    128    
0      -2704  
64     80     
32     144    
-32    112    
64     224    
128    80     
224    32     
-80    224    
0      192    
16     112    
16     -48    
208    -112   
-160   128    
-80    -176   
80     112    
144    -576   
48     -176   
304    256    
-272   144    
224    64     
-16    48     
-96    48     
160    288    
16     -64    
-64    0      
-32    16     
112    192    
-32    64     
-80    -160   
240    240    
-16    -144   
304    256    
-144   -288   
-16    48     
48     0      
48     16     
96     112    
-48    64     
160    160    
-48    -32    
144    64     
-16    -160   
0      16     
0      -112   
-48    96     
80     -224   
128    176    
-160   -1248  
-16    432    
80     -144   
0      64     
-48    176    
112    112    
-80    32     
16     32     
64     -64    
-64    -304   
176    208    
-112   -304   
192    48     
16     -496   
64     -16    
16     -512   
96     176    
112    160    
48     160    
-16    96     
64     -224   
-160   -96    
192    -608   
-32    16     
96     -64    
-96    -64    
176    -112   
48     560    
256    32     
-32    48     
-16    48     
48     64     
96     -48    
128    32     
32     48     
0      -16    
-80    -48    
192    208    
-656   -32    
320    -288   
16     64     
176    -160   
112    64     
-128   -240   
176    224    
32     -64    
96     144    
-192   -208   
192    160    
-64    256    
0      -272   
272    -32    
32     96     
288    -208   
128    -48    
-272   -1936  
512    -64    
-288   160    
448    -144   
48     256    
-128   -96    
240    -320   
-48    112    
144    -224   
16     96     
-112   0      
0      -48    
112    -128   
48     -624   
32     16     
192    -480   
-64    -48    
112    -304   
208    -48    
0      192    
-128   16     
32     -112   
-224   112    
112    80     
-224   96     
-1600  -624   
560    688    
-48    400    
368    -400   
496    384    
-128   -336   
-352   176    
688    -1056  
48     176    
160    -1648  
-128   256    
-192   -80    
416    96     
32     -384   
128    320    
-688   -208   
256    -176   
-272   752    
224    -96    
112    -176   
48     -496   
144    -208   
432    -480   
-384   224    
128    -240   
-224   528    
0      -240   
368    496    
-64    -432   
128    240    
-112   -64    
160    48     
-32    160    
-16    -256   
-640   32     
0      112    
-144   -160   
-48    -640   
48     224    
144    -144   
-32    192    
-32    96     
176    400    
-128   -128   
-128   -96    
48     48     
416    368    
-480   -384   
-80    -256   
-480   -384   
128    -48    
-32    64     
336    -96    
-256   32     
112    -1008  
96     0      
16     -1920  
0      48     
-16    -256   
192    -112   
-32    64     
224    496    
-288   -160   
96     -208   
-112   32     
176    432    
-512   64     
48     -576   
-80    16     
256    -208   
176    192    
64     -464   
0      144    
48     -64    
16     -80    
-192   0      
160    320    
112    320    
128    304    
-272   -80    
-80    -240   
-208   -272   
192    -80    
-160   80     
80     -384   
-160   -16    
272    -1056  
16     -32    
-48    528    
-320   -208   
128    176    
-64    16     
-112   16     
176    -64    
-208   80     
128    -208   
-240   -16    
-112   -432   
128    -48    
80     -176   
112    128    
-160   64     
32     -96    
-96    144    
64     -16    
80     -368   
48     -48    
160    272    
-144   -80    
256    -32    
-112   32     
-64    16     
192    224    
-128   96     
-1520  -368   
96     128    
-80    48     
-128   -96    
-96    80     
-32    288    
80     176    
368    -48    
-528   -112   
144    -192   
352    192    
-256   48     
176    160    
-320   -112   
160    96     
48     -224   
-128   48     
192    288    
-64    240    
48     -80    
-432   -208   
-144   64     
-784   64     
-96    80     
96     128    
64     96     
-192   -160   
-16    160    
-208   -192   
80     64     
-80    -144   
64     96     
-80    144    
64     -32    
-32    96     
-64    48     
-96    80     
112    80     
128    80     
-736   0      
48     48     
-208   -192   
-96    80     
176    -48    
-192   192    
16     80     
-48    -64    
48     80     
32     64     
-16    32     
112    96     
-80    16     
-48    128    
32     208    
-592   -112   
80     0      
64     -48    
32     144    
-48    176    
64     -96    
192    64     
-192   96     
-160   -144   
-48    240    
-128   -16    
0      112    
80     -112   
-112   0      
0      -128   
-224   -144   
-16    240    
-1680  -64    
-128   176    
-128   -224   
96     32     
32     -80    
80     128    
32     96     
-144   144    
80     48     
-160   16     
16     64     
-112   -48    
-1424  -1840  
704    688    
-656   1824   
-336   160    
112    96     
-816   -848   
272    896    
-608   -112   
352    304    
64     -96    
16     272    
64     -96    
-352   160    
272    -48    
0      128    
-96    -48    
0      96     
-80    176    
-336   -160   
112    144    
48     64     
-80    224    
112    32     
-96    80     
64     -112   
-240   48     
272    -32    
-256   192    
160    -16    
-288   -16    
176    128    
-176   -16    
96     32     
-224   48     
144    128    
112    112    
176    272    
-16    272    
-176   -144   
16     112    
80     32     
96     128    
-16    96     
-48    48     
0      0      
32     160    
-16    96     
96     -128   
-128   32     
16     144    
48     112    
64     48     
-112   80     
96     128    
32     128    
48     112    
0      16     
-112   -112   
80     192    
-160   -64    
112    48     
-112   32     
144    176    
-272   32     
48     32     
48     0      
128    160    
-48    48     
80     128    
32     112    
-48    16     
16     32     
16     -16    
-16    80     
-64    0      
80     80     
16     192    
-176   208    
224    96     
112    208    
-176   80     
256    112    
-176   352    
-160   112    
-80    16     
-96    -160   
224    -32    
-16    128    
-128   144    
-48    -64    
96     64     
-48    32     
112    144    
-64    48     
32     16     
-64    -352   
0      -192   
208    144    
-64    128    
160    16     
-80    144    
-64    -112   
48     176    
160    176    
-64    80     
0      144    
-176   -96    
0      -16    
0      -256   
-192   -288   
16     -80    
112    128    
64     112    
48     192    
-112   64     
16     160    
176    272    
-80    144    
144    112    
-240   48     
160    288    
16     -48    
160    -1152  
-96    160    
32     256    
112    32     
192    640    
144    192    
80     176    
-96    32     
96     176    
-32    -32    
-80    -128   
208    208    
-112   64     
208    112    
-208   32     
144    -192   
64     -32    
0      96     
144    240    
-112   64     
64     64     
112    304    
0      -32    
160    144    
-128   -48    
176    112    
80     272    
-64    -80    
112    64     
32     64     
0      -368   
96     160    
-16    48     
32     96     
32     160    
144    -208   
32     96     
-192   128    
32     -128   
-80    240    
128    64     
160    144    
-176   0      
-96    -336   
176    -128   
160    96     
0      240    
32     -2784  
256    224    
-80    160    
304    -48    
-192   208    
128    112    
112    80     
-32    48     
80     -96    
224    304    
-16    -96    
96     64     
-64    192    
16     16     
64     64     
-48    -560   
16     64     
-16    272    
-32    160    
96     16     
-48    80     
112    32     
176    160    
-208   -96    
64     112    
224    112    
288    160    
-48    128    
16     -240   
-336   1728   
-752   -1712  
608    512    
304    -832   
352    -1600  
-224   608    
-320   -416   
528    512    
-368   -736   
496    400    
192    -16    
-48    736    
-192   -192   
336    80     
-432   -784   
128    160    
-16    -112   
640    144    
-272   -448   
-32    -96    
-160   288    
64     -224   
-16    368    
32     -64    
-32    112    
-480   -352   
-96    -80    
128    -720   
-304   -192   
256    480    
0      48     
80     144    
-80    -64    
128    -272   
48     80     
48     -368   
80     -144   
-80    144    
176    320    
80     -32    
-336   -1152  
96     0      
32     -240   
112    80     
64     48     
176    160    
-160   -160   
96     448    
-96    112    
0      32     
224    -400   
-32    176    
112    48     
-64    304    
144    128    
96     -16    
144    112    
176    -16    
-32    192    
64     -432   
-208   240    
-16    -432   
224    -64    
112    -80    
-96    -864   
144    -32    
128    -832   
80     96     
-32    -336   
128    -32    
-32    -48    
144    -208   
128    -64    
-48    -2496  
160    -112   
64     368    
-80    -480   
176    -112   
112    -48    
128    -336   
112    0      
-144   144    
-32    -16    
-80    -224   
208    -32    
48     -144   
-16    -320   
16     -80    
112    -112   
-48    48     
64     -64    
144    0      
0      48     
112    -112   
16     -192   
-80    208    
96     -96    
48     -16    
-112   -80    
160    -176   
-384   48     
-16    -64    
144    80     
64     208    
-96    -352   
96     -352   
16     64     
256    -16    
80     160    
32     128    
-160   64     
192    -144   
48     -352   
0      -80    
64     -304   
48     48     
-352   -320   
480    64     
-192   -320   
96     -128   
304    -672   
0      -16    
-48    -560   
-16    48     
-48    -32    
160    -48    
-160   -144   
128    -352   
-240   -96    
-64    0      
160    0      
-64    -80    
-1536  -96    
48     -176   
-208   -16    
496    -32    
-112   64     
64     -528   
48     0      
-176   -128   
144    160    
0      -112   
-16    160    
-16    320    
160    16     
-272   -112   
-176   -48    
-816   -144   
208    -16    
0      0      
176    112    
-64    -32    
112    -320   
16     80     
112    -1296  
48     80     
64     128    
-16    320    
-48    -144   
64     -80    
-288   32     
192    -224   
-304   192    
16     32     
-320   0      
-64    -256   
48     0      
112    -576   
-16    32     
-80    -1376  
32     96     
-32    -128   
128    -80    
-272   -272   
80     112    
-384   160    
-16    -64    
48     288    
0      -112   
-672   -144   
160    -448   
-32    240    
32     -160   
-96    96     
160    -992   
208    80     
-144   80     
96     -16    
-192   96     
112    32     
32     32     
-16    64     
-32    48     
-16    -240   
-80    176    
-32    -80    
48     224    
16     -80    
-896   1264   
1568   240    
432    -480   
240    -336   
-240   -624   
-208   -368   
816    768    
-544   -480   
304    496    
-736   -304   
400    160    
-176   -272   
-96    128    
-224   176    
48     -336   
-272   96     
48     -96    
-640   192    
96     -144   
-736   128    
16     -224   
176    144    
-160   -64    
64     -128   
-224   -112   
-96    96     
80     96     
-240   -128   
-144   -16    
-320   -432   
-240   32     
64     32     
16     192    
48     -32    
-256   144    
-32    -96    
-576   96     
-112   0      
144    80     
0      64     
-128   -64    
0      80     
-160   -144   
96     0      
-80    -96    
-16    16     
-16    -96    
-96    -48    
-80    48     
-112   32     
-80    80     
-112   80     
32     96     
-1104  -48    
80     0      
32     32     
0      160    
-16    -224   
64     48     
0      64     
-16    48     
-80    0      
-64    -32    
-80    176    
-96    128    
-16    80     
-48    112    
-176   -64    
-368   -32    
-128   160    
-144   -16    
112    128    
0      -32    
128    96     
-16    144    
-64    96     
-144   -80    
112    0      
0      96     
80     448    
-32    160    
-80    64     
-192   112    
48     -96    
-144   16     
-288   -336   
288    304    
-112   80     
-32    -96    
32     48     
-16    32     
48     208    
-80    80     
112    80     
-80    -16    
112    176    
-320   -208   
80     -144   
-112   48     
128    336    
-928   -16    
-64    0      
-32    48     
-48    -32    
80     96     
-128   64     
48     160    
-48    64     
80     96     
-128   0      
-16    0      
-16    96     
-16    16     
-80    -80    
-32    112    
-512   -128   
128    144    
-16    16     
0      80     
32     128    
64     208    
-64    -32    
-16    32     
-144   96     
128    144    
-32    -80    
176    240    
-176   432    
64     128    
0      -64    
-384   96     
0      -80    
176    32     
-176   48     
144    160    
-96    -336   
192    240    
-304   80     
464    80     
-336   304    
48     32     
-80    -32    
-112   32     
-32    -32    
80     80     
-112   96     
-16    160    
-48    -128   
32     -64    
96     224    
0      32     
-16    128    
-64    208    
96     -32    
112    80     
-208   -16    
176    -224   
16     304    
-192   -64    
176    224    
-192   -96    
96     144    
-16    32     
16     48     
16     112    
-16    -16    
176    96     
80     208    
-80    64     
48     0      
-48    64     
16     128    
-16    16     
-176   80     
96     192    
0      80     
-128   48     
160    -32    
192    192    
0      144    
-32    32     
32     96     
16     112    
144    16     
-192   16     
64     144    
32     48     
96     128    
-160   -32    
-16    32     
-48    16     
192    256    
-64    224    
176    176    
-256   80     
0      0      
128    -16    
-320   -2224  
928    832    
-432   -160   
272    -576   
-368   -304   
96     -656   
-192   336    
112    336    
-224   -96    
240    32     
304    624    
-192   -192   
0      48     
176    32     
160    64     
16     112    
128    -16    
-272   144    
368    496    
16     208    
96     320    
-32    304    
144    -528   
240    320    
-64    128    
208    64     
-288   0      
64     48     
48     128    
16     -64    
128    48     
-128   224    
80     112    
-64    48     
-144   48     
208    -16    
16     32     
-16    -1232  
128    128    
64     16     
-112   192    
32     96     
128    80     
-48    0      
128    -96    
-96    128    
176    256    
-112   -272   
128    -80    
-96    112    
144    -128   
176    176    
-96    -400   
80     16     
128    16     
-32    240    
144    160    
-80    48     
128    96     
80     192    
-192   48     
192    112    
-16    80     
96     112    
16     -32    
-64    -112   
96     160    
-32    -160   
176    208    
-128   -1056  
192    64     
16     144    
32     32     
32     96     
0      128    
160    -48    
64     128    
-32    48     
96     48     
176    32     
-16    -32    
-64    96     
96     -160   
176    192    
-256   -512   
192    -48    
32     320    
-304   80     
416    -176   
-144   96     
16     48     
32     -80    
16     16     
16     240    
16     0      
320    112    
-272   144    
224    -192   
96     80     
-64    -528   
112    160    
16     -272   
0      160    
80     -128   
-96    0      
-32    -80    
288    96     
-64    64     
-48    0      
144    240    
-64    0      
160    64     
-80    -80    
352    240    
-96    -48    
128    272    
64     112    
-192   -80    
48     16     
48     0      
96     96     
-48    112    
272    240    
-64    -80    
-32    48     
-384   -1136  
224    -192   
80     -80    
64     256    
80     -96    
32     48     
-80    -432   
304    320    
128    208    
32     192    
-128   80     
224    352    
144    160    
-32    -400   
-288   -16    
224    -160   
160    112    
16     -48    
112    -48    
-80    -80    
272    96     
0      -288   
160    240    
-96    192    
176    -144   
64     64     
-16    -3040  
144    -336   
-32    -144   
0      144    
128    48     
-48    128    
304    -64    
16     144    
-48    -80    
32     128    
64     -64    
0      -80    
80     192    
80     -368   
240    272    
-1392  -240   
0      -16    
16     144    
-32    -432   
352    -144   
32     -752   
48     -112   
176    -304   
-64    64     
176    176    
-48    352    
-64    -432   
144    192    
128    -560   
96     144    
-304   -144   
32     80     
48     16     
0      -192   
16     -240   
64     -672   
160    -144   
-16    32     
-32    0      
144    -272   
16     176    
96     -352   
96     16     
-16    176    
224    96     
-128   16     
96     -128   
1024   1280   
-1200  96     
1200   1248   
-96    880    
1424   240    
-880   -944   
176    336    
-240   800    
-304   -704   
-16    480    
-32    -464   
576    336    
-464   -48    
32     -176   
-240   32     
-240   -288   
-64    272    
160    64     
64     128    
272    -32    
-48    -592   
144    176    
-32    -400   
16     -16    
-16    80     
0      16     
16     -160   
16     160    
32     48     
-128   -144   
-320   112    
80     144    
-1104  32     
0      16     
16     -80    
48     -128   
128    -16    
32     -384   
128    80     
64     -96    
32     128    
-48    128    
0      32     
128    -112   
48     -16    
-80    -32    
208    -80    
-784   64     
64     -224   
-288   160    
-48    64     
144    96     
32     -272   
80     112    
48     -1664  
48     -96    
-48    -112   
304    112    
96     240    
80     32     
112    -112   
32     -48    
-176   176    
-32    -208   
-224   144    
160    -160   
-16    64     
224    -576   
0      32     
0      -2160  
48     16     
16     0      
32     64     
-96    64     
-48    -32    
-192   -64    
160    224    
16     256    
-96    16     
0      -48    
-32    -192   
192    80     
48     -64    
144    80     
-208   80     
112    16     
-320   16     
16     -96    
-32    -32    
16     -48    
96     112    
48     96     
-16    176    
-16    -176   
96     32     
64     -240   
144    272    
-288   -176   
80     128    
-272   0      
-560   32     
-96    48     
0      -16    
-16    16     
112    64     
-128   -16    
48     -256   
-32    32     
-144   -272   
48     80     
-256   -128   
32     112    
-400   -112   
-112   16     
0      0      
-128   -112   
64     112    
96     288    
0      -32    
16     -64    
0      256    
176    -48    
-48    16     
-416   -16    
256    208    
16     -96    
-176   -288   
-304   -80    
-352   -128   
384    -16    
-576   112    
176    -48    
-32    80     
-160   80     
-208   32     
-48    96     
32     240    
-64    0      
48     -64    
96     -16    
-64    -64    
80     0      
-16    192    
-80    128    
80     80     
-304   160    
-192   -224   
-208   -320   
-256   -240   
-640   112    
-192   -32    
-1056  64     
32     144    
64     -80    
0      96     
-320   -288   
176    304    
64     336    
-112   -16    
64     -80    
-16    -48    
144    112    
-112   112    
64     0      
-144   80     
-48    -224   
-336   112    
-80    192    
-112   208    
-208   160    
-224   -272   
96     16     
224    32     
224    160    
-48    -16    
-192   0      
-32    16     
-96    96     
-48    -144   
32     -32    
-80    32     
16     32     
112    224    
192    -32    
64     128    
96     32     
-16    0      
-144   -16    
-256   48     
0      48     
64     16     
-32    336    
-144   112    
-48    208    
-368   -112   
-16    112    
-112   16     
64     80     
368    -928   
672    2128   
-944   -80    
-848   -1072  
464    112    
-64    -176   
0      160    
-224   192    
32     240    
16     32     
0      -80    
-176   160    
368    -144   
-64    64     
0      32     
-48    64     
160    -112   
0      240    
-128   -320   
80     112    
128    160    
64     64     
-64    48     
64     32     
-80    64     
144    112    
0      96     
64     208    
-288   -16    
96     80     
-688   -96    
-64    -16    
-48    128    
128    64     
-16    64     
32     160    
-64    64     
-48    -16    
0      80     
48     96     
32     80     
-128   0      
48     112    
-192   -128   
96     112    
-112   -16    
-16    208    
176    208    
-320   32     
176    -16    
-80    128    
32     -48    
-16    48     
112    80     
-48    128    
32     128    
-32    -80    
0      128    
-80    16     
192    80     
-64    96     
64     80     
0      32     
80     32     
-48    192    
-32    80     
160    48     
-192   -144   
288    112    
-320   64     
128    32     
16     64     
-48    64     
64     96     
48     64     
96     240    
-112   80     
144    112    
-16    64     
-64    32     
96     0      
-64    192    
-32    80     
176    352    
16     -192   
192    0      
-160   288    
-16    -16    
32     -32    
-48    160    
80     272    
0      32     
-32    64     
224    80     
-160   -96    
176    208    
-192   80     
208    160    
-16    32     
32     144    
0      112    
32     32     
48     64     
160    272    
-16    0      
16     -64    
-240   0      
160    176    
176    160    
80     -96    
-144   112    
16     208    
240    192    
0      160    
-64    -64    
96     144    
-48    0      
64     144    
64     208    
192    240    
-32    -80    
-128   176    
-16    128    
336    48     
16     48     
-304   48     
352    144    
80     304    
-96    80     
48     -48    
-64    80     
80     48     
0      -192   
400    48     
-192   -1456  
-80    32     
-48    48     
208    -96    
-16    -16    
-96    160    
112    208    
256    80     
-160   -208   
-96    -32    
-96    -80    
128    80     
160    416    
64     -176   
-32    240    
-128   -560   
224    64     
-48    -48    
-16    80     
112    112    
176    16     
-96    80     
80     240    
32     -352   
-144   -16    
208    320    
176    304    
-192   80     
-96    -368   
192    400    
-80    -384   
80     -128   
-304   -2048  
160    400    
80     288    
208    256    
-176   -256   
32     480    
-64    -32    
-48    32     
112    128    
128    176    
48     80     
96     -112   
-32    176    
80     -272   
128    160    
0      -800   
64     -96    
80     32     
-16    48     
176    176    
-80    48     
80     192    
48     -80    
-208   -96    
176    192    
512    160    
48     48     
0      272    
208    -144   
-32    112    
32     -48    
-704   992    
192    2256   
-992   464    
368    -528   
-112   976    
-336   -160   
528    512    
-896   -176   
736    272    
160    -96    
-400   -368   
304    288    
80     -80    
-16    -32    
32     -224   
-64    144    
-16    -208   
112    368    
-80    -224   
96     32     
-80    48     
224    288    
-192   160    
512    -208   
-208   192    
48     -496   
-96    320    
112    368    
224    304    
48     -48    
-112   176    
96     -1216  
0      112    
80     32     
176    48     
-16    80     
80     96     
-96    -80    
256    -80    
128    464    
0      -416   
64     176    
-16    16     
128    48     
144    96     
-16    32     
0      -416   
48     -16    
0      -32    
80     -80    
192    224    
-48    -384   
32     -1088  
-16    -128   
224    -1280  
-192   -208   
224    -16    
0      64     
144    160    
-48    -224   
96     224    
0      -224   
128    -880   
240    48     
-96    -272   
-144   64     
-944   -32    
128    -80    
0      -32    
0      0      
80     -32    
64     -656   
32     -160   
32     128    
16     -64    
80     144    
80     -288   
128    -336   
144    -96    
96     -256   
-32    496    
128    128    
0      400    
16     32     
224    -96    
-80    -96    
112    -432   
368    224    
48     -768   
-128   112    
0      -208   
128    -48    
160    -160   
16     160
[truncated: 632,011 more chars]
