# Supplementary material for: A Fault Diagnosis Method for One‐Dimensional Vibration Signal Based on Multiresolution tlsDMD and Approximate Entropy
Source: Hindawi journal article supplement (doi:10.1155/2019/3262818), 2019-01-01
Supplement: f1 [file 3262818.f1.zip › 3262818.f1/gear signals/broken teeth fault signal/Data18.txt]

-96    -576   
304    32     
-288   -1136  
160    -224   
80     192    
-272   -16    
432    48     
-400   -64    
208    48     
-80    64     
-64    32     
112    -208   
-560   -112   
-80    128    
208    208    
64     -112   
192    -96    
48     -208   
112    48     
144    -1104  
-112   0      
288    -96    
-176   64     
0      0      
80     -32    
-304   -208   
224    -128   
0      112    
0      -112   
-432   128    
-80    64     
80     16     
-32    -176   
96     176    
80     -1568  
176    480    
-128   64     
32     -240   
-336   64     
256    -160   
-192   -96    
112    -240   
-496   -48    
224    -192   
-304   -48    
224    -176   
-832   32     
-128   -528   
144    64     
-80    -528   
48     96     
-32    272    
-16    -112   
112    48     
240    144    
-224   96     
-32    -256   
-144   -32    
352    144    
-272   -128   
48     -224   
-16    96     
48     -272   
16     -16    
32     -224   
64     176    
-128   192    
176    64     
-208   496    
-16    -176   
0      160    
144    -208   
-144   -272   
128    -112   
-112   48     
-16    -240   
-64    112    
112    -48    
48     160    
112    -496   
-80    -128   
48     16     
0      160    
-48    192    
400    272    
96     336    
96     -176   
-352   -16    
48     -48    
-144   0      
80     112    
-128   32     
-400   -192   
112    80     
-848   -336   
-96    16     
-112   112    
-240   48     
32     128    
-784   16     
-128   -32    
80     -16    
368    -112   
48     -32    
-192   32     
-96    -32    
96     144    
-272   -128   
0      128    
-16    16     
-176   32     
-16    240    
-64    -64    
192    160    
-672   -48    
96     112    
1248   -16    
96     -1088  
-608   80     
-464   -64    
208    48     
48     -352   
224    112    
64     336    
-176   272    
-112   -16    
-112   -112   
-192   -80    
-16    16     
-160   32     
32     -96    
-272   -32    
-160   176    
-144   -16    
-192   -144   
48     -192   
224    256    
-96    -176   
128    112    
-176   144    
-48    160    
-256   128    
-112   64     
32     240    
448    448    
-608   -128   
-224   -288   
-336   -96    
-128   -224   
96     160    
-192   192    
112    224    
-16    240    
64     160    
-240   -16    
-16    -80    
-240   416    
32     -128   
64     176    
32     -288   
-32    192    
-224   -128   
32     208    
-640   -496   
-64    128    
0      -48    
16     -48    
48     64     
-208   16     
16     96     
-96    160    
112    -16    
16     -640   
176    368    
352    272    
-432   512    
64     48     
-32    176    
-496   -176   
128    80     
-368   -160   
144    16     
48     48     
-208   64     
48     112    
16     128    
-32    48     
-48    64     
80     48     
-16    160    
32     176    
-48    16     
-176   32     
-448   -384   
192    -160   
-400   368    
-32    32     
-32    112    
-16    -192   
64     112    
-96    16     
-128   0      
64     464    
-16    96     
-16    160    
16     112    
-48    -64    
32     80     
-128   -176   
192    352    
-224   16     
48     32     
128    208    
-176   -96    
224    -256   
-240   -128   
96     0      
192    224    
-16    304    
-48    -32    
-224   112    
-128   -64    
80     64     
-32    240    
48     448    
32     192    
-80    32     
-48    16     
-16    -16    
112    80     
48     16     
-32    128    
64     -304   
48     144    
-16    160    
-128   -304   
288    176    
-64    -80    
288    -272   
-160   48     
208    192    
-240   272    
112    48     
-80    16     
64     -464   
64     0      
192    192    
-64    128    
-240   0      
176    64     
48     80     
-112   -112   
16     96     
-128   -48    
48     112    
64     176    
80     144    
16     64     
96     240    
-144   112    
192    80     
-224   -80    
144    -544   
-16    48     
80     208    
160    176    
-256   144    
16     112    
-96    48     
-80    -64    
192    224    
-144   64     
208    160    
80     -160   
-112   192    
-16    112    
80     48     
-48    144    
16     80     
-96    32     
64     176    
-144   -112   
144    112    
16     208    
208    -96    
32     272    
-32    64     
192    224    
-272   96     
208    0      
224    16     
64     176    
32     512    
-304   -48    
240    -160   
224    128    
-80    240    
0      32     
16     64     
160    192    
-128   336    
-192   -96    
16     48     
144    -32    
80     112    
-32    144    
16     64     
-32    16     
0      96     
-80    -32    
272    -80    
-48    112    
16     -720   
-192   528    
-32    512    
816    1472   
288    272    
-480   -32    
-368   256    
-32    -672   
96     672    
-240   48     
144    128    
-96    48     
224    -320   
-64    272    
-48    160    
176    -64    
16     -160   
-16    -560   
-80    112    
176    80     
80     112    
-16    64     
16     208    
-32    128    
64     64     
-16    32     
48     160    
-240   -160   
-48    272    
144    128    
80     -304   
-32    128    
96     112    
64     16     
-16    144    
-80    128    
160    64     
-48    48     
208    -80    
80     192    
48     -240   
-64    240    
32     -16    
48     -80    
80     64     
-16    -80    
64     48     
0      -576   
80     128    
0      -1088  
208    192    
-112   48     
144    96     
32     112    
48     80     
80     0      
-96    112    
144    16     
-16    16     
112    96     
112    112    
-96    0      
176    -176   
16     272    
-96    -640   
272    176    
-160   -128   
192    48     
0      -48    
112    -16    
48     112    
-96    208    
80     48     
96     -80    
-48    208    
16     -176   
224    16     
0      256    
128    -16    
560    -288   
64     288    
-256   -1440  
176    64     
-48    144    
-16    -80    
0      272    
-272   320    
96     144    
-16    -432   
128    -96    
-32    -640   
-16    160    
0      -48    
176    256    
0      -544   
208    160    
-64    0      
144    288    
-128   160    
16     -48    
48     128    
16     96     
176    0      
-160   -144   
176    48     
16     -32    
128    80     
128    112    
-144   32     
112    224    
-80    208    
128    96     
48     16     
80     48     
32     384    
16     -96    
32     -208   
-80    48     
64     -16    
128    160    
96     -80    
16     640    
288    144    
112    -48    
-384   -176   
240    80     
128    80     
80     -608   
32     32     
32     80     
0      -448   
-96    0      
16     16     
-32    80     
80     48     
32     -48    
224    320    
-64    -128   
192    176    
-176   112    
320    -352   
-192   144    
128    -256   
160    96     
16     -48    
256    80     
-288   112    
160    -80    
-160   -224   
160    -736   
-32    -32    
160    -592   
112    176    
-112   48     
96     -32    
-144   0      
304    -816   
-160   -432   
176    -16    
48     256    
-208   -96    
-336   -128   
-176   -352   
224    16     
0      -128   
0      -32    
-176   -912   
224    32     
80     -1392  
-160   -48    
-112   -432   
208    144    
-32    32     
96     -80    
-80    -32    
-64    80     
-144   -160   
-208   112    
-1152  -32    
112    192    
-112   -144   
128    -64    
48     -64    
16     -384   
16     32     
112    96     
-112   -160   
352    -80    
-128   -64    
96     -96    
-48    -16    
-48    -16    
176    16     
-384   -32    
48     -176   
-304   96     
144    -624   
-112   96     
256    -144   
-800   864    
-528   -368   
528    416    
736    -256   
-320   -1120  
-64    304    
-80    272    
208    96     
-80    -432   
-368   192    
112    -304   
-672   256    
288    -320   
224    208    
-176   -464   
16     336    
48     -1808  
304    560    
-96    -144   
192    64     
-480   -176   
352    80     
-400   144    
80     -272   
-224   -64    
160    -192   
32     336    
608    176    
-336   -64    
-16    -640   
-48    368    
-32    -512   
-96    224    
0      -128   
64     -160   
-384   -112   
112    -208   
208    400    
-352   -192   
224    112    
32     224    
-16    -32    
-48    -240   
80     192    
176    -176   
-16    128    
96     -224   
0      -112   
-144   400    
-16    208    
-336   -224   
-16    -144   
-176   -96    
-48    352    
0      -64    
-32    -176   
-304   80     
112    -608   
-528   -16    
16     -512   
-288   -464   
-192   -528   
-496   304    
48     -16    
-96    96     
-64    -80    
112    160    
-80    160    
96     -48    
-64    208    
-144   -96    
-224   -192   
-32    -160   
128    16     
-224   48     
224    560    
-352   32     
-240   -416   
0      -176   
-160   -32    
240    544    
-1360  96     
-64    -160   
16     144    
240    96     
-64    -16    
112    464    
-256   -160   
64     128    
-352   -416   
-16    96     
-80    32     
16     -64    
-16    96     
-352   -80    
-32    -128   
-336   -80    
160    208    
-144   -16    
-176   -464   
64     224    
240    224    
-208   -112   
32     224    
-224   -224   
144    416    
-128   160    
-16    -32    
32     48     
-224   -96    
-16    32     
16     96     
-48    80     
224    224    
-192   -272   
0      -368   
48     512    
-48    -48    
160    160    
-288   -240   
-176   144    
96     160    
96     96     
-160   -96    
-176   -112   
112    -128   
32     48     
-80    32     
192    128    
-272   16     
-128   -128   
-16    240    
128    64     
80     288    
-256   -32    
16     -64    
112    48     
-224   -32    
176    0      
-336   112    
256    64     
-208   -16    
-112   32     
-128   96     
-80    -80    
-912   32     
-32    -112   
176    0      
-128   144    
48     48     
80     0      
-160   0      
16     144    
32     112    
48     -16    
-64    112    
-128   64     
80     -96    
-64    0      
-16    176    
-160   64     
80     16     
64     16     
-64    0      
-112   -32    
48     16     
-96    192    
-112   0      
96     0      
-32    64     
0      64     
-32    -16    
-32    304    
-128   160    
-112   -16    
-304   -48    
272    0      
-1024  -144   
80     48     
-112   160    
16     48     
32     80     
-32    336    
-160   -144   
64     80     
112    -144   
128    48     
-64    80     
-144   -144   
32     176    
-368   -48    
48     144    
160    -128   
0      384    
-224   -48    
432    48     
-256   144    
16     80     
1472   -1536  
-384   -432   
816    368    
432    -352   
-464   -144   
160    928    
-880   -416   
992    144    
-784   464    
416    0      
-96    448    
-64    -448   
-320   480    
656    -400   
-384   592    
240    -480   
0      640    
80     -256   
-288   384    
256    -272   
-192   320    
176    -16    
-144   400    
208    -128   
-208   176    
160    -160   
-16    384    
144    176    
-64    48     
64     -48    
-32    -16    
-176   16     
144    48     
-208   144    
160    -64    
-240   128    
96     -64    
-272   -16    
64     16     
-32    160    
128    -16    
0      128    
48     96     
48     144    
80     112    
16     128    
-32    -96    
16     240    
-64    -128   
272    208    
-192   -80    
208    128    
-160   144    
96     48     
112    48     
16     112    
32     96     
48     64     
0      240    
-80    -96    
0      64     
-16    -32    
144    176    
-96    -48    
144    64     
-96    -96    
112    224    
64     96     
-64    112    
48     80     
112    48     
-80    48     
-48    64     
0      96     
128    48     
-224   48     
32     -176   
112    192    
-288   16     
96     48     
-96    -400   
0      -304   
32     128    
288    432    
-192   -16    
128    16     
-176   16     
224    -48    
192    128    
64     352    
-80    -192   
-144   -608   
-64    160    
128    128    
336    336    
-224   128    
-16    -336   
112    48     
192    160    
80     256    
-64    32     
128    144    
64     112    
144    192    
-32    112    
32     304    
-32    176    
144    160    
-48    -128   
-48    -16    
112    144    
-32    -896   
64     96     
0      -208   
16     96     
80     80     
0      -32    
-64    32     
176    224    
32     400    
48     112    
-176   144    
144    240    
48     160    
80     192    
-112   -224   
-16    -336   
48     208    
144    -560   
80     128    
80     160    
16     240    
-48    64     
64     64     
16     -32    
304    784    
-160   304    
304    448    
-176   16     
112    -288   
160    80     
-64    -64    
272    64     
-208   -144   
160    80     
-16    -768   
64     240    
-32    -304   
128    160    
-16    48     
160    112    
-64    -16    
16     128    
32     176    
64     -208   
160    176    
-80    -128   
368    144    
-304   -352   
144    32     
48     -384   
96     192    
80     112    
-144   64     
80     -16    
-112   48     
176    304    
64     96     
96     96     
-112   -80    
192    112    
-48    -224   
96     16     
112    -176   
32     128    
-112   -208   
32     -96    
112    -1680  
48     32     
96     112    
-128   96     
160    -48    
48     112    
192    112    
-160   32     
16     -144   
128    96     
-32    272    
-48    -224   
96     192    
96     -32    
96     96     
64     -816   
176    224    
-176   -48    
208    208    
0      16     
176    -208   
400    1376   
-224   -464   
-608   -624   
-144   -208   
-544   -16    
944    160    
-368   -320   
352    128    
-32    0      
192    -304   
192    -272   
-176   656    
-96    -752   
80     352    
96     -528   
80     -976   
-384   -768   
128    144    
-192   -224   
256    192    
-304   -368   
320    336    
112    0      
112    0      
-64    656    
96     -1392  
-272   288    
-240   -1952  
272    -432   
480    64     
-288   -256   
64     -32    
64     -448   
128    16     
288    528    
-96    -112   
128    272    
48     192    
-80    48     
320    176    
-16    -112   
-112   80     
-160   240    
-192   112    
-896   -32    
-144   -144   
176    -144   
80     -112   
192    -192   
96     -368   
64     0      
16     176    
128    -192   
-32    -192   
-144   80     
-32    -128   
-16    144    
-48    0      
160    112    
-432   48     
48     32     
80     -128   
48     -48    
48     -80    
224    -320   
-96    -80    
112    -944   
96     -144   
-80    -368   
240    -16    
16     208    
-80    32     
32     160    
-48    -128   
-208   -80    
48     -80    
-576   96     
96     -64    
-32    -16    
-160   -320   
208    -16    
-48    -416   
240    16     
-208   352    
-176   128    
224    160    
-192   -432   
208    -192   
16     -48    
-224   48     
80     -112   
-288   -176   
96     -368   
16     -64    
-144   -512   
48     -144   
80     -448   
-32    128    
144    336    
0      208    
128    -48    
80     -128   
-32    352    
-16    192    
-16    96     
-16    -32    
-448   -16    
256    176    
-1776  -32    
96     -64    
32     -48    
48     -96    
32     160    
80     -1504  
144    384    
80     -64    
-192   -224   
-16    -176   
96     -16    
-288   -80    
144    -304   
-304   304    
240    224    
-16    192    
0      160    
-128   -144   
464    -496   
-208   272    
0      -160   
112    64     
32     -32    
224    288    
-176   32     
160    -64    
-480   -128   
112    -16    
-48    16     
176    -112   
-320   -64    
96     0      
64     144    
240    -176   
-272   224    
-48    -224   
64     64     
-224   -128   
224    96     
0      32     
112    80     
-304   64     
144    16     
-144   -16    
192    64     
-160   -160   
112    -384   
64     80     
48     -64    
144    192    
-208   48     
-208   -32    
-32    -80    
32     128    
32     -48    
112    96     
-16    -32    
32     144    
-112   0      
-96    48     
-112   -96    
-320   -112   
-32    112    
-128   -256   
16     160    
-272   0      
-80    -80    
-176   96     
-880   16     
-32    32     
-1408  64     
-64    0      
128    -240   
-32    32     
32     96     
-96    -160   
-128   -112   
32     208    
-288   -288   
80     80     
-32    -32    
32     192    
-16    32     
16     64     
-224   80     
-384   176    
-208   -128   
-496   96     
-80    -64    
-1248  -2960  
656    -48    
-448   720    
-160   -112   
160    304    
-880   -800   
704    816    
-704   -272   
192    512    
-48    -80    
32     -112   
-304   -64    
-112   192    
112    -240   
-288   368    
16     -400   
-64    304    
16     -304   
-208   128    
320    -256   
-176   144    
64     128    
-48    176    
-32    -16    
-80    -128   
-48    -48    
32     96     
-192   128    
-144   -16    
-64    176    
-1328  -128   
32     176    
-144   -208   
48     240    
128    32     
0      96     
-48    32     
-112   64     
-48    -16    
48     176    
48     -16    
0      144    
-112   48     
-144   0      
-128   48     
-320   -80    
32     224    
32     -48    
48     144    
-112   64     
16     16     
0      16     
-64    96     
80     96     
-96    64     
0      0      
-176   -80    
-48    80     
-96    16     
64     -96    
-336   -112   
80     528    
-160   32     
96     32     
-32    48     
-112   -16    
32     128    
16     32     
-48    -16    
0      48     
-16    -16    
-32    -80    
-48    64     
-144   0      
64     112    
-432   -192   
112    -192   
128    32     
-272   176    
-352   -448   
112    48     
80     208    
96     128    
-32    112    
-192   -160   
144    -16    
-16    80     
64     112    
-32    64     
112    80     
-352   -16    
160    -128   
32     96     
80     176    
-48    144    
-32    -48    
64     96     
-48    256    
0      112    
-48    -144   
0      112    
80     64     
192    144    
-256   -64    
-16    80     
-160   0      
32     -160   
144    32     
-80    320    
-64    -16    
160    32     
-96    128    
0      0      
128    192    
-176   0      
176    112    
-256   -96    
176    192    
-160   -32    
80     96     
-32    176    
-80    96     
80     -32    
-80    208    
96     96     
128    -64    
-96    320    
-32    128    
368    0      
-304   176    
48     64     
48     -32    
-160   64     
96     192    
-16    0      
112    176    
-144   -336   
288    320    
-352   208    
272    96     
-112   160    
96     16     
0      32     
-16    144    
64     48     
-160   -112   
176    16     
-48    368    
-112   -144   
176    -80    
112    256    
32     48     
96     96     
144    240    
-144   224    
16     80     
-64    -48    
-112   -48    
240    32     
-192   144    
48     -16    
-128   16     
80     0      
128    160    
-144   -144   
160    96     
-288   336    
80     -96    
256    208    
-128   96     
256    -64    
-160   208    
-96    -32    
224    96     
-80    144    
256    96     
-80    32     
80     16     
0      -16    
64     -128   
-16    80     
80     272    
-144   96     
0      64     
304    -384   
112    336    
-224   -32    
160    -48    
0      112    
64     80     
16     64     
-96    160    
-64    -32    
208    64     
192    48     
32     240    
-80    16     
-160   -64    
2592   -1872  
448    1392   
-368   -128   
-400   -160   
528    304    
-80    -608   
-448   -112   
160    208    
304    320    
-160   -272   
80     432    
32     -352   
128    128    
-256   -832   
272    -16    
-176   112    
464    640    
-48    208    
80     192    
-176   160    
48     -224   
-80    -96    
320    208    
-208   176    
48     -144   
80     240    
112    0      
96     96     
-32    -112   
80     64     
16     80     
128    144    
-16    96     
32     192    
0      -16    
32     -32    
16     144    
160    128    
-48    16     
-16    -96    
-176   0      
176    -80    
16     208    
160    -320   
-160   -16    
16     -1616  
96     240    
256    272    
-288   16     
144    96     
-80    192    
144    -160   
0      208    
-80    80     
320    -144   
-48    48     
112    -16    
-48    64     
128    -864   
-16    48     
80     -2000  
32     64     
112    16     
64     112    
-48    96     
96     128    
48     -16    
16     256    
48     48     
80     160    
16     16     
112    -48    
96     32     
-48    -256   
80     64     
112    224    
-128   128    
208    272    
16     -48    
128    32     
80     96     
-48    112    
-32    -160   
208    -32    
-64    -1056  
-16    352    
-128   -256   
272    -80    
-128   -48    
-64    144    
144    -192   
-96    -32    
48     -112   
144    96     
0      -48    
96     208    
-16    128    
16     -384   
144    96     
16     -224   
64     176    
-16    -48    
-32    80     
208    -16    
-64    48     
240    -48    
-96    160    
0      -176   
192    160    
-112   80     
304    -1888  
-64    -160   
-48    -64    
64     -2160  
272    -64    
-96    272    
176    64     
112    272    
-32    -256   
208    192    
-176   16     
352    112    
-208   96     
32     -16    
224    80     
-208   -288   
144    -64    
-112   -224   
192    -192   
-80    -64    
-64    -768   
384    -128   
-32    -144   
384    0      
-240   240    
-112   -64    
272    -240   
-240   144    
240    -336   
0      0      
-864   -80    
96     96     
-1488  -144   
64     16     
48     -112   
224    -96    
144    -272   
-48    -544   
48     96     
96     64     
-16    48     
16     -112   
0      112    
208    -288   
64     160    
-32    -32    
160    64     
-672   -288   
256    -368   
16     48     
48     -112   
96     0      
-16    -480   
160    -16    
80     -2976  
48     -16    
16     80     
-48    -224   
64     64     
320    32     
-272   208    
32     32     
-592   -96    
256    32     
-1680  -64    
0      -96    
224    -48    
144    80     
-32    -368   
160    -1584  
-80    80     
32     80     
-16    272    
-48    -80    
0      -192   
32     -64    
-16    -208   
-160   16     
-32    80     
-256   128    
80     -32    
-80    0      
80     -208   
240    -368   
-16    -112   
-176   256    
16     -208   
32     208    
928    -1088  
1216   912    
0      688    
-672   48     
432    224    
32     80     
-720   -32    
256    112    
-912   -64    
-272   -336   
128    128    
240    -464   
64     336    
-144   -160   
96     224    
-16    -80    
0      64     
-208   -80    
336    64     
-256   -96    
48     -112   
-720   -32    
192    -176   
-384   16     
160    -320   
-64    160    
80     -464   
32     288    
144    -944   
-144   32     
-176   -32    
-64    0      
-64    32     
32     16     
48     -208   
112    -48    
-192   32     
64     64     
-64    0      
64     -240   
80     144    
64     -192   
128    96     
-80    -288   
-32    -32    
-64    144    
224    16     
48     48     
32     0      
-80    -16    
128    96     
-32    112    
112    96     
-640   -48    
48     -208   
144    160    
-160   -32    
80     64     
-16    32     
-240   496    
-224   -144   
-1008  -160   
-208   -48    
16     -144   
48     48     
48     -16    
-288   -48    
-64    80     
-144   0      
-272   -128   
32     112    
-64    16     
-32    16     
96     32     
-208   16     
-80    -272   
-32    -512   
-64    -208   
-512   0      
320    288    
-240   144    
-128   -16    
-160   -16    
48     192    
-272   48     
48     0      
-96    -112   
-272   64     
-32    -48    
0      -16    
-48    80     
0      256    
-48    80     
-528   -128   
64     16     
-144   -32    
192    144    
-96    -64    
32     80     
-16    -64    
80     128    
-64    -208   
-176   -64    
-64    48     
48     80     
-32    64     
-128   -32    
-176   -144   
32     -32    
-208   32     
-656   0      
-64    128    
-32    -48    
96     96     
-128   -176   
128    208    
-144   -16    
176    112    
-112   96     
208    64     
-128   -80    
-272   48     
16     112    
-32    -96    
64     144    
-336   -160   
288    -112   
-288   -32    
-112   320    
160    -96    
-16    144    
-16    176    
64     -64    
-112   112    
0      -48    
-112   -448   
112    -32    
-112   368    
-48    -48    
176    80     
-400   -48    
256    128    
-688   -32    
-64    144    
128    -48    
-48    32     
-96    80     
96     16     
-32    -32    
-48    128    
48     112    
-112   64     
0      -96    
-128   64     
-64    336    
-304   -304   
-80    -192   
-704   -176   
624    224    
-304   96     
-96    48     
-32    0      
48     -48    
144    32     
16     224    
144    -336   
64     208    
-208   176    
48     -32    
-208   48     
240    48     
48     144    
144    224    
-384   48     
320    -64    
-96    400    
-64    16     
80     -64    
176    -32    
416    240    
176    -32    
-416   224    
-96    0      
128    608    
-192   16     
-128   112    
-48    32     
-240   -128   
-48    32     
160    -80    
48     32     
96     112    
-16    192    
80     160    
-240   192    
-80    -80    
-96    16     
-560   -2064  
-128   -1136  
496    416    
-80    -192   
416    864    
-1360  -816   
784    224    
352    864    
-80    16     
112    304    
-224   -96    
160    304    
-160   -96    
128    -224   
16     32     
144    80     
-112   224    
96     144    
-96    -16    
176    112    
0      224    
-80    112    
32     96     
-64    -160   
-80    -80    
112    32     
48     320    
0      -32    
96     -16    
-192   80     
224    112    
-192   0      
-80    64     
-48    32     
176    176    
32     176    
144    144    
-144   304    
32     -80    
16     16     
-32    32     
80     176    
-48    48     
144    0      
-192   16     
32     48     
-16    80     
-16    144    
-48    240    
208    -192   
-48    128    
-16    128    
96     112    
0      48     
128    144    
48     432    
-96    80     
176    32     
-48    176    
240    -176   
-48    160    
-96    144    
160    128    
-96    96     
-144   16     
224    48     
-48    240    
-32    176    
-176   -16    
256    80     
-16    0      
64     144    
-144   80     
160    64     
128    112    
-160   0      
144    144    
-192   144    
304    16     
-16    -1392  
80     -16    
192    64     
-32    160    
-16    320    
-16    0      
160    -16    
16     0      
-32    160    
-128   112    
192    -112   
-48    176    
-80    48     
32     16     
48     112    
192    144    
-224   160    
144    -48    
16     64     
0      64     
288    320    
-256   48     
208    112    
-80    128    
176    32     
-224   -112   
256    304    
-80    96     
272    96     
-208   112    
192    -80    
-96    64     
128    -912   
-64    144    
80     112    
48     -32    
-80    128    
80     96     
192    -128   
64     224    
-160   112    
160    48     
-112   16     
-112   -256   
192    16     
0      -400   
176    176    
0      -1072  
416    432    
-112   192    
32     208    
-208   16     
80     -128   
112    32     
-192   64     
144    -48    
144    80     
-16    112    
48     -112   
48     -48    
-32    -160   
160    112    
-16    -272   
112    144    
-16    -1632  
-32    -48    
208    0      
32     176    
-32    -48    
0      160    
0      -16    
192    48     
-112   144    
80     -32    
96     -64    
128    -96    
-96    208    
304    -352   
-48    320    
-48    -352   
128    144    
16     -560   
96     208    
-48    32     
144    176    
-32    96     
-208   -208   
256    48     
48     144    
48     144    
-160   -336   
-16    32     
80     -368   
160    224    
32     -48    
64     32     
96     -64    
64     112    
32     64     
16     128    
-80    32     
128    -128   
48     144    
-16    -224   
64     80     
64     -400   
80     272    
-80    -160   
16     16     
64     -96    
144    128    
48     48     
112    64     
80     48     
-32    64     
16     208    
160    48     
-112   160    
128    -336   
-368   1840   
48     400    
-368   -256   
-96    -832   
-192   96     
352    112    
384    240    
-192   -416   
-208   -448   
-208   -432   
640    80     
-304   -1568  
176    -192   
-272   -224   
192    -288   
48     208    
288    384    
16     464    
-128   -336   
-224   -160   
208    -288   
176    -208   
0      -96    
0      -192   
-176   80     
176    -288   
-16    -192   
64     -128   
64     -400   
208    320    
-224   -144   
192    -240   
80     128    
80     -272   
32     272    
64     -224   
16     -16    
-176   -96    
240    -96    
-80    -32    
0      -16    
-64    96     
-656   -96    
0      -96    
96     -80    
80     -880   
0      -128   
160    -1856  
-64    -64    
0      32     
0      32     
128    16     
-32    192    
112    -160   
-48    -16    
96     -32    
64     224    
-240   176    
16     -352   
48     -336   
48     -320   
176    -144   
0      -416   
304    -304   
160    -880   
-496   16     
-32    -176   
-80    32     
112    -160   
-16    96     
-112   48     
80     -80    
-208   -96    
128    -144   
-368   -112   
16     32     
512    736    
-192   464    
-192   64     
64     -1088  
-16    0      
224    -272   
64     -64    
-32    128    
-48    -176   
-96    -144   
352    -80    
-128   64     
64     -144   
0      208    
-32    -48    
400    -32    
-16    -80    
-112   -32    
160    -192   
-96    64     
176    96     
128    288    
-160   -32    
176    -112   
-208   -48    
80     -112   
32     -16    
0      32     
-480   -48    
80     -176   
-1744  -96    
48     -80    
48     -16    
112    -240   
0      96     
96     -624   
0      -16    
0      64     
80     48     
-112   48     
80     128    
-128   -32    
64     16     
-48    96     
16     48     
-304   -96    
-96    -160   
64     112    
256    -144   
64     160    
-112   -800   
80     -80    
64     32     
16     -128   
160    176    
112    0      
-64    -16    
32     -176   
-80    160    
-64    -528   
112    -288   
64     -48    
160    464    
-16    -320   
16     16     
-144   48     
128    -32    
112    48     
32     -192   
-144   -224   
112    -240   
64     112    
128    16     
-48    -64    
128    16     
-160   -32    
64     -368   
16     368    
-1312  -592   
144    -64    
-80    128    
-48    208    
-80    176    
-272   144    
-32    32     
64     -144   
0      48     
112    160    
-32    32     
-672   -256   
96     208    
-320   -480   
96     -32    
80     64     
-384   -80    
96     176    
-656   -160   
-128   -16    
-400   64     
0      224    
-656   0      
112    112    
-112   -80    
96     96     
-320   -176   
144    384    
96     16     
0      48     
32     -128   
-96    -32    
-128   -112   
-208   -96    
-16    128    
-80    64     
-16    64     
-384   -160   
-144   32     
-1120  -288   
16     32     
-48    -64    
272    80     
-240   464    
-144   -608   
624    -240   
384    336    
-576   256    
-176   16     
512    32     
-496   64     
560    -368   
-640   176    
16     -256   
176    224    
-160   128    
64     48     
16     96     
48     -80    
-64    128    
-96    32     
64     144    
112    80     
-96    -48    
-16    0      
-64    80     
64     96     
-16    -16    
-96    80     
-240   416    
-192   112    
-752   -288   
-64    32     
16     -16    
-96    -48    
-16    48     
0      16     
0      128    
-48    -48    
64     352    
-480   -224   
208    -80    
-176   208    
208    48     
-384   -144   
-80    96     
-1696  -128   
144    32     
-16    64     
64     48     
96     192    
-272   -16    
48     -64    
-80    96     
64     96     
64     144    
-80    112    
112    -48    
-64    80     
-128   -112   
224    128    
-224   16     
112    224    
-32    64     
-48    64     
-32    48     
-32    32     
32     240    
-208   80     
128    -16    
0      16     
-64    272    
-112   -176   
208    80     
-272   176    
-16    0      
-160   -32    
-16    160    
0      96     
-80    -48    
176    240    
-48    144    
80     32     
32     160    
-160   112    
-32    -32    
208    240    
-416   96     
208    16     
-48    -48    
112    96     
-112   -160   
-80    128    
-32    80     
144    -64    
-96    80     
112    80     
-48    336    
0      368    
-48    -80    
192    -32    
-48    144    
160    192    
-48    112    
16     144    
16     80     
-64    -112   
-80    -128   
192    144    
-16    -48    
64     -16    
-112   0      
48     80     
-48    16     
112    176    
32     96     
-48    16     
-176   -112   
96     48     
16     144    
16     112    
48     160    
-256   80     
240    64     
-64    64     
48     128    
224    240    
-112   48     
-112   -80    
-80    64     
-64    -160   
-48    -96    
-160   -144   
16     80     
0      80     
224    128    
-160   256    
352    160    
-16    128    
0      112    
-16    176    
160    -112   
-160   96     
-48    176    
128    64     
96     208    
32     -32    
-112   -64    
80     32     
96     176    
-144   -160   
160    144    
-80    32     
0      128    
64     48     
32     112    
16     160    
0      32     
-32    96     
64     128    
-128   -32    
0      192    
128    240    
16     80     
-96    -128   
128    -224   
-80    112    
64     -64    
48     272    
128    272    
-32    160    
-64    32     
80     -32    
-192   -272   
208    416    
80     160    
-112   -16    
16     208    
-160   48     
80     288    
-80    -1360  
224    176    
96     0      
16     80     
-48    96     
16     192    
144    32     
112    96     
-32    48     
192    288    
-112   -64    
80     -32    
16     -176   
112    96     
32     192    
80     -80    
-64    80     
192    -64    
192    160    
-64    48     
48     160    
-688   976    
-896   -16    
144    1168   
-144   336    
-320   96     
-448   -64    
128    224    
-112   1104   
320    -384   
160    -96    
-352   -416   
96     80     
-96    -48    
208    0      
-112   -368   
288    432    
80     464    
256    848    
-480   -272   
16     -256   
320    480    
-304   80     
144    -112   
256    -32    
-288   -880   
176    32     
288    -672   
-96    272    
-48    272    
-80    160    
-48    -112   
-16    112    
64     -32    
0      96     
-32    48     
-64    240    
48     288    
128    64     
-160   80     
240    -80    
16     -16    
112    -320   
-32    192    
128    -2000  
80     48     
-16    -48    
112    96     
64     160    
208    240    
-304   -544   
416    176    
-224   96     
320    -96    
-128   112    
-128   0      
176    272    
144    -544   
208    304    
208    -1152  
-176   -128   
256    64     
-96    208    
0      64     
-64    176    
80     64     
320    -304   
-64    64     
-16    -32    
160    64     
-96    16     
-16    64     
224    -288   
0      48     
-16    -384   
112    112    
96     160    
0      144    
-32    480    
304    160    
32     160    
144    -32    
144    144    
-32    -80    
96     272    
-128   48     
80     144    
-32    -112   
176    208    
-80    -32    
192    112    
-176   32     
80     -96    
64     -16    
160    192    
128    320    
144    64     
-112   -48    
80     -272   
176    112    
32     -240   
128    80     
32     -32    
64     32     
0      -144   
16     64     
160    96     
-32    -2288  
-32    -96    
32     64     
-16    -288   
256    -144   
-96    -1280  
112    -208   
32     240    
-112   -256   
176    112    
128    128    
32     288    
96     -368   
-16    -240   
0      192    
192    144    
80     96     
-256   -64    
32     -272   
304    64     
-208   48     
64     -272   
0      -176   
128    240    
192    608    
-48    -400   
48     304    
112    16     
-144   64     
64     96     
224    128    
-304   -160   
-240   208    
-128   0      
-1248  -32    
-64    16     
240    -80    
-16    -848   
48     -160   
112    -544   
64     240    
0      112    
48     -112   
128    16     
0      80     
80     -160   
48     208    
-32    -128   
-208   -160   
0      128    
-16    -16    
-16    -432   
160    336    
224    304    
128    336    
-48    -96    
16     -624   
16     176    
-16    -352   
176    32     
352    48     
-496   -624   
96     -144   
64     144    
96     0      
160    -80    
-144   192    
-144   192    
-16    -160   
208    80     
-112   -176   
144    -960   
-80    32     
128    16     
0      80     
80     -64    
32     -96    
-16    -80    
0      -80    
-368   64     
-48    -208   
0      -64    
144    -112   
-208   96     
48     -432   
-16    -144   
144    -480   
-176   0      
240    208    
-144   96     
-64    -32    
64     -16    
352    2992   
-1632  320    
64     -16    
96     656    
448    -416   
-592   -368   
-112   496    
272    80     
-128   -224   
-32    -64    
240    96     
-64    -368   
96     -416   
-48    80     
128    -64    
-128   48     
64     -48    
-160   288    
0      -160   
-96    16     
-64    -336   
-64    64     
192    0      
-16    80     
128    -128   
-32    -32    
0      -576   
176    -160   
-96    32     
176    128    
-192   32     
80     -16    
-272   -48    
80     -112   
-256   16     
304    -112   
-320   192    
256    -80    
-160   80     
128    -320   
-96    96     
0      0      
16     128    
64     96     
80     80     
-192   -48    
0      -112   
-176   -192   
464    112    
-352   128    
304    -32    
-384   144    
-1136  -336   
128    192    
-1040  -240   
-288   160    
-160   -32    
-368   -64    
-96    176    
-592   -64    
320    -32    
-144   192    
64     96     
96     -80    
64     112    
-80    112    
144    -128   
-192   -320   
32     160    
-240   -16    
80     -64    
32     32     
-368   -112   
-32    48     
-496   -16    
-16    -112   
-720   192    
-224   -32    
208    -192   
-160   144    
-384   -400   
176    96     
-192   -320   
64     -16    
-128   96     
-80    0      
192    144    
-464   176    
48     -208   
144    128    
-224   96     
-128   80     
-272   -16    
-368   -112   
112    336    
-112   -16    
32     272    
48     128    
48     48     
96     16     
-224   32     
48     -32    
16     64     
-64    -272   
-208   -32    
-64    -16    
-224   -32    
-80    112    
-944   -128   
16     32     
80     -64    
16     160    
32     -80    
-16    192    
0      -64    
-128   80     
-80    -48    
48     32     
96     32     
-192   -160   
-224   16     
-16    16     
128    -48    
-192   -32    
-80    32     
-608   -128   
-80    176    
96     32     
80     288    
-80    -48    
96     64     
16     112    
80     240    
-96    -16    
80     -144   
-32    0      
-320   -16    
208    64     
48     112    
-176   -112   
-912   192    
48     208    
80     48     
32     -96    
80     128    
-272   64     
288    112    
-368   -400   
192    128    
0      96     
0      192    
-48    80     
-80    0      
-192   -32    
0      144    
-832   -352   
0      80     
400    160    
-416   -144   
176    112    
32     112    
64     32     
-32    48     
-48    48     
-32    208    
-64    -16    
-80    32     
-224   -96    
-272   -80    
0      208    
-384   -96    
0      16     
96     32     
64     96     
-64    16     
0      128    
-32    32     
-32    96     
0      32     
-16    48     
-80    48     
-96    16     
-32    128    
-64    -16    
400    -48    
32     160    
-272   112    
64     0      
-128   48     
208    176    
32     96     
-32    0      
-64    128    
208    -96    
-272   32     
-80    16     
80     -48    
-32    272    
1648   -352   
688    768    
16     -192   
-688   -368   
336    992    
80     -176   
592    912    
-944   -368   
96     -16    
-544   -32    
560    -144   
-416   160    
208    256    
-224   64     
32     -16    
-208   -32    
288    96     
192    -112   
-80    -112   
80     352    
-112   112    
-16    144    
-48    0      
240    96     
-64    144    
160    32     
160    544    
-176   256    
256    -112   
0      128    
-112   -80    
160    -64    
96     -32    
-32    224    
112    160    
-112   16     
-416   112    
400    112    
-48    192    
80     32     
32     176    
160    32     
-144   -96    
80     80     
144    448    
-64    32     
96     -80    
-256   48     
304    240    
-80    -48    
32     -288   
64     320    
208    -48    
128    128    
-64    32     
-48    -128   
160    400    
48     224    
-192   -208   
288    352    
-48    -16    
80     32     
240    176    
48     160    
-144   -96    
160    256    
-16    -16    
256    224    
-160   128    
48     112    
48     128    
0      0      
64     -160   
64     16     
176    -80    
16     160    
-352   -384   
64     -528   
-208   -32    
560    608    
-448   144    
128    144    
112    -112   
128    48     
-32    224    
32     -16    
-144   -528   
288    224    
272    672    
-16    -240   
-256   -272   
96     -352   
208    272    
0      288    
-32    16     
96     -16    
-48    192    
0      384    
32     -112   
-96    -128   
128    64     
16     -48    
-64    128    
0      64     
0      -96    
112    144    
208    144    
320    896    
64     832    
-96    128    
0      96     
-112   -96    
160    80     
48     96     
64     -272   
-48    32     
16     32     
48     96     
48     80     
-80    -80    
240    80     
-32    -144   
0      176    
-32    -144   
16     -144   
112    208    
112    96     
128    -80    
-288   -16    
240    144    
48     128    
-16    -176   
-64    160    
32     208    
32     -240   
32     -16    
80     -112   
0      80     
224    -128   
-48    224    
-112   -496   
96     112    
96     -80    
-96    176    
32     64     
64     80     
-32    208    
32     -80    
32     112    
32     -96    
48     144    
64     -128   
48     224    
-112   -304   
192    160    
-112   -1664  
192    112    
160    -160   
-144   368    
0      -16    
208    128    
-240   128    
304    -64    
-240   -96    
320    304    
-128   176    
-16    -208   
160    48     
272    -256   
160    272    
-80    320    
144    -80    
-112   240    
32     208    
-80    -64    
64     0      
160    160    
-32    -208   
-96    112    
128    -256   
112    176    
48     -288   
176    224    
-224   -192   
192    64     
208    -48    
-32    144    
-32    160    
48     -16    
-48    224    
176    16     
16     144    
64     48     
64     -80    
48     -128   
-144   240    
208    -240   
-16    176    
1120   368    
96     592    
560    272    
-608   -1968  
240    -272   
0      -2208  
-224   -192   
160    464    
112    -624   
-176   -192   
208    -1072  
224    32     
-160   320    
144    -336   
-128   336    
256    -128   
-128   432    
224    -608   
-96    -304   
144    -176   
-128   112    
256    -112   
-224   224    
144    -688   
0      16     
-16    -224   
160    176    
64     -160   
-48    -80    
-48    144    
16     -80    
224    96     
160    96     
-112   -256   
48     16     
-256   -176   
304    -288   
-688   -96    
128    -192   
224    64     
128    16     
-80    16     
80     -320   
128    -224   
32     -1216  
160    -16    
-32    0      
64     256    
-304   -32    
256    -16    
-32    16     
64     -176   
32     80     
-208   -64    
32     -32    
32     -32    
32     -80    
192    -464   
-64    112    
48     -384   
16     144    
-48    400    
16     64     
64     32     
-144   80     
0      -48    
48     -32    
0      96     
-32    -96    
-176   0      
0      -288   
208    80     
-32    -176   
112    -32    
0      -48    
16     -48    
-128   -2208  
-64    -128   
240    -96    
-160   48     
-16    208    
-32    112    
-112   -288   
240    -256   
-192   -32    
-176   -240   
-320   96     
-272   224    
208    -16    
128    -160   
-48    48     
224    -240   
16     96     
32     -64    
-96    -96    
32     0      
48     -160   
-64    -96    
64     -272   
-80    176    
-64    -64    
48     224    
80     -96    
-800   0      
-32    -144   
48     96     
48     -224   
240    176    
112    -528   
16     -16    
-272   -48    
32     -416   
-240   -144   
144    -160   
-48    64     
16     -80    
-160   160    
64     -384   
-400   48     
0      -112   
48     112    
112    -240   
32     160    
-128   -48    
0      -80    
144    288    
16     -128   
-64    64     
32     -32    
-256   16     
192    -80    
-160   0      
112    -208   
-272   80     
96     16     
112    224    
-64    -304   
-16    96     
-112   -272   
-80    -192   
144    208    
-32    -160   
-32    256    
-80    -288   
16     112    
0      160    
352    16     
48     176    
16     256    
-544   -144   
16     144    
32     -304   
-48    48     
-96    112    
-368   -16    
112    192    
-1088  -208   
208    -256   
-48    -80    
-48    112    
112    -32    
-160   -48    
-96    32     
0      112    
-32    -128   
-144   -32    
32     -16    
-80    240    
-48    -160   
304    128    
-96    112    
96     -112   
-16    128    
-672   -128   
400    208    
-288   80     
256    -144   
-368   -64    
-48    48     
32     48     
-32    160    
80     16     
-64    64     
-80    32     
-256   32     
32     -16    
-176   16     
16     128    
-112   16     
-144   16     
-912   0      
128    0      
-96    -16    
-96    240    
64     -160   
32     144    
0      0      
-400   -144   
-1632  -688   
272    672    
48     512    
320    -176   
576    672    
-1104  -784   
128    496    
-240   128    
-96    272    
224    -544   
-240   544    
48     -448   
240    224    
-208   -320   
208    624    
-384   -240   
288    240    
-336   512    
320    16     
-224   -400   
144    -176   
-16    -144   
80     0      
-464   288    
96     -128   
-240   272    
-48    -208   
144    288    
16     -192   
32     432    
-96    -80    
32     64     
-16    128    
-128   -64    
48     176    
-32    368    
-80    48     
-368   -384   
-128   0      
-1744  -32    
0      192    
-144   32     
160    448    
16     96     
-304   -32    
0      112    
288    464    
-96    0      
-256   -80    
-112   -288   
32     -32    
-96    -16    
96     -112   
-192   64     
-592   -16    
144    16     
0      -160   
-16    0      
-16    -176   
0      -224   
-32    32     
96     336    
-192   -176   
48     -96    
48     48     
-80    304    
-112   224    
-176   -400   
0      80     
64     128    
64     160    
48     272    
-112   128    
48     -32    
-32    96     
32     80     
192    528    
0      336    
-64    240    
-128   -112   
-224   -144   
16     -80    
16     400    
-112   80     
-160   -128   
-240   48     
208    -32    
-160   80     
272    576    
-224   0      
112    96     
-192   128    
48     64     
-16    208    
48     336    
-80    128    
144    208    
-240   -256   
16     -144   
176    96     
16     128    
-64    48     
-16    -112   
-48    176    
112    224    
32     -272   
-96    -368   
288    464    
-128   -128   
368    176    
-208   0      
96     80     
0      144    
-192   64     
144    0      
80     112    
-64    128    
128    0      
-96    64     
160    240    
96     224    
160    -16    
-352   -80    
16     -192   
400    144    
-384   32     
192    144    
-320   -16    
64     32     
128    64     
-48    144    
192    336    
-16    240    
224    64     
-176   -112   
32     96     
64     192    
64     192    
-64    16     
112    176    
-240   -80    
0      160    
-48    16     
80     64     
32     64     
80     128    
-16    112    
112    80     
-32    112    
144    112    
-48    128    
64     80     
112    64     
-176   -32    
160    176    
-48    48     
-64    32     
256    112    
-208   144    
80     112    
16     16     
48     128    
96     160    
0      0      
128    112    
-48    48     
-16    112    
112    208    
-208   -32    
192    32     
16     -64    
0      -352   
-48    320    
-128   -1392  
304    -16    
64     208    
-32    -48    
96     256    
-144   32     
0      32     
96     -16    
32     64     
48     32     
96     0      
64     256    
-80    -112   
-128   -128   
-64    48     
144    -400   
16     16     
128    112    
64     -16    
-48    160    
-16    144    
48     80     
48     208    
96     80     
-32    2448   
416    3136   
-1872  144    
-224   688    
-272   -80    
-688   -560   
560    32     
-544   256    
400    32     
-400   -176   
128    0      
112    320    
64     -192   
96     480    
32     -448   
-176   224    
224    -176   
-144   416    
160    -80    
80     112    
-80    -192   
48     -432   
64     112    
80     -704   
-96    -112   
32     256    
240    48     
96     288    
-80    144    
16     -176   
80     64     
-48    80     
160    160    
16     80     
-64    -160   
128    80     
112    -96    
64     176    
32     -256   
32     -16    
-16    -400   
48     96     
64     64     
64     112    
-112   32     
112    16     
80     192    
128    64     
16     96     
16     -160   
64     144    
32     -448   
80     128    
-32    -128   
112    160    
64     -432   
16     240    
-144   16     
208    96     
0      80     
32     -16    
0      80     
-16    -240   
80     96     
48     -608   
-48    112    
144    -192   
48     16     
112    -384   
-64    96     
-16    -336   
144    176    
-64    48     
144    144    
-64    32     
-32    -32    
144    -128   
192    -128   
-144   160    
112    -272   
-16    -32    
-16    -368   
352    -48    
32     -208   
-16    176    
176    -384   
-80    224    
128    32     
224    224    
-48    176    
-80    -48    
32     -128   
96     0      
80     -176   
0      -96    
336    432    
-256   -64    
80     176    
176    -208   
96     192    
-16    -80    
160    -1568  
-16    80     
32     -832   
16     16     
-544   -48    
112    -144   
80     0      
144    -32    
80     48     
80     -448   
0      -112   
32     80     
-16    -64    
160    96     
-48    -352   
80     -416   
96     96     
96     -416   
128    -80    
-784   -48    
-64    -320   
80     -112   
192    -608   
-16    64     
-144   -336   
176    -384   
-176   -208   
240    16     
80     -416   
80     144    
-16    -32    
-48    64     
128    -144   
96     -144   
-144   0      
160    -96    
-320   -16    
192    32     
16     -128   
112    -208   
144    -112   
-96    -2336  
128    -32    
0      32     
80     112    
272    64     
-224   32     
128    -64    
80     -240   
-64    -16    
96     -16    
-288   -48    
80     16     
128    0      
-32    -352   
32     0      
16     -160   
-320   -240   
224    -224   
0      144    
208    -288   
-96    80     
-272   -32    
176    64     
208    -96    
-128   240    
-624   -160   
304    -272   
-64    96     
-144   -96    
128    -64    
-208   -64    
224    160    
128    -1072  
32     160    
192    -144   
16     80     
-192   -32    
80     160    
-192   0      
192    -192   
-224   -16    
32     -160   
48     16     
240    96     
-176   -32    
304    -192   
-144   144    
176    -160   
-16    112    
-96    16     
240    -16    
0      -160   
128    64     
-336   -144   
96     -128   
-272   0      
192    848    
-496   -608   
-320   -768   
-672   400    
-272   -912   
640    480    
-304   -864   
-112   768    
-208   -560   
80     160    
-272   -272   
160    240    
-416   64     
400    336    
-128   -80    
-144   -320   
-112   -80    
320    144    
-176   288    
0      -544   
80     304    
448    -64    
-112   272    
48     -96    
176    16     
-224   -144   
80     -160   
-128   -96    
-64    -192   
0      368    
32     -48    
-128   112    
-96    16     
-192   208    
0      32     
144    -144   
-80    -32    
336    32     
-96    160    
-16    80     
-128   32     
192    -80    
48     144    
0      0      
-64    64     
-128   -224   
-64    -32    
208    304    
0      48     
-608   -160   
-128   160    
-352   -464   
-368   -288   
64     -48    
80     128    
112    -128   
-464   0      
-160   96     
96     48     
64     272    
-64    -48    
160    -128   
-240   64     
-48    48     
-208   -288   
-128   -80    
112    160    
-48    64     
192    192    
-288   96     
-48    0      
-48    16     
-144   -16    
-944   96     
-144   80     
32     -80    
80     -464   
-160   -144   
-224   -32    
160    32     
-272   368    
16     64     
208    -112   
-272   144    
-352   -32    
-16    -48    
-272   -48    
96     32     
-400   144    
16     16     
-784   -80    
-112   -16    
64     -64    
32     176    
-48    -128   
64     96     
-112   16     
48     96     
48     80     
-48    64     
-16    64     
112    160    
-96    16     
-208   -128   
112    -160   
-1216  -32    
0      144    
80     144    
-112   -160   
64     0      
-32    -48    
144    144    
-32    240    
-32    48     
160    -48    
-256   16     
272    144    
-16    240    
-288   -128   
80     192    
-368   48     
144    96     
-240   -16    
48     16     
192    224    
-224   -16    
-48    -16    
80     96     
-176   128    
160    -16    
-64    48     
-368   -144   
32     -80    
-240   32     
272    -16    
-208   144    
-128   48     
-1376  -128   
-192   112    
80     80     
160    -32    
-144   160    
16     400    
64     96     
-32    32     
-208   112    
-16    32     
208    176    
-96    128    
112    176    
-256   -96    
64     112    
-1152  -16    
-48    192    
96     96     
-144   32     
-64    112    
-48    -64    
192    192    
-192   0      
240    96     
-176   160    
16     144    
16     -176   
-32    144    
-48    -256   
16     224    
96     160    
-160   32     
-32    -48    
112    48     
112    -32    
-112   128    
-96    304    
-288   64     
128    -96    
160    144    
-160   0      
80     -144   
96     192    
-112   80     
-80    144    
80     -16    
240    48     
0      224    
-160   80     
-16    96     
-16    0      
160    -16    
48     160    
-32    128    
-32    80     
-128   80     
96     192    
-32    160    
32     0      
-32    0      
-656   -496   
-1120  -304   
832    160    
-688   736    
16     0      
-496   -80    
672    528    
-1024  64     
592    -176   
-224   640    
288    -336   
-128   480    
-32    -192   
112    416    
-240   -272   
48     192    
80     48     
32     192    
-96    144    
176    80     
-160   -80    
112    96     
-224   192    
304    -160   
-224   80     
304    -48    
-368   48     
96     -16    
-304   128    
128    -48    
32     176    
16     48     
0      112    
-48    144    
48     48     
-32    16     
64     16     
-48    160    
144    96     
-80    0      
96     64     
-128   96     
80     160    
128    128    
32     64     
0      144    
-16    64     
112    224    
-128   112    
160    112    
-96    -48    
112    32     
64     32     
-32    160    
32     80     
-32    80     
-96    -48    
112    128    
64     192    
0      144    
-48    32     
-32    144    
96     128    
0      80     
16     0      
96     0      
48     64     
16     32     
48     160    
-96    -48    
288    16     
-64    176    
-32    32     
0      64     
64     -1744  
112    64     
144    160    
0      304    
16     80     
112    0      
-128   -208   
240    224    
-64    -80    
112    -64    
-256   48     
176    144    
80     256    
-224   -416   
80     48     
64     -400   
-32    0      
64     144    
-32    16     
80     208    
0      96     
64     80     
32     96     
32     96     
48     48     
0      -304   
64     80     
160    256    
32     -144   
-80    64     
16     -352   
144    144    
0      16     
32     48     
-64    48     
64     96     
0      -128   
48     48     
-32    -16    
80     160    
-32    -16    
96     128    
-96    96     
176    -16    
0      112    
80     -352   
-48    -32    
64     -2352  
16     96     
176    112    
-112   80     
80     176    
0      -272   
48     -128   
-96    112    
128    272    
64     -64    
-32    272    
-112   32     
336    0      
-160   -160   
128    208    
-32    -416   
240    -32    
-144   -432   
208    -48    
32     192    
-176   176    
224    48     
-128   128    
48     96     
64     -96    
32     128    
0      16     
-176   -80    
144    -768   
64     160    
144    -256   
96     96     
64     -464   
-144   128    
112    -16    
32     368    
-48    -128   
304    192    
-176   96     
192    -256   
-32    32     
96     -208   
160    240    
0      -144   
96     160    
-144   -288   
224    96     
128    -944   
-48    208    
-16    -64    
-32    192    
-16    176    
-32    16     
0      160    
32     -64    
128    144    
-112   112    
32     32     
176    -224   
48     192    
96     -112   
-16    112    
16     0      
160    128    
-240   -48    
64     -928   
48     96     
80     -208   
32     320    
16     -16    
-80    112    
192    -160   
96     288    
208    -208   
-32    256    
-80    -64    
96     64     
-1168  112    
-864   -2208  
1056   480    
320    -208   
64     -272   
-2048  -256   
784    1200   
48     112    
-464   -1216  
288    -176   
320    32     
-144   -176   
80     192    
96     80     
-80    -896   
128    256    
144    -256   
-96    128    
304    368    
128    192    
-48    -48    
-32    -256   
-32    -48    
464    -608   
-96    48     
256    -240   
-96    32     
-32    -400   
112    0      
-16    -448   
64     0      
-32    192    
128    240    
-16    0      
-48    -16    
-80    -112   
48     -256   
-352   -224   
112    32     
96     -48    
16     -480   
-48    -48    
144    -1792  
-32    -128   
64     -304   
0      112    
192    208    
0      96     
-112   -288   
-32    32     
16     -208   
224    0      
-864   128    
64     -128   
176    -48    
-32    -64    
112    112    
-64    -32    
80     64     
96     112    
-112   128    
112    -224   
64     176    
-48    16     
112    -128   
-64    -32    
112    80     
-96    -128   
144    -96    
-432   -48    
160    -240   
-16    128    
16     -192   
64     80     
-32    -288   
128    48     
96     -32    
144    32     
-160   16     
176    -112   
-64    16     
-80    -112   
-208   -208   
208    -80    
-976   -32    
96     -384   
144    256    
-384   -176   
288    -96    
80     -752   
-64    192    
-144   -192   
144    -96    
32     240    
-80    48     
32     -80    
-128   0      
-192   -80    
192    16     
-224   32     
0      -80    
112    144    
0      -80    
48     128    
-112   -416   
160    224    
-64    0      
176    80     
-160   -16    
272    -80    
-560   0      
176    -64    
-80    112    
-16    -240   
-144   -240   
-48    -256   
288    128    
96     -272   
-112   48     
-64    -208   
32     -32    
-144   -64    
112    16     
128    64     
64     -16    
144    384    
64     304    
-32    -128   
-160   -32    
-96    -16    
112    -208   
-176   -96    
32     -176   
-80    64     
-1024  -176   
-960   -32    
-112   -32    
-416   32     
240    448    
176    16     
-160   0      
-32    80     
-48    16     
160    32     
-96    -32    
-112   -48    
16     -48    
-80    -176   
32     -32    
-336   -160   
-336   -96    
-16    -16    
-224   96     
80     112    
-208   48     
-160   -64    
-80    32     
-256   32     
144    32     
112    64     
-288   -16    
128    48     
-16    -208   
-80    160    
-32    48     
-144   -224   
144    -144   
-192   -48    
-32    -80    
-688   208    
-208   48     
-1312  0      
32     112    
-16    352    
-64    -112   
-208   -336   
80     -496   
-32    -32    
-48    192    
-64    64     
-48    160    
48     -64    
16     32     
32     -64    
96     192    
32     -48    
-64    176    
-32    16     
-496   -96    
80     112    
-256   -32    
96     80     
16     80     
-80    128    
-48    32     
-48    -160   
16     128    
-272   -32    
-960   1712   
112    624    
-304   -48    
-304   -928   
-464   240    
-1344  -384   
368    736    
-64    -448   
80     624    
-304   -272   
384    160    
-432   496    
-16    0      
-368   480    
192    -272   
-48    208    
-272   -368   
-16    112    
-208   -192   
0      -32    
-608   48     
-192   -32    
32     -176   
128    96     
32     -32    
112    96     
-144   336    
112    -16    
-224   -112   
112    -48    
16     -32    
0      -16    
16     144    
-160   48     
96     80     
-32    -80    
80     224    
-816   -32    
48     -736   
-64    -128   
0      48     
-32    144    
96     64     
48     112    
-64    80     
-16    32     
-208   16     
160    48     
-48    48     
16     48     
-32    -48    
32     208    
-1264  -128   
-160   64     
16     32     
-48    -272   
32     -336   
-240   -128   
16     96     
48     176    
-32    112    
-96    64     
112    160    
-112   -240   
-80    176    
-320   -144   
80     160    
-256   -48    
64     192    
64     64     
-48    64     
-96    48     
32     48     
0      96     
16     80     
32     80     
-48    48     
208    208    
-48    32     
-128   80     
-64    160    
80     80     
80     -16    
48     -64    
-16    48     
16     208    
32     160    
-16    32     
-16    32     
48     16     
0      128    
-80    80     
-16    0      
-144   -64    
112    128    
-80    32     
0      -64    
0      32     
32     144    
48     112    
0      32     
-112   32     
80     -16    
32     160    
-32    0      
96     32     
-144   0      
16     176    
0      -48    
80     192    
-272   -160   
80     96     
0      80     
32     16     
16     -64    
48     96     
48     256    
96     0      
-48    16     
-48    160    
144    128    
0      -48    
-80    256    
64     -128   
144    112    
-144   96     
384    400    
-416   48     
352    -128   
-256   176    
48     -80    
192    32     
-240   48     
272    80     
-48    96     
176    288    
-112   16     
128    -16    
-112   96     
144    128    
16     -64    
96     176    
-96    304    
48     64     
16     128    
16     -128   
480    176    
-400   288    
32     176    
-224   32     
80     -128   
64     48     
32     144    
-96    288    
-16    -16    
304    288    
-96    64     
112    176    
48     -112   
64     80     
192    112    
48     160    
-16    160    
-32    208    
-80    32     
496    16     
-272   368    
-144   -48    
-80    -80    
160    -224   
320    -112   
160    -192   
0      144    
-192   432    
-128   288    
-80    -16    
336    256    
-224   32     
-48    -160   
-160   32     
96     -48    
64     96     
64     144    
128    160    
-32    -336   
16     64     
64     -992   
16     80     
192    32     
-64    48     
64     48     
-48    352    
128    80     
48     304    
-48    -160   
0      -16    
32     -48    
-336   1072   
-336   2496   
-848   384    
544    -288   
-32    -384   
-240   -208   
336    -256   
-96    672    
432    224    
448    0      
-336   -336   
240    128    
16     288    
352    16     
-256   336    
32     -224   
-96    208    
-16    -112   
128    48     
80     -512   
112    224    
-16    -2000  
144    96     
48     208    
144    128    
-112   -160   
32     16     
32     160    
176    224    
-64    32     
-48    -96    
48     96     
112    16     
32     64     
0      -448   
0      128    
-64    -208   
144    64     
-96    -80    
192    176    
-64    -80    
0      96     
-48    48     
64     64     
192    112    
-176   -48    
176    176    
-16    -256   
16     128    
176    -240   
48     176    
-16    -320   
112    96     
-16    16     
64     112    
-128   64     
192    32     
-32    208    
-16    112    
224    128    
-176   -32    
144    192    
-32    -288   
96     32     
96     192    
-96    -32    
208    -176   
48     224    
-64    -208   
-48    144    
-16    -16    
304    192    
-144   32     
64     -112   
32     128    
32     -528   
-48    32     
208    -272   
64     240    
-16    -96    
112    144    
-64    -160   
-16    64     
64     -448   
32     -64    
208    272    
-96    -1920  
0      -64    
160    -48    
-48    -608   
112    -112   
112    96     
80     -96    
80     192    
-96    -240   
160    304    
-112   -32    
272    -288   
-160   0      
112    -560   
80     80     
80     -176   
64     -400   
-944   -112   
64     -352   
160    -32    
176    -432   
32     112    
-96    -2208  
-32    -112   
16     -16    
288    96     
-64    -16    
-80    0      
112    -240   
-32    64     
80     -96    
80     112    
-128   -64    
112    -80    
-32    -112   
128    -304   
256    -176   
64     -464   
-320   48     
320    -208   
112    -208   
-224   -256   
48     0      
80     -272   
-32    144    
96     -48    
0      -80    
-400   -320   
-48    0      
496    -176   
-16    112    
-112   -64    
208    272    
16     -16    
224    -1184  
-208   48     
16     -48    
256    432    
80     160    
224    224    
-352   192    
176    -96    
-208   48     
192    -160   
-576   48     
16     48     
80     32     
80     -512   
-48    16     
80     -656   
176    96     
-32    80     
80     448    
160    128    
-32    -192   
-224   -304   
112    -144   
-48    256    
32     -368   
-112   -16    
-16    80     
576    544    
128    -272   
-304   -192   
-80    -992   
112    272    
272    -896   
80     160    
-128   -128   
80     16     
-64    -48    
96     -240   
-112   160    
0      -128   
-112   96     
-16    -32    
-1072  32     
96     80     
160    -64    
-16    -80    
96     112    
64     -352   
32     -112   
96     128    
352    -112   
-112   64     
-256   144    
-224   -224   
208    -224   
-96    32     
64     -96    
-304   -16    
-448   -640   
-896   -704   
0      -224   
416    -128   
1408   -1488  
-512   224    
416    464    
144    96     
-656   -400   
608    -288   
-368   -96    
32     -160   
144    -32    
80     -16    
-96    48     
-16    -448   
288    192    
-112   -592   
96     160    
128    -160   
-96    -144   
-208   -32    
176    240    
-32    -240   
32     -288   
64     96     
160    112    
-208   -80    
-64    -112   
-48    -304   
-32    -224   
16     208    
64     -64    
-80    144    
48     -96    
-1248  -128   
-64    0      
-720   416    
-96    64     
-96    -256   
-96    112    
192    -48    
-32    80     
-144   -176   
-32    -80    
-480   16     
32     176    
-176   -96    
128    176    
-32    192    
-112   -112   
-80    80     
-80    64     
16     48     
-384   -16    
-112   -176   
-48    -128   
-48    64     
-368   16     
16     240    
-384   -112   
48     192    
16     -16    
-16    0      
-32    112    
-64    96     
0      16     
-208   16     
-48    96     
-224   64     
-48    16     
-336   0      
0      64     
32     48     
32     128    
-176   -176   
16     -144   
-144   -448   
96     -96    
48     32     
0      432    
-32    176    
-192   240    
-48    64     
192    -112   
-160   48     
0      -96    
288    256    
-688   112    
-112   128    
-64    -368   
128    112    
64     -48    
16     96     
-80    48     
-192   -64    
-64    -128   
-80    160    
-48    208    
-144   0      
16     -32    
-208   32     
64     48     
-1152  -128   
-32    48     
-16    -32    
112    176    
-64    16     
96     128    
-128   96     
80     16     
-48    16     
-48    -96    
144    128    
-144   64     
0      0      
-144   48     
112    192    
-240   176    
96     176    
-48    -16    
-16    48     
96     144    
-48    -144   
-176   144    
-112   80     
496    832    
-352   384    
0      -256   
-192   -288   
48     -64    
48     -128   
160    80     
-272   64     
32     272    
-160   -96    
-64    -368   
272    -160   
-64    -64    
320    448    
48     448    
-64    -144   
-64    80     
-112   -240   
80     192    
0      32     
-160   -160   
112    368    
-176   -64    
-112   48     
-320   -304   
32     -16    
64     144    
-80    16     
80     64     
-112   64     
80     -480   
-80    128    
160    160    
0      80     
48     80     
-16    -112   
16     80     
-336   -160   
160    288    
16     128    
64     0      
-32    48     
0      -752   
272    656    
32     112    
-128   16     
48     144    
-48    304    
-96    48     
96     384    
-288   -128   
64     0      
80     256    
96     48     
32     96     
-96    -32    
80     80     
80     80     
-32    -64    
176    -80    
160    304    
-240   128    
-112   128    
-96    -64    
112    -16    
0      -64    
32     0      
48     48     
-144   128    
192    144    
-80    -32    
128    112    
1056   3408   
-1776  480    
528    272    
-64    384    
400    -192   
-368   -464   
64     304    
656    560    
-432   64     
-336   480    
64     -288   
-144   -64    
64     32     
192    128    
0      16     
0      112    
32     128    
-48    32     
80     144    
32     16     
16     16     
-176   80     
160    336    
64     64     
-128   16     
-32    -48    
-32    288    
96     96     
64     80     
48     48     
-112   0      
64     160    
-64    112    
80     64     
16     64     
48     16     
128    288    
-48    304    
-128   -160   
32     -32    
0      128    
128    112    
64     160    
64     64     
96     192    
-128   0      
176    80     
-208   48     
432    16     
-192   96     
112    64     
16     96     
-48    112    
80     -96    
-32    -32    
48     128    
128    112    
64     144    
-48    80     
160    192    
-320   0      
240    128    
16     48     
16     48     
32     112    
-32    96     
32     -352   
64     176    
-240   80     
128    -176   
64     0      
0      320    
-80    128    
80     48     
96     96     
-16    112    
32     -80    
64     0      
-176   0      
16     64     
-64    96     
16     16     
16     -96    
112    -48    
-48    -352   
-64    112    
240    -2720  
32     96     
96     144    
64     96     
16     -16    
32     48     
-48    112    
144    144    
48     288    
16     224    
-80    -16    
224    0      
48     144    
-64    -224   
96     80     
-32    -192   
80     16     
112    0      
-64    192    
-32    224    
192    400    
-176   160    
144    112    
32     -112   
-112   128    
16     16     
112    -160   
80     96     
16     32     
32     240    
80     -576   
-16    -16    
80     -2960  
-32    -144   
192    16     
112    192    
-32    48     
0      144    
256    192    
-48    80     
208    128    
240    288    
-16    176    
80     0      
32     128    
320    -208   
-144   208    
288    -224   
-32    16     
48     320    
0      160    
112    48     
-16    48     
16     48     
96     16     
-16    96     
64     -32    
96     112    
16     48     
64     -16    
-64    -160   
192    528    
112    144    
-48    -64    
32     -272   
16     64     
16     32     
96     112    
-64    -224   
304    144    
-112   224    
48     -848   
-48    32     
48     -672   
32     304    
192    -16    
-48    64     
-48    -176   
96     -64    
-192   -416   
128    64     
352    464    
-96    16     
-32    -48    
16     -160   
80     32     
64     112    
-32    0      
0      -176   
0      144    
144    -112   
80     96     
-208   -416   
-32    32     
32     -32    
112    128    
16     112    
16     -256   
16     -64    
224    -48    
112    -2752  
-128   128    
48     -720   
-80    32     
112    80     
48     -64    
80     96     
384    0      
-176   -672   
96     0      
-16    -48    
96     32     
-96    1760   
-464   -832   
-1280  -480   
16     -512   
192    96     
80     -304   
-128   640    
-320   496    
368    656    
-368   128    
256    -224   
-96    -400   
-144   144    
256    -128   
128    192    
-208   -32    
0      -16    
-160   -48    
176    -96    
272    -80    
128    -272   
-192   -64    
32     -400   
112    32     
160    -128   
128    160    
-224   -112   
320    336    
-80    -272   
-48    -144   
256    48     
144    -160   
-224   -16    
-240   -448   
144    -80    
-128   -256   
304    176    
-400   -656   
160    -272   
320    -2064  
-80    80     
-80    -64    
192    32     
-128   -96    
96     48     
-96    224    
-112   -96    
0      112    
64     -256   
-672   -160   
544    -192   
-80    0      
176    -288   
-128   48     
160    -704   
-256   -240   
320    -192   
224    512    
-192   -336   
368    64     
-384   32     
112    -304   
-272   128    
16     -96    
-64    160    
112    -64    
256    -112   
160    -256   
-32    -128   
32     -112   
16     96     
48     -480   
-64    32     
80     -16    
-16    -48    
48     160    
-160   -240   
-128   -96    
48     -16    
-320   -400   
160    -144   
-1216  96     
176    -288   
-48    128    
16     -304   
224    128    
-32    -288   
-32    -192   
-96    -304   
208    -128   
-64    192    
64     144    
-624   -80    
-176   -192   
112    -32    
16     32     
96     416    
-160   -64    
144    -144   
48     -384   
32     16     
192    -528   
-96    -80    
48     64     
96     64     
-176   -144   
80     16     
-160   224    
192    -96    
0      -176   
-16    -80    
16     192    
256    -128   
64     208    
-96    -112   
128    112    
80     -112   
48     128    
-96    64     
-80    -144   
-48    80     
32     112    
64     96     
64     304    
-64    192    
224    576    
-16    368    
-128   464    
-224   -256   
-64    -144   
-128   0      
112    240    
-592   48     
48     160    
-1488  208    
-192   -128   
112    96     
-208   -208   
224    96     
-80    96     
160    16     
-208   -16    
-800   -48    
0      -32    
-352   -256   
48     -224   
80     -560   
0      16     
-80    32     
-96    32     
48     112    
-544   48     
-16    176    
16     -176   
96     -112   
-400   -112   
208    48     
-160   -48    
112    -16    
-144   -160   
-336   -144   
48     48     
-160   128    
-48    112    
-112   -80    
32     48     
-512   80     
112    304    
-2288  -96    
-32    64     
144    -32    
48     96     
240    -336   
-48    240    
112    -32    
-208   32     
-64    -112   
128    112    
-176   96     
-192   -48    
-48    128    
-112   -160   
32     176    
-336   -656   
224    304    
-192   32     
-48    192    
-256   48     
-16    144    
-32    -128   
64     0      
32     32     
32     16     
-96    224    
-112   -96    
112    112    
-176   48     
-336   -208   
-864   -288   
720    368    
-1008  64     
-384   -112   
-144   352    
16     -368   
-176   752    
-192   -592   
224    464    
-96    -368   
-112   208    
-48    -208   
240    224    
-112   144    
64     -112   
-304   160    
80     16     
-896   96     
144    -96    
-96    96     
80     -160   
-208   368    
-96    -304   
-240   256    
96     -320   
-208   384    
208    -48    
-192   192    
-64    -288   
-48    304    
-64    -160   
-80    240    
-336   -208   
-48    192    
-192   -160   
-352   0      
96     -80    
-128   64     
208    128    
48     80     
-96    112    
-64    -32    
0      176    
16     -208   
-80    176    
-48    16     
160    176    
-16    0      
-272   176    
224    -32    
-128   208    
32     16     
48     96     
64     32     
-80    256    
-32    144    
-112   0      
80     64     
-144   64     
112    0      
-80    112    
-80    96     
-48    -208   
48     288    
-96    64     
144    48     
-64    -96    
64     192    
48     64     
-176   160    
-32    -16    
128    64     
64     96     
-48    224    
-32    -48    
0      80     
-80    304    
16     -368   
48     16     
-160   112    
96     176    
-16    64     
96     48     
-128   256    
0      48     
256    160    
-48    368    
32     96     
-80    -80    
192    -16    
-176   32     
80     128    
-112   160    
-16    -48    
176    160    
-144   96     
224    48     
-80    32     
176    224    
0      176    
144    176    
80     240    
-48    -112   
-80    -48    
16     96     
48     16     
128    112    
-32    80     
48     64     
64     96     
-128   -240   
176    48     
16     32     
32     96     
80     128    
-48    -32    
-48    -32    
-32    80     
0      48     
304    384    
-320   16     
0      224    
160    256    
-16    64     
160    304    
-32    352    
288    176    
-112   128    
64     176    
-16    0      
80     80     
240    192    
-96    32     
32     -224   
48     -192   
-240   64     
96     32     
80     -64    
144    160    
-80    128    
32     64     
32     160    
-48    -16    
208    160    
-96    112    
240    672    
-112   -160   
-64    -112   
-48    160    
144    96     
-144   -240   
112    -400   
-48    0      
-16    128    
64     64     
272    -32    
0      144    
544    352    
-480   -160   
-48    -112   
-80    -80    
-96    -112   
160    0      
48     -48    
-288   -80    
32     -240   
544    -240   
32     384    
-48    48     
-112   -48    
192    144    
288    -32    
144    128    
-176   176    
-16    48     
-112   -32    
176    -96    
240    80     
-80    144    
-96    176    
-112   64     
144    -624   
272    192    
-80    -1664  
-144   64     
64     16     
144    176    
160    80     
-64    32     
-80    192    
176    112    
-64    48     
176    96     
-192   224    
-96    -304   
32     160    
32     -272   
-624   -480   
-288   656    
-48    1728   
-256   -224   
96     -432   
368    48     
-160   464    
-144   -144   
512    896    
592    -496   
-288   208    
-96    368    
160    32     
-112   -80    
-80    32     
240    -112   
-48    -224   
144    -256   
-64    -2496  
-208   -64    
32     256    
-16    128    
-96    368    
96     -160   
-144   -208   
-144   -48    
272    208    
-112   480    
-128   16     
80     0      
48     32     
208    0      
-16    64     
-128   -976   
320    -144   
-16    176    
224    -32    
208    128    
112    96     
-176   96     
-144   112    
-96    352    
96     -288   
144    -64    
48     -912   
0      240    
-112   -752   
0      352    
-32    -176   
64     112    
-80    80     
32     128    
-16    48     
-32    -144   
-16    80     
160    -256   
144    320    
-96    -176   
336    672    
-64    -288   
96     128    
48     -144   
144    80     
-336   -288   
512    480    
-16    16     
80     192    
-112   16     
256    176    
80     96     
16     32     
48     64     
80     64     
0      16     
48     -32    
0      64     
64     -288   
80     -96    
224    -208   
48     352    
272    -128   
-192   -1184  
176    32     
176    -512   
128    -1328  
-80    -112   
192    -672   
48     -256   
32     -1456  
48     -96    
80     192    
96     -304   
32     -96    
-48    -96    
112    -16    
128    128    
160    -576   
-32    320    
240    224    
-32    -96    
-16    -112   
16     -224   
128    96     
16     16     
16     -224   
0      288    
48     -592   
96     0      
96     -16    
112    -80    
176    304    
-80    -512   
-32    -160   
144    -16    
48     48     
144    48     
48     -80    
-144   -336   
432    -80    
64     128    
208    -432   
-64    80     
192    -192   
-240   144    
80     -176   
128    576    
208    224    
-96    464    
-80    -160   
192    144    
-512   -80    
16     -16    
256    16     
176    -80    
32     48     
80     -240   
-144   -32    
-32    -384   
240    48     
32     -224   
48     128    
48     -80    
0      64     
-240   80     
192    -144   
-336   -32    
0      -256   
-640   96     
64     -144   
16     96     
0      -80    
224    -64    
-16    -240   
32     64     
144    96     
-128   32     
144    0      
-64    -304   
144    -80    
0      0      
-96    112    
160    -96    
-176   -32    
112    48     
-352   -176   
96     64     
-352   -176   
144    -432   
96     224    
0      -976   
144    16     
-192   -64    
96     -80    
-224   144    
-96    -160   
192    -48    
160    -64    
112    48     
-192   -128   
-1184  -128   
256    -224   
-48    -16    
160    -368   
16     80     
224    -2128  
-32    240    
-192   32     
96     -176   
-96    16     
128    48     
-144   16     
0      0      
-576   -160   
176    -32    
-336   16     
208    -16    
-112   224    
64     -192   
2880   2272   
-1776  -80    
32     -112   
480    832    
-384   -544   
-272   512    
128    -144   
-464   272    
448    -992   
-544   176    
144    -304   
-432   272    
-16    -416   
464    288    
-64    -272   
0      32     
80     -32    
96     -48    
-112   144    
192    -240   
-336   48     
224    -64    
-112   272    
112    -80    
-144   224    
-32    -368   
-752   -80    
-640   -288   
144    320    
-688   -512   
-208   160    
96     48     
-224   144    
-112   -48    
-208   128    
-96    -144   
240    448    
0      96     
0      -32    
-128   -16    
128    -48    
0      112    
-80    -112   
-80    96     
-16    -96    
16     224    
48     48     
-624   -256   
32     160    
-912   48     
192    -32    
-272   96     
32     64     
-16    80     
-48    -32    
-96    -16    
32     96     
-80    -80    
80     176    
-128   -144   
-32    -160   
-112   80     
-48    -32    
-16    80     
-144   -160   
-96    128    
-672   -112   
-128   112    
-2352  -240   
112    64     
-112   -96    
32     96     
-144   -112   
-16    32     
0      -304   
-96    64     
-32    -96    
48     208    
-208   64     
128    -32    
-96    16     
-32    64     
-80    -128   
-144   -112   
-96    -16    
-48    32     
64     288    
-16    -224   
176    32     
-352   128    
176    80     
-64    32     
-144   64     
96     176    
-240   -32    
0      -16    
-272   -32    
96     128    
-96    0      
-128   -32    
-1312  -240   
0      32     
-336   -240   
96     144    
-48    96     
16     192    
-16    -32    
-144   144    
-80    80     
32     128    
-80    16     
-16    32     
32     144    
-240   -112   
0      48     
-432   32     
48     192    
32     -16    
-32    -48    
-176   -240   
-16    80     
16     48     
112    176    
-64    64     
-32    32     
-48    -48    
-32    -16    
-144   -80    
-80    -384   
192    272    
-368   272    
16     96     
-32    256    
-32    64     
32     0      
304    560    
-80    176    
-112   -80    
224    240    
-144   -32    
96     160    
-32    -64    
112    256    
-288   -48    
112    96     
16     144    
32     48     
32     176    
-208   -16    
-32    96     
-32    0      
-32    96     
96     80     
-96    32     
32     -64    
0      96     
-160   64     
256    -160   
-128   128    
-96    112    
-96    -112   
-16    -272   
112    176    
-112   160    
32     96     
-176   0      
144    192    
-144   32     
128    112    
-144   176    
144    -48    
48     128    
-128   96     
64     -48    
-48    192    
-288   -48    
128    -128   
112    144    
48     176    
-80    96     
-32    -64    
48     96     
80     128    
64     64     
192    -160   
16     240    
-176   -128   
176    96     
-448   -64    
432    64     
-288   80     
96     0      
-16    160    
16     -144   
96     176    
0      80     
32     128    
-160   336    
-1280  352    
176    -496   
-224   192    
192    -208   
48     800    
-192   -432   
-128   512    
144    -288   
1056   32     
-976   0      
288    48     
352    -32    
-160   448    
32     -176   
96     448    
-208   -144   
16     272    
48     -192   
112    128    
-208   -128   
240    80     
80     128    
32     96     
-96    -32    
192    -16    
16     304    
32     96     
64     464    
-256   -160   
80     288    
48     0      
16     48     
112    80     
-64    0      
96     128    
48     -192   
64     48     
144    432    
16     400    
-240   -64    
176    64     
0      64     
96     336    
-128   80     
32     96     
-112   176    
192    288    
-32    176    
-160   -48    
64     128    
-112   32     
48     -1152  
-32    224    
128    80     
32     -48    
96     288    
192    112    
128    0      
-96    16     
48     144    
128    144    
-16    256    
-48    208    
48     0      
48     0      
160    112    
128    -224   
32     16     
-48    -112   
64     48     
-48    112    
128    192    
-48    32     
-48    80     
-80    0      
144    176    
-160   -48    
128    144    
128    528    
-592   -32    
288    -16    
80     -320   
-80    64     
544    -2240  
48     432    
-16    208    
96     32     
176    48     
160    240    
0      -288   
96     0      
48     16     
-16    0      
64     112    
-112   -384   
144    112    
80     -144   
-176   80     
-16    -608   
-48    80     
176    432    
304    432    
-48    -48    
64     96     
-144   -400   
224    -192   
-224   -272   
384    688    
-96    112    
-32    -48    
16     -128   
96     -160   
96     0      
32     -80    
128    80     
48     -2336  
16     80     
-16    -368   
-144   96     
256    192    
128    192    
-96    208    
48     160    
192    176    
32     208    
128    128    
144    -80    
-224   96     
-32    -288   
208    80     
16     -992   
112    352    
96     -160   
64     96     
-208   48     
48     64     
176    48     
128    -240   
-32    128    
-128   32     
240    80     
0      -96    
144    128    
96     -224   
-32    80     
-32    -160   
64     -112   
192    64     
-128   224    
208    32     
80     96     
-80    -64    
64     -224   
-16    48     
112    -160   
16     80     
128    -112   
-64    224    
-16    -48    
176    96     
64     -80    
128    64     
-16    -48    
144    -16    
80     192    
0      64     
128    112    
144    464    
-272   16     
80     -368   
192    -64    
176    -256   
16     80     
-160   -96    
240    112    
-80    -208   
96     192    
-240   -176   
224    -592   
128    -16    
80     -192   
16     -48    
-80    32     
304    -368   
48     -80    
80     -608   
176    -16    
-80    176    
16     -176   
64     96     
64     -240   
192    -1152  
-160   48     
112    -144   
112    208    
-304   -176   
208    -224   
-1152  1168   
320    1392   
-1760  -272   
80     -80    
208    272    
-368   -1360  
480    880    
-512   -400   
720    336    
-384   -592   
80     48     
-48    -96    
272    32     
-224   144    
160    -592   
-704   192    
352    -192   
-48    272    
64     -784   
80     160    
32     -416   
0      176    
112    64     
80     224    
112    -400   
-80    64     
48     -240   
32     0      
-32    64     
16     16     
-240   -32    
-16    -160   
64     -64    
64     -80    
-32    -128   
160    -240   
-64    0      
176    -480   
-128   160    
208    -48    
64     96     
-32    -64    
16     -32    
48     48     
128    32     
-48    -64    
16     -128   
64     32     
192    48     
-80    0      
240    -192   
-416   0      
192    -496   
-32    96     
48     -144   
64     80     
0      112    
48     -112   
-112   48     
16     -256   
-368   -96    
160    32     
-368   16     
48     16     
-160   80     
-64    -272   
48     -96    
16     -672   
64     48     
112    -288   
-32    48     
-80    -160   
16     -16    
-160   32     
144    -224   
-112   -80    
176    -112   
-128   160    
-128   -96    
-864   64     
-64    -16    
224    128    
224    -144   
-128   -272   
80     -48    
160    -32    
-256   -160   
160    -272   
-32    384    
-192   32     
160    96     
-32    -128   
-112   96     
144    -160   
-144   0      
32     -80    
32     -80    
48     -192   
64     48     
-48    -832   
80     -160   
-96    16     
96     64     
48     64     
0      -32    
-144   48     
304    224    
-192   -32    
144    -176   
-80    80     
64     -176   
96     48     
16     -544   
32     64     
-112   -16    
-16    64     
-128   -80    
16     -208   
-144   -80    
16     -96    
48     -16    
96     256    
-16    32     
-176   -160   
-112   96     
-192   0      
288    160    
-1040  -176   
0      128    
96     32     
96     -32    
-144   32     
-784   -32    
-32    144    
112    -32    
-48    112    
96     -32    
-16    128    
160    -80    
-80    80     
-80    -112   
-16    128    
-80    -112   
-32    176    
-144   -48    
-48    -16    
32     352    
-192   176    
-64    112    
-240   -80    
80     80     
-160   -16    
-224   -112   
-240   -352   
192    48     
64     -32    
-272   160    
32     -144   
208    96     
-144   16     
16     0      
-32    16     
112    96     
-64    128    
-144   -64    
208    144    
-1232  96     
80     -160   
128    80     
-48    96     
96     -112   
-48    144    
-112   160    
-64    -16    
-32    128    
-112   -48    
112    16     
32     128    
-144   96     
-112   48     
-128   48     
-176   128    
0      64     
-48    48     
-16    0      
32     176    
-16    64     
16     112    
-192   16     
48     80     
-64    -64    
-256   160    
-176   -16    
-112   32     
-528   -112   
96     -64    
-176   32     
-48    160    
-1232  448    
240    1072   
-496   -208   
144    144    
256    -784   
160    -400   
-128   208    
96     1696   
-656   272    
-96    288    
-112   80     
160    -16    
-272   -32    
16     -208   
-96    144    
-784   -192   
96     144    
192    -480   
16     240    
128    208    
-304   -160   
128    240    
-192   0      
400    192    
-320   -32    
272    48     
-176   96     
96     48     
-112   160    
-112   -16    
-80    -32    
0      112    
16     240    
-336   48     
32     64     
16     64     
32     -16    
-112   16     
32     80     
-64    80     
160    32     
-176   64     
0      48     
-176   -208   
128    224    
-16    16     
0      128    
-64    192    
-80    80     
128    176    
-64    -32    
128    48     
16     144    
-16    288    
0      -192   
-48    -192   
128    112    
-48    224    
64     -128   
96     192    
-272   0      
144    0      
16     16     
48     32     
-16    224    
-32    0      
96     -192   
48     160    
-112   160    
128    80     
-32    64     
-32    -16    
96     160    
-208   -48    
112    176    
-176   112    
-176   32     
144    160    
-16    80     
48     -16    
64     128    
-192   64     
144    272    
-160   -144   
240    -16    
-160   -80    
48     80     
-144   176    
16     208    
-64    112    
128    -96    
16     128    
48     32     
0      0      
32     272    
-112   -48    
512    144    
-96    144    
16     208    
-176   -80    
160    96     
-176   32     
192    64     
0      160    
-64    112    
112    160    
32     -128   
32     160    
96     144    
160    128    
-144   -48    
-48    -64    
144    48     
64     192    
-16    96     
32     176    
-240   -32    
160    144    
-112   64     
80     0      
0      -64    
-128   0      
32     112    
192    -16    
-192   -192   
-128   16     
128    -144   
112    16     
-64    96     
-176   80     
224    176    
-64    32     
272    208    
32     48     
160    -1392  
-64    128    
64     16     
-128   144    
-16    64     
224    -64    
-16    176    
-64    32     
320    112    
80     272    
-112   176    
112    112    
-192   0      
176    48     
-80    272    
128    -128   
176    80     
-112   96     
64     64     
32     192    
16     64     
64     32     
-16    32     
80     288    
-16    64     
-16    32     
96     80     
-32    64     
80     192    
-80    160    
0      -208   
128    48     
160    336    
-160   -112   
48     16     
96     176    
-112   48     
224    240    
-144   -48    
224    208    
-160   -176   
96     32     
80     32     
-16    -64    
16     144    
0      -240   
48     96     
96     -768   
-16    208    
-96    0      
176    112    
48     304    
-128   80     
208    -80    
192    32     
-16    192    
16     160    
-32    160    
32     64     
144    32     
-32    -240   
112    -144   
48     -448   
48     448    
1088   -16    
-592   0      
160    192    
-672   48     
464    176    
48     64     
0      -208   
-80    528    
432    -144   
-272   -272   
192    -208   
256    176    
-16    112    
-48    -192   
-80    64     
256    -2240  
-16    352    
80     112    
32     192    
64     -48    
-32    192    
16     0      
128    96     
-32    64     
272    -128   
-80    176    
112    96     
48     240    
96     -368   
-80    80     
128    -656   
48     96     
0      80     
64     144    
48     80     
160    80     
-64    96     
16     144    
80     96     
48     -576   
0      96     
32     -176   
112    0      
160    -32    
-112   32     
112    -256   
-16    -144   
112    16     
16     160    
112    128    
0      112    
-48    96     
64     -288   
96     -16    
32     -144   
160    240    
-192   -176   
96     64     
112    -208   
-256   -160   
-16    -64    
16     -64    
48     -576   
80     16     
-128   -80    
112    0      
16     256    
-16    -64    
-16    -688   
48     -64    
32     224    
144    -64    
-80    -16    
128    -288   
80     176    
16     -1248  
32     -1440  
-256   64     
256    -1424  
-32    224    
144    32     
80     -96    
48     0      
-32    -288   
32     -144   
48     -2464  
64     -192   
32     128    
-80    -112   
176    32     
112    -16    
48     96     
0      80     
48     0      
0      64     
-368   -192   
48     -288   
48     -176   
32     -640   
64     0      
48     -176   
16     -64    
0      -816   
112    -208   
0      48     
80     -32    
96     -16    
-48    96     
112    -176   
-48    80     
-192   -144   
80     -64    
-224   0      
160    64     
-16    -48    
64     -432   
32     -160   
112    -176   
-16    -64    
208    -112   
96     32     
112    0      
-128   80     
192    -128   
-96    -80    
32     -176   
0      320    
-208   0      
432    -48    
-352   -80    
288    0      
0      80     
192    -272   
-256   160    
64     -272   
128    112    
-64    -80    
240    -32    
-208   -32    
128    96     
-112   16     
80     64     
-304   -32    
32     -176   
-592   -80    
528    176    
-688   432    
256    -368   
-32    32     
-48    -512   
48     -128   
0      -128   
112    336    
-48    -208   
128    96     
-256   -112   
128    -48    
-304   224    
-208   -96    
-96    -128   
64     -16    
240    160    
-48    -400   
-128   -80    
176    -464   
-48    192    
80     112    
0      304    
-192   -96    
208    -208   
-224   80     
240    192    
-368   -64    
240    64     
-448   48     
224    -80    
-1232  -48    
128    -304   
16     0      
48     -288   
80     48     
48     -704   
-32    80     
-80    -32    
144    -16    
-80    192    
48     64     
-176   208    
-96    128    
-288   -272   
0      -160   
192    -112   
-32    -176   
176    288    
-64    -16    
112    64     
-32    -1648  
1328   -1328  
-1088  -2016  
-160   272    
-208   176    
-208   -912   
1184   -48    
-416   352    
288    -736   
-48    496    
-352   -240   
176    -336   
-128   288    
-32    16     
-80    -64    
-288   -128   
16     -32    
320    -160   
-16    96     
-80    -80    
112    -16    
160    208    
32     176    
-80    -96    
16     32     
-464   -64    
-768   -96    
-176   288    
-96    -288   
-784   0      
-112   -80    
-64    -16    
-96    0      
-144   80     
0      32     
-96    32     
16     128    
-208   -160   
80     48     
16     -208   
176    16     
-256   -480   
16     144    
-256   -160   
0      -16    
-48    48     
-80    48     
-32    48     
-32    0      
-64    -144   
-304   128    
-48    64     
240    48     
-288   16     
176    -176   
-48    112    
-192   -112   
160    208    
-144   32     
-16    0      
-96    32     
-112   -64    
-64    16     
-64    48     
-48    48     
-16    0      
-80    16     
-880   0      
-272   48     
48     -48    
64     0      
112    16     
32     176    
-128   48     
-80    0      
48     96     
-144   -96    
144    96     
-256   32     
32     32     
-240   -48    
-176   32     
-336   -144   
224    496    
-272   -112   
288    32     
-80    -176   
32     48     
16     48     
96     256    
-160   128    
176    96     
-240   160    
0      -96    
144    16     
-176   -128   
144    288    
-272   16     
176    176    
-720   -160   
32     32     
-64    -64    
-80    80     
-80    -32    
64     64     
80     -192   
-32    80     
0      176    
0      48     
16     0      
-112   16     
16     192    
-96    16     
-16    112    
-880   -176   
-48    16     
0      -16    
-96    -240   
-32    -256   
-176   -48    
240    240    
-48    32     
-176   16     
-448   -144   
336    -32    
-112   32     
32     112    
-96    80     
320    208    
-352   -16    
112    160    
-144   96     
176    96     
112    160    
144    48     
112    256    
-272   -48    
192    64     
16     160    
32     112    
32     0      
-48    16     
-208   -64    
-144   -64    
-112   -32    
48     -48    
-128   0      
112    16     
0      144    
-16    64     
32     64     
-32    64     
48     -16    
-112   0      
112    144    
-144   128    
112    144    
-160   -112   
256    304    
-432   -48    
112    -16    
-16    112    
96     -32    
-96    0      
-16    -48    
112    -16    
80     112    
32     480    
144    -32    
-32    304    
0      -64    
96     208    
-144   -32    
80     192    
-160   160    
192    -128   
144    208    
64     48     
-128   256    
-192   -144   
80     80     
-64    64     
112    144    
160    96     
16     0      
16     224    
176    224    
-192   0      
-48    -16    
-32    0      
32     48     
96     48     
-32    112    
16     240    
-96    64     
160    -64    
96     224    
80     128    
-48    96     
288    -1456  
32     -1360  
256    928    
-480   992    
-560   352    
-224   -336   
208    176    
592    960    
-512   -80    
256    224    
-256   144    
-16    -80    
112    224    
-144   -80    
48     -192   
48     160    
-288   144    
240    -32    
-144   208    
272    176    
-240   128    
224    80     
80     96     
64     -144   
-192   0      
-160   224    
-32    0      
176    -32    
-16    80     
-192   -304   
-96    -32    
-32    224    
64     48     
192    160    
-96    -1056  
224    304    
-112   128    
160    240    
-144   16     
144    -80    
-144   16     
-48    80     
80     112    
112    48     
-96    128    
128    176    
-64    -144   
-96    0      
-32    16     
32     -1584  
96     144    
-32    112    
128    176    
-112   80     
16     64     
-48    64     
160    384    
64     80     
224    304    
-128   -336   
16     0      
16     -64    
48     -496   
32     288    
-64    -624   
64     192    
80     144    
32     64     
-32    128    
80     96     
16     128    
64     128    
16     -64    
96     80     
-96    80     
96     240    
-48    -80    
-160   -192   
64     48     
64     -384   
80     -64    
112    -688   
16     96     
224    32     
-64    96     
64     112    
96     160    
-224   -384   
208    -176   
96     224    
176    288    
-16    128    
-96    -176   
128    112    
160    -176   
32     64     
-16    -944   
0      160    
80     112    
128    144    
-80    -208   
112    192    
-48    64     
80     64     
-144   0      
96     240    
-16    -16    
224    0      
-208   -16    
320    -288   
-176   80     
128    -336   
-16    80     
80     -1808  
112    128    
0      64     
-32    0      
48     -128   
64     256    
96     144    
16     -144   
-144   -48    
208    16     
128    32     
-16    -128   
-64    160    
128    -16    
112    128    
-16    -112   
64     -64    
48     64     
-16    256    
208    -16    
0      160    
64     144    
-176   96     
48     -224   
16     -304   
-16    16     
128    16     
-48    80     
-80    -544   
128    128    
16     -128   
96     -64    
-224   -656   
352    -208   
272    48     
-64    144    
48     208    
-48    -160   
16     80     
128    64     
-16    160    
0      -288   
-176   368    
368    -432   
224    976    
-240   112    
80     384    
-144   -240   
256    128    
16     -80    
160    -736   
0      -1424  
304    16     
-160   -816   
-192   -576   
0      -64    
384    0      
240    352    
112    0      
208    288    
-64    -32    
288    -96    
144    -48    
144    -560   
-112   128    
-272   -80    
48     48     
176    -272   
-96    -400   
-32    -112   
0      -2000  
16     16     
80     128    
-32    16     
176    128    
-192   -272   
208    -816   
112    176    
48     224    
-272   176    
-352   -32    
-48    -128   
192    -272   
-32    -208   
-352   624    
192    1824   
-1296  -432   
560    -832   
208    -560   
-400   -416   
544    64     
-400   656    
528    -112   
128    -176   
-400   -304   
240    -16    
-16    16     
96     -128   
256    0      
32     80     
32     -208   
16     -112   
112    -496   
16     -96    
0      0      
80     192    
-16    64     
160    -48    
0      16     
96     -256   
-224   -96    
-16    64     
16     16     
-64    -112   
208    -112   
-80    -96    
144    -128   
-96    -368   
32     0      
80     -432   
-80    208    
160    -192   
-112   96     
16     64     
48     16     
-96    48     
32     0      
-48    48     
-16    -80    
-448   -160   
80     -144   
32     160    
48     16     
64     16     
-80    -160   
208    32     
-112   -64    
16     -32    
256    64     
-112   -16    
96     112    
-64    -80    
-144   0      
160    -160   
-176   64     
0      32     
-32    64     
48     -192   
32     0      
160    -880   
-80    96     
128    -16    
64     64     
-64    0      
160    -144   
-160   -48    
128    -80    
-464   -64    
224    384    
-496   -96    
272    -480   
-800   64     
-112   -400   
112    176    
-64    -448   
160    224    
-96    -1552  
32     -352   
96     -64    
-144   -32    
-240   272    
-80    160    
16     -64    
-80    64     
-16    32     
-16    -144   
112    32     
0      -144   
240    208    
-96    -64    
-64    0      
-224   48     
-96    48     
32     -48    
16     -64    
-64    48     
128    16     
-208   -80    
112    -32    
-80    80     
160    -80    
-512   96     
160    16     
80     96     
-896   -400   
-16    96     
-32    80     
-832   0      
-144   -80    
128    176    
32     64     
16     -48    
-160   -64    
16     -144   
-96    -80    
-64    -160   
112    160    
-240   -32    
64     224    
-992   -480   
48     128    
-48    224    
368    272    
-160   48     
-400   -32    
-128   48     
320    176    
0      272    
0      112    
-144   0      
-208   -128   
96     160    
-16    -96    
208    160    
-176   -128   
-240   80     
80     112    
16     -288   
-160   -64    
-304   112    
32     32     
-880   -144   
-192   -32    
96     -64    
-48    16     
-192   -32    
160    160    
0      -48    
32     64     
16     48     
-224   -304   
32     -64    
-128   -224   
80     320    
-48    128    
-112   144    
-240   64     
-16    64     
-2688  -320   
-80    -32    
-48    -192   
64     0      
144    16     
-176   0      
16     96     
-32    64     
0      -128   
144    32     
-80    32     
32     128    
-160   16     
0      -32    
32     80     
-640   -64    
176    -128   
-64    -224   
16     320    
48     -128   
-192   -48    
64     240    
-80    -48    
32     96     
80     -32    
-64    240    
-80    32     
48     48     
-176   -256   
144    144    
-288   32     
160    160    
176    -32    
80     112    
1264   -1200  
640    1232   
-496   -448   
-496   -560   
-144   272    
400    -864   
-416   144    
464    656    
-416   16     
-208   -112   
96     144    
-288   -16    
64     -32    
-1056  -32    
160    208    
-160   160    
192    64     
-224   -16    
112    112    
16     48     
16     80     
-80    -32    
16     80     
128    336    
-160   16     
16     -80    
-368   -96    
-16    0      
112    240    
16     240    
112    0      
32     112    
32     96     
176    -80    
-128   80     
192    144    
144    240    
16     480    
-208   -112   
-144   -384   
256    160    
-320   64     
32     32     
-368   144    
-32    -32    
16     -240   
-48    -16    
64     96     
-176   64     
-16    112    
32     -208   
176    128    
-208   -160   
64     48     
-32    -112   
112    192    
-144   -400   
256    480    
416    -176   
0      368    
64     -48    
-16    144    
-64    -16    
144    64     
112    144    
80     0      
-48    96     
-64    16     
80     96     
-64    16     
32     128    
-16    16     
80     112    
-32    48     
160    304    
128    112    
240    384    
-144   496    
-16    176    
-112   112    
-32    0      
112    -192   
-128   -160   
96     16     
0      256    
48     128    
-352   -416   
128    -48    
0      336    
-32    -48    
-16    32     
32     96     
144    160    
-16    0      
-48    112    
0      32     
144    224    
-32    0      
96     64     
-96    -32    
96     208    
-16    96     
-64    160    
32     48     
-32    48     
112    96     
16     80     
-48    -32    
64     16     
0      144    
96     32     
0      144    
-64    16     
144    176    
-112   0      
64     192    
176    560    
-80    -32    
128    0      
-160   48     
224    80     
-32    -16    
64     48     
112    320    
80     96     
32     -160   
-176   80     
96     -32    
256    640    
64     80     
-96    128    
-48    512    
128    160    
-48    -16    
288    160    
-480   64     
144    -176   
0      192    
16     32     
0      256    
32     32     
96     96     
-144   48     
48     -64    
32     0      
48     16     
80     496    
64     -2640  
-96    -48    
64     112    
16     16     
-16    64     
128    96     
-32    160    
-32    112    
144    256    
80     224    
176    816    
-288   -528   
-144   -144   
80     16     
96     256    
96     64     
80     112    
16     192    
-80    240    
112    416    
-96    96     
16     64     
96     -48    
32     -304   
64     256    
-48    256    
-208   0      
32     -208   
64     -96    
-176   -224   
16     -128   
144    16     
0      224    
0      144    
-16    208    
32     240    
256    -432   
112    144    
32     32     
32     160    
-96    64     
48     112    
16     112    
160    32     
-16    224    
-32    -64    
208    224    
-112   -1408  
192    160    
32     -64    
96     272    
656    -224   
336    1488   
384    -80    
-704   336    
-128   -176   
720    544    
-768   -576   
384    304    
-416   224    
112    -400   
-80    32     
256    -128   
48     592    
112    -1216  
-128   480    
128    -400   
-48    352    
64     -16    
160    192    
32     -112   
-48    16     
160    272    
-16    -128   
112    -16    
-48    -432   
64     80     
80     -48    
16     128    
-32    -1264  
128    32     
96     64     
32     80     
-32    -64    
-48    208    
64     -80    
-64    -304   
96     -80    
-48    -80    
224    80     
-32    -176   
-32    112    
48     -240   
160    80     
-80    -96    
-16    -96    
32     16     
80     288    
176    144    
96     96     
-144   80     
80     -32    
112    -16    
32     -128   
48     112    
48     -128   
16     -112   
112    0      
-16    176    
192    -64    
16     80     
48     96     
112    -848   
16     64     
-1584  16     
48     -1120  
32     -160   
160    -1232  
32     -32    
-112   64     
16     -256   
160    -64    
48     -48    
-16    240    
-16    -272   
176    -1168  
-80    240    
416    -272   
144    64     
-16    -32    
16     160    
-240   -48    
256    -192   
112    112    
96     -1056  
256    32     
-304   32     
240    -192   
-16    144    
-48    -48    
160    -800   
-144   64     
48     -320   
112    -176   
-192   256    
-144   -368   
144    -80    
32     -560   
112    16     
0      -320   
112    -32    
16     -608   
32     -32    
176    416    
-112   64     
256    -112   
-80    48     
192    32     
-32    -32    
-448   -128   
96     -240   
-208   -128   
32     -48    
192    80     
-96    -240   
96     -64    
144    -352   
-160   -288   
416    96     
32     224    
176    -128   
-160   -32    
96     -16    
-256   48     
160    0      
208    112    
-384   96     
32     256    
-16    16     
272    -176   
-32    -112   
16     -848   
32     160    
96     -928   
112    144    
32     -80    
-208   0      
-16    -64    
304    256    
-64    -32    
64     -176   
-48    64     
96     -80    
-592   -32    
-64    -176   
176    144    
32     -224   
-96    -80    
112    -864   
-144   -144   
112    -224   
80     64     
-112   16     
96     304    
-32    192    
0      -96    
-160   0      
-16    80     
-336   0      
64     -64    
-912   -32    
128    -288   
-80    -32    
64     -368   
-80    -144   
144    -608   
-144   -256   
-32    0      
144    352    
-352   -160   
160    -64    
-480   32     
112    16     
-16    48     
112    64     
-816   16     
112    -320   
-64    128    
80     112    
-16    0      
-48    16     
192    -112   
-352   0      
16     -32    
-128   64     
32     -288   
128    112    
128    112    
48     16     
-96    -16    
48     -32    
160    -304   
-96    240    
-96    -160   
256    256    
-352   128    
208    -128   
-224   -48    
720    800    
-1072  -1312  
1216   1344   
16     736    
704    448    
-1072  -736   
608    144    
-624   480    
0      -576   
-64    -16    
-1248  -416   
448    160    
-448   192    
48     -32    
-304   48     
256    288    
32     256    
64     -64    
-64    96     
176    0      
-272   64     
-960   -96    
-64    336    
-208   -80    
48     64     
-144   -256   
-208   16     
32     -320   
-704   -512   
304    272    
-400   288    
-112   112    
240    80     
-128   144    
-16    -160   
-64    -144   
-160   -96    
-208   -272   
256    -16    
-64    160    
160    -112   
-240   192    
32     -96    
32     288    
160    -240   
-192   32     
-240   -128   
-48    320    
176    112    
-144   32     
-32    48     
-320   -192   
80     128    
-320   -112   
-48    16     
0      272    
-48    64     
192    768    
-720   -528   
432    -48    
-320   32     
48     32     
-80    320    
-176   0      
-816   -176   
-32    96     
-128   -80    
112    224    
-64    -32    
-16    112    
64     16     
-128   -16    
-80    -80    
-80    96     
-32    48     
-80    -144   
48     -96    
80     144    
64     432    
-224   160    
-112   64     
80     -96    
128    48     
16     -256   
-80    48     
112    0      
64     272    
-144   80     
-64    -16    
0      0      
-192   -128   
-64    176    
-176   -160   
-64    48     
-112   144    
-32    272    
-336   -192   
192    336    
-48    112    
304    352    
-240   64     
-32    -240   
144    96     
64     32     
32     64     
-224   -32    
0      176    
-48    -48    
16     -96    
-224   -80    
208    176    
-944   -96    
0      112    
-48    240    
80     112    
64     96     
-128   -272   
128    112    
-128   0      
-16    16     
192    16     
-128   -112   
48     -432   
128    224    
-352   -320   
128    -144   
-368   -160   
96     -96    
-48    -736   
192    272    
-16    144    
-32    -112   
-160   192    
32     48     
0      80     
128    240    
-32    272    
-176   112    
-64    288    
-48    -64    
96     -32    
-288   -48    
32     -32    
32     144    
-32    -16    
80     32     
-128   -176   
176    128    
-16    288    
0      32     
128    64     
0      -96    
-240   -32    
112    192    
-112   0      
112    48     
-32    144    
-32    -48    
80     32     
96     80     
0      160    
32     16     
80     -48    
0      160    
176    48     
-176   176    
-80    48     
160    176    
-224   96     
112    -80    
48     240    
-80    -80    
32     48     
-64    352    
-240   -112   
272    -32    
-16    128    
112    224    
-544   48     
112    -112   
128    32     
-16    112    
16     -16    
64     16     
80     -48    
-144   128    
0      176    
64     48     
32     80     
144    112    
-16    96     
-48    112    
-16    144    
-96    192    
-144   -80    
160    48     
144    0      
-16    160    
288    -1120  
240    368    
-496   -448   
608    -48    
832    384    
-160   -16    
-288   -64    
992    304    
-368   -144   
112    48     
-128   192    
320    -160   
-432   368    
480    -464   
-336   224    
192    -16    
-32    288    
176    64     
-80    64     
16     32     
128    48     
96     256    
16     80     
0      80     
-48    16     
128    432    
288    144    
-368   -48    
160    32     
-96    -176   
176    112    
-64    192    
256    -64    
-96    272    
32     -128   
-64    224    
64     -192   
-96    336    
256    16     
32     240    
-112   -96    
32     176    
80     16     
112    208    
-16    48     
-32    -128   
48     96     
144    -688   
-96    0      
160    144    
-32    176    
128    -80    
-64    224    
80     -80    
48     176    
-64    32     
96     272    
-48    -96    
32     160    
48     144    
-96    -400   
144    -32    
-64    -224   
0      -64    
128    160    
-144   128    
144    176    
-16    32     
80     -32    
176    208    
-224   16     
160    128    
32     -48    
16     176    
64     112    
192    -256   
80     576    
336    272    
352    -144   
128    544    
-208   -32    
176    128    
-128   -192   
80     -176   
-96    64     
-144   288    
32     144    
144    -80    
0      -128   
176    96     
0      32     
48     192    
-112   -16    
-64    176    
-16    -1520  
-48    -16    
-80    16     
-144   16     
48     32     
96     32     
-112   -64    
64     128    
-32    0      
160    -32    
32     -16    
16     -144   
-128   -16    
224    160    
-112   112    
144    -208   
16     16     
32     -800   
32     112    
128    -112   
-112   32     
96     0      
-16    192    
96     96     
32     -176   
-96    96     
224    -208   
-224   -208   
384    -112   
-32    64     
-112   -128   
0      192    
288    -256   
112    96     
-256   -16    
112    48     
160    128    
112    208    
-64    256    
112    -832   
-48    -48    
-32    -128   
16     112    
368    464    
-272   -64    
256    -208   
-64    48     
0      -208   
256    256    
-256   96     
176    32     
0      -80    
128    112    
80     160    
64     -208   
64     240    
-32    -224   
144    32     
32     -400   
80     48     
-112   -784   
272    416    
128    288    
-16    -96    
256    64     
-16    -1440  
144    96     
-16    -240   
80     -144   
128    0      
-112   -96    
-288   -80    
96     -96    
256    -288   
224    304    
-288   -80    
96     -352   
80     272    
32     -32    
176    -16    
-144   -80    
96     -1088  
-16    48     
-112   -32    
240    96     
-64    -144   
48     -96    
32     -752   
160    16     
32     -32    
80     336    
-80    -288   
160    -32    
-64    -112   
400    -16    
32     -48    
-64    -48    
-80    16     
-16    -32    
336    -320   
176    -16    
-64    -320   
-64    -400   
-752   -112   
-464   1184   
176    400    
-400   -176   
352    -560   
-144   144    
64     -32    
-176   816    
-224   -368   
480    48     
-544   -160   
-416   -144   
-160   464    
304    -256   
-144   144    
256    -496   
-48    -192   
-272   -816   
384    16     
-432   -112   
320    368    
16     -96    
128    32     
112    -368   
-224   112    
64     -48    
-272   272    
0      -160   
736    288    
-96    -16    
144    -144   
352    -368   
-288   -176   
0      -752   
96     80     
-160   16     
16     16     
-624   -304   
384    -16    
-592   -112   
96     -144   
-336   192    
112    -288   
-1232  -80    
64     -272   
-32    128    
-256   -416   
272    -224   
32     -688   
160    96     
256    288    
-16    80     
-112   48     
-64    -640   
160    128    
192    112    
-336   -48    
192    848    
-848   224    
176    176    
-32    -320   
-32    -448   
144    80     
96     16     
96     96     
96     -48    
80     -80    
16     176    
208    -144   
-112   544    
64     -80    
48     -32    
96     -112   
-16    160    
32     -112   
64     -128   
0      -736   
368    -96    
-160   -656   
-48    16     
-768   176    
288    240    
-192   -80    
-64    -16    
112    -48    
128    -16    
-48    288    
96     208    
-48    192    
-80    -192   
-16    -32    
112    -256   
240    96     
-64    -80    
-208   -128   
-128   -176   
80     -384   
208    320    
0      112    
-240   -384   
-48    96     
272    240    
80     64     
-224   160    
-64    -256   
176    416    
176    144    
0      -16    
-992   -80    
-624   -96    
32     32     
48     32     
0      64     
304    192    
-224   -256   
64     -208   
-96    368    
160    -80    
16     80     
-224   -336   
-64    192    
-240   0      
224    224    
-128   -352   
-464   -96    
0      -160   
-32    80     
-176   0      
-32    64     
-272   0      
432    -48    
-80    208    
176    80     
0      208    
-496   -208   
64     64     
-48    -368   
-64    32     
128    0      
-304   128    
208    48     
-16    80     
-192   -16    
-112   160    
-192   -112   
-480   64     
-240   -80    
144    96     
-48    176    
-160   -144   
176    96     
-192   -176   
48     144    
96     144    
0      64     
0      48     
-336   0      
80     16     
-128   -96    
16     144    
-256   112    
64     -16    
-1808  -144   
-16    48     
-112   -208   
32     -16    
224    80     
-112   208    
-80    64     
80     32     
-112   16     
-48    -96    
32     32     
16     16     
-176   240    
-352   80     
-96    -96    
-528   -96    
112    -64    
0      0      
16     128    
32     32     
192    -144   
-160   192    
-208   96     
32     128    
-160   -48    
208    80     
-32    32     
80     0      
-16    -16    
-80    208    
-272   16     
400    -256   
-96    304    
-96    80     
144    -48    
-304   32     
48     96     
-80    -1200  
32     -256   
-320   592    
16     -80    
-448   -304   
416    464    
0      176    
272    0      
-640   192    
448    -384   
-464   624    
176    -336   
-352   672    
112    -656   
-160   528    
208    -288   
-80    464    
-96    -464   
-80    288    
-64    -352   
-80    416    
-160   -96    
112    240    
-304   -272   
-32    144    
-624   -160   
-96    0      
-32    96     
176    32     
-48    144    
128    -80    
-128   240    
64     -128   
-48    224    
224    -144   
-80    192    
96     48     
-48    176    
-64    -144   
-16    192    
-128   -64    
48     160    
0      -96    
-16    -32    
-80    64     
64     192    
-32    -48    
-64    192    
-96    -16    
176    96     
-176   160    
16     -176   
0      208    
-160   -48    
96     176    
-48    64     
-16    112    
96     16     
-32    112    
16     80     
48     256    
-112   -64    
144    128    
-224   96     
-80    16     
-32    96     
-128   -32    
112    96     
32     96     
-96    64     
160    176    
-96    0      
192    208    
-80    224    
80     80     
80     336    
-16    96     
272    0      
-32    240    
-96    112    
48     64     
-16    -272   
128    112    
304    224    
-160   128    
128    112    
-144   160    
-128   -240   
288    96     
192    256    
96     208    
-320   16     
-32    -144   
0      32     
128    48     
96     288    
-240   -208   
-16    -96    
176    112    
-80    64     
80     176    
-48    -32    
32     32     
16     32     
32     80     
80     0      
-16    160    
48     32     
208    256    
-112   -32    
64     112    
-112   0      
32     64     
80     144    
16     144    
192    240    
-144   -96    
-80    -48    
-16    128    
32     -64    
80     80     
-16    32     
-16    -16    
-32    -80    
128    128    
-64    176    
112    -32    
-16    0      
-16    144    
0      16     
48     -48    
0      96     
48     160    
32     80     
-64    -416   
112    -112   
-144   16     
48     -80    
-96    416    
-80    32     
112    192    
-160   96     
176    -432   
-32    144    
0      -560   
80     0      
96     96     
0      144    
80     96     
16     160    
32     32     
-32    48     
-64    32     
112    208    
-64    -48    
112    160    
-96    176    
240    -256   
-112   144    
160    -640   
-16    128    
0      128    
160    48     
-48    96     
304    288    
-272   -144   
256    240    
-96    -64    
224    192    
-80    96     
128    96     
48     128    
0      16     
-48    64     
144    -192   
64     272    
64     -784   
64     192    
-128   16     
192    96     
0      112    
32     96     
-304   48     
224    336    
0      304    
-96    -208   
112    96     
240    -64    
-48    64     
16     -208   
112    192    
0      -1472  
224    -80    
112    -560   
-80    32     
-80    0      
-432   544    
-1216  -64    
672    112    
-848   112    
752    -160   
-384   688    
256    -576   
-400   832    
80     -944   
400    656    
-576   -640   
320    192    
-96    -144   
368    176    
-224   272    
112    128    
-16    848    
176    112    
-112   352    
0      -304   
48     464    
32     -624   
416    400    
-272   -800   
320    48     
64     -480   
176    96     
48     256    
288    624    
-288   224    
-256   0      
368    176    
-80    -48    
64     -16    
0      -80    
-48    80     
128    -400   
-16    -160   
-16    -224   
176    16     
-192   -48    
16     0      
80     -352   
-96    -224   
208    16     
0      160    
240    80     
-96    -144   
80     160    
-96    0      
32     80     
16     -16    
48     96     
16     -48    
144    32     
80     -112   
64     176    
64     -256   
32     -64    
-48    -64    
96     -608   
-32    192    
-320   -64    
160    -1712  
-112   112    
-48    -704   
208    48     
0      224    
48     0      
192    432    
-128   16     
192    -80    
96     -112   
48     -592   
176    -16    
-224   -192   
192    -192   
-512   -32    
0      -432   
192    48     
112    -384   
-16    -160   
192    -976   
-176   -496   
336    -112   
32     96     
-128   -288   
160    400    
-144   -144   
176    -16    
-16    -112   
64     -32    
112    160    
48     0      
112    -64    
160    176    
-48    128    
160    0      
64     0      
112    -560   
-64    -256   
-32    -320   
16     112    
144    -640   
-240   32     
80     0      
240    48     
-400   -48    
-64    -368   
-752   -176   
48     -224   
192    160    
32     -208   
48     96     
-176   -336   
336    16     
-144   48     
368    320    
-48    272    
96     128    
-64    176    
96     -16    
32     -208   
-384   -272   
-768   -112   
288    0      
-96    -64    
80     -144   
0      -112   
-96    -288   
-32    128    
0      -304   
64     -16    
-48    64     
320    0      
-80    -16    
-160   -112   
-48    32     
192    192    
-96    -64    
16     -16    
-1616  -48    
352    -128   
272    16     
-192   -80    
128    96     
-80    -432   
32     0      
-32    0      
384    -64    
-32    112    
-96    -16    
32     32     
48     -224   
-336   -64    
224    48     
-48    32     
96     -48    
-416   -336   
240    -176   
0      256    
32     -1088  
32     112    
-112   48     
192    32     
-144   32     
32     -112   
48     -32    
128    0      
-832   -80    
224    -144   
-128   128    
128    -64    
144    32     
-112   -304   
192    64     
-16    -336   
32     64     
-224   32     
96     192    
-288   0      
48     -80    
48     -144   
128    64     
-288   -16    
128    -32    
48     272    
-128   -160   
80     144    
96     -192   
0      144    
96     -64    
80     -96    
-96    144    
48     64     
-96    16     
80     32     
-32    -64    
-656   864    
816    2240   
-1760  960    
144    624    
-160   -288   
-464   -544   
-640   -96    
-128   -528   
256    336    
-544   -304   
-16    352    
-1216  -416   
-80    576    
320    -368   
-96    368    
-176   -240   
-16    208    
64     -16    
-320   -64    
-112   -432   
96     96     
-208   192    
144    48     
-160   160    
-128   -288   
-96    160    
48     -48    
-176   240    
-16    -128   
-80    112    
-944   -80    
48     160    
-32    -64    
-48    96     
-48    -64    
192    128    
-64    -32    
0      192    
-96    -80    
-112   112    
32     80     
96     32     
-128   96     
-560   -48    
-96    144    
-1408  -176   
48     128    
-64    -32    
208    80     
-208   -64    
96     144    
-96    -176   
-64    0      
0      16     
32     -32    
-16    144    
-64    -32    
-80    16     
-32    0      
-16    -32    
-128   0      
144    240    
-272   -80    
32     64     
-112   -352   
-48    64     
-16    -16    
32     80     
-64    64     
0      240    
-80    0      
-32    -80    
-32    -16    
-96    16     
64     128    
-48    96     
112    336    
-656   -240   
160    -304   
-64    64     
288    224    
144    208    
-176   64     
32     -48    
-160   176    
128    96     
-80    96     
0      64     
16     96     
-144   -272   
-160   32     
-48    144    
-48    -112   
128    208    
-16    32     
96     -144   
-128   -320   
16     -48    
64     208    
-16    80     
-16    64     
-128   48     
96     0      
-96    0      
-64    32     
-320   -80    
160    192    
-208   -160   
160    96     
-464   -16    
48     -16    
16     112    
-96    -16    
208    144    
-160   64     
64     64     
-16    32     
48     48     
-32    64     
16     16     
32     64     
32     192    
-48    -160   
80     80     
-704   240    
-32    -16    
320    288    
-400   240    
272    -32    
-32    96     
-176   48     
176    -48    
-128   -32    
112    240    
-16    96     
48     16     
-80    16     
240    -48    
-320   288    
144    64     
-32    160    
-16    48     
32     -32    
-96    80     
32     16     
-144   -80    
0      -112   
112    320    
-128   128    
96     -144   
-144   48     
-16    128    
48     -64    
144    -64    
-192   192    
32     144    
-128   0      
-80    96     
144    -96    
48     240    
-160   -32    
64     192    
-96    -64    
224    96     
0      144    
-80    -32    
32     608    
-416   -64    
336    48     
-160   160    
240    -80    
-32    128    
-272   128    
112    -32    
80     176    
16     16     
96     48     
-96    32     
-16    64     
64     80     
-128   -32    
288    48     
-32    272    
0      112    
-144   112    
336    -128   
-48    416    
-16    -32    
-64    -32    
112    32     
160    64     
304    -160   
-240   240    
-128   -80    
64     32     
112    176    
256    96     
128    64     
-432   1200   
384    -1072  
-800   48     
-240   -224   
176    -80    
288    528    
256    16     
-432   304    
-48    48     
128    -384   
48     -176   
-64    288    
144    272    
112    -256   
48     144    
32     -208   
-240   -272   
352    112    
-64    64     
128    -80    
32     336    
208    112    
-32    -32    
64     0      
112    48     
-32    -48    
0      112    
-64    -96    
160    -288   
-64    112    
48     112    
-32    64     
-16    -48    
128    80     
-16    192    
144    304    
-176   -16    
-32    112    
-16    -48    
112    -112   
16     -32    
-16    80     
32     -112   
-64    -336   
192    224    
80     528    
-128   -48    
-112   -80    
288    208    
-64    208    
256    48     
-160   144    
80     -64    
208    -64    
-240   304    
256    208    
-128   32     
176    32     
0      -80    
32     -32    
48     -880   
-16    16     
16     176    
32     128    
64     48     
0      48     
-80    80     
80     80     
80     96     
-32    32     
48     -16    
96     160    
-80    112    
96     -320   
0      96     
96     -512   
272    -32    
-48    240    
144    96     
-144   96     
48     96     
-32    -128   
160    -16    
-144   256    
80     400    
-96    -112   
144    -288   
80     352    
-144   -208   
288    144    
-96    -48    
160    16     
-80    -1632  
-64    32     
176    -528   
-32    224    
0      64     
144    192    
-96    16     
48     0      
160    224    
0      -16    
144    256    
-144   -32    
192    192    
0      -176   
96     160    
240    -288   
-192   128    
192    -208   
0      32     
-48    0      
96     0      
-48    -48    
64     192    
192    80     
64     -176   
-176   80     
176    16     
-32    144    
192    -336   
-144   96     
0      -288   
224    64     
-96    -736   
-16    -48    
-208   -80    
80     -192   
-80    -16    
-96    -160   
304    160    
80     16     
48     0      
32     -256   
-224   32     
256    -240   
144    288    
-16    -48    
400    128    
-224   -1376  
-32    128    
192    112    
112    16     
16     112    
64     -48    
336    352    
-80    0      
-48    64     
144    80     
64     48     
-32    48     
96     64     
16     -192   
112    144    
-192   -16    
240    -1008  
-128   -16    
16     -176   
432    96     
-64    -80    
96     -1392  
-80    -192   
64     -448   
128    -64    
112    80     
16     -240   
-80    144    
-48    -224   
320    -1360  
80     288    
-32    0      
-16    288    
80     -624   
-64    -48    
-432   80     
64     96     
80     208    
16     -432   
-16    -144   
224    -112   
64     -128   
96     192    
-32    80     
-176   -112   
-32    64     
224    -96    
-16    -96    
64     -16    
-48    -32    
-112   96     
64     -64    
32     32     
-128   -192   
176    -192   
192    -288   
208    112    
-32    -880   
880    -1856  
64     -352   
1216   -544   
-48    -496   
656    32     
-432   -176   
-112   -528   
432    368    
0      -592   
-256   -384   
-336   -160   
368    -384   
-64    160    
80     -416   
176    -560   
-304   -176   
64     80     
80     192    
96     272    
-16    -96    
0      128    
-64    144    
-16    -128   
-144   144    
-352   -224   
-128   80     
112    -176   
64     96     
128    -336   
48     -592   
80     64     
64     304    
-224   64     
96     -32    
-48    -240   
240    -32    
32     -144   
-32    64     
0      0      
-144   0      
16     -128   
-464   -48    
144    -160   
80     -16    
16     -272   
48     288    
-16    -928   
64     96     
-64    -80    
-32    -96    
-96    -80    
48     16     
-112   48     
160    16     
-608   -80    
32     -64    
-752   112    
-32    -48    
96     32     
112    -176   
-288   -160   
96     -432   
224    192    
-176   32     
272    112    
-64    0      
32     -64    
-176   48     
160    32     
-240   -48    
96     -112   
-272   112    
112    32     
0      16     
160    -256   
0      128    
144    -288   
336    160    
112    480    
-80    16     
32     -16    
208    -128   
-240   32     
64     -176   
0      -80    
112    112    
32     32     
96     -96    
-112   144    
64     -192   
32     -32    
-32    -448   
-80    -80    
128    288    
-304   -32    
64     32     
-128   -80    
16     64     
64     32     
-32    48     
0      -48    
-32    32     
-48    -240   
80     128    
-1392  -240   
80     96     
32     96     
64     240    
-144   -176   
-672   32     
-320   32     
-560   -16    
-64    0      
48     112    
-32    32     
-16    -48    
-48    144    
-480   -128   
192    112    
-208   32     
80     208    
16     16     
-320   -80    
16     144    
-128   -16    
208    160    
-48    736    
32     -48    
16     -112   
-352   64     
384    -320   
-32    192    
-176   -128   
256    112    
-176   -160   
16     -16    
-144   -32    
320    -240   
-160   464    
-128   -80    
48     80     
-240   80     
80     -64    
-1056  64     
-144   32     
48     -176   
48     64     
-48    64     
80     112    
-144   -288   
-32    -32    
32     224    
-16    0      
32     -96    
256    -48    
-320   256    
128    -96    
-256   192    
272    -160   
304    176    
-144   48     
80     176    
-336   -32    
288    -32    
128    112    
-240   -368   
160    -224   
-16    400    
-240   208    
-64    -64    
-128   -16    
128    112    
16     96     
-128   480    
-448   -96    
-464   -272   
-224   336    
-80    -224   
64     -112   
176    96     
336    -112   
64     352    
-320   128    
-192   112    
-32    -16    
-144   112    
-128   -64    
-64    208    
-384   -384   
64     -16    
-624   -256   
304    48     
-48    48     
224    -96    
-32    192    
-240   48     
64     64     
-16    48     
-352   -448   
-272   -1280  
512    1392   
-512   704    
-384   -192   
-160   -496   
832    560    
352    304    
-240   64     
-432   -80    
-320   128    
-16    -64    
-64    208    
-160   16     
224    32     
-64    96     
0      48     
48     208    
-192   0      
0      160    
-64    80     
80     176    
-80    -64    
-144   96     
144    -176   
-80    144    
112    112    
0      64     
-16    -64    
-16    192    
64     -16    
-32    32     
-128   96     
96     -32    
-32    160    
208    -112   
-112   272    
-240   -64    
48     96     
-48    -96    
112    160    
64     80     
16     16     
80     96     
-80    224    
96     32     
-32    48     
128    336    
-304   64     
368    48     
-240   48     
80     48     
-224   -80    
80     16     
0      128    
-16    352    
128    -96    
112    224    
-176   64     
240    16     
-16    256    
-96    48     
160    96     
-240   144    
208    -64    
-32    32     
-48    80     
-240   80     
80     0      
144    128    
-128   -64    
32     240    
-160   -128   
240    48     
-96    144    
80     128    
-160   160    
0      240    
-144   -176   
96     32     
-48    -80    
64     112    
0      416    
-80    -16    
176    -48    
16     -96    
144    256    
-208   32     
224    48     
-64    80     
0      112    
-48    16     
80     64     
64     480    
-224   -48    
320    32     
-16    0      
80     160    
32     144    
0      80     
192    208    
-80    64     
48     80     
64     -16    
32     80     
-32    64     
64     -32    
64     208    
32     32     
144    80     
-160   -32    
0      -1264  
80     64     
32     48     
16     80     
16     80     
-48    64     
16     160    
-16    144    
48     -144   
-96    0      
-96    80     
368    128    
-64    -16    
16     384    
32     96     
96     -544   
-144   -160   
-64    -80    
32     160    
160    112    
208    144    
-112   176    
448    224    
-80    64     
-80    96     
16     -32    
128    112    
-144   -64    
48     80     
144    144    
80     -144   
48     240    
64     352    
96     96     
-48    64     
-48    64     
176    304    
32     144    
64     80     
-48    64     
-80    -48    
144    48     
16     16     
-16    160    
176    32     
-96    -32    
-96    80     
256    -1712  
-112   80     
112    80     
0      80     
48     112    
32     224    
64     -96    
128    96     
-128   96     
48     272    
-64    80     
208    -16    
96     16     
16     -544   
0      112    
96     -176   
208    176    
-32    192    
-16    96     
-48    0      
48     144    
-32    0      
96     128    
-32    112    
176    192    
-160   32     
32     -16    
80     80     
176    0      
-48    160    
-64    -64    
64     96     
64     -1456  
48     176    
-32    -144   
0      -320   
0      64     
160    176    
32     96     
-688   1072   
-608   1328   
592    656    
-384   -80    
-432   -304   
-352   -64    
-208   -592   
256    704    
-256   -752   
640    224    
-784   -480   
192    112    
128    96     
208    112    
-320   272    
176    48     
-160   112    
0      -48    
400    320    
64     -240   
-48    -112   
48     -208   
64     240    
272    64     
-112   96     
48     -192   
-48    208    
112    272    
64     128    
-64    -208   
288    400    
-64    32     
-16    -80    
-64    256    
144    -112   
144    272    
-32    -384   
16     160    
0      -64    
304    256    
-144   -1184  
128    112    
-96    112    
224    -48    
-48    80     
128    -32    
-16    -1392  
48     -112   
64     240    
-48    -112   
64     64     
32     -176   
80     80     
16     -64    
-64    144    
-16    -304   
0      -960   
96     -16    
224    32     
64     -208   
16     -224   
64     -368   
80     -32    
-64    -464   
272    80     
-288   176    
64     -16    
0      160    
64     -176   
32     -640   
144    144    
48     -176   
-32    112    
80     -224   
128    -160   
-16    64     
128    -368   
-256   -144   
448    -672   
256    144    
208    -624   
112    224    
-208   144    
32     48     
64     32     
64     48     
96     240    
-240   -32    
-160   -160   
80     -64    
0      -112   
240    16     
-32    32     
64     -432   
96     -176   
-16    -832   
144    -16    
64     -720   
-16    -80    
176    -128   
-80    112    
144    -48    
16     0      
-160   32     
112    80     
-272   48     
16     48     
272    0      
32     -160   
128    48     
-32    0      
128    16     
0      -656   
-16    48     
64     -176   
-16    80     
112    -80    
0      -32    
16     32     
96     -48    
-48    -48    
48     -336   
-400   -64    
96     176    
224    64     
112    112    
-192   -32    
-32    -848   
96     -176   
16     208    
96     112    
80     96     
-128   -336   
-64    -80    
128    128    
-224   -240   
320    -80    
-624   160    
48     96     
-864   -160   
-32    -480   
64     -176   
256    -288   
-128   0      
-64    -1280  
0      144    
16     -352   
-80    -304   
80     -176   
-80    112    
-32    -32    
112    112    
-336   -32    
0      -240   
-1456  -304   
304    -128   
0      80     
64     -16    
-48    -16    
240    -352   
96     176    
-112   64     
16     -208   
32     -32    
176    -48    
-48    48     
160    112    
64     240    
-144   -512   
-160   32     
128    -64    
-64    -32    
160    144    
-160   -192   
-48    -1232  
208    -96    
0      48     
0      112    
-176   -400   
96     128    
-304   -272   
48     -64    
208    32     
32     16     
-128   32     
64     32     
16     -32    
-48    -448   
96     16     
-16    -320   
-80    16     
48     48     
-272   -64    
128    -64    
-80    80     
80     -96    
64     16     
176    96     
2000   -272   
-896   -592   
-736   -32    
144    1056   
-544   -288   
-208   -608   
144    464    
224    128    
-320   224    
-912   -80    
192    192    
112    -192   
0      272    
208    -48    
-16    80     
-48    -176   
64     80     
-80    -144   
-16    48     
128    -80    
-192   0      
-176   -16    
-320   80     
-32    64     
-176   -16    
-128   -352   
96     240    
-128   0      
384    -96    
-240   -16    
224    -160   
48     144    
-176   -128   
0      128    
-64    -272   
-16    64     
32     416    
-432   -96    
144    -128   
-96    208    
160    -16    
-192   80     
-240   0      
-688   32     
-32    -32    
-48    -32    
128    96     
-32    32     
16     224    
-16    -192   
-112   64     
16     -48    
48     48     
0      192    
-48    16     
64     32     
-336   48     
0      -16    
-384   -16    
48     144    
-208   -16    
112    96     
-64    -176   
112    0      
48     -16    
-96    176    
-48    176    
0      -144   
48     96     
-192   192    
-16    -208   
144    64     
-256   112    
96     -16    
32     48     
-992   -48    
-160   -16    
16     -176   
16     128    
48     160    
16     -80    
128    128    
-144   192    
-32    -144   
224    48     
-128   144    
-80    0      
112    112    
-496   0      
368    0      
-368   80     
192    224    
-64    176    
-16    64     
-80    -304   
16     -96    
-112   224    
-16    112    
128    80     
-208   -16    
112    64     
80     -16    
-80    -96    
-208   -16    
80     112    
-272   64     
96     128    
-160   192    
224    320    
-144   144    
112    16     
-176   0      
-32    -64    
128    64     
48     96     
-16    48     
-192   0      
-128   256    
-48    48     
336    192    
-368   80     
288    176    
-96    144    
-32    0      
-208   16     
-32    128    
288    112    
-176   0      
96     80     
-80    48     
80     32     
48     128    
-112   304    
336    240    
-16    272    
-304   16     
0      96     
64     -176   
-320   16     
128    80     
112    144    
112    224    
-16    64     
-128   -48    
-48    -16    
208    240    
-144   -96    
144    144    
-176   -16    
0      176    
-16    -96    
-64    96     
48     112    
-16    80     
0      128    
16     96     
-80    16     
-32    160    
160    272    
-16    16     
0      96     
64     160    
-64    160    
-64    -128   
80     272    
16     224    
-32    144    
-16    64     
80     -64    
-192   -128   
176    352    
160    208    
-160   -32    
96     240    
-304   -64    
80     272    
-176   80     
192    64     
0      -32    
32     80     
-32    112    
32     192    
160    32     
48     192    
-16    0      
160    224    
-16    48     
32     -48    
112    -48    
64     0      
32     176    
-32    112    
-48    144    
80     -80    
176    -1440  
-96    80     
-16    96     
-880   624    
-704   192    
16     1296   
-224   256    
-272   -96    
-352   32     
80     80     
-240   720    
-96    -1040  
576    192    
-512   -144   
80     400    
-32    -2624  
272    -80    
-192   0      
192    368    
112    512    
368    224    
-512   -480   
192    -64    
288    416    
-272   96     
96     288    
256    80     
-336   -384   
240    96     
224    144    
-128   -128   
-48    272    
0      224    
-112   176    
-16    96     
96     112    
0      48     
-32    0      
-48    112    
224    544    
48     128    
-128   16     
32     -96    
32     144    
-48    144    
48     -96    
128    -48    
64     -80    
32     176    
0      80     
192    272    
-48    -112   
16     -96    
144    32     
-160   384    
128    -112   
-80    96     
16     80     
208    192    
176    496    
64     -176   
-128   -256   
32     -992   
16     -32    
0      -16    
112    112    
-16    96     
112    352    
112    -368   
32     240    
-144   0      
128    96     
-160   32     
96     48     
144    64     
-64    -112   
32     64     
128    48     
32     64     
16     -272   
336    1056   
-176   496    
112    160    
-64    -256   
192    -112   
16     -32    
144    176    
-112   192    
16     -160   
-16    48     
160    -80    
0      144    
144    -192   
-32    224    
-32    -1280  
64     -64    
80     -1360  
144    240    
80     192    
-64    48     
32     128    
208    176    
80     64     
64     -352   
32     208    
48     -176   
96     128    
-16    -448   
112    144    
64     -704   
-80    -112   
96     272    
-112   -16    
256    112    
-48    240    
48     128    
112    -144   
-144   -16    
144    -128   
176    416    
16     176    
128    128    
-48    -16    
-16    192    
160    80     
112    48     
-128   -16    
48     16     
256    32     
-208   304    
-16    -288   
64     -32    
112    352    
160    -80    
-80    -176   
160    0      
48     48     
-96    -96    
96     160    
208    -80    
-208   80     
448    -368   
-112   112    
64     0      
-80    -80    
208    -592   
16     -256   
96     -1616  
112    -32    
64     272    
-32    -32    
-16    80     
112    -80    
96     160    
64     -80    
32     -2080  
144    -112   
-176   -896   
400    304    
-16    64     
-32    -544   
144    192    
256    -992   
80     32     
0      -560   
48     -208   
16     96     
0      -368   
192    112    
432    -208   
-416   -352   
144    -160   
32     192    
-32    144    
-176   128    
64     176    
-1552  80     
-32    -288   
208    32     
48     -432   
112    0      
-32    -1824  
80     -128   
32     80     
128    -64    
32     -144   
160    112    
-48    0      
-176   -16    
-144   -96    
144    -288   
-448   0      
16     96     
80     -112   
80     -64    
64     0      
-96    -112   
208    192    
-144   -416   
96     -16    
48     48     
-832   208    
-560   -240   
256    528    
-112   352    
928    -1184  
-832   32     
320    480    
-80    -240   
-32    -16    
112    -304   
304    32     
-336   -80    
208    -272   
-144   128    
144    -48    
-160   144    
80     -128   
48     112    
32     -80    
112    -96    
-432   -192   
-112   -336   
-48    -160   
-96    -16    
160    -112   
32     -128   
-32    32     
208    -32    
-144   128    
80     -16    
-80    -80    
32     16     
112    80     
-112   16     
-80    -96    
-32    -128   
-80    -128   
-160   -16    
0      144    
-208   64     
-32    -144   
96     64     
-16    -624   
224    112    
-192   -768   
144    -48    
-48    176    
128    -96    
80     288    
-208   -304   
16     64     
-112   32     
176    64     
-96    -112   
-192   32     
16     -240   
0      -64    
128    32     
-112   144    
288    -352   
-176   -176   
-320   -128   
176    -192   
-592   80     
80     112    
-160   -224   
176    -80    
-272   176    
112    -64    
-240   -176   
224    -192   
-80    192    
128    -208   
80     176    
-16    -832   
112    -48    
-112   -80    
208    16     
-112   112    
48     48     
-96    -128   
16     0      
-272   -48    
272    304    
-624   64     
256    -16    
-64    384    
-1232  -336   
448    288    
-432   80     
144    -48    
-32    48     
128    -32    
-32    128    
48     -192   
16     16     
96     -64    
-192   -144   
288    16     
-80    160    
-240   -304   
144    176    
-320   -384   
320    496    
-192   272    
-64    144    
-192   -16    
-96    32     
112    256    
-352   -64    
-144   -64    
-16    -128   
-32    -32    
128    -128   
-144   48     
-432   -112   
256    336    
-208   -224   
48     64     
-128   16     
272    144    
-208   32     
96     240    
-336   64     
192    32     
-80    96     
-576   192    
-208   -32    
-256   -240   
176    80     
128    0      
-96    128    
-80    80     
16     32     
-160   64     
-176   48     
288    240    
0      32     
-208   0      
-32    160    
32     -160   
-1600  -240   
32     64     
-128   -80    
-48    192    
176    64     
-16    0      
-96    480    
112    224    
-304   -176   
64     -32    
-16    112    
-128   -48    
64     48     
-240   -128   
-32    144    
-208   224    
-320   -256   
336    128    
128    144    
-192   -336   
-80    112    
80     48     
-64    160    
176    -48    
96     96     
-48    -240   
48     192    
128    -64    
-176   -192   
-80    96     
-96    112    
16     256    
-864   -208   
144    160    
160    -128   
-48    48     
112    0      
48     112    
112    16     
-64    16     
32     16     
-96    0      
16     112    
-192   48     
96     -32    
128    128    
-96    192    
-272   -96    
-16    96     
128    -16    
64     80     
80     -16    
-192   64     
224    -64    
16     176    
-48    48     
160    -48    
-944   832    
400    320    
-448   -1040  
608    -304   
-176   -144   
-608   0      
-64    -896   
-160   736    
-352   -432   
560    144    
-576   320    
272    160    
80     -144   
32     208    
-144   80     
-32    96     
-176   32     
-64    96     
64     -256   
192    240    
-128   64     
32     64     
-16    288    
-256   0      
240    -160   
-64    144    
-16    16     
96     448    
-320   256    
160    80     
-256   -32    
64     80     
-48    208    
-48    -176   
112    96     
-144   -224   
384    352    
-320   80     
-240   48     
144    96     
-192   80     
176    192    
-128   64     
160    -176   
-432   -128   
176    80     
-160   128    
144    384    
-464   -224   
112    192    
-192   -64    
208    32     
-256   -64    
128    160    
-112   208    
128    96     
0      96     
-240   -240   
192    224    
160    0      
-128   32     
0      -48    
32     80     
-272   -256   
240    448    
-176   -32    
160    336    
-16    0      
208    -16    
-176   64     
48     0      
80     32     
0      192    
112    128    
-48    256    
16     112    
160    832    
-32    800    
160    192    
-176   -528   
48     224    
192    144    
-128   176    
16     -64    
-16    -112   
0      64     
304    816    
-208   -16    
-144   -592   
-112   -64    
336    320    
-176   160    
-48    -64    
0      -176   
16     112    
192    352    
0      96     
80     -288   
64     144    
320    416    
64     192    
-16    -64    
80     112    
80     48     
32     -16    
32     144    
-112   -384   
64     -544   
0      -320   
96     -1408  
192    80     
160    288    
0      32     
112    144    
0      128    
96     128    
-128   0      
32     48     
96     16     
160    256    
-128   112    
112    112    
80     -16    
16     64     
112    -240   
-80    80     
112    64     
-160   160    
160    144    
-48    32     
16     0      
0      128    
144    -80    
0      128    
176    -240   
-240   144    
32     128    
208    -304   
-320   112    
32     -368   
96     160    
192    -320   
-64    144    
0      128    
96     96     
-96    -32    
48     -48    
96     144    
64     176    
-48    16     
96     80     
-96    0      
16     16     
16     80     
144    -32    
-16    64     
96     -720   
128    240    
-256   32     
288    -32    
-16    240    
16     0      
176    -128   
-288   48     
304    224    
-336   32     
80     -192   
144    -192   
272    192    
-80    -48    
-64    160    
224    -528   
-128   304    
48     -416   
32     -32    
96     -112   
64     160    
-16    48     
-112   112    
128    -64    
112    224    
64     16     
176    -16    
-224   64     
192    -272   
208    128    
-16    -416   
32     208    
0      -2032  
0      240    
128    96     
-16    96     
64     176    
0      -32    
128    144    
-160   304    
160    80     
-192   320    
368    416    
576    1056   
320    464    
-528   -240   
96     -352   
224    -1120  
-560   0      
752    64     
16     224    
80     -224   
-64    528    
96     -304   
-48    272    
192    -480   
-48    112    
160    -64    
-112   128    
192    -32    
48     -16    
-16    -144   
-16    -16    
80     112    
96     0      
-16    96     
176    -96    
-224   208    
240    48     
16     32     
192    48     
-128   48     
-48    -16    
-48    -32    
160    32     
32     -160   
96     -32    
208    400    
80     192    
-32    112    
-32    -2432  
32     80     
80     -1840  
96     -1840  
64     80     
-32    -2160  
32     -304   
-16    560    
128    -96    
32     16     
240    64     
-176   192    
240    -176   
-32    -32    
-32    0      
224    -176   
-16    192    
-272   -272   
48     -208   
0      -128   
176    -240   
-80    -176   
80     -784   
160    -112   
-16    176    
80     -112   
128    112    
-128   -304   
160    -736   
-16    -16    
144    -80    
-16    96     
-48    0      
96     -16    
-352   -48    
0      -192   
128    32     
112    -48    
128    -48    
128    -64    
-160   -64    
192    336    
64     -32    
128    -256   
48     176    
-240   16     
48     64     
64     304    
-288   -224   
96     -160   
32     -48    
-32    -32    
160    -192   
-128   -16    
128    -448   
288    304    
-240   -288   
112    128    
-64    -128   
160    176    
-144   -368   
192    64     
-112   -112   
48     144    
160    0      
64     -224   
-80    -272   
80     -336   
-80    -208   
64     -288   
-32    80     
112    -464   
96     432    
-16    96     
16     112    
-176   -192   
16     80     
-80    -80    
96     16     
-240   -32    
32     -128   
-672   -80    
-48    48     
16     16     
112    96     
-64    32     
16     -448   
32     48     
128    -208   
-272   -272   
496    176    
-192   80     
32     0      
48     0      
-80    -176   
128    -80    
-160   32     
48     16     
-48    48     
176    480    
-256   -112   
192    -512   
16     272    
288    -1184  
-208   -16    
112    -80    
-272   -608   
144    -272   
160    -208   
-224   32     
256    80     
-160   16     
-16    32     
-704   16     
64     -144   
-48    -64    
464    304    
-288   320    
464    -1568  
-80    80     
16     -48    
128    0      
-352   0      
320    64     
-144   64     
240    80     
-336   -32    
320    -176   
-336   112    
-96    -256   
240    -48    
48     64     
32     0      
-48    208    
-192   176    
192    -144   
-256   96     
-32    -48    
192    176    
-288   32     
320    -112   
-176   32     
80     80     
-64    -16    
16     -16    
80     160    
-224   -384   
112    128    
-80    80     
-1360  -32    
-144   128    
-80    -32    
-176   16     
80     48     
16     32     
-48    -208   
16     64     
160    0      
0      112    
1872   -1696  
-656   -1120  
672    688    
-496   880    
-32    -352   
496    416    
-784   -384   
1168   672    
-880   800    
256    -160   
-800   -144   
208    320    
304    128    
-432   -192   
128    0      
-80    16     
16     160    
288    304    
-352   432    
64     -112   
-16    64     
-48    -400   
48     160    
-208   176    
-48    112    
0      -128   
16     448    
-48    -144   
-64    32     
-144   -96    
176    -64    
-80    80     
-48    96     
32     160    
-32    -16    
192    240    
-160   -96    
-80    0      
-256   -272   
96     320    
-160   -96    
-1120  -96    
144    144    
-32    96     
-80    -48    
64     -112   
-48    224    
-80    368    
-320   -160   
-80    -304   
-32    -96    
112    16     
32     144    
-32    -160   
-96    64     
32     -32    
-336   -304   
32     -80    
224    0      
-160   -416   
96     64     
-48    32     
160    -48    
-240   -112   
192    16     
64     112    
96     144    
-80    -144   
-32    -320   
16     304    
0      128    
0      112    
-96    144    
-336   -112   
80     112    
-16    -144   
128    416    
-144   320    
128    384    
32     -16    
-304   -96    
-112   -96    
16     480    
-208   -96    
-64    32     
-144   -32    
-96    -80    
-48    80     
-464   -48    
96     128    
-224   -48    
0      -208   
176    128    
96     48     
-96    192    
128    256    
112    48     
-64    -112   
-16    -80    
80     -32    
112    160    
-208   48     
64     80     
-112   48     
176    112    
-16    96     
-240   -416   
304    208    
16     96     
-32    96     
-16    208    
16     192    
64     64     
144    176    
-336   -352   
128    96     
-352   -80    
256    96     
-208   -16    
16     240    
96     304    
64     176    
-176   32     
-48    -32    
224    -144   
-32    128    
-128   48     
80     112    
-224   80     
64     -80    
-32    96     
64     128    
32     288    
128    192    
-272   -32    
48     96     
-80    112    
384    192    
-128   192    
160    32     
-80    112    
-16    48     
16     64     
-64    96     
160    16     
32     208    
-144   -16    
112    144    
-32    128    
16     48     
128    80     
-96    32     
96     96     
0      240    
80     64     
-48    32     
16     112    
256    96     
-192   208    
-64    0      
144    -48    
-96    -16    
80     128    
64     80     
-16    -48    
64     224    
-16    -16    
96     144    
-208   64     
128    16     
32     80     
0      112    
-96    144    
-32    -64    
128    0      
128    144    
-304   64     
80     -32    
16     256    
0      -16    
128    64     
16     160    
32     16     
-48    176    
-48    96     
-64    240    
32     160    
-112   -48    
176    80     
-128   -32    
160    112    
-48    -48    
16     224    
80     -160   
32     320    
-112   48     
64     96     
-112   64     
-192   176    
1936   544    
1232   -224   
64     96     
800    -272   
-400   -656   
400    -176   
240    432    
-16    -208   
-112   -384   
384    -208   
-144   576    
-48    -512   
-176   688    
288    -320   
0      384    
-32    -128   
128    304    
0      -96    
-64    -16    
128    48     
-48    144    
144    80     
-96    0      
96     -1408  
16     32     
80     224    
96     224    
64     64     
-48    -16    
-48    208    
192    -32    
-48    112    
-16    32     
96     144    
256    208    
-64    272    
32     -96    
-32    160    
0      -352   
112    192    
80     -272   
64     144    
-112   -16    
96     112    
-32    160    
80     112    
-16    -64    
80     144    
-80    -16    
80     80     
0      0      
0      -96    
32     112    
48     -192   
32     112    
16     -512   
176    96     
-64    160    
16     112    
48     192    
32     48     
-48    64     
112    256    
-80    -64    
96     112    
128    80     
80     64     
-80    64     
160    -512   
16     80     
64     -816   
48     128    
80     -1008  
32     208    
-48    96     
-32    304    
-80    48     
320    48     
-32    208    
144    32     
-240   -32    
-160   -48    
320    80     
-32    -240   
-96    -32    
160    -192   
48     144    
-80    -608   
112    80     
-160   -144   
176    80     
32     0      
80     48     
16     112    
-96    -48    
272    160    
-96    -304   
16     160    
16     -128   
112    48     
-48    -416   
32     80     
80     -384   
48     128    
80     48     
16     -16    
-16    -64    
-128   -208   
32     -208   
16     16     
80     96     
48     -96    
64     192    
-48    -128   
128    144    
-32    -256   
128    80     
96     -272   
-112   16     
112    176    
80     80     
160    112    
-144   176    
240    144    
144    160    
-80    384    
160    16     
96     112    
-96    -240   
96     16     
64     -320   
192    128    
-112   112    
112    112    
-16    -48    
48     160    
16     -48    
80     -1264  
0      -1664  
80     96     
16     -1520  
288    -192   
-160   496    
112    -176   
-96    112    
32     -144   
224    64     
-80    16     
48     -1392  
-112   -64    
160    -576   
-128   48     
-224   -32    
-16    32     
224    64     
-256   -384   
320    -80    
-32    -1392  
16     -112   
144    0      
-16    0      
160    -160   
-16    -32    
-48    -144   
-144   0      
288    -144   
-80    224    
-368   208    
64     -432   
-96    64     
-32    -640   
176    192    
-160   -448   
176    64     
32     -784   
-80    -32    
128    -112   
-48    144    
112    64     
0      80     
-64    80     
96     -96    
-176   -128   
-112   -144   
-384   -288   
96     -64    
-112   -32    
112    -112   
-96    -272   
128    -464   
-48    112    
-16    -176   
-80    128    
96     -208   
208    192    
0      -48    
-208   400    
-1744  -800   
1200   368    
-688   320    
336    -848   
368    992    
-352   -944   
128    240    
448    -464   
304    704    
-16    -848   
128    464    
48     -304   
272    0      
-592   -352   
528    -128   
-16    304    
-192   -80    
-160   464    
-144   -224   
-1152  368    
-256   -368   
112    160    
240    -160   
-128   -16    
64     -864   
112    80     
144    48     
176    208    
-144   144    
144    0      
64     80     
48     -448   
-160   -96    
-176   -304   
-880   -192   
-128   -288   
192    -192   
-80    -96    
160    80     
96     -496   
-112   112    
32     16     
-80    -144   
16     -48    
112    -96    
176    -16    
-80    96     
-112   -240   
-192   80     
-416   -48    
192    -48    
-64    -64    
224    48     
-176   208    
160    -16    
48     256    
-64    -384   
256    -16    
32     -352   
224    -208   
-304   240    
-64    144    
32     -32    
160    80     
-224   144    
192    -128   
-880   -64    
240    -192   
-96    16     
208    -144   
-48    192    
-80    0      
144    96     
-176   -80    
144    -80    
-16    112    
32     448    
-224   96     
96     -128   
-352   -48    
192    -288   
32     0      
16     288    
-48    176    
256    -240   
-80    80     
112    32     
-656   64     
-16    -16    
-304   16     
-128   16     
96     32     
-176   144    
96     0      
-96    -64    
-176   0      
112    96     
-64    -144   
-48    96     
-464   -320   
-288   48     
-48    16     
-16    -32    
-144   -32    
-176   336    
-224   144    
-672   -416   
-208   -80    
128    -112   
96     160    
144    96     
16     224    
-272   -32    
48     48     
160    128    
-224   64     
176    80     
-208   16     
-48    64     
-176   -48    
-32    -32    
-160   -80    
-64    -64    
-144   -96    
96     304    
-208   -144   
224    208    
-336   -32    
288    112    
0      128    
-288   -80    
-16    0      
-160   -64    
0      -96    
128    176    
-256   48     
96     -64    
-80    112    
-1296  -64    
304    48     
-256   -96    
16     192    
48     176    
80     -16    
-256   48     
-144   0      
176    0      
64     240    
-16    64     
-32    144    
-32    0      
-352   0      
128    64     
-416   -144   
16     96     
0      64     
64     64     
208    -128   
-192   112    
0      -16    
32     64     
-176   192    
64     32     
-16    112    
-112   -96    
64     0      
-240   -16    
-80    288    
-736   -112   
160    80     
-496   -176   
96     128    
32     -416   
-240   288    
-288   -48    
208    112    
80     224    
-48    0      
96     -32    
32     128    
-128   176    
-64    64     
0      0      
224    -128   
64     240    
-352   48     
48     96     
-64    96     
176    16     
80     96     
-96    96     
64     112    
-112   -176   
32     272    
-112   80     
64     224    
-80    0      
-1200  1520   
1280   208    
528    -640   
-32    -320   
-16    -496   
-176   -80    
400    272    
144    -304   
-144   768    
-320   -240   
64     112    
-80    -384   
-96    416    
-96    -240   
64     -16    
-96    48     
-272   -128   
-32    192    
48     -144   
-96    144    
96     -112   
-16    256    
-48    32     
0      160    
-160   -128   
112    240    
80     16     
128    192    
-96    -80    
-48    -32    
32     112    
-16    32     
64     176    
64     32     
-48    96     
64     64     
32     80     
-48    48     
0      64     
112    144    
0      48     
-16    80     
-128   48     
80     -16    
-48    0      
80     64     
-64    -16    
112    16     
16     48     
32     80     
-16    144    
32     208    
48     80     
16     32     
16     -48    
64     16     
-48    112    
-96    -16    
128    80     
-16    128    
80     64     
-32    48     
16     -32    
64     176    
-112   144    
32     128    
0      176    
-144   -48    
192    -80    
0      208    
-128   128    
160    144    
0      32     
96     128    
-80    64     
0      192    
-208   -64    
128    0      
80     128    
192    192    
-160   288    
192    256    
-64    400    
64     -16    
-112   16     
224    208    
96     128    
-144   144    
32     48     
-32    80     
96     112    
-64    160    
-16    144    
96     48     
-16    -32    
160    352    
-256   -80    
48     -176   
-80    64     
160    272    
-16    96     
-96    0      
-160   -32    
128    64     
64     -16    
-32    80     
64     192    
-32    304    
144    144    
-32    80     
64     16     
80     144    
32     80     
128    64     
-16    80     
-96    16     
192    144    
-80    48     
128    112    
-32    32     
64     48     
32     32     
64     -1504  
-112   160    
192    96     
-48    -160   
208    192    
-176   320    
208    112    
32     -48    
-208   160    
160    -32    
144    -16    
-112   160    
64     16     
-96    -464   
224    176    
-192   -768   
400    64     
-192   224    
-16    32     
176    96     
-160   64     
128    128    
16     32     
32     144    
32     208    
-128   -208   
112    -16    
96     256    
96     -96    
48     128    
32     -192   
32     64     
112    -464   
-128   224    
240    -192   
128    256    
-112   -160   
192    192    
-80    -48    
128    128    
32     80     
48     48     
32     176    
-96    -64    
208    112    
112    0      
-48    144    
48     -256   
-48    144    
32     -336   
-16    16     
-80    0      
64     144    
16     16     
-112   160    
96     -64    
192    16     
-16    176    
48     -96    
-16    112    
32     -176   
128    48     
-208   -384   
80     144    
80     -608   
64     80     
-48    -32    
48     80     
-128   -64    
240    240    
-64    240    
192    112    
-176   112    
16     -224   
144    0      
-416   -2320  
624    80     
64     -1024  
208    -368   
-64    -976   
-208   -736   
224    848    
416    816    
-240   -144   
-32    -272   
480    608    
-128   -512   
-112   48     
128    -80    
272    16     
-32    32     
112    80     
-208   -160   
352    432    
32     -128   
160    240    
-128   224    
192    128    
224    288    
-80    -48    
224    32     
-224   -144   
64     64     
80     -112   
48     -80    
160    -192   
-128   256    
160    -16    
-16    32     
-96    -320   
208    -16    
0      0      
48     -1136  
96     64     
-448   -176   
-64    -272   
48     16     
144    -80    
0      -160   
128    -1312  
-16    -64    
208    320    
-64    -128   
128    -80    
-64    112    
176    -400   
192    144    
-80    -32    
112    -80    
112    -32    
-64    176    
128    80     
-64    -208   
144    -96    
64     -1344  
-128   -16    
160    32     
80     144    
48     160    
64     -96    
32     -144   
48     128    
16     -128   
144    -112   
-384   32     
176    -272   
-32    -80    
-16    -336   
112    -64    
0      -256   
144    -192   
112    -512   
80     -32    
-32    -1008  
80     -80    
48     -16    
-96    128    
96     -128   
192    0      
-528   -80    
144    -304   
-1280  208    
-336   -16    
384    -176   
-16    16     
0      0      
32     -224   
160    -80    
32     32     
-32    64     
256    64     
-240   32     
160    -112   
96     -192   
-144   16     
48     -96    
-80    192    
32     16     
32     -128   
-80    -464   
-16    0      
224    -112   
-64    96     
-48    -1184  
144    176    
-80    0      
128    80     
-192   -32    
288    -208   
-192   -80    
96     -80    
-32    64     
-144   -320   
-1600  -176   
32     -416   
176    16     
-64    -144   
336    224    
-32    -416   
-48    0      
-336   16     
240    -160   
-48    256    
0      -32    
16     64     
112    -48    
-160   0      
224    208    
32     192    
80     96     
-112   128    
208    192    
80     176    
16     -592   
-240   -16    
144    80     
192    48     
16     96     
160    -144   
-336   48     
272    0      
-64    48     
144    96     
-144   144    
192    -16    
-96    16     
-32    -160   
96     128    
0      -128   
-16    -48    
-304   48     
0      80     
-528   -80    
32     -96    
-288   -96    
48     0      
0      32     
-16    32     
-80    144    
80     -144   
224    224    
-224   -352   
-112   144    
48     48     
-32    -240   
272    -64    
-16    -96    
-64    -64    
240    -336   
-208   48     
112    112    
-160   560    
-96    -96    
-64    48     
128    -352   
144    160    
-1056  -80    
16     96     
-496   0      
-704   -160   
-80    -16    
-288   -32    
32     48     
-944   112    
-112   96     
160    -240   
-48    192    
32     -208   
112    -64    
-384   48     
256    256    
-352   -80    
64     128    
2224   -976   
-1296  -160   
1600   928    
-592   752    
1056   368    
-976   -416   
-272   -368   
0      1264   
-240   -736   
80     400    
-496   -288   
336    -128   
-288   160    
64     -640   
-160   336    
208    -80    
32     560    
32     128    
-16    208    
16     -16    
-304   -32    
272    128    
-16    224    
-112   32     
160    32     
-112   112    
32     -240   
48     240    
32     -48    
-32    0      
16     144    
-160   144    
144    64     
-144   48     
32     0      
-144   48     
32     48     
-112   80     
48     16     
-704   -48    
-80    80     
0      -80    
-48    144    
112    -144   
0      -48    
-32    144    
64     80     
-112   128    
-224   -48    
112    160    
-176   80     
64     32     
-208   -160   
16     144    
-544   -112   
32     96     
-64    48     
336    288    
144    304    
-160   -16    
-80    -96    
16     32     
16     64     
-80    -32    
80     176    
144    64     
-80    96     
-64    -48    
0      0      
-224   16     
80     96     
-416   -16    
0      112    
128    160    
-128   32     
64     32     
80     176    
16     128    
-192   16     
0      128    
-240   112    
96     32     
-48    80     
128    128    
-128   16     
32     64     
-656   -80    
48     144    
48     48     
-112   0      
80     128    
32     128    
32     144    
-112   48     
-48    0      
-64    16     
96     336    
-208   -64    
144    112    
-368   -112   
208    128    
-480   -48    
-64    32     
80     96     
48     96     
-16    80     
80     -32    
48     128    
-96    -16    
96     80     
80     128    
-16    80     
-48    -48    
32     160    
-96    0      
-16    -48    
112    96     
96     320    
112    48     
-96    -96    
16     272    
48     16     
96     48     
-256   64     
192    192    
112    -16    
-336   -544   
-144   144    
-192   144    
416    -32    
-272   208    
160    -80    
32     128    
-160   64     
128    64     
-16    -16    
0      256    
-80    32     
16     0      
32     -96    
-128   64     
0      -80    
-96    96     
32     272    
0      -16    
-112   224    
-176   -176   
176    -112   
-96    -160   
192    320    
-128   48     
-80    112    
0      128    
192    160    
0      80     
-192   32     
112    288    
32     208    
-48    128    
-112   -144   
0      -64    
128    0      
-48    160    
144    80     
-96    128    
-112   -240   
160    -64    
64     112    
0      272    
-256   304    
-288   -128   
16     176    
32     -96    
384    48     
-64    -96    
32     128    
-192   -64    
64     64     
208    224    
160    112    
-80    96     
-32    16     
48     112    
-16    -48    
0      48     
96     -96    
-32    80     
-80    0      
96     160    
0      64     
128    160    
160    -112   
-96    32     
224    -240   
-48    192    
272    128    
32     288    
48     128    
-48    240    
144    -1616  
-400   176    
-352   -800   
592    432    
-112   544    
560    -320   
-16    272    
-176   48     
144    416    
-208   -112   
64     272    
-80    32     
272    48     
-96    240    
32     16     
-16    304    
208    176    
-80    304    
-48    -112   
-32    -16    
64     48     
80     -848   
-48    -64    
64     96     
16     208    
64     64     
16     -16    
-64    64     
144    96     
-96    -16    
64     64     
-64    48     
32     96     
64     16     
32     -432   
32     272    
16     -560   
96     64     
32     -176   
48     112    
32     96     
16     96     
-32    96     
112    64     
-112   32     
240    192    
-96    -16    
128    208    
-224   32     
352    -16    
-240   112    
304    128    
-144   128    
176    -16    
48     336    
-160   -16    
192    80     
-16    160    
32     64     
16     80     
80     160    
-96    0      
-128   -240   
176    -16    
32     16     
-64    96     
256    0      
-176   0      
256    -256   
-128   64     
112    -1120  
-32    128    
64     -32    
64     176    
-32    -64    
112    192    
-80    96     
96     -128   
96     192    
0      -48    
144    32     
-16    -592   
160    -96    
-208   -160   
176    112    
160    -400   
64     208    
-112   -16    
240    48     
-64    64     
96     192    
-32    144    
64     112    
48     208    
-16    -176   
208    48     
-128   -240   
96     96     
144    -48    
32     80     
64     -240   
-96    -16    
32     -64    
144    112    
160    320    
48     256    
-80    0      
-32    -784   
48     16     
256    -64    
-80    -16    
-48    0      
112    -16    
128    -176   
80     64     
32     -240   
-32    32     
80     112    
-80    32     
96     16     
240    -64    
96     -784   
-384   -272   
304    80     
272    -32    
-112   128    
-32    32     
160    32     
-112   -272   
64     16     
48     -48    
-16    -272   
-160   176    
224    -1616  
208    224    
96     0      
80     -688   
-160   16     
304    -896   
0      -48    
-96    -1632  
320    -16    
-64    224    
288    -176   
-16    -16    
-240   -112   
144    32     
80     96     
176    -96    
-48    -32    
-336   0      
112    48     
0      -144   
0      128    
0      -336   
128    -992   
96     -48    
-32    -48    
-112   -80    
176    208    
32     96     
-16    -384   
-32    128    
480    192    
-128   192    
-576   -304   
-32    -336   
0      -272   
336    512    
-128   -192   
0      48     
336    -128   
48     -336   
-128   -80    
48     -80    
112    64     
304    -160   
-64    144    
-96    32     
0      112    
-192   -80    
112    -96    
-1104  -160   
112    -64    
16     128    
16     -144   
160    288    
-80    -672   
-240   -288   
112    -208   
176    304    
-64    176    
-176   128    
16     -80    
256    64     
-160   -48    
1840   -656   
-1520  208    
1152   1040   
-80    704    
1184   -1088  
-768   -928   
-416   -1376  
192    -208   
160    -1040  
544    256    
-256   -256   
32     192    
96     416    
-96    -368   
-16    -32    
16     112    
-192   144    
96     96     
-1648  -144   
128    -128   
320    112    
-96    32     
160    176    
-48    -32    
64     208    
-208   -368   
32     16     
16     96     
256    64     
-64    224    
96     -64    
-48    32     
16     -32    
-256   48     
80     -32    
-272   64     
-80    -336   
-80    -256   
160    -48    
240    576    
-160   -176   
48     -176   
0      128    
64     -112   
-128   48     
-16    -80    
-64    -128   
48     -240   
-160   -48    
144    16     
16     -32    
0      -144   
0      48     
176    32     
-80    -16    
-32    -112   
0      144    
-80    80     
272    32     
-240   112    
144    16     
-96    128    
0      144    
-96    192    
16     -304   
-32    80     
16     -336   
64     160    
64     -48    
-144   64     
-48    32     
-1104  16     
-80    32     
112    16     
-16    0      
16     48     
-320   -368   
208    -64    
-128   160    
-80    -368   
-64    128    
-80    -96    
192    128    
-288   -272   
-1120  -64    
-128   -80    
-336   48     
-192   240    
-1248  -128   
-16    -32    
176    32     
-176   64     
48     -112   
-272   -16    
-288   -80    
96     128    
16     80     
-48    240    
-128   -144   
-16    48     
-16    96     
48     112    
-64    -16    
-48    144    
-48    -80    
240    64     
-192   -192   
160    112    
-48    0      
112    0      
48     160    
-80    -176   
96     128    
-144   64     
80     32     
-80    48     
16     16     
-80    96     
-208   -128   
0      32     
-400   144    
128    144    
0      -128   
-48    208    
16     32     
288    0      
-352   -256   
320    -272   
16     160    
-192   64     
176    256    
-96    112    
-288   80     
-144   -16    
16     64     
-112   -160   
16     -112   
-352   -272   
48     -688   
-272   -384   
96     16     
208    -32    
-128   144    
96     -304   
16     32     
32     176    
-176   -128   
96     272    
128    320    
-48    80     
-112   -96    
0      -64    
-128   -112   
272    304    
-240   -80    
208    80     
-272   -208   
64     -96    
112    160    
-192   64     
128    96     
-144   48     
96     176    
-144   -96    
0      48     
80     208    
-112   16     
-560   32     
-64    -544   
-128   448    
112    192    
-144   352    
-224   128    
-32    16     
96     144    
96     320    
-48    -32    
-32    -160   
160    256    
32     96     
-224   64     
-16    -144   
-192   -64    
176    176    
-1200  -240   
-16    288    
-320   176    
64     16     
0      64     
32     -16    
176    144    
-160   -32    
96     64     
-176   -32    
64     -32    
16     176    
160    128    
-96    32     
256    -528   
464    144    
-864   -96    
-80    192    
1040   -592   
-512   304    
-160   -448   
112    784    
-192   -32    
-48    -160   
192    48     
16     144    
-32    240    
-32    48     
0      128    
-96    -80    
-64    176    
32     128    
-48    160    
96     -208   
-96    96     
240    80     
-112   144    
0      -32    
-112   -16    
-64    -16    
256    176    
-160   -48    
128    256    
-288   -64    
112    -32    
-48    96     
192    192    
-32    112    
64     16     
48     128    
0      272    
48     96     
-48    -64    
128    128    
-48    32     
112    80     
-144   0      
160    192    
-176   64     
192    32     
-112   144    
176    16     
-160   160    
-64    -48    
224    144    
-160   96     
112    96     
-48    0      
64     16     
-96    -16    
80     208    
-144   16     
224    80     
-208   112    
224    48     
-32    128    
-80    112    
176    160    
-128   16     
80     48     
-16    96     
0      192    
96     -96    
32     128    
-144   16     
112    128    
-16    -48    
32     144    
-16    144    
64     16     
0      240    
-160   128    
192    160    
16     32     
64     80     
0      112    
160    368    
-176   80     
208    -48    
48     -32    
-16    96     
-48    64     
48     -32    
48     160    
48     224    
-32    160    
80     96     
0      0      
48     -96    
128    32     
-48    160    
64     208    
-64    -16    
192    176    
-192   96     
208    160    
-160   -208   
96     -96    
112    -32    
0      -160   
-64    -80    
144    16     
-16    80     
16     160    
256    160    
-144   160    
-32    160    
96     32     
-48    -96    
0      -80    
224    272    
-128   80     
64     -96    
208    144    
-368   -112   
128    64     
32     144    
144    0      
-208   -32    
144    0      
-208   -128   
48     -128   
-80    32     
64     128    
16     32     
-64    16     
80     -48    
-144   32     
144    64     
80     16     
-160   32     
240    272    
16     80     
16     64     
0      112    
80     32     
48     80     
-32    32     
128    176    
0      112    
208    400    
-80    16     
-128   -400   
48     112    
96     -48    
32     176    
-16    -688   
80     48     
80     416    
16     -80    
48     80     
-32    -144   
256    288    
-80    144    
32     416    
-144   -320   
16     -64    
-48    -272   
144    -16    
144    -112   
208    672    
-128   -1504  
16     288    
64     -1360  
80     240    
-128   0      
96     128    
112    160    
-32    80     
-16    208    
-16    -48    
16     -48    
-224   -96    
80     160    
-32    -384   
96     192    
128    -240   
48     192    
-64    -144   
192    96     
96     -48    
-80    208    
-48    -16    
0      144    
112    144    
144    80     
64     128    
448    -1216  
-64    240    
0      -384   
-48    112    
96     -176   
-400   1312   
-688   -1456  
-432   -16    
16     384    
224    208    
-80    -928   
-32    -512   
880    -448   
-128   896    
-80    192    
-320   -256   
-48    192    
304    -160   
672    448    
-304   -192   
64     192    
-208   -448   
64     32     
176    -32    
304    160    
96     336    
-112   -128   
64     -1920  
0      -160   
192    -144   
128    144    
-144   320    
304    160    
-64    64     
-64    -352   
272    112    
112    -128   
-48    -112   
-272   -192   
128    -416   
-224   112    
-688   96     
-336   -928   
144    -256   
272    -512   
160    48     
-80    -1760  
288    -224   
-80    -96    
48     16     
-16    224    
-144   0      
160    -160   
-96    32     
48     -768   
352    -16    
-464   -160   
192    -48    
128    128    
128    128    
-144   -288   
192    -704   
192    112    
-80    -64    
192    96     
-64    16     
112    48     
0      -16    
32     48     
64     16     
144    -176   
-256   0      
224    -16    
80     -128   
48     -384   
-16    -112   
64     -704   
-16    0      
64     64     
-32    64     
160    16     
-96    144    
-144   -16    
0      128    
-128   -400   
64     -80    
-176   48     
208    -192   
-1712  -32    
-16    -400   
240    -32    
0      -32    
32     -64    
-112   -1264  
-16    -96    
0      0      
32     144    
32     -96    
-80    -32    
96     96     
48     96     
96     336    
-224   -272   
-112   -176   
-16    96     
96     16     
80     -48    
-144   -64    
144    -32    
48     80     
48     -1136  
128    192    
-32    48     
144    -448   
-32    -304   
32     -32    
48     112    
128    16     
-48    144    
-16    -48    
-1552  -32    
-16    -64    
144    48     
128    -80    
-80    -144   
112    -928   
32     160    
192    16     
48     384    
-96    128    
144    32     
16     368    
64     464    
-528   304    
-192   -160   
-1024  -224   
128    256    
-704   -112   
80     -96    
16     112    
32     -1104  
-48    176    
-96    -16    
64     -32    
-160   80     
128    224    
-256   48     
160    176    
-112   -48    
-96    -48    
48     -288   
112    -512   
-80    -64    
112    -224   
32     96     
80     -320   
-32    48     
16     144    
32     32     
64     208    
-176   -208   
96     192    
-96    -112   
64     32     
-16    32     
-32    0      
160    -96    
-32    192    
48     -144   
48     -64    
128    -144   
0      96     
64     368    
-240   -96    
-128   -112   
192    -96    
-112   -96    
304    -160   
-208   160    
144    96     
-352   16     
-1120  -304   
160    224    
-736   -128   
48     80     
-432   -16    
-48    -112   
64     176    
-48    -704   
96     304    
-688   96     
-64    176    
-112   160    
-144   16     
128    -128   
-64    -96    
-224   -176   
112    64     
-144   160    
16     -16    
192    80     
-208   16     
-544   -912   
-864   -384   
928    16     
-608   80     
-112   64     
-880   256    
416    -48    
-288   352    
80     -864   
240    576    
144    -256   
-160   -48    
-224   -64    
336    96     
-208   96     
160    -80    
-160   304    
64     -32    
-608   96     
96     -224   
-784   64     
48     -128   
-256   368    
208    -240   
-336   48     
224    -272   
-176   176    
128    -128   
-176   240    
64     -160   
-64    304    
80     -16    
-176   240    
-80    -144   
-128   48     
-48    80     
-16    128    
-288   0      
-176   -16    
80     48     
224    112    
-144   0      
-48    -16    
-16    272    
80     -64    
-64    0      
-64    48     
32     144    
-32    -48    
-144   176    
-48    -80    
144    176    
-448   -112   
80     176    
32     -192   
64     112    
-48    96     
-48    112    
-32    -16    
80     48     
-144   -32    
112    64     
-16    208    
-112   -48    
80     -32    
-256   16     
-128   112    
-128   -80    
48     128    
64     -80    
128    64     
-80    48     
48     144    
-48    -128   
32     128    
-64    160    
-64    -272   
224    48     
-256   304    
-48    32     
32     -112   
128    64     
-48    64     
0      16     
-64    -192   
-48    32     
-48    32     
144    -96    
80     128    
-64    144    
-32    128    
16     64     
-16    0      
-64    16     
192    336    
-352   -32    
192    0      
-176   16     
-32    -16    
-624   -112   
-112   64     
-48    -32    
-16    0      
160    112    
-288   64     
176    64     
-224   0      
-80    80     
-48    -128   
-16    0      
0      0      
-32    -112   
-272   -112   
144    176    
-144   32     
32     112    
112    224    
64     336    
0      0      
-160   -288   
176    -48    
-176   160    
64     336    
176    192    
64     224    
-272   0      
288    80     
-208   -16    
0      320    
208    272    
160    64     
-64    -144   
80     304    
-112   208    
-16    -96    
-176   80     
224    128    
96     48     
-144   -128   
32     128    
-240   80     
192    0      
-144   -32    
112    32     
80     160    
0      176    
-16    208    
-80    -272   
-144   -64    
304    128    
16     128    
-96    32     
-16    96     
-96    -96    
160    160    
32     -80    
128    304    
48     192    
-16    128    
-384   -112   
112    -112   
0      -144   
144    112    
192    96     
64     224    
-272   128    
288    -128   
-16    288    
-48    224    
-304   -48    
16     0      
96     64     
208    112    
48     144    
-96    128    
32     80     
-48    -80    
160    16     
304    176    
-64    128    
-16    80     
-144   48     
208    80     
128    176    
16     192    
-112   -96    
112    -752   
80     192    
64     128    
-112   160    
16     16     
64     112    
-16    -16    
432    -16    
-352   64     
160    16     
-80    112    
176    112    
1584   -528   
704    768    
-48    -352   
-640   -768   
448    448    
448    -640   
272    -128   
1008   1088   
-1024  112    
592    -224   
-144   -32    
96     96     
320    64     
-560   -32    
208    256    
48     -176   
96     -144   
-400   48     
-48    32     
-32    272    
-48    -640   
16     112    
64     0      
144    288    
-128   -208   
304    48     
400    -192   
32     608    
-192   -304   
144    192    
-304   0      
416    -96    
48     400    
-48    -592   
224    384    
-112   -480   
96     192    
64     -240   
240    80     
208    32     
-176   384    
-80    -576   
-48    112    
192    -96    
80     208    
128    -144   
96     -128   
80     0      
16     -32    
112    64     
0      -128   
112    176    
-128   -592   
272    352    
-80    48     
-48    -112   
32     0      
176    432    
-448   -112   
160    272    
-96    16     
112    -144   
64     592    
112    16     
-208   0      
112    -64    
128    64     
-64    -128   
-16    96     
48     -1312  
0      144    
-16    0      
96     128    
-48    32     
160    176    
0      192    
224    352    
-144   320    
128    -16    
-32    -560   
-64    352    
256    -16    
0      -496   
-256   80     
144    -704   
192    96     
-176   0      
272    -64    
-208   -80    
240    80     
32     176    
48     -288   
48     176    
-32    -512   
32     -16    
48     -368   
64     96     
-336   -336   
176    -144   
176    96     
144    288    
-48    0      
16     80     
64     144    
112    -16    
96     288    
16     128    
16     176    
96     -48    
-176   -128   
144    -176   
256    400    
-96    128    
112    16     
0      -992   
48     96     
80     128    
48     0      
-112   16     
32     -320   
224    -448   
-160   -64    
368    112    
16     -32    
-96    -192   
64     -464   
176    -192   
0      -240   
-48    -80    
144    48     
64     -304   
-96    208    
32     -336   
-112   -352   
-336   -96    
16     64     
256    -32    
128    -160   
-144   112    
96     -640   
-64    -32    
96     96     
240    -272   
-32    -16    
0      128    
192    -368   
-64    -144   
96     -80    
-32    -96    
-96    -32    
-80    -368   
112    -16    
80     -160   
-32    -304   
32     -224   
96     -64    
80     160    
-32    288    
-144   -32    
256    -32    
64     -208   
-48    192    
-208   -64    
-64    16     
-176   -16    
288    -160   
16     80     
0      -240   
64     -48    
16     -608   
96     -64    
64     -1248  
192    -240   
64     -112   
-224   128    
-112   -144   
-80    -48    
48     -96    
176    144    
-304   48     
112    -128   
-1360  -32    
48     -144   
64     32     
-64    -96    
256    80     
64     -304   
-32    176    
96     -144   
-48    64     
64     0      
80     0      
96     48     
48     -144   
-256   -80    
192    -160   
-368   32     
-1072  -2976  
288    64     
224    48     
-752   -592   
368    -352   
-720   432    
192    -1648  
-336   32     
272    496    
608    -192   
-432   -96    
288    -16    
-128   528    
320    -272   
-512   320    
320    -544   
-1872  352    
32     -576   
16     96     
96     -416   
-16    176    
64     -432   
0      256    
-32    -64    
64     -224   
224    -112   
144    256    
-192   -32    
-64    64     
-128   80     
304    48     
-144   -16    
-16    -144   
0      160    
80     -144   
0      192    
16     -944   
-80    192    
-160   32     
176    48     
-64    -32    
16     80     
-128   80     
192    48     
-224   -16    
-16    -144   
-48    0      
32     128    
128    16     
176    -112   
-144   112    
144    -464   
80     -128   
-48    96     
32     16     
80     -16    
16     -160   
-176   -48    
112    -272   
-32    96     
-96    -64    
112    80     
32     -128   
-32    128    
-240   -320   
128    -64    
-432   -208   
-464   -48    
96     112    
-864   0      
16     -32    
16     -48    
32     16     
32     128    
-48    48     
192    64     
-288   -48    
-544   -384   
224    176    
-592   -96    
160    80     
32     64     
32     64     
-112   128    
-48    -32    
-16    32     
-1344  192    
-192   256    
-48    -320   
224    96     
-96    64     
16     -32    
-160   -112   
64     112    
-64    -80    
-144   -176   
-64    -48    
-64    96     
-80    0      
-272   -32    
-32    0      
-240   -384   
-272   -80    
-480   112    
32     -64    
-112   48     
16     128    
48     96     
48     128    
-64    -48    
-64    -32    
32     48     
-48    128    
32     96     
16     32     
-80    -32    
-272   -48    
-16    -16    
-16    -208   
-240   -176   
-112   16     
48     80     
80     144    
80     128    
-224   -64    
-80    0      
96     64     
-208   -48    
64     -368   
144    368    
64     224    
-80    176    
-80    -208   
-160   128    
-48    112    
16     80     
64     304    
-176   -48    
144    -80    
0      96     
0      112    
-48    -32    
0      224    
-32    144    
-64    -32    
-96    -64    
16     256    
80     -32    
-128   80     
-96    -16    
-128   -80    
32     96     
-80    -192   
96     160    
-96    -96    
112    208    
-80    80     
-128   -32    
32     160    
-176   80     
32     0      
-144   80     
208    240    
-160   -32    
0      48     
-80    -16    
224    208    
-160   -48    
336    48     
-96    144    
-48    -80    
64     112    
-144   48     
192    32     
-64    144    
-32    0      
-16    -48    
80     48     
-256   0      
-64    -16    
-128   -16    
128    192    
-640   16     
-240   32     
0      0      
-128   224    
-80    -80    
112    208    
-304   -32    
400    224    
-224   144    
-32    -64    
-80    112    
64     96     
96     128    
-416   -80    
192    96     
-80    112    
-1088  1728   
-736   -256   
288    128    
624    -352   
-16    -896   
-448   384    
176    304    
-176   -192   
192    -128   
-368   624    
448    -496   
-256   256    
-48    96     
336    208    
-64    -272   
-48    192    
240    -112   
208    160    
-112   -80    
0      288    
176    -128   
-128   368    
-288   112    
384    -128   
-144   -192   
-32    128    
176    272    
-208   -48    
-128   -64    
256    256    
0      144    
-16    32     
-80    160    
160    112    
-144   64     
32     32     
-32    48     
-224   -736   
48     192    
320    480    
-96    -96    
-256   112    
32     -128   
-80    -16    
32     112    
0      -64    
192    80     
-64    144    
144    64     
144    112    
-16    80     
144    224    
32     96     
-32    32     
-32    80     
0      112    
-80    -32    
-32    112    
16     224    
48     96     
-48    32     
16     48     
48     -16    
128    -16    
-112   96     
32     64     
-96    64     
-32    16     
128    224    
-16    208    
-32    16     
96     64     
32     48     
80     160    
128    192    
112    208    
-64    16     
64     64     
-16    -32    
-16    -384   
64     48     
-256   256    
48     144    
-48    -80    
-368   -64    
-16    -640   
-16    -768   
-96    208    
48     -80    
-96    64     
-32    16     
-32    128    
96     176    
-32    112    
-48    160    
224    480    
-144   16     
176    -80    
144    80     
96     352    
16     32     
-272   -240   
-16    -224   
176    256    
32     160    
208    496    
-96    352    
112    176    
-192   -96    
208    160    
0      80     
80     16     
-16    16     
160    64     
-144   32     
160    128    
-64    -48    
96     32     
256    -144   
-80    -96    
-80    64     
-48    32     
304    -64    
-224   -48    
-96    -128   
224    -96    
-304   48     
160    288    
96     -16    
0      64     
-128   160    
64     -304   
48     -64    
-112   -128   
32     112    
336    16     
-48    16     
-128   80     
16     160    
192    -160   
160    144    
-240   80     
192    96     
-16    192    
-16    -64    
96     80     
96     -176   
16     352    
-80    -336   
240    32     
-192   -64    
64     48     
96     -32    
80     176    
-16    -16    
96     80     
-64    64     
128    336    
-80    -144   
144    -176   
-32    96     
80     -128   
-32    96     
32     -64    
-96    -32    
64     -1088  
32     64     
-16    -2944  
80     -208   
272    16     
64     320    
-128   112    
0      272    
208    0      
-32    0      
16     96     
32     -128   
80     -16    
320    -784   
-208   192    
48     -1120  
-16    48     
128    -304   
144    176    
-96    96     
112    112    
-16    176    
-160   -880   
32     144    
144    -160   
64     112    
32     -128   
16     32     
304    -480   
-96    336    
-80    -176   
176    32     
-128   48     
-1312  1136   
1376   32     
816    736    
544    -368   
-704   -240   
128    400    
-432   752    
768    -480   
-640   800    
144    -768   
224    400    
-96    -432   
128    320    
0      -416   
192    -784   
32     -544   
224    208    
-224   -128   
160    0      
-144   48     
288    64     
-176   -48    
160    -224   
-32    64     
112    -176   
-128   192    
208    -16    
112    0      
64     -624   
-16    80     
64     -752   
32     192    
224    -496   
-96    -512   
-80    -112   
0      -544   
-16    -240   
32     -720   
0      64     
272    -896   
-96    -144   
0      112    
0      -192   
160    -288   
16     128    
160    32     
-224   112    
192    32     
-144   -160   
-1392  -256   
112    -192   
-48    -96    
96     -416   
80     -320   
32     -656   
0      -192   
80     224    
128    -176   
48     64     
-144   112    
160    -128   
-64    16     
-160   -128   
64     240    
-496   32     
-16    -48    
80     -112   
144    -128   
96     16     
16     -272   
-48    -80    
288    -464   
0      160    
96     -192   
144    80     
-32    -160   
288    64     
-224   144    
192    -80    
160    256    
-96    48     
-352   32     
-96    -400   
80     -144   
176    -16    
-224   -208   
64     -864   
160    0      
-48    -240   
-64    192    
160    0      
-32    -64    
64     144    
32     -80    
-128   -80    
64     -64    
-544   -224   
80     -224   
-16    -256   
32     -256   
-256   -192   
64     -656   
0      176    
0      -1296  
48     128    
-48    144    
96     256    
-128   -96    
48     -240   
-176   -32    
80     48     
-160   -48    
-16    -48    
-1088  32     
-16    -112   
64     -80    
-48    -352   
48     -48    
16     -656   
64     -64    
144    192    
96     -32    
-48    -96    
-192   -288   
160    192    
80     -16    
240    176    
-224   -192   
-160   160    
-32    -400   
80     0      
0      -272   
64     224    
192    -352   
-16    16     
-512   -48    
224    80     
-192   -48    
128    64     
-192   -48    
112    -80    
-128   -16    
16     -288   
-16    32     
-64    -144   
32     -64    
176    176    
-192   384    
0      -432   
-16    -352   
96     96     
48     160    
16     64     
-224   -64    
80     -208   
176    224    
-128   64     
48     -144   
0      112    
16     112    
-32    -16    
-1680  -224   
352    64     
-16    240    
-832   -176   
128    272    
-1024  256    
-64    -64    
224    -112   
-176   48     
112    -16    
16     80     
32     80     
0      -16    
-688   -160   
128    160    
-464   -320   
256    80     
-112   96     
0      80     
-224   0      
-192   -160   
-16    80     
-1136  -80    
-272   48     
224    -64    
-80    144    
224    -224   
-256   48     
-256   -256   
224    16     
-48    -16    
64     16     
336    -352   
-112   320    
-176   -32    
-192   32     
-432   -944   
32     -144   
320    -720   
-400   -192   
-64    256    
-608   -192   
224    96     
48     -240   
-256   16     
176    -176   
-544   240    
-368   -240   
96     128    
48     -80    
144    336    
-176   32     
80     272    
-176   240    
-192   -32    
-224   64     
256    160    
-64    128    
112    -112   
-128   64     
48     16     
-80    -192   
-96    144    
-16    112    
-16    -32    
-48    -64    
-32    64     
-96    64     
0      -128   
-64    48     
64     64     
-1056  -96    
48     128    
-16    32     
-64    64     
144    0      
-112   80     
64     112    
-48    96     
0      192    
-128   -64    
-128   32     
-32    -32    
160    144    
-48    -80    
48     48     
-192   -80    
16     256    
-96    -96    
128    -80    
16     144    
0      192    
-64    192    
-96    -176   
128    176    
-240   0      
144    16     
32     112    
-32    160    
-192   48     
-112   -32    
-64    -128   
48     288    
-96    0      
192    -64    
0      16     
-160   64     
-16    128    
-48    -16    
64     80     
-16    96     
0      -32    
112    0      
-176   0      
-96    -112   
64     144    
-304   -80    
256    128    
-96    -16    
0      144    
-288   160    
192    144    
-16    64     
112    32     
-16    -96    
144    128    
-192   112    
-32    48     
48     96     
-144   0      
80     112    
48     224    
-480   128    
336    80     
-208   -144   
320    320    
-240   48     
272    208    
-48    112    
-96    0      
-32    -80    
96     160    
-144   32     
96     160    
-192   -64    
16     112    
-144   16     
192    160    
-80    96     
32     80     
-160   -128   
128    144    
48     96     
48     -80    
-16    16     
-192   16     
368    416    
-16    176    
208    176    
-432   64     
224    128    
48     80     
-80    112    
176    400    
-80    144    
80     32     
-160   32     
160    0      
16     -48    
-256   -80    
-96    -144   
272    96     
-128   96     
320    96     
-16    192    
-192   128    
160    64     
96     -16    
-256   112    
192    -64    
32     -32    
64     -16    
272    560    
-160   48     
144    -16    
-208   128    
128    16     
-16    80     
16     32     
-64    128    
192    -96    
-32    192    
128    -80    
32     64     
-96    -64    
128    208    
-64    80     
112    -96    
-96    48     
112    96     
16     80     
-176   48     
-80    -160   
80     32     
-96    32     
80     -1168  
80     160    
-80    128    
-80    96     
128    -112   
-16    176    
-16    160    
-48    64     
80     0      
112    64     
-96    80     
80     112    
-32    32     
128    16     
16     64     
-224   -1616  
160    112    
96     272    
-112   208    
-32    64     
112    -16    
96     32     
64     128    
80     -32    
128    -16    
-128   272    
-16    272    
-96    128    
96     -80    
560    -2000  
32     -768   
1360   0      
224    -400   
672    1328   
272    176    
-528   -672   
992    -336   
-80    352    
80     80     
-224   176    
80     -192   
0      224    
-32    -128   
288    288    
-112   -48    
16     32     
192    128    
-16    -896   
32     0      
128    48     
0      256    
0      128    
16     128    
48     64     
16     96     
48     64     
144    352    
-64    -48    
80     16     
-80    32     
144    80     
112    144    
-32    -448   
-16    112    
64     -48    
96     128    
48     80     
0      112    
32     -32    
80     176    
-80    -144   
0      16     
16     32     
160    -32    
96     192    
-160   -304   
-144   -256   
48     -784   
64     256    
128    -528   
-48    176    
16     -544   
48     32     
-48    -176   
128    128    
16     144    
64     160    
128    144    
-128   -320   
-96    16     
-16    -400   
64     48     
32     176    
96     64     
48     -688   
80     80     
-32    -16    
80     -48    
64     -112   
128    192    
48     320    
-112   32     
112    0      
-32    -64    
-64    112    
352    416    
-192   288    
208    -32    
-96    16     
-80    128    
192    112    
-32    96     
176    240    
32     240    
32     112    
0      96     
112    -240   
80     208    
16     -240   
-16    128    
48     -64    
80     -80    
128    -640   
16     96     
64     -96    
48     80     
16     224    
64     144    
64     48     
32     64     
0      32     
64     -64    
128    128    
16     0      
80     144    
32     -144   
-16    48     
144    -32    
0      96     
96     -32    
64     176    
32     -368   
128    -2896  
-80    48     
112    -1376  
32     -624   
144    112    
48     96     
144    16     
-144   -2128  
96     -80    
-16    16     
240    -64    
0      160    
160    -112   
-32    -672   
48     -272   
176    -320   
-208   160    
352    128    
0      -368   
-144   -64    
-48    -832   
176    -128   
80     -576   
-160   -144   
304    -1168  
-176   32     
160    0      
-32    -240   
96     -176   
112    96     
0      16     
64     64     
-304   -96    
-96    -208   
-1456  -384   
-176   128    
0      -48    
96     48     
128    128    
-96    -560   
96     -128   
-96    32     
160    160    
128    -144   
16     288    
-32    -368   
352    160    
-208   32     
112    64     
-176   -128   
64     -64    
240    176    
-112   -512   
240    32     
-208   -640   
224    -96    
304    -1536  
-32    48     
224    64     
-288   -128   
272    320    
-16    -256   
160    -96    
-128   0      
0      112    
-16    -192   
-96    -48    
96     -96    
16     -112   
-16    -128   
96     64     
192    -288   
-160   112    
48     -288   
-32    -32    
144    0      
160    96     
-32    192    
-144   224    
-64    0      
176    112    
-688   -240   
400    48     
-16    144    
128    48     
-224   -144   
928    1088   
-80    -64    
-336   -48    
1328   -1376  
-448   -592   
464    -496   
384    144    
-368   -160   
624    -16    
-160   176    
-192   -32    
128    -16    
-176   256    
224    -32    
-96    128    
-64    -176   
208    64     
-16    -480   
48     0      
-96    -208   
64     32     
208    240    
0      -112   
-272   16     
-16    48     
-48    384    
128    -400   
-944   -96    
-192   -560   
192    48     
0      -160   
0      128    
160    -240   
64     -176   
-112   416    
-256   -48    
0      -64    
0      112    
64     32     
16     -112   
-112   -128   
48     48     
-1104  16     
0      -80    
48     112    
128    0      
80     160    
-32    -736   
112    -96    
-128   80     
256    -32    
-128   176    
160    -80    
-32    -32    
0      -160   
0      112    
-96    -96    
144    144    
0      -112   
80     112    
-880   -160   
128    64     
-128   64     
-160   -96    
-32    -144   
-528   -112   
-336   0      
48     -32    
-240   -48    
208    -32    
-48    112    
-48    80     
-112   64     
16     -176   
-96    -112   
-192   -256   
-48    160    
-16    80     
80     128    
-80    128    
-128   32     
240    64     
-1136  192    
-64    -16    
240    16     
-48    80     
-384   -272   
128    80     
-720   -176   
96     64     
-16    48     
-304   144    
192    144    
-288   -112   
160    -32    
-368   -16    
-32    176    
-64    64     
48     -48    
-416   48     
16     80     
-528   48     
336    368    
-192   -96    
176    0      
-192   -64    
-80    -16    
16     -48    
-112   -192   
-144   16     
-64    64     
64     176    
-224   -64    
-80    -144   
-496   -176   
48     288    
-128   -192   
192    80     
-144   16     
272    240    
128    112    
-240   160    
48     32     
32     -64    
-416   -96    
192    -16    
-128   -80    
-144   -16    
-64    -16    
-192   -32    
-144   0      
-896   -192   
192    112    
144    -64    
-48    144    
32     -16    
0      -16    
-176   16     
128    80     
176    256    
-112   -96    
-208   208    
-288   -48    
256    256    
-352   -144   
80     208    
-1072  -128   
96     208    
-16    -176   
-80    32     
32     16     
-16    64     
80     48     
-96    32     
0      16     
-48    112    
80     -128   
-128   160    
-48    96     
-48    -144   
-16    -32    
-240   -64    
0      240    
96     48     
-64    -32    
368    464    
-288   -112   
-96    -16    
-80    112    
64     -96    
-16    160    
32     -32    
-80    336    
-160   -112   
-112   -160   
192    160    
-144   -192   
-64    224    
96     32     
64     512    
-64    32     
-128   32     
0      48     
96     80     
-16    -16    
-208   0      
-208   -32    
-48    -80    
32     80     
-64    -48    
64     144    
-16    160    
-80    192    
-128   -128   
112    16     
64     64     
-64    416    
352    -592   
912    640    
256    928    
-784   432    
-544   -80    
-64    0      
272    672    
96     -64    
-128   512    
-336   -400   
-192   -16    
-336   -208   
432    48     
-272   -64    
320    128    
-128   -144   
-48    240    
112    144    
224    448    
-144   160    
64     208    
-32    112    
96     16     
-64    48     
-96    -336   
-176   240    
48     352    
144    96     
-144   -416   
96     0      
128    176    
-80    176    
-80    256    
80     -16    
-32    128    
-48    -80    
64     192    
-112   -64    
-32    112    
96     240    
-16    240    
64     160    
-112   -16    
-16    48     
64     112    
112    -32    
-128   -80    
256    32     
-32    112    
32     160    
-112   -96    
96     128    
-144   -176   
144    144    
64     112    
48     128    
-96    -96    
0      112    
48     32     
-176   80     
160    304    
16     -80    
16     208    
-96    80     
32     288    
-48    -16    
96     112    
16     32     
96     -288   
64     112    
-32    112    
80     96     
-32    32     
32     128    
64     64     
96     128    
16     240    
160    240    
-96    64     
256    144    
-128   256    
-64    -16    
96     80     
-224   -832   
208    64     
-112   16     
304    272    
96     576    
-144   272    
-64    -192   
48     112    
16     112    
96     128    
-80    16     
-32    80     
64     -64    
-64    64     
160    128    
-64    -224   
208    144    
-32    144    
-16    -32    
32     0      
80     176    
112    96     
-16    128    
-32    80     
16     32     
112    128    
-128   0      
192    80     
-128   -160   
160    96     
-80    80     
80     112    
32     -800   
256    368    
-96    96     
96     0      
-80    192    
144    224    
128    112    
-160   64     
0      48     
144    32     
112    -16    
-208   -128   
112    -32    
176    -160   
-80    144    
64     -1616  
64     64     
-112   208    
144    48     
-48    -176   
224    32     
-80    352    
144    208    
16     -32    
80     96     
48     160    
144    48     
-224   -96    
304    0      
32     192    
512    -96    
-528   528    
144    -368   
112    64     
64     -272   
160    112    
-64    96     
112    48     
-32    176    
-48    16     
176    224    
-240   48     
160    -336   
112    -320   
112    208    
192    -320   
-224   240    
224    -688   
0      208    
-16    -976   
-160   32     
176    96     
320    320    
-96    128    
-160   96     
-112   32     
-16    -448   
192    -144   
-64    -256   
-80    192    
16     0      
-112   -48    
48     -400   
224    112    
-128   -272   
-112   224    
64     80     
176    160    
-112   80     
80     -192   
128    96     
-16    -176   
160    384    
96     -160   
-16    208    
0      -496   
64     -192   
256    -176   
32     304    
176    208    
-48    160    
128    64     
-752   800    
-1568  -576   
1296   928    
352    304    
64     32     
16     208    
-400   96     
320    -256   
-240   80     
576    192    
0      -208   
-176   224    
64     16     
304    -864   
-224   -112   
0      -384   
144    -320   
32     96     
144    -448   
16     -128   
-64    -480   
80     -128   
64     352    
16     -16    
-48    -80    
16     -256   
80     -864   
112    80     
-16    -304   
-16    192    
-208   64     
112    0      
-64    -48    
96     -160   
48     -112   
0      -448   
256    -64    
-160   -736   
240    96     
-16    80     
16     -64    
80     -208   
80     80     
32     -80    
128    -32    
-64    160    
80     0      
-784   -128   
-16    -128   
-32    -16    
240    -288   
-80    96     
128    -512   
128    64     
-160   432    
352    -32    
-64    80     
112    64     
144    64     
32     -160   
-320   -176   
224    -208   
-896   0      
112    -96    
96     112    
-64    -224   
224    0      
-96    -544   
96     -96    
64     -1216  
-96    32     
128    -16    
-32    32     
0      -400   
144    -256   
-144   16     
-192   368    
-64    128    
128    -224   
-48    -160   
192    48     
-96    -128   
176    -112   
32     288    
-64    -192   
208    112    
32     -352   
160    160    
-176   64     
176    -160   
-32    16     
48     -128   
-80    -32    
64     -112   
-352   -16    
112    -208   
-448   240    
96     -80    
144    16     
16     -928   
0      48     
176    -48    
-32    112    
64     64     
-64    -160   
-32    48     
16     -32    
-160   -112   
-32    -176   
-320   32     
128    32     
-304   -16    
0      -288   
96     48     
16     -544   
32     0      
-80    -704   
208    128    
-64    32     
272    -16    
-288   144    
288    144    
-224   32     
-64    16     
-80    32     
320    64     
-112   -112   
-160   -432   
-96    224    
64     -208   
208    80     
0      -608   
-64    -176   
-352   -224   
32     -272   
32     -32    
272    160    
-96    112    
-112   0      
-224   32     
192    -128   
-32    16     
16     -128   
112    384    
160    -80    
-48    32     
-144   0      
208    128    
96     80     
0      48     
-16    80     
144    0      
-304   -48    
176    -192   
-112   -96    
128    32     
-64    304    
-192   224    
-32    336    
-592   -528   
-32    0      
-32    0      
-560   -96    
80     160    
96     176    
-160   0      
32     -96    
96     240    
-16    -288   
-32    80     
-160   144    
-96    -32    
-384   32     
96     -128   
-176   -224   
-400   -160   
-48    176    
80     16     
-48    -16    
-32    32     
-112   -112   
-784   176    
192    144    
32     80     
-128   -48    
208    64     
16     -256   
-32    -192   
48     -16    
0      -80    
32     96     
16     160    
-80    -128   
176    -160   
-240   0      
-48    16     
-64    64     
-96    48     
576    688    
-32    -528   
-1296  -560   
-272   -512   
80     -160   
-16    -576   
432    544    
-96    160    
-240   144    
32     -96    
-64    64     
-112   0      
96     176    
208    112    
0      48     
-208   -16    
256    16     
-336   -256   
80     160    
96     -64    
32     80     
-48    0      
64     112    
128    224    
-256   -32    
80     -112   
-224   224    
-96    0      
192    288    
-112   192    
-96    -144   
64     144    
112    48     
304    0      
-144   -112   
112    16     
32     240    
0      400    
-144   -80    
-80    -304   
192    112    
-240   48     
-64    0      
-160   80     
0      -16    
-80    -320   
64     16     
-496   -16    
-64    176    
-160   -112   
112    -128   
0      208    
-128   -96    
-32    192    
128    16     
16     64     
-96    -560   
112    128    
640    384    
-288   432    
176    -32    
-112   240    
-176   -224   
96     208    
96     160    
64     32     
16     64     
0      80     
48     96     
-80    0      
0      32     
-16    16     
96     128    
-96    0      
80     160    
-64    -224   
368    624    
-288   224    
272    176    
-96    96     
368    16     
-128   96     
-64    -48    
-144   128    
48     112    
0      32     
64     288    
64     480    
-224   -96    
16     -80    
-192   -64    
144    160    
-96    48     
-160   64     
96     80     
16     96     
16     32     
0      80     
0      64     
96     192    
-16    48     
-64    -48    
-16    48     
-16    0      
48     32     
-16    48     
0      144    
32     80     
-96    144    
32     16     
64     144    
16     64     
16     128    
-32    -48    
16     112    
32     96     
-208   -384   
80     112    
-80    224    
256    128    
-272   80     
0      96     
112    48     
-16    -64    
80     128    
-96    64     
352    192    
-240   64     
144    -96    
-288   48     
240    48     
96     416    
-320   0      
0      -192   
-48    -400   
-48    -192   
160    48     
240    240    
-96    80     
176    48     
-48    144    
16     0      
48     160    
32     272    
80     272    
80     144    
48     64     
-32    -48    
-64    -64    
64     112    
16     16     
-16    -32    
64     144    
-64    144    
160    384    
-96    272    
-16    -48    
-144   32     
-80    -560   
176    416    
192    448    
-240   64     
128    48     
-160   -80    
144    128    
32     144    
-160   336    
-16    -96    
-192   112    
144    80     
16     16     
64     128    
144    16     
-240   80     
112    -80    
224    128    
-32    -112   
320    576    
-112   16     
96     160    
32     32     
144    -352   
-112   432    
-144   0      
0      160    
96     -48    
112    16     
128    96     
-16    32     
0      64     
96     32     
-16    128    
64     336    
-16    -112   
-32    256    
32     -48    
48     48     
-32    96     
1392   -1920  
-32    160    
160    -192   
176    624    
704    -592   
-304   288    
-496   -240   
848    160    
224    464    
-160   48     
-352   240    
112    -496   
-144   672    
368    -784   
112    384    
0      -1168  
-48    336    
80     0      
-64    128    
0      -16    
112    64     
32     64     
48     240    
32     0      
-16    -48    
-176   32     
272    -64    
-16    160    
128    -192   
-96    -80    
192    -608   
64     352    
192    128    
-48    96     
-48    -80    
16     144    
-48    -336   
16     -32    
80     160    
176    96     
-48    16     
-16    128    
160    112    
96     144    
-272   0      
32     -144   
64     176    
128    -240   
144    80     
-48    -112   
80     240    
-64    -32    
96     80     
0      0      
48     192    
112    48     
96     -176   
0      160    
-48    -160   
176    16     
-32    -160   
16     48     
64     -304   
16     144    
-80    112    
144    32     
80     48     
32     16     
96     224    
-144   -80    
192    64     
0      -320   
112    208    
-64    -304   
208    -16    
-16    160    
160    144    
368    -768   
144    -64    
176    64     
-128   288    
0      48     
368    464    
-352   -112   
384    -176   
0      208    
-208   -256   
384    144    
-272   -32    
256    128    
-96    -144   
32     -32    
48     -336   
32     96     
-64    -512   
144    240    
-80    -176   
128    144    
64     32     
0      -64    
112    160    
-64    -48    
160    192    
112    -16    
128    48     
-16    -176   
-128   208    
272    16     
-96    240    
112    16     
48     -928   
-80    192    
-352   -240   
176    -640   
-48    -160   
128    -592   
-112   -256   
64     432    
368    -32    
96     432    
-336   -32    
352    128    
-64    -16    
48     -336   
224    160    
16     -144   
160    128    
-352   96     
128    -128   
112    16     
16     -304   
144    64     
0      -224   
32     -16    
80     -736   
0      -80    
-96    -368   
112    256    
208    48     
-16    -64    
-96    -48    
16     48     
-32    -16    
16     -176   
-64    -32    
128    -128   
-16    -112   
-48    -160   
32     -336   
-32    -752   
144    -224   
32     -96    
-416   16     
64     -144   
16     176    
0      -112   
160    80     
-144   -288   
80     -16    
-1024  -80    
208    16     
48     208    
48     80     
-32    -144   
0      -416   
-32    -688   
-96    -800   
192    528    
-160   64     
64     208    
64     -144   
32     -176   
-48    0      
224    -48    
80     128    
48     0      
-416   112    
0      -160   
112    -80    
64     -160   
-16    -64    
128    -912   
96     192    
48     0      
-352   32     
-48    -80    
160    -64    
-48    80     
32     -96    
-144   -64    
112    -96    
-656   -32    
16     -208   
-912   -352   
64     96     
-80    -48    
48     -960   
-192   48     
-576   -1840  
80     -384   
80     368    
432    432    
-192   320    
384    -96    
-640   192    
256    -432   
-32    -448   
-32    -176   
288    48     
96     -96    
96     368    
-176   -272   
320    368    
-176   -144   
288    80     
96     16     
272    80     
-176   -128   
160    -256   
-16    208    
-32    -96    
144    32     
64     48     
96     -32    
32     -160   
-320   -144   
-48    -736   
528    144    
-48    80     
352    224    
-240   96     
-16    -96    
96     -128   
-64    -160   
-48    -592   
160    160    
-160   32     
128    256    
-1440  -112   
48     -288   
80     0      
16     -176   
-192   192    
-240   80     
0      96     
240    256    
-320   -128   
64     -32    
240    112    
-64    -144   
192    224    
16     -80    
96     0      
-48    -16    
-176   336    
-640   -688   
-1120  80     
192    -64    
-224   112    
-800   -32    
48     -336   
-592   32     
144    176    
-80    -16    
-64    96     
144    -112   
0      96     
64     0      
-80    160    
64     -176   
32     -112   
-32    -240   
80     0      
64     432    
128    112    
272    448    
-560   144    
-176   -480   
-144   -112   
-112   32     
128    0      
-16    144    
48     -112   
64     240    
-208   -448   
32     80     
-128   -176   
96     0      
0      160    
48     112    
-112   112    
-128   -128   
64     208    
-112   -64    
176    48     
-528   272    
64     352    
64     224    
-176   0      
-80    -320   
128    48     
32     128    
48     -144   
-128   144    
-208   -48    
32     -176   
-288   -320   
48     96     
32     80     
32     16     
-128   96     
-96    160    
48     -112   
80     -112   
96     256    
-112   -16    
-96    -64    
256    208    
-384   -272   
-16    96     
-80    384    
-112   -64    
-80    -112   
0      -256   
-144   -48    
0      -512   
192    608    
-384   112    
96     -16    
-96    -160   
96     176    
-144   32     
176    112    
-64    192    
192    48     
64     272    
-160   -16    
-96    -96    
-160   -80    
96     64     
-144   -272   
64     80     
-272   96     
48     160    
-64    464    
80     -32    
-80    -208   
0      112    
160    16     
-48    48     
128    64     
-144   128    
112    32     
-32    96     
0      96     
-48    128    
96     -48    
-832   -48    
-48    192    
16     -128   
32     144    
-48    -48    
160    208    
-96    64     
-112   -64    
128    256    
-384   -96    
272    32     
-96    144    
224    -208   
-240   16     
-112   384    
-336   -240   
176    -464   
208    -368   
-80    400    
-320   32     
48     0      
160    96     
-64    96     
16     112    
128    -176   
128    128    
-192   80     
96     192    
-208   0      
96     32     
16     96     
96     32     
64     0      
-96    48     
-16    288    
-112   80     
112    -80    
0      48     
-1136  -2304  
784    96     
-1072  -592   
448    -160   
128    32     
-976   16     
560    1488   
-368   -368   
-304   64     
704    144    
-288   -160   
-160   448    
96     -96    
224    144    
-160   -64    
144    128    
144    48     
-176   112    
-64    0      
192    112    
-224   -64    
64     112    
48     240    
96     112    
-32    -64    
192    -64    
32     288    
160    48     
0      192    
-128   80     
192    -32    
-80    32     
64     112    
-80    96     
112    64     
-112   64     
96     64     
-64    128    
-144   -32    
160    128    
144    -16    
-64    128    
-32    128    
128    80     
-16    -16    
144    144    
-96    160    
64     112    
-64    224    
80     -80    
-128   16     
-32    80     
176    64     
-48    144    
16     64     
96     -64    
32     80     
-16    16     
16     144    
48     16     
-48    96     
-96    -32    
176    96     
-240   -32    
128    0      
48     96     
0      -144   
160    224    
-16    192    
96     -32    
112    80     
-64    160    
32     16     
144    128    
48     288    
-48    32     
240    368    
160    784    
48     32     
80     -96    
112    16     
48     -176   
128    64     
-288   -144   
240    -176   
-192   32     
0      256    
-80    208    
288    96     
144    0      
96     96     
-80    -160   
-32    32     
-80    128    
-96    -240   
-80    0      
-160   -368   
-16    -96    
32     112    
224    160    
-160   128    
-128   80     
272    224    
32     240    
-256   32     
96     160    
32     -160   
64     64     
-64    0      
48     -272   
48     96     
-48    64     
32     96     
48     -1344  
-32    96     
128    0      
80     32     
-16    112    
112    144    
-16    -144   
96     -80    
-208   -64    
16     160    
352    160    
-352   -128   
96     80     
-16    32     
368    240    
-128   -416   
-16    80     
128    176    
112    208    
176    32     
-128   32     
48     -48    
48     -144   
-240   -128   
272    64     
176    192    
-208   -96    
208    160    
-192   -272   
80     144    
80     -256   
16     32     
32     -336   
-32    -48    
0      64     
208    288    
16     -64    
64     336    
-64    -160   
-96    -64    
128    -16    
112    -144   
112    224    
304    128    
-80    368    
32     -336   
16     208    
192    -224   
-96    80     
64     64     
80     112    
-48    96     
-80    -48    
16     -368   
320    -112   
368    496    
-288   -48    
0      -80    
-16    -64    
240    208    
48     -224   
64     272    
-48    -336   
160    160    
-224   48     
288    192    
-144   64     
128    128    
112    128    
32     -592   
-96    96     
256    -464   
-160   112    
160    -208   
80     224    
32     -480   
32     80     
-32    -384   
224    64     
-112   144    
16     48     
-48    496    
-80    -2048  
128    -272   
96     -304   
1392   400    
-976   -432   
848    1024   
-32    208    
544    -544   
-608   -272   
0      176    
768    704    
-448   -1616  
208    -80    
128    -576   
-256   -80    
-288   256    
416    -768   
-160   192    
80     -192   
-80    160    
48     144    
-352   160    
48     -416   
-48    -64    
-80    96     
16     368    
-64    -64    
288    -48    
-144   -240   
224    112    
-240   -704   
-32    -496   
48     -112   
208    -208   
-240   208    
160    -688   
-96    128    
64     80     
160    160    
48     -208   
192    160    
-352   -144   
400    16     
16     -112   
48     0      
-320   -128   
320    176    
48     -352   
-64    -128   
272    96     
144    528    
0      80     
-128   -80    
80     -384   
144    -304   
-80    80     
272    304    
-64    0      
-32    -48    
-48    -464   
-32    -976   
-208   -400   
-928   -608   
288    240    
224    384    
16     48     
-96    -80    
176    -1008  
0      -128   
64     -848   
0      144    
-32    48     
112    16     
-304   -48    
16     -192   
-240   -208   
144    -176   
-336   96     
384    592    
-208   208    
128    -288   
272    -272   
144    -48    
304    288    
-256   -432   
48     0      
96     16     
16     128    
-48    -16    
48     128    
-304   -320   
144    -48    
32     0      
0      16     
-1088  -32    
32     -368   
-288   -16    
-32    144    
96     256    
96     -176   
112    128    
-16    -816   
32     -208   
224    384    
-80    32     
112    -16    
112    -48    
-672   -112   
192    160    
-368   -192   
192    0      
-96    16     
-16    -96    
64     192    
32     -416   
48     176    
224    -512   
-32    -160   
-64    -144   
64     288    
-416   -16    
240    -96    
-480   -464   
128    -48    
16     160    
128    96     
-272   -96    
32     -480   
-16    0      
176    -704   
-64    64     
192    96     
-112   112    
48     -16    
144    240    
-112   112    
128    96     
-368   -96    
80     -48    
80     0      
16     -176   
-208   48     
-224   -144   
176    96     
64     -16    
-80    80     
-32    192    
-448   -176   
-48    48     
-80    -256   
192    128    
-64    128    
16     64     
192    -112   
-192   -48    
112    -160   
48     144    
-448   -128   
48     112    
-272   -16    
-176   -96    
-16    16     
-768   32     
-32    80     
-176   -96    
48     64     
-128   -32    
-304   -256   
80     -192   
-96    112    
-336   0      
80     64     
-80    -16    
-16    48     
48     -224   
-48    144    
-16    128    
-256   112    
-80    96     
-16    -32    
16     32     
-48    -32    
-96    80     
0      64     
48     16     
-32    144    
-208   48     
-160   -208   
16     32     
32     -96    
48     64     
-32    -64    
0      80     
-80    128    
-112   176    
-16    -96    
208    144    
-336   128    
-144   -80    
-96    80     
-240   -128   
-880   288    
912    48     
16     592    
416    -336   
-640   -96    
-336   208    
-112   368    
-48    -80    
-672   144    
160    -576   
-144   496    
-32    -384   
-464   416    
256    -448   
-224   176    
96     -320   
32     256    
16     -96    
-80    224    
-48    -176   
-32    80     
-64    160    
16     64     
128    80     
-128   -128   
-96    48     
16     -80    
-272   128    
112    -32    
16     144    
48     -16    
-112   -128   
32     -112   
-80    256    
0      -128   
-48    240    
-80    48     
64     176    
-80    -64    
-16    144    
-64    -80    
0      96     
-96    -16    
0      64     
-656   64     
64     192    
32     80     
-48    208    
-384   -32    
304    16     
-96    176    
64     -96    
-112   128    
-48    32     
32     48     
-16    32     
-160   128    
48     -112   
32     160    
-464   -176   
48     112    
32     -16    
64     32     
80     288    
-16    32     
176    128    
-32    80     
32     128    
-80    -16    
48     176    
96     0      
48     160    
-176   -64    
96     112    
-304   -176   
-32    128    
-96    -32    
272    -96    
-112   48     
-64    48     
32     48     
0      16     
-32    144    
0      -80    
-256   64     
0      80     
80     240    
-208   16     
288    128    
-480   -208   
32     208    
-16    -16    
208    96     
-112   176    
272    176    
-208   128    
-80    -64    
224    256    
16     144    
-80    112    
-176   -80    
80     0      
-80    16     
144    192    
32     160    
32     288    
-160   176    
48     112    
48     -16    
-80    -64    
48     128    
32     80     
64     96     
-80    0      
16     80     
-16    48     
16     -208   
0      64     
192    320    
80     384    
32     144    
-96    192    
112    224    
128    192    
80     208    
-128   -272   
-80    -96    
0      144    
64     -48    
112    112    
-48    128    
16     304    
-192   -48    
32     64     
48     -64    
272    752    
-144   320    
288    432    
-128   80     
96     -144   
96     0      
-128   -32    
272    80     
-208   48     
176    128    
-112   80     
64     256    
-224   -128   
80     112    
16     64     
128    112    
32     64     
-32    112    
112    240    
-16    -16    
144    144    
-80    80     
384    64     
-272   160    
96     32     
0      0      
32     160    
176    144    
-128   -16    
80     48     
-160   -48    
176    304    
80     112    
64     80     
-192   48     
160    80     
-32    112    
96     48     
16     48     
32     80     
-64    304    
-80    -48    
224    192    
-64    -848   
224    160    
-144   80     
64     32     
16     48     
112    128    
-144   96     
-112   -176   
32     96     
0      224    
-96    32     
48     80     
0      160    
112    -144   
80     16     
240    -960   
-224   -16    
208    128    
-16    80     
144    336    
-144   992    
-240   16     
-624   -448   
96     528    
-240   -272   
640    592    
-176   -672   
384    784    
-288   -368   
352    192    
-48    -672   
64     192    
-176   -736   
336    96     
0      208    
96     -544   
-64    -400   
240    32     
160    608    
-16    -48    
-80    160    
0      96     
240    192    
-176   -256   
176    512    
-96    -208   
-224   16     
-160   -2304  
272    128    
416    272    
-288   32     
192    -16    
-48    240    
112    96     
256    48     
-112   -48    
144    176    
64     256    
-80    96     
272    16     
-16    -144   
176    144    
272    96     
-256   176    
48     -304   
-80    224    
160    32     
48     336    
128    16     
160    160    
-16    -16    
0      80     
128    -48    
32     96     
16     176    
-64    -64    
64     208    
16     -64    
176    208    
-80    -16    
32     160    
48     -96    
80     304    
-128   -48    
288    224    
-160   32     
112    -160   
144    -48    
-80    -816   
304    64     
80     -576   
-112   96     
128    64     
-48    240    
128    -608   
48     128    
-96    32     
80     112    
-80    -80    
-144   32     
192    64     
-48    -32    
240    128    
-240   160    
-192   112    
224    64     
-208   -176   
400    -192   
32     80     
-80    -1184  
96     112    
-16    -80    
128    128    
64     16     
-112   -512   
208    -2368  
128    -112   
0      -160   
112    112    
80     304    
112    16     
48     -16    
128    272    
-16    240    
128    32     
16     -752   
32     112    
240    96     
-128   0      
-1488  -224   
80     -224   
16     -112   
64     -32    
0      -48    
160    -48    
96     -176   
-144   -48    
-48    -224   
128    64     
-160   0      
224    -544   
80     416    
16     112    
288    -64    
-464   48     
-96    -272   
400    -48    
-96    64     
-80    -48    
144    -368   
64     -208   
240    160    
-32    144    
304    64     
-400   -80    
112    -288   
80     144    
208    -80    
-16    -128   
-160   192    
32     -48    
256    48     
-80    16     
-144   96     
176    -448   
-144   -64    
192    -496   
0      32     
320    -208   
-224   112    
96     -96    
16     48     
80     -96    
-48    -112   
112    -96    
80     -208   
-992   -80    
192    -288   
-48    80     
0      -16    
80     -192   
16     -288   
-176   -176   
112    -1680  
32     16     
96     80     
-64    160    
-288   16     
32     -144   
-32    -112   
-32    -80    
-160   -192   
48     160    
-128   16     
160    0      
-208   -64    
-48    -112   
16     96     
-80    -848   
32     48     
176    -176   
80     0      
-128   176    
96     -304   
16     128    
32     -16    
-64    32     
144    -144   
-464   -16    
48     -144   
-432   -96    
128    -160   
-128   112    
240    112    
-96    -64    
112    144    
16     -80    
-928   -3696  
-512   -1696  
640    448    
-416   256    
320    304    
-656   -432   
624    528    
-704   128    
80     -16    
160    32     
144    -272   
-64    -448   
-96    -48    
608    -80    
-272   80     
160    -208   
-128   240    
-224   -128   
-128   0      
240    -80    
-192   80     
48     -16    
-32    288    
192    0      
-64    -144   
96     -160   
64     -16    
-128   96     
32     96     
80     176    
-128   96     
0      -32    
-128   -112   
80     96     
128    -48    
-64    96     
-48    32     
-16    -208   
-784   0      
112    -96    
64     -16    
80     -16    
0      -80    
48     112    
-1472  -192   
-96    -48    
48     32     
32     64     
16     112    
-112   0      
128    -96    
-144   -48    
32     -160   
64     160    
-400   -48    
48     -16    
-96    -144   
-240   32     
32     48     
-240   -112   
-64    -144   
-64    192    
64     0      
192    128    
-32    160    
32     -32    
-192   64     
-32    -64    
16     0      
-16    -144   
112    0      
16     48     
-192   16     
-48    80     
-320   -16    
48     -16    
-352   -256   
-64    80     
-976   160    
-80    -176   
-112   -128   
-16    0      
144    -32    
-16    432    
16     -192   
-128   -16    
16     -112   
-80    48     
-16    128    
128    464    
-160   -80    
-160   -64    
-256   96     
-816   -48    
-32    16     
-32    16     
304    576    
-112   64     
-32    -64    
-48    -240   
-64    80     
176    112    
-48    32     
-16    96     
-48    48     
64     64     
-96    -64    
192    224    
-112   128    
128    16     
-512   -16    
32     96     
-96    -208   
16     48     
-16    -32    
64     128    
16     96     
-96    80     
-48    48     
-64    48     
0      128    
-16    -80    
48     256    
-96    96     
48     -160   
-304   48     
-160   -128   
352    -176   
-224   160    
32     160    
96     -16    
-160   176    
-112   -16    
0      -16    
-32    48     
-16    112    
272    320    
-496   -64    
272    -16    
-208   32     
-160   -128   
48     144    
-1280  32     
144    112    
-32    64     
96     16     
0      320    
-32    -176   
160    176    
-16    304    
-64    -80    
-48    -80    
-160   48     
-112   -208   
0      64     
208    32     
128    176    
-96    32     
-320   112    
112    -64    
80     112    
-64    144    
80     64     
-256   128    
64     -80    
-48    160    
240    -384   
144    192    
-592   48     
384    -64    
-432   112    
304    -48    
-320   -144   
-240   208    
0      -16    
16     112    
0      16     
112    80     
-96    48     
0      80     
0      32     
-160   64     
96     48     
-48    0      
96     448    
-416   -400   
512    80     
-64    336    
-16    80     
-32    32     
80     112    
48     -64    
176    272    
-160   256    
-160   144    
-80    -128   
48     64     
64     80     
-1408  2224   
-1456  -1312  
736    880    
464    432    
304    128    
-448   176    
112    656    
480    128    
-480   -640   
-80    -32    
432    96     
-80    352    
-80    -64    
224    -16    
-176   0      
16     -16    
-368   -368   
368    96     
-48    160    
128    0      
32     272    
0      224    
-64    160    
128    112    
-48    144    
16     0      
-64    16     
32     64     
-224   -32    
144    192    
48     48     
16     112    
-192   -16    
96     -32    
96     144    
112    80     
-16    144    
-112   96     
48     128    
80     32     
208    192    
-288   192    
192    16     
-32    32     
224    224    
16     96     
-32    48     
-80    -144   
320    224    
-224   32     
336    48     
-144   224    
96     80     
208    208    
-368   144    
144    96     
32     16     
112    112    
0      144    
16     96     
16     -32    
-48    192    
64     16     
80     288    
32     -16    
16     144    
32     32     
80     80     
0      16     
32     80     
96     80     
-32    144    
-80    128    
32     -32    
96     160    
-128   -288   
176    -32    
-176   96     
64     -1104  
-96    48     
112    144    
64     16     
80     176    
112    256    
-32    64     
336    -128   
96     208    
-32    288    
-32    -48    
304    64     
-96    96     
80     -64    
128    304    
-48    -704   
128    224    
-112   16     
64     48     
112    48     
64     128    
32     112    
32     176    
-160   -48    
240    144    
-16    80     
80     48     
0      160    
-32    -416   
48     96     
48     -416   
128    32     
-80    -1008  
-32    128    
144    32     
160    272    
-288   192    
112    -48    
-64    48     
0      80     
160    32     
-80    -32    
160    80     
-192   -192   
256    112    
128    -352   
-192   32     
240    -480   
144    208    
128    -176   
64     400    
64     112    
224    176    
-256   -32    
48     96     
-176   -16    
80     -144   
288    192    
-176   16     
176    -48    
-32    -16    
-160   80     
272    -464   
64     96     
-80    -1104  
128    256    
32     32     
-64    32     
-192   48     
224    32     
0      0      
16     -80    
80     128    
144    16     
32     96     
0      -1200  
0      128    
48     -608   
32     144    
320    0      
-208   208    
-80    -64    
112    112    
32     -64    
160    288    
-48    144    
80     112    
-32    160    
240    -304   
48     48     
240    48     
-272   16     
176    -304   
32     96     
128    -304   
16     64     
-64    -16    
192    336    
-96    -112   
48     -32    
-80    208    
-96    -80    
32     144    
64     -288   
160    -32    
96     64     
64     240    
-48    -16    
176    368    
-48    -224   
128    64     
80     32     
80     -448   
48     80     
128    -32    
-160   -1280  
-32    -240   
320    352    
192    -80    
32     256    
-384   -480   
416    -160   
160    -256   
96     -496   
-384   -192   
192    -1088  
-272   496    
848    -944   
-512   368    
-1552  -368   
-160   208    
-48    -288   
336    160    
-272   -80    
400    160    
-80    -304   
48     96     
208    -16    
128    -288   
-128   16     
224    0      
-144   288    
144    -352   
-16    -160   
-224   -96    
0      -16    
64     -16    
64     -400   
32     -128   
128    -160   
48     -80    
192    464    
-208   144    
128    -112   
-272   64     
304    -176   
-32    128    
-192   -144   
32     80     
-16    -80    
48     0      
112    -160   
144    -48    
64     -48    
32     32     
80     128    
-144   -224   
64     -80    
80     -272   
-32    144    
48     -176   
32     96     
-144   48     
144    16     
-272   -80    
32     -112   
-464   -16    
-32    0      
96     0      
-16    -448   
-48    80     
96     -816   
224    208    
-80    -720   
176    96     
-16    -48    
16     64     
16     48     
176    -16    
-176   -16    
32     -144   
-16    64     
80     32     
-16    0      
176    -96    
-160   -48    
192    48     
240    304    
336    -176   
-176   -32    
48     -48    
240    -128   
-160   -16    
16     -304   
-64    -128   
112    64     
-96    -16    
96     -112   
-1152  32     
64     -96    
-576   -208   
-32    -432   
176    16     
208    272    
-112   96     
80     -128   
-64    64     
32     -32    
80     64     
0      16     
0      32     
-128   0      
80     -32    
-576   -32    
32     -64    
64     48     
96     -128   
16     176    
32     -592   
144    144    
64     96     
176    -160   
-80    32     
96     16     
-160   96     
-48    -160   
16     144    
-32    -304   
96     96     
-32    16     
80     160    
64     -368   
-80    16     
160    -208   
64     96     
96     144    
32     704    
80     -160   
64     -16    
-304   32     
384    -176   
-176   64     
-96    -64    
128    32     
-48    -64    
-32    16     
-144   -336   
336    -176   
-832   176    
-608   -48    
144    80     
-1136  128    
16     -80    
-208   128    
-128   32     
160    -32    
-64    -48    
80     192    
-48    -16    
-1424  -64    
32     16     
-576   64     
-48    48     
-16    -112   
224    -256   
-80    208    
-944   -192   
-112   240    
-368   -64    
400    32     
-272   160    
64     64     
-192   48     
-16    -128   
64     32     
-48    128    
-144   -512   
464    352    
-304   208    
80     0      
-256   -64    
16     128    
-80    16     
-64    400    
-480   -16    
-848   -336   
-288   112    
0      128    
-96    -128   
-32    -128   
400    -176   
128    -112   
-160   240    
-224   144    
-176   64     
-208   96     
32     80     
-176   32     
-224   16     
0      -128   
-128   80     
160    -48    
0      96     
176    -160   
32     48     
-48    80     
-16    -128   
-128   -16    
-384   -1936  
816    96     
848    560    
-912   816    
-304   848    
-448   576    
720    0      
-48    -448   
192    288    
-432   -624   
160    128    
-144   -192   
304    112    
-144   208    
176    -32    
-64    112    
-48    -240   
80     32     
-160   -16    
-80    32     
-144   16     
80     192    
-64    80     
0      176    
-480   -112   
128    0      
-32    128    
144    64     
48     48     
-80    32     
16     208    
32     0      
-80    80     
-32    0      
64     112    
-128   -176   
128    -80    
-208   -16    
144    112    
-320   -80    
64     80     
-592   80     
-16    -16    
80     32     
-112   0      
16     176    
96     64     
32     48     
-192   144    
-16    48     
176    -16    
-192   112    
0      16     
-112   96     
16     -288   
192    336    
-976   -64    
160    64     
-304   96     
-48    0      
192    64     
-128   160    
48     -96    
16     112    
-240   -32    
16     -192   
-96    -32    
48     128    
-128   208    
16     -16    
0      16     
128    48     
-144   208    
48     16     
128    80     
-144   -128   
256    112    
-160   -16    
-16    128    
-64    256    
-112   48     
160    48     
64     -80    
-80    224    
-208   144    
64     80     
16     -80    
320    288    
-288   80     
176    144    
-32    16     
0      80     
48     128    
-48    -288   
224    160    
-256   256    
64     64     
-80    0      
-64    -96    
-48    -16    
-112   -64    
256    208    
-128   32     
144    240    
-112   -192   
32     144    
-96    16     
176    112    
-128   -96    
80     176    
-80    32     
80     0      
-160   128    
32     128    
80     128    
112    112    
-160   192    
48     -80    
32     48     
128    192    
112    224    
176    160    
-224   160    
80     112    
-16    -160   
-96    -128   
-176   48     
48     -16    
128    80     
208    112    
-16    128    
0      240    
64     80     
-208   48     
112    176    
48     16     
16     96     
48     176    
48     64     
0      144    
-80    112    
48     192    
-32    64     
32     112    
-64    144    
128    32     
-112   32     
176    96     
32     96     
-32    160    
144    48     
-16    96     
-48    240    
-80    48     
176    -32    
-240   96     
208    0      
-144   80     
-32    -720   
16     80     
16     48     
80     160    
16     -32    
-32    -16    
160    336    
-96    48     
144    -128   
48     -16    
96     64     
-16    144    
-16    192    
80     272    
48     -208   
-96    -64    
32     96     
112    -928   
112    32     
80     64     
0      64     
32     144    
64     64     
-16    112    
128    144    
16     64     
96     160    
-144   -192   
-64    80     
160    112    
112    48     
-16    128    
48     -1056  
16     48     
80     112    
96     352    
-16    -48    
160    80     
-32    192    
-480   832    
-352   -640   
-1232  -512   
848    -16    
608    912    
-480   -512   
64     -320   
352    544    
432    -608   
-352   -16    
336    -1056  
-16    224    
80     -128   
-80    128    
-64    -176   
128    160    
112    192    
128    480    
-288   -336   
-64    -272   
32     144    
80     64     
-128   160    
-64    -48    
192    -16    
16     -256   
96     144    
-160   64     
128    32     
-32    112    
-128   -208   
16     160    
224    352    
-288   -112   
144    -48    
-112   -64    
192    96     
-96    -192   
64     -32    
-16    16     
128    -224   
-48    208    
64     -624   
0      128    
48     32     
16     48     
16     -32    
-16    64     
224    0      
0      -48    
-16    16     
208    -80    
-16    224    
32     -576   
64     176    
-64    -816   
240    320    
-80    240    
-96    -96    
160    16     
96     176    
-48    0      
32     288    
-80    64     
-32    -272   
176    208    
112    -208   
176    64     
16     -208   
96     112    
80     0      
48     144    
96     -16    
-32    32     
0      -64    
160    -48    
48     144    
416    528    
-272   560    
0      -384   
-160   -80    
80     -464   
208    32     
-16    -96    
48     96     
16     -16    
-48    -80    
208    -576   
-64    16     
112    0      
-112   -256   
-80    0      
288    -96    
-48    -16    
48     -16    
112    -352   
-48    -144   
192    192    
48     112    
16     80     
176    -176   
-96    112    
80     -64    
64     -224   
16     96     
48     -96    
96     -192   
-640   112    
-80    -224   
208    96     
-32    -448   
48     32     
64     -304   
32     48     
32     80     
80     -16    
64     112    
32     96     
64     16     
-32    64     
144    160    
64     -496   
-496   -304   
-64    -272   
80     128    
336    -96    
-64    -80    
32     0      
112    -80    
96     432    
16     128    
112    -112   
96     80     
112    -448   
176    288    
-256   -64    
144    -640   
-464   -80    
112    432    
160    112    
-160   -320   
112    -160   
224    -768   
-16    -144   
-32    -816   
0      96     
96     -464   
-48    -176   
256    -224   
-96    240    
-64    32     
112    80     
-144   16     
-16    -336   
-336   -160   
304    64     
-32    96     
-16    -64    
-16    -176   
224    -384   
64     144    
16     336    
-48    -16    
0      -144   
176    -32    
-16    16     
128    144    
-64    80     
-96    -384   
-208   -160   
144    48     
16     -224   
176    160    
-144   -208   
-144   -448   
192    144    
96     -80    
-80    176    
64     -384   
0      128    
-80    -304   
48     -464   
192    48     
112    16     
-336   32     
48     288    
-1280  -128   
48     -336   
-512   -112   
-16    -48    
48     64     
96     32     
-48    -96    
128    48     
-32    32     
176    -80    
112    48     
32     64     
1664   736    
-1440  -736   
960    448    
64     960    
1024   -48    
-944   -656   
288    -256   
176    832    
-128   -528   
272    208    
16     -32    
128    -128   
-336   288    
336    -128   
-192   160    
48     -176   
-240   16     
112    -80    
-96    16     
160    -128   
-80    144    
0      -240   
96     208    
64     -496   
96     -16    
160    -160   
-48    304    
-16    -144   
64     96     
-192   -112   
128    16     
-64    -32    
-32    112    
-48    64     
96     -32    
64     112    
-1600  96     
16     -80    
-880   -128   
-928   160    
208    0      
-1424  48     
-128   64     
-96    -96    
48     -64    
-64    -16    
256    160    
-128   80     
-176   80     
-96    -304   
-128   64     
-48    -144   
-80    160    
80     96     
-352   -64    
-48    80     
-96    48     
-48    -32    
-208   48     
-32    16     
-16    -96    
32     112    
48     -80    
-64    -96    
-432   -112   
-112   176    
96     -144   
80     32     
-80    128    
-96    -80    
208    -32    
-192   192    
-48    -48    
112    48     
-80    176    
-96    112    
-32    -48    
32     144    
-32    16     
-16    -224   
48     128    
-240   -64    
-80    -208   
96     112    
-416   64     
208    96     
176    288    
-272   144    
288    32     
-288   80     
-304   -80    
16     0      
-176   -224   
144    144    
48     224    
-16    432    
0      -240   
-32    -80    
-128   64     
144    192    
16     64     
-160   32     
-48    48     
-240   -112   
-48    -144   
48     64     
-240   48     
-208   -16    
-288   96     
16     -192   
-96    176    
96     80     
-32    48     
-80    32     
0      -80    
-112   48     
144    96     
80     64     
-208   16     
-80    0      
192    96     
-144   112    
112    80     
-16    208    
-112   -160   
-48    -16    
16     -16    
-112   -208   
32     16     
-80    16     
16     96     
-32    16     
160    224    
64     240    
0      16     
64     32     
-160   272    
144    -240   
-80    48     
-224   0      
64     144    
224    144    
-96    112    
-16    -304   
-160   16     
-32    128    
16     64     
-96    -32    
64     32     
-176   80     
16     -16    
-112   80     
-32    32     
160    48     
-928   -160   
16     96     
16     48     
-96    -272   
176    304    
16     96     
-48    128    
112    160    
-80    16     
-128   48     
80     144    
-128   32     
128    128    
-32    -112   
176    416    
-224   -80    
96     528    
144    -176   
-176   -144   
96     144    
-208   48     
-160   80     
-16    -288   
144    64     
16     112    
-48    112    
-48    0      
48     96     
-144   -112   
96     80     
0      96     
80     32     
48     16     
112    224    
-128   48     
-48    80     
64     128    
-16    96     
16     128    
-208   0      
208    80     
-112   192    
96     112    
-160   -80    
1776   -2000  
304    -208   
1296   816    
-672   880    
976    -640   
-448   -608   
400    224    
-480   -336   
-16    496    
96     -128   
32     -272   
128    -288   
-96    224    
-64    -16    
432    544    
-48    96     
-16    -48    
-176   32     
-64    -224   
208    -96    
-64    32     
32     176    
32     80     
-208   -96    
224    -96    
16     -96    
224    336    
64     48     
256    208    
0      112    
192    -112   
128    80     
-208   16     
64     112    
272    0      
-64    112    
272    320    
0      160    
-288   16     
32     64     
16     128    
-64    80     
-48    16     
32     112    
0      208    
-32    -16    
128    208    
32     320    
0      -64    
-288   32     
256    -112   
-96    240    
112    -96    
-32    96     
160    112    
32     176    
-96    352    
128    336    
-144   -96    
128    208    
-48    208    
64     -176   
64     128    
48     -32    
-160   96     
0      288    
80     112    
80     16     
-80    192    
160    96     
-32    -96    
0      80     
-80    32     
0      -416   
-32    192    
128    -1504  
32     368    
16     128    
256    160    
-80    -48    
352    224    
-192   112    
48     128    
-96    -160   
112    96     
-32    -224   
128    128    
-32    64     
64     -96    
-16    160    
-80    -880   
0      -144   
160    128    
64     240    
16     48     
32     112    
32     144    
112    160    
48     -144   
-16    64     
48     144    
48     144    
128    80     
-64    80     
-32    16     
192    -432   
-240   -192   
272    -688   
-208   32     
304    80     
-80    224    
32     -80    
144    128    
-160   -128   
160    64     
32     144    
176    256    
48     48     
-80    -352   
80     240    
160    -176   
80     32     
32     -368   
32     -64    
32     -400   
192    256    
-272   -96    
304    -160   
-176   528    
304    192    
-32    0      
-160   -16    
240    128    
-32    16     
16     -96    
288    -32    
-128   -224   
256    0      
-16    128    
-96    -240   
32     80     
32     -32    
256    32     
-336   144    
288    192    
-16    80     
32     80     
16     -192   
208    -192   
-96    176    
160    -144   
64     272    
-48    -544   
48     32     
144    -16    
64     288    
32     16     
64     336    
240    320    
48     -368   
-64    -32    
-48    -336   
80     0      
240    32     
-16    -144   
288    -352   
-80    -400   
-208   -304   
0      48     
192    144    
64     352    
224    240    
-144   272    
-32    -64    
128    -64    
112    48     
128    -96    
-16    64     
32     -64    
80     0      
80     -32    
0      80     
224    -224   
16     208    
-192   -64    
-32    -1504  
-64    -80    
208    -656   
48     -192   
-16    80     
32     -608   
16     -48    
32     -2608  
368    -416   
-240   368    
-64    112    
208    -48    
112    16     
304    -1344  
944    -800   
32     240    
-656   112    
352    272    
64     304    
176    -160   
384    -832   
32     -496   
-80    -112   
240    -32    
-16    -80    
-112   -112   
80     64     
192    -176   
64     -192   
32     128    
80     48     
-32    112    
32     -176   
32     -80    
-1056  -48    
128    -48    
112    16     
32     -80    
80     -96    
-176   16     
304    -176   
-80    -208   
192    32     
-32    -48    
32     48     
-16    -160   
224    288    
-192   -128   
176    -16    
-336   224    
176    32     
-32    -80    
160    -96    
-64    0      
96     -656   
-48    16     
256    -496   
-80    80     
80     64     
-48    64     
-80    -192   
448    -64    
-400   -16    
320    0      
-368   64     
224    -208   
-368   -96    
16     -448   
192    32     
-96    -32    
192    -16    
-144   -320   
-112   -144   
304    -272   
-128   176    
0      -48    
96     -80    
-32    224    
-160   112    
-144   -224   
32     -224   
-368   16     
-144   112    
160    32     
16     80     
-32    -128   
144    -256   
-48    96     
112    -560   
0      80     
16     48     
144    -32    
-208   48     
144    -144   
16     48     
-128   -288   
128    48     
-208   -16    
-176   -96    
176    256    
-432   -320   
368    -464   
-64    0      
64     -432   
16     80     
-144   32     
176    -128   
-176   -80    
160    112    
64     176    
-64    96     
-16    -112   
96     0      
-272   -80    
208    16     
-144   -192   
16     -240   
64     16     
80     -352   
48     -96    
-384   -144   
-32    -192   
80     96     
160    -64    
-32    48     
64     96     
-80    32     
128    -64    
-256   -208   
-32    -144   
160    176    
112    -96    
-96    -112   
80     -256   
64     64     
32     64     
48     -32    
0      64     
64     -16    
-80    -128   
288    176    
-64    96     
-48    -64    
-32    48     
192    160    
-48    144    
-976   -240   
16     -32    
-1136  -112   
-272   0      
304    64     
-544   48     
-320   -112   
304    560    
-48    160    
16     -144   
-192   0      
128    144    
-112   -16    
-112   -96    
-304   -384   
-384   -384   
-16    128    
96     96     
-48    48     
-48    16     
-64    48     
128    336    
-1328  -288   
112    0      
0      128    
-304   -112   
16     -192   
48     176    
-48    -96    
-16    16     
16     -64    
-128   0      
272    496    
-368   -96    
-48    144    
-304   -304   
192    176    
-176   0      
144    32     
-816   -96    
-160   96     
-160   -256   
96     112    
96     32     
48     32     
80     16     
-64    0      
32     112    
-96    -16    
48     0      
-112   -80    
32     384    
-176   80     
-144   -96    
-432   -64    
176    -96    
-272   -32    
-96    128    
176    -32    
-80    80     
48     304    
-192   -16    
-32    112    
48     128    
-752   -704   
32     1504   
-448   1824   
-16    -208   
-48    -448   
144    416    
1184   1584   
-2144  -448   
1600   96     
-992   -176   
400    -176   
48     -208   
-240   400    
240    192    
-128   96     
32     -128   
-176   80     
-48    -64    
0      352    
-192   80     
16     208    
-80    -112   
-80    -112   
80     -128   
128    -16    
-160   -16    
128    224    
-400   160    
192    -48    
-208   -128   
112    80     
-272   0      
-96    -16    
-16    176    
-64    0      
-16    224    
-224   16     
-496   -128   
192    160    
-176   80     
-32    256    
-208   48     
80     80     
-16    -128   
208    16     
-96    224    
80     -32    
192    240    
-256   80     
128    -32    
-400   32     
-16    -128   
96     224    
-48    -96    
144    272    
-112   -32    
48     -272   
-16    320    
208    176    
-64    -416   
208    160    
-32    0      
0      -224   
-32    272    
160    64     
-144   -80    
0      0      
-16    112    
-176   48     
288    48     
-144   32     
16     96     
32     112    
-96    -240   
0      96     
80     96     
-144   192    
144    224    
-848   -304   
-16    -592   
384    176    
-304   32     
-48    -112   
64     48     
-144   -64    
192    80     
160    336    
-272   -128   
-48    -208   
176    368    
16     192    
-16    -112   
-80    -160   
144    0      
128    208    
16     240    
80     576    
-176   -160   
80     16     
32     176    
128    336    
16     96     
-80    80     
-32    160    
48     80     
112    96     
64     288    
-64    112    
240    112    
160    192    
-64    0      
160    352    
96     160    
-16    32     
-64    112    
-48    80     
48     -16    
-16    0      
32     96     
160    128    
-160   32     
160    96     
96     0      
-288   0      
112    96     
-112   16     
80     32     
192    192    
-112   96     
32     -16    
32     64     
0      96     
96     -208   
-48    -16    
160    -64    
192    128    
-208   448    
224    192    
48     96     
-112   -64    
80     272    
-32    -496   
80     96     
80     144    
16     64     
64     0      
-16    128    
96     192    
80     80     
-32    32     
64     96     
-80    128    
96     128    
-64    96     
128    0      
-96    -112   
80     -656   
-48    16     
192    240    
-272   48     
288    32     
-144   256    
64     -32    
224    112    
-48    -96    
-32    304    
-240   32     
144    -160   
240    -240   
224    208    
-112   224    
-96    -864   
32     192    
64     160    
-96    64     
64     32     
112    48     
128    160    
-144   0      
112    144    
80     160    
32     -128   
112    192    
-16    176    
0      -96    
272    128    
-128   160    
64     -16    
-112   -464   
160    48     
-16    64     
80     96     
208    64     
-160   80     
192    -224   
-96    144    
0      -80    
144    64     
1712   2704   
-1440  352    
160    448    
208    560    
-48    -96    
-48    -80    
-352   -304   
-176   -1728  
-64    -176   
-240   48     
240    -304   
-368   288    
384    -224   
-112   336    
16     -480   
16     192    
208    -96    
32     272    
-16    -368   
176    208    
-96    -352   
64     48     
-16    -464   
128    32     
-16    -96    
80     16     
0      192    
288    144    
-128   160    
64     -208   
32     144    
208    -144   
80     400    
0      -288   
-48    272    
32     -352   
-32    240    
0      -672   
64     176    
96     16     
96     48     
0      144    
32     96     
16     80     
112    16     
32     176    
192    -80    
-80    80     
96     32     
-64    -80    
304    -352   
-160   224    
176    -944   
-16    192    
-16    -112   
176    128    
0      128    
96     48     
32     96     
-32    -560   
256    -48    
-16    0      
48     112    
112    -128   
48     176    
-16    -128   
192    112    
16     -160   
-32    112    
80     -352   
16     16     
48     0      
32     144    
0      -192   
80     -144   
-16    48     
128    16     
-96    -16    
144    -160   
48     -48    
-16    -32    
32     224    
-32    -16    
64     -96    
192    -192   
80     -672   
-64    -144   
32     -448   
-256   -432   
352    -64    
0      -992   
0      -144   
176    -2960  
-32    -240   
64     -176   
-144   -192   
224    208    
-32    -128   
16     -320   
-16    256    
432    32     
-368   112    
64     -32    
-64    48     
-320   -80    
176    -80    
48     -96    
-16    -272   
80     -208   
288    -96    
-16    -352   
-64    -176   
-128   -112   
160    -256   
96     0      
-96    -112   
32     96     
128    144    
-64    -128   
-1152  -256   
256    -480   
16     -16    
48     16     
192    32     
-32    -800   
112    144    
32     -1184  
96     -96    
-64    512    
192    -16    
-80    32     
-16    -16    
-208   -16    
80     -96    
-352   112    
0      -48    
64     -32    
128    -96    
144    160    
-256   -560   
224    -352   
176    320    
160    352    
-240   0      
144    0      
-160   -640   
304    -16    
128    0      
-16    112    
-48    112    
0      -32    
-288   -96    
112    0      
48     -80    
0      -144   
560    224    
-304   -160   
272    -336   
32     64     
-32    48     
144    -144   
-208   16     
256    48     
16     112    
128    80     
-128   -96    
160    -112   
32     160    
-416   -32    
192    -144   
-16    112    
0      -448   
96     272    
-224   -240   
320    -112   
-304   96     
80     -288   
16     144    
-144   -128   
48     -96    
-80    -96    
-144   128    
0      -112   
-48    64     
48     -144   
-1136  -192   
176    -304   
96     192    
96     -496   
-96    144    
-80    -32    
32     -16    
-224   64     
96     -64    
-144   -80    
80     96     
-48    48     
128    80     
1856   -1136  
-656   -1488  
992    992    
-304   848    
1056   -112   
-1056  -528   
672    -480   
-160   1040   
-384   80     
16     -400   
-192   -240   
304    272    
-128   64     
48     -240   
-48    -272   
-672   112    
-32    -32    
368    160    
-240   128    
400    -224   
-32    -480   
-80    -464   
16     496    
-256   128    
80     192    
-32    -352   
112    496    
48     -352   
-16    272    
-176   -256   
32     96     
-208   -112   
0      96     
-1328  -192   
-32    -32    
160    256    
-240   -48    
-16    32     
-336   -272   
384    288    
-832   -80    
-96    -32    
224    128    
-16    128    
-64    -64    
144    0      
-432   48     
-64    336    
-272   -288   
-16    -208   
-48    -32    
-160   32     
32     160    
-112   -272   
-32    112    
-960   -144   
-256   -240   
32     -96    
144    48     
-224   -576   
160    160    
-64    -144   
208    32     
-208   -208   
96     -96    
128    224    
-128   32     
-48    -32    
-176   -416   
-80    272    
-96    0      
112    160    
-1264  32     
-48    -112   
-144   -272   
64     48     
96     240    
-48    288    
208    368    
144    256    
-288   80     
-144   -80    
-32    272    
-48    -48    
48     112    
-240   -160   
144    80     
-128   -48    
16     16     
176    96     
-192   16     
64     -48    
48     112    
128    16     
-208   -32    
32     144    
112    0      
32     64     
-80    -144   
-16    32     
-176   48     
-16    32     
-176   -32    
64     128    
-1168  -112   
-48    -48    
-160   -560   
64     -112   
272    368    
-208   -48    
-32    160    
-16    112    
64     0      
64     176    
-208   -224   
-64    16     
-192   0      
112    -48    
-32    80     
-496   160    
176    320    
0      32     
-112   48     
0      32     
208    -144   
-32    176    
-80    32     
144    144    
-208   64     
208    64     
-64    80     
208    192    
-176   128    
384    272    
-608   -64    
128    48     
-496   -48    
288    80     
-16    272    
96     32     
-16    112    
-144   32     
64     16     
-112   32     
176    112    
-16    112    
-64    144    
-128   -48    
48     192    
-272   -32    
176    112    
-48    16     
-48    48     
-32    96     
-32    48     
-48    -80    
32     112    
80     -144   
-16    176    
-80    176    
-112   -176   
0      128    
-160   32     
112    96     
-112   -112   
48     160    
32     96     
128    32     
-80    112    
0      80     
32     48     
48     128    
160    464    
-320   -64    
48     -32    
16     -16    
144    80     
-80    64     
80     128    
-208   176    
32     -80    
64     144    
32     0      
0      112    
32     128    
64     256    
-128   128    
0      16     
-32    32     
16     32     
32     16     
64     64     
-32    144    
-16    -32    
144    192    
-192   80     
128    112    
-64    64     
1808   704    
384    528    
1376   -992   
-736   -672   
928    -1440  
-544   -224   
528    320    
-128   800    
144    -832   
-256   288    
336    -80    
192    656    
-464   -272   
224    160    
-96    192    
224    -160   
-192   256    
240    -96    
-144   224    
160    -240   
-112   224    
224    48     
-48    336    
0      -320   
-96    224    
16     -352   
192    368    
0      144    
128    208    
-96    -128   
-32    208    
112    64     
96     96     
-64    0      
32     112    
80     -32    
96     144    
-32    -16    
80     144    
-96    -16    
64     -272   
0      144    
112    32     
-112   64     
48     -32    
-48    192    
32     64     
192    208    
-48    0      
0      144    
-128   -16    
192    96     
-64    -144   
64     128    
-96    -48    
16     -1792  
48     96     
128    -16    
32     176    
-64    144    
80     144    
32     48     
48     80     
0      160    
-80    96     
64     64     
80     64     
-16    64     
-16    112    
48     96     
48     -272   
64     96     
48     -48    
96     96     
96     208    
-144   -64    
32     208    
-208   160    
224    0      
80     176    
-256   -448   
80     -64    
-224   32     
16     -288   
128    80     
-112   -240   
144    32     
96     -976   
-48    96     
176    160    
-64    128    
112    80     
48     0      
16     -176   
144    80     
224    496    
80     128    
-64    -144   
-128   -400   
160    80     
160    -48    
16     224    
-32    -240   
16     80     
16     48     
144    64     
48     -64    
0      -32    
16     96     
48     32     
-32    -80    
16     16     
112    80     
144    80     
0      128    
-80    -352   
16     64     
144    -64    
224    192    
-176   -688   
16     144    
32     32     
192    48     
-64    192    
112    144    
112    80     
-176   128    
80     304    
192    32     
-80    16     
-32    -320   
64     -32    
192    -256   
0      240    
32     -144   
64     128    
-96    -400   
64     48     
-32    16     
80     80     
32     192    
-80    -128   
160    -112   
-48    -192   
80     144    
16     -192   
-64    160    
144    -240   
64     192    
32     -368   
-16    96     
16     32     
128    208    
48     -32    
16     144    
176    -32    
-224   -1008  
176    -128   
240    48     
-112   144    
144    -80    
-80    80     
64     -48    
128    96     
-112   -224   
-80    224    
48     -144   
80     160    
-112   368    
-48    -400   
160    304    
-144   -144   
480    144    
-192   32     
48     80     
-48    -272   
-64    224    
-48    -416   
160    96     
16     -16    
160    80     
-64    96     
96     -704   
64     16     
-144   -384   
16     -224   
208    -32    
-112   -192   
224    -160   
-80    -784   
-48    -96    
208    448    
-16    112    
-32    160    
-144   -144   
224    -528   
0      80     
-240   -880   
-528   2080   
-352   464    
-48    -208   
-432   -688   
816    112    
-144   416    
-112   96     
384    560    
256    -368   
-528   -32    
480    -336   
64     256    
-32    -832   
160    384    
-48    -144   
272    400    
-672   -576   
288    -448   
-608   -512   
336    128    
-368   160    
80     -80    
256    -80    
-112   -352   
16     -432   
240    -320   
-32    160    
208    0      
0      352    
16     -48    
192    80     
-224   -288   
128    -64    
-416   -64    
272    -112   
-32    -176   
304    -288   
-32    -128   
96     -144   
96     -208   
-16    -1312  
80     224    
-80    -176   
112    0      
48     -160   
256    -64    
-208   128    
112    -240   
-272   128    
0      -144   
-240   -32    
-48    -176   
176    320    
-208   -80    
80     48     
32     -64    
-64    48     
224    32     
-96    -336   
48     -192   
16     256    
-192   224    
112    -208   
-80    80     
-80    112    
-128   -96    
-176   -176   
-800   16     
-48    -192   
176    16     
16     -400   
48     96     
128    -880   
-48    32     
80     0      
144    96     
-80    496    
0      112    
-224   -160   
-64    -32    
48     -208   
240    32     
-288   480    
16     16     
176    96     
-32    -256   
144    48     
16     -464   
96     -80    
144    96     
-48    -112   
-512   96     
16     32     
64     128    
16     -96    
-144   48     
144    16     
-144   0      
-80    -320   
48     16     
160    -96    
-48    64     
80     -272   
-32    -96    
-240   480    
32     -112   
-96    -368   
-192   -112   
48     -160   
112    64     
-128   32     
0      -96    
-224   -48    
48     -272   
160    288    
240    -192   
-160   48     
-32    16     
-544   0      
-272   -208   
-32    -160   
128    32     
96     0      
-48    -16    
-16    192    
112    64     
0      192    
-112   160    
-640   0      
-96    160    
-672   -224   
288    320    
-80    80     
-288   0      
-240   -32    
-352   -80    
128    32     
-1408  112    
48     -96    
48     -112   
-240   64     
16     -32    
-48    -192   
-320   -240   
-64    48     
208    -256   
-64    64     
-64    96     
-80    32     
-16    16     
-240   16     
-48    16     
-752   0      
-240   0      
96     96     
16     80     
48     -304   
-64    160    
-304   -240   
176    16     
-272   -48    
112    -80    
0      96     
-64    64     
112    112    
-48    112    
-160   48     
32     80     
176    -64    
-384   160    
-160   96     
-64    48     
-16    256    
-256   -160   
480    160    
64     128    
-224   -80    
112    0      
-272   160    
-64    32     
0      -64    
144    96     
-80    128    
-128   208    
-528   -112   
160    144    
-16    -192   
128    192    
-112   80     
0      80     
80     16     
-112   -80    
80     112    
-176   32     
160    64     
-32    64     
96     224    
1184   3712   
-1504  576    
-1376  -944   
-96    960    
-736   -720   
256    656    
-800   -160   
432    368    
256    -208   
-192   -288   
-64    272    
32     -16    
96     80     
0      -16    
64     0      
-96    0      
-16    32     
16     208    
32     -16    
-160   -80    
-128   80     
48     -32    
0      192    
48     192    
48     16     
-64    -48    
-96    -80    
80     112    
-144   16     
32     64     
-32    64     
32     48     
-112   96     
16     128    
-256   -48    
48     48     
0      240    
0      176    
-96    64     
0      -16    
-96    -16    
32     48     
-32    48     
-144   0      
32     64     
-48    -16    
80     176    
-160   0      
160    48     
-368   -64    
80     96     
112    272    
-80    224    
-32    96     
96     144    
48     -112   
16     112    
-32    160    
144    144    
112    160    
-176   -32    
112    160    
-96    -96    
80     128    
-16    -48    
-96    96     
48     32     
-16    64     
-176   -160   
32     48     
-32    144    
80     80     
0      32     
16     48     
-32    32     
-64    -64    
144    80     
-64    -64    
144    96     
-16    576    
-336   -160   
192    240    
-128   -48    
240    96     
-176   -48    
64     16     
208    496    
-48    96     
-96    32     
80     112    
-16    0      
112    320    
-96    128    
48     144    
48     16     
-16    32     
208    -16    
-96    -224   
16     -64    
64     272    
96     112    
-96    -64    
-160   -80    
176    128    
160    112    
-48    48     
48     144    
-32    48     
80     160    
16     96     
0      64     
112    112    
16     128    
16     16     
-16    48     
-64    16     
160    96     
-16    96     
16     80     
16     80     
64     160    
32     112    
-96    -48    
-112   144    
160    176    
80     32     
128    160    
-208   384    
192    336    
-16    -112   
-48    144    
-32    16     
240    16     
-128   48     
96     224    
-208   -288   
224    160    
-192   48     
240    -368   
48     192    
-176   16     
208    32     
-112   80     
192    144    
-16    48     
16     176    
96     416    
-80    -48    
160    16     
0      112    
48     -32    
-16    64     
-32    144    
-48    -512   
208    0      
-112   144    
96     16     
208    176    
-128   144    
256    0      
-128   144    
112    64     
-96    128    
-96    -160   
144    176    
-112   -96    
256    112    
-112   176    
16     -480   
32     16     
16     32     
96     160    
64     64     
128    160    
64     -48    
96     144    
-160   -128   
192    48     
96     128    
-48    160    
-80    -112   
32     -320   
48     208    
32     -688   
-48    144    
128    -1072  
96     128    
32     128    
-32    112    
16     112    
48     64     
368    -64    
-48    224    
32     -112   
-192   192    
16     -80    
128    -16    
-16    224    
2000   -1456  
448    1264   
-1264  -1216  
-320   -688   
64     912    
48     -448   
-48    400    
432    48     
-464   -384   
144    -448   
352    544    
-304   -96    
-16    -160   
160    224    
-32    -16    
48     16     
32     112    
-16    -288   
32     80     
160    -560   
0      160    
144    144    
96     -48    
176    272    
-32    240    
32     -16    
-176   144    
224    32     
0      32     
64     -224   
112    -144   
48     64     
176    -208   
-128   176    
96     -352   
48     -112   
128    192    
0      160    
128    64     
32     64     
32     112    
32     96     
80     64     
-80    -816   
240    16     
48     -16    
64     128    
-32    -192   
144    144    
-144   -144   
224    32     
48     128    
-32    160    
160    -96    
0      240    
-32    16     
144    -480   
16     48     
32     -240   
96     224    
-16    -32    
144    128    
-176   -384   
160    80     
80     -448   
0      144    
-80    64     
96     -144   
-64    96     
16     -3024  
128    -144   
0      -240   
192    224    
0      -16    
16     112    
64     -192   
304    192    
-32    -16    
128    64     
80     -128   
-144   -464   
64     112    
160    -624   
-128   160    
-608   -160   
384    -96    
-384   160    
176    -336   
272    -160   
-96    -832   
80     -16    
16     16     
112    64     
-16    160    
128    -96    
160    208    
-208   96     
288    -352   
-64    32     
-464   -176   
176    -32    
-160   128    
0      -208   
64     -288   
64     -1568  
96     -64    
128    -848   
32     48     
32     -32    
48     -160   
16     -176   
-48    48     
-96    -272   
16     -208   
-160   -96    
240    112    
-208   -48    
-64    -96    
-96    -80    
-64    -432   
144    -160   
0      -224   
320    -48    
80     -448   
16     224    
-272   176    
448    416    
-160   -112   
128    -16    
48     -48    
80     16     
-80    -96    
-16    -48    
304    80     
240    80     
16     -112   
-144   -304   
-320   128    
288    -16    
-160   128    
-112   32     
112    144    
80     -240   
144    -208   
-320   -192   
128    -80    
-112   -240   
16     -144   
-416   16     
112    -240   
-160   -80    
64     -352   
48     160    
96     -736   
-80    128    
48     -16    
-80    96     
32     -368   
96     -64    
-32    192    
32     -64    
-208   64     
96     -48    
-560   -80    
-80    -576   
-400   -320   
160    -208   
128    96     
-128   -352   
-80    256    
64     -448   
128    352    
-80    -16    
112    304    
224    16     
176    -64    
-240   -176   
-32    -32    
-160   96     
96     -192   
0      304    
144    -288   
64     64     
144    -720   
-32    208    
96     -1744  
-32    160    
-32    -48    
160    112    
-304   -16    
64     -112   
-128   144    
-144   32     
64     48     
0      -64    
-160   -64    
48     -144   
-656   -3392  
752    112    
-1120  96     
-96    -544   
48     -640   
-240   624    
-736   -144   
592    320    
-464   192    
784    -160   
-256   400    
-240   -144   
368    464    
-528   -480   
240    240    
-192   -80    
16     16     
-144   48     
112    80     
-1056  -192   
32     -32    
-272   -176   
208    -320   
0      336    
240    -64    
176    -432   
-160   80     
16     -80    
-32    -112   
-128   -48    
208    80     
-96    -48    
-128   -64    
-80    32     
-432   -128   
-32    112    
-192   16     
48     96     
-1440  -16    
-112   -32    
112    -32    
-144   80     
112    -48    
32     160    
-272   -96    
-16    112    
-176   -400   
-64    48     
0      80     
-48    -48    
-32    -80    
48     144    
-32    176    
-416   -16    
-64    -48    
48     32     
64     80     
-320   -192   
-128   -128   
-128   -272   
48     112    
32     -32    
-144   16     
64     112    
-16    16     
-224   -64    
-32    -128   
-32    64     
-336   -48    
32     80     
-64    80     
48     112    
16     -144   
-64    48     
128    -272   
96     64     
-16    64     
-112   -96    
96     96     
-80    0      
96     -64    
-208   128    
-80    -48    
16     16     
-208   -48    
-1040  -144   
0      64     
-112   -176   
-32    80     
16     -16    
48     80     
-32    64     
-32    80     
-32    16     
-32    112    
-16    64     
16     -96    
-32    -16    
48     144    
-48    32     
-48    -16    
-64    0      
-480   -48    
144    128    
-96    -32    
-16    48     
-176   0      
160    112    
-128   48     
96     112    
-112   80     
48     32     
16     112    
-96    0      
-48    0      
-80    -32    
160    256    
-576   -144   
-16    16     
-96    128    
128    64     
-16    -48    
-128   176    
64     128    
128    16     
-240   160    
128    528    
-192   288    
32     -240   
-64    144    
-160   -176   
256    96     
-656   -112   
256    96     
-32    80     
-64    128    
-16    80     
128    112    
-16    -48    
32     144    
-64    -32    
80     208    
-176   96     
192    32     
32     112    
-208   -144   
240    128    
-80    352    
-64    256    
-144   -112   
96     16     
128    -32    
-32    160    
-32    32     
-112   -48    
64     16     
64     224    
96     -64    
-144   -48    
160    192    
-80    48     
-32    352    
-288   -32    
80     128    
0      -80    
144    112    
-96    368    
-176   80     
-48    -112   
256    -112   
384    208    
-32    144    
-240   224    
-96    -32    
64     112    
-48    -48    
240    176    
48     288    
-32    -16    
-112   -112   
-48    96     
208    -112   
-80    160    
160    96     
-32    144    
-112   112    
80     16     
-16    192    
32     -112   
16     144    
-16    48     
-32    -64    
176    208    
-16    224    
80     208    
-112   240    
112    -128   
-16    80     
1984   -1536  
-176   -208   
1184   288    
-80    1120   
32     80     
-416   -960   
64     -16    
336    16     
-336   48     
176    0      
64     240    
192    -64    
160    512    
-80    -144   
0      128    
-64    48     
-16    64     
96     -208   
32     96     
-112   0      
96     32     
16     160    
-144   -16    
128    304    
-64    -64    
64     128    
-48    144    
96     224    
16     16     
-96    -48    
160    0      
48     240    
64     112    
-16    48     
32     96     
-16    -128   
160    128    
-32    112    
96     0      
128    160    
16     48     
0      144    
32     80     
160    80     
-80    64     
128    192    
-48    -16    
128    176    
-48    -144   
192    176    
-208   -112   
240    208    
-160   80     
224    -832   
-176   64     
128    -112   
80     96     
-160   192    
192    -16    
16     112    
0      0      
64     112    
16     48     
80     0      
-160   112    
96     -128   
144    48     
-272   -16    
272    -1376  
-96    0      
272    -80    
-80    112    
128    128    
64     128    
0      128    
-16    32     
32     -160   
48     128    
-160   64     
144    64     
32     192    
-64    -16    
160    32     
-64    -560   
304    192    
-272   -96    
192    112    
96     0      
112    192    
-144   208    
208    96     
-128   48     
80     80     
-32    0      
240    304    
-144   144    
64     -176   
48     32     
144    32     
48     80     
-16    -848   
32     128    
48     224    
-16    -32    
48     -128   
48     320    
176    112    
48     48     
-96    -128   
-80    176    
208    112    
0      -32    
-48    -32    
144    0      
0      64     
64     -672   
-80    96     
128    -336   
-16    -96    
-64    16     
272    400    
128    160    
112    176    
-224   80     
144    144    
176    -112   
-368   -144   
64     -128   
32     -224   
32     -16    
96     -144   
112    -32    
-112   -32    
-96    128    
160    16     
208    -64    
-128   16     
-32    112    
192    176    
144    -720   
48     80     
-224   -448   
304    112    
96     -112   
144    224    
-16    -16    
96     560    
-64    -832   
160    0      
0      0      
-32    96     
96     144    
80     112    
96     64     
16     -176   
16     48     
112    32     
-112   -80    
208    352    
144    432    
-112   -432   
144    -32    
64     -208   
160    416    
-112   -64    
16     -352   
256    192    
384    -2320  
0      -240   
-176   -320   
32     -1472  
160    144    
80     112    
-160   96     
160    -48    
192    -48    
-96    240    
-32    -208   
16     -240   
112    -80    
128    -240   
-112   112    
-752   -112   
112    -288   
128    80     
-16    -96    
128    -96    
80     -512   
-48    -400   
64     384    
16     112    
96     -112   
0      -224   
144    -304   
-48    64     
32     -352   
-32    -80    
-144   -48    
304    -848   
368    448    
-32    -304   
-336   -688   
16     208    
464    304    
-192   -672   
144    16     
144    -432   
-224   48     
-64    -368   
160    32     
16     -240   
80     0      
64     -128   
64     -384   
-336   -32    
176    -96    
-128   -16    
176    -48    
288    -16    
-80    -176   
208    -80    
320    704    
-240   112    
64     -32    
144    544    
64     368    
288    80     
-352   -32    
16     -192   
-400   -208   
80     48     
48     16     
80     -128   
0      -64    
32     -624   
-144   128    
240    -336   
-64    160    
-16    -16    
96     -32    
-96    48     
-80    80     
-64    -64    
128    128    
0      -64    
0      -128   
-64    64     
160    -32    
48     -176   
32     -32    
80     144    
192    -224   
-128   112    
96     -288   
144    224    
-112   224    
96     -208   
32     160    
16     -80    
-80    128    
96     80     
-512   32     
64     -112   
-928   32     
48     -80    
112    64     
64     -432   
64     112    
96     -1584  
64     -160   
-80    32     
112    -48    
0      64     
-32    -112   
-688   -224   
256    -336   
-480   96     
-96    -224   
-224   -144   
80     48     
64     240    
16     -272   
16     -48    
0      -1504  
176    -32    
-16    416    
-32    -16    
-208   -224   
112    -32    
-256   0      
80     48     
-128   48     
64     112    
128    64     
144    -64    
32     352    
-16    -288   
112    64     
-192   112    
176    48     
-64    -16    
16     0      
0      -16    
80     -32    
-48    -64    
160    32     
-96    48     
96     -224   
-192   128    
32     -400   
128    128    
-784   -48    
160    64     
-224   -32    
-352   0      
-16    160    
-432   16     
-80    -80    
-32    192    
80     32     
80     -192   
-208   0      
-832   144    
224    32     
-528   528    
144    -320   
-416   -416   
-448   -96    
256    128    
-48    0      
-176   128    
-48    128    
32     128    
-624   -384   
-16    -288   
16     -272   
-128   -672   
96     -48    
-32    352    
128    -176   
-48    176    
0      -112   
0      32     
-32    208    
-96    -16    
112    320    
-256   112    
-192   -64    
-16    -176   
16     32     
-64    0      
192    192    
-144   -48    
96     -80    
-288   -208   
240    464    
16     176    
-288   48     
144    48     
16     256    
-80    0      
-64    -112   
0      64     
-304   112    
-144   -80    
-992   80     
-128   -416   
48     288    
-32    160    
-128   16     
-80    96     
-16    128    
128    336    
-32    144    
-48    -112   
-32    80     
-32    80     
-32    16     
16     128    
-64    -208   
-208   96     
144    48     
-64    -128   
272    320    
-320   256    
0      -16    
48     128    
-144   -192   
192    48     
-272   -144   
112    16     
-112   48     
112    -16    
0      144    
32     -16    
-560   -64    
528    -800   
848    -32    
-496   0      
-192   400    
1008   -880   
-544   272    
-400   -560   
512    576    
-192   96     
-144   -144   
112    48     
-96    -64    
-16    208    
-64    -144   
-96    144    
-96    48     
-624   96     
160    144    
-48    336    
-32    -176   
-112   96     
192    80     
64     176    
16     64     
-64    -16    
-192   48     
240    208    
-112   -32    
160    112    
-304   48     
128    16     
-320   -96    
128    -512   
16     96     
0      80     
144    0      
32     272    
-32    32     
0      -16    
-16    -16    
-128   112    
192    112    
-48    16     
144    112    
-272   16     
64     80     
-272   -48    
-144   -16    
448    160    
-272   144    
240    64     
-176   32     
-16    32     
-64    80     
16     0      
0      -16    
16     32     
-96    48     
80     64     
-208   16     
-112   48     
48     -32    
-16    80     
80     64     
-64    48     
-16    64     
32     -16    
48     192    
-128   64     
240    128    
-96    -32    
80     192    
-256   -112   
208    80     
-80    48     
16     144    
112    -48    
32     -32    
-64    32     
-96    64     
80     96     
16     112    
-64    -96    
96     240    
-192   240    
208    80     
-160   32     
144    144    
-128   64     
112    0      
-32    96     
64     112    
-48    128    
80     144    
16     144    
0      64     
112    0      
-96    112    
16     0      
-32    -96    
80     48     
-80    192    
-32    -64    
48     112    
-144   0      
272    64     
-16    240    
-64    192    
144    48     
-16    -32    
-16    0      
96     112    
80     -16    
-176   -16    
288    208    
-32    64     
-176   112    
48     48     
96     128    
-208   32     
352    192    
-112   160    
0      64     
96     208    
144    352    
32     288    
208    352    
-80    240    
80     128    
48     160    
-16    128    
176    224    
-240   80     
320    32     
16     80     
-32    -944   
144    112    
-16    176    
-64    16     
64     64     
-32    48     
80     80     
112    -16    
-64    80     
48     144    
-16    -224   
-48    16     
176    144    
96     -144   
80     16     
-16    -896   
80     128    
64     192    
-192   -240   
160    -64    
96     192    
32     16     
144    -16    
-176   -64    
272    96     
-64    -176   
400    384    
-112   80     
160    144    
-208   -16    
-176   -624   
208    192    
288    512    
-160   64     
128    32     
48     208    
192    -112   
-96    96     
-16    272    
160    80     
-64    16     
224    480    
-144   96     
32     -272   
-80    16     
144    -464   
-32    160    
-128   -576   
144    -48    
-48    -32    
96     208    
-96    -128   
0      -64    
-64    -128   
144    64     
112    32     
-16    112    
96     80     
-80    -96    
-224   0      
112    -80    
16     32     
-736   -1936  
976    1552   
-816   -240   
608    -304   
-416   -1088  
128    -96    
720    -80    
-80    688    
144    -112   
112    -208   
-192   160    
-48    -256   
384    144    
128    -208   
336    656    
-384   -976   
144    -48    
-112   -288   
32     -336   
272    192    
272    304    
-128   224    
-64    48     
256    288    
-192   -208   
48     352    
-112   208    
176    -16    
-80    80     
96     192    
-112   -448   
-48    176    
-32    32     
-112   32     
-32    -112   
0      -128   
208    -192   
-48    0      
544    224    
-16    -848   
560    144    
-624   -240   
160    96     
-32    -16    
-64    -32    
304    -96    
-48    -128   
240    -816   
80     272    
16     -80    
128    -240   
176    -16    
-80    -16    
48     -96    
96     80     
192    128    
96     -160   
-384   -368   
432    240    
48     -272   
224    48     
-16    144    
160    -448   
-32    464    
-48    128    
160    -688   
0      -16    
-1600  -112   
16     -1184  
-32    -128   
80     -1840  
48     -96    
48     32     
128    -64    
48     192    
48     -128   
240    640    
-144   176    
0      -80    
144    240    
0      -464   
48     -80    
-1088  -48    
32     -176   
32     16     
80     -336   
32     64     
128    128    
-48    -128   
-128   80     
32     -48    
64     -32    
0      64     
64     -240   
224    192    
-96    -544   
240    -16    
-160   -112   
96     -176   
32     0      
48     -64    
160    -48    
-80    -304   
96     48     
80     288    
0      64     
16     176    
128    128    
48     -304   
0      -336   
-16    -112   
192    64     
128    64     
-48    -48    
-672   0      
144    -480   
160    -112   
-64    -480   
160    80     
0      -416   
16     -128   
48     -608   
-176   96     
48     -208   
64     528    
144    -48    
-96    -352   
32     96     
128    528    
64     -304   
-16    -48    
-80    -176   
272    144    
-16    -32    
-32    -592   
176    -32    
-32    -464   
112    240    
320    80     
-288   -32    
176    32     
-16    -144   
-96    0      
112    80     
-208   144    
192    208    
-224   -64    
112    -192   
-320   80     
208    -416   
0      96     
-16    -352   
48     32     
96     144    
368    176    
-496   -144   
304    -32    
-240   144    
-48    256    
0      -208   
-64    -64    
-208   0      
-16    -64    
-1904  32     
144    -224   
64     144    
80     -432   
16     160    
96     -992   
80     -176   
176    -80    
-48    -48    
-160   -64    
96     -80    
-304   144    
-32    -128   
0      48     
192    48     
-128   128    
48     -224   
144    128    
48     -384   
208    64     
-336   16     
48     -112   
-560   320    
176    -128   
-128   208    
16     -176   
144    16     
64     -144   
16     -32    
-16    208    
-192   32     
192    -320   
64     176    
96     -448   
128    32     
2448   1344   
-1392  -240   
-16    -288   
96     -176   
-256   -192   
752    208    
-480   -384   
112    848    
-112   -192   
-32    -448   
-576   112    
0      -144   
256    32     
-1392  -80    
96     -16    
-80    -16    
-560   -48    
0      0      
-592   16     
-48    -16    
-48    16     
32     48     
-32    256    
32     -64    
-528   -144   
112    16     
-480   0      
160    112    
-192   -64    
208    -112   
-128   64     
-304   80     
-16    144    
-336   -96    
80     176    
80     -256   
-16    112    
-64    16     
160    80     
-160   -208   
-16    64     
64     0      
112    96     
-80    -32    
-160   -48    
-96    112    
-64    -32    
-128   112    
-304   112    
96     -144   
-480   -16    
-96    160    
96     -160   
16     144    
-112   -48    
96     160    
-96    -304   
96     112    
-96    32     
96     80     
-48    32     
32     144    
80     16     
-96    240    
-208   32     
-48    -128   
16     112    
-320   -16    
0      144    
-32    32     
80     16     
0      -224   
-48    96     
-32    128    
0      -16    
144    304    
-288   16     
144    -160   
-112   0      
-192   176    
32     112    
48     0      
-128   16     
0      256    
-16    -256   
288    112    
-112   96     
160    16     
80     0      
-32    96     
-144   0      
64     112    
-32    16     
-64    48     
208    304    
-384   -48    
96     -64    
-592   -288   
-64    -96    
112    -144   
96     192    
-32    48     
0      32     
128    160    
-352   64     
112    0      
-48    48     
-48    64     
-48    -128   
-32    48     
0      32     
96     -16    
-240   -48    
160    176    
-384   16     
48     64     
64     144    
-48    0      
192    160    
-368   -192   
-224   272    
48     224    
160    -32    
-144   -160   
-32    64     
-336   -224   
192    -64    
-336   -16    
240    32     
-208   -64    
112    32     
-112   -144   
-192   224    
80     -32    
192    272    
-208   208    
384    336    
-224   -16    
-80    -192   
-224   160    
96     -64    
144    64     
-240   -112   
112    -16    
-224   0      
-176   -224   
192    528    
144    560    
-176   -176   
144    80     
-64    32     
0      144    
64     112    
48     -112   
80     -368   
32     32     
-96    16     
-128   -48    
48     752    
32     176    
-112   64     
80     -48    
48     -48    
0      128    
-176   96     
240    -448   
224    48     
-208   336    
-48    16     
-96    16     
288    32     
0      80     
-144   144    
-240   224    
80     48     
96     -16    
0      32     
128    160    
-208   192    
-128   -48    
128    48     
128    16     
192    224    
-336   0      
-64    -176   
32     64     
96     288    
-96    16     
-64    144    
64     -32    
80     80     
-80    48     
112    192    
-224   128    
96     -80    
208    208    
80     16     
0      80     
960    560    
-912   -1312  
1072   1024   
16     656    
1024   -576   
-1424  -480   
688    112    
-1008  -320   
896    -32    
-416   1040   
496    -528   
-320   128    
-160   128    
624    144    
-384   -96    
240    400    
96     80     
192    368    
-192   32     
432    -80    
-80    304    
128    80     
-32    192    
96     32     
80     320    
-80    240    
-304   304    
112    -416   
128    352    
-176   0      
208    176    
-384   176    
-80    128    
64     208    
-32    -96    
-64    -368   
-48    -16    
-224   128    
352    -80    
-48    256    
96     272    
-144   240    
160    -16    
-176   288    
32     48     
-80    80     
336    256    
-48    192    
96     -160   
-16    144    
-64    -496   
160    240    
80     272    
96     32     
-176   -48    
176    304    
0      176    
32     -224   
96     320    
32     16     
-32    48     
16     32     
16     240    
-32    -496   
-128   64     
176    -176   
-112   80     
160    16     
-128   160    
80     96     
96     80     
-32    -16    
64     144    
-80    -416   
64     32     
48     16     
-64    -192   
-96    -64    
-224   -352   
-336   -1024  
592    -48    
-176   48     
64     -2096  
32     224    
160    288    
-32    -256   
-48    144    
16     -32    
320    304    
-96    112    
-32    144    
96     -16    
96     112    
32     -176   
-48    -128   
0      -128   
-48    -80    
128    -368   
208    176    
32     -208   
64     336    
-80    80     
80     -16    
144    80     
-80    192    
16     192    
32     -192   
-96    -112   
-112   -560   
-16    -96    
288    144    
256    240    
-256   -1344  
64     144    
64     -592   
16     -32    
-80    160    
-48    -320   
256    176    
64     336    
128    176    
96     96     
48     -16    
-240   32     
560    368    
-256   80     
176    336    
96     80     
-144   64     
176    96     
64     128    
384    288    
-96    320    
272    176    
-144   32     
80     -16    
-144   -160   
208    0      
208    80     
-80    48     
96     -192   
0      -16    
-112   -48    
32     64     
176    16     
-80    48     
112    272    
-32    0      
96     208    
-96    32     
256    96     
-64    -240   
64     176    
176    -320   
16     112    
32     -80    
80     192    
176    -352   
-32    304    
-256   -352   
176    48     
-16    -16    
176    -1552  
0      176    
112    48     
-288   -448   
256    -432   
160    528    
-96    -192   
176    48     
-112   32     
176    224    
-208   -272   
224    -48    
192    -96    
48     -384   
-48    176    
-48    -272   
80     -96    
-704   -80    
-96    -496   
96     -32    
-16    -32    
64     64     
-32    -736   
-16    -144   
80     80     
96     -48    
64     -128   
32     160    
64     -176   
-48    0      
96     -128   
-80    -144   
-336   0      
48     32     
80     -160   
96     -48    
-96    -480   
112    -1600  
-224   -432   
-192   -288   
1456   -432   
-944   -592   
144    -112   
656    448    
-160   176    
-288   48     
464    -448   
-288   528    
16     -464   
-1648  352    
80     -304   
208    112    
-144   48     
96     64     
16     -400   
32     -64    
16     -320   
96     128    
-48    -144   
192    -128   
-304   -112   
192    -288   
16     480    
416    -144   
-608   -64    
32     -128   
80     -16    
224    -16    
112    288    
144    -720   
-144   80     
176    -608   
-48    304    
80     -80    
-48    16     
80     48     
16     -208   
-224   -176   
-32    -320   
-288   -96    
64     48     
-432   32     
144    -144   
-80    160    
-144   -448   
208    16     
-32    -608   
0      64     
96     -64    
32     16     
-128   -48    
128    -160   
-96    -16    
80     112    
-48    -32    
192    64     
-432   -144   
32     -64    
0      -192   
128    -176   
-80    176    
48     -240   
128    48     
32     -48    
192    -224   
-208   176    
0      -80    
128    144    
48     -160   
0      112    
-112   -80    
-96    -16    
160    80     
-112   32     
320    -288   
-112   208    
80     -528   
64     32     
-112   80     
-160   -16    
-208   160    
-48    -96    
-176   -272   
288    352    
-336   48     
160    -80    
-64    64     
48     208    
144    16     
64     -224   
176    288    
48     -224   
0      32     
16     32     
0      80     
-80    -160   
304    176    
128    48     
64     16     
-224   96     
160    0      
-32    16     
48     16     
-448   112    
-1808  -192   
112    256    
-784   -80    
-560   32     
-64    80     
-64    48     
64     144    
-1104  144    
-32    96     
80     176    
-48    80     
336    80     
-160   -16    
-608   -288   
-48    112    
-128   -272   
224    48     
-64    112    
32     128    
-112   64     
-496   -368   
-384   -176   
-336   -128   
-64    192    
-48    96     
-64    -80    
-112   -80    
-112   -96    
16     -288   
144    224    
-240   -288   
224    144    
-144   80     
-112   -64    
0      -80    
0      16     
-64    176    
32     -144   
-96    -32    
-288   64     
-80    16     
-16    32     
16     48     
80     48     
128    80     
-192   -144   
-112   48     
-48    -16    
0      48     
-96    112    
112    -96    
-32    160    
-224   0      
16     96     
-736   -224   
32     96     
-976   96     
-16    32     
-32    -112   
176    224    
-128   -288   
128    16     
-176   160    
112    -32    
-32    128    
-240   16     
128    -32    
-64    96     
-160   96     
-240   -32    
0      16     
-48    128    
128    96     
-224   -272   
32     112    
192    -448   
-256   -16    
64     48     
-240   128    
64     -16    
-144   160    
-208   32     
176    32     
-192   192    
416    -240   
-224   112    
-176   -192   
160    256    
-112   -48    
-832   -1040  
1248   1488   
-208   256    
912    -544   
-864   -208   
432    -80    
-416   688    
160    -320   
208    592    
-432   -560   
272    -16    
-464   -32    
320    160    
16     -176   
-96    256    
-32    -144   
16     240    
-128   32     
0      288    
-48    -64    
256    288    
-224   -16    
80     240    
48     160    
-224   -32    
-464   -208   
64     32     
-160   80     
208    -64    
-160   144    
-80    -272   
-112   144    
16     176    
288    48     
-80    0      
-16    48     
48     48     
336    208    
-672   -544   
160    -48    
256    304    
-192   176    
64     -48    
240    -240   
-64    16     
-48    112    
64     208    
-160   -272   
64     -112   
-32    -160   
80     -16    
-176   48     
112    96     
32     240    
32     240    
-160   0      
112    176    
-208   -16    
160    48     
176    112    
80     80     
16     80     
112    64     
-32    288    
-208   64     
-16    80     
-64    32     
32     -96    
48     160    
64     112    
-16    0      
32     112    
-80    -96    
-16    -16    
128    128    
96     128    
48     144    
-96    96     
64     48     
176    48     
-320   208    
-80    128    
192    64     
32     400    
-32    128    
-304   -256   
-16    192    
-112   -80    
368    512    
-208   128    
-64    32     
-32    80     
176    96     
-144   160    
48     -96    
144    304    
-48    -224   
176    -224   
-16    32     
128    112    
176    320    
-112   112    
16     144    
-80    -48    
64     0      
-16    112    
16     112    
208    112    
16     -16    
-64    32     
80     48     
-64    208    
144    128    
-192   128    
160    80     
-64    112    
0      32     
32     -64    
32     -128   
112    240    
208    448    
96     256    
208    208    
-320   32     
48     -16    
144    160    
-240   176    
416    192    
-192   16     
-96    128    
-80    64     
144    -32    
32     192    
32     224    
224    96     
-32    -32    
-208   16     
0      144    
208    80     
160    16     
-176   112    
32     32     
80     128    
-48    128    
144    32     
-160   -32    
16     -144   
32     304    
208    -752   
-16    144    
-80    32     
208    32     
-64    112    
64     192    
-48    64     
160    160    
-144   192    
128    48     
16     48     
-32    176    
96     80     
64     -144   
64     80     
80     -32    
-80    -64    
160    192    
-96    96     
160    48     
240    288    
-304   -16    
-64    160    
32     -272   
208    -32    
96     48     
-176   112    
320    144    
-48    16     
112    320    
-272   -80    
96     64     
224    -528   
80     160    
32     96     
-48    208    
112    -320   
64     32     
0      32     
240    64     
-64    144    
-32    0      
48     96     
48     -240   
160    64     
-144   -160   
64     48     
128    -128   
0      96     
176    -272   
-928   976    
224    1104   
-1632  -400   
240    256    
288    384    
-400   -784   
368    752    
-528   -640   
704    256    
-256   -640   
128    -96    
-96    48     
496    -640   
-80    352    
176    -1584  
-192   288    
352    -96    
-112   288    
80     -256   
48     368    
128    -32    
0      -32    
112    128    
64     80     
144    -208   
-48    -240   
80     -64    
-16    -208   
144    144    
32     96     
64     80     
-48    32     
64     160    
0      64     
48     128    
144    32     
-176   -224   
192    128    
-144   -160   
336    128    
-32    -240   
-32    48     
-16    -64    
112    128    
112    -1424  
48     32     
-80    96     
64     160    
128    304    
-16    -192   
208    64     
-112   -48    
192    -32    
0      -96    
64     -80    
-16    -48    
96     96     
96     -112   
16     224    
32     -64    
32     -2048  
96     208    
16     -640   
96     128    
-320   240    
16     -1424  
96     -208   
0      -336   
96     -80    
112    176    
-32    -48    
80     0      
-32    64     
0      112    
80     -304   
-48    -192   
320    32     
16     -32    
-48    -496   
240    -32    
-128   -208   
320    -16    
176    -528   
-16    -112   
-176   -592   
160    32     
-176   -192   
-128   -464   
96     16     
-80    32     
80     -80    
-80    16     
-16    -272   
160    64     
-160   -96    
64     32     
16     0      
32     -16    
-64    -144   
-16    -272   
48     -112   
64     -1024  
0      -48    
0      -96    
112    160    
64     -224   
112    -64    
-176   -288   
80     -48    
-16    144    
176    0      
-784   32     
32     -160   
176    96     
-16    -560   
128    112    
-32    -240   
80     80     
80     128    
176    224    
112    288    
-128   16     
-240   -176   
96     -16    
-96    160    
240    -176   
-1136  -256   
-240   -144   
144    -208   
96     -128   
-192   48     
208    208    
32     64     
-48    -720   
-32    96     
96     -96    
160    80     
-96    48     
144    0      
-176   16     
112    -48    
-432   -48    
64     -32    
-544   32     
112    -64    
32     32     
-112   -624   
16     -192   
224    -128   
128    192    
64     192    
-16    -112   
-96    48     
256    -32    
160    160    
-224   160    
-160   -96    
160    192    
-80    96     
48     -304   
-816   112    
64     -112   
208    32     
48     -688   
144    128    
-224   -16    
0      -624   
-192   144    
-16    -32    
0      -112   
16     32     
-320   48     
176    -224   
-160   48     
32     -112   
64     16     
160    -160   
-128   48     
224    -480   
-80    32     
-128   96     
96     -32    
-208   -16    
160    48     
-48    64     
-176   -80    
-128   -96    
0      -96    
-384   -16    
112    -160   
-32    192    
112    -208   
16     160    
-80    -368   
256    -144   
32     240    
-160   16     
96     48     
-592   -1664  
-128   -624   
1008   16     
272    208    
128    -112   
-192   400    
-144   288    
-32    -656   
-256   -256   
512    -160   
-16    80     
-624   -64    
192    224    
-320   96     
-144   80     
-192   272    
144    -16    
0      496    
-400   -128   
112    -32    
256    -16    
-864   -368   
208    48     
-224   -64    
32     32     
176    -64    
-240   -80    
128    64     
-32    -48    
-16    144    
-192   48     
-80    144    
-528   48     
32     64     
80     -64    
-32    -16    
-240   -160   
32     144    
-128   48     
256    256    
-80    112    
-176   -48    
0      16     
112    176    
-80    112    
-208   48     
-128   112    
-128   -16    
-64    48     
-432   -144   
32     64     
-16    48     
32     192    
-16    -272   
16     -80    
-112   96     
-32    176    
-208   -64    
240    48     
-176   144    
-80    -48    
48     16     
-496   -16    
48     224    
-496   -128   
208    0      
48     48     
-176   208    
-16    -448   
32     -96    
-64    64     
-16    224    
-32    64     
32     96     
-48    64     
0      -80    
96     16     
-80    -16    
64     32     
-64    48     
-96    96     
112    -96    
-16    -32    
112    192    
-304   176    
240    208    
16     64     
16     0      
-128   -176   
112    64     
-304   32     
48     128    
0      96     
0      80     
-576   -96    
128    240    
-368   -32    
352    112    
-160   -112   
272    304    
-240   -48    
208    128    
-32    80     
-176   -64    
64     -16    
64     144    
-80    96     
-128   -32    
-80    32     
-256   -160   
64     176    
-144   80     
-32    128    
48     64     
-176   -112   
96     144    
48     96     
48     -48    
16     16     
-144   48     
400    432    
64     224    
80     96     
-272   224    
112    -16    
96     224    
-304   64     
80     384    
-96    80     
-16    -32    
-128   80     
160    16     
48     -16    
-352   -144   
-96    -192   
192    64     
-80    128    
176    32     
64     336    
-336   64     
192    48     
0      -48    
-304   80     
304    -16    
-48    -80    
144    80     
192    592    
-192   32     
-64    -128   
-256   48     
96     -48    
96     128    
-144   -48    
80     176    
-32    -224   
-64    -32    
176    -96    
-64    112    
-16    -32    
32     208    
-32    0      
144    -80    
-80    48     
112    128    
64     208    
-208   -16    
160    0      
-144   -176   
32     112    
-48    -48    
16     144    
-96    144    
-48    144    
128    -80    
-48    128    
-48    112    
-112   48     
128    16     
96     80     
16     144    
-32    32     
0      48     
0      -112   
160    240    
-288   32     
128    80     
160    224    
-128   192    
-96    16     
32     -80    
112    16     
32     112    
144    -16    
64     -80    
-80    224    
-112   224    
-48    128    
-48    -176   
-448   -800   
752    208    
1008   80     
256    -480   
608    688    
64     -560   
-48    -512   
864    -544   
-112   368    
-32    -48    
-32    224    
-64    -272   
-64    96     
-112   -48    
416    272    
-80    -64    
-64    192    
-48    -48    
80     80     
16     16     
192    0      
32     288    
-16    144    
-80    96     
-32    -80    
-32    80     
192    96     
48     224    
16     32     
-32    32     
-96    -480   
80     176    
64     80     
32     80     
-16    96     
32     112    
48     112    
-16    48     
-16    64     
48     80     
80     160    
-16    -16    
-96    -288   
32     96     
208    48     
64     -368   
-80    176    
-96    -1616  
64     48     
64     272    
32     -16    
32     160    
-32    80     
64     48     
64     32     
96     -32    
96     208    
-32    16     
96     144    
-176   -208   
-64    -48    
48     -80    
80     -544   
96     368    
-64    32     
80     -48    
160    -48    
32     32     
16     -32    
128    -32    
64     -16    
48     256    
-176   48     
-112   -192   
160    112    
-176   -240   
208    0      
-160   -80    
32     80     
0      -1248  
112    16     
64     -48    
112    272    
48     176    
-64    96     
-96    16     
-32    32     
32     80     
16     -80    
32     160    
48     -208   
80     256    
16     -176   
128    96     
32     -208   
64     128    
48     -192   
-16    32     
16     32     
128    176    
0      96     
48     160    
-64    0      
48     -144   
160    96     
-32    -32    
80     80     
64     -240   
0      48     
96     16     
-64    48     
80     -912   
16     16     
112    160    
-16    80     
80     80     
0      48     
80     -16    
-32    -128   
112    80     
112    -272   
-48    32     
112    32     
-96    -16    
256    96     
-256   -272   
464    -224   
-432   288    
512    64     
-224   -64    
-80    0      
144    -288   
48     -16    
160    208    
-80    0      
240    -304   
-112   208    
32     -416   
224    160    
-16    0      
112    112    
32     -1360  
-32    0      
144    272    
48     80     
32     80     
64     544    
-208   -320   
496    -16    
-304   256    
272    -224   
-64    -96    
64     208    
0      96     
176    32     
-176   64     
320    -224   
304    -240   
-320   304    
64     -432   
32     16     
-16    96     
0      -512   
-64    -208   
80     0      
208    0      
176    -64    
176    0      
-368   96     
272    -304   
0      -304   
352    -16    
-240   48     
112    16     
-48    192    
256    -336   
-192   -144   
144    -112   
48     -16    
32     0      
160    -48    
96     -384   
80     32     
80     -32    
16     -160   
128    -256   
-64    112    
-16    112    
-80    -16    
0      -176   
160    -304   
240    16     
0      16     
400    -272   
-48    160    
-16    -160   
32     -96    
-160   464    
816    1536   
-1488  -1296  
-224   -688   
-240   -32    
720    544    
-208   -320   
-160   -352   
560    384    
-688   544    
496    -240   
-1264  -176   
112    -368   
-112   -144   
128    -992   
-96    16     
240    -816   
-368   -16    
288    48     
-160   16     
48     -144   
-16    96     
-176   32     
160    -80    
0      -48    
272    -128   
-592   -144   
160    48     
0      144    
64     -80    
176    -80    
-112   -144   
128    0      
16     -448   
-64    32     
96     -112   
-48    -352   
224    48     
-16    -32    
48     -64    
-96    -96    
-16    240    
16     -32    
48     -128   
112    32     
-16    96     
128    -256   
0      96     
112    -1712  
0      208    
-48    0      
256    32     
-368   -64    
272    -176   
-176   -48    
-16    48     
-48    32     
-80    -48    
-192   0      
32     -144   
-16    -16    
48     -112   
80     160    
-48    -864   
208    96     
-240   112    
96     192    
144    0      
256    -112   
-96    16     
96     64     
-224   -16    
144    -112   
-336   -80    
80     -192   
-16    96     
176    128    
-112   144    
160    -192   
112    -16    
-240   -80    
160    0      
-240   32     
16     32     
288    -144   
-64    128    
-112   16     
80     -176   
64     224    
-80    -192   
192    144    
-64    -32    
96     -64    
-288   -288   
-144   -80    
32     80     
-48    96     
80     -32    
-16    -16    
-192   -16    
112    -32    
-176   -64    
48     16     
-48    -64    
-384   -80    
0      128    
48     -16    
-128   -64    
-80    32     
-368   112    
80     -16    
-160   128    
-288   -112   
416    128    
-208   16     
224    32     
-16    64     
176    480    
-112   304    
-16    -144   
-288   -64    
-48    -176   
352    176    
160    272    
-288   144    
64     112    
-608   -272   
48     -48    
-560   -192   
32     -80    
320    112    
144    112    
-272   -256   
-224   -112   
-16    -288   
48     96     
96     -48    
-160   16     
112    -144   
-320   -32    
-80    0      
96     240    
-48    -48    
96     320    
-336   128    
0      176    
-208   -32    
-48    -32    
0      64     
-16    -16    
16     128    
-32    -64    
16     32     
-80    -16    
-64    -80    
-64    -64    
0      160    
96     128    
16     -160   
-16    128    
-336   80     
64     -64    
-96    -32    
208    240    
-80    240    
144    192    
-176   -112   
160    32     
-272   0      
-144   -112   
-48    208    
-48    -128   
0      48     
-224   -16    
128    256    
-320   32     
-48    -176   
-624   64     
64     -48    
48     176    
32     96     
176    320    
-272   -32    
-48    80     
-32    32     
112    0      
-224   -144   
-192   -64    
-272   -16    
80     48     
-32    48     
112    80     
-608   -160   
144    224    
-64    -96    
-128   -160   
160    32     
32     96     
-48    416    
352    -672   
1296   960    
112    720    
-832   -128   
-368   -128   
304    1248   
-80    64     
112    -464   
-80    352    
-48    -176   
-336   48     
-608   -192   
448    48     
-384   -16    
320    128    
-304   -176   
-48    176    
96     144    
256    480    
-128   208    
32     208    
-256   -64    
224    96     
-288   -96    
-32    -64    
-144   272    
-128   176    
176    16     
-192   -400   
64     -64    
32     80     
0      352    
-144   224    
112    -48    
-176   64     
16     -64    
-224   16     
176    96     
-256   0      
96     64     
16     272    
32     144    
-64    32     
-16    0      
80     176    
208    144    
-192   -80    
48     -160   
16     64     
-32    64     
80     128    
-64    80     
112    -96    
-176   -16    
-32    16     
48     176    
0      272    
80     336    
64     112    
-208   -80    
16     144    
160    -48    
-192   -32    
160    160    
-192   96     
128    64     
-32    80     
80     96     
-112   0      
48     80     
0      128    
48     96     
16     64     
-32    -32    
16     128    
-32    224    
-144   -176   
-64    -96    
48     32     
0      -48    
96     -32    
-96    224    
16     32     
208    32     
16     80     
-16    160    
144    144    
-224   -288   
144    -224   
224    160    
128    272    
0      224    
-96    -48    
32     48     
64     32     
96     64     
-32    64     
16     176    
32     80     
112    80     
-80    32     
80     160    
16     176    
64     48     
-80    96     
48     160    
0      32     
160    224    
-176   0      
256    112    
-160   80     
48     64     
-80    0      
48     64     
64     112    
0      64     
-80    -80    
32     -48    
32     208    
64     80     
-16    -48    
-128   -32    
160    112    
176    64     
-112   80     
-48    176    
48     0      
128    -272   
64     224    
48     -96    
64     128    
-16    288    
208    64     
-16    112    
96     256    
-192   224    
80     -208   
-48    -96    
-48    0      
64     176    
-16    48     
-64    -32    
112    0      
64     192    
80     -896   
-208   -592   
272    -208   
320    224    
-112   208    
48     272    
-96    80     
48     96     
80     160    
0      96     
-32    -160   
-112   320    
272    -144   
208    720    
-336   192    
96     -416   
-96    -208   
240    112    
16     160    
48     144    
-16    -96    
240    -32    
-80    48     
-256   -352   
-16    -112   
304    16     
176    -96    
176    0      
144    64     
-80    48     
208    -624   
96     96     
32     -2768  
0      224    
32     160    
48     48     
160    16     
-80    16     
-112   48     
80     -16    
32     128    
48     80     
0      160    
128    176    
-144   -224   
128    -80    
128    240    
0      160    
-160   176    
128    64     
-96    -16    
176    -112   
-64    160    
-288   960    
224    2432   
-832   848    
608    -816   
-112   496    
-400   -192   
368    176    
-416   656    
704    -304   
0      -208   
-336   16     
272    -272   
-48    240    
-16    -128   
240    208    
-64    128    
64     160    
0      32     
48     -48    
64     112    
0      -96    
64     176    
-64    -16    
240    -96    
-16    112    
64     -48    
64     96     
-32    176    
80     96     
-64    16     
208    192    
-112   -48    
192    112    
-80    -176   
80     128    
48     -112   
80     400    
48     -144   
64     64     
-16    48     
144    112    
-32    -640   
64     160    
112    128    
-32    -688   
-16    -96    
96     32     
144    352    
0      -16    
144    -352   
-64    -80    
192    32     
-144   -16    
32     -16    
320    -16    
-144   144    
128    -256   
-48    -1296  
-32    16     
144    -1184  
96     -176   
0      32     
160    -32    
64     -128   
16     -1248  
112    -128   
-64    0      
144    -96    
64     144    
48     -208   
160    -400   
-80    80     
144    -192   
-32    48     
192    368    
64     -304   
176    -432   
-48    -400   
-160   -112   
192    -384   
-48    -176   
208    -144   
-144   80     
64     -240   
208    0      
-112   -48    
96     352    
-16    112    
192    64     
-336   -80    
176    -64    
-400   -160   
96     -80    
16     -112   
256    -96    
-96    -80    
64     -368   
64     -176   
-80    -304   
-32    -112   
-16    -128   
-32    80     
112    -64    
-32    0      
-80    144    
48     -32    
-80    -48    
-64    64     
-1008  176    
112    -16    
0      -112   
-16    -320   
32     80     
64     16     
0      -32    
160    112    
112    144    
32     -240   
-16    -160   
-64    -64    
0      -144   
-192   -48    
192    0      
-160   128    
144    144    
160    -240   
80     96     
-16    192    
432    272    
-128   32     
16     -2320  
-64    80     
304    240    
160    160    
-96    176    
-48    -144   
-352   -96    
80     -224   
-352   -96    
160    -160   
-96    -48    
-80    0      
96     48     
160    -864   
-160   -32    
112    -2976  
96     48     
64     -64    
-144   16     
64     -144   
0      -32    
-96    -32    
160    48     
-80    64     
80     -48    
48     16     
-128   -464   
32     96     
-80    -688   
160    304    
176    -224   
-80    -128   
-32    272    
144    -80    
-32    -128   
128    -144   
-16    144    
48     -128   
96     496    
0      -272   
-128   -32    
48     -208   
192    -64    
96     96     
-32    64     
96     -432   
0      -128   
-48    -96    
176    208    
-176   -112   
272    -112   
-160   -368   
-224   64     
-176   -176   
-32    -32    
-400   16     
64     144    
64     208    
64     32     
-64    128    
-1328  -368   
-176   -64    
-48    -48    
96     208    
-144   32     
240    160    
-64    0      
112    -16    
1680   -1760  
576    1040   
640    32     
-688   240    
176    368    
-592   -656   
-688   -384   
624    576    
-272   -160   
-144   -48    
-208   128    
0      144    
-240   -240   
-96    -32    
320    224    
-112   240    
224    144    
-256   -16    
-160   -272   
112    192    
-16    -192   
-96    16     
-96    64     
-96    256    
-16    16     
-192   -32    
-384   -496   
-528   -368   
-112   96     
208    112    
0      96     
-144   0      
48     80     
176    16     
-80    80     
32     -256   
0      80     
112    144    
160    288    
-256   -96    
-16    -80    
-80    0      
-144   80     
-176   192    
272    96     
16     -32    
-192   -176   
64     96     
-112   -16    
-48    64     
160    160    
-304   112    
64     32     
-160   64     
32     64     
-32    0      
-48    -256   
-32    -640   
368    768    
-832   112    
272    96     
-288   16     
128    -80    
0      144    
112    128    
48     16     
-64    -64    
-64    80     
16     80     
-32    48     
-64    0      
16     16     
-96    0      
-112   -32    
-112   48     
128    -80    
-80    448    
-96    336    
144    -96    
-160   16     
288    0      
-48    80     
-16    -32    
-80    144    
48     144    
32     16     
96     80     
16     432    
-112   128    
-96    -80    
48     48     
-176   -48    
160    176    
-176   -48    
0      64     
48     112    
48     112    
0      64     
-80    0      
80     144    
-80    0      
0      48     
-128   64     
160    80     
-160   0      
144    96     
-464   32     
80     48     
-1136  48     
0      0      
112    160    
-80    48     
16     144    
-64    0      
0      112    
-48    48     
-16    -176   
0      -80    
-32    208    
-128   -48    
48     160    
-352   32     
192    304    
-48    -128   
64     -48    
-80    128    
224    80     
-32    160    
-160   -512   
48     0      
16     32     
272    -272   
-256   128    
192    224    
-112   224    
176    336    
-80    336    
-32    -160   
48     128    
-80    -256   
48     64     
-64    48     
112    96     
48     240    
-112   80     
-160   -176   
32     -208   
-80    -128   
176    320    
-208   -16    
112    128    
-80    -16    
-16    -32    
-96    64     
112    -48    
0      -144   
112    96     
-64    -480   
176    944    
-48    16     
-208   -416   
176    32     
-96    112    
80     64     
-208   -160   
176    16     
160    -32    
240    208    
-16    96     
48     0      
64     208    
-144   -48    
32     176    
272    288    
-112   304    
-224   -112   
-16    80     
-256   -288   
112    128    
-128   16     
-32    -48    
-16    128    
288    -192   
64     192    
-48    144    
0      144    
-112   128    
-16    96     
64     128    
0      176    
0      80     
-16    -80    
32     16     
64     160    
80     -32    
-48    -592   
128    160    
16     64     
-640   448    
48     -1296  
-192   608    
128    -288   
848    -448   
-640   -448   
288    752    
-288   112    
304    224    
-512   -560   
480    416    
-176   32     
-112   -368   
-192   112    
528    -64    
-240   192    
16     -16    
112    144    
64     80     
-48    96     
112    16     
-112   80     
128    16     
-160   144    
176    -288   
-112   176    
48     128    
80     -160   
96     32     
-144   64     
0      -128   
-32    144    
144    240    
176    80     
-32    32     
-16    80     
-48    336    
48     -176   
32     96     
64     16     
112    96     
-32    64     
-16    -336   
336    48     
-64    -2304  
-16    112    
32     128    
0      48     
-16    80     
128    32     
16     128    
-48    176    
32     -48    
32     64     
-16    -16    
80     -64    
32     48     
112    -80    
-48    144    
80     -416   
32     80     
-16    176    
48     0      
32     112    
0      160    
0      128    
64     16     
-32    -176   
144    32     
-192   144    
16     -80    
144    80     
112    16     
-16    288    
0      -368   
304    400    
-64    -720   
240    368    
-32    -144   
288    -192   
-48    96     
-176   96     
336    288    
-224   48     
176    -48    
176    -16    
-128   96     
368    -64    
-176   32     
32     -32    
48     64     
32     -1088  
48     -80    
-16    -496   
16     96     
128    272    
-64    -16    
80     32     
112    96     
0      48     
160    -160   
-64    96     
64     -224   
224    336    
32     -208   
32     144    
-176   -416   
144    -32    
-48    32     
128    192    
80     16     
-16    224    
0      64     
192    -96    
-64    48     
80     -144   
16     128    
112    208    
288    304    
112    -32    
-480   32     
416    -96    
-96    80     
-32    160    
128    176    
48     144    
64     32     
-128   -32    
0      64     
96     48     
32     -176   
48     16     
-32    -160   
208    272    
176    -176   
-64    0      
-80    -96    
224    544    
0      -336   
32     -16    
-16    144    
32     -336   
32     -1232  
80     16     
64     -800   
96     -48    
-64    -16    
-16    -192   
64     -48    
0      48     
128    544    
96     -144   
-48    -1392  
96     176    
48     0      
-96    16     
192    -128   
64     -640   
112    64     
-64    -480   
192    -64    
48     -1872  
32     -128   
-16    0      
0      96     
-16    -592   
-64    -32    
112    432    
-144   160    
80     -176   
-16    -16    
-112   -16    
48     -288   
-1072  -16    
32     -208   
0      -80    
32     -544   
-48    -80    
112    -1040  
128    96     
48     -144   
96     -208   
48     -80    
-80    80     
-16    -64    
144    96     
-160   -16    
-16    -64    
-1040  -112   
112    -64    
160    -16    
64     112    
-16    -48    
352    -112   
-176   -32    
128    -912   
-16    160    
0      -48    
16     -992   
384    352    
128    208    
-192   32     
272    -96    
-624   -224   
-32    -512   
144    -128   
0      64     
-16    -112   
160    -432   
-64    -144   
240    -544   
-144   48     
128    96     
-96    -256   
112    0      
192    -16    
-96    32     
0      -96    
64     -128   
144    128    
-672   -272   
48     -432   
-192   -480   
304    -112   
48     288    
64     480    
-800   -672   
-48    -1152  
64     0      
288    64     
112    208    
-48    160    
176    208    
-240   128    
272    32     
-752   -400   
384    96     
-384   -208   
448    -272   
-48    240    
224    -448   
-144   192    
-48    -2112  
-160   208    
-176   -64    
176    320    
64     80     
0      32     
-240   208    
-144   48     
-80    -64    
336    16     
-32    -64    
80     0      
288    832    
176    112    
-416   -336   
368    -1392  
32     -400   
-128   -128   
144    -16    
-912   -32    
112    -48    
-224   -16    
80     -176   
-272   128    
160    -80    
-256   112    
-48    -224   
64     96     
176    -48    
-128   96     
112    -448   
-176   -176   
-48    -144   
-16    -48    
272    208    
192    320    
-320   128    
128    -80    
-192   32     
32     -192   
-816   32     
-32    -320   
224    432    
-240   64     
32     0      
-64    96     
-528   -128   
-48    32     
32     -80    
128    288    
-32    160    
-16    -16    
240    80     
-208   -128   
304    -96    
-160   48     
0      -160   
272    192    
-80    -16    
80     48     
-288   32     
-144   64     
-32    0      
48     240    
-144   256    
-400   128    
-192   -48    
-32    -80    
-80    0      
112    0      
96     80     
-128   -96    
-16    -32    
16     -80    
-144   112    
-224   -112   
384    304    
-208   -160   
64     -320   
-64    -16    
160    -112   
-272   160    
80     48     
-16    32     
-256   -544   
320    80     
-16    -144   
112    -144   
-224   -32    
208    208    
0      192    
-176   -96    
32     112    
-48    112    
96     304    
-16    80     
96     16     
-448   -32    
176    32     
-352   -48    
224    48     
-176   -320   
32     -464   
64     0      
80     288    
-32    -64    
-112   -32    
-160   64     
-48    144    
-80    -16    
96     96     
-192   32     
-384   -32    
-16    -272   
0      -64    
32     160    
16     -96    
-16    192    
-96    -32    
-32    64     
-48    144    
-48    -48    
96     48     
0      224    
80     -128   
48     176    
-160   48     
-16    32     
-256   176    
-576   -16    
224    0      
16     48     
0      496    
-288   -64    
160    -160   
176    96     
-64    160    
0      32     
-128   -112   
112    128    
-320   224    
-112   -32    
-112   -32    
160    16     
-80    -64    
0      176    
0      -144   
16     48     
-64    80     
-48    48     
224    -128   
16     176    
-80    160    
-400   336    
-288   224    
736    1040   
176    176    
-512   -144   
-496   240    
-560   -624   
240    704    
-336   -16    
112    176    
-64    112    
128    -288   
-16    176    
-32    176    
160    160    
-128   -144   
16     240    
-64    80     
96     96     
0      -48    
0      112    
0      128    
-48    272    
128    0      
-128   0      
192    112    
-320   -32    
32     144    
-48    224    
208    0      
-48    128    
80     192    
-112   0      
0      64     
-288   48     
208    48     
-160   -16    
224    32     
32     144    
80     -96    
-128   208    
16     64     
32     96     
32     64     
-64    32     
-48    -16    
-16    0      
-176   0      
0      -16    
0      64     
-48    48     
16     16     
-16    160    
64     48     
32     32     
-112   112    
192    -48    
-16    128    
144    64     
16     208    
-128   -80    
192    176    
-112   192    
32     0      
128    128    
-48    48     
112    0      
-48    -16    
64     32     
-64    144    
-64    176    
176    -32    
16     128    
-176   96     
80     -144   
-16    0      
-144   16     
-96    -624   
176    64     
-176   224    
-128   0      
224    192    
-128   224    
208    240    
-112   448    
-48    192    
96     -16    
32     -176   
-48    -32    
-144   16     
-48    160    
16     80     
80     176    
112    176    
144    176    
16     -1072  
208    416    
-128   208    
48     -16    
-32    64     
16     0      
192    -48    
-128   0      
192    96     
-16    96     
-48    -16    
144    288    
-224   -48    
176    480    
-208   144    
128    16     
64     48     
48     32     
0      160    
32     0      
32     -32    
-64    80     
32     96     
144    128    
48     96     
0      400    
256    544    
176    48     
-464   -16    
208    32     
176    -752   
-32    -160   
48     176    
16     336    
-80    64     
160    128    
-32    112    
-48    208    
-48    128    
-16    144    
160    432    
-96    -96    
176    16     
-32    512    
176    64     
-192   -224   
64     64     
64     -2480  
32     240    
192    96     
-160   96     
112    80     
-176   -64    
112    -352   
0      160    
96     208    
128    96     
-208   -32    
80     -112   
-128   160    
96     -960   
16     -96    
144    80     
144    240    
-160   224    
192    48     
-208   -160   
208    176    
-32    48     
0      80     
-208   -288   
176    -16    
208    160    
64     144    
-320   -80    
240    -176   
-32    208    
160    -336   
80     16     
-64    -2960  
176    -48    
-48    160    
-80    80     
224    112    
-144   48     
80     48     
96     144    
16     176    
-32    -32    
240    144    
-144   -352   
208    32     
0      -240   
96     96     
0      -384   
-32    48     
224    -368   
-96    144    
-16    -16    
-16    496    
-144   16     
64     64     
96     -144   
1328   320    
-912   -432   
1024   96     
-144   464    
576    -688   
-656   -32    
80     144    
640    864    
-352   -1408  
176    -32    
-16    208    
16     0      
-96    320    
368    -64    
-128   224    
128    -384   
-224   208    
160    -64    
-336   384    
176    -464   
-32    80     
-192   -288   
112    480    
-160   -720   
336    0      
-240   -80    
288    112    
-208   -672   
144    -528   
-48    32     
288    -288   
-208   464    
192    -32    
-144   288    
144    -304   
208    368    
16     -272   
-192   304    
-64    224    
320    -64    
-96    0      
48     -16    
176    -2240  
112    160    
-176   -1296  
0      -208   
288    -112   
160    304    
-352   -352   
-16    -384   
112    48     
32     48     
-32    32     
224    144    
-144   -272   
-64    16     
-368   -656   
224    -96    
416    -336   
272    400    
240    336    
-32    -1024  
-128   -496   
80     144    
128    -224   
32     304    
-16    -144   
96     -704   
-176   -320   
288    -624   
192    96     
-192   384    
-80    48     
-320   32     
0      -304   
0      -272   
-16    -240   
-240   224    
176    -128   
-16    -32    
-64    -896   
160    128    
160    48     
-224   -16    
-80    -176   
160    -80    
-272   -432   
400    -32    
-176   80     
224    -16    
-48    16     
0      64     
112    112    
160    -144   
256    96     
-128   -208   
-240   -160   
-80    -160   
352    352    
144    416    
-272   -336   
-48    -240   
208    -144   
-112   -160   
144    -144   
-928   -288   
320    16     
16     -96    
192    -496   
-336   -96    
16     -864   
-16    256    
-32    -240   
16     144    
32     160    
16     96     
-272   -496   
48     128    
-144   -80    
320    480    
-576   112    
48     -64    
-96    -112   
192    0      
160    96     
-48    -32    
80     80     
208    -112   
-224   160    
144    0      
-32    0      
80     -336   
-48    -144   
64     16     
320    64     
-528   -16    
0      -240   
-496   192    
-32    -176   
272    80     
-144   -256   
224    80     
0      -2320  
112    64     
-128   -16    
192    0      
224    160    
-256   -32    
112    -208   
-176   -112   
-144   -64    
64     64     
-272   -80    
176    -96    
-32    144    
32     -192   
144    64     
64     -544   
-80    32     
144    32     
16     32     
-160   32     
64     -16    
-32    -48    
240    272    
-240   16     
272    16     
112    -80    
-112   -176   
64     -16    
16     -80    
-144   176    
16     16     
272    -32    
32     -128   
144    256    
-336   -48    
32     176    
-80    -48    
160    80     
16     80     
32     -64    
-80    -80    
336    -112   
-48    240    
-208   -16    
-208   176    
0      32     
-480   -48    
-208   -16    
288    -176   
-128   32     
64     160    
-112   -240   
192    -80    
-384   128    
272    -240   
-192   112    
976    240    
-672   -480   
272    -272   
-688   512    
976    160    
-896   240    
0      -784   
-48    816    
416    -272   
-160   240    
96     -512   
160    288    
-208   -32    
-320   304    
16     -160   
0      -64    
-160   272    
48     -208   
-272   80     
96     -144   
-160   256    
176    -64    
-608   304    
224    -256   
-336   224    
48     -208   
-112   416    
0      -160   
-144   128    
144    -112   
-96    -80    
176    -64    
-96    144    
-16    -80    
-64    96     
32     -64    
-80    -48    
112    80     
-160   32     
-80    16     
-16    80     
-272   96     
48     16     
-160   -160   
112    -80    
-224   -64    
160    112    
0      64     
16     112    
-176   32     
128    -16    
-208   144    
160    -144   
-32    192    
-48    -16    
64     128    
-272   -64    
0      144    
-32    -112   
96     160    
0      64     
64     192    
-112   16     
96     -16    
-224   160    
-144   -16    
-48    144    
-80    -48    
32     48     
-32    80     
-96    32     
-16    0      
-64    16     
288    112    
-32    240    
96     0      
-64    224    
-16    -16    
208    -16    
-80    272    
-16    128    
48     16     
-80    -400   
-16    -160   
160    272    
-112   208    
-32    16     
-176   240    
-336   -320   
128    -80    
288    544    
96     592    
-192   -48    
-128   -48    
80     48     
80     0      
-80    144    
80     -32    
-224   -112   
64     80     
-48    144    
0      144    
16     64     
-272   -128   
16     112    
-112   -208   
-48    0      
32     48     
32     -96    
96     160    
-96    32     
48     112    
-64    32     
64     112    
16     64     
48     144    
-192   176    
48     128    
-560   -160   
144    -112   
-32    96     
48     -16    
-80    -64    
-64    -16    
64     0      
240    608    
0      160    
-96    -48    
-96    64     
-32    -16    
96     96     
-160   -144   
-16    192    
-128   -16    
0      80     
112    -320   
-256   32     
48     0      
-32    112    
-224   112    
176    96     
-32    128    
32     -16    
160    80     
-208   -16    
224    96     
-80    -32    
64     240    
0      128    
-80    80     
16     112    
112    -16    
-32    80     
80     176    
-192   64     
128    -32    
-64    128    
48     -48    
144    112    
-272   64     
192    48     
-144   -16    
288    112    
80     176    
-80    16     
-48    16     
-128   -112   
320    176    
16     80     
0      144    
-144   -32    
48     96     
-16    48     
32     32     
-192   -80    
192    288    
-320   -16    
208    32     
-96    128    
144    80     
64     112    
-32    96     
0      48     
-64    80     
0      240    
-176   -192   
112    0      
64     144    
96     224    
-112   -48    
80     176    
32     -96    
32     128    
320    -48    
-192   128    
160    32     
-128   -16    
-32    368    
-928   -1360  
592    -336   
-832   48     
832    336    
-320   400    
608    400    
-736   -272   
672    96     
-304   528    
48     -1232  
48     112    
-16    -384   
240    352    
128    -208   
144    448    
-176   -176   
448    320    
0      -48    
432    480    
-400   -224   
304    -64    
112    192    
80     -112   
32     48     
272    -768   
-176   96     
-144   -928   
96     160    
464    736    
-112   304    
176    160    
-16    128    
-96    -32    
80     128    
-16    -304   
32     16     
176    288    
-48    -48    
16     208    
-112   -800   
80     64     
176    -992   
384    -160   
-112   64     
32     -16    
224    368    
-32    192    
48     336    
32     128    
96     48     
-16    144    
-48    0      
-48    -416   
96     -16    
48     -224   
-32    80     
112    -368   
-80    80     
144    176    
-96    80     
-16    144    
48     -32    
144    288    
-192   144    
112    48     
-32    96     
80     80     
128    -272   
64     160    
320    -80    
272    176    
-192   -560   
160    160    
-64    -3152  
-32    -96    
128    48     
0      112    
48     80     
0      -64    
-144   16     
160    64     
32     192    
112    -240   
-112   336    
-272   0      
176    272    
-208   144    
336    0      
128    -608   
-64    80     
96     -32    
0      -16    
48     -64    
96     16     
-80    0      
160    0      
208    96     
-48    -32    
144    272    
64     -256   
16     128    
-16    -384   
208    384    
-96    -112   
112    176    
-16    16     
48     208    
144    112    
-128   0      
32     -160   
80     -32    
32     112    
48     -384   
-32    96     
176    176    
128    48     
-112   -240   
-48    64     
144    -208   
-144   48     
144    -48    
80     432    
96     336    
240    272    
64     192    
-80    -256   
384    16     
-144   96     
0      112    
112    -32    
80     64     
192    160    
16     176    
112    -80    
-336   -16    
128    -16    
224    -32    
128    -32    
-144   -1616  
48     -640   
128    -176   
256    -1456  
-320   48     
48     -160   
80     -48    
-32    -16    
160    -16    
112    64     
48     -48    
-208   -336   
160    32     
32     -720   
192    128    
-224   -96    
112    -64    
48     -80    
0      -64    
256    224    
-208   -512   
144    -208   
0      -928   
48     144    
160    -240   
-48    0      
176    -176   
-112   128    
112    -64    
-144   0      
160    -96    
80     48     
-592   16     
240    -256   
-96    -64    
-48    -272   
112    -96    
32     -944   
-32    -32    
176    96     
-160   0      
144    -160   
128    0      
16     96     
-80    32     
16     -80    
112    32     
-624   -128   
80     -144   
112    -144   
0      -80    
48     -48    
64     -528   
128    -32    
-112   -1520  
272    48     
-48    -208   
80     112    
48     96     
-656   -1472  
-1728  -1904  
1040   -304   
-1040  688    
416    128    
-1152  -80    
784    368    
-800   544    
144    -560   
48     320    
256    -1456  
-96    576    
-32    -592   
496    592    
-240   -256   
240    -16    
-208   -112   
128    0      
-128   -160   
464    144    
-768   16     
96     -224   
-240   240    
352    -160   
-192   144    
208    -736   
-144   304    
96     -112   
-16    208    
0      -48    
64     0      
-48    -80    
48     64     
16     96     
96     -208   
-1808  -176   
48     -416   
-96    -128   
112    -16    
80     48     
48     -368   
-160   128    
128    -2224  
128    -64    
16     -128   
-32    144    
-160   -32    
144    80     
-224   -16    
160    0      
-192   -64    
80     80     
16     48     
128    64     
-64    64     
144    -288   
48     80     
32     -1680  
144    0      
-224   16     
0      48     
-304   -256   
128    -144   
16     64     
160    192    
16     96     
32     48     
-448   48     
96     -224   
0      -48    
96     -400   
-16    176    
-80    112    
48     48     
-144   -64    
144    -128   
-208   -192   
-64    64     
-272   160    
160    80     
-224   -112   
16     -208   
-480   48     
-592   80     
128    96     
-400   -224   
-320   -80    
-48    80     
64     96     
112    416    
-16    -96    
-32    48     
-48    128    
0      96     
16     -48    
-128   -48    
320    304    
-48    128    
-208   -224   
32     16     
16     16     
-80    48     
-160   32     
-208   16     
0      48     
-224   64     
-128   -48    
-80    128    
-176   144    
128    -96    
-48    112    
32     16     
112    64     
48     -64    
0      80     
64     -208   
-192   -80    
16     128    
-192   -16    
-16    32     
-112   128    
-64    -80    
-144   16     
-112   144    
224    -320   
-96    128    
-336   -320   
384    -64    
-192   -208   
-80    208    
208    0      
-112   160    
-48    80     
128    48     
-16    -48    
-192   96     
160    32     
-784   80     
176    -16    
-560   0      
48     16     
64     -32    
-80    144    
-32    -64    
32     128    
0      0      
128    384    
-208   -112   
48     -96    
-32    224    
-48    0      
64     -32    
-288   80     
160    128    
-256   -160   
224    144    
-208   -208   
224    32     
-80    16     
-192   0      
240    -16    
-240   112    
96     64     
-240   160    
-112   -64    
16     96     
-256   -112   
352    -160   
-368   272    
-80    -192   
-16    176    
-384   16     
240    -96    
80     288    
-80    48     
176    48     
-144   32     
144    32     
-16    96     
80     80     
16     96     
-48    272    
-272   -48    
16     32     
272    -400   
96     432    
-400   -304   
256    16     
0      192    
-48    80     
-96    48     
-32    224    
32     -96    
96     144    
144    272    
-96    128    
-112   -16    
-160   -64    
2640   -1776  
192    1120   
176    0      
-768   48     
128    432    
16     -896   
-208   -160   
208    384    
176    432    
64     272    
-288   320    
64     176    
-80    -256   
-208   -80    
144    0      
-192   96     
336    416    
-160   96     
-336   -176   
-208   112    
112    -176   
-64    112    
128    192    
-208   96     
32     -64    
64     240    
112    256    
64     112    
-80    -16    
16     -32    
48     96     
-32    32     
48     144    
-80    32     
-16    32     
0      -32    
0      128    
80     64     
-16    0      
-48    96     
-160   0      
224    176    
0      160    
48     112    
-336   -112   
144    0      
-48    144    
240    416    
-304   16     
192    32     
-144   208    
144    -80    
-16    128    
-112   32     
288    32     
-80    -96    
128    208    
-224   -48    
128    112    
-144   -64    
96     160    
-64    -16    
80     80     
80     96     
0      128    
16     128    
96     48     
-32    192    
48     32     
64     224    
-48    -16    
80     128    
32     -112   
16     192    
-32    16     
144    192    
-288   128    
160    416    
-48    16     
144    64     
64     48     
0      64     
0      80     
96     -112   
32     -96    
-32    192    
-128   96     
192    -160   
16     192    
-176   48     
144    208    
-48    96     
16     0      
192    96     
-48    -32    
192    240    
-80    112    
16     -16    
32     80     
48     16     
32     144    
32     80     
-144   32     
208    128    
-208   -224   
176    240    
-96    144    
-64    -1008  
176    16     
-96    64     
240    176    
-32    96     
-32    96     
-16    128    
320    48     
-112   272    
48     96     
224    224    
-112   96     
176    80     
-192   144    
368    128    
-64    -240   
-96    160    
192    144    
-144   48     
128    128    
-128   80     
128    96     
32     80     
-240   32     
320    32     
-80    48     
416    144    
-48    176    
-256   -48    
224    -32    
-208   -560   
16     128    
352    160    
-64    144    
-32    112    
16     32     
-80    -16    
-32    112    
-16    -416   
80     -80    
0      -112   
32     224    
0      16     
48     -112   
-32    80     
64     -16    
112    -64    
128    -160   
16     112    
144    144    
-96    272    
32     -240   
192    96     
-64    112    
176    160    
-160   0      
128    16     
176    160    
32     -288   
48     160    
16     -176   
0      256    
304    32     
32     112    
80     -1472  
-176   -16    
-64    80     
64     16     
-64    176    
96     -80    
64     256    
-240   -224   
160    -64    
128    -16    
80     64     
80     0      
-144   16     
-128   -32    
208    80     
-48    -320   
288    96     
64     96     
-32    224    
0      48     
16     176    
0      32     
224    -432   
32     288    
-128   -128   
-16    176    
-64    -288   
768    -272   
1232   752    
64     576    
-912   -624   
560    768    
-480   -464   
208    576    
176    304    
320    -32    
-416   -208   
368    -48    
96     64     
32     -192   
-128   0      
64     -16    
128    192    
80     32     
-112   80     
288    -288   
0      128    
-48    112    
80     192    
80     80     
-80    16     
112    -128   
-32    -144   
48     128    
128    32     
112    64     
-128   -240   
48     80     
-80    -192   
160    80     
-16    -208   
176    -144   
80     -32    
0      -384   
80     80     
48     -32    
16     -688   
48     -144   
96     -416   
192    -32    
-112   176    
-16    -48    
48     256    
208    32     
64     128    
-32    -16    
32     -112   
160    176    
-16    32     
32     224    
-224   -96    
48     -192   
144    64     
16     160    
112    48     
96     -624   
128    -80    
-176   -1056  
80     -144   
80     128    
-32    16     
160    -48    
-16    -80    
96     -144   
32     -192   
-96    32     
112    -80    
0      16     
80     -160   
-80    -96    
96     -240   
32     -64    
0      -2112  
-16    -528   
176    -160   
144    288    
288    -112   
-240   192    
16     -208   
144    0      
-80    48     
-16    128    
-608   -144   
32     -64    
-16    -48    
32     0      
160    -48    
32     -128   
128    208    
32     -1328  
-80    0      
144    -112   
-48    96     
192    96     
-16    -16    
-64    -48    
80     -144   
-480   -48    
64     -64    
-368   16     
32     -64    
128    96     
0      -480   
-96    -32    
-16    -1104  
80     144    
-64    16     
176    80     
-160   32     
112    -48    
-80    -32    
-16    -144   
-128   48     
-48    -96    
-144   80     
-32    -112   
272    -208   
-80    -544   
-16    96     
192    -672   
0      -80    
16     112    
-176   -384   
176    -208   
0      48     
-192   176    
320    -32    
-352   144    
96     80     
48     -48    
-48    48     
-480   -64    
-64    -464   
320    224    
-288   32     
272    -64    
0      -944   
0      -16    
224    -16    
-48    112    
-240   -16    
192    64     
-16    0      
-16    -48    
-96    -96    
32     0      
-32    144    
48     -80    
-80    48     
144    -432   
48     320    
-496   128    
64     -352   
-384   -176   
128    -48    
128    192    
-240   -96    
-48    -192   
128    -208   
80     16     
-32    64     
-96    48     
528    -704   
-304   416    
16     -624   
144    -48    
-96    64     
272    80     
-240   -16    
0      320    
-304   -320   
544    160    
-448   112    
208    -32    
160    -352   
112    -48    
48     128    
-592   -240   
-320   112    
-336   -208   
-16    -208   
288    144    
-624   64     
-32    -192   
-1184  272    
-96    -16    
16     112    
-48    -48    
32     0      
-96    64     
-256   -16    
-48    0      
-160   -192   
64     96     
-400   -560   
368    1024   
-1424  -1136  
-224   -400   
-496   -864   
448    -112   
128    -144   
-1248  -240   
576    512    
-352   -144   
48     192    
-352   -16    
128    0      
0      192    
-32    32     
64     144    
-112   32     
-128   160    
80     48     
48     -16    
-48    64     
-144   32     
-16    -48    
48     -176   
-656   -112   
128    144    
-32    240    
-16    -64    
-32    16     
-48    48     
112    96     
-144   0      
-48    96     
96     64     
32     144    
-176   48     
144    256    
-528   192    
0      -96    
96     64     
80     32     
0      128    
0      32     
32     -112   
-240   16     
-16    64     
-16    16     
48     160    
-192   -96    
336    -16    
-480   64     
128    96     
-192   64     
128    48     
-432   -48    
-16    96     
208    -352   
0      208    
-128   -224   
224    112    
-288   112    
112    96     
48     96     
-208   0      
144    0      
-32    208    
-80    160    
160    144    
32     -48    
-144   -16    
-16    192    
-64    -48    
48     32     
128    80     
-96    128    
-16    32     
-16    112    
144    -32    
64     32     
16     96     
-48    96     
-48    224    
-272   -112   
96     -96    
-96    -160   
-32    320    
-704   256    
-160   0      
256    32     
-240   -16    
64     96     
-16    32     
0      112    
48     176    
-144   -80    
320    -96    
-240   64     
-80    32     
128    144    
-176   -176   
128    64     
-592   0      
0      48     
-16    32     
80     192    
-144   -96    
208    64     
-96    144    
80     64     
-64    -32    
-32    -16    
48     240    
0      -16    
96     240    
-240   -32    
272    288    
-144   -96    
-208   0      
64     80     
128    64     
-80    128    
-32    128    
352    176    
-240   16     
48     208    
-128   160    
336    96     
-560   -240   
-32    48     
-96    -80    
256    96     
96     144    
0      320    
112    176    
-160   128    
48     160    
-112   -48    
112    48     
-64    144    
144    80     
-16    160    
-48    112    
-176   -16    
48     192    
-96    48     
-32    176    
112    80     
-80    16     
160    96     
32     64     
-16    176    
96     48     
64     128    
0      288    
-16    128    
64     -160   
-112   192    
-16    -96    
160    144    
-64    48     
0      64     
64     48     
16     112    
16     -32    
-64    -16    
208    304    
-112   96     
64     -192   
48     -32    
128    48     
-144   96     
48     160    
-80    128    
64     -160   
-176   0      
-80    80     
48     96     
32     -48    
144    64     
16     112    
64     128    
-32    0      
-16    128    
32     128    
32     64     
0      64     
-32    112    
-64    128    
160    160    
48     128    
-48    160    
32     16     
32     0      
64     112    
240    160    
-96    -16    
192    -32    
-16    256    
288    3376   
-1344  -448   
-400   -16    
752    464    
912    1264   
-992   -1344  
-80    160    
560    -336   
256    -400   
-144   304    
-64    32     
112    160    
32     -32    
80     176    
-160   48     
0      144    
96     208    
-160   -128   
-192   -320   
192    48     
-32    -144   
112    192    
-128   -304   
-64    160    
32     -32    
80     128    
32     96     
-48    144    
16     80     
32     160    
-208   0      
64     176    
96     288    
-288   -160   
80     0      
-144   -160   
288    448    
-32    -528   
48     160    
0      -80    
80     32     
32     256    
48     -16    
64     240    
64     64     
-96    32     
32     80     
16     16     
144    16     
224    272    
-112   16     
160    160    
-64    -288   
-128   -208   
208    -176   
-48    176    
160    112    
-112   -32    
-128   -464   
192    -128   
176    -16    
-48    80     
144    192    
-32    144    
32     32     
304    -336   
240    -64    
128    -64    
48     128    
48     -368   
-16    64     
96     -368   
96     80     
-96    -64    
160    -80    
80     0      
-160   -400   
48     -592   
160    -480   
-144   48     
144    -16    
-80    272    
96     -96    
144    80     
144    -1008  
96     160    
-112   -656   
96     16     
144    176    
-48    32     
176    160    
-80    160    
16     48     
112    -208   
0      144    
128    -528   
112    192    
-128   -304   
112    64     
-16    -48    
48     144    
80     -128   
0      128    
96     64     
-16    112    
-16    16     
80     160    
0      -48    
128    48     
-112   32     
224    -272   
-48    48     
80     -192   
0      128    
32     -144   
80     80     
32     -112   
32     112    
48     16     
64     48     
16     -32    
-160   -64    
288    240    
64     -224   
-176   -128   
-32    -160   
192    32     
176    -176   
-112   96     
96     -16    
-16    32     
-96    32     
176    -1120  
64     320    
32     -224   
48     192    
32     864    
320    -336   
-64    -496   
0      -1808  
256    224    
32     16     
-128   -16    
80     144    
48     -96    
32     -112   
128    368    
-64    144    
160    368    
0      80     
-64    32     
-672   0      
0      -240   
224    16     
96     288    
-272   32     
224    -336   
176    -32    
0      -1296  
16     -240   
-112   -208   
144    224    
48     176    
160    96     
-128   -256   
32     64     
-464   -32    
160    256    
-128   144    
-80    -192   
128    32     
-32    -112   
0      -80    
336    -1440  
-80    -96    
32     -208   
80     176    
-16    -144   
176    80     
-96    -32    
336    -112   
-176   -208   
80     32     
-16    -32    
0      -192   
48     -16    
240    128    
-144   96     
-16    -192   
-16    16     
112    -1232  
-16    208    
-48    -208   
144    16     
-240   48     
64     -96    
-64    272    
-64    -128   
-368   176    
416    -320   
-1424  -192   
96     128    
1040   0      
-720   -912   
432    -496   
-16    -1456  
-96    -368   
304    64     
-96    -64    
-16    0      
-16    -64    
-80    -64    
288    32     
-272   -64    
-96    112    
-368   16     
48     -32    
112    -192   
32     -160   
144    144    
-48    -352   
160    0      
-96    0      
112    160    
112    96     
0      -160   
0      224    
0      -208   
16     112    
0      -64    
-192   80     
96     -240   
-80    -64    
-32    -240   
160    -128   
48     -128   
-32    144    
64     0      
-112   -224   
-304   48     
64     -128   
208    -16    
-48    128    
-48    -64    
-16    -32    
-288   -160   
160    -304   
-112   80     
224    -192   
-32    192    
16     -352   
64     32     
-128   32     
64     -80    
144    112    
-64    80     
0      112    
16     -16    
-16    16     
16     -48    
-16    64     
96     160    
-240   96     
144    -192   
144    96     
-160   -48    
-80    -96    
160    32     
-112   256    
-112   -16    
192    -32    
-144   80     
64     32     
0      -32    
288    256    
-160   160    
144    -96    
96     112    
-544   -112   
16     64     
-304   -80    
-688   96     
96     -16    
-912   -96    
-112   16     
-1488  -176   
-48    48     
-32    -32    
128    -48    
-64    -64    
-64    0      
-128   -64    
0      368    
-368   -432   
192    64     
-48    144    
144    128    
-144   16     
-32    160    
-48    -16    
-112   -112   
-128   -144   
144    96     
-64    -80    
80     -64    
-256   -96    
48     16     
-48    128    
112    48     
-16    80     
-128   -64    
-80    -64    
64     32     
0      160    
-32    64     
-32    240    
-96    80     
96     -32    
-144   128    
256    16     
32     176    
-80    -80    
-160   48     
-80    -96    
64     -160   
-240   -144   
32     -16    
-48    48     
64     112    
96     96     
-240   208    
352    224    
-304   64     
-144   64     
-256   64     
96     -112   
-352   -64    
112    144    
32     -112   
112    192    
32     32     
-96    -80    
0      16     
96     208    
-112   -128   
64     64     
-64    0      
-64    112    
112    32     
-384   48     
96     160    
-32    -80    
48     112    
48     128    
-64    0      
-48    112    
224    336    
-16    80     
-48    0      
96     256    
-96    64     
64     -32    
48     240    
96     240    
-640   -32    
0      112    
-672   -128   
-176   -256   
160    384    
96     304    
-192   -64    
-48    256    
-240   -32    
-16    96     
16     -112   
160    80     
64     -48    
-240   -80    
-32    128    
-208   -16    
160    48     
-1040  -176   
-48    48     
176    288    
-80    -48    
16     -32    
32     -160   
80     80     
0      192    
16     160    
-96    32     
256    -176   
-96    96     
-32    48     
-80    64     
-192   640    
-1312  -2192  
528    384    
-32    576    
-224   608    
-464   16     
80     384    
-32    512    
-176   -736   
336    352    
-432   -64    
80     208    
-144   -160   
352    96     
-416   -416   
352    560    
48     384    
240    672    
-528   -304   
16     -80    
176    336    
-224   -96    
144    -48    
176    -16    
-240   -464   
32     -64    
160    144    
-112   208    
-64    160    
-272   -128   
128    144    
-32    96     
32     112    
-96    64     
48     112    
-80    352    
-128   -32    
176    176    
-112   192    
288    160    
32     -48    
128    -32    
-128   80     
128    160    
-64    0      
0      80     
96     80     
16     160    
240    256    
-288   -400   
336    144    
-112   -144   
272    160    
-64    160    
-176   96     
16     96     
176    -176   
80     176    
384    320    
-240   0      
160    128    
-176   288    
-64    16     
32     80     
16     -176   
384    112    
-16    -32    
32     256    
16     -32    
64     48     
-256   -144   
144    160    
-32    -48    
-16    176    
64     32     
112    176    
-48    128    
-368   -448   
416    -80    
80     144    
240    112    
80     48     
-32    192    
0      112    
32     176    
48     32     
96     64     
-80    48     
48     80     
64     128    
-48    0      
192    112    
48     176    
32     112    
-160   -112   
64     -48    
16     80     
144    32     
-176   -48    
-64    48     
32     192    
80     48     
-64    -144   
-16    -208   
64     80     
176    -2352  
-144   160    
272    432    
-160   -16    
288    112    
-160   176    
32     -80    
0      32     
-96    16     
304    96     
-112   64     
0      -112   
-112   -192   
-32    -192   
96     -176   
96     -112   
0      32     
48     192    
48     176    
112    192    
16     432    
-176   -112   
336    176    
-304   48     
64     -160   
16     -32    
128    400    
-16    -416   
64     -32    
112    272    
-32    -48    
-32    208    
192    -368   
-272   -336   
128    -32    
64     320    
112    96     
32     304    
-16    144    
48     128    
-128   32     
144    32     
-16    128    
192    16     
-192   64     
176    -880   
-48    32     
16     -1424  
96     272    
16     -128   
16     -144   
-128   -256   
96     224    
-112   -416   
-96    112    
176    0      
96     112    
0      224    
-48    -320   
32     192    
144    48     
-384   128    
192    208    
32     96     
-96    -2208  
16     64     
16     -240   
48     -16    
256    16     
96     144    
16     64     
-16    112    
-32    16     
144    128    
-16    32     
112    -64    
48     96     
32     -384   
-32    320    
144    -496   
224    96     
128    80     
160    160    
-144   64     
176    32     
-16    112    
96     -304   
-16    64     
80     -16    
-80    144    
304    -480   
16     256    
-48    -256   
-448   -1040  
608    672    
-1136  -176   
1072   -624   
144    528    
-224   -464   
304    -368   
-240   416    
304    0      
224    400    
-128   -464   
16     176    
32     -208   
320    144    
-96    32     
128    48     
48     112    
80     0      
-16    -48    
192    80     
-32    80     
192    -192   
64     -16    
112    -64    
-64    -528   
128    -48    
-48    128    
144    48     
0      272    
32     -128   
176    144    
0      -16    
112    -1264  
-160   16     
256    -224   
16     96     
-656   -32    
-240   0      
176    -128   
16     -912   
96     -112   
-96    -128   
128    -96    
0      144    
96     -304   
32     -112   
48     -16    
32     -688   
-80    -48    
432    96     
-192   16     
-976   -80    
-80    -80    
176    -64    
-48    -48    
0      -112   
192    48     
-112   -208   
336    -1360  
-96    48     
-64    -368   
320    224    
-64    176    
-16    64     
128    -288   
64     16     
-416   48     
288    -272   
32     -80    
80     48     
-176   0      
224    -496   
-32    -64    
32     -2288  
96     112    
0      16     
144    80     
-16    -64    
16     48     
-64    -112   
-96    48     
-16    -64    
144    0      
-1376  -240   
128    -112   
-208   -80    
144    -352   
144    304    
-320   -656   
400    0      
-80    80     
0      304    
80     -224   
-48    160    
96     96     
-128   80     
32     96     
224    160    
-240   32     
128    -176   
-256   48     
32     -80    
176    128    
-112   -432   
32     16     
80     -1632  
64     176    
112    -160   
-160   -96    
-64    -144   
176    112    
0      -144   
32     -176   
-80    48     
128    -32    
-144   32     
-80    -224   
-64    -64    
160    -80    
64     112    
-64    -1728  
32     80     
0      48     
80     16     
-32    -80    
96     -176   
-144   -144   
16     -256   
32     256    
16     16     
-256   -48    
16     -336   
-384   0      
-32    -464   
144    32     
48     -704   
-240   48     
-80    -48    
336    -96    
-96    -48    
-224   -48    
272    624    
48     224    
-208   -144   
-48    -16    
-160   96     
48     -128   
208    208    
-224   -576   
96     208    
-32    -160   
112    112    
-128   16     
48     -64    
-112   64     
288    448    
-320   -256   
160    -80    
-144   32     
-208   -304   
-224   -80    
80     32     
48     80     
-16    -208   
16     64     
-80    -288   
16     352    
-272   -32    
64     112    
-144   -256   
272    176    
-144   -96    
176    -144   
-160   -112   
-32    48     
-128   -64    
-816   -80    
144    192    
-464   -288   
32     192    
-224   -192   
-96    96     
-16    64     
-32    48     
-48    -80    
-848   336    
-208   0      
16     -112   
-16    96     
320    32     
-128   96     
-704   -208   
208    96     
-160   -128   
80     336    
-176   -32    
-80    80     
32     128    
-944   -896   
16     1808   
-672   1760   
-16    -240   
-48    -496   
64     352    
1184   1584   
-1920  -464   
1392   -176   
-816   80     
336    -272   
0      -288   
-272   336    
16     32     
-192   64     
-240   -224   
-160   80     
-64    -64    
64     384    
-496   -112   
0      144    
-576   -304   
48     16     
-32    -320   
160    80     
-128   -160   
0      224    
-288   80     
272    -96    
-160   -64    
144    240    
-160   64     
-112   -16    
-112   80     
-544   -112   
128    304    
-416   0      
64     64     
160    32     
112    224    
-160   112    
-256   48     
64     80     
-16    -192   
224    64     
-160   128    
32     -48    
64     48     
-224   16     
80     0      
-208   96     
-512   -48    
256    224    
-192   -240   
112    208    
-96    32     
48     -160   
160    416    
-48    32     
-176   -368   
240    64     
-96    32     
-192   -112   
128    400    
-128   -128   
32     -64    
-608   -176   
96     208    
-1168  -144   
352    48     
-32    160    
48     96     
80     112    
-144   112    
0      0      
32     48     
-64    -272   
80     -656   
-352   -368   
-80    176    
464    -32    
-528   -128   
224    -48    
-448   128    
64     320    
96     144    
-128   -608   
-64    -16    
240    112    
320    448    
-384   80     
-64    -176   
112    208    
80     112    
-144   -16    
-160   -128   
-64    0      
0      240    
-480   16     
-352   -240   
-16    -80    
64     112    
80     96     
-144   144    
32     128    
-16    80     
48     192    
-48    496    
272    784    
-64    448    
-128   176    
-80    -32    
-32    -16    
48     64     
-64    64     
-48    -16    
64     160    
128    64     
-48    32     
-16    32     
-16    64     
32     128    
-192   -80    
256    176    
-224   -272   
320    128    
-352   176    
208    0      
-176   -64    
96     112    
128    192    
0      48     
-144   288    
32     16     
-96    112    
-16    -80    
272    128    
-496   -192   
400    128    
-32    48     
-32    -16    
-192   16     
-32    80     
144    96     
-80    96     
144    144    
112    160    
-64    96     
-16    32     
48     16     
0      32     
64     96     
-80    16     
128    176    
-192   -48    
64     80     
-144   48     
0      80     
64     0      
144    208    
-112   64     
288    32     
-320   144    
160    128    
96     256    
128    -160   
128    240    
-224   208    
-144   256    
-176   -160   
272    48     
80     160    
-80    -16    
256    -176   
64     176    
-32    336    
-16    16     
16     64     
224    48     
-112   176    
16     -16    
-32    272    
-160   -112   
208    80     
48     48     
-224   80     
160    16     
64     64     
48     80     
80     128    
-16    96     
32     160    
-32    48     
112    32     
-240   16     
272    0      
-16    160    
-48    80     
-976   288    
640    496    
-624   -704   
576    -48    
336    -1184  
-176   -368   
304    880    
544    -192   
-16    336    
-176   -208   
208    288    
-64    -32    
0      112    
48     224    
208    48     
-240   0      
160    -32    
16     48     
96     -64    
-160   16     
352    -80    
-128   368    
128    -144   
-48    272    
64     -160   
64     256    
48     -48    
-128   -112   
144    0      
16     208    
96     16     
-64    96     
48     -192   
16     176    
160    -128   
176    -32    
-144   -192   
224    96     
48     160    
0      48     
-16    48     
48     32     
64     -16    
80     208    
32     80     
64     32     
-96    32     
128    128    
32     -16    
224    -352   
-160   160    
192    -816   
-80    160    
80     -224   
128    144    
-80    0      
128    96     
-48    80     
-32    128    
208    32     
-112   80     
80     80     
64     -16    
48     208    
-16    -160   
128    16     
80     -880   
48     240    
-64    -624   
208    176    
-16    -32    
128    224    
-16    -16    
128    144    
-144   64     
48     -16    
-112   112    
64     -400   
64     128    
-64    -32    
32     224    
-16    -240   
96     -192   
-112   -784   
-160   112    
-48    0      
176    432    
-256   -32    
416    64     
-112   128    
48     -480   
128    32     
-32    -48    
144    288    
32     -352   
-112   -16    
-64    -496   
176    272    
-96    256    
-64    -32    
272    192    
-80    112    
256    80     
-128   -128   
16     32     
48     16     
112    64     
128    32     
-80    -320   
128    -64    
80     16     
144    160    
32     208    
32     -320   
96     208    
-96    -16    
80     -1216  
-32    96     
-32    -96    
48     -736   
240    -16    
-16    -1376  
-32    -224   
176    192    
0      -112   
48     16     
144    -128   
-304   -304   
176    304    
208    -1136  
-16    144    
144    -768   
-128   -96    
-720   112    
80     -32    
48     -224   
48     -592   
96     0      
192    240    
-96    -80    
96     -96    
48     96     
128    -272   
-32    -64    
96     -240   
-96    -464   
288    -224   
32     144    
48     0      
32     -32    
16     16     
208    -336   
-16    48     
0      -240   
64     -16    
160    64     
-464   -224   
368    -96    
-368   128    
208    16     
-32    0      
-64    -112   
192    -96    
-544   -80    
16     -48    
-80    -80    
128    176    
-208   0      
160    -560   
96     96     
32     -1440  
208    -160   
-240   0      
32     48     
144    64     
-208   -112   
240    -112   
-192   80     
-272   -80    
16     208    
-1008  -80    
96     -128   
-32    -48    
80     -240   
160    -80    
128    -528   
-32    112    
64     64     
-16    80     
16     -128   
128    -96    
64     48     
0      0      
-32    48     
176    0      
-224   -64    
112    -240   
-144   32     
-1104  272    
-592   -752   
-80    -144   
288    432    
-112   -2944  
368    -16    
-112   160    
-160   720    
96     -192   
80     -48    
-288   -96    
432    -192   
-656   -160   
336    -32    
48     96     
208    -48    
-320   96     
272    -912   
144    -96    
160    -2416  
32     624    
256    48     
-240   576    
-144   -592   
224    144    
-256   -96    
288    352    
-464   -256   
192    208    
-368   -144   
320    160    
32     80     
160    -320   
32     288    
192    -672   
0      368    
0      96     
80     -16    
-544   -224   
320    16     
-256   144    
-32    -16    
0      320    
240    32     
-336   -16    
64     -80    
272    480    
240    16     
-224   32     
0      -304   
112    -96    
-144   -64    
272    256    
-464   -128   
48     -48    
-48    48     
128    -144   
-448   -208   
80     -320   
-320   -416   
-64    -240   
-16    240    
-64    -144   
16     80     
-1744  -560   
96     160    
-160   96     
272    400    
-400   -384   
112    -16    
-16    -16    
80     240    
-112   -32    
192    -48    
-176   96     
-432   0      
-96    -16    
-128   -352   
96     64     
64     400    
16     320    
0      144    
-368   96     
336    16     
-608   112    
-16    48     
32     80     
-64    -32    
-112   -384   
352    224    
32     -80    
-16    -16    
-272   -112   
128    80     
-64    -352   
-80    -160   
-48    0      
80     208    
-112   224    
-672   -32    
-80    16     
-448   -64    
64     224    
-96    16     
-96    -256   
-32    -320   
96     336    
-304   -336   
320    256    
-336   -32    
96     -32    
0      48     
0      -32    
48     192    
-64    112    
-64    80     
128    -112   
-192   144    
-496   -160   
32     0      
-80    -240   
16     352    
272    256    
64     160    
-240   96     
-16    80     
128    240    
-160   -16    
208    16     
-144   80     
64     192    
-464   -16    
-48    -192   
-496   -272   
304    240    
-64    96     
240    64     
-192   96     
-128   -144   
-128   16     
-32    32     
176    80     
-32    96     
-80    48     
-64    0      
-112   -48    
-16    -32    
-144   96     
-784   -32    
-16    112    
-64    -128   
48     96     
-16    112    
-48    -32    
208    160    
-192   64     
192    96     
-144   16     
96     -112   
80     128    
-144   208    
-96    96     
32     16     
-112   -48    
128    144    
-976   -80    
-16    80     
80     16     
96     0      
0      192    
-96    32     
0      64     
240    -80    
-208   208    
-208   32     
32     80     
-48    -96    
96     48     
-224   -144   
112    176    
-1504  80     
-16    -32    
144    256    
-112   -48    
32     96     
128    -32    
-32    80     
64     128    
-48    48     
-16    176    
-32    16     
-192   -80    
96     48     
-96    112    
80     -64    
96     224    
-32    96     
-240   704    
-864   144    
-752   -496   
-128   688    
-432   -192   
-448   352    
592    -656   
-448   352    
224    -208   
96     704    
-64    -640   
-112   320    
256    -304   
112    688    
-144   -256   
64     256    
-80    0      
32     192    
-64    80     
208    48     
-80    -64    
-16    0      
-96    208    
112    96     
-48    96     
256    -144   
-384   224    
96     -224   
16     160    
32     -16    
64     128    
48     -64    
-16    256    
16     80     
32     48     
-160   -80    
-192   -128   
0      -160   
192    208    
-16    -48    
96     176    
-320   -128   
-32    160    
128    80     
112    112    
-48    80     
16     16     
-80    144    
176    160    
-16    64     
32     32     
-48    144    
32     48     
80     160    
-64    0      
32     16     
48     96     
48     176    
64     16     
144    32     
-128   112    
16     96     
16     80     
48     32     
64     112    
-112   128    
64     128    
-112   -32    
0      32     
-64    16     
32     96     
32     64     
32     128    
32     48     
96     48     
96     160    
-112   -48    
160    16     
-192   192    
-16    -48    
16     -64    
-128   32     
240    -64    
64     160    
-240   0      
352    -96    
-160   176    
-32    80     
192    64     
64     160    
144    192    
96     272    
16     208    
16     128    
64     64     
64     48     
224    336    
-160   32     
240    224    
-288   -176   
64     -608   
176    208    
112    64     
0      80     
-64    -48    
48     112    
96     112    
176    176    
-16    208    
288    512    
-16    368    
48     0      
-128   -112   
160    -16    
176    96     
48     -192   
-96    -144   
64     -800   
64     224    
176    64     
-48    0      
-128   -32    
0      128    
80     64     
144    48     
-112   0      
96     -208   
-192   -144   
-240   -224   
144    224    
32     -144   
64     176    
0      -400   
48     80     
112    128    
-16    64     
128    0      
-16    240    
48     160    
64     80     
-32    -32    
64     192    
80     144    
0      -288   
112    64     
0      80     
64     112    
-48    160    
-16    -48    
128    -848   
0      128    
64     48     
0      48     
96     160    
-16    0      
48     32     
160    32     
0      352    
-176   -176   
432    144    
-176   -128   
112    32     
-16    -416   
-32    144    
208    -80    
-96    -16    
64     -2080  
-208   -32    
32     -112   
256    352    
-80    96     
160    0      
-128   256    
304    -352   
80     208    
-16    -240   
0      128    
32     -48    
-128   96     
272    -320   
0      96     
80     -544   
48     64     
48     144    
64     16     
32     208    
-112   304    
80     -80    
32     -64    
192    32     
80     16     
-224   48     
288    -192   
16     272    
288    -80    
-112   224    
-80    -240   
64     80     
-1440  -192   
944    416    
-544   -192   
1232   -1152  
-640   240    
0      -464   
304    1136   
-336   -512   
240    -416   
-32    -512   
-336   224    
96     -48    
192    48     
0      -240   
272    128    
-416   288    
-16    -2704  
80     768    
-80    -288   
400    128    
32     -480   
416    -496   
-112   -96    
256    128    
-32    -336   
128    512    
96     16     
-32    -256   
-144   48     
48     -1120  
368    256    
-288   -432   
384    -176   
-576   160    
256    -128   
-48    96     
336    272    
-128   128    
144    -208   
0      32     
32     48     
176    16     
64     -128   
176    144    
0      -48    
-112   144    
-320   -16    
160    64     
-240   96     
240    -336   
96     -96    
-64    64     
144    -64    
0      -480   
96     -64    
96     368    
32     -128   
0      -192   
-48    80     
272    160    
-368   272    
16     -192   
224    -160   
-768   112    
16     -128   
144    -176   
96     112    
240    96     
-96    -32    
96     16     
-16    -1136  
176    -16    
80     0      
-48    -16    
192    -96    
-32    336    
-192   -464   
176    -352   
176    -16    
112    -128   
-32    48     
-192   96     
-32    -176   
192    -416   
0      -144   
16     -192   
80     144    
-48    32     
80     96     
0      32     
48     -144   
96     128    
-80    -64    
32     -80    
16     -192   
-640   32     
32     -144   
-32    -48    
80     -160   
48     -32    
48     -304   
-64    48     
128    -2800  
48     208    
-48    -336   
48     -112   
64     -16    
224    352    
-144   112    
96     80     
-576   -80    
32     -48    
-304   -176   
128    -32    
-16    -112   
256    -400   
-288   -32    
256    -944   
32     48     
64     48     
224    272    
-176   144    
288    -16    
-112   64     
-80    -224   
-240   -144   
32     96     
16     -48    
176    -272   
-240   64     
224    -160   
256    208    
-80    -224   
304    -32    
-768   112    
160    0      
0      -16    
64     112    
-96    -128   
16     32     
-208   96     
240    -80    
-416   -240   
-48    -448   
-32    32     
400    -176   
-16    96     
-144   -288   
80     -96    
-192   -16    
192    64     
-144   16     
160    64     
-96    -48    
128    64     
-144   -32    
64     -112   
-32    128    
-80    -144   
128    64     
32     16     
64     64     
48     -208   
-544   0      
-16    0      
-464   256    
-304   -16    
192    96     
-112   16     
352    80     
-112   160    
0      192    
-128   80     
32     0      
160    -192   
256    -48    
-288   48     
-16    -96    
-64    128    
-128   64     
0      128    
16     -80    
-48    -144   
-96    128    
-176   -80    
32     -144   
16     0      
48     64     
-128   -208   
-144   160    
-240   -352   
64     128    
-64    16     
112    128    
-16    -112   
64     64     
-112   32     
-96    528    
992    -128   
-736   208    
304    688    
-784   160    
336    160    
32     -144   
-368   -496   
144    400    
-176   -352   
80     160    
112    48     
-176   208    
-160   -48    
-80    0      
-112   48     
160    -48    
-240   256    
-16    0      
-160   -96    
128    -176   
-160   64     
240    0      
-16    128    
112    -48    
-48    0      
-224   -48    
-96    160    
16     48     
160    48     
-144   48     
-16    -48    
-256   96     
16     16     
-368   16     
128    -16    
0      0      
112    144    
0      64     
-32    -32    
64     0      
-96    144    
48     144    
96     80     
-32    96     
-144   0      
-48    80     
-144   112    
16     176    
-224   0      
-16    32     
-64    -112   
112    48     
-96    160    
128    128    
-112   64     
0      0      
96     144    
-16    112    
-16    128    
-160   -48    
-32    160    
-16    32     
16     128    
-16    -128   
160    32     
-160   -144   
48     0      
80     224    
-80    48     
224    -48    
-80    96     
-64    208    
-112   -48    
32     -32    
32     0      
128    112    
-128   192    
0      96     
-128   -144   
-144   -208   
240    224    
-144   -48    
64     -144   
-208   80     
80     96     
112    224    
-240   -160   
80     0      
80     224    
-48    -16    
32     128    
-208   -96    
128    224    
-208   -48    
112    128    
16     96     
32     304    
-16    96     
-16    -208   
32     -32    
112    256    
48     128    
-128   32     
-16    48     
-16    16     
32     48     
-176   -96    
16     128    
-32    -16    
-32    96     
-16    64     
-16    16     
16     96     
16     80     
48     80     
-64    96     
112    96     
-64    48     
16     80     
-176   -160   
80     128    
-64    112    
160    64     
-256   -48    
0      128    
-32    -160   
16     -144   
-16    -64    
64     320    
96     32     
48     128    
-208   224    
192    -32    
-32    64     
-16    160    
64     256    
0      -160   
32     224    
0      16     
240    0      
-240   240    
272    96     
-32    128    
-64    112    
0      16     
-16    -32    
80     304    
-192   80     
144    32     
-64    32     
160    240    
-32    0      
192    80     
-128   208    
0      -96    
176    320    
-304   32     
368    32     
-192   112    
96     0      
0      80     
32     16     
208    240    
-96    -64    
-80    -16    
-96    96     
-48    -80    
112    -1312  
-32    176    
0      0      
-32    144    
-64    208    
-32    0      
-16    176    
64     96     
192    176    
-96    192    
-112   16     
208    -16    
-16    128    
144    80     
-80    32     
32     -16    
144    128    
-256   -32    
48     128    
64     128    
96     48     
16     96     
16     96     
-160   -32    
192    32     
-48    208    
224    144    
-32    160    
-48    64     
64     64     
-1248  384    
-1296  -1088  
1360   560    
336    448    
544    -80    
-432   224    
48     512    
-32    -128   
-480   -720   
480    144    
80     192    
-176   -128   
96     144    
224    256    
-288   -80    
256    16     
64     16     
80     -1024  
80     288    
160    336    
-48    -144   
64     112    
-176   96     
384    -400   
-80    96     
240    -224   
32     224    
-176   0      
80     -48    
-64    -224   
128    -192   
16     160    
112    224    
48     96     
-16    96     
32     128    
48     240    
48     0      
64     128    
64     80     
16     48     
-32    224    
48     -16    
-16    0      
-80    -96    
128    -112   
144    272    
-32    -224   
-16    -160   
16     -576   
0      64     
176    -208   
-48    176    
32     -16    
208    80     
-112   16     
80     272    
-48    32     
144    32     
64     112    
-112   -128   
112    0      
80     -32    
0      128    
112    -1536  
16     16     
96     144    
0      -16    
96     112    
-96    144    
176    48     
64     176    
32     64     
80     32     
-32    128    
112    -240   
144    112    
48     144    
16     96     
192    -160   
16     192    
-160   48     
112    -16    
176    192    
-240   32     
208    -80    
48     -144   
-272   112    
400    -448   
-112   64     
64     -224   
0      -80    
144    -80    
0      240    
-16    -336   
256    160    
-304   -1136  
304    80     
64     80     
0      144    
16     -48    
16     32     
16     144    
96     -176   
-64    -16    
32     -64    
256    112    
-32    -224   
-32    32     
112    -64    
-80    96     
176    16     
-16    -1392  
272    -64    
-32    -992   
80     -1408  
192    32     
-144   -384   
-32    -16    
32     -1584  
160    -16    
-64    128    
352    144    
-80    112    
-80    -128   
-304   96     
224    -112   
16     -400   
-128   128    
112    -128   
96     -352   
0      16     
224    160    
176    128    
80     -96    
-128   -160   
160    272    
128    48     
16     -144   
-288   -160   
240    -128   
160    80     
0      -80    
-16    -16    
-336   0      
304    64     
-912   64     
112    144    
-16    -48    
144    -432   
64     -80    
-32    -336   
160    80     
-48    64     
16     -208   
144    -48    
-32    32     
336    16     
-64    224    
48     32     
32     -192   
-272   -32    
16     -256   
48     80     
160    -112   
224    512    
-176   16     
128    16     
176    -2832  
-112   -176   
208    -32    
-80    64     
112    -192   
208    48     
-336   -96    
-64    -176   
-496   -128   
272    64     
-336   128    
80     -128   
-16    64     
64     -576   
-352   128    
96     -1344  
48     -16    
64     -112   
16     160    
192    -160   
-64    64     
-128   -160   
144    -96    
-80    128    
208    -272   
-384   80     
-48    128    
192    16     
-32    -208   
96     16     
1264   2816   
-1616  80     
176    0      
304    976    
1184   1296   
-736   -944   
240    624    
-224   752    
400    -272   
-416   208    
-912   -736   
448    208    
-528   -112   
288    256    
-304   -112   
192    -480   
-112   224    
288    -1472  
-64    80     
208    16     
-112   144    
112    368    
-240   80     
-80    -80    
-192   0      
48     -176   
96     -144   
-160   208    
224    -128   
-224   -112   
0      -496   
112    128    
160    -288   
16     80     
-96    -16    
16     -48    
-192   -32    
-16    -48    
-80    0      
16     64     
-48    32     
-32    176    
64     -32    
224    -176   
-64    128    
32     -272   
128    64     
-48    -304   
96     -48    
-32    64     
16     -64    
-16    48     
64     16     
-16    80     
128    16     
-32    32     
-48    -496   
-240   -192   
144    -16    
208    288    
-464   32     
32     144    
16     192    
-1024  -128   
-112   -176   
-1024  32     
-16    -48    
160    -32    
-16    48     
-32    -128   
-224   -96    
144    -64    
-48    32     
-224   -48    
16     16     
-80    -112   
32     176    
128    288    
-80    144    
-160   -64    
-96    -304   
64     -64    
-352   48     
96     80     
-112   16     
48     32     
-32    16     
32     64     
-96    -32    
0      48     
-192   -192   
-160   16     
64     160    
-128   0      
64     112    
-160   -16    
48     96     
-448   -208   
112    128    
-624   32     
240    144    
-80    -48    
-32    16     
48     -128   
48     128    
64     -112   
-160   -144   
160    176    
-208   -80    
48     64     
-288   -80    
-32    48     
-144   -48    
0      96     
-448   -48    
-96    -112   
-48    -96    
96     112    
-96    -304   
-112   112    
160    272    
96     -64    
-80    96     
-144   48     
208    -16    
-128   144    
112    224    
-160   320    
-160   -144   
-32    -32    
-368   -16    
-112   -224   
-128   128    
-16    -32    
160    112    
-48    208    
-96    80     
-16    0      
-48    -128   
96     80     
-64    112    
96     48     
-224   128    
144    128    
-96    -32    
-208   160    
-400   -16    
192    128    
-208   16     
-176   -16    
-144   -112   
16     -16    
96     160    
144    176    
-80    48     
-176   16     
64     208    
-32    176    
-80    -128   
64     -16    
128    64     
-112   128    
-144   112    
-48    -160   
-208   48     
-32    -224   
208    240    
-32    272    
16     432    
-400   128    
-176   -272   
160    -16    
160    48     
352    96     
-128   -16    
0      144    
-368   -96    
-32    0      
128    0      
128    160    
-16    96     
64     224    
96     80     
-16    -16    
0      48     
144    0      
-64    0      
-48    80     
-16    128    
-160   -112   
96     128    
16     -112   
-144   48     
192    -176   
-144   128    
272    96     
-80    208    
16     32     
-80    1488   
-128   336    
-1056  144    
-192   -544   
-624   496    
784    80     
-448   -176   
-400   400    
-192   -16    
-112   352    
288    -208   
-208   544    
-112   -256   
224    176    
-112   16     
96     208    
-64    224    
176    352    
-208   -16    
0      -112   
48     272    
0      -16    
80     112    
-64    -128   
-16    128    
80     112    
0      48     
32     16     
-48    112    
144    96     
-48    64     
48     -16    
-96    64     
16     64     
-16    16     
128    64     
-128   160    
64     32     
32     64     
0      32     
-16    80     
48     96     
48     80     
-32    64     
96     48     
-144   -48    
144    176    
-80    -32    
48     144    
-272   -80    
400    160    
-400   0      
208    160    
-176   64     
224    16     
32     352    
-128   16     
176    112    
16     176    
0      80     
0      32     
64     144    
-32    64     
48     160    
112    -96    
32     192    
-160   -64    
256    -1104  
-176   -32    
240    128    
-112   112    
96     48     
-48    112    
32     64     
64     160    
16     -32    
112    192    
-112   128    
96     64     
16     96     
-16    112    
-16    -32    
-16    -528   
176    -16    
-224   208    
144    96     
64     -80    
144    176    
-96    0      
176    80     
-96    80     
80     128    
-144   64     
64     128    
-64    112    
48     32     
192    32     
-80    -208   
48     48     
112    48     
-16    80     
112    192    
-112   -80    
112    64     
80     160    
112    352    
16     96     
-144   0      
80     176    
64     32     
256    128    
-128   16     
-32    -384   
96     0      
128    -144   
64     80     
16     176    
-16    0      
-16    48     
112    96     
64     384    
288    0      
-112   176    
-208   192    
256    -112   
16     -272   
-272   -32    
144    -304   
64     32     
-16    -352   
144    32     
-80    -48    
-112   -64    
-128   -208   
416    96     
-64    128    
-112   80     
112    224    
16     80     
208    16     
-144   -80    
-16    96     
400    160    
0      288    
288    -240   
-176   272    
-80    -704   
16     272    
160    32     
96     64     
-80    144    
96     160    
0      96     
32     144    
16     240    
144    -160   
16     112    
176    336    
16     16     
-192   -832   
96     304    
128    48     
96     144    
-80    -320   
288    480    
-112   448    
176    144    
-112   -208   
-96    -256   
48     64     
112    -64    
32     -208   
256    -352   
-96    160    
-80    -224   
64     80     
32     -544   
192    304    
-80    -400   
80     144    
-112   112    
144    144    
48     288    
32     -336   
16     176    
48     -144   
64     80     
48     -384   
192    144    
336    -368   
-80    -32    
-240   -160   
128    -16    
112    -336   
16     160    
96     0      
16     48     
-576   848    
-896   -928   
304    192    
400    -160   
1168   -1392  
-352   160    
96     368    
160    -512   
-160   -32    
640    -464   
-192   -32    
-112   128    
336    -528   
0      48     
-32    -688   
16     -1760  
304    -128   
-96    -720   
192    64     
0      -752   
-16    -240   
-64    320    
144    176    
-304   64     
208    -336   
32     -368   
-16    -64    
-16    -368   
-224   -64    
64     -896   
160    64     
32     192    
16     64     
32     -48    
32     0      
112    -128   
-64    -864   
16     -208   
-160   -160   
288    -32    
64     -368   
-144   240    
112    -288   
128    -64    
-128   160    
-32    -48    
-240   80     
144    -288   
-80    -144   
112    -704   
96     64     
32     -528   
-16    -64    
-16    64     
224    -48    
192    -16    
-224   80     
128    0      
272    0      
-128   -224   
272    -96    
-336   -128   
-16    -432   
-48    32     
96     -160   
112    0      
32     -96    
16     -16    
0      -2096  
-80    64     
112    -176   
0      80     
48     -32    
64     48     
-208   -112   
128    -48    
-416   -304   
-64    352    
-1616  80     
96     48     
-80    192    
64     -512   
16     -288   
96     -848   
-96    336    
208    32     
-16    208    
-208   -224   
96     -224   
48     48     
160    32     
-80    16     
-16    16     
-224   -16    
192    -192   
-480   -16    
16     0      
-112   -224   
192    -592   
-32    128    
160    320    
-80    32     
-208   -48    
160    16     
-32    0      
48     16     
-176   -64    
144    0      
-224   -96    
176    -128   
-192   0      
112    -176   
32     192    
64     -240   
96     80     
-16    -1040  
112    128    
-192   -112   
80     -112   
-128   112    
160    80     
-496   0      
0      -112   
-128   192    
224    -112   
-64    144    
-384   -896   
224    80     
80     192    
160    352    
-16    -256   
16     64     
-208   48     
80     -160   
-96    -32    
160    -64    
16     224    
-176   80     
144    208    
-432   -128   
144    -288   
64     -80    
-32    16     
256    -320   
-240   -32    
144    112    
16     -48    
-144   -224   
-32    -144   
0      0      
144    144    
-128   192    
-16    -80    
48     32     
80     -224   
0      64     
16     -160   
80     96     
-784   -256   
176    160    
0      16     
-816   -32    
-32    48     
-176   224    
-192   48     
-80    -48    
80     80     
80     -32    
64     768    
-496   -624   
48     64     
-192   -304   
0      160    
64     -96    
-336   -48    
-192   -208   
-288   0      
96     240    
-320   -224   
48     144    
-288   112    
-80    144    
208    16     
-256   -48    
32     192    
0      -272   
208    -208   
80     144    
-112   -144   
-112   176    
-208   -32    
16     128    
48     128    
128    -64    
-224   96     
-128   -128   
-128   48     
-720   -48    
1376   -2432  
-16    -768   
384    176    
-80    368    
448    384    
-512   -368   
16     64     
224    64     
64     -144   
112    48     
-128   416    
144    -64    
-464   240    
128    -128   
16     112    
144    16     
-272   -80    
128    160    
-176   -240   
80     144    
192    64     
-176   80     
-48    48     
64     48     
48     16     
16     32     
-160   176    
-16    144    
-48    16     
-224   -160   
-64    96     
-1424  -48    
16     160    
0      -96    
-32    -32    
-16    -48    
-16    -240   
-48    16     
0      64     
32     32     
-16    -16    
-192   128    
48     -48    
-112   0      
-32    -208   
-144   192    
-96    -96    
64     272    
-128   -240   
224    128    
-224   32     
64     32     
-112   112    
112    176    
-80    -16    
0      32     
32     96     
80     96     
-144   96
[truncated: 500,011 more chars]
