# Supplementary material for: A Fault Diagnosis Method for One‐Dimensional Vibration Signal Based on Multiresolution tlsDMD and Approximate Entropy
Source: Hindawi journal article supplement (doi:10.1155/2019/3262818), 2019-01-01
Supplement: f1 [file 3262818.f1.zip › 3262818.f1/gear signals/broken teeth fault signal/Data19.txt]

0      -192   
128    80     
-32    -272   
112    16     
-48    -80    
96     192    
-48    64     
48     48     
32     32     
-16    80     
144    0      
-48    0      
144    128    
64     -320   
-16    96     
0      -256   
64     80     
-16    -48    
64     144    
-48    -128   
128    64     
32     -240   
16     80     
64     -16    
112    304    
-48    -128   
176    32     
-48    208    
32     -80    
80     80     
-64    -160   
-32    128    
208    -96    
96     64     
80     -240   
192    496    
-352   -48    
352    64     
-80    160    
176    -368   
-160   -960   
176    -160   
224    -464   
-144   -64    
80     -832   
80     0      
112    32     
32     112    
32     128    
80     -112   
48     -1216  
-16    80     
112    -256   
-144   -176   
32     0      
64     -224   
-1584  -112   
-48    -96    
-16    -112   
192    -112   
128    -160   
-64    -480   
48     -176   
16     80     
112    -64    
-16    -96    
80     80     
128    -272   
0      32     
-96    -16    
0      64     
-304   -64    
112    32     
0      -80    
64     -160   
16     -32    
80     -240   
16     -160   
16     64     
112    64     
160    -336   
-32    80     
16     -160   
-16    -32    
144    -304   
-32    160    
-256   128    
208    -96    
-64    48     
112    -256   
80     -48    
32     48     
-16    224    
128    -976   
32     112    
-80    -80    
240    32     
-192   128    
240    0      
-80    0      
-48    -176   
-560   -192   
48     -304   
-608   128    
-192   -160   
96     -208   
80     0      
144    16     
96     -672   
-80    160    
16     -96    
176    144    
-128   -112   
288    -192   
-128   96     
-32    -64    
-96    112    
-32    -32    
48     80     
32     -16    
-272   -48    
-32    -80    
112    -192   
48     -80    
64     176    
48     -736   
80     224    
0      -16    
80     -112   
-96    -48    
0      -32    
-64    160    
-80    -80    
304    -112   
-48    -48    
-608   16     
80     -256   
-16    144    
176    -80    
0      48     
48     -1616  
160    96     
64     -128   
-48    -96    
-80    -32    
160    16     
-192   16     
112    32     
-480   -32    
112    -256   
-160   -32    
256    -96    
-48    192    
-48    -224   
0      64     
-624   -2416  
-32    -1360  
384    416    
80     752    
48     288    
-464   496    
496    528    
-544   -32    
-496   -512   
272    0      
-16    0      
192    16     
-128   144    
224    -416   
0      272    
-16    -224   
208    16     
208    304    
-48    160    
-64    -32    
0      -160   
-192   -80    
224    -48    
0      96     
128    -32    
-96    32     
-160   -240   
48     128    
-128   -176   
-16    -48    
96     16     
-448   16     
80     -16    
-416   16     
-64    0      
48     -160   
64     144    
48     64     
-16    -64    
16     -48    
0      16     
-464   -144   
32     144    
-96    -240   
48     208    
-32    80     
-320   -80    
-240   -144   
-128   176    
-48    -16    
304    32     
-320   128    
32     -160   
16     144    
-528   -48    
208    32     
-64    -16    
112    176    
-112   -32    
-144   -144   
128    80     
-192   16     
112    64     
-32    144    
-144   112    
-208   -208   
48     80     
-1840  -256   
48     16     
-48    -16    
16     80     
96     0      
-176   96     
112    -208   
-16    96     
-48    208    
0      16     
160    192    
-208   80     
80     -144   
0      32     
-336   16     
-512   -176   
80     64     
-272   32     
48     -208   
64     32     
-384   176    
352    -80    
-96    48     
-48    96     
16     -128   
64     96     
-80    224    
-96    -48    
160    160    
-288   64     
256    64     
64     80     
-928   -96    
160    160    
-144   128    
16     160    
112    -112   
-112   -64    
-112   -128   
112    16     
-160   32     
-96    -32    
-48    176    
16     0      
80     96     
-320   0      
384    416    
-592   208    
112    176    
-16    80     
-208   -112   
176    112    
48     48     
256    336    
-96    144    
32     96     
-256   -112   
-48    176    
-16    -336   
-80    -128   
-624   -224   
256    112    
-448   -80    
-160   64     
176    -48    
-32    -32    
-176   -96    
-272   -32    
336    160    
-16    -112   
-96    -96    
-32    320    
160    176    
-16    16     
-208   112    
-64    48     
48     -16    
160    -16    
-112   48     
-16    80     
-80    -144   
-16    -80    
-96    48     
112    16     
32     48     
0      80     
-16    192    
0      96     
-176   16     
16     224    
-160   -32    
304    -96    
-304   -80    
32     240    
-16    80     
-16    128    
80     144    
0      32     
-80    -80    
80     16     
-288   -32    
32     224    
-352   16     
0      -96    
176    64     
-112   -48    
48     64     
-160   -48    
144    128    
96     368    
-48    208    
-144   96     
192    -96    
96     224    
80     -144   
-64    224    
0      112    
-80    96     
-176   48     
48     80     
-16    -96    
-16    160    
-96    -32    
64     96     
176    128    
-160   -16    
96     112    
112    -128   
-48    192    
-16    192    
112    0      
-32    176    
624    -1712  
336    -464   
480    1120   
-688   656    
-128   -160   
800    544    
-784   -592   
496    336    
-304   -160   
-48    64     
-80    32     
80     -432   
176    384    
-64    -256   
48     96     
-80    -192   
-48    144    
48     48     
64     80     
48     112    
144    96     
-384   32     
144    -176   
0      96     
48     -192   
176    144    
-64    336    
16     0      
-64    -128   
-128   -96    
192    48     
0      128    
128    128    
-176   48     
32     -32    
128    144    
32     256    
48     128    
-32    32     
96     -96    
-32    80     
64     96     
-16    64     
0      176    
-32    16     
64     176    
-96    32     
160    160    
-176   -112   
32     -1456  
-80    0      
64     112    
80     160    
80     128    
-16    112    
16     176    
112    576    
128    384    
112    176    
-224   -96    
80     -80    
-16    16     
48     64     
-32    64     
112    -48    
144    64     
-48    192    
176    64     
-16    -16    
-32    144    
48     96     
112    64     
-32    80     
160    96     
-144   160    
48     80     
128    176    
-176   48     
-144   0      
80     -80    
-96    224    
160    -1040  
32     144    
96     96     
32     128    
32     80     
48     96     
-16    -176   
80     96     
-64    -32    
128    128    
-32    96     
112    80     
-48    80     
16     -368   
-16    80     
112    -464   
-112   -80    
176    -496   
-160   64     
224    -144   
-32    80     
-96    -240   
128    112    
-16    48     
128    144    
-160   -64    
128    -160   
-80    32     
192    -144   
-112   80     
112    -368   
80     96     
32     -3024  
16     -16    
0      0      
112    224    
0      -80    
16     48     
-96    176    
208    48     
96     -32    
-112   128    
144    96     
96     0      
-160   176    
160    320    
-128   32     
336    -1200  
-256   192    
208    32     
96     144    
-208   96     
320    96     
-176   64     
32     48     
48     96     
96     -288   
144    176    
-48    -288   
16     80     
0      0      
-16    -48    
160    -160   
-160   80     
304    64     
16     160    
-192   144    
240    -64    
16     -112   
256    -32    
32     144    
16     -16    
-16    -144   
48     -48    
96     208    
0      -80    
-112   -64    
64     160    
-48    160    
-96    -160   
-32    -80    
256    -32    
128    -32    
160    208    
-96    64     
-64    -16    
112    -416   
592    80     
-96    144    
-192   96     
-240   16     
16     -48    
96     -336   
128    -64    
48     144    
-80    -240   
176    -240   
-16    0      
176    -400   
144    0      
-80    -752   
96     -128   
112    256    
96     -16    
32     32     
-48    -80    
0      16     
-144   -160   
80     -640   
128    48     
80     -256   
192    -64    
-768   -144   
224    -528   
-32    -80    
64     -304   
0      0      
-624   -704   
1072   1840   
-1072  352    
192    -768   
160    -1360  
480    224    
-128   -128   
-704   -192   
512    464    
176    96     
0      -80    
-224   -352   
128    112    
96     16     
112    32     
-112   -592   
0      -48    
16     -272   
112    -208   
80     -208   
16     32     
128    -80    
-32    160    
160    32     
-16    16     
-208   -128   
-32    64     
-272   32     
128    -240   
-48    -224   
80     -112   
80     0      
96     -192   
48     -32    
-48    -1040  
160    80     
16     -320   
64     96     
32     -80    
144    64     
-96    16     
64     -16    
-176   0      
80     -64    
-48    64     
48     -64    
-32    -16    
208    80     
-112   -112   
80     -608   
-224   64     
368    -112   
-208   144    
240    32     
-48    0      
96     -48    
96     160    
-176   -48    
96     -48    
-128   48     
80     16     
-48    16     
112    -96    
-64    0      
80     -816   
160    128    
-48    -352   
-16    32     
-16    -128   
112    -240   
-144   32     
-96    -144   
96     32     
-96    16     
-224   32     
48     -208   
-1056  64     
-80    -272   
160    0      
16     -256   
-80    32     
176    -1072  
-96    160    
-48    0      
128    112    
96     -160   
48     64     
-224   288    
80     -112   
-320   -112   
-80    -80    
160    32     
16     -112   
32     80     
64     -160   
96     192    
-48    -144   
0      -48    
-160   -16    
80     64     
16     96     
32     -80    
-16    32     
80     -32    
-176   -96    
80     -96    
-64    304    
256    16     
-32    48     
48     -496   
-160   160    
96     16     
80     32     
-240   -96    
144    128    
-112   0      
64     96     
-224   -16    
48     -48    
-96    -128   
-64    -32    
112    288    
-1328  -112   
32     112    
-560   -256   
224    128    
64     -80    
-912   -176   
80     -176   
-144   80     
-64    -80    
208    48     
-80    -48    
96     224    
-48    80     
272    -32    
-288   -144   
-224   -144   
32     -32    
0      -80    
64     0      
-64    160    
-288   16     
288    96     
-400   -144   
-96    -112   
-512   176    
256    -32    
-16    144    
-48    32     
-80    -176   
112    144    
96     -160   
-80    96     
96     48     
-240   -96    
32     208    
-336   -96    
112    64     
-96    -176   
-112   -128   
-432   80     
64     256    
-2112  96     
-160   -192   
-208   -16    
416    416    
-176   224    
-144   -128   
-128   -224   
-80    -176   
80     144    
-32    96     
48     -224   
144    304    
-192   80     
-176   32     
-80    -48    
-208   -192   
32     208    
-80    -32    
96     192    
-160   -224   
64     80     
16     48     
96     16     
-80    48     
96     160    
-64    32     
-128   -16    
-64    112    
-112   224    
128    336    
16     -304   
-128   128    
-1776  64     
240    16     
-128   -112   
-96    160    
-672   1280   
-96    2384   
-1152  608    
320    -320   
-448   -416   
144    -256   
160    144    
-720   -464   
496    672    
80     48     
-336   -64    
-832   -64    
192    336    
64     -144   
-128   96     
-80    64     
96     -80    
112    160    
0      -80    
-96    -16    
-48    -32    
336    432    
0      64     
-176   160    
-384   -32    
64     -64    
-320   32     
208    0      
-32    -96    
-128   32     
0      128    
48     -16    
-64    144    
96     64     
-48    112    
-64    -16    
64     192    
128    -32    
-176   -288   
-112   -208   
128    176    
-80    0      
112    128    
0      -32    
32     -128   
-96    128    
96     16     
96     176    
-16    160    
0      144    
-288   -176   
0      0      
-112   0      
112    320    
-176   -16    
-32    48     
-224   -272   
112    96     
-80    176    
-64    -64    
208    240    
-112   -80    
32     96     
48     256    
-32    16     
0      48     
16     96     
-64    -16    
176    128    
-128   64     
80     144    
-112   -16    
0      64     
32     144    
32     48     
64     128    
-64    -16    
-160   -416   
-16    -64    
-112   192    
-48    -32    
-144   256    
-16    -224   
208    80     
-96    -208   
-16    288    
112    96     
48     160    
-224   -32    
80     -176   
48     128    
96     112    
-80    176    
-48    32     
-16    64     
144    48     
-32    112    
-96    -224   
-32    -80    
32     16     
-32    192    
176    192    
-64    16     
-48    96     
112    80     
32     96     
-32    64     
80     176    
-32    32     
112    144    
-48    112    
-32    32     
16     48     
-64    0      
160    112    
-128   128    
96     96     
-16    80     
144    208    
48     224    
48     128    
32     32     
-16    64     
48     48     
128    -32    
-96    192    
16     96     
192    560    
-176   80     
32     -272   
-208   -736   
128    144    
144    112    
-32    112    
-128   144    
128    192    
-16    -64    
224    -80    
-304   176    
-48    -48    
16     -96    
-448   -128   
144    -80    
32     96     
112    32     
-48    -656   
64     64     
80     128    
224    0      
-224   32     
112    128    
16     160    
96     96     
80     0      
-96    96     
64     16     
32     128    
-128   -144   
304    192    
160    112    
-96    -432   
48     112    
128    -16    
288    -64    
-128   -64    
240    288    
-16    208    
64     -32    
-128   -48    
-80    -208   
144    -48    
288    384    
-288   80     
176    -336   
-112   128    
16     -288   
80     384    
-128   -2704  
-32    -128   
192    368    
48     32     
-80    0      
64     224    
16     -576   
48     320    
-16    -80    
96     96     
-32    416    
-128   16     
304    64     
-64    -320   
48     48     
128    -240   
-64    32     
112    -352   
-96    -48    
80     0      
-48    48     
80     80     
-48    192    
-368   1328   
512    816    
-1552  -192   
-224   -1360  
608    416    
-240   -144   
800    208    
-416   304    
-32    -224   
96     -2320  
112    -64    
64     368    
-16    80     
0      128    
80     128    
112    48     
-96    112    
160    112    
0      -208   
112    144    
64     -160   
-48    128    
-32    -432   
128    32     
-16    -464   
272    80     
-192   176    
80     224    
-112   -16    
160    48     
-144   -16    
160    -32    
-48    160    
112    -416   
0      128    
112    -256   
176    208    
-80    -240   
48     64     
0      -256   
32     128    
112    64     
64     208    
128    48     
-48    208    
-64    -16    
160    -96    
-160   -48    
400    176    
-336   80     
320    -288   
-64    176    
-16    -32    
128    64     
32     32     
-32    160    
128    144    
-144   112    
96     -80    
32     192    
112    -80    
208    -176   
-16    224    
-16    -80    
48     80     
112    -208   
96     128    
-64    -128   
160    -32    
80     -800   
-48    -1312  
32     -16    
144    -320   
-32    128    
48     -288   
112    -48    
112    32     
80     -416   
224    -32    
16     -704   
128    -32    
16     80     
80     64     
-64    0      
208    -336   
-16    144    
-32    240    
16     -352   
144    160    
-208   -112   
144    -256   
-32    -176   
96     -112   
-16    0      
64     -160   
64     48     
48     -256   
64     -240   
-16    144    
48     -48    
32     -64    
208    112    
-96    16     
-16    -16    
-32    -32    
-64    -240   
-320   64     
-32    160    
-48    -192   
48     -336   
-48    -320   
96     -576   
80     -80    
32     96     
-224   64     
-144   -384   
80     0      
16     -496   
-64    -256   
-48    16     
272    -80    
-464   -112   
96     -96    
48     -48    
144    -96    
-160   -272   
160    -48    
-128   -208   
32     -144   
-32    -48    
64     -192   
48     -48    
-80    -208   
-48    -240   
-112   32     
288    -80    
-80    128    
-240   -304   
-208   -32    
-32    -336   
-16    48     
32     -272   
-80    0      
32     -432   
32     80     
64     -16    
32     -32    
-144   -96    
176    400    
-80    160    
-48    -576   
-144   -112   
0      -160   
-272   -32    
96     -16    
16     -432   
64     -336   
-112   32     
128    -416   
-64    -144   
-128   0      
112    -48    
96     176    
64     16     
-80    0      
64     240    
-304   -48    
96     -464   
-368   32     
400    80     
-1504  -48    
128    -432   
32     176    
64     -288   
80     48     
-16    -160   
144    16     
48     -80    
0      -160   
96     160    
112    128    
48     16     
-96    16     
-32    -128   
0      -80    
32     144    
16     -128   
48     -32    
224    -224   
0      400    
144    -1584  
0      -160   
-384   -16    
0      144    
-352   -80    
288    96     
-144   208    
160    -96    
-384   -48    
1280   2384   
-2096  -2096  
448    -176   
480    320    
640    320    
-96    -640   
256    656    
32     448    
-224   -128   
-176   176    
48     -112   
0      48     
-496   32     
48     224    
-288   -144   
272    144    
224    320    
-496   -320   
128    96     
-544   -272   
240    528    
-288   16     
-64    160    
208    64     
-512   -112   
-112   288    
-112   -16    
16     -32    
0      64     
128    224    
-224   -96    
-80    144    
-368   -320   
-80    112    
-32    176    
-208   16     
-16    -128   
-256   -112   
352    576    
80     -240   
-160   32     
-704   -80    
160    224    
-144   32     
-48    -128   
-208   -96    
144    -96    
80     112    
-48    -112   
144    -96    
64     176    
-256   272    
160    -32    
-48    144    
-144   -224   
96     48     
32     304    
-64    208    
-2416  -288   
96     368    
-304   -144   
160    80     
-16    64     
224    -112   
-16    48     
160    -80    
32     64     
0      32     
0      32     
-96    48     
16     64     
-192   -80    
-128   16     
-976   -32    
16     160    
32     32     
16     -208   
-208   -288   
32     -208   
-48    16     
-240   240    
128    64     
-128   96     
80     -64    
-64    16     
-48    64     
-96    -80    
-112   0      
-288   -256   
0      -48    
80     -96    
-32    128    
-80    -96    
-48    -48    
-176   -48    
208    128    
-48    208    
240    416    
-400   -160   
224    -80    
-128   64     
64     80     
48     80     
-304   -16    
240    160    
-848   0      
32     32     
48     192    
-176   -16    
64     -256   
0      -160   
-32    384    
0      0      
-48    64     
-208   16     
96     -48    
144    48     
-160   128    
-16    -16    
-16    80     
-320   -112   
16     192    
-16    32     
-48    0      
-192   -128   
160    -16    
-112   -304   
-112   -352   
-176   -416   
464    560    
-304   80     
64     -80    
-112   -192   
0      -80    
-64    160    
-352   0      
32     256    
32     64     
96     32     
64     272    
-176   0      
96     48     
112    -192   
-160   96     
96     64     
48     112    
-32    80     
-16    176    
32     448    
80     368    
-192   -112   
64     -48    
0      80     
16     208    
-96    96     
-32    -272   
448    112    
-208   592    
288    80     
-208   160    
272    208    
-32    -80    
-80    -48    
160    -128   
16     64     
-32    112    
-112   32     
96     -32    
-64    80     
80     -80    
-144   128    
-128   96     
-192   160    
-224   96     
128    112    
128    -160   
80     176    
-16    48     
-192   -320   
80     304    
-192   96     
144    112    
-80    96     
112    16     
64     -16    
192    -64    
-32    96     
-16    48     
-128   320    
-288   112    
128    80     
-16    -64    
160    -48    
-32    96     
-256   128    
32     32     
144    176    
48     0      
176    176    
2128   1872   
-1536  192    
176    -144   
-112   704    
-192   -48    
80     32     
-576   -656   
576    656    
-272   -336   
-32    528    
-96    -96    
224    192    
-240   288    
192    -224   
-96    208    
144    -240   
-16    304    
144    -32    
-48    144    
64     0      
-144   0      
80     64     
-80    336    
208    48     
-272   -16    
16     -2464  
-96    128    
144    128    
16     112    
80     -32    
-32    160    
112    0      
32     176    
-144   64     
160    64     
-112   16     
240    352    
16     256    
32     32     
-144   48     
176    -672   
16     192    
64     48     
48     176    
32     112    
32     48     
16     64     
-16    192    
32     -32    
32     160    
-96    -128   
224    208    
-144   -48    
0      -224   
80     -48    
16     -464   
-32    96     
32     176    
32     96     
80     96     
-64    32     
96     96     
-16    192    
-64    -160   
176    160    
-208   96     
80     96     
-96    -32    
64     -96    
48     32     
80     -224   
-16    128    
128    -800   
48     32     
32     272    
-64    -16    
256    176    
-128   400    
48     -288   
256    64     
-192   16     
80     208    
-16    96     
224    112    
-144   272    
144    -192   
176    336    
48     -352   
48     48     
112    -528   
80     64     
16     -208   
64     144    
-160   32     
112    -80    
-48    -48    
-80    32     
224    80     
-240   -336   
96     -64    
48     -464   
48     48     
32     -160   
144    80     
0      -1232  
-80    32     
224    96     
-208   -16    
-16    0      
-16    80     
16     16     
160    272    
-80    80     
96     -32    
96     80     
16     -192   
64     240    
-96    -112   
160    272    
16     -128   
80     -320   
-48    -112   
144    272    
-16    32     
-48    96     
-192   -384   
304    16     
-192   160    
176    32     
96     -256   
-96    -192   
176    304    
96     -256   
0      48     
192    -224   
-176   64     
192    -32    
-304   48     
32     32     
384    192    
-112   -32    
64     -192   
-80    256    
144    32     
16     112    
112    -96    
192    640    
-256   -496   
144    -304   
48     96     
112    80     
48     160    
-32    -48    
-16    -16    
96     -112   
144    448    
0      -160   
224    256    
-32    -176   
128    -112   
-368   -480   
160    0      
176    -176   
192    192    
160    -112   
16     -1408  
-128   -352   
448    -1792  
-80    400    
-112   192    
-320   16     
-48    -32    
160    -1472  
272    144    
-240   -2752  
-128   -96    
128    -16    
176    128    
240    240    
-256   96     
-144   -336   
144    -48    
272    16     
48     208    
-272   -112   
-32    -176   
112    16     
80     -240   
0      -144   
0      -288   
208    -16    
64     176    
-48    -256   
-32    -320   
-240   -48    
368    -128   
0      224    
208    -80    
-128   0      
-1456  64     
544    96     
-816   -864   
1376   -64    
288    288    
-912   -720   
320    320    
32     -576   
304    400    
-464   0      
80     -384   
-208   48     
624    32     
-48    -160   
-432   -288   
-304   -64    
352    -32    
-176   -32    
-16    -256   
-112   160    
-80    -128   
16     288    
-176   -32    
32     80     
-192   -1936  
48     208    
48     -32    
80     688    
-400   -176   
400    16     
-208   -32    
464    -208   
-448   64     
48     -608   
-784   16     
-208   -528   
352    -32    
272    -48    
192    304    
-272   -32    
-144   -32    
16     -64    
128    16     
144    -80    
0      -32    
-80    64     
128    -16    
-448   192    
-64    -32    
-80    -240   
32     -96    
-480   112    
192    -80    
48     224    
-16    -624   
-144   32     
64     -64    
192    0      
288    256    
-256   0      
-112   112    
64     -80    
16     -64    
0      256    
128    -16    
-192   -32    
80     -32    
160    -288   
96     176    
-112   -432   
64     208    
0      -1392  
64     -288   
-208   -128   
-64    -160   
16     0      
-32    96     
-32    208    
352    224    
16     192    
320    368    
-336   -176   
368    16     
-384   368    
416    -352   
-192   208    
-272   16     
80     -48    
-64    112    
160    -16    
-16    96     
-32    48     
-80    16     
112    -80    
-48    96     
-32    -48    
112    32     
-16    -112   
96     80     
384    48     
-144   208    
32     176    
16     80     
-64    16     
192    144    
-64    208    
-16    32     
160    80     
-128   -176   
-112   -224   
-80    -336   
-96    16     
-112   192    
-176   288    
-496   -304   
-896   -240   
-96    0      
-80    176    
32     -352   
-736   0      
-128   112    
128    -32    
-144   80     
-64    192    
240    64     
-32    -432   
16     48     
-576   -464   
176    -80    
-288   64     
-288   0      
128    0      
-176   -32    
-160   -96    
-304   -144   
-112   32     
128    96     
80     32     
-176   48     
-112   -64    
-64    -192   
176    176    
-128   0      
64     80     
32     288    
-64    -16    
-32    80     
-160   48     
144    128    
-160   -112   
-64    128    
-144   64     
176    32     
-1744  -32    
0      0      
-32    -192   
-48    176    
48     0      
48     -192   
112    192    
-224   80     
0      64     
16     -208   
-16    176    
0      80     
-32    176    
-224   64     
32     -112   
-992   -96    
48     16     
-16    -48    
16     176    
-32    -80    
64     32     
128    -64    
-64    32     
-80    224    
-112   64     
-112   -16    
96     16     
-16    80     
-208   -80    
32     112    
-368   16     
128    208    
0      -112   
160    96     
0      0      
-80    64     
-64    112    
48     -32    
-96    112    
112    48     
-80    96     
-32    -80    
-16    48     
-128   -16    
128    336    
-144   -16    
0      352    
-192   704    
464    1696   
272    96     
-992   -240   
176    64     
288    464    
-784   -176   
416    208    
-544   48     
112    -400   
-192   416    
128    -576   
-272   608    
-96    -624   
-96    672    
-96    -800   
-288   480    
176    -192   
48     352    
32     -112   
-32    96     
-16    0      
-32    160    
0      -32    
-48    -80    
112    400    
-80    96     
112    80     
-368   -80    
80     80     
192    32     
-64    160    
96     0      
-208   176    
96     -64    
-48    0      
48     -208   
-96    320    
272    64     
-48    112    
-80    -48    
-208   80     
192    112    
0      112    
-112   -16    
-144   32     
-16    96     
96     -160   
64     32     
-192   160    
144    0      
48     80     
-64    112    
16     96     
-64    -16    
-64    0      
-80    128    
64     96     
-80    208    
-16    -64    
128    48     
-80    112    
64     112    
32     -16    
144    176    
-176   144    
128    192    
-96    0      
80     32     
0      112    
-112   16     
112    160    
-16    48     
-64    0      
-16    -272   
32     -16    
272    336    
-240   48     
256    80     
16     96     
-16    48     
64     32     
48     112    
80     336    
144    80     
128    144    
0      -32    
-48    208    
-336   -144   
320    -32    
-96    176    
16     -16    
112    112    
16     64     
-16    48     
-240   -176   
-32    16     
32     192    
128    112    
-160   -176   
96     352    
-128   96     
-368   112    
-16    -144   
48     -128   
48     304    
80     128    
-80    -336   
208    96     
0      128    
96     80     
80     208    
48     48     
0      80     
-112   16     
112    112    
48     320    
64     176    
48     336    
-160   80     
320    -32    
-64    0      
32     48     
-64    112    
-96    0      
240    48     
-112   80     
96     96     
0      160    
64     -16    
-272   -16    
208    -128   
16     304    
128    48     
-16    -2880  
-80    128    
-80    -240   
16     -128   
208    64     
-224   -64    
240    176    
-16    128    
-64    0      
96     -32    
48     0      
-32    256    
112    16     
-224   -224   
80     32     
96     -688   
32     112    
64     112    
80     96     
176    80     
-96    96     
32     96     
64     96     
48     320    
96     -64    
96     16     
-32    224    
64     -16    
-112   -144   
48     112    
-32    32     
144    144    
-176   -512   
144    224    
-112   80     
176    96     
-32    144    
128    32     
32     128    
-80    96     
144    32     
-32    192    
-32    0      
96     -192   
112    208    
16     -16    
-112   48     
64     -1744  
48     160    
112    -128   
-80    80     
272    144    
-80    96     
192    -80    
-64    224    
304    -208   
-16    96     
-192   16     
304    -112   
-192   96     
112    -160   
-16    144    
80     -176   
64     64     
144    -1104  
864    1104   
624    320    
-976   -576   
-464   48     
-48    48     
-32    -272   
624    -352   
-16    1248   
-304   -80    
80     -16    
208    80     
-224   288    
288    -480   
-128   208    
160    -928   
32     256    
48     -48    
112    320    
-96    -144   
272    112    
-80    -128   
96     -416   
96     416    
-16    -416   
64     0      
48     -272   
64     224    
128    -240   
112    128    
-192   -480   
144    0      
16     48     
0      112    
48     0      
-16    80     
96     112    
32     -336   
-112   608    
96     -32    
-320   -272   
112    -64    
240    160    
0      -144   
16     272    
-16    -64    
-64    96     
48     144    
256    640    
-128   144    
240    -2080  
-112   -960   
112    -192   
16     32     
48     -96    
64     64     
192    -128   
0      224    
48     -64    
128    272    
-144   -96    
96     -784   
-32    16     
112    -256   
-48    -112   
-288   32     
0      -352   
80     -48    
0      -16    
80     -304   
32     -2288  
-16    -96    
48     160    
0      -48    
144    208    
0      -112   
48     -320   
-64    -64    
128    -208   
32     -64    
-272   -352   
96     -96    
-160   -64    
128    -320   
-128   -416   
-176   -400   
416    -32    
-32    -656   
-192   160    
64     -464   
-32    96     
0      -192   
96     160    
128    176    
-112   0      
-432   -112   
320    -16    
-352   -448   
128    -592   
192    112    
144    0      
256    160    
-256   -480   
16     -112   
144    -64    
32     96     
80     304    
16     112    
-16    -80    
-128   -304   
48     16     
16     -160   
-64    144    
96     16     
-48    64     
112    -272   
16     -80    
16     -752   
-48    -160   
16     -912   
96     288    
256    352    
0      176    
-16    96     
-288   -80    
-32    0      
160    400    
-400   32     
304    64     
-1744  -144   
32     0      
-32    -112   
144    32     
144    288    
112    -288   
96     48     
-64    -192   
-112   80     
96     80     
224    -96    
-208   64     
-96    0      
112    -16    
0      -48    
-208   -32    
-32    -96    
-208   80     
-16    96     
80     -320   
80     -176   
-176   160    
368    -32    
-96    -64    
16     16     
0      -144   
-176   -48    
48     -80    
-656   -160   
96     -16    
-208   160    
96     -176   
-688   0      
32     -304   
96     144    
64     -736   
-96    32     
-112   48     
128    16     
-448   32     
48     -272   
16     -160   
352    96     
-400   224    
-48    144    
-176   -48    
240    32     
-32    -16    
144    -304   
48     -224   
208    80     
-240   176    
-176   32     
96     32     
-144   16     
144    80     
-176   16     
16     0      
-96    128    
112    -224   
16     -64    
80     -208   
-96    208    
144    -144   
-48    64     
-224   -80    
-272   -176   
-32    -80    
-512   96     
-64    32     
128    -16    
928    -16    
-656   -1104  
-96    -368   
-384   848    
-352   -368   
16     592    
-320   -864   
272    944    
-128   -576   
-480   128    
176    -496   
-176   912    
-96    -208   
64     592    
-320   -416   
-16    128    
-160   64     
160    160    
16     -144   
-16    -80    
-128   128    
288    -80    
-560   144    
208    -128   
-256   224    
-128   -192   
-128   336    
0      -176   
-112   192    
-96    -176   
-80    192    
-384   -160   
32     144    
48     48     
112    128    
-80    -192   
-48    64     
-128   -288   
80     256    
128    64     
-112   32     
-112   64     
-16    -48    
-16    128    
-416   -64    
-48    144    
-352   -16    
176    368    
-1264  -112   
80     -32    
-144   -256   
80     160    
-144   -112   
80     80     
-32    32     
-112   48     
-80    -16    
-16    48     
-128   160    
0      -32    
48     64     
0      0      
-48    96     
-336   -112   
112    144    
32     48     
176    96     
-32    64     
-144   -16    
48     128    
-48    -48    
128    224    
-144   -192   
176    128    
-160   208    
48     256    
-320   -144   
208    64     
-592   48     
16     144    
96     -48    
-144   96     
0      -48    
-64    80     
240    208    
-80    -32    
-48    208    
176    128    
112    -176   
-256   48     
32     -64    
-32    112    
64     208    
-256   -64    
48     48     
-576   -192   
48     16     
-32    -48    
-144   32     
-32    -144   
16     32     
0      0      
64     96     
-32    64     
-32    112    
-48    96     
128    96     
-16    -192   
-96    -112   
16     224    
-144   -48    
32     16     
-48    32     
144    240    
-32    64     
32     80     
-128   -32    
32     32     
16     224    
96     208    
64     304    
-208   -96    
-112   -80    
-112   80     
96     272    
32     -112   
-144   0      
-96    96     
16     64     
112    144    
-144   96     
48     112    
-128   -112   
0      16     
-16    96     
48     80     
-384   -176   
128    48     
-336   -80    
64     176    
16     64     
16     96     
16     48     
0      -32    
32     112    
-80    64     
-16    -48    
128    352    
-80    288    
-32    80     
-80    -192   
112    -64    
80     160    
-48    16     
-128   -48    
112    128    
32     256    
-32    0      
-48    -48    
32     320    
-16    112    
-48    -48    
-144   -16    
128    192    
-176   16     
112    32     
-96    192    
48     -96    
32     -32    
-208   208    
112    128    
32     80     
-64    128    
112    -48    
96     144    
-80    64     
112    -192   
0      208    
-160   80     
80     16     
-16    160    
64     16     
16     160    
-96    -32    
0      144    
240    48     
-80    48     
128    -16    
0      176    
160    -16    
32     160    
-112   96     
160    48     
80     144    
-240   80     
320    16     
-96    288    
208    32     
-48    16     
352    736    
-96    -1232  
-352   240    
-80    448    
-80    496    
-592   -784   
864    0      
-272   -416   
336    -32    
-480   64     
-16    32     
32     384    
0      224    
-32    272    
-16    -384   
-16    32     
64     -16    
288    320    
-16    -16    
-80    -16    
128    304    
-144   -16    
-112   192    
-96    0      
256    32     
-80    -48    
288    352    
-288   112    
256    -80    
-352   16     
352    -1760  
32     160    
64     128    
-48    272    
16     32     
128    128    
-64    32     
80     64     
-112   16     
96     160    
64     64     
0      176    
-16    80     
144    -256   
-80    160    
80     -1120  
-48    160    
80     112    
-16    144    
16     -64    
176    32     
-64    128    
32     208    
-64    -160   
144    112    
-80    96     
112    192    
-32    32     
112    -288   
-128   112    
192    -384   
96     192    
-64    -80    
32     160    
32     -128   
144    128    
-64    224    
96     128    
48     -64    
-16    208    
16     64     
32     64     
96     80     
64     -128   
96     64     
-16    -304   
48     16     
-144   -1088  
0      96     
16     272    
96     48     
64     144    
-96    144    
112    80     
80     0      
112    -224   
-96    128    
64     144    
128    448    
-128   -64    
224    -96    
32     160    
-16    -288   
80     176    
-96    -384   
0      -176   
432    -272   
-96    304    
64     304    
32     160    
0      -16    
-32    16     
80     64     
64     -64    
-96    48     
112    -1184  
64     64     
-64    -112   
160    128    
0      -496   
-96    96     
256    96     
-80    208    
80     80     
-80    80     
208    96     
-112   -528   
112    112    
32     -544   
-80    -16    
144    240    
144    224    
224    32     
-144   272    
96     352    
80     112    
-80    240    
144    64     
240    80     
-48    272    
-64    112    
96     64     
64     64     
208    128    
272    432    
144    208    
-80    128    
-64    -336   
-128   128    
144    -272   
160    16     
0      272    
176    -1280  
32     96     
-224   -336   
-32    -368   
16     -272   
224    192    
-96    -128   
288    80     
-32    -240   
-144   112    
112    -96    
48     96     
80     -48    
128    -1296  
16     48     
96     -1104  
-160   -112   
-832   -96    
128    160    
0      112    
192    -512   
-96    0      
160    -608   
128    80     
-160   48     
176    16     
-48    -352   
16     64     
112    -416   
16     192    
-64    -336   
64     0      
48     224    
16     -112   
-32    -80    
80     -416   
144    -96    
32     -400   
32     -80    
80     -672   
112    -112   
64     -96    
80     128    
128    -240   
64     128    
-96    48     
128    -272   
-64    0      
64     -128   
-480   16     
48     -144   
-48    -64    
0      -80    
112    -64    
112    -1840  
48     -64    
-64    32     
-864   -2048  
608    160    
-1264  64     
128    -224   
144    -496   
-336   112    
-128   1024   
-368   -624   
-160   624    
272    -832   
80     528    
-96    -288   
432    32     
-160   -208   
208    224    
-272   -192   
368    128    
112    144    
16     -16    
-96    -192   
64     32     
-160   112    
0      96     
48     -32    
0      -272   
48     -272   
80     -160   
240    -160   
16     224    
96     -608   
-64    32     
64     32     
64     -32    
-128   -96    
32     -32    
-16    -32    
80     -16    
-384   -48    
-16    -64    
-1232  -96    
32     -240   
-32    0      
80     16     
272    208    
-80    -576   
-112   -64    
-16    -64    
256    144    
-16    224    
16     64     
-80    -112   
-32    16     
-352   -48    
112    -16    
-128   208    
-96    -64    
32     -16    
16     -448   
80     160    
48     -528   
176    208    
-192   256    
80     144    
-80    192    
80     -256   
-128   16     
288    128    
-80    -80    
32     16     
128    160    
32     -32    
112    -80    
-32    -256   
-64    240    
-16    -112   
176    -32    
-368   -240   
96     -352   
-224   16     
-112   -144   
-112   -96    
128    -80    
-112   -32    
176    192    
-48    272    
-48    -240   
-144   48     
80     -224   
112    144    
-368   -144   
48     32     
-96    -48    
-112   96     
-48    -96    
192    80     
-112   16     
96     112    
-192   -112   
80     -80    
-320   64     
-992   -32    
0      32     
-128   -80    
80     112    
-176   -48    
-640   -64    
0      64     
-256   16     
-80    -48    
-80    128    
-160   0      
-48    0      
-112   64     
64     -96    
48     64     
-176   -32    
32     144    
48     -112   
-16    144    
0      -48    
-224   -128   
-16    16     
-160   192    
112    -32    
-160   64     
-160   16     
-800   80     
-144   -432   
160    224    
-272   224    
240    80     
-176   -32    
-48    -144   
-48    144    
144    64     
-96    128    
-32    -48    
128    80     
-192   80     
96     -144   
-128   96     
16     192    
-96    80     
-160   -32    
144    112    
-160   -96    
96     112    
240    608    
-544   128    
576    -64    
-256   240    
0      16     
-128   -176   
-32    160    
-32    64     
240    -96    
-224   160    
-48    0      
-1392  -80    
-64    288    
-144   -208   
240    128    
144    32     
-16    144    
-32    -48    
-224   -96    
128    208    
-176   32     
112    192    
-480   80     
240    -208   
-176   128    
-64    48     
-528   -16    
240    -112   
-176   -32    
160    16     
0      64     
-160   16     
0      -16    
32     80     
-48    80     
-32    256    
-80    -80    
16     48     
-112   64     
-288   -64    
-16    112    
-144   64     
384    -192   
-464   32     
-144   0      
96     112    
-224   -80    
128    16     
-48    176    
272    -176   
-224   192    
48     96     
-784   -1232  
-912   -368   
1360   544    
736    384    
-656   -384   
512    -128   
-1376  -896   
-208   208    
224    -112   
-160   -96    
48     160    
80     80     
176    256    
-240   -48    
0      -112   
-16    -128   
-112   48     
-32    -112   
256    192    
-288   -128   
176    496    
-656   32     
16     96     
-96    -48    
-48    -64    
80     32     
-16    -96    
-16    48     
-16    112    
0      144    
176    -96    
-128   128    
-32    -32    
32     144    
-160   -16    
64     48     
-208   -160   
192    -16    
16     176    
128    48     
-128   48     
-32    224    
16     144    
48     -64    
48     128    
-96    48     
96     80     
-144   0      
64     80     
-192   80     
32     96     
240    144    
-240   32     
192    48     
-176   112    
32     96     
64     64     
0      0      
-64    48     
80     144    
-336   -128   
112    160    
-144   32     
64     48     
16     160    
-160   0      
128    -128   
160    -16    
64     192    
128    192    
-128   256    
128    32     
80     64     
-96    176    
-48    80     
48     16     
-32    -64    
128    -32    
80     64     
-48    112    
16     160    
-16    144    
128    -16    
320    304    
-416   224    
192    -64    
80     -64    
48     64     
96     48     
112    304    
-208   112    
336    112    
-288   112    
96     0      
160    0      
0      -32    
144    272    
-240   96     
160    48     
-16    -32    
-32    48     
48     112    
0      144    
-16    -16    
-80    -48    
48     -160   
-32    176    
32     0      
-32    -192   
80     96     
-32    192    
128    240    
0      112    
-48    16     
224    128    
0      240    
160    192    
0      80     
-16    48     
-96    208    
240    -208   
-160   -48    
-288   48     
240    -144   
240    96     
-80    -112   
240    256    
-48    144    
272    128    
-304   32     
80     96     
-32    160    
192    96     
-48    -32    
-48    64     
-176   176    
64     -48    
192    80     
-96    -176   
64     96     
-192   -1952  
64     128    
96     64     
160    160    
224    176    
-176   224    
176    80     
16     144    
-176   -208   
96     96     
-48    32     
176    128    
48     112    
16     -288   
80     112    
-48    -720   
144    16     
48     288    
-48    0      
48     48     
-32    144    
80     64     
-16    -16    
0      48     
128    336    
32     16     
48     -112   
160    464    
-192   80     
128    272    
-64    -192   
176    96     
48     -1040  
128    240    
-192   112    
-80    48     
160    48     
176    48     
80     352    
-144   -144   
-144   128    
-32    -288   
80     176    
240    -48    
160    0      
0      -32    
-16    112    
192    -576   
80     96     
96     -336   
-64    32     
-80    64     
48     128    
-144   -80    
16     64     
80     128    
112    0      
32     192    
64     -240   
-752   -3488  
1024   -640   
-1712  -128   
368    -560   
1248   400    
-448   -576   
-48    -784   
-32    496    
240    176    
592    -208   
-512   128    
304    64     
176    496    
-144   -32    
304    -96    
-448   -48    
384    128    
112    240    
48     -16    
-48    -208   
-112   -672   
256    320    
-64    96     
16     0      
64     -96    
96     -192   
32     272    
96     496    
0      0      
-112   -288   
128    96     
256    160    
16     96     
0      -144   
0      64     
0      -432   
32     0      
64     112    
16     -848   
0      64     
112    -192   
48     -896   
-32    16     
48     -976   
80     -48    
-64    128    
240    -16    
-128   48     
-32    -512   
48     -1376  
80     48     
64     -32    
0      80     
144    -16    
-64    -464   
96     -80    
48     -848   
80     224    
160    -368   
192    16     
96     -1744  
-48    -288   
128    144    
96     144    
-144   96     
64     48     
80     64     
-256   0      
80     -16    
-16    -112   
-16    16     
48     0      
0      -96    
80     -128   
80     -112   
-64    -576   
-32    -64    
96     352    
112    112    
32     -160   
-192   32     
-64    -32    
96     32     
-80    -48    
160    96     
-448   -48    
288    0      
-304   -224   
160    -128   
64     240    
-48    32     
-64    -224   
64     -96    
48     16     
112    -16    
-80    96     
-32    -160   
144    128    
-16    -32    
176    16     
-480   -48    
160    -96    
-208   -144   
64     -208   
16     48     
128    112    
192    -64    
128    -80    
-256   -160   
336    144    
-224   0      
288    160    
-48    -16    
-16    -64    
64     -128   
-128   -16    
112    -64    
-96    144    
32     -48    
-816   -96    
-16    -256   
-288   -16    
48     -704   
-160   64     
160    -1488  
176    16     
32     -16    
-160   -32    
-48    -16    
128    0      
-208   -16    
176    16     
-144   -112   
128    -80    
-448   0      
48     -48    
96     304    
-32    -288   
256    64     
-144   -288   
64     96     
-112   -64    
-64    -192   
192    160    
-112   -64    
128    32     
32     -32    
112    -96    
-336   192    
-176   64     
112    -64    
-96    80     
256    -224   
32     192    
112    -576   
-48    256    
-176   -128   
176    304    
-576   48     
560    -480   
-624   -304   
128    -64    
-192   16     
-272   -64    
16     48     
112    -64    
16     128    
144    -240   
-144   64     
128    16     
-16    144    
144    208    
96     64     
0      -32    
384    16     
-192   -48    
128    -32    
48     -64    
32     224    
-64    -16    
-80    -208   
-96    80     
160    -272   
-80    48     
-768   16     
-160   -32    
-144   80     
-528   144    
-80    32     
16     288    
-144   -144   
144    160    
144    320    
-96    -48    
-64    -48    
128    -16    
80     -160   
96     -16    
-48    16     
-208   16     
384    1696   
-624   192    
672    -576   
-576   -720   
448    0      
-160   304    
-208   -240   
560    560    
-304   144    
0      0      
-176   -208   
64     32     
-32    -160   
192    144    
-144   96     
-64    -32    
-112   80     
32     80     
96     64     
-208   -16    
-32    -80    
-448   64     
-176   48     
-176   -80    
-96    48     
32     48     
144    112    
0      -160   
-224   -16    
0      16     
-64    80     
48     80     
0      48     
-96    64     
-64    -32    
176    288    
-352   144    
48     -128   
-128   16     
-64    144    
96     -128   
0      48     
0      -32    
-32    160    
-112   48     
48     -80    
-32    64     
-96    112    
96     -48    
-224   48     
32     80     
-64    144    
-80    -144   
-528   -224   
-96    176    
0      -16    
-48    144    
-80    96     
96     -80    
96     240    
-336   -112   
160    32     
-128   48     
32     32     
48     144    
-128   -16    
-16    -48    
-48    32     
0      -112   
48     176    
-128   -32    
176    32     
16     96     
-144   -176   
128    -80    
-208   256    
-272   352    
64     16     
128    -32    
32     -32    
-64    96     
-240   -240   
176    128    
-448   176    
272    -64    
-240   -112   
128    80     
-272   80     
-64    -32    
-80    -16    
112    128    
-112   0      
64     144    
-128   -64    
0      -16    
-160   32     
-256   -192   
192    128    
-432   112    
112    48     
-1200  -256   
-160   32     
80     16     
16     96     
48     224    
32     80     
16     16     
-112   96     
80     80     
16     -16    
-16    80     
-32    128    
128    96     
-112   -64    
-96    112    
80     16     
0      -64    
-128   80     
160    144    
16     112    
176    144    
16     176    
16     -32    
-256   -96    
-160   0      
256    144    
-240   -144   
160    64     
-576   -176   
240    176    
176    80     
48     48     
80     80     
-48    144    
464    256    
160    144    
-80    16     
-144   -128   
-240   64     
80     80     
192    48     
-112   -48    
-64    96     
-208   -144   
32     0      
0      64     
48     64     
256    64     
-208   112    
48     32     
0      48     
-64    -16    
80     112    
32     160    
-80    32     
16     128    
64     -80    
-160   -96    
176    -96    
-224   -208   
32     224    
80     -16    
80     32     
-32    176    
128    112    
64     16     
-64    64     
-80    96     
0      -112   
-48    176    
176    144    
-96    -32    
-16    256    
64     -16    
-112   176    
128    -32    
0      96     
96     96     
-48    128    
-32    256    
-48    -32    
-128   144    
192    192    
224    -96    
-160   80     
-96    0      
96     16     
32     -3872  
32     -16    
128    0      
0      144    
96     144    
80     112    
-16    -112   
224    64     
-32    128    
48     176    
-16    32     
48     80     
1472   -2032  
1024   1040   
-1120  -864   
-352   -1168  
240    -144   
-96    -656   
48     224    
80     80     
64     176    
-48    -64    
-16    160    
-32    160    
208    -16    
-192   -16    
208    272    
-80    0      
32     96     
-48    304    
-32    -480   
192    208    
-48    -272   
48     240    
-128   304    
-16    32     
16     16     
0      16     
240    448    
112    576    
-192   -160   
208    48     
-288   -224   
128    32     
0      160    
-64    -432   
96     80     
-96    -416   
192    304    
64     192    
-176   -528   
128    32     
224    336    
-160   80     
64     112    
-16    192    
64     -80    
-64    -160   
256    112    
256    144    
32     -128   
48     0      
32     -160   
-16    288    
-16    144    
-96    32     
48     48     
-32    176    
48     0      
-112   384    
480    512    
-448   -32    
128    16     
-112   -144   
144    -64    
-80    0      
16     -16    
-112   -128   
64     64     
80     -432   
-32    32     
-48    -576   
64     144    
-16    64     
48     96     
16     64     
208    96     
-176   160    
96     240    
-112   160    
224    -240   
128    144    
176    -80    
144    144    
-192   -864   
64     208    
16     48     
-16    32     
16     32     
208    368    
-48    0      
96     -80    
80     192    
64     -80    
128    96     
-128   -224   
144    176    
16     -416   
96     48     
48     16     
0      160    
32     64     
64     48     
-48    -16    
128    128    
16     160    
-32    -80    
48     144    
-16    -16    
160    112    
-16    -192   
64     16     
32     -128   
16     80     
64     -96    
48     112    
80     208    
16     128    
32     112    
272    608    
-192   -128   
144    -32    
-80    48     
224    -112   
96     112    
16     16     
-96    64     
160    -112   
48     -32    
48     32     
96     112    
-64    64     
192    -256   
-48    176    
96     -544   
80     128    
96     208    
16     -880   
48     0      
-16    -1264  
80     32     
64     48     
0      -32    
128    -48    
-32    -64    
160    144    
16     96     
-160   16     
-16    -112   
128    -32    
80     -288   
-1136  16     
16     -112   
80     32     
-16    -432   
48     -144   
-80    -2512  
208    -32    
-96    -80    
32     -16    
-80    -704   
96     464    
336    96     
-304   0      
-384   -64    
112    -80    
-704   32     
-16    -16    
160    -272   
-192   -288   
208    32     
-112   -96    
-48    -176   
48     -80    
96     16     
160    -128   
-256   0      
288    -112   
240    176    
-48    -64    
352    352    
-240   48     
96     -96    
16     -80    
112    -128   
-80    -48    
32     -352   
176    176    
192    -528   
-32    96     
192    -96    
-32    144    
96     -96    
80     0      
-112   80     
-48    48     
-144   -112   
-64    -224   
-1376  -16    
-32    -288   
96     0      
784    3312   
-1936  160    
656    -464   
-112   320    
416    -512   
-304   -480   
-304   64     
416    496    
-320   -464   
64     112    
96     -464   
16     576    
48     -240   
192    128    
-496   -32    
144    -192   
-48    160    
96     -320   
0      96     
160    -896   
-48    96     
-64    0      
16     0      
32     -16    
-32    -160   
112    -112   
-32    176    
-192   -16    
0      0      
-288   128    
0      -96    
16     -48    
96     -32    
48     96     
96     -912   
-64    64     
-96    224    
80     -112   
-128   -144   
48     64     
-384   48     
80     -80    
-240   -32    
32     -224   
48     112    
-192   -48    
-64    -112   
0      -160   
48     160    
192    -752   
-32    128    
-160   176    
-16    48     
48     48     
32     48     
-112   64     
-32    -80    
0      -48    
-32    128    
-32    -64    
64     -64    
64     160    
64     -224   
64     64     
48     -288   
48     -16    
48     -16    
96     -16    
-32    304    
-192   0      
-16    -48    
160    -176   
-96    192    
-32    96     
80     -32    
-256   -272   
-128   -16    
-336   -592   
64     32     
80     160    
-720   224    
-48    -96    
-192   -16    
-416   -192   
352    16     
-416   288    
32     -192   
304    352    
-272   -208   
368    240    
-528   -224   
176    160    
-96    -48    
-48    192    
64     0      
128    -32    
16     208    
-192   176    
-16    48     
128    64     
-208   0      
256    0      
-64    32     
-592   -256   
160    224    
-368   -144   
240    32     
-176   -304   
-96    -16    
48     -32    
-160   48     
96     80     
-112   48     
-176   48     
-224   -32    
32     224    
-208   -48    
112    128    
-256   272    
-64    0      
144    -400   
-224   -64    
96     -144   
-224   -32    
-128   96     
-80    -48    
32     160    
32     -64    
-96    64     
-192   16     
-16    48     
-352   -80    
48     128    
-80    -48    
128    192    
32     -160   
-96    -16    
-224   -32    
160    384    
96     144    
64     -80    
-192   128    
-144   16     
0      16     
-48    -48    
0      96     
-32    208    
80     224    
-736   32     
80     -80    
-192   -208   
224    -496   
-64    176    
32     80     
16     0      
16     96     
16     16     
-64    48     
64     176    
-32    48     
64     80     
-160   48     
-32    -32    
-304   -208   
144    128    
32     48     
208    1024   
-208   -80    
-336   -352   
96     -48    
288    80     
-128   32     
-128   -32    
48     80     
-160   96     
-80    32     
-304   -16    
32     16     
-208   -32    
16     240    
-64    -48    
-48    112    
-96    80     
32     80     
32     48     
336    160    
-48    0      
-176   0      
96     0      
96     16     
-16    128    
-224   48     
48     0      
-96    96     
-80    128    
224    64     
-16    272    
160    32     
-48    80     
1504   -896   
816    992    
-400   -128   
-288   -48    
464    -48    
160    -288   
-208   320    
32     -16    
0      112    
128    -128   
160    256    
-96    48     
128    304    
-64    32     
128    96     
-112   240    
224    64     
32     112    
-112   80     
96     112    
-80    -80    
-32    240    
-272   144    
208    128    
-480   -544   
128    48     
144    128    
560    240    
-848   -240   
80     16     
96     240    
-16    -64    
112    112    
-32    176    
160    64     
-48    128    
-48    80     
176    176    
-432   -128   
208    -80    
16     -256   
288    -96    
-64    208    
0      0      
-192   160    
80     144    
224    208    
176    112    
-416   48     
304    64     
-80    -16    
-112   112    
48     128    
416    0      
-192   64     
128    -16    
-48    224    
-304   -720   
-448   112    
352    -64    
256    192    
-272   192    
32     288    
-176   160    
48     160    
-64    -64    
112    48     
-112   64     
160    144    
16     80     
-16    128    
32     64     
32     128    
80     -64    
16     144    
128    64     
-96    112    
128    -80    
144    448    
80     160    
160    64     
-176   176    
80     32     
16     -1376  
-32    128    
144    80     
-48    16     
272    240    
-80    224    
0      -64    
48     128    
-48    16     
96     112    
-64    16     
224    256    
-112   160    
80     0      
64     80     
-288   -1168  
320    48     
-240   -64    
96     112    
96     192    
-112   224    
144    16     
-208   128    
112    128    
80     96     
-32    80     
48     144    
-32    -480   
16     64     
96     256    
128    -576   
48     208    
16     -352   
32     80     
112    592    
-48    -48    
-80    -16    
112    432    
-288   464    
400    48     
-288   208    
32     -112   
-16    160    
176    -48    
0      336    
-32    0      
64     -272   
352    -64    
-320   112    
176    -128   
-64    320    
112    80     
80     176    
80     -128   
48     240    
-64    176    
-64    176    
16     -16    
128    -160   
-32    144    
48     -544   
208    80     
-144   -592   
144    112    
-80    -720   
-32    -32    
96     288    
112    112    
-32    0      
192    176    
-112   48     
32     192    
32     -128   
-16    -160   
112    128    
16     -208   
64     64     
16     -224   
48     96     
128    -736   
-96    112    
48     -384   
32     176    
-48    48     
176    176    
-112   -96    
224    96     
112    208    
-48    0      
64     80     
0      128    
112    -144   
304    -144   
-128   144    
16     -352   
0      -192   
288    -240   
-48    320    
-128   -48    
144    256    
-112   -32    
64     288    
-80    -48    
176    -256   
144    48     
80     112    
-112   128    
32     -320   
80     96     
64     -64    
112    -48    
-32    144    
-48    304    
-128   16     
144    -80    
16     64     
-592   -1152  
384    864    
-1200  -496   
1008   0      
-128   -224   
-144   48     
96     -784   
112    672    
32     -64    
304    208    
-320   -192   
192    -192   
-144   400    
256    -224   
-192   592    
96     -560   
112    448    
32     -128   
80     208    
80     -160   
-64    112    
80     16     
80     208    
16     -112   
112    144    
-208   -128   
208    -1536  
-320   192    
448    -240   
-80    -16    
-112   -240   
112    -416   
32     -224   
48     -752   
128    -176   
0      240    
144    -176   
-208   96     
208    -272   
-112   -1200  
160    16     
48     -432   
-16    16     
96     -96    
80     -400   
-32    -64    
48     -256   
48     -80    
160    64     
-112   -96    
176    -224   
-48    -80    
80     0      
-16    64     
64     -288   
96     96     
0      -96    
48     144    
-192   -32    
144    -352   
-64    256    
64     -288   
96     80     
-48    -112   
160    -112   
16     -1744  
-80    -64    
160    -80    
-32    -48    
224    64     
64     192    
-96    -176   
128    -224   
-144   48     
-16    -128   
0      -64    
-48    -160   
-96    -608   
16     -864   
-112   112    
32     -848   
48     64     
48     -1440  
-112   32     
240    0      
48     64     
368    -336   
0      -16    
-80    96     
128    400    
-272   64     
96     -288   
-1632  -352   
80     -144   
32     -176   
32     -16    
-96    -48    
-96    -560   
80     -16    
128    64     
176    176    
-112   -16    
-64    144    
192    192    
96     -112   
-384   -64    
112    -160   
-16    -64    
-160   -240   
112    272    
-112   -160   
80     192    
-16    -672   
64     -16    
32     -960   
48     -16    
-48    -64    
-48    -64    
-128   -16    
112    -16    
64     48     
-144   496    
-32    448    
224    -240   
-944   -176   
320    -368   
96     64     
80     -416   
-80    32     
-16    -1040  
288    208    
-224   32     
96     64     
-64    -224   
-16    64     
32     48     
48     -160   
-64    144    
-64    64     
-128   -256   
-64    -48    
224    160    
32     -64    
96     192    
80     -496   
-192   -96    
32     48     
96     -96    
144    176    
32     176    
-176   -48    
176    112    
-240   -240   
176    -240   
0      -32    
112    -48    
-16    -288   
192    80     
32     448    
-80    -1072  
272    -80    
-112   0      
224    112    
-80    0      
48     -48    
-128   16     
-80    -208   
-336   -128   
256    -368   
224    128    
-224   96     
-352   -16    
-320   -464   
32     128    
112    16     
-144   176    
-368   16     
-192   32     
-128   16     
96     48     
-176   16     
96     -32    
32     48     
-304   16     
-16    64     
-784   -176   
-128   64     
160    -112   
-48    96     
0      96     
-48    -32    
-128   112    
-112   16     
-176   32     
-336   80     
-112   240    
-16    -336   
64     272    
16     -64    
192    192    
736    592    
992    320    
-1232  -416   
-512   -320   
96     128    
-208   -416   
368    -176   
-768   272    
128    64     
-240   -16    
-32    -384   
-720   400    
-240   112    
-192   112    
64     -272   
-64    192    
-128   -128   
256    -48    
-368   -176   
528    240    
-112   -160   
-80    112    
0      336    
16     288    
80     -48    
-192   -128   
-432   -176   
-224   -704   
-112   -192   
96     96     
192    -64    
-288   352    
208    192    
-176   128    
-128   -48    
128    160    
-32    80     
-80    32     
-304   368    
192    -128   
32     80     
-112   48     
-16    -128   
224    64     
240    -112   
-208   -80    
272    464    
-112   320    
160    208    
-160   0      
-48    80     
48     0      
-336   -192   
-208   144    
128    -32    
0      48     
-192   160    
320    832    
-480   -128   
-160   -304   
-96    -48    
96     -48    
-32    0      
64     208    
-112   32     
96     -16    
-112   64     
-16    128    
80     16     
-80    336    
128    160    
-112   16     
80     304    
-368   -16    
128    -16    
-112   -208   
96     -240   
-128   272    
-112   176    
-32    48     
-288   -544   
112    80     
256    128    
16     160    
-272   0      
16     80     
-352   -224   
128    -144   
-128   -16    
64     224    
64     112    
16     96     
-128   -128   
0      96     
48     144    
80     256    
176    176    
-16    192    
-160   48     
-304   -512   
384    336    
-64    -32    
-32    64     
-208   32     
16     128    
-32    0      
176    64     
-304   -112   
192    112    
-160   128    
112    128    
32     144    
-112   -96    
64     480    
-176   128    
80     -96    
-32    64     
176    224    
-96    -80    
-96    -32    
-80    -288   
144    -144   
144    64     
32     80     
-176   48     
0      -176   
48     112    
-64    160    
192    80     
-112   0      
48     176    
-48    0      
-144   224    
-224   -208   
32     160    
96     48     
224    224    
-96    48     
176    240    
-352   48     
224    -32    
-80    144    
-48    0      
48     16     
-176   -224   
48     160    
-272   -80    
352    112    
-304   144    
288    32     
-96    96     
-16    -16    
32     160    
-48    -32    
224    160    
-64    160    
-32    48     
96     64     
32     208    
-192   -96    
240    112    
-96    96     
64     80     
64     32     
-16    -64    
96     144    
-96    -64    
336    144    
16     256    
-176   272    
144    32     
-80    96     
64     -160   
160    112    
64     16     
-208   304    
-272   16     
96     -912   
96     48     
192    -16    
16     112    
-64    112    
32     96     
144    256    
-272   48     
16     -16    
-32    0      
64     -112   
128    112    
-16    -32    
64     176    
-128   208    
-16    -1696  
144    -128   
96     368    
-256   -64    
528    64     
-288   224    
80     96     
2320   -864   
-784   -128   
288    -368   
192    -80    
272    -368   
-144   0      
-592   -208   
864    384    
-400   176    
208    -128   
-80    672    
176    -400   
-336   640    
544    -448   
-336   496    
320    -400   
-128   592    
240    -144   
-240   240    
240    -192   
-144   144    
64     -336   
32     400    
96     -128   
-80    112    
-32    -336   
96     288    
-80    -112   
112    48     
-96    48     
192    128    
-96    160    
96     64     
-192   160    
112    -16    
-32    16     
176    -96    
-80    304    
32     -176   
16     96     
80     -416   
-48    192    
96     144    
96     176    
-80    -160   
-16    160    
80     16     
176    128    
64     160    
-176   48     
256    128    
-80    -16    
128    64     
0      -128   
-112   176    
208    -400   
-32    288    
-32    -592   
128    96     
-32    -208   
-32    96     
48     80     
-16    96     
144    112    
-32    240    
176    16     
64     -176   
0      48     
192    -96    
-64    112    
96     -400   
32     16     
112    -240   
-16    160    
-48    -192   
160    224    
-176   -80    
160    0      
-128   80     
-64    -64    
32     -80    
64     144    
-80    208    
144    528    
-48    80     
96     -704   
0      48     
-16    -352   
176    128    
-96    208    
224    144    
-80    -80    
64     96     
-288   112    
160    -224   
0      32     
96     64     
128    80     
-240   -256   
96     128    
144    -144   
48     96     
64     -64    
-48    16     
32     -496   
112    128    
-80    32     
208    160    
-32    64     
64     -160   
272    144    
0      -96    
48     192    
32     -208   
32     112    
48     -96    
48     192    
96     304    
-32    192    
-144   -48    
336    -1952  
0      80     
48     -784   
-32    -32    
-16    -64    
144    -1296  
112    320    
160    48     
-144   -208   
-16    -48    
240    0      
48     32     
80     96     
-16    -304   
64     160    
-16    -352   
352    608    
-256   288    
112    -224   
-192   -80    
144    -336   
96     -16    
-48    -304   
240    64     
-144   -2288  
208    -128   
0      -192   
0      192    
-48    -64    
-32    128    
64     -48    
176    32     
-528   -96    
48     -64    
-1552  -160   
272    -112   
-48    48     
96     -48    
64     16     
-96    -992   
240    -64    
-32    -224   
112    256    
-128   -48    
-144   -16    
192    -144   
0      -32    
-160   48     
48     -48    
-528   -48    
320    128    
128    64     
-64    -80    
32     -48    
0      -464   
0      96     
16     -1184  
192    192    
-176   -96    
176    64     
-96    -112   
224    -32    
16     64     
0      0      
112    112    
352    -448   
-544   64     
-144   -240   
192    -192   
32     128    
-32    96     
96     -832   
-48    112    
-96    64     
0      -32    
-96    464    
0      -48    
80     48     
80     -384   
-208   1760   
-928   -880   
-80    64     
448    -128   
-784   -368   
176    160    
-528   -368   
656    176    
-320   -304   
32     464    
16     -192   
-288   352    
0      -160   
272    32     
-192   -64    
-320   -64    
0      160    
144    -32    
0      96     
0      -208   
272    -48    
0      48     
-176   -192   
304    -32    
-160   -208   
272    -48    
128    112    
800    224    
-32    256    
-624   -368   
80     160    
32     80     
0      -48    
176    -112   
-160   -32    
-112   -160   
96     32     
144    -368   
-208   -16    
208    -432   
-112   112    
-272   -16    
96     16     
-176   -256   
160    -48    
-80    144    
320    -16    
-512   16     
128    -96    
-512   128    
128    -160   
-48    160    
0      -112   
96     -32    
-48    -32    
128    80     
-80    64     
112    224    
-128   16     
208    80     
-192   96     
32     48     
-48    -32    
64     -16    
0      128    
-1136  32     
-32    112    
-1328  -288   
128    80     
-272   -352   
-96    -160   
-112   128    
-112   80     
-256   224    
32     48     
176    128    
-16    144    
-32    112    
160    -16    
0      208    
-128   -176   
96     192    
-288   -80    
32     416    
-128   128    
112    -48    
-96    -80    
-544   -272   
-208   -144   
-912   0      
80     112    
-112   -80    
80     224    
-384   -128   
-16    144    
-64    -304   
112    128    
-96    -16    
-32    -16    
-80    -64    
-160   -128   
-32    64     
48     80     
-112   -48    
-96    -32    
-144   16     
256    -96    
-176   16     
-208   -320   
80     -80    
-16    128    
128    256    
-48    208    
-96    32     
0      48     
-80    176    
-224   48     
112    48     
-128   -64    
-208   -48    
-16    -96    
-304   -192   
32     96     
256    336    
160    240    
-48    -32    
-256   208    
256    -32    
-112   0      
-96    -32    
64     32     
-48    112    
-48    240    
-144   -96    
80     0      
-544   -16    
176    304    
64     80     
-656   -32    
-80    272    
-48    -128   
224    -96    
-192   0      
-144   112    
400    -64    
-80    48     
-48    80     
64     0      
-32    -16    
-208   48     
80     0      
64     48     
-64    192    
-496   -48    
80     -64    
-192   -160   
80     192    
0      64     
64     96     
48     -304   
16     96     
-64    128    
-144   -16    
80     80     
0      48     
128    160    
-256   -96    
-32    160    
-720   -16    
-176   144    
16     -16    
160    64     
-48    64     
112    -176   
-80    144    
-192   48     
96     96     
-112   144    
-16    32     
-16    80     
-112   16     
-80    -128   
160    96     
-304   0      
-64    -320   
160    208    
-16    32     
0      16     
64     0      
-32    64     
-48    96     
16     48     
112    48     
-144   32     
-112   -80    
144    96     
-32    128    
0      144    
-16    48     
-80    80     
1776   576    
-944   304    
464    -240   
-688   160    
-32    -320   
-80    -144   
-16    -688   
-112   1056   
-16    -96    
-208   128    
288    -416   
-336   640    
144    -336   
-256   352    
-48    -80    
272    128    
-288   96     
32     -32    
-176   -96    
192    -16    
32     224    
256    -32    
-384   96     
64     -80    
-160   176    
176    -112   
-176   48     
112    80     
64     240    
-32    -32    
64     64     
-16    0      
96     192    
112    128    
16     80     
-144   -112   
32     160    
64     64     
144    224    
-16    0      
32     32     
-144   80     
160    96     
-32    48     
128    48     
-16    176    
64     48     
64     112    
-96    0      
96     64     
32     144    
64     128    
-32    80     
16     112    
-16    48     
128    192    
-96    128    
16     48     
80     144    
-16    224    
0      112    
64     -224   
-112   0      
-128   -48    
80     48     
-16    80     
32     160    
-112   48     
48     128    
-80    160    
-16    48     
64     -32    
64     -208   
-32    48     
128    160    
-112   32     
96     64     
176    -80    
16     -128   
-96    32     
176    64     
96     224    
-80    80     
192    192    
-192   -224   
144    0      
64     96     
48     -144   
16     112    
144    336    
-192   96     
160    32     
-32    208    
0      64     
0      64     
-16    32     
304    592    
-48    224    
-16    -80    
-32    -208   
48     -400   
176    144    
-48    -720   
0      80     
16     112    
96     144    
32     112    
64     160    
-80    -96    
144    -16    
-64    96     
96     80     
0      16     
-64    0      
96     128    
-16    -96    
112    128    
-64    -128   
112    112    
32     -2080  
0      -16    
112    256    
0      112    
96     -16    
-96    224    
160    176    
256    -48    
-32    448    
-144   -16    
288    -48    
-160   80     
112    32     
144    -112   
-16    112    
-80    -288   
144    32     
-160   -528   
176    112    
-16    16     
128    160    
-32    80     
-80    32     
64     64     
144    128    
48     144    
-32    -16    
112    112    
-96    -208   
-64    16     
176    -720   
-80    256    
16     16     
80     48     
-192   -112   
176    240    
64     -192   
-16    160    
-96    0      
144    320    
-176   48     
208    -192   
-48    160    
208    -192   
-80    144    
16     -208   
80     144    
-256   -800   
304    384    
-176   208    
32     -80    
48     176    
-80    48     
144    32     
32     64     
-96    48     
192    64     
-128   176    
128    -64    
96     144    
0      -112   
80     80     
-144   -208   
240    128    
16     224    
16     160    
80     -48    
320    192    
-144   208    
128    -816   
-16    16     
160    -128   
96     112    
160    -208   
-208   16     
32     -288   
288    304    
112    112    
144    32     
-144   32     
2800   -1856  
144    -128   
560    -1840  
-608   624    
528    528    
64     -1136  
-336   -208   
240    800    
464    240    
-256   16     
-160   -32    
224    64     
128    512    
-208   -1456  
240    176    
-112   -624   
-112   464    
192    96     
-416   -560   
144    -80    
288    -752   
-144   -16    
160    -224   
304    80     
-48    80     
64     -64    
-80    144    
144    -240   
-128   -128   
128    144    
144    -64    
-16    64     
-224   32     
96     -272   
80     -80    
112    -208   
32     -192   
-48    -240   
16     -16    
112    -1328  
176    96     
-224   -80    
112    -128   
32     -112   
128    192    
16     -96    
0      -16    
-544   -176   
304    192    
-1424  -256   
272    -96    
-112   0      
96     128    
48     64     
-128   -736   
192    -320   
64     -128   
80     208    
-80    64     
80     -64    
80     32     
96     -48    
-128   -48    
96     -208   
-96    112    
-64    -112   
128    64     
48     -112   
64     0      
96     -560   
16     0      
112    -1760  
80     112    
-128   112    
96     64     
-192   -32    
80     128    
0      -208   
32     -176   
-240   64     
-112   -80    
240    -16    
16     -160   
-112   -96    
-144   16     
16     352    
80     -624   
96     32     
112    144    
96     -112   
-48    64     
16     80     
160    208    
-208   0      
-32    -32    
-16    -16    
-160   64     
-144   0      
-256   96     
16     -128   
64     48     
112    -160   
64     144    
32     -320   
16     -16    
80     -96    
80     -48    
-144   16     
64     -240   
-576   -176   
48     -112   
16     208    
96     80     
-224   80     
-96    -96    
368    48     
-48    -288   
-64    128    
384    -48    
-160   -176   
80     -16    
-176   112    
-96    48     
64     -16    
-288   48     
192    80     
-144   -16    
192    -96    
-816   -288   
128    -592   
-32    0      
32     -224   
288    128    
-176   144    
448    0      
-528   96     
-32    -16    
48     144    
-80    160    
160    -48    
48     32     
-304   0      
176    -80    
-16    0      
224    64     
80     112    
80     16     
80     224    
-176   224    
208    -160   
-96    64     
64     -64    
32     112    
32     -32    
48     112    
32     16     
-64    -80    
0      -96    
240    -96    
-144   -128   
-128   128    
-48    -240   
-320   -128   
64     176    
-512   48     
0      32     
-704   96     
48     -32    
80     -48    
0      112    
-320   -48    
48     -176   
-112   -32    
128    -32    
-176   -224   
-48    64     
-208   32     
-144   0      
32     -16    
-256   144    
-160   0      
-32    96     
16     -192   
-640   112    
-32    64     
-112   144    
-128   80     
-16    80     
48     -32    
32     -176   
-16    160    
-16    96     
-16    96     
-32    160    
-304   -96    
160    -112   
0      160    
64     208    
-192   0      
2272   -544   
-1488  768    
1296   -256   
-352   -16    
448    -816   
48     352    
-320   688    
-432   368    
80     16     
-240   272    
224    -64    
-112   64     
-368   176    
144    -144   
-224   64     
-96    -48    
-400   -48    
-96    48     
-96    -256   
128    112    
0      -80    
-48    80     
-64    160    
16     32     
0      -80    
32     80     
96     176    
16     192    
-48    112    
-224   -48    
-16    32     
-288   32     
304    336    
-96    112    
128    80     
-160   -80    
-128   0      
48     0      
16     48     
0      80     
0      144    
-64    128    
-112   0      
0      80     
-16    32     
64     112    
-144   -48    
-80    112    
-304   -288   
208    192    
-176   32     
48     80     
-160   80     
160    144    
-112   128    
-112   -64    
16     96     
-224   0      
64     128    
-48    32     
-96    -336   
-384   -176   
208    48     
-192   -112   
-48    240    
144    48     
16     -16    
64     -32    
-48    128    
32     160    
32     32     
64     96     
0      112    
-96    96     
32     0      
80     32     
-256   -352   
0      -432   
-304   -272   
-128   160    
304    352    
-256   224    
0      80     
128    128    
48     192    
-96    144    
-64    32     
48     80     
-16    96     
-224   -224   
96     16     
-144   112    
112    336    
-208   -16    
-32    -16    
64     80     
-32    80     
0      32     
-96    32     
80     80     
16     96     
16     80     
-48    48     
0      48     
-96    -16    
-32    112    
-64    16     
-80    32     
208    304    
-112   192    
80     -32    
48     160    
-96    -16    
208    96     
-96    128    
32     80     
-16    -32    
64     128    
-32    112    
112    -16    
-32    144    
-64    144    
112    32     
-112   0      
16     192    
176    96     
224    144    
-48    672    
0      16     
64     16     
-272   80     
240    -32    
-32    112    
-96    16     
112    128    
-32    80     
-64    -16    
-112   -432   
224    160    
-304   288    
288    -80    
-96    224    
32     16     
144    96     
-160   80     
32     16     
48     32     
0      176    
-48    32     
-48    -32    
32     48     
16     96     
-64    64     
112    64     
224    208    
0      288    
-208   -208   
272    288    
256    -112   
64     336    
-384   16     
144    16     
-64    48     
144    192    
32     112    
-112   48     
-32    64     
-16    336    
-192   -176   
256    16     
-16    176    
80     80     
-176   64     
-32    96     
400    80     
176    240    
-416   32     
304    -240   
-32    368    
-16    112    
-160   96     
-80    -160   
272    -624   
240    112    
16     128    
304    -64    
-368   0      
32     0      
32     160    
-176   -128   
16     -32    
80     112    
16     -288   
0      272    
-48    -16    
144    -112   
-256   96     
128    -528   
-48    80     
-752   -1888  
-288   -1648  
784    400    
624    272    
928    -496   
-544   64     
512    736    
-32    464    
-448   -224   
672    16     
-224   -112   
-112   -192   
64     64     
160    -128   
-64    160    
128    -992   
-32    208    
96     128    
48     112    
16     -288   
96     128    
-64    -32    
128    144    
48     -48    
112    64     
32     128    
64     -64    
-80    48     
64     -16    
80     16     
16     -1296  
-16    96     
48     336    
144    128    
-80    -64    
64     64     
-272   64     
240    0      
-32    48     
144    128    
64     208    
-16    -32    
64     96     
16     -160   
160    -16    
-48    -608   
112    144    
112    -480   
128    128    
-224   144    
144    -16    
48     160    
-64    32     
112    96     
-16    -32    
112    176    
32     160    
-32    -16    
272    -304   
-64    48     
128    -112   
32     224    
-32    -400   
144    96     
-192   144    
224    -64    
64     112    
-48    192    
-128   112    
80     -288   
144    144    
-16    -992   
0      208    
112    -192   
144    176    
-112   -32    
160    288    
-96    -256   
176    -96    
80     -48    
48     112    
-32    112    
-192   144    
208    -144   
128    -336   
-32    144    
-16    0      
48     272    
256    -144   
0      208    
-32    -528   
128    16     
-48    -560   
64     176    
-32    -208   
192    16     
-208   144    
192    -160   
-32    -2672  
64     -96    
112    -208   
-96    -64    
80     80     
16     0      
32     176    
-144   -256   
336    272    
-160   -16    
192    -432   
-112   32     
80     0      
16     -48    
-384   -64    
0      -32    
32     144    
48     -736   
-112   -176   
48     -512   
304    -208   
48     192    
-160   16     
128    32     
-96    -32    
-16    -736   
176    16     
128    -272   
192    288    
48     64     
-64    -48    
-224   -64    
32     -416   
0      -160   
256    -64    
160    208    
128    96     
208    128    
16     -400   
-224   32     
256    -416   
-96    144    
64     -96    
160    32     
-80    96     
128    -176   
96     160    
128    -304   
-16    48     
48     -400   
0      32     
128    -464   
128    -112   
-32    0      
64     16     
128    96     
0      208    
-128   80     
176    -288   
-224   16     
96     -400   
-192   32     
32     -96    
16     48     
48     -224   
80     -48    
64     -192   
-320   -160   
80     336    
-32    -48    
240    176    
-32    48     
-224   -64    
-32    -96    
-112   0      
112    64     
16     240    
-80    64     
-160   -128   
48     -96    
-16    -112   
32     -208   
-32    96     
32     -1280  
80     160    
80     -96    
112    -80    
-144   -16    
64     0      
-16    64     
128    -48    
-144   80     
-16    -208   
-512   32     
48     -96    
-400   96     
32     -16    
112    -112   
-176   -80    
48     128    
160    128    
-128   224    
208    -752   
1248   400    
80     464    
240    320    
-544   -512   
656    480    
-528   400    
240    -144   
160    416    
-320   -640   
112    16     
96     -752   
80     128    
128    -352   
-32    -128   
112    176    
448    176    
-768   -304   
-16    -352   
0      0      
176    224    
80     176    
48     -304   
112    32     
-80    -192   
224    240    
-32    -144   
-32    -16    
48     -16    
256    400    
-464   -112   
192    -208   
16     256    
80     -32    
0      224    
-16    -64    
-64    48     
-160   -384   
-48    0      
16     -176   
176    112    
0      64     
80     32     
-48    16     
-256   -128   
64     48     
48     0      
48     96     
-32    160    
-112   48     
128    -368   
-224   -112   
-336   -272   
192    448    
-224   -208   
112    128    
-160   -512   
-288   -192   
32     272    
-544   -208   
112    80     
-336   0      
32     32     
-16    128    
16     64     
272    -144   
64     -96    
48     32     
112    80     
-240   -48    
-32    64     
48     0      
-320   -32    
-96    -112   
0      -128   
96     -32    
-688   -144   
32     -416   
-880   -240   
0      -32    
112    112    
-96    208    
80     0      
32     96     
32     -160   
16     64     
-128   -80    
80     128    
-112   144    
16     -32    
-256   32     
-272   -160   
48     32     
-352   16     
16     192    
-576   48     
-112   0      
96     48     
-16    240    
-64    -208   
64     48     
-80    64     
128    80     
-112   16     
-32    96     
32     32     
-48    48     
32     112    
32     -32    
96     112    
-656   -128   
144    64     
-208   -144   
96     144    
16     16     
-48    64     
-16    48     
-112   0      
16     80     
-32    96     
-32    -96    
-32    112    
128    192    
-80    80     
16     0      
-496   -160   
0      64     
368    176    
-192   368    
-16    112    
-32    -128   
-128   -80    
64     256    
-48    160    
-16    -128   
48     32     
-432   -368   
128    -160   
80     -176   
-160   272    
-112   176    
32     48     
-1248  -96    
32     64     
208    128    
-144   -96    
-128   -112   
64     -80    
64     -48    
96     240    
-80    -80    
16     96     
0      0      
-16    64     
48     96     
288    -352   
48     192    
-496   144    
-16    -224   
-112   48     
160    112    
240    208    
0      -128   
-48    32     
16     0      
-32    144    
-224   -64    
-32    64     
352    288    
-80    64     
-256   0      
176    48     
-432   96     
-176   16     
208    0      
-240   -48    
0      -48    
160    32     
-272   16     
192    96     
-112   128    
224    -48    
-96    -208   
-320   48     
176    192    
-240   48     
48     144    
-16    176    
32     32     
-16    128    
80     -128   
32     96     
-32    112    
32     -112   
-16    368    
-64    32     
128    208    
-128   -16    
48     -16    
1120   -1520  
848    2512   
-1280  -432   
-464   -944   
320    208    
-144   -112   
288    224    
-480   -80    
256    176    
-80    16     
48     48     
-80    240    
48     48     
112    160    
-32    -112   
-80    112    
16     -32    
48     176    
-64    32     
64     112    
-64    48     
-64    128    
80     144    
-32    80     
128    80     
288    64     
-192   144    
0      -144   
0      272    
-64    -48    
128    96     
-176   -64    
-96    96     
80     96     
16     112    
64     80     
-160   160    
144    -160   
16     144    
112    224    
32     0      
-64    160    
-32    112    
128    64     
16     64     
-80    32     
144    160    
-144   96     
160    -48    
0      256    
0      16     
96     144    
-112   32     
80     0      
16     176    
-32    32     
192    128    
-240   144    
144    64     
-48    -32    
16     96     
48     128    
48     192    
0      64     
48     -16    
112    16     
-112   176    
-32    96     
96     -32    
96     304    
-272   48     
352    64     
-240   64     
32     48     
64     -160   
-64    32     
112    288    
144    -1520  
-48    112    
-64    96     
144    -80    
32     208    
-112   144    
112    -128   
32     208    
-224   192    
144    16     
128    480    
-64    -48    
336    272    
-240   -80    
208    80     
-144   -816   
96     128    
80     112    
48     528    
-144   -16    
256    48     
-144   64     
240    240    
-96    0      
160    240    
-48    16     
0      -112   
-80    -48    
160    -272   
16     48     
80     -368   
-128   48     
272    -592   
-64    160    
96     96     
-64    64     
-96    16     
96     144    
208    176    
32     96     
-128   64     
-80    336    
320    192    
176    -144   
-160   128    
240    -160   
-320   0      
48     -912   
144    176    
128    -464   
272    496    
-64    240    
112    224    
-32    48     
80     64     
-112   32     
-16    -144   
-112   -32    
144    -16    
-80    -64    
192    -160   
-32    352    
208    -320   
176    112    
-160   -352   
64     32     
-32    -192   
96     240    
160    64     
-80    112    
-48    16     
48     64     
112    128    
32     -96    
96     96     
-80    -1168  
64     224    
48     -432   
112    32     
64     -48    
16     48     
32     128    
32     192    
-96    64     
48     144    
144    96     
-64    112    
-32    112    
128    -240   
64     160    
80     -160   
16     -32    
224    304    
-128   -144   
16     0      
384    -16    
-208   -80    
96     144    
-128   80     
-112   0      
160    128    
112    224    
128    128    
-64    0      
64     32     
160    -304   
32     176    
64     0      
-48    304    
176    -96    
64     192    
0      256    
-96    96     
112    176    
-16    -256   
-16    -2992  
64     -64    
-32    144    
32     192    
-160   96     
64     -128   
32     16     
80     3456   
-1056  -1072  
-128   -800   
656    -864   
1104   864    
-304   -1200  
-656   -368   
-544   656    
-192   -384   
32     -176   
-80    0      
0      192    
-128   -128   
320    -112   
-112   0      
-32    -144   
128    64     
16     -544   
304    -112   
-80    96     
32     -288   
112    96     
-304   128    
240    -128   
-64    32     
48     -320   
112    -80    
-48    -272   
0      112    
64     528    
-176   32     
80     0      
80     48     
80     -176   
-64    48     
16     128    
96     304    
-144   128    
-192   0      
256    -208   
80     -224   
160    -208   
0      -32    
80     64     
80     -368   
0      -112   
160    -96    
-80    80     
112    -48    
-16    -64    
128    64     
240    -288   
-32    48     
-16    -16    
-1232  -224   
-48    -160   
144    -272   
-32    -160   
416    288    
224    -704   
-304   144    
128    -64    
16     48     
256    -80    
-96    -64    
96     368    
32     -272   
64     48     
48     -112   
32     48     
-32    -16    
112    80     
160    -400   
-96    -64    
96     -256   
32     224    
32     -784   
288    -16    
-272   -64    
-144   -304   
0      -32    
-256   80     
64     0      
64     -80    
-64    16     
-32    -128   
-1072  -144   
128    -208   
-544   144    
-80    -320   
144    176    
-80    -48    
16     64     
144    -208   
144    32     
-64    32     
144    80     
-128   -16    
112    80     
-224   -32    
32     -112   
-208   80     
32     -16    
128    96     
0      0      
-112   64     
240    -368   
-224   -64    
432    176    
-288   -128   
400    48     
-112   144    
-160   -112   
128    -128   
-288   -144   
272    -64    
-32    96     
96     -96    
-80    -160   
-96    -416   
144    144    
192    -512   
-96    144    
32     80     
80     64     
-16    -48    
80     336    
-112   -304   
80     0      
-208   -368   
176    128    
-80    0      
112    -368   
-208   528    
160    -448   
176    160    
-464   -304   
-528   624    
16     32     
-1136  464    
-80    -160   
192    0      
-96    -48    
-16    64     
96     96     
16     16     
-160   16     
-1408  -240   
-112   16     
-272   144    
-160   0      
48     16     
-416   -144   
-112   -80    
-96    48     
112    320    
-304   192    
-144   -16    
-96    336    
-80    -32    
-80    -128   
-48    -176   
64     16     
176    96     
-160   -144   
0      144    
48     384    
32     -656   
-32    144    
112    384    
-32    64     
-448   112    
-80    -128   
-448   96     
-336   0      
48     -112   
96     0      
64     -240   
48     128    
-192   -288   
48     96     
16     32     
128    48     
32     64     
96     48     
-224   224    
-208   -128   
-32    96     
-160   -96    
-64    128    
32     0      
96     80     
-48    -80    
-16    64     
-144   -208   
-96    64     
224    -208   
96     64     
-128   272    
-848   -1136  
720    448    
-1024  128    
848    -592   
-208   0      
-96    96     
-352   -480   
-336   416    
0      -64    
480    64     
-160   -240   
-96    160    
192    80     
-112   16     
-96    48     
-112   64     
-48    128    
-32    -64    
-16    32     
-32    32     
-128   48     
-256   -112   
-48    208    
80     -64    
16     64     
16     48     
32     32     
-208   64     
176    32     
-32    -16    
16     64     
96     -16    
-112   144    
0      80     
-176   -16    
-64    -64    
-160   96     
32     304    
-496   -32    
-16    -16    
48     96     
-80    16     
32     64     
-80    112    
192    144    
-256   -16    
32     16     
16     80     
224    304    
-432   48     
96     -80    
-64    208    
-80    64     
-272   -128   
-192   -48    
48     16     
-80    96     
128    192    
-288   112    
96     -128   
112    176    
-336   -80    
128    -48    
0      80     
-144   192    
64     -176   
-64    -48    
-96    240    
0      112    
80     -48    
144    128    
-128   96     
16     96     
0      -16    
-32    32     
-16    80     
-64    -48    
192    128    
-144   112    
0      -80    
160    272    
-336   -32    
176    96     
-48    -144   
48     -112   
-48    160    
-112   16     
272    272    
-416   192    
144    -144   
128    96     
-144   96     
128    64     
-48    96     
-80    -80    
160    384    
-16    -48    
80     176    
-32    -32    
224    96     
16     0      
-192   32     
128    48     
-64    16     
240    448    
-112   272    
-32    144    
-160   0      
32     160    
128    240    
-80    32     
-96    -32    
-16    80     
-16    48     
48     96     
-96    48     
80     144    
240    240    
-64    0      
16     128    
-80    0      
208    288    
-64    -64    
-96    112    
64     16     
128    240    
-160   0      
-64    128    
-96    16     
240    -16    
-224   -128   
192    240    
16     64     
80     -112   
-240   -64    
128    112    
224    48     
-128   -48    
-240   128    
80     128    
224    -16    
-272   112    
384    208    
-80    288    
128    192    
-176   -16    
-32    192    
0      32     
288    112    
-304   -368   
-16    144    
32     112    
16     80     
16     96     
-160   -48    
16     -800   
240    464    
-288   -64    
64     32     
272    592    
-144   -96    
0      16     
64     192    
16     48     
32     96     
-112   80     
144    160    
-96    -208   
288    192    
-112   -80    
-64    -336   
96     224    
240    -672   
32     80     
-112   96     
64     96     
0      128    
-16    320    
-80    80     
-48    112    
-128   0      
112    208    
-80    -128   
48     128    
0      112    
48     -112   
112    16     
192    -912   
0      192    
16     112    
-240   32     
96     96     
192    112    
-112   16     
32     144    
160    -384   
-32    208    
-160   0      
208    16     
-80    208    
2080   -976   
752    512    
400    112    
-704   32     
352    -224   
176    272    
48     336    
-48    -608   
-16    -464   
496    -96    
176    480    
-304   160    
224    400    
-512   -464   
416    384    
-224   -112   
288    80     
176    336    
-176   256    
-48    -352   
-32    -80    
-96    112    
-16    224    
-32    48     
128    -96    
-80    128    
-96    0      
208    -112   
-96    -160   
192    160    
-112   -112   
176    224    
-112   96     
64     -64    
80     -592   
0      -192   
288    192    
128    224    
-112   80     
64     -16    
48     -208   
64     208    
64     80     
0      176    
128    112    
-64    64     
32     64     
-48    -640   
240    240    
-144   -560   
208    80     
-128   416    
224    32     
-240   320    
64     80     
-96    -48    
48     -48    
176    480    
32     -144   
0      -240   
224    -496   
32     96     
-64    -336   
112    224    
160    -64    
16     64     
-48    -464   
32     176    
-144   80     
288    32     
-48    80     
32     128    
160    192    
-32    -928   
-32    96     
96     -384   
16     240    
384    704    
-512   176    
-16    -848   
176    208    
-64    -784   
80     160    
16     240    
-48    -576   
128    64     
-16    160    
240    -112   
-48    -16    
-288   -112   
128    -160   
192    144    
192    64     
0      224    
-48    -208   
0      80     
-16    -128   
208    128    
-80    176    
176    -144   
-96    -224   
-768   -144   
176    -208   
48     80     
64     -112   
-48    16     
16     -80    
224    224    
32     560    
160    416    
16     192    
0      144    
-96    -32    
-32    96     
128    -80    
96     -320   
-480   -32    
112    -144   
32     -48    
32     -496   
-144   -144   
288    -896   
32     32     
-64    240    
-48    0      
144    -128   
-144   -16    
192    -272   
0      112    
-304   -48    
288    48     
-256   -32    
32     -96    
-32    64     
144    -128   
176    -144   
-176   -224   
96     512    
320    -928   
-240   160    
-16    -144   
160    80     
64     -128   
-16    32     
64     128    
112    -48    
-128   -112   
32     -448   
-256   -16    
96     -96    
48     32     
64     -224   
-32    -48    
-16    -928   
-80    112    
112    -176   
-64    32     
144    64     
0      208    
-272   -144   
304    -48    
-288   32     
240    -80    
-256   -48    
16     96     
336    -80    
224    -368   
144    144    
-144   -112   
-224   240    
-128   -432   
256    -16    
96     -160   
96     -32    
112    -400   
-176   160    
-128   80     
-32    96     
-48    -64    
80     96     
-928   32     
112    -192   
-144   112    
112    -288   
64     288    
-192   -48    
208    -32    
80     -48    
0      144    
-64    96     
48     48     
-496   -80    
112    80     
96     -256   
-128   -16    
-16    128    
48     96     
-272   32     
144    -176   
1872   2640   
-1696  48     
528    64     
32     480    
1024   -320   
-960   -336   
192    -720   
-224   736    
256    -608   
-464   448    
160    -640   
32     288    
-16    -16    
240    208    
-192   -736   
112    -128   
176    -480   
128    -32    
-208   112    
288    -80    
-320   64     
192    -16    
-288   336    
256    -320   
-256   160    
144    -160   
-144   288    
96     -400   
96     192    
-32    -240   
-16    400    
-1200  -192   
-1200  192    
-16    -32    
-1424  -32    
-16    -48    
400    224    
-64    224    
32     -64    
-144   -48    
128    -16    
-192   64     
-96    -144   
-16    144    
-96    -208   
-16    16     
-48    144    
-16    32     
-80    -80    
-416   48     
-224   -16    
-112   48     
-160   160    
208    -32    
-288   16     
64     -192   
32     96     
-224   -96    
240    80     
-32    96     
-192   48     
160    128    
-80    128    
-32    32     
64     96     
-176   128    
-32    0      
-16    16     
-112   48     
-128   32     
64     32     
-16    16     
80     16     
0      80     
16     -160   
-240   96     
-32    128    
-192   112    
0      -160   
96     80     
-160   128    
-48    160    
-144   32     
-224   -288   
-64    -32    
-224   32     
-16    112    
80     304    
-144   -64    
320    -176   
-336   64     
128    32     
0      0      
-144   48     
-112   -16    
128    272    
-272   -112   
-48    16     
-48    48     
80     144    
-752   -384   
-16    288    
32     -352   
-144   112    
80     -32    
-16    64     
64     -64    
80     176    
-32    -16    
32     272    
-304   112    
192    432    
-16    112    
112    -16    
-144   128    
-448   -224   
-48    -16    
112    96     
-32    80     
128    176    
-48    384    
-176   256    
-16    -64    
0      64     
-32    -64    
32     64     
96     304    
-80    160    
64     64     
176    352    
-720   -128   
272    112    
-144   -48    
64     112    
-96    112    
-80    176    
-32    64     
-48    32     
16     -16    
128    432    
-336   -80    
160    -48    
96     432    
-160   272    
-160   144    
96     -32    
-176   -384   
-912   192    
48     256    
-176   48     
80     96     
48     0      
-80    80     
64     144    
32     96     
-48    -112   
128    576    
-160   256    
608    192    
-288   144    
16     -80    
80     32     
-160   -32    
160    128    
-48    16     
112    224    
-144   -32    
208    224    
-144   32     
336    -96    
48     128    
-96    48     
32     -16    
-336   144    
368    -80    
-96    16     
-112   -16    
288    128    
-320   112    
208    0      
-16    96     
-32    0      
80     32     
-64    16     
112    64     
32     96     
-160   112    
16     128    
-144   -144   
32     112    
48     -32    
-32    96     
32     48     
160    64     
-96    96     
-112   192    
-80    -48    
48     128    
32     32     
-224   -32    
-1088  256    
560    1136   
-496   432    
272    -160   
544    592    
32     -256   
-272   416    
288    -160   
-176   192    
-16    -48    
128    176    
-160   496    
384    -176   
-144   0      
-32    384    
-208   96     
160    -304   
-128   704    
272    -304   
128    96     
48     -80    
240    224    
-80    -48    
-176   176    
128    96     
-176   336    
-32    -144   
288    288    
-144   -32    
256    144    
-64    144    
-144   -112   
224    160    
32     -128   
128    192    
0      -224   
144    160    
-48    128    
192    64     
-320   288    
144    32     
64     16     
-112   -16    
-112   160    
208    144    
96     176    
-32    -224   
-32    192    
240    304    
0      64     
0      128    
64     176    
-16    -240   
128    352    
112    304    
-48    32     
-32    -16    
336    336    
80     288    
48     576    
112    320    
-32    -336   
-64    -272   
-320   -304   
240    -112   
240    336    
-112   48     
32     -16    
64     -80    
-160   144    
0      144    
224    160    
-128   128    
64     0      
-16    -16    
-32    64     
48     160    
-80    160    
384    288    
256    192    
-80    240    
-16    -1904  
-32    48     
112    -16    
96     256    
-96    -16    
32     80     
-144   -144   
160    -160   
352    400    
-144   16     
16     256    
224    -144   
48     64     
-112   -256   
112    -112   
-224   -976   
208    400    
48     240    
80     352    
-208   -32    
224    144    
-48    -64    
128    -96    
-192   -80    
288    128    
-128   576    
48     -64    
-144   -144   
160    -128   
-80    288    
128    -320   
-80    144    
128    -896   
-80    176    
0      -320   
112    80     
-80    -96    
192    256    
-16    -16    
-32    192    
-144   -32    
128    -256   
48     64     
-32    0      
160    32     
16     16     
128    0      
-64    -336   
-16    32     
144    -848   
16     64     
112    208    
-48    32     
272    32     
-48    -32    
-16    160    
80     80     
80     192    
80     -48    
32     144    
-80    -304   
96     192    
48     -256   
16     96     
32     -64    
48     112    
48     48     
112    112    
-80    64     
128    -320   
-16    144    
112    -320   
80     176    
-112   -736   
240    192    
-144   -448   
64     112    
80     144    
-32    48     
272    -368   
-160   224    
32     112    
80     64     
-144   -16    
128    -32    
-48    96     
64     -64    
144    32     
80     -224   
-48    176    
0      -112   
80     112    
320    80     
-352   128    
-64    -96    
112    -768   
112    -128   
128    -400   
-32    -224   
-32    128    
-32    -768   
112    -80    
48     -560   
32     -80    
32     224    
96     112    
-96    320    
-80    -240   
80     -1408  
32     -48    
176    176    
48     96     
48     160    
96     -880   
-240   96     
-80    -272   
144    -48    
-112   -272   
-1296  1120   
1568   128    
416    16     
208    -496   
384    -912   
-368   -1328  
592    848    
64     -400   
160    592    
-352   -784   
224    352    
-896   -368   
160    288    
-272   -48    
336    -144   
-64    64     
32     -16    
48     -16    
96     -544   
-80    -16    
288    -64    
-144   304    
96     -352   
-16    272    
-64    -240   
64     224    
-160   -80    
144    224    
-32    -144   
112    64     
128    -112   
32     -544   
32     112    
96     -224   
32     -32    
32     -288   
-80    48     
112    64     
128    192    
-48    -64    
-16    -16    
-80    -16    
96     -64    
-64    -112   
-112   -352   
48     -32    
64     80     
288    48     
32     -480   
-112   16     
64     -96    
64     64     
48     -64    
80     80     
-80    32     
112    0      
-224   -96    
-16    -288   
-400   80     
-32    32     
-256   -32    
48     16     
64     0      
16     -448   
80     48     
112    -96    
48     192    
16     112    
48     -16    
0      -16    
80     -32    
-80    16     
144    -64    
-192   32     
64     -128   
-544   64     
96     -160   
-48    -80    
112    -400   
-160   -16    
176    -800   
128    464    
48     16     
192    -160   
-400   48     
416    224    
-240   64     
-64    -32    
32     16     
48     -48    
-32    32     
80     16     
16     192    
32     -176   
0      32     
160    -640   
320    400    
-320   0      
112    80     
-272   -288   
80     -32    
96     112    
112    64     
-224   112    
32     -96    
-48    96     
160    -64    
0      0      
48     -352   
-96    -176   
48     -512   
16     -192   
-32    -16    
112    16     
-16    208    
0      -32    
64     144    
-32    128    
32     80     
128    64     
-64    128    
144    160    
32     64     
-464   -144   
-208   0      
-176   -16    
-640   112    
-16    320    
-1232  -96    
-160   0      
-256   -192   
80     64     
48     32     
-48    224    
-80    -160   
-224   -16    
-992   -320   
160    128    
-320   -192   
112    272    
-80    -32    
16     -64    
32     -48    
-496   -32    
64     16     
-240   64     
80     96     
192    144    
-256   -48    
-32    -128   
64     32     
-288   0      
80     80     
-144   0      
-48    96     
64     96     
-336   -144   
48     224    
-400   -240   
240    -96    
-80    240    
-16    80     
-736   -64    
-48    64     
176    -112   
48     160    
-64    -16    
-64    -176   
288    48     
0      336    
-272   -304   
256    16     
-176   192    
176    -48    
-176   96     
-144   -64    
112    48     
-1376  -112   
48     -128   
64     144    
48     -32    
32     0      
32     112    
-80    64     
48     0      
-112   112    
64     80     
-48    368    
-160   -32    
80     48     
-16    0      
32     48     
-240   0      
80     -64    
-672   160    
272    224    
-192   -16    
-32    32     
0      64     
-1376  -912   
656    352    
64     -304   
912    -416   
-704   -752   
320    32     
-240   912    
-32    -288   
64     -304   
-112   -144   
-464   -112   
-96    320    
128    -224   
0      336    
-144   -112   
-112   288    
48     -96    
-416   -432   
160    -80    
208    -16    
368    928    
-416   224    
16     80     
-144   -208   
-112   32     
-400   16     
320    48     
-256   144    
256    352    
-16    352    
-192   -48    
48     -192   
-64    176    
0      -80    
-16    192    
96     112    
-256   -288   
48     -144   
-112   -16    
96     64     
64     80     
-64    176    
80     128    
32     -80    
80     80     
-80    0      
176    112    
-176   208    
272    288    
-336   80     
112    -16    
-128   80     
-64    0      
-16    -160   
80     -96    
-16    96     
112    112    
16     16     
-48    64     
-48    96     
64     304    
-160   0      
176    -144   
48     144    
-256   144    
192    -112   
-96    -64    
96     208    
-48    48     
208    224    
-368   16     
64     32     
64     96     
-16    96     
96     192    
-192   32     
-64    -80    
240    128    
-432   128    
-224   -192   
176    464    
-272   176    
192    128    
144    160    
-240   192    
-144   16     
48     96     
80     48     
80     64     
32     112    
128    80     
-32    112    
-48    -64    
0      128    
-16    128    
112    -16    
0      48     
-80    176    
-80    16     
176    192    
-144   16     
112    48     
-64    96     
80     -32    
96     80     
-128   304    
-64    16     
272    32     
160    320    
-112   208    
64     64     
-272   16     
0      80     
-48    -192   
96     112    
-48    -80    
176    0      
-192   -48    
96     48     
80     32     
48     144    
240    304    
-80    128    
-32    -16    
-64    16     
-16    96     
240    64     
-208   48     
208    -208   
-176   -256   
48     16     
256    80     
-240   80     
144    -48    
-112   160    
-112   -16    
400    400    
-224   -32    
112    -64    
-112   128    
-128   96     
336    16     
-80    80     
-192   64     
-16    -608   
96     64     
-208   48     
48     192    
256    112    
48     208    
48     48     
-48    80     
-16    80     
64     160    
112    48     
-80    160    
-16    -64    
48     128    
224    -176   
0      -288   
-112   128    
192    -48    
-112   192    
144    -32    
32     176    
-48    80     
144    240    
-32    112    
48     64     
80     32     
288    96     
-80    176    
-16    176    
16     144    
96     -224   
208    112    
320    -1136  
-176   192    
-16    0      
32     256    
-192   80     
304    -16    
128    -96    
32     96     
-160   96     
96     -160   
112    80     
96     -80    
32     224    
-80    -32    
80     -16    
96     -704   
128    96     
32     -80    
-32    128    
80     208    
-64    144    
-48    -272   
16     -32    
-800   -992   
-528   960    
672    672    
-592   -208   
-176   -352   
-64    800    
-496   -960   
256    480    
-192   -160   
544    -400   
-240   -352   
96     304    
-16    304    
256    -64    
-288   464    
80     -224   
144    464    
48     -16    
-64    80     
0      -272   
16     -160   
96     144    
272    80     
80     224    
112    -544   
-144   80     
0      16     
-112   176    
192    64     
80     80     
-16    -16    
0      160    
64     96     
48     64     
48     64     
64     -208   
96     160    
160    -416   
-16    32     
-32    -1008  
112    128    
0      48     
112    112    
16     64     
64     48     
-16    16     
96     -384   
64     16     
80     -272   
32     96     
96     -64    
0      160    
32     -80    
96     112    
-32    -96    
160    80     
96     16     
128    160    
16     -144   
32     80     
48     -64    
112    16     
16     112    
96     16     
-16    288    
48     -144   
160    192    
16     48     
96     128    
224    336    
-128   96     
96     -400   
80     -560   
-32    80     
160    48     
-48    -768   
-16    64     
128    -832   
64     -176   
48     -1824  
-64    -688   
0      368    
112    -112   
112    496    
-192   -224   
224    -672   
-48    32     
0      -272   
-128   32     
160    -256   
-16    -96    
64     -96    
96     -256   
64     -80    
112    -352   
0      -16    
32     32     
224    48     
-80    -192   
32     -448   
64     -512   
224    368    
80     0      
-128   -32    
0      -112   
128    -160   
-832   -48    
64     -80    
32     80     
80     -112   
48     16     
0      -352   
128    -16    
32     -112   
32     80     
64     48     
-128   16     
208    16     
-96    16     
-112   -96    
0      -32    
-176   144    
-16    -80    
-16    -32    
0      160    
256    -96    
48     -336   
128    416    
-144   -400   
288    -192   
-48    -192   
0      240    
192    -176   
64     0      
-160   96     
112    0      
-192   48     
80     144    
-848   -304   
256    -64    
-224   16     
288    -16    
-96    112    
96     -336   
160    96     
-80    -256   
-32    -48    
48     -128   
192    144    
-112   192    
112    -80    
-112   -112   
112    16     
48     16     
256    -64    
-240   224    
32     -128   
16     288    
-192   -1120  
304    64     
-96    -1376  
112    64     
-32    16     
64     -192   
32     128    
48     -368   
-144   80     
-112   -96    
-48    16     
224    -80    
-608   112    
80     -336   
-80    80     
0      -288   
-16    16     
-64    -720   
64     208    
-48    16     
-48    -192   
-96    -160   
144    64     
-192   96     
0      48     
-48    96     
64     -32    
16     -96    
32     -272   
64     272    
48     -112   
-16    160    
48     -304   
80     -80    
-176   16     
-32    288    
-112   16     
80     0      
-208   -128   
256    -32    
-64    -48    
-192   224    
-416   2416   
-704   656    
272    -128   
-592   -864   
1056   608    
-880   -1104  
-464   -944   
384    80     
656    640    
-544   -128   
-96    -80    
112    0      
112    32     
-224   64     
288    0      
-432   192    
64     -64    
272    -176   
-896   -672   
16     -48    
-48    48     
-384   288    
48     32     
-96    -48    
-144   80     
48     112    
48     64     
32     64     
-96    -16    
64     48     
144    -64    
-304   -48    
64     224    
-144   -176   
-112   208    
48     48     
-128   112    
-64    64     
-384   16     
0      -16    
-256   48     
-64    32     
96     80     
-96    32     
144    -144   
80     192    
48     -16    
48     32     
48     -48    
-192   128    
64     32     
-16    -16    
-176   48     
-48    -160   
-144   144    
-48    16     
80     32     
-736   -32    
-112   48     
-160   -208   
192    32     
-64    -48    
-48    48     
64     48     
-48    48     
-80    112    
0      0      
32     352    
-176   -80    
176    80     
-48    96     
-32    0      
-320   0      
-16    80     
96     32     
-48    304    
-176   32     
176    80     
-128   96     
-288   -128   
272    -16    
-144   -16    
48     144    
-32    -112   
80     144    
-288   -224   
272    -64    
-768   112    
-16    176    
-1328  -144   
-80    176    
-16    -48    
144    48     
112    192    
-240   144    
48     -64    
-96    144    
-128   16     
96     -16    
-160   48     
-160   -240   
112    112    
-128   144    
64     208    
-320   -224   
96     224    
-32    -128   
192    128    
-176   16     
192    176    
-176   80     
176    32     
-80    96     
208    -64    
-32    64     
-32    160    
176    192    
-336   -144   
16     64     
-544   -304   
144    96     
-16    -48    
352    240    
-96    48     
-64    -16    
-416   64     
96     -224   
64     416    
32     224    
112    80     
-16    16     
-112   128    
80     128    
112    176    
-288   -32    
0      128    
-48    32     
192    -112   
-32    48     
-304   -64    
304    176    
-16    48     
-128   32     
-160   208    
112    160    
-96    -176   
-80    176    
-192   48     
112    96     
-48    64     
-80    96     
-32    16     
32     32     
48     80     
80     224    
48     176    
-48    48     
-80    80     
-32    -160   
48     -48    
-64    176    
32     176    
0      112    
96     144    
-176   -32    
-160   -224   
128    -272   
-80    -112   
160    192    
-288   64     
0      112    
48     16     
96     96     
16     -16    
176    112    
160    112    
160    384    
-160   64     
-144   208    
112    -112   
112    192    
80     -96    
0      176    
-16    160    
-112   32     
-80    144    
-32    16     
160    128    
-96    112    
-32    0      
0      48     
192    160    
-256   -80    
176    192    
144    0      
-64    256    
-16    112    
112    32     
-32    128    
-464   -144   
-432   -1376  
96     480    
-304   720    
-496   -144   
480    1392   
-544   -480   
320    192    
-448   224    
272    288    
-144   96     
-32    32     
224    288    
-80    -64    
80     32     
160    -112   
-112   64     
16     64     
112    128    
-112   -80    
48     208    
-96    -128   
272    -16    
-48    -64    
64     -928   
-32    320    
-112   144    
144    -32    
-96    -32    
160    96     
80     64     
-48    112    
32     112    
0      48     
-32    -32    
64     176    
16     112    
32     64     
-96    -80    
144    -1392  
-48    80     
96     144    
-16    144    
160    -48    
64     80     
-16    128    
176    96     
-96    64     
64     80     
80     240    
0      176    
96     16     
48     16     
48     128    
96     -208   
48     48     
-64    -256   
144    -96    
96     256    
208    304    
-48    112    
-16    128    
128    208    
32     80     
0      -64    
-32    112    
96     -96    
48     -192   
144    144    
-32    -48    
48     80     
144    -2288  
0      96     
-64    0      
160    48     
32     64     
16     16     
-32    -96    
192    192    
-16    -64    
192    160    
-144   144    
-16    -144   
160    112    
-48    -128   
48     80     
112    -480   
48     160    
-16    112    
144    240    
16     0      
48     32     
-48    -112   
80     112    
64     128    
64     144    
32     64     
176    272    
-16    128    
144    -112   
-96    0      
48     0      
176    208    
0      -656   
48     80     
48     -80    
64     208    
-80    -32    
160    192    
-128   32     
160    112    
48     192    
48     -128   
32     80     
16     -16    
32     80     
0      -336   
144    320    
48     -576   
96     -16    
-96    -512   
48     144    
112    -112   
-16    208    
-80    64     
96     -240   
-64    80     
304    192    
-448   96     
448    -480   
-240   208    
16     -144   
256    128    
-192   -416   
208    144    
16     64     
144    288    
-32    -32    
96     96     
-32    240    
64     -864   
96     64     
0      -144   
-32    64     
160    -80    
-96    144    
256    -208   
176    688    
-128   -432   
176    272    
-80    -80    
224    48     
80     96     
-48    -384   
112    144    
112    -208   
48     64     
-48    -240   
144    112    
48     -96    
-48    160    
-16    -320   
-64    64     
144    0      
144    96     
112    16     
-32    -1488  
-64    -336   
224    -480   
96     -416   
32     64     
-112   112    
-192   -208   
144    -784   
272    -208   
192    80     
80     -32    
-176   112    
-16    -16    
160    -576   
64     112    
96     -752   
16     128    
-32    -16    
96     -192   
-16    -48    
160    -416   
96     -128   
-16    -352   
64     -16    
-16    -448   
112    16     
272    -48    
-176   -32    
288    -288   
-320   192    
192    -16    
48     288    
-64    -48    
464    1088   
-128   912    
-1200  -416   
-432   -576   
-240   192    
304    80     
896    -144   
-304   432    
208    -112   
-352   -128   
-32    -144   
32     208    
352    -256   
-80    0      
-80    -128   
32     32     
-32    112    
64     -48    
-64    -400   
64     96     
208    -64    
176    -432   
-16    0      
256    192    
-64    80     
160    16     
-64    192    
96     32     
32     -160   
-112   -128   
144    -32    
-16    128    
80     -32    
-816   -64    
16     -128   
80     -112   
144    -224   
-80    48     
176    -416   
48     112    
64     -32    
-64    144    
-80    -32    
160    64     
-176   0      
64     -144   
-352   -128   
0      -96    
-368   -160   
-64    -16    
-128   -32    
96     80     
-112   48     
128    -560   
0      -32    
192    -1952  
-16    224    
-32    32     
160    -112   
-192   -16    
208    -112   
-240   -64    
32     80     
-80    144    
160    -80    
-336   112    
-80    -112   
96     0      
64     -384   
240    208    
-144   -976   
96     0      
96     96     
32     -64    
-480   48     
32     -192   
64     224    
-96    -112   
80     -32    
32     32     
-384   -96    
208    -128   
-160   176    
192    384    
-176   64     
496    -960   
-48    -48    
-768   144    
112    -144   
-16    96     
-80    -80    
160    64     
16     -64    
-48    32     
-128   -208   
-48    -32    
-80    -32    
112    96     
-16    -192   
-16    96     
-112   -32    
96     -32    
-96    96     
-64    32     
-64    -80    
224    48     
-64    224    
96     304    
-208   -160   
16     -16    
0      -16    
80     -16    
-48    -16    
-1056  -176   
32     16     
192    80     
-944   16     
-32    112    
-576   -64    
-32    32     
336    -48    
0      192    
256    -192   
-112   304    
-256   48     
304    32     
-272   -384   
-320   -48    
176    -352   
-272   16     
80     80     
32     80     
48     -48    
-288   64     
64     64     
288    -48    
-480   48     
-96    -48    
176    176    
-192   -272   
-16    112    
-272   -192   
272    128    
-80    -304   
-176   16     
-96    256    
-176   -16    
288    640    
-64    -112   
0      112    
-416   80     
192    0      
-592   -32    
-112   48     
-64    -112   
160    0      
-112   0      
96     224    
96     -384   
-256   -96    
208    400    
144    128    
-176   192    
-240   -208   
160    304    
-80    16     
48     -48    
-912   -624   
64     240    
16     112    
256    352    
-32    -192   
-144   112    
-16    64     
0      -48    
-96    32     
32     -48    
-16    -128   
176    352    
-64    80     
-288   -240   
0      48     
-528   -128   
64     192    
-1152  -128   
48     112    
16     -16    
-160   32     
64     0      
64     144    
-96    64     
48     32     
-416   416    
64     -16    
240    -48    
-352   112    
48     192    
-48    32     
144    -16    
-752   256    
512    -944   
-576   480    
-320   -544   
32     160    
560    160    
1008   1168   
-512   144    
-336   176    
-128   160    
32     -16    
-192   16     
64     208    
-128   48     
288    112    
-736   -160   
208    272    
-144   -160   
96     16     
-16    112    
-16    -272   
-16    112    
-96    -96    
112    16     
-112   160    
304    272    
48     160    
-96    288    
-128   -144   
96     80     
-368   16     
144    80     
-96    80     
96     176    
80     96     
-16    48     
0      -16    
-16    384    
160    368    
0      160    
-96    32     
-64    -128   
64     192    
-240   16     
64     64     
-32    112    
128    -16    
-32    -32    
16     64     
128    288    
-96    16     
16     80     
32     -32    
112    304    
-48    16     
-32    -80    
-176   96     
48     224    
96     80     
-112   32     
112    0      
-176   96     
-96    0      
-112   160    
64     16     
48     128    
16     32     
-32    160    
-32    128    
-48    96     
96     48     
-64    32     
64     64     
-64    32     
80     96     
128    176    
192    80     
-144   224    
-80    144    
96     192    
16     112    
-128   -160   
16     -224   
48     64     
-32    256    
176    208    
-160   176    
-48    -240   
-16    32     
128    208    
64     160    
-96    32     
-32    112    
144    80     
128    144    
-80    80     
-16    -160   
48     -16    
176    272    
-80    96     
160    128    
-208   -64    
80     160    
0      32     
0      96     
16     96     
112    208    
-32    32     
112    128    
-32    128    
-16    48     
96     112    
-96    16     
176    112    
-176   32     
160    128    
-176   16     
176    224    
-16    192    
64     -832   
32     32     
-80    32     
112    176    
112    -64    
-32    208    
-80    112    
496    784    
-256   288    
0      -240   
-112   -96    
32     -32    
128    32     
160    80     
-16    256    
16     -320   
-80    48     
64     -432   
96     -32    
-336   -240   
192    64     
-16    64     
208    192    
32     208    
-112   -96    
112    192    
224    32     
32     96     
64     0      
96     144    
160    -224   
-48    176    
-16    48     
16     96     
80     48     
16     320    
-96    64     
224    464    
-400   -160   
208    128    
80     -96    
96     144    
-144   0      
80     -160   
128    144    
112    -608   
-128   -160   
32     -2192  
80     176    
80     832    
-256   -224   
-96    16     
432    48     
-112   240    
240    -32    
16     272    
80     -288   
-16    144    
224    0      
-112   -80    
144    176    
80     288    
-16    -784   
96     288    
48     -224   
32     336    
-80    -48    
272    -240   
-96    16     
-160   192    
112    -96    
-112   240    
80     112    
64     80     
0      96     
256    -64    
-112   0      
240    -160   
-16    0      
80     -1072  
-16    -192   
144    64     
1232   736    
-512   496    
320    0      
-160   480    
64     0      
720    -32    
-208   352    
-240   -272   
192    -16    
-96    -160   
160    -96    
48     0      
160    -48    
-80    64     
80     64     
-48    160    
96     32     
32     -96    
32     48     
240    288    
32     160    
-96    -256   
-16    -48    
-48    64     
304    112    
96     0      
128    192    
-96    -48    
96     64     
0      96     
80     160    
-32    80     
160    96     
-112   64     
-48    -928   
64     16     
128    -256   
112    304    
112    -160   
-96    112    
48     -432   
16     144    
64     -240   
48     128    
-64    96     
304    288    
-368   -96    
368    -1296  
-144   -912   
176    -208   
0      96     
64     80     
16     144    
48     -224   
80     176    
176    -96    
-32    240    
96     -224   
-96    32     
-48    112    
128    -2560  
32     -16    
-208   -48    
-48    -96    
64     16     
112    48     
-96    -32    
64     -1840  
96     -176   
80     208    
-80    80     
128    112    
80     -16    
-32    -224   
32     -160   
128    32     
-208   32     
-80    96     
-64    64     
128    -48    
0      -864   
208    -80    
-160   -128   
160    -128   
80     -320   
160    80     
-32    0      
128    48     
-32    -352   
80     208    
16     -80    
128    96     
-272   -16    
32     -176   
-1408  -32    
-80    -48    
192    80     
48     -48    
-64    64     
32     -336   
176    -224   
144    -208   
-64    64     
208    -128   
-192   48     
144    -192   
224    32     
-352   64     
256    0      
-192   144    
0      -96    
128    240    
0      32     
304    288    
-128   -656   
400    400    
-80    -944   
0      112    
160    240    
80     112    
64     -32    
-80    -160   
-32    -16    
48     48     
-336   96     
320    224    
-336   -112   
16     -240   
32     16     
48     -976   
176    176    
-64    -1440  
208    48     
0      -80    
0      224    
48     64     
-32    80     
-160   -48    
112    80     
-96    0      
80     -32    
-1072  64     
-112   -224   
224    0      
112    -160   
-64    -304   
48     -112   
128    288    
128    -320   
-32    -48    
32     64     
64     32     
-32    144    
224    96     
-496   64     
176    -160   
-368   -144   
256    32     
-208   80     
240    -96    
-320   48     
192    -288   
-192   -128   
208    -1968  
272    224    
112    288    
-304   -496   
-320   112    
16     -96    
-48    32     
-192   -96    
16     32     
208    128    
-208   -64    
112    -32    
-64    96     
16     -384   
-128   160    
0      224    
-48    32     
0      176    
160    -96    
-96    48     
-64    -16    
112    48     
112    -80    
-96    144    
32     144    
-144   -16    
32     -16    
64     64     
128    -80    
544    -112   
-176   128    
-576   -128   
-128   128    
112    0      
320    2112   
96     16     
-640   -496   
-32    -1040  
-160   96     
48     64     
-16    64     
48     160    
-160   176    
64     288    
-384   -352   
16     256    
-704   -64    
240    -16    
-512   -320   
144    80     
224    32     
-80    -16    
176    144    
-128   -176   
-160   176    
-32    -96    
-192   -32    
-160   208    
-96    -240   
-320   -160   
256    16     
176    80     
208    -48    
-96    160    
-144   -64    
-896   80     
64     128    
320    464    
0      272    
-16    0      
-208   -80    
144    64     
-32    -16    
320    112    
-496   0      
256    64     
-224   176    
32     112    
-80    -112   
0      -16    
-160   48     
-160   176    
-688   -48    
-112   96     
80     -144   
-240   224    
48     -48    
32     336    
-48    -160   
-256   32     
-208   -48    
400    464    
-432   -192   
176    368    
-64    -192   
-256   -16    
-144   32     
-176   -384   
32     112    
-176   -192   
-32    144    
-160   -32    
-16    176    
16     80     
80     48     
-112   96     
16     -16    
112    96     
48     112    
64     112    
192    48     
-320   112    
-272   -80    
64     128    
-272   272    
160    80     
-64    -64    
-80    128    
-32    -16    
-80    0      
0      112    
144    224    
-96    -48    
-208   -32    
32     96     
-80    -32    
-48    112    
-208   -64    
224    304    
-480   -16    
224    368    
-272   -176   
112    -80    
-64    128    
32     160    
112    112    
-240   48     
96     32     
-144   -16    
-64    16     
32     160    
-112   48     
-80    -288   
128    48     
-448   176    
112    96     
16     -128   
-208   96     
112    -16    
208    48     
-176   112    
96     128    
0      112    
-32    80     
240    192    
16     128    
96     240    
-368   -80    
16     -112   
-384   -112   
144    320    
-224   32     
48     -464   
-96    416    
16     144    
32     48     
-96    -336   
48     64     
80     224    
80     240    
-224   32     
128    64     
-304   -384   
288    432    
-208   0      
64     112    
112    48     
-32    32     
0      64     
-224   -144   
96     32     
-16    -272   
112    224    
32     416    
-16    96     
-176   -64    
64     144    
-16    176    
-128   -352   
336    -16    
-160   -96    
192    176    
80     0      
64     176    
192    320    
-16    128    
-48    32     
0      144    
-128   64     
-32    -144   
-80    -16    
32     112    
128    240    
-224   -16    
-112   144    
16     128    
32     144    
224    -80    
64     176    
224    176    
-112   96     
-64    -16    
128    192    
-288   144    
128    48     
16     112    
80     -16    
-48    32     
128    -304   
-48    240    
-256   160    
128    304    
-208   128    
160    -64    
144    -96    
80     80     
96     112    
-144   224    
-112   -80    
320    -32    
-256   64     
224    192    
-144   96     
800    304    
624    880    
-224   -176   
-576   256    
432    -416   
64     496    
0      -432   
592    704    
-384   -176   
32     192    
-96    112    
272    -32    
-432   496    
416    -368   
-176   528    
176    -672   
-64    464    
128    -80    
-128   208    
80     -160   
32     176    
64     16     
64     192    
-64    32     
80     144    
-96    -16    
144    128    
-32    -224   
80     208    
16     -48    
80     -1664  
32     224    
128    176    
-48    96     
-16    0      
208    272    
32     176    
48     128    
-192   -32    
128    160    
32     -352   
16     128    
32     -32    
-32    48     
48     16     
112    -416   
-96    96     
96     -96    
256    272    
-240   240    
224    -16    
-48    80     
32     160    
-32    -128   
48     0      
80     0      
80     224    
-80    -48    
192    16     
-96    64     
96     -96    
112    176    
-80    -1120  
144    0      
0      192    
-32    128    
128    48     
0      144    
16     -96    
208    160    
-128   112    
32     208    
48     -32    
160    32     
-80    96     
144    -224   
176    400    
-320   -1184  
304    -80    
96     64     
-80    208    
-32    112    
80     64     
192    272    
-224   144    
224    144    
0      176    
96     320    
32     -208   
288    128    
-128   -208   
128    80     
-16    -96    
-48    -64    
208    -304   
-96    112    
64     64     
112    -144   
-32    -16    
192    96     
48     96     
112    112    
64     80     
128    -160   
-176   32     
192    -48    
-112   0      
-64    -208   
64     -32    
48     -112   
128    176    
-48    -144   
112    192    
48     112    
-64    96     
32     144    
128    192    
80     368    
80     -1056  
-160   -336   
96     -176   
-128   288    
80     -128   
160    64     
48     -592   
-208   -64    
176    -64    
-96    80     
48     32     
224    224    
128    48     
-64    -528   
-64    336    
112    -80    
320    288    
-240   112    
512    384    
-48    -144   
-32    -96    
-144   -1200  
320    -16    
64     80     
0      96     
64     -48    
48     -896   
-144   -368   
208    272    
176    448    
-80    -160   
96     80     
-32    -80    
48     192    
64     -112   
144    -96    
80     -352   
96     -464   
-128   0      
80     -384   
-64    592    
-768   -32    
-16    -176   
16     32     
48     -464   
-32    48     
-80    -3008  
800    -608   
-208   208    
-160   -176   
224    -144   
112    -128   
368    -464   
-192   64     
-208   -352   
-208   -48    
16     -16    
240    112    
-96    48     
-96    64     
-160   -240   
240    -592   
256    -96    
128    -576   
-176   -32    
-48    -96    
176    128    
0      -160   
-80    32     
80     -176   
112    -32    
80     64     
-96    0      
-272   -48    
-32    -272   
-16    -96    
160    96     
-144   64     
208    -256   
-160   -96    
-1088  -1984  
1088   3104   
-304   1040   
256    -256   
-256   -592   
-304   -80    
160    -528   
-784   -192   
-1008  48     
416    -560   
-240   -272   
336    -160   
96     368    
-80    -272   
-320   96     
0      -1552  
176    240    
-48    -416   
144    80     
-464   -16    
-16    160    
-224   80     
-32    256    
-176   -48    
-32    -352   
-1136  112    
256    -160   
-48    576    
-288   -272   
288    160    
-128   -288   
304    256    
-16    16     
-112   -64    
272    -176   
32     112    
96     -32    
352    -16    
-64    -16    
16     -16    
-256   112    
-176   32     
-224   -16    
112    -240   
64     -48    
16     -320   
-64    -224   
16     240    
-48    -192   
-32    96     
-96    -48    
64     -16    
32     16     
-240   -64    
-48    -176   
-160   -16    
176    288    
-336   80     
176    -160   
80     -128   
128    -368   
0      32     
0      -128   
112    -496   
-384   304    
320    0      
-320   -32    
-32    -192   
-208   -16    
128    16     
32     48     
32     80     
16     112    
176    0      
-64    32     
112    -208   
0      80     
-160   -112   
-240   -192   
-192   -272   
-96    64     
192    144    
-160   -48    
320    -288   
-304   112    
128    -96    
192    -112   
-96    64     
160    -432   
16     128    
-176   -160   
128    96     
-80    256    
-144   -112   
-208   -128   
96     -160   
-96    0      
160    80     
-352   -176   
0      -208   
-96    -128   
-32    -64    
64     48     
-512   -80    
32     176    
-224   -64    
80     -48    
-32    144    
-208   64     
144    560    
-112   224    
-256   -224   
-96    -48    
0      -224   
160    -128   
-144   208    
-192   224    
112    160    
-224   -208   
-176   48     
-16    -352   
64     -144   
-80    144    
-304   352    
0      160    
-240   -48    
0      -128   
-960   -288   
-240   -128   
320    208    
-80    80     
32     -112   
-48    -128   
-128   -224   
96     112    
112    48     
-80    -16    
-80    16     
-272   0      
112    -48    
-96    -48    
-16    48     
64     -16    
-16    192    
-80    64     
80     128    
-224   -256   
176    512    
-256   -400   
224    160    
-256   32     
176    80     
-32    64     
-160   80     
32     -80    
0      -64    
32     112    
-80    176    
144    -208   
-528   16     
-160   240    
-16    -160   
80     80     
64     -96    
64     176    
96     96     
-432   0      
208    -80    
0      144    
-80    16     
0      80     
-160   208    
80     176    
-208   -128   
-256   -368   
48     176    
-128   -16    
-32    160    
-112   -48    
240    -16    
-48    144    
-208   -16    
96     128    
-176   32     
80     112    
-256   96     
144    -176   
-144   -32    
-80    48     
-176   -64    
16     208    
-592   -80    
112    192    
-64    80     
-256   144    
32     64     
80     -48    
96     112    
-48    176    
1488   -1408  
-176   64     
-176   -512   
400    112    
0      -464   
-48    -272   
-192   480    
-32    -560   
-256   -992   
48     -176   
-64    256    
160    -320   
-400   848    
608    -544   
-384   352    
48     -336   
144    560    
-48    -80    
-16    64     
48     16     
-64    144    
32     80     
-144   48     
-32    176    
128    32     
-352   16     
208    -112   
-96    192    
272    48     
-416   -32    
-16    64     
48     64     
144    112    
-160   112    
96     -48    
-336   64     
144    16     
-256   112    
-80    -32    
80     272    
96     16     
-48    64     
-80    48     
32     80     
176    128    
-48    96     
64     -16    
-96    192    
-48    48     
224    64     
-176   32     
48     192    
96     48     
16     96     
-64    80     
80     -16    
-32    80     
-32    0      
112    0      
16     160    
-80    64     
96     48     
16     112    
-80    96     
32     128    
160    -48    
-96    64     
-16    48     
48     112    
-16    -64    
144    64     
-128   80     
208    192    
-112   32     
48     0      
16     128    
-128   -96    
208    0      
-176   160    
16     80     
0      -112   
0      176    
0      160    
-16    -224   
-16    16     
16     80     
80     240    
-176   0      
384    160    
-368   0      
-16    -48    
128    144    
-32    176    
-48    80     
96     144    
192    224    
-128   144    
-32    -32    
128    48     
0      96     
-48    -16    
336    448    
160    48     
0      -32    
-112   112    
80     -32    
32     16     
48     192    
-272   0      
160    112    
144    192    
-112   48     
128    144    
16     144    
-16    96     
112    192    
-128   -192   
0      80     
128    48     
160    160    
112    304    
-96    48     
-16    144    
64     0      
80     -400   
256    464    
-48    -1632  
16     32     
-128   16     
384    880    
160    -64    
-112   -64    
-80    -272   
208    32     
-32    128    
48     240    
176    240    
-224   -112   
80     144    
-96    -80    
64     0      
-16    -560   
144    128    
176    208    
-144   160    
32     80     
128    208    
48     64     
112    160    
-176   -48    
64     128    
0      32     
48     128    
80     128    
-64    -176   
224    96     
-32    -880   
16     96     
288    -1888  
-160   240    
96     48     
32     64     
128    64     
-16    192    
-80    -64    
80     96     
-96    -16    
96     160    
64     -16    
-96    32     
-80    32     
240    -128   
-160   64     
288    -544   
-48    192    
-64    48     
256    32     
-16    224    
-112   272    
-64    -16    
176    48     
32     128    
16     -16    
-16    96     
-16    -64    
64     208    
176    -288   
128    320    
-80    -368   
512    160    
-384   -320   
208    16     
160    176    
-48    64     
-160   224    
32     144    
128    16     
0      -32    
128    112    
1872   -1568  
48     -1248  
768    320    
-736   384    
608    320    
-112   -560   
64     160    
-80    512    
-368   -320   
816    -80    
-592   320    
336    -272   
0      304    
-80    -192   
320    240    
-192   -336   
160    240    
-64    -512   
304    48     
16     -96    
192    -32    
-128   -352   
-112   400    
160    192    
160    -96    
-80    192    
256    208    
-16    176    
-160   -464   
-64    48     
160    -224   
96     80     
-32    -128   
176    176    
-64    0      
48     32     
-16    -224   
-288   -448   
448    528    
80     32     
-48    -32    
-304   -16    
256    -192   
-176   -16    
16     96     
0      -224   
144    112    
-80    112    
112    64     
128    -144   
32     112    
128    -112   
48     -640   
48     80     
0      -672   
-288   80     
-576   -224   
48     -80    
128    176    
96     0      
48     -48    
16     -1184  
160    -208   
144    192    
-208   32     
64     -128   
32     144    
0      -128   
128    304    
-32    -304   
160    -368   
-192   -32    
112    -208   
-32    -32    
176    32     
96     -16    
144    -384   
-64    16     
64     -464   
336    320    
-288   256    
-48    32     
208    -64    
112    368    
64     32     
-176   -192   
-128   208    
80     -240   
384    320    
-80    -304   
80     -64    
-48    -832   
128    -64    
-16    -800   
192    -16    
-16    -320   
16     96     
272    176    
-400   48     
16     -224   
-96    -64    
-48    240    
256    80     
-640   -96    
96     16     
-128   -272   
288    -48    
-192   16     
368    160    
-176   -96    
-16    -768   
112    -144   
16     0      
288    48     
-336   48     
192    -32    
-48    64     
-16    -368   
32     416    
-144   -112   
-304   -176   
-16    -336   
-112   -112   
160    -336   
128    208    
-112   -1632  
352    -48    
-256   16     
112    -32    
-32    -144   
80     0      
-272   -64    
-96    -32    
-144   -272   
-64    48     
-400   128    
128    -128   
-32    -192   
-80    0      
-48    128    
352    -400   
-160   192    
96     -64    
192    64     
-256   -32    
208    80     
64     -48    
128    256    
-688   32     
256    -80    
-272   -16    
-96    -64    
64     32     
-48    -80    
80     224    
80     -352   
-32    112    
-288   0      
144    -16    
32     0      
-80    128    
-64    192    
48     64     
16     160    
-128   0      
16     -96    
32     0      
80     -16    
144    -272   
96     -48    
-16    -32    
-240   80     
-80    16     
80     -16    
112    192    
-32    -176   
-32    48     
160    -272   
-256   192    
-160   32     
64     32     
80     -32    
-144   16     
32     16     
-112   -80    
-192   -144   
-432   -32    
112    16     
-208   -80    
-176   16     
-176   112    
-48    -32    
-16    64     
128    112    
-64    -96    
32     -48    
-400   32     
176    112    
-784   -144   
176    112    
-128   -1200  
-672   -560   
-352   848    
736    -1040  
-768   -480   
-720   400    
-496   640    
368    -304   
-608   128    
560    -288   
-80    464    
-336   -256   
0      384    
96     -400   
0      208    
-176   64     
-48    160    
-32    -160   
-16    -48    
-48    48     
144    48     
-144   192    
-848   -112   
-208   80     
-80    -112   
-80    240    
144    -96    
-48    160    
-32    -320   
0      176    
0      -48    
48     112    
-64    48     
80     128    
-16    -80    
-48    -64    
-96    48     
-16    144    
160    64     
-304   0      
0      128    
-96    -32    
176    160    
-64    -96    
-112   80     
-128   64     
192    352    
-64    64     
64     -64    
-80    -32    
-96    32     
-16    96     
-80    -16    
16     64     
-288   64     
32     80     
16     -64    
-32    272    
-16    -80    
96     48     
-16    64     
64     96     
0      144    
32     16     
0      32     
0      -144   
80     128    
-128   16     
0      128    
-800   -176   
224    224    
-208   -240   
240    80     
16     192    
-112   144    
-96    64     
-192   -208   
96     -48    
-176   80     
64     -80    
-96    80     
-32    96     
112    176    
-48    64     
-272   32     
304    480    
-64    192    
-48    32     
176    96     
-208   64     
96     0      
-64    -32    
0      144    
32     80     
80     192    
-80    96     
112    224    
-192   80     
128    352    
-160   64     
128    160    
-304   -64    
96     64     
-48    0      
16     -96    
48     96     
-32    304    
80     64     
-16    -64    
-128   0      
-80    16     
96     48     
-160   -80    
112    144    
-208   16     
176    272    
-48    -64    
-80    -32    
-112   -80    
32     0      
112    80     
176    256    
48     64     
-112   -96    
-128   288    
128    160    
176    128    
-80    208    
48     192    
-144   -64    
-96    -64    
32     -32    
160    224    
48     144    
32     256    
-80    -64    
0      96     
144    112    
-16    32     
32     128    
-32    112    
16     64     
0      128    
-16    112    
-48    -80    
352    320    
-128   384    
-32    288    
-128   -16    
112    16     
32     96     
-48    -32    
0      -48    
112    16     
224    144    
-336   96     
48     0      
80     64     
-64    128    
48     -16    
-16    48     
160    144    
0      96     
-48    -64    
128    208    
-208   48     
240    -80    
144    208    
-32    -32    
80     16     
-240   96     
32     208    
64     32     
0      176    
-32    -16    
208    160    
-160   176    
16     -16    
32     48     
-48    176    
256    64     
-144   64     
32     96     
16     48     
-160   160    
-64    0      
32     160    
-96    64     
240    96     
-48    96     
-112   96     
32     48     
-16    96     
-160   128    
224    -80    
-128   64     
96     144    
-1392  -576   
-864   -1296  
1136   736    
432    352    
832    48     
-848   96     
16     256    
208    -1040  
192    192    
496    -16    
48     336    
-464   368    
416    -16    
-128   144    
-112   -288   
272    496    
128    -32    
240    288    
-576   -256   
224    144    
320    -112   
-432   -384   
288    80     
224    -832   
-176   32     
128    -16    
-240   -64    
176    16     
96     96     
0      192    
80     112    
-112   128    
-16    96     
16     64     
64     128    
16     -16    
112    -64    
112    176    
-176   -1248  
208    112    
-80    128    
-16    96     
96     96     
16     208    
64     32     
-96    80     
-32    -160   
176    208    
-64    -80    
144    -16    
64     144    
-96    -144   
96     96     
112    -848   
-16    240    
32     -2208  
0      48     
48     64     
64     192    
-16    -208   
112    128    
-48    128    
64     128    
48     -64    
144    80     
32     240    
-64    16     
160    64     
48     -32    
-32    160    
144    -112   
64     32     
48     48     
-48    112    
128    0      
-32    192    
32     208    
0      192    
-16    -48    
96     -112   
176    32     
-64    32     
-16    32     
144    -192   
256    -16    
-16    -1440  
-96    272    
-32    -1120  
96     368    
-64    -208   
272    176    
-16    112    
32     128    
-64    64     
-80    -256   
-48    -400   
352    -160   
-224   304    
224    64     
-16    128    
48     32     
-16    176    
144    -272   
32     128    
-64    -32    
160    -208   
0      16     
-16    144    
144    144    
16     -240   
-64    80     
304    -384   
-96    176    
112    -112   
-80    128    
96     -144   
-64    176    
112    0      
112    128    
-64    -64    
304    336    
-112   320    
320    80     
-32    320    
-16    96     
288    272    
-192   96     
160    288    
144    -128   
160    80     
-96    32     
0      192    
48     -544   
0      48     
-64    -160   
240    288    
32     64     
176    -48    
-32    -1360  
-192   32     
128    -800   
128    -128   
-112   64     
304    -96    
192    320    
-48    -96    
48     -1072  
-96    16     
96     32     
-96    160    
208    -160   
96     16     
-96    -32    
32     -624   
112    80     
0      -336   
112    48     
16     -832   
128    176    
-16    32     
80     -192   
48     -272   
16     240    
48     -64    
-32    96     
80     -96    
160    -224   
-208   32     
128    -96    
16     48     
32     -224   
-32    -176   
176    -1152  
-96    -160   
224    -112   
64     -160   
128    -16    
-80    144    
-32    -224   
32     64     
32     -96    
48     16     
-128   80     
-48    16     
96     -112   
176    64     
-160   -304   
192    -48    
160    -80    
-48    -704   
0      176    
16     -144   
16     160    
96     -464   
64     16     
32     -48    
208    112    
16     304    
-112   -48    
-1392  1840   
1312   -704   
368    144    
176    -528   
320    -1472  
-272   -864   
656    944    
-240   -1824  
96     -80    
-272   -336   
688    336    
-304   -144   
-64    -160   
-288   -64    
512    -256   
-336   -80    
-128   -80    
-592   -16    
0      -48    
-192   -96    
144    -1264  
0      272    
-32    -2400  
32     48     
-64    0      
96     -48    
-32    112    
256    256    
-272   -48    
128    -48    
-208   -16    
192    112    
-352   96     
48     -272   
-64    -112   
112    -272   
16     96     
80     -144   
16     144    
96     -64    
-64    -64    
32     -80    
32     64     
112    0      
64     64     
-32    192    
-128   -224   
-32    -48    
0      -32    
-16    -48    
208    -112   
-144   128    
208    -608   
16     0      
-336   -128   
32     80     
-144   64     
80     80     
-16    64     
112    352    
-64    32     
112    -48    
-224   48     
32     -256   
80     192    
96     -192   
-80    192    
160    -320   
32     80     
48     304    
-96    32     
112    -80    
64     -16    
48     96     
-32    80     
-144   -48    
160    128    
112    -48    
32     -80    
0      224    
-176   -432   
-16    112    
-32    -64    
-864   -48    
-48    -144   
-1088  -32    
96     80     
64     192    
-128   -32    
112    144    
-32    48     
144    -64    
-64    48     
-912   -96    
0      128    
-192   -160   
16     64     
96     96     
-64    -16    
-96    0      
-16    32     
-48    32     
-1184  -64    
-160   -32    
160    0      
-32    48     
80     -48    
-48    64     
-272   -224   
96     144    
-112   -112   
16     64     
16     80     
-160   0      
16     48     
-48    16     
-48    -48    
-16    96     
16     16     
-912   96     
-16    144    
-160   -144   
-16    144    
-112   -16    
256    224    
-96    -48    
240    176    
-288   208    
112    -240   
-48    0      
-128   48     
128    240    
-208   -128   
32     128    
-528   -128   
160    -32    
-144   160    
96     -64    
-16    96     
-64    64     
48     -160   
-144   -80    
48     128    
-16    80     
-64    32     
0      64     
-368   -336   
96     -272   
96     256    
-288   -48    
304    144    
-1248  -96    
112    304    
48     -496   
32     256    
-96    -304   
80     160    
-128   112    
32     -32    
224    -16    
-176   128    
16     208    
-240   -128   
240    272    
48     80     
-80    192    
-160   -144   
-32    160    
224    -336   
64     288    
-160   96     
64     96     
-96    -32    
272    112    
-128   -48    
80     176    
-48    160    
64     0      
96     48     
-96    -16    
-64    160    
-288   -208   
96     112    
-912   64     
16     -32    
-48    32     
16     80     
-32    48     
240    192    
-128   32     
-32    64     
64     -16    
160    -112   
16     96     
128    -320   
112    400    
-448   -160   
112    112    
-848   368    
-224   -192   
-912   -768   
304    64     
-544   368    
976    1792   
-544   1408   
-272   -784   
592    208    
-96    112    
-16    -176   
-176   -208   
96     240    
96     96     
0      48     
-96    64     
32     96     
-112   -48    
176    176    
-112   48     
-144   -32    
64     144    
-112   32     
144    -32    
-128   0      
240    -144   
-192   -48    
224    160    
-240   224    
96     -64    
64     96     
-128   48     
144    0      
-32    128    
-16    16     
0      48     
112    -144   
16     112    
-16    80     
64     80     
-112   112    
-48    128    
96     32     
-128   -112   
64     192    
64     96     
16     80     
32     112    
160    192    
-160   112    
64     16     
144    192    
-112   16     
192    112    
-240   96     
112    80     
-64    -32    
160    32     
-128   96     
128    176    
-64    32     
80     144    
-16    128    
48     -32    
80     224    
-96    0      
176    -128   
48     -80    
-80    176    
48     112    
-96    240    
96     16     
80     160    
-48    176    
-48    96     
112    16     
-160   -112   
192    16     
32     64     
-32    96     
32     176    
-32    112    
176    -32    
256    272    
-464   176    
240    -16    
80     -64    
64     112    
128    80     
64     288    
-128   112    
336    128    
-160   224    
80     -32    
128    -16    
-16    -16    
160    288    
-288   64     
192    80     
16     16     
32     96     
-16    -80    
0      -304   
16     16     
-160   -144   
128    -64    
-48    192    
176    208    
-96    112    
96     64     
-48    192    
160    240    
-96    80     
0      16     
192    -32    
64     304    
0      32     
-64    -288   
96     208    
-96    -1424  
304    -32    
-272   -48    
-208   80     
304    48     
176    112    
-64    80     
224    272    
-128   -16    
224    112    
-336   0      
128    96     
0      128    
208    -16    
48     112    
-64    -800   
-112   288    
48     -64    
256    144    
-48    112    
128    144    
-144   80     
-16    80     
112    -80    
128    192    
320    112    
-208   208    
240    128    
112    48     
-48    16     
64     -192   
32     112    
128    -720   
96     112    
48     128    
80     96     
-48    -96    
144    128    
-32    16     
0      0      
16     16     
128    128    
-32    128    
48     -48    
-16    64     
160    160    
0      112    
-16    -304   
208    -128   
-176   -464   
112    32     
-112   128    
48     64     
32     32     
160    -144   
272    128    
-112   -144   
-128   144    
-16    -192   
128    -272   
256    32     
128    96     
32     64     
64     48     
-208   -2864  
80     160    
96     -208   
-16    208    
-48    16     
-32    32     
112    224    
96     16     
128    80     
112    -112   
160    96     
32     -160   
-112   192    
48     -80    
-32    0      
64     80     
2512   -1456  
-928   -48    
1616   1104   
-128   672    
256    96     
208    -224   
-64    704    
288    112    
-400   -464   
96     240    
64     -688   
-176   -192   
16     -96    
288    160    
-96    -1408  
288    32     
-320   64     
80     144    
384    304    
48     144    
-80    48     
80     80     
64     384    
-80    -16    
240    16     
-112   -240   
128    -112   
-176   -64    
240    96     
-384   -896   
320    -112   
-112   224    
128    -1712  
-16    208    
144    64     
176    -688   
-96    -80    
128    -1104  
-32    -192   
48     144    
-80    80     
64     144    
48     160    
96     -96    
-80    -224   
144    -432   
176    96     
80     -336   
-176   -400   
-1184  -64    
32     -208   
112    -48    
-16    -400   
144    0      
32     -1568  
16     -128   
112    320    
-32    -272   
320    -688   
-48    224    
96     -336   
0      192    
176    48     
-64    -288   
-752   -160   
224    -32    
80     -48    
16     128    
112    -80    
0      -336   
96     -144   
128    -1616  
0      16     
64     -96    
32     96     
64     -160   
-48    -32    
144    176    
-208   -96    
-64    32     
-48    -272   
80     -64    
80     -96    
160    64     
-80    -176   
-64    -176   
176    -1600  
-48    -112   
240    -224   
-112   128    
-16    32     
-32    -144   
-208   -144   
144    32     
16     80     
32     -16    
-1152  -192   
16     -224   
32     -240   
160    -160   
0      0      
176    -80    
-32    144    
112    -1696  
-96    48     
128    -32    
48     -112   
208    240    
-192   -96    
144    80     
-192   -48    
96     -48    
0      16     
-1536  -48    
96     32     
16     16     
0      -304   
128    144    
16     -1760  
128    64     
32     -80    
-32    208    
176    96     
16     -112   
-160   64     
32     112    
-288   16     
-16    32     
-304   -64    
176    -112   
-336   80     
16     -368   
192    112    
-96    -1072  
96     128    
-48    16     
176    -336   
-96    336    
64     0      
-32    -80    
32     -48    
-64    112    
176    -32    
-640   -240   
352    -128   
-368   112    
560    320    
-512   432    
240    -768   
64     64     
-272   -112   
128    48     
-192   0      
160    -16    
-96    128    
16     48     
-192   224    
-368   -16    
-1088  -464   
-224   -128   
96     96     
-64    0      
-256   0      
208    -240   
160    -32    
-112   80     
112    -32    
-144   16     
80     256    
-80    112    
160    128    
-32    -16    
224    -16    
368    32     
-112   -128   
0      16     
-656   -432   
32     240    
-992   -544   
-512   144    
-112   -16    
-80    16     
-80    64     
-384   112    
-96    -80    
0      -96    
0      240    
32     112    
-96    -240   
-1008  -112   
176    16     
-240   -128   
-48    224    
-320   272    
192    48     
-240   80     
16     -32    
-96    48     
-624   -16    
352    1360   
-1536  -736   
240    -480   
304    -848   
-448   -416   
496    -112   
-368   272    
-64    -112   
320    -368   
-320   32     
64     128    
-64    224    
-176   -48    
48     128    
-272   64     
48     176    
-384   -64    
64     0      
208    -96    
16     64     
-48    48     
-48    96     
192    -208   
-64    48     
-16    -16    
-160   0      
-96    144    
-32    32     
-16    0      
-32    0      
-80    0      
-624   -96    
-112   128    
-48    -128   
16     80     
-64    32     
208    96     
-192   -272   
-16    80     
32     -96    
-80    80     
-32    160    
176    176    
-96    -80    
-96    -96    
-16    96     
-160   0      
80     -16    
-704   48     
32     160    
64     16     
-96    32     
192    -128   
-176   224    
-48    64     
-96    64     
64     32     
16     -16    
16     48     
-400   0      
144    80     
-192   80     
48     80     
-128   -64    
-160   144    
96     -176   
-48    96     
32     32     
144    128    
-112   144    
-48    -32    
48     32     
-16    80     
-64    -304   
-80    -32    
-224   448    
-256   32     
272    16     
-560   -256   
128    240    
-640   -32    
160    48     
208    320    
-368   48     
272    128    
-112   -272   
288    48     
-240   48     
176    128    
-80    112    
16     96     
-160   -48    
112    176    
-320   -64    
320    32     
-496   240    
-240   32     
272    80     
-112   80     
-32    48     
144    112    
-80    192    
64     160    
-48    16     
96     0      
-160   80     
64     96     
-16    80     
-112   16     
64     144    
112    16     
-96    48     
80     256    
-48    64     
224    64     
-208   64     
128    144    
-112   16     
0      16     
-208   -48    
80     0      
-176   -64    
-80    144    
-16    32     
192    -352   
-176   64     
0      288    
160    32     
128    96     
112    48     
-112   128    
112    224    
64     240    
368    288    
-192   112    
-32    96     
-112   80     
32     112    
112    -32    
48     48     
-112   192    
-48    112    
80     128    
192    -16    
-176   96     
80     -128   
176    352    
-192   128    
192    128    
-176   -32    
32     -96    
-32    0      
16     80     
0      96     
-32    32     
176    448    
-160   -48    
144    80     
-256   -160   
-80    -80    
96     -96    
160    96     
-64    160    
144    128    
-32    -16    
-16    96     
-192   48     
96     -48    
48     224    
176    96     
32     48     
-96    208    
112    48     
-48    160    
176    32     
0      128    
96     80     
-96    80     
16     336    
-32    -64    
-32    512    
160    32     
96     -176   
0      288    
-176   -16    
192    96     
16     288    
-64    16     
112    176    
32     -16    
16     144    
64     208    
-128   -16    
352    -112   
-16    128    
32     192    
-64    -80    
-144   -1360  
48     1456   
288    -1392  
-1056  96     
176    -176   
-96    320    
80     -1008  
752    688    
-240   80     
16     112    
-176   -80    
112    96     
32     176    
144    224    
208    160    
16     -272   
0      128    
352    -1776  
-240   -80    
112    160    
96     -16    
48     80     
-16    -16    
96     64     
128    272    
-48    96     
64     32     
-320   -112   
-112   -144   
304    352    
-16    144    
160    16     
64     -128   
32     112    
288    224    
-80    48     
240    0      
32     240    
112    288    
288    336    
-208   -288   
-64    -48    
0      -48    
-192   -32    
-160   144    
288    -16    
48     64     
-112   -800   
16     64     
32     -304   
-128   80     
144    304    
-112   64     
80     32     
16     160    
-32    32     
96     80     
-80    -64    
48     -848   
16     560    
64     -624   
288    160    
-192   -800   
64     208    
-16    -384   
160    48     
112    -64    
32     16     
0      112    
112    112    
32     48     
64     48     
96     64     
80     16     
0      96     
-144   112    
48     176    
-48    -80    
144    -160   
80     -144   
-32    32     
16     -1808  
32     192    
112    384    
-32    96     
80     -32    
96     160    
16     32     
-128   -368   
176    -112   
96     -304   
0      176    
128    -192   
-176   64     
160    -16    
64     112    
-16    -96    
0      64     
32     144    
64     80     
-16    -32    
32     -320   
80     144    
144    -64    
-64    48     
96     -64    
0      64     
160    -288   
-32    16     
80     -160   
32     128    
32     -272   
128    144    
-16    160    
112    192    
48     112    
48     -64    
-32    176    
-16    -32    
144    -32    
-32    64     
336    208    
0      32     
0      160    
-48    80     
48     -144   
16     144    
112    -1632  
96     224    
-128   -1456  
80     -208   
-96    -256   
160    -272   
112    -16    
96     -656   
64     32     
-32    464    
320    -64    
-16    -32    
16     -16    
80     -1328  
-80    80     
96     -1488  
-144   128    
112    -32    
96     32     
-160   -80    
128    -928   
-96    -96    
208    -128   
176    16     
-48    -944   
64     -96    
224    80     
-32    -32    
96     -304   
32     0      
-112   -208   
160    144    
-64    -336   
384    304    
-336   -256   
48     -208   
-160   0      
160    -32    
-32    128    
64     -448   
-128   -48    
224    -336   
256    48     
-176   -80    
176    208    
32     32     
80     -208   
0      144    
160    208    
-80    208    
-112   -64    
160    240    
-32    -320   
-16    -208   
-16    -1360  
144    -336   
16     -1696  
80     96     
-48    16     
0      -112   
224    16     
-48    -128   
16     0      
64     -16    
-96    -64    
224    0      
-1424  96     
-160   48     
128    32     
-224   -160   
144    32     
-16    -496   
-80    320    
128    608    
-272   400    
1040   272    
-416   288    
-32    -336   
416    80     
-176   320    
592    -432   
-480   736    
-192   -704   
176    144    
-144   -192   
352    112    
-160   -288   
32     -144   
16     -2176  
112    -32    
-80    96     
208    -112   
-128   48     
176    -352   
-304   128    
240    -240   
-528   48     
160    -96    
-480   160    
16     -64    
144    64     
112    -512   
-16    160    
112    -464   
0      64     
-48    128    
96     -32    
32     -16    
192    -64    
-80    320    
-16    112    
16     -128   
0      64     
-144   -16    
176    -288   
0      96     
48     -352   
144    16     
64     -16    
128    -96    
-464   16     
-48    -48    
-80    32     
176    0      
0      160    
0      48     
-32    16     
16     -208   
-912   128    
-48    -80    
208    -32    
64     -112   
-48    128    
128    -224   
176    -112   
-320   -32    
80     -160   
64     80     
16     112    
-240   96     
48     -224   
48     -176   
80     -16    
-256   64     
224    -80    
64     -48    
-1168  -80    
-144   80     
208    32     
-32    176    
-160   16     
-144   96     
80     -272   
-272   0      
-432   112    
272    -80    
-160   192    
-112   -96    
192    0      
-160   0      
224    64     
-80    -240   
-80    144    
112    16     
-144   224    
-32    0      
-416   -176   
64     48     
-656   240    
-128   128    
144    -96    
112    80     
-16    -64    
112    128    
-112   -256   
16     96     
144    96     
-176   16     
32     64     
-256   -160   
0      -48    
-64    -32    
-80    96     
-48    16     
-144   96     
-544   0      
160    0      
-272   -96    
80     128    
-96    -48    
112    432    
128    48     
112    -48    
-544   -64    
272    96     
-80    48     
-64    160    
32     64     
16     144    
48     -32    
-32    -16    
-96    144    
-400   -128   
128    32     
32     -16    
-48    64     
112    224    
64     -16    
-144   16     
-176   32     
208    464    
0      48     
0      -32    
-160   32     
-48    96     
-384   -16    
-16    128    
64     16     
128    192    
-64    -80    
-32    80     
0      -208   
-192   -16    
80     64     
64     -32    
-96    80     
0      -96    
48     192    
-192   -80    
96     128    
-80    -128   
80     160    
-352   -16    
160    240    
-160   -128   
-64    -80    
-16    64     
128    80     
80     64     
-432   -352   
-176   -528   
272    400    
112    96     
-128   -16    
-16    80     
-64    32     
80     192    
-256   16     
16     144    
64     112    
-224   32     
48     176    
16     64     
224    80     
-144   32     
-96    80     
-128   -16    
368    -208   
64     176    
-208   96     
-256   -192   
32     48     
-336   -48    
144    176    
-48    112    
-16    -16    
112    272    
-224   -64    
256    64     
-32    80     
112    64     
1008   672    
288    -1136  
-992   -256   
-128   0      
96     336    
-208   -512   
128    -224   
32     352    
-32    384    
-128   64     
-128   0      
-80    144    
80     0      
208    256    
-80    -32    
-96    -48    
-144   96     
144    80     
0      80     
32     -80    
368    240    
-128   32     
32     -32    
-144   -32    
-64    -256   
48     64     
64     352    
320    896    
-496   -320   
-400   -512   
32     -128   
336    96     
-144   288    
48     256    
144    304    
0      304    
160    592    
-256   -160   
128    176    
-224   -160   
96     384    
-16    -80    
192    112    
-80    0      
-64    48     
-80    64     
64     0      
-192   -416   
32     224    
-176   64     
16     -80    
144    144    
-192   64     
48     224    
48     96     
128    32     
0      -640   
112    96     
656    240    
-336   656    
64     80     
128    160    
-112   -384   
416    0      
-352   16     
80     128    
48     128    
-16    96     
112    96     
-32    64     
-16    16     
-32    112    
0      144    
48     160    
-48    48     
176    480    
32     176    
176    128    
-112   16     
-288   -192   
192    -512   
-16    144    
48     160    
-32    304    
-32    96     
128    192    
-64    -192   
0      160    
48     64     
32     128    
-64    32     
64     80     
-32    144    
32     -48    
128    96     
-16    -576   
-48    32     
256    192    
-144   288    
432    336    
-80    288    
-32    -144   
112    0      
-32    48     
208    80     
-176   -64    
96     176    
-112   -48    
128    -112   
-64    32     
96     -144   
64     176    
16     -464   
-32    160    
80     80     
144    80     
-144   -304   
240    128    
-80    192    
64     208    
256    -256   
-96    -48    
-160   -240   
288    -48    
-176   -176   
192    -464   
-96    128    
144    -496   
112    -576   
80     224    
-112   160    
96     -80    
-144   352    
112    272    
176    112    
-32    32     
48     224    
-32    128    
-80    -96    
80     32     
80     -256   
0      112    
32     -1472  
176    96     
-96    -240   
128    112    
-112   -720   
112    32     
64     192    
112    160    
16     128    
224    160    
-96    112    
48     144    
16     16     
0      -144   
80     160    
0      -400   
80     0      
128    -752   
48     144    
160    -48    
-16    0      
16     32     
160    224    
-192   64     
144    144    
64     352    
-32    -112   
288    96     
-48    -144   
16     128    
16     -640   
-240   160    
80     -848   
256    208    
16     -32    
96     480    
-240   -336   
400    80     
64     160    
32     -16    
0      144    
0      -240   
192    240    
-160   -192   
0      192    
144    -272   
48     224    
96     -432   
-48    192    
0      80     
16     224    
-48    96     
80     -16    
320    32     
48     -16    
16     288    
2288   -464   
-672   160    
288    -768   
64     432    
656    96     
-336   -112   
-128   -688   
432    1008   
80     -768   
-96    432    
16     -208   
400    16     
-480   160    
672    -688   
-416   432    
256    -112   
-128   480    
192    -336   
-112   272    
160    -288   
192    208    
-16    -64    
32     272    
48     -224   
32     -2288  
-192   -240   
288    -1200  
-160   -672   
208    -32    
16     48     
48     128    
144    0      
0      -176   
16     176    
128    -240   
48     80     
256    80     
-80    -1264  
128    64     
-112   -160   
0      -16    
96     -384   
96     -96    
-320   80     
112    -336   
16     -64    
112    -384   
-32    -160   
208    -1568  
-144   -16    
256    32     
-64    80     
96     -368   
-48    240    
-64    -64    
192    112    
-160   -144   
32     -80    
-992   -80    
48     -352   
80     -112   
-64    -496   
176    -144   
112    64     
-64    -256   
192    -1104  
-64    -64    
160    -96    
16     240    
64     -96    
160    112    
-144   32     
-32    -48    
-304   -48    
96     192    
-112   -64    
320    224    
48     464    
-16    -320   
48     -304   
176    -1552  
-32    -32    
160    -48    
-176   16     
304    -368   
0      -240   
-64    112    
-32    16     
208    144    
192    32     
-464   32     
0      -208   
-48    -176   
16     -304   
-64    32     
-32    -256   
-160   -176   
48     -160   
32     128    
208    -16    
-160   -48    
-192   32     
320    -48    
-64    160    
-192   -224   
-32    -32    
80     -544   
-1280  -112   
144    -128   
-32    48     
160    -96    
-128   192    
32     -2576  
0      112    
-80    -80    
64     -96    
0      -80    
-32    -16    
48     48     
-32    -112   
16     160    
320    128    
-128   -128   
-80    -64    
-80    0      
224    -208   
-64    32     
272    -1552  
0      160    
-160   16     
176    64     
-272   32     
-80    64     
-288   -16    
32     80     
240    288    
-112   -160   
160    96     
-128   0      
192    0      
-128   -240   
48     16     
128    -240   
32     -16    
-16    0      
-160   -48    
16     16     
-208   -144   
16     -320   
-32    96     
-32    112    
160    16     
-464   -48    
112    -112   
-192   160    
320    -912   
-160   -128   
240    -256   
16     400    
-384   112    
144    -48    
-208   -48    
192    96     
-96    64     
48     0      
-272   -176   
256    64     
-464   256    
-576   64     
-208   -128   
96     -48    
48     192    
144    -96    
-960   48     
-192   80     
-144   -48    
-192   160    
272    64     
-48    112    
-32    -160   
16     112    
80     16     
-48    96     
80     -144   
-32    192    
-272   -432   
224    240    
-208   48     
80     -48    
-80    48     
-176   16     
-48    32     
-688   -176   
-128   112    
-208   32     
320    -80    
-112   -128   
160    144    
-1104  -1808  
1120   2720   
-800   96     
816    -480   
-544   -320   
736    112    
-672   544    
208    -512   
-208   288    
112    -144   
-416   288    
128    -16    
320    624    
-192   -368   
16     176    
-256   -496   
448    384    
-224   -192   
464    0      
-400   -144   
448    48     
-192   384    
96     -192   
-64    368    
-208   -240   
96     288    
-656   -224   
-144   -288   
464    -656   
304    0      
272    -224   
32     544    
144    128    
-128   272    
-64    -64    
224    304    
-80    160    
304    -496   
-160   96     
48     -208   
0      112    
-624   -64    
0      32     
-208   80     
-48    16     
-256   0      
80     -240   
176    256    
-176   176    
-96    -112   
-304   16     
80     176    
16     32     
432    432    
-144   16     
-128   80     
-48    0      
-272   -848   
48     -32    
272    640    
-32    64     
-192   400    
144    0      
-16    -80    
-96    240    
128    176    
-32    32     
-16    48     
-96    64     
64     -176   
-304   -48    
-160   176    
192    80     
-96    -192   
48     240    
-224   16     
64     640    
-256   144    
352    -144   
-16    160    
256    384    
-32    112    
-496   -96    
192    224    
-48    80     
48     176    
-176   -48    
176    352    
-592   -176   
48     -32    
96     80     
32     16     
-96    80     
48     80     
-32    -48    
16     -128   
112    -32    
-32    272    
208    224    
-128   -128   
-64    -112   
32     176    
240    272    
-256   128    
-16    96     
208    16     
-80    240    
-80    128    
-48    192    
48     96     
16     16     
-48    0      
128    32     
-304   48     
240    64     
-64    -32    
-192   -64    
112    384    
-48    -64    
-224   176    
224    0      
-256   32     
208    64     
16     304    
-144   48     
96     -80    
-112   80     
-64    0      
192    -112   
-256   144    
64     112    
-16    96     
-176   -112   
0      -144   
80     272    
304    144    
-32    256    
-80    32     
160    304    
-160   -16    
288    80     
-160   128    
96     128    
64     32     
-32    -80    
16     160    
-48    32     
288    176    
-304   128    
288    0      
-80    144    
16     16     
48     208    
-64    -48    
224    112    
-80    112    
-48    64     
176    128    
96     144    
-192   0      
208    64     
-128   16     
16     48     
48     80     
64     0      
176    368    
-176   -32    
320    48     
144    64     
-192   240    
96     -48    
-80    192    
-16    0      
224    64     
144    -208   
-32    192    
-272   336    
-112   -1072  
80     256    
64     -144   
192    192    
-32    96     
16     64     
288    -144   
-160   256    
-176   96     
64     160    
-192   -64    
272    64     
-48    64     
192    32     
-96    144    
-80    -64    
0      64     
416    48     
-352   272    
256    -80    
0      64     
-192   32     
-864   640    
720    -224   
-688   -32    
416    -32    
384    720    
-208   -848   
336    880    
80     -672   
144    -32    
-256   -368   
288    208    
16     -32    
48     208    
48     16     
160    -80    
-240   128    
272    -32    
-16    336    
16     -224   
-80    208    
176    -160   
-176   224    
208    -144   
32     144    
112    -288   
-128   -352   
128    -176   
64     512    
96     -128   
-16    208    
64     -16    
-64    112    
112    64     
0      176    
144    112    
-16    96     
-80    -80    
144    160    
-16    -16    
32     64     
32     48     
96     32     
64     144    
48     0      
112    160    
80     128    
32     32     
48     240    
-320   -64    
368    128    
-112   176    
144    -208   
-96    256    
96     -224   
176    144    
-48    -80    
-16    160    
160    -352   
48     272    
-96    -48    
80     64     
-32    -80    
160    112    
-128   48     
144    0      
80     96     
96     -48    
80     160    
-32    -320   
32     96     
112    -320   
-16    128    
0      -336   
16     144    
160    128    
-192   48     
208    -64    
-16    224    
-80    128    
176    -96    
-16    64     
0      -176   
96     96     
160    -144   
208    208    
112    -112   
-272   -16    
320    -256   
-112   80     
32     176    
224    288    
96     528    
-432   32     
176    96     
96     -288   
-48    -48    
32     32     
144    -48    
-112   -336   
112    304    
48     -32    
64     192    
48     -496   
-112   -176   
112    80     
-16    -144   
48     -48    
192    96     
-80    -80    
192    -96    
128    336    
-32    -64    
112    128    
80     16     
64     144    
16     -112   
80     144    
128    0      
-80    0      
144    -128   
-32    -1056  
128    32     
64     -432   
-16    -1216  
16     -160   
224    -176   
0      288    
144    -48    
0      -256   
-32    112    
80     80     
64     0      
144    32     
16     -112   
32     176    
-144   -432   
-112   -64    
-464   -256   
272    -256   
32     -112   
160    -240   
16     -96    
-48    -496   
144    -80    
48     64     
32     -64    
176    48     
-48    48     
48     -384   
32     -16    
0      -192   
32     32     
-80    64     
176    112    
-1888  -32    
-16    -64    
96     -32    
-48    -160   
224    80     
-48    48     
80     -80    
-80    -112   
176    -64    
256    -32    
-96    208    
48     -160   
144    -112   
-96    -48    
16     -64    
-272   -48    
-96    -160   
144    16     
48     128    
16     32     
48     -352   
320    -48    
-144   -2912  
80     0      
-32    96     
144    112    
144    48     
-112   -128   
-80    -48    
48     -48    
-208   32     
-128   -224   
-816   -160   
96     112    
64     -160   
-32    -112   
48     -112   
16     -880   
-32    96     
32     80     
-208   224    
-32    -112   
64     32     
32     -64    
-1216  976    
16     -320   
-272   -912   
864    -192   
384    -624   
-2352  -512   
464    544    
-96    208    
144    -176   
0      -208   
64     -880   
-240   240    
352    -752   
-160   176    
160    -384   
-144   304    
-80    -352   
-192   160    
-192   -336   
256    304    
-48    -352   
256    64     
-240   96     
496    -368   
-336   208    
160    128    
128    160    
-208   -224   
-752   -768   
448    32     
144    -256   
-864   48     
224    -48    
0      48     
48     -48    
-80    272    
-48    -224   
16     128    
-112   -608   
112    272    
368    -144   
-64    272    
-80    -64    
-80    16     
-192   80     
160    -192   
-208   -64    
192    -128   
96     160    
0      -224   
-1136  -16    
-64    -256   
144    160    
112    0      
0      144    
0      48     
-592   -16    
-224   -32    
144    -80    
-208   16     
176    -32    
48     128    
32     -16    
-32    -192   
16     -128   
-112   80     
0      -144   
48     192    
-176   -48    
272    400    
-384   -16    
-48    -176   
-48    -32    
-464   -272   
144    -32    
-128   112    
64     -32    
48     -32    
-208   -80    
-384   -32    
128    160    
-144   16     
128    96     
-352   -224   
272    -96    
64     128    
-304   0      
160    192    
-304   96     
96     48     
-320   80     
-160   -32    
176    128    
-64    16     
-32    32     
48     96     
-208   16     
0      64     
-160   -224   
-176   -224   
-112   -160   
64     128    
144    240    
-144   -256   
-192   -80    
-48    -32    
192    48     
-496   -32    
-64    192    
208    128    
-32    224    
-80    -128   
-16    80     
32     112    
-224   -160   
272    -48    
-272   16     
336    288    
-176   160    
-32    160    
16     208    
-32    224    
-64    -352   
-464   -144   
32     -288   
240    192    
-112   -80    
-32    64     
176    48     
-128   96     
-80    64     
-112   -112   
16     -96    
-160   96     
192    96     
144    144    
-272   -96    
-320   -32    
128    208    
-112   -96    
96     80     
-272   32     
192    80     
272    112    
-368   160    
128    80     
-144   -112   
48     48     
-128   144    
352    32     
-240   32     
-144   128    
-160   -48    
112    -80    
-768   -128   
192    192    
16     -64    
-16    16     
32     -256   
-32    112    
-96    160    
-48    32     
48     64     
-80    48     
112    112    
-144   -48    
-32    64     
-192   32     
-80    176    
-672   -144   
176    64     
-80    112    
48     -112   
80     112    
-144   112    
208    96     
-96    112    
-32    32     
-80    0      
-32    160    
-64    64     
96     -16    
48     32     
0      272    
-272   -208   
128    128    
16     240    
-64    32     
96     128    
-48    0      
32     176    
-32    -16    
80     48     
-160   128    
80     288    
-144   16     
64     144    
-112   -112   
-1072  -2832  
208    -928   
224    1056   
-128   -128   
448    480    
-736   -528   
576    1296   
-640   -240   
-16    368    
192    -48    
32     -112   
-144   176    
-224   -160   
608    48     
-528   48     
112    -48    
-144   112    
-16    80     
-80    0      
352    32     
-176   112    
-32    48     
-48    224    
160    80     
16     -32    
-16    -96    
32     192    
-240   32     
176    128    
-48    208    
144    112    
-48    160    
48     0      
-16    160    
80     -80    
-128   128    
16     16     
48     112    
-32    32     
128    160    
-80    -48    
-80    176    
-16    16     
96     128    
-32    -128   
16     48     
64     96     
112    96     
-144   160    
128    0      
0      80     
80     96     
-48    112    
0      128    
-96    96     
16     -48    
96     128    
-80    32     
144    128    
-64    -64    
-48    32     
-48    -80    
128    32     
48     208    
144    272    
64     112    
16     144    
-48    32     
64     48     
0      16     
64     0      
0      192    
-64    80     
64     112    
-96    -16    
160    -816   
176    96     
-144   224    
-64    240    
336    160    
-176   80     
32     0      
96     112    
-64    144    
240    192    
-288   -64    
128    64     
-112   -80    
96     176    
128    352    
160    -416   
32     240    
-144   112    
-32    32     
32     -16    
16     112    
240    512    
-16    -48    
-48    -96    
32     64     
0      -16    
144    160    
-160   -16    
48     96     
80     128    
80     -80    
80     176    
-16    -48    
-16    -128   
160    16     
-16    208    
64     48     
0      -32    
-160   -80    
240    224    
-32    0      
96     112    
-64    16     
64     -80    
64     144    
-80    -400   
112    208    
0      -224   
112    -16    
-64    144    
112    320    
144    -112   
224    352    
-400   -176   
368    -48    
-96    80     
16     128    
208    64     
-16    -352   
0      192    
32     -224   
32     80     
-96    -112   
400    224    
-128   112    
224    144    
-272   96     
144    128    
48     16     
32     64     
0      80     
-16    -160   
304    144    
-160   32     
128    64     
64     -192   
48     272    
176    -256   
-176   32     
-16    -2352  
64     160    
-16    64     
96     144    
-32    -160   
432    288    
-272   96     
112    -128   
-64    192    
240    -96    
112    208    
-80    -144   
448    560    
-464   -304   
640    64     
-96    -288   
112    32     
112    -160   
-240   224    
176    -48    
128    192    
-112   16     
176    -112   
-176   112    
144    96     
0      80     
32     -240   
304    -32    
-112   96     
112    32     
-32    -128   
96     448    
-368   -64    
192    32     
-32    160    
80     240    
-144   -16    
0      -32    
16     96     
256    -432   
384    -112   
-128   -128   
-48    48     
32     -16    
304    -64    
-896   -2000  
256    160    
416    368    
192    832    
-400   64     
400    -128   
-320   -1888  
160    -192   
112    -144   
176    -256   
-16    112    
32     -64    
288    544    
-176   -336   
160    224    
-112   -704   
16     -16    
400    448    
16     96     
0      -48    
-688   -176   
160    -400   
144    -64    
80     -1024  
144    -16    
0      -384   
-80    -176   
128    16     
144    -224   
0      144    
0      -112   
112    64     
-64    16     
240    -384   
-16    48     
32     32     
-16    -128   
48     64     
48     -16    
304    -32    
-96    -80    
80     -112   
48     -384   
96     160    
192    240    
-80    16     
64     -208   
-112   -80    
224    -16    
-144   -224   
160    0      
-176   64     
-384   16     
112    -32    
-144   -128   
144    -400   
80     -144   
208    -112   
-64    96     
160    -208   
-256   80     
80     -64    
0      32     
64     -16    
160    96     
-80    16     
-32    -80    
-672   -80    
-16    -208   
112    -48    
-32    -144   
64     -32    
160    -304   
-96    -128   
-32    -3264  
64     -208   
-32    96     
0      384    
-48    16     
192    0      
-80    -80    
32     -32    
-384   -32    
48     -192   
-1136  -272   
112    192    
-192   48     
320    -368   
-176   96     
-32    -480   
160    96     
-96    -112   
144    -16    
-32    0      
80     -224   
32     80     
80     -32    
0      80     
128    32     
-464   64     
112    -112   
-208   0      
-48    -336   
240    112    
-64    -192   
224    256    
-48    -464   
64     48     
64     176    
16     -16    
0      -144   
-144   -16    
-304   32     
224    -256   
-800   -144   
-128   -320   
-240   48     
-208   -416   
256    64     
16     -192   
0      -32    
64     -528   
-160   -240   
288    16     
0      -32    
-288   64     
208    64     
-16    -32    
160    64     
-272   80     
288    112    
-16    112    
-32    -160   
32     96     
-320   -336   
400    48     
0      160    
96     112    
96     -16    
-224   16     
-192   0      
240    -16    
-160   16     
288    256    
-32    96     
96     -16    
-832   176    
144    -48    
96     -16    
48     -144   
0      96     
144    112    
80     -48    
-160   80     
-32    -48    
-160   -48    
32     -48    
240    32     
-112   48     
-224   -16    
144    -208   
-240   32     
-1056  -64    
-64    128    
16     -160   
-32    128    
128    -32    
-304   -16    
112    240    
-640   -48    
96     -144   
16     96     
16     -96    
32     -112   
-240   -80    
-128   64     
-80    48     
-208   -160   
-64    192    
-160   -144   
-320   16     
0      -144   
-80    -16    
0      80     
-176   144    
-80    128    
-320   208    
-96    -96    
208    -96    
-48    96     
-80    -48    
80     128    
-16    48     
-176   -32    
64     -176   
-32    64     
96     128    
-144   128    
1712   -2272  
-480   512    
1264   -544   
-240   -272   
272    -784   
-1552  -224   
80     112    
-128   224    
-80    128    
-224   -160   
48     128    
240    -208   
-192   352    
176    -304   
-16    272    
16     -64    
-32    144    
-48    96     
16     144    
96     112    
32     112    
0      192    
48     -96    
-96    256    
48     -240   
-160   -16    
112    80     
96     192    
80     96     
-240   -160   
16     -48    
-192   48     
48     -128   
80     320    
144    0      
-320   -16    
-128   160    
-1072  -112   
-32    0      
96     -48    
80     -16    
16     176    
-272   48     
-16    -80    
-144   -32    
-48    64     
160    160    
-32    192    
-64    144    
-144   -112   
-160   -144   
32     192    
-1088  -32    
16     112    
112    16     
64     144    
-128   -80    
80     96     
16     48     
-16    -160   
240    448    
96     224    
-176   112    
-48    224    
-64    -96    
-176   32     
192    272    
-144   48     
-48    0      
80     32     
-80    64     
80     80     
48     128    
-48    96     
-48    16     
0      176    
32     192    
-16    320    
-464   16     
32     -352   
-80    80     
64     128    
-224   -16    
-224   144    
48     -16    
48     64     
32     64     
32     176    
-16    96     
64     176    
-64    80     
0      64     
-64    48     
-80    16     
208    240    
-272   -176   
128    144    
-416   -112   
80     144    
16     48     
64     96     
64     112    
16     128    
-32    96     
16     64     
48     96     
16     -16    
96     176    
-96    240    
96     32     
32     32     
-128   80     
144    32     
-16    96     
32     128    
80     96     
-64    -64    
48     176    
-16    80     
80     16     
-32    224    
64     64     
96     64     
-256   -96    
160    448    
-96    -128   
384    416    
-272   320    
112    -160   
80     128    
-336   48     
240    32     
-48    128    
-16    0      
160    128    
-144   80     
16     368    
-208   -192   
448    96     
-352   224    
160    -48    
-160   80     
16     144    
224    32     
-128   112    
16     48     
32     96     
96     160    
16     112    
0      32     
-32    16     
160    144    
-32    160    
-80    -16    
-112   -176   
240    368    
-224   80     
192    320    
-416   -176   
560    96     
16     208    
32     208    
-80    48     
-192   -32    
160    -32    
128    176    
-128   -160   
400    96     
-288   176    
80     16     
-144   96     
256    -720   
80     208    
528    -96    
-384   256    
80     -224   
272    464    
-352   16     
192    0      
32     -144   
496    224    
208    96     
-256   240    
-48    -16    
224    592    
-64    0      
64     -112   
32     144    
208    -112   
-64    240    
112    -64    
112    128    
16     128    
16     176    
80     240    
-224   112    
64     0      
-32    96     
-896   -1472  
-544   -1184  
720    -160   
336    -304   
704    480    
-1184  16     
896    1536   
544    928    
-464   -240   
208    -112   
-144   16     
-32    96     
112    128    
0      -336   
128    160    
128    112    
16     112    
16     144    
-48    -384   
176    176    
48     -368   
-80    128    
-16    96     
0      48     
-112   -144   
208    112    
-64    144    
64     48     
80     -64    
-48    208    
192    128    
-16    -208   
-112   48     
112    -256   
144    160    
48     -384   
176    192    
-128   256    
16     -32    
-16    0      
32     80     
80     208    
16     128    
192    32     
-64    160    
48     64     
48     -32    
0      160    
-16    64     
352    -80    
-160   16     
80     128    
64     -704   
96     16     
80     112    
-80    304    
96     -96    
144    144    
-96    16     
192    -208   
-144   144    
96     0      
128    128    
-32    -48    
48     -16    
160    -1008  
-128   288    
80     -160   
-32    0      
192    64     
32     144    
16     144    
-16    0      
176    0      
0      96     
-80    80     
176    272    
-32    16     
304    -624   
64     80     
64     -240   
-32    272    
-80    -32    
208    176    
144    -80    
96     160    
-64    400    
-160   144    
176    -64    
16     48     
16     192    
80     -64    
64     112    
16     -32    
32     384    
304    -96    
-32    0      
32     -16    
64     64     
96     224    
-32    16     
96     176    
0      -448   
160    -1440  
-16    -160   
-64    -2400  
160    -256   
96     208    
-160   16     
224    128    
-64    -128   
112    144    
-32    -96    
128    -2080  
-160   0      
192    0      
144    16     
-960   -288   
0      -496   
32     -272   
-64    -144   
-128   -128   
288    -192   
80     -96    
64     192    
48     64     
320    -976   
-368   -96    
-160   -64    
-48    64     
160    -144   
208    48     
-48    192    
192    -96    
96     64     
32     112    
-144   0      
208    -560   
-32    -32    
80     -1200  
176    32     
48     112    
48     144    
160    160    
128    80     
48     -32    
0      -128   
-144   -32    
96     96     
-1360  -160   
0      32     
0      -112   
192    -272   
112    -176   
-48    -1168  
48     -240   
128    64     
-272   -32    
336    -176   
-48    16     
48     32     
32     -48    
-128   0      
64     64     
-976   -96    
192    -32    
16     128    
-48    -128   
208    -16    
192    -560   
64     112    
32     -1520  
32     16     
-32    -80    
112    96     
-64    160    
16     0      
-112   -64    
176    -144   
-288   32     
48     -144   
-432   -64    
96     96     
-16    48     
-32    -320   
48     -48    
80     -1152  
144    160    
48     48     
-16    64     
-128   64     
-16    -80    
-80    -112   
64     -160   
128    -176   
-112   -16    
-96    -160   
48     -192   
1360   2288   
-1488  -1216  
448    720    
368    256    
1440   -288   
-720   -640   
-176   784    
576    832    
-432   -496   
416    160    
-464   -160   
160    -80    
32     272    
0      -192   
-96    128    
64     -16    
80     112    
32     32     
-288   -592   
336    48     
-16    208    
240    -16    
-112   48     
0      16     
-48    48     
48     16     
-48    80     
-128   -80    
-80    -32    
64     64     
-208   -112   
32     -16    
192    352    
-192   -400   
176    160    
-288   -112   
208    176    
-192   -224   
112    96     
-288   -112   
144    -48    
-288   48     
96     -128   
-64    0      
48     -144   
-144   -48    
112    -240   
-48    32     
112    -400   
-272   -32    
-48    -64    
-208   224    
-128   176    
-48    -224   
-48    96     
-64    0      
128    320    
-64    288    
-96    -96    
208    -112   
-48    128    
-848   -272   
48     224    
-304   -80    
-224   0      
32     160    
-256   -32    
96     0      
-496   64     
48     96     
80     48     
-16    80     
128    -32    
-192   -64    
-96    -336   
192    -96    
-64    -112   
288    224    
-480   -16    
-160   -320   
-240   -96    
-512   -208   
112    32     
-240   -80    
16     96     
-432   16     
-128   -112   
400    48     
-240   32     
0      -176   
-144   128    
-128   -208   
144    48     
-112   80     
-16    80     
16     112    
-80    -16    
192    128    
-32    288    
-144   -64    
-48    0      
-272   -48    
-432   -32    
48     32     
0      64     
64     112    
-16    -96    
96     336    
-144   -16    
176    160    
-192   80     
32     16     
0      32     
-48    48     
0      80     
-256   -16    
96     112    
-576   -32    
80     48     
-48    -128   
112    144    
-48    -304   
-112   -64    
-16    240    
192    160    
112    144    
-304   0      
-128   -304   
0      -112   
-80    256    
48     96     
48     64     
-384   -288   
64     224    
-1104  160    
16     -16    
448    432    
-464   432    
112    160    
16     -208   
-16    16     
96     64     
-16    128    
-112   16     
-16    304    
-96    0      
400    64     
-496   128    
192    528    
-992   32     
64     64     
-48    32     
16     -16    
-48    64     
-16    -32    
-32    352    
-240   -32    
144    -208   
32     160    
80     64     
-176   -80    
-96    112    
0      -64    
-128   80     
-400   64     
-208   80     
416    -160   
-256   -240   
112    304    
0      -16    
-144   16     
208    160    
-32    64     
-16    -128   
-16    224    
-16    32     
-32    0      
-128   16     
320    -144   
-112   -80    
-96    -96    
64     352    
-224   -208   
96     128    
112    96     
144    112    
48     64     
-112   64     
224    16     
0      224    
-96    0      
32     176    
-80    128    
128    0      
-176   176    
48     0      
-48    160    
80     -112   
-304   592    
-208   1360   
-864   928    
864    64     
-96    -128   
0      -16    
-16    -80    
-384   128    
448    384    
-32    -256   
-320   96     
144    -80    
48     352    
48     0      
16     144    
-16    144    
-16    32     
-16    32     
64     128    
64     80     
-48    -32    
-48    96     
-64    -64    
96     160    
0      -112   
-80    192    
80     544    
-208   160    
208    -48    
-128   0      
112    160    
16     0      
-48    112    
48     96     
96     112    
-96    16     
288    528    
-384   16     
208    -112   
-96    160    
128    160    
112    64     
-96    32     
0      112    
80     -16    
48     160    
32     32     
208    272    
-144   32     
128    -16    
-80    112    
80     48     
64     160    
-48    144    
80     48     
0      48     
-16    -32    
208    128    
-16    96     
96     160    
-32    96     
48     64     
-64    96     
48     16     
64     256    
-240   112    
192    16     
80     48     
-48    272    
16     -128   
224    -80    
-224   208    
112    32     
112    128    
-32    112    
96     80     
0      -32    
0      80     
32     64     
112    96     
64     288    
-80    80     
144    -16    
0      240    
-160   -48    
384    -320   
-112   144    
-96    -64    
240    176    
-432   32     
336    128    
-176   128    
288    352    
-80    112    
32     64     
-112   -688   
224    208    
-192   112    
176    -144   
-16    -16    
-64    -144   
32     0      
144    160    
-32    144    
176    272    
-96    128    
128    48     
-64    32     
112    -304   
48     -48    
-64    -112   
96     48     
-80    144    
144    16     
80     208    
-48    -272   
-16    48     
64     -544   
80     -112   
64     -64    
-96    32     
0      -112   
-80    48     
48     -16    
240    112    
-48    128    
144    160    
-176   -48    
80     -128   
-16    0      
64     -272   
80     160    
32     16     
128    144    
-16    -176   
-32    -32    
176    -48    
-96    288    
96     64     
208    160    
-128   96     
-64    -128   
192    128    
16     -336   
0      -128   
112    -96    
-96    224    
48     -880   
-16    128    
160    -704   
-80    96     
80     -48    
-32    112    
48     144    
192    -16    
-48    -64    
96     -48    
32     96     
-32    -448   
208    272    
48     -320   
-16    112    
112    -416   
16     -16    
-32    -480   
64     64     
112    208    
256    224    
-16    -80    
48     368    
0      -80    
-16    112    
480    256    
-48    64     
-80    128    
-128   -112   
0      -48    
176    192    
64     240    
176    32     
-64    304    
48     -32    
144    -208   
-48    80     
128    144    
-48    304    
208    -240   
32     176    
32     32     
-64    48     
96     -176   
-16    64     
32     -128   
64     96     
-48    -192   
80     320    
-208   80     
128    208    
-48    -48    
1264   2272   
-1440  -3168  
576    240    
368    -1488  
1520   -176   
-688   -848   
96     -176   
688    944    
-464   -672   
80     400    
-176   -192   
144    -544   
-448   -128   
384    -240   
-336   -80    
32     16     
-16    48     
256    432    
-16    -1264  
-224   -304   
304    -1008  
-144   -80    
-16    288    
-112   0      
144    32     
-112   -32    
32     -160   
-192   160    
48     -48    
112    -256   
-128   -16    
16     -624   
128    -64    
-16    112    
80     32     
-48    -416   
-32    -480   
32     -1040  
160    -208   
112    -16    
-160   208    
-16    -48    
128    16     
48     -144   
-16    -128   
-192   0      
16     -176   
-656   96     
-176   -352   
640    256    
-192   -208   
336    -176   
-64    -224   
128    -48    
160    64     
240    128    
176    144    
-304   -128   
-320   -384   
288    192    
-304   -64    
192    0      
-800   -224   
160    -352   
64     144    
32     -352   
80     192    
-48    -544   
48     96     
-144   -2496  
64     48     
176    16     
-64    80     
-32    0      
128    80     
-208   -16    
96     -256   
-112   864    
-144   240    
-1472  32     
32     -288   
96     -32    
16     -416   
128    96     
-48    -2336  
-16    32     
64     -48    
160    96     
-112   32     
160    -320   
-192   80     
-16    -96    
0      -144   
112    64     
-48    176    
80     128    
48     -128   
16     -128   
208    144    
144    -112   
48     0      
64     144    
64     -160   
0      0      
32     -80    
16     16     
64     0      
-224   -176   
240    224    
-480   -144   
352    -48    
-592   128    
96     -128   
96     144    
-64    -304   
112    16     
-48    16     
32     80     
-336   -96    
128    -160   
-384   64     
272    0      
-32    -112   
-64    -272   
-320   -32    
256    -320   
-144   176    
-16    -96    
256    320    
-16    -384   
176    256    
-128   -224   
240    -48    
-192   32     
80     112    
-144   160    
272    -320   
-400   -32    
576    -224   
-160   224    
128    0      
-80    192    
80     -336   
-16    -32    
-560   -224   
-416   -112   
16     336    
-880   -32    
16     272    
-128   -208   
-176   64     
144    64     
-112   112    
160    -224   
-160   192    
-304   352    
16     0      
-160   -608   
176    560    
160    -32    
-80    -64    
16     16     
-400   48     
-176   0      
-1104  -368   
0      0      
400    -272   
-416   -128   
224    160    
-112   288    
-176   -192   
64     112    
-48    128    
-144   160    
-64    -32    
96     0      
32     -96    
-64    64     
-80    16     
64     96     
0      80     
-80    16     
-32    80     
0      -16    
-32    32     
-256   16     
32     80     
0      0      
96     32     
0      192    
-16    -48    
0      96     
0      112    
-160   96     
112    336    
-192   144    
-256   -96    
0      96     
-1584  2208   
-1520  304    
272    240    
80     416    
1200   -1168  
-992   -80    
176    576    
-224   -32    
112    -16    
-96    64     
208    96     
-112   -112   
-96    16     
-448   -64    
32     -48    
-240   -64    
96     64     
48     144    
-48    112    
16     -208   
-112   -64    
-144   80     
208    128    
-96    128    
16     0      
-144   -80    
-112   -176   
64     64     
-48    128    
0      224    
-160   0      
0      80     
-224   16     
80     112    
-208   32     
256    16     
-256   128    
176    32     
-144   112    
0      48     
-96    32     
80     -16    
-64    224    
112    48     
-128   80     
-288   -256   
64     48     
-1552  -96    
336    464    
-400   -32    
336    16     
-288   80     
128    16     
-112   32     
48     0      
32     144    
-144   -144   
192    112    
-368   96     
144    -160   
-112   -48    
-176   192    
-48    -32    
-112   96     
96     208    
-128   -64    
240    -128   
-80    128    
0      240    
-48    96     
208    -32    
-96    48     
48     80     
-80    96     
-48    112    
80     -64    
80     192    
-112   -128   
48     144    
-48    144    
0      -64    
96     80     
-112   112    
208    208    
-208   96     
128    16     
48     432    
-288   96     
400    -80    
-272   192    
48     -80    
112    160    
16     -32    
16     160    
48     64     
144    160    
0      80     
-64    -16    
224    80     
-80    16     
-112   48     
112    80     
-96    64     
224    240    
-192   304    
-288   -32    
-32    144    
-48    64     
272    368    
-160   -16    
-48    -48    
-64    -96    
48     -16    
48     48     
-80    64     
0      240    
256    272    
-32    16     
-32    0      
-96    48     
144    128    
-112   128    
272    304    
-288   96     
176    64     
-80    112    
192    272    
-128   -32    
-32    -32    
176    128    
208    176    
-208   -16    
-32    240    
-32    -32    
-80    80     
-112   112    
352    288    
112    128    
-288   -48    
16     176    
128    -144   
-48    32     
48     0      
128    -16    
-80    176    
144    128    
-112   -64    
-48    528    
96     176    
-160   -48    
224    0      
16     112    
0      48     
96     0      
0      -32    
160    560    
48     80     
-240   -352   
128    240    
32     128    
0      0      
-48    128    
96     80     
-64    256    
144    -656   
64     48     
32     368    
96     144    
-128   -208   
224    16     
96     176    
112    112    
96     208    
-80    144    
48     -16    
208    96     
0      112    
80     96     
-64    -32    
-32    -448   
112    64     
64     32     
48     96     
16     192    
64     160    
-272   -224   
240    16     
96     176    
112    80     
-160   96     
32     48     
128    -176   
-16    96     
-144   -48    
-16    -208   
240    160    
160    16     
208    -96    
912    1632   
-944   -2096  
384    128    
528    224    
-304   -608   
480    96     
-48    -160   
528    96     
-672   0      
32     288    
-160   64     
192    -96    
0      64     
176    -448   
-240   128    
128    -1232  
240    208    
-48    0      
272    272    
80     128    
256    176    
48     64     
96     384    
-160   -32    
240    -16    
-48    144    
-96    -224   
192    64     
-128   -576   
128    48     
-112   -672   
144    176    
-80    256    
96     -48    
80     32     
16     -112   
352    304    
-96    208    
-224   -16    
160    -48    
-64    -128   
240    -48    
-32    160    
240    -64    
-128   -64    
128    16     
-32    208    
-224   -416   
128    96     
-240   80     
288    -96    
240    288    
-96    -64    
176    288    
-128   64     
112    64     
96     144    
-176   -240   
-96    -512   
208    384    
-64    -272   
96     144    
96     -272   
0      -48    
-272   160    
224    32     
-48    256    
-16    96     
208    224    
-96    -1056  
208    80     
-16    -80    
128    144    
112    64     
-96    -80    
144    -272   
16     -352   
-32    -576   
480    368    
112    720    
-96    112    
48     -64    
-64    -224   
208    192    
96     96     
-32    128    
-64    -752   
96     256    
272    0      
304    288    
-288   -112   
-112   32     
160    -384   
80     192    
80     48     
-16    -400   
192    208    
-48    80     
144    -1440  
-144   -192   
96     -2208  
112    -16    
64     144    
-64    0      
48     160    
48     80     
192    -144   
-64    160    
288    -432   
160    176    
-48    80     
112    48     
-496   80     
80     -240   
-32    -80    
-32    -400   
64     -32    
160    -1296  
-48    -32    
80     -144   
-48    -224   
128    -112   
112    -80    
80     -672   
-160   -144   
192    -16    
-112   0      
48     -32    
-144   -304   
176    0      
128    -80    
32     -16    
-96    -16    
160    -160   
-80    -2544  
272    -224   
80     432    
-256   -112   
320    48     
-144   112    
144    -112   
-64    -272   
0      -80    
176    16     
-752   -64    
112    -48    
48     176    
128    -48    
0      -112   
64     -2000  
-80    16     
112    192    
96     144    
16     0      
0      32     
-160   -64    
80     -32    
-208   -96    
256    224    
-640   32     
240    -240   
-80    32     
-16    -320   
96     -96    
112    -560   
-112   240    
-144   192    
0      -288   
352    -400   
272    32     
-176   96     
-128   208    
-80    128    
16     320    
-656   -144   
80     0      
-1600  -224   
256    144    
-64    -112   
208    -48    
-48    128    
112    -1136  
80     208    
16     -16    
160    -304   
160    192    
-160   288    
0      -144   
-80    -176   
-64    -112   
80     0      
80     48     
48     208    
-240   -192   
208    -320   
-192   -16    
320    -352   
-32    128    
-1264  -1056  
544    -96    
-608   432    
848    -48    
-544   -128   
48     -432   
-80    992    
192    -496   
-192   720    
32     -864   
0      128    
-160   -176   
208    -96    
-32    -384   
64     -256   
-224   288    
368    -272   
-416   352    
176    -272   
-144   288    
208    -272   
-304   448    
240    -144   
-192   192    
208    -464   
-176   288    
256    -256   
-208   288    
240    -304   
-128   176    
80     80     
-96    -96    
-96    0      
16     128    
64     16     
112    -32    
64     160    
48     16     
-80    128    
32     -176   
-16    176    
96     -208   
32     272    
352    -288   
-1664  64     
0      -224   
-960   176    
160    16     
-160   -64    
96     -64    
-240   0      
192    -48    
-32    144    
0      -80    
-128   16     
-112   80     
96     -368   
-96    208    
48     -16    
144    128    
-272   16     
64     112    
-32    32     
-720   96     
32     -112   
0      160    
-96    16     
80     32     
80     -16    
-400   -128   
80     96     
-176   -160   
160    144    
-80    96     
-16    32     
64     128    
-368   -144   
-64    64     
-160   112    
224    -48    
-560   96     
48     112    
-96    64     
-16    112    
192    -192   
160    96     
-160   -256   
112    -176   
-96    304    
-368   -48    
176    96     
-224   128    
80     32     
-16    48     
-192   -272   
-256   32     
64     0      
-1136  -32    
16     0      
96     32     
112    208    
-176   -144   
96     160    
-32    -48    
64     48     
-144   80     
0      80     
0      96     
192    32     
48     256    
-304   64     
-256   -128   
-320   -144   
144    64     
16     -16    
32     64     
-48    160    
160    336    
-96    0      
-16    80     
-32    224    
-64    176    
16     192    
-32    -16    
-80    48     
-112   64     
160    448    
-528   -64    
240    400    
-416   -336   
16     224    
80     0      
-80    16     
128    -32    
-96    32     
64     144    
-64    112    
-16    144    
-112   32     
-64    -256   
-240   -144   
240    224    
-464   -256   
96     336    
-224   -336   
192    128    
16     400    
224    112    
-16    144    
-80    64     
-80    0      
48     80     
64     -16    
16     160    
-80    128    
-64    -64    
176    512    
-704   -16    
304    32     
-1040  16     
128    64     
32     -16    
-16    0      
112    144    
-16    48     
-64    80     
-32    -32    
48     240    
-272   48     
160    -48    
-160   128    
48     80     
128    -64    
-256   176    
96     96     
-16    272    
-96    -96    
352    48     
-224   112    
160    32     
-80    192    
-32    16     
48     32     
-128   128    
16     16     
80     -64    
176    80     
-256   32     
48     160    
-48    64     
32     -16    
96     112    
48     128    
16     64     
32     80     
192    144    
-16    32     
16     64     
-144   0      
-496   1744   
-672   -624   
-512   -816   
48     -64    
608    368    
-1248  -592   
1440   -32    
-752   1248   
256    48     
-32    -224   
-64    0      
304    32     
-160   0      
64     96     
-48    192    
352    80     
-384   128    
-16    -176   
64     -240   
256    -112   
32     512    
336    192    
-384   384    
48     -336   
80     224    
-80    -48    
224    208    
-352   -176   
112    288    
-64    -112   
160    224    
-176   -64    
160    48     
128    128    
48     96     
48     0      
160    208    
-64    208    
-80    -128   
48     224    
64     80     
48     -48    
-80    -32    
240    208    
16     0      
64     224    
-80    -96    
368    368    
32     112    
80     192    
32     128    
80     16     
-128   240    
160    32     
0      -32    
-80    96     
288    608    
-128   -112   
16     96     
-80    -160   
-96    -96    
-128   -240   
112    16     
208    368    
144    16     
-64    -144   
-64    176    
-160   -48    
480    160    
-80    96     
-48    176    
-48    144    
16     -144   
112    256    
-48    -80    
-32    96     
-96    -352   
32     -416   
-192   -112   
-16    -208   
192    208    
176    352    
-112   -128   
192    192    
-96    192    
368    240    
-96    128    
0      16     
-160   -608   
256    224    
32     32     
32     304    
16     -240   
-16    64     
176    0      
32     240    
-208   48     
176    192    
-32    144    
192    112    
-80    32     
32     48     
80     288    
64     64     
-96    48     
144    96     
96     608    
-64    -256   
-48    64     
48     -384   
112    16     
80     -176   
-48    16     
64     0      
96     224    
32     -16    
80     16     
-208   16     
192    128    
48     -208   
-176   -240   
64     32     
336    -96    
48     288    
-144   -320   
160    128    
32     -1040  
64     -80    
16     16     
48     128    
112    80     
-128   -32    
-144   -160   
80     32     
240    176    
96     48     
-32    0      
-112   -64    
176    48     
-16    -64    
176    128    
64     -64    
0      144    
0      -672   
64     256    
-16    -16    
176    160    
-96    64     
160    192    
-16    48     
16     -112   
48     64     
-32    -384   
16     0      
176    0      
-112   -16    
224    -240   
-64    -64    
208    -384   
80     256    
-160   192    
112    160    
-32    0      
64     80     
128    176    
-64    -384   
96     112    
160    -80    
80     112    
-64    16     
48     80     
80     -320   
368    32     
-288   96     
-160   64     
48     64     
192    0      
64     -176   
32     -176   
96     176    
-112   96     
80     0      
176    128    
16     64     
64     -48    
208    -16    
64     -80    
176    192    
-16    -48    
-16    16     
-48    32     
48     -880   
-64    -32    
96     64     
32     -704   
80     32     
-16    -1776  
-64    512    
-544   784    
-1584  -1136  
480    736    
-416   -208   
160    -720   
336    -736   
-272   -128   
320    48     
128    -224   
112    -992   
-1312  448    
352    -688   
-112   544    
192    -1328  
-128   256    
-32    -608   
64     272    
16     -64    
160    0      
16     -272   
0      48     
0      -208   
176    112    
0      16     
368    -272   
-896   208    
384    -448   
-128   304    
272    -176   
-64    80     
80     -432   
-32    208    
192    -176   
-48    -64    
-16    -144   
-208   -64    
160    -112   
224    224    
-32    -64    
0      -112   
-256   -64    
48     -80    
-368   -16    
64     -64    
-32    -112   
80     -416   
-32    -48    
240    -640   
-64    32     
80     -80    
-112   144    
128    -48    
0      80     
-80    -112   
32     -112   
-112   0      
112    112    
-640   -80    
176    16     
-128   -16    
112    -144   
16     48     
128    -16    
64     96     
-32    -320   
-16    96     
80     -112   
-32    -144   
64     0      
32     0      
-32    0      
96     0      
-80    -96    
128    -160   
-1248  -48    
-32    -112   
112    -32    
-80    32     
-64    -64    
176    -800   
-48    304    
304    0      
208    16     
-224   96     
368    96     
-272   0      
-64    -48    
0      -48    
64     -112   
-112   80     
144    48     
-928   144    
32     -496   
0      96     
176    -1456  
128    176    
-224   112    
256    16     
-288   -176   
128    -48    
-32    112    
80     -96    
-192   -16    
-48    16     
-64    -16    
64     -96    
176    176    
64     -64    
304    480    
48     32     
80     128    
80     0      
96     -224   
-464   -32    
64     -96    
-208   -240   
48     -112   
16     160    
144    -96    
-48    -144   
-32    -320   
0      144    
144    -144   
128    32     
-80    -208   
96     -240   
-320   -96    
-32    48     
-16    112    
64     32     
-80    96     
32     0      
-128   -80    
128    -128   
-288   -96    
144    -144   
0      224    
-320   -32    
-16    80     
-976   -384   
-128   112    
32     192    
-720   -240   
-64    80     
16     48     
32     32     
-64    224    
-128   -144   
176    -16    
0      96     
48     64     
-16    64     
-512   -144   
-16    -32    
32     96     
-48    -80    
-96    224    
-288   -128   
336    96     
-576   160    
-48    64     
-80    -48    
-80    80     
272    96     
-80    0      
-64    192    
-160   -48    
0      -288   
-144   304    
-144   0      
96     -16    
-240   144    
224    -192   
-272   80     
-608   -144   
-64    128    
-1072  192    
-192   0      
-144   -96    
-80    80     
16     -304   
16     144    
-48    -48    
64     48     
-192   160    
-112   -32    
112    16     
-192   64     
160    0      
-208   32     
-144   64     
-32    400    
-256   32     
-896   -80    
-176   -16    
144    -48    
-16    144    
-432   -448   
-736   1552   
80     720    
-432   -352   
-256   -464   
752    560    
-32    496    
-448   448    
416    576    
-352   64     
-352   -16    
-752   -240   
-144   608    
144    -736   
-96    288    
16     -288   
160    304    
-720   -432   
192    128    
-208   -208   
208    480    
-320   208    
96     112    
-96    -48    
-240   -64    
-32    -64    
-368   48     
0      352    
128    112    
-16    448    
-224   -16    
192    -96    
-112   208    
96     -128   
-208   272    
160    0      
-272   -32    
64     -208   
-16    128    
-64    -128   
176    64     
-192   48     
64     144    
-576   -48    
16     -144   
-32    16     
176    80     
-16    16     
0      -272   
-96    80     
-144   64     
128    112    
-144   80     
288    336    
-336   208    
112    80     
-96    48     
-128   16     
160    48     
-32    -256   
144    -48    
80     240    
-176   272    
-96    -128   
192    96     
-192   160    
128    96     
-224   -80    
144    96     
-224   -160   
176    64     
-224   64     
64     160    
80     320    
-32    48     
96     16     
80     160    
-16    512    
256    256    
64     96     
-128   32     
304    -96    
16     -80    
48     448    
-32    48     
160    144    
-112   96     
112    0      
-64    0      
80     0      
-16    96     
-48    48     
80     192    
-112   48     
144    16     
-48    -32    
-48    112    
-80    16     
64     64     
-144   -48    
80     16     
-80    -16    
16     80     
16     80     
-96    176    
-32    160    
304    -80    
-160   176    
208    384    
16     128    
-160   -128   
-128   48     
-32    -80    
192    16     
-240   16     
16     48     
112    -48    
-400   -32    
288    0      
16     160    
192    32     
-160   32     
160    176    
64     144    
-32    192    
32     -64    
-96    -16    
-64    -160   
240    176    
-288   -80    
32     80     
160    160    
96     192    
16     128    
144    128    
-112   64     
192    48     
-64    176    
176    64     
112    64     
-240   176    
240    96     
112    32     
160    144    
-160   144    
320    112    
48     144    
-208   -32    
144    128    
-64    32     
160    176    
-80    48     
80     64     
-144   48     
144    128    
-64    48     
48     64     
-80    256    
-160   -48    
320    -48    
-160   -256   
160    80     
48     160    
-144   176    
144    -16    
-32    96     
80     -48    
112    176    
96     176    
-144   32     
-112   -48    
256    112    
144    -112   
48     160    
-16    352    
-368   -128   
48     -48    
288    -800   
-128   96     
320    -64    
48     208    
-16    144    
-48    160    
0      -80    
240    112    
-16    240    
-64    176    
-64    64     
16     0      
192    32     
32     -192   
16     144    
80     -800   
-112   80     
208    208    
-96    80     
112    0      
-96    -32    
-464   592    
-832   -192   
480    464    
-272   912    
-112   -224   
-128   208    
80     -752   
-144   -320   
112    272    
160    -112   
-32    -128   
144    544    
48     192    
176    -48    
-112   80     
-48    -64    
272    96     
-176   112    
48     128    
-48    16     
80     -240   
16     176    
64     80     
224    32     
-16    -368   
176    96     
-160   -80    
80     112    
0      304    
192    16     
-32    48     
64     64     
-64    64     
80     160    
-16    80     
64     -64    
112    64     
80     -96    
64     112    
-64    -416   
80     48     
-16    -32    
112    176    
112    -208   
-64    64     
-80    -16    
32     112    
80     272    
32     128    
160    64     
32     -192   
32     160    
192    -496   
-48    144    
80     -32    
-48    -16    
176    -240   
0      160    
64     128    
112    96     
64     208    
-16    112    
128    16     
48     -176   
112    64     
-96    -768   
-16    64     
64     64     
-160   -64    
256    -176   
0      208    
-96    16     
112    112    
32     160    
96     144    
48     96     
-48    176    
-112   -48    
112    -608   
64     96     
224    384    
-80    0      
96     -64    
-112   -16    
400    -48    
-144   0      
32     -528   
288    272    
-64    112    
80     -1344  
64     48     
144    -1504  
32     112    
-16    -128   
192    -224   
48     0      
80     -1056  
-128   -368   
128    16     
32     -48    
80     304    
-96    -112   
0      -336   
96     112    
128    -704   
-80    64     
-16    -544   
64     -16    
-688   16     
128    -288   
0      -48    
80     -352   
80     16     
16     -2144  
128    32     
-64    96     
176    48     
0      -352   
48     16     
96     0      
48     128    
-16    16     
16     -96    
-800   48     
208    -160   
48     -80    
-32    -464   
208    560    
-16    -112   
128    -144   
0      -704   
16     -144   
336    -192   
-256   224    
80     -80    
80     16     
-32    -208   
-48    160    
-336   -272   
208    128    
-576   -208   
368    -32    
-112   -16    
80     0      
128    -80    
0      -1136  
16     64     
-32    -304   
288    112    
-48    192    
64     -32    
-144   -112   
64     -112   
-48    -160   
272    192    
-368   96     
272    -128   
-16    144    
-160   -608   
64     -80    
-128   -336   
160    32     
48     48     
64     160    
112    32     
32     -96    
32     -80    
-192   80     
64     -80    
96     -16    
-48    -16    
208    -128   
-336   -96    
0      -160   
144    -96    
-48    -560   
-16    48     
368    -704   
-224   176    
-96    -112   
176    80     
-64    48     
112    128    
-144   -48    
80     16     
208    -64    
112    -144   
-544   -32    
32     64     
176    64     
32     -112   
16     144    
-112   -400   
192    -16    
0      64     
256    -80    
-128   128    
0      -48    
-208   -32    
-624   -2160  
-96    -784   
544    480    
32     720    
-64    336    
-112   368    
304    -352   
-304   256    
224    -448   
-32    64     
-352   -272   
416    80     
-224   208    
-96    -192   
192    80     
-256   -80    
224    -48    
288    -32    
-320   16     
-48    -624   
32     -32    
-272   -432   
224    -16    
-64    -208   
-16    -80    
-160   128    
144    -32    
-176   128    
48     -48    
-192   16     
240    -112   
-112   128    
160    16     
-144   0      
-112   -16    
80     16     
-192   -48    
0      192    
32     32     
-912   -64    
-144   0      
-1040  -32    
32     96     
-384   32     
16     -80    
128    -48    
-64    192    
-560   -192   
48     64     
-96    64     
48     128    
128    -208   
-64    272    
-32    -160   
-16    48     
-128   32     
-128   96     
-64    -16    
-1184  -128   
-144   48     
-160   -64    
16     32     
-128   -96    
48     128    
48     -144   
64     144    
-256   -128   
16     -16    
-16    176    
-144   96     
80     16     
-112   96     
48     -64    
-96    144    
-192   48     
-400   16     
288    128    
-48    144    
112    48     
32     -144   
-192   288    
-96    -64    
16     -208   
32     176    
-288   -48    
224    16     
-416   192    
-144   -64    
288    -96    
-80    128    
-176   128    
-32    -48    
-272   -48    
32     224    
-48    -224   
256    320    
-256   192    
128    -80    
-32    -80    
-176   -240   
48     -16    
-160   160    
-80    144    
0      -16    
0      -64    
-240   0      
48     -48    
-1936  -240   
0      64     
32     -64    
32     144    
64     96     
-176   -192   
32     16     
-160   32     
128    176    
32     48     
-208   64     
-80    -96    
-160   -192   
-96    -288   
16     144    
128    128    
-16    176    
-144   80     
-416   -80    
432    384    
-208   -80    
96     112    
96     64     
-80    112    
0      48     
16     160    
336    32     
-160   192    
-48    224    
-80    304    
-208   -176   
-128   48     
-336   -176   
0      0      
176    48     
48     32     
-112   176    
-192   32     
208    144    
80     -112   
-160   32     
-48    0      
0      64     
32     80     
-16    160    
-176   0      
-32    96     
-80    64     
80     240    
16     64     
384    32     
-240   32     
0      144    
-48    96     
16     112    
80     208    
64     16     
0      32     
16     -32    
-208   144    
-80    192    
-288   64     
128    -64    
128    80     
16     32     
-32    -80    
144    32     
208    80     
112    416    
-64    96     
-240   240    
48     -224   
112    208    
-96    -272   
48     256    
-16    -144   
-48    112    
-80    112    
0      80     
0      -160   
16     80     
-32    176    
0      0      
176    80     
-176   -16    
-32    80     
80     -96    
0      48     
16     160    
32     176    
-496   1280   
-192   240    
656    848    
-128   608    
-496   272    
-464   -688   
672    336    
-800   96     
256    -224   
-96    320    
-208   -672   
144    272    
-256   -352   
400    448    
-288   -32    
304    128    
-32    304    
160    368    
-176   64     
224    48     
-176   64     
48     32     
0      464    
96     208    
0      -32    
-128   96     
-144   32     
176    240    
-176   288    
224    80     
-80    144    
-64    32     
32     160    
-16    96     
48     0      
-64    80     
192    48     
-96    112    
-80    96     
112    128    
16     112    
-16    16     
-16    80     
-112   -320   
48     -400   
0      64     
96     144    
192    192    
-64    64     
80     80     
80     192    
-16    -16    
112    48     
0      96     
16     48     
96     144    
-16    336    
112    272    
288    304    
112    -112   
-16    16     
-64    96     
144    128    
-112   -16    
-16    64     
304    64     
16     224    
16     144    
-32    144    
128    -16    
64     128    
-80    80     
96     144    
0      80     
64     -128   
0      96     
160    208    
-16    272    
-112   0      
96     16     
48     16     
96     -16    
-32    192    
-80    144    
128    -368   
-32    16     
80     0      
-304   -160   
48     144    
32     -240   
48     16     
112    -688   
48     144    
112    192    
-80    64     
64     32     
-16    48     
192    -16    
-48    0      
160    48     
-48    176    
144    80     
16     -16    
-64    80     
80     -80    
0      96     
176    48     
-128   16     
128    208    
-80    16     
144    112    
-80    144    
96     80     
32     112    
16     96     
0      80     
-48    -96    
160    112    
64     160    
112    -192   
-48    128    
48     -368   
112    -64    
0      -928   
-144   208    
224    -240   
-96    -400   
128    -160   
-144   432    
112    -112   
144    144    
-288   96     
352    -48    
-80    160    
32     -144   
112    96     
80     -320   
-96    144    
112    32     
-16    32     
112    128    
-64    80     
128    16     
96     64     
-176   192    
352    160    
-208   112    
48     -192   
256    -160   
80     -160   
160    224    
-96    16     
112    -16    
32     -112   
112    208    
-32    -64    
64     0      
-112   16     
64     240    
-80    48     
-16    -640   
48     -64    
272    -400   
80     0      
48     -32    
-128   128    
-16    -208   
160    -32    
512    -144   
-160   320    
-368   -80    
-144   0      
96     -16    
96     48     
96     32     
16     144    
-32    368    
160    -432   
32     176    
128    -16    
176    176    
-48    -80    
64     16     
80     -608   
112    112    
0      -80    
160    -208   
-32    -144   
64     -320   
-48    -320   
128    -128   
64     -1072  
96     -16    
-80    -1344  
48     -128   
32     144    
48     32     
-16    96     
-800   -2032  
1184   496    
-112   -400   
576    -928   
144    720    
-1520  -768   
848    -576   
-240   720    
400    -16    
-80    128    
-320   -368   
192    -112   
-48    -1376  
-64    112    
160    64     
16     48     
176    -192   
-160   144    
112    -208   
224    320    
-304   0      
48     176    
-432   48     
64     -304   
32     -208   
80     -240   
192    64     
32     -16    
48     48     
144    128    
0      128    
0      -336   
0      128    
0      -96    
224    96     
-160   32     
192    48     
-272   48     
0      -240   
-16    32     
-16    -176   
64     64     
64     48     
32     0      
64     -1664  
-16    0      
208    176    
-144   0      
272    208    
-192   -48    
160    -32    
-176   -176   
-80    -48    
-16    -96    
-448   48     
0      -80    
32     96     
144    -432   
-256   -16    
48     -544   
16     144    
112    -16    
-32    176    
32     -256   
272    -48    
-400   0      
64     -32    
128    16     
-112   -96    
112    160    
-192   -48    
144    -128   
-48    -304   
32     64     
144    -96    
-16    48     
80     -736   
0      -80    
176    32     
-80    -16    
-32    -64    
96     144    
-176   112    
176    288    
-544   -112   
528    -256   
-336   112    
-80    80     
96     -16    
144    16     
-112   16     
272    -704   
0      -96    
128    48     
-128   -128   
-160   -32    
-64    144    
-160   0      
-16    -80    
-144   -64    
16     -96    
32     32     
48     -80    
32     240    
-64    -448   
176    -48    
16     -992   
96     160    
-96    16     
64     -64    
-384   -32    
192    64     
-32    32     
0      -48    
-80    112    
64     -16    
16     48     
176    -80    
32     208    
208    -32    
-336   0      
-112   -144   
64     176    
80     -112   
-64    -96    
-176   224    
368    112    
112    128    
-80    240    
32     80     
-16    -32    
-144   16     
-592   -128   
64     -32    
-32    -48    
-128   192    
384    160    
-224   16     
-48    -32    
-1664  0      
176    80     
160    -80    
-224   80     
336    -192   
-160   -32    
272    -352   
-96    -16    
-336   -336   
144    304    
16     -64    
80     0      
-176   112    
64     32     
-16    80     
16     80     
-96    176    
-464   -144   
-48    80     
48     480    
-80    32     
-544   -352   
0      80     
80     0      
160    288    
-304   -416   
-32    64     
-144   352    
320    480    
64     64     
-240   -208   
-160   -96    
-352   80     
208    -224   
-816   144    
-192   144    
112    48     
80     112    
16     -176   
-80    160    
-80    0      
0      96     
-64    -80    
0      48     
-16    32     
16     -64    
-192   16     
32     112    
-32    48     
-192   -48    
32     192    
16     336    
0      160    
-256   -208   
16     48     
160    192    
144    -48    
-96    80     
-112   48     
-976   -2976  
1024   784    
-976   208    
528    -320   
944    96     
-896   -512   
704    672    
-992   592    
-240   -240   
624    -176   
-400   144    
240    80     
-64    128    
16     0      
-80    64     
-144   80     
32     352    
64     288    
-176   -112   
128    112    
-480   -80    
0      -32    
-848   96     
496    -32    
-176   -176   
16     0      
80     272    
-144   448    
48     272    
112    48     
-160   112    
-80    -32    
32     32     
-272   -112   
176    64     
-288   -96    
64     48     
-496   -32    
240    304    
-32    224    
-224   -112   
80     80     
48     128    
-32    -16    
256    128    
-128   16     
-64    48     
-48    -80    
-128   -80    
48     16     
144    112    
48     80     
-128   -80    
-32    128    
240    176    
-256   0      
208    0      
-32    208    
80     96     
-128   -32    
112    272    
-64    -112   
80     32     
176    -64    
-64    -64    
-48    80     
32     176    
-256   -128   
0      0      
-16    64     
48     96     
16     80     
-16    48     
-32    48     
-32    64     
-32    80     
-48    32     
-48    -208   
0      48     
-80    240    
-176   -464   
-128   -16    
-32    -176   
176    -64    
-16    128    
0      64     
192    176    
-64    64     
-64    -32    
80     -48    
80     224    
96     176    
-16    128    
-192   -64    
96     96     
48     32     
80     112    
96     32     
-144   -96    
192    48     
-112   192    
176    64     
-64    48     
0      64     
48     144    
80     80     
-48    0      
16     80     
-128   48     
160    80     
-16    144    
-16    48     
192    192    
-144   112    
208    128    
-96    0      
96     128    
-48    -48    
16     -16    
-64    -80    
128    240    
-16    16     
-64    16     
-96    320    
32     32     
112    -96    
-384   -384   
224    -160   
-32    208    
192    480    
64     64     
-80    96     
-32    48     
128    0      
80     -64    
0      128    
176    640    
-80    320    
208    352    
240    624    
-32    -80    
112    -160   
-144   96     
144    -16    
32     96     
-112   144    
64     128    
160    464    
-32    64     
0      16     
16     32     
0      96     
240    112    
-240   16     
112    16     
-16    64     
-96    -656   
320    256    
176    160    
-160   0      
0      96     
160    -32    
256    -160   
-80    -48    
224    320    
0      208    
-80    -144   
0      0      
-160   -400   
416    688    
160    80     
-144   -176   
176    -528   
16     192    
-16    224    
64     208    
-272   -304   
192    416    
64     160    
-112   192    
48     32     
96     -64    
16     304    
128    96     
-32    -80    
32     96     
384    -432   
-320   224    
-240   -944   
176    48     
-112   144    
160    48     
-64    64     
32     48     
192    80     
0      16     
192    160    
64     32     
48     144    
32     -784   
704    320    
-96    -64    
-288   144    
512    -960   
-16    144    
-544   -336   
944    -288   
-192   320    
-64    -16    
80     240    
-160   -112   
128    192    
96     -16    
288    144    
-192   -224   
16     64     
48     16     
64     208    
16     -720   
32     16     
144    -2640  
112    128    
16     176    
48     16     
-176   176    
208    176    
0      48     
240    128    
-128   96     
144    -32    
-48    128    
160    64     
-32    144    
112    192    
176    144    
-48    112    
48     64     
0      -80    
112    128    
-32    80     
176    80     
-128   -48    
224    112    
-208   192    
240    -416   
-48    208    
80     -576   
64     240    
-208   -464   
320    96     
-144   -32    
144    48     
0      -48    
64     112    
-16    -48    
112    192    
-112   48     
224    -32    
-32    352    
192    -352   
144    80     
-48    -48    
144    176    
-64    -80    
96     96     
96     -112   
32     304    
48     -768   
208    144    
-96    -16    
128    16     
64     -64    
128    -16    
-32    -1568  
48     -112   
96     96     
-112   32     
64     112    
-80    -160   
160    80     
0      -16    
112    96     
-80    96     
-32    -240   
352    32     
-128   -272   
192    -464   
-48    -304   
144    -464   
32     96     
-32    -768   
64     0      
128    80     
16     -160   
112    -48    
48     64     
-16    -16    
48     -32    
128    -544   
-288   112    
-256   16     
32     -176   
240    64     
48     -288   
96     80     
-96    -192   
160    -304   
-32    224    
48     -160   
320    80     
-80    112    
-64    -16    
64     80     
-32    -416   
16     -48    
240    192    
48     0      
-80    128    
192    80     
-128   16     
192    -320   
-48    16     
160    -496   
-208   -128   
128    -48    
-352   -128   
160    -384   
-256   -144   
96     80     
48     -112   
-160   -128   
-32    -208   
-928   -64    
272    -208   
112    -128   
-288   -288   
304    96     
0      -528   
64     -80    
16     -336   
64     0      
32     -48    
64     128    
96     48     
16     80     
16     368    
80     0      
-368   -144   
0      -112   
-496   48     
16     16     
0      48     
80     -208   
64     240    
176    -464   
-16    224    
16     -208   
192    352    
-48    -32    
96     368    
-304   -208   
32     -224   
-80    -128   
160    -80    
32     112    
240    400    
-208   -496   
80     -32    
80     -144   
112    -128   
-192   -96    
112    -320   
160    208    
-144   -64    
80     -16    
-176   80     
-32    -144   
-160   80     
128    80     
-576   -96    
128    -64    
-656   -144   
160    -64    
-160   -16    
80     -368   
64     -96    
112    -1728  
288    48     
-208   48     
16     208    
16     16     
-96    80     
176    -384   
272    160    
-336   -128   
64     48     
64     32     
-1136  -608   
-480   -416   
256    32     
48     560    
336    -368   
-576   1088   
-512   -400   
160    80     
128    -416   
208    128    
-32    -64    
208    352    
-304   144    
96     -432   
48     -496   
288    -448   
144    400    
144    -240   
256    496    
-224   -128   
-112   64     
224    80     
-112   -192   
-160   -128   
112    -144   
128    -80    
-192   32     
-32    -16    
176    -128   
-384   -128   
-320   -192   
64     208    
-368   -208   
-224   112    
80     48     
-96    176    
96     208    
-688   -576   
0      -288   
208    32     
176    432    
16     -128   
64     16     
-480   48     
-112   32     
-16    144    
-96    256    
112    48     
-144   -48    
-192   96     
-16    -336   
-64    144    
-48    64     
64     128    
-288   -64    
-240   -256   
336    208    
80     176    
-432   -80    
384    -96    
-64    176    
-16    -112   
144    -128   
-112   -32    
128    96     
-80    -80    
96     64     
-112   32     
-64    0      
-480   -128   
-112   -16    
-1088  -96    
-160   32     
-32    32     
0      128    
0      -384   
-272   -128   
16     -96    
-32    -32    
-208   272    
176    32     
-96    48     
0      -64    
-64    48     
-32    64     
144    32     
-272   -96    
-48    -160   
80     -176   
160    144    
-128   -64    
-112   176    
16     64     
-176   -96    
272    96     
-320   16     
288    384    
-336   64     
80     -16    
-48    -32    
-64    48     
32     -32    
-96    96     
-1120  -64    
64     160    
-96    -112   
48     -16    
32     256    
80     368    
-16    -112   
-80    -112   
-144   128    
160    0      
96     144    
-240   240    
-16    80     
-192   -96    
16     160    
-416   -64    
80     208    
-16    32     
96     288    
48     144    
80     144    
-176   176    
208    768    
80     400    
224    368    
-32    -48    
-128   0      
128    -64    
-128   -256   
-16    224    
-144   240    
48     256    
-144   128    
64     64     
-240   -336   
304    336    
-144   16     
80     96     
48     32     
-64    -64    
48     96     
-288   -144   
96     304    
-80    160    
208    256    
-112   208    
-48    96     
-16    -32    
-64    80     
144    16     
-224   -176   
224    96     
-32    112    
32     176    
-32    -224   
128    288    
64     224    
-32    -64    
-240   -48    
160    16     
-192   -96    
0      64     
16     -16    
-16    16     
128    -272   
64     80     
-80    32     
-96    96     
0      304    
-48    288    
-80    -80    
112    80     
48     16     
-160   -96    
112    -16    
16     112    
-144   112    
128    176    
-128   80     
144    176    
-112   0      
400    -96    
16     0      
-16    16     
16     176    
-128   224    
-224   32     
64     80     
-96    -96    
240    32     
64     320    
-240   128    
240    0      
-304   64     
-736   -1872  
496    48     
-624   -304   
784    -16    
672    160    
-496   80     
16     -304   
160    320    
-112   -128   
528    304    
-320   32     
144    -208   
-256   640    
432    -496   
-144   576    
64     -416   
32     576    
160    -192   
-112   288    
224    -112   
-128   176    
64     32     
48     272    
48     64     
0      -96    
-144   16     
176    144    
16     112    
144    128    
-112   -16    
208    208    
-96    176    
96     16     
-144   80     
64     -64    
0      256    
128    112    
-80    256    
-112   -64    
-256   48     
208    -1696  
-112   112    
0      32     
16     208    
48     80     
32     -64    
-32    160    
96     80     
16     96     
-112   64     
-16    48     
192    144    
-256   112    
112    48     
48     112    
48     -640   
-32    256    
-16    48     
96     128    
16     80     
-32    32     
144    96     
-64    208    
48     -144   
160    240    
-176   224    
144    144    
-96    -112   
128    144    
96     32     
32     16     
-48    128    
160    64     
64     80     
0      240    
-80    16     
224    64     
-80    480    
-64    -208   
272    16     
-160   -256   
112    240    
-80    64     
80     -240   
-16    240    
-112   -352   
240    16     
-112   -2336  
0      128    
-16    32     
240    16     
-80    64     
48     112    
-112   -192   
-16    48     
128    96     
-48    192    
192    112    
64     -16    
160    240    
16     -96    
96     144    
176    -384   
-96    0      
144    208    
48     112    
0      -112   
160    160    
48     176    
48     112    
48     96     
-96    96     
288    64     
-80    -112   
112    96     
80     96     
32     64     
-16    -272   
-96    128    
128    -672   
464    -48    
-144   -16    
16     240    
16     144    
-32    144    
192    -128   
-48    112    
160    224    
80     -16    
-224   -48    
-96    -160   
304    544    
32     -1136  
-16    -16    
-64    -752   
80     -240   
-48    -624   
-144   0      
224    176    
192    16     
-176   96     
64     -368   
112    224    
64     64     
144    176    
-64    -256   
160    48     
-256   -496   
208    224    
32     16     
96     256    
32     32     
80     96     
48     80     
128    416    
-160   256    
272    112    
-80    32     
368    -528   
-256   -112   
-16    -208   
96     192    
32     160    
64     0      
224    32     
32     336    
-144   -112   
624    32     
176    64     
160    -16    
-208   0      
-160   -224   
240    -1536  
384    -304   
-48    240    
-96    -176   
-208   32     
176    -144   
288    0      
48     -592   
-96    -144   
-176   16     
112    -1072  
48     128    
-176   96     
-96    -112   
48     -144   
96     48     
160    0      
-64    -752   
0      -32    
224    128    
16     -240   
128    80     
-288   48     
16     -816   
32     160    
64     -128   
-528   80     
-1280  -496   
272    1168   
-416   320    
160    -464   
288    384    
32     -1248  
-528   528    
-32    -976   
1168   -192   
-848   128    
304    112    
176    -80    
-144   144    
-112   -256   
368    -208   
-336   -32    
448    -128   
-768   352    
16     -96    
-128   -16    
320    -528   
-112   160    
144    -624   
-160   -128   
-48    -176   
176    320    
-128   64     
64     16     
-80    -352   
192    80     
128    -112   
48     -48    
-1104  -160   
224    -80    
-112   -128   
224    -176   
192    144    
288    -128   
-256   160    
-192   -256   
-80    448    
112    -192   
176    -144   
-16    -128   
80     112    
48     -48    
-96    144    
-96    32     
16     -192   
-256   -192   
272    -80    
48     48     
128    160    
-288   -144   
128    -1024  
96     368    
64     96     
80     80     
144    -160   
-32    176    
-64    -128   
-80    112    
-112   -608   
-160   224    
-432   -48    
32     -16    
-208   -240   
64     -288   
112    32     
112    -240   
-16    160    
64     64     
160    32     
-144   -128   
80     -192   
-128   -208   
-48    -336   
-112   -176   
-32    -560   
128    752    
48     -144   
-992   176    
320    -96    
-64    208    
0      -240   
256    160    
48     -960   
80     144    
-256   0      
-112   -16    
64     -80    
96     -48    
-176   32     
16     -256   
80     -96    
112    -176   
-64    -160   
80     -64    
144    192    
96     -112   
176    112    
-256   144    
32     -112   
48     96     
-80    64     
0      160    
32     -96    
-320   -384   
32     -624   
-336   -224   
272    256    
464    368    
-176   -112   
0      -48    
-16    -688   
16     -16    
-96    -240   
304    224    
-96    96     
160    384    
-224   -16    
112    -32    
-48    -304   
96     64     
160    64     
-48    0      
-48    176    
-304   -64    
-240   0      
-752   -128   
-16    112    
32     208    
-352   176    
-192   -80    
-928   -48    
-160   64     
384    112    
176    160    
-112   208    
-112   16     
0      -144   
0      112    
128    -304   
32     32     
0      0      
128    16     
-176   -256   
16     112    
-112   48     
-112   32     
-240   128    
-224   0      
-16    0      
-80    -208   
-144   16     
-80    -240   
96     192    
-240   112    
-80    128    
176    -112   
-16    32     
-112   208    
-112   16     
-112   128    
112    -48    
144    0      
-64    96     
-48    -48    
-480   32     
-48    176    
96     -96    
112    176    
128    -160   
-64    272    
-176   80     
-208   64     
0      -144   
176    80     
-32    128    
-208   16     
64     64     
-112   32     
96     144    
-752   -48    
64     48     
112    96     
48     128    
-96    -48    
32     -96    
-128   128    
32     16     
0      144    
80     -48    
-96    32     
-240   -144   
128    128    
-176   0      
-336   96     
-704   -400   
848    1360   
-1424  -96    
-256   -176   
-496   192    
-144   -800   
288    496    
-448   -272   
528    -32    
-352   48     
128    256    
-64    -176   
-224   304    
256    -48    
80     176    
-288   -224   
-64    96     
-960   32     
176    144    
-80    -80    
-16    80     
48     144    
96     0      
-48    64     
-144   -64    
-352   -112   
112    80     
144    272    
112    -16    
-192   48     
-224   -112   
128    160    
-96    80     
16     144    
-16    -32    
48     176    
96     160    
-80    0      
-112   -64    
64     176    
80     80     
0      64     
-128   -16    
-224   -112   
144    192    
-160   80     
208    96     
-208   0      
-176   16     
144    64     
48     144    
-32    112    
64     128    
-16    80     
-48    64     
112    80     
-32    32     
80     112    
-128   48     
160    64     
0      112    
16     192    
-192   -80    
32     0      
48     192    
-128   80     
112    64     
-32    32     
192    0      
-48    160    
-96    80     
144    176    
-96    -64    
160    32     
-48    160    
-240   -64    
256    240    
-272   176    
160    -16    
48     64     
-48    160    
0      48     
16     -144   
-160   64     
-96    128    
-16    -16    
-112   -144   
400    368    
-464   16     
160    48     
-112   16     
16     240    
48     128    
32     128    
240    240    
-48    128    
-96    -32    
96     32     
-32    48     
-16    -128   
288    304    
240    112    
64     96     
-240   16     
96     -64    
-32    0      
-16    64     
-112   80     
80     112    
144    192    
-96    -16    
96     112    
-16    96     
16     160    
128    176    
-48    64     
-112   32     
96     208    
-80    16     
352    144    
-176   16     
-64    48     
16     128    
-80    -32    
256    64     
-112   112    
160    224    
-16    128    
48     -128   
-352   -96    
352    80     
-32    352    
112    176    
-96    0      
-80    112    
-32    -48    
112    -144   
160    16     
-160   -48    
240    176    
0      160    
-32    64     
64     -32    
112    48     
-80    224    
144    -48    
-32    16     
96     208    
-16    16     
64     176    
32     64     
112    -208   
144    48     
-64    80     
64     176    
0      -16    
80     96     
-128   96     
160    -32    
0      112    
32     144    
16     -176   
-48    0      
-32    16     
80     -48    
16     64     
48     -48    
176    256    
-80    -64    
240    96     
-144   176    
160    0      
-64    176    
-16    64     
160    -240   
64     160    
-112   -32    
-64    32     
32     -48    
128    80     
96     112    
-64    -256   
48     96     
288    -768   
-192   16     
160    112    
-144   176    
224    112    
-240   160    
-96    -80    
224    64     
-208   160    
480    -64    
-160   64     
48     -112   
144    240    
-32    -240   
-464   -944   
640    2352   
-976   1040   
672    -384   
-304   544    
192    -336   
0      272    
-656   -80    
576    672    
208    -608   
-176   -112   
-80    32     
432    -16    
-48    -16    
-64    -128   
176    96     
-144   -320   
-16    272    
32     -3376  
160    -80    
-16    128    
48     -16    
192    112    
128    288    
-160   0      
-64    -160   
32     64     
16     -112   
352    240    
-272   384    
16     -64    
-80    -256   
160    112    
288    -336   
-32    32     
48     48     
112    144    
528    176    
-480   -288   
0      -144   
288    -416   
-48    112    
48     64     
272    -128   
-16    32     
80     208    
32     -32    
-128   -208   
48     -144   
16     -160   
96     32     
-48    240    
144    128    
96     208    
32     144    
-96    -48    
80     64     
-96    0      
224    48     
96     -256   
80     16     
16     -160   
144    -64    
96     144    
-224   128    
64     32     
16     -880   
-48    -144   
192    384    
-16    -800   
128    -48    
32     -928   
80     -240   
0      80     
144    -48    
128    176    
96     -64    
-16    96     
16     -800   
272    -880   
-336   144    
-112   -400   
224    96     
-48    -16    
-208   -576   
0      -368   
32     -416   
-96    -32    
400    -2064  
-272   96     
64     -64    
-32    48     
256    0      
-144   64     
16     -688   
112    352    
-48    -288   
128    -240   
-528   -144   
144    -352   
288    32     
-208   -304   
-16    -96    
128    -240   
80     -96    
64     -576   
64     -208   
176    -144   
-80    -128   
144    -16    
32     0      
128    80     
80     -32    
-384   176    
144    -16    
-320   16     
32     -16    
0      -208   
112    -512   
96     -80    
192    -1360  
16     48     
304    -16    
-352   96     
80     -240   
176    176    
-464   96     
496    80     
-336   -48    
16     0      
-288   32     
160    -320   
-32    -80    
-48    -368   
144    32     
176    -432   
-80    -48    
-96    -720   
144    128    
320    -144   
-256   112    
-128   -48    
144    0      
-112   112    
112    -256   
-480   -96    
96     -128   
-464   272    
208    -192   
80     64     
-96    -272   
192    -48    
-16    -560   
64     208    
-64    -128   
160    96     
-144   64     
96     -32    
-48    -96    
0      64     
-192   -144   
64     80     
-192   32     
128    384    
-16    -80    
208    -240   
-80    128    
160    -288   
240    96     
-240   80     
-96    64     
0      -224   
208    -112   
64     80     
-192   -64    
208    112    
-32    -32    
0      256    
-240   -272   
-1216  -64    
240    -496   
64     112    
80     -160   
-80    224    
96     -1712  
96     -304   
-576   -80    
224    -32    
-208   80     
0      64     
-144   -48    
96     -48    
-48    -160   
-48    16     
-240   0      
432    -80    
-272   144    
240    -144   
1984   3376   
-1792  448    
-384   -880   
512    1312   
-496   -576   
-384   288    
-128   -400   
-96    976    
288    -640   
-512   128    
48     -480   
-272   528    
336    -336   
112    592    
-1728  -512   
-1200  0      
16     80     
320    160    
-208   80     
112    -176   
-128   0      
48     -48    
16     208    
80     -64    
-128   160    
288    -96    
-128   192    
-528   -256   
-112   192    
-272   -288   
-48    96     
0      -64    
-96    112    
-16    0      
-272   -16    
-64    -48    
304    144    
-176   96     
208    -32    
-272   -64    
-384   -352   
96     160    
-400   -336   
-16    80     
-64    -48    
16     64     
160    48     
-144   -80    
32     -48    
-80    144    
-96    64     
96     144    
-64    16     
48     96     
16     96     
-64    -80    
96     128    
-256   0      
192    16     
48     64     
-224   -128   
16     128    
-112   -96    
48     48     
-128   -16    
-112   80     
80     208    
-32    48     
-1680  -48    
112    128    
-32    -64    
112    96     
16     -96    
64     224    
-112   176    
0      80     
-112   -96    
272    208    
-176   208    
0      48     
-16    128    
-416   -96    
0      -160   
-1232  -112   
304    256    
64     -48    
-16    272    
128    -80    
64     -256   
-64    144    
32     32     
48     112    
48     208    
-80    0      
-16    16     
0      48     
-32    -32    
128    128    
-192   128    
0      32     
-80    -112   
144    80     
64     96     
-16    64     
16     64     
-96    176    
176    352    
-176   240    
64     -48    
-64    -80    
16     128    
64     64     
0      0      
-256   -160   
64     160    
32     -112   
80     48     
-16    -64    
-224   -64    
-96    -144   
16     -128   
112    128    
32     128    
-96    -64    
-192   -96    
-16    272    
96     64     
32     64     
-432   16     
48     160    
-400   -112   
-96    -80    
48     16     
160    256    
-16    80     
0      192    
-80    -80    
48     128    
128    80     
32     64     
-48    64     
-192   -32    
-32    64     
-80    128    
-16    128    
80     -16    
240    160    
-128   352    
-192   240    
-144   0      
48     0      
144    144    
-16    64     
-32    -80    
-112   -160   
256    16     
-208   176    
0      -16    
96     32     
-32    128    
32     16     
-48    -32    
32     32     
64     208    
-144   -16    
304    144    
-176   256    
48     -48    
224    80     
-176   96     
176    -48    
-64    96     
-64    192    
-32    16     
16     160    
-48    16     
192    -16    
96     192    
-80    80     
112    144    
-96    32     
128    208    
-48    0      
0      176    
-48    -32    
64     464    
-112   0      
160    176    
-224   16     
112    -144   
64     64     
-144   208    
0      160    
-16    64     
-352   80     
80     -96    
16     176    
-64    128    
928    1408   
-976   -192   
720    928    
32     720    
1040   -672   
-560   352    
-608   -112   
704    1312   
-544   192    
544    176    
-112   16     
-192   -160   
-80    176    
384    -80    
-224   240    
-208   144    
-224   48     
112    -368   
-144   96     
224    80     
-208   32     
304    288    
-176   256    
448    -48    
-320   96     
272    32     
0      416    
-48    160    
176    192    
-112   16     
224    96     
0      32     
0      256    
-96    112    
96     144    
160    176    
-32    32     
48     0      
-80    64     
64     80     
192    112    
-32    192    
0      32     
80     -96    
-64    64     
192    96     
-16    112    
-16    144    
-96    -48    
48     -432   
80     -48    
16     -2944  
48     160    
-32    192    
128    -80    
-16    0      
208    240    
-144   64     
208    -16    
-64    192    
-80    160    
176    -16    
32     64     
0      32     
-160   -224   
32     -112   
160    -224   
-48    176    
32     176    
96     -16    
0      48     
48     128    
32     112    
32     128    
0      48     
-16    352    
112    112    
144    160    
96     -48    
96     32     
32     160    
-16    64     
128    -176   
0      -32    
128    144    
-80    0      
80     288    
-80    -208   
208    48     
160    -208   
0      160    
-64    0      
176    128    
-96    32     
-64    -624   
16     -240   
16     -16    
96     448    
0      -928   
16     32     
-16    80     
144    96     
64     -160   
-96    80     
-48    -176   
96     -16    
-48    112    
48     64     
48     64     
-48    -160   
-64    160    
192    -368   
-48    112    
176    -272   
-112   -16    
96     -2848  
-64    112    
160    0      
96     128    
-96    80     
352    352    
16     288    
256    -128   
-256   288    
144    -80    
320    240    
-160   -32    
192    288    
0      80     
80     0      
-144   -432   
160    64     
48     -64    
-192   -160   
-48    -224   
288    144    
48     208    
176    -1072  
-80    256    
-144   -80    
272    -32    
-64    -208   
-32    160    
432    -448   
-64    64     
160    -96    
-16    336    
48     48     
32     128    
-128   16     
336    96     
32     128    
-16    -16    
128    64     
80     48     
0      160    
128    -160   
-112   208    
176    48     
-160   80     
160    -160   
80     272    
-16    -32    
64     -2832  
-112   16     
-512   -256   
272    -192   
-112   112    
80     -432   
80     -128   
-16    272    
32     -224   
32     256    
64     128    
0      64     
112    -48    
160    -960   
112    96     
-16    -336   
-64    96     
-240   16     
96     -432   
48     -160   
-16    -464   
80     -448   
160    -1680  
-112   48     
128    -32    
96     -16    
80     144    
48     -48    
32     -624   
32     160    
16     128    
96     16     
-160   -160   
144    -176   
64     80     
1200   4016   
-1296  -288   
-640   -32    
272    848    
144    -1328  
368    0      
-768   32     
736    304    
224    80     
-128   -240   
-432   -32    
160    -224   
256    96     
64     -64    
-112   -144   
-64    -144   
240    0      
64     144    
80     -160   
80     -560   
32     -112   
-16    0      
160    272    
80     80     
64     64     
-112   -272   
-128   -16    
-192   -64    
16     0      
-48    -64    
16     -192   
64     -224   
32     16     
112    -80    
80     -416   
96     16     
16     -1104  
64     192    
64     -80    
0      48     
-64    -128   
224    240    
-64    80     
240    32     
-928   -48    
96     -160   
-112   -240   
352    320    
-128   160    
80     -192   
80     48     
-32    -976   
176    176    
96     -288   
128    80     
-96    64     
96     240    
16     -16    
128    32     
-192   320    
256    0      
-304   48     
32     48     
-128   -80    
64     -432   
64     48     
48     -640   
112    176    
48     32     
160    144    
-224   0      
208    -160   
-320   -128   
240    -32    
-256   64     
-32    0      
16     448    
32     -224   
-640   -96    
0      -208   
80     -208   
128    -400   
-32    0      
-288   -48    
48     -176   
-192   -48    
224    -16    
-112   112    
-48    80     
-64    48     
-32    96     
-224   -240   
64     -144   
0      96     
80     -32    
80     144    
16     -144   
160    144    
-112   32     
64     -208   
-80    96     
48     80     
96     128    
16     96     
-240   -80    
128    -176   
-112   -48    
80     -128   
64     160    
-192   -192   
176    192    
-560   -224   
-400   -48    
-160   -80    
-256   96     
-48    48     
64     80     
-208   32     
96     -64    
-240   -176   
96     -64    
0      96     
-304   -96    
-48    144    
-464   -288   
-48    192    
-944   -864   
176    128    
-384   240    
400    208    
-208   -16    
-272   0      
-64    96     
240    32     
-32    176    
-64    48     
192    -16    
-160   144    
32     -80    
-192   -176   
80     160    
64     192    
-16    80     
-32    32     
-48    32     
-32    16     
144    -528   
-160   416    
-928   -112   
400    -96    
-176   272    
176    128    
-192   -288   
208    208    
-336   -48    
352    16     
-208   96     
-112   -160   
208    80     
-160   128    
-112   -32    
-320   -16    
48     -16    
-160   16     
-48    16     
-1968  -368   
-16    64     
-352   -352   
544    240    
-256   112    
48     -96    
-144   -16    
0      32     
-16    224    
16     -64    
-64    16     
-32    192    
-128   96     
16     64     
-48    112    
-608   -160   
64     176    
0      -48    
80     224    
0      -144   
-80    -112   
16     64     
-16    144    
80     368    
-208   192    
-112   80     
-336   -16    
64     64     
-336   0      
0      -48    
48     224    
112    112    
64     -32    
224    -928   
-64    -1392  
992    1664   
-176   928    
-496   2048   
-208   -1328  
192    448    
384    1072   
-496   -384   
-448   -400   
208    80     
16     -16    
-160   -48    
0      128    
-432   16     
64     384    
-96    32     
112    -32    
-80    160    
80     64     
112    0      
-96    144    
144    240    
32     32     
-336   144    
96     96     
-48    400    
-96    -256   
112    160    
-704   -144   
240    80     
-16    112    
48     96     
144    128    
-64    96     
144    432    
-336   80     
64     -48    
0      96     
128    64     
-192   -112   
80     80     
-192   32     
112    96     
0      -80    
-80    80     
48     64     
-32    96     
-96    -96    
0      48     
-64    96     
128    32     
-80    160    
16     -64    
16     0      
-272   -128   
208    208    
-272   -16    
208    112    
-16    48     
-16    96     
0      48     
112    48     
-64    96     
128    -32    
64     -128   
-208   16     
-304   -64    
-80    32     
-64    0      
224    48     
0      208    
-128   96     
0      80     
176    48     
-176   -112   
224    32     
-64    96     
32     128    
32     112    
-32    96     
128    -32    
208    320    
-448   192    
240    -80    
32     -48    
112    112    
-112   -80    
80     176    
-256   144    
320    32     
-128   240    
-32    32     
160    112    
-80    -112   
224    176    
-272   80     
112    128    
-48    -32    
80     80     
-96    -16    
96     112    
-208   16     
176    144    
16     -80    
144    80     
-64    144    
160    16     
16     0      
-16    0      
-32    128    
64     112    
64     176    
-32    -128   
16     -64    
-144   -64    
32     32     
32     -144   
48     -32    
144    224    
272    256    
64     160    
-384   112    
192    -16    
48     -48    
-240   48     
144    -64    
80     32     
-48    96     
112    112    
-48    -224   
-64    -256   
48     -32    
128    96     
240    96     
-240   112    
96     -48    
96     144    
-64    32     
144    128    
80     176    
-96    -32    
-192   96     
-176   -144   
272    224    
-288   -128   
64     -752   
80     48     
48     -1392  
0      48     
16     112    
32     48     
-16    96     
144    112    
-80    144    
64     32     
-48    80     
288    80     
-160   64     
48     48     
0      0      
48     -256   
16     0      
-48    -416   
144    96     
96     112    
208    736    
80     -128   
-32    192    
16     16     
96     112    
-80    -16    
64     176    
-256   208    
160    -192   
160    192    
96     -144   
-16    192    
-240   -624   
96     16     
-80    -368   
96     32     
208    160    
48     -16    
64     256    
144    224    
-80    0      
64     48     
-112   -96    
64     64     
64     112    
0      0      
-32    176    
0      -448   
160    32     
128    -976   
128    112    
-48    -32    
-192   -304   
-592   -1168  
-128   -16    
-480   336    
-800   144    
-672   -928   
1072   736    
144    848    
-224   -304   
48     352    
-80    -96    
128    -32    
160    160    
-144   128    
256    -1376  
64     304    
-240   48     
192    -48    
-128   208    
304    160    
-272   96     
320    -80    
-96    112    
192    -544   
-208   96     
-64    -128   
-96    0      
320    -128   
-32    32     
-80    -1552  
-192   -16    
32     192    
64     16     
128    64     
0      192    
176    288    
-80    -224   
160    176    
-112   -224   
176    -112   
-32    -176   
-112   160    
176    -128   
96     64     
-64    -2192  
112    208    
32     144    
-32    16     
-64    64     
32     -608   
96     208    
-48    -192   
160    240    
-80    16     
48     80     
16     -112   
128    432    
48     -160   
240    144    
64     -16    
-16    -192   
128    160    
144    -736   
-144   240    
64     -224   
96     -1712  
32     -112   
96     -464   
-48    -176   
64     144    
32     -160   
16     112    
80     -48    
64     112    
16     48     
48     -192   
48     0      
-80    -624   
-32    -16    
-496   -176   
80     -64    
144    144    
16     -96    
320    0      
-96    -704   
64     -16    
-80    0      
-32    -416   
224    -1232  
96     160    
80     -336   
-80    -32    
0      -336   
176    -48    
32     96     
0      -304   
64     16     
-48    -304   
128    -48    
32     -688   
128    80     
112    -1568  
48     64     
32     -192   
-288   -16    
112    16     
32     64     
176    256    
-112   -240   
-80    -32    
-176   -320   
-768   -80    
-64    -16    
192    64     
16     -48    
16     -96    
-80    -1152  
96     -80    
48     64     
96     -80    
0      -96    
-32    160    
144    80     
-16    -112   
-224   32     
48     96     
-16    0      
-48    -16    
0      -176   
192    -320   
48     -32    
96     -80    
64     176    
-16    -912   
96     272    
-96    -192   
272    -64    
-32    368    
-16    128    
-160   -144   
48     -176   
-96    -16    
144    -32    
-784   -144   
112    -208   
-208   128    
400    144    
-560   320    
400    -736   
-80    -192   
176    16     
272    -80    
-320   48     
368    -192   
-256   32     
384    -336   
32     -64    
-512   -448   
-64    -32    
0      64     
-496   -32    
80     0      
-128   -48    
-80    -512   
368    32     
-112   144    
336    -240   
-96    176    
128    -32    
-288   -16    
-32    -96    
-256   16     
-384   -64    
240    80     
96     192    
-672   0      
0      -368   
112    96     
96     -496   
128    160    
-160   32     
80     128    
64     -128   
160    16     
-160   -48    
176    -32    
-32    16     
-16    -176   
336    288    
-144   -112   
80     -32    
-64    -128   
368    80     
16     -128   
128    -80    
-176   32     
-48    -80    
-304   96     
64     -544   
384    -656   
464    1008   
-656   -64    
736    112    
-608   48     
320    -528   
384    752    
-32    112    
128    -16    
-1392  -496   
-800   -128   
48     64     
-352   96     
-48    144    
-128   48     
-112   32     
32     48     
0      0      
16     -64    
0      0      
-288   96     
-96    160    
-192   -192   
-64    16     
48     16     
-176   48     
32     64     
-256   144    
-96    -32    
-640   -16    
-64    80     
96     -80    
-64    48     
-32    16     
144    32     
-96    176    
-16    -32    
112    -336   
-160   128    
128    128    
-112   48     
48     -64    
64     160    
-192   96     
-80    -16    
-64    -128   
-464   272    
-16    16     
128    -48    
-64    -48    
0      -112   
-80    352    
-144   -224   
144    -64    
-32    48     
16     144    
-64    144    
-48    48     
32     -32    
-144   144    
0      32     
-32    80     
-16    176    
-464   -128   
128    144    
-96    -80    
128    160    
-160   80     
48     -16    
96     96     
-128   0      
-64    96     
80     384    
-192   224    
48     -64    
448    -32    
-16    0      
-224   80     
-1104  -32    
64     -16    
128    64     
-144   64     
192    -64    
-80    -64    
-48    128    
-208   208    
128    112    
-192   -32    
96     160    
-240   -160   
112    160    
-320   -80    
176    32     
-288   32     
-80    -48    
128    -80    
-144   112    
96     -32    
64     96     
-256   48     
128    128    
-48    -32    
208    224    
-208   -48    
96     64     
-64    32     
32     128    
-32    96     
-32    -16    
32     176    
-160   -80    
16     -80    
-112   32     
-16    -16    
64     80     
144    112    
-144   16     
-48    0      
48     -48    
-64    32     
64     128    
144    144    
80     128    
-416   -48    
240    304    
-512   -48    
144    48     
-256   128    
-32    160    
-32    16     
-48    -80    
-112   -144   
-272   -144   
-96    -160   
192    96     
224    288    
-64    32     
-64    16     
-304   32     
96     80     
160    144    
0      16     
160    320    
16     112    
0      0      
-144   224    
64     176    
144    160    
-16    64     
-16    80     
112    0      
-272   -112   
176    128    
-16    -48    
128    432    
0      288    
64     416    
-96    80     
-16    -112   
16     -144   
80     48     
-16    32     
64     112    
96     112    
-144   0      
-48    16     
0      0      
-16    96     
48     16     
-16    48     
-160   80     
64     144    
-48    32     
48     -32    
80     80     
80     144    
-32    112    
-160   176    
64     64     
-256   32     
304    288    
80     -160   
-48    224    
-256   -208   
256    128    
-64    -128   
0      48     
128    48     
48     32     
0      144    
48     160    
-80    -48    
288    -144   
0      176    
-32    128    
48     160    
-160   -32    
240    1280   
304    -864   
-1248  -128   
-80    -688   
352    848    
80     128    
240    224    
-48    48     
-176   112    
16     -80    
80     160    
-48    224    
32     80     
320    176    
-208   -128   
16     144    
304    48     
-208   -48    
80     160    
160    16     
16     32     
0      48     
80     48     
176    208    
-48    64     
-16    -128   
-32    432    
-192   -32    
384    208    
-96    352    
64     -128   
64     176    
16     112    
240    -96    
-96    144    
272    112    
192    240    
-16    528    
-256   -240   
-48    -416   
224    192    
-32    160    
-96    32     
160    304    
-112   16     
-96    -416   
80     160    
80     64     
-160   128    
32     176    
32     -208   
208    192    
-16    -48    
96     80     
176    16     
32     16     
64     272    
160    592    
160    -480   
224    224    
-160   -400   
176    208    
-192   -352   
208    64     
80     112    
112    0      
-16    128    
32     96     
64     64     
16     96     
-16    80     
128    112    
-16    0      
-16    128    
256    288    
128    -176   
208    272    
-64    128    
80     224    
-16    -96    
-48    80     
112    -160   
-16    -80    
48     80     
96     304    
-16    32     
-32    -112   
112    224    
-80    224    
32     -80    
0      -32    
64     96     
176    -16    
-80    48     
16     -1408  
48     80     
112    -128   
0      32     
48     48     
64     144    
-16    80     
128    160    
-160   -16    
160    -112   
-80    80     
208    -112   
-64    128    
64     -400   
32     176    
-16    -608   
144    144    
0      -640   
96     144    
-48    0      
64     144    
-48    32     
16     -80    
80     -96    
32     96     
176    176    
128    -224   
-96    160    
112    -64    
-64    -112   
160    -304   
-80    208    
256    -704   
-48    160    
-160   -176   
224    -128   
-80    176    
224    -176   
-96    400    
208    -64    
-16    608    
48     -192   
-16    -32    
112    144    
112    96     
-64    -368   
96     96     
80     -192   
144    96     
-112   0      
-64    48     
-96    -208   
208    112    
112    304    
-64    -176   
32     176    
112    0      
-96    32     
128    -144   
-48    0      
64     -512   
112    48     
144    16     
-112   128    
288    528    
-112   -1168  
-144   -80    
272    -64    
32     160    
64     -80    
-128   -528   
160    -32    
160    336    
-80    -336   
128    192    
64     -32    
48     -192   
-112   32     
128    -320   
144    160    
-176   -368   
-64    -896   
-80    -128   
-160   -192   
160    -176   
112    32     
-16    -80    
16     -2960  
272    -192   
96     208    
-48    112    
-32    -288   
16     80     
32     16     
-96    160    
48     0      
16     -96    
-208   -176   
160    -112   
128    -160   
160    -304   
64     -48    
144    -176   
64     64     
-96    -336   
0      -880   
-80    32     
-176   -80    
-176   288    
768    128    
-272   320    
-160   464    
-208   -784   
32     -464   
-544   -80    
-16    544    
-32    -128   
-80    128    
256    -80    
16     -1552  
-112   -16    
224    -240   
48     144    
0      -32    
64     112    
-112   -48    
160    32     
-128   16     
96     0      
-400   -16    
-16    176    
176    -48    
96     -192   
-240   -80    
96     -416   
-48    0      
32     224    
144    112    
32     -32    
208    -240   
-112   320    
0      -80    
-32    -160   
-32    80     
-240   32     
80     -192   
-256   -112   
80     -624   
160    -32    
0      -176   
80     128    
48     -1584  
-64    0      
-112   -16    
176    -80    
-112   144    
32     16     
-64    0      
32     -64    
-416   -16    
-96    16     
-800   -176   
64     48     
-48    80     
144    -16    
64     176    
-32    -432   
64     16     
96     80     
32     32     
-64    160    
80     -96    
240    -144   
96     0      
-320   80     
208    0      
-16    -64    
176    48     
-192   80     
320    -384   
-192   160    
-112   -768   
-176   128    
-64    -208   
240    16     
-544   128    
128    -272   
-176   160    
-208   -80    
176    -64    
128    224    
-112   -112   
208    -192   
-192   96     
208    -272   
96     256    
-32    -224   
80     -112   
96     0      
176    112    
-112   176    
80     0      
80     80     
-112   -32    
160    96     
80     -48    
-288   -112   
256    -112   
-192   48     
-192   -112   
-64    -96    
-464   -96    
-784   -112   
-64    48     
-176   -16    
0      64     
-80    64     
48     16     
176    16     
-192   -32    
208    16     
0      128    
-752   -272   
32     -144   
-32    -80    
-112   96     
-16    -48    
-480   0      
-208   -128   
-80    -32    
-144   -144   
-432   -16    
-256   -112   
-32    -48    
-96    -48    
-32    -144   
-128   32     
96     -16    
48     192    
-16    -256   
-48    64     
-96    -160   
-256   0      
96     160    
160    112    
-80    48     
-272   0      
32     -64    
-320   -32    
32     -144   
-16    96     
112    112    
-48    128    
48     96     
0      -320   
-272   112    
192    80     
-80    80     
-128   -32    
-48    48     
-112   -48    
-96    176    
-64    0      
-48    0      
64     64     
0      -336   
96     32     
-48    -80    
-96    -384   
368    944    
208    368    
64     -240   
-240   -64    
64     0      
-80    48     
48     160    
-48    -32    
16     32     
-224   -16    
-128   -48    
-688   -224   
368    112    
-176   -176   
48     128    
0      112    
-48    -32    
176    64     
64     96     
-144   288    
-224   160    
48     48     
16     32     
224    16     
-192   80     
-176   64     
80     -48    
128    144    
-112   16     
352    0      
-160   192    
64     80     
-688   160    
224    2384   
-1296  960    
240    -224   
-672   -496   
464    416    
96     272    
-464   464    
240    64     
-176   208    
-176   80     
-64    -192   
176    256    
-160   -144   
-96    96     
32     64     
208    352    
-224   80     
-112   -80    
-64    -208   
-160   -112   
-32    160    
64     -16    
-48    144    
32     16     
80     224    
-640   -96    
-128   -592   
448    400    
480    752    
-112   160    
-64    -144   
-64    16     
128    -160   
128    112    
16     -80    
320    128    
-448   -176   
656    384    
-576   -96    
368    528    
-352   480    
80     -128   
-16    96     
-64    -64    
-208   304    
-48    80     
208    240    
336    288    
-432   -208   
192    -32    
64     48     
96     -176   
160    352    
-128   -112   
112    192    
-32    0      
144    -48    
-752   -816   
176    352    
96     144    
-272   208    
-80    192    
48     -320   
-96    48     
64     0      
64     112    
-112   112    
176    32     
-96    80     
0      80     
48     128    
64     64     
32     -80    
32     48     
160    80     
112    400    
0      80     
272    336    
-208   96     
-64    -240   
64     96     
-32    192    
192    -48    
48     192    
112    0      
32     192    
16     -48    
32     112    
-16    112    
128    -32    
-32    160    
128    144    
-80    48     
0      -16    
48     160    
-96    -16    
160    0      
-64    288    
128    80     
160    272    
-224   -16    
128    -96    
32     80     
-16    112    
144    0      
-176   64     
-16    64     
112    -64    
-16    16     
-32    80     
80     144    
-96    -144   
48     -2384  
-48    144    
144    64     
16     -80    
-16    448    
144    -64    
-16    128    
-112   576    
-80    224    
-128   16     
0      336    
0      -256   
80     -112   
0      -160   
-96    208    
112    -80    
-208   144    
256    32     
16     48     
160    -400   
-176   256    
192    64     
144    304    
-64    48     
128    144    
-32    128    
96     128    
-112   -48    
80     96     
48     80     
256    -544   
-192   144    
160    160    
-128   -208   
32     -400   
80     -128   
176    48     
0      128    
112    272    
-32    160    
-112   -352   
0      -32    
128    112    
-96    48     
192    208    
48     -736   
32     80     
0      -2144  
112    32     
16     176    
-80    -32    
48     144    
64     208    
-32    0      
112    96     
-16    176    
240    -64    
32     272    
-64    -16    
208    224    
-256   -96    
176    -16    
96     -272   
96     192    
0      96     
-96    48     
304    -80    
128    112    
-48    256    
16     48     
-16    -48    
160    256    
-192   400    
-80    -336   
0      64     
192    -128   
80     144    
-48    -80    
64     80     
48     -288   
64     32     
112    -16    
240    16     
-144   320    
48     144    
-64    32     
832    480    
752    800    
208    -80    
-720   144    
288    -112   
592    608    
-784   -1040  
624    304    
-368   -592   
128    48     
-80    160    
320    -192   
-128   560    
176    -432   
64     448    
32     -32    
-80    224    
160    0      
-16    224    
96     -80    
-96    240    
64     -112   
0      128    
192    16     
-144   -48    
160    -96    
-160   352    
176    16     
64     48     
-224   64     
176    -320   
-32    112    
128    -208   
32     128    
96     -240   
160    176    
0      -144   
160    144    
-80    -160   
32     160    
128    -544   
0      160    
32     -48    
80     128    
-48    -32    
128    112    
32     320    
128    0      
-160   -64    
144    -32    
144    144    
-128   0      
224    32     
-176   -48    
80     -48    
96     96     
0      -288   
160    176    
-64    -1056  
176    -1216  
-64    64     
48     -400   
176    16     
-80    -16    
176    32     
48     32     
-64    -32    
80     272    
-144   -16    
192    -336   
64     48     
16     112    
-96    32     
224    -112   
-80    0      
-432   -64    
160    -64    
-480   -96    
-48    -208   
304    -224   
-32    -1472  
32     -160   
112    80     
-160   -272   
400    -192   
-96    80     
144    -48    
16     432    
-192   -16    
288    -16    
-176   -64    
0      -96    
0      -32    
-160   -288   
-16    -288   
-64    -336   
96     -96    
16     176    
112    80     
128    -160   
-176   -32    
144    -96    
48     0      
64     -64    
16     -176   
-256   -80    
-48    -256   
144    272    
-112   -160   
160    144    
48     -96    
32     -32    
48     -448   
-16    -96    
-208   -96    
208    64     
-48    80     
192    0      
-128   -176   
-16    -192   
80     368    
-80    -112   
-672   144    
-144   -80    
16     16     
48     -96    
256    112    
80     -480   
-160   -48    
48     -64    
224    64     
-16    96     
96     0      
-96    -64    
32     -80    
-160   -128   
-48    -48    
144    272    
0      -192   
-624   -64    
-32    -144   
64     -32    
176    -192   
-96    32     
176    -1104  
-32    -16    
16     -48    
-48    -288   
240    256    
-32    48     
64     32     
160    0      
-368   -112   
16     -128   
-736   -592   
528    512    
-400   368    
112    -208   
64     16     
0      -496   
128    208    
-208   -128   
96     144    
-48    64     
-96    0      
-752   -128   
224    -400   
112    0      
32     192    
-464   0      
192    -112   
0      208    
128    -416   
176    144    
-224   -720   
336    -64    
-48    64     
80     0      
-32    48     
16     -64    
-208   -128   
16     80     
-80    -48    
128    -32    
-1056  192    
32     -224   
160    112    
-16    -160   
256    112    
-48    -160   
48     64     
32     208    
112    -64    
480    -208   
-256   -64    
144    32     
-208   -32    
-16    384    
-832   -336   
-880   -672   
-352   -208   
736    544    
-528   80     
416    656    
-528   -432   
432    112    
-368   240    
-608   -352   
-192   416    
176    -720   
-128   320    
80     -176   
192    784    
-192   -192   
192    496    
-528   -336   
432    352    
-160   -448   
240    144    
-32    64     
-128   80     
-128   -96    
-192   144    
-128   0      
0      64     
-784   288    
-368   -176   
-128   256    
-240   -384   
368    352    
-160   -304   
112    -16    
144    -288   
112    -240   
656    448    
-448   -144   
272    224    
-144   208    
-192   48     
-352   32     
-96    96     
-384   -144   
-240   144    
224    -96    
96     368    
32     272    
-80    0      
-432   -496   
96     128    
176    -32    
96     432    
-64    64     
-192   -64    
16     32     
-528   -912   
64     -352   
-176   -64    
208    400    
-64    288    
144    48     
-208   -336   
-32    160    
96     192    
-64    0      
112    96     
-192   112    
32     -176   
-272   -96    
-160   112    
128    16     
0      -32    
-80    176    
-16    112    
-96    528    
-336   272    
352    -160   
16     144    
352    272    
-160   -16    
-304   128    
176    128    
-144   160    
-32    160    
-16    48     
96     -176   
-256   112    
-128   -64    
64     144    
-352   -64    
-80    -32    
80     48     
48     64     
64     192    
16     128    
-16    288    
-112   48     
-176   -368   
336    288    
80     32     
-240   -96    
-208   64     
-128   64     
16     64     
-272   -224   
-224   -96    
288    -16    
-416   16     
176    160    
16     144    
-144   -16    
256    96     
-368   144    
240    48     
-48    144    
-208   -288   
160    240    
96     -16    
-224   304    
-16    144    
48     64     
96     0      
-64    80     
16     256    
80     112    
-16    256    
-112   -16    
96     -112   
16     16     
-48    176    
256    192    
-16    224    
-64    -208   
-80    144    
-112   -208   
128    144    
-16    -96    
128    80     
-192   160    
112    16     
-64    48     
-32    80     
-64    32     
32     -48    
-48    144    
0      192    
160    -48    
-288   -32    
48     160    
-96    -16    
48     64     
64     96     
-176   224    
240    48     
-144   48     
32     112    
32     32     
176    16     
-144   160    
48     112    
-128   0      
32     48     
-96    -80    
80     -128   
64     -160   
-160   192    
-32    240    
-16    -48    
192    128    
32     48     
208    -96    
-208   272    
-64    160    
-192   160    
-64    -128   
224    96     
16     0      
128    48     
-128   160    
80     32     
48     160    
-112   224    
-32    -32    
-48    -32    
-64    64     
256    32     
-128   16     
64     -48    
16     128    
32     144    
-144   128    
80     32     
96     416    
-256   -48    
320    160    
-176   80     
-880   -2688  
432    192    
-512   -752   
432    -368   
192    320    
-720   -208   
864    560    
-576   -32    
384    448    
320    -400   
-336   320    
192    -544   
-64    -1040  
160    -256   
-224   432    
240    -272   
0      528    
80     -160   
-96    352    
208    -160   
-144   96     
48     0      
128    304    
64     -32    
48     64     
-160   0      
32     -80    
-288   -784   
320    64     
-112   160    
176    32     
-144   96     
48     0      
-48    208    
64     -16    
48     176    
160    80     
-32    208    
-48    0      
-48    -112   
112    96     
32     208    
80     -192   
64     112    
16     -16    
48     176    
112    112    
32     96     
48     192    
-96    16     
160    48     
-32    96     
96     48     
48     112    
-176   128    
176    -64    
32     288    
-48    -144   
112    80     
16     -1008  
-32    80     
128    128    
-48    128    
144    112    
-48    272    
80     32     
128    160    
-96    0      
240    144    
-64    128    
-16    -256   
64     80     
96     -288   
80     176    
-64    -336   
208    96     
0      -208   
48     -32    
96     -32    
-112   80     
48     -144   
176    128    
0      160    
64     -16    
-336   0      
-224   -368   
448    240    
-176   -48    
272    192    
128    -112   
-272   -64    
-48    -816   
496    304    
112    240    
16     128    
16     160    
-64    112    
208    224    
64     224    
112    144    
-16    -64    
32     80     
144    192    
64     272    
-16    -704   
64     208    
-48    -1280  
32     208    
32     -240   
-16    -96    
-80    48     
112    112    
0      96     
128    144    
-64    48     
112    -192   
-32    80     
64     -352   
144    208    
48     32     
96     160    
64     0      
16     96     
64     -240   
48     176    
-80    -384   
160    144    
96     64     
-144   -128   
80     64     
160    -16    
64     160    
64     -192   
80     208    
-112   -144   
64     96     
288    256    
-64    208    
96     -48    
-128   96     
144    -32    
-16    48     
-96    -64    
304    16     
-160   192    
256    -240   
-16    192    
48     192    
16     64     
-16    -32    
80     144    
112    -128   
16     272    
48     112    
-48    -1200  
128    144    
48     32     
80     -1120  
112    16     
-80    -1104  
144    -224   
0      -1856  
128    -160   
112    288    
-144   -144   
80     48     
240    -336   
-48    -688   
-32    208    
48     -128   
-272   -16    
-16    -48    
48     -16    
-1040  -32    
32     96     
352    80     
-192   -272   
224    -160   
-64    -576   
160    -64    
48     112    
-80    -32    
128    -144   
32     112    
224    -80    
-176   -128   
176    -160   
96     112    
-112   64     
0      -64    
96     -32    
32     -32    
-32    -16    
0      -256   
-192   176    
80     -80    
112    48     
128    -112   
-1312  688    
368    0      
-240   -1504  
912    -240   
-416   -480   
-112   -144   
-256   816    
224    -768   
224    96     
-80    -320   
240    64     
-240   96     
368    -1360  
-304   64     
224    -496   
-240   208    
-16    -304   
-288   96     
-16    -304   
144    256    
32     -480   
192    -112   
-1632  -64    
432    80     
-320   128    
256    112    
16     0      
352    -1120  
-848   -432   
272    128    
64     64     
-176   16     
208    48     
32     -16    
16     -64    
-144   224    
16     -64    
-32    16     
-128   -160   
-640   192    
368    32     
-128   240    
16     -800   
-96    192    
0      -1184  
176    -96    
-288   -128   
160    -368   
-32    -96    
32     -192   
80     48     
-64    -32    
-80    48     
144    0      
-1168  -16    
0      -416   
48     64     
48     -176   
144    64     
-64    -1440  
176    80     
-32    48     
64     112    
-80    -144   
224    -16    
-176   192    
176    -80    
-48    64     
-80    -224   
-144   32     
-272   -288   
32     128    
128    -80    
-112   16     
272    -176   
80     0      
48     128    
64     -32    
-48    144    
96     0      
-16    96     
-32    -16    
96     96     
144    384    
16     192    
336    -64    
-208   -32    
208    -592   
-64    64     
-64    64     
32     112    
-224   32     
256    32     
-256   128    
176    80     
-336   -192   
-16    -144   
-64    -48    
144    -48    
-240   -224   
-1552  -272   
160    112    
-1008  -80    
-112   -80    
32     16     
-352   96     
0      -144   
-928   -96    
-96    192    
64     256    
-160   32     
32     96     
-96    -64    
-1008  0      
-208   -80    
-16    -160   
-144   64     
288    176    
-224   80     
-48    160    
-16    80     
-176   144    
-80    -400   
-272   -128   
-144   -112   
160    112    
176    -80    
-160   -112   
160    -208   
-48    128    
-64    32     
-16    16     
0      -240   
-160   -32    
80     80     
64     48     
-288   -80    
-176   32     
32     208    
48     -64    
-32    -96    
-752   16     
144    80     
272    -112   
-224   208    
48     -48    
-16    -16    
-16    0      
-192   96     
240    -16    
64     128    
-112   128    
-16    80     
32     -128   
-256   -112   
64     160    
-160   0      
80     80     
48     -416   
224    112    
-112   80     
-64    112    
80     32     
-32    128    
112    80     
-32    32     
-48    -48    
-240   -64    
-64    176    
-240   -48    
192    48     
-128   144    
96     32     
-400   -48    
-128   96     
160    -80    
-80    0      
32     80     
-96    -16    
32     176    
-160   16     
-16    32     
48     -48    
16     144    
-176   -48    
112    32     
-384   64     
-96    32     
-1248  -144   
32     16     
-16    0      
48     32     
112    32     
-176   128    
-16    224    
-176   -16    
32     144    
48     32     
-1248  -2032  
944    0      
-672   1392   
-16    -128   
208    512    
-1024  -688   
864    1296   
-768   -464   
16     496    
-176   -160   
128    -96    
-176   112    
-32    112    
560    0      
-320   80     
-16    -48    
-64    112    
-16    112    
-256   -80    
400    48     
-304   80     
48     144    
-80    176    
80     32     
0      -80    
32     -48    
32     160    
-144   112    
64     48     
-128   160    
32     16     
-176   64     
80     80     
-80    128    
144    0      
-272   0      
-48    16     
64     48     
32     48     
112    176    
32     32     
-112   144    
32     64     
80     80     
-16    -96    
0      112    
32     96     
160    144    
-272   64     
128    16     
-176   -80    
48     80     
0      192    
80     192    
-96    128    
16     -16    
96     80     
-48    48     
96     128    
80     32     
0      0      
-176   -16    
144    16     
-16    32     
112    240    
32     112    
32     112    
32     96     
-64    -64    
-48    -80    
48     -64    
48     128    
-16    128    
-16    128    
-16    80     
96     -32    
-96    -272   
-16    208    
-272   192    
144    -96    
-160   32     
-16    -32    
144    112    
-32    352    
144    80     
-160   -48    
64     -32    
48     112    
16     144    
128    432    
-80    64     
16     80     
-48    224    
-16    48     
-16    -32    
48     80     
272    576    
16     368    
-96    -96    
48     -64    
48     96     
208    144    
-64    32     
0      112    
-48    32     
128    144    
-144   -80    
272    272    
-176   224    
128    -48    
-16    160    
-16    144    
128    32     
32     48     
48     96     
80     112    
16     80     
0      128    
16     64     
16     80     
16     112    
-32    -192   
112    256    
0      128    
48     -1424  
-32    176    
-208   -80    
416    -80    
-192   128    
-48    208    
224    0      
-64    240    
32     128    
96     32     
64     48     
-16    240    
304    288    
-384   96     
368    144    
-80    -272   
160    -32    
32     176    
-16    160    
48     80     
-32    96     
112    32     
96     400    
-48    -176   
192    128    
-96    192    
64     32     
-16    -80    
-112   -16    
144    32     
0      -336   
256    80     
64     -240   
288    144    
-272   160    
112    -16    
176    128    
-64    160    
80     -288   
-240   112    
112    -80    
0      176    
368    -272   
144    32     
-528   80     
384    -576   
-272   192    
336    -928   
208    64     
-144   384    
80     32     
64     16     
32     96     
64     32     
32     112    
32     112    
112    128    
-80    96     
128    -128   
96     96     
-96    96     
-176   -240   
576    128    
-208   272    
32     -272   
96     64     
112    -32    
32     48     
48     400    
-144   208    
-128   -16    
0      -112   
144    96     
16     -144   
-1312  -368   
144    -976   
368    -224   
512    -816   
80     -864   
192    -368   
48     624    
464    -368   
-416   -96    
-128   -256   
432    272    
-512   144    
320    -656   
160    272    
-64    32     
160    352    
-176   -960   
240    304    
192    48     
176    144    
-48    80     
48     128    
-48    288    
144    256    
-48    16     
16     96     
-112   -32    
144    -160   
-32    112    
112    112    
144    128    
-16    -384   
32     112    
80     -160   
144    112    
112    80     
32     96     
-96    -480   
32     112    
16     -32    
272    160    
-176   32     
256    -96    
-16    -720   
128    -176   
176    192    
-48    -192   
-96    -240   
288    -64    
-48    208    
176    -400   
16     -1488  
-48    -32    
288    -672   
-256   192    
48     0      
112    -96    
48     -224   
128    -480   
-64    -128   
176    -336   
-32    80     
64     96     
112    32     
0      -32    
96     -128   
32     -592   
64     32     
48     -176   
32     48     
32     -16    
0      -496   
-96    -64    
240    -288   
32     144    
-48    -304   
224    48     
32     -2496  
0      96     
-160   48     
176    64     
48     -48    
16     128    
112    192    
-160   48     
0      -272   
240    48     
-1328  0      
112    -64    
208    -80    
-64    -128   
96     -208   
96     -1152  
-16    16     
112    80     
-288   32     
112    -96    
32     32     
112    -32    
64     -16    
-144   48     
0      16     
-32    64     
16     0      
64     -80    
0      -80    
64     -112   
64     -96    
0      96     
96     -992   
16     208    
-48    -48    
192    0      
160    0      
-256   -16    
176    -112   
32     64     
-240   -16    
208    -160   
-1248  -80    
160    -112   
-80    16     
160    -80    
128    -48    
-224   -448   
144    160    
16     32     
192    112    
80     336    
-16    96     
32     -16    
-160   -336   
-240   -240   
-112   -112   
-272   -32    
400    32     
-416   96     
160    -400   
16     -80    
-192   -960   
176    80     
144    -224   
-96    80     
32     128    
-16    -128   
-192   -96    
-144   112    
-192   -32    
96     0      
-256   -32    
64     -112   
-384   -64    
64     -304   
0      208    
48     48     
80     144    
48     -288   
384    16     
-448   32     
-32    -192   
32     48     
128    -32    
96     304    
-64    -48    
-176   48     
0      -80    
144    0      
48     -192   
224    400    
-336   -192   
192    -128   
-224   -80    
128    -160   
16     -16    
16     -64    
128    240    
-96    -64    
-160   -256   
-16    80     
-448   -64    
64     16     
-368   -96    
128    -224   
112    128    
32     -144   
-64    144    
144    304    
-16    0      
80     16     
128    32     
-112   -48    
96     16     
-64    0      
-160   48     
-48    -16    
336    -80    
112    32     
-640   48     
-432   -240   
-80    -112   
-80    -144   
288    -416   
-640   -144   
64     -624   
-1088  16     
752    -688   
-432   112    
48     -304   
-224   384    
48     -160   
112    112    
-272   0      
64     -304   
-32    64     
-48    16     
128    160    
48     80     
-544   -96    
144    -80    
-96    192    
128    -16    
-208   112    
-16    -32    
0      -16    
-48    32     
-256   -176   
16     16     
-64    -48    
96     160    
80     -112   
-352   96     
-16    -144   
-384   32     
144    16     
80     144    
16     80     
-32    176    
-144   -48    
-592   64     
-112   -16    
0      0      
96     192    
-80    -32    
96     176    
-176   32     
-80    -64    
64     -64    
-48    144    
0      80     
48     64     
-160   80     
-48    -144   
-128   -16    
-480   -80    
64     224    
-80    -32    
112    96     
-16    -592   
-96    64     
-64    64     
208    192    
-96    288    
192    64     
-176   -16    
-112   -32    
0      32     
0      16     
-80    80     
-240   -16    
96     96     
-272   -224   
128    128    
-80    -176   
0      80     
160    512    
128    336    
368    512    
-320   -112   
-16    16     
96     -48    
-96    32     
48     -16    
48     -32    
-32    64     
96     64     
-384   -48    
96     272    
48     240    
0      16     
-32    -112   
0      -112   
208    224    
-224   48     
96     144    
-224   48     
144    128    
48     96     
-16    64     
-240   -32    
80     160    
-256   0      
96     160    
-48    80     
0      48     
-32    64     
16     256    
-112   -80    
112    64     
-80    144    
-32    -64    
-16    -16    
-224   -64    
80     64     
-352   -176   
192    240    
-176   -80    
176    -256   
-64    96     
-16    112    
16     -16    
-112   32     
112    208    
144    80     
208    128    
-80    656    
32     -16    
-32    -64    
-144   160    
144    -112   
96     176    
-320   -128   
128    80     
-96    48     
16     64     
-48    -288   
336    16     
-192   384    
112    -80    
16     160    
-144   32     
128    0      
-80    176    
32     80     
16     -144   
80     160    
-176   64     
32     64     
-16    32     
80     48     
0      208    
-80    -48    
112    -80    
352    208    
-352   160    
240    -32    
-304   176    
320    -208   
240    256    
-320   32     
80     128    
-208   96     
368    112    
112    96     
-352   -304   
288    0      
-64    416    
-112   144    
96     -16    
48     80     
208    208    
-96    0      
-192   320    
-288   -96    
512    -32    
-336   224    
-128   -160   
112    -112   
256    208    
240    128    
-48    432    
-336   96     
-16    176    
80     -96    
-32    176    
-208   -112   
96     208    
-112   -144   
64     32     
-64    -48    
240    16     
-128   128    
304    -176   
-160   192    
-48    -64    
80     176    
16     112    
-32    960    
-544   -2064  
-32    880    
-176   288    
-176   -528   
-48    -704   
880    880    
560    480    
-288   -160   
96     -160   
-192   256    
32     -112   
192    368    
-208   96     
288    64     
-64    64     
64     64     
64     208    
-32    48     
80     224    
-32    0      
64     144    
64     0      
-176   -1536  
144    -160   
64     176    
176    128    
32     80     
-48    0      
-16    112    
160    32     
-32    48     
-16    128    
160    -64    
16     192    
224    -112   
-416   -160   
48     16     
16     -480   
0      -64    
128    176    
32     64     
32     32     
80     128    
-32    224    
144    48     
-64    0      
160    288    
-192   -96    
272    160    
-192   16     
176    -128   
-112   32     
224    32     
-80    176    
48     -784   
304    -32    
-112   80     
64     112    
64     96     
-16    160    
-16    -32    
96     208    
-144   48     
304    32     
-48    208    
112    224    
-64    64     
144    -128   
112    160    
-48    -160   
32     192    
128    -368   
128    192    
-112   -224   
208    304    
-160   112    
160    128    
80     -112   
112    64     
128    96     
-176   64     
32     144    
96     -320   
144    -16    
0      -352   
80     432    
-96    -512   
272    192    
-240   48     
144    64     
-16    -32    
144    192    
-112   192    
16     -320   
352    144    
-48    -176   
48     176    
64     -80    
-96    80     
288    -96    
-112   144    
176    -320   
64     112    
-80    -16    
16     96     
96     32     
96     304    
80     64     
80     -304   
-96    128    
80     -128   
96     48     
112    -144   
64     208    
32     -160   
-32    176    
-48    -144   
128    16     
176    -96    
-128   96     
128    96     
288    176    
-48    112    
-32    128    
80     16     
128    -224   
-160   -208   
48     -336   
176    176    
144    -192   
160    208    
-80    -32    
416    208    
-240   -160   
16     176    
128    64     
48     16     
144    96     
80     0      
96     -384   
32     -112   
-80    80     
208    0      
-16    160    
-48    -48    
64     224    
128    -48    
80     -2208  
-48    16     
-32    -480   
144    32     
-208   144    
176    32     
-128   -144   
176    -224   
-272   -272   
304    -464   
144    176    
-96    96     
96     0      
32     -16    
-64    -144   
96     -192   
240    -16    
0      192    
-112   96     
-144   -208   
96     -208   
96     48     
128    -80    
0      112    
-192   -512   
64     112    
0      -1872  
48     -208   
32     0      
64     -32    
112    64     
-16    112    
160    -16    
-32    -144   
-80    0      
80     -128   
-1312  -64    
160    -64    
-16    16     
80     96     
96     -144   
96     -608   
16     -112   
48     -32    
48     -80    
208    80     
80     -32    
0      16     
80     -96    
-224   -64    
64     -304   
-1072  -1280  
192    352    
-304   672    
-240   32     
-208   -1008  
928    208    
-240   336    
-48    -2000  
-96    -16    
32     112    
112    48     
-32    -32    
-96    32     
96     -176   
144    48     
0      304    
-48    -80    
-1760  -480   
-48    -352   
-16    160    
320    48     
-80    -192   
128    -624   
-128   80     
192    64     
-48    64     
-80    -32    
96     -64    
160    32     
-128   -64    
16     -112   
176    224    
-160   -128   
80     96     
-624   -128   
144    -48    
-192   -16    
224    -784   
-32    48     
208    -176   
0      128    
-16    -32    
80     -48    
-112   -48    
128    -48    
-144   16     
144    -128   
-128   -112   
32     -32    
-80    144    
128    -80    
-48    176    
64     -448   
-96    128    
224    -336   
80     144    
-256   160    
-48    -528   
-448   -272   
64     -80    
64     -32    
-32    -32    
48     -368   
208    -208   
-256   -32    
48     -64    
-32    96     
96     -240   
32     112    
-32    48     
64     64     
-112   0      
-32    -160   
-144   -48    
32     32     
320    224    
-448   -64    
-560   -272   
192    -288   
-80    0      
208    48     
112    64     
-976   -128   
0      0      
-80    -144   
160    32     
-48    192    
0      32     
112    176    
-144   -128   
16     -80    
80     -80    
-64    32     
96     0      
-64    128    
-304   -112   
176    240    
-128   -336   
-160   -80    
-96    0      
-256   32     
80     16     
-944   -16    
-112   0      
-96    0      
-160   -16    
112    160    
-64    -16    
-32    -16    
-80    96     
-336   -192   
-16    64     
-288   -160   
64     96     
0      48     
-16    144    
-80    -48    
-256   0      
-16    32     
-464   192    
-48    16     
16     32     
0      -16    
64     -144   
80     208    
-240   144    
48     0      
192    -16    
-112   -48    
64     160    
-96    32     
-48    48     
-160   -16    
-32    192    
-288   -336   
144    -64    
-544   144    
176    160    
-128   -160   
-16    -64    
32     -16    
160    64     
64     112    
-224   -64    
-224   -208   
64     -64    
-224   -224   
32     96     
-112   -192   
-96    32     
0      32     
-224   32     
-16    -16    
288    -416   
96     224    
-384   -112   
32     -112   
-112   48     
160    96     
144    128    
-32    -128   
-16    -32    
48     0      
-80    32     
-192   -320   
0      16     
288    64     
-128   64     
-720   112    
112    0      
-16    80     
-160   0      
96     32     
-256   16     
32     192    
80     -64    
-16    416    
-208   -352   
-64    384    
176    -288   
-96    448    
-32    48     
48     144    
-864   -112   
-128   48     
176    240    
-352   0      
-64    64     
48     96     
48     -64    
16     80     
-192   224    
224    -192   
-192   192    
16     -80    
32     256    
-352   -112   
96     -400   
-176   -1712  
-416   224    
-80    384    
192    528    
-384   -256   
528    448    
-112   144    
176    160    
-224   -208   
176    240    
-16    -192   
64     64     
-80    112    
192    0      
-32    144    
-128   80     
80     112    
16     32     
-48    -80    
-48    0      
112    144    
16     112    
64     64     
-144   64     
128    304    
0      144    
-112   -128   
80     160    
-64    -32    
48     48     
-240   48     
112    16     
64     96     
-80    -16    
48     336    
-272   -160   
176    -128   
-128   112    
208    80     
-256   -80    
-32    128    
-80    -48    
192    16     
-160   128    
96     48     
32     208    
-48    -64    
128    0      
-80    176    
208    -32    
-48    192    
-48    80     
48     0      
-32    96     
-48    -64    
208    192    
-96    64     
112    208    
-128   -48    
112    128    
-48    80     
80     96     
64     288    
-160   128    
176    -48    
128    80     
-112   256    
-64    -160   
256    112    
-240   208    
144    16     
-32    32     
-48    128    
16     16     
16     -32    
96     240    
-48    128    
144    0      
64     224    
-192   16     
144    48     
144    432    
-304   32     
304    -48    
-64    -16    
32     -32    
240    48     
-176   96     
112    48     
16     80     
80     240    
48     128    
-16    400    
-112   -32    
96     -96    
96     64     
-16    224    
176    112    
-144   16     
16     32     
128    64     
-96    -192   
0      32     
128    160    
-16    96     
80     176    
-224   112    
352    352    
-112   176    
176    112    
-48    32     
-48    32     
96     48     
240    208    
0      64     
-16    160    
-96    352    
192    160    
304    96     
-192   -336   
256    160    
-176   112    
0      48     
-96    80     
-16    144    
368    240    
-208   16     
128    96     
-16    96     
0      -80    
64     208    
-144   128    
288    -32    
64     240    
-192   -96    
176    96     
112    -64    
-320   0      
192    48     
32     96     
80     176    
128    304    
-48    -304   
32     96     
96     192    
80     144    
-16    80     
-48    -32    
48     128    
144    -176   
-64    96     
96     -1200  
48     176    
0      80     
48     112    
16     -160   
16     -464   
48     176    
96     288    
-96    -112   
80     320    
48     80     
112    -80    
16     0      
160    -384   
112    288    
-32    -752   
48     352    
-16    -704   
64     416    
400    624    
-64    176    
-48    160    
-64    80     
96     96     
80     -464   
272    144    
112    -240   
-32    176    
32     -240   
16     176    
160    -480   
64     -144   
-16    -240   
192    320    
-96    -80    
144    112    
80     -48    
80     176    
-48    192    
32     32     
48     64     
432    -240   
0      240    
-16    -544   
32     144    
16     160    
-1008  -144   
-512   -1056  
384    496    
112    464    
144    384    
-1136  336    
-64    -1328  
336    160    
384    -592   
416    720    
-352   -240   
464    224    
-80    -416   
-64    -352   
176    -272   
192    256    
0      224    
-64    128    
-144   -176   
208    -16    
-96    208    
160    -64    
32     64     
64     -672   
64     64     
128    -16    
112    208    
-80    -352   
64     48     
144    -384   
-16    128    
48     -32    
16     48     
160    112    
16     -2208  
-144   -400   
-96    -2288  
64     -368   
432    288    
-32    48     
-96    32     
112    112    
48     -96    
96     96     
144    -64    
80     208    
-80    48     
32     -192   
208    656    
-160   -240   
432    64     
-656   -32    
128    -80    
-32    80     
-96    -832   
112    -480   
-64    -832   
192    -48    
432    448    
-352   32     
288    176    
-80    -352   
240    -1040  
-304   -48    
272    32     
-32    -112   
-96    16     
64     -128   
192    -96    
-32    -64    
80     48     
176    -16    
0      16     
96     -736   
32     96     
48     -1760  
-240   -384   
-96    -544   
-48    -80    
240    32     
-160   64     
-48    48     
-64    -160   
-704   -112   
64     -64    
48     32     
-32    -128   
96     -48    
32     -528   
160    -176   
96     80     
80     272    
-32    128    
-32    -96    
-144   -16    
96     -144   
-144   -48    
0      -64    
-224   96     
32     -48    
64     -144   
96     -304   
-32    -176   
96     -1232  
-208   -32    
0      -1920  
256    352    
-96    -272   
304    160    
-448   -48    
208    -144   
-128   80     
16     48     
144    48     
-128   16     
-352   -320   
160    -64    
-32    144    
304    16     
-80    96     
-48    -224   
80     80     
112    -160   
-48    -224   
-128   -112   
32     -256   
240    64     
-96    -16    
64     -176   
-144   -144   
-336   -32    
352    -304   
-400   400    
224    -32    
-96    240    
48     -1376  
128    272    
272    -368   
-48    224    
-64    240    
144    -64    
-288   -128   
208    -272   
-256   80     
-112   -96    
80     -16    
-32    -96    
32     272    
-48    -464   
-32    32     
32     -288   
112    -32    
-48    -112   
304    160    
64     48     
-208   -32    
-160   -48    
224    -64    
-352   -80    
208    -160   
-64    272    
32     0      
-112   -80    
64     -336   
192    656    
-416   -576   
384    576    
112    112    
0      -256   
-224   -64    
144    -32    
-32    -144   
144    128    
-112   32     
32     -80    
-96    80     
96     -176   
112    240    
16     -112   
32     192    
-384   -288   
-1680  -80    
-208   144    
352    -336   
64     128    
64     0      
-16    176    
-32    -112   
32     -32    
-16    -96    
16     80     
48     -96    
96     96     
-736   -304   
256    80     
-576   -80    
-256   64     
-48    0      
-192   928    
-704   448    
1152   224    
-416   416    
-272   -416   
128    96     
-416   464    
512    -240   
-128   80     
-112   -192   
-48    -32    
16     32     
48     128    
-224   -16    
80     80     
-144   48     
-48    -48    
-160   -48    
96     64     
-832   16     
112    16     
-48    208    
176    16     
-112   -176   
64     64     
-96    -224   
-64    112    
160    128    
-48    -64    
-48    96     
-128   -96    
-128   80     
64     32     
96     224    
-432   -48    
176    128    
-1008  128    
160    64     
-208   -288   
128    144    
-240   -80    
144    16     
-80    96     
144    48     
-208   80     
-128   -16    
0      80     
-32    -160   
272    288    
-608   -160   
352    64     
-688   -64    
256    160    
-208   -32    
64     32     
80     32     
-176   -96    
288    128    
-384   144    
176    -112   
16     176    
-96    208    
-80    0      
80     -48    
-304   144    
-192   -64    
-192   -80    
16     80     
-224   192    
-96    112    
176    -384   
-160   16     
-16    96     
16     160    
-16    -32    
48     64     
-160   -16    
0      32     
-48    16     
-272   16     
144    -32    
-160   0      
-16    -48    
-368   -64    
-192   0      
160    48     
96     416    
-144   -96    
336    144    
-288   128    
160    176    
-48    -64    
-64    192    
176    80     
-192   208    
192    32     
64     64     
0      64     
-160   -80    
-64    48     
80     16     
96     80     
-160   64     
224    128    
-144   112    
-64    -48    
-80    80     
128    448    
-32    -16    
-160   -128   
-80    -64    
-208   48     
128    176    
-32    -64    
-32    0      
-48    176    
-64    80     
0      80     
0      48     
144    16     
-272   -32    
272    128    
64     32     
-240   -64    
-64    32     
80     208    
-16    48     
-32    96     
128    256    
96     176    
-80    80     
16     256    
160    96     
48     64     
-64    192    
-96    240    
368    112    
-64    48     
-64    272    
128    64     
-128   352    
0      64     
-80    -48    
80     112    
32     144    
272    96     
-48    544    
112    208    
-208   -192   
-16    0      
80     160    
0      64     
-64    80     
48     80     
80     288    
-112   208    
-160   -64    
64     464    
32     -112   
-48    32     
80     208    
32     48     
32     112    
-160   -32    
96     96     
-96    -80    
160    176    
-192   -192   
32     -224   
96     192    
176    160    
-64    -64    
-32    160    
-32    112    
-32    64     
32     208    
0      112    
0      80     
-32    96     
96     112    
80     96     
48     128    
16     96     
160    96     
-368   16     
80     -112   
144    96     
96     144    
112    176    
-192   80     
32     112    
0      144    
48     48     
-112   96     
176    -32    
80     176    
-192   256    
-192   176    
-1344  1056   
-816   -912   
-208   -64    
304    64     
-80    16     
672    1344   
-912   -528   
800    80     
-224   -64    
256    -16    
-64    384    
224    -224   
-144   368    
224    -464   
64     0      
-64    32     
0      304    
-224   -224   
352    192    
-48    -1872  
432    272    
-16    160    
192    240    
-256   112    
160    144    
-192   160    
32     -224   
-16    -16    
-80    224    
0      272    
128    0      
-128   96     
32     -128   
96     96     
-128   -224   
160    208    
0      112    
112    -112   
240    16     
-48    -80    
288    160    
-272   192    
352    0      
-224   192    
112    -272   
144    240    
0      288    
208    -528   
-176   128    
208    -480   
144    368    
-224   -576   
208    32     
-64    16     
160    -16    
96     160    
-240   -256   
96     80     
368    416    
-336   32     
224    176    
96     144    
-96    -288   
160    288    
160    -272   
288    32     
-128   -1776  
-16    32     
48     -32    
-64    128    
80     128    
64     96     
176    192    
-80    160    
-96    160    
128    0      
32     288    
384    144    
400    432    
-448   -336   
320    48     
0      -176   
-64    128    
144    -208   
-16    144    
-80    -144   
128    624    
144    128    
-240   -144   
96     -192   
32     32     
224    128    
-16    -64    
-32    80     
0      -448   
0      -128   
176    -144   
-64    192    
96     -896   
-112   0      
32     -16    
160    48     
32     64     
48     208    
-16    128    
-16    -80    
176    128    
-16    128    
144    480    
80     160    
16     80     
-128   -128   
96     144    
96     -352   
96     48     
80     288    
48     96     
48     16     
-32    -128   
160    160    
-80    64     
64     48     
272    -144   
-16    176    
0      -16    
304    416    
-256   -112   
288    16     
-80    -192   
112    96     
64     80     
16     128    
96     -80    
-528   -32    
160    -2880  
32     -80    
0      -176   
-64    -16    
256    192    
-48    -256   
-16    192    
160    0      
16     144    
16     -144   
16     0      
96     224    
16     -928   
-144   80     
-432   32     
64     32     
16     -80    
-16    -320   
192    -208   
0      -1472  
96     -144   
0      144    
80     0      
0      -64    
272    -144   
-32    176    
-128   0      
112    32     
-96    -368   
176    112    
-128   -336   
448    -96    
48     -336   
-112   48     
-288   -256   
160    -48    
272    -1312  
16     32     
192    -432   
-96    96     
304    -48    
-48    288    
-96    -144   
176    0      
-256   -80    
128    -144   
80     -48    
48     -128   
-16    -96    
416    -16    
-288   144    
176    -560   
96     -256   
96     -352   
16     160    
32     -64    
32     176    
-208   -16    
112    -32    
128    48     
32     -224   
-48    112    
-96    144    
-640   -1696  
304    -112   
-736   -848   
624    -592   
-320   -64    
192    560    
-288   16     
96     288    
-144   96     
576    -32    
-224   -192   
16     -304   
-160   624    
384    -384   
-224   464    
0      -464   
-64    304    
-144   -304   
16     224    
240    -128   
-144   -144   
16     96     
-32    176    
240    -224   
-192   32     
80     -240   
-16    16     
-80    -48    
64     -176   
48     -112   
-992   -128   
-160   -96    
-528   -16    
16     -16    
192    -96    
32     -96    
368    80     
-96    160    
96     -128   
-144   64     
128    -48    
-176   32     
160    16     
-96    80     
-32    16     
-240   -128   
-48    112    
208    128    
-16    -368   
256    128    
-288   -544   
272    48     
-32    144    
112    -48    
112    144    
-80    -80    
-160   -96    
48     16     
-48    48     
256    16     
-336   32     
192    -160   
48     144    
-16    -192   
80     16     
128    -128   
-112   96     
0      80     
64     -192   
-192   -48    
64     -80    
-160   -80    
128    48     
-96    48     
64     48     
-64    32     
48     -128   
96     112    
96     144    
-64    16     
-448   -208   
-784   32     
48     32     
-848   480    
-32    128    
304    80     
16     160    
-48    -144   
256    -16    
-304   -96    
0      -80    
-1488  -32    
-48    112    
-96    16     
16     208    
-288   -112   
-176   128    
-144   -80    
-480   240    
160    128    
-720   -128   
64     48     
80     -240   
64     48     
160    16     
-16    64     
32     176    
-16    128    
-192   -240   
-64    -64    
-64    80     
112    368    
96     192    
-48    48     
-128   -48    
-288   96     
-64    -16    
-688   -352   
-16    112    
192    80     
-224   336    
-192   -144   
64     -16    
-160   -144   
16     160    
-32    -64    
-32    -32    
0      112    
-144   -656   
80     144    
-176   16     
-80    112    
96     48     
-80    -16    
-480   -112   
80     80     
-32    -96    
16     80     
-16    -80    
64     128    
32     208    
-192   -304   
48     -32    
-128   -128   
176    160    
-144   48     
80     -112   
-224   -144   
-16    96     
-1072  -80    
32     128    
-16    -16    
0      144    
32     -128   
48     -48    
-144   208    
-16    16     
624    576    
-448   96     
304    144    
-64    -80    
-96    -16    
16     48     
-192   -64    
-144   16     
-80    -32    
240    176    
-128   0      
320    -48    
48     80     
-112   80     
16     -96    
-240   272    
336    -144   
192    176    
-416   -96    
400    112    
-464   112    
160    -16    
96     16     
-80    112    
-704   -48    
-16    48     
48     128    
-112   -32    
0      160    
0      288    
48     32     
-96    0      
-16    32     
-16    -64    
-32    80     
-64    80     
-96    32     
80     16     
16     256    
-336   -48    
-144   96     
-1232  1040   
784    592    
-112   -768   
480    128    
-128   -320   
-320   -112   
464    -480   
-272   448    
160    -304   
-64    -176   
-80    -192   
-528   288    
496    -336   
-240   576    
-48    -400   
32     336    
48     -16    
-304   192    
64     -448   
160    464    
-224   16     
208    448    
-336   400    
48     -80    
128    -464   
128    208    
-32    -64    
144    240    
-288   -192   
336    -64    
-48    128    
208    -112   
-144   304    
-208   0      
240    112    
-288   -80    
320    320    
-32    96     
176    320    
-320   -144   
176    0      
-80    176    
32     -16    
-80    144    
48     64     
-80    64     
16     112    
-176   384    
224    176    
-80    176    
32     -96    
-80    96     
-80    -144   
-64    448    
-48    -128   
16     192    
-16    272    
128    336    
-112   0      
288    464    
-336   -64    
32     -224   
-96    64     
256    368    
-16    336    
-160   -176   
288    0      
32     176    
-64    352    
160    -64    
-32    144    
-112   -240   
192    112    
16     144    
0      128    
48     96     
0      -160   
-16    -176   
-176   -160   
-96    -176   
32     64     
176    352    
96     -64    
32     256    
64     48     
96     368    
112    288    
-112   32     
112    -80    
-192   0      
240    208    
-256   -64    
336    32     
-160   112    
16     112    
208    416    
-352   96     
16     16     
64     224    
-112   288    
32     -480   
80     160    
144    48     
32     96     
-192   -64    
288    368    
-96    592    
128    336    
-208   -272   
128    144    
-48    208    
176    160    
-224   112    
112    -144   
-128   112    
128    80     
128    128    
-144   -1184  
192    240    
32     -16    
-224   80     
-80    -16    
160    208    
208    160    
-144   240    
-32    -208   
160    192    
-48    -160   
160    112    
-176   80     
176    -320   
16     -48    
-96    -1584  
-160   -128   
288    240    
-112   -32    
288    48     
-240   -160   
-16    128    
16     96     
176    48     
32     176    
-16    0      
48     240    
112    96     
-32    -192   
160    64     
-48    -272   
64     80     
176    -1248  
-16    64     
16     48     
64     112    
96     -272   
48     16     
-16    192    
96     112    
0      96     
-384   -304   
288    112    
-80    208    
112    160    
-64    -96    
80     224    
-16    -80    
208    112    
-64    -160   
48     80     
160    64     
-96    192    
-32    -32    
96     80     
80     48     
-48    128    
-240   144    
80     -128   
192    48     
64     -304   
96     -16    
-64    -544   
-64    128    
80     80     
96     0      
-32    48     
112    64     
96     -80    
64     96     
16     128    
-96    48     
0      208    
-32    -240   
160    32     
32     -624   
128    256    
-160   -208   
288    128    
-128   -272   
176    144    
2544   2960   
-1296  1104   
-1056  -2400  
144    464    
-368   -368   
-208   16     
272    -320   
192    816    
112    -288   
-160   32     
-144   -160   
176    224    
80     112    
256    -736   
-176   112    
-16    -240   
208    272    
16     96     
0      48     
160    48     
-176   -512   
256    96     
-80    144    
240    48     
-240   -144   
240    112    
-32    -192   
224    48     
-160   96     
144    -32    
48     48     
0      -624   
0      32     
48     -144   
-64    -256   
96     -128   
192    -544   
64     64     
96     272    
-16    -224   
32     64     
32     -176   
112    192    
80     160    
-80    -80    
32     16     
128    -240   
160    -48    
-544   -64    
16     -432   
64     80     
96     -272   
64     -80    
16     -1040  
32     32     
160    160    
32     208    
-128   48     
192    80     
32     -160   
-144   -32    
80     -144   
48     -160   
-256   64     
64     -48    
0      -112   
160    -384   
-48    -192   
192    -192   
-64    -48    
32     -48    
128    32     
16     -224   
48     48     
16     -208   
-112   -208   
64     -160   
0      208    
-416   48     
224    -64    
-128   -448   
0      -416   
352    -32    
-176   -112   
-64    0      
144    -768   
48     -64    
208    -192   
-32    112    
80     64     
32     48     
16     80     
160    -48    
-192   -64    
96     -272   
-384   464    
48     80     
32     -96    
224    -272   
-64    -160   
80     -864   
-80    176    
128    -96    
0      64     
112    -80    
32     -48    
-112   48     
48     -176   
-128   -32    
0      -176   
-240   -96    
0      -208   
208    -240   
144    -368   
64     -64    
-16    -384   
0      -48    
32     -1344  
240    272    
-32    -128   
-16    -16    
-80    80     
208    -112   
0      64     
-16    192    
-208   16     
320    272    
-1104  48     
288    80     
-240   0      
48     -224   
-32    64     
0      -368   
240    144    
-144   32     
224    0      
-32    80     
48     16     
-176   -96    
112    -128   
144    112    
0      112    
-288   -48    
176    160    
-144   -32    
352    -144   
-160   16     
48     -800   
192    160    
-176   96     
160    80     
-480   0      
-16    -192   
-208   0      
112    -112   
-352   -80    
144    176    
-176   -192   
352    -176   
-144   144    
64     -496   
16     128    
128    -128   
224    16     
-64    64     
96     144    
-208   -240   
384    80     
96     208    
-224   -112   
144    -128   
-48    192    
-96    -160   
16     -240   
-144   176    
224    -80    
80     192    
-560   -288   
64     64     
-112   0      
-160   -64    
-96    16     
80     16     
-16    96     
144    48     
-304   -144   
336    -80    
-48    304    
-176   -208   
-64    160    
-16    -144   
432    -48    
-272   32     
-208   -64    
-272   -112   
-64    0      
64     80     
48     112    
2240   -2032  
-624   -672   
704    1072   
-752   400    
480    -192   
48     -144   
-512   432    
848    -208   
-384   1008   
240    -656   
256    272    
-496   -144   
208    576    
-80    -608   
-272   256    
-48    -96    
96     192    
-352   -560   
-368   -288   
-288   16     
208    -368   
-288   64     
48     -272   
-128   352    
-112   -496   
0      16     
224    400    
80     384    
-16    256    
304    80     
-416   -144   
64     -256   
-16    208    
-144   -64    
64     80     
-112   -160   
-16    48     
0      -208   
80     272    
-96    -144   
176    0      
-272   128    
80     -160   
-160   -32    
-48    0      
272    96     
-32    48     
-32    -32    
-528   -112   
-160   96     
48     -208   
0      48     
48     176    
80     208    
-80    64     
-32    16     
-48    128    
112    -16    
64     96     
-192   -272   
160    176    
-304   112    
48     -32    
-112   -16    
-144   272    
-16    144    
128    80     
16     192    
-208   -128   
128    32     
-112   48     
-32    112    
16     0      
0      96     
80     16     
176    368    
-416   -16    
224    80     
224    160    
32     -128   
-992   -96    
0      0      
-96    224    
-160   -32    
224    64     
-96    -112   
240    144    
-144   48     
-48    -32    
-80    32     
-112   48     
64     112    
-80    160    
-160   -96    
128    32     
-352   0      
-272   112    
64     32     
16     48     
32     -64    
48     128    
-80    80     
128    80     
32     176    
-144   160    
-64    -96    
224    -16    
208    352    
-192   144    
80     176    
-144   128    
-80    48     
80     -48    
32     80     
-48    112    
32     -16    
-32    -16    
-160   -16    
192    32     
-32    -32    
0      96     
-272   -128   
400    256    
-224   64     
-80    -48    
-80    48     
144    192    
-32    144    
48     -160   
-128   64     
-64    16     
352    80     
-160   272    
400    80     
-416   16     
-112   -16    
-144   -80    
64     256    
-32    -112   
16     128    
-160   176    
128    48     
0      -112   
-16    48     
-64    -16    
336    128    
-16    48     
-144   48     
16     -16    
-80    -16    
224    208    
-128   -16    
128    144    
-96    -64    
64     48     
-16    64     
32     48     
32     304    
-192   -32    
256    32     
-96    160    
96     -16    
112    32     
-144   128    
0      -80    
64     272    
-144   -48    
224    32     
48     48     
48     240    
-112   96     
-48    96     
48     48     
224    -48    
288    -32    
-64    352    
-288   -112   
128    256    
-160   112    
0      16     
160    48     
-64    96     
80     224    
-80    80     
-96    64     
336    -16    
-48    144    
160    112    
-16    144    
-96    112    
96     48     
-32    96     
112    112    
-32    112    
0      -48    
128    192    
-64    32     
-32    -304   
912    480    
-80    -192   
880    0      
-560   -80    
416    -1152  
-208   592    
368    880    
-464   480    
208    -352   
-448   128    
624    80     
-224   -32    
-240   80     
-16    176    
208    -96    
-48    128    
-208   -1072  
96     112    
16     -144   
160    -32    
-176   80     
352    64     
-192   272    
256    0      
-336   -176   
160    32     
-208   192    
288    48     
-16    96     
0      -352   
16     96     
48     -672   
128    144    
32     96     
96     112    
16     176    
160    160    
-96    0      
16     48     
64     32     
96     112    
32     80     
48     96     
48     32     
16     -80    
80     48     
0      -304   
144    16     
64     -336   
80     128    
-48    160    
64     272    
-48    -16    
32     96     
0      16     
240    96     
-80    48     
0      -256   
80     64     
80     -176   
48     48     
80     -496   
80     32     
96     -704   
-112   128    
-32    -224   
32     160    
-160   -112   
272    -80    
-64    128    
-64    224    
80     48     
0      -128   
96     128    
80     64     
-16    176    
-64    -336   
128    0      
96     -1584  
272    448    
-176   -288   
144    208    
-64    240    
384    112    
-240   -48    
224    192    
96     128    
-80    176    
48     0      
80     -288   
112    96     
0      32     
16     160    
96     -176   
48     64     
160    224    
-160   -96    
-16    -320   
-32    32     
144    304    
32     192    
-48    -32    
-48    -192   
128    96     
176    -336   
-96    80     
48     -80    
16     144    
144    16     
-16    96     
0      -208   
128    144    
-16    -16    
112    80     
-16    0      
0      -48    
176    176    
-16    -320   
112    112    
32     -192   
80     224    
32     -80    
80     112    
-96    -112   
160    144    
-96    -544   
272    208    
-160   352    
224    -256   
0      -960   
-160   16     
144    -608   
192    -160   
-144   -288   
192    80     
-16    -240   
208    48     
-208   160    
400    -144   
-256   -1328  
32     16     
144    -128   
-128   64     
192    16     
32     -240   
-1472  16     
-32    -224   
64     -224   
64     -480   
80     80     
64     -512   
32     -192   
-32    176    
176    -208   
160    16     
-128   -32    
336    -560   
-48    160    
-16    -272   
160    144    
-560   -16    
96     96     
0      -48    
144    -224   
32     -16    
64     -144   
128    32     
112    224    
0      -48    
128    -192   
-32    80     
64     -128   
-48    0      
-112   112    
32     80     
-16    0      
16     -272   
288    -144   
112    -224   
-48    -64    
-16    -288   
128    112    
64     -224   
-144   -128   
-48    -32    
0      192    
64     0      
0      96     
-80    -32    
96     -80    
-64    -80    
80     176    
-976   -48    
144    0      
-208   -80    
224    -80    
128    -256   
-432   -2112  
928    2240   
-592   -160   
384    -480   
-736   -704   
624    -16    
-592   -1008  
0      608    
592    464    
-224   -368   
-208   -128   
384    128    
-64    80     
48     -304   
336    32     
-32    -416   
128    96     
-336   96     
352    144    
-272   -64    
320    16     
-256   160    
416    -144   
-176   416    
48     -48    
-48    112    
-112   -224   
-976   80     
96     -320   
-96    112    
208    32     
-160   240    
128    -672   
-96    96     
-96    0      
208    -400   
16     -48    
48     80     
-144   32     
128    -80    
-544   -32    
224    -144   
-160   -32    
80     -192   
176    144    
-112   -48    
96     128    
-64    -608   
224    48     
-416   48     
256    -32    
-16    192    
-80    96     
96     -160   
-16    96     
-112   128    
192    -32    
-176   48     
144    -48    
48     224    
16     -448   
48     208    
-48    -368   
192    -16    
0      112    
-64    112    
-16    16     
96     16     
-16    96     
160    -32    
0      48     
-32    0      
112    64     
-176   -112   
112    0      
-160   -304   
32     160    
-304   -176   
-16    16     
-320   16     
-352   -96    
80     -64    
-176   48     
-48    256    
96     -64    
128    176    
-240   -96    
112    -208   
-624   -48    
-320   112    
256    -128   
48     96     
-128   144    
-160   -96    
0      -144   
-144   48     
-32    -32    
-224   96     
-192   112    
-48    112    
-96    64     
-800   -144   
192    -16    
-48    -96    
96     336    
-32    -48    
64     304    
-240   16     
112    112    
-304   -64    
80     16     
-96    48     
-352   0      
16     384    
-784   -32    
16     -32    
-16    -16    
48     128    
256    16     
-32    208    
80     80     
-128   112    
-80    -48    
-288   -80    
112    144    
192    -112   
-160   -96    
-512   -48    
112    64     
-336   -96    
-240   32     
80     0      
-32    96     
-256   -320   
-240   0      
304    64     
-160   -160   
80     -96    
-32    224    
64     96     
192    80     
-160   80     
-128   16     
-64    224    
192    160    
-16    48     
-352   -32    
-16    208    
-32    -96    
96     192    
-48    128    
-48    48     
80     32     
-16    -128   
80     48     
-16    240    
-96    -48    
16     160    
-112   192    
144    -64    
16     32     
-1040  -112   
32     64     
48     -64    
-32    80     
-96    128    
-352   192    
208    64     
128    -160   
224    144    
-96    176    
-160   192    
80     32     
-144   432    
-336   -64    
-48    32     
-176   -384   
240    176    
96     -208   
-176   208    
-80    -64    
32     144    
-80    32     
128    144    
160    32     
64     176    
-16    80     
-16    160    
-16    -80    
64     -16    
-32    272    
-64    -80    
160    304    
-976   -64    
128    64     
-80    64     
16     32     
48     208    
-800   -3760  
768    720    
-1136  -16    
-64    -416   
48     -832   
160    928    
-752   80     
832    384    
-560   384    
720    -320   
-224   544    
-192   -192   
464    512    
-176   -304   
288    320    
-320   -48    
336    144    
-288   -48    
192    16     
-208   -32    
144    16     
-448   -32    
288    -176   
-336   160    
368    -48    
112    -160   
-32    160    
0      112    
0      0      
-32    144    
176    0      
32     160    
-80    96     
48     80     
-48    32     
64     160    
-80    0      
160    128    
-112   80     
16     16     
48     160    
-16    112    
112    112    
-64    48     
0      16     
-80    112    
64     96     
80     208    
16     80     
-96    -144   
64     -48    
-112   176    
112    272    
0      32     
32     64     
0      64     
176    176    
-240   48     
-176   -64    
16     -144   
-64    -64    
144    176    
-96    -48    
48     112    
-64    112    
-32    16     
112    80     
48     96     
64     48     
32     64     
32     64     
96     128    
48     80     
-64    16     
192    80     
16     32     
80     -16    
-224   -224   
112    16     
192    144    
144    352    
-192   176    
-48    -368   
32     0      
0      144    
48     112    
96     96     
16     128    
-48    80     
112    224    
-64    16     
48     32     
-64    0      
96     176    
32     112    
32     96     
-96    -160   
160    -256   
-32    96     
160    112    
-96    -48    
32     96     
112    128    
-32    128    
0      32     
80     128    
0      144    
-16    32     
112    144    
-112   16     
64     64     
112    144    
-16    -16    
64     64     
64     256    
64     304    
48     32     
-48    -80    
-64    224    
208    160    
48     -80    
-64    192    
-48    160    
272    48     
-176   208    
-16    64     
96     80     
-96    -256   
480    144    
-352   -592   
384    144    
-112   208    
0      144    
272    80     
-160   112    
80     -48    
0      64     
0      144    
192    192    
-80    0      
32     -16    
0      320    
0      -384   
192    112    
-224   -1168  
272    80     
-16    176    
-144   224    
256    -208   
64     144    
96     80     
32     176    
-64    32     
16     -112   
48     64     
64     -16    
-32    80     
-80    -288   
16     240    
0      -192   
-32    96     
-32    -1296  
240    16     
112    -112   
128    128    
-80    128    
-160   64     
80     -112   
560    -160   
16     208    
-144   -48    
-256   208    
-96    -80    
48     16     
192    -240   
160    208    
-32    128    
32     -16    
176    -480   
144    192    
96     112    
48     288    
-80    -96    
48     80     
112    128    
0      -176   
192    176    
32     -640   
192    240    
-144   -80    
80     16     
-16    -240   
-32    272    
80     64     
-48    336    
64     -64    
96     272    
-32    -48    
-912   1296   
-1152  -848   
400    -432   
416    -272   
992    -240   
-1440  -320   
768    352    
384    1200   
-240   -256   
96     -224   
-496   -1472  
320    304    
-240   -176   
80     112    
64     112    
96     80     
48     -96    
0      -256   
128    400    
128    -48    
-128   80     
16     128    
0      288    
48     -128   
-80    -64    
80     -144   
128    -208   
0      -48    
112    96     
48     -544   
128    -112   
-16    -736   
80     -208   
-64    -1536  
208    -80    
-32    32     
144    -128   
-48    144    
16     -112   
112    -736   
-32    64     
64     16     
32     64     
112    -272   
-16    -208   
64     -320   
144    -208   
-96    -144   
320    -32    
-208   -16    
176    -1328  
-32    -48    
80     -256   
48     64     
96     -304   
176    48     
16     112    
64     0      
-32    0      
-80    -352   
-240   16     
64     -80    
64     96     
-16    -336   
176    -272   
96     -560   
-80    32     
80     -128   
32     48     
304    16     
-176   112    
-32    -48    
80     64     
-160   -80    
96     64     
-96    -192   
256    32     
-176   -48    
208    -240   
96     -48    
-64    -624   
240    -96    
32     -1088  
96     240    
-256   32     
-112   -160   
320    -336   
48     96     
-192   112    
128    16     
-304   -32    
144    32     
-544   0      
112    -32    
144    128    
-80    -176   
320    64     
-80    -224   
144    96     
64     -96    
0      80     
80     -16    
80     -16    
80     -16    
-112   -32    
-112   48     
144    -224   
-112   -112   
272    192    
-352   240    
288    -112   
-176   32     
64     -640   
144    256    
96     -496   
-64    224    
-80    32     
48     -288   
-48    -192   
-128   -32    
304    304    
64     112    
-144   -16    
-176   -16    
-1024  -96    
32     -496   
-1472  -288   
208    -432   
112    80     
64     -256   
80     128    
-112   -128   
16     0      
-304   32     
224    64     
-80    -224   
-80    64     
-208   -80    
192    128    
-128   -176   
16     -64    
-144   96     
352    16     
-112   256    
80     -352   
-32    -48    
-448   608    
80     -96    
-32    32     
0      0      
-208   16     
144    -80    
-224   -32    
144    -176   
-512   -112   
144    -144   
48     304    
-48    -512   
80     272    
208    0      
112    -48    
-128   -192   
32     -128   
-48    384    
-16    -128   
-240   -384   
160    -464   
320    608    
176    416    
-448   -16    
-832   -560   
112    144    
-464   -128   
-256   176    
160    -80    
32     112    
-176   176    
-224   -176   
-80    0      
-128   -64    
32     144    
-16    64     
-80    64     
128    96     
96     128    
-320   -240   
128    16     
-128   -16    
-64    -16    
144    208    
-176   288    
-176   -304   
-544   -112   
240    176    
-352   -80    
-96    160    
32     -96    
32     -16    
-304   1536   
-96    912    
-928   -208   
-48    -704   
-80    240    
-16    528    
224    1024   
-704   -400   
-608   -240   
-336   48     
112    48     
-336   32     
16     80     
-832   0      
48     -16    
-288   -272   
272    288    
-80    -192   
176    96     
-208   -192   
16     -288   
0      160    
-48    -48    
208    0      
-160   144    
272    160    
-176   48     
-288   176    
-368   -80    
32     0      
-128   64     
144    144    
-192   -96    
160    160    
0      0      
-64    -16    
128    272    
-16    336    
80     224    
-160   -160   
-48    32     
-16    -32    
48     144    
-144   112    
16     0      
-944   64     
96     64     
32     -128   
64     192    
64     240    
-112   -80    
48     64     
0      240    
32     128    
-176   -32    
-80    -224   
176    112    
-128   48     
-144   -80    
224    192    
-608   -272   
144    176    
-16    -32    
80     80     
0      80     
48     80     
-32    32     
112    32     
0      32     
48     80     
48     144    
32     96     
-16    80     
-96    -80    
64     128    
-224   0      
96     352    
-160   -240   
160    16     
0      352    
240    -144   
-32    288    
-128   240    
0      176    
48     80     
-96    -16    
-48    -128   
176    240    
-256   144    
32     0      
-192   -80    
128    80     
96     112    
-64    48     
-64    96     
0      48     
-128   -32    
240    304    
-96    112    
64     -128   
-160   64     
-32    32     
64     96     
-112   -32    
0      144    
-176   -80    
80     144    
-16    -32    
80     176    
-112   -32    
192    160    
-128   -16    
48     0      
-16    80     
-64    16     
64     64     
-128   64     
256    304    
-64    224    
48     -80    
-208   16     
0      112    
128    0      
48     16     
-16    256    
64     48     
448    800    
-400   -48    
224    -384   
-176   -48    
176    96     
96     144    
0      144    
-144   16     
16     144    
-80    -320   
144    -96    
-32    -160   
-80    -432   
256    -64    
-80    352    
144    -48    
-16    96     
32     192    
48     -144   
0      176    
-208   -240   
112    208    
32     16     
48     128    
64     128    
128    16     
-176   32     
288    272    
-160   80     
128    -64    
-208   -48    
80     336    
320    144    
-336   112    
272    176    
-32    256    
0      48     
64     -128   
80     -320   
336    256    
-160   64     
-112   64     
-64    -32    
256    624    
-48    32     
64     448    
-160   112    
48     48     
48     272    
64     128    
-112   -144   
64     352    
16     -208   
-48    -1264  
64     192    
32     -320   
48     288    
32     -32    
112    112    
32     544    
-240   144    
192    -64    
-48    48     
-80    -64    
192    144    
-192   -80    
128    80     
-208   -240   
96     -864   
48     192    
176    112    
-16    192    
128    560    
304    -96    
-1040  -64    
-112   -112   
16     464    
-112   -128   
432    384    
-224   480    
160    48     
-256   -112   
336    64     
32     16     
112    208    
-112   80     
208    160    
-64    64     
16     96     
-32    64     
32     16     
80     -80    
32     128    
144    -96    
-96    176    
-32    -160   
-96    -240   
208    32     
176    -400   
48     64     
-32    -2272  
0      16     
32     64     
96     32     
32     192    
48     96     
0      -320   
-32    160    
-64    -64    
64     16     
80     16     
112    176    
128    -16    
-80    -224   
64     48     
16     -528   
32     48     
160    -736   
-96    160    
336    288    
-416   80     
224    -64    
0      192    
0      48     
80     80     
32     176    
0      -32    
96     0      
48     112    
64     0      
144    -64    
-48    -64    
288    -128   
-160   160    
0      96     
128    160    
-16    -32    
80     96     
16     96     
32     48     
176    112    
-160   -128   
112    144    
0      -160   
176    176    
-112   32     
128    128    
112    -1168  
-32    272    
-64    -848   
240    112    
112    80     
-16    128    
-48    80     
16     -48    
-80    -16    
368    -448   
-256   32     
144    16     
-96    -16    
176    -448   
-128   160    
144    -608   
-16    80     
112    80     
-16    48     
128    -48    
16     320    
-176   16     
224    -272   
0      0      
128    32     
16     0      
144    -160   
-112   48     
112    -160   
160    96     
-128   0      
32     64     
-64    -160   
224    352    
80     -16    
-32    -32    
-192   112    
160    -112   
128    336    
208    -48    
-32    320    
64     0      
0      224    
32     -304   
-48    80     
256    0      
176    160    
-80    16     
0      -32    
272    128    
-16    -832   
144    160    
288    320    
-48    -640   
96     -176   
32     -1392  
320    -144   
-112   224    
224    -144   
16     48     
64     64     
48     -288   
112    48     
-48    -80    
80     80     
16     -64    
-32    -96    
-144   -64    
160    -736   
-48    -48    
112    -448   
-64    -160   
80     -560   
224    144    
0      0      
0      -48    
0      16     
-80    80     
80     112    
32     -352   
-112   -32    
-32    -144   
-800   -96    
-48    -368   
-112   112    
128    -336   
192    80     
48     -272   
16     -112   
128    -656   
-192   16     
32     -608   
-96    208    
352    -336   
-192   48     
-112   -240   
80     128    
-112   96     
32     -48    
-48    -160   
64     -208   
64     -128   
48     480    
128    -128   
-16    -848   
96     48     
-32    -208   
0      96     
-32    -256   
160    48     
176    -48    
32     96     
-48    -64    
112    -176   
16     -16    
112    -272   
-64    144    
208    64     
-80    288    
-176   -528   
272    176    
128    48     
96     80     
1264   -2016  
784    512    
544    480    
-448   208    
208    -384   
-256   -768   
144    16     
608    720    
-384   384    
-112   -912   
-32    -16    
96     -1312  
320    128    
-96    -416   
256    528    
-240   176    
32     -272   
-256   -16    
-128   -320   
-240   -96    
32     16     
176    176    
-144   176    
-1056  -64    
304    -32    
-176   -160   
480    -80    
144    48     
368    -400   
128    32     
-80    -64    
112    0      
-96    16     
512    160    
-48    304    
-48    -80    
-512   -272   
288    224    
-368   -32    
144    -64    
-304   256    
112    -64    
16     48     
224    -288   
-80    -64    
-256   -80    
224    -16    
-208   192    
-160   -176   
208    64     
-144   -240   
-16    64     
64     -192   
-96    32     
-240   -176   
304    208    
320    304    
32     -288   
-240   32     
144    -288   
-96    272    
-96    -32    
-16    240    
-48    224    
-160   -64    
16     176    
-96    32     
96     0      
48     0      
-1200  0      
64     160    
-1312  -256   
32     80     
80     -32    
-448   -48    
-64    -32    
-400   -128   
80     -112   
48     -176   
-160   -16    
368    -240   
-128   240    
16     -112   
96     192    
-16    -48    
-48    32     
-208   -96    
-128   -80    
208    160    
-112   16     
-32    32     
-144   64     
-48    -32    
-960   112    
-96    -96    
80     32     
-192   -48    
16     208    
-224   112    
192    -240   
-112   112    
0      -176   
128    64     
-144   -96    
-16    80     
-32    64     
-32    -80    
80     64     
-16    496    
-48    304    
-256   -176   
-96    -112   
-224   -96    
240    128    
-80    16     
-64    192    
112    80     
-48    80     
-64    -16    
-48    96     
96     112    
16     64     
128    96     
-144   -32    
64     0      
-528   208    
480    720    
-64    208    
224    48     
-528   32     
448    144    
-176   32     
-208   64     
64     32     
80     160    
-144   -48    
64     0      
-160   -32    
-176   80     
96     80     
-160   -48    
48     192    
-1168  64     
48     -96    
-96    -240   
-32    -224   
-96    -112   
80     256    
48     128    
96     192    
-48    32     
-80    -64    
-112   -16    
-16    112    
-16    -272   
144    64     
-272   80     
144    80     
-192   128    
288    144    
32     208    
-128   -128   
128    64     
-80    64     
-144   16     
-144   -16    
64     -32    
-48    64     
0      -64    
-208   144    
-336   -128   
-32    304    
-704   -64    
288    240    
64     -160   
112    176    
-64    32     
-64    -192   
128    176    
-240   96     
48     128    
-144   112    
32     16     
-16    -176   
128    -32    
160    -144   
-144   16     
-320   64     
-176   256    
-96    144    
32     96     
32     -48    
112    -80    
240    288    
-288   208    
80     48     
-80    192    
0      0      
-304   -528   
464    -512   
-624   400    
576    144    
-896   576    
0      -672   
352    -96    
-16    208    
64     208    
-432   -496   
224    288    
80     -32    
176    192    
-240   -112   
160    128    
-80    48     
32     96     
-192   176    
96     96     
-240   -96    
112    -64    
-96    272    
112    0      
-176   176    
176    -192   
-96    160    
128    0      
-32    256    
-16    -16    
-48    64     
16     -96    
48     304    
-144   -160   
-16    128    
16     16     
240    272    
-160   128    
128    16     
-128   96     
160    96     
-16    80     
0      16     
48     112    
32     160    
16     80     
80     -32    
-80    192    
-32    -240   
304    256    
-256   224    
272    32     
16     96     
-32    112    
-48    48     
16     -80    
80     48     
32     192    
-64    32     
176    112    
-112   112    
0      -64    
96     192    
-144   32     
96     32     
112    80     
-144   144    
80     48     
0      128    
-32    0      
160    80     
0      112    
-48    224    
-96    -32    
32     -48    
16     192    
-176   -144   
304    160    
-288   128    
-16    -1072  
288    -16    
-64    16     
48     208    
-80    -80    
144    -144   
-16    160    
-160   -112   
96     -32    
-144   -16    
0      240    
-16    96     
128    192    
-48    112    
80     32     
64     112    
-32    96     
224    128    
-176   160    
240    416    
-32    128    
0      112    
-80    96     
32     -64    
0      208    
32     320    
96     32     
-32    160    
32     224    
240    256    
-160   -272   
16     48     
128    176    
32     32     
-16    128    
112    16     
-48    -64    
80     272    
-128   208    
144    192    
-16    -64    
96     -288   
-160   -160   
128    16     
-48    16     
16     -160   
-160   -272   
272    -2768  
-240   96     
128    176    
144    -80    
48     48     
-16    80     
32     -144   
32     80     
176    16     
32     368    
32     96     
112    304    
-208   144    
192    -256   
-112   176    
208    -464   
0      112    
-16    -608   
-32    -48    
48     -272   
32     -448   
48     320    
224    560    
-96    -272   
80     192    
0      16     
176    0      
-80    80     
-144   -448   
80     -80    
-32    -208   
80     16     
-16    -1184  
80     320    
336    320    
-112   16     
-48    -96    
0      144    
-128   144    
-224   -32    
240    320    
-288   128    
16     80     
-32    -400   
400    144    
160    -80    
192    32     
-192   -1456  
16     -16    
64     -624   
240    160    
224    128    
-112   192    
-240   16     
32     -96    
128    80     
256    -688   
-48    208    
-96    -176   
144    0      
112    -48    
0      128    
48     -368   
-16    96     
176    128    
80     160    
96     -16    
64     224    
-256   -64    
224    -528   
-144   224    
192    96     
-80    208    
-1360  352    
-528   -912   
-208   -496   
336    80     
160    -176   
208    288    
-432   208    
-272   -592   
288    432    
-864   -528   
1152   320    
-448   368    
240    336    
208    -80    
-16    -64    
80     -32    
96     576    
32     48     
192    112    
352    -544   
128    -896   
208    -64    
-112   -1360  
128    -112   
416    -464   
-160   -48    
-208   0      
432    -640   
-16    -128   
64     -2224  
384    -96    
-160   80     
176    -64    
-48    416    
64     -304   
-16    -496   
112    -112   
160    288    
-224   128    
-128   -64    
176    -256   
80     -208   
256    -336   
16     -112   
48     -624   
128    80     
-96    -272   
-80    -48    
80     -144   
-48    -176   
192    -96    
96     64     
224    144    
-208   -112   
-144   -128   
112    32     
-368   -112   
16     -480   
464    272    
-272   -64    
256    176    
-192   -176   
528    -320   
-400   -752   
320    192    
32     48     
32     -32    
-80    -32    
112    -80    
0      -48    
16     -16    
-96    80     
192    64     
-16    -48    
112    -224   
-16    -176   
-16    -976   
-288   -176   
-64    -448   
-48    224    
368    144    
-272   -32    
304    16     
-112   -32    
-96    -176   
208    16     
-320   16     
112    -112   
-1312  96     
-96    -192   
-48    -128   
64     -272   
-176   -32    
0      -528   
64     -128   
48     -272   
-64    -112   
-192   -208   
144    112    
48     0      
208    128    
-432   0      
64     -32    
16     0      
-16    64     
-416   160    
48     16     
-128   -160   
80     -816   
-304   -192   
224    -624   
464    528    
-208   144    
80     -192   
-16    -208   
96     -80    
-144   -176   
224    -112   
-176   176    
128    416    
-448   -16    
16     -320   
80     -224   
112    -704   
128    16     
0      -1600  
-48    64     
368    128    
-256   -192   
80     0      
96     80     
0      144    
80     224    
-224   -112   
16     -208   
-48    -96    
224    -240   
224    112    
-96    -16    
-32    80     
-176   80     
32     16     
-48    -192   
96     -80    
-80    128    
176    32     
-160   -208   
112    80     
-240   64     
256    -112   
-176   96     
96     -144   
48     80     
64     -272   
-32    208    
-96    -16    
112    -48    
-128   256    
-160   144    
128    -64    
96     -160   
-32    240    
-48    -96    
-176   144    
16     0      
48     -16    
160    -16    
-64    32     
-304   -288   
-192   128    
-80    -32    
64     128    
144    -144   
-320   80     
-224   112    
0      -80    
-208   -80    
224    -80    
32     144    
-32    -64    
80     112    
-192   -192   
80     112    
-288   -272   
-128   -48    
240    160    
-112   16     
-80    128    
-48    -64    
-176   64     
-336   48     
-32    112    
176    64     
-48    80     
-208   -272   
208    176    
-192   -144   
-560   -912   
-336   32     
-32    -160   
32     -272   
-544   -272   
96     720    
-720   -1040  
-80    496    
320    -400   
176    800    
-2064  -496   
48     144    
-128   224    
400    -80    
-336   176    
304    -288   
-224   640    
144    -512   
-336   480    
80     -352   
-240   240    
208    -160   
-256   336    
208    -256   
-240   144    
-128   -128   
-432   224    
-48    -304   
-80    480    
272    -176   
16     160    
-144   -32    
-80    80     
64     80     
16     160    
32     32     
32     -64    
-16    256    
-16    -128   
-160   -32    
-192   -128   
80     240    
-432   -16    
64     240    
-240   -304   
32     16     
-32    112    
128    240    
-16    -64    
-112   112    
-48    32     
96     80     
-32    144    
-32    144    
-64    0      
-160   -16    
48     160    
-864   -192   
128    128    
-112   64     
-16    -16    
160    96     
-48    176    
-16    64     
-80    -80    
112    64     
-288   64     
96     64     
-64    48     
144    -64    
-112   -16    
-160   128    
-256   -16    
-80    -32    
192    16     
-96    160    
-64    32     
144    112    
-272   144    
96     -16    
0      16     
-48    208    
16     96     
64     -112   
-160   48     
-176   80     
16     64     
-240   -144   
384    352    
-320   128    
80     -32    
80     144    
-96    160    
16     112    
-16    80     
272    288    
-48    144    
-80    -16    
-112   -96    
-16    80     
-160   -160   
304    288    
96     32     
64     16     
-160   128    
48     -48    
0      16     
0      16     
-176   96     
80     112    
128    176    
-128   -32    
32     64     
-144   16     
32     176    
48     96     
-64    32     
-176   -112   
32     192    
32     32     
272    80     
-80    96     
-16    48     
16     160    
-80    -64    
272    80     
-192   -32    
144    224    
-48    112    
128    -48    
-400   -144   
352    16     
16     320    
112    112    
0      96     
-80    96     
-48    -48    
48     -112   
176    32     
-256   -176   
288    144    
-48    160    
-32    64     
32     -64    
80     96     
-192   112    
112    -48    
-112   -16    
112    160    
80     96     
-16    112    
0      32     
80     80     
144    16     
-96    48     
0      176    
-32    -48    
96     176    
-256   -112   
224    -80    
-224   0      
96     144    
-48    80     
-32    64     
16     160    
112    176    
-128   -16    
80     160    
48     208    
80     -32    
176    176    
-112   80     
224    80     
-288   48     
128    80     
128    96     
16     -752   
-48    96     
-32    -64    
192    112    
32     208    
16     96     
-64    -32    
144    192    
208    64     
-48    -16    
0      128    
-112   112    
272    -16    
-432   192    
224    -80    
80     -1168  
-112   96     
288    0      
-112   -48    
176    96     
96     208    
-48    64     
-336   -144   
-704   1456   
-752   528    
192    -64    
48     224    
144    352    
-416   -416   
-96    272    
80     -144   
912    -400   
-880   112    
192    -96    
432    208    
-176   272    
16     -16    
160    272    
-288   0      
144    160    
48     -112   
272    0      
-288   64     
176    -176   
192    288    
-32    -96    
-32    -16    
144    -1152  
96     240    
-32    64     
96     416    
-256   -112   
224    256    
-16    96     
64     48     
-16    -48    
80     80     
160    80     
96     16     
-16    560    
288    -80    
-208   0      
-288   -352   
208    80     
16     192    
0      304    
-32    -96    
128    48     
-112   -144   
304    416    
-96    -16    
32     64     
32     192    
16     -144   
32     80     
-112   -240   
112    112    
128    -176   
64     224    
112    -320   
64     80     
-176   -160   
-32    144    
112    80     
-32    224    
32     0      
160    128    
32     128    
32     16     
112    128    
80     -400   
-48    96     
16     -64    
48     160    
80     -32    
80     192    
-32    32     
-16    64     
64     64     
16     96     
96     80     
-64    -352   
48     -240   
272    -192   
-48    144    
-16    -576   
304    368    
64     -16    
112    -96    
64     -320   
-128   -352   
144    208    
32     144    
144    96     
-32    0      
64     32     
80     -32    
96     -32    
-48    -80    
96     448    
192    -32    
16     32     
-96    -384   
16     80     
288    -64    
-80    208    
144    176    
-112   -128   
176    -144   
-176   -2720  
192    -1424  
128    96     
-80    80     
176    -144   
-128   224    
304    -48    
-256   128    
176    64     
144    192    
-64    16     
304    400    
-208   -96    
0      -624   
-96    -96    
-880   -144   
192    -256   
144    80     
-48    -256   
400    -288   
-208   -1776  
-32    -144   
160    96     
176    16     
-32    176    
80     64     
112    -128   
-64    16     
64     -144   
0      208    
32     -32    
32     -48    
-304   -112   
272    -48    
64     -80    
64     -400   
192    32     
-128   64     
112    64     
48     -192   
128    -256   
-96    -208   
0      160    
304    32     
-192   -80    
48     -80    
-16    -224   
-256   -16    
80     -48    
0      -80    
80     -144   
-128   160    
96     -1792  
128    -128   
48     -48    
128    16     
-16    -352   
112    -32    
16     192    
64     -144   
-256   16     
0      0      
-144   32     
496    -176   
96     128    
48     -16    
-208   -48    
32     -352   
80     -192   
-32    -960   
80     80     
176    -176   
208    48     
-272   64     
112    -48    
-208   -16    
112    -144   
256    176    
-112   48     
-304   -48    
-80    16     
0      80     
176    -112   
0      80     
192    -48    
32     224    
-144   -160   
304    240    
-320   16     
272    -32    
0      0      
-1056  -2976  
448    -160   
224    336    
-1008  -768   
496    240    
-656   -32    
544    1088   
-368   -480   
112    320    
288    -320   
-144   368    
432    -432   
-208   736    
240    -448   
-208   464    
80     -464   
208    240    
-192   -304   
-112   128    
96     -48    
-192   160    
64     -656   
-16    208    
96     -608   
96     -160   
-80    -1392  
192    -288   
-160   272    
304    -16    
-480   0      
176    -160   
-256   80     
160    -32    
-96    208    
48     -48    
48     0      
-96    -384   
112    160    
-80    0      
256    176    
-160   0      
-16    -80    
-400   16     
160    -80    
0      96     
64     -112   
-80    80     
48     -16    
32     192    
-32    -256   
-256   16     
-48    -128   
160    160    
96     -176   
16     0      
-144   -16    
-1376  96     
-112   -128   
80     112    
-96    64     
-16    -32    
-96    -16    
32     -128   
-192   -32    
16     -80    
-160   32     
-400   -160   
0      160    
-432   -304   
80     80     
-128   -16    
96     -16    
-16    176    
-128   160    
16     -176   
-96    -96    
96     -160   
192    144    
-240   -16    
304    80     
-144   224    
-144   -176   
224    144    
-560   -688   
-128   144    
160    160    
-304   -144   
48     -128   
-16    240    
-224   96     
-960   -32    
-48    96     
96     128    
112    64     
-224   -80    
16     32     
-32    -272   
32     48     
48     16     
-80    -160   
16     -16    
-144   -144   
0      48     
-112   -80    
-80    64     
-432   96     
224    416    
-912   -64    
16     -144   
-128   -192   
64     144    
0      -144   
-80    -16    
48     64     
-32    64     
48     48     
-176   -160   
-64    -224   
-32    -48    
-64    -96    
192    160    
-48    192    
-496   -128   
-160   -176   
-96    0      
128    256    
256    -48    
-208   48     
-80    16     
-32    -64    
32     16     
-48    0      
48     112    
0      128    
-32    80     
-128   -112   
32     -32    
-432   0      
192    144    
-64    -32    
112    208    
-80    -144   
-96    -16    
0      160    
32     -48    
112    80     
96     384    
-144   192    
16     128    
-80    -96    
112    32     
-48    144    
-304   -80    
96     48     
-1072  -96    
128    224    
-304   64     
112    32     
240    192    
-112   128    
112    16     
-32    16     
112    80     
-160   80     
-112   -64    
288    192    
-256   128    
80     -192   
240    208    
-224   -96    
192    -544   
-80    128    
-80    224    
64     48     
-64    128    
-64    -16    
96     -32    
96     160    
-96    64     
144    128    
-176   48     
112    176    
-272   -128   
16     208    
-368   -160   
64     352    
-32    80     
80     112    
-128   112    
-32    0      
48     16     
-176   224    
-80    128    
-16    64     
-336   160    
-96    -160   
32     160    
-304   -16    
1600   144    
-560   256    
272    768    
0      576    
768    -752   
16     528    
-864   96     
688    1456   
-624   320    
416    176    
-48    -16    
-224   -272   
-128   160    
448    -80    
-192   288    
-288   144    
-32    112    
16     -304   
112    208    
48     64     
-240   160    
304    192    
-208   224    
320    -176   
-240   80     
160    -48    
80     464    
-240   96     
240    160    
-192   -32    
304    96     
-16    64     
0      160    
-80    160    
80     48     
128    112    
-80    96     
64     -32    
-48    32     
-80    16     
112    32     
48     192    
16     0      
16     -144   
-144   -32    
128    80     
80     112    
-64    176    
-16    112    
64     224    
64     -16    
64     80     
48     96     
-80    208    
128    -48    
-16    -16    
240    240    
-176   64     
256    0      
0      192    
-160   160    
224    48     
64     64     
112    80     
-240   224    
16     -96    
192    -32    
-32    176    
-16    160    
144    48     
-32    -16    
64     96     
-64    96     
32     144    
48     176    
-32    416    
112    96     
112    80     
96     -48    
64     96     
0      176    
-64    32     
160    -144   
-64    -96    
64     176    
-208   -80    
96     272    
-160   -32    
208    -464   
224    -32    
-64    -3024  
-16    96     
112    112    
-112   0      
-48    -416   
32     -176   
-128   272    
48     384    
16     16     
80     48     
-96    48     
160    144    
80     0      
-112   -160   
32     -32    
64     -768   
-48    144    
48     160    
32     16     
-48    128    
-16    192    
208    64     
-96    96     
112    288    
-96    16     
64     80     
-32    112    
128    -48    
16     -208   
-96    112    
304    -80    
16     272    
272    -2288  
-272   224    
128    112    
368    208    
-304   -176   
144    256    
-16    0      
112    48     
-224   -16    
192    64     
0      -32    
-240   -336   
-144   -208   
256    -112   
32     160    
256    -1344  
96     304    
-192   240    
144    48     
80     64     
-144   128    
304    -80    
-32    0      
64     -16    
256    560    
-80    144    
160    -64    
-192   112    
160    -224   
128    176    
16     -816   
16     192    
176    -480   
-32    240    
112    -64    
-48    96     
16     -96    
48     208    
-32    0      
192    -64    
-64    96     
112    -144   
48     224    
-160   -352   
208    80     
-48    -16    
-64    112    
128    -336   
64     224    
-96    16     
64     176    
-32    16     
16     80     
16     128    
32     -272   
176    64     
48     -304   
16     96     
144    -80    
64     0      
112    64     
-16    272    
-64    -1232  
224    208    
-96    288    
0      32     
80     -16    
128    96     
144    208    
80     -240   
16     208    
0      144    
32     144    
-16    -160   
144    0      
112    -64    
2192   3744   
-1616  -448   
-176   240    
192    1088   
-112   -656   
400    400    
-880   -112   
784    176    
160    -176   
-160   -32    
-576   -224   
288    112    
256    -80    
192    240    
-160   -400   
-80    -32    
192    -32    
112    -128   
32     -160   
112    -768   
-320   -48    
-1024  -48    
128    -48    
64     32     
80     -144   
160    -192   
-112   -448   
32     -224   
0      96     
160    -32    
80     64     
64     32     
64     -144   
0      112    
112    -576   
48     64     
-144   0      
96     64     
96     32     
64     -144   
96     -144   
112    -528   
80     -16    
208    -960   
-160   48     
96     -144   
64     -128   
336    368    
-128   112    
128    -112   
-16    -64    
-48    -16    
128    -192   
-160   -144   
32     -64    
32     16     
32     -96    
16     -16    
96     -256   
0      -192   
272    -16    
-16    144    
64     32     
128    176    
0      -32    
0      64     
-256   32     
208    -48    
-752   -48    
208    448    
-144   -48    
160    -192   
112    -208   
176    -16    
-160   48     
80     -528   
0      0      
256    -112   
-128   48     
-80    64     
288    -176   
-160   96     
64     -80    
-80    32     
-48    -304   
-672   -48    
144    -288   
-448   80     
0      -432   
96     224    
0      -576   
80     16     
32     16     
80     96     
-144   -32    
16     -64    
-80    -16    
160    64     
-288   -80    
16     -160   
-464   16     
80     -112   
-912   0      
-32    -112   
16     48     
112    -784   
16     16     
80     -224   
48     64     
-32    48     
144    80     
-176   -32    
96     16     
-464   -80    
224    64     
-160   16     
96     0      
-240   96     
112    -256   
-112   -16    
176    -320   
64     128    
-288   96     
-96    -48    
0      144    
-64    -32    
-272   -384   
192    176    
-368   144    
432    96     
-288   16     
176    32     
-320   80     
224    -176   
-80    208    
32     -224   
224    128    
-224   112    
272    -192   
-112   16     
128    80     
-208   16     
48     -64    
32     80     
48     16     
-128   0      
544    208    
-944   224    
416    -480   
-16    176    
-464   -240   
80     -112   
-208   48     
368    176    
-48    -256   
64     64     
-128   48     
112    64     
-128   304    
-176   -128   
96     -48    
272    -192   
160    224    
-128   -160   
-112   32     
-320   0      
-448   0      
48     144    
-1088  144    
48     -192   
64     96     
-80    176    
144    96     
-64    -160   
64     -64    
-128   0      
96     16     
-128   48     
32     -80    
0      64     
-16    80     
0      80     
-176   80     
-48    0      
-144   80     
-96    80     
-112   16     
-1440  -80    
-112   112    
112    -112   
64     0      
144    16     
-112   160    
-240   -224   
-32    304    
-240   80     
176    96     
-96    32     
816    1104   
512    1200   
-992   -336   
64     -160   
-432   -2048  
1168   80     
-976   -112   
1104   -304   
-784   384    
400    128    
-112   -128   
-400   -16    
64     96     
400    -240   
-288   144    
80     -64    
96     96     
-288   112    
176    80     
-176   32     
-96    336    
-304   -64    
-32    160    
16     -144   
48     -16    
48     208    
0      -144   
-32    144    
-128   -160   
0      16     
-272   48     
128    224    
-48    0      
-96    96     
-112   -144   
-80    -272   
-64    -208   
-48    272    
-128   0      
32     64     
32     80     
-64    128    
80     -32    
-144   0      
16     80     
112    128    
-16    16     
-144   -80    
144    96     
-288   32     
144    48     
-80    112    
-32    32     
-288   96     
-128   144    
128    128    
-112   16     
144    48     
-64    48     
80     128    
-96    -32    
144    112    
-192   48     
112    16     
-128   128    
-48    352    
96     0      
256    256    
-944   -208   
112    112    
-208   16     
48     48     
48     16     
80     112    
-128   96     
16     -16    
0      192    
-64    32     
160    32     
-128   16     
112    0      
-240   112    
-224   -96    
48     -240   
-96    160    
-16    80     
64     224    
-64    96     
-144   -32    
256    -48    
-144   80     
96     -96    
80     176    
-128   80     
48     208    
-144   16     
-64    -144   
144    64     
128    256    
0      80     
0      112    
-48    16     
240    144    
48     32     
-48    272    
-144   144    
64     80     
-48    0      
32     48     
-112   112    
176    80     
-208   16     
112    16     
176    272    
-64    176    
-96    16     
64     160    
320    736    
32     160    
0      -96    
-304   16     
112    128    
416    16     
-176   192    
-80    0      
32     336    
-224   -224   
-64    -80    
-16    32     
-32    48     
128    32     
64     96     
-96    -32    
-176   64     
-32    80     
112    -32    
128    0      
-192   48     
112    64     
-144   32     
208    144    
-32    48     
64     112    
272    224    
-208   256    
320    96     
16     176    
-80    -64    
16     16     
64     64     
80     112    
64     80     
-32    64     
80     64     
-160   -32    
208    192    
16     64     
-80    80     
32     32     
208    160    
-48    144    
16     192    
-32    64     
80     192    
-16    0      
16     144    
48     -720   
-64    128    
160    112    
-128   -96    
-16    160    
64     64     
64     96     
368    -384   
96     272    
-16    176    
-96    256    
16     128    
272    160    
64     208    
16     -16    
-32    112    
-32    32     
80     288    
-32    -16    
64     -144   
144    80     
240    -1008  
80     48     
32     192    
-16    112    
32     96     
16     -32    
256    -288   
16     160    
16     208    
80     144    
-176   -32    
-480   2048   
896    128    
-112   -368   
-320   -848   
-32    -608   
-608   -192   
1184   720    
-944   -416   
304    176    
-336   -160   
96     -112   
224    288    
-16    32     
-16    32     
112    16     
-160   320    
400    208    
-224   -192   
-144   -288   
0      -608   
288    -64    
112    -2128  
-48    32     
96     160    
-144   16     
288    96     
272    160    
80     128    
-96    112    
304    80     
-176   144    
256    -48    
48     -128   
-16    160    
64     -144   
0      224    
160    -1488  
-80    144    
80     176    
80     64     
64     -32    
32     80     
176    80     
32     208    
128    96     
-144   -160   
128    288    
80     64     
112    96     
0      -288   
32     -48    
112    -1808  
-16    240    
48     -512   
32     48     
64     32     
-16    16     
160    -176   
32     272    
-16    256    
176    -48    
-80    96     
112    48     
48     -112   
80     -144   
-32    208    
64     -256   
80     128    
-80    -96    
80     112    
16     48     
16     80     
64     80     
80     192    
16     176    
0      -384   
128    208    
-48    -224   
0      32     
48     -240   
0      144    
176    64     
16     112    
304    -112   
-160   80     
128    16     
-176   -32    
0      -288   
256    -64    
32     192    
-32    -432   
-48    -16    
0      -288   
160    144    
112    16     
0      64     
64     -48    
-64    128    
112    -448   
0      16     
112    112    
112    -112   
32     112    
-80    -240   
-32    -912   
96     -112   
96     256    
160    160    
-80    -16    
288    -16    
-192   -16    
176    -336   
-64    64     
176    32     
32     -384   
0      112    
-48    -672   
-80    80     
-528   48     
128    -400   
16     -16    
-16    96     
272    96     
0      -2416  
-48    32     
16     176    
272    64     
0      0      
16     96     
176    -224   
112    160    
48     -112   
160    -112   
-480   16     
128    144    
-128   -80    
256    -368   
96     64     
-112   -256   
-64    -320   
64     -560   
48     -112   
176    -112   
-160   32     
128    -336   
-336   -272   
480    96     
-240   240    
-144   128    
16     0      
0      -192   
272    -80    
-32    -32    
144    32     
-64    -48    
64     -144   
304    -272   
-352   16     
-32    -48    
128    224    
96     -112   
272    304    
-96    -48    
-192   96     
256    -288   
-304   64     
96     16     
-96    -160   
-32    -64    
192    -64    
96     -256   
160    -272   
-368   -1296  
-16    -16    
288    192    
160    160    
-208   -96    
-64    -112   
-64    -80    
192    32     
80     32     
-16    -144   
-1456  -192   
160    -256   
-304   -64    
112    -640   
-32    0      
32     -1520  
176    -176   
-16    240    
192    16     
-288   -16    
192    -176   
-80    192    
192    -192   
-32    112    
-16    -128   
-1280  -96    
624    1440   
-208   304    
752    -560   
-544   -528   
608    -128   
-176   448    
64     -208   
720    192    
-336   80     
48     -96    
-192   -16    
96     -48    
-128   -128   
256    -128   
-112   96     
112    -32    
-16    80     
96     0      
64     160    
16     -672   
32     80     
16     -48    
80     160    
48     64     
48     -16    
-368   16     
128    32     
-48    32     
240    -80    
-272   16     
128    -144   
-80    160    
112    -384   
0      64     
64     -208   
-208   -160   
112    64     
-32    256    
128    -64    
-32    -80    
-96    96     
32     112    
16     32     
80     -112   
0      96     
112    -32    
-16    80     
128    -304   
-160   224    
-64    -160   
-512   160    
-96    -96    
-176   -112   
-224   176    
32     48     
-48    -48    
128    48     
144    32     
80     16     
-208   32     
224    -112   
-64    176    
-160   -80    
160    128    
-208   -80    
-128   -80    
-160   0      
0      -64    
160    96     
-688   128    
0      0      
-352   -32    
-112   -32    
16     -416   
-128   -48    
-544   256    
-64    64     
144    -160   
80     -48    
32     224    
-272   64     
144    0      
64     240    
-336   96     
240    64     
-160   -352   
-448   -32    
-288   -32    
80     96     
-96    112    
-96    64     
32     64     
-96    -112   
-320   -128   
256    -16    
-48    208    
-144   32     
224    64     
-112   80     
-96    -80    
96     112    
-304   112    
64     160    
-80    -208   
160    96     
-176   -32    
192    144    
-32    -144   
-144   -16    
64     64     
16     -32    
-144   64     
32     144    
-112   16     
96     -48    
-288   32     
-48    80     
64     160    
-416   -80    
128    240    
-80    -80    
-16    -16    
-208   -176   
64     16     
208    0      
-208   0      
0      240    
-144   -80    
192    64     
144    32     
-32    128    
48     32     
-32    192    
240    160    
48     288    
-32    -112   
-80    -16    
-192   48     
96     64     
192    32     
-112   32     
-80    64     
-112   -112   
-48    -32    
-16    128    
0      96     
80     -320   
-160   112    
-96    32     
128    128    
-336   64     
80     128    
-32    144    
-128   -32    
16     80     
-64    -304   
-48    32     
144    -160   
0      48     
-32    288    
16     240    
-128   32     
16     80     
-160   80     
80     80     
-288   -128   
-272   -32    
112    432    
-32    -16    
32     64     
48     160    
-48    -64    
-80    96     
32     48     
-80    176    
-48    -16    
-96    32     
128    0      
-96    -208   
0      336    
112    32     
-432   -80    
-48    160    
320    -80    
-48    160    
-240   -16    
256    0      
-80    64     
176    96     
-128   64     
80     32     
-96    64     
64     144    
-208   -32    
0      -96    
96     128    
-16    128    
-64    288    
96     480    
-128   1392   
704    80     
-416   -80    
96     -224   
208    128    
-448   112    
432    240    
-112   -144   
-80    64     
-32    -64    
224    224    
-48    80     
-176   -160   
192    64     
32     144    
-48    240    
160    -32    
-144   -16    
128    64     
16     240    
128    80     
-96    176    
-80    -144   
48     96     
48     288    
208    16     
-160   48     
96     -64    
-112   -80    
32     128    
80     112    
32     48     
64     64     
64     -64    
-176   -64    
-48    -96    
-192   -416   
160    192    
320    704    
-272   -96    
64     48     
144    288    
-80    -48    
-16    64     
192    256    
16     112    
-112   64     
32     128    
96     32     
-48    240    
-16    -48    
112    304    
-80    -128   
48     80     
16     16     
368    752    
-320   0      
-448   96     
224    -144   
-144   128    
16     16     
-64    240    
80     0      
80     0      
32     144    
0      80     
32     128    
-96    -208   
48     -160   
16     96     
64     64     
48     96     
32     32     
304    -112   
-48    -240   
-32    -224   
144    128    
-272   112    
48     -80    
-96    144    
160    -16    
32     80     
160    -32    
16     -96    
48     224    
-176   -2528  
80     -64    
96     240    
-32    192    
128    16     
-64    176    
112    80     
112    112    
-80    0      
0      48     
48     48     
0      128    
144    16     
0      -192   
80     144    
176    -1616  
-48    128    
48     96     
0      16     
96     128    
96     80     
-64    64     
96     16     
-80    64     
112    48     
32     112    
64     144    
96     144    
-16    -96    
48     96     
176    -80    
-112   -112   
112    -800   
-16    48     
224    192    
0      96     
0      144    
-80    64     
144    0      
48     0      
0      160    
80     -112   
-32    352    
192    -384   
-48    128    
16     -288   
48     128    
128    -464   
144    896    
-128   -608   
0      -64    
176    256    
0      -16    
-80    80     
160    96     
-16    96     
64     -192   
-64    0      
-80    -192   
-80    -176   
224    -16    
80     272    
-64    -352   
80     160    
80     -400   
-64    48     
128    144    
16     64     
32     -64    
144    128    
224    160    
-144   -112   
304    496    
-160   -528   
64     80     
208    -784   
0      160    
64     -112   
-160   -208   
176    208    
144    352    
-112   -128   
128    160    
32     80     
48     128    
-112   64     
128    256    
160    144    
-224   -432   
-32    0      
-128   -496   
-160   -64    
192    -208   
112    240    
-32    48     
16     192    
208    -288   
112    192    
-48    144    
16     48     
16     160    
32     -176   
32     208    
16     -112   
32     192    
-48    -208   
176    112    
144    0      
160    0      
32     -688   
144    -160   
64     144    
0      -128   
-32    -464   
-112   0      
-32    -1648  
-256   176    
848    -448   
-208   192    
-256   544    
0      -752   
0      -240   
464    -144   
16     608    
-32    -96    
-64    -64    
224    64     
64     -48    
-112   -592   
32     -304   
16     -656   
16     -32    
64     96     
-32    -96    
160    -2464  
0      -64    
128    160    
-80    -112   
-16    208    
160    16     
112    -112   
-288   -32    
96     -288   
80     -176   
-272   128    
192    16     
0      -16    
208    80     
48     272    
-16    -752   
32     -256   
48     -192   
96     16     
80     -48    
-96    96     
304    -192   
32     96     
-208   80     
64     64     
16     0      
0      -176   
192    0      
192    -416   
-64    128    
32     -464   
48     48     
48     -720   
192    224    
-32    -80    
128    -16    
-48    -16    
16     96     
32     16     
32     128    
-192   -128   
128    -96    
-272   -48    
0      64     
-64    -16    
48     -160   
208    -128   
-48    -176   
-96    0      
192    -896   
48     -16    
128    112    
-144   16     
288    80     
-160   160    
-160   -80    
-176   -48    
-128   -352   
256    0      
-1184  144    
272    -112   
-160   80     
-128   -592   
320    32     
0      -848   
192    0      
128    -80    
-112   -80    
96     16     
112    32     
-64    16     
64     -112   
-80    32     
208    256    
-208   176    
80     -288   
-288   -16    
-112   -256   
224    144    
48     -912   
-48    64     
128    112    
-176   -128   
0      -64    
-144   -336   
-112   32     
128    -112   
-112   48     
192    -160   
-384   16     
-80    -64    
176    -48    
48     -112   
-16    80     
144    -592   
192    384    
-208   -48    
32     -384   
-160   -128   
144    80     
-48    -32    
-48    48     
-368   -240   
96     0      
-128   -224   
96     -48    
-80    16     
32     -192   
64     16     
-16    -336   
-112   -272   
288    208    
256    192    
-32    160    
-16    -32    
32     64     
-128   -288   
16     96     
208    64     
-48    192    
-32    -176   
96     96     
-832   -336   
64     -112   
-784   -240   
-208   -112   
0      160    
-112   128    
-16    224    
-176   -48    
16     112    
16     144    
-112   -64    
48     80     
-400   -96    
-1376  -208   
32     -16    
-160   -208   
144    48     
48     -144   
-48    80     
-80    -16    
-224   -592   
384    512    
368    368    
192    224    
-496   -160   
16     16     
48     80     
32     208    
-96    -160   
80     64     
-176   -48    
80     96     
96     -48    
256    144    
-176   -128   
-16    96     
-80    48     
-32    -80    
176    64     
-384   112    
-176   256    
-624   96     
16     48     
96     -16    
272    80     
-128   -64    
-272   -16    
144    0      
16     64     
-80    32     
320    16     
-288   160    
-272   0      
-720   256    
-1344  80     
-128   544    
256    64     
-208   -272   
496    336    
-656   176    
-32    -48    
48     -176   
304    176    
-192   -96    
288    32     
176    320    
-176   -144   
-144   32     
64     48     
48     416    
-208   80     
-384   16     
-16    -160   
-144   -176   
-16    176    
208    112    
-96    64     
320    128    
-80    48     
-176   144    
-192   -576   
544    576    
240    816    
-144   192    
-128   -304   
-160   -112   
-336   -304   
256    160    
-64    -160   
400    176    
-80    368    
192    32     
-240   64     
288    -160   
-112   160    
-48    -160   
-80    176    
-32    112    
0      304    
16     112    
304    256    
-240   128    
-272   -112   
-736   -128   
-240   192    
224    16     
304    80     
-176   -48    
96     96     
-16    128    
-352   -704   
-288   176    
336    32     
80     272    
-320   -16    
-64    384    
-224   352    
32     192    
-112   -160   
-32    16     
-64    128    
96     48     
0      112    
-16    64     
80     96     
-16    96     
0      16     
48     -112   
48     32     
208    544    
-160   352    
32     -160   
-368   -144   
48     16     
128    -16    
-80    160    
16     -16    
112    64     
-32    80     
32     -64    
-176   128    
80     -64    
-48    240    
32     -16    
-48    -16    
48     160    
-144   -32    
-64    -288   
96     64     
-80    128    
112    32     
80     272    
-160   -32    
224    208    
-192   144    
0      -64    
32     -32    
-32    32     
176    128    
-96    -16    
-48    144    
-128   -160   
32     -96    
64     48     
16     192    
96     64     
16     96     
-96    144    
48     16     
48     -32    
96     480    
96     -32    
-208   -96    
288    -80    
-304   48     
16     144    
32     160    
-144   160    
128    -16    
112    -80    
-16    144    
-32    -304   
320    576    
-224   112    
96     48     
-64    160    
64     64     
-368   -80    
368    112    
-128   96     
176    48     
-16    144    
-144   16     
112    80     
-32    96     
80     128    
16     -80    
144    16     
-96    208    
64     304    
-96    512    
128    272    
-192   -48    
160    224    
-16    -16    
128    32     
208    32     
-112   160    
160    80     
16     144    
16     48     
128    368    
-32    112    
64     80     
-112   224    
48     64     
160    240    
-144   -48    
192    144    
-80    -96    
-112   -608   
192    96     
-288   128    
144    16     
64     112    
48     0      
144    -48    
32     400    
-192   16     
80     176    
80     -480   
64     400    
-352   48     
0      48     
208    96     
-16    -352   
64     192    
64     -624   
160    64     
112    144    
0      112    
-48    128    
64     80     
96     112    
64     112    
48     -64    
32     176    
-96    192    
-80    208    
112    -96    
48     0      
-992   -1968  
800    -1536  
-832   80     
800    -304   
-160   -464   
160    624    
-496   112    
784    320    
-656   624    
704    -464   
-240   384    
16     -288   
32     512    
16     -352   
112    16     
-176   -304   
416    -544   
-80    208    
96     -1872  
64     32     
-112   32     
112    112    
32     -80    
96     160    
-144   -224   
352    176    
-128   144    
48     64     
0      304    
-32    -32    
304    -32    
-224   -64    
144    -16    
-80    -768   
80     64     
80     32     
-112   -80    
80     96     
16     16     
208    128    
112    48     
-208   160    
80     -144   
96     208    
0      -96    
96     176    
-80    -64    
96     112    
-48    -448   
320    64     
-160   -368   
64     128    
160    80     
-64    128    
112    16     
32     48     
96     240    
48     -160   
16     128    
224    96     
-224   80     
192    -672   
112    272    
-208   -608   
288    160    
-160   -64    
112    112    
80     112    
48     32     
80     -16    
-32    208    
80     96     
144    -208   
-16    176    
16     -272   
272    32     
96     -16    
96     464    
560    48     
80     176    
-128   -848   
112    96     
-32    192    
32     -144   
0      240    
-320   304    
96     224    
-32    -400   
192    -160   
-48    -304   
-32    176    
48     96     
144    224    
0      192    
192    240    
-48    -48    
112    384    
-176   144    
0      -1008  
96     -1216  
-16    -64    
208    -2080  
-176   -336   
192    -1456  
48     -160   
64     64     
128    -32    
-112   48     
160    64     
-80    -1264  
96     144    
64     -736   
96     64     
32     -272   
80     0      
-1344  -144   
-32    -256   
0      -48    
128    -176   
80     32     
-96    -64    
112    192    
416    -80    
-640   -256   
384    32     
144    256    
32     -288   
-32    80     
-224   144    
112    -32    
-336   16     
64     -112   
-128   64     
144    -240   
16     48     
256    -288   
-16    -128   
176    336    
-208   0      
304    64     
-48    80     
144    -176   
80     112    
-256   -144   
256    -144   
-224   112    
176    112    
-160   -112   
160    -672   
-48    48     
160    -144   
128    160    
-96    -1088  
-96    160    
-176   -64    
400    -368   
-352   -560   
208    -64    
64     432    
-208   48     
-304   -32    
-80    -160   
-992   -80    
0      -160   
48     -128   
-64    48     
192    304    
-16    -128   
-208   112    
-112   -992   
384    160    
48     96     
176    -112   
-96    144    
-80    -160   
176    -32    
-160   -80    
0      48     
-32    -80    
-240   0      
64     64     
-128   -32    
16     -752   
64     16     
-32    -1584  
128    -16    
80     256    
-48    16     
-32    -80    
48     -144   
-96    -64    
32     16     
16     -112   
0      48     
-608   0      
368    -256   
-144   -64    
224    -240   
-1072  -1456  
1232   2176   
-496   624    
560    -800   
-224   -528   
-160   -64    
-16    448    
-288   -336   
32     -16    
208    -128   
-400   224    
-32    -160   
224    320    
-96    -400   
96     160    
-272   -352   
544    176    
-432   -272   
736    96     
-496   -144   
336    160    
-48    432    
160    -80    
16     -48    
-112   -288   
240    -32    
-128   80     
-32    160    
512    -32    
96     176    
48     -256   
416    32     
-224   -336   
48     304    
112    208    
112    112    
80     176    
-496   -464   
288    112    
-480   -160   
112    -48    
-112   128    
176    -256   
144    176    
-1568  -496   
240    16     
-336   -176   
0      16     
-304   -256   
-656   -80    
-16    112    
-688   64     
-64    192    
480    -192   
-352   -48    
-48    80     
16     0      
-576   64     
512    688    
-80    160    
-144   144    
80     64     
-160   -32    
-48    0      
-464   -64    
112    48     
-336   -64    
64     64     
-32    0      
-224   -256   
-160   -128   
112    176    
-16    32     
-128   48     
144    -96    
-176   -112   
208    0      
-400   256    
48     144    
-48    80     
-224   -496   
32     -128   
64     224    
-1072  -144   
-320   0      
-128   -192   
-80    -48    
-16    -224   
128    48     
-80    -32    
32     16     
64     144    
-112   -16    
48     128    
64     176    
80     240    
16     208    
-80    -96    
-432   -64    
48     112    
160    48     
-160   -32    
-272   -208   
112    -32    
48     48     
-160   16     
64     -32    
0      144    
-16    64     
-48    112    
0      96     
-32    -80    
-64    128    
16     -368   
-176   96     
112    272    
-80    0      
-16    -224   
16     128    
240    224    
192    240    
-272   80     
0      80     
-144   192    
48     -96    
32     384    
-128   32     
112    208    
-352   -144   
144    48     
-352   -224   
-16    144    
-128   -160   
-48    16     
80     48     
96     64     
-256   0      
80     -16    
-144   16     
240    -64    
-176   160    
32     16     
160    160    
-144   -128   
-80    96     
-352   -256   
192    256    
-592   256    
-16    0      
0      -16    
-160   96     
80     80     
-80    64     
128    -32    
-160   176    
128    96     
-144   -48    
-32    96     
-208   32     
208    32     
-224   16     
-16    192    
32     0      
-144   32     
48     -64    
-32    48     
160    -272   
32     224    
-48    352    
-208   16     
80     64     
32     0      
144    -144   
-80    64     
16     112    
-208   128    
-288   48     
320    96     
-80    0      
208    -32    
-48    176    
16     0      
48     144    
-48    176    
-208   -112   
-48    64     
-160   64     
192    32     
-80    32     
128    32     
-48    -16    
0      96     
-48    240    
-32    32     
240    400    
-416   0      
368    128    
-224   16     
-1152  -2144  
800    48     
-880   -384   
544    -160   
208    368    
-656   -544   
656    976    
-672   -240   
288    576    
320    -640   
-304   352    
208    -416   
144    800    
-32    -288   
-160   304    
80     -288   
112    400    
32     -80    
-128   160    
144    -16    
-192   -64    
0      96     
240    208    
-48    80     
192    16     
-224   96     
208    -64    
-304   192    
320    -48    
-112   192    
176    16     
-176   160    
112    0      
-80    192    
64     0      
32     160    
176    32     
112    304    
-112   0      
80     0      
32     48     
0      192    
80     80     
64     80     
48     -96    
96     192    
16     96     
16     48     
-32    176    
-48    16     
96     48     
-64    -976   
144    96     
-16    80     
-144   144    
160    -32    
16     352    
-16    -48    
144    32     
-48    -48    
-48    80     
48     64     
-16    112    
112    64     
-16    320    
-32    0      
160    -480   
-64    48     
176    80     
0      176    
16     48     
80     112    
48     16     
80     160    
-64    -128   
192    112    
16     128    
32     48     
144    -80    
-48    128    
80     64     
128    -48    
96     176    
-32    -608   
-208   48     
-272   -64    
432    192    
-160   160    
176    192    
64     -64    
-240   16     
-16    -400   
512    192    
64     0      
-16    64     
16     160    
-112   -48    
288    400    
0      -768   
0      96     
-32    0      
0      16     
144    208    
16     208    
-48    160    
32     208    
-160   -368   
32     192    
-80    -160   
-32    -304   
-16    64     
96     -176   
48     176    
112    -256   
-64    32     
112    -320   
-64    -48    
208    208    
80     208    
-32    304    
176    224    
32     176    
-16    48     
48     160    
48     48     
-32    -336   
112    -112   
144    0      
-144   -144   
64     96     
160    -64    
96     160    
48     -64    
112    208    
-176   -64    
64     96     
256    432    
-32    256    
176    256    
-160   -160   
160    0      
-64    -240   
-80    -80    
320    -624   
-176   128    
256    -864   
-48    176    
32     -400   
0      48     
0      16     
112    160    
64     32     
32     176    
80     176    
-80    -192   
144    144    
48     -32    
80     0      
112    -96    
-80    64     
144    -192   
-16    -32    
144    32     
128    288    
-160   96     
144    96     
176    -112   
-80    -192   
16     192    
0      96     
-32    32     
144    -96    
32     144    
32     -128   
0      128    
384    80     
-192   32     
192    -128   
-48    144    
128    64     
96     112    
-128   0      
96     0      
48     160    
176    144    
-96    -128   
320    -464   
48     272    
32     -96    
16     80     
80     -16    
16     144    
-48    -160   
0      -2224  
-256   128    
96     -1104  
16     96     
160    -80    
-1456  -848   
496    272    
-368   -2176  
1328   -368   
-48    -304   
-448   -432   
-32    704    
368    -512   
-208   -608   
240    -448   
-16    -336   
-400   128    
560    -608   
-256   -176   
336    -384   
-224   -704   
16     -384   
-224   -64    
112    -272   
208    -1472  
0      -496   
224    272    
-192   -32    
480    -112   
-368   192    
32     448    
112    288    
-656   -784   
-464   -848   
-96    -96    
64     16     
-224   0      
176    -16    
80     -80    
-64    -608   
-16    -160   
-64    -400   
272    336    
-48    32     
0      240    
0      -320   
16     64     
96     32     
160    32     
-272   96     
0      64     
-80    128    
128    -16    
112    -80    
64     -416   
128    -32    
-16    -448   
32     -16    
208    -16    
-160   -80    
224    -112   
64     -128   
0      192    
16     -80    
128    96     
-64    -32    
-912   -32    
112    -240   
32     208    
32     -48    
192    16     
-64    -624   
-16    -96    
64     -208   
16     -208   
320    128    
64     -96    
80     192    
0      64     
-144   32     
96     -256   
-432   16     
-64    -176   
-592   80     
-160   -272   
80     -96    
48     -576   
-32    80     
160    -400   
-320   160    
80     48     
32     -32    
-176   -64    
368    -112   
-256   -176   
112    32     
-352   -32    
48     -32    
-240   0      
144    -112   
-48    96     
160    -240   
112    144    
80     -864   
288    464    
-48    144    
-48    -80    
-16    -32    
224    128    
-48    0      
-16    80     
-112   272    
240    -128   
-224   -80    
-80    -288   
112    32     
-32    -240   
128    160    
240    -736   
16     0      
-272   -16    
160    -144   
-304   -176   
80     -160   
-176   -224   
32     -144
[truncated: 410,011 more chars]
