# Supplementary material for: A Fault Diagnosis Method for One‐Dimensional Vibration Signal Based on Multiresolution tlsDMD and Approximate Entropy
Source: Hindawi journal article supplement (doi:10.1155/2019/3262818), 2019-01-01
Supplement: f1 [file 3262818.f1.zip › 3262818.f1/gear signals/broken teeth fault signal/Data20.txt]

-224   80     
-16    96     
16     80     
-192   48     
32     -96    
16     32     
-240   16     
-1072  16     
-48    48     
48     96     
64     96     
-96    -96    
-96    -64    
112    336    
-80    64     
128    96     
-96    160    
-16    16     
16     -32    
-192   208    
-272   96     
0      64     
-512   256    
80     16     
-64    -16    
-64    112    
2000   -944   
224    976    
-224   192    
-176   160    
560    -368   
208    384    
-816   -48    
672    896    
-704   368    
304    96     
-32    128    
-352   -320   
96     304    
32     -272   
-128   112    
-400   32     
176    0      
-64    160    
160    192    
48     48     
-240   336    
64     -112   
-304   144    
192    -80    
-80    -16    
208    64     
-192   224    
-208   208    
-992   0      
-240   -48    
304    32     
0      64     
-48    112    
-112   192    
-64    -48    
112    -48    
-48    128    
80     96     
16     16     
-336   -64    
208    144    
-128   80     
128    112    
-496   -240   
-32    64     
128    96     
16     64     
-80    176    
-64    -32    
96     256    
-80    0      
112    32     
-112   -16    
-16    272    
-208   -112   
32     -112   
112    112    
-64    160    
96     -32    
48     48     
-144   128    
32     32     
64     0      
96     -16    
-48    208    
-160   64     
16     -176   
96     64     
-48    144    
32     160    
-48    32     
-64    -48    
80     128    
-48    48     
32     96     
-32    368    
-176   128    
80     176    
64     96     
0      -64    
80     208    
-128   32     
144    272    
-96    -144   
160    -48    
32     -80    
-32    160    
-32    -48    
128    368    
-16    16     
160    16     
-80    96     
80     -16    
-32    0      
-32    112    
-48    -176   
512    160    
-48    176    
0      240    
-208   16     
96     112    
-96    64     
48     80     
144    176    
-16    32     
-64    -48    
128    -144   
-16    144    
32     64     
208    80     
-272   -64    
32     48     
-48    -128   
128    160    
-256   -208   
80     128    
-128   32     
224    224    
0      96     
48     0      
-96    0      
-16    -32    
224    48     
112    -48    
-256   176    
160    -16    
-96    -32    
0      160    
-64    144    
224    48     
-64    96     
48     48     
-80    112    
-96    16     
-240   -128   
0      48     
112    160    
240    112    
208    144    
-288   64     
0      48     
160    128    
-208   48     
112    64     
-48    -128   
16     -816   
304    320    
-112   112    
288    0      
-224   80     
-16    48     
96     112    
32     16     
-32    128    
128    -112   
-32    96     
112    64     
-16    -96    
-32    -16    
128    48     
-96    -352   
224    -32    
-112   -416   
144    112    
224    208    
-176   128    
80     -16    
48     160    
-64    160    
80     32     
64     80     
-32    64     
-16    -80    
112    -80    
16     144    
16     -16    
-48    96     
16     64     
192    80     
-32    96     
112    96     
-48    128    
80     -16    
160    192    
-160   224    
32     -160   
272    176    
-128   128    
16     112    
48     64     
64     -64    
80     176    
128    -688   
128    -80    
0      -1344  
0      304    
0      160    
-48    -32    
-432   -1712  
960    576    
240    32     
608    -720   
368    1888   
160    -176   
-688   -112   
736    -1072  
208    304    
176    -688   
-112   464    
-96    -272   
0      208    
-96    -128   
400    192    
-208   -80    
96     176    
112    336    
80     128    
-32    32     
128    -176   
-48    336    
0      -64    
16     112    
48     -32    
80     112    
80     -192   
160    304    
-80    -544   
64     48     
-96    -16    
128    144    
64     112    
16     80     
16     112    
96     -112   
64     112    
0      -400   
-16    80     
80     -144   
0      80     
32     -800   
-32    48     
32     -704   
208    96     
96     192    
-128   80     
-176   -224   
144    176    
64     208    
96     -384   
-64    192    
64     -48    
48     80     
80     -272   
80     112    
80     -224   
32     192    
80     -304   
-48    -64    
-112   112    
32     -16    
-16    -128   
32     -96    
16     48     
16     -208   
144    80     
0      -96    
80     -144   
80     -144   
224    192    
64     176    
-128   144    
16     -160   
112    -720   
-240   -48    
384    -656   
-224   192    
-432   48     
48     -576   
-80    32     
144    -1808  
80     80     
128    368    
16     80     
-32    160    
-32    -80    
32     160    
96     -144   
48     -256   
0      16     
64     -656   
0      -64    
-1376  -80    
0      -400   
64     -144   
48     -784   
16     -176   
80     80     
128    32     
-16    48     
48     -240   
16     -144   
96     64     
64     16     
64     128    
64     32     
-16    -304   
-304   16     
16     -160   
48     -16    
112    -112   
16     -16    
192    48     
-64    -64    
96     -3248  
-64    -288   
112    128    
32     208    
208    160    
-128   16     
-96    -160   
-64    -208   
-336   -112   
16     64     
0      -16    
80     576    
-48    -304   
288    -304   
-224   -192   
336    -1104  
80     -32    
80     48     
-144   -64    
144    -160   
112    144    
-400   -128   
272    -48    
-208   144    
128    -96    
-784   -64    
48     -160   
112    32     
64     -112   
160    -32    
32     48     
-144   224    
352    -1200  
64     352    
-176   -16    
224    -224   
-32    48     
-64    -16    
16     -48    
64     -240   
-256   48     
240    -176   
-1024  208    
-240   -16    
288    -48    
-80    16     
208    128    
-112   -800   
-64    64     
224    96     
64     80     
160    0      
-16    128    
-384   -160   
432    -176   
-208   64     
432    -80    
-464   -32    
256    64     
-1152  -48    
368    -688   
-112   32     
176    -896   
-16    144    
80     32     
160    -112   
-64    -16    
-16    64     
-64    16     
192    -80    
-128   80     
32     -64    
-320   -160   
112    -192   
224    80     
112    -16    
-16    304    
-32    -48    
400    16     
-112   -112   
240    -256   
-352   112    
16     -48    
384    1584   
-192   1168   
-416   -880   
-304   -704   
1296   -688   
-384   -960   
-80    -544   
80     -320   
144    656    
272    -672   
80     -96    
-16    -48    
-96    16     
-16    112    
0      160    
48     32     
-176   -112   
-32    64     
-80    -208   
-384   -288   
32     -176   
-16    128    
-288   -144   
0      144    
-704   -576   
-304   16     
208    192    
-688   320    
64     -128   
-336   80     
-112   -16    
192    -16    
-112   96     
0      -16    
96     48     
0      -288   
128    208    
-672   -160   
112    32     
-144   96     
-144   208    
0      96     
-432   -112   
0      96     
-96    48     
-16    16     
16     64     
-16    -80    
64     112    
-128   32     
176    -96    
-160   128    
80     -192   
-16    144    
-64    128    
0      80     
-272   -112   
-208   -96    
-112   16     
-480   -48    
-16    96     
-464   96     
-144   48     
144    -192   
-224   128    
-48    -64    
112    96     
176    -176   
16     16     
64     80     
-240   48     
96     32     
48     -16    
16     128    
-48    128    
176    160    
-384   80     
-128   -48    
-720   -128   
-48    -48    
144    64     
-160   176    
0      -160   
208    -128   
-160   112    
-144   -48    
-16    32     
16     128    
-32    16     
16     64     
-192   32     
-128   -96    
48     112    
-672   -16    
112    128    
-112   96     
240    -16    
-176   64     
-48    32     
16     48     
-16    80     
-80    80     
-64    -160   
-32    -16    
-160   -32    
128    176    
-208   0      
-16    112    
-240   144    
32     160    
48     -16    
-96    16     
32     64     
32     96     
224    320    
192    176    
-144   -96    
-192   96     
144    112    
-32    -96    
-256   -48    
-48    -16    
384    128    
-288   -80    
176    272    
-992   128    
16     336    
-16    96     
-128   -16    
16     112    
-64    48     
240    160    
-32    144    
16     0      
-240   224    
160    48     
-144   64     
-16    48     
-48    -64    
-176   32     
-592   -48    
-16    224    
384    -224   
-288   64     
64     48     
80     112    
-32    128    
-80    96     
16     80     
-144   -16    
-16    48     
-16    -144   
-32    128    
-208   128    
64     176    
-16    80     
32     32     
32     128    
48     -128   
16     160    
-48    192    
160    160    
-48    -16    
-80    -32    
48     160    
-224   16     
-96    -128   
80     160    
-48    80     
112    80     
-64    208    
0      -16    
-16    128    
144    0      
224    320    
-272   128    
-32    -128   
0      192    
240    80     
-64    96     
208    -192   
-80    160    
-48    112    
-208   -112   
-64    112    
80     -16    
128    32     
208    240    
-32    144    
-64    80     
0      112    
-80    -48    
0      112    
64     144    
0      192    
0      256    
-256   -96    
-832   -3408  
352    1568   
-592   96     
-32    -80    
400    736    
80     -528   
224    -208   
-560   48     
464    176    
528    -80    
-448   48     
256    176    
80     672    
-112   96     
80     32     
-336   -64    
384    320    
32     272    
-64    -192   
-16    -272   
0      32     
0      224    
-16    128    
112    16     
32     -64    
176    48     
-48    240    
144    256    
-112   240    
400    256    
-208   128    
144    144    
96     160    
48     48     
-16    16     
32     48     
-48    96     
208    128    
-144   64     
160    96     
48     -160   
0      176    
64     48     
128    160    
-80    80     
-32    -224   
-128   144    
192    320    
48     160    
-16    48     
-16    96     
32     176    
-16    64     
-16    176    
80     -16    
64     144    
-96    -112   
176    -16    
64     -64    
-192   -176   
80     -112   
96     128    
-160   -656   
224    224    
-112   16     
192    208    
-48    144    
32     48     
-16    64     
80     80     
64     224    
64     144    
-48    -32    
48     112    
64     64     
64     -288   
112    32     
96     240    
-32    192    
32     112    
-16    -128   
-16    -64    
32     112    
176    320    
-128   176    
48     -176   
112    0      
-64    -48    
192    160    
-144   176    
-48    -96    
-16    -32    
0      -336   
144    160    
96     -688   
0      128    
-32    32     
0      112    
64     -48    
112    -32    
-32    32     
160    272    
-80    64     
80     -64    
-48    96     
128    -16    
0      0      
256    144    
-208   48     
288    144    
-192   80     
224    0      
-48    176    
48     64     
80     160    
-48    48     
16     0      
112    48     
-16    144    
128    48     
-16    -304   
-48    288    
208    -208   
0      96     
-48    -256   
16     208    
192    -480   
-48    128    
-112   -128   
176    96     
0      176    
32     144    
176    128    
-128   -176   
128    112    
16     -288   
192    0      
48     32     
80     272    
96     -816   
0      96     
64     96     
160    224    
-272   -160   
368    144    
-32    192    
528    352    
-480   336    
256    -784   
48     96     
128    -112   
144    160    
-112   -144   
80     32     
-16    16     
-48    16     
160    0      
-352   224    
512    -496   
-128   -16    
80     144    
64     -208   
-320   112    
240    -192   
112    192    
-16    0      
-32    -48    
32     -176   
192    608    
-48    32     
-48    96     
-64    -192   
144    -1552  
496    -96    
-64    -1440  
-176   -256   
176    -208   
256    -112   
112    32     
192    -1568  
-96    -160   
-96    80     
112    0      
208    224    
80     0      
48     -528   
0      112    
128    -656   
-16    -144   
384    -464   
-128   -144   
-224   -224   
128    -576   
112    -64    
64     -368   
32     32     
32     -336   
176    -48    
-832   -1472  
-768   -1552  
880    384    
448    400    
416    -816   
-320   -160   
368    -80    
384    208    
-1200  512    
432    -320   
-416   -288   
0      -336   
240    -64    
128    -224   
-80    -128   
48     -3792  
64     -48    
-48    -112   
160    -32    
80     0      
-32    80     
-160   64     
16     128    
-688   -256   
48     -208   
-224   32     
176    128    
64     16     
32     16     
-64    -176   
224    -1248  
-96    176    
144    48     
-16    64     
96     -96    
48     -96    
112    208    
-128   48     
96     0      
-80    -16    
-544   80     
16     -336   
32     -16    
176    -272   
-256   48     
-16    -480   
64     96     
128    400    
-48    48     
144    -96    
32     -48    
-64    32     
0      48     
-176   64     
272    -256   
-432   -32    
128    -128   
-1056  112    
48     -112   
64     -80    
144    -208   
-96    144    
192    -2400  
-16    112    
-80    16     
176    112    
-80    48     
112    96     
-144   64     
-32    -32    
-48    -64    
0      -16    
-272   160    
16     32     
-976   336    
-32    -240   
224    -224   
240    -800   
-64    128    
48     192    
-112   -144   
208    32     
-80    32     
-176   -48    
336    -128   
-160   -64    
80     352    
-320   176    
176    -112   
-112   -16    
208    -144   
0      32     
128    -176   
-64    -112   
-80    64     
-144   -80    
-160   -144   
176    0      
-224   144    
176    -64    
-192   32     
-16    -320   
-160   -80    
-16    -544   
96     224    
16     -176   
128    48     
16     -320   
208    160    
-96    -48    
-16    -48    
-64    80     
176    112    
-144   -16    
0      -64    
-16    128    
128    64     
-432   -16    
32     -48    
16     48     
-736   -192   
-96    32     
-1136  -192   
-896   48     
-16    96     
-576   0      
-128   224    
-384   112    
16     96     
-128   -176   
-112   0      
96     0      
-32    64     
-32    -336   
-208   -112   
-16    -224   
-16    128    
320    272    
-16    -16    
-160   0      
-384   112    
16     -32    
16     -16    
-144   256    
-48    64     
64     16     
0      -80    
-16    336    
112    -64    
80     128    
-256   -48    
48     -80    
-64    64     
16     0      
-16    16     
0      160    
-64    320    
-64    208    
-64    240    
-128   -32    
-96    -96    
-864   -224   
192    64     
-112   -240   
-32    128    
32     16     
-16    16     
16     224    
-176   -144   
64     112    
-96    144    
-96    16     
0      208    
-64    -48    
-128   0      
64     32     
144    -16    
32     112    
-32    -416   
96     96     
80     400    
-224   176    
192    -144   
-208   0      
-80    32     
-96    -144   
144    -288   
-112   160    
-32    -16    
-272   0      
-64    -16    
-96    -96    
0      32     
-64    -64    
80     176    
96     128    
-16    96     
-32    16     
-768   64     
-1120  -1264  
544    448    
208    128    
544    -144   
-784   -128   
-48    480    
176    -16    
-448   -16    
320    0      
-128   16     
-224   -128   
96     288    
64     160    
-192   -80    
-144   0      
96     80     
-224   -160   
192    256    
-64    -112   
-128   0      
-176   64     
112    192    
-224   -128   
48     -32    
-1200  -400   
-32    128    
128    560    
192    288    
-240   112    
32     48     
96     32     
-112   -16    
-80    -16    
80     208    
-240   160    
128    224    
-48    384    
-272   -384   
-48    -320   
0      176    
112    160    
-112   208    
-96    80     
224    -96    
-96    -160   
144    64     
256    192    
128    64     
-32    16     
-16    -64    
-160   128    
48     112    
-272   96     
160    128    
-32    176    
48     96     
256    928    
48     80     
-160   336    
-128   -144   
304    368    
0      -96    
-48    160    
-176   128    
48     144    
-112   32     
96     128    
-112   0      
16     64     
32     128    
-32    48     
32     48     
-32    96     
-80    64     
32     272    
-256   -192   
96     -80    
-368   144    
-16    -16    
-96    -160   
-144   -112   
96     80     
-144   -224   
-32    128    
48     128    
-64    -112   
16     -192   
96     224    
16     304    
-64    16     
32     16     
-80    96     
240    112    
-112   80     
80     64     
-32    64     
64     144    
64     96     
-48    -32    
80     176    
96     128    
80     256    
-128   -48    
48     96     
-16    -16    
128    128    
-48    -16    
80     112    
-64    32     
32     144    
-80    -16    
32     144    
80     144    
32     128    
32     128    
32     288    
-96    32     
144    -128   
-80    192    
224    128    
96     192    
-32    32     
-80    192    
-80    -160   
128    96     
-176   -16    
192    -1120  
-144   -144   
192    192    
64     128    
-80    -176   
48     288    
96     -80    
192    352    
112    400    
32     224    
-80    -496   
304    288    
-224   -32    
144    16     
-16    240    
80     -144   
-144   -80    
128    -144   
80     32     
160    656    
208    -16    
-96    48     
-16    272    
64     112    
32     128    
-96    -16    
208    64     
-112   160    
80     144    
80     64     
-16    -656   
176    80     
-368   -1760  
240    192    
64     -32    
128    112    
-64    -80    
192    0      
96     384    
-16    -16    
-32    -416   
0      176    
80     -128   
160    48     
16     176    
64     -592   
-96    -208   
48     -592   
192    80     
128    -192   
160    416    
112    304    
64     48     
16     -32    
16     320    
64     -128   
64     128    
128    -16    
48     -32    
16     80     
128    -96    
32     192    
80     -192   
32     176    
-32    64     
-48    256    
144    80     
-96    16     
240    -16    
0      16     
16     0      
1616   3248   
-1776  -368   
784    576    
-128   -16    
352    -128   
-16    -448   
96     -480   
80     288    
256    -1696  
-416   352    
224    -352   
32     352    
48     -144   
320    224    
-432   -16    
80     0      
160    304    
64     32     
-32    128    
144    -256   
-80    96     
256    32     
-176   304    
320    -368   
-160   208    
288    -544   
-80    272    
-32    16     
-32    16     
176    80     
-48    160    
112    112    
-16    0      
64     144    
96     -96    
32     -32    
176    -272   
48     256    
64     -272   
112    32     
-64    32     
64     208    
112    48     
-48    80     
-48    -176   
48     -1184  
224    192    
16     -272   
112    16     
-80    -128   
80     128    
48     -144   
112    48     
48     -176   
64     128    
-48    -288   
192    208    
-144   112    
96     -368   
112    -16    
-80    -80    
80     48     
112    -80    
32     224    
-96    -80    
112    -48    
176    -304   
48     96     
48     80     
32     -96    
272    64     
-64    -240   
-32    144    
16     -320   
256    -624   
-256   -80    
224    -608   
128    -160   
336    -2048  
-64    128    
-96    176    
240    -160   
64     192    
-144   -96    
448    -32    
-224   192    
96     -256   
96     64     
-224   -32    
352    64     
-320   -80    
192    -368   
0      -96    
80     -352   
-112   32     
96     -256   
0      -224   
64     48     
-48    -160   
144    -96    
48     64     
0      -272   
96     160    
-96    -16    
272    -128   
-864   -16    
48     32     
384    128    
-256   -464   
256    -64    
-96    -160   
64     32     
160    -624   
48     48     
96     -336   
48     96     
-112   -48    
0      -144   
96     0      
208    224    
-368   32     
224    -96    
-128   32     
48     64     
240    80     
48     -336   
160    48     
0      -1104  
0      112    
160    16     
16     64     
240    112    
-64    48     
-48    -112   
16     -256   
-80    -112   
-80    -144   
-336   128    
176    -112   
32     -144   
-80    -464   
-400   -160   
176    -528   
80     48     
48     80     
96     256    
80     -16    
16     96     
-128   -256   
-112   -160   
-64    -320   
128    112    
-384   -16    
48     -224   
288    -16    
80     -128   
64     112    
160    -160   
80     272    
-16    -688   
128    176    
-112   144    
48     -176   
-16    80     
128    96     
-128   -160   
-448   -576   
-608   -336   
320    48     
-64    128    
64     -80    
48     112    
0      -272   
112    176    
64     -768   
32     128    
16     128    
-128   -192   
0      112    
176    48     
-176   -96    
-16    -96    
-288   32     
-64    16     
-288   0      
112    -176   
160    16     
16     -304   
-272   144    
48     -480   
128    96     
48     64     
0      -32    
192    -112   
-224   64     
32     -80    
32     128    
-160   32     
176    624    
16     -1904  
-496   -224   
336    256    
-528   -80    
592    0      
128    -416   
144    -224   
48     64     
80     160    
128    32     
-16    64     
64     368    
-32    32     
64     112    
-160   -352   
160    112    
272    32     
48     192    
-368   -144   
16     -96    
160    240    
-272   -176   
32     -224   
-1216  -208   
208    64     
16     240    
-144   -128   
-256   -944   
336    112    
80     160    
48     80     
-176   32     
0      32     
112    -384   
-64    80     
128    -208   
-352   -384   
304    288    
-320   -160   
288    -400   
-304   224    
112    -32    
0      48     
-160   -192   
-336   -16    
-32    -32    
-240   -144   
544    560    
-544   -144   
-128   288    
-208   288    
48     -176   
224    48     
-144   -112   
-16    176    
-304   576    
128    592    
-1312  -400   
176    0      
-48    -160   
-16    0      
-48    96     
-128   176    
-96    192    
16     -48    
32     32     
-176   64     
0      0      
-64    96     
-160   48     
16     48     
48     224    
-112   96     
-32    144    
-320   -224   
-32    64     
-288   -256   
272    32     
144    336    
-112   96     
-16    -16    
-96    32     
16     -112   
16     128    
-64    -48    
80     400    
-48    64     
-256   -96    
-32    128    
-352   -96    
96     144    
0      -64    
144    320    
-160   16     
16     -64    
128    256    
-288   -112   
224    32     
-288   -16    
176    16     
16     176    
-176   208    
-32    -128   
-176   128    
-160   96     
112    96     
48     160    
-80    112    
32     80     
-224   -112   
0      128    
48     112    
80     96     
-112   -32    
-128   48     
224    16     
-288   80     
-48    -64    
96     -400   
-400   -208   
128    240    
48     -208   
-112   240    
272    80     
-224   256    
176    32     
-112   32     
224    -144   
-304   112    
352    64     
-224   480    
-48    32     
64     -64    
-80    -48    
-96    -128   
-32    112    
96     96     
48     224    
32     112    
-32    16     
32     64     
-64    256    
-144   48     
160    96     
-128   96     
320    144    
-192   80     
-64    -16    
-128   -32    
-176   -48    
-32    176    
32     16     
16     128    
16     160    
-48    80     
16     64     
48     80     
-112   128    
-32    -32    
48     160    
-192   0      
0      64     
-224   -176   
96     96     
16     -32    
-16    128    
0      -176   
144    160    
-112   208    
64     48     
-112   256    
48     48     
432    80     
-176   48     
-32    224    
-176   -336   
144    192    
304    -16    
-224   368    
16     64     
-16    112    
80     16     
-48    112    
-144   80     
176    -48    
64     64     
112    160    
-16    128    
-32    -32    
-16    96     
-16    -16    
176    112    
208    -224   
-80    448    
-160   224    
32     -64    
64     -48    
-496   -16    
320    -112   
-544   320    
-176   128    
240    -112   
-176   -64    
-64    -128   
16     496    
144    -48    
-208   0      
192    -224   
-208   480    
288    -112   
-304   400    
288    -64    
-272   176    
-16    -64    
192    256    
48     16     
-16    -48    
-144   16     
128    112    
80     208    
96     -64    
-112   112    
128    304    
-80    -16    
288    -80    
-208   96     
160    -16    
-48    128    
16     32     
0      96     
128    96     
0      112    
16     112    
-224   -112   
32     224    
80     48     
128    144    
-80    64     
0      -352   
80     112    
48     128    
16     112    
-80    80     
48     48     
64     128    
64     -32    
32     112    
-32    64     
16     -80    
-48    208    
128    -64    
64     144    
32     160    
64     -96    
-128   0      
112    0      
64     256    
80     -48    
128    128    
-112   192    
208    -48    
-32    128    
-128   160    
176    48     
-48    80     
208    16     
0      32     
-112   64     
144    -400   
96     80     
-16    -336   
64     80     
160    160    
-64    -48    
336    208    
304    16     
-16    96     
-64    80     
80     208    
-80    48     
224    32     
-304   16     
80     272    
-48    -304   
128    -176   
32     -352   
-128   80     
16     112    
80     352    
-96    416    
176    352    
0      176    
144    256    
-48    144    
32     128    
96     112    
-80    -80    
224    208    
16     -144   
-96    48     
128    -144   
112    160    
32     -688   
112    256    
-16    -208   
224    128    
-192   -80    
192    320    
48     192    
128    112    
-48    256    
16     32     
48     224    
32     -128   
80     32     
0      -384   
64     80     
-128   -496   
288    32     
32     -592   
-96    32     
256    64     
-16    32     
48     -80    
-208   -96    
352    368    
96     -176   
-32    112    
-16    -464   
-48    208    
144    -304   
112    160    
192    256    
112    224    
-224   32     
0      128    
160    32     
80     176    
112    0      
-96    -208   
144    112    
48     -208   
112    224    
128    128    
-128   96     
48     -320   
-32    80     
96     -336   
-32    48     
80     352    
80     16     
0      208    
16     -288   
-160   -1408  
384    144    
-64    -752   
144    80     
-96    64     
176    -16    
-48    96     
48     -96    
48     -16    
752    -192   
-224   112    
-176   64     
-256   -224   
-16    -48    
272    -512   
16     -576   
144    -80    
-256   -64    
80     -160   
96     -768   
0      -208   
176    16     
-112   -80    
240    112    
32     0      
96     32     
-32    80     
64     -144   
-144   16     
-80    -32    
-96    -192   
128    -48    
-64    -160   
32     32     
96     -736   
-80    -272   
128    32     
-112   0      
208    -144   
-16    368    
144    -192   
32     144    
1520   -768   
688    336    
-480   144    
-560   -464   
96     464    
-32    -1232  
512    400    
-464   -528   
144    336    
-64    -560   
272    -224   
-128   128    
-32    176    
0      16     
-64    -256   
-96    -64    
288    -272   
-208   -96    
112    -240   
-352   160    
160    -288   
0      192    
48     -96    
160    256    
-16    -832   
160    64     
-208   -1984  
32     352    
32     112    
16     0      
112    16     
80     -128   
0      144    
48     -48    
-336   416    
32     128    
-944   256    
16     -128   
400    -144   
-16    -288   
144    -128   
80     -368   
352    176    
-288   -64    
160    192    
-32    80     
-80    -352   
-64    -320   
80     112    
64     192    
64     48     
-480   160    
208    -480   
0      -368   
128    -128   
64     144    
336    464    
-128   464    
32     -784   
-64    176    
272    -320   
-256   -368   
48     16     
16     144    
-384   -64    
208    16     
-784   -96    
144    -240   
-368   -112   
192    48     
208    -64    
160    -544   
-240   256    
80     -1008  
48     -352   
-416   -320   
448    16     
-544   -96    
-64    -96    
-240   -208   
64     240    
32     -80    
-112   128    
80     0      
-16    -176   
112    80     
-160   -416   
400    112    
-64    -592   
176    240    
-48    160    
0      48     
-48    48     
96     -208   
16     0      
-80    -48    
-176   -48    
-16    -32    
176    288    
80     -272   
-288   -80    
144    -96    
96     64     
48     -32    
240    96     
-368   48     
432    192    
-304   96     
272    -16    
-112   -80    
32     -176   
-112   240    
-96    -272   
-32    96     
16     -368   
-16    144    
-96    96     
144    160    
-304   64     
208    96     
-384   144    
-544   -64    
-48    288    
80     -16    
16     -96    
-64    32     
-48    0      
-48    -208   
-160   224    
-80    0      
96     176    
-432   -144   
-32    -240   
-48    224    
-144   -48    
80     272    
-336   32     
128    224    
-640   0      
160    0      
-224   32     
-96    48     
96     -80    
0      96     
112    80     
-208   128    
176    -512   
-304   128    
48     48     
-80    -16    
-80    96     
-144   -48    
-272   80     
-416   -288   
32     144    
-1408  -96    
160    176    
16     -192   
-160   160    
-80    -288   
48     128    
-64    96     
0      160    
16     32     
176    144    
-304   144    
-112   0      
144    -176   
-64    -16    
64     80     
-224   112    
-64    288    
-256   -208   
144    176    
48     -368   
288    240    
-64    64     
-16    208    
-176   96     
-144   -48    
96     128    
-128   32     
-80    48     
384    48     
-176   208    
-96    -64    
-16    208    
-1744  -112   
112    256    
-160   0      
128    32     
-128   -48    
64     160    
-304   -64    
160    -144   
-160   272    
48     144    
80     208    
800    400    
528    1344   
32     80     
-784   -224   
-224   -96    
704    176    
-1104  -400   
1120   112    
-368   272    
208    -512   
-176   544    
64     -640   
80     464    
144    -336   
-48    480    
64     -352   
-400   432    
192    -224   
16     368    
-160   -256   
80     256    
96     64     
-112   128    
32     32     
64     -16    
-64    128    
272    240    
-64    224    
-96    -96    
-144   32     
48     -32    
0      224    
32     -48    
-112   192    
-176   -160   
-80    192    
96     -96    
-112   48     
80     -16    
16     192    
32     48     
-128   80     
0      -16    
80     176    
-128   64     
-16    48     
-64    32     
-176   48     
320    48     
-368   -32    
80     80     
80     128    
-16    256    
112    -16    
-128   128    
48     48     
64     112    
-32    48     
48     224    
-16    -32    
16     128    
32     48     
-192   64     
48     -64    
96     -16    
-112   96     
128    128    
-16    176    
16     32     
16     64     
-32    0      
96     192    
-48    128    
48     0      
16     224    
-352   -112   
224    32     
-368   208    
64     16     
32     -32    
-16    192    
-64    144    
112    544    
-32    96     
112    -128   
64     96     
-128   -16    
160    32     
-128   256    
48     96     
-144   -112   
16     80     
-384   32     
240    96     
-16    80     
32     224    
64     -160   
-80    48     
208    208    
80     128    
32     80     
32     144    
48     112    
0      32     
112    112    
240    208    
-48    192    
48     176    
-112   32     
-16    112    
48     112    
96     32     
80     128    
-128   0      
48     48     
-48    80     
0      112    
144    224    
0      -144   
48     80     
0      176    
64     208    
-64    16     
32     -688   
-64    -80    
64     -160   
-32    48     
0      32     
64     16     
48     96     
0      96     
16     112    
208    256    
-240   -32    
96     80     
48     576    
224    224    
-64    16     
-64    -96    
160    144    
-48    96     
48     0      
80     224    
-112   -32    
208    128    
-128   128    
112    160    
16     -16    
-32    128    
144    160    
48     64     
-16    112    
-32    32     
0      -256   
176    240    
-48    48     
112    48     
-112   160    
192    32     
16     144    
160    192    
-96    128    
-96    256    
-96    -288   
160    176    
256    128    
-176   -192   
64     256    
-96    -384   
224    144    
-16    -1104  
64     80     
80     112    
0      144    
0      80     
16     -80    
112    32     
-64    64     
112    112    
-144   96     
48     0      
64     0      
32     96     
-240   -80    
160    176    
240    192    
-128   96     
96     -16    
256    16     
-64    -80    
0      -48    
96     160    
-16    176    
-16    64     
192    80     
-80    48     
0      -32    
-720   -864   
208    2208   
288    1184   
-288   -848   
512    544    
-384   -1792  
432    224    
-656   192    
496    -160   
560    16     
-608   416    
496    -272   
-192   864    
160    96     
-96    400    
-48    -80    
208    352    
-64    -96    
0      -1024  
-160   -192   
480    256    
-112   256    
192    80     
-176   80     
128    96     
112    80     
288    -144   
656    384    
176    240    
-544   -480   
48     272    
96     -288   
48     -16    
112    -96    
144    96     
0      144    
16     96     
-48    -272   
-144   32     
144    -32    
288    528    
-128   96     
48     -160   
-320   272    
160    -512   
64     144    
32     -160   
-32    176    
144    -64    
-64    0      
16     -144   
16     32     
32     48     
128    176    
0      128    
80     -48    
64     -512   
48     -480   
96     -1120  
-112   -288   
144    112    
80     -16    
16     192    
128    -304   
-16    112    
-160   -896   
288    -1552  
32     192    
-16    -464   
304    352    
-960   0      
80     -160   
96     -144   
64     -320   
272    -48    
-128   -608   
256    -32    
32     192    
32     -272   
48     128    
96     -16    
32     -432   
128    128    
-64    -432   
352    -32    
16     64     
-176   -288   
-128   48     
-256   -224   
112    32     
16     -272   
-80    -80    
144    -128   
128    -48    
208    192    
-32    -32    
16     16     
-176   16     
96     -144   
-112   -640   
-208   -224   
144    128    
-208   96     
80     -304   
-288   -144   
144    -656   
256    -64    
-144   -352   
0      160    
368    -80    
48     96     
48     -64    
32     96     
80     -144   
-192   -128   
272    -16    
-208   80     
-784   16     
-80    0      
96     -112   
0      144    
176    48     
336    128    
-384   32     
336    -1280  
224    224    
-176   -128   
256    80     
64     144    
-80    32     
-32    64     
48     -240   
-32    160    
48     80     
176    16     
-256   -48    
-272   -16    
224    -512   
160    -160   
-96    -1696  
-48    304    
80     80     
272    144    
-368   176    
-48    -64    
-16    -48    
-80    -368   
16     144    
160    16     
-32    -32    
-144   -64    
-224   -128   
-16    -320   
48     80     
32     -160   
192    80     
0      -1344  
96     -16    
0      272    
-176   -224   
16     80     
-32    -48    
0      192    
96     -80    
-112   -64    
112    -80    
-336   -32    
112    208    
80     -16    
208    -144   
16     112    
80     -768   
240    -128   
-560   96     
32     80     
80     32     
0      96     
-208   -96    
112    32     
-144   -48    
192    -16    
144    64     
-64    48     
-96    80     
288    -320   
16     192    
-128   -48    
128    32     
-128   -16    
64     0      
-176   -32    
144    -96    
-128   96     
-32    -176   
160    64     
-16    -176   
48     96     
80     -368   
-176   720    
-176   -192   
-752   -112   
256    576    
-880   -144   
-208   240    
-96    -1056  
-368   144    
64     -176   
256    512    
-144   -208   
64     208    
64     -560   
112    544    
-64    -272   
208    176    
-768   96     
-240   -128   
240    416    
-384   -176   
-144   -112   
-320   -96    
32     272    
-192   -48    
-128   112    
48     -128   
-144   144    
-16    -144   
-96    160    
16     -160   
16     96     
48     -96    
16     48     
-144   -80    
-48    64     
-16    -16    
-16    112    
-128   144    
-400   64     
-48    -96    
16     -16    
-80    -16    
-16    -64    
0      112    
64     0      
-80    80     
-144   -224   
-80    48     
-32    32     
16     16     
-112   96     
32     80     
-32    16     
0      -16    
64     -48    
-1008  32     
48     128    
-32    32     
128    160    
-192   -112   
-16    64     
112    208    
32     112    
-96    160    
-16    -64    
-64    -16    
32     64     
0      -48    
-32    16     
48     112    
-48    240    
-96    16     
128    -48    
-48    64     
48     -112   
-16    128    
-32    288    
-64    -16    
112    -144   
-224   -288   
96     -48    
-128   128    
-176   192    
96     272    
-256   0      
-352   -128   
160    64     
-2064  -96    
64     112    
-112   -256   
-16    256    
64     80     
144    16     
16     96     
0      176    
-16    48     
-160   -384   
-128   -128   
112    160    
-48    112    
-272   -32    
-32    160    
-928   32     
128    160    
0      80     
-48    16     
0      112    
-192   -144   
128    112    
-112   224    
64     64     
-16    -16    
-48    144    
16     112    
0      112    
-288   -64    
64     112    
-208   -32    
96     176    
-16    48     
0      48     
-64    160    
-32    -80    
16     -16    
-32    288    
192    64     
16     -80    
-304   352    
80     -240   
160    208    
-304   128    
208    16     
-304   -144   
-32    176    
-112   48     
176    64     
-272   -176   
320    96     
-160   32     
112    112    
-48    96     
-112   -64    
80     144    
48     32     
96     144    
-144   64     
80     32     
-80    112    
-208   48     
176    -192   
32     240    
16     208    
96     64     
-240   48     
64     176    
0      144    
-80    0      
-32    112    
96     -32    
96     352    
-352   -256   
272    256    
-64    32     
208    48     
-112   128    
-16    0      
16     464    
-384   -352   
784    80     
-320   208    
208    112    
-176   144    
-208   80     
240    -96    
0      224    
-160   -48    
128    176    
-176   112    
176    144    
-32    80     
-16    64     
240    -64    
-128   144    
80     0      
0      16     
96     432    
-448   -32    
176    -16    
-48    176    
128    240    
-192   16     
-80    80     
-64    64     
176    -80    
400    -160   
-64    240    
-96    16     
-64    144    
64     304    
-1008  32     
288    208    
-304   112    
-208   -352   
512    688    
-464   480    
-512   -128   
16     -240   
544    416    
-208   48     
128    -144   
-64    240    
224    -240   
-160   240    
160    -208   
-112   752    
112    144    
-320   -192   
128    144    
-64    -64    
-32    176    
64     64     
240    -656   
-192   -16    
32     -64    
128    160    
-48    304    
192    176    
-112   32     
80     96     
-16    96     
112    112    
-48    112    
-48    80     
-16    16     
96     128    
48     112    
144    -64    
48     80     
-80    208    
112    -96    
-16    176    
64     192    
-16    32     
-224   -64    
192    144    
80     240    
144    -64    
-176   -32    
96     -32    
-128   -64    
128    80     
0      -48    
-112   -96    
176    -16    
16     96     
80     208    
-128   144    
176    -32    
-16    192    
16     0      
0      128    
-80    -240   
160    208    
-176   32     
160    -32    
32     80     
48     -640   
96     144    
0      -3200  
-16    32     
176    0      
32     240    
-32    -16    
48     64     
32     96     
-224   176    
208    32     
304    16     
16     112    
16     -32    
0      80     
-16    -304   
176    -16    
144    -16    
-320   128    
32     -80    
208    112    
-288   -288   
224    96     
-112   16     
0      16     
224    48     
-144   0      
304    208    
-32    -192   
160    208    
16     -128   
32     144    
-32    -800   
160    112    
-32    -1280  
112    128    
-160   80     
224    224    
0      80     
48     128    
32     -48    
-96    -80    
32     80     
160    -224   
-16    32     
16     -80    
64     64     
192    32     
-48    288    
336    -32    
-256   176    
144    48     
160    320    
32     192    
240    96     
-224   16     
48     -528   
256    208    
80     -144   
-80    16     
-128   -96    
112    -32    
-16    -144   
-32    16     
240    112    
0      192    
368    96     
-144   272    
-64    -128   
224    96     
-160   144    
336    -32    
64     64     
-128   -352   
96     64     
-64    -384   
64     -32    
-32    16     
224    -96    
80     -160   
-48    64     
80     128    
64     48     
0      32     
0      176    
64     -704   
96     -144   
-80    -768   
176    -128   
0      160    
-112   -176   
352    80     
-16    64     
64     160    
-128   -752   
80     -560   
96     80     
256    -176   
0      64     
-480   96     
-64    -480   
336    -352   
80     -448   
-48    -64    
48     -1408  
64     -176   
-16    160    
16     16     
80     -272   
112    352    
32     -240   
144    0      
224    -64    
-64    16     
-368   -16    
-32    -192   
-160   -176   
64     -112   
144    -80    
160    -272   
128    -64    
-96    -784   
48     -144   
80     -96    
48     128    
-48    -256   
240    -112   
64     0      
144    80     
-176   -80    
2496   -1232  
-1408  0      
1168   96     
-96    -112   
864    -240   
-448   -560   
144    -1488  
96     1360   
112    -240   
-208   80     
-176   -464   
352    -32    
-256   -128   
448    -288   
-224   288    
144    -192   
-480   176    
144    -112   
-48    128    
192    -240   
-32    144    
96     -256   
-48    112    
-48    -432   
48     -16    
-224   -128   
64     -64    
48     112    
128    48     
-96    -32    
48     -480   
-416   96     
-128   -224   
-192   -32    
-48    -128   
464    -16    
32     -32    
-80    32     
32     -560   
-16    16     
80     -128   
16     112    
48     80     
48     -224   
-320   -144   
16     96     
-224   -80    
112    96     
-416   48     
-64    64     
48     -96    
64     -224   
-32    144    
128    -96    
16     128    
64     128    
112    80     
-128   32     
160    -96    
128    336    
-272   -272   
-192   -80    
192    -32    
-544   -192   
240    -16    
-1264  -80    
128    -240   
48     80     
96     -144   
-16    128    
0      -2704  
64     -352   
-304   -64    
112    32     
-32    128    
80     48     
-112   -16    
192    -176   
176    64     
112    144    
-336   80     
208    -192   
-32    96     
48     -592   
-160   32     
32     48     
80     -112   
-16    -16    
96     144    
-64    128    
80     -128   
-64    -160   
192    -80    
16     192    
-80    64     
-16    128    
-16    -112   
144    128    
-96    -192   
64     128    
-48    80     
-240   80     
-16    48     
16     -32    
-96    32     
64     -48    
48     176    
32     112    
-16    -112   
160    80     
-144   96     
-800   -224   
-16    64     
-128   -64    
-96    64     
-80    64     
32     128    
-160   -96    
-336   -16    
-144   112    
144    -16    
-32    -48    
-48    -48    
-48    0      
-224   -352   
96     176    
-544   240    
208    -48    
-32    -128   
-192   192    
224    -112   
-80    64     
-208   -32    
0      128    
-160   48     
-304   32     
-128   -464   
352    80     
-352   336    
112    -256   
32     192    
-48    -48    
208    112    
-144   128    
-128   -64    
0      -64    
-80    112    
-64    112    
96     64     
-64    32     
-368   -64    
-96    176    
-2032  -256   
208    32     
288    352    
-368   128    
336    -80    
-304   48     
464    -128   
-112   208    
-144   -16    
-16    128    
-144   32     
272    144    
-112   -96    
-576   -416   
272    144    
-896   304    
-16    96     
-16    -112   
128    112    
48     -16    
-176   -64    
-176   288    
-144   -128   
528    64     
-352   176    
-96    -400   
96     80     
176    160    
48     208    
-240   368    
-640   -32    
96     160    
-640   16     
80     32     
-160   -112   
0      272    
64     -112   
-64    80     
-16    -96    
176    144    
-96    64     
224    -80    
-160   112    
0      -80    
32     176    
-176   -16    
704    1744   
-576   -1072  
-752   32     
-144   -256   
-688   400    
80     -1216  
-256   -160   
704    416    
-624   32     
432    32     
-448   224    
48     -64    
-16    320    
-176   -96    
-176   -64    
-64    48     
-576   144    
48     -240   
32     64     
0      128    
16     160    
-48    80     
16     -48    
-192   -16    
192    -176   
-80    96     
112    0      
-96    16     
-16    160    
-112   16     
144    48     
-160   -16    
-16    48     
112    96     
-64    48     
224    256    
-160   192    
64     96     
-96    -16    
64     48     
0      48     
-16    64     
-48    48     
48     176    
-176   80     
96     48     
-320   -32    
0      0      
32     -144   
16     208    
-16    32     
112    80     
-176   0      
208    144    
-208   64     
16     -96    
256    176    
-320   32     
224    144    
-288   16     
80     64     
80     32     
0      176    
0      16     
192    128    
-160   144    
144    304    
16     -64    
128    96     
16     128    
-16    48     
16     80     
112    -16    
-32    240    
-144   0      
96     208    
0      112    
192    -96    
16     48     
-16    80     
64     240    
-240   48     
224    -112   
48     -16    
96     128    
-128   176    
-16    240    
16     -112   
144    240    
-160   48     
112    0      
0      0      
32     176    
-112   -256   
96     -128   
-48    160    
96     256    
-64    16     
-48    16     
-16    -80    
-64    -16    
32     112    
0      64     
64     256    
-80    -64    
176    64     
-64    128    
-16    32     
128    -16    
-64    224    
48     16     
112    160    
-16    -64    
48     240    
32     16     
-128   -32    
80     160    
144    128    
128    128    
16     272    
0      240    
224    144    
-288   112    
48     0      
0      64     
304    176    
-208   48     
464    240    
-144   192    
48     192    
-160   32     
32     48     
-80    -192   
-96    -624   
80     -48    
144    -1248  
-32    0      
-32    96     
64     -80    
-80    -16    
112    80     
-16    64     
144    128    
0      16     
0      64     
96     -128   
64     240    
-112   -160   
-32    -160   
80     32     
144    -240   
-96    160    
144    64     
96     -128   
16     112    
-48    112    
368    64     
-224   240    
48     -160   
112    128    
32     32     
48     112    
-64    48     
96     112    
32     112    
-32    -752   
176    160    
-32    -672   
256    208    
-64    96     
48     -16    
32     48     
96     112    
80     -128   
224    128    
-16    64     
0      240    
-16    144    
96     -112   
48     96     
16     -176   
0      96     
80     -608   
96     80     
-48    -176   
0      80     
0      -528   
80     96     
-48    -80    
32     112    
0      64     
0      128    
48     192    
-48    -240   
0      64     
96     -128   
112    -48    
144    -272   
2112   -2160  
-144   -2976  
896    592    
-352   304    
-352   256    
672    -640   
-736   -16    
560    544    
96     176    
-32    304    
-368   -176   
160    -64    
112    -128   
256    -48    
-64    -576   
-64    144    
-32    -704   
-320   -144   
80     0      
304    160    
112    112    
16     192    
-48    128    
32     -976   
48     64     
160    -304   
16     160    
96     -496   
48     176    
-112   -528   
224    240    
-64    -32    
240    176    
-176   16     
112    -112   
-16    64     
240    240    
160    336    
-48    -96    
144    192    
-80    -224   
160    160    
-48    -80    
176    112    
16     16     
16     192    
-64    -32    
96     208    
-32    80     
256    -816   
-16    208    
-96    -176   
48     -112   
-144   -128   
224    -368   
-96    -64    
192    -16    
-112   -192   
-160   -144   
208    -192   
176    192    
-112   0      
208    -704   
-112   96     
64     -304   
320    -32    
-560   -160   
96     -592   
32     -208   
48     -1136  
0      -144   
112    -1728  
112    -16    
-16    32     
80     -240   
112    0      
-176   -672   
64     -736   
336    -16    
-32    -96    
256    -32    
-272   160    
96     160    
80     -16    
160    -128   
64     80     
-144   64     
176    -256   
144    288    
-128   -336   
192    -48    
-48    160    
80     0      
80     32     
-16    -80    
176    -224   
-112   16     
-80    -272   
-336   48     
-80    -48    
176    0      
16     -352   
-32    48     
144    -928   
0      16     
48     32     
32     -80    
128    -64    
-32    208    
-208   -144   
176    -48    
-240   -32    
96     16     
-448   -16    
32     -272   
48     -176   
64     -112   
48     16     
96     -272   
80     -80    
96     -1008  
16     192    
208    48     
-96    -80    
-208   -32    
176    80     
16     32     
208    288    
-896   16     
192    -208   
-1040  0      
48     128    
288    160    
-80    144    
192    -176   
64     -640   
-48    256    
496    -432   
-80    32     
-128   352    
160    64     
-112   32     
16     -96    
-80    16     
96     -16    
-80    32     
-32    320    
-128   -160   
240    -80    
128    -64    
160    -1056  
96     -16    
64     128    
160    336    
-160   352    
-176   -672   
352    112    
-80    144    
-64    32     
-144   -80    
-656   -64    
144    16     
-816   -64    
192    -352   
-16    32     
80     -240   
32     128    
-368   128    
96     -144   
-64    -224   
32     16     
-160   -96    
96     48     
48     320    
128    -64    
-208   -16    
48     -64    
-256   -256   
160    368    
288    64     
0      160    
64     -96    
-352   0      
80     32     
-128   80     
192    208    
16     32     
208    32     
-48    -16    
128    -336   
-208   112    
48     -64    
-192   32     
-272   112    
-64    32     
-880   -16    
-368   -112   
112    16     
432    -864   
336    688    
-64    128    
-336   -352   
560    -672   
32     -224   
-304   -192   
112    -288   
-688   128    
352    32     
-256   -256   
-32    192    
-464   -112   
-208   -16    
144    32     
-352   32     
-16    -16    
-112   48     
-112   -48    
192    96     
16     112    
16     144    
-48    48     
-192   -96    
16     48     
-480   -288   
384    128    
-80    176    
96     -80    
-272   32     
-112   16     
32     32     
-288   80     
-80    32     
-624   -32    
0      -192   
416    192    
-240   272    
-64    -208   
0      32     
-80    -32    
192    144    
-16    32     
16     80     
-192   32     
-96    -32    
-160   48     
-96    -16    
0      160    
-576   -112   
-32    64     
-1744  -160   
96     -16    
-96    -32    
32     144    
16     -144   
-96    96     
-16    16     
0      0      
0      48     
-96    48     
64     64     
-80    96     
-48    -96    
144    -96    
-128   112    
-384   112    
16     -16    
80     -16    
-48    304    
-160   -336   
192    48     
-288   48     
160    0      
48     96     
0      208    
-240   -48    
-64    32     
16     64     
-128   -32    
32     0      
-144   144    
-48    32     
-48    -256   
160    128    
-64    160    
0      -80    
-64    128    
-224   144    
128    16     
-256   16     
208    128    
-304   112    
144    -128   
-176   -208   
176    160    
-416   80     
256    112    
-704   -128   
0      32     
48     64     
192    96     
-112   128    
208    320    
-224   128    
112    16     
-112   16     
192    112    
80     0      
-80    16     
96     0      
-256   32     
192    128    
-240   160    
48     208    
-16    0      
-128   144    
-80    -16    
352    80     
32     144    
-240   96     
176    96     
-368   -80    
192    16     
-32    112    
176    64     
96     368    
-80    240    
-48    64     
-160   0      
48     -48    
-176   64     
16     -16    
-96    0      
144    144    
-192   16     
192    0      
-128   176    
-16    0      
80     -48    
-128   80     
-224   -48    
80     224    
128    160    
-16    64     
64     -144   
32     320    
32     192    
-32    64     
112    64     
-16    112    
-96    0      
-48    0      
48     144    
32     -16    
16     96     
-128   64     
256    64     
-208   -64    
144    112    
112    80     
-80    96     
144    -16    
-16    144    
48     -16    
-208   0      
-96    0      
208    240    
16     -16    
16     320    
-64    -272   
-352   -96    
224    32     
112    48     
208    304    
176    112    
144    144    
16     192    
0      160    
-112   224    
80     80     
48     -160   
-64    96     
96     48     
-272   128    
128    240    
-144   -80    
96     208    
80     192    
-48    208    
0      32     
-48    -16    
80     0      
320    80     
-160   96     
96     64     
0      112    
48     0      
416    1696   
-832   -1120  
48     -208   
32     -32    
-224   416    
-928   400    
-80    -1184  
416    816    
352    64     
320    384    
-448   -80    
512    64     
16     -96    
-144   -224   
-16    -112   
336    240    
-176   64     
256    384    
-272   -224   
32     -240   
208    240    
-48    32     
-64    64     
112    192    
0      16     
80     64     
160    128    
0      -48    
64     -16    
-16    64     
48     80     
-112   64     
32     -704   
128    128    
-16    -2784  
-96    -320   
-160   -208   
-32    -368   
336    272    
0      192    
-192   224    
192    80     
0      0      
48     80     
144    96     
64     144    
-112   32     
-80    -176   
176    720    
-112   -464   
256    336    
-160   32     
128    48     
-16    256    
-96    -16    
48     -80    
-96    -464   
-96    -400   
480    560    
-432   -112   
448    176    
-144   0      
272    -176   
-96    176    
224    112    
-112   -32    
144    160    
80     96     
144    48     
-48    128    
48     16     
144    64     
-80    -160   
64     128    
-80    64     
64     80     
-240   -240   
-128   -304   
-144   -80    
208    -224   
-160   96     
144    -416   
-16    96     
176    -64    
48     96     
32     48     
-48    96     
48     48     
64     160    
64     -16    
144    96     
64     320    
-48    -16    
-64    -144   
16     -144   
32     112    
160    -496   
-80    16     
-80    -1776  
96     256    
0      -32    
112    160    
-64    144    
112    80     
128    64     
-160   -96    
288    512    
-224   -432   
432    192    
-208   -208   
80     -32    
48     -224   
-80    64     
240    -1760  
-64    160    
-48    -64    
64     0      
-32    64     
160    48     
48     160    
-48    -368   
32     192    
80     -112   
112    96     
32     48     
-128   -96    
288    -432   
-256   64     
32     -1488  
48     -48    
16     192    
176    -288   
-48    96     
64     176    
16     192    
-48    0      
288    0      
0      -528   
0      48     
64     112    
96     80     
0      384    
16     48     
304    -144   
-208   -112   
176    -32    
-16    -1376  
80     368    
-528   -192   
160    -432   
16     -16    
0      -752   
160    0      
80     80     
-48    -608   
-64    -16    
-32    0      
16     -320   
-160   -352   
272    -160   
16     80     
32     -256   
-80    80     
-304   112    
128    -224   
-384   -128   
96     112    
32     -128   
-96    -816   
224    0      
112    144    
-80    -256   
272    -736   
0      32     
64     -800   
-16    192    
32     -144   
128    64     
-256   -128   
32     -256   
32     -80    
0      -160   
-16    304    
112    -320   
128    48     
128    -1312  
112    32     
-48    -176   
48     16     
32     96     
48     112    
-208   -64    
80     -272   
-256   -176   
288    -496   
-704   208    
48     96     
32     16     
-128   512    
-656   384    
1184   -1120  
-752   144    
400    -304   
0      272    
-128   0      
400    144    
-48    -96    
-160   -208   
-320   -16    
96     -96    
-304   64     
16     -16    
80     -64    
16     -192   
0      -256   
64     -224   
128    128    
32     -944   
48     32     
-32    80     
176    -224   
-64    48     
64     -128   
-64    96     
-176   -128   
112    -16    
64     -208   
-736   48     
96     -224   
-176   144    
128    -208   
0      176    
-64    -1040  
160    256    
64     160    
48     -64    
-128   -144   
112    144    
-272   -112   
112    0      
-96    -112   
240    16     
-528   0      
48     -48    
48     16     
112    -448   
48     176    
-96    -1088  
224    176    
-160   80     
240    -48    
-272   48     
160    -192   
-224   48     
32     -144   
-112   144    
-176   -48    
208    -16    
-64    -80    
0      96     
64     -384   
160    112    
-96    -128   
-64    -64    
-16    64     
0      16     
-240   160    
32     -80    
64     -32    
48     0      
-32    160    
64     0      
16     -64    
144    -128   
-96    64     
240    -80    
-48    80     
-48    -176   
240    16     
-272   112    
160    0      
-384   96     
0      -48    
96     80     
16     48     
48     -112   
192    -16    
-352   48     
288    -304   
-80    64     
-64    -112   
0      96     
-1472  -432   
-112   -64    
-96    -16    
-624   0      
-112   64     
144    48     
-48    32     
16     16     
-128   48     
272    304    
-144   96     
-192   64     
-240   80     
-112   -112   
128    160    
48     96     
-128   0      
128    208    
-192   -96    
-16    32     
-960   -48    
-64    160    
112    32     
-32    128    
32     48     
176    272    
-32    -16    
-80    96     
-160   -128   
176    256    
-48    -48    
64     -48    
-112   -48    
-16    -16    
-256   -112   
16     16     
32     48     
-448   -224   
-224   -144   
-448   -64    
176    272    
-144   -336   
64     144    
-336   -96    
80     -208   
16     80     
-48    -224   
-32    144    
16     128    
192    -16    
-160   -256   
-128   80     
-192   -432   
0      -96    
-320   320    
32     128    
-144   -16    
80     112    
-48    -16    
-16    0      
-128   -32    
-48    -128   
128    272    
-16    -592   
160    176    
-80    80     
32     16     
80     -32    
16     -32    
-1136  -80    
80     240    
-176   48     
176    112    
80     -224   
-80    80     
-288   -64    
48     -64    
-32    80     
-32    80     
96     112    
-288   -80    
-48    160    
-432   -224   
-128   80     
-160   -32    
64     112    
0      -144   
64     96     
-112   48     
0      96     
240    -64    
176    256    
-112   160    
-32    96     
-224   -16    
64     64     
96     80     
-208   -16    
80     192    
48     -128   
-48    176    
-32    -96    
80     -80    
-64    208    
1712   -368   
768    256    
32     448    
-320   560    
480    512    
-288   -656   
112    192    
400    -672   
128    512    
-32    -368   
0      96     
-512   144    
-144   160    
-144   -144   
224    272    
-208   208    
224    16     
160    96     
-320   -240   
-48    304    
-160   -48    
-128   176    
-144   16     
32     64     
-16    -16    
0      -48    
176    560    
-16    384    
64     64     
-16    16     
-176   -32    
144    64     
80     48     
-80    176    
176    272    
32     80     
-400   -224   
240    0      
0      128    
64     -112   
304    48     
112    64     
-32    32     
-128   320    
80     144    
-64    -48    
112    144    
-272   -256   
368    432    
-64    -224   
208    -16    
-256   96     
192    -96    
16     240    
16     144    
-64    -96    
0      192    
224    304    
-128   0      
-144   288    
176    64     
-96    32     
32     160    
80     320    
16     -32    
-272   64     
80     48     
160    128    
-96    -64    
-32    176    
-80    -32    
80     16     
-48    -32    
16     160    
208    48     
-32    176    
-16    -192   
-256   -128   
-592   -368   
240    432    
32     -128   
-160   32     
224    0      
-112   -16    
80     240    
48     64     
320    464    
-352   112    
80     128    
-80    272    
112    32     
-16    48     
-112   -32    
112    144    
80     112    
144    432    
-240   -144   
240    176    
-176   128    
336    336    
-48    160    
32     112    
48     0      
64     0      
128    48     
0      96     
32     -16    
16     -368   
-64    -272   
-80    -80    
144    128    
-16    112    
32     128    
-48    -48    
48     80     
64     0      
-112   32     
80     96     
96     272    
256    64     
-128   80     
128    80     
0      -48    
112    -48    
112    96     
-112   96     
160    96     
-64    144    
16     -16    
-16    -32    
64     32     
-48    -1008  
-32    224    
112    80     
192    64     
-192   32     
128    608    
320    -80    
-288   176    
0      0      
224    64     
-64    -128   
64     64     
16     192    
80     -160   
-112   -144   
112    -752   
64     64     
32     80     
-32    144    
80     96     
48     96     
-64    144    
-16    96     
96     -144   
96     96     
-32    -64    
256    288    
-272   32     
176    -208   
64     224    
32     -240   
224    112    
-256   -176   
240    480    
-336   0      
256    -128   
32     -128   
128    128    
-96    240    
-112   224    
144    160    
-224   -96    
304    256    
208    -32    
32     128    
80     -416   
0      32     
80     -144   
48     64     
32     80     
96     64     
-80    336    
-16    -80    
192    144    
-48    64     
-48    144    
160    -192   
32     112    
64     -176   
144    144    
-48    -304   
0      224    
144    -864   
-112   128    
32     -1104  
208    64     
-64    -16    
-512   528    
-48    -432   
-464   144    
-96    320    
832    -560   
-448   -96    
112    -752   
-208   448    
336    -240   
-272   48     
368    -384   
16     560    
160    -896   
-160   176    
176    -32    
-16    256    
-32    0      
144    240    
-80    -16    
96     -176   
64     112    
224    48     
-80    208    
144    -256   
-48    192    
160    -48    
0      240    
64     -368   
-96    112    
176    48     
-32    224    
160    -144   
-32    0      
0      32     
96     80     
-112   -256   
96     -144   
144    96     
144    -320   
0      192    
80     -160   
-112   112    
96     -432   
128    256    
64     80     
96     -656   
-272   -32    
144    112    
-176   -64    
336    -16    
-112   -704   
48     -144   
48     192    
-48    -224   
176    64     
0      -16    
96     -240   
112    112    
-112   -1088  
160    32     
16     -272   
32     -512   
-112   0      
64     -224   
-16    -48    
112    -32    
96     -80    
80     -352   
-16    16     
192    208    
-16    -112   
112    160    
-32    16     
128    -176   
-128   64     
80     96     
-64    48     
-448   -240   
80     -176   
-80    -160   
48     -560   
-32    -80    
128    -464   
-16    -128   
-160   -832   
-96    -288   
208    384    
-384   -80    
480    -176   
-128   112    
-48    80     
128    -16    
-304   -16    
128    192    
-544   -144   
-144   -128   
-48    -80    
224    48     
-96    -224   
64     -560   
208    32     
16     -48    
224    240    
-32    -16    
-32    32     
-48    48     
-80    -272   
176    112    
-144   -160   
-48    96     
-192   -176   
16     -272   
0      -112   
112    -80    
48     -448   
-80    128    
80     48     
160    80     
-144   -64    
-64    32     
32     96     
48     -112   
-128   32     
80     48     
-336   0      
128    -48    
-16    -224   
-112   -384   
112    160    
32     -48    
96     32     
80     -2992  
-128   -48    
160    -32    
128    208    
-16    32     
16     0      
-128   -16    
192    -112   
-432   -176   
224    -112   
-800   -144   
64     304    
32     -64    
160    -48    
-48    96     
288    -560   
0      192    
-32    64     
64     0      
64     160    
144    -176   
-176   96     
0      -48    
-80    -64    
192    224    
-528   192    
176    -96    
-240   -16    
144    -400   
32     0      
-16    -704   
160    160    
-368   64     
32     32     
-336   -128   
128    80     
-336   96     
128    -208   
32     192    
80     32     
176    -128   
-176   -80    
-64    -80    
368    -96    
-224   32     
512    -208   
-96    144    
-224   -48    
176    16     
-128   0      
128    0      
-80    128    
0      48     
-64    -16    
160    -160   
-144   48     
64     -80    
96     112    
64     -160   
176    96     
-1312  -256   
-560   32     
-224   112    
-1280  -112   
16     64     
112    48     
-224   304    
-1936  -1392  
32     -544   
240    672    
336    336    
-160   48     
-224   -224   
-112   -144   
256    960    
32     -224   
256    -48    
-496   320    
464    64     
-208   224    
-400   -320   
96     224    
-208   -80    
16     144    
32     240    
-64    176    
-176   -384   
48     -64    
-272   -576   
384    48     
-496   96     
192    64     
-192   128    
32     192    
-192   80     
112    -160   
-240   176    
64     16     
176    256    
-96    32     
-16    128    
-96    -32    
-32    288    
-288   -176   
-112   -400   
32     304    
16     48     
-128   160    
-208   16     
176    208    
-192   -16    
-80    112    
-144   0      
400    160    
-800   -448   
-16    -32    
-96    -16    
80     112    
-48    128    
272    -64    
-288   80     
0      0      
96     -16    
-208   -384   
0      80     
16     -288   
288    416    
-80    192    
80     112    
-912   -320   
48     -96    
-112   128    
80     416    
-96    32     
240    128    
-288   96     
48     -96    
80     96     
0      176    
-128   128    
16     -80    
-80    48     
80     16     
112    432    
-160   112    
304    384    
-32    -32    
32     32     
-128   -144   
32     48     
-80    176    
48     -128   
-192   -32    
128    128    
-48    96     
208    512    
-432   -48    
352    240    
-160   -128   
-304   -112   
256    144    
-1296  -368   
48     -224   
176    32     
-96    48     
64     0      
-160   144    
96     48     
-192   -16    
-160   -208   
-32    144    
32     -128   
-32    -320   
-48    -224   
-48    208    
-16    32     
144    0      
-240   16     
144    48     
16     288    
64     64     
-16    -32    
32     128    
-16    144    
144    48     
-192   80     
160    272    
-16    16     
112    192    
-576   -160   
144    -64    
272    208    
-112   112    
144    336    
-208   112    
256    80     
-112   32     
-16    176    
224    288    
112    288    
-112   -144   
-48    96     
-176   16     
336    352    
-112   0      
16     64     
-48    32     
-16    32     
0      80     
80     -64    
-80    128    
96     -64    
-48    144    
-16    32     
48     80     
-80    0      
80     112    
-96    48     
80     160    
32     16     
-176   80     
208    128    
-80    80     
16     80     
128    368    
-208   48     
224    -112   
-80    0      
64     80     
48     64     
-128   -16    
128    48     
-96    32     
48     224    
-144   32     
80     -96    
176    128    
-96    192    
-48    16     
64     32     
336    -48    
32     320    
-192   96     
-64    64     
96     80     
-32    16     
224    128    
-96    16     
-80    160    
224    -80    
-16    -80    
-16    272    
32     240    
-32    -48    
160    0      
128    16     
48     160    
-32    112    
-48    160    
-128   -32    
224    112    
-192   80     
80     112    
-112   64     
-672   -1712  
-1168  -1152  
1104   624    
-288   512    
528    -336   
-464   496    
208    208    
-656   -112   
352    368    
240    176    
16     96     
48     -144   
-288   544    
384    -112   
-144   32     
144    -144   
48     368    
-16    32     
-48    32     
160    80     
80     96     
-48    80     
32     96     
32     112    
16     16     
144    -16    
-96    -16    
-32    80     
224    112    
-80    -464   
128    80     
0      -160   
16     80     
0      224    
96     0      
-48    96     
-160   -112   
112    -16    
112    112    
64     -80    
64     176    
-48    16     
-16    160    
112    96     
96     -224   
-48    64     
64     -1840  
-16    144    
160    208    
32     96     
-16    48     
16     112    
16     16     
80     128    
0      48     
48     16     
16     32     
-272   -48    
16     32     
176    -80    
-96    144    
112    -48    
16     96     
48     -144   
80     112    
-80    80     
32     128    
0      -48    
16     32     
64     48     
32     112    
-32    16     
48     -32    
0      80     
112    -80    
112    176    
-96    -736   
208    80     
-192   -1328  
0      -16    
144    -320   
-192   -48    
208    -144   
96     176    
-240   -80    
240    192    
-208   32     
48     -80    
160    96     
32     -176   
144    192    
16     -64    
128    256    
48     -464   
32     32     
192    -912   
368    544    
16     128    
224    352    
-352   -352   
80     -64    
224    240    
208    32     
-144   112    
-64    -176   
32     112    
128    -128   
176    288    
32     96     
160    384    
32     -384   
64     96     
-128   32     
112    0      
160    128    
16     -208   
-144   -304   
0      -192   
128    160    
128    -272   
-64    -32    
16     -224   
48     48     
144    -352   
80     128    
-32    192    
208    192    
-192   80     
0      208    
96     128    
0      -224   
16     160    
16     -144   
144    0      
64     48     
16     112    
144    -112   
-48    208    
48     -224   
96     96     
16     -192   
128    368    
0      128    
208    -912   
-160   -1920  
112    -160   
16     -256   
-80    112    
176    -224   
16     -16    
80     176    
0      0      
32     96     
80     32     
80     16     
16     128    
288    -64    
-176   -80    
96     -368   
288    -384   
-1440  80     
112    -272   
0      -96    
64     -576   
144    -176   
-96    -2864  
-144   -48    
112    -48    
112    96     
-144   240    
-64    -208   
176    -112   
-208   32     
128    80     
-208   80     
-256   0      
80     -64    
-96    -16    
32     -304   
64     -32    
64     -272   
144    -64    
-96    16     
48     -64    
128    -256   
-192   64     
192    -160   
112    144    
-128   80     
176    -160   
-304   -32    
112    -272   
-96    240    
16     -208   
-64    16     
96     -192   
208    112    
-48    -960   
-208   272    
-1424  -1232  
192    -320   
208    608    
192    80     
-16    432    
848    -560   
-1328  -160   
432    -80    
-720   -144   
176    -608   
-144   656    
384    -720   
-96    448    
-400   -688   
352    272    
-240   -288   
-32    336    
-144   144    
-32    160    
-352   -272   
240    -464   
-176   32     
352    -32    
-432   32     
288    -656   
-592   -256   
-64    -512   
224    -48    
-224   -160   
704    320    
-288   -1312  
80     -208   
-144   192    
0      -80    
144    -64    
-128   -400   
32     -144   
192    80     
-160   192    
-80    -32    
-208   -32    
96     48     
160    -144   
64     -96    
32     64     
192    -656   
-176   208    
192    112    
-272   16     
-16    -32    
96     64     
-80    -96    
80     -80    
-208   -288   
208    64     
-144   144    
64     -48    
64     16     
-16    -352   
80     80     
-192   -160   
64     -128   
112    -144   
16     288    
-240   -112   
192    -16    
-336   -64    
128    176    
64     -96    
16     96     
-720   32     
160    -96    
16     -64    
112    -192   
80     176    
-16    0      
144    -432   
240    16     
-144   64     
80     -176   
16     0      
-208   128    
-48    -16    
240    64     
-64    -224   
-176   16     
96     -256   
0      64     
-352   -16    
-48    128    
48     112    
-736   80     
-112   -48    
32     -128   
-64    176    
0      112    
0      16     
-16    -208   
-48    -48    
112    -48    
-112   128    
-80    0      
-16    192    
-304   32     
-144   -304   
160    -176   
-320   0      
304    352    
-144   176    
-160   144    
-544   80     
64     -32    
-128   32     
-208   80     
32     -272   
176    128    
-400   -64    
256    32     
-288   -144   
80     160    
-144   96     
32     0      
-48    80     
-192   96     
128    48     
-288   -160   
-192   -240   
32     48     
-240   -16    
144    96     
192    112    
-208   -32    
80     48     
-80    -144   
-144   96     
288    224    
-192   144    
176    0      
-256   0      
-208   112    
16     -64    
-16    64     
-32    256    
64     208    
16     -224   
-208   112    
-288   -448   
240    224    
0      64     
64     176    
-96    0      
-16    48     
-144   -48    
-32    144    
-80    96     
32     64     
16     352    
-320   -80    
320    48     
-816   0      
272    64     
-112   80     
-112   224    
208    0      
-192   -32    
16     -96    
-80    128    
32     208    
-192   -16    
32     0      
64     48     
112    -160   
-256   -96    
48     272    
-912   32     
16     0      
304    128    
-224   16     
288    -80    
32     96     
-16    64     
-64    160    
-32    0      
256    -16    
0      224    
-304   48     
-48    64     
-256   -96    
240    80     
-208   16     
80     112    
-960   16     
-240   48     
192    224    
-192   128    
96     128    
-48    -48    
-688   -1424  
-944   -32    
880    640    
-528   400    
464    -160   
-432   384    
224    -400   
-656   -432   
480    608    
176    288    
-112   -272   
0      208    
32     480    
288    16     
-208   96     
-64    -112   
144    208    
-96    128    
48     48     
16     80     
-128   -112   
64     208    
-176   64     
224    64     
-160   -80    
208    48     
-64    112    
0      112    
-80    144    
-144   -80    
128    32     
-80    80     
112    64     
-144   144    
80     32     
-224   -96    
64     -48    
-192   80     
80     80     
64     96     
-16    48     
-16    128    
0      128    
128    64     
0      48     
16     128    
32     80     
48     80     
-256   64     
128    160    
-176   -96    
80     -32    
80     0      
-16    192    
128    112    
-48    80     
-128   16     
80     80     
80     80     
0      128    
-16    48     
-96    80     
64     144    
-112   32     
32     32     
48     -32    
128    128    
80     64     
176    320    
-144   96     
176    0      
80     64     
16     240    
-32    96     
16     -48    
48     80     
64     112    
-16    272    
-80    128    
32     -64    
-80    -80    
224    160    
32     176    
-32    -240   
-176   176    
176    64     
16     -176   
-64    -32    
48     -112   
96     96     
-96    32     
96     128    
64     80     
0      112    
16     96     
0      -32    
-144   -1456  
224    448    
16     448    
112    48     
-160   -160   
176    112    
80     224    
80     144    
-48    96     
-48    112    
128    64     
64     0      
-80    16     
16     80     
0      16     
0      -208   
0      -16    
96     176    
0      160    
32     96     
-32    64     
48     48     
80     160    
0      112    
-16    -80    
-96    -80    
80     224    
96     -208   
64     16     
0      176    
-16    -256   
64     16     
96     -240   
-64    192    
48     240    
240    32     
-176   208    
96     128    
48     16     
0      176    
-32    208    
48     -160   
128    96     
-192   176    
384    0      
-192   -16    
144    160    
64     -768   
-80    160    
0      16     
48     -16    
64     272    
-112   192    
64     0      
-16    -48    
80     160    
160    144    
160    32     
-256   -96    
-48    -144   
272    -128   
-304   112    
336    -704   
-80    144    
32     -416   
80     144    
-48    -112   
240    224    
-80    -144   
112    128    
-128   128    
64     64     
48     -96    
0      -192   
-32    64     
-32    0      
-64    240    
16     -224   
96     208    
48     -400   
160    160    
-64    128    
-96    112    
144    -48    
16     208    
128    -16    
-16    80     
0      128    
80     16     
-96    144    
48     128    
96     112    
16     -160   
112    80     
32     -656   
-96    160    
64     -144   
64     240    
80     64     
208    288    
-64    16     
144    128    
-272   2080   
-1792  -1024  
496    1120   
304    480    
480    -544   
-496   48     
304    -224   
-128   -176   
-432   192    
464    -752   
-176   -112   
-304   112    
256    416    
208    -160   
-304   -192   
208    176    
-32    -352   
160    16     
-240   -160   
176    -112   
0      -128   
0      -32    
-16    -112   
112    -192   
-80    -176   
240    176    
192    80     
-96    176    
48     64     
0      -272   
32     -128   
16     -32    
80     224    
80     16     
80     128    
32     160    
32     64     
-16    -176   
32     96     
80     48     
80     -432   
-16    160    
80     16     
128    -1040  
-192   -288   
128    -32    
96     48     
208    -1008  
-112   -128   
144    0      
-112   -304   
32     -96    
112    -80    
0      -1024  
128    48     
64     -304   
-128   176    
48     -400   
112    -224   
-1040  -144   
32     16     
0      -32    
208    -240   
-48    48     
16     -1008  
80     -176   
144    96     
-48    -112   
160    -96    
-96    128    
96     -480   
32     112    
-192   0      
160    -48    
-112   112    
96     224    
0      -64    
240    96     
-48    -32    
144    -400   
176    32     
-176   240    
64     -176   
176    -176   
-112   160    
-48    -352   
352    112    
-368   128    
144    16     
-576   -144   
-64    -160   
0      -176   
112    -352   
192    96     
-160   -80    
64     -112   
0      -1136  
-416   -16    
256    -224   
-80    48     
-48    -192   
256    16     
-160   144    
96     96     
-176   -160   
144    112    
-1328  -16    
208    64     
-32    96     
208    -96    
-48    -128   
128    -944   
96     144    
64     -208   
32     -112   
32     16     
256    -48    
-128   32     
-64    -176   
-128   -160   
0      -160   
-240   -48    
368    -64    
-160   64     
64     -256   
-48    320    
96     -272   
32     288    
-48    368    
96     144    
80     -112   
-176   -176   
-16    128    
272    48     
96     16     
16     80     
-304   288    
-32    16     
-704   -240   
-80    -256   
-96    112    
192    -240   
80     160    
80     -2032  
-112   -112   
64     64     
128    -160   
80     128    
-48    0      
-224   16     
160    -48    
-320   16     
128    0      
-208   176    
0      64     
144    48     
-48    -144   
160    0      
128    -176   
-48    -176   
-176   160    
128    48     
-80    112    
80     48     
-32    64     
304    -128   
-224   -32    
-48    -16    
-96    320    
-208   -320   
352    -64    
80     -464   
64     112    
208    -672   
208    208    
144    240    
80     416    
-272   -64    
224    -16    
0      -48    
96     32     
-96    16     
0      -80    
-208   64     
192    -352   
-16    48     
-1440  -208   
192    112    
-112   112    
-400   16     
32     -160   
208    96     
-80    -192   
32     0      
-240   64     
304    208    
-288   -32    
-384   -64    
2288   2576   
-2112  48     
1072   1328   
-304   704    
1104   544    
-752   -320   
0      160    
-256   896    
96     -480   
-384   368    
-336   -416   
336    208    
-288   -192   
400    16     
-512   -32    
208    -160   
-192   160    
224    160    
-192   -112   
208    -112   
-240   16     
80     368    
-288   304    
-16    16     
-320   -16    
-304   -240   
32     -32    
-368   112    
96     80     
-224   -176   
16     176    
0      -64    
128    128    
-64    112    
-32    -16    
-48    80     
128    64     
-80    48     
128    64     
-80    64     
-128   48     
-96    192    
-272   64     
176    96     
-80    32     
32     0      
-32    -96    
-48    64     
64     96     
32     176    
-96    96     
16     80     
-16    144    
-192   0      
80     0      
-128   -32    
-32    -208   
-176   -144   
-48    64     
-496   48     
32     176    
48     32     
-32    208    
48     32     
-16    -128   
-128   80     
-16    -80    
16     48     
-32    32     
-96    80     
-80    48     
80     0      
-608   -160   
0      96     
-1008  -192   
16     80     
16     -112   
48     176    
80     192    
-192   -32    
80     -368   
48     48     
-32    80     
112    144    
-192   -32    
96     -32    
-16    48     
-128   0      
16     96     
-128   0      
128    144    
-192   -96    
-128   96     
-96    -16    
32     96     
16     80     
32     -112   
-48    -64    
16     144    
-48    80     
32     32     
-96    -32    
-112   -80    
160    112    
-224   0      
128    160    
-160   0      
96     128    
-96    32     
112    128    
-128   80     
112    32     
-48    32     
-64    -16    
-32    -32    
-16    80     
112    240    
-112   -128   
-16    0      
-224   48     
128    32     
48     -32    
-80    192    
96     112    
160    -16    
-176   208    
288    704    
-160   240    
224    -128   
-144   128    
-16    -80    
240    96     
-416   0      
256    112    
-80    0      
-48    96     
16     80     
112    112    
32     80     
-32    96     
0      -64    
64     224    
-144   80     
224    -32    
-64    32     
-80    -16    
160    112    
-96    240    
48     208    
-16    -128   
80     96     
80     48     
-32    160    
-128   -48    
-32    -112   
80     16     
0      176    
16     -128   
-64    144    
64     192    
-160   -16    
-96    176    
-112   -176   
144    128    
128    0      
128    160    
-208   224    
-96    -96    
224    -320   
288    -32    
256    320    
-240   272    
-368   160    
-48    -64    
224    176    
144    64     
128    224    
-144   192    
224    -80    
16     64     
16     80     
144    160    
-112   48     
96     48     
80     112    
-96    -16    
128    16     
-32    192    
128    80     
-48    144    
-64    -16    
-48    32     
-192   272    
80     -2688  
-48    400    
112    0      
80     192    
-48    64     
-480   3360   
-2000  -1088  
512    240    
400    16     
1456   -1056  
-1232  -352   
624    912    
224    656    
-656   -448   
128    -448   
-416   -624   
352    224    
-176   320    
144    0      
-16    272    
48     112    
32     -48    
48     -16    
80     336    
16     32     
-96    -16    
16     240    
-96    160    
96     112    
-112   -48    
64     64     
64     192    
0      -32    
112    16     
16     48     
144    160    
-16    176    
80     80     
-64    112    
176    112    
-112   -192   
112    128    
-80    48     
48     32     
96     64     
-32    -176   
16     128    
48     -480   
112    112    
-64    48     
48     -16    
112    176    
-64    0      
240    -128   
-176   128    
96     -32    
32     224    
-16    32     
32     -80    
48     -32    
112    -640   
48     256    
-16    -368   
176    112    
-64    64     
176    96     
32     -160   
16     96     
-48    128    
144    0      
64     80     
-48    176    
48     32     
32     -64    
240    144    
-80    0      
0      80     
160    -64    
-16    128    
64     192    
-16    -16    
176    240    
-176   -16    
224    -64    
32     176    
-144   -64    
320    112    
-80    176    
192    368    
-256   144    
80     -320   
256    -16    
-96    -800   
-64    160    
192    -144   
-192   80     
208    -640   
-16    80     
112    -16    
32     128    
-48    -192   
208    -16    
-80    208    
96     -48    
64     96     
-16    -304   
112    144    
64     -224   
192    272    
-160   64     
96     32     
-112   -192   
80     -32    
96     304    
32     96     
32     128    
-32    128    
128    176    
192    80     
-96    160    
-48    -128   
64     96     
128    -112   
64     192    
64     64     
64     160    
-160   -240   
48     64     
-112   192    
400    -48    
-144   192    
-144   -80    
336    -384   
48     -176   
16     192    
96     -128   
-96    224    
288    80     
64     240    
160    -400   
-352   16     
160    -48    
112    -1392  
32     32     
-16    -160   
32     -400   
160    -192   
144    -1376  
-160   -432   
-32    -1008  
16     -16    
224    -288   
-64    48     
96     112    
0      -64    
176    -512   
80     32     
-32    16     
16     208    
-208   -224   
144    -576   
-352   -96    
272    -336   
32     -224   
-32    -528   
-16    -64    
192    -3056  
0      128    
-48    -192   
0      192    
432    128    
-64    64     
-368   -528   
48     -176   
-288   -160   
384    288    
-1152  -64    
-32    112    
288    -208   
16     -176   
-160   -80    
80     -1312  
64     -160   
288    48     
-48    128    
32     -32    
-48    176    
112    -160   
112    48     
-208   -32    
144    -32    
-272   128    
48     16     
112    224    
16     -160   
192    -400   
-112   -80    
64     288    
32     -1232  
-192   96     
176    -288   
320    240    
-48    16     
1600   2064   
-1600  160    
928    864    
-336   608    
640    -656   
-880   -384   
-496   192    
512    400    
-16    464    
112    144    
144    -1296  
-336   240    
368    208    
-80    64     
-144   -144   
208    224    
-192   -112   
112    80     
-208   -64    
0      -176   
32     80     
-48    64     
-112   208    
-336   -304   
176    -192   
-96    -352   
-80    32     
32     -400   
32     32     
-96    -80    
208    128    
-176   144    
144    80     
-128   -32    
112    32     
-496   -64    
-48    -112   
-800   -192   
-128   -304   
224    128    
96     16     
-16    208    
80     -1408  
112    -304   
-112   112    
48     -144   
-128   192    
16     -32    
-208   16     
48     -224   
0      -16    
80     -48    
-32    112    
-48    -368   
32     64     
352    64     
-304   32     
112    -736   
288    48     
32     -128   
80     128    
32     -32    
16     -96    
-208   -160   
112    48     
-96    -16    
64     112    
-1088  48     
32     -48    
32     96     
112    -240   
64     48     
-64    96     
96     0      
64     96     
144    16     
96     48     
-96    96     
-144   160    
128    0      
-144   128    
16     -240   
-64    -144   
-1440  -256   
-32    336    
-240   -128   
-32    224    
-176   -208   
-368   -144   
144    112    
0      128    
-144   48     
0      16     
-16    16     
208    64     
-32    96     
48     -48    
-208   -192   
-400   -304   
-16    176    
64     32     
-192   -16    
-144   32     
16     -32    
-16    0      
-144   16     
-112   16     
-112   192    
-112   -64    
224    -32    
-208   -16    
64     -128   
-16    208    
-48    -128   
96     128    
-160   -224   
16     48     
-192   -80    
-48    -96    
-64    112    
96     112    
-64    48     
-80    48     
-176   80     
192    -192   
-112   128    
-384   -640   
224    176    
-176   320    
272    240    
-80    64     
-176   -64    
0      -32    
96     -112   
-16    160    
-96    80     
32     400    
-304   -208   
528    736    
-512   96     
272    96     
-144   224    
-96    -80    
336    96     
-224   80     
160    192    
-96    -112   
208    176    
-256   64     
48     -64    
-112   16     
-16    128    
0      80     
-80    80     
64     -144   
96     208    
-384   128    
272    448    
-656   -480   
128    128    
48     144    
-224   -64    
160    160    
-112   224    
64     144    
-192   16     
96     80     
128    96     
128    352    
-448   -432   
176    208    
-576   -464   
96     80     
368    112    
-384   0      
-64    96     
-32    256    
-144   64     
144    64     
-64    48     
16     48     
16     432    
-112   -128   
-176   240    
-64    160    
-144   -352   
-112   -80    
256    240    
80     160    
-64    144    
-96    96     
-16    80     
176    272    
-112   -96    
-64    176    
-144   -176   
0      160    
-192   -112   
832    -1616  
400    32     
-112   112    
16     128    
384    960    
-240   -544   
528    672    
-336   336    
240    -64    
-192   -32    
192    192    
144    160    
-176   -16    
-112   160    
32     -16    
80     176    
-112   -16    
32     192    
16     -192   
-80    176    
128    -32    
-176   128    
0      96     
96     80     
32     16     
112    16     
-112   256    
-32    160    
-48    48     
32     -16    
-48    64     
96     64     
-64    160    
-192   -128   
-48    48     
80     -16    
16     0      
16     64     
48     128    
16     0      
16     48     
-128   96     
144    48     
-64    96     
128    0      
-96    208    
-48    -64    
80     240    
-112   -80    
256    160    
-112   64     
160    96     
-48    96     
32     160    
80     -16    
0      112    
64     128    
128    128    
-48    144    
-48    -96    
-112   64     
-96    128    
96     -96    
112    80     
32     96     
32     80     
0      160    
0      128    
-48    96     
16     80     
128    48     
0      16     
-32    112    
-48    112    
80     16     
-16    224    
-64    -16    
64     -16    
48     -80    
128    288    
-288   80     
144    80     
-32    32     
0      -128   
288    176    
-384   -32    
192    240    
-144   -32    
112    176    
-48    32     
48     -16    
-32    96     
-48    432    
96     32     
96     224    
-96    224    
-80    16     
176    32     
16     80     
0      112    
48     -32    
16     192    
-32    -16    
208    64     
-64    16     
-32    208    
224    352    
-176   -864   
128    144    
112    -64    
-160   96     
80     96     
144    96     
32     48     
0      240    
-16    224    
64     -336   
-192   -128   
96     48     
-64    -256   
96     0      
-64    64     
32     64     
32     96     
272    288    
-96    160    
256    208    
80     464    
160    208    
144    208    
-64    64     
304    192    
-112   208    
432    288    
-336   112    
-32    16     
144    144    
112    -368   
-80    80     
96     -1296  
128    96     
-48    208    
96     112    
144    64     
-96    16     
48     -144   
0      -32    
-112   -128   
160    32     
80     96     
128    80     
-32    48     
80     -16    
16     160    
288    -144   
-208   80     
80     48     
112    32     
0      -112   
-80    -48    
16     -304   
224    112    
-16    176    
208    144    
-80    288    
64     -32    
160    -224   
-224   -352   
384    400    
-192   -224   
112    160    
-48    16     
112    80     
96     32     
-16    96     
64     112    
16     32     
16     0      
16     -288   
0      272    
160    -400   
-32    160    
48     -224   
-80    112    
144    -208   
64     64     
64     -544   
-16    48     
192    384    
48     112    
-16    32     
-16    160    
48     128    
-192   -224   
48     64     
160    384    
144    112    
-32    -80    
2480   -1536  
-992   -1728  
1008   1040   
-240   1104   
1120   -608   
-560   -192   
256    -352   
352    800    
-560   -288   
48     -464   
112    -304   
464    0      
-128   -400   
-176   -416   
384    112    
-16    256    
144    128    
-208   -112   
48     0      
32     -96    
-16    -432   
304    416    
-112   304    
160    -32    
-64    -400   
-16    -272   
416    384    
16     144    
112    80     
-64    -16    
128    192    
16     32     
208    224    
272    256    
16     -1888  
336    176    
0      -1824  
48     208    
-512   -320   
576    -400   
-144   -384   
432    -736   
-208   64     
80     -1264  
16     80     
192    16     
240    96     
-176   32     
224    -16    
-192   -400   
288    96     
-208   -64    
96     160    
-272   176    
-144   -624   
-144   -80    
32     -288   
640    432    
-528   -720   
224    336    
-144   -2672  
176    -320   
-176   192    
16     -176   
48     32     
-80    128    
-16    -16    
-16    -208   
-288   -16    
112    -32    
-1040  0      
-48    16     
32     -160   
208    -128   
112    -128   
64     -1168  
-48    -384   
-64    -192   
80     80     
-64    -192   
112    160    
32     -48    
0      -304   
48     176    
32     -96    
-256   -48    
80     -272   
-64    -176   
-48    -368   
80     -32    
128    32     
128    48     
80     -528   
-176   -64    
176    -32    
-64    96     
48     0      
80     224    
-272   -208   
288    -96    
-608   -144   
208    -208   
-1008  -96    
-16    -48    
-48    128    
-80    32     
48     -96    
208    -496   
-96    320    
80     -336   
16     -128   
-16    240    
176    112    
-64    -16    
-144   128    
16     -192   
320    48     
-336   -64    
128    64     
-112   -64    
80     -176   
-112   -112   
80     -704   
64     64     
112    368    
0      -64    
-64    -160   
160    -288   
-128   352    
464    -176   
-592   0      
32     -16    
48     -80    
-80    -176   
-176   208    
80     -336   
0      144    
48     -320   
304    -160   
-192   272    
304    -272   
-240   0      
112    -96    
-768   64     
176    -16    
0      48     
-208   -208   
128    -144   
-176   -416   
-16    -16    
112    0      
128    176    
-16    -288   
32     224    
352    208    
-464   0      
272    -224   
-176   -128   
32     -176   
32     -16    
-256   16     
208    224    
-336   64     
0      16     
-272   48     
80     16     
144    224    
64     -160   
80     368    
-16    0      
208    48     
-80    32     
160    -80    
144    -176   
-32    80     
-128   16     
0      48     
144    320    
-96    -64    
96     -16    
-16    -272   
0      16     
-144   -368   
-1200  -176   
-64    368    
-400   32     
192    144    
-1168  -80    
-48    -128   
240    -32    
-96    16     
80     96     
-128   192    
-720   -272   
224    -32    
-224   -112   
160    -32    
-112   -96    
416    2656   
-1408  816    
64     336    
48     -96    
1328   -720   
-352   -112   
-368   -352   
512    -560   
240    352    
48     480    
-384   -352   
-128   160    
-16    -112   
16     320    
112    -224   
-224   80     
128    -16    
-144   64     
16     0      
16     112    
-16    -48    
-368   96     
0      224    
320    -80    
-80    -16    
-64    -144   
-144   192    
96     96     
48     80     
32     -64    
-192   -48    
32     -16    
-16    208    
48     64     
-144   0      
-160   -128   
-96    192    
0      16     
-560   -64    
-208   -16    
64     -80    
80     176    
-80    -336   
32     32     
-64    96     
0      80     
80     64     
-112   144    
32     -48    
48     80     
-176   -32    
80     128    
-64    32     
-96    176    
16     48     
-752   -112   
32     80     
-32    32     
-32    -32    
128    176    
-128   16     
128    96     
-80    64     
-128   128    
16     -176   
32     112    
-112   80     
96     128    
-176   16     
0      80     
-784   -128   
16     144    
32     192    
-112   -96    
112    144    
-288   16     
0      -288   
176    144    
-272   336    
128    -64    
80     16     
16     16     
-48    128    
-448   -320   
320    128    
-640   -32    
48     -96    
48     -64    
-16    240    
-176   112    
112    80     
-16    -80    
80     80     
-16    80     
96     176    
96     48     
-112   0      
32     176    
48     96     
64     64     
48     160    
-80    112    
176    48     
-128   240    
96     48     
32     96     
-176   128    
288    192    
160    336    
-160   80     
-32    64     
-48    288    
0      240    
-48    48     
-16    80     
-32    -16    
16     -32    
-16    -256   
64     160    
-64    240    
64     80     
128    -48    
0      -176   
-192   -16    
-240   -80    
64     -304   
0      128    
-32    176    
80     -128   
-112   48     
-112   256    
192    480    
-128   288    
192    32     
-176   384    
-48    -208   
160    -160   
-272   16     
384    512    
-96    -96    
80     64     
-64    64     
160    144    
-96    144    
-64    80     
-48    64     
-16    -96    
16     -16    
224    336    
-144   16     
-64    32     
80     96     
96     64     
144    80     
48     0      
-64    128    
-208   -144   
-64    48     
-112   64     
320    160    
48     336    
-64    272    
-48    80     
-96    112    
-48    16     
784    -400   
-272   16     
-144   144    
-16    96     
-208   -80    
352    48     
80     64     
-64    304    
-352   -80    
80     48     
288    144    
16     160    
0      352    
-336   16     
112    -48    
336    48     
176    208    
-144   112    
-176   -32    
16     0      
112    240    
16     112    
-32    32     
64     80     
160    -80    
0      144    
-64    48     
0      256    
-224   48     
384    80     
-32    272    
208    48     
-128   80     
-752   2048   
432    -272   
-416   -576   
576    224    
-320   -832   
-304   176    
480    832    
-304   -160   
272    864    
-864   -320   
560    128    
-960   -48    
576    -128   
-80    48     
-48    112    
48     208    
-64    240    
0      112    
304    -208   
96     -368   
-64    16     
48     -496   
176    304    
112    240    
-16    208    
0      192    
-352   -176   
256    -304   
96     368    
-48    176    
64     144    
-192   -32    
144    160    
-80    144    
112    -32    
48     0      
-144   -224   
-160   -176   
64     -928   
0      80     
96     416    
-144   256    
96     96     
-80    48     
-32    -304   
-32    128    
32     176    
48     -48    
208    112    
-32    -32    
192    -80    
16     -464   
-80    176    
256    -752   
-128   48     
48     -48    
80     -48    
112    -48    
-368   -256   
336    304    
-128   -96    
96     112    
-64    144    
496    240    
-336   -192   
0      128    
-80    -416   
224    192    
-112   -304   
112    128    
112    -112   
96     96     
16     192    
-16    144    
80     -80    
128    160    
144    112    
-144   96     
-288   -128   
-64    -816   
144    352    
16     -224   
112    224    
-32    128    
48     128    
112    -992   
-160   16     
32     -384   
112    192    
-48    208    
128    224    
-16    32     
128    -208   
-80    -32    
0      -272   
-16    240    
-64    -384   
224    64     
-384   -304   
96     0      
-48    -112   
-16    64     
-32    16     
80     144    
-48    112    
128    80     
96     208    
96     64     
192    112    
32     128    
-144   0      
-16    -96    
80     112    
16     -400   
128    112    
80     -128   
32     272    
112    -240   
-144   128    
48     32     
400    32     
-176   -144   
48     416    
80     240    
96     -464   
-128   -32    
-192   -400   
176    80     
256    80     
-160   32     
208    -32    
0      -672   
-144   -32    
-16    -432   
-32    -64    
-112   176    
128    -160   
112    -16    
0      -928   
-16    -128   
128    -1344  
-16    -96    
0      64     
272    -32    
-96    -592   
96     -128   
-16    -1040  
48     96     
-16    -80    
208    16     
-320   0      
16     -96    
112    -48    
112    -240   
80     -48    
-48    128    
176    48     
112    32     
-208   -80    
208    -304   
0      80     
224    -128   
-112   144    
64     -208   
-16    -144   
-256   -208   
304    -192   
-720   -16    
160    32     
-48    96     
0      -16    
96     -160   
-16    -448   
384    -160   
-80    176    
-80    256    
48     16     
-48    -80    
352    -128   
-96    80     
-144   -96    
144    48     
-160   -48    
144    48     
-192   -112   
208    -496   
80     -240   
64     -992   
-80    -32    
16     -16    
0      16     
128    -96    
-48    128    
-176   80     
96     32     
-112   -64    
208    0      
-480   0      
-656   -272   
256    -160   
-704   -64    
752    -144   
48     208    
64     -320   
-240   -1184  
288    -896   
48     736    
0      -432   
48     496    
-32    -320   
176    448    
-176   -272   
16     -112   
-256   64     
208    -112   
-96    304    
64     -272   
-112   -16    
272    -192   
-160   -368   
224    -256   
-144   384    
336    -272   
-208   640    
112    -496   
-464   48     
224    -304   
-224   96     
208    -240   
-496   176    
208    -160   
-336   192    
96     -320   
-112   -64    
288    -368   
64     384    
144    -1120  
-16    -48    
-192   -64    
160    32     
-80    96     
80     0      
-208   32     
176    -64    
-240   80     
80     -544   
128    80     
-96    -192   
112    96     
112    -128   
16     128    
-80    16     
32     80     
-160   -32    
96     160    
-80    -80    
128    160    
-160   -16    
160    -144   
-128   64     
112    -64    
-48    80     
112    -192   
-32    128    
96     -352   
64     -16    
-368   -64    
-112   32     
-48    0      
80     48     
-128   80     
16     -128   
-32    -48    
96     -48    
-64    -64    
48     16     
-160   80     
-336   -256   
32     80     
-208   -208   
-496   -128   
32     -208   
-368   0      
16     128    
-688   176    
-16    -96    
128    128    
-496   64     
272    32     
-64    0      
-544   32     
160    208    
-128   -48    
48     208    
-336   -112   
16     -32    
-16    16     
-192   -400   
336    448    
-256   448    
-256   176    
-1392  -16    
-48    32     
144    64     
-112   -144   
-176   -96    
144    160    
16     -32    
32     80     
0      144    
-96    0      
0      32     
-80    -96    
-32    144    
48     288    
-64    96     
-496   -160   
112    -32    
-1232  64     
0      96     
-96    -144   
-48    -48    
-96    -320   
-48    64     
160    288    
48     -16    
-160   -528   
-320   128    
240    224    
144    384    
-128   256    
-240   -176   
32     -48    
-448   48     
272    352    
-176   96     
256    176    
-80    -64    
-32    80     
64     96     
16     240    
-144   96     
128    48     
-144   -144   
128    272    
48     192    
-368   0      
-32    64     
-432   0      
0      176    
-160   -48    
64     128    
160    64     
-256   -32    
64     16     
-64    320    
-160   80     
80     -16    
-48    32     
128    0      
-192   64     
-16    -48    
16     64     
-192   -96    
32     48     
-1856  -240   
-192   272    
0      -64    
80     144    
-128   -16    
256    128    
-176   96     
-64    80     
144    -32    
-32    272    
-112   208    
-128   -32    
160    16     
-48    64     
16     112    
-480   -16    
-80    -64    
32     160    
176    -160   
32     288    
-160   -80    
416    128    
-432   0      
224    -16    
96     144    
-80    32     
-288   128    
0      160    
16     -112   
0      112    
-32    16     
1728   -672   
192    -912   
368    416    
-896   16     
496    704    
-288   -800   
336    560    
-32    -144   
-304   -64    
48     -16    
32     208    
-192   -80    
80     -16    
-160   32     
224    48     
-192   112    
240    0      
-80    288    
80     -80    
80     64     
48     -32    
16     32     
16     224    
-160   208    
112    -128   
-16    -48    
32     96     
144    128    
96     -80    
128    128    
-32    -128   
48     144    
-80    128    
48     160    
-16    16     
16     96     
0      128    
352    784    
-352   -272   
-256   -16    
176    240    
192    64     
-240   16     
112    32     
48     128    
-96    64     
112    272    
16     240    
-128   208    
48     -96    
-96    -32    
-160   -48    
128    80     
-160   80     
128    112    
-80    -96    
80     256    
-240   -208   
128    -80    
-96    64     
192    96     
0      160    
48     176    
-32    128    
176    64     
64     192    
0      48     
128    96     
-192   -112   
192    192    
-160   -32    
32     176    
16     144    
112    80     
-32    64     
-16    96     
-32    32     
48     48     
64     112    
-96    -128   
320    32     
-48    192    
32     -320   
192    448    
96     208    
144    128    
-32    -64    
16     -192   
-48    -48    
288    0      
0      240    
32     32     
0      -48    
16     32     
-80    112    
64     0      
-16    512    
80     352    
112    16     
32     208    
-304   -128   
144    -176   
48     -16    
96     -1312  
0      96     
160    64     
-192   112    
96     96     
128    240    
-48    48     
16     128    
16     -80    
32     16     
320    -48    
-256   0      
144    112    
-48    16     
176    352    
32     208    
-64    -240   
-112   -48    
-48    48     
112    96     
240    96     
-208   96     
144    -128   
80     0      
-96    160    
208    -80    
16     96     
-128   0      
-112   -16    
64     -48    
-32    -288   
-208   112    
320    448    
176    64     
-128   16     
-160   192    
192    80     
320    96     
-288   -240   
144    96     
64     112    
-16    96     
112    48     
48     -112   
96     224    
-112   -576   
256    -48    
-160   -720   
-32    64     
96     144    
192    128    
48     80     
32     48     
-16    80     
16     336    
16     -128   
176    48     
-16    192    
80     64     
-48    224    
16     112    
-336   32     
-16    -224   
64     48     
48     -112   
240    -368   
32     128    
-128   304    
-224   -48    
144    176    
112    128    
-96    -64    
240    112    
-80    -448   
208    16     
-64    -416   
-176   112    
208    -256   
64     16     
96     -208   
32     160    
-128   -64    
96     96     
-32    80     
96     0      
112    128    
-48    -256   
32     96     
64     -560   
80     -64    
48     48     
-128   80     
448    -48    
-240   208    
176    -400   
1984   3120   
-2016  576    
-48    0      
528    1136   
32     48     
256    -288   
-112   -224   
272    528    
560    -128   
-656   560    
368    -832   
-288   640    
432    -736   
48     976    
-128   -624   
-128   384    
256    -176   
288    -576   
-208   -64    
-64    -224   
16     464    
0      0      
128    -16    
48     -112   
-80    48     
240    -288   
-144   304    
96     -304   
48     336    
80     -192   
96     -848   
0      -96    
-32    -496   
192    -16    
-992   48     
208    -64    
96     368    
-48    -656   
0      -224   
-32    -576   
192    -96    
64     144    
16     16     
-32    -352   
128    112    
48     -368   
208    112    
-192   -592   
192    -368   
-224   176    
192    -368   
48     -64    
32     -368   
16     16     
48     -656   
176    16     
80     560    
-176   -224   
208    -256   
-16    80     
-16    -80    
32     160    
32     -48    
80     -96    
-368   -144   
-128   -208   
-928   0      
16     -128   
-16    -32    
176    -288   
-32    -96    
80     -2656  
48     -240   
80     48     
-64    144    
128    64     
-48    -112   
256    128    
-224   192    
-64    -32    
64     96     
-160   64     
208    -16    
-112   -48    
336    -96    
192    -128   
-64    0      
144    64     
80     -624   
144    208    
32     -144   
32     80     
48     80     
0      -96    
0      64     
32     80     
-368   -32    
240    0      
-128   96     
0      -192   
48     112    
144    -16    
32     16     
112    -176   
-64    0      
64     16     
176    64     
-112   288    
128    0      
-112   -144   
16     -80    
-592   -48    
128    -288   
-784   -96    
32     -64    
-160   48     
176    -112   
64     96     
96     -208   
-112   -16    
64     -64    
64     -48    
112    128    
80     64     
-240   -144   
-48    160    
-240   96     
224    32     
-80    256    
-16    144    
144    -64    
-112   -448   
48     -16    
176    -224   
80     128    
-32    304    
-64    -112   
16     64     
128    -80    
-144   16     
64     -48    
-96    96     
16     -64    
0      160    
-32    -176   
128    -48    
320    -96    
-96    304    
-80    -64    
-176   48     
-144   -96    
176    -32    
-288   -32    
-16    -208   
-176   -224   
320    -32    
-160   192    
-32    -144   
-80    -96    
48     -96    
-16    80     
16     -160   
32     16     
192    -64    
-608   16     
192    16     
-144   224    
-16    16     
256    16     
-160   128    
192    -64    
-96    -32    
-80    -64    
-16    64     
272    -32    
-64    112    
-304   -176   
176    144    
-192   -256   
-288   48     
-144   -16    
32     160    
0      32     
-480   80     
-144   -64    
144    192    
-64    96     
160    48     
-80    144    
-128   -32    
48     32     
-176   -16    
-48    224    
-64    0      
-272   416    
-16    -16    
-48    64     
-256   -32    
1888   -1232  
128    624    
-1744  240    
-192   240    
784    -352   
-48    320    
-800   -272   
912    368    
-880   160    
480    32     
-128   304    
-304   -336   
96     320    
32     -192   
-112   64     
-528   16     
160    0      
16     336    
176    80     
-864   16     
-64    416    
16     -272   
-192   160    
160    -96    
-48    16     
256    96     
64     352    
-256   176    
112    48     
-272   -48    
272    -16    
80     96     
-176   64     
-112   144    
-336   -192   
96     -16    
-80    16     
64     96     
80     -96    
-256   -16    
96     48     
-48    112    
48     64     
-240   -144   
48     64     
64     80     
0      32     
-256   32     
-64    -64    
-496   128    
-64    48     
96     -112   
48     128    
16     288    
-96    32     
-16    -176   
160    112    
-96    96     
48     -32    
16     16     
-176   80     
16     64     
16     -48    
80     -32    
-112   96     
-80    224    
-592   -272   
208    128    
-32    112    
96     224    
-96    0      
96     16     
64     80     
-112   -32    
80     80     
-128   96     
-208   192    
0      144    
96     192    
-352   -208   
144    176    
-1104  -48    
96     368    
-144   -96    
208    -32    
16     -80    
48     80     
-64    176    
32     320    
-160   80     
80     -64    
0      48     
-160   -128   
96     80     
-224   256    
-96    -64    
128    -64    
-80    80     
-48    144    
-48    128    
16     48     
-32    112    
16     80     
176    160    
-16    160    
-64    32     
112    -144   
-96    32     
96     128    
96     -16    
-96    0      
-80    48     
144    0      
48     112    
-96    -16    
112    112    
-160   0      
192    160    
-48    80     
48     -144   
-272   -80    
-64    -32    
32     0      
256    -80    
-384   -176   
192    32     
144    -96    
-64    64     
-160   144    
208    96     
16     64     
-80    96     
256    208    
48     320    
-80    80     
-336   16     
64     64     
-96    64     
320    -48    
-160   -32    
0      208    
144    96     
-64    128    
-160   128    
96     48     
-112   -64    
-64    -272   
-32    144    
224    96     
112    -16    
-224   80     
80     112    
32     128    
144    144    
-240   -80    
96     0      
-64    192    
176    96     
-160   208    
224    64     
-64    160    
16     112    
-32    112    
-48    144    
208    32     
32     144    
-80    -16    
96     -32    
32     240    
-96    48     
64     80     
64     128    
-96    32     
224    128    
-48    -32    
128    144    
-96    48     
-32    128    
96     64     
-48    112    
-112   -32    
64     160    
-192   -16    
176    -176   
32     320    
-144   -112   
272    32     
16     80     
-32    160    
64     144    
-32    -32    
80     160    
80     -96    
80     -64    
128    176    
16     192    
48     272    
-160   -16    
-1248  1552   
1536   688    
128    -288   
528    -688   
592    -944   
-112   -560   
496    304    
-16    224    
48     144    
-128   -304   
352    464    
-128   -192   
-160   192    
-64    0      
352    176    
-160   -368   
-64    144    
0      -1040  
48     48     
112    48     
96     -128   
0      256    
-48    144    
-32    -16    
-16    -16    
-32    16     
160    160    
80     80     
32     112    
80     80     
-16    -256   
80     144    
112    80     
0      64     
-16    -128   
48     96     
112    112    
16     144    
32     96     
0      80     
144    128    
-96    48     
-96    -160   
0      64     
192    112    
96     64     
32     96     
-80    0      
96     -16    
64     -1008  
16     64     
128    -496   
-48    128    
48     32     
0      64     
0      -176   
176    128    
-64    32     
16     -192   
0      -112   
48     48     
48     32     
48     -256   
160    192    
-64    -480   
32     112    
96     -560   
64     32     
112    -16    
64     144    
112    32     
64     144    
-96    256    
16     -16    
192    128    
-224   -496   
144    -144   
48     -128   
0      144    
0      -544   
128    -32    
16     128    
192    288    
16     240    
-32    16     
-48    112    
-64    16     
160    192    
64     96     
96     256    
32     -288   
48     176    
-16    -144   
144    64     
-16    -16    
32     96     
32     -96    
-16    32     
80     32     
128    240    
-64    64     
-16    -256   
-32    64     
32     -256   
176    112    
-48    -112   
64     144    
32     -96    
0      48     
96     -144   
-64    48     
112    -288   
0      16     
144    160    
-16    -336   
32     -32    
-80    -256   
128    -672   
-16    0      
224    160    
16     -32    
32     16     
-96    -80    
160    64     
160    240    
48     -64    
224    432    
-240   -704   
464    48     
-256   -672   
144    224    
-448   48     
160    -432   
-80    -80    
128    -576   
192    -64    
-240   -160   
224    -112   
32     160    
48     80     
112    16     
-16    0      
80     -352   
-160   224    
80     -96    
32     -160   
-384   128    
400    -560   
32     144    
-176   -160   
224    -240   
64     -320   
-144   -64    
192    16     
-80    16     
96     -352   
-64    -48    
48     80     
-128   -144   
272    64     
-96    160    
-16    64     
-160   -224   
112    -96    
288    112    
-96    -64    
240    80     
-192   16     
192    -1552  
320    32     
-48    -112   
128    112    
-224   -256   
304    384    
-80    0      
224    -304   
-368   -48    
112    -80    
-512   16     
80     16     
48     96     
80     -192   
-64    -64    
112    -176   
176    -32    
80     -64    
-16    0      
-48    -32    
192    128    
-80    80     
-32    32     
-272   0      
32     -144   
-208   240    
-96    -288   
112    -112   
80     -144   
144    0      
-16    -1040  
416    240    
816    128    
-272   496    
1616   -784   
-832   -1136  
768    -400   
-448   928    
-272   -96    
400    -192   
-416   -16    
128    96     
-976   64     
96     0      
144    -16    
128    16     
-48    80     
128    -240   
-48    192    
-48    -32    
16     -240   
-64    128    
352    192    
96     32     
-128   48     
-208   128    
48     304    
-112   -32    
192    -32    
-192   -32    
304    -272   
0      96     
64     -224   
112    80     
128    80     
288    368    
-128   32     
96     -272   
-480   -32    
96     -160   
-80    -96    
80     -32    
-80    128    
144    -96    
-32    -32    
16     -320   
128    112    
112    48     
-96    16     
32     0      
16     16     
16     0      
-32    16     
-48    -16    
48     0      
-96    -96    
176    160    
-1344  -96    
176    -224   
32     64     
16     -48    
48     48     
-576   32     
-1552  -32    
32     -48    
-1568  -16    
-256   192    
-112   -96    
0      112    
16     -176   
128    96     
-16    -48    
-80    64     
-304   -176   
144    128    
-224   -176   
288    176    
-288   80     
-576   -48    
-32    -32    
-384   -64    
208    80     
-592   400    
-272   -48    
240    -112   
-176   -112   
-32    48     
0      128    
-432   32     
64     48     
128    -128   
-160   144    
128    -96    
-32    -48    
64     48     
64     384    
-320   48     
-112   -16    
-48    16     
-1008  -32    
32     80     
-16    128    
0      16     
-240   -368   
96     -32    
-224   -96    
144    80     
-160   144    
16     96     
-16    176    
32     192    
-80    80     
-128   -96    
96     64     
-160   160    
64     208    
-432   -176   
-32    -208   
-176   -144   
320    192    
-160   -240   
-320   64     
-32    -112   
224    16     
-144   16     
224    32     
-64    304    
256    96     
-336   0      
-128   0      
-144   80     
-1504  -80    
96     192    
-80    -96    
-112   320    
-112   -48    
256    112    
-176   -16    
48     64     
-144   -16    
-64    80     
96     48     
32     112    
272    80     
-336   -16    
192    96     
-144   -48    
-96    64     
32     -48    
16     128    
112    48     
16     64     
0      64     
-32    48     
-32    48     
144    96     
-32    80     
-240   -64    
0      -16    
-64    -16    
-80    144    
-48    80     
16     80     
-16    144    
-64    16     
-64    96     
144    16     
-176   -32    
32     112    
-80    64     
0      -64    
0      16     
-16    -208   
304    -16    
-304   112    
-112   192    
-192   0      
128    -320   
-400   -16    
-32    64     
16     160    
0      128    
-128   112    
-32    96     
0      -176   
-32    96     
0      -16    
-96    -16    
32     224    
-32    112    
80     64     
-112   32     
208    -16    
112    320    
-224   160    
16     160    
-16    -80    
48     0      
1520   -3168  
-144   -192   
896    448    
-304   96     
0      400    
432    -48    
-160   832    
160    -384   
-480   192    
-128   -64    
144    16     
-112   160    
-112   224    
96     -240   
-16    112    
128    -64    
48     112    
-160   128    
320    128    
-304   -112   
160    -48    
-304   128    
160    48     
-304   16     
144    0      
32     240    
304    416    
-256   48     
0      -224   
-144   384    
208    128    
176    272    
-128   160    
32     -16    
-64    32     
-16    -112   
32     48     
48     176    
-16    -64    
-32    64     
64     288    
64     144    
-48    96     
-224   0      
0      176    
64     -16    
-80    32     
-128   -144   
192    160    
-96    16     
128    144    
-80    96     
80     16     
48     96     
32     0      
0      112    
112    -48    
-160   224    
-144   -128   
160    -208   
-64    112    
64     96     
-112   -208   
160    336    
-64    80     
0      112    
-32    16     
64     80     
16     112    
48     96     
64     80     
16     144    
48     96     
64     96     
-16    112    
48     160    
-32    -16    
128    208    
256    112    
-208   96     
256    -32    
-112   -64    
32     -128   
-16    128    
64     -16    
224    112    
64     160    
160    400    
-80    432    
-48    176    
-16    -160   
176    112    
16     160    
64     160    
-112   -96    
-16    64     
80     64     
32     -160   
112    144    
-112   128    
80     176    
-144   -96    
48     -32    
16     144    
144    256    
-32    0      
48     160    
-240   -176   
304    192    
-272   -144   
272    176    
-48    144    
144    -352   
48     64     
-48    -1712  
96     112    
176    256    
16     208    
48     -48    
-16    64     
112    304    
112    -48    
-96    -144   
-48    176    
176    144    
176    -32    
-64    64     
-64    -96    
176    128    
-96    48     
64     48     
64     320    
-160   64     
160    32     
-80    -112   
208    -16    
-80    208    
-16    -112   
128    -80    
64     64     
80     -64    
0      96     
48     -208   
112    64     
-128   -32    
48     48     
-48    -2672  
176    -368   
208    32     
-96    272    
128    16     
-144   160    
-32    -80    
192    336    
-32    -112   
528    320    
-416   128    
304    -144   
128    256    
-160   -496   
32     128    
-176   -2208  
240    176    
96     -336   
80     272    
-128   -240   
192    192    
-128   0      
208    368    
-16    32     
32     -96    
224    64     
144    16     
64     480    
-288   -272   
112    -64    
80     -512   
128    224    
-160   -144   
-256   144    
64     -48    
256    0      
16     128    
48     208    
64     128    
48     208    
96     80     
0      -560   
-192   352    
144    -96    
-144   240    
-32    -64    
32     240    
224    -784   
-208   208    
64     112    
32     112    
-32    96     
720    -224   
-96    -928   
-1328  -480   
-112   -144   
-160   384    
-400   -272   
688    48     
-384   -80    
320    -256   
-224   32     
96     -368   
128    128    
256    128    
48     -896   
48     0      
-32    16     
96     -2256  
32     -48    
32     -288   
112    0      
176    112    
-32    96     
-64    16     
16     -272   
32     -448   
256    112    
80     64     
32     128    
-16    -288   
64     -448   
-976   -144   
176    -608   
96     0      
-32    -304   
64     -144   
256    -1104  
-48    -96    
32     -144   
64     -160   
-32    -112   
208    144    
-48    -208   
-32    32     
144    -272   
-32    0      
-448   -64    
16     -16    
64     224    
96     -32    
128    -112   
-48    -640   
144    128    
-32    368    
0      -48    
144    -320   
112    96     
128    -80    
-32    160    
-16    32     
80     -64    
-64    96     
80     -144   
32     -96    
16     -160   
32     -80    
144    -64    
32     32     
128    -176   
-320   -16    
128    -144   
48     80     
16     32     
16     160    
96     368    
-192   16     
-320   -160   
384    -256   
-320   -16    
-112   -16    
64     80     
32     -272   
176    -96    
-144   -576   
-32    -144   
128    -224   
16     128    
-32    256    
32     80     
-128   -16    
96     0      
-256   -176   
208    -32    
-384   0      
128    -64    
-96    -80    
-176   -224   
144    -240   
16     -384   
32     48     
208    -640   
-160   96     
112    -64    
32     -256   
32     32     
-96    -160   
32     64     
112    0      
-32    208    
-48    -128   
-640   -64    
32     -112   
-80    80     
192    -240   
-96    16     
192    -400   
-96    176    
176    128    
-144   -16    
-80    -32    
-64    -96    
-128   -112   
-80    -112   
96     -16    
256    -112   
-608   -48    
32     128    
48     208    
448    -128   
-144   16     
64     -80    
-144   64     
-48    240    
80     80     
-64    112    
-224   -16    
-96    16     
96     144    
96     16     
176    0      
-80    112    
-64    32     
112    128    
80     -352   
240    64     
-128   -304   
208    -176   
176    288    
-128   96     
48     16     
-16    -80    
-176   -192   
112    16     
-16    64     
64     64     
-16    32     
192    128    
-128   -64    
176    -288   
-160   -144   
-560   -224   
-1056  -48    
-64    64     
-1664  32     
-144   -32    
80     -64    
32     48     
-48    128    
-64    -80    
64     -16    
-80    160    
-1600  -336   
64     192    
-112   -160   
-32    224    
-16    0      
16     0      
0      -32    
-352   -112   
48     0      
80     176    
-64    640    
-224   -288   
-320   -240   
128    -176   
-160   96     
-192   16     
96     320    
-64    -144   
-48    112    
-64    -48    
-448   16     
16     96     
-64    112    
144    -16    
-208   -192   
96     176    
-1792  32     
-80    32     
64     -1952  
368    -16    
1024   608    
-288   1168   
320    48     
-80    224    
-320   -288   
448    176    
0      128    
-208   32     
16     32     
176    160    
-160   80     
-384   -272   
32     -96    
0      16     
-96    80     
48     -160   
-144   16     
176    -224   
-208   -32    
256    256    
-144   16     
160    -48    
-304   0      
64     80     
384    368    
-160   336    
128    80     
-176   64     
-1168  -80    
144    32     
-80    -80    
32     -48    
176    112    
-48    0      
96     16     
-432   -368   
16     -96    
96     288    
32     160    
-80    32     
-16    96     
-32    -16    
-192   128    
-912   -16    
32     176    
-32    96     
-16    176    
128    112    
-176   144    
80     -48    
-80    112    
48     -32    
16     48     
0      80     
224    784    
-256   208    
-672   -592   
416    -112   
-432   -16    
192    -80    
-48    128    
48     -128   
32     0      
-128   32     
-64    80     
16     112    
16     48     
16     160    
-80    32     
-32    16     
16     64     
-112   -16    
304    48     
-64    -192   
-64    -208   
128    160    
-320   0      
64     -112   
-192   160    
288    -16    
-48    48     
128    -96    
0      80     
-16    192    
-304   -208   
80     -32    
-16    176    
-48    128    
-272   -96    
-48    160    
80     64     
112    32     
-32    112    
-32    32     
80     160    
-80    32     
64     -32    
-64    32     
32     128    
112    224    
-64    80     
-128   -80    
-32    16     
-96    -48    
16     48     
-64    64     
80     48     
-32    128    
96     48     
-16    112    
-16    64     
112    144    
16     96     
32     96     
96     288    
-16    -144   
-16    16     
-16    112    
176    160    
-16    96     
32     272    
-160   -32    
144    0      
-32    -48    
64     256    
48     96     
0      304    
176    -208   
-112   128    
-16    -192   
16     224    
64     192    
128    768    
-96    144    
0      -208   
-112   304    
160    -64    
-16    144    
-96    -96    
144    208    
96     96     
-144   -64    
-336   -128   
-192   -352   
64     272    
160    176    
-96    0      
32     224    
80     80     
-32    0      
80     -32    
-48    112    
144    48     
32     48     
176    96     
-224   -496   
448    656    
-80    -160   
80     240    
96     0      
-16    160    
16     0      
-224   -48    
112    -48    
64     112    
80     320    
-16    80     
-48    32     
-16    64     
-96    48     
48     112    
208    304    
-16    272    
-128   -64    
-96    64     
-96    -288   
-64    -480   
80     -288   
16     128    
16     -48    
112    240    
-112   64     
-48    112    
-64    32     
64     96     
-48    128    
80     80     
-48    96     
64     32     
-64    -272   
160    128    
64     -48    
80     -256   
-80    64     
144    240    
-96    144    
-128   48     
496    -320   
-544   336    
432    80     
-528   416    
464    64     
-304   432    
512    -272   
-80    272    
80     -160   
272    272    
-208   80     
96     48     
-128   -944   
416    -208   
-80    272    
-32    -128   
112    176    
96     80     
-128   128    
128    0      
-96    112    
160    160    
-144   144    
80     -208   
-112   112    
128    -128   
112    160    
16     -336   
-64    0      
48     16     
112    256    
-16    128    
48     32     
-128   -144   
64     144    
-176   -16    
48     -80    
16     96     
144    -32    
32     0      
-32    -144   
32     128    
304    32     
-208   176    
-80    -3088  
16     128    
112    -192   
16     80     
112    80     
128    192    
-128   48     
80     64     
-80    48     
112    -48    
32     160    
80     -112   
160    240    
-144   16     
192    64     
0      -416   
-48    144    
96     0      
112    160    
-80    96     
16     144    
0      -48    
112    48     
112    272    
-240   -64    
304    0      
0      -192   
96     144    
-80    -448   
128    -16    
64     80     
48     256    
240    304    
144    -80    
160    0      
-80    336    
-48    -80    
320    416    
-336   -48    
480    -272   
48     160    
-304   -544   
352    160    
-352   -16    
288    144    
-112   0      
128    -16    
32     -48    
16     64     
-128   144    
128    176    
-16    -176   
112    -48    
0      48     
96     96     
48     112    
-64    -32    
128    192    
16     80     
256    -16    
-64    0      
-80    192    
384    -192   
-240   240    
224    32     
-32    -160   
-16    -592   
112    -64    
128    -528   
64     -192   
64     -64    
-112   -96    
32     -176   
112    -96    
208    528    
-80    -160   
160    -1168  
-48    48     
64     -352   
240    96     
-16    -912   
208    -16    
-80    -16    
0      -288   
144    -16    
-32    0      
240    144    
96     496    
80     -288   
-224   -32    
64     -96    
64     -176   
112    -32    
112    64     
-48    96     
-80    -64    
-16    -160   
-544   16     
80     -400   
0      64     
128    -288   
144    208    
48     -1312  
96     16     
-112   -128   
176    -496   
-16    176    
-176   112    
32     -256   
32     64     
-64    -16    
80     16     
-176   -16    
16     48     
32     -96    
64     -192   
-32    -112   
48     -656   
80     64     
112    112    
64     192    
-416   -640   
-256   -704   
416    208    
144    64     
-144   0      
96     80     
-336   0      
112    -16    
-32    -16    
48     80     
0      112    
-144   -176   
48     32     
160    -272   
192    112    
16     -64    
-64    160    
-64    -112   
32     -80    
0      96     
160    -192   
-160   64     
-192   -64    
-176   0      
160    16     
80     80     
-16    -320   
272    0      
-240   -320   
208    -16    
16     -144   
48     112    
576    1440   
-400   560    
-1040  -416   
-128   -448   
-304   208    
320    -656   
224    80     
-64    -32    
-720   -160   
-96    -528   
-48    -144   
240    -288   
32     368    
48     -880   
0      64     
-272   -304   
96     -352   
160    128    
160    176    
-128   -112   
176    -128   
-192   -16    
48     -320   
-288   -256   
0      -560   
256    48     
128    240    
128    672    
-240   -1376  
208    -304   
-112   144    
336    -112   
-224   240    
0      16     
112    144    
0      -32    
272    432    
-336   -384   
304    224    
-304   -320   
256    64     
0      -224   
256    112    
16     -304   
16     -16    
-144   32     
0      -80    
-384   -592   
144    144    
-32    80     
-48    -64    
-32    112    
-16    80     
128    -32    
-160   -208   
96     112    
-624   -320   
112    688    
400    80     
-592   352    
32     32     
-832   112    
-192   -32    
112    -16    
-208   48     
128    -48    
0      32     
-112   -80    
-48    64     
-1104  -160   
-32    112    
-144   -80    
16     112    
80     192    
-144   48     
48     48     
-592   16     
-224   -240   
-224   -208   
-32    160    
208    -80    
-96    96     
-176   -224   
80     16     
-128   -64    
80     80     
-96    128    
-176   -160   
0      48     
-304   -32    
-80    64     
-80    16     
-16    48     
0      144    
-208   -144   
-1904  -144   
-112   48     
-48    -96    
48     -64    
-304   -208   
304    64     
-96    -16    
-128   -16    
64     -16    
-160   112    
256    128    
0      112    
-176   16     
-48    -16    
-32    -144   
-512   32     
32     176    
16     16     
96     160    
-96    -32    
0      80     
256    528    
-160   -32    
-32    -64    
16     -144   
-112   160    
96     208    
160    96     
-480   176    
352    336    
-336   176    
240    80     
-880   -32    
384    496    
-240   -208   
240    32     
-144   384    
48     16     
16     -16    
-384   -112   
96     -48    
-256   -64    
48     16     
-48    112    
0      128    
-112   -48    
0      32     
-1040  96     
-80    96     
144    16     
-96    48     
384    464    
-192   80     
64     112    
-192   -128   
-16    16     
-32    144    
64     -16    
0      160    
32     144    
-176   -16    
80     96     
64     64     
-80    96     
0      -96    
-32    80     
-80    64     
-80    16     
-48    -80    
0      48     
144    64     
-48    96     
32     -176   
16     96     
-112   224    
-144   -48    
-32    320    
-176   0      
400    96     
-160   16     
-128   192    
-64    -224   
16     128    
416    -80    
-256   304    
-32    80     
-80    64     
16     -16    
-176   48     
-176   112    
48     -144   
48     48     
-224   -64    
-16    176    
16     0      
-16    96     
16     32     
160    96     
256    -240   
-96    384    
-208   256    
0      -48    
32     -64    
-208   -544   
784    112    
-864   48     
-240   48     
-224   64     
496    48     
-256   -208   
528    832    
-224   -128   
-160   64     
240    -192   
-144   368    
16     176    
16     -48    
208    352    
-240   -48    
-48    128    
0      0      
16     192    
-80    -176   
-208   112    
160    48     
-64    208    
272    -48    
-256   -64    
336    128    
-288   224    
400    0      
-272   48     
16     -48    
-64    80     
16     64     
-144   64     
112    48     
64     160    
224    96     
-256   96     
160    -96    
-112   240    
96     -16    
112    160    
-16    32     
64     96     
0      48     
0      96     
48     64     
32     160    
144    144    
-240   16     
192    128    
96     128    
-160   96     
160    0      
-208   224    
160    -32    
64     160    
-32    48     
96     208    
-128   -96    
176    128    
-144   176    
48     48     
96     32     
-192   -1968  
224    32     
-16    48     
-48    192    
64     224    
-80    32     
112    16     
-48    48     
-80    112    
-16    48     
112    224    
-80    160    
-80    -64    
192    352    
-672   -432   
0      -864   
192    128    
-32    32     
112    96     
80     208    
-128   -16    
384    -64    
48     -112   
96     320    
64     592    
-128   176    
304    128    
-64    -64    
48     -32    
80     96     
-160   -320   
96     0      
-16    -16    
80     -16    
32     128    
32     64     
64     32     
-48    80     
112    176    
48     112    
-32    -128   
64     48     
-32    -64    
-656   -208   
272    208    
-160   -560   
112    144    
-16    128    
-48    32     
48     112    
176    80     
64     144    
16     80     
-16    288    
64     176    
32     -128   
16     160    
128    -240   
-400   -336   
608    192    
-48    -208   
-176   -48    
64     -784   
208    224    
80     -16    
-208   -48    
32     0      
160    144    
48     48     
32     224    
32     -80    
-80    -112   
-64    32     
16     -48    
416    480    
-288   -144   
304    80     
-160   -48    
80     176    
160    -656   
-144   96     
80     -160   
64     -80    
144    96     
144    384    
-64    -144   
32     288    
-16    -128   
128    -256   
16     16     
64     -160   
96     432    
-144   32     
-96    192    
-144   -2144  
352    48     
-32    32     
176    128    
-96    48     
144    112    
80     48     
-32    144    
-320   336    
80     -48    
64     32     
240    -352   
128    224    
-32    -272   
-32    176    
-128   -320   
320    96     
-64    144    
96     16     
128    112    
-48    0      
176    112    
-80    -672   
32     80     
16     -80    
176    128    
32     -208   
48     368    
-128   -16    
144    -16    
-48    48     
240    96     
-32    48     
-32    112    
128    80     
16     96     
544    -256   
16     256    
0      -16    
-144   -208   
-384   704    
-1232  -1184  
752    208    
-656   -80    
288    -304   
608    688    
-224   -192   
352    480    
-160   -384   
256    448    
-288   -912   
160    0      
-16    -64    
240    -336   
-144   -272   
448    528    
-288   -208   
336    -176   
-416   -272   
-32    -208   
16     -176   
128    -960   
288    224    
48     -128   
80     256    
-272   -16    
-32    -592   
-16    -336   
-32    -432   
48     -288   
400    48     
-256   128    
512    -1200  
-208   16     
64     -16    
400    192    
144    -160   
608    0      
-320   -192   
336    64     
-304   64     
-112   -256   
-688   -16    
144    0      
-32    -16    
-160   -112   
112    -192   
176    -416   
-80    224    
-48    0      
-384   -192   
272    96     
-128   32     
336    16     
-96    48     
-272   -96    
160    0      
-288   -752   
320    192    
368    416    
-192   -176   
16     304    
176    -256   
0      -32    
-48    -336   
112    208    
-32    -192   
64     128    
0      -96    
160    -320   
-320   -32    
-16    112    
80     -80    
80     -288   
-608   64     
48     -80    
368    624    
-256   64     
416    80     
-16    -352   
208    144    
16     -208   
-256   192    
288    160    
-16    144    
-96    48     
48     -128   
-80    -176   
-224   -16    
-320   48     
16     -64    
-80    -64    
-32    -288   
-48    -192   
64     -816   
16     144    
272    -80    
80     336    
-16    96     
-176   -368   
80     176    
272    -16    
-96    32     
-112   192    
-224   128    
96     -48    
80     -144   
-304   -368   
224    0      
-96    -160   
176    160    
80     -304   
-32    -240   
32     112    
-192   -80    
-80    -96    
48     96     
-160   -112   
112    48     
-176   -48    
-304   -96    
208    -32    
32     -176   
128    -64    
-48    -16    
32     32     
176    -864   
-64    -16    
-368   -64    
64     -224   
-96    64     
16     96     
144    128    
16     -48    
-432   -272   
-96    -176   
96     -32    
48     -64    
144    16     
-80    -304   
-48    16     
64     -16    
-112   16     
-64    112    
48     48     
64     192    
-224   0      
16     -240   
112    16     
-144   160    
144    32     
-208   144    
-48    -112   
-112   208    
-160   -368   
224    160    
-176   32     
-176   128    
96     -96    
-1728  32     
-208   16     
128    -48    
-64    144    
80     16     
16     128    
176    -192   
-288   272    
-320   -256   
128    -80    
224    -272   
160    128    
-16    112    
-192   176    
-384   -80    
-784   16     
-32    -192   
-304   32     
-64    64     
32     64     
-208   96     
-160   -208   
144    160    
-160   -96    
-112   176    
320    -224   
-176   96     
112    16     
48     160    
-144   16     
0      144    
-208   112    
64     48     
-96    -64    
-800   112    
-400   -48    
96     -304   
-80    304    
-16    48     
144    304    
736    480    
656    1168   
64     192    
-960   -432   
0      224    
640    48     
-880   32     
544    -352   
-192   480    
-848   -736   
-224   656    
176    -800   
112    528    
80     -528   
80     608    
48     -352   
-400   368    
192    -144   
32     288    
-96    -192   
0      16     
32     128    
-256   -16    
-96    80     
16     -128   
-112   208    
368    -32    
-144   256    
-48    -272   
-96    80     
112    -16    
-32    224    
80     -32    
-112   176    
32     -80    
-160   160    
0      -144   
48     80     
16     32     
-16    128    
96     80     
-1008  0      
80     80     
64     160    
-160   0      
32     32     
-48    32     
32     96     
160    48     
-240   80     
112    0      
-32    160    
0      144    
80     -16    
-352   -16    
176    0      
-256   80     
-32    80     
80     224    
0      -32    
32     208    
16     16     
-160   64     
64     -112   
-16    112    
-192   -32    
64     128    
-176   32     
0      -16    
-144   -16    
-16    80     
-288   160    
-64    32     
128    192    
-112   176    
-96    64     
144    240    
-176   304    
224    -16    
0      128    
-48    192    
-32    48     
-112   -224   
144    80     
400    176    
-64    144    
-64    80     
-32    64     
-224   -192   
208    0      
368    288    
80     176    
-336   -16    
64     -112   
-64    48     
80     64     
96     192    
-272   -272   
-64    -48    
80     -32    
16     144    
-64    32     
-160   -80    
0      16     
80     80     
48     336    
192    160    
-160   -128   
32     -32    
272    288    
-48    48     
32     176    
-112   0      
48     96     
-192   -64    
80     128    
160    112    
-160   -64    
32     128    
176    48     
-112   -32    
48     -32    
-16    0      
-80    80     
64     16     
352    544    
-64    224    
48     144    
-32    128    
-144   -80    
64     128    
128    48     
-80    80     
64     32     
0      144    
-16    -464   
-208   -192   
64     192    
144    192    
-96    192    
32     32     
32     176    
-128   -128   
176    128    
-224   48     
192    -16    
16     48     
0      160    
32     96     
-32    80     
-32    144    
160    16     
-32    80     
32     176    
-192   16     
32     -96    
-48    128    
96     -64    
96     192    
-256   -96    
128    -112   
-48    48     
240    64     
208    176    
-96    112    
16     -96    
-96    16     
256    192    
96     48     
-96    176    
-80    16     
128    160    
48     64     
96     80     
-112   -32    
160    -1536  
-128   160    
192    32     
-48    160    
128    64     
80     160    
-64    80     
32     96     
-176   96     
16     256    
-208   -112   
112    -64    
48     48     
160    224    
-96    -32    
64     -208   
176    144    
16     64     
384    -256   
-176   160    
96     0      
-192   -16    
-48    448    
-560   1072   
-912   -832   
-352   -656   
128    288    
-256   48     
800    384    
-656   -208   
800    288    
-304   -80    
272    -528   
-16    128    
176    -352   
-64    320    
320    -160   
192    368    
-96    -432   
192    176    
64     -96    
432    640    
-384   -304   
256    16     
16     304    
176    -112   
-128   144    
256    -1712  
-240   64     
-336   -704   
96     -608   
352    576    
192    192    
-112   -32    
80     32     
-112   32     
160    160    
128    -32    
-32    -288   
80     288    
128    -128   
-64    240    
144    -704   
0      96     
240    -2128  
400    192    
-160   112    
80     -48    
-160   224    
96     32     
0      256    
176    144    
128    128    
16     -64    
0      176    
128    -208   
0      64     
48     16     
0      80     
16     -1776  
32     -16    
176    112    
-64    144    
32     176    
96     64     
0      96     
16     -48    
240    240    
-48    80     
-16    112    
128    -80    
-192   -240   
128    -336   
32     208    
112    -320   
-112   320    
-16    240    
240    112    
-16    80     
0      160    
48     112    
80     -320   
-80    16     
192    -144   
-48    128    
304    16     
-352   304    
-176   -352   
208    192    
-128   -272   
512    256    
-16    64     
16     144    
112    96     
128    16     
0      80     
32     -48    
-48    48     
112    -64    
128    112    
48     -208   
96     272    
176    -16    
80     16     
-16    -304   
16     160    
144    176    
64     -544   
0      96     
16     -496   
208    -128   
-192   -176   
80     -1136  
144    -144   
0      416    
0      96     
256    272    
0      192    
112    80     
-224   -288   
144    -544   
-32    0      
128    -464   
-144   -64    
-304   -48    
288    -16    
-32    -112   
-48    -96    
48     -320   
304    -128   
-208   80     
176    -1280  
-16    -144   
176    80     
16     80     
128    -160   
-272   128    
16     -48    
112    144    
-320   -64    
16     0      
-368   -80    
128    16     
160    -48    
-32    64     
-224   -96    
160    -448   
48     -48    
176    -176   
-32    64     
288    16     
-224   208    
80     -208   
128    -96    
-16    -80    
64     48     
16     64     
64     -32    
16     -48    
64     -96    
80     64     
-176   -112   
240    0      
0      -1024  
176    272    
96     -128   
-64    0      
128    16     
-96    -144   
-32    224    
128    -80    
96     48     
0      -192   
176    -80    
208    -208   
-144   -16    
48     -224   
32     -16    
32     -432   
0      -96    
112    -80    
-32    -48    
80     32     
128    80     
-160   112    
-80    -112   
160    -64    
80     48     
-896   -48    
80     48     
-80    -16    
64     -32    
32     0      
144    -416   
0      176    
-48    -64    
256    160    
-80    -64    
176    0      
-48    32     
-96    400    
-752   -592   
-432   -592   
-128   912    
-240   -304   
-560   416    
656    -1680  
-176   432    
32     -448   
432    560    
-128   -3344  
192    64     
-112   -496   
208    304    
-720   -144   
256    -32    
-240   96     
64     -80    
112    144    
80     -192   
-160   -240   
-32    -560   
16     304    
352    -224   
-96    128    
96     -800   
-80    128    
-176   -48    
16     112    
-64    0      
64     64     
-80    32     
128    160    
-96    -16    
48     -80    
-160   -16    
240    -144   
48     80     
16     -16    
-16    48     
-160   16     
-48    64     
64     48     
48     32     
128    16     
-48    128    
0      -96    
64     48     
-144   32     
192    48     
-128   16     
-208   32     
-16    128    
-704   -160   
-64    -64    
80     0      
-464   32     
-32    112    
-1184  16     
-128   -48    
32     -16    
-160   -256   
96     -80    
-80    96     
80     48     
-64    48     
-64    -288   
-32    48     
-64    -144   
-304   32     
128    80     
-96    128    
16     96     
-176   -16    
-80    -80    
-384   32     
176    416    
-240   272    
-48    32     
-112   160    
-112   176    
-16    -176   
0      64     
-128   -256   
96     208    
-128   48     
-128   0      
-144   -16    
-224   -32    
-80    16     
-160   -32    
0      192    
-544   -48    
-128   -16    
-48    -128   
-16    176    
176    336    
0      112    
-144   -96    
-32    -176   
16     16     
-32    48     
-176   -16    
-64    64     
32     80     
-16    64     
-16    96     
-1200  -16    
-64    -128   
32     -112   
0      176    
-16    -80    
0      -32    
-112   -64    
144    160    
-16    64     
64     32     
-64    32     
32     16     
-16    80     
-176   -240   
32     -16    
-80    192    
64     32     
-336   -144   
48     192    
-96    -272   
256    -32    
-400   208    
128    32     
64     16     
-160   192    
96     112    
-32    -176   
48     176    
-208   48     
336    560    
-560   -96    
512    208    
-768   -224   
272    32     
-208   -288   
16     64     
16     48     
-96    -32    
96     96     
-128   16     
112    -128   
-96    144    
-32    288    
-96    -144   
-32    64     
-224   -80    
80     0      
-400   -16    
208    16     
0      176    
240    160    
-240   -16    
384    -32    
-128   256    
80     -16    
-80    112    
-48    80     
208    64     
-192   64     
736    -112   
-576   272    
-32    -48    
128    0      
-160   80     
432    -16    
-208   176    
-112   96     
112    32     
-96    64     
80     64     
-32    64     
-16    128    
-32    64     
-112   -32    
16     80     
0      64     
96     96     
-384   -160   
48     64     
176    512    
-208   -64    
112    -64    
112    112    
112    144    
-96    80     
-240   368    
-144   -64    
0      -32    
-16    -144   
128    160    
-112   128    
-848   -1472  
1264   2144   
-560   272    
704    -560   
-816   224    
-48    -752   
336    16     
-80    208    
672    640    
-256   -144   
-208   320    
-192   32     
320    -240   
-144   464    
16     -192   
-80    336    
384    -176   
-448   -192   
352    192    
224    368    
-208   128    
64     48     
-112   192    
-32    -32    
-80    -32    
16     144    
224    240    
-144   48     
32     48     
-144   -32    
96     32     
-16    96     
48     144    
224    112    
-96    144    
112    80     
-80    32     
0      64     
80     112    
80     80     
-64    288    
-64    64     
-128   -144   
48     256    
-64    32     
-128   16     
48     48     
32     128    
256    304    
-176   -32    
192    64     
-144   112    
128    144    
48     160    
-112   -80    
128    -80    
48     112    
16     176    
-48    192    
64     -144   
-32    192    
112    128    
0      80     
32     -32    
80     192    
-96    112    
176    128    
32     128    
-48    32     
64     128    
-80    64     
80     32     
96     -176   
-48    240    
32     64     
64     -2192  
64     208    
-240   96     
192    -48    
304    80     
-64    96     
48     144    
-16    80     
-80    -112   
176    16     
64     208    
-304   80     
64     -32    
224    208    
-272   96     
240    -272   
-80    112    
48     -64    
128    64     
-192   -32    
304    96     
-80    112    
160    144    
16     128    
0      144    
-32    -112   
208    160    
-144   0      
144    -128   
-144   112    
192    48     
32     96     
0      -160   
208    176    
-160   96     
80     16     
64     -64    
-48    48     
16     -112   
48     32     
-16    96     
96     112    
144    -16    
-240   -80    
240    96     
48     32     
160    144    
-32    -800   
-160   128    
192    112    
64     32     
32     -96    
-16    160    
-128   -320   
64     -16    
-144   -16    
240    240    
112    384    
32     -160   
0      144    
-256   -224   
224    -48    
128    -288   
0      128    
240    -1200  
-208   176    
16     0      
192    160    
128    -64    
32     144    
112    176    
240    144    
-80    192    
-16    0      
112    160    
-16    -144   
16     176    
80     -96    
48     96     
16     -688   
-96    96     
112    -16    
-144   -96    
224    -128   
32     224    
-32    128    
-32    -208   
64     80     
96     -400   
-16    112    
32     -272   
-80    96     
-80    -128   
336    -352   
-48    -784   
-64    64     
64     96     
32     112    
256    192    
-128   144    
160    16     
0      -304   
32     -128   
96     -112   
176    144    
-96    48     
48     176    
-32    -144   
32     176    
336    -336   
192    176    
-48    48     
-16    208    
-176   -80    
224    -240   
48     112    
48     -16    
48     80     
96     112    
32     320    
-64    -128   
128    -96    
48     64     
-848   -1744  
992    -80    
-1280  -736   
384    96     
240    -1728  
112    -416   
-608   416    
880    -1856  
112    528    
-96    -1024  
224    320    
-192   -2752  
336    80     
-112   96     
240    64     
-304   -64    
304    -128   
-32    -416   
192    -48    
-144   -480   
192    16     
-432   144    
144    -112   
16     -112   
128    -464   
80     -144   
96     -416   
-112   32     
0      -32    
112    -80    
160    48     
80     176    
128    416    
-112   128    
-96    -64    
32     -208   
-208   -48    
176    -304   
-736   64     
0      -256   
64     32     
-16    64     
16     48     
64     -1440  
208    -64    
16     32     
64     64     
-64    48     
48     -144   
208    -64    
-32    -80    
-336   -48    
-16    16     
-288   -64    
-32    -48    
48     -64    
64     -528   
-48    32     
64     -416   
0      -128   
-128   -224   
64     176    
128    64     
32     96     
32     112    
-64    16     
-96    -32    
144    32     
-16    16     
16     64     
-64    -16    
128    -144   
-112   80     
16     -64    
48     80     
-16    -448   
320    528    
-96    336    
80     304    
176    -80    
-288   -96    
272    -80    
0      48     
-304   -32    
96     -208   
16     -64    
80     -32    
32     240    
32     16     
112    176    
-16    -624   
16     96     
16     -144   
48     -16    
80     160    
16     -144   
-48    -32    
32     0      
-192   -16    
16     -96    
-160   0      
64     -32    
-192   80     
32     -432   
-48    16     
96     -704   
-16    16     
176    -944   
16     160    
-16    -80    
112    32     
-512   -96    
192    -64    
-160   48     
48     48     
-32    80     
16     80     
16     16     
96     -288   
16     128    
80     112    
112    -16    
-128   64     
-16    -112   
-416   144    
192    -176   
-80    576    
96     80     
144    -112   
-16    -16    
-192   0      
240    -288   
-320   48     
128    -224   
0      144    
16     -144   
-96    -352   
96     -128   
160    192    
-320   0      
304    0      
-320   64     
240    64     
-112   -16    
-144   -96    
-128   -96    
48     -128   
-48    144    
48     -80    
0      32     
-912   -192   
-224   128    
-160   -16    
-112   -16    
-48    192    
-464   368    
-144   -240   
-128   -176   
-32    -48    
448    160    
-320   112    
-64    -80    
80     64     
-464   -352   
96     128    
-192   -128   
272    -288   
-80    336    
-288   -16    
128    -32    
-560   16     
240    96     
-592   16     
160    368    
-224   -192   
496    -16    
-144   384    
-112   -128   
192    -432   
112    80     
208    320    
-16    -80    
-416   112    
-16    -176   
48     -80    
-336   -288   
80     112    
-160   -160   
144    304    
-272   32     
-48    48     
-80    -192   
48     96     
-112   0      
-80    128    
-160   -64    
96     0      
-48    48     
-736   -1216  
976    944    
-528   -576   
80     -352   
-512   640    
-896   -272   
-48    912    
-464   528    
16     -192   
-96    192    
96     -128   
-160   96     
112    -32    
-112   64     
-80    96     
-48    32     
-32    144    
0      80     
32     64     
-48    16     
0      128    
-144   -48    
32     96     
48     -240   
0      -80    
80     -64    
-32    192    
-96    -80    
-16    96     
-96    64     
128    80     
-128   32     
-160   0      
96     112    
-144   64     
-32    128    
48     48     
-96    288    
-336   -208   
0      112    
0      16     
48     192    
0      48     
128    128    
-112   112    
16     48     
-48    32     
-48    48     
-64    -48    
336    80     
-240   208    
16     16     
-16    128    
-128   -112   
64     160    
-112   80     
96     -96    
32     160    
-80    16     
112    16     
-256   48     
112    128    
48     96     
-48    144    
16     -32    
80     144    
-320   96     
144    128    
-496   -112   
128    80     
0      96     
-16    128    
0      -32    
96     16     
-96    144    
-96    16     
96     224    
32     -32    
96     0      
-192   -16    
80     80     
-288   96     
-48    48     
-16    -48    
176    -48    
48     176    
-80    320    
-240   0      
336    96     
-208   16     
128    176    
0      80     
16     96     
-16    96     
-304   -160   
544    80     
-400   160    
208    176    
48     128    
-128   -176   
64     16     
0      64     
192    96     
-16    96     
96     240    
-176   -128   
80     -48    
-144   160    
96     128    
-16    -96    
0      80     
-16    144    
128    32     
-16    128    
-112   16     
176    192    
144    80     
-192   48     
-32    -48    
80     -16    
-64    0      
-32    48     
256    176    
-48    112    
-48    96     
-176   16     
-48    -192   
-368   -112   
48     80     
112    -16    
144    64     
32     160    
80     288    
-16    160    
-80    64     
96     224    
32     96     
48     128    
128    160    
16     80     
16     176    
-80    80     
-16    160    
80     160    
0      176    
-32    128    
16     48     
-64    48     
128    80     
80     96     
-32    192    
144    80     
0      64     
0      320    
-144   192    
208    -48    
-112   144    
96     -128   
128    240    
-96    160    
32     80     
-64    32     
128    160    
16     -48    
-32    32     
144    224    
-112   80     
-48    -272   
16     -96    
80     -128   
32     160    
80     192    
32     480    
-32    -48    
-128   -16    
-32    192    
80     16     
48     48     
128    16     
32     48     
16     128    
128    48     
-48    -32    
112    272    
0      -48    
32     -80    
16     192    
48     -1568  
112    128    
48     128    
-32    144    
64     -16    
80     0      
0      64     
240    240    
-112   -112   
80     64     
-32    272    
304    4368   
-1344  -672   
-96    -272   
528    496    
1488   -736   
-816   -368   
-160   -688   
160    768    
128    -224   
368    224    
-304   -64    
288    0      
-96    240    
176    -128   
-240   16     
288    96     
112    368    
192    -16    
-80    48     
256    -304   
-160   64     
0      -576   
-64    208    
-16    64     
128    0      
32     48     
128    176    
-192   80     
112    64     
-80    48     
-144   48     
48     176    
240    272    
-240   -32    
160    0      
-192   128    
256    176    
-112   -32    
32     -448   
-16    48     
128    0      
16     256    
32     -64    
32     128    
-48    16     
32     -80    
96     96     
-16    -256   
112    -80    
64     -128   
-48    80     
208    -320   
-64    240    
64     -448   
176    176    
-128   -48    
224    432    
-112   240    
80     160    
-112   0      
-32    -32    
112    0      
16     -688   
0      48     
-32    -208   
80     208    
144    -256   
176    80     
-48    -720   
112    128    
0      80     
96     128    
112    96     
-80    -16    
80     -112   
160    -800   
16     144    
320    64     
-416   96     
32     -240   
-48    16     
32     -224   
240    112    
-16    -656   
112    128    
0      112    
-32    -16    
256    160    
-32    272    
80     48     
-48    -160   
-96    -16    
176    -176   
16     112    
0      -160   
112    160    
-96    -352   
144    144    
32     -96    
0      -208   
192    80     
-80    -1232  
-16    16     
-448   -112   
16     112    
64     -16    
80     -208   
96     -16    
-96    -864   
208    -64    
0      128    
0      -48    
64     64     
64     32     
48     -352   
32     80     
96     -624   
0      112    
-16    16     
16     -576   
160    160    
64     -608   
32     -144   
-64    -1008  
32     80     
320    160    
32     64     
240    464    
0      -64    
96     -320   
-112   176    
144    0      
160    48     
-432   -368   
240    -80    
-208   -32    
64     -1216  
112    -80    
-128   32     
112    -32    
-32    -768   
-48    -128   
304    -144   
-240   -48    
0      -32    
-16    144    
-128   -240   
112    -336   
-544   -576   
96     -96    
-1184  -16    
208    160    
-48    176    
-96    -96    
-112   -304   
336    -112   
-208   64     
-48    -208   
96     176    
80     16     
192    160    
-96    0      
16     -64    
-96    -16    
112    -32    
0      64     
64     128    
-112   -160   
112    -256   
-48    48     
176    -464   
-16    0      
16     -592   
128    -208   
-112   -48    
-64    96     
-112   -16    
-80    64     
-80    -16    
-288   32     
-128   -144   
64     -256   
-720   48     
48     -80    
-256   -80    
0      -320   
48     128    
-48    -1344  
80     368    
-48    -64    
128    -64    
0      112    
112    64     
-96    48     
96     -80    
-32    -32    
176    16     
-32    32     
-112   3440   
-2528  -160   
320    320    
176    224    
480    -736   
-384   432    
-80    48     
752    192    
-496   192    
304    -256   
-32    -80    
-96    -112   
-144   -16    
160    0      
-96    64     
64     -32    
-32    32     
112    -48    
0      0      
0      -176   
-48    128    
-64    144    
112    48     
-304   -80    
96     -128   
160    240    
-240   -80    
64     64     
-16    160    
-64    -112   
-64    -448   
-544   32     
0      -144   
128    112    
96     -208   
176    32     
-416   0      
-528   -240   
-208   128    
240    112    
-64    -32    
-64    160    
-128   0      
80     -64    
80     0      
-80    -96    
192    176    
-368   -16    
96     -32    
-448   -144   
-992   -96    
16     144    
-352   -64    
112    48     
-800   48     
-16    128    
160    -96    
-256   0      
144    -128   
16     32     
-64    -112   
32     192    
-192   -112   
16     128    
-112   96     
-48    -192   
64     48     
-432   208    
-32    32     
-544   -144   
-272   80     
-352   -112   
208    96     
-128   16     
32     0      
-160   -192   
128    128    
-144   -16    
144    80     
-32    48     
-48    144    
80     0      
32     80     
-192   224    
64     -96    
128    -16    
-288   -192   
192    -144   
96     32     
-144   -96    
-16    -32    
-64    32     
0      176    
-128   96     
192    144    
-144   -240   
144    80     
-240   128    
64     32     
-64    0      
16     48     
-64    64     
112    96     
-160   -224   
48     112    
-256   0      
400    208    
-272   48     
192    64     
-80    208    
-64    -160   
-128   0      
-144   -48    
224    160    
-160   224    
64     96     
-192   -80    
-64    -16    
-240   -48    
256    224    
-144   160    
80     32     
-16    -64    
-256   -80    
208    304    
-64    160    
192    128    
96     320    
-48    208    
-32    144    
-64    32     
-64    -48    
-160   16     
-208   -112   
-128   96     
-496   80     
144    0      
-80    80     
-80    224    
160    80     
48     32     
-224   48     
-16    -16    
-64    256    
64     48     
-32    176    
-144   -128   
0      208    
-48    32     
96     64     
-1136  -64    
16     96     
-16    80     
-128   0      
-96    96     
128    128    
-112   80     
64     112    
-32    -224   
-192   -48    
80     176    
-80    -48    
64     64     
-224   -112   
48     304    
-496   -112   
-80    -240   
-48    -80    
112    240    
64     160    
368    176    
-400   -400   
-80    0      
176    48     
160    -128   
256    208    
-64    -32    
32     80     
-288   64     
96     -144   
112    176    
80     336    
-64    48     
-48    176    
144    -208   
-96    64     
16     128    
0      -32    
112    96     
-48    -80    
160    48     
-96    -48    
64     128    
-128   0      
-48    192    
80     -80    
-16    96     
-32    112    
-1024  -1968  
1536   2880   
-1456  480    
432    -144   
-576   -1008  
624    512    
-208   560    
-208   16     
64     -784   
288    -464   
-320   320    
16     -208   
208    288    
96     0      
224    96     
-304   -224   
240    192    
-112   -400   
320    144    
-16    144    
-48    -240   
112    336    
-64    288    
128    16     
-160   -192   
0      -240   
48     16     
0      208    
0      240    
48     64     
-48    16     
112    80     
80     160    
-96    48     
-128   0      
144    96     
48     752    
208    480    
-240   96     
-288   -304   
240    128    
-64    96     
-16    112    
160    32     
48     48     
-32    64     
64     48     
112    48     
144    0      
192    192    
-96    -32    
-48    336    
16     -32    
-80    -96    
-32    176    
288    272    
192    768    
48     288    
-160   -176   
-96    -128   
80     -112   
16     160    
64     -80    
80     80     
80     320    
48     -160   
144    208    
-32    16     
96     144    
-112   -96    
96     112    
96     -208   
-32    112    
16     32     
80     208    
0      48     
64     144    
336    1056   
-64    400    
0      48     
80     -32    
96     -80    
32     16     
16     112    
-112   -128   
32     96     
0      -544   
144    144    
-64    80     
176    160    
-144   112    
-16    -96    
0      -128   
112    240    
-32    112    
112    112    
-96    -32    
96     144    
160    16     
0      -464   
112    112    
0      -176   
64     16     
64     16     
0      80     
176    160    
-96    -192   
64     32     
-32    224    
0      16     
288    208    
-192   96     
128    16     
-32    64     
-64    -224   
224    160    
64     320    
-16    -32    
-32    -704   
16     320    
32     48     
96     64     
32     -32    
-16    240    
128    112    
224    320    
-368   48     
176    -208   
-32    -208   
-112   -48    
224    96     
176    -288   
-16    384    
32     -384   
-80    224    
112    -2048  
272    688    
-272   -208   
80     544    
64     -128   
80     96     
-80    128    
304    96     
-240   64     
80     -112   
32     144    
48     -112   
-16    112    
144    -736   
-16    208    
128    -240   
48     176    
-48    144    
128    32     
-192   -64    
288    0      
160    80     
64     -32    
64     448    
208    -816   
-32    96     
96     -64    
48     176    
48     -32    
-80    -256   
96     -32    
496    384    
-432   -208   
80     224    
160    240    
16     16     
32     48     
96     -16    
-32    16     
64     -320   
144    64     
128    -160   
0      112    
0      -400   
64     208    
64     -512   
192    144    
16     32     
128    80     
-144   208    
-64    -208   
64     -1008  
80     -256   
64     160    
16     -48    
112    64     
32     -96    
64     160    
-64    -272   
208    224    
-80    -272   
144    -304   
16     224    
-1008  -1728  
288    -352   
128    416    
240    -96    
736    -1104  
-400   -224   
352    192    
-176   -2192  
-16    128    
192    80     
192    -128   
-112   -144   
224    0      
80     48     
0      0      
-96    -416   
112    -96    
-688   176    
64     -96    
96     -80    
16     -64    
-32    -128   
304    -496   
-128   -112   
80     32     
48     -96    
32     -32    
160    256    
-80    -160   
32     64     
64     -160   
-16    48     
-16    80     
-32    16     
-48    -208   
160    -208   
-96    -144   
128    -464   
-16    144    
192    -256   
-48    -144   
176    -224   
-192   176    
224    -48    
-192   80     
144    -96    
96     128    
16     112    
208    144    
-960   -272   
224    -112   
-96    48     
224    16     
-48    -32    
160    -656   
-128   -48    
80     -112   
80     256    
-96    144    
304    0      
-288   -16    
16     -176   
-96    -64    
32     -48    
-512   160    
96     -336   
112    -64    
-128   -144   
-48    -16    
96     -384   
128    -32    
-16    -1456  
64     144    
16     16     
96     -144   
-144   -32    
0      -96    
80     32     
-32    144    
-192   -48    
160    -144   
-2720  -64    
0      -80    
160    224    
16     -144   
320    128    
-208   -208   
176    -192   
336    192    
-272   -192   
224    144    
-112   -224   
128    224    
-32    -96    
144    -64    
-64    -336   
-32    32     
-16    -160   
64     112    
0      -32    
32     0      
32     -912   
16     48     
-160   192    
48     16     
32     80     
-48    -64    
48     80     
64     32     
-192   -16    
64     48     
-16    96     
-32    32     
16     32     
-32    -352   
64     144    
224    -144   
-32    32     
-16    96     
-48    16     
176    256    
32     -48    
-224   96     
-48    112    
112    160    
-16    144    
32     96     
-96    -288   
-240   -144   
-80    -240   
304    256    
16     -80    
-320   -32    
-176   -96    
-128   -32    
0      160    
304    48     
-32    160    
-224   -96    
-32    -16    
160    -192   
-160   -128   
-288   -144   
320    48     
-112   -144   
192    16     
-480   -416   
-48    144    
320    480    
-560   -256   
48     -32    
-112   48     
32     16     
128    0      
-112   -144   
32     -16    
128    288    
-672   -320   
160    336    
-160   -176   
-48    80     
-128   80     
-80    16     
-96    112    
-16    -112   
32     64     
-32    128    
0      128    
-720   -288   
-80    -48    
-64    128    
16     160    
-48    144    
-48    32     
-96    -160   
256    32     
-112   48     
-32    -96    
-16    64     
-48    0      
-16    48     
-336   -64    
-64    48     
-496   32     
-96    112    
-48    -240   
320    96     
-32    0      
64     96     
-160   -80    
-64    -48    
176    128    
16     -16    
-160   32     
-48    -128   
32     144    
-144   -16    
144    -64    
-656   2656   
112    -304   
-880   -912   
608    224    
-272   -464   
-160   -16    
848    -240   
-624   240    
256    -432   
-464   32     
224    16     
32     560    
16     -192   
0      288    
-80    -64    
-192   112    
-64    0      
-144   -64    
-176   -112   
256    80     
80     -80    
224    304    
-112   272    
-80    96     
-64    -80    
0      144    
-192   -32    
128    -112   
-64    -208   
240    -32    
-256   64     
144    128    
-448   160    
144    -32    
0      -48    
0      -176   
272    272    
-240   128    
-224   -80    
0      16     
16     -208   
160    144    
-16    96     
32     32     
-112   -80    
-80    48     
-16    128    
-400   -240   
384    208    
-992   -320   
304    -128   
80     416    
-32    -64    
48     288    
-96    112    
0      64     
32     320    
-160   -128   
-288   -192   
32     336    
32     -80    
0      208    
-128   112    
112    288    
-512   -256   
128    16     
-64    112    
-16    240    
-48    48     
176    -64    
0      96     
-64    64     
112    96     
-48    320    
0      -48    
0      64     
-32    -592   
-192   -912   
240    32     
96     768    
128    -144   
-160   96     
96     -128   
96     64     
32     240    
-48    144    
-96    -336   
-80    128    
112    -48    
320    240    
-432   0      
-16    64     
-48    -96    
48     128    
112    80     
-96    64     
144    320    
-128   -16    
128    -80    
-288   -64    
176    16     
48     240    
32     160    
-192   16     
48     112    
-32    0      
176    176    
-80    240    
208    544    
176    256    
-144   -64    
80     0      
64     96     
80     48     
-80    96     
0      80     
16     208    
112    -16    
-176   -64    
-64    -32    
112    -128   
48     240    
-112   32     
112    -128   
-160   -96    
240    64     
-192   96     
192    -16    
-80    96     
96     144    
48     96     
-64    -32    
-112   368    
96     -64    
-176   112    
-48    -80    
288    0      
-544   -48    
416    96     
-16    64     
-48    96     
128    224    
32     80     
32     80     
-80    -32    
176    224    
128    368    
48     224    
-16    160    
80     80     
-80    48     
48     -448   
64     64     
112    80     
64     224    
-80    0      
64     128    
-144   -208   
224    32     
0      192    
0      96     
96     96     
-192   80     
128    -16    
176    -176   
128    16     
-192   -32    
-32    416    
128    144    
176    -32    
224    48     
-64    -16    
-32    48     
176    -128   
-256   176    
0      48     
-160   144    
208    -80    
-128   0      
80     48     
16     80     
-96    16     
112    16     
80     -464   
-192   176    
160    16     
160    80     
-48    192    
32     160    
32     144    
-32    -48    
32     176    
320    -160   
-80    224    
80     160    
144    208    
-144   -272   
96     64     
2432   1760   
-1360  448    
416    -128   
-32    752    
752    -160   
-576   -304   
48     -608   
352    992    
-48    -240   
-48    368    
-128   16     
320    -16    
-224   416    
304    -336   
-128   304    
64     -400   
-32    400    
192    -800   
-176   256    
208    -432   
-208   208    
96     -160   
-48    512    
112    -160   
-16    160    
-32    -192   
48     0      
112    -32    
16     -80    
0      -112   
192    -48    
48     96     
96     -240   
-96    96     
64     80     
48     -64    
-64    48     
-48    128    
128    128    
128    112    
32     32     
-48    160    
64     0      
96     112    
176    -32    
-32    -32    
112    32     
-96    -16    
64     192    
112    0      
128    48     
-112   160    
176    16     
-112   128    
208    16     
80     160    
-96    -528   
240    48     
-96    -304   
32     -16    
192    -464   
-96    96     
144    16     
48     80     
32     160    
96     -16    
32     96     
208    176    
-176   80     
160    -64    
0      96     
64     -112   
48     112    
48     -80    
80     32     
0      32     
112    304    
-112   -128   
192    16     
-160   -528   
96     176    
16     96     
0      48     
112    -208   
-208   48     
-32    -96    
160    272    
-320   96     
64     -96    
336    80     
-192   16     
192    64     
-48    -80    
16     160    
224    80     
-400   16     
112    48     
-16    -160   
48     -384   
-400   -480   
288    -1328  
64     -128   
0      -112   
160    -48    
0      -1840  
80     -240   
80     144    
-80    -176   
64     -48    
-64    48     
128    128    
32     160    
-176   -400   
160    16     
-400   -128   
-16    32     
32     0      
80     -208   
32     -176   
-48    -512   
48     96     
-16    304    
16     -32    
96     -48    
-16    96     
80     -352   
-32    112    
112    -32    
-208   -416   
368    144    
-160   16     
128    -80    
128    -48    
-16    -128   
112    -1120  
80     48     
64     -2224  
0      48     
112    144    
-96    96     
0      -32    
-64    -64    
144    -96    
-48    -80    
-224   -48    
-144   -96    
-672   -224   
-16    -176   
48     16     
96     -32    
48     32     
0      -528   
-128   16     
80     -160   
112    -48    
-112   -16    
160    112    
448    816    
-272   0      
96     80     
-32    -256   
-240   -96    
80     64     
0      -16    
48     80     
-336   -224   
176    -304   
-80    -16    
480    -464   
-32    144    
32     -96    
48     -208   
-320   96     
512    -352   
0      176    
-128   -128   
304    144    
-288   16     
-208   -64    
80     -192   
32     -16    
208    -128   
-64    64     
144    -816   
16     80     
-144   80     
48     -64    
-64    -80    
16     -80    
-16    16     
112    -16    
-256   -64    
96     -128   
-224   -48    
176    48     
-80    64     
32     -96    
-32    64     
-1056  -2784  
976    3008   
-832   1216   
400    -592   
-480   -336   
-48    -352   
-384   -240   
-160   -32    
-144   112    
464    -336   
-672   432    
288    -576   
224    736    
48     -528   
-128   384    
-240   -848   
208    320    
-288   -256   
432    320    
-656   -48    
352    64     
-368   96     
144    -16    
-80    -208   
272    -32    
-96    144    
128    -240   
-208   384    
288    -448   
80     144    
-16    -416   
128    192    
-176   -32    
96     -64    
-64    48     
-160   -160   
-224   -32    
80     128    
96     288    
0      -128   
-608   -64    
16     -224   
64     -32    
-912   -448   
48     96     
160    64     
-256   64     
-256   -256   
-176   144    
80     -32    
-160   112    
-160   160    
112    -16    
-240   -64    
304    16     
-144   128    
-96    -112   
144    528    
-96    -96    
192    624    
-128   -16    
-144   -160   
-224   -448   
-48    176    
48     208    
208    16     
144    384    
-528   160    
-112   -240   
224    16     
-144   32     
192    -144   
64     224    
-80    -112   
-112   48     
0      48     
-64    96     
112    192    
-288   240    
0      -144   
-816   -224   
0      -64    
-1248  -48    
-16    -96    
32     -32    
16     80     
-48    -64    
240    208    
-144   -128   
-176   -448   
-160   160    
256    -176   
-96    352    
-48    128    
32     96     
-160   112    
96     144    
304    48     
-64    16     
-384   -320   
256    176    
-96    -96    
112    208    
-96    320    
0      112    
16     320    
80     -272   
64     48     
-16    96     
-208   80     
240    -80    
-112   112    
-96    -96    
96     288    
-496   -48    
0      -48    
96     -16    
-32    192    
160    0      
-176   32     
128    144    
-96    128    
32     -272   
-416   -208   
80     16     
240    320    
-208   112    
-16    48     
-240   64     
-160   0      
112    64     
-96    32     
192    352    
48     224    
96     96     
-176   -80    
-32    80     
144    224    
16     112    
80     128    
-64    64     
-112   0      
-160   -32    
48     80     
-128   -32    
0      64     
-112   -16    
-176   112    
96     0      
16     96     
16     64     
16     144    
64     96     
32     0      
-48    -16    
-16    144    
80     48     
-240   -64    
208    32     
-256   96     
-16    160    
0      48     
-96    48     
112    160    
-32    64     
144    160    
-144   -32    
64     144    
-112   176    
-176   -48    
144    -64    
48     80     
-128   192    
-128   320    
-192   -272   
384    48     
16     272    
-112   -32    
48     256    
-96    -16    
48     96     
128    -32    
-32    112    
80     -32    
96     16     
112    48     
176    208    
-352   208    
-48    64     
-16    -32    
32     -80    
208    128    
64     32     
-128   160    
-16    16     
32     80     
-16    96     
160    48     
-1136  800    
672    1648   
-1216  560    
-80    192    
-128   464    
-320   -624   
432    880    
-640   -320   
240    112    
-96    -256   
64     96     
32     240    
80     -256   
-16    320    
224    -192   
-256   208    
256    -144   
-384   384    
272    -112   
-112   192    
48     -240   
64     368    
112    112    
-64    192    
-16    -160   
-128   160    
288    16     
0      272    
-32    80     
-48    -112   
64     64     
0      128    
32     96     
0      64     
0      96     
160    144    
240    112    
32     144    
-96    96     
32     16     
16     112    
96     80     
16     160    
0      -32    
16     64     
-16    32     
112    240    
48     -48    
16     48     
-64    -176   
0      -1728  
112    64     
-32    80     
64     112    
32     96     
80     128    
-16    80     
-96    0      
128    144    
-32    32     
32     -32    
16     128    
-32    -32    
0      192    
-128   -96    
48     -848   
176    192    
-16    64     
96     208    
-48    96     
32     0      
32     96     
80     48     
48     112    
-16    48     
-48    -96    
256    208    
-240   192    
80     144    
208    112    
-208   -240   
144    -144   
-16    -368   
-304   224    
-48    64     
-16    48     
80     -32    
112    64     
-96    80     
16     16     
-64    -464   
64     176    
96     256    
-16    96     
112    16     
0      -240   
144    128    
48     -528   
176    240    
32     48     
16     16     
-80    64     
192    96     
-16    80     
32     48     
-48    0      
64     112    
80     48     
112    -16    
-64    -32    
48     -288   
0      -64    
96     -112   
160    128    
-16    -512   
0      144    
-64    -96    
48     96     
160    256    
-64    32     
64     96     
80     224    
144    16     
48     -16    
-16    256    
-64    80     
352    800    
-32    96     
176    224    
-144   -912   
112    128    
16     -784   
-48    -64    
256    144    
-48    112    
144    -16    
-96    96     
64     48     
96     -240   
96     96     
192    208    
-112   160    
-32    -1248  
144    304    
-176   -1216  
304    128    
-224   -784   
176    48     
96     160    
-16    144    
32     -32    
-16    80     
-32    16     
176    -224   
16     128    
-16    -176   
112    272    
0      -544   
192    144    
-192   -48    
64     -64    
-64    144    
192    128    
160    128    
-32    128    
-112   96     
80     -368   
304    336    
48     32     
-80    -224   
320    -96    
-112   240    
320    -192   
-128   192    
0      16     
240    144    
-32    -96    
96     -80    
256    240    
16     -176   
112    48     
0      -96    
-16    -112   
48     -336   
-16    192    
-80    -336   
208    304    
-128   80     
160    64     
-96    -192   
96     -1312  
304    -96    
-176   -256   
16     96     
112    -416   
272    112    
48     -48    
144    -112   
992    400    
-912   -1808  
320    432    
368    944    
64     -1344  
-528   336    
-736   32     
1104   -48    
-496   464    
320    -80    
-160   -144   
-80    -80    
96     144    
-304   -96    
-672   -704   
160    64     
112    288    
624    -736   
-352   -1296  
-144   -336   
80     640    
-240   -256   
192    272    
-96    160    
-160   -448   
-400   -160   
-256   -480   
208    -224   
-528   -176   
480    400    
-128   -80    
208    -416   
-96    176    
144    -656   
32     176    
48     -1936  
-48    -208   
32     -96    
96     336    
16     -128   
-160   128    
-160   -80    
144    32     
-16    80     
64     -176   
-128   -112   
-80    -64    
144    176    
-112   48     
-16    32     
208    -416   
16     112    
64     -32    
-32    80     
80     -64    
176    80     
16     112    
144    -160   
-80    112    
96     -224   
-512   128    
-16    -240   
224    -128   
128    112    
-352   64     
160    -976   
80     144    
112    128    
-64    32     
80     48     
-48    -16    
-144   -144   
128    -208   
-384   -256   
160    -32    
-240   128    
0      -592   
-1520  -464   
-48    -224   
96     48     
112    -192   
-272   208    
0      -1360  
32     -128   
48     -16    
80     -144   
-192   16     
-16    112    
16     96     
-16    128    
-64    -16    
160    -32    
-96    -48    
160    -368   
32     112    
0      48     
80     112    
144    -592   
-128   -64    
144    48     
96     48     
-64    64     
128    144    
80     192    
-160   -400   
-32    -224   
-48    -32    
16     176    
128    -112   
96     256    
-64    -48    
208    64     
80     -336   
0      -48    
-64    -64    
112    160    
-368   64     
464    -32    
-336   -128   
0      -80    
64     192    
80     -32    
-240   -16    
-48    -176   
144    16     
448    -176   
-256   96     
16     -416   
-592   176    
176    32     
-512   112    
-448   -48    
112    -128   
-352   0      
-48    -64    
368    336    
-112   80     
16     -48    
-16    -96    
-96    32     
-352   -144   
-96    80     
48     176    
-176   128    
-48    0      
-1248  -112   
-112   16     
-704   -96    
48     192    
64     -16    
-112   96     
48     -128   
-16    144    
32     -208   
-112   144    
-48    -96    
-80    96     
-16    -192   
176    -16    
-288   128    
-128   -96    
-48    128    
-256   16     
96     64     
-1152  0      
-96    -64    
32     -48    
-176   128    
32     112    
16     -96    
80     -32    
-112   48     
-16    64     
-144   288    
-320   -32    
160    -32    
208    80     
-192   -64    
96     -48    
-640   64     
-176   144    
-96    -128   
64     64     
32     -128   
112    336    
-352   -48    
0      48     
-64    -48    
112    112    
16     112    
-112   48     
80     48     
-160   16     
144    160    
-336   0      
176    80     
-640   -96    
96     160    
2864   928    
-1696  -288   
192    -272   
-16    864    
-416   -1040  
320    880    
-512   -352   
496    1152   
-432   -448   
-16    -240   
-256   0      
160    144    
-160   192    
-544   -368   
-192   240    
96     -352   
0      288    
16     64     
-80    16     
128    -96    
-176   96     
32     80     
0      288    
-32    160    
96     112    
-112   -80    
-224   -208   
-16    112    
-128   -64    
80     192    
0      0      
-48    48     
48     128    
-128   64     
144    64     
-80    16     
32     176    
-48    160    
-32    48     
-16    0      
-32    -16    
-80    16     
16     144    
-144   -32    
80     64     
-928   -64    
-16    64     
0      64     
32     -32    
-32    96     
-16    64     
96     256    
-176   96     
-32    0      
-16    -32    
128    -16    
-112   112    
16     176    
-64    -32    
160    96     
0      64     
48     96     
64     80     
0      80     
48     192    
-160   96     
144    112    
-112   80     
-176   -224   
-32    -16    
-80    80     
112    -48    
32     48     
-16    -16    
-96    0      
128    32     
64     0      
-32    -16    
48     144    
80     336    
-16    -64    
-80    112    
0      -256   
208    464    
48     0      
-48    160    
-16    416    
144    160    
-160   -16    
-96    0      
128    112    
32     160    
0      144    
-32    16     
0      96     
-64    32     
0      -176   
0      -208   
-16    80     
0      208    
32     96     
-224   -144   
32     64     
128    160    
160    128    
-96    80     
0      64     
0      48     
80     64     
-48    80     
32     80     
112    160    
16     64     
16     80     
-96    80     
0      16     
96     96     
-16    96     
96     160    
-16    80     
144    224    
-96    -64    
-16    160    
-16    144    
240    128    
0      48     
96     576    
-240   -32    
320    -144   
-144   -160   
64     272    
64     -64    
128    208    
-112   176    
64     16     
-48    -16    
112    288    
-160   -32    
320    16     
-256   208    
112    -64    
0      80     
-80    64     
208    128    
-160   112    
-80    48     
-144   -176   
128    -912   
32     288    
112    144    
-48    0      
16     96     
80     128    
240    -112   
-48    256    
-240   -80    
368    176    
-368   144    
304    -16    
0      112    
-80    48     
192    208    
-96    -496   
256    192    
-48    48     
80     48     
-48    240    
-32    48     
128    -16    
48     48     
-96    96     
48     160    
-112   272    
48     0      
80     16     
64     80     
160    176    
-32    48     
-112   112    
112    -1856  
0      160    
128    32     
-48    48     
0      128    
80     96     
-144   112    
32     176    
-32    -304   
96     144    
-48    -32    
16     -80    
-96    112    
112    -352   
16     240    
160    -992   
160    304    
0      64     
96     112    
-864   2768   
-1920  -1360  
880    912    
432    448    
960    0      
-768   464    
672    96     
-32    -96    
-592   -432   
592    16     
16     -32    
-240   -384   
160    432    
320    -432   
-304   64     
240    -352   
-80    48     
128    -48    
-224   112    
240    -16    
-80    32     
48     -48    
-96    -48    
192    -224   
-80    -320   
272    96     
144    -224   
-64    192    
32     -624   
32     32     
-64    -160   
48     160    
32     192    
80     96     
48     80     
32     192    
32     80     
16     -144   
32     96     
80     -160   
48     128    
32     0      
48     96     
96     -240   
-176   16     
96     -704   
144    192    
176    416    
-80    128    
64     -192   
-48    -464   
-16    -80    
112    0      
16     208    
144    -160   
64     80     
-16    -96    
48     112    
96     -48    
32     -16    
-16    48     
16     64     
160    64     
0      240    
-32    32     
48     -80    
176    128    
-32    -192   
128    112    
-112   -320   
112    64     
96     -32    
-128   64     
176    -64    
32     160    
64     -256   
32     240    
128    128    
-16    416    
208    -624   
80     112    
-176   -368   
144    -368   
192    224    
-176   -16    
80     -144   
272    64     
-336   256    
304    -800   
-16    -544   
-16    112    
48     -1600  
128    48     
112    96     
-80    0      
272    -160   
-192   -224   
64     -96    
192    -1184  
-48    -48    
64     -128   
96     64     
-48    256    
80     -80    
-64    -256   
64     192    
128    -80    
128    128    
-544   -160   
240    -352   
-768   -112   
192    -112   
32     32     
192    -192   
32     -224   
64     -672   
192    -32    
-16    128    
-112   -16    
16     -288   
-32    0      
-48    -272   
304    96     
-112   32     
80     -16    
-448   256    
96     128    
0      96     
-32    -96    
112    -48    
224    -864   
-160   -128   
112    -224   
144    80     
208    -64    
0      144    
240    128    
-64    64     
32     112    
-16    -112   
-144   64     
160    0      
-176   64     
64     -272   
-80    -16    
16     -416   
-144   -144   
192    -1024  
-48    -96    
112    -48    
112    80     
16     16     
64     0      
48     128    
64     128    
-384   -128   
48     -48    
-1136  -208   
128    -240   
128    -16    
64     64     
-48    0      
-48    -704   
-80    112    
48     -96    
272    -176   
-64    32     
-48    48     
-208   128    
-320   -192   
-128   -192   
96     -64    
-128   176    
64     -48    
-768   128    
240    16     
80     368    
-240   -432   
48     16     
144    96     
160    -48    
-48    80     
96     -144   
-112   160    
-64    -112   
-160   96     
-16    -128   
0      96     
48     -160   
-336   80     
96     -368   
64     160    
-64    -160   
192    -64    
-80    -720   
320    48     
-256   48     
64     48     
1504   -3664  
-112   112    
816    144    
-96    -368   
544    784    
-48    -1200  
-560   -288   
1104   -336   
-144   64     
64     -192   
-224   48     
240    -528   
-96    -64    
96     -288   
64     160    
48     -112   
96     320    
-176   0      
112    160    
-80    -80    
96     16     
368    80     
256    -32    
-80    224    
-560   -112   
-128   320    
-48    -48    
-720   0      
224    96     
-336   48     
32     0      
-112   32     
48     -32    
16     16     
32     -64    
96     176    
-128   96     
-1040  -144   
-16    -32    
-80    -208   
-48    160    
48     96     
-64    64     
-16    0      
-96    -112   
-112   64     
-896   48     
-32    176    
-16    32     
64     -48    
-32    -112   
-128   16     
-240   -512   
48     112    
-160   -96    
112    192    
-32    384    
128    128    
112    208    
-64    32     
-96    -32    
-256   0      
-16    16     
-400   -96    
-64    80     
32     -240   
48     128    
80     -48    
-112   48     
-16    48     
-96    0      
-16    48     
-192   -48    
96     80     
-288   48     
16     32     
16     160    
64     144    
-720   -176   
32     112    
-80    176    
112    144    
-16    -16    
80     96     
32     48     
-144   -32    
32     32     
-48    80     
80     80     
-32    32     
-112   -16    
-80    -112   
-80    -32    
-304   96     
-128   16     
-128   -16    
160    352    
-160   -48    
64     48     
-80    80     
48     48     
128    192    
-144   128    
32     64     
16     80     
-96    16     
112    0      
-16    80     
-80    32     
48     32     
-176   -32    
-32    128    
-48    -160   
-48    48     
32     208    
-64    -80    
64     128    
0      272    
96     112    
-48    -128   
-64    176    
0      144    
192    0      
-320   48     
80     240    
-32    -144   
-256   -544   
32     48     
-240   208    
464    -32    
-272   192    
0      -128   
32     16     
-176   80     
32     64     
64     0      
-80    208    
-96    0      
-224   -160   
48     -32    
-64    64     
48     48     
96     160    
-16    272    
64     48     
-128   160    
-224   -160   
160    112    
-112   -96    
112    304    
-112   -16    
-176   -16    
0      128    
96     80     
0      176    
-144   16     
160    336    
32     256    
-144   -176   
144    -32    
48     80     
160    128    
-208   176    
32     32     
-224   0      
-64    -208   
144    240    
-80    336    
-64    432    
-320   16     
48     -336   
112    80     
80     112    
208    128    
-144   -64    
-32    96     
160    48     
-80    64     
-192   64     
-16    -112   
-96    80     
128    16     
16     192    
-80    0      
48     80     
0      -144   
0      128    
80     -48    
-128   96     
48     176    
144    80     
128    368    
-128   16     
0      320    
-48    -16    
-80    160    
64     32     
128    32     
1296   -1456  
720    368    
112    -16    
-400   224    
-336   736    
656    -96    
-832   -304   
80     16     
-32    528    
48     208    
368    112    
-240   224    
288    -224   
-160   112    
80     -48    
-160   96     
176    144    
-48    320    
-32    -192   
96     128    
80     192    
64     32     
-80    80     
128    64     
16     96     
160    112    
-128   96     
64     272    
-128   -16    
48     0      
-32    0      
64     -208   
32     160    
80     16     
-64    48     
64     176    
80     80     
32     112    
48     64     
64     144    
16     48     
-16    96     
48     128    
32     32     
48     112    
80     112    
-128   96     
208    176    
-256   16     
288    64     
-112   112    
176    64     
-128   16     
208    144    
-144   128    
32     0      
96     48     
-32    128    
16     16     
128    96     
-48    80     
80     -224   
0      48     
192    128    
-112   208    
16     -32    
224    112    
-272   -64    
288    224    
-192   48     
240    -32    
-48    -160   
0      64     
48     -64    
0      -208   
0      128    
48     -496   
128    192    
-160   224    
144    16     
96     160    
-128   80     
176    16     
-16    -144   
304    112    
-224   320    
32     64     
208    32     
64     48     
-128   -32    
176    32     
-48    -80    
32     96     
-32    -336   
208    176    
-128   176    
80     80     
96     80     
48     128    
16     96     
48     80     
0      96     
96     208    
-64    -96    
96     -112   
16     320    
256    -144   
0      64     
112    -368   
-144   208    
240    -960   
32     144    
-144   -128   
128    160    
-16    16     
16     240    
-64    32     
-48    -16    
48     -48    
-64    -192   
480    384    
96     -160   
64     144    
-112   -192   
144    144    
144    -512   
-384   -48    
112    -112   
80     208    
80     -16    
64     144    
-16    -16    
112    256    
32     96     
240    -16    
-96    -112   
-16    112    
-16    32     
160    48     
112    16     
0      -112   
-160   112    
384    80     
-240   192    
0      -32    
-32    320    
80     432    
64     -896   
48     64     
-64    -224   
64     144    
160    -160   
-16    48     
112    -656   
-80    -64    
224    -304   
-80    288    
48     -144   
-16    -272   
80     -32    
192    336    
80     -128   
-144   -272   
48     240    
144    48     
32     -240   
-112   -656   
64     304    
320    32     
-48    336    
272    -224   
-144   -16    
176    -80    
-48    -608   
128    80     
48     -1904  
-48    -64    
128    240    
144    -240   
32     -112   
48     -1328  
32     -144   
-16    96     
96     -32    
48     160    
64     -48    
128    144    
-112   32     
208    -672   
-240   128    
-432   -176   
256    -400   
352    0      
-176   -560   
-176   -192   
144    -816   
304    -80    
48     -16    
2192   -1920  
-432   -416   
816    432    
-208   112    
-176   768    
-32    -384   
-736   -64    
368    384    
-208   288    
16     160    
80     -352   
-80    144    
192    208    
64     -64    
-80    -1664  
192    32     
-176   -352   
112    272    
48     -128   
32     0      
144    112    
16     -48    
-160   208    
-368   -304   
-640   -112   
-64    -272   
-80    -160   
96     -384   
-64    -48    
112    -800   
192    -48    
-16    32     
32     176    
-48    16     
80     80     
176    -80    
-80    -80    
-48    -128   
-112   -144   
-160   -176   
48     112    
128    -32    
144    -208   
64     -112   
-64    -288   
-192   -32    
32     -400   
48     128    
16     -96    
-16    -96    
80     -32    
64     208    
0      160    
-16    -96    
-128   -160   
352    32     
-688   -64    
112    -256   
-16    32     
240    192    
-144   16     
224    -256   
96     48     
-48    -176   
48     224    
0      16     
48     16     
-128   64     
96     16     
-96    48     
96     -96    
-192   32     
32     16     
-432   64     
80     -48    
96     -32    
256    -128   
-64    288    
96     -432   
192    -32    
176    32     
-64    160    
-224   -80    
32     32     
-112   -96    
-16    -16    
-192   -112   
304    -112   
-336   96     
0      -192   
-96    -16    
64     -416   
0      128    
176    -448   
32     -112   
-448   -32    
16     -80    
64     176    
64     256    
-80    -32    
96     -32    
-176   32     
176    -48    
32     -32    
0      -144   
0      128    
160    -64    
-112   0      
32     128    
-80    -48    
32     0      
0      -64    
-32    -32    
176    64     
-144   80     
160    -80    
-208   0      
192    128    
32     192    
80     -80    
32     32     
-1152  -224   
128    80     
-160   -112   
-1136  176    
-80    32     
416    672    
-432   32     
224    -416   
-192   -80    
-32    -64    
144    0      
144    32     
-48    176    
-512   32     
-80    0      
-640   -816   
16     -48    
-400   -448   
208    16     
-128   -128   
-16    0      
96     192    
-1248  -224   
128    128    
160    -32    
32     192    
-16    -128   
64     32     
-144   80     
64     128    
-272   -80    
-96    48     
32     -64    
-16    208    
-240   0      
-400   -240   
-384   -352   
-48    448    
224    192    
0      -48    
0      304    
-192   -240   
-160   32     
-32    -32    
176    64     
128    176    
-192   -112   
128    -656   
48     384    
16     -224   
-144   112    
144    192    
-240   -192   
208    -64    
-864   304    
-176   -160   
-96    224    
-48    -320   
32     32     
128    64     
-80    96     
-64    32     
80     192    
-64    -288   
-32    272    
-128   512    
128    48     
-128   -80    
-80    -16    
-160   -160   
-32    48     
64     -208   
-64    96     
-48    -32    
-48    0      
-48    112    
-64    112    
-1072  -64    
-496   0      
480    -176   
272    -192   
256    -512   
-624   -400   
544    816    
-288   -80    
144    432    
-1376  192    
368    -384   
-208   0      
208    -144   
32     304    
-96    -128   
-240   32     
208    -16    
-144   176    
-48    -208   
96     -32    
-240   -16    
128    176    
-176   256    
112    48     
-672   -224   
-48    -16    
96     240    
32     112    
128    64     
-128   0      
80     96     
-80    64     
128    176    
-112   32     
112    80     
-112   48     
-48    224    
-144   -128   
-16    0      
-384   64     
48     48     
80     208    
-112   64     
144    144    
-144   0      
16     -16    
-16    160    
0      80     
176    192    
-176   48     
208    -16    
-176   144    
-48    -80    
80     144    
-208   112    
-48    64     
112    160    
-208   -16    
80     48     
-80    -80    
80     -96    
96     176    
-80    160    
-32    64     
-16    80     
-160   -160   
128    80     
-192   32     
144    16     
-128   16     
-48    32     
16     64     
96     0      
16     176    
16     80     
48     48     
48     160    
-16    208    
144    160    
-32    -128   
112    64     
-80    80     
96     96     
64     320    
-96    -208   
256    -16    
-160   144    
160    112    
-48    160    
-80    32     
96     64     
-32    -80    
144    160    
-128   -64    
32     -32    
-48    -96    
144    352    
-256   -48    
160    80     
80     288    
-144   16     
224    32     
16     80     
16     240    
-80    0      
112    48     
-224   -48    
192    -80    
48     272    
-128   192    
64     16     
-80    128    
-112   -112   
80     224    
-32    112    
288    304    
-160   144    
464    432    
-112   144    
-48    96     
144    192    
192    144    
96     96     
-192   80     
64     16     
-96    -176   
-160   96     
64     112    
-112   -128   
-96    -64    
144    144    
-112   -64    
32     16     
-272   -16    
112    0      
304    48     
-80    -32    
-16    48     
128    0      
-96    48     
-32    48     
16     112    
112    160    
-48    -1568  
128    112    
-48    160    
32     96     
160    416    
96     256    
16     48     
-16    32     
-16    16     
80     160    
32     144    
-128   -176   
-16    0      
208    160    
-64    -16    
128    -2176  
-32    304    
288    256    
-96    160    
160    64     
-16    80     
112    -16    
-96    16     
-176   -272   
272    480    
144    -80    
-96    112    
128    -112   
32     0      
192    -128   
-144   -32    
64     16     
240    176    
-48    112    
272    544    
-336   -112   
80     240    
0      48     
128    -96    
16     256    
-16    0      
96     112    
-144   -64    
-16    -96    
176    336    
-32    -512   
-48    128    
32     -1872  
112    160    
-80    96     
32     -32    
96     -208   
-240   112    
80     -128   
-48    16     
-1056  -224   
1024   1360   
-768   32     
672    -80    
-320   -336   
528    320    
-1024  368    
624    -992   
32     624    
128    -768   
48     432    
-448   80     
336    400    
128    144    
112    96     
-368   -320   
304    -112   
-64    272    
144    -48    
-16    240    
144    -16    
-160   144    
-48    -496   
352    112    
-256   -304   
112    400    
-304   272    
64     -16    
-160   80     
144    144    
-96    64     
-96    48     
16     96     
-96    -336   
208    -32    
-16    -416   
272    -80    
-112   -96    
416    288    
-208   -656   
480    240    
-592   176    
192    -32    
-112   160    
-16    192    
64     96     
-32    -736   
288    16     
-176   -496   
256    160    
64     -512   
192    160    
-48    -320   
48     -128   
48     96     
176    224    
112    48     
-464   -640   
496    384    
288    -96    
-16    480    
-96    -208   
304    192    
-128   144    
-16    240    
112    -112   
32     32     
-80    -192   
80     224    
-16    16     
128    112    
0      96     
80     -1152  
32     176    
32     -1184  
128    -416   
128    368    
112    240    
0      0      
160    -32    
128    -656   
-16    0      
64     -48    
48     112    
0      -32    
96     -400   
-16    112    
160    -432   
32     256    
-624   128    
16     -224   
128    -48    
32     -384   
64     0      
176    -496   
-80    -112   
128    128    
-208   -240   
368    80     
-128   -16    
144    -688   
32     112    
-80    -144   
240    80     
32     64     
16     -112   
224    48     
-64    0      
48     -384   
80     -288   
-64    336    
144    -144   
80     -192   
-160   112    
192    -80    
208    -112   
-112   160    
160    112    
48     -128   
-352   -144   
256    -224   
-496   -112   
224    -352   
-224   -16    
0      -368   
176    -160   
-144   -480   
-256   -192   
-96    -704   
-288   208    
160    208    
-64    176    
48     176    
176    -128   
-432   -288   
240    -112   
-112   0      
208    176    
224    496    
-144   -304   
32     -272   
80     -624   
-160   -16    
160    -944   
112    192    
112    336    
48     192    
-64    336    
32     -112   
-96    -208   
32     -64    
-32    48     
64     -48    
160    0      
96     320    
-352   -96    
496    432    
-304   112    
64     16     
-64    -224   
-48    -208   
48     144    
-96    -32    
128    0      
16     16     
112    160    
-400   -128   
32     16     
-16    -64    
320    -160   
-624   192    
16     -224   
112    160    
32     -608   
-192   16     
64     -592   
48     48     
64     240    
-16    -96    
48     -80    
32     -16    
-176   -64    
0      128    
-208   -96    
-48    224    
96     -176   
272    -288   
0      -16    
256    -176   
96     112    
-368   224    
48     96     
-320   96     
80     -240   
80     48     
-144   96     
192    -96    
-112   80     
-1152  -816   
304    80     
-560   352    
736    -592   
1232   128    
-528   -576   
-80    -368   
464    -704   
-96    256    
336    160    
-320   64     
-128   16     
96     32     
0      128    
128    -272   
-304   176    
272    -176   
-464   112    
128    -192   
80     160    
-784   -288   
-160   240    
96     0      
224    128    
-48    -224   
-160   144    
48     -16    
80     144    
64     -80    
-64    -64    
16     -16    
-912   112    
16     176    
-176   -64    
0      48     
-128   -128   
-112   160    
-80    144    
-656   -112   
-16    80     
-320   32     
-192   -32    
-1600  -80    
-32    16     
16     48     
-16    -16    
-112   32     
32     80     
32     -80    
-64    48     
-80    -160   
128    96     
-112   96     
-16    48     
-48    -16    
-160   -96    
-160   80     
-736   48     
16     48     
32     16     
-112   -32    
-48    -160   
-32    176    
-160   -368   
224    16     
-128   224    
0      80     
16     112    
-32    32     
-48    -32    
32     48     
-128   112    
144    144    
0      -32    
-256   128    
-160   -16    
16     -304   
80     384    
-320   32     
304    0      
16     0      
0      16     
-64    128    
-192   -272   
128    160    
-304   48     
96     -128   
-112   16     
-160   224    
-576   16     
192    64     
-48    -144   
112    160    
-32    16     
-64    48     
176    112    
-160   16     
96     96     
-48    -32    
96     96     
-128   144    
-16    -16    
-96    48     
-240   -192   
-64    -192   
96     192    
-1680  -16    
176    160    
-64    -32    
48     96     
32     128    
-208   -16    
224    80     
0      32     
0      -16    
32     176    
-96    32     
-32    80     
-176   0      
96     144    
464    176    
-512   -144   
-48    256    
80     208    
-64    48     
288    144    
-96    336    
272    160    
-240   0      
-256   -32    
-64    -32    
144    64     
64     -80    
-160   80     
-144   -416   
192    0      
-560   48     
176    -496   
64     0      
-32    64     
0      160    
-32    -16    
48     160    
-96    96     
112    96     
-128   48     
256    304    
-320   -224   
-16    -96    
-160   128    
144    144    
-272   -16    
64     96     
32     112    
32     368    
-64    240    
256    240    
-96    16     
368    -112   
-304   -128   
16     64     
0      160    
-160   0      
112    16     
48     32     
48     432    
-176   96     
336    -96    
192    -128   
256    80     
16     144    
-256   144    
112    -64    
288    16     
-32    208    
-48    -16    
-256   -32    
48     -112   
256    16     
16     192    
-112   240    
-176   0      
0      -112   
192    144    
-16    128    
-32    96     
-16    64     
96     192    
0      64     
-112   16     
-112   -16    
160    128    
-16    0      
112    128    
-480   0      
32     -144   
-32    192    
80     128    
-256   576    
-1808  -1520  
400    48     
320    864    
96     192    
240    320    
432    -480   
-864   416    
176    -400   
1024   80     
-560   240    
96     304    
-80    -144   
96     240    
96     -352   
336    352    
-224   192    
320    512    
-272   272    
192    208    
-160   -80    
448    272    
-160   144    
48     -272   
-192   -128   
272    -288   
-96    240    
-64    0      
240    128    
-256   -240   
144    304    
288    -112   
-64    -64    
0      -48    
64     320    
-96    -96    
112    0      
32     48     
272    432    
-432   0      
-16    -16    
176    144    
96     -368   
224    0      
0      -16    
32     160    
144    160    
-112   432    
-64    144    
80     -48    
-112   -112   
224    144    
32     48     
192    336    
-240   -112   
32     -224   
128    288    
64     -144   
-16    -240   
528    416    
-384   64     
288    240    
-160   144    
384    -176   
-432   -16    
352    176    
16     80     
-48    32     
-64    144    
64     112    
48     -192   
16     160    
-16    -576   
224    240    
-112   128    
112    272    
-80    64     
32     -128   
-240   -112   
-64    -288   
48     496    
176    80     
-240   160    
288    0      
-160   208    
32     -544   
256    48     
-80    -512   
64     -176   
192    -2256  
48     144    
96     0      
64     256    
-112   -32    
-16    -80    
96     -96    
0      48     
-32    32     
-80    -224   
-80    0      
96     -176   
64     112    
16     32     
80     64     
48     -448   
-16    160    
160    96     
144    224    
-112   -80    
112    16     
-256   -64    
-32    48     
256    208    
-112   -80    
128    32     
-16    -80    
144    160    
-48    -256   
32     64     
80     -192   
112    480    
-112   -192   
48     128    
16     -192   
144    32     
64     -16    
64     96     
-96    128    
240    64     
-144   96     
96     -80    
96     160    
128    -496   
96     224    
-128   -144   
-32    64     
16     -208   
192    192    
192    96     
-96    240    
16     80     
48     112    
32     128    
-16    -496   
144    80     
-32    -160   
112    64     
-48    -224   
112    128    
-64    64     
224    80     
-64    -208   
64     80     
80     48     
-32    -96    
0      176    
112    96     
160    64     
0      -16    
-128   240    
112    -160   
112    -96    
96     112    
-16    80     
-64    -128   
-32    64     
112    -208   
96     160    
0      -16    
80     -1120  
-48    176    
-1056  -176   
128    -1280  
192    -240   
112    16     
-16    80     
-80    -16    
-80    -208   
160    64     
96     0      
-32    128    
128    16     
16     -208   
32     128    
0      -304   
-160   -48    
80     32     
80     -352   
16     160    
64     -368   
-96    -32    
144    -896   
48     -16    
128    96     
0      64     
-80    -80    
192    80     
16     -144   
-464   -1056  
160    608    
-672   -704   
272    -432   
-400   -32    
-16    608    
-128   -736   
-80    304    
160    -368   
352    192    
-272   -352   
176    -80    
-112   224    
224    -336   
-400   64     
432    -384   
-224   688    
240    -592   
-352   544    
288    -432   
-400   176    
176    -256   
-192   304    
320    -224   
-96    128    
496    -224   
-288   160    
0      -880   
-192   448    
320    -128   
64     160    
-32    0      
-32    0      
48     0      
80     -64    
-288   32     
112    -288   
80     144    
128    -176   
112    0      
-16    -480   
32     160    
128    -400   
128    272    
-32    -48    
-64    0      
-112   -96    
128    -48    
-48    -160   
16     32     
-448   -16    
224    16     
-352   -96    
64     -144   
-96    -160   
112    -240   
-16    80     
64     -336   
80     48     
32     -16    
48     -96    
64     64     
-48    0      
16     48     
0      32     
96     -192   
-144   -64    
-80    -128   
96     96     
32     -80    
192    -48    
-128   48     
240    -32    
-112   64     
144    64     
64     48     
-16    -128   
208    -192   
-128   112    
-32    -80    
-16    -64    
80     -80    
-16    112    
-48    -208   
48     0      
16     -496   
128    448    
-208   -352   
224    0      
-176   48     
-160   -64    
64     0      
-64    -112   
-160   32     
64     -32    
-304   -112   
-48    80     
-64    -16    
112    32     
-320   -224   
32     64     
352    528    
-256   96     
-64    -144   
-96    -112   
112    96     
-64    144    
32     -208   
96     32     
-48    96     
32     -32    
80     112    
-112   -16    
32     -128   
-96    -32    
-400   -48    
352    272    
-752   -16    
-80    -208   
-224   64     
-144   176    
64     80     
224    64     
-48    -48    
-64    -96    
-128   -176   
176    -80    
-192   -16    
80     -432   
0      320    
240    -32    
-32    304    
-48    -528   
-368   -16    
-64    -48    
-112   32     
32     160    
-64    96     
-80    64     
-1488  -48    
-112   32     
16     -112   
0      96     
32     32     
-48    48     
-144   -432   
80     176    
64     -48    
-80    48     
-64    -96    
96     64     
-80    80     
-144   16     
-128   64     
-336   -112   
64     192    
-16    -16    
64     144    
-80    48     
-64    112    
-112   -192   
-80    48     
240    224    
-96    -16    
0      0      
-176   0      
48     80     
-272   -224   
352    176    
-288   32     
80     16     
-432   32     
64     64     
48     -128   
-64    176    
-16    -208   
64     112    
96     48     
-80    128    
-192   -112   
0      16     
80     112    
-144   64     
-144   0      
48     -32    
-288   32     
-816   -304   
48     256    
-336   -192   
416    288    
-272   80     
96     -16    
-64    208    
224    64     
-32    80     
-272   -32    
176    80     
-96    112    
-1424  112    
320    -80    
16     -352   
752    -240   
-464   -1024  
-176   384    
16     336    
-448   -224   
224    -32    
64     224    
-288   -80    
48     144    
192    -32    
48     192    
-128   -192   
-48    192    
-112   -192   
160    192    
-32    -32    
48     352    
-416   -224   
-96    320    
-192   192    
368    -64    
-208   -96    
16     144    
144    272    
-192   -96    
-112   -80    
128    -64    
80     64     
-144   48     
16     304    
80     112    
-112   112    
-240   -192   
32     -16    
-240   -608   
32     336    
432    240    
-96    32     
-352   144    
288    48     
-176   64     
48     -32    
-48    0      
48     -16    
-176   224    
-80    -144   
80     208    
-176   0      
64     224    
48     112    
0      112    
-48    0      
-80    112    
-80    -80    
-48    96     
112    256    
48     96     
-80    16     
-128   -96    
64     48     
0      -32    
-128   224    
48     -16    
0      80     
-96    16     
160    208    
-96    64     
0      48     
0      64     
16     16     
80     176    
0      64     
16     128    
-128   -64    
80     96     
-64    0      
112    -96    
-144   16     
-224   64     
144    144    
-160   -336   
-144   32     
304    16     
-48    144    
-288   208    
128    -160   
-272   96     
48     -48    
-48    176    
192    336    
-240   160    
-144   -48    
224    176    
-208   -320   
144    -208   
224    160    
80     432    
224    0      
-288   -16    
96     32     
64     128    
-32    0      
96     480    
-96    64     
176    112    
-352   -336   
192    112    
-64    32     
144    288    
-80    112    
48     272    
0      64     
-16    64     
-64    32     
-32    -144   
160    64     
48     192    
176    352    
-176   32     
288    32     
-320   48     
80     -16    
192    192    
-288   144    
384    208    
-192   16     
-16    48     
-32    80     
144    0      
-32    192    
32     64     
112    64     
64     -144   
-272   -144   
-16    144    
352    48     
96     -368   
-272   64     
96     64     
16     112    
64     80     
64     16     
-48    112    
32     176    
-32    112    
240    -16    
-224   64     
144    48     
96     96     
-32    -128   
32     144    
-176   -2640  
208    176    
-80    80     
160    -48    
16     192    
-64    96     
112    48     
16     48     
-32    48     
32     352    
96     -192   
288    304    
-80    64     
112    -176   
128    560    
-336   -1520  
48     64     
288    -48    
144    80     
48     32     
-160   16     
176    96     
-32    224    
32     304    
-240   -16    
288    -32    
112    64     
48     112    
16     -64    
-160   208    
304    -208   
0      144    
0      -288   
240    112    
-96    176    
-16    48     
32     -32    
80     64     
208    128    
-208   64     
112    -96    
48     320    
-16    32     
208    -112   
-1408  448    
432    176    
-1312  -448   
656    -1056  
-96    528    
-624   -3488  
624    1376   
-272   -272   
304    336    
-144   -720   
224    304    
-144   -128   
304    -112   
-96    240    
144    -336   
-128   224    
336    -352   
-176   288    
192    -624   
-16    288    
144    -384   
-64    224    
96     80     
48     288    
80     -288   
-16    160    
64     -32    
-16    128    
224    192    
-64    -32    
96     32     
-64    -1008  
64     128    
96     0      
0      128    
96     -224   
-192   0      
160    64     
-112   176    
272    160    
0      64     
-32    96     
-16    -160   
144    96     
96     -128   
32     32     
-16    -128   
48     176    
144    144    
-32    -48    
160    -512   
-112   112    
144    144    
16     112    
80     -16    
16     96     
48     -128   
112    -128   
16     224    
32     0      
32     48     
112    64     
32     160    
32     -128   
32     256    
80     -80    
160    -48    
-96    160    
96     -816   
16     128    
-176   -224   
96     -1840  
-32    32     
-32    -48    
224    -160   
-48    -256   
288    96     
-224   128    
192    -256   
64     128    
-64    -272   
224    32     
16     128    
112    144    
-240   16     
-1056  -80    
256    -736   
-80    48     
-64    -672   
144    -224   
-48    -976   
96     -256   
-16    64     
80     16     
48     96     
160    128    
-32    -208   
-16    176    
-48    -224   
64     192    
-96    -16    
32     128    
-48    -224   
16     -176   
64     -80    
80     -224   
-48    -288   
176    32     
32     256    
112    -144   
-16    32     
16     -336   
80     224    
112    128    
16     -64    
-160   80     
128    128    
-544   336    
48     -32    
48     128    
-80    -256   
16     -112   
32     -144   
48     240    
48     -48    
80     0      
-240   48     
288    256    
-80    32     
176    128    
-288   -112   
112    -304   
-864   -320   
-16    -64    
160    64     
160    -32    
-80    -208   
144    -432   
-128   -16    
96     -928   
0      80     
48     32     
32     -32    
-64    -80    
112    48     
-224   -32    
0      -256   
-80    240    
-16    224    
-688   112    
-128   -480   
-32    -240   
80     -64    
64     128    
-160   -368   
192    -64    
192    96     
48     16     
-112   -208   
96     16     
-48    288    
16     -64    
-48    -64    
352    48     
-224   144    
-32    -320   
-160   224    
0      0      
96     -64    
192    -176   
0      160    
192    -112   
16     -272   
-240   16     
112    -48    
-144   48     
16     -96    
-368   -128   
144    -112   
-128   0      
96     -64    
-144   16     
128    -240   
112    192    
48     -624   
80     16     
32     144    
-16    16     
96     0      
-144   96     
-48    -160   
288    -32    
-160   -112   
80     0      
464    -208   
-240   32     
112    -48    
0      -64    
160    368    
-288   1968   
-640   688    
208    -112   
-624   -832   
800    592    
-352   592    
-288   -448   
704    -272   
80     368    
-96    -512   
-16    48     
176    -96    
224    112    
-736   -208   
384    -272   
-208   -288   
-384   -448   
208    288    
-912   96     
-176   -128   
240    128    
208    272    
-128   -224   
16     48     
32     -32    
240    256    
-1008  32     
0      -48    
0      48     
-64    112    
112    -32    
-128   16     
32     0      
-192   80     
-48    0      
-112   176    
-16    -32    
-720   -80    
-160   -32    
192    80     
-48    128    
-112   48     
0      16     
-160   -112   
0      64     
144    144    
-288   -128   
96     96     
-64    48     
-48    288    
-352   -64    
32     64     
-144   16     
-16    80     
-32    0      
112    112    
-176   96     
64     0      
96     -160   
-304   80     
-16    80     
0      -16    
32     48     
-64    112    
-192   48     
-64    -176   
48     32     
-624   96     
32     32     
-960   -48    
80     96     
-96    -176   
-112   80     
48     -16    
-96    112    
96     256    
176    0      
-48    32     
-32    64     
80     112    
-192   112    
64     -16    
-16    -16    
192    48     
-528   144    
0      272    
-224   0      
128    0      
96     -96    
160    64     
-48    192    
-208   48     
-16    112    
-208   -128   
-160   -320   
48     80     
-336   160    
112    96     
-112   -16    
-336   -80    
16     144    
0      -96    
16     128    
-80    -16    
32     -240   
32     0      
-192   96     
80     48     
-48    -48    
-64    64     
144    -16    
-176   -48    
-112   -80    
-80    48     
-224   -96    
-64    176    
-416   16     
80     160    
-48    -16    
320    144    
-128   240    
240    64     
-48    256    
-64    112    
368    112    
-432   48     
-16    144    
16     0      
192    -16    
-208   64     
-16    176    
-256   -144   
-304   -224   
-160   -96    
16     32     
160    112    
192    128    
96     48     
-128   256    
-144   80     
144    0      
-144   128    
48     -80    
160    80     
-272   -48    
320    272    
176    208    
-80    64     
-160   112    
-176   160    
288    16     
-112   -32    
-96    16     
-96    16     
48     208    
-80    0      
144    96     
-160   -368   
48     208    
-256   -64    
96     112    
16     32     
112    16     
80     80     
-48    240    
-80    0      
240    160    
-208   80     
96     -32    
208    160    
-176   96     
272    32     
-288   0      
64     160    
-48    64     
-48    48     
112    0      
0      64     
32     80     
-32    80     
0      160    
32     96     
112    96     
-176   48     
96     -32    
192    144    
-256   160    
96     -32    
160    64     
-112   48     
112    96     
-80    128    
0      176    
16     144    
-144   48     
16     -48    
48     -64    
-64    1024   
-16    -624   
-224   624    
192    896    
-208   48     
-128   528    
288    -816   
-336   -272   
272    -240   
304    48     
-304   -128   
64     -16    
208    0      
128    304    
-96    -80    
16     128    
64     112    
96     432    
-112   304    
208    96     
-208   16     
208    48     
-80    304    
176    -64    
-112   160    
304    -96    
-64    176    
96     336    
32     208    
-32    -32    
0      80     
-16    32     
112    80     
-80    80     
112    112    
-32    -16    
80     -576   
-32    96     
32     128    
16     96     
48     -32    
-16    64     
32     192    
160    128    
112    176    
-128   16     
-32    48     
96     48     
-32    -80    
-16    176    
64     0      
-48    -272   
16     160    
112    -2672  
112    48     
-96    48     
208    256    
-128   64     
160    128    
96     448    
-80    144    
-16    208    
80     32     
-48    64     
-96    96     
96     -64    
240    -16    
-112   128    
-64    -560   
-48    -160   
-80    16     
16     192    
112    176    
-16    -48    
128    96     
-80    112    
352    128    
-320   192    
-16    -80    
320    192    
80     16     
-32    144    
-48    96     
-80    -288   
256    80     
112    -704   
32     144    
144    416    
-160   240    
64     -128   
96     64     
16     -96    
64     128    
-32    32     
64     -144   
48     96     
96     -96    
-16    144    
96     64     
64     96     
-16    -656   
96     80     
16     160    
96     176    
64     224    
-112   96     
128    48     
96     112    
0      16     
80     64     
-32    64     
192    16     
16     144    
112    176    
-80    64     
128    -1104  
-16    48     
256    -176   
-80    160    
176    112    
-64    -16    
16     -32    
-16    160    
240    128    
-80    -272   
96     96     
0      416    
-64    -48    
288    -816   
-336   96     
304    -32    
-96    16     
64     -192   
-128   192    
144    -192   
-48    192    
-48    64     
240    112    
-144   192    
112    -64    
48     -48    
48     -192   
96     176    
0      -160   
-48    48     
80     48     
-192   -448   
368    -1760  
-208   336    
32     -112   
288    160    
-112   96     
80     96     
224    -464   
-80    64     
144    16     
16     -16    
-16    96     
112    -112   
272    64     
-160   32     
96     96     
-224   -208   
288    176    
144    112    
-64    0      
0      16     
-80    -128   
256    -1344  
128    32     
-192   -1472  
128    -80    
-128   -16    
496    -96    
-224   -16    
208    -224   
-80    160    
112    -64    
32     -320   
144    64     
0      -96    
32     -144   
-496   -224   
208    -256   
32     0      
16     -32    
-16    -16    
32     -96    
432    -432   
64     176    
-64    48     
112    -48    
48     -48    
176    -112   
-192   160    
208    -528   
-64    -192   
-48    48     
-736   -1136  
-1120  -160   
1808   1200   
848    128    
-272   -688   
-144   368    
400    -304   
-224   -112   
192    240    
-176   -128   
-224   64     
80     32     
160    -96    
128    16     
-464   32     
128    16     
-240   -144   
112    -576   
224    64     
-32    -288   
320    -192   
-176   -576   
336    -80    
192    48     
-32    64     
176    -144   
64     224    
-112   -64    
96     32     
-304   32     
112    80     
-160   -160   
-48    48     
128    -80    
192    192    
-48    80     
208    -368   
-112   32     
-32    -544   
16     176    
160    -64    
112    -48    
-224   128    
192    -144   
-96    -80    
-80    -144   
80     128    
96     96     
-112   80     
96     -432   
0      96     
0      -224   
112    96     
-16    -896   
144    48     
32     16     
144    0      
-336   -64    
144    -160   
-32    -80    
64     48     
-320   80     
64     -48    
-544   -16    
16     -144   
112    -96    
16     -16    
-160   64     
96     -384   
-32    -48    
80     16     
32     -80    
-112   112    
16     -112   
48     64     
-16    80     
-176   -192   
128    -16    
-320   16     
160    -48    
16     144    
96     -176   
160    176    
-32    -112   
96     -16    
0      0      
-112   160    
32     -48    
272    176    
-352   -16    
224    16     
-96    176    
16     -48    
224    16     
-112   -144   
48     48     
176    -16    
-192   112    
192    -304   
16     -112   
-128   16     
176    64     
-64    -16    
-96    -304   
-192   -304   
208    -48    
16     112    
144    32     
-208   64     
320    -128   
-112   48     
-1360  -128   
-32    96     
-304   -256   
-80    -32    
160    192    
-768   48     
-432   -448   
-720   -144   
-16    160    
224    16     
-176   -16    
-240   -128   
-160   -48    
-48    -176   
176    192    
-64    192    
96     352    
-16    160    
-368   -96    
-96    80     
-272   -32    
256    192    
-400   80     
-48    64     
-192   128    
32     32     
64     -160   
-96    -16    
128    -96    
-128   64     
96     -48    
32     208    
352    -208   
-272   16     
112    48     
48     176    
-80    96     
-464   48     
-112   -16    
-720   -32    
-96    32     
16     -112   
-64    112    
-96    -32    
16     176    
-128   -224   
32     32     
16     -16    
144    -80    
-80    240    
32     160    
64     96     
-80    144    
-96    0      
-96    208    
-272   -32    
16     -304   
-128   240    
-48    -144   
96     112    
-96    -48    
0      -32    
-48    128    
144    -64    
-64    320    
-320   -144   
0      -96    
-32    16     
224    96     
-48    208    
208    0      
-736   144    
-48    96     
-96    -96    
32     32     
32     -128   
-16    -32    
-16    240    
-112   0      
-112   128    
-16    32     
-32    32     
16     112    
64     144    
-240   96     
-96    -144   
-624   -272   
-336   1376   
-512   -416   
400    928    
192    496    
-784   -144   
-240   -192   
-368   80     
560    928    
-112   144    
240    256    
-272   -112   
176    -64    
-672   112    
544    -48    
-496   64     
112    -80    
-16    -16    
-16    128    
64     208    
64     32     
-240   0      
160    48     
-32    192    
144    64     
16     64     
-208   -272   
-96    144    
-224   336    
96     -16    
-352   -400   
176    48     
64     208    
-128   80     
-80    192    
32     0      
-32    0      
16     -16    
80     224    
-64    16     
-32    32     
-112   96     
-96    128    
-160   16     
-32    -16    
-208   -80    
64     160    
192    80     
-96    32     
32     -48    
48     160    
-16    64     
144    144    
-80    128    
144    -112   
-16    128    
-48    32     
176    144    
-128   128    
64     336    
-112   -32    
-96    -592   
-48    256    
176    32     
0      -96    
64     112    
-16    48     
16     64     
16     128    
64     80     
80     48     
-16    80     
-48    128    
-48    0      
48     112    
-80    0      
48     128    
96     240    
-176   -320   
80     -32    
-64    -16    
128    48     
-16    -32    
-48    144    
0      -112   
96     -64    
-64    48     
-96    176    
-64    112    
-64    -224   
128    -32    
144    112    
208    256    
-32    256    
-32    0      
0      0      
48     64     
128    96     
64     112    
-64    80     
-64    32     
32     -16    
16     64     
80     176    
64     240    
64     64     
-80    0      
48     128    
-64    0      
240    336    
-224   -48    
368    176    
-272   0      
144    80     
-112   16     
144    128    
0      64     
0      96     
-144   -144   
16     -1344  
16     192    
32     -32    
16     16     
-80    80     
240    256    
16     -48    
-80    96     
-96    128    
208    144    
-16    32     
48     144    
64     -112   
96     224    
-144   64     
144    -208   
-16    160    
160    368    
-176   96     
176    16     
64     272    
-80    208    
-48    16     
-80    -48    
48     -16    
144    176    
0      64     
16     -160   
-208   -208   
496    320    
-272   32     
208    288    
16     -1168  
80     64     
208    16     
-80    128    
192    112    
-128   80     
80     -64    
304    -32    
-512   -352   
144    0      
16     176    
224    -32    
176    368    
-128   -272   
-48    160    
304    -1008  
-32    240    
144    144    
32     128    
64     224    
-32    -16    
-96    -128   
-32    128    
-448   -256   
432    96     
16     256    
16     -224   
-96    -64    
128    -304   
176    176    
64     -1072  
-64    64     
0      -2256  
160    -80    
192    288    
-144   -16    
96     80     
32     80     
-112   -128   
416    240    
-192   112    
96     -64    
-176   160    
288    16     
128    -80    
32     -112   
144    128    
-112   -464   
-112   192    
-96    -752   
912    160    
256    464    
-176   352    
-16    576    
-528   -288   
704    368    
144    -32    
192    384    
-304   -224   
-32    160    
144    -336   
128    160    
96     -928   
64     160    
-32    -272   
64     160    
-32    80     
144    144    
-112   -64    
128    48     
176    112    
-32    -64    
32     80     
-48    -16    
-32    112    
208    -320   
64     128    
160    -48    
-128   64     
160    -48    
-32    208    
112    80     
64     112    
32     96     
-128   -368   
128    160    
-32    112    
272    -32    
-160   -288   
144    192    
32     -64    
80     32     
48     -96    
48     224    
144    -112   
-48    -16    
48     64     
-96    208    
224    48     
-16    0      
112    -304   
96     16     
-144   144    
128    -192   
16     0      
112    48     
112    112    
64     96     
-64    32     
96     -592   
-48    -2864  
64     0      
80     -400   
-128   16     
176    16     
-16    -448   
64     -160   
32     224    
-16    -64    
176    48     
32     -64    
32     144    
208    48     
-224   -1360  
-96    160    
320    -128   
112    0      
-64    0      
80     -448   
-496   -208   
272    -320   
-112   144    
48     -112   
192    -144   
32     -624   
0      176    
-32    144    
-16    -16    
64     96     
-48    -16    
240    32     
-176   64     
-224   -208   
160    -32    
-272   -160   
112    -160   
80     -64    
0      -32    
176    -144   
-144   -496   
48     -112   
16     -1936  
96     -32    
0      80     
64     144    
128    -160   
48     192    
-256   16     
256    -16    
-272   64     
-48    16     
176    16     
-96    -96    
224    80     
-112   -96    
304    192    
-128   80     
112    0      
-64    -304   
64     -16    
-96    -256   
224    64     
240    144    
-48    -48    
-208   96     
48     80     
32     -32    
0      -112   
80     32     
-96    32     
48     240    
64     -16    
176    160    
-160   -1728  
-48    80     
16     80     
224    -16    
160    32     
-16    -368   
-224   -80    
112    -160   
-160   32     
240    -80    
-1104  0      
192    -320   
0      192    
-176   -1008  
160    80     
-32    -2144  
-32    -144   
48     32     
32     -96    
-48    16     
80     -48    
64     336    
-96    -80    
32     -80    
-176   -192   
-1072  -272   
128    -176   
96     0      
64     -80    
80     112    
96     -240   
32     80     
-144   80     
32     -288   
16     176    
176    144    
-144   -80    
16     144    
-16    -48    
-64    -16    
-128   -48    
128    -144   
128    48     
16     -224   
64     240    
112    -496   
0      608    
-496   -288   
-80    -192   
112    64     
-176   0      
-96    -32    
64     176    
-112   -144   
128    128    
-96    -32    
48     0      
32     144    
-16    -160   
128    -32    
32     -368   
176    96     
-16    144    
-32    32     
96     -1872  
496    -992   
688    960    
-336   944    
320    576    
112    464    
-208   -256   
-800   48     
32     224    
-1008  -224   
144    112    
160    208    
0      160    
-176   -208   
-688   -128   
-16    112    
-1488  -96    
208    128    
-112   -48    
240    32     
-144   -64    
192    224    
-624   -272   
208    0      
-272   -112   
144    160    
416    352    
-352   192    
160    48     
-496   -16    
-208   -16    
-272   -48    
-16    96     
-144   -160   
80     48     
96     -160   
80     32     
-480   -400   
-48    -224   
16     -272   
128    208    
-80    192    
-224   -112   
80     144    
-208   80     
-112   144    
-16    176    
-64    192    
-560   64     
32     32     
-272   -112   
240    80     
-48    32     
176    64     
-16    -96    
-64    16     
256    880    
-192   336    
-384   -720   
432    -64    
-336   0      
64     -144   
-256   176    
-192   -288   
32     48     
-48    -64    
16     160    
0      -64    
32     64     
-32    96     
-80    0      
32     64     
16     80     
-48    48     
112    -16    
-48    -160   
-208   -352   
64     208    
-240   16     
96     -96    
-1296  176    
304    96     
-128   -192   
160    -48    
144    144    
-16    192    
-288   -160   
48     -16    
64     240    
-96    64     
48     16     
-112   128    
144    96     
16     48     
-32    64     
-208   -80    
128    208    
-64    -32    
48     -32    
-16    48     
0      128    
128    224    
-160   32     
32     32     
-96    -32    
64     112    
16     48     
-32    96     
-80    -96    
-48    128    
-192   -64    
32     160    
-1056  48     
-96    80     
-48    80     
-64    48     
176    480    
-176   -176   
80     48     
-112   16     
224    176    
-192   -48    
-48    160    
-416   -192   
176    32     
-160   -128   
64     240    
64     96     
-80    352    
160    -192   
-144   112    
16     -160   
48     96     
128    256    
80     768    
-32    208    
-144   -192   
208    384    
-16    -64    
-80    32     
32     64     
144    240    
96     128    
-256   -144   
-128   -32    
-112   -320   
304    288    
80     208    
-128   -112   
-80    128    
80     64     
-176   -48    
128    64     
-32    48     
80     0      
-64    48     
96     32     
-48    304    
96     112    
-192   -112   
128    -16    
32     112    
-96    48     
-64    -16    
-192   -160   
192    448    
-48    240    
-208   -112   
48     176    
96     32     
-240   32     
-32    208    
96     160    
-32    0      
-192   -160   
96     80     
-128   -96    
-16    240    
160    176    
144    160    
-48    112    
-128   160    
208    -112   
32     -48    
-16    176    
16     176    
48     96     
64     80     
-16    96     
48     96     
64     192    
-112   176    
0      16     
176    144    
-32    -144   
208    176    
-80    -80    
144    112    
544    -320   
16     320    
240    208    
-480   128    
400    -48    
48     176    
-608   -560   
544    544    
-464   -240   
464    -144   
96     160    
-176   176    
0      208    
-16    -96    
96     256    
32     -288   
-160   -848   
192    80     
16     96     
-16    -16    
80     112    
32     48     
128    112    
-32    80     
32     64     
-96    16     
-80    208    
160    64     
64     80     
-32    48     
-16    -112   
32     -336   
16     192    
112    128    
16     64     
144    96     
192    480    
-80    112    
16     -16    
-16    96     
96     112    
64     64     
16     96     
80     -192   
128    112    
48     192    
64     -240   
-32    64     
-48    80     
80     112    
144    32     
-32    176    
0      16     
0      112    
-16    16     
160    224    
-160   48     
240    -16    
-96    16     
16     144    
144    144    
32     -32    
-80    96     
80     -2400  
128    128    
32     176    
-112   144    
0      -128   
192    -48    
0      208    
-128   96     
112    48     
48     16     
96     176    
-192   32     
352    80     
-112   128    
-32    48     
-192   -96    
160    -176   
208    -1232  
-192   192    
240    -32    
-48    288    
-336   -128   
384    32     
-32    96     
224    80     
48     -16    
-96    -32    
144    80     
48     128    
-32    64     
80     -176   
176    96     
160    -368   
-32    288    
48     -240   
144    96     
-80    -16    
160    128    
-16    32     
32     112    
208    304    
-96    -288   
144    48     
-176   -416   
144    80     
0      -384   
112    176    
144    -144   
-48    192    
-32    32     
240    64     
-32    160    
64     176    
64     112    
16     368    
224    240    
112    -160   
-336   -48    
336    144    
48     96     
-80    -288   
32     32     
96     -240   
-16    -32    
-16    -32    
16     176    
64     80     
144    32     
-48    -48    
-64    -448   
192    240    
288    16     
-96    144    
-96    -208   
192    352    
48     -288   
80     32     
-48    -64    
32     160    
32     -720   
64     192    
32     -48    
112    112    
-144   -304   
-16    -96    
48     -624   
48     80     
64     416    
112    -208   
-32    160    
64     -80    
96     160    
32     16     
144    176    
48     -176   
96     -1184  
-144   96     
240    -144   
48     0      
48     64     
-16    -272   
-112   -96    
16     -1232  
176    -96    
576    928    
-336   -16    
80     192    
144    -48    
-48    -368   
-64    48     
224    -32    
-16    80     
96     112    
-16    -368   
-912   -144   
160    -336   
112    128    
32     -592   
32     -32    
32     -1200  
-112   -176   
-304   112    
80     -272   
208    -272   
176    160    
-112   80     
-16    -16    
-416   -80    
208    -192   
-976   -112   
400    -160   
-160   64     
96     -128   
32     16     
-32    -160   
160    -176   
-304   -2816  
160    768    
96     464    
160    -160   
-480   -176   
176    -576   
256    208    
-176   -144   
80     0      
16     0      
48     -160   
160    224    
-80    -112   
32     -352   
-96    -352   
240    -800   
160    224    
144    192    
-144   -80    
160    -224   
176    -32    
-144   -400   
-16    -192   
-384   -512   
304    -384   
-704   160    
80     272    
-176   -656   
256    -176   
16     128    
368    -464   
-80    256    
-32    -32    
224    176    
-64    160    
416    336    
-448   -384   
352    176    
-512   -320   
256    -80    
-208   -32    
320    32     
-176   176    
16     -48    
-160   -112   
0      -656   
-192   -464   
256    -224   
0      160    
-16    80     
48     80     
-144   -32    
240    -96    
16     -48    
128    32     
-32    64     
272    752    
48     -256   
-80    96     
80     -80    
-32    -288   
-32    224    
16     -1136  
-160   -192   
-96    -144   
80     -176   
16     0      
144    -128   
-176   96     
-16    16     
-112   32     
96     -128   
-192   80     
-16    -416   
128    112    
-80    -176   
-64    -112   
16     -1120  
-16    -16    
80     -32    
64     80     
-96    -48    
96     128    
-144   0      
112    16     
-320   -64    
112    -256   
-96    112    
-16    -48    
64     144    
48     -80    
48     144    
-1152  -96    
-256   -208   
80     32     
-16    32     
144    96     
-16    -96    
-160   0      
224    0      
-160   144    
64     -224   
-16    160    
-528   -128   
176    64     
-528   -304   
-96    16     
-64    -176   
-176   -112   
0      112    
32     144    
-80    -32    
-576   16     
-160   64     
128    -32    
0      304    
160    -112   
-160   80     
-224   16     
-112   480    
-272   -144   
-128   192    
32     -160   
64     464    
48     -96    
64     176    
-272   -32    
-224   528    
240    -176   
-384   112    
192    -192   
-160   16     
-48    144    
-160   -64    
320    272    
-224   -80    
176    -112   
-224   -48    
48     16     
48     64     
-192   -16    
-32    80     
128    112    
0      112    
-800   16     
-32    384    
80     96     
-96    80     
16     -32    
48     112    
80     -64    
-112   -48    
0      48     
-160   -32    
16     -16    
-128   64     
16     128    
-160   96     
32     208    
-288   16     
-16    64     
-32    -32    
80     176    
48     -128   
-32    112    
-128   32     
176    112    
-288   16     
-16    -32    
128    112    
-96    -64    
0      48     
48     16     
-336   64     
-64    -48    
0      192    
-368   -96    
-192   480    
-208   -240   
128    -80    
16     128    
80     48     
-48    128    
192    -64    
48     16     
-160   112    
-16    128    
-144   -80    
112    112    
-112   16     
0      208    
-176   -16    
-32    304    
-208   -256   
64     -16    
144    -80    
16     128    
-16    -640   
112    32     
-432   -160   
272    -208   
-768   368    
592    -352   
-784   176    
400    -256   
-16    320    
-512   -464   
32     144    
-240   96     
176    48     
-176   112    
144    -192   
-176   128    
64     -32    
128    352    
64     -48    
-128   64     
64     -96    
32     272    
16     -16    
0      176    
-208   -144   
0      384    
240    128    
-32    32     
-48    0      
-48    -32    
64     144    
-32    96     
112    32     
0      160    
-32    32     
-144   -16    
80     -64    
-160   288    
256    96     
-16    80     
-112   -48    
16     80     
0      48     
32     112    
16     32     
-96    64     
64     64     
-16    32     
64     -128   
-192   64     
-80    -112   
176    112    
-272   32     
336    96     
-368   0      
48     80     
-16    288    
-80    -64    
128    176    
-32    112    
160    -16    
-32    128    
-112   128    
288    48     
-176   256    
-16    0      
192    144    
-144   -96    
160    160    
-48    128    
16     -48    
96     64     
16     128    
0      96     
80     -144   
-192   80     
-144   -464   
128    -176   
-256   144    
80     176    
-32    96     
-16    208    
-16    0      
160    496    
-32    160    
336    0      
-64    16     
96     112    
0      256    
-176   64     
112    32     
-32    48     
80     32     
160    16     
64     48     
128    80     
-16    96     
80     112    
144    208    
-80    64     
192    96     
32     192    
80     128    
32     -144   
-64    -48    
128    96     
160    224    
32     64     
-240   -96    
48     240    
32     112    
128    16     
-64    64     
-16    -864   
160    304    
-16    288    
112    128    
-16    16     
-16    32     
208    288    
-320   -464   
-224   -48    
304    176    
128    96     
16     64     
-80    -304   
96     112    
-64    32     
64     -320   
160    64     
-80    80     
48     128    
176    224    
0      16     
32     96     
-16    208    
0      176    
0      256    
-112   -208   
144    0      
48     16     
16     192    
16     144    
112    -416   
-64    48     
224    -400   
48     336    
64     272    
16     -32    
0      48     
80     -16    
-144   192    
80     160    
128    32     
176    208    
128    192    
-336   -464   
96     -48    
112    240    
320    288    
-112   -800   
80     176    
-64    -32    
96     96     
80     0      
672    480    
-240   368    
-64    368    
-192   -240   
368    -32    
128    -16    
-48    -64    
48     320    
-288   -176   
304    -32    
-96    -224   
112    48     
-48    -1968  
16     64     
176    32     
-16    64     
80     -144   
0      144    
-96    112    
208    64     
176    176    
-144   -16    
160    64     
-144   -160   
48     192    
80     -240   
-32    64     
96     -16    
-144   16     
320    -112   
-96    400    
128    16     
96     96     
1760   -1520  
784    160    
-80    480    
-736   -384   
320    592    
-144   -1200  
368    560    
-368   -480   
208    496    
-160   -1104  
224    96     
-128   -160   
208    208    
-16    32     
32     -48    
-240   -112   
288    -176   
-224   -128   
128    176    
-208   240    
288    -288   
-208   336    
128    -192   
96     352    
-32    -512   
128    352    
-208   16     
16     512    
80     128    
32     80     
-16    48     
160    -320   
96     240    
16     -112   
80     560    
48     16     
-112   320    
-112   -368   
432    0      
32     -208   
176    48     
48     192    
336    336    
-272   96     
32     -1616  
16     -464   
64     -272   
64     -288   
-240   -192   
192    128    
176    -176   
-208   208    
144    -112   
128    0      
-112   -64    
80     -496   
16     592    
144    -32    
224    176    
-64    -288   
336    -368   
-128   -272   
80     -336   
-80    -80    
-32    -48    
144    0      
-32    48     
128    -80    
-96    -192   
240    -272   
320    -1200  
48     320    
-176   -480   
64     48     
-80    -64    
-256   -368   
144    64     
-384   -256   
48     -128   
-96    -400   
-16    48     
368    -912   
0      -16    
-64    160    
-80    -192   
128    -144   
-240   -128   
448    96     
-32    128    
-16    160    
32     -80    
-256   -32    
96     -176   
112    -80    
160    -64    
-48    48     
-64    -528   
-128   -192   
304    -640   
-64    112    
-192   -192   
32     112    
160    -48    
112    -176   
-32    -16    
-96    -208   
112    112    
-16    -16    
48     -16    
16     -336   
-32    -400   
0      -832   
0      -176   
144    -1616  
48     96     
32     32     
-112   -32    
192    -32    
-128   -64    
208    240    
-224   320    
16     -144   
48     128    
-1584  -96    
144    -32    
-80    -32    
160    -112   
112    -112   
-112   -48    
176    112    
48     -192   
-48    -192   
-144   -176   
192    112    
272    176    
-96    80     
-112   -16    
64     16     
-464   -176   
304    -96    
-224   128    
224    48     
-16    16     
48     -560   
-32    64     
160    304    
288    288    
-352   32     
304    -48    
-272   -80    
64     -240   
-432   0      
32     -112   
-176   32     
0      64     
-320   -16    
160    -176   
48     144    
-112   -496   
160    48     
48     -464   
96     -64    
-96    64     
80     -32    
48     272    
-112   -48    
192    112    
304    -32    
-240   112    
32     -48    
-560   0      
32     -224   
64     32     
384    -256   
192    0      
32     -112   
-112   -32    
-224   208    
-16    -192   
112    64     
128    0      
-96    144    
176    -320   
112    176    
-160   -32    
144    128    
-144   -48    
96     80     
112    0      
-32    48     
0      -80    
-896   -112   
-112   176    
128    -400   
64     208    
-272   128    
128    -32    
-32    -112   
464    -448   
-208   -176   
240    16     
-944   128    
1120   -880   
-784   -112   
-128   -912   
-48    896    
-208   -176   
-240   128    
160    -192   
-64    240    
-288   64     
-272   80     
192    -160   
-80    32     
-368   16     
304    128    
-320   -96    
144    16     
-320   -80    
-48    48     
-176   304    
112    -208   
-48    208    
-32    -192   
-112   304    
-432   -176   
-224   144    
272    -80    
-80    160    
16     -256   
-32    224    
48     -288   
16     128    
112    -224   
-48    0      
64     176    
-64    48     
-48    -16    
-144   16     
-176   16     
-48    64     
-176   0      
-208   -64    
-176   16     
32     -64    
64     48     
-112   -16    
-144   16     
240    112    
-176   144    
96     -128   
-96    112    
-96    -64    
128    128    
-80    48     
-96    96     
32     -16    
-64    0      
0      112    
32     96     
-80    -16    
208    96     
-192   224    
96     48     
-128   32     
-80    -48    
32     64     
64     160    
-96    32     
112    144    
-176   -144   
112    144    
-528   48     
112    96     
-368   240    
80     0      
224    -48    
-112   224    
-16    64     
-80    -16    
-48    -224   
-64    -272   
80     288    
-128   144    
128    96     
-336   96     
0      -64    
-160   -240   
144    464    
-480   432    
288    128    
-320   -288   
80     48     
16     96     
-32    176    
176    256    
-224   48     
0      64     
-160   80     
128    192    
16     0      
-16    -48    
-96    16     
-32    -368   
-304   -256   
144    144    
-96    -128   
16     32     
80     176    
-64    16     
48     128    
-80    48     
48     64     
-32    48     
48     256    
-80    64     
-64    -16    
96     128    
112    320    
-400   -96    
-16    48     
128    80     
96     80     
-112   352    
160    48     
-160   -48    
16     16     
128    144    
32     80     
48     208    
-304   48     
128    80     
-288   -80    
480    288    
-656   96     
48     160    
96     176    
-48    -16    
64     128    
-48    112    
160    -112   
-32    192    
-32    16     
176    80     
-64    176    
-176   112    
80     112    
-144   0      
112    64     
96     64     
-64    80     
80     160    
-32    -64    
112    128    
-64    112    
368    144    
-304   160    
32     0      
0      -64    
16     80     
144    32     
-48    192    
-96    -32    
-16    32     
96     320    
112    80     
0      64     
-160   32     
208    80     
-96    80     
80     -16    
-32    0      
-16    96     
-192   240    
48     -128   
32     176    
32     80     
-112   -16    
-144   -192   
160    16     
16     80     
240    80     
-128   112    
80     -48    
16     304    
-112   160    
-80    -80    
176    208    
48     176    
16     48     
-16    -64    
80     288    
-16    -144   
48     240    
112    112    
272    96     
1312   144    
560    208    
-416   -144   
-784   -704   
16     416    
-176   -704   
848    672    
-720   0      
432    288    
-400   -128   
272    144    
-96    80     
288    -1888  
-400   416    
304    -208   
-32    528    
-240   112    
-128   400    
-192   -400   
112    80     
-144   128    
-16    192    
-128   -80    
336    64     
-112   112    
384    128    
96     336    
384    -560   
-304   -496   
400    -144   
-288   -80    
176    160    
-16    256    
80     160    
336    288    
-112   144    
128    -224   
-64    160    
0      -16    
224    576    
-64    -16    
48     160    
-272   64     
32     80     
48     320    
32     -224   
32     64     
192    -144   
-144   80     
-96    16     
128    160    
-96    48     
160    208    
-80    224    
16     -16    
-48    -304   
-64    -80    
144    -144   
0      32     
32     -672   
32     96     
96     112    
-96    -32    
144    -32    
-96    64     
0      16     
144    128    
-96    160    
304    400    
-160   448    
-32    -288   
240    192    
-96    -432   
208    -48    
-80    -1904  
0      64     
128    160    
32     48     
-48    48     
128    224    
-48    176    
112    96     
-80    -304   
128    96     
384    160    
32     112    
272    496    
-272   -80    
-96    112    
176    0      
-32    32     
0      -304   
32     80     
80     -64    
160    144    
48     96     
16     176    
-96    16     
-32    -176   
-112   -32    
0      -128   
144    128    
-64    -384   
64     16     
0      -176   
160    32     
-32    -528   
-48    -64    
240    32     
80     160    
32     128    
128    176    
0      0      
-32    -160   
48     -32    
16     -192   
112    144    
192    128    
-32    176    
128    144    
96     192    
112    -256   
-48    176    
112    144    
256    -48    
-160   256    
-128   288    
192    0      
-96    -160   
128    16     
0      -144   
208    80     
-112   64     
208    128    
176    -272   
-160   0      
-128   -64    
208    144    
160    -16    
-64    80     
48     240    
256    416    
160    -2640  
32     48     
-32    -160   
32     -208   
0      256    
-96    -112   
336    112    
-32    -16    
-32    32     
32     48     
16     -1440  
64     80     
16     -592   
-96    64     
-464   -64    
-16    0      
240    160    
-272   48     
112    -112   
32     -1536  
0      -176   
160    144    
16     -80    
96     48     
176    352    
-80    -192   
32     -16    
64     -208   
96     80     
-144   -48    
128    -32    
160    -48    
-16    -592   
80     -64    
-16    -464   
112    48     
-16    -768   
-64    -16    
224    -64    
-32    48     
16     -144   
0      112    
96     -32    
80     32     
-208   -64    
176    -176   
-1680  -80    
160    -208   
-64    -32    
96     -192   
0      32     
144    -608   
-144   -192   
256    -688   
-176   80     
32     -48    
1056   -2208  
-288   -880   
560    528    
256    -592   
-592   192    
448    688    
-672   640    
1136   -112   
-464   384    
48     -496   
-128   -48    
48     -656   
192    -208   
-16    -64    
64     240    
-144   -208   
80     48     
-16    -144   
144    208    
-304   -48    
240    -64    
-176   96     
-592   32     
-32    32     
-96    -192   
-64    -16    
176    -16    
16     -544   
128    112    
-64    -32    
96     -80    
-128   144    
208    -160   
-112   96     
0      -96    
-240   0      
256    -288   
-144   96     
64     -432   
-480   -32    
0      -112   
32     112    
144    -368   
-16    0      
128    160    
48     48     
16     -48    
-32    32     
-96    -48    
144    -16    
-352   80     
96     0      
-384   -32    
64     -64    
32     80     
144    -48    
-16    192    
32     -384   
80     160    
64     -544   
48     112    
32     -160   
0      -64    
-528   -16    
80     -192   
-96    64     
32     32     
112    208    
-16    -32    
80     48     
-16    -176   
48     80     
80     -272   
-64    32     
160    32     
64     240    
16     336    
-16    -176   
128    16     
32     144    
48     -16    
176    48     
-192   -64    
112    -64    
-560   208    
144    -64    
16     80     
-32    -128   
80     -64    
-16    192    
-544   144    
-96    208    
192    32     
-16    -48    
-16    160    
-32    0      
64     -16    
-224   -224   
144    -288   
0      112    
0      48     
16     112    
-272   -160   
-304   -32    
0      96     
-224   32     
80     256    
-672   -192   
48     -160   
-1088  -16    
16     112    
112    -160   
-160   -80    
160    16     
0      112    
-16    -128   
-64    64     
-80    -320   
-320   -80    
-96    -64    
64     0      
-48    240    
-416   -208   
-32    -96    
-1120  272    
96     80     
352    192    
-416   176    
48     -224   
96     48     
-208   -144   
160    112    
-96    -144   
144    224    
-160   112    
208    -16    
-320   -176   
256    -208   
-272   32     
96     80     
16     272    
-32    16     
-16    0      
-32    48     
192    96     
-240   -208   
160    -16    
0      384    
-128   -32    
32     -224   
64     112    
16     160    
-48    32     
96     64     
-384   144    
144    144    
-528   -224   
-64    -16    
144    -240   
-48    224    
-80    -128   
-80    -16    
-48    -48    
224    192    
-160   80     
112    32     
-240   496    
-192   -176   
224    112    
-336   64     
208    -112   
-512   -16    
-208   96     
-976   -144   
48     256    
0      -144   
64     16     
-32    0      
-80    80     
64     32     
-128   -16    
224    160    
-112   192    
-32    96     
160    -208   
208    336    
-432   -16    
240    -192   
-256   -32    
160    192    
-16    64     
112    0      
-176   48     
32     -64    
208    192    
112    288    
80     16     
-208   -16    
1936   -880   
112    -144   
240    64     
-640   -48    
-32    32     
-176   -928   
-96    32     
176    208    
-32    336    
-16    -112   
96     32     
-320   176    
208    -400   
-80    272    
208    -320   
-112   464    
-48    -32    
-240   -32    
112    -208   
-112   176    
-688   -32    
112    -80    
-144   0      
-16    128    
-80    96     
112    144    
112    112    
-80    -48    
16     -16    
0      48     
64     64     
-80    48     
32     160    
0      144    
16     240    
-112   -32    
16     64     
-32    144    
48     -16    
176    352    
-336   -16    
112    48     
-48    128    
176    160    
-32    48     
-176   -96    
-48    48     
192    96     
-176   192    
-48    -80    
144    128    
-128   32     
144    64     
-128   128    
96     -96    
-16    -48    
160    144    
-48    208    
-32    0      
64     48     
-48    96     
-80    64     
96     0      
-48    32     
96     176    
0      176    
16     16     
32     224    
-16    -32    
128    160    
-112   80     
96     32     
128    0      
-16    144    
-96    64     
128    -176   
-128   208    
32     400    
-96    -32    
144    32     
-16    64     
32     96     
16     192    
-16    0      
128    -240   
208    144    
-256   192    
160    -112   
-32    160    
-144   48     
256    160    
-224   48     
32     0      
160    160    
-128   80     
384    352    
-160   112    
128    32     
0      -16    
32     32     
-48    80     
16     128    
-96    48     
192    80     
-80    -16    
128    272    
-208   80     
0      -48    
-16    -64    
0      -1408  
144    224    
-48    0      
0      128    
-32    208    
432    96     
-176   320    
0      64     
192    208    
-80    48     
208    16     
-96    240    
256    80     
112    160    
-160   128    
80     -720   
-16    128    
144    48     
-192   -112   
-32    32     
112    64     
-48    48     
224    96     
-16    112    
416    144    
-32    -32    
-272   224    
288    96     
-224   -80    
112    64     
192    -1088  
-64    80     
0      80     
-48    -48    
-96    16     
16     128    
64     -32    
64     -112   
-16    -272   
32     176    
128    -16    
-16    144    
-80    -80    
0      -112   
176    -80    
128    -272   
-32    80     
176    -528   
-112   128    
128    -112   
144    144    
-48    80     
64     96     
-128   -64    
192    -64    
144    144    
48     0      
32     192    
-112   -208   
16     240    
384    0      
-64    208    
64     -400   
-192   -32    
80     -112   
48     64     
-48    16     
160    16     
112    304    
-32    0      
176    -64    
64     160    
0      112    
80     96     
-144   64     
-80    -208   
240    -16    
-32    -192   
272    80     
-16    -560   
-64    160    
96     64     
-32    160    
16     -16    
288    -272   
-16    240    
-176   128    
48     80     
-16    96     
816    -1280  
544    1296   
640    560    
-704   -304   
256    496    
384    -144   
-544   -336   
320    112    
112    224    
112    -192   
128    192    
160    -192   
-16    448    
-32    -144   
80     -128   
128    16     
16     64     
-144   -16    
336    -144   
-128   128    
48     -288   
32     224    
64     -48    
-144   96     
96     -160   
-32    192    
192    96     
96     128    
112    16     
-176   -256   
48     16     
-176   -224   
176    128    
80     -144   
144    -80    
64     -224   
-48    160    
80     64     
48     112    
16     0      
144    -128   
80     -896   
112    -176   
-112   -96    
16     -80    
80     144    
256    -32    
16     144    
48     -96    
32     32     
96     32     
0      -1008  
48     96     
80     -544   
32     32     
-288   48     
96     -496   
80     -32    
80     -32    
192    544    
0      -1024  
96     -128   
-128   48     
-16    -336   
80     112    
80     -48    
96     32     
-176   96     
240    -112   
0      -640   
-304   32     
32     -80    
16     64     
48     -368   
144    -160   
-64    -816   
16     -400   
-32    -1440  
-240   -336   
400    240    
-160   48     
64     -304   
-80    240    
80     -32    
-64    192    
-112   -80    
64     -48    
-1808  -208   
48     -160   
128    -192   
16     80     
32     112    
-16    -112   
32     -160   
128    64     
-80    48     
160    -128   
-32    64     
128    16     
48     16     
-176   -80    
64     -224   
-208   -80    
32     -32    
48     48     
64     -48    
-16    -128   
112    -512   
-336   128    
-16    -1408  
208    80     
-64    160    
96     64     
-48    0      
-32    -64    
-32    -48    
-48    -160   
16     80     
48     16     
-1200  -192   
-48    -192   
0      16     
208    -528   
-144   -128   
-48    -1168  
-80    -448   
272    -288   
-160   160    
-112   96     
320    -112   
-288   128    
144    64     
-112   16     
0      48     
-688   -32    
-48    -160   
-160   336    
-416   -128   
464    -192   
-144   -384   
112    176    
112    -464   
-144   -64    
96     -32    
112    64     
0      128    
-64    -80    
32     -32    
0      64     
-96    0      
-48    -64    
-128   32     
112    16     
-16    192    
-128   -384   
272    80     
-208   64     
416    256    
-496   64     
160    -224   
-416   -80    
208    -96    
-128   -80    
-176   -48    
-48    -16    
416    384    
-560   -208   
608    -368   
-96    208    
144    -176   
-144   -32    
-16    96     
-48    -176   
176    96     
-96    240    
-224   -160   
224    48     
16     416    
-128   112    
-240   -112   
176    -144   
128    -96    
80     -80    
-176   112    
-704   224    
-1568  48     
-16    272    
-1136  -224   
-64    192    
16     -160   
-96    16     
160    16     
-96    80     
320    -288   
96     192    
-176   -224   
144    144    
-368   -80    
-368   -1840  
-16    -688   
304    528    
-416   688    
-480   1232   
-576   816    
-528   -752   
0      -240   
-816   192    
-416   -464   
208    48     
-240   -16    
-464   -224   
-96    160    
-16    -16    
64     112    
-176   -464   
32     -16    
-64    48     
-112   -64    
-96    64     
64     144    
-32    112    
-192   144    
-272   -16    
112    -144   
-80    176    
96     -80    
112    48     
-192   -144   
144    208    
16     48     
-144   64     
-48    32     
16     16     
-144   -96    
-32    -64    
-80    160    
-176   0      
-64    128    
-192   -32    
-16    144    
-16    -224   
128    48     
-176   -176   
80     144    
80     96     
64     144    
-352   112    
-64    -80    
0      112    
-144   -80    
16     80     
-208   -32    
80     96     
-336   160    
-64    -48    
192    -80    
-160   80     
80     -144   
32     192    
-80    48     
64     32     
-160   176    
-16    -144   
128    16     
-192   0      
-64    160    
-80    16     
96     48     
-128   -48    
48     208    
-96    -160   
272    32     
-64    240    
32     96     
-128   144    
-48    48     
96     -16    
-64    -96    
128    32     
-160   176    
-16    304    
-272   -144   
96     -96    
-80    -176   
64     336    
-384   -112   
336    160    
-240   16     
-80    80     
-112   -16    
112    48     
-32    368    
-304   -208   
432    128    
-208   32     
64     128    
-80    0      
-112   160    
144    32     
-32    112    
-672   -176   
80     16     
-32    32     
16     80     
16     16     
160    352    
-64    96     
192    0      
-208   80     
0      64     
96     64     
-16    0      
48     176    
-96    -16    
32     112    
-160   -80    
0      32     
32     -128   
-80    -32    
-48    128    
240    32     
64     32     
-144   160    
-48    64     
64     32     
-128   -48    
-96    -96    
144    128    
-32    -16    
192    112    
-192   96     
352    192    
-80    112    
-80    96     
112    112    
32     48     
96     208    
-48    48     
80     48     
-112   64     
-160   96     
-64    16     
-48    112    
-224   -96    
64     176    
64     96     
112    64     
-112   80     
-32    32     
112    48     
-48    128    
112    416    
16     -64    
48     96     
-304   -64    
416    64     
-176   288    
48     96     
-16    96     
16     96     
-16    64     
32     48     
144    160    
-224   32     
96     128    
48     48     
-64    -16    
-80    -64    
-32    192    
-128   128    
32     272    
-128   224    
32     -32    
48     0      
48     -16    
64     128    
-48    48     
-32    48     
80     208    
64     64     
-80    96     
16     48     
32     0      
64     112    
-160   32     
80     48     
16     80     
128    128    
96     80     
96     -16    
48     -32    
-16    112    
64     144    
176    192    
64     48     
16     0      
-304   2000   
-400   -48    
-624   16     
-16    -208   
-560   -144   
688    128    
-160   -272   
-16    288    
-16    32     
-288   -304   
432    272    
-112   144    
48     128    
-128   80     
96     -208   
176    160    
224    608    
48     432    
-192   80     
-64    16     
32     -16    
192    96     
80     0      
-64    -656   
-64    0      
32     16     
-16    144    
32     80     
48     -16    
144    400    
-192   16     
0      -64    
-16    112    
96     -64    
48     240    
48     48     
-112   -48    
-80    -160   
160    -432   
16     -32    
112    48     
-80    176    
112    16     
48     144    
-16    -32    
112    80     
-16    48     
112    80     
-48    176    
-16    96     
176    -256   
-32    -128   
48     64     
272    224    
-192   16     
176    -304   
-96    -32    
128    112    
240    464    
16     208    
0      80     
80     96     
80     80     
16     352    
-80    272    
112    -16    
-48    -400   
-64    32     
224    -304   
-96    160    
48     -800   
112    96     
0      -16    
144    112    
-16    48     
-16    224    
192    800    
0      512    
80     128    
80     64     
-32    128    
128    -352   
-32    -96    
48     -208   
0      32     
64     -1056  
336    240    
-160   -1456  
48     32     
32     160    
16     64     
128    32     
-32    160    
-16    48     
160    128    
-112   0      
208    -64    
96     256    
16     -864   
176    96     
-144   -16    
128    64     
112    -192   
16     160    
32     16     
80     128    
80     144    
-64    96     
192    112    
-48    352    
96     80     
16     -864   
64     96     
64     -144   
48     96     
48     -160   
64     128    
0      -272   
96     96     
-16    128    
0      48     
-48    -112   
112    192    
192    160    
96     -416   
-80    224    
-160   -624   
144    -80    
80     -64    
128    192    
160    0      
-112   -48    
-64    -672   
208    128    
-112   80     
256    -560   
128    464    
-992   -32    
480    -1408  
-80    -368   
240    -720   
-32    0      
16     176    
80     0      
-32    80     
16     -192   
272    336    
-352   -16    
304    16     
-304   160    
224    -112   
-336   16     
-400   -144   
304    -640   
384    144    
-352   -64    
80     -256   
224    -80    
-160   -336   
288    32     
-112   -64    
224    160    
16     144    
80     -144   
-176   48     
80     -416   
-16    -192   
96     -48    
-48    -32    
-112   64     
224    -80    
128    128    
-112   -432   
112    -176   
-192   80     
0      -64    
256    -416   
32     352    
16     -416   
-160   208    
160    -368   
48     224    
128    0      
224    -48    
-400   -144   
-128   -480   
160    -64    
-352   -128   
176    64     
80     112    
96     -112   
96     -64    
-80    208    
272    -272   
-208   192    
112    -64    
0      176    
-160   -176   
32     -432   
-400   -976   
-704   -112   
96     304    
720    -640   
-192   240    
-176   -272   
384    -304   
-256   -1232  
256    -256   
32     160    
-112   -256   
64     176    
-32    -32    
48     -32    
-144   -96    
-352   32     
192    112    
-1552  -80    
16     -144   
32     -80    
192    -176   
0      96     
112    -608   
-128   32     
176    80     
224    -96    
-208   -16    
160    -144   
-112   -192   
48     48     
-96    96     
224    32     
-544   48     
-16    -240   
16     -160   
0      -496   
96     -16    
96     -64    
224    160    
-112   -32    
64     -96    
-16    -96    
192    -16    
-112   96     
192    16     
-576   -64    
48     -320   
-256   -160   
-96    0      
288    0      
-112   -176   
16     48     
80     -128   
96     96     
-16    -16    
144    80     
-128   80     
144    160    
-176   -48    
96     64     
-112   -16    
112    0      
-32    224    
-128   -16    
96     0      
176    -160   
-80    256    
-16    -624   
224    80     
-304   208    
112    -32    
16     96     
-32    16     
-32    64     
32     -128   
64     256    
-64    80     
112    48     
192    32     
-544   0      
176    -208   
192    256    
-976   -176   
-1120  -96    
80     16     
-1488  -80    
80     -96    
-208   -224   
-64    64     
80     -144   
-48    64     
96     48     
-208   224    
-16    -208   
-64    -112   
-336   -288   
-16    192    
192    -32    
-224   16     
0      80     
-64    0      
-144   -224   
-224   -160   
176    176    
-48    112    
16     144    
-208   -64    
128    144    
-208   -64    
144    128    
-112   -48    
-48    0      
-16    0      
48     16     
-16    80     
-96    80     
-112   384    
96     128    
288    32     
-576   0      
160    128    
-48    0      
-80    64     
-80    -16    
-48    128    
400    -144   
-144   48     
32     48     
-128   64     
48     48     
32     144    
-176   192    
208    192    
-176   112    
-480   16     
16     32     
-944   -192   
-272   48     
144    -96    
80     96     
-80    -16    
96     288    
-80    -96    
-16    32     
112    288    
16     48     
-32    80     
-160   80     
0      64     
32     -64    
-64    32     
0      32     
16     144    
-96    -48    
64     112    
-96    -64    
-48    -48    
144    368    
-16    160    
-112   16     
0      208    
-96    64     
32     -64    
0      96     
160    160    
32     384    
-272   -112   
48     80     
-144   -656   
160    528    
368    544    
-160   128    
16     240    
-336   -96    
64     208    
-224   -352   
272    0      
16     -32    
-32    64     
-208   96     
-80    208    
-160   -224   
80     -48    
-1104  -16    
192    -896   
-144   -48    
144    -80    
32     16     
0      64     
-80    208    
64     112    
0      80     
304    -144   
-48    176    
-160   -48    
32     144    
-256   384    
-1104  -1600  
-16    -112   
576    592    
-688   752    
-640   32     
496    416    
128    816    
-64    -352   
64     384    
-288   -304   
-32    48     
-32    288    
272    -144   
-160   32     
16     128    
64     304    
-432   304    
-320   -80    
-96    -192   
192    304    
-128   16     
128    -48    
0      32     
96     128    
-64    96     
48     96     
16     80     
-160   -80    
128    16     
-208   -80    
32     128    
80     80     
16     96     
96     80     
0      320    
-192   -240   
-80    -192   
-96    32     
576    528    
-128   144    
-48    144    
112    64     
-96    -16    
96     96     
-32    -16    
64     144    
48     176    
-48    -16    
16     -16    
96     80     
256    -192   
64     192    
16     80     
0      80     
-80    -32    
64     -432   
48     112    
288    432    
144    256    
-128   272    
-112   16     
128    128    
-160   16     
80     -96    
336    80     
-192   -32    
0      160    
208    -16    
-80    64     
-16    0      
-32    16     
48     16     
-112   80     
80     64     
48     208    
-48    48     
-336   -464   
352    0      
64     64     
192    16     
192    0      
-32    304    
0      112    
-16    112    
64     32     
48     16     
-32    96     
0      48     
112    176    
-48    0      
128    48     
48     240    
-64    128    
-64    -96    
0      0      
32     128    
128    32     
-64    64     
-160   16     
96     256    
-16    -32    
112    176    
-160   112    
112    -688   
144    80     
-160   -336   
288    496    
-224   -48    
416    144    
-272   96     
32     -48    
0      64     
-64    80     
272    64     
-80    208    
-128   -144   
128    16     
-80    48     
224    -112   
-16    96     
-48    -496   
80     160    
64     32     
64     64     
-16    336    
-112   -128   
288    32     
-176   128    
32     -80    
0      32     
-112   -160   
208    -320   
-80    64     
96     48     
-32    224    
-48    -368   
304    64     
32     -448   
-32    160    
96     320    
144    80     
-16    352    
80     16     
208    -32    
-224   -48    
160    -32    
-32    80     
96     560    
-160   -336   
80     80     
0      -672   
-64    0      
80     -336   
272    160    
0      -80    
-208   32     
-96    224    
192    -160   
-320   -16    
272    32     
64     208    
32     224    
-80    0      
112    -176   
256    624    
-480   -592   
224    256    
208    -368   
-48    -192   
-16    -112   
96     144    
48     -176   
80     224    
-32    0      
48     112    
-80    96     
80     16     
128    224    
16     -48    
32     144    
0      -48    
-64    128    
-16    192    
272    -48    
64     -960   
96     96     
0      176    
64     16     
96     112    
0      80     
96     224    
-32    -160   
96     208    
32     -336   
64     400    
-240   -96    
96     80     
304    -1072  
240    256    
80     480    
1200   432    
-288   80     
32     -240   
80     192    
-240   320    
592    64     
80     -336   
-160   16     
208    -192   
48     64     
-48    -144   
64     48     
80     -16    
16     80     
16     -192   
96     112    
96     112    
0      64     
32     -64    
-64    -48    
176    144    
80     -32    
32     16     
16     -32    
-192   112    
272    0      
64     96     
64     32     
80     0      
-96    -64    
128    192    
16     128    
-80    -704   
192    208    
-48    192    
96     -912   
-64    -352   
80     -2848  
-32    -160   
96     112    
16     -32    
256    192    
-224   -160   
32     64     
80     -112   
224    -800   
-128   144    
0      -480   
80     160    
-1744  -144   
192    -192   
-144   -192   
176    -144   
0      16     
112    -192   
-16    -32    
-80    -80    
288    -240   
-192   -480   
128    96     
128    -368   
96     272    
-160   -240   
224    -352   
-208   0      
-16    0      
-48    64     
160    -144   
32     -96    
48     -576   
-48    -48    
112    -176   
144    0      
32     208    
16     128    
192    -80    
-112   48     
-32    -240   
96     64     
-432   48     
192    368    
80     -128   
368    -64    
16     -80    
-16    -464   
400    -48    
-176   -512   
32     32     
80     -192   
-48    192    
64     -192   
-80    16     
80     -160   
-80    64     
-144   -112   
112    64     
-640   -64    
176    32     
16     0      
32     32     
128    128    
-32    -240   
160    -128   
240    304    
-176   0      
320    -272   
-64    -112   
176    160    
48     160    
96     64     
32     -256   
-288   -32    
128    16     
-672   64     
0      16     
128    64     
64     -192   
64     96     
224    -192   
-128   96     
-48    160    
352    96     
-224   -240   
176    -320   
-320   -144   
160    -208   
-304   -96    
-64    -112   
-608   -16    
-16    -416   
-160   -128   
-96    -544   
304    96     
112    -224   
-224   112    
-272   -96    
368    -48    
-288   -192   
192    176    
-112   128    
144    176    
48     -48    
-48    -48    
-224   -32    
304    -400   
-144   -352   
144    -32    
176    176    
-32    -112   
-48    112    
-48    -48    
112    64     
-240   96     
64     -336   
-160   128    
352    -112   
-208   16     
176    -256   
0      64     
128    -80    
64     112    
16     -96    
64     256    
-64    -320   
16     -112   
-80    96     
208    176    
-208   16     
48     -16    
-272   -80    
64     -128   
-32    64     
-16    -48    
-16    176    
-32    -144   
-32    128    
-688   -112   
0      32     
-560   -112   
-656   48     
-96    80     
-448   32     
240    -128   
144    240    
-240   144    
48     -16    
-144   0      
224    112    
32     32     
-800   -240   
48     176    
176    -208   
-96    144    
-96    32     
160    -32    
-144   208    
1520   -400   
800    224    
-304   160    
-368   528    
768    688    
-560   -1104  
592    336    
128    -608   
144    144    
-112   -288   
96     32     
-400   272    
496    0      
-512   -80    
16     128    
-464   144    
160    -16    
80     96     
-224   -176   
-912   208    
-320   -112   
-1344  16     
-96    0      
48     -32    
-16    -16    
96     -192   
144    448    
-208   192    
32     -32    
-160   -80    
-240   -96    
240    128    
96     16     
-192   112    
-384   144    
-96    -48    
-960   -256   
256    32     
208    128    
64     -80    
192    -96    
-80    0      
-80    16     
-144   304    
48     112    
-112   -144   
80     176    
-288   -320   
160    400    
-16    -304   
192    160    
-528   -32    
176    -48    
0      48     
16     144    
-32    -64    
-32    128    
272    352    
-48    64     
-240   240    
112    48     
-176   -48    
-96    192    
32     320    
128    64     
-368   0      
-32    -112   
160    32     
-16    -128   
-96    176    
32     96     
144    32     
-80    -48    
-48    96     
160    32     
-80    112    
-32    -192   
-240   -112   
-480   -272   
16     272    
80     -96    
-384   -160   
208    32     
-64    48     
64     128    
32     32     
224    288    
-368   32     
64     208    
-64    272    
48     48     
-32    80     
-160   -32    
96     112    
-128   0      
160    464    
-320   -64    
272    160    
-352   144    
224    208    
-64    144    
-48    112    
0      -32    
32     -32    
112    32     
-16    80     
48     96     
-144   -400   
-64    -304   
-160   -144   
112    128    
-48    64     
32     96     
0      48     
-16    128    
0      -128   
-48    64     
64     80     
96     288    
80     0      
-32    0      
64     64     
-112   -80    
112    -112   
80     -16    
-112   32     
16     128    
-48    128    
-48    -16    
0      48     
96     16     
-48    112    
-112   256    
48     32     
144    32     
-304   -96    
144    560    
240    -128   
-144   208    
-192   0      
176    32     
-272   -144   
-32    48     
-32    208    
80     32     
-80    -144   
128    16     
16     96     
-32    80     
-48    96     
96     128    
32     144    
-80    144    
-80    80     
-112   -48    
80     80     
-112   16     
288    -96    
-224   336    
0      0      
160    64     
-160   80     
288    16     
-224   -144   
320    240    
-224   272    
-32    -128   
80     16     
304    128    
112    64     
-16    272    
128    -80    
-160   288    
-80    -48    
0      176    
-144   -80    
128    112    
16     128    
0      32     
128    112    
16     0      
0      128    
160    -128   
-176   336    
-32    -32    
288    112    
-96    48     
0      240    
48     -64    
-96    224    
176    -48    
-32    80     
96     192    
-64    -96    
16     224    
-256   128    
160    48     
-64    96     
1072   96     
704    480    
48     -272   
-816   -48    
48     128    
448    -112   
-800   -256   
1248   144    
-464   176    
80     -192   
-128   368    
192    -160   
-48    544    
192    -288   
-96    240    
160    -128   
-224   192    
192    -432   
-16    240    
16     -160   
-32    160    
208    32     
32     192    
-80    -64    
144    80     
-96    192    
240    128    
-80    224    
16     -48    
-48    -128   
96     128    
80     192    
128    -224   
-160   176    
144    -736   
-368   176    
224    -192   
-112   176    
112    -96    
80     224    
144    96     
-32    128    
-64    0      
176    64     
-32    96     
208    160    
-16    160    
144    -16    
-288   176    
192    -752   
64     208    
-16    -1136  
176    224    
-208   80     
160    32     
16     -144   
0      208    
192    -32    
0      272    
-128   0      
224    80     
-64    128    
64     -112   
64     160    
-64    -48    
96     176    
80     -496   
80     160    
-64    32     
192    144    
-80    -48    
192    208    
-80    32     
96     16     
32     64     
-128   -336   
48     160    
-160   -208   
224    -16    
-48    -80    
64     144    
0      -1168  
-64    -16    
256    -784   
160    32     
-176   -160   
256    -48    
-176   288    
-16    80     
304    160    
-144   -176   
160    96     
64     -352   
-160   -272   
80     -336   
128    16     
48     -1104  
48     64     
64     80     
80     288    
-64    -16    
80     192    
-16    -176   
80     144    
48     128    
48     -80    
48     96     
192    -96    
224    304    
-112   80     
-80    -80    
144    -144   
176    112    
-16    -480   
64     32     
0      96     
224    384    
-64    -32    
144    -48    
48     -96    
64     -112   
48     224    
96     -272   
-16    32     
64     -48    
96     336    
32     0      
352    448    
-464   -336   
256    -2144  
-112   112    
80     -528   
-96    16     
-48    -48    
96     -224   
80     -48    
0      -1712  
-32    -224   
0      -48    
128    16     
128    208    
-192   -144   
288    32     
-48    16     
80     -432   
80     192    
-160   -336   
96     -464   
-416   64     
16     -576   
128    -64    
-48    -512   
128    -64    
192    -80    
-384   -304   
256    -80    
80     -320   
112    -240   
368    192    
-16    48     
256    272    
-64    -112   
48     -256   
-704   -176   
80     -96    
-96    -32    
80     -192   
352    160    
-208   -688   
224    -224   
16     -560   
16     -144   
528    -176   
-480   32     
384    -192   
-48    176    
-288   -240   
304    0      
-752   -16    
224    -16    
-240   -16    
48     0      
256    -80    
-48    -272   
-96    -32    
16     -592   
48     16     
64     -16    
176    64     
-64    -96    
48     -208   
144    -16    
-16    32     
-64    192    
-16    -176   
-384   -32    
80     -304   
-320   -480   
-1376  -800   
272    896    
288    304    
176    48     
384    48     
-48    976    
-1360  -336   
2192   -544   
-848   464    
192    -432   
-224   -16    
16     144    
-80    176    
-432   -336   
-1888  -160   
-144   -80    
208    64     
-288   -32    
-160   80     
-64    -608   
96     -208   
-16    48     
384    -336   
-304   208    
112    -80    
-240   176    
-208   112    
-32    160    
160    -272   
-64    224    
32     -80    
144    64     
-64    -160   
32     80     
-80    -256   
-112   96     
-144   -16    
32     -448   
160    272    
-128   -112   
32     112    
128    -16    
208    -160   
0      -80    
-80    -16    
96     -64    
32     -368   
-48    -256   
176    -80    
240    -368   
-64    176    
160    112    
0      -512   
32     208    
48     -96    
-16    -48    
16     96     
112    16     
80     -128   
-16    48     
64     -80    
-32    -400   
-176   -240   
80     -80    
304    -656   
192    400    
-320   112    
112    -432   
-128   144    
0      -96    
80     -16    
-16    80     
-128   112    
16     48     
-224   32     
128    48     
240    416    
-272   16     
256    160    
-720   -352   
-944   -176   
-96    32     
-272   -112   
-144   112    
176    -240   
-192   -64    
304    112    
32     208    
240    128    
-432   64     
208    -80    
-160   48     
-208   -240   
176    144    
-144   -240   
160    -64    
144    0      
-256   -48    
-144   -176   
-1040  96     
32     0      
-144   80     
-144   16     
96     64     
-48    -96    
32     -368   
-64    -144   
144    224    
-96    48     
192    -48    
-304   16     
80     -32    
-128   288    
32     64     
-304   -80    
32     144    
-208   128    
64     -32    
-560   -176   
160    240    
96     80     
128    160    
-368   -64    
48     -64    
224    176    
-208   64     
96     320    
-192   112    
272    144    
-96    16     
-80    128    
32     144    
48     256    
-112   -272   
0      160    
-80    -16    
352    304    
-128   -240   
-160   -32    
-176   -16    
-112   -32    
64     112    
64     -64    
-80    96     
0      -144   
-160   48     
-144   -128   
16     112    
-1120  -80    
80     128    
-128   -112   
64     144    
64     112    
-176   16     
208    112    
-64    144    
48     48     
-32    240    
-176   -112   
176    -128   
-144   112    
0      96     
48     64     
-288   -112   
112    112    
-144   -48    
-16    160    
64     -32    
176    -32    
-32    192    
-192   96     
-16    0      
240    -304   
-48    208    
-304   128    
-80    32     
0      -32    
176    16     
-528   -112   
160    128    
-352   32     
-16    -48    
160    224    
-80    16     
-112   64     
0      -96    
64     -16    
160    64     
-16    32     
-80    240    
-112   32     
-208   -80    
128    32     
-32    128    
-64    -96    
128    192    
-112   96     
-96    464    
-448   -208   
-736   -80    
672    1072   
-240   -16    
-96    160    
480    -1104  
-864   -160   
624    -96    
-64    640    
0      -496   
-208   320    
192    -224   
224    432    
-160   -192   
96     80     
-144   208    
96     -16    
-112   112    
208    48     
-96    -16    
-48    16     
-160   112    
192    64     
-96    112    
272    -160   
-368   256    
112    -192   
0      336    
80     -16    
-16    64     
48     0      
-32    240    
64     64     
-16    48     
-112   -64    
16     -192   
32     -48    
176    224    
-16    -16    
-64    112    
-224   -96    
-32    128    
112    64     
32     64     
-32    32     
48     144    
-64    64     
160    128    
-16    96     
-16    112    
-16    144    
80     32     
48     144    
-64    -16    
48     80     
-80    16     
32     144    
160    0      
16     144    
-96    96     
48     80     
-32    80     
16     64     
80     224    
-112   48     
96     160    
-32    -48    
64     128    
-208   -32    
144    144    
16     80     
16     112    
48     48     
32     48     
48     176    
-128   -16    
16     224    
-224   144    
256    -48    
-64    80     
-80    -144   
-144   64     
-288   224    
48     -96    
-48    -752   
-160   -32    
128    32     
96     48     
-64    128    
32     112    
0      -16    
160    48     
32     32     
48     -16    
-48    64     
144    480    
224    128    
-64    -32    
80     64     
-96    -816   
112    -32    
64     240    
-16    160    
64     112    
-32    112    
144    48     
32     160    
80     32     
-96    -96    
32     -128   
16     -16    
48     0      
112    112    
80     192    
-32    -368   
128    16     
-160   -1456  
240    128    
160    240    
-48    16     
16     176    
48     176    
160    144    
-144   256    
112    -80    
112    448    
-80    304    
128    240    
0      96     
-48    -240   
96     16     
64     -1520  
144    144    
-144   112    
96     48     
32     144    
32     80     
0      48     
48     96     
-48    80     
80     240    
0      -128   
176    240    
-112   128    
208    128    
-192   48     
240    -592   
32     128    
-48    -864   
32     112    
-80    -80    
112    160    
96     -80    
96     112    
-48    -48    
144    112    
-192   0      
272    288    
-224   176    
64     -496   
160    -48    
48     -560   
96     112    
-144   -656   
-16    80     
96     -32    
256    112    
-288   112    
-144   16     
144    64     
-64    288    
96     -16    
-80    -160   
32     176    
272    -176   
-16    64     
32     -432   
240    128    
-208   -144   
112    112    
-96    -560   
16     112    
48     32     
64     80     
16     64     
432    16     
-144   128    
64     -176   
32     112    
32     32     
192    128    
-272   -240   
128    16     
96     -96    
192    128    
-48    -640   
16     80     
-96    96     
-160   1280   
-736   -736   
-496   -1232  
144    208    
320    -432   
-144   560    
336    -592   
-576   288    
224    -416   
112    304    
128    -288   
160    272    
-240   432    
368    144    
-64    192    
0      -48    
-80    16     
416    -96    
-128   464    
128    -640   
32     336    
192    -336   
-48    80     
-16    -368   
512    352    
-144   96     
176    48     
-208   176    
16     -816   
-32    352    
-32    -816   
240    -1440  
-144   208    
256    -768   
-112   208    
400    -2496  
-96    256    
112    96     
-48    96     
-32    96     
160    112    
64     -880   
144    224    
-144   -304   
144    96     
-96    48     
128    -320   
-112   208    
224    -192   
96     -16    
-16    -160   
32     -32    
96     -960   
128    32     
-112   0      
208    -224   
-16    -432   
96     128    
112    -80    
128    336    
-144   -64    
288    -272   
-1328  48     
-128   -112   
240    -128   
32     -240   
80     128    
48     80     
176    96     
-96    -1536  
16     0      
128    -176   
-32    48     
48     -80    
-96    96     
-160   -112   
176    -560   
-352   -48    
-192   -256   
112    -64    
-208   176    
-80    32     
96     -720   
96     -32    
-112   -368   
144    112    
-160   -16    
64     112    
128    80     
0      -160   
0      -32    
32     0      
16     -32    
160    -240   
-96    128    
48     -96    
64     -208   
-32    -432   
-48    -48    
128    -608   
0      176    
192    16     
-80    128    
96     -80    
-64    -384   
-32    -128   
-112   112    
80     80     
80     16     
-704   160    
80     -16    
-848   16     
16     96     
-16    112    
112    -496   
32     -16    
48     -1056  
192    128    
-288   -32    
288    320    
48     144    
-48    -256   
-288   -112   
48     -144   
32     128    
-80    -112   
-208   -64    
288    160    
-208   0      
208    -304   
48     112    
-176   -704   
112    -32    
-272   32     
144    0      
320    208    
-128   0      
112    -80    
-272   32     
-96    16     
272    -64    
-640   -112   
48     96     
112    112    
64     -256   
-192   128    
32     -384   
272    160    
-96    32     
48     96     
-240   -64    
64     80     
-80    -32    
192    160    
-112   80     
32     -48    
-192   208    
-96    -160   
288    112    
-208   32     
240    48     
-48    -512   
-192   112    
160    -80    
-32    0      
32     -64    
112    176    
32     192    
-128   -128   
-80    -80    
208    -32    
96     -144   
16     -48    
64     256    
-336   -160   
32     0      
112    128    
-1424  -48    
288    -32    
-1104  96     
-80    80     
-272   -64    
-112   -112   
320    -240   
-48    176    
-112   32     
-48    48     
-336   -192   
208    80     
-576   -304   
32     96     
32     144    
-112   80     
144    160    
-176   64     
80     16     
-816   -96    
-432   80     
-816   -912   
512    848    
-192   912    
-16    -304   
-624   80     
128    -128   
-736   -560   
432    432    
-96    224    
32     -112   
-192   352    
-240   -64    
32     160    
-64    -176   
-32    112    
-752   16     
-160   208    
-80    -128   
64     96     
16     -272   
16     208    
-48    -16    
144    -64    
-192   -64    
112    -80    
-272   64     
32     96     
-176   192    
64     -48    
-64    96     
-416   -80    
-96    80     
-288   -32    
16     112    
0      -80    
96     32     
-48    144    
48     80     
-16    16     
-16    32     
-32    112    
-32    160    
80     80     
-128   -16    
-48    80     
-224   32     
80     112    
-544   80     
96     144    
-144   -112   
48     -16    
144    0      
-80    96     
96     80     
-80    144    
-128   32     
32     16     
80     0      
-144   16     
-128   -32    
-48    144    
64     160    
-560   -16    
0      112    
112    -208   
0      16     
32     48     
160    336    
-160   128    
96     -32    
96     -32    
-128   96     
-16    112    
-48    -64    
64     96     
-64    16     
-32    224    
-320   -16    
16     -160   
32     -112   
80     16     
32     176    
-64    -192   
-208   -16    
96     -80    
-128   -288   
-16    16     
112    112    
32     112    
-80    80     
-80    0      
32     80     
-48    -32    
-32    96     
96     32     
-112   -112   
256    400    
-32    400    
64     16     
-256   -176   
160    80     
16     176    
112    128    
-192   -16    
-80    96     
-128   -80    
48     16     
-144   16     
16     32     
80     96     
-16    96     
-48    -32    
48     144    
-32    144    
48     96     
-16    64     
0      48     
0      96     
-112   32     
16     -48    
-144   -112   
64     208    
-16    32     
64     0      
-64    128    
0      256    
0      -16    
176    -240   
-32    96     
80     272    
176    -16    
-208   112    
0      128    
32     -32    
-16    144    
-16    320    
-48    -96    
128    -16    
-304   176    
320    -64    
-112   160    
96     208    
128    112    
-128   176    
-128   -80    
-16    -112   
80     144    
-16    288    
64     16     
-48    -48    
-48    32     
128    128    
240    -48    
-176   256    
-128   -128   
272    208    
-368   112    
288    -32    
-48    128    
-80    -32    
112    128    
-48    -32    
240    240    
-240   -144   
112    96     
-352   0      
96     80     
176    32     
-16    128    
-48    32     
-48    128    
-80    240    
-16    -48    
48     208    
64     80     
160    176    
-112   160    
-16    96     
64     -112   
0      208    
128    -80    
-16    -416   
16     144    
64     64     
-176   0      
-64    144    
64     96     
48     112    
48     96     
0      48     
-144   -16    
160    -16    
-48    288    
128    112    
0      288    
-32    -80    
80     -928   
-1312  1488   
-1024  -848   
576    112    
400    -368   
128    0      
-736   64     
992    1056   
-224   -112   
-240   -208   
256    144    
176    240    
-240   -64    
144    208    
240    96     
-272   -672   
240    384    
16     -1408  
96     80     
-32    144    
272    128    
-64    0      
64     16     
-192   144    
352    -240   
-160   64     
288    0      
-160   48     
-656   -352   
112    112    
-32    -432   
80     32     
-32    -736   
128    224    
32     112    
0      112    
64     160    
48     16     
-32    -16    
96     80     
80     -48    
0      144    
-32    112    
64     -192   
0      128    
-16    -224   
48     32     
128    -240   
16     288    
-48    -256   
32     128    
-32    208    
240    96     
-112   48     
32     48     
48     -48    
0      112    
64     224    
-96    -112   
176    176    
80     -192   
-128   160    
176    -432   
16     208    
32     -1040  
128    96     
-16    80     
112    160    
-112   -80    
144    240    
-48    16     
240    64     
-64    112    
144    16     
-16    144    
-16    -160   
144    -80    
32     128    
-112   16     
160    -288   
48     176    
-144   80     
208    0      
80     32     
80     352    
-80    -32    
256    128    
-160   336    
144    -208   
272    176    
-352   -96    
224    96     
64     -272   
0      192    
-64    -384   
96     -80    
208    304    
-112   176    
208    48     
0      112    
-32    64     
208    48     
-80    256    
32     -176   
80     -112   
-16    -64    
96     16     
208    -128   
-176   80     
144    -368   
-96    48     
48     -880   
128    80     
-32    48     
256    304    
-144   288    
0      -32    
48     160    
-96    -160   
272    32     
32     32     
352    384    
96     160    
-16    144    
-256   -144   
96     192    
176    -176   
16     -688   
-144   80     
224    -1472  
0      -560   
-128   -32    
192    -176   
32     -16    
-128   -2496  
-240   -208   
272    112    
-192   -384   
112    -80    
160    240    
96     -80    
240    112    
-144   -464   
-96    16     
-240   96     
272    -64    
-96    -16    
-64    -320   
-64    -176   
96     -848   
48     -128   
32     -32    
64     -48    
64     32     
144    -16    
80     176    
-160   240    
-32    -96    
-16    96     
48     -160   
192    -192   
-112   48     
0      -112   
16     48     
112    -272   
-48    80     
-96    -672   
192    -192   
112    -368   
176    -96    
-80    112    
-192   160    
64     48     
176    304    
-352   -176   
192    160    
-240   -128   
176    -96    
208    16     
-224   64     
48     -144   
176    -528   
80     -80    
128    -1216  
-48    -64    
64     -96    
-64    192    
48     -48    
0      -128   
-64    -80    
32     80     
-432   -16    
176    16     
-624   64     
-48    -48    
240    -32    
0      -272   
96     128    
-32    -80    
-608   320    
-176   1152   
288    1456   
-208   -336   
-416   -272   
-464   64     
-80    -672   
-160   656    
-464   -496   
256    416    
-480   -464   
-336   16     
-336   64     
384    0      
-208   0      
176    -128   
112    -880   
32     64     
-64    176    
64     -96    
-112   80     
-16    -80    
80     224    
0      48     
-688   -176   
-64    -96    
-544   -32    
80     -32    
32     304    
192    -640   
16     96     
-128   -656   
80     80     
-48    112    
144    -64    
-192   -16    
160    -96    
-288   48     
-16    96     
64     64     
-16    48     
144    0      
-16    -208   
64     64     
64     -128   
16     48     
96     -144   
160    32     
-624   -16    
128    -80    
-352   32     
112    -32    
-16    96     
-32    16     
32     64     
64     -192   
-800   -48    
96     -224   
336    288    
144    112    
96     224    
-96    48     
144    48     
-160   -64    
48     -352   
0      32     
-32    0      
-32    144    
-16    80     
-80    -128   
64     -208   
-208   48     
208    -160   
32     80     
-192   -64    
16     96     
16     96     
-240   272    
96     128    
-800   -16    
-48    -160   
-48    48     
-48    160    
-16    48     
48     -80    
32     -208   
144    128    
16     48     
48     128    
-288   -272   
32     32     
64     112    
-208   128    
-16    112    
-304   0      
32     0      
-672   -16    
80     64     
-32    -80    
112    128    
-64    96     
192    144    
-192   -80    
-32    32     
-16    -160   
-176   -32    
112    48     
-240   -64    
32     112    
-224   -160   
0      32     
-752   -96    
112    80     
-1344  32     
-48    0      
-112   -336   
32     -16    
-112   16     
80     80     
-16    0      
-16    160    
16     64     
32     -112   
-128   160    
32     0      
128    48     
-224   48     
336    512    
-688   32     
320    -288   
-512   -32    
0      64     
192    -48    
-224   112    
176    96     
-80    0      
112    224    
-192   -128   
64     -16    
-64    208    
64     128    
-96    -160   
16     160    
-448   48     
80     -16    
160    32     
80     -48    
512    128    
-384   272    
-16    112    
-304   -48    
-16    -144   
192    128    
-80    64     
48     176    
-176   -32    
160    112    
-176   -80    
-48    0      
96     0      
-368   96     
144    208    
-208   -64    
-80    96     
64     144    
-32    -48    
528    64     
-384   240    
-160   -208   
0      -176   
352    -16    
480    192    
0      176    
-304   32     
-160   336    
-272   16     
96     -16    
64     352    
-16    16     
80     144    
-96    64     
32     -32    
-16    64     
-80    48     
64     48     
-32    64     
-160   128    
32     192    
-144   -96    
256    -32    
-288   -80    
16     144    
-32    416    
-80    0      
16     240    
-64    -128   
96     -80    
-80    -16    
-176   624    
-992   -1024  
752    -48    
160    256    
-96    80     
-464   -704   
272    -1088  
-208   32     
848    832    
-96    -32    
-208   64     
64     16     
224    80     
64     160    
-96    -80    
96     48     
-64    208    
-64    144    
-96    -240   
48     -144   
-96    0      
128    96     
-80    64     
160    112    
96     96     
-112   -48    
-80    96     
32     160    
144    176    
-112   -16    
-32    48     
48     48     
80     64     
-112   -16    
-32    128    
32     32     
-64    32     
128    32     
-64    80     
144    96     
-48    48     
48     80     
0      128    
48     32     
112    96     
-144   48     
-16    48     
80     128    
-112   96     
256    16     
-192   80     
96     80     
48     128    
80     64     
-16    144    
-80    80     
224    48     
-80    176    
-16    48     
144    144    
-128   16     
112    160    
0      80     
-16    0      
128    224    
-192   -48    
192    -240   
32     208    
-16    128    
-16    192    
-48    0      
256    96     
-240   64     
176    64     
32     80     
32     96     
-96    -16    
272    128    
-128   224    
0      48     
128    48     
-112   -208   
16     64     
32     -224   
-16    -144   
256    288    
-160   304    
0      0      
176    80     
-112   -16    
176    -16    
-128   -16    
96     144    
-128   -16    
16     0      
192    240    
-128   -464   
192    64     
-112   64     
48     80     
80     32     
80     112    
48     208    
-80    64     
-32    -64    
240    80     
96     336    
112    400    
-128   16     
48     112    
32     64     
208    -672   
-96    -32    
-176   176    
192    16     
176    128    
32     112    
-16    192    
-48    48     
48     96     
16     -32    
112    -64    
176    128    
112    -96    
-304   -160   
224    176    
304    -288   
-176   112    
-48    -2064  
32     16     
0      96     
80     -48    
-144   64     
32     -128   
-208   64     
368    96     
96     192    
-32    112    
48     144    
-144   -80    
256    -16    
-16    -80    
-160   128    
384    -208   
48     176    
240    64     
-144   256    
-16    -384   
32     304    
160    32     
64     80     
-144   128    
112    112    
80     128    
0      0      
-16    256    
128    -192   
16     112    
96     240    
80     176    
-64    -752   
-32    80     
96     64     
144    272    
-128   -208   
224    384    
-160   448    
384    544    
48     -32    
-112   -288   
-80    -96    
0      -304   
192    -144   
224    -368   
-176   144    
32     -144   
112    112    
64     -848   
-32    160    
-96    -64    
112    192    
-64    0      
96     80     
48     240    
96     -240   
-16    160    
112    -272   
96     160    
0      -336   
96     160    
352    -368   
-16    -16    
-400   192    
192    -96    
224    -64    
96     240    
16     48     
-96    -896   
-816   -1664  
288    -1168  
-16    32     
448    -176   
992    -944   
-192   448    
-480   32     
144    -448   
32     288    
544    -400   
160    64     
-256   0      
288    -96    
-80    -400   
112    -496   
-48    -96    
416    -16    
-240   128    
240    48     
64     128    
-16    -576   
-224   176    
112    -128   
-336   48     
192    -368   
128    -272   
128    -144   
64     -1440  
16     -304   
208    -128   
64     16     
-96    -32    
64     -1440  
-96    -176   
160    176    
64     0      
-32    128    
128    0      
-48    -208   
96     -112   
48     -176   
-32    144    
-80    -16    
80     -208   
-240   -16    
32     -416   
32     112    
80     -448   
16     -80    
16     -1456  
80     32     
64     240    
64     48     
32     -352   
-16    -64    
336    64     
-288   16     
-64    -304   
256    208    
-160   -176   
16     -176   
160    -48    
16     -272   
48     -32    
96     -96    
48     -112   
64     32     
-288   -32    
96     -64    
32     112    
96     -80    
112    32     
-208   -64    
64     -80    
-1184  -96    
160    -80    
304    208    
-144   272    
-16    128    
176    -304   
0      -160   
-112   -160   
80     -176   
96     0      
16     320    
128    -64    
-32    -16    
-192   -336   
96     -176   
16     112    
96     96     
-48    32     
-16    -80    
48     -80    
176    -304   
-224   16     
-32    -624   
0      -96    
224    160    
-80    144    
-32    0      
-64    -128   
-128   32     
160    -144   
-64    48     
0      -16    
-576   -16    
48     -96    
-256   -96    
80     -80    
-80    0      
208    -144   
-80    96     
208    -208   
-96    -48    
0      -48    
64     -128   
-48    -80    
48     32     
-160   48     
96     0      
-144   -80    
112    32     
-352   48     
144    -224   
-160   208    
112    -576   
-64    368    
-128   -1216  
320    -80    
-208   -160   
0      0      
-224   0      
176    -128   
-96    96     
-16    -32    
32     368    
80     -256   
256    672    
0      -80    
304    320    
-176   -304   
-48    -112   
208    32     
0      -32    
144    112    
16     -256   
0      288    
-16    -112   
16     -32    
48     -32    
16     32     
112    -80    
-400   -144   
192    -560   
-64    80     
128    32     
192    784    
-272   -128   
-544   -64    
-128   32     
80     -256   
-128   208    
-16    160    
96     224    
-64    -32    
-80    -96    
144    -16    
160    624    
-784   -384   
-112   320    
-496   -176   
-32    160    
16     192    
-1152  -48    
-192   -160   
-1088  48     
176    -48    
-448   272    
0      -208   
64     -96    
-192   224    
-256   32     
0      -48    
128    128    
224    -176   
-96    -464   
-464   -16    
-64    112    
128    80     
-112   64     
-64    112    
-96    160    
-1024  -96    
-224   32     
224    -80    
-144   80     
0      -160   
2160   -2672  
-48    -320   
224    96     
-32    672    
160    640    
-304   -560   
352    528    
192    368    
-64    80     
-208   0      
0      224    
80     -48    
-528   48     
64     96     
-80    -16    
112    112    
-240   -224   
80     192    
80     80     
-48    160    
112    16     
-336   96     
48     48     
0      80     
48     16     
-16    48     
-112   256    
-544   144    
-16    0      
48     -160   
-32    64     
112    -16    
-144   -32    
64     80     
-96    16     
16     -96    
-160   16     
-32    192    
-64    -16    
16     -112   
-176   80     
64     32     
-512   -32    
16     16     
48     -64    
-80    48     
144    -96    
-160   -32    
256    64     
-144   64     
64     0      
64     96     
-112   128    
144    0      
48     16     
-208   16     
64     32     
-320   -48    
0      64     
-624   224    
-160   64     
176    -160   
32     16     
-80    96     
-16    112    
-32    48     
48     -32    
144    208    
-192   -48    
208    144    
-288   -48    
128    160    
-256   -16    
192    112    
-384   0      
32     -16    
0      -32    
-80    64     
-16    288    
-112   16     
96     -48    
-48    80     
-64    0      
208    192    
-352   16     
176    32     
-32    32     
32     16     
32     80     
-176   -48    
48     80     
32     160    
16     32     
112    272    
-144   48     
80     -112   
144    80     
-192   32     
192    160    
16     -16    
-144   48     
32     128    
0      -80    
144    240    
-384   0      
112    32     
-16    128    
64     -48    
160    -160   
-160   128    
128    80     
112    160    
-80    112    
160    160    
-192   -112   
-192   -208   
64     272    
128    -48    
-48    176    
96     160    
48     112    
-144   128    
112    -32    
-16    32     
-128   -16    
16     -112   
-32    192    
-112   -128   
-32    -64    
-96    0      
-32    -112   
-32    64     
-80    -64    
-96    128    
-48    48     
224    48     
-64    -112   
-32    128    
192    112    
16     48     
-16    128    
0      32     
0      160    
-64    192    
112    80     
-48    48     
112    336    
96     144    
-64    -16    
-48    -80    
80     96     
48     96     
-16    144    
112    -32    
-32    256    
-64    176    
16     -112   
-48    64     
48     32     
256    320    
-80    112    
-80    112    
-256   -128   
176    64     
-80    -112   
144    112    
112    480    
-80    304    
-160   -208   
112    80     
48     144    
-16    0      
80     -48    
64     -16    
16     176    
48     -16    
-32    176    
48     -288   
-64    -1520  
96     -80    
32     240    
32     32     
128    160    
-64    144    
32     128    
-16    96     
48     96     
224    224    
-192   -64    
192    160    
-96    32     
32     144    
-80    128    
-144   -672   
240    240    
-176   208    
144    16     
-160   -16    
288    3824   
-1120  -1328  
-80    -720   
336    64     
928    1008   
-304   -624   
368    720    
-144   160    
240    -192   
-272   384    
208    -1088  
-144   384    
-192   144    
-80    272    
-224   -192   
240    272    
192    336    
0      96     
-272   -192   
304    112    
128    448    
-304   80     
-64    64     
352    -256   
-192   64     
0      -528   
-304   304    
80     -2080  
-80    160    
80     176    
-32    96     
-64    96     
32     80     
-144   -32    
208    64     
-32    -112   
288    -112   
-80    -16    
448    192    
-144   -608   
544    224    
-496   208    
224    -144   
-112   192    
-16    96     
64     112    
-16    -256   
272    80     
-192   -64    
288    144    
64     -352   
96     288    
112    -32    
0      -272   
-16    320    
208    32     
240    240    
-592   -1520  
368    320    
288    -1440  
-48    448    
-64    -16    
288    288    
-176   224    
0      224    
80     0      
16     -160   
-48    96     
64     96     
0      176    
80     -128   
32     96     
48     -224   
112    224    
16     -208   
112    80     
144    544    
96     320    
-64    112    
192    224    
32     -288   
16     64     
96     144    
16     -144   
48     112    
48     -432   
0      192    
192    64     
48     256    
-176   -96    
32     64     
32     -16    
32     48     
16     112    
208    304    
-144   16     
160    0      
-240   -192   
288    -608   
-96    192    
96     32     
112    144    
-128   -112   
208    80     
32     -432   
32     64     
128    144    
-96    64     
32     -336   
176    -160   
-64    -656   
112    -176   
80     -64    
-144   -160   
160    -16    
176    -192   
-144   208    
96     -176   
48     128    
-48    -672   
288    48     
32     176    
256    -176   
-208   0      
-1024  -368   
176    -288   
-80    -208   
-240   -560   
-48    -368   
-272   -1504  
160    224    
32     160    
-96    160    
272    0      
-240   -288   
224    48     
0      144    
192    -416   
-80    544    
-368   -288   
-32    -96    
96     -128   
-112   -112   
176    -160   
144    -288   
48     160    
96     64     
48     288    
48     -48    
16     -192   
0      -288   
0      80     
64     -64    
48     0      
-112   576    
-176   -160   
-656   608    
-240   64     
80     80     
-48    -624   
-16    -192   
112    -80    
48     -32    
112    -80    
144    64     
112    0      
64     32     
64     16     
80     64     
224    -96    
208    48     
-288   0      
144    -16    
32     -80    
-128   -160   
32     32     
32     -96    
-48    176    
-80    -608   
176    -64    
96     48     
32     48     
-48    96     
80     -176   
-160   208    
16     -400   
96     32     
16     -96    
48     -32    
112    -240   
-224   64     
48     -16    
-144   -32    
32     -1200  
272    96     
-80    112    
224    -80    
-304   -16    
-960   -464   
-176   336    
-144   624    
496    -208   
1328   80     
-1280  -608   
-128   -608   
720    -1056  
32     512    
464    432    
-288   -144   
-64    96     
112    -128   
64     48     
144    -208   
-160   176    
176    48     
-64    112    
32     -80    
96     -48    
-464   -224   
-80    -32    
192    32     
16     32     
16     -112   
-96    -256   
32     96     
64     -2880  
192    64     
-272   -32    
80     -32    
-112   160    
32     32     
-208   -128   
32     -160   
-16    112    
304    208    
64     -32    
-80    -224   
-144   32     
224    -288   
-64    80     
-48    64     
96     0      
-192   160    
16     -48    
16     48     
-32    48     
-16    0      
112    -32    
-144   48     
208    144    
-928   16     
112    0      
-16    64     
144    -320   
64     96     
0      192    
80     -48    
16     96     
-80    -112   
32     48     
112    32     
-176   176    
128    -144   
32     96     
-16    -112   
-32    32     
112    -112   
-16    160    
160    -144   
-112   -16    
-16    128    
-128   -160   
-16    16     
-1632  48     
-160   -288   
384    -16    
-224   320    
48     -272   
-16    -32    
-688   -416   
80     176    
-224   -256   
320    80     
-576   -256   
48     -176   
-32    -176   
-80    192    
-208   80     
48     112    
-16    -80    
-720   32     
-80    48     
160    112    
48     32     
-352   -64    
0      176    
80     64     
96     96     
-64    144    
-208   -16    
160    80     
-80    256    
128    80     
-16    96     
-272   112    
-112   48     
96     208    
-192   80     
-32    80     
0      256    
48     256    
-16    -112   
-16    48     
16     32     
32     0      
-48    -224   
0      144    
-160   144    
-80    -16    
32     -112   
-96    -160   
-208   -16    
-240   -64    
96     -320   
32     -64    
-48    176    
208    -96    
-192   -32    
-96    256    
176    384    
-112   320    
128    16     
-240   352    
-80    -192   
208    32     
-256   32     
368    400    
-560   -288   
176    32     
-176   -80    
96     112    
32     112    
-128   112    
-64    16     
-48    -16    
176    480    
0      224    
-128   0      
-112   -64    
80     144    
-64    -96    
32     -48    
-192   -448   
112    160    
-416   -192   
112    288    
0      560    
-144   16     
-128   -96    
0      -64    
16     -48    
-32    112    
-112   112    
112    -688   
96     16     
-160   224    
-128   64     
-496   -80    
112    16     
192    -80    
176    288    
-400   96     
-96    -32    
128    -32    
80     112    
192    272    
-272   208    
-240   -96    
48     -112   
128    -32    
64     144    
-144   80     
-112   -96    
112    176    
-144   48     
-96    16     
-32    96     
80     16     
80     128    
-96    32     
80     192    
-336   64     
128    -112   
112    224    
160    48     
-80    32     
976    1760   
-992   -2400  
192    -80    
-224   256    
176    -16    
96     0      
80     256    
80     -160   
112    128    
-528   1216   
112    -592   
-160   352    
48     -48    
464    464    
-720   -496   
352    528    
-256   -48    
240    512    
-240   -64    
400    -128   
64     320    
176    160    
-48    304    
-128   -64    
160    128    
0      272    
-176   704    
-32    -144   
256    432    
-320   -96    
288    160    
-384   112    
64     224    
64     176    
-160   -160   
0      144    
-96    -112   
-176   240    
336    -16    
-48    208    
80     224    
-160   320    
16     -160   
-240   304    
-64    -32    
64     160    
224    192    
-16    256    
176    32     
-176   48     
0      -32    
96     208    
64     256    
176    160    
-224   -48    
80     96     
0      64     
-96    -368   
32     272    
112    48     
-96    208    
-128   -208   
-80    224    
96     -16    
-208   144    
224    112    
-192   48     
192    96     
-128   64     
16     48     
64     -16    
16     96     
32     176    
32     144    
-48    -64    
144    112    
0      -160   
-208   -1008  
-256   -160   
-96    -592   
480    176    
-304   -96    
240    -64    
-176   304    
112    192    
-48    -96    
-80    64     
0      -48    
176    320    
-128   -48    
96     208    
16     80     
80     -1776  
-96    -64    
-16    -128   
32     64     
-112   32     
80     -48    
-224   32     
48     -48    
32     32     
-16    96     
-64    -320   
176    160    
-128   144    
48     -80    
160    240    
0      -528   
-64    -144   
-48    -80    
-240   -144   
352    320    
32     224    
-48    32     
192    112    
-144   -128   
48     160    
-112   -112   
256    224    
-128   352    
208    -80    
144    32     
48     -752   
-272   336    
416    -592   
-144   -16    
256    256    
96     304    
0      -32    
0      0      
16     32     
304    352    
-112   208    
176    192    
-288   -48    
144    -128   
-16    144    
224    -208   
144    256    
-80    -496   
128    80     
-32    -48    
-144   -16    
16     -480   
64     128    
16     0      
48     -208   
-32    64     
-320   -208   
176    80     
96     -192   
-48    144    
80     -32    
176    80     
0      -800   
16     144    
112    -2544  
240    112    
-240   272    
112    32     
16     48     
208    64     
-48    112    
16     -144   
-32    48     
-64    -64    
320    160    
-112   -144   
176    112    
-64    -320   
32     128    
64     -96    
-16    64     
384    48     
-176   192    
-128   192    
80     48     
0      -176   
272    -560   
-160   192    
16     -608   
80     224    
-96    -304   
160    144    
-176   -176   
304    -80    
80     -224   
48     128    
0      48     
16     192    
16     -192   
144    176    
-32    160    
32     96     
64     96     
64     -288   
192    80     
-48    -16    
848    -1824  
688    -160   
-336   -256   
672    -368   
80     32     
96     -352   
-336   672    
304    -608   
-160   -160   
192    -1024  
-144   384    
208    -2128  
-112   512    
144    -368   
0      144    
-32    48     
288    16     
-16    224    
16     -160   
-32    -1120  
208    -48    
-112   288    
160    -144   
-736   -16    
288    -576   
-192   208    
96     -704   
-176   48     
272    -1136  
-16    -16    
112    -80    
-192   16     
240    0      
-16    192    
128    -336   
-64    80     
352    -224   
-32    272    
-144   -160   
-80    -32    
96     -144   
80     32     
144    -32    
-32    -608   
16     -352   
128    -1248  
32     -96    
64     -512   
80     224    
-32    32     
128    -16    
112    -272   
0      -64    
-16    80     
48     0      
-576   -32    
80     -16    
64     -48    
48     -80    
-16    -112   
128    -608   
-16    16     
144    48     
-352   -32    
160    -48    
-112   128    
-80    -16    
0      -32    
-144   -64    
160    -32    
-1488  -176   
96     -32    
-64    -112   
80     -192   
80     -80    
64     80     
-128   -32    
-144   -2240  
-80    32     
208    -96    
-16    112    
-80    80     
112    -16    
-112   -80    
-208   -32    
-672   0      
-96    -96    
-992   -80    
144    288    
-128   0      
320    -368   
-144   64     
80     -400   
112    144    
176    288    
112    384    
-208   16     
160    -64    
-80    -48    
128    -224   
-48    736    
128    512    
-176   256    
-128   -288   
64     -80    
96     -608   
16     64     
-96    -832   
192    160    
16     16     
96     16     
-96    96     
80     -224   
-96    80     
80     128    
-240   -64    
96     -16    
-320   80     
16     -144   
-624   256    
80     -48    
-16    80     
96     -672   
-64    -48    
16     48     
0      -96    
-208   80     
192    16     
-144   352    
-320   -128   
112    -96    
160    224    
-256   -304   
64     -32    
64     16     
176    -720   
-48    16     
272    -272   
144    96     
-208   160    
160    -16    
-144   -16    
64     -32    
-64    -96    
224    -16    
-272   -64    
48     -160   
-80    64     
144    128    
96     96     
160    -192   
-32    64     
-368   -288   
96     -48    
48     176    
-224   -64    
-32    80     
-144   -96    
-16    -160   
176    32     
-80    -64    
128    176    
-176   -16    
96     -112   
48     -48    
-1280  -304   
64     0      
-304   -96    
-272   0      
192    16     
-256   32     
-32    -16    
-208   96     
-176   32     
160    48     
0      80     
-16    48     
-128   -32    
-208   -192   
256    144    
-272   -128   
16     32     
0      144    
-128   -32    
-192   48     
-176   32     
-128   208    
-32    -64    
-16    288    
-768   -208   
224    112    
-16    32     
-16    16     
-256   0      
48     144    
128    -160   
-16    160    
-48    0      
1824   -1744  
-368   -640   
480    880    
-688   384    
224    544    
96     -480   
-1232  -48    
720    16     
-784   -80    
464    16     
-224   304    
-48    -336   
-48    32     
-32    -96    
176    272    
-256   -96    
288    368    
-160   -112   
224    96     
-208   -112   
128    32     
-176   -16    
-96    512    
-432   64     
240    -64    
-240   48     
208    224    
-160   -112   
-80    32     
-144   0      
112    0      
112    64     
-224   -112   
-16    -48    
-128   16     
64     80     
-112   144    
-192   304    
96     64     
-256   -112   
32     16     
224    112    
16     80     
0      128    
-80    64     
-320   -32    
-16    192    
80     256    
-224   112    
208    320    
-160   112    
64     -144   
-128   -80    
-128   -144   
64     80     
-1024  -48    
0      272    
32     -16    
-96    208    
-208   -176   
64     112    
-32    64     
96     192    
16     -80    
144    176    
-64    48     
-64    -48    
64     208    
-208   -160   
96     224    
-256   -16    
-64    96     
-16    64     
112    96     
-32    48     
-16    80     
-16    32     
32     32     
48     112    
-192   -288   
192    -16    
-208   160    
64     -192   
-16    256    
112    208    
48     80     
-288   -256   
-96    -64    
-176   -368   
144    0      
-16    192    
128    128    
-80    80     
-128   16     
-240   0      
176    96     
-240   0      
144    112    
160    16     
64     464    
-48    -80    
-144   -80    
112    0      
64     192    
48     96     
128    432    
-272   80     
48     32     
-112   -96    
192    128    
-32    48     
96     48     
-80    80     
96     64     
-192   64     
144    112    
-80    32     
80     -16    
192    224    
-32    32     
-128   112    
-80    48     
224    -128   
-112   80     
-128   -128   
256    -16    
-448   96     
288    160    
-160   -16    
-32    16     
-32    144    
0      -48    
-80    -112   
-112   32     
16     80     
208    96     
-80    -64    
-272   80     
128    176    
240    -32    
-48    80     
-272   32     
160    96     
-64    208    
48     48     
32     64     
32     64     
48     336    
80     16     
144    48     
-208   64     
160    96     
32     112    
128    160    
-176   48     
80     48     
-80    112    
64     208    
144    0      
32     144    
-32    96     
32     144    
0      208    
-16    336    
-336   16     
16     -64    
48     64     
48     32     
224    -336   
-96    160    
-128   272    
-160   -96    
176    144    
96     176    
-144   32     
272    160    
-80    -96    
176    80     
-128   192    
-112   64     
192    16     
0      16     
96     112    
16     208    
-160   -96    
144    96     
-224   -48    
144    -880   
80     128    
-64    -1776  
80     64     
64     96     
128    -64    
-32    208    
-128   48     
432    160    
-240   208    
176    112    
1488   3184   
-2064  496    
208    832    
416    816    
832    -464   
-624   -32    
464    400    
-624   928    
848    -432   
-704   576    
528    -656   
-224   736    
208    -464   
96     912    
-208   -560   
-64    432    
144    -256   
240    432    
-224   16     
224    -240   
-48    208    
32     -704   
64     256    
32     -752   
-80    112    
224    -144   
-160   352    
144    -384   
0      352    
0      -144   
80     128    
16     -96    
0      240    
144    80     
-96    -96    
192    128    
128    96     
-80    -16    
64     -464   
-112   16     
208    -32    
80     144    
0      48     
-32    80     
96     48     
64     144    
192    96     
-208   -224   
208    0      
-96    48     
128    96     
112    32     
-16    80     
48     -32    
80     96     
128    -1008  
48     128    
-176   144    
208    16     
64     32     
-32    32     
48     112    
32     -160   
80     64     
32     -112   
-48    112    
176    304    
-16    128    
-112   -192   
160    176    
0      -1072  
112    112    
16     16     
144    240    
-144   160    
144    224    
-112   -48    
400    -320   
-128   224    
64     -208   
112    128    
-160   -320   
192    80     
-64    -160   
352    144    
48     96     
48     320    
208    208    
32     -272   
144    -32    
-16    128    
144    96     
96     48     
-16    64     
80     -16    
64     160    
0      -240   
208    192    
48     144    
48     224    
144    96     
96     272    
-80    -32    
160    -208   
-64    32     
-144   -192   
128    -768   
0      112    
64     -1024  
0      -432   
16     64     
80     0      
160    160    
-32    -128   
48     128    
-32    -480   
288    -768   
32     272    
64     -480   
-176   -48    
-320   -64    
48     -272   
192    0      
160    192    
-48    -208   
-64    -432   
32     144    
240    192    
80     -16    
-112   176    
128    -16    
0      -240   
64     -48    
144    -80    
16     0      
-48    176    
-144   -80    
64     -16    
80     -48    
160    -16    
48     -624   
-16    -64    
32     -416   
128    16     
32     -128   
80     0      
224    -352   
-96    48     
-64    64     
-32    -256   
-288   -176   
160    16     
-304   128    
16     -48    
-80    -352   
224    -176   
128    112    
-80    -928   
128    -144   
144    -32    
-16    144    
96     -128   
-176   -96    
32     160    
-64    32     
128    -128   
48     192    
-1728  48     
144    -224   
-48    -96    
96     -96    
192    -64    
-64    -16    
16     160    
112    -1184  
-48    112    
-16    -176   
224    96     
-96    96     
128    -16    
-128   -48    
64     -80    
-304   16     
32     -112   
-592   0      
224    -16    
-16    176    
128    -320   
-48    160    
-32    -1136  
48     48     
48     224    
-32    176    
-64    -48    
32     608    
-192   -112   
144    -64    
-560   -96    
2528   -1536  
112    1264   
-816   -720   
-400   -464   
-16    -464   
800    -496   
-352   -688   
688    -672   
-448   256    
-144   -256   
80     256    
-128   -512   
-48    224    
224    -48    
0      -160   
-160   -48    
-128   -32    
416    368    
-1056  -224   
-128   -176   
416    256    
-304   -368   
-16    112    
-160   128    
336    -144   
-400   -32    
240    16     
16     160    
96     -112   
-320   -48    
160    -224   
-128   -80    
32     -112   
96     112    
-32    -32    
96     0      
80     -96    
-32    240    
-128   -16    
32     48     
-144   -16    
192    0      
-16    64     
0      32     
-96    -48    
0      -192   
-64    32     
96     -80    
-112   32     
192    -352   
-144   96     
-336   -512   
-160   -80    
-16    144    
-544   240    
0      -16    
-32    -144   
-80    32     
48     96     
-144   -240   
160    80     
-352   80     
-1136  -128   
64     32     
-672   -208   
16     320    
-496   -208   
-144   0      
-16    80     
64     112    
-192   32     
-224   -112   
-16    16     
32     -64    
96     112    
-32    -176   
-224   128    
-240   -176   
32     208    
-192   -224   
192    96     
-64    144    
128    368    
-256   0      
-80    -160   
32     -64    
-96    -128   
-48    144    
-704   272    
-288   96     
160    -128   
-32    -32    
-128   -176   
240    176    
176    720    
-240   160    
240    0      
-48    -144   
-80    -48    
48     144    
0      80     
-16    112    
-16    48     
-80    32     
-80    80     
-96    192    
48     -32    
16     -32    
64     192    
48     -32    
-80    64     
-192   16     
80     80     
-16    64     
32     160    
32     128    
-192   -16    
-48    -48    
-352   -48    
0      -32    
-480   -32    
-16    48     
0      16     
160    48     
-192   -192   
0      208    
224    -64    
0      -80    
-96    176    
-128   64     
64     0      
-336   -112   
272    192    
96     304    
288    288    
-288   16     
-64    48     
-224   -176   
64     -64    
192    -32    
32     240    
64     16     
80     112    
-112   176    
-16    144    
-64    -80    
-304   -80    
32     64     
32     176    
224    0      
-240   -80    
-48    96     
-480   -16    
80     128    
-112   32     
80     32     
-80    112    
48     208    
-160   80     
32     32     
32     80     
16     192    
16     176    
-240   32     
96     -48    
-128   -16    
-48    144    
-384   -160   
112    176    
-128   80     
-48    32     
48     176    
-208   0      
256    192    
-32    16     
96     96     
-32    32     
-112   48     
-96    -16    
-16    128    
-96    16     
112    160    
-240   0      
96     -80    
144    240    
-304   48     
160    32     
144    -48    
-80    160    
48     192    
-48    16     
-112   16     
-16    -48    
48     -16    
112    -32    
112    64     
48     240    
-96    160    
-640   1424   
544    -1120  
-64    -32    
-128   240    
512    -1568  
-432   -64    
784    1184   
-672   736    
224    32     
-464   -288   
752    288    
-192   144    
-272   -64    
-176   224    
368    16     
-80    112    
-240   -32    
-16    32     
-96    -16    
192    32     
-96    -160   
128    48     
-96    288    
-48    -160   
-80    64     
-160   -96    
128    128    
-64    -80    
-16    96     
112    48     
16     64     
64     112    
48     160    
-32    16     
-48    32     
48     80     
128    176    
-16    128    
16     -16    
-16    64     
16     64     
-112   64     
48     -48    
0      32     
176    128    
16     80     
48     96     
-80    128    
112    -48    
-16    208    
16     80     
80     48     
-64    128    
-96    -16    
0      32     
0      -160   
176    160    
16     144    
0      -64    
-48    -160   
32     112    
32     -48    
48     96     
144    224    
-96    128    
16     64     
32     -112   
96     48     
80     80     
48     144    
96     -240   
32     -112   
-96    272    
-48    80     
176    112    
-176   -64    
160    -112   
32     208    
-16    80     
16     -176   
96     -64    
-80    160    
176    224    
16     256    
16     -80    
-64    64     
-112   -144   
160    96     
32     16     
80     192    
32     176    
32     128    
0      144    
96     16     
-16    64     
16     96     
64     96     
16     64     
0      -224   
128    192    
-80    64     
32     -160   
-48    32     
-16    -656   
224    96     
-48    144    
32     64     
64     160    
-48    48     
144    144    
-80    64     
48     -560   
32     32     
16     -48    
0      96     
80     112    
-32    -192   
128    16     
-32    -224   
176    128    
48     160    
-32    -16    
-16    144    
32     48     
208    368    
-16    -128   
256    272    
-336   144    
528    80     
-272   -144   
224    224    
80     32     
96     48     
-64    -480   
80     -16    
208    -496   
-240   80     
208    -80    
80     144    
-16    144    
64     0      
-32    32     
48     48     
64     208    
32     -224   
32     128    
-128   0      
336    -240   
112    -32    
-208   272    
208    -432   
64     144    
-208   -1328  
176    48     
-112   64     
16     144    
192    32     
112    304    
-192   -64    
384    -96    
-96    256    
192    0      
-160   0      
0      -160   
272    256    
-48    -256   
272    208    
-176   -640   
96     0      
304    128    
-64    144    
208    128    
-320   -80    
304    384    
-64    -528   
304    48     
-96    -112   
176    224    
-48    -176   
96     112    
80     64     
64     96     
-48    0      
160    144    
256    -112   
96     128    
-16    -64    
-96    -272   
192    144    
192    80     
32     272    
-144   -48    
-16    112    
144    -48    
-240   -192   
352    -32    
64     176    
128    -1040  
-80    0      
384    672    
528    -2576  
-288   272    
1648   -640   
-656   -1008  
592    -624   
-80    -896   
-160   -368   
448    -160   
-176   -64    
192    128    
-32    16     
112    -832   
32     64     
208    -1344  
-112   80     
160    -48    
-16    -224   
-336   -32    
-32    -352   
-16    -80    
384    -496   
64     0      
-112   336    
-16    144    
96     448    
32     -192   
192    -352   
-224   16     
288    -16    
-32    128    
48     16     
144    -64    
-176   -112   
336    -64    
-240   -16    
-16    -400   
16     -64    
80     -128   
96     -144   
80     -1696  
-64    -160   
160    -32    
-48    64     
-16    48     
16     48     
0      160    
-96    0      
-32    -112   
32     16     
96     -16    
64     64     
48     -32    
64     -272   
0      -192   
208    -656   
-144   -16    
208    16     
-32    48     
80     -144   
0      48     
-32    -16    
-16    0      
-80    -64    
112    -144   
-736   48     
-176   -320   
96     64     
-64    -176   
400    48     
0      -384   
-32    96     
48     -80    
128    48     
-112   -240   
272    -208   
-160   64     
0      48     
16     48     
-16    -272   
-336   -128   
112    128    
-1040  -16    
272    -240   
96     -16    
112    -288   
16     128    
48     -2608  
-48    80     
304    16     
-192   64     
64     -144   
96     -80    
-128   -128   
256    320    
-608   -112   
256    32     
-496   0      
16     48     
64     16     
64     -304   
16     0      
-48    -752   
48     -16    
-80    128    
288    -96    
-208   80     
128    -48    
-112   176    
112    128    
-336   48     
32     -96    
-64    80     
96     -112   
48     192    
-32    -208   
48     16     
-32    -448   
256    128    
-416   -192   
-256   -32    
-112   -192   
224    -16    
-160   -32    
320    80     
-192   176    
256    -128   
-544   -80    
0      -256   
0      112    
304    -128   
-16    192    
112    -272   
-80    176    
-176   -96    
304    64     
-240   -32    
96     128    
-64    16     
-16    0      
16     -48    
48     -112   
192    -32    
-192   -144   
256    144    
48     -96    
-128   96     
-1584  -272   
-1344  -32    
16     32     
-48    -16    
16     32     
80     128    
-128   48     
144    48     
-96    -32    
176    304    
-128   16     
176    -48    
-16    192    
-80    -112   
-32    48     
-80    16     
-32    -128   
80     192    
-16    -608   
0      176    
-656   128    
-160   64     
64     -32    
32     -16    
80     128    
16     -480   
128    -224   
64     256    
-400   -208   
-64    320    
160    -64    
128    304    
-48    -32    
-16    0      
-32    -80    
-192   144    
-80    112    
-32    16     
48     64     
240    176    
48     48     
-80    -32    
-16    112    
-80    -16    
-64    -80    
176    -304   
-144   80     
0      176    
-96    112    
-160   -112   
-512   1856   
1040   560    
-368   -144   
-32    -832   
-336   384    
256    816    
560    176    
-896   -432   
144    0      
-352   -112   
320    -208   
-16    288    
16     176    
-96    160    
-64    -96    
-128   224    
176    144    
-192   16     
-384   -320   
-320   -208   
192    -80    
64     64     
-64    192    
64     -32    
-224   16     
320    192    
128    160    
128    160    
-160   48     
288    128    
-256   160    
192    0      
-80    0      
-16    160    
-96    -64    
0      192    
-16    -176   
-32    144    
64     48     
-16    16     
128    16     
-48    160    
192    96     
-64    64     
144    80     
-192   96     
128    176    
-80    160    
48     32     
-432   -128   
16     -16    
160    -32    
-112   208    
16     80     
16     -32    
64     160    
-176   -64    
160    -176   
-208   144    
-48    256    
160    -32    
-112   48     
-224   112    
112    -192   
-560   -96    
80     160    
-944   -80    
-16    80     
-32    80     
16     32     
16     48     
-16    48     
32     64     
0      144    
-32    112    
16     80     
-16    288    
-128   96     
0      64     
-144   -80    
-96    240    
192    112    
-16    64     
192    304    
-224   64     
160    0      
-160   -224   
48     16     
-80    -80    
-32    128    
-160   16     
-80    -192   
-64    -64    
160    208    
-112   96     
-48    48     
48     176    
-128   -32    
144    64     
-160   -32    
208    208    
-16    192    
32     48     
-128   -96    
-16    96     
-16    -32    
144    144    
-128   96     
128    80     
-128   16     
-112   -16    
160    128    
-48    80     
176    160    
-32    80     
0      144    
-48    -176   
16     224    
-32    96     
144    -48    
-64    80     
48     224    
176    144    
-64    16     
-208   32     
64     160    
288    96     
-80    48     
16     32     
144    -32    
0      208    
48     80     
48     160    
-32    64     
128    368    
-176   -128   
272    144    
-160   272    
32     224    
-48    -112   
-16    -32    
144    64     
32     192    
-96    -96    
112    32     
-224   48     
400    400    
-496   240    
336    112    
-48    -128   
16     0      
288    80     
-304   64     
320    128    
-176   112    
160    -160   
224    0      
-496   -128   
112    -32    
0      240    
256    -32    
144    400    
-128   -48    
-144   128    
384    0      
-96    176    
208    160    
-48    -16    
16     -240   
-16    32     
-32    112    
32     48     
-432   48     
352    16     
160    336    
32     160    
-208   -192   
128    128    
112    112    
144    176    
-80    96     
-16    144    
-96    -112   
192    -656   
-160   64     
48     -96    
-16    16     
-64    304    
224    -144   
-112   384    
192    0      
-160   64     
208    -64    
16     240    
208    -192   
-16    -32    
-48    144    
-80    160    
64     -672   
688    1296   
944    -784   
-560   96     
720    288    
-224   688    
-208   -112   
768    208    
-352   80     
48     -96    
112    224    
32     16     
-96    -80    
224    64     
32     144    
16     -16    
64     96     
48     -96    
64     144    
0      16     
0      96     
16     16     
208    96     
80     208    
96     64     
-208   128    
112    176    
32     80     
160    -128   
-80    96     
128    -96    
0      160    
0      -656   
64     48     
32     -864   
-112   32     
176    -240   
-48    224    
48     -112   
96     -16    
-96    64     
48     160    
80     96     
-32    -192   
32     112    
128    -112   
16     64     
112    -288   
-112   192    
96     -16    
112    160    
-32    -816   
160    -32    
-112   224    
32     112    
16     48     
112    16     
144    112    
64     32     
-144   144    
192    -272   
-64    160    
48     -272   
176    128    
-128   -64    
112    80     
-112   -736   
80     64     
208    112    
-64    208    
-16    0      
80     -160   
64     112    
16     -720   
32     32     
-112   80     
-96    128    
96     -352   
144    -16    
80     -320   
-224   128    
128    48     
240    192    
-304   144    
160    208    
-112   -288   
304    -400   
-112   80     
224    32     
0      176    
16     48     
0      16     
160    -80    
-176   80     
256    -208   
160    368    
-240   -368   
336    -112   
-32    16     
-16    -2912  
176    64     
-48    96     
112    -432   
-32    -64    
288    -1456  
-128   -144   
144    176    
16     -80    
-16    80     
64     48     
192    64     
-48    32     
128    -496   
-16    64     
48     -592   
-32    -240   
-1088  -16    
240    -224   
0      -160   
224    -1648  
-32    -128   
144    -1616  
-208   -208   
-80    16     
240    -48    
-112   -1008  
112    48     
-240   -400   
176    96     
224    0      
144    16     
-1664  -208   
-16    -96    
272    -32    
272    128    
-48    -128   
48     -384   
-192   -64    
64     224    
112    -240   
144    -240   
-96    80     
-32    -176   
0      96     
16     176    
-32    -144   
-192   -288   
96     -144   
-160   128    
144    -80    
112    192    
16     -208   
48     16     
-80    -2704  
272    96     
-32    -256   
48     112    
208    128    
192    64     
-208   48     
32     -64    
-320   48     
-48    -144   
-1360  -32    
96     48     
112    -144   
-16    -368   
-48    80     
-96    -448   
16     96     
176    -16    
-80    64     
64     16     
16     48     
48     48     
-32    64     
-96    32     
160    192    
-1296  -48    
64     -304   
16     -368   
432    384    
-16    112    
16     -256   
192    48     
96     -1888  
-192   176    
-32    0      
32     -48    
64     48     
112    -64    
-144   0      
80     -48    
80     48     
16     80     
-80    -16    
16     -32    
-784   -2800  
960    -496   
-672   -448   
160    -1936  
480    -976   
-432   160    
448    672    
-64    192    
-400   -128   
160    -16    
-16    -192   
48     48     
-64    64     
-16    48     
0      -96    
-144   -64    
208    -272   
80     320    
-128   -560   
256    48     
-368   -16    
288    16     
-256   48     
112    -160   
-320   -80    
128    -32    
-48    96     
-224   -224   
-64    -320   
-112   -320   
256    160    
80     0      
32     192    
16     -96    
128    128    
-112   -128   
48     -112   
-112   -48    
240    352    
96     352    
96     -32    
-192   48     
128    -272   
144    -16    
-160   -144   
160    208    
-448   0      
-112   -80    
-272   -400   
-256   -16    
-80    80     
256    32     
-80    128    
240    -32    
-256   64     
32     -32    
-192   -96    
-240   -992   
-256   -208   
-96    416    
-224   208    
-832   -304   
-80    336    
96     -176   
-256   224    
-48    32     
-192   144    
-16    80     
-176   -16    
-128   64     
64     64     
0      112    
32     32     
48     80     
0      -144   
-144   80     
-128   160    
-160   0      
240    -96    
48     80     
112    320    
32     0      
-288   80     
-736   48     
0      80     
-512   -48    
32     32     
48     368    
-64    112    
-112   -352   
112    112    
-48    -32    
176    32     
-208   48     
32     16     
-32    16     
-128   -32    
-80    48     
-304   -16    
0      144    
-640   -32    
-128   -64    
-128   -384   
144    176    
-160   -224   
96     256    
-112   0      
80     144    
16     48     
-48    48     
16     16     
-32    112    
16     -32    
32     96     
-48    32     
-144   16     
-32    -48    
-512   64     
-144   272    
128    -112   
-144   64     
-96    16     
0      -128   
64     48     
-16    224    
-64    80     
80     80     
-160   16     
-80    -96    
320    80     
-656   192    
208    112    
-240   208    
-16    0      
48     -112   
256    -80    
-368   192    
-32    352    
176    -256   
-240   64     
48     0      
80     32     
-64    -80    
-176   -32    
48     192    
48     64     
96     800    
-448   -80    
48     32     
-64    80     
128    -16    
-16    80     
48     144    
32     80     
112    192    
-128   128    
80     96     
-32    112    
336    64     
-496   -144   
240    224    
-128   -32    
-320   -64    
48     176    
-16    96     
144    400    
-320   -96    
80     -48    
0      208    
0      96     
64     192    
-64    48     
112    112    
-176   -16    
-144   -64    
96     240    
208    48     
-48    112    
224    352    
-64    -64    
-48    -64    
96     192    
-64    48     
-112   48     
96     -240   
96     128    
144    208    
-64    32     
-32    -64    
0      32     
-240   -112   
224    192    
-192   240    
-96    80     
128    192    
-160   -64    
208    80     
0      16     
144    32     
400    -688   
768    368    
16     256    
-832   -32    
368    272    
-672   -256   
112    -144   
-128   0      
-48    32     
-400   -128   
128    48     
64     64     
144    176    
-112   -16    
80     96     
32     48     
0      192    
32     32     
64     0      
-96    0      
128    80     
-96    96     
192    48     
-112   96     
96     0      
-80    96     
-32    176    
80     96     
128    64     
-96    32     
48     -48    
0      96     
-16    144    
128    176    
-48    -16    
208    80     
32     336    
-32    112    
16     -32    
-16    96     
128    176    
96     64     
-32    48     
80     -160   
112    48     
96     208    
80     160    
-48    96     
-16    32     
-64    48     
176    80     
-64    96     
0      -576   
32     112    
-16    16     
176    192    
-160   128    
208    -80    
32     96     
-64    144    
144    112    
64     160    
-144   16     
96     32     
16     16     
64     160    
-160   160    
16     -288   
144    -64    
0      176    
-160   112    
160    144    
16     -48    
128    160    
-192   144    
272    -16    
-160   144    
-208   -112   
-128   160    
0      -544   
256    48     
-160   240    
176    -976   
16     272    
-304   -32    
336    0      
0      208    
192    48     
96     64     
-144   128    
128    64     
80     320    
-96    -32    
96     16     
160    16     
176    304    
-48    304    
48     -96    
176    96     
-112   -480   
192    144    
0      96     
-16    32     
224    256    
-176   96     
128    0      
-208   -240   
48     -48    
80     64     
-32    16     
128    -288   
-48    160    
-32    -240   
208    32     
0      -256   
16     128    
96     128    
144    432    
32     16     
-48    -288   
-128   -96    
224    160    
32     -48    
-32    144    
-192   -192   
112    -160   
-48    -128   
64     -144   
-32    80     
32     16     
96     32     
-48    -624   
-96    -112   
304    176    
304    288    
16     176    
-80    176    
96     144    
-80    -16    
144    112    
112    64     
96     240    
-112   -160   
128    80     
0      -416   
64     -160   
-32    -288   
96     -96    
96     -480   
128    336    
80     176    
-96    16     
96     96     
16     288    
0      -16    
64     -48    
64     96     
16     -432   
80     -80    
-96    -192   
192    96     
80     -256   
64     176    
-48    -1072  
-192   -480   
304    192    
512    608    
352    560    
-512   -544   
240    208    
16     -96    
-32    128    
0      -144   
192    48     
-32    -64    
16     80     
192    -256   
240    464    
-144   -528   
112    144    
-32    -16    
112    16     
96     -16    
48     -416   
-240   208    
-80    -48    
0      80     
128    -32    
192    128    
-16    -64    
-64    96     
192    -160   
64     144    
288    -224   
144    384    
-176   16     
112    -560   
-176   -16    
-688   -1280  
224    -1728  
496    112    
-64    -352   
288    704    
-816   -16    
256    128    
-112   96     
416    -304   
-704   -1360  
256    64     
432    -288   
64     -96    
-240   -528   
320    80     
208    352    
16     208    
16     -96    
-96    -336   
80     -208   
64     288    
272    160    
-128   208    
432    224    
128    -48    
-48    96     
16     -1088  
288    96     
448    656    
-112   48     
-528   -192   
112    -208   
128    -240   
160    0      
-32    -176   
192    -336   
-224   -208   
576    128    
-400   -240   
496    624    
-336   416    
96     -208   
-64    112    
-96    -128   
-176   -112   
-784   -64    
192    -336   
320    416    
-96    -80    
64     -112   
96     -256   
160    -32    
256    -1648  
-400   0      
160    -48    
0      96     
80     -432   
-656   -784   
80     224    
240    64     
-384   160    
-16    208    
-1568  -320   
0      32     
192    -208   
64     -432   
-64    -176   
144    -272   
32     128    
32     48     
48     128    
80     -64    
96     -240   
-96    -32    
192    -128   
-48    192    
128    -128   
-288   416    
-112   -48    
-16    -176   
-32    -192   
96     112    
192    -688   
16     192    
192    -1232  
0      192    
-112   -160   
16     -16    
-128   -32    
144    -176   
-96    80     
112    -64    
-672   -80    
48     -208   
-544   208    
-80    -128   
304    64     
-112   -192   
192    80     
176    -1648  
-176   16     
112    -128   
-32    112    
-32    112    
176    -160   
-400   16     
48     -96    
-48    -32    
0      16     
-176   160    
80     -32    
16     -80    
64     -224   
-32    112    
176    -288   
16     -64    
-288   240    
224    -144   
-144   160    
144    -48    
-208   112    
-96    -192   
-32    480    
32     -16    
64     -32    
128    -528   
-48    112    
0      -544   
80     656    
128    -384   
-80    96     
-64    -176   
16     -112   
-112   -96    
304    160    
-96    160    
160    -16    
-80    48     
-176   -208   
-48    -80    
32     -208   
0      128    
0      -368   
-48    96     
-80    96     
-1008  -336   
-224   64     
-560   160    
-144   32     
192    224    
-32    -32    
64     -112   
-64    144    
-272   -112   
224    96     
-304   0      
160    80     
-48    -80    
160    -16    
0      256    
-432   -48    
80     64     
-256   208    
64     64     
-832   128    
-208   -96    
96     -144   
16     304    
-144   -112   
240    -32    
-96    64     
208    -192   
-160   -80    
-160   -48    
-16    64     
-32    32     
224    192    
-368   -16    
-224   16     
-144   -96    
64     -64    
48     80     
16     16     
16     -128   
176    112    
-176   -32    
0      96     
-80    -128   
80     -80    
0      208    
0      0      
112    -32    
-160   128    
-128   144    
-48    -48    
144    -80    
-112   160    
-928   -976   
416    528    
-1056  -192   
944    -496   
-496   -208   
304    384    
-704   -480   
672    336    
-752   384    
576    64     
-560   -16    
16     -256   
112    544    
112    -160   
-336   256    
-192   -176   
-400   0      
-32    176    
16     0      
144    16     
-176   64     
32     16     
-16    240    
16     16     
-176   -96    
304    16     
-224   160    
-112   -64    
-192   272    
-320   -256   
112    -96    
-496   32     
112    80     
-32    32     
-32    -32    
-32    112    
-64    -64    
80     64     
48     -16    
144    112    
0      32     
-160   208    
16     -96    
16     192    
-112   -128   
32     208    
-368   -32    
80     144    
-144   -112   
192    64     
-176   0      
32     112    
160    80     
-96    80     
176    32     
-160   16     
64     176    
-64    16     
32     48     
80     160    
-208   48     
-48    -64    
0      256    
-176   -128   
272    144    
-176   80     
96     96     
32     -80    
0      -32    
-96    64     
-112   112    
128    80     
-16    -32    
-64    192    
-160   -192   
240    96     
-176   176    
16     144    
512    176    
-48    160    
-32    0      
48     128    
-96    160    
112    -32    
-80    288    
-192   304    
112    208    
-144   -240   
128    -160   
-272   -112   
-48    176    
-16    144    
96     224    
16     224    
144    192    
-16    -48    
16     224    
-64    176    
80     96     
48     176    
-96    16     
240    208    
-288   -64    
64     -16    
-16    32     
160    128    
-128   -16    
-80    112    
0      240    
32     80     
-32    80     
16     0      
64     128    
-16    176    
32     16     
-80    -128   
-128   0      
-160   -32    
112    144    
-80    16     
-112   624    
96     480    
368    0      
-624   16     
384    128    
32     176    
32     -48    
-64    48     
32     192    
96     160    
-160   64     
112    112    
-160   -112   
80     -16    
-32    176    
224    400    
80     128    
96     144    
-304   -112   
288    128    
-96    48     
96     48     
80     192    
-96    -48    
192    160    
-160   160    
224    160    
-272   -80    
160    -352   
-240   -208   
112    176    
128    112    
-128   160    
144    160    
-256   160    
112    -848   
0      192    
240    336    
32     336    
-368   32     
144    -160   
-80    48     
112    128    
-32    160    
-160   -96    
-240   -1024  
240    -16    
112    -48    
240    208    
-192   192    
-32    64     
-16    128    
192    16     
256    144    
-112   160    
96     -128   
-96    224    
16     0      
176    224    
-144   -16    
96     -272   
96     128    
32     112    
32     48     
48     256    
-176   -144   
336    64     
-48    240    
112    -32    
-48    96     
-16    -112   
208    192    
-48    -32    
32     -32    
-384   96     
160    -464   
-32    160    
160    -416   
-1360  -720   
864    1664   
-128   272    
560    -128   
-352   -432   
96     -256   
64     1264   
-448   -960   
528    272    
-240   208    
16     -128   
-160   32     
336    -480   
32     336    
-32    -112   
-256   288    
304    32     
16     560    
672    -192   
112    544    
-160   -64    
272    432    
-192   -32    
176    -48    
-224   -272   
336    16     
-96    240    
128    624    
400    432    
-32    208    
-112   48     
464    -624   
-384   -176   
32     -176   
192    288    
-256   -192   
16     160    
-528   -80    
336    288    
-480   48     
112    -96    
0      224    
48     -240   
16     96     
-32    -448   
272    64     
-272   -800   
144    -208   
-32    -272   
224    240    
256    192    
-48    208    
16     128    
32     -416   
-16    176    
208    -64    
112    96     
208    704    
144    208    
-16    -432   
128    224    
48     -240   
-16    96     
32     32     
128    80     
208    -16    
-32    144    
16     144    
208    -64    
64     624    
48     -192   
144    48     
64     128    
-96    160    
160    -160   
-80    -256   
48     -512   
192    -32    
-336   208    
112    80     
-288   144    
432    352    
160    -80    
-96    -96    
80     96     
128    -144   
-32    16     
160    448    
240    240    
-208   -160   
144    -48    
160    -304   
64     240    
16     112    
-64    -1408  
16     112    
16     -832   
-48    -1520  
0      -144   
256    304    
16     -176   
-112   -176   
-16    -144   
128    48     
80     -64    
-32    16     
192    64     
144    -240   
0      208    
48     -96    
-48    112    
-480   -208   
144    -592   
-208   -208   
16     -208   
160    304    
-32    -992   
128    0      
-32    128    
224    144    
272    16     
-208   16     
112    -176   
-144   208    
192    -64    
32     336    
-320   -80    
144    -176   
-528   -144   
240    -176   
16     -192   
32     -928   
-80    80     
48     -1744  
64     -16    
176    -80    
-160   -112   
128    -320   
-32    80     
240    -192   
-96    80     
-64    0      
272    48     
-1040  -144   
-48    0      
32     -208   
256    96     
32     240    
16     16     
96     -96    
-96    -1888  
96     112    
96     -176   
112    16     
-64    0      
128    64     
-80    -32    
16     -16    
-272   48     
160    -96    
-256   32     
-16    112    
80     -16    
0      -80    
96     -80    
112    -1056  
176    -160   
160    208    
-16    352    
-288   -96    
144    -112   
-192   -176   
192    -320   
-32    -32    
64     64     
-208   144    
-288   -336   
496    -80    
-16    -240   
240    -96    
0      -368   
-32    32     
128    -368   
16     176    
-224   -192   
64     -176   
-272   16     
160    -16    
-112   -32    
80     -64    
-192   0      
0      -112   
-64    32     
48     -144   
240    384    
-224   -128   
352    112    
-240   -1520  
-720   -1856  
320    384    
-1184  -368   
864    -336   
-240   352    
-256   -352   
-16    -48    
112    -160   
112    704    
352    0      
-320   32     
144    -384   
64     288    
112    -144   
-96    -176   
0      -448   
112    240    
80     -96    
-208   80     
176    -256   
-368   -32    
32     -64    
112    112    
32     -48    
128    80     
-112   -368   
64     32     
-80    -208   
256    32     
-64    80     
64     80     
-192   80     
112    -80    
-96    112    
48     -48    
-48    80     
112    -32    
80     208    
-48    -32    
-416   -48    
144    -144   
-32    144    
-1216  -96    
32     96     
96     -64    
-832   48     
-16    48     
-1280  32     
0      96     
32     -80    
160    80     
-64    32     
32     16     
16     -32    
-144   96     
-48    -144   
-16    272    
-112   -160   
-304   0      
-144   -48    
-432   -80    
48     48     
-112   48     
80     96     
-1328  144    
-32    -128   
128    -48    
-96    -64    
-352   -80    
-16    192    
-96    -160   
48     32     
-160   -448   
-16    112    
-112   -224   
112    112    
-144   -48    
48     -48    
-112   -64    
-416   16     
-64    -112   
-64    80     
-64    192    
144    448    
-208   208    
-352   -464   
352    192    
-224   -80    
160    80     
48     416    
-160   48     
-272   -192   
-64    16     
-80    144    
-96    16     
-48    80     
-208   128    
144    -48    
-64    -48    
224    272    
-96    -176   
64     112    
48     208    
80     160    
-16    32     
-32    64     
96     -16    
-224   48     
96     128    
-144   16     
-128   32     
-32    32     
0      -32    
-144   -144   
-64    32     
32     -112   
-80    64     
16     144    
160    192    
-32    -176   
-80    48     
64     160    
0      192    
48     160    
32     96     
-160   -160   
-208   -288   
48     16     
-400   -80    
80     128    
96     96     
-48    80     
48     128    
64     176    
-224   0      
32     16     
224    592    
0      176    
-112   -80    
-160   -16    
192    80     
-272   32     
0      32     
-304   144    
-112   16     
256    48     
-304   64     
96     144    
-112   -64    
-32    32     
96     96     
96     48     
-240   -32    
-128   0      
-192   -128   
160    208    
-128   -32    
160    32     
-560   0      
160    16     
48     112    
144    112    
-32    128    
-96    272    
-96    -80    
112    80     
320    144    
-288   64     
64     240    
-224   -64    
224    112    
-112   32     
112    96     
-160   -64    
-80    112    
48     96     
-16    -112   
240    224    
-160   48     
128    144    
-272   0      
80     32     
64     96     
0      80     
-288   160    
144    160    
64     208    
-128   128    
-112   -112   
224    -16    
-80    144    
-48    -64    
80     128    
-96    112    
-80    32     
192    0      
-144   32     
48     128    
-816   -1152  
32     2064   
192    1984   
-160   -368   
-368   -1008  
1008   448    
-656   160    
496    144    
-432   208    
752    144    
-512   272    
96     -208   
224    608    
-96    -80    
-112   304    
-176   -176   
0      288    
-400   -128   
32     64     
-304   -160   
544    32     
-208   144    
32     16     
112    272    
-144   352    
272    144    
304    96     
624    -128   
-352   208    
-400   112    
48     80     
-192   0      
160    144    
64     48     
-32    48     
-32    288    
-96    48     
-32    -32    
-80    32     
160    160    
288    336    
-80    208    
-48    -64    
-224   288    
-16    -16    
160    -96    
-192   32     
144    -64    
-16    -128   
-80    -512   
64     96     
-16    64     
96     144    
144    224    
-16    144    
0      32     
64     64     
0      16     
128    64     
-112   112    
144    64     
-16    128    
32     176    
32     -224   
80     -224   
-32    224    
224    64     
48     192    
-80    144    
208    240    
-352   -32    
32     48     
112    48     
-32    -208   
144    -32    
-32    256    
128    -48    
16     64     
32     32     
96     -160   
144    128    
-48    144    
96     112    
32     448    
288    144    
224    112    
-240   0      
48     -208   
-192   0      
80     -80    
-16    128    
-128   0      
224    80     
0      160    
208    -128   
-176   -128   
-32    -512   
0      32     
112    80     
-112   -176   
48     0      
128    144    
80     272    
-48    -112   
-32    16     
192    256    
48     -16    
64     -128   
128    352    
32     -32    
-48    32     
96     -336   
-48    -48    
144    192    
-112   16     
176    -240   
-80    64     
288    240    
-32    192    
32     176    
192    240    
-64    256    
32     -336   
-208   -144   
-80    -368   
144    96     
112    -128   
-96    -32    
144    -2464  
-16    96     
-48    64     
-32    32     
0      -176   
0      112    
-96    32     
400    304    
-144   16     
-48    -112   
16     272    
256    -80    
128    0      
-272   -960   
128    144    
416    -368   
-128   80     
80     160    
160    112    
-64    32     
-80    144    
160    16     
160    16     
-48    176    
96     64     
96     112    
-96    -576   
112    176    
16     -224   
128    144    
32     -496   
224    80     
112    112    
-32    208    
-32    -16    
64     176    
-48    128    
160    48     
-16    -64    
48     -304   
80     240    
-128   -352   
160    112    
-16    -128   
32     192    
160    -80    
-128   64     
112    16     
48     112    
64     -16    
16     80     
208    320    
-80    48     
0      128    
160    -224   
240    -16    
-112   144    
32     0      
256    -16    
-96    64     
112    -144   
32     80     
16     80     
112    -1904  
-16    -48    
-320   -64    
16     -1248  
96     -16    
0      -272   
96     0      
1040   3600   
-432   1856   
-1504  -784   
-32    560    
-288   -336   
-592   -128   
560    -576   
-320   48     
576    -608   
-592   128    
-128   -160   
-16    -224   
128    -304   
208    -16    
16     -352   
80     -80    
112    -128   
64     -512   
-208   -192   
352    -64    
-128   -64    
208    32     
-16    272    
144    -448   
-128   -16    
-48    -144   
80     112    
-64    80     
-32    -160   
224    -160   
-128   -160   
224    -96    
-144   -176   
160    -48    
32     96     
160    0      
64     -64    
-80    64     
32     -368   
16     -128   
16     64     
128    0      
-880   48     
96     -256   
-48    -16    
80     -240   
80     112    
-16    32     
224    80     
-96    -1952  
128    32     
16     -32    
64     96     
112    80     
48     -64    
-128   48     
48     -240   
-304   -128   
96     -208   
-336   -224   
112    -208   
192    352    
-112   224    
128    -64    
80     -1120  
-32    48     
112    16     
48     64     
-16    0      
112    176    
-224   -32    
224    -112   
16     -48    
16     0      
-272   80     
-48    -96    
-80    -256   
256    -416   
-112   -160   
-112   -400   
240    64     
32     176    
144    96     
64     64     
-224   16     
240    48     
32     96     
-64    32     
48     -16    
-368   -352   
80     -176   
-608   -128   
144    -208   
112    336    
-48    -112   
48     -240   
-80    -608   
48     -496   
0      176    
-48    96     
32     96     
-32    48     
-96    80     
48     -128   
-304   -112   
0      -80    
-304   -96    
160    -176   
16     272    
-32    -224   
128    -16    
-96    16     
-16    16     
160    192    
-112   0      
-48    48     
-48    -48    
-80    0      
-32    32     
-32    16     
160    352    
-336   0      
96     -240   
-64    240    
176    -208   
160    32     
-208   176    
0      0      
288    48     
-64    64     
-64    64     
96     -160   
-176   32     
160    192    
16     -144   
128    80     
-80    -272   
-720   -64    
-128   176    
-240   -128   
-96    0      
144    -64    
-1056  64     
-64    64     
-400   32     
-176   -96    
240    320    
-336   0      
176    -256   
-128   16     
-752   -48    
48     16     
-512   -256   
160    240    
80     -160   
160    64     
-96    -64    
144    0      
-160   64     
-336   -32    
144    -80    
-496   128    
160    80     
-112   48     
-192   -48    
-304   -64    
-112   -96    
336    -144   
-320   352    
16     -224   
-128   64     
-32    96     
144    -176   
-32    288    
-64    0      
208    64     
-1040  -64    
64     32     
-32    -64    
48     96     
0      32     
-80    224    
-112   -160   
96     64     
224    272    
-336   -144   
320    -208   
16     384    
-64    64     
-128   -80    
-96    32     
-112   -64    
256    64     
-752   240    
-208   224    
-160   -192   
48     32     
-208   -336   
-672   2304   
-1424  -992   
400    592    
368    176    
896    -944   
-368   1008   
-400   224    
560    48     
-800   -496   
16     -128   
256    160    
-384   192    
0      -80    
288    -64    
-224   32     
112    32     
-320   -96    
480    256    
-160   -16    
-48    -64    
-32    176    
-176   48     
64     288    
64     304    
-64    -64    
-480   -112   
-144   64     
-1040  -64    
-112   80     
160    144    
0      128    
16     64     
-128   64     
-32    -80    
48     48     
80     80     
-16    32     
-64    144    
-272   -80    
0      -48    
-96    -48    
-160   224    
-320   -80    
-16    -16    
128    144    
128    80     
-48    16     
-176   -272   
272    176    
-80    112    
160    32     
-64    112    
16     112    
112    112    
-240   256    
0      208    
112    16     
-224   -96    
80     -944   
-96    96     
48     -64    
-32    160    
32     48     
96     208    
-16    -96    
48     112    
-48    0      
32     48     
-96    64     
32     64     
48     32     
0      224    
-192   -64    
96     0      
-32    160    
-112   -160   
192    32     
-80    96     
-16    304    
-224   -80    
160    16     
-96    0      
96     80     
-16    208    
0      0      
0      -224   
80     240    
-144   -80    
176    -48    
32     96     
-16    144    
48     128    
16     208    
160    144    
0      144    
-16    224    
48     0      
48     32     
-96    -48    
80     96     
-224   -16    
48     64     
208    128    
16     144    
-16    80     
0      64     
-16    0      
-32    16     
-32    -48    
-16    48     
16     240    
0      16     
112    48     
-96    208    
0      112    
224    224    
-80    240    
272    176    
-160   128    
-96    -16    
128    112    
-48    192    
288    48     
-96    96     
-160   32     
288    160    
-32    16     
-64    -32    
-144   80     
96     64     
-48    -48    
-112   -16    
208    176    
0      144    
384    144    
-48    240    
-96    -16    
208    80     
-208   64     
208    80     
96     32     
-128   112    
112    96     
-112   32     
96     -48    
-80    144    
192    -144   
80     0      
-64    80     
224    176    
16     80     
48     48     
-80    96     
48     64     
96     48     
-48    112    
80     96     
32     176    
-224   -256   
368    80     
-64    192    
32     -240   
-80    -48    
32     -32    
144    80     
176    144    
96     64     
-176   128    
-64    16     
320    -32    
80     336    
-144   -32    
32     352    
16     -176   
-64    -224   
32     32     
112    -112   
80     240    
80     64     
208    64     
112    16     
-16    160    
32     160    
-48    288    
-48    -160   
240    0      
-16    -80    
128    128    
-128   176    
-32    -64    
80     128    
32     -32    
16     64     
48     -304   
224    336    
-208   240    
112    64     
-64    -112   
288    3840   
-1344  -1056  
-96    784    
480    992    
1040   464    
-816   -304   
-32    -320   
352    -496   
736    -592   
-560   48     
496    -784   
-288   272    
112    -240   
160    432    
80     -432   
-160   64     
144    64     
16     96     
-128   -160   
224    160    
16     128    
64     -240   
-144   352    
192    -352   
-96    80     
208    -704   
48     272    
160    160    
-32    256    
-64    -16    
-32    80     
16     0      
352    96     
-64    336    
256    80     
-64    32     
-160   16     
160    112    
-16    -128   
96     128    
96     -272   
32     176    
-32    -752   
32     32     
80     48     
96     80     
160    96     
-32    128    
32     144    
-16    -176   
64     48     
48     -96    
96     128    
48     -736   
80     32     
64     -240   
-16    16     
96     -224   
48     112    
0      -192   
176    416    
48     128    
16     192    
64     288    
-32    -224   
-64    96     
176    -48    
32     48     
0      -336   
48     128    
-16    -96    
128    48     
128    -1328  
32     176    
-16    48     
64     176    
112    48     
112    336    
-256   208    
16     -640   
64     304    
-16    -112   
144    192    
-16    192    
16     80     
80     -80    
128    48     
64     -272   
32     -960   
-16    -16    
0      -1360  
80     160    
-784   16     
-48    -960   
176    -32    
-64    48     
224    -160   
-48    176    
96     -32    
32     96     
32     -304   
64     144    
32     -112   
32     -224   
48     80     
16     -64    
64     -80    
-288   -48    
96     320    
-32    0      
160    -144   
-64    0      
112    -320   
144    -48    
-64    -96    
160    -112   
-32    -64    
144    192    
-16    -112   
80     0      
0      -160   
96     -224   
-144   -128   
-128   -128   
-96    416    
-64    -192   
400    -32    
-336   64     
128    -208   
176    -1136  
-272   96     
160    144    
192    160    
-32    -80    
0      96     
16     -48    
240    528    
-336   -192   
624    0      
-800   176    
224    -640   
-32    -192   
-64    -480   
224    -112   
0      0      
-176   32     
64     32     
64     96     
64     -128   
16     48     
-80    0      
192    80     
-160   80     
-16    -144   
-224   -400   
368    240    
16     -16    
320    288    
-288   -144   
512    -176   
-16    80     
64     -1552  
-48    112    
-208   -64    
208    32     
80     96     
-112   -240   
208    -112   
-96    48     
-320   -80    
-96    -144   
192    -32    
128    80     
368    -176   
-368   -112   
-48    -256   
416    -288   
-304   160    
192    -16    
48     -240   
320    -48    
256    -176   
-416   -16    
16     -112   
80     352    
-32    48     
-240   -112   
32     -80    
-1584  -208   
0      -224   
64     -48    
128    -48    
0      128    
-16    -1664  
176    -48    
-384   80     
208    -96    
-112   16     
-864   1200   
-1712  -1536  
976    416    
400    160    
960    -240   
-1008  48     
672    1216   
320    416    
-448   -400   
448    -240   
-352   208    
48     -160   
48     160    
0      -128   
176    -16    
96     96     
-32    32     
-16    -128   
-192   -32    
256    64     
-320   -16    
64     80     
64     208    
160    -192   
-176   96     
0      -64    
-32    160    
0      96     
80     -144   
-176   -32    
144    0      
-48    64     
-48    16     
-96    16     
112    -16    
-32    -80    
-1456  -368   
-48    -32    
-1360  -48    
-240   -96    
-96    64     
-16    64     
-96    32     
240    -80    
-128   -64    
0      48     
32     16     
-112   80     
32     256    
-288   -272   
272    80     
-528   -64    
224    96     
-160   -32    
160    -16    
112    432    
-560   16     
144    -80    
-400   128    
16     -96    
-640   48     
-80    160    
128    -192   
16     144    
-480   -240   
272    48     
-96    -144   
-80    112    
-128   64     
48     32     
-32    -48    
-64    96     
-208   48     
-32    -48    
96     80     
-400   -48    
128    160    
-464   -64    
208    112    
-32    -128   
16     -16    
112    -32    
-128   192    
80     192    
-128   -32    
144    -64    
-32    112    
-160   112    
-144   -16    
144    -96    
-112   48     
32     80     
-480   -48    
80     160    
32     336    
-16    48     
48     -256   
-112   64     
48     16     
208    384    
-224   64     
96     96     
-128   -16    
48     -64    
-160   -64    
64     224    
-16    80     
-48    16     
-208   144    
80     -64    
48     96     
-32    -928   
-80    192    
48     96     
-176   -80    
0      112    
-128   -16    
192    -48    
-128   112    
-112   208    
-32    32     
-96    48     
-368   -336   
64     0      
-2048  -224   
240    336    
128    208    
0      144    
-208   64     
-48    144    
-48    16     
64     -48    
48     80     
32     96     
80     0      
80     16     
-160   0      
-144   -96    
64     112    
-304   -80    
160    112    
48     96     
0      80     
80     80     
-32    -16    
96     80     
32     144    
-16    80     
-48    96     
128    16     
-112   -32    
-96    160    
32     16     
128    -48    
-288   48     
-112   -16    
240    64     
-320   48     
192    -48    
0      32     
0      96     
-16    32     
-144   -48    
-48    112    
-48    -16    
-128   -112   
144    160    
-192   48     
288    272    
-368   -48    
32     0      
16     -48    
48     48     
128    80     
176    144    
-64    32     
-48    176    
-48    80     
80     128    
32     112    
-48    -32    
16     80     
-96    -64    
112    64     
-48    128    
-32    96     
48     64     
64     96     
-32    -32    
0      80     
32     128    
-48    144    
32     208    
-128   64     
-16    80     
0      -16    
128    -16    
-96    -96    
1376   -2864  
304    -272   
640    240    
-256   -176   
288    -816   
-128   -608   
128    592    
432    -32    
-176   432    
144    -64    
-432   16     
-208   -128   
144    80     
160    32     
-48    16     
-144   256    
-32    -96    
-368   -176   
176    0      
144    16     
128    64     
-16    208    
-64    160    
-48    208    
48     48     
32     16     
48     192    
0      128    
48     192    
-160   -256   
96     256    
-48    192    
240    240    
-288   -48    
112    -112   
-32    288    
208    304    
64     256    
-96    32     
64     112    
-80    -32    
128    208    
-128   80     
96     144    
-48    144    
-16    96     
-64    32     
64     112    
64     -48    
192    192    
-80    208    
128    32     
-48    160    
-176   -400   
304    160    
-176   64     
288    320    
-192   16     
-128   -208   
96     -32    
80     -2288  
16     -32    
80     224    
16     -64    
-32    288    
240    48     
32     0      
192    32     
-32    160    
80     96     
0      -32    
96     96     
16     32     
-96    -256   
112    -32    
128    -112   
-128   -192   
-16    -560   
96     0      
16     144    
192    192    
-112   320    
128    240    
48     224    
144    112    
-16    96     
-160   64     
144    16     
48     80     
-64    -16    
144    -80    
-144   112    
128    32     
0      80     
-64    64     
192    144    
-48    112    
-32    0      
0      -224   
-48    112    
128    0      
-16    160    
16     128    
128    -112   
-16    80     
16     -624   
16     -96    
96     -528   
-64    208    
128    128    
96     128    
-80    -144   
96     96     
-16    48     
48     112    
32     64     
80     112    
16     128    
48     -80    
16     48     
144    96     
48     96     
48     -432   
-80    16     
-32    -752   
272    160    
-32    -16    
176    448    
32     64     
64     16     
-128   160    
128    -160   
112    128    
-32    -576   
224    192    
-112   -48    
96     -624   
-32    -512   
-64    304    
64     -544   
-80    -48    
16     16     
272    96     
-64    -64    
16     160    
-80    48     
16     -352   
96     -176   
0      -576   
32     48     
-16    64     
224    160    
-64    112    
-96    0      
-128   -320   
352    240    
-16    288    
-48    -32    
80     96     
96     176    
208    160    
-32    -160   
0      96     
32     -80    
96     128    
-16    -112   
64     304    
-80    -304   
80     96     
0      160    
208    160    
-112   16     
64     176    
144    -240   
-48    64     
0      208    
80     80     
-112   128    
0      -240   
-240   304    
96     -256   
-16    48     
208    32     
80     128    
-80    -1120  
-16    -2816  
-48    48     
-80    -960   
96     240    
-1296  48     
160    -304   
64     16     
112    -1584  
16     -192   
96     -32    
32     48     
176    144    
32     -48    
-592   1584   
-2416  -512   
448    -384   
144    176    
208    -496   
-240   -416   
-912   560    
576    -416   
-464   -192   
176    -736   
112    -80    
0      -128   
-96    -16    
144    464    
-64    -112   
80     -464   
16     144    
112    48     
16     0      
16     -112   
32     -144   
-336   32     
64     -80    
-256   -176   
-16    -160   
112    64     
-144   -368   
48     32     
64     -1344  
176    -128   
-128   -128   
144    160    
64     48     
48     80     
-128   16     
96     -64    
-384   -80    
256    -64    
-432   144    
288    0      
-48    -96    
-48    128    
48     -16    
96     80     
80     48     
-48    -192   
144    128    
-112   -224   
64     -64    
0      96     
16     -64    
112    144    
-96    -32    
-144   -32    
64     -32    
0      16     
144    -80    
-288   32     
160    64     
-48    -16    
96     -1072  
-16    160    
112    16     
16     -16    
-96    112    
224    -80    
-48    -48    
-80    -208   
-560   -160   
272    -160   
-608   96     
-16    -112   
192    64     
-144   -512   
96     0      
-16    -1136  
112    112    
-96    96     
208    0      
-128   0      
16     -48    
48     -48    
48     112    
-352   80     
320    -80    
32     64     
-240   -272   
288    -256   
-96    -336   
160    96     
-32    96     
80     64     
144    352    
0      -192   
48     -112   
112    -288   
-176   128    
0      32     
96     32     
-16    -192   
-64    -160   
80     -192   
80     48     
288    16     
-144   256    
-32    -320   
240    320    
-512   -128   
416    48     
-400   -48    
240    -80    
-160   16     
96     32     
48     240    
-112   -80    
-288   -48    
112    -144   
-352   -16    
144    -240   
112    192    
-224   -304   
128    -176   
-272   -48    
48     -16    
96     224    
208    64     
32     0      
-80    192    
-64    112    
64     16     
-32    32     
32     -96    
-80    16     
-272   -384   
-176   48     
-688   -192   
-368   -16    
-128   80     
-256   256    
160    16     
-336   0      
-240   16     
176    -112   
-208   48     
272    128    
-48    192    
-208   -400   
-32    224    
-160   -208   
96     64     
-80    96     
-80    176    
32     112    
-256   -80    
-208   -16    
-400   16     
-112   64     
-240   64     
80     -16    
-80    -176   
-80    -32    
-96    -144   
80     -16    
-144   -192   
16     240    
96     160    
-96    128    
-224   -320   
16     64     
-32    -64    
96     736    
-272   -224   
-416   -96    
-48    -160   
-144   -352   
64     128    
-32    32     
32     416    
-160   -64    
16     -96    
16     176    
-96    -64    
-48    32     
-80    96     
128    128    
-112   48     
64     112    
-272   -16    
-80    64     
-848   -160   
128    144    
176    -32    
16     144    
-112   -176   
-48    16     
144    -80    
-80    96     
-16    96     
-1200  -2096  
592    1856   
-1168  1248   
224    80     
-592   -1488  
832    448    
-656   320    
-272   -160   
448    -16    
432    -480   
-448   128    
-80    64     
480    320    
-160   32     
272    112    
-384   -176   
96     64     
112    -32    
-288   -320   
320    304    
48     64     
-320   112    
192    336    
-448   -32    
-96    -128   
48     -80    
80     16     
-64    128    
-80    176    
48     176    
-192   -64    
48     128    
80     128    
-32    48     
-64    96     
0      256    
-112   160    
64     128    
-480   352    
-32    128    
-80    -64    
112    -48    
-80    48     
-16    96     
32     -32    
-64    -16    
64     160    
-80    -144   
128    96     
-416   -560   
208    288    
-336   -112   
128    112    
-624   -80    
-128   64     
16     80     
80     -112   
176    352    
432    480    
-192   -160   
240    368    
-304   48     
160    128    
-208   144    
-48    -224   
368    -16    
-176   80     
0      128    
192    16     
-144   16     
16     32     
112    64     
-16    64     
-32    96     
128    112    
16     48     
-48    144    
-320   -432   
528    112    
16     32     
160    112    
112    -48    
-16    272    
0      112    
-32    80     
32     80     
48     0      
0      144    
-48    -48    
32     160    
-176   -32    
144    -48    
-48    16     
96     176    
-224   -96    
96     -48    
-144   16     
128    -32    
-32    0      
-112   -80    
144    272    
-16    64     
64     64     
-48    160    
64     0      
208    128    
-208   -32    
240    288    
-192   64     
160    0      
-16    208    
-144   -80    
80     -16    
-96    80     
112    -16    
96     192    
-48    160    
-16    -64    
-16    -80    
48     176    
96     112    
48     48     
-64    96     
0      144    
16     32     
160    400    
-240   96     
240    16     
-144   -176   
-160   80     
96     -80    
16     240    
16     176    
80     -16    
-96    208    
0      32     
64     752    
-128   -240   
-128   -112   
64     -144   
64     208    
64     48     
160    528    
-208   80     
176    0      
-160   32     
160    144    
0      80     
144    -128   
-224   176    
208    -32    
-16    48     
-64    80     
192    400    
-144   32     
16     -288   
16     -64    
-64    176    
-112   -160   
64     320    
160    208    
16     64     
-16    -144   
-64    160    
48     224    
-16    -64    
-192   432    
-144   112    
-64    -96    
-160   -208   
256    -752   
32     64     
-144   -736   
336    -16    
64     112    
48     16     
32     240    
-80    0      
96     176    
-64    -32    
80     -224   
96     96     
-48    -112   
80     304    
-48    0      
96     -256   
128    160    
144    -320   
-48    176    
128    -48    
0      128    
96     80     
-32    112    
48     -112   
-48    272    
240    -368   
144    336    
-112   144    
-688   -640   
720    1008   
-864   -80    
864    -448   
-112   -464   
-16    -16    
192    -1232  
-384   272    
208    400    
384    -112   
-144   -192   
32     32     
176    112    
32     144    
16     96     
16     48     
32     144    
16     -144   
64     0      
112    -32    
-16    64     
144    -240   
64     208    
-16    -784   
0      -16    
96     -48    
16     96     
32     224    
48     208    
-48    -32    
128    -96    
64     80     
112    -336   
-128   112    
384    -192   
-96    80     
160    -288   
-224   192    
304    -800   
-32    32     
80     32     
-128   192    
96     64     
32     112    
96     32     
48     -192   
48     144    
0      -288   
-192   -64    
432    -16    
-256   112    
352    -528   
-80    160    
112    -112   
16     96     
-80    16     
240    176    
-240   128    
336    -32    
0      288    
-176   -128   
352    160    
-80    -64    
-48    112    
80     -352   
208    176    
-240   -16    
96     112    
112    -528   
144    96     
-112   80     
112    160    
-80    0      
80     -112   
96     -32    
-80    64     
128    -16    
112    -32    
-80    64     
176    -208   
0      144    
0      64     
176    64     
-96    -96    
304    -2624  
-144   240    
-48    -1104  
304    208    
-432   -112   
272    -112   
0      -32    
64     -1904  
32     -32    
80     192    
96     112    
-128   -112   
160    176    
112    208    
-112   -96    
144    -144   
-128   80     
80     -96    
144    32     
-496   -304   
0      -512   
160    -176   
80     -480   
160    -96    
-80    -1264  
-112   -288   
160    32     
80     -208   
32     -480   
64     224    
16     -128   
96     64     
-240   -224   
48     -208   
-144   -16    
96     32     
-144   -208   
144    -32    
-32    32     
80     -224   
112    -144   
80     -864   
0      -96    
32     -96    
224    304    
-32    0      
-48    32     
-144   -96    
320    -16    
-112   144    
192    -208   
-208   -128   
-208   -80    
-16    32     
320    -320   
80     16     
-96    -1216  
96     416    
16     160    
-16    80     
-80    128    
64     336    
32     -48    
368    256    
-464   -288   
-64    -256   
-560   0      
112    -160   
0      -128   
48     -240   
-64    32     
288    272    
-352   -176   
144    -496   
96     -32    
-224   -80    
192    -112   
-96    64     
48     -32    
-96    -80    
112    80     
-256   0      
400    272    
-832   -160   
176    112    
80     80     
128    -176   
-64    0      
160    -640   
32     32     
-32    64     
16     -256   
128    32     
224    0      
0      -64    
160    0      
-192   -16    
128    96     
32     96     
160    -32    
48     -112   
0      -64    
-48    64     
0      -880   
0      80     
256    48     
0      0      
-272   -48    
176    -96    
-272   -80    
-16    144    
-144   -176   
96     64     
-352   144    
-352   208    
-2032  -2064  
448    -176   
400    912    
48     112    
96     112    
-80    1472   
-992   128    
1056   -640   
-64    -416   
256    128    
-144   448    
-272   -144   
160    288    
-368   -768   
240    -256   
-256   80     
240    144    
-288   256    
352    112    
-624   -160   
48     0      
48     -64    
160    -48    
-128   0      
64     0      
-96    192    
-256   -64    
256    -224   
-128   -16    
256    416    
-16    80     
-560   -80    
48     -32    
-64    -48    
-512   -16    
32     112    
-816   96     
128    -304   
-176   80     
-208   -272   
320    128    
-336   112    
288    112    
-320   64     
0      -288   
80     160    
-432   16     
304    -272   
-304   0      
112    -112   
80     432    
-336   -96    
176    -16    
-240   -48    
48     -32    
224    96     
-256   -336   
160    48     
336    448    
-448   -208   
208    208    
-64    -128   
-48    16     
80     96     
80     96     
288    -48    
-320   -32    
-32    32     
-272   208    
-112   -48    
-336   96     
0      80     
-208   -32    
-144   64     
-144   48     
160    80     
80     400    
192    80     
400    288    
-576   -320   
224    64     
-32    0      
-144   64     
192    -48    
-144   144    
-80    -112   
-128   368    
-1632  -96    
-144   -96    
96     -256   
0      192    
64     -112   
-64    144    
-96    16     
-32    -160   
-96    -112   
112    176    
-144   80     
80     -96    
-272   -144   
-32    -144   
96     32     
-256   64     
48     240    
-128   16     
16     -16    
144    208    
-144   432    
176    528    
0      176    
-32    -16    
-128   -16    
80     112    
-96    -16    
16     48     
-112   112    
80     112    
-192   -64    
-32    -256   
32     -48    
-112   0      
112    -32    
224    48     
-176   176    
64     16     
144    288    
-176   -128   
128    48     
-224   64     
224    64     
-176   48     
16     144    
-48    -304   
-208   160    
-160   -128   
-32    112    
-96    -240   
-144   144    
336    96     
-144   16     
-112   96     
192    96     
32     240    
-48    32     
-32    208    
0      272    
80     208    
-144   96     
80     144    
16     32     
-32    80     
-32    0      
96     32     
-96    64     
16     96     
-32    64     
32     96     
0      -112   
240    -16    
-144   272    
-32    -96    
-16    224    
-128   -64    
128    -32    
0      16     
224    160    
-96    448    
-112   176    
-128   96     
176    -64    
176    48     
-48    -128   
80     48     
-384   -80    
64     16     
-288   48     
80     16     
-96    192    
-32    -288   
128    160    
0      -16    
0      112    
192    -176   
-80    320    
-128   96     
272    -32    
-96    32     
-16    208    
-48    -32    
-32    208    
16     -80    
64     48     
-64    96     
32     -112   
0      304    
-208   128    
176    48     
-32    80     
1104   -288   
576    -32    
64     208    
-864   -160   
688    496    
-448   96     
192    656    
64     -256   
-64    0      
-176   -304   
-32    256    
320    -144   
-128   464    
32     -224   
16     272    
64     -80    
-48    176    
144    16     
-32    176    
0      -64    
-128   16     
224    80     
-48    112    
-16    16     
112    48     
-16    224    
208    96     
-64    224    
16     -64    
48     112    
64     64     
48     128    
112    64     
-128   160    
192    48     
-416   -112   
208    -128   
-32    112    
192    -256   
32     240    
112    48     
-64    176    
0      -64    
128    96     
16     160    
160    176    
-48    112    
144    208    
-368   64     
320    32     
-96    160    
64     32     
16     192    
-176   -192   
176    32     
-32    48     
-16    128    
144    64     
-96    224    
96     -16    
64     160    
-96    64     
64     80     
-64    128    
-32    96     
0      -16    
144    112    
64     192    
-48    -368   
176    192    
0      -1232  
144    224    
0      48     
80     64     
-32    80     
64     208    
-160   192    
-64    -96    
112    -48    
-80    112    
0      176    
-32    128    
80     -208   
0      -288   
-160   96     
-32    -96    
192    528    
-240   -80    
416    64     
-224   96     
144    112    
48     -32    
-16    128    
128    240    
0      0      
-176   32     
-272   -336   
192    288    
-96    -208   
32     -80    
160    48     
80     144    
144    -2096  
-48    32     
-48    -80    
112    176    
-128   -16    
256    176    
-224   -336   
256    112    
-144   -96    
16     -256   
-48    144    
160    -48    
0      288    
-96    -144   
80     -96    
80     -464   
-48    128    
16     -400   
256    16     
32     -64    
-32    64     
80     80     
32     80     
64     -48    
112    -32    
-192   -288   
192    176    
96     192    
64     -208   
192    0      
-192   -464   
240    128    
0      -592   
96     48     
-64    -16    
80     128    
288    576    
112    144    
-96    16     
16     -384   
112    320    
128    -224   
48     240    
-64    -592   
64     32     
112    -16    
80     80     
-80    -592   
80     48     
128    80     
-48    112    
-16    128    
64     -384   
80     640    
80     -400   
208    320    
-352   112    
96     -96    
-48    -144   
144    48     
64     -144   
96     112    
-64    -256   
240    96     
-112   80     
-32    -560   
176    160    
-224   160    
80     -384   
16     128    
-160   -176   
352    224    
-240   240    
224    -192   
-16    272    
-32    -64    
224    160    
-208   160    
144    -272   
0      80     
-16    -80    
160    -752   
-32    -64    
96     -176   
-96    -112   
80     -1296  
0      -208   
144    -32    
-32    -96    
-32    144    
80     -16    
336    -416   
-48    144    
16     -944   
-32    16     
0      -48    
1488   480    
592    352    
32     -544   
-320   -256   
288    -416   
-528   -1152  
848    160    
-592   -768   
704    432    
-352   48     
256    -512   
-288   336    
480    -208   
-80    416    
-32    -288   
-48    96     
-112   -336   
96     -16    
-160   -368   
-16    320    
64     -144   
208    272    
-272   -576   
480    -1312  
-160   -48    
224    240    
-112   -256   
80     176    
-160   -48    
128    -16    
-208   -16    
-288   -224   
16     160    
-368   -96    
144    144    
48     -432   
80     -560   
96     -176   
448    -1424  
-672   -240   
224    80     
128    112    
-64    -112   
-288   32     
-48    32     
208    -64    
-240   -160   
-192   -16    
-272   208    
80     240    
48     -80    
112    16     
32     -352   
96     224    
128    288    
48     -768   
16     48     
352    176    
32     -48    
208    560    
48     -144   
48     -208   
-160   -256   
-336   -240   
288    32     
80     160    
-160   192    
-32    -240   
224    -256   
-80    176    
64     -1104  
112    -192   
-128   128    
32     0      
96     128    
-112   -48    
320    128    
-192   32     
-512   16     
-16    -320   
-384   -128   
0      -112   
144    -48    
-32    -304   
16     -112   
144    -384   
128    208    
-16    176    
64     160    
-112   -48    
144    16     
-176   -288   
-16    192    
96     80     
128    80     
16     288    
256    -80    
-32    48     
128    -352   
80     160    
128    -160   
-96    128    
-16    48     
272    112    
-176   -32    
112    176    
-176   80     
560    272    
-368   -176   
320    -144   
-80    192    
176    -80    
-64    176    
208    -64    
-112   16     
256    -80    
-64    -64    
-80    -96    
288    -128   
-32    80     
-128   256    
32     -112   
-208   -80    
-144   0      
256    -80    
-32    0      
-352   -176   
176    64     
-800   -64    
288    64     
-112   64     
-176   -48    
-192   48     
-176   16     
-96    112    
-176   32     
-368   80     
240    -80    
-112   48     
-112   -32    
0      96     
-144   16     
160    -16    
-256   -96    
160    80     
-32    16     
-16    32     
-80    128    
80     64     
-144   32     
-144   -32    
-64    -32    
-176   0      
48     80     
48     128    
-32    16     
-16    -144   
96     -112   
-80    -160   
-224   96     
-48    16     
16     48     
-16    80     
32     16     
-64    -32    
-272   32     
96     16     
-320   160    
-272   96     
0      -224   
144    112    
-112   -96    
-32    368    
-336   -240   
320    16     
160    96     
-64    112    
-96    -48    
0      96     
-80    96     
112    0      
0      176    
-336   -64    
-64    48     
-1200  -64    
160    304    
-112   160    
-112   160    
128    64     
-128   -96    
192    64     
-112   0      
48     192    
-176   -96    
128    240    
-240   112    
128    48     
-336   -80    
816    32     
-560   -16    
352    -528   
-544   32     
1248   -576   
-1168  -128   
912    240    
-480   880    
176    -704   
-304   496    
272    -336   
32     576    
-464   -432   
32     384    
-160   -80    
80     -64    
-400   16     
224    128    
-64    -272   
-16    -224   
-64    64     
0      176    
64     304    
0      -192   
-32    256    
-80    -176   
32     272    
-16    16     
48     160    
-112   -112   
0      176    
-32    -80    
96     192    
-400   -144   
-32    144    
208    112    
0      192    
32     64     
-96    96     
-80    -64    
-16    32     
-16    64     
112    96     
-64    48     
0      16     
-48    192    
-176   -48    
48     160    
16     80     
-16    112    
16     32     
80     32     
-64    48     
0      64     
0      64     
-48    80     
32     64     
112    32     
-112   160    
-176   -96    
48     160    
-160   -64    
64     128    
64     208    
-48    48     
64     64     
64     32     
64     160    
-96    48     
128    112    
16     96     
32     96     
-80    16     
80     128    
-16    112    
-64    32     
-32    240    
-192   112    
288    -16    
-16    96     
-32    -176   
-160   48     
-256   160    
160    -48    
-32    0      
-208   -64    
144    16     
-48    -16    
-64    112    
-32    48     
16     16     
0      -80    
16     -16    
32     -32    
-16    96     
176    512    
192    128    
-48    -64    
32     32     
-128   32     
-48    -176   
80     256    
-128   64     
64     160    
-160   32     
160    64     
-32    96     
128    64     
-128   -48    
128    -48    
0      -16    
64     48
[truncated: 236,011 more chars]
