# Supplementary material for: A Fault Diagnosis Method for One‐Dimensional Vibration Signal Based on Multiresolution tlsDMD and Approximate Entropy
Source: Hindawi journal article supplement (doi:10.1155/2019/3262818), 2019-01-01
Supplement: f1 [file 3262818.f1.zip › 3262818.f1/gear signals/normal gear signal/Data1.txt]

-624   -368   
336    -80    
-32    368    
32     -112   
-16    160    
192    -96    
64     400    
256    -240   
-256   32     
240    -960   
240    560    
-112   -864   
-192   32     
-320   -32    
208    144    
-80    192    
64     240    
-80    -240   
-96    368    
-384   -192   
304    -96    
0      768    
256    -544   
320    -352   
192    656    
-384   -256   
80     -560   
-176   288    
-80    80     
176    -48    
-240   192    
-112   -176   
-144   -192   
272    336    
-896   816    
112    400    
-32    -272   
0      -80    
112    32     
-16    192    
-48    64     
-48    -288   
272    320    
-160   400    
176    160    
-32    48     
-16    48     
-704   -32    
64     -96    
-112   0      
-32    0      
-16    96     
192    0      
-272   -80    
96     -80    
224    32     
160    -64    
112    128    
64     96     
-64    16     
-208   -16    
208    -16    
-176   -16    
128    0      
-192   -48    
272    -480   
-400   -416   
48     160    
-128   -80    
128    -64    
208    0      
-928   -96    
-688   96     
48     16     
-928   96     
80     0      
0      0      
256    96     
-160   112    
16     -32    
32     -16    
-80    -16    
-1440  -64    
80     0      
-80    -80    
-32    128    
-400   -32    
-592   -32    
80     64     
-368   -48    
-128   -32    
-400   -48    
-96    -144   
160    0      
32     64     
48     96     
-96    176    
-304   -96    
144    -96    
48     0      
-112   64     
-48    -32    
-240   -48    
192    160    
-480   32     
-80    176    
-352   -16    
64     240    
-1136  -160   
-112   32     
288    80     
-96    32     
-176   -96    
0      -224   
-176   -192   
-144   144    
-176   80     
128    256    
-144   16     
128    -64    
48     80     
-96    16     
-288   -96    
32     -96    
32     0      
112    64     
-48    64     
-176   -48    
-448   -1072  
112    -672   
-752   512    
-240   208    
80     112    
256    192    
-848   -112   
208    -192   
-112   16     
32     48     
208    96     
256    0      
-2080  -48    
-112   16     
64     -112   
160    32     
144    96     
-112   32     
128    -16    
256    96     
-160   112    
-272   -16    
-144   -96    
256    48     
96     16     
-240   -48    
80     0      
-544   48     
160    112    
48     0      
-16    16     
-64    -48    
272    32     
80     32     
-208   0      
16     -32    
16     80     
-224   -16    
-416   -80    
96     -32    
-192   48     
192    144    
-320   0      
128    48     
-272   0      
176    80     
80     -64    
-272   -96    
32     96     
-192   -144   
144    -96    
48     64     
-240   -80    
32     32     
48     64     
48     48     
-80    32     
-48    16     
80     16     
48     32     
48     0      
-32    32     
-80    48     
112    64     
-48    -16    
0      -16    
-64    96     
-64    -80    
-112   -96    
-16    -240   
-208   -112   
-64    80     
-352   -208   
80     16     
-32    -96    
32     336    
160    48     
48     -64    
-272   -32    
256    16     
16     -528   
-240   80     
352    -544   
-32    272    
96     352    
-160   -288   
256    1056   
-624   -464   
112    -672   
320    560    
144    -224   
-208   112    
0      -64    
-192   96     
256    16     
-272   -144   
224    -144   
256    -48    
-96    -256   
-176   560    
-64    -384   
48     352    
32     176    
80     192    
16     16     
-16    -288   
80     592    
-128   -208   
80     144    
144    16     
-336   -400   
-144   -112   
96     -64    
-320   192    
496    272    
-144   64     
96     128    
400    304    
-80    -16    
64     -16    
-48    -48    
48     80     
48     112    
-272   48     
592    -32    
0      -16    
-192   32     
176    -192   
-240   0      
-16    -80    
-80    144    
176    48     
16     64     
32     -32    
64     32     
-32    112    
16     -48    
208    48     
224    112    
-144   32     
16     -32    
-144   160    
112    224    
464    144    
-176   -32    
-112   -16    
-112   -112   
-80    -48    
48     32     
-32    16     
128    112    
176    160    
-176   16     
128    112    
0      32     
384    80     
-144   32     
16     -128   
96     -160   
0      112    
48     64     
192    -1024  
-96    160    
-48    64     
112    64     
128    80     
-64    224    
-64    -16    
32     16     
32     128    
160    64     
64     32     
32     112    
-64    176    
176    80     
64     0      
288    -48    
48     144    
-64    0      
-48    -32    
80     16     
80     48     
0      -16    
256    0      
-32    32     
32     48     
-16    -208   
304    80     
-112   64     
112    -16    
32     -64    
16     -80    
160    96     
112    112    
-128   32     
-80    -352   
64     32     
-144   240    
-32    64     
0      -32    
224    224    
-416   128    
-128   -192   
144    -432   
128    -512   
256    192    
0      32     
-336   160    
-400   -896   
-224   176    
32     -32    
-32    80     
352    -208   
208    64     
-112   64     
-160   176    
-112   144    
48     64     
320    32     
176    -16    
-96    -32    
64     -208   
112    144    
0      -48    
96     -32    
-272   112    
80     -64    
-192   -208   
-80    -160   
352    0      
368    -16    
224    -208   
240    -144   
-224   352    
0      -16    
-384   -192   
-288   128    
112    -16    
-32    -672   
144    32     
224    -896   
-32    -32    
112    80     
-80    -16    
-16    -80    
352    416    
-112   -112   
-144   -112   
64     128    
144    48     
464    -432   
-224   -432   
80     288    
-16    32     
0      -160   
208    -16    
0      176    
-64    624    
-48    -16    
-112   -144   
-48    144    
192    -16    
32     -208   
160    -96    
112    192    
-96    144    
-48    -128   
160    -128   
-96    -80    
-16    80     
64     -48    
-144   -96    
144    0      
144    144    
64     -16    
16     448    
32     624    
-256   -224   
-96    -80    
32     -192   
-160   112    
144    -128   
48     48     
96     0      
-32    96     
192    -576   
64     -816   
-16    32     
0      -96    
112    -32    
-368   -64    
0      80     
112    48     
-32    -192   
-16    -192   
224    80     
-112   128    
208    64     
240    -80    
48     176    
-112   64     
176    -32    
-48    496    
80     288    
32     -160   
-304   -256   
-16    -176   
80     16     
80     -352   
160    48     
32     -48    
16     64     
64     0      
64     -128   
-112   32     
144    48     
192    48     
-48    80     
128    -16    
-16    -112   
-736   48     
-16    -64    
112    -48    
112    -16    
-256   -96    
256    -320   
32     -16    
192    -672   
-64    -48    
-112   16     
96     0      
208    -192   
-160   -64    
128    32     
-48    -64    
-368   -32    
112    32     
256    32     
16     -16    
-192   -224   
208    -80    
176    -96    
64     -144   
144    -16    
48     -32    
-256   -32    
144    -64    
320    64     
80     48     
-48    -64    
-96    -16    
80     -16    
-720   80     
-160   -96    
144    -64    
176    0      
-192   32     
208    0      
-96    32     
-192   -288   
16     -32    
288    -96    
-80    128    
-32    0      
96     64     
-208   -32    
-32    -64    
-208   -32    
160    -32    
-1584  -32    
144    -96    
-192   -112   
128    -240   
96     -80    
176    -848   
48     64     
48     -16    
64     -64    
-48    64     
-112   -80    
-64    -64    
64     -48    
-368   16     
48     -80    
80     -128   
144    -32    
176    96     
-64    -240   
208    -16    
112    96     
128    112    
512    48     
-208   -64    
-96    16     
-528   -1040  
-400   -720   
-144   304    
-608   192    
-96    0      
-480   -432   
-144   -240   
-112   80     
-256   -192   
496    -416   
576    -192   
352    96     
256    -48    
-176   -112   
-432   -224   
144    -32    
80     64     
144    -16    
-128   16     
352    288    
-592   64     
16     -208   
-320   -16    
224    -128   
240    48     
64     -464   
80     -96    
-736   16     
432    144    
-48    240    
-320   32     
-288   -144   
128    -16    
-352   48     
-32    -16    
192    -32    
-64    -144   
128    -160   
-1008  -64    
-208   -288   
-1232  -352   
-800   -112   
-160   0      
-208   128    
-64    48     
-1648  -48    
-240   80     
128    224    
-208   -16    
-208   -32    
224    128    
-256   -320   
-480   -944   
-144   368    
96     576    
-48    -304   
-192   48     
-368   128    
-496   176    
64     -96    
-704   -80    
-176   0      
240    64     
-128   64     
48     -256   
0      160    
-432   192    
160    -16    
-96    128    
336    -528   
-112   80     
96     272    
-48    -176   
-144   224    
-208   -32    
80     0      
144    112    
-480   0      
64     -176   
80     96     
144    576    
128    -64    
-288   288    
-48    -144   
-480   128    
-96    208    
-224   64     
-464   -32    
-32    -416   
-48    -48    
96     48     
-48    16     
-208   0      
80     80     
-224   144    
16     160    
-80    48     
-32    -32    
0      80     
-64    176    
128    -112   
-320   208    
48     -32    
80     0      
32     -96    
-16    -32    
-208   48     
-368   112    
-336   128    
-816   -144   
-128   64     
-256   -128   
48     320    
48     32     
272    -16    
-128   128    
192    112    
176    544    
-80    112    
64     -128   
-48    -32    
-48    32     
-144   96     
-80    96     
-256   -128   
-80    80     
-96    16     
-64    96     
144    160    
80     48     
16     -80    
-32    -208   
32     -16    
-144   -48    
256    288    
-176   32     
-16    400    
112    -32    
224    -48    
-240   -208   
-64    128    
-224   -64    
-272   -64    
-80    -192   
16     -112   
144    16     
-336   -128   
144    80     
-64    48     
64     96     
128    16     
-80    48     
0      -160   
-48    64     
0      -64    
160    96     
48     128    
-48    96     
32     96     
0      -16    
0      16     
208    128    
-16    176    
-32    -32    
-64    0      
-48    -80    
-80    16     
-80    -32    
128    80     
-144   48     
144    32     
0      0      
32     0      
-64    16     
144    -48    
-64    48     
96     -48    
176    160    
-176   48     
96     32     
-144   -16    
0      -48    
32     0      
64     160    
-128   0      
48     16     
-112   -16    
-256   0      
16     48     
16     48     
48     16     
80     128    
128    -32    
48     -32    
0      64     
-304   -16    
112    192    
-112   0      
-224   256    
16     32     
304    96     
128    64     
32     -96    
160    -128   
80     -160   
80     160    
320    432    
-480   208    
-256   -432   
96     -160   
80     16     
272    320    
-32    288    
320    -192   
368    -128   
160    80     
-304   96     
-368   -528   
32     -64    
-16    208    
-64    -272   
-144   32     
496    160    
448    272    
160    16     
-384   -80    
-448   48     
16     272    
-368   -384   
272    144    
224    128    
320    -16    
80     64     
-384   -176   
-432   32     
160    416    
-16    640    
192    -112   
-144   -496   
-96    -96    
-192   48     
336    0      
256    -32    
16     -144   
80     240    
-224   96     
-160   -96    
-160   -32    
16     -32    
112    -48    
272    64     
96     32     
176    112    
-144   64     
32     16     
96     224    
16     32     
96     32     
-16    -352   
80     64     
-32    -16    
16     16     
64     16     
112    80     
96     112    
-32    32     
-64    224    
192    96     
-160   64     
112    0      
-32    0      
32     -48    
64     400    
176    -512   
16     -64    
-160   160    
-208   64     
272    160    
48     32     
304    -240   
-160   -16    
-112   48     
80     32     
176    96     
-224   96     
-144   -16    
176    -48    
144    32     
112    -48    
112    48     
96     112    
80     -32    
-64    -128   
0      0      
0      144    
256    160    
-192   144    
-32    16     
224    0      
496    192    
-352   144    
96     -224   
192    64     
-64    0      
176    32     
16     -704   
16     32     
64     32     
-16    64     
240    16     
384    192    
-496   32     
96     0      
64     16     
80     16     
96     48     
96     -96    
32     16     
-208   -16    
16     0      
224    -352   
-240   -96    
240    -368   
-32    32     
80     -32    
-192   -64    
96     32     
160    -16    
48     112    
144    -16    
80     64     
-256   48     
496    144    
-256   -96    
-32    32     
48     80     
304    160    
16     -240   
-144   96     
256    48     
160    160    
-128   -32    
0      16     
176    160    
112    -48    
-144   0      
144    -400   
80     112    
176    32     
0      48     
176    -176   
32     32     
-32    -240   
0      32     
96     64     
240    -16    
-144   0      
80     0      
64     64     
32     -176   
16     -368   
-160   -256   
160    80     
-160   -96    
256    48     
48     -160   
-128   128    
32     -96    
112    64     
0      -16    
64     -864   
112    64     
-48    -192   
176    400    
-32    -112   
208    48     
96     16     
32     96     
80     -32    
176    16     
-48    -32    
64     96     
144    32     
-96    -368   
64     -416   
160    -288   
272    384    
32     -304   
32     -400   
-144   96     
-16    16     
16     32     
-320   -208   
-16    -16    
-96    1056   
400    304    
-64    -576   
-208   -128   
-32    -80    
0      48     
-256   -208   
-240   -224   
-64    224    
-160   144    
-112   -80    
144    -288   
288    0      
192    -160   
256    -16    
160    -48    
-96    -48    
-128   -128   
-368   -144   
-64    -48    
-128   16     
480    -256   
976    496    
-496   -992   
-208   -80    
144    416    
-288   -320   
-112   0      
-112   0      
48     -160   
416    -752   
128    -48    
144    -144   
0      32     
16     -288   
0      -208   
144    -16    
32     64     
32     32     
-192   -832   
-480   208    
208    192    
-320   -352   
-48    -160   
128    -16    
256    112    
192    64     
80     -80    
160    144    
80     -224   
64     -688   
-400   -192   
-32    -96    
-32    160    
160    -128   
80     -32    
256    48     
-64    -336   
96     -256   
-448   -288   
-16    208    
16     64     
48     -800   
0      112    
-16    -256   
160    -16    
-16    400    
48     272    
-48    192    
400    784    
-832   544    
48     112    
-2064  -272   
-16    -144   
32     496    
48     32     
-48    0      
32     -592   
-96    -240   
128    -240   
-32    224    
224    112    
176    448    
-80    352    
112    80     
-512   128    
272    -272   
320    -96    
-240   64     
-144   -16    
-128   -256   
240    -80    
256    -48    
-160   32     
112    -80    
160    48     
-80    -16    
-176   48     
-480   -160   
288    32     
-96    96     
-80    96     
144    -176   
48     -192   
48     -32    
256    48     
-32    -16    
80     -192   
96     96     
0      32     
-176   80     
-96    -96    
0      112    
-304   -256   
352    -208   
-256   96     
48     288    
288    192    
-176   64     
160    80     
-192   -32    
144    128    
-1328  -208   
128    32     
-368   64     
-528   80     
0      96     
272    -48    
-240   0      
-32    -96    
64     144    
-240   -32    
-160   -16    
-352   -112   
144    -48    
112    -32    
32     -192   
-80    -192   
-512   32     
-144   144    
-16    -48    
-48    -192   
-784   -176   
-192   64     
-224   96     
-96    32     
-32    -96    
-80    -64    
-144   -96    
224    64     
-272   -192   
-112   16     
-64    128    
176    176    
-48    -64    
80     16     
-96    -80    
-64    16     
48     0      
-160   0      
-80    -32    
-96    48     
80     176    
160    80     
-208   160    
-48    -128   
-272   64     
-48    -32    
480    288    
-192   144    
-352   16     
-32    96     
-80    80     
32     -48    
-144   -64    
16     80     
-400   128    
64     496    
96     16     
32     64     
0      16     
-48    -176   
160    -160   
-352   -576   
-336   -192   
-224   64     
-80    192    
-96    -336   
-48    -304   
-288   -32    
-256   144    
-528   -48    
-224   -288   
112    224    
-144   144    
0      128    
112    -272   
192    -384   
320    1472   
-96    -496   
144    0      
-48    48     
176    80     
-160   64     
-192   -288   
-144   0      
-368   48     
176    544    
64     -112   
240    -416   
304    256    
-320   320    
240    320    
-48    0      
-208   -64    
80     32     
-272   16     
-64    208    
192    368    
-752   -96    
-160   -96    
-448   -32    
48     48     
192    128    
32     192    
-160   304    
32     32     
320    32     
160    -16    
-64    -32    
-80    16     
-48    32     
-384   16     
0      -32    
-176   -16    
176    64     
32     -208   
16     -48    
-400   -32    
-160   0      
-112   48     
240    80     
208    96     
336    48     
-256   -32    
-160   64     
-432   -192   
144    -96    
32     96     
-144   16     
-176   96     
96     96     
-112   -64    
-96    -80    
144    0      
48     96     
160    48     
-96    -16    
-96    64     
-64    32     
32     16     
16     32     
16     48     
80     32     
-96    -32    
32     64     
0      112    
-304   16     
224    32     
-112   32     
112    64     
-32    0      
32     272    
80     64     
-320   16     
-32    112    
-32    0      
-160   -48    
32     144    
-112   128    
80     -112   
-32    0      
192    -16    
32     80     
-96    48     
256    80     
-224   32     
0      16     
32     -64    
80     64     
-144   48     
144    -176   
-240   -112   
96     176    
-64    -32    
256    0      
112    144    
96     16     
64     16     
416    208    
-544   96     
160    32     
96     -32    
-32    16     
112    48     
-160   -64    
176    32     
-208   48     
-48    64     
224    -48    
-80    16     
0      80     
-32    48     
64     32     
-48    32     
144    32     
-16    112    
32     64     
-112   -32    
0      48     
-96    -208   
320    16     
-352   80     
-128   -64    
64     -112   
32     96     
304    144    
48     128    
32     48     
-80    0      
-128   112    
64     64     
256    48     
-128   -16    
48     128    
-80    48     
160    16     
-176   16     
64     80     
224    64     
-96    -32    
80     64     
32     144    
-16    16     
-32    0      
64     16     
160    112    
-128   48     
144    48     
16     96     
160    32     
-272   16     
-160   -256   
48     0      
96     -16    
-16    -304   
48     112    
48     32     
160    176    
32     -16    
32     -368   
-208   192    
112    112    
-208   112    
144    -144   
80     272    
-48    -16    
0      -48    
96     16     
0      128    
-112   -384   
240    112    
48     -96    
-16    16     
224    -128   
208    32     
64     48     
-192   96     
-64    -48    
208    -96    
176    624    
-48    -144   
-128   -288   
32     192    
144    -64    
-48    112    
-80    -48    
160    -512   
96     368    
176    -112   
-16    -48    
-176   80     
96     -32    
16     -512   
240    560    
-112   48     
0      16     
-48    112    
-16    -288   
80     80     
96     80     
-48    48     
112    -432   
-48    416    
-96    160    
-112   -688   
0      -208   
-32    544    
16     -224   
368    -224   
-32    -96    
112    -144   
80     16     
80     -128   
64     16     
272    -224   
80     -160   
160    -1008  
-80    -32    
-112   -576   
80     64     
-112   -176   
368    -320   
-192   16     
-592   -32    
-112   -64    
-16    16     
272    -32    
192    16     
176    -48    
128    -560   
176    128    
-80    -96    
-304   240    
64     -80    
-48    48     
320    -48    
160    240    
64     176    
48     112    
16     48     
48     -48    
16     -16    
240    -272   
96     128    
160    -176   
-128   -48    
64     -224   
-16    160    
-32    -80    
112    112    
0      80     
144    160    
-16    160    
96     -96    
96     32     
-48    -48    
128    224    
32     32     
48     64     
128    -208   
-224   -144   
304    -672   
-96    -256   
96     -80    
96     -1120  
-208   128    
32     -464   
112    352    
-64    0      
96     -240   
-160   288    
144    -912   
48     -64    
176    -272   
32     -384   
-128   -96    
-64    -256   
560    208    
-320   224    
64     -80    
-64    -96    
96     304    
176    -16    
-544   -176   
80     -368   
16     -208   
112    -240   
-160   -16    
288    -96    
224    -112   
-224   80     
16     -96    
80     96     
112    80     
-160   -96    
336    112    
-96    96     
-16    -256   
-240   -336   
64     80     
-80    80     
64     176    
336    -176   
-64    -32    
128    -48    
-96    64     
144    80     
256    -144   
80     80     
304    -144   
240    416    
-496   0      
176    32     
-192   80     
160    16     
-624   -288   
224    -464   
96     -192   
96     -400   
-128   -16    
224    -416   
-16    144    
-16    96     
80     96     
48     -112   
-64    -96    
-384   -240   
256    96     
-64    176    
192    64     
-1984  -32    
144    -320   
48     -16    
96     -160   
-96    -176   
-16    -416   
-320   16     
-32    -112   
96     0      
240    96     
16     0      
-80    144    
80     -64    
-64    64     
272    16     
-464   208    
272    112    
-480   0      
80     32     
-16    32     
-128   -96    
288    -272   
128    -432   
64     32     
48     -192   
112    0      
496    368    
-304   560    
-224   288    
0      -96    
-352   96     
16     496    
-400   144    
208    -176   
-96    96     
96     -144   
160    -80    
192    -288   
48     -16    
-384   80     
96     -432   
-144   224    
-16    -160   
-400   192    
144    -160   
192    208    
128    -384   
-464   96     
-48    -240   
16     192    
64     -224   
-96    -48    
0      -208   
-32    192    
-320   48     
112    48     
0      -80    
288    80     
-336   48     
-64    32     
-1072  -944   
96     32     
-464   640    
-112   96     
-64    352    
0      -176   
-16    32     
-880   -304   
-336   -512   
-192   -240   
336    -144   
224    144    
112    96     
-144   -80    
448    -144   
80     96     
96     -176   
-256   -176   
-848   32     
64     0      
-864   -176   
-384   -16    
304    0      
32     128    
-368   48     
-448   -80    
144    96     
208    96     
-304   0      
192    -80    
176    -64    
96     32     
-400   -64    
-208   0      
-112   48     
-304   -48    
-160   112    
-256   -48    
288    48     
480    -32    
-224   -80    
-608   -64    
0      -48    
-16    64     
480    32     
304    48     
-304   -80    
-32    64     
-224   -128   
-48    16     
48     48     
-160   32     
-48    -32    
-176   -32    
608    176    
-688   -48    
-16    48     
-288   48     
-32    16     
-1440  -48    
-144   -128   
-160   -128   
32     96     
-48    0      
96     64     
-128   -16    
-48    32     
-64    16     
176    192    
-304   -80    
288    -16    
-192   32     
48     -32    
-64    0      
-1120  -256   
112    -80    
-288   32     
240    16     
-224   16     
64     -80    
-16    -96    
-192   208    
32     -176   
-144   64     
-208   96     
-48    80     
144    -96    
-160   -64    
-32    64     
-176   -128   
64     80     
-336   0      
256    32     
-112   16     
-224   32     
352    144    
-272   0      
-256   -160   
160    32     
0      208    
-496   80     
48     -48    
-80    -48    
-112   32     
-96    -192   
208    -224   
112    64     
64     32     
-80    -80    
160    96     
-208   16     
-128   64     
48     -32    
-64    -48    
-64    176    
32     64     
112    -16    
-48    64     
-32    48     
-80    0      
-80    112    
-848   -96    
128    48     
304    176    
-160   160    
-48    -16    
32     16     
224    288    
-192   176    
48     -64    
32     64     
128    -96    
-32    -128   
-224   48     
-112   -176   
144    -16    
-256   16     
128    -48    
-64    96     
128    128    
-16    -48    
0      -128   
208    128    
-144   -144   
128    48     
-112   144    
-32    0      
0      288    
-272   -704   
48     432    
-128   64     
16     -80    
0      192    
112    -96    
-160   112    
-128   400    
-208   64     
-16    -64    
-32    -80    
-32    -80    
384    416    
-336   -400   
-240   -80    
272    -32    
-80    -320   
48     976    
-464   160    
-16    -656   
64     -304   
128    368    
64     288    
144    48     
48     -48    
208    144    
-160   -48    
-144   32     
-16    80     
-224   -544   
240    48     
48     432    
-80    320    
112    176    
240    192    
-48    208    
-96    80     
64     -64    
80     0      
-80    32     
-144   -288   
80     -160   
-48    -16    
-64    0      
-80    -112   
176    64     
-160   48     
144    -80    
-240   -608   
128    -144   
48     176    
-112   16     
-48    96     
-160   -112   
-80    -160   
0      -192   
288    -128   
208    -64    
304    160    
-176   432    
-64    96     
128    80     
352    112    
112    64     
208    48     
80     128    
-32    208    
80     144    
-224   144    
-192   48     
-48    0      
-112   -32    
-48    -32    
272    -32    
368    160    
16     -96    
368    144    
192    336    
32     0      
96     32     
-64    0      
-96    160    
144    80     
-112   0      
80     -96    
-48    32     
96     16     
192    96     
640    352    
-400   32     
-16    -64    
256    16     
32     -400   
240    240    
192    160    
64     32     
-208   -208   
-16    -16    
32     96     
-32    16     
16     -32    
64     160    
16     64     
16     176    
-176   -80    
32     -240   
48     0      
32     -496   
240    -128   
160    -32    
144    96     
-128   -32    
-144   -176   
0      -144   
192    -64    
96     -80    
272    -208   
-128   400    
112    288    
-288   -32    
96     -32    
-128   16     
208    192    
176    304    
-192   400    
32     240    
112    224    
-32    -80    
112    -64    
64     176    
224    128    
176    -256   
-480   -400   
96     -240   
-288   80     
160    -416   
112    -32    
-128   -256   
-128   80     
-48    -208   
32     -208   
32     128    
64     -352   
272    -160   
-112   -192   
-160   -48    
192    -288   
-320   0      
0      -64    
80     0      
-48    32     
-64    -128   
368    -416   
208    0      
128    -80    
112    -32    
-32    -32    
144    48     
464    672    
-368   480    
144    176    
-96    -368   
48     256    
480    432    
-32    320    
240    528    
0      160    
-48    -256   
272    -144   
-272   -64    
96     -32    
-80    -560   
208    -288   
-400   -416   
224    64     
-176   464    
112    96     
224    -400   
-64    -656   
-96    -384   
-48    -16    
192    480    
-64    -48    
240    -864   
48     336    
-16    416    
-304   -928   
384    32     
192    608    
-64    368    
112    -480   
-48    -48    
224    544    
32     112    
144    -192   
80     -128   
64     176    
96     32     
80     112    
48     -272   
64     160    
-288   -160   
16     192    
128    32     
352    -192   
176    384    
-128   -336   
160    -1024  
-16    160    
240    -528   
176    0      
-144   384    
144    32     
112    -320   
-32    -96    
48     96     
-32    -192   
128    -64    
96     128    
176    -128   
-80    -80    
-2048  -32    
80     16     
-16    -48    
0      -208   
48     -16    
32     -16    
176    80     
48     48     
96     -32    
144    -16    
-80    -64    
32     -448   
-48    -176   
176    32     
144    -64    
-464   -256   
80     -224   
16     16     
48     -80    
32     48     
32     192    
224    0      
144    -352   
288    -16    
80     -96    
-336   48     
176    -176   
-96    32     
-208   -48    
32     -96    
192    64     
-80    32     
-288   -176   
224    -272   
-64    -144   
416    -32    
32     -48    
160    -208   
192    -80    
224    -112   
0      64     
0      112    
-112   -48    
-32    16     
-160   -96    
-112   -112   
320    80     
-432   0      
336    16     
0      -80    
96     -64    
-16    224    
384    -64    
-224   320    
-272   -112   
-496   -336   
448    -128   
96     48     
96     48     
400    -64    
-208   160    
-368   -80    
-176   96     
-112   16     
-144   -64    
112    0      
80     -32    
-96    -192   
-64    48     
112    -256   
128    64     
176    -128   
144    -16    
-128   16     
176    32     
-272   48     
112    -64    
-144   0      
208    -112   
-960   32     
-48    -128   
-96    -32    
176    -64    
128    80     
32     -400   
160    -16    
-208   32     
-16    -64    
16     16     
48     -48    
-16    -48    
64     -96    
-352   -32    
32     -80    
-272   0      
-96    32     
32     32     
16     -208   
-80    -16    
80     -496   
112    -192   
128    128    
192    -16    
-176   -176   
64     48     
-176   80     
160    -32    
-160   0      
0      -128   
112    176    
-192   -16    
512    256    
-176   -128   
-16    -48    
96     -48    
32     16     
-160   -64    
208    -16    
-432   -16    
416    176    
-208   320    
-48    -160   
160    -304   
464    48     
-160   112    
32     -224   
304    -176   
-960   -528   
80     0      
-384   -80    
-528   -32    
-240   48     
-2096  -64    
-128   32     
144    -16    
-128   -32    
16     48     
0      48     
64     -304   
-32    -256   
-352   -48    
80     80     
-624   -112   
240    80     
-64    -144   
-224   32     
-192   96     
48     -144   
-80    -256   
96     -32    
-272   304    
-96    -464   
-272   80     
48     -128   
112    144    
-208   -592   
432    256    
-336   -80    
-240   -64    
208    -464   
-624   384    
240    -96    
16     304    
-272   -96    
-592   -608   
64     336    
-1136  -96    
160    32     
-80    336    
144    -160   
-48    -288   
64     80     
-64    -224   
-96    -112   
-272   -128   
224    -160   
-48    32     
-128   -128   
-112   -192   
-400   -80    
-64    0      
-384   -32    
32     -64    
-128   -96    
160    -240   
-32    -112   
48     96     
0      112    
-48    -32    
-128   -64    
32     32     
48     -32    
-160   -16    
112    0      
-16    -16    
112    16     
48     0      
-32    80     
-1680  -96    
-80    -128   
32     -16    
160    64     
-96    -96    
-80    -224   
-64    -16    
64     160    
64     64     
176    144    
-256   80     
-32    -80    
-16    0      
-464   -48    
112    -80    
-1152  0      
144    16     
0      0      
96     -16    
112    -32    
-304   -48    
0      -64    
-80    -112   
-16    -48    
224    64     
80     96     
0      -128   
-96    0      
-448   -64    
-48    16     
-256   -128   
256    -32    
160    -48    
304    -16    
32     112    
-112   -32    
-384   0      
-368   -144   
-160   0      
-96    32     
80     224    
-96    64     
0      -96    
160    -160   
224    48     
112    144    
-160   96     
-16    96     
0      96     
192    288    
0      128    
480    160    
-176   128    
-256   -224   
-80    -80    
0      16     
-240   144    
288    32     
-256   -128   
32     -80    
-304   -112   
48     0      
0      0      
96     0      
144    -64    
-368   32     
-432   16     
48     176    
-16    112    
144    160    
128    32     
0      -128   
-96    -128   
-192   16     
-304   160    
-144   -64    
112    -16    
32     240    
112    240    
48     112    
112    224    
-16    -160   
-48    80     
-32    -96    
96     -128   
-48    32     
-128   -32    
112    48     
-128   64     
128    16     
208    -32    
224    -32    
-320   192    
-16    224    
0      192    
-160   96     
32     -128   
272    64     
-112   464    
-320   1072   
544    -480   
-48    -176   
-320   128    
-80    -512   
-64    -576   
48     -48    
320    960    
-288   -160   
-288   48     
352    -320   
-96    -368   
64     528    
16     -16    
64     -240   
80     208    
-176   144    
-192   -352   
-16    -176   
-48    48     
160    -352   
144    32     
-144   -336   
-336   -480   
192    1056   
96     304    
32     -464   
-144   384    
224    -784   
80     -304   
64     576    
48     -272   
-112   144    
32     512    
96     -64    
-352   -1056  
0      416    
-16    288    
176    -208   
-64    -288   
-144   32     
192    128    
16     -64    
-144   -112   
128    208    
-208   -288   
96     160    
-48    -32    
96     -272   
64     256    
-192   -1056  
96     -112   
224    528    
80     -16    
0      -144   
-368   128    
192    16     
48     32     
-80    48     
192    48     
176    32     
-192   32     
288    -32    
16     -144   
16     -16    
0      -592   
-144   32     
160    32     
-80    -64    
32     16     
80     128    
-32    32     
384    288    
-192   -64    
96     -144   
48     32     
32     80     
0      16     
16     16     
80     464    
64     -240   
144    -48    
-96    -80    
-32    -112   
64     144    
208    32     
288    176    
-176   0      
-128   -64    
16     -32    
192    -496   
256    -48    
160    -144   
16     -160   
32     48     
0      -656   
64     16     
-32    -336   
-16    32     
48     80     
-112   48     
-32    -384   
-16    -272   
0      -80    
-16    -16    
-48    -160   
224    96     
0      16     
192    -272   
-32    32     
96     -160   
128    16     
224    -544   
32     80     
-48    176    
-16    -64    
16     0      
0      -96    
64     -16    
96     176    
-224   16     
-80    0      
448    448    
-352   672    
176    304    
352    -112   
32     48     
-192   -256   
560    16     
32     -224   
384    128    
-592   -480   
336    -64    
-592   240    
-384   -64    
112    32     
-208   -80    
320    48     
336    96     
-160   16     
0      -64    
-240   48     
-288   -144   
-64    112    
-288   64     
-352   16     
-176   -48    
80     -208   
336    -208   
336    384    
304    192    
416    -384   
-288   -224   
-48    -160   
0      128    
-288   -160   
176    64     
-400   -144   
368    -48    
192    -496   
480    80     
32     -16    
-144   96     
-192   -32    
-48    -32    
64     -304   
384    -48    
0      80     
224    -160   
144    0      
16     -16    
240    32     
-336   16     
-64    48     
144    -224   
-336   192    
224    80     
-48    -224   
-32    16     
224    16     
-128   32     
144    -48    
16     -352   
0      -32    
96     -80    
16     -80    
64     64     
64     0      
112    -144   
32     0      
144    -160   
240    192    
-192   -96    
144    -160   
-2336  64     
-48    -80    
128    -112   
128    -192   
112    32     
-64    -192   
64     -208   
-48    64     
0      -96    
-176   -112   
0      -16    
-128   -128   
144    16     
-48    -32    
48     -240   
-112   -240   
-144   -240   
224    -80    
64     -160   
224    -48    
48     -96    
-80    16     
48     -1056  
64     -304   
96     288    
-192   176    
64     -352   
160    96     
-224   -336   
64     256    
288    672    
-80    -416   
-112   -592   
208    80     
-448   -384   
256    -96    
-96    464    
432    -560   
-160   176    
112    -192   
128    -32    
-288   -320   
592    64     
-352   16     
0      144    
-112   -80    
-16    -496   
-480   48     
224    288    
80     128    
112    48     
-544   -240   
224    -352   
64     -288   
400    -32    
48     -64    
-368   -512   
-224   -256   
192    -336   
208    -96    
-224   -160   
192    -32    
-416   48     
64     48     
-48    -32    
128    0      
16     -64    
80     -176   
64     32     
16     -160   
96     96     
-192   -80    
80     16     
-48    -80    
80     -16    
-96    64     
400    80     
-576   80     
144    -112   
-1872  -16    
-32    -192   
112    -80    
-160   -32    
-16    128    
-80    -144   
-176   64     
-80    -96    
48     0      
-256   0      
32     48     
-32    176    
176    0      
-272   -64    
128    16     
144    -96    
48     32     
-48    48     
112    -64    
96     32     
0      -208   
96     -48    
-752   -16    
-32    16     
-144   32     
-16    96     
-176   -96    
288    -416   
-288   -96    
80     -96    
-400   -48    
16     -16    
-96    96     
-112   -32    
-64    32     
-80    -240   
144    -176   
-160   48     
0      -96    
-192   -16    
96     32     
-240   32     
192    -32    
-224   -48    
-64    32     
-16    240    
-400   320    
32     16     
80     -336   
-160   -80    
-80    -32    
-112   16     
-48    -96    
-128   -160   
-32    128    
-576   176    
-432   64     
64     -96    
528    208    
-160   32     
688    144    
-688   32     
-48    32     
-528   -96    
-160   -112   
144    48     
128    48     
-224   64     
-368   -16    
-320   -160   
0      -272   
144    -32    
192    256    
688    832    
-592   400    
-208   -96    
240    -192   
272    16     
416    -80    
-144   -32    
-128   160    
-480   -16    
-336   -624   
112    -192   
-240   352    
-576   256    
0      80     
-912   -80    
128    96     
-240   -64    
64     48     
16     -192   
128    208    
-112   176    
256    128    
160    192    
96     176    
-176   608    
96     416    
-160   160    
-208   272    
-144   48     
-1008  -224   
32     -64    
224    -240   
240    112    
-288   -128   
96     -128   
-16    256    
-256   112    
32     -144   
-96    112    
48     -16    
-144   160    
-128   -432   
64     96     
240    400    
-112   -48    
160    32     
-1264  16     
16     -384   
224    208    
-448   80     
240    32     
-64    64     
272    -64    
112    -96    
304    544    
-16    448    
-32    -480   
-96    64     
-320   -32    
-384   -368   
288    16     
-1200  144    
128    128    
0      -112   
16     96     
128    144    
0      64     
-48    -304   
-96    -176   
-16    160    
128    160    
304    -48    
-224   -960   
160    -16    
-192   272    
-96    368    
-96    -272   
-80    -560   
-176   112    
48     160    
-32    -16    
160    -64    
-80    -16    
0      96     
0      16     
48     48     
0      288    
-16    16     
-16    32     
-368   -16    
192    48     
-256   -16    
160    32     
0      0      
-48    16     
-128   16     
-48    -16    
400    96     
-240   -32    
-192   -96    
-16    96     
368    -16    
-560   -192   
48     -32    
-96    -32    
128    112    
-384   -16    
-64    -48    
176    -32    
64     272    
-192   -16    
-16    -48    
128    16     
-16    32     
16     0      
32     -128   
-48    80     
208    48     
208    0      
-224   0      
0      32     
320    288    
-304   0      
-80    -96    
416    32     
80     64     
64     -48    
448    96     
-400   16     
-256   -64    
-80    64     
144    -32    
16     -144   
128    16     
-112   16     
-16    96     
128    16     
0      224    
288    0      
80     -80    
-96    -64    
-64    0      
-64    -16    
-48    -48    
128    16     
-160   0      
80     80     
-208   -80    
80     48     
-208   16     
128    32     
16     16     
144    48     
48     32     
-16    0      
48     16     
-48    -352   
160    -192   
48     160    
-160   128    
-64    0      
128    -144   
-144   -32    
-80    144    
-192   -16    
64     64     
112    64     
-224   -64    
176    48     
-112   32     
-80    0      
-944   -1136  
400    -544   
16     480    
-656   192    
-224   -48    
-112   -272   
-16    16     
176    304    
-112   144    
-48    0      
64     0      
16     64     
160    32     
208    32     
64     -16    
-32    16     
0      -48    
16     80     
0      -16    
336    128    
-288   144    
112    -16    
96     -144   
-64    16     
-48    -320   
-464   -32    
-64    -192   
176    -64    
-304   -48    
96     -32    
144    80     
96     16     
208    16     
112    32     
176    64     
96     80     
-192   16     
-64    0      
272    0      
272    -48    
304    288    
-16    80     
-288   64     
-400   16     
-48    32     
64     32     
352    112    
256    0      
80     0      
-240   -32    
0      48     
-32    32     
-256   -192   
448    32     
32     -176   
512    128    
-48    -16    
48     -48    
48     16     
304    160    
-48    -224   
64     16     
-48    16     
48     -16    
64     -16    
64     0      
0      0      
128    -224   
80     -16    
176    -96    
-112   -368   
-16    -464   
-192   80     
96     -80    
-144   112    
-160   48     
416    -16    
-320   0      
416    224    
-32    -320   
32     144    
96     -400   
-176   -96    
80     208    
-32    0      
-64    -96    
32     -80    
-96    -224   
416    688    
-432   -1840  
192    816    
112    112    
144    -480   
208    848    
160    16     
-304   112    
-240   112    
-48    -160   
-64    -416   
240    -448   
-224   384    
384    -240   
-112   80     
208    -1152  
-256   128    
448    64     
0      80     
-176   480    
144    144    
80     16     
16     -304   
64     -48    
48     -368   
64     -16    
368    -176   
-112   48     
-96    -352   
0      -176   
-144   -272   
208    0      
0      224    
160    48     
-96    -128   
32     -608   
32     0      
-144   16     
32     16     
48     -176   
0      -16    
-16    -64    
16     -48    
48     -96    
128    80     
96     48     
-128   -80    
336    -144   
-32    -320   
144    -48    
-32    -128   
-32    -416   
32     -80    
384    -128   
-176   16     
-32    -80    
0      -192   
64     48     
48     -176   
160    -16    
208    -112   
0      -352   
16     96     
240    -208   
48     -160   
-1536  -208   
-64    0      
-16    -48    
-96    -176   
144    32     
96     -640   
-64    -192   
192    -48    
128    0      
-32    -128   
64     -176   
-64    -320   
-96    288    
176    32     
272    -64    
-784   0      
96     -144   
112    -16    
160    -160   
64     48     
144    -112   
-16    -32    
64     -992   
16     -112   
192    -16    
-32    64     
48     0      
16     128    
-16    80     
112    -208   
-608   -240   
208    -176   
0      16     
96     16     
160    -80    
112    -176   
48     -48    
192    -352   
144    -16    
208    -64    
-16    -16    
192    96     
-96    48     
-304   -256   
160    -512   
-320   -112   
128    144    
-544   16     
112    -32    
80     144    
-384   48     
-288   -240   
-128   -160   
80     64     
240    128    
352    -16    
-96    -128   
-208   -80    
-256   240    
176    176    
-16    128    
-112   32     
-448   -96    
-48    -96    
112    -16    
240    448    
336    352    
224    16     
-144   288    
-336   -1520  
32     -144   
-304   176    
688    640    
192    608    
-336   -128   
-288   -64    
144    -176   
-416   -16    
64     112    
-1504  -576   
352    -80    
32     176    
512    -272   
112    192    
432    -368   
112    -208   
144    112    
48     272    
-96    -448   
16     208    
-32    128    
16     -128   
-112   -176   
32     48     
-48    -256   
-256   -176   
48     64     
-160   -80    
240    320    
192    -224   
-176   -256   
0      0      
-208   32     
16     -80    
80     64     
-224   16     
128    0      
-32    -16    
192    64     
48     16     
64     -240   
-96    112    
0      -512   
-272   -416   
-128   -176   
112    -112   
-240   -80    
240    -32    
-48    208    
64     96     
-320   -16    
16     0      
-112   -80    
192    -272   
-1424  112    
144    -144   
-112   -112   
-1056  -208   
224    128    
-112   -64    
-848   96     
32     64     
-544   -48    
-32    -32    
-112   -96    
32     -80    
32     0      
-224   -16    
-848   -128   
720    352    
-720   -176   
80     16     
-256   -336   
-512   -416   
48     32     
-432   -96    
-112   -176   
-80    -32    
-32    112    
-400   64     
160    240    
-176   -112   
48     -112   
-128   32     
112    64     
-64    -48    
112    80     
-48    -160   
-288   16     
-64    16     
-224   16     
-16    -32    
-64    0      
-288   -16    
-128   -16    
-96    0      
-288   16     
-96    -112   
192    -192   
-128   -64    
0      0      
96     144    
48     -48    
48     16     
48     32     
-128   -16    
-128   -32    
-96    0      
-32    256    
160    112    
-96    -48    
-288   -48    
-112   32     
-160   -48    
32     48     
-336   -96    
16     32     
240    80     
96     0      
16     64     
-32    32     
128    80     
-224   -32    
-32    -112   
64     80     
-32    64     
-576   -80    
128    -32    
32     -80    
-32    128    
208    -16    
64     0      
-64    -112   
-336   -80    
0      16     
0      80     
-96    64     
-64    -16    
-64    0      
-16    -16    
64     -48    
-416   192    
0      32     
-1216  -32    
288    32     
-224   -48    
-16    0      
192    128    
-272   96     
-96    -48    
112    64     
16     -144   
16     112    
-128   -32    
-48    -96    
16     16     
16     176    
16     256    
-112   0      
272    32     
32     80     
-128   -112   
0      0      
16     32     
160    112    
-32    16     
-16    -96    
-16    -96    
160    48     
176    16     
-320   -48    
304    592    
-432   1008   
-512   560    
80     -160   
112    -16    
320    32     
352    544    
208    96     
352    -736   
-96    -576   
272    800    
288    560    
176    -208   
-176   -320   
16     -272   
-80    -80    
112    48     
-352   -16    
-80    80     
128    16     
-448   432    
176    480    
-32    0      
-368   -160   
208    32     
-208   16     
336    -48    
-64    -256   
0      -208   
-16    144    
-192   64     
-80    -16    
32     96     
-144   0      
64     -48    
-304   -96    
672    432    
-80    464    
-496   -144   
64     -608   
80     -240   
544    256    
-352   -144   
480    -736   
-144   -400   
368    208    
144    192    
-160   160    
-192   -112   
-32    -464   
-160   272    
224    64     
48     64     
320    272    
-112   -96    
48     80     
-160   -96    
80     0      
-208   0      
48     -320   
160    912    
-48    -592   
64     -96    
0      384    
-80    -48    
48     16     
-16    80     
16     16     
112    -16    
-240   400    
64     -496   
16     224    
208    0      
-64    -16    
16     -144   
-48    144    
112    688    
384    576    
-16    -608   
-320   208    
-112   192    
32     -416   
96     0      
272    -288   
-64    32     
112    32     
-336   144    
192    144    
-176   -16    
16     192    
192    208    
176    96     
-112   112    
192    64     
0      64     
64     48     
32     -32    
64     -96    
240    192    
-128   80     
240    16     
-384   80     
-64    -32    
608    208    
-432   224    
288    192    
-112   -48    
-48    128    
96     -64    
112    48     
48     80     
64     64     
-64    96     
-48    48     
0      -480   
192    -96    
-224   128    
144    160    
32     0      
448    160    
-320   352    
144    -816   
48     -64    
0      64     
-160   -352   
224    -176   
0      80     
-224   -256   
176    -96    
96     64     
-80    32     
144    32     
-32    208    
288    112    
-224   0      
16     -96    
112    -480   
-48    192    
-80    96     
304    -32    
-16    -112   
-128   128    
448    224    
48     304    
-224   -240   
-128   48     
-192   80     
-96    -48    
32     16     
208    -80    
32     0      
-16    -432   
64     -80    
224    -1040  
-144   48     
48     64     
80     16     
-64    192    
128    96     
128    0      
48     64     
16     -48    
-144   -304   
144    -112   
160    64     
-272   -160   
128    -304   
128    96     
-224   -352   
144    64     
176    -336   
112    16     
144    64     
16     32     
128    16     
80     48     
32     -32    
80     -80    
48     144    
96     -64    
-32    64     
80     -16    
48     48     
-64    -656   
144    -32    
32     -576   
192    48     
32     128    
112    96     
208    208    
-144   -16    
-16    64     
32     -96    
112    16     
80     -32    
48     -176   
320    48     
160    288    
224    400    
544    1104   
-192   496    
-208   208    
32     -96    
-48    -416   
-16    -240   
176    176    
320    -208   
32     -224   
176    960    
-256   16     
-288   -288   
-128   -16    
48     32     
288    -32    
176    304    
-368   -208   
-144   144    
-192   -192   
224    112    
96     -656   
352    -144   
416    -992   
-320   -240   
-320   64     
-304   -384   
-400   -352   
624    160    
304    352    
416    -384   
448    -1168  
208    16     
-240   -784   
-128   208    
-416   -128   
-176   -80    
240    352    
240    -48    
240    -208   
-144   -464   
32     -144   
-288   -480   
80     -32    
-64    -48    
-144   -176   
224    16     
128    96     
16     0      
160    64     
96     0      
-16    -160   
-656   -80    
176    -352   
-48    -176   
-16    -48    
-32    -64    
144    -240   
-112   -96    
-48    64     
176    112    
32     0      
144    32     
48     -64    
-112   32     
-160   -64    
112    48     
-704   -48    
208    80     
288    64     
-288   -112   
240    -80    
32     -224   
80     -80    
48     -768   
96     -112   
-112   -48    
-144   16     
112    -176   
-112   32     
-16    112    
-80    -16    
-80    -64    
128    -16    
256    16     
176    -48    
-16    -128   
128    -112   
64     80     
0      -96    
-32    -64    
128    208    
-352   0      
384    -32    
32     -96    
-32    -144   
240    32     
-64    -64    
144    -224   
-672   128    
32     -48    
352    144    
-224   0      
-416   -256   
368    -416   
32     176    
144    -48    
64     32     
0      -16    
-16    -80    
-240   -80    
160    -112   
-80    112    
-208   -128   
-16    64     
-128   -128   
224    32     
80     -96    
96     32     
-16    -288   
128    16     
-48    -976   
80     96     
-224   -48    
16     -96    
-32    -48    
96     -16    
-288   -80    
32     0      
-48    -96    
288    0      
-816   -16    
128    -160   
48     16     
-16    -80    
128    -48    
64     -224   
64     -176   
16     32     
-112   -128   
16     32     
112    -16    
0      32     
0      -80    
-352   -32    
304    -80    
-208   16     
-32    -64    
48     0      
64     48     
-112   16     
128    -560   
320    -32    
-288   -80    
-16    -112   
-128   64     
112    80     
-368   -112   
144    96     
-64    64     
96     -32    
-720   -32    
320    0      
-160   64     
-992   -128   
-96    -64    
-64    -128   
-352   48     
96     -112   
-160   0      
-272   48     
32     -16    
-112   -16    
64     -48    
16     -32    
128    144    
48     128    
-640   -160   
192    -288   
-32    240    
16     176    
-128   0      
-304   48     
0      -304   
-352   304    
-160   112    
-1072  16     
16     -128   
416    48     
48     128    
80     -160   
80     -64    
-32    -176   
48     64     
-224   64     
-352   96     
352    96     
-464   -16    
-352   -1568  
96     -96    
-256   1264   
-464   -192   
-400   -224   
176    -64    
-144   32     
416    976    
-416   -512   
368    -224   
128    192    
-112   -208   
-256   112    
-144   -1200  
-176   432    
32     800    
96     -224   
208    -528   
176    208    
144    176    
-1152  -64    
-16    -16    
-64    -96    
144    224    
-176   16     
-64    -16    
16     304    
-240   368    
320    -336   
96     -176   
48     304    
32     112    
-16    -80    
-336   -288   
-64    48     
-896   192    
288    176    
-48    -160   
608    224    
-192   -112   
-144   -176   
0      -640   
80     80     
336    480    
-128   96     
-80    -128   
-320   -176   
-208   144    
-48    -112   
-16    0      
-352   176    
96     96     
-528   0      
-48    -144   
0      -144   
16     -96    
-48    48     
208    -64    
48     -48    
64     448    
48     256    
-112   160    
16     96     
80     176    
-16    32     
-320   -32    
128    16     
-272   -112   
192    224    
-32    304    
256    192    
-208   80     
-16    288    
160    176    
-144   336    
160    384    
384    336    
-304   -32    
80     -48    
160    336    
-128   -112   
-80    128    
-832   -48    
-304   272    
48     208    
16     -48    
-96    144    
160    -112   
-304   0      
-64    -256   
-128   -64    
16     0      
80     -80    
-272   -96    
160    0      
-448   -48    
0      -384   
-224   -160   
320    0      
16     176    
0      16     
80     160    
0      176    
128    96     
80     48     
-32    -48    
-128   80     
32     0      
-320   32     
176    48     
-192   -32    
192    112    
-48    208    
-80    -32    
80     -240   
-32    -16    
96     64     
-48    -176   
32     -32    
-128   -64    
96     96     
-128   -16    
80     -16    
80     240    
80     128    
-48    -128   
-112   0      
192    80     
0      0      
32     48     
0      -16    
-48    16     
112    -64    
-32    0      
-16    112    
-128   656    
496    160    
0      -304   
-16    -208   
-48    -112   
-320   96     
48     -80    
240    352    
-112   288    
32     160    
80     144    
144    -16    
48     352    
-64    96     
32     -112   
32     -32    
-80    -16    
-64    0      
-112   -112   
240    -272   
-192   -176   
176    -80    
32     48     
-32    128    
-256   176    
192    16     
96     -48    
-64    -224   
-16    96     
256    272    
-176   464    
176    112    
352    192    
-176   240    
-96    -48    
16     32     
-80    -112   
-96    176    
80     -64    
96     -240   
192    -64    
160    112    
-80    208    
0      0      
-32    -16    
48     128    
-96    -208   
-128   -192   
-160   288    
144    -32    
208    -112   
48     96     
-16    64     
368    592    
-112   -384   
160    192    
16     160    
-16    -128   
144    240    
-80    -144   
256    176    
-64    -32    
448    704    
-464   -240   
-96    -288   
128    64     
64     -800   
128    272    
160    0      
-176   -464   
240    -288   
0      -480   
32     528    
208    592    
-352   -304   
176    144    
144    192    
-272   -48    
-64    -48    
-208   -192   
32     48     
304    -208   
-112   112    
160    256    
16     128    
16     -32    
-208   112    
-416   -16    
96     80     
176    80     
480    64     
272    0      
128    -32    
-192   -80    
-272   -16    
-192   16     
176    -416   
544    160    
-304   -272   
592    -112   
368    16     
96     0      
-32    -288   
80     128    
176    192    
32     64     
144    -112   
224    -80    
-112   112    
-144   64     
112    48     
128    -64    
256    80     
32     -432   
96     80     
400    -16    
-192   -16    
-128   0      
64     16     
96     64     
64     64     
64     -32    
16     -80    
144    16     
240    -16    
-160   16     
96     -208   
-16    0      
96     -64    
144    48     
48     -816   
-160   -112   
112    -16    
112    48     
160    32     
-32    32     
64     32     
-112   -480   
48     -80    
-208   208    
224    -128   
-64    32     
0      48     
464    -48    
272    96     
240    -208   
-192   80     
-32    128    
208    0      
-32    96     
112    112    
128    240    
32     112    
32     -112   
-128   -112   
-16    48     
288    -32    
-16    128    
-32    -112   
224    48     
-544   -480   
208    -80    
352    240    
-144   64     
48     -176   
192    -16    
-112   48     
32     -96    
-224   -64    
320    -32    
160    -64    
176    -256   
304    128    
-160   -96    
48     48     
-96    0      
288    -240   
-144   16     
112    -368   
96     -192   
160    0      
-32    -288   
16     32     
240    -560   
0      -128   
-16    32     
192    -80    
48     64     
320    192    
-400   -208   
208    -80    
64     -384   
-16    80     
192    -16    
48     -80    
-256   -32    
176    -272   
0      144    
144    -192   
0      -48    
-112   -816   
272    16     
64     48     
-128   -64    
160    -32    
-16    64     
144    -176   
-208   -96    
176    64     
176    32     
-608   -352   
96     192    
128    256    
-96    -496   
128    -288   
-32    -160   
272    112    
-128   -224   
-32    0      
128    48     
-96    112    
288    -16    
0      -64    
-128   64     
64     96     
-544   -96    
48     -336   
-64    96     
48     96     
32     0      
96     -528   
-32    -16    
-64    -800   
16     64     
128    -64    
144    -64    
320    176    
-128   -96    
-96    -336   
80     -304   
-80    32     
48     -128   
-848   176    
-48    96     
144    608    
208    -304   
-112   0      
0      -224   
80     80     
304    624    
0      -464   
128    112    
16     -96    
-176   -64    
64     64     
-144   -192   
128    -48    
-2336  -32    
112    -144   
-448   -80    
160    0      
128    464    
144    -224   
32     -256   
-32    -1424  
0      -208   
112    288    
128    -64    
80     -336   
112    -96    
-256   -288   
448    320    
-1136  -128   
-240   -224   
-592   -304   
192    -368   
496    -48    
272    -192   
-256   -112   
-48    -624   
144    16     
0      112    
16     80     
0      32     
144    -16    
0      -48    
16     -112   
-256   -192   
176    112    
256    48     
528    -160   
-32    16     
-32    16     
-288   192    
-160   -192   
240    64     
320    128    
192    48     
-752   -16    
-432   -208   
-432   -80    
0      0      
208    144    
-16    32     
0      -208   
192    -192   
-128   0      
0      -320   
80     -144   
-96    48     
32     80     
-432   -80    
128    32     
48     160    
-16    336    
-48    288    
64     -96    
-96    -208   
64     -128   
96     128    
-64    320    
48     64     
-400   -208   
32     -160   
96     -192   
-304   -160   
112    -160   
-1952  -128   
-128   48     
-64    128    
-80    -96    
320    0      
-256   32     
-592   -48    
64     0      
64     -544   
-288   -432   
0      -208   
-496   176    
-272   -16    
-208   80     
96     -192   
-192   144    
32     384    
-1184  -32    
-288   -96    
-128   -320   
-240   -16    
-288   -32    
432    320    
256    -16    
0      16     
-304   -368   
-176   -432   
64     -304   
192    -144   
80     160    
32     208    
16     32     
-16    -16    
32     64     
-48    16     
16     48     
32     -208   
-144   -96    
-32    32     
-144   -96    
-96    -256   
-192   -160   
160    -192   
-288   -80    
-160   48     
-96    48     
-32    96     
-176   160    
80     624    
320    144    
-176   16     
208    0      
256    112    
-64    160    
96     -32    
0      112    
160    48     
-464   0      
-144   -176   
-48    80     
-48    -144   
96     -80    
112    -208   
-224   -432   
-1136  -288   
48     -16    
-320   32     
128    48     
160    -48    
-224   -176   
-64    64     
0      48     
-144   -112   
-80    -160   
-16    -16    
176    144    
-176   -96    
64     -64    
-160   -224   
-336   -32    
0      -144   
-144   -464   
256    -208   
96     -32    
0      -128   
-48    -80    
-208   -48    
288    208    
32     480    
-64    144    
-176   224    
80     256    
192    -96    
32     496    
-80    0      
-64    -208   
-464   304    
192    -80    
-96    208    
-192   -432   
-208   -256   
96     0      
-192   80     
16     -144   
-48    0      
-192   -16    
144    -240   
192    480    
-144   -448   
64     624    
240    -64    
-176   -192   
-240   144    
0      -288   
48     -96    
208    208    
0      -128   
-304   -560   
-80    176    
80     176    
176    32     
-16    16     
-128   -144   
176    32     
-176   16     
112    80     
-48    144    
-16    80     
32     -16    
-32    -16    
288    16     
304    688    
-352   800    
-176   432    
304    -128   
176    -144   
192    32     
-336   -224   
-320   144    
-112   224    
-176   -128   
304    -160   
-272   -32    
416    64     
208    48     
-320   -96    
336    -48    
-80    112    
-368   16     
-256   -112   
16     -80    
16     48     
-224   32     
144    -32    
48     -16    
192    -64    
96     80     
-80    16     
0      -64    
-160   -144   
-208   16     
-16    48     
16     16     
208    256    
-480   32     
-128   -96    
464    96     
432    304    
-80    272    
-256   48     
-48    -208   
240    -96    
112    48     
512    160    
-80    48     
-48    16     
-656   -48    
496    96     
16     16     
-304   64     
-224   -32    
208    48     
-272   16     
480    112    
400    144    
-592   -32    
176    16     
0      96     
32     112    
0      16     
336    160    
-176   -32    
320    16     
-144   0      
48     64     
16     32     
-16    0      
-112   -16    
128    80     
-32    32     
80     112    
80     -144   
-128   -48    
-32    32     
112    80     
-112   0      
128    112    
-96    96     
368    192    
-112   -80    
272    -16    
176    48     
-32    112    
240    -240   
160    -176   
-112   96     
192    96     
0      -16    
112    96     
-272   -48    
96     -48    
112    128    
112    112    
112    32     
272    48     
-368   -48    
0      -240   
-240   -144   
112    -16    
-272   -496   
144    -960   
112    320    
-208   48     
544    48     
16     80     
-224   32     
-112   -256   
288    -272   
-16    -32    
-176   -96    
176    -128   
240    112    
16     32     
16     -80    
144    48     
0      -1104  
16     16     
32     80     
144    -32    
-48    144    
176    112    
64     -192   
0      64     
-80    -64    
144    -80    
176    160    
-416   -272   
400    -32    
-256   176    
256    32     
80     160    
80     -64    
64     -544   
96     160    
-64    -32    
0      32     
16     -128   
64     96     
-128   -80    
128    -192   
-128   240    
224    -96    
48     -32    
0      -160   
160    176    
112    -160   
-80    -64    
-64    -480   
288    384    
-48    -384   
32     -112   
48     144    
272    -16    
16     992    
-160   -208   
0      -320   
96     352    
272    -192   
288    -272   
-16    -224   
16     336    
-32    96     
176    -96    
0      176    
-64    288    
144    96     
272    -384   
16     -80    
-64    16     
160    0      
0      160    
64     400    
224    192    
128    32     
0      96     
-80    -288   
64     -48    
112    -16    
192    96     
144    -160   
-112   -48    
112    -304   
96     -32    
144    176    
496    352    
-288   208    
48     -368   
-16    80     
208    -160   
96     -48    
128    -96    
112    32     
80     -32    
112    96     
-80    -352   
128    80     
-48    48     
16     -352   
288    -80    
-112   -304   
240    64     
-16    -48    
16     16     
96     -16    
-128   32     
288    -96    
80     176    
0      -32    
64     -1168  
48     -80    
0      -320   
64     96     
304    -144   
256    -224   
16     -48    
80     -112   
80     -96    
128    -112   
160    32     
256    192    
160    16     
0      -32    
-96    -144   
16     -336   
-48    16     
48     64     
-128   -32    
-160   -16    
-96    -48    
384    -144   
176    -176   
-32    64     
-48    64     
-16    -144   
176    -160   
208    -64    
304    208    
384    304    
16     112    
-480   256    
-256   -128   
96     64     
16     80     
240    -80    
-416   240    
-80    192    
192    96     
80     -64    
256    272    
-208   208    
176    -96    
144    -352   
96     -48    
144    -144   
-32    48     
16     -240   
48     -288   
-80    16     
112    192    
-192   80     
112    -112   
112    -112   
16     -176   
128    -48    
-16    -80    
-48    -112   
112    -560   
80     96     
-128   0      
128    160    
224    32     
128    16     
-128   256    
368    272    
-752   128    
-16    64     
16     80     
208    -80    
-208   -192   
352    432    
-288   416    
64     -192   
128    208    
-48    48     
128    192    
224    208    
64     192    
-144   432    
368    192    
-64    -48    
16     96     
-272   0      
16     16     
-112   -464   
-128   -96    
544    144    
0      -464   
224    -240   
192    -32    
-224   -16    
128    -384   
16     -144   
240    144    
-192   448    
-16    32     
0      -160   
224    320    
160    16     
144    528    
80     160    
-48    64     
-16    -176   
-48    -96    
272    -832   
-192   -288   
-96    -16    
48     -48    
-48    528    
384    0      
-112   16     
-80    80     
-288   -336   
80     32     
304    -112   
176    -32    
192    416    
0      -192   
-32    192    
-416   240    
192    -384   
320    304    
-144   -64    
-160   96     
0      -48    
-160   -16    
400    224    
-208   -112   
160    0      
-384   -48    
288    0      
0      96     
-2368  0      
-192   -80    
16     128    
-640   32     
32     -80    
-928   48     
-16    192    
-48    -256   
160    272    
80     -80    
160    -48    
-128   -80    
-80    304    
-176   -224   
-112   -80    
-256   -80    
-256   64     
0      224    
-96    -112   
-96    16     
-528   -128   
-240   -32    
496    -48    
-208   -304   
0      -48    
-48    96     
-560   176    
128    224    
-192   -112   
32     32     
32     -48    
-16    32     
-320   -96    
-16    176    
-256   -64    
-288   -144   
-112   -272   
-128   160    
-32    80     
176    -32    
-48    -48    
16     -48    
112    48     
-48    -48    
32     -96    
-80    -144   
32     -160   
-16    16     
-96    64     
32     -16    
-48    -48    
128    144    
-256   -48    
128    112    
-2112  -64    
-32    32     
960    1056   
-944   704    
-512   -384   
48     -96    
-48    -32    
-240   -144   
624    48     
96     208    
160    416    
-80    192    
-144   -176   
-32    80     
-256   96     
-400   -48    
176    -64    
112    0      
-96    48     
0      -144   
80     16     
-400   -160   
464    -80    
-64    128    
320    128    
-112   0      
-576   0      
0      80     
-544   -32    
224    48     
-32    48     
0      0      
-496   -48    
96     32     
-272   -32    
-64    64     
-96    0      
-48    0      
-96    96     
-160   48     
592    80     
-96    32     
-304   -48    
48     16     
96     32     
-80    -48    
-96    48     
-1088  0      
32     48     
-48    64     
-96    0      
352    160    
-384   -80    
0      0      
192    64     
-400   -16    
256    80     
-128   -32    
-592   -64    
176    48     
-272   -64    
-16    -48    
-32    80     
-240   -16    
16     -32    
32     32     
-32    16     
80     0      
-32    -16    
112    16     
48     112    
-176   -112   
160    0      
-224   0      
176    48     
-112   16     
-16    32     
-272   -128   
80     96     
-224   96     
176    64     
-48    304    
256    176    
-224   96     
-16    -96    
-48    -112   
48     -16    
-112   0      
-128   -176   
16     48     
-208   -80    
128    -208   
0      -16    
96     144    
-160   -64    
0      -208   
-160   -192   
240    -96    
64     -80    
-80    -128   
32     96     
-32    496    
272    96     
256    -192   
-112   16     
-608   -144   
48     320    
-48    -448   
-80    -208   
224    320    
224    128    
-64    -192   
128    -16    
0      0      
-96    192    
-160   0      
160    32     
-96    32     
-160   -16    
144    320    
-144   -32    
-96    16     
32     384    
400    -400   
-16    1360   
-176   96     
16     -432   
384    448    
32     -496   
-128   608    
32     -480   
64     112    
48     128    
-176   96     
-160   80     
80     -384   
-48    128    
160    -176   
48     64     
0      32     
64     0      
-64    224    
16     -32    
48     96     
16     128    
-16    -48    
-304   -208   
320    -32    
-64    96     
112    -160   
-112   -16    
48     -128   
176    -96    
-16    -64    
32     16     
208    80     
288    -64    
-144   0      
-128   -128   
32     -176   
96     16     
96     96     
112    32     
80     48     
192    -32    
-176   224    
-144   32     
-80    -48    
-48    144    
192    -64    
272    -32    
144    -48    
-96    48     
32     64     
-16    48     
144    32     
128    -64    
256    144    
-240   -16    
48     -320   
-144   16     
-64    -192   
80     -16    
288    -16    
80     160    
416    208    
-128   336    
-384   80     
48     -112   
0      -16    
160    112    
0      -16    
256    80     
-80    48     
96     -48    
-112   -64    
48     -496   
16     80     
48     -128   
160    32     
80     624    
-80    208    
240    -112   
-224   144    
-192   48     
272    304    
-352   64     
-64    -240   
320    -240   
240    -16    
160    80     
0      64     
-336   -32    
176    64     
192    160    
64     96     
256    -64    
272    -192   
448    -16    
112    -176   
-80    128    
-240   32     
-304   48     
240    128    
128    -32    
256    320    
-304   -96    
112    -64    
384    -832   
96     240    
-208   16     
-80    -64    
256    32     
48     16     
-192   -32    
32     -16    
-16    0      
112    -80    
160    0      
224    -144   
304    -48    
208    -240   
48     96     
-128   -304   
-96    -64    
-128   -32    
224    64     
-96    -128   
176    -64    
400    208    
-256   -112   
128    -16    
16     48     
64     96     
80     -16    
160    160    
176    -96    
-48    -112   
192    -288   
160    16     
32     0      
160    16     
48     -16    
-32    -16    
64     -480   
80     -272   
-48    320    
144    -320   
-208   224    
-16    128    
-80    96     
208    0      
400    560    
16     -432   
128    -384   
112    160    
-240   208    
128    64     
112    -288   
32     400    
576    224    
-176   272    
0      -448   
464    -400   
-224   -240   
384    336    
-144   -112   
80     -32    
64     272    
-48    -64    
0      80     
112    -1088  
192    64     
0      -192   
-352   -688   
624    -80    
320    -304   
64     -176   
-128   -208   
64     -192   
80     -112   
-224   32     
64     -64    
160    -16    
-240   -688   
432    752    
-48    -192   
-432   -304   
464    176    
0      -112   
160    0      
-112   -80    
-32    -80    
80     -80    
208    16     
0      -480   
96     32     
-128   -176   
304    -208   
32     144    
96     -48    
-160   -352   
80     144    
-336   160    
112    32     
448    0      
176    48     
32     32     
-80    64     
48     -32    
32     0      
64     -32    
176    -176   
32     -96    
16     -144   
176    -16    
16     -48    
-16    -16    
-400   -128   
80     -208   
-1152  -80    
128    32     
32     32     
208    -16    
-80    -32    
160    -272   
-240   -176   
256    -1536  
-32    192    
80     32     
144    0      
-80    -16    
320    80     
-352   -16    
144    -48    
-752   -16    
32     -32    
80     -16    
144    -144   
16     -128   
32     -64    
0      16     
64     -496   
-48    -48    
144    112    
48     64     
-240   -16    
64     -16    
224    336    
-144   0      
-160   -64    
224    112    
-512   32     
144    -96    
-16    -80    
64     0      
0      32     
64     -80    
192    32     
128    -208   
32     48     
0      96     
160    144    
-128   -96    
224    -240   
-144   -32    
96     -80    
-64    -32    
64     -48    
-464   -112   
64     -32    
32     0      
-16    -32    
80     160    
-16    -384   
176    64     
-96    16     
144    -64    
288    688    
-416   448    
-1152  -256   
208    -256   
-112   48     
-64    -176   
-160   -96    
192    -32    
320    -32    
0      -320   
-144   -192   
64     -592   
-496   176    
-432   -64    
16     -144   
-16    -64    
176    -32    
-160   0      
80     128    
-320   -32    
-240   304    
-192   288    
112    -112   
-240   -32    
128    0      
176    192    
-544   64     
-960   208    
-80    208    
224    -112   
-384   -160   
144    -32    
128    32     
160    64     
-80    -64    
48     -96    
80     256    
-528   112    
-176   -80    
-512   -128   
-80    -32    
-208   0      
-256   -80    
16     16     
-368   176    
-416   16     
128    48     
-528   -48    
96     16     
240    96     
-560   -112   
304    -32    
-224   -48    
352    224    
-528   -80    
-208   -64    
128    16     
-304   0      
-32    -48    
-416   -32    
-32    -144   
-96    -32    
80     64     
0      -64    
0      80     
-176   -80    
-16    16     
-144   -48    
32     48     
80     -112   
0      32     
96     48     
0      16     
-48    -32    
-208   -32    
-32    -160   
-560   -160   
16     16     
-464   -32    
-128   64     
-208   -96    
160    -80    
160    -48    
-32    -48    
224    -80    
-96    96     
-32    144    
-128   -304   
-16    -128   
-272   304    
-192   32     
-128   -528   
80     -176   
-1040  -544   
128    1104   
-144   16     
-176   -880   
48     656    
-48    -480   
64     -144   
-112   160    
-128   -48    
144    256    
-96    -240   
144    416    
-272   -96    
64     48     
-16    96     
-432   -16    
-64    752    
288    -400   
32     64     
-144   -640   
16     -592   
-272   128    
128    -160   
32     368    
-16    80     
288    240    
-32    0      
-176   -944   
-400   -448   
-144   -336   
-464   -48    
80     336    
-464   288    
80     288    
-352   -368   
320    -128   
-96    -112   
64     144    
16     -128   
-224   16     
-48    80     
-112   112    
144    0      
-16    64     
64     -16    
-32    -48    
-176   48     
-1888  -192   
-208   -16    
32     96     
-112   112    
-16    -208   
112    0      
-32    -48    
128    -16    
-64    64     
-80    -80    
48     -32    
16     80     
-16    96     
-112   -80    
64     0      
-80    0      
-80    32     
32     -32    
48     64     
144    48     
0      -16    
48     48     
-96    64     
176    48     
32     16     
208    32     
-160   -16    
-112   -16    
-32    -144   
144    0      
80     32     
32     0      
0      -32    
0      32     
48     112    
-96    96     
0      112    
-32    144    
-16    64     
-16    -48    
208    0      
-352   48     
32     80     
-192   0      
112    -48    
176    32     
-144   112    
-128   -96    
-48    128    
48     96     
16     -32    
144    -48    
-64    -16    
96     32     
-80    80     
32     160    
32     32     
0      -112   
176    -16    
128    128    
-32    0      
0      -96    
32     80     
-304   -48    
-80    32     
-16    112    
128    -128   
48     -112   
96     -64    
-208   -176   
160    32     
-48    0      
96     368    
80     224    
64     -16    
80     144    
-112   128    
-144   0      
160    -176   
272    -112   
128    32     
64     112    
208    368    
-352   256    
-288   -96    
96     144    
-32    144    
-16    240    
96     144    
0      -16    
-16    -16    
80     -112   
208    240    
144    256    
-48    -272   
80     32     
208    -64    
-480   -784   
16     -64    
-80    -96    
-96    96     
-304   -128   
-192   -64    
320    304    
96     128    
176    192    
160    272    
-208   0      
-64    -528   
-64    96     
32     16     
-80    16     
16     128    
288    -304   
-80    16     
80     -176   
-160   32     
-80    -144   
96     448    
-16    0      
-16    0      
-48    -16    
112    160    
-16    144    
48     -160   
64     112    
32     64     
-288   -272   
304    96     
112    -80    
144    304    
208    240    
-352   -320   
-64    -560   
64     -160   
112    192    
144    32     
-64    80     
32     -112   
224    192    
208    16     
80     -144   
96     -192   
240    256    
-64    432    
0      272    
144    -544   
-416   -496   
0      -144   
-32    -928   
-208   -384   
16     16     
0      0      
144    -64    
-80    112    
-96    64     
352    -48    
-240   64     
96     -32    
80     16     
144    -64    
464    32     
-96    -320   
192    -16    
80     -64    
-32    -48    
112    160    
-208   80     
240    -144   
176    0      
-336   -96    
352    0      
-240   0      
368    144    
-208   -32    
64     -16    
192    64     
-96    -128   
224    80     
-144   -80    
-16    48     
128    -384   
80     0      
160    -48    
96     192    
-448   -16    
192    32     
112    0      
96     64     
0      16     
-16    -128   
80     112    
80     0      
176    48     
160    -368   
-32    0      
64     32     
-32    80     
208    32     
48     64     
-128   -16    
208    112    
-32    96     
-48    -112   
160    64     
48     -16    
224    64     
-128   -544   
112    0      
-48    -256   
0      48     
176    -16    
-112   -176   
32     -80    
208    96     
-272   -16    
160    64     
-64    -96    
240    -96    
128    16     
224    -64    
80     80     
-160   -128   
-48    16     
16     -32    
128    64     
0      0      
32     48     
96     32     
112    48     
80     32     
128    -528   
336    -848   
-112   64     
-128   -1280  
32     -48    
32     -128   
160    -64    
112    112    
64     -16    
160    112    
112    -16    
-64    -368   
32     112    
128    -48    
-16    -16    
192    -128   
-64    -48    
-16    -32    
128    -80    
176    0      
64     -128   
64     -32    
128    96     
-80    -176   
320    112    
192    -48    
-32    608    
-48    240    
272    -352   
128    -32    
-480   -96    
192    -208   
544    256    
32     80     
-96    -112   
48     -176   
-384   -240   
-112   -336   
-112   16     
-48    -240   
352    176    
-320   16     
-192   -80    
336    -48    
-272   -256   
672    -224   
288    -48    
-640   96     
240    96     
-112   0      
-96    -96    
-288   -80    
496    -272   
416    -80    
304    -272   
368    -160   
144    -160   
16     64     
16     16     
112    -80    
-608   -192   
-304   -128   
-912   96     
-96    -96    
128    176    
-224   -224   
112    -144   
336    -32    
128    0      
512    -1008  
-192   16     
-32    -16    
-416   -32    
-224   -16    
224    48     
-208   32     
352    144    
-240   -32    
-208   -208   
-2176  32     
-16    96     
-208   32     
208    -160   
192    -16    
128    -224   
144    112    
208    0      
16     -304   
-48    -160   
16     160    
32     288    
-96    -192   
-48    64     
16     -240   
48     -272   
16     480    
-144   -128   
160    -144   
-32    48     
-112   -160   
320    -304   
64     176    
224    112    
-304   -240   
64     -320   
-544   -368   
-32    256    
-48    -416   
112    -16    
-1120  544    
48     -304   
-48    64     
176    -256   
-240   368    
272    32     
-208   -208   
256    -1376  
208    208    
288    640    
432    32     
-288   64     
288    -80    
-448   -144   
224    -400   
-240   -208   
208    0      
-64    0      
192    128    
400    400    
-272   336    
208    0      
-320   -48    
48     0      
0      -128   
224    160    
128    -64    
96     16     
-96    -16    
16     64     
-32    -160   
112    -176   
176    96     
144    -256   
-16    -224   
0      -288   
-1936  0      
176    0      
-1232  112    
0      48     
-1424  48     
-560   -192   
-96    -64    
-80    288    
144    -192   
-32    -32    
-400   -192   
112    -32    
-416   -224   
0      0      
-128   160    
-288   96     
-48    -128   
-32    96     
-160   -144   
-192   -208   
-128   48     
128    32     
-160   0      
320    32     
-224   -32    
-896   -160   
-16    -80    
-496   -96    
224    -64    
192    96     
176    96     
-192   80     
-288   -64    
-208   -96    
400    368    
-384   464    
-672   -64    
-96    -272   
-496   192    
288    64     
48     -160   
224    80     
-32    64     
208    480    
96     96     
-240   -112   
-160   -144   
-192   -48    
-64    -64    
128    80     
-16    16     
-240   -64    
-96    64     
-1712  0      
48     128    
-144   64     
0      96     
-80    -16    
96     16     
-16    32     
32     32     
-16    -48    
80     -64    
-176   -16    
128    -240   
-32    -64    
-368   144    
-64    96     
-608   112    
160    80     
-80    -112   
0      32     
48     32     
-144   32     
-16    32     
64     -48    
80     -128   
-288   -192   
32     -80    
-144   32     
64     32     
-80    64     
176    224    
-368   16     
16     0      
0      32     
288    128    
192    80     
64     64     
112    -144   
-368   -368   
-288   -144   
-448   304    
144    176    
-32    96     
160    192    
-80    64     
-256   -176   
-448   -352   
80     272    
-1216  32     
288    240    
208    -16    
-128   -112   
160    176    
-304   32     
48     -272   
-144   224    
224    384    
-496   -432   
-112   160    
-352   -32    
400    464    
-208   -48    
416    -160   
-208   0      
-608   16     
176    -256   
-64    96     
-96    -160   
-384   80     
-256   -32    
-64    128    
176    400    
48     -144   
224    -112   
-208   -64    
144    176    
-400   336    
272    240    
-224   -128   
-240   0      
-48    -144   
-48    -96    
0      176    
16     240    
-48    112    
-48    176    
16     -32    
144    -64    
-160   32     
-208   -32    
176    -16    
-192   -64    
144    32     
32     64     
-64    0      
160    -32    
-16    -16    
144    32     
-16    96     
-32    112    
-32    -16    
-64    -80    
-160   -64    
208    112    
-176   -112   
240    -80    
-80    -32    
-128   -112   
-80    80     
176    240    
-208   160    
240    64     
0      -48    
-48    -160   
128    80     
272    96     
192    64     
128    32     
-272   -64    
-144   128    
-480   -128   
-192   -224   
288    -32    
96     176    
0      80     
96     -16    
272    0      
-80    16     
-96    -48    
224    -64    
-304   16     
-464   208    
-576   -176   
400    48     
-240   0      
288    160    
-144   0      
-208   48     
48     16     
160    48     
-16    80     
-16    64     
144    16     
80     16     
-32    64     
-96    -16    
48     -32    
-48    48     
144    48     
128    32     
-160   0      
352    -64    
-48    0      
32     96     
-64    16     
96     48     
192    64     
80     -16    
-16    64     
48     64     
-48    -16    
48     32     
-64    0      
0      64     
144    144    
-80    -352   
0      0      
176    80     
128    144    
-112   -64    
176    -16    
-64    64     
-16    32     
144    0      
32     96     
-64    0      
0      48     
-16    -80    
-80    32     
64     32     
48     -448   
48     -288   
208    16     
128    64     
32     16     
128    144    
-112   0      
112    32     
64     48     
48     0      
80     64     
112    16     
112    208    
144    96     
-96    80     
80     -48    
32     112    
32     -560   
128    -64    
0      -32    
32     -64    
96     -48    
64     80     
144    -64    
48     32     
-128   32     
96     80     
-96    -128   
48     -128   
32     64     
-32    -144   
128    32     
-32    -608   
-32    32     
32     -32    
-32    0      
64     96     
112    32     
-16    -160   
-16    -48    
-32    -16    
96     144    
272    176    
-528   -16    
-128   -352   
16     -16    
496    816    
592    144    
288    -64    
288    -1312  
240    -32    
-368   -272   
-208   -80    
320    464    
-432   -112   
96     -16    
112    48     
32     64     
48     64     
32     64     
176    -48    
272    32     
-48    144    
144    128    
416    -304   
-368   -288   
-128   -240   
368    256    
224    80     
240    -96    
-272   -128   
128    240    
-560   384    
-128   -112   
48     -112   
128    -608   
432    256    
432    -32    
-464   -1168  
-128   -80    
-96    -384   
448    112    
400    240    
384    -160   
0      736    
-96    -48    
272    -112   
272    192    
272    -128   
32     16     
416    96     
-64    -32    
0      16     
-48    160    
80     144    
-32    -768   
96     368    
192    -80    
144    -272   
112    -640   
32     -672   
80     -112   
32     96     
32     208    
176    -112   
224    304    
-192   112    
112    -496   
128    -32    
240    272    
32     48     
-16    -48    
-112   -1024  
112    -672   
416    208    
-112   -144   
-32    16     
-80    -112   
144    -96    
144    -240   
128    -112   
16     176    
0      288    
96     320    
240    144    
-32    -192   
64     304    
192    48     
-128   288    
-816   48     
-128   32     
32     -208   
80     -144   
-48    224    
32     -272   
80     -96    
-48    -48    
32     32     
-16    64     
272    -16    
96     112    
-96    176    
64     64     
64     -64    
-64    -16    
-32    -160   
320    32     
16     -80    
48     -208   
0      -336   
-160   64     
-16    -112   
-32    0      
208    0      
-368   -16    
336    -64    
144    16     
208    272    
-48    336    
-432   48     
96     -144   
-800   32     
64     -176   
96     0      
128    -128   
-256   -368   
416    -368   
-48    96     
32     -800   
704    496    
-592   -80    
-48    64     
176    224    
32     416    
64     112    
176    -192   
-320   240    
176    224    
208    208    
288    -16    
-80    32     
-32    -464   
-112   -80    
256    -160   
288    112    
176    -16    
-80    16     
176    176    
-16    176    
-64    400    
336    160    
0      112    
272    -128   
-1424  -80    
-32    -160   
32     32     
32     -80    
112    176    
176    -192   
192    -96    
96     -96    
144    96     
-336   32     
112    -192   
48     32     
80     32     
-96    -80    
128    -160   
-352   -144   
208    -144   
-336   224    
128    64     
-272   64     
-80    -416   
144    -64    
96     144    
64     96     
160    -48    
80     32     
-560   -160   
32     -144   
-224   -32    
64     -208   
-32    96     
80     -16    
-144   -64    
144    -144   
96     32     
80     -176   
192    0      
-448   0      
160    -304   
-592   -80    
128    160    
-160   64     
-64    -16    
-128   -16    
-16    -96    
-48    80     
240    96     
-48    112    
80     -96    
16     -16    
-32    160    
208    400    
-208   48     
-1664  -240   
-544   -160   
288    96     
-352   32     
-48    32     
-368   336    
80     -176   
-352   -304   
304    -480   
320    240    
-560   -208   
208    32     
-816   -32    
-32    -48    
-304   176    
-528   32     
-464   -224   
-608   208    
240    176    
240    -160   
80     -80    
-304   -144   
256    64     
-752   -240   
96     -736   
-304   -160   
720    -160   
432    -368   
144    -224   
-224   -80    
-144   240    
-416   96     
-944   -64    
-176   -96    
-832   -112   
272    -48    
288    -96    
96     0      
-176   -16    
-352   -64    
-48    -128   
48     144    
32     96     
16     -32    
-64    -16    
-176   0      
-352   -176   
48     -128   
-64    16     
-576   32     
48     -96    
160    -96    
-112   80     
432    64     
-448   -144   
-144   -288   
144    -96    
-272   -208   
224    16     
0      16     
128    96     
-96    -32    
176    48     
-96    0      
-128   128    
-64    0      
-1392  -64    
-16    0      
-64    -16    
80     32     
16     -64    
-96    128    
80     48     
-112   48     
-64    48     
-144   -64    
-64    -208   
-112   -128   
-64    80     
-320   0      
96     96     
-352   32     
112    16     
-80    -80    
48     48     
16     48     
-32    0      
-32    64     
16     112    
-112   0      
-48    -96    
1056   768    
-1168  384    
-320   -240   
-96    16     
-416   -80    
-192   -48    
400    192    
-288   272    
-720   80     
-400   -192   
288    80     
464    96     
-448   0      
-32    64     
496    176    
-608   0      
-48    -112   
-16    32     
192    112    
-128   80     
16     -144   
112    -16    
-496   32     
-16    -48    
64     48     
32     0      
16     32     
96     96     
64     -48    
-224   16     
64     80     
-304   -64    
208    80     
-128   -80    
224    144    
-560   -160   
0      16     
-16    -64    
0      48     
144    80     
-240   112    
96     112    
160    16     
48     80     
-208   -80    
-112   -64    
112    48     
96     96     
-336   -112   
176    96     
-352   -80    
112    96     
32     64     
-128   16     
0      -64    
0      -16    
224    80     
-176   48     
192    -32    
-48    48     
-64    208    
208    256    
0      112    
-288   -96    
240    144    
0      80     
48     0      
96     -64    
64     0      
-64    32     
112    176    
-176   128    
0      48     
96     32     
-16    -224   
224    176    
-304   16     
-32    -192   
-192   160    
48     32     
16     80     
48     80     
0      -112   
240    416    
-96    -240   
176    16     
-32    64     
-64    16     
0      48     
64     -32    
-144   -48    
-16    64     
192    -32    
48     128    
288    784    
16     -416   
32     240    
-240   -112   
64     224    
80     -160   
176    144    
128    304    
-288   224    
336    16     
96     -128   
192    -128   
0      -96    
400    80     
-48    160    
-48    -384   
0      240    
144    -448   
304    -16    
816    240    
0      -96    
64     208    
-80    160    
-208   0      
48     0      
64     80     
-64    -96    
-272   48     
-64    32     
-448   -256   
160    -2800  
112    -656   
-16    1520   
-128   288    
-240   -352   
-16    -48    
-144   32     
240    336    
240    -400   
656    -144   
192    496    
224    -192   
-304   -608   
-160   -32    
96     448    
-480   -112   
-208   -144   
-464   192    
512    352    
-208   320    
288    -32    
320    32     
192    176    
176    80     
-160   144    
-32    64     
48     240    
-144   0      
240    80     
80     128    
-96    -272   
224    64     
112    -16    
128    144    
-208   -96    
-32    -112   
-48    16     
32     -96    
-128   32     
160    -96    
16     -224   
192    80     
32     -16    
-48    -80    
112    -48    
-48    -272   
-160   -160   
192    -880   
288    16     
-128   64     
-48    16     
-48    80     
128    -32    
16     -80    
416    352    
-448   256    
240    -64    
64     -64    
-160   640    
96     64     
160    96     
160    64     
80     -160   
80     320    
240    16     
-160   -48    
240    -368   
-240   -64    
448    -352   
48     80     
-16    336    
64     256    
64     432    
96     -240   
-112   128    
48     208    
144    576    
240    -192   
448    240    
-384   -128   
-80    0      
-176   -144   
240    -112   
192    80     
-144   48     
0      32     
-144   0      
176    -48    
128    0      
0      32     
16     -128   
160    112    
-240   -736   
224    160    
256    16     
-304   -80    
48     0      
48     224    
0      32     
-16    -48    
64     -112   
32     -128   
384    240    
-272   -64    
-64    -672   
240    -400   
16     304    
144    -80    
-48    -560   
16     -624   
160    -128   
-176   32     
-16    64     
208    -272   
-128   -112   
384    -272   
-80    -80    
112    240    
256    -64    
224    64     
48     -112   
80     32     
-80    -192   
16     -80    
-64    -688   
336    -96    
224    32     
64     288    
-80    112    
-16    -96    
224    -432   
192    -224   
144    -608   
0      -256   
32     -32    
-48    -16    
160    160    
-96    0      
-32    64     
32     -320   
208    -144   
128    16     
288    304    
-176   304    
-752   32     
-160   -16    
80     -144   
-80    -288   
0      -80    
0      32     
48     64     
16     224    
368    0      
16     144    
-96    -192   
-48    -416   
-80    -80    
16     -32    
32     320    
64     -480   
-32    144    
-208   -80    
96     -176   
128    112    
32     -352   
144    144    
80     -208   
32     32     
176    32     
176    32     
-16    0      
48     -64    
240    -48    
32     -48    
-48    -16    
144    -160   
-752   48     
96     80     
144    336    
224    -192   
-320   -336   
-128   -80    
16     160    
16     -304   
-160   16     
160    -80    
416    176    
64     288    
336    0      
48     0      
160    0      
-464   -80    
-256   -112   
64     -16    
-64    -64    
144    0      
48     32     
16     64     
-400   -832   
144    48     
400    0      
-256   64     
-32    -16    
112    -48    
-288   -240   
640    -416   
192    -48    
-80    -112   
304    -160   
368    0      
-176   112    
-96    -192   
-272   -16    
112    -256   
-48    160    
656    384    
-448   -128   
-416   -112   
80     -48    
-288   0      
208    144    
-400   -16    
64     -16    
-608   0      
-32    -176   
-64    -80    
96     -144   
-64    -16    
-112   32     
208    80     
240    -48    
192    -64    
-496   -80    
96     32     
-80    32     
144    48     
32     -64    
-32    -128   
-160   16     
64     -16    
96     64     
-80    -80    
-16    48     
-80    32     
32     64     
-48    32     
128    -16    
-384   -64    
96     0      
304    32     
224    -80    
-448   -32    
-96    -48    
-144   -32    
-96    -64    
64     128    
112    -144   
144    128    
-176   -144   
464    128    
-144   32     
96     -144   
-64    80     
-80    -16    
-80    -112   
160    -32    
-224   -16    
128    96     
-320   96     
-16    -128   
176    -64    
-2464  -256   
32     -112   
-1168  -272   
-80    96     
-288   224    
-544   -128   
144    -32    
16     64     
-96    32     
-112   -160   
736    144    
-448   96     
-624   48     
-752   -208   
112    112    
-512   -48    
192    96     
224    0      
-224   -32    
-80    80     
-576   -32    
-112   80     
-1072  -16    
-112   16     
288    -32    
48     -16    
-240   -96    
80     64     
-160   -64    
80     32     
-48    -96    
128    48     
-32    112    
-64    144    
-64    -64    
32     208    
-80    80     
48     -64    
-48    48     
-832   16     
-112   0      
-384   -64    
176    96     
-224   48     
192    160    
-112   32     
144    32     
64     64     
-128   -96    
-32    -112   
-160   -48    
-96    -16    
-96    128    
64     112    
176    48     
144    288    
-592   -320   
0      -80    
32     240    
48     0      
-64    -96    
80     208    
-304   -224   
48     48     
144    160    
-128   -112   
-160   -144   
16     80     
96     -64    
-64    -32    
64     48     
-720   -16    
144    160    
-160   480    
112    -624   
-112   592    
-160   -192   
176    -304   
0      144    
0      464    
-320   -320   
16     -304   
-288   480    
224    480    
-48    48     
48     80     
-448   -160   
-48    112    
-80    -64    
176    96     
-80    176    
-96    336    
224    160    
-80    80     
-96    0      
-48    -160   
112    -432   
112    304    
80     352    
-192   -32    
-80    160    
-304   -208   
144    208    
-432   448    
-368   176    
32     -112   
48     -80    
-16    368    
0      256    
64     192    
-64    288    
-64    336    
-64    416    
-96    -112   
-256   -352   
-48    272    
-624   96     
0      96     
-720   144    
-176   16     
304    -112   
304    16     
-80    -32    
48     112    
-240   80     
-192   128    
-400   400    
-32    64     
240    64     
112    -16    
48     80     
32     64     
128    -32    
224    -96    
-32    32     
112    96     
224    288    
-96    96     
128    32     
-272   16     
-32    208    
-432   -112   
352    -352   
320    -96    
240    -48    
64     -240   
-464   -16    
-304   64     
-96    240    
288    240    
368    160    
-64    272    
-96    -80    
32     -128   
32     -16    
-16    32     
-64    -64    
0      -48    
144    112    
112    400    
160    208    
-304   -32    
112    0      
-48    -112   
112    0      
64     32     
-192   32     
112    64     
-80    144    
80     80     
0      128    
32     448    
-224   176    
80     -160   
-160   -368   
-16    -16    
-32    -80    
208    304    
96     192    
-160   16     
-160   -208   
336    32     
-48    208    
112    -48    
-48    528    
176    368    
-96    208    
-224   112    
144    0      
128    384    
144    16     
192    48     
32     -48    
-80    -336   
304    -368   
96     112    
-64    352    
-16    -32    
-160   96     
192    -192   
-48    16     
-80    -256   
-384   -304   
448    48     
64     256    
-448   128    
32     -32    
-96    -96    
112    48     
160    -544   
48     -368   
-16    0      
-464   176    
16     80     
-80    -128   
16     128    
48     32     
192    96     
112    -64    
32     80     
112    -528   
-272   128    
-32    -64    
-80    144    
0      64     
-64    -96    
208    -96    
80     96     
192    176    
-192   240    
-64    -608   
-160   -400   
96     -16    
-128   96     
160    -240   
0      -448   
320    128    
-96    192    
224    432    
32     224    
48     16     
192    -320   
0      32     
384    208    
112    96     
64     48     
176    112    
-16    112    
112    32     
48     304    
0      272    
240    192    
128    -784   
-192   -304   
-208   80     
480    224    
-368   -384   
64     -224   
64     288    
16     112    
64     -16    
176    224    
-224   32     
-176   -176   
16     400    
96     -144   
80     64     
16     -384   
64     0      
288    -32    
384    928    
-368   -224   
0      176    
160    -400   
-304   -48    
16     -128   
144    384    
192    -48    
336    64     
80     80     
64     -80    
0      112    
-224   -128   
112    144    
-128   -432   
224    16     
128    32     
240    112    
32     -80    
192    -128   
-160   -16    
-48    80     
16     48     
-16    -64    
16     48     
32     -16    
96     48     
48     -512   
128    -32    
192    -304   
-128   64     
-16    416    
128    144    
112    -128   
-416   -544   
-224   -592   
0      -48    
-208   144    
-288   -96    
192    304    
-256   80     
176    528    
-336   -48    
80     -64    
160    -224   
128    32     
384    96     
-32    -80    
480    -16    
48     32     
112    64     
208    -48    
-48    80     
-32    -16    
-32    240    
208    32     
48     0      
-112   -80    
-384   176    
-528   -336   
96     -272   
576    -64    
448    208    
496    -16    
416    -736   
-16    176    
-96    -16    
-16    80     
-176   -48    
-368   -32    
256    -176   
-48    144    
-112   -64    
-64    176    
-384   -240   
-96    -640   
-80    -16    
496    -64    
-80    -16    
-1024  -128   
48     -176   
-272   -16    
128    -240   
304    -32    
-160   -80    
48     -112   
224    80     
352    48     
-256   -576   
-96    48     
32     -112   
128    64     
192    -256   
-64    96     
-432   -176   
272    64     
48     -48    
80     -336   
48     16     
48     -480   
160    -16    
112    224    
96     0      
16     -192   
-16    0      
80     16     
-160   -80    
64     32     
16     -16    
-160   -208   
-64    -96    
208    -96    
160    -48    
-16    -144   
496    368    
-480   160    
256    -368   
0      112    
192    -48    
352    128    
-304   0      
176    -96    
128    -16    
0      -16    
288    80     
-112   -64    
160    -48    
64     16     
-224   -224   
720    -64    
512    -96    
240    -528   
416    352    
-32    112    
-112   -64    
64     16     
-240   240    
368    304    
-304   16     
-176   112    
112    -128   
-96    -192   
112    -144   
96     -48    
320    0      
-32    16     
256    -80    
-208   112    
48     -976   
160    160    
48     -32    
96     -160   
-144   -112   
160    160    
-144   0      
80     -112   
-96    -16    
0      -144   
-576   -208   
-240   -384   
-64    160    
112    112    
144    -288   
64     -80    
-32    176    
320    -208   
32     288    
-112   -160   
-48    64     
-336   -832   
544    400    
-736   336    
-32    -176   
-368   64     
96     -32    
736    512    
-336   128    
32     -384   
368    -336   
-32    432    
-16    112    
-272   16     
320    -1008  
128    288    
32     800    
16     -272   
-96    80     
16     0      
144    32     
-64    320    
-80    144    
16     -48    
176    272    
-96    -96    
48     0      
-192   -176   
128    0      
-304   128    
-224   -80    
48     -128   
160    -48    
256    96     
32     112    
-112   128    
-96    128    
-224   64     
384    -32    
32     112    
272    -16    
-656   0      
-80    -208   
-1104  160    
-144   64     
112    -48    
-128   -48    
224    64     
48     48     
368    160    
-592   144    
-160   -176   
16     16     
-272   -48    
128    32     
-288   -144   
-352   -32    
-16    -16    
-1120  -32    
64     -144   
-784   -240   
-48    -96    
-48    -144   
-160   -112   
256    0      
-96    128    
32     32     
32     0      
-64    -48    
-48    -16    
144    272    
-48    368    
-96    176    
-432   176    
0      -144   
-400   -48    
-224   112    
-2496  -48    
48     -160   
112    48     
-128   112    
-192   -48    
160    160    
-368   -240   
48     -96    
32     -128   
-48    144    
-304   80     
0      112    
-32    128    
-224   48     
192    -48    
112    -256   
80     0      
-208   48     
-272   -48    
-208   -176   
112    32     
16     -48    
-128   -160   
144    -96    
-48    -64    
224    0      
-208   -336   
-96    48     
-320   64     
-144   -144   
-192   -176   
-64    -32    
-864   -96    
240    128    
-32    16     
160    -64    
352    0      
-272   -16    
-32    16     
-128   -32    
-48    48     
-48    -176   
64     112    
64     160    
-32    128    
-144   -112   
-128   -64    
-208   -32    
32     64     
128    48     
80     -96    
-144   -224   
96     -304   
-48    80     
-16    368    
80     288    
-224   384    
0      304    
16     112    
0      48     
-160   0      
80     -16    
-16    560    
-240   560    
-448   272    
144    -352   
-464   -624   
96     -96    
-240   80     
-64    128    
192    32     
128    128    
208    672    
-384   512    
80     48     
-448   400    
160    192    
176    -464   
-208   608    
192    -16    
-96    176    
304    368    
256    80     
-240   112    
352    -368   
-32    64     
192    -224   
96     176    
-80    48     
32     16     
336    688    
-512   608    
-496   -224   
144    -80    
-64    112    
128    -32    
336    528    
-80    288    
-160   16     
-64    -208   
16     -128   
16     176    
208    48     
-96    352    
-176   -384   
512    192    
-16    496    
-560   384    
416    -208   
-96    48     
32     -80    
-48    -208   
-176   96     
64     144    
-96    32     
-64    -96    
416    192    
-96    144    
16     -192   
128    240    
-288   -336   
112    448    
-528   240    
240    64     
-320   -16    
-112   -112   
112    -80    
-64    192    
48     208    
0      -176   
64     208    
-176   32     
128    32     
-192   -32    
112    80     
0      -16    
32     16     
16     -48    
16     16     
96     112    
16     16     
128    0      
-112   112    
-64    176    
80     112    
144    -128   
48     -96    
-32    96     
0      32     
16     0      
-64    224    
112    272    
-32    -176   
0      464    
64     496    
-128   -288   
-48    -64    
128    176    
96     48     
80     32     
16     0      
80     208    
-64    208    
-48    608    
176    336    
-144   80     
-96    32     
96     32     
-128   -160   
64     -112   
32     96     
-96    32     
16     -32    
112    64     
80     16     
112    288    
-128   144    
48     -64    
176    -16    
32     16     
-48    -80    
64     -928   
-32    48     
176    0      
256    80     
-272   -240   
160    -336   
112    144    
208    112    
416    64     
32     -176   
304    -336   
112    -128   
368    -448   
320    -128   
64     48     
144    16     
-48    16     
16     16     
128    144    
32     32     
208    -80    
304    0      
240    112    
96     32     
112    -144   
-176   -192   
-400   144    
32     -48    
208    32     
-16    32     
128    -144   
176    -80    
240    -16    
-128   128    
-288   128    
192    -48    
64     48     
176    -48    
128    80     
336    0      
336    96     
256    288    
-336   144    
160    48     
-80    16     
352    -448   
48     -32    
240    -624   
-144   16     
272    16     
320    64     
-80    0      
64     64     
48     80     
-112   32     
-80    0      
96     112    
-16    0      
-272   -48    
192    128    
272    -16    
-368   -16    
192    -112   
192    80     
96     16     
416    -48    
80     176    
96     64     
32     0      
-32    -48    
-16    0      
80     96     
64     128    
352    368    
-256   176    
320    -80    
0      112    
80     -208   
128    32     
-96    -800   
112    -80    
-32    80     
64     48     
32     16     
-16    -224   
-288   -208   
-32    80     
-128   64     
-304   -112   
240    16     
128    -192   
-32    -48    
288    -112   
80     -64    
80     -64    
-64    64     
320    80     
144    32     
32     16     
0      16     
224    192    
-64    304    
-112   -64    
-48    176    
-336   144    
-80    -288   
160    -128   
-144   -96    
192    32     
-352   -496   
-528   256    
192    208    
144    -192   
464    256    
432    -32    
64     16     
-48    80     
-208   -320   
320    480    
80     736    
-432   -704   
144    -64    
-96    240    
272    -432   
-16    -192   
176    -96    
-64    -128   
160    -464   
-144   48     
-64    -288   
16     -448   
32     176    
112    -512   
144    -224   
384    784    
-416   16     
384    -592   
-96    -480   
128    -1024  
-16    0      
96     -624   
64     96     
272    96     
16     32     
-432   -176   
208    -1024  
176    -96    
112    -368   
320    208    
48     528    
-96    -80    
96     -864   
256    336    
-176   -176   
0      32     
80     -112   
80     112    
112    -32    
16     -192   
-400   -256   
0      -112   
32     0      
160    -96    
-64    -128   
48     -256   
144    -96    
0      -1792  
48     32     
96     -48    
80     32     
192    -160   
-48    16     
-16    -176   
192    16     
-160   64     
-16    64     
-304   -80    
-16    16     
-128   -48    
-176   -80    
96     -464   
208    -400   
208    -64    
272    128    
-128   192    
-16    -32    
48     -32    
0      -128   
64     -144   
-176   -288   
192    -64    
-944   48     
16     -48    
304    112    
-112   -32    
192    -48    
304    0      
-96    208    
320    -1200  
-128   16     
96     -112   
432    320    
-448   144    
96     32     
-384   -80    
352    32     
-352   64     
160    -48    
-1008  -64    
-320   -496   
-176   -448   
80     -176   
-336   -272   
384    -1168  
-80    240    
464    192    
32     96     
-544   -160   
-16    -208   
-16    96     
224    48     
160    16     
224    48     
-816   -80    
224    -144   
-240   -80    
-144   -272   
80     -112   
-96    -272   
336    0      
32     80     
-64    160    
-112   48     
112    -64    
-880   -48    
-160   32     
-208   -64    
160    80     
64     208    
-160   -64    
-144   208    
480    48     
0      -64    
160    -272   
16     -224   
0      32     
-112   -64    
-736   -32    
192    -288   
-176   0      
464    48     
0      -112   
64     -16    
-288   96     
32     -112   
96     -32    
64     -48    
16     -144   
-144   -336   
64     -272   
-224   -16    
48     -16    
-32    -112   
144    144    
-224   -224   
-160   -480   
-224   -336   
112    432    
224    48     
-32    0      
304    208    
-848   -144   
-304   -32    
-96    -400   
-1088  560    
16     -288   
-960   -112   
-128   96     
-1072  -272   
-64    208    
272    -112   
-224   -16    
32     -224   
-608   272    
-528   -208   
-16    176    
-48    32     
112    128    
48     -32    
-128   176    
-128   0      
416    240    
-208   -224   
-992   -112   
-208   1232   
-128   -624   
-144   -304   
-480   560    
256    -176   
-528   -560   
432    176    
368    112    
-16    -144   
224    256    
-96    32     
128    -256   
128    -64    
-1008  128    
672    1248   
288    192    
-1312  -384   
-528   -256   
144    -320   
400    544    
464    -80    
80     -208   
-64    64     
-80    160    
-240   112    
-112   16     
64     96     
-48    96     
80     -16    
80     -48    
-64    -16    
-688   16     
-48    64     
-160   -32    
240    96     
-176   0      
224    48     
-16    -80    
-80    -48    
-224   -80    
-48    16     
112    96     
-112   80     
-48    0      
-128   -16    
-48    336    
-464   288    
16     128    
-1472  96     
304    32     
-144   -48    
-64    -16    
160    48     
16     16     
-16    64     
192    64     
-80    48     
224    80     
-272   -16    
48     -16    
-80    32     
-32    0      
96     32     
-288   -80    
80     -48    
-272   16     
-48    48     
32     48     
144    48     
-80    48     
-240   -16    
176    16     
32     -128   
-16    -48    
-192   -192   
192    -48    
-336   144    
64     160    
-400   -32    
224    80     
-96    -16    
80     0      
48     16     
0      16     
-160   48     
-112   -32    
16     -32    
-32    -160   
80     -96    
-128   -128   
-80    32     
-336   0      
16     32     
80     224    
-176   80     
0      -32    
16     -16    
48     -176   
192    -80    
112    240    
-96    16     
0      16     
-48    0      
-16    112    
-16    48     
32     0      
-64    32     
0      80     
416    448    
-544   304    
272    64     
128    -240   
144    48     
16     -32    
304    208    
-16    272    
272    48     
80     -48    
-256   256    
-512   0      
-128   -112   
-192   16     
-112   96     
-112   16     
160    -64    
256    64     
-80    96     
-128   -64    
32     -160   
80     -16    
112    16     
96     16     
-224   -16    
-64    176    
-432   -16    
592    400    
-672   64     
-64    64     
-16    48     
-64    -16    
-48    16     
-16    64     
-144   144    
48     32     
-32    32     
304    112    
272    176    
128    32     
80     16     
-48    80     
-304   0      
-48    -16    
128    80     
-192   -32    
16     -48    
176    0      
96     -32    
-16    -64    
208    -16    
144    0      
128    48     
224    -48    
-144   -16    
32     112    
-272   -32    
240    48     
-64    -16    
-32    32     
48     64     
-16    0      
32     32     
96     32     
-48    16     
240    16     
-128   0      
64     -48    
64     16     
-320   -16    
288    64     
48     32     
256    64     
-64    96     
80     -1072  
-32    32     
144    -160   
-16    176    
64     128    
64     80     
-128   -16    
-16    512    
560    0      
-80    416    
96     -192   
288    -176   
640    560    
-416   -816   
192    304    
-128   -544   
144    -80    
176    288    
464    80     
48     160    
176    144    
-704   -304   
64     176    
32     176    
240    144    
-32    240    
256    -144   
416    512    
-256   96     
288    592    
-432   -112   
32     96     
64     224    
288    176    
-128   320    
256    0      
-144   -272   
-80    -272   
-208   -176   
192    160    
-208   336    
448    192    
-176   64     
144    -32    
400    304    
-48    -16    
64     -32    
-48    -240   
32     48     
16     80     
-272   -80    
544    -64    
-32    32     
-128   -80    
224    -144   
-112   64     
64     -48    
-16    48     
112    -80    
16     112    
128    32     
-80    80     
-16    -624   
128    -96    
-32    0      
240    80     
-128   48     
80     -16    
-192   80     
160    48     
528    144    
-128   320    
0      16     
0      -32    
0      112    
-16    -144   
0      16     
32     -304   
160    48     
96     -1424  
-112   16     
176    -112   
240    80     
96     0      
-64    32     
32     80     
-32    64     
224    -16    
80     -80    
-16    64     
48     -112   
-48    112    
0      -160   
128    -160   
48     -656   
80     112    
-48    -80    
224    16     
112    16     
32     -64    
-80    -160   
176    -144   
80     16     
-272   -640   
192    -48    
160    160    
-32    64     
80     -48    
176    176    
-32    -112   
128    128    
80     80     
128    48     
0      64     
16     64     
160    96     
-32    -576   
96     128    
32     -96    
96     16     
16     -48    
-64    64     
96     -160   
-80    128    
192    0      
-80    112    
0      48     
16     -128   
288    32     
96     -1280  
-144   -544   
288    -64    
96     -192   
-64    -384   
320    -544   
352    -528   
416    128    
288    0      
272    464    
-192   320    
64     -16    
0      32     
288    -464   
16     272    
-512   64     
80     -16    
-160   -16    
0      -624   
80     -304   
16     -1136  
128    64     
64     -48    
384    -240   
144    -416   
176    16     
-176   -544   
112    -208   
-352   -336   
-80    -192   
-368   16     
0      -144   
160    16     
560    -224   
528    -16    
112    288    
48     0      
0      -272   
-64    -32    
64     -192   
64     0      
112    -32    
-272   48     
240    -240   
96     416    
-416   -32    
96     -16    
-48    -16    
-96    -16    
-16    432    
320    -656   
240    64     
-160   -304   
176    128    
-64    -304   
80     -48    
240    -160   
96     192    
-48    32     
-64    -176   
-240   144    
128    240    
-1152  -112   
176    -176   
64     -64    
224    384    
-16    144    
224    -176   
-192   144    
80     -96    
240    192    
-272   48     
208    96     
-272   16     
128    -400   
-144   -576   
112    336    
-144   240    
-272   -288   
-64    -176   
-208   -80    
96     -128   
96     -224   
224    112    
448    -480   
288    96     
256    -16    
-96    0      
-288   16     
368    240    
-80    320    
80     128    
-432   -208   
-32    -240   
-2272  352    
-352   112    
-112   -64    
464    -16    
208    224    
-304   -368   
272    240    
-816   0      
-16    352    
48     -48    
448    -16    
-224   -48    
192    32     
0      -32    
0      16     
-16    96     
-48    -96    
-32    64     
128    -176   
-16    16     
224    -288   
144    32     
32     16     
128    -64    
-112   -48    
112    -80    
-384   -64    
0      16     
-352   -48    
208    0      
-288   -16    
304    -80    
-32    80     
-112   -144   
48     48     
208    -208   
64     -128   
64     -16    
-160   128    
48     -32    
160    64     
48     16     
-96    48     
-240   -16    
176    -16    
-96    -160   
-16    -288   
64     48     
-48    -64    
16     16     
-1088  -48    
-320   16     
-400   -64    
-1456  -16    
0      16     
160    16     
144    -16    
-48    48     
176    96     
240    16     
-272   -80    
-832   -112   
96     96     
-48    -16    
64     96     
80     48     
-528   -192   
-416   -112   
-48    96     
-32    -64    
-320   -16    
-192   16     
16     -16    
-224   -16    
64     -32    
96     16     
-176   176    
32     272    
-176   -144   
144    176    
16     64     
0      32     
144    176    
-160   80     
-96    -96    
-80    224    
-64    224    
-832   16     
-192   -48    
48     -32    
160    96     
-80    -64    
144    48     
-256   -96    
-96    -32    
48     80     
96     112    
160    80     
-400   -48    
-64    48     
-496   -848   
-320   -656   
-272   240    
-288   272    
-32    16     
400    96     
-368   -64    
-240   -144   
-80    -80    
432    -192   
480    -80    
368    112    
-112   80     
-352   0      
-144   -64    
-208   -32    
32     -64    
16     32     
80     96     
-1232  -64    
-112   176    
-112   288    
32     64     
320    -48    
368    16     
352    240    
-208   144    
368    -64    
-256   -112   
-272   -224   
-144   -32    
-32    192    
-240   -80    
192    0      
-208   80     
-144   -32    
-224   -208   
-192   96     
-16    160    
160    64     
-208   48     
224    224    
32     336    
240    240    
176    96     
-496   -16    
64     208    
-512   16     
304    -144   
-240   -48    
224    80     
432    -224   
-240   -656   
544    16     
-144   784    
-32    64     
-64    -272   
112    80     
32     64     
64     96     
-368   -48    
96     -48    
-192   -32    
64     0      
-560   160    
96     -64    
-64    -272   
64     80     
-80    -160   
-64    272    
-176   320    
80     -96    
48     -80    
-64    176    
-96    -240   
-64    160    
112    96     
16     32     
288    -80    
-448   288    
0      32     
16     -32    
464    -192   
208    144    
64     416    
-336   -128   
-272   -16    
-272   -192   
-544   -640   
112    -80    
-64    -16    
240    96     
-240   32     
-16    16     
-160   64     
-112   176    
-32    0      
-208   16     
-160   -224   
-432   -336   
-48    -288   
96     -64    
-336   0      
176    -32    
-208   352    
128    224    
400    192    
-352   -80    
32     32     
-144   -144   
32     -16    
-64    32     
64     16     
-64    -272   
-16    -16    
-32    112    
256    128    
48     -80    
-32    -176   
96     96     
-144   64     
80     192    
-64    -80    
144    32     
144    208    
-288   96     
144    -112   
-112   -48    
144    -64    
-16    192    
16     144    
16     -48    
16     -112   
-32    -128   
0      80     
96     32     
-192   256    
16     -80    
64     -112   
64     -128   
-64    0      
32     224    
-16    48     
192    240    
-80    64     
128    0      
-112   144    
48     240    
368    48     
-48    0      
-128   -32    
32     96     
-192   -80    
128    112    
-224   -16    
128    144    
48     112    
144    32     
-64    -32    
48     -16    
48     0      
-80    80     
16     0      
96     -272   
80     -64    
-32    16     
48     48     
96     -80    
-160   -240   
176    80     
112    32     
-64    80     
224    48     
-48    96     
32     -32    
0      -32    
208    -48    
-96    64     
-48    -64    
224    128    
-192   -64    
96     -16    
64     32     
48     -144   
96     240    
96     224    
0      16     
32     32     
-32    48     
-80    -48    
64     80     
128    -16    
96     -32    
16     32     
320    256    
80     96     
-64    0      
-16    -64    
-160   -496   
-64    -64    
128    -208   
128    48     
96     -64    
192    -16    
0      64     
-48    224    
176    224    
-32    32     
-368   -224   
336    -464   
320    240    
256    416    
256    272    
-80    64     
176    -288   
0      -128   
-256   192    
-288   0      
-96    0      
-64    -544   
160    368    
160    160    
-96    16     
-64    16     
208    352    
-128   208    
-544   -208   
256    -160   
448    -128   
448    176    
112    -288   
48     -208   
-96    256    
-480   -32    
0      -112   
240    208    
-16    -208   
464    -352   
-336   -384   
272    416    
224    496    
400    48     
-16    -96    
144    -80    
-80    240    
-144   -256   
320    -144   
64     -464   
32     48     
-80    176    
224    112    
-336   64     
256    336    
-240   160    
192    -16    
192    -80    
368    0      
-128   48     
0      -96    
-48    -16    
-16    -224   
48     80     
32     32     
160    48     
0      32     
0      16     
0      -16    
112    96     
32     48     
64     -208   
160    80     
-96    -128   
64     16     
64     -208   
128    112    
-176   368    
560    32     
-320   -240   
64     368    
-16    128    
208    352    
144    48     
528    16     
-320   32     
-48    -240   
16     -48    
144    32     
32     240    
-224   32     
256    -16    
192    -80    
208    32     
32     -480   
240    0      
160    96     
336    -496   
-624   -80    
-208   32     
-96    -624   
-80    -144   
272    -288   
-320   -96    
0      -304   
352    -144   
240    272    
-368   -128   
304    -32    
-32    80     
-224   -192   
0      80     
-16    -96    
16     64     
-448   -80    
-208   -560   
448    -144   
0      48     
-32    16     
176    -368   
32     -48    
-16    -16    
64     -144   
144    -128   
112    16     
0      -176   
-80    -80    
-128   -32    
144    -80    
-464   -96    
192    -64    
48     32     
96     -64    
-80    -96    
48     -16    
32     -48    
96     -176   
288    16     
-64    128    
144    208    
144    -64    
16     -48    
-176   144    
192    -192   
16     48     
0      0      
128    144    
-16    -80    
96     -128   
-160   -96    
32     0      
256    -208   
32     64     
0      80     
-112   16     
224    -48    
-32    64     
0      64     
160    16     
-400   -48    
64     -80    
-1696  -32    
112    0      
48     -80    
-64    -80    
208    80     
128    16     
32     176    
48     -80    
-192   32     
256    80     
64     80     
-192   -96    
64     48     
-48    0      
-16    -32    
-192   -112   
112    -128   
-1472  96     
128    32     
-208   0      
96     -272   
96     192    
32     -224   
32     16     
48     -176   
16     -48    
-80    176    
0      -304   
-192   -176   
144    -64    
-96    208    
336    128    
-528   -160   
64     -48    
-64    48     
80     -80    
48     80     
-176   -448   
96     48     
16     784    
272    112    
-224   -400   
-64    -160   
16     16     
352    80     
-880   -208   
-288   -272   
-560   368    
-176   -144   
112    32     
208    -176   
352    48     
304    -64    
48     -32    
-368   -80    
-240   0      
-400   80     
-240   -48    
-352   -256   
192    -16    
96     -112   
1232   864    
-1664  752    
-48    -656   
144    320    
512    416    
-272   -144   
128    -192   
160    -48    
144    -32    
64     32     
-112   16     
144    -80    
-96    144    
-112   48     
144    32     
112    -112   
-272   128    
128    416    
-624   -224   
-496   -112   
208    192    
64     16     
-544   48     
144    0      
-896   -144   
-304   144    
-1136  -224   
-288   112    
112    96     
-32    416    
-224   80     
48     -480   
-176   416    
-144   0      
-400   -192   
48     -16    
0      416    
-80    240    
-128   -64    
48     -48    
-16    -144   
-112   64     
112    -112   
-96    160    
-192   480    
-240   32     
208    368    
-528   352    
96     96     
32     -192   
-160   -336   
16     -80    
256    496    
-448   240    
-16    -64    
-48    -192   
240    -96    
-208   -48    
-928   112    
-224   32     
-32    160    
-80    384    
80     208    
368    384    
-32    -48    
-432   -224   
-96    112    
160    0      
144    80     
16     -192   
-112   -48    
-432   -64    
64     -32    
-304   0      
-48    16     
-224   16     
128    48     
352    128    
-336   96     
112    64     
-160   -48    
-32    -272   
256    -80    
-240   -128   
-192   -224   
-96    16     
-112   64     
-64    128    
-208   -64    
256    32     
-656   -16    
160    128    
432    144    
-448   240    
16     -112   
16     -144   
-192   -336   
-16    -112   
-48    -16    
48     -112   
0      96     
-32    48     
-16    192    
64     -144   
16     48     
-688   -208   
-48    112    
64     -32    
-48    32     
-128   -176   
64     64     
-48    128    
0      96     
-304   112    
192    16     
-288   400    
-32    16     
64     -80    
-160   -64    
128    96     
-608   -128   
288    -80    
304    -48    
-144   32     
-128   -64    
-96    -64    
32     48     
64     32     
176    64     
48     -16    
-80    -32    
-16    -48    
16     144    
-224   16     
32     -16    
-96    16     
48     96     
208    48     
-64    16     
32     32     
80     176    
16     256    
192    -48    
-112   16     
-32    -16    
-256   272    
-208   -48    
368    64     
-256   -144   
-96    64     
-48    144    
16     96     
-32    -32    
96     -96    
64     96     
-144   144    
0      496    
112    128    
-16    0      
-32    16     
-64    -160   
80     0      
-224   -304   
-480   -432   
48     112    
-336   160    
224    288    
-144   -128   
0      -384   
-16    224    
256    304    
-320   -112   
80     48     
-48    192    
64     16     
400    496    
-192   -160   
256    -1008  
192    1088   
32     -336   
96     48     
80     80     
80     80     
432    512    
-432   -96    
-160   -80    
256    -704   
464    32     
368    624    
-80    -96    
416    64     
-784   -448   
-176   -288   
-64    112    
112    80     
560    496    
-256   -96    
-160   -368   
224    0      
176    96     
64     48     
128    32     
-160   96     
0      48     
256    -96    
304    -80    
-80    -128   
64     96     
-128   64     
-384   32     
112    0      
-48    -16    
-96    -64    
208    80     
160    48     
-80    -80    
48     -64    
208    112    
176    112    
160    0      
224    0      
-160   -32    
-224   -16    
64     32     
32     -80    
336    224    
-96    -16    
128    32     
224    144    
432    240    
-480   -48    
64     0      
64     32     
224    -64    
-32    -48    
-64    144    
-16    -32    
160    16     
80     64     
80     -256   
32     96     
80     16     
-32    16     
-16    48     
-16    96     
-16    -32    
80     304    
32     0      
-16    -48    
-32    16     
-160   32     
-16    -128   
32     -256   
176    304    
288    -336   
80     -112   
112    0      
128    48     
160    0      
64     64     
-160   96     
704    160    
-352   32     
160    64     
64     -48    
-208   -80    
128    16     
304    112    
128    64     
112    -48    
432    80     
-464   48     
-352   -128   
192    32     
-256   -144   
240    0      
64     192    
160    96     
-96    0      
592    320    
-928   32     
64     -144   
448    -80    
240    64     
288    -336   
-304   -80    
384    -1280  
-256   64     
-224   96     
320    112    
-48    16     
112    0      
48     48     
64     32     
-48    16     
176    32     
-16    0      
80     -48    
96     -32    
64     -128   
416    192    
-304   -48    
48     64     
144    144    
224    96     
256    16     
16     -48    
-32    -16    
-16    80     
-144   0      
288    16     
192    32     
-208   -112   
112    48     
0      -176   
224    64     
-64    48     
96     16     
160    -16    
-48    48     
160    112    
16     224    
16     64     
128    16     
272    112    
-48    -80    
-64    32     
160    192    
96     80     
96     -144   
16     16     
272    -208   
144    -96    
48     -368   
-96    96     
128    32     
112    16     
64     96     
-80    -112   
32     240    
-80    80     
112    -528   
416    32     
-112   48     
224    80     
-64    -64    
112    -144   
128    80     
80     -112   
144    32     
-64    32     
160    -960   
-144   96     
-16    -80    
0      -176   
272    320    
176    -176   
224    -176   
-64    80     
16     32     
256    96     
-16    -592   
16     304    
-96    160    
128    -256   
0      128    
48     -80    
80     -128   
-1856  480    
96     -576   
256    -32    
-48    -48    
-64    112    
0      -784   
304    -320   
-32    864    
48     -352   
144    -288   
-144   64     
64     -288   
48     16     
48     16     
-48    -96    
-448   -160   
0      384    
-176   -400   
-112   -400   
128    -64    
-112   128    
48     -176   
352    -320   
-32    -32    
160    -80    
-16    64     
160    -160   
96     -32    
64     368    
224    -128   
-336   -288   
-256   -176   
-64    -480   
64     16     
528    112    
-16    -640   
-496   -512   
-432   -1552  
0      -64    
272    16     
176    80     
-80    80     
-16    112    
32     160    
-160   -128   
-240   -144   
112    -224   
-752   64     
272    -176   
-64    -208   
128    -240   
16     -64    
-112   -480   
-400   80     
-32    0      
64     -16    
16     -272   
160    -64    
-560   -48    
80     -16    
-96    -144   
112    -128   
-368   -80    
128    -64    
0      32     
32     -96    
-80    64     
96     -80    
80     -16    
112    -112   
80     32     
0      -112   
112    -176   
144    48     
0      -48    
384    464    
-208   96     
-416   192    
288    -224   
-432   -32    
128    -80    
-112   -48    
-32    -272   
128    -144   
128    -112   
64     -96    
16     112    
0      96     
-320   -352   
256    -176   
-432   -256   
64     -160   
96     320    
-272   -144   
-176   -208   
-96    -96    
192    32     
240    16     
144    -32    
16     -336   
64     -144   
-96    -96    
-192   32     
128    -48    
512    48     
-304   64     
-64    -48    
-224   -48    
80     48     
-576   -352   
96     -496   
0      -32    
-48    -320   
-16    -32    
256    48     
96     32     
-384   64     
240    -112   
-432   80     
64     -64    
-256   -224   
208    -96    
-128   208    
368    -48    
-32    144    
272    -208   
256    -128   
-160   -128   
320    0      
-288   -80    
-1936  16     
-352   80     
528    256    
-96    32     
208    -96    
-144   -16    
80     -128   
-112   -64    
96     -96    
-224   32     
-864   32     
208    240    
208    -432   
-384   -272   
-144   96     
-448   -32    
-112   16     
-384   80     
144    -16    
-144   -64    
-64    -272   
128    144    
-96    -128   
-144   -112   
48     16     
-544   80     
208    96     
-208   -96    
-304   48     
32     32     
-240   -16    
192    -16    
-176   0      
32     96     
-176   32     
-112   -160   
288    208    
-144   272    
-160   48     
112    16     
192    176    
-80    -144   
-272   -704   
-384   -432   
112    -288   
-80    256    
-48    -64    
-304   -368   
-128   -64    
64     96     
-288   -208   
-528   0      
16     112    
16     -176   
160    16     
-256   -288   
192    336    
-48    -32    
48     144    
-48    112    
96     0      
80     -48    
64     -304   
-80    176    
-240   0      
0      112    
-432   -112   
-112   -96    
-720   -16    
-16    192    
-160   -32    
144    112    
240    64     
0      32     
-128   16     
-160   16     
-128   -768   
-368   -656   
-288   0      
-208   192    
-48    112    
0      -48    
-480   80     
-336   48     
-144   -64    
-96    -384   
496    -128   
64     -16    
-80    0      
-16    -96    
48     48     
-48    80     
576    512    
-576   368    
-624   -128   
400    176    
-336   48     
464    32     
-240   48     
32     96     
160    -48    
144    16     
-368   -144   
-304   -288   
304    -224   
256    176    
-432   64     
-112   16     
64     176    
-336   -128   
176    16     
-48    -48    
288    -32    
-144   16     
208    32     
-176   -256   
240    -96    
0      160    
-240   64     
448    16     
0      -64    
-320   -48    
-240   112    
-192   64     
-32    -48    
128    -48    
0      -16    
0      64     
-272   -16    
64     16     
-128   -32    
80     144    
80     80     
48     16     
-16    -64    
-112   -48    
-208   -80    
256    -16    
288    48     
-144   -96    
128    16     
-240   -32    
80     0      
-224   32     
48     48     
-64    96     
48     128    
-144   0      
-16    -16    
32     32     
80     48     
688    432    
-560   112    
400    -32    
-368   -64    
176    -144   
432    272    
-176   128    
256    -64    
80     32     
96     48     
224    -112   
16     -96    
128    272    
144    32     
-16    -16    
48     48     
-48    16     
64     80     
-224   -32    
304    0      
160    128    
-48    -80    
128    -48    
-320   64     
160    32     
320    112    
-256   128    
-80    16     
560    336    
-784   144    
80     -112   
-432   -48    
544    96     
96     -64    
240    64     
240    0      
-160   48     
-48    80     
144    -64    
-48    -32    
0      144    
80     144    
144    -16    
-16    80     
16     32     
224    80     
-96    112    
80     32     
48     16     
240    64     
-96    240    
-80    144    
192    -16    
80     -16    
176    144    
-16    272    
96     64     
16     304    
64     112    
-144   -48    
-32    224    
192    32     
-112   80     
-272   176    
288    -16    
48     -16    
96     144    
-64    48     
96     16     
144    176    
-256   48     
80     -16    
-16    64     
32     -464   
384    848    
-112   -400   
240    32     
32     224    
-32    16     
16     -288   
112    -16    
160    -656   
256    -64    
160    -48    
-16    144    
-32    -304   
-112   256    
224    -784   
16     272    
16     288    
-96    0      
160    896    
96     -192   
-240   -880   
224    320    
96     464    
-32    -288   
-32    48     
-48    -144   
-96    160    
48     16     
192    192    
128    48     
128    -128   
80     -160   
96     368    
192    448    
160    160    
-96    272    
-112   -128   
176    128    
80     -368   
80     48     
32     -192   
64     96     
16     -192   
64     -144   
-128   -16    
304    144    
-176   192    
16     80     
192    288    
-176   560    
176    -16    
-96    -208   
-16    80     
192    -192   
64     48     
160    -240   
96     112    
-64    -304   
32     144    
144    112    
-64    -176   
-192   -160   
-32    -96    
-256   16     
-96    -208   
256    -16    
176    -16    
32     -32    
96     -128   
-208   -32    
432    -208   
384    144    
-80    16     
80     48     
-128   160    
-128   112    
240    -16    
-48    -160   
256    -224   
496    -32    
112    208    
192    16     
-16    16     
16     -240   
-32    176    
416    64     
-288   160    
-16    -176   
16     -176   
256    16     
576    192    
-80    64     
-176   -80    
48     -160   
96     -48    
320    16     
320    -256   
16     -112   
48     -272   
-16    112    
80     32     
-64    -80    
144    -16    
48     48     
128    16     
80     32     
-112   128    
112    -144   
-16    64     
96     -256   
192    -80    
128    -128   
176    -16    
-48    -64    
-16    -208   
0      -32    
240    -16    
64     -224   
320    -336   
-208   560    
96     -208   
-160   -48    
0      -32    
-48    -832   
224    368    
128    -976   
-208   192    
144    -64    
224    0      
112    16     
128    -144   
-32    -1136  
80     -48    
416    176    
-464   336    
-96    224    
272    32     
-1760  480    
-208   0      
-112   16     
-144   -224   
208    -224   
-80    -544   
80     -160   
176    432    
-208   256    
272    16     
240    80     
560    544    
160    224    
48     0      
192    -240   
112    48     
112    48     
-512   96     
256    176    
-48    -48    
64     -400   
128    -112   
-144   -496   
-128   96     
304    208    
16     352    
368    144    
144    464    
-272   176    
-16    -96    
-160   192    
-112   -32    
-48    -192   
-80    -464   
144    -96    
208    -48    
112    -80    
-128   -240   
128    -352   
-64    176    
400    176    
64     0      
-528   -304   
-96    -992   
16     -192   
-32    -176   
416    528    
-816   0      
-64    -720   
208    -192   
240    368    
384    176    
-32    -992   
-80    192    
224    816    
-80    -160   
16     -400   
416    384    
-112   320    
-192   48     
-32    -144   
-64    -416   
208    160    
0      -64    
-384   -16    
128    -176   
-128   -48    
656    -128   
-112   160    
-144   -112   
-256   -128   
96     336    
128    -208   
-288   -112   
64     0      
-256   -64    
32     -160   
112    16     
128    -80    
-192   -112   
144    -112   
144    288    
0      -160   
16     -80    
0      -128   
80     144    
-16    -48    
16     -112   
-128   0      
144    32     
-240   -48    
0      96     
-528   -224   
96     -192   
-592   16     
80     -80    
64     80     
176    112    
-48    384    
112    112    
48     128    
-128   -96    
224    0      
-128   144    
96     -16    
-336   -112   
128    -160   
-224   64     
128    0      
-64    -96    
288    -272   
112    48     
32     0      
-80    64     
96     -368   
-32    -64    
-112   -48    
272    -128   
-272   48     
-208   -112   
-80    -128   
-16    -144   
208    64     
80     -64    
16     112    
-784   -208   
144    -32    
-1568  -160   
-64    112    
-144   -48    
32     96     
-368   -112   
240    -80    
80     48     
256    0      
192    32     
-16    16     
-368   0      
-1376  -16    
-320   336    
-864   240    
-128   112    
-432   -160   
400    16     
208    0      
-144   0      
-128   64     
-752   -16    
32     -16    
-160   80     
128    32     
192    64     
-192   -32    
-144   16     
-144   -32    
80     16     
112    -32    
208    -16    
-48    16     
-368   0      
-96    32     
-336   -16    
-96    -144   
192    32     
-240   32     
-304   -192   
-1184  -48    
-224   64     
-208   -48    
64     208    
16     0      
112    48     
-336   -80    
176    80     
128    112    
-80    -48    
80     32     
-48    0      
0      16     
-80    16     
-16    64     
-272   -96    
272    80     
-64    64     
256    0      
-48    0      
80     16     
-304   -464   
-128   -128   
-112   208    
-64    -128   
160    128    
-80    240    
-368   80     
144    -96    
-272   -128   
-192   -80    
-240   240    
-992   -32    
-144   -16    
-288   -144   
480    -48    
-48    48     
-128   -144   
96     -48    
-288   -96    
128    32     
-864   -224   
112    0      
144    464    
-416   336    
-592   -368   
16     -48    
-192   208    
-304   288    
528    304    
-432   128    
304    48     
-240   -160   
96     -32    
0      0      
192    80     
144    48     
96     80     
-160   80     
0      -304   
-400   48     
144    176    
-176   -112   
128    80     
32     -64    
128    112    
32     -64    
-64    0      
-96    0      
0      -48    
32     -48    
192    96     
-160   288    
-256   -384   
160    336    
112    -192   
64     192    
-592   -80    
416    -848   
-272   720    
-224   48     
272    -384   
-432   96     
112    176    
48     624    
208    304    
-272   -176   
-64    -160   
16     0      
-176   -112   
-80    -352   
96     208    
-208   208    
64     0      
-144   80     
176    16     
-64    192    
-32    128    
80     112    
32     224    
32     16     
-160   96     
160    96     
224    144    
160    176    
-64    80     
-80    -144   
-96    -96    
32     -48    
-112   -64    
-32    48     
64     -16    
208    -80    
-96    -272   
160    -208   
-80    16     
-112   128    
48     64     
-192   0      
80     112    
-160   32     
64     -32    
112    -112   
0      0      
-16    32     
80     -144   
80     48     
192    144    
-288   192    
-16    -16    
64     64     
64     48     
0      -64    
-144   -32    
224    48     
-384   -48    
32     0      
0      80     
128    0      
48     64     
128    96     
304    160    
16     272    
-208   80     
-144   -16    
80     -64    
-16    -16    
208    80     
32     0      
80     16     
112    144    
-160   48     
64     -16    
16     -32    
256    -112   
160    -64    
176    -16    
16     48     
-224   48     
16     -80    
-32    32     
80     112    
-144   64     
-128   -96    
160    -96    
224    16     
352    160    
-48    112    
-48    144    
48     160    
224    224    
32     192    
400    208    
-96    176    
-48    -48    
0      0      
-160   -32    
-80    -64    
144    -80    
0      -208   
-256   -112   
240    -240   
208    80     
224    0      
240    16     
-416   112    
-416   32     
80     -80    
-80    -208   
64     -256   
336    -48    
112    -96    
112    112    
16     32     
-224   -112   
272    32     
-16    -80    
96     80     
144    -48    
-96    -16    
64     -32    
-160   -32    
32     -176   
96     16     
-32    -288   
64     -256   
-32    48     
112    -16    
64     80     
112    48     
80     192    
48     0      
-240   -48    
368    352    
144    144    
64     192    
160    192    
176    240    
16     -128   
-160   48     
832    1136   
-384   1728   
-128   160    
112    -432   
288    720    
-224   -160   
32     -880   
272    -688   
112    -544   
128    1104   
240    384    
-208   32     
64     48     
288    -272   
-32    272    
-96    144    
-112   -528   
208    272    
208    384    
-416   -96    
176    -48    
384    80     
416    128    
-96    48     
384    752    
-80    -768   
-400   -736   
320    368    
-384   -400   
416    -192   
624    880    
112    -240   
608    -224   
-272   640    
32     -288   
-160   -688   
-368   -272   
64     112    
-64    96     
240    -624   
-112   -672   
0      -48    
160    176    
80     -48    
-144   -32    
96     96     
-96    -128   
80     128    
192    48     
160    -368   
-48    48     
144    32     
48     -48    
272    -400   
-16    208    
0      288    
-128   -272   
80     -48    
96     96     
64     -80    
-32    16     
96     128    
80     -192   
160    144    
112    -32    
-48    96     
16     -96    
128    80     
64     -96    
240    16     
-112   80     
80     32     
64     0      
32     -672   
96     -208   
32     -112   
0      -656   
96     -48    
48     -400   
128    -64    
208    224    
-176   -384   
64     -144   
16     96     
160    48     
96     176    
-112   -80    
-16    -32    
160    -368   
240    -240   
144    -32    
-64    -528   
-224   -384   
0      -288   
-64    -240   
144    -48    
-16    0      
176    32     
144    -16    
16     -400   
192    -96    
0      -304   
48     64     
0      -272   
80     -336   
-160   -48    
96     -224   
48     -160   
16     -80    
96     -64    
-16    -224   
48     96     
64     256    
0      16     
96     -144   
-336   -16    
240    64     
-48    48     
-176   -144   
192    -80    
-368   -16    
128    -192   
0      -48    
-48    -16    
-256   -720   
176    -688   
64     32     
-80    -864   
96     32     
192    160    
-192   32     
48     16     
160    -32    
192    272    
144    -32    
448    -16    
-400   80     
-1856  -112   
160    -64    
-32    -96    
384    -48    
96     -64    
208    -128   
-208   -32    
-48    -48    
48     16     
-64    -32    
-176   -96    
-224   0      
160    -16    
-112   -96    
752    128    
-384   -16    
464    -96    
-176   -112   
-64    -32    
-176   -32    
-240   -128   
96     144    
-416   -432   
272    -64    
224    -64    
480    32     
-16    96     
-208   16     
-352   -32    
16     -48    
-128   -80    
336    -16    
-672   16     
176    -32    
16     48     
144    -144   
176    160    
-592   -704   
112    48     
-16    -16    
-112   -160   
112    0      
-304   -80    
-16    -48    
224    32     
-368   32     
0      16     
-48    48     
32     -80    
-32    0      
176    -128   
-80    48     
64     -176   
0      -128   
0      16     
-96    -112   
-832   -80    
-112   -80    
0      96     
16     -48    
80     -32    
256    48     
16     64     
-128   -48    
-32    32     
64     -96    
160    144    
-32    -32    
-160   0      
-112   -32    
176    -96    
48     64     
240    16     
-112   32     
160    208    
-576   112    
-64    -176   
176    -112   
-80    -224   
-192   32     
176    80     
-368   -160   
-400   -384   
-960   544    
-256   -32    
-144   -224   
0      0      
-48    -80    
-144   64     
1248   1104   
-1264  -1200  
-272   -320   
-416   64     
-688   48     
560    -96    
592    272    
-368   48     
-16    80     
-512   0      
-240   -160   
-144   96     
176    -64    
-2128  -368   
64     16     
144    96     
-64    -304   
-176   -240   
144    -128   
-144   -448   
16     304    
-64    208    
384    256    
-352   336    
-160   208    
-176   -32    
-96    256    
192    272    
-176   304    
-320   384    
-32    16     
-96    -16    
176    16     
80     32     
-208   -128   
-80    0      
-144   0      
-48    64     
192    160    
96     -32    
128    112    
-240   96     
-256   176    
-112   -64    
-48    0      
-176   16     
128    128    
-16    -16    
-64    64     
-80    -32    
-96    16     
-128   80     
112    -144   
-192   0      
-176   -192   
-272   -176   
-160   80     
80     64     
96     48     
-32    16     
-112   48     
144    256    
-336   16     
32     -16    
240    80     
64     32     
16     48     
-144   64     
-80    -48    
0      0      
-16    80     
-32    80     
16     0      
-400   -16    
-80    48     
-816   16     
16     -112   
-976   -432   
208    -16    
48     -48    
-96    0      
-112   112    
-288   112    
128    128    
-80    48     
-16    -240   
64     -128   
-80    96     
-144   -32    
-80    80     
-80    64     
16     112    
160    240    
-256   208    
-96    -80    
-32    144    
-32    80     
96     -144   
112    -48    
-80    -48    
-32    160    
-176   -32    
176    -80    
-272   64     
-64    -32    
-16    16     
208    16     
128    -112   
448    -16    
240    -128   
240    112    
-288   -16    
160    -32    
128    0      
208    144    
96     96     
-304   96     
-304   -48    
-256   -96    
96     48     
-240   192    
208    208    
-368   -160   
-384   -512   
192    -592   
-16    -96    
-96    -128   
272    160    
-112   64     
-208   -112   
-240   0      
-64    -256   
592    560    
-608   176    
224    -288   
208    -256   
224    -48    
384    -16    
-224   0      
32     144    
80     0      
48     160    
64     -112   
64     -160   
80     0      
-176   -128   
-160   -48    
240    -16    
-528   -416   
32     -256   
-48    128    
144    -112   
64     112    
192    64     
-64    -256   
-288   288    
112    -128   
96     16     
16     256    
16     160    
160    -224   
-96    -16    
176    64     
-80    320    
48     -128   
32     -368   
-192   608    
-96    -176   
-96    144    
0      16     
0      -32    
64     208    
-64    384    
288    144    
-240   -128   
-32    192    
-112   192    
-496   -976   
16     912    
48     432    
-352   -400   
416    368    
464    160    
-80    -160   
-192   -240   
-96    96     
112    208    
-320   -208   
0      -80    
32     208    
208    368    
128    16     
-144   -528   
-128   112    
656    848    
128    784    
-80    -496   
160    -656   
-48    -112   
208    224    
416    736    
32     80     
512    -64    
-448   96     
-64    176    
-176   32     
-80    -32    
304    64     
-160   -48    
160    -192   
-16    -128   
-16    112    
96     32     
112    16     
-32    64     
64     16     
112    -64    
48     80     
80     112    
64     48     
-32    16     
-224   -96    
272    64     
-272   160    
-112   -80    
-64    32     
384    -464   
112    128    
-224   0      
336    64     
-144   32     
176    32     
176    32     
112    -112   
-288   -32    
160    48     
-128   48     
32     64     
176    32     
-128   -96    
64     16     
32     -944   
176    64     
96     32     
16     48     
128    -16    
-288   -96    
-32    -32    
208    128    
-128   -16    
256    0      
352    -48    
-208   -80    
-144   80     
16     48     
-32    -16    
144    -480   
176    32     
96     176    
-16    80     
112    32     
-16    208    
240    -48    
112    -96    
-48    -32    
-16    0      
-80    -112   
0      -64    
96     112    
-16    -64    
208    48     
16     -64    
48     80     
-80    -704   
16     -64    
128    -320   
112    112    
16     16     
80     80     
16     64     
352    272    
-144   176    
-224   -64    
80     32     
224    -96    
112    144    
-208   -144   
32     80     
80     -416   
96     0      
144    -16    
96     16     
0      112    
64     16     
48     96     
608    912    
-576   960    
-48    -32    
304    -256   
256    -128   
208    416    
-144   -64    
32     32     
160    -192   
208    32     
384    48     
64     0      
144    80     
64     16     
-336   80     
304    160    
64     48     
176    0      
80     144    
-224   16     
288    480    
-304   96     
224    -112   
32     -16    
144    128    
144    32     
-240   -64    
192    -32    
176    160    
144    -48    
128    -64    
176    -64    
-192   -64    
-96    112    
-176   -96    
128    0      
-16    -64    
144    64     
-16    -160   
-160   304    
-640   96     
-16    -1024  
192    -16    
160    -48    
128    -64    
-64    -240   
-272   -208   
-48    32     
80     -288   
-16    -128   
384    -32    
368    -48    
112    80     
384    176    
-512   -256   
48     80     
-320   112    
288    192    
16     -80    
0      -144   
-768   -176   
192    32     
192    64     
-64    -64    
80     32     
0      -656   
16     -32    
112    -16    
80     80     
144    48     
128    -32    
-32    48     
-80    192    
-304   -592   
32     160    
-1088  288    
-224   -96    
384    -16    
-144   -336   
416    320    
-64    -656   
32     -64    
112    -240   
-160   -80    
112    0      
-336   48     
-16    -176   
96     288    
-368   -192   
432    624    
-704   64     
-16    -240   
176    -64    
-128   16     
160    -384   
576    480    
-400   480    
16     -240   
-128   400    
256    304    
224    0      
-16    -512   
-208   -192   
-48    -16    
288    384    
-192   -96    
-192   -480   
-1296  16     
144    -320   
-464   -272   
96     -48    
16     64     
112    -64    
176    160    
96     144    
-112   176    
272    144    
112    80     
-96    -80    
0      -240   
-304   -400   
80     -128   
-192   64     
112    112    
-64    -192   
272    -592   
-96    32     
160    -224   
-64    32     
256    -1200  
-64    48     
-16    -32    
80     -48    
-32    -16    
-96    64     
-288   -144   
224    -224   
-96    -144   
272    -144   
16     -112   
160    -160   
-48    48     
64     -16    
-112   16     
384    -224   
64     80     
-48    0      
64     0      
48     64     
240    272    
-272   16     
-16    -96    
-128   -32    
176    -48    
-208   32     
64     -32    
112    96     
48     -128   
112    48     
192    -304   
48     -96    
-384   128    
256    48     
64     -48    
-32    -16    
-320   -304   
80     -48    
-32    112    
64     -96    
-656   -32    
96     -32    
16     48     
144    -176   
144    128    
-32    32     
32     0      
-144   -64    
-80    0      
-160   -32    
160    0      
-128   48     
64     16     
-48    128    
224    112    
-80    -80    
-1520  -336   
144    32     
-784   -80    
64     128    
96     96     
16     64     
48     32     
-1008  -112   
0      -176   
160    0      
-64    80     
-32    -144   
80     -176   
-368   16     
224    304    
-112   32     
0      48     
-16    -48    
16     80     
-192   80     
-336   0      
112    160    
112    32     
-112   -64    
-288   -96    
-304   64     
-176   -48    
-112   64     
-288   -352   
96     -176   
-64    -80    
-288   -128   
-16    -160   
112    -144   
176    64     
0      -240   
-496   -464   
-480   -256   
-448   48     
160    -80    
-96    -128   
448    688    
-160   1072   
-384   160    
64     -528   
272    32     
112    32     
32     144    
384    64     
-528   -288   
-64    -560   
-128   432    
-240   -384   
-352   -224   
-176   368    
-320   -128   
-976   -96    
-32    -80    
464    640    
-272   -288   
224    -32    
-224   208    
192    -32    
144    32     
48     -64    
-32    240    
-16    -48    
-368   -48    
-112   -416   
-96    160    
-80    416    
-144   -16    
32     0      
-1520  -128   
-144   16     
64     -112   
-80    -16    
-48    48     
-96    -32    
-32    -32    
0      112    
320    176    
-32    -48    
16     304    
64     512    
-80    112    
-336   -112   
-16    16     
-144   128    
176    48     
320    64     
-368   -16    
-80    -16    
-320   112    
128    176    
16     256    
80     272    
48     32     
-400   192    
-240   48     
-176   -144   
-160   128    
208    240    
-912   -144   
208    -64    
-224   -144   
224    -96    
80     80     
-48    -32    
128    0      
784    624    
-480   160    
32     -128   
16     -112   
-352   -240   
144    128    
-320   -32    
-192   -112   
400    272    
-144   -80    
-32    48     
128    240    
-480   80     
448    16     
-272   -48    
288    64     
48     64     
-512   -80    
160    160    
-112   -64    
-32    16     
112    80     
-32    0      
-192   -32    
16     -32    
0      16     
64     112    
32     48     
-96    0      
-208   -128   
80     -64    
80     176    
-304   -48    
64     -64    
-192   -16    
80     48     
-96    -48    
160    112    
112    48     
352    256    
-512   32     
32     32     
176    0      
48     0      
64     -16    
0      32     
176    80     
-32    48     
96     64     
-288   -48    
16     32     
-80    48     
-96    0      
-16    16     
32     112    
192    16     
-192   -48    
224    64     
-64    16     
224    96     
-64    -48    
48     48     
-96    -16    
112    112    
-48    64     
160    96     
-32    -32    
-16    0      
32     64     
192    64     
-48    112    
-48    208    
96     96     
16     -144   
48     -16    
64     112    
-32    0      
32     32     
96     16     
32     -96    
80     -16    
80     144    
32     0      
224    144    
64     -32    
-64    48     
-96    -64    
96     -32    
64     48     
-224   -144   
-192   -48    
112    32     
-32    -16    
176    160    
-64    32     
32     96     
176    0      
112    32     
64     -16    
32     0      
96     48     
224    -16    
-192   32     
448    624    
-288   816    
64     336    
176    48     
32     0      
272    112    
256    352    
144    -48    
288    -736   
-16    -512   
320    832    
400    688    
96     -80    
-16    -208   
-16    -208   
32     0      
96     144    
-384   0      
128    16     
48     -80    
-512   -400   
-112   80     
-192   336    
-96    48     
64     -576   
16     16     
256    -32    
496    96     
160    80     
-176   -192   
192    32     
-176   128    
32     96     
48     96     
-112   48     
560    96     
-160   -272   
-16    -384   
240    96     
96     112    
544    432    
96     -48    
-224   -80    
-928   256    
672    704    
-176   48     
-384   -288   
-112   64     
-256   96     
-352   -128   
16     48     
80     -112   
16     160    
32     -48    
144    -400   
48     256    
-32    -304   
32     64     
80     -144   
80     32     
-224   880    
288    -848   
-128   176    
16     320    
144    -64    
112    0      
16     32     
112    -176   
64     -16    
0      752    
240    -672   
112    672    
-192   -432   
176    -96    
32     320    
-16    -816   
336    608    
-176   736    
-352   96     
640    -560   
304    -32    
128    576    
-80    -576   
-240   -176   
48     -128   
64     32     
112    -560   
208    -128   
48     -32    
192    -48    
-48    96     
48     -48    
160    48     
272    112    
64     -80    
224    -336   
-176   96     
-272   80     
-240   -80    
-160   -80    
240    -48    
-16    -256   
64     -96    
80     80     
-640   -288   
416    -96    
-80    -128   
-320   -64    
112    -288   
-64    48     
64     112    
128    -80    
80     -80    
-48    -32    
160    0      
-208   496    
288    -112   
256    -128   
0      64     
208    32     
-112   -288   
-64    -624   
-224   -784   
64     -32    
96     -400   
-96    368    
560    -224   
-96    -32    
64     96     
16     -32    
272    -16    
48     -128   
352    -624   
-112   32     
80     -272   
-240   -208   
208    -672   
-64    -560   
96     0      
176    160    
224    160    
144    -304   
64     112    
368    -432   
-176   -192   
-80    -432   
80     -96    
-128   112    
-208   -32    
144    -160   
272    16     
144    48     
-16    -112   
-1616  -48    
128    -80    
-128   -96    
96     -80    
80     -32    
32     -320   
144    32     
144    192    
-32    -80    
96     -160   
-160   -208   
64     -192   
160    80     
-544   -240   
128    -288   
-528   -16    
-240   224    
256    32     
208    -64    
80     -48    
64     -192   
128    -144   
96     -64    
-64    -96    
240    -128   
80     80     
0      80     
112    -64    
-208   -16    
64     -144   
-96    64     
0      16     
352    112    
112    -112   
64     32     
64     -128   
64     48     
560    -32    
-256   464    
112    176    
112    112    
96     176    
160    -160   
-384   -240   
256    -544   
-416   -144   
-80    -704   
-2144  -480   
-144   192    
-176   48     
400    464    
80     256    
48     -320   
80     -288   
256    -400   
176    160    
-464   -928   
-224   208    
-288   256    
224    -48    
112    -16    
32     96     
-304   -80    
32     -96    
-288   -176   
560    272    
112    -16    
-80    -304   
16     272    
-208   -1072  
-304   16     
16     64     
336    176    
384    192    
80     432    
32     -384   
-96    -224   
-256   400    
-128   192    
-672   -112   
0      -144   
416    -112   
688    -416   
464    64     
-384   -672   
-624   -288   
-384   32     
32     112    
-800   176    
16     -32    
32     128    
64     112    
-64    16     
0      -112   
-160   -64    
112    -240   
80     -80    
224    -112   
80     80     
-64    -80    
192    0      
-160   112    
288    112    
-288   -16    
224    32     
-80    32     
320    -80    
-208   -64    
-208   -80    
-112   16     
160    -16    
-64    32     
-368   -32    
16     224    
-224   64     
-1104  -96    
-48    80     
-224   144    
-176   16     
-96    -32    
0      96     
-176   -176   
224    64     
-336   -48    
432    16     
16     -128   
80     80     
-304   -112   
-272   16     
-272   -144   
-464   -128   
-160   128    
-368   16     
-32    -80    
-592   16     
-448   -128   
704    -48    
-16    -16    
-240   -144   
688    112    
-640   -144   
32     0      
-144   -64    
-16    48     
416    240    
-144   64     
-192   -64    
-176   0      
-256   -128   
-80    -32    
752    352    
-640   48     
-416   -16    
-256   -64    
48     80     
-80    32     
-192   64     
-208   0      
208    144    
-320   -176   
0      -64    
-96    48     
-256   -32    
112    80     
-176   -64    
144    112    
-928   0      
0      -32    
16     -16    
48     80     
-208   16     
192    224    
-32    0      
160    -16    
64     48     
-544   -64    
-64    -48    
112    112    
0      -48    
64     32     
-144   64     
-720   -240   
176    -64    
-128   0      
128    128    
-48    -128   
-128   -32    
48     16     
-16    64     
-96    32     
-128   -16    
80     16     
192    64     
-48    0      
-112   -16    
-16    0      
-160   48     
-32    64     
16     -32    
224    0      
-144   -16    
-224   -96    
96     96     
16     96     
-160   -48    
64     128    
160    128    
-80    -32    
64     0      
-128   32     
-128   112    
-16    48     
-80    48     
-1136  -208   
176    96     
48     -16    
-32    -16    
-144   64     
-16    -16    
16     32     
-16    16     
32     -192   
-80    0      
96     32     
-208   48     
144    -320   
-32    -192   
48     352    
-1216  -128   
32     48     
176    64     
-224   -432   
0      48     
112    -16    
112    96     
208    -128   
0      64     
-48    96     
-32    64     
-112   64     
0      48     
-208   32     
48     -64    
-16    -48    
352    64     
672    880    
-576   0      
-192   -1008  
16     320    
-16    160    
224    -128   
240    -16    
-48    -672   
608    384    
-192   160    
128    -64    
-96    208    
-176   48     
-48    784    
240    320    
16     -784   
-272   -240   
0      400    
0      288    
-320   -224   
128    16     
144    64     
-144   -80    
80     176    
-192   -80    
256    -32    
-112   208    
368    48     
0      -288   
-224   128    
-208   384    
-64    192    
-48    -192   
-32    -64    
-16    320    
64     288    
128    -80    
-256   -32    
0      80     
-288   32     
144    -128   
160    -176   
-352   -288   
-64    256    
-128   480    
48     -160   
224    -32    
352    96     
-368   -16    
160    -128   
128    0      
-16    304    
-32    64     
0      64     
16     -240   
0      -48    
-48    -208   
48     -256   
-96    -112   
208    -208   
160    416    
0      368    
160    160    
-80    160    
-32    80     
-48    208    
96     176    
-16    144    
-48    128    
-48    -336   
80     -32    
-32    -144   
32     -32    
32     -192   
-80    -32    
80     -336   
256    -256   
16     -80    
240    -272   
208    48     
-16    -112   
-16    80     
16     -96    
0      32     
-304   -384   
112    -384   
160    176    
144    48     
-96    16     
528    96     
-384   368    
-176   -80    
16     128    
176    176    
128    16     
32     -192   
368    0      
-256   288    
-384   272    
-128   -112   
224    -144   
192    32     
528    -832   
112    176    
160    64     
-16    16     
48     96     
-96    96     
-80    32     
-144   80     
48     16     
-32    -16    
128    32     
192    304    
16     16     
112    -320   
16     32     
80     -592   
-96    -176   
80     -64    
0      -64    
128    128    
48     -16    
-48    0      
64     32     
208    -80    
96     96     
-144   256    
368    32     
-96    0      
-32    0      
112    64     
-112   -240   
192    -16    
112    -96    
96     16     
-176   -400   
224    192    
304    400    
-16    304    
208    304    
304    -80    
16     64     
-32    -320   
-48    -272   
-128   -240   
32     -16    
176    -256   
-112   -240   
32     -1408  
64     192    
-112   128    
176    -48    
144    160    
-96    64     
-336   112    
432    192    
-80    -64    
192    -288   
160    -48    
400    320    
-256   416    
16     -64    
32     -64    
160    -128   
176    -32    
272    208    
128    304    
-400   240    
128    208    
128    80     
176    -64    
48     -16    
336    -16    
64     112    
0      -448   
-96    -320   
-16    -80    
64     288    
256    304    
48     144    
-80    64     
0      64     
-32    -400   
336    -256   
192    400    
32     -112   
-160   -128   
272    -688   
0      48     
-80    368    
64     -160   
32     -96    
16     320    
48     -320   
16     80     
16     16     
112    160    
144    112    
80     -416   
0      336    
-112   -224   
-16    -432   
48     -192   
256    48     
176    64     
448    704    
-304   144    
-160   512    
80     -368   
96     -384   
80     240    
224    -672   
-64    -224   
96     -48    
-80    -96    
0      -16    
-128   -96    
-64    -96    
160    -944   
288    48     
144    160    
64     -112   
16     176    
-304   128    
-208   128    
80     80     
384    -48    
592    48     
-448   -224   
16     -112   
-112   128    
-480   -112   
128    -80    
496    -96    
-336   -416   
656    -240   
496    -80    
144    -272   
-32    -192   
64     80     
256    192    
16     -144   
320    -64    
-32    -112   
-112   80     
-1216  -64    
224    -32    
208    16     
336    16     
-16    -80    
32     -32    
432    208    
-496   64     
144    32     
0      -112   
160    64     
176    -16    
0      -112   
192    0      
-48    -64    
-416   -16    
80     -112   
176    96     
96     -160   
48     0      
176    32     
-16    16     
192    -848   
-48    80     
304    0      
-224   48     
0      -16    
128    -32    
640    640    
-784   224    
96     -128   
-224   -96    
-192   48     
448    -32    
-144   -336   
80     -144   
-1104  192    
32     -624   
336    144    
-336   -32    
560    48     
96     -32    
352    192    
-560   -48    
-240   -256   
-416   -144   
192    160    
-192   -32    
432    112    
-288   128    
-112   -160   
-144   -192   
32     -400   
752    464    
-320   -560   
0      -112   
288    -48    
16     16     
-80    16     
-32    -80    
64     32     
-16    80     
-528   64     
96     -112   
-960   48     
160    -160   
288    48     
160    -176   
-176   64     
128    -448   
112    -64    
-176   -96    
208    16     
-624   0      
208    48     
-256   32     
16     -32    
-1056  -96    
112    96     
112    32     
304    -96    
-176   -16    
-16    -48    
-128   -32    
80     -416   
160    80     
-208   96     
64     16     
0      48     
64     192    
-32    176    
-16    -144   
-240   -48    
272    32     
112    48     
-64    -64    
112    -32    
272    -48    
48     32     
-336   -96    
128    16     
80     128    
-224   -528   
-128   176    
208    400    
-128   -48    
224    -128   
-144   -272   
432    384    
-272   -48    
-864   -176   
176    192    
-256   -192   
-400   128    
-16    -96    
-496   32     
-160   32     
-1424  64     
48     192    
-208   -352   
96     208    
144    128    
416    480    
-432   -480   
-80    -16    
-480   -112   
48     80     
-48    -48    
-224   -112   
16     0      
-96    432    
272    160    
-288   80     
-192   -112   
16     -16    
80     272    
-224   -816   
-144   448    
-144   -144   
288    -288   
48     208    
96     -544   
-32    320    
-176   -80    
0      144    
-176   -48    
0      64     
-208   112    
-32    16     
-512   32     
48     64     
-1584  -48    
-48    80     
-128   -64    
64     -208   
32     -224   
48     288    
-96    -64    
-32    48     
-256   -160   
-208   -208   
-96    -64    
0      -128   
-240   192    
192    -288   
112    -224   
-224   -288   
128    -272   
-336   -256   
-192   -112   
-192   -80    
144    -128   
144    -128   
64     96     
64     176    
32     112    
-160   0      
-80    -80    
-96    32     
-80    -80    
384    288    
-400   304    
-368   -16    
-128   16     
160    96     
16     32     
336    336    
176    336    
-208   160    
-256   32     
80     128    
-16    80     
432    -336   
256    -48    
-128   128    
-224   -16    
-400   -128   
144    32     
-352   112    
0      80     
16     96     
-112   -64    
-16    -32    
-80    48     
-32    32     
-144   -32    
-64    -256   
-64    -112   
144    16     
-240   0      
160    176    
-304   0      
-96    -16    
-240   -400   
16     48     
0      176    
16     224    
16     304    
-80    80     
48     224    
176    160    
-80    64     
-64    16     
-240   64     
-192   -272   
80     -144   
48     -96    
32     -32    
96     144    
32     0      
80     -224   
-432   -752   
144    -512   
-16    -368   
-32    64     
64     -80    
64     160    
-96    -128   
-16    64     
-336   144    
-128   -192   
-160   -96    
496    16     
336    240    
464    192    
-208   144    
-256   32     
-304   96     
16     80     
288    -80    
256    80     
336    -64    
96     0      
144    64     
-208   0      
0      16     
-240   -256   
64     -112   
112    208    
-368   -160   
16     -224   
-176   -96    
192    -160   
-128   -32    
-64    16     
96     96     
48     96     
-112   256    
80     512    
368    112    
-80    80     
96     16     
256    112    
-80    176    
160    16     
48     112    
192    64     
-304   -16    
80     -240   
112    160    
-128   -80    
256    -240   
80     -208   
-32    -224   
-336   -208   
32     16     
-272   64     
48     32     
352    192    
-272   -64    
16     144    
96     160    
-96    112    
-16    -160   
-16    16     
96     32     
0      48     
-112   32     
-144   80     
-384   48     
16     -16    
96     -96    
96     96     
144    128    
48     240    
48     0      
-48    -176   
-16    -256   
32     -288   
-16    -112   
-144   32     
240    176    
-160   112    
384    -208   
96     256    
0      176    
-32    -288   
-96    336    
128    -320   
368    368    
-208   -288   
64     -176   
-144   16     
-144   128    
288    0      
-96    16     
48     32     
176    -256   
-112   416    
-48    -688   
448    144    
-144   -16    
0      -96    
128    368    
96     -16    
16     -32    
112    384    
-48    320    
-64    -416   
160    -64    
48     144    
32     48     
-48    192    
128    64     
64     -16    
-32    32     
192    16     
-32    -256   
80     80     
112    32     
-32    64     
-192   -224   
352    -576   
144    -288   
208    160    
-48    32     
16     80     
96     160    
-32    48     
-304   -176   
-192   -32    
-256   288    
368    -96    
384    64     
48     16     
416    112    
-368   112    
-96    48     
32     -80    
16     96     
-176   96     
160    0      
304    -16    
80     48     
-160   0      
80     -16    
-288   48     
-208   -560   
416    288    
-160   96     
-32    64     
416    128    
-64    0      
-208   -160   
496    -32    
96     48     
64     32     
256    -192   
448    -240   
-96    -80    
176    0      
224    128    
176    -144   
-48    0      
80     -176   
80     48     
720    144    
-496   32     
-320   16     
160    0      
144    32     
176    -16    
736    208    
-496   -176   
-416   -32    
384    0      
32     48     
224    0      
240    0      
176    -288   
-16    -48    
208    16     
112    48     
80     16     
32     80     
32     16     
-48    64     
64     64     
0      -256   
112    48     
96     0      
-96    -112   
112    -160   
48     208    
192    -224   
32     32     
48     64     
208    384    
16     96     
64     -48    
-448   -112   
0      -304   
256    240    
-80    -32    
-432   -288   
576    -16    
-176   208    
208    80     
0      160    
-32    -48    
192    48     
-144   16     
256    -1040  
-160   80     
-96    -272   
208    -304   
-224   -80    
-112   -224   
-128   16     
0      -1408  
-80    -464   
720    368    
-272   16     
368    96     
32     80     
-912   -768   
-96    -192   
176    -656   
48     -128   
192    0      
64     -224   
208    -32    
192    -32    
-160   -64    
256    -464   
-160   80     
112    -32    
80     -16    
64     80     
32     -304   
256    -64    
-176   288    
96     -128   
64     64     
-144   144    
-160   -32    
-112   272    
240    144    
-80    -320   
256    -64    
-112   -176   
-96    112    
96     80     
176    -224   
96     48     
144    0      
128    96     
-32    -112   
16     -112   
64     352    
-224   -112   
-560   96     
-48    -48    
96     48     
32     -272   
192    224    
96     -512   
-16    -96    
96     -1168  
-240   -176   
-64    80     
112    288    
80     -256   
544    304    
-672   -976   
-48    -16    
-48    432    
368    -208   
-64    320    
-64    64     
32     320    
96     -640   
80     -32    
224    -816   
-240   -96    
-32    -352   
208    -64    
-16    368    
16     128    
-256   32     
176    48     
-512   240    
96     -240   
-1136  -304   
128    -192   
64     -80    
288    16     
32     144    
-32    -80    
192    32     
64     -192   
160    -32    
-80    176    
128    176    
192    176    
144    -112   
-368   -560   
16     -160   
-576   48     
176    -96    
-48    -16    
160    -128   
96     64     
112    -160   
160    176    
96     160    
48     112    
16     192    
32     -32    
192    128    
16     16     
-528   -160   
176    -96    
-160   -32    
64     -32    
-752   -64    
272    -384   
0      96     
80     -304   
-80    -32    
96     -32    
128    -128   
-192   112    
288    32     
-352   32     
16     16     
-128   160    
128    32     
-16    80     
192    32     
272    96     
192    -16    
32     -32    
0      -64    
32     -80    
-160   32     
32     -32    
-368   -16    
64     32     
-128   -16    
352    160    
-32    80     
-96    -16    
-128   -128   
16     -288   
240    32     
416    -32    
80     288    
-32    224    
-176   448    
-432   240    
112    -48    
-128   160    
48     -16    
-32    -32    
-128   -80    
-272   -80    
192    -32    
-400   -176   
-688   -256   
192    -64    
0      48     
128    48     
-304   -176   
-320   -32    
-48    48     
-32    48     
-160   48     
-160   -16    
-112   -144   
-1152  -112   
32     0      
160    128    
-176   112    
32     32     
96     64     
-480   32     
-144   48     
112    0      
32     -48    
144    -48    
64     32     
-112   -48    
-240   -32    
-432   -272   
-288   -304   
16     -240   
-16    -144   
-144   144    
64     224    
-304   176    
32     -416   
112    -32    
0      32     
80     -80    
16     160    
-240   -160   
-176   128    
96     32     
-272   -416   
-304   16     
-256   112    
-544   -80    
-80    -64    
-176   -768   
544    64     
-416   48     
-256   -96    
-432   -288   
-384   -192   
-208   32     
-336   -496   
112    -48    
-96    48     
-320   432    
192    240    
32     -32    
-1008  96     
0      112    
-176   160    
400    464    
48     -96    
48     -48    
144    224    
-224   -240   
-112   -64    
176    80     
16     32     
176    192    
-144   384    
-272   -224   
-16    -64    
-256   288    
32     -160   
320    240    
-304   -272   
64     -352   
-16    240    
144    -48    
-272   -464   
160    256    
64     144    
-80    32     
160    -208   
-32    128    
-176   0      
96     -96    
-80    -144   
16     48     
-1248  -32    
288    128    
128    16     
-48    -48    
144    -96    
176    144    
-144   192    
112    -112   
16     304    
144    448    
-240   -368   
-112   288    
96     32     
-48    -96    
192    32     
-416   64     
-32    -48    
80     -112   
-240   128    
64     -48    
32     240    
-48    0      
0      -32    
96     112    
-128   -144   
-16    144    
32     -32    
-128   -336   
-304   -32    
128    208    
-128   320    
80     176    
96     -16    
-64    16     
80     0      
-112   16     
-96    -64    
-16    48     
16     -96    
-48    -48    
-16    -528   
32     -16    
112    208    
-128   64     
240    112    
160    144    
-16    112    
-96    128    
-112   96     
-64    48     
112    80     
96     32     
48     64     
32     48     
-64    0      
0      -32    
-144   -32    
32     48     
16     -16    
32     80     
-16    -288   
416    -560   
368    224    
16     112    
-96    64     
128    80     
-528   -80    
160    -192   
144    -192   
-432   -240   
304    288    
-192   -208   
512    -16    
-96    96     
-144   112    
-128   -224   
176    80     
-112   192    
-208   48     
96     32     
-336   -128   
448    176    
-592   144    
-208   -16    
-32    -16    
16     -112   
432    -96    
288    48     
256    -16    
176    80     
-80    48     
16     48     
208    48     
80     64     
96     0      
0      -16    
768    256    
-448   160    
-528   -64    
208    0      
144    0      
48     0      
80     80     
48     112    
80     128    
-112   96     
112    192    
16     64     
32     -16    
160    48     
160    144    
-80    96     
-64    -48    
0      -32    
-48    64     
176    64     
160    80     
0      -144   
-16    16     
-32    32     
224    32     
0      160    
96     112    
16     0      
-32    -16    
80     64     
-16    144    
-64    16     
128    0      
-96    -32    
160    144    
-128   96     
176    -256   
16     80     
160    128    
80     48     
384    224    
-256   -32    
528    16     
-400   -304   
384    -160   
80     -64    
-16    -32    
-64    64     
144    160    
64     112    
208    272    
-160   48     
-16    48     
400    -336   
-432   416    
64     160    
288    128    
128    -80    
-64    -112   
-176   -176   
256    144    
16     32     
336    -32    
112    304    
144    304    
144    -128   
464    -320   
-64    128    
-368   -544   
0      256    
128    64     
-336   -416   
192    464    
352    208    
-160   144    
176    -64    
-16    -32    
-112   96     
-16    0      
144    -48    
80     160    
48     -192   
32     -128   
32     -176   
64     144    
64     -528   
-80    304    
96     -1024  
192    416    
192    0      
-144   192    
-16    256    
-80    -688   
0      144    
48     192    
-32    32     
0      -96    
320    0      
128    -96    
224    384    
-112   -48    
112    -80    
256    144    
-32    -80    
-112   -48    
208    -128   
80     96     
32     256    
160    96     
272    -80    
-160   176    
-64    352    
-32    -32    
96     -160   
144    -32    
-160   -160   
256    144    
112    176    
-64    160    
-272   -64    
208    0      
96     144    
144    -272   
-16    -48    
16     -144   
-48    64     
0      -64    
64     128    
192    224    
160    192    
16     -160   
240    0      
-144   16     
-16    -256   
-80    -64    
224    80     
208    -512   
-96    -16    
64     -1472  
64     112    
0      128    
-144   80     
128    -64    
0      -80    
128    -32    
16     -80    
224    240    
-240   176    
0      -416   
-144   -128   
272    -144   
384    -592   
-48    32     
-16    -272   
-48    -128   
32     -496   
64     16     
240    -64    
-80    -96    
192    144    
0      -16    
48     -384   
-16    144    
-112   -496   
400    -368   
16     -96    
16     0      
128    -32    
32     -64    
0      -144   
-80    -112   
-96    16     
64     -864   
352    48     
80     -96    
368    16     
-192   32     
-32    48     
-48    -176   
464    256    
-688   112    
48     32     
-560   -32    
144    16     
256    -48    
-80    -160   
96     -128   
-80    -256   
80     -64    
208    -320   
-240   64     
-176   48     
-288   64     
416    -16    
-48    96     
-400   16     
-112   -208   
-1120  -224   
48     -80    
144    112    
-208   -64    
64     -80    
80     -16    
-96    48     
272    -1472  
240    -16    
256    -32    
-144   -80    
-288   -144   
-128   -112   
-160   -32    
-96    64     
-240   -16    
320    -80    
-1568  -432   
128    -96    
96     112    
0      -64    
80     80     
160    -176   
192    96     
32     -208   
256    -32    
96     32     
64     16     
0      -32    
64     -128   
-112   16     
64     -320   
16     -240   
-144   240    
-224   224    
-208   -384   
-192   80     
-80    -352   
384    -304   
416    352    
208    400    
-128   -528   
-176   -384   
-192   224    
320    176    
-176   -112   
208    -272   
-656   -48    
400    304    
-1056  128    
288    304    
240    336    
-464   -624   
112    176    
0      -320   
208    -368   
-224   192    
416    32     
-80    96     
272    64     
-384   -64    
-16    96     
-512   112    
640    -144   
208    208    
-48    -288   
-144   64     
480    160    
-96    -16    
64     80     
128    -80    
336    896    
-112   -528   
496    -384   
464    304    
-400   -32    
224    -112   
-64    112    
-144   -48    
-288   32     
336    16     
-256   -208   
-512   -48    
-48    32     
16     -96    
48     464    
64     -96    
-368   -272   
-144   128    
80     96     
32     -128   
144    -208   
-192   -16    
240    -64    
-96    16     
-864   -96    
-192   -64    
-400   -112   
64     48     
-224   -64    
-48    -96    
-176   48     
-1104  -96    
-208   32     
0      96     
-16    64     
208    -16    
64     32     
-208   48     
-48    -16    
-496   -48    
160    64     
-416   -48    
176    -112   
-96    16     
-304   64     
-160   -112   
-144   16     
0      128    
-288   96     
64     64     
240    -112   
-48    64     
-32    -64    
160    80     
-48    -32    
48     64     
-16    -16    
-48    0      
-160   -96    
96     -64    
32     48     
-16    0      
-16    112    
-144   32     
-176   32     
-1296  16     
80     -32    
112    64     
-144   16     
-128   -64    
0      -32    
-208   -64    
16     48     
192    16     
96     64     
-240   -32    
-32    32     
160    128    
-384   32     
-48    96     
-160   -144   
48     -96    
-96    0      
112    32     
-176   -96    
-144   -224   
240    -96    
160    96     
-48    80     
-224   32     
-32    -112   
-48    -64    
-32    144    
-48    0      
32     80     
-528   80     
128    48     
128    -48    
-160   48     
-112   64     
256    -16    
-432   96     
-384   -48    
-288   -240   
-16    -256   
464    32     
-48    -32    
336    48     
0      16     
-208   16     
-800   -96    
160    48     
32     -48    
192    272    
-64    -224   
80     -272   
304    80     
128    0      
32     16     
-208   64     
-336   -48    
0      -48    
-192   -96    
-32    240    
128    96     
16     112    
-16    16     
-816   -80    
-32    96     
80     96     
-256   -96    
-80    -144   
224    240    
256    96     
32     48     
-480   -48    
-208   32     
-80    16     
-208   0      
16     -128   
-96    -16    
160    32     
-272   -80    
-192   48     
-368   -32    
-96    64     
-160   0      
0      16     
32     -144   
160    -16    
-80    64     
-240   48     
192    96     
-192   16     
320    288    
-480   112    
-16    80     
32     0      
224    64     
96     16     
320    160    
-16    48     
-112   0      
224    144    
-144   144    
64     -16    
80     32     
320    144    
-80    48     
64     48     
-368   112    
-128   224    
48     -16    
-352   -112   
-192   -288   
400    224    
-512   256    
64     -160   
448    272    
-304   256    
-16    -64    
-192   -384   
496    112    
320    384    
336    -64    
64     -160   
0      208    
-448   -256   
240    1312   
80     -336   
-448   -1136  
640    736    
224    -208   
304    -48    
176    272    
128    48     
-80    144    
0      320    
-32    -96    
128    192    
-240   128    
320    -320   
176    80     
80     -16    
-160   672    
448    -592   
-80    -496   
-192   -96    
320    -640   
-304   752    
288    192    
0      112    
48     336    
288    -288   
32     -16    
-96    -864   
-16    -48    
-144   -96    
32     -32    
32     688    
416    176    
80     272    
-320   -336   
288    -160   
-96    -96    
96     112    
-64    -144   
-128   32     
-48    128    
16     -384   
192    64     
128    80     
48     80     
96     48     
-176   0      
48     -112   
-16    32     
16     96     
-112   96     
-48    -240   
80     48     
-16    -368   
112    -48    
32     16     
-80    -528   
64     48     
112    160    
-80    16     
96     -48    
-96    -32    
336    -160   
96     128    
80     -80    
112    -16    
112    80     
64     16     
-32    32     
-48    -16    
160    96     
80     -80    
16     48     
32     -144   
-32    -96    
0      -80    
240    16     
0      96     
272    48     
-32    16     
-32    96     
-16    96     
-48    144    
-48    0      
128    -160   
-64    48     
80     -128   
112    64     
32     -480   
0      48     
96     0      
208    -96    
-80    0      
-160   32     
-32    128    
-16    0      
-128   -48    
80     80     
-96    128    
304    160    
-16    144    
48     -64    
128    -80    
0      -112   
112    176    
-64    -1056  
112    48     
64     -48    
-112   128    
64     64     
16     192    
64     -16    
336    -48    
144    176    
-208   32     
64     144    
-80    80     
-32    80     
128    -80    
48     -256   
80     -32    
-128   112    
-368   -16    
-112   -96    
128    -80    
80     32     
-64    64     
-112   32     
48     -48    
-160   -208   
208    -336   
272    -416   
288    0      
208    -32    
160    128    
48     -560   
128    112    
-208   112    
128    48     
-64    112    
160    224    
192    48     
-16    320    
64     -96    
304    -688   
288    400    
160    32     
208    160    
368    -128   
368    208    
32     240    
0      208    
-32    32     
208    400    
-128   0      
176    -464   
96     -32    
160    -80    
240    240    
336    176    
-336   -208   
48     -144   
144    80     
-16    -240   
352    416    
32     -272   
208    256    
64     80     
112    -256   
-112   -192   
176    -384   
112    -656   
16     -128   
48     -352   
112    240    
-64    -1328  
48     -320   
-304   -192   
320    -96    
144    224    
400    496    
192    -544   
-288   -128   
304    -416   
-48    128    
-224   32     
-32    -176   
-288   -96    
64     224    
336    288    
-144   -192   
-16    -560   
48     -880   
528    320    
176    576    
352    208    
272    -16    
-288   224    
112    128    
192    48     
-128   -64    
240    -112   
384    32     
448    -16    
480    288    
32     96     
48     96     
80     -208   
-80    -272   
-32    -448   
128    -80    
-96    -16    
48     -128   
64     16     
64     16     
-528   64     
16     -48    
-1872  -96    
-224   -80    
208    -64    
-96    0      
272    -80    
-48    -80    
64     -64    
128    -224   
-16    -64    
272    80     
-224   -16    
48     -48    
176    -32    
-32    32     
256    64     
-176   224    
-352   16     
304    16     
128    -64    
64     -32    
-48    -544   
32     -64    
32     -160   
160    64     
112    -48    
144    96     
-176   -16    
64     -16    
-64    0      
144    64     
0      32     
-256   -112   
-624   -48    
64     -64    
-48    -48    
224    48     
16     16     
256    -464   
-144   -16    
16     -16    
96     0      
-96    48     
96     -160   
464    208    
-272   -112   
-320   -48    
288    80     
-336   0      
192    -112   
-320   48     
336    80     
-128   48     
-48    -208   
160    96     
32     96     
112    -80    
16     48     
272    144    
-336   -96    
96     -96    
-400   -48    
0      64     
-176   -16    
16     -32    
176    32     
-16    16     
208    112    
208    0      
-112   16     
96     64     
224    48     
-464   16     
32     32     
-32    128    
48     16     
96     96     
80     16     
-32    -128   
96     -192   
112    80     
272    -144   
-256   48     
-32    32     
16     80     
32     0      
96     16     
-400   0      
64     -16    
-144   -256   
-16    -16    
-128   64     
-112   -224   
-32    -48    
192    -112   
-208   176    
-1424  -16    
-272   -288   
-416   -304   
80     -16    
240    -32    
-400   80     
-224   32     
-656   32     
-128   -16    
320    0      
-208   128    
-272   -64    
512    400    
-784   128    
256    48     
-48    -32    
208    -32    
128    -64    
-448   0      
-208   128    
-256   -80    
208    144    
16     160    
64     192    
-16    80     
160    -64    
64     32     
-16    64     
-48    112    
0      176    
-224   -128   
-16    -16    
-320   -128   
-400   -80    
-64    112    
-128   16     
-48    16     
-112   -128   
-48    -112   
-1088  16     
-512   -80    
-80    -64    
64     160    
-64    -48    
272    80     
0      -160   
0      16     
-128   224    
-80    144    
-192   -48    
128    0      
-32    0      
16     0      
64     48     
48     112    
-192   -368   
-64    -416   
64     368    
96     320    
-160   -256   
16     0      
-16    0      
224    -256   
-208   128    
32     80     
-112   -96    
16     224    
0      64     
-80    -48    
-64    -320   
-304   176    
-416   336    
-272   -576   
96     640    
160    -320   
368    368    
-96    -176   
-240   -704   
16     432    
-48    0      
-288   -64    
112    -288   
-480   -272   
192    416    
-880   512    
480    -192   
-176   -704   
64     -128   
-80    192    
-64    128    
-432   -176   
-96    512    
224    176    
112    112    
144    -64    
-144   -224   
-112   -176   
416    32     
-160   192    
128    0      
272    272    
-80    128    
-224   -96    
-720   -16    
-96    16     
-32    112    
224    160    
128    416    
-16    96     
-96    80     
-112   -16    
32     128    
48     -80    
352    80     
-192   64     
128    80     
-352   -48    
-192   -16    
-928   -224   
-80    240    
256    336    
-96    -16    
112    96     
-80    -80    
-240   -96    
-16    -144   
64     32     
0      64     
0      192    
-160   0      
176    0      
-352   16     
176    -80    
-192   -64    
-64    64     
-64    16     
96     -16    
-144   -64    
224    48     
160    96     
80     -16    
128    -96    
-256   -48    
-80    96     
-400   -48    
288    -16    
48     -16    
160    48     
-416   -192   
256    -208   
160    -48    
-160   -336   
80     -64    
-32    64     
176    128    
0      -32    
-16    -160   
-112   -208   
192    -32    
-64    112    
0      48     
-224   112    
160    160    
96     80     
64     -32    
-48    32     
208    -48    
96     128    
-176   -96    
-144   -128   
-64    48     
96     32     
32     64     
112    16     
0      48     
256    96     
0      128    
-32    -128   
0      -144   
-128   -48    
192    -192   
96     -64    
48     96     
32     176    
-48    48     
-32    -16    
352    208    
-208   256    
0      96     
16     0      
112    -128   
-16    -128   
16     -96    
64     -96    
160    64     
48     128    
64     32     
-256   -192   
-80    -112   
48     48     
160    -32    
240    -112   
32     48     
-32    -288   
-336   -336   
-144   -624   
-192   176    
288    96     
-16    96     
32     224    
64     0      
-192   -112   
160    -96    
80     368    
128    144    
160    208    
240    -176   
-112   -32    
240    176    
-336   -160   
128    -336   
-64    192    
240    336    
-512   -208   
-64    160    
-192   0      
320    400    
128    80     
400    -224   
400    176    
-560   -32    
176    -144   
-64    -16    
32     -224   
-352   64     
-224   -48    
16     -128   
256    544    
272    160    
208    -272   
128    0      
32     144    
-432   96     
128    416    
-240   160    
-240   -16    
368    -48    
-128   -272   
-64    -48    
32     144    
-16    -320   
-32    384    
208    -560   
112    -16    
-208   64     
-80    112    
144    80     
-32    -64    
48     -96    
160    64     
-48    -32    
224    160    
64     16     
-48    -80    
-48    96     
-128   -208   
176    48     
144    48     
96     48     
80     32     
0      0      
304    176    
288    144    
-64    32     
-192   48     
-272   -32    
48     -128   
112    64     
128    -80    
416    176    
336    112    
-64    160    
80     112    
32     48     
-528   -1472  
0      -16    
288    128    
240    208    
-224   112    
-80    -96    
144    -144   
224    96     
-224   32     
16     32     
144    208    
-368   -32    
-16    32     
432    176    
640    16     
-400   -304   
160    80     
-144   -48    
160    32     
96     16     
288    112    
-176   -96    
192    0      
256    176    
-336   -48    
144    32     
144    -80    
64     48     
32     -32    
192    48     
224    32     
0      80     
-64    16     
48     -80    
-32    -96    
-64    176    
112    16     
192    -64    
-128   0      
-16    -208   
0      48     
192    0      
-32    32     
48     0      
112    -48    
-32    -96    
160    160    
-64    64     
224    0      
-16    16     
16     160    
48     -752   
0      -192   
80     -768   
160    -96    
0      64     
-48    -144   
208    112    
0      -96    
80     80     
208    -272   
96     -864   
-80    0      
32     -528   
-32    -128   
-912   0      
64     -176   
96     48     
144    -208   
96     48     
-64    -384   
304    32     
-64    0      
-80    -96    
112    96     
-48    240    
160    -528   
144    -32    
128    0      
-80    96     
0      -112   
112    -176   
48     -16    
208    -320   
144    -16    
-32    -256   
-32    -16    
160    -400   
224    -48    
0      80     
96     -32    
112    0      
0      0      
80     -144   
96     -32    
-192   -96    
32     -48    
-560   -16    
48     -64    
-32    -64    
16     -192   
80     -176   
160    -208   
-32    32     
128    96     
48     -32    
272    -112   
-432   -864   
-80    48     
-128   592    
-192   48     
128    -160   
-976   0      
400    128    
240    -80    
208    0      
-144   208    
128    -160   
-224   32     
0      -320   
80     0      
16     -112   
-128   48     
-96    64     
-80    -96    
-64    -64    
96     -144   
16     192    
-96    -368   
-640   -128   
-208   176    
-240   32     
128    -400   
208    -304   
160    -752   
368    416    
-144   160    
-192   0      
-304   -448   
-224   -128   
-144   928    
448    -752   
80     144    
-160   -64    
-800   -208   
0      96     
-304   -896   
224    128    
48     496    
-448   -608   
-16    160    
-256   -176   
192    -48    
-208   16     
304    -16    
80     -48    
0      0      
352    416    
-336   240    
-1120  -112   
112    -64    
-160   304    
256    -448   
320    128    
176    208    
-176   -80    
16     32     
-16    -128   
-592   -208   
224    656    
-656   272    
80     -352   
-48    64     
208    0      
32     112    
224    384    
-240   256    
64     -592   
160    -96    
32     112    
-32    96     
-864   -32    
160    -288   
-304   16     
-96    -112   
-368   -656   
544    -80    
-208   -224   
192    -48    
0      -160   
-48    -320   
112    -32    
48     -304   
48     16     
256    0      
-176   -96    
32     -352   
-480   -16    
-272   -32    
272    -96    
-368   0      
256    32     
-464   -16    
-16    -304   
-256   -80    
80     -48    
32     48     
-352   -112   
16     80     
-176   48     
-544   48     
-320   -16    
-576   176    
-112   -64    
-1984  -176   
-256   112    
32     32     
-80    256    
80     64     
48     -64    
-64    -384   
-112   -240   
-32    -112   
-48    272    
-112   -48    
-64    64     
-144   16     
-272   48     
-80    336    
96     160    
80     -160   
-224   -32    
-240   -768   
-256   -464   
80     -48    
-304   -240   
304    -96    
-160   144    
-32    96     
112    -144   
-80    160    
-16    -144   
96     128    
-288   32     
-176   32     
48     -96    
-80    160    
96     32     
-48    -48    
144    112    
80     224    
-144   144    
-80    -128   
-96    144    
80     48     
16     -32    
-112   -112   
-80    0      
-80    48     
-208   0      
32     64     
-544   144    
64     -80    
-448   0      
128    144    
-352   -64    
96     -192   
16     -16    
-16    96     
-16    0      
96     0      
32     -80    
0      -112   
-112   160    
-176   160    
-240   16     
-240   32     
192    -48    
-1088  -80    
32     48     
96     -208   
64     112    
-176   -176   
0      -176   
-144   96     
-32    32     
-48    112    
128    112    
-256   -48    
-64    -16    
112    128    
-208   -80    
144    -336   
-176   -208   
128    -144   
-240   -208   
-144   -16    
144    192    
-80    352    
-32    112    
-80    64     
48     -208   
-144   -144   
-32    -16    
48     -176   
0      -16    
-240   -176   
-64    -352   
-304   80     
16     96     
-1024  96     
-112   272    
96     -80    
32     160    
288    -272   
-64    -48    
48     160    
64     704    
-48    96     
-144   -208   
-272   400    
-112   -64    
96     224    
-144   144    
-64    64     
48     64     
-80    176    
192    -64    
-16    -176   
-160   0      
208    320    
-368   80     
-192   48     
-432   -16    
96     464    
-368   32     
-576   -192   
-256   288    
-384   176    
-160   -48    
336    160    
272    96     
240    64     
112    -144   
-160   -64    
-64    48     
-208   -64    
64     48     
176    128    
-160   0      
464    192    
-240   0      
-64    -48    
-32    -16    
0      16     
64     16     
-288   -144   
448    48     
-272   64     
-368   -144   
240    -16    
64     32     
160    0      
592    -112   
-128   -112   
-176   -160   
192    -144   
-64    -32    
48     16     
-64    96     
0      16     
96     64     
-96    64     
-48    16     
144    -96    
192    144    
0      -128   
272    16     
-256   32     
16     -32    
0      48     
96     48     
0      16     
160    112    
-80    16     
48     0      
480    160    
128    32     
-176   -96    
608    128    
-352   0      
336    64     
64     16     
-96    -32    
-400   -96    
160    112    
-128   16     
-176   32     
32     0      
96     32     
160    96     
32     -480   
160    -400   
-256   288    
-96    192    
-256   112    
-448   -16    
-368   -304   
608    144    
-320   112    
192    336    
-336   -256   
0      -288   
416    64     
-192   224    
16     0      
-64    -64    
32     128    
-128   32     
528    176    
-272   32     
160    -96    
32     16     
64     80     
-16    112    
160    48     
112    48     
0      -176   
128    112    
96     16     
-96    64     
80     -32    
-176   -48    
160    208    
32     -16    
208    112    
-160   -80    
-48    -64    
272    32     
-144   -64    
192    64     
-96    128    
-64    112    
496    208    
-128   80     
-16    -48    
64     96     
96     48     
128    64     
64     -48    
-208   -96    
208    32     
-256   -112   
176    64     
-192   16     
96     -48    
-16    96     
224    -144   
96     32     
48     -1504  
0      16     
256    -208   
-272   -256   
48     0      
-96    112    
48     -112   
192    -16    
-112   144    
144    32     
0      144    
-16    0      
16     0      
208    -48    
96     -64    
144    -112   
80     48     
-144   -416   
64     -96    
16     16     
384    208    
32     -48    
160    144    
-80    -64    
112    -48    
80     240    
-16    -464   
0      80     
16     -48    
80     -16    
160    -224   
32     64     
80     -208   
160    144    
-64    -16    
-32    64     
400    880    
-320   -576   
128    128    
224    -64    
64     -32    
96     64     
-128   32     
80     80     
-16    80     
192    64     
-224   -160   
-16    -80    
-144   -32    
-64    -592   
0      240    
176    -224   
192    -176   
192    640    
-336   -864   
-64    336    
32     -16    
192    -32    
128    -48    
208    144    
-64    -304   
-32    0      
192    -32    
208    -112   
256    80     
160    64     
624    928    
-352   176    
48     -1296  
576    432    
80     432    
176    -432   
128    128    
-32    -288   
-288   -128   
272    528    
-176   -512   
480    -240   
176    1136   
304    0      
480    -896   
-48    -176   
384    -288   
-160   -176   
336    -80    
-480   -688   
-144   -288   
-96    -208   
-32    -144   
384    16     
256    16     
352    -144   
112    80     
0      -640   
-144   -96    
192    -96    
-400   -448   
-144   -320   
176    -80    
176    -80    
176    -448   
64     -144   
80     -784   
-80    -48    
112    192    
48     -80    
80     -32    
128    16     
96     -64    
80     0      
16     -32    
96     -80    
-256   -176   
-144   -208   
336    -336   
224    80     
-112   32     
0      -448   
16     112    
176    -1200  
80     -48    
416    176    
-384   304    
256    -192   
80     -96    
-80    448    
160    48     
-80    496    
192    -80    
-368   -128   
-64    112    
320    80     
-192   128    
256    -224   
-96    -16    
688    272    
272    304    
112    48     
-304   16     
112    -144   
-32    -112   
-208   -224   
-432   -768   
-272   -320   
240    -192   
64     48     
-64    80     
32     -160   
-64    -16    
432    -80    
304    256    
32     -288   
464    80     
-16    -32    
272    112    
-208   -48    
176    80     
-96    32     
-16    -80    
-752   -160   
16     -192   
-1168  -160   
224    -352   
-400   -16    
144    -176   
0      -128   
128    -128   
-96    96     
192    -80    
-48    -144   
160    -112   
416    400    
-432   560    
144    256    
-544   -80    
336    176    
-240   384    
32     112    
96     -80    
272    -96    
-96    -80    
336    -336   
-320   -256   
368    -128   
224    16     
-304   144    
16     0      
-464   80     
64     16     
-80    -96    
192    -112   
176    96     
144    64     
-320   32     
96     -144   
112    -48    
144    112    
-96    176    
-496   112    
80     -192   
-272   -240   
160    -80    
-512   -16    
32     -16    
64     -64    
112    96     
-592   16     
96     0      
-96    0      
208    32     
-144   480    
0      64     
272    160    
32     64     
-16    -96    
128    -32    
112    128    
-48    96     
128    128    
-32    128    
-112   128    
-192   0      
208    -192   
144    -160   
-768   -64    
80     176    
-928   0      
96     -480   
144    320    
-416   -176   
-128   -80    
-432   -64    
-80    -128   
0      192    
-48    -96    
-32    -224   
32     432    
-64    48     
224    96     
-320   -48    
32     -48    
-144   64     
-256   -80    
-224   -352   
-192   16     
-144   -64    
-16    224    
16     320    
640    -208   
-64    -32    
-32    96     
-96    0      
-480   -128   
-96    -176   
-512   -320   
-80    48     
-208   -32    
-176   -64    
96     0      
48     -16    
176    -64    
-112   32     
0      48     
-96    112    
-32    32     
-336   -320   
560    -224   
304    -16    
48     176    
128    -32    
0      0      
-112   0      
560    480    
-512   192    
-48    -16    
592    80     
-448   -16    
-400   -64    
-144   -16    
48     -32    
-1888  -176   
-208   -112   
256    -96    
-80    -16    
288    -16    
-96    64     
-288   48     
64     48     
64     -16    
-320   -80    
48     48     
-160   -16    
112    16     
128    32     
-16    64     
-1472  -176   
416    -16    
-48    0      
-16    48     
-176   -32    
240    32     
-224   -16    
-256   -16    
-48    48     
-48    64     
160    96     
-224   -16    
128    0      
-160   -80    
192    80     
-208   -144   
368    96     
-192   -16    
368    144    
160    80     
-480   -144   
48     -64    
128    16     
64     144    
368    80     
-144   16     
-336   -176   
16     0      
-80    128    
-128   -96    
-48    -240   
-288   112    
-928   128    
112    -96    
16     -80    
240    112    
-32    112    
-368   -80    
112    -48    
16     16     
-16    112    
-16    96     
-160   0      
48     -128   
-96    0      
-656   -240   
304    -16    
0      128    
-272   240    
-240   -160   
272    0      
-96    80     
0      64     
-256   -208   
976    240    
-576   144    
-544   112    
16     -96    
-96    32     
192    32     
-16    32     
496    192    
-176   32     
-128   16     
-16    -80    
-128   48     
48     96     
-48    32     
160    -48    
80     16     
32     16     
-96    -16    
48     80     
-144   -16    
96     64     
-112   -80    
80     -32    
-16    224    
112    -16    
-80    -48    
160    32     
-16    48     
32     -48    
-64    -32    
-48    16     
-160   32     
-64    48     
112    32     
48     -16    
192    144    
-48    368    
176    208    
-128   -32    
0      160    
-128   80     
0      -80    
176    112    
64     64     
208    48     
48     32     
-32    176    
-160   -96    
192    -48    
32     112    
208    16     
0      -112   
16     384    
48     -128   
48     -112   
32     336    
-64    64     
208    -64    
128    144    
-112   0      
0      -128   
-32    64     
0      -416   
-176   64     
-192   496    
64     -464   
128    480    
0      112    
-176   -320   
288    16     
112    272    
-112   32     
-176   -608   
96     -224   
224    576    
-192   -192   
-16    272    
-192   -160   
0      -16    
-192   272    
-32    -1216  
-112   64     
112    160    
64     112    
96     -64    
16     0      
16     -272   
48     -112   
-32    112    
-32    304    
-128   48     
0      -80    
-112   64     
112    -48    
-64    304    
224    208    
0      -464   
96     -384   
32     32     
16     176    
-16    96     
-208   -128   
96     16     
160    208    
-96    -96    
-288   -320   
32     -112   
64     -48    
208    48     
16     -96    
288    -176   
144    160    
-80    -32    
-48    -64    
-208   -96    
-144   -80    
80     -384   
336    -80    
208    -80    
48     48     
16     -32    
32     -160   
112    32     
-48    64     
16     112    
-64    -208   
144    96     
-96    -224   
80     16     
-16    -16    
-176   48     
160    -160   
304    192    
304    272    
128    160    
-464   240    
-320   64     
-192   -32    
32     -16    
464    -16    
32     -32    
-48    -128   
96     -80    
-128   32     
80     224    
80     64     
128    -64    
128    64     
64     64     
96     -32    
64     -16    
112    0      
160    112    
96     0      
-64    32     
32     -16    
16     16     
-96    -320   
128    -16    
-32    -1184  
208    -48    
48     -256   
-80    -320   
-48    176    
288    432    
16     224    
160    128    
160    -144   
64     -208   
208    -128   
0      128    
-128   48     
176    -512   
-32    80     
0      -608   
-240   -240   
64     -336   
-48    112    
240    112    
64     32     
176    32     
16     -160   
-112   160    
-224   -352   
-288   32     
128    -384   
-80    0      
-176   -192   
80     0      
-96    240    
208    256    
624    304    
624    976    
-752   816    
-496   -208   
272    -96    
96     -16    
608    128    
128    -112   
-160   -192   
-144   -272   
192    -336   
288    -464   
208    0      
176    -1072  
64     288    
176    -48    
-224   176    
-16    -80    
-80    -448   
64     -656   
112    -48    
192    -656   
256    -176   
32     192    
160    -32    
-144   -720   
-160   -624   
-80    -240   
-112   112    
80     -832   
464    16     
0      64     
128    64     
-800   -208   
48     -352   
-96    80     
96     160    
384    416    
-16    -160   
64     112    
-96    64     
400    464    
128    176    
-96    -32    
224    336    
176    240    
176    176    
112    112    
-224   320    
480    224    
-64    160    
-16    -16    
-128   -192   
480    -448   
-112   256    
32     -944   
144    -400   
16     272    
176    128    
0      -32    
-400   128    
48     96     
464    -112   
-256   144    
192    368    
96     -256   
128    48     
0      48     
-224   -752   
160    320    
32     512    
448    -224   
128    96     
-16    -336   
256    16     
16     -144   
-208   96     
-112   16     
-192   0      
64     -112   
48     -128   
160    -48    
272    80     
32     -80    
32     112    
-32    -384   
64     64     
32     -1456  
96     192    
128    -16    
272    -32    
144    64     
-32    -64    
-208   -112   
160    -128   
-448   -176   
144    128    
-304   0      
64     32     
-144   16     
0      -368   
-80    -64    
112    -1040  
48     96     
512    416    
304    224    
-32    176    
-48    -192   
-160   -64    
48     -144   
-576   -48    
-32    -160   
-304   64     
-64    240    
-384   96     
80     -176   
80     48     
144    48     
112    48     
48     -64    
304    32     
-32    64     
112    0      
-128   -208   
800    112    
-112   -32    
288    -16    
-416   0      
-16    16     
-288   128    
-64    96     
64     176    
240    -48    
512    96     
240    0      
144    -64    
80     32     
192    128    
-288   -16    
-432   -64    
-336   -32    
64     -112   
-224   -64    
32     128    
-480   112    
-64    -80    
-160   48     
512    -224   
128    -144   
-272   -48    
112    16     
-352   64     
48     48     
48     48     
-144   -64    
-336   -48    
368    64     
240    48     
-192   -112   
-160   112    
-1440  -112   
256    80     
-1104  -48    
-1376  80     
-320   -96    
-1280  48     
-80    32     
352    -32    
-64    64     
80     -96    
128    -32    
48     144    
16     112    
-320   -112   
-176   16     
-160   -16    
96     0      
-192   16     
96     0      
400    256    
-1424  160    
-16    -144   
-624   -32    
256    160    
-176   -48    
-112   -80    
448    144    
-592   -320   
320    -112   
-160   16     
-288   -112   
400    144    
-304   0      
208    32     
-256   -160   
336    144    
-176   112    
-256   -48    
176    128    
-1376  -352   
-272   -368   
0      16     
-128   32     
-48    -176   
176    96     
0      80     
192    240    
-112   -32    
256    -192   
400    48     
384    -128   
-192   -176   
112    192    
-736   -144   
-96    128    
-32    144    
-192   -48    
304    176    
-32    -16    
192    112    
-144   16     
-256   -32    
-112   -96    
-16    -16    
16     224    
-32    -16    
-64    -80    
-80    16     
-224   80     
16     -32    
32     -192   
-1264  48     
-32    304    
-144   -624   
80     176    
0      480    
-144   -256   
160    192    
80     32     
-208   96     
0      -368   
-240   -64    
336    192    
-16    -16    
-192   304    
-96    -208   
-432   -896   
128    688    
80     176    
-96    -336   
64     96     
16     -288   
368    496    
-352   880    
-224   128    
-80    -784   
32     224    
176    0      
-96    96     
0      96     
-96    -128   
-752   80     
-144   128    
16     -64    
-144   -64    
176    112    
-48    256    
192    208    
-128   320    
-144   0      
128    -48    
32     96     
208    64     
-144   128    
-48    80     
-144   208    
-400   80     
272    256    
112    112    
240    176    
0      48     
-32    -192   
-64    288    
80     128    
48     0      
-128   -32    
96     32     
0      80     
368    256    
-432   160    
32     0      
-288   16     
128    48     
64     32     
48     0      
16     0      
32     16     
16     48     
112    -48    
-128   -192   
-144   -64    
-48    -96    
-144   -128   
192    176    
-208   128    
160    96     
-288   -48    
32     80     
-32    48     
-112   304    
352    288    
-112   224    
-176   -48    
144    -80    
16     112    
-272   -64    
112    0      
-64    48     
-48    112    
-272   -80    
0      -16    
-208   -160   
-48    112    
272    384    
-192   352    
-176   64     
16     -160   
64     0      
-16    -48    
224    -96    
224    32     
608    448    
-272   256    
0      80     
-64    -80    
96     272    
112    128    
112    32     
192    144    
-96    400    
80     224    
-352   -80    
112    176    
-176   80     
160    -32    
240    128    
16     208    
0      144    
192    128    
0      48     
192    16     
160    112    
-256   64     
32     128    
64     192    
128    16     
-160   -80    
112    -48    
144    64     
16     160    
-176   -32    
96     80     
-64    80     
160    80     
32     16     
-80    112    
-128   -32    
160    -192   
96     -96    
128    112    
320    304    
-160   176    
336    272    
-16    368    
0      144    
-48    -112   
64     112    
48     0      
64     -80    
224    784    
384    -176   
-176   -224   
16     -640   
304    -208   
-80    368    
208    64     
160    256    
-368   -32    
112    96     
-64    752    
96     192    
672    496    
-80    560    
-16    304    
-640   -720   
0      -368   
64     480    
-64    64     
16     800    
-416   176    
80     -160   
-320   -384   
48     176    
-240   112    
-176   -48    
-96    -112   
80     -64    
-608   160    
304    736    
-80    -144   
-112   -400   
-48    64     
-80    -176   
0      144    
320    176    
256    400    
160    144    
80     -320   
0      -144   
-96    -224   
-144   368    
192    -160   
-480   -720   
128    -16    
464    560    
32     -368   
208    176    
-208   -400   
112    -48    
176    -112   
224    112    
-160   96     
224    -96    
-384   -80    
224    96     
48     16     
176    128    
208    -96    
-96    -80    
304    -320   
-208   -48    
304    192    
176    -576   
-192   320    
304    -192   
176    176    
112    224    
-80    -160   
144    64     
-96    16     
-64    0      
96     112    
-32    160    
176    -32    
192    128    
-64    -80    
-32    32     
128    -160   
128    64     
96     -928   
-144   -48    
-64    -160   
448    352    
48     224    
32     32     
192    80     
176    144    
-48    48     
48     -32    
32     624    
288    -80    
64     -160   
-64    160    
224    256    
0      -208   
-32    32     
240    112    
48     80     
256    80     
-160   32     
144    -192   
16     -96    
32     -160   
48     -208   
32     128    
-16    80     
64     176    
128    -96    
-80    80     
-80    -256   
128    -16    
208    16     
384    352    
-288   48     
-32    -16    
240    0      
192    0      
64     48     
144    -128   
80     48     
176    -32    
224    64     
256    464    
-208   144    
-16    0      
224    -688   
64     32     
304    -208   
-112   16     
-400   -160   
176    -240   
80     16     
160    -528   
368    288    
-144   480    
-336   -144   
224    80     
-32    64     
176    128    
208    144    
32     -176   
144    0      
-288   -64    
176    64     
-176   144    
-224   -48    
224    -16    
-64    -128   
160    -80    
0      -432   
272    -48    
464    224    
-112   -144   
80     -320   
80     192    
144    112    
-32    16     
192    48     
176    176    
-176   240    
-368   -80    
-288   -336   
288    -112   
240    144    
320    48     
160    -16    
160    -624   
-128   48     
96     -160   
224    32     
128    16     
48     -16    
240    -96    
128    0      
-16    32     
-64    -160   
-368   -16    
304    48     
16     32     
160    -16    
-176   16     
16     -784   
128    96     
48     48     
96     0      
176    32     
176    48     
16     48     
-112   -48    
-144   80     
48     -96    
32     -144   
-208   -80    
208    0      
-16    -48    
16     16     
176    -32    
64     64     
-112   -912   
320    80     
-80    -240   
-16    -176   
-112   288    
208    416    
-128   -64    
0      -32    
-544   176    
-336   -64    
-2480  -192   
224    224    
-208   32     
304    176    
-48    160    
64     -544   
-112   16     
128    0      
-192   -48    
704    368    
-368   80     
-64    -16    
-96    64     
-928   -144   
32     -304   
-416   -64    
32     16     
112    224    
-464   -464   
288    512    
112    -112   
-432   0      
496    432    
-176   -224   
256    96     
272    192    
-1088  -352   
480    160    
-384   128    
-304   -928   
-496   304    
48     80     
256    -256   
-80    560    
128    -384   
112    80     
208    144    
48     -80    
96     -32    
-576   336    
32     256    
0      48     
-32    80     
480    592    
-560   -304   
-992   -544   
304    224    
16     576    
208    336    
-16    80     
112    -48    
352    96     
64     208    
-144   96     
0      112    
32     432    
64     128    
192    192    
240    128    
-80    -432   
-176   -96    
-32    -144   
-80    -240   
-272   -48    
48     80     
-160   80     
-208   -48    
144    112    
-1424  112    
-96    240    
-1344  80     
-96    -32    
-48    -16    
-32    64     
160    208    
32     48     
160    -80    
80     32     
-176   -128   
16     96     
112    112    
-16    16     
48     128    
-48    16     
-128   -32    
-320   -16    
-160   -16    
-704   -32    
48     80     
144    224    
16     496    
-480   0      
-16    48     
-320   0      
-80    -96    
-48    16     
-16    48     
128    224    
-32    32     
-176   144    
-304   -48    
-144   32     
-496   16     
-144   -256   
-112   -272   
-144   144    
-208   -144   
208    0      
0      -176   
128    -96    
16     144    
-272   112    
32     80     
-304   -112   
-80    48     
-336   112    
-96    -48    
-160   -16    
-176   -96    
-224   -128   
160    272    
-48    288    
336    592    
-272   432    
16     -16    
80     64     
112    32     
176    16     
-240   64     
-160   128    
-144   48     
176    64     
-384   -96    
240    -64    
-704   48     
352    112    
48     160    
-160   80     
160    208    
-240   176    
-112   -192   
128    -352   
384    -256   
512    112    
272    48     
-64    -32    
224    224    
-544   208    
-32    128    
-480   80     
192    464    
-208   272    
352    208    
-192   192    
-240   -48    
-192   112    
128    64     
144    -128   
-288   -320   
-80    -160   
-608   -96    
0      -112   
-80    -48    
80     96     
-224   -16    
-16    0      
-96    96     
144    48     
224    32     
32     -112   
-112   48     
48     -16    
-128   -192   
16     -96    
-48    208    
80     -144   
-144   -384   
-64    144    
48     160    
-128   96     
48     -96    
160    96     
192    304    
-368   -752   
352    432    
-80    304    
-32    -240   
96     256    
128    -32    
-128   528    
64     -112   
320    -16    
144    -624   
576    672    
-352   -256   
-160   80     
-640   64     
192    -208   
224    336    
240    144    
128    192    
-96    -32    
-64    272    
-432   -720   
368    592    
144    800    
208    -1024  
80     272    
-304   608    
-480   -320   
-64    -32    
0      80     
208    32     
-320   -192   
96     352    
-128   256    
-480   -432   
912    -1136  
208    -368   
224    640    
-16    -80    
1008   592    
-1104  -16    
-416   -448   
-16    400    
112    64     
400    0      
-16    -224   
160    -112   
-16    128    
-32    32     
-16    -16    
-80    80     
0      48     
16     80     
16     16     
160    48     
192    112    
-144   32     
-80    -64    
-48    96     
16     64     
48     112    
160    128    
80     32     
-288   -64    
80     -16    
-16    48     
-144   112    
48     -208   
64     -400   
-64    0      
-144   -208   
0      208    
-48    112    
80     0      
320    128    
-224   0      
224    32     
-32    96     
128    64     
-80    -208   
112    -48    
112    112    
-32    128    
-80    48     
64     64     
-80    96     
48     -448   
-16    80     
112    96     
-64    -16    
0      -64    
32     0      
-32    64     
128    48     
-224   64     
288    96     
160    208    
-64    144    
-128   80     
32     0      
176    -80    
48     -608   
-48    48     
48     112    
32     -16    
288    176    
-112   112    
0      256    
192    96     
96     240    
-48    0      
-112   128    
224    176    
-160   -32    
-48    -48    
176    -16    
-160   -736   
-48    192    
16     64     
176    -48    
176    -48    
160    96     
0      112    
16     112    
-80    16     
160    96     
32     32     
144    96     
-48    48     
0      0      
592    800    
-608   208    
144    -112   
208    -208   
32     -16    
48     48     
192    -32    
96     416    
80     64     
-80    -176   
-48    64     
-256   16     
-176   -48    
32     96     
0      -16    
96     128    
208    -160   
272    48     
112    -272   
-160   -32    
48     -176   
144    32     
144    -64    
256    0      
64     64     
128    288    
-544   80     
176    112    
-416   112    
-112   -144   
112    32     
48     -80    
-128   80     
-16    -320   
-32    192    
-80    -1264  
-48    0      
288    176    
240    192    
32     16     
128    32     
64     128    
-400   -48    
128    64     
256    112    
-288   0      
16     -160   
112    32     
112    -112   
32     -32    
304    -144   
240    16     
176    48     
160    -48    
-64    32     
64     144    
-208   -32    
208    80     
16     64     
-16    -512   
-32    64     
-48    -144   
64     48     
176    -144   
16     48     
416    144    
-160   16     
-32    -80    
320    176    
-240   48     
304    288    
176    176    
160    -64    
-48    192    
64     -32    
-320   -112   
560    -176   
32     224    
192    16     
208    128    
-176   -160   
-192   288    
112    0      
352    208    
-32    -16    
384    112    
608    -176   
32     176    
-448   -1248  
320    192    
224    496    
304    -400   
272    288    
160    96     
-384   -128   
288    416    
-704   -448   
208    -80    
352    -96    
352    -304   
-880   -32    
-144   -480   
80     -224   
-256   -944   
400    48     
352    -464   
272    -128   
272    -240   
192    16     
-528   -320   
320    16     
-336   608    
16     64     
-48    -112   
368    -80    
-864   -432   
224    0      
16     -240   
-224   16     
272    48     
48     -320   
160    -32    
128    -592   
144    64     
480    304    
-480   256    
160    -176   
-112   224    
64     -224   
336    -64    
-112   -64    
192    112    
-96    80     
96     -160   
32     32     
64     -240   
64     128    
0      -512   
208    64     
-224   -16    
48     112    
160    16     
192    128    
-112   80     
-144   16     
-256   320    
240    96     
96     -80    
128    -48    
192    -64    
112    64     
176    64     
-16    -176   
-192   -16    
320    64     
-144   48     
48     -128   
-192   48     
64     32     
288    -16    
-384   0      
0      64     
-480   0      
16     64     
208    0      
256    112    
-480   -32    
96     -464   
112    -48    
112    -432   
-80    80     
64     0      
-32    0      
-48    -80    
64     -208   
48     -96    
64     -16    
64     32     
128    -208   
-992   -16    
64     16     
80     48     
0      -16    
16     96     
320    -48    
-16    112    
-64    48     
64     0      
16     80     
64     -176   
-80    0      
304    128    
-160   224    
160    16     
-656   32     
176    80     
-144   -32    
48     -464   
192    -80    
96     -96    
-96    112    
-64    0      
208    48     
-336   192    
-32    -128   
-16    -288   
64     -320   
-336   -48    
64     128    
-736   -160   
-48    -272   
-16    208    
64     -32    
-128   -96    
272    -240   
112    96     
-272   128    
-160   32     
80     192    
192    48     
-112   64     
48     0      
-192   -32    
-64    -208   
-16    -128   
-80    -272   
-160   64     
-1328  -32    
-112   16     
-992   -144   
-512   -272   
-16    -176   
-576   -192   
-496   48     
-112   224    
-320   -224   
-32    192    
-288   176    
-32    -432   
32     192    
-928   64     
64     48     
-112   -160   
-112   112    
32     96     
96     -352   
16     448    
-240   -272   
-224   -128   
-704   0      
208    144    
208    -80    
-272   -224   
-192   672    
-32    -64    
16     -208   
384    80     
-256   192    
-464   16     
352    496    
-656   -304   
112    -160   
-80    320    
96     -192   
16     -48    
-128   -96    
-144   192    
-240   48     
432    144    
-416   -384   
128    -176   
112    160    
32     -208   
96     176    
-64    -272   
-224   -80    
-192   96     
-336   -272   
240    528    
-256   560    
368    -464   
-272   -304   
32     256    
32     192    
128    64     
-208   -80    
16     96     
16     224    
-304   -16    
192    -48    
144    16     
-48    -32    
272    160    
-16    -32    
128    -192   
160    -224   
304    256    
-192   192    
-560   -96    
112    -48    
-272   16     
-32    96     
1088   544    
-592   384    
0      64     
464    496    
64     336    
-688   -240   
496    -96    
48     128    
32     -32    
-304   0      
416    144    
-400   -64    
48     160    
-80    -96    
-48    48     
-96    0      
80     80     
208    16     
-144   32     
16     16     
-160   16     
16     16     
-128   0      
-32    112    
-384   -64    
64     128    
-608   64     
336    112    
160    112    
-384   -16    
96     16     
224    80     
208    176    
-112   176    
-64    -16    
176    32     
192    144    
80     -16    
-80    64     
-368   0      
-32    80     
-400   -112   
240    -16    
144    144    
-256   -16    
80     80     
96     32     
32     -32    
-176   0      
16     48     
-96    32     
128    176    
0      48     
-144   96     
160    80     
176    -32    
-208   -64    
-64    32     
-96    80     
-192   32     
128    64     
144    96     
-48    -176   
-32    -48    
224    144    
-240   -16    
0      -16    
-48    32     
32     96     
-224   80     
80     80     
-224   -16    
32     208    
-16    176    
16     32     
96     208    
-64    -64    
48     16     
176    128    
-112   32     
-64    64     
144    144    
80     96     
96     112    
-144   64     
80     128    
112    128    
-16    16     
176    64     
48     112    
-80    -16    
48     -32    
112    64     
-16    32     
112    64     
-64    96     
-304   -304   
48     -16    
-32    48     
-384   -48    
128    128    
-48    -144   
-48    -96    
144    256    
-272   -336   
304    -112   
336    128    
192    -64    
192    -16    
-32    -16    
-224   -64    
304    64     
48     80     
128    32     
32     64     
224    160    
-240   0      
-144   -192   
-320   -80    
48     48     
208    48     
80     -64    
112    -16    
-384   224    
384    288    
0      192    
-272   -16    
-176   -96    
192    48     
-80    48     
-96    16     
336    64     
-112   -48    
160    -128   
-48    64     
0      -144   
-16    -176   
-240   -160   
32     -64    
0      128    
32     16     
304    -16    
-288   112    
160    496    
-272   128    
-256   -64    
400    400    
-144   240    
496    -224   
-448   -912   
160    320    
-64    352    
128    -48    
-256   -96    
64     -144   
96     144    
240    144    
-288   -96    
192    -192   
16     -64    
-144   -48    
64     48     
128    -160   
64     32     
240    -160   
144    80     
16     240    
-64    -32    
-48    -144   
192    224    
192    -208   
400    304    
-448   0      
-368   -80    
0      -144   
96     48     
464    624    
-496   32     
128    64     
-128   80     
96     256    
256    -64    
368    80     
608    80     
336    -592   
16     -176   
-16    176    
-272   -96    
176    -32    
-96    -112   
192    -16    
-80    144    
208    -1440  
272    -144   
368    -208   
112    -272   
416    -112   
368    64     
96     80     
736    336    
-288   448    
-304   64     
32     48     
240    0      
96     -48    
320    -144   
-32    64     
-16    -528   
0      -32    
256    16     
320    64     
-256   112    
96     -64    
-48    -80    
112    -304   
-32    96     
-32    144    
192    112    
32     -48    
64     -32    
48     240    
208    80     
192    -208   
32     -208   
96     -384   
32     208    
0      80     
112    128    
112    -16    
128    0      
-48    -80    
272    64     
-96    64     
-32    208    
240    160    
176    -336   
176    -80    
-96    -144   
112    112    
-320   -960   
48     -304   
0      -144   
176    192    
-368   0      
224    16     
96     144    
176    0      
112    64     
80     32     
176    -64    
48     -64    
48     32     
32     -64    
80     -112   
32     -272   
160    32     
128    96     
80     32     
0      48     
32     176    
112    112    
0      -48    
16     144    
336    208    
-80    80     
16     -224   
176    80     
-16    -48    
192    192    
64     64     
80     -464   
-64    128    
352    -128   
-96    80     
-272   -16    
208    -64    
80     32     
48     -384   
80     -96    
-32    -240   
176    -224   
-64    0      
-160   -96    
48     -224   
192    80     
256    -64    
80     48     
48     -64    
16     -112   
-656   -240   
-16    -16    
-80    -16    
352    144    
80     272    
144    -144   
176    464    
368    400    
64     112    
48     -128   
80     176    
-32    -320   
-112   -288   
128    16     
32     32     
-208   304    
112    -368   
0      -320   
112    96     
32     112    
224    176    
128    64     
-464   -32    
112    -32    
208    0      
464    464    
-96    -416   
48     160    
-144   -32    
64     -688   
-384   -416   
-400   -16    
-128   112    
528    -64    
432    80     
208    -208   
-112   624    
-144   -624   
-256   -288   
-144   48     
16     64     
528    48     
256    112    
96     -192   
-288   -544   
-272   -368   
272    192    
-240   496    
-32    256    
-160   -160   
48     -32    
-80    192    
320    -64    
144    -64    
-112   -288   
-48    176    
32     32     
-304   -32    
32     256    
-80    224    
160    240    
320    -64    
-64    -32    
-80    -32    
-560   64     
-112   -80    
80     16     
48     -96    
96     48     
160    -352   
-48    32     
-176   -16    
96     0      
-16    80     
16     -48    
-352   -128   
304    16     
-1488  16     
-16    -96    
-272   32     
128    80     
-464   416    
832    -16    
-128   -16    
240    48     
-288   272    
-208   176    
240    48     
656    144    
-288   48     
-432   -16    
-144   -224   
-16    48     
32     112    
-288   112    
336    -144   
144    16     
352    -80    
96     16     
288    0      
128    128    
128    240    
-624   -128   
-240   0      
-176   -176   
96     -80    
192    32     
-576   -192   
16     -368   
288    0      
32     160    
-176   32     
256    -80    
16     208    
-128   -112   
-1152  -16    
-240   0      
176    -32    
-80    32     
-208   32     
304    208    
-96    80     
-80    80     
160    -176   
-224   0      
-192   -160   
224    32     
-192   0      
128    112    
-224   -16    
-336   0      
-160   0      
-416   80     
-80    32     
-448   32     
-128   0      
176    80     
-416   -80    
-208   -16    
128    80     
-288   -208   
416    -96    
-528   48     
320    112    
-80    -128   
-128   -48    
32     208    
-64    -96    
176    -32    
-1120  -16    
-64    32     
-48    -48    
0      48     
-224   -64    
-16    128    
112    -48    
80     32     
-160   -128   
-96    -32    
48     16     
32     -112   
-80    48     
-96    16     
-352   32     
-240   -32    
0      -16    
-320   64     
0      16     
-208   -112   
128    96     
-160   -224   
-16    112    
112    0      
-208   -144   
224    112    
-16    208    
-160   -32    
0      48     
80     48     
-80    80     
32     64     
0      32     
-96    -16    
-32    160    
-32    48     
32     0      
96     128    
32     112    
-64    80     
48     32     
-240   0      
0      32     
48     128    
-16    0      
32     -400   
16     -80    
-160   288    
-96    -80    
-512   -128   
32     -48    
0      -16    
-96    128    
-176   64     
-16    48     
-144   -144   
144    672    
-112   144    
-176   -208   
64     32     
-112   176    
-272   80     
-352   -176   
416    160    
-352   -192   
400    240    
64     0      
208    -16    
160    32     
-160   -64    
-112   64     
-304   48     
-400   32     
-112   128    
-16    -64    
160    -80    
112    336    
160    -272   
64     800    
-48    176    
16     -304   
656    320    
-176   176    
224    -48    
192    128    
64     96     
-192   -128   
-128   32     
-48    112    
-80    -32    
-208   288    
176    224    
-80    80     
-176   96     
-464   -128   
-160   256    
-96    -192   
240    -288   
144    352    
48     -32    
80     80     
-288   80     
-128   -64    
64     16     
-112   -112   
-304   0      
240    224    
48     80     
208    128    
-32    -224   
-256   288    
-160   -16    
-32    -112   
96     48     
16     -144   
-32    512    
128    -48    
64     80     
96     48     
64     -16    
-128   -16    
64     272    
-176   416    
256    272    
16     416    
160    736    
96     384    
16     112    
32     -32    
208    16     
-16    336    
336    64     
-144   -176   
96     -64    
80     -80    
16     0      
-16    208    
-16    32     
-48    64     
112    32     
-96    -240   
16     -48    
64     -160   
112    -240   
608    80     
464    80     
368    288    
-336   208    
-512   -32    
160    96     
-208   80     
-112   64     
-192   -48    
464    16     
416    64     
352    -16    
128    -48    
432    96     
560    528    
-272   256    
480    160    
-256   224    
-192   48     
192    0      
224    64     
80     32     
-80    176    
0      32     
16     16     
-112   -32    
304    -288   
-64    144    
-48    272    
496    272    
-224   128    
144    80     
-160   64     
208    80     
-32    -80    
352    192    
-320   192    
32     80     
144    -16    
176    128    
-64    -64    
-96    -64    
176    224    
16     176    
-128   0      
32     -48    
224    240    
0      48     
416    128    
-176   160    
64     112    
-64    32     
-16    0      
336    176    
-80    -32    
-112   -16    
-64    16     
224    80     
240    32     
32     176    
64     160    
-48    80     
-80    -32    
64     96     
-80    -32    
144    -80    
64     96     
96     32     
208    32     
16     -64    
32     32     
0      64     
96     160    
176    128    
-32    256    
-80    -32    
352    -48    
-80    -96    
336    192    
16     224    
-16    0      
224    -240   
112    -32    
80     128    
-144   -256   
16     -16    
64     -896   
-32    -48    
112    48     
272    448    
-128   240    
0      32     
-80    -112   
96     0      
-128   -160   
32     -304   
288    -496   
272    64     
144    320    
-128   -32    
-64    -288   
64     -1616  
64     368    
64     64     
64     96     
144    -16    
144    240    
96     0      
0      256    
-16    352    
-176   -1520  
32     432    
16     704    
-160   -192   
144    256    
16     -48    
-16    -16    
128    272    
144    -128   
32     0      
-336   -96    
32     432    
112    48     
144    -176   
224    -560   
144    -176   
336    224    
112    64     
-128   64     
256    -528   
176    -96    
64     -592   
-128   -16    
-144   16     
48     16     
208    48     
592    336    
-480   64     
32     -144   
-160   -64    
-208   -208   
288    48     
352    -32    
208    -48    
192    -112   
208    160    
-16    80     
-144   -16    
-32    -32    
-240   48     
400    64     
-112   48     
-96    0      
-80    16     
320    32     
256    -16    
0      64     
192    -160   
-16    112    
-704   16     
368    240    
32     16     
-48    -32    
48     -288   
288    160    
-48    -64    
-32    -272   
128    0      
160    112    
224    -896   
48     -32    
32     304    
-160   -32    
304    112    
-192   -32    
64     80     
-16    -112   
64     -1056  
-192   -32    
736    -256   
-656   80     
64     -336   
32     -80    
64     32     
272    -176   
-496   -336   
864    128    
-656   64     
-240   -288   
208    -96    
-96    0      
-96    0      
-112   -224   
368    112    
-272   -240   
336    112    
-208   96     
32     -256   
-960   -16    
-144   -144   
608    224    
-160   32     
-272   -32    
112    -48    
144    176    
-80    160    
320    -16    
160    32     
64     -48    
288    16     
-192   48     
-208   -80    
192    16     
-240   32     
144    48     
560    -80    
-608   -128   
-32    -16    
-64    -400   
336    -80    
304    -400   
48     96     
304    64     
-256   -32    
112    -96    
-64    128    
112    32     
16     0      
-480   32     
64     -48    
-1984  0      
272    16     
-16    -16    
-96    64     
192    16     
-48    -288   
128    256    
-16    -48    
-224   0      
32     -48    
128    -96    
128    64     
256    16     
-272   0      
32     -128   
-176   -112   
176    80     
144    48     
32     -96    
-96    16     
208    -112   
-112   16     
176    -720   
96     80     
32     144    
272    32     
-272   -64    
16     32     
-208   32     
224    16     
-176   -16    
-80    -80    
-816   -48    
-16    -240   
16     -240   
-144   -512   
112    80     
-16    -464   
-16    -16    
-48    16     
64     32     
-128   -80    
128    256    
-272   -32    
160    -320   
-928   272    
128    16     
-1376  32     
192    -256   
224    272    
-64    -96    
16     -32    
112    -96    
32     -96    
-192   128    
272    80     
-256   48     
80     48     
160    304    
160    -160   
-160   -48    
-80    64     
0      64     
32     -368   
272    192    
64     176    
0      -208   
48     -176   
112    -48    
-160   -272   
-16    208    
-96    -496   
192    224    
-96    96     
-16    -32    
-224   -336   
208    160    
-656   320    
128    -784   
80     416    
-1072  -272   
128    48     
-16    112    
-176   -80    
96     32     
-592   80     
-144   224    
-128   -320   
80     112    
160    336    
-144   128    
-992   -256   
112    272    
-352   240    
-240   -80    
-432   -128   
-80    16     
80     240    
-112   16     
-320   -128   
-272   448    
-384   512    
-864   -160   
-112   240    
144    -16    
576    384    
-384   832    
-368   368    
192    48     
288    64     
384    -16    
-96    112    
-240   -192   
-432   0      
-144   -112   
-432   -16    
-160   128    
224    48     
48     -320   
-2064  -128   
-160   -160   
-256   -144   
-80    32     
-192   -16    
96     96     
-144   -96    
64     -64    
-160   -288   
-64    -32    
-256   0      
-64    80     
160    0      
96     16     
-64    32     
-976   16     
-32    96     
-64    0      
0      16     
32     -48    
80     0      
16     80     
-80    16     
-80    -32    
16     -80    
160    48     
-272   16     
416    512    
-528   128    
288    224    
-80    -160   
96     32     
112    -64    
-96    -48    
-96    -144   
128    -80    
-80    176    
192    -320   
48     48     
-160   192    
-336   -48    
128    80     
-160   -80    
-144   80     
192    -32    
-384   -304   
-112   -160   
-2288  -96    
256    -64    
96     16     
688    384    
-160   336    
64     208    
-16    208    
-432   480    
-16    0      
80     -240   
112    -16    
-32    48     
16     -32    
-272   32     
-384   48     
256    400    
-384   256    
-304   -112   
256    -208   
0      48     
-128   144    
64     128    
320    -16    
-112   80     
64     96     
-128   352    
-16    112    
160    -128   
-144   80     
288    112    
80     448    
-144   240    
64     176    
-144   112    
96     0      
-96    -112   
-32    144    
176    -32    
64     160    
-240   48     
0      80     
-352   144    
96     64     
-160   -16    
32     -32    
-320   -64    
0      -32    
-256   432    
432    208    
160    -160   
-96    -80    
0      128    
32     16     
80     256    
288    144    
-80    288    
-160   0      
-16    192    
80     176    
96     -64    
-160   -48    
48     -48    
80     96     
-48    -96    
-48    64     
32     -16    
96     144    
32     -48    
-32    48     
-32    -16    
144    96     
-224   -112   
48     -32    
-64    0      
64     -96    
-160   208    
80     176    
96     704    
384    272    
80     -208   
-160   224    
272    240    
-96    400    
16     -144   
-16    176    
112    208    
-128   -368   
-32    64     
-176   0      
96     0      
160    -96    
-32    48     
48     48     
144    -112   
64     240    
-176   -368   
-112   464    
144    -240   
128    80     
16     -80    
192    128    
-80    -32    
224    -96    
0      96     
48     144    
32     80     
-144   96     
32     64     
80     -16    
128    96     
-64    -48    
448    -192   
80     -336   
240    -32    
-128   -48    
16     -32    
160    -96    
112    80     
272    320    
-112   144    
240    160    
-384   80     
-320   -48    
128    -48    
320    288    
-288   128    
-112   0      
-16    304    
96     256    
320    -32    
-528   144    
-176   48     
224    112    
-144   16     
160    64     
-16    0      
176    112    
96     -112   
48     -272   
176    160    
80     64     
64     96     
32     0      
112    48     
128    0      
-32    64     
-48    48     
176    80     
-528   16     
16     -448   
-208   48     
528    96     
48     288    
-512   0      
80     0      
240    64     
352    64     
208    64     
112    96     
-112   -208   
-144   48     
320    144    
-112   -128   
-160   16     
16     -208   
496    48     
-48    -32    
-48    176    
-96    32     
-96    48     
64     64     
-32    -32    
64     48     
128    144    
-176   0      
112    80     
-96    48     
288    48     
16     48     
640    288    
-640   -16    
288    -192   
-256   0      
224    48     
208    80     
-208   -208   
800    64     
-272   64     
256    32     
-160   -160   
-128   -80    
576    64     
-304   64     
176    -64    
16     -48    
-368   32     
-224   -208   
384    128    
-160   -32    
352    176    
-80    128    
-224   96     
32     -96    
320    112    
-272   32     
32     -192   
144    80     
-144   16     
400    336    
-368   -320   
-144   -96    
400    -128   
32     48     
144    -96    
576    160    
256    64     
112    272    
-496   96     
320    0      
-400   -48    
-128   -96    
256    16     
-256   -304   
-256   -208   
336    -144   
96     112    
-16    -32    
16     16     
48     80     
64     160    
32     64     
144    112    
64     32     
144    64     
-48    64     
-48    -32    
320    176    
80     -64    
160    144    
-64    96     
192    272    
-32    -112   
32     192    
128    32     
32     -80    
432    144    
-128   64     
96     -48    
352    160    
-48    -128   
32     -176   
32     192    
80     -80    
208    192    
-224   -208   
416    128    
80     -16    
192    -16    
32     96     
-32    -464   
96     352    
0      -320   
-112   -240   
96     144    
-128   -128   
224    -48    
-96    -304   
128    -240   
-352   -208   
112    32     
48     -112   
160    144    
-96    -688   
-144   -128   
320    -64    
144    608    
48     752    
32     -96    
-368   -448   
192    -448   
208    640    
16     160    
160    -208   
64     -544   
192    16     
272    16     
-112   32     
112    16     
-128   128    
-32    -144   
80     672    
-80    256    
-64    -240   
-768   0      
240    -144   
-64    192    
-64    -112   
-16    -96    
128    -416   
-64    -80    
-32    -880   
32     -192   
64     -48    
-96    112    
160    32     
128    48     
-352   64     
224    48     
-352   -736   
80     -224   
-96    208    
48     -32    
64     32     
16     -80    
-48    -144   
192    -496   
240    -32    
48     -192   
80     -112   
128    80     
160    -80    
-48    80     
112    -64    
0      -128   
144    -176   
-576   48     
32     0      
368    272    
-288   0      
-128   -32    
96     -208   
32     0      
192    -64    
80     208    
112    -16    
160    64     
-448   144    
160    32     
-144   0      
-224   -32    
-1264  -48    
144    -112   
96     64     
-96    -192   
-48    128    
208    -48    
128    -32    
112    -976   
-192   -144   
0      -48    
16     -64    
-16    -64    
288    -96    
-128   -176   
-256   -272   
-640   -80    
-80    -48    
16     240    
112    0      
64     -48    
-32    -288   
144    16     
-16    -192   
-32    -176   
240    64     
-80    208    
240    272    
224    -64    
-320   192    
128    48     
-160   -48    
192    -272   
-80    -96    
176    -256   
-80    112    
-80    -160   
-128   -208   
352    272    
-112   32     
-704   288    
256    -128   
-656   112    
336    176    
-80    288    
144    608    
176    112    
16     32     
-560   -64    
208    -208   
-16    128    
-64    -160   
48     0      
32     432    
-240   512    
-32    144    
-128   240    
-192   320    
192    288    
544    -432   
272    -16    
0      -16    
32     -80    
64     160    
-576   336    
-96    464    
-352   -128   
208    144    
-624   288    
-640   144    
-144   16     
-880   32     
-160   -48    
-896   320    
-288   448    
544    240    
-256   -208   
-176   -144   
336    -80    
32     112    
288    176    
-640   -272   
-96    96     
-448   496    
32     368    
16     208    
16     -160   
-96    128    
-336   -240   
-144   -416   
160    64     
-320   -272   
-16    -48    
-96    -48    
64     -496   
-192   -16    
176    64     
-256   448    
-16    -48    
144    -784   
-160   -592   
-192   -432   
-160   464    
-48    432    
-176   -128   
-656   -1008  
-16    560    
-304   304    
-368   -704   
144    -208   
464    752    
-176   416    
144    -448   
-208   -16    
-64    416    
128    432    
64     -128   
16     -32    
-128   -320   
-48    272    
-624   -96    
32     -64    
-112   32     
-128   -336   
-192   352    
96     -192   
336    64     
304    304    
-368   -192   
-176   144    
48     -272   
128    256    
-96    -272   
-144   -256   
-48    192    
-96    304    
-32    -176   
-128   -64    
144    288    
-48    16     
32     -64    
-32    48     
-240   112    
16     48     
16     48     
-48    64     
64     144    
16     48     
64     96     
-272   -192   
-144   -80    
-16    64     
-416   -80    
96     48     
-16    176    
112    528    
96     208    
-64    16     
-80    0      
64     16     
-80    80     
-32    -48    
112    -96    
-96    -16    
-112   112    
-208   32     
16     -192   
-368   -272   
176    384    
-128   208    
16     -16    
128    32     
64     0      
-48    -16    
144    -64    
16     32     
-80    48     
-80    96     
-32    -96    
0      -48    
-352   240    
-256   80     
-880   -128   
-48    16     
112    144    
-16    32     
192    -32    
80     48     
-288   -112   
208    32     
-208   208    
-208   0      
80     0      
384    288    
-272   352    
288    624    
-288   352    
-192   -48    
288    -80    
272    -224   
16     96     
-464   176    
-128   -64    
288    144    
-96    16     
512    112    
-80    16     
128    128    
-48    -16    
64     112    
112    32     
64     112    
256    64     
-320   48     
-32    32     
144    48     
-48    32     
320    96     
208    192    
-192   80     
16     32     
-144   128    
-336   48     
-80    -80    
272    -16    
48     32     
0      48     
-224   -160   
400    128    
-144   64     
48     -32    
288    32     
80     112    
48     32     
-48    64     
96     32     
-160   -48    
224    112    
-176   -16    
384    32     
-192   80     
-96    -64    
48     32     
96     320    
-416   160    
416    160    
-48    16     
240    192    
144    -96    
448    16     
-96    64     
624    288    
-416   48     
208    -128   
128    144    
384    352    
-64    -48    
-448   -64    
64     96     
192    224    
-400   96     
240    128    
-384   0      
832    432    
-160   464    
-400   -224   
240    -320   
704    304    
-144   368    
0      -112   
416    16     
-176   -352   
368    -64    
80     48     
576    128    
-160   224    
176    16     
-160   -80    
128    112    
-160   -32    
-32    48     
-16    288    
128    96     
16     -96    
64     -16    
96     -64    
-48    160    
224    -128   
48     112    
64     208    
-48    -64    
176    160    
96     80     
-48    384    
176    -480   
128    416    
32     -544   
80     448    
-128   -192   
-64    -112   
-112   1344   
272    -1216  
-48    96     
-64    544    
464    32     
-240   -160   
80     -528   
-16    -192   
384    0      
-288   496    
256    48     
-96    160    
16     336    
-80    -80    
80     -288   
80     80     
16     -256   
-96    144    
384    -224   
-64    48     
-16    -32    
-16    -128   
-96    -112   
224    -64    
128    -32    
128    -16    
-80    48     
16     -48    
160    -32    
-128   -128   
128    112    
-16    16     
48     0      
192    -304   
432    224    
-272   112    
48     112    
-80    128    
-64    48     
0      0      
32     96     
-64    112    
96     -96    
144    -16    
128    -224   
-64    96     
-16    -112   
192    32     
80     -864   
160    144    
-240   -688   
32     0      
32     80     
192    96     
-48    -32    
64     0      
80     32     
-128   -64    
80     -16    
48     0      
128    16     
48     -96    
128    192    
272    0      
16     176    
-160   -176   
32     -16    
-160   -64    
144    -32    
160    0      
224    160    
64     96     
128    -336   
-112   16     
-32    16     
144    48     
256    -16    
352    80     
288    48     
176    48     
-80    96     
48     16     
-96    -64    
224    -80    
-160   -64    
64     48     
-128   112    
192    -256   
80     -128   
224    -96    
-32    80     
-48    -176   
112    -144   
-48    -128   
144    16     
-32    -96    
-224   96     
-16    48     
80     -848   
-96    96     
240    224    
-112   -752   
160    -16    
-160   -144   
32     -64    
64     144    
304    48     
352    32     
-192   -144   
-384   112    
64     272    
16     272    
192    224    
224    16     
224    -16    
-144   -160   
144    -32    
-320   64     
96     -128   
144    -16    
-80    -1168  
224    160    
80     144    
176    240    
32     64     
0      128    
96     160    
-160   64     
-320   -96    
-16    -64    
-576   -80    
112    -192   
160    -144   
128    -144   
192    144    
-144   -320   
-288   -80    
112    0      
64     48     
192    160    
0      112    
240    -400   
112    -480   
0      1024   
128    224    
-272   -368   
272    624    
944    832    
-480   320    
-400   -752   
176    -1088  
80     64     
80     64     
496    400    
-144   80     
-304   -576   
240    272    
-128   208    
-64    -672   
32     240    
80     192    
464    0      
-304   80     
-400   -64    
-160   16     
208    528    
576    512    
-16    -1568  
160    -512   
-32    416    
-928   -1152  
224    384    
176    640    
-720   -432   
416    416    
-480   224    
-48    -576   
192    -1072  
192    752    
240    16     
-512   -432   
-32    -512   
-96    -96    
-16    64     
-128   -112   
288    -144   
48     528    
0      -528   
80     96     
-32    144    
-288   -288   
160    112    
64     160    
240    -96    
-1472  -48    
16     160    
80     144    
320    -288   
192    224    
80     -304   
-48    32     
80     208    
-48    -112   
-128   -32    
176    96     
-32    -16    
80     -32    
-304   16     
112    -144   
-320   -80    
32     -112   
128    64     
144    -96    
64     80     
48     -352   
-48    144    
-224   208    
160    -32    
-272   -80    
176    -32    
-304   -48    
80     -256   
-560   96     
96     256    
176    -96    
128    -224   
176    -16    
64     48     
-112   0      
-32    -96    
96     48     
144    240    
160    496    
-224   400    
96     304    
-16    48     
96     160    
-32    64     
96     96     
-592   64     
-192   -128   
-128   96     
-2224  -144   
16     32     
-160   48     
-480   336    
32     48     
-176   176    
-208   64     
-16    32     
224    160    
-80    64     
-16    0      
112    32     
-80    -80    
-176   -160   
128    96     
-176   64     
-480   0      
-64    32     
-672   -32    
-176   32     
-288   -32    
-320   -32    
-1776  32     
144    416    
-176   96     
-16    64     
-336   -32    
32     -64    
-288   -272   
256    -96    
-64    64     
176    32     
-224   48     
-256   0      
0      288    
-560   48     
-80    -64    
-272   64     
-32    0      
-288   64     
-272   -32    
-128   32     
-176   32     
-272   96     
32     96     
-272   80     
-432   -96    
-144   16     
0      -112   
112    -64    
368    256    
256    128    
0      -240   
-416   -208   
-1184  128    
16     64     
-336   32     
144    96     
-528   -176   
384    -48    
64     16     
368    80     
32     128    
-256   48     
-224   -16    
-176   0      
-48    -16    
128    0      
-48    64     
-640   -64    
112    48     
64     -16    
272    96     
-608   16     
-112   16     
160    -16    
-288   -128   
304    48     
-320   -16    
16     0      
240    112    
-208   48     
-64    -16    
-16    48     
-64    -16    
64     48     
-1456  0      
48     16     
48     -16    
-16    32     
0      32     
-176   16     
208    176    
-336   96     
144    128    
-112   0      
128    0      
112    48     
-48    64     
-400   0      
-176   16     
-1040  112    
-400   -32    
352    112    
-576   112    
144    96     
-176   64     
96     48     
320    96     
320    400    
160    320    
-528   -96    
-352   -352   
160    0      
-400   128    
32     224    
-640   -128   
-192   -176   
-272   320    
112    304    
-144   -320   
464    128    
224    80     
128    96     
-160   240    
-672   -1424  
192    -1328  
-736   832    
-768   320    
160    -480   
240    496    
960    784    
-416   -512   
288    288    
-224   208    
-48    -320   
32     64     
-64    -432   
-272   432    
304    144    
16     -80    
-32    240    
16     -736   
208    -112   
-192   528    
112    192    
0      288    
304    -16    
-208   48     
-176   -96    
-160   -48    
144    416    
320    224    
304    352    
-480   144    
-320   -160   
112    -80    
-16    0      
160    -176   
-192   -112   
-96    0      
-144   -80    
80     80     
128    192    
128    32     
176    -16    
0      -80    
-80    -80    
-64    16     
-48    -80    
-32    -32    
192    0      
-192   -48    
96     -48    
-64    48     
-64    0      
0      160    
-32    80     
64     -96    
-16    -112   
-144   -112   
128    96     
0      80     
224    0      
64     32     
-64    -32    
240    64     
-192   48     
256    64     
304    128    
112    80     
144    -96    
0      96     
0      48     
48     32     
96     96     
16     80     
96     0      
-80    48     
0      48     
-192   48     
192    48     
-96    -112   
208    16     
16     -48    
128    32     
-32    -16    
-16    -128   
80     -16    
-32    144    
112    112    
-48    0      
160    -32    
-176   -128   
80     16     
32     112    
48     192    
16     -16    
-176   -544   
-64    144    
96     208    
288    624    
0      160    
288    -144   
-64    -112   
0      -64    
-96    -96    
48     -128   
0      -192   
176    144    
32     224    
-112   64     
64     -64    
432    16     
80     48     
448    -1184  
-352   144    
80     32     
64     48     
160    -32    
96     160    
-16    48     
-208   32     
-128   96     
-16    0      
80     -32    
208    144    
-48    -64    
240    -80    
-64    32     
96     -304   
160    448    
464    160    
160    96     
-112   -16    
-112   -16    
-48    544    
736    624    
-608   176    
0      112    
144    336    
224    288    
448    144    
-112   -192   
-64    -144   
288    144    
-48    16     
16     -432   
288    -32    
208    -64    
128    -16    
16     80     
-240   -480   
-128   -320   
-128   -80    
256    -80    
192    128    
128    176    
240    -96    
48     304    
-192   -128   
-32    0      
224    -144   
-272   48     
32     -304   
32     208    
128    32     
272    128    
-128   -224   
176    256    
96     896    
-80    -464   
48     224    
-416   -224   
16     128    
240    48     
-288   208    
592    112    
-128   -48    
384    16     
32     64     
-64    -80    
-64    976    
-176   240    
-80    -768   
-400   208    
-96    -176   
368    -240   
32     48     
160    400    
32     192    
256    -96    
0      96     
-48    352    
144    176    
-112   -144   
112    -544   
304    96     
-208   560    
928    640    
-784   -656   
-320   -1312  
16     304    
-48    400    
160    448    
832    -256   
176    -544   
592    -160   
-192   208    
-96    32     
-64    16     
-112   0      
224    -480   
-112   0      
48     -288   
128    48     
-32    80     
16     48     
224    -80    
-32    112    
80     -112   
128    -112   
112    48     
112    -16    
80     32     
32     -752   
-160   144    
304    -416   
-80    0      
-128   -32    
-64    32     
464    112    
224    -624   
-240   -96    
272    16     
-80    -48    
160    80     
112    -80    
112    -592   
-48    64     
112    -208   
-368   0      
128    48     
288    80     
-208   -16    
128    -352   
0      32     
160    -32    
160    -80    
48     -352   
-16    -256   
-176   -128   
160    32     
0      32     
-288   0      
288    -80    
240    -192   
-272   -144   
64     176    
-2576  64     
-112   -32    
208    -48    
240    -64    
0      -48    
0      -112   
64     -144   
-32    -576   
336    -16    
128    -80    
0      -48    
48     0      
-16    96     
-96    -64    
240    -64    
-272   64     
64     32     
48     16     
160    16     
16     48     
144    -144   
-32    -32    
160    -240   
96     48     
64     16     
48     64     
64     -304   
128    -224   
-304   96     
-160   64     
-224   -16    
96     -208   
-1696  0      
-96    64     
-64    32     
96     -64    
224    64     
-128   -368   
192    112    
-96    -64    
96     32     
-176   -304   
-224   -320   
-96    272    
-112   64     
80     -96    
176    -160   
-1520  0      
176    16     
-1072  0      
224    0      
128    32     
208    -176   
240    96     
0      -752   
192    -80    
16     0      
224    80     
48     48     
288    -48    
-304   -192   
112    -416   
160    64     
0      224    
-416   112    
-128   -144   
192    -96    
256    -144   
-496   96     
-32    -800   
16     80     
-64    64     
32     -176   
-464   -96    
176    32     
-432   48     
-192   -80    
64     -64    
464    -96    
-864   32     
48     -512   
-176   -176   
-192   -160   
-224   -48    
336    -272   
448    -64    
304    144    
224    -96    
-512   -64    
-112   64     
48     192    
-224   32     
-256   -64    
176    -80    
-608   -48    
432    -48    
-144   -160   
64     -96    
112    144    
-208   80     
-1632  -208   
-16    -160   
96     0      
80     80     
176    80     
-32    64     
16     -96    
-144   -16    
48     -176   
-64    32     
-416   0      
32     -160   
-32    16     
608    416    
-688   -432   
-576   -160   
288    304    
-720   -112   
144    80     
-1104  -176   
-272   -80    
400    112    
-512   -416   
-224   -16    
-48    -80    
-224   16     
48     160    
-192   -32    
-64    32     
144    -64    
96     400    
480    -992   
112    304    
-160   384    
-48    -512   
-368   400    
176    544    
176    48     
416    240    
32     192    
-336   -368   
-208   -240   
336    176    
-144   144    
-64    -464   
-64    -544   
400    160    
-880   656    
-112   160    
80     128    
176    -64    
-752   0      
32     64     
-112   -64    
0      224    
-16    0      
-240   32     
80     -48    
64     16     
48     320    
16     224    
-208   0      
-208   -160   
-128   -32    
-32    176    
-32    416    
-144   16     
64     0      
-128   -112   
32     160    
144    32     
48     64     
224    128    
-48    48     
-112   -32    
-256   -96    
16     272    
144    416    
336    240    
-192   64     
-224   -32    
-528   -112   
16     96     
240    -64    
48     -64    
-96    -32    
-144   0      
32     -32    
-192   112    
256    -48    
16     64     
48     0      
-144   112    
208    128    
-240   32     
0      48     
-176   16     
-64    -64    
-352   -240   
160    144    
-16    64     
-272   48     
176    16     
96     -16    
-96    -96    
-96    -304   
-48    16     
-112   288    
-16    64     
80     -80    
96     112    
-112   -16    
144    16     
-624   16     
64     112    
64     64     
-96    0      
32     32     
32     -16    
96     80     
32     80     
-32    32     
-32    160    
176    160    
-64    -144   
32     -176   
-64    -64    
48     112    
-224   112    
64     -16    
160    112    
32     64     
112    96     
-112   -32    
192    48     
-64    32     
128    96     
-32    48     
32     -96    
-16    -432   
176    16     
-144   80     
16     112    
160    160    
0      288    
-176   224    
-96    -48    
96     112    
-80    176    
176    96     
96     -16    
-208   64     
-48    -32    
-112   304    
80     192    
-16    128    
-352   -80    
144    -48    
272    144    
160    144    
-48    384    
256    320    
-208   96     
-112   -144   
-64    160    
352    160    
32     -992   
-96    -496   
144    192    
-384   352    
80     32     
112    -144   
112    208    
-464   288    
288    192    
-32    -320   
128    -32    
112    80     
48     -320   
-32    240    
-144   -128   
-128   96     
-176   -288   
-112   720    
32     -160   
-64    -176   
-80    192    
-432   -48    
-112   32     
304    352    
-192   0      
112    -48    
496    176    
-128   -304   
-96    -80    
64     320    
-288   128    
144    -16    
464    304    
-368   -224   
176    -48    
128    80     
128    16     
-16    -112   
320    112    
-160   112    
-96    32     
224    272    
-96    416    
336    528    
112    64     
224    144    
32     112    
16     -32    
-224   -240   
80     -240   
0      16     
800    240    
-352   176    
480    224    
-464   176    
-112   112    
288    160    
64     -48    
512    80     
320    192    
32     128    
-176   32     
-400   -112   
192    -16    
-112   -208   
96     64     
80     16     
-224   48     
-128   -288   
400    -384   
288    80     
240    224    
-160   0      
48     -16    
16     48     
-80    0      
-752   -464   
704    -64    
256    144    
-16    64     
64     -48    
-416   -1632  
256    32     
48     160    
-192   16     
560    240    
-240   -128   
64     0      
48     80     
0      0      
160    48     
0      64     
160    64     
48     80     
16     -64    
0      64     
-128   -96    
384    64     
-240   -64    
112    -64    
-16    128    
128    256    
-160   -304   
112    -48    
64     80     
176    144    
80     32     
32     -144   
0      80     
0      48     
320    96     
96     -176   
96     -112   
176    -1312  
64     80     
32     32     
80     80     
-32    16     
-96    0      
112    32     
32     64     
-32    -48    
-48    -16    
352    96     
-224   -48    
256    32     
64     32     
240    80     
-80    -176   
-16    48     
-16    -448   
160    16     
96     112    
112    96     
80     0      
80     -48    
0      32     
224    64     
-64    80     
16     176    
112    112    
16     -320   
80     0      
64     80     
0      16     
192    48     
144    32     
32     -80    
80     -32    
-16    112    
32     176    
224    144    
112    176    
-32    160    
-32    -400   
80     0      
16     -256   
-144   -128   
-96    32     
80     16     
48     -32    
256    288    
-80    144    
48     48     
96     -32    
160    -96    
160    208    
-32    -32    
48     16     
144    -144   
160    176    
0      -176   
-416   -368   
-128   -336   
-80    112    
32     32     
96     -96    
176    -272   
256    -384   
320    -224   
32     320    
288    -672   
64     -544   
144    208    
-48    96     
128    192    
64     -32    
208    -48    
416    0      
112    -160   
-176   32     
416    -496   
96     -512   
80     -16    
80     -176   
32     -16    
144    -160   
-176   96     
-160   48     
112    112    
400    -112   
-96    -160   
176    96     
-144   16     
-144   -48    
-64    48     
112    0      
144    -176   
-48    -208   
-512   -176   
-1440  192    
-32    384    
32     -80    
96     -528   
48     -144   
80     -224   
336    48     
624    -416   
272    -128   
-48    -304   
336    608    
-304   -48    
336    -80    
-112   208    
320    -16    
-112   -208   
144    -64    
64     16     
32     -16    
80     0      
352    304    
-112   -800   
144    416    
96     48     
80     80     
-192   176    
96     -160   
80     -256   
-144   128    
400    464    
-752   -640   
80     160    
288    -368   
176    80     
96     128    
240    -368   
32     672    
192    224    
416    176    
-64    -560   
-112   256    
-368   384    
48     -592   
-144   0      
288    -128   
-112   -32    
96     176    
-864   64     
64     160    
-416   -16    
48     -80    
192    128    
336    -240   
-32    144    
128    48     
-192   96     
-208   48     
272    -48    
144    -176   
656    192    
64     80     
256    64     
-304   128    
-320   -240   
384    304    
-464   128    
96     16     
64     16     
-64    192    
320    -1088  
160    128    
-80    0      
64     0      
-112   -64    
-64    -256   
80     -208   
-224   48     
-432   32     
240    32     
-48    -112   
352    256    
-32    160    
304    -256   
32     48     
112    -480   
176    -128   
-432   -320   
144    64     
-384   144    
208    -64    
-176   128    
64     48     
-528   208    
272    80     
-352   -16    
128    -32    
-64    672    
576    352    
-80    80     
-288   -320   
-64    -224   
-224   144    
-144   -96    
-176   -128   
416    -48    
-96    448    
-208   160    
64     -96    
176    0      
-224   96     
-784   32     
-128   -16    
336    -128   
-2288  -16    
96     80     
-592   80     
-160   16     
-1856  32     
-144   -48    
16     -32    
-80    32     
48     0      
0      32     
-96    -16    
-192   256    
-464   -240   
272    96     
-656   144    
-16    144    
-96    -304   
-144   -128   
-48    80     
-448   64     
-208   -32    
64     32     
-144   64     
192    -32    
32     112    
-176   -64    
-112   -64    
-176   16     
64     32     
-16    -64    
-144   -80    
-144   32     
-208   0      
16     160    
-272   16     
-48    -16    
-176   -112   
-32    -224   
-96    -176   
112    -48    
144    -64    
112    -32    
16     128    
80     160    
-224   144    
-16    16     
-160   -176   
-576   -1008  
-96    -656   
32     -208   
64     -64    
-144   480    
-48    320    
160    -304   
128    0      
336    800    
-400   -416   
-160   -352   
48     400    
192    -128   
160    0      
-96    112    
32     -96    
80     -32    
160    -160   
448    176    
-112   176    
-272   -832   
-176   304    
-304   96     
-416   -192   
160    224    
176    -64    
352    304    
-96    656    
224    -224   
-224   -336   
-256   272    
-240   304    
-384   -32    
32     -16    
384    -112   
656    -208   
-224   64     
-416   -80    
-2096  -272   
-96    16     
-16    176    
288    208    
-48    48     
64     160    
-128   112    
-240   -96    
-32    -64    
-32    0      
128    0      
-128   -96    
192    64     
-256   16     
32     96     
-1616  64     
64     0      
240    112    
-160   80     
96     112    
-16    32     
80     -192   
224    0      
-304   48     
-144   32     
-16    64     
-272   -16    
64     48     
-112   144    
-64    80     
-192   -144   
64     -112   
96     80     
-128   16     
-160   32     
144    128    
-288   -144   
304    16     
-96    96     
240    -16    
112    -16    
-208   48     
208    144    
-112   0      
16     48     
-128   0      
-176   32     
-240   -32    
-48    -32    
112    64     
-80    64     
192    -80    
128    64     
-64    80     
432    64     
-192   -64    
-160   -48    
272    256    
-576   32     
384    64     
176    144    
-368   32     
144    32     
-304   -96    
272    -32    
464    -48    
-416   -192   
-176   176    
-288   48     
-64    48     
0      48     
16     80     
224    256    
-256   16     
-240   -112   
160    96     
0      32     
-48    16     
48     64     
16     -16    
0      80     
0      64     
16     80     
144    80     
32     -16    
-160   16     
0      -80    
-16    64     
32     144    
320    48     
-256   48     
-160   0      
192    64     
32     80     
112    128    
-112   16     
240    0      
-16    48     
96     160    
-64    96     
-32    -64    
-48    -32    
32     112    
112    48     
0      64     
-96    0      
176    64     
32     80     
48     0      
32     48     
32     80     
16     -64    
-16    96     
64     80     
-128   -80    
192    128    
-16    128    
320    192    
80     32     
-32    80     
-80    -176   
48     -112   
96     176    
128    128    
272    -64    
-144   -128   
-48    -64    
-144   -48    
32     208    
-144   -128   
288    80     
128    96     
-80    -544   
48     0      
-32    16     
16     64     
96     352    
304    240    
-128   -64    
64     -96    
144    400    
48     144    
0      -176   
32     160    
-48    -80    
176    256    
0      448    
-64    -272   
-64    96     
128    -864   
240    224    
176    0      
128    16     
80     -64    
32     0      
80     64     
-144   48     
-144   144    
256    80     
-208   96     
-96    -544   
448    592    
-80    784    
-352   -320   
80     -16    
0      80     
-64    240    
176    160    
-112   -416   
336    176    
112    160    
128    32     
-192   -272   
176    -80    
80     960    
176    32     
96     -480   
224    -80    
208    352    
112    -432   
-160   -32    
-64    -1200  
-32    0      
80     64     
-112   64     
-32    -192   
128    384    
-256   -144   
352    16     
352    160    
64     336    
192    96     
160    -304   
32     176    
48     144    
80     -16    
320    -464   
-80    -144   
656    144    
-128   -96    
-208   -144   
240    -416   
224    416    
448    432    
96     -288   
48     -144   
-128   0      
-32    176    
96     16     
48     -64    
32     368    
80     -80    
96     112    
-128   -192   
176    80     
32     -48    
-96    16     
256    -32    
80     16     
64     496    
80     256    
-32    192    
48     48     
176    240    
48     -80    
32     16     
112    -432   
192    48     
80     144    
16     240    
240    64     
-96    96     
0      128    
256    -16    
0      384    
80     160    
576    576    
-272   192    
48     464    
336    64     
224    -32    
-80    0      
-112   -128   
64     400    
224    208    
-16    96     
0      -1504  
416    -784   
-480   -32    
0      -800   
-80    -80    
48     -192   
224    -96    
224    -32    
288    240    
-416   176    
-112   -416   
64     -416   
496    112    
384    -80    
288    -64    
-64    -160   
0      -128   
48     80     
208    -160   
-16    -112   
-128   -464   
192    -128   
-112   -48    
96     -32    
48     48     
-80    96     
256    -416   
64     32     
256    -176   
-192   -160   
-80    16     
80     160    
-288   -96    
64     48     
32     -48    
160    -48    
0      16     
-16    -144   
320    -208   
-96    -96    
-16    288    
368    -128   
-80    32     
16     -32    
128    128    
-112   -48    
176    -96    
-64    80     
112    -112   
-144   -416   
256    32     
384    480    
16     64     
176    272    
224    -352   
-64    128    
80     -288   
-16    -192   
-96    -48    
64     -128   
-48    -144   
-192   -400   
-384   -112   
64     -48    
-96    96     
160    -16    
64     -80    
-192   -240   
96     288    
368    480    
112    160    
176    96     
96     -32    
240    -336   
-176   -144   
-208   -16    
-64    320    
-304   112    
96     -80    
-608   -496   
0      -288   
-48    -176   
-160   -400   
64     -16    
16     64     
160    144    
64     -144   
32     16     
16     288    
176    224    
-32    -16    
-32    -304   
-192   16     
224    0      
144    -112   
-48    176    
-80    336    
-256   -352   
64     -304   
128    -160   
16     160    
-48    -304   
64     -560   
224    544    
16     -48    
-32    -208   
96     64     
-224   -192   
80     -144   
-256   -128   
32     -64    
-720   144    
256    -1312  
224    480    
192    -48    
-48    -64    
32     -624   
-112   -240   
96     -64    
208    528    
-256   464    
32     352    
-432   -352   
336    -16    
-160   16     
16     -32    
96     -32    
160    16     
96     -16    
176    -80    
80     96     
192    96     
-48    -112   
-496   -80    
-80    0      
-144   16     
352    -16    
304    80     
560    96     
-368   -48    
-384   -112   
-288   64     
-240   -80    
112    48     
32     -16    
176    48     
-208   -64    
-16    -32    
-672   160    
-96    80     
-320   48     
-224   112    
-304   96     
240    -80    
144    -128   
304    112    
-224   128    
-384   0      
144    -64    
-896   -224   
-224   32     
-144   80     
-48    -16    
-80    48     
-240   -32    
32     -48    
-432   80     
-192   0      
160    0      
160    64     
-432   -32    
368    192    
-448   -48    
-32    -16    
112    0      
-32    0      
80     48     
48     0      
-64    64     
-656   -48    
0      96     
-1456  -176   
512    208    
-352   64     
-128   -32    
96     -16    
480    672    
-1056  64     
672    144    
-336   -32    
432    192    
336    80     
-352   -400   
96     -48    
-576   288    
-464   -160   
-288   112    
-384   48     
-16    0      
48     -32    
32     -16    
-160   32     
-448   -144   
-128   -64    
176    160    
-208   0      
352    112    
48     208    
-496   0      
272    32     
-576   -48    
480    224    
-224   64     
-1232  -128   
320    32     
32     -112   
240    0      
144    -16    
-160   48     
96     -16    
-368   -48    
-80    0      
-128   0      
48     96     
-400   -176   
256    160    
-128   16     
-160   64     
-128   -96    
128    64     
-16    16     
240    0      
-160   32     
96     16     
96     16     
-368   -48    
144    -112   
-32    64     
96     128    
64     32     
-192   -80    
-352   48     
-48    48     
-352   -64    
96     48     
-368   -48    
-32    -112   
112    80     
144    304    
0      0      
32     0      
0      32     
128    80     
16     16     
-64    -64    
128    16     
-112   128    
176    48     
-160   16     
-208   64     
-416   -464   
64     0      
0      384    
0      128    
48     -112   
-48    -352   
48     384    
80     64     
48     0      
-352   -64    
160    144    
-128   80     
112    -16    
-160   0      
48     80     
-416   16     
-16    -96    
96     -64    
-48    192    
-128   -80    
-80    864    
192    -448   
-128   96     
-80    160    
48     -128   
64     96     
-336   -144   
352    608    
-512   -224   
16     48     
160    -112   
96     -144   
-352   112    
208    -1088  
96     784    
-64    -160   
-80    -400   
-224   304    
-112   -336   
-96    576    
16     -96    
-208   64     
128    0      
0      96     
112    96     
128    16     
-48    112    
-32    32     
-160   32     
32     96     
-32    -496   
-16    208    
-48    80     
-80    128    
16     176    
48     -96    
-64    -64    
368    336    
-64    320    
-64    176    
48     0      
-144   -224   
112    512    
-48    384    
-160   288    
96     192    
48     64     
240    176    
288    192    
-192   192    
32     -64    
-80    -96    
128    -64    
48     0      
128    48     
224    64     
80     224    
-240   48     
48     -80    
272    208    
64     224    
352    32     
128    -80    
-64    -128   
-160   64     
-16    160    
-32    -64    
192    64     
112    144    
128    64     
-80    80     
-128   -16    
-16    -64    
96     -64    
64     272    
-32    96     
16     112    
-96    336    
160    48     
-128   -64    
80     48     
-144   -144   
-48    -320   
-32    -208   
-96    -256   
176    -112   
16     144    
144    192    
16     64     
-128   -48    
80     -336   
96     112    
-96    192    
160    272    
0      144    
64     96     
16     224    
176    16     
-96    64     
-16    48     
-208   96     
-80    -96    
64     -128   
176    16     
48     16     
128    512    
384    272    
-64    0      
-176   -384   
160    -320   
176    -48    
-80    80     
112    -96    
128    -352   
32     -576   
208    160    
-64    320    
-96    -48    
-304   -208   
240    -80    
240    64     
944    400    
32     224    
144    624    
-384   464    
-368   -32    
32     -112   
96     -448   
208    0      
320    -80    
224    16     
144    64     
-16    0      
-448   -64    
144    -32    
80     32     
-432   32     
384    160    
432    240    
-720   80     
-16    -128   
-48    -48    
96     -16    
192    192    
-48    -176   
272    160    
-64    272    
16     -80    
384    64     
32     32     
224    64     
96     160    
-16    32     
112    16     
-192   0      
272    256    
-32    0      
496    256    
-80    336    
144    -64    
-48    80     
272    -288   
192    64     
-208   80     
144    64     
-240   -176   
160    0      
80     -160   
48     -96    
96     -96    
80     96     
160    64     
176    -112   
-160   -16    
128    -608   
96     48     
192    0      
128    80     
-160   96     
288    -32    
32     -160   
240    -112   
0      0      
96     -32    
416    400    
48     48     
-192   128    
128    0      
96     -96    
512    208    
-240   -128   
16     -240   
96     80     
-48    160    
336    112    
-112   304    
-64    128    
160    544    
112    112    
-16    112    
96     -80    
-48    32     
144    -64    
240    416    
64     -384   
320    416    
-144   288    
0      -656   
64     128    
48     -208   
32     -208   
272    224    
224    -656   
-80    -528   
-48    128    
-16    224    
16     48     
160    -96    
64     -16    
48     -96    
96     64     
112    -320   
144    -768   
-16    80     
80     -112   
-144   0      
-224   16     
160    16     
432    576    
-368   336    
80     32     
352    -352   
80     -144   
176    -416   
-32    -64    
96     240    
-112   224    
-224   -448   
80     -288   
256    96     
96     112    
-80    32     
-32    96     
112    32     
240    -32    
-192   0      
16     -160   
-80    -32    
160    -688   
-16    0      
16     16     
368    0      
208    -32    
128    64     
0      -48    
-208   -64    
-80    96     
-48    32     
-784   -48    
112    -112   
256    -48    
-96    -272   
-320   16     
-16    -240   
160    -176   
128    -1424  
-304   0      
48     240    
-304   16     
240    -16    
48     -16    
16     16     
-96    -32    
-48    32     
-64    -16    
240    -48    
112    -112   
-160   -64    
-80    -48    
176    64     
464    -32    
224    0      
-48    -144   
-96    128    
-96    -96    
-32    -16    
-128   48     
192    0      
-608   -144   
64     -64    
-208   32     
112    -16    
-320   -32    
240    -128   
64     48     
48     -32    
-64    -96    
352    64     
-288   -96    
320    64     
-48    -48    
-240   -128   
192    96     
224    480    
-576   96     
-384   -256   
224    96     
352    160    
-240   -240   
144    -16    
240    0      
-608   -288   
816    -720   
-144   96     
32     112    
192    96     
-432   -64    
256    16     
-48    176    
80     80     
-480   0      
320    -64    
-48    48     
-16    -64    
-16    64     
16     -128   
-576   -336   
-432   -64    
304    128    
-352   32     
496    0      
352    192    
-528   64     
-672   -368   
368    -208   
-16    16     
-368   -176   
144    -80    
240    48     
64     48     
96     -112   
160    112    
-208   -80    
112    0      
-16    144    
96     -112   
-128   64     
224    272    
-32    -112   
-16    -64    
-128   64     
144    -176   
256    400    
-2400  -272   
304    -224   
-2064  112    
-240   -64    
176    288    
48     48     
-96    -192   
-464   128    
-128   0      
-32    -16    
-112   -32    
224    80     
-208   256    
-160   -16    
48     64     
-352   -112   
160    160    
-128   -304   
-368   128    
0      -32    
-272   48     
-64    96     
-160   -192   
144    256    
-864   128    
-16    -368   
-336   -80    
240    -896   
-240   432    
272    304    
-256   -384   
464    512    
160    192    
128    64     
-304   -688   
-224   -32    
-112   -48    
-16    16     
-176   -192   
-624   112    
96     368    
-80    16     
144    32     
-208   -96    
272    -272   
-144   -464   
-96    -96    
-32    128    
-160   64     
-160   0      
32     80     
144    0      
128    -32    
48     160    
-272   32     
64     192    
-768   -96    
48     -256   
-48    -160   
-48    112    
64     112    
64     -16    
112    80     
-16    160    
144    112    
32     48     
48     64     
-176   -64    
-96    -112   
-64    -128   
16     -112   
32     -128   
32     -16    
-160   -288   
16     -96    
-240   128    
0      112    
192    144    
-240   80     
80     336    
-32    128    
-160   -32    
-304   -112   
96     -16    
-160   80     
96     -32    
-528   -64    
272    96     
-464   32     
64     -64    
224    48     
128    0      
-32    -96    
-32    128    
-32    -32    
-16    16     
-128   64     
96     80     
160    96     
-224   -48    
160    80     
-320   -80    
240    16     
368    336    
-192   160    
-64    0      
144    -160   
-128   -192   
96     -112   
160    0      
-160   144    
208    96     
-208   416    
-48    112    
-96    -80    
64     176    
192    -48    
80     64     
-464   -240   
-192   -32    
80     0      
-224   -128   
-112   -256   
240    -80    
224    176    
96     48     
-256   -96    
-192   -16    
-64    112    
-80    64     
-80    96     
-160   -64    
32     -96    
-16    -96    
128    16     
144    160    
-112   128    
96     192    
80     176    
-48    128    
-192   -32    
224    -96    
-48    -64    
208    -16    
128    -16    
-16    -32    
-288   -352   
-128   -576   
0      -256   
-192   16     
528    -16    
-144   144    
-80    0      
-352   -528   
144    -368   
128    -32    
32     -144   
304    -32    
-80    -288   
32     -272   
352    -208   
-224   -400   
272    -128   
160    48     
-208   -64    
-96    48     
16     64     
-256   560    
-192   -96    
192    -96    
784    336    
-176   352    
-480   160    
-304   -96    
-96    256    
208    208    
-64    -64    
432    -352   
288    32     
304    -80    
112    -416   
-208   -224   
-32    -528   
-96    -224   
128    -32    
112    32     
112    64     
-208   288    
304    240    
-32    -128   
48     80     
-112   -400   
64     240    
144    32     
64     -48    
112    256    
-48    -160   
112    272    
320    112    
-368   -320   
-352   -128   
176    96     
144    -368   
256    288    
-352   -64    
96     -496   
-304   -192   
144    80     
160    192    
-240   -160   
128    80     
64     224    
0      32     
-336   -112   
96     64     
-176   64     
48     -192   
96     576    
32     -224   
-144   96     
32     -368   
-144   -224   
352    352    
160    48     
-48    -208   
-48    176    
-48    224    
160    -64    
-336   -208   
288    160    
96     112    
32     240    
192    -112   
-96    -96    
48     160    
128    -80    
96     160    
0      -128   
144    -160   
80     272    
80     192    
256    240    
-80    -112   
0      -96    
112    144    
16     48     
32     32     
-16    -48    
160    288    
0      -64    
160    -128   
64     416    
80     -512   
192    32     
-48    -112   
112    48     
-96    -32    
-96    -16    
48     -48    
-16    -32    
-80    16     
32     80     
-32    16     
128    -32    
48     32     
80     -144   
112    80     
-48    -992   
32     0      
208    96     
80     32     
-80    -96    
672    0      
-80    -16    
144    144    
0      -64    
112    48     
-80    -208   
-16    -112   
112    368    
-80    48     
160    80     
144    -144   
128    80     
-64    -128   
0      0      
96     -368   
160    112    
-160   192    
-96    32     
192    32     
-240   -80    
480    176    
-544   96     
-160   -64    
112    -16    
64     -112   
608    -240   
256    48     
240    64     
368    208    
-272   32     
48     64     
64     80     
144    96     
80     16     
0      -80    
368    -32    
144    -16    
-592   48     
48     -224   
288    112    
96     64     
64     32     
-96    -128   
192    96     
-224   0      
48     -32    
-80    96     
64     96     
-208   -144   
352    -288   
208    144    
128    160    
352    48     
-304   -32    
-16    64     
16     -32    
256    48     
0      48     
128    112    
-192   -80    
160    -112   
176    96     
80     -368   
160    112    
112    32     
-64    32     
80     16     
-144   -96    
384    -80    
-48    192    
224    -32    
208    16     
-208   -32    
-48    -1136  
736    272    
-528   -304   
64     -128   
-160   -336   
208    -448   
96     -240   
192    0      
240    -48    
192    -352   
32     -32    
160    32     
240    96     
128    -160   
16     -208   
736    192    
416    288    
64     -432   
144    -112   
-208   224    
-48    64     
80     16     
336    -160   
-288   -96    
112    128    
96     -192   
16     -944   
-48    0      
32     96     
512    400    
-368   -80    
-384   -528   
416    240    
144    32     
-496   -208   
288    -224   
-1360  48     
0      48     
32     48     
320    -176   
48     -160   
144    -304   
176    64     
112    -64    
-224   -16    
288    32     
128    272    
-208   -192   
48     1152   
240    -640   
96     -624   
-992   -96    
256    -144   
-96    688    
192    -656   
-112   -176   
208    80     
16     272    
416    -416   
16     -272   
144    -64    
-16    -224   
-240   -32    
192    -144   
-96    80     
0      112    
-144   -144   
96     -16    
32     128    
192    16     
-176   -96    
-64    48     
-32    144    
16     -96    
208    80     
160    -128   
-224   16     
176    48     
192    256    
-160   64     
-224   -32    
-448   -112   
160    -16    
-1840  -320   
48     -112   
-160   0      
-16    -144   
0      96     
48     -416   
192    96     
160    64     
64     176    
336    160    
-112   176    
-256   -16    
-224   16     
-352   -48    
192    16     
-176   80     
32     32     
16     -80    
0      -176   
128    48     
16     32     
240    112    
208    112    
16     48     
-144   -176   
208    -48    
-832   16     
96     32     
240    112    
-16    48     
192    0      
80     64     
-112   64     
-16    -160   
32     32     
32     -144   
240    112    
-160   -16    
256    -16    
-96    96     
-64    -16    
-64    -16    
-192   80     
-464   -64    
256    -80    
-176   -112   
80     -64    
304    160    
64     176    
64     112    
-416   -144   
-672   -128   
-144   -112   
-176   288    
-128   176    
160    -80    
-32    -144   
-16    208    
-32    80     
-96    32     
-272   -144   
400    -80    
144    64     
16     -64    
0      48     
-176   -208   
-528   -160   
288    -144   
-400   128    
112    128    
-400   -128   
0      -96    
-352   64     
128    80     
240    32     
80     96     
96     -16    
336    112    
0      -64    
208    32     
112    64     
16     176    
-304   64     
-288   -16    
-160   -96    
-608   144    
64     32     
-2320  16     
480    224    
-160   128    
-80    -80    
-176   32     
80     224    
0      -128   
-16    -96    
16     -48    
96     -48    
-32    -64    
80     112    
-96    16     
-144   16     
-128   -16    
-96    64     
0      48     
-1040  16     
96     480    
-32    288    
-240   -208   
-16    -128   
96     128    
-192   -208   
16     -176   
64     128    
16     -368   
112    -144   
-128   640    
-256   144    
-64    -336   
400    48     
-192   240    
400    -48    
-416   -544   
304    -528   
-208   272    
-272   256    
528    384    
-192   368    
80     -752   
192    496    
-16    272    
80     -464   
208    -16    
-336   -288   
112    192    
-784   -80    
160    -544   
-400   368    
176    336    
16     112    
-48    -80    
-352   -288   
160    208    
64     160    
288    32     
-128   -208   
624    624    
-80    48     
16     -624   
544    352    
-416   64     
112    -16    
-48    32     
-224   -32    
-16    -16    
176    160    
-208   -96    
336    64     
-112   48     
-32    -112   
-128   496    
-48    -80    
-32    -240   
-48    192    
64     160    
-16    -144   
96     -160   
-1152  -128   
-176   16     
-96    32     
224    32     
-192   -112   
144    80     
64     48     
-288   0      
80     80     
-48    96     
-64    -16    
-96    64     
-64    176    
-352   -96    
176    192    
144    160    
112    48     
-32    -16    
0      0      
-80    48     
-64    96     
144    16     
32     144    
112    -128   
-176   -64    
112    112    
-256   0      
64     48     
64     -80    
112    -16    
0      0      
128    144    
64     32     
-144   32     
-80    -64    
0      32     
112    80     
128    64     
-16    160    
-176   16     
176    -48    
-80    -32    
32     96     
-240   -272   
208    -240   
48     96     
16     48     
0      -32    
-80    80     
-128   48     
112    160    
32     48     
32     96     
-32    -64    
-208   -64    
80     48     
-128   -64    
144    -16    
-96    -48    
-16    208    
80     96     
160    112    
0      32     
64     128    
80     288    
-160   80     
112    48     
48     -48    
112    0      
64     144    
-16    -16    
192    48     
-16    32     
-64    -208   
272    -288   
128    96     
352    128    
144    48     
64     112    
-64    64     
48     -32    
0      128    
0      208    
64     176    
-160   -64    
320    96     
112    64     
128    -512   
0      80     
128    144    
-224   96     
-80    32     
112    32     
64     -208   
-48    -208   
-272   0      
192    112    
160    32     
208    -64    
144    -32    
160    -144   
-112   -272   
-208   -400   
-16    16     
64     192    
80     112    
-112   -48    
48     48     
0      96     
-32    -160   
16     -112   
-160   96     
32     80     
528    160    
48     -32    
432    160    
-144   96     
-128   -240   
368    0      
-272   -16    
480    16     
64     0      
336    -48    
368    64     
288    192    
-96    96     
-224   -96    
144    -208   
288    112    
16     160    
144    112    
192    48     
-32    -320   
160    272    
128    384    
48     -48    
48     96     
-224   0      
64     32     
-80    16     
208    80     
-16    -16    
144    80     
128    64     
96     -16    
-80    -96    
96     64     
32     -48    
544    400    
-80    -272   
32     -64    
320    304    
-144   336    
-416   48     
464    144    
-32    -32    
32     32     
464    208    
128    -256   
208    16     
-176   480    
80     48     
-128   -384   
-240   80     
-48    352    
864    608    
-160   240    
-448   -1520  
608    -32    
-256   832    
-496   -560   
-336   544    
-352   144    
144    -192   
32     32     
224    -352   
112    80     
208    -192   
224    -48    
16     -128   
160    208    
192    -432   
-144   -592   
-304   -928   
304    224    
-176   880    
128    368    
144    448    
-48    96     
224    -208   
48     -32    
-144   -240   
240    -16    
464    672    
-304   240    
128    432    
-64    0      
368    272    
-240   -608   
144    -208   
-160   240    
-144   224    
432    240    
112    -80    
144    128    
-80    -240   
-48    0      
160    -192   
128    176    
-96    16     
48     160    
16     -16    
416    192    
-256   128    
144    80     
-128   -112   
112    -16    
112    304    
-32    160    
272    192    
-64    -32    
192    112    
-160   64     
0      128    
144    -192   
128    -32    
-32    -80    
48     112    
96     160    
288    -368   
272    112    
96     -704   
0      -384   
-16    -64    
32     -656   
48     -80    
-64    -32    
176    112    
-128   112    
80     -176   
192    176    
-64    144    
192    -192   
48     64     
368    -160   
0      96     
-304   -16    
-16    -448   
-16    -96    
112    -368   
144    -48    
-80    -320   
0      -48    
96     -1072  
112    -80    
64     80     
128    0      
256    -48    
-240   16     
-144   -48    
-32    80     
-544   -48    
80     -144   
80     48     
64     80     
176    128    
16     80     
48     16     
96     -1040  
16     -64    
160    64     
-16    208    
128    80     
-144   -16    
48     -64    
176    320    
-320   352    
-32    208    
-992   -16    
96     -368   
96     -352   
128    -16    
0      32     
144    80     
48     112    
-32    -240   
128    112    
80     -128   
0      -128   
48     160    
144    176    
-48    80     
176    -48    
-1216  16     
64     -64    
288    256    
-96    352    
144    160    
80     -176   
-320   -16    
64     -288   
96     112    
-16    -144   
-32    -32    
-128   -176   
256    80     
-64    48     
176    -496   
-464   -224   
288    -48    
-2064  -576   
-16    -416   
-240   -256   
-192   -16    
-192   -144   
-64    -160   
320    224    
144    80     
160    -16    
-112   352    
-96    112    
-224   -656   
64     32     
-288   -96    
-48    32     
-1248  256    
336    -320   
-1664  -16    
-32    -48    
32     -112   
-112   0      
128    192    
48     -48    
80     -32    
-160   0      
144    -512   
-240   432    
176    -80    
-96    -16    
320    384    
-800   -416   
176    -112   
240    -208   
128    0      
192    272    
-160   -32    
-176   -400   
432    -160   
192    112    
368    192    
16     304    
-480   -208   
160    0      
-112   80     
288    -224   
256    -224   
368    -304   
-208   -128   
128    1280   
624    1168   
-400   -608   
-112   -432   
368    336    
-208   32     
-176   -480   
208    -224   
-320   -32    
-16    -240   
-368   -144   
48     -16    
-48    -192   
368    64     
-16    16     
-928   -64    
256    352    
-464   272    
-528   112    
-128   48     
-384   96     
0      0      
-2336  -112   
96     16     
-272   48     
-80    48     
112    64     
16     32     
-176   -80    
-32    0      
-112   0      
160    96     
-96    64     
112    16     
-144   64     
-304   -32    
-160   0      
-336   16     
0      80     
-1216  0      
-32    -32    
432    96     
-160   0      
-224   -16    
0      32     
-128   -80    
112    64     
112    48     
-48    -16    
-48    32     
-144   48     
32     96     
48     -32    
-80    0      
-592   64     
-368   -48    
-336   -144   
160    0      
-64    -96    
192    80     
-80    0      
112    80     
-160   0      
-176   0      
160    64     
-32    96     
64     32     
304    48     
-416   -160   
-528   -80    
192    160    
-1072  80     
160    0      
-16    0      
464    144    
-320   -96    
-96    -80    
16     48     
-192   -32    
0      48     
48     16     
16     -96    
-480   -64    
-48    80     
0      -64    
128    80     
-736   -16    
64     32     
-64    -144   
32     96     
0      32     
128    96     
-144   -16    
32     80     
-16    16     
16     -64    
-32    -48    
16     -256   
16     -48    
64     0      
160    32     
-80    32     
-96    -48    
16     64     
112    128    
176    64     
-16    -192   
-112   -32    
-160   64     
32     0      
-112   32     
-192   -176   
112    -448   
160    112    
-192   160    
80     -32    
-544   16     
304    224    
-1168  0      
272    -80    
-112   0      
-144   176    
-32    144    
80     32     
144    96     
208    80     
-80    96     
-288   -64    
16     16     
-112   16     
224    80     
-96    256    
0      176    
160    -16    
-336   -112   
-64    0      
96     -80    
96     -80    
256    0      
384    192    
0      48     
-112   160    
0      128    
-96    -16    
-48    112    
0      224    
-224   64     
-112   -96    
240    64     
-256   96     
112    240    
64     192    
176    -48    
352    0      
80     48     
256    208    
-192   128    
-288   64     
-112   160    
-304   16     
400    64     
-400   -128   
288    144    
16     96     
-336   -160   
272    -128   
-96    64     
80     160    
48     112    
80     48     
16     -48    
224    112    
-112   144    
48     176    
-192   -672   
-80    -208   
-160   160    
-192   0      
256    224    
32     -96    
224    -208   
-64    64     
96     304    
48     -80    
32     144    
-48    96     
-32    -416   
192    -240   
64     272    
-64    112    
-16    -560   
-208   464    
-16    -192   
192    -192   
-128   -352   
96     240    
-48    656    
-224   -176   
-16    48     
-448   176    
32     64     
-112   304    
-48    -864   
144    -144   
0      432    
400    480    
144    176    
192    -96    
-288   32     
-16    -512   
-64    -96    
304    32     
128    80     
400    160    
752    592    
-784   496    
16     0      
-80    -16    
-16    0      
224    -240   
400    -848   
208    32     
32     32     
-64    96     
-32    192    
-32    -48    
208    -48    
240    128    
0      -64    
16     -112   
16     -64    
-208   176    
224    64     
96     96     
80     160    
288    -336   
-192   -288   
-96    336    
256    544    
64     32     
16     -16    
144    -80    
0      -112   
-16    -144   
112    -32    
80     144    
-112   176    
-96    -48    
80     208    
112    -32    
272    -400   
16     0      
0      48     
48     192    
288    176    
-80    0      
-64    -16    
-16    16     
-16    32     
192    96     
128    32     
448    144    
-256   64     
-32    -80    
-96    0      
704    192    
-384   224    
-208   -1376  
-112   272    
144    176    
272    176    
192    -112   
256    16     
0      224    
272    256    
144    96     
-96    96     
-128   -80    
-128   -80    
144    16     
208    -16    
112    112    
-64    -496   
96     48     
48     -32    
-64    80     
-144   -224   
0      128    
32     320    
176    16     
64     0      
144    64     
160    80     
80     -96    
-112   -112   
112    -560   
0      -16    
112    -240   
48     -32    
32     -352   
64     240    
-64    32     
96     0      
288    208    
-160   256    
-16    48     
256    96     
112    -80    
32     -144   
0      -64    
48     -224   
192    80     
32     -240   
112    -112   
-160   -336   
-48    -96    
-128   -192   
224    -240   
208    -304   
192    48     
-208   -256   
16     -48    
-80    -80    
48     -528   
192    64     
64     -112   
112    32     
112    -336   
240    256    
-96    176    
128    -64    
-144   -16    
-48    -144   
32     272    
336    -32    
-128   80     
-48    16     
-48    96     
240    -192   
128    192    
-32    112    
-256   32     
-240   -176   
-96    -368   
-416   144    
48     240    
-112   -48    
608    -192   
-80    160    
208    144    
176    -688   
368    64     
128    -304   
-432   -416   
-208   -64    
112    448    
-176   -144   
304    -192   
-48    -112   
304    -160   
64     -464   
224    80     
-64    -160   
-32    -80    
-288   -128   
128    -224   
80     0      
32     -144   
-16    64     
32     -992   
144    -16    
320    112    
80     112    
-112   0      
112    96     
-112   -192   
-48    -48    
400    160    
-384   32     
-384   -16    
16     -80    
176    0      
32     -176   
240    16     
144    -432   
16     -64    
112    -48    
96     -176   
-272   -160   
144    -32    
208    -32    
400    208    
-336   16     
224    32     
-208   -192   
0      -48    
80     -48    
448    400    
-480   80     
0      -64    
144    176    
112    -112   
128    -272   
352    -176   
144    192    
208    32     
-208   -64    
-48    16     
144    0      
-240   -16    
256    -64    
208    112    
288    176    
0      -16    
-80    -272   
400    128    
-176   -32    
-48    -64    
304    -832   
112    112    
144    16     
144    32     
-464   32     
64     -224   
64     -144   
64     0      
-80    32     
48     -80    
208    48     
16     -160   
-352   -16    
-16    -160   
80     64     
432    -144   
-432   160    
256    -96    
240    -48    
-80    0      
-48    -48    
64     128    
112    32     
-608   -48    
64     -32    
-928   -64    
192    80     
96     48     
32     0      
64     32     
-112   -224   
224    64     
-272   -48    
176    -16    
224    96     
96     -32    
-224   -80    
176    0      
-896   48     
32     -160   
272    64     
304    48     
-96    64     
144    -240   
-128   64     
288    16     
-64    64     
-128   32     
64     32     
-16    -32    
-32    16     
-304   -64    
192    -32    
-272   -32    
-16    112    
-272   0      
208    -192   
16     -128   
240    -144   
0      -48    
0      -64    
-128   112    
-352   -32    
144    -16    
-288   32     
224    48     
-80    16     
-48    96     
-80    64     
192    16     
16     -48    
-16    -16    
80     32     
128    -96    
-64    16     
-1824  -96    
-384   32     
-192   -48    
-1248  -80    
64     -32    
112    64     
-48    80     
80     -32    
-16    -64    
160    -16    
-144   128    
-416   0      
80     80     
-32    -80    
-224   -144   
80     352    
-576   352    
-208   48     
-432   32     
-16    0      
-432   -112   
-32    -144   
-48    48     
-32    -320   
176    80     
-160   32     
-144   -64    
48     128    
-128   -32    
32     144    
-176   16     
96     176    
-96    160    
-128   -80    
-64    -560   
256    128    
144    432    
-592   -112   
-144   -96    
16     144    
-48    288    
272    96     
592    -192   
96     -192   
-208   32     
-160   416    
-448   -496   
176    -544   
-96    736    
144    16     
-160   336    
-352   -16    
-608   -176   
-192   464    
-112   -448   
144    -112   
-112   -16    
128    80     
80     176    
-352   -144   
80     96     
-256   80     
48     64     
-176   16     
-160   -880   
144    928    
-112   -192   
-224   -144   
-80    576    
-848   -176   
-16    -256   
32     64     
400    112    
-112   -48    
32     -16    
64     -528   
80     128    
96     192    
-128   0      
80     -144   
-160   112    
-112   176    
-208   384    
-64    688    
-512   -384   
112    -240   
176    0      
0      48     
0      -192   
0      -240   
48     -48    
208    208    
-112   -544   
-464   -144   
-176   -464   
-32    -96    
64     -32    
-240   -464   
-48    32     
-368   -96    
432    272    
-240   32     
-80    -224   
-64    -144   
144    -16    
-160   0      
48     0      
48     -112   
-32    80     
-336   -128   
0      -96    
-192   -64    
96     -112   
64     112    
-496   32     
-128   -48    
336    -48    
128    320    
-144   496    
-32    64     
-64    -144   
368    -112   
-64    -16    
256    -16    
-80    16     
-16    112    
-208   -80    
80     -176   
96     -208   
-192   48     
128    32     
128    80     
96     -16    
-16    192    
64     -176   
-288   32     
-112   64     
0      64     
416    240    
-48    528    
-144   48     
160    -144   
-192   -64    
272    -256   
-192   144    
-240   -64    
144    96     
32     -112   
144    128    
144    -96    
-64    16     
-128   160    
144    48     
272    112    
64     0      
-240   -48    
112    -160   
-240   64     
-32    64     
192    112    
224    96     
224    64     
-112   96     
-48    16     
80     112    
112    0      
-32    160    
176    48     
208    32     
-112   144    
48     192    
-96    48     
-16    112    
224    144    
112    112    
16     -16    
-112   -112   
208    -208   
208    128    
-96    320    
112    48     
-208   -160   
-96    -48    
64     32     
16     64     
-32    0      
304    -80    
-48    144    
-96    -176   
0      -208   
-96    96     
80     16     
32     176    
96     -80    
-192   -64    
32     16     
64     64     
-112   -96    
112    -352   
160    -64    
-64    -256   
144    -112   
-224   304    
176    112    
-144   176    
-32    -16    
-48    -64    
112    -96    
96     128    
-64    80     
-16    -32    
112    96     
96     64     
192    368    
0      128    
-272   -144   
-16    -48    
176    80     
-32    0      
-32    -96    
192    224    
96     128    
-48    -64    
32     -496   
272    176    
-160   48     
-32    -272   
64     160    
-48    -112   
-208   -16    
-112   -80    
-176   -288   
336    176    
576    -112   
176    80     
0      32     
-256   -240   
160    -48    
-304   0      
224    -832   
96     -448   
832    -448   
528    -336   
64     -368   
-64    -80    
-176   64     
-368   -192   
-336   -32    
112    -336   
432    -32    
288    -864   
208    -32    
48     80     
-48    64     
-352   -64    
112    -16    
64     192    
176    128    
112    48     
0      -16    
-48    48     
-80    -32    
32     0      
144    -80    
272    96     
-160   -256   
464    64     
-176   32     
48     -464   
-32    -320   
-176   240    
-400   -112   
368    64     
-96    112    
128    144    
240    112    
-224   -112   
240    16     
-16    0      
16     112    
-112   -480   
304    192    
-416   -128   
64     32     
-160   16     
160    0      
64     80     
288    96     
-192   -16    
-240   -144   
-48    96     
208    64     
96     128    
-16    0      
-64    32     
224    16     
240    128    
224    -16    
-96    240    
-224   0      
160    -16    
-96    80     
-112   0      
224    96     
-16    16     
32     32     
1296   384    
-832   96     
-336   -144   
112    128    
-512   -16    
-80    -32    
16     -160   
864    208    
-688   192    
-64    160    
-224   -128   
416    -144   
240    16     
-192   32     
64     -32    
-112   -464   
96     128    
-160   -112   
608    224    
-256   -160   
160    -80    
96     -336   
96     32     
-64    -32    
208    96     
48     64     
0      16     
176    144    
48     -144   
32     96     
64     0      
-192   -16    
304    -64    
0      48     
224    16     
-128   0      
-32    -176   
-32    160    
272    112    
112    -384   
-256   16     
-672   -144   
64     -80    
288    0      
-96    -336   
-144   -48    
208    112    
64     32     
48     0      
224    32     
-64    112    
224    64     
80     -208   
-48    32     
32     -128   
32     48     
-1520  -64    
0      -208   
112    -32    
-64    -96    
160    80     
240    -496   
96     -160   
80     192    
-64    -64    
160    -32    
96     144    
32     -16    
288    -16    
80     -224   
144    -48    
-480   -176   
128    -48    
0      -16    
240    272    
80     -336   
128    -160   
-112   80     
-48    48     
16     32     
80     -112   
-32    0      
112    0      
-144   -336   
48     272    
208    -80    
0      16     
16     -64    
-1088  96     
64     16     
-160   -64    
48     -240   
32     96     
-32    -688   
272    192    
144    480    
80     -112   
64     128    
-80    -160   
-112   64     
0      -192   
-336   -304   
-176   144    
-768   -80    
-64    160    
48     -96    
448    624    
80     -544   
240    240    
112    -64    
176    -992   
-320   176    
128    -224   
144    272    
80     -192   
32     16     
-176   64     
16     -32    
-192   -80    
288    96     
-1136  -112   
144    16     
-32    -16    
352    528    
-432   -928   
176    -1248  
320    752    
80     352    
48     -240   
-80    -192   
64     16     
-208   496    
-320   -528   
16     288    
176    240    
-320   -768   
224    -96    
112    224    
448    -80    
128    48     
656    32     
-176   288    
144    240    
48     -336   
-336   -240   
16     80     
-512   96     
240    224    
-464   160    
176    96     
-288   -32    
16     -160   
-128   -208   
304    -752   
80     -272   
-32    -496   
-208   0      
-176   -208   
48     -144   
-16    128    
192    64     
-256   32     
80     192    
-256   0      
16     80     
-64    16     
32     48     
16     128    
144    -48    
176    16     
0      112    
64     80     
-16    48     
112    -32    
96     64     
96     32     
48     208    
-96    -112   
288    -192   
32     160    
-16    112    
448    -336   
-176   -320   
-544   -592   
144    160    
208    48     
-352   -96    
-176   -128   
-1360  -64    
-208   336    
32     -32    
-224   528    
192    48     
80     -144   
-288   -608   
-144   -240   
-1040  16     
-240   0      
-192   -64    
0      -672   
192    -48    
-368   -48    
-16    -48    
-208   64     
-16    64     
144    256    
128    224    
80     -16    
272    -64    
-224   -32    
256    112    
-416   -48    
176    128    
-32    16     
-112   -16    
16     -48    
-224   -144   
48     -48    
48     128    
-80    0      
-32    -160   
-16    -96    
-320   32     
-96    288    
112    32     
48     -32    
144    -160   
544    288    
-688   16     
-80    -128   
-112   96     
416    416    
-400   368    
-256   112    
-96    112    
-512   -32    
224    208    
-880   80     
128    400    
-128   112    
128    -208   
48     -304   
64     48     
-96    64     
-64    -16    
48     144    
-128   96     
256    16     
-288   16     
-96    16     
-192   16     
-64    96     
0      -176   
352    -240   
-144   112    
224    240    
-320   128    
-208   0      
-48    144    
272    208    
96     112    
-48    -192   
-112   -144   
-160   48     
144    144    
-192   -112   
112    -160   
240    192    
-80    384    
-528   96     
320    208    
-208   192    
0      -48    
208    64     
0      -16    
80     256    
-96    336    
0      288    
-240   128    
-48    -80    
128    -48    
-32    176    
-192   -208   
-64    -176   
-208   112    
48     -272   
128    112    
-160   -208   
64     -64    
144    96     
-32    -32    
48     -288   
112    224    
-64    80     
16     96     
-48    -80    
16     144    
-240   -64    
144    -160   
96     -128   
-16    96     
80     384    
144    464    
-240   -48    
-240   -208   
176    112    
128    -16    
176    -64    
32     -112   
304    -16    
-32    208    
160    144    
-96    -32    
48     16     
-272   -64    
-240   48     
48     96     
-64    0      
112    32     
-48    64     
32     48     
-304   224    
160    160    
64     32     
-176   64     
-144   16     
80     -16    
-224   -208   
416    -224   
128    -16    
144    224    
-128   48     
192    64     
160    128    
-96    96     
-192   160    
-16    16     
96     80     
368    112    
-272   -16    
-544   -48    
32     16     
-48    32     
368    272    
-352   48     
-48    48     
224    64     
-32    -96    
352    32     
-144   80     
96     32     
80     48     
48     80     
80     32     
-16    -112   
-48    16     
-128   96     
-416   -64    
80     48     
-64    48     
144    64     
-48    64     
144    32     
176    -32    
96     64     
-144   -64    
272    32     
-112   64     
144    96     
144    80     
-496   -144   
176    -16    
-48    32     
160    224    
464    96     
-144   0      
-112   -16    
-64    48     
208    128    
0      96     
-416   -160   
-16    48     
-80    176    
-160   -32    
304    96     
128    64     
336    80     
-192   48     
48     -160   
128    48     
-240   -192   
384    -48    
272    256    
-64    32     
400    48     
48     112    
-176   -16    
224    -144   
32     -128   
32     112    
-304   -48    
592    96     
128    64     
400    -272   
-800   -304   
672    48     
224    96     
-656   80     
-32    32     
112    0      
48     -16    
-128   -16    
160    128    
16     -32    
16     48     
-176   -96    
-16    -176   
-32    48     
144    -304   
112    176    
-48    32     
208    -48    
-16    144    
32     48     
-32    80     
288    0      
-176   -96    
256    112    
-144   -32    
192    -96    
-208   -16    
32     32     
112    64     
192    -112   
96     32     
64     80     
-32    -32    
-192   -32    
-16    -96    
-144   -176   
208    96     
-48    16     
336    144    
-64    112    
96     128    
16     -96    
-144   -160   
160    64     
32     -208   
96     240    
112    -192   
96     48     
-208   0      
128    144    
-48    -80    
144    -368   
-96    160    
80     32     
80     -32    
160    432    
-16    32     
-96    16     
176    80     
16     -96    
96     -176   
32     -48    
80     -608   
320    144    
80     208    
-80    -256   
208    384    
-128   32     
128    -640   
-64    288    
112    112    
-96    -368   
80     -368   
-48    144    
96     336    
208    80     
96     48     
96     16     
48     -192   
112    16     
192    128    
176    352    
-144   128    
112    -48    
-16    16     
32     -304   
-80    -192   
112    80     
80     352    
272    -112   
80     176    
32     -64    
0      48     
240    192    
256    352    
-112   -224   
-32    16     
96     496    
-16    384    
160    64     
304    240    
48     400    
16     96     
96     -384   
240    -224   
336    240    
160    96     
16     256    
128    32     
-208   0      
-32    -32    
112    48     
-16    160    
-160   -16    
192    -992   
336    400    
-48    144    
-96    -48    
32     -144   
96     -16    
128    192    
-160   80     
16     -112   
96     -64    
96     -48    
-144   32     
128    -144   
-80    64     
-1600  96     
112    -160   
48     16     
-240   -560   
176    -336   
-272   -96    
-48    -272   
112    144    
336    16     
432    -384   
-64    0      
-144   -448   
-240   32     
80     -16    
-64    16     
-656   -112   
224    -16    
48     224    
128    64     
224    -128   
64     -384   
-48    -384   
-48    -576   
-48    -32    
160    -192   
-16    192    
64     -80    
16     80     
32     -192   
144    -192   
48     -48    
112    -144   
64     -112   
-192   -304   
48     112    
256    -32    
112    384    
320    -528   
96     -176   
80     -272   
128    -176   
64     208    
-144   -16    
-112   -96    
-64    -176   
-416   -640   
-176   -416   
-576   -288   
-64    48     
192    16     
160    -192   
192    -32    
48     -208   
-160   128    
-160   -160   
-176   464    
176    -144   
-96    -160   
-288   -144   
112    -96    
-256   352    
352    272    
240    368    
528    752    
-528   272    
-736   -432   
176    0      
128    -64    
640    288    
256    -848   
416    480    
-704   400    
-80    96     
-16    -352   
48     -80    
496    -80    
176    176    
64     -48    
-208   -64    
-704   0      
112    16     
-32    160    
256    -208   
-96    176    
256    -624   
96     144    
-80    80     
-128   32     
304    208    
-112   -112   
-96    -368   
544    480    
-624   592    
-176   256    
80     -48    
512    368    
-16    288    
-240   -64    
144    -144   
-64    -448   
176    -208   
-176   -160   
112    304    
-112   -16    
-80    -48    
-64    -208   
256    -224   
-208   -64    
192    -96    
-560   -336   
112    -640   
0      -272   
208    -32    
48     16     
256    384    
-352   -432   
176    256    
48     560    
-240   -224   
352    -320   
-144   96     
144    -160   
-192   -288   
128    16     
-608   -96    
16     -432   
32     448    
272    -176   
0      16     
-960   0      
-416   -880   
64     176    
96     416    
-192   -64    
432    320    
-432   -144   
-64    -224   
160    32     
240    -80    
160    32     
-928   -64    
48     -64    
-240   16     
-176   48     
-32    16     
-240   -16    
128    48     
64     80     
96     144    
-1168  32     
-64    -160   
-160   -16    
-176   64     
-720   -32    
80     32     
-272   -192   
112    32     
-160   32     
16     -16    
96     -32    
-80    112    
-112   96     
-224   224    
0      64     
-368   -80    
-304   -448   
-1536  -368   
-208   144    
-224   32     
-32    96     
144    32     
-112   112    
240    128    
-112   0      
48     -48    
48     64     
-32    16     
112    32     
-256   -96    
160    -32    
0      48     
-288   32     
0      32     
-272   0      
16     16     
64     192    
112    112    
-64    16     
0      0      
-320   128    
-400   -48    
-48    32     
32     64     
336    128    
480    160    
128    48     
-48    -48    
16     32     
-560   64     
-176   -16    
-416   -32    
192    32     
160    -32    
-224   -64    
-96    64     
-432   -80    
48     -80    
160    64     
288    64     
48     -48    
0      32     
-384   -96    
-128   96     
-384   32     
-128   32     
96     80     
-192   -32    
0      48     
-320   -16    
304    128    
-96    -16    
-16    32     
-96    32     
-32    -16    
-272   -144   
80     96     
-352   0      
128    48     
-352   -80    
112    80     
256    16     
-208   -32    
128    0      
-112   96     
144    128    
80     64     
80     32     
80     128    
-96    -16    
128    -16    
-112   320    
-112   64     
224    -32    
-336   -144   
352    80     
-672   -96    
368    96     
-144   -48    
-464   -144   
400    48     
-496   0      
208    80     
64     -32    
-80    112    
192    240    
-672   32     
80     -48    
80     64     
-256   -16    
1216   704    
-400   656    
-432   0      
-144   -128   
-288   -32    
0      64     
96     -48    
-112   -240   
48     -128   
-176   64     
-240   160    
400    304    
-496   240    
64     0      
-16    -16    
-128   -112   
0      -96    
96     64     
64     16     
96     160    
-64    -160   
-112   96     
80     64     
-96    -112   
48     -48    
-160   96     
160    144    
-112   -112   
144    0      
-96    96     
224    -96    
32     -144   
176    192    
-48    144    
-16    192    
208    144    
-112   -48    
-224   80     
160    64     
112    0      
-80    -192   
224    0      
-160   176    
128    32     
320    352    
-32    -400   
16     432    
-288   1072   
240    -1008  
32     -32    
-128   480    
304    -16    
0      320    
-304   -1024  
32     -208   
96     128    
-112   496    
-64    144    
16     0      
80     256    
192    304    
160    352    
272    144    
64     256    
160    112    
0      32     
-48    -32    
16     144    
-16    336    
144    144    
-48    -96    
0      -128   
-160   0      
0      0      
96     160    
224    80     
288    176    
-208   304    
48     176    
-144   144    
-96    48     
-176   -16    
400    128    
16     32     
80     32     
-80    48     
64     -64    
192    64     
-48    -752   
144    -96    
-16    96     
176    80     
112    112    
16     64     
-112   144    
0      48     
0      0      
224    80     
-48    160    
96     304    
-32    -64    
128    80     
-112   144    
-128   -736   
224    -48    
96     32     
-80    32     
48     48     
32     64     
-288   -224   
272    -160   
-48    -208   
-16    -272   
64     64     
-32    144    
-64    -48    
96     -80    
64     176    
-64    -80    
112    0      
48     -48    
192    -48    
-32    32     
320    352    
-112   320    
-144   64     
16     -272   
160    -16    
-48    -16    
160    -112   
128    16     
448    384    
-192   192    
-32    -144   
80     -80    
96     -368   
32     80     
16     -16    
-48    32     
-48    96     
96     -112   
-128   112    
256    464    
-400   144    
-144   64     
288    0      
-160   -112   
64     0      
-48    -192   
256    128    
64     -624   
304    16     
128    -256   
-176   48     
32     -16    
192    112    
160    112    
32     -48    
16     16     
80     -48    
96     128    
96     -192   
-32    -32    
112    16     
48     144    
144    128    
128    48     
-128   -736   
96     -192   
-16    96     
32     288    
64     320    
-80    384    
80     400    
160    64     
128    80     
80     128    
64     48     
368    608    
-336   496    
-176   0      
224    -512   
-352   -624   
384    64     
-448   -48    
0      112    
240    -96    
160    64     
784    624    
-176   288    
-80    128    
-240   -304   
-144   -272   
1072   304    
-384   832    
-80    384    
-272   -288   
320    160    
896    -256   
32     112    
464    80     
16     -64    
464    144    
480    176    
208    32     
64     -32    
288    -48    
-448   -912   
112    -64    
-352   352    
-240   -128   
128    384    
176    -368   
144    -144   
48     -208   
128    -176   
448    272    
-144   -16    
-16    0      
-176   -432   
544    -432   
-400   -400   
-160   -592   
480    -288   
48     368    
192    -32    
-208   -496   
112    336    
112    -288   
192    0      
-144   -48    
272    96     
-2688  -80    
176    -368   
256    336    
112    -160   
144    32     
32     -592   
144    -448   
-80    80     
288    64     
208    -400   
-176   272    
384    -416   
32     160    
96     64     
-80    -288   
-48    -48    
-112   0      
0      -48    
80     -64    
-16    64     
144    -528   
272    96     
-80    64     
0      -64    
48     64     
16     -48    
112    -144   
-80    0      
-176   -16    
336    272    
-368   -176   
112    -128   
0      0      
128    -128   
16     -256   
-160   -176   
224    -608   
176    -944   
-224   -48    
128    -560   
112    16     
-48    -32    
32     64     
0      0      
80     -32    
-208   -208   
64     -320   
-1152  -48    
112    240    
208    176    
48     64     
-80    -48    
144    -304   
0      -32    
176    96     
0      96     
64     16     
-64    16     
-80    -16    
-32    -112   
-48    0      
160    -48    
-144   0      
32     -16    
-736   48     
-16    -64    
48     48     
96     -96    
-16    48     
-16    -96    
160    -144   
-64    224    
-144   96     
-208   -96    
-144   -288   
0      -144   
-112   -112   
-528   -112   
80     -48    
-1760  -16    
80     -192   
144    48     
32     -64    
-176   0      
48     -224   
-80    -48    
-160   48     
128    80     
-176   -192   
224    -96    
320    192    
-16    48     
-368   -64    
48     -64    
80     -16    
-192   0      
-368   -48    
240    48     
96     96     
-224   -400   
368    32     
-704   80     
-64    16     
-352   16     
80     -16    
-288   -32    
400    -176   
208    -80    
384    -16    
-144   0      
-192   -16    
-272   16     
320    -80    
32     48     
48     -208   
112    0      
-352   -32    
-48    32     
-416   -96    
208    -32    
-272   -16    
0      16     
-192   -112   
160    0      
-48    80     
-2160  -112   
176    32     
-64    -112   
64     0      
304    64     
-176   48     
-64    48     
-576   -48    
-320   -64    
96     16     
-112   0      
192    64     
656    704    
-832   16     
224    -64    
-208   -64    
80     0      
336    -16    
128    128    
-112   -96    
-112   48     
-336   -48    
96     -96    
-448   -336   
-144   16     
-48    192    
-432   -160   
-624   -16    
-480   -96    
-240   -256   
-96    -64    
0      128    
208    48     
-128   144    
-192   -48    
-80    -80    
48     32     
-240   0      
432    208    
-320   96     
-48    176    
-1760  96     
-368   -32    
-304   -160   
-80    -128   
-64    -224   
32     224    
-752   -672   
112    192    
-368   368    
-240   0      
336    224    
80     -128   
464    192    
-192   256    
-176   -256   
-272   -352   
32     976    
-464   -480   
-288   -208   
0      48     
144    -256   
48     896    
-48    -512   
64     272    
16     16     
96     -160   
-224   -48    
48     176    
-160   128    
48     256    
-176   -128   
560    336    
-1712  592    
-176   -512   
272    -672   
-160   -96    
160    64     
16     -16    
-16    -32    
48     128    
240    464    
-192   128    
-96    -32    
80     -64    
112    32     
-128   320    
480    416    
-608   -112   
-96    -16    
-16    -112   
0      -32    
-176   0      
-32    32     
-112   0      
48     16     
272    208    
-48    192    
32     192    
-240   48     
32     32     
-192   -16    
160    240    
-160   160    
176    48     
208    0      
0      0      
16     0      
-32    64     
224    80     
0      32     
112    160    
-48    0      
-48    -16    
-80    -48    
16     48     
-32    -32    
160    96     
32     192    
16     496    
-304   32     
-128   -32    
-16    80     
160    -64    
16     32     
16     48     
96     192    
-176   -128   
-96    16     
-272   0      
-160   64     
-64    -48    
-208   -288   
-256   -368   
-144   192    
-208   32     
160    32     
-48    -32    
256    -64    
96     64     
-64    368    
192    288    
-224   -80    
208    144    
-368   112    
-48    -16    
32     -32    
-16    -160   
112    -464   
160    -160   
-16    32     
96     -48    
-112   240    
-416   32     
256    256    
-48    96     
112    -192   
128    -32    
-64    208    
-160   64     
64     0      
-192   -32    
64     -32    
144    -32    
80     -16    
32     -160   
-16    -64    
96     -96    
-128   16     
160    368    
-32    416    
-64    144    
416    32     
80     80     
48     -32    
32     -16    
-240   -128   
96     80     
336    160    
-256   -272   
-272   -288   
-304   -208   
128    -240   
-48    -32    
0      -32    
64     128    
-32    288    
256    368    
-160   224    
-304   64     
80     192    
0      -48    
240    80     
96     128    
160    80     
32     -48    
-64    240    
112    256    
240    112    
272    144    
-16    80     
0      240    
32     -80    
32     672    
112    288    
192    0      
-64    -80    
0      -192   
-224   64     
208    -256   
-144   320    
144    480    
272    -368   
-224   128    
80     400    
-32    -160   
16     352    
-288   -256   
160    336    
-96    80     
-80    496    
-176   -688   
-176   -1008  
480    16     
176    16     
512    16     
-160   16     
-448   -112   
-304   -160   
-112   -16    
176    96     
224    352    
-480   -1408  
304    688    
-304   768    
-496   -1184  
48     192    
912    592    
112    -144   
16     -320   
48     128    
0      -144   
240    -112   
464    432    
-80    288    
560    -368   
-928   -1616  
-528   -320   
48     688    
-64    -32    
592    80     
400    0      
528    -64    
-128   368    
-128   -48    
-352   -256   
176    -208   
16     64     
80     96     
192    -48    
48     -16    
128    144    
-112   48     
64     96     
128    48     
-128   -160   
32     0      
208    -256   
144    128    
144    -352   
176    160    
-144   80     
96     -32    
208    -16    
64     64     
32     32     
64     32     
288    -544   
-384   -432   
128    304    
-16    -160   
96     64     
240    -48    
-128   48     
80     112    
192    32     
-128   288    
240    48     
-64    -64    
336    256    
-160   208    
48     32     
48     0      
112    -128   
64     32     
16     -80    
64     16     
-32    80     
-16    112    
96     -144   
160    224    
-16    -512   
-32    48     
144    96     
384    64     
-144   -96    
-192   -192   
240    -16    
-96    128    
80     256    
96     -16    
208    112    
-80    -48    
48     0      
96     -336   
160    144    
-64    112    
48     -32    
80     0      
48     -208   
96     -160   
16     -80    
96     112    
-64    -16    
32     64     
288    192    
-176   128    
0      -96    
96     0      
48     -256   
256    -16    
144    -192   
16     80     
-16    16     
32     -960   
16     96     
176    -96    
128    -640   
-32    -32    
32     -800   
592    608    
-624   400    
176    -288   
144    -112   
32     -48    
64     128    
96     -112   
192    144    
80     0      
-48    -672   
-144   -64    
-816   32     
-96    -48    
80     -64    
144    0      
192    -32    
272    -512   
64     -64    
176    112    
128    32     
-64    -192   
144    112    
176    -160   
400    48     
144    48     
-64    -256   
-320   -96    
-336   -160   
144    -80    
32     -320   
-160   80     
96     -144   
368    32     
0      -432   
-64    -128   
80     -144   
-256   96     
-192   0      
-384   -32    
128    -64    
176    -32    
-640   -16    
144    -32    
96     32     
-112   -128   
336    80     
112    -496   
-208   -208   
192    -1024  
80     -160   
176    -208   
48     48     
-208   -160   
176    0      
-80    0      
368    -16    
-336   -64    
176    48     
-1728  -80    
176    -16    
256    0      
-16    -96    
-64    -96    
288    -48    
-80    0      
32     -96    
128    128    
-128   -256   
224    -240   
-256   -432   
128    -224   
-96    64     
-80    -96    
-1152  -144   
128    -160   
144    288    
64     -80    
464    48     
-336   -176   
208    -64    
-16    -1840  
-400   -48    
800    -576   
96     112    
144    192    
-192   -448   
368    352    
-288   240    
-320   -1040  
592    16     
-336   48     
-80    -128   
32     -208   
-336   16     
592    48     
-528   -448   
224    16     
192    16     
496    48     
-304   -400   
-288   -48    
-192   -80    
-176   -480   
0      -48    
416    -112   
176    0      
336    -416   
160    -64    
-432   -384   
224    176    
-560   512    
112    128    
96     64     
160    -304   
-592   -176   
112    64     
-304   -176   
224    -208   
-96    128    
224    48     
-192   96     
112    -64    
112    -16    
160    -320   
-224   32     
80     -224   
0      -160   
-208   208    
352    48     
-176   144    
176    -192   
-176   16     
32     16     
-16    32     
-80    -64    
-960   -64    
160    -112   
-144   80     
-144   -160   
32     16     
-208   0      
-704   -96    
16     -112   
-576   -48    
16     -112   
-80    96     
-64    32     
208    64     
-320   64     
0      -112   
48     32     
-672   -96    
160    16     
-368   -128   
128    64     
0      16     
-64    -32    
-112   112    
-48    272    
0      48     
-960   -96    
-48    -16    
48     -96    
16     -16    
-48    64     
16     -16    
80     -272   
80     128    
-80    -48    
-240   -64    
128    0      
0      0      
-80    -64    
-208   -48    
16     -96    
-336   -48    
-288   48     
224    48     
48     32     
-304   -80    
160    64     
-96    16     
-32    32     
16     -144   
-16    48     
16     -48    
0      -16    
144    112    
-144   128    
-80    -32    
-80    -176   
-32    -160   
288    48     
-16    128    
-240   -96    
-32    128    
-112   -32    
-176   -80    
80     32     
-32    0      
96     240    
-288   96     
-32    -144   
224    -256   
160    -192   
-160   176    
64     416    
-848   288    
-96    96     
-560   80     
80     -32    
16     -272   
224    -208   
-32    48     
-288   -32    
-176   160    
32     -16    
96     144    
80     64     
-16    96     
-320   -128   
-80    -240   
-384   -144   
-80    -192   
-976   -16    
-64    -48    
-64    -112   
-288   -176   
288    -672   
-64    -144   
272    -64    
-240   -48    
-16    16     
-272   -32    
96     384    
-592   -96    
-208   224    
112    416    
32     -16    
-80    -48    
160    48     
-48    -64    
-224   -16    
80     480    
0      -400   
160    368    
-304   0      
16     112    
-144   0      
256    176    
784    368    
-704   -832   
-128   112    
-16    272    
-624   -192   
384    -224   
80     64     
-272   256    
-144   160    
-224   -32    
-208   -48    
288    336    
-192   112    
128    -320   
64     -16    
-176   96     
-64    736    
32     160    
-224   -96    
-304   -16    
48     0      
-368   96     
432    96     
16     -48    
224    -32    
-416   -304   
80     352    
-208   352    
-496   -400   
176    112    
-400   240    
400    192    
-128   -64    
144    32     
-96    -80    
192    64     
64     64     
-272   -32    
-80    64     
112    -112   
0      -144   
-32    -240   
80     -176   
-336   160    
176    176    
-288   -176   
0      -128   
160    16     
176    160    
-208   -224   
752    -160   
224    -96    
-64    -432   
192    -608   
160    400    
-784   80     
-320   96     
288    -16    
-320   -112   
-96    16     
-80    -96    
-64    176    
-80    -32    
32     48     
208    64     
160    32     
32     -16    
32     32     
48     80     
64     0      
64     80     
-192   -48    
0      48     
-64    16     
240    80     
-48    -48    
160    32     
-304   32     
-48    16     
224    112    
64     16     
16     -112   
352    -96    
-288   176    
288    32     
112    80     
48     64     
-128   32     
-288   -80    
256    64     
-64    -96    
32     -80    
128    80     
-96    48     
80     16     
176    0      
16     0      
-160   0      
-32    64     
-32    -16    
192    176    
128    112    
-80    96     
176    48     
128    -32    
-272   -176   
240    96     
-48    80     
-48    32     
240    48     
160    96     
-240   -96    
160    32     
192    160    
-128   64     
64     64     
176    48     
96     96     
-176   0      
144    64     
-96    0      
112    -208   
16     -32    
16     -928   
-96    -144   
-112   -32    
160    96     
-32    -64    
160    16     
-16    -32    
-16    -96    
80     -32    
160    32     
32     -80    
0      16     
-112   -32    
48     -16    
96     16     
32     -112   
32     144    
-48    96     
-32    0      
240    48     
128    64     
-160   112    
480    -80    
0      64     
240    256    
-64    0      
16     -32    
128    16     
144    48     
64     0      
0      128    
-240   64     
80     -1312  
272    176    
160    96     
144    80     
0      96     
128    0      
16     -16    
144    80     
-96    0      
80     160    
192    464    
-128   112    
-16    96     
-176   32     
-224   -16    
208    -480   
0      -224   
272    -384   
32     -96    
224    64     
240    176    
96     112    
-48    64     
-192   -48    
160    -32    
96     160    
432    272    
64     0      
-112   -272   
480    48     
0      -416   
320    -96    
-96    -592   
-176   -64    
0      -96    
144    -32    
80     -80    
128    224    
288    192    
176    32     
-208   272    
96     192    
160    -208   
-96    -992   
144    160    
176    144    
96     -128   
0      -80    
176    176    
-192   96     
240    128    
80     32     
32     -96    
192    128    
144    208    
16     -192   
64     -240   
-16    -32    
-176   16     
64     240    
112    -96    
240    -96    
0      96     
32     -240   
16     112    
112    224    
256    64     
240    -176   
-160   -736   
-32    -160   
80     -128   
416    -320   
496    176    
352    432    
-224   -112   
-128   -336   
-288   -352   
-624   -752   
0      -384   
48     144    
512    -384   
-32    208    
128    64     
-96    -64    
80     112    
-128   192    
-128   -48    
-224   -16    
-112   96     
-272   208    
96     -208   
-80    -32    
-128   -64    
400    80     
288    -64    
448    -48    
176    -16    
-480   272    
-560   -64    
32     -144   
-112   -64    
48     -80    
48     -544   
96     -64    
336    144    
48     16     
96     112    
256    160    
208    -160   
-48    -64    
-432   -128   
64     32     
-144   0      
208    -176   
32     -128   
-144   80     
160    32     
-16    -384   
144    -208   
64     -944   
192    -32    
-64    48     
-112   160    
64     0      
-32    0      
160    0      
96     -304   
-416   -208   
0      128    
96     160    
80     -112   
144    -32    
48     -64    
416    336    
-224   192    
-112   32     
32     -192   
-176   128    
240    32     
128    -64    
-48    -80    
96     -80    
-128   224    
320    -48    
-736   0      
64     -144   
64     144    
96     -64    
-432   16     
96     -128   
-16    32     
-32    -272   
0      -160   
128    16     
-16    16     
-208   -176   
160    -384   
-256   -64    
0      -48    
-48    16     
64     16     
-112   112    
176    -128   
-48    -64    
-144   -640   
112    -32    
208    -880   
-144   128    
-48    96     
128    0      
-128   -80    
176    16     
32     96     
-128   80     
-208   -112   
-16    32     
-816   0      
256    -192   
288    160    
0      32     
0      32     
224    -48    
-224   208    
-176   16     
0      -64    
128    -128   
368    -80    
-224   144    
96     -496   
112    16     
48     -160   
-240   -64    
224    0      
128    64     
-192   32     
32     -192   
160    112    
176    320    
-80    32     
-16    -384   
-80    -400   
80     -208   
-448   160    
128    192    
-576   -208   
272    0      
-256   32     
368    480    
-240   -256   
64     -112   
16     0      
80     -544   
-176   -448   
-320   0      
240    160    
368    96     
320    96     
-112   -112   
-160   592    
-160   -48    
-112   -256   
-368   48     
-1408  -32    
448    256    
-512   -176   
192    -368   
-288   -480   
-224   304    
192    464    
-320   176    
-176   -64    
288    112    
-240   192    
-176   -144   
176    -128   
64     -144   
144    96     
0      16     
320    160    
-384   -64    
-496   -16    
-240   -80    
-512   -256   
-96    -96    
-416   48     
-48    64     
-480   -64    
64     48     
288    -48    
-80    32     
-192   -80    
-16    64     
64     -32    
-16    16     
-144   -16    
-128   -96    
-240   -160   
320    -32    
-192   0      
400    128    
-112   16     
-176   80     
-688   -208   
0      -192   
-32    400    
112    80     
-224   -320   
-224   -240   
-176   -16    
80     224    
-288   192    
192    96     
160    -128   
160    128    
-384   -272   
-128   -256   
-224   112    
-16    96     
-160   80     
-32    96     
128    0      
160    176    
-16    32     
-112   -48    
304    -96    
-80    -64    
-48    -160   
416    64     
-496   -16    
320    -32    
208    -192   
144    -64    
-624   -16    
288    96     
-192   -32    
-576   0      
208    64     
32     -32    
96     48     
-176   16     
368    96     
400    112    
-416   48     
-144   -64    
160    32     
16     -32    
64     64     
96     0      
-208   -64    
-192   144    
-400   -64    
336    -48    
-320   -176   
240    128    
-80    16     
144    32     
-256   -80    
80     32     
96     16     
-16    112    
128    32     
-48    16     
-320   -144   
64     16     
-192   96     
-608   48     
80     80     
224    96     
-80    16     
-288   -16    
224    80     
48     112    
-64    0      
16     96     
112    48     
224    112    
-480   -112   
80     16     
-272   112    
288    112    
-336   -16    
0      80     
-64    160    
-96    32     
64     32     
128    -32    
224    160    
-112   48     
-32    0      
144    32     
-96    64     
208    384    
-272   48     
-96    144    
208    192    
-144   0      
16     -32    
-48    64     
0      80     
96     48     
64     -16    
-64    16     
-16    96     
128    176    
-144   -144   
208    48     
64     64     
64     112    
-208   -144   
144    0      
144    160    
-80    64     
64     16     
272    128    
16     176    
128    192    
-32    -272   
-48    -80    
32     240    
-224   -48    
144    -96    
-176   -32    
16     128    
-224   -16    
112    48     
-96    -928   
16     256    
-16    560    
-80    96     
112    -32    
224    192    
-160   192    
64     0      
400    128    
-96    -192   
368    192    
112    112    
240    -32    
-112   32     
-96    -16    
-48    0      
-144   -32    
-32    64     
-16    80     
64     -176   
160    32     
160    32     
688    800    
-304   688    
-64    -576   
368    432    
128    288    
-144   -64    
96     80     
32     -48    
160    80     
-16    96     
-64    -32    
144    -16    
32     160    
-96    -320   
272    -128   
-64    64     
160    160    
-208   -240   
-288   176    
144    208    
-144   176    
80     -64    
64     -48    
208    0      
336    160    
16     -32    
272    336    
-48    -112   
320    0      
-416   -432   
-64    -256   
256    608    
240    -432   
112    -16    
80     48     
-224   -224   
96     -144   
80     -608   
96     352    
-32    -32    
96     240    
112    112    
-48    -32    
-64    -192   
112    48     
32     176    
32     -48    
240    112    
144    656    
16     336    
-16    144    
16     0      
-96    -304   
32     64     
-80    0      
176    -224   
-144   -272   
32     -128   
-96    288    
144    96     
0      288    
-112   320    
-32    32     
-352   0      
112    -336   
480    -336   
-80    80     
-320   -112   
-496   -64    
160    -96    
368    256    
-16    -16    
272    -144   
368    64     
576    224    
-288   -112   
-240   -208   
-160   176    
-64    160    
-288   -128   
192    -320   
288    -112   
-304   -320   
336    32     
256    -304   
96     128    
16     -144   
-80    64     
-272   -128   
208    0      
-80    80     
-96    64     
192    320    
-48    48     
192    -96    
192    -304   
0      -48    
128    -224   
-176   48     
176    -160   
64     80     
48     16     
-80    256    
0      -80    
96     -192   
176    112    
32     -16    
-64    144    
160    -64    
272    80     
-80    -128   
32     64     
208    80     
64     48     
432    48     
-80    304    
64     112    
96     -16    
0      32     
400    192    
-160   368    
-112   -16    
16     16     
224    16     
192    64     
32     96     
48     160    
-32    -32    
64     64     
32     -48    
-112   -16    
320    -48    
160    96     
64     48     
224    144    
-16    96     
-48    -288   
112    0      
112    -144   
16     0      
0      -176   
208    48     
0      -272   
160    64     
160    -128   
64     16     
160    -240   
80     240    
160    -80    
64     -352   
48     -48    
48     80     
64     -272   
144    224    
-80    -608   
-80    -352   
304    224    
128    48     
224    144    
176    224    
272    -288   
32     688    
-320   -336   
0      -224   
224    -64    
400    272    
-48    208    
-96    -448   
80     128    
160    -144   
-64    80     
144    -336   
64     64     
96     -32    
320    400    
-80    224    
112    -1088  
336    1024   
160    -32    
128    32     
128    -48    
-208   -32    
352    304    
-272   -288   
-48    -240   
304    -496   
320    -128   
128    352    
-16    -64    
-64    -560   
-224   -512   
-96    -16    
96     80     
96     96     
-160   -64    
-192   -240   
-1280  -96    
96     96     
208    144    
-32    80     
48     -160   
-64    -560   
320    -288   
112    -80    
304    80     
496    192    
16     96     
-80    -128   
-144   -112   
-144   144    
-96    -16    
-80    -64    
256    48     
-592   128    
608    336    
-608   32     
-16    -304   
-80    -16    
112    -16    
0      48     
144    64     
416    192    
-448   -96    
-32    0      
96     -208   
-48    -176   
-176   32     
48     -64    
-1312  32     
336    -32    
0      -16    
-32    -64    
144    16     
64     -400   
144    16     
-64    -976   
-80    64     
-64    -32    
256    80     
-272   48     
144    80     
-176   16     
16     -48    
-800   -160   
672    336    
-784   112    
32     -192   
80     0      
176    0      
304    -32    
-528   -576   
800    240    
-688   96     
-80    -16    
96     0      
-128   -176   
-576   48     
-32    192    
144    48     
-464   -336   
480    -64    
-128   80     
-64    -32    
416    80     
-432   0      
256    -304   
-16    -208   
-256   176    
-144   -128   
96     336    
-160   192    
-544   -96    
464    -48    
-528   -32    
320    -32    
-752   -96    
256    -144   
-112   0      
976    160    
-80    32     
176    -320   
-32    0      
-464   128    
-112   -48    
-720   -240   
384    -16    
240    64     
-208   -176   
96     -112   
48     112    
-448   64     
160    -16    
-16    48     
-416   -16    
96     96     
-304   0      
-304   -32    
32     48     
-864   -144   
-48    -96    
176    112    
0      -64    
192    -16    
-224   -16    
0      32     
-112   112    
-96    -64    
256    0      
48     -80    
208    96     
-304   32     
-224   32     
112    80     
160    16     
-96    -32    
-464   80     
0      32     
-48    16     
-272   -192   
224    -64    
64     64     
96     -64    
16     -112   
-80    -128   
-32    80     
-16    112    
128    96     
-64    0      
-256   96     
96     176    
48     240    
-112   -272   
-432   -112   
144    -64    
16     -32    
96     144    
-336   -272   
48     176    
-64    144    
16     -432   
384    0      
-240   -32    
144    272    
-272   -112   
128    64     
-176   0      
80     -16    
-464   64     
-128   -48    
112    16     
-128   96     
32     64     
144    144    
-96    128    
-16    -144   
80     -128   
-240   144    
-80    128    
-320   -656   
32     80     
-16    272    
-112   -192   
-672   32     
0      -32    
48     -176   
384    672    
-240   -608   
64     464    
0      128    
-112   -224   
96     -80    
-64    304    
-32    256    
32     -656   
48     192    
-32    48     
-16    80     
-128   -64    
64     48     
-192   -176   
112    256    
-32    -288   
32     -288   
-64    784    
96     -192   
160    -144   
0      464    
-48    240    
-128   -112   
304    -64    
-240   16     
112    144    
-128   -32    
336    48     
-1056  368    
272    272    
128    -96    
64     144    
-128   -304   
-192   -112   
32     320    
256    -112   
-48    -224   
-192   -144   
-224   48     
-32    48     
32     32     
80     112    
64     32     
-400   128    
304    0      
-144   -176   
-32    -128   
-32    80     
144    16     
-64    32     
144    -96    
96     -48    
96     32     
304    -32    
-128   -32    
144    112    
-224   144    
304    64     
-96    16     
96     -48    
48     16     
-16    -80    
-96    -80    
-64    16     
96     -16    
64     272    
-48    192    
0      32     
96     0      
-224   -32    
80     144    
-128   80     
48     96     
144    -48    
-256   -224   
256    -480   
-80    -272   
64     240    
32     0      
-192   144    
-32    -48    
160    288    
-32    192    
64     -64    
-416   64     
96     16     
-64    16     
560    112    
-176   224    
-96    336    
-144   96     
208    32     
-112   416    
112    320    
48     0      
-48    96     
208    -16    
-160   -96    
320    -240   
-32    48     
16     -80    
144    -384   
144    16     
544    320    
-144   80     
-112   64     
-192   64     
-64    0      
128    32     
-368   -240   
144    -240   
32     128    
-208   288    
368    80     
96     0      
176    -144   
-320   48     
-32    0      
-80    48     
-80    -400   
64     -32    
32     128    
208    144    
32     112    
176    -240   
128    -128   
-176   -112   
256    0      
0      80     
-160   80     
-144   144    
288    368    
16     48     
160    -32    
-48    160    
64     48     
128    -16    
-16    0      
80     112    
16     368    
224    304    
-32    -512   
-64    -256   
48     -32    
-352   64     
96     -48    
-80    544    
352    128    
80     -48    
112    -272   
32     -224   
-128   -32    
128    -96    
80     -32    
-80    -160   
64     112    
144    -32    
-128   -32    
32     -16    
-16    112    
176    -48    
80     0      
32     -1056  
144    -32    
128    256    
-48    -192   
-16    -32    
144    16     
-16    0      
-192   16     
-48    192    
128    896    
352    272    
64     -48    
0      32     
224    -144   
64     576    
32     -896   
32     128    
128    272    
0      -288   
-48    48     
-32    32     
112    32     
240    -48    
-48    -32    
64     32     
128    -112   
128    272    
-208   -368   
-128   432    
176    -272   
128    32     
160    -64    
64     96     
80     -16    
192    -128   
112    176    
16     64     
64     96     
-192   128    
64     48     
16     -64    
112    -32    
-96    -48    
400    -400   
64     -384   
208    -272   
-16    0      
-48    -560   
192    -80    
80     128    
256    256    
-128   16     
64     96     
-240   -16    
16     80     
80     -32    
192    112    
-32    32     
48     0      
272    240    
96     64     
96     16     
-160   32     
-160   -48    
176    0      
-32    80     
64     32     
144    -48    
144    16     
256    400    
-400   64     
16     48     
272    16     
128    -80    
96     32     
304    -112   
32     80     
96     0      
-112   16     
288    -128   
-160   96     
-416   48     
-80    112    
240    16     
624    -16    
-384   32     
-64    -416   
-336   32     
-80    -496   
448    32     
320    80     
0      16     
64     -80    
-16    48     
96     48     
-160   0      
64     0      
-192   16     
496    112    
160    -48    
32     -192   
-32    -64    
-128   16     
288    -48    
432    224    
-128   -96    
96     -16    
-96    -160   
160    -48    
-112   64     
176    -176   
-368   -80    
432    -224   
-208   -160   
16     -96    
48     -432   
48     -32    
1008   -544   
-752   16     
368    -48    
-208   -144   
224    -32    
608    256    
-352   48     
