# Supplementary material for: A Fault Diagnosis Method for One‐Dimensional Vibration Signal Based on Multiresolution tlsDMD and Approximate Entropy
Source: Hindawi journal article supplement (doi:10.1155/2019/3262818), 2019-01-01
Supplement: f1 [file 3262818.f1.zip › 3262818.f1/gear signals/normal gear signal/Data2.txt]

-96    -688   
-144   368    
416    208    
-480   -368   
-128   128    
-352   -32    
-336   272    
-128   -64    
-400   -480   
784    976    
176    464    
-352   -80    
-176   0      
160    -272   
224    272    
-352   96     
112    -32    
-224   80     
-608   560    
16     208    
160    -720   
-704   96     
176    368    
-16    96     
-160   48     
112    -32    
-16    16     
96     64     
-16    -192   
-192   -128   
96     96     
0      96     
128    416    
-336   -368   
-16    -256   
208    528    
64     80     
32     -144   
144    80     
-32    48     
64     -48    
0      16     
112    -64    
288    16     
-32    160    
-128   -16    
128    128    
-160   112    
64     -16    
144    112    
-192   -16    
256    -128   
80     48     
272    0      
-240   -128   
32     16     
48     64     
16     64     
80     64     
96     80     
112    0      
64     32     
-48    224    
80     48     
-64    48     
-32    32     
-32    80     
80     80     
96     96     
80     128    
0      0      
64     64     
0      80     
-80    48     
144    -16    
-16    0      
48     -112   
80     -48    
128    16     
48     64     
96     128    
112    112    
0      48     
192    -144   
32     -144   
128    80     
-128   -32    
-80    0      
-16    64     
-16    176    
112    192    
192    -16    
-96    -240   
-176   -272   
48     96     
128    0      
32     32     
-32    48     
-64    0      
64     48     
112    64     
16     32     
144    144    
-16    288    
0      128    
48     -96    
240    48     
-32    96     
64     192    
16     32     
224    208    
-48    32     
-112   -192   
416    -80    
112    0      
416    64     
144    16     
0      80     
-208   -48    
112    32     
-176   128    
16     208    
96     192    
-64    -112   
320    112    
288    -288   
192    80     
-16    16     
64     80     
-160   96     
48     64     
128    48     
64     -160   
-208   -240   
48     48     
160    64     
240    48     
48     16     
96     -64    
32     -80    
-96    -128   
48     160    
0      -64    
144    112    
0      96     
0      -32    
64     80     
112    64     
-32    64     
-16    144    
-160   -32    
128    -48    
400    128    
-32    -160   
240    64     
-32    16     
16     0      
16     -208   
-80    32     
80     -176   
48     32     
240    80     
16     64     
208    -16    
128    64     
160    176    
-304   -32    
0      32     
192    -16    
-96    32     
112    -176   
-160   -32    
384    -416   
208    -16    
256    96     
-32    -16    
80     96     
-64    0      
-128   -32    
32     96     
144    96     
64     -96    
160    128    
96     48     
160    64     
0      -144   
-32    16     
-256   -192   
32     0      
16     64     
-80    -176   
-256   -320   
160    -128   
-256   112    
320    96     
64     160    
-48    80     
-96    144    
-208   -576   
448    -416   
528    160    
400    368    
112    -288   
48     -176   
-416   -400   
16     960    
192    192    
-272   -1168  
624    752    
304    -384   
416    -96    
176    240    
144    192    
192    176    
-80    256    
288    -96    
-48    16     
80     -48    
32     -496   
256    0      
16     -1088  
256    -64    
368    -352   
0      -768   
0      -48    
224    -112   
112    560    
-32    528    
128    -64    
80     48     
224    -160   
16     -16    
-80    368    
400    -176   
48     288    
-128   -320   
32     16     
48     -32    
208    -144   
384    176    
-96    -48    
-64    -32    
112    -64    
32     64     
240    -1168  
64     -160   
48     16     
96     176    
144    -48    
-112   144    
96     -96    
-176   32     
-160   -16    
64     -32    
-2016  -64    
160    48     
-96    160    
128    80     
16     32     
64     -160   
112    0      
320    32     
0      64     
32     -160   
192    32     
-48    32     
256    -96    
-320   -160   
-80    -32    
-192   80     
80     16     
112    -16    
80     -64    
96     -48    
224    -160   
-32    80     
144    -800   
64     16     
160    -16    
96     32     
112    64     
-112   96     
-240   -48    
0      0      
-304   -16    
144    -16    
16     0      
128    -80    
16     -80    
192    -80    
112    -80    
80     -400   
-96    144    
96     0      
96     -48    
-176   -128   
160    -128   
-80    32     
256    -48    
64     96     
-32    64     
-912   -16    
224    -48    
-208   16     
96     -144   
-128   0      
128    -128   
32     192    
-96    -320   
304    -80    
-192   112    
-160   -80    
-32    -112   
160    -128   
96     -112   
304    -80    
-160   112    
-80    -16    
-1280  144    
192    -144   
48     -112   
32     -320   
160    -64    
320    192    
-160   -32    
-144   96     
32     64     
-160   176    
240    -64    
-224   -208   
-112   -144   
-528   -144   
96     -128   
-592   -16    
224    -176   
208    -144   
160    -144   
0      176    
-432   160    
0      -32    
-112   16     
16     160    
-16    0      
0      96     
-256   64     
400    128    
-400   576    
144    -32    
-160   -256   
96     784    
272    272    
144    144    
160    112    
224    112    
-112   32     
-96    -112   
96     192    
-160   -336   
-192   32     
80     304    
128    -96    
-16    256    
160    0      
192    -304   
-1328  64     
128    128    
-800   -192   
-656   176    
96     -224   
-224   288    
-192   -240   
-928   64     
0      32     
320    336    
-384   -112   
256    -224   
-176   128    
-624   -80    
288    208    
-224   -16    
48     256    
-448   -80    
-224   -272   
-144   -112   
-144   448    
-240   304    
-64    0      
-240   -112   
-288   -256   
320    368    
192    -16    
304    -48    
-272   32     
176    96     
96     -144   
-176   -512   
-688   -512   
192    1152   
-336   864    
-432   208    
400    256    
-368   432    
304    192    
-240   -32    
-192   0      
-1344  -240   
-352   32     
-32    128    
256    0      
352    96     
-96    176    
-96    32     
16     272    
-320   256    
-80    16     
-96    32     
-128   112    
32     0      
-512   -240   
128    0      
-1184  96     
-144   64     
96     112    
48     96     
0      -128   
-160   0      
0      48     
208    128    
-144   112    
144    80     
-112   128    
16     -48    
-32    48     
-272   48     
112    160    
-208   144    
-64    16     
320    64     
-32    0      
-32    -80    
-128   0      
-16    -48    
-48    64     
208    80     
-208   0      
96     96     
-368   16     
48     48     
-16    64     
112    16     
-64    0      
-256   -16    
-2352  -80    
16     0      
16     16     
144    144    
-16    32     
144    144    
-240   -48    
-80    -16    
16     32     
-128   48     
96     48     
32     -320   
-192   -288   
-208   32     
-48    80     
-1104  48     
0      -64    
192    -16    
128    0      
-16    48     
112    64     
-176   64     
-112   0      
32     0      
128    48     
-32    48     
-192   32     
144    16     
-112   32     
128    64     
-240   -16    
256    128    
-144   128    
-144   -16    
48     64     
0      -96    
128    16     
-32    96     
64     64     
80     80     
80     144    
-208   240    
112    224    
-48    64     
-16    32     
192    80     
-176   144    
-160   -16    
-80    -64    
112    16     
128    208    
80     128    
-128   -80    
-48    48     
-112   -32    
496    624    
-496   240    
64     -48    
96     0      
0      -128   
304    192    
-288   48     
144    16     
80     80     
208    208    
256    336    
-144   176    
-208   -80    
-80    -16    
-48    0      
144    64     
0      64     
-64    80     
-192   -32    
288    288    
-96    96     
160    16     
160    32     
48     16     
16     48     
-96    -80    
64     112    
-144   0      
240    160    
288    256    
-16    192    
-48    -32    
144    -16    
0      32     
32     96     
64     16     
-16    -80    
80     80     
96     48     
-80    144    
-112   96     
-32    32     
-64    -32    
96     48     
16     64     
208    160    
0      48     
208    112    
-128   80     
176    144    
-144   112    
-96    128    
32     48     
-240   -48    
336    112    
80     96     
48     -16    
-48    -32    
96     -16    
-96    48     
208    128    
-272   -32    
-208   -304   
192    496    
-48    288    
0      -112   
64     272    
80     -176   
-64    176    
256    544    
-64    -336   
-16    -32    
80     0      
32     -32    
-32    128    
-48    512    
-160   -80    
-16    -944   
-80    688    
336    -464   
160    672    
336    -64    
192    480    
-240   128    
-160   -816   
176    400    
-272   -176   
256    48     
-368   -32    
32     -368   
-272   784    
560    368    
-16    -496   
-80    -720   
80     -1472  
0      272    
-384   64     
-16    656    
176    112    
288    112    
96     16     
-128   16     
-288   -336   
544    -528   
80     -208   
208    -16    
560    64     
-80    96     
-64    -48    
192    192    
-256   80     
128    -32    
16     -80    
224    -176   
-336   0      
32     -16    
128    64     
-96    -16    
-144   112    
-64    -192   
48     -144   
0      80     
144    -48    
608    368    
-400   176    
-80    -272   
-240   -944   
208    16     
0      -64    
128    112    
224    -16    
-128   128    
-64    48     
96     288    
-32    32     
96     -112   
0      80     
32     -160   
240    -64    
0      -144   
224    32     
-64    -240   
320    64     
64     32     
-80    -48    
-80    -144   
-64    32     
176    -48    
224    112    
432    144    
-64    80     
-48    0      
-96    -128   
784    400    
-432   176    
-176   48     
-144   -208   
192    160    
256    -464   
144    -96    
224    0      
48     208    
208    208    
224    96     
-80    144    
-16    -176   
-144   0      
160    -176   
224    48     
96     16     
0      -32    
144    -96    
112    64     
-160   -16    
-96    -80    
0      128    
160    240    
0      96     
112    -224   
64     64     
240    -16    
-16    144    
96     -160   
-32    -48    
-128   -128   
224    -128   
-16    -176   
240    -48    
32     128    
32     112    
48     64     
160    -160   
-128   -1152  
48     -16    
240    -352   
128    160    
144    256    
-176   -16    
16     -32    
144    -96    
64     -16    
64     -112   
240    32     
-112   192    
-144   -32    
272    -48    
176    192    
256    -16    
112    480    
240    320    
-208   -32    
80     -576   
112    -32    
96     96     
192    -160   
144    336    
16     -64    
-144   -944   
16     -112   
-32    -208   
-80    176    
-336   -176   
224    208    
-64    -48    
48     -160   
96     -208   
224    -48    
208    -16    
160    -272   
16     48     
-16    -64    
-48    368    
-32    -288   
-80    -192   
176    64     
368    208    
-480   -128   
96     -480   
-880   224    
272    -48    
160    -80    
-64    192    
16     -48    
0      -448   
112    0      
48     -352   
384    400    
-128   32     
240    -96    
176    16     
272    64     
-336   112    
48     80     
-256   -48    
64     -64    
304    -16    
-160   -240   
-32    -112   
0      -240   
112    -80    
176    -1072  
64     48     
64     32     
96     80     
-224   -16    
0      64     
0      80     
-80    -32    
-416   -16    
-16    -80    
-1984  -16    
224    128    
-224   112    
80     -48    
112    48     
192    -64    
352    304    
-176   -80    
-224   0      
-240   -32    
0      -176   
16     64     
176    0      
272    96     
240    48     
-880   112    
224    -16    
48     112    
-464   -96    
48     -16    
128    -128   
224    112    
-80    -176   
-128   -96    
0      -96    
224    -16    
-176   0      
-64    -16    
-704   144    
192    320    
-752   96     
-32    -224   
352    -32    
-80    -48    
-96    144    
320    -112   
-320   0      
-32    -256   
96     32     
208    112    
80     0      
-240   -224   
144    -64    
-208   144    
-64    16     
112    64     
-192   -144   
272    16     
128    -48    
160    80     
-48    -80    
16     208    
48     -32    
80     -16    
-208   -48    
256    48     
-176   -16    
0      -64    
80     16     
144    80     
0      16     
48     -16    
-176   48     
192    -32    
64     48     
-192   -48    
-1440  0      
128    0      
-1472  32     
-256   -48    
-64    -96    
0      64     
48     32     
48     32     
144    -80    
-272   48     
-2160  -176   
96     112    
-144   -64    
128    32     
-64    -80    
-128   -272   
16     96     
-112   128    
-96    -16    
64     192    
-144   -64    
-320   0      
-48    -32    
64     96     
16     16     
-432   -112   
80     80     
48     144    
-112   32     
-32    80     
-160   80     
16     32     
48     -48    
-48    -48    
-144   -96    
48     -64    
-672   16     
128    0      
-192   -128   
-48    48     
64     64     
-80    -96    
0      -176   
32     48     
-96    0      
32     64     
16     112    
-144   64     
-144   -48    
-128   16     
-160   0      
-384   16     
80     32     
-752   80     
96     112    
-128   -112   
128    -16    
-320   -32    
576    848    
-432   800    
96     48     
208    -288   
128    -128   
16     144    
-32    -160   
16     96     
-80    112    
-304   -144   
-336   240    
-96    -32    
-96    -48    
208    112    
-16    48     
-144   -64    
112    0      
16     -48    
112    -48    
-96    16     
176    576    
-224   96     
-160   -192   
-304   -32    
112    128    
-224   -16    
288    -96    
-112   -384   
-80    96     
-80    304    
-208   96     
0      -208   
-256   -176   
256    1104   
176    -272   
-48    -48    
-256   0      
-128   -272   
16     208    
-16    -512   
-496   64     
80     368    
-1520  -208   
128    -1072  
-128   -144   
-96    32     
-96    32     
80     0      
32     -32    
-32    48     
272    832    
-272   -832   
-32    320    
-64    48     
-128   -352   
32     80     
176    272    
-720   -128   
32     -64    
32     256    
0      -16    
80     528    
-16    96     
-64    -176   
-224   -48    
48     192    
-208   -80    
240    -32    
-112   -512   
-112   -528   
-32    496    
208    272    
64     -64    
64     32     
112    160    
-272   208    
64     112    
80     96     
192    672    
-416   -112   
176    0      
0      -144   
48     64     
-192   368    
-112   -16    
-176   96     
336    112    
128    80     
464    400    
128    96     
0      0      
0      0      
80     80     
256    192    
-256   0      
192    -208   
-96    -336   
96     -80    
-288   240    
112    208    
128    -16    
-16    48     
144    256    
-16    160    
-16    -112   
144    -16    
304    -32    
448    144    
-96    128    
368    256    
-320   192    
-96    -80    
-144   -96    
0      -352   
176    160    
-96    80     
80     64     
128    -64    
-80    96     
32     160    
432    320    
-496   208    
112    -160   
-64    -64    
-352   -256   
416    -256   
-160   -256   
144    32     
-16    -528   
-208   160    
-96    144    
-80    -176   
48     -144   
-96    -48    
128    32     
176    32     
48     176    
-32    48     
80     160    
96     -32    
64     32     
-32    -48    
-16    -64    
-160   -272   
-16    -256   
208    -64    
112    -48    
144    128    
-16    144    
80     80     
112    32     
112    48     
-256   -16    
224    32     
208    112    
-224   128    
0      -32    
80     16     
-112   240    
208    -128   
192    16     
64     0      
-160   -48    
256    -112   
240    240    
-224   208    
128    -64    
-96    -288   
16     -32    
64     112    
16     80     
-48    -16    
256    -160   
112    176    
-128   -544   
0      -176   
-112   32     
112    48     
16     144    
48     -96    
-144   -96    
48     32     
144    48     
-16    -48    
112    -320   
48     -32    
-32    -240   
192    -96    
96     320    
112    -128   
-48    -64    
-96    -864   
-32    -64    
192    208    
256    256    
-48    176    
-48    32     
64     96     
240    400    
48     352    
48     -112   
-160   -80    
-176   -16    
192    96     
-240   -304   
64     128    
48     32     
112    -128   
-144   -368   
272    144    
208    272    
0      -112   
-96    80     
64     192    
16     -32    
-64    240    
-96    32     
-16    -80    
192    320    
288    -48    
176    -64    
32     64     
-16    48     
224    48     
-80    -192   
32     -112   
160    -192   
272    -272   
192    -48    
96     -16    
48     -32    
16     16     
-192   -48    
-64    64     
80     -48    
192    -64    
176    -160   
128    16     
-16    -400   
32     16     
32     208    
80     80     
128    0      
112    32     
16     -16    
-16    -128   
80     64     
288    144    
-208   -16    
192    -272   
176    64     
-16    32     
192    96     
32     -112   
-400   272    
80     80     
48     96     
-160   96     
336    336    
-352   -48    
128    -128   
-16    48     
16     -96    
-32    64     
48     -240   
208    -32    
160    16     
144    32     
32     -48    
-112   48     
64     32     
32     80     
176    80     
-48    48     
176    112    
-64    -32    
64     -160   
240    -224   
112    -96    
272    208    
416    160    
-304   -32    
64     -16    
-96    -272   
96     0      
192    192    
0      240    
64     -80    
304    -128   
-208   -96    
32     -80    
32     -768   
32     272    
480    48     
336    -192   
128    16     
0      -128   
176    0      
208    48     
-96    -96    
464    208    
-448   -96    
176    -64    
-688   -32    
-304   -96    
112    -192   
560    64     
-48    32     
-32    0      
96     0      
160    384    
-176   -288   
208    -304   
144    176    
-16    -64    
96     32     
0      -32    
48     64     
-224   64     
-32    -160   
-576   -80    
192    0      
-32    -32    
288    -208   
-128   -160   
-64    -992   
112    -80    
208    96     
48     -16    
128    0      
-112   16     
160    0      
464    -48    
-576   -128   
80     -80    
-736   80     
320    -112   
48     -64    
-32    -64    
192    64     
-128   -48    
176    -64    
0      -736   
-128   112    
112    -64    
128    32     
-144   -32    
0      -16    
96     0      
-32    32     
-592   -64    
448    176    
-400   -272   
96     -240   
32     48     
64     -192   
64     -16    
-64    -176   
144    80     
16     16     
0      -48    
-112   0      
320    0      
-144   -80    
288    -16    
-208   208    
32     -384   
-160   224    
0      80     
240    -144   
16     -224   
144    -16    
16     -416   
-16    144    
224    -240   
256    384    
-48    -32    
-48    -96    
-144   48     
176    0      
-224   32     
272    -112   
-272   -16    
208    -112   
-1072  -128   
0      -192   
-64    512    
-80    -352   
-96    96     
176    -1056  
224    -32    
-64    -96    
16     -224   
-32    -144   
160    64     
320    -112   
96     64     
-176   32     
-32    -720   
128    512    
0      -192   
32     -208   
256    608    
128    -528   
288    336    
-176   -256   
-448   16     
-16    176    
-48    -112   
160    48     
-64    96     
-48    -224   
-160   0      
96     -64    
-112   128    
208    -864   
-224   -1312  
80     224    
-16    464    
-128   16     
160    -256   
-16    240    
224    432    
64     -448   
256    384    
-416   -16    
64     -800   
32     304    
192    432    
-96    16     
-1424  -288   
-80    112    
-896   288    
-640   80     
-224   -384   
-64    -240   
16     48     
-16    -16    
-112   0      
176    -64    
-112   64     
-48    -144   
-32    32     
-112   -64    
-16    48     
-240   272    
80     96     
48     -16    
144    256    
208    208    
-224   272    
-16    -16    
-288   -192   
0      144    
-1104  -64    
48     -80    
32     -48    
-32    -96    
80     -112   
32     64     
16     96     
224    160    
-224   -288   
-240   192    
16     112    
-208   -96    
-48    -80    
-448   -256   
-16    48     
-112   272    
160    -16    
-384   -192   
48     -16    
64     368    
496    528    
-416   64     
-256   -80    
176    -96    
-288   368    
272    48     
48     -256   
-16    -32    
-144   -416   
-432   -288   
-336   0      
-80    672    
-320   208    
-224   176    
96     -176   
528    192    
-32    720    
-464   160    
-48    -112   
64     256    
320    128    
304    -80    
-112   -272   
-16    -192   
64     144    
-256   16     
208    48     
-192   -32    
-16    0      
-96    -80    
224    96     
-32    32     
96     48     
48     144    
-208   80     
192    -32    
-64    48     
176    64     
-256   160    
96     48     
-48    -224   
32     0      
-416   -80    
144    144    
288    192    
32     208    
96     80     
-96    0      
288    80     
-48    128    
-144   -96    
0      -96    
160    48     
-80    128    
304    112    
-432   -16    
560    48     
-304   -64    
-112   -32    
-832   128    
-32    80     
16     16     
144    48     
-16    208    
400    320    
-192   240    
-192   48     
-48    -160   
64     -96    
96     -48    
-160   160    
224    176    
64     176    
-112   112    
-928   -96    
-80    -32    
208    160    
80     -16    
48     -80    
-80    -48    
-96    0      
64     80     
-160   -176   
112    -224   
304    144    
-240   160    
112    96     
192    208    
-112   240    
80     -80    
160    -16    
-48    -16    
112    224    
32     320    
144    368    
-240   192    
-96    -64    
128    -48    
-48    240    
80     -272   
-160   -96    
0      112    
-96    -272   
240    240    
-64    -320   
80     64     
192    0      
16     16     
160    64     
64     48     
-96    112    
-96    48     
176    -16    
-48    160    
112    48     
-32    -208   
288    0      
-352   0      
176    608    
176    336    
-304   -288   
-224   -112   
64     96     
80     -112   
64     -32    
192    144    
384    240    
224    416    
16     32     
96     112    
-144   32     
-48    -32    
32     32     
48     32     
48     64     
16     48     
0      48     
-64    -32    
336    208    
224    160    
48     16     
-64    0      
-16    48     
-48    -96    
352    208    
-240   -16    
240    144    
400    240    
-256   112    
48     32     
32     0      
0      16     
16     -16    
48     -16    
240    32     
32     48     
-32    -32    
-64    64     
-112   16     
192    80     
-80    -64    
-80    -432   
192    48     
-16    48     
240    96     
-96    32     
112    64     
128    96     
0      -96    
-80    48     
192    64     
-128   80     
144    48     
-208   -160   
160    64     
16     48     
192    -608   
192    16     
-144   16     
-48    80     
64     112    
160    48     
336    272    
-240   64     
80     96     
-16    16     
80     128    
208    80     
-96    0      
-176   -96    
128    32     
-32    -96    
336    16     
144    -288   
144    32     
32     96     
-64    -272   
256    -16    
192    176    
-352   -32    
112    32     
-256   -48    
208    112    
80     112    
16     -128   
48     32     
-160   -144   
496    240    
-176   -480   
-128   -48    
336    144    
-336   64     
-160   -128   
208    80     
272    176    
272    0      
-160   -80    
496    320    
-432   96     
160    112    
-800   -240   
496    -128   
352    128    
368    -240   
112    64     
240    32     
-240   -16    
-32    0      
-96    -48    
160    96     
448    208    
-128   112    
48     -144   
288    64     
128    64     
-80    48     
32     16     
48     16     
48     32     
80     96     
64     -48    
80     80     
96     -112   
-32    -32    
64     64     
-96    -16    
144    -80    
64     64     
160    128    
-48    -160   
-48    -16    
48     -112   
0      48     
256    -208   
80     -64    
208    -464   
64     208    
32     256    
-80    -48    
-64    -176   
128    416    
-32    32     
176    -224   
192    144    
64     -352   
224    208    
-112   -176   
-32    144    
160    -144   
192    48     
80     -304   
-96    -32    
160    208    
176    -16    
160    96     
112    240    
-48    192    
96     -240   
128    144    
-16    32     
144    -160   
-48    80     
144    -352   
-336   -480   
32     640    
64     -384   
112    160    
224    320    
-176   -352   
272    -256   
128    -384   
48     64     
-160   -336   
304    -752   
176    192    
32     176    
64     240    
-32    -192   
0      -128   
192    272    
16     160    
-64    16     
272    160    
48     48     
-32    16     
-736   -240   
256    -464   
208    336    
176    208    
-64    -208   
-16    -128   
48     -144   
240    288    
48     352    
-288   -112   
16     -400   
384    304    
-176   304    
240    -304   
64     -144   
-176   -80    
80     160    
16     -176   
48     -96    
80     400    
48     -112   
-256   -64    
16     -640   
-64    -128   
224    336    
-64    176    
128    -144   
240    16     
128    128    
32     -32    
-288   -144   
-32    -384   
-688   -48    
96     -144   
48     32     
64     -96    
128    -144   
240    64     
0      0      
224    64     
-48    32     
96     -192   
112    0      
-16    -64    
160    -80    
-544   -32    
352    208    
-1456  160    
128    256    
464    288    
240    64     
32     16     
-32    -304   
-240   16     
144    -256   
64     144    
64     -32    
176    16     
64     0      
-64    0      
48     -144   
0      -304   
32     112    
32     112    
-16    352    
176    80     
320    64     
-32    -96    
160    0      
-16    -96    
144    32     
304    176    
-80    144    
-96    128    
16     -64    
32     48     
96     112    
-32    -32    
-48    -160   
-512   -448   
64     -32    
-80    0      
-80    176    
160    304    
160    -240   
160    48     
-112   -144   
96     144    
304    512    
-16    560    
0      336    
176    0      
-272   16     
-176   -32    
-48    224    
128    144    
-144   -96    
192    -224   
-336   -688   
-144   -416   
-272   80     
-144   192    
128    0      
-656   -336   
80     -256   
-448   -48    
96     -128   
-496   80     
352    96     
48     -48    
464    16     
288    -128   
64     -48    
-448   -448   
416    -640   
304    -384   
368    144    
352    -128   
-256   160    
64     -176   
-112   64     
-208   -16    
-192   0      
-48    -64    
-320   -224   
64     48     
208    -80    
128    16     
-32    0      
-464   -32    
-624   -448   
-480   -544   
-992   -64    
-368   336    
-16    -16    
448    -384   
-64    -192   
128    -48    
176    -224   
-224   -128   
-576   -192   
48     304    
224    240    
-16    272    
-112   0      
-400   32     
352    336    
-144   -112   
-48    0      
160    464    
176    272    
-1504  96     
96     176    
-32    624    
448    432    
-240   0      
0      32     
0      -144   
256    336    
-464   -336   
176    -496   
96     256    
32     512    
32     96     
-352   32     
-336   160    
-1984  16     
-144   80     
176    0      
-112   -384   
-16    128    
128    64     
-16    -224   
-16    656    
-256   -528   
432    -480   
-192   320    
208    48     
-80    64     
48     224    
304    -288   
160    144    
112    -64    
-464   -32    
-32    128    
-368   -128   
-16    16     
0      -16    
80     0      
176    64     
112    64     
-16    32     
-16    64     
32     160    
-224   0      
-144   48     
-256   -32    
64     -16    
-1088  -336   
-48    -192   
-48    64     
16     96     
176    48     
-32    112    
-176   64     
-352   32     
32     48     
-192   32     
-176   -384   
-480   -320   
-288   64     
-320   96     
-64    -48    
-752   -96    
48     -16    
192    32     
208    0      
32     -16    
240    48     
96     32     
144    96     
-192   -112   
224    64     
96     16     
-80    32     
-176   -16    
-336   0      
48     48     
0      272    
64     144    
-544   -64    
-160   -16    
-176   96     
-240   -176   
240    -144   
448    -16    
304    160    
32     0      
16     0      
-208   0      
0      32     
-160   64     
-48    32     
-272   48     
80     16     
-80    0      
-272   -32    
-32    128    
-256   -48    
144    -16    
240    112    
160    64     
-96    -64    
-96    -16    
-128   -16    
-112   64     
-48    32     
16     80     
-304   0      
64     16     
96     32     
-128   112    
320    128    
0      32     
-32    16     
16     64     
80     16     
-32    -112   
256    16     
-112   64     
144    96     
-112   -48    
128    64     
-112   -112   
0      0      
128    80     
0      -16    
192    80     
-32    80     
96     0      
-64    -16    
0      112    
-16    -80    
160    64     
-160   -48    
144    32     
-352   -160   
240    48     
160    272    
48     0      
768    304    
-688   192    
0      -96    
112    112    
64     112    
-112   -32    
-112   16     
304    144    
-224   32     
-368   -112   
320    128    
-496   -16    
624    -80    
192    -96    
-256   96     
208    336    
-208   160    
-128   -16    
144    48     
112    112    
64     208    
336    32     
288    16     
592    160    
-240   -224   
256    144    
-704   -208   
144    32     
80     304    
-96    -16    
288    128    
-32    0      
224    128    
-96    128    
-80    -16    
-64    0      
48     160    
48     32     
16     -16    
0      32     
160    112    
-224   -48    
240    -288   
112    480    
112    -64    
-96    -160   
32     352    
192    80     
0      -160   
-208   0      
48     80     
80     96     
544    464    
-368   592    
112    48     
-160   -176   
-240   160    
144    -944   
-32    224    
-112   448    
208    -800   
144    -112   
-96    736    
240    64     
0      80     
-64    -288   
208    80     
80     240    
32     -32    
-96    176    
128    96     
80     256    
224    48     
48     176    
176    128    
32     48     
368    0      
-144   96     
80     160    
-48    64     
144    112    
-48    16     
-64    -16    
272    160    
80     0      
128    -160   
160    -80    
112    -384   
32     -80    
48     -1456  
48     -32    
-32    -16    
16     48     
80     224    
16     0      
-16    -64    
192    64     
-80    0      
112    176    
176    32     
336    64     
-304   48     
32     -400   
-16    16     
176    -304   
48     48     
96     -48    
64     48     
80     64     
-32    16     
144    -128   
-32    -160   
16     -16    
16     -48    
-48    -16    
192    -64    
-32    128    
48     32     
80     0      
160    32     
-32    -16    
224    224    
144    336    
-64    80     
-16    272    
-32    0      
128    -64    
-32    144    
48     128    
32     -32    
128    -64    
16     32     
160    16     
48     208    
-64    -688   
0      -272   
32     -1136  
144    32     
-144   80     
80     -16    
144    80     
16     128    
-96    0      
-32    -96    
160    16     
160    48     
96     64     
16     176    
144    160    
48     -96    
272    192    
-48    -48    
144    160    
128    -48    
32     384    
80     -32    
48     -16    
-32    128    
304    320    
0      64     
80     -96    
-32    16     
-48    -192   
64     288    
160    -96    
0      96     
-16    -32    
144    112    
192    128    
-48    144    
32     -32    
192    -160   
64     32     
80     -64    
64     160    
-80    -96    
-16    48     
48     -112   
112    368    
192    160    
16     -48    
-32    -112   
208    -1152  
-16    0      
320    -608   
144    336    
-384   240    
128    -112   
32     0      
48     -592   
32     112    
320    96     
-16    368    
-96    0      
400    -64    
-48    -128   
128    144    
304    256    
-368   -64    
128    240    
-112   720    
-352   176    
720    272    
32     496    
-80    304    
-624   -784   
192    224    
80     624    
48     -432   
-80    656    
-336   -352   
-208   64     
-208   -272   
-176   -224   
-208   112    
-128   -80    
-720   16     
336    32     
32     816    
432    -320   
-48    -176   
112    80     
336    -80    
-400   -64    
32     -32    
16     96     
-64    -224   
96     -192   
-96    480    
256    96     
112    160    
128    -224   
-336   784    
-240   -144   
96     -384   
-320   -144   
192    -208   
-96    528    
448    0      
-64    496    
-336   -368   
288    -144   
80     224    
-64    -256   
192    160    
-80    -80    
-112   -16    
192    192    
-496   -464   
608    64     
-704   -272   
144    16     
-176   400    
224    -128   
-96    -64    
-288   -960   
176    240    
-16    -224   
32     -96    
32     80     
176    16     
-144   16     
208    0      
-384   -256   
32     0      
-640   80     
240    -96    
64     32     
272    -272   
-256   -80    
160    -128   
112    240    
96     144    
128    -320   
-304   -128   
96     -32    
-336   -224   
48     -128   
-208   64     
112    -576   
-1152  -432   
64     224    
16     -336   
-112   -256   
208    96     
128    -32    
128    48     
-48    16     
32     64     
-80    144    
0      560    
112    384    
64     304    
-256   32     
144    -112   
-384   -176   
144    -64    
48     80     
-32    -128   
0      -16    
192    -96    
224    64     
48     464    
-128   400    
-240   -176   
368    -80    
-48    32     
176    -16    
-128   -80    
64     -80    
-96    0      
192    16     
288    432    
-176   -32    
16     32     
-64    -112   
64     0      
160    320    
-368   144    
0      -64    
160    -48    
-32    48     
272    112    
48     112    
-128   80     
-240   -48    
-48    -32    
48     64     
-464   112    
64     80     
-304   -48    
-112   32     
48     112    
-304   -48    
-192   0      
-480   16     
-16    32     
16     -48    
96     64     
384    336    
0      80     
-272   -256   
240    128    
-240   -32    
-16    64     
0      -64    
-48    64     
-128   48     
-256   -48    
-128   -112   
-464   -80    
-64    96     
-432   32     
64     64     
352    -48    
-272   0      
-192   -208   
-96    0      
-64    -80    
96     32     
0      96     
16     96     
-160   16     
-48    16     
32     80     
240    176    
-240   96     
-560   0      
0      32     
-16    -64    
96     32     
-160   -16    
-192   0      
16     32     
-128   -16    
-112   -16    
-176   16     
-80    32     
96     64     
48     80     
-320   -80    
288    -16    
-592   32     
160    64     
128    -48    
0      48     
-80    -48    
256    112    
-288   32     
128    48     
-256   32     
448    480    
-256   128    
-240   -112   
64     224    
-432   64     
128    32     
160    320    
-192   80     
80     -32    
112    112    
80     -192   
-96    -48    
272    160    
144    64     
112    16     
-288   -16    
448    64     
-32    32     
-80    -64    
-160   208    
-368   176    
-112   144    
256    -16    
-800   -160   
272    -16    
-528   -448   
-560   288    
144    80     
256    -64    
560    176    
320    -32    
48     48     
-144   144    
-16    -544   
256    1040   
-192   144    
-608   -656   
208    32     
-416   -16    
224    288    
-176   -112   
32     176    
96     -16    
-16    -16    
-144   16     
-128   -16    
64     96     
-32    48     
-80    -176   
224    96     
-144   544    
-624   -304   
352    -288   
-528   -240   
192    -160   
-32    -96    
0      -192   
112    48     
256    384    
-48    112    
-64    -80    
176    -240   
144    -16    
-64    176    
272    320    
-112   128    
-240   -48    
32     32     
-96    -64    
-224   -32    
0      32     
-96    16     
64     48     
224    176    
-32    192    
32     192    
-224   48     
-32    -16    
-64    48     
16     160    
128    208    
-32    -32    
256    0      
-192   -32    
0      32     
0      96     
192    96     
-16    16     
160    176    
-80    0      
-48    -16    
48     -16    
-80    16     
96     0      
112    80     
352    272    
-304   224    
-272   -112   
-32    -32    
-16    224    
208    0      
32     16     
80     0      
96     112    
-96    -256   
112    0      
-48    176    
-272   64     
160    64     
-320   -272   
208    -112   
-32    208    
-128   224    
64     160    
-112   96     
224    -32    
64     0      
128    288    
112    272    
-96    112    
128    80     
-240   32     
-144   0      
64     80     
16     32     
0      16     
32     -208   
80     -464   
-112   -528   
0      -144   
-240   80     
128    -32    
96     112    
-112   64     
192    16     
32     0      
-80    48     
-192   80     
240    272    
-320   64     
128    -64    
64     16     
160    208    
48     144    
-16    -32    
16     -48    
160    192    
-96    208    
-96    144    
112    144    
16     80     
208    64     
-192   -128   
144    32     
96     -160   
224    -176   
-160   144    
48     -368   
-48    464    
272    496    
-32    160    
16     32     
48     -16    
48     272    
64     -128   
-144   -240   
128    64     
-64    -64    
16     48     
48     -112   
-80    -256   
128    64     
128    256    
-160   -16    
-80    48     
32     -16    
-16    -144   
80     0      
64     -48    
176    272    
-320   -496   
80     -256   
128    32     
176    160    
-112   112    
208    -80    
-96    80     
-272   -112   
352    -336   
0      -464   
48     -112   
144    -32    
-128   16     
-144   -112   
176    432    
160    -16    
-112   -48    
-160   -320   
-352   208    
0      128    
-80    0      
528    32     
96     432    
160    -304   
144    -448   
-192   -80    
464    176    
112    -112   
160    -64    
224    304    
0      -896   
400    192    
-256   816    
176    -528   
-496   -112   
672    608    
192    -48    
416    -32    
16     240    
0      -272   
-16    -96    
336    -192   
336    1184   
416    224    
400    -608   
-560   -16    
-112   240    
-368   176    
-32    240    
272    -256   
368    128    
128    512    
144    208    
-192   -144   
-32    -32    
0      96     
16     -368   
48     -112   
192    32     
144    144    
96     64     
144    48     
176    208    
-96    -32    
-144   32     
48     -336   
112    64     
64     -160   
176    80     
112    64     
-224   -48    
144    -192   
-16    48     
-48    128    
16     -240   
128    -400   
0      -48    
144    -144   
-48    16     
-16    32     
128    -48    
160    32     
-80    -128   
208    128    
-80    -176   
160    -16    
-192   -128   
272    240    
80     112    
0      64     
-112   -64    
144    -384   
352    -448   
144    -64    
128    -192   
144    64     
32     80     
80     112    
16     0      
336    80     
-176   96     
80     32     
112    -656   
144    -256   
48     -608   
48     112    
-48    320    
-160   -32    
128    32     
272    -176   
-32    -48    
-32    -784   
-32    0      
128    144    
144    -16    
-48    -16    
48     -224   
-16    -112   
128    16     
64     48     
208    0      
-112   0      
80     128    
80     -80    
192    -144   
16     -208   
-112   -160   
-80    -16    
16     -832   
128    -32    
192    -48    
112    128    
-16    0      
32     16     
112    16     
160    32     
-240   48     
320    624    
-400   -176   
256    -208   
-48    -64    
96     80     
48     -240   
128    -128   
-64    48     
-32    -288   
80     -112   
256    16     
288    112    
0      64     
176    -176   
-208   0      
48     -32    
-48    32     
112    -48    
80     128    
0      -256   
128    112    
-80    -272   
-176   16     
32     240    
112    -80    
160    -112   
80     112    
-272   -96    
0      -16    
144    128    
-64    -96    
-224   0      
64     32     
48     -96    
144    -128   
-16    -16    
288    -16    
128    80     
112    -736   
-112   -32    
96     0      
0      16     
-16    16     
112    -80    
-240   -16    
112    -64    
-560   -48    
64     -48    
-1264  -128   
48     -176   
224    32     
176    0      
-16    32     
96     -32    
-16    32     
64     -64    
48     0      
64     32     
96     -16    
-32    -32    
48     -32    
80     64     
-48    -16    
-288   32     
64     48     
-64    32     
80     -144   
-16    112    
128    -496   
-96    144    
32     160    
112    0      
-96    -48    
32     -64    
112    -192   
-96    64     
-80    -96    
48     -96    
-64    144    
64     -160   
144    512    
-912   -1264  
368    656    
-16    -112   
64     -64    
-464   656    
96     -112   
-560   -1008  
-64    224    
-304   16     
-128   80     
-80    48     
64     320    
-656   -336   
800    -16    
-112   144    
-80    -352   
-352   -336   
-96    -32    
-1520  224    
-192   160    
-1584  -96    
-288   320    
80     -144   
16     176    
-208   -16    
-304   -96    
272    -64    
-160   -144   
-32    80     
304    80     
192    -80    
-80    64     
-16    0      
-240   112    
-32    208    
-400   -80    
-160   -64    
-160   -80    
-128   -48    
160    48     
-128   16     
-288   -144   
240    -160   
-384   -64    
160    96     
128    -48    
-144   -32    
-96    272    
-16    48     
48     -64    
64     -16    
-32    48     
-64    160    
-32    64     
-1552  -128   
128    0      
-208   16     
96     80     
64     -32    
160    80     
-48    0      
-304   -48    
-192   304    
192    128    
80     0      
-32    16     
64     -16    
-240   32     
112    96     
-336   64     
-64    80     
144    16     
-144   64     
-48    -144   
-160   128    
80     16     
-96    -240   
144    0      
-80    64     
-176   32     
-96    160    
64     128    
16     -48    
-80    80     
-240   160    
-80    80     
-784   -144   
272    48     
-224   -32    
-48    32     
64     80     
304    176    
-256   80     
-288   32     
-32    16     
16     144    
-32    112    
48     0      
-32    -32    
-144   -64    
16     48     
-400   0      
144    48     
128    32     
-112   32     
-208   -80    
-160   -96    
-128   80     
-128   112    
192    272    
0      80     
-48    32     
-192   32     
32     -192   
-256   -64    
288    128    
-208   128    
48     64     
-320   -160   
272    0      
0      112    
-208   144    
224    272    
-32    -32    
48     -368   
96     -352   
144    -288   
0      48     
32     -16    
32     352    
-112   320    
-240   112    
-112   0      
144    -224   
-32    64     
-16    -16    
-96    48     
0      -80    
80     112    
-64    224    
224    240    
-112   272    
-144   64     
272    224    
-64    112    
144    144    
-144   688    
288    192    
-128   -64    
-208   -80    
80     240    
176    208    
-112   -128   
16     176    
208    -304   
96     -144   
208    272    
-96    -128   
96     32     
-224   48     
112    144    
-64    -320   
-80    368    
-112   -384   
-16    64     
160    48     
80     144    
-64    -144   
-64    48     
-48    688    
-32    -240   
176    -80    
-192   0      
160    240    
-352   16     
224    -176   
-352   -336   
352    32     
80     288    
64     -96    
64     -64    
-48    304    
192    128    
-144   -64    
144    -528   
-208   -176   
144    96     
-16    0      
64     -16    
0      -208   
-96    224    
304    96     
-176   32     
448    224    
-528   -384   
288    -304   
-160   304    
192    128    
160    -48    
288    64     
-80    -32    
32     48     
-80    0      
-176   -16    
-144   0      
-304   -48    
96     16     
464    304    
-288   128    
464    336    
-96    176    
-288   -160   
-160   -32    
-144   16     
624    64     
-80    32     
-48    -32    
32     -112   
560    368    
-272   0      
1408   640    
-400   240    
-176   48     
-896   -320   
352    -48    
80     -48    
-160   144    
224    64     
-368   -16    
-32    96     
16     0      
96     32     
304    0      
128    128    
-16    0      
48     -32    
48     128    
64     16     
112    64     
-176   0      
128    0      
-32    32     
224    96     
80     -80    
16     -16    
-256   -32    
128    -16    
96     112    
160    48     
-16    -192   
464    -272   
-272   192    
304    64     
32     64     
0      48     
-96    48     
-192   -64    
320    0      
96     -272   
0      -208   
0      -160   
-48    144    
-48    -80    
240    -32    
128    64     
-128   -192   
-144   48     
16     -96    
192    96     
192    48     
-112   96     
304    80     
144    -16    
-192   -64    
240    112    
-32    80     
-32    64     
96     64     
144    -16    
-80    -96    
0      -112   
256    176    
-32    -208   
64     16     
176    64     
32     64     
-128   80     
96     96     
-32    48     
128    -80    
0      -80    
48     112    
-16    -48    
-144   -240   
112    80     
32     -128   
128    32     
-80    -352   
48     -192   
192    -272   
144    80     
48     0      
0      128    
-128   -32    
96     64     
16     32     
128    -80    
-16    96     
0      -64    
32     64     
192    -80    
192    80     
-48    -16    
544    416    
112    -176   
192    80     
-16    0      
32     48     
96     80     
112    272    
48     -112   
64     288    
-176   144    
112    32     
320    176    
192    -48    
128    96     
-16    -144   
96     0      
48     -32    
128    64     
-16    16     
240    256    
144    288    
-80    80     
-128   48     
-48    0      
-48    32     
272    -128   
32     -96    
64     -208   
48     -64    
224    -112   
80     80     
48     -16    
32     64     
-96    -16    
144    64     
128    64     
272    144    
0      -128   
-112   -160   
336    -16    
144    -96    
112    -32    
-128   -176   
48     -16    
80     -64    
160    0      
16     -80    
80     -240   
208    128    
48     -176   
0      208    
-576   240    
192    -896   
80     -480   
-32    -608   
-16    48     
48     144    
48     -32    
48     240    
-112   -64    
176    -144   
16     -48    
128    -176   
160    240    
128    -96    
-16    -192   
-768   128    
-16    -256   
-80    48     
-112   96     
240    -128   
128    -192   
96     -144   
96     -448   
0      96     
-256   -304   
112    48     
256    160    
-304   -96    
-352   -288   
336    -496   
16     304    
576    112    
128    -560   
96     48     
0      -144   
-160   16     
112    592    
-80    -368   
32     -32    
352    48     
64     -32    
272    -160   
-416   -192   
96     -368   
128    -144   
432    144    
48     144    
496    -80    
240    80     
-128   48     
464    -224   
0      16     
288    -528   
-160   48     
112    -160   
224    -112   
144    -176   
-112   -64    
-288   112    
-128   -48    
-288   -32    
208    -416   
-688   112    
96     -176   
0      -32    
176    -64    
-48    208    
-48    112    
0      -48    
112    -1696  
-48    -16    
96     112    
0      160    
240    -48    
32     -80    
-208   -16    
48     160    
-576   96     
96     32     
-1984  -80    
128    -160   
64     -64    
32     -128   
240    240    
16     -208   
-128   144    
368    -96    
240    -32    
32     -48    
-80    32     
64     -16    
-224   -32    
-240   -320   
64     -128   
-304   128    
-288   -160   
112    -96    
112    -96    
112    128    
192    -256   
80     64     
64     -176   
-16    -48    
-48    -16    
80     32     
-48    -64    
48     96     
-32    16     
128    -96    
-704   -64    
208    128    
-32    256    
32     -176   
0      16     
128    -64    
144    176    
-352   -32    
96     48     
-128   0      
80     -64    
64     -160   
80     64     
-304   0      
336    32     
-48    64     
16     -96    
240    -16    
64     -64    
-96    0      
208    -160   
64     32     
64     208    
240    304    
-32    32     
32     -16    
-64    32     
0      -48    
16     80     
208    0      
48     -16    
-592   16     
288    240    
-640   -16    
-96    32     
-320   -208   
-272   -256   
-240   -288   
-64    -544   
-64    -48    
-2032  -112   
-32    -176   
48     -48    
192    192    
176    432    
-224   -128   
-480   -176   
80     320    
-96    16     
32     -240   
-128   -416   
112    -224   
0      192    
-304   160    
-96    -16    
-512   16     
-176   -48    
-400   464    
208    -176   
-400   -32    
16     96     
-32    -208   
256    -32    
-176   -208   
-352   176    
-48    128    
0      80     
240    -272   
128    368    
192    160    
32     -112   
-176   112    
-1456  -192   
-112   80     
272    208    
-96    32     
80     -560   
-80    -128   
-112   -112   
32     112    
16     80     
-176   32     
32     144    
-16    32     
-256   -64    
96     32     
-160   16     
-752   -48    
80     160    
32     16     
240    240    
-16    64     
-48    -32    
-128   -32    
-64    -16    
128    16     
-16    -48    
112    48     
16     48     
32     64     
-176   -32    
48     32     
-112   0      
192    48     
-608   -32    
160    32     
128    -32    
-224   -32    
16     16     
-112   32     
96     80     
-112   48     
-384   -448   
368    112    
-592   240    
-64    -368   
48     -80    
-256   -32    
608    64     
-240   464    
-416   64     
-128   -96    
-96    0      
-80    -32    
176    16     
-160   48     
128    0      
48     -16    
80     32     
128    16     
48     64     
-32    192    
-304   112    
-528   -48    
-512   -176   
-144   -128   
400    0      
-96    48     
-464   -128   
-16    -320   
480    48     
-112   192    
-160   48     
240    16     
-64    192    
-352   -64    
16     48     
-208   -16    
224    64     
-64    0      
-192   -32    
400    16     
-288   -32    
-48    96     
96     -128   
48     96     
-112   -112   
128    -48    
80     64     
96     64     
-240   -256   
368    16     
-384   80     
176    48     
-272   -80    
240    -48    
-64    160    
-16    -64    
-48    0      
-32    32     
-48    48     
384    224    
-336   112    
48     16     
112    32     
96     80     
-112   96     
-144   32     
320    176    
-496   -16    
32     32     
64     16     
304    128    
-16    96     
-144   -176   
208    48     
-80    48     
176    96     
-192   -32    
48     64     
112    48     
-16    16     
32     -48    
144    80     
96     16     
-144   -32    
112    -32    
176    112    
-16    32     
32     -64    
-80    -192   
48     -224   
64     0      
128    -128   
32     -128   
-224   112    
176    192    
16     -112   
-80    0      
0      48     
288    112    
-112   -32    
-64    -144   
-48    32     
64     -16    
80     64     
32     -32    
112    160    
-32    80     
32     16     
-96    -80    
64     32     
-64    64     
80     -176   
-48    -336   
96     256    
-64    352    
-128   -192   
224    16     
80     272    
112    96     
64     -16    
192    16     
48     16     
656    816    
-464   80     
-96    -544   
224    48     
96     224    
-16    -16    
32     -176   
208    64     
64     80     
176    -144   
176    160    
16     -64    
-128   64     
-32    96     
-112   64     
-48    128    
16     80     
48     0      
144    64     
144    -1296  
80     80     
-160   -128   
-208   -80    
144    -864   
240    448    
-16    -32    
224    -48    
0      176    
208    -32    
80     48     
-112   128    
0      -208   
48     32     
80     144    
-96    -224   
64     288    
112    192    
-48    128    
-64    48     
208    -16    
-32    176    
96     -48    
272    -240   
128    272    
32     144    
80     32     
-208   -112   
0      64     
208    -32    
-32    176    
208    80     
32     288    
240    208    
144    -368   
208    512    
-160   0      
-112   96     
96     32     
0      256    
16     128    
96     -304   
32     176    
112    -112   
112    96     
208    -48    
-32    0      
-208   -1184  
128    -160   
-16    -368   
-208   -656   
96     -384   
80     112    
-32    304    
240    288    
-256   -640   
-272   -400   
-16    80     
480    288    
16     400    
-144   -208   
0      -208   
16     -176   
-192   -464   
48     -1168  
160    -128   
96     -288   
256    224    
-176   64     
-272   -144   
-448   160    
-208   -48    
128    272    
272    112    
224    -32    
144    112    
176    32     
112    64     
-96    16     
-288   -640   
-624   -64    
-64    0      
64     -160   
-144   -64    
48     208    
-480   64     
544    -32    
144    144    
112    -304   
-144   -48    
-80    -64    
48     -96    
-80    -160   
80     0      
-64    -64    
-80    384    
320    128    
272    -224   
-192   -144   
272    -144   
-80    96     
96     -208   
0      -32    
144    80     
-112   -16    
144    -176   
32     -96    
64     -144   
128    80     
96     160    
32     128    
64     -96    
384    -1472  
-128   80     
-192   -32    
128    -128   
176    96     
272    -352   
32     368    
192    -64    
48     -128   
-48    48     
240    80     
32     176    
-96    -176   
0      -80    
192    32     
272    -208   
-32    64     
-384   96     
-48    32     
32     -16    
64     32     
-64    -160   
304    -1328  
80     48     
80     64     
240    64     
48     48     
-48    0      
128    -144   
64     64     
80     -96    
-16    0      
-256   -64    
160    -224   
96     -32    
256    -80    
80     -16    
16     -336   
224    -160   
304    -208   
-16    -32    
128    -160   
96     128    
-16    -32    
96     176    
0      -80    
-128   -608   
-416   -208   
144    0      
48     0      
224    112    
144    176    
176    688    
-144   320    
64     -816   
160    -192   
416    448    
0      336    
-128   -176   
48     -80    
-96    64     
48     -32    
-192   16     
112    32     
-1696  -288   
224    -112   
32     272    
128    -1296  
384    560    
176    -176   
48     0      
128    -48    
32     32     
384    400    
-160   16     
-176   -208   
352    -512   
112    96     
80     432    
-416   -16    
96     -208   
-304   -416   
16     -192   
112    160    
96     -64    
128    -48    
-144   -496   
112    0      
144    -32    
128    80     
-48    80     
80     -96    
-128   -144   
192    -144   
-64    -160   
288    -64    
0      144    
0      16     
-96    -32    
-32    -112   
32     96     
-64    -256   
32     -16    
112    32     
176    0      
192    208    
-208   -48    
-448   -128   
32     -80    
-624   -48    
96     0      
-144   48     
256    48     
-336   -96    
96     -144   
-32    -160   
-176   -368   
160    64     
-208   64     
64     128    
-240   16     
-64    -16    
-272   0      
32     48     
-208   -32    
112    64     
-144   0      
64     -80    
64     32     
112    -96    
0      64     
160    -48    
80     -32    
-16    -16    
48     -32    
288    176    
-256   -16    
176    16     
-48    0      
144    96     
128    -96    
-816   192    
304    48     
-352   16     
-320   64     
-144   -16    
-288   -128   
-1152  32     
-16    240    
-112   -208   
-464   -256   
224    -16    
-64    176    
-112   -64    
288    160    
-304   -16    
-240   -192   
-672   -224   
176    160    
-640   -112   
272    -80    
-64    -32    
-640   192    
144    64     
-80    96     
-96    16     
-64    -48    
80     32     
-112   -176   
256    -144   
176    112    
-32    -64    
176    0      
64     112    
-432   32     
-464   112    
-288   32     
112    -16    
144    176    
-128   112    
32     -176   
-368   32     
-16    48     
-1568  16     
112    48     
-80    -144   
48     96     
-112   -64    
64     32     
368    192    
-464   64     
48     -80    
80     160    
112    0      
192    -32    
-176   -32    
-160   -80    
-96    64     
-208   0      
176    48     
16     -96    
-208   -48    
-48    -112   
112    32     
112    -48    
-96    16     
16     16     
64     64     
-160   -16    
96     112    
-192   176    
48     64     
48     0      
96     128    
-32    96     
-896   -80    
224    64     
-32    -64    
80     0      
0      -32    
128    -96    
-160   -208   
128    48     
-48    32     
-32    208    
-32    -32    
64     48     
96     272    
-352   -128   
-64    -368   
-144   400    
-32    96     
272    144    
-32    -336   
-272   96     
-224   -144   
96     80     
48     144    
16     16     
320    112    
-96    144    
-240   -16    
0      48     
-192   112    
-224   -176   
-384   16     
160    208    
176    -32    
-80    -96    
-176   560    
0      -48    
288    -368   
144    272    
-80    -144   
128    192    
-64    32     
-112   -432   
32     528    
-208   -288   
80     -80    
208    336    
64     128    
-48    -192   
112    224    
128    256    
16     -80    
176    48     
32     -64    
-48    96     
-96    32     
80     96     
0      -32    
80     352    
0      -464   
128    -64    
-80    288    
-16    32     
32     -368   
0      16     
16     240    
-224   16     
0      16     
-48    16     
-16    128    
-176   -256   
-80    -240   
-160   -48    
-16    208    
-112   288    
96     240    
0      48     
48     288    
160    704    
512    336    
64     112    
48     96     
-96    48     
16     -32    
-80    -96    
16     -96    
128    16     
-128   224    
304    160    
-160   -352   
0      -80    
32     -144   
-64    -64    
32     -32    
-112   96     
64     112    
-48    0      
64     -48    
-96    -336   
80     -32    
-192   -80    
128    48     
-16    -112   
48     0      
16     -112   
112    0      
-32    64     
0      48     
16     144    
96     112    
16     -16    
96     -48    
112    -16    
-112   64     
16     -80    
-32    -64    
32     16     
112    -288   
-160   -400   
80     -592   
128    224    
144    64     
192    160    
32     -32    
16     272    
128    432    
-48    -320   
304    -96    
48     0      
-16    -48    
48     496    
160    352    
64     368    
0      176    
-304   -304   
96     256    
48     384    
-64    -128   
48     96     
-48    -80    
384    0      
192    -112   
112    32     
-224   -256   
208    -256   
-352   208    
-400   112    
176    -48    
320    16     
256    112    
-80    -960   
464    16     
256    -368   
192    64     
32     304    
-112   272    
-480   -80    
0      -208   
176    176    
96     112    
80     16     
0      -192   
208    -192   
-80    -112   
48     304    
-176   -416   
-32    -16    
0      -336   
48     -128   
128    -64    
-64    48     
112    112    
208    224    
240    208    
-32    192    
0      80     
224    32     
-32    176    
240    -192   
16     -16    
96     -192   
192    288    
-16    336    
-224   -96    
480    -448   
-64    16     
128    176    
144    176    
320    176    
-224   192    
-32    64     
-128   -256   
224    -144   
288    -320   
-144   96     
16     -272   
176    -64    
-32    -1216  
32     -64    
-16    48     
144    16     
176    96     
-144   0      
-64    0      
-32    -224   
96     0      
-16    272    
16     64     
128    -32    
64     32     
-16    -80    
464    -16    
-80    144    
320    272    
-464   -304   
-176   -320   
32     -48    
240    48     
-112   336    
112    -272   
96     -48    
-160   96     
32     -240   
128    32     
224    -112   
192    0      
-48    -208   
144    432    
-32    -48    
96     16     
16     144    
208    192    
80     -272   
160    -240   
192    144    
-320   48     
16     -256   
64     -16    
-32    32     
32     0      
-48    -592   
-128   32     
80     -112   
144    0      
224    -16    
-80    80     
-16    48     
-256   -80    
112    -48    
-48    96     
-48    -96    
96     -128   
0      -64    
0      0      
-160   -96    
-112   -400   
192    160    
64     -64    
176    64     
192    272    
16     0      
144    -48    
176    80     
-64    -160   
-80    -112   
0      80     
-80    -240   
-80    32     
64     32     
192    112    
160    -16    
-144   64     
96     0      
160    64     
64     -96    
272    -768   
128    64     
0      -128   
160    16     
16     -96    
32     -208   
48     -112   
48     -320   
0      0      
-48    -80    
304    -48    
240    -48    
-176   -208   
32     -96    
-16    -32    
96     48     
384    64     
224    16     
32     -80    
-896   -80    
32     -64    
16     -32    
176    0      
0      0      
-16    -240   
64     0      
320    96     
-112   -128   
80     -144   
16     80     
64     -128   
32     48     
-320   -48    
176    -48    
-64    32     
64     -16    
48     16     
64     16     
160    -16    
48     -16    
208    -144   
-192   -416   
288    48     
-160   0      
48     48     
48     -16    
128    -16    
-272   -48    
192    224    
-336   0      
256    128    
224    32     
-112   -112   
224    144    
-128   -144   
336    48     
176    -112   
-64    16     
208    -32    
48     80     
-160   -192   
-48    -64    
-64    32     
-128   64     
-528   -96    
368    64     
-1872  96     
176    -96    
-32    -112   
-352   16     
304    64     
272    -48    
-448   176    
32     -560   
512    256    
-512   128    
160    -176   
-192   -80    
656    -80    
-96    -80    
176    -112   
352    80     
-16    -16    
-240   -32    
384    -160   
32     -32    
48     -224   
192    144    
160    -1056  
64     192    
-16    144    
240    64     
-256   48     
16     -128   
-160   -32    
384    96     
-592   128    
-48    -224   
-704   -32    
224    0      
-64    128    
96     -208   
112    144    
176    -64    
80     -208   
-288   128    
80     96     
144    -224   
-192   64     
208    16     
-160   64     
-80    -48    
80     16     
-320   -64    
384    80     
-80    -48    
-16    -48    
-128   80     
-80    -176   
800    1056   
-1104  -944   
160    272    
48     160    
16     -464   
224    272    
224    48     
-176   304    
-208   48     
224    -96    
0      240    
0      80     
128    -32    
592    208    
32     224    
-112   -48    
48     -432   
176    -496   
-256   -640   
-64    -128   
-176   112    
144    -320   
32     -240   
16     -128   
176    0      
-1376  -128   
144    48     
-736   -208   
-144   48     
-48    64     
-416   -160   
-112   -592   
-544   -32    
-256   176    
-896   16     
48     96     
0      128    
-128   64     
-304   -80    
128    192    
-288   -160   
16     -160   
-176   -240   
-432   -128   
-112   -64    
-240   16     
16     64     
-640   48     
112    128    
-608   -736   
64     -96    
64     112    
-80    -16    
-176   0      
-16    -48    
-64    -176   
112    -112   
176    -192   
80     -176   
64     64     
-192   432    
-160   144    
144    176    
112    144    
-304   80     
32     96     
-752   96     
-176   160    
-80    -16    
-64    176    
-112   32     
32     64     
0      -32    
0      -80    
64     -80    
192    64     
-160   -144   
256    -32    
160    240    
-304   -16    
-64    64     
-480   -80    
-16    192    
128    144    
-32    64     
-64    -64    
128    -48    
48     -160   
96     48     
256    240    
-288   64     
-80    0      
96     -112   
64     160    
-64    112    
144    0      
-128   -112   
-32    -256   
-304   16     
160    96     
-96    -160   
-96    -128   
-64    48     
-16    0      
0      64     
-176   224    
48     144    
-240   128    
160    -96    
-16    288    
144    64     
-96    -272   
-16    -160   
-512   -480   
32     368    
80     -48    
64     -112   
128    -144   
-32    -160   
16     304    
-256   -64    
-80    96     
-160   48     
32     -160   
32     0      
-176   224    
-256   64     
16     176    
-320   -176   
96     16     
208    224    
160    240    
0      -400   
-224   -480   
-80    -320   
-672   -192   
64     -464   
480    -240   
-112   352    
-448   64     
-368   240    
-336   -336   
-160   32     
-336   -464   
304    -272   
-160   -48    
-288   0      
-352   -64    
-288   32     
-64    32     
-32    -112   
-240   96     
-208   -288   
448    -272   
384    64     
32     336    
64     -64    
112    176    
-48    80     
448    640    
-608   368    
96     192    
-224   -64    
176    304    
368    496    
80     16     
128    464    
-192   -112   
32     -96    
96     -80    
-256   -112   
-80    -64    
-80    -16    
192    -352   
-208   -208   
224    48     
-272   192    
64     -176   
160    -448   
192    -272   
-192   -144   
-128   240    
208    -48    
-176   -48    
112    464    
432    256    
-432   256    
128    -352   
368    416    
-400   384    
-48    -192   
16     -528   
224    240    
192    288    
-192   -64    
-16    -192   
80     -48    
-144   704    
368    -256   
-256   80     
32     112    
-192   -160   
-128   736    
224    -256   
96     144    
-112   256    
-192   -496   
64     288    
112    -144   
0      144    
160    32     
320    304    
-288   -192   
0      -144   
32     496    
-48    304    
16     -256   
-32    0      
160    208    
-16    0      
144    -96    
128    16     
-112   64     
-16    -32    
160    -32    
-144   16     
-16    112    
96     320    
176    96     
-80    -16    
80     0      
128    32     
64     128    
0      272    
64     576    
80     240    
64     -32    
144    80     
-16    176    
64     32     
-64    -144   
96     -96    
48     80     
160    144    
-16    -112   
192    -384   
80     16     
176    -192   
0      48     
96     48     
-176   0      
32     64     
128    -32    
-64    0      
-48    144    
208    192    
64     32     
0      -80    
112    16     
240    16     
32     -32    
160    96     
32     -608   
160    32     
-16    16     
128    80     
80     224    
-192   0      
80     -32    
256    96     
64     -16    
-64    -64    
64     -176   
144    -144   
448    -240   
96     -64    
-64    -16    
32     144    
-272   -32    
144    -16    
272    48     
32     0      
112    0      
-176   -32    
-96    -32    
-128   -80    
224    16     
-48    112    
48     64     
16     16     
0      -48    
96     32     
160    -128   
160    64     
48     -1136  
96     32     
0      -112   
64     16     
-16    128    
96     -32    
16     32     
176    64     
192    16     
64     160    
32     96     
-80    -224   
304    128    
-96    -48    
128    0      
64     -80    
96     64     
80     -416   
-32    80     
80     32     
-16    -16    
96     32     
128    96     
208    32     
-16    16     
32     -32    
16     -48    
256    320    
-288   -224   
240    -96    
-96    64     
240    96     
-48    -640   
48     0      
112    112    
96     -128   
96     128    
-256   -48    
320    -16    
-496   -384   
64     -128   
416    -32    
112    80     
64     -176   
32     -32    
-80    -176   
304    160    
-592   -48    
192    176    
368    608    
-288   240    
-336   16     
-128   -80    
448    448    
-400   256    
448    -32    
-400   -400   
112    -144   
-224   -192   
176    176    
304    16     
0      64     
224    -256   
128    48     
64     0      
48     656    
-64    -96    
-16    -32    
32     -976   
192    -176   
96     -480   
-32    -288   
64     144    
192    32     
128    208    
-80    0      
336    64     
-400   -784   
48     352    
80     192    
-96    -320   
224    32     
272    -16    
784    672    
-400   -256   
0      -400   
240    -352   
-256   -48    
368    48     
-64    -192   
32     -800   
-64    -624   
208    336    
96     96     
16     496    
96     -16    
320    -64    
-864   -16    
0      0      
144    -128   
256    -112   
-192   16     
192    -208   
-64    112    
208    -112   
-64    80     
192    64     
144    80     
-32    32     
-80    96     
-176   96     
128    -128   
-928   -80    
32     -192   
272    -240   
128    0      
144    32     
-48    -240   
128    -192   
-288   -432   
112    0      
112    32     
-80    16     
96     -16    
16     -32    
-32    -80    
96     80     
-240   160    
0      16     
-1184  16     
272    112    
0      112    
-64    -160   
176    -240   
80     -144   
-80    -64    
32     -64    
-96    112    
48     -128   
240    96     
-352   16     
176    -48    
0      16     
160    -32    
-336   64     
96     -112   
272    16     
112    160    
-48    144    
-80    -272   
176    -64    
128    -576   
144    80     
48     -64    
64     -48    
96     128    
-128   80     
-64    -80    
144    -80    
32     -64    
288    -96    
-256   -16    
112    16     
-176   112    
80     -208   
-112   32     
176    -1168  
-208   -48    
-48    16     
48     16     
176    -64    
80     -208   
-64    -80    
-48    -64    
-304   -64    
160    -224   
-240   -80    
96     -112   
-32    -48    
-32    -32    
96     32     
144    -176   
96     -64    
-96    288    
-96    0      
240    144    
-16    96     
-240   32     
112    160    
160    240    
128    -16    
-368   -80    
-16    128    
192    208    
-16    -80    
32     160    
144    -80    
-48    -208   
-48    -176   
160    -48    
-416   144    
96     80     
-176   -48    
160    48     
-48    96     
112    -32    
-352   -336   
-32    -240   
80     -80    
-160   -144   
224    16     
-80    112    
-288   32     
16     96     
-368   288    
-64    112    
208    112    
128    -176   
-176   -256   
-48    0      
-16    -192   
-384   -192   
-624   -416   
272    416    
-592   224    
-352   -400   
352    -848   
-160   -160   
-416   224    
-64    -512   
-256   -48    
-944   464    
352    1088   
-352   -720   
-368   -272   
176    -288   
144    -192   
176    800    
240    -320   
-64    -304   
336    496    
-192   -272   
-176   -432   
-192   -96    
-272   -32    
96     -464   
-464   -112   
-272   -368   
-320   -480   
-272   1296   
-176   224    
-32    -720   
-176   144    
752    -704   
304    -768   
336    672    
96     144    
-528   -432   
-336   544    
112    704    
-656   -880   
-128   320    
16     96     
176    704    
-80    -416   
-304   96     
240    96     
64     256    
-144   -496   
0      464    
-160   -240   
48     -32    
32     224    
80     -144   
-272   -288   
160    96     
-80    48     
352    -448   
-576   32     
32     240    
-240   -256   
128    128    
32     -32    
0      16     
-160   32     
96     80     
-176   128    
96     144    
48     32     
-160   -32    
-144   0      
-96    -112   
-16    -32    
-80    0      
-112   -32    
32     -80    
64     128    
64     -112   
224    256    
-144   192    
128    -16    
0      32     
32     -16    
-64    -112   
64     -352   
0      144    
-144   320    
96     -80    
-400   64     
16     -16    
-32    96     
64     32     
32     144    
-160   160    
112    144    
272    432    
160    16     
-48    160    
0      64     
-80    16     
176    64     
-224   0      
96     48     
-32    160    
16     0      
-528   -64    
192    64     
128    16     
-224   -272   
-48    -32    
160    16     
16     48     
-128   96     
160    192    
-80    64     
96     48     
32     32     
-64    -80    
-208   -64    
-160   48     
-336   0      
112    0      
160    -64    
-128   48     
-224   -32    
176    80     
-96    16     
80     -272   
288    -496   
16     -96    
64     176    
-128   -48    
224    80     
-144   16     
272    192    
-96    32     
-16    208    
-336   64     
-112   -192   
208    48     
144    128    
96     -32    
-16    -16    
0      112    
-160   0      
-16    64     
-32    -32    
176    64     
-256   -16    
48     96     
80     -16    
96     16     
-48    48     
128    176    
-128   -144   
-96    -48    
-16    224    
-144   96     
16     -16    
96     112    
64     64     
-32    -48    
96     64     
16     112    
224    128    
-240   32     
-16    48     
-64    -32    
144    16     
192    112    
64     64     
-48    32     
32     48     
0      112    
-32    80     
128    48     
-48    112    
-112   16     
-48    16     
32     16     
32     -32    
16     32     
0      16     
64     32     
176    112    
-80    32     
0      16     
-32    32     
-16    48     
128    32     
64     64     
-64    -16    
144    80     
48     48     
48     32     
48     128    
320    256    
-160   128    
112    48     
48     80     
-32    16     
96     16     
16     -112   
64     80     
-256   64     
80     -32    
-464   -64    
160    -64    
-160   16     
0      16     
-176   -32    
112    48     
64     32     
176    -112   
-80    -336   
-96    -96    
144    448    
-48    256    
256    -208   
32     -256   
272    192    
48     96     
16     -400   
-64    480    
208    96     
-176   -96    
224    -32    
224    -128   
32     -96    
528    1632   
-112   -352   
400    -672   
736    240    
-912   80     
-352   -272   
-480   624    
512    -112   
112    -144   
192    224    
320    -160   
-528   -144   
336    -368   
-16    560    
-16    -16    
80     -320   
-16    64     
-48    -576   
-240   -336   
208    128    
64     80     
-144   144    
192    208    
208    320    
288    208    
400    16     
-352   272    
-80    -656   
80     464    
352    288    
224    80     
-96    -32    
-16    -48    
32     48     
160    112    
176    16     
224    -112   
-64    80     
-16    -80    
-80    48     
96     -112   
16     -80    
64     -304   
112    32     
64     -64    
64     0      
304    96     
128    32     
80     48     
-16    64     
-32    -64    
240    32     
-112   112    
-32    112    
-80    208    
-112   -48    
96     -32    
-48    -928   
0      32     
0      -208   
80     192    
240    16     
-96    16     
-16    32     
176    16     
32     192    
-48    96     
112    -32    
144    -224   
16     96     
64     -160   
112    64     
-64    -48    
80     80     
-48    144    
48     -112   
176    -368   
240    16     
-48    -32    
48     -320   
16     112    
0      -208   
128    96     
-32    -96    
112    -48    
0      -128   
208    16     
-176   -128   
48     48     
96     -336   
32     160    
-96    -144   
32     -96    
-48    112    
80     -32    
432    464    
-16    160    
256    -128   
-96    -160   
32     0      
0      -48    
16     144    
256    -128   
208    176    
-160   -96    
-224   -752   
-80    16     
272    32     
128    -16    
64     -256   
144    -64    
-80    -32    
-112   -576   
80     -96    
208    0      
128    -16    
80     80     
-80    -96    
48     -368   
16     192    
64     96     
224    -16    
-48    -656   
-224   -416   
-224   -272   
128    -272   
144    32     
208    -96    
64     -48    
144    -1024  
-16    112    
64     720    
240    368    
-32    -32    
-80    -48    
144    -16    
-16    176    
-112   -192   
-80    -288   
-816   144    
144    16     
16     -176   
-80    -160   
144    -256   
32     -224   
16     -320   
336    -848   
208    -96    
144    128    
-272   -208   
144    16     
-192   32     
-128   128    
96     192    
32     -176   
112    176    
96     -16    
208    -368   
176    -16    
-80    80     
64     -32    
0      -336   
64     96     
96     560    
-160   -608   
48     -16    
336    80     
128    -32    
80     -80    
-144   16     
112    -336   
-112   -80    
-16    -32    
304    -112   
-160   -112   
400    240    
-448   -960   
96     -256   
272    640    
272    0      
208    -80    
176    464    
-128   -288   
-144   -480   
-656   64     
16     48     
-304   -144   
0      -128   
32     96     
48     240    
-336   0      
176    -432   
112    -208   
416    592    
288    944    
240    -96    
192    -528   
-96    -448   
176    576    
-64    432    
432    -32    
-768   0      
96     64     
-864   -48    
96     -112   
224    48     
16     -80    
0      -368   
80     -352   
-128   96     
-80    -16    
176    -64    
-464   64     
128    -48    
-48    -160   
144    48     
-416   64     
80     -80    
-368   -48    
-80    240    
256    336    
48     -48    
-240   0      
-16    -160   
384    80     
64     -128   
-112   -96    
-160   0      
96     -32    
-48    0      
0      -32    
-160   64     
368    64     
-192   -48    
-128   -128   
112    80     
0      -160   
-32    -32    
-64    64     
-16    64     
16     0      
256    48     
-128   0      
-144   240    
-64    176    
160    80     
-416   -96    
224    0      
32     96     
-464   192    
256    224    
-928   -240   
-304   -160   
0      64     
48     0      
-16    64     
-1072  -32    
32     144    
256    112    
-96    192    
-32    224    
96     -32    
128    -96    
-80    -224   
-96    -128   
224    224    
-112   -48    
-16    -64    
-16    -64    
16     16     
-112   64     
-64    48     
-176   -144   
-528   0      
-16    0      
48     -32    
-128   16     
-448   -96    
96     -80    
80     -48    
112    144    
32     -144   
-48    -96    
48     -16    
16     32     
176    -32    
-16    32     
-80    16     
-64    96     
-64    -16    
-1776  48     
-96    0      
-160   -432   
352    -592   
-64    144    
272    224    
-32    -32    
-128   -192   
-64    -48    
64     80     
80     96     
-96    0      
32     48     
-256   0      
-128   64     
-512   16     
-160   -96    
256    -48    
32     0      
-112   48     
-112   48     
-128   -16    
144    208    
-144   96     
-64    0      
-32    16     
-96    -16    
32     96     
-288   -144   
32     -144   
-544   0      
144    96     
-2656  -96    
144    64     
-192   -32    
-16    16     
-96    16     
0      -32    
128    48     
32     112    
-80    32     
32     208    
-288   80     
64     -16    
80     16     
144    160    
96     144    
-1088  -32    
-32    112    
-112   80     
32     16     
64     128    
-160   80     
80     32     
16     0      
-80    -80    
-16    32     
0      -32    
-160   -48    
160    128    
-304   0      
16     -16    
-320   -128   
-16    64     
112    64     
16     48     
-16    64     
-80    16     
-128   0      
0      208    
-16    128    
-96    16     
80     160    
-304   192    
288    -480   
-352   144    
256    272    
96     -128   
-160   48     
256    -48    
-400   272    
224    -672   
-48    352    
80     416    
0      80     
-256   80     
416    64     
-160   160    
-416   -192   
-112   240    
-688   -480   
928    1072   
-320   256    
-80    -240   
304    144    
32     -224   
224    -272   
-64    -64    
144    96     
96     -224   
432    384    
112    432    
304    160    
-416   -240   
32     -176   
16     528    
160    64     
-256   -160   
144    -32    
112    -256   
-576   -320   
0      96     
-64    112    
128    128    
192    224    
-112   144    
-16    256    
128    112    
64     144    
0      112    
-192   16     
-96    -128   
240    -48    
48     48     
192    160    
144    336    
-224   -16    
192    -144   
-64    0      
208    288    
-128   32     
64     16     
-16    48     
-144   16     
144    -48    
96     16     
432    352    
-304   336    
-16    160    
-272   240    
128    16     
160    16     
144    48     
-144   0      
96     -80    
16     144    
-80    64     
112    -32    
-16    16     
-32    0      
-32    80     
112    32     
224    96     
-192   32     
0      128    
160    80     
64     160    
16     0      
160    -128   
-48    32     
-16    48     
160    80     
-128   160    
-192   32     
144    0      
144    -32    
96     -48    
208    -48    
-144   32     
-48    16     
-16    112    
96     80     
-48    -16    
48     64     
0      32     
112    64     
80     -48    
112    80     
-96    80     
16     -112   
96     32     
16     0      
160    16     
0      -32    
-96    96     
-16    224    
96     64     
144    0      
-96    64     
-48    -64    
112    96     
48     32     
32     16     
80     -16    
-64    -64    
80     96     
0      -176   
176    -32    
144    80     
160    544    
16     224    
64     -96    
0      -80    
112    80     
-112   -128   
320    -16    
208    112    
128    128    
-48    -64    
32     -304   
-32    128    
-192   16     
80     112    
16     -272   
96     -80    
208    80     
-192   -16    
128    -80    
288    -144   
128    112    
-240   -592   
-128   -112   
-64    -272   
-48    -144   
208    64     
224    416    
272    -96    
-368   -1088  
16     -176   
160    752    
80     -224   
16     16     
-16    48     
-208   192    
304    64     
32     496    
64     -368   
32     400    
0      -208   
32     144    
-64    -208   
-48    256    
80     -304   
48     176    
128    80     
-32    64     
80     272    
-176   -208   
-32    160    
288    160    
32     96     
240    80     
368    -32    
-112   -80    
80     -224   
80     192    
-48    -64    
272    48     
240    -144   
-32    -144   
128    -592   
192    64     
48     48     
48     -16    
128    0      
-80    64     
-80    -160   
384    288    
-144   336    
208    144    
96     224    
144    208    
112    80     
-32    -384   
-96    -80    
64     64     
32     96     
320    -112   
48     128    
16     -320   
-16    -208   
176    368    
-224   -272   
144    -80    
224    96     
16     -96    
128    -160   
-112   64     
-128   32     
32     32     
240    48     
32     208    
144    -16    
192    -32    
-224   128    
80     -80    
112    96     
976    288    
-432   16     
0      -80    
272    128    
-288   -64    
112    112    
-16    -32    
96     -224   
-112   -272   
0      -816   
32     192    
-160   -368   
384    -80    
160    112    
-608   -432   
240    -112   
80     -96    
-80    -64    
176    16     
80     48     
112    64     
80     32     
16     -16    
96     128    
96     -64    
-192   -16    
-416   -80    
272    48     
-1744  96     
-96    -160   
32     -256   
-48    -288   
80     0      
96     -128   
176    32     
96     -544   
480    32     
-528   -224   
-32    0      
64     96     
176    32     
-192   80     
-48    0      
-1040  -16    
64     32     
96     -32    
-64    -80    
112    16     
-16    96     
-48    -80    
80     -752   
144    48     
-16    -48    
160    16     
144    32     
-64    -80    
-16    -32    
144    -80    
64     64     
0      -32    
-48    -96    
192    -80    
64     96     
64     -208   
64     -80    
240    -592   
16     112    
0      -432   
-96    -160   
-64    96     
96     -160   
-176   64     
-80    -96    
-112   16     
144    -48    
-512   16     
128    80     
96     96     
0      -128   
48     -96    
-48    -288   
64     -96    
160    -224   
32     -64    
-160   -48    
272    64     
-16    -96    
176    48     
-448   128    
0      48     
-1184  -64    
96     -16    
-880   64     
-48    -48    
0      0      
64     -64    
128    64     
0      208    
64     -16    
-160   128    
704    560    
288    240    
176    -16    
-16    112    
-32    -16    
16     32     
-304   -272   
-272   -528   
16     -112   
208    752    
-336   -304   
-48    -432   
112    -464   
112    -16    
-256   48     
128    -32    
-192   -80    
96     96     
-176   16     
320    400    
-304   -160   
32     -432   
304    -48    
16     -48    
32     16     
64     -32    
240    272    
-80    176    
0      128    
-240   48     
64     -112   
-96    48     
128    16     
-80    0      
288    96     
-464   -64    
64     -272   
-144   -48    
272    208    
192    352    
-480   16     
-32    0      
-224   544    
-656   432    
-480   -48    
-736   -288   
48     -112   
0      128    
-112   400    
208    -208   
-192   -80    
0      32     
-16    -144   
128    144    
80     0      
-64    -112   
-272   -16    
-160   0      
-288   64     
368    -640   
-208   448    
-48    128    
-1904  -256   
-144   -48    
64     -16    
-112   224    
-288   -48    
-256   -112   
64     160    
-96    -64    
-192   16     
0      96     
-192   16     
-192   -16    
192    -624   
160    -112   
16     288    
-208   144    
-544   -208   
-112   -320   
96     400    
112    -96    
448    208    
-336   -64    
16     -160   
-240   -48    
-224   -224   
176    -48    
-304   48     
80     -64    
-192   -64    
-176   96     
-416   16     
-176   -144   
80     -128   
608    256    
64     -48    
512    144    
80     -208   
80     32     
-224   80     
-272   -128   
688    208    
-464   320    
-48    -176   
-96    64     
-32    160    
288    -160   
96     208    
-1152  -96    
-16    96     
-224   -128   
-96    -208   
272    -208   
-288   192    
-112   48     
112    48     
-96    -64    
304    352    
-112   112    
288    -80    
-64    32     
0      112    
32     -304   
-544   -384   
128    96     
-400   64     
208    -80    
64     112    
-112   48     
-144   208    
32     160    
320    0      
0      128    
-80    624    
336    368    
0      48     
-208   -256   
128    -272   
-256   112    
-176   0      
-16    32     
272    240    
-80    336    
-464   112    
-64    0      
-80    -64    
-16    64     
16     48     
-112   -16    
-304   -128   
-128   -112   
48     32     
-112   80     
-128   32     
144    32     
-544   128    
-176   48     
112    0      
0      64     
64     0      
-64    -224   
16     -128   
96     128    
-336   -224   
64     -240   
96     96     
-256   448    
256    80     
-32    -96    
112    0      
-240   32     
-144   96     
144    80     
-32    32     
96     0      
0      -16    
80     128    
-16    -16    
-32    64     
48     48     
32     80     
-208   -48    
112    -48    
-112   -80    
240    16     
16     128    
48     48     
-144   -384   
-112   -368   
-128   -144   
-128   -112   
192    -16    
0      160    
416    528    
-128   448    
64     208    
48     240    
-32    -624   
-128   -608   
-240   -432   
16     -240   
240    608    
-192   384    
48     -320   
32     80     
48     416    
256    -496   
128    368    
-144   -48    
-352   16     
112    32     
48     0      
96     -48    
-160   -16    
-176   -48    
-16    240    
0      -560   
304    848    
160    16     
192    -272   
32     336    
-144   80     
-128   256    
400    576    
-320   -240   
160    -208   
16     96     
176    208    
176    80     
-48    16     
-64    48     
-192   -32    
-96    -192   
112    -144   
608    240    
-160   112    
112    48     
112    -80    
-80    -96    
0      -16    
176    -128   
-48    -48    
48     32     
0      32     
144    96     
0      96     
112    128    
16     48     
-48    -64    
144    -112   
160    -32    
32     48     
64     16     
112    48     
-16    -16    
256    176    
-192   16     
-32    -96    
64     32     
112    48     
16     48     
80     32     
16     208    
-32    64     
-96    -32    
144    -16    
96     64     
-48    0      
-16    96     
16     96     
-64    -96    
144    -32    
-16    -144   
288    64     
0      80     
-48    64     
288    80     
112    32     
240    144    
144    64     
-192   -48    
-48    32     
16     160    
128    80     
288    240    
-400   -16    
64     0      
448    48     
-16    -16    
512    -224   
0      272    
-176   96     
-368   -32    
-208   -48    
304    64     
-112   48     
-144   16     
288    112    
0      128    
-512   -64    
336    48     
320    80     
-96    -96    
48     64     
-32    -256   
64     -32    
128    -240   
144    48     
336    -32    
32     32     
144    -32    
-64    96     
80     96     
-32    -48    
80     0      
80     -96    
112    48     
0      -16    
80     0      
384    160    
-256   144    
-112   -112   
112    96     
80     -48    
304    144    
-16    80     
0      64     
-192   48     
192    144    
96     -16    
-160   -192   
240    96     
-80    32     
192    32     
64     -400   
32     48     
128    16     
-16    16     
240    80     
0      0      
-16    48     
96     32     
-48    80     
240    80     
-48    -32    
128    0      
48     128    
304    80     
-128   80     
192    -384   
-160   -80    
96     -16    
-32    0      
144    -64    
224    304    
48     128    
224    -64    
-48    16     
-16    80     
144    368    
-48    -32    
112    -16    
192    -32    
128    144    
128    -160   
-64    -32    
32     16     
112    64     
32     -80    
176    -128   
80     80     
144    32     
-96    48     
176    -512   
256    -160   
64     128    
-32    -64    
80     80     
112    -272   
-112   352    
32     176    
96     -16    
32     -160   
384    160    
128    -800   
128    -64    
128    -80    
48     -160   
0      -48    
-128   80     
-128   128    
272    -288   
-96    16     
-16    -160   
576    784    
-160   464    
-336   -400   
16     112    
32     64     
0      144    
-64    -320   
-208   -336   
240    32     
224    -80    
144    112    
16     -272   
112    336    
96     640    
208    -400   
0      -512   
176    176    
224    176    
0      -112   
-224   -16    
-16    -112   
0      32     
-496   0      
-80    0      
-1760  96     
-16    -112   
16     -448   
224    256    
176    128    
-16    -320   
192    -144   
128    -112   
96     320    
80     -96    
96     -368   
64     -352   
16     208    
128    -192   
-32    176    
32     -96    
144    512    
0      -48    
128    -688   
320    192    
160    128    
-48    -16    
-48    -752   
-16    208    
80     -128   
-80    -240   
0      0      
112    -32    
16     128    
112    -112   
-528   -256   
128    -16    
-976   -192   
32     -304   
128    -48    
112    256    
0      0      
16     -176   
-32    112    
96     176    
32     160    
32     144    
-32    128    
-80    -208   
96     -80    
-80    -144   
144    16     
-256   48     
80     192    
-112   192    
144    -96    
112    656    
576    512    
-192   352    
-16    -208   
96     -64    
144    160    
272    -112   
-304   400    
96     128    
112    -80    
80     -80    
192    144    
144    -240   
-480   -416   
160    -144   
-48    -64    
0      -176   
112    48     
192    -560   
96     -496   
112    -736   
96     -176   
-96    112    
-464   80     
-304   256    
-256   64     
-432   64     
-112   -192   
-48    16     
144    96     
-96    32     
384    -160   
176    80     
-192   0      
272    112    
-320   96     
48     112    
-128   -112   
144    -240   
-288   48     
80     -32    
-144   -256   
32     0      
-480   48     
16     -64    
144    80     
-288   -48    
-160   96     
64     -128   
256    208    
-240   48     
64     -32    
-64    32     
80     -48    
64     64     
-16    -256   
48     -80    
80     48     
496    656    
-512   384    
-384   160    
-400   -432   
-368   64     
96     64     
-496   32     
16     -32    
-544   272    
304    288    
-32    -16    
-272   16     
352    160    
-208   336    
-336   -224   
160    -32    
-128   -80    
112    128    
-16    -96    
-96    -288   
-96    -320   
-48    -16    
-112   -80    
-336   192    
144    192    
-224   160    
80     -112   
48     -288   
48     32     
-464   -32    
256    512    
64     320    
-336   288    
144    80     
32     128    
80     -48    
-112   0      
304    144    
-16    96     
-96    -224   
-96    -192   
-80    32     
-688   64     
-16    -144   
80     -144   
16     96     
-112   -160   
240    144    
80     400    
-128   -16    
-160   -240   
0      16     
-64    -32    
-192   32     
96     -576   
-400   272    
-32    -80    
-400   -192   
0      384    
32     -128   
48     160    
-272   -224   
-96    32     
96     -32    
32     -384   
64     368    
-240   16     
-208   -48    
-16    -80    
-192   -48    
-32    160    
96     32     
-64    560    
64     304    
144    96     
-16    208    
-144   -144   
0      0      
96     16     
112    -48    
64     32     
-96    16     
64     48     
-256   48     
32     0      
112    16     
160    64     
-288   16     
144    240    
-2240  96     
-288   -16    
-192   -80    
112    64     
-32    0      
96     80     
224    48     
48     16     
-112   16     
-16    0      
-48    176    
-448   -32    
-176   64     
-256   96     
144    96     
-640   0      
96     -16    
224    128    
-80    48     
32     48     
-16    -64    
-80    -48    
80     64     
64     96     
-80    0      
-64    64     
-80    48     
48     32     
0      64     
64     48     
144    32     
128    16     
-32    16     
160    48     
-160   -16    
16     64     
64     64     
80     64     
80     0      
-80    16     
160    64     
-176   -32    
192    32     
-32    192    
288    -16    
-144   0      
-80    32     
0      0      
512    192    
-608   -80    
336    -144   
-176   48     
-144   -144   
240    16     
-128   160    
160    -64    
400    64     
-560   128    
-96    -288   
240    -32    
-272   96     
144    16     
-208   -16    
352    64     
192    176    
-464   32     
96     16     
-48    64     
-240   16     
-112   -128   
128    96     
-96    -96    
192    -32    
-864   0      
80     -32    
320    64     
48     224    
0      192    
-48    -80    
224    -96    
224    16     
192    48     
112    64     
96     64     
-160   80     
-272   -176   
192    -112   
80     144    
-224   192    
320    -16    
160    0      
-144   -32    
112    -16    
-144   -192   
64     16     
-64    128    
-32    0      
336    48     
-352   -240   
-16    -64    
-128   112    
112    80     
320    112    
96     112    
128    16     
-112   0      
64     -32    
0      -32    
128    -192   
-224   -16    
176    320    
80     128    
-144   0      
144    32     
-144   64     
176    -16    
-144   -96    
224    16     
-144   64     
112    -96    
144    64     
-160   -736   
-128   112    
176    416    
16     -80    
128    160    
-96    -224   
256    288    
-176   112    
-96    -96    
336    48     
-16    -128   
144    -416   
80     -112   
0      48     
144    192    
-64    112    
256    352    
-336   -464   
208    368    
-16    80     
448    720    
-272   -672   
-48    160    
128    304    
80     -272   
112    128    
48     -256   
-48    688    
-32    -1168  
352    0      
16     128    
-144   -256   
128    16     
-176   -736   
96     944    
128    -48    
-32    -304   
256    320    
48     -336   
464    448    
-32    16     
112    32     
48     -80    
-16    -64    
80     96     
48     -80    
96     0      
96     -16    
224    32     
112    64     
176    -96    
144    496    
144    160    
0      -64    
32     -112   
48     -112   
144    256    
80     144    
32     -288   
48     -48    
-80    -1136  
368    416    
-352   176    
-48    -176   
112    -304   
176    -80    
192    0      
32     0      
-224   -176   
64     -176   
256    128    
0      -32    
-48    128    
64     -96    
96     96     
96     -400   
128    32     
64     -160   
192    192    
128    16     
128    -112   
-128   -96    
96     160    
-96    144    
-32    -224   
80     -224   
112    144    
-96    -96    
-32    -432   
-48    208    
48     -16    
144    192    
288    80     
-64    128    
-32    -48    
144    -16    
80     0      
-32    -304   
192    176    
16     112    
32     32     
32     -144   
144    96     
176    224    
-144   -16    
-16    -96    
48     48     
80     -96    
64     -16    
64     -176   
-96    -32    
48     112    
-64    -32    
144    192    
192    144    
48     224    
192    0      
96     176    
-64    176    
0      192    
-160   0      
64     -336   
32     -208   
208    -128   
-32    -32    
208    96     
176    -1056  
96     -208   
-272   -1344  
256    -352   
192    -624   
-96    160    
112    -96    
128    -176   
112    80     
208    208    
-32    80     
-144   -96    
-224   -224   
64     -256   
400    -112   
880    256    
112    320    
224    448    
-320   480    
-432   -560   
-48    -176   
32     16     
112    48     
304    16     
160    -128   
320    -288   
-80    64     
-304   160    
128    80     
-304   -224   
144    224    
304    192    
736    448    
-608   160    
-112   -192   
-96    -32    
-96    -416   
320    -240   
-16    -1024  
288    -304   
-224   -400   
384    224    
128    -16    
-16    16     
112    -144   
-48    -32    
-720   -128   
-160   -32    
320    32     
-112   -112   
144    144    
48     -256   
-64    -112   
-128   -896   
240    208    
272    128    
80     80     
224    -32    
-64    -80    
-336   192    
416    288    
-304   192    
128    16     
112    32     
160    -176   
16     -32    
48     -224   
-16    0      
112    48     
256    48     
336    32     
-144   -80    
-160   -128   
-240   16     
-256   176    
-48    192    
-192   128    
0      48     
-2112  16     
320    16     
480    -64    
0      -80    
0      64     
-16    448    
208    608    
16     80     
144    -336   
-16    288    
80     -64    
-144   -288   
448    0      
-272   176    
368    64     
128    -32    
48     0      
272    144    
-144   -112   
-96    288    
144    -704   
32     768    
96     160    
32     -128   
-32    192    
80     -160   
-288   -80    
112    288    
-544   -384   
128    -256   
-192   288    
96     48     
48     -48    
0      -240   
-32    -96    
112    -112   
16     48     
0      -320   
176    64     
-32    32     
80     0      
-48    -16    
-96    -16    
-144   32     
464    160    
-48    64     
192    -48    
-256   -48    
32     -160   
192    144    
-80    0      
-144   -16    
112    112    
144    224    
144    16     
160    48     
-128   16     
144    -80    
-224   -32    
16     48     
-128   0      
-16    -128   
32     48     
144    16     
112    16     
-48    16     
-832   -48    
-128   -32    
-1376  -80    
-144   32     
400    0      
-304   -48    
-48    16     
64     32     
0      -96    
-80    112    
-1680  -80    
128    -32    
-128   -128   
288    192    
-400   16     
-288   -32    
48     -112   
-208   -16    
80     80     
192    64     
-224   16     
80     0      
-192   80     
208    48     
-144   0      
-208   32     
48     0      
-160   -80    
192    128    
304    112    
-64    -32    
-208   -96    
16     32     
-64    -32    
-208   64     
16     32     
-928   -32    
-160   -48    
272    64     
64     16     
64     -32    
16     48     
32     -80    
0      32     
-48    16     
64     0      
16     16     
48     192    
80     32     
-160   -32    
-96    -16    
128    48     
-176   -336   
-464   -64    
-96    144    
144    -16    
-48    64     
-304   -112   
0      112    
256    -48    
-64    176    
0      -96    
-128   -32    
-352   -144   
160    -16    
224    176    
-80    -16    
48     64     
-608   16     
-112   16     
-176   -48    
96     -16    
-48    -272   
32     -176   
-80    48     
160    -176   
400    112    
-352   64     
480    176    
-112   96     
-880   -272   
-176   -240   
64     -288   
-96    -80    
192    144    
-224   -192   
320    48     
32     160    
-496   -16    
352    208    
-432   16     
-32    -176   
32     96     
16     48     
-96    -32    
272    480    
-592   -192   
32     -256   
-192   48     
64     -160   
-1664  -128   
224    -1360  
-240   16     
112    320    
64     96     
16     144    
48     -208   
-176   144    
-128   -64    
-32    -16    
16     80     
16     -208   
-80    192    
176    -64    
-224   -592   
-272   336    
-176   -16    
-32    -64    
128    144    
-80    288    
-272   -208   
112    -208   
-144   320    
192    -112   
-16    -544   
208    384    
-48    112    
-32    96     
-288   1040   
480    480    
240    352    
-112   -256   
-160   -64    
48     -96    
-96    272    
144    352    
32     128    
-256   208    
176    32     
160    -16    
-32    -352   
-304   -48    
-48    240    
0      144    
16     -32    
464    192    
32     240    
-96    -16    
0      64     
16     0      
-64    -32    
64     160    
208    64     
144    0      
-112   112    
64     48     
-32    304    
224    128    
-128   -48    
-48    -160   
-64    16     
96     144    
160    32     
96     96     
48     160    
144    80     
64     64     
80     48     
32     0      
-176   -128   
96     -144   
-64    -64    
112    -96    
-32    -176   
-208   -352   
112    -176   
-208   144    
48     160    
176    128    
-160   64     
160    80     
96     176    
-240   -32    
-48    -16    
48     -112   
80     16     
0      64     
224    128    
64     48     
-32    64     
112    208    
80     64     
96     144    
144    112    
144    96     
32     80     
-128   -80    
48     -64    
64     -32    
-96    48     
64     80     
-112   -16    
208    -592   
-128   96     
-48    -208   
176    -16    
176    160    
-192   176    
16     224    
96     96     
16     -16    
272    -112   
-176   -304   
-64    -448   
-96    -256   
-192   -128   
16     -160   
48     -304   
80     48     
176    -80    
-128   0      
-16    16     
160    112    
-96    -240   
-64    -48    
0      96     
192    224    
208    288    
-80    80     
-32    -112   
192    208    
176    240    
-32    -288   
80     -144   
0      -112   
-16    32     
48     144    
176    112    
48     176    
160    272    
160    32     
128    -96    
-272   -208   
32     80     
-160   -16    
64     48     
64     -64    
176    -368   
48     -64    
416    -816   
-192   96     
-64    208    
128    96     
416    -288   
-64    -16    
16     48     
48     64     
-112   -256   
144    -80    
-192   96     
-320   -208   
208    192    
-384   304    
-240   256    
112    -368   
224    128    
208    16     
512    528    
-16    48     
-176   64     
-656   -48    
64     -160   
-144   96     
128    -32    
176    -112   
0      -400   
-48    -80    
-576   -240   
160    240    
48     -16    
-16    -448   
-96    -1424  
0      -384   
368    496    
192    224    
16     112    
256    272    
-160   -160   
0      48     
320    -32    
48     176    
384    256    
-160   352    
32     -112   
32     -240   
128    368    
0      -256   
16     288    
-336   -224   
272    -304   
32     528    
256    -192   
144    -16    
256    544    
-208   -256   
-96    48     
384    32     
112    -544   
32     0      
64     -512   
16     256    
-112   -288   
176    224    
224    16     
-16    64     
64     -80    
416    336    
-96    -80    
0      -320   
-48    0      
48     -144   
80     48     
-96    64     
160    -128   
-80    368    
16     -128   
144    16     
304    -64    
208    352    
-144   -208   
304    64     
-128   -96    
64     0      
144    160    
16     -32    
144    -32    
176    -80    
112    0      
80     64     
16     -288   
144    16     
0      -192   
176    -208   
-16    144    
96     -192   
64     48     
64     -48    
64     -48    
336    -336   
-112   -800   
96     16     
128    -864   
-32    -320   
144    80     
128    -112   
-16    96     
-48    80     
-96    112    
160    80     
160    -80    
-96    -96    
-432   -192   
-32    -96    
64     -96    
208    -112   
-16    -48    
96     96     
-64    0      
128    128    
112    -32    
144    -80    
48     128    
416    464    
-32    224    
112    -240   
48     16     
-128   64     
208    -224   
-480   -16    
128    336    
-32    112    
96     -320   
176    0      
32     -240   
-32    16     
96     -16    
-96    -160   
48     -112   
-64    112    
96     -48    
192    16     
-192   -144   
96     192    
-1216  -32    
48     -112   
272    16     
208    -192   
304    -16    
112    32     
112    -48    
128    -208   
-160   16     
96     -64    
64     80     
-80    16     
96     0      
-112   -48    
256    -16    
-192   0      
-144   -48    
-1200  -96    
240    16     
-16    0      
64     -16    
-128   -32    
144    -240   
-112   0      
112    -80    
32     144    
-16    32     
48     -144   
16     -96    
160    0      
-144   48     
144    -32    
-352   0      
96     -16    
64     16     
144    -144   
32     64     
112    -288   
48     16     
48     64     
176    64     
-64    -112   
64     -48    
32     48     
-32    0      
-224   32     
-64    -112   
-464   -64    
96     48     
-288   -32    
48     -192   
-16    0      
16     -80    
256    -128   
-96    -1744  
208    -144   
-176   -64    
-192   -464   
-128   -240   
0      144    
0      96     
-64    -192   
-96    -144   
-32    -96    
368    -16    
-16    -144   
-48    48     
624    -16    
128    -144   
-272   -112   
176    0      
192    160    
192    96     
320    64     
320    -96    
-416   -128   
192    -496   
80     -208   
384    384    
432    480    
-64    -16    
-208   -336   
-128   -224   
320    816    
-560   -160   
432    -176   
224    304    
-288   224    
-176   -64    
-64    16     
-480   -160   
80     32     
0      112    
144    16     
-32    -192   
-544   -336   
112    160    
-64    -96    
-64    -400   
-224   320    
128    -832   
-256   720    
-208   320    
208    -160   
144    592    
-240   -992   
-64    368    
352    560    
-816   368    
144    -336   
-208   -96    
32     224    
0      -32    
-208   224    
336    -16    
0      80     
-240   -96    
-192   -80    
112    160    
-160   0      
32     -64    
144    -48    
-96    -112   
-80    -192   
0      -32    
64     -80    
-112   32     
-240   -64    
144    -144   
-96    16     
-224   -32    
16     -96    
128    -80    
-224   -32    
-304   32     
-16    48     
-320   -32    
176    16     
0      0      
224    80     
64     64     
-272   128    
-144   -112   
64     -112   
-144   64     
192    -128   
144    -144   
-32    0      
-336   48     
-144   16     
-16    64     
-96    0      
176    96     
176    160    
-32    32     
-32    16     
-192   -64    
-64    0      
16     -32    
288    0      
-48    144    
368    192    
-256   272    
-368   96     
64     -128   
48     0      
-64    48     
128    64     
128    -32    
-80    32     
32     -32    
-160   -64    
16     0      
-48    96     
-160   -144   
112    -48    
224    592    
-192   304    
96     -128   
-256   0      
-32    48     
-160   256    
-240   176    
0      -80    
240    -160   
144    -80    
32     -64    
160    240    
-416   144    
96     0      
80     48     
176    112    
-80    176    
96     -96    
32     -96    
80     -96    
-432   -48    
16     -16    
-288   48     
16     176    
-32    -80    
64     -96    
-144   48     
-144   48     
-80    32     
240    -16    
-64    80     
-176   48     
-80    -96    
-208   -64    
176    112    
-112   80     
-80    96     
-368   -32    
-208   128    
-64    64     
0      144    
144    64     
32     -48    
208    192    
-96    304    
0      144    
-144   -32    
112    48     
-96    48     
32     480    
16     336    
0      144    
16     32     
176    112    
-32    176    
32     224    
-96    272    
-16    -32    
-144   -176   
-112   -176   
160    32     
-144   0      
128    112    
192    400    
-192   -400   
176    -272   
48     224    
32     -48    
352    160    
128    192    
0      -288   
-256   400    
-208   32     
-64    -544   
96     16     
208    144    
64     80     
-80    224    
-304   32     
-32    192    
-464   368    
320    272    
48     16     
-544   -448   
352    -320   
-64    784    
0      -256   
-208   -480   
208    384    
32     112    
288    304    
-480   -256   
-112   -48    
528    880    
-224   -576   
-656   -480   
-96    96     
96     112    
32     320    
-112   -176   
368    -160   
288    128    
96     32     
416    -624   
128    -176   
-80    688    
192    -32    
48     -176   
-448   -128   
48     -32    
-64    128    
272    0      
224    64     
-64    128    
112    272    
64     -32    
0      32     
64     -528   
-16    240    
-80    288    
32     -336   
96     0      
160    288    
304    112    
-368   -272   
80     112    
-48    80     
240    208    
-16    64     
224    32     
112    80     
-96    -112   
-16    -208   
-32    16     
-48    -32    
-48    64     
-32    -160   
144    128    
176    -16    
32     -272   
112    128    
-48    -32    
-32    64     
96     64     
-80    32     
336    -96    
-64    48     
64     -96    
-80    -112   
16     112    
-16    64     
-16    16     
240    -64    
80     -64    
-64    -176   
192    208    
144    -64    
-48    16     
-32    -32    
64     32     
32     48     
112    128    
-80    192    
48     0      
144    -192   
144    16     
0      80     
-32    -224   
240    -48    
32     80     
16     96     
96     -672   
48     48     
-160   -96    
208    0      
96     32     
96     224    
80     176    
64     -16    
32     -48    
-80    64     
128    16     
16     -48    
208    224    
16     -32    
128    112    
32     -320   
-16    0      
-128   -1152  
-192   -16    
112    160    
96     64     
64     -48    
112    -128   
-48    96     
128    96     
64     64     
416    416    
-256   240    
16     -16    
288    48     
112    -80    
144    -48    
304    -16    
176    80     
208    -48    
-192   -80    
-192   -192   
-80    96     
-240   80     
64     0      
128    -64    
192    -64    
112    32     
-112   -224   
0      128    
-112   -160   
272    352    
16     -272   
0      80     
-192   -48    
80     48     
112    0      
-48    144    
208    48     
64     0      
32     -48    
-32    -80    
160    64     
112    -80    
80     96     
-48    -192   
-32    -48    
192    -464   
288    80     
-112   64     
0      112    
-144   -16    
112    64     
-16    48     
160    -96    
144    64     
-96    -96    
176    16     
-64    -32    
32     48     
-32    -16    
0      80     
16     -288   
144    80     
32     -48    
32     -592   
32     -16    
80     -80    
96     -320   
0      -80    
224    -304   
-112   -96    
80     -464   
32     -128   
160    32     
16     32     
160    -80    
32     -80    
160    -240   
-96    0      
48     -96    
-176   16     
-256   32     
48     48     
112    0      
-16    -400   
144    -304   
112    32     
16     -96    
192    -32    
208    -80    
-80    -80    
160    16     
48     -144   
-96    32     
640    96     
-144   -144   
-592   -352   
-112   224    
-384   272    
-112   -128   
-288   -416   
160    16     
400    864    
-96    -416   
464    -1008  
48     736    
-672   -240   
-464   -160   
-256   352    
144    -64    
-16    -160   
-160   -16    
112    -416   
-32    -128   
144    -176   
0      -128   
144    0      
240    -64    
-128   -1008  
-304   -512   
288    96     
-192   672    
144    176    
160    560    
64     96     
224    -192   
-256   16     
-64    -16    
-240   240    
464    544    
-400   160    
96     112    
-32    96     
208    -560   
48     -224   
192    -64    
-336   64     
64     144    
192    336    
96     96     
192    -64    
-320   16     
0      144    
32     32     
160    -352   
-576   -240   
128    -64    
-512   176    
112    -256   
-32    -32    
80     -112   
-96    96     
0      -64    
48     -320   
-144   48     
96     -16    
16     -96    
64     32     
-352   -128   
128    -16    
48     80     
-48    0      
320    -64    
96     -96    
160    48     
16     -272   
-48    0      
176    16     
256    16     
48     -16    
128    -16    
-112   64     
224    0      
-464   16     
272    -16    
-80    0      
-64    128    
240    112    
-16    -128   
96     0      
48     -144   
112    96     
-112   16     
48     -176   
-192   -32    
128    -80    
-128   -48    
224    80     
-112   64     
64     -64    
-64    -112   
80     32     
-128   48     
176    0      
80     16     
304    -96    
-144   -32    
-176   -80    
160    16     
-64    176    
-48    80     
16     160    
64     96     
-64    -48    
112    -112   
-272   -128   
224    -16    
-192   144    
128    -144   
320    64     
-624   32     
-960   352    
144    368    
-400   80     
-224   -144   
16     -368   
-16    -160   
64     64     
-96    0      
96     96     
-16    304    
-592   288    
128    48     
-208   -128   
224    192    
-272   16     
-400   16     
-320   -208   
48     -80    
32     112    
-160   96     
0      448    
-1600  -32    
32     -112   
0      160    
224    320    
-48    64     
160    64     
48     0      
160    -32    
-160   112    
-80    192    
0      -32    
48     240    
48     -96    
-512   -544   
-96    16     
-944   32     
176    336    
288    48     
224    368    
-368   0      
32     48     
-32    48     
-224   -208   
-144   96     
160    -48    
-64    160    
32     -32    
64     144    
80     -208   
-320   -80    
96     48     
-80    32     
-864   16     
192    -128   
-192   304    
-80    -176   
-32    -64    
144    208    
192    128    
-96    336    
112    -144   
16     -48    
-96    0      
160    -96    
0      240    
-16    480    
-96    112    
-1136  -224   
-96    -192   
176    -32    
-16    288    
144    96     
-272   -112   
-32    -160   
-112   112    
16     -80    
48     -48    
-80    112    
-176   304    
96     128    
-128   -240   
-752   -1488  
-1104  -704   
-256   512    
-240   400    
288    32     
-32    144    
400    528    
32     400    
-208   240    
144    144    
-448   -16    
-384   144    
80     272    
-80    16     
-400   48     
-128   -80    
-160   -16    
-32    48     
-288   -96    
-112   -160   
80     48     
176    64     
272    112    
-128   128    
-448   0      
48     0      
-320   0      
128    48     
16     -32    
-224   -112   
128    64     
-304   -144   
176    48     
16     0      
-16    48     
48     80     
48     64     
-32    48     
-32    64     
-192   -32    
80     -64    
352    144    
-128   -32    
112    96     
-176   -16    
0      48     
-192   -32    
208    48     
-32    -16    
32     80     
-48    64     
48     80     
48     -48    
16     16     
160    80     
-240   0      
80     -32    
96     -48    
96     -48    
16     32     
96     96     
176    112    
-112   16     
-16    16     
144    64     
16     96     
48     96     
448    -80    
-320   -304   
-64    -64    
128    160    
80     160    
-96    -32    
128    64     
256    32     
-128   -32    
16     -80    
-48    80     
-128   0      
-16    32     
160    16     
-64    -80    
-112   48     
112    96     
96     0      
32     32     
0      32     
80     128    
-96    64     
-64    -48    
96     32     
16     -208   
32     -208   
16     96     
64     112    
160    32     
144    80     
-112   -176   
32     32     
96     80     
-32    -16    
96     -144   
-192   -144   
48     144    
64     96     
256    96     
64     32     
48     -16    
64     80     
-64    -64    
160    112    
-96    -288   
-16    -272   
128    224    
144    0      
16     -96    
128    -32    
96     32     
192    192    
-80    -32    
-192   -1920  
-144   -112   
-304   -128   
0      16     
80     128    
96     32     
128    112    
-112   32     
48     0      
208    80     
-160   -144   
368    -48    
112    32     
64     80     
-400   32     
48     -400   
32     48     
-64    16     
336    64     
320    32     
-80    -48    
48     -144   
96     -80    
48     64     
-16    80     
-112   0      
-128   -48    
-48    0      
272    144    
-96    48     
-32    32     
-64    -80    
176    48     
128    64     
64     80     
96     -16    
-32    -64    
-32    0      
-240   -96    
112    64     
32     128    
144    16     
160    32     
160    -16    
304    224    
-128   -144   
-64    0      
48     -288   
32     48     
16     16     
48     64     
48     -80    
96     -48    
240    288    
0      256    
64     64     
160    -160   
48     64     
-64    -304   
208    336    
-128   48     
112    -576   
0      16     
32     96     
144    -16    
128    336    
176    -336   
112    -48    
320    16     
176    624    
144    -560   
-144   416    
-16    0      
-224   -320   
144    -272   
416    48     
-160   496    
368    -112   
-80    -160   
336    -1056  
144    112    
624    816    
-336   -528   
-112   -544   
-192   208    
-160   192    
16     32     
544    336    
272    208    
16     -256   
-48    -144   
-240   80     
208    -464   
-320   224    
-688   -176   
304    0      
256    -48    
-240   -32    
224    64     
-224   48     
-368   -48    
176    -80    
48     48     
224    0      
-16    -32    
256    -208   
-32    -80    
-112   -192   
144    -160   
224    -320   
192    144    
32     64     
112    16     
-80    0      
-128   80     
144    -16    
96     224    
336    240    
-112   -64    
224    -16    
112    -96    
-96    -64    
272    -80    
32     -16    
16     64     
80     192    
96     112    
288    64     
-96    80     
-112   -176   
192    32     
0      -176   
160    -48    
-128   -96    
-80    96     
176    -32    
96     16     
256    48     
-48    112    
16     -144   
-64    128    
-80    144    
128    80     
192    48     
-1216  -128   
288    64     
96     240    
400    -64    
208    64     
-144   -432   
-64    -64    
-96    -16    
112    -112   
-32    -256   
-128   -160   
96     -64    
64     96     
272    -176   
128    16     
-464   -32    
-16    -208   
48     0      
112    -160   
-48    -48    
128    -240   
208    -144   
304    304    
80     160    
-176   -112   
16     0      
64     -48    
-160   32     
-32    112    
112    -32    
-880   -208   
448    48     
-256   -80    
-80    -224   
176    -192   
-96    -208   
96     -64    
-32    -256   
16     -96    
384    48     
-352   112    
32     -32    
-80    128    
16     176    
128    160    
256    32     
64     0      
-432   -96    
32     -96    
64     16     
0      192    
320    -16    
176    -64    
0      128    
144    -624   
368    480    
-272   336    
64     272    
48     80     
160    240    
-48    32     
-32    -304   
-144   224    
0      -80    
144    -272   
128    -192   
-160   80     
240    -64    
-48    -192   
-48    -672   
160    112    
-48    -32    
112    -160   
-176   112    
80     32     
-352   -80    
48     -48    
-32    -64    
368    304    
-544   16     
288    -384   
96     128    
-208   -128   
160    -64    
160    -224   
-112   -224   
-144   176    
-64    -32    
-80    -16    
208    144    
-144   -240   
32     -96    
-224   32     
32     96     
-736   160    
160    -64    
-112   -64    
16     -32    
16     176    
80     48     
192    96     
-48    48     
32     -96    
-192   -16    
160    -64    
48     16     
-16    -80    
-256   -16    
-16    -16    
-272   48     
64     0      
32     32     
208    96     
-80    0      
160    -352   
112    32     
-48    -64    
192    0      
-160   112    
128    112    
-208   48     
96     0      
-176   0      
-144   -80    
224    32     
112    -16    
400    144    
-432   -192   
240    32     
-224   -192   
-64    32     
-112   64     
176    400    
-496   80     
176    -48    
-48    160    
144    0      
-16    -208   
288    -80    
48     112    
464    96     
-176   -16    
-560   -48    
80     48     
-96    -16    
-32    -32    
240    48     
416    -16    
48     0      
-256   176    
112    112    
16     80     
-176   -144   
528    64     
64     16     
-64    32     
144    48     
-208   -80    
-32    208    
-336   288    
48     -16    
64     48     
-176   -16    
112    -48    
-112   16     
80     48     
-1456  -32    
-256   -64    
256    -320   
-384   -304   
-336   -48    
240    144    
32     48     
-208   -32    
-32    0      
-128   32     
32     64     
-176   -16    
0      16     
160    -16    
-112   16     
-336   64     
-176   64     
96     -80    
64     48     
-64    -32    
128    80     
-240   -96    
-16    64     
80     16     
-208   0      
-32    -16    
144    64     
-144   -64    
-256   48     
224    64     
-576   -32    
-32    64     
-256   -128   
-96    16     
-16    48     
-112   -48    
32     -16    
160    -32    
-16    80     
-112   160    
16     -96    
-80    0      
192    64     
-528   112    
-192   -112   
48     48     
16     -112   
-496   -96    
112    112    
16     32     
-16    16     
32     48     
32     192    
128    176    
160    80     
64     96     
-112   16     
-96    -128   
144    144    
-80    128    
-96    16     
128    -48    
-320   -160   
-32    48     
64     -16    
160    96     
-32    0      
32     32     
96     32     
-80    0      
-80    -64    
-16    16     
48     80     
128    96     
-240   16     
-96    -288   
48     -544   
-224   48     
496    336    
-1056  176    
112    0      
-80    -128   
-400   -208   
-128   32     
-336   -288   
-64    -96    
96     240    
32     32     
-48    96     
-16    144    
-432   -64    
208    0      
-96    32     
224    176    
32     64     
-80    -240   
-224   256    
-144   288    
80     -208   
208    96     
48     112    
160    96     
-240   -256   
-496   -208   
0      176    
0      160    
240    144    
-240   -240   
176    992    
240    208    
-160   -128   
-128   48     
-96    -304   
224    288    
-112   -528   
-80    160    
-48    288    
-192   -128   
64     256    
16     -112   
-48    112    
-16    16     
-240   -32    
16     64     
0      48     
48     192    
32     -688   
-64    224    
-96    -128   
-48    -224   
32     320    
-64    -48    
16     -64    
176    320    
-64    -336   
-48    208    
64     -336   
160    -288   
160    80     
-96    176    
80     -160   
-112   144    
0      144    
144    560    
-48    624    
-32    -400   
48     -224   
208    112    
-176   64     
48     -320   
16     -128   
128    32     
160    -112   
-80    -368   
-48    48     
-64    240    
80     64     
80     16     
96     -272   
112    112    
-272   -80    
144    -48    
-112   -64    
-352   -64    
-16    128    
96     48     
-160   64     
48     32     
-144   -112   
384    32     
0      512    
192    368    
-176   -48    
192    -144   
-80    16     
-160   32     
-64    -48    
96     -32    
96     32     
48     -80    
-240   96     
-288   -352   
-80    16     
352    64     
-16    -112   
368    -80    
144    112    
176    336    
-128   448    
-160   112    
32     -112   
-16    128    
80     -16    
64     64     
160    -80    
-288   -96    
448    -576   
-160   208    
-32    16     
512    192    
-592   -352   
-16    48     
-32    400    
64     272    
160    336    
144    -192   
0      144    
144    224    
16     256    
400    -224   
-176   80     
-16    -288   
0      -48    
144    160    
144    32     
112    80     
96     80     
144    224    
-128   -48    
80     -112   
32     16     
48     -32    
0      48     
-64    -64    
16     -96    
-64    80     
0      -64    
160    -80    
16     -736   
-32    128    
272    -80    
64     -112   
288    208    
-96    320    
-160   -16    
64     -48    
128    48     
208    -16    
-80    48     
-128   176    
48     128    
-48    -240   
240    -368   
128    -368   
-64    240    
0      16     
48     0      
-48    -144   
96     -16    
192    -256   
224    80     
96     80     
16     48     
-64    32     
176    -256   
288    48     
-48    -48    
0      48     
-144   -336   
-64    -144   
224    -560   
-96    -96    
176    192    
-192   128    
0      -48    
192    -64    
160    16     
-80    -96    
-96    112    
112    80     
272    80     
48     -208   
208    256    
-80    336    
48     -16    
176    -416   
272    144    
64     16     
48     -96    
240    -80    
160    432    
-176   -48    
80     -352   
48     -240   
-16    176    
-32    0      
-32    -112   
288    400    
64     32     
128    160    
96     48     
224    80     
144    448    
-48    112    
-144   -192   
-48    -32    
272    144    
-112   -128   
-16    144    
0      -64    
32     192    
-352   -368   
-240   -208   
80     -144   
-160   16     
64     -160   
288    16     
128    144    
208    -272   
32     64     
-128   -160   
0      -272   
-80    0      
176    -560   
208    80     
-48    -96    
160    -48    
-64    -64    
32     -16    
64     80     
48     -48    
16     -896   
64     128    
224    -288   
64     32     
32     64     
-176   48     
176    64     
208    -80    
48     16     
176    -304   
288    16     
-224   -16    
224    32     
64     16     
80     16     
112    0      
-32    80     
96     48     
-48    -64    
-112   -64    
-80    -176   
128    -128   
32     -144   
256    -80    
0      32     
64     -48    
112    -800   
-16    -16    
80     -16    
96     -48    
-64    -240   
-32    -64    
48     -48    
-112   -48    
208    48     
-128   0      
512    -64    
-80    0      
160    48     
-32    80     
32     -128   
144    -208   
48     64     
64     -64    
0      -80    
912    704    
-1008  368    
-208   -96    
32     -48    
-432   -176   
448    -16    
416    304    
224    288    
-656   -32    
-288   -384   
416    -16    
704    -96    
-800   64     
48     -704   
544    144    
-448   -112   
-48    32     
-192   -48    
688    240    
-656   48     
80     -336   
-144   -64    
-80    96     
32     -112   
160    -16    
48     0      
16     -144   
160    112    
112    -928   
-112   16     
96     -32    
-192   -48    
160    -16    
0      -64    
112    48     
-112   -128   
-752   -64    
0      -64    
-944   80     
80     48     
-240   16     
288    -112   
112    -80    
272    32     
-96    -48    
-112   -64    
224    96     
0      64     
64     -64    
112    64     
-48    -16    
128    64     
96     -16    
-256   48     
112    0      
144    112    
-96    -160   
0      -48    
64     -416   
-112   96     
32     -64    
112    -256   
208    -48    
80     -144   
-592   0      
192    64     
-48    128    
32     64     
-80    -208   
112    -16    
16     -64    
-128   -240   
48     64     
112    48     
16     -64    
-64    -160   
304    176    
-320   -32    
-16    -32    
-144   16     
48     -80    
-176   -48    
16     0      
-1008  -320   
96     256    
176    0      
224    -48    
48     112    
-288   16     
-848   -32    
-288   -32    
-1344  -48    
-112   64     
-160   -576   
384    448    
96     192    
208    0      
48     80     
-96    -80    
-208   -48    
0      -112   
0      -352   
-144   96     
-224   208    
-64    32     
-128   -16    
64     640    
-144   -560   
-688   416    
32     -16    
64     32     
-368   352    
-48    -464   
96     400    
32     -272   
0      -16    
-32    80     
-16    -144   
-64    -32    
160    112    
64     -64    
-32    64     
-32    16     
64     688    
-592   -528   
-800   -1120  
240    640    
-128   304    
32     -96    
-176   -288   
32     -64    
-192   368    
-336   -528   
32     240    
208    400    
-240   -704   
96     -96    
32     208    
176    128    
16     -48    
224    128    
-192   224    
-48    256    
-16    -96    
-256   -320   
80     96     
-128   112    
128    192    
-112   176    
-48    128    
-16    -48    
-288   -80    
-144   -112   
-48    -688   
-64    -288   
-592   -112   
-272   -128   
-1072  -336   
128    -144   
0      144    
112    64     
-48    32     
16     304    
-48    144    
16     192    
-16    64     
32     144    
32     160    
48     0      
48     0      
-272   128    
16     96     
-272   -16    
32     16     
112    32     
-80    64     
144    256    
-352   -144   
288    -336   
-32    160    
144    192    
112    -256   
-256   -480   
-224   -560   
80     192    
160    48     
-224   -128   
-144   -176   
-128   -48    
-320   336    
208    0      
-112   640    
144    128    
16     -112   
-448   -608   
0      -272   
-48    112    
-256   -128   
16     -176   
-112   -912   
112    -128   
-304   -64    
-144   -96    
128    96     
-48    64     
448    192    
240    256    
32     32     
336    0      
-48    16     
224    112    
-112   64     
96     64     
-32    80     
48     48     
-160   -48    
80     -64    
0      -48    
64     272    
-64    0      
0      -208   
80     32     
0      16     
-16    304    
128    96     
160    48     
16     -48    
384    -112   
-656   -176   
64     -96    
-176   32     
368    176    
-448   -16    
-208   112    
-80    160    
-208   -96    
352    16     
-224   48     
368    256    
-48    128    
128    -176   
256    -96    
112    16     
-272   -64    
16     32     
-144   -32    
-48    0      
144    -192   
0      -96    
128    48     
16     240    
-96    160    
-16    -112   
384    -288   
224    80     
144    32     
-176   80     
-64    32     
-160   96     
224    144    
-112   80     
48     -48    
48     -64    
80     112    
128    80     
96     272    
32     240    
432    256    
-224   208    
48     64     
32     0      
-176   80     
-32    160    
-48    80     
48     0      
240    64     
-64    112    
-48    -64    
-96    -96    
-80    -112   
-48    80     
96     144    
112    16     
-48    304    
-48    -80    
48     0      
0      144    
112    240    
-96    112    
16     -16    
-128   80     
32     480    
128    -112   
-32    32     
0      -80    
240    160    
-112   -80    
64     96     
192    272    
-112   16     
80     112    
208    -48    
48     -448   
-160   -48    
-48    256    
-96    80     
64     80     
-112   144    
256    224    
160    320    
128    -32    
96     48     
128    48     
160    128    
-48    32     
96     -32    
-80    -48    
144    80     
-32    32     
0      48     
-112   -160   
288    -720   
288    128    
16     32     
16     0      
64     80     
-16    48     
272    224    
-160   96     
32     0      
96     -224   
-128   -144   
32     96     
64     32     
112    -96    
-48    -80    
-64    -288   
96     -48    
192    288    
240    -16    
0      -16    
-16    64     
80     32     
-80    64     
32     -128   
64     80     
0      80     
352    96     
-224   -32    
80     -16    
256    208    
-240   -112   
80     32     
112    -96    
272    32     
80     64     
0      32     
-16    80     
0      16     
112    96     
16     32     
48     80     
-64    16     
112    48     
48     -160   
320    48     
-128   -176   
240    64     
-112   -128   
288    80     
48     -720   
-48    16     
80     144    
-208   48     
80     32     
160    96     
-16    0      
176    0      
96     64     
80     -32    
432    -48    
-112   -144   
80     -16    
352    -16    
-352   -32    
80     -48    
144    64     
192    96     
-48    32     
160    96     
-400   -176   
176    0      
-96    128    
32     -32    
272    192    
144    240    
-400   -144   
-160   48     
224    48     
16     16     
-96    -208   
256    -16    
-192   -128   
1056   496    
-1184  256    
-160   -128   
336    -48    
80     16     
160    64     
144    -192   
592    224    
-272   32     
-144   16     
-176   -240   
112    112    
128    -160   
-32    16     
176    -32    
176    -16    
-16    -64    
96     32     
-16    -384   
96     -112   
80     16     
128    -80    
64     96     
176    112    
112    16     
224    160    
-64    96     
64     -128   
160    -160   
80     96     
160    -80    
-64    16     
-560   -96    
-176   -80    
160    -32    
-128   -592   
240    -272   
48     -128   
144    112    
0      -336   
-32    144    
32     -208   
-64    -176   
96     208    
144    48     
64     208    
64     -160   
-576   96     
-224   -208   
144    80     
-48    -80    
80     -384   
-112   16     
0      -160   
96     112    
80     208    
64     32     
-32    96     
192    -112   
-128   32     
112    -320   
-48    0      
-224   -528   
352    -32    
288    400    
-80    -384   
144    -160   
-32    480    
-48    -592   
0      -320   
160    32     
80     -176   
-256   288    
-80    -272   
192    32     
-48    320    
160    80     
-128   -32    
-16    16     
-320   64     
336    320    
32     -32    
-48    0      
32     80     
32     -256   
0      -80    
-112   512    
-96    208    
48     -192   
96     48     
48     -288   
0      0      
-224   -64    
224    -368   
-1088  -256   
160    80     
96     -160   
0      -272   
-208   -224   
-64    -512   
-96    -320   
-16    -2080  
256    160    
32     320    
-208   -240   
-48    -176   
160    -48    
-80    -80    
16     -144   
-224   -48    
112    128    
-2816  -112   
-48    -176   
-48    -208   
64     -160   
176    -208   
272    -288   
144    -48    
48     -64    
16     -64    
64     -16    
96     16     
32     48     
16     64     
-304   128    
176    176    
-464   80     
208    -80    
-112   16     
256    128    
-224   -48    
336    -624   
80     -224   
-224   -112   
-32    -368   
-240   -64    
48     16     
-32    48     
64     96     
0      -224   
-32    -32    
-304   -32    
128    -16    
-48    -80    
336    240    
-96    272    
-32    -96    
32     -208   
-128   -416   
128    -224   
-176   -32    
48     64     
-128   144    
128    -16    
-224   32     
80     -80    
-16    -16    
64     -144   
64     -64    
-64    -224   
64     -320   
192    -64    
-64    320    
48     352    
-112   -80    
-176   -32    
-48    -16    
16     -16    
128    336    
320    -16    
-224   64     
96     112    
256    -48    
240    544    
-704   -32    
192    16     
96     -16    
-400   -368   
-240   128    
-96    -16    
-224   -32    
-928   128    
-160   80     
-304   -80    
-416   -32    
-32    240    
0      -80    
-608   -416   
-16    -448   
-544   -240   
-80    -464   
-192   -384   
368    16     
-112   208    
192    -48    
-64    -80    
-16    -16    
-544   -368   
240    -640   
208    -448   
352    80     
496    -32    
-96    272    
32     -224   
-256   80     
-400   -32    
-160   64     
-224   -128   
64     -160   
-48    160    
272    -32    
96     64     
-144   0      
-1344  48     
-272   -800   
-240   -528   
-112   -128   
-96    240    
112    128    
368    16     
-176   16     
64     32     
320    -16    
-64    -16    
-192   112    
0      32     
48     304    
-80    -160   
-880   112    
-64    544    
-656   512    
0      96     
128    208    
352    480    
16     336    
224    144    
64     272    
-96    400    
112    -64    
-80    -192   
-64    -112   
96     32     
-192   64     
-128   -240   
176    240    
-304   400    
272    112    
-224   32     
16     -80    
-128   -176   
80     32     
-288   64     
-192   -576   
-64    16     
80     128    
-112   -48    
80     32     
64     -480   
-80    -496   
176    448    
-704   0      
464    288    
-256   -256   
-48    128    
352    -144   
64     16     
192    -96    
-160   80     
-16    -112   
-224   128    
-176   0      
0      -16    
-32    0      
-192   -16    
176    32     
-192   48     
176    144    
96     -32    
-256   -64    
-160   16     
-80    16     
0      -32    
-32    -272   
16     -64    
0      160    
-32    0      
80     -16    
112    128    
-160   64     
128    256    
0      48     
96     -32    
-240   -528   
-240   -384   
-240   112    
-240   80     
-16    112    
192    192    
-96    80     
80     176    
32     48     
-80    -80    
224    64     
0      16     
240    96     
-304   -112   
224    -16    
0      16     
160    96     
-32    32     
16     64     
-32    32     
192    320    
0      96     
-272   0      
-112   32     
-288   80     
-128   -16    
0      -48    
288    0      
32     16     
240    96     
16     64     
0      0      
128    48     
48     112    
-128   16     
-32    96     
80     -32    
-48    -48    
-64    16     
-16    64     
-224   -112   
-64    -112   
336    160    
256    80     
32     -16    
16     48     
-64    16     
-80    48     
16     80     
16     32     
-64    32     
48     16     
96     64     
0      144    
64     32     
48     32     
-96    -16    
-16    64     
160    32     
-80    -64    
64     0      
-160   80     
64     48     
-48    0      
80     16     
48     -48    
-16    64     
-64    16     
32     0      
-48    16     
64     80     
-16    -48    
16     0      
32     96     
0      -64    
32     112    
32     32     
64     0      
-144   -96    
176    32     
96     336    
112    -16    
400    240    
-576   224    
96     -80    
80     160    
96     128    
-112   -112   
-80    48     
336    208    
-272   48     
-48    -64    
272    144    
-416   16     
704    0      
96     -16    
-224   32     
144    288    
-128   208    
-176   -16    
176    32     
96     64     
48     -1216  
352    0      
384    32     
576    64     
-192   -240   
176    144    
-608   -224   
48     -32    
-32    320    
-32    16     
208    0      
112    0      
128    80     
-144   80     
-80    -16    
80     -176   
80     144    
128    80     
-48    -16    
64     32     
128    96     
-80    16     
272    -224   
160    384    
144    -64    
-144   -144   
48     272    
128    -16    
48     -112   
-144   32     
32     192    
64     64     
592    656    
-432   544    
336    -32    
-224   16     
160    320    
160    -432   
-144   96     
-80    608    
112    -688   
176    -368   
-64    560    
272    96     
-16    272    
-112   -688   
96     0      
96     -272   
-32    32     
0      144    
96     32     
32     160    
272    192    
16     224    
224    160    
-32    112    
320    -80    
-64    160    
80     -48    
-16    144    
96     64     
32     32     
-80    -80    
192    48     
-32    -928   
160    -160   
0      -16    
288    -96    
176    80     
-64    272    
80     48     
-144   32     
-48    48     
-64    176    
224    -64    
64     -64    
176    64     
80     -64    
64     48     
224    -240   
64     0      
16     -160   
96     96     
64     16     
224    64     
0      16     
0      48     
16     96     
48     -208   
128    32     
240    112    
-80    256    
48     -144   
32     48     
-96    -128   
16     176    
-32    80     
240    -64    
-64    -128   
112    48     
32     80     
-160   48     
400    160    
32     128    
-112   -160   
256    -176   
0      144    
-208   -80    
144    -32    
112    -80    
32     80     
16     32     
64     -1248  
240    16     
-448   -16    
288    -64    
-48    128    
-112   -144   
-32    -80    
176    16     
96     32     
16     48     
320    -32    
256    16     
-160   -112   
-48    -224   
-96    -16    
112    -480   
128    -208   
-720   -96    
-128   -288   
128    -208   
64     -192   
144    32     
-16    -1168  
-112   -16    
-64    48     
64     -144   
80     -592   
16     -32    
16     -176   
224    144    
16     -16    
128    -176   
-416   0      
-112   -48    
160    -16    
160    -192   
64     -32    
0      -128   
144    128    
160    -448   
80     80     
48     -112   
16     -16    
176    -64    
48     32     
176    16     
16     -416   
-592   -256   
32     -144   
48     0      
64     320    
128    176    
-208   80     
112    -208   
128    -672   
-112   -48    
0      -160   
-16    128    
224    416    
-464   16     
-336   -656   
0      -624   
-464   -256   
320    -32    
-1680  -336   
32     -176   
304    -80    
48     -128   
448    -48    
-128   -736   
-352   0      
-192   -912   
-208   -576   
912    1120   
-320   -144   
-416   48     
-224   -528   
-32    -352   
736    -112   
-368   128    
272    560    
352    -32    
240    288    
256    -160   
256    -112   
0      192    
-64    -1136  
-320   -496   
224    112    
-416   144    
-224   -144   
16     -112   
0      -416   
224    -272   
-144   112    
192    -16    
192    240    
-80    -320   
-160   -256   
-112   -16    
304    240    
-416   -1152  
-16    -416   
352    640    
-16    -368   
128    160    
-208   -448   
-288   -208   
272    -288   
-208   -32    
-96    144    
-80    -496   
-352   32     
176    32     
32     -224   
64     128    
368    -528   
-320   160    
480    -448   
-112   256    
112    448    
-240   -64    
-208   -192   
352    16     
-224   160    
144    -320   
-80    96     
256    -16    
-176   112    
80     -48    
-16    -48    
112    -240   
160    192    
32     -48    
-32    -112   
-144   48     
-192   -128   
176    160    
112    192    
160    224    
-224   -208   
-176   -208   
160    112    
176    144    
-576   -176   
32     144    
-256   208    
-1760  80     
64     496    
-320   624    
160    -32    
272    304    
-208   304    
112    80     
-128   -64    
80     32     
-48    80     
-304   272    
432    608    
-384   -224   
128    -160   
-112   -160   
-144   -80    
48     176    
-144   160    
16     208    
-256   -16    
64     -48    
112    48     
-48    32     
-80    32     
240    176    
-160   -96    
-64    176    
-176   -96    
-224   -16    
-192   -48    
64     -48    
32     48     
-288   -32    
-176   80     
-48    304    
112    80     
-224   -112   
48     32     
-272   -48    
272    192    
-176   0      
224    400    
-112   -16    
-96    -128   
-224   -112   
16     -112   
208    48     
64     48     
64     0      
-176   -48    
112    -48    
-80    48     
-48    64     
-16    -64    
-288   -32    
-160   -48    
240    112    
48     64     
32     0      
16     32     
-96    -16    
-224   -80    
-32    0      
-64    64     
96     -16    
144    48     
-160   -80    
0      16     
-688   -96    
192    64     
80     288    
-128   160    
32     64     
64     -64    
96     32     
-96    -16    
16     16     
80     80     
64     16     
-192   32     
-48    16     
-288   -16    
32     0      
-176   -48    
144    80     
96     32     
-144   -48    
16     -48    
-64    48     
-32    32     
80     64     
-16    32     
-80    -32    
192    128    
-240   0      
96     0      
-192   48     
160    48     
144    32     
-128   0      
64     -32    
-288   32     
-128   -48    
128    48     
-176   64     
-32    -32    
48     16     
0      64     
48     64     
-16    0      
0      64     
80     0      
-96    -64    
-32    -272   
48     128    
160    32     
320    -160   
288    -32    
80     -160   
32     -64    
-80    -32    
-32    -144   
48     192    
144    224    
-96    -96    
96     -32    
-64    64     
0      -128   
224    128    
224    160    
464    192    
32     48     
32     -176   
48     -208   
144    352    
-176   144    
576    384    
-544   448    
-240   -592   
-16    -128   
368    16     
240    -352   
64     288    
-16    32     
-448   -176   
-272   752    
128    -544   
304    288    
-176   624    
272    -64    
32     -48    
0      176    
16     -160   
192    -144   
-256   224    
80     48     
-224   32     
224    0      
16     -256   
-64    128    
128    176    
-272   -48    
464    -272   
-320   144    
288    304    
80     288    
112    64     
-144   48     
192    176    
-128   16     
80     -48    
-32    -128   
-16    -96    
192    -208   
96     112    
0      16     
256    176    
16     320    
-112   80     
16     112    
64     160    
-208   -32    
-96    -16    
32     32     
96     48     
192    160    
-112   -16    
16     -48    
-176   -32    
64     64     
0      48     
0      192    
64     112    
224    0      
128    0      
48     0      
96     16     
32     128    
352    96     
-144   -16    
144    112    
-48    -16    
0      16     
80     32     
16     32     
112    -16    
128    80     
336    224    
-176   240    
-272   -112   
0      0      
0      224    
112    -32    
16     -16    
-32    -32    
144    112    
-112   -256   
256    -720   
-64    192    
-288   32     
112    64     
-240   0      
240    64     
144    144    
-144   208    
-80    80     
-64    160    
16     16     
32     -48    
176    -48    
112    96     
48     192    
48     -496   
-112   -16    
-112   64     
0      128    
432    400    
-240   464    
-16    -32    
192    -176   
-192   -256   
240    -240   
80     32     
-48    -128   
128    112    
0      256    
64     16     
192    -240   
-16    0      
-16    0      
192    224    
-288   128    
-80    48     
112    96     
256    272    
-64    -32    
16     160    
-32    64     
-128   -304   
-128   -320   
64     -256   
-240   0      
96     -64    
128    16     
96     -768   
272    208    
-128   112    
-64    176    
320    -64    
-80    -144   
-64    -288   
144    -256   
128    -32    
-160   32     
16     0      
96     -176   
128    272    
368    160    
144    96     
-32    -16    
-32    64     
-64    -224   
48     64     
-16    -16    
272    -192   
16     176    
144    368    
-208   -16    
48     64     
96     32     
80     144    
176    352    
48     576    
-112   144    
-80    -528   
224    128    
128    -160   
160    -240   
64     336    
432    320    
-448   -64    
256    -80    
32     208    
48     -128   
176    176    
-48    -448   
48     80     
176    -432   
240    144    
32     -240   
320    432    
-304   -576   
-80    208    
-384   80     
160    -480   
272    384    
368    192    
160    320    
-64    -192   
-64    176    
-240   -720   
272    800    
336    880    
208    -976   
368    0      
-384   768    
-208   -368   
-128   -64    
0      144    
144    -112   
-208   -16    
128    224    
-16    -128   
-624   -992   
400    -336   
224    768    
368    432    
432    -304   
512    -96    
-512   -464   
-304   176    
-304   -224   
-128   -1024  
496    -240   
240    80     
384    144    
144    -176   
32     -272   
64     96     
-144   -112   
32     -96    
0      16     
112    -64    
0      128    
160    -144   
96     -512   
80     112    
-32    -80    
16     -48    
128    -128   
80     16     
-256   32     
160    64     
48     32     
80     96     
128    320    
16     176    
112    0      
464    272    
-192   0      
128    176    
144    160    
-32    -144   
-64    48     
-160   -64    
-16    -80    
96     64     
-128   -224   
240    -112   
-80    32     
208    -16    
144    -32    
160    32     
-64    -16    
0      160    
64     128    
-224   -16    
160    -16    
-32    -80    
-32    128    
0      -16    
-64    176    
336    224    
-96    32     
-176   -96    
224    -80    
-32    -176   
32     -80    
48     -80    
-224   96     
16     0      
-144   80     
240    -64    
0      -64    
-16    -192   
64     -144   
-544   -192   
48     0      
-752   -128   
128    -32    
-64    -64    
80     16     
-240   32     
272    -16    
-144   144    
96     -608   
144    64     
96     -144   
304    -16    
0      96     
0      -112   
-112   -64    
16     -80    
-240   64     
176    32     
80     0      
32     -96    
-128   32     
512    80     
-496   208    
320    -672   
160    -80    
-176   -32    
80     -32    
32     32     
112    144    
-80    -48    
-16    -192   
-592   -64    
-80    -48    
-704   -80    
96     -16    
64     32     
144    -48    
192    32     
48     -272   
64     96     
-48    48     
32     -64    
128    112    
272    80     
-160   0      
16     32     
-256   -112   
-48    -128   
-448   -128   
-32    -64    
32     48     
-48    48     
128    80     
16     -192   
32     -64    
-208   0      
16     0      
-64    16     
48     0      
-240   16     
160    -32    
-160   0      
0      -32    
16     -16    
176    16     
64     -16    
144    -48    
80     80     
96     -160   
144    -16    
128    32     
-400   -32    
-224   -16    
-64    -96    
-112   -48    
112    16     
64     32     
16     -80    
-160   0      
-512   -144   
144    48     
-656   -128   
-48    48     
-16    16     
-112   48     
-160   -32    
-544   -32    
-80    32     
-400   -112   
-64    -176   
64     -224   
-128   -192   
-1408  -96    
0      0      
-32    -176   
128    32     
-96    208    
128    64     
-80    80     
-480   -96    
192    -112   
-416   -240   
-224   -96    
224    -80    
32     -176   
336    176    
-464   -304   
160    -352   
48     768    
96     -800   
560    -208   
288    288    
-432   -304   
-144   -160   
-608   144    
576    16     
-592   -112   
128    80     
-128   144    
208    192    
-656   -576   
-576   -64    
80     -224   
-176   -320   
288    -176   
432    -144   
192    80     
224    -496   
160    64     
-592   -160   
128    48     
-480   464    
48     -32    
-224   48     
144    -176   
-224   -192   
128    112    
-416   -208   
80     -96    
-128   64     
144    176    
0      80     
96     32     
96     -16    
224    -48    
-400   80     
-80    48     
-80    -16    
-64    224    
304    144    
112    64     
144    -112   
-1024  -16    
32     64     
-16    -96    
-160   -48    
64     0      
48     64     
-144   96     
-208   -48    
-32    -16    
-224   0      
32     -48    
0      -64    
-48    -48    
-208   -224   
-112   144    
-448   -32    
208    80     
-160   16     
-16    -16    
-32    32     
-64    -48    
32     32     
-224   32     
16     16     
32     -16    
224    32     
-128   176    
-176   288    
-112   -96    
224    -16    
-192   -32    
80     -32    
0      -48    
-112   0      
16     -16    
64     -80    
80     80     
32     80     
64     -64    
64     0      
64     96     
-224   -80    
-16    -144   
0      -16    
-16    144    
-560   -192   
48     -176   
160    96     
-96    80     
16     64     
128    64     
-16    32     
80     144    
32     80     
-80    0      
-80    32     
-208   64     
192    112    
-160   -48    
112    48     
-272   -256   
64     16     
32     80     
-112   -16    
144    320    
-112   240    
-48    -96    
-16    -64    
-32    80     
-112   -48    
176    -112   
48     -64    
208    416    
256    608    
-240   176    
288    128    
0      288    
240    384    
64     0      
80     -48    
144    -256   
-16    -16    
-192   -176   
-256   -32    
-48    -80    
32     16     
16     128    
-80    32     
-128   16     
80     -32    
-48    176    
240    -128   
-224   -96    
-144   64     
112    208    
-48    176    
16     64     
64     208    
272    -176   
0      -240   
-240   176    
-240   224    
16     -176   
-240   64     
-96    128    
160    -272   
224    304    
96     176    
48     -224   
64     96     
0      16     
80     176    
176    -48    
-64    128    
-208   -400   
80     192    
128    64     
208    32     
-80    -48    
144    160    
-16    560    
-48    -256   
144    -112   
-16    128    
176    240    
-176   96     
144    -320   
-416   -448   
320    -32    
0      176    
144    0      
-48    -96    
48     320    
160    112    
-192   -48    
96     -496   
-112   -224   
96     96     
144    16     
80     0      
-16    -208   
-64    208    
112    80     
-128   48     
208    64     
-336   -272   
192    -368   
-160   -32    
192    96     
224    -336   
256    96     
-80    0      
32     32     
16     32     
-192   0      
-48    32     
-240   -16    
80     32     
528    304    
-368   48     
480    304    
-224   128    
-288   -272   
-48    0      
-48    -448   
640    48     
-64    64     
-128   -64    
112    -80    
624    272    
-80    48     
1536   672    
-496   208    
-224   -16    
-896   -352   
368    -48    
16     -16    
-144   32     
256    80     
-384   -176   
-32    64     
-32    -128   
48     -16    
320    -16    
80     96     
-32    -80    
48     48     
-112   64     
96     48     
-16    64     
-112   48     
176    -48    
0      -64    
192    128    
160    -240   
-128   -80    
-176   -512   
224    -64    
224    48     
128    64     
-128   -144   
416    -144   
-272   112    
336    96     
0      32     
16     32     
-64    48     
-160   -192   
304    0      
288    -240   
-96    -224   
112    -80    
48     160    
0      -528   
224    16     
96     16     
-96    -32    
-224   0      
112    48     
176    64     
208    -128   
-128   80     
320    0      
192    16     
-176   -480   
224    80     
-16    0      
-64    96     
176    -624   
160    32     
-128   -112   
80     -32    
192    192    
-16    64     
48     16     
224    96     
64     96     
-96    -112   
144    112    
32     -48    
112    -128   
0      -160   
0      112    
-48    -272   
-128   -64    
112    64     
16     -48    
128    0      
-224   -192   
16     -176   
192    -128   
176    64     
144    -16    
-32    0      
-144   -224   
80     96     
112    16     
128    0      
32     -144   
0      32     
-64    -16    
240    -432   
48     0      
-112   16     
432    -720   
96     -96    
240    -976   
-16    -80    
-48    -48    
112    -96    
144    112    
64     -80    
16     -224   
-304   -48    
32     -304   
176    128    
224    -64    
176    64     
112    -32    
96     -112   
64     -112   
96     -400   
-16    -128   
320    32     
192    192    
-16    64     
-144   -96    
-112   -80    
-128   -64    
256    -160   
96     -64    
-16    -128   
32     -64    
-512   32     
64     -128   
64     0      
64     -96    
0      0      
160    160    
160    16     
192    160    
-32    -144   
-160   -128   
224    -160   
144    -96    
48     -16    
-240   -32    
0      -16    
-832   -208   
208    80     
96     80     
192    96     
256    0      
112    -192   
160    -192   
-80    -688   
192    -272   
96     560    
96     272    
-32    -176   
96     64     
16     64     
-48    0      
-480   -96    
80     -160   
-1200  96     
128    96     
64     -144   
176    -160   
0      208    
144    -176   
32     128    
32     -48    
-96    -336   
256    128    
-80    0      
144    128    
336    48     
-160   -176   
-304   32     
-240   64     
80     -176   
160    160    
224    144    
-256   448    
240    -112   
96     -160   
224    80     
256    -96    
144    -64    
624    -176   
176    -528   
192    -96    
-256   80     
-192   -112   
-368   80     
-96    0      
-48    144    
-48    144    
112    144    
80     -576   
512    0      
32     -816   
80     0      
608    80     
-144   160    
464    192    
-256   -144   
-960   -128   
-48    -16    
-192   224    
320    208    
448    64     
384    -160   
64     128    
224    112    
-80    240    
48     -272   
-112   -224   
32     208    
-48    32     
-720   160    
176    -240   
96     -32    
64     48     
192    112    
-48    -112   
128    -144   
0      -16    
224    192    
48     144    
32     -32    
128    -256   
-48    -48    
-32    -80    
96     64     
-272   64     
192    48     
-224   144    
96     -192   
-160   -304   
48     -240   
-1168  112    
16     48     
96     80     
-240   -48    
-48    16     
128    -208   
-336   128    
0      208    
192    -112   
-160   -80    
48     16     
-128   96     
-80    -16    
-32    -128   
128    -96    
32     144    
-208   64     
-16    16     
-496   -80    
-16    80     
-112   32     
-16    0      
64     112    
-144   224    
64     112    
-1040  -48    
176    112    
-144   -32    
64     0      
128    64     
48     80     
-64    -112   
-208   -128   
16     -160   
-32    112    
16     -96    
-224   -16    
16     64     
-624   -96    
-160   64     
-640   -128   
-32    -16    
-496   0      
208    320    
-384   176    
-64    96     
-224   -128   
64     32     
176    -16    
176    176    
-128   48     
-112   -64    
64     112    
-224   272    
-208   32     
-16    16     
144    -128   
64     -112   
-48    80     
-208   -608   
192    32     
-80    -96    
-160   -16    
160    112    
-64    32     
-288   112    
-192   -224   
48     112    
32     352    
16     32     
-128   -432   
-96    -272   
-160   -160   
48     224    
64     128    
-240   -128   
208    16     
176    64     
240    432    
-320   -288   
-96    64     
-80    -16    
-64    -464   
-128   -112   
-176   -64    
16     256    
240    48     
-272   16     
64     -16    
-832   256    
0      -32    
-304   -192   
-176   32     
208    80     
240    128    
-144   -32    
32     -304   
-48    -176   
-32    224    
112    208    
-64    16     
-112   0      
32     80     
-96    64     
-272   -144   
80     48     
32     -64    
128    0      
80     96     
192    32     
-128   -16    
-64    -176   
-128   -80    
-128   -80    
80     32     
48     48     
64     96     
-176   32     
128    96     
-864   -64    
96     16     
32     0      
80     48     
96     80     
-32    0      
-32    16     
-192   32     
128    48     
-192   -80    
112    112    
-16    0      
112    32     
-144   -32    
432    416    
-928   0      
368    -48    
-224   96     
432    288    
352    400    
-448   32     
-128   -352   
-80    -128   
208    128    
384    208    
-160   -80    
160    64     
352    176    
-16    -32    
48     32     
-16    48     
48     48     
-208   48     
-96    -64    
-208   -128   
432    192    
112    160    
128    48     
64     208    
-352   -16    
624    128    
-656   16     
176    240    
-256   -160   
784    112    
-480   16     
96     80     
-48    -16    
-128   32     
96     32     
-144   0      
400    224    
-480   32     
-112   368    
0      112    
320    -176   
-144   32     
-16    32     
-288   -16    
176    48     
-48    32     
208    96     
-80    80     
32     112    
144    -16    
-48    128    
48     32     
-96    32     
64     -64    
160    144    
-96    -16    
48     64     
160    80     
-240   -192   
320    -128   
-128   176    
368    112    
96     0      
-32    -96    
32     176    
64     -80    
144    16     
-80    80     
112    192    
-48    96     
128    -16    
-320   64     
96     16     
272    144    
48     64     
-48    64     
-32    48     
208    64     
-16    112    
112    128    
80     0      
-112   48     
-64    0      
64     208    
-16    96     
32     -16    
-288   48     
176    160    
112    496    
480    224    
-144   160    
-16    288    
-80    -288   
64     -208   
128    144    
-16    64     
32     16     
-48    -144   
128    128    
-48    272    
80     112    
-128   -144   
0      80     
16     160    
0      -640   
16     -32    
-96    96     
0      96     
144    0      
-16    32     
-16    320    
224    352    
-304   -80    
80     -288   
176    224    
176    128    
16     -128   
48     -144   
96     0      
96     -368   
-32    80     
-304   -336   
272    -592   
256    480    
320    304    
-160   -112   
16     64     
32     -16    
192    208    
48     32     
-208   272    
-80    -256   
-96    48     
-112   96     
16     -240   
176    96     
208    -912   
224    -16    
208    32     
96     96     
80     32     
-160   -80    
224    240    
-112   -80    
96     960    
112    192    
-112   -288   
-80    80     
208    -16    
176    0      
0      160    
-96    -288   
96     48     
16     -352   
16     112    
32     -80    
208    144    
-16    -144   
-32    -144   
144    64     
-16    64     
336    -432   
0      400    
32     224    
16     -288   
48     208    
-112   -384   
96     -32    
48     128    
16     0      
-64    80     
32     -128   
-80    -128   
176    0      
48     -32    
-176   288    
48     -208   
96     -400   
-48    112    
192    -432   
-96    0      
160    -144   
112    256    
80     16     
96     0      
-112   240    
80     -112   
48     -144   
0      128    
80     -80    
176    -560   
112    464    
160    272    
144    224    
-16    -32    
144    -368   
176    144    
416    176    
-176   -384   
64     0      
80     -240   
48     -48    
-96    96     
80     -48    
32     -656   
224    -192   
32     -112   
144    -112   
64     -256   
64     -400   
656    96     
512    -112   
400    112    
-144   112    
-304   -432   
96     0      
-112   -224   
-160   -32    
-304   16     
336    -368   
752    48     
-16    240    
128    -128   
304    -320   
384    -240   
240    96     
-96    -304   
-144   -176   
-80    -64    
144    -64    
80     96     
144    -336   
384    -128   
-944   64     
256    32     
528    352    
-416   208    
80     -304   
80     -752   
-144   -384   
176    -32    
-80    -48    
192    -32    
-80    80     
96     16     
-16    80     
16     -224   
0      -80    
-736   -144   
16     96     
112    0      
32     -96    
-112   -304   
128    -208   
64     96     
176    336    
-208   80     
304    -64    
-384   384    
80     -96    
80     -80    
-144   -16    
176    96     
-448   -48    
288    -144   
400    -64    
-128   0      
-80    -80    
64     -32    
96     48     
176    -208   
128    80     
96     -80    
0      -64    
192    -96    
16     96     
-80    96     
16     -128   
-224   128    
80     16     
-80    -48    
16     -48    
0      32     
256    16     
-608   64     
-144   -656   
0      -96    
0      160    
-64    240    
-128   160    
-240   -656   
-112   -240   
80     -112   
-224   -16    
96     -32    
-464   -64    
96     -176   
0      -176   
80     -400   
-16    -544   
-16    -368   
16     0      
-80    -496   
48     112    
-144   -48    
272    464    
-16    304    
-112   -96    
-80    -144   
-112   368    
-16    304    
176    -64    
-1072  -128   
48     -176   
48     48     
-32    -176   
-64    48     
-128   -512   
16     -144   
288    1072   
-528   -1280  
-288   288    
32     16     
-240   -32    
80     -208   
-448   80     
0      208    
-64    96     
144    224    
-400   -352   
112    -256   
192    272    
224    -368   
208    160    
-64    0      
160    -16    
-224   64     
48     -48    
-16    80     
64     -32    
-240   -176   
-128   -160   
-48    -48    
64     -160   
96     80     
320    0      
-336   32     
0      -48    
-672   -32    
0      16     
256    0      
-48    0      
144    -32    
-32    0      
160    64     
-112   80     
-64    -64    
112    32     
112    80     
96     128    
-752   0      
-48    16     
64     32     
-64    0      
-96    16     
-1040  16     
-48    0      
96     -48    
80     48     
256    128    
-176   0      
-112   -272   
208    48     
-80    -64    
176    96     
128    0      
-352   -48    
32     32     
16     16     
-48    -48    
-80    -16    
-48    32     
-352   16     
-16    16     
-176   -16    
-128   -16    
-208   -224   
208    32     
-144   192    
304    64     
-272   -128   
16     -16    
-240   32     
-16    -64    
144    -272   
-32    240    
352    80     
32     -32    
-128   -64    
-2672  -48    
96     48     
-48    80     
0      80     
192    -160   
-112   32     
112    128    
32     16     
-208   64     
16     -144   
400    64     
128    64     
32     -32    
400    16     
-64    128    
-768   -64    
176    96     
16     -48    
-160   -32    
160    96     
-32    48     
-272   64     
256    32     
-288   0      
-448   160    
64     -16    
-192   0      
208    -64    
144    -64    
176    112    
-112   -32    
-144   -80    
-2656  -96    
0      112    
128    -64    
64     16     
112    48     
160    32     
-32    32     
32     -32    
32     128    
-160   32     
16     0      
-16    144    
336    128    
-368   -160   
-304   -16    
-1184  -112   
32     64     
384    112    
-80    64     
64     16     
-192   -32    
-144   48     
-64    0      
320    16     
-128   32     
-96    32     
-128   64     
192    80     
-448   -96    
96     64     
-176   64     
-112   128    
128    80     
-160   -16    
-96    -16    
-112   128    
112    112    
128    48     
-208   -16    
96     -48    
-128   32     
-160   -288   
-176   -32    
-80    -192   
16     48     
32     -208   
64     176    
-16    -16    
32     144    
0      304    
32     -128   
0      -592   
-32    464    
48     144    
-384   144    
288    -240   
0      224    
48     16     
-112   16     
112    32     
-320   0      
-208   272    
336    80     
-16    -64    
48     80     
224    -432   
112    208    
112    80     
-272   -48    
-96    16     
352    176    
0      496    
-128   -320   
-352   -32    
112    112    
80     64     
-32    320    
48     -512   
160    624    
16     -256   
208    -128   
-48    128    
-176   304    
48     -128   
32     -272   
-16    816    
-272   -336   
96     144    
-320   32     
16     -112   
144    144    
0      192    
0      -32    
112    96     
-208   336    
-96    -912   
48     496    
112    288    
-112   -464   
80     -128   
160    160    
96     208    
160    80     
16     -48    
96     64     
-16    48     
176    -400   
64     0      
192    256    
160    160    
-96    400    
64     16     
0      224    
320    816    
-336   320    
-192   112    
-112   32     
160    48     
80     96     
224    -128   
48     96     
-80    -32    
288    144    
-192   -48    
-96    -352   
112    -64    
-32    -48    
0      -240   
48     -80    
-16    112    
48     -112   
32     64     
48     16     
48     -32    
64     -32    
128    48     
128    64     
-32    -96    
80     -128   
32     -80    
-80    -48    
48     -32    
0      -16    
160    256    
-80    288    
48     64     
0      -32    
-32    -48    
112    208    
32     0      
32     64     
112    -48    
-176   -240   
288    -240   
160    96     
112    640    
144    80     
-272   32     
16     -48    
48     112    
64     80     
32     -192   
-176   288    
192    160    
32     -160   
208    -240   
-64    -336   
-80    -32    
-80    -224   
560    256    
-320   608    
16     192    
-208   -128   
48     400    
176    64     
80     -128   
128    -432   
32     -320   
32     -176   
-192   -944   
368    16     
544    176    
-224   224    
-48    16     
-128   0      
0      -64    
-336   -320   
192    -320   
-128   96     
-144   -288   
96     -240   
288    208    
16     48     
192    208    
288    -208   
-144   160    
32     -96    
-224   368    
304    112    
80     48     
256    -80    
256    256    
304    416    
-96    304    
0      144    
16     -32    
144    32     
-80    -304   
48     144    
192    -304   
48     176    
-80    -480   
208    0      
-48    368    
16     80     
-32    32     
32     -128   
-48    -288   
-32    -128   
64     656    
368    192    
224    32     
176    -240   
-48    -112   
224    -384   
32     48     
384    -128   
-96    224    
-272   -288   
48     -64    
128    224    
208    160    
48     208    
48     160    
112    96     
160    -336   
240    112    
-128   32     
272    48     
-96    240    
0      80     
16     -112   
-96    0      
240    -256   
160    48     
112    48     
-16    192    
144    -240   
272    48     
-16    464    
80     256    
96     208    
80     96     
-112   -112   
32     384    
160    144    
-16    -304   
192    336    
160    -96    
128    -624   
0      48     
-96    -336   
-128   -512   
224    32     
-96    -256   
64     -112   
96     -688   
592    -16    
96     528    
-144   -128   
48     32     
64     96     
16     -400   
-64    -160   
-16    -432   
-48    48     
128    -176   
64     80     
336    112    
-32    -384   
80     -32    
-32    -336   
144    -368   
-416   -656   
-64    -176   
48     224    
176    -32    
208    64     
-272   -48    
176    32     
-112   0      
-64    -208   
288    0      
-1376  -32    
96     -144   
16     -128   
112    -80    
128    96     
208    -288   
-272   -160   
-16    -320   
272    128    
-80    -144   
48     -80    
240    16     
32     128    
-336   -64    
64     -64    
-880   -64    
272    240    
240    176    
144    -64    
-80    -96    
48     -16    
32     -80    
-32    -640   
192    96     
96     48     
-32    0      
144    -80    
256    16     
320    48     
-304   -128   
-256   -32    
224    -32    
144    48     
368    -32    
176    16     
-16    -80    
-496   -16    
80     -464   
16     0      
144    48     
-32    48     
16     -16    
80     -96    
128    0      
-160   -96    
-112   0      
16     0      
-480   -80    
160    -128   
96     -96    
0      -48    
-16    0      
64     -208   
64     48     
32     -256   
128    64     
-128   16     
272    64     
-400   -160   
400    -16    
-736   -64    
304    -32    
-640   -16    
64     -176   
-944   -144   
32     144    
144    32     
144    80     
96     -16    
144    -32    
64     208    
-176   -128   
240    64     
-176   80     
64     -16    
224    32     
208    16     
-208   -16    
0      -96    
-160   16     
-80    -144   
80     -48    
368    -176   
-96    192    
176    -496   
-32    -112   
-720   -80    
304    32     
0      128    
-352   144    
-256   -80    
560    288    
-720   144    
208    -112   
-352   -80    
576    -96    
144    0      
144    -128   
528    32     
-64    48     
0      -112   
-128   -160   
160    32     
-128   176    
208    144    
48     -16    
144    128    
-272   64     
208    16     
-48    64     
0      -96    
80     0      
-1072  32     
-224   32     
-192   -176   
112    32     
224    208    
-1248  32     
32     -144   
80     48     
32     -192   
208    -80    
-448   240    
-48    -448   
160    64     
-160   -48    
352    80     
-560   -192   
-368   32     
-144   16     
208    -64    
80     80     
-304   -176   
-256   -32    
-2224  -16    
-320   -32    
192    704    
-416   -1088  
64     304    
-128   384    
-224   -816   
224    272    
-48    0      
-176   240    
-304   -16    
160    -96    
-192   304    
-32    160    
-80    -80    
432    192    
-224   96     
-96    64     
80     -336   
-112   -720   
-128   -224   
-288   -128   
144    -64    
96     -336   
64     -160   
0      0      
-48    16     
-64    0      
-16    32     
-144   -48    
-432   32     
-48    80     
-1024  -448   
32     -496   
48     -16    
-80    208    
32     -16    
320    224    
-112   176    
-192   80     
-48    -112   
0      48     
-176   -96    
-272   -256   
32     -160   
-192   -80    
-288   -48    
-1104  -144   
144    64     
-96    64     
160    -80    
-272   -752   
80     -144   
32     112    
-160   16     
-48    80     
-80    -48    
-16    -96    
48     -128   
160    -144   
64     -144   
112    48     
-320   368    
32     144    
-688   144    
192    128    
-112   80     
32     80     
32     128    
16     240    
80     96     
-144   144    
-144   80     
-80    0      
-16    -32    
0      -48    
96     -48    
80     32     
-64    -80    
-864   128    
176    240    
-144   -112   
-48    80     
0      -32    
-32    144    
64     48     
-304   -64    
112    -224   
-192   -64    
64     64     
-48    160    
320    304    
-512   0      
96     96     
16     112    
80     240    
96     224    
224    192    
32     112    
-240   -176   
0      -160   
80     160    
-144   112    
48     144    
48     176    
16     176    
16     208    
-256   -448   
-32    -256   
-144   -160   
-144   -208   
288    -304   
16     -192   
160    208    
-208   -16    
-96    -112   
-16    -368   
256    192    
96     192    
256    0      
-384   592    
48     0      
-368   112    
96     48     
-16    128    
208    464    
48     592    
-288   352    
32     256    
224    240    
-16    64     
48     32     
-80    128    
80     64     
336    192    
-576   16     
-48    48     
-160   48     
224    224    
-48    240    
-464   -864   
-480   -16    
-64    -64    
-96    144    
96     96     
144    0      
224    192    
-240   -176   
-400   -96    
432    -432   
-208   -80    
80     -48    
-32    112    
-32    -48    
-16    48     
592    -192   
64     -320   
432    -48    
128    80     
-32    144    
176    80     
-16    -48    
0      64     
64     -160   
64     -432   
-288   -320   
480    -64    
-144   480    
80     -80    
144    288    
-96    240    
160    112    
-128   256    
96     -16    
128    112    
352    336    
-400   144    
-368   -80    
-192   -112   
192    256    
320    496    
-160   576    
96     208    
-240   -80    
-192   -48    
512    272    
112    320    
-384   -720   
-64    -208   
-304   592    
192    -160   
352    -400   
64     -64    
240    480    
-224   320    
-272   -592   
160    -320   
256    256    
112    160    
-32    -64    
-208   -240   
112    48     
80     208    
16     -48    
192    432    
-448   -528   
-32    -16    
432    336    
304    -304   
-16    320    
48     -208   
176    -192   
96     224    
-96    112    
48     -304   
128    224    
256    608    
-16    -96    
16     -48    
32     192    
16     208    
-32    -64    
64     -16    
-144   48     
144    64     
112    112    
-32    -144   
96     128    
128    -672   
224    128    
-224   -208   
0      -32    
-48    32     
128    -16    
0      -16    
64     160    
336    480    
128    16     
0      16     
-128   112    
208    160    
-80    -144   
32     16     
128    -80    
160    -64    
-80    16     
-80    96     
-64    16     
-48    -128   
80     -16    
-112   80     
0      16     
192    112    
112    0      
-48    -128   
144    -112   
240    32     
48     208    
-16    64     
16     16     
64     -224   
-112   -64    
-80    16     
-64    160    
-32    -16    
96     0      
-16    16     
0      48     
128    0      
288    32     
160    64     
-48    -48    
-128   48     
32     -240   
-80    -64    
80     -448   
-336   -224   
-256   -240   
208    48     
96     64     
400    288    
144    48     
-128   0      
-128   16     
-48    -128   
128    16     
240    -32    
192    96     
32     -368   
-128   0      
240    0      
-16    32     
96     16     
128    64     
-32    -16    
64     64     
-112   16     
144    -48    
-16    32     
-16    -208   
256    112    
64     -16    
16     112    
112    0      
-96    -80    
32     -144   
160    48     
48     -64    
16     16     
-32    48     
-16    144    
-64    32     
160    -80    
32     -752   
96     -64    
80     0      
16     0      
80     32     
0      0      
-80    64     
112    0      
32     -16    
16     32     
112    -432   
208    -64    
192    16     
208    -704   
-112   -320   
96     -304   
64     144    
160    -512   
-160   -64    
112    -64    
352    320    
-352   160    
592    208    
-400   -208   
-240   -96    
96     -32    
-400   80     
-304   -96    
192    -128   
-256   -16    
768    144    
-240   384    
32     -304   
304    -128   
560    -192   
48     240    
32     160    
416    32     
-64    -480   
192    -304   
80     -160   
288    192    
-352   256    
160    -80    
-1744  -160   
176    16     
-96    32     
-64    -48    
-16    288    
160    -224   
160    -112   
48     -160   
112    -144   
-48    208    
240    -304   
96     144    
112    16     
-96    0      
176    112    
-1216  -32    
48     -672   
384    144    
-16    176    
272    112    
288    144    
-256   240    
-112   -848   
-304   640    
416    -288   
-96    -464   
96     304    
208    0      
-576   -240   
-16    -768   
-528   -304   
176    -192   
-1360  32     
448    144    
-112   64     
-48    -240   
-256   -16    
128    -320   
32     0      
-16    -32    
144    16     
64     224    
0      160    
-48    16     
160    80     
-128   32     
32     64     
-496   64     
336    16     
-320   -48    
64     -128   
-64    96     
256    48     
-16    -96    
-32    -144   
32     32     
-176   0      
-32    -112   
304    32     
144    -32    
112    16     
128    16     
-176   -16    
32     -32    
-416   -80    
80     -96    
224    176    
16     96     
176    64     
80     -1120  
-80    -64    
-64    16     
-16    -272   
64     0      
80     48     
-368   -128   
208    16     
-224   -112   
64     -96    
-80    144    
160    -128   
48     64     
16     -256   
0      48     
-336   32     
-112   -48    
-144   48     
304    80     
32     80     
-16    -80    
-176   -112   
-32    64     
-256   -16    
64     32     
-336   -64    
272    -96    
32     80     
0      -48    
-96    32     
-176   96     
-288   96     
-144   32     
176    32     
-96    16     
160    32     
-112   -112   
288    -144   
192    96     
48     176    
16     80     
-112   -144   
-64    0      
-304   -272   
-288   -112   
0      -80    
-352   48     
32     16     
-1296  -144   
96     128    
16     64     
-80    64     
80     -208   
-64    -128   
-480   -160   
-144   -112   
-64    -160   
80     48     
-128   -112   
16     -96    
-368   64     
-336   16     
0      -128   
-64    -304   
-16    -16    
112    -64    
-32    -32    
368    128    
-304   160    
-368   96     
-16    -64    
32     -80    
128    -32    
-128   48     
16     -64    
0      80     
96     64     
-16    336    
-16    48     
-64    32     
-448   144    
-112   -80    
-1024  64     
-32    -112   
96     -160   
208    -64    
-48    -128   
192    224    
-112   240    
-336   368    
96     256    
32     208    
32     320    
-192   -336   
96     -272   
-288   -320   
160    1024   
-320   112    
0      -192   
224    784    
352    432    
-656   -720   
-208   -1024  
80     672    
64     48     
0      288    
144    224    
-384   -544   
-176   0      
240    320    
-64    -192   
48     -96    
-32    528    
240    224    
80     -96    
-240   416    
-272   -16    
96     528    
-320   672    
-336   -1104  
-32    -528   
0      752    
16     -96    
-576   656    
224    1120   
64     -624   
-560   -224   
-208   512    
-816   -704   
-1824  -416   
416    1088   
320    -240   
128    -64    
96     -528   
160    656    
-160   -80    
-32    0      
144    -48    
64     464    
-288   -528   
-48    368    
128    16     
-176   -208   
240    432    
-864   -80    
336    -112   
-16    16     
336    -64    
-448   -16    
48     96     
240    -48    
-208   -16    
208    48     
-112   -16    
-160   -192   
-224   64     
224    0      
-32    64     
128    96     
-288   32     
-96    16     
80     48     
80     128    
128    32     
-128   112    
0      16     
32     16     
-32    -176   
112    -16    
0      208    
16     160    
96     64     
-64    0      
64     16     
96     -336   
-192   -144   
-96    16     
256    240    
-144   112    
-32    -112   
-80    64     
-208   -96    
80     32     
-96    16     
112    128    
-32    656    
224    496    
-368   144    
-32    112    
96     112    
112    96     
-96    144    
64     80     
144    48     
80     16     
176    32     
144    80     
288    336    
-192   0      
0      -16    
0      128    
64     64     
-32    48     
0      272    
96     208    
144    -16    
64     48     
-160   -192   
-16    -16    
-176   32     
176    144    
128    0      
224    64     
-288   -16    
-96    -16    
48     48     
16     32     
-48    -208   
320    -352   
16     -32    
-80    80     
-96    -32    
80     64     
0      32     
256    128    
-96    96     
-80    -32    
-336   80     
-240   -224   
224    16     
128    112    
128    -32    
96     0      
0      96     
-208   32     
-32    48     
112    32     
80     48     
-144   64     
-112   64     
-32    0      
96     0      
-16    -32    
192    -32    
240    304    
32     32     
-144   -592   
-240   -208   
64     32     
128    192    
-48    80     
128    16     
-128   16     
240    64     
240    48     
-16    80     
-64    16     
-32    96     
48     48     
128    48     
-96    -48    
16     -528   
32     64     
80     16     
112    64     
0      32     
16     16     
-96    128    
48     80     
48     16     
-32    0      
64     64     
80     32     
-112   -96    
224    96     
-48    32     
128    -336   
32     16     
16     -1072  
80     32     
32     32     
16     48     
128    144    
112    80     
64     32     
128    144    
192    32     
-96    0      
96     -64    
192    160    
-32    80     
64     -64    
192    -96    
64     -384   
-64    96     
-48    -160   
80     64     
-48    32     
-32    48     
-48    -256   
-160   -32    
96     48     
16     -32    
-64    -272   
-16    -240   
272    400    
80     96     
-80    -192   
240    -384   
96     -64    
256    -752   
-96    -256   
320    64     
-224   368    
32     -176   
-160   64     
32     -48    
80     -128   
-208   96     
1264   -432   
-128   -1216  
864    -320   
1008   848    
-752   -512   
-144   -48    
-592   720    
256    -480   
96     16     
80     448    
272    -368   
-128   -288   
624    384    
-224   272    
-96    256    
128    32     
-64    -320   
0      -304   
160    160    
64     208    
160    128    
-176   -288   
176    -128   
96     -560   
240    112    
176    -48    
-224   -112   
-288   16     
256    -224   
160    224    
0      -640   
240    112    
-64    -256   
64     32     
80     -48    
64     144    
32     -144   
96     -16    
80     32     
64     96     
32     48     
-96    0      
-144   32     
112    0      
144    96     
80     0      
400    160    
-32    -16    
144    0      
-96    -96    
-64    -16    
256    -80    
-144   128    
16     80     
-160   -1280  
-176   96     
160    -288   
96     -976   
16     32     
48     -272   
112    160    
176    -544   
0      -160   
208    112    
192    -16    
96     144    
-64    48     
80     -256   
128    16     
128    80     
32     64     
128    -80    
0      -48    
80     0      
-64    48     
144    -208   
144    -912   
192    -112   
-16    16     
160    -48    
0      16     
-48    -288   
96     -128   
-64    112    
144    96     
-32    -32    
32     -80    
-144   -144   
80     -32    
144    -80    
32     16     
-96    -240   
96     -144   
16     32     
32     -144   
416    -736   
-64    240    
256    -48    
-64    -16    
32     -48    
16     -80    
-416   96     
288    48     
-64    64     
-64    -80    
-224   0      
-48    0      
160    16     
176    112    
16     -272   
192    -448   
-16    16     
-112   -80    
48     0      
240    -16    
112    -16    
-128   -16    
0      -64    
-224   -16    
16     -32    
32     -16    
272    -32    
64     -48    
-336   -592   
-240   -288   
272    -432   
208    -16    
288    -80    
-48    -32    
-240   -224   
16     -256   
-368   -48    
240    -16    
-288   0      
-160   -320   
-2032  0      
80     64     
224    -32    
-96    112    
32     -80    
80     -112   
80     48     
-64    -320   
192    16     
80     -128   
16     -128   
16     -256   
96     -416   
-64    -112   
-208   32     
-224   -32    
-48    0      
-128   -64    
352    160    
112    -240   
-16    -224   
96     160    
112    -96    
-32    -48    
-64    32     
64     16     
-208   224    
96     -112   
-320   -176   
208    608    
-224   -96    
288    -64    
272    64     
32     -80    
32     288    
352    -32    
-320   32     
288    -96    
64     192    
96     80     
576    176    
-16    576    
128    -192   
-64    -480   
336    144    
-336   -16    
-96    -464   
544    368    
-16    320    
-272   -112   
160    -176   
-32    272    
-160   128    
48     -176   
-320   -352   
-160   32     
192    352    
-64    -192   
304    -1136  
256    -384   
192    544    
528    544    
-288   288    
-640   -896   
160    -128   
-400   176    
-1040  0      
-96    -80    
-1872  -32    
96     64     
-80    64     
-16    96     
448    352    
-528   160    
240    -304   
-48    0      
-1680  48     
240    48     
-320   -112   
112    144    
-128   -48    
144    48     
-112   -16    
-48    48     
240    -64    
-304   -272   
-512   -176   
288    64     
32     -320   
96     -96    
-96    160    
-256   48     
272    224    
-272   -16    
80     0      
192    48     
128    256    
-304   -64    
-160   -48    
-16    80     
-288   -32    
128    16     
-1024  -96    
0      128    
240    -96    
160    16     
-208   -80    
-32    64     
208    96     
-320   -160   
-32    -64    
224    160    
-176   -48    
80     -48    
352    16     
-336   -192   
-224   144    
-224   240    
-144   96     
-160   -176   
192    0      
-144   -144   
-32    0      
32     -144   
0      -112   
192    -64    
-32    -96    
-96    -64    
16     144    
-32    240    
-48    -48    
128    -32    
-208   64     
-48    48     
-688   -80    
112    32     
-16    48     
192    112    
-144   16     
0      64     
64     64     
-112   16     
64     16     
-160   -304   
144    -192   
0      144    
-240   96     
-176   48     
-16    -224   
-48    -16    
-16    208    
-1040  16     
96     80     
80     48     
-336   -16    
144    32     
-176   -16    
64     16     
-432   -592   
16     -288   
-256   272    
-272   96     
-16    -48    
16     -128   
-352   -64    
112    192    
-2192  -16    
96     -1216  
128    80     
64     112    
160    96     
80     48     
-192   -96    
-96    -32    
-16    -32    
144    128    
64     32     
32     96     
0      128    
-64    0      
96     16     
-976   -16    
-48    48     
-64    16     
-144   -128   
-16    -96    
-96    -32    
112    0      
0      112    
96     48     
80     16     
112    32     
-112   0      
32     32     
-256   32     
64     112    
176    80     
320    208    
160    192    
-64    80     
-112   64     
-80    80     
-32    32     
48     128    
192    112    
-48    -16    
16     0      
-112   80     
48     80     
-160   0      
-64    -32    
160    16     
0      16     
128    -32    
80     48     
32     96     
48     32     
112    -112   
-16    -80    
96     96     
-176   32     
64     64     
-64    48     
64     16     
-16    -64    
0      64     
64     112    
80     -48    
-16    192    
-128   64     
-16    -208   
-48    128    
-32    176    
-224   -32    
128    32     
208    112    
-32    -208   
-80    -368   
304    352    
-96    256    
224    224    
-48    -80    
-96    144    
64     176    
176    -256   
96     256    
-336   -1120  
-160   1456   
-160   -144   
-128   -336   
64     656    
48     -480   
-608   -576   
304    -224   
-448   -80    
-304   -400   
-96    112    
-48    192    
176    400    
288    208    
720    320    
-432   816    
-96    112    
-16    -480   
128    -288   
304    -224   
400    224    
-112   80     
-128   -448   
0      96     
-208   0      
416    128    
48     144    
144    -16    
-304   128    
208    -96    
-64    -112   
208    -96    
-176   96     
112    112    
-128   32     
80     -272   
16     -256   
-160   80     
48     64     
0      112    
80     -48    
-32    -16    
48     0      
-16    16     
128    48     
48     160    
-160   208    
304    -48    
32     -32    
208    -96    
-48    0      
-32    80     
48     -48    
400    192    
-160   112    
-32    -16    
0      0      
64     64     
48     -48    
128    -48    
144    -48    
-16    48     
-32    96     
272    80     
48     64     
16     -96    
-112   32     
-48    -32    
-80    -32    
144    -160   
128    64     
-32    -80    
224    0      
80     48     
-16    -32    
16     -160   
-96    80     
-224   176    
208    0      
192    -80    
64     -80    
64     0      
112    -32    
128    80     
64     0      
160    48     
-80    16     
-16    -16    
0      -160   
112    112    
80     80     
112    48     
-64    48     
208    128    
-48    -112   
32     -224   
144    16     
64     -16    
80     128    
192    -304   
144    48     
64     -1536  
160    96     
-32    48     
224    48     
-32    64     
176    160    
-128   32     
64     -112   
224    -416   
160    -16    
128    128    
32     32     
112    128    
16     16     
-272   80     
-96    -384   
176    80     
176    192    
160    256    
16     -32    
-96    -16    
-80    -16    
0      288    
320    336    
-144   0      
-112   32     
144    -672   
112    208    
208    -96    
176    592    
256    128    
-80    112    
-208   144    
-112   -176   
80     -224   
80     816    
368    720    
-144   -208   
-144   -352   
128    -32    
144    128    
-176   -400   
224    -80    
-64    -304   
304    432    
176    -240   
160    0      
-16    224    
224    64     
112    -64    
144    96     
-64    304    
128    -400   
144    224    
64     -80    
-16    -112   
160    -224   
64     272    
-48    -560   
-48    272    
48     48     
-32    256    
240    224    
112    -176   
32     96     
176    -256   
-128   -32    
128    0      
144    -80    
-64    -48    
112    -752   
48     -48    
96     48     
80     0      
256    144    
-48    32     
-48    -176   
-32    -80    
-112   -368   
-288   -256   
-480   -96    
96     16     
192    16     
192    -32    
-128   -16    
-16    -256   
96     208    
32     -240   
304    112    
128    -48    
96     128    
-304   112    
-368   48     
-48    -64    
80     144    
144    64     
48     -96    
-592   -144   
304    112    
-256   -48    
352    -240   
32     80     
-272   -304   
-352   -784   
224    -256   
128    528    
-496   160    
-96    64     
96     -208   
32     -64    
528    400    
-720   -128   
-1776  -192   
400    -160   
-48    -240   
768    80     
-368   96     
224    -192   
32     -64    
-304   -688   
320    -96    
112    64     
224    -48    
-96    48     
96     16     
-112   -16    
176    32     
-400   -96    
128    -16    
-576   -16    
288    16     
160    0      
208    -16    
-80    192    
176    -272   
96     -128   
144    -128   
64     112    
0      32     
80     -16    
-160   -48    
-112   -240   
128    -144   
96     -48    
32     48     
112    -128   
-288   96     
192    -144   
144    112    
0      -352   
32     16     
176    0      
0      -80    
-48    48     
144    -64    
-48    64     
-80    -160   
240    112    
-128   -96    
-640   -16    
48     -176   
112    -32    
-48    -160   
-80    112    
64     -144   
144    32     
32     -1552  
112    -16    
0      0      
80     -112   
-256   -48    
256    128    
-432   -48    
128    64     
-176   176    
0      -400   
64     -48    
128    32     
-48    64     
192    -80    
96     16     
-720   -128   
96     -144   
-32    96     
32     -32    
32     160    
112    -80    
-176   144    
16     -48    
64     48     
32     -176   
-352   -32    
-112   -48    
-32    -96    
-96    -208   
288    192    
-160   32     
48     -16    
-176   -32    
112    -48    
-80    48     
-64    -32    
-192   0      
48     -48    
288    64     
-1328  -752   
-288   -448   
-1328  -160   
-240   16     
-112   -80    
-32    16     
-32    128    
208    576    
-128   288    
-1040  -528   
128    -192   
208    448    
96     208    
96     96     
-208   -144   
-400   -80    
144    144    
-32    -128   
144    32     
-128   -256   
176    -96    
192    384    
-128   144    
-48    16     
-368   -16    
64     -16    
-512   -48    
-16    -176   
144    -128   
-112   -112   
48     32     
32     32     
112    -48    
144    96     
-160   -32    
-352   -80    
0      224    
-48    128    
64     80     
-480   -336   
-192   -288   
-528   64     
144    -80    
-256   -496   
-16    -160   
80     176    
272    144    
-64    -32    
208    -32    
-176   -96    
80     208    
-160   -48    
48     64     
-112   272    
-48    -208   
-128   16     
-160   -80    
32     80     
-576   0      
-64    608    
32     -688   
32     352    
-32    32     
48     0      
80     96     
-32    -48    
112    -96    
-112   -48    
-80    400    
160    -384   
-80    496    
-272   -448   
160    128    
-320   -96    
272    848    
160    160    
-288   -240   
-16    -288   
96     352    
112    176    
-112   -336   
96     240    
-16    48     
-128   96     
16     144    
320    240    
-224   160    
48     224    
-368   -48    
-16    80     
-384   -128   
-96    32     
-112   -16    
128    -16    
288    144    
176    32     
352    -16    
-240   -128   
0      176    
-368   -16    
272    0      
176    16     
-256   -64    
384    -384   
-144   -32    
32     -176   
304    -112   
160    224    
-48    -64    
48     112    
-176   -48    
64     128    
128    64     
176    368    
-400   176    
160    -192   
-288   -256   
-128   224    
-272   -208   
464    -176   
-592   112    
-48    96     
128    -32    
256    336    
-336   352    
-16    80     
144    16     
-80    160    
16     80     
-144   -96    
-272   -80    
80     -128   
96     96     
-112   -160   
-144   -384   
208    -192   
256    32     
-48    80     
-416   384    
-64    32     
-32    0      
-256   -16    
80     -128   
80     -176   
-32    -128   
112    32     
144    96     
128    80     
-416   -48    
-176   -48    
64     128    
-96    80     
-80    64     
304    16     
-112   0      
-96    -32    
96     -112   
-112   -16    
-32    32     
-64    48     
96     32     
112    176    
-128   240    
-256   -112   
288    256    
-336   336    
32     -32    
160    -304   
-16    -48    
-96    96     
-112   48     
-64    -32    
176    64     
-80    80     
0      32     
240    176    
-16    -48    
-96    -80    
48     48     
16     64     
32     0      
16     -80    
0      80     
240    128    
96     208    
-48    0      
-16    -16    
48     -48    
432    112    
-208   400    
128    96     
128    96     
128    176    
144    32     
-176   -112   
160    -624   
64     -144   
-96    -688   
160    48     
-208   384    
-48    224    
416    752    
-144   -32    
48     -272   
96     -48    
320    384    
-208   -672   
-144   -144   
-144   368    
-160   -352   
176    240    
240    -48    
-32    48     
-48    80     
-32    48     
16     0      
144    -48    
-96    -32    
144    880    
-80    -544   
112    112    
-192   272    
16     -320   
176    64     
-64    -208   
320    -480   
96     32     
128    352    
112    64     
-80    -16    
-144   48     
96     160    
0      48     
144    176    
112    240    
-208   96     
0      64     
144    -128   
-16    -48    
-64    -80    
144    64     
-80    -160   
-160   -48    
144    80     
48     112    
0      96     
96     16     
-48    0      
64     0      
0      -16    
32     -240   
-32    -16    
16     -80    
32     32     
-16    -1200  
-64    32     
-32    0      
128    16     
48     80     
240    48     
-48    -224   
112    80     
-16    -32    
176    144    
-160   -16    
224    -32    
32     -256   
-32    -192   
112    96     
192    -64    
16     64     
80     -80    
32     -16    
176    -32    
-176   80     
80     -48    
96     96     
-16    -16    
-96    80     
208    176    
-128   -32    
224    112    
208    48     
224    160    
-144   16     
16     -64    
176    -16    
240    112    
176    -112   
-176   32     
-32    96     
-96    64     
64     16     
656    80     
128    144    
0      -160   
336    112    
-144   -272   
448    80     
-48    -64    
528    544    
-560   -240   
-400   -80    
160    0      
48     112    
240    192    
-304   48     
-272   -288   
400    64     
-240   32     
-144   -256   
160    80     
16     -48    
128    144    
0      -208   
208    112    
-80    -928   
64     -32    
144    16     
96     128    
-224   0      
256    304    
-32    80     
336    -144   
176    80     
-272   -64    
0      16     
336    48     
128    0      
224    -32    
-32    96     
80     -128   
208    -16    
0      96     
96     -864   
-96    -96    
32     -432   
128    -288   
96     32     
32     -384   
-96    -160   
160    -848   
144    -80    
32     0      
16     0      
96     80     
32     -160   
16     -576   
0      0      
32     -512   
0      48     
-224   160    
352    176    
144    -64    
-16    -176   
-96    -384   
64     -256   
112    160    
192    16     
192    -208   
48     -160   
0      48     
48     16     
-144   208    
-32    -192   
288    224    
-64    208    
-64    -240   
80     -144   
64     80     
16     0      
16     -208   
384    160    
-144   -736   
208    160    
-128   272    
-48    -400   
160    96     
-48    -16    
48     0      
-32    208    
-176   -560   
96     -48    
-656   -96    
240    256    
-80    -160   
240    -176   
176    16     
64     -208   
64     -48    
160    -96    
0      32     
-32    -32    
-224   -16    
32     0      
704    1232   
-160   -256   
112    -528   
-608   320    
-64    16     
48     32     
-224   -96    
-112   -672   
160    352    
16     -16    
208    -32    
176    112    
320    128    
-32    928    
-240   -576   
304    -400   
32     160    
96     320    
-32    -160   
48     -48    
-928   96     
-64    -176   
-304   96     
96     -208   
-96    64     
224    -208   
-176   -336   
80     -96    
144    160    
-16    -160   
16     -192   
-32    -32    
160    96     
-288   -80    
96     -176   
112    -32    
0      -96    
16     192    
96     -128   
-48    160    
320    -48    
-64    240    
32     -336   
192    -272   
208    352    
192    64     
-160   -64    
-176   -48    
-224   -160   
160    -64    
-96    0      
16     0      
0      0      
128    -240   
16     -48    
16     -320   
160    -32    
0      -112   
192    -240   
-240   368    
80     352    
32     176    
32     176    
-64    80     
80     48     
-240   80     
80     -16    
-64    160    
144    -64    
48     144    
192    80     
160    176    
-256   224    
80     176    
-80    352    
160    64     
48     592    
592    688    
-288   288    
-80    -128   
-368   -128   
176    16     
224    -80    
-192   272    
208    112    
-688   -272   
-976   -48    
-176   80     
-32    -64    
112    -256   
112    32     
-64    -112   
80     0      
-32    32     
64     192    
192    16     
-96    -464   
-64    -176   
-1216  32     
-416   160    
32     128    
-640   32     
176    -64    
-32    -64    
64     80     
-240   32     
-64    -112   
320    -288   
208    16     
-16    96     
288    208    
-208   80     
64     16     
-80    -224   
0      16     
-16    64     
144    -16    
-64    -16    
-192   16     
-80    -64    
-704   -16    
-64    16     
-672   -32    
-144   -256   
64     -128   
64     336    
-352   48     
0      32     
32     -32    
48     96     
48     16     
128    -80    
-208   -80    
-128   48     
144    96     
112    528    
-352   224    
-112   16     
-176   288    
-1600  -112   
48     128    
-112   -192   
-144   96     
528    32     
-48    192    
-112   -96    
0      -48    
-32    112    
208    -144   
144    16     
-96    128    
64     80     
-80    -48    
176    -144   
-1536  -240   
32     16     
-80    192    
32     208    
-32    -256   
-32    -320   
80     -160   
-304   32     
64     16     
-16    112    
-176   272    
-160   400    
-192   96     
-112   0      
240    144    
-464   -160   
96     16     
192    -288   
48     160    
0      0      
-208   -256   
-96    80     
16     288    
160    240    
-16    80     
-160   32     
-176   64     
32     -208   
112    -192   
288    496    
-224   32     
-128   -112   
-80    160    
-48    96     
-128   -176   
96     192    
128    208    
-128   -160   
-64    96     
16     160    
32     96     
-144   64     
112    -32    
32     1104   
16     -512   
-528   -96    
-192   208    
-64    -224   
160    48     
-64    48     
-112   -384   
-176   -288   
64     272    
80     384    
128    128    
32     176    
-64    80     
160    -16    
-160   -80    
176    16     
-224   -32    
128    48     
96     128    
-112   112    
32     -16    
160    16     
128    64     
160    80     
48     176    
96     208    
-272   32     
-272   -112   
144    48     
-96    -48    
192    96     
224    64     
80     32     
-96    16     
16     0      
-48    160    
-304   -16    
-96    48     
48     144    
64     80     
48     0      
128    0      
96     128    
-32    96     
-32    48     
64     -64    
-128   -96    
-16    64     
64     96     
-96    0      
-16    64     
48     96     
0      64     
128    64     
32     -16    
16     48     
128    32     
-176   -16    
240    48     
-256   -64    
128    128    
-32    32     
112    48     
64     16     
16     32     
192    48     
-64    -16    
96     0      
64     176    
192    -48    
-144   16     
-32    64     
-48    16     
400    -192   
-512   -288   
272    -16    
16     80     
-48    -48    
240    96     
224    336    
240    -48    
144    -64    
-432   112    
144    -112   
208    128    
-240   96     
208    80     
-144   32     
304    0      
-32    -80    
-256   -1264  
-48    16     
160    16     
-224   80     
-112   -64    
224    64     
-480   -384   
368    -32    
-160   288    
-224   16     
64     -128   
272    224    
-224   128    
32     48     
-592   -128   
320    -224   
0      -128   
320    -80    
544    192    
-16    64     
-48    -48    
-16    32     
432    288    
-384   112    
64     0      
48     0      
160    80     
0      0      
16     48     
304    144    
-80    -176   
-48    0      
160    -32    
32     80     
336    336    
-416   -48    
240    -80    
48     80     
16     32     
160    48     
0      16     
0      64     
112    -16    
16     160    
32     256    
0      -400   
-208   -144   
224    -208   
16     80     
-128   -32    
160    -16    
-128   64     
32     -144   
-128   64     
320    160    
64     80     
-48    528    
32     320    
-32    -400   
-80    64     
144    -336   
32     320    
288    -304   
-256   -16    
48     112    
-16    240    
-16    48     
384    -128   
160    80     
192    144    
48     -32    
-112   0      
-96    -368   
80     352    
-48    208    
0      0      
0      -592   
-176   112    
16     96     
-64    -1040  
192    336    
96     -16    
224    128    
-176   -464   
80     -48    
-80    272    
160    -80    
240    272    
-96    80     
80     784    
208    -784   
144    -48    
-144   -432   
-64    -80    
16     144    
-48    -496   
64     96     
192    80     
-112   64     
176    160    
112    -112   
176    144    
96     192    
16     -112   
-112   32     
80     16     
224    64     
-176   -592   
48     16     
32     128    
160    112    
-48    48     
144    -224   
272    192    
96     208    
48     128    
208    192    
-176   -224   
128    48     
32     320    
-112   176    
144    288    
80     80     
304    224    
352    144    
-48    192    
-80    -80    
64     -32    
96     -64    
96     -96    
96     -384   
96     -160   
-16    304    
-48    0      
64     176    
176    208    
160    272    
176    16     
48     -16    
16     -80    
176    0      
64     288    
128    -48    
176    240    
-1936  80     
208    -624   
16     -144   
-32    -240   
-32    -80    
160    -384   
160    -144   
64     192    
-48    -96    
-48    -128   
32     -128   
64     -64    
160    176    
144    -80    
64     16     
-336   -32    
128    160    
128    240    
32     -144   
176    32     
96     -64    
96     240    
144    352    
-64    0      
176    -176   
32     -128   
128    -272   
64     -176   
64     -112   
192    -288   
-256   -48    
32     -16    
96     -48    
-64    112    
128    96     
48     -288   
-288   -288   
144    -880   
432    -112   
32     80     
0      464    
-192   -32    
-192   -336   
48     -48    
80     -64    
-192   320    
96     -368   
-80    -112   
288    -112   
432    48     
112    448    
-736   192    
-400   -128   
-480   -304   
384    -976   
112    -528   
272    -224   
16     224    
-336   16     
-304   -208   
-176   48     
-16    96     
-64    -16    
320    -96    
-416   -160   
304    -272   
240    -80    
16     -208   
256    -256   
144    -384   
-64    -464   
512    -112   
16     192    
-240   0      
64     -32    
-160   240    
368    544    
-576   160    
144    208    
-304   -16    
-400   -128   
320    -16    
-208   -96    
96     32     
-80    -240   
224    112    
272    0      
-112   64     
0      -320   
-272   160    
48     -64    
32     -96    
-48    -224   
80     -128   
-640   64     
192    96     
-112   -64    
320    -272   
0      0      
64     -160   
48     -32    
80     0      
32     16     
-224   0      
112    16     
-256   -16    
176    -272   
-432   -32    
80     -192   
-32    0      
176    -176   
144    -96    
-16    -288   
-64    -192   
240    -368   
-144   64     
-64    224    
16     272    
-128   224    
-64    16     
-240   -80    
112    -400   
-176   -336   
160    -288   
-256   192    
16     -240   
64     80     
592    432    
-144   160    
192    -96    
16     -64    
-144   32     
352    80     
-192   -192   
128    112    
16     -256   
-80    464    
48     -704   
480    80     
-208   80     
-384   -112   
144    192    
-1840  48     
32     -176   
144    448    
-240   288    
-96    -400   
-704   -112   
48     96     
-336   80     
16     208    
128    16     
0      0      
-32    16     
-80    -16    
-320   -96    
80     48     
32     -48    
144    96     
-192   -352   
48     -688   
48     -16    
96     224    
0      48     
48     16     
32     32     
-2640  -240   
-336   -112   
32     -64    
176    160    
16     -144   
368    16     
-80    -32    
-272   -128   
-16    -112   
-176   80     
-176   -48    
-48    48     
96     16     
32     32     
0      48     
-448   -16    
-80    0      
-80    -64    
16     80     
-64    16     
128    64     
-400   -160   
-256   32     
32     32     
-48    16     
64     80     
-240   0      
-16    -80    
-128   -16    
192    96     
-192   96     
-32    -16    
-880   -16    
64     16     
112    16     
160    64     
-96    16     
-80    48     
32     112    
96     80     
-144   0      
-208   32     
-144   -64    
-128   -48    
176    64     
240    112    
-32    16     
-336   -192   
96     96     
-160   -128   
48     112    
64     64     
0      48     
-160   -48    
80     16     
96     32     
64     32     
16     32     
144    48     
-16    32     
-224   0      
176    128    
-672   -80    
208    224    
144    0      
64     16     
-80    16     
112    16     
-240   -384   
-32    16     
-224   176    
224    -32    
-240   16     
-96    64     
32     160    
-224   -128   
16     224    
-240   -48    
80     -32    
-1376  -176   
32     -16    
240    144    
-256   -64    
112    112    
-288   96     
-112   0      
-176   0      
-32    -64    
-272   -336   
112    -112   
-400   -48    
304    -176   
176    48     
-208   128    
416    160    
-176   96     
-864   -336   
-16    -208   
96     -288   
-32    -48    
144    96     
0      -128   
64     -16    
-48    176    
-176   96     
416    304    
-368   112    
-336   -304   
48     80     
16     48     
64     -144   
336    592    
-336   112    
32     -304   
80     16     
80     -16    
-320   -160   
160    112    
-96    -192   
144    304    
48     208    
-48    272    
-272   -224   
-128   -16    
32     240    
32     -64    
112    64     
128    256    
-208   -208   
288    336    
-256   32     
192    -64    
-64    96     
-176   -16    
128    0      
-80    176    
-80    64     
0      -96    
32     -16    
272    -64    
-240   320    
304    -304   
-112   -272   
48     112    
-192   -576   
336    480    
240    384    
272    288    
-288   416    
-256   80     
-288   -256   
96     -416   
240    96     
-32    -64    
32     160    
272    80     
48     416    
-304   0      
-80    -240   
112    -96    
176    16     
-128   16     
208    96     
-144   80     
16     16     
0      16     
16     -96    
-32    48     
0      48     
-16    96     
-192   -48    
112    16     
-128   -192   
96     -32    
-160   32     
-208   96     
48     80     
160    -48    
32     48     
-16    64     
-192   -288   
-48    288    
-80    32     
80     64     
64     48     
16     144    
32     144    
240    240    
32     240    
-160   112    
128    384    
-336   192    
240    -112   
128    -160   
80     16     
192    80     
-160   -752   
64     -48    
80     144    
-256   48     
32     144    
96     -64    
96     96     
112    32     
32     48     
48     -48    
-16    -112   
144    -96    
-112   144    
160    -112   
-112   -128   
80     -144   
128    112    
-16    64     
112    96     
240    128    
16     80     
160    48     
-64    -16    
128    128    
272    128    
-256   0      
32     -64    
96     -96    
112    -32    
32     -48    
48     -112   
-176   -144   
96     -1088  
96     48     
144    -32    
240    16     
-32    -80    
64     -112   
-80    32     
-64    -208   
48     80     
336    112    
-96    32     
48     -224   
160    -144   
80     -64    
-16    -32    
-96    -48    
96     16     
80     112    
32     64     
-128   -48    
32     -160   
-48    -336   
64     -240   
160    -16    
160    144    
-48    144    
32     112    
64     208    
-64    -96    
-48    -176   
256    -384   
16     64     
176    48     
176    48     
-96    -128   
-64    -288   
0      -144   
48     16     
-112   304    
560    144    
-32    112    
-176   -304   
-160   -368   
160    -304   
192    208    
112    -128   
144    64     
48     -672   
256    32     
224    64     
80     288    
480    496    
96     64     
-96    16     
-32    -48    
160    224    
0      176    
-240   -48    
624    -368   
400    144    
288    -464   
32     0      
-288   -128   
368    -464   
96     -192   
448    -64    
-64    576    
-176   80     
-80    -448   
544    -256   
80     -128   
256    256    
-16    304    
48     48     
-32    0      
-32    16     
304    -160   
-192   -288   
0      80     
-16    -144   
128    176    
304    96     
144    -64    
80     -272   
16     -32    
128    -480   
128    -224   
208    -288   
240    208    
-144   240    
96     -256   
-96    320    
64     176    
384    -752   
-80    -64    
-96    -192   
16     -80    
-336   -192   
320    0      
80     64     
176    -416   
-160   -192   
160    -272   
128    32     
16     96     
-240   160    
192    -496   
96     256    
160    -208   
16     48     
240    320    
-32    -304   
-288   256    
144    -224   
128    -32    
-128   -352   
-144   528    
304    -160   
-160   -96    
16     -384   
256    -48    
0      96     
80     -48    
112    0      
0      -80    
-112   -112   
224    48     
-528   -352   
32     -112   
320    80     
-32    336    
208    176    
64     -160   
32     -160   
176    -224   
32     16     
-144   -128   
64     96     
16     0      
32     -112   
-208   -224   
176    16     
-112   32     
128    -48    
-96    -16    
272    -16    
96     0      
-32    -224   
80     -208   
16     -336   
112    -32    
48     -880   
64     -16    
144    -128   
32     16     
-64    144    
16     48     
-16    16     
-208   -96    
-480   -16    
304    48     
-496   -80    
-48    -48    
96     128    
144    -160   
-160   -128   
336    -864   
144    128    
304    96     
272    176    
-352   48     
144    -176   
-96    32     
96     64     
-816   -80    
112    -272   
-656   144    
224    96     
96     16     
128    -144   
-80    -80    
368    -192   
288    144    
96     48     
-48    48     
-240   -80    
-96    16     
-80    -32    
16     -48    
160    64     
96     0      
-288   16     
96     -96    
16     16     
96     -176   
-96    16     
128    -256   
160    128    
-80    -16    
48     -64    
-16    -96    
160    32     
-224   16     
96     -16    
48     -32    
112    -80    
-48    -16    
48     -128   
112    48     
80     -112   
0      64     
-16    -192   
-32    -80    
-160   0      
128    32     
-112   -32    
112    32     
-176   0      
112    0      
-208   -16    
96     80     
-640   -16    
16     -16    
0      32     
-512   -32    
16     32     
-608   -48    
-928   0      
-64    32     
-1312  -48    
-128   -48    
240    -16    
-96    32     
96     16     
96     64     
-16    -144   
48     192    
-16    -32    
496    512    
-368   96     
240    64     
0      16     
-192   -144   
-176   96     
64     96     
-384   -80    
-816   16     
-128   -16    
-160   -112   
224    176    
48     96     
-272   48     
-432   -288   
-144   -224   
-96    -240   
0      160    
-176   144    
-128   320    
64     352    
-96    -352   
-368   -384   
-176   -64    
576    416    
-816   320    
-400   -736   
336    -16    
32     352    
-480   -368   
352    0      
-224   48     
0      32     
0      224    
64     -144   
-48    -80    
0      48     
80     304    
48     32     
-192   -112   
-112   176    
112    272    
-496   -304   
-64    944    
320    -832   
0      -592   
-496   80     
256    -320   
-160   1056   
-48    -608   
-368   -560   
-80    -464   
-112   448    
192    144    
-16    -128   
-416   64     
-144   -208   
-1936  96     
336    112    
-112   16     
-32    32     
0      -80    
112    -16    
-32    208    
240    176    
256    80     
-208   208    
-112   48     
0      160    
-48    160    
-256   -64    
0      128    
-176   144    
176    48     
-256   -48    
-128   96     
144    144    
-96    64     
80     128    
96     -32    
48     16     
-80    -48    
128    96     
-288   -112   
32     -96    
-64    16     
192    160    
-80    -32    
160    32     
-560   -32    
-64    32     
-96    32     
-16    -32    
176    16     
-16    96     
-128   64     
0      -16    
48     -80    
-48    -16    
128    48     
-96    0      
128    16     
-48    112    
96     80     
224    16     
-48    48     
-288   48     
272    -64    
-80    48     
112    -48    
128    32     
0      144    
-64    0      
32     64     
-32    -64    
-304   -16    
64     32     
16     -176   
160    0      
32     624    
-32    80     
224    -32    
-304   112    
-64    112    
240    288    
-192   144    
80     -80    
208    -320   
-64    -80    
64     -32    
-48    240    
-288   80     
96     0      
128    48     
160    176    
-160   112    
32     -96    
176    -96    
-16    -144   
-80    -32    
-48    16     
-48    96     
32     144    
-272   -128   
144    -64    
-240   48     
32     64     
-48    -16    
224    0      
-112   96     
-96    48     
-48    -144   
32     -64    
96     64     
32     144    
-208   80     
96     16     
-48    176    
-64    96     
160    224    
112    32     
112    -32    
176    128    
-64    288    
64     160    
-32    48     
144    304    
0      112    
-80    256    
96     368    
48     160    
-16    32     
240    80     
-64    176    
144    288    
-256   192    
-80    32     
-80    -176   
-96    -256   
224    -48    
-48    80     
96     128    
336    448    
-256   64     
208    -288   
144    112    
-96    16     
416    -16    
-112   128    
-16    -352   
-432   272    
-48    96     
-16    -272   
192    -16    
224    -16    
80     48     
-32    128    
-224   288    
80     208    
-96    48     
288    464    
16     96     
-480   -160   
320    -368   
32     480    
64     -128   
-32    -768   
128    240    
64     208    
240    336    
-304   -144   
-112   -128   
624    976    
-96    -416   
-688   -560   
-96    32     
-16    48     
176    400    
-96    -256   
352    -192   
304    160    
48     -768   
368    -688   
192    -176   
-32    784    
272    64     
48     -224   
-336   -96    
-16    80     
-176   112    
256    -48    
176    64     
0      144    
16     256    
64     -208   
-32    32     
96     -736   
-64    192    
48     -32    
32     -288   
176    16     
96     272    
304    176    
-320   32     
80     48     
-16    80     
256    192    
32     80     
96     32     
64     0      
-144   -128   
80     -144   
16     32     
64     -304   
-48    80     
16     0      
128    112    
128    -32    
112    64     
64     128    
-64    -16    
-112   0      
96     96     
-32    -16    
320    -208   
16     80     
112    -304   
-96    -64    
48     -272   
-96    32     
0      -368   
224    -48    
80     -112   
32     16     
112    224    
112    16     
-128   -16    
32     -128   
64     48     
112    32     
160    224    
-96    112    
32     0      
192    -352   
144    -32    
96     0      
-48    -64    
192    80     
0      224    
-80    128    
224    112    
32     16     
-160   -144   
272    -32    
112    16     
160    128    
208    112    
112    -16    
112    -64    
-80    128    
192    128    
32     32     
144    160    
48     48     
112    112    
64     0      
-32    -32    
-128   -496   
-208   -16    
96     -80    
96     96     
128    -112   
112    -128   
-16    -96    
128    80     
-64    -96    
336    224    
-192   -48    
80     112    
256    32     
16     -48    
112    -240   
240    -16    
112    -64    
288    -96    
-208   -32    
-48    -16    
-160   80     
-96    -160   
160    48     
192    -32    
208    -704   
128    128    
-144   -96    
48     0      
-608   -80    
32     -656   
-64    80     
0      -480   
-16    -48    
208    -976   
128    32     
0      96     
128    112    
0      48     
48     -16    
-80    -128   
144    0      
208    -32    
-32    48     
-672   -64    
96     -192   
240    128    
144    -80    
-224   -208   
32     -160   
128    -144   
80     -48    
128    -16    
48     -32    
144    128    
-96    -80    
64     96     
-32    16     
128    64     
-272   -16    
-112   -16    
144    -32    
144    16     
336    48     
-160   16     
80     -16    
48     -48    
-16    -16    
32     -48    
-16    -48    
64     -160   
64     112    
112    -48    
80     48     
-48    0      
160    32     
-192   -16    
32     -112   
240    64     
-16    64     
96     -32    
96     -224   
-432   48     
64     48     
48     48     
112    256    
16     192    
0      32     
-144   -32    
-48    -64    
80     -144   
-1184  64     
144    -160   
240    -64    
-160   -80    
-48    -96    
368    80     
0      544    
-32    -432   
176    -128   
576    416    
-16    256    
-224   320    
64     -800   
-528   -160   
304    688    
-256   -672   
832    688    
-1312  112    
-32    -272   
32     -160   
-80    -240   
48     160    
-64    -432   
-256   128    
464    256    
-416   144    
-144   48     
-48    -256   
464    752    
-112   112    
176    384    
336    96     
-848   -576   
208    -480   
-80    -336   
-32    -32    
160    336    
-240   -400   
-96    -16    
128    -592   
64     -64    
256    -144   
-32    0      
-400   304    
-144   -96    
0      0      
224    -192   
-336   -144   
64     -16    
-160   48     
320    -112   
176    176    
-16    -48    
48     -64    
-224   -96    
144    -32    
0      16     
-64    -16    
32     -32    
80     16     
-96    32     
16     128    
48     -96    
224    -192   
0      -64    
128    -192   
-32    144    
208    -208   
64     -48    
-128   16     
160    112    
-144   0      
272    -32    
-272   16     
160    80     
112    -32    
128    16     
-240   48     
224    -176   
-16    112    
-720   -16    
-80    64     
-112   -32    
-176   -16    
-144   32     
-352   -16    
-176   -80    
128    -16    
144    0      
32     32     
-128   -80    
80     0      
-48    0      
-480   -48    
48     192    
-256   80     
96     64     
-128   0      
-176   -80    
-32    48     
-96    96     
-16    32     
176    112    
-288   192    
336    32     
-80    -64    
176    -16    
-144   144    
-160   -48    
16     -96    
32     -112   
-208   -144   
-16    -80    
-16    32     
-64    48     
-144   80     
32     -64    
-512   -96    
-208   48     
-1632  -64    
48     -112   
32     -208   
160    -144   
256    -128   
80     304    
-272   144    
-48    112    
-80    112    
-96    64     
80     -32    
-160   -304   
-32    -272   
-192   -64    
-352   -192   
-544   -224   
160    96     
-1312  224    
128    224    
-240   -16    
64     -32    
0      -80    
32     -96    
320    304    
-128   32     
48     -224   
-16    -32    
0      64     
-176   -64    
-32    -96    
-64    -16    
240    -64    
-176   -64    
224    -48    
-416   -576   
64     -96    
-336   240    
-192   -656   
0      -352   
-288   -128   
-32    -96    
-32    144    
320    144    
-32    144    
112    -64    
-160   144    
-80    0      
-320   -512   
112    320    
-144   -336   
-96    -32    
0      224    
128    -192   
-64    -112   
0      48     
32     0      
-240   16     
96     208    
-272   96     
-64    -160   
-496   32     
64     -272   
-544   160    
144    128    
32     -96    
16     128    
-272   -160   
128    -256   
96     80     
112    304    
144    400    
-288   16     
-48    -368   
-112   -16    
112    192    
0      -32    
-32    160    
-48    -112   
208    80     
176    0      
-48    -208   
224    144    
160    320    
32     480    
352    0      
32     -1184  
-352   -720   
32     16     
-368   -256   
-112   -352   
-240   -80    
-96    -64    
-64    -16    
32     128    
48     -208   
368    0      
-176   128    
16     -128   
-16    -112   
-128   -176   
-64    -304   
48     -96    
-80    -48    
-112   -144   
96     48     
-128   48     
224    208    
-272   -16    
240    -32    
-48    -32    
0      16     
48     48     
128    -16    
96     -32    
0      -32    
-112   -80    
112    0      
-16    -48    
-176   -64    
32     128    
-288   -64    
320    16     
192    48     
16     -128   
-112   -80    
-256   112    
48     16     
176    48     
160    128    
-112   64     
96     48     
-64    -16    
272    -16    
-96    16     
112    128    
-32    -32    
16     -64    
16     64     
32     32     
96     64     
-80    -16    
64     -192   
-32    -112   
-96    48     
32     96     
-64    96     
-32    0      
128    96     
-240   -32    
112    112    
-208   96     
32     240    
432    48     
-16    64     
-48    -32    
-48    144    
256    288    
-160   112    
-96    32     
320    16     
-48    -64    
32     -32    
304    160    
-32    128    
-16    -128   
192    -96    
256    144    
-192   48     
32     -32    
128    16     
-80    80     
-64    32     
160    -48    
112    -32    
-144   0      
112    -160   
-96    -48    
80     176    
-112   192    
64     32     
0      -144   
96     -1264  
128    0      
-16    0      
0      -16    
112    -144   
64     16     
176    192    
-256   80     
-112   -16    
80     32     
80     -64    
144    128    
-64    -32    
48     16     
-80    -544   
32     -80    
64     224    
-208   -96    
64     64     
-112   -112   
32     48     
-80    192    
-32    -80    
80     -240   
240    -176   
208    -64    
224    144    
-48    64     
32     -64    
224    112    
64     0      
64     32     
-64    96     
-160   -176   
-48    -96    
-48    128    
80     144    
176    64     
16     16     
192    224    
-48    16     
-240   0      
-112   0      
-48    -112   
64     48     
0      -240   
16     64     
80     -224   
240    112    
144    160    
-64    112    
-80    -144   
160    -48    
240    -144   
112    112    
48     64     
-32    -48    
0      0      
-16    -176   
-32    64     
224    -112   
128    0      
96     -32    
64     -96    
32     -48    
48     48     
-240   0      
240    -48    
96     0      
160    80     
64     96     
176    32     
112    96     
112    16     
16     128    
-64    -80    
48     -272   
16     -320   
160    -32    
-192   -176   
240    192    
0      64     
240    -192   
-80    -96    
208    416    
80     32     
32     -256   
-96    16     
288    -400   
48     0      
96     -48    
-112   -304   
64     -320   
-224   -464   
0      640    
256    -336   
64     432    
176    480    
-128   -736   
96     432    
192    -112   
-160   80     
272    288    
-192   -784   
240    304    
32     320    
272    272    
608    -176   
80     16     
-160   -512   
384    -208   
-176   528    
16     -1408  
-80    32     
-160   -48    
208    -416   
464    -304   
16     -512   
-32    176    
-336   96     
-240   -80    
304    160    
320    112    
-48    0      
288    -64    
-160   -224   
0      -64    
128    112    
240    112    
-464   -32    
96     -112   
96     112    
-80    -32    
224    -96    
-16    -976   
176    -48    
32     16     
-272   -16    
336    -320   
240    -32    
224    -272   
-16    64     
32     16     
0      0      
-1520  112    
288    96     
112    -112   
96     -112   
144    -112   
-48    16     
112    -16    
368    -544   
-208   112    
16     -112   
0      -16    
288    0      
-48    -80    
192    -96    
224    -32    
-512   -64    
208    -160   
-224   0      
-32    16     
-112   -48    
240    -320   
112    -64    
144    -1008  
-592   144    
544    -112   
160    -80    
304    -224   
-128   80     
-208   -16    
144    0      
-336   48     
208    -112   
-1968  208    
16     -256   
224    -112   
128    -144   
144    0      
16     -336   
32     64     
80     -160   
144    0      
192    16     
80     -16    
128    176    
224    128    
-80    0      
0      32     
-1040  -64    
80     32     
80     0      
-96    -80    
176    -48    
192    -272   
-32    -240   
80     -208   
-144   144    
368    192    
-64    208    
48     -16    
192    -144   
-96    -48    
96     192    
-192   160    
96     0      
-208   -48    
160    -192   
32     -176   
288    -192   
-16    32     
32     -448   
-80    -96    
-32    -176   
80     -192   
96     -192   
96     -224   
-752   -336   
80     -96    
-64    96     
-32    160    
16     144    
288    -384   
-96    -48    
64     -208   
-64    16     
-48    -496   
-16    176    
128    208    
48     -320   
-240   -160   
224    -64    
-32    128    
-176   -192   
-32    272    
64     -128   
-496   -48    
-80    -320   
-80    208    
96     -80    
16     112    
224    -80    
272    -192   
-16    288    
272    -48    
-64    -32    
-112   0      
32     160    
192    48     
-272   -496   
-384   -96    
-224   0      
224    -64    
288    384    
-320   48     
-32    -160   
-240   -192   
-672   96     
-240   240    
-368   144    
-208   -48    
-16    48     
-96    -16    
16     -32    
-32    64     
64     16     
-80    64     
-144   64     
80     80     
0      -128   
-112   0      
-96    0      
-240   -16    
48     80     
-208   32     
-96    32     
-432   48     
-144   -64    
112    0      
96     32     
16     -64    
144    48     
-336   -16    
64     80     
-320   16     
-112   64     
32     112    
-128   -16    
176    160    
-176   64     
112    0      
-304   -240   
-48    -64    
-192   80     
176    208    
-336   0      
-256   -16    
-160   -112   
192    160    
-64    -64    
368    -16    
128    -64    
-48    48     
96     288    
-160   -80    
-208   -160   
-64    48     
96     96     
32     -16    
80     -32    
-96    16     
0      208    
-176   -64    
16     -208   
320    144    
-128   32     
96     -64    
0      0      
48     48     
32     16     
192    176    
-400   112    
-160   -256   
-32    -384   
32     160    
-384   32     
96     48     
112    16     
-80    -48    
-96    48     
-224   32     
16     48     
320    288    
-400   128    
80     -48    
176    48     
-304   -32    
-192   -80    
-128   -16    
64     0      
-416   -32    
16     80     
64     -48    
144    48     
-64    16     
-48    32     
-48    112    
48     64     
32     -48    
-320   -16    
80     112    
-32    32     
-32    -112   
-96    -16    
32     80     
-640   -112   
208    80     
16     32     
-48    32     
192    48     
48     32     
-80    16     
-32    -256   
-96    -160   
-80    0      
48     -16    
48     80     
192    -16    
-112   16     
-64    0      
128    0      
0      -64    
80     128    
-32    256    
-112   208    
32     -64    
96     64     
96     144    
16     80     
-32    -16    
64     -64    
-32    48     
0      -96    
-16    -112   
64     -80    
-32    -48    
128    144    
16     176    
-16    -16    
-32    80     
0      64     
144    144    
-208   144    
32     32     
16     32     
48     -16    
-208   -48    
80     0      
-192   0      
-64    80     
-160   32     
32     0      
32     80     
-96    16     
160    64     
-80    160    
768    688    
160    -192   
-112   -576   
-176   96     
-128   224    
-112   -96    
-112   208    
32     128    
224    -144   
176    400    
48     -112   
176    -16    
-112   80     
32     -128   
144    -32    
208    48     
-192   16     
-128   -128   
-64    -48    
176    256    
32     128    
336    -32    
64     -16    
0      192    
-48    0      
-176   -160   
0      -160   
80     112    
288    320    
96     64     
-112   -112   
64     -240   
384    800    
-640   -688   
160    -304   
96     -64    
288    -176   
-64    320    
16     -224   
64     304    
144    384    
208    -96    
80     256    
32     -80    
-16    64     
192    112    
0      16     
80     96     
48     176    
80     352    
-272   -1120  
192    672    
-32    -112   
112    -352   
112    304    
16     176    
176    -144   
-96    0      
-32    128    
176    96     
128    224    
-192   -656   
0      96     
80     224    
128    -80    
64     0      
96     64     
32     -16    
304    720    
16     304    
-64    -320   
-48    -160   
-32    80     
32     32     
128    -304   
-16    32     
-128   -144   
-208   -304   
416    -128   
-112   -64    
64     -80    
48     -208   
-32    -16    
128    -1376  
112    32     
80     -16    
-48    256    
64     -48    
176    -400   
48     -16    
48     -16    
64     -64    
-16    0      
192    48     
-128   128    
-176   -32    
-32    16     
304    -112   
-16    -288   
144    48     
128    80     
80     -128   
48     -176   
64     288    
-32    240    
144    48     
-112   -304   
-16    -16    
-368   -112   
208    -128   
-96    144    
32     -32    
160    -48    
192    16     
304    -32    
32     -608   
-16    176    
16     -96    
32     176    
-224   -272   
528    -96    
-160   144    
256    224    
-64    -48    
-272   672    
688    144    
32     48     
176    272    
0      -272   
160    16     
176    -1136  
32     272    
48     -352   
-160   112    
16     -16    
256    112    
224    -96    
32     48     
-272   32     
-96    -16    
64     112    
32     -32    
176    240    
384    288    
-160   336    
-112   176    
-176   -32    
208    -272   
208    96     
80     48     
128    0      
144    48     
-112   128    
-144   -48    
208    -96    
-112   192    
80     -48    
112    -176   
160    -368   
32     112    
-80    -32    
16     -16    
-192   -192   
208    -80    
240    -64    
0      64     
192    240    
128    384    
240    -32    
160    -96    
16     80     
-64    -48    
-48    176    
224    16     
-32    160    
160    -96    
0      -112   
144    -80    
192    64     
80     160    
160    48     
32     32     
128    48     
-112   -256   
224    192    
288    208    
-96    96     
-48    -272   
-64    -320   
0      -80    
-16    -128   
224    -16    
96     192    
-144   -448   
-32    -32    
144    -80    
48     -32    
128    -16    
-128   -416   
-96    -208   
64     -112   
304    80     
-80    -544   
128    -112   
96     176    
336    -240   
48     -544   
80     160    
112    400    
-16    -160   
-80    -144   
-32    80     
-80    -128   
144    64     
-80    -96    
80     -64    
96     16     
160    -432   
240    -176   
-112   112    
-96    80     
128    -128   
-96    16     
-64    -160   
160    480    
144    144    
208    384    
-32    400    
48     -32    
-320   -80    
96     112    
80     0      
16     -192   
144    0      
336    16     
64     80     
-32    -16    
-256   -16    
96     -32    
80     -16    
-96    0      
144    64     
-272   64     
80     -112   
-64    -48    
64     -112   
-80    -144   
176    -96    
96     48     
208    -560   
256    -128   
32     -176   
48     48     
272    -16    
-96    -144   
16     0      
48     -160   
-480   -128   
80     0      
-688   -64    
256    64     
-32    -32    
240    48     
-528   -16    
64     -112   
32     16     
80     -336   
-160   0      
160    32     
0      -16    
48     -96    
-16    -32    
128    0      
16     -16    
-48    16     
32     16     
160    -32    
32     -112   
-224   64     
-16    -128   
192    0      
16     -768   
224    176    
-240   176    
-80    -128   
48     -48    
-64    -32    
-144   -48    
208    -32    
-784   -64    
128    -16    
-560   -400   
-176   -288   
-320   80     
0      0      
-176   160    
-368   -432   
-240   -240   
192    -128   
-64    -32    
384    336    
-80    0      
-688   -176   
496    48     
-208   128    
-608   -208   
160    48     
160    64     
-400   32     
-128   -304   
160    32     
144    112    
-64    16     
160    -16    
16     16     
-96    48     
32     -64    
-240   -16    
128    -16    
-144   96     
240    112    
16     -32    
208    32     
-112   160    
0      -80    
192    96     
240    -96    
112    16     
-144   -48    
176    -32    
-336   -48    
464    80     
-576   160    
160    64     
176    64     
32     -48    
-96    -80    
-1056  -96    
64     -64    
-224   -80    
0      48     
32     0      
-208   96     
80     -16    
-704   -32    
-80    -144   
-752   -32    
48     96     
32     112    
-256   -144   
-800   -96    
-64    352    
-112   208    
192    -16    
-224   32     
-272   -80    
-96    -176   
-416   48     
-48    32     
-144   -16    
48     -32    
128    -208   
208    192    
96     -80    
-32    -144   
-272   304    
48     -208   
-16    112    
352    96     
-32    -64    
-96    -16    
-48    -16    
-80    -176   
0      240    
-48    -400   
-112   112    
-352   16     
-128   -128   
-976   16     
-16    -48    
64     80     
272    80     
-128   -160   
-32    128    
-256   -368   
-192   -512   
-112   448    
32     0      
96     160    
192    -80    
-144   32     
-256   0      
352    -16    
-16    -64    
272    352    
-288   -16    
-16    96     
-208   336    
32     -288   
-48    208    
-16    -16    
224    16     
-96    480    
-224   -368   
-144   272    
-16    -208   
-64    -80    
144    176    
16     -144   
-32    96     
-672   64     
32     -48    
48     -32    
48     80     
672    1536   
-96    512    
-304   -880   
-160   -192   
48     48     
-96    160    
16     -448   
128    -368   
80     448    
-272   -464   
-16    112    
-912   544    
64     -336   
-352   -496   
80     240    
-384   128    
-80    -160   
-272   -80    
544    256    
-112   320    
256    160    
192    -16    
-144   96     
96     112    
-320   160    
144    144    
-32    160    
16     -16    
288    16     
-256   -160   
-96    -544   
128    -96    
-16    -16    
0      -176   
-48    -144   
-160   -224   
-64    176    
-144   96     
112    32     
-32    272    
240    208    
-224   64     
16     96     
-32    80     
-144   144    
-80    -96    
112    80     
160    400    
-96    -144   
128    0      
-112   48     
48     -32    
-224   80     
-80    -80    
-272   -448   
96     -160   
-352   16     
-320   -288   
320    -416   
112    112    
-80    544    
-48    -128   
-48    -32    
208    -176   
128    192    
160    464    
-240   -16    
400    560    
-432   208    
-304   208    
240    144    
-304   48     
64     -112   
128    -384   
240    -320   
96     -320   
-128   -16    
192    -304   
-80    416    
400    160    
288    32     
-96    -352   
-96    -240   
-16    192    
-160   96     
208    64     
-16    -16    
-16    -32    
-64    16     
192    96     
64     48     
-80    112    
160    128    
-192   80     
144    224    
-112   0      
208    16     
-384   208    
208    -16    
-96    -224   
-64    16     
-48    48     
16     256    
64     32     
224    -224   
64     16     
16     112    
80     -112   
96     -384   
-80    -208   
-16    -64    
224    96     
-192   -48    
304    16     
-400   -224   
336    -112   
64     192    
-288   144    
-48    96     
-16    32     
96     112    
64     -64    
48     48     
288    128    
-32    208    
-272   16     
-16    -64    
96     -176   
208    192    
-80    432    
176    176    
176    -16    
-112   -32    
-48    -48    
-32    -48    
144    128    
240    -16    
128    64     
-80    80     
-112   32     
64     0      
-48    -144   
16     -256   
32     -128   
80     -64    
64     -256   
288    112    
-64    96     
208    -32    
208    0      
128    80     
-112   64     
48     80     
160    96     
-96    208    
-48    80     
256    80     
-64    32     
96     -64    
-32    -224   
32     -80    
64     32     
160    -112   
-64    -80    
80     -80    
240    80     
-16    0      
96     -352   
144    -128   
-16    96     
-80    32     
176    16     
128    288    
32     -144   
112    -160   
256    -688   
-32    80     
16     160    
240    560    
-240   16     
-176   -192   
160    -16    
112    -112   
32     -112   
192    -48    
256    -96    
176    240    
192    96     
0      -144   
48     32     
-80    -272   
-96    80     
64     -752   
32     16     
64     32     
16     80     
-32    16     
208    272    
80     80     
48     16     
-80    64     
80     -16    
64     -48    
192    -64    
48     -112   
224    112    
400    368    
-272   0      
48     32     
16     -624   
-32    32     
0      112    
96     0      
208    80     
96     16     
-144   -32    
-144   -64    
16     48     
160    -64    
128    16     
-96    -448   
224    96     
96     -160   
192    64     
-16    -576   
64     80     
64     16     
160    -48    
-48    64     
192    64     
-32    144    
160    -16    
-64    0      
80     16     
48     80     
80     -112   
96     32     
-80    -144   
144    64     
80     112    
208    48     
192    112    
0      48     
96     128    
-128   -16    
144    112    
176    64     
-80    0      
-208   -160   
128    64     
32     0      
368    48     
112    -224   
176    48     
32     32     
32     -464   
96     -16    
96     80     
-208   0      
16     0      
-96    -224   
176    -16    
208    -896   
96     -128   
64     48     
-64    -48    
384    128    
-48    48     
-80    0      
288    16     
-192   -64    
-80    0      
32     -48    
240    64     
-64    -64    
-176   -144   
480    112    
-256   -272   
176    160    
-608   -256   
48     -192   
352    144    
448    -32    
144    -112   
224    64     
-176   -224   
96     0      
-80    -32    
96     -96    
480    80     
-208   -96    
48     -160   
304    16     
128    32     
0      -16    
32     -16    
0      -48    
48     -32    
80     0      
-192   48     
48     32     
128    -64    
-240   -80    
160    -64    
-816   -160   
240    -144   
32     16     
160    -16    
-48    -176   
0      -160   
32     -32    
144    -240   
64     48     
96     -192   
208    144    
64     448    
16     -128   
-256   -400   
80     304    
-240   160    
-48    -416   
288    288    
208    -32    
160    -48    
240    112    
-336   -288   
0      -32    
112    -96    
80     80     
176    -80    
160    -208   
16     432    
96     -288   
256    48     
112    0      
-112   -224   
-1120  -16    
144    -160   
96     96     
128    -80    
-32    176    
112    -224   
-144   448    
-48    -192   
80     -304   
-144   48     
224    368    
48     -176   
240    240    
-224   -192   
96     -16    
-304   288    
288    -64    
-528   256    
128    80     
-16    256    
48     -368   
0      -80    
288    -288   
-80    96     
-48    64     
352    64     
-224   64     
48     16     
-432   -208   
272    112    
-48    288    
192    336    
-48    -64    
16     -176   
48     -48    
224    -80    
0      16     
-224   -352   
48     -208   
-80    304    
-96    -96    
-544   -144   
112    -192   
-96    -192   
144    -240   
-32    -272   
96     48     
-16    256    
48     -192   
-80    -80    
-80    -112   
-48    -96    
320    -64    
-80    144    
-128   -48    
256    -96    
-112   96     
48     -48    
-384   -304   
16     -432   
-288   -96    
128    -64    
-336   -48    
144    -96    
-16    -32    
-224   16     
16     128    
32     240    
-1424  112    
16     160    
-480   16     
-64    -32    
336    64     
-272   80     
352    128    
-336   176    
-272   -240   
368    240    
-320   -160   
80     48     
-480   80     
-224   112    
48     336    
-208   144    
48     96     
-176   -144   
16     -112   
-736   -192   
32     -128   
112    -64    
128    112    
-32    192    
-128   288    
0      -16    
-48    -64    
-112   -160   
-64    -80    
-144   32     
-16    96     
-48    -96    
-512   -112   
-160   -80    
-224   64     
336    224    
-64    368    
-16    -272   
-272   -592   
128    0      
80     -80    
64     208    
-64    -16    
96     80     
80     -80    
-288   0      
0      -48    
-144   -128   
48     128    
-352   -448   
-32    -224   
-784   48     
96     32     
-208   304    
256    -96    
-176   16     
-128   80     
16     -288   
-384   -528   
16     -176   
-320   32     
-64    -208   
96     64     
-112   128    
32     320    
560    352    
-176   976    
-608   768    
-496   -272   
288    -224   
128    48     
496    128    
-64    48     
-32    160    
-720   288    
-144   48     
80     -304   
64     16     
304    -368   
16     304    
64     -80    
-480   64     
-16    -16    
-448   96     
-32    144    
32     -176   
-96    96     
224    -256   
96     48     
16     96     
-208   160    
320    288    
-224   -48    
80     -304   
448    512    
-416   448    
-304   240    
144    -48    
96     288    
48     272    
-256   -32    
176    -128   
-80    -224   
128    -32    
-112   -240   
96     -80    
-48    -16    
-48    240    
208    -192   
144    -240   
-32    -128   
-128   -64    
-224   -304   
-592   -672   
-64    -240   
208    80     
96     32     
16     96     
-480   -272   
320    288    
-352   224    
-96    -144   
128    -160   
-208   -144   
-80    -144   
112    -96    
-224   -32    
-272   -64    
-336   16     
128    448    
96     -16    
-16    -144   
0      80     
160    -480   
272    688    
-256   352    
-64    -112   
240    -192   
-304   -80    
-80    -288   
160    464    
96     -160   
336    160    
32     64     
0      16     
0      112    
-288   0      
64     208    
-160   -64    
208    -64    
80     64     
224    96     
64     -16    
128    -176   
-160   -32    
-32    96     
-192   16     
16     64     
32     144    
32     144    
0      -16    
16     -80    
80     -48    
176    96     
-144   16     
32     144    
48     32     
-48    -32    
-240   -128   
-48    16     
-112   80     
-480   -112   
-64    80     
160    208    
-144   192    
272    336    
-64    96     
128    48     
32     48     
96     -16    
160    48     
-16    32     
96     -16    
16     32     
192    96     
0      96     
-80    0      
-128   -144   
544    128    
80     0      
192    128    
-80    16     
-96    -16    
-48    160    
-96    224    
-112   -48    
240    80     
208    96     
0      32     
-16    -112   
224    80     
64     80     
-128   -96    
256    128    
64     0      
80     80     
-80    112    
16     0      
-160   -128   
-16    -16    
224    48     
192    96     
0      0      
128    80     
-208   -80    
-32    -64    
-48    16     
80     32     
16     48     
80     64     
-48    32     
160    32     
160    64     
80     48     
32     0      
-80    48     
176    80     
-16    32     
144    32     
-64    80     
96     -48    
0      48     
64     -656   
-48    80     
112    160    
-32    -16    
208    32     
32     0      
16     64     
256    112    
-128   -32    
128    48     
-48    -32    
192    -64    
16     176    
-64    -96    
240    240    
-192   -368   
288    -80    
32     128    
288    -112   
-208   16     
-192   16     
128    -192   
288    208    
-320   -32    
256    0      
-256   -240   
480    160    
-192   176    
-80    -224   
320    160    
-816   48     
-32    -16    
256    64     
-272   -256   
80     -128   
208    128    
-160   16     
176    -80    
112    -32    
32     128    
64     112    
0      128    
192    176    
16     -64    
288    96     
96     -160   
32     -96    
-144   -352   
160    16     
128    112    
224    -240   
144    144    
208    128    
-112   -144   
128    -32    
0      48     
-64    -32    
176    64     
-112   -144   
368    480    
-496   -384   
80     16     
144    128    
16     -368   
240    -112   
-112   32     
304    16     
96     176    
-48    -128   
-192   48     
-96    -944   
576    480    
-160   -176   
-16    -160   
80     496    
-48    -112   
240    -224   
480    256    
32     352    
-96    128    
96     -176   
-176   -336   
96     208    
224    48     
192    384    
208    -160   
80     144    
176    16     
-96    -208   
176    -80    
-96    32     
-80    0      
-96    -144   
176    112    
-96    -432   
16     -16    
96     -112   
96     16     
16     -16    
-160   -288   
240    -848   
16     -208   
448    192    
-48    96     
256    208    
-176   32     
-16    0      
208    -192   
128    48     
176    48     
96     -96    
32     -80    
80     -352   
64     16     
32     -128   
-32    -64    
176    -32    
64     48     
160    -64    
32     176    
-160   -32    
64     80     
-16    -16    
256    32     
16     176    
128    -128   
-160   -64    
176    -176   
-16    80     
-192   176    
64     -48    
176    32     
336    80     
-224   -32    
144    -864   
112    0      
32     48     
128    32     
240    96     
-192   -64    
80     -224   
176    -176   
176    -80    
0      16     
-944   16     
144    -144   
176    -112   
96     -144   
32     80     
48     -240   
-32    -112   
176    16     
96     48     
112    96     
48     144    
128    -16    
80     80     
-112   128    
112    96     
-1312  -96    
-272   -176   
224    -400   
144    144    
80     80     
16     -112   
128    -64    
32     -416   
-112   112    
112    -288   
-16    224    
176    -16    
-96    -416   
80     -384   
128    0      
-224   128    
80     -320   
-64    0      
160    -48    
48     208    
192    -160   
-352   -16    
-80    -352   
16     160    
192    288    
0      -48    
-256   -80    
208    -128   
-96    80     
0      -32    
-256   112    
176    112    
-224   128    
144    0      
128    -80    
-16    -160   
-32    -144   
80     160    
160    400    
144    -208   
176    -16    
-432   -384   
176    -624   
-272   -432   
80     -64    
-160   96     
48     -32    
-240   96     
-160   -352   
-1248  -448   
352    -144   
480    1040   
96     720    
-240   336    
304    -144   
64     48     
-32    128    
208    -240   
-480   -352   
64     -144   
-352   -112   
64     304    
192    528    
-160   272    
432    -800   
16     -208   
288    336    
304    -192   
0      672    
-144   -816   
240    -32    
128    -208   
176    -368   
32     144    
80     0      
-144   48     
272    176    
-352   1120   
32     -48    
80     -208   
208    -80    
128    -256   
496    464    
-80    176    
-192   160    
-816   -256   
-96    -112   
-688   176    
48     -32    
48     352    
-192   -432   
656    480    
-144   320    
-336   272    
464    0      
-624   -144   
64     256    
-160   -96    
48     432    
288    192    
-576   -288   
-48    272    
-528   -80    
-128   96     
368    -128   
80     144    
16     384    
192    -224   
-608   368    
240    -48    
-192   -288   
208    80     
-272   -64    
32     96     
48     -160   
-64    336    
-192   -240   
80     16     
-112   0      
-608   -48    
-224   32     
-64    0      
-144   -112   
-32    64     
-96    -16    
-64    -112   
0      176    
-160   -304   
96     -112   
-64    -32    
-16    128    
176    160    
-224   -336   
0      32     
128    112    
-96    -240   
-1472  -272   
-320   -176   
128    -816   
112    -192   
-224   -32    
144    -496   
-16    -128   
-96    16     
48     48     
-80    16     
32     16     
-208   16     
192    208    
-288   464    
176    480    
-128   272    
64     144    
-96    -128   
128    -80    
-80    -240   
80     -16    
32     32     
80     64     
-112   112    
-256   16     
-32    368    
-192   192    
0      -144   
-144   -112   
-112   0      
-224   -96    
16     64     
-1520  -16    
-16    32     
-48    -16    
0      208    
256    -48    
64     96     
-192   -16    
-96    80     
-224   240    
80     80     
-192   -128   
-80    -16    
32     240    
-528   -128   
240    48     
-96    144    
96     48     
0      0      
-112   48     
-64    64     
-96    32     
0      64     
80     192    
-192   -16    
0      -96    
208    112    
-192   32     
32     32     
-160   -96    
64     208    
-400   144    
32     -208   
-48    -80    
-112   144    
144    48     
0      -32    
32     -16    
96     144    
64     80     
-224   -176   
16     -64    
32     128    
128    80     
-144   -48    
-48    16     
-160   -32    
64     32     
128    32     
80     48     
-32    -16    
-16    48     
80     80     
-32    32     
0      64     
-112   80     
-48    0      
-128   16     
240    96     
-176   32     
16     16     
-288   -16    
0      0      
208    32     
64     -16    
64     96     
16     48     
64     64     
80     32     
-112   48     
16     64     
48     16     
-96    -384   
-80    -16    
-208   -48    
32     0      
80     64     
80     64     
112    0      
-64    96     
128    32     
128    80     
-144   128    
176    128    
96     -16    
64     32     
48     112    
-272   0      
-112   144    
-272   96     
400    96     
-272   64     
16     -112   
32     -80    
96     80     
-224   48     
16     -32    
224    112    
-384   -304   
0      -176   
-224   -32    
112    -64    
416    96     
224    208    
64     0      
144    -112   
-128   -64    
480    -368   
560    224    
256    176    
-160   -64    
-448   304    
-272   0      
-352   -80    
-16    272    
160    -32    
-208   -400   
48     640    
416    -256   
0      -16    
96     64     
-80    -800   
0      736    
32     -208   
-64    80     
16     240    
64     -224   
-16    112    
0      128    
48     -64    
0      -80    
144    -16    
-240   192    
480    288    
-160   -320   
16     -256   
0      -176   
64     -96    
96     0      
16     -64    
16     144    
-240   112    
240    176    
-96    -128   
128    -32    
176    112    
-224   80     
-144   112    
96     64     
160    48     
96     16     
272    -96    
112    64     
96     112    
48     -16    
16     32     
-32    128    
160    192    
208    96     
160    64     
160    -64    
112    96     
-32    112    
-160   -64    
64     -16    
-176   -272   
16     96     
144    80     
-32    80     
0      16     
80     96     
-32    128    
144    64     
-48    -48    
128    48     
-128   -16    
-32    80     
-48    0      
112    -64    
320    -224   
208    -544   
48     256    
-112   96     
96     -32    
176    -16    
16     48     
-96    -384   
64     -176   
-16    0      
272    208    
32     32     
240    64     
-64    64     
176    -112   
304    112    
16     112    
304    208    
-112   64     
16     -64    
256    -32    
-304   16     
-16    112    
-192   32     
400    -112   
176    144    
96     112    
64     0      
-80    336    
144    -80    
176    -224   
-32    -512   
160    -368   
272    -1040  
-176   -32    
128    -80    
64     288    
-224   112    
176    -80    
16     -64    
240    48     
-48    80     
192    112    
208    208    
160    0      
-32    144    
64     64     
208    208    
0      -80    
48     -176   
256    -720   
272    -144   
96     80     
112    32     
-144   -16    
224    176    
-64    256    
48     -304   
240    64     
176    304    
-48    336    
320    48     
-176   32     
-80    -208   
48     80     
208    48     
80     -240   
-48    -304   
96     -32    
-288   16     
192    -240   
208    256    
144    192    
48     80     
16     -128   
-64    -16    
48     -400   
224    -208   
112    128    
288    160    
-16    96     
16     -1104  
-176   -192   
384    -1664  
192    256    
112    320    
-48    -16    
64     64     
-16    -640   
-32    -272   
224    144    
0      -192   
144    368    
80     -368   
-16    -240   
256    -144   
144    112    
304    -48    
-240   -208   
112    -112   
80     -176   
208    48     
464    -160   
224    -592   
-48    -256   
144    304    
-144   -208   
80     -80    
-80    -208   
96     -16    
-272   -64    
96     -16    
240    -16    
-1216  -960   
80     224    
320    672    
-224   -1104  
912    160    
16     384    
-96    -336   
-80    -896   
-16    -32    
240    -720   
16     176    
32     368    
880    384    
-1120  -1536  
-304   -848   
-128   464    
64     64     
-496   352    
384    256    
272    -112   
-48    272    
240    192    
-448   -368   
48     -480   
96     -288   
80     48     
176    -80    
144    48     
160    -16    
0      -16    
-16    64     
64     -64    
-80    -80    
80     -48    
-32    -144   
192    32     
112    -32    
192    64     
-352   96     
48     -512   
208    48     
48     -32    
32     0      
128    -32    
128    -400   
-240   -160   
128    256    
-400   0      
224    -96    
-224   -160   
-64    -176   
80     32     
144    -80    
-128   80     
288    -256   
-80    64     
432    176    
-272   112    
16     -64    
32     32     
-48    -48    
96     0      
-320   -144   
112    -128   
-544   -16    
80     32     
-208   16     
192    -176   
16     -16    
-64    -160   
240    -64    
80     -592   
112    -128   
-128   -160   
224    96     
-112   224    
96     -112   
-16    -112   
160    -128   
-160   80     
128    -112   
-1072  32     
416    48     
-176   192    
-96    -80    
160    160    
176    -208   
16     -112   
-32    32     
320    128    
-704   -48    
-16    -48    
-96    -208   
0      -144   
-224   160    
-16    16     
208    80     
48     -176   
160    -16    
128    -16    
-80    48     
-224   -96    
224    -64    
-320   0      
224    80     
-192   16     
96     16     
-240   -448   
-144   -304   
-320   224    
96     64     
-288   32     
320    48     
-304   -16    
-1920  -224   
176    64     
-96    48     
-656   96     
-48    -48    
-448   0      
32     16     
32     -64    
-32    0      
128    0      
-80    16     
192    0      
48     48     
-272   -80    
16     16     
-32    -96    
240    0      
0      64     
-16    80     
-112   16     
-128   48     
96     80     
-1360  -64    
-80    -64    
176    0      
96     48     
-240   -48    
-16    16     
-176   -128   
-64    80     
-176   -128   
16     -32    
80     32     
-48    64     
64     80     
-176   0      
-112   0      
-128   48     
80     64     
64     -16    
-64    80     
-96    16     
16     32     
-32    -16    
64     96     
64     112    
-176   16     
-32    32     
-80    -32    
-16    48     
-128   16     
-32    48     
16     0      
16     0      
-1008  -64    
96     96     
-32    -48    
240    96     
-192   -64    
96     64     
64     192    
-160   80     
128    288    
-16    208    
0      0      
-160   80     
0      112    
-272   -48    
0      -208   
-576   80     
128    48     
-48    48     
-32    32     
-32    288    
528    112    
-192   416    
208    -320   
192    -112   
352    416    
-448   -752   
528    1088   
-400   96     
-32    -240   
16     352    
144    -176   
144    -160   
-224   208    
-528   -16    
272    -32    
0      592    
-64    304    
-224   144    
544    -320   
368    64     
-256   -160   
96     -432   
-272   80     
-368   -192   
-176   112    
-80    -224   
208    -32    
-992   112    
48     48     
224    288    
0      144    
-272   -64    
208    -64    
-240   48     
-64    -112   
416    0      
-368   -64    
240    48     
-368   112    
96     16     
-320   -64    
-224   -32    
-32    176    
128    192    
320    0      
112    16     
-160   160    
-176   -192   
-80    -32    
128    80     
-64    176    
64     16     
16     -112   
-16    -32    
64     128    
-336   144    
352    80     
-112   -48    
32     32     
-32    -16    
-64    -64    
48     112    
-224   -160   
320    -80    
0      32     
-32    16     
-48    80     
112    32     
-160   -48    
112    64     
-144   -64    
96     48     
96     -16    
-128   80     
-112   -16    
-32    16     
368    224    
-208   144    
96     0      
-80    16     
-48    -48    
-16    -96    
144    96     
-48    0      
32     -112   
-96    -176   
112    160    
-64    32     
0      16     
-48    64     
64     -16    
96     0      
48     0      
0      -16    
144    80     
-96    64     
-96    -64    
160    96     
112    32     
-32    144    
-176   16     
-16    -48    
-16    -16    
32     -16    
64     48     
112    96     
-144   208    
16     -48    
48     -64    
144    -80    
-64    96     
-96    -16    
112    -16    
96     160    
64     48     
48     16     
96     -48    
192    0      
96     48     
-16    224    
48     64     
80     -144   
-304   -432   
240    -96    
-144   288    
240    336    
0      288    
48     48     
-208   80     
32     -144   
-16    -176   
160    -112   
256    144    
256    272    
-32    80     
-96    112    
112    -64    
-32    144    
112    0      
80     -128   
-32    -80    
112    0      
80     32     
224    -256   
16     -176   
144    16     
-192   -480   
0      176    
-176   192    
112    16     
96     -208   
144    -128   
-64    336    
448    -192   
288    336    
-144   96     
-48    -224   
0      208    
-128   48     
0      -176   
176    -80    
80     320    
-80    -240   
256    320    
-64    -48    
80     112    
112    32     
-160   0      
-304   -112   
32     -576   
192    512    
48     128    
176    0      
0      -48    
-32    -112   
384    528    
176    -320   
256    64     
176    -64    
-96    96     
96     -48    
-128   -240   
160    0      
-16    128    
464    320    
-176   -32    
96     -128   
96     80     
96     0      
112    128    
0      -160   
96     32     
-16    48     
208    352    
80     416    
304    384    
160    160    
160    -16    
256    0      
32     -48    
128    32     
-112   64     
80     -32    
-80    128    
-128   -16    
-64    32     
16     -336   
240    128    
-224   -416   
192    224    
-96    240    
112    128    
-128   -160   
256    16     
16     288    
-128   128    
176    -144   
32     -112   
-256   320    
-64    128    
1088   704    
-720   288    
-320   -16    
544    -432   
160    0      
-288   176    
-32    16     
352    256    
-368   112    
-32    -144   
224    96     
160    0      
224    -32    
48     80     
-80    -80    
0      32     
16     -128   
96     64     
80     80     
112    128    
208    -16    
112    64     
32     80     
448    96     
-368   0      
-48    -304   
320    112    
112    16     
96     80     
-80    -48    
128    144    
96     -144   
144    96     
-96    -416   
-160   32     
-48    192    
-16    16     
336    -16    
512    288    
-208   32     
-16    -256   
192    0      
64     -32    
80     32     
288    176    
0      224    
-288   -144   
144    64     
96     -240   
288    -48    
32     48     
192    -176   
224    176    
-96    -800   
48     -112   
192    0      
48     -736   
-16    0      
208    -368   
272    -48    
-240   -160   
48     32     
48     32     
128    -64    
80     -192   
-112   80     
16     -160   
-144   48     
-176   -16    
-16    80     
144    224    
64     -16    
208    192    
-64    -384   
64     -176   
256    -1424  
-64    -16    
-16    96     
96     32     
192    -96    
-48    64     
64     -128   
48     160    
-96    144    
64     0      
-1616  -16    
96     80     
-96    -64    
96     -112   
128    -80    
128    -320   
192    -16    
32     -128   
96     560    
160    176    
-128   -176   
-80    -128   
80     0      
-128   64     
96     32     
-1152  80     
-32    0      
80     112    
240    0      
288    -48    
144    -48    
48     -16    
32     -528   
48     96     
128    0      
48     48     
32     16     
-16    -256   
-224   16     
-208   0      
-640   -64    
80     -16    
-96    0      
272    160    
0      0      
176    -240   
-48    -240   
128    -448   
0      32     
64     80     
48     -16    
-80    -32    
112    -16    
-16    32     
304    320    
-192   64     
-16    -96    
-736   208    
48     64     
-336   0      
-96    -224   
48     -112   
208    -80    
176    -16    
128    -512   
-48    96     
112    160    
-16    80     
-144   128    
96     288    
32     112    
176    -496   
-448   -32    
64     -32    
-544   -144   
0      -112   
48     80     
0      16     
192    144    
64     -816   
80     -176   
64     -16    
176    128    
-208   -128   
96     -224   
-544   16     
-144   -128   
-112   272    
176    -128   
-112   -160   
64     112    
-64    -208   
80     -224   
80     176    
-80    48     
304    -48    
-224   160    
96     32     
-224   -496   
480    -64    
-16    240    
128    176    
-336   -112   
-112   -304   
-144   -240   
-176   -464   
48     176    
96     -16    
400    96     
-128   304    
16     192    
-272   96     
16     48     
-272   80     
-32    -32    
-272   16     
64     368    
-224   304    
-48    -256   
32     160    
-1456  -224   
512    -208   
112    -320   
-64    -16    
-16    128    
-208   224    
-608   112    
-480   -112   
-304   0      
0      0      
-224   240    
160    16     
80     0      
-912   0      
176    96     
-160   448    
112    0      
-144   -272   
-240   -64    
-112   32     
-320   80     
-16    -144   
224    -112   
-288   144    
-192   240    
-208   0      
192    -144   
16     32     
-48    -144   
0      32     
-80    48     
48     96     
48     160    
-96    144    
-112   -400   
128    -272   
64     160    
-112   144    
-192   96     
-288   -48    
-304   176    
-208   -144   
-176   48     
-32    48     
-224   96     
-112   -240   
-80    96     
64     32     
-80    -32    
144    0      
48     96     
64     112    
-144   32     
-48    0      
-208   -144   
0      16     
-336   -64    
112    112    
-192   -144   
-16    -32    
-144   -176   
64     48     
-48    64     
-64    64     
192    112    
-256   64     
-96    -64    
-16    16     
-48    -16    
176    128    
16     96     
-160   -32    
48     144    
128    16     
16     64     
0      -80    
160    16     
32     48     
-192   0      
16     -16    
-240   -176   
176    -96    
-208   0      
-176   -48    
-144   -48    
80     160    
-288   -96    
240    48     
-976   16     
-32    -112   
32     -48    
-16    0      
-192   32     
128    176    
-224   96     
-16    32     
208    432    
160    176    
-80    -16    
-176   -16    
-32    32     
-208   0      
192    0      
-672   128    
-256   -80    
288    -320   
208    320    
16     464    
0      240    
-64    80     
176    -144   
-64    32     
-208   96     
-192   -48    
-80    -32    
192    -176   
-16    256    
64     32     
-336   -16    
0      512    
-32    32     
-112   224    
-272   -304   
80     -128   
320    64     
64     96     
96     -224   
112    160    
-48    128    
-368   -112   
128    32     
-96    64     
224    96     
-16    240    
240    560    
-64    32     
80     -64    
0      -80    
-80    16     
-64    -80    
-272   -160   
48     48     
-96    128    
160    112    
16     -64    
160    128    
-160   -112   
16     -128   
-16    -32    
-32    0      
-80    144    
64     48     
32     0      
96     32     
0      64     
128    80     
16     16     
32     16     
32     16     
-32    0      
128    80     
-16    0      
48     32     
48     128    
208    208    
-176   -32    
80     48     
32     32     
96     32     
112    48     
400    288    
-592   64     
368    -144   
-160   144    
304    192    
320    288    
-256   48     
-16    -208   
-192   -176   
64     112    
224    144    
48     -96    
272    176    
288    144    
160    -16    
-64    0      
-64    32     
-16    48     
-112   64     
-128   -64    
-128   -112   
448    144    
64     160    
128    96     
112    240    
-224   0      
560    144    
-336   64     
176    256    
-224   -96    
512    128    
-336   96     
32     96     
0      -16    
-224   -80    
96     -144   
-96    0      
384    192    
-368   64     
144    352    
0      80     
288    -128   
-48    64     
-112   16     
-96    32     
128    32     
32     80     
160    128    
-32    80     
-64    16     
-32    -544   
16     112    
48     48     
32     96     
32     -64    
192    128    
-192   -32    
128    48     
48     16     
-48    -176   
288    -112   
-64    240    
192    64     
128    0      
32     -64    
64     16     
128    -80    
160    -400   
-48    96     
96     224    
-48    112    
112    -80    
-176   96     
80     -32    
304    144    
16     80     
-16    48     
-64    32     
288    128    
16     144    
128    96     
144    64     
-96    -496   
32     80     
-16    160    
208    160    
32     -16    
48     80     
16     224    
192    224    
432    112    
48     192    
-208   64     
-176   -432   
48     -48    
128    -96    
-80    16     
0      -176   
96     -32    
128    -768   
64     288    
-16    -176   
-48    0      
-128   -48    
32     64     
0      -112   
96     64     
-48    128    
0      -32    
160    0      
-64    -80    
16     368    
240    304    
-240   -160   
64     -928   
224    336    
144    -224   
80     -16    
112    16     
112    -16    
96     32     
-32    64     
-224   -400   
288    -400   
256    640    
288    80     
-80    -32    
32     -16    
64     128    
128    -80    
64     16     
-240   288    
-64    -240   
-144   192    
-80    48     
16     -48    
144    -176   
192    16     
224    -320   
224    80     
128    32     
112    80     
-176   -352   
208    224    
-112   -160   
224    912    
112    336    
-112   -320   
-176   64     
176    16     
32     -112   
0      160    
-64    -48    
144    0      
80     80     
0      -64    
112    -64    
192    96     
80     -112   
-48    -224   
272    112    
0      160    
320    -528   
-32    352    
32     -992   
80     -1120  
80     144    
-64    -944   
80     -144   
96     272    
32     -160   
-16    64     
0      -208   
112    -176   
96     48     
48     -240   
-192   176    
112    -144   
96     -96    
-32    176    
176    -544   
-80    -48    
160    32     
80     16     
80     -64    
96     -96    
0      224    
80     -208   
64     224    
-80    208    
224    -128   
96     480    
160    640    
80     144    
-112   -256   
64     -272   
320    272    
-176   464    
320    -16    
-160   -528   
288    -256   
-80    -352   
304    224    
-160   128    
144    304    
-64    432    
192    368    
384    384    
32     -128   
-560   -240   
96     32     
224    80     
272    -16    
32     -256   
32     -272   
-16    -48    
128    -288   
-32    112    
-208   -304   
-16    96     
64     304    
96     192    
-112   -32    
224    176    
-688   48     
-224   -224   
304    -128   
-176   48     
64     -144   
128    -240   
16     -64    
48     32     
64     32     
80     -48    
-16    -32    
32     -96    
176    -224   
-336   -240   
80     272    
-240   -96    
-16    144    
-288   -112   
288    32     
-2080  -80    
48     -32    
80     -48    
16     208    
144    224    
240    -608   
-192   80     
160    -240   
336    64     
64     80     
-128   192    
288    -80    
96     -96    
-112   -96    
-48    -96    
16     -128   
96     -208   
-304   192    
-32    -64    
0      48     
-16    -336   
240    192    
144    160    
144    0      
-48    -32    
16     -16    
-112   -80    
32     -112   
-224   -32    
-32    48     
-416   -16    
336    80     
-784   48     
-16    -208   
64     32     
64     -32    
96     -80    
96     -224   
16     80     
-176   0      
128    -32    
-288   0      
-16    32     
80     240    
48     96     
-176   -208   
144    -80    
80     -48    
192    272    
64     224    
112    -144   
64     48     
-336   0      
160    -80    
-160   -112   
208    64     
224    400    
-32    256    
-48    0      
32     16     
32     -32    
-128   -128   
-320   -512   
224    -448   
288    80     
-288   -64    
-1024  -256   
-128   -304   
-1872  -144   
-64    160    
-48    -64    
16     144    
144    -96    
0      -80    
288    128    
-224   -192   
-896   -384   
160    1296   
-224   -320   
-80    -416   
-576   -96    
-80    64     
16     -16    
-144   -208   
256    -176   
-192   320    
-112   464    
-608   -80    
-224   -336   
-128   48     
96     272    
-112   352    
64     176    
48     -128   
144    32     
160    80     
-16    176    
96     96     
16     16     
-48    0      
-96    -80    
-128   32     
-656   32     
32     160    
224    160    
-32    80     
-288   -176   
0      -16    
-16    32     
-32    64     
0      16     
-64    0      
-16    -48    
-48    32     
-112   0      
-96    -32    
-64    -64    
-304   96     
32     32     
-784   -80    
48     0      
-208   -80    
112    160    
-112   -32    
96     128    
320    256    
-368   -16    
144    48     
80     80     
128    -48    
-192   -48    
-96    48     
-176   0      
-80    64     
-544   -32    
48     32     
0      16     
64     64     
144    16     
-176   -16    
96     48     
-16    48     
144    16     
16     48     
64     -64    
-192   48     
-96    16     
-160   -16    
160    0      
48     96     
320    48     
-400   -336   
224    -48    
-416   112    
128    -48    
80     128    
-64    -16    
-48    48     
-96    32     
192    -16    
-288   -112   
112    16     
-192   112    
240    0      
-288   128    
-256   0      
-2384  -160   
-80    -1296  
0      128    
-128   -16    
464    368    
-224   240    
-336   -64    
208    48     
-320   -32    
208    0      
64     -16    
208    96     
-192   -112   
752    112    
48     48     
-416   -96    
112    0      
-48    160    
-160   128    
-560   0      
-16    -64    
256    0      
-320   -48    
384    112    
144    16     
-224   16     
-256   32     
0      0      
-208   -32    
32     0      
-16    64     
0      32     
80     48     
240    160    
-352   128    
176    -144   
112    32     
160    48     
144    -64    
-224   32     
-160   0      
-272   32     
80     16     
96     16     
224    96     
-288   -80    
80     -32    
128    192    
176    80     
-80    -32    
64     16     
256    96     
-112   48     
48     48     
-96    128    
32     80     
-16    -48    
224    144    
-144   64     
-112   64     
128    0      
-16    -16    
80     0      
-16    0      
304    -176   
-96    -16    
176    -112   
-144   -48    
112    320    
-64    -176   
160    224    
64     16     
32     320    
-352   -672   
208    -80    
-16    256    
240    240    
48     -160   
-160   -16    
32     -32    
-32    32     
64     160    
-16    0      
176    -32    
-32    288    
-112   96     
-112   -48    
304    592    
-320   -528   
64     320    
144    224    
224    16     
16     -48    
-208   128    
0      496    
112    -272   
288    64     
-80    32     
144    -80    
-32    256    
-64    -688   
-48    272    
-96    -224   
48     -112   
176    32     
192    240    
32     224    
-48    -448   
160    528    
128    -96    
48     0      
176    192    
-112   -64    
0      -96    
-192   96     
32     0      
32     -256   
400    528    
-240   -240   
16     -288   
208    96     
32     240    
-144   -160   
32     -96    
0      144    
32     -80    
64     32     
-80    -96    
224    208    
-240   -352   
128    -224   
112    80     
192    -160   
112    320    
-112   -112   
32     -432   
288    240    
544    240    
0      144    
32     48     
-160   16     
112    112    
-160   -144   
32     -48    
128    -48    
16     272    
368    320    
-32    -256   
0      -64    
80     -480   
-96    -80    
48     0      
-16    208    
16     64     
48     64     
-16    -96    
-32    -288   
48     -112   
32     -16    
-16    16     
32     -192   
16     0      
112    -176   
32     0      
-16    -96    
32     64     
-32    112    
32     64     
48     -144   
112    -16    
112    -80    
-16    48     
0      -112   
144    0      
-112   -64    
224    -320   
-224   -432   
272    -640   
176    256    
176    -368   
224    112    
80     -1536  
80     272    
112    368    
-16    -352   
288    -288   
128    32     
-32    -16    
96     576    
256    352    
32     304    
-128   160    
-64    -672   
96     80     
112    80     
0      -208   
304    -208   
176    -96    
432    304    
-16    32     
-80    256    
-128   -64    
32     -144   
-176   176    
-336   0      
464    -176   
208    32     
224    -128   
-32    -16    
352    80     
432    -96    
96     -80    
-16    352    
-144   320    
-384   -176   
-48    -192   
288    128    
48     48     
176    -48    
-32    -96    
352    -400   
-144   32     
176    192    
-192   -64    
64     -240   
64     -336   
-80    -224   
192    -80    
-144   96     
112    64     
64     64     
432    32     
-32    304    
128    -32    
144    -16    
96     -80    
192    -128   
-32    -16    
128    48     
160    112    
16     320    
-320   -208   
528    -496   
-64    112    
256    -256   
144    144    
352    -64    
-160   -400   
32     -80    
-48    -784   
144    -256   
128    -1440  
-48    -96    
112    -112   
176    -32    
0      0      
-32    48     
64     112    
96     112    
320    -144   
-544   80     
-272   80     
-112   -128   
80     32     
64     176    
-96    -64    
272    -512   
112    -144   
112    -32    
112    -48    
144    -112   
448    304    
-224   464    
-192   448    
80     -48    
128    144    
-240   336    
112    480    
-432   32     
0      -256   
80     160    
160    -208   
128    80     
80     -64    
-176   32     
-16    -480   
80     256    
-64    -288   
112    128    
128    -96    
544    320    
-144   -16    
-112   0      
-2176  -112   
48     208    
32     -96    
-48    -176   
32     160    
-32    -192   
64     -128   
64     -80    
256    64     
48     32     
16     48     
-96    16     
-16    -656   
-560   -560   
-80    -192   
-464   80     
160    -96    
288    0      
-192   -32    
160    -16    
-48    -144   
64     -176   
288    -160   
176    64     
160    32     
32     -16    
64     32     
80     64     
32     -48    
-224   -176   
-176   16     
256    192    
-1504  -32    
64     -144   
224    -32    
96     48     
-96    -16    
80     -640   
32     -32    
272    240    
224    160    
-48    -112   
-64    -80    
-16    32     
48     0      
-336   0      
144    -48    
-1072  0      
48     -192   
32     16     
208    0      
432    224    
-352   -208   
-64    -80    
272    -1552  
96     192    
272    16     
160    32     
-464   -16    
-48    -48    
-240   -48    
112    -64    
-224   -48    
48     16     
64     32     
192    -144   
176    96     
-144   -80    
32     0      
-352   64     
112    -16    
-256   0      
64     -160   
-512   -64    
80     -32    
-96    0      
176    32     
0      32     
128    -32    
16     48     
352    64     
-224   32     
272    -112   
-80    32     
16     32     
144    -16    
-432   -128   
224    -64    
-288   0      
240    -32    
-336   -16    
112    -64    
-176   -128   
-128   48     
144    -144   
-832   -64    
-96    80     
-64    -80    
16     -16    
-240   -96    
-384   64     
-160   0      
-816   32     
-112   -96    
320    16     
-96    112    
-160   -48    
112    80     
-736   -48    
-176   -96    
0      0      
-112   144    
-400   -64    
208    -16    
64     -48    
-16    -112   
0      -224   
448    -224   
336    192    
-176   -32    
144    -64    
288    112    
-208   -16    
16     -16    
224    112    
-128   -144   
144    0      
-80    64     
-32    -80    
-112   -96    
16     0      
144    48     
-736   64     
-80    16     
-384   0      
64     -16    
80     48     
-96    192    
64     -80    
-16    80     
96     -112   
-16    208    
16     64     
32     192    
-80    96     
-240   -240   
-240   288    
112    240    
-240   -64    
-96    160    
464    160    
-160   -80    
64     48     
-208   -48    
160    32     
-80    192    
-112   0      
-16    80     
-32    96     
64     -592   
256    784    
-192   -496   
48     -160   
192    624    
-32    112    
-112   -192   
-400   -480   
112    32     
208    256    
240    -160   
-48    -208   
-96    -160   
-160   48     
336    -256   
-144   48     
-80    272    
160    352    
160    848    
0      48     
-560   -64    
272    368    
-288   176    
128    176    
0      32     
-112   0      
-160   48     
192    64     
-176   48     
80     48     
288    112    
16     624    
64     256    
0      -48    
48     0      
-224   -160   
208    -128   
-48    -16    
128    176    
-432   -32    
-32    128    
272    176    
-208   320    
16     48     
208    -32    
0      128    
80     112    
32     -16    
-16    176    
80     784    
-160   160    
160    32     
-64    0      
0      -16    
-528   0      
-160   -32    
208    48     
176    176    
-112   160    
-80    -32    
144    -192   
-16    -144   
16     -32    
-16    -32    
0      -96    
-144   -96    
32     0      
-336   -112   
320    240    
-368   80     
-96    -48    
144    0      
0      32     
80     96     
80     192    
16     0      
112    128    
-32    432    
-32    -96    
128    -48    
-224   -48    
80     64     
-112   -96    
0      -32    
-112   -128   
256    -16    
128    192    
-64    176    
-16    176    
-16    -48    
80     -32    
160    32     
240    208    
-48    -32    
16     -48    
-176   -16    
176    192    
-272   192    
-16    0      
112    176    
-32    80     
-16    176    
144    64     
16     80     
-16    160    
192    -112   
-208   -320   
16     -160   
-320   64     
208    -384   
0      0      
144    208    
-64    304    
16     352    
-48    -448   
176    0      
160    240    
272    224    
-176   464    
-160   64     
-96    144    
-32    16     
96     80     
256    464    
96     512    
-160   288    
272    272    
272    272    
16     240    
32     0      
-48    0      
144    -48    
368    336    
-384   416    
-144   320    
208    112    
240    384    
-144   160    
-240   -336   
-160   -320   
48     -400   
-208   304    
160    0      
128    432    
48     480    
-16    256    
64     32     
592    256    
48     48     
-96    0      
64     160    
224    -16    
176    112    
-96    448    
48     128    
320    -336   
48     -48    
32     -80    
-16    96     
-304   -384   
560    -576   
-80    -128   
384    368    
-160   -96    
32     -272   
-96    -384   
-128   -432   
112    -224   
-176   -48    
-48    224    
224    -96    
144    64     
304    144    
80     176    
176    624    
-544   128    
176    -128   
144    -224   
192    48     
-64    400    
256    256    
-128   400    
-96    -240   
272    64     
448    720    
-368   -384   
-160   -224   
-64    160    
160    -1216  
208    -48    
32     -384   
304    32     
-128   528    
-256   -256   
-16    -368   
288    112    
80     48     
16     160    
-272   -432   
112    64     
96     256    
32     -304   
224    416    
-512   -800   
80     -16    
512    256    
368    -224   
-48    0      
64     -128   
64     -128   
176    272    
-96    -192   
64     -64    
128    464    
160    304    
-32    -352   
64     112    
32     32     
48     80     
192    48     
16     -704   
0      144    
80     80     
96     112    
48     48     
288    144    
32     64     
80     -384   
-48    -160   
-48    48     
-48    160    
144    -32    
80     0      
48     -640   
208    -336   
0      -752   
64     48     
48     240    
96     112    
-96    -16    
0      112    
-16    144    
48     -80    
96     -64    
16     -112   
128    400    
-48    -112   
32     -208   
-48    -224   
-160   128    
112    0      
176    48     
160    144    
16     48     
288    32     
96     80     
16     16     
192    192    
112    32     
-112   -176   
64     32     
-64    -16    
-32    0      
0      0      
144    64     
32     64     
80     -48    
288    32     
240    -608   
-16    32     
-16    -352   
32     -272   
0      48     
144    -336   
-272   -80    
-176   -96    
48     -80    
-80    32     
480    -32    
240    112    
48     -64    
-32    -736   
-144   48     
112    -304   
-64    64     
-176   48     
48     80     
-32    -48    
192    48     
-64    -48    
144    -368   
112    0      
96     -64    
32     -64    
-48    48     
64     -48    
32     -224   
16     112    
272    48     
32     48     
-48    32     
128    -160   
-80    -128   
64     -192   
128    32     
176    32     
16     0      
48     -768   
-112   -16    
0      -64    
176    80     
48     16     
96     64     
96     -48    
48     -80    
-224   -64    
32     -16    
-1024  64     
112    48     
16     -16    
-32    -176   
48     -160   
176    -608   
208    16     
176    -48    
-144   -112   
144    0      
-16    176    
176    -144   
-128   0      
-192   -112   
192    224    
-944   112    
464    -32    
-192   -16    
-48    -208   
64     0      
48     0      
-80    32     
288    128    
-272   16     
752    352    
-224   512    
-160   -32    
352    -192   
480    208    
16     272    
-672   -80    
400    -240   
-976   -496   
240    -144   
80     176    
448    128    
-208   192    
160    -464   
-112   -144   
192    80     
-48    64     
-176   32     
112    368    
-112   -480   
224    -48    
-272   32     
128    0      
-224   240    
368    -16    
-80    -160   
96     0      
-96    64     
192    -496   
-96    -80    
480    80     
-32    448    
-288   -240   
304    -112   
96     176    
-16    -416   
-480   80     
528    -800   
-416   432    
64     304    
288    -96    
-480   -112   
112    -96    
384    704    
128    432    
32     336    
48     -112   
-224   0      
112    -176   
-16    112    
240    32     
0      -16    
80     16     
-304   -80    
224    32     
-320   -112   
352    -48    
-80    160    
224    -32    
64     -48    
-352   -16    
96     64     
48     16     
160    -16    
-32    32     
192    48     
-112   96     
-16    80     
-208   48     
112    -112   
-64    0      
224    160    
352    240    
-752   -128   
-128   -64    
-16    -16    
-80    64     
64     48     
112    48     
-224   -80    
96     -112   
-32    -48    
160    32     
-336   -16    
-640   -32    
-16    80     
-1136  -16    
240    64     
128    96     
-256   64     
128    -64    
32     -16    
-192   -16    
-336   -48    
-64    -16    
288    0      
-96    0      
160    16     
96     160    
-224   -80    
32     0      
48     -160   
176    0      
64     112    
16     -32    
-96    32     
-448   32     
-176   48     
-224   -80    
192    -80    
-256   64     
-32    48     
-80    128    
-128   96     
-320   32     
-208   16     
0      -32    
-16    64     
64     64     
-48    -48    
160    -48    
160    96     
16     144    
0      144    
64     64     
-416   48     
-96    -160   
-960   -144   
128    32     
-16    80     
256    144    
-96    -96    
128    160    
-112   0      
-112   16     
32     -144   
48     -128   
-16    -96    
-240   -144   
336    16     
-272   16     
0      16     
-336   -96    
-288   160    
-64    16     
256    -64    
-128   -320   
-192   -192   
160    -64    
-176   -64    
128    144    
-208   144    
-176   64     
-208   -128   
-16    -16    
-128   -64    
-16    -176   
-816   -336   
80     -128   
-64    -320   
96     528    
48     128    
-128   144    
96     160    
0      -48    
-16    32     
-32    -48    
-32    192    
112    32     
-160   -80    
-256   -208   
272    -608   
-592   192    
144    144    
-960   -80    
96     304    
-128   80     
96     -752   
176    -2048  
-464   -672   
0      208    
-208   -320   
352    64     
560    1424   
-304   416    
-576   -816   
208    -608   
-96    688    
-96    128    
160    -176   
-224   240    
-160   -320   
-16    176    
-128   -16    
-80    -496   
-16    -16    
256    208    
336    192    
-368   32     
-464   160    
-384   -16    
192    624    
192    176    
-16    -1200  
192    16     
-80    272    
-944   -688   
160    1168   
128    336    
-624   -496   
464    800    
-544   -112   
-256   -864   
736    -288   
288    480    
336    176    
-352   -688   
288    0      
-176   -16    
16     144    
-16    -144   
416    448    
-256   -208   
160    32     
208    416    
-48    -272   
-16    48     
-48    496    
192    -176   
176    -16    
272    560    
-448   -304   
-80    -112   
208    304    
-240   -192   
192    -16    
-80    112    
16     -32    
-272   16     
304    -16    
-112   -32    
-112   -112   
-32    112    
48     96     
160    48     
-32    112    
144    96     
-32    48     
-64    112    
80     0      
64     80     
-32    -176   
112    -96    
-96    64     
48     16     
0      64     
80     128    
144    352    
-48    32     
48     96     
-272   -144   
288    -32    
176    224    
-112   0      
16     48     
64     112    
192    80     
112    -80    
-208   -688   
-368   -608   
48     -144   
-208   -320   
128    -112   
-144   -16    
192    -80    
-96    -96    
0      -1104  
192    -64    
-128   128    
16     64     
-48    -192   
96     -256   
16     16     
16     -176   
64     -48    
80     32     
-48    -256   
16     -48    
-64    48     
16     112    
-192   192    
-64    -528   
192    -32    
192    32     
32     16     
-96    -144   
208    -48    
128    96     
112    48     
144    48     
-48    112    
-240   -144   
48     -80    
80     176    
64     64     
160    48     
144    -320   
-416   16     
192    48     
16     -176   
384    -256   
320    224    
64     -64    
64     -32    
0      128    
-96    -16    
96     -48    
144    32     
160    80     
96     -48    
0      16     
128    -224   
256    144    
272    -544   
0      16     
0      48     
-64    -128   
160    432    
-352   112    
-48    16     
256    -176   
128    -112   
160    128    
-96    -32    
96     -96    
32     48     
256    48     
-176   0      
48     -512   
272    128    
128    48     
112    112    
-48    -256   
-64    -32    
176    64     
64     48     
96     96     
64     80     
48     -16    
96     0      
288    192    
32     -32    
96     80     
0      -240   
48     0      
192    -192   
-16    16     
64     -32    
80     32     
128    80     
-16    16     
64     -48    
112    96     
32     64     
64     -16    
96     48     
-16    -96    
64     128    
48     -368   
-80    32     
176    0      
128    48     
48     -48    
64     112    
48     16     
32     -48    
-240   0      
288    80     
32     0      
224    -144   
-96    32     
288    -160   
128    80     
208    -112   
64     0      
80     -112   
-176   -96    
32     -128   
48     -64    
320    464    
96     320    
-48    -192   
-208   -800   
0      144    
-144   -32    
48     -272   
160    480    
-48    -96    
272    -176   
64     48     
-128   -144   
0      -32    
1040   944    
-816   -1040  
-528   -816   
-560   -80    
0      384    
512    -480   
944    496    
-352   16     
256    192    
32     -64    
-64    64     
48     -288   
-16    -464   
-176   96     
320    240    
160    96     
-48    -288   
48     -512   
-2144  -272   
32     -528   
144    -80    
80     -240   
288    -80    
-112   -112   
-144   -224   
-192   16     
176    176    
320    -96    
416    288    
-272   -48    
-160   176    
176    -288   
32     112    
-208   -112   
112    -208   
-112   16     
-64    -464   
176    -32    
16     -256   
144    16     
112    16     
64     -144   
224    16     
16     96     
64     -80    
80     48     
80     32     
-192   -32    
160    -48    
112    32     
-16    -64    
144    -176   
-16    -48    
288    160    
160    128    
176    -432   
192    -64    
96     -80    
-16    32     
288    -96    
32     144    
-144   32     
160    0      
-416   -64    
-48    -64    
-624   16     
80     144    
96     -32    
32     -80    
144    64     
32     -144   
0      0      
160    -320   
160    16     
144    48     
16     96     
-304   -224   
96     -272   
-128   16     
80     -176   
-48    32     
256    -64    
48     0      
16     -16    
-32    -32    
16     -112   
208    -80    
16     -320   
176    32     
96     16     
112    80     
-160   -48    
256    -144   
32     96     
-48    160    
-128   144    
-208   128    
-928   -144   
160    -96    
208    0      
128    -112   
128    96     
-80    -512   
-32    0      
96     -144   
384    -16    
-16    80     
-48    0      
-160   112    
-224   -80    
-224   -208   
64     -48    
-304   0      
160    32     
-16    80     
-112   -112   
176    0      
112    -160   
144    112    
-80    0      
80     -16    
256    112    
-304   64     
272    -48    
240    80     
-560   -272   
-96    -176   
-208   -96    
-32    -96    
48     16     
80     -496   
160    16     
48     -320   
304    -64    
384    -16    
0      -80    
80     -144   
-80    48     
-64    80     
192    -48    
-336   96     
96     -64    
-48    -144   
144    -144   
-224   -176   
0      -144   
0      -304   
-192   -672   
-96    -272   
-32    480    
-416   -208   
-128   32     
352    80     
-160   112    
-80    -32    
-32    16     
128    128    
-208   64     
320    -144   
96     144    
-1152  -80    
144    176    
-80    -96    
-112   48     
-64    992    
-320   -112   
-176   -352   
-1056  -48    
16     48     
224    288    
-320   16     
320    48     
-192   32     
-144   -16    
-80    176    
-112   -112   
-96    192    
-224   -240   
-416   -464   
-368   160    
-576   64     
64     -176   
-64    224    
-112   96     
-2672  -80    
-128   -80    
-224   -80    
-32    0      
-32    -192   
-112   -80    
128    -16    
240    112    
-432   -176   
-656   -976   
-64    160    
-112   912    
-240   192    
16     -272   
304    0      
-1200  496    
112    320    
-208   -208   
288    -96    
192    96     
-48    48     
64     -96    
-208   -48    
0      -80    
272    -256   
64     -160   
-208   80     
32     16     
-240   -96    
64     0      
32     48     
-48    -32    
-976   32     
112    48     
128    -48    
192    128    
-128   208    
208    176    
192    64     
272    240    
-368   96     
-288   -64    
32     -48    
-112   -48    
192    0      
-192   16     
48     32     
-608   -96    
128    112    
-208   -64    
304    48     
64     48     
-64    32     
112    0      
-176   16     
192    144    
0      32     
-176   0      
16     96     
192    176    
-192   208    
-112   0      
0      -16    
288    64     
-112   -80    
176    240    
-160   272    
-352   -112   
32     32     
208    -96    
64     -64    
0      -48    
96     144    
-272   64     
96     144    
-176   432    
304    96     
-320   -144   
-80    0      
-1264  -112   
-256   -192   
0      0      
-96    96     
-64    -16    
80     48     
0      -32    
-48    64     
-80    32     
-224   -128   
64     -80    
-80    48     
80     0      
-176   -64    
80     80     
224    48     
-16    16     
-272   64     
-64    96     
144    -64    
80     -16    
-256   -32    
-144   112    
-16    32     
-16    -32    
240    112    
-224   0      
224    160    
-336   -16    
-16    32     
0      -112   
-368   -96    
32     192    
-160   128    
112    -64    
80     -96    
-112   -48    
32     32     
128    64     
128    48     
208    64     
-112   -48    
208    128    
-240   -128   
-32    -144   
64     16     
112    64     
32     80     
80     0      
-32    -16    
-96    -144   
176    96     
0      48     
-128   48     
-208   -48    
-32    -112   
-144   -176   
48     0      
32     16     
128    80     
80     112    
-16    16     
32     0      
112    16     
80     96     
-16    32     
48     0      
112    80     
256    32     
48     224    
144    240    
-160   48     
-64    0      
32     48     
32     16     
96     32     
160    112    
48     32     
48     48     
144    112    
-80    80     
-80    64     
-192   -80    
208    -32    
-16    0      
256    0      
16     32     
-48    80     
32     32     
64     -112   
-16    -80    
128    64     
-48    112    
16     64     
32     16     
-64    -32    
80     -80    
-48    -16    
144    96     
0      -48    
-32    128    
-368   -96    
-64    -208   
-32    32     
16     144    
-176   80     
192    64     
64     -96    
96     304    
-160   -464   
256    -48    
160    528    
160    160    
0      144    
-144   64     
64     128    
144    -128   
-48    -48    
-32    -1088  
-128   1024   
144    -128   
-96    -48    
256    480    
80     -320   
-320   -448   
192    -208   
-448   -32    
-416   -512   
-80    96     
-128   48     
48     224    
320    256    
736    272    
-512   752    
-32    48     
-144   -304   
80     -256   
336    -336   
352    192    
-16    176    
-96    -16    
-16    80     
-336   96     
496    144    
-128   160    
272    -144   
-160   240    
192    -32    
32     -112   
176    -560   
-32    -16    
16     160    
0      144    
0      112    
368    -144   
-128   -32    
96     48     
-48    176    
208    48     
32     -16    
224    -16    
-16    64     
64     -128   
-64    48     
48     288    
320    336    
368    208    
176    80     
-32    -48    
16     -48    
-32    64     
304    -16    
0      -64    
16     128    
-48    32     
64     -144   
-64    224    
272    -144   
48     48     
32     -112   
80     176    
176    -1168  
0      80     
-64    -16    
16     112    
-112   -96    
80     -128   
48     80     
80     -32    
-80    96     
320    -48    
144    0      
-64    -96    
-64    -224   
64     -240   
32     224    
112    -400   
256    0      
144    64     
32     64     
112    80     
176    144    
-16    192    
-64    -128   
16     -48    
128    -32    
64     -32    
96     -112   
80     96     
-16    0      
144    304    
112    -16    
240    0      
-48    -16    
240    16     
-32    64     
128    128    
128    0      
80     -16    
96     32     
224    32     
-80    256    
128    -272   
-32    0      
240    128    
-208   192    
48     -832   
64     112    
160    -16    
240    -64    
80     48     
-48    -480   
96     -672   
-304   -32    
-160   -864   
-16    -384   
384    0      
208    96     
144    144    
160    -96    
-256   -160   
160    -688   
160    -880   
0      -16    
48     0      
-128   144    
-1136  -192   
-32    -304   
416    -752   
192    -192   
176    -176   
-160   -400   
64     -64    
-128   256    
-96    368    
224    -688   
128    -480   
-80    368    
-176   -144   
128    32     
96     -192   
-1232  208    
48     128    
16     112    
336    -304   
128    464    
48     -256   
160    160    
272    -1504  
80     272    
48     -544   
160    256    
80     64     
64     -240   
-32    32     
304    -208   
-240   176    
-48    -96    
-48    128    
16     32     
-16    144    
272    176    
16     -304   
128    -64    
176    64     
-96    64     
112    192    
192    64     
-96    32     
-96    32     
64     -64    
80     -32    
144    96     
336    80     
16     -16    
-64    -112   
64     -208   
-112   48     
16     -432   
80     -32    
160    -1392  
128    80     
176    -16    
-160   32     
-144   -16    
96     272    
-96    -32    
176    -48    
-544   48     
128    32     
-176   96     
16     -32    
-48    16     
160    -16    
240    160    
0      -1024  
80     -144   
192    176    
-80    16     
240    64     
48     96     
-496   -160   
-112   -880   
-256   -384   
176    528    
-800   96     
112    -48    
96     -192   
-64    -208   
576    448    
-672   -448   
160    -80    
400    -64    
16     -192   
384    64     
-272   64     
304    0      
96     -16    
-416   -208   
544    -256   
-32    -64    
240    -96    
-176   64     
0      -144   
48     32     
160    -48    
-48    32     
16     16     
0      -48    
64     -16    
0      -176   
160    -160   
-128   -32    
80     144    
96     -80    
16     -128   
80     -48    
64     96     
16     -128   
-48    -16    
-32    -128   
80     240    
64     64     
0      -64    
-160   -32    
-48    112    
-112   80     
96     32     
-400   -80    
16     -32    
-16    -16    
144    -16    
96     96     
-208   16     
224    64     
-368   -48    
-1072  -96    
48     80     
-896   48     
0      -16    
-16    -32    
-224   -16    
-80    16     
144    48     
128    80     
-16    -112   
-416   -80    
112    112    
-16    0      
-48    64     
-80    -64    
-240   -96    
512    -192   
-160   -112   
96     400    
-1072  64     
-176   -80    
304    -16    
-128   48     
32     -16    
160    176    
-592   96     
-112   48     
64     -32    
176    -96    
96     160    
-208   -64    
-32    -144   
-192   -64    
32     208    
-256   176    
0      -80    
128    64     
32     128    
-96    -64    
32     32     
-144   0      
176    80     
16     0      
-48    -16    
-64    -16    
-144   0      
128    -64    
-400   0      
464    624    
-384   752    
-64    256    
-288   -128   
16     -32    
144    -48    
272    144    
-48    -432   
240    -448   
16     32     
224    816    
-16    -112   
-192   -352   
-64    -144   
-128   80     
16     96     
-304   -160   
-32    80     
-224   64     
-96    -16    
-1520  464    
96     192    
-208   -288   
-48    -80    
96     80     
-96    -64    
-16    -16    
0      64     
96     64     
32     240    
-80    96     
-64    -80    
0      80     
-272   -64    
80     -16    
-176   112    
352    224    
-256   -64    
-496   -352   
80     -48    
128    272    
160    96     
-256   -624   
0      -608   
16     400    
368    240    
0      -96    
-16    -112   
-160   -144   
192    448    
-752   -96    
272    -80    
-16    96     
-32    0      
-80    -160   
32     0      
-16    64     
16     112    
0      0      
272    608    
-224   -880   
32     288    
128    256    
-224   -192   
16     128    
-400   -192   
176    48     
0      32     
192    -96    
-112   80     
-16    -176   
112    128    
64     -96    
176    144    
144    272    
-432   -896   
-96    -64    
112    -80    
-240   96     
336    208    
80     -176   
-272   480    
16     -64    
-144   240    
336    48     
-208   -352   
96     -80    
256    -96    
-256   -128   
176    -128   
48     -80    
-16    0      
144    80     
-208   -80    
224    -32    
-512   64     
-304   304    
-128   -80    
-256   -64    
272    -112   
-112   -48    
48     -48    
-48    48     
-736   -160   
336    -160   
-112   -256   
-384   -144   
128    224    
-192   -96    
-48    240    
64     -112   
16     0      
0      -64    
128    -112   
16     528    
96     288    
304    -288   
0      96     
80     64     
-352   -176   
320    -144   
-192   192    
0      144    
-192   -16    
208    96     
96     96     
112    144    
128    224    
-144   192    
80     -16    
400    176    
-64    64     
-80    -80    
-144   -176   
448    304    
-80    592    
-448   160    
160    -320   
144    -112   
0      96     
128    128    
256    -80    
-240   -144   
48     128    
240    368    
176    48     
160    -48    
64     32     
96     192    
32     80     
160    -16    
48     32     
112    0      
-160   48     
128    16     
80     80     
80     80     
-32    160    
80     32     
80     48     
32     96     
-48    -64    
288    -112   
16     48     
-272   -64    
320    -288   
64     -64    
352    320    
-176   288    
-32    -656   
32     0      
-16    64     
-192   96     
176    48     
-16    80     
80     16     
96     64     
48     96     
-112   96     
48     -32    
144    48     
-64    128    
144    64     
0      -32    
-16    -1040  
-32    64     
16     32     
80     96     
-144   0      
272    -272   
96     -32    
48     64     
-80    48     
-48    32     
-16    96     
-48    400    
48     352    
256    512    
-304   720    
176    -400   
256    32     
-64    -48    
0      -528   
32     -16    
176    448    
-176   -320   
272    304    
0      880    
-160   -592   
320    -176   
208    256    
32     48     
-80    -16    
208    32     
192    32     
128    16     
176    320    
-64    112    
-128   -992   
-112   528    
-96    0      
112    -272   
240    192    
288    16     
-64    256    
-48    624    
128    144    
-96    -256   
-128   -80    
64     -112   
16     48     
160    -272   
208    0      
384    -128   
-32    80     
-192   -240   
64     64     
-64    80     
64     48     
32     48     
64     -32    
208    240    
0      -16    
112    16     
64     -16    
64     32     
192    -240   
16     16     
144    16     
144    96     
144    176    
-80    80     
64     16     
96     16     
64     64     
80     48     
64     16     
80     128    
144    16     
80     -80    
32     32     
16     0      
144    64     
32     16     
128    -32    
96     80     
336    288    
-256   32     
272    48     
0      80     
112    -96    
48     96     
160    -160   
-176   96     
16     -80    
80     -16    
-96    -256   
96     144    
-144   -240   
48     -48    
192    32     
288    112    
144    -32    
-176   -192   
208    -320   
-32    -16    
0      -80    
32     -96    
112    432    
-432   -128   
288    64     
-176   -256   
224    -112   
256    16     
176    -416   
192    -48    
32     -960   
16     -32    
192    160    
-368   -720   
-224   -256   
400    -32    
-48    96     
112    -1568  
64     -16    
176    80     
-64    -16    
80     -432   
192    32     
32     288    
-352   -32    
400    48     
-176   16     
-688   48     
96     -128   
176    16     
-16    -208   
128    -160   
48     -1120  
96     16     
-176   64     
160    208    
128    -64    
240    -80    
96     -112   
-496   -32    
80     -96    
400    128    
-144   -96    
256    -64    
-16    32     
80     -208   
160    -128   
-32    -192   
144    96     
16     -592   
32     -144   
96     -160   
-80    64     
32     -96    
-80    16     
144    16     
128    16     
-208   -80    
80     -16    
-976   0      
48     -128   
32     48     
64     0      
-48    -32    
208    -208   
-576   64     
288    16     
80     0      
16     -80    
-64    -144   
-160   80     
64     80     
16     -32    
32     -96    
-656   64     
16     160    
176    144    
-128   -192   
-64    16     
64     -304   
128    -224   
288    176    
112    224    
0      -128   
-112   -48    
-240   -288   
256    80     
-256   -176   
144    368    
-544   -416   
16     16     
368    -64    
64     -80    
-16    -32    
-144   -688   
320    -256   
160    32     
-32    32     
80     48     
-96    -256   
128    144    
176    16     
-48    112    
112    -48    
-336   -64    
64     -256   
-608   80     
-384   -48    
-208   80     
208    -1344  
0      -304   
384    160    
48     -80    
-160   16     
-80    -112   
-256   -112   
48     624    
-1040  -288   
0      32     
-272   0      
192    -144   
96     288    
-288   -960   
48     96     
144    368    
-48    32     
-80    -800   
240    16     
144    16     
160    48     
-416   128    
112    -176   
-176   48     
80     48     
-80    64     
256    400    
-224   128    
64     -128   
64     96     
128    -32    
32     160    
-32    -176   
96     48     
192    336    
96     -80    
-256   -16    
0      -96    
-128   -32    
160    -96    
-112   -368   
-80    96     
-48    336    
-896   -96    
-32    -176   
-144   -64    
224    128    
48     -48    
-128   224    
-80    144    
-592   -192   
-32    0      
-48    64     
-112   304    
144    112    
-32    192    
-112   192    
48     160    
-240   -96    
-96    -464   
-288   -352   
16     -160   
-96    -144   
64     -48    
-80    80     
96     -48    
-256   -112   
-128   16     
-240   -304   
-1072  -48    
-16    -352   
-256   -128   
0      -240   
-64    -304   
208    -176   
-560   -416   
-272   -320   
-224   -544   
-96    32     
144    0      
-144   0      
16     -64    
-400   -400   
112    176    
-1536  -112   
-32    -96    
-16    -32    
-64    -64    
160    304    
160    272    
112    32     
-192   -48    
-112   208    
16     -16    
-128   48     
112    448    
16     368    
0      80     
48     -96    
-400   -48    
-432   -240   
-704   -176   
-128   -96    
-64    -160   
-16    16     
96     -32    
240    -16    
48     -16    
-272   64     
-128   0      
-240   0      
144    -96    
112    48     
304    192    
-400   32     
-80    16     
-1376  112    
48     16     
0      64     
-16    0      
128    80     
-176   64     
-112   -208   
128    -160   
-96    160    
-48    288    
416    80     
-144   32     
-112   16     
-192   64     
-96    -48    
-400   -32    
96     144    
80     -16    
-288   -32    
416    272    
160    352    
64     96     
-64    192    
160    -64    
-32    48     
0      -192   
-288   -224   
-256   64     
-288   -160   
320    -16    
-752   -224   
112    16     
0      32     
-192   112    
-16    32     
-16    -32    
-208   -16    
80     304    
192    208    
176    208    
-16    160    
-32    -48    
64     -512   
-112   -256   
-48    64     
-400   192    
80     128    
80     16     
352    -272   
-16    -160   
160    -48    
-224   -64    
-80    80     
-112   -80    
-80    48     
-48    -176   
-32    16     
192    352    
16     48     
48     32     
-336   -64    
-16    224    
112    128    
96     -48    
-64    208    
-112   16     
-224   -352   
0      -32    
96     224    
16     64     
-80    96     
176    48     
48     80     
-80    32     
128    240    
-96    -32    
80     -160   
32     208    
112    64     
-64    144    
-16    -160   
176    816    
0      -224   
304    32     
112    144    
-64    -16    
-288   80     
64     -80    
96     -224   
240    48     
-256   -368   
112    -64    
-16    0      
-48    -80    
176    128    
-192   32     
144    48     
-112   96     
160    64     
96     32     
16     0      
-160   16     
48     80     
-176   0      
-32    32     
32     -128   
160    -112   
192    -16    
-48    96     
0      80     
-64    32     
-192   -32    
-80    0      
80     32     
-32    -32    
240    80     
-192   -144   
352    -16    
0      112    
-144   -80    
-96    -176   
144    160    
192    144    
32     64     
96     -32    
-16    -32    
-32    64     
0      176    
96     16     
96     32     
224    32     
32     -16    
96     64     
112    -32    
-176   -144   
32     80     
16     48     
160    48     
-64    64     
80     0      
16     80     
128    16     
112    32     
-32    16     
16     64     
16     -16    
-32    64     
96     48     
128    176    
-160   -1264  
208    -48    
16     112    
272    32     
-16    48     
16     16     
-224   208    
288    240    
-320   144    
192    -16    
16     80     
-176   -160   
368    -80    
304    96     
160    -16    
240    -320   
-208   256    
16     -64    
32     48     
-96    -32    
432    128    
-48    32     
64     -64    
64     -16    
-48    64     
-64    -80    
208    16     
160    96     
112    0      
112    192    
-224   -272   
704    -48    
80     384    
-352   96     
-16    -240   
-80    32     
208    304    
-432   128    
-16    96     
0      -16    
16     -80    
480    96     
192    64     
560    192    
-496   144    
32     -416   
112    -80    
-112   -96    
-64    80     
176    96     
-64    64     
64     80     
160    128    
-32    -48    
128    48     
16     96     
-64    -16    
272    176    
-368   -224   
144    -32    
0      -128   
112    32     
192    -64    
48     128    
0      320    
160    64     
32     272    
144    160    
-64    -208   
-112   -48    
208    64     
-16    -32    
-80    0      
160    16     
-32    144    
-48    -320   
32     64     
272    32     
112    48     
-32    592    
176    -112   
-16    -304   
-32    256    
32     -208   
80     368    
288    -16    
-208   -400   
112    144    
-112   144    
0      224    
256    -400   
128    144    
144    -80    
80     -32    
-112   -128   
-32    -304   
64     256    
-48    320    
-96    -112   
16     -400   
-96    448    
112    0      
48     -256   
208    208    
96     0      
128    -192   
-32    -368   
16     -48    
-48    288    
48     -144   
224    240    
-96    160    
112    496    
176    -624   
144    -96    
0      -128   
-64    -176   
64     416    
32     -240   
80     -160   
192    64     
-32    224    
128    -32    
112    -48    
112    160    
96     -720   
32     32     
-64    -48    
48     -176   
-800   160    
-208   -544   
0      -336   
80     -320   
128    16     
64     -480   
208    -240   
224    32     
-64    -176   
112    -304   
80     -48    
-144   -384   
-32    -64    
-96    -192   
-16    -352   
-1856  -144   
192    -128   
240    -64    
144    32     
48     0      
160    -96    
32     -144   
80     144    
64     48     
128    80     
224    144    
80     48     
-272   -64    
304    -416   
352    -112   
-48    -48    
160    -112   
128    -64    
-176   -272   
64     -192   
160    -64    
144    16     
-16    -704   
16     48     
112    304    
-16    128    
48     -128   
112    -32    
-144   -64    
96     208    
-96    32     
48     -16    
320    240    
208    -96    
-16    -128   
80     -112   
144    -16    
96     -320   
-16    -304   
-48    -448   
128    -64    
48     0      
192    160    
-16    80     
-64    -144   
0      -256   
176    -16    
-1264  -16    
160    64     
32     16     
0      0      
16     32     
208    -464   
-64    -176   
96     -928   
-112   64     
-96    256    
192    320    
48     288    
-80    48     
16     384    
672    224    
-256   224    
416    928    
-496   720    
32     576    
-112   -208   
16     -144   
224    -64    
-80    -16    
224    -144   
32     -288   
224    208    
-272   224    
-336   64     
-64    -176   
224    -176   
-48    -224   
-32    -400   
-560   -208   
-128   -16    
-128   208    
-112   112    
-80    160    
96     -288   
96     96     
288    32     
-144   96     
-128   96     
144    96     
-352   32     
448    48     
-48    -32    
352    -192   
-448   -160   
48     -48    
-96    144    
-96    -144   
288    -48    
272    -224   
0      32     
-304   0      
432    48     
-304   96     
208    -16    
-48    144    
64     -160   
-160   32     
48     -48    
336    128    
-144   -240   
192    -32    
-1344  -320   
-48    -160   
-496   -208   
176    -400   
-64    64     
-720   96     
80     144    
-192   -160   
-48    -32    
192    32     
-128   64     
64     0      
16     0      
-768   -64    
-16    32     
-224   0      
64     -48    
48     -208   
-64    -16    
32     -144   
-64    -192   
-16    -400   
-368   -224   
-192   -192   
-96    -176   
208    16     
-160   176    
-32    464    
-368   256    
304    208    
-272   96     
-112   -48    
0      288    
-16    -176   
-64    -224   
-320   208    
-96    -304   
-176   176    
448    432    
-352   720    
-16    176    
-128   -256   
-32    144    
224    -112   
32     32     
-80    64     
0      -144   
-160   352    
-112   -512   
192    -288   
-128   256    
0      32     
-416   160    
16     176    
-416   -224   
-64    272    
-96    368    
32     -256   
48     -240   
128    112    
-160   32     
-48    256    
-32    0      
64     -16    
-96    48     
96     64     
-208   0      
16     -16    
-64    -16    
-512   32     
-112   -336   
352    -688   
160    -64    
80     256    
128    80     
0      32     
64     32     
-384   -48    
-128   -32    
0      112    
32     256    
48     -32    
48     -64    
0      32     
-192   -144   
48     -48    
-816   96     
-80    0      
-128   -112   
64     16     
32     80     
160    32     
-16    32     
32     16     
-48    0      
-176   -16    
16     48     
80     64     
-240   -16    
-320   0      
96     64     
-1184  -112   
80     128    
-160   48     
48     -64    
224    32     
176    128    
-64    64     
-112   -32    
32     64     
0      -16    
176    80     
144    64     
-16    16     
-304   -16    
192    144    
-464   -16    
96     64     
-16    32     
-16    32     
-128   -96    
128    32     
304    112    
-48    -80    
-64    -64    
0      80     
-32    -32    
-48    64     
32     48     
-272   -16    
-80    48     
-176   16     
112    16     
32     32     
0      32     
128    16     
-64    32     
0      16     
192    160    
-144   -16    
16     64     
0      32     
-160   -32    
-64    32     
0      -64    
-128   -144   
-112   48     
-304   112    
144    -112   
-192   32     
-16    160    
-32    144    
-144   -144   
-32    96     
48     96     
144    0      
-80    -16    
64     -32    
288    112    
-208   0      
144    128    
-160   64     
-192   -32    
144    160    
-80    -16    
-112   -96    
-48    160    
32     -144   
-320   -288   
784    512    
-432   96     
-16    -144   
128    -48    
-64    256    
-80    192    
-272   -112   
0      32     
208    144    
-448   -80    
176    96     
-48    -144   
-144   -80    
-160   -320   
-64    -112   
96     176    
-160   112    
160    80     
-144   80     
144    -400   
-144   -224   
0      320    
80     64     
112    256    
128    -32    
224    176    
-256   96     
240    -176   
-192   -144   
464    -144   
80     432    
-96    -64    
-64    -80    
-96    48     
-64    48     
96     480    
240    -272   
48     96     
112    816    
128    -240   
48     144    
224    192    
-128   -240   
80     48     
272    112    
-144   304    
-32    0      
32     -48    
112    464    
32     -16    
128    -240   
-480   -320   
192    -992   
-240   -272   
192    -368   
-128   -32    
320    -32    
272    -32    
224    -96    
-192   -368   
-80    -192   
-96    -176   
96     80     
-128   -128   
144    64     
400    48     
80     -1376  
80     -16    
16     16     
80     -144   
-64    -208   
208    -16    
112    80     
-16    96     
-160   -32    
128    -16    
112    32     
208    64     
80     -16    
-128   -128   
192    -144   
16     -128   
192    0      
432    432    
-272   192    
32     -80    
-64    64     
208    32     
144    0      
112    0      
112    48     
-64    16     
176    144    
0      32     
80     -32    
80     160    
48     -208   
400    208    
32     368    
96     -96    
160    48     
-32    48     
-16    -32    
-16    -128   
112    -208   
160    -16    
128    160    
160    96     
-16    48     
96     -112   
-64    80     
96     -144   
-64    0      
192    -1136  
64     -32    
-32    -16    
48     -80    
96     -48    
96     112    
16     -16    
64     112    
128    128    
-48    0      
96     96     
32     16     
32     96     
96     -48    
16     -64    
112    304    
128    96     
96     -288   
-48    -128   
0      -160   
16     0      
160    64     
32     128    
144    400    
128    336    
96     160    
288    -48    
-64    32     
208    -240   
112    -64    
160    0      
-48    -32    
32     -224   
144    -80    
-128   64     
128    32     
-32    -96    
80     -128   
48     -208   
-16    -304   
64     16     
128    -144   
64     -224   
128    -272   
160    128    
128    0      
-32    -16    
16     -1088  
224    96     
-64    192    
112    -64    
96     -112   
-48    -288   
272    48     
144    -48    
-144   80     
16     16     
208    144    
-48    320    
96     480    
512    224    
-400   80     
-112   -240   
144    -560   
400    224    
48     464    
144    368    
80     -32    
-16    -16    
256    -48    
-96    304    
0      192    
432    384    
-256   -96    
-112   112    
96     144    
48     -400   
0      0      
144    -848   
256    96     
-400   -512   
64     128    
-784   -64    
-160   -208   
-64    96     
-240   -256   
336    256    
-64    -368   
144    256    
368    16     
480    400    
-224   400    
32     384    
-112   416    
144    -224   
-176   -208   
272    -112   
-128   -192   
-288   32     
464    -80    
112    48     
192    -128   
-128   -432   
-176   -336   
-16    -304   
144    240    
208    -320   
-352   192    
224    -128   
272    320    
-368   304    
-208   -544   
-272   304    
480    -64    
0      -592   
-208   256    
240    -64    
-208   -144   
128    -48    
240    -784   
-32    176    
32     -288   
64     192    
240    -48    
-224   48     
-208   -16    
80     32     
-400   -368   
112    96     
-400   112    
-16    48     
160    128    
-256   80     
64     -64    
224    -96    
-128   -288   
-64    192    
64     96     
368    368    
-352   -560   
160    96     
176    16     
-176   96     
240    32     
-432   -160   
64     -48    
32     16     
256    144    
-48    -96    
128    -400   
224    368    
0      -640   
544    400    
-272   -160   
-64    -400   
-48    128    
32     -48    
-112   16     
144    -32    
-1584  32     
16     -192   
-384   80     
-48    256    
96     288    
272    -128   
16     -160   
176    -256   
-160   -64    
-272   -64    
96     -128   
-256   -144   
48     16     
-256   32     
144    96     
-144   32     
32     -64    
16     -96    
128    -48    
-144   48     
64     -176   
240    112    
80     -16    
-96    -336   
672    -208   
-32    176    
-384   272    
80     -80    
-96    -96    
-160   -448   
-16    -176   
48     16     
-576   -64    
352    112    
80     -64    
208    -192   
0      112    
-16    -224   
-304   -160   
-256   64     
32     48     
-384   -64    
208    0      
-192   -16    
32     -160   
-352   128    
-112   -160   
-512   -16    
384    -192   
288    64     
-16    0      
64     64     
32     80     
-720   -80    
-16    48     
-16    64     
-128   32     
224    16     
-144   16     
112    -96    
-224   0      
-624   -96    
32     0      
-144   -32    
112    80     
-176   -48    
-464   -32    
-48    -32    
-768   -80    
-32    -32    
-80    80     
-16    64     
-576   -16    
-32    -16    
288    0      
128    80     
-112   -96    
16     -16    
-32    -48    
-16    64     
96     -80    
-256   -32    
-48    -48    
112    160    
-208   48     
80     -48    
-96    0      
0      -16    
-16    32     
64     -48    
32     32     
-16    48     
-48    -80    
64     -48    
16     48     
80     32     
-112   32     
-48    -16    
-240   -144   
80     80     
-288   64     
176    112    
-256   304    
224    176    
-352   96     
32     -80    
-176   -160   
208    64     
-224   -64    
80     -48    
-48    80     
-160   -16    
16     -176   
-96    0      
160    176    
-208   -80    
-48    -256   
-208   -192   
224    16     
-640   -32    
240    -16    
-160   224    
160    448    
160    -224   
160    -352   
-64    -128   
-320   256    
-112   208    
-288   -784   
-80    64     
160    288    
224    -192   
-416   -224   
16     -16    
-416   -176   
-16    368    
-1360  -48    
304    16     
-224   -96    
-192   128    
64     256    
-48    -16    
-64    80     
0      96     
352    -160   
-32    976    
-304   -576   
-144   208    
624    48     
-208   -464   
0      656    
-288   432    
192    320    
96     -496   
-160   128    
-112   -32    
-96    -80    
-48    32     
96     -272   
256    144    
-176   -80    
-32    0      
-112   128    
176    224    
-160   96     
64     128    
-288   -144   
-416   -192   
240    -96    
0      -48    
16     -144   
-96    -48    
-64    -96    
176    -96    
0      -16    
-80    64     
192    112    
64     -112   
-144   48     
-352   -112   
144    -96    
-400   -48    
112    96     
80     32     
176    80     
160    48     
-208   112    
-48    80     
-144   -16    
32     112    
80     32     
352    144    
-48    0      
16     16     
-48    48     
32     96     
64     0      
192    -16    
176    32     
-96    96     
32     144    
-272   0      
48     80     
-16    16     
144    -80    
80     64     
256    48     
-288   -96    
112    80     
-320   96     
144    48     
96     48     
-64    48     
224    0      
-48    48     
16     32     
-96    128    
64     32     
16     48     
-144   112    
-224   -224   
640    -272   
-208   96     
-16    0      
-96    -208   
-16    96     
-48    -32    
-144   48     
-128   64     
112    272    
352    96     
96     32     
288    -64    
-208   144    
-128   32     
-144   -96    
480    112    
-368   -16    
64     160    
0      64     
16     176    
144    32     
-16    -112   
160    -112   
0      0      
-16    96     
-96    -64    
32     -48    
-128   32     
-48    96     
144    -112   
128    -16    
-144   48     
-16    272    
192    272    
96     208    
-96    32     
-32    -32    
80     32     
-208   -80    
-48    -32    
-16    -32    
128    112    
16     48     
288    224    
-32    80     
-16    80     
-208   -144   
112    -624   
112    -48    
-32    -16    
96     -128   
-32    -16    
16     112    
192    176    
0      160    
-80    64     
16     -96    
-16    -64    
-112   160    
-48    432    
112    176    
-32    -64    
80     -80    
16     -432   
-16    -960   
368    544    
-192   -48    
400    -160   
176    480    
224    128    
-32    592    
48     -128   
-304   -48    
96     -176   
32     192    
48     128    
336    128    
-144   320    
80     96     
-480   -128   
-144   128    
352    -400   
-256   -208   
-16    -368   
128    272    
-256   288    
80     -32    
-80    -112   
272    256    
112    -16    
112    160    
-176   -224   
32     -32    
576    240    
-352   -736   
-480   16     
-128   -1040  
240    224    
-48    16     
-176   -208   
352    208    
240    80     
-208   -256   
592    -832   
320    720    
-144   256    
528    -368   
48     -64    
-192   -240   
-48    96     
-48    -16    
176    -240   
384    160    
-192   -528   
304    96     
-64    -80    
96     -32    
32     192    
80     320    
-32    -176   
16     -240   
112    160    
176    -48    
144    -128   
-144   -304   
-16    64     
-16    -320   
224    80     
-176   -96    
256    48     
64     32     
-112   32     
64     48     
48     176    
-32    48     
192    64     
-80    144    
80     -208   
160    272    
208    16     
64     16     
-48    -144   
176    32     
-112   16     
160    128    
-16    176    
128    96     
48     -48    
-112   -48    
96     16     
-112   -64    
240    96     
16     96     
80     112    
-32    -32    
112    16     
-64    -144   
176    16     
32     -704   
32     16     
272    112    
208    -512   
-144   -80    
-64    96     
240    -784   
-176   80     
0      -848   
368    336    
64     416    
-144   -112   
192    192    
32     -32    
128    -48    
-80    -176   
160    -384   
64     112    
80     -240   
384    0      
64     48     
16     -176   
80     112    
112    -112   
-48    -144   
272    -640   
-16    -64    
112    16     
32     -192   
112    -224   
-80    32     
-16    -176   
64     -64    
112    16     
144    64     
-80    -16    
160    -80    
0      0      
128    80     
416    352    
-384   -208   
-128   -160   
160    64     
64     -16    
128    -128   
384    -64    
272    112    
112    16     
-256   -64    
-48    -288   
-384   -80    
-192   112    
-48    -48    
64     -128   
144    -112   
144    -192   
32     -48    
64     -800   
-448   -48    
320    64     
48     48     
16     -64    
-208   -64    
-128   -64    
80     -48    
-432   -48    
208    -48    
144    -32    
48     -48    
48     16     
112    32     
80     64     
112    -32    
-32    48     
48     -160   
96     -48    
336    32     
48     0      
-112   32     
-32    16     
-352   -32    
64     -160   
-208   48     
16     -96    
48     -16    
32     -80    
48     -16    
-16    -176   
-16    16     
80     -160   
0      64     
32     32     
64     80     
-64    0      
32     -80    
-128   -32    
96     -80    
-64    16     
-16    -192   
-304   -64    
48     -80    
-16    -48    
64     -384   
48     64     
112    -976   
64     48     
-48    32     
48     -64    
-64    64     
-16    16     
-336   -16    
96     64     
-160   16     
176    0      
-16    32     
160    -16    
32     64     
144    -112   
-32    -288   
160    -208   
144    -48    
-208   -96    
-48    48     
0      0      
48     -80    
-96    192    
144    320    
-336   -32    
-16    -304   
96     368    
656    448    
-256   352    
-80    -816   
528    208    
-432   -256   
-80    -576   
-576   640    
0      -80    
0      -144   
-32    -48    
-224   -176   
-16    80     
16     -16    
-128   -16    
128    352    
128    0      
240    160    
-448   -64    
320    640    
48     384    
-272   -368   
-16    -48    
-128   -592   
64     -320   
96     144    
-64    -128   
320    144    
64     80     
-144   -720   
16     -272   
-1536  -384   
96     0      
-432   528    
384    176    
96     -80    
-224   -144   
160    -160   
-576   -96    
0      -16    
-1152  -32    
0      -48    
160    0      
-16    112    
96     288    
48     176    
-176   -160   
224    -80    
-352   64     
48     -16    
-16    -16    
-160   -32    
-112   112    
-432   96     
80     -16    
-304   96     
80     64     
320    -48    
64     48     
-192   -144   
80     -16    
48     48     
-48    160    
368    112    
-336   80     
-208   -16    
-224   64     
-16    80     
80     16     
0      0      
-80    32     
16     0      
-1472  -32    
64     96     
64     -32    
96     64     
48     96     
144    176    
-224   80     
-160   -80    
-32    32     
64     48     
64     64     
-48    0      
48     -16    
-272   -96    
80     -96    
64     -64    
64     112    
-112   48     
96     32     
-16    -192   
-272   -144   
-48    -128   
48     64     
176    16     
128    128    
-96    64     
-64    -32    
-48    -64    
-272   -16    
48     48     
-288   64     
112    176    
-784   48     
-128   -64    
128    -208   
-144   96     
-224   32     
16     -128   
112    -112   
16     -288   
192    -208   
-32    96     
-64    192    
-176   352    
80     32     
-160   -144   
32     48     
-400   -176   
64     -80    
-32    -80    
-64    112    
-144   96     
-112   -80    
208    -64    
-144   0      
16     176    
-80    0      
96     -64    
-64    -192   
112    -256   
64     144    
-64    32     
-864   -240   
64     -160   
16     32     
-112   -64    
-48    -48    
-112   112    
80     -160   
128    -128   
400    272    
-416   -352   
64     80     
-240   784    
-112   -192   
-80    -176   
-128   -320   
-272   -128   
96     -128   
80     -48    
0      64     
-16    -256   
16     368    
-48    -16    
-80    -304   
192    384    
-240   -80    
-112   -112   
-96    480    
256    -176   
-96    160    
-16    32     
176    -16    
-112   304    
-80    -432   
-112   144    
-32    176    
48     -48    
160    -80    
-272   -224   
256    80     
-224   96     
208    112    
-112   32     
0      64     
-64    -432   
48     -48    
-16    -64    
-160   -48    
-32    224    
-16    144    
96     48     
16     32     
-112   16     
160    0      
160    128    
144    48     
96     16     
-112   -224   
96     -32    
-400   -144   
-64    688    
416    1136   
-336   416    
96     144    
336    304    
-64    176    
80     -256   
-48    -496   
192    -176   
16     16     
-144   -32    
336    -144   
-80    -176   
288    -16    
-32    -64    
160    144    
416    48     
-96    32     
272    208    
0      64     
-48    -64    
0      48     
-160   80     
256    -32    
272    80     
-464   -80    
496    -32    
-304   16     
416    80     
-32    128    
32     64     
128    16     
-160   -16    
144    64     
-128   16     
-16    64     
16     -64    
192    -32    
16     -16    
48     32     
-624   -96    
48     80     
112    112    
96     96     
0      16     
0      -16    
80     96     
32     -16    
208    64     
176    48     
-16    -32    
80     80     
-80    80     
128    16     
32     96     
-16    48     
192    128    
0      160    
-48    -16    
32     32     
32     -624   
112    -48    
0      -48    
192    64     
-96    32     
16     16     
64     16     
-144   160    
224    224    
160    0      
-304   -80    
96     -16    
80     -32    
64     -64    
-96    128    
448    -240   
0      32     
-144   0      
112    32     
-32    112    
-48    64     
80     48     
128    48     
64     64     
80     0      
32     16     
16     32     
48     -160   
336    -128   
-208   144    
-96    -64    
240    448    
16     208    
-48    32     
64     -32    
112    0      
32     32     
48     -176   
48     64     
-32    80     
-96    64     
208    80     
48     -16    
32     208    
-176   64     
-16    -320   
160    -160   
144    -176   
48     64     
176    64     
48     64     
192    -208   
-384   -400   
-64    160    
112    384    
-48    16     
320    64     
-240   208    
0      -224   
-48    -64    
256    -352   
272    208    
80     -112   
-80    48     
-128   -752   
16     48     
16     48     
96     80     
-128   16     
-32    48     
416    320    
-64    80     
160    -32    
192    -32    
96     48     
16     -48    
-16    -128   
112    -128   
-144   112    
176    80     
352    176    
-96    32     
128    -32    
96     0      
160    0      
96     96     
96     -320   
-48    -80    
128    -96    
208    80     
32     160    
-16    112    
-80    -64    
-32    -48    
80     -128   
160    112    
192    128    
224    144    
112    0      
-160   -32    
176    112    
-144   0      
32     128    
64     -96    
-16    -96    
112    -128   
80     96     
16     -192   
16     16     
-16    16     
16     -688   
64     16     
-32    -720   
-16    -224   
80     336    
80     32     
112    -112   
128    -224   
32     -224   
-48    -64    
240    256    
32     -64    
16     -208   
128    -224   
32     16     
48     -576   
-208   448    
32     -160   
-96    -240   
-160   -112   
448    -176   
192    480    
176    -352   
112    544    
-128   -528   
64     -560   
224    400    
-144   -400   
416    80     
-272   0      
352    -352   
-160   560    
304    224    
-80    -64    
-544   -768   
80     -144   
16     48     
-80    -160   
-64    432    
192    -16    
160    96     
80     -576   
-208   -144   
-128   -384   
384    -336   
-48    -32    
320    32     
176    16     
32     112    
-1632  -192   
16     80     
-96    -64    
112    80     
192    -80    
240    -80    
-288   -16    
-16    -816   
16     96     
96     320    
-112   176    
384    -160   
-128   -64    
-48    -64    
64     -64    
-48    -16    
80     48     
-640   -64    
-448   -400   
176    0      
48     -160   
-560   112    
320    -432   
-112   80     
16     -48    
-16    -112   
-48    -112   
80     16     
-160   -176   
16     -16    
-288   288    
176    96     
-432   0      
32     -192   
-96    -128   
256    -80    
-240   144    
64     -48    
-80    -64    
160    -208   
-16    112    
-128   -96    
224    -96    
-192   48     
144    80     
-208   -144   
368    -416   
-656   -64    
-16    48     
-864   -144   
160    -48    
48     112    
-80    -144   
64     -64    
0      -800   
224    16     
112    -16    
0      32     
80     16     
64     80     
-128   64     
64     -64    
-224   -16    
0      80     
-80    128    
112    -64    
-48    144    
32     -256   
80     -208   
240    -400   
32     128    
-128   48     
64     -144   
-224   -32    
-32    48     
16     320    
256    -16    
-112   0      
16     128    
-544   -176   
208    -368   
32     -16    
16     -96    
80     80     
80     -80    
-400   -48    
-112   -96    
128    -64    
-336   -96    
96     16     
-48    64     
96     0      
-160   32     
176    160    
-144   48     
112    -48    
192    176    
-16    176    
160    176    
-128   96     
-752   -304   
-416   -416   
-1776  -240   
-176   224    
160    80     
-144   80     
128    176    
16     -80    
-720   -176   
192    160    
192    336    
32     128    
-48    -96    
-64    -16    
-32    16     
-208   -32    
-160   64     
32     0      
-96    128    
-1744  -64    
-608   0      
0      -128   
-128   48     
-16    -16    
-256   -128   
176    144    
-16    16     
-176   -112   
16     -128   
128    32     
80     496    
-48    -16    
-320   -80    
-208   16     
-208   -208   
160    128    
32     80     
160    160    
-112   -80    
16     -176   
-320   -160   
64     32     
-128   0      
-48    16     
96     48     
-48    -16    
-32    -48    
-128   -96    
32     -112   
48     128    
160    48     
16     16     
48     48     
-112   0      
80     64     
-64    -64    
-16    -16    
128    64     
-224   32     
0      16     
-368   0      
32     64     
-80    0      
160    16     
-80    -64    
-64    16     
-688   -64    
-64    -16    
-224   -160   
112    -32    
80     32     
256    80     
-160   160    
80     48     
-144   -96    
-32    0      
-64    0      
192    272    
-352   0      
144    32     
96     128    
-192   0      
160    0      
-80    -176   
-48    -32    
128    240    
-240   32     
-48    64     
-224   -48    
48     64     
-96    -48    
-16    -256   
480    -112   
352    112    
128    240    
-64    -16    
-160   64     
-128   -96    
208    32     
208    -96    
160    128    
-240   -128   
32     -16    
80     352    
-400   256    
240    0      
0      64     
-160   -48    
48     32     
-16    80     
160    48     
-160   0      
-48    32     
-400   -240   
48     -32    
-96    144    
48     16     
176    64     
-144   -48    
-80    80     
-16    64     
240    48     
-128   -16    
16     32     
-160   -64    
160    80     
-192   -64    
176    16     
-64    48     
48     80     
64     -64    
16     32     
-144   64     
208    112    
112    80     
-96    0      
80     48     
16     -48    
-144   -32    
-176   80     
192    112    
-112   -80    
112    0      
112    432    
0      320    
128    0      
-208   0      
80     -144   
48     128    
-32    48     
176    -32    
16     160    
-48    160    
176    -112   
-464   -384   
-48    80     
-208   -32    
-48    -64    
144    64     
112    144    
160    64     
-80    32     
-64    -16    
208    144    
16     128    
320    128    
-16    -16    
-368   -304   
80     80     
-32    32     
48     -48    
-32    -32    
-80    -192   
96     112    
-112   176    
48     0      
80     -48    
-16    48     
96     128    
160    32     
-16    -32    
-48    -64    
0      32     
160    64     
112    112    
-256   0      
480    576    
-256   944    
176    128    
352    -448   
256    144    
176    208    
-176   -480   
-80    -96    
-96    208    
-432   -640   
128    448    
-64    64     
96     -16    
32     192    
48     96     
-48    -48    
144    16     
160    64     
192    16     
32     -32    
96     144    
-240   272    
-144   -16    
64     0      
144    96     
144    16     
176    -32    
-128   -288   
-208   32     
-64    -48    
96     128    
64     -48    
-48    -48    
288    720    
272    -544   
-48    176    
-112   -192   
-80    0      
192    256    
-80    -288   
112    480    
-112   -32    
-112   16     
192    80     
-16    -64    
64     160    
-64    -432   
32     96     
80     112    
48     16     
16     -144   
176    -400   
-16    176    
-80    -176   
-144   0      
64     256    
-144   -144   
96     -32    
288    288    
-64    -432   
128    288    
48     -976   
176    -160   
128    160    
-112   96     
144    -128   
-64    224    
-32    240    
128    528    
-80    256    
32     -352   
64     -48    
160    80     
0      0      
-64    -528   
160    -96    
128    -16    
160    -128   
0      -752   
-48    160    
-32    0      
16     48     
96     112    
160    -192   
48     224    
-160   -96    
112    -96    
-144   -240   
-96    -96    
48     -16    
192    64     
-96    -80    
144    64     
-32    -368   
288    32     
0      304    
192    352    
-96    -16    
240    -80    
-32    32     
-80    0      
192    64     
-16    -32    
32     -80    
32     -288   
-176   112    
-128   16     
-48    96     
320    -112   
-96    96     
336    -96    
192    0      
256    288    
-80    224    
-192   208    
0      -32    
16     64     
96     48     
48     96     
176    -192   
-208   256    
512    -96    
-16    -16    
48     48     
112    -640   
-272   -320   
128    -48    
-256   48     
320    -112   
-80    320    
48     -192   
256    -112   
16     -48    
32     96     
112    -144   
-144   -16    
16     -48    
96     16     
32     64     
64     0      
16     -144   
160    144    
64     -16    
16     -240   
96     -416   
-112   -160   
128    32     
-32    48     
144    -16    
64     -80    
0      64     
64     -16    
64     -32    
16     -288   
-16    -128   
192    -96    
48     -992   
368    192    
-64    160    
-112   -160   
48     -112   
176    -96    
128    -128   
-48    -320   
-96    176    
32     -80    
-32    -208   
288    -288   
96     16     
-48    -64    
0      -16    
112    -16    
-352   -80    
-576   -176   
224    -192   
448    -32    
160    80     
0      32     
-80    -128   
192    -256   
272    -288   
-32    16     
-48    96     
-96    -352   
-112   -352   
-48    -80    
-48    -176   
192    288    
-256   240    
112    80     
-480   0      
240    144    
-48    -112   
-48    -96    
128    32     
272    -256   
112    112    
192    208    
-192   320    
96     64     
128    -112   
272    -96    
176    304    
-64    -192   
320    -176   
176    480    
-112   -272   
160    -96    
64     -336   
-32    288    
16     -160   
-112   16     
240    -416   
80     128    
176    112    
96     48     
256    64     
128    448    
-208   -16    
-80    -384   
-656   -128   
304    16     
-896   -16    
-16    16     
-144   0      
32     96     
-368   -208   
-208   -608   
16     144    
-128   -80    
48     -80    
240    32     
160    64     
-144   0      
80     -112   
-544   -64    
32     0      
-176   -16    
192    -16    
96     80     
-32    -48    
144    0      
-32    -304   
48     48     
80     -528   
16     -16    
-64    -16    
96     96     
128    16     
48     -48    
192    96     
-144   16     
-64    80     
144    48     
-1248  80     
224    -48    
336    96     
-240   -160   
192    16     
64     -592   
112    -96    
-192   -16    
96     0      
-288   -16    
-16    16     
-336   -48    
-96    -16    
-16    -48    
48     64     
208    -48    
0      -112   
32     16     
112    -96    
-48    96     
-496   48     
112    -128   
-256   -176   
16     -96    
-128   48     
-16    80     
-80    16     
0      0      
-48    -16    
16     16     
-32    48     
64     -32    
112    16     
-1952  -64    
80     128    
-176   32     
-1008  -32    
928    768    
-880   320    
-256   -304   
96     48     
-560   -16    
112    -80    
-16    -144   
656    208    
-720   192    
-32    -16    
-80    -144   
-272   -336   
-48    96     
-96    208    
-96    -144   
-208   -16    
-288   128    
-352   -32    
192    80     
-416   -32    
80     -48    
16     48     
-640   -192   
-144   48     
-384   -128   
48     48     
-112   -96    
144    64     
-96    -96    
-32    -32    
-96    16     
-560   -64    
128    -16    
-256   64     
112    -16    
0      0      
-64    16     
-400   -16    
384    112    
-128   0      
-208   -128   
208    -144   
-144   -16    
192    64     
-352   -112   
-144   16     
0      112    
0      80     
-496   -64    
48     48     
-2384  -16    
192    32     
32     -64    
32     32     
48     48     
144    160    
-272   32     
-48    -32    
-48    80     
-272   0      
64     -208   
-64    -224   
112    112    
-304   -144   
-336   48     
-704   112    
0      64     
-48    -16    
0      -96    
48     96     
16     208    
-48    -272   
16     16     
128    240    
-208   -320   
-64    176    
144    -32    
-32    80     
-48    -96    
-80    80     
-368   -96    
96     224    
-80    -80    
-48    64     
-144   240    
48     -32    
144    0      
-80    128    
-64    64     
-224   -160   
-112   48     
-112   0      
-96    80     
-16    -64    
208    1152   
-96    -368   
320    128    
-80    -112   
64     112    
-128   -112   
16     -16    
-96    -240   
-224   96     
-240   96     
-112   0      
-160   0      
32     0      
-16    -112   
-32    -80    
112    -96    
-192   384    
-352   -240   
-144   -256   
128    208    
192    -176   
0      80     
64     96     
-48    48     
-80    -80    
160    16     
48     -16    
80     112    
-32    16     
-224   272    
-400   -1584  
176    80     
304    816    
-64    -144   
-32    32     
0      -112   
-112   112    
-80    272    
-288   -416   
48     208    
112    272    
-112   -480   
48     -112   
48     192    
288    32     
80     128    
320    208    
-176   208    
192    256    
-112   -112   
-176   -160   
-48    48     
-144   96     
224    208    
-64    192    
16     80     
48     -64    
-224   -80    
-80    -160   
-48    -512   
32     -112   
-144   -96    
-48    -80    
48     -32    
112    16     
160    256    
128    112    
0      -64    
64     416    
0      96     
-96    0      
0      32     
-48    0      
112    224    
-32    0      
112    80     
-240   400    
208    0      
-80    128    
48     32     
96     -112   
48     48     
272    -112   
-160   -160   
160    -288   
128    -32    
112    32     
-48    -704   
-112   144    
48     432    
192    160    
320    112    
-240   -432   
256    208    
-160   208    
144    240    
80     48     
16     496    
240    448    
64     -144   
-192   16     
288    -304   
-112   64     
16     -320   
-176   -640   
-80    -560   
144    -192   
-16    -48    
0      96     
48     96     
-144   16     
368    16     
224    240    
-240   256    
160    128    
-160   -48    
288    64     
-32    32     
176    32     
-16    0      
80     -80    
-16    48     
80     16     
368    208    
-176   400    
16     -16    
-16    -224   
144    144    
-48    -64    
64     240    
0      112    
320    224    
-176   96     
208    -576   
-416   -608   
-64    -528   
128    64     
96     -208   
-192   -464   
-80    -80    
-112   160    
-112   32     
352    -16    
-240   -64    
464    16     
-160   176    
176    80     
256    112    
272    32     
48     -32    
0      -128   
-16    -128   
-64    -672   
0      -272   
240    -128   
240    80     
32     272    
-96    160    
-32    -48    
272    -144   
192    16     
144    -80    
-32    -16    
0      0      
-16    64     
112    16     
-128   80     
0      80     
128    64     
176    80     
96     16     
320    336    
-16    288    
192    -64    
-96    -80    
80     -48    
-192   -144   
32     0      
-64    96     
-16    80     
0      -16    
432    -128   
32     -144   
-64    -160   
0      -176   
-32    -16    
-112   -64    
112    112    
-16    192    
32     256    
-112   -240   
112    240    
16     144    
176    224    
0      80     
-32    -160   
32     128    
-32    -160   
160    -16    
16     -160   
32     0      
192    48     
-64    -144   
64     320    
320    448    
-128   32     
64     -80    
272    -432   
128    -192   
16     336    
-144   -64    
-144   -48    
64     144    
-112   176    
240    208    
96     48     
112    -160   
128    144    
112    -16    
192    80     
-16    80     
112    -592   
48     0      
144    16     
64     80     
-16    16     
-96    -176   
240    -400   
304    128    
96     -128   
48     -16    
32     -48    
32     16     
176    96     
-144   64     
96     16     
-48    -432   
16     -32    
64     -16    
160    96     
176    -16    
-48    0      
-16    -96    
96     -32    
224    96     
240    32     
64     -48    
64     -1088  
48     48     
-16    -960   
112    -1120  
32     16     
32     -448   
288    32     
-64    -448   
128    0      
320    208    
-240   -80    
112    80     
96     -16    
304    -272   
64     64     
112    -48    
-128   -16    
-272   -64    
176    -48    
-16    -16    
160    16     
-176   -144   
112    -624   
-48    -80    
240    -928   
-64    -144   
240    80     
-96    -80    
288    -144   
-128   0      
32     -64    
48     176    
-416   -48    
160    0      
-16    0      
112    -64    
208    32     
64     -128   
144    96     
304    -16    
128    -48    
64     -32    
144    96     
-224   -144   
96     64     
64     -16    
176    16     
-176   -48    
176    -80    
-1312  -176   
160    -112   
16     64     
112    -176   
304    48     
160    176    
-288   48     
-176   -1312  
64     48     
112    -48    
-144   -96    
240    -32    
-128   -208   
704    304    
-880   112    
-864   -128   
96     -112   
96     32     
144    0      
176    -48    
464    112    
-192   -48    
0      -224   
-144   32     
80     64     
128    64     
-176   -16    
240    -64    
-48    -48    
48     -16    
176    48     
-64    16     
-288   -16    
48     -48    
-176   32     
-32    -80    
224    96     
48     -112   
224    160    
-112   -192   
48     0      
48     112    
112    48     
48     0      
64     -48    
-16    -96    
-128   0      
-240   -176   
-64    -304   
-128   304    
-48    256    
160    -288   
96     0      
-32    336    
160    -1008  
-96    192    
-80    -32    
80     -32    
-288   400    
304    -368   
-208   112    
-48    -288   
-32    128    
0      -144   
-16    -448   
16     288    
-32    -96    
-64    -208   
240    240    
-304   -80    
0      208    
-32    -256   
16     -16    
-96    -144   
-144   -32    
0      -224   
256    32     
224    368    
-48    -448   
112    -224   
0      96     
-32    -240   
80     320    
128    80     
112    -16    
-272   288    
-288   -112   
208    -128   
16     -16    
144    208    
96     304    
0      0      
-160   32     
352    192    
-16    128    
-784   -80    
-80    48     
-64    -80    
-112   -224   
-352   448    
-992   256    
-96    32     
-544   144    
-160   -272   
32     0      
-192   -80    
256    -144   
-160   -192   
-656   32     
80     -144   
-96    -144   
-16    0      
-592   -288   
-368   -352   
-176   -448   
-32    112    
-176   208    
-208   -256   
-48    -64    
-64    0      
48     -48    
32     -144   
240    -32    
96     96     
-112   16     
-272   -112   
-32    -96    
0      -16    
-32    -32    
224    48     
112    -16    
-16    -32    
-208   -32    
32     64     
-176   0      
48     -80    
-16    96     
80     16     
-32    144    
-64    48     
32     -48    
-80    80     
272    112    
-288   -64    
176    -288   
48     -192   
-64    -64    
-272   -48    
-176   -64    
-512   0      
80     -48    
-592   -32    
192    -160   
-256   -176   
96     96     
0      16     
-80    0      
288    368    
-160   288    
-192   -16    
-32    -240   
32     -384   
80     -112   
80     0      
-16    80     
16     160    
-208   -16    
112    80     
16     -64    
32     80     
32     -80    
-64    -80    
-272   -64    
64     -416   
304    208    
-240   352    
-16    320    
-208   -128   
-128   -112   
-384   -48    
48     16     
-464   336    
368    -48    
-16    48     
224    176    
176    112    
208    704    
48     256    
128    48     
96     64     
-240   -272   
-80    272    
-32    80     
-208   -48    
80     -32    
-192   -208   
-304   -272   
-80    32     
-1616  160    
0      -48    
-128   -240   
96     -256   
48     -16    
80     -288   
16     32     
272    64     
-80    64     
288    64     
0      -96    
-144   32     
-224   -400   
-32    -528   
32     -544   
-224   -112   
-32    -256   
-32    96     
32     -64    
64     80     
-224   112    
-80    -32    
-128   16     
48     -304   
32     80     
160    -80    
144    -160   
80     16     
-176   32     
-176   -704   
64     -144   
-160   -240   
64     -32    
352    480    
64     688    
-272   288    
80     -16    
400    336    
64     64     
-288   272    
176    -48    
-208   176    
128    -272   
-240   48     
144    624    
336    496    
-48    240    
304    224    
304    368    
0      272    
224    128    
-32    160    
-32    -48    
-48    -288   
-48    -192   
64     -80    
64     96     
-320   -128   
64     -32    
16     400    
-64    288    
192    -144   
-144   -32    
64     -128   
0      -208   
96     32     
-304   48     
-176   -480   
48     240    
80     80     
-32    -80    
-32    48     
160    -704   
48     -80    
-32    496    
-144   -32    
336    112    
-240   -160   
-48    -144   
272    160    
144    -96    
288    64     
-96    128    
32     -32    
-32    160    
-240   0      
0      144    
-80    0      
224    0      
160    48     
256    112    
192    48     
144    -192   
-112   -16    
-80    48     
-32    80     
-32    48     
0      112    
160    192    
-16    0      
64     -64    
-96    -96    
208    -128   
-80    32     
96     112    
128    48     
64     0      
-144   32     
64     176    
-128   16     
-320   -96    
48     96     
160    208    
-144   160    
80     272    
-48    96     
-80    32     
16     -160   
144    16     
240    48     
-16    48     
80     -48    
32     16     
288    144    
-32    80     
16     0      
-80    -96    
352    112    
128    48     
-32    16     
16     48     
-96    16     
0      128    
-32    192    
0      -144   
256    64     
304    96     
-64    0      
128    -48    
160    80     
32     64     
-96    -32    
64     128    
80     -48    
32     -16    
0      112    
32     64     
-224   -256   
48     -32    
352    -416   
320    112    
128    32     
96     80     
-80    16     
-80    48     
-80    208    
64     -16    
-64    -32    
112    80     
0      80     
64     -96    
208    80     
-48    -224   
48     0      
32     -144   
176    80     
0      -272   
176    -16    
-64    -352   
64     48     
-48    0      
128    16     
-16    16     
112    208    
32     48     
112    -176   
112    32     
32     -16    
240    32     
-16    -96    
112    144    
0      -432   
192    -32    
0      96     
112    48     
64     112    
-32    48     
128    128    
112    32     
352    48     
-400   64     
32     -32    
144    -48    
160    160    
-80    -432   
144    0      
-64    -512   
64     80     
-64    -128   
256    0      
48     80     
-544   -352   
-80    -416   
192    -144   
-128   -16    
160    -256   
128    128    
-16    -304   
272    128    
-16    -400   
192    -64    
224    -80    
144    -32    
16     144    
128    64     
-96    96     
128    288    
-48    -208   
-128   -128   
288    -112   
144    80     
144    16     
112    -144   
128    96     
16     -80    
80     64     
160    -320   
-64    176    
128    48     
-32    32     
416    176    
-288   352    
112    -1296  
128    32     
-144   -1136  
272    -192   
-64    16     
256    32     
80     64     
0      -48    
-112   -32    
-16    -800   
224    -1440  
-80    -16    
-160   -128   
128    -16    
-16    192    
-80    -176   
480    -864   
128    224    
32     400    
112    -512   
-192   -112   
144    -352   
32     336    
336    288    
64     -208   
176    -304   
80     -16    
0      -80    
48     -96    
-464   -144   
-80    -256   
0      -48    
160    -48    
224    80     
-80    -288   
128    -48    
-80    -976   
176    -192   
-176   64     
144    32     
192    48     
176    112    
144    -64    
176    -128   
-288   -80    
-16    -176   
-448   -320   
96     16     
96     -48    
0      -112   
144    -16    
-48    -80    
80     16     
224    -32    
-224   -32    
176    48     
160    64     
368    96     
-240   -16    
-48    -112   
16     -64    
-336   -16    
96     -176   
80     -144   
48     -128   
96     0      
0      -128   
240    -128   
-96    -1216  
-16    0      
0      -176   
-80    -80    
160    64     
-64    160    
0      0      
80     -64    
-512   0      
0      -80    
-1872  272    
256    352    
-48    128    
-144   16     
112    -96    
144    -208   
-112   192    
80     -16    
32     -144   
64     48     
80     -32    
-64    64     
224    80     
-208   -96    
112    -192   
-432   -176   
96     0      
-224   96     
128    -32    
96     176    
-64    -128   
128    -32    
16     -272   
64     -160   
-128   96     
-16    -64    
-208   112    
208    -16    
-448   0      
128    -96    
-128   304    
32     -16    
-528   -288   
-64    -336   
80     -112   
48     32     
-128   16     
368    -176   
32     64     
-176   192    
80     -128   
-112   -32    
112    192    
48     160    
-48    32     
-320   -144   
192    32     
160    16     
-16    112    
128    -80    
144    -176   
96     0      
-400   192    
80     112    
-64    -48    
112    0      
112    -48    
112    336    
96     304    
-96    48     
-128   -160   
240    -368   
-512   -224   
160    -528   
112    192    
128    64     
-544   -48    
-32    48     
-1120  32     
-48    -304   
-144   -208   
-128   464    
48     768    
368    544    
-32    -224   
-80    96     
224    -112   
-96    -128   
-288   -304   
256    -416   
-400   -64    
-112   -368   
0      528    
-272   880    
-384   -1056  
-1504  -224   
-160   -704   
-112   528    
288    400    
-80    240    
176    128    
-528   -528   
224    144    
-192   -192   
48     192    
96     -160   
-224   -176   
-336   -400   
-112   784    
-112   -208   
-1072  -448   
-96    160    
-272   -400   
-16    304    
0      -96    
128    368    
144    -32    
0      -384   
-32    -192   
-96    -272   
-112   480    
-32    -592   
-432   -240   
176    112    
80     576    
0      -256   
16     -144   
-352   -128   
112    -416   
-1584  80     
128    176    
-96    -144   
48     -128   
-224   -64    
32     224    
-128   -96    
-64    -48    
304    112    
-144   224    
496    112    
-32    -64    
432    160    
-656   16     
160    -192   
-368   432    
-16    -192   
128    112    
112    160    
-48    -80    
-96    96     
32     32     
-16    96     
16     -96    
16     192    
-64    32     
-16    80     
-32    32     
-192   -64    
112    176    
-112   96     
192    -208   
-288   -80    
-32    416    
80     -16    
96     0      
-128   128    
112    272    
0      96     
528    880    
-400   272    
-112   -256   
384    224    
-16    96     
48     80     
-832   -48    
48     128    
224    -160   
-80    -1056  
304    -64    
0      -480   
-160   -560   
-240   -496   
-128   -16    
176    192    
336    176    
-128   0      
16     96     
-160   -16    
272    64     
-96    32     
0      48     
-496   -256   
96     -496   
128    -96    
-16    240    
-64    16     
-64    64     
-112   96     
64     48     
128    80     
-368   -16    
-224   -176   
48     -96    
48     16     
112    16     
192    48     
-128   -128   
192    -192   
-80    16     
176    112    
0      0      
-112   -96    
-16    16     
-112   -16    
64     32     
160    96     
48     -32    
-96    -32    
176    -16    
-144   48     
112    48     
-64    -112   
-176   32     
-16    112    
80     0      
160    32     
16     32     
160    64     
-16    -176   
-80    -112   
-16    160    
16     0      
-16    -96    
208    160    
-80    48     
-64    -32    
160    0      
112    32     
160    224    
-272   -48    
-48    -160   
160    -16    
96     128    
112    96     
-48    32     
80     48     
0      48     
-80    16     
208    80     
-128   -48    
0      -16    
48     -32    
144    32     
112    112    
-160   -80    
32     -32    
80     80     
32     0      
96     112    
0      32     
-176   16     
112    48     
-288   -80    
224    64     
48     64     
128    16     
160    -32    
-80    -16    
128    16     
-48    112    
112    352    
128    128    
-144   32     
-48    -16    
80     16     
-96    48     
96     128    
0      80     
-48    -64    
32     -96    
80     -48    
144    176    
32     208    
240    -128   
272    -32    
352    96     
144    -80    
-80    0      
-112   32     
0      -64    
48     144    
96     96     
-112   96     
0      -240   
32     112    
-176   -176   
368    -16    
224    0      
224    96     
-16    128    
-224   -176   
32     96     
352    272    
-384   -80    
672    288    
-784   -144   
-352   -64    
352    176    
112    -544   
592    240    
192    -16    
64     -96    
-64    384    
-208   -112   
448    256    
48     768    
-464   -576   
208    -48    
-208   176    
368    -416   
-96    368    
160    176    
112    -176   
144    112    
-16    16     
32     -336   
160    128    
32     64     
-96    -144   
416    176    
-176   432    
-176   -192   
304    -160   
-128   -144   
176    -64    
-96    -144   
16     -288   
160    32     
288    192    
-48    192    
80     -320   
32     64     
80     -80    
80     48     
320    48     
-80    -112   
-64    -112   
-48    16     
-192   -128   
16     0      
-64    32     
-16    -32    
32     64     
288    -96    
-64    112    
16     -112   
-192   128    
80     -1008  
-32    32     
160    -16    
224    160    
-32    64     
320    32     
80     96     
48     96     
80     32     
160    16     
64     16     
192    48     
-112   80     
48     -144   
48     48     
-48    -192   
208    80     
176    0      
192    -144   
-272   -496   
0      -128   
16     144    
48     96     
96     96     
32     -144   
80     32     
96     -336   
-64    0      
336    -144   
-16    128    
-128   -16    
-32    48     
112    352    
112    208    
160    -96    
-80    48     
-192   -16    
32     32     
96     128    
-80    -512   
352    -320   
112    -128   
224    256    
-128   -256   
112    48     
-32    0      
-64    112    
416    368    
-288   384    
-144   48     
288    208    
48     288    
144    -80    
416    80     
-144   0      
64     16     
144    16     
32     112    
128    -80    
64     -16    
80     -80    
64     -112   
-16    -48    
-144   -592   
32     -16    
224    -896   
-112   -400   
192    48     
80     -192   
-48    48     
32     -672   
112    -208   
-112   96     
48     16     
0      -16    
256    0      
208    -400   
-208   80     
-64    -128   
128    -192   
-752   -512   
0      -288   
112    -224   
192    16     
-144   -96    
144    -112   
-48    240    
224    240    
304    160    
112    0      
-80    -32    
-16    -80    
-96    -48    
16     -128   
-16    -48    
192    176    
224    144    
16     240    
-144   -288   
80     -144   
80     -16    
80     -96    
48     608    
144    -48    
-176   -384   
-48    32     
112    -64    
96     -80    
144    -32    
208    80     
-80    208    
-288   -416   
-1888  256    
16     -224   
32     160    
176    -64    
32     -208   
-80    -112   
144    -80    
208    64     
112    -32    
208    240    
-288   -192   
-64    32     
-176   16     
-64    -208   
128    384    
-288   256    
128    176    
0      -32    
32     144    
160    -368   
224    800    
128    400    
208    -960   
256    384    
-416   -32    
144    -432   
-304   160    
0      176    
-32    -288   
-16    64     
-320   16     
-176   -352   
-688   192    
-48    1184   
-80    784    
352    -464   
432    -128   
16     -992   
-64    -112   
-96    224    
-256   -352   
-208   -96    
160    224    
128    352    
240    -16    
-224   -48    
144    -112   
-304   16     
-32    -128   
-1168  -64    
64     -112   
96     80     
-144   -368   
80     112    
192    64     
176    48     
-128   32     
16     -48    
16     -112   
48     32     
-288   64     
160    48     
-224   32     
96     -16    
304    656    
-272   -112   
112    -272   
384    0      
-240   -96    
464    144    
128    112    
-592   -48    
80     -48    
-208   -32    
64     -48    
16     32     
-96    -192   
96     0      
-96    48     
176    -16    
160    -16    
112    -16    
-16    -80    
0      112    
-64    32     
-32    -16    
-192   -16    
48     48     
-48    144    
-32    0      
48     176    
592    320    
-320   80     
-464   -208   
352    -144   
-976   -160   
144    176    
-656   48     
-272   224    
-256   -48    
-944   80     
-80    -80    
-368   32     
-112   -32    
64     -64    
-176   -128   
0      -304   
-48    -208   
-96    -240   
112    64     
-48    32     
-16    48     
176    240    
-352   224    
-48    16     
-160   -16    
64     -208   
32     -112   
32     128    
-1856  0      
-80    64     
0      -16    
32     160    
0      32     
80     64     
-160   -112   
-32    80     
560    752    
-848   368    
160    -176   
48     -160   
-96    -80    
-352   -64    
48     -160   
-832   272    
32     0      
-80    -224   
-176   -112   
-272   -80    
-112   80     
-80    -48    
64     0      
96     80     
192    80     
-64    -16    
-64    32     
-144   0      
-16    -16    
128    96     
176    80     
0      16     
0      0      
0      -96    
-256   -144   
96     -64    
-80    -64    
-16    32     
-80    96     
16     32     
-64    -16    
-192   0      
48     0      
-112   0      
-96    16     
-208   32     
-176   80     
-1120  -128   
176    0      
-48    -64    
64     32     
96     64     
16     -80    
-64    16     
-176   80     
-80    -64    
144    -16    
192    64     
-288   -16    
-48    -32    
-320   -64    
96     -16    
-144   16     
176    64     
-64    -48    
0      16     
64     0      
-208   48     
64     32     
-64    32     
-16    0      
48     32     
-64    -32    
-16    -16    
16     64     
-144   -128   
144    -96    
-64    -256   
0      -144   
-1088  -16    
-32    -16    
96     -32    
32     0      
-16    256    
144    80     
16     32     
-240   -48    
256    -48    
-16    -304   
-256   16     
256    -448   
80     224    
-336   112    
-208   -256   
-480   16     
-256   464    
32     -768   
192    208    
32     80     
-368   -224   
80     -80    
-288   208    
496    -80    
-368   -176   
224    48     
-208   -80    
176    -48    
-576   -176   
-112   -160   
208    96     
0      -240   
192    96     
64     -208   
-64    -80    
16     -112   
64     -192   
-256   -48    
464    80     
-496   432    
160    96     
-160   -48    
112    -16    
-16    -96    
16     128    
-192   -80    
208    -128   
-32    96     
128    96     
0      96     
48     48     
160    0      
112    -128   
-272   16     
-176   32     
-16    -16    
-128   240    
272    128    
-80    32     
96     -128   
-64    64     
-32    64     
48     0      
-96    0      
32     -48    
64     64     
-112   96     
-144   -48    
0      0      
-224   -16    
112    -16    
32     -112   
96     -16    
96     -48    
-128   144    
80     32     
144    112    
-96    80     
64     -32    
0      32     
16     -32    
144    48     
-224   16     
176    48     
-16    -32    
288    48     
-176   128    
-64    160    
64     16     
224    -16    
-16    16     
64     0      
48     -16    
-32    64     
32     -16    
96     -144   
32     80     
48     80     
64     -32    
96     -16    
128    96     
-160   -80    
-128   -464   
176    -16    
0      80     
-256   -96    
192    -96    
192    112    
-112   64     
48     64     
112    80     
0      48     
64     64     
96     96     
-96    -80    
32     80     
32     128    
144    48     
-16    -16    
96     48     
-16    -112   
160    48     
48     96     
-48    0      
160    368    
-96    224    
-16    -112   
-48    -96    
0      96     
-64    -64    
176    -80    
192    -32    
128    192    
368    688    
-352   112    
224    32     
-16    160    
224    272    
96     -32    
144    0      
160    -160   
0      64     
-192   -176   
-208   16     
-16    -128   
32     -80    
128    112    
-96    -208   
48     32     
32     -1408  
-96    192    
304    -80    
-192   -64    
-112   96     
160    240    
-48    0      
64     64     
48     208    
256    -224   
16     -288   
-256   64     
112    288    
80     -192   
0      96     
-32    -208   
208    -240   
224    240    
112    176    
32     -112   
112    112    
-48    0      
96     176    
144    32     
48     80     
-144   -352   
32     160    
240    128    
192    -16    
80     -16    
192    144    
-80    432    
-16    -1984  
208    -144   
80     112    
224    288    
-160   -16    
96     -560   
-384   -352   
384    32     
48     160    
160    -16    
128    -48    
32     128    
128    0      
-112   -352   
160    -400   
-48    -560   
112    96     
112    32     
112    0      
16     -176   
32     144    
80     -16    
-48    -16    
352    288    
-144   16     
352    64     
0      -128   
128    48     
224    -336   
176    -16    
112    -64    
-16    48     
32     0      
-16    144    
-64    32     
32     64     
144    96     
256    112    
-192   32     
272    160    
-48    304    
-32    -64    
-128   -160   
176    -64    
352    320    
-160   32     
80     -160   
48     -112   
80     480    
-112   192    
1280   448    
-672   576    
-384   -192   
272    -320   
176    -272   
-240   192    
0      -32    
400    256    
-400   -16    
64     -128   
144    -176   
144    -704   
192    -48    
80     -128   
0      0      
-592   -16    
0      -192   
80     -64    
112    -144   
64     80     
240    -416   
48     -32    
96     176    
432    0      
-304   -16    
-112   -96    
352    48     
112    96     
128    -48    
-112   -16    
-32    0      
16     -80    
224    64     
-48    -96    
-80    0      
32     -544   
-80    -96    
400    -416   
448    144    
-160   -128   
0      -48    
112    80     
-192   -80    
160    -80    
288    112    
-384   -16    
-240   -80    
-352   0      
112    -224   
272    -128   
-48    -176   
240    -16    
352    -576   
-112   -32    
48     -48    
16     48     
-16    -48    
144    64     
240    -48    
128    -208   
-352   -144   
32     96     
-1808  -32    
-96    -80    
160    -32    
16     48     
-80    64     
80     96     
128    48     
160    -112   
-32    80     
0      -128   
80     176    
-144   -192   
144    -80    
-16    -16    
48     -176   
-592   64     
144    -160   
320    -112   
144    16     
80     96     
64     0      
-128   0      
64     -384   
112    144    
192    96     
-96    -16    
-112   -128   
112    -64    
-80    -16    
192    -32    
-496   16     
528    688    
-512   288    
112    -64    
-80    -64    
-16    -336   
32     240    
128    -160   
80     -16    
64     336    
-96    208    
32     -16    
336    64     
80     112    
160    80     
-160   80     
160    -16    
-96    -16    
96     48     
-48    16     
160    -48    
112    192    
-176   -32    
-80    32     
-32    64     
16     -112   
-96    64     
16     -160   
-96    -176   
48     -320   
-48    -32    
96     80     
-224   48     
48     -80    
-16    0      
176    -48    
192    96     
272    32     
-176   32     
-320   -48    
336    80     
-32    80     
96     -112   
-240   -144   
48     -192   
-192   -32    
176    -160   
-16    -48    
80     128    
48     192    
-160   -112   
-64    192    
240    48     
272    -304   
-32    -416   
-304   240    
-96    48     
0      -144   
-144   -96    
64     208    
-160   0      
288    80     
-48    -48    
-400   -160   
160    160    
-160   -112   
-16    -176   
32     48     
-32    0      
-128   144    
-208   320    
80     -160   
-1968  -32    
-48    80     
80     -64    
32     128    
-400   0      
128    64     
256    32     
-144   -144   
-208   -96    
416    -560   
256    416    
224    -32    
-176   -432   
-272   96     
-160   -208   
-448   128    
96     512    
-256   224    
-112   0      
96     -16    
-48    -112   
16     -144   
-224   -144   
176    -320   
0      -112   
128    160    
-96    48     
208    -176   
160    48     
-160   128    
272    -112   
-16    160    
-48    176    
-336   96     
-432   -128   
272    -96    
-32    -80    
176    -96    
-144   64     
-144   -64    
-96    -64    
192    -160   
208    112    
-240   80     
0      -48    
-272   -144   
16     -368   
-496   16     
-96    144    
-112   32     
80     32     
-48    -176   
208    208    
-48    128    
128    -112   
-80    -128   
96     -16    
-80    192    
-240   32     
16     128    
-272   0      
16     -16    
-128   -48    
160    -96    
-688   -80    
192    352    
-112   240    
144    -64    
32     -144   
160    -16    
-160   16     
48     -144   
-192   304    
160    0      
112    -96    
224    -32    
16     160    
-96    32     
80     -32    
96     64     
64     80     
-240   16     
-16    -80    
144    80     
96     0      
-48    128    
-32    -32    
32     64     
-144   32     
16     0      
192    -16    
-32    16     
-352   -48    
32     0      
-224   -128   
-80    -64    
128    112    
0      16     
-112   64     
208    64     
-192   144    
0      -48    
-32    0      
48     -128   
-144   48     
16     0      
0      144    
-336   16     
112    80     
-96    -16    
16     -112   
128    -32    
16     32     
160    112    
128    64     
-80    -32    
-192   0      
-16    0      
-16    48     
64     80     
48     0      
192    -32    
128    0      
96     128    
-304   176    
48     240    
288    400    
-352   544    
48     144    
208    144    
16     160    
48     -176   
80     -128   
64     -176   
32     144    
64     128    
-272   -256   
-112   -64    
208    304    
80     416    
-80    288    
-32    -256   
240    -96    
160    160    
-48    0      
-240   0      
0      -272   
96     192    
32     32     
128    -32    
-80    208    
288    -32    
-64    224    
-48    -112   
-288   -80    
-224   0      
192    112    
-208   -176   
256    64     
176    160    
160    -48    
-160   16     
-64    80     
-48    -48    
144    176    
48     576    
112    192    
-112   -80    
32     0      
176    -64    
96     -48    
192    -16    
-16    48     
-32    48     
-112   128    
-112   -32    
16     -64    
32     -16    
0      -96    
144    32     
-64    -32    
192    96     
-144   32     
16     192    
96     80     
-48    16     
48     32     
32     64     
16     32     
16     16     
0      32     
-48    16     
32     48     
-32    80     
16     48     
32     224    
208    32     
48     -16    
32     -400   
0      32     
-48    -32    
256    144    
-80    32     
288    80     
-224   -64    
-256   0      
192    64     
48     48     
224    -192   
64     16     
-128   112    
16     80     
192    32     
-304   -320   
32     64     
112    128    
176    48     
48     64     
176    96     
80     48     
96     80     
-192   -96    
256    -64    
32     -48    
208    -32    
64     32     
-400   -192   
416    -16    
80     -400   
80     -16    
-352   112    
400    144    
-240   -32    
176    80     
128    32     
128    96     
80     -80    
-112   32     
272    -80    
352    80     
-384   -160   
-64    -112   
144    32     
80     -128   
16     80     
80     -1568  
96     32     
-192   128    
0      0      
208    0      
-128   -96    
192    112    
-16    32     
160    48     
-224   -64    
224    64     
176    -48    
96     128    
96     -32    
112    64     
-352   -192   
496    128    
-208   -176   
-80    32     
80     144    
304    128    
48     0      
-128   128    
240    80     
160    192    
-64    32     
-80    -128   
208    128    
128    -240   
-160   -16    
208    -176   
48     112    
240    -656   
-96    32     
160    0      
32     64     
-96    16     
48     32     
80     80     
240    -64    
-112   0      
112    -96    
128    -16    
64     -80    
48     -368   
-272   -512   
192    -48    
-96    -800   
240    32     
64     240    
-112   208    
32     -96    
208    64     
96     -48    
64     80     
128    64     
32     -272   
240    320    
-96    -112   
192    32     
48     -48    
32     192    
112    0      
176    32     
-64    144    
80     80     
64     64     
-64    -160   
192    -336   
160    96     
240    192    
-16    -320   
-16    176    
-16    -208   
80     208    
-32    -64    
-80    0      
96     32     
272    992    
-64    -560   
48     -592   
-192   32     
-2224  -80    
288    -192   
-224   -272   
48     -112   
256    160    
64     -576   
192    -48    
272    -48    
272    -16    
48     -192   
48     32     
-16    -224   
-96    0      
-32    -304   
-96    -64    
-32    -16    
160    0      
224    -128   
448    384    
-384   -608   
128    -656   
272    400    
-80    -112   
-64    -48    
128    -208   
96     -32    
256    80     
48     -32    
144    -32    
272    -48    
-320   -112   
-32    -320   
224    -80    
0      160    
112    0      
-224   -784   
-48    208    
224    -256   
-160   -384   
96     64     
128    -48    
208    16     
128    128    
16     -160   
160    -48    
-176   -240   
48     -400   
-1328  0      
96     -96    
128    32     
256    -32    
144    -32    
240    112    
-144   -304   
160    32     
128    96     
-48    80     
48     80     
-64    -128   
32     -112   
-96    -144   
304    176    
-128   416    
0      96     
192    464    
32     208    
-128   -240   
32     -800   
-80    -208   
0      240    
208    752    
112    16     
96     -80    
-400   -144   
192    -32    
32     208    
192    288    
32     160    
352    336    
-1392  368    
96     48     
-496   224    
288    -112   
480    96     
-176   -448   
-160   -48    
-80    -240   
240    -128   
96     -48    
-48    0      
-16    32     
96     0      
-208   -112   
-208   144    
-400   -48    
432    192    
144    128    
-80    -64    
240    -128   
80     -304   
-48    -64    
192    64     
128    -96    
32     -80    
96     0      
-288   32     
-176   -128   
-16    -80    
-32    48     
-240   -48    
208    176    
-96    64     
128    -160   
352    -128   
-16    -288   
160    -112   
-560   -48    
176    -16    
-224   -16    
176    240    
-272   160    
64     -16    
-128   -288   
240    64     
-288   -112   
-112   -80    
128    96     
192    -48    
-96    48     
64     -112   
64     192    
-240   0      
240    128    
-304   208    
80     64     
32     -48    
64     16     
176    160    
-128   224    
-688   -112   
32     -144   
240    96     
-768   0      
80     208    
-1312  0      
-352   -16    
-144   0      
-320   0      
-192   -48    
-352   -80    
80     80     
80     -16    
64     80     
64     32     
-64    32     
-32    -96    
112    80     
-16    -128   
-16    -16    
-32    -32    
-48    -176   
32     32     
-464   32     
-32    48     
-1488  -240   
96     -224   
400    -144   
-128   96     
128    -48    
-16    96     
-288   -112   
32     64     
-384   -256   
-288   -544   
80     -272   
96     -16    
16     16     
144    48     
-96    64     
-192   384    
-128   480    
-304   -32    
112    -176   
224    96     
160    416    
-256   224    
-16    -176   
-48    -48    
48     0      
-48    32     
48     -80    
-32    -272   
-48    -128   
32     336    
-208   -624   
160    -384   
-96    368    
-16    -48    
352    -16    
32     -80    
112    112    
144    464    
0      -144   
240    -192   
16     -144   
-256   240    
-272   112    
112    304    
-304   -256   
-144   -256   
96     144    
0      64     
192    192    
-752   -144   
112    -128   
176    -64    
80     64     
32     -32    
-48    -32    
-128   48     
240    112    
256    48     
112    48     
-32    16     
-224   0      
-128   48     
-528   -48    
32     16     
-96    -48    
160    0      
208    48     
-32    32     
96     192    
-304   -16    
176    48     
48     48     
32     48     
-16    -32    
-112   -32    
-32    112    
-192   -32    
-48    64     
416    176    
-752   -64    
224    64     
96     -16    
-48    -112   
-112   -64    
-80    -16    
-16    64     
-80    128    
-96    32     
-208   -48    
-80    16     
-176   -16    
208    48     
-288   -48    
176    48     
-384   0      
208    32     
16     32     
128    -48    
-112   0      
96     -16    
-128   48     
176    16     
-48    48     
208    80     
-64    -160   
-112   -176   
-48    80     
-160   -96    
112    80     
-256   32     
-48    16     
112    -96    
112    -80    
160    80     
-128   128    
96     -16    
48     -48    
-64    -16    
64     -64    
240    192    
-208   96     
64     32     
-224   -64    
128    224    
-32    96     
16     -16    
32     -16    
0      -112   
176    16     
-32    64     
0      64     
-16    -16    
640    192    
-144   -16    
224    0      
-368   0      
16     160    
-208   -48    
-304   -112   
320    48     
128    112    
-112   -128   
176    -64    
112    144    
-192   112    
192    48     
-32    0      
48     48     
0      48     
-96    48     
16     -16    
208    80     
96     -16    
-176   80     
144    0      
128    -64    
224    32     
64     -32    
-48    128    
-144   96     
-16    48     
64     -48    
208    64     
160    64     
-272   -32    
32     -48    
192    272    
32     96     
-112   0      
32     48     
256    64     
-80    64     
32     32     
80     176    
-80    80     
80     -32    
128    16     
32     96     
-144   128    
192    48     
-144   -32    
64     -16    
-304   48     
336    -432   
0      16     
160    -96    
-176   -64    
128    144    
-32    -48    
96     144    
48     32     
112    416    
-192   -464   
176    -576   
96     208    
96     160    
176    96     
-128   -96    
80     -224   
64     48     
96     112    
32     32     
16     -128   
144    272    
-224   160    
192    64     
320    592    
-320   -528   
-16    288    
160    304    
64     -96    
48     -96    
-224   0      
48     304    
112    0      
288    -224   
-48    208    
16     -208   
160    320    
-160   -624   
0      -48    
-144   224    
-16    -80    
80     48     
208    240    
48     80     
144    -336   
112    560    
-16    -448   
16     -48    
192    -688   
16     16     
32     -96    
16     160    
-32    0      
144    -144   
368    480    
-224   -208   
-16    -272   
208    80     
128    160    
-128   -256   
80     -80    
0      128    
48     -64    
80     -96    
32     -96    
48     -64    
-112   -336   
32     -304   
48     128    
160    96     
160    352    
32     32     
96     -96    
256    336    
624    64     
48     80     
112    -64    
-64    -16    
32     -768   
-96    -128   
-64    -736   
96     -16    
-112   176    
368    272    
-32    -192   
16     0      
0      -64    
-112   -144   
64     32     
16     112    
96     64     
64     -96    
32     -48    
-32    -560   
48     -48    
16     -160   
112    64     
112    -48    
48     -16    
64     -80    
48     16     
-32    96     
48     16     
48     160    
128    16     
48     0      
80     -480   
144    -32    
-48    64     
128    -16    
128    -112   
32     -48    
176    -400   
-192   -384   
272    -368   
128    384    
256    192    
224    -112   
96     64     
64     240    
48     336    
0      -544   
336    -96    
64     16     
0      -64    
80     -944   
176    160    
0      0      
-160   -16    
-128   -160   
240    160    
96     -16    
128    -240   
160    80     
144    -176   
240    -128   
48     -320   
-16    -80    
-128   -432   
240    -320   
-224   -128   
-128   -1072  
288    144    
128    -112   
192    112    
32     -64    
336    -528   
16     -544   
224    -384   
144    160    
-16    -320   
-176   32     
96     -64    
112    128    
-64    -64    
192    80     
144    -176   
256    128    
112    -64    
-128   -176   
-1648  0      
-224   128    
-32    -32    
464    80     
-48    0      
128    -208   
0      32     
416    192    
-96    416    
32     -176   
-16    160    
368    112    
-144   320    
208    -128   
160    -112   
-800   -16    
224    192    
-16    80     
160    16     
64     -64    
32     -480   
128    -96    
96     -64    
304    192    
-224   -112   
-176   128    
-240   208    
208    96     
528    32     
0      16     
0      128    
192    -272   
-1104  -64    
128    -304   
-80    -48    
128    -176   
96     -112   
96     -320   
-544   -208   
112    272    
112    -64    
-48    -32    
192    208    
-160   320    
-16    32     
-432   -128   
352    16     
-736   -96    
-112   -528   
-112   -544   
64     -416   
-80    -16    
80     -208   
48     -736   
64     -112   
96     64     
-16    -80    
80     16     
-80    48     
176    -224   
-64    64     
384    208    
-384   80     
64     -16    
-784   0      
-16    -208   
-96    -16    
-272   -240   
304    400    
208    -144   
-160   -96    
256    80     
32     96     
64     -208   
80     80     
-128   32     
-16    -64    
-176   -16    
112    0      
-544   -64    
64     -48    
-400   112    
544    624    
288    320    
144    32     
-96    208    
-96    32     
144    32     
-176   48     
128    352    
-352   256    
224    112    
-576   128    
64     -160   
-160   -32    
176    16     
-80    64     
176    -208   
64     224    
96     -272   
96     -144   
-528   0      
48     -32    
-32    0      
96     16     
-128   -16    
32     -64    
0      48     
320    16     
-752   -112   
160    32     
224    48     
80     -80    
96     32     
-480   -80    
352    -16    
-96    64     
32     16     
-144   16     
-112   -64    
-128   32     
80     112    
48     -16    
160    80     
-384   32     
-112   -80    
80     80     
-240   -176   
224    48     
96     128    
-80    -16    
-16    32     
-464   -32    
-176   -32    
-592   0      
-128   0      
0      16     
128    80     
96     -16    
-208   0      
-656   -112   
-48    32     
112    -48    
320    112    
-112   -32    
48     -48    
-144   -32    
-80    -32    
-64    96     
-112   48     
-96    64     
-656   48     
-208   16     
-80    -16    
16     64     
48     -16    
400    176    
-336   0      
144    -64    
-208   -16    
-48    -112   
80     80     
-240   32     
176    -64    
96     -96    
144    112    
-320   -48    
-240   -32    
0      -64    
-112   48     
96     16     
32     112    
-96    32     
-208   -64    
-32    96     
-112   -112   
0      -64    
-144   80     
-144   -64    
208    -80    
-272   -32    
-528   -176   
192    48     
-1376  64     
-288   -288   
-64    -160   
-32    16     
-160   -48    
-320   80     
96     -16    
112    192    
-160   48     
176    0      
448    272    
-496   128    
112    -144   
-208   -176   
112    64     
-624   -96    
80     -112   
-144   -64    
-176   0      
144    80     
80     96     
-160   64     
-80    -144   
144    160    
-96    240    
-16    0      
-112   -224   
96     16     
-208   128    
64     48     
-416   256    
16     -128   
448    -80    
-208   656    
0      -208   
320    208    
-368   16     
-112   -48    
-32    32     
128    112    
48     144    
-112   208    
144    80     
16     0      
112    48     
-432   -160   
96     976    
304    -288   
-32    64     
64     240    
0      160    
-192   -224   
-64    -336   
96     208    
272    384    
-400   -176   
-176   -224   
144    48     
-224   320    
-112   -16    
-128   272    
240    272    
224    96     
-208   544    
160    -160   
320    368    
-176   464    
-64    288    
-64    96     
-64    64     
48     -16    
-16    0      
32     48     
80     -48    
256    48     
-448   0      
160    400    
-64    256    
-192   64     
-48    48     
0      -32    
-96    -256   
32     -96    
16     128    
-320   0      
-32    176    
-144   -16    
112    352    
-80    112    
64     -16    
-32    64     
-48    176    
-80    -16    
208    0      
-32    528    
112    352    
-16    64     
32     -64    
224    16     
-64    80     
96     144    
144    224    
-64    112    
-224   224    
208    160    
-112   -80    
-80    -272   
32     -96    
0      0      
0      -16    
160    0      
16     48     
-144   -96    
112    -160   
-192   -32    
352    -64    
-48    112    
-112   0      
-80    0      
16     128    
-48    128    
240    16     
-80    -96    
80     -64    
304    -112   
32     128    
32     16     
-64    16     
144    -16    
-128   -48    
352    272    
-416   80     
80     48     
-16    64     
80     0      
128    -160   
-64    -160   
-48    0      
-112   -16    
96     -96    
176    -48    
48     -48    
48     32     
224    336    
-48    -16    
112    64     
128    96     
-48    16     
64     -112   
64     -16    
96     80     
-16    256    
208    192    
-96    -16    
160    448    
-240   -32    
48     96     
-16    176    
176    208    
16     608    
-16    -224   
-16    0      
32     192    
-160   -208   
576    -960   
128    -32    
144    144    
-48    -224   
-96    -208   
-144   -176   
64     -576   
128    -352   
-176   -112   
16     16     
-16    192    
-32    -48    
16     -192   
208    -128   
-64    -48    
320    -144   
48     80     
-352   -112   
208    80     
720    112    
-256   864    
96     -48    
-80    -208   
48     48     
0      -64    
16     80     
384    64     
-368   240    
256    64     
-160   576    
32     112    
-16    112    
16     -640   
-96    16     
80     -64    
208    112    
304    384    
-80    160    
32     0      
48     16     
16     80     
496    416    
-480   192    
144    96     
-288   304    
224    128    
128    288    
128    -560   
80     256    
-128   -512   
144    -352   
80     -16    
-208   -192   
-96    -48    
-80    -48    
176    -464   
-16    240    
304    240    
-192   176    
64     -144   
176    -672   
160    -240   
-80    -192   
-48    368    
272    80     
-160   0      
224    240    
368    320    
-304   336    
128    -480   
336    416    
-272   464    
-64    -80    
48     -656   
240    256    
320    288    
-112   -16    
160    -160   
48     -80    
-64    400    
320    -192   
16     128    
80     144    
96     -48    
-128   528    
192    96     
160    -64    
-48    192    
-112   -320   
176    64     
160    -128   
32     240    
128    -416   
320    400    
-256   -208   
-16    -256   
80     96     
-16    416    
-80    -272   
-208   -128   
128    240    
48     -32    
288    -48    
240    -64    
-192   0      
32     -192   
96     64     
-112   -96    
64     32     
48     432    
256    64     
48     -112   
64     -448   
80     48     
-96    -32    
32     -144   
128    352    
112    32     
48     -176   
144    -176   
-48    -80    
112    96     
112    -64    
64     -400   
0      160    
80     48     
16     -144   
224    -384   
-96    48     
-1248  144    
32     -176   
-80    -160   
-48    -128   
80     -144   
192    -256   
-80    0      
32     -80    
176    -128   
-16    -240   
224    64     
80     -112   
176    224    
16     -64    
96     -80    
-832   -16    
64     -32    
0      -80    
96     -80    
32     32     
176    -160   
272    32     
128    -1088  
80     -128   
-32    -112   
208    112    
160    128    
112    288    
-64    160    
-176   -64    
-304   -288   
256    -96    
256    96     
240    0      
16     -16    
0      16     
-96    -80    
80     -688   
-336   16     
96     64     
80     48     
80     -32    
-128   -64    
-192   -16    
144    -48    
-48    -32    
64     -80    
-560   48     
80     -80    
64     -16    
48     -224   
-128   16     
80     -192   
160    -32    
176    -112   
0      80     
-16    -96    
112    0      
-80    80     
80     -32    
-64    -16    
-64    32     
-1520  -48    
144    -80    
64     -112   
48     16     
128    0      
32     -96    
96     80     
16     -864   
-32    112    
64     -32    
64     0      
-80    0      
128    -176   
-64    -224   
240    160    
-368   -16    
192    -80    
-224   32     
96     64     
160    0      
48     -144   
-112   -96    
240    -144   
-240   192    
368    256    
-128   -48    
-48    -80    
128    -16    
-864   32     
16     -16    
64     -16    
-96    16     
304    224    
-128   272    
-352   -304   
208    -592   
432    192    
0      16     
-128   -400   
160    -304   
-16    -128   
-336   336    
224    304    
80     64     
-32    -32    
-16    32     
160    -80    
-144   96     
16     -96    
-112   128    
112    -160   
32     -272   
208    -32    
128    96     
-112   112    
32     -112   
32     320    
48     -272   
-16    96     
-96    16     
-32    -80    
128    -80    
240    544    
-176   -160   
-96    -208   
-96    -176   
144    128    
-80    -272   
-1184  -64    
432    -528   
-1456  288    
-32    480    
48     -128   
-656   -80    
240    -16    
144    816    
128    352    
-112   256    
-96    -80    
80     -96    
-160   -304   
-64    128    
80     32     
-32    16     
-32    80     
-48    -48    
112    96     
-608   -16    
16     64     
-64    112    
96     64     
0      -48    
32     32     
-48    32     
288    16     
-80    -80    
-80    0      
0      240    
96     192    
-80    128    
-224   0      
-16    -16    
-880   -80    
-208   128    
-320   96     
-16    32     
64     -48    
112    48     
0      -80    
48     96     
-80    -80    
-80    -16    
112    80     
-64    32     
48     32     
-176   0      
-160   144    
-80    48     
-96    -80    
-288   16     
-16    96     
-224   -144   
192    64     
-16    -112   
0      16     
192    128    
32     0      
32     32     
-112   -64    
0      16     
16     64     
-192   32     
-80    48     
192    80     
-80    16     
-32    0      
-304   -96    
32     144    
-176   0      
-32    64     
-80    -48    
112    -16    
0      64     
-32    32     
-112   64     
-64    80     
-192   64     
-304   32     
48     112    
-288   -16    
176    80     
-928   -144   
256    -96    
192    32     
0      192    
-16    80     
-48    -64    
-96    -80    
-32    -112   
64     -80    
-224   -240   
16     -32    
-208   -64    
-64    -144   
32     96     
-32    144    
-544   -16    
144    -112   
-16    -48    
-48    -16    
-160   16     
352    48     
48     144    
48     32     
16     112    
-288   160    
-32    16     
240    -32    
-48    -240   
-128   -176   
256    0      
-208   -64    
144    144    
-48    144    
-112   80     
112    -48    
32     -32    
64     0      
-144   -224   
16     -240   
-32    -192   
32     -240   
0      576    
112    144    
-208   128    
160    144    
-464   -96    
-16    64     
48     -32    
112    128    
128    0      
-144   -16    
-96    -80    
192    -448   
-256   304    
128    112    
96     112    
-48    320    
-144   -80    
-48    -768   
256    -1728  
-240   0      
48     64     
48     -576   
368    448    
448    1648   
-496   -512   
-240   -1008  
272    320    
176    688    
-176   -128   
80     -128   
-384   64     
-64    -144   
32     160    
-64    -160   
96     -256   
32     96     
304    256    
96     -176   
-144   208    
-64    160    
176    208    
80     704    
-96    -448   
-96    -608   
224    416    
-112   -96    
-368   48     
320    1120   
0      -176   
-416   -336   
400    736    
-480   -432   
-160   -576   
576    144    
0      208    
256    64     
-400   -672   
400    -64    
-288   32     
192    96     
-144   -128   
416    368    
-352   16     
48     -160   
208    320    
32     -16    
48     -48    
16     480    
272    -96    
128    -80    
352    640    
-528   -368   
176    -64    
256    304
[truncated: 74,011 more chars]
