# Supplementary material for: A Fault Diagnosis Method for One‐Dimensional Vibration Signal Based on Multiresolution tlsDMD and Approximate Entropy
Source: Hindawi journal article supplement (doi:10.1155/2019/3262818), 2019-01-01
Supplement: f1 [file 3262818.f1.zip › 3262818.f1/gear signals/normal gear signal/Data3.txt]

256    -16    
-160   -64    
160    -160   
-144   -160   
-144   -384   
-144   -272   
-464   -240   
-304   -448   
0      -304   
256    -112   
400    -32    
240    16     
-144   -64    
-16    -16    
-320   -64    
16     64     
-192   48     
160    192    
48     64     
-48    64     
-320   -128   
240    -208   
256    -64    
32     -64    
192    -48    
64     16     
-272   -64    
-96    -192   
-80    -192   
32     -16    
32     48     
-112   -32    
112    112    
-208   64     
-48    -16    
112    -32    
48     -48    
96     240    
0      144    
16     128    
0      256    
96     16     
-112   -16    
128    96     
0      16     
64     -16    
-256   -272   
48     -16    
64     128    
-32    -32    
176    112    
48     176    
0      192    
32     224    
-64    -64    
96     -192   
32     -64    
64     -240   
-64    -128   
-80    -80    
176    -208   
-64    -160   
32     32     
64     16     
-16    320    
112    240    
0      -16    
-352   -144   
80     -576   
352    -96    
-48    160    
304    320    
-240   -80    
-144   -400   
-80    16     
96     0      
-176   368    
80     -352   
160    32     
208    32     
304    -80    
-112   144    
-432   112    
-112   144    
-80    -112   
352    -16    
32     -272   
112    -80    
16     48     
-224   -80    
-32    -144   
16     64     
-64    224    
128    0      
112    -16    
-128   -112   
208    -128   
48     -64    
-16    32     
128    -112   
-96    -48    
-80    -368   
272    -160   
208    144    
-16    48     
144    192    
96     352    
224    448    
-336   224    
80     240    
32     80     
-400   -48    
304    112    
-192   80     
112    80     
-192   -32    
336    208    
176    112    
-112   208    
176    -240   
-208   272    
176    160    
48     -224   
112    16     
16     -96    
128    112    
192    96     
-32    -32    
256    -160   
-16    32     
16     -144   
80     -128   
64     -64    
16     80     
-128   -32    
112    -240   
-16    80     
128    -288   
-48    48     
48     -1424  
160    160    
96     96     
160    -48    
-16    -176   
-32    -64    
192    48     
-80    48     
-144   144    
0      224    
80     192    
-96    -128   
-112   -32    
160    -400   
96     -224   
160    -1200  
-96    176    
48     -208   
112    160    
528    480    
16     384    
80     128    
-96    -48    
-144   32     
320    128    
48     -96    
80     336    
176    -272   
-160   400    
48     -704   
448    96     
-96    112    
32     -192   
96     144    
176    64     
96     -224   
176    592    
-32    336    
-304   -528   
96     -208   
176    256    
-96    48     
32     192    
80     -384   
112    0      
-48    -304   
144    48     
-192   -176   
0      32     
-80    -80    
416    80     
-432   -704   
480    -1040  
416    -64    
240    288    
288    176    
224    -128   
256    128    
-528   -288   
-64    -96    
-176   -32    
48     304    
-80    -160   
720    -64    
240    32     
64     -192   
192    -112   
-208   208    
-176   0      
-272   -400   
176    48     
-32    64     
208    16     
160    -16    
48     48     
128    -32    
-48    32     
-80    -48    
288    144    
-192   -16    
-272   -528   
0      -64    
-208   -144   
256    96     
-432   -112   
160    -592   
384    0      
480    224    
-128   112    
-112   -16    
192    -224   
256    -64    
160    16     
352    -128   
-112   32     
16     -368   
-512   112    
-368   80     
64     -48    
-32    80     
-48    -144   
176    -48    
80     -336   
464    96     
208    128    
-192   -64    
128    -192   
-96    0      
96     -240   
48     48     
128    -176   
0      -96    
112    -16    
96     -48    
128    16     
64     -16    
96     -16    
48     -432   
80     16     
32     -160   
144    0      
0      -16    
160    96     
-144   16     
128    -48    
96     64     
208    112    
-1184  -32    
224    -192   
16     -32    
208    -96    
-32    -144   
128    -192   
320    112    
-48    -432   
336    -32    
-160   -48    
16     112    
192    16     
-192   48     
-128   -16    
16     -48    
-368   -48    
112    64     
-1040  -96    
48     32     
160    320    
32     48     
48     -176   
144    -80    
-48    128    
208    -592   
-16    64     
144    -16    
368    64     
-320   112    
224    160    
-48    192    
96     -32    
-80    128    
-112   -48    
240    -80    
80     -48    
-496   -160   
96     -208   
144    48     
48     -480   
16     64     
192    0      
-64    -192   
-96    -64    
144    192    
80     16     
176    160    
-368   96     
96     32     
-256   384    
-16    -160   
80     -208   
-32    -416   
-144   176    
192    -64    
64     -160   
160    0      
144    112    
112    0      
-16    -80    
-240   -144   
320    560    
-432   -192   
208    -80    
-144   -16    
-48    32     
256    -272   
0      96     
0      160    
208    -288   
112    224    
-144   256    
80     16     
-816   48     
112    -224   
0      -496   
-176   -1008  
-128   -352   
336    -48    
-160   64     
-192   160    
-80    -208   
-80    -96    
48     -256   
144    -96    
32     -224   
-416   -112   
96     64     
-272   128    
48     96     
-192   0      
208    112    
-384   -112   
144    -224   
-64    -160   
-48    -112   
64     112    
176    -64    
256    32     
-1136  -144   
-1152  -16    
-176   -16    
208    0      
160    144    
-64    144    
-48    32     
80     0      
-288   192    
288    304    
-240   80     
-192   -96    
48     208    
-544   -48    
-16    48     
16     -16    
-528   16     
-48    -16    
-176   -80    
-64    -112   
-432   -192   
48     16     
-176   -416   
368    -208   
-48    176    
112    112    
-32    -128   
80     64     
320    240    
-416   240    
-128   -112   
192    -112   
224    112    
48     96     
-240   -96    
-288   -48    
-448   0      
-272   64     
-64    112    
-112   0      
16     -48    
-256   -32    
0      16     
-288   -80    
-32    -80    
240    32     
112    128    
-96    -80    
80     -80    
-64    32     
-176   16     
-64    80     
-160   16     
80     16     
-304   144    
48     -32    
-80    -112   
64     -16    
16     -16    
128    208    
-160   64     
-32    288    
64     288    
-112   64     
208    96     
-240   0      
64     80     
-48    112    
-16    288    
-1072  48     
96     32     
0      176    
128    368    
80     96     
0      -112   
-144   -16    
-192   -128   
-48    32     
-112   -16    
48     -160   
-32    32     
32     0      
-464   128    
128    128    
-1600  -112   
16     -64    
64     -192   
-80    -64    
48     -176   
16     96     
-128   80     
320    176    
128    128    
-80    0      
-96    112    
128    288    
-336   416    
-144   176    
448    -64    
-560   -32    
-112   -96    
-64    32     
-112   416    
-48    272    
112    -16    
32     -112   
-16    96     
176    192    
-224   144    
-16    192    
128    -128   
-224   -368   
-176   -96    
0      176    
-352   -320   
0      -32    
32     -352   
144    144    
-336   176    
336    -96    
-240   528    
-96    -16    
-128   144    
-176   384    
208    336    
-320   144    
208    -288   
-16    -48    
288    176    
-464   -16    
0      16     
-176   -336   
48     -304   
96     -112   
128    144    
80     -64    
-176   368    
336    64     
0      48     
64     32     
-272   -592   
48     272    
-80    -96    
160    32     
32     192    
-48    -96    
48     240    
352    48     
-336   -272   
-320   -144   
208    -48    
192    -224   
176    368    
-144   -112   
64     96     
-464   -352   
192    256    
-128   -112   
-80    -160   
160    160    
96     192    
-80    16     
-320   -112   
128    64     
-112   48     
0      -16    
160    352    
0      -176   
48     160    
-160   80     
-128   -544   
240    608    
32     -336   
48     16     
48     192    
-176   208    
-64    -480   
-96    160    
144    192    
16     16     
144    160    
80     -208   
-128   80     
-80    -16    
208    176    
-32    96     
192    128    
16     336    
16     96     
64     -112   
96     -384   
-64    -64    
-16    112    
176    64     
-96    16     
-32    0      
0      0      
16     32     
160    128    
80     80     
-96    64     
64     -80    
48     -240   
64     256    
160    144    
16     64     
-48    112    
-144   176    
-256   240    
96     192    
96     96     
112    64     
160    80     
16     192    
32     96     
-208   -160   
32     -64    
-96    112    
-64    -272   
128    80     
144    80     
112    -176   
416    192    
144    -48    
0      176    
176    128    
-176   384    
256    80     
48     -304   
-160   -288   
288    48     
-224   192    
160    48     
336    -128   
208    96     
-192   240    
64     48     
192    -48    
112    96     
-320   -16    
192    32     
-304   80     
416    112    
-336   -16    
-416   0      
64     144    
-176   -64    
544    192    
160    80     
160    0      
112    -112   
80     48     
-336   0      
-64    48     
-64    48     
96     32     
-352   -112   
304    16     
304    80     
-304   96     
-16    48     
224    -64    
64     48     
-32    -400   
-112   16     
48     -1360  
0      64     
32     128    
96     48     
112    -64    
-16    16     
224    0      
208    64     
-96    0      
160    16     
0      80     
-16    -16    
144    64     
0      -32    
64     32     
160    -240   
-144   0      
128    -128   
64     48     
16     -32    
112    16     
0      0      
112    48     
112    112    
-176   -256   
256    -48    
0      16     
208    96     
48     -96    
0      48     
-176   -160   
176    192    
-32    -256   
48     128    
128    208    
288    176    
-224   64     
48     -96    
-64    112    
208    32     
48     144    
96     32     
48     112    
144    256    
-96    352    
224    48     
144    80     
176    -48    
0      16     
0      -80    
96     48     
128    208    
304    304    
-96    176    
64     -240   
160    -192   
96     -304   
64     64     
32     -48    
48     -192   
32     208    
48     176    
48     -240   
112    64     
-16    208    
80     32     
-16    80     
208    -80    
-32    16     
64     -176   
32     -16    
144    -48    
112    -48    
-128   -16    
-16    48     
192    -432   
192    576    
-432   -1696  
192    -704   
448    1056   
-240   -896   
240    496    
320    -624   
224    208    
80     192    
48     -1104  
-48    -16    
192    -48    
-128   288    
432    176    
-80    -96    
-208   64     
0      -48    
288    -256   
32     -48    
-16    -160   
-80    -480   
-144   -160   
-128   -384   
272    64     
112    -176   
128    -16    
112    -352   
160    112    
240    80     
-272   0      
-16    -112   
64     -32    
144    -144   
-384   -64    
208    0      
176    160    
-576   -64    
96     32     
-64    16     
-32    -48    
-32    -80    
0      -224   
160    -112   
160    -528   
112    -48    
0      -48    
-96    -144   
0      -144   
112    48     
16     48     
-80    0      
-176   16     
96     96     
-256   64     
-48    48     
96     -64    
144    -64    
208    0      
80     -96    
224    -64    
0      48     
-192   96     
0      112    
320    240    
16     -48    
240    -96    
-80    160    
-112   64     
-864   -64    
80     -96    
96     0      
128    -48    
-96    -48    
112    -288   
-64    16     
80     -1056  
592    464    
-592   240    
-96    -128   
352    16     
80     -32    
-48    16     
256    0      
-592   16     
112    -272   
-784   -160   
-64    -96    
-192   16     
96     -256   
256    48     
288    -560   
32     0      
-352   176    
176    96     
-304   -48    
-160   -352   
-64    -160   
208    64     
-160   80     
16     48     
-656   -128   
-16    -192   
304    -64    
128    48     
80     112    
-16    -192   
112    0      
48     64     
128    -32    
16     -64    
144    -16    
-16    -16    
272    80     
-160   64     
80     -64    
-48    80     
192    96     
-144   64     
48     -64    
80     16     
48     -64    
144    112    
-192   48     
240    -96    
-160   -96    
288    176    
-256   512    
144    208    
-144   -128   
0      -144   
-48    16     
160    96     
224    160    
96     -64    
112    -112   
320    -256   
-80    -16    
-48    48     
112    64     
-96    48     
48     -208   
-160   -432   
-144   144    
96     384    
-192   128    
-528   192    
-2032  -192   
176    464    
-544   -96    
80     -240   
64     -16    
-16    -112   
-272   16     
-816   48     
144    352    
-1248  224    
432    32     
-192   208    
-80    -416   
416    -352   
-272   -208   
304    480    
-16    -272   
64     -32    
32     288    
-224   128    
-352   -144   
16     -160   
-464   128    
-144   64     
-656   -608   
304    160    
-80    48     
-144   -112   
-416   80     
128    -64    
-48    -160   
-32    176    
-16    -128   
144    -448   
-224   -160   
288    576    
-288   -112   
-16    -288   
160    128    
-64    64     
-32    -16    
-512   -80    
-144   32     
16     144    
208    0      
-16    16     
128    128    
-256   -256   
112    32     
-64    224    
80     -144   
-64    32     
160    128    
-256   -64    
-224   -16    
-64    160    
-656   -32    
96     128    
-192   48     
80     0      
-96    -48    
160    -16    
48     80     
32     32     
32     -48    
48     80     
-16    144    
0      160    
-112   96     
-384   16     
-96    48     
-368   -64    
192    32     
-368   -48    
320    48     
-352   -16    
-48    144    
80     -128   
-48    -112   
176    112    
48     16     
64     32     
-192   0      
-16    -80    
160    32     
-48    -32    
16     -48    
112    64     
-160   -16    
48     64     
-80    -16    
-176   112    
176    128    
48     96     
-160   48     
-176   -16    
80     64     
128    32     
-224   624    
48     368    
80     144    
-512   -16    
32     16     
-112   -48    
-144   -224   
240    -176   
208    80     
-80    240    
-560   32     
-272   -32    
208    192    
-112   192    
-80    64     
256    -160   
-144   -240   
-208   96     
-560   -80    
-64    32     
-288   -320   
448    -144   
368    -16    
128    64     
-256   128    
-288   -176   
144    -16    
-32    160    
-144   48     
-48    48     
-400   224    
128    160    
576    32     
-272   -48    
-128   48     
96     16     
-544   96     
-416   -64    
-352   -272   
128    -224   
640    64     
224    16     
256    48     
224    64     
-336   -16    
-160   32     
-32    -32    
384    48     
64     64     
368    96     
-208   64     
192    96     
112    -32    
240    16     
64     64     
-288   32     
240    304    
-368   96     
208    128    
48     32     
352    16     
-80    -16    
-16    0      
-192   0      
208    96     
256    320    
-288   48     
288    48     
176    32     
-16    -112   
144    16     
-176   32     
144    64     
112    48     
64     128    
224    112    
-256   64     
192    64     
-304   -64    
64     32     
96     64     
48     80     
-80    16     
48     64     
176    64     
-64    32     
208    96     
96     16     
144    80     
-112   -96    
80     48     
-176   32     
128    80     
-80    32     
48     16     
32     144    
80     80     
-16    80     
-64    64     
160    160    
-16    64     
-48    0      
0      64     
48     64     
48     80     
32     96     
16     64     
16     16     
112    -64    
16     -416   
160    96     
80     192    
-96    -32    
-96    224    
240    160    
-64    -128   
-160   -80    
32     512    
-256   -96    
-48    -96    
160    304    
464    64     
48     1056   
-80    -784   
288    -1104  
-112   672    
-256   -480   
32     432    
80     176    
128    -144   
-32    112    
96     -48    
32     -32    
80     -64    
48     0      
0      64     
32     128    
224    -96    
-160   -752   
-64    -368   
480    368    
-112   848    
16     624    
64     -256   
-128   -128   
160    -240   
64     -96    
16     272    
288    304    
272    592    
-336   32     
-32    128    
-32    16     
64     -432   
112    -192   
208    32     
-288   48     
96     224    
144    320    
160    160    
144    16     
-192   96     
-64    112    
96     32     
80     -320   
112    -160   
96     96     
-16    144    
128    -128   
-32    -16    
64     112    
-48    -192   
-16    32     
64     -80    
0      80     
64     -80    
128    -80    
-32    48     
-64    -16    
64     32     
144    112    
-64    16     
128    -192   
-32    0      
208    -128   
-16    160    
96     -320   
128    64     
192    -992   
80     -16    
16     0      
16     80     
144    16     
112    -16    
128    32     
-48    -48    
-96    -32    
80     -320   
192    0      
80     -16    
144    32     
16     -16    
96     80     
48     -384   
-16    128    
64     96     
80     160    
32     80     
96     32     
272    32     
-32    32     
64     64     
16     48     
96     128    
224    -48    
-16    96     
-224   -256   
64     64     
128    -48    
64     0      
144    -80    
-160   -32    
144    -80    
144    96     
16     112    
240    128    
-192   -80    
336    -336   
224    64     
144    -96    
96     -16    
-48    -416   
-48    -288   
64     -432   
16     96     
288    432    
64     208    
80     -32    
176    -32    
48     -432   
-16    -176   
400    -576   
176    0      
224    240    
384    128    
-112   -32    
-112   -176   
176    0      
160    96     
224    -176   
96     0      
64     -496   
-48    -416   
-80    16     
64     -128   
32     -96    
16     -544   
112    -16    
144    144    
32     32     
64     80     
32     -64    
-96    -176   
32     464    
224    16     
-256   64     
208    656    
224    240    
-352   256    
208    80     
-112   -64    
-32    -48    
96     -144   
16     -32    
48     -256   
224    -16    
272    -32    
-48    240    
64     -32    
144    -160   
-96    48     
-176   144    
32     192    
-624   32     
64     -32    
16     -304   
96     112    
208    -336   
224    -80    
48     16     
16     -1056  
48     -144   
128    -80    
-80    224    
208    0      
-64    0      
16     144    
336    240    
-640   -432   
352    -320   
-480   -176   
240    96     
112    192    
-48    -208   
208    -32    
-16    -160   
112    48     
-32    -48    
-160   64     
144    32     
160    96     
-176   -48    
240    -256   
-80    -720   
416    -160   
-448   688    
288    320    
-48    -64    
-128   128    
-160   256    
16     -144   
32     128    
-32    -496   
224    80     
240    64     
64     -112   
-112   -32    
144    48     
48     96     
0      224    
-224   192    
176    128    
-64    176    
0      112    
176    64     
16     -288   
48     -32    
192    -512   
-128   64     
240    64     
-192   32     
240    80     
-128   96     
48     48     
32     0      
-96    112    
-48    32     
0      48     
160    -48    
128    0      
64     -96    
-256   64     
128    -272   
208    144    
96     64     
160    -96    
-176   -16    
80     -48    
-608   -96    
176    -16    
-112   32     
32     16     
-336   -32    
80     -144   
112    -32    
208    -32    
0      64     
0      -128   
304    32     
-256   32     
80     112    
-96    80     
112    64     
-80    0      
-48    0      
48     -32    
80     -16    
-1568  -32    
192    -80    
128    0      
-960   -240   
176    64     
-224   112    
-496   -96    
80     16     
240    -16    
32     -112   
-64    -48    
32     -16    
-208   48     
96     64     
208    -48    
32     -64    
-384   -32    
192    256    
-320   -16    
176    -48    
-160   0      
-1040  64     
-64    -32    
-256   -16    
80     176    
-1536  112    
192    96     
208    -32    
-384   80     
-288   80     
288    64     
-384   -80    
-32    64     
16     256    
-64    240    
48     160    
-112   64     
16     48     
-32    192    
-16    64     
192    -256   
48     -160   
-624   320    
-352   192    
-304   -48    
400    80     
-544   -48    
48     128    
-160   720    
192    352    
48     -208   
-416   80     
-176   96     
-624   -176   
208    -160   
112    128    
64     448    
-560   272    
-64    128    
32     -32    
352    -16    
208    -80    
-64    -80    
384    64     
-96    32     
112    -96    
144    32     
-848   -192   
-16    -96    
-256   96     
-256   32     
112    0      
-592   32     
304    176    
-32    -192   
-32    -64    
-496   96     
-512   96     
0      192    
0      176    
-80    64     
-400   -96    
128    16     
336    352    
-144   144    
-112   -80    
-96    -176   
32     -160   
112    160    
-496   112    
96     80     
-192   -96    
-32    -16    
-16    64     
128    -32    
128    -32    
-48    0      
128    -96    
-144   -144   
64     0      
-368   16     
48     64     
-48    -64    
144    -16    
-256   48     
144    80     
48     64     
-32    32     
-144   16     
-48    224    
32     -272   
0      -208   
96     96     
-368   -32    
112    16     
-144   32     
176    -16    
-208   -208   
208    240    
-464   -96    
64     192    
-16    96     
-96    -240   
160    -240   
-160   192    
144    272    
-288   -288   
-128   64     
16     -288   
256    -112   
-80    -224   
112    528    
-208   80     
64     16     
-224   32     
-272   336    
256    -32    
-240   -80    
224    -560   
32     272    
144    752    
288    48     
-64    208    
80     -272   
32     -384   
-16    -208   
48     -160   
-112   32     
-80    0      
0      -64    
464    352    
-464   288    
80     128    
-48    208    
-240   -48    
208    -48    
240    -16    
-16    80     
112    16     
-176   80     
-256   96     
-16    352    
144    128    
256    80     
80     160    
-32    288    
16     32     
-32    64     
32     176    
208    -32    
0      80     
-112   -384   
208    -96    
-16    336    
240    0      
-128   320    
-32    16     
32     0      
-80    128    
256    64     
32     0      
48     -176   
-32    0      
-64    112    
160    16     
352    352    
-176   176    
0      -80    
-144   -32    
272    48     
-16    -48    
112    112    
48     96     
-48    64     
224    16     
-80    80     
0      48     
-80    -96    
176    -16    
32     0      
80     96     
-560   -160   
432    -128   
112    16     
96     -224   
-96    16     
0      80     
144    96     
32     48     
144    -128   
-96    144    
16     -128   
176    32     
32     48     
112    48     
96     48     
32     112    
64     64     
96     0      
192    112    
-80    -32    
176    208    
176    144    
-96    -288   
64     16     
144    32     
32     128    
-64    16     
16     -48    
144    16     
288    -48    
-224   -192   
32     48     
-160   144    
368    224    
-128   176    
128    -96    
192    0      
-48    -736   
-112   160    
112    128    
160    16     
-144   -80    
176    -208   
80     -240   
112    96     
-240   32     
32     48     
-48    -64    
128    32     
160    -128   
112    64     
-64    128    
-176   -336   
-16    16     
-304   -288   
384    -544   
304    -272   
544    128    
0      32     
-96    176    
-144   80     
-128   -80    
80     -176   
224    128    
192    480    
-32    80     
192    224    
0      -112   
-192   160    
0      -256   
192    -144   
112    144    
96     320    
-416   -352   
512    -32    
112    368    
336    112    
16     -208   
256    -64    
304    256    
-176   0      
208    80     
-208   -32    
144    16     
352    -960   
-608   -336   
144    -144   
176    96     
240    -208   
208    128    
96     64     
128    -48    
-256   -48    
-128   -192   
144    224    
48     128    
32     32     
416    -96    
-80    -48    
144    -384   
32     0      
-16    -320   
48     160    
64     192    
64     48     
-160   32     
16     96     
176    64     
16     -16    
176    32     
80     144    
16     -32    
240    -16    
32     32     
128    -80    
48     80     
0      80     
16     16     
-32    -112   
-16    -16    
128    80     
32     16     
208    -32    
128    208    
128    32     
-48    -464   
224    48     
-240   0      
240    32     
80     -176   
-176   -80    
-32    -64    
336    -64    
32     176    
160    -32    
-112   -80    
32     64     
-80    32     
176    -208   
128    -48    
0      -160   
192    64     
160    32     
112    16     
-32    -96    
-16    0      
48     -224   
32     -48    
-80    128    
96     -400   
208    16     
16     0      
32     -208   
48     -64    
-32    -1216  
80     -64    
160    80     
48     16     
208    96     
-224   -96    
160    -144   
96     16     
48     32     
112    64     
-112   -48    
64     -128   
-1248  -48    
224    -64    
-80    192    
208    96     
96     -96    
64     -560   
-32    -144   
208    96     
160    -32    
-192   -32    
80     -16    
112    -64    
64     48     
-224   32     
-16    48     
-464   -96    
-112   -16    
304    0      
-256   -144   
160    -48    
288    96     
16     -48    
-64    64     
144    32     
16     -32    
-80    -32    
176    -80    
288    96     
-48    16     
144    -80    
-48    32     
208    176    
-64    -64    
64     -160   
80     64     
128    -128   
48     192    
96     -128   
-288   -144   
160    -32    
-144   96     
-48    0      
144    -128   
-64    64     
160    -16    
-464   -48    
48     -48    
-448   112    
80     -96    
128    -128   
64     -64    
320    -96    
160    -560   
-160   0      
-80    -112   
48     -208   
256    -80    
48     80     
32     -176   
176    -128   
-512   -224   
144    -48    
-160   272    
160    64     
-704   -208   
320    -96    
112    160    
0      32     
-64    -16    
0      -288   
256    144    
-112   80     
160    -48    
-96    -32    
480    -144   
-80    608    
352    624    
-768   -192   
-496   -112   
-384   224    
-192   -512   
304    -400   
480    -192   
272    384    
352    -896   
176    288    
-80    -32    
112    -96    
-112   128    
144    16     
80     128    
-96    -32    
-1040  128    
-208   64     
-816   -128   
288    -1184  
448    272    
416    80     
-272   80     
-176   -112   
48     -16    
-368   208    
544    112    
320    -32    
256    -48    
-320   0      
-144   176    
-528   -448   
224    80     
-384   448    
256    -288   
80     176    
-64    -304   
-128   80     
-368   560    
144    -448   
-128   160    
-48    -32    
-128   96     
144    0      
-272   -112   
192    48     
-96    32     
192    0      
-336   64     
-528   -432   
160    928    
-880   -288   
128    -144   
80     672    
-112   -320   
-144   -160   
-928   96     
-112   -160   
-240   80     
-80    -288   
192    -400   
80     480    
96     224    
64     -176   
-48    -112   
16     -16    
-288   192    
144    736    
-80    -400   
-288   -288   
0      96     
-64    160    
-144   48     
-656   -288   
64     80     
64     128    
-208   -288   
-688   16     
128    64     
-208   480    
160    96     
48     32     
-64    -64    
-32    32     
-544   -96    
176    -112   
-384   -160   
-32    -16    
-592   160    
96     96     
-2368  -80    
32     48     
-80    -96    
272    96     
-32    384    
224    336    
-256   -48    
128    -144   
-96    0      
-144   0      
-16    -32    
32     -16    
-80    -16    
-464   -208   
-272   0      
-1024  48     
64     64     
160    -16    
-48    -160   
80     -208   
112    128    
80     304    
-80    480    
-48    64     
-80    -144   
-32    160    
-80    -48    
-32    32     
-32    -160   
-336   -176   
208    -112   
-128   224    
-1168  -64    
544    288    
-784   -528   
-64    0      
48     496    
32     336    
176    384    
16     -272   
32     208    
-32    112    
80     256    
192    48     
-176   160    
-288   -160   
-16    -144   
-1280  64     
208    64     
112    -48    
16     48     
176    368    
-304   0      
32     -32    
-144   16     
96     64     
-16    -48    
0      -64    
-224   -32    
-144   32     
-496   -80    
192    -32    
-368   32     
0      -32    
304    -48    
32     -64    
-160   0      
-96    -96    
-64    -48    
16     64     
96     96     
416    240    
-320   192    
-432   -176   
240    -96    
-64    -16    
-16    304    
-256   176    
-96    -48    
16     0      
96     16     
48     160    
32     48     
144    288    
-16    176    
144    -16    
-224   96     
0      -64    
-224   112    
32     128    
-96    0      
-32    32     
-32    192    
-48    336    
-384   112    
96     176    
0      -16    
240    -224   
0      -128   
112    -32    
-48    -48    
-112   48     
128    32     
80     16     
112    -32    
-304   -192   
-128   -16    
256    -208   
32     -176   
224    -64    
80     208    
96     48     
0      -352   
144    304    
-96    -176   
-272   -208   
-80    320    
336    608    
-288   -208   
144    -48    
352    400    
-80    -208   
176    -48    
48     -96    
432    -16    
160    16     
464    176    
-448   -144   
-352   0      
112    208    
96     0      
400    -96    
320    128    
1088   912    
-288   64     
304    464    
-400   416    
-32    80     
384    112    
464    32     
208    112    
80     -32    
-64    96     
-80    144    
-368   96     
128    112    
-32    32     
192    64     
-160   -32    
224    96     
-224   0      
64     -16    
32     64     
128    80     
112    48     
80     32     
448    192    
-304   -32    
112    32     
-48    16     
64     64     
-16    80     
64     32     
-16    432    
-32    64     
16     -80    
48     32     
144    112    
-176   32     
160    -16    
-80    64     
160    16     
-112   112    
80     -96    
-16    -48    
160    160    
128    -32    
32     16     
-160   0      
96     -112   
-80    80     
240    -144   
-48    32     
112    96     
-16    0      
80     -32    
112    -64    
64     -112   
80     208    
144    80     
-96    32     
144    -96    
32     -80    
32     -96    
-80    128    
48     48     
64     -400   
32     80     
-16    32     
144    32     
64     0      
-96    464    
432    176    
-160   -112   
-48    -32    
128    16     
-192   -80    
128    48     
64     256    
336    0      
-144   16     
192    -96    
96     -80    
-64    96     
144    -64    
112    -48    
64     192    
-32    -64    
-16    96     
48     96     
0      -16    
0      0      
272    96     
-16    48     
112    -80    
16     16     
16     -192   
96     160    
-64    -208   
80     0      
192    0      
-112   0      
80     -208   
48     -32    
-96    -16    
128    16     
0      64     
288    64     
-16    112    
-16    -144   
128    16     
112    -320   
-64    -112   
0      -128   
-32    0      
368    176    
-32    64     
32     48     
208    80     
-288   0      
320    -16    
-112   32     
64     -48    
48     80     
96     0      
-16    128    
128    224    
208    16     
0      -80    
48     16     
224    -832   
-208   -288   
0      16     
-80    112    
144    16     
160    64     
-48    256    
176    64     
16     -160   
80     16     
0      144    
192    -64    
-48    32     
192    -288   
-112   -176   
192    96     
0      192    
64     -64    
96     -80    
-48    -16    
240    -144   
64     192    
-48    80     
192    -160   
176    416    
160    -64    
32     -96    
0      160    
64     -96    
48     64     
272    -144   
112    16     
256    80     
320    -1552  
96     944    
16     144    
-32    -432   
-400   -48    
-16    -64    
48     -64    
256    112    
176    112    
-144   528    
400    304    
368    -192   
128    -32    
128    -256   
192    -176   
-16    32     
-32    -352   
-32    -176   
208    112    
256    -832   
672    -64    
-176   -240   
48     128    
-208   224    
-48    -160   
192    112    
192    -128   
-112   -144   
-208   -80    
-144   16     
-240   -64    
352    -944   
400    -192   
64     432    
-112   256    
-64    -144   
48     -128   
-96    32     
400    -176   
288    -256   
400    -336   
96     -16    
176    -64    
32     16     
-32    304    
-144   32     
-160   -32    
-896   -64    
0      256    
288    416    
-160   0      
240    -32    
192    -256   
256    80     
64     -1216  
-96    160    
112    256    
-64    -16    
0      -16    
272    -48    
-544   -416   
80     -304   
-272   -64    
80     0      
-48    32     
176    -80    
48     128    
32     48     
112    -80    
160    -64    
-112   112    
160    0      
-48    0      
96     -112   
144    -16    
-336   48     
64     160    
256    256    
-96    -80    
-192   208    
288    -32    
0      -32    
80     -208   
-224   -240   
112    -160   
0      304    
288    64     
-80    -128   
64     -112   
256    608    
288    592    
-304   64     
-160   -16    
368    -176   
-640   416    
416    -16    
-272   -336   
-32    -80    
-48    -576   
-240   -416   
80     -64    
224    128    
-112   192    
-16    160    
160    16     
304    208    
0      672    
-640   128    
192    -160   
-64    224    
224    112    
-320   -48    
-48    -304   
144    -176   
144    -128   
112    80     
240    -288   
16     16     
-96    -48    
-16    0      
-400   32     
48     16     
-32    16     
112    112    
-352   32     
288    -32    
32     0      
256    -64    
-96    224    
176    16     
-112   -208   
48     -80    
-48    -160   
-576   144    
224    224    
-256   352    
208    240    
-80    48     
384    48     
-208   208    
16     -112   
96     -80    
240    -128   
-48    16     
352    -80    
-272   0      
432    -16    
-800   -64    
-352   -32    
-16    112    
-160   64     
48     0      
-48    16     
16     144    
112    256    
-176   176    
-224   48     
-448   -272   
128    -112   
-320   -112   
-144   288    
192    160    
-96    192    
-208   64     
-320   -64    
-128   -80    
-944   112    
128    -32    
144    -128   
-128   -32    
-464   -64    
160    128    
-656   -288   
144    -224   
-96    -32    
-160   112    
32     64     
224    176    
-224   128    
-224   -144   
96     -16    
-80    -32    
32     192    
32     176    
176    272    
-272   112    
-32    96     
32     -80    
80     -16    
32     -48    
-176   -160   
-96    32     
-240   -160   
64     -128   
-384   -144   
-48    -128   
-112   48     
-112   -16    
-592   -208   
80     192    
-256   -80    
-64    128    
-32    -160   
144    208    
0      -80    
64     -320   
400    32     
64     224    
-224   624    
400    416    
-384   -448   
-288   0      
-144   256    
-960   -240   
240    0      
32     -96    
624    176    
288    272    
176    0      
64     16     
-128   -16    
16     -96    
-304   32     
32     112    
-160   -32    
16     16     
-224   32     
-144   80     
-720   192    
112    112    
-608   -64    
-144   96     
-144   -64    
-32    -64    
-16    -32    
16     -144   
320    112    
384    464    
-368   112    
-16    -64    
64     16     
-240   16     
-144   112    
-112   -48    
240    160    
-1440  0      
-32    -64    
-480   -16    
-144   48     
144    96     
336    128    
-256   -64    
48     112    
16     48     
-96    -80    
128    32     
-112   80     
16     -32    
176    -32    
0      80     
-16    32     
-32    -176   
0      16     
0      16     
-64    48     
48     48     
-16    96     
96     80     
-32    -16    
96     -16    
96     48     
32     48     
32     -16    
-144   -128   
16     96     
-272   -16    
0      -16    
32     48     
64     144    
-160   48     
64     16     
96     16     
64     -32    
64     160    
-48    128    
64     0      
-192   96     
-48    96     
-144   -80    
-208   48     
48     80     
192    32     
112    64     
96     -16    
-192   16     
144    96     
0      -16    
176    32     
16     16     
48     48     
-80    48     
-96    -64    
48     80     
32     176    
96     304    
-32    128    
-128   -64    
-32    32     
48     -32    
256    32     
64     32     
144    240    
64     112    
-96    -96    
-192   -32    
32     128    
16     48     
-32    112    
112    -16    
32     64     
144    64     
-80    80     
128    32     
32     -16    
64     128    
-80    16     
16     -32    
64     48     
-96    64     
-16    32     
96     64     
-96    32     
96     128    
-224   -64    
16     -32    
-16    96     
64     0      
144    48     
96     128    
-16    80     
-48    48     
128    48     
-32    32     
176    0      
48     -16    
224    -96    
-80    -352   
-32    0      
112    160    
-64    -64    
112    80     
160    288    
160    -224   
112    -16    
-64    -16    
-32    -192   
112    304    
0      -80    
208    112    
112    -64    
112    64     
-240   -112   
272    -144   
176    320    
96     112    
32     224    
-16    128    
112    32     
16     128    
-16    48     
80     0      
0      -192   
80     -64    
-304   -480   
-272   -464   
32     464    
112    -48    
48     -432   
-144   16     
176    -368   
48     288    
160    -32    
-160   -320   
176    96     
144    -128   
-96    -32    
-96    -320   
-32    -112   
-16    16     
16     64     
32     32     
-240   -80    
48     64     
128    48     
80     -720   
-80    0      
32     64     
-32    -496   
32     -256   
48     96     
-112   -16    
0      144    
80     80     
160    240    
-256   144    
80     240    
-16    -80    
240    -256   
64     96     
112    -96    
48     16     
-272   144    
-32    352    
-64    -32    
-96    -352   
-48    32     
-240   -32    
64     48     
-80    160    
-160   16     
304    -144   
368    32     
-32    -48    
144    96     
-16    -32    
-96    160    
-272   16     
0      64     
224    -48    
256    96     
-32    80     
224    128    
32     48     
176    -128   
-32    -64    
160    -96    
80     16     
80     16     
32     16     
-80    -128   
272    -32    
0      -64    
0      -64    
336    -112   
288    48     
176    176    
-16    -16    
-240   -144   
96     -80    
-80    -96    
208    -176   
48     -80    
144    -32    
80     80     
-128   -656   
320    176    
-128   -144   
-48    48     
-16    -512   
64     -256   
32     -48    
112    80     
-64    112    
160    112    
96     16     
96     -96    
112    16     
16     16     
96     48     
48     -224   
-160   0      
256    -480   
400    240    
-112   352    
80     288    
-128   -144   
-32    -32    
-48    -64    
48     -240   
80     480    
352    -144   
-224   80     
144    16     
80     -176   
400    96     
208    -96    
176    -32    
192    -64    
-160   -384   
-224   64     
176    -48    
48     -192   
352    -624   
224    688    
-224   -704   
32     0      
272    -512   
16     -80    
192    144    
-160   -432   
-176   -128   
-192   -608   
368    -960   
304    -64    
-48    304    
336    -48    
-208   -208   
128    -16    
-48    192    
160    144    
64     480    
320    224    
288    320    
128    -560   
-32    -96    
-32    128    
0      -128   
-16    80     
0      -192   
0      112    
-16    96     
272    144    
256    128    
-256   96     
240    128    
368    320    
-480   -128   
80     48     
-144   -336   
-32    -80    
400    -720   
32     -304   
320    -32    
-208   -208   
48     -112   
-64    -288   
-112   112    
352    64     
-256   512    
112    -48    
-144   -384   
352    -176   
112    -192   
-208   -240   
192    144    
240    -784   
16     64     
176    -96    
-48    432    
528    352    
-16    352    
-96    160    
-80    -16    
-144   -112   
-176   112    
80     -416   
160    -304   
32     256    
272    128    
-192   64     
-112   48     
0      160    
320    -176   
384    496    
-144   112    
-16    -176   
128    0      
0      32     
-192   64     
112    784    
368    -112   
112    -192   
0      -160   
320    -16    
-16    0      
160    288    
16     -144   
16     112    
-160   16     
-160   48     
64     -48    
-128   -16    
128    -16    
112    -64    
160    -32    
-672   -16    
128    -160   
-2064  -128   
-224   -208   
80     176    
-16    -128   
144    64     
240    -416   
384    448    
-448   288    
-112   -32    
-192   -112   
144    16     
-320   -48    
256    -80    
192    144    
-160   -368   
-496   -48    
240    688    
-272   752    
-256   128    
400    -176   
608    -80    
96     -80    
224    112    
208    0      
432    160    
32     -48    
-144   48     
224    -64    
-176   -80    
32     -16    
-496   -160   
240    -96    
32     144    
-176   -128   
-32    48     
16     48     
752    240    
-656   112    
-144   160    
-400   0      
336    -64    
192    -16    
-144   -80    
0      48     
288    80     
-1248  -112   
-2528  -224   
32     144    
-400   -32    
-112   16     
80     16     
368    272    
-560   16     
-1104  -80    
-96    -128   
256    80     
256    32     
192    -64    
160    112    
-1920  -96    
-208   -16    
-432   -48    
16     112    
256    64     
-144   -16    
144    96     
-464   -64    
256    32     
-576   -32    
80     64     
-704   32     
32     32     
160    -64    
-80    32     
16     -128   
-64    16     
112    -48    
-64    0      
96     48     
-128   0      
-96    16     
-224   -48    
-32    -64    
-128   128    
-80    96     
-1056  -128   
-272   -16    
-992   -96    
0      -48    
-32    -48    
48     48     
256    16     
-224   144    
176    -64    
-48    -32    
32     -144   
160    368    
-192   160    
192    -64    
-176   112    
64     32     
112    144    
-800   32     
368    -32    
-192   -48    
96     96     
16     48     
-144   -16    
16     -32    
-192   48     
16     -32    
-32    48     
16     144    
-32    64     
64     240    
-272   128    
32     -32    
-576   16     
48     192    
256    96     
-128   64     
32     32     
-64    -144   
16     -80    
16     0      
-144   32     
-64    160    
-96    32     
-16    176    
-160   0      
-128   -96    
0      176    
-624   -128   
80     48     
-1680  32     
48     112    
-32    -112   
32     144    
0      48     
-48    112    
-80    -272   
80     240    
-64    192    
-48    -272   
352    736    
-544   -288   
112    -128   
-16    48     
80     80     
-192   -16    
-48    -32    
-80    800    
0      -192   
304    -320   
-272   320    
0      -496   
48     544    
0      -16    
-336   -1216  
112    496    
-96    560    
0      -288   
-144   0      
272    0      
-560   544    
-160   256    
-16    -112   
0      96     
128    16     
-80    112    
16     -144   
-32    -128   
48     -48    
-160   -32    
-208   -112   
-112   112    
192    144    
-64    16     
144    -16    
-528   -208   
256    128    
-256   64     
16     80     
-240   -48    
0      -64    
-96    -144   
-16    -64    
112    48     
-208   -176   
112    32     
-48    64     
368    96     
-320   -16    
-16    -16    
64     32     
0      48     
192    96     
-224   64     
-48    0      
-128   0      
256    -16    
80     48     
-48    48     
48     -16    
32     -32    
-96    -48    
160    112    
-304   -48    
-48    -64    
96     -160   
96     16     
64     96     
-160   -64    
192    -16    
0      176    
-256   48     
144    -16    
-16    48     
-64    48     
640    256    
-576   80     
80     240    
-48    240    
16     -16    
400    -32    
128    192    
-336   112    
16     -64    
-32    -80    
192    112    
128    176    
16     96     
64     128    
-96    -64    
128    -208   
-16    -80    
144    128    
128    192    
80     48     
160    160    
-80    16     
-96    -224   
32     -160   
112    0      
32     192    
112    176    
-16    32     
80     -16    
-64    64     
144    336    
-48    160    
-80    -480   
240    -16    
0      64     
192    -48    
208    160    
-112   160    
80     176    
48     80     
-16    -48    
112    32     
144    -16    
-80    224    
16     -16    
112    112    
-64    -96    
-48    -544   
144    144    
80     32     
16     -16    
-16    -80    
160    128    
-48    0      
144    64     
64     32     
48     16     
176    256    
-128   256    
64     96     
32     48     
-144   -112   
64     -80    
-48    -64    
64     464    
192    400    
16     128    
64     240    
112    16     
208    208    
32     512    
0      672    
336    -112   
-464   -480   
32     -384   
-208   240    
0      16     
176    96     
240    272    
208    96     
-192   800    
64     64     
-288   640    
160    208    
320    -752   
-112   768    
224    0      
-176   160    
288    352    
96     -224   
-192   160    
560    -368   
16     16     
432    -48    
16     16     
-32    64     
96     -720   
288    800    
-336   -304   
96     128    
-128   176    
-16    16     
128    384    
256    144    
-160   0      
-16    -416   
32     176    
368    160    
-192   272    
144    304    
-128   -288   
448    192    
-48    448    
-176   -544   
64     -480   
176    608    
48     -80    
-64    256    
144    448    
64     64     
144    -128   
-160   32     
320    112    
-256   -16    
112    -496   
208    80     
64     -240   
96     48     
32     -208   
128    -144   
-48    48     
288    160    
144    -128   
-176   288    
336    -208   
128    -112   
144    128    
-32    -80    
224    128    
-32    -176   
-16    0      
48     -48    
0      176    
48     -16    
240    112    
-112   -48    
80     -48    
-64    80     
160    -80    
128    112    
208    240    
-64    64     
96     -128   
32     -144   
96     -48    
96     0      
-48    -256   
128    64     
-224   -576   
304    -16    
-32    480    
144    -864   
176    -64    
0      -336   
112    144    
48     -32    
-80    64     
16     -128   
80     352    
544    752    
-176   576    
208    256    
96     -816   
64     -96    
16     -352   
-112   32     
32     -192   
208    -144   
336    -16    
128    -240   
112    -16    
-144   -432   
208    416    
64     160    
0      -224   
256    -16    
-416   16     
-288   -480   
112    -48    
48     -80    
-208   96     
-144   96     
-128   304    
240    16     
592    -336   
16     -80    
-16    -176   
-192   432    
-16    -560   
80     -32    
-64    144    
208    288    
-432   -160   
160    -160   
336    64     
176    16     
16     -80    
288    -32    
-2448  -16    
112    -32    
48     -32    
448    336    
-496   -32    
-16    -432   
256    -48    
-16    -64    
-208   32     
112    -64    
336    256    
-416   128    
-336   -144   
-112   -176   
-128   80     
-112   16     
336    -64    
224    -16    
0      -48    
176    32     
-144   -656   
96     -80    
336    0      
-16    112    
304    16     
-256   -64    
64     -128   
-16    -80    
256    32     
320    0      
16     -48    
-16    -112   
144    96     
-80    -80    
128    -16    
96     96     
48     0      
-160   -400   
192    112    
144    -16    
-176   32     
-16    -16    
144    48     
16     -48    
192    -80    
-464   48     
80     -80    
-640   -16    
48     -112   
-544   16     
32     -32    
48     96     
352    240    
-368   96     
304    -16    
16     96     
16     16     
192    0      
-176   -16    
16     16     
-416   0      
0      -64    
-160   -112   
128    304    
128    336    
16     -64    
-176   -48    
-336   96     
-48    -32    
0      -256   
192    0      
-96    64     
224    96     
-112   48     
96     -80    
-16    -16    
224    -16    
-112   16     
352    16     
-288   0      
128    -192   
-80    -16    
0      -176   
-16    -32    
-336   128    
176    160    
-480   -80    
96     288    
-80    -144   
304    -112   
-512   -48    
112    -320   
-368   288    
96     -240   
80     -128   
384    688    
-304   -304   
-880   -176   
336    800    
-80    -160   
-528   -80    
-224   32     
272    -288   
-176   160    
48     160    
-112   -64    
144    112    
-304   -112   
240    -224   
144    -64    
-496   0      
144    -32    
-752   -144   
-48    640    
-160   -208   
-384   -416   
48     -400   
-192   -160   
-16    -16    
-1200  -128   
-192   32     
-112   80     
176    96     
-144   -336   
32     -96    
112    -32    
-144   208    
-272   288    
16     96     
112    48     
-240   -64    
96     -80    
-80    32     
-16    32     
-912   -80    
-48    48     
-48    160    
64     80     
-144   -32    
160    32     
-128   -160   
192    112    
-64    144    
-160   64     
32     0      
-336   16     
-80    -64    
48     80     
-224   48     
-144   32     
32     64     
-752   48     
128    16     
16     -80    
-16    64     
80     -48    
-112   32     
32     96     
-144   368    
272    304    
-64    64     
-64    -32    
-128   -48    
96     -16    
16     16     
-80    160    
-880   -80    
352    16     
-192   0      
288    0      
112    -48    
-224   -96    
256    -352   
80     80     
-32    112    
-112   -32    
64     16     
-96    -80    
-16    16     
-64    352    
-432   288    
-384   -32    
288    -80    
112    64     
400    48     
64     -16    
-128   -64    
-352   -416   
16     -208   
-240   224    
-256   208    
256    304    
-112   224    
592    64     
-400   80     
-320   -144   
-224   -176   
144    192    
-1328  80     
240    32     
80     64     
48     32     
224    -16    
-96    0      
-208   -144   
-16    -144   
-192   -112   
144    -80    
208    112    
-80    368    
192    432    
-256   -128   
-112   0      
-1168  0      
-176   -32    
304    -16    
112    144    
-176   64     
-160   -16    
208    -64    
-160   -320   
-112   -288   
32     -144   
176    -48    
-272   -32    
240    192    
-448   256    
160    336    
176    208    
64     96     
32     112    
-64    32     
-32    80     
-64    64     
-96    -32    
192    208    
160    208    
16     240    
-160   -16    
-64    -32    
64     160    
-64    0      
64     592    
192    336    
-272   96     
-32    -240   
0      32     
48     -64    
112    -368   
64     384    
352    240    
-448   -128   
128    0      
80     144    
-128   -64    
144    240    
-128   -160   
32     192    
192    48     
160    80     
-64    48     
176    272    
-400   -224   
-64    32     
-256   144    
48     -512   
-16    448    
64     96     
64     80     
0      -16    
16     208    
-96    -448   
208    560    
272    704    
240    -304   
-192   -192   
-128   384    
-16    -240   
-80    -80    
32     272    
80     -96    
-80    -80    
64     144    
128    48     
-96    -512   
368    -672   
48     352    
208    256    
32     16     
208    -112   
-336   -352   
96     80     
-64    -32    
0      -272   
288    -144   
-32    112    
160    16     
0      -64    
80     32     
-48    96     
-64    48     
64     0      
16     16     
112    80     
-128   64     
144    16     
0      -48    
48     112    
-64    -16    
32     -48    
96     0      
64     112    
-160   80     
160    80     
-144   128    
96     -176   
96     416    
0      256    
48     208    
448    192    
-288   32     
96     64     
128    96     
-16    0      
-112   16     
128    0      
-32    -32    
16     32     
-48    -128   
112    -16    
-32    0      
64     64     
112    128    
112    144    
-112   16     
32     96     
48     112    
112    48     
-16    32     
32     -128   
-16    -48    
64     -32    
-64    -32    
144    32     
64     192    
-160   -528   
80     400    
0      -1520  
80     -160   
-144   -176   
80     -16    
144    96     
-112   0      
144    96     
48     -16    
208    -176   
160    96     
-64    96     
64     48     
32     192    
304    160    
-144   96     
128    -208   
80     64     
48     -112   
288    -208   
320    96     
176    64     
192    112    
256    240    
0      0      
144    16     
-112   -48    
112    0      
64     -64    
208    16     
-192   64     
96     80     
32     32     
-208   -720   
816    -1056  
400    224    
192    512    
192    208    
16     80     
-368   64     
272    -128   
400    -16    
-96    208    
-304   256    
-240   0      
128    96     
16     -240   
-208   -96    
128    -736   
96     48     
-16    -16    
-128   96     
-128   -96    
-32    0      
128    -16    
272    48     
128    144    
-240   -16    
-192   -48    
-48    -192   
624    400    
-224   -176   
-16    112    
464    32     
-96    16     
-16    0      
-64    48     
-112   16     
256    48     
48     32     
448    128    
352    192    
128    160    
16     0      
48     -208   
-416   32     
64     0      
208    112    
-208   -160   
32     -32    
160    -64    
32     0      
-16    -96    
144    -112   
112    0      
112    -16    
80     -32    
48     -32    
96     80     
48     -96    
96     64     
-16    -64    
-16    32     
-64    -144   
48     32     
176    80     
64     -736   
48     32     
80     -112   
112    -240   
64     16     
0      -1024  
64     -80    
-32    -64    
96     80     
176    0      
32     -128   
16     -32    
416    -64    
-320   -432   
320    -64    
32     -224   
-64    96     
-160   -160   
112    -48    
-224   -528   
-32    384    
80     -32    
64     -304   
0      800    
128    -1104  
80     -784   
-32    448    
-32    -128   
64     -48    
272    128    
-16    288    
-128   -176   
-128   -64    
-224   48     
144    -336   
-128   -272   
336    176    
-128   -480   
-16    336    
208    -208   
-144   464    
240    -240   
256    144    
-16    192    
96     -160   
176    80     
-96    -160   
64     -208   
96     64     
-2128  -192   
144    176    
32     48     
16     0      
96     208    
-192   0      
64     -112   
48     -240   
80     -32    
128    -32    
16     32     
192    32     
112    -176   
-256   -128   
80     -16    
-320   -48    
32     -304   
0      144    
144    144    
80     -80    
144    -272   
-240   0      
128    -496   
128    64     
48     -112   
192    -32    
-256   48     
64     0      
-128   -48    
224    -96    
-224   64     
-144   -64    
-1920  240    
224    48     
-288   -112   
144    -32    
32     -48    
96     -448   
160    80     
-32    32     
-64    64     
224    16     
-112   -160   
-112   -96    
-192   128    
-112   16     
96     -240   
-192   -64    
32     16     
-608   -32    
128    80     
144    160    
272    -64    
-64    96     
32     -752   
144    16     
112    0      
272    0      
-64    64     
-16    -80    
32     32     
352    144    
-208   80     
-16    -80    
-192   80     
0      160    
-16    64     
208    -176   
96     -48    
-96    -32    
16     16     
-272   -96    
96     -16    
-48    -32    
48     -16    
-240   -80    
-16    -32    
-192   64     
-80    -96    
144    112    
0      -16    
-176   48     
96     -256   
96     -96    
-64    -288   
224    128    
-208   160    
320    -128   
-80    -48    
144    160    
-80    128    
48     -416   
-160   -656   
304    -224   
-368   128    
-736   32     
320    128    
96     -64    
-336   64     
-32    16     
-1104  -80    
32     -64    
-80    0      
240    208    
208    208    
-160   192    
144    -48    
-336   32     
-368   -208   
160    -96    
-304   -256   
192    -16    
48     -128   
256    -208   
-96    -192   
-16    48     
-496   -464   
-432   -16    
-304   -208   
-1200  -192   
0      -48    
160    -80    
-192   144    
-64    -112   
448    144    
-240   208    
48     48     
-112   -96    
-80    16     
-64    -96    
32     32     
64     384    
-160   -368   
96     272    
-240   80     
-48    48     
-128   0      
-144   0      
-272   -112   
160    -544   
0      368    
128    96     
80     -32    
-128   -64    
-32    32     
272    416    
80     48     
-80    -48    
-48    -144   
-432   80     
64     32     
-368   -224   
240    112    
-112   16     
464    304    
-288   -160   
48     -96    
64     144    
48     -32    
96     160    
-208   -224   
-80    -16    
-176   -16    
32     96     
-112   160    
256    352    
-96    144    
144    32     
64     -112   
16     16     
16     0      
-48    128    
32     -64    
128    32     
-160   16     
48     32     
0      0      
-48    -32    
-80    -64    
48     -32    
16     96     
-208   80     
128    -16    
48     0      
32     304    
16     64     
64     -64    
-256   0      
-256   64     
128    32     
-80    16     
-16    224    
96     96     
352    -144   
-512   0      
112    64     
-336   -80    
176    112    
-1376  80     
112    -96    
144    32     
-96    32     
64     -16    
-64    48     
-48    16     
-48    16     
-16    48     
-144   0      
-32    64     
-288   16     
224    48     
-192   -48    
96     96     
-256   32     
-432   -32    
-64    -96    
224    32     
64     112    
112    96     
-96    -32    
144    112    
-16    -16    
16     96     
-64    -80    
-288   -16    
64     80     
-256   -48    
352    0      
448    176    
-336   -32    
32     -32    
32     80     
80     -32    
64     -16    
272    208    
-192   48     
-288   -16    
0      48     
128    -32    
144    -96    
-16    96     
-16    0      
144    112    
-176   -32    
32     -16    
144    96     
-32    96     
16     48     
64     48     
-16    -160   
-176   -64    
240    128    
-160   0      
64     -48    
-160   0      
-16    112    
-288   48     
32     128    
112    80     
128    240    
0      96     
16     -16    
160    208    
-176   -112   
64     -48    
176    80     
16     32     
-384   32     
256    -176   
144    -208   
288    64     
208    176    
80     304    
-144   32     
-144   -96    
16     96     
176    208    
-224   48     
64     -96    
336    16     
-64    -32    
480    80     
-96    32     
16     912    
64     608    
144    -32    
-160   -80    
-80    -32    
-368   288    
0      256    
384    240    
-64    432    
-256   416    
-16    80     
320    -48    
400    176    
240    128    
-80    48     
272    192    
-48    16     
48     0      
-32    80     
-112   -272   
96     -80    
-224   128    
-192   80     
-112   208    
-112   128    
96     240    
160    240    
304    144    
256    -32    
64     -480   
16     -80    
-288   192    
32     -128   
48     -16    
-32    48     
112    -128   
320    -32    
128    224    
-128   128    
-384   128    
48     416    
112    512    
-336   80     
160    -80    
16     -176   
224    112    
288    0      
-320   -576   
128    -32    
-176   208    
-240   -192   
-48    208    
-192   576    
80     208    
128    -128   
144    64     
80     208    
-192   160    
0      -16    
48     0      
-1200  -160   
0      32     
128    -48    
0      -64    
176    -720   
-32    272    
-80    160    
176    48     
-80    -48    
448    -240   
-96    112    
208    176    
-64    -144   
-96    240    
-208   -64    
384    64     
240    144    
-32    0      
176    -224   
256    -32    
176    336    
176    176    
-320   80     
16     -80    
-128   288    
-96    80     
0      256    
-432   240    
128    -224   
16     -48    
160    -32    
128    -112   
-128   -240   
320    -16    
-96    -32    
80     -16    
-144   -1360  
32     -176   
-176   -272   
128    -208   
-16    -64    
-160   96     
160    48     
-16    416    
368    208    
336    144    
-112   16     
176    96     
-96    -32    
128    -224   
-160   32     
0      -720   
-32    -80    
-48    64     
304    272    
112    48     
144    48     
176    -304   
240    -80    
144    32     
-160   80     
80     32     
-64    -112   
208    -96    
-160   -144   
-80    32     
128    -160   
0      -16    
176    0      
0      48     
160    112    
-112   144    
64     64     
64     -624   
-64    -48    
256    -128   
224    32     
-176   -192   
-48    160    
48     -96    
160    -64    
16     -16    
176    -64    
272    352    
-160   304    
-160   -112   
48     64     
-144   176    
160    -16    
128    -304   
32     -192   
0      32     
-64    16     
304    48     
0      0      
48     -64    
32     -32    
144    -1184  
0      112    
64     -816   
96     16     
48     -176   
32     -224   
96     -32    
-32    -128   
128    -176   
48     -1456  
112    -96    
16     96     
128    32     
80     80     
-256   -96    
272    -112   
112    48     
-144   -208   
128    -32    
32     32     
-112   0      
112    0      
112    -352   
16     -80    
128    0      
224    144    
-128   -432   
-32    -128   
32     -48    
64     0      
288    -128   
192    160    
-80    16     
-32    -48    
-224   64     
-96    176    
-1408  16     
16     -64    
176    -160   
464    -208   
128    16     
-64    -688   
256    -176   
0      -128   
-192   -16    
96     96     
192    160    
-272   -32    
32     -288   
32     0      
144    48     
16     304    
96     -112   
-64    -224   
48     -432   
-80    -288   
128    272    
-448   128    
144    -560   
320    160    
640    496    
16     80     
-304   -208   
144    -64    
160    -208   
-32    -176   
-832   -48    
128    -272   
400    48     
416    0      
80     -144   
-224   240    
-256   -32    
-144   -848   
-176   160    
128    -96    
416    128    
0      32     
240    -80    
-480   -496   
144    -384   
80     128    
384    400    
-992   160    
48     0      
-16    128    
16     48     
256    48     
240    -400   
0      0      
16     32     
224    64     
-272   48     
96     208    
-144   128    
192    64     
48     -64    
176    0      
-304   48     
16     -96    
16     -32    
96     -192   
48     96     
96     -64    
32     64     
80     -208   
32     -144   
-144   -32    
144    48     
-608   -32    
256    160    
-144   -16    
208    0      
-256   -32    
64     -48    
-64    -272   
400    -288   
-240   96     
544    64     
-416   -256   
-496   -160   
128    -64    
-128   32     
304    0      
64     -32    
-64    16     
-192   80     
224    -96    
-416   -192   
-128   -96    
96     112    
176    -32    
32     64     
-1584  16     
-128   48     
-144   32     
-64    -80    
-64    -32    
0      16     
128    -64    
80     48     
-176   -32    
304    -128   
160    0      
-48    48     
32     -16    
48     -16    
-112   16     
-416   -128   
-912   -64    
-48    48     
-384   16     
-160   48     
-368   -64    
112    112    
-144   -128   
-16    112    
96     -32    
-32    -64    
-48    -32    
64     -48    
-288   -112   
-192   96     
-96    16     
48     -96    
-304   -128   
224    112    
-288   16     
32     -32    
-480   -112   
144    0      
96     -16    
-32    64     
160    32     
-80    -32    
-256   0      
336    32     
-208   96     
-80    32     
-16    64     
208    112    
-208   16     
-272   -16    
-192   32     
64     208    
-384   16     
-128   0      
304    -16    
224    0      
-320   -112   
160    16     
-16    16     
208    48     
-176   0      
64     32     
-80    96     
-224   16     
-64    32     
96     32     
208    96     
-464   -16    
-128   -64    
-176   -48    
32     48     
32     -176   
-288   -272   
96     -16    
-96    -16    
80     -192   
112    -96    
-80    176    
96     -16    
64     48     
-16    -32    
-144   336    
-32    112    
0      -80    
192    -48    
64     16     
128    80     
16     -32    
0      160    
16     128    
288    112    
-128   48     
32     80     
224    288    
-208   -112   
-48    -624   
96     128    
112    416    
112    -272   
-320   64     
-160   -112   
-48    144    
-224   144    
-256   0      
-112   80     
-176   528    
272    560    
-176   -416   
-368   64     
-144   -32    
96     208    
-384   80     
-224   -304   
480    288    
-592   -208   
448    288    
-2016  -80    
320    -16    
208    32     
208    80     
-128   -32    
-208   80     
-368   64     
-240   -32    
16     -80    
304    48     
256    144    
480    256    
-256   1248   
-352   -352   
-16    -256   
784    624    
-224   -112   
384    64     
-32    0      
64     -16    
-80    16     
-128   32     
-32    80     
-32    32     
-272   128    
256    128    
-304   -112   
-96    -32    
176    368    
-304   -80    
144    128    
144    208    
112    256    
0      112    
0      -160   
-16    -32    
-16    208    
256    32     
-96    160    
96     416    
-112   304    
-80    112    
208    -416   
64     128    
-112   -48    
-16    96     
32     192    
-16    96     
64     320    
96     -240   
-16    96     
112    16     
32     64     
112    176    
-176   -96    
-112   -400   
64     -160   
0      -320   
-160   -736   
32     -272   
64     176    
16     352    
224    224    
-160   -512   
-128   -176   
-96    96     
448    192    
-128   144    
-96    -128   
-32    -160   
80     16     
-272   -320   
80     -288   
128    -16    
-16    -288   
32     16     
-176   -144   
-144   -192   
-256   144    
-16    32     
32     144    
144    256    
-16    -48    
32     48     
80     0      
80     128    
-240   -144   
-80    -400   
-192   -32    
160    96     
0      -144   
-176   -144   
224    80     
-256   48     
432    -112   
-16    -16    
64     160    
-112   -48    
32     112    
-48    -240   
0      80     
-48    0      
-112   -64    
0      496    
144    144    
224    -272   
-32    -208   
192    -224   
-64    -80    
-64    32     
48     -80    
128    160    
-144   64     
64     144    
-16    32     
96     -128   
160    80     
0      -240   
-64    112    
48     0      
256    -16    
-112   32     
64     80     
192    192    
32     80     
352    160    
-32    368    
64     -80    
96     -64    
-48    16     
336    208    
-112   320    
-192   -320   
0      -32    
256    32     
208    80     
64     160    
32     176    
-128   16     
0      48     
-80    48     
-80    -16    
272    -96    
144    64     
16     0      
176    64     
64     112    
-16    -176   
112    -32    
144    -64    
96     0      
-16    -48    
144    0      
64     -112   
112    48     
208    80     
112    48     
-32    -112   
160    -96    
80     -80    
-16    -64    
112    32     
48     -16    
-16    64     
64     -32    
-48    -48    
-128   -512   
160    -208   
48     -112   
112    32     
144    0      
16     80     
-64    208    
64     448    
80     -48    
272    -224   
368    0      
64     32     
80     208    
-64    -512   
112    96     
176    -592   
-16    64     
192    -208   
-64    -256   
384    64     
256    432    
-144   -608   
16     -432   
320    496    
16     -144   
192    160    
64     -304   
240    176    
64     336    
0      -144   
256    -288   
384    -208   
224    240    
-48    240    
304    528    
-512   -256   
-208   -384   
32     192    
16     176    
672    80     
-144   32     
-96    -336   
352    -48    
224    -32    
240    48     
224    -272   
-144   64     
-32    -48    
352    16     
304    -32    
256    -16    
48     80     
32     16     
-320   64     
16     -160   
0      -16    
-32    -128   
256    96     
208    -32    
304    272    
-432   -80    
400    96     
-64    96     
208    128    
128    -32    
32     -576   
256    -432   
-384   -112   
80     -1072  
736    304    
-432   -64    
208    -48    
176    96     
336    -112   
-224   -48    
-16    -16    
48     80     
-32    144    
16     -96    
-192   -48    
-1408  -48    
64     -32    
272    -16    
-64    -96    
176    16     
96     -368   
208    -96    
32     128    
144    -160   
-128   16     
80     -112   
-48    -48    
160    0      
160    -80    
176    48     
-848   -288   
-144   -208   
-48    0      
48     -96    
64     -48    
64     -160   
-32    -32    
176    -272   
160    -144   
160    -128   
-32    144    
128    -112   
160    -48    
-16    -64    
0      -112   
192    64     
-64    96     
144    32     
48     -160   
128    48     
224    -80    
192    48     
112    -48    
0      -112   
80     144    
-240   0      
48     -16    
64     96     
48     192    
64     80     
-224   -160   
-176   -48    
-592   48     
-48    -176   
48     -112   
256    -48    
144    16     
-32    -432   
-144   -96    
160    -496   
-128   112    
176    48     
0      32     
-32    0      
32     -80    
-192   0      
80     16     
-352   16     
352    64     
-816   80     
288    -160   
48     -80    
192    -128   
144    -32    
-64    16     
-64    48     
64     80     
32     -80    
176    0      
208    16     
-336   -96    
160    0      
-80    112    
224    32     
-1888  -32    
96     -64    
96     64     
-32    -64    
144    128    
48     0      
16     128    
96     -80    
240    16     
-96    32     
-48    -32    
64     64     
80     -48    
-1232  -96    
-16    -176   
-16    -144   
0      -352   
208    64     
-16    -80    
80     96     
48     -400   
32     96     
-320   144    
48     48     
-192   -448   
272    192    
-240   -96    
256    320    
-160   -336   
-128   32     
-64    -96    
128    0      
96     160    
64     -80    
224    -16    
64     272    
-224   -32    
64     48     
272    608    
-528   -560   
80     192    
-80    336    
272    -272   
-32    -80    
-112   320    
16     416    
160    -256   
336    -160   
-176   -48    
80     -176   
-464   160    
-976   -688   
-128   -224   
-1184  336    
-336   -80    
-96    -128   
80     208    
304    32     
-112   -336   
272    544    
-608   16     
-1056  -368   
240    112    
-448   0      
32     -80    
-176   80     
-96    48     
-128   -240   
160    224    
-208   448    
-272   -400   
128    -272   
112    176    
-304   -16    
-448   -32    
64     0      
-128   144    
128    176    
-240   -96    
560    448    
-448   -96    
-32    160    
64     -208   
-48    -384   
208    -112   
-288   -384   
240    -576   
-1008  -544   
320    -16    
240    0      
-160   112    
-128   -32    
128    192    
-176   -64    
-256   -112   
-144   16     
-224   -96    
176    0      
176    256    
-224   48     
128    160    
-352   64     
-672   32     
96     80     
0      16     
288    16     
-144   -128   
128    256    
-272   -32    
80     32     
16     0      
208    160    
-128   160    
-112   96     
-176   16     
-144   80     
16     32     
-160   -240   
16     -16    
-1200  -32    
80     112    
-80    -32    
32     -96    
112    64     
160    96     
-48    48     
368    464    
-160   256    
128    304    
304    -384   
-128   -112   
64     0      
-256   -32    
-48    -64    
-224   -160   
64     192    
128    -368   
80     32     
-96    160    
-272   0      
192    224    
-96    144    
-32    224    
176    -176   
-240   -400   
-32    -256   
-256   80     
48     -272   
80     128    
64     320    
-192   384    
-384   224    
16     224    
-144   496    
0      32     
-80    -208   
96     -128   
-64    128    
192    32     
32     32     
-208   256    
576    560    
-496   160    
16     160    
96     48     
-48    -176   
-80    48     
-32    0      
160    192    
-80    -48    
16     96     
176    64     
-96    160    
176    -32    
-224   48     
48     -272   
112    0      
-384   -192   
272    -32    
-320   96     
160    64     
-176   -176   
320    -432   
-16    128    
96     -96    
-112   -16    
128    -288   
64     32     
-176   80     
16     32     
-160   -112   
48     -112   
-352   -208   
304    112    
-272   160    
112    240    
160    96     
96     -224   
96     0      
16     -80    
192    -80    
-48    -96    
-240   80     
0      -48    
80     48     
64     176    
80     32     
-160   160    
128    0      
-48    144    
128    48     
-144   144    
192    16     
-80    208    
-80    48     
48     -64    
-128   32     
240    -80    
96     112    
144    32     
-256   128    
288    -288   
-112   16     
144    176    
48     144    
32     272    
-16    0      
-144   -496   
-32    288    
144    176    
0      -112   
96     208    
144    144    
-128   96     
16     208    
-336   -64    
-64    160    
176    -128   
-128   -48    
96     -96    
80     48     
496    -160   
-16    672    
-128   -96    
64     48     
80     0      
-16    80     
48     96     
-400   112    
-80    -48    
96     48     
-16    -16    
304    96     
-80    -80    
80     32     
-256   48     
944    576    
-544   -96    
-160   -288   
-224   64     
240    0      
304    368    
-416   16     
128    368    
16     368    
-32    80     
560    240    
80     48     
256    -512   
208    0      
-352   128    
112    -80    
544    400    
-432   256    
-224   -48    
288    0      
144    80     
672    128    
-144   96     
32     80     
96     -160   
288    192    
-336   32     
-368   -416   
432    -144   
224    176    
-336   16     
-64    32     
208    208    
-144   16     
144    -64    
160    -48    
272    16     
144    160    
128    16     
-352   -320   
272    -128   
128    192    
-144   16     
416    32     
96     -192   
-304   -64    
-80    176    
-176   64     
96     64     
272    80     
-48    192    
48     0      
32     32     
192    64     
-112   -48    
160    -32    
96     64     
-16    -288   
80     0      
-32    -624   
0      -48    
128    64     
112    32     
144    -128   
-16    64     
96     48     
-48    48     
16     32     
-64    16     
240    144    
16     -32    
64     64     
0      -48    
-64    16     
32     -208   
-48    -224   
128    -1136  
-48    80     
240    32     
0      224    
-144   -208   
128    160    
-16    64     
-176   -192   
320    128    
224    160    
64     0      
144    -144   
16     112    
224    -352   
48     32     
144    64     
-128   64     
48     0      
64     128    
-32    80     
208    64     
-80    0      
192    -160   
16     96     
192    -64    
32     112    
-48    -240   
-16    -16    
80     -128   
-96    -160   
32     -192   
96     192    
-128   16     
176    128    
32     -16    
80     96     
304    32     
-64    -160   
-16    80     
32     96     
48     64     
128    -192   
80     128    
16     -176   
128    112    
80     -880   
144    32     
-80    -16    
48     176    
240    176    
48     32     
96     176    
-80    192    
208    160    
16     -48    
32     224    
32     -192   
96     -128   
400    208    
-304   -176   
160    -128   
160    -800   
-160   16     
224    -112   
-48    112    
-912   128    
-176   -208   
32     48     
112    -128   
240    -112   
240    -64    
16     -160   
64     1104   
224    -784   
96     -256   
-64    -32    
64     -624   
-48    320    
0      -176   
336    208    
-720   -112   
32     64     
224    96     
288    112    
-128   112    
-224   336    
176    48     
0      -368   
-96    -432   
-64    -672   
160    -304   
544    48     
-288   272    
-48    -256   
-128   -224   
-160   -128   
112    -80    
0      -16    
16     -112   
240    -96    
288    -144   
-32    -16    
256    -1136  
-112   -320   
128    -80    
-112   192    
32     64     
-256   -144   
336    -80    
112    -48    
-224   -48    
16     64     
-416   32     
192    112    
80     32     
-64    -160   
208    96     
-144   -48    
80     -64    
288    272    
-240   768    
336    240    
-176   80     
-160   -160   
256    -64    
-160   48     
208    96     
-400   128    
-64    -144   
-160   128    
176    160    
-272   -96    
16     -384   
-64    -64    
-96    176    
-128   -16    
240    -96    
176    -48    
-16    -32    
160    -64    
-192   32     
352    -160   
-384   48     
-48    -80    
96     48     
-48    112    
-208   80     
272    -112   
16     -48    
96     -336   
400    -144   
208    80     
128    32     
-192   -48    
128    -96    
-224   -80    
416    192    
-1072  -16    
128    -32    
-224   16     
64     -64    
64     -112   
32     -256   
-32    80     
-128   -144   
112    -64    
128    -48    
80     -16    
48     32     
256    240    
-144   -112   
80     16     
48     160    
-64    -32    
-128   -112   
96     -176   
48     80     
80     16     
128    144    
0      -112   
144    320    
-784   0      
48     -16    
-16    256    
240    144    
-32    560    
32     -176   
-96    128    
32     160    
-176   -208   
528    160    
224    -176   
272    32     
0      -160   
-48    -384   
208    64     
-176   -160   
336    -320   
-176   -64    
-80    -96    
-16    128    
-16    -80    
-32    -224   
224    -192   
-144   400    
480    416    
-112   224    
-912   -144   
176    416    
0      272    
-128   -368   
-128   48     
80     -144   
-160   128    
-256   0      
-96    432    
112    544    
-272   -16    
240    144    
-352   192    
-640   144    
96     80     
-464   -32    
112    -144   
368    544    
-480   384    
32     -32    
-400   -256   
-128   -32    
-48    -112   
-16    32     
-400   -736   
-80    -352   
-80    -144   
-192   288    
80     -160   
-112   -512   
144    -256   
80     -544   
-64    32     
336    96     
-256   -32    
-128   80     
-224   32     
-432   208    
-80    496    
48     208    
-240   16     
-400   -560   
80     0      
32     752    
368    560    
64     656    
-48    -368   
64     -336   
-96    128    
-80    992    
304    -240   
-128   -368   
192    832    
0      112    
-656   -912   
176    -64    
-480   560    
288    -128   
208    -368   
-80    -160   
32     208    
-80    160    
-16    -96    
96     112    
-16    -80    
32     96     
176    -48    
-192   -16    
64     96     
-64    64     
-288   48     
-304   -112   
208    256    
48     -48    
48     -128   
32     320    
208    64     
-144   -144   
-96    -96    
16     480    
-176   128    
48     -240   
-320   16     
96     128    
-192   -80    
192    -64    
-304   -48    
-112   144    
-96    -176   
64     -32    
-144   80     
-144   48     
144    304    
96     64     
-96    -192   
0      -80    
80     0      
96     144    
16     400    
-64    656    
-96    272    
-480   -320   
384    128    
-112   128    
32     -16    
96     -208   
96     -112   
64     112    
48     176    
-64    -224   
304    -384   
272    80     
-128   336    
160    64     
-112   -96    
-144   16     
-368   -64    
224    -80    
112    48     
-416   0      
64     64     
-64    -128   
256    -96    
16     0      
288    192    
32     -64    
416    16     
16     -16    
112    96     
-480   -80    
176    64     
-64    64     
-224   -16    
240    48     
80     64     
208    32     
-128   -144   
432    -32    
-16    -16    
736    -32    
384    16     
-288   32     
-528   -128   
-176   48     
128    48     
304    80     
208    -64    
352    32     
-400   -16    
-80    0      
-128   48     
32     48     
64     80     
16     -80    
96     16     
-224   -16    
96     64     
16     32     
128    32     
144    48     
32     32     
-32    -64    
96     -16    
-192   80     
-64    -64    
368    -16    
144    64     
192    160    
-112   64     
-16    64     
-16    64     
160    0      
-64    32     
-32    64     
-304   -32    
128    48     
-16    48     
0      16     
80     48     
16     64     
48     96     
-48    -32    
-32    32     
-48    64     
32     -16    
-112   -16    
272    96     
-176   32     
272    208    
-144   -32    
208    144    
48     -96    
112    32     
96     80     
240    128    
-144   32     
176    -112   
-192   96     
272    176    
-48    -16    
-160   128    
144    96     
-32    0      
-80    96     
272    32     
-80    128    
256    -80    
-240   -112   
-80    -240   
64     16     
128    -64    
-16    -240   
-16    -144   
16     -240   
112    192    
-128   464    
192    272    
16     -160   
80     -16    
160    112    
128    -48    
32     64     
16     48     
-96    64     
128    -368   
64     176    
128    208    
48     -32    
80     48     
96     -96    
-48    16     
128    16     
32     16     
-80    -176   
96     208    
288    64     
-32    688    
-208   -512   
96     192    
96     -160   
144    160    
272    80     
160    -288   
64     1360   
-80    -624   
96     -464   
-64    176    
-192   -80    
-16    288    
160    -704   
-336   -448   
224    -208   
128    -512   
16     400    
176    80     
112    32     
-64    -16    
48     -96    
112    -112   
160    192    
-224   -128   
-64    16     
192    -112   
80     -64    
96     0      
80     -240   
16     0      
48     -368   
112    160    
32     80     
0      0      
176    -192   
112    48     
80     0      
80     112    
-32    16     
-32    0      
144    80     
80     32     
32     0      
144    -128   
64     80     
112    -176   
208    64     
-48    -144   
-32    32     
-80    -112   
192    96     
96     96     
-32    -48    
64     -144   
-32    -16    
176    192    
80     -80    
288    96     
-224   64     
96     32     
48     -48    
32     80     
144    -224   
48     48     
176    0      
16     64     
144    0      
192    64     
-208   -16    
144    -128   
80     -48    
48     -160   
416    128    
160    64     
304    0      
-32    -64    
-96    64     
-144   -480   
224    0      
208    0      
256    0      
224    224    
80     208    
-256   0      
-368   -224   
-272   -80    
-64    -16    
48     112    
144    192    
32     160    
96     -64    
256    -128   
160    -32    
448    288    
-192   96     
96     -128   
32     80     
144    96     
64     32     
464    48     
-96    -400   
0      -160   
80     112    
-32    -112   
-80    48     
288    -144   
0      32     
-144   -192   
208    -80    
128    16     
0      -288   
32     -176   
-2320  -96    
-256   16     
-32    -192   
144    -176   
112    -192   
272    -736   
160    -192   
224    80     
-176   80     
48     144    
-144   16     
96     -16    
0      -16    
-64    64     
272    -192   
-240   -64    
240    48     
32     160    
96     -64    
48     160    
160    -80    
16     -128   
48     304    
32     -112   
128    -224   
144    -96    
80     16     
208    224    
-304   240    
-192   272    
80     240    
64     224    
112    256    
0      -368   
160    -160   
240    112    
368    1280   
128    -208   
-96    -416   
176    688    
272    -80    
-400   -880   
-16    -848   
48     1152   
160    0      
-672   -48    
160    176    
-880   -624   
32     336    
336    80     
-64    -304   
128    48     
16     160    
112    160    
240    -256   
-144   416    
16     16     
256    480    
-304   384    
48     -1120  
-48    96     
224    464    
-192   -272   
-112   864    
400    560    
32     -640   
-336   16     
368    128    
-432   -624   
160    -272   
144    944    
160    -528   
144    -64    
-224   -480   
272    352    
-192   -192   
208    16     
-432   -96    
304    304    
-1104  -304   
144    -176   
272    160    
96     -144   
96     128    
16     -608   
288    -64    
-64    -112   
496    544    
-624   -224   
128    -192   
80     176    
-144   -208   
-288   -176   
0      16     
-320   -64    
-128   -64    
272    48     
16     -32    
32     -16    
0      -240   
128    32     
-48    64     
64     96     
144    96     
48     64     
-240   48     
192    -80    
-336   0      
32     -224   
96     -32    
-32    32     
96     32     
48     -64    
192    112    
240    224    
-16    -192   
-160   -32    
16     208    
-32    64     
160    192    
-368   -96    
-48    96     
-128   -112   
192    48     
-32    -112   
-128   -848   
-112   -160   
-864   -320   
-128   -160   
-304   -96    
-496   16     
-64    -112   
-608   64     
-32    0      
272    -96    
-48    80     
64     112    
-64    -64    
48     -16    
-192   64     
-896   -64    
240    0      
32     -32    
-528   -368   
176    -160   
-576   48     
-112   -80    
-144   256    
-528   128    
-688   -32    
96     16     
192    64     
32     128    
-64    0      
32     64     
-128   -112   
432    16     
192    -32    
-128   832    
-160   448    
-80    -96    
-192   -48    
-208   48     
272    16     
-1136  -144   
-160   80     
-1072  -352   
288    -272   
368    160    
-64    80     
512    -128   
288    144    
-576   -160   
32     0      
-160   -32    
336    64     
160    64     
32     -80    
240    -16    
240    64     
304    96     
-80    -16    
48     48     
-64    -80    
368    576    
-1040  16     
96     -80    
144    -256   
560    -128   
352    80     
-48    0      
-64    32     
-304   -96    
464    256    
-688   16     
-160   -48    
-48    -48    
304    64     
-1904  -48    
-16    32     
-208   -160   
288    128    
-224   32     
208    128    
-112   64     
-368   -112   
48     -32    
-80    0      
16     16     
144    32     
-144   -112   
112    -64    
160    48     
-592   -64    
96     32     
-80    -64    
144    48     
64     -32    
-176   -48    
-80    0      
-112   -16    
-32    0      
48     -32    
-80    48     
16     64     
-48    -48    
-304   -80    
192    256    
64     16     
48     0      
-48    -64    
-128   -16    
-48    32     
0      -144   
256    0      
64     64     
112    96     
16     -128   
272    -80    
-176   32     
96     96     
-320   0      
48     -48    
-640   48     
80     64     
96     -32    
16     -112   
-224   0      
0      -16    
-16    -16    
144    -16    
64     80     
0      240    
-208   -400   
-112   112    
48     112    
-384   -144   
32     0      
-176   -48    
640    576    
-656   1536   
320    -48    
48     -208   
-32    64     
272    -80    
-208   -352   
96     448    
-64    -544   
-16    -208   
-256   464    
96     112    
256    208    
-256   -592   
-192   -208   
80     16     
-16    -272   
0      400    
80     -96    
16     -448   
0      -48    
16     16     
480    240    
-240   272    
-64    272    
-192   32     
32     224    
64     176    
464    240    
-256   432    
-48    80     
16     48     
144    96     
80     -80    
0      48     
-112   -32    
-144   -112   
-16    64     
96     144    
112    -80    
32     -80    
32     -112   
-240   -128   
16     32     
-32    16     
16     0      
96     -64    
-160   -16    
32     -64    
48     48     
-48    0      
64     80     
-112   64     
48     -96    
64     -32    
-208   -80    
256    96     
-80    0      
208    -80    
80     16     
-48    -80    
160    -64    
-64    16     
288    0      
208    80     
96     -32    
64     -80    
32     48     
-64    0      
64     0      
80     -64    
80     -32    
-112   -128   
16     0      
-32    -64    
64     64     
304    176    
-240   160    
-32    16     
48     80     
160    48     
80     -32    
48     -32    
-112   -32    
160    32     
-48    192    
64     224    
80     -48    
16     -320   
144    0      
96     -32    
-48    -96    
-144   80     
112    16     
96     -208   
-64    -384   
384    -352   
224    144    
208    224    
176    96     
-128   16     
-192   -112   
32     128    
240    256    
288    0      
-128   -96    
-272   -48    
-496   16     
-288   -32    
64     48     
-224   -144   
480    -112   
-64    112    
-432   -288   
-160   -64    
64     -32    
256    -96    
384    16     
-96    -416   
48     112    
-224   176    
-80    -64    
432    -128   
128    -528   
128    -176   
-352   16     
-224   96     
80     48     
192    -32    
368    16     
192    -320   
-16    -16    
-144   624    
224    -64    
-112   -384   
-160   -656   
112    -64    
96     128    
288    -16    
-112   96     
-16    80     
80     80     
48     -160   
-112   -144   
96     -96    
48     -176   
-64    -416   
224    -656   
128    -352   
144    -160   
-112   -400   
176    288    
-160   -144   
48     144    
64     240    
192    -224   
96     256    
112    160    
160    -368   
80     -80    
-128   128    
80     -64    
32     0      
224    -16    
128    672    
-160   -352   
80     -128   
224    -320   
256    -64    
32     -32    
192    576    
192    -160   
-176   -64    
-80    -64    
256    0      
-48    48     
624    192    
-144   -160   
336    -720   
144    48     
304    -272   
16     -48    
-64    176    
384    208    
-128   16     
-64    0      
128    48     
48     144    
32     48     
96     -112   
-32    -160   
-48    -16    
160    240    
-64    -512   
192    -592   
128    -80    
192    192    
0      -48    
-128   64     
-80    -80    
224    288    
-48    64     
-80    -176   
144    32     
-16    48     
64     -48    
48     -176   
32     64     
208    -112   
-80    -80    
128    -144   
176    64     
16     -496   
80     -448   
-32    -48    
176    -448   
48     32     
288    32     
112    -64    
-48    -48    
-48    -352   
224    -160   
-160   144    
-48    -48    
-112   48     
432    -32    
96     48     
-176   -112   
288    -384   
-80    0      
176    -272   
112    -192   
-1360  -160   
0      -96    
32     -48    
-144   -352   
128    0      
192    -208   
-96    -64    
144    -96    
0      32     
176    -112   
224    0      
48     0      
-128   -224   
0      -128   
224    0      
-1024  -96    
0      -32    
240    -16    
-48    -192   
240    0      
208    -240   
-208   -224   
0      -1872  
176    80     
128    -64    
-48    -32    
208    -144   
-160   -128   
-224   16     
48     80     
-752   -96    
176    16     
-240   -96    
208    48     
208    48     
-48    -144   
64     -160   
16     -208   
80     16     
64     64     
80     32     
144    -48    
-192   -176   
-48    -48    
128    0      
-112   64     
-16    -80    
-640   336    
-48    112    
416    -224   
336    -128   
-352   -80    
-16    0      
160    16     
416    -80    
-80    -48    
80     0      
-272   -272   
288    -32    
0      32     
-80    -32    
0      32     
64     848    
208    336    
-1392  -400   
48     -112   
-320   48     
-64    16     
32     96     
256    -80    
-160   80     
-368   -16    
192    64     
-256   -96    
-80    -16    
224    192    
-144   160    
0      32     
-208   -48    
-288   -32    
-16    0      
240    -16    
320    -176   
-288   -64    
176    -96    
160    16     
96     -64    
240    -32    
-128   256    
64     80     
0      64     
-128   -32    
-48    -32    
224    -32    
-160   -112   
288    -96    
160    32     
448    64     
-64    144    
-544   -336   
-256   -400   
800    -384   
544    -272   
416    16     
272    -48    
0      0      
-416   -64    
-384   -112   
240    -176   
-176   -16    
160    -112   
384    48     
272    -128   
-48    32     
96     -480   
-624   32     
-144   -48    
-16    -48    
16     48     
48     48     
-224   -16    
144    -192   
-144   -64    
128    48     
-80    32     
64     32     
48     -16    
-1200  -80    
128    32     
-32    112    
-432   64     
112    32     
-272   304    
-240   -64    
-1952  -64    
-240   128    
64     -128   
-144   -48    
16     0      
208    112    
-304   -464   
-96    192    
128    -272   
176    368    
224    240    
-112   -16    
-112   64     
-304   16     
-16    -288   
-1344  144    
-144   -992   
-80    992    
112    -208   
-512   -208   
288    432    
16     -480   
-144   -320   
96     -416   
-384   -48    
-32    -336   
-32    32     
-16    32     
-48    288    
144    240    
304    256    
-480   624    
-688   64     
-96    -304   
-144   -416   
96     -240   
144    128    
16     112    
64     -16    
-160   16     
-224   80     
304    128    
-96    144    
80     -80    
-224   192    
128    0      
-64    -128   
-288   -176   
-80    -32    
0      48     
-16    112    
-32    -112   
320    -160   
-224   -16    
-64    -32    
-112   96     
-16    -96    
-32    -32    
0      -16    
-80    0      
-368   -192   
-144   64     
-752   304    
400    128    
-1424  -16    
240    0      
-224   -144   
-80    -16    
-96    -16    
384    128    
-192   0      
-64    -16    
-80    -16    
-48    -32    
-64    -48    
96     -128   
96     -80    
-176   -16    
80     144    
-288   -32    
80     64     
-160   -224   
-128   48     
-32    16     
-144   -112   
96     128    
-64    0      
-128   -160   
64     -80    
80     48     
-96    -96    
160    -80    
-336   -48    
-128   224    
-416   -16    
240    -48    
48     48     
-112   -32    
64     64     
64     16     
-16    48     
80     16     
-176   -16    
-64    -64    
48     -16    
0      80     
48     64     
-160   -32    
-32    32     
-16    48     
32     -64    
32     -112   
80     -16    
0      32     
48     32     
112    16     
128    64     
48     32     
80     0      
-32    -112   
0      16     
-32    48     
-128   0      
48     -48    
0      -112   
432    -272   
160    48     
-16    96     
0      48     
128    112    
-96    336    
-176   304    
48     144    
0      64     
0      128    
256    16     
320    80     
-464   96     
-208   -16    
-432   240    
176    128    
128    -64    
-336   -128   
-16    0      
128    64     
160    80     
-176   192    
288    192    
-160   -48    
-128   -256   
-240   -64    
256    144    
-48    -672   
-16    -768   
-80    -400   
-240   112    
64     112    
224    192    
96     16     
-336   -96    
240    320    
-64    -64    
224    -112   
-176   192    
128    -208   
-48    176    
48     0      
-304   0      
-48    -208   
-80    512    
192    -208   
-112   -176   
160    144    
-208   16     
-144   16     
272    256    
-208   32     
208    0      
352    128    
-112   -208   
-192   -192   
144    176    
-240   -16    
160    32     
240    160    
-80    -96    
96     0      
128    0      
0      0      
16     0      
176    96     
-80    32     
-64    96     
128    448    
-144   320    
16     224    
64     80     
112    112    
144    80     
16     -80    
-128   -80    
64     48     
48     32     
416    128    
-160   112    
384    -16    
-480   96     
144    80     
80     32     
240    80     
224    96     
144    80     
32     80     
-144   -48    
16     192    
112    16     
0      96     
0      48     
64     32     
-32    96     
96     -336   
32     -224   
208    192    
144    176    
-112   192    
176    -48    
-32    -32    
-64    96     
-32    -704   
192    0      
0      -176   
-32    -144   
16     -64    
80     192    
112    -48    
160    48     
-64    -48    
-48    -192   
32     -80    
80     0      
-16    16     
112    -112   
0      48     
32     -96    
128    16     
16     0      
176    96     
32     32     
-80    0      
-192   -96    
224    -16    
80     176    
-96    0      
32     -64    
-48    16     
96     32     
32     -48    
192    96     
128    0      
384    128    
-512   -336   
112    16     
64     80     
208    16     
32     0      
-16    64     
128    0      
96     64     
16     0      
-128   -144   
96     32     
16     -32    
-64    48     
48     -144   
144    48     
-80    -160   
112    -16    
64     -32    
-80    0      
48     -80    
160    32     
64     16     
-32    -16    
-48    -64    
160    -96    
32     96     
80     0      
80     32     
208    -16    
32     0      
176    -160   
-192   -128   
-144   -640   
240    288    
0      144    
-112   -16    
32     -64    
240    48     
-80    112    
-16    144    
240    208    
-64    -96    
64     48     
-48    -96    
272    128    
160    -80    
192    -96    
48     -192   
96     224    
128    144    
240    112    
-224   0      
-112   -112   
160    -144   
32     -240   
160    288    
-64    96     
-64    80     
0      -288   
160    16     
-224   -144   
-160   48     
256    -272   
-96    336    
512    1072   
272    80     
-416   -272   
-128   -192   
128    -32    
-240   368    
416    464    
-528   -832   
-208   -704   
272    880    
176    800    
16     -368   
192    -272   
48     32     
304    144    
224    128    
-32    -400   
128    -368   
-1072  -528   
480    0      
432    640    
160    -32    
288    -144   
-80    -1088  
400    112    
-352   64     
-32    -272   
0      -304   
80     -64    
368    32     
32     -32    
128    -128   
192    0      
-1968  -160   
80     -272   
-224   -112   
272    32     
496    320    
-464   -624   
-224   -432   
0      288    
1264   848    
-576   -128   
128    -432   
128    -112   
160    -16    
176    128    
448    192    
-640   -272   
112    -32    
128    48     
64     -80    
64     -16    
-48    48     
160    -80    
80     -304   
64     80     
208    -160   
-64    -432   
-96    496    
144    -288   
16     16     
-16    -112   
-112   -112   
112    -80    
-720   112    
128    -48    
144    -560   
-48    656    
192    -688   
80     400    
208    -96    
208    -240   
32     -16    
-256   -816   
-64    -352   
-320   208    
272    -96    
-48    0      
416    -128   
-656   256    
-16    -16    
-96    64     
272    -96    
-272   -368   
128    -96    
288    -32    
-192   -624   
224    -80    
-160   -144   
160    0      
-112   -32    
32     -112   
-48    -96    
-336   32     
-384   16     
192    -112   
-512   -64    
112    -192   
-64    -16    
-64    -192   
64     80     
-128   -480   
288    -160   
-160   -208   
-176   -208   
160    -16    
32     -32    
-416   128    
128    -160   
-624   -64    
-32    -128   
-256   16     
-160   384    
336    -48    
272    -416   
0      96     
256    -128   
-48    -320   
-96    -256   
-64    144    
-592   -48    
80     16     
-464   368    
448    240    
-352   -48    
144    192    
-144   96     
272    -160   
160    -128   
240    -208   
-272   -64    
-64    -304   
0      -320   
80     -336   
-128   -192   
-96    -192   
352    240    
0      192    
224    -16    
144    0      
80     0      
-352   -416   
144    -304   
224    -16    
-192   -160   
-192   64     
160    -32    
-64    -32    
-16    48     
-1328  0      
256    176    
-128   -64    
-64    -64    
160    -64    
-208   -32    
208    -224   
80     16     
-976   -48    
16     0      
64     -32    
-96    288    
-32    160    
-400   -112   
32     272    
-640   176    
-240   -208   
-1024  -208   
-16    96     
64     -80    
-96    -48    
192    -48    
-112   192    
-48    48     
-144   96     
-384   -144   
-80    -96    
80     -64    
112    32     
-112   -32    
32     16     
-48    -80    
-64    16     
-272   16     
-128   64     
48     -96    
-32    -96    
80     0      
-384   -608   
208    -176   
-144   -112   
-272   -48    
144    112    
-96    112    
480    576    
-368   144    
-80    64     
-272   48     
64     -688   
16     -448   
-256   -240   
-256   -512   
240    256    
-304   320    
64     -144   
-112   48     
160    368    
208    -208   
176    -496   
-80    64     
-528   48     
-208   -192   
48     80     
112    -144   
-96    -80    
-304   -48    
-320   16     
-400   -640   
480    672    
160    48     
208    -160   
400    224    
-272   0      
-480   352    
192    656    
-592   -352   
0      -320   
176    352    
224    224    
-16    -64    
224    -32    
-896   -80    
-560   -208   
-64    -272   
304    -400   
560    128    
0      192    
-32    112    
96     -64    
176    -112   
64     16     
80     16     
80     32     
0      -16    
-512   -112   
96     32     
-672   -48    
0      80     
32     -16    
-160   16     
-64    112    
-96    128    
0      -32    
-32    0      
32     -16    
-176   16     
-16    48     
-496   -128   
80     48     
-96    -32    
32     0      
16     -32    
0      48     
32     -48    
-160   0      
32     32     
-48    112    
160    64     
-96    16     
112    -32    
0      -32    
-64    32     
-16    48     
240    32     
-128   48     
48     -16    
0      -48    
-80    -64    
-96    32     
32     -16    
-224   -160   
64     224    
112    48     
48     -32    
-128   0      
-64    -48    
304    144    
-128   32     
128    -144   
-352   -96    
-160   64     
-128   -16    
96     80     
208    16     
80     288    
-112   0      
-32    -112   
-16    -16    
80     16     
48     16     
304    240    
-384   112    
-64    64     
80     32     
-112   -48    
96     32     
-80    64     
192    128    
16     64     
0      -32    
96     48     
-80    48     
-48    32     
176    112    
-32    16     
-80    -32    
48     80     
-144   0      
128    64     
-16    -48    
16     -112   
144    -128   
32     16     
0      144    
144    0      
112    -32    
-160   0      
-64    48     
128    64     
-64    -48    
-96    -64    
240    160    
-208   -16    
160    -32    
16     64     
64     80     
16     112    
-80    0      
-16    -32    
-32    -16    
272    64     
-128   64     
48     0      
-80    16     
112    16     
-160   -96    
160    160    
-16    80     
-80    16     
80     -16    
128    -96    
16     -32    
-80    96     
192    48     
64     160    
96     192    
-224   -96    
-64    -32    
-64    96     
64     64     
176    32     
112    -96    
32     -128   
80     96     
-16    -112   
-224   -176   
112    128    
240    192    
112    -32    
-32    -64    
32     48     
-64    384    
-160   -96    
144    192    
-96    -480   
-160   400    
48     80     
-96    0      
128    -480   
-128   -304   
384    -480   
208    320    
256    -64    
96     32     
-128   -80    
-160   176    
-112   -112   
48     48     
-112   -32    
48     -48    
128    -16    
384    192    
304    -224   
32     0      
-160   192    
-144   -16    
-64    640    
192    -832   
432    176    
400    160    
-32    0      
144    256    
160    -240   
-240   -80    
-16    160    
-160   -288   
160    144    
0      -720   
192    352    
176    704    
-192   -480   
-304   -416   
-128   144    
-144   96     
224    -208   
256    224    
-64    -128   
144    0      
128    -64    
272    96     
48     160    
288    272    
-256   48     
-224   -320   
-64    0      
16     272    
80     -128   
-64    -736   
128    192    
80     416    
144    64     
-128   32     
-80    -16    
-144   176    
112    -176   
-64    -208   
-192   -448   
208    144    
128    480    
16     -80    
208    -192   
288    96     
-176   -912   
96     96     
176    96     
-64    80     
64     16     
96     32     
-32    16     
96     0      
144    80     
-80    -16    
96     96     
272    224    
64     320    
16     -464   
176    160    
-64    -352   
32     48     
96     -112   
80     0      
-176   -112   
48     -32    
-80    224    
0      64     
224    176    
352    128    
-96    176    
192    64     
224    384    
-496   -64    
272    -112   
64     -80    
-224   -80    
-176   -80    
224    112    
112    32     
160    432    
64     -208   
-112   -144   
48     64     
-32    -112   
224    128    
-96    -80    
384    32     
144    -80    
-96    32     
80     -64    
64     -80    
144    -96    
16     -1456  
288    192    
0      -640   
96     -208   
-16    -128   
176    128    
-176   -16    
80     -336   
-64    -48    
160    32     
192    96     
-96    112    
416    128    
-128   64     
160    -48    
64     -128   
-80    0      
64     16     
112    -192   
192    -48    
16     -16    
16     -128   
192    -208   
128    -32    
64     -592   
-32    -96    
144    32     
96     -16    
-160   64     
96     -64    
288    -112   
-384   -80    
-544   -160   
-48    0      
-736   -144   
176    80     
-80    -208   
256    -48    
80     -16    
496    592    
-480   96     
-368   -208   
-64    -384   
144    -256   
240    160    
0      -64    
176    144    
-240   256    
464    304    
-208   -80    
-80    48     
336    144    
-128   160    
224    -208   
192    -208   
80     32     
112    -528   
16     -16    
112    -352   
-160   -304   
128    -80    
-64    16     
-176   160    
0      -144   
-368   -272   
192    -96    
400    -208   
128    -112   
96     32     
-128   256    
48     304    
-128   -352   
80     96     
320    -16    
96     -112   
80     -32    
320    -272   
0      112    
80     -48    
-304   -304   
-32    32     
-672   176    
192    208    
32     112    
0      32     
-32    96     
96     -336   
208    -160   
272    16     
48     240    
-208   48     
208    128    
-192   -32    
-32    432    
0      -144   
0      144    
-256   80     
-176   -208   
-464   320    
176    80     
-80    224    
64     -224   
224    944    
224    -400   
144    -16    
-416   48     
-144   -400   
144    320    
-160   0      
-368   -400   
-144   -304   
-368   -1040  
96     -112   
-304   288    
320    -352   
-16    0      
128    -48    
256    80     
272    -240   
48     -32    
-496   48     
-224   -112   
-144   -192   
160    -48    
32     32     
224    0      
-96    -80    
192    -208   
-528   -144   
-128   -160   
160    144    
128    -64    
400    176    
96     80     
288    -144   
-192   32     
-128   96     
-336   -48    
608    432    
-656   80     
352    -128   
704    -128   
256    -48    
-192   16     
-864   -192   
-112   64     
-752   -64    
-112   32     
-48    -112   
-640   -48    
0      -64    
-768   112    
-368   -48    
-800   48     
-176   0      
-240   -32    
192    0      
-448   -64    
0      0      
-352   -96    
-16    64     
-192   -128   
112    0      
48     64     
-80    80     
-80    -32    
-432   -16    
-96    0      
-160   16     
-64    64     
176    80     
-64    128    
-560   -112   
48     0      
-32    -16    
144    16     
-112   48     
32     592    
-96    96     
0      -64    
-320   32     
-48    -240   
-80    -16    
-160   -48    
192    -48    
-192   64     
160    -32    
-96    -144   
-208   32     
64     -64    
-80    -96    
112    -64    
-64    112    
16     128    
-144   -64    
-144   -32    
-160   -16    
16     -16    
-352   0      
-112   64     
-272   128    
-144   -64    
-64    -256   
80     160    
-208   -32    
224    -96    
-160   32     
-16    64     
-304   80     
80     96     
64     0      
80     16     
64     -32    
-112   48     
80     64     
-512   32     
112    -176   
144    -80    
48     96     
-176   -64    
80     32     
-176   80     
32     112    
64     96     
-48    0      
80     0      
-144   176    
112    96     
96     -32    
-208   -16    
-256   -48    
-32    -48    
-912   -64    
144    160    
-48    80     
-64    48     
32     64     
-32    96     
128    80     
-176   -80    
-192   -96    
144    32     
0      -32    
-144   16     
64     80     
-320   0      
0      -144   
-400   -80    
256    160    
16     0      
-64    560    
208    160    
16     -208   
-208   -96    
128    -80    
32     432    
96     -240   
-64    -64    
-160   80     
0      144    
-192   176    
352    -160   
-352   80     
128    96     
16     48     
-224   -64    
-80    -400   
-64    400    
-80    -96    
-64    0      
16     -848   
-160   448    
-48    -16    
-144   -272   
160    288    
-64    -112   
336    304    
-480   -160   
-160   -432   
80     208    
-80    -128   
48     -128   
0      144    
-128   -32    
64     848    
96     240    
-432   -336   
112    0      
-192   -144   
368    240    
-64    176    
32     -80    
48     -176   
-64    96     
32     32     
64     -16    
64     -112   
208    16     
272    32     
112    48     
32     -176   
240    -128   
384    432    
112    288    
272    112    
-176   0      
-80    0      
112    240    
64     160    
-96    128    
32     224    
112    336    
-208   480    
48     160    
-64    208    
288    432    
160    160    
-80    80     
-384   -48    
-256   272    
-224   16     
224    -64    
128    -48    
160    16     
112    112    
-304   -32    
-16    0      
16     112    
-80    0      
240    -64    
-16    192    
-400   32     
-64    -64    
-48    -192   
160    -128   
96     -16    
48     -16    
208    16     
-96    -48    
176    208    
-16    16     
96     -16    
80     0      
96     -48    
160    176    
-80    112    
16     48     
272    192    
-144   224    
160    48     
96     -16    
0      16     
48     16     
-64    -48    
176    -288   
48     -176   
64     32     
144    80     
-112   192    
-16    80     
160    -272   
-80    -176   
272    128    
-208   176    
48     0      
48     112    
16     160    
-48    112    
16     80     
80     -144   
224    128    
80     -16    
160    16     
-32    0      
0      112    
416    512    
-416   592    
-160   208    
224    -304   
128    -224   
176    -16    
128    -960   
224    -80    
-16    64     
0      -176   
128    240    
32     400    
16     32     
64     16     
96     -352   
48     0      
-240   -96    
16     320    
352    288    
32     384    
160    288    
80     -288   
64     -64    
64     -128   
224    -32    
-80    0      
0      48     
-16    -208   
320    96     
-32    96     
32     0      
336    -80    
-304   192    
-96    32     
-160   192    
512    144    
192    -304   
96     32     
224    -80    
-160   16     
48     -224   
-272   -64    
176    -160   
-288   64     
-208   -144   
64     0      
-176   -80    
96     32     
-48    -80    
352    -32    
16     224    
64     -112   
32     48     
112    -592   
64     416    
368    176    
-208   400    
-48    -64    
160    96     
96     48     
224    0      
256    112    
-128   -64    
128    16     
96     -80    
160    208    
-16    -352   
0      48     
240    -16    
0      192    
64     -272   
-144   16     
-96    112    
336    416    
80     416    
208    112    
80     -16    
80     48     
160    64     
-64    -640   
-32    -144   
-64    -112   
-32    16     
-32    -320   
-112   -48    
64     -560   
96     -160   
208    -80    
-112   144    
-32    -48    
80     96     
480    416    
64     256    
48     176    
-80    32     
-16    48     
320    -64    
64     -32    
-16    112    
160    -208   
-96    272    
48     -224   
240    -400   
64     -1008  
0      32     
16     -16    
224    368    
32     -160   
-144   -80    
144    720    
112    48     
80     -384   
144    80     
-48    16     
-80    -160   
32     48     
48     -64    
-128   -96    
272    -48    
-80    -192   
80     -48    
240    -144   
32     -48    
-112   -672   
752    -496   
288    -240   
112    112    
288    80     
-16    -48    
240    64     
32     272    
-288   -96    
-224   -96    
-864   -128   
672    64     
-960   112    
-48    -64    
544    208    
-496   -32    
-80    -80    
112    -176   
96     64     
-32    48     
256    -112   
352    -128   
16     64     
-192   -96    
64     32     
-304   0      
-160   -80    
-928   192    
-128   16     
-32    -80    
512    16     
-16    -16    
-144   -144   
176    -96    
304    -240   
176    32     
272    -176   
192    -176   
-48    48     
288    128    
240    -32    
-16    -160   
-512   32     
-16    16     
128    -32    
80     -224   
304    -64    
-352   -144   
-208   -144   
160    -1056  
-80    64     
208    -96    
96     0      
-240   -128   
96     -16    
-64    48     
64     -32    
-16    0      
144    -16    
-1872  -32    
160    -32    
192    16     
-64    -48    
-64    16     
112    -80    
32     16     
32     -64    
96     32     
-16    32     
32     -96    
192    160    
-288   -64    
64     -16    
32     16     
-1200  0      
-16    -288   
-928   -240   
272    48     
112    64     
64     -112   
272    64     
80     -1376  
96     32     
-32    80     
-144   -112   
112    -96    
-96    -96    
-160   -64    
-48    -64    
-976   -64    
208    -96    
-224   -16    
256    -96    
144    48     
-32    -272   
160    -16    
-160   -1072  
224    -16    
-64    128    
-48    -144   
-272   -96    
176    0      
-80    48     
-128   -112   
48     -272   
64     -48    
-32    -80    
-32    -96    
16     16     
192    -320   
96     160    
-320   80     
48     32     
0      160    
80     32     
-144   -80    
48     32     
16     -96    
48     -48    
96     320    
144    -144   
-784   -32    
0      -96    
112    -144   
368    272    
-368   -144   
256    -176   
-2128  176    
32     -80    
288    272    
-112   -192   
144    -208   
-64    272    
128    48     
-208   -128   
-1280  -288   
80     128    
-1008  80     
192    -240   
-288   96     
64     -112   
-32    -16    
-176   -224   
48     384    
-112   -112   
-272   -240   
-480   224    
-112   160    
-80    -240   
-240   128    
-240   -336   
-112   -352   
176    -208   
-48    528    
-96    368    
-80    128    
336    352    
64     -208   
128    -208   
-480   -528   
-208   -112   
-400   -16    
-32    112    
-16    192    
144    304    
304    -16    
96     -144   
-128   -160   
0      -32    
-128   -160   
-192   -192   
160    0      
64     80     
-80    48     
-304   -80    
16     -112   
16     0      
96     -32    
80     -32    
-128   0      
128    -176   
0      -16    
-32    -192   
480    448    
-352   352    
32     48     
-112   -32    
112    16     
-16    -16    
160    32     
48     -32    
0      48     
112    32     
-512   -96    
64     -80    
-240   -160   
-16    -160   
256    -336   
-176   -208   
432    -112   
-400   96     
-208   32     
-64    16     
-144   -32    
256    -16    
0      176    
-16    16     
0      -128   
-688   -160   
-96    64     
-16    32     
288    112    
176    -192   
0      32     
80     192    
-96    -48    
16     96     
-16    32     
240    32     
-16    32     
-144   -80    
-160   -32    
-80    -48    
-384   -64    
32     80     
-1120  -80    
160    64     
-144   32     
-48    -176   
96     32     
0      128    
-128   48     
48     48     
112    64     
16     0      
144    128    
64     192    
16     -48    
-176   192    
-160   16     
-224   32     
-48    144    
48     -112   
48     272    
-32    224    
144    96     
96     80     
160    352    
-288   176    
-64    -128   
64     -48    
128    -80    
144    48     
-112   -32    
-16    -64    
-688   -192   
-112   64     
48     208    
-96    96     
32     -32    
-32    -64    
0      -96    
16     -144   
-32    -144   
-48    -16    
144    176    
-192   144    
-192   0      
-160   48     
224    112    
144    80     
80     464    
384    368    
-384   32     
16     32     
272    16     
208    64     
-240   128    
368    480    
-176   192    
-48    0      
48     144    
-112   48     
64     400    
240    160    
-160   48     
-112   144    
256    -32    
80     16     
-112   112    
32     -48    
-160   -304   
128    -384   
160    96     
160    272    
16     -336   
64     0      
304    -80    
-80    -64    
-48    80     
112    -32    
384    336    
-384   96     
-128   80     
-144   528    
352    576    
192    544    
-144   384    
-16    96     
-384   -240   
-64    48     
-64    -336   
240    128    
-464   -80    
-64    -64    
-32    160    
176    240    
304    128    
64     80     
-112   128    
64     -224   
16     16     
64     0      
144    32     
176    304    
48     64     
-112   192    
-176   160    
208    -192   
320    288    
-224   -48    
-64    176    
-32    -96    
-64    96     
352    224    
-96    32     
160    64     
-272   -48    
112    32     
16     96     
64     144    
-304   16     
96     -320   
192    176    
64     -64    
-80    -384   
368    352    
-112   -272   
240    160    
32     112    
144    -80    
-192   -112   
-176   288    
208    112    
-96    -112   
-96    144    
144    -160   
64     48     
-16    0      
128    -96    
80     16     
-112   0      
256    144    
-48    -32    
-16    -144   
144    32     
-64    16     
0      192    
112    112    
-32    -112   
128    96     
48     64     
-64    -112   
64     0      
64     -832   
-32    -48    
-16    -544   
256    48     
16     96     
160    48     
96     64     
272    160    
80     128    
-48    144    
-144   16     
64     -64    
272    -48    
16     -208   
32     64     
208    0      
-32    48     
-80    32     
112    -16    
64     144    
-288   32     
-96    -352   
512    800    
-560   336    
384    144    
112    -192   
48     16     
64     96     
-16    288    
144    96     
224    -560   
-16    -272   
512    -1104  
-288   144    
128    48     
400    16     
128    32     
-272   240    
192    96     
240    -16    
-112   64     
-176   -32    
-128   16     
-16    -160   
288    144    
-528   32     
-224   0      
-32    -16    
240    32     
448    16     
336    32     
640    160    
-112   16     
-48    32     
-160   80     
-48    32     
144    -112   
48     48     
128    -112   
400    64     
-528   -160   
-176   -112   
240    -528   
128    144    
32     16     
-112   -32    
160    32     
-208   48     
-48    -112   
32     80     
64     96     
-48    -128   
320    -32    
160    -64    
80     144    
304    -32    
-272   0      
80     -48    
192    96     
32     -48    
96     48     
32     144    
0      -48    
112    -144   
112    96     
112    32     
-32    16     
128    16     
-32    -96    
128    112    
-96    -48    
224    80     
-32    -48    
192    64     
-80    96     
16     0      
32     16     
432    176    
-176   48     
320    -96    
-208   -544   
416    -16    
-240   400    
240    -32    
160    48     
144    -64    
-64    208    
176    48     
-16    -464   
64     32     
208    64     
-112   240    
256    96     
0      144    
-144   -64    
96     -336   
112    -288   
96     -176   
-96    0      
80     272    
160    32     
128    160    
-112   32     
-112   -448   
160    -112   
176    -48    
80     320    
-176   -144   
144    -512   
-1008  176    
48     -48    
112    -16    
48     -240   
80     -16    
144    -528   
144    -208   
96     16     
32     80     
192    -64    
176    80     
-288   -64    
304    32     
-528   -304   
16     400    
-400   -736   
224    784    
512    528    
-576   -496   
-48    304    
384    -720   
384    800    
-144   32     
-112   -256   
112    -320   
64     272    
224    128    
-64    -224   
144    32     
-112   -288   
-432   80     
96     48     
192    -112   
80     304    
-64    0      
64     -208   
64     -80    
-64    -416   
272    -32    
32     -160   
64     -32    
112    -64    
208    128    
32     0      
-224   -48    
-432   -128   
64     -160   
-224   -160   
-176   -112   
240    64     
208    128    
-96    -16    
112    -48    
-80    32     
0      -32    
-32    48     
-128   48     
176    -288   
32     -208   
-112   -128   
-240   -96    
48     16     
128    -64    
32     0      
-176   -48    
-16    -288   
-48    32     
80     -144   
0      64     
16     -1504  
160    -160   
-192   0      
-112   -16    
-128   0      
176    128    
-256   48     
112    -64    
-384   -256   
80     -288   
368    80     
-208   48     
16     48     
112    -96    
16     32     
256    -464   
160    -64    
16     48     
32     64     
-128   32     
160    0      
-224   96     
-128   -336   
448    -384   
96     -64    
-224   80     
160    -208   
-32    64     
32     -208   
-256   64     
-432   64     
32     -16    
208    0      
352    0      
352    48     
-416   64     
-448   -96    
-208   -224   
320    192    
-304   32     
64     144    
80     -112   
176    144    
-1120  -160   
-480   -144   
32     -64    
-176   64     
-32    -64    
-960   -208   
-224   16     
-192   48     
-288   32     
400    -128   
-80    80     
-1056  -16    
-192   -64    
-752   -128   
80     64     
-192   32     
-640   48     
160    16     
-224   96     
-128   -32    
-336   64     
160    16     
-784   -128   
144    48     
-48    64     
-112   32     
-224   -160   
96     176    
-16    80     
-16    -80    
96     144    
-96    -16    
-128   -112   
-192   -64    
-288   -112   
-224   48     
-96    -32    
-224   96     
48     96     
-1312  -128   
144    -112   
-208   -96    
112    64     
208    -64    
-32    688    
-16    -48    
160    -320   
-112   96     
96     -336   
-80    48     
32     64     
-496   -384   
-352   32     
-256   400    
-1328  -96    
368    32     
-272   -96    
-32    -176   
-400   -128   
48     -336   
128    64     
-272   -256   
352    320    
-256   128    
352    112    
64     -272   
-192   320    
80     -80    
-240   -160   
-224   0      
-128   -32    
208    0      
48     48     
-336   -352   
144    224    
64     336    
-240   160    
32     64     
32     -208   
-32    224    
-272   128    
-112   -128   
-144   128    
-304   -176   
80     544    
80     -208   
-2416  -400   
320    304    
32     -176   
16     112    
160    -80    
-48    64     
-48    16     
-16    48     
32     -144   
-16    -96    
128    64     
-32    240    
-80    208    
-192   -96    
112    32     
-1488  16     
192    -224   
-96    -192   
112    -64    
0      32     
-48    -16    
112    32     
-80    -16    
-16    32     
-32    -32    
96     48     
-128   -16    
128    96     
-320   -32    
96     80     
-112   128    
128    80     
0      192    
-288   -16    
-48    0      
32     -16    
128    16     
-80    0      
288    48     
-368   32     
-64    96     
-128   -192   
32     -96    
0      48     
80     80     
96     32     
-32    -80    
-16    -64    
128    -32    
-96    -112   
96     96     
16     16     
144    64     
-64    -16    
-96    16     
-16    -48    
-32    32     
144    112    
-16    -64    
16     -96    
0      -64    
-64    48     
-80    -480   
-48    -192   
0      0      
96     -32    
48     96     
-32    96     
240    96     
-96    64     
-192   16     
-96    0      
96     -64    
48     0      
-80    -80    
112    -112   
32     -32    
288    336    
-256   400    
-32    96     
0      0      
-48    -32    
240    64     
256    208    
240    304    
-160   112    
-288   -160   
80     -16    
-368   -32    
-256   -32    
80     80     
-48    80     
-432   -624   
160    -416   
-240   368    
-592   128    
-16    0      
192    304    
-480   80     
320    128    
-240   96     
128    48     
272    224    
96     48     
160    -16    
-368   48     
-304   48     
-160   -16    
96     -32    
288    128    
288    16     
-240   -208   
368    -336   
176    -64    
96     160    
-112   96     
-368   -32    
-160   -160   
-288   -192   
80     -144   
160    -80    
176    48     
208    176    
16     32     
-16    32     
144    -16    
-208   -16    
-336   -208   
352    -144   
48     -16    
304    128    
-176   32     
-624   -592   
96     64     
-240   0      
96     32     
368    -16    
-112   0      
272    96     
-192   48     
-64    32     
-112   32     
-128   16     
-32    16     
96     48     
432    -16    
-80    -32    
-96    -176   
-48    48     
-16    -448   
-32    96     
208    176    
-48    144    
16     48     
80     16     
48     16     
128    32     
144    96     
48     48     
-144   32     
192    64     
-48    112    
80     -192   
80     64     
192    -944   
16     32     
48     96     
48     272    
-80    160    
64     16     
-128   0      
256    -16    
32     272    
-224   224    
80     -144   
304    -48    
-80    -32    
112    -272   
336    256    
112    48     
112    -336   
320    0      
256    352    
-192   -112   
-16    816    
-16    -992   
-64    -416   
144    624    
176    -512   
352    544    
48     32     
-64    -224   
128    112    
32     -176   
16     -208   
192    -32    
-224   -592   
592    96     
-336   320    
96     96     
-112   -224   
592    608    
-272   176    
80     560    
352    272    
-288   -176   
192    -448   
-80    -688   
-80    112    
192    48     
-336   160    
-32    -528   
240    -416   
-48    -912   
320    -96    
-272   -48    
128    192    
-112   -96    
128    16     
192    -80    
-208   -112   
96     96     
-112   -128   
320    32     
176    112    
-80    96     
-16    -416   
-64    -112   
48     -48    
240    64     
-160   -16    
368    -32    
16     0      
80     224    
16     208    
144    -320   
192    -176   
-16    -96    
112    -32    
-64    32     
144    -48    
160    -96    
0      80     
-48    144    
112    -32    
192    -16    
-112   -880   
128    48     
80     -64    
48     80     
-48    -48    
32     0      
0      -32    
112    96     
16     -208   
-80    -48    
96     -320   
-16    32     
160    -32    
32     -736   
-64    -160   
144    -336   
-64    -48    
80     -64    
128    16     
80     -64    
192    0      
80     80     
0      128    
176    0      
64     32     
48     -48    
112    16     
0      64     
112    -224   
64     -32    
-192   80     
192    16     
128    -48    
432    -48    
-128   64     
0      -256   
64     -176   
64     -304   
64     -96    
0      -16    
80     112    
16     48     
-224   -32    
272    -96    
-80    64     
-624   0      
-128   -224   
-576   -128   
176    -336   
352    -208   
32     64     
-48    144    
-208   112    
224    -112   
96     -368   
-224   -32    
96     -160   
272    224    
-208   240    
-160   112    
-432   0      
32     80     
-448   16     
144    -192   
-176   -160   
-144   -96    
-64    -32    
-64    -192   
272    -80    
304    -112   
336    0      
80     112    
240    240    
-48    16     
128    -64    
-208   16     
224    -128   
-432   160    
32     160    
224    96     
0      224    
16     -208   
256    -624   
-96    96     
240    -336   
192    336    
288    144    
256    288    
-288   272    
48     176    
-96    192    
-64    96     
-384   -176   
96     -576   
-2192  288    
160    64     
-240   48     
240    -160   
-208   -304   
96     -192   
-112   -144   
144    -128   
192    -64    
-64    304    
16     -208   
-80    -16    
192    16     
-16    112    
80     160    
-448   -112   
128    0      
-528   32     
304    -448   
-48    208    
0      368    
64     400    
-80    -560   
0      -176   
240    -304   
-16    -112   
-704   48     
-16    -96    
-320   -144   
144    -32    
16     112    
0      16     
-256   -32    
-128   -176   
-80    80     
32     144    
224    640    
-528   -592   
96     -672   
-272   -272   
224    -80    
-240   -320   
128    -256   
-160   -128   
48     -64    
-144   48     
-80    -144   
64     -96    
96     -160   
-32    -32    
16     -240   
96     0      
-128   -112   
32     -80    
-304   -80    
224    -64    
-64    -16    
160    0      
-80    32     
-48    0      
-384   -96    
-176   -48    
96     -48    
-272   -80    
64     96     
-368   -48    
-352   64     
-144   -16    
-992   -80    
-128   112    
-64    0      
0      48     
160    -16    
-64    32     
-176   0      
-32    -48    
80     -32    
176    144    
-16    -96    
-32    48     
-128   -32    
-16    -96    
64     16     
-144   16     
-96    32     
-480   -32    
-112   -32    
-1712  -80    
-48    32     
-32    32     
-96    0      
240    48     
-80    64     
-240   -48    
80     80     
32     64     
0      32     
-96    0      
112    0      
-32    48     
-64    0      
64     32     
-368   -32    
-176   -224   
192    -128   
-16    160    
-144   -112   
224    32     
-272   -64    
-64    -96    
-160   -64    
48     -16    
-272   64     
80     -16    
192    16     
-32    -16    
0      0      
-48    64     
0      16     
-1040  -64    
-48    48     
-80    -16    
96     16     
-32    -16    
-80    224    
-16    32     
112    -80    
-176   -224   
-176   -352   
-32    -112   
16     128    
-160   80     
-320   32     
-192   -176   
-176   -96    
240    64     
-96    -160   
16     -96    
64     -400   
192    -80    
496    336    
-432   176    
-528   -96    
-64    -16    
80     -16    
80     96     
-16    16     
-288   -16    
208    -704   
-576   -400   
-112   352    
-944   -16    
-128   -48    
432    240    
-688   352    
-240   -112   
-256   -96    
80     -272   
256    176    
208    160    
-208   -16    
-272   16     
-304   -32    
-32    -48    
112    -16    
-176   80     
-1200  -80    
-112   112    
-160   -48    
464    208    
32     80     
256    -16    
144    64     
-32    160    
-432   -64    
0      -224   
288    64     
176    64     
368    288    
-176   80     
224    48     
-784   -32    
-64    -64    
-224   16     
-112   288    
0      80     
-96    -48    
-304   -192   
-448   -192   
112    160    
-16    96     
80     96     
48     -96    
80     -64    
-160   48     
-448   -32    
16     16     
160    176    
192    144    
240    0      
192    -80    
224    112    
-16    272    
-80    0      
-32    -160   
48     -16    
112    64     
-144   0      
176    96     
0      -128   
96     -160   
16     784    
-64    -32    
96     -240   
32     240    
32     16     
0      -48    
144    0      
-128   240    
32     -96    
-128   128    
32     -80    
-400   -128   
464    -144   
-224   48     
272    176    
-176   -352   
-16    464    
-400   -656   
-96    352    
272    -240   
128    80     
144    800    
-112   -464   
32     192    
96     -32    
-192   320    
144    208    
-208   -304   
192    -576   
112    176    
160    656    
320    144    
32     128    
224    -96    
-208   -112   
144    -368   
-64    -80    
48     32     
-112   32     
64     128    
416    384    
-400   448    
208    -144   
48     -32    
0      -16    
112    -80    
128    112    
288    0      
-64    80     
112    16     
-64    48     
32     -208   
-80    -160   
208    160    
-80    -112   
0      -224   
-240   -320   
-176   -400   
160    16     
64     112    
112    64     
640    304    
-400   144    
-176   -128   
-16    16     
80     -64    
0      16     
64     32     
272    96     
-256   -64    
32     80     
128    240    
-32    48     
96     -64    
-16    -48    
16     16     
160    144    
48     144    
256    16     
-112   -96    
176    -16    
192    48     
-320   -32    
0      -16    
-240   -144   
224    -96    
128    176    
144    -128   
144    -64    
-96    -64    
32     16     
48     -32    
144    -96    
-80    -112   
-16    -144   
-144   -192   
208    -32    
-160   -112   
-112   16     
-64    -64    
0      -320   
160    80     
160    -48    
-48    48     
176    -736   
80     160    
-64    96     
-80    -48    
96     32     
-64    -16    
-128   48     
128    -32    
48     -16    
256    -80    
64     -48    
-96    -48    
0      48     
0      -16    
112    -16    
-32    80     
144    112    
-272   160    
480    144    
-96    -416   
-80    -144   
144    -32    
-96    96     
32     32     
64     96     
48     -16    
256    128    
32     176    
64     32     
-48    80     
32     32     
-32    -16    
384    -592   
32     32     
-32    -16    
-64    -112   
48     -208   
160    -112   
384    -80    
144    -48    
-320   -256   
-48    -96    
-192   -16    
0      -176   
224    -32    
496    -304   
256    -144   
96     -240   
-160   96     
-304   -336   
-96    112    
160    256    
240    64     
96     -80    
192    -48    
256    -64    
-192   -160   
-64    192    
128    -432   
320    352    
16     80     
-288   -368   
288    432    
144    64     
320    80     
128    -272   
384    -112   
432    304    
-48    176    
128    -112   
-272   80     
96     -192   
400    480    
-608   -448   
192    -48    
144    32     
416    -304   
256    -176   
80     160    
160    96     
-192   -48    
-16    -320   
-80    -656   
32     32     
128    -80    
576    -368   
-176   0      
128    16     
48     -144   
32     -32    
64     -176   
-112   -64    
-32    0      
-48    -1056  
64     32     
224    96     
-48    0      
-1200  32     
96     -16    
-16    -96    
80     -128   
144    16     
-48    0      
32     16     
32     224    
48     -80    
128    0      
96     112    
80     64     
32     32     
80     80     
112    64     
-784   -48    
64     -16    
-32    -192   
128    -176   
64     128    
48     -112   
240    -16    
144    -960   
-96    -224   
-32    -96    
-112   80     
80     -160   
112    48     
112    64     
160    112    
-288   32     
0      -16    
-1280  -64    
32     80     
-112   -144   
128    -160   
128    64     
64     -64    
192    -64    
256    112    
112    48     
-112   -48    
144    48     
-32    -80    
160    -64    
48     32     
160    -16    
-224   -64    
192    -96    
192    64     
-176   -160   
144    64     
80     -160   
-16    16     
-16    -1072  
96     0      
160    -32    
96     96     
-128   64     
-16    -64    
16     -48    
32     0      
-560   -48    
176    -128   
-736   -16    
-64    32     
-240   32     
288    -176   
-32    0      
112    -272   
-144   -48    
160    16     
48     0      
-80    -80    
176    176    
-240   -16    
144    -16    
-240   -16    
-144   48     
-352   64     
176    -32    
-32    -64    
96     -128   
144    -16    
-96    -256   
16     96     
320    144    
160    -96    
-16    0      
0      0      
-288   112    
96     -16    
-416   -80    
128    -144   
112    0      
80     -16    
-48    144    
112    -256   
64     32     
256    -144   
-192   192    
-192   -80    
112    -32    
-64    -48    
272    -16    
-64    32     
80     -16    
-368   -64    
32     -16    
-240   -32    
160    -48    
112    -64    
96     -112   
80     288    
16     -112   
128    32     
-432   144    
96     128    
272    368    
-192   144    
-160   -208   
80     -48    
-48    80     
256    64     
0      -48    
144    0      
-64    64     
-1936  96     
-128   -16    
-2144  -96    
-432   -160   
384    32     
-768   96     
752    96     
64     -800   
208    -96    
-240   112    
-496   -336   
-96    -64    
-176   368    
-240   208    
-144   -560   
416    400    
96     256    
48     -208   
-160   176    
-32    -96    
-112   -16    
176    -64    
-400   16     
-160   96     
-80    -48    
-544   -688   
448    512    
400    464    
-208   -384   
32     208    
-256   -64    
0      304    
-336   80     
304    -240   
448    -160   
320    128    
-32    32     
-240   192    
-320   -400   
-288   448    
-272   256    
-96    -288   
224    224    
-320   -144   
-112   32     
-192   432    
-64    -432   
16     64     
-336   -64    
-64    64     
-80    48     
-400   48     
-16    32     
-96    176    
-800   -32    
64     -16    
-112   -768   
352    656    
-112   16     
-64    -496   
32     400    
-176   0      
-160   -368   
16     160    
192    96     
-96    -336   
-16    176    
-128   -416   
-80    -224   
-80    48     
-128   112    
-688   -192   
0      64     
-112   64     
208    416    
-144   784    
-32    -256   
32     -352   
48     16     
-48    16     
-32    -192   
32     -288   
16     -64    
192    160    
-288   -544   
-336   -80    
-448   -352   
48     -16    
-80    -96    
64     -288   
32     112    
-128   -96    
304    192    
-192   64     
-64    -176   
-144   -112   
128    -48    
-192   -48    
144    16     
-16    -80    
64     112    
-352   32     
240    112    
-1504  -96    
352    -128   
16     112    
-96    64     
-272   -112   
64     -80    
-32    192    
-192   336    
-48    0      
-112   -128   
240    -80    
-496   -144   
256    -96    
-336   -64    
96     144    
-160   -128   
144    -32    
0      -176   
-144   96     
48     16     
64     0      
64     -32    
32     128    
64     -192   
-384   -32    
-32    96     
-224   -16    
544    320    
-192   528    
0      160    
112    -208   
-80    -48    
240    -352   
-80    160    
-208   -112   
176    48     
80     -48    
0      32     
176    -112   
-160   -32    
-48    208    
-16    -48    
304    112    
-80    -16    
-160   -48    
-32    -256   
-144   -48    
-64    -48    
336    48     
208    32     
160    48     
-112   144    
-64    16     
48     64     
-16    -48    
-80    80     
112    -32    
352    112    
-464   48     
96     96     
-16    0      
0      256    
224    128    
128    0      
64     -16    
-176   -64    
240    -144   
224    256    
-160   240    
48     -112   
16     -352   
-112   -176   
192    208    
-16    112    
64     32     
144    -80    
32     144    
-16    -128   
-80    -176   
-80    112    
16     240    
64     112    
256    64     
-144   16     
-208   -16    
208    112    
-256   -128   
192    -336   
272    -48    
96     96     
0      0      
-112   128    
112    176    
-144   208    
0      80     
32     176    
160    -48    
-192   -128   
-48    -112   
-208   -224   
224    208    
-80    -192   
80     -1104  
-176   16     
-208   208    
96     80     
-288   -272   
-64    400    
-144   48     
384    -352   
256    288    
176    -32    
16     208    
144    -96    
-16    64     
0      -32    
-112   48     
48     -352   
-144   -96    
-144   -16    
-96    32     
0      -208   
416    16     
80     176    
-144   80     
96     112    
-304   0      
-208   -48    
-224   864    
240    208    
-224   368    
0      464    
-48    -176   
-656   128    
-192   112    
176    192    
320    0      
32     -16    
144    128    
160    192    
-192   96     
-272   -16    
-16    -16    
272    224    
-304   16     
160    -208   
80     -64    
32     -80    
-16    80     
0      -400   
48     16     
-144   160    
192    128    
80     0      
144    176    
-336   -112   
224    80     
-96    -192   
272    112    
224    160    
240    192    
-160   64     
128    16     
16     80     
-32    -560   
80     32     
16     0      
80     48     
160    -64    
-32    16     
0      -112   
128    144    
144    32     
336    128    
-160   -48    
288    -48    
-160   -48    
64     -80    
112    32     
176    -48    
-80    96     
128    -176   
64     96     
256    -48    
-64    -112   
0      -32    
-16    80     
96     64     
224    128    
112    -16    
80     -32    
80     0      
112    -144   
-80    32     
128    -288   
-128   64     
288    64     
-16    32     
144    -32    
80     32     
-64    48     
96     -64    
-96    -128   
272    96     
320    240    
-240   16     
240    -176   
64     -512   
0      144    
96     -160   
160    0      
112    -144   
-80    32     
16     96     
128    32     
-64    -16    
48     64     
144    48     
16     -368   
112    32     
16     -176   
64     0      
96     48     
-32    -48    
80     -160   
192    0      
-96    -208   
272    32     
-48    -80    
16     32     
64     16     
144    -400   
224    0      
0      0      
-16    16     
144    -16    
384    48     
-416   -176   
80     16     
32     -64    
304    32     
64     -64    
16     -528   
176    144    
-96    -880   
96     0      
-448   16     
-16    -48    
208    32     
160    -400   
32     -192   
-112   -416   
240    80     
0      -16    
80     -32    
400    288    
-192   192    
96     0      
144    -64    
48     -16    
-80    48     
-144   -208   
16     -80    
80     0      
-16    -320   
128    -160   
96     -928   
272    32     
64     192    
64     -288   
-144   80     
-16    -160   
0      -128   
48     -48    
208    80     
-16    -16    
-64    128    
96     -48    
112    -16    
16     320    
96     -272   
80     0      
112    64     
144    -528   
-32    -64    
-160   -368   
-32    112    
-16    64     
-208   -48    
224    304    
-208   1184   
112    -640   
288    16     
-560   -160   
160    112    
-64    -144   
-16    -304   
-160   -352   
-48    224    
-240   384    
-112   -416   
32     -48    
624    528    
-224   -336   
-48    16     
400    32     
-208   128    
-432   528    
-112   -368   
-144   288    
208    -128   
112    -208   
-16    48     
0      -464   
-192   -96    
272    48     
160    16     
256    -32    
128    48     
64     320    
-240   1072   
48     -752   
352    -608   
-208   336    
160    -160   
-240   112    
144    80     
-624   -32    
368    368    
32     192    
608    -64    
240    16     
384    80     
448    -128   
-112   -80    
288    -64    
-256   96     
304    -48    
-592   -160   
-16    -288   
-160   -48    
16     -80    
384    16     
80     -64    
320    -96    
-16    -304   
-64    -96    
-96    -48    
160    0      
-144   -160   
16     -144   
64     -32    
96     -96    
-288   0      
208    16     
-64    144    
64     16     
0      0      
144    -16    
-32    160    
224    -128   
32     0      
80     48     
96     64     
-496   112    
16     -80    
-64    48     
176    448    
-96    -80    
112    -96    
-2352  0      
144    -48    
32     240    
-16    -144   
16     -224   
32     -160   
288    96     
-336   80     
-288   -304   
-176   -96    
320    -512   
-112   64     
0      144    
224    -96    
16     -16    
-416   -208   
16     112    
32     -112   
-32    -80    
160    -64    
-80    -384   
-16    -16    
-304   80     
-192   304    
-144   -32    
-304   688    
176    64     
16     224    
-80    -128   
-224   -272   
-112   64     
-176   -32    
0      160    
-112   -272   
-80    -96    
-208   -112   
-320   64     
-48    -32    
64     0      
-160   80     
-160   -48    
48     -16    
-1904  -32    
112    96     
-80    -80    
-192   -256   
-160   -80    
48     384    
-112   -144   
-272   -96    
144    -128   
-16    0      
272    64     
-352   96     
-320   64     
192    256    
-144   416    
-592   32     
-32    -352   
224    -96    
240    -32    
-176   -192   
-16    -32    
32     -272   
-128   -192   
224    -320   
-176   32     
32     240    
48     160    
112    32     
-48    0      
32     0      
-240   -192   
-112   -128   
-2624  -272   
288    -160   
64     -80    
96     208    
-112   144    
-144   -16    
160    -96    
112    -48    
80     -144   
-112   -96    
-32    64     
-80    96     
128    176    
-368   0      
0      -32    
-800   -112   
144    192    
128    32     
32     176    
48     208    
352    256    
-272   272    
-32    128    
192    160    
-224   112    
64     32     
-80    32     
-16    -32    
-272   240    
80     304    
64     256    
-160   144    
-48    -80    
32     0      
0      -96    
-32    48     
-176   -288   
-32    64     
-16    -96    
144    -80    
-208   -32    
-96    -256   
128    176    
-336   -96    
64     -528   
-160   192    
-48    160    
-368   16     
0      -112   
192    192    
16     -48    
80     -224   
528    -272   
96     128    
-192   -112   
160    448    
-272   320    
-336   -304   
48     -48    
192    208    
128    -256   
320    -208   
432    -208   
240    -368   
400    80     
96     -96    
112    32     
0      128    
-368   -160   
-48    0      
-48    112    
-32    80     
48     48     
-64    -48    
32     -304   
-96    -144   
-432   144    
-224   -48    
304    32     
-32    48     
-240   -64    
96     144    
-272   192    
16     -192   
336    -64    
32     224    
-320   -16    
176    -32    
-48    -96    
32     -80    
112    32     
-144   16     
-112   -80    
336    208    
-80    80     
208    48     
-96    -144   
400    16     
208    160    
-160   16     
-16    32     
-384   -16    
192    64     
-80    16     
176    -64    
64     -16    
-112   160    
-320   -128   
336    96     
112    64     
256    16     
128    -16    
32     80     
64     80     
-160   32     
144    32     
-272   -16    
96     64     
-64    0      
240    -80    
-144   -48    
208    64     
-80    32     
144    48     
112    0      
-48    80     
48     160    
-320   -16    
96     0      
64     0      
112    -48    
144    48     
32     80     
-96    -208   
288    -96    
0      32     
-32    48     
144    160    
-208   16     
160    48     
16     96     
112    32     
-48    -32    
80     96     
80     -96    
144    64     
-64    64     
320    64     
-288   -48    
80     -752   
16     -128   
224    -48    
176    48     
-192   -16    
96     16     
-192   32     
96     176    
-240   -64    
224    -144   
112    96     
240    64     
-128   -176   
144    64     
-112   -64    
128    -416   
-96    48     
80     32     
224    48     
-208   -48    
80     -48    
160    80     
96     64     
-64    64     
64     80     
-80    -48    
112    48     
-80    16     
-112   -96    
64     64     
144    -336   
-64    -80    
144    112    
-96    -48    
176    -64    
48     64     
160    112    
-32    0      
-112   -48    
160    48     
-64    -32    
224    48     
48     -48    
192    -208   
64     -176   
-16    -80    
32     144    
-32    32     
48     128    
144    272    
192    -176   
96     -16    
-32    0      
-48    -400   
144    336    
-64    -96    
224    112    
176    0      
80     -64    
-96    32     
240    -320   
128    304    
48     96     
-32    112    
96     112    
80     48     
32     96     
0      144    
80     96     
16     -208   
96     112    
-272   -448   
-112   -608   
32     496    
272    -32    
80     -464   
-80    128    
64     -336   
112    160    
160    -448   
-112   -176   
16     80     
112    -96    
-32    16     
-48    -416   
32     80     
-32    0      
16     48     
80     -80    
-192   -288   
-48    64     
128    -16    
80     -384   
-16    64     
160    512    
-32    -208   
-64    -240   
80     48     
-96    -128   
-16    80     
0      -80    
48     -96    
32     16     
80     112    
-48    -64    
272    -544   
112    -160   
48     -272   
32     -32    
-352   -512   
-48    -304   
192    144    
-80    208    
-304   -32    
-128   0      
0      64     
224    -96    
192    -112   
416    -96    
176    176    
112    -64    
-16    -16    
-256   -48    
-208   -64    
48     -736   
448    -80    
272    0      
112    -576   
112    0      
-16    -480   
112    -208   
-80    96     
16     -1152  
-16    -64    
160    96     
0      0      
96     32     
-96    -80    
-48    -560   
64     -192   
384    -304   
160    336    
240    64     
-400   96     
-2240  -32    
48     -112   
48     32     
400    -144   
64     64     
0      -224   
80     -144   
-48    -32    
80     64     
32     -240   
16     -240   
224    -64    
32     80     
176    112    
240    192    
-336   -32    
240    -32    
48     -16    
64     -112   
64     16     
-16    -112   
32     176    
176    -720   
96     -48    
240    48     
-64    -48    
0      -144   
48     208    
64     -96    
128    -432   
-160   0      
224    176    
176    128    
32     160    
-144   -400   
240    80     
144    160    
96     -160   
-96    480    
112    160    
-128   192    
-48    -160   
-16    -304   
384    -176   
80     96     
-192   64     
112    -160   
-336   160    
288    80     
32     272    
96     -128   
-80    144    
64     -368   
-336   -112   
224    -1616  
224    -128   
-112   -720   
-256   -576   
-288   48     
0      16     
-48    48     
224    -32    
-464   80     
480    336    
-704   288    
32     416    
-384   256    
32     -288   
144    368    
192    -976   
128    64     
224    -96    
32     16     
224    32     
-112   176    
-160   48     
-128   -128   
-160   112    
192    -144   
-432   64     
0      720    
384    416    
32     -32    
80     0      
576    -224   
-624   -432   
-240   -192   
-16    144    
176    -112   
-64    0      
-48    -368   
16     -96    
-112   -320   
112    96     
-736   -288   
208    -736   
-96    -240   
160    -304   
128    -224   
272    -672   
64     -240   
-96    -128   
-128   -400   
80     -336   
32     -64    
112    192    
160    176    
-64    192    
-320   -464   
192    272    
-160   448    
-96    -400   
272    -304   
-64    96     
160    -336   
96     -192   
0      128    
-368   -176   
-96    -304   
-16    304    
128    -112   
-32    -48    
0      32     
208    -832   
32     48     
16     224    
-208   -64    
464    272    
-256   -144   
-64    -208   
-1216  -48    
208    -16    
-576   -64    
-240   16     
-816   -64    
-288   0      
-64    -16    
-32    -32    
80     -96    
-32    96     
-64    -112   
48     112    
-368   -16    
96     192    
-240   48     
-240   112    
-304   -192   
-48    -64    
32     -160   
-1248  -240   
-112   80     
-80    96     
192    128    
-464   0      
96     16     
-464   -528   
144    64     
96     256    
480    704    
-512   528    
-880   -64    
-208   -16    
-208   -128   
-96    -80    
-272   -160   
32     -224   
288    -144   
96     48     
192    32     
272    16     
-48    -48    
96     16     
-432   -128   
160    0      
-48    64     
-256   32     
-192   48     
80     0      
368    -64    
-528   -32    
-336   320    
-1056  32     
-16    -64    
128    -80    
-160   64     
176    -16    
480    96     
-352   -112   
-384   0      
-48    128    
32     64     
-208   -32    
64     32     
592    304    
-416   64     
80     0      
-288   -144   
288    48     
-576   48     
352    64     
272    144    
-640   0      
-272   -96    
-96    -32    
-48    0      
464    80     
240    32     
32     32     
0      0      
224    112    
-176   32     
-128   -96    
240    64     
-480   -32    
208    64     
-160   -32    
-64    0      
16     32     
48     144    
-80    64     
-80    16     
-16    32     
-128   -16    
-32    0      
-112   48     
144    48     
-400   -96    
240    96     
-1136  -144   
96     48     
208    96     
-16    16     
128    16     
-144   -16    
176    -144   
-64    112    
-64    16     
192    144    
-144   0      
144    16     
32     64     
160    16     
-352   128    
-320   -16    
144    -80    
144    96     
-160   0      
80     16     
-128   -112   
-96    -16    
-64    0      
192    48     
-64    16     
256    -240   
-288   -288   
-80    48     
-176   144    
96     128    
-176   16     
128    64     
64     144    
-16    208    
16     32     
32     96     
96     80     
-224   -160   
144    -32    
-192   -128   
16     112    
-112   160    
-16    -32    
32     192    
16     48     
-224   -32    
-64    144    
-48    -16    
16     -96    
112    32     
64     192    
48     -96    
32     0      
48     -16    
-160   112    
192    -240   
-32    -160   
208    384    
-288   -80    
112    240    
96     64     
-80    16     
-192   96     
240    0      
160    32     
-128   -144   
304    -336   
-176   32     
144    352    
240    112    
16     64     
-208   -144   
64     192    
48     720    
32     -320   
0      -512   
256    160    
96     112    
304    480    
-432   -192   
-272   -112   
-272   -128   
64     -160   
112    -80    
-48    -256   
48     -112   
-48    -176   
272    -32    
-160   -208   
-112   -48    
160    144    
144    144    
32     -16    
16     -176   
16     -192   
352    112    
-224   96     
64     48     
-288   -32    
-80    -96    
-64    -160   
-96    -144   
272    80     
-192   -192   
176    48     
144    64     
272    144    
-288   144    
0      -256   
112    32     
-64    144    
48     16     
-144   32     
0      16     
-240   -176   
288    80     
-176   64     
32     16     
-32    16     
192    -368   
0      128    
64     64     
-64    -32    
208    64     
-48    192    
64     208    
-16    48     
32     48     
256    224    
-160   -128   
320    -48    
-48    64     
208    32     
208    64     
-32    -736   
272    -208   
-80    -128   
224    -48    
352    160    
-272   144    
-48    -144   
224    64     
-48    96     
240    80     
224    16     
144    32     
-16    32     
48     80     
-64    -16    
-80    -112   
112    0      
272    80     
-96    64     
-32    0      
96     160    
-240   112    
0      0      
-16    -176   
320    -48    
64     192    
-80    -16    
-256   112    
96     -80    
32     48     
144    -208   
128    192    
-16    160    
256    -192   
-160   -336   
144    -64    
-80    224    
-192   -176   
112    -128   
16     0      
-96    32     
144    80     
-16    48     
96     -160   
384    80     
-176   -128   
48     0      
128    -768   
80     32     
64     -256   
112    32     
80     144    
80     112    
-32    -96    
16     -64    
128    64     
64     64     
176    96     
80     -64    
-144   -112   
96     -352   
-16    112    
0      64     
160    256    
-112   -560   
80     304    
112    304    
80     112    
-16    144    
160    0      
176    32     
0      352    
48     656    
480    336    
-432   -416   
32     -400   
-64    208    
64     -192   
0      112    
224    -208   
-48    128    
-112   448    
176    -48    
-112   704    
448    608    
-160   -160   
448    -560   
112    -288   
208    240    
144    -192   
-128   496    
112    -16    
80     -336   
304    -176   
-48    -32    
96     240    
-16    -160   
160    32     
-80    -336   
96     384    
-32    64     
256    -336   
176    112    
0      -272   
64     -176   
96     -32    
80     304    
-96    96     
-64    0      
208    -480   
32     -176   
240    128    
-176   -512   
352    -608   
-816   208    
112    -336   
-16    16     
112    -544   
-96    -176   
192    256    
-256   -352   
64     0      
176    112    
-112   -320   
224    -256   
96     -288   
0      240    
32     -384   
-32    16     
-1120  -208   
448    -544   
-256   -64    
176    48     
-192   -80    
256    -256   
144    -96    
-320   -224   
224    64     
-16    -96    
48     64     
112    -112   
144    0      
128    -32    
240    0      
-496   -32    
80     -112   
-16    32     
224    16     
64     -80    
192    64     
-144   -128   
208    -384   
64     -128   
64     16     
-144   208    
64     16     
176    64     
-256   32     
208    -96    
-512   -112   
512    272    
-1920  -592   
64     -336   
336    384    
-144   80     
0      48     
128    -448   
-368   48     
32     0      
16     -80    
256    -128   
-80    -480   
-336   -400   
48     -480   
-112   -112   
224    0      
-224   304    
-176   160    
48     112    
48     -16    
176    -64    
144    0      
96     0      
-160   -480   
288    -304   
160    -240   
48     128    
192    -32    
-48    -48    
-400   -80    
176    -48    
-272   0      
-256   -80    
-464   64     
288    288    
128    32     
512    -112   
192    -48    
32     -704   
144    400    
-16    208    
176    112    
16     288    
128    144    
-608   -208   
32     -240   
-432   16     
160    -128   
-320   -16    
352    16     
-48    32     
160    -160   
-16    0      
336    48     
-480   80     
48     -144   
208    32     
-240   48     
112    -32    
-352   -64    
80     112    
-688   80     
32     64     
-224   -112   
-320   -256   
368    96     
176    -112   
-64    48     
-112   -192   
-16    -16    
96     48     
384    -112   
-560   -128   
480    -48    
-352   -48    
-48    0      
-400   -64    
224    0      
-160   -16    
16     -96    
160    96     
-176   -48    
112    16     
48     -160   
-32    80     
-608   -64    
96     -64    
272    48     
-208   -16    
-208   -48    
240    16     
-176   -16    
64     -16    
-144   -96    
-80    -48    
0      128    
-416   -96    
-32    16     
-48    16     
-208   80     
96     48     
-240   32     
-240   -64    
-224   32     
-144   0      
192    16     
-192   0      
-1488  -64    
16     16     
208    128    
-112   96     
-224   -80    
-112   -80    
224    208    
-176   432    
-16    80     
224    -112   
224    96     
-320   48     
208    16     
-560   0      
-16    64     
32     -80    
112    160    
16     -80    
0      -16    
-144   -128   
-256   0      
16     -64    
-16    320    
64     32     
-64    -128   
-128   0      
-256   -160   
0      -208   
-640   224    
-128   64     
64     -80    
-48    368    
-144   -400   
128    -64    
112    -96    
64     -320   
-208   336    
16     -16    
-384   -352   
144    224    
-160   112    
128    -528   
144    304    
-64    96     
-48    -80    
-896   832    
128    -720   
32     208    
-128   128    
-48    -240   
-176   32     
240    304    
-192   -16    
-96    112    
112    176    
-176   80     
128    -32    
-32    -352   
-464   128    
352    400    
-1984  336    
80     112    
224    96     
-144   128    
-112   -96    
-224   -32    
96     144    
-208   464    
112    176    
112    128    
-368   -272   
-80    -368   
-160   16     
-336   -112   
160    -80    
-176   -96    
96     64     
-16    32     
64     32     
-32    -16    
80     64     
48     160    
208    96     
0      48     
208    16     
32     0      
-128   48     
-208   64     
-80    -48    
-96    64     
-256   32     
128    112    
-80    80     
-176   -16    
32     80     
-48    112    
160    64     
80     -48    
0      48     
-112   0      
-96    64     
-80    0      
48     272    
256    32     
256    32     
-64    80     
-112   -32    
80     -32    
144    16     
16     160    
-304   -64    
272    -16    
-256   80     
224    16     
80     0      
-208   -80    
256    -336   
208    64     
-304   32     
-32    -32    
-320   -80    
32     -80    
48     80     
96     144    
-80    160    
144    -48    
384    -112   
32     -16    
384    32     
16     112    
-208   -16    
-16    0      
-320   96     
-608   160    
80     448    
-144   480    
176    32     
608    -32    
-384   64     
-80    0      
-128   32     
32     0      
368    80     
112    -16    
-128   -48    
112    -16    
-352   0      
-352   -16    
-240   16     
160    320    
144    208    
112    176    
112    0      
-96    -352   
-256   -352   
-320   32     
-544   80     
-80    0      
144    16     
-160   112    
256    48     
-64    -80    
64     -96    
-128   96     
64     208    
-160   368    
208    464    
64     112    
-64    32     
32     -176   
224    -16    
16     -208   
176    -224   
80     16     
-160   -64    
-32    -48    
48     -112   
144    80     
-64    32     
112    256    
-128   -16    
-48    16     
80     80     
-32    -80    
64     -64    
64     -80    
288    288    
-256   -384   
96     -176   
176    -144   
112    176    
-128   32     
80     -144   
80     448    
-320   -64    
272    -416   
112    240    
-128   160    
112    -208   
-80    144    
-112   -144   
112    656    
112    80     
-160   -112   
-352   -432   
-64    160    
-224   -240   
320    256    
352    240    
240    -1776  
80     608    
-16    16     
48     176    
144    -80    
128    192    
80     64     
16     -112   
48     800    
-272   -192   
-192   -624   
448    784    
128    -80    
48     -448   
256    192    
-48    -864   
80     -128   
-48    96     
208    208    
-192   -96    
32     -944   
-240   -512   
160    432    
-192   272    
96     48     
144    -208   
208    -128   
128    240    
-176   -144   
96     -320   
-80    -752   
112    -32    
64     -128   
32     -48    
48     16     
112    80     
96     128    
48     80     
16     48     
16     16     
-32    -48    
160    -80    
128    -96    
144    0      
112    0      
208    176    
-192   64     
96     -656   
240    64     
32     48     
80     32     
16     -16    
144    -448   
-80    -208   
112    304    
-272   -112   
-64    -16    
160    -16    
-80    -64    
128    128    
192    16     
-144   96     
272    -112   
-16    0      
272    -272   
-144   176    
0      -16    
144    32     
96     -48    
96     48     
-64    16     
48     -64    
-16    -16    
-32    32     
96     32     
128    96     
16     48     
-16    -512   
128    128    
384    128    
-96    0      
-224   -112   
176    -80    
-176   -48    
64     176    
32     64     
176    144    
32     64     
0      -256   
160    32     
64     -208   
32     -160   
112    -240   
32     -48    
32     16     
64     80     
208    144    
-160   48     
0      -16    
96     112    
208    176    
-96    -160   
176    -32    
160    -192   
160    64     
256    96     
-16    80     
64     -16    
32     -32    
16     144    
-48    0      
208    -16    
-112   -112   
-32    -16    
0      -48    
-192   -1248  
608    -1088  
592    -64    
192    448    
176    224    
48     -16    
-400   144    
272    -304   
448    -752   
-176   208    
-336   -48    
-208   80     
176    -160   
-128   -288   
-896   -208   
144    -320   
80     -32    
-64    -224   
-80    0      
-16    -208   
-144   -48    
288    80     
144    -32    
96     -128   
-272   48     
-224   -304   
160    -144   
336    0      
112    -80    
-256   80     
464    48     
-48    80     
208    -48    
-176   -32    
0      -784   
272    -96    
240    -160   
272    16     
352    0      
608    192    
-160   -96    
-208   -48    
176    -64    
80     -32    
-224   -48    
320    -48    
16     -16    
80     -64    
288    32     
-64    -208   
-32    112    
160    -48    
64     16     
288    16     
-544   32     
128    -144   
-16    48     
-112   0      
96     64     
-608   0      
128    -32    
-112   -96    
80     -32    
128    32     
128    0      
160    0      
-64    -96    
0      112    
48     -16    
64     112    
112    16     
96     128    
-144   32     
-64    -160   
-64    0      
16     -160   
-800   224    
96     -32    
176    -48    
-160   -16    
-256   -64    
128    -688   
-304   96     
496    -1760  
112    544    
112    -16    
-176   -160   
48     64     
-144   192    
-320   -672   
240    80     
-224   80     
-192   -240   
-544   -192   
-48    112    
384    -256   
-48    16     
0      0      
16     -288   
240    288    
-192   -384   
-160   48     
192    -240   
0      48     
16     -288   
48     128    
16     176    
-272   -416   
16     320    
-160   -48    
-48    160    
240    -208   
64     16     
16     -160   
400    96     
-432   32     
288    -176   
-336   32     
-400   272    
32     -64    
0      0      
32     -48    
160    -48    
-16    32     
400    144    
-192   16     
16     -224   
-48    96     
160    -576   
144    -208   
-144   112    
160    144    
-80    -96    
128    -96    
-320   -32    
128    128    
-80    64     
96     -144   
32     -16    
0      -80    
-16    16     
-2240  -224   
0      80     
-16    -32    
-288   -48    
-384   48     
-288   160    
-16    16     
112    -16    
-32    80     
96     16     
32     32     
80     -48    
-48    -64    
-1712  -144   
160    -16    
-400   0      
-16    -16    
32     16     
48     240    
-288   96     
-208   -80    
-80    -48    
-1488  -96    
64     -48    
64     -112   
32     0      
96     32     
-32    32     
-112   48     
-128   -16    
-32    -48    
-112   32     
-128   48     
-128   -32    
-96    80     
32     176    
-48    0      
208    16     
-240   -16    
-704   -16    
-288   -96    
48     -160   
48     -32    
0      -80    
192    64     
-192   -80    
-32    -32    
-16    -96    
240    32     
-48    80     
32     16     
-32    -112   
-320   0      
0      80     
-608   48     
-112   80     
-128   -96    
32     176    
-416   -64    
96     32     
-16    0      
-48    160    
-176   64     
-16    -128   
352    32     
240    32     
-192   208    
48     352    
-272   688    
-80    400    
16     0      
-176   -128   
416    -288   
128    -144   
-64    80     
-480   -96    
-336   -128   
-128   -272   
80     64     
-96    16     
-176   -48    
-16    80     
-400   208    
224    176    
-640   240    
-256   128    
-640   0      
32     112    
144    -112   
-32    544    
432    464    
-288   240    
-304   -80    
-128   -96    
256    272    
-448   -48    
448    -144   
656    288    
80     -32    
-48    -160   
-48    -32    
-416   16     
-80    -48    
192    16     
48     400    
-256   -288   
16     176    
-32    240    
-112   -16    
304    144    
-208   16     
-192   -16    
-240   -352   
224    32     
-64    16     
48     160    
-368   -16    
16     -64    
96     -96    
144    160    
32     208    
0      32     
-208   -48    
16     32     
-16    272    
-176   -144   
64     -16    
-208   -112   
176    128    
-208   144    
192    -48    
-432   48     
-32    -32    
160    192    
-288   80     
176    64     
-32    80     
224    96     
48     -240   
-48    -16    
-16    -16    
-144   -112   
-208   -32    
-96    48     
32     -96    
96     32     
-144   144    
144    48     
128    64     
-32    32     
16     16     
32     16     
144    -32    
-112   208    
80     112    
-80    -32    
-16    -80    
272    240    
-224   160    
-16    -80    
192    16     
-80    32     
-32    -16    
144    144    
-208   -128   
-32    -80    
240    32     
-48    128    
-112   112    
96     -16    
0      0      
-16    80     
-128   32     
-48    16     
-320   -16    
128    128    
96     48     
192    80     
112    16     
32     32     
32     48     
16     0      
64     80     
-144   -32    
-16    16     
-64    32     
192    64     
-112   -64    
160    16     
-176   0      
48     16     
240    112    
16     -16    
-48    -192   
384    -160   
-256   176    
304    16     
32     32     
32     80     
-96    48     
-304   -112   
320    -48    
144    -96    
-96    -80    
96     -32    
-48    80     
32     -48    
80     -16    
208    160    
-112   64     
-192   48     
16     0      
64     -96    
96     -112   
32     96     
48     0      
240    160    
-208   16     
96     -16    
176    96     
16     48     
-16    64     
240    64     
288    16     
-336   -48    
176    32     
48     -16    
64     -16    
-48    80     
-48    64     
-64    -64    
32     -16    
0      -64    
-96    -208   
16     256    
80     -112   
192    16     
192    112    
96     112    
208    144    
-96    48     
96     -80    
-80    240    
96     304    
192    48     
-224   -128   
32     -112   
128    -80    
128    -64    
256    64     
-32    -240   
256    -16    
-48    64     
16     96     
432    96     
-256   16     
-64    80     
176    -192   
-544   -592   
-256   -48    
-432   304    
-32    96     
608    496    
-304   160    
-240   -160   
176    -448   
384    -64    
464    144    
240    64     
-176   192    
-192   48     
-160   32     
-48    48     
-96    -112   
64     96     
16     96     
192    -64    
128    -80    
-48    -32    
512    112    
288    32     
272    128    
96     -80    
-32    256    
608    576    
-400   320    
-288   -336   
128    -432   
96     -32    
336    256    
64     144    
16     -48    
144    208    
64     -176   
-128   -464   
144    -160   
-240   -80    
480    -992   
80     -176   
-32    -736   
64     384    
-160   160    
-256   -176   
96     -64    
16     288    
320    256    
320    -32    
256    -96    
32     -16    
-192   -96    
320    -736   
-80    416    
-16    -192   
112    -128   
-48    16     
32     16     
96     256    
0      -96    
224    16     
32     112    
32     0      
176    -48    
144    144    
-96    -96    
-16    -80    
48     32     
-192   -128   
288    -80    
-16    176    
240    -192   
-48    96     
-160   -96    
-32    -96    
336    400    
224    -368   
-32    80     
96     -32    
160    64     
16     672    
400    -192   
-256   -272   
80     384    
-160   160    
-64    176    
-96    16     
-416   -1152  
16     -176   
16     -544   
80     64     
192    -240   
-112   -32    
320    -160   
-128   -496   
80     -176   
-112   0      
112    -144   
-208   -272   
160    -320   
-48    -320   
-64    -80    
96     -144   
-112   64     
368    -64    
208    -96    
-880   -160   
-32    -176   
192    -240   
-16    -160   
144    -16    
176    -864   
80     -112   
-128   -64    
-48    -160   
224    -32    
80     -64    
16     16     
-48    80     
-288   48     
176    -32    
-1536  -80    
224    16     
32     64     
-32    -144   
176    -144   
32     0      
80     -16    
-64    -336   
64     -128   
32     -160   
128    -112   
80     -64    
-80    80     
-96    32     
-144   176    
-928   -192   
192    -336   
112    -192   
0      80     
-48    192    
144    -208   
144    96     
64     -272   
208    96     
144    160    
128    224    
512    32     
-32    -64    
-128   -48    
16     -48    
112    -64    
176    112    
-1008  0      
128    80     
64     0      
160    -144   
-128   -48    
80     -352   
0      0      
16     16     
16     0      
160    -336   
96     -160   
-16    32     
48     -16    
-16    -160   
-80    -96    
-896   0      
112    -96    
144    0      
272    0      
-64    64     
96     -176   
-176   -32    
304    -1680  
-128   80     
-64    -64    
176    0      
-192   48     
128    -32    
-176   -48    
112    -48    
-512   176    
224    224    
-128   16     
80     -32    
16     48     
-64    -144   
0      96     
176    -320   
80     0      
80     32     
320    208    
-32    64     
-48    -112   
-336   -80    
-144   -176   
-176   -80    
208    -336   
-144   16     
224    -192   
176    0      
64     -192   
-32    240    
336    160    
32     -32    
-944   -176   
240    -560   
-144   128    
320    416    
0      272    
16     368    
-48    -256   
48     -272   
-432   -16    
-240   -192   
-96    -80    
112    -640   
144    160    
192    32     
-912   -64    
-176   352    
192    144    
-144   224    
-576   -112   
-16    -128   
416    -64    
256    144    
272    -400   
112    144    
-208   256    
-512   -256   
-288   -48    
48     160    
-112   -288   
-272   -176   
-64    320    
-688   544    
144    208    
-816   -208   
-48    -176   
384    176    
-336   48     
-576   -256   
192    -64    
-80    -96    
288    32     
-112   -80    
64     64     
-336   -16    
-32    32     
-256   -16    
-368   -128   
-48    -64    
-1056  16     
-80    48     
-48    -144   
-32    0      
-112   -64    
64     80     
-224   -96    
32     48     
-144   -128   
0      -32    
-16    32     
64     48     
-256   16     
32     176    
-96    0      
64     -16    
-128   0      
128    -16    
-64    -144   
208    -112   
-176   48     
160    -32    
-304   -160   
-368   -32    
160    0      
-16    16     
160    -240   
-48    16     
-416   48     
-96    0      
208    80     
-336   64     
-480   16     
208    96     
64     -96    
160    -16    
64     -32    
112    -16    
32     -80    
-96    -192   
-256   16     
-144   160    
64     176    
-208   48     
0      -32    
64     160    
48     256    
-496   0      
240    -64    
-1008  -48    
128    48     
-32    -48    
16     -16    
-48    16     
16     -16    
32     64     
0      -16    
208    112    
-368   224    
144    -16    
-144   -32    
-64    128    
-112   -48    
224    160    
-656   96     
96     -16    
48     -32    
144    192    
-320   32     
176    -16    
64     112    
128    112    
0      48     
-16    0      
-32    80     
0      64     
16     -16    
-272   -32    
480    144    
-1536  -128   
240    -16    
-96    0      
128    -128   
-176   -16    
-32    48     
160    64     
-304   -48    
16     -80    
-192   -80    
352    48     
-144   96     
0      -176   
-64    -32    
-128   48     
-96    -32    
-144   -16    
48     -16    
128    80     
-64    -32    
144    16     
0      16     
48     64     
-160   32     
80     32     
208    80     
-144   -32    
48     -48    
-240   -80    
112    -304   
256    -64    
-48    16     
48     -112   
-208   -208   
64     32     
64     128    
-80    -16    
-64    -16    
144    48     
0      128    
48     224    
-224   -80    
-48    16     
-256   -64    
48     160    
48     -128   
-16    -32    
-48    128    
-96    64     
80     -64    
-64    0      
-160   240    
80     256    
-208   288    
-272   -528   
352    160    
-16    192    
288    0      
48     144    
-16    -224   
192    32     
-192   80     
-304   144    
64     -1328  
144    192    
384    336    
144    -128   
-160   256    
-128   -352   
-208   112    
-176   336    
-256   -208   
0      544    
-560   -128   
-48    -176   
192    32     
144    64     
464    16     
224    64     
-48    -48    
-96    -32    
-320   0      
-224   -48    
-128   0      
304    -160   
1232   976    
-576   -560   
-160   -528   
-80    464    
96     176    
-224   -176   
48     192    
80     -128   
176    80     
80     32     
-32    -80    
128    -32    
-32    192    
-112   -160   
176    48     
-80    -32    
-304   -112   
480    688    
-640   -368   
48     240    
96     416    
240    80     
112    80     
128    -112   
48     -48    
-80    176    
224    -64    
-48    0      
208    320    
-96    544    
288    352    
96     -272   
208    64     
-176   -48    
-176   -16    
64     -16    
-128   160    
64     144    
64     144    
128    112    
96     0      
160    80     
96     -160   
16     144    
-144   496    
64     224    
192    368    
-128   416    
144    336    
48     -1344  
-16    -240   
80     -160   
384    432    
-240   480    
256    48     
-224   -368   
256    -224   
-160   -256   
336    144    
-176   176    
128    240    
-64    320    
176    112    
256    80     
80     -112   
96     -256   
80     -160   
464    144    
160    80     
144    0      
-272   96     
16     16     
128    48     
-16    -64    
32     80     
-48    128    
304    -160   
320    -160   
0      96     
32     -16    
320    -80    
192    320    
-224   144    
80     -32    
-160   0      
-96    -64    
176    112    
64     80     
96     16     
32     64     
-16    80     
192    -96    
96     -80    
112    -80    
32     -112   
-32    144    
240    -800   
-160   256    
80     -272   
0      176    
112    64     
-16    -16    
288    -176   
-128   112    
-32    64     
128    128    
224    32     
-176   -48    
-16    -80    
288    112    
-224   128    
-32    -496   
32     -64    
224    16     
-16    0      
272    -176   
0      -32    
-48    176    
112    144    
96     0      
368    208    
-160   320    
-192   80     
16     -16    
176    -112   
176    32     
64     96     
64     128    
-48    -16    
96     80     
-48    48     
-80    -32    
224    -48    
80     -96    
112    16     
192    -368   
64     144    
-16    -112   
48     32     
96     0      
160    112    
-16    -48    
-80    -112   
256    -592   
80     64     
400    272    
48     208    
-144   -80    
352    -576   
208    -752   
96     80     
-48    -16    
80     16     
-32    -208   
-32    -256   
160    -48    
208    80     
-80    0      
-16    -48    
32     -592   
144    -80    
-112   -96    
96     -736   
224    -480   
304    32     
208    112    
-64    16     
0      -192   
0      -1392  
80     -224   
96     144    
96     0      
192    -384   
112    288    
256    112    
-400   352    
-112   -16    
-368   -1616  
-160   832    
-64    160    
-224   -192   
80     -80    
-128   -240   
32     -544   
-48    112    
272    -112   
592    320    
-624   -384   
-512   112    
80     128    
64     48     
-144   -48    
256    -288   
48     -32    
-16    160    
-64    -80    
48     256    
48     0      
288    -80    
-384   -112   
-304   -464   
16     -16    
160    48     
464    528    
-16    208    
-144   48     
-112   -32    
256    -128   
16     0      
64     -128   
192    32     
96     -48    
-144   32     
112    -16    
128    32     
112    -400   
112    -80    
-32    -48    
-336   -32    
-48    -16    
32     48     
-112   32     
224    0      
-224   -48    
-320   -128   
-960   32     
80     -336   
32     -80    
48     0      
0      -48    
80     -208   
-32    -32    
-64    -32    
-16    48     
-48    176    
16     -16    
-128   -48    
-32    -128   
-96    0      
272    0      
-416   -48    
176    -32    
-496   16     
240    -128   
-16    48     
176    -96    
-160   -64    
176    -608   
-48    96     
160    96     
96     -16    
64     48     
256    32     
-272   -96    
320    -80    
-752   -64    
96     -80    
-144   96     
48     -80    
128    -16    
-48    -224   
320    144    
-160   -208   
288    -352   
-544   -80    
64     -16    
-16    16     
160    64     
-208   -32    
80     -160   
-464   0      
112    -224   
-160   -96    
176    -32    
0      64     
240    -160   
-256   80     
80     -496   
80     80     
-80    64     
-224   -368   
128    -160   
-16    160    
-496   -64    
224    48     
-32    -16    
288    176    
-384   112    
16     -80    
144    32     
-1184  0      
176    16     
128    -32    
-608   32     
-16    16     
-1792  -32    
-96    -64    
112    -80    
16     112    
-112   -16    
32     32     
-400   -16    
288    80     
-432   -224   
-240   -32    
240    -80    
-16    32     
224    80     
-224   48     
-48    0      
-1040  -32    
-224   32     
-576   80     
208    80     
-128   -64    
-208   80     
-928   -32    
96     32     
-400   -48    
-64    48     
128    -112   
80     -160   
-192   -128   
0      64     
-112   32     
32     -64    
-176   -48    
-80    16     
-96    16     
-288   0      
-16    48     
-48    48     
-32    192    
-80    336    
368    80     
112    48     
-400   16     
-112   -128   
48     0      
192    128    
-128   -80    
96     176    
-400   448    
-144   128    
-48    -144   
80     -192   
-240   80     
64     -112   
96     64     
64     80     
-32    48     
224    80     
-128   96     
-112   16     
80     64     
-128   512    
-416   -496   
-464   128    
48     384    
-144   -208   
48     -128   
-192   48     
48     560    
-96    -128   
96     -368   
-80    192    
0      -96    
160    16     
144    352    
-224   -416   
-192   112    
-128   176    
-64    -352   
160    -272   
-128   -64    
48     96     
-608   -432   
0      144    
-16    -16    
0      -64    
128    32     
96     144    
-400   -192   
-176   80     
-80    304    
-160   -176   
112    -624   
-96    544    
128    496    
-336   -352   
160    -144   
-672   -80    
560    256    
208    32     
368    48     
16     -80    
-96    -96    
336    -400   
32     -160   
288    -48    
288    16     
-112   480    
-240   -16    
-288   0      
112    16     
-32    96     
-1072  -48    
-112   -32    
-64    32     
96     -32    
112    64     
80     -48    
208    48     
0      16     
0      64     
-352   256    
-144   48     
-192   32     
224    208    
32     176    
144    80     
-272   48     
-176   -32    
-48    0      
-16    128    
176    176    
112    80     
-32    0      
-48    -16    
32     224    
-64    112    
16     0      
32     -16    
112    -64    
-80    -32    
192    0      
16     64     
-112   -16    
48     16     
112    32     
48     16     
-112   240    
-16    -80    
0      -48    
-80    -176   
-48    -64    
64     352    
-176   -48    
256    192    
-96    -96    
80     112    
80     96     
-112   32     
144    -112   
240    320    
-16    288    
-64    -240   
64     384    
96     96     
48     144    
-240   -48    
-144   -240   
128    288    
128    352    
-128   -224   
224    96     
160    -32    
320    96     
-144   -48    
-32    112    
-144   64     
32     -176   
-112   192    
-160   -16    
288    -80    
-144   16     
176    144    
-224   -16    
96     256    
320    304    
-288   160    
-16    288    
96     160    
-112   -224   
-48    -48    
128    48     
96     144    
32     0      
-96    0      
160    128    
-224   48     
304    48     
-192   16     
240    -80    
208    64     
-352   32     
240    16     
-160   128    
128    48     
-128   -192   
272    -288   
48     -112   
144    -32    
-240   0      
208    -256   
-32    144    
16     160    
-80    -16    
-32    -208   
-16    -336   
-32    -96    
48     592    
400    336    
256    48     
80     0      
-80    -112   
96     -224   
64     96     
384    224    
-80    272    
-288   208    
96     144    
0      320    
-16    -256   
64     64     
64     -320   
96     64     
48     0      
-64    -16    
16     -96    
96     32     
64     -144   
-48    -32    
128    64     
144    -48    
-256   128    
80     48     
96     80     
64     -304   
-112   368    
128    -304   
160    272    
352    112    
160    -256   
-160   288    
352    416    
-80    224    
64     -96    
0      208    
112    80     
-32    -336   
0      64     
16     32     
144    -64    
272    -80    
-112   -128   
48     48     
32     -112   
32     144    
-128   -304   
-80    512    
112    -256   
128    144    
0      -128   
208    80     
32     32     
240    -176   
112    32     
-48    16     
64     -16    
-176   80     
-64    64     
96     -672   
288    96     
32     80     
640    256    
240    -416   
368    -208   
96     80     
64     16     
48     48     
304    64     
64     320    
-304   400    
272    512    
-592   64     
16     -176   
208    -48    
16     80     
80     16     
352    -16    
-384   -112   
224    32     
240    208    
-528   -128   
-48    48     
-336   48     
96     32     
288    160    
-208   112    
-112   48     
288    64     
336    -176   
144    80     
48     -80    
352    0      
128    0      
-144   0      
16     96     
-80    -208   
96     96     
-160   -128   
-32    -16    
416    -96    
896    240    
-416   -384   
-320   -144   
384    -160   
32     96     
144    0      
400    32     
32     16     
-96    112    
-32    -16    
96     -32    
-96    -32    
64     -32    
144    80     
368    -48    
64     112    
-176   -112   
128    16     
32     -32    
208    96     
128    16     
256    208    
-288   64     
32     -624   
128    -48    
64     0      
160    -272   
-16    -32    
112    -1168  
-16    -208   
176    -96    
16     48     
224    96     
-16    16     
16     -128   
-80    16     
-80    -176   
224    112    
-128   -128   
352    -80    
16     32     
-96    -432   
192    16     
16     -32    
16     -176   
320    80     
192    128    
112    64     
144    -112   
32     -192   
160    -112   
64     -112   
192    80     
-240   0      
128    -48    
-1936  32     
48     0      
176    32     
-32    -176   
336    -112   
-16    48     
96     32     
144    -672   
-112   -16    
-176   -384   
80     -32    
-224   -240   
0      -112   
-272   176    
-32    -144   
-320   160    
-64    -48    
160    16     
320    128    
-208   32     
128    -480   
-32    -128   
160    -272   
-112   -48    
112    -96    
0      32     
32     -48    
160    -48    
-240   -32    
-96    -32    
-64    -176   
64     -128   
80     96     
-16    -144   
96     -288   
-48    -720   
-256   0      
80     -96    
288    160    
64     128    
-32    -16    
-80    0      
32     32     
-48    -208   
208    224    
-704   -96    
224    -96    
-2544  -32    
304    -80    
48     -96    
128    -128   
48     96     
-64    -160   
-16    64     
-48    -32    
-192   -848   
-16    480    
-80    -32    
96     -192   
256    192    
96     -48    
-48    176    
-464   80     
304    -144   
64     240    
96     -16    
16     144    
464    -160   
80     496    
96     -880   
112    -288   
144    -48    
-160   -768   
-240   -208   
48     528    
-128   224    
208    -48    
-144   -256   
192    -48    
-128   -64    
-48    -208   
96     80     
-176   -112   
80     48     
336    -448   
96     608    
256    144    
144    -64    
-128   -64    
-16    -112   
80     -128   
128    -16    
-80    128    
160    -112   
96     112    
256    -192   
-64    192    
112    -48    
128    144    
-48    -96    
160    -64    
32     0      
-320   -464   
64     -656   
192    -224   
-32    32     
32     48     
-336   128    
176    -96    
-48    64     
-48    -128   
-96    64     
-624   -288   
-112   -64    
-112   256    
-608   96     
64     128    
-848   -16    
-272   96     
-64    -32    
-144   -32    
240    32     
-208   64     
-1168  176    
192    96     
32     -80    
48     64     
-272   -208   
-320   128    
-432   48     
-288   128    
128    192    
-352   176    
176    -160   
-752   -16    
-32    64     
48     -80    
112    -48    
-496   -96    
464    320    
-496   -32    
-64    16     
-176   -112   
80     16     
176    128    
-16    -48    
-272   -32    
-208   -192   
-112   -128   
-64    -160   
160    -160   
320    -160   
64     16     
16     128    
16     80     
-112   -160   
112    -16    
-32    48     
32     -48    
-80    -16    
-288   96     
48     -16    
-160   48     
64     -256   
-144   16     
80     -16    
-1264  -160   
-64    -16    
-272   -416   
0      16     
176    -16    
80     32     
224    -80    
-304   608    
-16    32     
-304   -32    
48     32     
-32    -80    
192    608    
-96    352    
-272   208    
-192   -16    
304    176    
112    128    
96     0      
-64    -64    
0      -144   
272    304    
-544   384    
-144   368    
208    128    
272    512    
-352   160    
-224   272    
-288   -208   
144    -208   
-256   144    
192    -16    
-400   256    
-96    224    
192    240    
80     112    
64     528    
32     304    
-48    80     
-48    -128   
304    64     
-400   0      
-336   -48    
0      144    
-128   288    
-32    -32    
144    48     
-1104  -112   
-32    -256   
-48    592    
64     352    
80     80     
288    384    
-112   240    
-48    384    
-16    368    
-160   352    
48     96     
-160   -432   
48     176    
16     -48    
-48    32     
-656   -176   
-32    -272   
320    -224   
320    -128   
32     432    
-176   432    
-240   240    
-96    -224   
176    -560   
224    32     
-96    304    
-208   272    
-32    -496   
64     -176   
528    576    
-480   160    
-144   -800   
-160   -400   
192    544    
-240   224    
288    -192   
176    -192   
-112   32     
0      96     
-80    128    
64     -144   
-16    160    
32     -80    
0      48     
208    -32    
-16    96     
96     16     
-16    128    
-80    224    
-96    -416   
112    192    
112    -48    
32     256    
64     -176   
160    400    
-176   208    
16     32     
0      -208   
-144   144    
16     -32    
-96    -272   
64     176    
128    128    
208    32     
96     -16    
-112   -16    
48     80     
-80    16     
-64    -32    
-48    64     
-32    -192   
32     -16    
32     144    
-192   32     
-16    144    
-32    -16    
0      -144   
192    -688   
256    -208   
144    256    
-176   224    
160    272    
-144   32     
-176   96     
-176   16     
192    -112   
-112   -160   
-144   96     
-400   16     
64     -16    
320    240    
-400   144    
-192   0      
16     32     
208    80     
-32    -80    
304    -16    
32     96     
48     80     
-80    -32    
96     -80    
-64    -32    
80     352    
-368   64     
32     32     
-96    32     
0      112    
0      -32    
288    0      
80     112    
-144   -128   
64     16     
-336   112    
-48    32     
-64    0      
480    384    
-768   -80    
336    128    
-16    304    
304    160    
432    16     
576    224    
-640   0      
-192   -96    
144    64     
80     -32    
224    0      
272    144    
-240   32     
-208   -240   
288    16     
48     144    
-16    -224   
112    64     
-16    -64    
0      0      
112    96     
64     80     
256    32     
128    32     
32     -48    
256    48     
-288   96     
-32    -48    
448    0      
192    80     
288    176    
-160   -48    
64     64     
64     -64    
16     -48    
128    48     
0      112    
-96    32     
112    32     
-32    96     
80     64     
64     -16    
64     64     
16     16     
-64    -32    
-96    112    
64     -32    
16     16     
0      -192   
80     112    
176    -16    
112    -16    
96     -272   
-32    -48    
-112   0      
80     -32    
-16    80     
-208   16     
-144   80     
-32    -144   
192    -224   
-192   -144   
208    -80    
256    -80    
-48    128    
112    -1184  
160    112    
-16    48     
96     112    
-64    -112   
112    -208   
-64    -240   
32     -112   
144    240    
-48    -160   
-16    -192   
64     -272   
0      -80    
-16    -32    
96     240    
48     -16    
-64    128    
16     16     
16     -80    
-80    0      
256    112    
0      80     
320    304    
-240   -288   
176    -16    
-80    144    
96     -768   
96     240    
-64    -320   
16     240    
-48    -32    
240    48     
48     64     
-48    32     
32     -448   
-128   -448   
128    496    
32     -208   
-48    320    
80     -288   
240    -240   
448    944    
-304   -1168  
256    208    
288    704    
-336   -48    
400    -384   
-64    -192   
80     0      
0      16     
240    720    
0      -896   
48     32     
80     16     
272    -320   
-32    176    
32     16     
208    -32    
224    112    
-160   -80    
16     -48    
128    -32    
80     0      
80     -16    
32     -48    
48     -304   
0      -256   
96     64     
48     -128   
32     -48    
224    -192   
144    -16    
16     96     
32     -16    
32     48     
-64    -16    
32     144    
416    240    
-64    -160   
48     -64    
-32    -80    
192    -128   
-224   32     
-16    -64    
-16    -96    
96     32     
96     -96    
160    -64    
64     -48    
-16    208    
64     80     
0      -160   
96     32     
80     -128   
48     -128   
176    80     
96     -32    
-32    16     
80     32     
224    48     
-32    -256   
96     -64    
-48    -144   
-32    -48    
64     -192   
-16    -64    
176    -32    
48     160    
144    32     
-144   16     
-432   -32    
32     -64    
-544   -48    
208    -48    
32     -16    
64     -80    
-96    32     
-80    -16    
-224   -48    
16     -1072  
240    -16    
464    -128   
592    48     
144    0      
192    112    
-256   128    
48     80     
-288   32     
-192   96     
-1232  16     
-240   64     
272    -80    
128    -192   
16     -32    
64     -48    
-48    64     
-288   -16    
144    0      
32     176    
0      32     
-176   -240   
224    -208   
-144   0      
112    192    
-368   32     
-224   16     
-160   -112   
112    -16    
240    256    
384    -16    
32     -48    
-16    0      
48     96     
-304   -16    
-16    -64    
-64    -16    
-112   -192   
16     -96    
144    -96    
-512   80     
32     0      
-896   -64    
192    80     
80     256    
128    0      
48     80     
-16    -1312  
0      32     
-144   -160   
176    -224   
-608   -16    
16     -16    
-272   -160   
64     -96    
-160   -48    
256    128    
304    208    
-256   256    
-112   160    
80     144    
-16    272    
-128   240    
-16    -272   
-192   -112   
304    384    
96     1216   
64     256    
-16    -720   
160    736    
464    736    
-528   -480   
-288   -1088  
368    -160   
208    640    
-368   208    
272    -48    
-256   -128   
-528   0      
32     96     
-624   -96    
-192   -480   
64     288    
128    80     
112    -48    
-352   -80    
-304   -64    
-16    -96    
-528   32     
128    768    
-640   -768   
32     -432   
-176   368    
48     -1072  
-176   -192   
48     544    
-256   -176   
0      176    
48     480    
-48    -240   
48     -880   
144    496    
208    -112   
-704   432    
224    -608   
-64    352    
-80    -96    
-272   32     
-80    -288   
336    320    
-192   -48    
144    -112   
-1024  80     
-208   -48    
96     -240   
64     96     
-16    144    
-160   -304   
16     -16    
64     320    
80     -128   
-48    48     
-80    112    
-64    -48    
48     16     
-128   16     
-304   -32    
-256   16     
-224   -16    
224    -80    
160    80     
-80    -48    
128    112    
-240   -32    
16     208    
80     48     
-16    -16    
-144   -16    
112    -176   
-192   -144   
144    96     
-208   16     
-32    64     
-112   48     
-368   144    
176    -64    
-80    -48    
224    112    
-208   176    
-80    -16    
208    0      
48     48     
304    144    
-336   48     
-160   -80    
-272   -32    
256    -608   
240    -64    
144    -64    
-544   -80    
-48    48     
80     -192   
0      32     
-32    32     
-16    176    
16     32     
-192   -16    
48     16     
-64    -304   
-112   -240   
-80    -112   
80     -176   
16     32     
-64    128    
-64    -48    
64     48     
-1312  48     
272    64     
-128   16     
224    32     
-160   16     
-144   0      
16     -32    
240    -112   
-64    32     
-416   64     
112    48     
-368   -32    
48     -352   
416    -1008  
320    -208   
0      240    
-80    0      
64     16     
-560   -144   
544    240    
-16    16     
400    704    
-800   224    
-128   -160   
176    32     
112    96     
352    80     
-32    80     
-208   64     
-128   0      
-544   -96    
128    -32    
432    288    
-112   64     
144    48     
448    96     
176    112    
-160   -48    
-352   -160   
512    448    
-976   320    
-832   -368   
96     -192   
96     -16    
496    64     
384    -16    
16     -16    
-80    32     
720    176    
-368   16     
-240   -112   
-176   32     
176    48     
176    112    
16     64     
0      -16    
160    128    
-208   112    
0      128    
-96    96     
-32    -32    
176    32     
-96    0      
240    16     
112    64     
-144   -16    
352    48     
-64    -16    
272    128    
-144   64     
16     16     
-80    -80    
192    48     
16     64     
-48    48     
16     0      
32     32     
0      16     
-64    -16    
64     -48    
16     -64    
160    16     
32     -272   
0      -16    
-144   64     
160    -16    
-208   16     
80     32     
304    112    
96     96     
48     64     
-128   -176   
160    80     
-64    -16    
0      80     
-112   -64    
-208   -128   
48     64     
64     -48    
-32    -112   
112    -64    
-176   176    
80     48     
32     48     
224    32     
64     16     
16     16     
64     -128   
144    64     
-64    224    
0      -48    
-16    -80    
80     48     
144    -160   
-48    48     
320    928    
0      -1120  
144    -992   
464    464    
-608   -320   
96     160    
-16    528    
176    -128   
-128   32     
192    112    
224    112    
-432   -112   
64     -368   
208    224    
-32    -288   
-16    -96    
32     144    
-128   -624   
-240   -208   
208    -208   
32     16     
-64    112    
0      304    
368    464    
96     128    
256    112    
0      240    
0      0      
-96    112    
288    272    
352    224    
-176   -16    
64     48     
16     96     
96     -384   
224    128    
128    112    
16     32     
-16    -16    
64     0      
-64    208    
192    256    
128    128    
48     32     
-48    -112   
96     0      
-176   96     
32     64     
32     16     
208    -432   
176    64     
32     -16    
160    16     
160    64     
208    32     
128    -64    
96     0      
96     16     
-32    112    
192    -16    
144    80     
-208   128    
208    -32    
96     -16    
-80    -368   
192    0      
96     -144   
80     96     
32     80     
80     48     
-32    16     
144    80     
32     96     
160    32     
0      -32    
96     16     
192    128    
-144   16     
-128   32     
144    -32    
208    160    
256    -208   
32     80     
-128   -48    
192    -16    
32     48     
128    224    
16     48     
96     96     
176    0      
48     -112   
-16    -16    
-144   -256   
128    -16    
64     -224   
-32    -256   
528    -416   
160    208    
224    144    
64     96     
0      -32    
-96    64     
-176   48     
288    64     
368    160    
-48    -240   
-384   32     
-256   -64    
208    192    
176    144    
512    16     
-32    -752   
-112   64     
-256   -16    
64     -32    
160    -128   
304    144    
-96    112    
-160   -128   
-144   -128   
208    -144   
240    64     
112    64     
608    528    
-432   192    
16     -160   
192    48     
512    160    
224    32     
-64    -416   
-112   -64    
-128   -288   
624    176    
-448   -16    
-64    -224   
288    272    
96     -288   
416    -64    
-112   -112   
16     -304   
320    192    
-128   -144   
16     -512   
176    16     
224    -848   
-48    -48    
-112   -16    
-192   -480   
-48    -272   
-176   -288   
144    -240   
192    -368   
96     128    
256    -16    
64     208    
-64    0      
64     32     
176    48     
-208   -80    
96     -336   
16     240    
160    16     
192    -48    
0      -336   
160    128    
0      848    
-32    -528   
32     208    
-256   -176   
112    16     
128    96     
-144   288    
240    224    
64     64     
144    0      
-128   112    
-192   -96    
-192   480    
-224   384    
-32    -400   
-224   -160   
240    -112   
288    -192   
-48    -992   
16     48     
144    336    
112    16     
-64    -112   
48     64     
176    -16    
16     80     
-176   -64    
-16    -128   
-256   0      
480    768    
-64    432    
64     -384   
208    -256   
-176   -384   
160    64     
240    336    
-32    -32    
256    -176   
-208   144    
0      80     
-96    -112   
16     32     
144    32     
-336   -32    
96     -336   
-944   -192   
64     -64    
-16    0      
144    -112   
-48    32     
48     -448   
112    -32    
48     64     
96     112    
-32    0      
-32    16     
-176   -224   
208    -192   
-832   -16    
-16    -64    
-528   -144   
352    -16    
-192   112    
-80    -144   
320    160    
-112   -208   
144    48     
240    -64    
192    224    
-288   -16    
128    -16    
-192   32     
48     -32    
-96    0      
80     -32    
-144   96     
208    -112   
-576   -48    
-32    -160   
-16    96     
336    112    
-240   48     
48     -192   
480    -80    
-208   -16    
112    -112   
320    224    
-224   192    
-320   -160   
112    -64    
144    -112   
64     -128   
16     -32    
144    0      
-32    128    
48     0      
80     288    
-144   32     
128    0      
-336   32     
-16    -64    
0      32     
-64    -64    
-288   48     
256    -48    
-128   -16    
48     -80    
32     16     
0      -48    
0      64     
-640   -128   
-592   64     
-160   32     
32     64     
16     0      
-272   -112   
-208   -208   
208    -32    
-192   -32    
144    112    
112    112    
-240   0      
112    64     
-160   -32    
256    96     
-80    -32    
-272   48     
-16    -32    
-48    16     
-112   -32    
-512   -528   
720    -912   
-112   -320   
400    384    
96     32     
256    -160   
-128   -288   
176    -32    
-80    -160   
-144   -144   
-224   128    
-176   32     
-224   32     
-384   32     
-48    -32    
-272   32     
0      96     
-1200  -16    
32     -64    
-64    -16    
48     -80    
32     -240   
-240   -32    
0      0      
144    0      
144    0      
144    64     
-144   224    
32     128    
32     16     
-224   -16    
96     32     
176    0      
176    -80    
-1008  -64    
224    64     
208    192    
-48    288    
-480   -80    
0      0      
560    144    
416    80     
224    96     
-112   208    
-320   144    
-352   0      
64     272    
-48    32     
176    -80    
-512   -48    
-64    80     
-32    32     
-32    96     
-304   -592   
208    16     
-32    48     
272    128    
-16    0      
96     -96    
48     0      
80     176    
-144   48     
-384   -64    
80     48     
-432   -112   
192    32     
-176   -80    
0      160    
16     80     
32     96     
-32    -48    
96     176    
-192   0      
96     -80    
-128   320    
-128   -192   
144    -128   
-160   160    
208    0      
-464   48     
448    0      
-288   -320   
-272   528    
96     -32    
-176   160    
224    80     
-32    48     
-48    208    
-16    -304   
-208   48     
192    -1024  
240    816    
-64    0      
-80    -320   
-480   480    
-64    -32    
-416   160    
160    176    
304    32     
-80    -144   
-96    -256   
-16    -144   
64     208    
-112   -16    
-128   -480   
80     -176   
240    208    
-608   320    
112    176    
-32    240    
112    -16    
80     -16    
0      16     
-16    0      
-48    160    
96     48     
-256   16     
64     -48    
160    80     
128    272    
32     96     
64     16     
-160   -96    
-16    48     
0      144    
0      272    
304    0      
-16    -80    
48     16     
-64    80     
176    32     
-32    0      
192    64     
-80    -16    
32     -80    
-144   32     
-16    432    
256    128    
160    80     
112    0      
-144   -32    
-48    0      
-48    0      
368    144    
-256   112    
-16    -80    
-96    32     
64     80     
-48    -112   
16     48     
64     -32    
-16    112    
32     -16    
48     -48    
128    32     
32     -32    
-144   32     
-16    64     
-64    256    
48     32     
64     48     
256    16     
-144   80     
-96    48     
176    144    
128    128    
-32    64     
-32    -192   
-16    -176   
-32    96     
-16    64     
48     80     
48     -48    
32     80     
16     32     
48     64     
128    -80    
80     48     
-144   48     
192    -32    
-96    80     
64     16     
96     80     
-176   -720   
-64    0      
-80    -160   
176    -96    
-16    64     
16     96     
-80    32     
-48    32     
0      48     
0      48     
-224   -48    
144    -16    
0      32     
112    64     
-112   -32    
160    -112   
-80    -160   
-176   -208   
-176   64     
-48    144    
64     0      
272    224    
144    272    
256    208    
16     160    
-208   256    
-256   16     
-16    -144   
288    64     
416    176    
192    -112   
-16    -80    
16     -96    
128    -176   
400    144    
0      112    
-256   48     
-368   -432   
80     -512   
336    -272   
480    -48    
320    -224   
192    144    
-448   352    
-208   160    
96     -576   
144    -384   
-96    -272   
-96    32     
-32    192    
-144   -32    
384    -320   
-64    96     
-32    560    
208    -176   
400    112    
32     304    
304    -304   
224    112    
320    80     
48     -80    
128    -304   
-16    48     
176    128    
0      -144   
-64    -64    
-32    64     
336    32     
-464   -192   
96     128    
-208   -240   
240    288    
128    304    
-32    -176   
128    -64    
-16    0      
336    -64    
-80    -224   
160    16     
112    -368   
80     32     
32     80     
224    64     
-176   0      
-48    -16    
208    400    
-112   368    
208    224    
0      64     
160    112    
112    16     
0      -64    
-80    -688   
112    48     
144    -112   
384    176    
-160   64     
400    240    
-400   176    
160    -64    
224    160    
224    112    
224    16     
80     64     
32     32     
-64    176    
32     -80    
224    -224   
-160   32     
160    -32    
-64    80     
48     -16    
208    48     
224    -272   
240    -64    
-160   128    
304    -384   
112    -16    
16     -96    
128    -16    
-288   -352   
480    -160   
-64    416    
112    272    
-32    0      
128    -112   
144    -16    
0      208    
-48    16     
288    -80    
-176   -896   
192    -160   
64     128    
64     -48    
144    16     
16     -32    
112    48     
64     -160   
-16    80     
-64    -128   
64     -96    
320    240    
-112   112    
48     16     
176    -112   
64     -336   
96     -64    
80     -176   
96     16     
64     0      
32     -128   
-64    -320   
176    -288   
112    -288   
112    96     
128    -48    
-16    32     
144    -32    
112    112    
-288   -32    
96     -336   
176    16     
-32    -208   
80     32     
144    -240   
144    16     
-80    -16    
176    -16    
96     -32    
16     48     
128    -80    
144    0      
-16    -32    
-80    32     
-336   0      
96     -16    
-272   -176   
0      -16    
144    -16    
64     -48    
-16    16     
32     -432   
-96    -32    
224    -256   
48     0      
192    176    
-32    48     
208    -64    
304    32     
-352   32     
48     -32    
-32    32     
-16    64     
-48    -96    
160    -32    
96     -144   
112    112    
-160   0      
160    -544   
-16    32     
144    80     
96     240    
64     48     
272    -16    
-96    0      
64     -128   
-272   -176   
192    -64    
144    112    
112    -16    
48     16     
160    -224   
48     64     
384    -64    
-304   -48    
-320   -384   
48     -624   
48     352    
480    592    
112    96     
336    48     
-528   -128   
240    336    
-608   752    
208    -96    
-656   -1280  
-304   -736   
-240   528    
32     240    
-112   -16    
-80    -272   
-16    0      
-304   64     
240    32     
-96    -32    
672    304    
-656   -496   
-320   -368   
48     272    
-144   128    
176    -96    
-144   -16    
352    112    
80     48     
48     368    
-224   -128   
128    -208   
80     128    
320    -64    
320    -176   
416    160    
-448   224    
128    -160   
-128   -384   
560    -448   
64     144    
-160   256    
-48    -400   
32     -896   
272    -448   
-640   240    
128    144    
32     240    
-32    -96    
192    112    
-160   -176   
112    144    
-64    -128   
64     64     
80     160    
-144   -96    
144    -48    
-32    -48    
80     -48    
32     48     
-176   -704   
-48    896    
112    -304   
192    -208   
-160   144    
192    48     
32     80     
96     80     
-240   -48    
-848   -656   
-176   656    
-240   -432   
96     416    
64     96     
0      -368   
-32    96     
-736   -720   
-64    -272   
-832   384    
176    -128   
224    32     
352    -32    
-240   208    
-160   80     
-544   0      
272    112    
-176   -272   
128    80     
192    -16    
-592   -96    
96     -80    
-48    -32    
16     48     
-32    16     
-96    -16    
-1680  -48    
-448   -16    
0      -112   
192    48     
-16    32     
32     -16    
-112   -80    
-224   -32    
-96    96     
64     -176   
-112   -192   
-48    32     
-368   -96    
96     -192   
-320   96     
-736   -64    
-80    -16    
-96    32     
-32    80     
32     304    
-176   -176   
352    -288   
-256   128    
16     112    
80     48     
352    48     
-528   128    
32     -16    
-272   -144   
-112   48     
-576   -320   
288    -16    
-1152  16     
-144   -288   
96     -176   
192    64     
-256   32     
80     128    
-48    208    
112    160    
-224   96     
-240   336    
240    160    
-112   144    
-112   -112   
-32    -192   
-64    -16    
-1072  -128   
400    80     
144    288    
32     352    
-288   192    
-48    32     
0      0      
-32    80     
-96    64     
-128   -32    
64     -64    
-192   32     
176    80     
-160   48     
0      48     
-416   -16    
32     16     
0      -16    
16     32     
0      -16    
-64    32     
336    160    
-256   240    
-80    -48    
208    32     
-288   256    
-64    96     
-32    -240   
-208   -176   
96     112    
-288   48     
-80    16     
32     80     
-96    112    
64     128    
-16    176    
80     0      
-32    -64    
-48    48     
-96    0      
32     16     
-176   -32    
16     -16    
-208   -128   
80     0      
-176   -16    
16     64     
0      64     
-224   16     
176    -240   
96     16     
96     80     
-16    96     
-80    0      
-32    16     
-144   144    
-112   48     
80     288    
-208   640    
272    784    
80     336    
336    432    
-16    -16    
-80    -400   
80     -112   
-112   288    
-464   -384   
-16    -864   
336    544    
416    544    
224    -160   
-144   -64    
48     112    
-272   -48    
80     -16    
32     -32    
-80    160    
-48    -144   
32     400    
-80    272    
64     -32    
128    96     
416    64     
128    240    
-160   176    
384    608    
-848   -576   
-64    -160   
-160   416    
160    160    
208    -80    
320    0      
96     -48    
-624   -224   
-64    -256   
160    -336   
480    -32    
384    96     
240    176    
304    112    
16     64     
-32    96     
-64    128    
0      48     
176    -16    
-16    16     
128    64     
-240   -32    
80     -64    
0      0      
32     48     
-192   64     
80     96     
-48    64     
-192   -32    
32     48     
-16    64     
-48    -48    
48     -96    
32     128    
160    64     
16     -16    
32     80     
0      16     
128    144    
-64    -48    
208    80     
64     -128   
-256   -16    
32     16     
160    64     
-32    0      
80     112    
-80    48     
-160   336    
-96    32     
112    -64    
-96    64     
96     128    
0      -32    
16     -80    
160    32     
208    80     
144    80     
-64    -96    
256    32     
-208   0      
208    32     
-272   -16    
-80    -576   
144    -144   
112    112    
352    112    
32     48     
-240   -192   
144    144    
0      176    
-192   -128   
384    -32    
-192   -48    
224    80     
-80    -16    
272    368    
32     176    
288    -176   
80     64     
64     112    
80     64     
160    80     
-224   32     
144    0      
160    -16    
-16    16     
192    -32    
-96    160    
96     64     
-96    -32    
160    -16    
80     -16    
96     -48    
112    64     
32     -1328  
368    272    
-240   208    
112    -64    
144    80     
16     80     
224    -160   
-16    32     
-208   16     
80     -112   
0      -16    
112    0      
16     -16    
-16    -208   
64     -48    
144    -240   
208    80     
0      96     
112    32     
16     0      
64     0      
144    0      
-112   80     
48     16     
64     48     
160    16     
16     -128   
112    176    
96     -32    
-112   16     
32     -48    
176    -32    
48     -1408  
80     0      
64     0      
96     -80    
0      192    
16     192    
-64    32     
128    -32    
-32    0      
192    32     
32     128    
176    256    
-16    0      
-48    -80    
128    160    
112    -720   
32     -16    
96     -16    
48     64     
0      48     
32     32     
256    208    
-176   -256   
192    80     
32     224    
16     -384   
144    -16    
-32    -80    
32     16     
256    704    
-80    16     
32     -64    
-96    0      
160    -112   
160    208    
176    -96    
160    112    
80     -48    
112    32     
96     -16    
-112   352    
-384   -240   
288    96     
-176   -96    
80     -192   
1040   1088   
-304   -320   
-416   -432   
-160   -1056  
-96    0      
80     -608   
736    544    
-272   -272   
448    -560   
112    0      
112    176    
-80    -96    
-32    -176   
64     -560   
288    480    
144    128    
224    -608   
192    -128   
128    176    
-80    -16    
0      -16    
80     192    
64     0      
64     -304   
80     -32    
96     -432   
208    -464   
400    320    
-80    128    
64     64     
-176   -208   
-144   -80    
160    448    
160    96     
-176   -320   
-464   -256   
144    -96    
-240   -272   
0      -304   
16     32     
-16    -288   
32     336    
64     -1264  
-64    -96    
-192   -336   
32     -192   
320    160    
-96    -64    
48     48     
336    32     
-1008  0      
112    -16    
-320   -64    
48     -96    
32     -96    
32     -112   
16     -224   
32     -416   
240    96     
160    336    
-48    224    
272    48     
-64    128    
-112   64     
80     16     
-48    144    
48     112    
-480   16     
96     -224   
48     -80    
64     -208   
32     -48    
64     -432   
-16    32     
128    -1120  
192    -144   
32     192    
352    0      
-48    96     
48     -112   
-112   -96    
192    -112   
-400   -192   
-128   -144   
400    -336   
208    -16    
-224   16     
-32    -112   
304    48     
-288   0      
32     48     
144    32     
192    208    
-80    -16    
96     -192   
64     -128   
-48    368    
-240   256    
144    0      
-672   -160   
16     0      
240    -16    
-32    64     
160    128    
16     -192   
0      112    
112    32     
48     16     
-160   96     
192    -16    
-256   -80    
240    -48    
-96    208    
0      0      
32     -224   
112    -48    
48     64     
-32    -304   
48     -16    
64     -208   
128    80     
-224   -32    
48     -80    
-32    80     
224    -112   
-256   16     
-80    256    
224    48     
-32    -112   
-400   0      
112    -176   
-208   0      
240    -192   
112    144    
160    -112   
-208   -192   
-64    304    
336    480    
-144   288    
192    288    
96     -48    
144    32     
-240   -304   
48     -464   
-448   -96    
64     -128   
208    16     
-1040  -304   
96     32     
-544   0      
-560   96     
96     -64    
-1648  96     
-160   80     
32     80     
160    96     
64     -160   
32     -240   
176    -96    
320    368    
-464   272    
32     80     
-240   -304   
192    112    
48     -80    
144    192    
32     368    
-624   208    
-128   160    
-32    128    
-32    -64    
32     -32    
208    -128   
0      64     
0      0      
-384   -432   
-16    80     
-80    80     
224    352    
32     192    
-80    96     
-16    208    
0      -144   
112    -288   
-80    -80    
-48    320    
-400   160    
208    -80    
-384   -128   
-16    592    
-240   -224   
-48    16     
-144   176    
16     -224   
-64    32     
-128   -80    
-48    48     
80     144    
-144   -1040  
32     496    
-304   16     
-400   16     
-96    32     
96     -288   
288    192    
416    720    
-176   368    
-192   624    
32     -80    
-96    -368   
-320   208    
128    64     
-176   -256   
64     -32    
-176   64     
-144   48     
-640   -112   
-32    0      
-1552  -32    
160    176    
80     48     
112    48     
-144   112    
-480   48     
-176   64     
16     96     
384    16     
448    80     
-16    -96    
-288   -64    
-448   80     
-512   -48    
144    -64    
336    80     
-48    -96    
464    -128   
96     16     
-128   -224   
80     -272   
-80    96     
80     192    
128    96     
400    0      
-16    0      
-352   16     
-368   -176   
64     -96    
128    160    
-16    64     
-16    32     
-32    -64    
-16    160    
-288   16     
208    64     
-96    -48    
64     96     
-16    32     
-16    0      
176    0      
-208   -16    
48     48     
-128   -16    
144    112    
-160   -80    
32     32     
96     32     
-48    32     
112    80     
-16    80     
208    48     
-240   16     
-32    0      
16     16     
416    448    
-400   416    
480    96     
-336   -16    
240    128    
112    -32    
-48    -256   
-48    32     
-272   128    
16     -48    
144    112    
-160   64     
320    16     
32     32     
64     -16    
-112   64     
-176   -80    
64     -32    
96     0      
-32    80     
96     48     
64     160    
-192   48     
32     -16    
-256   16     
208    -16    
64     48     
-96    80     
80     -32    
-96    -176   
96     -16    
-16    0      
-112   48     
-32    -48    
48     32     
-528   -64    
-64    -64    
16     112    
-48    -48    
224    64     
192    144    
-48    80     
0      32     
64     16     
-128   0      
160    -48    
-64    32     
176    48     
48     -16    
-208   16     
208    -192   
16     -16    
96     128    
256    48     
-144   32     
-192   16     
32     16     
48     -48    
0      48     
96     0      
-64    -96    
80     -80    
256    112    
-304   0      
144    -48    
96     80     
80     80     
112    32     
96     0      
128    -32    
-160   192    
144    144    
48     0      
-128   48     
32     -160   
240    -272   
-160   -128   
16     176    
32     480    
-16    -320   
32     -112   
128    208    
48     32     
-224   -96    
-32    -48    
272    128    
96     112    
160    -48    
0      -64    
-128   16     
0      0      
16     304    
-80    -224   
0      128    
64     -1040  
-64    544    
-32    -32    
32     -144   
64     256    
144    -64    
208    240    
-96    -576   
0      -48    
32     144    
-16    -48    
128    96     
-32    176    
64     720    
144    208    
48     -592   
-80    0      
80     -96    
128    288    
288    256    
80     -64    
0      -112   
16     32     
-176   -32    
64     64     
-16    -112   
144    -48    
64     48     
272    -96    
96     64     
-16    -176   
272    16     
384    384    
208    272    
160    48     
-32    -16    
-112   0      
112    256    
80     144    
-96    160    
64     224    
96     272    
-272   400    
96     64     
112    288    
304    480    
240    272    
-128   256    
-224   -16    
-272   304    
0      112    
256    0      
176    -16    
112    32     
128    176    
-336   0      
64     32     
48     112    
160    -224   
160    -208   
-240   -64    
-208   -80    
-80    -976   
160    -16    
208    -160   
112    -176   
32     -176   
64     32     
-256   -176   
464    208    
32     192    
400    48     
128    -32    
112    0      
64     176    
0      -128   
160    -144   
112    -128   
48     112    
96     64     
240    32     
112    -16    
144    64     
-64    64     
128    192    
144    112    
-48    -144   
0      80     
16     -48    
-16    -96    
432    144    
-48    144    
80     80     
64     -80    
-16    -256   
144    48     
-96    -96    
144    16     
128    48     
304    224    
80     80     
-16    0      
96     32     
16     -624   
32     -112   
-304   -464   
80     -448   
320    -208   
16     128    
448    -128   
-224   320    
-144   -240   
16     128    
0      -80    
16     176    
112    -320   
192    -208   
208    -48    
256    16     
-96    384    
-368   -80    
32     16     
192    -352   
64     -80    
16     -288   
-64    -288   
-144   80     
16     -304   
-16    144    
-112   96     
96     -640   
112    -32    
272    -256   
-64    48     
-80    512    
208    112    
-112   -80    
144    224    
400    -400   
528    368    
-320   160    
48     48     
-64    -144   
-96    -64    
-624   -288   
-96    -352   
304    -336   
-176   -400   
240    -32    
288    -128   
-48    -80    
336    -80    
0      112    
128    -192   
-48    -48    
-32    -224   
16     176    
-32    -32    
512    224    
-480   352    
176    112    
16     224    
352    96     
176    32     
-176   -96    
112    16     
-112   -304   
64     -16    
160    -224   
32     -144   
64     -240   
0      80     
96     48     
224    96     
-144   -80    
176    -240   
-160   -160   
48     -176   
48     -96    
-160   -288   
240    -304   
144    -704   
0      -272   
96     -208   
-80    80     
352    288    
48     464    
-160   144    
80     192    
-336   176    
368    32     
-688   544    
176    96     
-64    -288   
80     240    
144    -224   
0      -176   
-64    -192   
-176   -1056  
176    -32    
-128   -80    
96     -128   
-112   48     
-32    -80    
-176   -480   
448    480    
-448   -336   
240    -80    
160    624    
-96    -288   
-48    112    
144    16     
128    -208   
144    -336   
160    496    
-48    -16    
-32    -384   
80     -16    
192    64     
-96    16     
48     112    
-464   0      
112    -128   
-1424  -32    
224    -128   
-96    16     
64     -80    
112    32     
96     -512   
-272   -176   
592    -800   
416    -400   
144    320    
272    80     
-592   -32    
240    128    
-320   384    
-384   -64    
-352   -160   
-400   -352   
688    64     
48     -16    
-16    16     
480    160    
-592   192    
-160   -32    
144    32     
-160   160    
-80    -80    
224    -96    
240    64     
-96    32     
0      0      
-96    0      
-208   -80    
80     0      
80     -144   
112    48     
336    -32    
384    192    
-160   -16    
192    -80    
32     -32    
0      0      
112    -64    
144    -64    
176    160    
96     -48    
-256   -208   
-304   -112   
160    128    
-208   -144   
112    0      
64     64     
160    336    
-832   32     
-16    -112   
80     32     
176    48     
192    -16    
192    96     
-560   16     
-64    -112   
-64    96     
64     -32    
16     -32    
-144   -96    
48     80     
-128   32     
-112   -16    
-128   16     
-336   32     
80     16     
-272   32     
-96    0      
-1008  32     
-144   -32    
-224   -32    
256    128    
-208   -32    
240    112    
-96    -32    
-64    -32    
-208   16     
48     0      
-128   -352   
-144   16     
-240   144    
-48    0      
-256   64     
-784   -128   
96     128    
80     -32    
-96    144    
416    -96    
-144   -16    
-48    -64    
48     -48    
-80    80     
-80    48     
-48    -128   
-272   -48    
-192   16     
-64    -112   
16     48     
-128   352    
48     208    
-880   -96    
208    464    
-416   192    
352    -144   
-96    -80    
80     0      
864    400    
-640   256    
32     48     
128    224    
-112   96     
144    80     
-128   112    
64     -112   
80     16     
-432   -112   
176    -128   
-64    -64    
16     192    
32     16     
144    160    
-256   176    
16     -368   
96     32     
-48    160    
-48    -128   
96     80     
64     -240   
-368   -336   
400    400    
-928   48     
224    288    
-192   -272   
128    -128   
16     288    
16     -32    
-96    -96    
-128   96     
80     -144   
32     176    
-192   -160   
-160   -224   
-336   160    
-80    -128   
160    0      
-208   -240   
144    368    
192    -48    
-288   -208   
-64    304    
128    16     
-64    -16    
32     320    
128    -336   
-448   -304   
208    -912   
-176   288    
288    352    
-224   -128   
368    400    
128    208    
320    192    
-192   -224   
-224   -352   
-192   -224   
96     96     
112    -336   
-32    -272   
80     224    
-128   304    
192    176    
-112   -16    
416    240    
-80    240    
-80    32     
-288   -48    
-96    0      
-48    -32    
-80    96     
80     128    
80     96     
-176   -48    
64     32     
-224   -192   
80     -16    
-48    128    
-304   80     
176    128    
-144   -208   
128    112    
-304   0      
32     -16    
-32    48     
-64    0      
16     64     
-32    48     
-64    32     
32     -112   
160    64     
16     48     
128    -96    
-416   -192   
320    -416   
0      64     
80     256    
-32    80     
112    16     
448    320    
-368   208    
-16    -48    
144    -144   
320    16     
64     144    
-96    -32    
-128   -16    
-304   16     
-160   128    
80     112    
-96    -96    
-48    32     
-112   80     
64     -64    
-32    80     
80     -32    
64     48     
160    176    
0      -16    
-32    144    
-96    48     
-256   -16    
208    48     
-256   -32    
-160   128    
-16    -64    
368    80     
-208   64     
-80    128    
-192   16     
-48    -64    
448    -32    
112    -304   
160    -192   
0      -112   
-416   -96    
48     -80    
48     96     
192    32     
464    48     
-304   192    
32     176    
192    192    
272    320    
-352   144    
16     -48    
96     -16    
256    16     
144    0      
0      64     
16     -64    
-32    -64    
16     64     
-96    176    
-32    128    
48     -32    
96     -1104  
80     0      
128    128    
0      16     
-80    -128   
16     16     
96     16     
-160   80     
160    144    
288    96     
-48    64     
-32    -32    
144    128    
-144   160    
-128   224    
672    80     
48     -32    
-256   -336   
-48    -192   
32     192    
192    176    
192    32     
176    144    
-32    -272   
208    0      
192    16     
112    -48    
192    336    
128    -16    
16     -80    
48     -192   
240    128    
-160   368    
80     0      
160    -48    
528    336    
-144   128    
0      320    
-112   -32    
144    352    
112    160    
-144   -64    
256    -272   
64     -176   
240    32     
-128   -304   
-32    -32    
-112   -608   
0      -224   
48     -112   
144    48     
32     -528   
-208   256    
320    48     
128    64     
112    144    
-384   -400   
-224   -336   
16     -48    
240    256    
208    -336   
-128   176    
144    -192   
144    320    
-16    368    
-256   -112   
112    192    
592    432    
-32    -224   
-288   32     
48     -48    
160    320    
208    -64    
288    -64    
-80    256    
-32    32     
-16    -112   
208    -208   
160    128    
0      16     
80     16     
192    160    
112    -32    
-48    -32    
16     112    
32     -48    
144    -608   
-160   224    
96     -400   
-96    144    
96     -208   
208    64     
96     -544   
304    64     
0      80     
64     0      
128    144    
-208   -208   
80     64     
208    208    
48     -96    
-16    32     
192    144    
-48    -16    
-16    240    
176    16     
-32    16     
112    -48    
208    96     
-64    -272   
48     112    
144    0      
96     -128   
-128   -16    
160    48     
-48    -16    
144    64     
-32    -144   
144    80     
-64    0      
80     -64    
176    16     
176    -128   
192    -32    
-16    -192   
144    -672   
16     -64    
176    -112   
0      32     
-384   0      
144    -512   
144    -128   
128    -336   
0      -32    
304    -832   
-384   -32    
-32    80     
1008   1056   
-864   544    
-528   -240   
336    -432   
256    32     
-160   -16    
608    80     
-2096  80     
176    144    
208    -96    
352    -304   
32     112    
-32    -128   
352    -128   
224    -432   
-64    144    
112    -64    
112    -96    
48     48     
-256   16     
48     -32    
-64    -144   
0      48     
-416   16     
-352   16     
0      -16    
-16    -16    
432    -192   
304    80     
608    -240   
-96    16     
112    48     
-272   80     
0      -48    
32     32     
-304   -64    
16     -192   
320    16     
-400   64     
-464   -160   
272    -128   
144    64     
80     -176   
-80    -128   
256    -96    
-304   48     
-16    -208   
-128   32     
80     16     
-64    -128   
176    -64    
192    48     
32     112    
336    112    
-880   -64    
16     -80    
320    80     
32     -80    
32     16     
144    -16    
-192   -96    
272    -464   
96     128    
128    -32    
32     0      
80     -16    
64     -112   
-48    112    
-48    -16    
32     16     
-16    -96    
-496   -16    
16     48     
-64    -64    
112    -112   
320    288    
-64    -320   
208    80     
-256   0      
528    336    
-272   192    
240    -48    
-64    0      
64     -144   
-144   128    
144    16     
-592   -224   
96     -112   
128    160    
-64    -400   
96     0      
32     -16    
-96    80     
-16    -224   
64     -224   
-464   -64    
-352   -192   
128    32     
-16    -448   
-48    128    
320    544    
-224   -144   
144    -224   
-48    -80    
400    32     
192    400    
48     -368   
240    -160   
-512   144    
64     144    
-64    80     
80     32     
96     -208   
144    128    
-96    0      
32     -80    
-272   -16    
160    -80    
96     -32    
-1184  -128   
-112   96     
-192   -496   
-128   256    
-416   -528   
-48    -304   
432    384    
-272   -336   
-128   256    
48     -800   
80     -96    
144    496    
-16    256    
-960   -416   
-80    -160   
-1152  48     
208    128    
32     256    
-336   -192   
-112   0      
64     80     
-224   -272   
-96    -48    
-96    32     
0      240    
-112   0      
-416   48     
416    176    
-240   64     
112    48     
-320   -128   
48     -32    
-32    0      
-16    64     
-32    48     
-32    160    
48     -32    
-608   16     
-80    -64    
-864   -128   
-16    -64    
48     32     
64     64     
16     -16    
208    48     
-144   96     
-128   48     
-160   -48    
-160   48     
0      -112   
160    -32    
48     -48    
-240   48     
32     96     
-1056  -32    
-80    -32    
-112   -80    
192    176    
-128   -96    
96     32     
-48    -32    
-128   -64    
-32    -32    
144    80     
-16    112    
336    80     
-32    192    
-464   96     
160    -128   
-416   0      
160    -64    
-112   16     
80     160    
-64    -64    
80     96     
64     64     
-288   48     
48     -16    
208    -32    
-144   144    
-384   -208   
96     -224   
-224   112    
-320   -16    
-224   -32    
48     -64    
-208   -224   
320    96     
272    256    
-112   144    
-160   80     
-416   -224   
320    -16    
-80    128    
208    -96    
32     -128   
144    80     
144    192    
-16    96     
-192   272    
-176   16     
-448   -64    
64     -96    
112    -96    
-32    -32    
-96    -192   
272    -96    
112    16     
240    208    
-128   -160   
96     -48    
112    64     
128    80     
240    112    
-160   48     
96     96     
-16    48     
192    64     
160    -16    
192    144    
144    160    
-320   16     
-192   -48    
-112   -112   
0      96     
256    0      
128    64     
448    272    
-240   256    
-400   -240   
176    -112   
-192   16     
96     -16    
-48    -32    
16     -64    
-16    -128   
-224   -112   
224    -32    
0      96     
-48    224    
-96    176    
-112   80     
-272   0      
-16    112    
-176   -400   
112    432    
-64    192    
-160   -384   
400    160    
-80    144    
240    224    
128    320    
64     272    
-256   -288   
-64    -176   
16     144    
48     272    
208    48     
-16    -208   
32     304    
-144   288    
-240   256    
192    -160   
-224   -144   
-320   -112   
288    -240   
-112   608    
96     -304   
0      -304   
80     352    
128    48     
112    112    
-208   -48    
96     16     
96     432    
48     -128   
-400   -224   
-48    -96    
160    16     
192    256    
48     -96    
-32    -208   
128    192    
-48    -48    
-48    624    
48     -576   
-64    64     
-240   272    
240    -64    
-272   112    
48     48     
112    160    
208    48     
0      16     
48     -192   
-160   32     
112    -16    
48     80     
288    304    
-304   -192   
48     -144   
160    240    
-64    96     
144    -64    
80     -16    
32     -32    
128    -64    
16     -48    
128    -48    
128    -32    
-16    96     
32     -16    
128    80     
-32    112    
144    64     
-16    144    
64     96     
-16    208    
208    16     
128    240    
-240   64     
-16    0      
96     -16    
128    16     
-32    48     
320    64     
-240   96     
16     144    
-32    -128   
32     -48    
80     96     
64     64     
32     -16    
128    -320   
-32    -32    
96     -1744  
-64    -32    
80     112    
64     64     
160    96     
16     -32    
16     64     
32     -48    
-112   -176   
96     -32    
112    96     
80     -16    
-48    32     
-48    -112   
352    176    
-272   -240   
-48    -32    
176    176    
96     32     
96     48     
96     16     
-32    80     
16     32     
-32    32     
208    48     
112    80     
80     48     
32     176    
128    32     
-16    0      
208    -496   
0      48     
64     144    
16     -16    
-32    -64    
-192   -400   
-80    -288   
64     112    
-80    64     
96     16     
160    -256   
288    144    
16     96     
240    -32    
320    160    
-192   -160   
208    112    
224    -528   
80     48     
320    -96    
192    112    
256    -64    
672    64     
96     176    
96     400    
-560   80     
0      -112   
288    16     
224    16     
224    144    
272    -16    
-224   128    
-144   -192   
80     32     
272    -192   
16     -128   
-192   16     
208    112    
96     0      
288    -64    
480    16     
448    -48    
-16    -48    
-208   -160   
32     -80    
32     -64    
16     64     
32     -96    
0      -96    
224    -176   
480    240    
-384   -144   
-16    -112   
96     -32    
112    -64    
496    64     
-48    -240   
176    64     
32     -80    
-208   0      
352    16     
-112   16     
288    -16    
-112   0      
-176   64     
16     0      
48     80     
16     16     
-256   48     
272    -240   
176    80     
0      -112   
64     -16    
144    0      
192    64     
-144   -192   
16     -16    
-48    -32    
208    0      
32     80     
208    -144   
64     16     
128    -112   
-16    -80    
-64    -176   
-32    -192   
160    -112   
144    -320   
64     -32    
80     -80    
144    192    
-16    112    
32     -176   
-48    -464   
176    64     
128    224    
-336   64     
144    -640   
336    48     
-880   -64    
112    -320   
304    -16    
272    400    
208    -256   
288    -352   
96     -16    
-48    112    
-48    256    
-16    496    
-112   -800   
96     -448   
448    944    
192    -544   
128    -80    
-96    336    
160    -368   
32     304    
-64    -96    
160    -80    
32     -112   
-64    16     
112    -528   
112    0      
-64    -112   
-160   304    
432    -480   
-112   -592   
-160   -112   
320    -768   
-1248  416    
208    176    
96     -64    
0      160    
352    -288   
48     0      
-112   -848   
64     -928   
-400   -256   
112    -256   
0      560    
416    80     
80     256    
-464   -320   
368    -208   
-224   -48    
96     112    
-1488  -176   
-128   32     
32     192    
48     -80    
208    -320   
112    -352   
96     128    
-16    -32    
112    -192   
0      -32    
64     48     
-240   16     
80     -128   
0      48     
-64    112    
80     -48    
-32    -176   
-32    -32    
-144   48     
-64    96     
128    -128   
112    -64    
48     -704   
-32    80     
0      64     
192    -96    
128    32     
160    -32    
-224   -16    
32     -32    
-80    -48    
112    0      
-672   -112   
80     48     
-80    32     
160    -96    
272    128    
-48    -352   
-48    192    
0      16     
128    0      
-64    -48    
64     32     
-144   -16    
192    -32    
-224   32     
16     144    
-48    32     
48     16     
48     -16    
96     0      
-32    112    
96     -192   
64     -80    
-304   64     
192    80     
-32    -64    
416    144    
-240   64     
32     -32    
16     -160   
48     -32    
96     -80    
16     -80    
80     192    
16     16     
-176   -64    
288    -144   
-320   80     
-208   16     
160    -128   
-160   32     
160    224    
160    304    
-208   64     
-208   -176   
192    -416   
-608   -80    
368    -48    
16     112    
-1312  48     
112    208    
-240   96     
-80    -128   
16     -224   
-800   -80    
48     0      
160    368    
-240   144    
96     80     
-288   16     
-752   -80    
-96    -80    
144    96     
-176   272    
-464   -192   
48     -224   
-256   -208   
-256   -16    
80     -16    
-624   80     
32     16     
-784   -32    
-288   -240   
-160   336    
80     144    
-176   -48    
176    896    
64     80     
-272   112    
160    -112   
-416   -32    
-240   208    
16     -16    
-48    0      
-80    16     
176    -256   
-224   -416   
-64    416    
-640   128    
-16    96     
-144   -192   
64     -192   
-16    0      
16     -32    
32     -112   
-144   192    
48     -192   
80     304    
96     0      
-112   -64    
-112   -16    
-144   416    
0      -96    
-80    -112   
96     128    
-144   -112   
-96    -32    
96     -80    
240    192    
128    304    
160    224    
-288   32     
-240   -512   
-64    64     
-48    96     
48     -48    
-96    128    
96     -16    
112    112    
256    96     
-464   -160   
64     -80    
64     -112   
-192   -128   
-144   1008   
144    960    
-384   240    
-112   160    
192    336    
-64    304    
160    -16    
-48    -64    
-96    80     
-608   -224   
-112   -64    
-672   112    
224    64     
256    144    
-272   144    
-96    0      
-48    256    
-320   96     
-48    -48    
-96    -48    
48     128    
208    32     
48     32     
-32    80     
-368   -16    
144    16     
-352   -16    
288    32     
-64    0      
-80    -96    
64     32     
-144   -144   
192    -32    
-64    0      
144    -48    
-144   64     
80     16     
-224   -48    
-128   16     
-208   -208   
336    -32    
-48    128    
96     48     
-48    48     
-48    0      
-32    16     
176    48     
32     0      
-112   16     
-224   -16    
-128   -48    
96     -32    
16     80     
-64    64     
-96    -64    
272    96     
-304   16     
-32    96     
96     80     
64     80     
-48    32     
-64    0      
80     32     
96     80     
16     0      
112    48     
128    48     
-304   -224   
224    -176   
-144   -32    
144    96     
192    80     
-80    80     
192    80     
-240   16     
0      -16    
-80    -48    
32     -80    
256    0      
160    128    
0      64     
-80    -96    
-32    -64    
240    224    
-224   16     
64     16     
128    0      
-48    80     
-160   -16    
192    -80    
32     -32    
-160   64     
144    128    
-32    64     
-112   48     
-128   -32    
80     0      
-256   -112   
64     -192   
16     32     
-80    144    
-32    64     
192    160    
32     -16    
-64    112    
-208   16     
-32    -48    
144    -64    
96     80     
0      0      
16     -16    
208    32     
832    736    
-288   256    
-224   -128   
144    240    
144    64     
208    160    
-176   -144   
400    208    
-144   80     
-144   208    
48     32     
-320   0      
-144   96     
-208   -64    
-96    -80    
240    64     
-288   144    
-160   -16    
272    48     
-224   -256   
800    -160   
304    -64    
160    48     
208    144    
-112   64     
-128   0      
-272   -16    
432    144    
336    -32    
256    -48    
160    -560   
64     -400   
-48    32     
48     -960   
96     176    
-176   -64    
-400   -272   
272    112    
-128   176    
128    336    
80     176    
176    -144   
464    0      
64     -64    
400    208    
-208   96     
-288   -64    
0      112    
-192   -144   
336    -32    
-16    -176   
272    128    
64     192    
-320   16     
176    -256   
-32    -48    
176    304    
80     144    
128    64     
144    -32    
-16    64     
-48    -192   
16     144    
-32    -768   
32     -272   
160    272    
-176   -16    
112    -16    
144    16     
96     592    
0      -192   
32     -128   
64     64     
112    0      
160    32     
0      224    
-64    384    
-176   -16    
16     -496   
-192   496    
432    -1824  
416    496    
224    32     
144    240    
-160   624    
-32    -672   
240    -96    
-96    192    
304    368    
-48    96     
0      -32    
112    -768   
-48    -16    
352    432    
-336   400    
0      96     
-48    80     
160    -464   
-224   -448   
48     -96    
48     0      
-64    64     
320    64     
-224   48     
-192   448    
288    160    
240    -80    
-112   64     
336    48     
-80    -16    
-240   -336   
128    32     
-128   -16    
160    96     
-32    -32    
336    -16    
-64    -32    
-64    -48    
160    -144   
224    -272   
80     80     
144    -80    
64     32     
16     -176   
-80    96     
64     368    
16     96     
576    -176   
-16    80     
160    -208   
128    48     
-192   16     
32     -128   
176    304    
64     -16    
48     96     
208    -240   
64     -16    
-16    -48    
320    64     
-224   48     
-80    32     
-32    -304   
208    -48    
-80    -96    
224    64     
192    112    
96     -80    
192    -256   
-80    -48    
-32    128    
-80    -144   
240    -32    
96     -64    
128    112    
-336   -480   
272    -496   
128    48     
-160   -1008  
112    -64    
80     -96    
192    16     
192    -128   
16     -288   
96     -400   
192    -752   
48     144    
-16    32     
-48    16     
160    128    
224    -32    
160    -320   
-32    16     
192    -400   
0      112    
-64    -224   
-64    -272   
-544   -16    
112    16     
160    -16    
128    -112   
128    32     
160    -160   
64     -16    
-80    -64    
96     -320   
32     -128   
16     -80    
128    -144   
-128   176    
-208   128    
0      -80    
-576   -64    
304    128    
-112   160    
-16    -32    
144    -128   
96     -640   
-96    -352   
128    -480   
48     -48    
176    96     
-80    144    
208    112    
-272   16     
-272   -16    
32     80     
-144   48     
336    128    
128    64     
288    -80    
-224   -352   
-160   -288   
-272   288    
224    -16    
0      144    
192    32     
16     128    
-208   -272   
96     -368   
-32    240    
192    64     
144    224    
304    -80    
-1360  -208   
272    64     
-144   64     
288    -256   
-128   112    
368    320    
-592   -432   
32     16     
0      -48    
320    240    
288    176    
336    -144   
352    -16    
-848   -176   
144    -32    
-480   -32    
112    -368   
-1552  16     
-144   -112   
-48    -352   
320    -96    
288    320    
288    -1424  
112    16     
-112   112    
-400   -96    
-64    128    
-176   112    
-240   0      
688    48     
-240   -160   
-80    -192   
144    -144   
64     -96    
-256   32     
224    80     
0      48     
-144   -160   
-16    32     
80     96     
96     -80    
224    0      
144    0      
-112   0      
96     80     
48     32     
-16    -64    
-16    32     
80     -128   
80     32     
144    64     
160    144    
80     -352   
96     -16    
-528   128    
256    96     
-336   32     
80     48     
-256   -144   
112    -224   
-352   96     
80     -32    
-16    96     
128    48     
-32    -288   
-1392  -208   
-144   64     
-80    -96    
-400   80     
208    256    
0      96     
-256   0      
64     128    
-128   -32    
96     48     
-432   -48    
192    48     
-64    48     
-1088  -352   
448    -48    
384    64     
432    192    
-256   -64    
-144   64     
-256   -96    
-288   0      
0      16     
-1616  80     
-32    -80    
64     0      
208    256    
-336   144    
208    32     
0      -32    
-32    16     
64     -64    
-128   -16    
112    48     
-224   -16    
-144   -32    
-128   -176   
-288   -176   
-608   48     
80     80     
160    48     
-256   0      
-128   -112   
-16    0      
32     -32    
-80    32     
32     -48    
160    16     
-208   -16    
64     80     
-224   48     
128    64     
-64    -80    
-304   16     
0      64     
-912   -16    
64     -32    
-112   -48    
96     80     
-128   -32    
80     64     
80     32     
112    80     
-48    0      
-16    -16    
-144   16     
160    288    
-128   64     
-416   -96    
-32    96     
-416   -48    
-16    128    
0      -112   
256    48     
-144   -144   
-64    112    
-176   80     
48     -112   
128    -144   
112    32     
-64    -32    
-128   -96    
-176   -16    
-208   0      
-32    96     
-144   48     
192    192    
-144   32     
16     80     
-128   -32    
16     32     
112    96     
-16    16     
-64    144    
32     96     
-64    16     
80     176    
96     64     
64     48     
-112   32     
-240   -32    
16     48     
-304   -32    
112    48     
96     32     
16     160    
112    64     
112    48     
224    0      
-608   48     
624    1024   
-800   624    
32     -496   
240    -224   
544    160    
-64    -208   
-64    -480   
-640   -96    
-96    368    
-176   -416   
-320   32     
-144   288    
-80    -208   
32     240    
-96    96     
-16    208    
96     -80    
272    -32    
-304   128    
144    224    
16     416    
-320   -512   
-320   -224   
144    48     
208    64     
224    0      
-352   -224   
-192   128    
-352   304    
-32    144    
176    -32    
64     -64    
416    -128   
848    832    
-624   -416   
0      -224   
128    384    
-128   -272   
368    80     
-272   -32    
144    -832   
144    416    
64     16     
400    -128   
64     64     
32     32     
-304   -208   
0      160    
-336   -144   
96     16     
-128   0      
272    -16    
304    720    
-128   -160   
112    -240   
32     784    
-160   -336   
-32    -384   
32     288    
128    16     
-112   -160   
-80    -16    
160    -448   
16     -80    
240    272    
-336   -48    
16     -208   
16     48     
0      48     
208    80     
-160   800    
128    -16    
96     -192   
144    -64    
-64    -64    
96     -32    
-80    -256   
144    160    
64     352    
272    512    
-656   32     
144    -416   
32     -32    
112    0      
0      352    
-112   -32    
80     48     
80     112    
144    -32    
192    288    
48     -16    
-64    0      
176    128    
-48    64     
256    112    
-144   -32    
288    16     
-176   -128   
96     -48    
-256   176    
128    128    
96     0      
-32    0      
-64    112    
144    48     
128    -176   
0      -144   
336    208    
-176   -16    
160    0      
-16    -48    
128    -64    
16     0      
-16    112    
-32    480    
224    176    
176    16     
160    -16    
16     48     
-112   16     
96     48     
-208   -144   
480    -224   
-112   192    
128    48     
48     80     
-208   672    
544    384    
32     144    
64     32     
64     -128   
192    32     
16     -64    
160    80     
48     -160   
-176   176    
-48    -176   
112    16     
128    144    
0      -112   
-64    -16    
-64    -272   
48     64     
128    -64    
128    -224   
0      -240   
48     -96    
-224   -224   
176    32     
-80    160    
144    112    
-32    -64    
32     64     
-16    0      
128    -176   
48     48     
-128   -48    
288    -80    
64     -80    
48     -16    
-48    -16    
0      -48    
-16    -96    
160    128    
368    272    
-160   288    
-176   -256   
176    -160   
160    112    
-112   368    
-160   112    
48     -176   
128    16     
96     -880   
208    16     
48     -224   
-96    64     
48     32     
32     -64    
16     -272   
64     80     
-64    -48    
-144   -112   
96     48     
96     -48    
-32    -48    
176    -240   
96     -32    
144    -384   
192    -112   
48     -480   
160    256    
-144   176    
32     80     
-96    64     
144    -48    
48     -64    
-16    -176   
32     -80    
160    96     
-16    -272   
112    -320   
-48    192    
-96    144    
160    112    
-208   16     
32     272    
-192   48     
496    -320   
176    160    
288    160    
160    688    
80     -208   
-16    -16    
-192   112    
112    48     
160    240    
32     112    
-112   -160   
80     96     
-80    176    
272    -48    
48     -160   
-112   16     
160    288    
-384   -256   
-160   80     
-480   -480   
240    304    
-352   -288   
-416   -368   
-192   -80    
-240   -32    
-192   -208   
352    16     
256    192    
464    112    
144    -160   
-208   -1264  
-32    -224   
-176   -96    
112    -32    
80     -16    
288    -560   
432    64     
-112   -64    
-96    -96    
224    80     
128    32     
96     -512   
80     -160   
240    -272   
-224   80     
-256   -192   
480    -112   
-144   64     
272    -16    
288    80     
-176   -624   
32     -192   
208    -368   
64     -80    
0      48     
48     -32    
80     -64    
64     -16    
-32    0      
112    -144   
-32    -96    
80     112    
-560   -64    
-64    -64    
-64    -144   
16     -128   
-48    -64    
224    -512   
-16    -144   
96     -112   
-64    0      
32     -96    
16     224    
-16    96     
-64    -64    
-224   -96    
64     -64    
-544   48     
192    16     
-48    64     
-96    -32    
160    64     
-128   -48    
64     -112   
176    -528   
-128   96     
32     -96    
624    32     
-256   -208   
-288   16     
-208   96     
-224   16     
-608   -128   
-224   -368   
672    160    
-288   144    
-144   192    
-128   -368   
80     -384   
192    -464   
-112   240    
32     -16    
-144   64     
64     -16    
-16    -16    
224    80     
-224   0      
-32    -208   
96     0      
-608   0      
0      -48    
-80    -48    
96     -64    
-128   32     
144    0      
64     -16    
-16    -832   
16     -48    
-240   32     
160    -48    
-128   -48    
224    112    
-304   -80    
48     -32    
-528   -80    
96     32     
-304   32     
-112   48     
32     176    
448    96     
-96    48     
48     -352   
16     0      
128    32     
176    16     
-112   -64    
80     16     
-528   -32    
0      -32    
-32    32     
-112   -32    
-176   16     
64     -80    
304    80     
-48    -96    
240    32     
-16    -576   
-32    -128   
64     160    
-16    192    
-1232  -192   
320    96     
-224   96     
48     -64    
48     16     
64     -144   
-128   176    
-16    -112   
96     -96    
64     -16    
176    48     
-112   48     
160    -160   
-224   224    
96     32     
-112   -176   
48     -32    
64     -16    
-16    -32    
-80    160    
64     -304   
256    256    
-848   -32    
-96    80     
-608   -64    
160    96     
-16    -64    
-320   0      
32     16     
-1840  -112   
-112   96     
-240   -1008  
-80    96     
-128   256    
-64    32     
-944   64     
224    -16    
-320   -16    
64     160    
144    48     
-544   -80    
-112   -32    
-608   -160   
-144   288    
-448   -80    
-112   368    
-640   -16    
-432   -112   
96     -368   
-128   144    
-1008  -144   
32     -224   
-240   112    
112    160    
192    -208   
-48    144    
-112   96     
32     -208   
224    -48    
176    112    
80     16     
-128   -400   
-416   -992   
-288   672    
336    672    
272    -400   
160    176    
-48    -224   
-80    -176   
-96    368    
-544   -400   
-384   -240   
320    224    
-336   32     
192    -208   
144    -192   
-80    192    
192    16     
-400   -240   
-16    -208   
-144   96     
144    336    
-400   -16    
-96    32     
-128   32     
128    32     
48     -64    
48     -80    
-32    96     
-192   96     
0      144    
272    448    
-192   256    
-880   -48    
16     -48    
-368   48     
240    112    
-64    -176   
96     0      
0      -48    
0      -32    
-128   -16    
-160   -32    
-64    48     
-48    -48    
112    -32    
-48    32     
-48    96     
-256   -32    
-176   -288   
16     96     
192    192    
32     -16    
-16    -112   
-160   -192   
-80    -32    
-80    48     
192    -64    
-80    -32    
-256   -240   
272    160    
256    304    
-320   416    
-480   -112   
112    -128   
-752   128    
352    160    
-32    192    
-336   -96    
272    336    
-400   240    
-128   144    
128    -16    
-80    -176   
16     -48    
-16    -352   
-160   -160   
96     -768   
-16    -128   
128    16     
-1264  -192   
0      16     
-64    32     
224    176    
-192   96     
32     16     
144    0      
-128   144    
112    -64    
-208   112    
112    80     
-96    -16    
160    64     
-208   -80    
208    0      
-256   -96    
-112   -288   
208    96     
-16    112    
176    -192   
-96    96     
112    80     
-176   144    
80     -48    
-128   -224   
128    -16    
-208   752    
400    448    
-48    -192   
-96    112    
16     640    
384    576    
240    160    
-80    -64    
176    -32    
-368   96     
368    64     
-240   16     
-48    -144   
48     144    
80     112    
-32    -16    
16     144    
-128   -32    
0      128    
0      176    
-176   320    
400    192    
240    80     
32     -176   
-96    16     
144    128    
-64    288    
16     -32    
-64    -160   
192    -48    
96     -16    
0      48     
-16    -16    
-160   144    
0      112    
0      176    
160    32     
48     64     
272    336    
-64    368    
320    192    
-256   0      
128    48     
-192   -64    
0      32     
-128   128    
80     112    
-16    64     
304    192    
48     272    
16     96     
-160   -64    
-64    -160   
16     16     
0      192    
16     -288   
-176   32     
64     80     
16     -304   
336    192    
-144   -320   
192    -32    
192    96     
0      -32    
48     -304   
128    224    
-16    96     
-16    96     
80     -32    
64     96     
32     32     
-48    -208   
448    -160   
-16    112    
-64    48     
96     400    
-160   192    
-240   -208   
192    16     
160    208    
384    -144   
224    -240   
464    -224   
240    -368   
416    64     
208    -80    
96     16     
80     160    
-464   -352   
48     48     
-128   64     
-16    0      
48     32     
192    -768   
-16    -320   
96     -96    
-400   160    
-320   -48    
320    32     
-112   64     
-64    -32    
-64    144    
-80    240    
-64    -256   
432    32     
-32    208    
16     -112   
224    -48    
224    -1488  
48     -80    
192    64     
-112   0      
0      -32    
256    240    
-144   96     
272    48     
-80    -128   
400    32     
208    160    
-112   0      
16     48     
-224   -48    
176    64     
-80    -240   
352    -48    
-128   -112   
-128   128    
-208   -128   
496    112    
-32    -16    
336    48     
32     -48    
96     80     
48     80     
-176   -80    
208    80     
-144   -208   
64     48     
48     -256   
256    0      
-176   -1440  
320    48     
-80    16     
176    80     
128    -32    
-96    -48    
-112   80     
-112   32     
96     80     
224    0      
96     -176   
240    -16    
0      80     
144    -256   
96     32     
96     -112   
-144   64     
-32    -112   
16     32     
160    112    
128    48     
-48    -64    
160    16     
16     96     
624    416    
-144   128    
80     -368   
128    96     
-288   -128   
-16    -192   
416    -80    
352    320    
320    224    
224    96     
-16    176    
-464   48     
80     0      
-224   -672   
688    256    
192    -288   
304    -64    
240    -224   
-32    112    
144    -64    
-224   80     
288    16     
96     48     
16     32     
160    -48    
208    48     
-112   64     
32     -16    
32     -32    
80     -448   
32     -160   
-16    32     
160    -112   
80     112    
-32    -64    
160    -144   
0      -96    
176    -64    
-96    -80    
112    -544   
-32    0      
80     -32    
112    -384   
192    -64    
64     -112   
128    -48    
-32    -912   
-96    -64    
16     -144   
-144   -240   
192    -208   
16     160    
304    -16    
48     96     
112    64     
-96    -80    
-352   -112   
96     -32    
224    0      
128    -144   
48     0      
144    64     
-192   -48    
112    -96    
32     -32    
144    -64    
-144   48     
112    -64    
0      144    
32     -128   
0      48     
-400   -32    
208    -128   
-816   176    
32     256    
160    -96    
32     384    
64     192    
160    -688   
-48    512    
-80    48     
80     -384   
336    192    
32     672    
-16    -48    
176    -576   
80     208    
384    416    
48     208    
64     48     
32     -304   
96     -64    
96     64     
224    64     
-64    128    
-16    -384   
320    144    
-64    64     
32     16     
-32    -192   
256    -496   
32     384    
256    304    
-368   -16    
-32    208    
-1792  -144   
144    64     
128    368    
-352   0      
-352   32     
112    -640   
64     32     
160    -16    
144    -16    
-48    48     
-256   112    
-256   288    
48     -64    
-240   -448   
-112   160    
-576   -64    
-16    48     
-352   64     
-32    -272   
464    -80    
416    -48    
32     -32    
96     -16    
-256   -80    
-304   -48    
-48    -256   
160    -96    
320    -80    
-48    32     
160    -48    
-256   -160   
128    -32    
-256   112    
16     -80    
-144   80     
80     -144   
-32    -16    
96     -448   
64     128    
-304   -80    
256    -176   
-480   192    
448    384    
-128   128    
-400   240    
-1104  -48    
64     -112   
96     -208   
320    -256   
-128   -48    
-16    -384   
80     128    
-160   -192   
160    48     
80     80     
144    224    
-48    96     
208    -48    
-240   -336   
32     -384   
-144   -144   
-16    0      
144    96     
16     96     
48     64     
208    -96    
112    -128   
-80    -144   
-96    32     
-80    64     
432    208    
-384   96     
64     -144   
-16    -288   
96     144    
272    -16    
128    -64    
0      0      
-656   -16    
224    32     
-448   -144   
-336   16     
-48    -80    
320    608    
-176   224    
-1312  224    
-80    48     
0      -64    
-144   240    
96     48     
-64    176    
-144   -304   
288    144    
-336   -208   
-240   -32    
-128   -16    
128    224    
16     -48    
0      -112   
-224   -272   
-384   -240   
-272   -320   
160    -784   
272    -48    
-128   -64    
320    -48    
-512   -64    
-80    32     
-128   192    
0      704    
160    528    
112    48     
240    272    
0      -160   
-240   192    
-160   -64    
48     -32    
-704   32     
16     16     
-2288  -32    
320    -48    
-16    64     
64     -32    
32     -32    
-80    -48    
-112   -112   
48     -80    
-16    -144   
112    -176   
-48    -96    
-416   512    
464    384    
-192   304    
-336   -144   
-1008  16     
432    384    
272    272    
-112   224    
-64    -128   
-224   -64    
416    224    
-288   704    
48     144    
288    192    
64     432    
-144   384    
-32    352    
-240   64     
192    512    
-576   336    
0      240    
-208   0      
176    -16    
-208   -256   
-80    304    
240    -48    
-272   -608   
176    272    
-160   208    
48     -64    
96     112    
144    224    
-224   48     
-160   -32    
-112   384    
48     16     
-560   32     
0      -48    
32     -96    
16     -256   
256    912    
-400   -288   
-112   176    
192    64     
-352   -96    
-128   -192   
192    192    
48     -32    
272    -32    
-400   -112   
80     -32    
-704   16     
-128   80     
80     64     
96     -48    
160    64     
80     64     
-48    0      
-16    80     
-16    208    
-80    64     
-176   80     
-224   -96    
208    48     
80     144    
-144   16     
-288   -32    
-16    64     
96     112    
-144   -64    
96     -96    
176    -192   
-144   -128   
-192   144    
224    848    
-480   720    
-304   128    
112    -288   
448    32     
-192   48     
336    144    
128    32     
320    160    
-32    -32    
208    -16    
176    48     
-160   -16    
-48    32     
-224   -144   
-96    0      
-240   80     
-144   16     
-32    -32    
272    144    
288    608    
-624   224    
112    -48    
432    -144   
336    32     
416    144    
368    -112   
-64    -80    
-544   0      
-368   176    
-320   0      
-64    -32    
96     48     
96     16     
224    48     
-64    -64    
416    -80    
160    80     
128    112    
128    48     
80     -96    
224    112    
-304   -16    
224    16     
64     64     
224    112    
352    128    
64     80     
-112   -16    
-80    16     
-64    -16    
-48    -16    
128    64     
-96    32     
-96    96     
208    64     
0      -48    
0      16     
32     96     
80     32     
64     32     
-112   16     
32     64     
-224   0      
48     -16    
112    64     
160    112    
-128   -32    
144    -64    
-64    96     
80     96     
144    80     
-32    64     
-80    80     
80     0      
32     64     
-368   -96    
240    64     
-80    48     
176    32     
48     32     
256    -144   
-320   48     
-80    -16    
320    32     
80     160    
352    32     
-224   -48    
176    80     
-48    48     
64     -112   
224    -112   
32     80     
112    0      
48     -368   
-432   -320   
464    -208   
352    -48    
160    32     
560    336    
0      176    
-96    0      
0      144    
-208   320    
432    320    
-368   64     
-48    128    
64     16     
176    -80    
16     -304   
160    -16    
288    48     
-64    0      
208    32     
-32    192    
48     -160   
192    144    
-16    80     
176    -48    
-32    -48    
128    96     
-96    96     
32     -48    
112    128    
-48    -160   
352    288    
-384   -416   
112    -48    
128    384    
-64    -448   
176    480    
-32    32     
304    80     
80     160    
-80    -64    
-64    -80    
-16    -560   
128    -240   
-64    -208   
-144   112    
272    192    
-96    -544   
-160   -176   
544    -1200  
64     1024   
-96    432    
80     -480   
-256   -64    
176    -256   
-16    656    
432    464    
32     256    
128    -208   
-64    32     
-16    -32    
-32    -64    
192    -80    
0      64     
208    -80    
48     -64    
288    -128   
16     128    
48     128    
0      208    
0      336    
128    64     
48     64     
64     -16    
16     -48    
64     -48    
80     128    
144    176    
192    192    
-128   128    
32     160    
-32    96     
-32    0      
-48    -160   
432    16     
32     192    
-48    64     
176    48     
192    -256   
-112   80     
-80    -32    
96     256    
176    -64    
224    48     
-32    -48    
64     32     
-80    -32    
128    16     
112    48     
0      80     
-96    -48    
128    -304   
160    0      
64     -96    
-32    -64    
304    -32    
80     224    
-192   -96    
160    -16    
32     -256   
128    80     
624    304    
-368   -304   
48     256    
176    -512   
272    -976   
256    -144   
-48    -96    
0      -32    
192    -224   
112    -112   
80     112    
192    -16    
16     -64    
112    -48    
128    -112   
96     288    
32     -320   
80     -16    
224    -96    
96     -80    
0      -144   
112    0      
-352   0      
-144   128    
48     48     
224    -176   
304    32     
-16    32     
-96    96     
-16    -240   
288    192    
-96    -112   
272    48     
-288   176    
128    368    
288    32     
176    -144   
-32    112    
176    32     
-48    0      
80     32     
-128   -48    
-48    -176   
-16    192    
352    16     
112    128    
-80    -96    
64     -48    
112    48     
-112   0      
-144   -48    
176    -160   
128    32     
-16    96     
48     96     
48     -384   
32     -32    
192    -1488  
-480   -112   
176    -16    
-32    208    
16     -80    
112    -48    
-368   -96    
-80    48     
-96    -176   
128    -288   
96     -80    
0      -192   
48     80     
208    352    
-880   -64    
-176   -704   
-64    -768   
-176   -480   
304    -112   
-384   -368   
16     -176   
64     -80    
144    176    
240    672    
-240   96     
-560   80     
-224   -64    
-48    -128   
576    -304   
-320   640    
176    192    
-32    -48    
288    496    
448    -96    
-400   -16    
528    -272   
-80    112    
448    -80    
64     128    
16     48     
-688   -16    
448    640    
-672   160    
0      -160   
32     32     
16     -256   
96     112    
400    400    
-32    288    
-160   96     
0      -48    
-48    -144   
32     0      
256    64     
0      256    
-960   -416   
736    32     
-544   560    
-224   336    
192    -240   
-96    -224   
-128   -368   
-160   -192   
-64    -208   
0      240    
112    32     
-320   -80    
416    64     
-256   224    
208    64     
-64    -32    
32     -208   
-224   128    
32     -416   
32     240    
-80    128    
-128   64     
144    256    
-16    -304   
-592   0      
192    48     
-176   -64    
-48    48     
80     0      
112    16     
32     80     
192    0      
-32    -16    
16     -80    
16     112    
0      48     
-16    32     
-80    -80    
-1104  -32    
-80    16     
-240   0      
-80    96     
192    80     
-112   -32    
112    -16    
-368   -48    
-320   -256   
80     -64    
176    -304   
-336   -736   
-240   -192   
208    320    
-320   64     
-80    96     
64     144    
64     16     
-48    80     
-832   -128   
112    -96    
-96    -640   
-80    -208   
-432   -128   
0      112    
-32    48     
288    240    
-240   112    
-48    96     
0      128    
96     16     
96     96     
-304   -16    
-208   -144   
64     -272   
48     48     
160    288    
-16    64     
48     0      
-112   16     
-16    -64    
128    64     
-272   48     
-368   48     
448    272    
-80    -112   
192    -32    
16     -80    
-96    16     
112    240    
-112   176    
-1216  288    
176    368    
-80    -16    
-400   -144   
-128   -208   
336    80     
64     0      
528    0      
256    128    
-112   16     
48     64     
-112   0      
336    288    
-448   128    
-80    -128   
-512   -64    
-16    112    
-64    -32    
256    32     
48     48     
-544   176    
-112   80     
-160   -96    
-400   -80    
208    64     
144    80     
-80    32     
-96    16     
-208   -16    
-48    80     
-208   -128   
240    -64    
192    0      
-176   32     
-192   64     
-608   -112   
160    80     
-176   48     
-80    64     
160    128    
-240   64     
32     16     
16     32     
-128   96     
-160   16     
-176   -32    
592    176    
-560   -16    
-240   -32    
272    80     
-32    32     
176    48     
16     -48    
-256   -16    
16     144    
32     32     
-256   -16    
-48    32     
-128   48     
192    96     
-32    96     
-64    80     
-144   240    
-32    80     
80     32     
-48    64     
0      32     
16     16     
48     192    
-80    32     
32     80     
-16    -144   
176    0      
32     352    
176    384    
-96    -144   
320    -96    
192    80     
48     -96    
-64    -128   
64     -64    
-64    -32    
-16    368    
48     352    
-160   -144   
-64    -208   
-240   -176   
400    144    
-720   -160   
256    64     
32     160    
16     112    
832    32     
192    304    
-64    -256   
224    64     
-192   16     
560    -368   
304    432    
304    144    
-192   96     
-240   240    
-80    32     
-80    -80    
256    400    
288    288    
-384   -544   
48     640    
272    464    
48     -144   
96     -80    
-96    16     
0      -192   
-16    0      
-96    352    
112    16     
-48    80     
-48    32     
32     -320   
96     -32    
-64    64     
80     48     
-304   -512   
64     48     
432    592    
-352   256    
176    48     
-160   32     
0      96     
-96    64     
48     -16    
48     -144   
-112   -112   
256    224    
-288   96     
-80    128    
128    -320   
16     -320   
80     48     
208    0      
-80    48     
-96    32     
96     32     
64     80     
-96    32     
16     96     
176    -16    
0      64     
-32    48     
-160   -688   
32     48     
-48    80     
192    0      
192    208    
96     96     
224    32     
80     64     
32     64     
80     128    
192    96     
48     32     
96     112    
0      48     
-96    -80    
0      -384   
0      64     
112    16     
128    96     
224    144    
160    496    
-256   320    
-16    16     
16     -80    
192    -16    
-80    32     
0      64     
-32    208    
448    400    
-352   288    
112    -128   
144    0      
-48    96     
480    304    
-368   208    
-144   0      
208    -64    
208    32     
384    144    
0      160    
0      96     
80     -160   
-256   -144   
144    160    
-288   96     
352    -64    
80     160    
192    -192   
96     112    
-336   128    
208    -144   
256    -144   
-272   -576   
272    -400   
192    144    
64     96     
272    96     
-368   -16    
-128   -128   
192    144    
32     -144   
224    32     
208    -48    
48     80     
320    32     
-32    48     
-272   -80    
48     -192   
-288   -224   
352    -48    
240    144    
32     352    
32     288    
48     -64    
-320   -16    
-224   -96    
-160   -32    
224    -144   
384    288    
-160   -560   
-128   192    
512    144    
96     -96    
128    -176   
96     -224   
224    64     
-80    112    
-128   0      
128    -288   
48     96     
448    128    
368    -48    
96     48     
-96    144    
16     -176   
64     -16    
32     48     
176    -48    
-192   -176   
80     -176   
-128   16     
-16    -96    
80     -80    
144    32     
224    80     
-224   -528   
64     -304   
80     -80    
224    144    
-64    -80    
176    -64    
32     336    
-224   48     
208    -608   
160    272    
-96    432    
112    -416   
-16    224    
-64    -192   
96     752    
96     -16    
-160   -112   
-304   -512   
-80    160    
-144   -1024  
352    160    
240    128    
304    -288   
-80    176    
176    -32    
80     32     
0      -96    
112    -512   
48     128    
-352   -1104  
208    720    
-160   512    
-160   -704   
96     160    
896    528    
-32    -544   
-16    -144   
-48    -336   
16     -32    
240    -160   
224    144    
-32    272    
1200   528    
-1152  -736   
-336   -1248  
320    48     
192    64     
192    176    
256    464    
32     -336   
-192   16     
96     352    
-96    192    
16     80     
-608   112    
80     16     
112    -48    
96     -16    
64     16     
-48    48     
128    -32    
160    -1120  
-160   -80    
96     -144   
160    48     
176    32     
0      112    
48     -112   
160    -208   
-224   64     
32     64     
144    32     
32     96     
128    0      
48     320    
-16    224    
80     -528   
464    208    
-192   48     
160    32     
224    80     
64     80     
-208   -96    
368    -16    
-304   -16    
0      32     
-592   64     
96     64     
176    -48    
0      -96    
160    -48    
-48    -176   
128    16     
64     -336   
0      -144   
224    16     
32     96     
-144   16     
144    80     
-128   0      
288    96     
-1584  -96    
128    16     
96     -16    
112    -336   
144    -304   
160    80     
176    208    
-48    -176   
64     16     
240    16     
-16    80     
-96    80     
128    -272   
-32    -16    
192    -16    
-208   -16    
208    0      
-448   80     
96     96     
-48    -16    
64     -96    
-48    64     
-96    -352   
144    -64    
112    48     
-64    96     
-80    224    
-48    -80    
-80    -80    
256    64     
-176   -32    
-80    -64    
-16    -96    
160    -96    
-1408  48     
-96    -144   
-32    80     
-304   -1216  
96     -368   
-528   -288   
-160   304    
96     128    
336    96     
-352   -96    
368    -144   
-352   -48    
48     -160   
240    -64    
96     -96    
-112   112    
-64    -160   
256    -32    
192    -48    
224    112    
-576   -32    
368    32     
-16    80     
96     112    
-160   80     
96     -48    
48     96     
224    48     
-48    -64    
-144   -32    
-208   -96    
-80    -160   
-176   48     
-960   -208   
496    64     
-112   0      
128    32     
-80    112    
-64    144    
-448   -16    
96     0      
-208   -80    
-112   -48    
48     96     
96     -48    
-208   48     
-1120  -128   
320    176    
-1568  -128   
-368   -16    
32     96     
-176   112    
-128   -48    
-1136  -112   
-176   16     
144    96     
-112   -16    
48     64     
0      64     
-752   -64    
0      80     
-400   -80    
48     80     
-112   48     
-112   48     
16     32     
-432   -16    
-144   32     
-160   -64    
-80    0      
-960   -32    
-32    -80    
-496   -160   
96     -240   
48     -208   
192    144    
-48    -64    
96     96     
-64    -80    
-64    -128   
-96    128    
-160   64     
-64    0      
-416   -16    
-64    672    
208    -48    
-336   464    
-864   -624   
272    400    
288    304    
-256   -224   
0      -720   
0      800    
0      16     
128    -80    
-80    160    
0      352    
-160   -192   
112    96     
-480   -192   
16     -32    
288    -128   
-560   -336   
-128   96     
80     -64    
0      352    
-176   -224   
-32    304    
128    -48    
-16    -320   
96     320    
80     -288   
-320   -16    
400    160    
-624   304    
32     128    
-32    -32    
-192   -160   
144    -48    
-16    64     
-144   -176   
112    -192   
-112   96     
144    192    
-64    112    
64     80     
-80    -48    
112    48     
-704   48     
32     64     
-144   48     
-32    128    
-288   0      
272    16     
-144   -112   
-96    240    
64     16     
-112   32     
-16    -96    
32     64     
-96    112    
80     112    
-304   0      
80     112    
-16    112    
96     16     
112    96     
-672   -32    
128    128    
192    -16    
16     0      
128    16     
-64    -16    
64     96     
0      64     
-80    80     
-64    112    
336    96     
-224   48     
0      -32    
-432   64     
112    64     
-48    -240   
112    32     
16     128    
-128   64     
-16    160    
64     112    
128    144    
-64    80     
0      -64    
64     48     
128    48     
-48    16     
-80    80     
-256   -48    
112    -48    
64     48     
0      48     
-32    -80    
224    64     
-80    128    
-16    48     
144    64     
208    80     
-80    192    
-80    128    
96     48     
-176   -16    
64     64     
-32    64     
256    224    
-336   48     
96     -48    
192    48     
-48    32     
96     -128   
-48    -64    
112    64     
96     -48    
0      400    
16     32     
304    -48    
-32    112    
96     32     
-112   -96    
80     16     
-176   240    
-336   320    
-176   208    
288    -160   
-144   -464   
-240   -592   
-256   -80    
-240   16     
-48    240    
-176   448    
160    304    
80     0      
112    128    
-224   64     
-64    192    
-16    16     
240    80     
192    96     
-160   -112   
48     -96    
96     -32    
-112   -48    
0      16     
-224   -208   
0      -96    
-240   -160   
144    -784   
272    -192   
496    16     
32     0      
32     256    
-304   -208   
64     352    
-512   208    
-144   -176   
224    448    
144    160    
160    -48    
160    64     
-176   16     
32     128    
64     -128   
192    224    
-224   -432   
-128   -1040  
288    64     
128    80     
224    32     
160    112    
-80    624    
0      -272   
64     64     
-48    128    
80     304    
-256   -64    
352    32     
-336   -304   
480    -16    
160    256    
48     -1392  
112    -16    
-112   224    
256    112    
-128   -16    
320    -240   
-224   -288   
208    -32    
96     80     
144    -48    
192    -64    
-16    -16    
96     48     
-80    80     
192    352    
64     384    
304    176    
176    80     
192    -16    
320    0      
48     32     
160    32     
-80    96     
96     -16    
48     128    
-240   0      
160    96     
-16    32     
96     -96    
16     -32    
-112   -192   
-80    48     
288    -64    
80     -32    
112    48     
-352   160    
48     64     
432    112    
-480   -64    
-560   -512   
256    -256   
-720   -304   
-80    -464   
416    48     
736    400    
-448   128    
272    -48    
-16    -768   
64     0      
192    -48    
96     80     
96     80     
16     176    
0      80     
-16    16     
16     64     
48     48     
128    96     
64     16     
64     -16    
176    -32    
-16    32     
160    -144   
160    112    
-208   -128   
336    -16    
-112   0      
176    0      
80     0      
-96    112    
-96    0      
192    -128   
-32    -96    
176    64     
-80    32     
192    -80    
96     96     
192    -128   
96     0      
-208   -16    
128    16     
112    48     
48     64     
32     48     
96     48     
-176   16     
128    16     
352    80     
208    160    
-16    48     
32     -128   
-96    -64    
80     32     
-32    96     
32     -224   
176    112    
-48    -48    
-16    16     
176    64     
-48    128    
16     144    
144    0      
160    128    
96     -32    
0      -112   
96     -48    
192    96     
144    -48    
128    32     
64     -32    
16     -96    
224    80     
80     304    
-16    96     
-48    192    
80     -1184  
64     48     
-80    -704   
176    -16    
128    -256   
-144   -128   
96     64     
112    -192   
112    16     
-64    -272   
-64    -400   
32     80     
64     -144   
0      -48    
-432   112    
-96    128    
-112   -16    
192    16     
208    -80    
32     -368   
800    -320   
288    -320   
464    192    
112    96     
16     80     
208    192    
128    304    
320    -240   
304    480    
-656   48     
-144   -256   
208    160    
384    -32    
320    0      
144    -64    
304    144    
112    -704   
64     96     
-96    -32    
-192   -352   
80     -144   
-336   240    
-80    160    
-112   176    
-400   0      
80     -16    
144    176    
208    224    
368    208    
192    -624   
-96    -368   
-144   -320   
112    -16    
80     -32    
-48    64     
272    -160   
64     -320   
112    -48    
-32    160    
-464   -432   
-96    -352   
-1136  112    
0      256    
112    368    
256    -32    
288    -224   
-112   -80    
48     496    
-176   -592   
-256   -192   
464    272    
-240   -128   
288    -368   
-48    -288   
96     160    
144    -144   
208    176    
-144   -64    
32     -304   
64     96     
-448   -80    
-32    64     
144    80     
64     -256   
-160   112    
208    32     
112    -224   
-16    -144   
192    -208   
-48    -16    
64     -32    
-208   64     
48     -256   
-64    288    
288    -208   
16     -144   
-352   272    
-64    0      
192    -640   
-16    160    
112    -80    
0      608    
32     0      
336    -432   
-32    80     
288    80     
-240   192    
304    128    
64     400    
-80    112    
80     -64    
112    -64    
64     -160   
176    -256   
-256   -96    
32     -192   
32     -64    
96     160    
32     160    
-240   16     
64     176    
-288   112    
432    -96    
-256   32     
352    -272   
-48    16     
192    -272   
128    -32    
144    -64    
-144   48     
-64    96     
-64    -96    
-192   32     
96     80     
-80    144    
224    -32    
-160   96     
240    32     
-176   416    
80     -80    
144    -112   
16     -112   
32     64     
-336   32     
-464   -112   
96     -80    
-1632  32     
80     272    
-224   16     
112    -16    
64     16     
-32    -48    
-48    -32    
-48    128    
-2032  -16    
-48    64     
-16    0      
112    -208   
-256   -208   
-192   144    
-64    160    
-288   16     
48     0      
-672   64     
304    400    
-320   224    
-144   -32    
96     -176   
-192   128    
80     32     
80     32     
-96    -160   
0      64     
-176   80     
80     0      
-64    64     
-32    -32    
-80    128    
-80    96     
-48    112    
-1936  -64    
16     16     
-16    128    
-32    304    
-144   0      
0      16     
32     -128   
-208   0      
128    -32    
48     96     
-64    80     
-96    16     
-224   -144   
0      -48    
-96    96     
-96    32     
-320   16     
-96    64     
128    96     
-272   -144   
160    -16    
-80    0      
-80    80     
96     -16    
-176   -80    
-80    -96    
0      16     
128    96     
-64    80     
-192   32     
-80    -48    
-96    64     
-1008  -16    
160    -112   
64     -112   
256    32     
32     64     
-176   256    
-16    160    
-16    224    
-368   320    
-32    128    
224    112    
0      80     
-80    -176   
-80    -192   
96     -128   
-976   48     
320    400    
-368   448    
-16    -128   
16     -384   
-112   -400   
272    -368   
144    416    
288    240    
384    32     
-304   192    
-560   64     
-320   512    
32     -192   
144    -48    
-400   96     
224    -96    
-48    -176   
112    0      
-176   192    
-480   80     
-64    96     
64     -336   
496    320    
256    240    
192    -160   
-192   144    
-208   -32    
-336   -80    
336    528    
-176   352    
608    304    
-672   -416   
-128   -368   
-96    -64    
16     64     
192    -80    
-352   -208   
-80    48     
-368   160    
-80    0      
96     -48    
240    112    
80     -80    
96     -80    
-480   -256   
-128   -128   
-208   48     
80     96     
128    48     
240    64     
-224   64     
96     96     
-96    32     
32     48     
0      32     
-32    32     
128    96     
-160   -16    
64     64     
-240   -64    
-192   -32    
208    0      
0      64     
192    96     
-96    32     
48     48     
-144   -320   
464    -112   
-224   192    
592    176    
-480   -368   
-288   -192   
-112   -80    
128    48     
48     16     
288    32     
-48    96     
-208   32     
368    112    
-544   -176   
-272   80     
-48    144    
144    96     
-64    -16    
48     64     
-128   -112   
128    0      
-128   -192   
128    64     
160    192    
448    240    
-352   96     
-144   -80    
656    224    
576    528    
-640   160    
256    -192   
16     16     
-272   32     
240    -16    
208    96     
32     48     
-16    -16    
48     -32    
48     16     
112    0      
-224   176    
240    32     
96     16     
16     176    
112    32     
128    128    
-160   160    
48     -48    
192    48     
128    80     
-16    96     
-96    -16    
48     -48    
16     32     
160    32     
48     128    
0      32     
48     32     
-32    32     
-160   16     
304    256    
-304   80     
112    16     
224    64     
32     128    
-32    112    
-224   -96    
320    -400   
-160   96     
80     80     
176    112    
112    176    
32     0      
-160   48     
112    -16    
64     144    
144    192    
-160   0      
0      80     
160    48     
0      176    
240    112    
128    64     
-64    -32    
0      32     
0      96     
96     112    
64     32     
-96    32     
176    160    
0      320    
240    256    
-128   80     
-128   80     
224    176    
48     160    
-80    -32    
32     -80    
64     32     
-32    -32    
128    -32    
112    -48    
0      112    
128    208    
-128   32     
-16    -192   
160    256    
-48    64     
96     32     
16     -64    
-48    32     
64     176    
64     -400   
-48    -32    
208    -864   
224    384    
272    208    
-32    -320   
-16    256    
0      -96    
32     176    
0      144    
-32    0      
96     112    
256    976    
80     -112   
-48    -320   
-112   160    
0      -144   
336    352    
-304   48     
-176   -96    
384    256    
0      -272   
464    288    
272    96     
352    48     
176    -16    
160    80     
-112   32     
-176   0      
-272   128    
-96    16     
32     -16    
288    -448   
80     240    
80     -944   
80     592    
80     592    
-16    -480   
480    -16    
304    384    
192    -224   
400    144    
-16    80     
-176   -144   
-176   80     
80     -128   
-160   -32    
-96    80     
80     112    
128    288    
-192   176    
-304   -368   
448    448    
-160   -208   
384    -224   
208    -32    
272    32     
-16    128    
-160   -48    
0      -32    
-16    -16    
-16    96     
-224   -352   
304    -512   
96     -480   
208    256    
-128   112    
0      80     
0      -80    
-64    144    
288    -48    
-176   -272   
144    -256   
112    -208   
176    96     
48     -96    
32     256    
80     -32    
48     -192   
32     -832   
0      -464   
64     -464   
48     -848   
64     -32    
-256   160    
0      48     
-48    -208   
400    -624   
304    80     
32     240    
-160   272    
320    320    
-112   -16    
240    -144   
-48    -128   
320    -688   
112    -176   
-112   -288   
80     -144   
-128   400    
288    -96    
224    -144   
64     -48    
128    112    
-112   -336   
192    -48    
128    -1168  
0      144    
48     48     
336    -144   
176    160    
16     144    
464    -160   
-16    0      
-192   112    
336    240    
-80    64     
288    64     
48     144    
48     -224   
64     -192   
48     -976   
112    -48    
-144   32     
176    -16    
-16    16     
-192   -16    
288    -64    
-64    96     
-240   64     
416    -64    
-816   -128   
208    -64    
-144   -176   
144    48     
96     -64    
176    32     
32     192    
48     -256   
80     -192   
208    -48    
16     -48    
-144   48     
96     16     
224    -32    
-64    160    
-1152  32     
160    80     
192    64     
304    128    
112    352    
176    -208   
-64    -64    
-16    -1408  
16     16     
160    -80    
-16    -192   
-160   32     
256    -64    
-80    -80    
32     -128   
-464   16     
-16    -48    
-1200  -64    
144    16     
80     -112   
-64    -208   
-64    32     
128    -624   
112    -32    
96     -16    
96     0      
-192   112    
112    48     
-64    0      
-16    160    
-320   64     
288    192    
-1152  80     
160    -192   
144    32     
96     -192   
96     448    
128    80     
128    64     
-208   112    
64     -144   
160    64     
-32    48     
-176   208    
352    384    
-96    512    
32     32     
-272   -96    
32     48     
32     -64    
80     192    
208    -192   
256    -224   
16     192    
-208   192    
32     352    
-512   0      
128    -240   
-208   80     
48     240    
-80    -112   
64     -96    
-208   -16    
0      -32    
-16    496    
128    -368   
-480   -832   
-128   656    
-112   -320   
-32    64     
-80    -192   
-64    112    
-192   320    
-48    -144   
576    720    
-1152  -432   
-304   -208   
32     384    
128    96     
144    304    
-432   -208   
416    -64    
-752   112    
-496   0      
-96    320    
-576   128    
192    -16    
-1216  -144   
-448   -176   
96     -64    
96     128    
464    512    
-144   240    
-320   48     
0      16     
16     -128   
272    48     
-48    -32    
96     64     
-96    0      
-272   48     
-128   -16    
-960   -16    
16     32     
224    -272   
128    0      
-832   -64    
-16    32     
-288   -32    
144    80     
112    16     
256    -32    
-176   -16    
-208   112    
-496   -224   
160    -16    
-64    80     
-160   16     
-272   112    
-32    64     
-224   -64    
-416   -112   
144    80     
-160   -48    
192    64     
-128   -16    
-160   32     
-32    -32    
0      32     
-144   80     
0      48     
64     48     
-112   0      
16     -32    
-128   112    
-128   80     
-400   -48    
128    48     
80     48     
288    80     
-224   -384   
-112   -96    
-304   144    
176    -96    
64     112    
-112   64     
-112   32     
-192   -160   
96     -48    
-208   32     
-48    208    
-480   -48    
192    0      
-224   -112   
80     -16    
384    304    
-240   192    
-192   -32    
48     48     
-336   -64    
128    0      
192    80     
0      96     
336    80     
48     96     
-160   -16    
-288   -48    
192    112    
-784   -176   
240    80     
544    48     
-688   80     
-48    16     
-208   -48    
496    160    
-64    64     
64     80     
320    176    
-288   128    
-240   -176   
-16    64     
-416   -16    
32     32     
144    0      
32     -80    
32     32     
112    80     
-144   16     
-176   64     
16     256    
16     80     
224    96     
-304   96     
-176   -32    
-320   -48    
272    -48    
-176   16     
208    80     
-48    80     
-160   -16    
16     -96    
208    48     
16     144    
-32    -16    
-16    64     
112    96     
-128   0      
-48    0      
160    96     
-224   176    
240    208    
-64    48     
16     -96    
-64    32     
32     80     
224    64     
-224   16     
192    64     
-16    112    
240    16     
-400   -64    
48     -272   
16     -16    
128    -64    
-176   -16    
48     176    
-256   -64    
144    16     
0      144    
48     -160   
-208   -208   
112    -128   
48     192    
-160   80     
96     32     
-128   80     
16     -144   
-112   96     
80     64     
-144   -384   
-16    48     
208    16     
16     160    
32     96     
-32    112    
-240   80     
112    -64    
128    112    
0      272    
16     -560   
112    32     
320    480    
-128   -176   
64     176    
16     64     
-64    -48    
96     672    
80     -192   
-64    144    
0      96     
240    192    
0      96     
-32    -320   
240    624    
48     -256   
-128   -48    
192    160    
32     0      
32     48     
-16    32     
208    176    
-160   -64    
128    96     
336    368    
-192   -720   
16     0      
304    416    
128    32     
-208   -192   
-80    -96    
-224   224    
96     32     
-128   96     
0      -48    
176    192    
-256   -336   
64     -112   
-112   -144   
144    -336   
320    288    
-208   -144   
16     -608   
288    -464   
576    -64    
624    48     
0      96     
-144   64     
96     160    
-48    144    
32     -64    
-80    -752   
-32    -96    
288    -16    
352    400    
-112   112    
336    272    
-336   176    
96     16     
96     -16    
112    192    
352    16     
80     64     
-16    176    
-96    160    
176    80     
0      -224   
112    64     
0      48     
144    16     
-64    -64    
32     64     
48     16     
112    240    
-160   112    
64     64     
0      -208   
-32    32     
0      80     
-16    -48    
32     80     
144    -272   
-240   -176   
304    -384   
-112   -336   
48     112    
112    48     
-176   240    
48     0      
176    352    
96     256    
-32    -16    
-32    -128   
-80    -64    
224    112    
496    240    
-272   496    
160    272    
64     -96    
32     80     
192    -224   
64     128    
112    160    
16     -128   
-176   -48    
-96    48     
-128   336    
224    368    
48     256    
336    368    
-96    64     
176    -224   
144    -48    
16     -336   
48     0      
-16    -944   
368    256    
-352   272    
32     368    
160    304    
128    0      
64     16     
384    -80    
-16    112    
-64    -64    
48     32     
32     -112   
240    256    
-160   96     
208    -144   
-272   -912   
224    -64    
-176   64     
-48    208    
304    144    
-80    128    
112    80     
0      -16    
208    -112   
-320   -640   
80     -64    
96     -128   
96     0      
0      -80    
-32    176    
112    16     
16     32     
176    -208   
80     -208   
624    496    
-528   512    
16     -48    
-16    -464   
64     112    
256    -416   
-128   -80    
48     -144   
-208   544    
272    224    
480    240    
0      -112   
16     240    
192    -16    
0      -80    
80     -48    
-32    -96    
144    -96    
128    -208   
48     -496   
16     -144   
-64    16     
224    -224   
-128   80     
64     -80    
64     80     
48     64     
32     -240   
368    -16    
0      48     
272    480    
-400   -96    
-144   -320   
32     112    
288    -304   
-80    496    
80     -1408  
160    32     
-80    432    
80     -400   
224    -112   
96     64     
48     -48    
-240   160    
16     -560   
176    176    
-800   -208   
128    -64    
80     -144   
544    16     
144    256    
-176   -176   
32     -32    
16     96     
-64    16     
144    -144   
-144   48     
80     -112   
128    32     
112    -32    
304    80     
-304   -16    
128    0      
-48    16     
944    752    
-320   240    
-144   -240   
-192   -64    
240    -80    
144    448    
-368   -80    
16     272    
96     288    
112    240    
128    176    
192    -48    
368    -64    
-48    0      
-928   0      
256    -112   
32     -112   
-96    -144   
368    96     
16     -528   
528    -48    
560    272    
-208   128    
176    -80    
112    96     
-48    128    
-80    48     
-64    -96    
32     -48    
-768   32     
-16    -128   
48     -80    
64     -128   
-336   32     
144    -272   
208    48     
32     -800   
32     80     
192    -32    
-512   -80    
-80    -16    
16     48     
336    -48    
80     -16    
-736   208    
-368   -32    
-1904  -64    
400    -16    
320    144    
48     -48    
48     32     
128    -496   
32     64     
-160   0      
16     -64    
-304   -32    
592    64     
-64    16     
32     0      
-608   0      
-48    -48    
0      96     
416    48     
48     48     
160    -112   
-16    16     
48     -288   
64     48     
-16    16     
128    -224   
-480   -80    
288    -16    
-640   -48    
256    0      
-128   32     
160    -144   
-144   -224   
48     64     
64     80     
112    48     
-80    -16    
144    -256   
96     160    
-256   16     
176    128    
-320   64     
-112   64     
-96    -128   
112    -32    
-224   0      
-80    -176   
-240   0      
-112   -112   
288    48     
32     -16    
-272   -16    
-960   80     
-768   48     
-448   -112   
-1344  -16    
-160   112    
-240   -32    
160    80     
-16    -112   
208    -128   
272    -80    
384    -96    
-288   -80    
-192   112    
-96    -80    
-64    160    
-336   -32    
-576   -112   
-272   144    
-304   80     
176    -48    
-704   -32    
-80    32     
32     -64    
-32    -48    
112    -96    
48     32     
64     -16    
96     16     
-288   -128   
160    -144   
-96    -128   
96     112    
-80    0      
48     -160   
-112   -208   
-64    0      
-352   -224   
-992   -32    
-32    112    
-32    -96    
-112   32     
-48    -32    
-48    -304   
-160   96     
48     64     
-32    -16    
128    0      
-288   32     
-96    -32    
-128   80     
-32    32     
160    -16    
-336   -16    
80     512    
208    -368   
80     96     
-80    -112   
64     -208   
-112   112    
-48    160    
208    144    
-48    -64    
-96    144    
48     112    
112    112    
-256   336    
-256   128    
-368   288    
32     320    
-1808  -368   
-224   -80    
48     -624   
432    32     
-48    784    
-64    224    
-272   -128   
-208   -176   
16     -64    
112    48     
64     -64    
32     0      
192    96     
-448   32     
272    496    
-384   352    
-160   -192   
-64    -144   
-32    32     
32     -192   
-144   -48    
0      64     
-192   112    
32     0      
-112   64     
-80    80     
-48    176    
64     304    
-560   -96    
208    -16    
-384   -64    
32     16     
0      -768   
-400   -144   
208    -176   
0      0      
80     208    
-48    112    
-96    80     
-80    -96    
-80    208    
-80    -160   
224    -32    
144    96     
-112   432    
-448   16     
208    112    
304    48     
-32    64     
208    80     
112    64     
-64    256    
144    176    
-352   160    
-336   48     
-80    16     
-208   -16    
192    0      
32     0      
336    128    
-64    -32    
80     512    
96     16     
112    -128   
-128   48     
-192   0      
0      16     
32     -48    
-240   -64    
192    -144   
32     208    
48     144    
64     112    
0      0      
16     -144   
-144   0      
64     192    
208    0      
80     -80    
-64    -32    
16     112    
-176   272    
-112   144    
16     96     
32     32     
-96    -32    
0      -96    
16     -16    
-240   -32    
416    240    
-416   80     
144    224    
80     192    
64     416    
96     336    
-64    -176   
112    -80    
112    -160   
144    304    
0      -80    
-48    -64    
-16    32     
32     -336   
-224   16     
64     -48    
-64    304    
192    -32    
16     128    
32     -320   
208    80     
64     384    
96     48     
-16    144    
0      112    
144    128    
-224   176    
-320   -112   
304    -320   
48     -192   
96     -112   
160    -144   
-320   -128   
0      -432   
336    96     
256    -192   
48     128    
64     64     
-160   -48    
96     -80    
-256   -112   
272    112    
-112   -240   
96     -304   
0      0      
80     320    
-208   0      
96     0      
544    320    
-496   176    
-80    -256   
-176   48     
0      -48    
96     -32    
176    0      
-192   -816   
144    -224   
-128   -96    
-64    192    
160    32     
-128   -512   
224    -112   
176    -448   
-64    -112   
352    80     
-80    16     
-80    16     
64     16     
-192   192    
128    -16    
288    688    
160    384    
-224   -368   
48     -464   
176    -320   
288    -128   
144    496    
-112   416    
224    -432   
-176   -320   
240    752    
400    368    
-432   -112   
192    -368   
448    1008   
-592   16     
112    -496   
80     -16    
128    192    
288    -32    
-96    -512   
112    48     
96     32     
-32    512    
304    -96    
-32    144    
64     64     
80     112    
-432   128    
176    -208   
0      208    
224    240    
80     -192   
16     -80    
128    -64    
-32    160    
192    -224   
176    -336   
-176   224    
80     48     
48     -240   
-112   64     
64     176    
-48    -208   
80     -16    
144    176    
288    80     
16     32     
-64    -144   
48     64     
0      -80    
-48    32     
32     -160   
-48    -240   
48     -176   
48     128    
-16    0      
112    176    
-48    -16    
64     -160   
80     -640   
208    -224   
112    160    
96     160    
80     272    
-96    0      
-64    128    
64     -96    
96     -112   
96     -928   
32     96     
48     336    
-16    80     
96     -224   
-96    -16    
-336   128    
96     64     
256    128    
48     16     
64     -32    
320    272    
-64    288    
-112   32     
-64    -16    
336    0      
32     32     
-256   48     
-224   144    
-224   -32    
48     16     
80     96     
-32    -336   
208    -16    
-16    -128   
256    96     
256    -32    
-320   64     
-64    -48    
144    -112   
224    80     
-96    176    
-384   -240   
32     -96    
80     0      
48     48     
704    256    
-320   -128   
-368   32     
208    -32    
-48    16     
208    -80    
320    32     
512    192    
-192   16     
16     -480   
256    -112   
96     96     
400    -368   
-192   0      
-16    -64    
48     -688   
-16    32     
192    -224   
496    128    
-176   32     
80     -16    
368    192    
-400   -80    
80     48     
-128   32     
192    -128   
0      -64    
0      32     
80     -80    
-528   -48    
240    -288   
64     0      
112    -112   
32     -16    
64     -352   
128    -32    
-32    -16    
160    -64    
192    -144   
128    64     
96     32     
-400   0      
112    -80    
224    192    
-1312  48     
256    -112   
0      48     
144    16     
16     -64    
224    -176   
128    -48    
544    -320   
-96    144    
-192   -336   
336    -32    
-544   -384   
96     -80    
32     144    
0      -64    
-16    0      
-32    -32    
176    -16    
-32    -160   
-304   -480   
208    -640   
16     288    
-208   -16    
-448   -336   
48     -416   
-128   160    
-64    64     
480    592    
-496   256    
496    -48    
-208   -64    
64     -160   
-1968  -16    
176    -64    
144    48     
64     0      
-48    64     
80     -528   
-144   192    
160    -624   
64     -64    
144    64     
112    -192   
48     112    
128    -80    
-64    -48    
-64    -64    
-64    0      
144    -96    
336    640    
-256   -320   
-64    -288   
128    -112   
240    -80    
224    -592   
-368   -64    
688    -416   
-208   416    
-176   512    
224    -608   
-544   16     
336    352    
160    976    
96     304    
-2128  -448   
96     -256   
96     -208   
96     -96    
32     160    
224    -432   
48     192    
-96    80     
-112   -208   
128    16     
-144   -16    
160    240    
48     112    
-176   96     
112    -112   
-1232  16     
112    16     
288    48     
176    -176   
32     32     
-80    -272   
240    -32    
-528   -80    
-32    16     
-16    48     
-80    16     
-208   -160   
304    -48    
32     -64    
16     -48    
-832   64     
96     0      
-80    48     
112    -128   
-112   80     
176    -64    
16     112    
192    48     
112    48     
-192   -48    
256    -112   
-16    -16    
-32    -112   
-160   48     
224    0      
-96    160    
64     -16    
80     112    
-464   -144   
224    64     
-176   48     
-416   48     
-240   48     
-480   -48    
-112   -48    
-96    -80    
-128   -48    
48     -32    
-16    96     
-256   80     
-368   -16    
-240   -96    
192    96     
-176   -32    
-16    16     
-32    32     
-224   64     
-112   96     
-272   64     
144    48     
240    -16    
384    -64    
336    48     
-208   48     
-48    48     
-32    160    
-208   0      
32     128    
-240   96     
-224   32     
-320   96     
176    -80    
0      16     
-240   -16    
-16    128    
-352   32     
-368   64     
-1120  -48    
64     160    
-48    80     
-32    -160   
160    -192   
32     -32    
48     80     
-144   32     
-320   80     
-368   -80    
-32    -16    
304    176    
288    128    
-144   -80    
-80    -32    
-656   144    
-144   16     
-144   16     
48     48     
-288   -208   
224    -32    
64     -32    
-32    112    
-96    144    
-128   -48    
144    144    
-128   192    
32     208    
-64    -80    
-176   -176   
-224   -32    
-32    -192   
192    -240   
80     64     
-96    -48    
-96    -48    
0      144    
-16    64     
208    176    
224    80     
-320   336    
-128   176    
48     272    
-176   224    
16     192    
-144   -240   
80     304    
-1120  1728   
560    832    
-48    160    
-64    -96    
-48    480    
144    -16    
-528   -1072  
-96    -816   
0      864    
32     432    
80     336    
128    256    
-272   -704   
-368   272    
368    304    
-1024  -352   
112    -16    
-32    480    
96     192    
288    32     
-272   320    
-224   96     
-32    384    
-368   576    
96     -608   
64     -784   
96     -176   
-16    368    
-1072  -336   
480    1040   
-48    -160   
-464   -320   
368    688    
-464   -528   
16     -352   
480    16     
208    192    
128    240    
-288   -800   
240    160    
-128   -128   
-160   80     
0      -128   
240    272    
-80    80     
-64    -256   
112    208    
-48    16     
-80    -96    
0      128    
176    48     
128    -80    
0      128    
-208   192    
-144   208    
176    0      
-32    112    
160    224    
-176   16     
128    144    
-80    -16    
-96    16     
144    96     
-192   48     
96     64     
192    64     
0      -32    
80     0      
-32    -32    
112    -32    
144    16     
-48    48     
16     48     
-176   144    
0      96     
320    -32    
-144   -48    
208    32     
-48    64     
112    -256   
-144   -320   
160    -64    
80     112    
80     -160   
0      64     
160    64     
-64    0      
80     -112   
-176   -144   
96     144    
-64    -288   
0      144    
160    16     
192    -32    
80     64     
32     96     
-64    0      
192    48     
-48    64     
-304   -144   
112    48     
-336   32     
16     64     
-96    64     
160    112    
112    96     
-32    48     
160    48     
-32    -48    
192    -96    
-16    64     
48     64     
80     16     
208    176    
-16    48     
48     80     
-64    -16    
48     80     
48     -16    
112    48     
112    96     
-144   16     
80     112    
304    224    
-288   800    
80     256    
224    -80    
32     32     
-96    0      
304    80     
256    32     
192    -16    
-352   -464   
240    0      
-704   -80    
-160   -64    
80     96     
-304   -64    
384    112    
64     64     
-320   64     
-112   128    
-288   32     
16     -64    
-208   112    
-336   112    
-400   -80    
32     -400   
-16    -16    
288    -480   
-480   -144   
672    32     
176    272    
-416   96     
-288   -80    
0      304    
0      64     
256    -32    
304    0      
-224   80     
624    208    
-320   -16    
-32    -112   
-176   -16    
208    -96    
272    80     
176    144    
-288   -64    
112    0      
-96    -80    
48     64     
96     144    
-272   -96    
464    64     
-48    16     
64     96     
352    192    
-288   -32    
352    16     
-160   -384   
16     48     
48     -1056  
144    112    
-144   16     
32     0      
144    96     
112    64     
64     32     
176    112    
-32    48     
128    80     
64     192    
-128   0      
192    112    
112    -96    
144    48     
16     0      
48     48     
16     -208   
-192   -32    
272    96     
96     48     
144    32     
-48    80     
416    -48    
144    -32    
400    128    
-16    -64    
80     32     
-224   -112   
208    -96    
304    -160   
336    -16    
-192   -784   
144    272    
-352   -16    
208    48     
-32    112    
400    144    
-96    -336   
256    128    
-32    128    
-80    -144   
-112   0      
-16    128    
544    16     
-432   1264   
288    144    
192    -304   
-96    -384   
304    224    
-192   368    
368    -1008  
-256   768    
-16    160    
-32    -496   
64     272    
560    224    
192    400    
-208   -496   
-16    -80    
-144   240    
112    64     
224    192    
256    576    
-80    -64    
144    -1056  
64     -160   
-32    -224   
64     -144   
240    -96    
-32    -224   
-80    -304   
-176   -128   
240    -512   
112    0      
-96    -96    
272    0      
0      112    
64     -176   
96     32     
64     48     
-160   0      
-80    -80    
112    -32    
48     -16    
112    16     
-48    -32    
32     160    
112    -32    
144    112    
64     48     
416    -80    
-32    112    
160    -368   
-160   64     
16     -160   
256    48     
-512   64     
64     144    
-32    96     
-80    -128   
144    -128   
-48    96     
96     32     
-48    16     
0      -112   
304    -128   
-128   48     
-16    -32    
48     32     
16     48     
0      -32    
-32    0      
80     -96    
-32    -16    
128    -144   
48     112    
48     16     
32     -64    
112    -560   
-112   -64    
432    224    
-96    96     
368    112    
-224   64     
-288   16     
-48    -32    
-352   -32    
272    -32    
-224   112    
144    144    
-224   16     
288    -128   
-32    -16    
32     -176   
-96    -64    
240    -16    
0      -32    
272    -80    
-64    -224   
-320   -208   
-112   32     
-736   0      
112    0      
-1488  -16    
176    64     
272    128    
-96    0      
0      0      
32     -224   
384    -96    
480    -480   
48     32     
-48    96     
-384   -144   
240    -48    
-16    -16    
240    64     
272    -48    
-768   96     
-208   -192   
-496   64     
96     48     
288    48     
288    -304   
-48    -96    
112    -608   
-480   304    
-80    672    
480    272    
352    336    
-432   -144   
-592   -112   
-192   48     
-416   48     
432    352    
-432   -432   
592    -400   
-80    304    
368    144    
144    224    
-304   -112   
-64    16     
-80    48     
288    0      
-208   -128   
224    128    
-208   208    
-32    80     
-256   208    
-16    192    
128    144    
112    432    
432    400    
160    -48    
160    336    
112    -64    
-16    -160   
-112   176    
-112   -192   
-256   112    
144    -64    
32     -192   
224    112    
256    256    
-160   -224   
-208   -80    
48     -352   
128    160    
16     -256   
-32    -400   
-192   176    
-1584  32     
-144   -16    
16     -48    
48     -336   
64     -80    
64     -16    
-176   0      
0      -192   
-192   -304   
-352   224    
-1120  -896   
416    16     
-32    320    
256    0      
176    -32    
-448   384    
128    -96    
-640   -288   
-336   0      
-896   144    
-16    -32    
16     -144   
-16    -64    
-368   192    
-224   256    
224    -32    
-336   -576   
144    -432   
-48    544    
288    416    
320    256    
-192   -112   
-880   -464   
144    304    
-304   144    
-464   -48    
128    -32    
-128   96     
160    80     
128    64     
-32    -32    
288    256    
-208   64     
64     -80    
-16    64     
-112   112    
-16    -32    
-240   -32    
-48    96     
-368   -16    
160    48     
-240   64     
-96    16     
304    -176   
-176   -240   
-464   -176   
64     208    
368    -160   
-96    -48    
-64    96     
32     0      
96     128    
-32    64     
0      -16    
160    48     
144    304    
-816   -96    
-16    0      
-48    -32    
0      64     
64     -32    
160    0      
-112   96     
160    0      
96     16     
-128   -32    
-64    64     
240    320    
-208   96     
-176   -192   
400    32     
-224   -16    
32     0      
-896   192    
-240   224    
-176   -160   
-144   -32    
64     -96    
-416   -64    
-64    16     
48     96     
0      112    
-48    96     
-32    352    
-16    32     
0      -32    
-336   0      
-32    -80    
-320   -176   
-48    48     
-96    112    
-48    -16    
64     48     
-32    16     
0      128    
-16    16     
-32    -64    
80     -64    
64     80     
-64    16     
48     64     
-64    64     
320    304    
-176   224    
-176   16     
80     16     
128    -32    
160    224    
-256   112    
0      32     
0      -96    
16     -32    
48     0      
16     0      
-32    112    
64     64     
-208   32     
896    1152   
-1136  928    
-336   -80    
112    -240   
160    -48    
224    448    
-240   144    
-80    -96    
48     -160   
320    32     
64     32     
208    -80    
112    64     
128    32     
-208   80     
96     192    
-96    48     
112    16     
272    80     
-320   -48    
448    64     
-144   32     
32     96     
-32    96     
-32    48     
400    240    
-144   464    
-544   48     
240    32     
-192   80     
48     112    
96     -48    
-208   -96    
144    96     
-288   32     
-176   -80    
160    -16    
352    80     
336    64     
224    16     
-576   -160   
-224   -64    
-192   16     
368    96     
160    48     
368    224    
64     32     
-288   -64    
-48    64     
176    240    
-240   128    
-48    -16    
224    48     
-224   -240   
288    -16    
-208   -112   
128    -80    
-128   -16    
32     128    
-416   -16    
64     -128   
32     -16    
112    32     
96     80     
80     144    
-48    16     
80     -16    
-112   -352   
-128   -32    
0      192    
-16    32     
224    -16    
288    448    
-176   -656   
256    224    
64     192    
-112   -80    
176    224    
-32    -144   
-256   416    
160    -32    
-304   -400   
64     224    
160    -272   
16     16     
256    32     
144    -176   
0      416    
176    64     
-80    816    
160    -928   
32     32     
80     624    
-48    -320   
-240   16     
112    256    
144    192    
448    112    
-176   512    
-16    272    
-400   32     
496    -16    
-176   48     
224    -368   
-144   -448   
352    -64    
-416   432    
-32    112    
368    -112   
224    -80    
16     192    
96     80     
64     64     
-128   272    
208    176    
-240   16     
128    -64    
144    64     
128    208    
224    208    
-80    -240   
80     -80    
-80    16     
64     160    
64     432    
304    128    
144    0      
16     16     
32     -32    
208    160    
80     32     
352    128    
32     96     
-64    -176   
-192   -80    
144    -48    
96     400    
496    192    
112    48     
-112   -32    
-32    -16    
-112   128    
240    -64    
0      -144   
16     160    
-112   32     
-256   -256   
-48    176    
272    -224   
80     16     
64     -96    
64     176    
224    -1200  
64     96     
48     -144   
-48    96     
-80    -48    
16     -208   
128    144    
96     112    
-208   -16    
272    -64    
128    16     
-32    -64    
128    -144   
-80    0      
-80    272    
160    -272   
272    -48    
80     -32    
48     16     
96     48     
176    96     
32     64     
192    96     
-48    32     
32     -96    
128    64     
112    64     
64     80     
48     -432   
-80    32     
208    -432   
16     -16    
48     -112   
144    48     
32     80     
80     80     
128    96     
192    128    
96     96     
96     -48    
112    -112   
192    -160   
-16    128    
-16    -160   
160    -112   
192    -16    
288    -16    
32     112    
64     128    
-16    64     
256    176    
-112   224    
16     256    
176    192    
208    48     
-32    192    
224    -144   
80     128    
-384   128    
-96    48     
-224   -80    
384    64     
160    -144   
-288   -128   
-16    -16    
256    -16    
416    96     
-112   -416   
176    -992   
-160   -240   
-352   -512   
0      -160   
240    240    
768    96     
-176   -672   
-304   -720   
-64    -1328  
160    48     
240    176    
160    -16    
-256   -656   
96     0      
48     736    
160    -320   
-224   112    
112    288    
-96    -176   
-144   432    
-288   -48    
-16    -16    
-80    -384   
176    16     
64     -80    
16     -144   
64     80     
-240   -64    
-64    -400   
144    112    
176    176    
384    96     
-96    -16    
96     -48    
128    -464   
-144   -64    
96     96     
16     0      
128    64     
-64    96     
256    0      
-64    48     
-96    0      
-192   -80    
-64    -16    
32     -128   
32     -224   
240    -272   
80     -368   
416    -208   
-32    -112   
128    -304   
-48    -32    
128    0      
-32    112    
416    32     
-96    -96    
80     -96    
-288   -128   
-320   -160   
112    -80    
240    -336   
448    0      
32     32     
-16    -192   
80     -80    
-64    -256   
640    176    
-32    160    
128    48     
-48    0      
-80    0      
-16    -80    
80     128    
-432   672    
-304   112    
-144   -432   
576    -32    
224    192    
0      64     
336    112    
912    -240   
-704   160    
-240   -944   
16     -160   
-112   -80    
800    272    
-480   -64    
48     -80    
-48    -16    
-32    -48    
-64    -48    
64     -32    
-816   -112   
-48    -144   
32     80     
64     -192   
128    48     
-16    -832   
-16    96     
-320   -32    
256    -48    
-32    -144   
320    -64    
-656   96     
224    96     
-240   -96    
112    -112   
64     64     
64     -64    
32     32     
-32    -80    
-96    96     
96     -160   
400    48     
-16    -96    
48     -64    
-384   80     
128    64     
-80    80     
-96    -160   
-160   16     
208    16     
80     64     
128    -32    
112    64     
288    -80    
-96    32     
0      -704   
240    48     
-96    48     
96     -16    
-96    -16    
-32    0      
-208   64     
256    16     
-96    32     
112    0      
-400   16     
144    -112   
48     160    
-288   -64    
16     -64    
96     -32    
192    448    
160    160    
-272   -96    
-144   32     
192    48     
208    128    
-112   32     
-32    -64    
-1760  -128   
96     -64    
-64    -144   
96     32     
-768   112    
-576   80     
32     112    
-432   96     
-48    64     
-784   -32    
176    -176   
-432   32     
160    64     
128    -80    
-144   16     
-224   -48    
128    96     
16     -112   
-16    -16    
-64    -32    
-48    96     
-64    0      
-48    16     
-48    80     
-672   -128   
496    -640   
80     -832   
416    -256   
-2368  -32    
-144   48     
-256   -640   
-112   -160   
-432   96     
176    896    
96     240    
-720   -976   
-384   -352   
-144   448    
-16    400    
-192   32     
-176   -176   
0      -16    
-96    208    
-656   -16    
944    896    
-464   -224   
-144   -768   
192    -64    
-64    128    
48     144    
-304   -208   
160    -48    
-64    128    
48     304    
-272   32     
96     -80    
-224   -80    
288    32     
-16    -192   
304    144    
-688   160    
80     144    
-32    -368   
480    -432   
-176   -32    
-256   352    
-80    -304   
32     -592   
112    -576   
-608   96     
32     256    
160    224    
-96    -64    
480    192    
-176   -80    
-736   80     
-112   -48    
160    112    
48     288    
-96    -32    
64     0      
16     -16    
64     16     
96     128    
16     -624   
-176   800    
80     -368   
176    -64    
-256   192    
192    0      
-560   112    
48     32     
176    0      
48     -544   
-192   624    
192    -256   
32     416    
80     224    
144    -432   
-48    48     
-304   -496   
-176   -224   
32     480    
112    -224   
192    96     
112    -64    
-528   176    
-80    64     
-272   128    
176    112    
-144   -176   
80     96     
320    32     
-304   -16    
64     -64    
112    80     
-192   0      
144    80     
-112   -32    
256    96     
-944   -64    
-304   -48    
128    64     
112    128    
160    16     
208    64     
-240   -16    
-144   128    
-128   -208   
-32    -208   
48     128    
-352   -64    
160    -128   
-144   160    
128    16     
96     0      
-48    32     
-32    80     
128    336    
-208   -64    
416    -224   
0      160    
-112   112    
176    80     
208    -80    
-368   80     
-80    32     
128    -112   
-256   -16    
-128   80     
448    208    
-96    32     
-80    -208   
96     16     
256    32     
-176   -80    
224    16     
-128   144    
160    160    
-320   -96    
96     -384   
-112   -256   
0      208    
-176   144    
224    96     
96     -80    
-48    144    
496    288    
-64    208    
-176   -288   
-64    -48    
-160   128    
-96    -16    
32     16     
96     16     
112    48     
-160   -80    
144    -64    
176    48     
-96    80     
48     96     
48     32     
0      192    
112    96     
160    16     
-16    96     
48     -16    
-160   -224   
112    -112   
32     96     
-192   -160   
32     -208   
128    112    
-240   384    
176    64     
208    -48    
48     16     
64     32     
64     -48    
32     -48    
32     -128   
208    -48    
0      80     
16     192    
32     0      
16     64     
-64    -64    
48     -96    
-32    96     
224    160    
64     48     
80     80     
32     32     
112    96     
528    432    
-240   528    
48     176    
112    80     
80     192    
112    -192   
-80    -160   
144    -432   
16     -224   
-48    -560   
64     -192   
-208   256    
0      96     
320    496    
-16    288    
160    48     
128    -208   
336    352    
96     16     
-352   -896   
-368   32     
-176   416    
160    -80    
384    0      
48     112    
16     -416   
-112   -64    
16     -32    
464    272    
16     -208   
16     848    
96     176    
-32    -64    
-464   240    
32     32     
80     288    
304    16     
224    -80    
320    -240   
96     144    
112    272    
-176   208    
-336   -448   
-176   16     
240    -64    
304    -160   
480    -400   
-128   -48    
-720   32     
-32    224    
-48    80     
192    -32    
64     0      
320    80     
-64    -48    
-32    -384   
64     96     
96     -240   
240    112    
-48    -32    
160    96     
96     112    
368    352    
-240   48     
112    48     
112    32     
64     32     
0      128    
-16    -96    
-176   32     
288    -96    
-48    64     
-144   -256   
16     48     
-64    0      
32     -32    
96     -112   
144    176    
16     -32    
160    -96    
64     80     
80     -144   
16     64     
128    -208   
16     192    
-48    0      
128    96     
96     -144   
48     64     
-96    -64    
288    64     
-96    96     
400    144    
80     -16    
-32    48     
0      32     
192    -176   
-64    0      
736    352    
-608   64     
-32    -192   
512    128    
-112   -48    
640    176    
112    208    
-256   -16    
-240   -48    
-288   64     
128    -96    
272    -32    
-176   0      
336    64     
32     144    
-480   -176   
176    96     
624    -240   
-112   32     
0      48     
80     32     
96     -48    
-48    -768   
80     48     
208    -480   
16     -496   
208    -80    
0      80     
80     -16    
16     -112   
144    -32    
96     0      
112    -16    
112    64     
80     -16    
464    -80    
-304   160    
48     -176   
208    80     
64     -32    
352    64     
-80    48     
-64    -128   
-64    -32    
144    -304   
112    -48    
-96    -112   
240    16     
-64    96     
160    -32    
128    -80    
48     32     
208    48     
-96    16     
64     32     
64     -176   
-464   -112   
144    -96    
16     0      
256    -48    
-64    -96    
192    -48    
0      -16    
160    -112   
32     -48    
288    208    
-192   144    
-16    16     
32     0      
-128   -64    
64     -224   
-432   -48    
192    112    
-192   -32    
128    -144   
64     -240   
176    -240   
128    -32    
208    -384   
-32    -80    
-112   48     
16     128    
160    -64    
144    -48    
-80    -32    
240    112    
-112   96     
32     96     
-976   -48    
144    96     
-16    336    
48     -432   
0      96     
176    -432   
80     -32    
272    848    
-96    -240   
16     -32    
80     -48    
-192   320    
-32    -112   
-336   -16    
48     -32    
-624   -48    
112    -32    
320    96     
272    -48    
112    -160   
208    -96    
288    784    
-288   -16    
-192   -976   
192    96     
208    48     
112    32     
48     80     
-160   48     
528    -528   
-464   256    
64     -96    
-384   64     
48     -32    
-128   -272   
368    768    
64     32     
-128   -864   
-192   -272   
-48    416    
-336   -160   
240    -80    
256    112    
-112   -208   
128    160    
-32    -96    
288    0      
-64    112    
288    -192   
-112   -448   
-176   -48    
64     720    
-128   -512   
-112   -352   
0      80     
192    432    
-368   -48    
96     -304   
-48    80     
-224   -272   
-400   -128   
32     -128   
-1120  -352   
-48    128    
80     400    
-16    128    
-224   -160   
-240   -224   
-96    96     
-208   -32    
-64    176    
128    32     
48     32     
-80    16     
144    64     
-416   128    
112    -16    
176    272    
-544   64     
160    144    
-896   208    
-16    160    
-96    16     
-592   48     
-80    80     
-256   32     
48     -48    
32     -128   
-352   -112   
48     -80    
-128   272    
-128   -32    
192    208    
288    64     
-128   176    
48     0      
112    432    
-544   256    
128    32     
64     240    
-496   32     
-304   -112   
-720   -112   
112    80     
256    320    
-48    -48    
-288   112    
48     160    
-368   -240   
208    144    
-160   -96    
368    -160   
48     -16    
-96    16     
-64    -112   
32     16     
208    96     
-416   -288   
224    -464   
-32    -32    
-80    160    
-560   -32    
208    320    
-512   -16    
240    176    
-96    16     
112    64     
48     176    
-192   48     
208    -48    
48     64     
64     64     
224    160    
-208   112    
-160   64     
0      -64    
0      -304   
48     128    
48     -48    
48     -208   
-64    32     
-32    48     
-112   -32    
0      48     
48     80     
-256   48     
144    -160   
-224   176    
-416   80     
-1104  -144   
96     80     
32     -48    
128    96     
-32    -272   
-32    -128   
-64    80     
320    512    
-160   688    
-384   304    
48     -320   
-96    176    
-16    16     
-160   96     
80     -96    
-272   128    
640    304    
-16    96     
-80    -32    
112    -64    
-192   176    
224    -160   
96     0      
80     112    
-80    64     
128    -16    
96     -96    
-288   -48    
-144   -32    
-80    400    
-240   160    
-112   -256   
-144   -576   
112    -176   
112    144    
16     32     
16     128    
-448   80     
-32    112    
-144   -80    
-48    -64    
240    48     
128    112    
-32    0      
128    -128   
-224   0      
128    224    
-672   16     
-160   32     
112    112    
304    352    
0      336    
-48    80     
112    272    
32     16     
240    -288   
96     -112   
32     336    
-400   96     
208    -112   
-272   48     
80     576    
-16    -32    
-48    0      
-16    160    
112    -144   
-80    0      
0      32     
-32    -32    
256    144    
-96    -896   
96     592    
-160   128    
-368   -224   
144    208    
32     -240   
128    160    
576    864    
-400   208    
-224   304    
-48    -336   
0      -432   
192    48     
192    -16    
-144   -64    
176    128    
-272   32     
32     80     
-224   80     
-176   -80    
96     -144   
192    64     
192    80     
64     160    
176    96     
16     352    
-576   -48    
0      -144   
144    -32    
464    80     
-128   128    
320    96     
144    96     
-576   -16    
0      96     
-64    32     
-112   112    
144    -64    
576    176    
960    624    
-448   176    
128    16     
-144   -32    
-160   48     
-288   64     
224    16     
96     0      
512    256    
-304   -48    
160    16     
32     48     
176    48     
112    80     
-128   -176   
368    48     
-272   96     
48     32     
-96    32     
-16    48     
16     16     
112    96     
-32    32     
320    16     
-192   32     
-64    -384   
16     16     
48     48     
32     48     
288    144    
-304   -112   
256    -16    
32     160    
304    32     
128    48     
-64    48     
-640   -48    
544    224    
-176   128    
-16    -32    
272    96     
-432   -16    
560    32     
464    272    
-240   -128   
480    32     
-288   304    
-128   -32    
96     -32    
-320   80     
464    176    
0      48     
0      -336   
368    48     
-176   16     
112    -144   
48     80     
-80    -352   
208    32     
-416   -288   
160    32     
464    192    
-288   96     
16     -48    
400    192    
-240   96     
160    112    
-480   -112   
320    16     
48     -64    
240    -304   
496    192    
0      -864   
0      -16    
48     -32    
160    144    
-256   192    
96     32     
112    16     
96     16     
112    16     
-16    -112   
208    32     
-64    -16    
-64    16     
304    -80    
-208   -176   
208    112    
-176   96     
208    128    
208    96     
0      96     
144    -16    
-64    64     
112    16     
-64    -32    
144    -176   
-240   -48    
128    96     
112    64     
48     -16    
16     32     
-80    -176   
224    0      
-128   -592   
224    160    
-16    32     
32     -32    
144    16     
176    64     
-448   -432   
96     -48    
176    416    
128    224    
-16    -208   
272    -272   
-80    304    
16     96     
256    32     
256    -192   
64     128    
48     -16    
-80    -32    
96     64     
80     128    
304    128    
-256   16     
192    -192   
224    304    
272    96     
-144   352    
-32    -320   
336    -144   
96     336    
32     -144   
-128   -80    
80     -400   
80     544    
192    64     
0      48     
-32    224    
176    -128   
384    592    
-288   -1056  
-112   48     
272    128    
224    -208   
208    320    
-80    -128   
96     -528   
-16    240    
112    208    
48     16     
48     112    
-80    -608   
16     -336   
80     0      
160    112    
112    -64    
-16    48     
32     240    
112    -240   
128    -384   
0      16     
32     -128   
192    -1072  
-176   -208   
-64    -240   
32     -32    
96     -192   
-112   -512   
416    -336   
304    -208   
400    -176   
128    -496   
-240   -304   
-256   -1600  
-112   32     
96     -400   
208    -176   
80     80     
48     128    
64     80     
-304   -16    
-320   -128   
112    -16    
-80    -96    
464    128    
-256   224    
-400   -400   
-32    -96    
48     -1200  
192    32     
432    240    
288    256    
-112   16     
-336   64     
160    -48    
32     0      
336    -80    
448    0      
-448   32     
-80    64     
32     -48    
272    -144   
48     48     
-32    -32    
64     -208   
80     -432   
96     32     
176    -32    
80     48     
32     -48    
112    192    
48     224    
48     144    
-608   -112   
192    -208   
32     0      
256    112    
64     224    
48     -32    
160    -208   
48     -704   
16     -176   
-64    -112   
16     -16    
192    -208   
192    -160   
-144   -32    
64     -96    
-608   304    
144    256    
-304   160    
-112   64     
128    0      
576    272    
-80    384    
384    352    
32     736    
16     368    
0      -32    
-160   -176   
224    -128   
-128   64     
224    128    
-16    -176   
256    256    
-416   144    
-336   -96    
112    -160   
240    -288   
256    -80    
192    -160   
-48    16     
-240   208    
-160   128    
-240   160    
-48    16     
64     -80    
272    48     
368    96     
-64    32     
-288   240    
144    32     
-192   -160   
192    32     
368    176    
544    176    
-368   224    
112    -256   
-64    -112   
-464   -80    
256    -288   
-160   -288   
272    -352   
-544   -368   
384    96     
-80    -32    
-16    0      
400    -144   
0      -48    
96     -32    
-112   -192   
112    64     
-240   -16    
48     64     
192    96     
-128   144    
-272   64     
128    448    
80     208    
128    64     
-96    -112   
64     0      
-176   96     
656    112    
-48    64     
-1216  -176   
160    256    
16     128    
-192   144    
16     -48    
-1760  128    
32     160    
208    160    
288    192    
176    256    
-144   432    
-96    240    
48     160    
-176   112    
16     112    
-80    -128   
-224   -240   
128    -336   
-592   -240   
-32    -272   
-592   -80    
-144   -272   
112    -416   
48     -64    
48     224    
-112   -304   
-320   64     
-144   -192   
-320   480    
144    96     
-160   160    
192    -112   
-208   160    
-304   -112   
128    256    
-80    32     
-240   -48    
176    272    
-352   -496   
-336   256    
64     112    
112    -192   
32     464    
64     -16    
208    -48    
-112   128    
-64    448    
-144   48     
-256   -96    
64     48     
-80    -48    
64     128    
-336   -16    
32     -64    
-1728  -80    
64     16     
96     32     
32     48     
-16    -64    
-128   32     
400    16     
-320   16     
-592   144    
-96    0      
112    -112   
-16    0      
-240   64     
432    -16    
32     0      
-80    144    
-240   0      
48     96     
-384   48     
-80    -176   
432    112    
32     32     
384    32     
64     16     
208    96     
-400   16     
-112   -16    
48     -32    
32     144    
16     -16    
96     16     
272    80     
0      -48    
32     80     
160    96     
0      -48    
48     -32    
-224   48     
-176   16     
224    32     
-64    192    
-704   0      
-400   -144   
240    160    
160    240    
-336   16     
-256   0      
-368   -16    
-176   32     
224    144    
-256   -192   
272    -96    
112    112    
-16    128    
112    48     
272    96     
-528   -112   
16     64     
-368   -48    
-128   -48    
224    96     
-80    -32    
-288   -48    
-432   64     
-32    48     
-336   -32    
48     112    
-112   16     
128    80     
32     16     
-16    48     
112    64     
-32    16     
-96    32     
224    160    
-144   0      
272    160    
80     80     
64     -16    
-128   64     
128    -16    
-144   -384   
48     48     
-272   208    
176    16     
-272   16     
-320   -112   
16     176    
32     -80    
-176   160    
-96    -48    
96     -96    
-144   -96    
160    -16    
304    240    
32     32     
16     -48    
-208   0      
-96    16     
-384   -64    
192    0      
112    -80    
240    -128   
-64    128    
560    160    
-32    -176   
-128   64     
528    272    
-304   96     
-208   -320   
64     -256   
416    336    
-112   -16    
16     -48    
528    144    
0      32     
80     192    
-80    112    
16     112    
-96    240    
-64    -32    
64     0      
64     64     
80     -208   
208    256    
-224   256    
48     -96    
112    64     
128    32     
-128   -64    
112    400    
-32    -112   
-16    -32    
144    112    
0      288    
16     224    
-48    -256   
128    64     
-80    160    
112    64     
96     64     
-128   -80    
304    304    
0      48     
0      -160   
80     -64    
-224   64     
-16    -144   
112    96     
0      192    
-32    64     
208    -128   
144    128    
-288   448    
304    -160   
-176   0      
80     -208   
-96    -864   
176    464    
80     368    
256    240    
-80    368    
-208   240    
-224   -176   
0      -1088  
224    0      
-16    -96    
32     128    
224    32     
112    432    
-160   256    
-48    -128   
-64    -80    
208    96     
-320   -128   
208    -240   
80     16     
-16    64     
96     112    
48     -336   
144    -16    
16     16     
-80    48     
-16    64     
0      -16    
128    32     
-112   -128   
-48    -128   
-32    32     
112    576    
304    256    
-112   16     
80     16     
48     128    
-80    0      
-96    48     
32     -288   
-16    32     
-16    80     
96     -96    
128    96     
16     16     
80     -112   
-160   -96    
64     -432   
304    80     
-64    176    
-80    0      
224    96     
256    48     
-128   16     
-64    96     
32     -48    
160    -144   
176    96     
-208   48     
64     96     
-272   -48    
256    48     
16     128    
-96    208    
80     48     
16     32     
-96    144    
-64    -32    
-16    -32    
224    -96    
160    48     
48     -512   
192    32     
16     -128   
96     -32    
-96    32     
48     16     
176    -128   
-48    144    
16     96     
224    -112   
80     160    
-32    -176   
64     240    
-256   -64    
128    112    
240    -480   
128    80     
400    112    
-224   64     
-128   112    
112    192    
32     304    
80     144    
112    32     
80     128    
48     368    
176    96     
112    -64    
-128   -176   
-32    -64    
-32    -32    
80     48     
80     -176   
128    0      
128    -16    
128    192    
80     32     
-32    -464   
64     -16    
176    32     
-64    112    
144    -64    
64     96     
-80    -160   
336    160    
144    16     
-80    32     
-64    80     
240    192    
-176   336    
128    192    
448    176    
-416   112    
-48    -80    
0      96     
336    400    
96     416    
96     224    
144    -32    
-64    240    
272    128    
-80    288    
-80    288    
592    -608   
-352   160    
-160   -336   
64     -320   
96     16     
32     -768   
112    -592   
448    -464   
-432   -192   
32     -16    
-432   -112   
-160   -144   
0      0      
-224   -336   
416    144    
-112   -272   
48     272    
16     0      
368    144    
-160   416    
80     320    
-80    528    
208    -112   
0      64     
336    240    
64     -96    
-272   -192   
352    -144   
176    144    
96     -64    
-64    64     
-336   -336   
-544   -48    
224    176    
336    -224   
-80    96     
128    -272   
80     272    
0      352    
-224   -416   
176    208    
576    224    
-32    -304   
-368   0      
112    64     
64     208    
256    -224   
208    128    
-224   80     
-880   -96    
-16    -144   
352    -16    
-32    -32    
32     -32    
144    -368   
112    64     
64     -112   
0      160    
-96    -96    
160    0      
-240   240    
96     -112   
-112   -144   
16     144    
-144   -192   
208    -224   
288    64     
112    -80    
64     -80    
288    16     
-112   -176   
0      -144   
112    144    
64     -16    
16     -16    
0      16     
160    0      
48     -16    
192    -144   
-96    -16    
32     -176   
-144   16     
32     -80    
64     0      
96     16     
48     16     
64     -224   
400    -256   
-128   -240   
112    96     
80     -432   
-16    -304   
0      48     
176    80     
-224   128    
32     224    
-80    112    
208    128    
-432   144    
80     -208   
96     -64    
0      -96    
0      48     
240    -336   
-48    -80    
-64    112    
64     -112   
-128   -64    
80     -64    
-128   -16    
0      64     
-64    496    
-96    -32    
336    -128   
-144   -176   
-16    192    
704    112    
-688   192    
-624   -16    
48     -48    
-416   -176   
384    16     
-336   192    
-64    0      
-32    -48    
288    256    
-608   80     
64     -192   
192    -16    
176    32     
368    192    
-160   144    
-240   -80    
128    -32    
160    -32    
224    16     
272    -16    
32     64     
-112   0      
-448   -80    
176    -208   
-192   32     
368    64     
240    64     
-560   -112   
176    64     
-144   176    
-832   -80    
-224   -112   
-304   64     
48     96     
-368   0      
-144   48     
0      96     
-416   -48    
96     -32    
-16    64     
48     16     
128    48     
-160   -80    
64     128    
-592   -80    
-64    -64    
-96    -96    
288    96     
80     64     
-48    64     
-96    16     
-1152  -32    
-96    16     
208    48     
144    176    
-48    -16    
96     64     
-352   -96    
112    80     
0      96     
-96    32     
80     16     
-256   -16    
80     32     
-352   -16    
112    -32    
-336   64     
96     80     
-368   -208   
288    -240   
-256   64     
240    16     
-112   32     
-112   -32    
-16    96     
64     0      
-80    -112   
-272   -192   
32     -64    
-16    -112   
-112   -112   
0      48     
-528   -528   
-2496  -576   
-160   64     
-384   -112   
416    224    
224    192    
288    272    
-640   -240   
48     -64    
32     -144   
16     -480   
-16    368    
-160   384    
-176   -112   
-144   -96    
416    -208   
-64    176    
-48    400    
48     -272   
0      144    
-80    -128   
0      320    
144    -32    
-176   -16    
176    64     
-144   -80    
64     16     
-352   32     
-32    32     
-192   -240   
-128   128    
-448   -64    
176    -192   
288    656    
-416   -912   
-192   48     
560    -48    
-224   -96    
144    624    
-256   -784   
176    -320   
16     240    
64     688    
-240   -416   
-272   -256   
16     80     
-80    -32    
144    416    
-688   -256   
-192   48     
288    64     
-96    -144   
80     -80    
0      96     
-112   224    
-144   -32    
-32    160    
384    208    
112    160    
-96    64     
16     32     
80     64     
-96    144    
-256   32     
64     64     
336    304    
0      48     
-144   64     
-112   -64    
0      -16    
64     -32    
128    80     
32     80     
0      96     
-96    -208   
48     16     
-112   208    
-208   96     
160    192    
64     128    
368    208    
-32    0      
0      -32    
64     48     
-64    96     
48     -16    
144    -32    
-144   -80    
-16    96     
-256   48     
-176   64     
-96    32     
-16    32     
160    -112   
32     96     
368    128    
-240   0      
-32    80     
-176   48     
96     16     
64     112    
-64    48     
144    -16    
-32    48     
48     -32    
-80    64     
64     -16    
-16    96     
-144   -32    
-16    -112   
544    320    
-208   272    
192    -48    
-176   -128   
-48    96     
160    224    
-320   176    
-176   -128   
272    -96    
240    -96    
192    144    
208    320    
-608   192    
128    -80    
64     16     
272    144    
-128   128    
144    -80    
288    -144   
160    -112   
48     -16    
-160   96     
-192   48     
144    208    
0      -96    
304    80     
-240   112    
-144   48     
96     16     
320    160    
-208   240    
-240   0      
48     -208   
0      -240   
-16    16     
64     128    
-208   112    
-32    32     
80     80     
-160   -32    
224    -544   
336    48     
272    16     
32     -16    
-240   32     
-80    0      
-16    16     
-64    336    
144    208    
96     -496   
-32    -320   
96     0      
-80    48     
128    32     
-144   -16    
144    -32    
16     -160   
-96    48     
224    112    
0      128    
208    80     
0      144    
144    144    
32     -64    
128    288    
-64    272    
96     -176   
96     -176   
-96    224    
96     112    
-32    -32    
-240   400    
128    80     
0      -416   
224    304    
288    464    
-320   -224   
-48    -144   
-160   176    
96     144    
416    144    
-208   -448   
112    -224   
320    -272   
-16    48     
400    544    
-240   -416   
224    32     
-224   272    
192    48     
-192   -96    
192    -144   
224    240    
-112   -192   
-32    -752   
656    448    
128    304    
112    16     
160    -48    
336    80     
-272   -144   
-192   96     
-144   -272   
-640   -816   
384    224    
224    864    
-560   -448   
16     -96    
224    16     
272    112    
176    -32    
64     48     
48     32     
32     144    
144    32     
-16    -48    
144    128    
-48    -160   
256    112    
16     176    
224    -144   
-32    0      
208    160    
-240   -64    
192    48     
0      176    
128    96     
176    112    
-64    64     
112    0      
-32    -16    
144    0      
144    -64    
128    80     
96     -256   
160    -16    
32     80     
144    256    
-128   48     
0      0      
-32    64     
208    -32    
144    112    
32     -304   
240    96     
-256   -496   
-16    112    
192    -112   
-16    -80    
224    -16    
64     160    
16     -16    
160    -80    
-96    -32    
176    16     
-96    32     
128    -32    
96     64     
144    48     
32     0      
0      -48    
-32    -80    
-16    -64    
144    64     
80     -112   
-16    -96    
48     0      
0      80     
96     -336   
16     -976   
-32    -1248  
176    -48    
112    304    
112    16     
336    128    
16     80     
-112   16     
0      -112   
80     -80    
160    -32    
0      -448   
128    0      
96     -96    
144    176    
-1808  96     
176    -240   
80     -32    
48     -208   
240    48     
192    -16    
160    64     
-96    0      
80     -160   
96     96     
-48    96     
112    0      
16     64     
80     -144   
-224   -416   
-960   -304   
-224   272    
-240   64     
208    -128   
160    240    
-320   -96    
480    80     
-208   -752   
208    48     
288    144    
144    48     
112    -128   
-480   64     
-144   -64    
-16    -80    
16     -48    
288    96     
176    0      
-304   -416   
528    -384   
272    -176   
208    128    
-48    128    
-240   -48    
-64    -176   
-608   -208   
80     -224   
224    -16    
208    48     
304    224    
-128   64     
-64    -80    
-112   -64    
-80    -48    
-160   -192   
192    -272   
368    112    
336    -144   
-288   0      
-512   -816   
16     32     
-128   -80    
48     64     
64     -128   
128    -32    
-32    -48    
32     -64    
-368   -32    
-256   -48    
176    48     
-32    0      
192    -16    
64     -352   
208    16     
80     -80    
-144   64     
192    0      
-16    -64    
208    304    
-176   64     
-112   -64    
64     -48    
128    48     
128    -16    
224    80     
48     -128   
-80    -32    
112    -208   
-48    0      
16     -288   
128    32     
176    0      
80     -32    
-112   80     
160    160    
-144   48     
128    0      
-1056  64     
368    384    
-720   208    
-240   -352   
-160   0      
288    -80    
-320   -288   
176    -368   
656    800    
-320   16     
96     -224   
288    224    
528    160    
-272   160    
112    384    
-304   -1120  
-192   -32    
48     992    
432    -848   
720    160    
544    592    
-224   -416   
144    -128   
-48    -288   
-32    -96    
64     112    
-352   -80    
528    80     
-480   272    
48     16     
-240   -256   
656    320    
-320   288    
80     624    
-48    288    
-64    -32    
192    -448   
0      -688   
-96    48     
80     160    
-2288  112    
-304   -80    
544    -384   
-160   112    
336    -112   
-384   -64    
240    -80    
-208   -96    
-640   48     
320    64     
-976   -144   
48     80     
-480   -32    
-32    0      
96     224    
-192   80     
-160   -176   
-224   -304   
-48    -112   
256    128    
-304   -32    
368    -128   
-144   64     
-544   -16    
16     160    
-16    -128   
160    -112   
-192   0      
-48    -160   
-224   -16    
-48    -64    
112    48     
-112   96     
-112   80     
-960   -144   
16     -32    
-240   -272   
0      -96    
-176   -48    
16     -16    
-48    -48    
48     64     
-160   16     
-64    16     
48     -32    
-192   32     
96     16     
-112   32     
-16    -80    
-288   -128   
-112   -128   
-128   16     
-112   80     
-32    -80    
144    112    
-64    -64    
96     160    
64     176    
-64    80     
128    48     
64     -48    
-80    0      
-144   128    
-80    96     
32     -32    
-112   -112   
-240   -16    
224    128    
-48    -96    
368    176    
-144   128    
-32    0      
128    -80    
-96    -64    
16     -64    
-160   16     
64     176    
-112   128    
-160   -48    
160    -80    
-64    80     
-1280  -48    
-32    -80    
48     -144   
144    -208   
272    -144   
96     144    
-64    208    
-400   288    
112    0      
-128   -96    
-96    0      
-32    -96    
176    96     
-416   48     
-208   144    
-512   64     
48     96     
304    0      
32     -144   
-160   -32    
-352   -48    
-144   -32    
-208   -80    
224    -192   
320    -128   
256    16     
0      80     
48     96     
-112   0      
144    80     
-336   64     
160    -16    
-272   96     
0      144    
496    352    
-272   656    
-32    -48    
288    -288   
208    704    
160    288    
48     128    
176    128    
496    320    
-160   272    
64     144    
-192   176    
-16    32     
-272   -224   
48     -336   
176    544    
16     160    
144    16     
256    -64    
-304   -304   
-160   160    
-176   -224   
96     128    
224    -48    
-64    208    
-16    -48    
-368   0      
160    48     
144    352    
-48    160    
128    -48    
64     64     
-144   -32    
272    -224   
-96    288    
-80    400    
-16    224    
-144   -16    
-80    -176   
144    -304   
16     32     
48     112    
-160   -16    
64     -112   
192    -32    
144    128    
64     96     
-128   32     
-480   -64    
-16    128    
224    464    
-48    16     
-736   -1328  
-144   -528   
-16    -144   
208    -16    
128    -272   
352    16     
-128   160    
-304   128    
208    256    
-416   0      
-432   -160   
112    128    
-144   -16    
-160   -112   
-32    -144   
-272   -400   
288    -48    
-240   -48    
256    -160   
320    -64    
128    112    
288    224    
-448   32     
-80    -64    
288    48     
-80    -16    
288    32     
-32    80     
-16    -64    
112    128    
-176   -96    
256    -32    
-128   64     
144    -64    
-16    80     
112    32     
96     16     
-208   0      
-48    -176   
288    -48    
160    208    
32     32     
0      96     
-128   16     
32     112    
144    64     
160    48     
-240   -160   
-192   -1424  
0      0      
96     48     
224    0      
-96    32     
128    80     
32     80     
-128   32     
0      112    
96     176    
112    32     
128    48     
-80    -112   
112    0      
32     64     
80     -96    
192    96     
64     -32    
224    176    
-80    256    
-192   96     
288    -16    
192    -48    
16     32     
-48    0      
112    112    
48     80     
-400   0      
288    128    
144    96     
48     -144   
176    96     
240    160    
-160   32     
80     -96    
128    64     
0      96     
48     48     
32     48     
176    64     
-160   96     
256    112    
144    48     
-64    -32    
160    112    
208    -32    
-112   80     
-48    -400   
192    240    
-16    160    
128    176    
80     64     
80     -16    
-64    -160   
240    96     
128    -176   
64     16     
64     256    
-96    0      
80     48     
240    -64    
-160   80     
80     -320   
80     416    
192    592    
-16    -64    
-224   -80    
96     0      
-272   -224   
304    -96    
-128   336    
-176   64     
16     16     
160    -320   
400    -16    
448    32     
192    32     
160    -64    
336    128    
32     -528   
288    64     
-176   48     
-80    -208   
0      -48    
-432   48     
96     48     
48     16     
-48    16     
128    -16    
384    272    
-448   -176   
-416   -176   
-80    -592   
-112   -128   
160    112    
-96    80     
128    -48    
272    -80    
400    -32    
96     16     
144    32     
256    112    
368    16     
96     -224   
-176   0      
-96    -64    
-48    64     
128    -288   
272    0      
320    80     
624    176    
-256   48     
208    240    
-352   320    
0      176    
-48    0      
-192   -112   
400    320    
96     96     
112    -80    
-64    -208   
0      48     
-32    32     
128    224    
-144   -16    
16     -560   
128    816    
0      -464   
-16    -192   
32     336    
64     -224   
-112   -320   
240    -336   
112    16     
16     160    
112    0      
80     48     
48     -304   
-384   -208   
256    -128   
-192   -208   
304    64     
416    80     
272    -832   
-240   288    
-16    -144   
112    -272   
160    512    
0      -32    
128    80     
64     -160   
272    224    
80     320    
400    -80    
-320   -464   
192    -608   
-496   304    
-128   -160   
-64    64     
352    352    
80     -96    
64     -192   
64     -176   
-208   64     
304    -64    
-336   96     
-496   -224   
512    16     
176    -272   
-224   -32    
384    64     
-80    112    
-208   -48    
96     -96    
-768   -80    
176    0      
-1680  -128   
320    -160   
16     -80    
-80    -160   
144    -272   
224    -752   
128    64     
176    -32    
0      32     
0      -48    
-208   64     
-112   304    
16     48     
304    -80    
-48    96     
0      -192   
128    -112   
-144   -64    
224    0      
80     144    
128    16     
-16    192    
240    -528   
160    0      
-32    32     
48     -208   
-160   -144   
-96    -16    
80     32     
64     16     
-160   48     
320    -160   
-800   -32    
208    -80    
-32    -48    
48     -64    
-80    48     
-208   -144   
240    96     
192    -48    
160    -64    
-320   560    
384    160    
128    -256   
480    0      
-304   0      
16     -32    
-480   -16    
48     64     
224    176    
-240   32     
-80    -32    
240    -672   
208    16     
-48    -48    
64     0      
-192   0      
-16    48     
-64    -64    
192    160    
-192   0      
192    240    
-384   96     
-48    -192   
64     48     
160    -112   
48     128    
-16    -80    
128    32     
16     -16    
416    48     
-352   -96    
64     0      
-96    336    
176    0      
96     -96    
176    -112   
-16    -16    
-16    -48    
-224   -192   
160    -208   
64     48     
32     -112   
192    0      
-32    32     
-112   112    
-224   96     
80     -32    
-16    32     
48     224    
208    224    
-80    80     
-272   64     
96     208    
32     256    
-560   -96    
240    176    
-192   48     
144    304    
-192   352    
-1056  48     
80     32     
336    336    
144    16     
80     -288   
-128   -144   
-96    96     
-128   160    
-416   176    
-96    -192   
-352   -128   
80     144    
-128   -208   
32     16     
-16    160    
160    -320   
304    16     
-48    -48    
16     128    
-208   128    
-96    -208   
-112   0      
144    80     
144    0      
-128   -48    
-304   -368   
320    288    
224    128    
208    -96    
128    384    
-464   -160   
-464   -304   
-240   112    
-208   96     
48     288    
-256   144    
32     -144   
240    96     
-96    -96    
0      64     
-80    96     
0      160    
-32    128    
512    288    
-320   -32    
-112   -112   
-80    96     
208    48     
160    -16    
-96    -16    
-48    0      
-256   -32    
16     96     
-112   -112   
16     16     
-80    -16    
-64    0      
144    32     
-256   0      
128    -80    
-160   -176   
64     96     
-64    32     
-112   -112   
-240   -48    
-192   -48    
-1072  64     
144    64     
224    144    
-48    128    
-240   -160   
-176   -208   
192    64     
304    -64    
-208   -144   
-368   80     
160    32     
-176   96     
32     112    
-240   -128   
-32    -64    
-624   208    
32     64     
-64    32     
-336   -16    
32     80     
-304   -16    
-144   -272   
640    0      
560    160    
336    224    
-320   -64    
48     96     
-416   -128   
336    32     
224    96     
-32    32     
112    -32    
-160   -48    
112    224    
-240   160    
288    64     
64     80     
-160   0      
64     48     
-48    0      
160    64     
-32    0      
-32    32     
-80    -160   
64     -16    
-464   80     
96     64     
128    32     
-96    32     
-32    48     
-48    80     
224    64     
-144   -16    
-16    0      
-96    -80    
96     80     
-48    112    
-32    32     
-32    16     
-16    80     
-224   -32    
48     48     
-160   0      
144    128    
160    48     
-160   -16    
-48    0      
160    32     
-112   -16    
48     80     
224    96     
-32    0      
48     64     
-208   -144   
48     80     
-144   -16    
-112   -48    
80     48     
160    -32    
64     112    
-160   96     
224    -80    
0      -16    
176    112    
-240   304    
-160   112    
-128   -16    
128    64     
112    96     
80     128    
-160   -64    
0      -48    
-16    64     
-32    0      
96     32     
128    -80    
32     -16    
48     48     
-16    32     
32     80     
16     112    
-32    -16    
256    80     
-320   32     
64     80     
112    96     
112    112    
64     96     
96     32     
144    128    
-64    80     
-16    144    
-48    -48    
112    0      
-80    16     
256    32     
-272   96     
672    -208   
-32    -752   
32     -224   
-48    368    
-160   16     
224    208    
-256   528    
-128   -48    
240    224    
-32    208    
112    -288   
192    192    
-48    -48    
144    -144   
128    -96    
384    80     
32     -80    
-160   -928   
48     32     
480    832    
-288   -368   
160    -496   
416    432    
224    -16    
272    176    
-352   -240   
-176   -80    
-432   224    
48     224    
48     0      
160    -96    
432    -64    
768    -352   
-656   -864   
48     -48    
128    0      
128    -160   
432    224    
-192   -352   
256    128    
-64    320    
224    -144   
336    96     
304    96     
-64    -176   
400    304    
-80    -112   
-160   -416   
0      176    
-32    -16    
96     432    
112    -608   
304    64     
32     544    
80     -608   
-96    64     
48     496    
32     -208   
128    48     
-16    320    
288    -16    
-144   336    
144    -96    
96     -224   
208    272    
16     -16    
-112   -16    
-128   -176   
-16    -848   
368    -64    
-144   -64    
48     352    
-32    112    
144    192    
16     320    
144    -64    
32     256    
-16    48     
128    480    
320    80     
32     64     
32     272    
224    112    
48     400    
224    368    
-144   0      
16     0      
48     -16    
16     160    
-64    112    
48     16     
0      48     
-64    16     
80     160    
-80    -224   
304    -368   
32     -688   
672    272    
-64    208    
-64    -32    
0      0      
368    224    
-352   112    
-224   -192   
160    128    
80     -64    
-32    32     
-112   32     
32     64     
-32    -208   
80     160    
208    -240   
128    -304   
-48    -336   
64     64     
-144   208    
32     -80    
16     48     
32     16     
32     112    
144    224    
176    272    
240    -352   
0      32     
-112   -464   
192    128    
112    -32    
-192   -576   
320    -96    
16     48     
-64    128    
352    -208   
16     32     
-64    -416   
32     -32    
-48    -240   
96     160    
144    224    
-64    0      
48     -96    
96     32     
112    -96    
160    -288   
96     -48    
96     -32    
-176   -128   
144    -576   
0      304    
144    112    
32     -32    
0      -80    
128    48     
-16    0      
32     -48    
96     64     
96     144    
0      -32    
528    -496   
-96    240    
-160   -288   
-64    -64    
-384   -48    
48     -256   
32     -96    
80     16     
-64    112    
-48    -816   
272    -448   
288    16     
-16    80     
0      80     
16     -16    
0      -144   
32     -64    
208    -496   
192    -112   
-128   16     
64     -80    
-80    48     
192    -336   
288    32     
32     -272   
-64    48     
-96    -336   
-80    -240   
160    -80    
-80    -208   
272    96     
-192   192    
112    32     
224    -80    
-96    48     
-32    -80    
-48    0      
144    -112   
224    -48    
80     16     
64     80     
-32    -224   
176    176    
208    -128   
144    -112   
240    -144   
-64    208    
32     -64    
-48    128    
-368   80     
48     -192   
-272   -512   
-128   -96    
0      96     
-96    -320   
96     112    
80     -176   
64     -128   
288    -32    
304    96     
160    -64    
-80    96     
-96    144    
-128   -32    
-128   -48    
96     -48    
-288   -48    
544    -272   
-208   -512   
496    -256   
-592   -192   
-208   -560   
288    128    
224    -976   
304    -144   
336    -112   
592    48     
-128   64     
-352   -128   
-96    16     
-48    -96    
-16    80     
176    -48    
-1296  -96    
304    0      
-128   0      
-48    -192   
208    64     
160    -240   
48     16     
0      -240   
400    -16    
-400   64     
-208   -128   
272    32     
64     64     
-288   -32    
624    -336   
-576   -16    
-96    -256   
320    -64    
-48    -112   
144    64     
-64    -32    
64     80     
-80    32     
-16    -16    
96     224    
96     -144   
0      96     
64     -32    
-16    48     
-16    -48    
-96    -128   
192    144    
32     80     
16     -144   
288    160    
64     -208   
-96    -208   
-256   -96    
272    -32    
288    320    
128    64     
-416   0      
-32    -80    
-192   -64    
96     0      
80     144    
-96    -224   
128    48     
256    -128   
-368   80     
256    -192   
-400   -16    
96     448    
-320   176    
112    -256   
224    -64    
-208   -16    
112    -96    
208    64     
128    144    
-64    144    
-976   -208   
352    -16    
-448   -32    
-240   -48    
0      -32    
-48    32     
-96    144    
-1200  -112   
-144   48     
-1216  64     
48     0      
192    -96    
-16    64     
-320   -64    
80     48     
-336   -16    
64     48     
0      32     
-32    0      
32     -48    
48     64     
-144   -48    
320    128    
-288   -48    
-256   -80    
-96    0      
-96    16     
-160   -32    
-640   -64    
-48    16     
48     -32    
560    288    
-768   64     
48     -48    
48     80     
16     0      
48     -16    
-112   96     
48     0      
-64    64     
-192   32     
-160   32     
-128   160    
160    -16    
144    16     
-32    -208   
-144   0      
-128   0      
-96    32     
32     64     
160    32     
-80    384    
-112   336    
176    48     
-160   224    
-112   112    
-272   -32    
-64    16     
-688   -144   
32     144    
32     -32    
128    144    
224    288    
-112   0      
-16    -192   
-288   96     
-64    160    
-176   -240   
32     -48    
-32    64     
-96    0      
-80    112    
16     112    
-832   -48    
0      544    
-96    -352   
80     64     
96     96     
-16    64     
-64    0      
-128   -160   
-32    48     
-96    112    
-112   -48    
192    448    
-176   1392   
-176   -688   
272    128    
-496   -112   
96     192    
-144   -128   
-32    -96    
-48    -64    
-224   288    
-112   160    
-16    64     
-80    -32    
224    144    
-64    -80    
-48    -224   
96     48     
256    560    
-608   -48    
-288   -400   
32     336    
144    -176   
-80    64     
32     144    
-112   -96    
-96    -32    
224    80     
192    -80    
144    80     
80     48     
416    688    
-624   -1136  
-16    -416   
592    576    
0      240    
256    256    
-80    -304   
-112   -144   
-192   32     
-336   -32    
-288   -528   
528    208    
-240   272    
224    -192   
224    -272   
352    176    
208    0      
400    -192   
64     -208   
-272   144    
128    304    
-288   80     
-128   32     
-160   112    
224    96     
80     0      
272    48     
128    112    
80     112    
96     160    
304    192    
-80    176    
-464   16     
-128   -80    
16     -48    
160    0      
128    -192   
128    -32    
-32    32     
-48    -80    
0      0      
-144   32     
32     64     
-48    0      
64     -48    
-80    -128   
128    0      
-240   -288   
-240   -192   
288    -48    
96     272    
176    32     
-112   0      
-32    -16    
64     0      
128    512    
192    80     
32     -144   
256    304    
-16    480    
80     208    
-160   -240   
-128   48     
352    192    
-352   256    
208    -16    
-32    -336   
32     32     
-144   -512   
-16    -208   
0      192    
144    560    
-432   256    
-416   -64    
112    0      
400    112    
48     768    
-384   128    
-32    -16    
144    224    
240    112    
352    -32    
-128   -272   
176    -144   
128    144    
-64    128    
176    64     
-96    32     
-48    -64    
16     32     
144    48     
96     80     
48     96     
192    32     
-160   96     
144    256    
160    80     
192    32     
-48    288    
128    -16    
128    -176   
-96    0      
-16    64     
-48    304    
80     0      
192    -352   
160    64     
32     160    
32     -336   
128    -512   
32     -240   
128    -32    
160    48     
-112   -192   
144    -80    
-272   -368   
176    -160   
144    224    
-368   96     
0      64     
-128   -80    
64     -16    
128    -80    
176    -128   
208    16     
80     32     
-304   -16    
16     48     
128    -32    
144    272    
-96    192    
32     64     
64     -144   
-208   -272   
160    16     
-32    16     
32     -16    
288    -16    
160    176    
32     240    
-16    -784   
16     -48    
208    192    
-112   384    
-112   144    
272    -96    
-16    -48    
32     -48    
272    -208   
208    224    
144    176    
112    16     
-128   32     
-64    -64    
64     -144   
144    -512   
112    -48    
256    144    
176    256    
-192   -240   
176    320    
112    -16    
32     64     
-48    144    
176    -208   
64     336    
0      -144   
80     64     
160    240    
-176   -160   
144    64     
144    96     
-48    -1104  
80     144    
32     64     
80     16     
-256   32     
352    144    
80     528    
-304   -96    
272    -368   
128    -48    
224    64     
64     -208   
-32    64     
176    -32    
-64    224    
16     128    
-48    112    
16     96     
32     192    
