# Supplementary material for: A Fault Diagnosis Method for One‐Dimensional Vibration Signal Based on Multiresolution tlsDMD and Approximate Entropy
Source: Hindawi journal article supplement (doi:10.1155/2019/3262818), 2019-01-01
Supplement: f1 [file 3262818.f1.zip › 3262818.f1/gear signals/normal gear signal/Data4.txt]

-336   -48    
32     -112   
-256   64     
192    -176   
32     -384   
160    640    
-80    -16    
-288   -336   
96     -576   
240    -144   
288    400    
-256   192    
400    416    
-304   -32    
-80    -160   
-64    -16    
128    128    
48     32     
-96    0      
80     -16    
192    240    
-16    240    
144    64     
112    128    
80     64     
-16    144    
48     48     
320    96     
128    32     
80     112    
-224   -128   
80     -144   
64     -112   
-80    -80    
80     80     
-80    64     
-16    -128   
160    -64    
256    -32    
-144   16     
96     96     
16     0      
0      48     
-16    -80    
96     112    
16     16     
-80    -128   
192    64     
64     -1168  
-96    128    
144    16     
96     -96    
16     -32    
-48    16     
128    -112   
128    160    
64     96     
96     64     
-80    32     
256    112    
0      80     
128    -96    
-64    80     
-48    -512   
32     -32    
-64    -32    
208    128    
224    240    
32     16     
-16    48     
-144   32     
-96    -48    
112    -16    
48     16     
160    224    
32     112    
96     -16    
-176   -80    
-80    0      
-64    0      
208    160    
208    80     
192    32     
160    -16    
64     -192   
48     48     
0      -48    
32     -32    
-16    -32    
-144   -48    
176    64     
16     64     
144    112    
-32    80     
32     144    
-144   -320   
176    48     
32     -448   
160    -64    
48     32     
192    272    
-160   48     
128    96     
304    -32    
-16    -32    
32     0      
96     -128   
-160   16     
48     -176   
432    64     
432    -96    
96     128    
144    64     
48     176    
-96    144    
-16    -32    
224    48     
160    80     
208    80     
176    -16    
64     0      
224    176    
-144   192    
192    16     
-48    128    
192    0      
48     48     
224    192    
-32    256    
0      16     
160    96     
16     0      
144    -384   
-32    -208   
128    -160   
-112   80     
80     -96    
432    224    
144    -128   
160    -48    
112    -16    
112    352    
-48    48     
80     -208   
192    1280   
-64    416    
16     -32    
528    384    
-176   352    
144    352    
272    -240   
-48    -864   
144    176    
304    368    
-336   544    
48     176    
224    -752   
176    336    
64     272    
-192   -560   
240    -480   
208    304    
-432   0      
176    -480   
400    160    
400    -464   
48     272    
320    320    
96     -1184  
-288   -464   
304    528    
128    -432   
-32    928    
176    432    
80     -640   
560    240    
144    96     
176    -416   
112    -976   
-320   592    
-48    -304   
128    -176   
96     -528   
224    80     
48     -96    
144    0      
-80    -496   
-208   368    
192    -384   
-128   80     
-208   96     
32     -80    
-2064  32     
128    160    
-320   -128   
80     -16    
208    336    
176    -336   
128    -272   
-240   -144   
144    -16    
48     -64    
0      96     
208    -48    
128    -112   
-304   0      
400    0      
-320   32     
48     -32    
-16    16     
-80    -80    
208    -64    
-16    -384   
16     -48    
128    -768   
-80    32     
416    304    
-80    16     
-32    -96    
240    64     
-176   16     
96     -64    
-432   -64    
32     416    
0      208    
208    -176   
-80    -368   
32     -96    
-48    112    
240    -448   
240    304    
-112   -16    
-96    80     
-32    -48    
336    0      
64     48     
112    80     
-80    0      
80     -16    
-1600  -128   
32     -112   
16     80     
96     160    
64     112    
48     -144   
160    64     
112    -784   
32     -64    
-32    -16    
144    -96    
16     80     
-64    -96    
96     -112   
-32    32     
-144   96     
128    -64    
-240   80     
96     -64    
-128   0      
16     -272   
48     32     
80     -976   
128    32     
-128   64     
64     -80    
-336   48     
304    -144   
-176   32     
240    64     
-128   -96    
-16    -96    
-576   32     
192    -32    
256    48     
-48    -208   
-144   -192   
-128   -448   
-192   -160   
-32    -96    
240    80     
-256   -64    
208    48     
-160   0      
-128   16     
-288   0      
80     -48    
-832   32     
-64    32     
-208   16     
-48    -96    
144    0      
-80    0      
0      -16    
-480   -128   
608    16     
64     240    
-416   16     
-496   -112   
128    208    
-192   32     
192    -96    
96     32     
-192   16     
560    160    
-128   -112   
-80    48     
-480   -80    
-816   -96    
256    80     
-112   80     
-400   16     
192    16     
-240   16     
16     32     
128    16     
-272   80     
-304   -64    
-320   -128   
16     80     
-112   -64    
-320   16     
-272   -32    
96     16     
-112   16     
-224   64     
-208   32     
-336   16     
-128   32     
144    -16    
96     48     
-224   -16    
80     -48    
-272   -112   
32     0      
-32    -80    
-144   -144   
-96    -48    
-128   128    
-128   -48    
-32    -64    
224    96     
-160   144    
-208   160    
-576   -48    
16     64     
-288   16     
96     192    
-352   48     
144    80     
16     16     
16     32     
224    64     
32     192    
48     368    
-576   240    
-176   0      
192    -48    
-272   -112   
-1456  32     
-144   -80    
-352   -160   
-16    160    
96     192    
-176   -128   
352    16     
112    32     
-208   -96    
64     112    
-16    -448   
-160   -1632  
-528   528    
-816   464    
-144   -208   
-80    64     
1168   304    
-528   496    
240    -112   
-128   -576   
-336   352    
32     0      
-240   -560   
-224   128    
240    96     
144    144    
-208   -112   
64     -400   
-256   -272   
-16    -80    
16     16     
48     112    
-1488  -16    
-160   208    
-256   48     
-256   112    
96     320    
288    256    
496    400    
-560   192    
-224   128    
-32    -48    
32     224    
32     -128   
64     48     
-384   -80    
-96    -128   
-272   -48    
16     176    
112    32     
64     -64    
48     -128   
-32    -128   
-32    144    
-16    0      
-16    32     
80     -32    
-224   0      
48     -64    
64     96     
-272   -48    
128    96     
-224   112    
144    48     
112    112    
-64    0      
272    32     
-16    32     
128    -32    
80     -16    
-32    -32    
0      -64    
16     48     
80     -16    
160    80     
-112   -48    
96     96     
64     48     
-16    16     
-16    0      
16     -48    
16     -16    
-48    64     
80     0      
-32    -80    
112    80     
48     144    
-176   176    
-400   -64    
224    144    
0      48     
256    144    
0      32     
-160   16     
128    16     
64     80     
80     224    
48     64     
112    112    
64     32     
-32    -48    
-240   -96    
0      192    
-16    64     
128    -144   
-208   -304   
304    -384   
320    96     
-64    240    
16     112    
48     112    
-64    80     
64     112    
144    320    
-32    -32    
-80    -32    
-240   -16    
-128   0      
-208   -96    
192    32     
-368   -128   
240    -96    
-48    112    
-112   -48    
-16    16     
192    96     
160    80     
144    0      
-128   0      
64     128    
-48    256    
-128   0      
352    -240   
-224   -528   
-16    -256   
-160   -128   
48     16     
144    64     
176    64     
64     16     
112    -272   
-64    32     
-160   576    
432    64     
0      -256   
-256   -96    
-144   -64    
112    160    
272    -112   
-48    -208   
-64    208    
48     144    
-16    -144   
-240   -176   
80     -192   
64     -176   
-64    -384   
480    -592   
144    -256   
208    -176   
-272   -368   
-16    96     
-144   224    
-192   0      
288    320    
240    0      
64     16     
176    192    
128    -240   
128    -48    
-112   208    
0      16     
-96    128    
224    32     
64     640    
-48    -112   
16     -160   
336    64     
272    112    
-16    -208   
208    432    
176    -1824  
-144   -80    
-112   16     
320    80     
-272   0      
896    864    
-464   -240   
64     -752   
256    304    
448    64     
96     -240   
-16    304    
496    400    
-80    -16    
-400   -192   
128    -176   
224    224    
80     80     
240    -48    
-144   -176   
-240   48     
128    224    
-144   -192   
448    -928   
224    -352   
208    368    
496    400    
-160   176    
-768   -784   
176    -32    
-240   176    
-96    80     
-64    -64    
32     96     
208    0      
96     112    
176    64     
352    272    
-416   80     
240    -80    
-48    16     
0      48     
224    48     
0      -48    
160    112    
16     -96    
208    80     
-48    96     
-48    16     
400    -144   
-96    -288   
-304   -144   
64     176    
240    -208   
64     -16    
16     160    
32     0      
288    192    
-64    -32    
112    0      
208    -208   
192    208    
-240   -112   
96     48     
32     -160   
0      0      
208    0      
96     32     
16     96     
144    -112   
176    32     
-48    -224   
32     96     
224    -112   
-288   -48    
160    -80    
224    144    
-32    -96    
160    -16    
288    -32    
-160   -48    
16     32     
0      192    
-16    128    
240    -160   
96     48     
-16    -48    
-32    80     
96     -96    
16     -32    
256    -96    
112    48     
32     -240   
48     96     
48     240    
96     16     
192    -64    
16     -368   
-16    -896   
32     -128   
144    -1328  
32     48     
144    128    
-64    -16    
176    48     
96     -16    
32     64     
48     -112   
0      -992   
160    -176   
96     0      
-192   112    
32     -80    
64     -288   
96     -64    
-80    -112   
-96    32     
128    -528   
80     -144   
0      -800   
144    -112   
-32    64     
16     -48    
-240   -432   
240    -112   
-48    176    
-288   32     
-160   -32    
32     -80    
160    0      
208    80     
-32    0      
16     -96    
208    32     
96     -704   
176    32     
304    144    
-112   0      
48     -160   
-80    0      
208    -16    
48     48     
96     112    
96     192    
-1136  -32    
224    -208   
128    -64    
48     96     
32     160    
-96    -16    
112    16     
80     -896   
-560   -64    
208    -32    
224    64     
192    -48    
240    32     
0      32     
352    64     
-368   128    
-496   -224   
-112   -208   
704    -192   
544    -112   
480    -32    
0      96     
-16    -400   
-608   0      
-32    80     
256    48     
-32    -48    
192    -16    
128    80     
192    64     
-304   -32    
-80    -112   
-1408  -32    
48     -16    
48     -176   
336    -112   
16     96     
32     -128   
0      -256   
144    -96    
144    208    
-272   48     
128    32     
-96    0      
80     -48    
32     -112   
192    256    
-352   256    
208    64     
-944   96     
-272   -192   
256    -160   
0      352    
160    -32    
112    -464   
208    -16    
240    128    
-64    -480   
-192   80     
208    -304   
-336   384    
208    272    
-1056  96     
-16    -32    
144    -32    
304    -32    
-16    -64    
192    -688   
-624   -880   
-112   384    
-64    688    
0      -512   
224    288    
-240   -144   
128    -80    
-704   240    
-144   -240   
-240   -336   
208    -144   
-272   176    
448    -112   
224    112    
-128   -48    
-416   0      
784    -320   
256    -80    
-224   640    
128    128    
-128   -144   
-112   -112   
-112   48     
48     -256   
48     -32    
320    -160   
-992   48     
-160   -160   
80     -176   
-736   -224   
-1376  16     
-144   240    
-608   -32    
-80    -96    
-32    -464   
-272   -32    
-112   80     
-96    0      
96     -128   
-272   -80    
-1712  -96    
-144   0      
-448   -112   
64     192    
-32    0      
-160   -272   
160    -320   
-432   -272   
-32    -96    
-256   192    
-144   96     
-224   -16    
128    80     
-48    176    
-112   -64    
-416   -16    
64     112    
-48    -64    
80     112    
-32    -96    
-272   48     
128    -32    
-96    -64    
80     32     
32     -16    
-224   -64    
-1152  32     
-208   224    
-16    -16    
80     32     
144    -176   
16     16     
-16    48     
80     64     
256    240    
-528   48     
-240   -64    
224    -48    
48     96     
-192   32     
-64    -16    
-400   -32    
48     0      
-1072  -48    
272    80     
-112   80     
-64    -48    
-64    -64    
-64    128    
16     64     
64     48     
-112   -96    
128    0      
-112   48     
-96    -32    
48     96     
0      0      
-16    -48    
-240   64     
176    96     
-96    0      
32     -64    
-32    -208   
112    48     
-32    144    
-96    -32    
-16    -80    
-48    -32    
192    -224   
32     48     
16     144    
-48    64     
160    144    
-352   272    
-128   192    
-48    -32    
160    112    
48     240    
144    96     
48     -32    
-368   64     
-64    -32    
-256   304    
240    256    
-112   128    
-192   -96    
-256   -96    
128    80     
-528   0      
32     512    
-1600  272    
-80    -864   
-80    -80    
-176   128    
224    0      
-144   -816   
32     -160   
240    304    
-208   192    
32     32     
32     -128   
-224   192    
-176   352    
128    -48    
80     -512   
-400   48     
0      -176   
64     -192   
-80    48     
48     -32    
0      -112   
80     96     
-256   432    
0      -144   
-176   32     
48     96     
-544   144    
32     -48    
416    672    
-480   -224   
96     -192   
304    0      
0      -288   
128    32     
16     80     
-32    128    
48     -32    
320    176    
-368   -192   
0      -48    
128    96     
0      -64    
-16    -16    
112    -16    
-64    64     
-48    -128   
416    592    
-288   304    
192    112    
-16    192    
144    128    
96     128    
-16    -160   
-96    -32    
64     48     
-80    64     
384    -80    
-32    144    
-224   -192   
-48    64     
-48    384    
-96    -64    
32     -64    
224    176    
208    16     
32     64     
-16    64     
-288   128    
96     16     
144    32     
-16    64     
80     32     
64     128    
-384   -384   
0      -160   
400    336    
752    464    
-752   80     
-96    -128   
368    64     
-336   96     
-368   -48    
80     48     
368    -144   
-208   -32    
96     32     
-640   32     
160    0      
304    112    
-192   48     
32     -64    
80     -160   
80     144    
-32    64     
80     80     
48     48     
0      0      
-16    0      
16     64     
64     96     
128    96     
-192   16     
80     -160   
-96    -240   
160    80     
-96    144    
64     32     
-80    32     
64     0      
112    48     
80     64     
160    64     
208    304    
-400   160    
-32    -32    
224    -48    
32     -128   
112    -736   
0      64     
128    -16    
128    80     
128    96     
-144   -32    
-16    48     
112    96     
-176   32     
48     0      
144    80     
48     -32    
-176   -256   
144    48     
-48    96     
176    -208   
32     0      
144    128    
-48    32     
16     64     
128    -32    
64     96     
64     64     
112    48     
176    64     
0      16     
192    64     
-352   -32    
-64    16     
208    304    
-16    112    
-64    0      
0      -528   
224    64     
-96    144    
16     32     
272    112    
112    -48    
0      96     
0      -80    
48     -48    
96     80     
-16    64     
0      16     
96     208    
96     48     
0      128    
-128   -832   
32     -80    
112    -464   
-32    -32    
64     224    
-48    144    
0      -80    
96     -96    
-16    16     
-48    96     
-16    64     
320    -64    
-112   32     
144    272    
-64    320    
-176   -192   
0      0      
144    -544   
-80    464    
304    368    
-208   -272   
-48    -448   
256    528    
192    496    
240    16     
80     -96    
32     -192   
176    80     
112    32     
0      -16    
112    0      
-16    -224   
160    -416   
368    560    
48     96     
80     16     
-160   -32    
208    -64    
-352   -160   
80     -176   
96     -144   
16     -32    
368    208    
48     -464   
224    32     
240    -112   
-144   -112   
-96    -304   
-80    336    
192    176    
544    96     
-464   -464   
-176   -160   
16     176    
896    384    
-96    -368   
-352   -544   
224    336    
304    0      
160    80     
784    224    
-224   -144   
224    80     
-128   -16    
128    80     
80     320    
-48    -128   
192    80     
96     -48    
176    16     
128    128    
80     -592   
-176   608    
96     -288   
208    -48    
48     192    
224    112    
96     96     
96     -240   
160    32     
192    -976   
-160   368    
352    -112   
-32    -48    
96     160    
224    -544   
-48    -272   
16     -1360  
16     80     
-304   384    
704    -464   
144    80     
336    32     
-48    -256   
-224   32     
-64    -80    
-112   128    
48     -112   
256    -80    
192    -176   
80     48     
-16    -144   
32     -208   
272    -16    
368    -512   
144    -80    
208    -240   
-224   64     
-160   272    
-384   -16    
-304   -192   
224    -32    
-352   -112   
224    -192   
-656   -16    
-800   -288   
496    -128   
-80    -176   
-128   -80    
64     -48    
-80    -32    
-128   160    
128    -64    
128    -32    
-80    -32    
240    -112   
-16    496    
-240   96     
368    -320   
-1184  32     
160    64     
-192   -320   
272    -272   
-128   96     
0      -96    
32     -48    
144    -352   
240    176    
112    64     
112    272    
-48    80     
224    -64    
256    0      
80     0      
-256   -64    
-128   -240   
272    0      
80     144    
-240   0      
160    -320   
384    160    
80     -176   
176    80     
320    -224   
-160   -128   
-176   -192   
208    224    
240    0      
96     -128   
-384   -16    
272    64     
-512   16     
176    0      
96     64     
320    128    
-240   48     
128    -400   
112    80     
-32    -32    
176    -64    
128    0      
80     -32    
-240   -32    
16     -112   
-256   160    
64     112    
-448   -80    
464    96     
-656   240    
-144   -368   
176    -272   
128    -400   
0      144    
96     -496   
256    -80    
-176   0      
64     -48    
-304   -48    
-96    -32    
-320   -32    
144    16     
-112   0      
64     -16    
16     -96    
128    -32    
112    64     
-32    128    
128    80     
16     0      
64     -112   
-656   -16    
-64    0      
16     192    
64     0      
-80    -32    
176    16     
-224   -96    
240    -64    
-288   -272   
-80    -416   
144    -688   
192    -448   
144    0      
-160   80     
-96    480    
48     208    
-208   -176   
-144   64     
-96    208    
-208   -688   
320    -96    
-32    448    
-64    -272   
-240   -16    
-720   96     
64     32     
-1008  -208   
-416   -32    
-144   64     
-192   32     
0      -80    
-672   352    
-64    -16    
240    48     
-96    224    
-96    -48    
-96    64     
208    448    
-400   -352   
-320   -288   
-80    336    
-80    96     
64     16     
224    48     
-304   16     
-128   160    
-624   -144   
-192   -80    
-624   336    
-64    224    
240    -16    
192    -160   
0      -208   
16     -80    
160    -368   
304    0      
-16    80     
-64    0      
-64    64     
-192   -16    
-112   96     
-112   -16    
-112   -144   
208    -144   
176    -16    
-512   -16    
16     -48    
0      -128   
192    16     
400    320    
-432   0      
-96    16     
-64    32     
16     48     
-176   16     
-32    -32    
-64    144    
-32    112    
-112   80     
-96    144    
-576   144    
-48    64     
-208   -64    
208    112    
-304   -144   
416    64     
-144   48     
240    -16    
0      -16    
-160   96     
80     64     
64     32     
-112   -80    
-368   -48    
-192   32     
-208   -128   
-96    0      
208    32     
-192   -80    
224    -192   
176    80     
-144   64     
576    96     
-144   -16    
-64    0      
176    240    
-656   -112   
208    -96    
160    160    
-464   80     
16     0      
-240   -32    
-160   -96    
-96    -384   
176    -144   
-160   256    
-496   80     
80     -48    
-256   -112   
64     80     
368    176    
-336   -16    
32     48     
80     144    
-32    -32    
-384   32     
16     64     
-928   16     
-16    32     
32     80     
128    64     
32     64     
-32    0      
16     -128   
-128   -160   
112    48     
0      144    
160    32     
112    -48    
-176   16     
-448   -32    
176    48     
-512   -80    
0      0      
176    128    
-192   0      
64     -64    
0      32     
112    96     
-48    112    
16     48     
-48    -32    
-112   0      
-160   -48    
16     144    
-272   -32    
96     48     
112    32     
32     -16    
80     160    
64     96     
-144   32     
16     32     
112    -112   
32     -32    
-80    64     
64     0      
112    80     
-32    240    
-64    48     
-112   -64    
-16    80     
-64    176    
160    192    
80     16     
16     16     
48     48     
-16    0      
-160   -160   
-32    -48    
192    112    
-96    -16    
48     32     
-128   -96    
96     304    
-208   160    
96     48     
-96    -400   
0      288    
64     224    
80     -160   
128    304    
-208   -256   
256    304    
32     384    
128    -32    
-64    48     
-64    112    
-208   128    
-96    -64    
0      16     
16     -48    
80     80     
192    0      
224    208    
96     16     
112    112    
48     496    
-176   944    
80     640    
240    -448   
176    160    
208    64     
-64    112    
-48    0      
256    -560   
-128   368    
16     -48    
0      0      
-32    176    
-32    -80    
384    1136   
-48    128    
-112   -624   
-32    192    
-16    320    
-192   -160   
208    16     
64     -32    
48     -416   
64     224    
96     -16    
64     -16    
-48    64     
0      -368   
-48    -176   
-16    160    
176    560    
-96    -368   
-208   -64    
240    416    
-112   144    
-128   -256   
-80    -304   
144    -400   
-256   -144   
64     -176   
64     192    
-16    -48    
160    688    
-80    160    
-176   -672   
-256   32     
-48    16     
48     32     
432    256    
-320   48     
112    -32    
112    -16    
16     -272   
368    240    
-176   160    
192    224    
288    320    
-224   208    
96     176    
-32    112    
-128   -352   
160    -16    
-16    -64    
64     48     
112    -32    
0      -160   
48     -32    
-80    -448   
80     48     
32     -592   
-16    128    
192    -48    
128    64     
32     -112   
0      -128   
-16    -416   
-320   -272   
-80    -272   
-176   -336   
64     0      
80     112    
-128   144    
128    -64    
-16    -176   
288    -272   
32     -48    
-16    32     
16     208    
-320   -112   
416    288    
160    208    
416    192    
112    -16    
0      176    
16     128    
-176   96     
240    448    
240    336    
224    112    
256    -256   
176    -16    
-400   -736   
-32    -16    
-192   -96    
144    32     
-80    64     
16     0      
224    -16    
176    48     
-96    96     
96     -48    
-128   16     
112    -192   
80     112    
272    -208   
-80    272    
0      -192   
80     128    
-16    0      
112    96     
-32    -48    
128    96     
-32    64     
0      -144   
272    16     
-128   48     
80     64     
320    -224   
-128   80     
-48    -64    
144    144    
-16    -192   
96     224    
144    144    
160    0      
-160   -544   
192    112    
320    224    
-64    -32    
256    272    
224    -272   
112    144    
0      -224   
64     -208   
-160   -208   
48     16     
224    -128   
-208   -224   
64     -80    
96     192    
-112   112    
144    -832   
96     -352   
-176   0      
-16    384    
304    240    
272    144    
96     32     
128    -16    
176    -384   
-144   -64    
-64    16     
-96    -608   
80     96     
128    -384   
416    -464   
-544   -240   
80     -160   
-224   -144   
144    -32    
-64    -64    
112    -368   
16     -224   
96     128    
208    192    
208    16     
32     48     
-32    -112   
0      304    
176    32     
144    -32    
-320   240    
32     32     
-144   -464   
128    32     
176    288    
48     -448   
-48    -64    
240    -528   
192    288    
128    64     
80     144    
16     -32    
64     -64    
128    32     
160    -80    
-80    0      
-128   -512   
-48    -32    
256    336    
224    -16    
32     -128   
32     -112   
-160   -96    
144    0      
320    192    
544    608    
-80    -288   
16     -240   
160    -48    
0      -144   
-144   80     
-64    -16    
-960   48     
0      16     
208    -16    
192    -16    
48     -16    
-16    -240   
-192   -48    
-16    -16    
-48    48     
144    -144   
432    -208   
272    -48    
128    0      
-336   16     
288    176    
-736   16     
-144   -176   
320    0      
208    -64    
240    64     
160    -144   
-32    -32    
112    -128   
-176   -256   
288    -240   
-272   96     
160    32     
320    -112   
272    48     
-48    -32    
-224   48     
-272   -256   
-1200  -128   
128    64     
368    0      
16     -224   
48     48     
400    0      
-512   16     
144    -224   
112    -64    
144    112    
64     32     
-48    16     
64     -96    
48     -16    
144    128    
-336   16     
224    0      
32     -16    
48     -64    
240    96     
-80    -272   
-64    -80    
176    112    
112    -160   
160    64     
-16    32     
-112   16     
0      -752   
48     -80    
-576   48     
-64    -112   
16     -32    
0      80     
544    112    
240    80     
528    -240   
-192   160    
-544   -96    
416    96     
-544   48     
-16    -64    
-432   -32    
256    -48    
288    0      
-256   80     
-176   0      
112    -16    
-304   0      
-256   -352   
160    96     
-400   -240   
-464   -48    
-704   64     
-496   -32    
224    -16    
-16    160    
-208   144    
144    -64    
96     -96    
384    32     
-368   80     
-272   -32    
32     64     
-576   16     
-256   -64    
400    80     
-496   -64    
-80    48     
112    -16    
-32    16     
-1744  -16    
80     0      
96     -48    
-144   32     
48     32     
16     16     
336    112    
-288   48     
-80    -192   
160    80     
-160   32     
176    -16    
-96    32     
16     64     
-240   -32    
-112   16     
-176   16     
-1120  48     
-528   -48    
-112   -256   
384    48     
-208   32     
32     48     
-112   -32    
144    48     
-208   64     
64     0      
112    176    
-48    96     
0      -80    
256    496    
-416   -240   
-176   -400   
128    112    
-240   -32    
64     320    
-128   -400   
144    288    
-128   -80    
96     -16    
256    48     
-160   -112   
-32    96     
-288   -64    
32     -48    
-16    0      
192    32     
-208   192    
96     -336   
-736   208    
48     -224   
16     880    
16     -448   
176    -224   
0      496    
-80    -144   
-272   -32    
0      -528   
-160   368    
64     144    
-192   -16    
0      224    
48     -48    
320    544    
-640   -976   
-80    -32    
96     128    
272    -192   
160    384    
-48    -208   
96     -128   
-64    144    
32     160    
16     -16    
0      64     
-96    32     
-96    144    
-96    48     
176    48     
-256   -16    
-32    64     
-64    -112   
16     -224   
32     -96    
-48    160    
0      208    
-96    -144   
-112   -208   
-32    144    
-80    -80    
0      -112   
-208   32     
80     -320   
192    112    
-160   -144   
48     -144   
-1520  -64    
-256   -208   
-16    -32    
-112   32     
48     96     
96     -32    
16     32     
-32    32     
0      176    
-272   48     
112    80     
-112   48     
208    -144   
-304   -352   
-176   -32    
48     -160   
16     0      
96     16     
48     -80    
0      -128   
-112   -176   
96     -32    
-160   -176   
400    224    
32     176    
256    32     
-48    -48    
64     0      
-32    176    
-96    32     
224    -48    
256    192    
-80    272    
48     64     
176    16     
16     0      
112    0      
-80    -32    
256    -176   
16     -176   
48     0      
-176   96     
-96    208    
-144   16     
160    -240   
80     -112   
128    192    
-112   192    
-64    160    
0      176    
-32    176    
0      176    
48     128    
112    -64    
-16    64     
96     -16    
-128   -160   
-48    -128   
80     32     
336    368    
-336   432    
-160   160    
304    -144   
48     -256   
0      -384   
208    160    
144    -144   
-48    -80    
0      -480   
-160   -32    
0      288    
-16    64     
0      0      
144    -288   
176    -32    
-368   -32    
-272   256    
0      224    
112    512    
288    272    
96     -192   
80     -112   
-192   -160   
80     16     
-224   64     
-128   96     
-160   -112   
512    224    
-128   240    
-48    -48    
768    48     
-624   224    
-16    0      
16     304    
512    128    
288    -64    
-32    48     
80     48     
-176   -80    
-112   -352   
-112   -64    
48     -128   
-336   -288   
-32    -32    
-16    -80    
-80    -64    
64     128    
0      -16    
304    112    
-32    304    
80     96     
-16    96     
144    160    
16     384    
288    320    
-304   352    
32     -64    
96     -16    
160    48     
336    96     
112    192    
-128   -32    
160    64     
16     96     
160    128    
-48    32     
16     32     
128    0      
16     192    
-112   272    
-128   64     
-16    144    
304    208    
64     560    
128    80     
128    176    
80     160    
48     16     
-32    -272   
-16    -368   
-192   -224   
-176   -144   
32     -192   
-96    -64    
176    -288   
80     224    
192    192    
-64    -448   
-16    368    
112    -1616  
288    128    
-176   -416   
112    -208   
-80    80     
16     32     
192    96     
0      64     
48     -256   
512    544    
-256   -464   
208    80     
432    832    
-208   -480   
96     80     
96     272    
160    -480   
112    32     
192    512    
-128   -288   
-16    -112   
208    96     
192    208    
0      -16    
96     128    
80     80     
80     -80    
-16    96     
64     -80    
0      32     
48     -16    
32     48     
240    -1936  
16     192    
-176   -192   
320    80     
256    160    
96     112    
128    0      
16     -272   
-176   -160   
-80    64     
-208   -32    
304    -304   
96     96     
368    -160   
128    112    
-48    -544   
144    -32    
-16    48     
-160   32     
48     112    
32     32     
0      -80    
48     -464   
96     0      
304    -112   
160    48     
176    -96    
48     16     
-112   32     
64     80     
-32    -48    
-48    112    
32     16     
112    -64    
32     16     
-224   208    
-240   -32    
-80    -352   
256    -128   
48     64     
-96    288    
-240   -112   
192    32     
-224   -80    
288    112    
-192   -240   
512    0      
0      96     
144    -1264  
208    -48    
176    -528   
-448   -240   
256    -64    
144    -608   
-32    -192   
432    128    
-64    -80    
0      32     
0      16     
32     192    
-192   -128   
64     -32    
-192   0      
160    -176   
16     -16    
-272   32     
256    48     
0      -64    
48     -224   
208    128    
-160   -368   
576    128    
-48    80     
512    -16    
-128   -192   
240    -32    
-464   -416   
400    144    
-384   144    
272    -160   
-1072  -208   
-112   32     
-64    32     
-160   -384   
288    144    
-176   -368   
192    -176   
-208   -304   
80     -112   
480    144    
32     0      
176    48     
-272   80     
-32    -160   
-144   -48    
-368   -80    
96     -240   
-960   -144   
32     96     
512    -112   
384    -96    
-208   80     
592    -96    
-240   96     
-544   -464   
64     -272   
512    128    
-144   -16    
16     -48    
384    -32    
32     48     
160    208    
-464   32     
416    96     
-320   160    
96     -288   
128    0      
96     -128   
0      -240   
304    0      
-272   144    
64     -224   
128    80     
16     -48    
-96    -144   
32     400    
96     -304   
-656   -64    
320    96     
-640   288    
16     -32    
-192   -272   
128    80     
-96    16     
208    -544   
128    240    
-96    -240   
320    288    
-64    176    
48     -288   
-64    -16    
-16    64     
-448   -240   
192    -48    
-176   272    
0      64     
224    -304   
176    64     
-224   544    
288    -400   
-144   32     
112    -144   
-80    -1136  
32     -80    
144    160    
48     256    
-16    320    
-368   320    
-80    -272   
-96    -352   
224    -176   
16     -112   
48     -128   
208    -16    
144    208    
-160   144    
-256   -144   
48     -112   
64     64     
-224   -128   
-208   -240   
144    32     
-224   0      
112    0      
-352   -32    
80     -208   
16     -32    
32     -32    
-144   48     
64     -144   
-208   -160   
-224   -144   
16     -32    
-288   96     
240    304    
80     -16    
112    16     
-208   16     
16     -128   
-176   32     
-64    -112   
32     96     
-1376  -48    
0      160    
-1280  -112   
-1200  208    
16     224    
-560   64     
96     432    
-1376  64     
160    -160   
176    16     
-80    16     
208    48     
-128   -272   
-448   -144   
80     192    
-512   -16    
64     112    
48     -96    
-208   48     
0      32     
-240   48     
-224   -96    
-656   -112   
-80    -208   
96     144    
-16    80     
-112   -112   
-96    16     
-64    -32    
-80    80     
-48    -64    
192    112    
-16    32     
96     80     
-192   -64    
-16    16     
192    160    
-256   128    
-80    -112   
-32    -32    
-48    48     
-96    -64    
32     96     
-336   -144   
32     -96    
-96    16     
64     -112   
224    48     
-208   48     
192    -16    
-256   0      
-384   -224   
-192   -16    
112    16     
-768   -160   
-208   -320   
-192   -224   
256    224    
80     32     
-80    -80    
-32    -48    
-96    48     
-64    80     
-208   -16    
-96    -64    
-128   -64    
-48    -32    
-16    0      
32     32     
-304   96     
-16    288    
-400   144    
-32    -80    
-112   -112   
304    -112   
-160   32     
144    64     
224    0      
-112   16     
-128   -240   
64     -48    
-208   16     
-272   192    
592    208    
-208   -16    
-144   -384   
144    -16    
-96    272    
-32    32     
128    64     
-16    80     
208    -16    
192    144    
112    64     
96     192    
320    336    
240    -64    
-240   0      
-80    48     
-160   32     
0      -112   
-848   32     
704    144    
192    -208   
480    -384   
256    64     
-432   32     
144    -336   
16     -96    
544    192    
-304   480    
-240   -32    
-288   -320   
512    64     
-192   -176   
64     176    
-464   96     
-48    160    
-16    64     
-32    208    
272    -96    
-240   -16    
-96    96     
-48    -64    
16     576    
256    224    
128    96     
-48    64     
32     -64    
-64    32     
160    -48    
32     -144   
272    336    
-176   128    
64     -112   
-112   384    
-32    -32    
384    192    
-208   -192   
-176   256    
-80    -80    
-80    -176   
96     192    
48     64     
80     64     
-192   16     
-112   -32    
80     80     
-16    128    
-208   48     
112    -128   
128    144    
96     16     
-192   -336   
304    352    
-208   -176   
160    -16    
-112   96     
224    -112   
-368   -176   
-64    240    
-80    80     
-16    -16    
-144   96     
240    -144   
96     224    
16     96     
96     -16    
32     16     
-96    80     
16     -16    
-96    -160   
-112   -16    
160    48     
-208   -160   
160    80     
160    112    
48     -64    
112    64     
48     48     
-128   -48    
64     -144   
-32    -32    
-64    -176   
48     -400   
160    192    
-96    128    
64     48     
96     128    
32     48     
0      48     
-32    32     
32     16     
32     -48    
160    -32    
0      32     
-48    16     
192    -48    
32     112    
96     240    
0      0      
144    80     
-448   -64    
96     112    
208    528    
-528   192    
-32    -176   
208    -48    
-32    112    
-112   -96    
368    -112   
176    224    
160    384    
160    208    
-128   -64    
16     0      
128    160    
64     112    
16     -112   
112    -32    
64     208    
80     80     
16     48     
-32    -64    
128    -16    
320    144    
128    48     
144    64     
-288   48     
-128   -32    
-240   48     
-64    -16    
0      -16    
-16    128    
112    80     
-64    -352   
32     16     
-16    112    
-16    48     
-208   -96    
432    16     
96     176    
304    48     
0      -48    
-224   -16    
16     80     
208    16     
128    -16    
208    -32    
192    128    
192    -144   
64     32     
64     -176   
0      16     
128    64     
-80    64     
-160   -16    
368    80     
128    80     
-32    -16    
80     32     
-112   32     
176    48     
80     -96    
-112   -112   
256    48     
-112   64     
80     -320   
32     80     
-160   -16    
176    64     
208    -96    
288    64     
-96    144    
-224   16     
48     80     
32     80     
208    64     
128    0      
112    464    
-176   -96    
432    64     
-416   -832   
608    -48    
-16    -864   
48     160    
-64    96     
208    288    
-32    80     
208    304    
-192   176    
16     32     
592    656    
-480   432    
16     48     
224    -112   
208    48     
-96    -304   
-80    32     
160    112    
112    208    
736    304    
64     560    
-128   -144   
96     -352   
176    0      
96     48     
-64    320    
-112   -224   
-32    -528   
-112   -160   
80     176    
416    144    
-16    -288   
64     64     
80     -32    
-128   160    
-160   192    
224    -128   
-144   -80    
0      176    
96     304    
208    -64    
0      32     
32     192    
464    -256   
-32    992    
-144   -576   
-64    560    
752    -1248  
-192   -464   
32     528    
0      608    
112    128    
96     -1168  
32     -384   
-64    -160   
-16    192    
32     16     
192    -224   
320    64     
96     -16    
-32    -32    
64     176    
160    176    
96     -688   
96     64     
112    -176   
-144   -224   
-384   -128   
48     -80    
64     -240   
-80    -208   
0      -128   
320    -896   
16     -96    
32     112    
144    0      
320    -80    
-208   -48    
-32    32     
128    -80    
32     -32    
80     48     
-944   -48    
224    -16    
224    64     
-144   80     
-32    -112   
0      -448   
-16    -32    
160    16     
304    -48    
128    -128   
-48    48     
96     -80    
-80    48     
128    -80    
192    16     
64     128    
-32    -16    
112    -48    
-64    -32    
0      -80    
16     -112   
304    -96    
96     -16    
480    160    
-112   208    
-208   80     
64     -176   
80     -16    
144    144    
128    -16    
32     0      
-64    -64    
-784   -80    
-112   -192   
112    -32    
64     0      
16     -128   
160    -480   
368    528    
-96    48     
192    -64    
-112   -48    
-64    80     
128    272    
-272   112    
-496   -144   
272    -224   
-48    -128   
96     -16    
160    144    
-320   0      
192    -112   
144    -256   
80     64     
48     -256   
128    -128   
304    -144   
64     -208   
-240   0      
-16    -32    
-128   96     
208    208    
-464   -64    
192    -16    
-512   32     
0      -48    
96     -96    
224    32     
-160   192    
-48    -96    
112    -176   
64     -320   
32     -128   
96     144    
-176   0      
144    16     
112    16     
-976   -16    
240    -16    
-752   -32    
192    -112   
144    0      
-192   -64    
48     64     
32     -176   
16     320    
-16    176    
16     -432   
-176   -160   
80     -16    
-576   32     
192    -32    
-480   -96    
144    -64    
-256   -192   
16     64     
192    112    
32     -192   
192    48     
48     -400   
144    -16    
-48    -80    
80     560    
-64    144    
160    -352   
-176   -48    
32     -208   
-32    16     
176    128    
-992   96     
112    -496   
64     144    
304    592    
208    -48    
-128   -272   
32     48     
-384   96     
-912   -272   
16     -416   
0      -176   
272    288    
-304   256    
0      240    
48     -528   
-368   96     
-752   336    
-624   -400   
-192   0      
-464   -128   
128    256    
-496   16     
-704   -544   
-432   656    
160    592    
-1712  -16    
-192   -16    
304    -320   
96     176    
-272   96     
-128   -96    
-256   -32    
-672   624    
240    144    
240    -624   
-848   48     
-64    288    
-112   64     
-32    0      
224    -32    
80     112    
16     -48    
-1152  -16    
-272   -192   
0      -32    
48     112    
160    320    
-240   -48    
-192   -400   
-48    208    
-16    128    
16     -96    
-16    -80    
0      -32    
-16    -96    
-160   0      
-64    -32    
-832   -112   
-96    80     
-48    -32    
192    112    
-128   -16    
160    80     
48     112    
-128   80     
48     112    
144    -16    
176    240    
-704   -48    
-160   -32    
-304   -48    
48     16     
-608   16     
304    32     
-1808  32     
48     192    
-192   -224   
144    -48    
80     128    
64     0      
96     32     
-144   64     
16     -112   
16     -48    
-208   -144   
176    32     
32     48     
0      16     
32     80     
-688   0      
-112   128    
80     128    
48     96     
-48    32     
-112   80     
-16    0      
-32    -16    
-224   160    
112    144    
224    96     
-240   -32    
64     96     
-208   -16    
0      -176   
-304   -160   
96     192    
80     224    
-208   64     
-32    -96    
-48    128    
-208   80     
-16    64     
80     -160   
-48    -16    
-48    96     
-48    32     
-48    16     
-240   -320   
288    -112   
128    64     
32     112    
-96    48     
-112   -192   
112    16     
-32    160    
0      16     
0      112    
176    320    
208    80     
64     -96    
-208   -16    
-128   80     
-48    -160   
-128   96     
-336   -32    
80     32     
112    -144   
160    -112   
320    80     
224    128    
64     -16    
-176   -64    
-16    64     
-192   -48    
176    48     
176    96     
304    288    
-128   288    
48     80     
-176   -80    
0      0      
64     -48    
160    48     
432    144    
-240   64     
-176   -96    
-48    -64    
16     32     
16     80     
-48    32     
-64    -48    
176    80     
-160   -224   
-96    -96    
-352   -32    
112    64     
416    112    
176    96     
256    144    
-224   48     
-144   -64    
432    32     
-176   0      
416    32     
80     16     
208    -16    
256    80     
128    112    
16     112    
-256   -112   
208    -48    
272    96     
-32    144    
32     80     
160    48     
-16    16     
272    304    
128    128    
-96    -96    
48     48     
-320   -48    
64     80     
-176   -96    
256    32     
-80    -48    
192    -80    
112    -64    
144    -32    
-16    16     
48     0      
-48    48     
352    160    
-96    -48    
-176   -112   
368    304    
-144   416    
-352   480    
144    -304   
240    -64    
-80    240    
368    -32    
-64    -224   
304    192    
272    288    
192    -352   
304    112    
-144   -48    
64     192    
560    448    
-672   -1056  
-112   80     
288    1152   
-384   -816   
-128   -224   
-272   672    
-256   -304   
48     -128   
-80    96     
176    -224   
-32    368    
416    96     
-240   -16    
592    416    
32     96     
432    128    
-320   -544   
288    528    
272    560    
-336   -368   
96     704    
-80    -144   
160    -288   
16     -32    
112    -80    
128    288    
208    208    
32     -128   
-240   -256   
-304   16     
80     176    
-224   48     
400    64     
192    160    
-384   -224   
256    -64    
0      160    
160    224    
112    -144   
-224   48     
48     192    
32     96     
192    -144   
176    -16    
16     0      
64     112    
-224   -64    
96     -64    
48     80     
48     -240   
-64    80     
-32    -896   
64     16     
0      0      
224    -32    
-16    64     
16     -32    
16     -64    
176    112    
-96    80     
80     -16    
160    96     
32     48     
-16    16     
-32    -224   
112    96     
208    -368   
144    16     
96     16     
64     144    
96     32     
64     112    
224    0      
-16    64     
-80    176    
256    192    
-32    16     
112    -32    
16     64     
96     -80    
176    48     
16     -96    
80     0      
96     -1232  
32     -32    
160    112    
0      112    
-48    -16    
96     -48    
16     64     
-112   -16    
144    64     
112    0      
320    32     
-96    32     
144    -16    
160    -48    
192    176    
-160   -32    
160    208    
16     192    
112    48     
32     32     
80     -48    
240    112    
-224   128    
-16    32     
384    0      
64     112    
96     -176   
336    384    
-256   32     
-80    -112   
16     -496   
144    -96    
-32    48     
32     16     
0      112    
304    352    
-192   336    
128    16     
144    -48    
144    16     
192    112    
80     -48    
-176   -80    
160    -80    
48     112    
0      -112   
112    320    
176    16     
176    -176   
-64    176    
304    208    
-16    -192   
96     32     
112    -560   
192    -128   
-64    64     
32     112    
80     96     
160    160    
160    -48    
80     -592   
128    -464   
32     -32    
352    -48    
160    80     
-1168  256    
-128   64     
96     176    
32     -144   
64     176    
-96    -288   
112    -640   
160    288    
128    -128   
208    -288   
368    128    
-304   -624   
0      80     
-64    -272   
272    16     
-992   32     
144    112    
-48    16     
-16    16     
192    48     
128    32     
224    464    
128    -848   
144    -128   
-80    -80    
224    -256   
-48    160    
-256   32     
-16    128    
48     224    
-128   -80    
112    -432   
-160   -272   
336    48     
-384   -64    
128    -160   
128    -208   
352    16     
288    96     
-48    -48    
-416   -80    
-32    0      
208    496    
16     368    
-784   -1264  
-320   -736   
208    -64    
-320   -16    
320    -320   
352    -192   
-80    -128   
-240   48     
240    48     
-336   48     
-240   -624   
80     -32    
-112   -64    
96     -160   
48     -96    
192    -192   
16     -32    
-80    -128   
-640   -112   
192    -16    
16     80     
208    128    
-496   -48    
192    -144   
256    64     
-240   48     
336    -112   
-96    64     
0      -16    
-32    96     
-48    -80    
160    -48    
-144   -16    
-144   -64    
80     -16    
-176   64     
128    -16    
-368   -32    
16     -368   
256    0      
192    -560   
160    48     
-80    48     
16     -32    
-176   0      
224    80     
-592   -48    
0      -64    
-384   -64    
64     -96    
-16    -48    
256    -96    
-144   16     
160    -64    
112    48     
-32    -80    
96     112    
-128   128    
160    -16    
-176   0      
64     32     
-80    -32    
48     16     
16     80     
224    32     
-224   -96    
352    160    
-160   320    
-192   0      
384    32     
208    -272   
64     -64    
-224   32     
368    176    
-112   48     
-160   32     
208    128    
80     0      
-64    -32    
192    0      
112    -16    
-128   -48    
48     0      
-192   -48    
80     112    
-304   16     
-2320  -144   
96     -112   
-368   96     
96     96     
240    144    
-256   48     
128    32     
48     -128   
48     -64    
-64    0      
128    32     
-112   -32    
-688   -112   
0      96     
48     160    
-128   112    
144    16     
-48    0      
-16    -64    
-1088  0      
-352   -16    
-16    16     
80     32     
-288   -16    
-16    176    
96     272    
176    112    
16     -80    
-272   96     
0      48     
-160   16     
-48    -48    
-240   -48    
-16    304    
-592   112    
48     64     
-624   64     
144    16     
16     -64    
-64    -16    
96     -144   
96     96     
16     -96    
-80    64     
-352   -48    
-160   -16    
-160   48     
-208   -16    
32     0      
-160   64     
208    64     
-352   -80    
-160   0      
-480   64     
-384   224    
32     192    
0      144    
32     96     
-288   32     
112    192    
64     192    
16     96     
-112   -16    
64     -128   
208    0      
80     144    
96     16     
160    48     
-112   -16    
-32    112    
-352   16     
272    112    
-16    -32    
208    -32    
48     -240   
32     -112   
48     160    
-400   -16    
176    -256   
-160   -176   
160    160    
-144   112    
160    128    
-288   -16    
224    80     
-176   -80    
-112   272    
112    -768   
-80    -80    
192    464    
-336   -240   
96     -16    
-160   16     
-64    144    
-272   -320   
32     176    
-112   -64    
144    176    
-464   16     
-112   64     
432    -352   
-320   112    
176    -80    
-432   -240   
112    1008   
-320   -368   
304    -16    
272    32     
-192   -768   
-16    496    
-80    224    
-464   16     
-144   -480   
-624   -272   
144    320    
-144   544    
448    192    
-112   -688   
-32    -256   
320    -336   
16     224    
-432   368    
32     304    
80     64     
96     -64    
208    64     
-144   96     
16     -80    
-240   -256   
80     -160   
192    -160   
240    80     
0      96     
-112   80     
288    16     
-272   32     
80     -16    
-128   -32    
96     -352   
-320   -160   
144    128    
-96    -112   
48     -96    
-352   -16    
-128   -16    
192    -48    
-16    96     
96     16     
640    368    
-432   224    
-144   -128   
-64    -128   
-80    -80    
16     -32    
-64    16     
240    64     
-224   64     
16     128    
80     288    
-64    16     
80     -64    
-16    96     
-16    -32    
320    -64    
-64    128    
144    0      
-96    -16    
240    48     
64     16     
-208   -96    
0      -48    
-352   -48    
240    -48    
144    112    
288    112    
-48    96     
-32    0      
-128   -64    
640    432    
-464   368    
-192   -112   
-80    -208   
-48    256    
336    96     
-96    -128   
240    112    
-192   96     
192    464    
208    80     
16     -48    
-16    -48    
-112   -48    
-16    -64    
112    96     
0      64     
48     -16    
64     96     
-48    64     
96     160    
-208   112    
0      128    
-32    144    
144    -16    
96     48     
64     32     
48     0      
64     -32    
-144   -32    
192    -304   
176    -32    
16     192    
16     80     
-320   192    
144    144    
-64    -96    
80     0      
256    128    
-64    208    
0      80     
112    0      
96     -128   
-96    -240   
112    -112   
80     48     
80     80     
-64    96     
176    112    
-336   -96    
48     -48    
-48    64     
240    -160   
208    -96    
96     64     
-144   -304   
-144   -352   
-80    -240   
-48    -16    
320    64     
0      32     
96     176    
16     -176   
80     32     
48     368    
208    256    
-112   64     
-32    -160   
128    96     
160    96     
-32    48     
32     96     
80     160    
16     32     
16     -16    
-176   240    
-16    -16    
0      -16    
192    -224   
-352   0      
240    400    
-96    -48    
304    -288   
-48    208    
176    0      
176    -96    
352    -176   
16     208    
-528   -144   
-160   0      
176    240    
-144   -48    
176    32     
-80    -32    
208    -224   
-240   -176   
288    64     
-80    -192   
64     -96    
208    -208   
64     0      
48     -816   
16     -64    
48     -32    
32     224    
112    -48    
320    64     
0      80     
-80    32     
80     80     
-64    -64    
48     32     
352    160    
-368   32     
32     -48    
64     80     
112    -416   
112    16     
208    32     
160    16     
-32    -48    
112    64     
0      -128   
-208   -64    
96     0      
224    0      
352    192    
-240   160    
240    80     
80     -272   
80     80     
48     -272   
528    480    
-640   -208   
80     16     
80     160    
80     64     
176    -160   
336    -16    
96     192    
48     208    
-80    -48    
48     32     
-16    48     
32     -16    
192    32     
368    48     
416    192    
-112   -848   
208    -16    
416    176    
-80    96     
-112   -112   
448    -16    
32     -112   
304    80     
368    208    
-368   -16    
32     -192   
64     -64    
256    160    
32     -16    
-16    80     
192    -64    
0      -64    
32     80     
-16    -560   
-64    -16    
352    0      
-400   -432   
96     -64    
288    -400   
48     -32    
-96    -32    
80     -128   
32     -32    
48     -32    
-48    -160   
128    64     
256    -256   
-128   0      
176    -48    
16     80     
-2112  32     
64     -144   
-208   -32    
80     0      
160    -16    
96     -624   
32     -48    
96     80     
-64    -48    
160    32     
96     48     
208    -64    
192    0      
144    -96    
32     -32    
0      -144   
0      -144   
-32    -32    
112    -96    
144    48     
176    -32    
128    96     
-128   -992   
336    64     
-16    0      
-336   0      
128    -16    
-96    224    
-16    -16    
128    -16    
-400   -16    
0      0      
144    -128   
128    -144   
32     -16    
32     -272   
192    -160   
32     -144   
-416   16     
192    32     
48     48     
48     -16    
112    32     
-96    -32    
160    96     
-288   -16    
128    -32    
-208   96     
64     -64    
160    -80    
80     -16    
96     32     
-32    -304   
16     96     
112    80     
96     96     
16     -48    
240    32     
-128   16     
736    768    
240    640    
48     160    
-192   -208   
-80    -192   
-512   -80    
-96    -144   
112    112    
160    -544   
272    512    
144    -304   
160    -48    
-192   32     
80     -224   
16     -112   
192    0      
-208   16     
-64    -224   
-464   -112   
176    -96    
-656   288    
352    -96    
144    -32    
16     -16    
-48    32     
-112   -432   
-96    -288   
96     128    
320    224    
112    80     
-48    -32    
16     -224   
608    640    
-1120  -896   
192    -16    
-96    -32    
256    -224   
288    208    
-160   -464   
128    352    
16     -128   
352    -96    
160    160    
192    16     
-288   -96    
336    208    
-224   -80    
0      96     
-48    160    
128    224    
-48    -768   
128    -144   
112    288    
160    -688   
128    80     
-32    112    
144    -160   
-240   64     
-864   368    
-240   -272   
224    368    
-352   -320   
32     -448   
48     64     
128    -32    
-48    0      
-1888  -240   
-64    -240   
64     336    
176    688    
16     192    
-528   -288   
-176   -64    
-320   -176   
-16    -176   
-32    48     
-48    -256   
-304   16     
400    -144   
-752   -320   
208    -160   
-128   -144   
64     160    
-64    -464   
-320   -240   
128    0      
-496   320    
-288   -112   
-192   -288   
32     0      
-32    0      
64     -16    
64     -64    
96     32     
-240   160    
-256   176    
-16    192    
112    -176   
96     -256   
64     64     
16     16     
-256   -224   
160    -112   
16     336    
-208   160    
-192   -32    
-96    -208   
-1664  -80    
-384   -16    
160    -128   
-96    96     
-176   -16    
32     96     
80     16     
208    -96    
48     -32    
0      208    
-80    -112   
-16    112    
-336   -224   
176    -176   
-144   128    
-48    160    
64     16     
-320   560    
448    144    
-80    -48    
208    496    
-160   -48    
192    16     
224    80     
-208   256    
32     -96    
-448   32     
32     48     
96     64     
272    -80    
-480   -128   
-192   96     
-2608  -80    
64     144    
-32    -16    
32     304    
256    272    
-272   192    
-160   48     
-320   -64    
112    -112   
96     16     
96     80     
0      -32    
-16    16     
-656   0      
-64    16     
-1440  -240   
-80    48     
112    32     
-48    -144   
176    -128   
80     32     
-96    80     
-80    48     
-112   320    
144    48     
144    -208   
-96    -64    
256    240    
-160   224    
96     32     
-128   -64    
96     16     
-64    192    
-128   48     
192    176    
-96    256    
0      -16    
-16    128    
80     96     
176    32     
-16    128    
-80    -16    
144    48     
-32    64     
80     80     
-384   48     
16     272    
-144   208    
-192   -176   
16     160    
-48    144    
0      80     
-16    96     
96     -64    
-320   -176   
-64    -112   
-48    -48    
128    48     
-224   -208   
-16    -304   
-640   112    
-80    16     
208    176    
0      96     
64     160    
-32    -16    
256    -96    
16     48     
144    96     
64     208    
32     32     
-272   -16    
16     -192   
-112   -80    
176    176    
-144   -128   
64     -16    
0      -16    
80     -192   
336    96     
-240   144    
-112   32     
-16    48     
48     32     
-64    -48    
304    160    
160    32     
528    368    
-80    288    
176    96     
-384   0      
-80    208    
-80    16     
-176   -48    
-32    -32    
352    176    
240    96     
-48    -16    
-16    0      
-144   80     
-96    -80    
-80    -48    
-48    128    
64     96     
144    32     
-128   -16    
-64    48     
-160   -128   
448    -48    
0      16     
288    112    
112    -96    
208    16     
-224   64     
192    -128   
-208   -128   
-320   16     
16     -176   
96     -144   
-80    64     
80     16     
256    192    
-160   16     
224    96     
-32    32     
-80    176    
-48    -16    
32     96     
-176   0      
16     64     
-80    64     
192    -16    
-96    208    
336    96     
-240   48     
-16    32     
-128   0      
128    -112   
48     -16    
-16    112    
-256   32     
384    112    
32     32     
304    192    
-176   160    
-48    16     
0      -112   
-160   -304   
96     64     
224    -688   
32     64     
0      -96    
1328   800    
-1104  384    
-304   -240   
112    32     
-432   64     
-16    -48    
80     -80    
736    144    
-752   256    
-576   -192   
176    -112   
640    -16    
-192   -96    
-144   112    
192    -16    
-208   96     
144    64     
-64    32     
736    208    
-432   128    
48     -240   
208    16     
-176   32     
48     48     
144    64     
64     -48    
16     64     
96     -576   
80     -48    
-32    128    
32     32     
-144   128    
96     -48    
-112   16     
208    96     
-288   -16    
32     32     
-64    -48    
272    80     
128    80     
-224   16     
144    144    
224    -80    
96     96     
-48    -464   
-96    -48    
240    64     
80     96     
-112   -32    
256    144    
-64    64     
208    144    
32     16     
-96    0      
16     -80    
160    -16    
144    96     
-32    -80    
192    -16    
-16    -208   
80     352    
256    48     
0      -128   
0      112    
64     0      
64     -96    
128    128    
-128   -48    
160    -32    
64     -32    
192    48     
-304   -64    
80     -352   
-80    -16    
272    208    
112    -128   
32     -272   
-64    288    
-192   -16    
48     80     
-96    -64    
80     -176   
112    80     
-64    -368   
64     48     
224    -16    
96     80     
-48    0      
-32    48     
176    112    
-224   48     
48     80     
112    144    
-64    240    
192    -1232  
144    304    
224    -96    
16     208    
-80    -32    
32     96     
144    -128   
256    304    
-384   -32    
48     -16    
32     80     
128    32     
368    96     
48     208    
80     -96    
304    320    
-272   -256   
352    160    
320    -256   
80     -464   
112    -624   
-16    -224   
-32    -32    
48     32     
64     -16    
224    -64    
16     -624   
-80    64     
96     -960   
-64    -144   
368    1072   
176    -128   
48     -640   
48     -176   
96     -176   
80     112    
128    0      
-144   -96    
416    256    
16     224    
288    -288   
0      -80    
160    176    
336    -144   
-112   80     
192    -176   
-80    -112   
-848   -208   
-400   -448   
48     -80    
-240   -160   
0      -48    
160    -368   
-32    -128   
240    -352   
48     -240   
-16    -32    
0      48     
160    96     
80     512    
-544   256    
32     -112   
-720   -160   
208    96     
368    128    
0      -32    
48     -112   
32     -304   
80     0      
-48    -1424  
0      0      
64     -64    
0      0      
192    -112   
-64    48     
-144   64     
208    128    
-400   -224   
80     144    
-160   80     
80     -144   
144    -112   
-96    -192   
80     -16    
-32    -432   
288    0      
-48    -144   
-112   -96    
304    32     
544    320    
-368   256    
-112   -96    
32     -128   
-96    112    
-688   80     
160    -128   
-48    -48    
336    16     
-272   80     
-384   32     
48     352    
-384   -176   
16     64     
176    -384   
320    -176   
0      -160   
-144   -80    
-96    -208   
-112   128    
16     64     
368    -48    
-512   -288   
16     -240   
-160   240    
-48    16     
48     112    
0      -304   
48     32     
-176   16     
224    16     
-16    0      
-64    32     
-48    16     
-112   -16    
-208   416    
320    96     
-1120  -32    
80     -64    
64     -16    
224    -80    
-224   80     
96     -208   
-144   240    
-16    -176   
432    -576   
-240   -144   
144    128    
-192   -144   
128    -464   
-80    -64    
144    16     
80     64     
-16    -288   
-128   -80    
-16    -288   
-240   -16    
112    -176   
-176   32     
-368   -80    
32     -112   
-16    32     
64     -16    
64     -224   
-16    -208   
-128   -144   
-240   -208   
-224   80     
144    144    
64     208    
-448   -480   
-112   -80    
-208   -96    
-944   -48    
32     80     
-192   144    
-144   -16    
160    48     
-272   32     
128    -32    
32     80     
-96    16     
224    160    
-576   256    
16     160    
-208   96     
112    192    
-160   16     
144    80     
48     208    
-384   64     
-80    64     
-1456  112    
-112   176    
80     32     
176    -32    
-192   -192   
160    0      
-288   -16    
-176   32     
80     -144   
160    112    
-96    -96    
-192   48     
-48    -240   
-224   224    
-208   80     
-400   -64    
16     96     
80     80     
-128   64     
-128   -112   
-48    48     
-160   -96    
128    80     
-32    32     
-176   -160   
0      144    
96     416    
-272   96     
176    -272   
160    -48    
128    96     
16     -16    
-224   -16    
32     80     
-448   80     
-96    320    
-64    80     
-32    32     
48     48     
-48    -16    
208    64     
-176   0      
144    16     
-96    0      
96     32     
-128   32     
208    272    
-1184  16     
-16    -32    
160    -32    
112    112    
0      0      
-48    -96    
-304   80     
-64    96     
-48    32     
0      144    
64     208    
-64    -32    
32     -80    
-64    32     
32     -16    
-160   80     
-96    64     
-1264  -96    
336    192    
-192   -96    
96     0      
-128   -112   
336    0      
144    64     
16     0      
-128   48     
-384   48     
160    48     
-192   -80    
-224   0      
240    32     
176    160    
-912   160    
-336   16     
128    0      
-32    48     
112    80     
48     64     
-208   -112   
80     16     
-96    16     
112    96     
-176   0      
-112   16     
-176   112    
48     48     
-16    -48    
-208   -48    
-16    64     
32     48     
240    32     
96     -96    
-32    48     
-176   16     
-144   -32    
-32    64     
-48    64     
-112   -96    
400    80     
-576   112    
-224   16     
432    64     
-368   -176   
384    128    
-128   80     
-176   -80    
112    -48    
16     32     
96     128    
112    144    
-160   -32    
176    -32    
-160   -32    
-144   -144   
240    -80    
-80    112    
-176   224    
-256   -80    
224    16     
112    160    
-48    96     
64     -64    
640    80     
-96    112    
-544   224    
-288   -96    
96     0      
80     80     
176    112    
224    -32    
-32    -32    
-96    128    
-144   96     
-48    128    
112    80     
32     80     
176    0      
96     -32    
16     32     
-16    48     
-160   64     
-80    0      
128    16     
80     80     
-48    208    
-32    64     
0      -32    
208    288    
-48    80     
80     0      
128    128    
32     80     
112    80     
-208   16     
176    16     
-160   160    
128    208    
-96    16     
16     -448   
48     -48    
-16    320    
-48    -224   
-16    -144   
-80    368    
-80    -16    
32     80     
240    112    
48     -384   
-160   272    
64     -160   
-80    224    
-80    0      
160    176    
80     192    
-208   -192   
128    192    
288    176    
0      -144   
-32    80     
0      -16    
112    -16    
48     224    
-32    288    
144    -112   
-64    480    
96     -288   
208    -240   
-208   288    
-256   -160   
160    -416   
432    720    
-80    -96    
-112   -160   
16     96     
464    -128   
-128   144    
32     -288   
96     -320   
80     144    
0      192    
128    -32    
64     -128   
16     -224   
192    0      
-80    -80    
144    32     
48     -80    
176    320    
-80    -240   
112    -144   
96     -128   
128    16     
144    304    
16     32     
16     48     
192    160    
368    384    
-16    32     
-368   -96    
80     -32    
-16    64     
64     -736   
384    192    
16     480    
-32    256    
160    -352   
192    -16    
272    0      
144    80     
0      112    
96     160    
-352   -96    
80     -64    
208    192    
-80    -32    
176    16     
176    -224   
384    352    
-48    240    
-32    48     
-16    -16    
176    112    
32     64     
-48    96     
-144   -96    
128    -16    
-112   -112   
-80    -112   
176    -64    
-32    64     
208    80     
-144   -240   
208    -32    
-112   48     
336    240    
-144   -80    
-64    176    
64     16     
208    80     
64     -208   
208    -48    
-112   -176   
16     -160   
144    96     
-80    0      
128    224    
48     -288   
112    -48    
48     -32    
160    64     
80     -928   
192    96     
-128   -48    
144    96     
-32    64     
48     16     
64     112    
48     0      
32     224    
160    0      
48     0      
128    -144   
-48    16     
0      -48    
160    64     
-32    -1232  
80     -256   
-32    80     
272    352    
96     224    
-112   32     
-96    -208   
288    -352   
112    224    
64     -176   
-64    640    
192    192    
-48    80     
-32    -160   
-64    -240   
352    80     
208    96     
64     -16    
160    -80    
80     -192   
704    -512   
400    288    
144    208    
128    -32    
-176   -32    
256    -304   
224    0      
-176   -272   
-192   -496   
320    -96    
256    352    
-576   176    
-176   0      
-80    -848   
320    -416   
400    -672   
368    -592   
-112   16     
-816   80     
-224   -16    
-96    -128   
352    -32    
240    48     
400    48     
144    -352   
48     96     
112    -240   
-352   176    
0      -352   
16     -112   
-80    0      
-64    -256   
352    -384   
64     -160   
384    192    
-256   -1200  
-96    -640   
32     -240   
208    32     
-128   -144   
32     -160   
240    -288   
160    368    
-368   32     
160    368    
-1968  -32    
400    240    
-64    240    
96     -128   
432    48     
64     224    
-128   288    
80     224    
-96    144    
480    480    
-480   384    
80     -64    
-64    -16    
144    -160   
-96    96     
-736   48     
-16    -320   
128    112    
240    416    
-208   32     
112    -80    
256    -64    
48     -528   
224    112    
16     -64    
128    -480   
160    336    
-48    -64    
-64    -144   
208    16     
-720   -816   
-288   -176   
256    112    
80     144    
16     128    
240    -96    
-176   -480   
-208   128    
-144   96     
64     -16    
96     -16    
272    -256   
192    -32    
32     64     
16     -48    
-208   16     
-16    -16    
-720   96     
-80    -80    
-16    0      
128    -256   
224    -64    
256    -256   
-32    112    
-16    -1184  
64     -224   
-64    -16    
240    16     
-240   -16    
128    -32    
-208   112    
256    32     
-848   80     
16     48     
-1328  -400   
528    -480   
224    -80    
240    96     
160    96     
0      -896   
16     -192   
32     -16    
-96    48     
-16    16     
-128   -64    
-400   -32    
-32    -48    
0      32     
224    16     
-96    32     
112    -48    
-16    0      
96     -144   
48     112    
272    352    
-160   -64    
-128   16     
352    -48    
-496   16     
224    0      
-432   -208   
-176   -176   
-208   96     
-176   64     
-80    -128   
272    -64    
48     144    
-16    -160   
96     32     
240    256    
-144   0      
160    96     
80     -64    
112    -80    
384    48     
416    256    
96     240    
-672   -16    
32     -176   
-288   -32    
112    -176   
528    80     
-352   16     
144    80     
-16    16     
80     128    
-336   -16    
-96    -64    
-16    48     
192    32     
192    48     
0      0      
-160   48     
-848   -144   
480    224    
-272   -16    
192    32     
-208   -48    
-448   -64    
-80    32     
-256   -64    
-128   -96    
-144   32     
144    160    
-944   -96    
16     0      
144    48     
-112   -48    
-320   -96    
368    320    
-432   80     
272    16     
-352   -96    
416    176    
-432   -144   
48     -160   
320    224    
-512   -336   
432    -48    
-768   96     
-448   -96    
-128   0      
-288   0      
192    -16    
0      64     
272    32     
-16    48     
-240   -80    
288    176    
-784   272    
-272   128    
224    -48    
-560   -352   
-96    -160   
80     48     
-240   0      
-416   -160   
64     -112   
-16    -112   
256    48     
-16    -80    
80     192    
-64    16     
192    -48    
-16    -48    
32     32     
-272   -80    
96     -112   
-48    144    
128    -160   
64     160    
-352   32     
-80    -96    
-96    -160   
176    80     
-160   64     
176    64     
-48    32     
368    256    
-448   256    
0      -416   
160    128    
-320   368    
416    -688   
-224   32     
208    304    
-224   -48    
-32    -48    
-672   -48    
208    16     
0      -400   
-128   -240   
-288   160    
96     -352   
-32    704    
-208   -176   
496    -992   
32     960    
-96    768    
-96    -432   
-224   -96    
16     -304   
48     752    
-208   304    
48     64     
80     -128   
-112   -32    
-48    96     
-64    -80    
96     -144   
-144   -64    
0      112    
-160   -144   
240    32     
-368   -16    
176    176    
-272   32     
176    -16    
-800   -64    
-208   176    
128    128    
96     -16    
160    -96    
112    -112   
80     -128   
-16    -112   
-16    -160   
-96    -48    
-48    -32    
-112   16     
96     256    
-176   -80    
112    -64    
-128   32     
-64    0      
80     128    
240    32     
224    96     
-272   -112   
32     -64    
-128   0      
224    32     
-64    -32    
96     -48    
-176   48     
96     96     
-304   -80    
272    64     
-128   -32    
16     80     
-64    -48    
-160   -64    
176    160    
-176   144    
144    -32    
-16    -16    
80     96     
-112   16     
128    368    
16     304    
32     224    
-304   64     
208    -96    
64     96     
-160   160    
0      0      
80     -128   
64     64     
32     112    
96     112    
224    160    
-128   -16    
0      -112   
32     -112   
-96    64     
-96    128    
16     96     
176    176    
-128   96     
112    0      
64     -304   
48     -80    
16     160    
-64    -32    
112    96     
112    0      
32     16     
-64    -48    
128    304    
0      80     
160    -176   
-176   -304   
80     -80    
-16    112    
-240   -64    
368    96     
-64    48     
0      144    
-48    -80    
-96    32     
-48    -16    
480    160    
-208   0      
-96    -32    
-16    0      
224    -32    
-16    -16    
96     -16    
128    256    
144    96     
0      144    
-16    0      
96     0      
16     32     
176    80     
-32    -208   
64     -80    
-32    16     
0      -80    
-128   224    
16     -80    
-128   272    
128    48     
112    -96    
48     0      
-32    -64    
0      64     
288    576    
-496   208    
-128   -176   
-32    -640   
-160   -496   
176    -48    
-144   -224   
0      64     
240    -320   
128    -112   
784    48     
-64    64     
-176   144    
-192   -256   
-128   -208   
992    368    
-272   576    
-32    368    
-320   -272   
320    240    
784    -240   
16     176    
512    -48    
-16    -240   
464    48     
464    -496   
288    416    
64     80     
512    384    
-448   -832   
80     -80    
-400   96     
-128   0      
112    400    
336    -80    
96     -64    
-368   -240   
48     0      
384    128    
-336   240    
96     128    
-176   -368   
544    128    
-128   128    
-160   -208   
256    -544   
96     464    
208    16     
-224   112    
160    368    
16     128    
176    -144   
-192   0      
224    128    
-288   64     
96     -272   
272    272    
96     -576   
112    80     
48     -336   
-16    -288   
-80    96     
128    80     
192    -64    
-160   336    
336    -16    
96     -80    
144    224    
-112   -112   
208    32     
-32    -80    
-48    -32    
32     -240   
0      128    
160    128    
160    112    
-16    -16    
32     144    
48     32     
144    -64    
128    -48    
-32    -224   
16     -80    
288    96     
-64    64     
0      -176   
208    144    
176    0      
0      -96    
-64    -48    
224    -128   
128    -304   
16     48     
32     176    
112    384    
-48    32     
80     32     
96     -16    
112    -144   
16     -192   
48     -608   
272    -256   
176    -16    
176    144    
80     192    
-48    32     
96     -32    
80     64     
96     96     
80     16     
32     -544   
-64    -16    
0      -112   
16     -288   
112    -48    
128    80     
-192   128    
-64    -32    
224    -688   
-32    48     
128    48     
0      96     
96     32     
-128   -640   
208    -208   
-16    -16    
-240   80     
16     -256   
-144   -384   
208    -16    
-80    -128   
-112   -176   
112    32     
-32    -400   
96     112    
368    160    
16     48     
-176   -80    
64     -64    
-96    -112   
48     -176   
64     0      
80     16     
-16    -96    
288    -1504  
144    16     
96     48     
32     -64    
128    -64    
-192   48     
-80    -96    
48     128    
-592   -48    
-176   -144   
-1616  -16    
80     48     
-16    0      
-48    -64    
80     -64    
-80    -304   
416    -208   
320    -160   
288    96     
-144   16     
-240   16     
-288   -112   
256    -16    
64     48     
112    48     
-96    32     
-160   -48    
64     -48    
-80    -176   
160    -80    
-80    -32    
-16    48     
-64    -624   
-16    16     
160    64     
-304   -16    
160    -16    
128    -48    
-48    -16    
352    64     
-624   -48    
64     -64    
-2000  -64    
-48    -80    
224    16     
64     16     
32     -48    
368    -432   
-544   80     
288    -48    
96     0      
80     -32    
336    48     
-96    48     
48     -192   
-272   48     
-96    -32    
-384   32     
-400   -416   
-240   -80    
-48    32     
-144   -80    
-432   -128   
-32    64     
-160   -448   
-64    -112   
128    112    
336    32     
-32    304    
-32    -64    
112    -144   
112    -112   
-256   -16    
432    112    
-2160  192    
144    144    
-272   80     
-208   -384   
-160   80     
-144   -496   
64     -16    
-112   144    
-400   -560   
144    512    
48     96     
-608   -48    
464    288    
-144   -272   
448    -48    
96     320    
-64    -640   
544    16     
-160   -32    
-352   -576   
-480   16     
32     144    
-48    -128   
208    672    
-160   -272   
144    -256   
-32    224    
192    -160   
-304   64     
48     160    
112    176    
96     32     
-112   64     
-688   16     
-352   -80    
-48    -128   
-96    96     
-16    80     
224    96     
-48    -96    
64     48     
-96    80     
400    0      
-256   96     
400    256    
-176   384    
64     -64    
144    -64    
-64    -368   
-752   -256   
-48    -80    
-272   -16    
-208   0      
-1360  -32    
-160   16     
-208   0      
-336   -32    
160    -112   
-192   -32    
-256   -96    
-16    144    
-384   -64    
32     -16    
0      -208   
112    32     
-80    112    
64     16     
32     48     
-320   0      
-112   -32    
-112   -16    
48     16     
176    16     
-240   32     
-384   -16    
-16    48     
-64    32     
224    96     
176    48     
-192   -320   
-96    -112   
-64    64     
-144   16     
80     -48    
-32    96     
-176   48     
-32    32     
-1488  -64    
96     272    
128    -48    
48     -96    
48     -16    
-240   32     
256    224    
-224   80     
0      -80    
-176   -160   
-256   -32    
16     16     
-16    144    
-752   -208   
160    -256   
-720   -176   
352    80     
-224   -160   
176    64     
-176   -16    
-176   -16    
288    320    
-352   256    
-224   160    
96     304    
-48    384    
96     -64    
288    -16    
-480   -16    
32     0      
-176   96     
48     80     
192    -16    
32     -16    
-32    32     
-80    -48    
-192   32     
-208   16     
64     80     
80     208    
-80    96     
-96    96     
0      80     
-256   -304   
-128   -336   
-176   -128   
-240   80     
-2400  -16    
128    0      
48     272    
224    224    
-192   112    
-32    192    
272    128    
-176   0      
-48    -144   
16     -176   
288    96     
-336   48     
-32    16     
-208   -208   
128    240    
-560   64     
176    16     
32     96     
-96    160    
-80    64     
-96    16     
-144   -16    
144    -208   
48     112    
80     176    
-208   32     
-48    64     
80     48     
-128   160    
48     0      
-224   560    
-48    352    
-80    -288   
64     16     
160    -32    
32     -160   
48     304    
336    288    
-480   -112   
16     -240   
112    416    
-208   96     
256    0      
-112   -112   
-16    320    
176    48     
176    16     
352    -544   
480    736    
-208   -240   
-160   96     
-592   -96    
48     -176   
272    48     
208    176    
224    192    
-192   -96    
-96    160    
-464   -560   
240    768    
256    768    
240    -800   
304    144    
-384   560    
-128   -352   
-128   -32    
-112   144    
96     -96    
-304   -32    
48     272    
64     64     
-800   -768   
640    -736   
-16    80     
240    496    
368    -32    
928    432    
-704   -64    
-368   -64    
-272   160    
-16    -144   
560    -304   
-64    -64    
240    96     
32     -48    
-48    -32    
-80    96     
-128   112    
160    16     
-64    80     
48     64     
96     32     
288    -32    
-240   -112   
0      32     
-112   0      
-16    16     
128    128    
176    144    
-128   -64    
-80    -16    
-128   -16    
112    32     
-176   -352   
304    80     
-16    336    
416    64     
-96    0      
16     -80    
0      48     
160    128    
-224   32     
240    64     
-32    96     
-128   -16    
80     176    
-144   208    
240    -64    
0      32     
128    16     
-32    80     
64     16     
16     -16    
160    -80    
112    112    
96     48     
16     112    
64     -32    
64     64     
112    -64    
-80    -96    
128    -32    
-80    -256   
-48    192    
176    144    
192    48     
32     -64    
-64    80     
80     0      
48     -16    
-64    -16    
48     64     
-96    144    
256    208    
-80    -32    
0      32     
32     -64    
240    -192   
-48    64     
32     -1264  
176    64     
32     -128   
208    -32    
96     128    
128    96     
16     48     
32     16     
0      80     
0      64     
-96    16     
96     -64    
128    64     
0      80     
-32    16     
128    -80    
144    64     
-160   -176   
480    -272   
-112   224    
176    96     
-32    16     
48     16     
-112   -64    
240    -48    
-176   -32    
-32    64     
48     32     
32     -64    
176    80     
48     -304   
-16    -64    
80     -48    
80     64     
0      -48    
-32    32     
0      -80    
112    48     
144    -16    
32     96     
-48    64     
-32    16     
128    48     
-16    -96    
496    416    
-208   16     
16     0      
224    -320   
-112   32     
-96    128    
32     80     
32     80     
80     144    
-64    16     
384    96     
160    96     
-144   -112   
112    80     
96     64     
-256   48     
96     -112   
384    144    
-272   -64    
32     16     
96     -128   
-64    112    
208    64     
-112   0      
-16    96     
160    -112   
-96    112    
176    0      
-80    -32    
112    -208   
-112   96     
96     -112   
112    48     
-80    -144   
64     64     
176    96     
-176   64     
32     48     
-48    80     
240    -16    
64     -80    
-128   128    
96     16     
-80    208    
32     96     
80     -16    
64     -176   
32     16     
768    -720   
-576   32     
0      -48    
0      -640   
-16    128    
-64    -1056  
112    -192   
-576   -736   
144    -368   
0      288    
-64    -96    
-576   -352   
288    800    
240    -672   
-256   -432   
-128   176    
-96    -256   
-32    192    
272    -448   
32     32     
-1088  32     
368    -336   
432    240    
-192   64     
-240   -48    
352    -320   
176    -592   
96     -96    
128    -624   
-64    0      
-240   0      
-304   -464   
-176   -112   
448    -320   
288    224    
-288   128    
464    208    
160    48     
-384   -192   
352    -336   
-208   -112   
144    -96    
464    -256   
-192   -16    
288    -96    
-192   224    
80     -64    
0      16     
-128   -176   
384    160    
-80    176    
320    -80    
-528   -64    
-128   64     
-80    -192   
32     -96    
160    16     
48     -48    
96     -16    
64     -880   
64     16     
128    96     
-48    176    
352    16     
96     -112   
-176   -32    
16     -112   
-208   -176   
96     -64    
-160   -192   
352    -144   
96     -32    
-16    -320   
96     64     
160    -720   
64     0      
128    0      
32     16     
-256   -32    
208    -32    
-352   32     
48     -32    
64     -16    
416    256    
144    32     
64     -96    
-272   -64    
64     -144   
96     -16    
80     -176   
96     16     
208    -48    
0      -96    
-128   112    
-96    0      
32     -48    
80     112    
-160   32     
16     -208   
-208   -96    
160    -16    
-80    48     
176    -336   
16     -16    
80     -64    
112    64     
-16    -976   
64     -16    
176    112    
16     48     
-176   64     
80     0      
-96    112    
-16    -96    
-432   -96    
272    16     
-32    96     
112    -176   
-96    0      
128    -224   
112    -32    
112    464    
160    32     
320    -80    
32     80     
-512   0      
-48    -176   
-48    -96    
240    320    
-288   464    
-16    320    
224    -48    
-16    -352   
-32    -224   
16     64     
-16    -96    
112    80     
176    112    
-288   240    
144    -16    
-48    -112   
176    -48    
-96    -96    
96     64     
0      -80    
176    -48    
-400   144    
-160   176    
160    176    
96     32     
-1456  16     
-192   144    
-1104  128    
192    208    
-592   528    
128    304    
144    16     
80     112    
-32    -176   
-112   128    
-624   -272   
-240   64     
-208   -448   
32     -256   
-528   -80    
-32    80     
176    16     
-336   0      
-48    192    
112    -272   
-48    304    
-816   -96    
0      96     
-192   -112   
-80    96     
-448   -80    
176    -592   
32     320    
-160   256    
-192   -160   
-336   -96    
224    96     
176    320    
-144   480    
-96    80     
-256   -208   
-576   16     
96     -96    
96     -176   
48     -160   
160    192    
-48    176    
16     160    
304    96     
-304   -112   
-144   64     
-32    32     
-288   -144   
80     16     
-64    16     
32     -32    
-224   416    
208    624    
-1200  -320   
-256   -96    
-80    112    
-368   112    
-32    -176   
32     -16    
112    64     
32     -32    
320    16     
32     64     
-48    32     
-160   32     
-80    -144   
208    -64    
-256   -112   
-592   -160   
-128   160    
-80    32     
-32    -32    
-304   -176   
368    80     
224    176    
-384   -288   
608    -240   
256    48     
-832   -752   
544    -400   
208    464    
-896   80     
-256   32     
64     -48    
32     -16    
-368   -128   
256    48     
-96    64     
-240   0      
-32    64     
-128   0      
128    48     
16     -16    
32     32     
-144   16     
-16    0      
-336   32     
-176   -48    
-384   -48    
48     80     
-1152  0      
-32    -64    
48     16     
-128   -16    
-96    16     
208    112    
32     0      
0      -176   
240    -80    
-384   144    
256    16     
-128   16     
144    96     
-208   16     
-80    -48    
-400   -144   
0      -304   
-48    -192   
64     16     
-96    80     
-32    -80    
160    0      
-16    0      
-144   -96    
-160   48     
-16    48     
-32    16     
192    -32    
-416   32     
272    80     
128    -32    
-160   -48    
144    80     
-32    96     
-112   32     
112    80     
96     64     
-256   -224   
64     -48    
112    128    
-64    80     
-144   -16    
256    96     
-144   16     
-64    48     
64     96     
16     48     
80     -112   
-16    -48    
-16    64     
-48    -112   
-112   -48    
64     96     
-16    -48    
96     0      
-16    -48    
-160   -240   
224    -80    
80     64     
16     64     
-32    96     
-160   -64    
64     64     
80     48     
96     -16    
-16    80     
-16    64     
-32    48     
144    16     
-48    32     
-112   96     
352    0      
112    32     
208    192    
-32    -16    
-16    0      
32     16     
64     176    
0      -64    
48     320    
-256   128    
-32    -48    
208    112    
144    64     
16     64     
144    48     
-16    0      
80     0      
64     64     
-80    0      
128    304    
160    272    
-176   80     
-112   96     
-80    64     
-48    0      
224    0      
-80    -112   
208    -176   
0      -304   
208    64     
-32    144    
32     -352   
-32    0      
-64    -16    
128    -16    
208    80     
464    432    
-80    48     
-192   -80    
176    176    
80     64     
208    -192   
-224   -256   
-256   -144   
96     80     
-96    -224   
192    -608   
112    304    
304    320    
176    176    
-256   272    
-48    -16    
48     -528   
32     -144   
144    336    
128    -240   
-32    -48    
16     0      
0      240    
-80    16     
192    32     
64     16     
64     -64    
192    112    
48     96     
-112   -144   
-64    -16    
32     -112   
-176   192    
96     112    
144    48     
192    -112   
96     304    
-64    -224   
96     160    
-32    80     
176    -112   
144    64     
-224   -176   
-144   144    
128    -528   
336    -352   
592    -48    
384    512    
-160   208    
-176   -416   
-384   -416   
-384   -384   
-80    80     
48     -16    
432    80     
-32    80     
240    192    
-288   -144   
192    -32    
-48    144    
0      48     
-320   32     
16     208    
-288   80     
176    -96    
112    128    
-240   -48    
448    -112   
160    -224   
384    80     
240    16     
304    208    
-576   -144   
-32    -48    
-192   -1376  
-48    32     
16     240    
192    96     
320    32     
0      128    
144    144    
288    496    
128    16     
160    -224   
-48    0      
48     32     
-32    128    
16     -224   
240    -80    
-256   -48    
192    272    
-80    16     
192    -32    
32     32     
128    -64    
-80    -48    
64     16     
32     112    
128    192    
160    176    
-96    -832   
160    -240   
96     -32    
32     160    
-48    -16    
240    0      
-176   128    
272    -80    
-224   -32    
32     144    
-288   48     
64     -336   
128    160    
144    -32    
64     16     
208    -48    
160    112    
128    16     
48     64     
80     32     
96     -64    
0      32     
128    0      
80     0      
64     64     
96     -48    
16     144    
144    -528   
0      16     
0      176    
224    64     
-80    80     
80     -32    
112    48     
-32    -128   
272    -96    
32     64     
0      80     
224    160    
240    64     
64     -192   
160    -144   
96     -944   
48     -128   
64     128    
96     -48    
-16    80     
288    32     
-48    96     
-144   -128   
80     -128   
96     112    
192    -16    
208    48     
-96    -32    
-48    -224   
144    -16    
144    32     
-96    -32    
112    48     
-144   -224   
64     144    
208    -128   
192    -16    
64     -48    
224    0      
-96    32     
32     96     
112    80     
-128   -64    
-128   -352   
-32    -384   
288    304    
112    448    
80     0      
-32    0      
144    -880   
0      48     
-48    80     
-240   -48    
64     -64    
128    16     
160    320    
0      -64    
-208   -80    
208    480    
-528   -32    
-32    -48    
-288   -256   
112    -192   
320    80     
176    -240   
224    -240   
208    -640   
64     224    
-272   -176   
-64    -256   
-112   -16    
464    416    
-208   208    
272    32     
-400   -144   
-64    -224   
0      0      
240    64     
-80    -128   
64     -112   
160    240    
-272   -400   
240    32     
128    -144   
208    80     
80     80     
192    -32    
-80    176    
16     112    
-208   0      
48     -80    
-400   -64    
272    -64    
368    -48    
144    -112   
-48    32     
80     -752   
-48    16     
192    64     
0      -16    
80     0      
64     -80    
16     32     
592    320    
-608   -16    
128    -32    
-544   -16    
224    -48    
-1632  -112   
368    -800   
-96    32     
-336   -208   
-128   -208   
656    -160   
400    -176   
-48    32     
-96    -16    
-656   -192   
-80    48     
32     176    
-208   -112   
-96    -32    
208    16     
192    96     
80     -96    
64     96     
160    -32    
-144   80     
96     -16    
-112   -128   
-64    144    
128    96     
-128   -16    
432    224    
-672   -16    
352    -144   
-96    16     
208    304    
-400   -48    
752    -48    
-320   48     
-800   -208   
16     -16    
-304   48     
-16    -64    
-208   -32    
544    176    
-704   32     
272    272    
-128   128    
272    -96    
-160   48     
-16    -96    
-32    48     
-720   -144   
64     96     
-416   -32    
-400   96     
-16    16     
144    64     
-160   48     
-288   16     
-160   32     
144    0      
96     112    
-96    -16    
-32    0      
16     -16    
-48    -128   
272    -240   
-112   160    
352    192    
0      -48    
-32    -112   
-576   80     
16     -80    
-448   0      
-96    48     
-80    192    
16     144    
112    -80    
-288   32     
-48    -32    
240    160    
48     32     
-80    64     
-64    0      
96     48     
-160   48     
32     96     
48     0      
-512   0      
-48    0      
-720   112    
-32    80     
-880   -112   
-80    32     
-32    0      
128    432    
352    160    
-176   160    
-96    208    
-32    16     
-64    -112   
64     64     
-112   80     
-16    48     
-128   -96    
-272   64     
-48    128    
-48    80     
-80    -112   
-160   -64    
32     144    
-64    -304   
-128   -96    
-144   16     
-144   32     
112    96     
-64    -64    
-80    256    
32     272    
-128   144    
-208   -240   
192    32     
-80    240    
64     -16    
16     -112   
96     16     
0      -32    
-96    48     
-400   -112   
112    -1088  
80     160    
224    624    
-256   -112   
-272   -32    
-32    144    
-48    208    
128    160    
-688   112    
-112   -304   
-224   96     
-32    128    
48     -64    
112    64     
192    16     
176    -16    
128    64     
32     80     
48     160    
-240   -128   
224    224    
-192   -64    
112    784    
-112   496    
-128   -384   
-544   16     
80     224    
80     -96    
-64    288    
-48    -96    
128    32     
16     80     
-48    64     
160    -80    
192    384    
48     -64    
-320   -208   
256    32     
-112   -16    
256    -16    
208    80     
-80    224    
-96    288    
-160   16     
-144   -144   
-16    32     
176    208    
-192   -112   
80     128    
-96    240    
32     416    
-192   -48    
-160   -368   
-416   80     
128    -48    
96     176    
-16    64     
208    176    
-16    160    
48     -176   
80     112    
32     -96    
-96    128    
-160   16     
-144   96     
128    -144   
-16    -480   
-16    -384   
-48    -528   
-112   -528   
80     -240   
64     32     
-32    96     
-112   -224   
416    -464   
192    192    
16     208    
-304   304    
272    304    
-160   0      
160    -128   
-80    -176   
176    -432   
80     -224   
-16    -240   
112    -80    
192    416    
144    80     
512    16     
384    -16    
416    208    
-352   192    
-352   16     
128    80     
-176   80     
-80    80     
-160   -64    
560    -16    
528    64     
256    16     
32     -32    
496    32     
496    448    
-176   208    
304    -32    
-192   32     
-176   0      
224    80     
256    48     
-32    16     
112    128    
-128   112    
160    -128   
144    144    
0      -16    
64     -16    
-16    112    
192    416    
-160   176    
-16    0      
112    112    
96     80     
-112   48     
272    -352   
-128   -48    
-32    144    
-16    144    
112    -512   
-144   16     
-64    0      
160    48     
-288   -16    
16     0      
64     80     
96     -80    
0      32     
16     -224   
-16    -96    
64     80     
-64    16     
176    16     
64     -128   
-112   -384   
-48    96     
-16    160    
112    64     
16     32     
112    -48    
-32    16     
176    32     
32     32     
-16    48     
-48    192    
304    112    
96     -32    
96     64     
32     -16    
32     -176   
96     32     
16     64     
96     0      
-48    -32    
96     16     
384    304    
-288   224    
80     -32    
-128   -240   
16     -80    
608    400    
-336   448    
-16    -144   
112    -16    
208    -160   
96     -16    
224    -1040  
128    272    
-192   160    
-64    400    
240    352    
64     144    
256    96     
80     144    
240    144    
-160   160    
-464   -448   
16     -80    
176    240    
400    160    
0      96     
-32    -1360  
0      80     
256    224    
-176   16     
144    96     
32     192    
0      128    
336    496    
-176   -336   
256    -288   
384    896    
128    -240   
192    64     
80     64     
32     64     
336    336    
-192   -240   
-48    -432   
288    -272   
304    80     
96     304    
-32    -48    
112    -224   
-208   -256   
64     -32    
144    176    
80     -48    
128    -16    
-144   -224   
32     32     
112    16     
96     160    
48     -32    
-32    -32    
-96    -480   
224    -48    
144    -176   
240    80     
96     128    
-32    -32    
0      16     
-96    -224   
48     112    
-96    -176   
64     -16    
272    -16    
208    144    
432    272    
-624   112    
176    -32    
16     48     
96     -48    
96     16     
128    0      
432    -240   
-464   -48    
0      -64    
704    208    
-448   -48    
112    64     
176    -208   
176    -64    
32     -208   
-160   96     
-176   48     
0      160    
-16    -64    
80     -480   
-16    -432   
-32    -16    
336    48     
-144   -48    
0      96     
80     -48    
192    48     
0      -128   
144    -32    
-16    0      
-128   -480   
64     48     
176    -432   
-80    32     
-944   0      
-320   -752   
576    64     
-560   112    
-128   -208   
304    -112   
96     16     
-80    96     
-80    -224   
144    32     
-160   32     
144    -272   
-176   0      
272    -144   
-16    80     
-80    -32    
464    192    
-240   112    
-208   -64    
192    -32    
32     -224   
64     64     
208    -368   
128    -16    
80     -64    
304    96     
-176   -64    
-144   -32    
272    32     
-128   80     
-336   64     
544    -96    
-592   -32    
-64    -80    
-112   -144   
304    -176   
352    16     
112    -48    
368    64     
-160   -272   
-624   -48    
-96    64     
240    32     
-176   -16    
176    64     
-304   -16    
32     16     
-560   -48    
48     16     
-144   16     
112    -64    
-16    -80    
272    48     
0      96     
-176   -544   
64     64     
96     -80    
176    64     
128    32     
-32    -64    
-48    -32    
0      -144   
112    112    
176    -16    
160    -176   
80     -144   
-112   32     
0      -112   
96     0      
96     -192   
-16    176    
240    32     
0      -64    
-208   16     
48     112    
128    80     
64     16     
-304   -112   
208    -64    
-3696  -96    
64     -240   
-96    -32    
288    176    
-208   192    
144    -224   
192    80     
16     -80    
112    48     
-208   -16    
192    -96    
64     320    
112    160    
-368   112    
-240   -320   
304    208    
192    -16    
0      96     
-16    -48    
128    16     
32     -80    
-192   160    
16     -48    
0      -16    
-368   48     
448    -528   
-288   208    
240    80     
-352   -224   
-16    -16    
320    448    
32     -48    
-128   -272   
-48    128    
80     64     
128    64     
-32    128    
-272   -352   
64     640    
-192   -432   
320    -176   
-112   192    
-64    224    
-80    -112   
256    -192   
-256   688    
0      -528   
64     112    
-16    -16    
16     -112   
-1216  -80    
80     208    
-272   -32    
-288   -16    
-384   384    
-48    -672   
-48    -128   
224    384    
-208   32     
128    -384   
-240   -160   
-656   80     
112    64     
-368   80     
80     -64    
-256   0      
-272   -448   
-96    -64    
-352   -128   
0      48     
-160   416    
80     80     
-256   -64    
32     160    
-48    96     
-208   64     
160    -80    
112    48     
16     -96    
160    0      
-48    0      
0      -80    
112    112    
-288   112    
-256   144    
-112   -96    
-272   32     
-160   -112   
-80    144    
48     112    
16     16     
0      0      
64     0      
-272   -96    
112    -128   
-32    48     
112    0      
-80    32     
80     0      
-96    176    
-224   48     
64     144    
-112   48     
0      -80    
32     -64    
112    32     
-96    0      
-32    96     
-32    -16    
-48    -80    
80     -96    
-96    176    
-64    64     
-80    208    
-112   256    
-304   -144   
-96    144    
-80    -64    
0      96     
-944   -80    
80     -16    
-112   48     
64     -368   
-144   -96    
80     16     
192    288    
-512   320    
-96    -80    
0      112    
-96    0      
208    -368   
176    32     
-368   80     
112    -208   
-880   -80    
-112   48     
-336   336    
32     304    
-32    176    
576    512    
-224   64     
32     -96    
80     -80    
-32    0      
-64    0      
-144   112    
480    304    
-560   400    
-32    320    
-160   224    
160    -16    
-48    -48    
400    -16    
-192   0      
-464   0      
0      16     
16     48     
224    80     
-288   80     
176    -208   
-336   112    
80     -192   
-208   -176   
-32    96     
-128   -32    
80     48     
0      112    
-128   -64    
-80    -192   
-96    -144   
-16    16     
112    -144   
-272   -272   
-16    -112   
-112   80     
80     144    
0      16     
-80    0      
224    32     
176    -288   
-448   -112   
-32    144    
-256   64     
48     96     
-32    48     
208    0      
-48    -144   
48     -256   
32     64     
-32    -32    
64     0      
160    -32    
-352   80     
240    176    
-208   0      
-48    80     
16     80     
0      208    
224    112    
48     224    
144    16     
48     0      
112    208    
-16    -224   
0      -128   
-48    -48    
96     80     
-400   -144   
128    176    
-64    704    
352    368    
112    224    
-128   32     
192    160    
-32    560    
48     -16    
-64    64     
128    208    
-64    -160   
-96    16     
-288   -32    
176    0      
112    -112   
-32    64     
96     32     
128    -96    
64     224    
-224   -384   
-144   208    
144    -112   
160    112    
144    64     
16     96     
-80    0      
272    -192   
64     64     
80     192    
32     96     
-96    176    
-32    16     
16     -32    
128    80     
-128   -112   
480    -432   
176    -176   
288    288    
-80    80     
-64    32     
96     -48    
80     112    
176    112    
-80    48     
-224   -176   
-208   32     
-112   128    
64     0      
224    144    
-16    96     
-32    0      
256    16     
128    80     
32     -32    
16     112    
-80    -48    
80     -16    
-144   0      
144    80     
32     -80    
160    -272   
272    464    
-272   64     
16     64     
128    16     
48     48     
32     32     
224    32     
96     64     
128    64     
-96    16     
176    16     
-112   -32    
-384   64     
224    128    
-64    -48    
320    -96    
64     48     
-32    224    
-384   0      
-96    -16    
192    48     
192    64     
144    -80    
128    80     
-128   -208   
160    64     
16     -48    
-32    -80    
208    160    
96     -80    
112    32     
80     16     
-32    0      
-208   -128   
272    0      
160    -16    
16     32     
-64    -144   
160    112    
-96    0      
80     80     
-32    32     
96     192    
96     96     
32     -192   
16     96     
-208   -624   
96     48     
96     -288   
192    -32    
-240   96     
256    160    
-368   80     
-208   -240   
288    80     
-208   0      
272    -48    
112    80     
240    208    
-224   -80    
80     -160   
-208   -16    
608    80     
240    -48    
208    96     
-176   -288   
256    144    
-176   -32    
80     0      
176    48     
-48    -48    
784    48     
-80    -48    
-64    -64    
336    64     
-112   32     
-464   -512   
192    -48    
-128   -736   
112    16     
-336   160    
144    32     
368    96     
-96    64     
160    32     
656    144    
-480   192    
128    -288   
0      -128   
112    -32    
0      -32    
96     -224   
32     64     
-48    32     
176    80     
128    80     
-96    80     
64     -144   
160    16     
128    256    
32     -112   
0      -208   
128    64     
64     224    
96     -272   
336    336    
-16    48     
384    -192   
-48    480    
64     -80    
400    256    
-160   -32    
-64    -32    
80     32     
112    96     
192    64     
-144   -16    
384    -48    
112    112    
176    -112   
-32    64     
-48    -448   
224    896    
-64    -528   
-80    -736   
48     544    
-96    -1040  
64     -192   
32     -224   
208    -144   
-400   -192   
32     -800   
112    -144   
112    80     
-64    -384   
-64    0      
288    -32    
336    208    
-48    880    
112    -96    
64     -32    
144    -112   
112    352    
-128   112    
176    -208   
112    -80    
240    -320   
160    -48    
16     -240   
176    80     
-128   272    
32     112    
128    448    
-112   112    
-16    -144   
32     80     
160    -224   
0      -16    
-464   -48    
-64    -16    
80     -128   
-16    -80    
64     32     
96     112    
144    112    
-208   -656   
112    -80    
48     -112   
-144   -16    
96     -416   
-32    272    
256    -160   
96     -128   
-64    144    
-16    64     
-784   208    
288    128    
-48    336    
-64    16     
272    16     
80     48     
-128   -208   
16     -64    
32     32     
144    -64    
112    16     
-16    128    
-16    -96    
-16    -192   
-176   -240   
-832   -64    
96     16     
-96    -32    
208    -48    
160    32     
-16    -32    
176    -64    
-96    -416   
240    -304   
384    0      
-16    128    
-16    0      
48     -32    
-64    -32    
0      16     
-816   144    
-240   64     
-912   -80    
112    -208   
48     -32    
208    -144   
-208   0      
-160   -464   
128    -112   
112    -64    
224    -32    
-128   -160   
64     -96    
-64    -32    
112    128    
-192   32     
32     -32    
-640   -112   
16     -16    
48     -128   
80     -192   
-16    400    
240    48     
-32    112    
256    192    
16     176    
32     96     
144    -432   
-80    -80    
16     -304   
-48    224    
240    -208   
-112   -192   
160    -192   
128    -128   
128    336    
-112   -48    
144    0      
-192   -48    
-512   -80    
160    48     
-832   176    
48     192    
0      240    
-16    0      
-128   -128   
192    80     
-48    160    
176    -432   
-112   -432   
0      -384   
-640   -128   
240    -528   
432    -304   
-256   -192   
-208   -208   
-464   80     
-80    -192   
-352   64     
32     -336   
256    -48    
-128   -16    
-608   -16    
-96    -400   
-224   -16    
-768   -80    
32     16     
-160   16     
-160   -208   
752    -272   
64     -80    
128    304    
-1088  0      
-160   272    
160    32     
176    80     
-368   128    
160    -128   
-512   -704   
-112   -144   
224    -144   
-128   432    
96     112    
-128   224    
-256   208    
-384   -32    
-256   224    
-640   -32    
16     64     
352    304    
-464   160    
-544   -160   
-112   -32    
-176   176    
544    512    
-448   448    
160    160    
-336   -64    
-368   -112   
272    176    
48     256    
-560   -736   
-80    -192   
-464   576    
48     -176   
160    -416   
-32    -80    
400    544    
-432   128    
-160   -608   
128    -48    
-16    288    
48     -48    
-112   -96    
-240   -16    
80     -48    
-32    160    
-160   -64    
32     112    
-784   -64    
144    96     
0      0      
400    -192   
-80    160    
48     -32    
176    0      
-64    64     
-16    144    
64     -48    
0      96     
192    288    
-48    -48    
-80    -176   
-112   64     
-528   368    
0      16     
0      -128   
-96    96     
-128   -64    
144    144    
-80    16     
80     0      
128    96     
304    288    
-208   -64    
-64    16     
-64    16     
16     -32    
48     32     
-144   208    
288    688    
-240   192    
48     0      
-192   -176   
96     -32    
-48    16     
16     -64    
112    -96    
0      32     
-224   80     
-192   0      
-48    -128   
-64    -112   
96     400    
-336   112    
176    -16    
-80    -16    
224    64     
-192   -96    
0      -80    
80     144    
-128   32     
-176   -16    
-160   -240   
-16    32     
-192   112    
-112   32     
-80    -32    
-112   0      
-320   -64    
112    80     
-272   -96    
128    16     
32     80     
128    64     
-128   48     
-224   -16    
0      16     
64     -112   
-16    208    
-112   0      
-256   -128   
80     -64    
224    48     
-112   64     
224    128    
-448   0      
-144   -96    
64     -48    
16     -48    
144    80     
96     32     
400    176    
-288   -48    
32     -32    
-16    0      
96     64     
48     0      
48     48     
-112   64     
-96    48     
-144   0      
-224   -64    
176    -80    
96     48     
-16    112    
-64    -192   
64     64     
-128   112    
-144   64     
-48    160    
-32    144    
128    48     
-288   -16    
16     0      
320    80     
-160   -16    
32     16     
112    80     
64     32     
64     -16    
320    208    
-160   80     
112    -16    
-96    32     
80     0      
336    80     
-144   0      
-256   -16    
0      192    
96     48     
-112   128    
-304   -80    
80     -80    
-96    112    
-16    64     
-320   -32    
-64    16     
736    224    
-448   96     
608    48     
288    256    
-256   112    
336    -32    
-144   144    
80     64     
64     64     
80     0      
352    208    
48     -144   
-16    -464   
-96    -144   
224    192    
144    -48    
320    -16    
-336   -336   
-240   -256   
-304   112    
-192   160    
-240   160    
32     -128   
176    64     
-144   0      
256    16     
128    64     
288    176    
-48    80     
144    -32    
-208   48     
64     -16    
32     160    
-32    32     
-64    336    
48     -80    
208    208    
80     -224   
-144   64     
224    -160   
-320   -608   
128    672    
64     48     
-160   160    
144    240    
144    -496   
640    1072   
-448   -800   
96     0      
160    32     
-288   -192   
448    176    
-176   -1232  
16     -592   
-48    -432   
224    256    
32     64     
80     480    
96     32     
304    -80    
-80    32     
16     112    
96     -32    
208    80     
-320   32     
192    0      
-32    144    
208    -224   
-32    160    
112    80     
16     80     
-32    64     
-48    112    
-48    112    
128    -16    
16     -80    
64     -96    
176    -208   
112    96     
96     128    
-96    -96    
176    -80    
-256   -112   
208    16     
112    -752   
-32    48     
64     0      
128    16     
112    -48    
48     144    
-160   112    
64     64     
64     64     
176    48     
16     64     
-64    -64    
224    -32    
-16    32     
80     -16    
-96    -336   
-16    112    
64     -480   
64     144    
-96    0      
160    80     
64     -16    
80     64     
96     16     
144    -16    
-16    -16    
64     -144   
0      0      
-16    -112   
416    112    
128    -96    
176    -16    
0      -560   
48     16     
16     80     
96     48     
128    16     
144    32     
160    0      
0      32     
-80    -32    
-176   -96    
-144   -48    
80     -64    
32     96     
192    192    
32     176    
32     -192   
192    -112   
128    48     
304    192    
-192   128    
96     160    
160    160    
160    32     
32     160    
352    0      
-48    144    
-160   -288   
80     16     
48     -48    
-48    208    
256    -400   
-64    -32    
176    16     
144    -64    
96     -32    
-32    -96    
80     -592   
0      -192   
-128   -64    
-96    16     
240    176    
80     80     
224    112    
160    -32    
176    -16    
-80    -48    
128    -656   
-224   112    
128    -64    
64     16     
-576   192    
208    -64    
112    144    
208    192    
16     -208   
16     0      
16     -16    
224    16     
32     48     
32     48     
48     -64    
64     -288   
32     -112   
240    -32    
320    128    
-400   368    
-32    32     
48     112    
32     0      
96     176    
64     -144   
96     48     
160    1584   
480    880    
48     240    
-16    -32    
80     368    
352    48     
-384   -912   
-144   -864   
-576   384    
-160   336    
416    464    
496    176    
-144   -832   
-32    224    
336    352    
-80    -912   
112    96     
-32    448    
176    112    
336    48     
-112   432    
-192   48     
176    416    
-608   528    
-272   -1152  
-240   -752   
272    192    
16     160    
-496   272    
160    992    
224    -448   
-896   -272   
496    592    
-768   -704   
-176   -352   
544    656    
192    -32    
176    -112   
-176   -512   
288    560    
-608   -160   
48     80     
80     -368   
336    368    
-320   -432   
192    96     
176    208    
48     -16    
64     64     
32     192    
336    -160   
0      -32    
496    528    
-592   -384   
80     -224   
-16    304    
-144   -240   
-256   -64    
0      16     
112    -64    
-176   -128   
272    48     
16     -336   
0      -32    
-224   -80    
208    -16    
96     112    
16     80     
96     64     
48     96     
-176   80     
160    -48    
-256   -16    
64     -208   
128    16     
-64    -16    
96     16     
32     -304   
176    96     
272    512    
-32    0      
-160   0      
48     192    
-976   64     
128    32     
-240   -96    
-32    80     
-32    32     
176    32     
112    32     
-80    -528   
-128   -96    
80     -144   
-128   -48    
32     0      
32     -64    
-112   -96    
96     16     
-80    -16    
256    0      
-208   48     
176    80     
-1728  -144   
48     -192   
0      48     
32     -64    
160    64     
-640   -32    
-2080  -368   
144    -48    
-1440  64     
-208   -16    
192    160    
-192   16     
176    0      
64     48     
176    -16    
32     112    
-688   -80    
144    32     
-64    -48    
224    128    
-160   48     
-816   608    
-272   48     
-848   -144   
-64    64     
-384   80     
-96    -288   
-144   -32    
-224   112    
-816   16     
0      -144   
-208   96     
288    208    
112    -96    
96     64     
-320   48     
16     32     
-48    32     
32     16     
128    64     
144    48     
-160   16     
-528   32     
208    128    
-128   32     
-16    0      
-224   -96    
64     -96    
-528   -16    
-256   -32    
48     144    
96     160    
160    16     
-160   -48    
48     0      
-176   16     
16     16     
-384   0      
-224   0      
-176   -16    
80     -48    
176    -128   
192    96     
32     48     
-368   -64    
80     0      
-176   -64    
-64    48     
-176   64     
-272   32     
-128   -96    
112    16     
-160   64     
192    144    
-272   -64    
-32    -48    
-64    -48    
-16    32     
112    80     
-80    16     
-128   16     
-96    0      
-32    -48    
80     64     
16     64     
32     -64    
-144   -80    
-192   -64    
-16    -48    
-64    -240   
-64    -80    
160    80     
-64    -48    
368    -16    
208    112    
-80    160    
-352   112    
-64    0      
48     96     
-208   112    
-192   96     
-368   96     
-368   -32    
80     32     
96     16     
384    112    
160    192    
32     400    
-496   224    
-224   -48    
288    -64    
-192   -32    
-80    160    
-240   -160   
-240   -64    
-272   256    
128    16     
-256   -128   
464    112    
-320   32     
32     -48    
48     272    
-896   -1760  
464    -1104  
-544   960    
-752   688    
256    -560   
-32    240    
1200   848    
-576   -560   
112    32     
32     48     
-240   176    
128    16     
-560   -608   
128    400    
272    320    
176    112    
64     272    
80     -256   
192    -96    
-176   288    
128    32     
48     0      
-48    -288   
-32    -448   
-112   -48    
-496   -192   
288    16     
-160   160    
48     -144   
-64    -128   
-128   160    
-16    112    
-32    -80    
0      32     
32     -48    
-32    176    
-80    32     
192    -48    
-304   -48    
96     160    
-384   -48    
176    64     
304    112    
32     16     
32     32     
16     64     
-144   144    
-160   80     
80     16     
192    32     
80     64     
-64    -64    
128    16     
64     80     
208    160    
128    48     
96     16     
208    64     
-144   112    
224    16     
80     176    
-240   128    
160    16     
80     16     
-144   16     
160    80     
-48    64     
64     96     
-32    -16    
128    96     
-128   96     
16     48     
96     48     
96     16     
144    96     
-64    64     
-208   -176   
96     -112   
-96    64     
-64    -80    
-16    64     
128    -96    
48     48     
16     96     
0      80     
-160   64     
192    -112   
64     -16    
176    48     
48     64     
80     80     
-48    -48    
208    -176   
256    160    
-80    160    
64     192    
-320   272    
-144   -32    
-64    -16    
176    16     
112    48     
192    160    
-112   0      
-16    32     
64     -48    
368    -16    
256    112    
-80    48     
32     144    
-256   -32    
304    -64    
-112   32     
176    112    
16     64     
16     96     
-80    -48    
208    -128   
64     80     
80     48     
-16    -96    
-32    -48    
272    160    
-336   176    
320    448    
160    352    
-32    32     
-400   -80    
16     -96    
-96    112    
208    48     
96     48     
-160   -752   
240    -592   
64     -64    
304    64     
48     -192   
-64    -48    
64     128    
64     192    
64     64     
112    -144   
128    144    
16     288    
80     80     
-192   128    
-32    176    
368    320    
-208   432    
272    -416   
128    176    
192    144    
96     -128   
224    -128   
-48    -112   
-224   -176   
192    112    
48     -64    
144    96     
128    416    
208    -240   
-32    -48    
112    -208   
128    288    
-48    -480   
160    -528   
-160   720    
-16    0      
-128   -64    
96     64     
48     48     
32     128    
-224   352    
352    48     
-16    -80    
-208   -48    
80     224    
-736   -576   
160    640    
0      -144   
-416   -416   
288    -528   
560    448    
-144   -304   
0      -112   
-128   224    
320    128    
-128   16     
-208   0      
128    144    
-80    0      
256    128    
192    -48    
-176   160    
912    960    
-352   400    
32     -464   
32     -96    
-64    -112   
160    176    
704    96     
224    -320   
672    96     
-240   -64    
-16    96     
-112   -208   
-80    64     
160    -160   
-96    0      
-96    -160   
272    80     
-48    16     
32     32     
192    32     
-112   112    
48     -64    
144    -128   
176    96     
96     16     
128    16     
32     -128   
-160   384    
256    272    
32     144    
-176   -64    
-144   192    
384    64     
288    -144   
-192   -64    
128    0      
0      -16    
128    32     
96     -736   
16     -144   
144    -1120  
64     -16    
-160   -16    
144    48     
208    176    
-96    -80    
160    -880   
-48    144    
128    96     
176    32     
96     -32    
-112   -336   
-176   -176   
336    112    
-304   -48    
112    -208   
272    16     
-80    -672   
224    -48    
256    176    
-224   -112   
0      80     
256    176    
128    -96    
-64    -48    
96     -96    
32     -96    
-656   -32    
64     -16    
224    -80    
208    16     
48     -64    
224    32     
208    144    
-32    48     
96     -96    
0      -64    
80     -16    
160    32     
160    80     
-128   -32    
-112   -112   
-16    -16    
128    80     
0      48     
64     -128   
-16    176    
128    -288   
304    -80    
48     -352   
-80    0      
144    96     
192    48     
144    -32    
-128   16     
-64    80     
-64    -144   
-80    16     
48     -48    
-1520  48     
16     -16    
176    432    
240    96     
-48    -112   
-96    -320   
-512   96     
48     128    
-112   80     
176    -16    
-80    64     
-176   -80    
144    -96    
-192   -64    
144    -16    
-352   128    
-64    128    
64     48     
0      48     
192    0      
80     -48    
160    96     
80     144    
48     16     
128    32     
112    -16    
-96    16     
112    160    
-128   112    
-64    -64    
-48    48     
80     -96    
-544   48     
160    -80    
32     -32    
160    -144   
128    48     
128    -432   
-48    208    
-288   -80    
80     -112   
400    -192   
352    -128   
-368   128    
80     144    
-256   80     
-304   -128   
-880   80     
320    -80    
16     0      
64     -128   
368    128    
240    -272   
32     -48    
-160   32     
-192   -16    
-112   -32    
-16    -80    
240    80     
16     48     
-272   16     
-64    -208   
-96    -16    
208    64     
-128   96     
128    16     
128    16     
192    -288   
256    224    
-16    384    
64     176    
16     32     
96     192    
-272   -416   
288    432    
-128   192    
-32    -384   
160    0      
64     16     
560    400    
-336   -928   
-80    496    
112    208    
-736   160    
176    416    
-1104  -96    
-352   16     
432    96     
-32    -208   
128    -96    
-32    -832   
-352   -240   
-208   720    
-352   -96    
112    -336   
128    144    
-32    16     
80     -144   
-576   176    
-304   -288   
-256   -416   
16     -192   
-384   112    
256    0      
16     16     
-160   -144   
-832   -112   
960    -32    
-80    -32    
-128   592    
-64    32     
-32    -80    
-272   -48    
-272   0      
80     -144   
-576   -176   
384    -112   
-352   64     
16     -112   
-2560  -48    
-144   96     
-96    224    
176    144    
96     -128   
128    -48    
160    96     
-528   112    
-48    32     
-304   -48    
80     -112   
-400   48     
80     48     
-224   48     
-96    0      
-512   64     
144    48     
64     -352   
0      -112   
-352   -160   
-144   64     
-80    192    
0      64     
144    -16    
-64    -48    
96     -32    
-48    80     
-80    96     
-128   -48    
144    96     
-368   0      
128    240    
-640   16     
288    0      
-224   -144   
-16    48     
80     128    
-160   48     
-48    48     
-48    96     
0      48     
-48    16     
208    32     
-368   64     
-80    64     
16     32     
288    256    
-1888  -16    
64     -256   
0      -192   
-32    176    
-32    64     
48     64     
-96    -64    
-16    32     
32     0      
-64    -16    
16     64     
-80    -16    
-32    64     
-384   -48    
80     0      
-176   -64    
128    -16    
-32    -64    
-128   112    
-32    256    
16     48     
96     -48    
-128   0      
-32    -16    
96     48     
64     64     
-176   -48    
160    80     
-240   16     
80     96     
-208   -128   
224    -32    
240    128    
96     544    
32     256    
-80    -128   
0      -48    
-32    0      
-96    -208   
272    -112   
304    112    
-64    48     
-32    -144   
-160   -128   
-64    144    
-480   -64    
48     112    
16     -336   
-48    -176   
96     -48    
-176   -32    
112    -32    
160    -48    
112    80     
-352   -672   
-240   -384   
-240   -432   
-80    -128   
32     -144   
128    272    
192    528    
-464   -576   
-192   -576   
224    256    
128    -32    
-32    144    
48     -112   
-80    -144   
176    208    
-128   560    
112    -96    
-144   304    
16     16     
-160   64     
-16    16     
-48    288    
16     -176   
0      96     
32     112    
96     -144   
0      144    
-32    -192   
-240   112    
128    0      
112    320    
96     192    
560    288    
-112   -48    
-64    -288   
64     160    
-304   16     
256    144    
160    224    
-48    96     
80     32     
176    -16    
32     96     
80     -112   
112    32     
-208   16     
-64    128    
-256   -16    
-16    128    
-32    320    
240    -48    
0      0      
192    -32    
96     80     
-176   -16    
-48    64     
-16    -16    
752    336    
-368   80     
528    160    
-560   112    
-80    96     
96     224    
0      128    
400    144    
304    224    
-48    80     
-128   64     
-448   -112   
368    32     
-176   112    
48     32     
128    80     
-256   -32    
16     -368   
112    -496   
496    224    
96     384    
-336   -64    
256    -16    
304    80     
-240   80     
-624   -128   
608    0      
272    48     
-128   144    
-112   32     
-512   -48    
240    -16    
144    144    
-256   80     
288    0      
-96    -208   
16     -32    
-16    80     
144    -336   
64     32     
48     48     
112    64     
0      32     
112    96     
96     96     
-160   32     
16     -192   
-48    -208   
160    96     
-80    144    
-32    -32    
-80    -144   
64     0      
144    -32    
192    112    
176    64     
352    288    
-464   112    
80     0      
208    32     
224    80     
96     128    
16     80     
48     -64    
176    112    
80     80     
-160   -144   
64     64     
32     -208   
-128   64     
0      -368   
192    96     
-48    -48    
32     16     
112    80     
-64    48     
0      -16    
96     0      
16     64     
-48    -48    
16     16     
160    -176   
64     112    
64     -160   
112    48     
144    -80    
32     32     
160    -96    
-256   -80    
-192   0      
224    272    
-64    176    
-48    16     
64     16     
176    0      
-80    176    
-32    -48    
256    128    
64     -160   
32     64     
0      -368   
176    32     
32     128    
64     64     
-32    32     
128    160    
48     144    
112    128    
-112   96     
0      -160   
64     -352   
64     -304   
128    288    
-48    -16    
16     64     
48     -432   
112    112    
-64    -144   
64     112    
80     -32    
512    736    
368    544    
96     224    
-96    112    
-48    -176   
192    240    
-240   -96    
-64    -352   
-64    -320   
304    576    
-208   16     
0      -256   
64     -432   
96     -32    
-32    32     
128    -176   
32     -80    
64     48     
112    64     
416    464    
-112   96     
48     -432   
288    -48    
16     -32    
112    96     
0      -48    
208    176    
0      112    
48     64     
128    96     
64     -368   
-128   0      
112    -48    
80     -384   
352    224    
-208   -608   
96     -336   
288    -112   
176    208    
128    384    
-80    -208   
-16    -256   
-576   528    
720    592    
-528   -16    
-224   -432   
112    -144   
-1744  144    
-112   208    
128    -288   
0      -256   
32     -48    
-32    -400   
176    -64    
112    192    
96     0      
16     16     
0      16     
0      -80    
96     -752   
160    704    
-48    -128   
-848   -272   
160    48     
32     -112   
48     -32    
144    80     
-224   -208   
288    -672   
144    -752   
-64    -352   
-32    208    
-144   320    
-160   -480   
336    -64    
-32    -272   
-48    -128   
-560   528    
-400   -352   
-240   -256   
128    240    
224    -48    
480    304    
-240   16     
80     -576   
-240   -128   
-112   -80    
352    16     
-64    16     
176    -160   
-384   -96    
-80    -32    
-704   64     
-160   -208   
-80    -160   
592    128    
224    112    
336    -368   
80     -144   
-224   -176   
112    16     
160    -80    
80     -48    
176    -112   
-16    -240   
352    -112   
208    -96    
304    176    
64     80     
-192   16     
-16    -176   
-272   0      
80     -128   
352    224    
-400   224    
208    -144   
96     -688   
-192   128    
-112   16     
368    -352   
0      96     
16     80     
32     0      
400    176    
-768   128    
96     16     
-144   112    
112    0      
32     112    
48     -368   
-384   16     
304    -1184  
128    -64    
48     -160   
-144   -144   
272    -32    
320    -32    
-480   -160   
-352   192    
-320   80     
48     -64    
-160   -112   
272    -272   
112    32     
-16    -144   
128    -32    
224    0      
128    48     
-352   48     
-64    -80    
-208   48     
-96    32     
-80    96     
320    0      
-96    -48    
96     -16    
-48    -144   
16     -176   
-32    48     
48     -64    
64     64     
48     176    
-1744  224    
-176   -64    
288    80     
-496   224    
48     48     
-144   -400   
208    -176   
-192   80     
-32    16     
-416   -64    
48     -144   
-80    48     
-256   -176   
144    80     
64     16     
-256   -96    
-16    32     
-240   16     
-16    -16    
96     0      
-144   80     
272    80     
-64    80     
-592   -64    
16     16     
16     -16    
448    208    
-784   320    
-160   80     
96     64     
-336   80     
144    -112   
-240   -240   
176    -448   
-128   -64    
-240   -624   
224    208    
-288   512    
-16    256    
400    688    
-144   -64    
64     -240   
128    -64    
208    240    
-208   -576   
-192   -80    
-128   512    
-560   -304   
16     112    
-176   192    
-160   -112   
-1472  64     
-80    112    
-16    -32    
208    32     
-208   -272   
160    1008   
-144   -144   
-32    -80    
-176   176    
48     -80    
112    112    
-240   -96    
112    -336   
32     0      
16     112    
-224   32     
-48    96     
-208   -48    
144    128    
-32    -16    
32     256    
192    16     
-384   -16    
-128   128    
-128   112    
-48    -64    
-224   -208   
176    16     
-80    -144   
-272   -176   
-240   -80    
16     160    
-224   48     
272    112    
-32    64     
-176   -32    
-96    0      
-96    -320   
-64    -96    
-128   96     
-144   32     
0      0      
-96    0      
-272   -32    
144    96     
-256   -32    
400    32     
-384   -48    
-16    80     
16     32     
224    224    
-272   32     
224    80     
432    0      
-368   0      
128    48     
-32    16     
-64    16     
48     80     
-16    -176   
144    32     
-304   80     
-96    -160   
160    112    
288    128    
-304   48     
160    224    
-320   64     
32     16     
160    -48    
128    144    
-240   16     
192    80     
-512   -48    
272    0      
320    304    
-800   48     
-384   16     
-480   -160   
-32    -80    
544    128    
-64    -64    
208    -48    
160    176    
-240   -32    
480    176    
-416   64     
-368   -288   
160    -128   
448    272    
-352   -48    
240    32     
-128   -112   
48     0      
64     0      
240    32     
160    304    
-592   32     
176    -48    
-32    0      
224    96     
112    16     
176    128    
-176   -16    
128    16     
-320   32     
112    96     
16     32     
-48    -96    
272    -16    
16     80     
-288   -32    
0      48     
32     -32    
224    16     
144    80     
-96    -64    
96     0      
-288   -48    
160    32     
-64    16     
48     16     
48     32     
-144   64     
176    64     
-32    32     
96     80     
48     32     
-80    48     
176    32     
-48    48     
-160   32     
96     0      
-96    96     
-16    16     
-64    0      
272    64     
-112   32     
-144   -160   
128    48     
144    160    
-80    -16    
96     192    
128    64     
80     32     
112    32     
224    144    
-80    128    
48     64     
-96    -16    
32     -64    
32     0      
224    -208   
272    32     
-96    80     
0      32     
32     0      
16     16     
64     160    
208    288    
-16    176    
-48    -208   
224    176    
0      384    
32     -208   
64     208    
16     80     
128    -336   
-48    720    
-32    144    
16     80     
64     -224   
288    256    
112    -16    
80     0      
128    -48    
-128   -128   
16     80     
-384   -80    
-128   -32    
272    96     
-32    96     
32     -768   
480    1040   
-176   544    
-272   -384   
48     128    
96     32     
16     192    
224    432    
-64    -448   
192    176    
96     -16    
32     0      
-208   -208   
192    -256   
96     800    
144    48     
32     -336   
240    -80    
176    272    
-48    -32    
-144   -32    
80     64     
-16    -112   
128    272    
-96    48     
96     80     
48     240    
-16    -64    
288    -208   
176    -192   
-64    416    
96     -80    
128    -96    
64     96     
96     304    
-48    -192   
288    80     
-96    -32    
432    64     
-208   -144   
0      -144   
320    -112   
112    480    
192    336    
160    -496   
48     -16    
-48    -688   
0      144    
80     256    
-32    -16    
48     80     
80     48     
64     16     
128    288    
64     144    
112    112    
112    384    
208    192    
112    176    
32     16     
272    -112   
-64    -176   
96     16     
32     -528   
-16    -32    
-32    -32    
160    -32    
64     -192   
256    224    
16     144    
112    96     
-112   -64    
32     96     
64     48     
-96    -192   
304    96     
64     -496   
-48    -352   
416    -560   
-48    272    
-16    32     
80     32     
0      96     
-112   -208   
0      112    
160    32     
128    144    
192    -144   
384    192    
-416   -16    
-304   -96    
-144   32     
80     64     
128    48     
208    -240   
128    -80    
-208   192    
-400   272    
32     -32    
352    -64    
192    -112   
608    80     
160    16     
352    80     
96     32     
112    128    
0      96     
-128   32     
-256   48     
256    -96    
-48    0      
304    -336   
96     208    
-48    -96    
64     -592   
128    -64    
80     -688   
-32    -224   
128    64     
64     -16    
128    64     
-32    -144   
128    -384   
144    304    
48     80     
128    -112   
-16    0      
160    -48    
208    -16    
64     -176   
16     -32    
0      -320   
160    -96    
32     -384   
32     16     
32     400    
416    -48    
96     -416   
144    -64    
-80    -128   
-160   112    
-32    -64    
304    112    
-1168  256    
128    32     
112    192    
144    -304   
160    240    
-32    -192   
64     -80    
64     -16    
0      -32    
-32    64     
-112   -48    
224    -352   
-128   -112   
-128   -272   
96     -48    
-624   80     
-208   432    
272    80     
192    -320   
32     -208   
-32    -208   
272    192    
-240   -768   
192    208    
336    80     
-208   240    
-80    -176   
16     0      
-288   -80    
-80    240    
-64    -48    
160    -368   
176    -128   
256    48     
-16    -48    
80     -128   
112    -96    
80     -288   
128    -96    
16     96     
-48    448    
48     -288   
240    -272   
80     336    
144    -96    
-176   -144   
-64    -96    
-496   -48    
-16    -192   
208    208    
144    -80    
-352   -112   
288    -240   
-64    48     
656    928    
-464   -800   
-144   -384   
336    320    
-32    -128   
144    80     
-176   -64    
-16    -80    
-96    -16    
-32    -176   
384    368    
64     240    
-80    64     
192    0      
-16    -32    
-32    -400   
-64    32     
-128   -16    
0      48     
-112   -80    
160    -32    
96     96     
48     96     
-160   -16    
32     -16    
-1504  176    
-48    -128   
240    32     
320    -64    
192    80     
-16    -272   
128    -16    
-160   16     
-144   -48    
32     64     
96     32     
80     176    
128    -64    
240    96     
576    48     
-416   0      
144    -32    
-48    -16    
-32    -96    
64     112    
-800   -48    
208    -160   
160    16     
-16    -80    
-64    112    
-96    -48    
-64    32     
160    -16    
-544   96     
224    -48    
-384   -32    
176    -64    
-304   0      
-1840  -192   
-48    0      
32     -16    
-112   80     
-160   0      
-16    32     
-256   16     
144    64     
-320   16     
64     48     
-80    -48    
0      240    
-624   -32    
-896   -144   
128    160    
-336   -32    
-896   -240   
896    -176   
-544   -64    
240    0      
-688   -288   
-256   -112   
-1152  528    
-912   160    
-336   -384   
448    208    
-480   -176   
352    -160   
-64    16     
176    112    
240    160    
-672   -48    
-16    -48    
48     128    
-80    -16    
112    48     
-144   48     
-80    32     
144    16     
-624   -128   
416    -96    
320    144    
-448   16     
336    -176   
240    112    
-160   128    
-160   64     
-256   -144   
176    96     
-144   64     
144    112    
48     64     
-208   64     
64     0      
-400   -176   
320    -48    
-464   160    
112    272    
-64    -176   
-16    -32    
0      16     
-112   -160   
80     -96    
-16    80     
112    32     
-272   64     
96     -240   
-224   -208   
-80    80     
-432   16     
-224   80     
-160   0      
80     64     
160    -112   
-128   -16    
112    -16    
-160   -112   
128    -64    
208    112    
-224   64     
-112   -48    
-160   32     
-16    64     
48     0      
-464   -128   
176    -16    
-2592  160    
176    32     
-128   -48    
-320   80     
320    -608   
144    208    
-48    384    
-32    -128   
-16    -224   
-48    -80    
32     544    
144    -112   
96     96     
-640   -112   
160    176    
-1280  0      
144    -16    
112    144    
16     112    
48     64     
-64    -176   
128    16     
-80    288    
-32    -80    
-144   -48    
336    -160   
-160   192    
-176   -64    
-240   -224   
96     96     
-112   368    
96     368    
-192   -368   
-16    -48    
-64    128    
-80    -432   
-48    -128   
256    720    
-16    160    
-32    64     
-64    288    
-128   -288   
-32    208    
-96    288    
48     -208   
-160   -80    
0      128    
48     80     
-48    0      
-64    -192   
48     -48    
-16    64     
0      64     
-64    32     
-144   352    
-32    128    
-80    -176   
32     -192   
-32    0      
208    192    
-224   32     
-112   -112   
0      -80    
64     -144   
-112   -208   
352    -64    
160    -80    
-32    -224   
-80    -384   
-272   -304   
-48    -144   
-48    16     
16     -112   
-240   -208   
64     128    
48     64     
16     112    
80     128    
-16    96     
80     64     
-48    -48    
240    -64    
-368   -176   
-272   -192   
64     -176   
112    112    
-48    96     
128    128    
-256   -224   
-64    -224   
16     48     
0      -96    
352    192    
32     240    
64     32     
-96    -96    
32     48     
128    192    
-32    112    
80     -144   
176    48     
-112   128    
80     96     
96     -16    
16     0      
64     48     
-96    32     
112    -32    
48     -80    
-16    -96    
16     96     
-32    128    
-16    -48    
288    -96    
-128   -144   
160    240    
-160   160    
48     144    
112    224    
64     144    
32     160    
112    160    
96     -32    
240    144    
48     -48    
176    -128   
-96    -112   
-16    0      
384    384    
-496   400    
-128   320    
288    0      
-16    -368   
80     -320   
192    160    
96     -224   
32     -160   
32     -368   
-96    -48    
-16    208    
-80    64     
-192   96     
176    -176   
544    -16    
-192   -96    
32     96     
-96    128    
144    176    
256    160    
112    -16    
304    48     
80     128    
112    16     
-48    16     
-288   80     
-176   0      
720    400    
-224   320    
-48    0      
560    80     
-608   0      
-256   16     
256    240    
160    224    
368    -304   
192    0      
32     -96    
-176   -144   
-80    -496   
144    -128   
32     16     
-240   48     
128    112    
-128   -112   
-96    -32    
-384   -304   
192    144    
80     -128   
-16    160    
160    -560   
-208   96     
384    -208   
-64    128    
336    368    
-416   112    
-16    80     
32     -32    
32     64     
512    160    
-128   224    
-16    48     
176    192    
32     144    
96     32     
-64    -112   
48     32     
96     -80    
128    176    
-128   304    
-176   80     
-128   80     
288    112    
80     304    
224    256    
176    272    
144    192    
-80    16     
80     -304   
16     -192   
-80    -224   
-128   -32    
224    -112   
160    -32    
160    448    
192    384    
-64    0      
96     80     
-16    128    
16     48     
112    -304   
-176   -352   
160    -304   
-192   -16    
144    -128   
160    48     
-64    -64    
128    -256   
480    288    
-288   -304   
288    576    
384    272    
-80    -144   
16     224    
80     -448   
80     -128   
176    48     
64     144    
-160   -560   
32     128    
112    -80    
224    32     
32     -128   
112    32     
80     16     
160    64     
96     32     
32     64     
16     96     
-32    -128   
16     32     
256    -128   
384    784    
-480   352    
176    48     
288    -288   
64     80     
128    -64    
-32    -144   
-16    0      
16     -368   
-272   -256   
144    -816   
128    -512   
304    32     
192    -64    
64     112    
160    208    
80     -80    
-224   16     
96     -16    
-48    16     
64     -112   
160    -400   
48     32     
192    -208   
0      48     
160    -128   
-64    -160   
112    64     
16     -208   
-32    -96    
48     32     
144    -64    
0      48     
16     32     
48     112    
-80    -48    
48     -176   
112    -112   
0      48     
-32    240    
-560   -64    
192    -48    
-1792  -96    
224    32     
-128   -320   
416    -240   
160    32     
144    -320   
160    -96    
144    -528   
-464   -128   
208    -96    
160    32     
32     -112   
432    96     
-224   -64    
0      -16    
-1312  0      
16     -16    
-128   -48    
80     48     
-96    -16    
144    -320   
-32    -80    
112    -1104  
224    80     
16     -16    
48     64     
256    112    
-208   -160   
320    16     
0      -96    
320    32     
-16    80     
288    -80    
-336   -288   
304    208    
-192   -64    
-160   -256   
-224   -608   
128    256    
-32    112    
-416   -304   
224    96     
-240   -48    
128    -64    
-224   -240   
-64    -64    
464    64     
-704   -96    
224    48     
-848   64     
-16    -144   
-112   16     
80     -432   
16     -176   
224    -352   
-64    32     
304    -80    
352    -64    
-304   80     
592    208    
-592   16     
-512   -464   
-400   -336   
528    192    
-128   -32    
112    -112   
448    96     
96     -80    
176    208    
-80    -208   
464    176    
-400   272    
96     -96    
16     -64    
128    16     
-384   -304   
224    48     
-240   400    
80     -144   
176    -32    
192    -32    
-240   -80    
64     240    
240    0      
-80    -688   
320    144    
-624   128    
-32    64     
-464   -240   
144    176    
-160   0      
208    0      
64     208    
-96    -336   
128    128    
192    368    
-128   -288   
256    16     
-96    16     
-288   -144   
400    -80    
-96    160    
-16    272    
80     -240   
160    176    
-176   496    
128    -64    
-416   -112   
160    -352   
-16    -720   
-80    -832   
16     -272   
-96    0      
-1088  96     
-320   304    
-1152  -400   
-144   -128   
-880   -256   
32     -80    
16     -128   
-48    -144   
128    128    
-208   80     
-304   16     
0      0      
192    80     
-224   -144   
-64    -368   
-144   -144   
-192   32     
-176   64     
-48    48     
16     -48    
-208   -96    
-1648  16     
-48    48     
-16    -16    
128    64     
-272   -112   
16     -112   
-256   -208   
64     384    
144    336    
-96    64     
32     -64    
0      240    
-128   16     
-128   0      
-112   -64    
-384   16     
-32    0      
48     -128   
48     -32    
-208   -176   
128    -16    
-400   -352   
336    -320   
112    128    
-16    176    
-80    32     
-80    0      
240    272    
-496   80     
-48    32     
-80    -112   
128    -48    
-832   0      
-144   0      
-32    -80    
-112   16     
128    48     
-32    112    
-160   128    
-64    -80    
-80    80     
-48    32     
-96    16     
-16    -96    
176    0      
-80    64     
-256   -112   
-1152  -144   
16     64     
-32    -48    
0      112    
-64    0      
112    -32    
-16    176    
-192   48     
80     0      
32     16     
16     16     
112    208    
-224   64     
-48    256    
128    208    
-144   80     
304    128    
-400   16     
144    112    
144    96     
-16    208    
-64    64     
16     32     
16     208    
80     336    
48     64     
16     -80    
-128   -48    
-240   -80    
32     80     
-64    -32    
112    -112   
-1152  0      
112    0      
32     192    
-32    80     
16     -16    
-32    -64    
96     -112   
-224   -64    
128    -16    
-320   80     
-64    112    
192    128    
144    144    
-288   -48    
0      96     
-128   96     
-464   320    
64     176    
416    0      
-336   80     
-112   -144   
-16    208    
96     464    
240    272    
128    96     
160    64     
0      96     
192    224    
-368   16     
-144   272    
448    80     
-288   -112   
-224   32     
-160   128    
-64    16     
-80    0      
112    -512   
368    -16    
-352   -64    
-176   -128   
-512   -16    
-560   -192   
-96    48     
-448   -176   
256    176    
-80    64     
112    208    
288    112    
384    448    
-352   544    
-144   336    
-128   560    
208    128    
80     128    
144    0      
96     32     
-464   -192   
432    -48    
-16    256    
176    -96    
-160   -144   
-288   -224   
-64    16     
144    256    
192    -160   
-96    112    
176    -128   
48     304    
-256   352    
-432   -384   
160    352    
512    272    
-64    -528   
-336   48     
128    128    
-176   16     
176    80     
192    128    
-96    240    
48     -192   
-48    48     
320    64     
-320   32     
32     64     
-16    0      
128    -112   
-48    192    
112    64     
-128   -64    
-16    128    
-144   512    
256    -208   
176    288    
-64    -240   
-144   -16    
-32    128    
336    368    
-144   -224   
144    -112   
176    208    
-80    0      
-32    160    
32     -896   
-32    -48    
64     96     
112    64     
80     -64    
112    -208   
128    16     
64     80     
208    176    
32     336    
-80    112    
144    16     
0      48     
16     32     
-32    96     
80     -288   
32     -112   
128    224    
0      -256   
112    -16    
240    0      
80     -96    
128    80     
-64    176    
-112   16     
48     16     
48     80     
-112   -144   
48     -32    
80     -16    
80     16     
48     -16    
80     -48    
-16    208    
-160   64     
96     -64    
144    112    
176    112    
-48    -192   
560    -96    
-176   96     
80     96     
128    -48    
112    96     
-208   -352   
64     -224   
32     176    
-272   -352   
320    144    
144    32     
112    48     
32     96     
-32    32     
-32    -240   
176    144    
-64    48     
-64    64     
112    0      
-64    -96    
64     -64    
-160   48     
-224   16     
96     48     
224    16     
256    192    
336    64     
48     192    
176    96     
-144   -64    
144    80     
-48    32     
96     80     
16     -16    
16     -16    
-16    -32    
160    -80    
-144   48     
-64    -32    
128    16     
208    -368   
16     48     
-96    -32    
0      -48    
-16    -64    
-32    16     
-64    16     
96     48     
240    192    
-256   -112   
240    0      
320    -16    
-224   -64    
272    -448   
-96    96     
-128   -96    
256    48     
16     0      
16     -16    
320    240    
-320   64     
64     -48    
160    112    
16     48     
128    -16    
64     0      
64     0      
192    176    
-240   -400   
384    -48    
64     16     
240    80     
112    64     
-16    64     
-544   0      
480    224    
-32    96     
320    112    
64     400    
208    224    
-208   80     
-160   -368   
-64    144    
128    144    
-128   16     
16     16     
48     224    
240    304    
-304   224    
-16    256    
336    48     
112    -432   
0      -272   
-32    -1024  
240    -128   
176    192    
400    0      
144    416    
128    288    
128    -288   
320    -384   
16     -544   
-160   320    
-112   -112   
-16    -624   
-96    -48    
64     -384   
416    80     
-32    -352   
160    32     
112    -416   
-48    96     
-128   192    
288    -208   
-160   -64    
-96    112    
192    336    
208    -16    
16     16     
-128   288    
208    -224   
-96    736    
-176   -480   
16     192    
768    112    
-128   -848   
16     176    
16     96     
208    352    
32     -704   
0      -48    
-96    -240   
-176   32     
32     -144   
128    -224   
-64    16     
64     32     
-1984  -16    
64     48     
144    160    
32     96     
112    -48    
96     -528   
-144   -240   
240    -128   
-112   0      
48     -256   
-144   -64    
16     -224   
304    -144   
0      0      
48     96     
-960   -32    
304    -240   
-128   -64    
-48    -144   
128    -128   
48     -64    
176    80     
96     -528   
64     64     
240    32     
-176   160    
-112   48     
-80    -64    
-112   64     
96     -64    
-112   16     
96     -96    
64     -48    
112    64     
-64    16     
96     -96    
192    -96    
208    -384   
-32    96     
96     80     
-224   16     
-16    64     
32     0      
-64    -96    
128    64     
112    -48    
-80    -176   
-400   48     
-240   112    
64     -32    
144    -80    
-128   48     
256    -272   
48     48     
64     144    
80     128    
-64    16     
112    -32    
-144   128    
-112   -240   
176    -368   
208    -16    
-288   80     
112    -192   
-960   16     
-112   -304   
-48    0      
0      96     
48     272    
336    -240   
96     -96    
-80    -192   
16     -32    
-384   48     
-32    -96    
160    48     
-256   -160   
-512   144    
144    0      
-128   256    
176    -48    
80     -64    
144    -352   
32     32     
-304   112    
16     64     
-16    -64    
0      0      
-128   48     
192    -64    
-288   -80    
16     0      
-160   240    
240    144    
-64    192    
-96    -144   
-48    -32    
-1200  -96    
-128   -16    
-64    48     
0      16     
128    112    
-48    0      
32     48     
144    -16    
-144   -16    
-96    -128   
160    -256   
-640   -80    
0      384    
-480   -64    
-128   32     
-48    -32    
144    80     
-48    160    
-704   -16    
-96    -32    
-400   -48    
-288   16     
0      96     
-32    32     
48     -64    
-96    -48    
-240   -240   
-48    -384   
-256   128    
-96    240    
272    0      
64     416    
112    176    
16     -32    
-128   384    
-368   144    
-64    -688   
16     -16    
16     656    
96     -32    
16     -192   
-16    144    
-96    224    
-192   272    
208    -448   
-384   -640   
-48    -240   
192    416    
-320   272    
96     -224   
-160   272    
320    -48    
-160   48     
224    -112   
-1056  -144   
-160   80     
544    -352   
-448   -144   
-352   144    
-352   112    
160    208    
-384   -128   
-256   -224   
336    320    
112    48     
-464   -544   
464    -192   
-176   464    
-160   -48    
-304   -96    
-48    32     
-304   -272   
-128   32     
-272   -240   
112    96     
304    80     
-176   144    
368    48     
-80    -32    
-48    -64    
-128   208    
-64    272    
-128   -80    
-16    -96    
-96    0      
176    64     
96     -80    
-176   -32    
16     128    
-128   32     
240    144    
-192   -48    
160    64     
-64    32     
-240   -64    
-32    -80    
-64    80     
-96    -128   
64     128    
-336   112    
64     48     
-1072  80     
240    144    
48     64     
-176   -64    
-80    -32    
-96    48     
-64    96     
80     16     
16     96     
32     -208   
-112   -48    
-304   48     
-32    32     
-576   -96    
240    -16    
-1200  -80    
-160   -96    
144    80     
-96    -48    
-96    64     
-16    16     
96     48     
144    80     
112    144    
-160   112    
32     16     
16     -80    
80     48     
-144   80     
48     -80    
112    -48    
0      64     
-32    112    
16     64     
80     32     
-144   -96    
144    -64    
0      16     
48     224    
16     176    
128    0      
-16    -48    
-32    96     
0      48     
48     16     
80     16     
16     128    
64     80     
16     32     
-32    -32    
-192   -256   
-224   16     
-112   80     
16     -16    
96     -80    
128    -128   
-240   -16    
160    32     
-288   0      
176    160    
-192   -160   
64     64     
304    112    
112    32     
128    0      
80     176    
48     -48    
240    32     
-144   64     
-112   128    
-160   64     
-160   -32    
224    64     
0      16     
112    112    
96     128    
-128   112    
-48    16     
-48    -16    
-48    -128   
-144   16     
0      96     
-16    -32    
208    64     
-48    80     
96     80     
-48    48     
-16    96     
16     80     
-144   32     
64     0      
96     96     
-48    32     
16     0      
48     48     
144    224    
96     208    
-240   -64    
48     -16    
144    -48    
0      48     
0      0      
16     -224   
144    112    
-144   48     
64     80     
-48    48     
96     80     
352    80     
-240   16     
32     -16    
160    16     
400    272    
-368   96     
-224   -96    
176    -32    
-80    -64    
-128   -208   
-80    -128   
16     -128   
128    112    
224    64     
80     80     
176    96     
48     96     
-144   64     
-32    112    
224    256    
-48    256    
0      -48    
112    96     
-304   64     
-112   -480   
-16    -16    
-176   224    
-96    240    
128    -32    
-304   -144   
-288   -304   
496    432    
-480   352    
32     -336   
352    208    
-272   240    
-80    -208   
64     -208   
320    720    
288    160    
320    -128   
400    -560   
96     176    
-224   752    
0      352    
-272   -1184  
112    -272   
592    928    
448    -720   
576    192    
96     512    
144    -304   
176    368    
-160   -256   
224    32     
-240   -32    
288    -656   
-304   -48    
320    32     
-160   0      
336    -304   
240    -176   
-64    -288   
160    -16    
0      0      
288    352    
-160   560    
80     -48    
112    80     
176    -176   
16     16     
-96    224    
336    240    
160    -1120  
-256   -144   
192    -272   
48     32     
80     80     
480    240    
-208   96     
0      0      
128    -16    
16     96     
240    32     
112    -160   
32     64     
112    112    
96     112    
0      -48    
128    -16    
-96    -16    
128    80     
16     0      
208    0      
176    112    
-176   192    
160    96     
64     64     
64     80     
64     -32    
272    128    
-48    -48    
64     -48    
192    32     
-112   160    
256    16     
-240   -48    
-160   64     
-48    112    
16     64     
96     -48    
96     16     
112    -336   
256    32     
-16    -64    
128    96     
128    -80    
112    16     
80     -48    
128    208    
-176   96     
-16    -32    
0      32     
192    96     
128    80     
48     -16    
80     16     
48     -144   
160    -96    
208    -80    
48     112    
-112   -64    
80     16     
112    -32    
-144   -64    
176    -48    
160    -224   
256    80     
128    -32    
96     -848   
96     16     
240    -80    
-128   -16    
160    -448   
-32    32     
128    128    
128    48     
0      -80    
272    32     
-176   176    
-144   -16    
272    -176   
112    64     
-64    176    
336    -16    
-192   64     
-96    -176   
-16    -304   
160    -896   
16     -144   
32     -64    
128    -48    
336    240    
-304   208    
48     -16    
144    64     
144    160    
128    32     
-240   -96    
-176   -192   
144    -96    
112    -16    
48     16     
176    208    
208    -64    
176    -176   
0      128    
192    144    
16     96     
160    -48    
48     144    
192    -64    
0      96     
-48    112    
208    32     
-1296  464    
176    -128   
304    -480   
112    400    
176    128    
192    -80    
272    64     
320    144    
-112   240    
64     128    
48     176    
-96    -160   
-144   -144   
-32    -288   
64     208    
-144   80     
192    32     
272    -80    
-192   -464   
48     112    
-144   -816   
16     224    
240    -928   
128    272    
32     -112   
-80    16     
-32    16     
160    144    
-128   320    
112    -112   
-112   -48    
-64    -16    
80     -256   
-32    112    
-32    224    
64     160    
16     208    
-48    -352   
176    -208   
-288   -176   
320    64     
-352   -96    
240    -240   
128    -32    
400    0      
-48    16     
-16    -96    
-544   48     
16     16     
336    304    
288    32     
-832   -1200  
16     -880   
48     144    
272    -16    
304    -336   
224    -80    
0      48     
-656   32     
272    144    
-640   -32    
-400   -352   
16     -64    
-112   0      
-48    -160   
96     -288   
112    -272   
304    -112   
-128   48     
288    -112   
256    -48    
192    128    
288    240    
-832   -16    
64     -160   
304    32     
-464   -176   
416    -80    
-112   -64    
-32    -64    
64     -32    
-176   -16    
320    -128   
-240   80     
192    -80    
-48    0      
-64    16     
128    -48    
-320   -48    
-16    -192   
272    -16    
208    128    
64     0      
32     -48    
-64    48     
-176   -16    
256    96     
-256   -80    
-752   -48    
-304   -48    
-592   -96    
0      -48    
-496   -32    
-208   16     
176    -48    
-176   0      
-32    -16    
-112   48     
-1472  112    
112    64     
32     -64    
-32    32     
-224   -208   
-224   32     
-64    48     
48     80     
-48    -32    
176    112    
-272   224    
-272   64     
32     -96    
0      -128   
32     16     
-288   -32    
240    160    
-240   -48    
-304   64     
272    128    
64     80     
-16    -80    
0      16     
112    112    
-480   -48    
-16    -96    
-1232  -16    
-32    96     
-80    -16    
32     -64    
48     -160   
-112   128    
96     -32    
64     144    
-160   144    
112    80     
128    -112   
-128   -16    
-128   16     
-64    80     
-160   -16    
-16    96     
48     96     
-768   80     
-64    112    
0      -96    
144    48     
80     -112   
176    0      
-160   32     
-128   16     
64     0      
-208   16     
-112   80     
176    0      
128    64     
-16    144    
64     80     
-576   -48    
176    176    
-64    -16    
320    -96    
32     208    
-208   240    
-64    192    
80     0      
128    64     
128    48     
0      112    
-112   -16    
80     0      
-32    64     
-64    64     
-240   160    
64     128    
-16    -48    
-64    -16    
0      32     
-368   -112   
0      -64    
176    64     
144    144    
-144   -32    
16     -16    
-64    -48    
-128   48     
-320   48     
0      112    
-368   -64    
32     -48    
-1280  -80    
-240   64     
80     208    
32     80     
112    -64    
224    80     
-48    48     
224    112    
-112   48     
-224   16     
-96    96     
-128   48     
256    96     
-272   112    
272    256    
-864   0      
-176   -112   
-32    272    
-32    224    
0      -32    
112    -16    
16     -16    
-144   0      
144    48     
176    -32    
112    -352   
-128   688    
80     240    
-144   -368   
224    368    
-128   -128   
144    96     
64     304    
-80    0      
80     48     
-80    -64    
32     16     
-224   -272   
816    704    
-688   192    
448    0      
-368   272    
192    -144   
-560   -576   
-304   736    
-240   -80    
64     384    
240    80     
-96    -816   
224    -64    
192    192    
160    0      
112    -48    
112    -400   
-64    480    
-224   416    
16     -32    
624    240    
-144   -96    
-128   -208   
464    -80    
-304   432    
-112   -64    
-64    0      
112    64     
96     80     
352    -336   
224    -192   
-16    384    
-544   176    
-208   -16    
96     -32    
400    112    
-48    16     
256    16     
-144   -64    
-48    16     
80     144    
208    288    
112    48     
-16    48     
16     224    
-144   -80    
256    -48    
-176   64     
176    80     
-80    -48    
-176   288    
304    -16    
288    -48    
128    -208   
16     80     
-32    128    
-64    96     
-32    128    
224    192    
48     -48    
32     -112   
144    -48    
-96    80     
96     16     
272    192    
-240   -96    
-48    16     
-64    -16    
208    32     
-32    0      
192    48     
64     80     
80     -16    
144    -48    
-48    0      
-160   96     
-192   32     
144    -16    
176    32     
96     16     
-432   -32    
448    48     
272    -160   
336    -64    
-208   80     
-64    80     
80     32     
32     160    
224    144    
-272   288    
-112   -80    
208    -16    
96     -128   
160    48     
0      0      
-16    -96    
16     64     
160    0      
96     96     
48     0      
288    160    
288    144    
32     224    
-208   96     
176    -48    
-96    128    
48     48     
-144   80     
-384   0      
-144   -384   
240    -368   
112    128    
-144   -432   
320    272    
-144   256    
80     32     
96     0      
32     -16    
160    16     
80     288    
48     96     
-112   16     
0      -96    
64     -112   
320    0      
-16    -224   
32     48     
-32    -400   
80     -96    
32     -160   
256    -80    
32     -304   
-288   -240   
0      -64    
48     0      
-48    80     
240    112    
288    -192   
0      -224   
64     -64    
-32    -128   
-80    -160   
32     -384   
160    272    
64     -368   
96     -128   
144    -128   
272    224    
-192   -160   
144    176    
48     80     
240    128    
-32    -48    
-96    -64    
176    112    
112    32     
208    48     
32     -496   
352    288    
208    -48    
-48    -32    
-64    -80    
128    304    
48     -16    
96     -96    
-464   -64    
288    -48    
192    96     
320    160    
64     112    
0      -608   
80     64     
-32    -112   
-224   112    
320    256    
-208   80     
-128   -32    
48     -32    
-16    -16    
176    224    
-80    96     
-16    32     
16     224    
192    32     
208    64     
-176   -160   
-32    48     
128    -96    
80     32     
160    -64    
96     96     
0      -48    
240    16     
-16    -16    
208    96     
32     -96    
64     -16    
-64    -672   
-16    -176   
-48    48     
240    96     
96     160    
-160   -64    
112    48     
80     -96    
160    -192   
192    -144   
0      -224   
112    144    
-320   -96    
-240   -128   
-432   -272   
480    -608   
192    96     
96     -608   
352    -96    
144    256    
-400   -64    
16     -16    
336    16     
64     -256   
-16    16     
304    -160   
224    -32    
-1280  -16    
-256   -176   
-192   -352   
256    -144   
-272   96     
-288   -128   
352    -96    
240    -320   
-192   -176   
272    -48    
-192   16     
-32    -192   
256    48     
128    32     
144    112    
-64    16     
64     -160   
64     16     
64     32     
144    32     
-144   -288   
128    -48    
128    -64    
144    -64    
80     -48    
192    176    
64     -16    
16     16     
32     -64    
176    64     
80     160    
-144   16     
-1056  -160   
112    -64    
48     -64    
208    -80    
-112   16     
304    -112   
-208   -80    
288    -720   
-112   48     
192    -112   
144    32     
0      80     
-64    -16    
-176   32     
112    16     
-1280  -64    
160    -144   
240    80     
-80    16     
0      16     
-16    -96    
224    144    
-32    -128   
160    144    
208    64     
160    64     
-176   -192   
32     -128   
144    48     
-112   -224   
-112   48     
0      48     
-624   48     
256    -192   
176    -64    
48     -176   
0      32     
-16    -32    
48     48     
112    80     
128    64     
96     144    
-32    64     
-272   32     
16     32     
-208   32     
176    -128   
-544   32     
96     -96    
-1088  -32    
-16    -224   
128    48     
128    -240   
112    -16    
-192   -16    
128    16     
-48    -16    
-48    80     
-32    -32    
144    -32    
-96    -32    
16     -32    
-256   32     
16     -112   
304    96     
-416   -992   
-304   -816   
-256   -400   
-144   400    
-96    192    
208    -16    
160    224    
304    0      
-96    96     
48     -272   
-16    -160   
-48    128    
-80    -96    
96     -32    
80     112    
16     -16    
-144   64     
112    -144   
192    128    
-144   144    
304    -480   
-32    -128   
32     224    
-464   -112   
160    -32    
-240   -96    
160    128    
272    336    
-1104  -128   
-112   -48    
-688   -176   
-32    256    
-336   -592   
192    0      
112    576    
-192   -384   
-208   240    
-1280  -48    
-112   48     
32     688    
112    -432   
-16    48     
-128   0      
-624   -32    
96     144    
-288   -160   
160    128    
-48    80     
48     16     
-80    16     
-208   -496   
96     912    
-192   -128   
48     -272   
-720   704    
-128   -240   
64     -336   
112    224    
-16    -128   
-16    -128   
0      -96    
192    -384   
0      176    
-192   304    
-160   -256   
-208   16     
-32    -48    
-288   368    
192    944    
-416   48     
-192   -224   
-144   -464   
80     -32    
-128   -128   
48     -224   
0      -128   
0      -48    
176    64     
-224   -576   
-256   -256   
-240   -16    
176    32     
-64    64     
-256   -624   
-896   -128   
-304   -128   
-128   144    
-112   144    
-240   -272   
-16    0      
176    48     
-224   -64    
16     0      
48     -112   
240    112    
-336   112    
192    224    
-512   -112   
208    -208   
-240   16     
-128   128    
-784   -128   
400    -64    
320    240    
-80    464    
-224   32     
-160   -160   
416    -112   
96     32     
144    -64    
-112   -32    
-80    96     
-288   -144   
64     0      
-128   -272   
-16    64     
-336   0      
128    80     
16     -96    
-32    144    
64     -240   
-256   48     
-112   96     
-80    -32    
576    432    
-336   384    
-64    144    
192    -128   
-64    224    
112    -240   
-16    112    
-448   -16    
256    80     
-128   -48    
208    16     
96     16     
-144   -64    
-144   128    
80     -80    
304    128    
128    64     
-80    16     
-64    -112   
-128   192    
-288   256    
384    224    
112    48     
272    16     
-112   48     
-176   16     
-32    80     
-80    -48    
16     176    
144    96     
240    -48    
-128   80     
96     192    
-416   -32    
64     -48    
-32    48     
112    112    
-96    -32    
-32    -80    
48     -96    
80     -48    
-80    208    
144    160    
-240   64     
-96    0      
144    -32    
0      48     
-64    -32    
128    -48    
128    112    
-208   -80    
48     -64    
-240   -64    
32     -224   
64     144    
-80    -80    
-160   0      
80     16     
64     16     
48     32     
80     176    
-208   64     
112    -128   
96     0      
192    16     
-128   -64    
-16    -96    
-144   -96    
-32    -96    
160    304    
224    224    
-48    96     
-48    80     
0      -48    
224    400    
32     224    
0      -128   
-80    48     
-400   -144   
208    128    
-432   -144   
128    272    
-48    192    
208    -16    
-176   -304   
240    240    
224    192    
96     -32    
0      304    
32     64     
64     -32    
-96    192    
-16    48     
-96    160    
80     128    
96     -80    
304    -48    
80     96     
-96    64     
144    64     
-64    -128   
-16    -48    
128    -96    
336    -208   
272    64     
192    32     
16     80     
64     32     
-224   64     
-96    0      
-32    -48    
-16    -1072  
240    32     
112    64     
64     112    
0      -16    
32     96     
16     0      
128    -32    
-96    -16    
80     16     
-112   0      
96     64     
320    480    
-512   -32    
224    32     
96     -384   
-48    128    
224    80     
144    16     
-416   256    
112    96     
-64    96     
-240   80     
256    336    
-192   32     
128    48     
112    48     
-112   16     
0      -144   
48     -48    
144    -352   
32     128    
304    80     
-176   -32    
-96    32     
48     96     
-144   0      
368    16     
-64    -32    
80     48     
-160   -32    
144    48     
432    192    
80     -96    
48     -80    
480    0      
-400   16     
224    -960   
-80    -48    
-48    -64    
-64    48     
128    96     
0      48     
-176   64     
-16    0      
64     -32    
192    128    
-896   -608   
864    -192   
-80    256    
-320   -112   
352    32     
-336   -704   
-176   128    
-432   -224   
368    -176   
560    144    
16     256    
-432   0      
320    160    
208    -16    
-464   0      
160    128    
-80    -144   
-112   64     
-464   -320   
336    48     
160    64     
-96    80     
272    -80    
-16    32     
-16    0      
80     16     
-80    64     
128    0      
16     144    
160    48     
64     0      
336    32     
-176   160    
16     -144   
96     96     
288    -144   
-16    80     
-112   -336   
160    48     
-96    -32    
288    48     
-176   144    
128    192    
208    48     
-32    -48    
32     16     
-64    0      
80     -64    
256    -112   
-64    0      
160    -352   
80     80     
160    64     
64     -48    
128    -16    
-80    48     
-16    64     
128    224    
32     32     
0      -400   
112    112    
48     352    
320    208    
48     112    
-96    160    
80     0      
-32    -48    
80     -240   
96     256    
128    16     
80     -672   
240    320    
-16    -48    
128    -176   
-144   -112   
80     -16    
112    -224   
256    48     
128    -32    
-32    64     
176    64     
64     -32    
48     96     
-16    -544   
32     -192   
64     -80    
-144   -48    
-48    64     
64     -48    
96     80     
224    80     
0      -64    
-32    -704   
464    800    
-432   -1184  
176    192    
192    -48    
112    112    
256    -176   
-224   -16    
128    -48    
384    384    
-48    -80    
176    -80    
-144   -48    
-48    -32    
-16    432    
0      -448   
96     208    
32     176    
32     -736   
16     656    
-352   -48    
240    -64    
16     224    
96     -224   
272    240    
-368   -208   
-16    -112   
-80    96     
128    -128   
128    48     
160    -32    
32     -32    
192    1072   
-160   -208   
64     -816   
64     112    
0      -96    
112    256    
-272   -128   
-32    -112   
-528   352    
-176   -272   
-1136  -96    
240    528    
-224   128    
0      -240   
-80    -64    
192    -160   
-160   -240   
240    -640   
256    -208   
224    64     
224    112    
-208   -208   
48     -128   
-160   -160   
0      -128   
-32    -48    
96     -192   
64     48     
224    128    
-528   496    
144    -64    
176    -80    
176    -448   
-192   48     
0      112    
64     -96    
-112   -64    
48     32     
0      -96    
96     16     
-464   -64    
128    0      
-1664  -128   
128    -112   
-16    -48    
-144   -240   
112    -304   
256    -704   
-192   48     
-16    48     
48     -64    
32     -64    
128    -32    
272    208    
-384   208    
-64    -96    
144    -32    
-240   704    
64     16     
240    -192   
144    -48    
-32    -16    
256    176    
112    48     
-16    -208   
0      -96    
-752   -240   
336    -496   
320    -80    
256    224    
624    144    
176    384    
32     -16    
-32    -48    
-112   576    
320    208    
0      288    
240    -208   
0      -128   
-656   -16    
160    144    
-544   80     
0      -224   
80     -144   
-64    0      
-112   64     
-32    -128   
96     -112   
-80    -160   
-128   0      
352    -176   
-48    80     
-512   -80    
-1280  -304   
-144   -240   
0      0      
-32    80     
32     0      
-80    -32    
144    -16    
-96    -80    
64     -224   
-64    16     
-528   592    
544    400    
-384   -144   
-80    64     
-176   352    
-192   288    
128    0      
-288   -64    
224    144    
-1168  176    
336    256    
-496   16     
-96    -144   
176    -144   
-32    128    
80     -16    
32     112    
0      -128   
144    272    
-224   64     
-48    144    
0      192    
80     -32    
-176   -80    
-160   -112   
128    0      
-560   -16    
-176   64     
-48    112    
256    192    
144    -144   
-16    96     
-320   -112   
-128   -32    
112    -32    
112    0      
-176   80     
32     0      
-144   -96    
-64    -64    
-80    336    
-336   240    
-64    48     
-320   48     
0      112    
-240   -160   
0      64     
144    32     
-128   288    
32     224    
64     48     
64     0      
-96    -96    
16     0      
-160   80     
176    -160   
-448   160    
-32    -144   
-208   -32    
112    -96    
16     192    
-16    160    
-32    -80    
-160   -32    
-16    448    
-224   0      
112    -80    
-176   96     
0      -128   
0      48     
-112   16     
-448   -256   
0      128    
-656   176    
-64    384    
208    -192   
192    -208   
80     16     
-32    -16    
-64    -48    
32     48     
-272   160    
-192   240    
-176   128    
-192   -64    
-96    0      
-176   -16    
320    112    
-288   32     
176    16     
-96    -96    
0      -16    
32     64     
288    320    
-336   112    
-48    -64    
192    16     
-48    48     
16     48     
-96    -64    
-144   16     
-192   0      
-16    64     
-512   64     
224    160    
-32    32     
48     32     
160    128    
16     32     
0      96     
-208   -32    
-48    -112   
256    176    
32     -16    
32     0      
-32    -16    
-64    -64    
128    64     
-336   -96    
0      64     
-80    80     
160    96     
-64    -32    
-160   -32    
208    -16    
32     128    
16     208    
-320   16     
144    0      
64     48     
112    112    
-112   -16    
-144   -80    
128    0      
-48    48     
272    128    
-128   -32    
48     48     
-240   112    
272    64     
-16    -32    
80     144    
-224   16     
96     -64    
128    -16    
128    -112   
272    96     
-192   80     
-96    -128   
-32    32     
16     96     
-272   -160   
400    -112   
-448   112    
144    160    
304    -16    
-224   -80    
288    96     
-80    80     
-336   -112   
176    -16    
-64    32     
48     80     
192    96     
-96    16     
176    -16    
-48    16     
-32    -96    
192    -64    
112    144    
-208   128    
-288   -112   
240    32     
256    208    
-32    112    
128    0      
288    -64    
48     32     
-432   272    
-432   -96    
240    16     
128    96     
336    112    
0      -112   
112    0      
-160   112    
-176   128    
-80    160    
240    64     
-144   16     
208    32     
-64    -48    
-64    48     
224    48     
-64    96     
48     32     
48     0      
240    160    
-208   48     
192    16     
-32    16     
272    224    
-192   32     
128    16     
-80    160    
112    112    
128    32     
-96    -96    
176    -64    
-144   128    
128    96     
-272   -192   
192    -352   
96     256    
240    304    
-48    -400   
16     144    
-160   368    
-64    -160   
16     48     
192    96     
144    64     
0      -160   
128    128    
-256   0      
80     176    
16     96     
256    -96    
-192   80     
96     0      
192    144    
80     128    
0      80     
48     0      
192    -48    
64     256    
-16    32     
64     -384   
-80    160    
112    -688   
448    96     
-256   112    
-192   -16    
48     -304   
304    192    
-208   96     
-64    -144   
-80    128    
400    -224   
-144   -64    
48     -336   
96     -256   
112    -224   
112    64     
112    -608   
176    -48    
0      -176   
176    -64    
-80    -240   
208    48     
80     64     
176    320    
-96    -144   
176    -128   
144    -192   
64     -48    
160    224    
32     -16    
96     16     
80     -416   
400    272    
-144   160    
-160   -448   
32     -96    
48     -48    
48     -80    
224    64     
64     80     
0      96     
128    -176   
256    -432   
256    112    
112    0      
-128   80     
16     -304   
-64    -128   
-32    -656   
64     80     
112    0      
256    32     
80     0      
208    128    
-32    208    
-16    -48    
64     0      
80     0      
144    192    
-144   144    
112    -64    
80     -192   
96     144    
-64    -64    
160    144    
-80    32     
192    80     
112    80     
16     160    
-80    -192   
0      -576   
-112   -144   
64     -304   
208    96     
208    -80    
224    96     
-96    32     
-16    64     
-48    -64    
32     112    
-32    -32    
144    -80    
128    -16    
112    240    
160    128    
192    -240   
-80    -64    
-96    -320   
0      -16    
-32    -32    
160    96     
32     32     
-16    0      
80     -336   
96     48     
48     -80    
96     -224   
32     96     
-48    0      
-272   -208   
32     0      
208    -208   
96     416    
352    80     
112    -224   
48     -224   
160    -352   
128    -448   
-192   -48    
208    -240   
-48    -48    
0      -576   
-224   -672   
16     -272   
-80    -160   
272    80     
80     16     
304    -64    
96     -272   
-96    128    
-208   -80    
-272   288    
144    -176   
-32    -32    
-96    -128   
-224   -16    
32     272    
320    0      
48     288    
464    624    
-528   256    
-752   -368   
112    -80    
192    32     
704    208    
256    -528   
448    480    
-768   400    
-480   96     
96     -432   
-16    0      
336    -112   
224    224    
0      -32    
-208   0      
-80    -16    
64     -32    
-96    32     
272    -160   
-64    160    
256    -368   
96     128    
80     48     
-240   16     
368    32     
-160   -112   
112    -272   
608    576    
-512   624    
-144   224    
-928   -32    
496    304    
80     192    
-208   32     
16     -160   
-16    -544   
16     -176   
-48    -1040  
160    432    
144    272    
64     256    
224    96     
304    48     
-304   -16    
272    16     
-144   -48    
80     -160   
-1488  -368   
160    -240   
-80    -144   
256    -80    
-320   -96    
96     -608   
80     336    
-192   288    
288    -176   
-400   -112   
160    -192   
-352   -304   
192    96     
-608   16     
32     -496   
-2256  128    
240    -144   
-64    32     
128    -16    
160    -560   
48     -464   
240    400    
-304   0      
480    384    
-288   -96    
16     -80    
-32    -224   
336    -32    
-400   64     
-32    -128   
-656   64     
-96    -112   
-144   32     
176    32     
112    -16    
288    -352   
96     80     
-816   80     
96     80     
96     160    
-144   32     
-304   -64    
-16    -32    
-112   -64    
160    -320   
-144   -160   
-64    32     
0      48     
160    -160   
0      80     
-144   -160   
144    -96    
192    80     
-48    96     
-144   -432   
-224   -256   
-416   112    
-48    128    
-16    -48    
208    0      
-544   -112   
208    32     
240    64     
-608   -128   
256    48     
64     32     
-64    96     
-176   -64    
-1456  32     
-48    0      
-624   16     
-32    16     
48     80     
16     0      
112    304    
-288   16     
-528   -112   
-160   32     
-288   -32    
-48    -96    
192    -128   
-16    -32    
128    160    
-160   -16    
-96    -16    
-592   -16    
0      16     
160    32     
-272   -16    
-16    -112   
96     80     
-368   -96    
-48    16     
-112   -16    
-240   32     
32     48     
112    80     
128    80     
-96    -48    
-192   -48    
-128   -16    
-288   16     
-720   32     
-208   0      
-80    32     
-128   0      
16     -16    
-224   -64    
224    -16    
-160   -16    
-160   -16    
-96    32     
80     0      
112    -32    
16     128    
-224   32     
16     16     
-240   -112   
80     48     
304    128    
-192   -32    
96     -112   
-32    96     
0      48     
48     48     
64     16     
-96    80     
32     -16    
-208   32     
-400   240    
-16    80     
16     -80    
-704   -176   
384    96     
-1088  -240   
480    96     
-256   -64    
-256   -160   
272    80     
-336   16     
288    96     
128    32     
-48    96     
224    240    
-672   -16    
352    32     
-128   32     
0      16     
768    544    
-656   400    
-192   -16    
-176   -208   
-176   -192   
272    32     
112    32     
32     -128   
16     -208   
-384   -128   
-240   96     
-64    -16    
-288   240    
48     80     
-16    16     
-96    0      
-416   -160   
112    32     
-16    -176   
-16    112    
-192   16     
-304   -144   
32     16     
-160   48     
112    -32    
-112   -96    
192    208    
-192   -96    
16     80     
-368   -80    
144    576    
-304   -336   
176    -32    
-160   144    
32     -960   
-112   352    
48     -32    
-128   0      
144    64     
176    80     
-176   16     
-16    -672   
-512   384    
592    -208   
-144   -224   
240    400    
-208   144    
-416   -896   
64     -144   
192    704    
16     240    
16     -128   
48     -320   
256    336    
-272   464    
-208   272    
0      -128   
-32    32     
144    0      
-144   0      
0      -192   
-240   -176   
80     -16    
-48    -64    
-128   16     
160    64     
96     112    
0      32     
16     -112   
16     -144   
272    96     
-256   112    
-128   0      
-224   160    
-176   -96    
-16    80     
64     -32    
96     -128   
-32    -160   
96     -16    
-32    64     
176    0      
64     16     
-64    96     
-32    32     
80     0      
224    128    
-336   0      
-32    32     
-32    112    
224    16     
224    48     
-16    96     
128    48     
-112   32     
96     0      
80     32     
80     48     
-96    0      
144    -256   
-80    -48    
224    16     
-304   32     
0      -80    
176    -32    
-176   208    
32     16     
0      64     
-16    16     
-16    -96    
16     -144   
48     0      
48     240    
-176   144    
128    -32    
112    -16    
-64    112    
-48    64     
16     32     
160    -48    
-16    32     
-32    64     
64     32     
96     112    
-48    -16    
-16    -16    
240    0      
16     0      
-96    -16    
224    -64    
48     144    
384    240    
-240   160    
128    0      
144    -32    
48     -320   
16     112    
0      64     
64     32     
-16    192    
80     -128   
-176   64     
384    592    
-224   192    
192    32     
288    16     
-144   208    
-32    32     
-48    -304   
144    -16    
32     -592   
288    64     
-48    -32    
32     32     
80     0      
128    160    
16     32     
48     144    
0      -48    
48     -32    
-64    -64    
96     -112   
-176   -112   
176    -128   
80     144    
160    -160   
176    224    
-160   32     
96     -64    
32     96     
-48    96     
128    192    
-64    0      
16     352    
208    256    
32     112    
48     144    
112    -48    
320    400    
-208   416    
-48    336    
368    -144   
-272   -1264  
288    224    
-288   352    
80     256    
128    176    
384    144    
736    528    
-128   352    
-176   -32    
-192   288    
96     48     
752    -192   
-176   880    
32     256    
-176   -16    
400    48     
848    0      
-176   336    
496    -160   
-16    -112   
512    -224   
336    160    
288    352    
0      144    
592    720    
-608   -576   
80     -128   
-256   16     
-96    -32    
272    432    
400    0      
112    112    
-64    -752   
16     0      
336    176    
-240   400    
160    288    
-144   -336   
432    384    
64     320    
-96    -192   
16     -624   
240    752    
176    -304   
-144   240    
32     320    
80     144    
208    -32    
-128   -64    
240    304    
-192   32     
80     -192   
256    304    
144    80     
80     0      
-32    -240   
208    -384   
-96    240    
224    -176   
192    -16    
-224   144    
304    -336   
96     -352   
208    128    
-64    -32    
224    -128   
-112   16     
-32    -96    
48     -304   
48     112    
176    -32    
224    96     
-64    -64    
48     -128   
32     48     
144    -128   
112    16     
176    16     
-80    -752   
64     48     
0      -320   
128    16     
-96    32     
-16    -288   
96     -128   
-192   -480   
352    -688   
144    -144   
48     0      
320    -192   
96     0      
-192   128    
80     16     
-80    0      
32     -16    
48     64     
304    320    
-528   80     
192    -96    
80     -144   
32     -112   
16     -112   
64     -208   
112    -128   
192    144    
144    -128   
112    -32    
-64    80     
-32    -80    
80     352    
-176   32     
80     -240   
-352   -128   
-144   16     
64     -160   
80     -32    
80     48     
-112   -128   
32     0      
96     -480   
304    -16    
192    -80    
-192   48     
16     64     
112    368    
16     128    
32     -224   
-240   16     
144    176    
-736   -112   
176    -128   
400    80     
160    -128   
144    -32    
128    -368   
32     64     
160    80     
48     64     
224    160    
-224   -112   
-320   -208   
288    16     
-240   48     
48     -64    
-704   -64    
80     128    
-48    32     
32     -240   
-16    -80    
96     64     
176    64     
144    -912   
48     16     
224    48     
176    48     
-96    -32    
32     -48    
112    128    
96     -48    
-576   -32    
-32    -48    
-1312  0      
160    0      
176    -32    
240    -112   
-16    0      
80     -192   
80     64     
0      32     
80     48     
80     96     
-48    -80    
0      16     
304    16     
-160   48     
-32    -80    
-96    32     
112    -48    
256    48     
64     -160   
112    48     
176    -304   
144    -192   
96     32     
-112   -16    
-352   80     
48     -112   
-16    -320   
-240   -112   
-144   0      
-32    -48    
-560   16     
112    -80    
160    16     
-16    -96    
256    48     
144    -224   
-176   -16    
-96    256    
272    -64    
-80    -144   
96     160    
-128   192    
-96    112    
-352   96     
384    176    
-1728  0      
32     -96    
80     -112   
112    64     
-176   128    
-1680  80     
-1968  -32    
240    144    
-736   -176   
-272   -288   
288    -176   
-80    32     
304    -32    
-128   272    
48     -224   
112    -48    
240    368    
48     -512   
336    32     
-464   80     
-304   -272   
-736   160    
-272   -80    
464    -304   
480    864    
-336   -144   
-160   -176   
256    560    
-112   0      
-160   -32    
208    432    
-544   -624   
-224   96     
-224   176    
16     -128   
48     256    
-48    -128   
16     -192   
-144   32     
-128   128    
48     128    
-256   -224   
-160   -112   
448    352    
-448   208    
224    128    
-288   96     
96     128    
-160   64     
-80    -16    
112    -96    
-96    -128   
160    0      
-576   -64    
-144   48     
-512   16     
-48    16     
0      96     
224    64     
-176   -16    
48     176    
32     -32    
112    32     
16     0      
-160   48     
-160   -48    
-48    -176   
-48    -160   
64     16     
-112   128    
-80    -80    
-16    0      
-720   -128   
-16    128    
-224   -160   
96     0      
-144   -64    
-80    32     
-16    32     
32     -32    
-16    -48    
48     0      
80     128    
-128   0      
32     48     
96     32     
0      64     
-320   -160   
128    368    
-112   128    
-48    -112   
64     -96    
-112   16     
112    64     
-208   32     
-160   64     
176    320    
16     80     
48     -192   
112    48     
-496   -112   
400    160    
-224   48     
96     -16    
-160   -208   
-128   -48    
64     -32    
-80    96     
-128   -32    
96     -32    
144    -48    
352    -64    
-160   -16    
80     0      
-128   64     
-320   -64    
96     -16    
-416   -32    
-112   208    
-96    384    
144    496    
-16    80     
400    16     
-160   112    
-96    -112   
176    -48    
96     144    
96     144    
-48    0      
64     32     
-80    -80    
80     16     
-448   -48    
0      -32    
-208   -112   
-240   -64    
176    16     
32     128    
-64    256    
-16    144    
16     -48    
-160   16     
32     80     
-48    -16    
304    112    
0      128    
-160   80     
-304   -96    
384    -16    
-144   -368   
-64    -336   
160    -192   
128    -16    
-160   32     
0      32     
-96    240    
112    272    
272    192    
64     80     
-64    48     
-272   0      
-16    48     
-256   -32    
16     0      
208    -64    
64     176    
64     336    
-192   64     
112    112    
32     64     
128    192    
64     32     
-64    464    
-176   320    
-16    -176   
32     0      
176    -80    
112    -16    
80     144    
192    112    
-352   464    
-48    -368   
192    80     
80     336    
160    -80    
-208   -144   
112    -128   
224    176    
-32    48     
336    288    
128    80     
-304   64     
-368   80     
-160   192    
144    -192   
336    -96    
240    -224   
224    240    
144    80     
-16    -32    
-208   96     
0      -1024  
448    464    
704    1040   
-304   -528   
-320   -112   
-384   720    
240    176    
80     -96    
464    176    
-352   -96    
192    96     
32     288    
64     128    
1184   -496   
160    -880   
352    -64    
16     368    
448    512    
-768   272    
-416   -112   
-16    144    
352    192    
576    80     
96     -288   
112    -64    
80     144    
-160   16     
48     64     
-64    64     
288    96     
0      112    
48     48     
64     -32    
304    160    
-304   -80    
-16    -144   
16     128    
0      -640   
48     128    
176    128    
112    -64    
-288   -144   
144    16     
0      32     
-160   -48    
48     -336   
128    -272   
-16    -176   
240    -112   
-160   208    
-64    -144   
176    48     
48     -848   
16     -16    
112    96     
-32    32     
112    16     
-112   160    
224    144    
112    0      
-64    -16    
-16    -48    
112    32     
224    128    
112    0      
80     -64    
96     112    
-16    -160   
80     176    
48     -544   
320    176    
-320   96     
80     96     
64     0      
128    -336   
48     -176   
208    144    
160    256    
-112   96     
128    16     
192    -112   
16     32     
-32    -80    
0      32     
176    -1280  
80     -80    
-48    -64    
80     -192   
-32    -144   
144    32     
-16    96     
208    64     
-64    32     
-16    112    
160    112    
128    -64    
64     -48    
-112   -112   
-80    32     
0      -384   
160    0      
144    -160   
144    160    
-48    80     
128    48     
32     16     
176    80     
48     112    
384    688    
112    48     
160    -240   
-128   -64    
-32    -288   
32     -160   
176    96     
0      160    
16     -304   
224    -32    
144    64     
288    112    
64     32     
256    32     
-32    128    
-16    192    
-96    32     
112    -448   
64     128    
0      -192   
128    160    
-128   80     
-80    0      
32     -336   
128    0      
208    -16    
32     -32    
128    -96    
160    48     
160    96     
-48    -32    
144    144    
48     -160   
64     0      
192    -32    
144    64     
176    -96    
64     16     
224    96     
-96    144    
16     0      
208    -96    
64     48     
-32    -48    
128    -816   
48     -64    
128    -784   
112    48     
-64    16     
144    80     
256    176    
-16    -112   
240    -576   
-208   0      
144    -48    
-112   32     
240    0      
48     -224   
-304   -48    
64     -96    
-32    -112   
112    -128   
144    -64    
-16    -336   
224    -240   
-80    32     
48     -128   
64     -272   
-224   -48    
192    -352   
112    -112   
288    -48    
80     -96    
-1008  -64    
288    224    
-448   32     
272    -32    
-160   64     
256    -144   
-48    -96    
16     -544   
944    576    
-688   -896   
272    624    
-208   -368   
-320   -848   
80     384    
1088   1392   
-640   -704   
-112   -48    
-208   -128   
304    64     
192    -528   
208    -96    
-208   112    
432    -32    
64     448    
-112   192    
-368   256    
480    -352   
352    -336   
-80    -176   
256    -448   
-1104  -128   
-288   -304   
-272   48     
-32    -240   
336    16     
336    192    
16     144    
288    -128   
32     80     
-208   -144   
272    -160   
-96    16     
144    -48    
256    64     
-176   -64    
-128   16     
-128   96     
-608   -80    
64     16     
-48    -80    
192    208    
112    80     
320    -80    
48     0      
0      -480   
-144   -240   
-64    0      
144    64     
-64    128    
112    -112   
-64    -176   
192    -16    
0      240    
0      32     
-816   0      
128    -160   
80     64     
64     -192   
32     48     
112    -144   
0      -192   
-16    -288   
112    -64    
-256   -48    
64     0      
-528   -16    
48     -48    
-176   -32    
128    -48    
-304   -32    
224    -64    
-32    128    
208    -160   
-32    32     
352    32     
-32    96     
32     -48    
64     0      
-112   -80    
128    -48    
-208   -80    
160    -16    
-128   -32    
16     -112   
-352   112    
-32    -16    
128    -16    
32     -32    
32     96     
-176   -96    
240    -64    
96     112    
80     16     
-80    -272   
32     -32    
-128   96     
176    16     
-48    48     
80     16     
208    144    
-672   -16    
0      80     
-512   -144   
224    192    
-160   16     
-32    -48    
112    16     
-688   32     
-112   -144   
80     -96    
80     48     
240    64     
-16    416    
112    -48    
240    -144   
-320   -80    
0      32     
-832   -240   
144    -96    
208    400    
-640   432    
-192   304    
-416   32     
-112   0      
160    128    
-128   128    
96     -96    
-240   -192   
32     -224   
32     32     
-80    48     
176    -48    
32     -64    
-240   -144   
16     64     
-160   -16    
-32    32     
208    112    
-256   -48    
64     -32    
48     -64    
-2240  112    
-112   112    
0      144    
320    336    
-384   -368   
-32    -256   
96     32     
112    272    
-416   -96    
304    -384   
80     384    
-128   -16    
-192   32     
-160   288    
-112   -48    
-1248  16     
176    48     
0      -32    
32     -112   
-192   128    
144    -176   
48     224    
-80    -32    
-96    16     
-64    -32    
-32    128    
-16    464    
224    -384   
-48    -64    
-240   224    
-16    80     
-64    -160   
-384   -368   
400    -96    
32     112    
80     96     
-80    -48    
-96    288    
112    432    
-336   -128   
160    -160   
-160   -176   
144    240    
-112   288    
272    -16    
-208   48     
32     -48    
-448   256    
-496   48     
80     -64    
-384   -384   
288    -336   
-32    -352   
512    288    
256    144    
-240   -256   
-64    32     
-240   160    
-128   -48    
-96    48     
-288   96     
80     32     
-832   -80    
224    96     
-112   16     
224    176    
-80    16     
160    -64    
128    -48    
304    80     
-160   16     
240    -32    
144    -32    
-512   160    
-144   0      
704    320    
-384   224    
-576   16     
864    240    
-96    48     
-496   -80    
480    -112   
352    192    
16     80     
-208   -48    
688    32     
-48    -64    
48     208    
-160   -80    
32     32     
-320   -16    
48     64     
-32    32     
-16    48     
80     32     
-32    16     
144    160    
-32    32     
112    16     
-16    48     
-336   -176   
160    -64    
-48    112    
16     -128   
32     48     
-240   80     
0      32     
208    -176   
-192   -96    
96     160    
-128   32     
240    48     
96     80     
176    48     
16     -80    
-240   -48    
80     -64    
160    0      
-64    80     
112    64     
-160   -32    
-176   -32    
144    16     
272    0      
224    160    
-64    16     
-80    -64    
-64    0      
112    96     
-240   32     
128    0      
144    80     
-96    48     
16     32     
272    96     
-464   16     
-144   -96    
400    -48    
-128   96     
-16    32     
32     80     
-16    64     
-160   32     
112    32     
144    48     
-32    64     
0      144    
0      -64    
-224   -192   
144    80     
-64    -128   
144    48     
-64    16     
96     -64    
32     96     
48     -192   
80     -160   
-48    32     
-16    112    
80     16     
160    16     
0      0      
64     144    
-112   32     
112    64     
64     -48    
48     -32    
192    160    
-208   16     
32     48     
432    544    
-384   320    
-64    0      
80     64     
112    -80    
400    336    
-176   160    
64     16     
128    -112   
368    -32    
128    176    
-64    -48    
-176   80     
-16    32     
16     96     
0      48     
48     0      
32     -32    
96     96     
128    192    
-96    256    
112    112    
256    32     
160    0      
160    -32    
80     64     
-144   -304   
-48    -288   
96     -144   
16     144    
-112   144    
128    48     
64     16     
16     32     
48     48     
32     80     
-240   -16    
160    -64    
80     16     
240    -16    
-80    -48    
32     -384   
176    -112   
96     -64    
176    80     
-16    -96    
-48    96     
192    352    
-80    224    
-96    48     
352    272    
-144   -128   
0      -864   
-128   -144   
128    432    
16     -176   
64     -464   
-16    96     
80     -16    
128    96     
144    32     
-80    -32    
64     -128   
32     64     
-144   32     
144    -80    
32     16     
48     64     
304    272    
224    32     
48     32     
-112   -240   
0      224    
32     -480   
112    48     
272    0      
208    -224   
-144   16     
160    288    
288    32     
272    -448   
-288   -480   
-160   -80    
-416   416    
208    -192   
-48    -144   
112    -304   
480    -96    
96     -48    
416    -48    
-112   -160   
-48    192    
32     80     
64     224    
192    -16    
256    112    
80     144    
16     240    
256    400    
96     16     
-368   64     
464    32     
-128   16     
-64    -448   
128    -256   
-176   16     
-96    64     
-176   -16    
416    176    
64     80     
400    160    
224    32     
224    96     
-128   0      
-80    -192   
80     -96    
128    32     
0      256    
-160   144    
144    32     
208    0      
48     64     
224    64     
48     304    
16     -96    
80     32     
128    128    
80     112    
64     144    
96     -208   
0      -48    
112    -160   
80     32     
16     80     
176    16     
-160   144    
208    -880   
48     -128   
64     -320   
-64    -560   
48     128    
144    0      
192    32     
-80    -416   
304    -240   
32     176    
128    160    
368    -48    
-32    -144   
16     -112   
-48    128    
0      -224   
128    -16    
-144   -160   
112    112    
160    64     
32     -80    
160    -144   
32     -256   
80     -32    
32     -64    
96     -16    
16     96     
144    0      
240    -80    
272    144    
-128   -16    
96     160    
176    16     
48     -80    
-32    -96    
160    -80    
-64    -16    
32     -48    
304    80     
-208   192    
-64    -64    
144    -2032  
-144   -96    
112    -48    
32     80     
0      64     
176    -48    
-384   -144   
144    -144   
32     -64    
160    0      
96     80     
-80    -128   
0      -144   
0      -144   
32     -176   
160    -1200  
-64    64     
240    0      
96     -32    
96     -32    
128    16     
-48    352    
-272   -96    
-352   32     
0      48     
-1408  16     
240    48     
-48    -16    
240    128    
32     -80    
-48    -704   
-80    -176   
96     336    
80     464    
144    304    
-208   -272   
-48    -224   
304    144    
-48    -32    
208    -32    
-336   -352   
144    240    
-256   64     
144    -112   
224    288    
112    400    
64     -16    
336    -608   
48     -16    
-256   -32    
-192   48     
-32    -288   
-208   -176   
32     144    
192    176    
-240   144    
16     -240   
-256   -64    
0      112    
64     144    
128    -176   
48     32     
64     -1008  
0      16     
-32    -64    
224    -16    
64     16     
128    112    
-256   64     
0      64     
-592   -96    
-96    -80    
32     -112   
144    -176   
80     128    
208    16     
224    96     
16     -160   
32     16     
-384   128    
-80    -80    
-272   0      
144    -16    
80     0      
96     0      
-144   16     
0      -64    
-432   48     
96     -48    
-16    32     
48     16     
256    80     
-528   16     
-320   -80    
-240   -16    
80     48     
16     512    
176    -64    
0      -160   
352    544    
-976   80     
224    -16    
-32    -64    
352    -384   
144    64     
-752   80     
-352   -160   
272    320    
-688   48     
-192   -64    
-64    64     
16     -16    
-320   -48    
-48    -48    
96     -128   
48     -64    
-592   -48    
-320   80     
-112   128    
304    272    
-1072  -224   
96     -96    
208    256    
272    288    
-656   -96    
208    -64    
-224   16     
-896   16     
144    -32    
48     0      
-64    48     
16     -16    
48     80     
-160   -208   
48     -48    
-416   96     
256    32     
0      -64    
0      160    
-16    -16    
64     112    
-336   112    
-192   -96    
112    32     
-1008  160    
-176   48     
-16    -80    
144    80     
-160   -32    
208    16     
32     96     
-32    48     
0      32     
-112   0      
-288   -48    
416    336    
-592   16     
192    -48    
48     -80    
-224   -112   
-144   32     
-176   -16    
256    144    
-256   -32    
-48    -80    
64     -64    
240    16     
-80    144    
-208   -224   
176    32     
-208   16     
128    32     
-288   -128   
0      16     
-864   -80    
-32    -16    
192    -64    
96     48     
128    16     
-192   -80    
-16    -32    
144    48     
-48    16     
32     -32    
-64    -208   
-80    -240   
16     -112   
-48    -192   
-48    -208   
-544   32     
176    176    
-80    -96    
-32    16     
-80    16     
-80    144    
-96    -48    
-80    -128   
16     16     
144    96     
32     96     
-32    -80    
-16    144    
-96    64     
64     80     
-48    -48    
96     -32    
-272   64     
128    -352   
-48    -336   
-32    96     
-48    224    
-80    -128   
176    16     
-64    112    
112    128    
-16    16     
240    32     
64     0      
640    800    
-528   384    
-96    -528   
-208   -240   
32     256    
64     0      
64     -272   
160    16     
-32    48     
96     -224   
128    320    
-16    -80    
-240   0      
-32    96     
-384   -16    
-32    128    
-336   0      
48     -64    
176    80     
208    224    
48     48     
-192   -128   
-336   16     
192    -976   
224    352    
80     192    
80     -192   
96     176    
96     32     
16     -48    
-144   48     
-64    -80    
96     112    
16     128    
-208   -32    
16     32     
-64    96     
-64    192    
-48    80     
112    -240   
256    448    
-64    -304   
112    -352   
80     272    
-96    -96    
16     64     
-240   64     
64     0      
96     160    
-112   -272   
-48    -128   
240    336    
224    208    
16     144    
80     -160   
-240   128    
-192   48     
-64    -144   
64     288    
-48    -112   
80     320    
-48    -64    
48     64     
112    0      
128    -96    
32     112    
-96    256    
64     256    
224    400    
-224   448    
128    224    
16     128    
64     -80    
240    160    
80     320    
-352   80     
32     16     
96     96     
224    208    
-96    48     
208    -96    
-16    -48    
-96    -32    
-64    -80    
16     224    
448    304    
144    272    
-544   208    
-320   144    
-352   96     
128    -48    
32     64     
272    -64    
288    112    
16     192    
-112   32     
-320   -144   
-16    144    
-176   352    
-208   -32    
-16    -144   
464    288    
-704   112    
-288   96     
160    -64    
16     80     
32     96     
176    64     
-144   80     
16     32     
336    128    
-80    64     
192    80     
0      -32    
96     -256   
-64    -176   
80     336    
-128   0      
48     320    
176    64     
320    -32    
-48    48     
80     -288   
16     32     
48     112    
64     240    
256    0      
-208   96     
128    -96    
352    48     
16     -32    
-64    240    
256    -16    
80     0      
16     -48    
-16    -192   
-160   -64    
112    -1136  
112    224    
-64    144    
48     48     
-96    -96    
288    144    
64     16     
176    64     
80     16     
32     64     
32     -32    
64     -128   
96     32     
-64    -48    
128    48     
336    16     
-144   144    
-64    -912   
32     16     
16     96     
48     -48    
32     32     
16     112    
64     16     
112    0      
-80    -16    
32     0      
192    304    
96     112    
144    -144   
96     -128   
112    0      
80     -96    
48     240    
160    -64    
-80    48     
32     16     
176    32     
-192   -112   
224    128    
352    464    
-64    288    
48     64     
-16    -16    
128    64     
-192   -192   
96     -368   
208    -608   
304    80     
208    16     
-128   0      
-48    -448   
32     -192   
16     176    
96     -80    
224    -112   
112    -16    
144    96     
240    48     
-32    304    
64     -176   
64     496    
272    -112   
-112   -352   
-32    208    
112    -32    
48     80     
-112   0      
368    -224   
128    112    
-32    -112   
48     32     
-16    192    
-48    -144   
48     -96    
192    -224   
192    96     
32     -32    
64     16     
-64    -96    
144    -240   
176    128    
160    -256   
96     -480   
208    -32    
-48    -512   
-64    -176   
-96    -128   
80     -32    
80     192    
-256   -112   
96     0      
64     -48    
112    -496   
48     80     
224    -48    
128    -48    
128    -256   
-16    -16    
-96    -256   
304    -144   
96     16     
304    64     
64     -32    
144    -672   
-112   -64    
-64    -32    
176    32     
144    64     
176    112    
64     -256   
-80    32     
192    48     
320    208    
-496   -16    
128    0      
48     -48    
128    -544   
16     -48    
-128   -336   
-16    -32    
144    32     
208    144    
16     -32    
176    64     
128    -48    
112    64     
-176   0      
224    160    
-912   -192   
288    -176   
-80    32     
288    48     
32     -64    
128    -304   
464    176    
-496   -288   
144    -176   
-128   -176   
208    64     
128    128    
-144   32     
-32    -112   
-48    -112   
-384   240    
-528   128    
304    -192   
80     -64    
-80    0      
320    16     
320    256    
-128   -400   
-80    -64    
192    0      
-336   -256   
432    -112   
496    192    
-208   -64    
560    0      
-224   16     
-64    -160   
-272   -32    
208    48     
-768   -256   
448    -48    
224    80     
-672   -384   
64     16     
48     -48    
720    208    
-48    64     
80     -112   
256    160    
-400   -16    
-256   -176   
0      48     
-96    -16    
16     -112   
0      -16    
64     -272   
48     64     
224    -96    
16     32     
-96    -480   
128    16     
-176   0      
320    256    
-160   96     
-176   -32    
-32    0      
80     -128   
-48    0      
272    -32    
-16    32     
64     -112   
-32    -48    
224    -32    
128    0      
48     -608   
64     -112   
-112   32     
48     16     
80     16     
16     -32    
-48    -16    
208    -32    
-112   32     
0      16     
96     32     
288    -32    
16     48     
32     -176   
0      0      
-432   -16    
80     -32    
80     128    
208    448    
-688   -96    
176    80     
-176   -16    
16     -144   
-144   112    
-32    -304   
176    144    
448    272    
368    -48    
-2544  -288   
-32    -240   
144    352    
224    -144   
-80    144    
-672   -48    
-32    0      
-32    0      
-80    -192   
96     64     
-272   32     
-416   -400   
432    352    
-208   -160   
208    -16    
-592   0      
-352   0      
224    208    
-736   -624   
-208   128    
-448   208    
80     -96    
272    144    
32     -256   
448    464    
-416   -16    
0      -192   
224    128    
-256   -32    
112    -16    
-32    -80    
128    432    
-384   -544   
-224   64     
-16    144    
-384   -64    
-80    48     
-208   80     
-304   -32    
112    -32    
-32    352    
-240   -464   
128    0      
48     512    
64     144    
-80    -336   
80     224    
0      144    
272    64     
0      96     
32     -32    
-64    96     
16     -192   
0      176    
-976   16     
336    352    
240    272    
-112   -64    
-336   -160   
-48    416    
240    528    
-208   32     
0      32     
-192   64     
48     32     
-160   16     
192    16     
-96    32     
-112   112    
-208   32     
-192   -112   
-32    -368   
80     48     
-48    -160   
-112   -112   
0      -112   
48     32     
0      -64    
-32    -32    
-64    0      
-224   -48    
32     0      
32     -16    
48     96     
-400   -160   
96     -96    
-496   -128   
-32    0      
64     32     
112    112    
80     304    
-320   112    
-16    -80    
-16    0      
-160   32     
64     128    
0      64     
-48    -16    
176    0      
-512   -160   
288    -544   
-288   -304   
112    32     
48     48     
-304   176    
-32    16     
64     368    
16     112    
-16    144    
-96    160    
-64    0      
96     32     
96     16     
-64    400    
-336   336    
-32    64     
-144   48     
-352   544    
16     288    
-64    -96    
-96    144    
304    -64    
-64    -96    
272    -368   
-48    0      
-96    -112   
16     -464   
48     16     
576    400    
-352   96     
-64    16     
-528   -32    
-112   -16    
-64    -144   
-192   -400   
224    -160   
16     -16    
-48    160    
224    80     
96     16     
48     -80    
32     32     
-192   48     
-16    32     
-288   -304   
208    -32    
-48    288    
304    16     
96     224    
176    -96    
224    -80    
-224   -16    
272    64     
-96    -16    
16     128    
-272   256    
320    464    
-96    96     
128    -48    
-240   160    
-16    48     
128    -48    
-48    -32    
112    112    
-112   368    
144    304    
-256   -480   
208    -208   
-80    -32    
-240   -16    
-96    80     
-80    448    
64     112    
160    -64    
-112   -256   
-16    -144   
-176   16     
80     0      
48     -32    
-96    -160   
80     96     
144    -16    
16     32     
-32    0      
48     128    
80     96     
144    64     
-48    32     
176    32     
128    288    
0      -144   
-32    -96    
32     0      
64     -32    
-192   128    
128    112    
112    672    
448    320    
-16    32     
-64    80     
176    304    
48     608    
32     -16    
48     -912   
144    240    
0      -160   
-128   -16    
-64    -48    
112    -16    
176    -352   
-32    208    
48     0      
0      -32    
-64    144    
-160   -192   
-160   0      
144    -64    
32     -32    
240    -816   
32     128    
0      -16    
224    -160   
176    64     
112    192    
112    176    
-112   144    
-64    0      
32     0      
112    64     
-80    -256   
448    -528   
256    -192   
192    272    
-96    -208   
-16    0      
192    64     
112    48     
288    32     
-96    -32    
-80    -144   
-80    -48    
-160   112    
64     16     
208    176    
-16    112    
-176   32     
320    -32    
128    64     
0      -64    
64     128    
-64    -400   
48     -48    
-48    32     
144    64     
-64    -80    
176    16     
240    464    
-240   48     
-64    -144   
160    16     
-64    -32    
32     -112   
208    32     
112    -64    
64     80     
0      -272   
112    0      
-176   48     
-32    112    
144    240    
144    -32    
80     96     
-144   32     
48     64     
-32    64     
64     32     
256    0      
128    128    
-32    -64    
80     64     
64     -64    
112    64     
-96    -16    
128    32     
-112   -128   
368    112    
64     0      
16     64     
-64    16     
-80    32     
304    96     
336    -32    
-16    64     
112    -144   
-16    0      
128    -16    
-16    80     
64     -272   
-192   -32    
272    112    
-160   16     
0      32     
96     48     
0      48     
880    480    
-528   208    
288    -224   
-208   -48    
128    -80    
448    272    
-240   80     
112    -160   
224    -128   
96     16     
272    -112   
64     -64    
240    64     
48     -48    
272    64     
160    -112   
96     48     
96     -96    
-48    80     
32     -160   
256    32     
-112   -144   
160    32     
368    -16    
-16    -16    
80     -208   
336    64     
-288   128    
336    96     
-256   80     
400    464    
-480   240    
-80    -272   
512    0      
160    -112   
160    0      
368    -16    
48     16     
-96    -80    
400    128    
-288   16     
208    -736   
-48    112    
144    -384   
0      -352   
16     -80    
80     -272   
32     -128   
0      224    
400    -48    
-256   -160   
80     -160   
32     80     
272    192    
-160   -432   
32     -160   
96     80     
32     -192   
80     96     
-176   -48    
304    -656   
128    -16    
-64    -112   
352    -272   
-288   -48    
304    -880   
-64    0      
256    -320   
128    112    
96     -144   
-160   64     
-96    -48    
-64    32     
-240   800    
-336   -1280  
80     496    
-80    -80    
128    -528   
288    256    
320    0      
-80    -208   
-240   -144   
176    48     
-144   224    
0      -112   
96     -96    
720    176    
-208   16     
-304   -192   
160    -448   
-576   -784   
-64    -192   
-16    32     
160    -128   
96     -384   
128    -416   
16     -48    
208    0      
48     0      
256    16     
-80    -32    
-80    -32    
32     -48    
-336   -336   
48     -560   
32     -80    
0      96     
80     48     
256    64     
-80    96     
0      -32    
160    -112   
144    -432   
-48    -64    
0      -224   
64     -96    
-96    -16    
-64    -112   
16     -16    
192    64     
-624   96     
320    192    
-1104  -544   
176    -112   
-32    160    
-16    -144   
0      -16    
0      -672   
-112   -112   
160    -256   
224    -112   
16     -32    
192    176    
-144   304    
64     96     
-320   64     
208    -48    
-496   -32    
144    0      
-1088  112    
96     112    
192    192    
-144   48     
-96    64     
192    -528   
16     -32    
80     16     
192    -80    
32     80     
16     -128   
0      528    
112    0      
-96    -128   
80     0      
-32    -32    
32     -176   
80     -16    
-128   -208   
272    -224   
-560   96     
96     112    
-688   176    
256    16     
-400   -128   
160    -16    
144    256    
192    96     
-304   96     
176    48     
64     48     
-128   -144   
0      -160   
160    80     
0      112    
-224   64     
288    48     
-16    96     
32     144    
16     -256   
-32    -288   
-64    -128   
-160   -128   
80     -432   
112    -160   
160    352    
-1520  128    
32     272    
-1408  -480   
64     64     
80     48     
-624   32     
-192   576    
-480   -128   
-128   48     
64     -128   
-208   128    
240    144    
-32    368    
-304   0      
96     -80    
320    -32    
112    32     
-32    -160   
-304   -16    
128    -32    
400    400    
-624   368    
-576   176    
-176   80     
-1632  528    
-160   576    
-160   -144   
-544   0      
-240   -384   
-240   224    
-288   -80    
272    400    
96     432    
-208   192    
160    0      
592    304    
-96    192    
-64    -64    
16     96     
-16    -32    
144    32     
-144   384    
-160   112    
80     -368   
80     64     
-224   -336   
-48    -64    
-448   -256   
448    -528   
-112   0      
240    448    
-192   128    
-160   -160   
-112   -368   
-368   -336   
16     -272   
-1568  -208   
-64    80     
128    -240   
144    128    
288    -32    
-64    80     
192    400    
-640   176    
160    -64    
-208   -352   
16     -112   
-112   48     
176    208    
-336   368    
-176   -240   
-416   -208   
576    720    
-432   -32    
-80    176    
0      -144   
80     64     
128    288    
0      -336   
64     -288   
32     288    
-160   208    
-272   -320   
128    -128   
16     16     
128    544    
-448   -320   
80     160    
-336   0      
16     16     
256    352    
-432   -448   
208    288    
64     208    
240    -336   
-16    320    
-48    -48    
112    144    
-160   -112   
-48    304    
128    128    
-208   48     
256    96     
-1040  32     
-112   0      
-64    -192   
32     352    
48     160    
-112   -48    
-144   0      
-64    -32    
96     80     
-48    -80    
128    0      
-32    -48    
384    368    
-544   0      
0      48     
-512   -160   
32     16     
0      80     
-112   192    
64     576    
48     368    
-96    -48    
-64    -384   
128    -128   
0      32     
112    -32    
0      -112   
176    144    
-368   80     
32     16     
0      -128   
-80    -128   
64     432    
-160   64     
176    -16    
96     48     
192    80     
-16    -16    
240    -64    
-64    64     
-16    16     
-352   -96    
0      -224   
-144   -32    
-80    96     
-112   64     
16     -48    
-64    32     
64     48     
48     64     
64     0      
80     -16    
0      80     
112    64     
-240   0      
-128   32     
-64    0      
48     -144   
-80    112    
-208   -80    
-240   -160   
224    -16    
176    48     
96     160    
160    80     
-224   0      
-96    -48    
-48    -96    
96     -32    
96     80     
112    80     
128    80     
-144   -48    
160    0      
16     16     
112    96     
112    32     
-32    0      
32     64     
-80    48     
32     32     
-32    -16    
48     -96    
192    64     
32     64     
-160   -128   
0      48     
-48    32     
48     0      
192    160    
32     160    
176    32     
-224   64     
32     16     
64     -16    
-112   -32    
128    64     
32     48     
176    48     
-208   -64    
208    96     
-224   0      
-112   -608   
80     48     
112    80     
128    -16    
48     64     
208    384    
144    176    
160    -112   
32     208    
-160   -96    
-176   -192   
144    128    
-336   -96    
304    144    
-320   -64    
208    -448   
-240   -96    
384    -32    
544    400    
-304   192    
-32    -128   
288    80     
-32    32     
272    144    
-368   -272   
128    -384   
272    -128   
-32    48     
160    32     
80     -176   
16     -560   
-256   -176   
272    192    
32     432    
-16    80     
-48    -48    
192    -16    
80     160    
-128   16     
-64    144    
-80    -80    
-48    -32    
96     -320   
160    80     
144    96     
-96    -96    
48     192    
-112   -752   
80     320    
160    -240   
-48    176    
176    -48    
48     -64    
64     96     
-160   576    
112    0      
448    -288   
-96    128    
-192   -240   
16     -112   
-128   448    
144    -528   
160    640    
160    512    
-80    -448   
528    80     
-16    -160   
272    592    
-224   128    
64     240    
0      -272   
-32    -112   
144    -80    
64     -32    
-80    176    
64     -112   
96     96     
-16    0      
-16    48     
192    -256   
96     -80    
-32    -48    
-32    32     
-160   -128   
176    -80    
-32    -16    
0      48     
-80    32     
64     -80    
240    80     
-160   -48    
160    240    
48     -432   
48     48     
192    -32    
416    192    
-256   112    
32     176    
-32    32     
80     64     
-16    0      
-16    0      
48     128    
96     -128   
144    -64    
192    -592   
-80    112    
16     -128   
192    -32    
112    32     
208    160    
-288   112    
64     0      
128    128    
64     112    
112    48     
16     -32    
112    0      
0      -160   
-32    32     
96     -176   
16     32     
0      -64    
192    144    
128    -144   
-32    -64    
-96    -144   
160    160    
-336   128    
64     -560   
272    -432   
176    -16    
80     -288   
-48    -160   
32     -16    
-16    -16    
128    144    
0      0      
256    144    
304    -160   
192    -1360  
304    16     
16     -32    
128    128    
-432   144    
32     -352   
-16    -80    
0      -208   
-48    32     
64     -160   
176    0      
128    64     
0      96     
112    256    
0      -16    
80     16     
96     160    
272    -224   
48     144    
-1200  -80    
0      -240   
80     -128   
256    -16    
-128   -112   
-80    -464   
-32    -144   
-64    -2304  
304    -64    
304    144    
-64    16     
48     -432   
-160   -128   
-48    -192   
-16    -240   
-128   0      
112    224    
320    192    
48     -48    
208    -176   
0      -48    
16     -128   
96     -144   
96     -160   
64     -352   
64     256    
-16    64     
144    256    
-48    224    
80     128    
80     -32    
64     -16    
-336   32     
-112   -112   
16     -32    
48     -384   
-112   -192   
400    -368   
160    -112   
128    -1536  
-224   -128   
64     144    
64     -32    
-832   -768   
400    -1872  
-96    64     
272    272    
-592   -672   
-16    112    
96     800    
528    1024   
144    -272   
-352   -896   
48     -352   
-208   -640   
288    496    
288    -32    
272    -368   
-64    192    
304    48     
-288   -752   
48     96     
-480   0      
-64    -384   
-256   0      
464    -16    
-352   -336   
32     176    
-224   704    
-320   -816   
224    -352   
-384   -176   
592    -1168  
464    544    
224    320    
416    -400   
-256   592    
-320   64     
-64    -576   
-496   -768   
-96    128    
-256   464    
176    -928   
128    128    
-16    -208   
256    224    
-64    -96    
-128   -16    
-128   48     
-80    -256   
-96    160    
176    -32    
-96    -336   
80     208    
-240   -48    
64     -192   
272    448    
144    -80    
-16    48     
-288   -336   
96     -16    
-208   64     
64     0      
-16    48     
352    80     
-608   16     
368    112    
-192   32     
48     16     
-80    16     
0      -176   
224    -64    
64     -160   
-48    -144   
-928   -64    
400    16     
-16    176    
-912   160    
-320   64     
128    -80    
-224   32     
112    -128   
-64    -96    
-32    -240   
32     160    
-1456  64     
80     -464   
-608   -176   
-16    -16    
-64    -16    
-336   48     
-144   48     
-304   48     
-16    -112   
272    352    
16     64     
32     96     
-64    32     
128    -16    
-96    32     
-688   -64    
64     48     
-32    -32    
48     0      
128    32     
128    32     
96     112    
-208   -48    
-96    0      
144    64     
16     64     
-1296  48     
16     256    
-256   48     
80     0      
-128   -16    
0      -64    
-32    -16    
-144   48     
0      0      
-16    -32    
32     -96    
-192   -16    
-144   16     
96     32     
-48    64     
-432   -304   
160    -624   
224    160    
-16    160    
16     -48    
240    48     
-144   -48    
128    144    
-208   -48    
-128   192    
-336   160    
-192   -224   
96     16     
-48    80     
-160   -96    
-400   -32    
-64    80     
-2256  -48    
32     48     
0      -112   
176    96     
-288   16     
-80    16     
112    -16    
96     32     
-80    48     
48     160    
-208   -240   
-144   -64    
-96    304    
-128   128    
112    48     
-560   64     
80     48     
-16    -80    
128    64     
64     112    
192    64     
-176   0      
-64    -16    
-48    -64    
0      -48    
144    112    
16     64     
-112   32     
-96    -16    
0      80     
-368   16     
128    64     
-32    48     
-160   -80    
96     16     
-112   16     
96     -16    
-176   32     
-224   -48    
80     16     
192    96     
-112   64     
-224   -16    
-192   16     
0      48     
-64    -64    
80     64     
-400   -32    
0      0      
-32    -32    
-32    16     
-96    -16    
304    160    
-192   128    
48     96     
-80    -16    
-112   -32    
112    48     
-192   -48    
80     64     
-272   32     
144    112    
-320   -64    
336    32     
-400   96     
208    176    
-144   80     
16     -16    
288    112    
272    288    
96     112    
-640   -336   
320    -64    
-32    80     
80     128    
-112   -16    
-64    -32    
240    288    
-320   176    
80     -432   
144    128    
128    96     
288    48     
352    192    
-208   192    
-1408  -656   
1008   1280   
-336   640    
-960   -448   
224    160    
-528   16     
368    -192   
160    -416   
352    112    
-160   400    
128    -144   
-112   -48    
-400   304    
336    64     
112    400    
176    128    
128    192    
80     320    
64     128    
0      320    
-16    48     
64     0      
-224   -224   
192    -384   
-16    0      
-224   -160   
288    -160   
64     96     
-80    -336   
48     -96    
0      16     
-240   64     
80     -64    
-112   0      
160    16     
96     240    
64     144    
112    -32    
0      0      
-16    48     
-48    160    
176    128    
288    160    
64     -64    
-80    -32    
112    80     
-336   64     
64     128    
-64    16     
224    48     
128    96     
-32    -32    
128    0      
96     32     
240    -48    
288    112    
0      32     
144    16     
-48    112    
96     16     
208    128    
-304   128    
144    16     
-176   -32    
-208   -528   
64     96     
64     -16    
48     96     
32     32     
112    80     
-16    112    
32     0      
80     32     
112    48     
144    48     
-32    80     
-176   -112   
112    0      
96     80     
-96    -416   
16     16     
160    -128   
32     16     
112    112    
0      112    
-64    128    
112    -96    
48     -32    
144    64     
-64    -48    
144    96     
-192   -80    
336    -432   
224    176    
-64    48     
96     192    
-288   240    
-192   -32    
112    -32    
160    0      
144    16     
176    128    
-144   -16    
48     -16    
-16    -32    
400    32     
128    112    
-80    16     
-32    160    
-224   -96    
320    0      
-48    -16    
176    48     
64     80     
0      112    
-64    -96    
224    32     
0      112    
144    96     
-48    -160   
16     -64    
272    192    
-304   176    
320    512    
272    208    
-80    16     
-240   -432   
0      -64    
32     -48    
176    112    
16     -224   
-64    -544   
112    -624   
112    -144   
224    16     
32     -240   
-16    -112   
-16    32     
48     128    
96     -64    
64     -16    
160    32     
16     128    
112    -96    
-176   0      
-64    64     
304    176    
-256   -208   
128    -224   
48     160    
176    -192   
80     96     
288    32     
0      -240   
-224   272    
192    -80    
160    80     
0      336    
96     -192   
128    -128   
160    176    
240    128    
-48    112    
64     80     
176    912    
-144   -64    
-16    -112   
-320   -272   
112    128    
112    -176   
-80    128    
240    16     
-64    48     
112    -160   
-176   80     
80     64     
-176   976    
-48    160    
48     -512   
-384   112    
32     -80    
208    -272   
-160   -112   
272    368    
128    160    
336    32     
176    -80    
-176   160    
160    -128   
-240   -112   
448    96     
512    -288   
-352   -16    
848    448    
-512   -608   
-160   -416   
-48    -432   
48     112    
64     96     
464    -416   
336    -176   
608    80     
16     16     
-96    -32    
32     -192   
-96    80     
128    -144   
-96    32     
-512   256    
176    288    
16     -80    
-64    -96    
240    -64    
-64    -416   
80     16     
0      -32    
256    16     
80     -48    
32     32     
16     -160   
-80    64     
0      -144   
224    -16    
-816   0      
32     -144   
32     32     
192    -112   
144    -80    
-160   -96    
160    -32    
96     -128   
-160   -16    
64     -16    
464    80     
-48    -80    
-16    -16    
144    48     
-48    -192   
-160   -48    
16     0      
-480   -128   
112    32     
192    80     
80     48     
80     192    
240    48     
-128   -192   
-64    -112   
192    80     
-112   64     
-16    208    
96     16     
176    -160   
-320   -176   
96     -96    
-848   -80    
80     32     
112    32     
224    -80    
224    224    
-128   -416   
-48    48     
160    -896   
144    -32    
64     -96    
48     0      
16     -64    
48     0      
-144   48     
112    -64    
-352   -48    
16     16     
0      -48    
0      -48    
128    48     
-16    -32    
-16    -48    
176    -240   
-144   -32    
128    -192   
224    -80    
32     144    
208    -96    
-32    -96    
112    -224   
16     64     
208    -16    
-400   48     
16     -32    
-160   128    
32     -224   
112    48     
64     -384   
80     -384   
224    -704   
192    304    
64     224    
112    -64    
-64    -208   
48     -64    
-128   32     
96     64     
-480   -80    
96     0      
-96    80     
16     -80    
-16    0      
-112   -224   
272    16     
-48    0      
32     32     
-16    16     
-16    16     
-112   176    
-80    16     
-64    0      
80     64     
-32    -16    
192    32     
-128   -48    
80     -304   
160    32     
112    32     
-80    16     
16     -16    
-32    -32    
64     48     
-32    16     
-16    -48    
224    48     
16     64     
80     -32    
-112   32     
-176   -48    
80     -32    
-32    -64    
304    144    
-1072  -80    
-608   64     
-112   16     
-2096  -16    
16     48     
320    128    
-224   0      
96     -32    
32     32     
0      -96    
32     16     
-304   -112   
0      16     
-544   -112   
0      64     
-176   -144   
-336   -48    
-64    128    
96     48     
0      16     
-336   16     
-160   16     
-208   16     
-64    272    
-432   176    
16     96     
16     272    
-32    192    
-16    -640   
-80    432    
80     112    
64     -352   
-96    96     
0      -64    
-464   144    
112    -304   
-160   -16    
-224   352    
-80    176    
-256   80     
464    80     
-160   16     
-208   -64    
-224   -32    
-768   -368   
640    80     
208    944    
-64    -64    
192    -784   
0      288    
16     -192   
32     -256   
-48    80     
-96    -528   
-864   -368   
96     -32    
416    48     
-368   -16    
64     64     
-208   704    
160    384    
-432   -256   
192    -368   
176    144    
-576   -224   
-176   80     
144    48     
-272   0      
96     96     
-464   -16    
-80    64     
112    80     
80     192    
16     16     
-112   -112   
-80    -320   
128    32     
-16    112    
112    128    
16     16     
-48    -128   
32     -80    
-368   0      
112    160    
-672   0      
80     0      
16     -80    
-160   16     
128    -96    
-304   16     
256    320    
-288   176    
144    0      
-368   -16    
112    16     
-160   -16    
0      16     
-224   -48    
-48    208    
-176   -16    
208    48     
-496   -48    
-64    -80    
-16    -16    
-128   -112   
-16    80     
32     96     
-144   -16    
-80    0      
48     0      
224    0      
176    80     
176    128    
0      -32    
-336   -16    
-32    -16    
112    -16    
-48    64     
0      16     
-16    0      
144    128    
96     176    
-16    0      
-128   -16    
-64    64     
-32    16     
128    16     
-256   0      
-16    32     
-368   -80    
240    128    
80     32     
0      -16    
64     80     
-144   64     
-80    -48    
80     32     
-80    144    
16     64     
-16    -160   
-48    -112   
-64    80     
-144   -48    
64     96     
-160   -80    
-48    112    
0      32     
-80    0      
112    -48    
80     64     
96     64     
-32    112    
80     80     
-256   -384   
-64    -304   
-208   64     
-48    176    
-64    0      
288    128    
160    144    
176    80     
144    -32    
96     256    
-400   192    
-80    -144   
304    80     
144    -32    
448    432    
-352   240    
16     96     
128    32     
272    80     
-96    48     
-16    176    
416    640    
-512   304    
96     272    
128    224    
224    384    
0      -144   
32     -320   
128    544    
48     528    
16     -16    
288    80     
-160   -80    
96     224    
224    32     
-304   -240   
176    -384   
-256   192    
16     -336   
48     -80    
-16    128    
48     64     
16     -112   
16     -32    
320    528    
-224   -336   
272    144    
-160   96     
272    0      
-16    -80    
-16    -208   
192    -160   
48     128    
-128   -64    
-112   -192   
48     112    
48     112    
144    144    
-16    -144   
0      0      
-176   -112   
32     16     
-32    0      
-16    48     
176    128    
-208   -384   
64     128    
160    -96    
48     48     
352    96     
32     0      
272    96     
-48    48     
-32    80     
48     48     
-96    0      
144    48     
240    16     
-112   -96    
112    -96    
-304   -336   
96     32     
48     0      
288    -176   
368    -48    
160    48     
32     -96    
32     0      
-128   -32    
672    352    
-384   128    
224    -128   
-96    80     
-160   -48    
272    -48    
32     -16    
-80    784    
-304   -80    
224    -304   
576    112    
-224   176    
-144   -32    
560    48     
576    -32    
-416   208    
-336   32     
-16    -144   
-192   -160   
752    272    
-336   16     
-144   -48    
160    16     
-64    -240   
32     80     
96     64     
352    -48    
-80    256    
0      48     
-64    0      
176    64     
-176   -96    
112    128    
-128   16     
192    -144   
288    16     
160    -16    
-16    240    
192    -576   
32     -112   
64     0      
48     96     
112    64     
144    80     
-48    -16    
-64    32     
32     48     
272    -48    
48     32     
144    16     
-80    112    
112    64     
96     128    
-144   -80    
96     0      
224    -80    
48     48     
80     64     
176    80     
144    80     
-48    0      
64     -32    
144    0      
32     96     
176    16     
192    48     
0      -176   
-96    144    
128    -128   
176    64     
-16    -240   
0      80     
96     32     
80     16     
-48    32     
128    176    
-160   -240   
240    -368   
192    80     
144    64     
64     32     
80     -96    
112    16     
96     -160   
96     112    
208    96     
-112   240    
-32    48     
160    64     
144    -144   
80     -240   
-32    -752   
64     -256   
96     -128   
112    0      
-144   0      
-48    -96    
144    64     
64     -16    
192    144    
64     144    
80     -576   
144    -96    
128    48     
64     96     
-1456  0      
128    -16    
96     -160   
32     -240   
400    464    
-400   288    
-64    -64    
128    192    
16     -96    
192    16     
288    -144   
96     -528   
240    -288   
48     -240   
128    176    
-832   -304   
80     -160   
32     -96    
0      0      
96     -64    
80     -240   
128    0      
0      224    
-32    -32    
272    320    
96     -112   
-64    -240   
16     0      
176    -32    
48     -112   
-48    64     
32     208    
176    96     
112    96     
16     16     
48     -368   
80     -16    
-80    -752   
96     32     
112    224    
416    48     
-80    -176   
-384   -256   
-32    240    
160    272    
112    -160   
32     -496   
176    -192   
288    560    
416    -16    
96     -224   
0      -272   
48     -112   
-112   480    
-80    -1184  
272    -48    
32     -16    
32     -96    
-160   -48    
48     -32    
-80    48     
144    48     
-912   -16    
320    624    
-96    -1104  
112    432    
48     128    
64     -416   
-96    80     
96     -608   
128    -16    
96     32     
288    320    
-224   -608   
-80    320    
160    -448   
176    0      
-96    304    
432    80     
-1728  160    
32     -272   
336    -464   
64     528    
272    -16    
96     -704   
-128   208    
80     -48    
-192   -48    
128    -192   
-48    -16    
-224   -80    
352    256    
-752   -112   
240    -80    
-1424  32     
368    48     
128    -48    
256    -64    
224    320    
-368   -304   
-448   -256   
208    -32    
512    192    
112    112    
464    64     
-448   32     
-192   64     
-192   64     
-144   -32    
-96    240    
-384   -32    
-32    -112   
16     16     
224    -80    
224    48     
64     80     
-864   64     
32     192    
-160   -368   
416    -240   
-336   240    
144    80     
32     16     
480    64     
-512   256    
144    -192   
16     -96    
96     -128   
-160   -112   
512    -176   
64     32     
-320   -208   
-496   -80    
0      0      
-112   -48    
112    0      
-80    160    
144    128    
-176   16     
-160   -160   
-1344  -144   
-80    272    
-944   0      
320    -32    
32     -80    
-240   160    
352    192    
-288   112    
-304   -320   
-800   0      
-272   96     
-128   -64    
32     -48    
304    0      
-16    80     
-160   -112   
256    32     
-128   -48    
-16    80     
48     48     
-160   16     
0      32     
-384   32     
96     -16    
-304   32     
80     0      
-976   48     
112    32     
208    -32    
-176   208    
80     -48    
16     -48    
112    128    
-128   64     
16     -80    
-64    -48    
288    144    
-336   192    
176    160    
-304   80     
-224   -16    
-624   -96    
64     -16    
0      -16    
-16    48     
32     -48    
80     -48    
-160   -160   
-112   0      
-16    64     
176    -48    
-64    -16    
64     16     
-256   -464   
0      -304   
-112   -144   
-384   -64    
224    112    
-752   112    
416    528    
-240   112    
64     96     
192    176    
-128   -656   
-16    -416   
-352   -352   
-96    -448   
16     320    
-256   432    
-192   -240   
112    128    
-64    368    
192    -400   
-816   96     
-128   112    
-256   -144   
144    80     
16     0      
80     -80    
-96    -32    
-160   -48    
-96    272    
-272   -624   
336    592    
64     0      
80     -208   
-496   128    
-96    0      
-1168  160    
272    336    
-32    48     
96     96     
176    -32    
64     80     
80     48     
-112   0      
-48    -32    
-288   -128   
64     -112   
176    -192   
320    48     
-176   -96    
128    128    
-48    64     
16     64     
96     80     
0      48     
0      32     
16     -32    
-80    -32    
64     32     
-16    80     
32     64     
-16    64     
-144   32     
160    48     
48     80     
-80    0      
32     -48    
144    -16    
160    0      
320    352    
-432   48     
112    48     
96     64     
16     0      
96     32     
-192   0      
-48    -64    
-192   -16    
0      96     
-192   192    
192    160    
-448   -64    
0      0      
64     16     
-32    48     
272    96     
16     112    
176    16     
-96    -48    
32     32     
16     32     
272    112    
-160   -224   
-128   -80    
-192   112    
-48    0      
-208   -160   
80     32     
-304   -144   
640    -64    
112    112    
-240   -144   
672    128    
-528   0      
64     -32    
256    224    
-272   0      
320    48     
80     160    
-464   -48    
272    48     
-336   -48    
256    -32    
432    -48    
-320   -96    
-368   192    
-288   48     
16     -32    
-176   -80    
112    112    
352    240    
-208   -16    
-80    0      
208    176    
-256   -48    
-96    112    
16     32     
-112   32     
32     48     
80     64     
144    96     
96     64     
112    16     
32     -144   
0      -192   
-48    16     
48     176    
16     -16    
240    -32    
-240   -16    
-112   16     
224    64     
-96    -48    
32     16     
176    128    
-128   0      
128    -96    
112    48     
144    112    
48     160    
-64    32     
96     16     
-96    0      
288    80     
-544   48     
0      -32    
16     48     
112    16     
32     0      
176    112    
48     80     
-176   32     
64     -32    
96     -96    
32     48     
-112   144    
272    32     
-16    304    
96     96     
-112   -128   
0      -1488  
-96    160    
64     112    
224    16     
128    -112   
80     -32    
112    144    
-112   -240   
-192   -112   
128    112    
160    96     
144    48     
-48    -16    
48     0      
48     368    
0      128    
128    -64    
80     0      
80     512    
32     -256   
144    0      
160    192    
-32    -272   
320    608    
32     48     
112    -144   
112    32     
-144   304    
-96    -112   
-112   0      
-32    -304   
64     48     
32     272    
112    -16    
192    192    
32     -80    
304    112    
336    720    
-464   1120   
32     224    
80     -368   
256    160    
288    -16    
160    112    
-48    -336   
320    -272   
-112   352    
48     -784   
0      160    
-80    16     
176    720    
208    464    
-96    -656   
-128   -160   
96     496    
-32    0      
-176   -48    
128    32     
208    -64    
160    80     
48     32     
128    0      
16     -32    
16     -160   
64     -528   
128    352    
-112   48     
192    -432   
-48    96     
64     144    
64     176    
32     -224   
-144   -176   
96     16     
272    128    
0      16     
144    144    
112    -144   
-48    464    
64     -960   
-96    -288   
-80    128    
32     208    
-80    112    
160    -48    
304    128    
-128   -160   
32     -64    
224    -48    
96     32     
160    -48    
-48    -176   
32     -256   
16     -304   
-16    -144   
48     -80    
-16    -256   
48     304    
32     0      
96     64     
224    80     
208    96     
48     96     
128    160    
192    224    
-16    -128   
96     -80    
112    -208   
16     48     
-16    -416   
288    144    
-48    80     
48     -944   
384    112    
-352   224    
-16    448    
432    -160   
256    -528   
-208   -160   
-160   -48    
80     32     
192    240    
64     0      
16     -128   
368    -64    
-464   -208   
-32    -80    
-112   -416   
-224   -96    
32     -32    
208    -112   
352    288    
-448   208    
-208   -480   
32     -1440  
448    96     
336    352    
304    -160   
80     144    
-16    32     
112    -64    
96     0      
128    32     
-112   16     
-560   -32    
-208   -144   
208    -80    
-32    -368   
32     176    
240    80     
96     -32    
144    -208   
-16    -240   
16     32     
80     -32    
96     -96    
80     -16    
96     48     
144    -80    
-672   -32    
112    -80    
224    -96    
64     32     
-64    272    
368    -464   
-16    -192   
16     -864   
-32    -16    
-128   -96    
128    -96    
64     64     
48     32     
-384   560    
720    320    
-192   176    
240    96     
-1616  48     
96     -32    
112    -96    
176    -16    
0      -128   
-80    144    
64     -64    
352    -240   
-144   80     
96     -48    
144    -192   
-192   48     
64     16     
-80    0      
-112   -80    
-1136  -16    
112    -64    
304    208    
48     144    
0      16     
-144   -672   
128    -224   
96     -1088  
-96    0      
32     80     
288    144    
-16    192    
128    -32    
80     32     
-160   0      
-752   -64    
-48    -256   
-1360  -96    
-32    -160   
80     -48    
224    -208   
208    -80    
128    -144   
-80    272    
32     240    
144    0      
-16    80     
64     -48    
-384   -208   
-48    -80    
-208   240    
304    80     
-64    -32    
16     -64    
400    736    
-128   -624   
208    208    
112    32     
48     -64    
224    240    
-16    -32    
-352   128    
-16    16     
112    272    
32     688    
-144   -480   
432    -240   
0      160    
64     -160   
-64    176    
-80    -240   
160    -320   
192    -528   
-112   -352   
-800   -112   
-80    -128   
-256   -64    
208    0      
-352   -96    
128    -80    
-432   16     
112    -64    
0      16     
64     -128   
-16    48     
-336   -96    
-16    48     
-1248  -144   
-608   -144   
112    -112   
-512   16     
0      112    
32     48     
-208   -16    
-208   -96    
-272   -48    
80     -16    
160    32     
-304   32     
-64    -96    
-96    -144   
80     64     
-160   -144   
-240   -240   
0      176    
288    80     
-32    64     
-880   -48    
-80    -80    
16     -16    
-48    112    
96     -32    
208    112    
0      -112   
80     16     
-96    -80    
-32    -48    
-192   32     
-32    64     
-112   -32    
112    -16    
-160   -16    
-320   -64    
-80    64     
-528   0      
64     48     
-288   -64    
96     32     
-176   -112   
112    64     
-64    -96    
64     96     
-144   -112   
96     -48    
-64    48     
224    0      
-144   48     
0      48     
-288   0      
96     112    
-336   96     
-16    -64    
256    224    
-496   -208   
528    0      
496    288    
-368   -144   
464    48     
-256   304    
-288   -112   
64     -48    
-368   -48    
464    112    
-192   0      
-688   -112   
320    0      
-1440  -32    
32     -48    
192    -48    
144    80     
48     16     
-112   112    
-288   -64    
624    -16    
-16    192    
-416   64     
112    -224   
-320   -48    
144    224    
-992   16     
80     16     
-432   -96    
144    -80    
336    -96    
112    48     
496    240    
-496   128    
176    -176   
-80    -64    
-80    112    
-96    64     
208    112    
-128   64     
32     176    
48     112    
16     -32    
-224   32     
64     64     
128    208    
208    224    
-432   -48    
160    -96    
-16    -16    
-48    0      
80     48     
-96    96     
-64    0      
48     0      
16     288    
-96    240    
64     -48    
-592   -208   
288    80     
-32    16     
-176   -16    
80     -16    
-112   64     
96     -96    
-224   -144   
176    96     
16     112    
-96    -224   
-16    608    
96     224    
-416   -304   
176    -112   
-416   80     
304    224    
-288   -256   
-32    128    
176    160    
48     144    
240    48     
112    -80    
144    176    
64     128    
-208   16     
-80    -96    
-32    -16    
-96    272    
48     0      
-32    384    
-144   -688   
-128   352    
32     224    
144    -320   
96     192    
224    112    
-144   560    
0      -384   
128    -16    
-32    144    
-208   -432   
160    304    
-208   -144   
192    944    
128    -32    
-32    -272   
112    64     
16     -80    
400    560    
-32    -128   
96     48     
-144   -96    
-48    -80    
-16    96     
96     -16    
-48    -96    
176    32     
64     48     
128    96     
96     -144   
208    384    
128    272    
32     32     
-64    -128   
48     -112   
80     288    
32     192    
64     16     
16     160    
-48    64     
272    96     
-304   224    
-144   -64    
112    96     
176    112    
192    144    
-48    96     
-272   -32    
128    -96    
160    32     
0      192    
-96    16     
96     48     
0      -48    
16     -16    
0      -64    
128    -48    
112    336    
176    224    
176    16     
-192   16     
32     176    
-64    128    
-16    128    
64     32     
80     112    
-48    64     
48     -64    
-208   -80    
-16    96     
48     192    
288    80     
-112   144    
0      0      
144    -32    
80     -96    
-32    -112   
192    16     
64     32     
-16    96     
16     0      
48     64     
240    256    
-224   128    
48     128    
-16    -32    
112    -160   
96     -64    
64     -1168  
-64    144    
32     176    
16     48     
112    32     
224    64     
48     112    
128    16     
64     80     
-16    240    
-80    144    
-64    48     
48     -336   
0      -240   
48     -160   
-48    -160   
128    -240   
0      -144   
144    -256   
-416   -720   
96     -448   
0      -368   
-80    112    
32     -256   
176    432    
48     -160   
144    160    
-160   224    
-272   -320   
-128   -192   
496    -192   
576    208    
800    -16    
-48    304    
-176   96     
-368   240    
-112   -64    
336    -144   
320    -32    
480    -16    
176    64     
144    48     
-32    48     
-48    -96    
-224   -272   
192    -256   
240    192    
-624   -752   
176    -32    
-144   64     
-288   -128   
-176   -64    
16     48     
208    80     
240    208    
-80    208    
112    416    
224    272    
-80    -160   
368    16     
128    -128   
64     256    
144    32     
32     160    
176    -528   
-288   -48    
208    -112   
32     64     
240    112    
16     176    
128    -80    
-160   -432   
192    48     
160    -128   
-256   112    
80     -160   
-48    -144   
-32    -352   
144    -64    
32     -432   
32     -64    
-32    48     
144    48     
176    128    
-160   -64    
128    -144   
64     -384   
64     -32    
176    -80    
-208   -16    
176    -320   
144    -112   
208    -192   
32     -128   
32     144    
384    336    
-16    240    
-80    128    
192    176    
64     -176   
336    400    
-208   -720   
0      -256   
16     96     
48     -128   
288    64     
-64    96     
-160   400    
160    112    
-96    16     
288    112    
-32    128    
-80    -496   
0      208    
32     -80    
-128   -384   
416    144    
-240   -624   
128    272    
128    48     
112    -304   
16     592    
64     -144   
224    -512   
0      64     
128    384    
16     32     
-16    -272   
192    -32    
-912   -64    
96     0      
112    80     
128    -96    
96     -160   
128    -592   
112    -48    
48     48     
96     16     
48     -16    
96     -528   
-176   -384   
-384   144    
48     -80    
176    -160   
16     48     
144    128    
384    -80    
112    32     
304    224    
-416   -240   
80     -176   
-144   -576   
0      -128   
304    -128   
-80    16     
304    -32    
96     32     
16     -16    
-32    96     
-144   0      
32     -32    
160    32     
-112   -96    
208    -32    
192    -80    
-64    -144   
192    -160   
224    64     
96     -80    
-32    -32    
160    32     
224    96     
16     16     
80     -144   
-592   -64    
176    112    
-1008  -32    
80     -160   
64     16     
96     96     
-128   -128   
48     -192   
96     64     
336    -64    
-336   32     
160    16     
112    -64    
-48    -48    
160    -144   
64     0      
-272   -80    
-448   -48    
240    -48    
-64    32     
96     -80    
-64    -32    
128    -576   
0      -32    
240    -928   
112    144    
-160   -32    
64     -48    
-128   -48    
0      16     
-96    -32    
160    64     
-784   0      
16     0      
-1888  176    
-304   -64    
160    0      
32     16     
80     32     
-16    -288   
128    -208   
112    144    
128    16     
-96    0      
592    192    
0      0      
208    -112   
304    208    
-384   -128   
176    -64    
-176   -176   
192    48     
-16    -48    
-96    0      
192    -320   
0      -144   
-192   0      
560    128    
-720   -48    
160    -320   
-512   -400   
288    112    
-544   -224   
304    -144   
-384   32     
112    -48    
336    96     
-368   -288   
272    -176   
192    -384   
608    -176   
-80    96     
-400   -112   
272    -96    
272    112    
-96    32     
192    48     
240    176    
80     -16    
-1008  -48    
-2048  -16    
64     -80    
-528   96     
160    176    
80     -256   
-176   -16    
-144   -48    
-1248  -192   
64     208    
-432   -384   
480    144    
-224   288    
224    256    
-112   -240   
128    -144   
48     224    
48     -112   
-112   16     
-32    16     
16     -80    
-656   176    
-336   -352   
-480   -576   
-320   288    
-64    -96    
112    -48    
-256   240    
0      112    
-400   -336   
-32    -208   
-96    -80    
160    288    
-496   -608   
16     -112   
-48    256    
400    224    
-16    1216   
-128   416    
-112   336    
144    224    
0      96     
-496   48     
-64    -64    
-80    256    
192    144    
160    304    
-64    128    
-144   144    
112    -112   
80     -80    
-16    0      
-96    48     
-32    -16    
-224   320    
-176   208    
64     16     
-32    0      
80     -16    
112    -16    
80     128    
-144   -64    
224    64     
-80    16     
144    -16    
-112   112    
80     128    
64     80     
-144   -368   
-192   -336   
-80    16     
-16    96     
-272   0      
48     64     
-864   -64    
48     64     
-128   -64    
80     16     
240    128    
-96    0      
-32    -32    
48     208    
-192   32     
432    272    
-224   192    
224    -80    
-16    -96    
-240   -32    
400    304    
-768   208    
96     -112   
352    -64    
144    192    
-64    96     
-160   -16    
-16    -32    
-240   16     
112    160    
-16    112    
-64    -16    
-112   -16    
-80    48     
-304   -112   
32     48     
-416   -64    
240    64     
32     128    
-192   -80    
128    -48    
-160   32     
48     32     
-112   64     
-16    16     
48     48     
0      208    
-208   -128   
48     -80    
-208   -144   
80     64     
0      176    
-400   96     
96     368    
80     240    
-16    160    
256    112    
-176   32     
160    112    
160    80     
32     240    
-160   32     
-48    0      
64     176    
-32    256    
128    64     
-144   -96    
-144   -64    
16     -48    
-16    32     
80     16     
-16    -160   
80     -16    
32     -16    
96     192    
-80    48     
0      -16    
-80    -64    
160    -112   
-320   -80    
128    -32    
-64    144    
-64    128    
384    160    
160    112    
-80    16     
-96    80     
192    240    
-320   336    
64     160    
384    -96    
-272   48     
-256   -176   
80     272    
-208   400    
208    96     
128    112    
112    64     
96     112    
112    224    
-48    -96    
-80    192    
432    -48    
-176   -256   
-144   48     
-160   144    
-16    0      
-64    -48    
32     -368   
224    -16    
-384   -80    
208    -112   
-640   368    
-384   -80    
-240   -16    
-288   112    
208    240    
-112   64     
320    -128   
384    64     
448    400    
-128   432    
-160   272    
-96    368    
0      -80    
112    32     
256    48     
64     -96    
-320   32     
448    -64    
32     224    
160    -48    
-240   -336   
-416   -240   
-16    16     
-64    208    
256    -144   
-240   48     
256    -144   
144    320    
-320   352    
-208   -384   
64     368    
560    240    
-16    -544   
-272   192    
160    48     
-192   32     
112    80     
224    112    
-128   256    
48     -192   
-112   0      
304    -160   
-224   64     
-16    -416   
96     16     
96     -144   
48     240    
80     16     
-64    -64    
-16    192    
-160   416    
272    -192   
224    304    
-96    -240   
-96    96     
-64    112    
304    176    
-224   -320   
208    -752   
272    240    
-128   128    
208    144    
-64    -224   
-48    32     
96     128    
48     80     
-16    32     
128    -160   
32     112    
112    144    
288    336    
-80    48     
-80    80     
128    -320   
48     48     
-48    48     
128    32     
80     368    
80     112    
128    128    
-16    352    
48     -64    
304    -16    
-112   -80    
224    48     
16     -80    
-112   -48    
64     80     
-48    -160   
96     80     
48     -768   
128    64     
144    48     
-32    80     
80     -80    
112    16     
-176   0      
-16    16     
176    64     
80     32     
0      -496   
448    -720   
160    288    
-32    64     
48     0      
256    -128   
-256   48     
240    -336   
-80    -208   
-240   -144   
384    224    
16     -48    
112    16     
48     80     
-32    -80    
48     16     
160    0      
-16    64     
-64    64     
96     16     
16     -672   
-16    -112   
-128   48     
-240   64     
48     -16    
192    80     
192    64     
416    128    
192    96     
144    -32    
-112   -32    
128    -32    
16     64     
32     -64    
128    32     
0      48     
48     -32    
96     16     
-96    16     
0      48     
192    32     
80     64     
-80    -192   
48     48     
80     -48    
-80    -16    
16     -80    
64     80     
48     -96    
128    64     
-16    -96    
256    64     
176    -320   
-80    -48    
16     -16    
32     -880   
-64    16     
176    -16    
32     -432   
64     -48    
288    320    
-160   -16    
192    16     
128    -32    
64     32     
160    -16    
16     144    
80     -48    
192    -448   
-160   -96    
304    -464   
0      -304   
176    16     
32     -192   
16     -32    
-160   -480   
256    64     
-32    144    
272    64     
176    512    
400    304    
-240   -224   
-96    -208   
-16    -16    
64     208    
-112   0      
48     32     
-1040  112    
224    112    
-272   16     
16     80     
256    112    
96     -496   
16     -272   
-32    -48    
240    -112   
192    -48    
128    -16    
224    256    
176    512    
-304   -160   
400    -352   
-816   -80    
-192   64     
-48    192    
-32    -640   
-96    -272   
160    192    
544    112    
-160   -448   
192    -32    
48     -144   
-144   320    
-112   -16    
256    48     
-288   -96    
-48    -64    
0      304    
256    -80    
32     80     
0      -384   
96     16     
320    288    
-240   -304   
16     624    
624    64     
-64    96     
-32    -480   
-48    368    
576    880    
-240   304    
128    -256   
-464   -272   
-32    80     
-1776  -96    
64     32     
336    -80    
256    16     
-160   -96    
16     -160   
16     128    
176    -144   
96     -80    
160    -96    
48     -96    
-144   -64    
32     -64    
-16    -16    
-112   -32    
-384   -64    
496    -96    
-992   112    
80     -16    
16     -144   
384    -192   
-80    16     
16     -288   
128    128    
16     128    
208    16     
-16    16     
288    -64    
192    80     
-96    -16    
-336   -160   
160    -128   
-336   80     
192    -240   
112    -160   
144    -224   
-80    112    
64     -160   
192    48     
0      16     
128    32     
-224   96     
32     -112   
-128   -32    
80     -32    
-64    -16    
128    -160   
-928   48     
64     -128   
352    96     
0      64     
-336   128    
272    -208   
16     16     
-64    -32    
208    -32    
-112   96     
-32    -16    
-80    48     
-32    -96    
-224   0      
48     -16    
-624   -64    
144    -64    
96     512    
-64    -16    
192    32     
-384   80     
-2112  32     
192    144    
-448   48     
80     -64    
208    -240   
-112   -16    
64     -80    
-176   128    
-112   -128   
192    80     
-32    16     
-64    128    
0      -192   
160    -112   
64     -112   
-128   -160   
-192   48     
-160   16     
-240   112    
96     128    
-208   -64    
208    32     
-224   80     
-96    -48    
160    -32    
-208   64     
-176   176    
-96    -80    
-112   -192   
-80    -288   
-64    0      
48     96     
-80    80     
80     32     
-416   -16    
-64    48     
256    96     
96     32     
-272   -160   
96     -48    
-368   -48    
64     48     
-80    -32    
48     352    
32     256    
-176   -320   
-112   -48    
-208   0      
0      -32    
96     -64    
-64    -48    
80     16     
-96    -64    
-176   112    
160    160    
-80    -144   
240    -112   
-16    32     
-128   -32    
80     -16    
-192   656    
-16    16     
80     -384   
-80    96     
-16    -464   
-80    16     
-272   112    
-480   -432   
-48    -208   
80     768    
80     160    
208    -448   
-240   -160   
-128   -48    
-400   -48    
-64    -80    
16     -368   
-80    96     
384    544    
-576   400    
-16    48     
-352   -784   
-48    400    
0      192    
-448   -272   
64     -32    
-464   -96    
144    336    
-160   -80    
-464   -400   
848    896    
112    496    
-304   -160   
-128   -16    
-16    -336   
288    304    
-464   96     
16     -112   
-1104  48     
-544   832    
176    64     
48     -736   
-736   128    
0      272    
-128   80     
-48    -16    
160    -160   
48     176    
32     -16    
-48    -96    
-128   -176   
-16    0      
48     112    
-160   368    
-144   0      
96     -224   
128    128    
80     112    
64     -64    
-128   -96    
96     -16    
-64    -32    
48     16     
192    -16    
144    -64    
-64    32     
-160   -96    
144    96     
-144   64     
64     160    
144    192    
-48    112    
144    144    
80     -32    
176    240    
-304   32     
-32    0      
128    48     
48     16     
-192   -16    
320    64     
-304   48     
80     160    
-112   -32    
128    -16    
16     112    
32     -48    
112    32     
-176   112    
112    -64    
80     32     
-48    -16    
80     -48    
48     64     
-96    -16    
80     64     
-112   16     
-64    144    
176    112    
128    48     
-112   64     
-16    96     
96     144    
80     0      
-32    512    
112    160    
128    48     
-304   -64    
112    48     
0      16     
-64    -16    
48     48     
128    0      
32     64     
-240   32     
32     32     
192    144    
-32    112    
-48    64     
0      -192   
0      -80    
0      -16    
-96    -48    
128    160    
-96    0      
192    80     
-16    -144   
144    -16    
-48    128    
16     64     
112    96     
112    80     
-80    64     
-128   -16    
336    176    
128    32     
272    -16    
64     16     
-64    112    
-304   -272   
112    80     
-176   144    
32     144    
64     64     
-48    -48    
384    96     
288    128    
128    32     
0      0      
0      32     
-128   48     
48     32     
112    16     
144    -48    
-192   -64    
64     48     
160    64     
256    80     
0      -16    
80     0      
64     -128   
-160   -80    
0      128    
-32    96     
144    96     
48     80     
0      -16    
16     -32    
128    96     
-48    96     
16     80     
-64    -32    
144    64     
368    112    
-32    16     
192    64     
-64    112    
0      -16    
-16    -32    
-64    0      
-32    -16    
144    32     
224    112    
-48    64     
208    16     
80     -144   
112    96     
-128   -640   
48     16     
160    48     
-32    48     
32     0      
-48    -48    
144    -112   
144    16     
160    16     
-16    48     
80     96     
48     0      
-48    64     
0      0      
192    176    
48     -16    
112    112    
80     96     
208    80     
-32    16     
32     -32    
-112   -16    
32     176    
-32    80     
-16    -112   
-176   -272   
208    -176   
-240   224    
256    -160   
336    240    
-272   16     
0      -144   
32     -688   
336    640    
192    -80    
288    -224   
464    272    
16     192    
-208   1008   
32     32     
-368   -1344  
320    16     
448    512    
640    -528   
608    496    
-112   -48    
208    -144   
80     -80    
-144   -400   
208    -400   
-432   -144   
480    16     
-400   384    
-64    0      
-368   -224   
720    -624   
144    192    
240    576    
512    112    
-80    704    
304    -144   
-176   32     
-32    80     
256    64     
-160   -208   
32     -16    
160    352    
160    336    
320    144    
-352   -128   
320    -256   
-96    -144   
160    304    
432    -336   
-272   64     
48     -48    
-96    112    
272    16     
272    272    
-80    0      
32     -144   
-80    -256   
160    -48    
80     272    
-192   32     
336    -48    
16     -48    
112    96     
80     -32    
224    -128   
144    -144   
-96    64     
96     -240   
-96    0      
144    16     
224    144    
-32    80     
-16    -96    
112    -672   
144    -160   
-128   -448   
80     -32    
32     -80    
32     -48    
-16    96     
32     -16    
64     64     
96     0      
96     -448   
-64    0      
160    32     
-48    64     
144    -48    
64     -384   
-16    -160   
144    -288   
-32    48     
96     -208   
64     -48    
48     -352   
208    -48    
128    208    
32     48     
128    -112   
0      32     
32     -272   
112    64     
-144   32     
96     -48    
-1024  160    
-128   160    
112    -64    
96     -160   
272    -144   
-16    -480   
32     -16    
-16    -160   
288    0      
-48    -112   
-64    -32    
144    -208   
-48    -64    
-16    176    
0      80     
16     -80    
96     -80    
-96    128    
192    16     
-16    160    
16     -208   
400    -96    
80     -400   
-352   -112   
64     16     
-80    176    
128    112    
64     112    
-240   -112   
224    -208   
-544   -144   
-128   -432   
0      -32    
192    128    
80     224    
192    -32    
-176   16     
96     -240   
128    128    
0      176    
160    192    
-144   -32    
96     -80    
-224   48     
96     0      
-608   -192   
16     -64    
-848   -96    
288    64     
160    32     
64     -560   
-240   -256   
256    -144   
-368   -544   
80     -432   
160    -112   
-336   16     
64     -224   
-80    192    
352    272    
-48    160    
176    64     
-464   16     
-128   -48    
-496   -448   
16     16     
-80    -112   
0      -288   
48     96     
256    -736   
-32    -32    
-32    -192   
80     128    
-240   -176   
112    496    
-512   0      
32     -160   
-304   96     
48     -240   
-288   448    
112    -80    
32     -112   
144    -16    
-208   -144   
240    -464   
176    64     
64     272    
336    352    
-384   -96    
160    -240   
-160   0      
96     128    
144    -64    
80     32     
-96    32     
80     -112   
112    16     
128    -192   
176    288    
272    288    
240    160    
48     -496   
192    -1200  
-336   -320   
112    192    
-512   -320   
-112   -368   
-160   16     
-64    -48    
-720   16     
-448   -96    
32     -192   
672    -160   
-48    112    
-128   -128   
-560   -144   
-192   -96    
-1728  -192   
16     -32    
144    96     
-64    -64    
-16    -16    
-16    112    
-944   -32    
96     0      
192    -208   
-448   -112   
384    -80    
-112   48     
208    -16    
-144   48     
-112   32     
-160   -80    
-176   -48    
48     48     
-272   -64    
16     48     
-176   -96    
-64    -96    
192    -16    
-16    -128   
-384   -48    
-224   -32    
48     0      
-48    80     
-304   16     
-64    32     
0      64     
-48    -32    
112    -48    
0      16     
352    -112   
0      0      
-80    -48    
176    48     
-96    -16    
160    80     
80     80     
-80    80     
-160   64     
-32    0      
0      96     
-128   -96    
-144   0      
-352   -32    
-368   0      
-1200  -48    
48     48     
-144   240    
464    336    
16     -96    
-288   -48    
-32    -48    
112    160    
-64    112    
-208   64     
448    112    
-80    0      
-176   -16    
96     80     
0      176    
-80    -64    
128    16     
-288   16     
0      64     
-144   -128   
-16    32     
-16    48     
-16    -176   
192    -48    
-208   112    
-160   128    
160    304    
0      144    
-112   0      
32     -48    
-400   -96    
16     -32    
-624   -240   
128    112    
-64    112    
16     48     
128    96     
-240   -16    
-80    192    
-416   32     
-64    -128   
32     -80    
64     80     
-192   -64    
80     48     
-272   -80    
368    224    
-1088  -160   
-64    112    
160    288    
-96    32     
192    144    
-288   128    
64     -144   
-64    32     
256    128    
176    352    
-96    144    
-336   -96    
-48    -32    
-128   0      
144    64     
-64    32     
-192   0      
-96    32     
320    288    
-176   128    
144    -16    
160    32     
0      16     
32     80     
-144   -80    
16     112    
-224   -48    
240    128    
272    224    
-16    192    
-480   -48    
48     -48    
96     48     
16     96     
32     112    
-48    -32    
48     16     
64     32     
-128   96     
-128   112    
-48    16     
-144   -64    
160    80     
-240   48     
160    144    
48     32     
80     64     
-64    96     
64     0      
-160   -32    
-96    112    
128    48     
96     -240   
0      -48    
16     96     
128    160    
-112   16     
0      0      
-176   -16    
96     160    
-32    96     
128    -672   
-32    320    
48     416    
48     -64    
0      64     
-16    -16    
-112   -144   
224    48     
16     256    
0      -112   
-80    80     
64     32     
-48    -496   
-384   32     
224    128    
-272   -48    
400    80     
176    384    
304    -800   
0      416    
-32    -64    
-32    192    
96     768    
0      -272   
-16    48     
144    192    
144    368    
80     480    
144    -912   
-288   -496   
496    144    
-416   864    
-304   224    
-48    160    
432    112    
-80    -560   
144    -48    
128    0      
-224   64     
128    0      
-256   128    
-352   592    
-80    144    
336    -144   
-64    128    
224    48     
-144   16     
-528   -48    
80     48     
-144   80     
288    96     
-32    144    
208    16     
-128   -16    
-32    -96    
-96    -208   
176    -624   
256    176    
-80    128    
128    32     
-16    32     
-272   0      
304    -192   
-32    304    
192    352    
-48    16     
128    112    
128    -48    
-160   -240   
256    -48    
-144   -80    
-32    -256   
48     192    
176    -416   
272    80     
-96    48     
-192   -128   
144    -64    
48     80     
160    96     
-160   96     
-112   64     
208    48     
64     -16    
240    80     
-80    128    
32     -32    
-16    -16    
16     -784   
80     112    
192    16     
-160   -48    
368    160    
16     320    
352    112    
256    96     
-192   16     
16     32     
-160   -32    
96     -32    
-48    160    
-144   -224   
64     224    
64     -256   
272    16     
128    96     
-112   64     
-32    16     
32     32     
-48    -64    
0      -32    
16     -80    
224    -64    
192    0      
112    160    
-176   80     
64     -144   
48     -16    
64     -96    
-48    144    
176    -752   
-208   -144   
384    48     
48     32     
-144   -176   
272    112    
-128   160    
112    80     
64     64     
16     -96    
304    224    
0      160    
96     128    
-80    0      
32     64     
48     -480   
336    0      
32     -48    
80     0      
-48    -128   
96     -80    
0      -80    
320    -48    
48     -64    
-272   -336   
32     16     
80     -352   
-64    224    
208    32     
256    -208   
-16    -384   
48     -48    
-96    -32    
-16    -128   
-16    128    
192    256    
32     -304   
112    -240   
176    -128   
240    128    
-144   -160   
144    64     
112    128    
224    -96    
-112   -128   
-64    48     
96     64     
96     128    
192    32     
80     -160   
304    416    
144    -32    
16     -80    
-112   -416   
128    208    
128    0      
32     -288   
-336   -32    
192    -32    
272    128    
192    192    
128    -32    
-32    -64    
80     -560   
-80    96     
-48    -176   
192    96     
-48    -32    
16     -304   
96     -112   
0      -624   
160    0      
32     48     
32     -16    
80     160    
64     -64    
208    48     
-144   0      
48     -144   
112    -16    
-96    0      
112    32     
32     -32    
80     -64    
160    -80    
48     32     
192    -32    
64     -32    
160    -64    
-64    -64    
32     0      
-32    -112   
128    128    
128    64     
-32    16     
0      96     
128    -48    
-320   0      
-192   -320   
192    -48    
64     96     
96     16     
-192   -432   
-336   -144   
288    -112   
160    176    
-48    -128   
368    -16    
208    80     
-64    -16    
-288   112    
208    -160   
-720   -96    
-16    -32    
272    16     
128    -160   
224    -96    
-96    -224   
-304   -48    
192    144    
-96    -112   
32     0      
0      32     
288    -192   
-128   -32    
176    80     
48     -32    
-64    128    
-288   16     
32     -176   
416    -240   
96     32     
192    -80    
112    0      
80     96     
-16    80     
-160   -48    
-32    16     
48     32     
416    208    
-304   192    
288    0      
0      -64    
80     -48    
-496   -64    
160    -16    
0      80     
-160   32     
16     0      
144    -592   
112    64     
128    -32    
0      0      
64     -64    
-80    -32    
16     -16    
-272   -96    
-160   -64    
272    0      
-400   0      
-96    -48    
32     48     
32     -112   
-16    -128   
208    -320   
288    160    
-16    -928   
128    16     
-240   0      
256    288    
-448   48     
128    -32    
-48    112    
160    96     
-176   176    
112    -48    
48     -96    
96     -144   
-48    176    
-128   -48    
208    -176   
160    -560   
176    -32    
-400   -176   
32     -64    
-208   112    
96     -16    
48     -48    
96     -32    
32     48     
64     -96    
-384   128    
-16    16     
144    80     
224    -16    
-80    64     
-32    -80    
-784   -64    
-80    16     
96     64     
-64    80     
96     -48    
-240   -128   
160    -192   
-208   0      
16     -16    
-48    -32    
-448   -144   
112    32     
-528   -32    
64     -48    
80     112    
-272   32     
0      240    
-336   624    
-240   432    
-32    128    
-256   16     
-16    -176   
32     -192   
96     32     
64     -224   
112    -16    
160    384    
-224   -256   
-112   80     
0      96     
80     -32    
80     16     
-288   -16    
-144   -96    
-384   -64    
-96    -224   
320    272    
368    352    
-16    -144   
-32    96     
-64    -64    
-80    0      
-144   -192   
112    -64    
224    272    
-48    112    
-144   32     
-176   -320   
480    944    
-848   -272   
96     -352   
-96    272    
-48    -336   
-176   80     
-208   -208   
32     -304   
128    496    
96     -112   
32     96     
-16    0      
-144   -144   
48     160    
80     -96    
-16    128    
0      144    
-96    32     
-960   -112   
224    -208   
-16    -32    
112    0      
64     -272   
-80    144    
0      96     
-112   0      
-32    304    
64     -144   
288    432    
-336   320    
96     -368   
-272   -336   
128    400    
-208   -32    
-64    32     
-144   -448   
256    -608   
256    608    
-160   336    
-160   -64    
0      -112   
48     -32    
80     240    
-32    0      
-160   -64    
-320   352    
128    192    
-16    144    
-144   -448   
0      80     
-208   192    
192    64     
80     192    
-80    -64    
-208   240    
-128   -32    
16     -288   
-32    16     
-16    64     
0      -64    
-112   96     
144    96     
-208   32     
-208   -368   
48     0      
-336   -80    
-32    -32    
48     32     
80     80     
144    -32    
-112   -32    
-80    320    
-192   304    
96     -96    
-48    -256   
-16    48     
-432   32     
208    -16    
-416   0      
144    144    
-640   -272   
96     -16    
240    -144   
-144   48     
-64    160    
-144   -80    
-96    128    
-320   -176   
480    -32    
-224   192    
256    80     
-256   -112   
-192   704    
224    16     
80     128    
96     96     
-16    -48    
112    -16    
96     128    
48     144    
80     -192   
-208   16     
-16    -64    
112    96     
48     -64    
80     48     
-416   -48    
-64    80     
-32    64     
64     0      
176    112    
336    304    
-208   304    
-144   64     
-112   -16    
144    0      
128    96     
0      64     
96     0      
80     80     
-192   128    
-160   -64    
240    0      
-320   192    
16     64     
128    -144   
48     -112   
-64    96     
-80    80     
-16    -16    
-224   144    
160    -80    
288    -64    
-64    64     
112    240    
128    384    
112    -64    
240    -64    
32     80     
-96    64     
-48    176    
224    144    
-64    176    
144    -32    
-32    -160   
128    0      
128    0      
144    144    
144    32     
-32    -48    
160    64     
-240   400    
224    320    
288    256    
-64    208    
0      -192   
-64    -192   
0      -128   
-16    16     
224    32     
48     160    
-128   -32    
-16    -64    
160    16     
0      -32    
96     16     
-288   -304   
-144   -368   
48     160    
256    176    
-32    144    
128    16     
64     96     
288    -112   
-16    -48    
192    176    
80     592    
-176   0      
-64    -96    
-176   176    
192    -32    
-16    48     
-16    -96    
80     48     
96     80     
176    -96    
144    -48    
-144   48     
-64    64     
176    96     
-48    48     
16     80     
0      576    
208    320    
-208   416    
-192   192    
80     144    
-352   -160   
96     0      
160    -112   
48     0      
160    64     
224    128    
-48    112    
-32    144    
-160   0      
112    32     
80     -144   
0      48     
16     64     
48     96     
48     32     
-32    -304   
16     32     
-48    -320   
240    16     
48     96     
160    16     
144    -32    
-96    -48    
32     80     
368    240    
-208   -128   
192    64     
16     -176   
-64    -208   
128    64     
64     -80    
240    128    
0      -256   
208    112    
0      32     
-16    176    
64     160    
96     144    
-112   -16    
112    96     
-48    48     
192    48     
0      176    
224    -48    
0      48     
48     16     
64     96     
192    -160   
0      112    
-144   -336   
64     16     
128    32     
240    112    
160    160    
-64    192    
-256   -96    
256    80     
-176   112    
-96    -96    
224    48     
32     -32    
80     64     
336    -560   
-128   -176   
-368   -16    
96     144    
-144   -176   
-432   0      
-336   -304   
528    48     
-224   32     
240    352    
-160   -80    
-128   -352   
512    192    
-112   -112   
-496   -48    
160    0      
96     96     
-416   -48    
176    -48    
-16    -16    
-112   224    
0      16     
304    -32    
-128   48     
144    -160   
32     32     
-64    -336   
176    32     
0      -48    
160    16     
48     -32    
0      -16    
64     -192   
-16    96     
144    -32    
0      48     
-16    48     
-80    -384   
368    80     
-16    -96    
-144   -352   
256    -240   
0      -96    
304    -48    
-96    -16    
-192   -80    
128    144    
0      -144   
144    -656   
208    48     
16     -32    
208    0      
-720   -96    
32     -96    
128    112    
128    80     
-64    -16    
96     -176   
64     -32    
-96    208    
144    -304   
128    -656   
128    0      
96     -192   
-144   -16    
192    -176   
48     176    
-496   32     
64     -224   
176    192    
32     -208   
-64    -240   
112    80     
144    64     
16     -240   
96     -32    
304    -16    
-64    -48    
48     48     
-48    -16    
80     -144   
128    80     
-192   -32    
16     -48    
-1232  208    
128    -224   
128    -64    
32     -112   
-48    48     
-96    -320   
-64    16     
32     -1520  
128    16     
16     -704   
368    784    
144    -144   
384    160    
-144   -16    
0      -64    
-688   -96    
16     -176   
32     -416   
-80    -64    
-192   208    
96     -64    
-208   -64    
304    -528   
-48    -176   
192    160    
224    -80    
96     192    
-208   192    
16     -448   
144    192    
0      -160   
64     -96    
-592   208    
80     -272   
-224   -16    
256    0      
-16    -80    
128    -144   
32     64     
384    688    
-448   -288   
-32    -1024  
320    272    
-192   416    
144    -32    
-240   -288   
-32    -320   
-800   -16    
-192   -320   
-256   -464   
528    288    
-208   0      
256    -432   
160    -208   
416    -864   
64     -64    
176    -144   
-112   -112   
-16    336    
144    256    
-256   32     
128    48     
-1312  128    
336    32     
0      80     
208    144    
96     80     
16     -128   
-48    64     
48     -320   
0      -240   
-448   96     
-80    32     
32     -96    
80     -144   
-64    -176   
176    -80    
-96    160    
64     -80    
48     16     
16     -48    
-16    48     
48     -112   
-48    32     
-16    -32    
224    -80    
-208   -80    
-144   32     
16     -160   
32     -16    
176    160    
-32    64     
32     240    
0      -112   
208    192    
352    32     
64     -32    
-1408  256    
-352   48     
-176   -288   
192    -224   
-64    80     
-768   208    
-448   -80    
-48    -80    
-192   -16    
272    48     
-992   -288   
-592   -304   
208    192    
-624   -272   
-208   256    
-272   0      
-752   272    
624    560    
-480   352    
-192   224    
-1168  -16    
240    -112   
208    32     
144    16     
80     48     
48     0      
-16    -320   
208    -48    
192    -64    
16     0      
-224   -64    
-32    48     
32     80     
80     -16    
112    -32    
-64    80     
-320   -32    
-768   -320   
-272   32     
64     0      
-64    -48    
-16    64     
-16    -80    
0      -112   
-144   -64    
128    16     
352    464    
-352   416    
192    64     
-80    -48    
256    192    
-144   240    
-624   -144   
16     -80    
-640   48     
32     256    
208    96     
-208   112    
368    -32    
-112   -112   
-64    -48    
-144   160    
-64    96     
-96    -16    
96     48     
-192   160    
272    224    
-320   144    
-112   64     
-608   -192   
96     -80    
80     -112   
64     304    
112    400    
272    112    
-192   48     
-224   -112   
-128   -80    
80     128    
144    0      
-144   -80    
-16    -16    
-240   -48    
64     80     
-1120  -320   
112    -240   
96     -96    
64     64     
48     32     
368    96     
-176   144    
96     -64    
96     -32    
64     0      
-128   112    
48     64     
160    256    
-352   160    
48     144    
-64    64     
16     -192   
-480   64     
-80    -224   
32     32     
-64    -128   
224    32     
-112   -16    
96     -80    
272    208    
-32    -80    
-96    -608   
80     320    
-288   64     
64     16     
-112   64     
80     -32    
-656   48     
-192   -32    
192    -16    
-48    32     
-112   -176   
112    512    
-160   368    
-80    -112   
80     -32    
32     -16    
0      -48    
-32    -160   
352    -128   
-64    -128   
256    64     
-16    -32    
-64    -16    
-48    16     
-160   32     
96     80     
32     16     
0      16     
-16    64     
0      32     
-80    144    
128    112    
-96    32     
-80    48     
-112   -64    
64     16     
160    96     
112    -112   
224    128    
256    320    
-160   48     
0      -16    
48     16     
-96    48     
16     176    
-16    0      
240    64     
-48    -48    
-192   -16    
-384   -32    
-16    0      
160    64     
96     64     
-144   -16    
48     64     
64     16     
-16    -32    
96     64     
16     48     
64     -128   
-96    -64    
80     112    
-176   -32    
-80    32     
-32    0      
-80    0      
-16    80     
32     48     
48     80     
176    112    
-96    -48    
128    32     
80     96     
112    32     
96     16     
-80    -64    
64     64     
64     0      
32     64     
112    112    
-64    96     
-240   -48    
128    0      
64     64     
240    -16    
80     64     
128    144    
-32    16     
-48    48     
-160   208    
288    192    
-288   16     
-272   -96    
128    -912   
80     112    
112    32     
-48    -16    
48     80     
-64    16     
544    336    
-320   96     
64     -96    
192    160    
-368   -32    
80     -192   
336    80     
352    320    
128    48     
144    -848   
288    304    
-544   112    
208    96     
-496   -160   
832    160    
80     48     
144    0      
320    112    
96     112    
-176   64     
-256   -32    
16     16     
288    80     
624    368    
-176   112    
-96    -160   
192    -16    
48     144    
-112   16     
80     32     
112    64     
-32    96     
96     48     
80     -16    
-16    128    
96     176    
-96    -96    
80     -48    
-16    144    
64     -160   
112    32     
80     128    
32     112    
-96    32     
144    48     
16     16     
176    16     
48     0      
128    -192   
0      -528   
48     208    
-48    320    
-96    -416   
160    32     
224    320    
96     -304   
256    -544   
-32    48     
-48    -176   
176    400    
32     -144   
128    272    
208    -80    
96     160    
-208   -80    
352    -416   
112    448    
32     64     
-96    32     
176    192    
80     48     
48     -192   
64     16     
160    -336   
48     -80    
112    0      
-224   -416   
-240   -640   
96     560    
176    -80    
-16    -416   
-128   160    
192    -416   
96     304    
112    -160   
-160   -368   
160    -256   
128    -160   
-128   -448   
16     16     
32     192    
32     16     
48     0      
64     32     
-192   112    
176    160    
32     144    
112    -208   
0      -16    
96     -592   
16     32     
160    -80    
-16    160    
-16    -16    
48     -16    
128    224    
176    384    
-336   224    
80     -256   
304    400    
-64    -32    
240    304    
224    160    
32     240    
128    224    
48     192    
-96    -224   
144    512    
0      32     
-160   80     
64     0      
0      48     
224    176    
-80    144    
160    -80    
192    -128   
112    160    
48     0      
-160   -16    
-32    -320   
-16    112    
112    -96    
64     128    
16     -80    
128    -304   
192    80     
-16    -416   
160    0      
48     -256   
96     -96    
144    -32    
-48    -224   
224    -112   
-48    -128   
400    112    
-208   272    
48     0      
400    352    
224    -32    
80     -240   
96     64     
-144   -80    
112    160    
0      208    
64     -288   
192    -176   
160    -112   
-80    -80    
96     -624   
48     -112   
144    80     
80     112    
-112   304    
112    192    
0      -176   
96     -64    
160    -112   
-32    -64    
-496   -16    
272    64     
-80    32     
80     32     
32     96     
400    64     
-160   352    
80     -848   
16     -576   
96     -176   
352    -16    
128    64     
-144   0      
176    96     
160    -208   
-336   -16    
112    -16    
-512   -64    
240    176    
-208   -144   
48     80     
16     192    
288    -272   
-32    352    
256    -208   
-16    160    
-112   -32    
-176   -352   
-560   -208   
128    -224   
-256   128    
-96    -160   
-192   112    
-80    128    
352    224    
832    128    
448    832    
-624   256    
-784   -352   
240    -208   
96     96     
720    224    
176    32     
208    352    
-688   304    
-192   0      
160    -480   
-976   -64    
560    -304   
-64    272    
352    -144   
-288   64     
-32    -144   
-48    144    
-64    -80    
208    -64    
0      96     
320    -256   
80     112    
96     64     
-400   -176   
352    64     
-592   -208   
192    -224   
448    624    
-240   656    
-160   288    
176    -128   
496    432    
80     -112   
-224   128    
224    -176   
-16    -128   
96     -160   
-64    -224   
-192   352    
128    208    
-192   288    
352    80     
320    128    
16     -80    
224    48     
-144   -272   
80     -320   
16     -544   
224    -16    
-176   -16    
128    128    
-688   -336   
320    32     
-448   320    
-48    -32    
96     -320   
-112   -160   
-544   -144   
80     -304   
96     160    
-320   -144   
-16    -48    
64     224    
112    -32    
-224   -80    
-144   -32    
48     -624   
400    880    
-400   0      
48     80     
176    -320   
-352   -112   
-256   -240   
192    384    
160    -80    
16     -32    
-80    96     
-576   -256   
-480   96     
-304   0      
-208   32     
-224   -80    
-224   32     
48     16     
256    -48    
80     -48    
192    -192   
-48    -48    
64     112    
48     48     
-352   -144   
144    288    
-64    160    
-80    0      
-96    16     
-48    -16    
80     32     
-336   -64    
-80    144    
128    -16    
96     0      
-80    64     
144    48     
-304   0      
-288   -16    
-256   -48    
96     144    
-208   80     
96     112    
-240   -32    
32     112    
-208   0      
-96    -16    
80     48     
-240   48     
16     -32    
-16    -32    
272    112    
-160   16     
128    32     
-144   -208   
352    -32    
48     32     
32     32     
-48    48     
-208   -32    
16     144    
-208   208    
-176   -64    
112    -64    
160    80     
-2512  -64    
160    -16    
128    0      
64     64     
-128   -112   
32     16     
48     0      
-64    -48    
-32    112    
-192   -32    
-96    -96    
-144   -80    
80     32     
-16    48     
32     32     
-1456  -16    
16     48     
-64    -16    
0      32     
-48    0      
0      16     
-16    64     
-80    48     
64     32     
112    80     
-48    32     
-32    -64    
-64    48     
-64    64     
16     -16    
-256   -48    
16     128    
0      -48    
0      32     
80     0      
-64    48     
176    176    
-96    -16    
160    0      
-80    -32    
64     48     
64     48     
-16    16     
16     48     
0      -64    
0      -224   
16     112    
-1392  -48    
64     128    
-192   -96    
480    48     
-80    -32    
416    64     
-272   96     
-448   -96    
256    -128   
64     144    
-240   32     
-208   -128   
-16    -192   
-256   16     
-304   128    
224    48     
-176   32     
-480   -640   
144    -560   
16     160    
48     320    
16     48     
-96    32     
64     128    
32     160    
48     112    
224    -96    
400    16     
320    -176   
0      -176   
192    224    
-528   16     
96     192    
-48    112    
-176   48     
320    16     
16     -160   
192    272    
-64    32     
-240   -48    
80     112    
-128   176    
208    -32    
-128   -32    
64     96     
64     48     
-112   -96    
240    -64    
96     400    
96     -144   
-112   -80    
-96    608    
48     0      
-80    -352   
-368   0      
64     176    
0      0      
624    432    
-480   400    
288    48     
-224   80     
64     352    
128    -640   
-112   160    
-112   704    
112    -624   
112    -592   
-80    320    
368    224    
-80    320    
-80    -480   
-48    -160   
160    -16    
-128   128    
-64    176    
80     -16    
112    144    
224    272    
64     240    
288    112    
-16    64     
304    -16    
-32    64     
80     48     
-80    48     
80     272    
-64    48     
-32    48     
112    -32    
-112   16     
192    -80    
-48    128    
224    48     
96     144    
-128   336    
-64    96     
-96    128    
-128   -16    
-112   64     
160    -48    
144    0      
-128   0      
176    -1072  
80     -64    
160    80     
-32    -16    
112    -48    
16     224    
112    48     
176    64     
80     48     
-64    128    
-80    0      
128    16     
96     80     
96     208    
16     256    
112    -480   
192    96     
-112   96     
-96    32     
176    -80    
144    80     
-64    48     
48     16     
-48    32     
-208   -208   
208    -128   
16     -144   
-144   -320   
192    240    
-32    64     
32     -416   
80     -16    
16     176    
-80    80     
112    48     
80     -96    
112    -32    
-80    0      
256    208    
-32    304    
-160   64     
160    -80    
48     -48    
0      -80    
128    -80    
288    -208   
432    432    
-192   -944   
-16    32     
112    -48    
32     -48    
32     80     
48     -16    
-80    -96    
16     -176   
16     -80    
96     160    
64     272    
-112   16     
0      64     
192    -112   
-32    -48    
96     -192   
-32    -80    
176    144    
32     48     
160    -144   
208    -96    
-144   0      
160    64     
48     0      
80     96     
-16    -112   
64     16     
96     64     
96     48     
80     -160   
-16    -464   
192    80     
16     112    
160    128    
96     -32    
-112   -96    
-32    -224   
0      128    
-112   144    
176    336    
-96    208    
96     208    
192    160    
80     -144   
0      96     
32     -464   
288    368    
-64    256    
-48    464    
272    -272   
-384   -576   
208    -16    
-176   208    
0      80     
96     32     
272    256    
496    624    
-176   544    
-32    -336   
-144   720    
304    192    
432    -688   
0      480    
128    224    
-208   256    
448    176    
624    48     
-272   256    
496    -240   
144    -16    
448    -288   
384    32     
160    192    
96     16     
576    960    
-480   32     
32     160    
-112   -1408  
0      160    
272    192    
720    528    
32     304    
-192   -496   
-48    -544   
208    -144   
-144   480    
320    256    
-96    32     
224    -128   
320    624    
16     -64    
-208   -464   
320    464    
192    -1008  
-112   448    
48     64     
96     176    
-576   0      
-112   -464   
208    320    
-16    -256   
80     -160   
224    -208   
112    -16    
64     272    
0      -448   
80     -400   
-16    208    
128    -112   
224    16     
-112   256    
288    -160   
-272   32     
208    -64    
-64    -112   
224    16     
-64    -48    
-16    -336   
16     -48    
32     144    
160    64     
192    112    
-64    -64    
16     -48    
-256   -16    
144    -256   
80     -128   
-272   -16    
-48    -112   
288    160    
-16    -80    
48     -80    
224    -96    
160    -128   
48     -288   
-144   -288   
256    -592   
192    -464   
128    -48    
112    32     
112    320    
-144   16     
16     16     
16     -96    
-288   -112   
16     -304   
64     -368   
224    -272   
160    32     
192    -336   
32     32     
16     -1552  
112    -80    
112    32     
96     128    
-96    32     
48     -16    
-240   16     
16     -48    
-304   -160   
96     -48    
112    0      
-128   -128   
-256   -16    
192    -144   
-144   0      
160    -704   
0      48     
128    0      
-192   -352   
96     -80    
0      208    
-400   64     
32     16     
-352   -208   
240    -48    
-1648  -240   
-112   -208   
80     144    
-80    -128   
176    80     
400    32     
48     64     
48     -112   
144    -64    
-160   0      
112    16     
16     32     
176    160    
-944   -48    
144    -112   
-128   48     
64     16     
16     -16    
144    -80    
-48    144    
-80    -128   
32     32     
-64    -144   
0      64     
0      48     
128    -32    
-576   -48    
144    64     
-464   32     
-80    -336   
-176   -112   
288    80     
80     48     
48     -160   
-64    32     
48     -336   
176    16     
80     32     
192    64     
-208   -48    
32     -48    
-64    64     
16     16     
-128   -32    
32     96     
-544   -16    
-32    -16    
144    96     
96     -80    
-48    32     
-208   -48    
-1008  48     
80     -16    
-2160  -96    
-128   96     
192    -48    
-96    16     
96     -48    
32     48     
80     64     
16     48     
-416   96     
-352   128    
144    -160   
-80    80     
16     16     
-656   64     
0      -32    
-496   80     
-48    -16    
-624   -48    
-160   -80    
256    304    
64     -16    
160    -192   
-240   176    
-400   128    
-96    112    
-208   0      
368    224    
-368   32     
-64    -64    
-64    -96    
32     128    
-272   128    
-48    96     
-112   16     
-896   -160   
-416   -192   
-944   -256   
192    -160   
192    16     
272    192    
-224   16     
-80    -240   
-80    0      
352    -16    
288    -224   
320    176    
-416   48     
-640   32     
-464   160    
-1216  -240   
80     240    
320    432    
-192   -528   
80     512    
384    208    
-48    -480   
-128   0      
-112   -336   
-176   112    
48     16     
-496   176    
-64    -64    
-176   -160   
-96    80     
64     -96    
-32    -48    
-1504  -144   
176    0      
-400   -64    
352    288    
-64    -208   
-48    -192   
-16    -144   
-48    -128   
-128   0      
-32    -64    
-112   144    
-176   128    
176    64     
-160   -240   
128    -96    
-176   64     
-192   128    
-96    224    
176    160    
208    48     
16     -80    
192    -80    
-32    16     
64     80     
-32    -48    
16     48     
-112   144    
128    144    
-128   64     
160    48     
-448   -48    
144    128    
0      32     
-240   64     
0      -48    
-288   64     
-64    64     
64     64     
-80    48     
48     0      
-16    64     
-160   112    
64     48     
-192   -96    
128    48     
-480   16     
-64    64     
-608   -96    
-176   -80    
240    -320   
96     -16    
64     240    
-112   48     
48     -16    
32     -16    
0      0      
-192   -144   
-96    -176   
0      16     
304    176    
-96    48     
448    240    
-272   192    
16     -32    
288    80     
0      128    
352    160    
-256   48     
48     -32    
-64    -208   
-224   -128   
-64    144    
-224   16     
304    -128   
128    160    
-128   96     
-48    96     
96     512    
0      176    
96     -208   
48     -128   
-80    -144   
240    -32    
-144   0      
96     -48    
128    272    
-400   112    
128    -32    
-336   -128   
256    48     
-448   -112   
320    96     
176    176    
192    80     
-96    128    
-48    112    
208    208    
-96    176    
16     -192   
208    -384   
272    -208   
64     96     
64     80     
-176   -32    
272    176    
-160   272    
96     96     
256    128    
32     272    
-160   288    
240    80     
-176   32     
-48    -144   
64     144    
16     64     
48     -240   
-96    -160   
16     16     
-352   -48    
208    16     
160    160    
128    160    
32     48     
16     0      
-96    -112   
48     -144   
160    -48    
144    240    
240    112    
-128   144    
48     64     
-176   -240   
272    144    
16     400    
144    608    
-64    -384   
64     32     
-160   -112   
176    -144   
64     384    
64     416    
272    0      
-160   -80    
32     256    
32     -32    
-48    224    
112    -128   
32     208    
-208   -64    
32     -160   
-80    -672   
64     608    
496    -128   
224    368    
288    -224   
-384   -144   
-320   64     
-80    368    
96     16     
48     -112   
240    272    
-560   -864   
416    800    
-144   448    
-432   -1120  
528    208    
544    592    
-48    -336   
240    -224   
-32    96     
240    16     
128    80     
480    144    
-128   -80    
-1280  -1184  
-32    0      
-16    848    
-512   96     
-288   32     
720    -432   
576    -96    
688    368    
64     32     
-176   -528   
-48    -288   
-208   176    
-112   96     
80     48     
112    128    
144    48     
144    80     
96     64     
64     32     
0      80     
-16    -144   
96     0      
32     -288   
224    64     
96     -16    
224    96     
-272   -16    
96     16     
160    32     
48     112    
32     0      
144    80     
32     576    
80     176    
-16    16     
-272   -96    
288    48     
80     -640   
0      -80    
336    112    
-80    64     
64     32     
224    16     
32     160    
256    -224   
-128   -80    
176    112    
-16    80     
0      -16    
64     48     
176    -112   
96     32     
-48    -64    
128    48     
-48    160    
64     -176   
16     48     
80     80     
0      64     
-80    64     
208    16     
416    304    
-96    32     
96     -32    
96     0      
112    -176   
80     0      
96     -80    
48     144    
-32    -208   
112    -160   
16     0      
48     112    
96     32     
272    272    
-176   112    
80     -224   
208    -64    
64     48     
-32    80     
-128   -480   
160    -64    
48     48     
-128   128    
144    80     
-96    48     
128    16     
272    96     
-48    -32    
64     32     
80     -16    
96     -96    
192    32     
-48    -80    
80     96     
-400   -928   
224    -96    
-96    400    
-48    224    
272    -240   
240    -16    
-304   16     
256    -480   
192    176    
96     80     
304    16     
96     -32    
128    -1328  
96     80     
-32    32     
80     0      
96     16     
48     64     
160    48     
80     32     
-32    -64    
-128   -16    
96     0      
240    32     
-1712  48     
176    144    
-64    -48    
128    -240   
272    -16    
-16    -384   
128    -144   
192    112    
144    -48    
80     -112   
0      16     
144    -64    
-96    32     
-16    -176   
256    80     
-400   48     
64     -80    
240    0      
-16    -16    
-16    -16    
192    0      
96     -48    
64     -880   
144    64     
0      -80    
32     224    
192    112    
16     48     
208    0      
-64    -64    
-144   -16    
48     -64    
224    64     
80     -16    
32     64     
96     -144   
32     -64    
112    -80    
144    48     
64     32     
336    80     
-128   -48    
64     -16    
-32    96     
-64    -16    
112    128    
160    128    
32     16     
0      80     
32     48     
-48    -128   
80     -192   
0      -256   
-16    32     
128    -368   
-144   -48    
48     272    
1056   480    
-832   256    
96     -400   
-64    48     
688    320    
-1344  -688   
592    352    
-432   544    
-48    -192   
112    192    
480    16     
128    304    
208    -720   
-464   -176   
32     176    
16     32     
240    -96    
96     -160   
-16    272    
720    384    
-640   16     
400    640    
-800   160    
-192   112    
224    160    
400    144    
-16    208    
464    -320   
80     -112   
-432   -352   
-240   80     
-112   -144   
-128   320    
224    128    
48     48     
0      80     
416    144    
-192   -64    
128    -336   
-144   16     
64     -112   
0      96     
-160   -256   
496    -48    
-144   32     
-64    -64    
-32    -112   
-80    144    
-256   0      
80     64     
0      -128   
64     80     
-160   128    
-32    -16    
0      -48    
128    -192   
144    48     
240    -32    
-48    -32    
-320   -16    
-48    96     
0      48     
720    176    
-304   176    
16     -64    
-336   16     
-16    -80    
-32    32     
-16    0      
112    80     
-224   32     
-48    -32    
-752   -160   
-1504  -48    
224    96     
-1264  16     
-112   -160   
96     -96    
-416   96     
208    -64    
-96    0      
-16    96     
-80    64     
-32    16     
64     48     
-608   -128   
-48    32     
-32    32     
-256   48     
176    64     
-240   -32    
-160   0      
-880   112    
80     -32    
112    -16    
96     224    
-208   80     
112    48     
-288   -144   
160    80     
-144   -16    
-160   -64    
240    -32    
-80    32     
-32    -48    
-192   -128   
208    112    
-544   48     
0      0      
-1152  -160   
-48    -64    
64     -48    
96     128    
-144   -48    
0      48     
-48    -32    
-272   -64    
0      16     
-128   -48    
0      192    
-480   96     
-48    -128   
240    -208   
96     -224   
-624   160    
-48    384    
-320   352    
0      128    
-80    48     
96     -32    
32     -272   
144    -256   
-80    16     
-256   -16    
-128   160    
112    16     
128    128    
-64    64     
-64    80     
-304   -96    
-16    -208   
-688   -112   
-96    -144   
-64    -32    
-16    -96    
-64    -96    
-256   -240   
192    -672   
128    -96    
208    48     
-272   -48    
128    0      
-208   16     
-128   224    
-528   -192   
208    400    
-448   288    
48     -96    
128    -16    
-16    16     
-224   -80    
-16    0      
48     272    
-48    -240   
64     320    
-160   -112   
16     112    
-16    48     
32     96     
176    176    
-448   -560   
-176   0      
16     176    
0      -96    
128    0      
-176   -144   
0      -224   
-240   128    
96     160    
-96    -48    
208    304    
32     160    
128    32     
32     -64    
-272   -48    
-48    208    
48     160    
0      160    
112    -16    
112    64     
-112   64     
96     208    
48     48     
-128   -48    
-16    -432   
-416   -592   
288    272    
-416   0      
384    160    
-336   -80    
448    192    
-272   -16    
128    0      
48     0      
-80    -80    
16     32     
-240   -16    
0      16     
368    176    
-304   80     
208    48     
-64    -16    
-544   -64    
-16    32     
-256   -128   
656    80     
-288   -32    
-144   -32    
240    -96    
608    272    
-224   64     
1360   576    
-272   144    
-624   112    
-912   -384   
576    -128   
-208   64     
-288   64     
288    96     
-496   -48    
64     80     
-96    16     
16     -48    
336    0      
80     112    
32     0      
48     32     
80     80     
-48    0      
48     176    
-160   64     
192    -16    
-32    32     
176    128    
48     -96    
-176   -32    
-80    -80    
176    -64    
128    176    
80     16     
-32    -48    
208    32     
-144   64     
208    96     
-32    -48    
-176   -16    
32     80     
-336   -48    
352    -48    
128    144    
-272   64     
48     -16    
80     128    
48     0      
64     0      
240    176    
-112   96     
-272   16     
16     32     
80     -96    
208    -96    
80     80     
16     0      
288    192    
-240   -32    
48     -64    
208    96     
16     80     
-16    32     
224    80     
224    -48    
-368   -16    
144    64     
48     16     
80     -64    
-64    32     
0      112    
-96    -48    
64     32     
128    48     
32     624    
32     256    
16     16     
128    256    
-64    -32    
80     -16    
256    112    
-48    64     
-80    64     
176    256    
-16    208    
128    128    
-48    112    
64     96     
96     80     
48     -320   
128    64     
112    80     
-32    48     
144    -16    
144    16     
96     16     
80     80     
-80    80     
80     464    
160    208    
32     -160   
-160   -80    
0      0      
-128   160    
48     80     
160    224    
-48    64     
64     176    
256    64     
320    -48    
160    32     
80     64     
-16    64     
192    64     
32     16     
80     48     
-16    64     
-128   -272   
-16    80     
-224   -16    
-48    32     
64     -224   
112    48     
144    144    
-48    80     
224    32     
160    0      
32     -48    
96     32     
-80    64     
64     16     
48     16     
96     -48    
176    80     
224    96     
16     160    
-32    -192   
112    288    
-32    240    
64     240    
-144   0      
80     -32    
144    112    
128    16     
16     -80    
-48    -208   
160    112    
-80    32     
-160   -32    
48     208    
-16    816    
48     -784   
-16    48     
144    -112   
-16    -64    
-64    0      
112    -64    
16     160    
224    80     
16     48     
48     -16    
160    32     
144    128    
-96    -96    
-32    -320   
64     64     
-192   -208   
256    128    
-16    0      
272    -96    
0      192    
-96    -144   
16     -32    
192    272    
192    -16    
112    -96    
-96    320    
-48    -160   
-32    -192   
464    -272   
288    -16    
224    528    
-224   -32    
-288   -480   
-224   -384   
-480   -608   
48     128    
64     16     
480    144    
-32    96     
224    48     
-240   112    
176    -16    
-64    176    
-16    0      
-160   160    
48     160    
-144   240    
112    -384   
160    -368   
-224   -32    
480    -208   
128    -144   
368    -112   
288    -480   
288    144    
-464   -160   
-144   -80    
-304   -1520  
-96    -176   
96     288    
192    -96    
400    -112   
-16    80     
208    -208   
160    448    
144    -336   
208    -176   
-2080  -32    
64     64     
-32    16     
80     -288   
256    -176   
-208   -48    
208    80     
16     64     
160    -96    
80     16     
64     -64    
0      -16    
80     128    
64     48     
128    0      
-128   128    
-16    -448   
112    -288   
32     32     
112    96     
16     -464   
176    0      
-80    -336   
272    -16    
-144   0      
-128   64     
-176   -64    
-48    -96    
-48    128    
144    -32    
-64    -112   
208    -32    
192    48     
160    -48    
48     -16    
112    -48    
96     -144   
96     -384   
-80    -16    
160    -16    
-32    0      
80     -32    
16     80     
-32    16     
0      -16    
-352   80     
272    0      
-816   16     
96     -16    
96     16     
0      -96    
160    -64    
80     -208   
-32    16     
272    -240   
192    96     
48     -16    
176    -96    
16     16     
64     -80    
-64    16     
128    -16    
-64    128    
272    112    
-352   16     
16     -96    
0      16     
0      -48    
96     80     
224    -128   
48     -32    
-80    -64    
240    64     
16     80     
-48    -64    
-240   -144   
-112   -288   
-848   -208   
240    -560   
-1392  -96    
192    -160   
96     -96    
80     -96    
112    208    
112    -160   
-96    -192   
-208   -176   
192    192    
144    240    
96     -96    
-544   -384   
128    -416   
-336   160    
112    240    
-32    -64    
-160   0      
-112   -16    
80     336    
256    -160   
-48    -256   
32     80     
0      -112   
224    -256   
-96    -48    
-192   128    
-304   80     
160    -16    
256    -176   
320    288    
160    224    
192    -304   
-80    -96    
-240   -288   
-32    192    
320    -32    
-48    -16    
-16    -288   
32     -32    
-304   0      
160    0      
-64    48     
-64    64     
16     112    
112    -112   
-1392  -160   
176    -128   
-112   32     
-1008  -64    
144    208    
64     32     
208    0      
-112   16     
-432   -16    
-96    0      
-144   -48    
96     16     
128    16     
-16    32     
64     0      
48     64     
-592   -32    
80     64     
-192   0      
176    64     
-64    -32    
-80    -32    
32     -144   
-16    -80    
-48    32     
-496   48     
-48    16     
-1152  32     
-480   -48    
608    64     
-496   176    
192    -336   
144    -112   
-144   -64    
352    32     
336    464    
-560   -16    
-96    -32    
-304   -64    
-48    64     
-352   16     
-384   32     
-752   -80    
-32    -48    
192    -16    
112    0      
0      -80    
80     176    
112    224    
-720   -96    
-160   -192   
-80    -96    
80     0      
-32    32     
-592   -112   
112    -208   
224    -96    
-96    176    
-400   -80    
480    16     
80     144    
-528   -96    
112    64     
-112   -32    
80     48     
0      -32    
-400   -304   
320    -192   
-80    48     
-144   0      
208    80     
144    112    
-192   -128   
-64    64     
-1456  -96    
112    48     
16     -128   
128    0      
-96    80     
112    0      
-192   -16    
112    -80    
-128   80     
-144   -64    
96     64     
-112   16     
-256   -48    
160    272    
-400   160    
-176   -128   
160    -64    
176    -48    
-176   96     
-96    32     
208    128    
-208   -16    
-16    -64    
32     -128   
336    48     
-96    176    
-256   -224   
64     16     
-528   -96    
208    64     
-256   -48    
112    32     
0      -96    
-160   -80    
144    32     
0      0      
128    16     
-112   -112   
64     32     
-16    48     
-16    16     
-80    -32    
64     -128   
-112   16     
16     16     
-16    -192   
-160   -96    
-128   128    
0      96     
128    -80    
-32    0      
-32    32     
128    -32    
-144   -144   
-160   -208   
-16    96     
64     -48    
80     80     
-80    -48    
96     208    
-192   0      
16     -48    
64     -16    
64     48     
64     64     
160    -160   
-80    -272   
48     224    
-192   176    
-112   -240   
192    128    
16     160    
160    80     
-64    -32    
256    16     
-80    -16    
544    752    
-288   416    
-160   -592   
208    -112   
64     256    
16     -32    
32     -256   
160    -16    
32     32     
160    -208   
0      368    
0      -80    
-400   -64    
0      160    
-16    48     
-64    128    
112    144    
0      -96    
160    32     
112    176    
48     64     
-144   -160   
-272   32     
80     -1120  
320    288    
-80    224    
144    -192   
32     160    
112    48     
144    0      
-256   16     
32     -48    
16     80     
32     128    
-144   -16    
32     -16    
64     192    
-64    208    
-128   -16    
112    -192   
176    384    
96     -192   
192    -336   
48     304    
48     -64    
-16    32     
-128   144    
48     0      
96     96     
-64    -160   
16     -32    
192    416    
224    128    
-32    -64    
208    32     
-256   160    
-128   32     
80     -112   
-16    304    
96     32     
32     288    
144    -48    
64     -16    
112    16     
96     -192   
16     176    
-128   400    
80     208    
160    384    
-176   480    
-96    0      
64     -592   
-48    -240   
192    -1280  
320    560    
-352   208    
80     -80    
16     -128   
352    -32    
-128   80     
368    128    
-208   0      
128    192    
-128   336    
16     304    
368    368    
-32    -80    
-352   -128   
-176   96     
192    -16    
288    48     
128    -128   
128    -112   
64     96     
-16    80     
-128   128    
-352   -112   
-144   112    
-160   240    
320    160    
-16    0      
320    192    
-400   80     
-240   -480   
480    -48    
-208   224    
-16    -16    
80     64     
-80    80     
48     80     
304    16     
80     -32    
160    32     
-32    80     
288    -128   
-192   -96    
64     176    
-48    -96    
-96    -32    
208    -96    
224    -272   
64     16     
64     64     
80     16     
-16    256    
160    176    
176    -80    
-128   64     
112    -144   
288    32     
112    128    
-176   112    
352    0      
48     -48    
96     -48    
-96    -80    
-48    -96    
-32    -368   
64     224    
-80    32     
144    48     
-64    -64    
160    304    
80     256    
240    -112   
112    -32    
-80    0      
160    64     
32     -128   
176    96     
-32    -240   
80     48     
192    -304   
-48    48     
-64    -16    
0      64     
-64    64     
80     48     
80     112    
80     -144   
32     16     
0      -80    
144    -112   
64     -176   
-176   192    
176    -112   
-80    -16    
160    -224   
96     160    
-320   288    
80     192    
208    -64    
0      -32    
48     96     
208    16     
-64    400    
64     32     
192    -96    
64     -48    
16     128    
64     0      
32     192    
80     240    
128    464    
224    272    
192    -496   
-64    64     
0      176    
-32    224    
112    16     
128    -192   
48     48     
80     304    
64     -192   
48     80     
16     -112   
-16    -96    
32     304    
0      -1008  
-224   -128   
192    288    
-112   -288   
112    64     
32     -96    
-16    -16    
64     176    
48     -240   
144    48     
-352   -352   
112    32     
192    144    
144    -464   
288    128    
208    -32    
16     -80    
-32    0      
32     -192   
-1088  32     
144    48     
-16    -144   
-80    -208   
32     0      
32     -496   
160    48     
288    -880   
-208   -48    
80     -112   
-128   0      
80     32     
112    32     
48     -32    
80     -192   
-80    -32    
144    -48    
-32    64     
-64    -128   
96     -80    
80     -32    
144    48     
0      -1536  
-80    -64    
96     16     
-48    48     
144    -64    
32     128    
-112   -32    
48     16     
-528   64     
256    128    
-288   -32    
-48    -240   
224    -64    
160    -64    
144    -16    
208    -112   
80     32     
224    -208   
128    80     
96     -48    
16     -48    
-64    32     
48     48     
0      32     
-80    -32    
-400   0      
0      -128   
160    16     
-16    -96    
112    80     
-16    -400   
-16    -16    
32     -1488  
-128   -32    
320    -160   
16     80     
240    0      
-128   -128   
-160   -48    
256    16     
64     -112   
-48    -144   
-1568  -32    
736    176    
-400   -48    
368    -288   
-64    96     
-128   -320   
288    16     
208    144    
224    -32    
16     -80    
368    80     
-704   144    
-32    -64    
336    32     
-240   -128   
-1040  -48    
112    -16    
112    64     
-96    -192   
880    480    
-848   -96    
-144   -224   
400    -48    
144    16     
-560   -48    
-80    -224   
544    -16    
16     80     
-608   -80    
336    -256   
-576   -32    
208    0      
176    80     
208    -32    
-80    48     
128    -144   
48     32     
-480   32     
48     -64    
0      16     
144    -240   
32     -128   
-160   144    
-256   -16    
320    -32    
-432   64     
192    -48    
128    128    
-1712  -128   
-272   0      
-16    0      
-336   -112   
-32    128    
-752   64     
-96    -160   
32     -176   
-352   -48    
80     0      
-272   -80    
144    -32    
384    176    
-320   -16    
144    -16    
-240   0      
288    160    
-176   48     
-656   -112   
160    48     
-176   -16    
-80    -32    
-1856  -160   
64     -16    
-128   -160   
272    256    
160    16     
-48    160    
-272   -128   
112    -112   
0      192    
-96    -192   
-64    -112   
32     512    
-240   64     
176    80     
-192   -480   
-960   160    
-16    -144   
-384   112    
0      64     
-128   -96    
336    192    
-336   -112   
-32    80     
16     -32    
48     208    
-256   -304   
-64    80     
48     176    
176    -96    
-32    -112   
-224   512    
0      96     
64     -416   
176    176    
-240   -144   
272    144    
-80    48     
16     -416   
32     528    
-288   -304   
-48    -80    
0      192    
80     208    
-144   -48    
112    64     
96     416    
-16    -272   
-496   16     
128    64     
-32    -80    
80     0      
-16    160    
-144   -144   
48     192    
64     384    
-192   -768   
-48    160    
160    480    
-16    -272   
-224   -304   
-272   -112   
-224   144    
-336   -64    
96     80     
-1440  -48    
48     32     
-288   -496   
-48    -336   
0      128    
320    64     
112    352    
-80    -32    
-64    -400   
160    112    
576    96     
16     64     
32     32     
-208   -32    
128    96     
-480   -192   
-16    -16    
48     -48    
-224   192    
400    240    
-16    64     
-16    32     
32     48     
-160   -16    
-128   64     
32     272    
-80    -16    
96     64     
-224   -128   
16     -96    
-624   -128   
16     32     
16     96     
128    64     
-32    32     
16     32     
0      80     
-112   64     
32     16     
-48    -96    
96     48     
-64    -64    
64     64     
-144   -32    
-32    32     
-160   -128   
160    64     
-16    64     
336    288    
-224   -160   
144    -176   
224    16     
64     0      
176    144    
-32    -80    
-112   128    
-16    96     
-32    -48    
176    -352   
144    -32    
-32    128    
-96    384    
176    304    
-16    176    
-16    272    
-144   -432   
16     48     
-16    176    
-304   -160   
64     -64    
32     -32    
592    352    
-32    208    
-16    288    
-80    224    
-96    192    
-400   96     
-352   -176   
368    -192   
176    32     
208    128    
-64    16     
-64    288    
528    384    
-400   144    
-160   224    
-96    128    
-240   -240   
-224   -48    
224    -32    
272    176    
112    -48    
-16    48     
176    128    
-208   160    
304    64     
-176   48     
128    -224   
192    0      
-256   16     
256    32     
-272   80     
192    48     
-208   -192   
272    -288   
16     48     
144    -80    
-32    0      
176    -272   
48     144    
-112   112    
96     80     
-16    -80    
48     -64    
-240   -208   
336    112    
-96    272    
352    192    
208    96     
16     -176   
64     -48    
16     -16    
192    -80    
-16    -64    
-192   80     
0      -16    
96     32     
176    160    
0      160    
-128   160    
96     80     
-16    128    
320    128    
-208   176    
272    128    
-144   160    
0      96     
0      32     
-128   48     
288    -224   
128    32     
96     80     
-80    0      
160    -144   
384    240    
-144   640    
-48    400    
-32    -16    
112    240    
-64    576    
80     432    
160    -16    
-16    16     
128    144    
160    -64    
112    96     
48     0      
-272   112    
64     -336   
96     192    
-48    -112   
16     80     
64     -96    
448    144    
32     -1008  
-64    48     
-48    32     
16     336    
-32    -16    
0      -160   
-176   64     
-64    64     
-48    -16    
160    240    
176    112    
112    96     
-48    32     
16     -64    
16     -704   
-112   -832   
-208   32     
-96    256    
128    96     
112    32     
-272   0      
128    -16    
96     0      
80     -144   
368    32     
80     64     
160    16     
32     -32    
144    32     
64     176    
192    -64    
-272   -112   
-48    240    
224    160    
-96    0      
128    -32    
160    32     
112    192    
-208   -32    
96     -64    
-64    16     
240    256    
192    160    
160    -112   
-80    16     
96     -48    
32     0      
-64    -176   
144    112    
48     -1184  
0      -16    
32     16     
272    96     
304    48     
-320   -32    
80     -32    
224    -32    
64     80     
240    0      
176    64     
-16    -368   
-96    0      
80     -208   
32     -16    
80     -464   
64     64     
-32    16     
128    -16    
224    32     
-128   64     
128    48     
32     -320   
64     0      
144    -32    
16     -64    
-16    -48    
48     96     
32     -32    
128    48     
-16    0      
240    128    
16     -16    
320    144    
-320   0      
368    -96    
-112   16     
304    -144   
80     64     
64     -160   
160    -192   
-64    48     
160    48     
-64    16     
48     -48    
48     -288   
32     -640   
-64    -160   
384    -288   
-320   80     
-80    -96    
80     -992   
64     -48    
-96    -64    
-32    -144   
0      80     
-96    -48    
272    0      
80     64     
-224   -288   
400    112    
-272   -80    
-304   -176   
160    -224   
-32    -144   
-1136  -64    
288    32     
64     -64    
32     -384   
32     -272   
544    -480   
512    144    
-160   0      
208    -48    
368    128    
-208   -16    
208    -64    
160    128    
-528   -192   
192    -80    
-1280  64     
336    -96    
0      -176   
64     -32    
256    -80    
-80    48     
32     0      
176    -576   
176    -32    
160    80     
-256   192    
224    -64    
128    16     
64     160    
96     160    
-960   -32    
112    320    
48     -144   
-112   -384   
16     656    
368    -112   
-160   -16    
128    -272   
224    64     
112    -192   
112    112    
-32    96     
400    48     
-176   80     
-48    -80    
-352   16     
-32    -48    
176    432    
-560   448    
144    -544   
352    -96    
-224   384    
272    -592   
-16    16     
176    288    
-144   224    
304    -128   
192    -256   
-224   48     
48     160    
64     144    
352    240    
-544   96     
32     48     
96     288    
-176   -496   
-176   -176   
32     16     
160    432    
272    -912   
48     -32    
16     -48    
-64    -128   
-176   -64    
128    48     
-240   -16    
128    -16    
-768   96     
48     304    
-2224  -96    
48     -80    
64     48     
64     -160   
144    -144   
96     -400   
112    144    
64     112    
64     96     
224    304    
-96    208    
-304   32     
240    -128   
-224   176    
192    32     
96     -16    
352    336    
48     784    
32     -32    
96     -32    
80     -544   
48     -224   
-336   128    
-32    -80    
-272   16     
256    128    
-352   112    
32     0      
112    -208   
208    -112   
320    -80    
96     -144   
-48    -80    
32     -208   
16     16     
-16    -48    
496    224    
-464   112    
0      -80    
16     -48    
16     0      
-16    48     
144    208    
-32    16     
160    48     
-480   384    
-2320  -208   
112    -144   
-848   -48    
64     96     
-16    -64    
-976   -80    
-288   -176   
336    -96    
-16    160    
128    128    
-16    144    
192    16     
-112   -160   
160    -32    
144    272    
128    0      
112    96     
144    16     
-80    48     
-272   128    
-144   -144   
-80    96     
-224   32     
-48    96     
-592   16     
-80    0      
32     0      
64     -96    
-224   -320   
112    -64    
-160   64     
208    -224   
-64    -128   
-64    144    
-208   240    
128    352    
-64    -144   
96     64     
32     96     
48     224    
-224   -128   
-1376  -80    
32     -32    
-160   -16    
192    48     
0      -128   
-80    32     
-16    -352   
-144   -304   
240    -96    
208    80     
-64    16     
-288   -144   
-160   -144   
-624   64     
-336   304    
-688   240    
432    112    
304    208    
-256   0      
-80    688    
-272   176    
96     112    
-96    64     
96     32     
96     272    
-336   112    
16     80     
368    -16    
352    592    
240    272    
-336   -32    
160    -96    
256    32     
128    16     
-560   304    
-80    144    
48     -144   
-48    -48    
-32    -144   
-144   -144   
-416   -16    
416    -32    
-80    304    
432    416    
-80    336    
-336   16     
-64    -448   
-1056  -96    
0      -320   
-80    -96    
-96    -96    
192    -128   
32     48     
144    -32    
-144   -16    
416    32     
-448   96     
368    -64    
-192   -352   
-128   -336   
-432   -416   
96     80     
-608   176    
176    -64    
-96    -288   
352    336    
-400   544    
-160   160    
160    -352   
64     144    
16     400    
-48    144    
-144   -448   
-288   -592   
32     640    
-224   112    
32     -192   
-256   -128   
-96    384    
-96    48     
-48    112    
-16    -16    
48     128    
112    -48    
96     128    
-16    -272   
-224   160    
32     208    
96     -304   
-80    256    
192    48     
-48    -112   
-160   64     
-80    464    
128    240    
-16    -144   
32     0      
96     304    
32     48     
-160   -432   
16     80     
-192   112    
48     32     
-64    32     
256    -16    
-48    -32    
64     96     
160    -32    
16     -80    
-16    160    
0      64     
144    0      
-176   0      
-80    80     
-16    -208   
-80    -512   
-16    -48    
96     112    
32     -48    
-208   -32    
-48    -64    
160    144    
144    192    
-160   112    
48     -16    
176    32     
128    224    
-80    208    
16     -112   
288    -64    
112    80     
96     64     
32     16     
-160   -16    
80     160    
-80    0      
32     -16    
-32    -80    
64     176    
-144   96     
48     48     
0      48     
224    64     
96     16     
96     64     
64     -16    
32     32     
32     64     
-176   -160   
-48    64     
-160   48     
-64    0      
112    -16    
224    272    
-240   48     
320    224    
80     176    
160    48     
176    32     
16     -48    
-224   32     
-208   -16    
144    48     
192    112    
32     112    
224    80     
-112   48     
128    64     
144    16     
48     80     
208    64     
32     96     
48     16     
-160   32     
16     16     
128    48     
16     48     
208    112    
96     192    
-80    -144   
-16    48     
160    192    
-96    48     
112    16     
48     0      
0      -16    
0      -32    
16     48     
128    32     
32     0      
352    144    
-144   32     
112    48     
-112   -16    
32     -224   
144    64     
16     -368   
128    -32    
176    128    
80     64     
128    64     
48     80     
96     16     
0      -192   
-256   -16    
80     96     
-80    -128   
96     32     
160    320    
-80    -32    
256    16     
-320   -1296  
352    -16    
-128   304    
192    16     
-224   -48    
-32    -192   
480    -144   
112    160    
-64    -128   
208    0      
-192   -96    
96     80     
-368   224    
176    256    
336    448    
-336   -112   
-208   96     
80     -96    
480    464    
-288   384    
352    -32    
-240   -208   
0      -64    
-320   -192   
192    128    
176    16     
64     16     
224    -16    
208    -176   
64     -32    
80     320    
-32    48     
80     -256   
96     144    
144    -304   
144    352    
-128   -288   
128    128    
48     48     
80     128    
16     128    
448    272    
-192   -224   
-208   -272   
80     336    
64     -256   
224    192    
304    64     
400    -96    
-80    688    
-64    -96    
112    -464   
-112   -176   
-32    192    
160    368    
176    -208   
-224   -256   
32     -400   
112    -304   
0      16     
160    -224   
240    160    
16     32     
48     0      
112    0      
112    144    
-64    -176   
-96    -112   
192    -176   
16     -64    
112    48     
32     -48    
80     48     
0      16     
112    144    
32     -144   
16     -48    
176    -336   
48     32     
64     64     
80     144    
0      48     
-16    -912   
112    112    
80     16     
48     -624   
224    -128   
80     -32    
112    -64    
208    64     
-32    -16    
-16    32     
-112   -176   
160    272    
144    112    
16     -480   
96     -80    
0      -80    
208    48     
64     0      
224    -672   
-160   -48    
64     -992   
64     0      
80     112    
80     -48    
96     112    
128    -96    
64     -240   
192    16     
208    -32    
-112   -16    
128    -48    
48     -128   
32     -80    
416    -96    
96     48     
192    -592   
16     -48    
32     -256   
-32    -128   
80     96     
144    -128   
192    -128   
80     80     
-16    64     
-208   -48    
-368   -48    
-64    -144   
-2224  -16    
48     64     
176    176    
48     128    
64     -128   
240    -128   
144    32     
320    -400   
-112   112    
128    48     
160    128    
224    160    
64     64     
240    96     
-96    48     
-448   -96    
112    -48    
80     -48    
-32    48     
256    -16    
-64    -368   
144    -80    
176    -688   
96     -16    
0      -48    
0      -176   
-48    -144   
-64    64     
-192   -112   
240    48     
-448   96     
256    -160   
176    -64    
192    -48    
-144   -32    
112    80     
-176   16     
112    -272   
112    0      
-16    64     
208    176    
16     128    
240    288    
-128   16     
48     32     
-160   -16    
144    0      
-704   -80    
32     16     
-96    -112   
112    -288   
48     -112   
128    -336   
208    352    
-32    160    
-208   272    
64     256    
80     112    
-16    304    
-16    -160   
32     -96    
320    592    
256    1296   
96     160    
-784   -576   
160    656    
432    448    
-432   -688   
-112   -880   
112    240    
32     96     
80     432    
256    64     
-144   -704   
-32    112    
-48    224    
-80    -320   
-288   -16    
64     496    
-224   0      
272    -112   
-144   480    
-128   0      
128    576    
-240   176    
-160   -928   
-176   -784   
256    544    
-160   32     
-528   528    
112    1184   
224    -528   
-800   -336   
480    688    
-1008  -544   
-272   -608   
640    480    
-752   -176   
480    128    
-336   -608   
336    624    
-128   -160   
96     160    
80     -272   
416    496    
-224   -288   
160    64     
96     240    
80     -240   
64     192    
-320   208    
288    -240   
48     -64    
-496   448    
-624   -416   
80     -80    
160    320    
-528   -272   
96     -80    
-1216  48     
-80    -80    
-192   0      
176    0      
-352   -16    
16     -48    
-304   -192   
96     48     
32     -32    
-144   128    
192    176    
-80    192    
-160   112    
176    16     
-192   -48    
-400   -208   
80     -48    
-64    176    
32     32     
-208   32     
176    112    
0      352    
-80    -128   
-32    -64    
-32    256    
80     160    
-80    160    
-176   -64    
-208   80     
176    -16    
112    112    
128    48     
-272   -480   
-160   -48    
-144   -128   
-160   -64    
144    -16    
16     32     
32     -16    
-48    0      
-32    -16    
32     -48    
16     64     
80     80     
80     -48    
-384   -80    
-48    0      
-496   -48    
96     32     
16     -48    
-256   -320   
144    -128   
48     112    
-144   -32    
96     208    
-224   32     
16     0      
112    32     
80     64     
-32    80     
-208   -32    
32     16     
-336   0      
176    112    
-448   32     
112    560    
-48    80     
64     -160   
-16    64     
0      80     
48     -144   
-416   -16    
64     112    
-160   -128   
64     -208   
224    176    
144    112    
0      -16    
176    80     
-2160  -80    
144    48     
-16    0      
192    16     
96     64     
48     64     
16     0      
144    80     
224    144    
-96    16     
-48    -16    
-192   -176   
240    336    
-864   112    
-64    -192   
-736   -208   
32     96     
160    32     
128    0      
144    32     
-16    96     
128    -64    
-144   -64    
-128   -16    
144    80     
128    0      
64     32     
80     112    
-128   -16    
-48    -48    
-272   -32    
64     16     
32     32     
-32    32     
-64    -48    
144    16     
0      0      
80     48     
208    160    
-176   48     
96     16     
-256   -64    
48     48     
-48    32     
96     32     
-48    16     
16     48     
144    16     
16     32     
48     64     
16     0      
16     16     
0      0      
-64    -16    
-224   -128   
-16    -160   
-64    32     
96     16     
0      -32    
144    112    
16     112    
-272   192    
16     0      
32     16     
112    144    
112    256    
-128   96     
96     -64    
112    48     
16     64     
384    128    
112    208    
208    384    
-624   160    
-128   -48    
224    32     
-224   16     
32     96     
-112   -64    
-48    -96    
-192   352    
128    -16    
-128   -192   
400    128    
176    80     
192    64     
-160   304    
-1328  -2096  
848    -368   
-640   1136   
-816   592    
400    -368   
-112   464    
736    496    
-64    -816   
240    208    
-160   448    
48     -304   
32     -32    
-352   64     
336    272    
16     368    
256    128    
160    272    
112    96     
224    128    
0      400    
80     96     
80     -16    
-208   -272   
128    -416   
-32    -16    
-256   -192   
336    -128   
16     128    
-64    -288   
-96    -112   
-16    -192   
-32    144    
64     -80    
16     16     
96     0      
80     224    
64     144    
96     -32    
16     16     
48     96     
-96    144    
208    144    
240    224    
96     -32    
0      0      
64     -112   
-176   96     
-16    96     
16     32     
192    16     
128    96     
16     -16    
144    0      
48     16     
224    0      
112    48     
48     48     
144    -32    
-32    112    
208    32     
176    -128   
-224   128    
176    -1376  
32     32     
-112   48     
112    128    
64     16     
-16    80     
-48    0      
128    80     
-16    144    
80     32     
112    48     
176    64     
176    80     
-80    -32    
-160   -96    
80     -192   
64     64     
-32    -48    
48     32     
160    -112   
32     32     
112    -128   
0      112    
-48    96     
160    -64    
-48    -48    
80     -112   
48     16     
144    -48    
32     16     
176    -400   
272    160    
-64    240    
-64    16     
-240   0      
-208   -32    
128    16     
240    64     
16     16     
256    192    
-240   16     
0      -32    
112    -80    
384    -176   
288    128    
-16    -48    
48     80     
-208   -128   
224    -112   
112    -16    
144    96     
112    96     
16     96     
-224   -16    
112    -32    
96     32     
208    64     
48     144    
80     32     
192    0      
-384   -624   
320    -352   
128    176    
-112   -96    
-48    -128   
-16    -32    
-64    -48    
16     32     
64     -272   
384    80     
-112   112    
224    -352   
416    -128   
-64    -208   
208    -32    
-112   -112   
112    16     
128    -128   
-48    336    
-32    -96    
176    -208   
64     -32    
-112   -240   
-80    -48    
48     -576   
-256   -544   
32     -528   
96     224    
256    -128   
96     64     
304    -96    
0      144    
-224   -640   
192    0      
128    272    
-96    160    
96     -144   
128    16     
192    -288   
256    128    
-16    -1344  
96     64     
144    1024   
-48    -80    
0      -256   
-304   -144   
96     80     
112    -16    
-32    -144   
256    288    
-48    -32    
96     0      
-112   -112   
-48    -16    
-64    800    
0      -192   
-48    -640   
-272   -272   
64     64     
96     -752   
-160   -192   
224    320    
192    144    
320    -304   
192    64     
-96    -32    
96     -32    
-528   -112   
480    -176   
464    -64    
-256   16     
304    -128   
-304   -544   
-240   -256   
64     -176   
96     208    
112    -176   
0      -368   
288    48     
272    -48    
320    -48    
48     48     
96     16     
16     0      
-1216  -112   
160    -16    
240    208    
-16    32     
144    -64    
-16    48     
32     32     
32     -144   
64     144    
-48    48     
160    48     
224    16     
96     0      
-272   -80    
208    -352   
-832   -240   
176    -80    
-112   -64    
144    -192   
-96    64     
128    -176   
176    -80    
-128   -1040  
32     16     
144    48     
-208   96     
-48    112    
416    -16    
-176   -16    
80     -48    
-224   32     
-96    -128   
-1664  16     
0      32     
-32    -160   
112    -32    
128    128    
80     -64    
96     224    
208    32     
-112   -112   
-224   -128   
208    -80    
-192   16     
64     224    
176    128    
208    -112   
-1440  -192   
80     -192   
-976   -112   
112    0      
128    96     
224    -128   
176    272    
-96    -1392  
-48    16     
-80    16     
192    -128   
-96    -80    
112    0      
-816   -96    
16     -112   
-848   -32    
128    -48    
144    16     
32     -48    
96     64     
48     -256   
48     80     
32     -912   
96     -48    
144    48     
-64    -16    
-272   -144   
176    -32    
-176   144    
208    -64    
-48    -80    
128    -128   
144    80     
240    -80    
112    48     
0      -176   
16     160    
48     0      
160    0      
-128   0      
48     -336   
80     -560   
128    48     
128    208    
160    -16    
80     -96    
-16    -160   
-640   64     
-208   -96    
-96    -32    
-240   0      
-32    144    
-112   64     
-464   -96    
-320   -224   
-1584  -128   
-80    16     
16     48     
-48    32     
64     -48    
-176   -96    
-592   -192   
16     128    
-336   -80    
208    48     
-496   -208   
-240   -128   
224    16     
-48    32     
32     -16    
-288   -32    
48     80     
-80    96     
-288   0      
96     -96    
-112   48     
-112   -64    
-32    0      
-208   0      
16     112    
-208   80     
-48    64     
112    16     
-160   -48    
-16    -32    
-368   -80    
-80    -32    
-208   48     
32     32     
-128   -176   
128    0      
224    -16    
128    80     
128    -80    
-144   0      
0      16     
-176   32     
32     0      
-64    32     
-48    80     
48     96     
-80    16     
-192   -48    
-48    32     
-416   -32    
-32    32     
-32    -64    
32     -128   
-144   -176   
-16    0      
-32    -160   
192    -208   
432    464    
-336   -400   
272    -64    
96     288    
-224   -32    
48     160    
-96    -320   
-672   560    
224    -208   
-416   -368   
128    112    
64     -240   
-48    112    
160    128    
-64    64     
48     96     
16     -128   
-48    -32    
544    -1008  
352    320    
-80    592    
-112   -368   
-1152  176    
320    352    
224    32     
624    384    
128    224    
-112   -144   
-64    -96    
-48    32     
-128   -80    
-480   -704   
240    -384   
304    224    
-432   432    
-384   96     
192    336    
-240   -176   
256    -16    
-1232  -16    
-80    32     
32     96     
-256   32     
-176   -32    
-144   -32    
288    32     
144    224    
192    320    
-240   -16    
-16    -64    
-240   -64    
64     128    
16     288    
176    224    
-272   -32    
-112   -80    
128    48     
16     96     
128    64     
304    96     
32     96     
-240   -48    
-240   -144   
-32    -64    
32     304    
352    160    
64     64     
-176   -48    
48     -48    
-48    48     
64     -112   
192    -48    
-32    128    
-80    32     
96     16     
-128   192    
192    112    
-80    -32    
-96    -48    
96     112    
32     80     
32     64     
-208   -32    
96     80     
-16    -48    
80     -48    
144    80     
48     48     
-64    160    
224    48     
64     0      
-64    32     
-80    -32    
-32    16     
224    128    
-96    16     
176    32     
16     48     
-48    48     
160    16     
80     96     
-16    80     
-144   -32    
-16    16     
208    96     
-16    -32    
112    -16    
64     80     
-160   0      
144    96     
-80    -96    
288    160    
-176   144    
64     16     
32     48     
64     16     
-16    80     
-32    -32    
96     16     
224    112    
-64    224    
-64    -64    
-96    -32    
-48    48     
-240   128    
0      80     
-48    304    
160    32     
224    -64    
96     48     
-48    -96    
80     -48    
-272   -48    
-176   32     
-112   -240   
320    -32    
112    80     
144    96     
80     -16    
-176   -176   
192    -272   
64     -112   
0      64     
-48    80     
-80    96     
-176   -128   
-32    -144   
384    -672   
208    -80    
48     -32    
-224   -176   
0      -32    
-112   192    
-224   640    
256    -320   
-128   -752   
-160   208    
128    -32    
96     48     
-48    -160   
304    80     
-112   272    
96     160    
320    64     
144    432    
-16    -96    
160    128    
208    -80    
-16    112    
-96    -384   
224    0      
80     -176   
112    -144   
-48    64     
272    -96    
0      128    
-32    -176   
-80    208    
48     160    
-32    272    
256    304    
-80    -176   
48     112    
48     16     
-32    64     
128    64     
160    112    
-48    64     
80     -736   
64     32     
112    0      
144    80     
240    112    
0      32     
-112   -96    
-48    -96    
-224   80     
112    -128   
-16    16     
128    0      
192    80     
64     -224   
-160   32     
-64    -736   
48     384    
48     32     
288    160    
64     80     
176    32     
-400   -32    
-144   96     
-160   -32    
80     112    
192    128    
-144   -320   
384    -48    
64     80     
-96    -32    
432    -32    
-80    112    
-96    -1600  
128    -512   
208    -208   
-176   384    
-720   -336   
496    -144   
240    128    
-368   80     
304    192    
-368   -288   
352    96     
512    160    
208    208    
-32    -208   
96     16     
272    -544   
-96    64     
-32    -80    
608    -80    
144    48     
32     176    
-128   80     
-112   -128   
-16    32     
160    -48    
0      48     
144    -368   
64     32     
160    -112   
64     0      
224    -464   
-144   -144   
96     112    
128    176    
64     -64    
160    64     
-16    -32    
16     -48    
0      -16    
-64    -16    
64     352    
496    64     
-32    -96    
-32    -176   
-64    80     
96     144    
112    112    
-96    -64    
80     80     
176    80     
176    32     
112    96     
128    32     
256    96     
-48    -112   
16     -96    
192    -48    
0      80     
112    -64    
208    64     
-16    -32    
-48    -352   
160    48     
160    -816   
0      -80    
-48    -112   
144    -80    
80     32     
-16    -96    
-32    -160   
16     -1344  
304    -96    
224    32     
208    288    
32     112    
112    -144   
304    -352   
-128   32     
48     -80    
128    96     
-384   64     
0      -64    
192    -80    
96     -352   
80     -32    
0      -112   
160    -64    
80     -368   
144    32     
0      64     
64     32     
256    0      
-80    96     
32     -208   
-32    -240   
-176   -16    
144    48     
-352   32     
112    -96    
96     -64    
160    -80    
208    0      
-304   -768   
416    304    
-160   688    
-32    384    
352    32     
64     80     
320    -48    
256    448    
-400   48     
208    -384   
-432   -320   
320    464    
160    80     
0      -160   
48     -112   
16     -192   
208    -80    
80     -560   
0      112    
48     0      
-16    0      
176    304    
128    144    
-160   -144   
32     32     
-768   80     
48     -16    
80     48     
32     112    
144    48     
128    160    
-32    192    
80     -288   
16     -16    
-48    -144   
64     48     
16     208    
272    -32    
-160   -240   
-160   -288   
-400   336    
128    256    
-160   -32    
256    -96    
-304   288    
256    368    
352    -144   
128    -544   
16     -224   
240    48     
128    448    
-176   -288   
320    -48    
-224   0      
128    -208   
-368   16     
64     -144   
-272   128    
112    16     
-720   -48    
144    96     
-176   -384   
192    -352   
160    272    
48     -80    
80     96     
-144   0      
144    80     
-496   -16    
160    -480   
-96    320    
64     -384   
-64    240    
112    -32    
128    -160   
192    64     
-384   -512   
48     -496   
96     192    
352    128    
240    -64    
-496   -272   
-224   368    
-128   64     
-80    272    
224    48     
-64    -288   
-64    -16    
336    -208   
-192   -64    
160    -160   
224    32     
160    -208   
288    144    
-128   -64    
272    -112   
-496   48     
-336   192    
-192   -64    
-96    -48    
0      -128   
16     -80    
-224   -144   
80     0      
-720   -288   
-128   -240   
-144   -192   
-304   -160   
-384   176    
-208   64     
-320   208    
48     -112   
-704   -32    
-112   -80    
256    -16    
-176   544    
176    144    
288    -288   
-304   64     
160    112    
-832   -352   
240    -160   
-224   208    
-32    32     
-96    0      
-80    144    
0      192    
-304   96     
16     224    
-256   96     
80     16     
416    80     
-80    32     
-128   -176   
-192   -208   
176    0      
0      272    
-240   -16    
-32    -320   
192    96     
-320   144    
64     32     
-288   -160   
-208   -80    
-240   -192   
96     208    
64     -80    
0      -32    
-352   -96    
256    96     
208    -32    
144    48     
16     80     
208    128    
-272   0      
16     -112   
48     16     
-16    0      
48     -80    
-256   0      
-112   32     
-1040  -48    
80     48     
-96    192    
64     176    
-16    -112   
240    160    
-48    192    
-352   -256   
272    -240   
64     144    
-48    96     
-160   -16    
208    -64    
-352   16     
80     -16    
-304   -48    
-64    16     
-48    -80    
192    16     
32     32     
-112   -16    
-64    -48    
-64    32     
32     48     
-144   192    
-80    32     
-32    -16    
-96    -48    
-176   -32    
-48    160    
-272   240    
64     48     
-1712  -112   
128    64     
-64    -96    
96     -128   
-272   -384   
-128   -432   
96     -752   
64     32     
112    144    
64     208    
-32    688    
48     64     
-160   -304   
-208   176    
-160   0      
-912   -800   
256    480    
224    320    
-48    -176   
-176   -32    
-48    32     
96     0      
32     48     
80     96     
-112   96     
0      -192   
16     576    
-48    -64    
-240   -240   
240    304    
144    224    
-48    -16    
-16    -128   
144    160    
-352   -272   
0      -192   
-16    80     
112    64     
192    96     
-16    32     
-32    32     
-336   80     
-208   -32    
-176   32     
608    240    
-112   48     
80     32     
160    -32    
-48    -80    
0      -48    
192    -128   
64     -64    
48     16     
-64    -16    
-48    48     
0      64     
-48    96     
128    80     
-144   -48    
96     -144   
176    0      
-16    32     
112    32     
-16    -16    
96     -16    
256    288    
-256   32     
-48    48     
48     16     
-48    -16    
112    48     
-64    0      
16     80     
-192   32     
-80    80     
80     176    
112    128    
-80    16     
-16    32     
80     16     
-112   -32    
272    64     
-48    64     
256    48     
-144   -64    
80     128    
-144   16     
160    112    
-272   -144   
-64    0      
-16    128    
-32    0      
-64    -64    
160    80     
-224   -80    
368    -96    
128    112    
-112   0      
688    160    
-352   -32    
48     0      
160    224    
-448   -16    
384    16     
112    192    
-304   32     
256    48     
-320   -16    
192    -48    
64     -304   
-112   -176   
-48    288    
-336   32     
80     -48    
-288   -128   
144    128    
240    16     
-192   -448   
160    96     
176    128    
-112   16     
-128   96     
-32    32     
-64    48     
0      48     
64     48     
48     80     
-64    0      
128    32     
-176   -144   
96     -224   
48     48     
48     -416   
256    0      
32     16     
-224   32     
32     16     
208    176    
0      80     
-32    0      
320    224    
-48    80     
112    64     
96     144    
16     48     
208    112    
-32    64     
32     -496   
-32    80     
48     -96    
144    144    
32     64     
80     0      
48     -16    
64     32     
-16    96     
128    160    
-80    -48    
-32    48     
112    128    
96     -144   
208    -64    
128    -224   
0      -160   
0      -1056  
-32    256    
-32    128    
112    16     
-16    0      
240    160    
16     192    
128    192    
-112   -96    
48     192    
-16    192    
96     -144   
112    -16    
80     0      
32     80     
-16    -656   
16     -256   
80     -96    
48     16     
96     304    
-144   -336   
-16    -32    
160    320    
-96    -272   
32     224    
-144   -176   
304    -416   
80     160    
-176   -80    
64     144    
-112   -336   
224    144    
160    -32    
64     208    
112    16     
256    32     
0      -96    
208    16     
-512   0      
0      272    
416    -64    
-80    -992   
432    352    
0      -32    
-96    -16    
-64    -672   
-176   -80    
32     384    
-80    80     
-80    -976   
144    176    
128    -304   
528    688    
-336   -768   
0      -240   
208    512    
32     224    
-112   -256   
256    -64    
208    112    
64     -16    
-128   128    
48     -448   
128    48     
-16    0      
192    -96    
64     -64    
0      448    
32     16     
-80    -976   
128    80     
192    16     
0      192    
48     -320   
208    -48    
160    336    
-128   192    
32     -32    
32     224    
32     48     
336    448    
-256   -496   
80     -912   
192    -80    
224    48     
208    -672   
112    -144   
-256   64     
160    -272   
176    32     
-64    16     
48     48     
-16    -32    
160    -400   
-16    -48    
32     -608   
112    -240   
-1536  -192   
240    -240   
208    464    
0      320    
288    80     
-32    -32    
16     16     
112    128    
80     112    
48     208    
-64    112    
96     -128   
0      -16    
112    -112   
112    48     
-176   64     
96     96     
192    368    
48     32     
144    544    
624    560    
-240   80     
0      -864   
144    -208   
208    -176   
256    -64    
-208   192    
80     16     
96     -176   
240    -80    
-32    80     
224    -128   
288    -192   
-16    0      
32     -176   
80     -80    
128    48     
96     192    
416    48     
336    -208   
-48    -128   
-336   32     
-368   96     
-32    -16    
48     32     
-384   -160   
96     -96    
-2144  -32    
-48    -80    
144    -160   
-128   -160   
256    0      
-64    -128   
80     64     
64     -432   
32     -64    
-80    -32    
48     336    
64     16     
272    -112   
-80    112    
64     -48    
-192   16     
112    48     
-16    -32    
128    -176   
112    -224   
16     -112   
-48    32     
96     -224   
0      32     
256    112    
160    16     
-240   -48    
368    128    
-432   80     
48     -64    
-688   -336   
624    -416   
-2544  -144   
416    208    
-144   -16    
-48    -128   
-32    0      
-64    -16    
128    -240   
96     -256   
224    -80    
-128   -48    
-128   16     
208    -256   
96     144    
16     96     
112    -32    
-272   -80    
176    32     
544    288    
-112   240    
-112   64     
-96    -240   
144    -32    
0      0      
320    48     
16     256    
272    0      
-208   48     
112    -112   
-464   -320   
-64    -400   
240    -80    
128    -96    
144    -80    
128    80     
64     64     
48     80     
32     -32    
80     128    
-48    256    
-368   0      
224    -176   
0      -128   
0      -32    
-96    0      
176    -96    
-32    80     
240    -16    
-32    -192   
0      -224   
-48    128    
-992   -160   
16     112    
-272   -384   
-912   144    
-192   -96    
-64    -16    
128    96     
-64    -112   
-32    32     
48     -80    
-256   64     
-256   -816   
-288   48     
-544   368    
16     -48    
-144   -80    
-352   -32    
-192   -32    
-80    336    
-256   224    
-400   784    
240    336    
-320   -32    
-48    96     
208    -16    
-144   32     
32     16     
-48    112    
-48    -64    
-48    96     
-96    -64    
16     -32    
0      32     
-352   80     
-160   32     
-16    32     
-256   112    
-1232  -64    
16     -80    
256    0      
208    32     
-16    112    
176    96     
-240   -96    
-352   -16    
32     48     
0      32     
208    240    
-80    64     
208    128    
400    -32    
-272   -32    
-304   32     
-192   -64    
-176   16     
112    112    
-160   -64    
96     16     
-144   -144   
-112   -96    
48     128    
-80    0      
112    80     
80     16     
-160   160    
48     48     
-32    -16    
-48    16     
-80    16     
208    0      
64     16     
-48    -96    
64     80     
16     96     
32     16     
-80    16     
-80    0      
-128   0      
-240   -16    
-16    -16    
0      80     
-288   -32    
48     -48    
-16    64     
-320   -80    
-160   -96    
224    -288   
0      48     
192    0      
-208   -128   
-112   -48    
304    448    
-560   176    
-240   -384   
384    160    
-112   -32    
64     -160   
-224   80     
176    96     
-176   224    
-384   16     
-80    -64    
192    128    
32     32     
224    16     
0      80     
32     64     
176    64     
-368   -128   
544    -64    
224    272    
-384   16     
80     -192   
240    64     
-320   96     
16     64     
-2112  -240   
32     48     
-144   96     
80     80     
-48    112    
-320   112    
64     0      
-48    -224   
240    -32    
-240   288    
32     224    
0      -144   
-48    -16    
-224   -32    
64     -96    
80     -64    
16     64     
112    16     
-112   64     
192    -208   
48     -144   
-16    96     
208    16     
-224   16     
-176   32     
64     64     
80     -80    
80     32     
-16    -48    
-144   -160   
80     -32    
304    256    
-48    160    
96     -48    
16     64     
80     80     
96     -32    
16     -64    
160    0      
-48    144    
144    -16    
-224   -48    
-256   0      
240    -576   
96     560    
48     368    
-16    -128   
32     -256   
-112   64     
32     320    
176    -16    
96     64     
-320   -16    
112    112    
-320   80     
80     -64    
-128   64     
160    144    
64     96     
64     128    
112    -240   
32     384    
-80    -96    
-80    128    
272    -208   
80     176    
-160   176    
-32    -432   
160    176    
16     240    
368    544    
-224   -288   
80     -96    
128    256    
-48    -480   
-176   -256   
384    32     
64     592    
16     128    
64     -32    
-176   -144   
-96    0      
-32    672    
48     -240   
-192   -64    
240    160    
-48    -48    
0      128    
-48    -128   
16     -48    
-32    112    
-16    80     
32     80     
48     48     
-48    416    
32     144    
-112   -176   
16     -32    
192    96     
-224   304    
96     32     
-96    -128   
-32    -544   
-48    -272   
240    240    
208    -32    
128    16     
-128   -144   
-176   -192   
-16    48     
80     96     
128    -112   
-160   -192   
32     144    
48     144    
96     160    
64     32     
112    -16    
80     0      
0      -48    
272    80     
-272   112    
-272   -224   
160    -96    
160    128    
96     192    
160    240    
-80    -320   
-16    -224   
-96    -32    
64     -176   
304    96     
128    208    
144    16     
-80    -48    
80     144    
80     128    
48     -32    
48     -144   
48     -48    
-112   -64    
64     144    
16     -96    
128    32     
-32    32     
0      0      
128    208    
144    -336   
-16    -80    
0      -1440  
16     0      
-48    -112   
416    80     
0      -80    
80     208    
-48    96     
80     80     
128    240    
16     144    
144    112    
128    80     
240    176    
160    16     
-32    -128   
208    -352   
-32    -192   
48     -256   
-16    -144   
-128   -64    
-48    -160   
160    -448   
240    -704   
-240   -592   
96     -128   
112    48     
64     96     
-176   -288   
80     48     
176    160    
128    176    
208    -208   
128    -1872  
-128   48     
-544   0      
-256   336    
112    160    
224    480    
240    192    
176    -224   
-48    -208   
-144   -288   
16     16     
-192   128    
-16    48     
0      -176   
288    16     
0      -80    
96     -32    
672    64     
-288   304    
-96    -32    
-32    192    
704    16     
400    -496   
32     80     
128    144    
-128   96     
-16    -112   
-208   -80    
176    -80    
-160   64     
-128   -176   
144    16     
-176   -64    
144    160    
-80    -128   
320    176    
80     208    
64     16     
128    -96    
-48    64     
48     288    
320    -96    
-160   192    
48     -240   
144    48     
192    -656   
128    0      
224    -96    
-112   -1136  
48     -64    
-240   -176   
192    -160   
-16    -32    
-32    -512   
224    -96    
-48    176    
144    -160   
-48    32     
48     -48    
144    -96    
96     128    
208    -400   
-16    -128   
48     -192   
288    96     
-208   0      
16     -64    
-32    128    
64     48     
-32    16     
-48    -128   
128    -256   
96     -336   
128    -256   
-32    80     
-16    -176   
144    32     
480    448    
144    144    
176    80     
-592   -160   
-32    16     
256    -80    
112    -96    
16     304    
128    -384   
0      480    
0      -1952  
304    -304   
16     176    
-368   -112   
64     176    
144    512    
16     -240   
80     -224   
-528   432    
144    0      
-848   -16    
128    -16    
48     64     
-32    -64    
128    -48    
48     -320   
-16    -64    
224    112    
-112   0      
128    -112   
64     32     
-128   16     
-64    -320   
400    -368   
16     -144   
-16    32     
176    -128   
48     16     
176    96     
-240   144    
-64    -128   
80     16     
208    -288   
240    48     
272    16     
-32    -112   
32     -112   
-32    -64    
-208   64     
16     -64    
-608   -48    
192    -80    
-1072  0      
176    -48    
32     80     
32     -80    
0      0      
-48    -432   
-32    32     
272    32     
-160   -16    
-176   0      
192    -240   
-368   -48    
144    128    
-592   -48    
208    -16    
-288   64     
272    176    
-48    208    
-48    -176   
208    -64    
128    -208   
160    80     
224    112    
-48    -80    
-80    -32    
-80    32     
0      64     
-96    -64    
-288   64     
64     -64    
-96    32     
128    0      
304    96     
112    16     
-144   16     
176    -320   
-16    64     
-32    96     
112    -16    
-160   -32    
-48    -48    
16     -16    
96     16     
-64    32     
96     -64    
-384   16     
48     -144   
48     48     
0      -176   
192    48     
16     -144   
96     80     
-496   0      
208    -64    
-128   64     
208    224    
-400   96     
240    -144   
-144   128    
208    -112   
-240   -112   
208    -48    
288    176    
-1968  -160   
576    128    
-1008  -144   
-768   16     
80     -16    
-416   48     
192    128    
-1136  -112   
-176   0      
48     48     
-144   -144   
336    64     
304    448    
-80    208    
-96    -144   
128    144    
-288   112    
496    -96    
-144   32     
-96    48     
800    320    
-752   256    
-496   80     
-256   96     
-16    -80    
432    144    
-464   64     
160    -144   
-144   -176   
-224   -176   
64     -368   
304    96     
16     176    
80     -48    
96     160    
-416   64     
-80    -432   
-32    112    
128    160    
-432   -80    
0      192    
-48    -592   
80     144    
32     224    
-192   -192   
80     -16    
-368   -80    
160    192    
-128   -112   
128    32     
-128   16     
-64    -48    
-16    224    
-192   16     
-576   -480   
-16    144    
96     -160   
128    96     
144    64     
64     272    
112    64     
-32    -304   
32     48     
-96    -64    
-16    -32    
-336   -304   
112    -16    
-160   416    
624    352    
-384   1088   
-128   448    
-176   240    
336    176    
80     -80    
192    160    
-32    16     
16     304    
128    128    
288    304    
-80    128    
-128   160    
176    16     
32     -96    
-16    -64    
-208   -16    
224    16     
-304   224    
96     224    
-16    -64    
-16    0      
64     -32    
48     0      
80     96     
-64    64     
160    32     
-32    -32    
0      -48    
-48    -80    
112    64     
96     96     
160    -48    
-704   -384   
32     -32    
48     48     
64     -80    
96     -16    
16     -32    
-48    48     
-144   -32    
32     96     
-80    16     
0      176    
32     144    
-16    64     
-16    176    
208    368    
-720   -128   
224    -16    
-16    48     
-48    48     
-112   -144   
96     -176   
48     0      
160    144    
32     80     
-48    16     
144    16     
-272   80     
80     -16    
-352   -112   
208    -16    
-48    64     
16     64     
0      -48    
80     144    
112    16     
-32    48     
-80    32     
112    0      
32     48     
-80    96     
0      64     
-224   -32    
240    0      
-224   32     
16     -48    
-32    -80    
160    80     
-240   48     
0      256    
-64    32     
32     0      
288    -80    
-32    -304   
-80    -224   
-16    -176   
-160   -80    
-16    -48    
96     80     
-96    -16    
224    -144   
-112   0      
32     80     
176    16     
-64    -272   
0      -48    
-48    176    
112    128    
256    272    
-128   32     
96     32     
208    240    
80     192    
16     16     
-64    -192   
48     16     
-16    64     
32     112    
208    112    
32     144    
160    224    
144    -32    
192    -48    
-288   -144   
-16    32     
-128   -16    
48     32     
-128   -80    
224    -256   
-128   -240   
192    -16    
-128   -48    
-144   192    
224    0      
112    -80    
16     -384   
-64    -192   
-16    0      
-32    -208   
-32    80     
-96    -240   
-80    -80    
-208   -208   
-128   -288   
-176   192    
272    -80    
304    -48    
208    32     
80     304    
-176   384    
352    128    
-416   -64    
224    736    
112    176    
368    160    
656    432    
-240   352    
-80    176    
-192   -480   
-64    -288   
144    80     
-16    -144   
96     -112   
64     -192   
-32    -384   
176    -160   
-240   16     
16     -32    
128    208    
-32    32     
-144   128    
48     -64    
96     -304   
256    -64    
160    -112   
-112   -288   
-32    -192   
-16    192    
192    16     
-176   16     
48     160    
272    -416   
416    208    
-544   -128   
-32    -368   
208    400    
256    -16    
-48    0      
208    -80    
16     128    
-48    -256   
336    -240   
-48    96     
-32    128    
256    192    
272    48     
-64    -64    
144    -160   
208    80     
-96    160    
48     48     
80     160    
352    112    
-256   -256   
32     176    
-64    -208   
176    96     
256    -784   
16     176    
224    -368   
0      240    
-96    0      
192    48     
-96    80     
80     -208   
96     80     
144    64     
-16    80     
96     16     
32     96     
-16    -80    
160    128    
-64    -288   
48     256    
160    -976   
0      32     
-32    48     
192    32     
-32    -48    
0      96     
64     240    
-64    240    
304    304    
-112   224    
32     -16    
-32    -192   
80     -80    
112    -192   
96     -144   
224    -448   
144    64     
80     32     
80     224    
-16    0      
64     16     
80     128    
-48    -80    
176    -32    
176    -96    
48     96     
208    -144   
-128   32     
0      -16    
-288   -768   
32     -624   
48     496    
-96    160    
208    -48    
32     96     
-160   0      
192    -96    
208    -448   
64     96     
-112   -80    
-32    -32    
80     -128   
96     112    
144    32     
-80    64     
64     -1536  
160    80     
64     48     
224    144    
-160   -112   
160    -176   
384    -784   
288    -16    
144    128    
-80    16     
-80    16     
-176   48     
-16    -16    
144    -128   
128    96     
144    48     
176    -720   
48     16     
128    -528   
0      176    
-912   -128   
128    -112   
208    80     
160    16     
-48    -32    
96     -112   
80     32     
64     32     
48     -48    
144    80     
64     48     
64     -208   
48     -16    
208    16     
-32    -128   
-896   0      
80     -64    
16     0      
80     -80    
192    -64    
16     -560   
80     -128   
128    176    
-48    -48    
144    -144   
64     32     
96     -112   
-112   0      
160    -96    
32     -80    
32     64     
-32    -32    
160    16     
16     -160   
144    -32    
32     48     
48     -48    
48     -80    
448    272    
-176   112    
256    -16    
-208   -64    
352    16     
-288   64     
272    -32    
-128   -32    
320    128    
-992   160    
176    -48    
-32    208    
176    0      
32     -240   
416    -32    
592    432    
64     -80    
-48    -80    
-160   112    
-96    48     
-288   -80    
176    64     
-560   -32    
64     272    
-512   0      
-48    -496   
-80    -208   
-16    80     
96     320    
-320   -320   
-320   -352   
208    -256   
160    48     
-256   -304   
192    -144   
-128   256    
96     176    
-320   -176   
464    80     
-144   -272   
368    128    
-1264  208    
48     -208   
-144   -112   
224    0      
192    352    
-272   -448   
-128   416    
176    -352   
112    -848   
-608   -32    
560    -224   
-208   928    
96     -608   
-768   -816   
144    -448   
-304   416    
352    256    
64     -96    
176    0      
-112   -64    
96     48     
336    144    
-208   -32    
0      -48    
-64    -64    
272    0      
-400   128    
240    80     
272    64     
-160   128    
-224   48     
144    64     
0      144    
32     -208   
-16    128    
288    -32    
192    -80    
-288   16     
48     128    
48     96     
64     32     
-256   64     
160    -48    
-112   0      
128    -32    
-752   80     
32     -128   
128    -64    
-16    -16    
128    144    
112    -16    
352    48     
-320   128    
-112   16     
-176   -16    
128    -112   
96     -16    
80     96     
-112   32     
128    -128   
-304   -48    
-1280  -144   
176    96     
-16    -32    
112    32     
0      176    
-304   -16    
16     -48    
-752   -96    
-448   16     
-800   -32    
-192   48     
208    -144   
0      0      
32     64     
-192   -32    
-272   -16    
16     -32    
-144   -32    
16     0      
128    -96    
-64    0      
-144   416    
-48    -96    
176    80     
-384   128    
-144   64     
-1552  80     
-224   32     
256    -128   
224    -144   
64     32     
0      80     
-192   48     
-352   -128   
176    80     
16     80     
-64    128    
80     -80    
96     -112   
80     -144   
-224   -208   
-1184  0      
-80    48     
16     176    
208    176    
-64    -112   
128    64     
-224   48     
-64    0      
112    -64    
0      96     
-240   144    
-368   16     
32     -192   
-192   -336   
-80    -32    
-64    64     
-192   80     
272    -80    
64     16     
-192   -64    
160    48     
96     -16    
112    -16    
-16    -64    
-64    -16    
-16    -16    
-80    0      
-16    368    
16     272    
-16    -352   
-224   -160   
160    64     
-800   -64    
112    -48    
-144   -160   
32     -16    
32     -96    
-288   176    
144    272    
-160   -32    
112    -144   
-16    16     
96     16     
112    -176   
48     624    
-320   240    
176    -336   
-272   -48    
16     -144   
32     -96    
48     192    
-416   -304   
64     -80    
16     528    
64     288    
272    -208   
-224   -128   
-160   -128   
-448   -96    
-64    -48    
-96    -352   
-64    -176   
-112   240    
-80    368    
320    160    
192    -544   
-144   304    
480    208    
-592   -288   
144    64     
-400   -128   
208    288    
-32    0      
-592   -512   
848    784    
112    512    
-112   -64    
-496   -80    
208    -704   
208    272    
-352   160    
-64    -144   
-64    80     
-512   880    
208    80     
80     -816   
-784   160    
-48    304    
-176   64     
64     48     
32     -240   
208    272    
-288   -64    
96     -112   
-64    -192   
176    64     
96     112    
64     432    
-224   -16    
-80    -288   
96     128    
16     128    
80     -64    
-208   -128   
192    32     
-272   -48    
64     16     
-96    -80    
240    -48    
-80    16     
32     -48    
96     64     
-32    112    
112    176    
80     160    
64     112    
64     160    
192    48     
-32    192    
-144   144    
-192   16     
160    48     
176    0      
-32    0      
336    32     
-208   112    
64     208    
-64    -128   
96     -80    
112    144    
80     32     
64     0      
-80    64     
-128   -128   
160    16     
-192   -96    
176    -16    
64     64     
128    48     
0      64     
-32    48     
-96    128    
160    192    
160    80     
-112   -48    
-48    96     
16     80     
112    0      
-224   288    
160    208    
64     16     
-128   0      
144    96     
96     48     
-48    -192   
128    -112   
80     176    
48     256    
-160   128    
48     -32    
192    128    
-96    80     
64     80     
128    -128   
32     32     
16     128    
32     128    
64     48     
48     -240   
240    -112   
160    -16    
-16    80     
-144   64     
-32    -192   
96     -48    
48     176    
-32    48     
64     112    
-64    80     
352    128    
64     -32    
-192   -208   
-32    48     
160    -32    
-256   128    
-80    -48    
0      -48    
96     -144   
288    48     
208    80     
208    64     
-96    -80    
-64    16     
-96    32     
80     -96    
256    64     
144    96     
224    160    
-16    112    
160    48     
208    32     
96     48     
48     64     
-16    48     
160    320    
-80    96     
128    48     
192    32     
192    32     
-80    -16    
80     0      
32     -80    
144    96     
160    -112   
-160   64     
160    16     
224    48     
-112   -144   
80     64     
-96    -96    
64     32     
16     0      
160    128    
208    144    
0      -144   
64     48     
-48    -160   
112    64     
128    -272   
32     80     
-64    32     
128    96     
128    16     
-32    32     
128    32     
128    48     
64     48     
0      -64    
96     80     
-16    -96    
112    64     
0      -48    
112    48     
0      0      
192    128    
-64    -448   
112    96     
128    96     
80     48     
-80    -32    
112    64     
-16    48     
320    272    
-48    224    
192    0      
144    144    
48     -32    
0      -64    
304    208    
128    160    
-112   -64    
192    48     
16     -256   
128    64     
0      656    
96     -240   
16     -304   
-112   192    
16     160    
880    800    
-432   -448   
-336   -1296  
512    480    
-464   208    
-256   -432   
-304   384    
-224   -16    
80     -176   
80     48     
80     -320   
64     240    
368    -64    
-32    -160   
320    352    
144    32     
448    112    
-96    -960   
-80    288    
368    528    
-384   528    
16     544    
160    32     
64     96     
176    -1456  
128    -48    
0      80     
272    -336   
464    416    
-400   -1248  
32     96     
16     160    
144    -416   
96     -224   
224    0      
-272   -928   
16     272    
240    -16    
112    48     
224    32     
-224   -32    
-336   0      
176    -240   
144    -208   
16     -560   
64     112    
-32    -128   
272    -176   
-112   96     
64     -32    
-48    -432   
0      -48    
128    -128   
-208   176    
176    -48    
0      -112   
-304   -64    
-128   48     
64     32     
128    -16    
64     -128   
96     32     
-112   0      
352    -928   
112    80     
272    -112   
32     -16    
112    -16    
-16    0      
-96    16     
-48    -144   
80     -32    
128    -48    
-48    48     
80     -64    
96     -80    
-48    -304   
240    -16    
32     -560   
368    0      
-32    0      
-64    96     
144    16     
-112   128    
-144   -48    
160    -112   
-96    32     
112    0      
-688   -48    
0      -96    
16     -16    
128    -176   
160    -208   
64     -400   
-256   64     
64     -64    
-144   96     
128    -160   
80     0      
0      64     
144    128    
-320   96     
32     32     
-496   16     
112    -16    
128    -144   
160    112    
208    160    
16     -112   
32     -16    
128    -80    
-176   208    
0      128    
192    80     
32     -336   
112    -320   
-48    -64    
48     -112   
16     80     
48     32     
32     368    
112    112    
-80    -64    
80     -240   
0      160    
160    -208   
176    0      
80     -64    
0      -80    
-176   16     
352    256    
-592   208    
-48    -160   
80     112    
80     96     
-800   112    
80     0      
-16    -16    
16     -96    
160    -32    
304    144    
64     144    
-192   64     
-32    224    
-96    -208   
-64    -640   
-32    400    
80     160    
-272   48     
32     48     
-704   320    
320    0      
32     -96    
32     240    
352    -160   
-80    -320   
96     400    
0      -240   
16     128    
-144   16     
128    -400   
32     288    
112    -32    
64     32     
-64    80     
-64    -128   
144    272    
112    -160   
-336   -112   
16     112    
-240   432    
-1344  144    
-144   -192   
-1184  0      
-160   -32    
0      -160   
48     -32    
64     240    
0      208    
352    128    
-48    -64    
-432   -192   
0      64     
-384   -48    
48     -48    
-80    -96    
-336   16     
96     -48    
-288   32     
-128   -32    
-832   208    
-80    96     
160    16     
256    -656   
-32    -1136  
80     -128   
48     160    
-304   -288   
-160   -416   
-256   32     
-48    112    
-16    16     
96     -16    
-336   -240   
448    -96    
-272   48     
-96    -112   
-752   -112   
-96    -80    
80     -272   
192    48     
16     16     
48     -80    
-48    -64    
48     144    
-304   144    
48     -48    
336    -32    
-608   -112   
320    0      
-304   0      
496    16     
-704   16     
-272   64     
-144   -112   
-144   0      
96     0      
-48    16     
-48    80     
-16    -96    
144    -64    
96     -48    
96     -16    
-432   -64    
-16    80     
96     -32    
0      80     
-464   0      
16     64     
64     16     
-16    -16    
112    0      
176    96     
-48    -32    
-80    -16    
-96    0      
160    16     
-16    48     
-16    0      
112    96     
-256   96     
-144   64     
-288   -48    
96     96     
-944   -96    
48     48     
80     -64    
-336   16     
16     -16    
-16    64     
-96    352    
272    272    
32     -32    
-384   -64    
-64    -48    
-32    64     
-16    80     
-352   0      
560    144    
-800   -96    
-96    0      
64     32     
16     144    
-80    0      
80     32     
112    64     
-80    16     
-48    -16    
96     64     
0      48     
-64    -176   
272    -48    
-256   64     
-48    192    
-144   352    
-32    176    
-96    -32    
64     -32    
64     0      
-112   -80    
16     -256   
0      16     
-32    112    
0      96     
176    96     
-160   -64    
80     288    
-464   16     
0      -112   
-64    -160   
96     64     
16     32     
112    0      
-16    16     
160    -176   
-352   -240   
-112   224    
0      336    
-96    64     
160    32     
-448   128    
16     -64    
-144   -32    
336    -32    
128    240    
96     112    
-32    0      
-64    -16    
16     48     
112    144    
96     64     
-48    64     
-112   64     
240    176    
-128   144    
-16    -80    
256    48     
32     32     
32     16     
16     -128   
64     80     
-272   96     
48     -32    
256    -16    
-64    -32    
64     16     
32     0      
176    0      
96     32     
224    80     
-240   -96    
96     64     
16     32     
176    160    
0      16     
-128   32     
16     0      
0      48     
112    48     
80     64     
192    96     
48     0      
-96    48     
128    192    
-176   128    
-176   0      
0      32     
-288   -96    
96     112    
144    96     
112    -16    
0      -16    
32     0      
-32    96     
-16    -112   
-96    -48    
16     304    
144    496    
-96    80     
80     -208   
-112   160    
160    32     
-32    144    
240    464    
-16    -272   
-48    16     
112    0      
0      -32    
48     -48    
-112   608    
-32    32     
-64    -32    
-48    496    
304    -560   
352    624    
192    -96    
192    304    
-192   384    
-32    -752   
240    240    
-208   -80    
384    208    
-240   -32    
80     -464   
-272   448    
432    480    
32     304    
-64    -672   
-96    -80    
32     48     
-400   -64    
80     304    
256    32     
256    -240   
176    32     
-208   80     
-256   -336   
592    -384   
80     -32    
256    208    
384    -16    
-112   144    
16     -64    
112    112    
-240   64     
16     -32    
-48    -144   
240    -160   
-272   -128   
96     48     
80     112    
80     80     
-240   96     
96     -160   
64     -64    
-16    80     
64     32     
640    368    
-432   320    
16     -272   
-272   -448   
48     -96    
16     16     
64     -96    
304    112    
-176   48     
16     96     
32     96     
112    -32    
32     16     
64     16     
-64    -16    
208    144    
-128   128    
336    -96    
-48    -112   
128    -80    
192    96     
-224   -368   
-16    48     
-144   -256   
208    -128   
112    80     
192    80     
112    -16    
-16    32     
-80    -16    
400    160    
-160   160    
-32    -144   
-96    -144   
-128   16     
272    48     
64     -48    
48     48     
-16    -112   
160    144    
224    -112   
112    -48    
-112   -48    
32     0      
-16    32     
128    144    
64     32     
128    -64    
32     96     
-48    80     
144    96     
-80    32     
0      48     
64     -304   
224    64     
32     64     
80     64     
0      -80    
160    -16    
-144   16     
288    96     
160    32     
16     128    
0      128    
-176   -96    
224    -16    
64     -112   
48     64     
224    -32    
16     48     
-64    48     
160    -16    
80     -128   
-64    -144   
48     -112   
16     -32    
128    -48    
32     64     
208    128    
-144   -64    
96     0      
64     16     
240    16     
192    -144   
112    112    
-160   -560   
-64    -352   
-48    -192   
0      -336   
160    0      
0      -32    
96     -16    
128    -288   
128    -416   
96     272    
176    32     
-32    -16    
-16    -64    
112    64     
208    -32    
-48    16     
32     -272   
32     144    
80     -304   
48     -192   
-1728  64     
0      -48    
16     -32    
128    -336   
-288   -128   
304    -464   
0      -208   
160    -96    
32     80     
208    144    
128    64     
64     -64    
-128   16     
-224   -48    
64     -32    
272    192    
0      -112   
240    0      
16     -112   
112    -192   
64     -304   
144    0      
-48    -752   
48     -96    
112    -80    
-288   48     
32     -64    
64     -32    
-16    -80    
112    96     
-256   -48    
96     -16    
96     -48    
16     -16    
96     -32    
64     -256   
80     -48    
128    -720   
-240   -16    
128    -96    
-32    64     
256    80     
32     16     
16     -80    
64     -160   
-48    -64    
176    16     
-656   -64    
-96    -128   
96     -48    
128    -48    
144    -32    
-16    -16    
80     144    
-48    -160   
96     -64    
192    -128   
480    48     
-624   -112   
-144   -16    
160    0      
-128   64     
-240   80     
128    -192   
-112   -64    
192    112    
-272   -64    
192    -16    
-272   32     
96     -192   
-32    -48    
-288   -352   
704    -16    
320    176    
304    112    
-224   -32    
224    48     
-896   -176   
336    -112   
-1040  -48    
352    0      
-192   -128   
304    -160   
320    464    
-656   -496   
80     -64    
32     -32    
64     -64    
144    16     
192    64     
-80    32     
0      -32    
-304   -16    
48     -240   
16     -128   
0      80     
64     16     
208    -64    
-112   32     
-32    -128   
64     32     
128    80     
-16    -32    
-624   -16    
32     -176   
-192   32     
128    48     
-112   48     
320    48     
-672   48     
128    -128   
16     48     
-96    -144   
96     144    
-80    32     
-96    -16    
-224   -32    
96     -16    
-352   -64    
64     0      
128    64     
160    0      
-80    32     
-64    -112   
-704   80     
-1200  -128   
-144   -96    
-608   -160   
208    -32    
64     64     
-192   128    
80     -112   
-544   -16    
160    96     
-272   240    
-224   -32    
112    0      
-144   -48    
-448   -144   
112    112    
-448   16     
0      48     
-112   -32    
-336   128    
80     128    
0      -16    
32     0      
-48    80     
-80    0      
-848   112    
-176   144    
48     0      
80     0      
-304   -64    
32     80     
64     -48    
192    192    
-160   0      
-176   -80    
48     48     
-112   64     
-80    112    
-144   -32    
-32    -32    
-496   80     
-48    -32    
-960   112    
736    320    
96     -272   
112    -256   
-320   -352   
-80    32     
-32    144    
-304   256    
16     16     
352    352    
-240   48     
96     -336   
64     96     
-176   -16    
-48    -176   
-288   -80    
224    32     
-128   -48    
-128   -80    
-32    -80    
224    304    
16     160    
144    -64    
192    0      
-192   64     
-48    32     
-288   -240   
-16    -80    
-128   256    
336    272    
-128   -128   
32     -208   
336    -96    
-32    -144   
-432   -880   
16     368    
16     -336   
368    64     
-64    176    
96     -64    
-96    560    
-64    -80    
240    48     
-80    80     
-48    -16    
-304   32     
256    80     
48     32     
80     128    
32     -32    
-48    192    
-64    -880   
-80    576    
-128   -112   
176    -272   
96     448    
-64    -16    
144    -112   
-256   0      
0      -112   
-96    144    
0      -32    
-464   -592   
0      144    
144    272    
-48    -224   
192    112    
96     32     
64     96     
176    896    
-16    192    
-128   -368   
-128   -256   
-256   32     
48     48     
0      -304   
-32    48     
-320   -224   
-512   -288   
480    -240   
-208   -352   
112    -64    
0      -112   
-96    -16    
48     -336   
-16    -176   
0      -16    
-96    256    
-176   -96    
208    -384   
-272   -48    
64     32     
-768   -160   
-112   32     
176    48     
-208   48     
-64    -256   
-48    16     
432    -32    
-32    -48    
48     48     
48     80     
240    32     
-176   -32    
-64    224    
-176   288    
32     -48    
32     -192   
-192   112    
-208   112    
-16    176    
-48    112    
160    -16    
160    -400   
-16    -192   
192    -16    
-176   208    
0      0      
-176   0      
0      96     
-160   -48    
208    208    
96     240    
272    -128   
-32    0      
-208   -288   
176    -32    
64     208    
-272   -432   
368    -32    
-64    96     
-208   48     
336    -144   
-224   -80    
0      -32    
-112   -32    
-48    32     
64     128    
112    240    
-64    48     
-16    16     
80     0      
144    16     
112    -208   
-16    -96    
112    -144   
-240   -144   
144    48     
-144   176    
176    128    
-32    -32    
-80    64     
80     32     
0      -16    
48     -16    
-32    160    
208    -16    
0      -64    
368    176    
-192   224    
-96    0      
-32    -32    
224    128    
80     -48    
-48    64     
-160   160    
32     16     
0      -96    
160    -208   
48     160    
-176   128    
32     32     
16     32     
-32    -48    
-16    32     
304    64     
0      32     
256    224    
-288   112    
16     -464   
16     80     
160    32     
32     64     
-96    64     
336    -32    
-96    -128   
-144   32     
32     176    
-16    16     
96     128    
176    128    
128    64     
112    160    
-144   48     
160    -176   
128    -80    
80     -128   
-96    -16    
-144   -64    
176    -384   
176    -48    
224    304    
48     16     
112    176    
-80    -208   
160    240    
-224   -352   
32     16     
176    240    
160    480    
-192   -256   
224    -1008  
304    272    
-144   -176   
112    -64    
128    0      
240    16     
32     112    
80     -64    
-368   -208   
96     64     
208    128    
112    16     
176    80     
160    16     
496    544    
-320   80     
352    688    
-112   -176   
112    112    
288    48     
112    -48    
48     -16    
112    16     
0      96     
112    112    
-224   96     
288    96     
144    48     
96     -64    
64     48     
192    -112   
80     64     
32     -112   
48     80     
128    16     
96     32     
64     0      
240    -64    
-176   -32    
80     64     
-96    -48    
208    -128   
32     96     
80     -32    
176    16     
-64    -112   
-32    -112   
176    -544   
-16    64     
-16    -256   
16     80     
-48    16     
128    48     
-112   64     
256    192    
32     -32    
176    80     
48     48     
224    -16    
16     64     
48     -160   
96     144    
80     -80    
16     48     
160    96     
128    48     
-48    -80    
128    16     
32     -16    
352    -16    
64     -32    
144    -112   
16     16     
176    -64    
256    128    
160    -48    
32     48     
128    -16    
288    48     
-144   -64    
160    224    
-384   -128   
1024   144    
-32    -112   
432    -144   
496    -48    
-80    -160   
224    -736   
112    -272   
576    288    
576    272    
-688   112    
-144   -432   
480    -464   
-64    128    
-64    -944   
608    0      
304    -64    
80     32     
112    -32    
448    -224   
-96    0      
-240   -16    
336    -64    
32     -160   
176    16     
64     32     
80     -64    
160    64     
-32    -48    
64     -144   
192    -32    
-80    -208   
160    -112   
144    -80    
32     0      
96     -80    
96     -144   
288    96     
-16    -112   
-48    -96    
192    32     
80     -256   
-64    -224   
-256   80     
16     -64    
352    48     
-112   -32    
96     -48    
-912   32     
-208   -96    
272    -16    
-80    -64    
48     -48    
80     -304   
160    -16    
16     -704   
-128   64     
192    -48    
-160   16     
96     -128   
400    80     
-576   -384   
80     -240   
-256   16     
160    -128   
160    -48    
-80    112    
176    -32    
32     -288   
96     0      
-16    -160   
192    -48    
32     -224   
256    208    
-48    272    
-64    -352   
48     192    
32     112    
-16    -112   
80     -96    
-176   -64    
0      -256   
16     64     
96     -176   
240    160    
32     -368   
-128   64     
48     -80    
192    16     
0      16     
320    -80    
-32    0      
176    -80    
-304   -96    
-64    -928   
-384   768    
-96    -192   
-336   128    
160    -224   
160    -16    
64     -160   
-128   -208   
336    -240   
272    112    
176    64     
96     -64    
-64    16     
-64    -464   
16     384    
0      -112   
-224   -256   
336    752    
-832   -528   
128    32     
-128   144    
80     -336   
16     272    
96     -352   
208    112    
-32    32     
0      -112   
-288   0      
80     0      
-32    112    
256    176    
-768   -1536  
0      -96    
-176   608    
48     -48    
32     -144   
32     -256   
320    288    
272    -176   
336    -192   
-304   272    
96     -208   
-128   -256   
0      80     
-240   48     
-160   -144   
-304   -112   
-16    352    
-128   384    
-144   -32    
208    -80    
-1872  -160   
144    208    
-48    80     
-720   208    
0      272    
112    -80    
-192   -48    
288    -32    
-400   -496   
80     -544   
80     -48    
32     32     
80     -160   
-848   -112   
48     32     
-1120  -16    
-224   112    
96     48     
-176   240    
160    96     
-560   -16    
16     32     
-2016  16     
-112   128    
80     -32    
192    160    
160    336    
-32    0      
-16    -208   
16     64     
0      -16    
-272   144    
-144   -16    
-416   -352   
-176   -128   
-816   128    
-560   -224   
-128   -576   
32     48     
-32    208    
-256   -128   
-352   -16    
352    -224   
16     96     
272    336    
-240   112    
592    608    
-624   480    
-320   128    
-48    -464   
128    -224   
352    -112   
208    96     
128    -144   
-400   -736   
160    -288   
-32    -80    
-208   -48    
240    -32    
96     96     
96     64     
-368   96     
-432   32     
-144   16     
-32    128    
80     16     
-96    80     
-336   64     
0      16     
-496   -16    
-224   16     
240    -32    
-48    0      
-128   0      
208    128    
-128   32     
-32    -144   
-32    48     
160    160    
-288   128    
-128   -64    
-352   -32    
-64    -128   
240    16     
-320   0      
224    -16    
-896   -144   
80     304    
128    336    
96     80     
96     -32    
112    -64    
-352   48     
256    224    
-704   128    
64     -96    
-208   -112   
-160   0      
80     32     
-16    -64    
64     112    
-848   -128   
-160   0      
176    -80    
-304   16     
160    64     
-16    272    
32     32     
16     -384   
-192   -144   
-224   32     
0      80     
0      112    
272    128    
-336   -80    
64     64     
-1264  -48    
128    -80    
128    0      
-128   48     
144    128    
-272   368    
-80    0      
112    160    
80     176    
-176   16     
208    -80    
-272   32     
96     96     
-192   -32    
64     80     
-128   32     
-48    64     
176    -80    
32     -112   
112    -32    
128    80     
-64    144    
112    128    
192    64     
-96    -16    
-48    144    
-80    -112   
128    224    
-96    -48    
128    96     
272    480    
-304   -416   
80     0      
80     128    
-32    -80    
16     208    
112    32     
0      0      
-208   32     
160    96     
160    448    
-400   -320   
224    -480   
48     0      
240    96     
64     0      
80     112    
96     160    
16     224    
-80    384    
-112   128    
-64    48     
-80    48     
0      48     
32     0      
16     48     
-16    16     
0      16     
-224   -64    
112    80     
208    96     
-304   0      
-64    32     
144    0      
112    32     
-32    48     
-16    -48    
-16    96     
16     144    
-64    -64    
160    32     
48     160    
48     48     
-32    -32    
96     48     
96     -32    
80     80     
-64    96     
-160   -80    
208    96     
-48    -16    
112    32     
32     0      
112    0      
-32    48     
32     16     
-176   16     
0      80     
176    96     
-48    -16    
-32    96     
128    64     
-16    48     
-32    48     
-48    16     
80     32     
112    48     
32     32     
64     0      
-176   -96    
176    48     
-64    -112   
208    -96    
-64    16     
0      48     
-64    160    
128    64     
-32    48     
112    96     
-96    -32    
96     -48    
240    48     
80     0      
240    112    
-224   32     
48     -80    
-128   16     
0      -192   
0      -64    
96     -384   
-240   112    
176    144    
320    -16    
-48    48     
272    112    
-80    64     
-80    16     
80     -16    
160    80     
-192   -80    
416    16     
80     160    
16     -96    
256    32     
-128   -144   
48     -48    
176    -128   
-16    -96    
-160   16     
48     16     
432    144    
0      112    
240    112    
-528   -352   
576    -128   
48     256    
-640   64     
144    -208   
128    16     
192    -64    
-96    -32    
192    80     
48     80     
48     16     
208    -32    
-128   128    
32     96     
80     -16    
144    128    
-144   16     
208    -96    
0      128    
48     16     
16     80     
304    -208   
-240   -80    
208    64     
-48    64     
240    -128   
-144   -16    
16     80     
128    112    
64     -16    
80     -16    
-16    -16    
48     -96    
-112   80     
48     -288   
-160   -320   
240    48     
-16    320    
224    -464   
144    160    
16     304    
16     -368   
-160   64     
32     80     
64     -16    
64     496    
240    -304   
160    256    
-160   -96    
96     80     
-64    16     
112    -496   
-128   224    
80     -208   
160    112    
80     320    
80     96     
-64    16     
240    -16    
16     144    
32     -112   
16     -64    
-64    -672   
208    -592   
512    384    
-224   -48    
-112   -320   
144    -112   
160    -208   
-96    64     
-16    -160   
-48    160    
272    -256   
-112   -160   
112    -80    
96     -448   
96     400    
96     -112   
112    80     
112    -80    
128    -64    
208    -96    
-128   80     
160    -272   
112    64     
112    240    
-64    -544   
64     -160   
112    -528   
192    -560   
160    192    
32     176    
64     -32    
160    -384   
496    160    
-96    64     
-128   -416   
112    96     
0      -96    
96     -464   
336    96     
112    64     
32     208    
224    -464   
272    -400   
256    32     
144    16     
0      96     
128    0      
-176   -192   
48     128    
144    80     
64     48     
208    -16    
176    -80    
288    288    
-16    192    
-128   48     
-512   -112   
128    16     
-176   96     
-128   -16    
32     -240   
128    -304   
16     -112   
-64    -192   
176    -48    
-16    -224   
160    48     
64     -96    
80     96     
-160   -208   
64     -224   
-272   -32    
64     -208   
-928   64     
240    0      
208    -128   
-48    -16    
-80    -208   
16     -80    
64     16     
-16    -1040  
16     -16    
160    -16    
160    288    
192    96     
208    -144   
-224   -384   
96     -416   
-176   -96    
32     64     
-144   96     
-32    96     
80     16     
96     -80    
-464   -208   
112    -560   
32     0      
160    -32    
160    -96    
-336   -384   
80     176    
96     256    
144    288    
128    192    
96     -192   
-32    -192   
240    -288   
16     352    
-128   -144   
144    -144   
0      -336   
-80    -656   
-192   -352   
16     -304   
-288   16     
176    32     
-112   -160   
224    0      
-176   -64    
-32    96     
-1344  -160   
-48    416    
112    32     
-64    -208   
-96    -32    
128    -144   
16     416    
416    -32    
832    288    
352    624    
-528   288    
-736   -272   
144    -112   
240    32     
704    160    
-496   32     
432    464    
-752   544    
-192   96     
-16    -304   
96     -224   
496    -112   
256    -448   
384    -96    
-912   16     
-112   -32    
-400   48     
-80    80     
-160   -112   
-32    128    
112    -224   
224    128    
48     80     
-176   -224   
288    128    
-80    -352   
224    -208   
464    624    
-320   608    
-400   288    
160    16     
352    400    
80     112    
-320   48     
224    -176   
-176   -128   
192    -256   
-48    -96    
384    208    
80     272    
-1152  192    
272    144    
240    96     
-1072  -32    
16     32     
-352   -160   
64     -336   
0      -272   
160    -16    
112    -32    
64     128    
-1568  -304   
192    80     
-320   272    
-64    48     
64     -256   
-320   -144   
-64    -112   
-480   -224   
64     64     
-624   -32    
-144   -320   
-1504  320    
0      32     
-32    -208   
-176   80     
64     -1040  
272    128    
-272   160    
-192   64     
272    224    
-416   -128   
-144   -256   
160    144    
272    -96    
208    48     
-240   32     
-320   -144   
-240   48     
-176   64     
144    144    
-32    -96    
240    16     
-64    0      
128    160    
-16    128    
32     32     
-240   -16    
-176   0      
-96    16     
-192   -64    
-16    -240   
-400   -176   
-96    128    
-1776  -32    
96     16     
0      32     
-48    80     
0      -64    
112    48     
-16    32     
-128   -496   
-288   -240   
-464   128    
-304   64     
-208   -48    
112    32     
-48    -64    
192    160    
-352   -64    
144    16     
160    -16    
144    32     
144    16     
-112   -32    
192    16     
16     32     
32     64     
-16    16     
48     64     
-16    32     
128    400    
-48    80     
-272   -48    
-624   -80    
-64    80     
-224   -128   
192    -64    
224    16     
256    112    
224    112    
-128   16     
-16    16     
48     48     
16     64     
-208   0      
-64    64     
64     48     
-96    -64    
-192   -48    
16     96     
-640   -64    
-32    -64    
240    112    
144    64     
-64    -48    
-80    -32    
-96    -16    
-144   48     
0      48     
-208   -32    
-32    64     
-240   -32    
176    64     
-304   0      
176    96     
-528   -32    
-64    16     
-16    64     
32     0      
16     0      
48     112    
-64    64     
0      32     
-48    -48    
-96    16     
96     32     
-160   -16    
144    32     
-160   32     
192    96     
-48    0      
-48    16     
16     32     
32     48     
48     16     
-176   224    
128    96     
-112   -16    
-80    -128   
112    -32    
-48    144    
160    96     
-128   16     
-368   -128   
288    80     
-160   160    
224    128    
-64    -48    
-80    64     
288    384    
-640   -16    
240    -96    
-32    64     
-112   32     
1056   656    
-224   720    
-672   -112   
96     -48    
-528   0      
64     16     
240    0      
-80    -160   
144    -64    
16     48     
96     112    
624    448    
-272   192    
48     -64    
-224   -208   
-208   -160   
16     48     
-144   -16    
96     208    
80     240    
-96    -240   
-128   176    
-144   48     
-48    -208   
64     16     
112    192    
144    -32    
48     0      
48     -64    
-160   160    
64     -528   
224    208    
128    256    
-176   -112   
80     592
[truncated: 146,011 more chars]
