# Supplementary material for: A Fault Diagnosis Method for One‐Dimensional Vibration Signal Based on Multiresolution tlsDMD and Approximate Entropy
Source: Hindawi journal article supplement (doi:10.1155/2019/3262818), 2019-01-01
Supplement: f1 [file 3262818.f1.zip › 3262818.f1/gear signals/normal gear signal/Data5.txt]

96     80     
-160   -688   
96     48     
0      48     
1056   384    
-336   272    
-528   -16    
16     -128   
128    -144   
160    32     
-128   32     
448    272    
0      -64    
-48    -160   
48     -416   
208    288    
-160   -112   
256    16     
208    224    
64     64     
320    48     
-144   16     
80     0      
-240   80     
64     48     
48     -32    
48     48     
256    -160   
208    96     
224    -32    
16     32     
-80    48     
176    112    
-96    -16    
0      112    
80     -16    
-32    -32    
-16    48     
32     64     
-16    -32    
32     -304   
80     -160   
16     -96    
32     272    
-80    -64    
192    16     
-32    -240   
144    176    
-96    -112   
160    -304   
176    112    
-560   0      
32     -192   
80     -80    
-192   -272   
208    -80    
240    80     
96     -112   
80     80     
16     -64    
16     -16    
48     0      
48     -544   
16     0      
-32    64     
-16    16     
-32    16     
32     -256   
48     -16    
224    -112   
64     16     
64     -32    
224    96     
-96    -640   
272    80     
112    96     
160    32     
-80    16     
128    16     
-144   -288   
48     -32    
-704   80     
272    -192   
-160   -16    
-16    -32    
32     80     
0      -192   
-16    0      
256    -752   
32     -112   
0      -112   
-16    0      
208    80     
-144   0      
144    -128   
-32    -32    
-384   -64    
0      0      
-608   -32    
32     -160   
64     -160   
-48    -48    
160    -16    
-48    -128   
16     -32    
192    -160   
-176   48     
160    -352   
0      -96    
64     144    
-80    32     
32     48     
144    -80    
-1280  16     
192    -32    
16     0      
288    -64    
-96    240    
144    -32    
-64    -32    
32     -400   
16     -144   
208    -80    
-112   304    
-48    128    
176    -16    
-144   128    
-112   -96    
-560   400    
224    16     
-2112  -288   
320    -32    
-224   -80    
-48    112    
-64    -32    
160    -400   
64     224    
144    64     
208    80     
-208   -224   
208    112    
0      368    
-96    -336   
32     -16    
0      48     
-496   -128   
240    -256   
32     256    
16     48     
224    -256   
144    160    
-64    384    
-16    -176   
0      80     
0      -144   
128    -608   
-672   -1072  
32     -496   
-16    32     
-16    -96    
-288   208    
48     -272   
-128   128    
128    -336   
176    -80    
112    -256   
-80    -160   
-320   -192   
112    -16    
-480   192    
-32    96     
-176   112    
-80    -112   
-192   0      
256    -144   
-480   0      
96     -96    
48     48     
400    -64    
-16    96     
-288   -256   
176    -48    
-160   0      
336    96     
-272   208    
160    80     
-80    -16    
-32    -368   
-96    -176   
-48    96     
-128   -16    
48     32     
96     16     
-480   -64    
-48    16     
-1680  -128   
-832   -32    
176    160    
-384   48     
48     48     
-2240  144    
-112   192    
480    400    
-160   112    
288    -128   
-16    -64    
-320   -80    
96     0      
-160   -112   
112    -96    
240    112    
-32    192    
-240   0      
-432   -64    
-288   -32    
-320   -64    
-192   32     
-880   0      
-48    -176   
-32    48     
-96    -128   
160    -144   
32     128    
-32    -64    
96     96     
64     96     
-128   0      
-16    32     
-80    48     
-112   32     
48     16     
-80    -32    
-192   384    
-80    -48    
-64    -224   
-96    -48    
-176   -176   
-32    32     
32     -16    
-16    16     
80     128    
-128   64     
32     -48    
128    48     
-128   48     
144    64     
-32    -16    
-320   -176   
-128   -192   
-1408  -32    
96     -128   
-96    -224   
96     -48    
-112   -48    
-112   -96    
-48    16     
-160   -112   
16     64     
112    144    
0      -160   
-288   -208   
-32    -176   
-800   -96    
-32    64     
-1024  48     
240    240    
-160   144    
80     240    
96     -144   
-16    -208   
-112   -80    
-32    32     
-192   16     
-80    -32    
-112   -80    
16     -256   
-48    0      
352    288    
-208   64     
-240   160    
160    80     
256    -336   
-160   -160   
-32    16     
-48    16     
-32    -112   
-48    0      
-48    -128   
-304   -176   
144    -16    
-80    144    
-48    240    
0      -128   
96     48     
-528   -48    
224    544    
-384   176    
160    128    
-400   -128   
128    368    
-64    128    
32     16     
176    224    
-288   -80    
48     64     
-144   -480   
-48    -32    
-176   -224   
48     -480   
-336   -352   
48     -608   
-16    -48    
256    32     
-128   224    
96     64     
64     224    
-96    -144   
16     16     
0      160    
144    -304   
96     32     
128    80     
-432   -224   
64     -112   
-32    288    
176    288    
-240   -304   
-112   0      
288    -128   
336    192    
-576   -320   
-32    -240   
224    528    
0      -144   
96     160    
-16    -224   
64     272    
-80    224    
288    -240   
-160   -48    
-80    -80    
96     112    
128    48     
-48    -80    
192    -96    
16     -48    
-96    288    
0      -112   
-96    48     
384    528    
-368   -304   
-16    224    
0      64     
144    -48    
-176   -160   
-176   96     
48     144    
48     -128   
-80    32     
-64    -48    
112    224    
16     176    
64     -144   
112    64     
-80    -16    
-112   48     
240    0      
-208   -336   
-176   -32    
32     64     
-368   0      
80     208    
208    80     
32     -112   
144    32     
32     80     
-240   -112   
112    32     
-80    -48    
160    -96    
-32    -736   
240    -48    
-272   48     
208    80     
96     112    
288    144    
64     160    
-80    80     
-112   16     
-64    -64    
304    0      
80     32     
48     32     
112    16     
-16    48     
-224   -16    
176    16     
112    64     
-352   -128   
32     16     
688    1072   
-496   1072   
-192   -16    
432    -256   
80     32     
-112   80     
256    336    
80     144    
80     -240   
112    -112   
320    32     
-80    160    
48     64     
288    -928   
208    32     
-96    224    
16     32     
128    -80    
80     96     
-304   -32    
144    32     
-144   96     
352    112    
-384   0      
-288   16     
48     112    
32     32     
464    96     
224    -432   
240    0      
-96    -48    
112    48     
-160   48     
-48    32     
-64    16     
16     48     
-128   -96    
208    32     
-128   32     
0      -16    
0      -32    
80     -16    
-32    16     
-48    -256   
96     16     
-112   -64    
32     -80    
32     64     
32     80     
48     0      
112    -16    
176    16     
176    96     
32     0      
-80    16     
-48    -16    
96     0      
80     16     
96     32     
96     80     
-16    -32    
112    32     
64     80     
112    16     
-16    32     
192    64     
-80    32     
160    64     
-160   -80    
208    64     
-16    112    
192    16     
-32    32     
-32    -224   
0      32     
464    48     
-272   224    
272    96     
-128   0      
176    -144   
-176   -16    
112    0      
192    48     
144    192    
-32    160    
192    128    
-16    16     
128    48     
112    -160   
112    384    
272    240    
32     112    
-112   -304   
-32    0      
96     -128   
96     -112   
-80    -16    
80     48     
128    320    
96     288    
16     64     
-64    -112   
160    -64    
144    -16    
32     240    
80     -336   
176    -240   
0      144    
16     96     
80     -32    
80     -16    
64     48     
144    160    
192    -96    
32     128    
48     128    
96     -336   
272    160    
-176   -112   
256    192    
-16    -464   
48     464    
-16    -960   
304    1120   
368    544    
-464   -544   
-128   368    
352    -1760  
400    32     
-64    272    
16     -240   
176    -480   
80     352    
208    16     
-112   80     
304    -16    
-128   -160   
-224   144    
96     -112   
240    -64    
96     -128   
-64    -16    
256    -224   
0      -256   
-96    -16    
272    -288   
112    64     
144    -1296  
96     64     
112    144    
368    160    
-288   32     
-48    -32    
160    16     
256    160    
-160   32     
112    -272   
-288   48     
-48    96     
144    -48    
64     -240   
0      -112   
-16    -32    
48     -208   
160    -80    
192    144    
-288   16     
32     80     
128    112    
224    144    
48     0      
80     -32    
-432   -64    
16     -64    
80     -80    
176    -144   
160    -96    
64     64     
64     96     
-160   -352   
64     0      
16     -144   
-16    -64    
144    -48    
288    16     
-240   -176   
144    16     
-208   32     
112    -64    
-768   64     
-32    0      
288    -48    
0      -48    
80     -48    
-112   -48    
-320   -16    
64     80     
-112   32     
48     -96    
592    192    
-368   160    
240    -224   
-272   -144   
-64    0      
-48    160    
-256   64     
-96    -176   
176    -352   
96     -96    
80     -192   
240    144    
-272   -912   
144    0      
80     -16    
240    48     
-336   96     
160    -112   
144    -128   
32     -208   
-240   -80    
-64    -16    
-1888  -16    
176    112    
32     -80    
192    64     
-144   96     
48     -240   
192    16     
160    96     
-112   144    
-128   -32    
208    -144   
-96    -240   
-16    -96    
48     16     
-32    -80    
0      16     
96     -128   
32     80     
176    -208   
96     0      
160    -496   
-112   16     
-112   -144   
48     -112   
0      -32    
-32    128    
-672   32     
96     -304   
-480   -464   
224    -144   
-80    80     
80     -48    
-48    0      
144    -240   
32     -112   
-96    -240   
320    48     
-48    256    
160    144    
-80    32     
128    16     
-256   -176   
176    -608   
-16    320    
32     224    
-128   -336   
-240   272    
64     112    
-32    -96    
-48    432    
528    -272   
-880   -416   
-96    304    
-1008  96     
-384   -48    
240    272    
16     -80    
208    288    
576    208    
-240   -64    
-48    -416   
-96    -432   
-176   -176   
544    560    
-16    -144   
-80    80     
-496   32     
-240   0      
-576   -96    
16     96     
-480   -32    
-48    96     
-240   -96    
128    -288   
128    -176   
-48    192    
-448   -144   
32     -32    
-32    -160   
-96    112    
16     64     
208    240    
-496   -560   
160    -224   
112    336    
-224   -160   
-32    160    
-1136  -32    
16     16     
-368   80     
64     48     
-16    -112   
80     0      
-64    80     
-368   -16    
0      48     
-112   -16    
64     -80    
-112   128    
-288   16     
-320   -48    
0      64     
-288   48     
144    -32    
16     -32    
-64    0      
32     -32    
-160   -32    
64     -64    
-96    32     
32     80     
-48    48     
-128   -16    
-96    64     
-80    80     
-160   -96    
-128   -80    
48     112    
176    48     
-304   16     
-128   -48    
112    -64    
-128   0      
192    144    
-192   96     
32     48     
96     32     
-144   16     
208    16     
-160   -32    
32     96     
32     96     
-272   -48    
16     0      
-832   -16    
32     -32    
-48    -16    
-48    32     
80     48     
160    112    
208    160    
-352   0      
-48    16     
176    208    
-144   112    
-112   -32    
272    432    
-336   352    
112    -16    
-272   -112   
96     64     
176    -48    
-432   -192   
32     -144   
-16    32     
-16    112    
176    208    
272    48     
96     -64    
-272   80     
-192   96     
-112   0      
128    48     
16     96     
-48    32     
192    80     
-112   -64    
-192   -288   
-336   -80    
-64    128    
-176   48     
128    -64    
432    -224   
80     48     
-16    64     
160    48     
48     -64    
-112   -304   
272    224    
0      96     
208    32     
368    16     
0      80     
272    16     
416    48     
32     192    
-48    352    
-624   16     
-96    -128   
256    64     
96     48     
224    128    
-64    -16    
-208   128    
-528   -80    
16     -16    
112    -224   
-16    -208   
-208   32     
128    48     
192    48     
96     -16    
336    32     
160    -128   
-176   -96    
-272   0      
48     48     
-176   0      
64     96     
-112   -80    
160    -16    
144    64     
-112   -112   
-176   -144   
-48    16     
192    80     
272    112    
48     80     
96     112    
-16    0      
-208   -64    
256    32     
-96    32     
240    96     
112    80     
64     0      
112    48     
96     80     
32     64     
-192   -48    
176    -32    
160    48     
-16    48     
-32    0      
96     64     
-48    0      
144    240    
16     80     
48     16     
16     16     
-96    -32    
64     32     
-64    48     
192    80     
-112   -48    
160    64     
16     32     
48     32     
-240   -64    
96     48     
-64    16     
320    272    
-320   144    
128    16     
48     112    
16     32     
-48    -32    
368    176    
112    144    
-128   160    
-64    128    
0      -144   
0      -96    
-96    352    
96     48     
-336   -240   
-16    64     
128    448    
544    208    
-240   -336   
128    -336   
288    352    
-240   32     
-112   -208   
-64    448    
0      0      
96     -80    
0      -16    
64     -192   
48     336    
0      -176   
16     96     
80     288    
160    -160   
240    144    
-96    -544   
80     848    
352    448    
-160   -208   
-128   496    
-16    -880   
32     -176   
192    32     
32     -384   
192    672    
144    160    
128    80     
-352   -464   
-48    -784   
32     64     
-16    -624   
224    80     
192    64     
-320   -16    
144    192    
160    272    
80     160    
192    -32    
-256   16     
0      160    
64     32     
176    -352   
64     -160   
64     -80    
-64    192    
144    -784   
-64    64     
48     112    
-32    64     
-16    -48    
128    -48    
-144   64     
128    0      
-16    -64    
160    16     
-144   80     
64     -48    
80     48     
0      -128   
80     64     
-176   32     
320    -160   
0      128    
240    48     
-48    -192   
96     48     
0      0      
32     64     
-144   -64    
32     -112   
160    96     
-112   -112   
80     -32    
208    -64    
-80    64     
208    -32    
-16    80     
288    -1392  
-48    16     
-48    64     
96     16     
-64    48     
80     -64    
48     -80    
-80    0      
48     48     
128    -16    
112    -16    
32     -128   
192    48     
160    -272   
-16    -32    
-176   -112   
64     96     
-80    -16    
80     0      
0      16     
48     112    
256    112    
-16    112    
48     32     
112    -288   
48     -32    
128    -32    
-16    208    
112    -80    
80     16     
-80    112    
176    320    
-160   304    
-64    144    
288    -224   
96     -192   
64     -112   
48     -32    
-48    96     
128    -32    
48     96     
-144   -32    
240    -16    
96     -32    
-48    -80    
-48    -320   
112    16     
80     144    
240    -1184  
-48    16     
96     0      
288    -544   
-112   112    
160    -304   
64     0      
96     -16    
-16    128    
80     80     
0      -176   
16     0      
48     -192   
256    -304   
128    32     
80     -608   
-272   -336   
-864   -64    
-352   -304   
-48    -544   
112    -800   
-224   -176   
64     -512   
0      -224   
192    112    
64     -64    
160    -240   
32     336    
0      96     
-16    -320   
128    -160   
-96    -240   
-464   48     
128    304    
224    -176   
16     80     
16     0      
144    -288   
-48    192    
0      -416   
-48    96     
64     32     
64     16     
208    -112   
-256   -416   
208    128    
-32    64     
-176   -32    
128    48     
32     112    
128    -256   
16     -160   
-64    -304   
-160   -176   
48     -224   
0      192    
144    -32    
-208   -16    
0      -96    
240    64     
-160   0      
224    32     
-336   32     
-64    -80    
-240   -48    
-80    -320   
-192   -736   
-144   -368   
128    48     
240    -176   
240    80     
112    -1344  
256    96     
0      96     
-64    96     
64     -48    
-160   -32    
-256   16     
112    32     
-416   -32    
16     -16    
128    -16    
160    -80    
-272   -64    
16     -224   
48     -112   
144    -1184  
144    64     
176    64     
-96    64     
16     0      
240    -96    
-240   64     
352    -96    
-144   48     
160    -128   
-1104  48     
-16    -192   
160    -112   
-48    -224   
224    0      
32     -336   
144    64     
-48    -64    
-64    -144   
-224   -176   
352    -208   
-96    160    
80     -16    
-256   32     
0      -80    
-704   0      
288    32     
112    0      
0      -192   
-80    0      
0      -304   
64     32     
96     -112   
-96    -48    
-272   -16    
48     48     
-176   48     
80     48     
-368   48     
160    -32    
0      -16    
16     -64    
96     -48    
64     -48    
-64    128    
208    -16    
96     -128   
-96    -112   
64     80     
-256   144    
288    -96    
-16    -80    
80     -64    
-432   -208   
80     -80    
-192   48     
-192   -16    
80     64     
-1008  -96    
96     -64    
-80    -32    
-80    256    
-416   48     
-160   -112   
-160   0      
48     32     
-112   -64    
128    -48    
-80    224    
-208   48     
304    0      
-288   -400   
-272   -288   
-880   -128   
176    176    
-160   16     
16     32     
-128   -96    
-96    80     
16     16     
-560   -144   
-112   -128   
128    -368   
240    -16    
80     160    
-224   144    
-800   -112   
-16    32     
-240   -48    
-64    48     
160    48     
-80    -16    
80     -640   
-464   -528   
-80    192    
-560   96     
-16    48     
368    208    
-448   256    
-320   -208   
-176   -64    
176    -272   
432    208    
240    144    
-160   32     
-320   0      
-256   -48    
-176   -96    
144    -16    
-304   16     
-288   -48    
-16    48     
-1056  -208   
352    128    
48     -32    
224    48     
128    -16    
48     160    
-448   -64    
240    -96    
192    16     
208    96     
64     160    
16     112    
48     0      
-80    64     
-176   0      
-560   -160   
32     48     
-448   96     
-64    32     
-176   -128   
-80    -128   
160    48     
-48    32     
-16    48     
112    64     
-80    -80    
-208   -48    
-192   16     
-256   32     
144    64     
-128   48     
288    144    
-608   -32    
-16    -64    
16     96     
-160   48     
-32    -32    
240    -32    
32     0      
-32    32     
-48    16     
0      -176   
64     -320   
0      640    
0      224    
0      -192   
16     96     
-480   -160   
80     128    
32     -48    
-48    256    
64     -176   
112    144    
32     0      
-192   -64    
368    -224   
-128   112    
272    144    
-224   -176   
-32    -448   
-448   -512   
0      400    
48     -496   
96     448    
128    432    
-64    -496   
-16    400    
16     -240   
-256   224    
176    240    
-192   -432   
240    -320   
64     368    
16     576    
336    -112   
-144   -80    
224    -16    
-272   -208   
112    -336   
-192   -112   
-32    16     
-208   32     
80     176    
336    304    
-192   448    
112    -64    
-32    -96    
16     16     
-240   -160   
160    176    
176    -48    
-32    96     
-176   -128   
-80    -64    
80     -336   
-224   -112   
16     80     
64     -32    
-48    -160   
-176   48     
-112   -80    
32     -64    
32     48     
16     -32    
576    384    
-384   416    
32     -208   
-336   -544   
0      48     
80     -48    
0      160    
352    192    
-144   112    
-16    96     
-112   -128   
144    -48    
-16    32     
80     -64    
-96    -48    
-112   304    
-32    32     
288    -16    
48     -48    
-192   -16    
192    96     
-160   176    
16     80     
48     0      
-32    176    
0      80     
32     -64    
32     16     
0      160    
32     16     
-288   -64    
288    -240   
-144   272    
336    272    
160    0      
-144   48     
-64    16     
-112   0      
80     16     
-48    64     
-112   -160   
64     208    
-32    96     
304    -16    
-32    -64    
-32    16     
-64    64     
-32    48     
112    16     
-16    -96    
96     32     
176    16     
304    80     
80     208    
-176   96     
80     0      
0      16     
-128   0      
-96    16     
96     64     
48     -288   
96     -176   
32     16     
-144   80     
288    224    
-80    128    
144    0      
160    -16    
-48    32     
-96    64     
32     48     
192    32     
-160   -96    
208    -160   
-32    -208   
-80    -80    
-80    48     
16     -1696  
96     48     
96     176    
352    112    
-48    192    
-128   96     
-48    240    
-96    144    
-160   -128   
464    -80    
224    144    
320    384    
-240   272    
-112   -80    
160    -32    
48     16     
160    96     
-16    -64    
16     -96    
-128   32     
48     -64    
0      112    
64     80     
64     -16    
80     144    
-144   16     
240    -96    
160    304    
160    -64    
224    -304   
48     32     
32     144    
-144   32     
-48    -208   
-64    32     
128    48     
320    160    
-288   -224   
32     -160   
304    112    
112    96     
144    -80    
-96    176    
32     48     
16     -176   
80     -272   
112    80     
288    -608   
0      192    
160    32     
192    48     
-96    -64    
64     0      
32     128    
80     80     
-96    48     
320    112    
-48    96     
80     -16    
64     96     
112    -80    
96     0      
48     -224   
80     48     
0      -416   
64     80     
16     -32    
0      32     
0      48     
96     32     
256    112    
-32    -112   
224    0      
48     -224   
16     16     
160    -160   
-64    0      
-176   -240   
64     -16    
48     -160   
320    80     
-176   128    
256    80     
-64    -32    
32     144    
-80    -32    
240    -144   
-272   -32    
400    32     
96     224    
112    -96    
208    -48    
-32    -160   
-32    112    
96     -464   
80     -80    
96     112    
208    48     
32     32     
96     -208   
-48    32     
96     80     
48     16     
32     -96    
80     80     
64     -32    
128    -32    
64     16     
112    48     
16     32     
144    -416   
-160   64     
160    -368   
-128   -32    
112    16     
64     -112   
0      16     
192    -208   
0      -112   
0      -128   
-80    -144   
80     16     
400    112    
-416   96     
112    -32    
272    -128   
32     64     
-48    -192   
192    -112   
-656   -48    
-16    0      
32     -32    
144    -16    
176    0      
32     -352   
96     -48    
48     32     
32     64     
192    -384   
-304   -32    
112    -208   
144    80     
32     -112   
-16    -80    
-208   32     
-32    -64    
80     -64    
176    -96    
304    64     
32     -48    
144    -64    
-48    -592   
256    304    
-32    0      
112    -32    
144    112    
176    32     
-240   144    
64     -128   
-160   -240   
256    -80    
-464   160    
-352   -208   
240    -288   
320    -272   
368    -32    
288    -720   
224    -144   
-64    -32    
-80    16     
-64    -16    
64     32     
240    224    
-144   192    
-464   80     
-80    176    
-1632  96     
432    -224   
96     -224   
128    32     
-128   0      
-64    -144   
64     -32    
64     -160   
320    96     
32     32     
-112   -16    
-64    -32    
32     -32    
80     16     
176    0      
-592   32     
224    -64    
-192   -16    
16     -288   
0      128    
288    448    
-976   -416   
-336   -1376  
256    256    
80     304    
208    -256   
-112   112    
320    256    
-16    -128   
-368   -32    
-672   192    
-224   -544   
-352   160    
192    -64    
48     32     
-288   -208   
-112   -112   
112    -480   
400    -128   
32     -96    
336    384    
-368   192    
-256   -128   
-448   48     
144    -48    
64     80     
320    16     
-240   -384   
-160   -112   
-144   192    
80     -96    
176    128    
-48    -272   
304    944    
0      -352   
-64    80     
-336   368    
16     -384   
-96    128    
144    -352   
-208   -240   
160    224    
-544   -160   
128    -48    
-16    0      
144    -240   
32     96     
-32    -208   
272    -32    
-368   -64    
224    0      
-240   576    
144    -256   
0      80     
-32    576    
-144   -464   
160    -96    
-416   224    
96     -208   
208    64     
-176   -144   
-32    -240   
-80    656    
-432   48     
-48    -160   
-784   256    
96     32     
336    80     
112    288    
-224   304    
-160   -592   
-288   -128   
0      288    
-192   -80    
-16    0      
-352   -352   
-400   -64    
-208   -48    
-176   -560   
400    272    
-128   0      
128    144    
-1104  -64    
-80    -192   
240    16     
80     -48    
16     -112   
48     208    
-96    -224   
176    -192   
-48    -144   
96     -16    
48     -64    
-96    -16    
64     0      
-240   64     
-112   32     
-320   160    
128    -144   
-480   -96    
32     16     
80     0      
80     -96    
-176   -256   
144    320    
64     192    
64     0      
-16    -224   
-32    16     
-272   -48    
80     -128   
-208   112    
-32    144    
96     -272   
0      -32    
288    -48    
-160   -16    
16     144    
-128   -192   
64     160    
-160   -144   
416    16     
-208   224    
32     128    
-64    -80    
-288   480    
528    176    
0      224    
-16    -240   
-256   -128   
112    16     
-1072  32     
176    48     
80     -256   
-224   32     
-96    -160   
-64    16     
112    64     
-160   160    
-208   -64    
-144   16     
-16    32     
-336   -128   
-16    -272   
-448   -96    
16     144    
-624   -160   
112    16     
-80    80     
16     144    
0      0      
-144   16     
96     0      
-64    32     
0      -48    
32     160    
48     32     
-160   -96    
432    176    
-208   192    
-112   32     
-192   -64    
176    96     
80     -96    
-160   0      
-96    208    
-48    32     
32     -144   
128    -272   
0      112    
-320   144    
-48    0      
-64    -32    
16     -16    
-96    -16    
304    48     
-208   -32    
208    176    
-144   192    
-32    -32    
16     80     
80     112    
-128   16     
-208   16     
352    0      
-144   0      
-336   32     
-96    96     
64     -16    
48     -176   
144    -96    
-16    -64    
16     0      
-128   -16    
160    -80    
144    -64    
128    48     
-128   -192   
-176   0      
240    -224   
64     -128   
224    -64    
-128   16     
144    384    
-304   -304   
176    240    
-160   -112   
-160   -160   
64     304    
48     272    
-112   -80    
160    -64    
464    368    
-160   -48    
160    -112   
-48    -48    
352    16     
-16    -48    
432    336    
-384   -80    
-208   -112   
208    80     
-16    -32    
176    80     
112    160    
272    48     
-64    336    
64     160    
48     -80    
64     128    
96     0      
128    -16    
-96    -48    
-64    112    
-272   -32    
-16    16     
32     -48    
144    48     
144    64     
16     80     
16     0      
0      80     
-112   0      
112    -16    
32     16     
48     -16    
16     16     
32     32     
192    208    
-240   -48    
64     64     
208    64     
-128   32     
240    48     
-48    48     
-64    -272   
-80    -128   
0      192    
-128   0      
192    144    
-32    48     
192    96     
32     -32    
-32    16     
208    16     
-80    48     
112    48     
0      32     
112    144    
-176   -16    
48     64     
-128   48     
128    48     
-64    112    
160    0      
-96    -16    
16     48     
-128   -48    
288    16     
-64    64     
-64    160    
-80    48     
48     48     
48     48     
112    112    
-80    176    
48     48     
80     0      
-64    16     
128    32     
16     32     
112    96     
-32    -80    
480    288    
-464   272    
256    -736   
160    16     
-112   32     
208    -16    
112    -96    
256    144    
-336   208    
112    112    
32     16     
96     -144   
-192   16     
160    112    
48     -16    
-48    -32    
224    32     
-64    -160   
400    160    
-272   48     
176    -96    
80     -32    
-112   64     
80     32     
96     0      
-16    0      
64     64     
64     80     
144    0      
-112   32     
32     -240   
-112   64     
144    -400   
-16    -32    
240    -1120  
-192   -32    
-16    0      
128    -64    
32     96     
176    80     
-128   112    
64     224    
320    192    
-48    -16    
16     0      
-32    -96    
176    64     
112    48     
-32    -32    
64     -528   
32     0      
-48    -288   
96     64     
-160   32     
48     0      
-16    -48    
384    96     
-208   128    
240    -80    
0      80     
0      -256   
176    272    
-32    192    
-192   -112   
288    -128   
112    144    
80     -272   
272    -48    
64     64     
48     288    
-128   48     
80     -16    
80     208    
272    -128   
80     -80    
288    -48    
0      224    
-32    -144   
0      -96    
16     -128   
368    64     
-80    -16    
16     160    
112    -224   
384    320    
176    96     
-16    -144   
-32    48     
144    -64    
16     -16    
256    -272   
192    96     
192    -112   
96     96     
-192   -1248  
32     560    
-208   128    
16     128    
112    160    
272    64     
-16    80     
128    -64    
368    -1232  
256    -128   
48     -64    
-128   -272   
-32    368    
-128   256    
48     128    
32     0      
-32    -352   
0      -496   
0      -160   
-544   112    
80     -304   
0      16     
96     144    
336    -416   
96     176    
-48    -544   
160    -192   
272    -224   
176    -48    
160    48     
-144   -560   
-80    -976   
96     592    
288    480    
272    -256   
16     -96    
64     -256   
-960   -320   
-32    80     
-160   -464   
0      32     
272    256    
-144   -736   
256    -208   
96     -128   
400    64     
128    -32    
336    -48    
-80    -80    
-48    336    
-80    192    
-160   -16    
-464   -16    
16     80     
288    32     
32     0      
144    16     
0      -64    
64     16     
-16    -160   
224    144    
-64    -96    
-64    96     
48     0      
128    128    
0      32     
48     -240   
-32    -32    
48     64     
48     -304   
48     -112   
32     -96    
32     -32    
-16    -64    
160    -320   
80     64     
80     -64    
16     -64    
-160   -448   
208    48     
112    224    
96     -96    
-256   -96    
-32    -320   
-832   32     
64     336    
304    0      
-48    -192   
-112   -176   
272    128    
384    464    
-336   208    
-96    0      
160    -192   
-80    256    
144    80     
32     -96    
-560   -224   
336    144    
-464   192    
-80    48     
160    32     
16     -272   
32     -32    
96     -816   
-48    -96    
144    -1920  
96     -64    
16     0      
-160   -272   
64     0      
96     -16    
128    144    
-128   96     
-160   -112   
64     -64    
-64    16     
160    -224   
-64    128    
160    -96    
-48    0      
208    -288   
16     -256   
32     -48    
16     -96    
-336   -384   
160    0      
-96    32     
144    -144   
-144   32     
80     -112   
0      32     
112    -160   
80     -144   
16     -96    
-192   688    
576    16     
48     -16    
-352   80     
16     96     
320    208    
320    -48    
-416   -144   
144    -16    
-304   -80    
208    -192   
-240   -224   
-16    -96    
176    304    
-1760  80     
272    64     
-112   32     
-336   -64    
-144   -80    
32     0      
-240   80     
448    -64    
48     48     
96     0      
-112   112    
-112   -16    
112    48     
-592   -160   
112    -80    
-304   -208   
80     48     
-112   48     
-80    96     
-160   80     
-640   0      
-16    0      
-1616  16     
112    48     
208    288    
-64    224    
-144   80     
-192   112    
-224   -80    
-48    -64    
-80    -144   
-96    32     
-32    48     
-256   -16    
192    176    
-496   192    
48     112    
-448   0      
-192   -160   
-320   -96    
-96    -176   
-32    -192   
-64    64     
-128   -16    
80     -240   
224    -16    
-176   -32    
-48    -192   
128    144    
-144   -48    
-144   -400   
112    96     
-208   96     
-160   64     
-1504  -192   
128    48     
16     -32    
96     -112   
496    -256   
48     96     
-176   16     
160    352    
-176   112    
-432   -336   
160    48     
112    208    
384    -160   
-128   -224   
352    -176   
-928   -464   
304    -16    
80     -64    
80     64     
-64    0      
-288   -128   
-96    -16    
-96    96     
-64    48     
-80    32     
112    16     
64     -240   
-240   -192   
-640   64     
-160   -64    
-256   16     
0      80     
-208   -192   
-48    128    
-224   80     
112    -80    
128    32     
128    256    
-160   16     
48     -80    
96     64     
-48    -64    
16     96     
-160   -16    
112    -64    
144    160    
64     16     
-400   -48    
0      0      
96     -32    
128    96     
-64    0      
-48    0      
-96    48     
-64    16     
-64    16     
-16    -144   
16     0      
-16    80     
-112   32     
-144   16     
96     48     
-640   -32    
-48    32     
96     96     
-80    16     
32     48     
-80    -32    
-144   16     
-48    32     
-64    0      
-16    -80    
-32    32     
-272   -48    
0      -16    
-112   -32    
80     64     
-320   48     
176    144    
-336   -32    
0      -16    
-32    16     
-16    48     
144    48     
128    48     
64     208    
160    -80    
64     -64    
-128   32     
160    112    
-272   32     
128    0      
-288   -32    
80     112    
-80    16     
64     -32    
0      -176   
144    48     
0      144    
128    -48    
0      96     
-96    80     
32     -96    
96     -128   
208    64     
-304   -64    
48     -64    
-160   -48    
-64    80     
-16    80     
-80    -32    
224    -32    
128    0      
-144   32     
64     -32    
-112   -96    
144    96     
-144   80     
0      -16    
160    -80    
-320   -128   
32     64     
96     64     
128    32     
64     96     
16     64     
-16    -64    
112    48     
16     32     
0      48     
16     0      
64     -160   
32     48     
-32    32     
-80    -128   
64     -80    
0      48     
128    32     
-32    -64    
-16    -16    
0      48     
96     32     
112    48     
112    -32    
192    0      
80     256    
48     192    
-64    48     
-80    0      
-16    224    
0      -16    
96     -32    
160    96     
48     16     
128    160    
-208   -32    
-16    160    
144    -32    
176    32     
-16    -48    
-80    0      
64     -64    
208    192    
16     -16    
16     -64    
16     176    
64     64     
80     32     
-32    96     
128    112    
64     -112   
192    224    
-304   -400   
-208   -736   
-16    656    
256    -16    
16     -320   
-80    -48    
-16    96     
128    0      
96     -240   
32     64     
-64    224    
64     -16    
96     112    
-112   -288   
80     48     
0      -80    
-80    144    
-16    16     
32     -176   
-144   -288   
128    -64    
-16    176    
-16    -144   
160    304    
-48    -272   
-64    240    
16     -64    
48     48     
-16    -208   
-32    -64    
-48    16     
256    -112   
-64    -160   
208    64     
64     64     
48     48     
48     240    
-64    -16    
96     96     
-80    -656   
256    128    
112    592    
-224   48     
144    64     
96     -48    
416    -96    
256    48     
64     160    
80     80     
48     16     
-160   -64    
-16    80     
80     48     
224    -160   
112    -208   
48     32     
-48    -848   
144    -32    
0      -96    
48     80     
-112   80     
48     16     
-112   -16    
144    0      
48     -32    
144    -16    
64     48     
-128   -112   
160    -48    
128    288    
208    416    
-80    -96    
-160   240    
0      -1152  
96     32     
16     -112   
288    -80    
-48    -16    
32     -96    
160    64     
-64    -96    
128    288    
0      -112   
32     -112   
192    -64    
144    128    
128    -416   
160    176    
32     64     
208    96     
48     80     
16     -48    
32     160    
32     48     
0      224    
128    80     
64     16     
208    -256   
0      -176   
0      -240   
128    336    
64     96     
80     -256   
32     80     
256    80     
80     112    
144    336    
-208   -160   
144    48     
192    160    
-16    -32    
-48    144    
0      80     
48     128    
-80    -272   
32     -192   
448    -480   
64     256    
0      64     
80     -16    
-160   368    
208    -352   
112    96     
96     -176   
-48    -160   
192    -128   
96     -560   
288    -112   
368    48     
-64    -288   
-352   -400   
-240   -128   
160    -304   
80     96     
336    -128   
-16    96     
528    208    
-384   384    
176    400    
-128   -400   
-96    -112   
320    -624   
16     -32    
256    -720   
-16    -80    
64     176    
208    -32    
-112   16     
192    -96    
-112   96     
144    -176   
96     -64    
48     -16    
-1104  -176   
384    224    
-96    -224   
160    -320   
592    512    
-272   80     
-112   64     
112    -160   
384    240    
128    64     
-368   192    
208    -48    
-32    160    
-144   -224   
0      -64    
-2016  672    
320    352    
-64    112    
288    64     
304    496    
160    192    
208    80     
176    96     
-128   448    
240    80     
-64    -208   
0      -208   
192    -160   
-96    256    
-272   0      
-320   -560   
144    224    
256    400    
96     0      
144    -16    
-176   0      
0      96     
128    -176   
432    416    
-176   -304   
48     -64    
224    96     
-16    -192   
-144   704    
-32    272    
96     -368   
-80    80     
-2528  -352   
304    64     
-48    160    
320    0      
144    -96    
112    -192   
-192   0      
-176   -464   
-80    48     
16     -48    
192    32     
368    96     
304    80     
-192   -80    
16     -208   
-960   -128   
-240   -16    
-352   96     
64     48     
176    48     
240    -208   
352    448    
-368   -112   
-32    -80    
96     -48    
112    -48    
-16    -64    
272    -128   
-464   192    
-112   -144   
-272   -80    
-32    240    
-112   0      
0      -64    
560    96     
320    48     
-32    48     
224    -432   
128    16     
16     112    
64     -144   
-880   -32    
32     -64    
-512   -96    
-16    -48    
-144   -64    
0      -32    
-224   96     
-224   -208   
96     32     
224    -48    
400    560    
-608   176    
304    -96    
128    -128   
416    0      
224    64     
336    -112   
-208   -128   
-464   -16    
-640   64     
-208   -144   
112    48     
16     -80    
192    64     
-432   -32    
0      -16    
-80    -80    
-432   0      
-16    64     
160    16     
-32    -80    
128    96     
-272   -16    
144    -48    
112    48     
-944   -64    
224    96     
80     -48    
-16    32     
-128   -176   
-576   -64    
-160   0      
-96    32     
-96    32     
-224   64     
64     32     
-1040  0      
-224   -64    
0      -16    
48     32     
-304   -160   
144    -32    
-192   -32    
112    64     
-320   -96    
-16    -16    
-48    -48    
0      144    
-64    64     
-224   -64    
-32    -32    
-32    64     
32     -32    
-240   -48    
16     96     
-32    -80    
64     224    
-128   -64    
32     -16    
-176   -128   
96     -32    
-80    272    
128    64     
-80    80     
-416   -16    
192    -48    
-480   144    
192    128    
-304   -80    
32     64     
0      144    
-224   48     
160    -128   
-80    48     
16     32     
256    352    
-240   432    
-80    0      
-16    -80    
-160   -112   
48     0      
-96    16     
-80    -112   
-784   -192   
16     16     
-128   -16    
144    144    
-112   96     
144    144    
-48    -48    
-176   16     
32     -96    
-144   -16    
32     -192   
64     96     
-16    128    
-304   -144   
128    80     
-464   16     
144    240    
-496   -192   
160    48     
48     112    
-16    16     
-96    96     
-112   208    
176    304    
16     -176   
-64    -80    
80     192    
-256   -64    
-272   -64    
128    -48    
-240   16     
176    112    
-976   -144   
-64    784    
64     -256   
288    -272   
-192   256    
-64    -448   
0      416    
112    304    
-432   -1088  
-32    384    
96     720    
-240   -240   
80     240    
-368   -480   
288    -144   
-1152  -160   
192    288    
64     272    
176    192    
16     208    
240    128    
-192   272    
-96    96     
-112   160    
96     96     
-176   -64    
-48    -80    
96     16     
-48    -64    
64     80     
-240   -80    
224    -16    
32     64     
432    144    
-80    160    
176    112    
-176   128    
-96    -96    
288    -48    
0      -16    
112    48     
-176   -96    
224    -16    
-288   144    
96     80     
128    -16    
-112   0      
64     96     
144    16     
256    80     
-288   -32    
80     -112   
-48    0      
192    16     
-144   -16    
64     -16    
-336   -16    
80     80     
-16    -48    
352    192    
-128   160    
-80    128    
16     48     
-64    0      
-48    144    
0      0      
192    -64    
-64    0      
48     16     
-112   32     
-256   -48    
304    -32    
16     -16    
-192   -272   
48     176    
-96    64     
-16    -64    
112    0      
-16    192    
-128   32     
64     -16    
32     -32    
-112   -32    
32     0      
80     112    
-64    224    
-160   -48    
192    -64    
64     -32    
-96    64     
160    -64    
64     96     
304    160    
-176   144    
64     0      
80     -64    
64     256    
-112   32     
80     80     
0      -16    
80     352    
-16    144    
-80    -16    
304    160    
-48    80     
208    -16    
272    112    
-128   112    
112    144    
128    80     
16     48     
160    16     
128    64     
-80    96     
-32    64     
144    128    
-80    -32    
-96    -160   
128    64     
112    48     
16     128    
-32    -48    
128    64     
32     160    
96     48     
144    16     
-64    48     
-112   -112   
144    -96    
48     80     
144    144    
160    128    
-256   -240   
416    192    
-208   -32    
-96    -176   
-32    -176   
16     -64    
144    -112   
16     80     
208    608    
272    240    
-352   -992   
272    -816   
48     -256   
96     352    
272    96     
128    -128   
-240   256    
176    -1200  
-32    736    
288    224    
400    624    
48     288    
-272   -288   
-176   -656   
208    288    
-96    608    
240    -64    
0      640    
-160   -208   
64     -240   
-208   -208   
160    176    
0      112    
64     -176   
96     48     
80     64     
-16    208    
176    544    
-80    -208   
-16    -176   
48     96     
48     -272   
-128   256    
176    16     
96     256    
144    -160   
112    -304   
0      -336   
-80    -208   
-48    -736   
208    -96    
-432   -480   
96     -176   
384    416    
-32    -256   
224    208    
-208   -112   
160    -288   
16     0      
208    48     
32     -64    
144    80     
-224   -240   
96     128    
144    -336   
128    128    
128    -48    
-48    -192   
368    -64    
-208   576    
192    -224   
240    112    
-128   448    
256    -192   
144    128    
112    -96    
-112   -112   
256    224    
0      0      
-48    -208   
32     96     
-16    48     
176    128    
96     112    
16     16     
-80    16     
112    48     
224    0      
64     -560   
-32    16     
-48    -416   
288    224    
32     48     
-80    112    
208    48     
352    336    
-160   80     
-16    48     
-128   480    
288    80     
256    -64    
-528   16     
0      240    
96     -32    
-96    -112   
400    -160   
64     80     
528    80     
-208   128    
144    -192   
-32    -176   
176    -16    
128    -240   
16     16     
-208   -80    
96     -96    
192    -160   
-128   -96    
-32    -48    
32     -1040  
304    0      
832    672    
-432   288    
-336   -640   
208    -272   
336    64     
160    -64    
448    -192   
128    16     
-224   -32    
352    -128   
608    480    
-448   432    
-240   -48    
176    -160   
96     -112   
512    208    
-256   96     
32     -176   
160    -400   
256    -48    
336    176    
544    160    
-112   208    
-1072  -160   
240    32     
-784   64     
96     80     
256    64     
224    -224   
224    -80    
-272   -320   
336    16     
32     128    
-176   32     
176    -80    
-16    32     
176    -64    
96     -256   
80     -64    
176    176    
-752   -96    
128    -272   
32     64     
144    -144   
144    -80    
176    -176   
224    64     
272    -64    
-512   32     
16     -176   
160    -32    
192    80     
80     -16    
-16    -64    
144    16     
-432   -48    
176    -64    
208    -48    
48     -48    
48     0      
64     -80    
-448   0      
80     -752   
-112   0      
32     -80    
192    96     
16     48     
-16    -16    
-144   -80    
112    0      
-368   -64    
128    -64    
-640   64     
128    0      
-16    -32    
96     -192   
0      64     
96     -32    
96     80     
416    304    
-304   192    
96     -96    
0      -48    
-16    -32    
176    -16    
-16    48     
80     48     
-384   64     
-16    -160   
0      -128   
96     -80    
96     304    
48     -32    
-144   -48    
-352   -1312  
32     -48    
-224   -224   
176    16     
-592   0      
176    -32    
-256   80     
48     -80    
-144   -32    
112    -128   
-64    -64    
192    -48    
32     224    
80     64     
-80    112    
-128   128    
-32    -208   
-208   -176   
176    0      
-96    208    
0      -400   
-128   160    
48     288    
-128   0      
240    224    
-16    -336   
256    208    
-96    256    
32     -512   
480    -16    
-208   736    
-304   -640   
-224   -16    
32     176    
-112   -368   
16     880    
-16    -560   
144    192    
64     48     
176    -224   
0      32     
-736   160    
112    192    
-832   -32    
-624   -80    
496    288    
-1024  512    
-464   -496   
-160   -496   
-352   -192   
288    -208   
-128   -112   
160    -144   
-32    112    
96     240    
-16    112    
-832   -304   
240    -288   
-48    -128   
0      192    
400    336    
-144   304    
-224   32     
-112   64     
-16    96     
-368   -64    
-64    0      
-256   -64    
112    80     
-176   16     
96     16     
-80    -160   
-32    0      
-32    64     
-144   -32    
-144   32     
-176   -80    
96     -32    
-48    0      
32     16     
-736   -32    
-64    -16    
416    -80    
32     32     
-96    -112   
176    16     
48     48     
-32    96     
160    -32    
-208   48     
-288   0      
-304   -64    
144    -352   
-96    -80    
96     -16    
-160   -32    
-288   128    
-352   -32    
0      16     
32     -112   
160    64     
-352   -192   
112    -32    
224    64     
16     64     
528    288    
-496   224    
-32    -48    
112    32     
-64    96     
112    144    
-176   48     
-64    -96    
288    96     
-576   -112   
0      144    
-288   -32    
352    -32    
80     128    
128    16     
32     16     
-352   -48    
144    -160   
80     -16    
-256   -320   
240    -240   
48     144    
-832   0      
112    0      
-576   -80    
-32    -32    
208    80     
-48    16     
80     32     
-96    16     
48     192    
0      0      
0      -32    
-160   -128   
96     -192   
-384   -176   
224    -48    
-224   48     
16     368    
-1568  272    
32     -48    
-64    0      
-128   80     
-192   -32    
192    -16    
64     144    
-208   80     
-16    128    
304    32     
-96    -272   
-208   -368   
144    -192   
0      -64    
-96    80     
-80    80     
-160   144    
144    288    
192    144    
144    48     
-16    144    
-32    144    
-96    48     
0      -32    
-160   -48    
192    -144   
-240   48     
128    192    
-288   -48    
80     160    
80     80     
48     256    
-32    -304   
-80    384    
48     352    
-112   -16    
208    16     
-48    -80    
208    -32    
-224   -64    
128    16     
-96    576    
-96    -288   
0      96     
-96    16     
16     32     
-160   64     
112    -192   
192    128    
112    64     
128    320    
-336   -224   
-128   304    
-112   -112   
272    -16    
96     384    
0      -352   
96     16     
-352   -336   
432    176    
96     -64    
144    112    
48     -80    
48     -576   
-64    32     
-208   448    
64     48     
-320   0      
416    304    
0      -64    
208    48     
-32    16     
240    48     
-16    -64    
48     128    
-32    672    
128    368    
0      -160   
-176   -64    
64     -192   
64     -208   
48     80     
256    -64    
-64    0      
-272   80     
208    160    
-240   -16    
112    80     
160    64     
-64    0      
80     -64    
48     48     
112    16     
48     64     
64     96     
112    64     
160    144    
-160   48     
192    16     
32     64     
208    32     
-224   -48    
96     32     
80     80     
-16    64     
32     32     
112    80     
80     608    
96     432    
-16    -16    
-336   80     
272    16     
-112   0      
64     -32    
224    64     
-48    64     
-64    0      
144    -240   
64     112    
208    -48    
-192   -80    
192    96     
-32    48     
-48    32     
0      -16    
80     0      
96     16     
-160   64     
176    80     
-80    48     
160    16     
0      48     
-80    -80    
288    -80    
-96    -1136  
272    32     
112    0      
-176   160    
0      256    
-80    -112   
368    0      
304    64     
-176   96     
128    -16    
-96    64     
-976   112    
-208   272    
-128   -64    
160    80     
16     -720   
96     -112   
-64    -208   
272    64     
-112   96     
32     16     
496    256    
-272   256    
-368   -32    
16     -128   
-48    -256   
480    -224   
384    304    
-128   64     
96     96     
-112   -80    
-192   80     
96     64     
32     48     
-48    -16    
-80    64     
160    80     
-432   64     
512    224    
352    -128   
176    -32    
208    0      
16     336    
-32    -64    
288    -16    
128    -16    
-272   368    
-288   -480   
-16    -16    
-48    64     
-192   -96    
48     -16    
128    16     
-32    80     
-96    48     
-16    -16    
-96    -112   
240    112    
144    -64    
128    192    
-272   -96    
-144   -208   
144    -480   
256    80     
48     0      
192    80     
352    192    
-128   96     
128    -32    
-112   -16    
64     -16    
128    -288   
160    -16    
240    -240   
80     -32    
288    -64    
-80    48     
-64    -128   
128    48     
0      32     
-16    32     
128    16     
144    48     
32     48     
96     -80    
-32    -16    
144    112    
176    176    
96     -48    
160    96     
-80    -224   
96     48     
16     -32    
112    96     
32     48     
0      304    
64     64     
80     -800   
80     -16    
128    -64    
112    -416   
224    48     
-96    96     
80     -16    
128    224    
-32    0      
176    304    
96     192    
0      80     
-112   -16    
48     -480   
-192   -80    
304    -192   
0      16     
208    -112   
-160   -16    
112    0      
96     -944   
-64    0      
368    -160   
48     224    
224    336    
32     -208   
272    544    
-352   -256   
176    -1264  
128    496    
-192   96     
-240   -256   
96     -96    
-144   32     
464    -144   
-144   -112   
176    -48    
128    -144   
192    -32    
-160   -224   
-112   48     
336    -224   
-16    -80    
304    -160   
-16    80     
32     176    
-160   -496   
-560   384    
-176   -64    
-32    -16    
208    -144   
96     -80    
-32    -144   
480    16     
-432   16     
416    -144   
128    -16    
-480   240    
240    -144   
-32    16     
-288   -176   
144    48     
-960   0      
224    48     
48     -144   
-64    -208   
64     -32    
224    -432   
-496   -176   
64     -144   
32     160    
160    -160   
0      32     
-112   -64    
112    224    
-32    0      
96     -112   
-208   -16    
160    16     
-16    -80    
224    -48    
0      -48    
96     -256   
48     0      
-240   -192   
368    64     
144    0      
48     0      
32     96     
128    -96    
16     0      
144    -48    
-240   -32    
-48    -96    
-96    16     
32     32     
112    -16    
0      -32    
256    144    
16     -240   
48     0      
64     -32    
144    -80    
0      32     
48     -80    
-64    0      
192    16     
-480   96     
-64    -32    
-96    -16    
32     16     
144    16     
192    -288   
-48    32     
-48    -352   
160    80     
144    -1232  
320    112    
-144   112    
32     -64    
-256   -112   
192    0      
-112   80     
0      -16    
80     -80    
48     -16    
48     -16    
0      -192   
128    112    
64     0      
0      32     
-416   -96    
-32    -272   
-128   -80    
96     48     
-256   -48    
160    384    
-176   192    
0      -240   
-176   -96    
16     -64    
-16    16     
240    -176   
144    32     
-640   288    
-640   672    
-336   -16    
-1280  -352   
-16    -416   
384    -128   
128    16     
208    48     
80     240    
-112   224    
-320   48     
-1584  -192   
128    -160   
-256   -160   
112    80     
-336   -80    
-352   -32    
32     48     
-144   16     
96     304    
-432   352    
-192   -32    
480    -272   
-32    -160   
240    -16    
-176   -304   
-208   64     
-80    -64    
-384   -272   
96     0      
32     -32    
-224   96     
368    -16    
256    176    
-208   400    
-176   -48    
-160   -160   
-1056  0      
32     -48    
144    0      
176    176    
-160   -144   
272    -32    
-80    320    
0      -48    
-112   32     
-112   32     
-80    80     
-256   416    
-32    -512   
-304   -32    
-144   144    
-224   0      
-80    -96    
-48    -304   
144    -320   
-240   -144   
-80    80     
-176   -208   
-48    96     
48     16     
-128   128    
80     32     
-208   -48    
0      -208   
-32    -192   
0      48     
-176   0      
-128   -32    
-1312  -160   
80     80     
-48    48     
144    32     
0      400    
-64    352    
-160   -96    
-336   -80    
-48    112    
-240   48     
144    -16    
-96    16     
112    112    
-432   -112   
64     -48    
-496   -48    
16     48     
16     -16    
240    0      
-176   0      
-176   -48    
-80    -80    
-224   80     
32     80     
32     -32    
128    -112   
-128   0      
-32    128    
-320   -128   
160    48     
-352   16     
496    96     
-1568  -256   
16     176    
-32    -112   
64     -144   
-144   80     
96     48     
112    48     
-288   -32    
96     64     
-144   0      
96     -32    
80     -16    
112    80     
-144   -48    
64     32     
-240   32     
-160   -16    
80     64     
-64    80     
160    16     
-48    16     
128    96     
240    16     
-272   -16    
-48    -96    
160    32     
64     96     
128    48     
-432   -32    
64     144    
128    32     
0      64     
-16    -96    
-336   -80    
112    80     
-112   32     
144    80     
208    208    
-112   240    
-80    96     
208    -16    
-176   -16    
-16    16     
-208   -64    
96     96     
-112   64     
112    -48    
64     64     
-16    128    
176    112    
0      80     
-112   -192   
112    16     
112    144    
-96    32     
336    128    
-48    -144   
-80    0      
-176   80     
64     48     
-16    128    
16     16     
208    112    
64     64     
-48    32     
176    112    
112    96     
-272   32     
416    432    
-320   -16    
128    -240   
0      48     
80     -48    
192    -32    
16     0      
288    80     
-16    96     
544    320    
16     288    
-416   64     
-176   64     
-16    112    
16     224    
160    224    
-160   0      
0      -16    
-208   -16    
352    192    
-48    176    
-544   0      
144    16     
-96    32     
-192   -640   
448    -768   
400    128    
416    144    
240    0      
80     -96    
320    -176   
224    -144   
176    48     
-48    -352   
-560   -320   
-336   64     
48     80     
192    -48    
448    48     
224    176    
96     48     
-16    64     
48     64     
-208   0      
-160   80     
352    288    
-224   32     
-96    64     
-336   32     
-256   -656   
96     160    
112    160    
432    0      
144    -112   
-16    -256   
32     80     
-48    208    
32     16     
64     16     
-144   64     
96     -16    
-160   -48    
0      64     
48     96     
-48    -512   
-160   -96    
-64    144    
16     176    
144    208    
176    112    
112    32     
-32    112    
48     192    
-64    -32    
-176   -176   
208    144    
-160   -192   
-32    -656   
-32    272    
160    64     
48     -80    
80     -32    
-16    0      
32     0      
192    -64    
128    128    
-64    16     
96     -32    
0      -16    
-160   96     
144    16     
64     -208   
16     -128   
208    -176   
224    80     
96     320    
-112   -704   
48     -48    
144    128    
192    -160   
-32    0      
-128   -32    
-64    80     
144    288    
-16    64     
224    592    
-608   -352   
144    96     
-96    160    
336    -128   
288    112    
288    -320   
432    -32    
96     -672   
128    -144   
-144   160    
-80    -16    
208    208    
-64    32     
176    112    
80     272    
224    128    
96     -224   
288    -144   
-16    -48    
224    -112   
96     -144   
48     112    
320    -128   
-192   320    
-144   32     
-16    96     
176    32     
48     -80    
224    -64    
32     -48    
64     80     
80     -96    
256    -32    
192    -272   
-224   176    
-80    -656   
0      -48    
80     -432   
-32    224    
-32    128    
160    64     
0      -80    
128    32     
-16    288    
320    -224   
80     16     
80     -368   
-16    176    
96     -144   
48     80     
80     -160   
96     -112   
144    0      
32     32     
160    208    
64     144    
-160   -96    
288    -192   
192    144    
112    -96    
-80    128    
240    -144   
-224   176    
288    -64    
-128   48     
-32    0      
-144   32     
-48    -32    
96     208    
80     -48    
32     -496   
128    0      
48     -160   
256    -1040  
-48    -80    
48     -400   
48     -80    
160    48     
96     -48    
96     64     
80     -144   
-48    -64    
48     -288   
128    -576   
-96    112    
64     -192   
-208   -80    
-1232  -32    
0      0      
160    0      
80     -208   
-160   32     
192    -272   
160    -48    
-160   -288   
144    -128   
192    -304   
-112   32     
96     16     
112    0      
96     -192   
48     32     
128    208    
-160   96     
32     16     
64     32     
80     -16    
208    -352   
144    112    
-32    -416   
-16    -80    
128    -16    
-16    208    
-112   0      
-64    -48    
208    -176   
224    -208   
80     48     
48     -176   
-416   -304   
-48    -96    
-224   0      
96     -176   
256    144    
-288   -96    
256    224    
192    176    
0      -272   
0      -368   
-272   160    
-160   224    
368    368    
-400   224    
-32    -240   
-432   -272   
112    -208   
304    -224   
-128   -320   
64     -224   
-64    128    
-96    192    
128    -864   
-112   496    
320    -16    
288    128    
48     -48    
-144   -128   
-256   0      
240    0      
-384   -368   
272    144    
-656   160    
272    0      
-704   -128   
32     -288   
-64    -144   
80     -336   
112    576    
32     224    
-32    -112   
-160   -112   
240    -224   
-192   48     
224    48     
-160   -128   
-64    -32    
-848   128    
-128   -176   
32     -80    
144    -144   
80     32     
272    -112   
64     -48    
96     -128   
-16    -176   
-144   -32    
192    -16    
-112   32     
128    48     
-144   16     
128    32     
-544   -16    
128    -48    
48     48     
192    -16    
-16    0      
192    -160   
160    64     
-320   -48    
144    -48    
-112   48     
160    32     
-128   0      
144    -512   
-400   -160   
-48    48     
0      -240   
288    -64    
128    -16    
112    -80    
-48    80     
-80    -320   
-128   64     
-48    96     
64     0      
144    48     
64     0      
-80    0      
0      -48    
-208   -32    
80     -32    
-160   32     
112    -144   
-96    -64    
-2064  -144   
48     160    
-944   -48    
-192   112    
-64    16     
-32    112    
-496   96     
320    176    
-64    -64    
240    32     
-288   32     
288    32     
-80    -16    
-960   -16    
240    32     
-320   -80    
208    48     
-112   0      
-16    64     
176    -16    
-208   -48    
-256   96     
-432   16     
0      0      
-480   128    
96     48     
-80    -96    
-96    48     
-256   -80    
448    96     
-192   -48    
112    48     
-144   32     
-48    0      
-64    -16    
-80    -16    
16     64     
16     32     
-32    96     
-480   160    
192    48     
-160   -128   
-160   -48    
-160   32     
352    144    
-80    -48    
-64    80     
112    48     
80     96     
-176   0      
-112   -32    
160    128    
32     -80    
-240   -32    
-272   -16    
-80    80     
288    48     
-32    64     
64     144    
-32    176    
-288   -80    
-112   0      
96     80     
288    192    
-272   80     
-176   -80    
224    96     
-32    64     
608    496    
-736   0      
-128   32     
-608   192    
112    -80    
272    -288   
240    0      
-48    80     
-32    0      
112    32     
-240   -288   
-128   -176   
-176   192    
-176   48     
-64    -192   
80     -144   
144    128    
128    32     
-176   -240   
48     -48    
128    -48    
-32    64     
-16    -144   
160    -128   
-208   -432   
176    384    
-192   400    
-512   -432   
144    192    
-112   96     
192    0      
-32    -16    
240    -64    
-48    48     
224    336    
-688   800    
16     -480   
272    80     
-16    48     
176    -32    
-16    192    
96     -208   
320    16     
-448   464    
-496   -352   
-208   16     
-432   128    
-112   32     
-224   -112   
256    80     
352    -16    
224    0      
240    160    
16     192    
-400   -64    
-96    0      
32     160    
-560   -880   
448    656    
-336   96     
-16    -224   
-320   32     
-176   224    
-176   -192   
192    0      
272    144    
-32    -32    
80     48     
160    64     
32     -272   
16     16     
208    96     
-16    80     
80     144    
-432   -736   
-16    160    
96     240    
-96    -256   
-80    -80    
48     80     
80     16     
32     144    
16     -96    
144    240    
-32    -208   
112    -160   
-144   -336   
-32    -160   
192    592    
32     -496   
96     -16    
-80    256    
-64    16     
-208   -240   
-32    -368   
64     288    
-48    112    
80     176    
32     -32    
32     80     
-176   -176   
-80    -528   
128    -16    
32     -64    
-320   -672   
176    -256   
-160   256    
80     432    
176    384    
-128   -432   
-224   -496   
-64    -80    
288    368    
256    384    
-128   336    
256    -32    
-144   -80    
-96    -192   
-32    -144   
-96    0      
304    192    
-112   112    
-304   160    
64     368    
64     32     
208    0      
-48    -144   
64     -144   
-16    48     
160    -48    
-64    128    
-48    -48    
-192   48     
144    192    
176    176    
-256   -32    
112    -16    
-80    -64    
-32    -272   
176    -96    
-256   -80    
16     -144   
0      64     
64     48     
128    160    
-80    -64    
272    -16    
-240   32     
256    48     
432    304    
-384   384    
0      -160   
144    -528   
-144   -176   
-16    -48    
-48    -16    
176    32     
64     160    
0      112    
160    -128   
32     -112   
32     144    
32     32     
80     208    
-144   16     
48     80     
192    -96    
-272   -192   
64     16     
96     -32    
112    -80    
80     0      
32     -112   
32     -80    
80     96     
-32    128    
144    0      
128    -128   
-80    16     
-160   32     
-32    -32    
144    96     
16     -16    
80     64     
-64    160    
16     16     
80     64     
-48    16     
-144   80     
336    16     
96     48     
128    80     
48     80     
64     80     
-80    -16    
96     -112   
96     80     
64     -96    
0      -64    
48     -1520  
208    -112   
48     64     
384    160    
32     144    
-112   -112   
352    -416   
304    64     
-32    128    
16     32     
64     48     
-96    -304   
16     -176   
96     -48    
144    128    
0      -288   
16     64     
-16    -192   
192    0      
-288   -160   
192    -480   
112    -400   
400    64     
208    128    
-144   96     
48     -32    
-64    -192   
80     -16    
48     -208   
208    128    
80     -432   
176    176    
288    -256   
-192   160    
-336   -64    
-592   -928   
128    880    
-144   -240   
-128   48     
128    80     
-16    32     
-96    -272   
176    112    
144    -240   
496    -48    
-464   -224   
-256   400    
-64    -224   
0      -64    
432    -368   
288    -32    
496    128    
80     112    
-128   64     
176    96     
80     96     
240    -112   
-256   -80    
-208   -112   
16     32     
224    32     
560    496    
-160   128    
48     16     
64     -80    
128    -96    
192    32     
144    -176   
128    -160   
96     -32    
-32    -64    
32     -16    
64     16     
80     -112   
144    -80    
-144   -160   
-16    0      
32     -48    
128    -752   
64     80     
176    -384   
128    -32    
-1952  -192   
96     -112   
64     -192   
-96    -528   
128    -80    
128    -480   
112    -32    
-16    -32    
16     -64    
-16    -160   
64     128    
-16    -224   
0      32     
16     -176   
32     -208   
144    16     
-32    -160   
128    -48    
96     -224   
160    -48    
64     -208   
128    -16    
-64    -128   
128    -160   
-32    -48    
192    64     
128    -16    
176    48     
192    -112   
-224   -96    
-832   -176   
32     -80    
112    -48    
160    -32    
16     -16    
160    -240   
-16    -144   
304    -144   
-176   -16    
288    -192   
-224   16     
112    -32    
128    16     
112    0      
160    -48    
-448   -64    
80     32     
-432   -128   
128    -96    
80     96     
0      -112   
192    32     
-176   -448   
272    -16    
96     64     
64     96     
96     -288   
32     -32    
-128   96     
-16    -80    
96     64     
112    -48    
128    128    
64     -16    
32     -32    
176    -112   
-272   16     
144    -112   
128    -16    
32     -352   
64     64     
176    -32    
16     -96    
-96    -48    
128    64     
-144   16     
112    -80    
-336   -192   
448    -32    
-400   -96    
-224   -240   
208    16     
48     -128   
256    176    
96     -48    
32     0      
-64    -80    
16     16     
-48    16     
272    128    
-496   -80    
32     -80    
-832   -160   
-64    -64    
-512   48     
-16    -48    
128    0      
400    -48    
-224   0      
160    -160   
16     112    
336    144    
-64    64     
-80    -64    
176    -48    
-400   -32    
96     -96    
-128   -96    
256    -144   
-96    -256   
256    -96    
-192   48     
112    -192   
32     80     
128    -96    
112    128    
-400   208    
-128   -384   
-256   -432   
128    -96    
80     128    
304    384    
-448   -160   
32     -32    
-224   -112   
352    -80    
192    0      
-16    -208   
224    16     
-80    0      
-688   64     
-128   -304   
240    448    
80     -256   
272    -160   
-32    240    
64     128    
-16    -128   
-80    -592   
-272   144    
144    240    
96     -64    
-192   128    
64     16     
144    -16    
-624   384    
-32    -208   
-560   -144   
0      192    
-800   320    
-128   80     
240    -176   
-384   480    
16     -320   
112    16     
-224   144    
-16    -64    
48     -144   
32     224    
-128   32     
64     -240   
-144   112    
-320   416    
-208   -656   
-496   -400   
-144   272    
240    112    
160    16     
-112   -192   
80     80     
-352   -240   
64     112    
-224   -304   
-128   352    
32     192    
-256   176    
-288   -64    
-48    -560   
-64    0      
192    112    
-448   -32    
-464   -160   
-96    -48    
32     32     
240    64     
-112   48     
-64    -48    
-80    96     
160    96     
-16    0      
-80    112    
32     -144   
-208   -192   
0      -176   
-208   -208   
16     -96    
-80    -48    
-112   -192   
-2064  48     
-64    48     
-16    -112   
16     -176   
96     -32    
-128   -16    
-16    32     
-64    -80    
-128   -112   
0      0      
0      0      
-96    80     
-112   0      
-576   -48    
64     48     
-112   -80    
80     48     
48     -16    
0      -64    
48     -64    
80     48     
-96    16     
416    480    
-240   128    
112    -16    
224    -320   
-96    -80    
16     48     
-320   -80    
-32    -64    
240    -80    
160    352    
-64    -192   
16     0      
-96    144    
-352   -384   
192    -64    
-48    -128   
32     64     
368    464    
-288   -176   
-192   -224   
-96    -32    
32     16     
240    272    
-528   -144   
64     -16    
-16    -128   
-160   -32    
-80    80     
144    -32    
272    80     
-336   80     
-64    -48    
-176   -48    
80     64     
-128   -240   
-64    -352   
-112   -192   
-32    -192   
-704   16     
160    176    
48     48     
64     32     
96     -16    
16     96     
-64    -16    
-112   -320   
-16    -112   
0      160    
224    64     
-32    32     
256    -160   
-64    -144   
-144   -80    
-16    -64    
-64    80     
64     64     
-208   -32    
160    256    
-112   32     
160    -176   
-176   -256   
64     -96    
32     16     
64     80     
-144   0      
80     -48    
-32    16     
496    -16    
-736   -48    
-32    160    
-256   96     
-112   80     
-16    -192   
96     -64    
-32    -96    
-16    0      
160    304    
80     16     
-16    16     
-80    32     
-80    304    
128    80     
144    64     
-16    64     
80     112    
-48    -32    
144    -32    
-16    -48    
144    112    
112    16     
-112   -240   
192    208    
-192   192    
-64    80     
16     -64    
304    256    
-160   -64    
-160   -448   
-256   -304   
64     -352   
64     224    
160    112    
64     -224   
0      -256   
224    -128   
-224   96     
-16    -160   
0      32     
208    -80    
128    -48    
-128   -128   
32     240    
-112   0      
176    224    
32     96     
160    128    
16     -160   
224    -128   
-48    80     
-304   16     
-192   32     
112    80     
64     -208   
-128   48     
-384   320    
-352   64     
-96    112    
432    -80    
240    32     
80     64     
-144   80     
-16    -784   
-304   -1008  
-432   -192   
-256   112    
0      -32    
352    256    
-528   80     
192    352    
-224   336    
32     16     
496    176    
80     -16    
336    32     
16     16     
-352   64     
112    -96    
272    160    
-320   144    
128    176    
32     -64    
544    -16    
448    160    
-96    96     
16     -80    
192    0      
160    224    
-160   -560   
-96    -176   
128    -64    
-240   96     
-112   -32    
80     48     
96     64     
192    80     
64     -80    
176    32     
16     80     
176    112    
-80    0      
-304   -192   
176    32     
176    0      
0      -48    
-16    -544   
144    176    
-192   48     
32     32     
160    48     
128    96     
32     -64    
96     32     
80     32     
80     96     
0      0      
0      -80    
80     80     
256    64     
64     48     
48     -160   
16     0      
-48    16     
208    64     
288    96     
-16    48     
16     -64    
16     32     
-16    -16    
64     96     
80     64     
-64    -144   
144    144    
-112   -80    
64     0      
48     -192   
80     32     
368    -128   
-160   192    
272    32     
-112   -16    
64     -48    
208    192    
-96    128    
224    -112   
-80    16     
288    -16    
-16    32     
-128   64     
144    240    
48     64     
-64    -48    
16     -128   
0      16     
-16    96     
176    0      
128    48     
0      176    
208    32     
-128   -128   
32     32     
48     176    
96     128    
-144   -176   
240    32     
128    -16    
-32    64     
160    -160   
112    -208   
176    80     
64     64     
48     96     
176    112    
-144   48     
96     -128   
32     112    
-32    -128   
128    -96    
160    -96    
128    -32    
-32    -112   
128    64     
112    -976   
0      112    
32     16     
144    -416   
16     -80    
192    -80    
-48    -80    
224    -48    
0      -320   
192    -240   
48     0      
112    16     
32     48     
-48    112    
80     112    
0      -176   
112    -192   
-48    16     
-96    -368   
240    80     
96     -16    
80     -160   
32     -256   
-112   -144   
240    -112   
-208   -48    
224    -48    
208    48     
-144   272    
528    -1584  
-80    1008   
256    -144   
64     -272   
48     288    
0      -224   
-1312  304    
368    -96    
80     -304   
176    272    
192    80     
224    -304   
-224   -128   
-240   384    
144    160    
16     32     
16     -224   
-160   -640   
80     -304   
96     0      
-112   496    
-16    144    
-112   -16    
112    -112   
80     -112   
208    0      
64     -192   
144    0      
272    -96    
-80    64     
176    224    
64     592    
-128   0      
-48    -64    
0      -32    
192    -64    
-128   48     
32     0      
-1008  16     
112    -192   
-80    64     
-64    -192   
128    48     
160    -224   
-496   -80    
240    -224   
96     0      
-32    32     
224    -368   
-400   -464   
240    -160   
-544   112    
0      -80    
-816   -32    
-32    -144   
-48    -240   
112    -224   
144    -144   
224    -48    
160    128    
16     176    
0      32     
304    -16    
336    -16    
-32    -32    
160    -112   
-128   0      
0      144    
192    256    
-320   240    
-1424  -80    
128    -96    
16     -32    
208    -144   
96     192    
128    -224   
144    48     
-128   304    
112    -144   
16     -112   
-112   -48    
96     32     
128    -80    
-304   32     
0      -208   
-240   144    
112    16     
16     -32    
80     -128   
-32    -64    
240    -192   
128    48     
-80    -64    
96     -160   
112    -224   
-64    -224   
-160   -48    
32     -48    
-336   224    
32     -64    
16     -64    
80     -176   
144    -16    
16     -112   
-48    -192   
288    -256   
-80    208    
-112   224    
224    -32    
-224   96     
128    0      
-352   -112   
160    -256   
-320   -112   
208    -256   
-128   112    
-16    0      
-144   -160   
-720   272    
-80    112    
-976   192    
-1136  -80    
32     96     
-1408  112    
-160   432    
192    480    
208    0      
-16    208    
-128   112    
272    16     
-160   32     
-640   -240   
144    -48    
-32    288    
560    464    
-144   240    
-320   16     
48     208    
160    416    
-224   48     
-432   80     
-144   -272   
0      112    
-96    -48    
-544   0      
256    224    
-768   -144   
240    144    
-224   288    
-32    96     
-96    -32    
-128   -128   
-224   -32    
-336   -128   
256    -240   
224    224    
-32    256    
-1040  0      
-144   128    
-320   32     
528    480    
-384   496    
240    112    
-240   -464   
-176   112    
400    288    
-256   432    
192    384    
112    336    
-208   384    
16     -240   
-224   208    
-592   -80    
80     48     
288    336    
-336   0      
-528   -224   
48     -304   
48     112    
416    352    
-160   752    
176    368    
-304   112    
-288   -352   
32     -416   
96     672    
-496   144    
-432   -224   
160    -144   
-1008  256    
32     624    
-48    -512   
-16    -272   
80     -16    
-112   464    
-128   -112   
-112   -304   
-80    160    
-80    64     
32     160    
-32    -16    
-48    -16    
-128   96     
48     -128   
-240   336    
48     -304   
-368   -304   
-160   192    
80     64     
-128   -48    
-96    -128   
-80    208    
-128   -272   
-304   -224   
256    224    
-80    144    
-256   -224   
-224   -144   
416    384    
-256   -16    
-112   -144   
-208   -64    
-224   64     
256    64     
96     64     
-192   -16    
-16    32     
-176   48     
-272   48     
64     80     
-144   -48    
160    -48    
-160   -96    
144    48     
-160   176    
-32    448    
0      752    
-176   208    
0      -496   
512    -224   
32     -176   
144    16     
128    -16    
-16    48     
-192   128    
48     16     
272    -16    
224    112    
-160   64     
-320   -176   
48     -48    
-192   64     
-240   0      
96     0      
160    192    
-192   64     
224    32     
48     0      
0      16     
48     208    
16     32     
-16    -144   
-32    0      
-176   112    
-512   -64    
-208   -32    
96     112    
-208   48     
112    -48    
160    64     
192    80     
128    0      
-176   0      
-288   -16    
-64    -144   
160    96     
-112   48     
-768   -320   
144    -16    
192    64     
-32    0      
544    176    
-400   80     
-240   -112   
224    96     
-80    48     
240    0      
32     32     
208    144    
80     16     
-96    -48    
160    64     
-80    32     
144    64     
-80    -16    
48     64     
80     32     
-32    48     
144    32     
112    112    
0      80     
-48    64     
112    96     
-112   48     
112    16     
-32    -80    
96     96     
-96    32     
-16    -48    
240    112    
-48    32     
64     16     
-32    16     
48     48     
16     0      
16     64     
96     48     
-16    -16    
32     32     
32     16     
-48    -16    
16     80     
-96    -64    
-80    16     
128    16     
-48    96     
288    192    
0      16     
256    112    
80     -32    
48     96     
16     16     
112    48     
-128   -112   
368    160    
-336   208    
480    240    
-240   16     
48     -176   
80     80     
0      64     
48     0      
192    16     
-32    48     
144    224    
-48    368    
16     208    
176    160    
144    80     
64     256    
-16    192    
96     160    
32     320    
-16    -592   
-32    64     
144    -112   
0      32     
0      128    
-80    -96    
-16    96     
80     32     
-48    80     
144    -224   
-96    -160   
160    208    
-192   96     
160    -80    
-16    -112   
96     112    
32     -144   
16     128    
64     0      
176    -80    
-32    96     
-208   -96    
160    672    
304    -416   
48     432    
-208   -352   
48     240    
16     16     
80     -1056  
48     704    
208    -48    
16     -304   
-16    -736   
432    416    
144    368    
-160   208    
144    608    
208    -240   
-336   -64    
208    -80    
-160   -208   
304    -32    
32     -32    
16     64     
144    32     
272    -64    
-176   112    
240    -704   
-48    192    
192    -160   
-16    128    
16     80     
64     48     
-64    32     
48     160    
-80    64     
-32    -128   
224    -144   
80     -144   
32     16     
96     -96    
64     80     
0      -208   
48     208    
160    -752   
-80    80     
144    -16    
128    48     
176    32     
176    80     
-32    64     
-32    -80    
80     -112   
112    80     
96     48     
16     32     
80     80     
-80    -288   
-80    -16    
336    -16    
160    96     
-32    -48    
144    48     
64     0      
32     0      
112    96     
192    96     
80     64     
48     -288   
0      80     
-48    -96    
-48    0      
-96    -80    
208    64     
304    -320   
128    -16    
-96    96     
-336   48     
-208   -160   
-64    -48    
160    16     
80     32     
128    96     
-80    -96    
-112   96     
-256   -32    
-96    48     
320    0      
400    -32    
496    48     
48     -832   
112    64     
0      160    
0      16     
0      -32    
-64    -64    
0      32     
-16    -224   
240    -112   
96     48     
32     -48    
128    80     
32     -32    
-32    -240   
96     -48    
160    -16    
-80    80     
-16    -256   
208    -176   
-1824  0      
16     -16    
-32    -32    
-112   48     
0      -128   
80     -256   
368    128    
176    128    
-128   -192   
48     -128   
96     176    
-96    -96    
-176   80     
80     -32    
-80    -176   
-1248  -96    
128    -160   
80     32     
32     96     
0      -64    
208    -80    
64     96     
128    -1312  
64     -112   
16     -288   
-48    -48    
-16    -320   
176    -144   
-80    0      
16     -80    
16     -64    
48     32     
64     80     
208    192    
336    48     
-288   336    
0      128    
96     -896   
-144   128    
32     -32    
48     -192   
160    288    
176    1504   
272    1136   
-32    -224   
-16    -304   
144    848    
-176   272    
-496   -1392  
-48    -944   
224    688    
0      336    
-64    -480   
176    80     
-192   -240   
-208   0      
144    -64    
-80    -80    
-160   -464   
128    96     
96     96     
96     -112   
-944   -272   
-240   48     
-352   -240   
688    -176   
224    992    
-80    -416   
112    -272   
-64    -480   
176    -432   
-272   -944   
240    608    
-112   256    
-144   -496   
464    128    
80     208    
-544   512    
352    -432   
-320   16     
112    48     
-80    464    
64     -448   
0      240    
64     -400   
-128   224    
32     -224   
192    32     
-144   128    
64     -112   
-976   16     
64     176    
-336   -192   
-112   288    
-144   160    
16     -464   
208    -64    
256    -176   
0      -16    
80     -336   
64     -112   
-240   32     
272    112    
-288   16     
0      0      
128    0      
32     -16    
-16    -16    
64     -16    
-176   80     
112    -112   
-16    48     
144    32     
-144   144    
-256   -176   
64     208    
-160   0      
32     -96    
96     96     
16     64     
32     0      
0      48     
-128   304    
48     304    
48     128    
-48    -400   
-64    -208   
-400   16     
144    32     
160    288    
-1600  64     
-224   16     
-832   -96    
208    464    
336    160    
-64    -64    
-16    32     
-176   32     
192    224    
-448   48     
-48    -64    
192    -16    
-176   -144   
384    16     
176    48     
384    512    
-192   176    
-240   -96    
-224   256    
-1136  144    
112    -128   
-272   -16    
128    112    
80     -16    
-64    -48    
-64    -48    
-304   48     
-432   -80    
-96    0      
288    144    
128    256    
-224   64     
-32    -48    
-128   -16    
-240   -32    
224    32     
-928   960    
-304   576    
112    -336   
-160   -96    
-80    -96    
544    320    
-752   16     
-16    -48    
-320   -368   
544    -224   
240    80     
0      -48    
448    -48    
-112   0      
-208   -48    
-688   0      
0      16     
272    -48    
208    48     
-224   -304   
320    -112   
192    64     
176    48     
48     0      
-192   0      
304    304    
-720   -192   
352    -208   
368    96     
208    240    
160    288    
16     -64    
-384   -160   
32     112    
-80    16     
-352   -128   
-48    -32    
-64    48     
240    64     
-160   -80    
-16    16     
-112   32     
-64    0      
-112   -32    
64     32     
-496   -32    
80     -80    
-864   16     
16     64     
-128   -112   
-112   64     
-64    48     
-48    0      
-96    -16    
0      16     
0      -16    
-96    16     
112    48     
-224   -16    
64     16     
-192   -32    
32     96     
-704   -96    
48     0      
-16    32     
-80    64     
48     48     
48     32     
32     64     
240    256    
-256   96     
80     16     
-80    16     
0      -16    
240    112    
-112   -48    
48     80     
-432   16     
96     64     
-80    -16    
128    48     
-240   128    
128    32     
64     96     
96     48     
112    96     
0      192    
144    128    
-256   112    
192    208    
-160   256    
-48    80     
-320   -96    
32     -48    
-32    -96    
-64    160    
112    144    
-48    -192   
112    48     
-32    128    
-16    -16    
-176   288    
-464   -1696  
-80    -1008  
-256   704    
-400   288    
528    -320   
-48    672    
128    272    
-256   -320   
320    368    
-96    -64    
80     80     
112    -48    
-128   -560   
-80    576    
80     -16    
208    -112   
-208   176    
288    -448   
160    -128   
-80    688    
160    112    
-32    192    
240    -48    
-224   -48    
-192   -80    
-208   -80    
192    416    
320    224    
432    352    
-496   144    
-144   32     
48     -64    
144    112    
-80    -128   
16     -16    
-96    16     
-144   -160   
64     112    
80     144    
128    0      
112    0      
-64    16     
-336   -32    
-48    -32    
-144   -48    
96     64     
-32    16     
144    16     
-320   -64    
32     32     
-96    -32    
-64    112    
160    0      
-96    16     
-16    -144   
-128   -144   
-80    96     
0      48     
160    96     
-64    48     
96     144    
-64    192    
144    64     
16     -64    
144    96     
144    48     
80     240    
-80    48     
16     -16    
112    32     
-16    48     
96     96     
32     128    
0      64     
-48    -16    
-32    80     
-224   64     
512    48     
64     48     
336    80     
-112   48     
-96    160    
-176   192    
112    96     
144    -16    
32     -32    
192    80     
-416   96     
240    64     
-224   0      
32     16     
64     -80    
432    112    
-144   160    
144    -1040  
-32    -176   
-160   -320   
32     0      
-320   144    
80     96     
32     96     
112    112    
240    128    
-144   144    
-128   16     
32     -112   
432    -80    
320    -32    
160    -16    
144    -96    
-320   -96    
320    -96    
32     0      
176    80     
240    112    
-32    80     
-112   -16    
96     -32    
64     112    
112    32     
128    -112   
0      -96    
144    -64    
-208   240    
224    432    
224    224    
160    64     
-336   -96    
16     -48    
64     144    
128    0      
240    464    
-240   -144   
432    48     
-80    320    
160    112    
96     512    
-112   48     
144    -16    
128    -256   
96     -128   
16     -176   
80     96     
-80    64     
-16    64     
32     -16    
64     48     
32     -240   
304    -192   
240    32     
160    -32    
-32    -176   
112    112    
-144   96     
48     -16    
80     304    
96     -464   
112    224    
128    256    
160    -256   
16     -64    
-32    192    
-16    80     
-32    304    
96     -80    
160    224    
96     368    
144    -512   
272    176    
272    -128   
48     64     
112    16     
352    224    
-368   32     
320    -16    
-32    32     
288    112    
288    -144   
384    512    
128    544    
144    -512   
32     48     
-176   -192   
-96    -16    
160    -96    
-96    -80    
224    16     
128    80     
48     48     
176    16     
0      32     
64     96     
48     160    
240    -96    
16     -624   
-80    480    
128    400    
16     80     
-32    -48    
80     -192   
400    272    
-224   304    
176    128    
-48    -64    
192    -96    
224    80     
16     -48    
64     32     
0      -96    
96     -272   
176    -112   
-80    -272   
80     -32    
48     32     
32     -96    
128    32     
64     -16    
-176   32     
144    16     
176    -160   
-192   32     
-16    -160   
256    -320   
-656   -240   
208    48     
-64    -16    
64     -112   
-48    -48    
176    -224   
112    -144   
-144   -96    
128    0      
112    -16    
-144   16     
48     0      
336    64     
-224   -64    
-16    -160   
-112   96     
80     -80    
48     -80    
112    -144   
-64    0      
96     -320   
272    48     
80     -912   
-160   -16    
144    48     
-16    160    
-352   -112   
64     48     
0      16     
-80    -192   
-176   -48    
256    -16    
-240   -144   
0      112    
176    128    
96     -224   
0      -144   
128    -272   
-512   -64    
64     -48    
128    80     
320    -16    
384    64     
-64    32     
32     224    
-384   -16    
160    -160   
-352   0      
-96    16     
48     -32    
160    -64    
0      -16    
352    -48    
-336   64     
96     -112   
32     112    
-96    0      
256    -80    
-256   -512   
288    -528   
-16    160    
-480   64     
-304   0      
0      -192   
128    64     
-80    32     
-368   0      
-160   -224   
320    160    
-240   -320   
304    80     
-448   32     
224    -80    
464    112    
-464   -64    
-640   112    
-432   80     
-624   -160   
448    -96    
-1344  -32    
48     -320   
96     -16    
384    -272   
224    16     
192    -704   
304    16     
-128   32     
-112   112    
-240   176    
80     32     
16     48     
80     0      
-480   -16    
304    288    
-320   176    
192    -144   
48     32     
176    -96    
80     96     
-128   -448   
480    -144   
-16    16     
288    0      
-160   -80    
64     48     
-352   96     
-48    -64    
-48    -16    
192    -16    
160    16     
-48    -176   
-224   64     
-304   -336   
-16    -96    
112    0      
-576   0      
-224   -96    
128    -64    
-448   -16    
64     -224   
-64    -16    
144    0      
-32    0      
208    -96    
208    16     
-1120  -80    
16     48     
-528   -48    
16     0      
-16    32     
-144   48     
-48    32     
-432   0      
-80    -208   
224    -48    
48     112    
-48    32     
-144   32     
-512   -160   
32     16     
-400   -176   
80     32     
0      -16    
48     0      
-224   16     
-96    128    
-224   -352   
-368   16     
-96    256    
-272   -32    
176    16     
-144   -64    
144    -16    
-112   -400   
80     400    
-16    -592   
-80    96     
0      -160   
-224   48     
-256   -80    
-208   144    
-192   -96    
192    560    
-496   256    
-368   -704   
96     48     
-3280  128    
176    -320   
208    320    
-288   368    
-16    -208   
96     352    
16     336    
16     -160   
-16    -384   
-208   -32    
112    96     
-48    448    
96     -80    
-496   -592   
96     -160   
-96    -208   
-336   -256   
0      -80    
16     96     
-128   128    
0      16     
208    176    
-240   64     
304    176    
-96    80     
160    -80    
-144   -128   
96     -224   
-208   16     
32     128    
-448   48     
-96    -224   
-2064  -208   
16     256    
176    128    
-112   -96    
192    32     
-112   80     
48     64     
80     32     
-64    64     
-224   48     
-192   -208   
192    -240   
-96    112    
96     32     
64     32     
-1328  -80    
-16    -16    
16     128    
64     -96    
96     -128   
-128   96     
-96    -16    
80     -16    
-112   160    
224    -32    
32     0      
-160   -64    
80     144    
-128   48     
64     64     
-336   -64    
16     -144   
-64    16     
-112   -208   
96     128    
-32    64     
-64    -96    
160    -16    
64     80     
-128   -32    
176    80     
-528   -48    
-192   48     
16     -32    
288    -16    
-336   80     
-80    -48    
0      16     
96     -16    
48     -48    
224    64     
-128   160    
-144   -80    
16     16     
-128   80     
80     16     
-112   0      
48     -96    
-176   -96    
-80    112    
-368   128    
-16    32     
144    -32    
-32    16     
-16    -16    
112    16     
0      64     
-96    0      
0      160    
-160   64     
160    0      
16     -16    
144    128    
-32    112    
-32    -176   
144    -144   
64     48     
-64    48     
-112   0      
112    -96    
112    64     
256    32     
192    16     
240    192    
-576   96     
-64    -128   
0      -48    
240    32     
368    320    
-288   240    
80     -32    
176    32     
208    32     
-112   64     
-144   112    
160    256    
-352   416    
208    32     
240    -112   
32     0      
256    -16    
-784   -464   
304    -848   
-176   -320   
96     32     
80     -32    
-32    272    
32     48     
128    64     
112    96     
208    704    
-256   -592   
224    176    
48     336    
-128   -432   
272    448    
160    -32    
32     48     
96     -176   
80     368    
64     -112   
0      -64    
-80    16     
400    80     
0      80     
16     112    
-128   160    
-64    -160   
-16    288    
160    64     
64     -128   
32     80     
192    128    
-96    32     
64     16     
112    48     
-48    64     
96     64     
16     -16    
64     80     
16     48     
48     -32    
-192   16     
96     -96    
-304   -192   
16     0      
-128   -112   
-16    0      
192    64     
48     352    
-80    0      
-96    48     
-32    64     
128    -192   
160    -48    
-32    -32    
80     0      
-112   160    
-96    -224   
96     -48    
192    128    
176    32     
0      -96    
-32    0      
-64    -32    
112    48     
-64    112    
-32    48     
32     48     
-48    96     
48     -224   
192    -224   
48     336    
160    240    
-128   -48    
208    -32    
0      96     
-80    -16    
48     160    
240    -976   
-80    -16    
0      80     
80     32     
160    32     
176    -64    
0      16     
-32    32     
48     -112   
-64    -96    
80     80     
-48    48     
272    80     
48     -80    
16     32     
128    -160   
16     32     
112    -272   
64     80     
-128   0      
176    -80    
-304   -192   
240    32     
-80    128    
96     128    
-80    0      
64     -64    
112    48     
160    -16    
176    32     
192    16     
-144   144    
48     -256   
272    -16    
32     -224   
128    -64    
96     48     
160    80     
16     0      
144    128    
-16    32     
-160   -64    
160    0      
-80    -80    
80     -48    
-16    96     
272    64     
-192   -416   
160    16     
48     -480   
192    32     
-48    0      
-48    48     
16     -32    
144    0      
48     64     
64     -256   
144    16     
80     -112   
0      -48    
208    48     
-528   -384   
208    -352   
400    224    
128    -64    
368    -96    
80     16     
32     16     
0      -96    
-32    0      
368    304    
-224   208    
-144   64     
64     32     
256    -96    
352    48     
-144   -16    
-64    -304   
-16    48     
176    208    
-16    400    
-32    -80    
240    -416   
48     -16    
32     -80    
128    -432   
96     -160   
96     144    
96     16     
128    16     
176    -208   
96     80     
528    112    
-336   -320   
-240   -256   
-208   -400   
144    928    
384    400    
432    -240   
448    -16    
-176   -112   
336    272    
-80    400    
80     -384   
-208   -1072  
-64    176    
-144   560    
-128   -80    
16     -288   
-128   32     
80     -176   
-192   -32    
128    -16    
-32    -96    
-32    -96    
-336   -496   
-288   -176   
304    96     
-96    80     
144    -272   
-80    112    
400    -368   
0      128    
32     208    
-336   -32    
0      -144   
80     64     
96     -96    
192    -192   
-1104  144    
-112   112    
112    0      
176    -400   
64     -464   
-16    144    
-32    144    
48     -1504  
48     -784   
128    -400   
-256   448    
64     -64    
336    128    
-304   -160   
288    -176   
-352   0      
192    272    
-48    -160   
176    32     
80     96     
0      -144   
64     -16    
80     -512   
64     80     
160    16     
-48    -720   
-128   704    
176    -224   
64     -256   
80     112    
-80    16     
160    0      
-288   112    
80     -80    
96     -336   
-32    416    
320    -352   
16     48     
128    16     
176    0      
-96    -592   
-288   -1024  
-128   208    
-160   256    
256    -336   
-96    400    
288    -112   
-816   208    
16     -240   
-1008  -96    
320    0      
-144   -416   
128    -368   
272    -48    
-288   -512   
272    -112   
64     -208   
144    48     
-32    -128   
64     -64    
224    -32    
-272   16     
-272   -80    
208    48     
-736   80     
48     -176   
80     64     
-224   -224   
0      176    
304    -304   
-32    -208   
-160   48     
-256   -128   
-80    -240   
-32    112    
16     -112   
112    64     
16     80     
0      64     
-272   320    
-112   -512   
400    -176   
0      128    
16     144    
-80    32     
528    112    
-640   272    
176    -144   
-144   -128   
16     48     
-160   -448   
128    -352   
-160   0      
-208   -224   
-32    -128   
224    0      
-32    144    
-992   112    
80     192    
176    -32    
-304   32     
-208   640    
576    432    
16     0      
80     -336   
-304   -208   
-128   64     
-448   -128   
144    -112   
352    -112   
-144   224    
-128   192    
-96    -224   
-432   -32    
-64    32     
-704   16     
-128   -16    
-384   32     
-192   48     
-2448  16     
192    0      
0      -112   
16     -16    
-112   -80    
-48    48     
-160   -96    
16     48     
0      -112   
16     64     
-32    16     
-96    -48    
-16    128    
-272   16     
-160   -80    
-176   208    
-448   224    
-144   -96    
-32    -48    
-32    -96    
-160   128    
-16    -64    
32     176    
48     -32    
-32    32     
0      128    
-160   48     
16     -16    
32     -16    
-16    112    
32     64     
-48    32     
-1248  -144   
48     80     
-208   -32    
80     192    
-224   -32    
48     496    
112    256    
-16    0      
-48    -32    
-64    -144   
-96    -80    
0      -288   
-304   -224   
-320   -464   
16     -736   
-592   -176   
256    48     
32     -112   
-16    288    
416    352    
-432   -64    
-176   -16    
-432   64     
128    -96    
224    -368   
320    -352   
-32    -80    
-288   144    
-176   -224   
-48    192    
-128   -192   
48     -16    
-80    -80    
-240   240    
-608   -480   
608    16     
272    336    
304    -144   
128    0      
-352   -128   
-496   -48    
-288   80     
224    432    
-224   -160   
496    -256   
192    160    
432    160    
-1360  -144   
32     224    
-464   -32    
48     64     
304    416    
-64    -48    
80     -80    
-48    0      
48     -64    
-304   -16    
80     96     
-208   -96    
-128   -64    
-128   0      
80     112    
-400   -16    
-80    32     
48     80     
16     -32    
32     48     
32     -112   
-160   -144   
-32    -16    
16     16     
32     32     
-64    -16    
-208   -48    
112    208    
-224   -32    
112    16     
-192   -48    
16     16     
128    48     
-16    -32    
48     -96    
96     144    
240    256    
-144   -48    
192    80     
-32    48     
144    32     
-128   -32    
128    64     
-352   32     
176    64     
64     80     
-80    -16    
0      16     
112    -32    
-48    64     
208    -48    
112    32     
0      64     
-80    -48    
-144   16     
0      48     
128    144    
-240   128    
192    -80    
192    -16    
32     112    
208    16     
-112   64     
-32    -16    
-80    32     
80     32     
160    0      
-192   -32    
0      0      
-96    64     
128    112    
-176   -64    
272    16     
-288   -48    
-128   32     
128    16     
-48    -32    
160    0      
64     -32    
-48    96     
128    32     
-80    64     
64     -48    
16     144    
-16    32     
16     16     
16     0      
48     32     
128    48     
16     32     
96     32     
176    -16    
-32    -48    
144    64     
-32    64     
0      16     
256    -32    
-192   16     
-96    32     
144    64     
-96    0      
-112   -80    
304    208    
-112   16     
160    48     
96     112    
64     48     
160    96     
-80    32     
16     -48    
-32    48     
112    48     
32     80     
48     48     
-64    -32    
144    48     
-80    -48    
32     -48    
128    96     
-64    32     
-80    -16    
160    160    
64     128    
288    80     
112    32     
64     64     
-192   -256   
16     -112   
144    240    
32     32     
288    -176   
16     -128   
-48    -192   
-80    32     
-192   272    
-256   -192   
272    16     
464    320    
80     80     
192    -80    
-64    -48    
32     80     
-80    416    
288    80     
0      80     
-160   -176   
256    0      
336    448    
224    -80    
48     0      
-16    0      
64     -432   
-176   192    
-96    304    
-64    -16    
-224   16     
352    -224   
128    144    
160    -16    
16     0      
144    -80    
16     144    
-272   -144   
-96    -112   
-32    -384   
864    48     
1040   768    
-1088  -1744  
0      224    
-112   528    
-64    -80    
320    0      
288    160    
112    -160   
560    -288   
-208   208    
0      48     
-112   0      
-32    48     
-160   -496   
384    912    
64     -688   
-16    -368   
-464   -400   
-96    288    
-304   -16    
192    -192   
128    144    
80     96     
128    64     
144    -224   
128    160    
64     -80    
224    384    
-128   -48    
-48    -96    
-48    -912   
96     256    
144    192    
-16    -32    
-32    -192   
240    16     
96     384    
-176   112    
48     64     
-32    64     
80     80     
288    208    
-144   -208   
0      -528   
240    -64    
288    320    
192    240    
0      -48    
-128   16     
32     -96    
144    64     
-16    -48    
0      -560   
16     32     
112    -32    
80     64     
0      -224   
208    96     
32     -32    
-16    -144   
128    -416   
144    -32    
112    -80    
80     0      
-16    -96    
16     96     
-16    128    
128    -496   
96     -128   
176    -288   
64     -48    
0      -128   
-80    -96    
16     -224   
16     -96    
-112   -560   
192    48     
144    -352   
-80    -1040  
304    -384   
80     -48    
80     -112   
-80    -112   
64     -240   
16     -240   
16     192    
272    -112   
-64    128    
400    -112   
-272   16     
80     -192   
-112   -432   
112    16     
128    -128   
-80    48     
-48    0      
-384   -16    
16     -528   
0      -560   
240    128    
64     64     
48     -112   
-48    -1232  
192    -32    
80     -176   
288    16     
80     -160   
0      32     
224    -80    
-192   -96    
-656   -80    
48     -64    
-32    -32    
128    -128   
160    -64    
336    -16    
-112   -64    
0      -288   
48     64     
96     192    
80     80     
16     -128   
48     96     
96     -96    
64     0      
-112   192    
-16    48     
-160   -304   
-48    -96    
48     -32    
-48    -32    
96     -80    
144    -16    
-64    -48    
256    -432   
64     48     
464    400    
-576   16     
-208   -288   
-64    -320   
-32    -192   
208    32     
-256   -16    
192    -32    
-224   160    
560    448    
16     -16    
-48    -288   
96     -96    
-64    -224   
192    -160   
192    -16    
64     128    
-64    -16    
192    -48    
224    16     
-224   208    
-400   -32    
-176   240    
-368   -64    
0      -240   
64     -128   
144    176    
112    144    
0      -96    
16     -32    
-256   -256   
-240   -128   
32     -112   
144    -48    
-128   -128   
32     80     
-64    32     
-16    144    
-992   0      
96     -48    
0      -128   
176    -64    
256    48     
-16    -192   
48     -128   
96     -32    
160    -16    
16     -80    
-128   -112   
-224   96     
96     128    
-416   0      
64     -16    
-560   -144   
672    608    
-224   -208   
112    -16    
64     240    
-48    -448   
352    224    
-864   -16    
240    288    
-416   128    
256    192    
-448   112    
-64    -80    
-64    192    
208    -192   
0      -160   
-112   128    
-16    80     
464    -528   
576    352    
-256   -576   
32     -144   
32     208    
-320   -192   
128    64     
-160   176    
48     64     
-160   -48    
144    -32    
320    32     
160    0      
16     -128   
-112   -32    
-2160  -16    
-96    0      
-464   -80    
144    0      
448    64     
-832   -64    
-544   -64    
-416   16     
-384   16     
176    48     
432    64     
272    -16    
-80    -32    
-384   -96    
-192   208    
-336   -192   
-320   48     
-112   176    
-176   64     
-144   0      
-80    -80    
-64    0      
-352   -16    
16     64     
-896   80     
-336   80     
0      -208   
-240   -48    
-336   -112   
96     96     
-64    -144   
192    -32    
-16    48     
-96    0      
-64    -48    
-80    16     
0      32     
64     80     
-208   -48    
-128   16     
-32    0      
-112   -64    
112    64     
16     32     
0      -16    
-144   -96    
-192   -48    
80     64     
-400   -64    
96     0      
0      48     
128    48     
-352   -240   
224    -192   
-448   -16    
112    -32    
-1584  -208   
-96    -32    
48     240    
-272   112    
80     -288   
-96    128    
64     32     
128    -144   
-208   80     
-208   -64    
-160   -48    
-96    -80    
32     80     
96     160    
32     0      
-592   -48    
0      32     
-64    -80    
64     64     
-48    -32    
176    192    
-112   -16    
80     -112   
-64    128    
-144   80     
128    -176   
-80    0      
80     112    
-304   80     
144    32     
-272   -80    
160    48     
-272   -96    
96     96     
144    64     
-224   96     
208    -112   
-176   -32    
-32    96     
-48    16     
208    80     
-128   32     
16     128    
48     64     
-32    -32    
-288   0      
144    -32    
-336   -48    
208    176    
-464   -32    
80     -64    
-32    16     
-64    48     
112    0      
32     64     
-16    -48    
-160   -64    
-80    -112   
-432   -96    
144    192    
-208   -16    
96     48     
-448   -64    
-96    48     
144    -16    
-128   -32    
112    112    
0      160    
-32    0      
64     -32    
176    352    
-608   -464   
64     -224   
64     288    
128    160    
-48    144    
80     -432   
48     176    
-80    128    
192    0      
368    144    
-128   -160   
-144   80     
-128   32     
-96    -80    
176    -48    
-32    -160   
320    320    
-176   -48    
384    -96    
-512   -384   
384    160    
96     128    
96     -128   
80     192    
-96    112    
0      -112   
64     160    
112    -480   
64     112    
-16    -16    
-144   -96    
144    208    
64     96     
16     1024   
-320   -336   
-32    -160   
160    320    
144    -128   
-112   368    
-80    352    
-160   -208   
-176   -224   
176    208    
48     64     
64     64     
-128   -208   
80     -64    
-208   112    
-80    64     
-16    32     
-96    -160   
80     352    
112    352    
-64    128    
112    96     
96     -16    
-176   224    
240    208    
96     80     
32     272    
0      224    
-128   240    
240    256    
144    368    
-208   320    
-176   288    
-64    96     
224    -16    
576    320    
-144   208    
-16    -80    
-16    -112   
80     -32    
-112   64     
128    128    
48     48     
32     144    
-352   -128   
176    -976   
272    -32    
16     -48    
192    -16    
112    16     
-192   -80    
-32    -224   
80     -272   
96     32     
-96    -16    
0      -144   
-32    240    
-48    80     
48     -32    
128    -16    
-64    -240   
0      80     
80     -32    
80     -48    
0      -16    
192    176    
0      48     
16     32     
-32    -16    
128    80     
144    256    
-80    128    
-112   -64    
80     -16    
112    -96    
96     -224   
96     48     
-64    464    
48     96     
-16    -64    
64     -128   
80     -160   
32     -32    
160    -112   
-16    16     
-144   80     
-128   240    
-48    -112   
384    128    
16     96     
-16    -80    
96     -32    
256    -384   
-336   -432   
32     80     
-16    560    
-144   464    
160    304    
192    -80    
96     112    
64     -48    
16     48     
-64    -176   
-96    -320   
48     96     
-80    -16    
304    288    
320    -400   
-160   -32    
112    -208   
80     64     
112    -128   
80     48     
48     16     
144    -32    
80     80     
240    -32    
80     32     
-64    -16    
-64    -32    
352    32     
-64    272    
16     -224   
448    0      
-304   -336   
-80    48     
-208   208    
480    128    
80     -32    
144    64     
224    112    
-32    224    
176    304    
-336   -64    
128    -16    
-128   -64    
-304   -208   
256    -224   
-208   80     
176    -96    
-64    32     
192    144    
288    176    
-160   128    
320    -176   
-368   -32    
192    -176   
-160   -208   
304    -512   
80     -32    
64     -48    
272    112    
-144   -208   
80     32     
256    80     
-48    96     
48     176    
112    -16    
112    0      
96     32     
-64    80     
160    -320   
64     224    
224    0      
368    80     
-80    -224   
80     -16    
-208   64     
16     224    
-48    -272   
-16    64     
80     -128   
-16    -400   
208    -208   
272    -496   
80     -176   
144    80     
-144   -352   
-16    -80    
128    32     
64     -112   
144    64     
160    -112   
-96    -48    
-64    0      
0      -1664  
32     -80    
304    -976   
-96    0      
-16    -112   
464    352    
-256   -320   
-32    -304   
400    -304   
-208   -672   
-112   368    
112    0      
352    176    
-64    400    
-32    -176   
208    -192   
64     544    
288    320    
16     -240   
-480   -224   
32     -16    
112    -48    
192    -288   
48     -16    
160    -496   
272    -32    
-16    -528   
64     -64    
-160   -256   
32     0      
80     -96    
1488   992    
-672   640    
-560   -192   
-160   -240   
0      -128   
-1696  -48    
-48    -160   
-16    192    
-16    224    
-224   -416   
384    -704   
-224   -144   
432    -80    
368    80     
-96    -160   
416    -32    
-48    64     
-304   -96    
-384   -96    
144    0      
-144   16     
160    -80    
192    0      
16     -64    
144    -48    
64     -128   
-48    -32    
400    -736   
-240   -16    
-208   -144   
208    -48    
-176   -16    
-16    32     
-240   -80    
304    32     
-64    32     
128    -96    
224    -208   
-32    32     
-96    96     
256    -112   
16     32     
96     -320   
-48    48     
80     -64    
224    -160   
-272   48     
-80    96     
-80    -32    
192    -80    
-336   -64    
288    -16    
-2160  -96    
-80    -48    
128    16     
176    -16    
64     32     
128    -256   
96     -16    
48     -80    
160    0      
48     80     
16     -80    
-80    0      
96     -80    
-624   32     
64     0      
-128   0      
112    0      
80     -16    
16     -192   
80     -32    
96     64     
192    -16    
80     -1184  
96     -32    
64     272    
192    32     
-688   -80    
-128   -144   
-144   -64    
16     160    
-432   64     
-160   -224   
-16    32     
0      -48    
176    32     
64     -144   
128    32     
96     48     
-32    -48    
-160   80     
-16    64     
-112   -96    
0      96     
-16    -32    
32     -224   
-592   -128   
-32    -48    
128    -112   
32     -16    
-16    32     
-1328  16     
-2000  32     
-80    -256   
176    -144   
112    192    
-96    80     
64     80     
160    -64    
-176   64     
240    -16    
-64    96     
48     -64    
-64    176    
48     0      
-64    32     
-144   -176   
-192   -16    
-128   -128   
-336   16     
-16    128    
-704   -32    
-64    112    
-96    80     
-112   -256   
-64    96     
96     176    
-432   -176   
64     32     
-496   -336   
192    48     
16     160    
64     -32    
-48    -16    
64     -16    
-48    128    
-448   16     
-16    -160   
-1200  96     
-48    -112   
-128   48     
128    16     
-272   288    
288    -160   
-32    -96    
-32    144    
-80    -144   
112    240    
-240   -192   
-160   -176   
32     32     
32     80     
224    832    
-336   432    
-64    192    
-896   144    
304    -16    
-32    -256   
176    -464   
-64    -320   
-192   -144   
32     96     
-64    16     
-176   160    
48     288    
304    128    
-16    48     
48     16     
-1088  -112   
64     -192   
-1712  -304   
112    -32    
-16    32     
32     96     
-112   -64    
0      96     
64     -32    
16     0      
-48    80     
-80    16     
-48    240    
112    144    
-128   80     
-432   -224   
80     -352   
-176   -80    
224    112    
-64    0      
64     -80    
16     -16    
-112   64     
16     16     
-80    64     
16     64     
-128   128    
176    176    
-224   112    
-96    48     
-160   208    
-272   32     
192    -208   
176    96     
128    -48    
160    160    
64     -160   
-128   -32    
-128   176    
-288   -16    
0      -160   
48     0      
-192   32     
-128   32     
-208   0      
32     -48    
96     128    
-464   80     
112    112    
-544   -80    
-176   128    
-64    0      
-32    -48    
224    16     
32     48     
-32    -96    
112    -112   
48     80     
16     64     
-16    96     
-320   -16    
128    288    
-224   64     
144    -144   
-16    -128   
16     -176   
-48    -32    
128    64     
-32    64     
128    320    
16     144    
64     64     
272    16     
-208   0      
144    48     
-192   -96    
144    -128   
-208   -240   
32     96     
128    -48    
-224   -320   
0      -48    
-160   160    
144    96     
192    192    
-80    16     
16     0      
128    176    
-64    112    
0      112    
-80    48     
-32    112    
-192   -48    
0      16     
80     -112   
64     -144   
80     -128   
96     144    
176    288    
-144   208    
-272   32     
32     32     
112    160    
48     16     
96     432    
320    304    
-320   48     
-144   0      
272    -16    
240    112    
-224   -160   
304    528    
-48    464    
0      144    
112    240    
-80    -48    
80     32     
320    272    
0      304    
80     512    
96     192    
144    64     
-32    144    
48     64     
64     80     
-32    -96    
-144   32     
480    0      
112    64     
48     -224   
48     32     
-304   64     
240    -304   
-128   -16    
176    -192   
-160   192    
-48    -1216  
32     -592   
208    -288   
16     -416   
144    -48    
0      160    
48     320    
32     32     
-32    176    
112    -16    
96     96     
32     32     
-192   -176   
-32    -208   
-16    256    
112    -160   
224    -224   
112    352    
16     -96    
-32    208    
448    112    
-384   -256   
-208   -128   
112    256    
336    -256   
96     48     
-272   96     
128    128    
-320   -128   
288    64     
256    144    
-272   48     
48     -96    
-112   -80    
432    -16    
-144   80     
-48    80     
32     -16    
96     80     
80     -32    
-112   128    
-16    -80    
-32    -16    
48     432    
48     -48    
16     -496   
-48    128    
-64    -80    
176    -48    
288    64     
192    256    
-16    -96    
208    -32    
64     -64    
-128   -48    
160    160    
96     96     
48     0      
96     -112   
128    48     
-32    144    
32     224    
208    -176   
-96    -64    
192    -336   
224    -32    
-112   80     
112    48     
32     -16    
112    -32    
112    240    
-80    32     
-112   64     
432    448    
32     352    
0      64     
-240   64     
-176   -32    
128    48     
112    -128   
192    -112   
176    -16    
288    -16    
80     80     
112    48     
0      0      
16     -16    
112    -144   
224    -32    
272    240    
144    -16    
448    80     
-336   -64    
-112   64     
928    -128   
-752   48     
-608   -192   
112    -80    
32     -48    
-128   -160   
592    96     
224    176    
176    512    
208    112    
112    -128   
80     112    
-112   160    
208    -16    
304    16     
96     96     
48     80     
80     -80    
128    96     
-288   -96    
160    48     
-192   64     
448    -32    
-256   64     
-352   160    
64     64     
32     -112   
480    96     
256    48     
480    112    
-80    -240   
80     128    
-336   -16    
-32    32     
64     32     
32     48     
48     -128   
432    -160   
-304   64     
-32    -224   
192    32     
176    32     
-48    0      
-128   -160   
224    64     
-160   -304   
48     -80    
16     32     
80     -336   
32     -48    
224    -656   
128    -720   
64     32     
160    -1104  
-96    -16    
64     -208   
192    32     
80     0      
80     -48    
112    -64    
-80    -80    
208    -304   
80     112    
96     -208   
-112   16     
-864   -64    
-16    -224   
144    48     
-64    -224   
144    0      
16     -944   
80     -144   
0      32     
-32    -112   
64     -48    
288    272    
-64    32     
272    96     
-96    -160   
400    368    
-464   192    
240    0      
144    0      
96     -208   
-16    16     
112    -80    
-16    -304   
112    -496   
192    160    
-112   -320   
160    -128   
-32    -64    
-176   32     
192    -272   
112    -144   
0      16     
-80    -112   
-64    -64    
112    -416   
64     -16    
128    112    
0      144    
192    64     
64     -48    
112    -128   
96     352    
16     -160   
-32    -144   
-16    128    
128    96     
-416   -64    
128    -128   
-304   -144   
112    -16    
0      -48    
16     -96    
96     128    
176    -208   
-480   48     
96     -1584  
-160   48     
208    -288   
80     192    
-512   -1168  
160    -96    
48     976    
-144   -768   
-256   96     
80     -208   
80     176    
16     -32    
128    -48    
-160   -272   
-32    -144   
-16    96     
192    80     
128    240    
-32    -208   
-176   -48    
304    -160   
-112   -304   
112    0      
-32    64     
0      128    
-1120  -48    
16     -80    
384    80     
96     -48    
80     -16    
-16    -96    
128    -16    
80     48     
0      -16    
-144   -64    
256    80     
160    -80    
-144   0      
-352   -112   
144    -224   
-528   -48    
160    16     
96     16     
160    -32    
176    112    
-128   16     
-32    -32    
-96    -128   
-48    16     
112    -128   
288    -128   
-32    -32    
-48    32     
-144   16     
144    48     
0      16     
160    64     
176    160    
16     -192   
112    0      
80     -112   
0      -80    
-16    0      
240    128    
-80    64     
320    0      
-128   64     
-304   0      
176    -64    
-48    32     
112    -96    
224    -48    
48     128    
-528   -208   
48     96     
80     -16    
-688   80     
-16    -32    
-400   -32    
-416   48     
-128   -432   
272    -192   
-240   176    
-384   -144   
192    -80    
-368   -128   
-304   -176   
224    144    
-176   112    
64     -64    
-112   16     
-688   -144   
96     176    
-224   16     
256    -176   
-160   -192   
0      192    
0      112    
-208   0      
-480   -80    
-64    -48    
0      0      
176    32     
-64    16     
96     -64    
-160   -112   
128    -48    
-80    160    
-192   0      
-16    -32    
-160   176    
64     80     
-1344  -96    
-32    -352   
80     -128   
16     -64    
32     80     
96     64     
-160   -256   
-80    48     
-16    -16    
-192   0      
-48    16     
-48    32     
-32    -96    
-80    -48    
-240   -96    
-352   -32    
-80    144    
-112   -80    
144    -272   
-112   -256   
-48    48     
-240   0      
144    32     
-32    112    
-112   16     
48     -144   
-32    16     
-192   64     
-48    128    
-48    64     
-240   0      
48     64     
-320   -256   
-32    -432   
256    224    
-64    208    
208    -224   
208    272    
240    224    
-16    -160   
-224   448    
-384   -112   
-64    -640   
112    160    
144    208    
16     32     
-64    336    
-720   -112   
0      288    
-144   -48    
96     352    
128    256    
-560   32     
368    -384   
-80    32     
-160   0      
176    -48    
-144   -128   
128    144    
-144   48     
-336   160    
48     -176   
-784   -208   
352    848    
80     -192   
-160   -32    
-32    144    
112    -160   
32     192    
-128   128    
-16    -208   
-64    128    
-224   128    
160    416    
64     -112   
-480   -256   
224    144    
64     -272   
112    160    
96     -32    
-208   -48    
-32    32     
-16    64     
192    -32    
-16    128    
48     64     
-224   -160   
224    -112   
-192   112    
256    -48    
-288   -48    
176    96     
-416   16     
144    32     
80     32     
160    48     
32     112    
-112   32     
-32    -16    
-112   0      
-48    -16    
32     -32    
16     0      
-48    -32    
160    -32    
-64    16     
16     0      
-304   -96    
32     -16    
176    -32    
48     128    
0      32     
192    64     
-208   -32    
160    80     
-208   16     
128    64     
144    144    
-144   48     
272    48     
-416   -80    
144    112    
-160   64     
-16    16     
64     64     
32     112    
-16    -48    
-16    32     
-80    0      
128    48     
128    80     
352    240    
-256   112    
-192   -96    
192    32     
-80    0      
176    160    
-80    -80    
144    176    
208    128    
-64    -208   
160    -64    
-16    64     
-352   0      
208    80     
64     16     
-16    64     
176    -80    
32     -32    
0      64     
-400   -224   
128    -160   
-48    -16    
-368   112    
160    160    
288    -16    
-96    16     
128    224    
-160   432    
-400   160    
-176   -192   
224    -96    
368    128    
-64    208    
80     64     
272    16     
-144   -96    
-128   80     
336    336    
96     80     
544    -176   
352    -16    
-144   96     
160    -112   
-384   64     
-480   -32    
-320   -224   
16     -208   
464    0      
272    48     
400    96     
224    -1008  
-112   80     
-240   0      
128    48     
192    80     
160    16     
-16    -240   
224    -336   
304    0      
224    64     
64     48     
-208   64     
-400   -112   
-192   -208   
-16    -176   
224    -80    
208    80     
320    208    
16     80     
-80    0      
144    0      
-208   0      
-112   -144   
240    -176   
256    64     
160    80     
-64    160    
-544   -48    
208    -16    
-80    -16    
192    16     
224    32     
-176   -96    
208    112    
-96    80     
48     32     
128    112    
-112   0      
-16    -288   
144    32     
272    48     
-128   48     
0      0      
80     -32    
-32    32     
-16    -80    
16     -80    
80     -464   
96     64     
160    16     
64     48     
64     -48    
48     16     
-112   -64    
64     48     
32     48     
128    0      
144    32     
128    -96    
160    64     
-16    -272   
-32    -16    
48     -256   
-16    -112   
112    96     
144    32     
-64    160    
16     224    
192    -48    
320    32     
-48    -112   
240    -112   
-32    -64    
16     128    
112    288    
64     -320   
-96    16     
-160   336    
0      -272   
384    -944   
-208   -480   
160    496    
256    144    
-176   -432   
-32    176    
-80    -64    
-16    -176   
128    48     
0      -128   
160    -32    
16     -96    
144    48     
64     -256   
16     352    
160    48     
240    208    
-48    -624   
-64    928    
336    112    
-64    -336   
-96    592    
208    -560   
-64    224    
240    -224   
96     -128   
32     208    
272    272    
432    736    
-304   208    
64     0      
-48    -224   
192    -128   
-128   -560   
96     -448   
-64    416    
-144   96     
432    176    
128    -96    
64     -32    
16     -48    
-48    -224   
160    -112   
96     240    
-80    304    
-16    64     
128    -128   
288    192    
-32    -720   
160    -64    
-144   -176   
0      -256   
80     64     
112    -192   
128    -144   
96     -176   
48     144    
80     0      
128    -128   
112    16     
-112   64     
96     -368   
176    -48    
-160   -352   
128    48     
-832   -80    
48     -64    
32     -48    
48     0      
32     -16    
80     -144   
176    -48    
-96    112    
112    -64    
48     -272   
80     -16    
144    -128   
128    16     
-48    48     
-96    -128   
-528   -32    
208    -80    
128    0      
80     -112   
64     -64    
112    -240   
80     -176   
240    -288   
-48    32     
-80    -80    
96     -48    
128    32     
-128   32     
192    32     
64     -64    
16     -80    
-256   -160   
-1680  -128   
144    -16    
224    0      
64     -48    
-64    -80    
80     -384   
-96    -16    
144    -16    
304    64     
-208   -96    
224    -128   
192    -32    
288    16     
0      -48    
112    -320   
-1440  -288   
96     0      
16     16     
288    288    
0      112    
208    -80    
96     -16    
144    -1056  
-32    -80    
384    -64    
96     112    
128    64     
272    192    
-272   -16    
-160   -208   
64     -112   
240    -80    
-720   16     
112    0      
336    224    
-272   -48    
-176   -32    
128    -544   
32     64     
16     160    
112    48     
-64    0      
-32    -112   
-64    -144   
272    32     
-160   64     
32     -544   
-656   -176   
256    -64    
-400   -512   
32     -416   
96     -352   
-208   -256   
0      -240   
-16    -160   
208    -176   
-48    -112   
112    -112   
-192   -16    
-16    288    
-240   288    
144    -288   
-1168  -288   
80     -64    
112    144    
176    80     
32     0      
-48    144    
128    0      
-48    112    
32     -352   
-720   -16    
96     16     
48     80     
288    224    
-256   -352   
240    -64    
-224   112    
64     -192   
256    0      
16     16     
80     496    
16     -96    
-720   -96    
-576   -256   
144    -144   
-208   96     
128    128    
-192   -80    
160    -96    
0      64     
128    -48    
-32    0      
-80    -48    
-144   0      
-560   -32    
80     288    
160    656    
-400   -128   
144    -352   
-144   64     
48     32     
-1088  -96    
-256   -96    
-32    -112   
-176   -64    
-80    16     
64     96     
-32    -32    
16     -32    
-208   -96    
128    16     
160    80     
-352   160    
-64    96     
-144   -32    
112    144    
-800   80     
16     32     
48     -176   
176    -16    
144    48     
-64    80     
240    -16    
-304   48     
288    -16    
-432   64     
112    16     
0      -64    
-144   64     
-112   -64    
-160   64     
-720   -64    
-16    48     
-480   0      
16     -32    
-16    -48    
64     -32    
-160   -176   
-192   80     
16     -80    
208    80     
16     80     
-176   16     
-32    -16    
-176   -80    
144    -32    
80     32     
64     32     
-304   -80    
-16    32     
-800   -32    
48     64     
80     0      
176    112    
0      64     
-208   0      
-16    0      
-176   0      
112    -32    
-112   -16    
144    32     
-400   -32    
-96    16     
-384   -80    
-176   -64    
-976   -32    
224    128    
-336   -128   
144    16     
-112   -96    
144    -80    
0      -80    
272    160    
16     112    
-368   -16    
-144   -32    
-144   -48    
-32    -16    
-352   -64    
192    144    
-128   -32    
-48    64     
-176   -112   
80     48     
400    368    
-480   176    
-64    -48    
112    -32    
-128   -384   
320    -256   
0      64     
-176   0      
144    32     
-32    0      
-160   -336   
-128   -112   
96     32     
112    -80    
144    -128   
-256   -224   
-32    128    
-80    160    
96     80     
368    -128   
128    -64    
-64    64     
-160   -80    
-48    32     
-496   -224   
304    -560   
224    -352   
352    368    
304    48     
-128   96     
-192   112    
-112   -32    
640    -96    
288    320    
-192   272    
-96    160    
0      80     
-80    -128   
304    64     
-400   -192   
384    32     
-176   0      
128    -16    
160    32     
-624   -288   
16     -160   
-384   96     
-96    16     
112    32     
-160   64     
128    144    
368    176    
-544   -48    
-480   -112   
-272   -288   
-32    -64    
64     192    
-160   -16    
160    0      
80     -16    
336    -32    
0      -96    
128    32     
96     96     
144    176    
-208   -48    
-224   -16    
-160   -48    
128    48     
-80    64     
240    160    
64     32     
112    16     
-96    96     
48     16     
-192   64     
-48    128    
48     48     
128    -192   
-64    -48    
-80    0      
144    144    
-48    32     
-48    32     
-160   -16    
208    208    
-80    112    
240    -336   
-112   -288   
144    128    
48     256    
176    -96    
-64    -64    
16     -64    
-48    -304   
144    224    
16     144    
-144   -64    
144    80     
0      400    
-64    -208   
240    -96    
176    32     
288    608    
64     208    
-208   416    
-48    -384   
-256   48     
96     -560   
256    208    
-192   384    
336    -128   
-208   80     
272    48     
-208   -144   
320    272    
-304   -112   
-272   -368   
112    -272   
96     304    
-64    32     
32     -16    
592    512    
-224   288    
176    112    
-176   -64    
112    32     
-96    80     
144    -416   
-112   -416   
32     -1456  
-112   128    
-80    16     
144    128    
272    96     
-128   64     
336    32     
-176   -16    
-48    112    
0      240    
224    240    
224    64     
80     144    
48     256    
16     96     
-16    -656   
80     144    
96     -16    
64     80     
16     -480   
112    -240   
-48    480    
224    256    
-48    272    
-64    -48    
112    -32    
16     -144   
-96    -176   
96     -256   
96     128    
-176   -304   
32     32     
96     64     
32     -48    
336    -176   
-32    32     
32     48     
-16    80     
320    160    
16     -16    
-112   -80    
32     -16    
-80    0      
176    -144   
240    96     
352    80     
-32    80     
-48    -400   
-80    -48    
656    336    
-400   416    
-176   -160   
-16    -288   
-96    192    
384    80     
64     -16    
-224   -80    
-16    64     
176    256    
176    96     
112    -240   
16     -16    
48     -96    
32     32     
64     -416   
64     0      
112    0      
-16    96     
-160   128    
192    64     
-80    64     
80     -96    
64     -224   
112    16     
-16    64     
32     -80    
96     -32    
80     -80    
64     96     
-128   64     
496    176    
-144   -160   
-96    48     
-16    -144   
0      112    
0      48     
0      96     
32     -48    
368    -192   
32     112    
144    -32    
0      80     
-48    -64    
0      16     
432    -48    
48     32     
-32    -16    
0      -48    
112    -288   
224    -48    
320    64     
0      -208   
-272   -80    
-64    -176   
-352   -256   
304    -512   
336    -176   
576    32     
128    128    
-176   208    
0      240    
-192   80     
144    -192   
96     -32    
224    160    
-16    -208   
128    -16    
-48    160    
-144   -112   
80     -32    
176    160    
80     32     
256    80     
-176   64     
320    -672   
256    -192   
208    0      
64     -688   
-240   -48    
-1072  -48    
-192   96     
288    -32    
96     -96    
-112   -16    
0      -384   
320    144    
224    80     
272    -96    
48     -16    
16     -144   
-80    -208   
224    128    
-48    -128   
400    288    
-336   128    
336    -112   
224    0      
96     -368   
48     -48    
64     -448   
64     0      
-64    16     
304    192    
-48    0      
64     0      
80     -48    
96     16     
144    -96    
64     -32    
-176   0      
32     -16    
64     -16    
96     -144   
-64    -80    
48     -112   
96     0      
256    32     
-48    -96    
208    -160   
0      -80    
32     -112   
96     64     
-144   -64    
-144   -96    
-384   -80    
112    0      
-304   0      
-144   16     
288    -16    
-32    -48    
48     96     
-80    -160   
96     192    
-96    -64    
384    96     
48     144    
224    -96    
80     -128   
-48    -96    
-160   144    
256    -144   
-512   -160   
128    16     
208    32     
80     -128   
-304   -48    
-16    -48    
16     128    
96     -1008  
-96    -32    
80     80     
144    -32    
-160   -128   
32     128    
-128   -32    
-48    -16    
-176   -16    
32     -16    
80     -128   
128    -176   
-224   32     
128    -144   
64     16     
112    -480   
64     64     
-240   48     
112    -96    
-32    0      
256    16     
-160   64     
304    176    
-112   -64    
64     -48    
-544   -64    
144    16     
256    176    
-96    16     
128    -48    
80     -384   
-32    -32    
192    16     
-80    48     
-192   -16    
-224   -80    
-192   32     
128    16     
-112   80     
64     -96    
80     16     
-16    -16    
-16    64     
304    -128   
-16    48     
64     -464   
80     16     
-128   80     
-96    -64    
-688   -80    
96     -160   
-224   -304   
288    -32    
-64    96     
80     -48    
-64    144    
-80    -176   
-80    16     
-32    -256   
48     80     
176    -144   
-368   -192   
-112   -16    
-592   160    
-304   -80    
0      -128   
-112   128    
160    96     
208    32     
16     -112   
48     32     
-384   64     
-48    176    
32     176    
192    160    
-304   -208   
-752   -272   
112    224    
-672   96     
-32    -32    
-400   16     
-160   -48    
-112   -96    
-48    -32    
-160   80     
48     112    
64     -144   
240    48     
-112   32     
-272   176    
-416   -96    
-304   -96    
-336   -32    
64     48     
-320   64     
1088   528    
224    -880   
-208   -912   
-256   320    
-672   64     
-240   -320   
-336   80     
272    384    
-336   -592   
816    240    
96     400    
32     -352   
160    272    
-32    -32    
64     -16    
-48    64     
-192   32     
-432   192    
-304   96     
-416   -256   
208    -368   
208    -16    
368    128    
-240   80     
-208   -16    
-112   32     
-48    160    
464    192    
528    -32    
96     -128   
-432   -64    
-272   160    
-544   -304   
256    -544   
-1216  528    
224    -288   
-96    -304   
-208   224    
128    16     
-96    496    
48     176    
-192   -176   
-224   16     
-112   80     
-32    -80    
-32    96     
-80    32     
-336   -32    
96     0      
-960   -64    
352    688    
-288   -816   
64     224    
64     432    
-304   -704   
16     48     
96     272    
-80    -48    
-64    0      
64     192    
0      -80    
0      224    
-112   528    
-144   -48    
-384   -224   
16     368    
80     -128   
128    32     
192    432    
-432   -192   
16     -304   
16     -16    
0      272    
32     16     
-48    -80    
-144   -240   
-80    -48    
-400   -128   
-48    -544   
-80    224    
16     32     
112    32     
-48    -80    
-32    -192   
64     112    
112    -32    
48     0      
-112   304    
-64    -16    
48     -336   
-192   -32    
32     64     
-48    -144   
-96    96     
-208   -64    
-160   16     
112    -336   
-96    -96    
320    112    
-192   128    
0      -16    
112    64     
336    192    
-320   96     
80     -192   
-16    16     
-64    32     
-96    0      
-64    208    
-80    64     
-224   336    
208    -16    
224    -96    
192    144    
-160   0      
-96    96     
-64    48     
-16    16     
0      48     
48     -16    
48     16     
-224   -144   
304    -48    
-48    112    
-16    48     
560    416    
-640   -160   
-80    -16    
128    288    
-112   416    
240    128    
112    -224   
-128   192    
176    112    
176    224    
-112   -80    
80     -32    
-304   -128   
-16    160    
112    32     
256    96     
48     32     
-64    -64    
-48    -192   
-80    -224   
-16    -128   
304    -80    
160    0      
32     0      
48     192    
-32    0      
160    48     
48     32     
-112   -48    
112    -16    
64     64     
-128   -48    
-80    -128   
176    64     
-96    16     
240    -32    
64     -32    
-16    48     
-240   48     
-32    336    
48     0      
272    -160   
0      -80    
240    192    
0      336    
176    -32    
192    -80    
32     32     
-80    48     
-96    112    
208    64     
-128   16     
192    32     
0      -192   
208    -32    
-176   -32    
224    -48    
272    64     
-16    -16    
-64    48     
-304   -192   
16     -112   
192    -48    
-176   -128   
96     240    
-112   256    
32     208    
272    112    
208    192    
-16    96     
-160   16     
96     -368   
192    -48    
64     -192   
-80    16     
80     -176   
128    -64    
208    192    
208    176    
224    -208   
32     128    
272    304    
-128   -368   
-48    48     
16     224    
112    528    
-336   -400   
240    -80    
416    160    
-208   -112   
144    -128   
32     -64    
352    32     
160    0      
528    288    
-336   -32    
-464   -176   
176    128    
-48    32     
288    80     
288    208    
368    -48    
-112   496    
-208   -240   
288    16     
224    80     
432    32     
384    16     
96     80     
-304   176    
-336   -16    
-192   -176   
176    0      
128    96     
288    80     
208    48     
-32    -64    
-208   48     
16     -208   
160    80     
48     -16    
160    16     
-48    -160   
32     64     
-160   -192   
320    -32    
16     48     
288    80     
80     -48    
-32    -176   
16     80     
272    -144   
-224   -208   
160    -96    
160    -96    
-48    -288   
112    64     
80     -656   
176    112    
-80    16     
256    64     
0      16     
48     160    
-160   -16    
-80    -64    
0      0      
96     -64    
192    0      
16     -16    
64     64     
96     -304   
-32    128    
64     -320   
112    -32    
0      -16    
-64    0      
-64    0      
112    16     
-48    48     
176    0      
-48    0      
64     -144   
256    -48    
32     16     
208    32     
64     -80    
112    0      
32     64     
80     96     
-256   -224   
368    -288   
-176   160    
256    192    
192    -16    
112    -48    
96     80     
-144   -224   
192    -64    
160    -112   
-112   112    
112    -64    
128    -48    
80     -208   
96     256    
80     16     
128    -1200  
-64    32     
64     32     
96     -176   
-32    -144   
32     -176   
224    -96    
-16    32     
128    -80    
48     16     
64     -128   
96     -304   
-64    -48    
160    -80    
160    16     
-16    -16    
320    -160   
-1024  -176   
48     -192   
112    -80    
224    -16    
128    -48    
96     -736   
-64    -16    
96     48     
496    128    
-480   80     
192    -48    
128    32     
144    0      
128    -48    
-16    48     
-912   -160   
144    -96    
-64    -32    
176    -80    
-32    64     
240    -320   
112    -160   
128    -1568  
-128   -64    
48     64     
128    160    
16     -16    
0      -144   
-208   80     
64     288    
-272   112    
112    16     
-112   80     
128    96     
0      -48    
32     -320   
0      16     
240    -320   
32     -16    
176    128    
16     144    
144    64     
-80    -288   
-32    208    
272    -32    
-144   -80    
48     16     
-976   -16    
-16    -208   
48     112    
176    -48    
0      -208   
-32    48     
64     16     
144    -320   
48     64     
16     -16    
208    -32    
-320   64     
-208   32     
-288   96     
-512   -496   
-640   -1216  
400    752    
400    -128   
368    128    
-304   -64    
-64    -336   
32     64     
464    -1328  
-352   48     
-320   -160   
0      -96    
176    32     
304    -256   
144    224    
256    -160   
-624   -112   
-160   112    
-112   -608   
208    352    
496    -16    
160    -256   
208    288    
-80    -208   
-144   176    
0      -80    
160    -160   
-208   -80    
-176   -16    
-144   32     
-192   -32    
-96    -1232  
272    -80    
-400   848    
-208   -16    
-112   -112   
112    -384   
-80    64     
400    -512   
192    -48    
272    -368   
16     -48    
-416   240    
-16    -176   
-448   -160   
160    176    
-592   -192   
64     -256   
-384   -304   
576    -272   
-32    224    
336    32     
96     112    
-96    -208   
-128   -96    
-336   -96    
128    -240   
48     208    
112    -16    
0      112    
224    384    
-176   448    
128    160    
-384   -32    
256    96     
-160   144    
-1344  64     
112    -16    
-240   -32    
-656   32     
48     -48    
-48    32     
112    -48    
-272   64     
-112   -80    
112    48     
-48    128    
64     64     
-32    208    
176    -64    
-224   16     
-224   -112   
32     -128   
48     32     
-320   -96    
-256   -176   
-368   -448   
-192   64     
-352   144    
-32    -560   
-144   -320   
-112   -256   
-208   128    
304    128    
-576   -416   
0      -64    
-240   -272   
48     432    
224    -16    
-160   160    
192    -48    
0      16     
-64    -416   
-640   -16    
64     96     
-496   112    
384    640    
-416   -336   
-160   160    
-336   -128   
240    -96    
48     128    
16     16     
-176   96     
0      -64    
112    16     
16     -48    
224    0      
-176   -112   
-32    16     
-224   -48    
160    128    
-32    -80    
128    64     
80     80     
-128   64     
96     32     
-80    32     
80     64     
-240   224    
80     0      
-48    -240   
-144   0      
-112   -16    
-192   288    
-176   -112   
320    -352   
-80    0      
-32    240    
-112   -272   
96     -720   
-32    -240   
32     -48    
80     112    
-48    -192   
-80    -80    
-160   -224   
-336   -80    
-64    128    
-224   128    
-288   -48    
32     -48    
-272   -32    
64     32     
64     -256   
-256   -176   
144    -128   
-368   -112   
176    48     
0      288    
0      144    
96     -336   
-192   -144   
-160   16     
-48    176    
0      112    
304    112    
-1056  -32    
-48    64     
-96    -64    
-16    -112   
160    0      
-160   112    
-48    -32    
-112   -208   
128    -80    
-336   96     
80     80     
-16    -64    
-48    240    
-192   -16    
-96    -16    
-336   -96    
112    -32    
112    -48    
48     -96    
0      96     
112    144    
-64    176    
-160   112    
-32    -80    
112    192    
-64    -80    
-48    128    
16     256    
-336   -96    
304    336    
-176   -32    
-128   128    
-48    64     
-176   -448   
128    -96    
32     144    
16     32     
208    176    
-96    64     
-160   96     
256    432    
-528   48     
160    -32    
96     -432   
128    -368   
48     432    
-160   160    
-288   -48    
-208   0      
-176   160    
160    320    
272    176    
320    384    
112    80     
32     16     
32     80     
-64    -112   
-96    80     
-128   48     
0      -32    
80     0      
0      96     
-32    80     
-448   112    
208    112    
416    48     
-320   48     
-48    16     
112    32     
-288   -112   
640    -128   
128    64     
-80    -16    
320    -208   
272    128    
-96    160    
-64    80     
-64    -48    
112    0      
32     128    
448    288    
-624   -112   
-16    16     
48     64     
-48    16     
112    80     
-64    -32    
96     80     
0      -16    
-80    -16    
-48    96     
96     80     
0      -48    
-288   80     
240    80     
-48    64     
-64    96     
0      48     
96     16     
0      0      
112    80     
-112   16     
-16    16     
144    48     
80     16     
48     80     
-48    32     
-32    32     
-64    -16    
48     80     
0      16     
48     -48    
80     32     
80     96     
48     96     
256    128    
-288   -112   
112    16     
48     32     
-48    -48    
128    48     
64     48     
96     192    
240    -64    
96     -64    
16     80     
128    144    
-320   -16    
128    0      
-80    -16    
208    160    
-112   0      
96     -256   
32     -176   
128    -1200  
16     144    
272    0      
-64    80     
80     80     
-32    -128   
96     -144   
80     16     
-208   -16    
128    64     
-208   32     
144    160    
-288   -64    
208    -320   
96     80     
176    -192   
-16    64     
128    64     
-64    -32    
96     32     
0      -16    
32     32     
240    128    
-240   64     
144    -32    
96     32     
144    96     
-48    48     
32     -80    
160    0      
-16    16     
48     64     
96     16     
64     80     
64     128    
16     32     
48     -112   
32     160    
-16    32     
128    48     
64     96     
-16    0      
-16    48     
160    0      
64     80     
112    -112   
144    80     
80     -480   
176    160    
-176   -224   
112    -128   
-32    112    
240    -80    
16     -64    
304    336    
16     48     
-144   -48    
-48    96     
0      -240   
288    144    
96     -288   
16     32     
48     -144   
-80    128    
160    384    
0      -128   
-32    128    
-80    0      
320    48     
16     -96    
-32    160    
144    96     
0      -272   
128    -64    
-128   -64    
96     -608   
352    128    
224    544    
-48    -432   
-16    -256   
112    416    
80     -192   
-64    -240   
-32    -272   
-64    -48    
352    64     
-192   -512   
80     -48    
144    -448   
96     368    
144    -80    
176    -32    
144    -176   
-80    -176   
160    -464   
-16    -64    
224    96     
176    160    
240    256    
64     400    
256    48     
192    -304   
32     48     
144    -208   
112    32     
128    -144   
32     -304   
32     -240   
-192   192    
144    128    
-112   -592   
144    -32    
224    -272   
-16    16     
304    -272   
48     -416   
0      192    
112    64     
144    64     
-64    144    
-112   -64    
-208   32     
32     256    
-224   192    
144    -64    
272    -112   
304    160    
240    144    
-80    -112   
-944   32     
-112   -48    
112    32     
192    -256   
-16    0      
272    -160   
112    0      
176    -96    
64     -16    
192    -96    
64     144    
32     -32    
16     48     
-336   16     
288    128    
-1152  -16    
272    -368   
208    -256   
80     -224   
-32    -384   
-96    -112   
0      112    
112    -96    
192    272    
288    144    
16     336    
48     -80    
96     -80    
-16    96     
48     -48    
-480   -176   
128    -48    
192    80     
240    352    
240    336    
80     96     
272    32     
16     -1008  
-400   -80    
80     48     
-16    128    
80     272    
160    208    
-80    0      
192    96     
-656   -192   
-48    64     
-1504  320    
128    224    
160    -288   
48     -16    
304    48     
160    -192   
96     368    
-64    -256   
96     192    
192    64     
-32    64     
-224   -64    
-128   -64    
-32    64     
-48    -208   
-80    -48    
368    -464   
192    224    
16     -80    
-64    80     
-48    128    
64     624    
256    -352   
16     -112   
-96    80     
256    -112   
-80    464    
336    160    
448    256    
192    544    
-1600  240    
-176   -144   
-16    -32    
32     96     
336    128    
64     -32    
112    48     
-48    -16    
208    -192   
-64    -352   
0      -16    
-32    -176   
-48    272    
-464   -80    
-176   128    
-112   -64    
-112   32     
-32    -224   
112    -96    
192    80     
256    -240   
-16    224    
176    -96    
16     -224   
-416   -800   
0      -112   
-352   240    
0      -48    
48     -528   
96     -112   
224    208    
-64    -112   
-368   -144   
-16    -320   
16     48     
304    -16    
64     384    
64     144    
48     -528   
-352   -448   
208    -288   
-640   48     
-16    -496   
-160   -224   
96     -176   
-224   -144   
320    -480   
-128   -400   
-1296  -48    
-96    96     
-208   128    
176    160    
192    -64    
-576   192    
32     400    
-576   -160   
-224   -224   
80     64     
0      -160   
-16    -224   
-16    80     
-1392  -64    
128    -448   
-224   192    
-80    128    
-176   -224   
96     416    
-416   -320   
-272   -496   
32     224    
192    144    
-48    496    
16     96     
0      64     
-256   -112   
-160   64     
-96    -16    
256    32     
48     224    
48     0      
-272   -80    
-384   128    
-288   0      
-128   32     
-160   -16    
176    -96    
208    32     
-48    32     
80     64     
-560   224    
0      112    
-160   -48    
64     384    
-32    160    
272    -32    
16     32     
-352   0      
352    48     
-224   -48    
-48    96     
-288   0      
80     -32    
-1616  -416   
208    -288   
-176   192    
-400   208    
-576   -16    
64     288    
-384   -32    
96     240    
32     48     
240    -16    
272    16     
208    48     
336    128    
-128   -16    
144    96     
112    96     
16     -16    
-224   -64    
32     144    
-1056  -32    
-416   -288   
320    -96    
-208   304    
-528   128    
-464   -16    
-160   -16    
-96    80     
384    112    
496    -16    
32     -32    
-176   16     
-16    128    
-464   0      
-176   80     
-992   -16    
624    256    
-368   112    
-16    -48    
-96    -80    
64     96     
192    48     
256    16     
352    160    
-688   32     
-208   -128   
-144   16     
32     80     
224    48     
176    96     
-560   64     
128    80     
240    144    
-112   64     
-48    -48    
160    16     
64     128    
160    48     
-112   48     
-32    32     
-32    48     
64     144    
-16    64     
-80    48     
112    96     
-416   -16    
-32    32     
-48    64     
112    48     
-64    16     
224    128    
-80    0      
80     64     
192    176    
-160   0      
96     48     
-192   -16    
256    -96    
-176   112    
16     80     
-48    144    
-256   16     
192    96     
48     64     
368    64     
-480   144    
-80    0      
-16    -48    
144    128    
-48    16     
176    64     
-160   -48    
-112   64     
-176   -48    
112    96     
-16    48     
400    112    
-160   176    
-80    144    
112    96     
0      144    
144    80     
96     32     
0      -48    
0      0      
64     176    
-48    128    
208    336    
-272   160    
144    16     
16     -64    
-48    -64    
48     0      
-80    -16    
144    48     
16     224    
16     0      
-16    64     
192    128    
-176   -32    
80     64     
-208   -160   
208    176    
-16    48     
64     80     
-48    128    
112    288    
80     112    
96     -160   
-48    128    
192    -256   
-64    -48    
16     368    
16     -144   
32     80     
160    176    
-112   -32    
32     320    
-32    -80    
432    -48    
-96    -16    
0      256    
-128   -128   
16     -576   
-32    192    
144    288    
80     128    
-80    32     
144    -256   
192    0      
16     912    
-48    544    
160    -32    
80     32     
208    -48    
-16    240    
240    32     
-64    48     
0      128    
-128   208    
-80    -16    
-96    -64    
144    96     
96     192    
304    256    
-48    272    
-128   0      
64     -224   
0      112    
336    -144   
-112   144    
160    144    
-192   224    
32     112    
160    272    
96     80     
224    112    
32     32     
112    -64    
-160   320    
48     128    
-32    -32    
-32    -304   
208    80     
96     -1264  
400    240    
-256   128    
-144   64     
0      32     
112    80     
240    80     
160    96     
-80    -80    
112    48     
-96    48     
112    -128   
16     -160   
16     -96    
16     -48    
-48    -480   
240    80     
-112   176    
144    64     
144    32     
128    96     
-160   -176   
160    352    
80     304    
96     160    
-256   48     
128    -160   
48     160    
-192   0      
160    -16    
192    -400   
64     160    
-64    -992   
-32    80     
112    -80    
-64    0      
160    -32    
64     16     
-48    144    
-112   64     
32     96     
80     -48    
16     64     
368    -64    
368    64     
-16    0      
-96    64     
16     -336   
48     -80    
80     96     
144    -32    
-112   16     
80     -112   
32     -160   
112    192    
112    144    
-176   48     
-16    64     
256    -48    
-48    48     
160    -32    
-96    0      
144    96     
48     96     
288    -224   
32     -16    
-16    16     
160    96     
80     112    
96     128    
96     96     
80     -64    
64     -16    
16     -272   
160    48     
-48    -272   
128    48     
32     -160   
64     64     
160    208    
-48    384    
80     208    
80     48     
-16    -128   
-112   -160   
128    -176   
-208   -272   
96     -16    
48     64     
96     96     
400    96     
-288   16     
432    -560   
352    -336   
320    544    
352    816    
-272   400    
336    -1168  
80     -640   
-32    -48    
-32    -736   
-240   -384   
-64    -576   
176    -64    
240    -560   
-48    -448   
320    -16    
-144   672    
496    -224   
80     -416   
-208   -112   
-112   -704   
80     32     
112    416    
-48    240    
-96    -384   
-64    -224   
144    -784   
0      0      
208    176    
48     -608   
240    -16    
64     208    
208    -320   
288    256    
-256   -32    
144    -112   
-208   -224   
64     128    
-352   0      
-96    304    
272    96     
112    32     
272    -80    
-272   192    
192    -304   
176    464    
-400   -640   
256    432    
-160   32     
416    304    
144    112    
-368   -16    
208    -80    
-112   -96    
176    336    
144    -64    
-32    -256   
-64    32     
16     -48    
96     16     
592    -144   
-768   -416   
496    0      
112    384    
-352   -544   
288    0      
-224   320    
80     -96    
-208   -32    
144    -128   
-16    0      
192    112    
80     -48    
176    -80    
-256   -112   
80     -272   
112    160    
96     -48    
32     112    
-64    -32    
144    96     
112    80     
304    16     
-944   -96    
-80    -192   
-2464  -80    
160    128    
32     -32    
0      256    
224    176    
32     32     
144    448    
80     496    
160    -128   
304    -384   
176    -240   
-80    96     
32     96     
-208   0      
-32    -16    
-576   288    
480    736    
-256   368    
224    128    
-80    0      
160    -352   
-64    -96    
256    -112   
80     -64    
144    -16    
192    0      
-80    48     
16     64     
-816   16     
-240   336    
48     208    
544    -96    
-1056  -64    
-368   -128   
48     112    
-128   16     
-32    128    
112    -576   
-64    96     
-832   -784   
576    -336   
-96    336    
-416   192    
-320   64     
-320   -512   
112    -240   
80     192    
-336   -192   
-96    -288   
176    144    
-128   -80    
304    -16    
224    48     
-304   -32    
-336   -48    
-64    0      
-384   80     
32     64     
-352   -160   
448    -64    
16     144    
192    32     
-176   48     
0      0      
32     96     
96     -112   
496    224    
-240   96     
-1152  -128   
544    272    
-416   80     
-256   -48    
0      -64    
-192   96     
-48    64     
-144   16     
-160   -304   
128    -64    
-1296  -112   
208    112    
-352   -112   
192    272    
-288   32     
160    64     
-240   32     
-416   -32    
112    32     
-448   0      
-144   -32    
96     -32    
240    0      
-256   48     
-96    -32    
128    -96    
192    112    
-304   -32    
96     96     
0      80     
-160   -48    
32     112    
-384   16     
16     0      
-160   80     
144    64     
-96    48     
-112   16     
-64    -64    
0      16     
-64    -384   
-96    -48    
-32    64     
-64    -16    
-48    96     
-96    48     
-16    0      
-176   80     
144    16     
144    80     
-288   0      
-848   160    
128    128    
0      -80    
32     144    
-256   144    
-176   48     
-176   80     
160    112    
-144   32     
176    160    
-64    48     
64     16     
-32    32     
-32    16     
-96    32     
-176   160    
-224   -32    
112    -80    
32     144    
-272   -256   
-128   -48    
-80    256    
-16    224    
80     -112   
-48    448    
96     208    
0      -160   
-256   0      
-128   -128   
-32    112    
-240   -96    
304    -144   
-1040  128    
80     608    
-160   -752   
-112   -512   
-16    464    
-16    128    
128    304    
-352   -400   
0      224    
-128   -80    
144    160    
-48    48     
80     -32    
-384   192    
48     176    
-816   -112   
-48    112    
288    416    
-672   -720   
272    -160   
112    512    
64     512    
96     416    
-48    80     
64     144    
80     112    
224    176    
-96    208    
-224   0      
96     288    
-480   -16    
-32    336    
448    384    
-144   -112   
-96    -16    
-80    -32    
-64    -48    
-224   -16    
0      48     
-48    48     
160    64     
48     160    
32     144    
-176   0      
-96    48     
-224   32     
-32    0      
-48    176    
-64    32     
128    0      
0      0      
32     16     
80     16     
32     80     
96     16     
-32    32     
-208   -80    
208    48     
-48    112    
-64    96     
240    32     
-32    64     
-96    80     
-192   -32    
144    -256   
-32    32     
144    96     
208    0      
-80    176    
-208   32     
32     48     
16     -96    
160    48     
-224   -80    
160    80     
240    96     
-80    64     
416    272    
-304   176    
144    -32    
336    64     
128    160    
304    208    
-144   80     
-16    -64    
320    288    
-432   64     
80     144    
-336   -48    
224    32     
208    128    
192    -48    
48     32     
-416   -304   
208    -240   
16     176    
-432   -96    
256    112    
-64    192    
448    96     
0      144    
-544   -128   
32     -112   
64     192    
208    128    
256    64     
176    112    
16     -32    
160    16     
-224   -16    
-208   -48    
112    80     
-160   48     
272    80     
64     128    
-144   -64    
-48    -208   
64     0      
-416   112    
-16    96     
48     16     
80     288    
288    160    
-128   48     
80     240    
256    272    
-16    288    
-80    144    
240    256    
-96    96     
-112   96     
-96    -192   
144    -416   
16     -80    
224    -80    
80     -48    
-96    -48    
-32    64     
80     -32    
80     64     
32     48     
96     176    
-288   -144   
32     -112   
-32    -16    
32     -48    
-16    -80    
80     -512   
256    304    
-288   -368   
64     -256   
160    -48    
144    208    
48     208    
64     -64    
0      352    
-224   -64    
176    -320   
224    -16    
-112   464    
144    -304   
-32    192    
-112   -240   
176    544    
64     -448   
-128   -32    
-160   32     
0      -224   
-112   96     
368    192    
176    288    
224    -352   
-128   192    
48     0      
-32    16     
-32    176    
-96    -64    
96     192    
-16    -736   
-160   -16    
176    640    
-80    224    
192    -80    
496    336    
-176   144    
112    -16    
64     208    
-80    48     
16     32     
-272   48     
16     96     
608    592    
-384   -16    
176    -320   
112    -144   
64     64     
48     -1664  
48     96     
16     32     
-16    32     
144    176    
16     272    
96     64     
112    96     
0      64     
112    -32    
112    64     
-64    -64    
0      32     
32     -80    
144    128    
-160   -432   
128    160    
64     32     
160    112    
-144   48     
0      32     
112    -16    
80     112    
64     160    
128    -16    
16     80     
80     64     
112    320    
-16    192    
80     288    
560    192    
-288   0      
32     -32    
112    96     
32     64     
-144   16     
256    144    
-64    32     
32     96     
-48    208    
144    144    
144    -208   
16     64     
144    16     
80     128    
16     -80    
-16    -32    
32     -16    
256    128    
64     64     
64     112    
96     0      
48     -64    
224    48     
-176   -144   
208    0      
48     32     
-16    -32    
224    -32    
192    112    
176    48     
-160   144    
-16    -16    
240    -480   
112    32     
32     -448   
-320   -256   
208    16     
192    -880   
-48    -112   
80     -1104  
112    -208   
192    48     
-112   -272   
288    112    
112    48     
-256   192    
48     96     
320    -544   
-192   -64    
-336   16     
-336   16     
-240   0      
400    -112   
64     -112   
0      -112   
96     -64    
176    64     
240    0      
-16    -48    
96     112    
-592   -1264  
176    -544   
-448   576    
-336   336    
-48    128    
288    160    
-176   -128   
288    -240   
-80    -96    
32     -544   
224    -160   
32     -240   
-160   80     
-128   -96    
240    -16    
144    32     
176    96     
288    0      
304    16     
-96    48     
144    16     
-2224  -16    
176    -96    
192    -32    
240    48     
336    128    
-368   -112   
144    -128   
-160   -80    
-464   0      
-224   -144   
240    96     
-64    16     
64     64     
-64    96     
16     176    
-768   -48    
256    16     
304    32     
-80    0      
160    32     
160    -96    
-288   -48    
32     -272   
336    176    
-256   32     
16     -16    
64     64     
-32    80     
64     16     
16     -96    
16     80     
128    64     
-992   32     
128    -64    
-416   -16    
80     -176   
64     80     
64     -208   
48     48     
0      -48    
16     64     
-16    0      
0      -48    
-64    32     
96     -48    
-64    32     
96     -16    
-176   -144   
-80    -240   
-240   -256   
176    -160   
288    80     
64     -240   
96     96     
320    -1344  
-256   16     
80     16     
-32    64     
144    -16    
-32    0      
-288   -400   
464    400    
-1392  -608   
240    -96    
192    112    
80     -672   
16     288    
512    672    
-368   -448   
288    -480   
112    480    
-16    -144   
16     -112   
-336   336    
-256   -176   
112    176    
208    272    
0      192    
-32    16     
352    -272   
160    368    
-304   -96    
352    -128   
-272   -32    
0      0      
-48    448    
48     -288   
-112   432    
112    128    
-64    -432   
0      48     
64     -144   
-16    144    
-64    320    
288    -80    
64     -48    
256    144    
-240   160    
-16    48     
-64    -32    
-464   0      
-64    -16    
-736   96     
-336   0      
608    -32    
-96    16     
-64    -48    
16     -144   
-608   -16    
16     16     
-144   0      
160    16     
-128   -16    
-352   112    
-128   80     
-336   0      
80     -80    
-208   32     
192    64     
-304   -32    
-96    -32    
-80    48     
32     -32    
464    112    
-80    336    
-96    0      
0      48     
-96    96     
-256   48     
-64    16     
-144   0      
48     -16    
-368   -32    
-208   32     
-32    -16    
-32    48     
-224   -16    
-80    160    
-176   192    
48     32     
16     -192   
-48    16     
-32    -32    
-16    -32    
-64    64     
-32    16     
-16    -32    
16     16     
-32    96     
32     -32    
48     32     
16     96     
32     48     
16     -96    
48     32     
-144   32     
-320   -96    
192    -80    
32     144    
-80    80     
-208   -64    
48     -16    
-64    -16    
-112   128    
-16    48     
144    48     
-384   -64    
-96    48     
16     -128   
-64    80     
-96    0      
240    240    
-64    176    
-272   16     
-112   96     
-160   -272   
32     -208   
224    192    
-240   208    
192    -32    
64     0      
-768   128    
80     160    
160    -352   
-80    -592   
224    -96    
-464   208    
352    464    
192    272    
160    0      
80     32     
-112   -128   
-112   -208   
48     -80    
-48    96     
384    320    
144    192    
0      176    
-160   -32    
-256   16     
-32    0      
176    -32    
-240   -240   
96     -240   
272    -16    
112    128    
48     112    
-96    224    
112    80     
-480   -384   
-80    -176   
32     240    
288    256    
-1040  -64    
272    -224   
112    256    
-192   128    
0      -112   
-32    96     
16     96     
-272   32     
208    128    
-160   0      
-48    -96    
-16    16     
176    160    
-368   -304   
48     128    
-160   -64    
-16    32     
80     160    
144    384    
192    192    
32     -112   
-80    -16    
112    32     
64     208    
48     -112   
32     -48    
-240   16     
-80    48     
-208   -48    
64     64     
96     -80    
32     192    
176    160    
-192   32     
64     -32    
16     -160   
0      80     
-16    48     
32     48     
-192   -112   
112    112    
-64    96     
128    32     
-96    320    
48     464    
-80    -64    
-192   -16    
0      144    
-192   128    
144    -16    
32     64     
144    112    
-112   -16    
32     -32    
-112   0      
16     64     
-96    16     
272    -16    
16     32     
0      16     
48     -32    
-160   96     
64     128    
32     -32    
208    -160   
64     80     
64     208    
-16    -32    
272    -96    
-336   16     
272    -176   
-96    -352   
32     288    
-144   112    
304    -16    
-16    80     
16     64     
112    32     
-64    -16    
80     96     
-48    0      
128    96     
80     16     
112    64     
-16    -16    
112    64     
-96    64     
-32    -80    
112    176    
-160   96     
128    -16    
-16    64     
144    128    
128    -32    
-160   0      
-192   -96    
176    16     
112    176    
96     48     
-112   -64    
256    64     
-224   32     
256    48     
32     -32    
-112   16     
64     112    
-144   16     
272    16     
448    384    
-240   192    
48     16     
144    96     
80     80     
96     0      
192    224    
64     224    
-240   32     
112    -48    
176    16     
112    0      
176    112    
64     32     
80     96     
-48    48     
48     32     
144    80     
208    128    
-208   -48    
128    64     
256    272    
-288   128    
48     32     
176    -96    
128    0      
-64    -1568  
-128   64     
48     -32    
80     -16    
96     48     
-96    -304   
-144   -144   
64     208    
16     -240   
288    0      
16     176    
112    -64    
144    -112   
240    -128   
-352   -304   
288    -384   
208    48     
-224   -32    
-16    -32    
144    -272   
352    -32    
176    192    
80     64     
224    80     
0      -32    
48     -32    
272    112    
-400   64     
-48    -32    
1136   1280   
-624   880    
-192   16     
-160   -688   
176    0      
304    160    
-160   304    
16     208    
240    -80    
112    400    
384    368    
-144   -16    
-496   -48    
-128   112    
-160   -16    
160    48     
-16    -64    
-96    32     
-48    -272   
64     -48    
320    -224   
208    -224   
528    80     
144    80     
-144   32     
-368   -208   
-96    -64    
176    240    
-272   336    
144    304    
240    112    
288    -464   
288    48     
-32    64     
-32    64     
160    32     
288    160    
272    48     
208    -16    
-128   -176   
464    -160   
-16    -176   
128    -272   
-96    -144   
-192   -208   
64     128    
-48    -16    
224    0      
80     160    
224    288    
80     64     
-224   336    
-32    80     
-16    144    
16     -352   
0      256    
160    64     
-16    -224   
-16    96     
48     -128   
32     96     
208    -96    
48     176    
32     -208   
80     -416   
160    80     
-16    -96    
-48    32     
160    -16    
-128   -368   
368    -576   
-64    208    
192    96     
16     -368   
48     224    
-48    16     
336    -32    
208    -272   
-128   64     
272    -208   
304    240    
240    0      
96     432    
-464   -64    
-16    -320   
-192   272    
0      -336   
64     400    
-64    720    
64     -128   
48     -384   
48     -208   
160    -160   
-48    -32    
272    -160   
-48    -128   
80     -112   
-112   -224   
-528   144    
-160   -128   
-1392  -144   
-160   48     
160    0      
-80    -336   
-64    -288   
144    -1328  
32     -80    
64     -96    
-176   -48    
224    0      
-96    176    
272    -80    
240    -48    
-144   192    
-48    -16    
-528   -192   
80     -96    
144    64     
-32    208    
-80    160    
80     16     
272    -128   
96     -64    
176    80     
-112   -128   
224    -96    
-64    144    
288    64     
-128   224    
192    -96    
-240   -80    
0      0      
128    96     
64     160    
80     48     
144    -128   
64     -144   
-160   -192   
256    208    
32     256    
96     64     
-32    -224   
224    -48    
-400   -64    
112    -144   
-432   128    
224    -80    
-352   -144   
96     -128   
160    64     
32     -128   
48     32     
224    -384   
32     80     
176    -48    
16     0      
64     32     
176    0      
-64    0      
80     96     
-96    80     
128    0      
-544   48     
256    176    
-48    240    
48     -96    
48     -16    
128    80     
144    96     
-32    -352   
80     -32    
-48    0      
48     -64    
0      -48    
64     80     
-208   48     
208    64     
96     32     
16     -16    
-224   0      
192    0      
64     48     
80     -64    
64     32     
64     -208   
288    -144   
-528   0      
-176   -64    
-80    -48    
176    64     
192    -32    
240    0      
-192   0      
16     0      
-48    -128   
-32    -64    
-160   112    
496    -80    
96     224    
80     0      
64     128    
288    160    
192    16     
-400   -64    
32     64     
-192   -112   
-48    -144   
-320   -192   
128    -112   
144    464    
-960   80     
208    -64    
-592   -288   
-592   -304   
-80    -288   
64     208    
-320   304    
-1088  48     
240    144    
496    352    
80     464    
-144   -48    
128    -160   
432    320    
-336   -240   
-480   -192   
144    -80    
320    128    
64     160    
-192   -32    
-640   -304   
-336   304    
-320   -128   
-80    -64    
-528   128    
272    16     
-96    16     
-176   320    
-224   112    
112    -352   
80     -352   
32     64     
-48    160    
-288   48     
160    -144   
128    64     
80     208    
112    144    
-240   32     
-208   -64    
-272   -32    
-704   -96    
48     -64    
112    16     
224    80     
160    48     
-240   96     
-32    16     
-48    112    
-64    0      
-80    64     
32     80     
-16    32     
-112   0      
-688   -48    
-80    64     
-368   48     
48     16     
160    -16    
32     -144   
-80    -336   
-224   16     
-16    0      
-64    64     
0      64     
-304   -192   
288    48     
-592   160    
96     -272   
80     -144   
0      0      
80     0      
48     288    
-224   -208   
-48    112    
16     96     
-48    48     
304    16     
48     64     
96     80     
-16    0      
-128   48     
32     32     
-160   48     
16     -16    
-16    -16    
-144   80     
128    192    
-912   64     
80     192    
-16    32     
304    112    
-304   160    
0      272    
48     -48    
64     16     
-272   64     
208    64     
32     -16    
-256   48     
224    48     
-512   -32    
208    64     
-1104  -32    
48     144    
288    32     
96     -48    
-160   144    
-64    64     
-48    -16    
32     176    
96     80     
32     16     
-160   32     
-400   16     
400    112    
-384   -16    
112    64     
-80    80     
64     64     
80     48     
-32    32     
160    96     
80     64     
16     144    
32     160    
256    96     
-64    -80    
-96    -48    
-192   80     
320    96     
-64    96     
176    48     
0      32     
112    -32    
-144   -32    
-144   0      
96     128    
32     16     
0      32     
64     32     
16     48     
48     32     
-16    32     
80     0      
0      48     
-256   32     
-64    0      
96     96     
192    48     
-144   48     
16     16     
112    0      
-80    0      
64     -160   
-480   -304   
144    32     
-160   16     
128    -240   
-16    -160   
80     208    
-240   -64    
112    32     
208    0      
-224   192    
112    224    
144    128    
-48    -304   
192    80     
240    208    
32     -16    
208    -112   
144    -16    
288    176    
0      112    
32     -96    
192    -16    
144    304    
368    560    
240    -16    
-32    -432   
-32    496    
-368   64     
80     -48    
-48    272    
-80    -96    
320    96     
-48    16     
816    352    
-608   -1088  
-176   416    
-144   336    
32     -80    
112    48     
80     -208   
208    288    
-16    112    
512    -256   
384    64     
208    32     
-32    32     
48     96     
-240   64     
-256   128    
-112   112    
128    -448   
176    -16    
384    96     
256    160    
0      -144   
-416   80     
176    -240   
16     -656   
384    464    
-160   -80    
304    -304   
208    352    
208    16     
-336   32     
-144   96     
80     -128   
32     64     
96     48     
192    16     
32     16     
-16    -128   
192    144    
80     32     
224    48     
96     48     
0      224    
32     384    
-16    32     
48     -64    
80     64     
112    -464   
-112   -80    
96     176    
96     272    
32     528    
64     -80    
-144   -272   
0      384    
48     64     
176    0      
64     -32    
256    416    
-64    256    
32     -16    
64     -176   
80     -272   
-32    128    
-16    -1504  
32     256    
304    336    
64     -96    
-144   16     
240    336    
-64    -32    
-160   -592   
-48    -464   
32     -64    
-80    160    
256    544    
96     160    
64     -64    
-192   -96    
112    -528   
176    144    
64     128    
240    224    
304    432    
-16    448    
-32    128    
-208   288    
128    -16    
496    64     
-176   224    
-112   -96    
-128   -48    
240    -320   
160    96     
-80    -368   
160    -32    
96     128    
352    128    
-176   0      
0      -48    
64     224    
144    128    
-112   -48    
144    -224   
240    -64    
-160   -144   
432    16     
80     -288   
16     48     
48     -48    
16     112    
-48    -208   
112    16     
-16    48     
-96    48     
80     480    
144    128    
224    -144   
64     -128   
176    -176   
48     -624   
0      16     
-16    -144   
192    176    
-96    96     
96     128    
16     -224   
96     -112   
112    96     
128    112    
-80    160    
64     -32    
336    -112   
-64    -400   
128    144    
96     48     
208    96     
144    112    
128    272    
192    -352   
0      -32    
-16    -80    
32     16     
224    -144   
32     -320   
-128   64     
192    -464   
192    304    
-16    -96    
112    -96    
48     -64    
-64    -32    
80     -96    
256    80     
-96    0      
-16    0      
64     64     
112    -208   
48     -32    
96     -160   
-16    128    
-416   16     
160    -368   
-16    112    
16     -48    
160    144    
48     -640   
96     -176   
160    0      
144    -32    
0      448    
48     224    
224    -160   
-96    32     
64     -160   
176    160    
-576   160    
112    176    
240    48     
0      192    
96     -80    
-48    -240   
80     64     
112    -384   
144    352    
272    80     
240    32     
-64    -80    
-288   176    
-64    240    
0      160    
-256   -48    
144    0      
16     176    
112    32     
-48    -192   
96     112    
-224   192    
-304   272    
0      -416   
-176   -672   
48     640    
-64    -464   
160    256    
-224   -192   
0      16     
-464   368    
256    -192   
224    496    
-704   -320   
-288   -256   
176    352    
320    64     
192    -96    
176    -80    
560    -144   
-208   176    
-32    16     
-80    320    
-96    128    
400    -64    
-576   -112   
-272   -192   
-224   -16    
192    16     
288    368    
96     48     
-208   144    
48     -176   
208    -32    
256    -192   
-48    -16    
192    0      
80     64     
-304   32     
80     0      
16     32     
160    96     
-48    -96    
-80    -96    
-1568  -64    
80     -32    
0      64     
112    16     
208    112    
464    -144   
-352   -96    
-80    64     
96     -256   
-32    -128   
32     48     
96     64     
-16    0      
-32    -48    
-80    -48    
-144   96     
48     48     
-96    0      
80     -64    
-48    48     
32     -224   
160    0      
-48    0      
96     0      
-48    32     
160    -64    
-320   0      
96     -112   
-240   80     
-16    -64    
-128   16     
160    -32    
96     64     
288    -48    
-368   -304   
112    -80    
-240   128    
48     0      
112    96     
-96    32     
-16    64     
-32    -112   
144    -112   
80     48     
-48    208    
-256   -48    
128    -176   
-80    80     
-32    -160   
176    208    
-992   64     
-320   64     
48     -16    
-416   48     
144    0      
192    16     
-16    0      
96     -32    
-160   32     
16     -32    
-144   16     
-800   -16    
-96    224    
144    32     
128    -48    
-464   -144   
-432   0      
-176   -144   
112    -64    
32     64     
-144   96     
32     0      
-272   -144   
-112   16     
-112   128    
208    0      
-320   -16    
128    96     
-176   -64    
-16    96     
112    16     
16     48     
-224   48     
80     -16    
-144   64     
128    240    
-144   64     
-816   -48    
-112   -16    
-16    -64    
160    80     
128    32     
-32    80     
-32    -96    
-208   -112   
176    144    
48     32     
-32    -48    
-112   16     
80     80     
-448   -32    
160    0      
0      48     
-128   208    
240    112    
-16    64     
-80    0      
-48    112    
160    48     
96     -16    
-160   0      
176    32     
-128   64     
112    -144   
-400   -112   
-32    -160   
0      176    
-144   -176   
16     80     
-336   112    
32     -16    
16     160    
48     -48    
32     -256   
-208   64     
96     -32    
-224   224    
-16    -144   
96     176    
-48    32     
-112   -112   
-16    112    
-192   48     
16     -192   
-240   64     
240    48     
-48    96     
128    656    
64     -48    
-224   80     
-32    176    
-16    48     
-80    0      
176    -464   
160    400    
32     496    
-64    -192   
-240   128    
160    -128   
-336   32     
80     496    
0      -432   
16     112    
-32    128    
144    64     
-80    -224   
-16    -336   
464    608    
48     -400   
48     32     
-48    176    
96     -16    
-192   -80    
112    176    
-16    80     
-112   -80    
48     208    
112    144    
-80    -752   
48     240    
304    560    
208    -64    
-272   -208   
-128   -48    
-320   192    
-32    -16    
-16    160    
-128   -48    
256    256    
-464   -240   
160    -128   
0      -112   
128    -368   
288    336    
-352   -144   
208    -528   
64     -432   
448    0      
240    16     
-144   64     
-160   48     
144    224    
-176   144    
0      -48    
-256   0      
64     -112   
80     -144   
272    272    
-96    64     
128    160    
-144   64     
64     -16    
96     -64    
0      176    
192    -32    
-128   -16    
112    192    
-352   48     
272    96     
-128   0      
16     16     
16     -64    
80     -32    
0      -96    
32     80     
64     16     
80     256    
-64    176    
48     48     
80     0      
-160   -32    
144    160    
-64    64     
96     80     
160    -48    
-304   -176   
320    -496   
-112   -336   
144    208    
96     64     
-192   192    
-16    -48    
160    336    
-64    192    
0      -32    
-176   -176   
16     -16    
96     112    
496    256    
-256   416    
64     256    
32     160    
64     -48    
224    32     
32     160    
80     144    
-240   -144   
-112   -32    
-288   16     
64     224    
64     304    
48     192    
0      176    
-128   0      
144    32     
176    0      
-16    0      
32     64     
-48    32     
320    256    
-336   336    
0      304    
208    368    
32     48     
128    48     
272    -64    
16     32     
-96    64     
64     224    
32     80     
272    240    
-224   160    
160    -176   
-208   0      
160    -48    
-192   160    
-112   240    
368    144    
-208   112    
176    32     
-144   -112   
288    -32    
-336   -144   
96     -256   
0      48     
80     144    
-48    128    
-48    144    
192    96     
64     48     
224    -32    
-96    -176   
480    416    
-400   192    
32     -160   
48     -48    
128    32     
368    0      
-256   -272   
16     64     
-304   400    
240    160    
576    112    
-16    64     
32     144    
176    -160   
-144   -112   
192    -80    
-160   -16    
208    80     
160    0      
-96    -32    
64     48     
-160   -112   
160    16     
-32    -128   
-64    -16    
192    -64    
144    -16    
-16    160    
176    -96    
-64    160    
640    416    
-352   320    
-16    384    
-16    -80    
112    64     
48     240    
32     448    
208    288    
16     -288   
96     320    
64     -64    
32     128    
16     80     
-144   -144   
-112   80     
384    0      
-96    -48    
32     -80    
112    160    
400    -160   
96     512    
-176   -144   
144    0      
256    -576   
-80    0      
0      -160   
-64    192    
-112   -112   
528    -32    
272    -144   
256    -32    
-64    64     
-112   48     
0      16     
512    560    
-368   864    
80     720    
288    96     
80     32     
96     16     
128    -96    
80     -128   
496    -384   
432    -112   
-304   -192   
224    -16    
-16    224    
-320   -304   
272    -48    
32     -96    
-384   -16    
496    -432   
400    -32    
-16    -176   
544    32     
-128   -784   
240    16     
-160   -48    
-80    32     
112    -112   
352    32     
352    576    
-528   64     
-16    48     
176    -144   
32     80     
64     -80    
416    -32    
128    80     
112    96     
-176   -544   
336    224    
-224   80     
-240   -864   
-288   240    
-176   112    
720    -128   
-576   48     
-32    32     
48     -16    
128    0      
416    16     
272    144    
-64    -48    
32     48     
144    16     
64     -64    
-96    48     
16     0      
16     48     
-416   -160   
64     32     
48     -96    
64     16     
80     0      
96     -80    
224    80     
-32    -176   
64     -32    
32     -224   
0      48     
208    64     
-96    64     
224    -112   
-208   -144   
-608   -64    
-112   0      
256    16     
128    64     
16     -176   
160    -224   
-48    0      
208    144    
-80    112    
48     -48    
-80    -80    
-16    96     
80     -16    
-96    32     
-144   -48    
-192   -16    
288    -112   
-160   -176   
224    -128   
0      -48    
128    -16    
176    -16    
224    -400   
-64    80     
192    48     
-16    48     
0      0      
96     64     
-224   -16    
112    -64    
-112   -144   
128    -64    
-976   -32    
96     -112   
112    80     
144    0      
48     48     
128    -64    
-128   -112   
48     -512   
-48    48     
96     -32    
-32    0      
80     32     
272    48     
-256   0      
32     96     
-368   48     
96     -32    
-1616  32     
176    0      
80     16     
80     -112   
0      80     
176    -320   
64     -96    
96     0      
96     16     
-64    -16    
144    -176   
-128   -80    
-32    -128   
-288   -144   
144    0      
-96    0      
-112   -160   
112    32     
64     -320   
48     128    
176    -160   
-32    0      
80     64     
-192   -96    
-64    32     
64     -64    
48     64     
272    16     
-240   -48    
144    176    
-768   -160   
112    -96    
-32    16     
32     -336   
-64    144    
32     -48    
112    176    
-144   -80    
64     160    
48     112    
224    64     
-256   304    
-176   272    
-96    288    
96     240    
-1248  -368   
-224   -320   
160    -464   
496    16     
-48    704    
-64    96     
-48    -112   
16     -144   
96     -80    
64     48     
96     -96    
-32    0      
304    0      
-224   64     
240    432    
-32    512    
-160   -112   
-48    -32    
-528   -96    
48     -208   
-16    -16    
-112   80     
-256   96     
-528   48     
-272   -16    
-160   112    
-80    112    
192    96     
-416   -96    
-48    -96    
0      -32    
-416   -160   
48     -576   
-528   -208   
272    -80    
-32    0      
32     240    
-96    32     
-32    112    
96     -32    
-336   272    
-64    -96    
80     -96    
352    80     
-80    176    
-320   96     
-192   -64    
256    160    
-32    0      
208    176    
96     -16    
-16    32     
-192   -96    
-64    -32    
-224   64     
-336   32     
-64    -16    
-720   -32    
112    -32    
-384   112    
-112   -32    
272    96     
112    304    
-112   -128   
-208   -48    
-160   -16    
-240   80     
0      -64    
-208   -48    
176    -192   
-112   80     
-48    128    
-96    80     
80     16     
-384   -224   
176    48     
192    224    
192    112    
48     80     
32     144    
48     112    
-176   160    
-64    -96    
-16    112    
-160   64     
-112   32     
64     32     
-192   -32    
32     144    
-608   32     
-128   -16    
0      32     
0      176    
128    176    
16     224    
16     0      
-16    48     
192    32     
-128   256    
48     16     
-112   -48    
64     208    
-176   -464   
-304   48     
-528   -224   
-64    240    
272    -144   
-112   -176   
-48    -320   
32     -304   
-80    112    
48     -144   
16     -32    
-96    80     
96     32     
-288   80     
-272   -160   
-16    -336   
80     -224   
-80    -48    
256    -320   
-464   -320   
48     -32    
224    496    
320    256    
48     -32    
0      160    
-48    -256   
-144   -256   
64     -224   
160    192    
-256   -256   
176    -176   
304    0      
-160   48     
144    48     
48     112    
-64    -384   
-80    -288   
-208   208    
32     128    
96     128    
-64    192    
64     144    
-192   464    
208    208    
-96    -64    
304    -368   
0      80     
-144   496    
16     288    
0      416    
160    240    
32     176    
-16    80     
160    128    
-80    128    
-16    -32    
-368   256    
512    -544   
-80    -192   
80     224    
-128   288    
-16    992    
-224   32     
48     32     
16     -496   
48     -160   
96     352    
-144   112    
320    -320   
256    64     
-48    688    
-48    -304   
-496   -832   
288    288    
-80    624    
192    -144   
272    -304   
-80    -176   
32     256    
48     112    
-64    -32    
208    96     
-32    -32    
48     112    
48     -64    
-48    256    
96     -192   
176    320    
-272   160    
-64    -448   
-80    192    
128    -16    
-32    96     
128    64     
400    432    
-224   32     
48     48     
32     -112   
-80    160    
-32    -144   
-80    -160   
48     336    
224    128    
176    -144   
256    0      
-400   32     
-64    48     
96     96     
-192   48     
0      16     
-224   240    
272    208    
128    0      
112    -16    
64     96     
-48    -80    
-16    -352   
224    -128   
192    144    
400    144    
352    -112   
96     -224   
-48    160    
-80    96     
-96    160    
-96    32     
272    0      
208    48     
80     368    
-272   16     
48     -208   
160    -80    
-256   160    
-112   -176   
128    64     
208    192    
-240   -208   
304    112    
48     32     
0      32     
-32    224    
128    80     
-64    -208   
32     16     
-384   96     
-224   64     
-192   -112   
176    128    
-288   48     
32     -128   
320    80     
208    -720   
320    32     
-80    48     
-128   64     
-336   -176   
480    0      
-496   -384   
-416   -368   
-16    48     
-80    144    
0      192    
640    192    
-64    -16    
-416   -80    
-64    -112   
112    -64    
112    48     
224    32     
496    176    
-272   -16    
48     -32    
64     0      
160    112    
272    64     
-16    48     
-64    32     
-64    80     
48     96     
-16    -160   
384    16     
0      -288   
-16    80     
128    -1584  
-192   0      
32     112    
48     112    
96     80     
64     64     
64     0      
-16    -96    
96     48     
320    128    
-32    64     
96     -16    
48     64     
96     -128   
144    64     
112    -80    
96     0      
240    -352   
64     96     
144    32     
128    128    
16     16     
-48    -304   
-64    -32    
-32    160    
80     -32    
64     -16    
112    256    
-16    160    
336    -16    
-32    -96    
240    32     
-48    0      
272    -48    
-80    32     
-32    -96    
160    -112   
64     144    
64     -16    
48     -112   
-16    -48    
112    -272   
0      96     
240    32     
96     320    
-80    32     
48     64     
112    -352   
128    192    
-48    144    
416    352    
-176   176    
272    176    
-32    -96    
112    -256   
144    112    
96     -112   
112    96     
64     -16    
-64    64     
48     -368   
32     0      
80     80     
80     128    
80     -64    
96     -112   
32     -80    
160    -16    
32     128    
-80    -192   
112    64     
224    -32    
224    768    
-240   -464   
96     32     
0      -240   
288    224    
112    -48    
0      -1008  
288    752    
-176   -304   
-192   -64    
-528   -176   
-320   224    
208    -48    
176    -64    
-176   -112   
48     -608   
176    144    
112    0      
176    -48    
-32    0      
144    -160   
80     -304   
16     80     
-64    -304   
256    -128   
-784   -224   
320    -32    
0      48     
224    16     
48     -176   
16     -64    
80     64     
256    -144   
176    -64    
96     -272   
32     304    
192    64     
-48    208    
48     48     
96     0      
-336   -16    
-112   -16    
496    144    
48     -112   
112    -48    
176    -80    
128    32     
64     -336   
16     -48    
64     -48    
48     192    
16     80     
208    96     
-48    16     
-48    144    
-384   -64    
64     -256   
-416   -32    
-112   -48    
128    -144   
176    -16    
192    16     
192    -208   
-432   112    
352    64     
-48    96     
64     0      
-272   80     
-448   -64    
112    -80    
-176   -112   
224    32     
-240   96     
64     48     
-224   48     
-400   -112   
0      -112   
176    -96    
192    48     
96     -464   
80     112    
-32    -16    
16     64     
-288   64     
64     0      
336    16     
416    -160   
-80    32     
48     -48    
192    64     
16     64     
0      96     
96     -160   
-176   128    
-80    -496   
-176   112    
48     -80    
144    -32    
-96    -48    
32     48     
-192   -32    
-208   32     
-816   -80    
176    64     
-304   96     
-16    -160   
192    -160   
64     -240   
64     240    
16     -352   
-192   64     
-192   -48    
112    16     
128    192    
256    112    
-592   -96    
64     -48    
16     80     
-96    0      
-272   16     
96     -48    
-96    -48    
256    -80    
96     -32    
144    -48    
32     160    
-144   -80    
224    -64    
-192   64     
128    96     
-48    -224   
-32    -96    
-32    -96    
-16    -272   
0      -48    
80     -64    
48     32     
160    16     
0      336    
-160   96     
-528   48     
16     -96    
-16    128    
-64    192    
80     144    
-272   48     
0      -176   
-32    -64    
64     448    
-544   2144   
-752   240    
16     -240   
-16    208    
16     240    
-128   -608   
-576   -1312  
112    -320   
-736   1376   
-32    48     
-560   -192   
-80    128    
-64    -320   
-240   208    
192    -48    
-112   -112   
-208   48     
32     400    
0      -96    
-80    -32    
-272   224    
-608   -16    
176    208    
64     672    
-64    -368   
-80    -864   
144    240    
-240   -16    
-96    -384   
240    928    
144    32     
-304   -416   
448    624    
-256   128    
-336   -448   
400    -816   
-16    704    
256    -16    
-560   -80    
224    -512   
-864   368    
-32    -80    
-864   64     
-64    -160   
272    240    
-16    128    
0      -160   
16     112    
-128   -208   
96     -80    
128    224    
80     -112   
-160   -176   
-48    80     
-64    256    
96     -48    
192    128    
-32    224    
-16    64     
-16    -64    
48     -48    
-272   -80    
272    112    
-112   64     
0      16     
144    96     
-128   -16    
64     -64    
-128   -64    
176    -48    
80     -64    
0      48     
-112   -16    
-96    144    
-464   80     
320    96     
-128   -144   
112    -16    
-160   0      
-128   -256   
-80    -320   
32     -32    
128    160    
48     64     
0      64     
-160   0      
32     16     
-320   -192   
48     -80    
-176   128    
-16    -160   
-64    16     
160    112    
176    16     
-48    48     
48     96     
-128   96     
192    80     
-80    16     
-304   -208   
48     -16    
-80    112    
-288   32     
-48    288    
0      224    
240    128    
-240   32     
16     0      
32     -80    
192    -32    
64     64     
-80    0      
48     -32    
272    32     
80     80     
32     64     
-32    32     
-256   16     
-224   -64    
-336   -64    
288    -48    
-400   48     
-64    80     
240    480    
-528   752    
336    400    
192    -272   
144    16     
-64    48     
240    208    
192    -16    
240    16     
-352   -416   
-80    48     
-1200  -112   
80     -80    
208    144    
-176   -64    
512    112    
-16    48     
-224   80     
-288   64     
-64    16     
288    -32    
-160   80     
-368   48     
80     64     
-32    -32    
16     80     
64     112    
-416   -304   
480    -144   
-320   352    
-288   256    
-288   48     
96     112    
288    0      
304    32     
160    16     
-80    32     
160    -32    
-288   32     
-160   -32    
96     32     
336    80     
112    64     
128    112    
-224   -112   
48     -16    
0      -64    
64     16     
-96    80     
-64    0      
464    144    
-128   80     
-64    -16    
112    48     
-144   0      
320    96     
-96    -16    
48     32     
0      32     
176    144    
-16    16     
144    0      
32     64     
-16    64     
48     48     
48     16     
16     112    
64     160    
64     128    
-176   48     
192    288    
96     96     
80     32     
-48    96     
48     32     
0      32     
-80    -48    
304    48     
64     64     
144    192    
-16    -80    
304    16     
0      96     
160    240    
-144   176    
-16    -112   
-112   80     
112    176    
176    192    
224    208    
-160   240    
112    32     
144    -16    
80     32     
144    0      
64     304    
0      80     
-176   -432   
80     272    
-32    64     
80     -384   
240    208    
80     -656   
112    80     
112    976    
432    480    
-32    -224   
64     416    
-256   -224   
480    -144   
-224   256    
64     -96    
-96    272    
32     -160   
480    256    
0      0      
-160   -208   
32     0      
16     448    
96     528    
240    144    
192    224    
-144   -288   
32     -352   
160    112    
0      -176   
112    16     
224    80     
-80    -480   
-16    -176   
-128   -400   
224    -256   
112    -784   
-96    96     
288    80     
-16    192    
-32    96     
96     16     
-48    -48    
48     16     
96     -32    
112    96     
0      32     
112    -112   
-80    16     
32     -64    
144    64     
112    -192   
48     96     
400    208    
32     144    
80     -16    
-16    112    
0      -48    
256    112    
-128   64     
-16    144    
-32    240    
-48    -32    
96     -16    
-80    48     
80     48     
-112   -192   
48     -32    
240    -224   
-80    64     
-48    48     
96     48     
-96    -32    
64     80     
80     32     
16     -32    
-32    32     
96     -96    
48     112    
48     -288   
48     16     
112    -480   
-112   32     
352    16     
48     144    
304    128    
-256   112    
-144   -16    
-32    -16    
208    -16    
320    80     
96     240    
112    208    
-208   32     
288    -128   
-64    96     
16     -64    
160    16     
208    -16    
16     -32    
240    64     
16     -32    
-48    -192   
-160   96     
-432   80     
32     -32    
96     80     
240    -16    
352    208    
-192   32     
-80    48     
0      -192   
544    -176   
544    -624   
192    32     
32     80     
-384   -560   
304    -144   
-32    -48    
336    -400   
352    -16    
64     -752   
-240   -112   
96     64     
16     0      
256    48     
144    -336   
96     -48    
112    224    
-480   -48    
80     640    
304    224    
560    -32    
-560   -240   
-192   -144   
-128   112    
160    -80    
304    224    
-240   -576   
528    -480   
-32    416    
400    384    
160    -336   
-304   144    
80     -48    
-48    16     
192    -96    
144    -176   
-880   112    
-16    160    
80     64     
-48    0      
-16    208    
368    176    
16     608    
384    336    
144    64     
224    384    
64     -32    
96     -128   
16     128    
-480   -336   
144    144    
64     -80    
144    -240   
240    208    
336    208    
-96    -272   
128    -112   
48     -160   
112    -128   
112    -640   
-96    -80    
-32    192    
112    -48    
112    80     
-112   -16    
48     -336   
-288   48     
304    -16    
-256   -32    
240    -176   
-192   -192   
16     -400   
-96    -272   
320    64     
64     240    
384    -112   
192    128    
16     144    
224    -160   
-80    -224   
-16    0      
-272   -48    
80     -240   
-240   0      
144    32     
128    64     
0      32     
-48    -32    
128    -480   
304    336    
192    112    
272    32     
-32    -80    
-16    -176   
-16    400    
128    160    
48     -64    
-64    -112   
-192   80     
-32    -16    
-240   -32    
112    -48    
-96    0      
160    -288   
0      -128   
112    -400   
64     64     
-128   48     
32     -96    
-192   -48    
176    16     
-256   16     
256    80     
-32    16     
-128   -64    
-96    -160   
288    -208   
-272   64     
-96    -32    
0      32     
368    -144   
64     -32    
-464   -16    
384    80     
-256   48     
192    -32    
32     48     
144    -64    
-224   -32    
208    -64    
-128   48     
80     -48    
224    144    
-16    -80    
112    48     
80     -160   
208    0      
-96    0      
96     32     
-80    -160   
-224   -144   
-48    32     
48     112    
-176   0      
288    -64    
0      -192   
-64    -192   
16     128    
-576   -48    
-128   128    
112    -32    
-16    32     
-48    0      
-640   -32    
-144   -80    
-48    -224   
16     -80    
176    64     
32     -32    
80     80     
-64    304    
-128   -48    
272    -96    
-128   0      
-96    64     
-64    48     
-96    32     
64     48     
-784   192    
-432   80     
-336   16     
64     96     
0      64     
128    -16    
-336   -448   
176    -240   
80     64     
-416   144    
-320   16     
-288   -224   
224    48     
-112   176    
-416   32     
-128   80     
112    112    
-640   -32    
160    16     
-2832  -32    
-320   -48    
-1312  -1344  
320    -656   
-432   512    
-720   272    
-176   -16    
-64    -304   
-128   -32    
-144   224    
-80    32     
336    64     
-32    32     
-64    64     
192    48     
-880   -160   
448    -128   
48     -80    
128    16     
-48    48     
208    32     
-16    -96    
-272   -336   
400    80     
-80    208    
-176   80     
-288   -64    
-32    -144   
-16    32     
-480   192    
-480   -48    
128    32     
-128   16     
80     48     
-48    -128   
64     48     
-160   32     
-320   -64    
128    -48    
240    -96    
288    80     
-304   -400   
-240   -304   
-416   16     
-336   -48    
16     -64    
512    80     
-1088  32     
208    -112   
-112   -32    
-160   96     
16     48     
-224   -48    
-176   32     
32     32     
-288   32     
256    80     
-112   -80    
-16    64     
96     112    
-224   0      
144    -64    
-944   -48    
0      112    
128    64     
160    96     
64     32     
-16    80     
-64    32     
-80    112    
-16    112    
-80    48     
208    224    
-160   160    
208    -400   
-416   176    
288    96     
-48    -320   
32     144    
224    64     
-400   16     
96     -128   
-224   32     
-176   -128   
144    368    
-192   64     
160    80     
-16    128    
-304   64     
176    -160   
-320   224    
368    -1312  
48     1024   
32     -160   
-80    -48    
-112   560    
-128   -160   
192    48     
128    176    
272    0      
-112   -432   
-192   -144   
320    240    
-176   400    
-16    16     
-304   -544   
432    240    
-64    352    
-160   48     
224    352    
0      368    
-96    48     
96     -112   
48     -64    
-144   -96    
256    -192   
-368   -240   
48     0      
-144   -16    
352    32     
-176   -16    
256    304    
-240   80     
64     80     
-80    -32    
-32    -48    
224    112    
-32    288    
224    160    
-112   -80    
208    96     
-16    96     
224    96     
96     16     
112    160    
-336   32     
-208   -208   
256    -320   
-64    128    
384    48     
16     16     
16     48     
-48    48     
80     80     
-32    -48    
320    -16    
0      96     
48     80     
-64    32     
-32    144    
128    240    
-32    48     
16     -32    
48     16     
96     112    
0      48     
80     80     
144    64     
48     16     
112    32     
112    80     
-144   32     
16     192    
128    48     
176    16     
-48    96     
-96    -16    
80     16     
144    112    
48     32     
176    16     
144    80     
-16    96     
144    0      
0      96     
48     112    
-144   -64    
48     -16    
32     112    
48     -32    
160    48     
32     96     
-48    32     
128    192    
128    64     
160    -16    
-64    -48    
160    0      
0      80     
48     112    
192    -16    
64     112    
112    80     
144    128    
-48    -32    
272    48     
-48    112    
192    208    
-160   128    
0      -176   
240    -368   
256    16     
32     160    
96     64     
176    96     
32     368    
-384   256    
-112   96     
-144   48     
64     -32    
416    48     
384    80     
-272   128    
-208   0      
-416   240    
224    160    
208    -32    
-208   -32    
-16    64     
-16    32     
256    160    
-128   176    
400    176    
-64    -32    
-320   -464   
-64    -48    
272    -160   
160    -688   
112    -608   
-176   -288   
-288   -48    
96     96     
224    144    
208    176    
-272   -192   
288    272    
-48    304    
160    -400   
16     288    
-16    -176   
32     96     
48     320    
-144   -64    
16     -448   
0      384    
176    -128   
-32    -192   
48     112    
-224   -96    
-192   48     
192    16     
48     368    
208    0      
480    336    
-96    -144   
96     -176   
80     -80    
-112   48     
160    -208   
80     112    
-16    -128   
32     96     
112    -32    
-16    112    
144    16     
-48    48     
0      48     
-32    16     
-32    -192   
224    -464   
128    64     
400    -144   
32     -64    
144    -256   
32     128    
-16    64     
160    160    
304    64     
80     64     
48     -64    
112    224    
-64    48     
128    -288   
192    -32    
288    48     
96     64     
-64    -112   
32     -32    
-64    -112   
272    64     
-96    48     
176    -16    
0      -16    
32     64     
128    -128   
128    0      
96     624    
-128   32     
64     -176   
96     -144   
-112   176    
80     -80    
144    -64    
272    -96    
-176   64     
96     176    
96     -336   
112    -32    
272    -176   
-400   -32    
64     32     
16     -176   
192    176    
-48    -208   
256    -64    
144    0      
48     0      
112    32     
16     16     
144    -96    
32     0      
32     -352   
-96    32     
48     -32    
480    -16    
-192   160    
160    -160   
160    -16    
32     -336   
80     -16    
48     -416   
96     48     
160    112    
64     -32    
-64    -192   
96     -128   
64     80     
208    160    
48     -16    
16     -96    
-272   0      
160    0      
-96    -64    
96     -432   
176    -16    
-32    -80    
112    0      
128    -800   
80     16     
-64    -96    
112    64     
48     -16    
-16    64     
-112   -16    
208    -16    
-304   -144   
-80    64     
160    0      
176    96     
0      -160   
-32    -32    
112    -16    
112    -896   
-16    80     
64     -16    
-64    48     
256    -208   
224    -80    
0      240    
48     32     
-64    16     
368    48     
-112   96     
0      -48    
128    64     
-144   48     
-288   16     
272    -272   
176    -144   
256    224    
-224   96     
64     -96    
48     32     
-64    128    
96     304    
-80    64     
160    -32    
-1568  32     
112    -144   
-432   -208   
128    -96    
64     112    
112    0      
80     80     
192    -1376  
32     64     
368    192    
-272   16     
-512   -416   
16     -672   
-64    192    
464    384    
256    16     
400    16     
-864   -128   
240    256    
-160   768    
192    -64    
-208   -1056  
-128   -512   
-112   480    
-48    192    
16     64     
-176   48     
48     -32    
-384   -96    
224    -16    
-208   80     
528    32     
-384   -416   
-320   -368   
320    240    
-80    -112   
144    -80    
-64    -96    
528    352    
0      160    
32     192    
-672   -32    
-48    -224   
-64    16     
256    -16    
96     -80    
496    240    
-208   144    
144    -272   
48     -288   
272    -352   
208    416    
-400   160    
48     -272   
-992   -848   
752    80     
-592   432    
-16    32     
192    352    
-272   -160   
48     -400   
-16    208    
256    288    
-96    -208   
112    32     
-288   112    
-32    -16    
96     32     
-608   -112   
0      32     
-1552  80     
-32    -256   
-80    16     
0      144    
176    -224   
-224   112    
-48    -16    
160    256    
-64    48     
96     16     
64     288    
-336   -288   
160    256    
-400   -176   
176    288    
-320   -112   
-160   -1040  
-992   48     
-480   544    
-176   320    
416    -352   
-32    208    
240    368    
-368   -560   
-208   -144   
-240   -272   
32     32     
48     -208   
208    -80    
48     0      
-112   -112   
-16    128    
112    -32    
96     64     
272    96     
-64    -64    
-32    -224   
-272   48     
-192   240    
64     -96    
-112   -48    
176    -64    
-96    -48    
-80    -96    
0      32     
-560   -128   
352    -112   
-192   -176   
-64    -96    
-656   160    
48     -16    
-144   160    
96     -64    
0      -80    
-96    -80    
176    -48    
-176   640    
80     96     
160    -288   
-32    80     
64     32     
-160   -320   
-64    -224   
-304   224    
-800   -80    
16     32     
-80    400    
512    304    
-64    -32    
112    240    
-144   112    
176    -32    
32     -128   
192    -64    
-112   -16    
-64    -80    
-224   -224   
48     -560   
-192   -224   
-48    -16    
272    336    
-16    224    
208    -16    
80     112    
160    144    
-256   -304   
-176   -400   
176    -32    
-192   112    
-208   16     
-112   -112   
288    64     
-144   16     
16     48     
16     16     
48     16     
-208   -16    
112    64     
-16    32     
-48    16     
80     96     
112    0      
-32    32     
-32    -32    
-368   16     
16     -16    
192    48     
-352   144    
224    -48    
-176   -48    
48     304    
-80    32     
112    -80    
96     0      
320    128    
-96    192    
208    128    
-96    128    
0      32     
32     -16    
160    80     
128    80     
-144   16     
128    64     
-256   -32    
48     64     
-192   -96    
64     0      
192    16     
16     80     
80     48     
160    -32    
-160   -144   
-144   16     
-48    96     
144    80     
112    144    
64     32     
192    240    
0      192    
336    560    
672    880    
-192   368    
-448   208    
-48    224    
-192   -160   
16     -240   
288    176    
368    -80    
-80    -112   
-208   32     
-160   448    
-416   224    
-240   -112   
-64    176    
304    -96    
192    288    
-352   176    
-208   96     
-80    -80    
176    16     
80     80     
288    -64    
224    288    
-432   48     
-368   -64    
-112   48     
-304   -208   
560    -416   
352    272    
352    352    
336    -96    
-16    -48    
-320   112    
-208   48     
-48    64     
-144   288    
272    48     
-96    -16    
-432   224    
-176   160    
-48    -80    
-112   -208   
208    -16    
192    -16    
-224   -128   
48     -32    
80     160    
-32    112    
272    160    
-80    96     
-48    0      
32     96     
352    96     
-176   -112   
-128   -64    
80     48     
-64    -16    
32     64     
32     48     
96     240    
112    48     
64     48     
-32    32     
-48    32     
112    64     
32     0      
112    -64    
128    160    
352    336    
-352   0      
256    80     
-128   0      
128    -160   
48     80     
176    48     
-240   144    
80     16     
48     16     
-32    48     
64     144    
80     -32    
32     16     
80     0      
304    80     
-64    -96    
32     -48    
48     -16    
-32    64     
80     -208   
-224   0      
48     112    
32     -112   
176    112    
224    32     
64     0      
-80    0      
80     80     
-192   0      
160    64     
32     16     
-16    64     
80     0      
-64    -160   
176    64     
112    -896   
0      0      
128    64     
32     32     
144    16     
256    272    
-272   176    
240    16     
-96    48     
288    48     
-64    16     
192    112    
112    16     
32     48     
32     -16    
176    48     
-112   128    
208    -336   
48     48     
48     -112   
80     -96    
-224   96     
-32    48     
112    0      
128    64     
48     0      
128    -16    
-96    144    
176    -16    
16     48     
-16    -112   
160    160    
-80    -432   
160    48     
-128   -48    
192    64     
32     48     
80     64     
144    48     
-96    16     
128    80     
64     0      
48     64     
176    0      
-32    16     
112    -16    
48     80     
304    -16    
-112   112    
272    -256   
-96    -16    
32     32     
-32    80     
112    -80    
144    128    
112    176    
224    64     
-176   -64    
96     -320   
48     224    
32     -224   
176    224    
272    -48    
80     256    
16     0      
16     0      
-64    -48    
176    48     
80     16     
320    -224   
-160   -208   
112    -272   
32     32     
272    432    
16     -368   
0      -240   
48     128    
96     -160   
496    608    
112    64     
-96    -480   
80     -64    
224    224    
0      384    
48     -288   
32     320    
-16    -160   
0      96     
-64    16     
32     160    
256    -128   
176    -288   
832    64     
720    1392   
-736   1520   
-304   -1344  
48     -80    
224    64     
400    -208   
272    48     
160    -96    
544    -608   
-288   -80    
0      -96    
0      96     
-80    -32    
-96    -144   
368    768    
176    -192   
-128   -400   
-368   -224   
64     480    
-384   -224   
240    -128   
480    128    
96     -272   
128    128    
192    -96    
272    16     
32     -320   
304    112    
-128   -336   
-208   32     
32     512    
-112   -48    
16     -352   
-48    -48    
-32    272    
32     176    
-688   -192   
32     -48    
-144   -128   
-112   -80    
176    -80    
16     -496   
32     144    
176    320    
-96    288    
-96    -368   
80     -176   
240    -16    
16     -112   
-16    176    
256    48     
-208   -32    
112    -32    
160    16     
16     128    
96     64     
176    144    
-96    160    
128    -480   
96     352    
-16    -96    
0      -64    
144    48     
16     -16    
-80    -64    
144    -176   
-160   -80    
-160   -192   
-464   -112   
0      256    
48     80     
192    96     
240    144    
-64    -32    
144    256    
272    464    
-400   336    
208    176    
256    464    
-432   0      
-128   -64    
16     -32    
208    112    
-176   384    
32     0      
-16    176    
80     -128   
-64    -16    
160    0      
0      -80    
304    -304   
-16    -16    
-64    16     
96     -240   
-80    80     
176    144    
16     -32    
160    -512   
-336   -224   
32     -32    
-944   64     
256    32     
-128   64     
192    -112   
-32    -48    
96     -96    
-16    32     
-80    -96    
128    -112   
192    48     
48     112    
80     144    
-96    96     
-256   0      
-80    -192   
32     -64    
112    16     
192    0      
-16    -144   
-16    0      
-224   0      
64     112    
-256   -16    
128    16     
-96    -256   
112    -32    
-208   192    
16     128    
-80    0      
288    80     
-224   128    
-16    -112   
208    128    
-1120  -112   
-64    96     
-160   -304   
672    -80    
-224   96     
400    416    
-240   288    
-32    -48    
0      -16    
-32    0      
48     -240   
176    -368   
128    144    
-1136  -208   
-192   0      
-16    -416   
32     144    
-48    192    
-48    0      
-144   -64    
-704   32     
352    288    
-64    256    
-208   96     
0      -208   
-16    -96    
-464   -96    
128    416    
-432   256    
192    0      
-48    -16    
-32    -64    
-320   -224   
-384   -128   
160    0      
16     -16    
-48    16     
-224   16     
-32    128    
-16    176    
-112   80     
16     -64    
64     80     
32     48     
272    -16    
-64    -160   
-160   -256   
-16    32     
-96    -48    
96     -32    
-96    80     
-64    320    
-736   -192   
64     -144   
-1184  64     
192    80     
48     -48    
-48    -192   
96     -32    
-48    -128   
240    160    
64     0      
48     -272   
272    -128   
160    -80    
224    336    
-432   -272   
-384   80     
-272   -160   
-352   64     
112    208    
272    -144   
-16    -160   
-64    -16    
-144   -272   
128    432    
128    368    
-272   -96    
176    176    
112    96     
-320   -128   
-240   -48    
-224   64     
-96    64     
-48    16     
0      96     
-48    64     
80     128    
32     -32    
-240   80     
-368   -48    
-16    48     
144    128    
288    64     
288    32     
128    0      
-336   -48    
-416   48     
-80    16     
64     -32    
448    128    
-640   -224   
512    -16    
16     96     
-256   -224   
176    -304   
-128   128    
160    208    
128    80     
512    32     
-64    -16    
-224   80     
-544   -224   
304    -16    
-432   48     
288    160    
-480   -48    
0      64     
240    256    
-416   32     
304    32     
-80    -16    
112    112    
112    48     
-32    -16    
96     0      
-96    32     
-96    16     
32     64     
96     112    
80     32     
-32    32     
32     48     
-32    32     
16     0      
80     128    
176    48     
-160   48     
-112   16     
48     16     
288    384    
-448   304    
224    -176   
-16    80     
32     -16    
304    -16    
-48    -112   
-48    0      
-208   144    
-96    0      
288    48     
-224   16     
272    32     
-112   -16    
-48    -48    
-192   16     
32     128    
-128   -48    
336    64     
-208   0      
272    32     
32     32     
-32    112    
256    224    
-176   96     
224    -208   
96     48     
-16    160    
96     -80    
0      -112   
16     32     
256    96     
-144   128    
112    96     
-288   32     
-48    32     
0      0      
96     96     
64     144    
48     0      
208    -160   
0      64     
-32    64     
48     96     
80     32     
128    192    
-192   160    
80     -48    
192    64     
-112   32     
16     256    
-32    160    
144    32     
-48    32     
160    -80    
16     16     
-16    144    
-48    80     
208    80     
16     32     
0      144    
-48    160    
48     96     
336    96     
-64    96     
32     0      
128    112    
80     32     
16     48     
96     48     
144    -64    
80     16     
-96    64     
-160   -304   
416    288    
-48    432    
160    176    
80     -96    
-96    -464   
-32    112    
48     64     
192    80     
112    16     
-128   -96    
16     368    
-96    -112   
16     64     
64     112    
48     128    
144    80     
128    -288   
128    320    
-48    64     
-128   -320   
-96    -352   
304    128    
80     160    
-64    -128   
96     16     
64     32     
96     336    
224    512    
-80    -304   
-32    16     
96     64     
-32    -320   
-240   -144   
400    -512   
80     512    
32     128    
112    -464   
-128   80     
-160   -192   
64     400    
-16    192    
-80    0      
128    -32    
64     128    
112    80     
112    128    
-64    64     
-800   -80    
-240   128    
-32    48     
48     -352   
-112   -112   
-112   352    
-64    288    
288    272    
96     -16    
64     -16    
368    112    
64     224    
-48    80     
224    336    
-272   -48    
288    288    
-80    224    
-320   -48    
-80    192    
64     -544   
464    0      
592    -224   
-32    176    
96     -208   
-16    -48    
-48    16     
64     128    
48     144    
320    144    
48     112    
-288   -240   
256    -208   
240    -336   
224    -128   
480    -192   
128    112    
-272   -272   
-192   -192   
16     -272   
192    96     
-80    16     
112    -144   
-32    240    
16     96     
48     0      
224    -48    
-32    112    
-32    -144   
128    -32    
64     -208   
16     32     
176    -32    
48     0      
-16    -16    
80     48     
96     64     
192    208    
-160   -64    
16     -48    
48     80     
112    -192   
112    -48    
48     -112   
-16    176    
32     -48    
0      80     
96     -96    
192    48     
16     80     
192    0      
48     16     
16     256    
-112   112    
-80    -80    
128    -320   
-16    -224   
64     -144   
48     -208   
208    -368   
-64    -384   
176    -240   
-368   -688   
96     -512   
-32    -416   
32     -720   
80     -64    
112    -944   
112    -928   
-48    48     
-64    0      
-64    -160   
48     -784   
416    -32    
336    320    
288    80     
-128   160    
48     -16    
-16    -464   
192    48     
240    -288   
112    64     
112    -80    
64     0      
128    48     
-16    -240   
32     -96    
80     -400   
16     -224   
160    176    
-208   -208   
192    -80    
-48    -176   
144    -480   
-128   -80    
-16    -144   
80     128    
-368   144    
48     288    
240    544    
448    240    
-80    -80    
368    48     
240    48     
16     -112   
160    -32    
64     96     
288    80     
-336   -96    
272    -48    
48     48     
128    -160   
-16    -144   
208    -272   
-1184  -528   
-32    -208   
160    -32    
-208   128    
144    16     
192    -320   
-192   -240   
112    48     
-64    208    
-48    -32    
0      -64    
32     -96    
224    96     
-400   -144   
176    -64    
-144   -208   
-176   16     
16     -192   
-16    -496   
240    -224   
144    -208   
-48    -48    
80     -624   
-80    16     
304    112    
48     384    
-160   16     
64     144    
48     272    
384    96     
-80    608    
224    208    
-1024  -160   
144    224    
192    -96    
-48    0      
48     -256   
-176   -528   
144    -80    
-80    32     
176    -16    
-16    -16    
-16    -80    
112    -336   
368    320    
-352   -240   
288    528    
224    -192   
16     -96    
-352   64     
80     -320   
48     -176   
432    160    
208    -144   
-224   -512   
-144   144    
-32    192    
240    -96    
-176   -192   
144    -176   
-144   -16    
224    16     
-320   80     
-112   64     
-656   32     
-16    -256   
-80    16     
384    -464   
352    592    
-368   272    
288    160    
-32    80     
96     -16    
16     48     
16     -224   
-656   -112   
96     128    
-400   0      
320    -96    
-336   -112   
784    -80    
304    96     
-224   -272   
448    -48    
-432   144    
-224   -80    
-544   -32    
192    16     
-112   48     
112    32     
80     0      
160    -16    
-96    -32    
176    -64    
-48    32     
-32    -16    
-128   -64    
-912   -32    
-624   -48    
-160   16     
-32    224    
-592   32     
160    -48    
288    64     
464    272    
-272   208    
-208   -80    
-64    -176   
-960   -80    
208    96     
128    48     
-48    64     
-272   -128   
-672   64     
304    128    
224    -16    
-192   96     
-416   -64    
-64    0      
-1152  80     
448    128    
384    96     
-528   -32    
-64    -64    
-32    80     
-192   16     
80     32     
176    80     
-144   -48    
176    0      
-80    32     
0      64     
-336   -16    
-64    32     
-624   -32    
16     80     
-16    -80    
96     64     
-176   -240   
128    64     
-336   -48    
160    -16    
-96    32     
208    320    
-384   192    
80     -96    
-176   -16    
64     -32    
-64    16     
-64    48     
256    80     
-2160  -272   
48     128    
-144   -16    
112    64     
48     0      
-272   -16    
48     -48    
16     144    
-80    96     
48     16     
176    16     
-208   112    
96     -48    
-128   -48    
16     16     
-576   -288   
192    -16    
-64    224    
48     96     
160    -64    
-112   48     
0      32     
-112   -208   
160    -144   
-192   48     
0      0      
-16    -48    
80     48     
-304   -32    
-80    112    
-320   -80    
16     16     
128    48     
96     112    
64     -16    
-320   144    
80     32     
-64    -96    
-48    80     
-80    -48    
16     -64    
48     0      
-400   -208   
96     -112   
-160   160    
-16    144    
-112   176    
-592   -304   
32     16     
80     80     
-80    16     
48     48     
96     48     
-96    96     
-32    -144   
16     -112   
-160   -48    
128    144    
48     32     
0      320    
112    -224   
160    80     
-560   128    
-256   -160   
128    -96    
-160   144    
224    -224   
-48    496    
784    560    
-544   368    
-272   -336   
48     -224   
128    80     
-64    -304   
208    256    
-304   192    
64     400    
144    128    
96     32     
-160   96     
-160   -272   
160    -144   
80     80     
-16    192    
-96    48     
144    32     
-144   368    
32     176    
-288   -112   
128    0      
-96    -16    
272    64     
64     208    
-96    16     
176    64     
-16    0      
160    -16    
-80    144    
112    160    
208    144    
16     -288   
-144   -352   
32     48     
-144   64     
64     -48    
32     48     
48     48     
16     48     
0      0      
144    96     
160    144    
-64    144    
64     128    
80     112    
240    304    
560    432    
-64    -48    
496    -32    
-224   0      
-112   48     
-208   -192   
64     -144   
224    -64    
304    160    
320    240    
-32    96     
192    16     
-288   64     
-112   16     
-336   -16    
176    0      
48     -80    
-32    112    
-160   -96    
112    112    
80     112    
144    64     
0      64     
176    80     
16     64     
-16    144    
-32    80     
-80    16     
224    16     
-176   0      
-144   128    
128    -64    
336    112    
-352   48     
96     -752   
-32    96     
80     16     
304    -16    
48     -272   
0      -144   
16     -112   
-16    -16    
80     48     
144    80     
-16    0      
240    -160   
-96    -80    
32     128    
48     -80    
-48    -384   
0      48     
-64    128    
192    96     
224    160    
-96    -16    
48     16     
176    160    
96     224    
0      80     
0      -32    
-32    80     
-96    -48    
80     80     
160    -16    
48     -176   
144    32     
176    96     
208    112    
-240   16     
-144   -32    
-16    -16    
64     96     
-16    -32    
224    -16    
80     -272   
-32    -288   
32     -96    
16     64     
352    48     
32     96     
80     -464   
-192   -320   
-32    -64    
32     -112   
-96    128    
96     -112   
-80    -32    
-192   -336   
-16    -320   
96     32     
192    64     
0      -48    
32     -80    
-48    0      
-32    80     
512    96     
-208   0      
176    448    
208    112    
192    176    
368    224    
-256   400    
144    208    
128    -144   
-272   -336   
160    16     
-208   288    
128    16     
16     96     
-128   -448   
176    -144   
-176   -160   
0      -16    
272    -128   
-64    80     
-144   80     
16     -64    
64     -16    
384    -320   
144    288    
-80    112    
-80    -256   
144    336    
240    160    
-96    48     
-32    208    
448    -288   
384    288    
-528   32     
-224   -400   
352    208    
288    -16    
-48    416    
80     -272   
-112   144    
16     368    
400    -96    
-80    -48    
80     -192   
-64    -176   
176    16     
16     -208   
160    32     
-176   -32    
160    256    
160    16     
80     16     
96     -16    
192    176    
-192   -128   
320    -80    
48     32     
208    -336   
-176   32     
-16    32     
64     64     
-48    -144   
-96    96     
208    -944   
144    224    
0      -32    
112    16     
32     32     
-32    64     
288    144    
-96    -112   
-64    -240   
160    -48    
-48    -160   
32     96     
240    176    
96     -48    
144    80     
0      -352   
-32    -16    
-64    -48    
144    -64    
144    16     
112    -720   
256    -272   
48     32     
336    -368   
128    -32    
336    -336   
112    112    
-16    144    
-80    -96    
-32    -64    
304    -64    
112    -352   
96     80     
240    -144   
-256   48     
-384   -48    
144    -80    
176    160    
-304   80     
64     0      
704    976    
-768   752    
304    -976   
240    -176   
-16    64     
32     48     
176    288    
176    192    
240    -480   
80     -224   
416    48     
-192   64     
-144   -16    
432    -32    
208    32     
-176   224    
96     32     
208    -544   
16     48     
-256   0      
80     64     
-96    -64    
320    112    
-384   16     
-304   -64    
-64    96     
-16    -48    
144    0      
304    -16    
608    48     
-32    -176   
64     96     
-240   0      
-80    -16    
128    -1680  
-368   32     
-160   -224   
624    0      
-320   48     
-368   -96    
0      0      
160    80     
-512   -48    
-16    -64    
128    -16    
-192   -32    
-48    -112   
48     -48    
16     112    
0      -624   
224    -16    
272    0      
176    160    
224    112    
-304   -128   
-176   -48    
192    -16    
-64    -32    
128    -16    
64     96     
0      -112   
-560   -112   
112    -128   
0      16     
-16    -176   
128    16     
48     -16    
160    64     
-272   -32    
192    -64    
-224   -64    
144    48     
-192   32     
64     -48    
-624   -32    
416    192    
-224   192    
304    -80    
-160   32     
480    96     
-240   176    
256    -272   
144    -224   
32     48     
-16    144    
80     64     
0      -112   
-96    -16    
192    128    
-192   128    
304    64     
-16    128    
-144   0      
80     -96    
176    -336   
16     -128   
-352   -80    
128    16     
-32    192    
144    336    
-96    192    
-48    -144   
-144   -32    
128    -48    
-48    176    
144    -80    
144    -320   
48     -32    
-32    144    
96     -176   
32     -64    
-32    112    
128    64     
-32    -80    
32     -32    
-144   96     
48     -112   
96     80     
-144   64     
160    32     
144    -288   
-32    448    
-1296  -688   
400    1280   
-96    1008   
-560   -912   
32     624    
-448   -112   
208    480    
-624   -224   
-16    112    
160    0      
64     224    
176    176    
-416   -304   
-560   0      
-112   -160   
-336   0      
48     176    
144    48     
-80    320    
-208   16     
-416   -176   
32     -48    
-224   0      
176    -80    
-1632  -160   
-64    0      
112    -192   
192    144    
-96    -208   
-160   -80    
0      -176   
16     -64    
-128   -192   
-368   -112   
64     48     
128    208    
-160   48     
-208   32     
-240   16     
-528   -48    
-160   64     
-192   80     
144    48     
80     -256   
64     0      
-128   -144   
-96    -112   
-48    -96    
48     64     
96     96     
-64    16     
0      16     
0      96     
-160   80     
-864   48     
96     -80    
-688   0      
80     16     
-48    -80    
224    192    
-400   80     
-128   -32    
-160   -32    
304    96     
256    16     
-144   0      
-144   0      
-224   -16    
32     16     
-80    48     
256    96     
-544   -16    
320    48     
-256   0      
-16    -80    
192    96     
-64    144    
16     -192   
368    -80    
-64    128    
16     -48    
144    16     
-368   -144   
48     32     
-224   288    
-432   80     
-496   0      
288    16     
96     -256   
288    48     
-368   128    
-192   -16    
48     48     
-336   -128   
-224   144    
-48    224    
48     192    
192    144    
96     -96    
-64    -176   
0      32     
-400   32     
16     -16    
176    -80    
-256   32     
-304   -16    
16     -112   
160    -16    
-224   96     
-208   208    
16     272    
112    144    
-240   0      
-208   0      
-176   0      
-96    160    
-224   -32    
208    80     
112    96     
-16    -64    
224    128    
-48    128    
32     128    
-240   -64    
224    -80    
0      112    
-64    448    
0      288    
-48    0      
-112   -128   
176    32     
-256   -80    
32     96     
-64    160    
-48    64     
16     80     
0      -32    
176    -48    
-32    -48    
48     0      
208    224    
-224   -176   
192    -128   
192    256    
-192   -16    
464    -160   
-48    80     
-48    -160   
-320   -176   
-32    272    
-64    48     
160    -176   
240    -16    
-80    96     
-192   256    
-304   -112   
96     80     
-144   -48    
192    608    
128    368    
-528   16     
336    -368   
112    -32    
-64    224    
176    -176   
-160   -64    
192    160    
0      144    
-32    224    
48     -192   
80     272    
176    544    
-480   -368   
0      -160   
-224   48     
320    96     
80     32     
-128   -144   
144    80     
-80    80     
-160   608    
144    -416   
-48    -240   
-144   384    
288    64     
-16    192    
80     80     
16     80     
112    96     
-80    0      
64     -64    
-32    -16    
160    0      
32     128    
192    208    
-240   -16    
96     -80    
112    224    
16     96     
112    -32    
-48    -64    
80     48     
16     16     
32     32     
-32    -96    
192    -1376  
-48    112    
96     32     
128    112    
-48    48     
144    64     
112    176    
-64    32     
32     32     
80     0      
192    176    
-304   -32    
16     32     
160    64     
-176   -16    
16     -416   
224    80     
80     96     
16     80     
-96    32     
144    -32    
16     128    
80     64     
176    32     
-80    128    
0      0      
160    144    
-128   -32    
256    0      
80     80     
160    -192   
48     32     
48     96     
-112   64     
208    64     
224    48     
-96    80     
48     96     
192    112    
96     32     
-64    352    
176    112    
64     16     
-192   -64    
96     48     
112    -32    
-80    -48    
48     16     
256    96     
48     240    
-288   80     
-64    -32    
304    240    
-176   96     
16     64     
-80    -400   
256    -176   
-176   96     
-64    -32    
-16    128    
-160   -352   
384    -112   
320    -240   
208    32     
-128   144    
-224   -128   
208    64     
48     160    
-176   -32    
64     80     
-160   384    
272    224    
640    -96    
96     -80    
-208   112    
208    -128   
-304   128    
-592   -112   
-160   -160   
32     -80    
640    0      
192    -48    
448    96     
320    48     
-96    48     
-160   48     
0      -64    
240    48     
48     -64    
336    112    
-32    -64    
288    48     
160    -320   
320    48     
128    -768   
-352   48     
240    224    
-224   112    
272    176    
112    64     
320    32     
-32    -32    
16     -16    
48     128    
192    112    
224    208    
-288   112    
240    -128   
256    96     
0      -272   
64     16     
-272   32     
272    96     
-16    32     
-208   -16    
480    64     
-80    -272   
240    -32    
-128   80     
-160   32     
64     -112   
64     48     
16     -96    
-160   80     
288    64     
80     0      
32     -16    
128    -32    
0      48     
96     -416   
-96    0      
48     -16    
32     -272   
192    -64    
0      96     
112    -240   
80     16     
144    32     
-64    -32    
48     0      
-80    -1296  
80     48     
64     -160   
80     48     
-720   -96    
176    -144   
64     -48    
96     -320   
48     0      
400    544    
-112   -128   
-48    -16    
-64    128    
-48    -368   
96     -80    
128    208    
64     256    
-48    -400   
32     96     
48     416    
64     -608   
-224   -224   
240    -448   
208    864    
0      -240   
32     -432   
32     -464   
48     -800   
176    32     
144    240    
32     -32    
128    128    
16     48     
48     112    
-16    -208   
144    -144   
-32    -288   
64     32     
272    544    
-416   -1008  
-80    -144   
304    -448   
-32    -288   
304    720    
-64    48     
192    320    
48     64     
-320   -560   
80     -144   
112    64     
64     800    
-592   352    
16     160    
592    592    
-304   -288   
-32    -112   
48     -96    
-224   64     
400    32     
48     -32    
128    -16    
-48    32     
-96    -80    
224    -144   
0      224    
-80    80     
-80    224    
64     -80    
400    128    
-176   -48    
192    80     
-80    -160   
16     -64    
128    -432   
-80    144    
320    64     
0      -32    
96     64     
-176   144    
-80    80     
144    -128   
-176   -96    
0      96     
-384   64     
208    80     
160    80     
336    -64    
48     48     
0      -528   
-48    48     
0      -32    
64     0      
-160   -48    
176    112    
-432   16     
112    -80    
128    112    
-16    160    
80     176    
96     32     
272    32     
-32    -96    
-48    48     
48     -80    
112    -48    
64     -112   
160    48     
-304   32     
16     -16    
-912   -64    
176    -48    
0      80     
192    16     
112    96     
-144   -112   
-176   -16    
192    -48    
160    -80    
80     -80    
-64    112    
-432   48     
304    32     
-304   0      
80     -64    
-64    -128   
16     -64    
-128   96     
-112   96     
-144   -48    
64     -128   
-256   128    
96     112    
-80    336    
-896   16     
-416   -128   
-32    -128   
16     -96    
-192   128    
-16    64     
-16    48     
128    96     
-304   -96    
288    -112   
-64    0      
-464   -176   
-128   32     
-320   32     
144    192    
-336   -16    
-912   0      
-64    16     
-48    128    
-144   240    
-496   176    
-112   -32    
192    -64    
-48    128    
128    64     
48     -48    
-320   -64    
-144   -16    
48     -112   
128    -16    
176    -432   
-208   -448   
96     160    
-624   160    
-208   -208   
-592   -496   
-432   -272   
-1824  -288   
-80    -128   
128    -320   
16     -144   
-240   -304   
-96    0      
-192   112    
-80    288    
32     -240   
-256   -304   
-144   -48    
112    256    
64     144    
-96    -160   
-80    208    
-304   -176   
-224   352    
-32    -240   
-32    96     
-80    0      
112    64     
80     -448   
-144   128    
176    144    
-256   -16    
160    176    
-240   48     
0      -112   
64     -352   
0      -32    
-416   -48    
-144   112    
-2096  208    
16     144    
64     -64    
80     64     
-160   16     
112    16     
64     80     
144    48     
-32    16     
-160   -96    
-48    -32    
-320   -160   
-304   -96    
-176   752    
-208   320    
-272   0      
416    176    
-80    128    
448    192    
32     16     
112    96     
48     -32    
-128   32     
-16    240    
-48    16     
64     64     
-288   80     
0      112    
80     224    
-64    176    
-48    -32    
32     96     
-272   64     
48     -16    
80     -112   
-16    0      
-64    128    
80     64     
112    96     
-96    16     
128    80     
-192   16     
96     16     
112    32     
-80    96     
-112   0      
-64    112    
-1120  -96    
-80    80     
0      80     
144    176    
-96    144    
-128   -64    
224    48     
-272   -64    
144    64     
-48    16     
-64    0      
-208   0      
224    32     
-272   -80    
96     112    
-128   48     
128    112    
48     80     
32     16     
48     80     
-336   -32    
160    0      
64     -64    
48     -16    
64     48     
208    80     
-16    0      
-32    32     
-144   0      
112    80     
96     112    
0      -32    
432    240    
-368   0      
-208   0      
160    128    
64     48     
48     -32    
-64    160    
208    192    
-128   16     
-112   -112   
144    144    
-272   -16    
16     48     
144    32     
112    -32    
-208   16     
0      32     
160    16     
48     64     
-32    80     
-64    -32    
144    -112   
-128   32     
128    64     
160    208    
-64    128    
16     64     
48     -80    
128    -32    
0      -32    
240    -112   
-32    -96    
32     -32    
176    112    
176    400    
-256   112    
32     -16    
-144   0      
336    0      
496    -80    
-32    -16    
-208   32     
-16    0      
-80    16     
-176   32     
224    -400   
352    -272   
224    256    
96     208    
-144   144    
-208   48     
48     -16    
672    -128   
384    496    
-352   320    
-176   64     
0      64     
224    16     
352    64     
-80    -48    
320    16     
-32    32     
128    -32    
272    64     
-656   -96    
32     -32    
-128   112    
-464   -48    
128    16     
-16    128    
320    -944   
80     0      
-16    -64    
-400   128    
-544   0      
0      112    
48     256    
-32    64     
-32    -80    
208    -48    
352    176    
16     192    
48     0      
128    -112   
464    -208   
112    -64    
-48    176    
-16    80     
-176   -32    
112    -96    
208    16     
416    80     
544    128    
-192   16     
288    256    
-368   128    
80     32     
-256   -32    
-288   32     
288    176    
128    -304   
-16    -48    
-16    -16    
32     128    
-48    96     
-32    -128   
-144   -80    
32     608    
48     288    
-16    -176   
0      -48    
64     160    
96     128    
-64    -208   
240    416    
32     -304   
64     16     
96     -144   
48     32     
48     -400   
-224   336    
112    48     
-256   -48    
112    -432   
320    80     
320    64     
16     32     
160    416    
-64    496    
-32    -464   
256    0      
-144   -48    
368    32     
-32    48     
96     -80    
112    -416   
16     512    
256    688    
-304   -352   
-32    112    
-144   128    
144    -160   
-192   -320   
288    -112   
32     96     
128    -96    
160    -32    
-96    -240   
-64    624    
96     -592   
256    64     
-48    176    
256    16     
-224   -112   
-160   -96    
80     48     
-48    64     
304    192    
112    208    
128    112    
-48    -96    
-32    -16    
192    -64    
160    -64    
352    64     
-16    80     
64     64     
16     48     
-256   -16    
272    -224   
-16    352    
256    256    
-32    0      
224    288    
112    -64    
-112   -160   
224    -80    
16     -48    
48     96     
32     128    
160    112    
224    48     
-64    80     
-80    -224   
32     -96    
-48    112    
128    -16    
-64    80     
-112   -96    
288    0      
112    -48    
240    48     
-16    -144   
32     0      
-80    -608   
-160   208    
176    64     
208    -688   
112    -64    
-2000  592    
336    176    
336    -272   
464    -112   
-160   16     
-16    -16    
112    -16    
0      112    
208    64     
-256   256    
-16    -32    
224    -288   
192    0      
80     -368   
-16    32     
-1248  48     
16     -224   
176    -64    
160    144    
96     0      
240    -512   
224    64     
-16    32     
0      0      
176    16     
64     96     
-48    -80    
-176   -16    
144    16     
240    -288   
-432   -208   
80     -128   
-48    144    
304    -32    
48     -112   
176    -192   
176    -64    
0      176    
-128   -80    
224    -208   
144    32     
32     -112   
80     -64    
176    -64    
-128   112    
-144   0      
64     -32    
192    -32    
48     32     
432    64     
-80    128    
-80    80     
0      64     
-80    160    
-16    -128   
352    96     
304    176    
288    304    
-96    352    
-48    -48    
-16    -112   
176    192    
-416   192    
160    -144   
32     -256   
-144   -96    
-80    -144   
-96    -16    
-480   32     
112    -464   
64     16     
16     -16    
240    -112   
-96    112    
352    368    
64     -480   
176    -48    
-112   80     
-144   224    
-304   -192   
-112   -176   
-64    -96    
576    192    
-304   -192   
-32    -768   
384    96     
320    192    
304    -176   
-240   256    
-16    32     
-352   -304   
80     48     
-256   48     
464    224    
-448   288    
256    -32    
224    32     
-32    -112   
128    16     
80     160    
112    144    
-112   112    
320    192    
-144   -16    
112    -48    
144    96     
208    -16    
-384   -32    
96     -64    
-352   0      
32     16     
48     80     
48     -112   
16     16     
32     -256   
48     64     
144    48     
-64    -64    
-48    -64    
48     -176   
-192   -16    
208    -16    
-320   -96    
-80    -128   
-48    -64    
112    0      
176    48     
32     -80    
112    112    
64     -224   
16     0      
-112   16     
240    96     
-528   -112   
224    80     
0      0      
32     80     
16     16     
48     -96    
-288   -16    
80     112    
0      -32    
-1840  0      
32     32     
-272   16     
-160   32     
-48    -112   
-1392  -80    
-128   48     
-32    -32    
-16    -16    
96     144    
-48    -48    
208    0      
-112   32     
-304   -64    
16     0      
-304   -80    
192    256    
-304   96     
112    -16    
-112   0      
-400   -16    
-32    -32    
-224   64     
48     48     
-144   -16    
-240   -16    
-656   -288   
-64    -128   
-368   64     
112    96     
64     -16    
-144   32     
-128   0      
-16    64     
176    80     
-208   -32    
32     16     
-336   -80    
-48    64     
-208   80     
-112   16     
128    16     
-32    96     
16     -16    
32     80     
-368   -96    
0      48     
80     32     
-224   0      
0      64     
48     16     
-160   -48    
-256   64     
272    96     
-320   32     
80     32     
-96    16     
-32    128    
-80    -96    
-112   -16    
-16    -64    
48     -32    
64     96     
-96    144    
32     -128   
-272   -80    
160    96     
-576   144    
-160   -48    
-288   32     
48     16     
-864   0      
80     112    
-160   -112   
-16    32     
-16    48     
-32    48     
80     48     
-48    -64    
0      -32    
80     192    
-96    128    
144    144    
-64    240    
-96    32     
464    288    
-944   96     
-32    32     
-16    -32    
128    80     
160    144    
-16    -32    
144    96     
-208   96     
-96    176    
-272   -32    
16     -48    
-192   16     
320    80     
-496   0      
1184   448    
160    -656   
448    -704   
-96    176    
-240   304    
-256   -80    
-432   304    
32     240    
-32    -320   
560    512    
96     0      
48     -128   
-96    80     
0      -176   
48     -144   
368    16     
-32    32     
-48    -112   
-128   -128   
-224   -160   
240    352    
480    288    
336    -32    
352    128    
64     144    
-240   16     
-512   -288   
-192   -80    
256    240    
320    192    
288    48     
112    -320   
880    976    
-736   -144   
-16    -320   
144    496    
-96    -320   
352    208    
-480   -272   
176    -272   
-32    384    
160    -32    
384    48     
272    32     
-128   -176   
208    208    
-336   -112   
-160   16     
-16    128    
48     32     
32     368    
-16    -608   
176    112    
-16    352    
64     -560   
-32    128    
32     304    
-48    -96    
160    272    
-176   -48    
320    256    
-160   384    
160    -192   
96     -176   
240    336    
-64    -64    
-80    -80    
-192   -192   
128    -768   
384    304    
-144   416    
-48    80     
-208   -112   
128    48     
48     496    
208    128    
32     80     
-64    368    
192    336    
112    272    
-16    -112   
0      176    
176    192    
-48    80     
80     64     
-272   16     
-32    32     
64     32     
16     208    
-48    112    
0      0      
-16    32     
-80    80     
16     144    
32     -32    
96     -320   
0      -112   
224    256    
-240   144    
-16    -48    
-32    -16    
368    240    
-272   144    
144    -80    
-64    -96    
-48    32     
0      32     
-96    160    
96     112    
-16    288    
112    128    
144    -80    
160    -224   
-64    -256   
64     80     
-112   224    
0      -48    
64     64     
0      32     
48     144    
96     -256   
176    256    
240    -176   
16     16     
-80    -432   
112    112    
64     112    
-208   -432   
304    -192   
-16    80     
-64    192    
320    -240   
-80    0      
-64    -272   
0      0      
-64    -400   
48     176    
144    160    
-64    64     
32     48     
48     16     
80     0      
144    -192   
-48    -80    
160    -224   
-336   -352   
176    48     
-240   176    
96     -16    
64     16     
-16    -240   
64     32     
96     -32    
48     16     
-16    176    
208    -48    
64     -64    
368    160    
-176   224    
-48    16     
-16    -32    
208    96     
128    32     
-112   80     
-176   240    
32     -208   
16     -160   
80     -224   
16     176    
-112   176    
32     32     
144    112    
16     0      
-48    -16    
272    32     
48     64     
288    224    
-64    240    
-16    -144   
80     96     
176    16     
32     80     
-112   -368   
256    -144   
-96    -512   
-160   16     
-64    96     
80     96     
48     144    
160    80     
176    96     
160    48     
-80    32     
192    -144   
144    -32    
176    -128   
48     144    
-64    128    
112    -256   
128    -464   
304    224    
160    160    
368    -96    
32     32     
448    320    
-224   -320   
192    160    
-16    160    
192    256    
-288   -240   
80     48     
144    -160   
-48    -400   
176    -64    
208    -384   
400    96     
288    96     
416    -112   
-256   -16    
-160   240    
-32    160    
16     -96    
352    -48    
48     -208   
1120   672    
-400   -496   
512    400    
-640   128    
-144   -16    
464    96     
368    32     
240    48     
256    -112   
32     -64    
-32    160    
-416   96     
160    64     
224    48     
176    -96    
128    32     
384    -64    
-64    0      
96     0      
64     96     
176    48     
160    -384   
64     -16    
640    -992   
-464   -96    
80     64     
32     -304   
176    -48    
96     -432   
192    -32    
-128   528    
-48    96     
16     16     
48     16     
208    64     
-176   32     
240    -128   
-32    80     
128    -16    
-32    -96    
-1456  -176   
192    -32    
112    16     
208    -288   
-96    -80    
-32    -496   
96     -16    
-16    -96    
192    -48    
16     -176   
80     96     
32     -80    
-16    32     
288    64     
32     0      
-752   -48    
160    -64    
-112   -32    
288    -16    
32     -64    
32     -16    
-128   -16    
144    -992   
-80    -48    
80     -112   
96     -16    
176    16     
48     80     
-192   -432   
304    -208   
-368   192    
80     -64    
-144   0      
-128   32     
176    144    
128    -224   
128    -176   
48     -272   
-96    176    
112    144    
96     96     
64     -32    
-128   48     
-80    -16    
-16    -96    
-288   0      
64     -192   
-336   -32    
96     0      
-64    -16    
192    -112   
-16    16     
32     -64    
16     0      
16     -1024  
96     48     
64     16     
208    48     
-96    -80    
320    96     
-400   144    
64     0      
-1296  -48    
224    16     
-2656  0      
-64    -32    
176    16     
0      -128   
256    80     
-64    -784   
96     176    
288    32     
-48    32     
-16    0      
-48    16     
-112   -64    
272    -96    
48     -48    
160    -96    
-160   16     
192    -32    
-32    -32    
176    16     
-64    144    
-64    -16    
176    128    
-48    0      
-48    -272   
-16    -288   
32     -32    
-112   48     
112    -160   
-240   -64    
144    96     
-624   16     
48     -80    
16     32     
224    -16    
-16    -96    
96     -320   
32     112    
192    112    
-16    -128   
-128   16     
208    112    
-160   -160   
112    48     
-288   0      
128    -48    
48     240    
64     -128   
48     288    
-16    48     
48     16     
112    -160   
-400   32     
-48    48     
-128   -320   
-48    64     
-112   112    
-336   0      
-224   -320   
-64    944    
304    -336   
432    128    
-384   -64    
128    160    
-1408  -208   
-224   -128   
-272   -576   
-896   -32    
-400   176    
-224   0      
-112   96     
-720   304    
-288   -112   
176    112    
304    96     
48     -16    
-256   768    
-416   -496   
-208   272    
-304   -112   
48     -224   
64     176    
0      -176   
-192   16     
128    112    
-48    0      
-240   16     
-32    64     
-32    112    
-48    1632   
-400   -768   
288    -848   
-112   384    
16     -32    
-176   160    
-48    160    
-416   64     
368    432    
-64    240    
176    -144   
176    -64    
224    224    
448    32     
-432   -96    
96     144    
-320   96     
192    128    
-544   -64    
-96    -224   
-32    -112   
-48    -16    
256    0      
16     48     
224    -64    
-48    32     
-112   -48    
-160   -16    
48     0      
-960   -208   
-64    -80    
-96    -96    
96     48     
48     -16    
208    80     
0      208    
16     80     
16     48     
64     128    
-112   160    
176    48     
-48    -16    
0      32     
32     64     
-352   48     
80     48     
-192   240    
80     432    
-128   128    
112    -144   
-80    64     
-32    -16    
-160   112    
-112   -32    
-128   -384   
-32    -128   
-160   160    
-528   -240   
304    -560   
16     16     
64     384    
-976   -144   
-16    80     
272    -288   
-16    176    
224    336    
-368   96     
416    448    
-416   336    
-96    144    
-160   -448   
80     -176   
-48    -144   
-16    192    
-192   -96    
-64    -368   
-656   -144   
64     160    
-176   -224   
16     -96    
-32    112    
272    208    
-272   192    
16     -96    
-32    32     
-80    32     
96     -16    
-112   160    
112    16     
-272   -32    
176    48     
-240   -80    
144    -32    
16     -16    
-112   -368   
160    144    
-128   48     
128    -144   
-144   112    
96     96     
-32    128    
96     -80    
-224   -240   
128    16     
-336   752    
304    400    
0      -224   
-112   96     
0      688    
336    544    
176    144    
-32    -64    
240    48     
-336   192    
480    240    
-368   64     
-16    -112   
-64    -48    
-32    96     
96     16     
80     144    
64     48     
96     304    
-64    208    
-64    272    
272    224    
224    48     
64     -224   
-16    -80    
288    240    
-416   240    
16     96     
-128   96     
304    112    
288    -144   
0      48     
-64    -32    
-176   -16    
128    112    
64     80     
64     -16    
-16    0      
272    -240   
-64    -64    
-192   -128   
-96    -96    
272    -16    
-320   0      
272    64     
-288   -16    
-176   0      
16     -64    
128    -192   
48     -144   
-32    16     
192    112    
-112   224    
-80    112    
-96    -64    
128    256    
-112   -32    
192    192    
-160   176    
-80    16     
-16    224    
-48    -32    
-48    112    
0      48     
-80    -352   
96     -16    
80     144    
-16    112    
256    224    
-112   -32    
64     96     
320    528    
-544   -16    
-208   -304   
304    -528   
0      -96    
368    608    
-80    -16    
-272   -112   
-32    416    
-416   128    
272    256    
-16    176    
240    -48    
-80    64     
112    64     
-32    64     
-32    0      
320    -16    
0      48     
144    112    
-64    0      
16     48     
-272   -160   
480    32     
176    112    
128    -32    
304    16     
-176   96     
-256   -112   
704    336    
-400   -16    
400    160    
752    352    
-592   128    
-160   -96    
176    -480   
16     -16    
112    80     
-112   -48    
368    16     
-160   32     
288    16     
-224   48     
-192   -64    
224    96     
112    -16    
-80    -64    
64     128    
-64    -64    
240    64     
160    64     
80     64     
-32    -112   
496    -64    
-48    96     
64     96     
-256   128    
320    64     
-144   -64    
-96    64     
-32    96     
64     96     
160    112    
-80    -144   
192    64     
128    -64    
144    48     
32     -592   
128    16     
-16    80     
112    16     
-32    -32    
80     64     
16     160    
-96    64     
64     0      
160    -112   
144    0      
64     32     
80     192    
64     -384   
32     176    
-80    0      
144    0      
-176   -656   
64     112    
192    32     
192    96     
112    -16    
-80    64     
128    112    
112    -32    
112    -16    
32     -32    
48     128    
-96    -224   
64     0      
16     144    
128    224    
80     64     
0      48     
-96    -96    
-16    -16    
96     -112   
240    48     
112    48     
-16    368    
208    112    
-16    -688   
-64    48     
64     -128   
128    64     
-80    -32    
240    96     
16     48     
112    -16    
0      -32    
240    96     
-48    -48    
112    96     
-16    32     
112    -368   
112    112    
-80    16     
240    32     
96     0      
0      32     
16     48     
144    240    
0      -16    
80     48     
-16    144    
176    80     
48     -16    
-16    -32    
64     -48    
112    -16    
80     -32    
160    -16    
176    80     
144    96     
160    160    
-192   -176   
144    -96    
-48    16     
224    -112   
80     32     
320    96     
112    -256   
-1232  -96    
-64    -32    
128    -432   
208    16     
96     128    
160    -1488  
16     48     
-96    48     
176    -496   
96     320    
-16    128    
-176   -432   
96     -48    
96     -176   
48     -144   
-1120  64     
176    224    
96     -64    
192    224    
16     -64    
-208   -944   
128    560    
288    -80    
80     -320   
-32    -16    
-32    288    
192    -48    
32     -304   
-48    64     
-16    16     
-208   -16    
80     -32    
-128   -592   
112    32     
32     48     
-16    -128   
64     -48    
-112   -1040  
-64    -80    
208    -96    
-16    96     
48     48     
112    480    
-160   -256   
-64    -256   
-672   -32    
-64    -240   
16     32     
96     -144   
80     -80    
0      16     
64     224    
-32    -640   
208    -272   
128    -144   
64     -176   
48     -48    
-432   -224   
-240   48     
176    96     
-224   -480   
-16    -32    
-752   -64    
64     80     
-80    96     
-64    -240   
160    -256   
432    -144   
-32    112    
96     -384   
-192   16     
-128   -16    
-304   240    
-32    0      
304    0      
240    48     
16     80     
112    48     
128    -96    
256    -160   
48     -112   
192    16     
240    128    
-32    64     
128    -976   
-256   16     
48     48     
-288   -128   
224    -304   
320    -176   
64     -96    
320    -192   
-912   -96    
-112   -64    
-80    64     
-32    160    
304    -32    
64     -128   
16     64     
96     -176   
-64    -96    
224    176    
-144   160    
-400   -32    
80     -96    
-432   -208   
144    -48    
-192   -48    
96     96     
112    64     
160    32     
112    64     
-48    -192   
96     -160   
32     -144   
112    48     
-544   -112   
256    -32    
80     -48    
0      128    
96     400    
-176   128    
-144   32     
64     -288   
-64    -224   
48     -256   
112    176    
-176   -208   
32     0      
-112   -272   
-128   -592   
-16    -224   
-144   -16    
-256   -32    
0      80     
-480   -176   
176    -32    
64     80     
208    192    
48     592    
-288   224    
208    16     
-224   -320   
-32    96     
240    80     
-592   112    
-304   -96    
-720   64     
336    -192   
-528   80     
32     112    
240    -128   
-384   64     
64     -96    
64     368    
-288   416    
160    544    
16     0      
224    304    
128    -112   
-240   128    
-64    -48    
-384   0      
-80    32     
-752   -112   
-208   240    
-1344  0      
256    256    
16     16     
0      192    
144    -16    
560    688    
-576   416    
-96    240    
-224   48     
-64    -64    
144    -368   
-16    -288   
96     -128   
-768   -16    
-112   -48    
-1312  -224   
-64    -176   
144    -208   
32     256    
-112   -176   
-80    -512   
-208   -592   
176    -208   
-544   -192   
32     -400   
-32    -208   
-192   -112   
-48    -144   
16     -272   
208    64     
-64    400    
0      256    
-32    208    
384    -352   
0      -80    
80     400    
96     -256   
-64    -208   
96     160    
-80    112    
-144   16     
-144   160    
368    -144   
192    160    
112    384    
-560   -288   
160    96     
-2000  128    
-208   -256   
80     672    
400    -64    
64     176    
-304   -272   
208    -80    
-48    112    
160    192    
-128   -128   
-64    64     
-160   64     
-320   -16    
-160   0      
192    112    
-944   -80    
288    32     
64     80     
-288   64     
32     -64    
-192   -112   
-240   -128   
64     80     
32     64     
144    80     
96     112    
256    464    
-480   272    
-240   -80    
144    -48    
-16    -16    
80     -16    
304    -80    
320    224    
-208   -144   
-240   -112   
256    752    
-512   368    
-48    80     
400    -32    
464    192    
-96    80     
288    160    
-80    0      
352    144    
-400   -144   
128    64     
32     32     
-192   -32    
16     32     
-320   -160   
112    -32    
-112   144    
-384   48     
-144   0      
160    64     
576    736    
-848   304    
-320   -144   
128    -80    
80     -16    
352    64     
-32    -176   
80     -96    
-48    144    
-480   64     
-512   -80    
80     80     
80     160    
-48    16     
208    64     
160    160    
0      16     
240    96     
80     16     
176    -80    
304    64     
608    368    
-96    240    
-512   -48    
0      -112   
144    16     
208    0      
480    48     
-16    32     
-16    -48    
-16    0      
128    160    
-32    16     
-128   -80    
496    64     
80     112    
96     80     
-80    0      
16     32     
64     64     
112    112    
112    64     
-48    64     
-48    -16    
16     80     
-16    -16    
-16    112    
96     128    
-64    -32    
240    48     
-48    -32    
64     80     
272    144    
0      48     
144    32     
-48    -32    
144    -160   
-16    144    
-80    16     
176    240    
-240   -16    
288    16     
32     64     
336    0      
-304   112    
-144   -16    
176    -96    
176    144    
-80    48     
192    0      
-64    -160   
-16    96     
-128   64     
128    -16    
16     48     
-48    -288   
160    -336   
-96    112    
-32    80     
96     0      
112    96     
80     128    
80     144    
16     80     
0      -112   
80     48     
-16    -256   
0      -64    
96     128    
32     144    
48     144    
-48    -160   
-64    144    
224    -1344  
0      -64    
224    96     
-32    32     
48     80     
64     48     
64     208    
176    -80    
-32    80     
176    64     
-48    -128   
256    48     
-80    160    
112    176    
144    -80    
-240   -384   
208    -176   
0      -112   
48     144    
-64    80     
64     -32    
96     112    
688    640    
-528   336    
80     -240   
-160   16     
304    -144   
272    528    
-208   -416   
368    -1008  
48     592    
-48    336    
0      -80    
-48    96     
160    -288   
144    912    
304    176    
-64    128    
0      -512   
0      -16    
-32    80     
0      -112   
176    96     
-16    -64    
144    224    
0      -416   
336    -64    
-64    -416   
128    192    
-32    176    
112    224    
-16    -32    
-16    128    
208    128    
32     -32    
192    -96    
64     -48    
224    -48    
144    -32    
-80    304    
80     -48    
-80    128    
0      -544   
-96    176    
240    -544   
96     -96    
96     48     
144    112    
32     -16    
240    80     
16     0      
176    -160   
64     256    
128    -160   
160    80     
96     -192   
-64    160    
0      -576   
64     0      
192    -256   
0      144    
48     80     
160    16     
144    32     
-32    144    
-144   -48    
416    -256   
-16    176    
-96    64     
-32    80     
-32    -176   
-112   -256   
240    -240   
32     -64    
-48    112    
-192   240    
112    -96    
432    64     
-208   112    
-144   96     
-128   32     
128    -16    
80     96     
48     96     
16     64     
112    0      
32     -80    
64     -80    
224    64     
-16    64     
144    -768   
208    16     
64     -704   
160    -64    
-64    -48    
112    -448   
80     -32    
128    -368   
144    -64    
112    32     
32     -48    
96     320    
80     112    
-112   -784   
208    32     
-80    -224   
224    -48    
208    -128   
-96    48     
160    16     
128    -144   
80     -80    
192    -32    
192    -16    
-80    -336   
176    64     
80     176    
96     -80    
-80    -128   
144    80     
96     -128   
0      64     
-336   -128   
160    16     
-1376  96     
144    16     
176    -64    
16     64     
80     -48    
32     -240   
144    176    
96     -432   
192    -112   
-160   -304   
304    -16    
-208   -384   
-32    -240   
-336   -64    
112    -128   
-416   16     
-288   0      
496    -400   
240    -400   
176    -176   
336    -480   
-80    -32    
304    -1248  
128    64     
-32    -320   
-128   96     
-192   -256   
0      -656   
0      32     
240    -528   
-224   -320   
208    -160   
192    160    
416    128    
256    -544   
-256   112    
-384   -640   
80     -208   
0      304    
96     128    
-144   160    
16     -160   
80     80     
32     -16    
48     -64    
-64    -912   
